# Supplementary material for: Genome-Wide Gene Expression Analysis Implicates the Immune Response and Lymphangiogenesis in the Pathogenesis of Fetal Chylothorax
Source: PubMed Central journal article supplement (PMC3329545; doi:10.1371/journal.pone.0034901), 2012-04-18
Supplement: pone.0034901.s001.pdf [file pone.0034901.s001.pdf]

Appendix S1: The probe list of customer ITGA9 Tiling chip (Agilent Customer Array, Changhua Christian Hospital, Taiwan).

| ProbeID               | Sequence                                                       |
|-----------------------|----------------------------------------------------------------|
| A_14_P126474          | AGTATCAGTGATGCTGCCCTGTTAGACATCATTTGTAAGTGTGTCAGTGATTTGTATTTATA |
| A_14_P201291          | AAGATGAAATTTTCATAGAAAGTCTTCAAAGAGGAAAAGCAATGGTCTTTTCCCTCTGCTA  |
| A_14_P129860          | CTCTCGGTCTTATACAAGGAGTATGCTGAAGATGACAACATCTATCAACAGAAGATCAA    |
| A_14_P112145          | GCCAGTAAATTAGGACAGTGTTCACAACAGCCTAGGCTATCTCGTAAGTTGAAAAATATC   |
| A_14_P119265          | CTCCTGTCACTTCTAACAGAAATAGCATAAAGTATCCAGCAGGAAAAGTGCACACAATAT   |
| CUST_4306_PI426210822 | ACAGGTTTCATGTCTTAGCCTTGGGACTACAIGTTTTCTCTTTCCCTTCT             |
| CUST_4023_PI426210822 | GAAGAAGCCATGAAGGGCTCGGCCATAACCCCGGGAAAGCTCACT                  |
| CUST_2226_PI426210822 | TAGTGTATTAGGACAAGGCAGAGAGTGTAGTCATTGGCTACCATGACATTCTC          |
| CUST_1693_PI426210822 | TCTTTGGAGTTTTGTCTATAGCTGAAAGATTTCTCTAGAAATTTTGTGATTTTAACT      |
| A_14_P102394          | GGAGATTTGGAGCCCATTTTAGAGGCATCTGTTCTATCTTCCCATCATAAAAAAGTAAGT   |
| CUST_3498_PI426210822 | ATAATCTCTCCCTCTAGTGTTTTGGAACAATCACACACAAATGTTTATATCCACATACAG   |
| A_14_P104870          | GCCTCTATCTGCTCCTGTTGATTTTAAAAATATCTGTTATTTGATTTGGGGGTGAAGGA    |
| A_14_P108415          | ATTCACCTAAGACACATTGGCTCAAACCTGGAAAGGAGTAATATTTCTGACAAAAATTCA   |
| A_14_P125940          | AGTTATTCACATAGTGTCTACAGGGCAGAATCTCTTCCAAAGCAATTTTCTGTTCATAA    |
| A_18_P13888920        | CACTCAGAAAACCTCCACTAAATTTATGTTTTCCCAATTAAAACCTCACCTATTTACCTCCA |
| A_16_P40463081        | TCCCAACCTAGGAATATGAGAAGTATCTGTGTCAGGTAAATGGTTTTGTGAATAATGCTGTA |
| A_14_P113185          | AATCATGGCTCAGGATAGAATACGCCAGTTTATTTATTCTACCACAGTCATGGCAGT      |
| A_16_P17838182        | ACAGGCCCATTAGTATATCTCTTCAGTAGATTATGCCGGATATGGATTTTACTCTGACAT   |
| A_14_P108946          | AATGAGATCACAAATGTTGGAGACAACTGTAAGAACTGACAAAATGACATAAAAGGCC     |
| A_14_P126509          | TTAGGATATAAGAGGGCTTTTTAAATTTGGTGCCGATGTTGAACTTTTTTTAAAGGGGAGA  |
| A_14_P113516          | GACCAAGAAGCCTGGCATGAACTTGCAGAACTTTACATCAATGAACATGAGTAAGTTATT   |
| A_16_P17716115        | AACACTTCTATTGCCATCCTTACTCATTATAACCACTAAACACTCTGATTTATCTCCCTGC  |
| A_16_P18301351        | AACTGATGTTGTCAACCTTTGATTATGGTCAGATTTCTACACATGCTGTAAAAACACACG   |
| A_14_P115632          | AGTGATTTGTTTTAAAATGCAACATCACAGCATACTCATACTTTCAACAGGAAGCACATCC  |
| CUST_4338_PI426210822 | CTCCATAGAGCAGTGTATTTGGTTTTCTTAAGCAGGAAGAAGGGGGC                |

A\_16\_P02686289

CATGTCATTAGAAGCCTAGATTCAAGACCTTCATTTCCATCATGCATTGACATGTTCTG

A\_14\_P133978 TTTATAATCACCTTACAAGTAAGTTAAAGTGCATTCCCTGGTTCGTTTTGGCTTTGTCTTT

A\_14\_P124258 TGGCTCATTTCCTCATTAAAGTTTGAATTTCCAGTCACCAGTGTTTTGTCTTTCTTAC

A\_14\_P127130 AACTTCTCTCGGCTGTTCTCAGTTCCTCCATTTATCGTTTCTTCGTCATGT

A\_14\_P202097 TGTATGGATTCTTCTTTCAACCTTGACGAAAGGGTATAATTAATCTGTAATTAAGTCAT

CUST\_2311\_PI426210822

TTTCAACTCTTACTCAGAGTTGGAGCCATTTATTTAAGAAAGGAAAGGAAGCTTTCTCTT

A\_18\_P17039232 CCCAGTGACTCCTGCTATCTTCATTTTGTCCAGTTCACCTCTCAGTC

A\_16\_P17218405

CTTCAGTTCCCATAAAACCAAAAATCACGATTGTCTTTTCCATCATTATAGTCACTGTGG

A\_14\_P120490 CCCTGTTTTCTGTTTTGTTTTGTTTCTCAAGTTTCATTTTTACTAAGCCCCTTCTGAC

A\_14\_P129911 ATCTGTAAAACCTTGGGGACTCCCATTTTCGATCGTCAACACTAATCCCAG

A\_14\_P117324 CTCAAGTAATTCTTGGTTTTATTTTTGTAGGCTCAGATCACCATGAAAGTAATCCAAGGC

A\_14\_P200933 ACACATTAGATGTTACTGTGTGAAGAATAATGCCTTGTATGGTGTGATACGTGTGTGAA

CUST\_5490\_PI426210822 GTCCAGCATCTTGCTAGCCTGGACATACTTTCCACAGTGAACCTAT

CUST\_9404\_PI426210822

AACTCTTTGTGAACATGTCAATATCAATATCCAAATATCTGGCTCTAACTGCTTGGAAAC

A\_16\_P17318754

ATTGCGCGGCATTAGAATAAACATGTATACAATGAAAAACCTCCAGATTGACACTTCTTC

A\_14\_P102021 GAATCAGTGAAAAGAACCTGGGAATGAAGTTTCTGAGGTTAAGTTAGTTTCTACAGATC

A\_14\_P117361 CTTTAACTTTTTTTTCTTAAAACACATTGCTACTCTTCTTTCCCATGTTCGTTTCTGGA

A\_16\_P21503674

AAAAAATCAAGATGGACAGTTGAAAGTCTTAGGCCAATAAAGTTCTTTACAAATATCCCT

A\_14\_P136493 AAGAATGATTACTTTGAGGAAGAAAGGAAGACTTTTAGGAAAGAAGCGACTTTGTTTTCG

A\_16\_P21184352

CTCAAAACCTGAGAGAAAAGCAAATGGCGAATGTGATTTTCATAAAAATGTTTCACTGACA

A\_14\_P108668 CTCTTTAAAACACTGCACAGGACCAGACAACAAGTTTTTAAAATGATGCCAGAGCATT

A\_14\_P130289 CTGTCTTTTACTTAGTCTTGCTGACACCACTTAAAAGGAACCTCAGACAGATAGATTC

A\_18\_P14137986 CCTATAGAGTGAGCCTTCTTTGGTTTTCTTTCTCTCTGTATCAGCATTTGATC

A\_14\_P104291 ACCTGTTTCTGTTTGTCTGCTTTTGCAGGAGAGTAGTTATCTTGATGGAATTAGAAGTTT

A\_14\_P201326 TTCCACATTTGGTTTGGTGAACAGATTCTCATTGATCACTTGTCTCTAGAAGGATTATAG

A\_14\_P125462 CTCCAAGTTTCTTCCAACCTTGATACTTCTTTTATAACCTAGAATCCTGTGGTATGATGGT

A\_16\_P15076426

GTCTCTCAGATAAAGATGCCAATTCTAATGGTGTAGAACGTTCTCTTTTTATAGTGGTG

A\_16\_P00836034

CCACTGCACTTTTTCAATACCAAGAAAATGGAATTACTGCCTAGTAAATTTCTCACCCT

A\_18\_P14114886

ACTGCAACAAAAATACTTCTCATTGATAGGAACAGAACCAGTTATGATTCTTGAAGCCT  
A\_16\_P02220975

GTGACTTCCTACAAAATTCCTGAAAACTATTTGCCACTACATATGATCACACCAAGTCA  
CUST\_9072\_P1426210822 GTGAAGTCCTTTTGTTCAAATTCTAATAGCCATGGACCTCTGCCAGCTC  
A\_14\_P107372 GTTTTTTAATTTGGCTGTAAAGAGTAGGGTAGGAGGCTGTGCACTTGAACAGTTTGTA  
CUST\_2497\_P1426210822 GCCTGTGGTGGTTGTGGCTAACTGGATAAAGATACATGATTTCAAACCC  
A\_14\_P127666 TCGACTTTATTATTAATACGGTAAAACACTACAGAGAGTTTGAAACATCAGTCTGGGGCGTC  
A\_14\_P128347 TTCGGATACTATTTGTGAAGCAAGTCAGAGGAATGAAAGACTGTCATAACAGTCTTGAAT  
A\_18\_P14820363

GGACTAGATCTCAGAATAATTCCTATCCTCACAGGTATTCATCATTCACTCAATGGAA  
CUST\_2817\_P1426210822 CATGTGTGCACACACGCCACTCATGCAGAAATATTTACGTGAGCTA  
A\_14\_P107007 ACAGTTGGCTTGGAAATTATGTCTTTCTCTTTTAATTTGATTGAGTGGAAATCTGAGTGAA  
A\_14\_P123051 TTGCTTTTGTATGTTGGGTCAACTTGGCCTGACGTTTCAGAGGTAGAC  
A\_14\_P120150 TAACTCAGCAAGGCTGTGGTCTGATCTAATTTGCCTTTATAAATGCCTACTTCATGG  
A\_16\_P02248578

TCAATACTCAAATCGTTTGGCTCTAAATCTCTACCTTAGTTCTTACATCTCACCTCTCCTC  
A\_14\_P105429 ACTTCCAATAACAGTGTATCTTTACAATATTCCAAATTCAGTCTTCAGATGCCCCCAAAT  
A\_18\_P15651117

TACTAGCATCAGCCAATGTCTAACTCTTAATTTGTCATTTGCCACTTTTTTTCTTACCCC  
A\_14\_P115281 AGACAAAGCCCTTAAGAGGAGATTCTCCTTGGCAACAAACTTAAAGGGTTAAAAC  
A\_16\_P16886738

AATGACTTGTTATCTGCATTCTTTGAGGCAATTCATGAACTCGATTTTCATCTGAGGAAT  
CUST\_5618\_P1426210822 CATATTTTGCAGTTTGGGGAGATCGTAGATGTGCCTCAGGGAGATTG  
A\_14\_P127245 CATTGCAGTGGAAATCCTGAGAAGAATGGAGAGAGAAGAATGAGGTATGAATGAAAGAT  
A\_14\_P122141 CAAGGAAATTTTATTACAAATTCCTTATAAAGGTGGCAGTGTGGCACCATCTACCTAGAA  
A\_14\_P106628 CCTGTGTGGTGTGTCATGGGGATGATAATTGTTTTCTTCAAATCCAAAGGTA  
A\_14\_P111965 CAAACAGCACTCATTTGCACCCGGAGCATTTTCTGACACTGTTTGATTTTC  
A\_14\_P139931 CATTAGAAAATCGAGATCTACTTACTGAAAGTTGAGGGTGTGGAATAGAGGTGCAG  
A\_16\_P02991999

ACTTATCTGAGTGAAGACTTCATTCACACTGAGACATGTTTGCTTATCTGAGACAAGAGT  
A\_14\_P128154 CTATTTATCATCATATGATGTCAGCCCTGCTTTAGGTATGTAGACTTTTCCCTTCCATA  
A\_14\_P132564 AAAACACATCTTATATGTGGATACACAATCCTGAGGAAGAAATCCTGTCAATAACGTCTC  
CUST\_4054\_P1426210822 ATCAAGTCACCTTGCTCATTACAGTCATGTGTGGCTAGGACACC  
A\_14\_P104995 CAATAATACGTCAAGCACCAAATGCTACAAAGAAATCATGAAAATAGGCCTTAAACGAGT  
CUST\_1673\_P1426210822 CATAACACGTATTGTTTAAAGGCATTGCCCTCTTGCTGCAGGCTCTAT  
A\_14\_P117235 CATACTAAGACTTGGGCCTTATTTTCAGGATAAAGGTGTATTTTGATTGCCAATTTCTGC  
A\_16\_P00779908

AGGACACTTCTGCCTAAATTCTCCATTAAGATACACATTTTCCATACATACAGTGTAGCC

CUST\_5729\_PI426210822 GTTTTAAGGCATTTTTTTTTCTCACTCCCAGTTGCCTGCCCATGTCTG  
A\_14\_P108014 GGAAAGGAGAAAAGTAAATCACTATTTCTCATCCTCAGATTCTTACAATCTGGACAGGAA  
CUST\_379\_PI426210822 TGCAAGGGACTCAATTTTCTTTTTTCTAATAACACCCAGAGTGTCTGCCTG  
A\_14\_P121839 TCTAAATACTTACCATTTTATCAGCAGACACCAAGGTCCTAAGGTAAAAGGACTTGGAAA  
CUST\_10095\_PI426210822 ACTGAGTGTTACCCAGCTGCCACTGCTGACCGGTGCCCCACTTCA  
A\_14\_P125204 CGAGCCCAGAAAGCCACTTTATCTGGAAGACTATTTTTTCTTTCAAGGATTATTTAGGTA  
A\_14\_P133419 CTCTCTGCTTTTAGAGTGAATGACTAGAACACATGACTTCATCTAGAATCAGTGTAGCAT  
CUST\_7601\_PI426210822  
GAATTCAACTTGAATTCCTAGTTTGTGACTAAGAATTTGCAGCCTCCGAGGAAATTTTT  
A\_16\_P18783717  
AAAAAAATTGTGCCACAATTTCTACTGTCTTGACAAAGATTACTTCTGATTTGCTTCCCC  
CUST\_143\_PI426210822  
TCTGAAAAGCCAATGTTGTTTTACCCCAACATTTAATCATTCCAATATTCCTCTCTG  
A\_16\_P18647433  
AGTATTTCCCTATCAGATCCCTTTCTCTACCTACAAATGTTTGATTCTTCTGTTTCGCTCA  
CUST\_8957\_PI426210822  
AGCATGAAATTAGCCATGTTTCATATTAAGGAGCAATCTAAGATCATTATTGCTGTTTCTC  
A\_16\_P18707134  
AGAAACTTAGCAGTAGTTCAAACAACAGACAGTGTATTTGTAAATTCCTAACAGGCTCCA  
A\_16\_P18325358  
AAATCCAGCAAAACTTACTTTTACTCATTCATCAGTTCTATGTCACTCCTTAGTTTCCCT  
A\_16\_P19139317  
ACCCCTCCAGTTATTAACATACTCCTTCTCAATAAAACAGTAAGACACCTGATATACGTC  
A\_14\_P115075 ATTCTGCTGCAATAAATGTTTCTACCCTCTTGCGATAGAATGGTGTGAGATGTCTAACAT  
A\_16\_P17379648  
AGAAACACAACCTGAGTTTGTAACACTATCATGCTAGCAGTCCTAATTATTGAGTGCCTGCTG  
A\_14\_P138157 ACTCATGTTATTTGGGAATATTGGGATTAGACACTGAACATGTGGAAATTCATTGCTCAG  
A\_18\_P25452176  
AAACAACCTAAAACACAAGAAAGATGAGTTTTTTTAAAAAATGACACGGGGAATTTAATGT  
A\_14\_P134584 GTAATGAAATGATCATCTTGCTGCAGAAGTATATGATGACAAAGCCTCAGAGGTTATAACC  
A\_14\_P128338 CACCCTTGCCTGGAAAAAGAAGGAAGAATGAACAGAGAATAAACAGGGCAAATA  
A\_18\_P22841637  
TGCAGAAGAACA AAAAAGCCAGTTAAACTTATTCCTTTTTTTTAAATAGCAATCTGGAATG  
A\_14\_P113616 TCTGCTAAGCAAAAATCTTCTAAGTTCTAAATCAGATTTGAATCATGGCAGAATTCAAGCA  
CUST\_9687\_PI426210822 ATCCTATGCCATCAGCAGTGGGTGGTGTAGTGTCTTTCTCTTCAC  
A\_14\_P131050 GATCAATATGAGTTTGGCCCTGGGAGATGGATATGCTTTTCAGATTACTAACAAAAATAGT  
A\_14\_P111144 GTTTTGTAGGTGCTGACTGGGTACTTTTTTAAACACTAGGAATGGTAATTTCTACTCTT  
A\_14\_P123468 TCCAATAGTTTACTTTATTAATCAATAGAACGGGATCTCAGTGGTTAAGCCGTCTTAA

A\_16\_P19184575

AAAGACTTTAGCCTCTGAGATTA AAAAGCATCCCTCAAGTATAATGTCACCTTCTCTTCAT

A\_14\_P109119 ACTGGGACATTTTCATTGATATTCTATACACCAAAGTTTTGACGGTTTACCATCATTCCA

A\_16\_P16847730

ATTCTTAAAAAACACAATCTGATGAACTCTCCCAATCTATGATTCGTTTCCTCTTGGAT

A\_16\_P18979994 TTGGATTATCACCTCCAGTAAAGTAGACCCTACATGTGGTTAACCAGAAGACTGAT

A\_14\_P106137 TCCTACCTCTGGATTACCTTAAAATACTTGTCTAGGATTTCACTGTAGTTGCTGCCTTT

A\_14\_P137461 GGTCTAGCACTTGAAGAAATAATAGGTAGATTTGAAATGAAACAACCCAGGGATATTCCT

CUST\_4865\_PI426210822

TAGTTTTCTACCCTTCAAATACTTTGTGTTAAACTCAATTACAGAGATAGATCCTTCCA

A\_16\_P58424117

TCTGCTACTTCCTCTTATTAACAGTGTAATCTCAGATGGGTTATTTAAGTTCTCTGTGCC

A\_16\_P16922957

AAATGGGAACAGAGAATACTGATGCTGTCTGTTGAATGTAGTGGAATACGAAGAACTAA

A\_14\_P119687 CTTAATCAATACATTTTGTAAATGTGCCATAAAATGAGACTTTTTACGCCTTTATAAG

A\_16\_P17839268

ATACCTTCTAGGAAGCACATATCTTGATTCCCAAAGTCTGATCTTAGATGCTCCACTTT

A\_16\_P17733619

AAAATGAGCACCTTATTAGTTTTATCCCTGGTATGACAATTAGTTACATGACCTCCCACT

A\_14\_P113847 TCCGGAAAGTTTGCTCTTTAGTATTTCCGTTGTAATTTATTACCTCCTGCTTGAAATTGA

A\_16\_P00824169

CTACACCCTCATAGAAATGTATCTCCCTTTCTACACATATCCAGATCCTATACATCCTTC

A\_16\_P36230906

GTTTAAAGTTTGGAATGCCTGCTGATGCCAAATACCACTTCCTTTTTCACTAGTATGAATT

A\_16\_P40075007

CCCAGAATTCTAAGAGAACTCATCTTCACTAAGTCTGTCTGTCATCATGAACTACCTATT

CUST\_4818\_PI426210822

CATTTCTTGATCATTTCAAAGTGAGGTCAGTTACAGAGTGAATGGGTTTCATCCTG

A\_18\_P16172286

AAAAATTGGAGAGGCATTAGCAGTCTTGAGATGTCCAAACCTTTACAGAAGACGATAAAT

CUST\_3360\_PI426210822

TGTGATTATAAAGATCCCTTCTGCCTCAAACCTTGAACCTTAGATATTCATTATAAGCATG

A\_14\_P202256 AATCCCATGAACAGTAACTCTCCCAAGTTCTCATTTTATTATGTTTCCTTTGACATTAGAT

A\_16\_P58424408 CTCCTTTAAACTAACGTCAAGTCACGCTGCTCCTCTGCTCAGAG

A\_16\_P15637375

GCACTTCCATGTCTAATTTTTTTCCCTTTAAACTCCTTCAGAAAACATATCGGTATCCT

A\_14\_P116890 TCTTTTCAGGTAATTGTGATTTCTGCAAAGGTAGGATTAAATTAGATTGCAAGGACTCG

CUST\_5689\_PI426210822 GAGAAGAGTCACTCCAGACGTCAGAACCAGACAGGCTCCTGAGAC

A\_14\_P119852 ACTGTCACTGTGGAGAATGTTCTAAAGCAGAATGAACTACAATACAAGTAAGTTTATGTT  
A\_14\_P108162 CAGAGGTTAGCATGATGAGCAGCAGTGCCAGTAAGAATCTGAAGTTCAAATTAGC  
A\_14\_P116914 GCTCTGGATATTCATTTTGTGACCTGCTACTCTTAGATCACATGATTCAACTCAAGTATG  
A\_14\_P105682 ACTTCTTAAATTCTTAAAAGCAAGTGATACGAGAAGCCTTGACTACTTGGCTTCTCTTGA  
A\_16\_P21661266  
ATGAAATGTTATCTGAGGCTACTATCTCTCTTCTTATCCACATACCCTTTCTGTAGAACT  
A\_16\_P18728740  
TTGTCCAATTTCTTTAGTGCTGAAAAAATGCATTGTCCATACTAATGACAACCCACTGT  
A\_14\_P133154 CTATACACATTTCTTGTGCTGTCATAGAAATAAGACACAGTAACTGCATGCTTGCTGGTG  
A\_14\_P101353 GTGCATGATGACGATCTTTTGTCTTCTTCTGAAGAGGAGTGCAAGGATAGG  
A\_16\_P00766784  
AGCACTGTAGCCAGATAATTTTTTCATAAACAAGACTCTCATTGAATCATATTCCTCTTCA  
CUST\_8934\_PI426210822  
AGACATCTAGAGTTAAAGTTACGATCTTTTCCTTTCTGTGCTTAAAGTGAATACTAGGTCAT  
CUST\_10251\_PI426210822  
TTATTTTGAGTTTTTATTTTTAGAGAACTGATATTTTTTCTGTTCTTGATGAGGTAATCA  
A\_18\_P13003465  
CTGATGTTTTGATGAATCTGTGTAACCTCATTACCCACATTTTCCTATGAAAATATATTCA  
A\_16\_P02847698  
GCCTCTTAGATAAAAACTCCAAACTCTTTAGAACAGTATTCACCTTTCTTTAGGACCTGGC  
A\_14\_P107160 TTCTACACAATAAGCACTCAACCTGGACTTCTAGACAACTTATTAATGCTTTGGGTAA  
A\_14\_P112566 CTGGGTAGGAGGGGCTCTTTAAAGGTCCCAAGATTCAAATGTTCTTGTA  
A\_16\_P16315150  
CTTTCAAATTCCTCAATTTCCAAAACCTTAAATGCCTCACTTTTCATTGACTTTCCAGCC  
CUST\_1072\_PI426210822 AGATGCTGGAGAATTGGGCGCATCCTGAATGTGGTTTTAAGAGCT  
A\_16\_P20565975  
AAATCACAAATGAGTATTGGTCTAATTAGGATACTTGACAGTGACATCTTACACCGAGGC  
A\_14\_P123557 CAGCAACTTGACTATCATATCTTGGTCCTAACATTGTCTTCAGAGGTAAGAATCTTCCTA  
A\_16\_P01930498  
ACCAACCCAATAAAAATTCCTACTGAACTCTAGCATTCACTAATTCTGTCCTTACATGCAT  
A\_16\_P40504061  
AAAAACATTTTAATTCAAATAACCATAAACAAGGACATTTTTAACATGGTAAACGGGCAA  
A\_16\_P16191152 AGATATCTGTGCTGACTTCCTTGGGTGACCAAATCATTTCTGGGAACTTAG  
A\_16\_P20699279  
TGAAGTAACATGAACAAAACCTCTCATCATGACATCTAACTCTGCAAGATATCTCACTGGA  
A\_16\_P37121696  
TCAGACATATCGTGCAAACACATACTTCTAGTTGTGGTAAAAGATCTTACTCATCCTG  
A\_16\_P00046732

CTGTCAGAGCCCTAAAATAACCTATGGAGATAAGCATATTATGACCCCTAGTCCAAGA  
CUST\_6747\_PI426210822 CAGCCAGAGCACAGGGTATTATGGCCAGCAACTGGGTTTCCTCAG  
A\_14\_P109517 GTTTGCAGCAGCACATCAGAAATATTAGGCATGACATCTAAGCCACTCTTT  
A\_14\_P125822 ATTAAACAGGTGCTTGAGTTCATTTTGTAACCTTTACATGTTTCATTCTGCAACCTGGTTTT  
CUST\_2872\_PI426210822

AGTAGAAAGAGAAATGTAGAAATCTGCCAGAAAATGTGCTGGCAGTGAAATGGAG  
A\_14\_P107298 CTTTATTTGCTTATATCAGTTGTCATACTGGGCTGCTGTCAGAGAATGTTTTTTTACATG  
A\_14\_P118621 GTAGGGATAGAACTATTTGAATTAATAGGAAAACCTAACGTTCAAACCCAACAGCCAGA  
A\_14\_P117506 GATGTTGAACTAGAAAGTAGATACTGACTTTGTGAGAGACCATGATGGAGTGTGAGATTA  
A\_16\_P18591054

TGTGCACTCTGTAGATTTCACTTCTGACTGTCTGATAATCTTTACTTCCAAAACCAAAC  
A\_18\_P22841915

AGATCTGCTCAATTATAAGATGATCTTTTATCTGTCCGCCTTATCTATCTTCACTGACGT  
A\_14\_P116043 GTGTAAGTTGCAGATGTGGCTTTTACTTTTTAAATGGCATATTAACAAGCCAGCAAAGTG  
CUST\_4515\_PI426210822 TCCCCACCTCCTTTTCATCATGTCTGTGTGAAAACGAAAGCTATTGTTTATGTA  
CUST\_251\_PI426210822 TGGGGCAGGTAGTTATCTCTTGGGAGAGCCTGAGTCTCATCTCAT  
A\_18\_P22841389 CCATAGGGGCAGAGACCTTCTGCTAAGTCATACCCGCATATCAAGAAATATATTGCTA  
A\_14\_P110074 TGAAGTTATCCATTAGTTGTTATGCTGCCTTTAATTTTTCCAACCAGATATCCAGTGAG  
A\_14\_P108312 TATCTACCAACTCATATTTGTCCAAACTTCTAGGGGATTGCAACATGGAGAAATTATC  
A\_14\_P110402 ATCTTTGGACTAAGAATCTGTAAAACAAGTCTTTCAAACCTGCCTTCAAGTATCTCCTCTG  
A\_16\_P00488576

CTGGTAAACTCTTTAGGAAGAATACAACCTCACACCTTTTACAGTTTCCATCACATTTCT  
A\_14\_P125997 AGAAAAGAGAAAGAAGGGAAGTTTTCTTACTGAGTAAGATTTCAAGACCCGAGCA  
CUST\_1518\_PI426210822 CATCCTTCTGACTCCGAGGCTTCCCAGTCCATGGAGGATTACAAT  
A\_14\_P114816 ACAGCCCATTTCGTTTCATGTTCTAAAGGAGATATCTGTTTTTATTGAATGGAACCTTTGCAA  
A\_14\_P101441 GGATTTGTTTTCTTTGAAAATTCGGTTGATCTCACTACCTTGCTCATTCTTAAACTCCTC  
A\_14\_P111901 TCTGGCCACTTAATCTTAGTGAAAACATATTTCCCCTCTTCTAACACAGGAAAGATGTAA  
A\_14\_P113406 CCTAGAGTCTATGTGATCTCCCTAATCTCTCTTGGACAACATACACACATATTCACACTT  
A\_16\_P15712838

AATAGGATCCGTAATACTTTAGTTTCCAGGTAAAATCCATGACATGTCAAGAGATCACAT  
A\_14\_P122857 TTGTAGCGTTCTGTCTCATTACGAGCAAATAAATAGACTTTTCATTGGAGTTCGTCACATC  
A\_14\_P128147 ACAAACCTGTCCAAGAATAGTCTATGCCATCCTTTACTTTGACTTGCAGGAGTATTACAA  
A\_14\_P111125 AACTCAAGCAGAAGGTTGAAAAAATCTTCTAAAGATCATGTTTAAAGAAAGGCTGCATCC  
A\_14\_P134228 TGATCCTAAATTTGTGCAAAGACCCTGCTGTCCAAAAATTTTCAAATGAATACTGAAAGC  
A\_16\_P58424068 AAATAACATGCTCATATCTCATTGGCCAGACACTGCACATGGCCACTCT  
A\_14\_P138161 AAACCATGTGATGCAAAATGATTGGGTGCTGAGGGAAAAGAAATTGAATTTTCTTTTAGA  
A\_14\_P105856 AACGAAAAAGGAGAGAAAAGTAAAACCATATGACACATAGACGCCAGAAAACACAC  
A\_14\_P112073 GTTGTTTTTGGCATAAGCGAACTTTGTGCCTGTCTAGAAAGTGAAAATTGTTTCAGT

A\_14\_P121336 CCATTGAAGATTCTTGAGCAATGCATGGGAGGATAAAAACCAGTTTCAAGAAAACCTAG  
A\_14\_P127031 GTATCTTTGACTGGGGAAACATTTGCAATAAATGTTTACTATTTCAGCATTGGGGCATATC  
A\_14\_P132846 CACTCCATGATAGACTTTACAGTATCAACTTAGTAACGTATCATAACAGAGCATGTCGTCCG  
A\_14\_P101544 TTTCCCTAAGTAATTAGAAAAGTATTGGTCCCAATTTTGCTATCTCCCATCCCATAACAGC  
A\_16\_P01249211  
CATTGTCCCATAAAATGTCTCTTTGATCTCCAAATTAGGCCCATCTTCAGTAATACTCA  
A\_14\_P128705 TGACATTGTGAATTGCAAAGGCTTAGAGTAAAAACAGTATCTTCAGCACAATAGCAGAGT  
A\_18\_P15413493  
ATCTATACAGCCACTTAAAACAGTATCGTAGGTGAAGAGTATGATGGGAAAATGGTAACG  
A\_18\_P25453096 ACTTCCTCAGGCACAAATCTTCCATCCCAGTCATTTTCAGGTGAGG  
A\_14\_P113045 CAAGAGATTCTTCTATTATTTCCAGATAGTAGGCCTGAGAAAGAAGCCTAGTGTGACAT  
A\_14\_P129074 CAACTTCTTTAGTTTTTAGAATATCAGGCAAATGAGCCAAGTAACAGTTGCAGGTCTTGA  
A\_18\_P22839419 GTGCTGCTTTCTGAGCAAGTCTCTGCTTGGGGCTGCAGTCTCCTG  
A\_14\_P102535 GAAAACCTTCATATTCTGTCCACAGTGTCTTCTATTTTTACTGTCCCAAATGTGAGATTGC  
CUST\_3762\_PI426210822 AGACAAGCAATGGGTAAGAAGACAAGGCCACGGAGGTCAAAGATA  
A\_14\_P135709 GAAAAGTGAAATAAGCCACTTTGAAATAAGCCCAGAGTGTCTTGTCAACAATTTCTCTTA  
A\_14\_P107936 AGGTTGTATTTGTATCTTACATCACCGGCTCTGGTCAGATTTCAATTAATGTCACAGATA  
A\_14\_P110721 AATCTGATTTCTCTCAAAAAGTTTCCATGCCTGTGATCTAGCACTTTGCAAAGATATTGTT  
A\_14\_P114258 AAGACACAAAAACCTGTTCAAAACTAGTATCTCCACCGAAATGGGACAATATATGAATCT  
A\_16\_P21234393  
ACTCTAGGCAAGTTATAAGTAACTCTAGACTCCAAATGGATAATAGAAGACCCAGTCCTT  
A\_18\_P14134206 ATTGTTCCCTTGTCAGTGTGTAAAGTTGCATGCCAACCTTTTGTAACAGGCTG  
A\_18\_P22843012  
ACCTCTAGATTTCTTTTTTCTAACTAACTGCAAAACAGCAATTTAATAATTTCTCTTT  
A\_14\_P107174 AATACGTGCTAATGGTCATATCTGTTATTTAACTGATGCAAAATTTGGGGTCAGAAGCAT  
CUST\_5991\_PI426210822  
AGTCACTAGTTTTGGTAGTTATTTTTCAAAAATGCATAGTGTATCCCTTACTTAAAACCTAT  
A\_14\_P120363 TTAAACCATGTAAGTAAACTGTGCATGGTAGAACTAGAGATGGTCTATTAACCAGAGTGG  
A\_18\_P26793737 CTCTCGGCTTCTCCACCACTGGCTTCTCTCTCTGACTCTTTCTCC  
A\_14\_P106531 ATGCACTTCAATAACCCTTTGGAAGGTTGTATACCCAGTTAAACTACAATTTGAGAAGT  
A\_14\_P114972 CGTTTCAGGGGTCTAAAGGAACACAGATTTTCGTTTTTTGGTGGAGAAAG  
A\_16\_P02654821  
CCCCTCTCTTTAACAATTGTGCTGTTTATCAGAAAACTACAGAGATTAGAAACCACA  
A\_14\_P126279 CTCATGTTTTTCCAATATCAGATGTTCCCTCCATGGTCTCTGTTCCCTC  
A\_16\_P00685134 GTAAACTTCTCATTTTCAGATGTCACTGTTGGAGCCTTCATGTCCGACAGC  
A\_16\_P15650726  
GCACCAGTTAATGTTCACTAGTATCTCCATTGATGTAGATTAACCATTGCCTTTCTAGA  
A\_14\_P120810 GTCTCTCTAGGTGATGTGTTTACTTCAATTTCTTTCTGTGTCTGAGAAACAAGATTGCAAA



A\_14\_P135831 ACTTGTCTCCAACCTTTTGAGGTCTACCTTGTGGTCTTTAGAGGTAAAACTTTGAAATAT  
A\_14\_P120247 GAAGCAAGCCATTACAGAGAATACTATAACCAAGGAAGATATTTCCACTTCCTTTTCATAGC  
A\_18\_P14137145 AATATCACTGGGAAAAACCCAGATCCCCTACAGAAATACAACACCGGTG  
A\_14\_P132934 TACAAATGGAAGATACTTTTATTATTCCAAGCCATGGTCTTCTGTTGATACCCCAAACCTG  
A\_16\_P16747288  
AAACCCACTTTGAACATTTCACTTTACTTCCCTCCATTTACTCAGTCATTTTCAGTCTA  
CUST\_4344\_PI426210822 TTAAAAATTGAGATTCCCATTGATCCAGATCCAGTTGGGCCTGGGAAT  
A\_16\_P03798330  
GAGCAATGTGACTGTGATTACCTAAAAGTAGTAGAATAAATTCTAAAAACCCAAGGGT  
A\_14\_P124881 GGCTTCTTGGAAATTCGGTGAATGTAGTATTTGGTATACTAGAAGGAAACAGATGGAATC  
A\_14\_P132312 GAGAGAAGGAAGAGAGGAATGTCGTAGAATTATAGAAGTTATGTGTTCTACCATGTCTCT  
A\_14\_P118436 AATTGTGTCCAAAAGTATCTGTGTTGACAATTATAGGAGCAGGACTGGCCTGAAAA  
CUST\_9445\_PI426210822 GACCTAGTAACTGCTCTTTAACTATTTACCACCCCTTCTCCTCCATAAAGTG  
A\_16\_P18402389  
ATGGCTTTGCTGTTTTATAAAACCACAGAGGTTAACATTTATACTCTAGGCCCAGATTCT  
A\_14\_P122083 TCAAAAGAGATTAACCTGGGATTAAGTGAGATGACGCATGTAAAGATGCTGTGTAAACTGT  
A\_14\_P200698 AGTTTCATCTGTTACCTGACAAATTAAGAAGGGAAAGGCTTTTGAGACAAAACCTGTGCT  
A\_14\_P123580 GAATGTCTGATCAAGACGTATTCATGTAAAGGCCGTAAGTATGAAATTCTGGGCAACAT  
A\_16\_P37140731  
CTAACCATTCATGCCTTTACCTACGATTTCCATATATCCCTTTCAAAAAATCCTGAGGTT  
A\_16\_P20258822  
AAAGGCCTGTTACATTTGAATTTCTGCATTCTCAAGAACAATTCATGGCAATAACTAA  
A\_14\_P106627 CTAGTCTAGAAGCCTTAAATAGATAAACATTCCAAATGATTCCTGCAATGGTGATGGCTA  
A\_14\_P108813 TGTTTTAGGTATACATGATCGTCTGAGTGGTCATAACCTTTTCTTTTATCATGTCTCGCT  
A\_14\_P121167 AGTAAGAATTACAGTCTGTCCATAAACAGATGTGCCAAATACATCTTTAAACTGTGGAGG  
A\_16\_P17266973  
AAAACCTGGAACATGGAGGATCATACTAAGAGTTACATTCAAATTGCACACTGTCATGTCT  
A\_14\_P118213 CATTCTTGCCCTTTATGACAAAATGTTAATGACAAAATATAGGTGATCCTCCAATGGAGG  
A\_16\_P15609434  
CCTTCCACCTTCTTTTAAAACTTTGCATTTTATACTACCGATTCCATATCAGTTTCCAC  
A\_14\_P133540 ATGCTCTGCTTACAGCAATTGTTATCCTGTCTCCAGGTAATTCCAATGTTACATTTTAAT  
A\_14\_P105144 ATCCACTGAGTTTTTCAGTGTCTCCATGGATACCTTTATTAACCTAGAATACAAAGAAAAT  
A\_14\_P202355 TTGTTACAAAGAACACAGGTGATTCTACAATCGTTAAAAAGGCCTGTTAAAAACAACCGT  
A\_14\_P117896 ACAGATCATTA AAAAGAGCATGTTTGTA AAACTAATATCCTTCTGGGGGATTGCAGGAAA  
A\_14\_P124027 AGTCTCCATCAAATGTTGTGAGTGAAAGAAGGGAAACTATTACAGGTAAATAAAGTGTT  
A\_14\_P122099  
TATAAGATGTATAAGAAGGCATCTGAGAAAAGATGAGGAGACAAGCAACACAACAACCTT  
A\_18\_P22442173

TGCCTAGTGCCTTATACAATTGAAGAACATTAGTCATCATCATATTCCTTTCCCAACAA  
A\_14\_P107903 CGATGCCAAGAAGAGCCTGAACCTCAACATCTTCCTGAAGCAATTTAAGT  
A\_16\_P18017537  
AAAAACGTGTCTAGTTTTAGAAATTACGGACTTGATTAGGAGAAAGGATTAAGAAGGGCA  
A\_14\_P109373 GTTGGATGCTTTTGGTCCTGTGTTGCTTTTAAAAACACCTTATAAAAGAGGAGAGTATTT  
A\_14\_P116953 AATTTGATTTGGCAAAACATACCGAACTTGATATTTTTTGAGGCTAIGCTTTTGTGGCT  
A\_14\_P131831 CTTATCTGTTTACCTCTCTTTTTACCTCTGTTGGTCTGTATCTTTCAGTGTGAGAAAA  
A\_16\_P18574990  
ACTGCATCTTTCACTAACAAACGAAATGTAACCTGAACTTTGTCTTACACATAGCCTTGA  
A\_14\_P124474 CAACTCGACACCTTTCTTAATAAAAAGGCAAAGTGCAACTTAGAAATTCTAACTGCAGACA  
CUST\_5699\_PI426210822  
TAAATACTCTTTTCAAAGAGGGCACCATGGCAGAACACATGTGAAAACCATCTA  
A\_16\_P16843119  
CACTGAAGTTCGTTATCAACAGTTTTATCTGACAATATCTCACCACAAAATTCCTAAGGG  
A\_16\_P01149916  
ACCAGACTTGAATCCATATATCTCATTGCAAACCTAGATTGATTTACTAATTGGCTGCCA  
A\_14\_P116039 CTTAGAAATCTTGGGTGGCCTTCACAGCATGGTGGTTTCTTAAAAGTATAGCATTAATAT  
A\_14\_P135093 CTGCCATGCAAATGAACTAATGAATATTTATGAAGTCTGTTCACTGAGGTTGAAGAGACT  
A\_14\_P105275 ATTAATTTTACGTTTGTGCGATATACAAATAAGTGAGAGCCCTTCAGTGTTCAGTGCTCA  
CUST\_10348\_PI426210822 CTTCTTCAGGGGAGCTTATGACCATCAGGGTGGCTGTGATGCTTC  
A\_14\_P136750 CCTCACTTAGTAGATCTTTTTTTAATCCAAAGGATTTGTCCAAGTGATGCTCACTCTATG  
CUST\_9535\_PI426210822 TATATCATTTCAGGGCATCTCTGGGAAGTAGTGATGCCTGTCTTCC  
A\_14\_P126834 CTTCAAAGAGGAAGCCTTCCACAGCAATAAATAAAAATTGTGCAAATGTCACAATGTTCC  
A\_16\_P18557013  
GAAACTTCAAGAGATAAAAAGTCAGCCTATACTTCATTGCTCTCCATTAATTGCTCTTCCC  
A\_16\_P16657772  
TCGGAAACTAAAATAAATGCCCTGTAGAATTATCAATCATGTAAATCCAGAAACAGGCA  
A\_18\_P14132352 GTTGTGTGCTTTGCTCCCAGAGGGACATGAGTATCAAAGGTCTGC  
A\_14\_P138662 GTCTTACCAAAGTCATTTTATCCAGCCTTCAAACAATACAGTTTACAGAAGTGTCTCC  
A\_16\_P00685524 CTTATATATGGGAGGTTTTTACGGGGAGCCTAATGAAGTGTAACCACTCCAAACT  
A\_14\_P201561 CTTGTTGTTCCCTTTATATTCTAGCAGGGAATAAATAATTGTTTTAATTAGGTATTTGTT  
CUST\_2152\_PI426210822 AAGCAGGAGACCAGTGAGAAAGCAGTCTTTTCAGGATCTGGAAGTA  
A\_14\_P109436 TGGTCTTCCTGCAAGGACCTAATCCCTTTTCTTGTTTAAAATAATTATTGCATTGTTT  
A\_16\_P19725284  
TTGGGAAATAAGACTTTAAGTCCTATCTGTGCGACTTTAAATGAGTGATGCTAGTCTTGG  
CUST\_10227\_PI426210822 ACTTTGGGTCTGCGAGTAATGGAATAGGTAGGACTGGCTATGAAG  
A\_14\_P104827 AGAGGATAAAAAGTAGTCATGACACACCATCCTTTTCTGTCTTACATTTGATATGAGTA  
A\_14\_P104796 CAAGAACTTCTCCATCTGGGATAGATGGGATACAAGGTTATGTTCTGTTTTGTTTTATTG

A\_14\_P117236 AACTCACAGACCTATTAACAAATTGAGTGCAGTTATTTTCAGACAGAATCCTAACCAGTTC  
A\_14\_P119386 TCTCAAACATTATACAGGGAAAAGCCTCTCCTAATTCCTTTTCTCTAGGCAAAGACAAAGC  
A\_14\_P138021 CAAAGTGAAATAAACACTATTTTGACGGCTGTCTTTTATATTTCTGAGCACACACAGAGC  
CUST\_6732\_PI426210822 AGGCCTCCAAGGTTACCTATCTTCTCTGTGCATCACACAGTCCATTAGTTAT  
A\_16\_P38959159  
TTTCTCATCTTGCCTTAGTTCATAAATGCCTTACAGATTGAGAGAATTCCCCTAACTAGC  
A\_14\_P111002 ACACAGTTGTTTTGAAAGACATGTTTCAAAAATCCATTCAAATGTTGGGTTTTATGTGGG  
A\_16\_P30099679  
AAAAAAAAAATCACTATCTGGCAGGAAAAATTATTCAGATTCAAAAATATGCCTCACA  
A\_14\_P201289 TACACCCATTGTTTTGTTTTATCACTAAAATGACAAGAATGCACTGCAGATGGAATGGAT  
A\_16\_P20930053  
AAACTTCCAGAATTAGTGATTGATATGCATTTCCCTTACAAGAGAAACATAAAAACCCCTCA  
A\_14\_P132292 TAGCCACTCTTGGTCATGAGGAAGAGAACTCTAGAATAGTAGGGAAAGGACAT  
A\_16\_P18223444  
GGTTTCGAATAGTCACCTGTATCTTCATGTAACTATCTACTAGCACTTTTGAATTCCCT  
A\_14\_P110507 GTCCACAAGAATTTCCAATTCCATCATGGTTCATACCAAAAATGTTTTAATGAGGAA  
CUST\_5581\_PI426210822 AGGACAGGCAGGAGACCAAGCCTTCCCTCTATAGGGTACATAGTC  
CUST\_8758\_PI426210822 CTGGACATCCAGAAGTCTCCGTGTGTGTTCTCATTAGCTTTCACTCT  
A\_14\_P111763 CTTTCATTTCTGATGTCACCAGTCTTCTTAGATCTCAGGATTTACCAGAAAGTTTTGTTC  
A\_16\_P36230105  
ACCAACAAGAAGATATCAAGGCTTTTTCTTAGATCTGCCAGAAGTCTGTAATTTGCTCTA  
A\_14\_P126224 CATTAAATTCATCAGACAACCCAGTAATTCACTTACAGAGTGTGACTTGTTCCTGTAAT  
CUST\_4680\_PI426210822 AGACCTTGTTCCCTCTTGGGAGTTGCAGGGGAGTGTCCCAATGCT  
A\_16\_P41758365  
TTGGTTTTTCTCCTTCTACCAAATTGCTTAAAGTCTAGTTATATATCCTTGCATCCTGGC  
A\_14\_P135132 GGCAATAACTATTAACTCCAGATTCCCCAGAGAACAGAATTTGACTTTTTGTGCTTAGTTT  
CUST\_6604\_PI426210822  
ACCTATCCACTGTTTAAAGATTAATAATGGCCAACAATAATAATAATTGCCACAATAGCTT  
A\_14\_P136375 ACTAGGGCAAATCTTTAAAAAAGAAACATTTACAATAATAGAGAAAAAGACTGTGGCCC  
A\_18\_P10793233  
AAATGTCTTCAACACTGGTTTTGTAAAAGAAGAACTGAGGAAACTCTTCTGACTCCTTTGT  
CUST\_5285\_PI426210822  
AGATTCTTGCCTTTTATGCTGTGCAGAATGACACTTTTATTAGATGCTTTAGAACTGCAGAA  
A\_14\_P115804 CTGGTTTCCACTACAGCATCTGGATGACGTAGGCCAATTTTTACTAAACAAAATGTAAA  
A\_14\_P102688 GTCGGAAGGGTTTTTGTTTTTGTCTGTTGCCATTTGTGTAAATACTAGTCTTTTTGGA  
A\_14\_P117545 AATCTCAAACCTTTGGGGAATTGGTCCAGTGTATTTCCACAATAAAAATGGAACCA  
A\_14\_P132481 TCACAAATGTAGGCAAATTCATGCCTCTGAGGAGTAAATTGATGCTAGAAGGAATATGAT  
A\_16\_P00685078

GAGGTTGCTCATTAGGTTCTTCAGTGCCCTTTGTATTATATTTGGACACTGATTACAAAT  
A\_16\_P17940552  
AGGGTCATAGAACACTAGAACAAATTCTCTTAAGTTTTGAATTGGTAACATCATCGGCTCT  
A\_16\_P17910070  
AAGTTAACTACTGAAATTCATCTGTGTCTACTCATTGTCAGACAAGTTTAGAGGG  
A\_16\_P18308587  
ACCAGACTCCTTGATCATTTTACCTTCTCATAGCACGTAACATATTACATCCTAATCACC  
A\_14\_P138547 ACTGCACTGCTTAAAAATAGACTGAGGCAAACCTTATTGAGGCTTATCGTTAAAAATGACA  
CUST\_6930\_PI426210822  
AAGGCTATGTTTTGCTTTAGAAATGTCAACAGAGCTGTAGTTACGACAAGGATCAATTAA  
A\_14\_P105651 CATTCAATCCTGAGAATGGTTCCTCCTCAGATTATAGGGTCAGAACTGAAACCTA  
A\_18\_P14241048  
ACTGGACATTTTGCAAAATTAAGAGAACTCCATCTGTTAGAATAAGCCACAACCTCACA  
CUST\_1023\_PI426210822 GTCATGTCCAAGCAGAAGGCAGGGGCATGTTTAGTGTGGCAGAAG  
A\_14\_P102625 ACATATAAAATCAAAAGTTAACTGGGCTTAGTAGAGGAGCAGAAGCAGAGATGTTTGCAT  
A\_14\_P131670 GGAAGAAAACCTGTAAGGTAGATGTTCTTCTTTGTCTCTGAAACTGTTAATGCATTACCA  
A\_16\_P30952473 GCGCTTGCTGACTTTCATTATTGCCTGGAATAGGCAATGATTCTACAAGCACTAAT  
A\_14\_P106373 TTATTGGTTATCAGTCTTCACACTTATTAACCATCAGCGTGGAAACACATCTTCACATTT  
CUST\_6175\_PI426210822 CTTCTAGGAATACTTTCATTTCATGTTTTGCCAAACACCCAACATTCTCCAGT  
A\_16\_P03469787  
GCTGTTGAAGATCATTTATTTTGGGTTCTTAGTCTCTCACAAAACCTTAGAACACTGACA  
A\_14\_P100116 AAGGACAATATAATATATTGGTATTTTCATCAACCTTATGGCCAAGGCTTCAAGTCCACAG  
A\_14\_P109289 GGATCTTATCCAGACTATTTCTCCCCTAATTTAGAATAGGAAAGTGGTATCAGAAAGTGC  
A\_16\_P02191036 CTCATTAGGCACCTCTCACTGATTTTCTCATGTCTAAACTAACTGGTGAGGTAGG  
A\_18\_P22842844  
AGAAAATAATCACACTCAGAGACTCCACTTCAAATCCCACATCTCTTTTGTGGCAAACCT  
CUST\_6348\_PI426210822 CTTTTTGAGCATAAAACTGGCCAGGTGGGTACCTATGAGGGAGG  
A\_16\_P38392734  
AGCAAAAGCACTATTGAAGAAAGACTTTGTGTAATGTCCTTTATCCAAGCCTAATGTTCA  
A\_14\_P135473 CAAAAGAACATGCTGCAACTACACATCAGATAATATATCAAACACTGTGCTTCTCAACT  
A\_18\_P22842276  
TAAAATAAGGACTTTTAAGGGAGATGGAAAGACACAGCAGGATATCTGTAAAGCCAGAAT  
A\_14\_P126245 ATCACATGGTGCTGAGGATATTTTCGTGCTTAATGGTTTGATTCTACACAATTTACAGAAT  
A\_16\_P01939188  
AGCACCATGTTTTATCAAAAACCTTTCAACAGAAATTCAACTATCCAACCAGGCTTACTT  
A\_14\_P126204 ACAAGTCATCTTATGCACATTTTCATTGACTTTTCTTATTGCATCCTTCAGTTGGAGAAGT  
CUST\_1197\_PI426210822  
GGGGATCTCTCCAAAATGTCTCAAGCTTTTGAATTCTTAAAAAATTGGTCTCTGGT

CUST\_1858\_PI426210822

TGGCTTTGATTTAATGGAGCTAGGTCCAGTCTCAGATATCTTTGAGGCTTTATTCAT

A\_16\_P36196912

ACAGGTCAGATGGCTTTTTGATGGTTTTCTTGGTTTCTTACACAAAATGATAAATGCTCT

A\_14\_P135943 AAATGATTGGTGGTCATCTCATCTCATGGTATACTCCTTACACACAAAACATTCAAACATA

A\_14\_P136892 CTGGTGAATTCTGAAAAGAAAGTGCCCACTTGGTATTTTCATTAAGAAGAACTTACGTTG

A\_14\_P103672 CCTTGACTAACCCCACTTAGTCATTTTGTGTTAATTATGTCTGCAGAAAGGAAAAGGTAT

A\_18\_P13695407

AAATCAAATGCCATAAGACTTGTGGAGCATGCTACAGTTTATAAACGGGGTTTTATTGC

CUST\_6284\_PI426210822 AGTCCTTACTGCATAAGGGGACAGATGATGTTTCAGTTACAGTCATAAGCCTTT

A\_14\_P108133 CTGATAGTATTTTTATGTGAATCACAAATACGAATGCCTACAATTGCCCGAAGTCTGGTT

A\_16\_P18680592

ATGTAGTGAAGTGAAGTTCCTCTAATGCCTCACAAAGATATTTTTCCAATTTTCAGATGGG

A\_14\_P106308 TCTATTGTCTATAGATGCTGACATTAGCCCCAGAAGAGGAGTAAGAATGCTAAGAAGTG

A\_16\_P02959455

CCTACAGAGACCTTATAACTTTGACTACTTAGAATTGCGTTCCATTTTTAATGACCAAGC

A\_14\_P116276 CTGGCTTTTCGTATATTGTGTATAAAAAGATCAGATTCAGGATGATTTGGTGGGATTGCC

CUST\_8884\_PI426210822 CTCTCAGAAAAGCAGTGGAAGAGGTTAGATAGATGGTGTAGTAGGAATCATGG

A\_14\_P119424 CTAAAATAGTTACTATTTGATTGTGCATCTTCTTGTGCCAGGCACCTCTTAGGCATTTA

A\_14\_P104460 AGTGTGAGAGGAGAAACAAAATATGAGCGTTTAAAATACATCGCCATTCAGTTCGTTTGT

A\_16\_P20894443

ACACTGCACTTTGACTATAACATGCTTGTGAAAATCCTCATCTCCGAAAATGTTTCAA

A\_16\_P19182218

AAGGTAGGCAGTAATTCACCTTCAGAAAGAAGCAGTATAGGTATTGAAAGTAATGGTAGGG

A\_14\_P122555 CAGATTCTGCTTTAGTCCCAACACCTGATTTCTACATAAGATTTTTAGAAGAACCATTGG

A\_14\_P202134 TTTTAATGTCTTCTACGAGAAAATGGCCTTGCTTAGGAACATACTTGTCTGCTAGGAAA

A\_14\_P111774 AGGATTTGAGATACTTATTTCTTTATTTGAGCCAGTCTTGCAAGGTTAACTTCTCACTGG

A\_14\_P116804 CTAAAGAAGTGTGCTTAACACGTGTGAAACGTTTAAAATTTTGATTCAACTCAAGTCA

A\_16\_P02422172

TGCCCACTTTTGTTTTTAAGACCACTTAATAGACTTCATTTCTTAAACCAAAATCACTGG

A\_16\_P17427563

AAGTCCATACCCATAAAATGTTCTGCATGCTTAAAGATGCTCTTATAACCCGGAAAAATTC

A\_18\_P22840691 CTTCAAGGTGTTTCAAGATGGAGTGGGGTAAGGTAAGGAAACAACAGTAAGAATT

A\_16\_P40055451

AGCACTTCATTTTTACAACATGACTCTTGATTGACATCCCATTACTTACATGCCATTCAA

A\_14\_P128866 TATCTTACATGATAGGATTAAGGGCATGCTCATTAAGCAAGACCAAACTGAATGCATCT

A\_14\_P116695 AAGGATAACTTTTTAAACAAGAGCAATAATATTATTTCCACCTTCTAGGATCTGGGGTCTG

A\_14\_P135934 ACCTTAGAACCTGAGATGTCGAGTCAAAAACACTCTTCTTTAACCTTTCATATATCTGTC

A\_14\_P113024 ACCAGCACTGCTGAGATTTACTGTAATGTCACTAATGTGAAATTTCAATACTCCCTCTAT  
A\_14\_P125171 TTCTCAAACATGAACGACTGGTTTGTGAGTATGTTGAACTTGCCACTATCTAGTAAACA  
A\_16\_P20229401

AACTACAAGCCAAAGAACTTCAGAAAAAATGTGTATATCCCAAATCTCTAAATGCTGCT  
A\_16\_P15048277

ATTGGCTTTTAATTTTCCTGGAAATTCTAGAAATCACCATGAATACTGCTTAGGGAGCAC  
A\_16\_P00913328

AAATGCAAGTGCAATTTGAGTTATAAAAAGAGCAAGGTTGATGTTTCACAGTTGATGGCTT

A\_14\_P113133 TACAAAACAATGGCAAAACCACACAATGCTTTGTAAACAAAAGAAATCACCCCCAAG

A\_14\_P119084 CTGGATGGCACAATAAATTATTAAGCCATGTTATGAAAATATAACTATATTTAAGTAACC

A\_14\_P139972 TTGCCAAAGCAAACCTCGAAACTAGCCTCGATGTAATTTAAAACAGTGTCATCCAGTTATA

A\_14\_P137099 GCACATGCATGAAAGATAAGAAGTGAGATAGCATGATGGATTATGAGAGAGGTTGTATCA

A\_16\_P37254320

TCAACTTACAAAAGTTGCTTCCTAGCCAAAAGTTATGTTTGATGCTCAATTGCAACAGTT

A\_16\_P20722959

AACACACCTATTATTTATCACCTTTAGAAGCAGATTTCTCTGATGTATACTATGCACCCA

A\_14\_P136664 CCTCATCAGACACAGATCTAATTGTCATGCTTTCTGAATTCTTTTAATTGTCTCTTTCCC

CUST\_3941\_PI426210822

ATGTCCTGTCTTGCTTATGTTAAGTTGGATAGGAAGAAAAAATCCACACCAGGA

A\_14\_P129696 CCCCTGGTTGCGGAAAGAGCAGTTTTATGTGAGTATTCAAAATTTCTCTCAACT

A\_16\_P19125790

ACTGTTACAATTTGCAGTCTGCCAAATTTTCAGTTAAGTCTGACTTAAAAATCACACGTC

A\_18\_P22840721 CAGAGTAGATGGGCTGGCCTTACTCTGAGGTGTGGAGAAGGCTAG

A\_14\_P124945 AAAATTTACATTCTGGAAAGATTTACCAGGCTGATGGTAATGATCTCATTATAGGCCAA

A\_14\_P117596 GTGGCCAATATCACCTTTAAAAATGTAACCCTTTTCTAGACCTCAAGGAAGCAGA

A\_14\_P110087 AGCATGGAAACCATAAAATGGGCACATTTTACTTGTATGCCAAAACACAAATTTCCAA

A\_14\_P127718 CTTCAAATTCCTCATGTTTTAAATGAGCACTAGAGGGAGGTTTATCACCTTTTTGGTTAC

CUST\_7964\_PI426210822 CATTCCCTGGGTGCTCACAGTTTTCTGAAGAGAACTCTCAAATTTCTCAA

A\_16\_P02744245

CTTCAGACTTTATACCCTTGTTTCATGATCGTATAAAGCCCTTTTACATGACCTTGTTCTG

A\_14\_P120989 GGAGAAAGGGAGCCCTAACTTCAAAGTTTGTGTTTCTCCAACCTTTTTTAATAGTTAAATT

A\_14\_P202332 CTTGAACATGGTTTTTTGTTTTGAGGGCTATGAATTTGTTGGGTATACACTGGTGTATATA

CUST\_6883\_PI426210822

TATGTGTTTGTATACCTTTATTTGAGGGAGTGCTTTGGCCTGTTTTTAGACAGAAGG

A\_16\_P19722817

AAAAATAGGACCTGCTAAGAGACATTTTCCATTCTAATTCACGATTCATTTTTCCAAGGA

A\_14\_P119542 CATCCAATAGCAGAGCCACTCCCTAATTATATGGCAGTGACTGAATCTTATTTTATGTGA

A\_14\_P202282 ATTTAGAACTCTTTATGATTTCTTTATGGTTCCCGTAAGCCCTTTAGTCTCGTAAACCCT

A\_16\_P03401487

AAAACAGCCACTTTGACAATTACCTCTTCTGTATCTCTACCTGAAATGCTGATGACATAA

A\_16\_P15562164

AAATGCTACATCCTACACCAAAAATTCATCACCTCTTTTATTTCAAATTATGCCCTGCCA

A\_14\_P131038 CAAGCGGTTAGTGGCTAATATAAATGGATGGGATAAAACATCCCATATTGAAAGTCAGAT

A\_14\_P105453 TGTGCTTAAATCTCATTGAATTATAATCACACTGAGGTGTCAGCAGGAATTTCTTTGGTC

A\_14\_P121931 ATTACTATTCACCATACTTACAGATCCCTTTGGGCCAGGTAATCCTATATCTCCCTAAAT

A\_14\_P120553 TGATTAAGTCTGTGCCATTTTTCCCCTCAAATTCATGAAAAATGCAGAGTTACTATCT

A\_16\_P19551822 CCTATTTCCCCTCCTATGTTACTTATCCAGATTACAATTCCTTCATCTAGCATTTTCTC

A\_16\_P19997941

TGTCTCTCATACTGAAGAAATATCCAGACTTCTCTACATACTAACCAACCCATTATGACA

A\_16\_P03610416

AGCCACTCAGTCTATATACTAATCTTTCATGTTCAAAGACCTATTACTGTCTCAAATGT

A\_18\_P16393576 TATGCGTATTCCTAATCGTTCTTAGCATATTCTTTCCTGCACATACAGTTATTTCCACCC

A\_18\_P10271441

ACTGGAGGGGATGTTACTAGTTTCTGATTAAAAAACAAAAAGACGCATATAGCAATAGA

A\_16\_P16939037

CAGGCTCTGATGTAATTTTCTATACCAAACCTCCACACCTAATACTGTTTCTTGTGCAAAG

A\_18\_P16334181

GGACTCTGCAGAAAGGCTACTTTTTTTGCTTCTAGAAGTTACGTATATCAGAAAGAAACC

A\_16\_P16172869

ACCTTAAGTTCTGAGTCTGAATAGTGCATAGCATTGGTGATTACAGACCAATGTGTTAG

A\_16\_P16644402

TGATTTTCATGAAATCCAAACATTGGTTACTCAAATCCCCTTTAAATGACTCAGACTGCA

CUST\_6715\_PI426210822

ATTAATAAAAATAATCCATAATCTCAGTTATAACCAATAACAATTTGAGAAGAAAGTTGA

A\_14\_P123295 TAGGCTTTATTTGACTGCATCCACATCTTGTTTCGTAATTTTCTTAGGATTTAAGGCAG

CUST\_4973\_PI426210822 AAGTCCTGCCTCTCAGATTAAGGCACCAGCATTACGCATAAGAGG

A\_14\_P134445 TTAGTTCCAGCCACAATACTCCAATTTATAAAATCGAAGTTGAACAATGCTGCCTGTCTA

A\_14\_P108763 CACACGTCATCTTTCACACTAACTTGAAGGATCTCTGTATGGCAACATTTCCCTTAATATT

A\_16\_P18394300

ACTTCCAGAAGTGAGAAATCTTCAATTTACAGAATCAAGTTACCCAGAAGATTCCAACCT

A\_16\_P16659146

CCCCATTACAGTTTCTTATACACCCTAGATACTCGATTAGCATTATTTTGTCAATTTGTGG

A\_14\_P131407 TGCAGTATGCTTCTCACTTCTTCTATTTGCTCATTGCAACTTTTCAAGCAATTAGCAGA

A\_14\_P121170 ACATTATTGTTTGTGCATGCTTCTTGGGAAGCACATGTCATGCATATGTGTGTATACACA

CUST\_2791\_PI426210822 ACTGGTGGAGATATAGTGCCCGGAGCCTGGCCCTTAGGGAACATT

CUST\_1643\_PI426210822 TTTTTCTAGCACTTGTGAACAGCACCAGAAAGGTCACAAGCATCATC

A\_14\_P132966 ATTCTGTATGCCTTTGAGATGTTCCGTCTCAAGTCCTGTGTGGATTCAAG  
A\_16\_P30952306 GTCATTTTATTGGGCTGGAACCATCAAAGTGCTGAACCTTACGGACAAC  
A\_16\_P16877159  
CTGGATATTACCTTGCCCTATAGAACTTAATTTCTACAGCCATTTTTTTCAGACTGCAGG  
A\_16\_P41067635  
TAGGACAGTCCTTGCTATTAATGATCTCCTACCCTAATATTGTTAAATTTCCAGCCAGAC  
A\_14\_P104953 CTTCAGCACCATTGTCACGACTTGATTCATCACATATAAATGGTTAAACCTTCAGATTC  
A\_16\_P00300346  
AGTTGCTCACCCAGAATAAATTCCTCCTGTTCCATTATCTAAAAATGCTGTCTCATTAG  
CUST\_7558\_PI426210822  
AAAGAGAAAGGGAGGAAGGATCATCTAGAAAGTGGATACCAGTTCTTTAAGAAG  
A\_16\_P58424619 ATTACATCTGACAAATTTCTGGGTCAGGGATCCAGGAAGGGTTTG  
A\_16\_P17667044  
GGACCAAAGTAAAATACCCCTAACCAAAAATTTTAGTCATGTTCAAGTATAACCATGCCTG  
A\_14\_P133478 TGATACTTAAATACTCCCTGGCTAAATTGTTTCAGATAATCCCTAAAAGCAGCAAGT  
A\_14\_P109304 GACGTTTTCACTGAGTATGAATAATAACACATAGTTGGCGGTTTCACACCCATTTCTTAA  
A\_14\_P111296 GAAAAAAAAAAGCAAAAACACCTCCTTCTTTGCCATGAGTTCACCGTAAAGT  
A\_14\_P112916 CTTTAGAATCTATAAACTTGATGTGCTTCTGCAAAACAGTTGCAGATGGTCTGAAGTGAT  
CUST\_2866\_PI426210822  
ATCAGGCTTAAAGGGGATGGTAACTGGAGAATTTTGATATCTCAATATAATAAGGCAATG  
A\_14\_P201236 AATACACTTGCTTAAAATTCACACAAGCCAGAAACATTCTGACAGATGCACTAACAGTTT  
A\_16\_P03809820  
AAAATCGCCTAGAACCTTTCACCTTATAATAAACACACACACCTCACTACATTTAACAG  
CUST\_6321\_PI426210822 CTTGCCGGGTCAAGTCATACATCGCTGCACACCGGGGCTGTCTTA  
A\_14\_P127258 TCCTTGACTATATCTCTTGTAGGTGTTTAATTAAGAGCATGTCTGTGGAAACCTTTTCCT  
A\_16\_P02277194  
AAAAGCAGCCACTTTTCTTAAGATTGAATCTCTAACTTGGACCTCAGTTGTGTTTGTAAC  
A\_14\_P114533 CTCTAAGACAAACTTAGTGCTTTTGCAACTTTTCTGATGATTCCTTTCATCCAAAAGT  
A\_14\_P139936 TGAGTGGAAACTTAGTTTGAGTAATGAAGGAATCTTCACAGAAGCAAATCAGAATATGGG  
A\_16\_P15350855  
ATGACTGGACATCTTCTTCTTTCCCTACCACAAAAAAAACCTGAGACACAAGTAAATCT  
A\_16\_P01575421  
AAATCCCCATCTATAGAGTAAGTCATTTAGGTAGGACTGTAATTTTCAGGTTGATCCCAA  
A\_16\_P17026631  
CCATTTCACTTCTTACCTACAGTATAGAATATCTTGCAACTAATCTATCTTCAGCCACGA  
A\_16\_P58424444  
TGCCACAATATGTTTTCTCCATTATCCTGATGATGGACATTGAAGTTGTTTCTGGTTTTA  
A\_16\_P33503431



CAGTCAACTTCTAAACTTCCAAACACAAAATAGTTATACTCAGTCTAAGAATATCCGACC  
A\_14\_P104046 TATTTCTTGTAGTGGGTCTGCTGATAATAAGATATTCCTACTCTTTTTTGTCTGAAGCCAT  
A\_14\_P113605 GCCCTGTTAGATCTTTAATAACTGACCATCTAATCAAGATTTCAATTCCTTCTGCATGCT  
A\_14\_P137834 GGAATCCTACTGATGCTAACTGTAAAGTATTTAACCTTGGGAAAACCACTGAAAATTGTC  
CUST\_2784\_PI426210822 GGTTCCCTCCCCTTCTATTTCTGCTTATCAACATGTTTCTAATGTCACACAAC  
CUST\_10002\_PI426210822 CAGACTCTGCCCTCTGCCACAGACTGGGAGGGAGAGGGGCAGTCAC  
A\_16\_P19908455  
AAAACAAAGGTATGAAACATCTTGGCTTAAACAAGAGATACTATAGGTCTAGGGCAGCAA  
A\_14\_P126229 CTTCTGGGACAGAATTACGGTTCTCTAAGTATTTGCTTGCAGGTGGGTTTAC  
A\_16\_P18074904  
AAACAAGTGTAACAATTGCAACCCATGAACATCTTTTTCTAGTCTTCTTGGCAAAACTC  
A\_14\_P138016 ACATCCTCCGAACACTCTGAGTTTACTCTGAATGCTAATGGGATTAATCTGATCATTTTA  
A\_14\_P115159 ACCTAACCTTGATACGAGGAAGTCTGGTAAAATAATTTAGCATTAGATAGGTTTCAGTTGC  
A\_16\_P00400242  
AGCCTGTATTTTCATAGAACCTACAAACCTCAAATTCGAAGTTATTTTGTCCAACCTCTCC  
A\_16\_P20412081  
CAGGGACAGTATGTTCACTTAAGAGTCATTCAATAGATATGTGTCCAATGCATGAAGTTC  
CUST\_34\_PI426210822 CTAGGCTTCAACTTAAAACTTTCTGGGGGAAGGCATAAGAAGGCTTTTTCTT  
A\_14\_P102744 CTTCTCTGGCCTGTAATAGAAAGTGCAGCAAGATCAGACGACTGACAATGTAATC  
A\_14\_P139402 GTCACACTCTGCAAAGGACTCTGATTCCCTACTTAAATCCTTTAAAACTGTCACATTTAAA  
A\_14\_P105129 ACCATTTGCGTATACTGAATCTGGCATGATCATATAGCGCTAGGTTTCATATATTGCATGA  
A\_16\_P00608496  
AAGCAATCCACGTTAGTTTTCTGTTCTAGATTAAAGTATATCTTTCCAACCCATAGGTGG  
CUST\_5273\_PI426210822 TTTTAAGATCACATAACCTGCAAAGTGCCCTGAGATCTGGTTCTGCATGAAT  
A\_18\_P22842084 CTGGGTCAGAGGGCTTCTGTTGAGTCAGAGCCTCCAGCCGATAT  
A\_16\_P19336516  
CTGCCCTCTATAAAAGGACTTGTTTTTCTTGTAACCTGCACCAGTTAGACTTCTCTATTGTA  
A\_14\_P130601 TCGGAAGTAGGTATTTCTTTGTATTTTCTTTTTTTCTCCCTTCACTCTTGCCTTAGAGG  
A\_16\_P17504978  
GGAACTCATCCCATGACTTTAGAATTGACATGAAAATTTATGCTTATATCCCTGCCTGT  
A\_14\_P100673 CTATCAGTTGCCTTCCAATGAATTCCAGTCTTTAAAACTAATGACCAGAACTATGGTTG  
A\_14\_P131981 TGGATTCTCTGGCAGAAACATTTTGGGAAACTACTAAATGGACTGATCTCTTTGACAATA  
A\_18\_P14133989  
TATCTCATGCTGTCATCTTTATGTTGTATTGGAAAAATCTGGGATTCTTTTTCCCTTGGT  
A\_14\_P127538 TGAACACAAATCCATACGTCATGGCAAGGTTTTAGATATTTTCATATGGCAGAATTTT  
A\_14\_P126915 ACACAGACTGAAGTCGATAATATACGGACTCCTCAGTTTACTTGGAGAAATATGGATAAC  
A\_14\_P123383 AAGTGCTACAAATCGCAACACCAAATGCATCAAGAGGTAGATTATTAGTATGAGTCAGTT  
A\_14\_P111662 ACATTTCTAGAGCATCATGAAAAGATAAAAACATCAAAGTAGACTTTCCAAGGTCAAGTCC

A\_14\_P136872 TTGTAAGACGTTTCATCGCCGTGTTATCCTTGAGTAAAGGTGAGTATTAGGTGC

A\_16\_P18100854

AAAGCCATCAAATACCTAGAACTACCCCTATAAAATAGACTCTATTATGATTTTCAGTCCA

CUST\_78\_PI426210822

AGCTTTAATATTTCAATTGAAGTGAGAAGTGTTTTTAAACTTGGCATTATGTTGTACAG

A\_14\_P104806 TGGTTACCTACAGGAGAACAACAATCTTTGAAGCCCATCATCTCCATATGAATTAATTC

CUST\_8457\_PI426210822

ATTCATGGCATAATAGGTGTCTAAAAAATGAAAGACCTCTGGACTGTTTAAAAAAAAAAAA

A\_14\_P139867 CTGAATACCTATACACCTTGAAAATTGGCTTGGTTATTGCCCTTCTTAGAACTTTCTTG

A\_14\_P136340 TTTTCCACCTCTTCTCTTTTTTTGGACTTGTTTTTCATAGTCTGGGGCATAATTCATTT

A\_16\_P19493455

CCCCATTCTAATTCTTTCCTTGCTGATCATAACACAAAATCCTTTAGTTCTCACATTTCC

A\_14\_P202297 CATTTTCAGTAAAGGAAATGCTCACCAACACATAGTCACCAACTATTAAAGGAATCATGT

A\_14\_P135111 ATTTGTTCTATAGTGATGAATTATGTTTTCCATGGATGACCTGCTTAGAAGCATGGAGTC

CUST\_908\_PI426210822 TCAGCTCCATGGACACTGTTGCACCTCCCAGGTTTTCCCAGAAA

A\_18\_P11801824

ATCTCCTGACTTGCTCAATTATTTCTGGACTTTTTCTACAAAGACCCTCTGAATGTTTGT

A\_14\_P109503 GCTGTGATTCACAATAAAGTCTGCCTTTATTGATGTGTATCATGTTTACTATCCCGGGT

A\_16\_P39354998

TCCTTCAAATCACTCCTAAAAAACTCAACTGTTCCACAAAATTTAACTTGTCAGTGCTT

A\_16\_P41850814

CTAGCAAAATCCATTCTACCCAAATTTCTCATCCAATTCTGACAGAGGAAGTATATAGGC

A\_14\_P131380 GTTTTCAAAGAACAAGAGACAACCTGCATCCTTGACTTGATCACATTTATTCAATATGG

A\_14\_P117774 GTTCCTGTAGAGTTATTTGCATTACTTCTGCAACCTTCATTAAGATGCTGTATAACCACT

A\_14\_P108672 TGAGATCCACAAGCAGAAGAGTAACCAGAAAGGATCAAATGTCTTTGTGTTGTTTCATTT

A\_14\_P119112 CATAAGCCAACTCATACATTTTACGCTTTTCCTTTTACAAGAGGAAGAAGTGTTCGTGA

A\_14\_P123534 AAAAAATGTCATGAACTTGGTGTCTTAGTAAGTGAACCTTAGTGGCATGAACTTAGTGTCC

A\_14\_P119830 TTTTCTTTTTTAAATAATCCCAAATGAAGTTTGGGAGGCATGCTTAGTATTGTGCCCTGA

A\_16\_P32712964

AATCTGCAACAATAAGATACTCTGGTTGATATGTAGCGAATTTATGTCCTTATGGGCTGG

A\_14\_P101501 ACTGAAACATTCATTTTCCAAGATTCCTTTCCAATTCAACTCCATGGTCTTTCTTTTGT

A\_18\_P15521696

GGAGGTAAACTAGATTAAGTTCTCACACTGTAGAATCAGTCAAAAACTACACGACGTTG

A\_18\_P13218135

AAAAAGTTCAATGCCTAAGAACAGTTTTTTGGAGTGAAAAAAATGGGAAATGCATGACACC

A\_18\_P14604367

AACTAAAACAAAGTTGTTTCACCTTGAAAACCTGTTTGTAACCTAACTGAACCTTTGCCAGG

A\_16\_P00392172

CGTCACTCATTACATGAAAGCCATCATCTTTATTACTTCTGAATACAATGCTAGTGCAGC  
A\_14\_P102791 ACAAAGGTTTTTTAAAGCACATTTGTGCATGTCAGTACTAGAGATGCTGCCGTATTTTTACTT  
A\_14\_P129004 AATCTTTCCGGAATGTAGATAGTCCAAGGCAGAGACAATTTCTGCACCATAGAAAAC  
A\_14\_P100853 AAATGGGACAACATAATGGATACAAATCAGGATTCAGTACTCAGACAGGTATGGGATATTTTCT  
A\_14\_P138363 TCCAGAAAATGTAATCTCTACTTTTACCTTGTCTCCTGGGGAAAGAGAAGATGAAATAAAC  
A\_14\_P117083 TCACCTTTGTTTTTTGTTGGAGTGTCTTAATAAACTTGGATTCTCTAACCTTTAGAAGC  
A\_14\_P133705 AATAACTGGTTCAGGCAAGAGCAGGAAAATGGGAAATAGGTCCTGCAG  
A\_14\_P113987 TACAGTTGCTTTGCAAAATTAATAATCTGAATGGTCTACTGCTACACAAGAGTCTGCATCT  
A\_16\_P30952564 GAAGAAAAGTCTTGGTAAGGATTTGTTTAGTGGTTGGGGTAACACGGGTG  
A\_14\_P201596 AAAGACATTGTTTAGTCACACAATTTTAATTGTGAATTATAGTGAATGGTAAACAGTAAA  
A\_16\_P00685224

CTTCAAGGAAGGAAATATATTTTTTACATTGAAAGAAGAGAATATGAGCCATGTGTGCCAG  
A\_18\_P22842477 CTGCCCACAGCAGTGATCCCAAGGCTTTTGTACCCCCTGGGAAA  
A\_16\_P01897150

TAAGACTCTACCACATTAGGAATATGTGATTTTCGCCTCTGTAGAATTAGCAACCCCTTCT  
A\_14\_P116931 TTGGTGATCAAACAATGCTTGATCAGTATTTCCATTTGCTAGAACTTTTTCTTGGCATCT  
A\_14\_P123909 CCATCTCCACCATTAATGCCCTTTTTCACTAAGGACCCTATTCTGAGCAG  
A\_14\_P131084 GGAGCAATAGATTTTATCATGTGGAAAGTGATTTTLAGGCTGCCTTTCTTTATCTGGAAC  
CUST\_2811\_PI426210822

CACCTGAAGGAAATGAATCTGGAGCTTTATGCATATTACTAGGTGCTTCATTTTTATTTA  
A\_18\_P14132355

TGCTCACAGTTTTCTGAAGAGAACTCTCAAATTCTCAAACATAAATACCTGTATCCCA  
A\_14\_P201452 TACCCTGACACTGCATTGTAGTAAATCTCTGTCTCTTTTGCTTTCATCTTGTCTAGG  
A\_14\_P101282 TTATATGTGGACTGTAAAAAATACACTGGACTCACAGGTAATTAAGGGGTGAATCAGAGT  
A\_14\_P105254

ACAAAAAGAAAAGTATAGGTCTGCCTCAGAGACAAAATACAGTCCAACAAGAGTTCTTA  
A\_14\_P135868 CATGCAATCAAAGCCAGATCATAACAATTCTTTGCAAAAATGACTCAGTCTTCTTACTGG  
CUST\_7738\_PI426210822 AAATGAGCTGCTTCTTGCAGCCCCTTTTGGCATCTCCCATAAG  
A\_14\_P116593 GACAAAGCACCATGCTTGACAGACTTCAAGCATTGAGTTATTAATTCTGTTTATTGTCC  
A\_16\_P20672576

AAAAGCAATGATTCAGGAACTAATTTGAACAATCCAGGGATAGTCATATTGATTCCAGCC  
A\_16\_P15294040

GAAAATGTAAGTCTTCTCTTGTTC AAGGTA ACTTCCAAGGCTCTTAAACACTTACCGAAT  
A\_16\_P16487628

ACCTCATGAGTAGCAGAATATAAGACAGGATTTTAAACACACCTATACGAAAAGAGGACAT  
CUST\_1975\_PI426210822 TGTTGCCACACAAAGAAAATCCAAACACAGGTTGCCTGATTCTCTT  
A\_16\_P02470056

CCCCAAGCACTATTAGACACATTACTTAAGGAAGCAGTTAATAACTTCACACAGCATTTC

A\_14\_P200592 ATAAAAGTGCCTTGACCGTGCTTTTTATTCTAACATATTCTCCGATATATCGAGCACCA

A\_16\_P02381987

TAGGGGGTAAAACACAAATCAAAAAAGTATTAGGAAAAAAGATTTTGGCGTTGGAATGGA

A\_14\_P115937 TTAGTGAGGTTTCATCGACGAGAACTCAATGATGTCATATCAATCTGGGAAAAGAACTTA

A\_14\_P201907 TGGTGCTCCTCAGTCTTGCTATTTCTTTTGTCTTATAAAAGATCAGGAGCAGACTTATT

A\_14\_P121854 TTTCTGACAAAGTTTAGTAGAATATGGTGGAAATCCTTGAACCCATGTGAGTTAATGGTA

A\_14\_P135332 CTTCTAATGGATAATACCAGTGTCCACCAGACAAGGAGAAAAAACTTGACATTAAGACA

A\_16\_P00550973

TCCTATTGTAATTATCTCACCTCTAACCTCAAATCACATGAACCTTCTAATTCTGTCCCA

CUST\_940\_PI426210822 AGTGCCATTACCCACCTCTAGGAGGGATGTGTTGTTTCCATACAA

A\_14\_P115164 CCAGTTACAGGGGCATTTAGGGAGCAGATGACTGAGAACATTAATAAAAGAACTTA

A\_14\_P117999 GAGAAAAAAATAATAATGTTCTGATTTGATATGAAGGCGAGAGATTTCTCTGACACCC

CUST\_10070\_PI426210822 AGATAAAATCACAGTTGAACTCCTTTGGGGAAGAGGAGGCAAAACAGAAAATG

A\_14\_P103074 ACACACTCAGAAGTTATGTTTGTGTTTTAAGAGAGCATTTTGTGGCAATATGGCATCAAT

A\_14\_P100643 GTAACCATAAAAATTCATGACTATCACCCATACTACCCCATTTTCAATGCAAACATGC

A\_14\_P111043 CTTTGGGGGAAATAGTTTCCCACTATTTACATAATATTAATCACAATCTCCCATCACAG

A\_14\_P113508 ATCTCAACATACTTTGAGAAGAGAAATAGGCGCCATGTAGTAATTGGCTTAACTTTGGAA

A\_18\_P13689450

TCACAATACTCAATGTGGTGCAATAGAAAAAGAAACCTTTGATAGGAATTCAGCCTTCAG

CUST\_557\_PI426210822

AGGCTTTTTCTTAGATCTGCCAGAAGTCTGTAATTTGCTCTATCCCTTGGATTTTAGT

A\_18\_P15909224

AATTTTCATGATGACCAAAACCTATCCACTTGAAACATACAGAAATCACCATTTTCACCG

A\_14\_P120389 CTAAAAACCCCATTTCTCAAAAATCAATTTTCTTTGTGCGACTCCTATGAAAAATCTGT

A\_14\_P124850 AGAAAAAGTAGGTTTCAGGTCTAGAAATGAAAAGTTATTTCTTGCAGACAGCCAGAGTTTG

A\_16\_P21512302

ATGCAGGTAAACCCTTACAGTTGACAAAATACCTCAAACCTTCCCTAAACTCTACTTTCTA

A\_14\_P139304 CTACCCTTATTTTAAGAATTATAAATAGGTGTCAACCCACACAAAGAACAGATTGTGGAT

CUST\_6696\_PI426210822 CTGCAAGGTTGATAAACAGCGGATGTAAATGGCATCACCCAGCAC

A\_16\_P21436103

CCACCTCCAATCTAAATCTACCAGCCATTCATACATTTCTCATAGCCCATCATTTTTTTT

CUST\_8256\_PI426210822

ATTTTTAACTGTATCATTTATTTACTTGTCTCATCAAAGGCACAGCAAGAATATAACCCAG

CUST\_2940\_PI426210822 GGAGAATTTGTTAGAATTTACAGCTGAAATCTTGTTCTGACGGAGAGCAGG

A\_14\_P111403 TGAAATACAAATGATATTCATAATGCAGTTTTGGAGAAATTTACGCCAAGGATGGAAGCC

A\_16\_P18116166

TAGAACAAATTCCTAATTCCTACGATGAAATTCCTTGTCTATCCTAATTTTTTTGCCGGC

A\_14\_P119190 CAGTATGTATTTATTTATACCCAACCTTTCCCTAAAAAGCCTTGGTTGCAACTTCAGATC

A\_14\_P134446 GGATTTTTCTCTAAAATTACCAGATGAGTTTCAGGCAGGCCATTTATCAGCAGATTACTC  
A\_14\_P118649 ATTAAGGGAGCCAATTGAGAGATGTCTGGAACCTTTGATTCTTATTTAATGATGCTCTGGA  
A\_16\_P03403131

ACATAGGCATCCAATAATGATTGAAAAGCAAGTTCTGAAAGTGAAATACCAGAAGGAAG  
CUST\_2978\_PI426210822

TTTTAACATTTTAGAGAAATCTGAAAGTTAATGTGCTGGCATGCACACACCCCG  
A\_18\_P13101968

TATTCATCCTCTCCATCTTTTTTAGCCTACTGTGATCTAAGAGCAATGAAACTCCTAACC  
A\_14\_P136964 TCATCATCTTTTCCTATTCACCAGATACTGATGAGTGTATATCTCTGGTGTCCCTTATTC  
CUST\_10245\_PI426210822

TTGACTTGCATTTATTGAGAACTGTTGGGAATAATATTGTGCCTCTAGGGCATTTAGAAG  
A\_14\_P103600 CTGAAAACCTCAGGAAATGGGATCTCTCCAAAATAAGGATGAAATGGCTTGTCTTCTAAA  
A\_18\_P12008053

AAAACCTTCCCTTTGGCTATCTCTGATAACCACAAATGTCATTGAAAAGGACAGATCCTA  
CUST\_947\_PI426210822 ATTCTAATATTTGGAGTGGGACAAGGCCCTCCTTCCCTTTCTTATGATTA  
A\_14\_P107324 TCCTATGAGAAGTTCCTGGAATAGGTGTAGATTCAGTAGATCTTTACAAGACCATATCTG  
A\_14\_P136428 GGAAGGAACACCTTCAAACTATTAGTTTTGGAAAGGATAATTAAGGACACTACAGCATGA  
A\_14\_P110473 AAAGATAGTATTCACACAGGTGATTCTAAACATGAGGCCAAATTGCCATTCTCATTCTT  
A\_14\_P130515 CTTTACCATCTGTTACCATGTGCATTGACTACTAGGCCAGATTTAGACATCAAGTAATGA  
A\_16\_P18151060

TACCAAAGAACAGGGCATAATTGAATCAATTTTTTTGAAGCACGTTTCTAAATGACTCAGG  
A\_14\_P102660 ACTTGTTGCACTGGTTATAATTGCCTCTCTATTTTGTGAGTCTTTCCTACTAAGTTTTCC  
A\_14\_P121504

AACTATCAAAGATCAAATGGCAGCAAAAGATCAGGGAAAGAAGGTAGAAAACTATGCAG  
A\_14\_P100899 GTTTATTCCTACAGTAGCCTCATTCTATCTTATCGTGCCAAGCATGAGGCACTTCT  
A\_16\_P02045853

ACATACGCACATTGTTTTTTCCTCTTCCACGATTATCTGCCAGAATTCTACTCAGTTAAT  
A\_14\_P125197 GATTTTCTATTTGGGAGACTGGTAGTGCAAATTAAGTTCTTGCTACCCAACATTTATCC  
A\_16\_P02299864

ACGTCTGTCACTTATAAACTGCTGTTTTTCATGCATTCACTTGTAACATACTTGCTGAGG  
A\_14\_P122935 ACTTTGCTGTCTCCTGGATTCCATATCTACTGGATGGGTGCCATCTT  
A\_14\_P138800 GCTGCTTTTTCAAACGGATCCGGGCAATGCTTCGTTTTCTAAAGGATG  
A\_16\_P01830274

AAAAAGTGGGAAAATGTATTAAGATATGCCCTGATTTTGTCTTCTACCACGACACACTC  
A\_14\_P200404 CTTGAGGGTGGGACGGGGTAAATAATTGGCCAGATTATTTTAATTGCTATTTGATAGTAA  
CUST\_2061\_PI426210822

GTTGACTTCTCCAAATAGTACACTTAAGAAATCACCAACATGTGTGCAGTTCAGATGTT  
A\_14\_P100488 TTGGGCAGACTTGAAACCAGTTTTGTCTTTAGGTTTTCTTTTCTTAATGATTGGTCTACAA

A\_14\_P133610 CATTTCCTTTCTGAGAGTAGAGCCCAGAGGAGAAAGAATGGCTGTTTCAGTAG  
A\_14\_P100962 AAAACAACCTCTTAAGGATGCCAGATTCAGTAACCTCTAAAGAGGTGATGTGATACAAGAT  
A\_14\_P114590 ATCTTCCATCCAGCCTTCTAAAACCTCTACCTTCAAAGAGGTCAAAAAGACTGTGTAATG  
A\_14\_P134875 AGTGAAACTTTCTTAATTGGCATTAAATGGGGCCATAGAAAATGGCCAATGCAAACTAATA  
A\_14\_P104036 GGTGATAAGAGTAATAGCCCAACTACTATTTCATTGCTACCTAGTTTACAAATGGATGCA  
A\_14\_P111864 GCAATATGAATCTAGTTCTTCTAGCACTCACAGTGATAGTAGCAGTGACAATGAGCAAGA  
A\_14\_P130470 CACACCACTCAAAACTGAACAAAATTTTATAAGAGCCCTAACAAAAACCCTAACCCCTAAT  
A\_14\_P134171 AAACCTTCAGAAATCCTTGTCTATACTCACTGTAATCACTTCCTTACTTCTCAACCCATTG  
A\_14\_P127368 CTAGAGTAGGCACAGTGTTAACAAAAGGCTGATATTCTTACCTTCTCTACAAATACACGC  
A\_14\_P130242 TGGCCCTTCTATGTCTTCTTGAGAGAGTTTTCTAAACCCAAATATCACTTCTTATGTAT  
CUST\_7279\_PI426210822 GTGAGTCCATGCTTTGGAAAATGATGACCTGAGAGTGTGAGGAAGG  
A\_18\_P10526046  
AAGACTCACCAAAGTCATTAAACCACTCTGCTTAAATTGTCACTTACTAGAACAGACAGA  
A\_16\_P15389042  
TCTCAGTCTTCCAATTATTCCACACATACTCTCATCATGTTAATTCTCCAGAATGACCAA  
A\_14\_P116643 TCTGCATTTCTTCTTATTTTGAAGGACAAACTCACATACGACTCTTACTCTCCTGATACC  
A\_14\_P103163 TACCTCTCTATTCTTGCTCAAATTATTGCAAAAAGCCTCTATAGAAAGTCCTCTGTGATC  
A\_16\_P00608361  
AAATCATGAGGAGCATATGGTTTTTCATTCTACCAAGACTTTTCATTTCACTGTTACCAG  
A\_14\_P125711 AAGACTTGAAAGAACTCAGTCCTGATTTGGGAAAGTAAGTAAACAGAGTTCCTGAGAAA  
A\_16\_P00909616  
TACACACTCTACTCACATATCTTTTCTACATCTTTGTGTCCCTTAGCAGTGATCTTAGT  
A\_16\_P37198888  
CAGTGCCATCTTTTTGCTAAAATCACTGAGTATGGAATAGGCAGTATTAGAAAGGAGAGT  
A\_14\_P129001 GGTTAAAAATTAACATTTCTCTTTTCTTACTGTATCAGAAACTGGCCTCCAGCCATTGTT  
A\_14\_P133377 GAGTGGATATATTTATATTTGGTGCTCTGTGTGTCTTAAAAATCTGTTTCAGTGGCTGCT  
A\_16\_P01212250  
CAGAAGAACTTTCATTTTGAAGTAACAGTTTCTACACTTTACCATTTAACAGGAAATGCC  
A\_16\_P20456357  
CCCCATTTCATTTTGATTCTGTGCTTGAATGATTTCACTGCATGCTTCTGATACTTGTAT  
A\_16\_P03298840  
ACAGACAACCTTTGTGAAATGTTTAAATATCTGCTGACCATATTAAGTTGCTGTCCCAAG  
A\_14\_P102939 ATCTTCTTCAAACACGCTCAGTAAAGAGCGAGTCTGGAAGAAAAGAAGAAAAAAGGT  
A\_14\_P101163 TTTGCAGATCACAACAGTATCAGGAAATGAGTTCCTTCTACAGTCAGATATTGACTTCAT  
A\_14\_P134823 TATTTTCAGGCCGAAATAGAATAATTTGTGAACAGACTTGATTTCAGTGAATCAGTTCTT  
A\_14\_P129855 TGTGATTTACACATATGATTGCTTAGGATGAGACTAATGGGGGTATTAATAAATGGTGG  
A\_14\_P122168 CATTTGTAATAGTTTCTTCCCTTCCCCTTAACTACCTCACATTTGTCACGAGAATGAAGA  
A\_14\_P122358 CCTTTTTTACCTGTAATGCTTTCTCCTTCTGTCTCATGCCTTTAAAAGGTAAAATCACT

A\_14\_P131899 ACAAGCAGTGATTGCTATTTACCAGAGAATTTTGTCTGGTTATTTTCCTGATTTCTTGTGT  
A\_14\_P127531 TGCTTCCTAACAGACTTAGTAGAACTCAAACTCACCTTTTCTTTTGGCAAATTTCTTTG  
CUST\_3717\_PI426210822

TCTTCTTCAGCTTCATGTTTTAATAATGGAAGAACTTAGTGATGTTTCATATGTAGAGAT  
CUST\_1844\_PI426210822 ATTGACCTGAACATTCTACTGGGTGGCTGGTGGGGAGGTGATGAG  
A\_16\_P17245301

GTCTCTACAACCTTACTGGTAAATTCACACAAACATTGAACATTGGATATTTCTCACCCCT  
A\_16\_P21635109

ACTCACAGGCAGTTTTAAAACAATAACATCCCATAGGATTGGTATAACATTGTAATGGCA  
A\_14\_P127824 CTGAAGGGGAAGATCTCAATGAATGGGTTGCAGTTAACAGTAAGTAGCCTTTTTATTTC  
A\_14\_P104840 GACCATGTAAAACAACGACCATTAGAAGCCAAGATATGCAAATTGAGTTGATTAACTTGC  
A\_16\_P58424224 CTGGATTGGGAATCCTTGTTTTGTCACATCATCGCTGTGTGATCCTAAG  
A\_18\_P22840161 TTCATGGTGTTCACTCAGTCACACTGTTGTGCGCTCTCATTTGCCAATGTTAAATA  
A\_16\_P19735377

GTGAGGCATCTTTGCTAGATTCTCTTTAGGGATTATTTGACATCAGTAGTATCATGCCTT  
A\_14\_P129670 AGCCCTTTAAAGACCTGGATTGATTGGAAGGACAAAATTTAAAGCAATCTGATCCAG  
A\_18\_P22842455 TCTTCTTATATGCCTTCAGAAACACCATGCTCACCTTTCCCTCCTGCTGT  
A\_16\_P36230983

GTCAGGATTAGGTTTGCCTTAAATCTTTTTCTCAACAGAAGCCAAACACTTAAAAGAAGG  
A\_14\_P106693 AATATGAGAATGTGAATAAAACAAATAGTGGCTGTGCAGAAAGAGCCCCTAAAGCATTTAG  
CUST\_1059\_PI426210822 CTCACCTGACTTGGCTGCAGAGCCCACGGTGCCTACCAAGCATT  
A\_14\_P200112 AGCCAACGGGCACAAGCATTCTATATATAAGTGGCTCATTAGGTGTTTATTTTGTCTAT  
CUST\_8082\_PI426210822

ACATAATTTACATCACATAAAACATGACTGTGATCTAATAGAAGCCTATGCAAAGCATAG  
A\_16\_P16158229

GTGCCCAAATGACAAATTCTAAAATGATGATCTCTGTTGATTAATCTCATGTGCCCAAG  
A\_18\_P12917776

AGTGTGGTAGAAAATAGATAAAGATGAGTGTAGATGGATTCTTGAGAATAGCATGGCACC  
A\_14\_P121829 CTATTATTTTTGGGAAAGTAGGACAGAAGACGAGAGACTTAGGAGATGTTGGTGTATCTA  
A\_14\_P112434 CGTAGAAAAATTTAAAATACAAGCAAAGCCAGAGAAAAATGCCCGCAGTTTTACGATCT  
A\_14\_P107510 CTCTCCAGCCACTCTAGCCTTCAATAACACAATGCTAGTGTAGAAAAGACCTTAGAT  
A\_16\_P03800481 TGATCTGCCCTTTCTATATGTTCTCATCTTATTTACATCACTTATCTATGGCAGTTCAT  
A\_14\_P118472 TGCCTATAAATAAATCTTCCAAGTGCAGGTTATCATATTTGGTCCGCTTTAAAAGAGTGC  
A\_14\_P133720 AACTTCACCTTCCCTAAATAAACCAGTTGAGAATCAGTTGAGAAGGGAAGATTCAATTTA  
A\_18\_P15226091

AACCTGGCATTGAAACACTATTGCTCTCTAACTCACCTTCTATTAATTGTCAAGACCTA  
A\_14\_P115845 TCATCACCACTTTTAACTAAAGCATTCTGTCTTGCAGGAAGGTATCATCAAGATTCTAGT  
A\_14\_P124005 CCTTCCTGTAAAATTTTTAAATGGAGAATTGGGTGCGAGATGTGGTTTCCAGC

CUST\_3416\_P1426210822 CTCCCGGACATACAGACTCCAGATGTGGAAAAAGCCCTTGCCATC

A\_14\_P103142 GGAATTTCAAAGCACTGTAAGCACTTCTGAGTTACTTGTAAGTAAAATTTGGCCAGATAA

A\_16\_P15949139

TAACACTCCTTTCAAAAATGCTCCATTATTTCTAGGCTCAGTTTTTCAATTCCTTCCCT

A\_16\_P00847678

TCTGAGCAGTGCCTATATTACCCAGAATATCATATTTCCAATGGTGCCAGATTAATTAGG

A\_14\_P106052 CAAAATCAATACAGGACTGTCCCTCAAAGGAGTTATAATACTGAAAGAAGCGTCAACA

CUST\_2804\_P1426210822 AGCTGGTAACTGTCCCTGCCATTTTTCTGGCTGGGGAAAATCAAC

A\_14\_P112460 ATGGAAGTGTATCGGAGCCATTCTAAATTTATGAAAAATAAGGTAATGGCATGTGAGACT

A\_16\_P02133301

CCTATCCTTATTGTTGACAGAGATCATGCTCACTGTTGAAAAAGTTTTTAATGTTTGAGG

A\_14\_P129251

GCTGAAATGGTTACTGAGGTCTTAAACAATAATAGAACAGGACACAAGAAGAAAACCTT

A\_14\_P139523 GGTTCCATATGCAACTCTCTAGACTCTTCCATATTTCCACTCTGTGTTTGACATTTCAAAA

A\_16\_P16916424

GCAATGACAGAACCATAAGTATTCTTTTTCTAGGCCACAATATACAATATGTGCCCATGG

A\_16\_P17491813

TTTGTGGAACATAATTAGGACAGGGGGATAATTCTAAGCAACAAAGAACTGTAAGTGAATG

A\_16\_P17051020

TGACAGAAAACCCTGCAATTCTATAAATCTTCACCTACCCTACTACCAATATTTTGCTGT

A\_14\_P138179 TTCAGAATTTCAATTTGCAGATAGTCTTACCGGACTGCTTCCCTCTAGTTTTGTTTTTTT

CUST\_8053\_P1426210822 AGAAATGGTTACTCAGTGATAAAGCCTTGAGCCGCAAAGTGGAATTGGAT

A\_14\_P133028 CTTTTGCCACACAGATATCATCAAGAATTTTGCAGTTTTCTGGGACACAAATGCAAAA

A\_14\_P118328 CATAGGTTTTTTTTGTTTTATTTTAGGTATGATGCATTGTGTATTCTCCTTCGTCACAGCA

A\_18\_P16437815

AAGCATTACCTAGGTTAGTATTGCCTCATGTTAATCAGTGACCATAAAGGCCATTAGGAT

A\_14\_P128678 CCTCTCTGAGCGCTAACTAGATTTTTAAAGAGCAAAATGTTTTGGTTTTTCGGTTCCTA

A\_16\_P40944083

ACCAGTGCCTCATAGTAAATTTCCCTAAAGACAAGTAATTATGGATCCAGAAACATT

A\_14\_P135538 CTTTGAAGTAAAGAAACTAGAAATTTCCAAAGGCCACAATGGTAAACTCAAGCACTTGAT

A\_16\_P18344226

ACACCCCAACCTAATTCTTTTACCGCAGAAGTAAGTATCTCAATTATTCTACAGTGAAAA

A\_14\_P103136 TTTAGCCAACAATTAATACTTACTGGGGACATCCTTTGTAATGCTAACATGGAATTATTCCTG

A\_16\_P39814284

TGGATACCTTTAGTAGTAACTCTCTTTTGTCAAACCCTCTTGTATATAACCATCGCACA

A\_14\_P120486 AGCAAATAACAGTAACTACTGCTTTGAATGCCAAAGTTTCTTAGAGTGGTCTGTTACGTT

CUST\_458\_P1426210822

ATGGAATTTTAAACAACCAAAATGAATTTTCGTCAGATAGTATCTACAAGAAGTCAGATGCT



A\_14\_P131636 CTTCTTTGCTCCAGATTTTGTCCGCTTCATGCTGCCCTTGTAACACATTTTCTTTAAAA  
CUST\_5896\_PI426210822 CTCTGTCCTCAAAGCTCATAAAGCCCACCTTTCATCTTGCCTGAG  
A\_14\_P125037 TACCTCAGCAACACAGTGGAGGCACATTTATTAATAATATGGACAGAAGTATCCAGAAAAA  
A\_14\_P122074 CTTCTCCTCTTGAGGCCTAAGGAAGACACAGTCTCTCTTTAGAAACAAG  
A\_14\_P128834 CCCTTGATTTTTCCGTTCTAAATAATCAGTCATCAGTGGCAAAATAAGGAATCATCTT  
A\_14\_P137300 GACTACAAGGATCAGAGTGCCTGGAAGTTTCAGATCTTGTAGAGGACG  
A\_14\_P201087 TTTGCTGAAGATTCTACAGACTGCCTATCCCTTAATCATCTTCAGGTAAAATTTCTGTT  
A\_16\_P20871537  
TTTTATTTGCCACCATTAGATTTTACCCTCTACAGATAGAACAATAGCCAACACAC  
A\_14\_P128399 CCTAAACAGAAGTGTCTTCTAAATGAAATGACCATGACCATACAGCATACTGAATGCTT  
A\_16\_P21622568  
TCCCCAAATTGTTACCTATTAACCAAAAAGCATTATTGACTGACTAATCTTCCTTTCCC  
A\_14\_P118983 ACCGACTCTATCAGGGTATAAATCAACTACCTAATGTTATACAGGCTCTGGAAAAACATG  
A\_14\_P119153 ACTCTCCTCATTGTCCAGATGCTGAAGGTCTTGATACTCCTTGGTCAT  
A\_14\_P120767 CTTCAAGGGAAAATGTCATTGCCTGTGATATTGGAACCTTCTTACAATCATTCTGTGAG  
A\_14\_P129232 GATGTTAACATTAGCACAGGTAGATAAGTCAATACACCAGTCACATACGAAACCTCTAT  
A\_14\_P125314 TTGTCACATCAACTGTCTTTATGATGACTTCTCATATTTCTTGCTTGTCCCTGAGACAAG  
A\_16\_P15215841  
AGTTTGTCCATTTTAGAGTCATTCTTTCCTGTTTAATCCAAAAATCAAATTCACCCAGC  
A\_18\_P16469215  
ATAGTGCTGACAGAATCCATTGTATCGCTTTTAAAGACCTGTAATGATTGTGATTAGCCG  
A\_14\_P201990 TATCAAAGCAAATTACCTTTGAAGACTCTCTTATTCTTTACTGGCTGTCCAAGATCCACA  
A\_16\_P36903553  
ACCTAGAATTCACAAAAATAACAGATCTCCAAAACCATTTCATTCCATAATTTCCCCATC  
A\_18\_P22840686 GGAGGTTTGCTTGTGTGTAGTGTATTAGGACAAGGCAGAGAGTGTAGTCATT  
A\_14\_P133026 ATGACGTAAAGAAATCTGTCCCTTCGTGCTTATGGCCCTTAAGTTCAATTTTTATTTTCA  
CUST\_1792\_PI426210822  
AGCTAAATTTAGGAAGGCCTAATGATGACACACAATGCTCTTTCGCACTCATGATA  
A\_16\_P03546142  
GCCCCCTAGAGGTCTAATATTTGAAATCCGACATTTTACTTATCCTTCATTGCTTGCAAT  
A\_14\_P103577 CTTCCGATTGGTGTCTATTGCCAGTAGGACCCCTAGAGGTAAAGAAATTATATTAAC  
A\_16\_P16282581  
TTTACACATTTACATCAGAAGTTCAGGATAATGGTCATCACTTGTGTATATCAGCCCT  
A\_16\_P18825760  
AACTATAAAGCAGACCTTACATCCATAAGACTTGAAACTGTCTTACTAGTAGTCCTGGGT  
A\_14\_P102668 ACTAATCTTTTAAAGTTTTTAAAAGAAAAGAGTGCATAAGACCAACAGGTATAGGGGCGG  
A\_16\_P17399935  
AAAGTTTCAGGAAGAAGCATCTTAACTCAAGAAATAAAGTAGTTGCCCTAAGTTGAAGGC

A\_18\_P22839939

TCATGCCATGTTTAAATGTTCTTAAATTTGGGATTGTTGAAGTCTGAATTTTACTGTGCT

A\_14\_P112391 TGAAGTCTTGTGACAACACCCATTAGATAGAAAATGAAACACTGACAGTCTCTAATGCAA

A\_14\_P113108 GCTTAAGCAGGAAACACTGGGACGAGGTTCTTTAATAGGAGTAGGAAAGAGAAAAATAA

A\_18\_P15007500

AAAGCACGTTAACCATCATATGGAAGAACACCTTAATTTAGTTCAAACCATGAGGGAAAA

A\_14\_P119762 ACCAGTTGACTCATCTCAGTTATAATTTGTTTAAACAGGTTTCATTTGCTTTTCCCCCTTA

A\_14\_P108523 AAAATTGCCCTTTTTCTTTGGTGACTGTTAATAGAGTTGTTGATGCTGTTATTCCTTC

A\_14\_P102425 ACCAAAGTTTCTTTGCAAAAATAGTATCTGAGATACAAAAGGAAAGGCAGATGTGCTTGT

A\_14\_P100940 CTCATCAGGAAGATCATTTTCCAAGTCAAACAATGATCCAAAATCTAGAAATTAACAGA

A\_16\_P02848593

AAACAAAGTCTCTTCTTTAAGAGAATTGCGATGAGTGACATTTTCTCTACCCATGAACCA

A\_14\_P132598 ATGGGTTAGGTAAGTGATGATGGCTGGAACCTTTTGTCTCAGATCAAACTTAAGACTATA

A\_14\_P118544 CTACAAGGCAAAAATGTTGATGATTCTCCGGGATTTAAAGAGTGCTTCCTCATTTTTATT

A\_16\_P36064590

AAGATGGCAGGGTAAATTAACAAAAATGGAAATACGTGATACTCCATATCTCATCCCTTG

A\_14\_P129087 TAATTCCCATGCCTTCTGGATCATGAAGTTTACCCTAAACAAAAACAAAAGTACTTC

A\_16\_P20184158

ATCGTATTGTCTTAGTTAGTGAGAGATTTCCGTTTAAACACAAAATTTTTGCTCCAGAGCC

A\_14\_P132362 GCTCTTGGTATATTGTTCTTGGACTGATTCAGTTGTAGTTCTGTTGGATAGAGAAAAGAG

A\_14\_P123912 AAGTTCATAATCAGAATAGAGGACAATATGAGCAGAGTGCTGCTTCTGCTAACATAGGTA

A\_14\_P123992 CTGTTTGTCTTGTATTGTTTCTGTCTAGTTCATGTCTTTCAACTTTCTTTCCCTTTGTT

A\_14\_P121813 ACGTTATAAACACTGTGTGCTGATTTACGATGGCAGCAACGGAAGTTGTTACAAAGAAAG

A\_14\_P200305 GGACCTTCAATTTTTACTTCCCAGGGAAGGAAATTCATTTCCCTGAGGA

A\_16\_P21564471

AAACTTCAGCCAATCCAAATTTTCAAAACCCTAGTATTCTCTAATTTTGGTTCAGTGGGTAT

A\_14\_P109512 AGGAGTGCCAAATAGAGCAGGTTTTGCGCCTTTTTGTTTAAAATGTATGCTAATGATTTAC

A\_14\_P113365 AGACATTATAACAATAACTTATGTGTTAAGACGGCAGGATTTTGGGTGCATCTTGGATGA

A\_14\_P128222 TATGCCTTCTTAATTGTCTTTCTCTAAGGTCTAGTATCCAAGTCTTCTGTTTTCTAGAA

A\_18\_P11863590

CTGACATGACTGCTTTTGTACTCATAATCACAACCTGATGGAAAAAACTCCTGAATACA

A\_14\_P120549 TAGGTCAGTTAATTTTTGTGTGAACAGAGGGACATTTCTATCTCTAACCCAAGGTATTGA

A\_14\_P119477 ATTAGTTGTTTTTAAATAAACGTCAGCGGGCATGCTTTAATTAAGCCTTCTTCCCAGTGA

A\_16\_P17124285

AGTCTCTCCAACATATACAATGTCATGGATGCTGTATTAGTCATTTGAACAAAGTGCTA

A\_16\_P20375863

AGCACTGGAAGTATGAATCACAGCAACAAAACACTTCTTCAGTAGTTTAGAATTTCTGCAT

CUST\_1588\_PI426210822 GAACCGGCGGGGCAGGAGTGTGGAGGGGAAGTCCAGGTAGCTGTG

A\_14\_P116604 TAGATTACCAGTTAGGATACAAATTCAGACACAACCAAGATGCAAAAACAACAGAGCCTTA

A\_14\_P132943 GTTATTTGAAGTGAACATGAAAAGGAAAACTTGGTTGTTATTGACTGGAACCTCTGGATT

A\_14\_P118481 CAGTCCCGGACATCTATAACTACTTTTGGGAGAAGTAATGTAAATGAGCAATTCTAATCC

A\_16\_P38280238

TCATTTAGCCTACTCCTCTATTATATTTGCTGATATTGCATAACCTGGACAACCTTTGCA

A\_16\_P20342499

CCGGCAGAAACTTTAATCTCCCCACGTTTAAAAAAGTTTTCTCAGTTATAAGACTCTCTT

A\_14\_P130784 TGTTGTCTATAGAAGATATAAATTGCCCAAACCTGGCCACATTGCAACTTTATGAAGTTC

A\_16\_P16052354

GGTGTATACAGACCATCACAGATACATAATACTACTCCTCAAACCTCTTTGATATTCACA

A\_14\_P124612 GAATAAAACTGGACTTACTGTATAGGCAGTAATGACCCCTCAGGGAGCAGGT

A\_14\_P131606 AAAACTTAGAAAAGGCTGGTTGATCTTTATCTTCTTGAGTGTTCCTCTCAATAAGGGCT

CUST\_5351\_PI426210822 GGAGATTTCCAGTCTGCCCTCCAGTGTCTCTGCATGCATTCTACT

A\_14\_P105104 TCAATAACCATTGCATTTGGCTTTTTATCTTTAAGGAAAAGTTCAGATGACCCAAACAG

A\_14\_P121195 AAAATACACAGGATAATGAATGGTTTGAAAGAGCGCATTGGAAGCAGAGAGAACCCAATT

CUST\_8792\_PI426210822

CATGTAGAGAAGTTGAGCTATTACCTTGACTTCCCCCTTCTCTTCCAAAAAAGATTA

A\_14\_P201606 TGTATGTTTTTTATTCTATCCTGGTGATGTTTTCCAGACTGAGTCCACTATTGTGGTTTC

CUST\_2095\_PI426210822

AATTAAGCTATAATTAAGTCAATATTATCTTGCTCTGTTCCCTCATCAGTTAAACAGT

A\_14\_P114748 CTGCAGGCCTCAATTACAATATATCATCAAAATTTAGAGACAAGATCCAGAATTGCCACT

A\_14\_P201375 TTTTCCAGGTGATCCTTAGGACTCAGTTGTTGATTGATACCATTTATTAAGTACAGTTC

A\_16\_P36059285

TCACCATCTGTCTAAATAGCATTAACTTCTTGTAACCTCATAATATCACTGTTACGCCT

A\_16\_P02520660

CCACATGATAAATGTCTGTGTGTATCCTGAACAAGACTTTTAGTTAAAAGTGCTGACTGC

A\_14\_P136087 GAACTTACAAAATATGCAGAGGGTAGATTATGGATAACGTTTCACAGAGAAGCAGTTAGT

A\_14\_P110607 ACTTTTTATTGTTAGCAAGTAGAACTAACCAATTGAAGCAGCAGTCACACCTACAGAACA

CUST\_1098\_PI426210822 TCTCCCCTATAGAGTGAGCCTTCCCTTTGGTTTTTCTTTCTCCTCTGT

A\_18\_P26792768 AGTGTTGACCCATCAAAGCCAAACTCTTCTTCCACCATCTCCTGAA

A\_14\_P124350 CTGGAGAGAGGAAGATAAATAATGTTTTGCTTTTCTCTCATGGCTCACACATGATTTCTT

A\_16\_P18676874

AAAAAAGCAAATGGAGAAATTCCTCTTTCTGATTGGATTTTATGGTCCTATGTGGCAAC

A\_16\_P30710604

TGCCTAAAATCAAAAACACTACAACGATGCTCTACTCTAAATATGCCCAAGATAATACTCAC

A\_14\_P128641 GGTTTACAATTGTGTCCAGTTTAACTTCACTGTCATTGCTTTGTGCTTTTTGTAACAGT

A\_18\_P12832706

AAAAATTCAGAAATGTCTCTGATACCCCTACTTCAATACTGAATCCCTCATCATATCCCA

CUST\_9202\_P1426210822 TGATGCTACAACCTTCTGCCTTTTCAGCTTTTCAGCCATTGTTCTCCACT  
A\_16\_P15919007

GCACAGCATGGCAAATATTACCTCCTTCTTTCCATAACTTTCCACTTACCAACTTAAAT

A\_16\_P17232079

CAAGTGGCATCTAGAAAATATGAAGTCCTAGTTGGTAGAAGAAAAAATGAAGCAAAGCCA

A\_14\_P131808 TTGCTTATGAATATCTGTGCCACTTAGAGGAAGCCAAAAGGTAAGATCCAGACTTAGT

A\_16\_P02810049

TCAGACCATTTCCATACTTTCAACAATGTATCCTCTCCATACTTAAATATTCCATGGCCT

A\_14\_P127846 ATATACACTTAGGCAGCCAAATGCATCTTCAAGAGGCACTAAGGTAATGCAGATATTTTT

A\_16\_P16596169

CAGTGGCAAATAACCTTGTTTAAAATGTTTGGTAAAGTGGTAAGAGCAACTATCTCCAGT

A\_14\_P132653 ACCCAAATTCCTTGTGGGAACGATGATAAGGAGCAGGTTTACAGATCATAAGT

CUST\_2117\_P1426210822 TAGGGGGCAGCATAGCCATCCAGCCTCTGAGGGATGTTTCTTTTT

A\_14\_P111783 TGGTCTTTGTCAATATTTGGATACAGATACTTCAGGGGATTCTCAGGAATATTCTCAGC

A\_14\_P202278 TGCTCAGGCTTGAGAGAAATTTGTCTTCATAAAGACAATACTATGAAACTTCCATTCTCG

A\_14\_P121836 AGTGGCTTCTTTACTAGCAAAGAGAAGTGTAATACAAGTGATCATAGAAGGTGAGAATGT

A\_14\_P115320 CTTCATTAAGTGATACAACCTTCACTCCTTATGTTGTGCATAATCCTCTAGGTTGCAAGGA

A\_14\_P108383 TGCCTTGGCATAAACTGCAAATCTGGTTTAAATATCCTTACGGGGTAAAAATCCATTAAT

A\_16\_P19810582

AGCCTCTTCTAAAATATCAAGTCTGTGAACTCAAGTAACCTTTTTACCTTCTAAGACCA

A\_14\_P100584 GCTAATACTTTCTTATTGGTTTTCTTAGCAAGAGAAATTGGGTGATATCTGCTTCTCCCT

A\_14\_P128236 TACTCATCTTTGGTCAGCAGTTTACTATTCTTGACTGCTTGTGTAGTAGTAGAACATGA

CUST\_2958\_P1426210822 GCTGTGGGCAACTTGGACAGCCTGATCCACCCACCTTCCAGGGC

A\_14\_P136466 CTTACAGATATTCTTCTCTTCTCTCTGTTTCTATCCTTTCTACCTAGCAC

CUST\_5773\_P1426210822

GAATACAAAAAAAATTTAAATACTGTGCTAGGTGCTGGGGGTATAAACATGAATTACA

A\_16\_P18007849

ATCACCTTTACGTAACCTATCAGAAAAATAACCACTTGCTTTCATATACTCATGGCCCA

A\_16\_P16022614

TGGACATCCAATGATCACACATACCCAATATCTGTATTCAAGTTAAGGTAGATGAACATG

A\_14\_P130390 TAACATATCTATGCCCTAAACCTACAACCTTCCCCTATCCTGAATACAAAAGAGAAAACA

A\_16\_P16943113

AAAGTCTTTATTTCAACAACAAAAATGTCTGTAATATTTCCCATACTTGAATGTCATCCA

A\_18\_P22839762

CTAATTATCAGGGCTGTCCCTTATCTGTTCAAGTCTTCCCCTGTTCCATTTTTTTTTTTTC

A\_14\_P103556 AATGCAGTAGGGGATCTGTCAAAAACAATAAAGATTGGTGTA AAAACAAGCCACAAGTTA

A\_14\_P134556 CCTCAAGATGCTGAAGTCATTGACGAAGAAGAAGAAGTCACTGGTGG

A\_16\_P16701045

AAAACCTTGCTTACTCTAAGCCATTTTCATGAACACTATCTTTCCAGGTCTCTGATTCTTCT  
A\_16\_P00905291  
AAAGTTCCCTTGTAACAAAGTGTCACTTCTTACCTTGGATTTCAAATTCATCAACCTCAT  
A\_16\_P16766342  
CTGTAACTCCAATCATTTGAAAGGAAGCGATCTCAAACCTTAAGGTTCCAGACTCTATAG  
CUST\_1327\_PI426210822 TTTTATCCTGGTCTTTTGGAAAGGGTACAGGAAGTGACCCACCC  
A\_14\_P103184 TGGGTGCAGAGGCTAGAAGTCCCTTAATCTCATATTGGAAAAATTTACTGTAGAAAGAAA  
A\_16\_P18869842  
AATTCCTGTAGCACTGAAAACCTTGAAAACAAACATGAAAGAGGAACAAGATCACATTCTGT  
A\_14\_P115514 ATCGATCTTTTTTTGCTGACACTACTGTATCATGCACTCACCAAATCAACTTTAGCACTA  
A\_14\_P138825 GTTTCCCTTCATTATACCAAGGACTTAAACAATACCATTAACCAGAACTCAACAAGAAAGC  
A\_14\_P120690 CTGTGCTTTGATTGATGTGGATCTCTGAACTCCCTTAAATACAAAGACCAATTATTTAGC  
A\_14\_P118562 ACTCATGATCTGAGATGCTTACCTGGATAGTCACCATTGCAATTTTTAGAAATTTGTATGG  
A\_14\_P137727 TGTTTTAGGACCCATTTTTTTTTTAATTCTATGACCCCAATTTCTACTCTTCCCCTCTACT  
A\_14\_P120026 GCACAGGGCAATCTACAATGGGGCCAAGTGCTAAAGCAAAAATTTATTAATAAATTCATTTA  
A\_14\_P110427  
TCTCATGTCTAGAAGCAGAAAAAAGAAGCCAAACAAAATACACAGATCACCTTCAGT  
CUST\_6632\_PI426210822 TGTCTATTTTTTCGTTACAGTATGGATGAGAAAACCTGTATCTAGCTTTGGGGG  
A\_14\_P128915 GTTAGGAGAACTACATTTCCATAATCCTTTGTTCCAGGGCTGGAGC  
A\_14\_P132567 GACATTTAAGTCAGTGTGAACTAGATGAGTTTATGGACATATGATGGAGAAACCAAGGCA  
A\_14\_P113076 AAGTAATGGCAGTGTAATTGATTCATGTCTGCTTAGGTCTTGAATCAATCATTATGCACC  
A\_16\_P20530859  
AAAACCTCTGTGAATGTTCACTTCATTTTTTTCCTGATATATCGAGGACTCCAGATGTAACC  
A\_16\_P58424530  
TTAAAGTTTGGTATTCAGGCAAATAGTTTTCTTCACATCTGACCTGAAATAGGACTCAGG  
A\_14\_P127872 CACGAGACAGAATAGACTACACTCAAACCTCCAGGGGAACCGTTCATTG  
A\_16\_P02938441  
GAGGAGGTATTTAAATTACAGAATTGCAAACATCTTCAAATGAGCGTTAGGTCTCTGGT  
A\_16\_P30952656 GCATATAAACTGTGGGTGTGGCAAGACCCCGAAGACATTTACATCTTTATC  
A\_16\_P15270599  
ACTTGACATCTCCTCTCTTTAATCCATCATAAGTATGCACCATCACATTAATCTTCCAAA  
A\_18\_P17037076 ACCTACTATAATCTTATATGTTTGAATTTCCCTGTCAATTGAGTTTTATAACTTTCTGCCC  
A\_14\_P120645 CTCTGAAGAGAACTTCCCTGGAAGTACCGAATTAATAATTTATACTTCGCAAAAACCTCAGC  
A\_14\_P134672 GCAAGAATGATGAGTGAATGATGTATGAAGGCTTAAGAATCTTGGATTTTGAAGTTCATC  
A\_16\_P01645175  
AGAGGATGAAATCTGGAAGGCTAAATGAAAAGAGAATGTGTCTGTTGAATTCGATAAGC  
CUST\_4507\_PI426210822 GAGTCTGCCTCCACTGGGCAGTGCTGGCCTGGAGGAAACTTCCAT  
A\_14\_P104118 AACAGGTAAAGGCTACATCCCAAAAGTTCCTCTCCAAAAGAACGCCAAAATATTAATAA

CUST\_7497\_PI426210822

CAGCCACAAAGGCCTATTCACAGTCTTTAAGCCTGATGAAGTTCTGAATAAGTAA

A\_14\_P132817 GCACCATGACTTCTTCACTAAAACCACAAAGTCCTGCTTAAACTATGGAAAACCTAAC

A\_16\_P20954511

TTCAGAAGGGAAGTAACAAATTCAGCATTAGGTTAGATCATTAGCATAGAGGCCATTCAT

CUST\_9124\_PI426210822 GTTTCTCACTCGCTTGCCTTCCAGCTCCCTGCCCTCT

A\_14\_P116778 AGAAATCCTCATAGAGGAGAAAAGACATAAGCCTGGTGTTAGGCTAAGTGAAATTTGTA

A\_14\_P112894 TTACATTCTCTCCCCTTGTACCCTCTAGGGAGAAAAGTTGCC

CUST\_3577\_PI426210822 ATTTCTGGGTGGATTGGTGCTAGGTTTCTCCTGGTCTTGGACGAG

A\_14\_P106696 TCCCTCTTGCTGGCCATCTTGAATGAGTAGTTTCTTTAACTTCTAACTAAAAGAGGAA

A\_14\_P118996 AACTTGATAAATGACATTATTGTCAGTTTTCCAGTAACTTGGGCAGTTTCTCCAAGTGA

CUST\_4157\_PI426210822

CCTCCATCATGATTTAGTATATCATCCTTCCCAAGAGAAGTTTTGAGAAGTTGTCCT

CUST\_9369\_PI426210822 TTTTCTGTGGAGTCTCTACCTTCTGTTTCTTTGAGGGTTTAAACCAAAG

A\_14\_P129404 TTATAATTACTTTTCTAGACTATGGGCCATCTAGTTTTCTCCGCATACAATAGCAGCCA

A\_16\_P39656744

TCTCCTGAAATATCTTTTCTAAACACTAAACCCTCAAAAGACGTTAACTTCTCAGACTCT

CUST\_8991\_PI426210822 GTCATGTTTACCCGGTTGCCGTCAGCTGCGATTGGTGTAAATATGATAT

A\_14\_P129360 TTCCTAGCCTGGTCTTAGATATGGTTCTGAATCTACAGTTTGTCTTTTCTTTTCTCTTT

CUST\_2880\_PI426210822 CTAGAATTCAGCAAGGAAGGCAGCCTCTTGGCTCTGCACAGTTTG

CUST\_3205\_PI426210822 GTATAGGATTTTGTGATAAGGCACATCCTCCTGAGGGGAGGGCAG

A\_16\_P17306357

AACATGGTCTCTATCGTCTCTTAAGTAACAACATAACACAGTGAAAAGAGCCTAGTGTCA

A\_16\_P19170471

GGCAAAGTGACTCCAATTACGTCCTTAATGAGTATGTTAAGCCATGTAAATCACATGTCT

A\_14\_P139822 ACGAAGTTAATGGGCTTTCTGCTGTTTAACTGCTTTGAGATTTTAAAAATTCATTCAGC

A\_18\_P10585970

AAAGTCGGGCAGTGTATTCTATAATTAAGTATGAGATTCACAATGAGTGCTGGAGTTTTTCTT

A\_14\_P102413 TTTCTCAATGAGAACGTGGTTCATAAGTGGTTATGGGGATTACCTTAACCAATTAATTT

A\_14\_P120792 CGTTGCCTCCATAAGAGCATAAAAAAAGGTTTCAGGCTTTGGTGAAAGG

A\_14\_P202232 ACAAAGCCCGATACCAGGAAGAAATGATGAATTATGTTGGCAAGAGGAAGAAAC

CUST\_642\_PI426210822 GTGATTGAAGTTCACCTTTTGTGATCACCTGAGCCTGATGGGGAGG

A\_14\_P125517 CTGGGCATGATAAGGAGTTTTATTTTTAAACACAAATTTACCCTTGTTTCATACTTGGG

A\_16\_P35286483

GCCTTCTCTAATCACATGACACCTAGAATATTACAAAATTACAAAATCATCCCTCTTGCC

CUST\_9579\_PI426210822

TGTAAGTATTAGACATGCTGACATGTACATATAAAATATGCCTAAACCAAATTAAGAA

A\_14\_P121872 AGTTTCAAACCTCTCCTTTCTGGCTGAGATTACCTAATTCGAAGAAAGGAAACAGTTTA

A\_16\_P00812644

AAATTTTTGTCCTGCTTATTAGTCAATTCCCAATTGACCAAATTGTGAATTAGTCCCCTG  
CUST\_2070\_PI426210822

TTTGTATTTCAAACACTGAGATAGGAACTTCACATATAGAGATTTCTAATTTAACATTGA  
A\_16\_P21101961

ACTTGAGACCCCTTGTCTTTATACATGTGGCTATTGGAAAACATTAAGACCACTATGTCT  
A\_18\_P22842633 GAAGCCGGCTTCCTGGTGTGTGAGGAGAGGATGAGGCCGTCATG

A\_14\_P115904

CCAAGACTTTAGAGAAAACATGTTAGACAACAGGGGAGAAATATCACTACTCAAAAAACC  
A\_14\_P108856 CATTCAAACACTGAGTGTGGACTGAGTCATTCAAGCAATTCAATAAAACAACCTGTTTGA

A\_16\_P00825617

AAAAAACACAGGTGACTCCTTATTCCTGAGAATTTGATGCAATTGAAACAGCGACTTTC  
A\_16\_P15598898

CCTGACTTTCTTAACAATACAATATCAAAGATGACCAACCTAAAAATAGCCAAACTGACA  
A\_16\_P39719647

ACCCACAGCATTTTTTTACTCCACAATATTTTTTTCCTCCTATATCTCTTCAAGGACTGT  
A\_14\_P123778 AGGCAAAGTAAAACCTTCTTGTAAGTCATAATAATCATCTCTGTCCACTTTCCCAAGTTT

A\_16\_P02846621

AATTATTTGCCTGATGAGCATTATTTTCATGATTCCCTTCCTAAAAGGATGAAGCATCTGG  
A\_16\_P30952589

TGCATTTAGAAGCATTTGAATTGTTGACATCTGATTTTGGGTAAAAAAAAGGAAAAAGGA  
A\_14\_P129188 TGATGGCTGATGACAATATAGAAGATTCTACAGCAAGGTAAGAGTTTTTGGTTCGCATAAC

A\_16\_P19265260

AGTGATCTGCATAGAGTCAAAAATTCAAGCCATGGGTATAAAATGCAAGTAAAATCCCTG  
A\_14\_P108043 CAGATTTTGTAGCCGATGGATGTGACTTAAATCACCTTCAAGAACAAGGTCTTGTATTAA

A\_14\_P129298 AGATCTTTGGGAATATTTGGGTGTTTTGTTTAGTCAAGTAAATGAGCAACCAACAATTTCG

A\_14\_P132308 ATGGTTCTGGAAACCCCGTTATAAGTGTGTCAACCTGTCTATCAAGGACAT

CUST\_6456\_PI426210822

GAGGCTCATTTGCACAACATACAACTTTGGACATCAGATTTTGGTGAAACTCAAA  
A\_18\_P22840911 AGAGACCATATCCTCCCTCACTGCTGTCAACCAAGGACCCTCTCT

A\_14\_P100499 CAGTTACCCTGATTCAACAGAACAAGTTTAAAACCATTGCCATAGGGCATTAAAAAGAT

A\_14\_P139109 TGTCTCTTAAATAGTTCTAATACAGCATTGTAGACCAGTTCATATTGTTTCTGAAGAGCA

A\_14\_P116214 GTGATTCAGTTAACTCACTATCCATCTATGCAGATTTATGAGAGGAAGACCTTTCCACTA

A\_14\_P102208 TCCAAGTCCAAGTGCCTGGTCCCCTTTCTCCATATGTAGTAAATAATTATTATGACTAAT

A\_14\_P101563 CTTTTATAGAGGGTCTAAGCAGGCAGGTATTCCTAGGATACCTACACCAAGG

CUST\_4268\_PI426210822 TTCTTGTFTTCTGCTCTTACTCTTCCCTACCTCCAACCCCATTCCAAATTC

CUST\_9392\_PI426210822 ATATTTACCCCTTCCCCTCTCTCCATCAGGCATCCTCTTTCAATGTTTA

A\_14\_P125888 ACTTAGGATAAAGGTGAGTTGAGATCTGAGTCAAAAAGAAAAGATTCAGAGTATTCAAGCC

A\_14\_P128648 CTTACTCTGTGCATAAGAGAATTTCACTCTTTTAACTGATTGCATTGGAATGCTGACCAA  
A\_16\_P01165968

GCTCCTGCATTGGTTTAAAACCTCTATGATCATCTTGTCCAATCTTACACAGAAGAACAG  
CUST\_4000\_PI426210822 TCCCAGATCACTGGTTGACCTTCAGCGGGCATTAAACAGCATATT  
A\_14\_P122161

AGAACGAGATAGCAGTCTGACAAGAGAATAAACTCTGACAAGCAGAACAAAATCCTAAAA  
CUST\_3838\_PI426210822

TGGATGAGAATCCAAGTTATGAGAACCTATTGATGAGAGGCATGCAGAAATAAAAAGC  
A\_14\_P121061 TTCTGTTTCTCTGAATTACTAAGTGGAAAGCAAACTTAAAGGTGTCAACACGGTTAGC  
CUST\_2058\_PI426210822 CATAGACAGGAGGGTTCTAACTCAGCAAACCACCGTTCACTTCT  
A\_16\_P00926525

ATTTGCCCATTTATAGGACGTAGAACTATCAAGATATTCTGAAAGATCACCTTCATGCCA  
A\_14\_P119913 GTTGGCATGTAAGATGCTTATTTAGGTCTGAAATAAGAACTCATTGAGTGAGAACTGGAA  
A\_16\_P02022553

ATTGGGTATGCACAAGTTAAATTCCTGTCCAACCTCTCTCAAATTAACCTATTCTGTGTCT  
A\_14\_P200718 CTTTCACTTTAAAGAGGCACAGATGCTGGAACTACTACCCTTACTGAATGCAGAA  
A\_14\_P129261 TCTGTGAATCAGGCCTCCTAAGCAGATTTATATCAGTTTGGCCTCTGTGAG  
CUST\_5678\_PI426210822 CCCACACCCCTCAATGCATGCATATAGGAATATAGCTCATGCTATGGAAAT  
CUST\_5543\_PI426210822

ATAGCATAAAATGCAAATGTCATTAACTTGATTATATAAAGGTAAAAGTAGAATAAGAT  
A\_14\_P122788 TTACCAAGCCTTTGTGAAATCTGTATAACAGGTTACTACTCCATTGAGCAAGAAAACACA  
A\_16\_P15625132

CAAGGCAGAGGACCATTATATTAGGACAGATCATTTACAGTGGATATCAGACTCAGATTT  
A\_14\_P117559 GACAAAAAAAAGAATCTGGGGAAAAAGAGGCGTTTCTTTTCCAAATATTCATTAAGTCCT  
CUST\_2112\_PI426210822 AGGAATGGGGGACTTTGGGCCAGTTAGCTTTGTCTCACATTGACT  
A\_18\_P13295287

AAAATTGTAAATTAACCCAGGATGTTACCTACAGATTGTAGGGTGATATCAGTAGGGTTCG  
CUST\_4920\_PI426210822 AGAAGGCCACATGCTCTCAGCACCAGTCAGTGGTGCTCGCTAGTC

A\_14\_P124894 AGAGGAGATTTCTCCATCCTGGTCAGGGAATTTGTTAAAGACTGATGAAAACATGAATA

A\_14\_P114990 CTTGGGGAAGTCAAAGTCTATACCAAGGCATTGCTAATAGTTGATTTTCAGGTTTTAATG

A\_14\_P201368 ACTGGCCTTGATGTGTCTACATGGAATTATGTTCCTTAAATAAATTCACAGCATATGAGG

A\_14\_P103940 TGTGGTTGGTTAACTCTTGAAGGAGCAAATAAGACTATTAATCCAGATCTGAAGGGAT

A\_14\_P107788 ACTCTTTTCGTTGTAATAAAAAGGAAAATGAGAATTTAATACCCATGCCCGTCTCAAAGG  
CUST\_3677\_PI426210822

TTATTCCATAGCTCTCCTGAATCTGACATTTGTTCCCTCTTTCATCCTATACTTCCCT  
A\_16\_P18075120

AAAATCCTTTACTTGAGTGCAAAGACATATGTATAACCACTCCACTCTTTAGCATGACTGC

A\_14\_P105962 AGATGGAGAGTGCTTTATTCAATTTATTTCTTGAAGGGAACCTCTACAATCTGCCACTTAC



A\_16\_P19473827

AGAGGAAAAAGACTGTTTCAACATCTGTTATTACCCCAAATCTGATAATTATGGTGCCAG

A\_16\_P03718528

CTGCCTTATCTCACATTAAGTCCTTATTTCCCATATTCTCATTGCAAAGAACTGTGTAGG

A\_16\_P18613024

ATGGCATATTGAAAACAGCAGTATGATGTAAGAGAAAAGATCACAAATTCCTTGAGGGTG

A\_14\_P134123 ATGTATTGCCCCCAATTATAAATGATGTATTGTCTGAAATCCAAGGAAGGACTTCTAGGA

A\_14\_P125925 GGCCTATTTTTAGAATGCTCCTGATAATGCCTCAGGAGTTGCTAGATCTGAATTA AAAAC

CUST\_3774\_PI426210822

TGACCTGGCTCCTATTGTCTCTGTCTCTCTATACTATAACTTTTAATCTTGAAATAGT

CUST\_434\_PI426210822 TTTCTAGGGAAATGGCATTTCAGACATTGTTCTGGTCTCACTCAC

A\_14\_P122127 ACCTCAAAACTTCTGTGTTAGATAGCATATAACCCAATATAGTCACACCCAAAAGGCAAA

A\_14\_P136901 CTTATGAAGATCAGACCAAGGCTAGAACACTACTCTACTTTTCTCAGACAAATTCCTGTC

A\_16\_P58424371 ATTTAATCCCTTCTATGAACTACCTGGCATGGGTTCTGCTTTCCTCTCTG

A\_14\_P120769 GCAAGCAAATCCTGAAACATAACTAGGATTTGTATGTGACAGGAATTAGAAGAGGATCAA

A\_14\_P116392 TAAACATGGAGTGCTTCAGAGTATTTGACAGAAATGCAAACCTAGACAATCATCAACCAAG

A\_16\_P16191563

CAGCATGGGATTTGGTTGTCATATCAACCCTATAAACAGTGTTGAATCCATGTCAATAAT

A\_16\_P58424538

CCTTTTTCATGTGCTGTCAAATTTAATCCTTATGGCACCTTCATAAGGTAAGATCAGCAT

A\_14\_P101305 TGGGAGGTGGGTTTCATAACTTCCAAAATTAATTCATCTTTTTTCAGTTTCCAGAAATTTCT

A\_14\_P101322 GAGGAACAATTTACTCAACGTTTCAATTTTTACCCACTCCTGGCATATACTTTTTCAAT

A\_14\_P118186 CTCCTTAAGGCTCTTTTTGTAAGGTTTTTTGTAGTGATTTTTATGCCACCTGAATAAAGAAT

A\_14\_P128594 TTTTTGGGGAGGTCTATGAAGGTGTCTACACAAATCACGTGAGTTCTAGGAT

A\_14\_P137744 GTGTCACAAACCAAGGTCACTAAGCCATTATTGCTGAAGAATGGGAAGACT

CUST\_9927\_PI426210822 AATCCTCATCTTCCTGCTGCTGGCCGTGCTGCTCTGGAAGGTGAG

A\_18\_P14136919

AGCATGTTTCTGTCACTTCTCTGGCATTTCATATCTCAATCTTTGCAGTAGAAAGAGAAA

A\_14\_P102840 AAAGTGACATTCTAAATGTTCCCTCACTCTGCGAGGCTTATTTTTTAGGGACTTTGCTATA

A\_16\_P02975124

TATTACAGCCTCAAGTTTAAGGAAAAGTTGCATATACCTGAGTTCTTTTGCTTGGTTTCC

A\_14\_P129641 ATTACCTTTTGACAATCTGTTAGGAAGGTATGCAGTGTGAGAAGTGAAGTATTTCTGATC

A\_14\_P100657 CTTTCACATTGGTGACATATAGATTTAAAAGGCCAAATACAGACCAGAAGAGTGACTGAA

A\_18\_P13691922

AACTCTTGGTCTTATGGGAATTACTACTTAGGAAAACAGGAAAATAGGCCTTGA CTCTAA

A\_16\_P30952646 TTTTATATTTGTATCGATGTTTTATTATTTCTATTAATAGTTATATAATTC ACTCAAGC

A\_14\_P119604 GTCTTATTGCTCATTGTTCTTTTTCTTATGAGTTCTGAGAAGTGGGCAGCAGTAGT

A\_16\_P00916838

CTTACCTTCCACCTAGTGAGAATCCTAACTGTTCTCATGGTAAATGTCACACTTACTG

A\_16\_P36714347

ACTGCCAGTTCATTTTAATCTTTCTTACCACCCTATTTTTAATTTAAGGCCCTTTAACCA

A\_14\_P124315 ATAAATACAATCAATTCCAAATGCCCAACTATACATGAACCCGAAGTAGCCAATCTTTA

A\_18\_P22840303 TAAGTCACCTTCTCTCTTGGCCCTGCAGAGCAAGGCCTGTCATTA

A\_16\_P58424288 CTTTTGAGGCATGGGCTTCAGAAGTGGCATGATGTCATTTCTTACACATTCT

A\_16\_P18657234

AAAGGAATACTACGGGATCAACCTACTACTTCATGATCGCTGTCTAAGTAAGAAATGTCT

A\_14\_P132170 ATTGAAAATGCAACTGCTCCAGCATGATAAAGAGGATTATTTCTCAAGCATACTAGCAA

A\_14\_P201866 CAAGAAGTAAAATTGGGGATATTTTGATTTTTTCAGAGACGGTGATATGAACCTGATGGTT

A\_18\_P14132142

CCCATTCCAAATTTCTCTTAAGAAAAGGAAGGAGAGTTTGTTTTTCTCAGTAGAGTAAG

A\_14\_P133342 TTTGACAGAATACTCTTTTCAAAAATGGCATTGCTGATTTTCATAAACCTTTCACGTCTGG

A\_14\_P118424 CTCCAAAATCCATACAGTTTATTTAAACTGCTATGAAGCACTTCCATTTGGAAGCCGATA

A\_14\_P200230

GAAAAGGATAAGGGGATAAGAAAAGAGGGGATAAAGTGAGCAATGAACTGTAAATTTGTC

A\_14\_P117416 ACCTGATTTTGCAAATATTTTGCCAGCAGATTGTAAAGAAAAATCACCTGTATGAAAAGC

A\_14\_P139246 GGGGCTATACATTTGGTTACTTTTTTTAACTTTGTTTTTTCCCGTGTCATGAAAATGTC

A\_14\_P100525 CCGTGGCTCAACTAAAAACAATGCAAATCATCAATCTTGTAGTCGTCCTGCAAATATTA

A\_14\_P137533 CAGCATGTCCACACAGATATTCTTCTTGTAGGAGTTCCTATAACTGGAAATATGAATCAG

A\_14\_P101471 ACAGGGAAATAAATTACTTACCTGAATAAGTTGGAAAACAAAGTGAAGCGCCGCAATAAA

A\_16\_P21671678

ACATCAGAACTCTCCTACGTAAAGATGGCTTAAATTTCTATTGACCCTCACCATTAACA

A\_16\_P20609950 ATGCCACTGCCACAGCAAGAGAGACAGGGAAAAAATGGACATTTCT

A\_14\_P138921 GAATAGTTTAAATCCCCGGATTTCCAGGGTAGTGCTGATTTTTCCAAACACTATTTTAAA

CUST\_9861\_PI426210822 GACCAGATTAAAGCCAGCGCTCCTCCCTCTCCATCTTTCTAACA

A\_16\_P15478011

AAGTCGGTCAATTTATCACTTATGTCTTATCCAGAATGAGAATAATCCGCTCCCTTTTCT

CUST\_1889\_PI426210822 CTCACGTTTCTGGAGCATGTGCCTCCCTCCTCCCTAACACTGATG

CUST\_8628\_PI426210822 TTCCGTATGCCTTCTGCAGATGTACAGCAGATAGATATTTTGGCAGAATGACA

CUST\_7447\_PI426210822 CAGGACCTGGAAGACCACTTGCTCAGAGTCTGAAATGTTTACTG

CUST\_2640\_PI426210822 GACAAGGGAATCAGGGAGAGCAGGGAAGGCTTCAAAGACAGGCTG

A\_16\_P15884526

TGGGTTTTTCATAGTCTCTAGGCTCTAATTCAGCAATTTCTATCCATAACAACCAATAGA

A\_14\_P202534 CTTCTGAATGTCTTGTGTATCTTTCATCTTGGCTAGAAAAGAAGTCTCTTTTCTTTCT

A\_16\_P00526186

AAGGTCTTATGAGACTTTTGCCTGTAAAACCTTACACATTGTGCTATTCACTCTGCTTT

CUST\_1515\_PI426210822

ATTCTTACTTACTGTAAAGTTTGGCCTTCGTATCAGTTCCTCCTCTCTCAAACACTT

A\_14\_P120106 ACCTTTGTTATCTAGGAAGTATTGGAGTCATGTTTCTCTTAGAAGGATAAACTGTTTCCC

CUST\_5172\_P1426210822 C TACTGATATGGATCTGCCTGGTCCACATCATCCTGGAGTGCTAG

A\_14\_P115297 CTTTTTGCCAAAACATTGGTGGTATAGTGGGTTTCCTTAGGAACCACTAACATTATTAAC

A\_14\_P104505 AGAGGCTATTGTGTATACACTCCCATAGTCTTGGTGTATATGCTGTCCCTATTAATTAGT

A\_14\_P102358 AACACTGTCATTGGGTGCTTACCTTGTCATGATTTTCTTTATTCCAGGCTCATTCT

A\_16\_P35578867

AAGTTCTCCTCCAAATATATACAGCCTAAGAAGAAATATCAGAAAAAAAAGCAAATCCCA

A\_16\_P19303510

AAGTTCTACTCTTCTCTTTTTGTTCTACATTCCCTTCACAATTCTCAATGTTTCCTAGGGC

A\_14\_P138524 GAATTTTAGGCCTGCTGTTTCATTCAAATCCTAGTCAGAATGATCTCCAAGTATCATCA

A\_14\_P119773 TGTGTTTAGTGCAGAACTTTAGACCTCATAATTCTGCTTCATGTGCACAACCATCTTAAA

A\_16\_P17858495

GACACTAATGATTCCCGAATTTGCAATATCCAGACAAAAGGTAGAAAGTAAGCGTTCCTTTT

A\_14\_P130388 CTCTCCTGTTCTCTCATCCCTAGATAGGTGACAAGTCCACATCATTGTTTTTATAAAAAA

A\_14\_P110026 GAAGCAGAACAGGAGTGAACATAGCATCTCTGTTACACAAC TATAAATAGGAAATCAGGA

A\_14\_P135085 CCACAATGCTCTCCGTGGCTGATAATTTTTCGCTAACTCCATTTATTTTATTAATTAGGT

A\_14\_P113068 ATTGAACACACTTTTTGGTTCTGAAGAAATGTTTGAGGAATGGAAGTGGGTTATTGCAA

A\_16\_P16361284

GAGTGGACTTGGTCATAAGACAATCATAAACCATAAAGATGATCCCACACTAATTTTTGAGT

A\_14\_P119572 AAATTA CTCCATGCTATTTGCTCCAAACCATCTAGTTTGAGGTTTCATTTGTCCTAAGTT

A\_14\_P115475 CTATTTACTATTA AAAAGGTTGAATGAACAGTATGAACATGCCTCCATTCACCTGTGGGAC

CUST\_9043\_P1426210822 GAAACCTGTGTCCTCTCTTTGCTCTGAGTCAACAGACA ACTCTTAGAA

A\_16\_P20029868

AATTGATATTCAAGACCACTAGTGAGTTCTAACCATACCACAAATCCTCTTACCAGAGTT

A\_14\_P129556 AGTCCTGGGAAACAGAGTTATTTTTTTTTTGAGAGGGGAAACTTCTAAATACAACGAGTTA

A\_14\_P134398 TAACAAAGGCAATCCATGCAAGAGCGAAATAAAAATTGATGGAAGTACCAGATTTCTTTTC

A\_14\_P131833 ATTTGAGCACAATCTGGACATCTTTAGCACAAAAGTGAAACAAAGTAATCAAGGACAAAAG

CUST\_5114\_P1426210822 AAAATGCACCAGTGCCTTCCTATTGGCTGAATGTCCACTTCTGTTCTAT

A\_16\_P38045223

TAGATATGCATGTCATATGTCACTTGACTTATGTTCCCTTGACTCAAATTGTCTGTTGGCA

A\_14\_P108752 CATTTGGGAGCAGCGAAGTATAAAAATTCAAAAAAAATATTCACAGTAGATGCCAGGG

A\_16\_P17431447

TTTAACCTACCTTTAAGGACAGTAGTGCAAGTAGTTAGTTCTCAAAAAGTTCCACAGTGC

A\_16\_P03307144

AAACTCCACTGAAGTATGGTTATAAGTTTCATCTCCAGACAAATAAACAAGCAGCCTAT

A\_14\_P130128 GCATGCATCTGTATTTTTGTCTTAGATTTCACTTGATTCTCAAATGGATCCTTGACTCC

A\_14\_P139689 ACTACCTCAGTCTTATGAGTATACTTGCTCACATTGATAACAACATGGTAGCATTGCTTC

CUST\_5011\_P1426210822

GTTAATAATTTACCCACTTAAAAGGTTAAGATCAAAGAGATCATAAACACACATGAATAC  
A\_14\_P122683 CGAAGGGACTTCCATATGCACGAGATCAACTGTTTATTGATTTTTTTCCTCAAATACTAC  
A\_14\_P105563 CTAAATAGGGATCAGTAACTTTATCTCTATCCTTAATGAACATTTGTTTTATTGGTGGCT  
CUST\_5202\_PI426210822 GCCACTGCTGCTATATTCCATGCTTTTGGACAAGAGCATGTTTCAGTATTGT  
A\_16\_P20240557

AAAATGGGTTTAAAGCAGTGAGATCTGACTTAGGATCAGGCTATCTAACTAGTAAAGTCC  
A\_14\_P138053 GGGAAGAAACCACTGACAGTATTGTAAAAGAGAAATCACTTTTACTACTGCTTTGACTTC  
A\_14\_P129163 ATAAGTCTTGAGTCTGCACTGGTTCTCTGAGTCATATTGGATCCCTGATCATCT  
A\_16\_P0377558

TGCTAATTTACTCTTAGAACAGGCATACATATATGGCACAGACAAAAACATAAGAATCAG  
A\_14\_P109649 CAGTTTTGAATCTCAGGTCTAAGCCCCAAACCAGAAATGATTTTCAGGAATC  
A\_16\_P01280187

GGAACCAAGTAAGTATTCACATAACAGAATCATAGAATCACTTTATTTAAGCCCAAACCC  
A\_14\_P103095 ACATGAATCAAAGGTTCAATTTTATGAGAACGAATGTGTAGGGCCTGAATTTTAAACACG  
CUST\_9165\_PI426210822

CCATGGGATTGTAAGCACAATTCTAAATTATGAATTACTAATTATTAATTTTCTGGTTTA  
A\_14\_P108352 CAAATGATTCATAGCCTCTGGAAAACCTTATCAATACCACCTTCATTTTCTCCAATGTTCT  
A\_16\_P38429524

AAAATTCCTCACAAGGCACATACTTGAGAAAAATTTAAACTTTTTTCCCCTAGAAGCCAC  
A\_14\_P112387 CAAAATTTCTTAATGAATCCAAACCCAGTATTAAGTGTGGATCTAAGTGCCTTAGAGGA  
A\_14\_P112981 CAATGACACAAAGATAATAAAAGACTCGAGCCACCTGCAACCAACAACATTCTTAAGTG  
CUST\_4181\_PI426210822

TCAATAATGTTGGAAAAGTAATTCTAGGCATGAAAATTAGCAGTATGGTACATATGAAGT  
A\_14\_P105353 TATGAAACCTCAGAAAGGATGTTGAGTCTTCAATAACACTAGGAAGGAAGATATGCTGTT  
A\_18\_P22842482 CTTGATTTTCAGCCCTGTTTGATTTCTGACTTTGAAAATGCCAGCCC  
A\_16\_P00685535 AATGAGAATTTCTTTGCCCATGGAGTCCTTGCCAAGTCTATGTCTTTTCTGAGAAT  
A\_14\_P112777 CATGGCAACTTAAACTGCAGATCTAATAGGTCTGCAACTTTTACACTAAAATGGCACAA  
A\_16\_P18105296

GCAGTATAGGCCACATGATATATTAACAATGAGAGACCCATAAGAAGATGAACAAGACCA  
CUST\_7807\_PI426210822 GAGCAAATGCCTAGGACTTTCCAAGTGGTTCTCGGTGCCAGCAGC  
A\_16\_P02027422

AGTGACTGTGATACATTTAGCCAAGCCATATGTTTTGAATGCTATGAATCTGACCAAT  
A\_16\_P19318732

AATGACAGGAAAGAAAATTATACCGAGGCCTAATAGCAATACATTACAAACAGACAGGGA  
A\_16\_P16886914

AAAAAAGGCAGTCTACATTTTGTGCTGCAATAATTCTGGATCCATATAGCAAGACAA  
A\_16\_P18331617

CCTTGATAACCATTTTTAGAGTTATGTTTGCCTCCAACACTAAATTAGGGCCATTCTGT

A\_16\_P18607669

AACAATTAGGGCACTTTCAATCCAATGATAGATTAAGTTGATTCAGACCATTTCTCCTGC

A\_14\_P135950 TTCGAGCAAATGTATGAAGAGATGCTTCAGACTCAACACAGGTGATTATAGATTCATACT

A\_14\_P128054 CTTGACAATATGATGGCAAATATAAACTTACCAGCAACCATACAGACACCAAGAAGAGCC

A\_14\_P124694 GGAGTCATTTTTCTTTCCAAACATCTTTAATGGCTTTTCTTTGCCATTTAATAAGGAG

A\_16\_P21459221

CTACAAAACCTCCTTTAGTGAGTCTTAGATGCCATCAGACAGAAATGATTTTACCTTGAGG

A\_14\_P107264 CCATTTATTGATAGGAAACCAAAAGGCAGAGATTATCCAAACTCACAGATCTCCTTAGTG

A\_14\_P117397 CTCTGGCTAAGCACTAAAAGATGGATAAAATTAACATACCCATCTCCTTACCCAG

CUST\_10093\_PI426210822 ATATTCCATATGTAATTTCTCCTCATTCTTTCAAGGGGAAAGCCACTGAGTGTTA

A\_14\_P130648 ACAATCACACTTTGGGGTTTAAACTAACGAGTTTCAGTTTTAAACATGTTAAAAACCT

A\_14\_P115844 ATGAAATACAGGAATATTCCTAGAAAGTTCGGAGGCTCACTCTCAACGATCTGTC

A\_14\_P130512 CTCAGTGGTCATTTGTTTCAGTCAGATGGTTATGGTGACAAGTTTGTGAACAATG

A\_14\_P124967 AAAAAATCCTCAAATTTATACTCACCCACTATGCTTCATATGTGCTGGTTTATCCATTTCG

A\_14\_P124022 GAAACATTATTTTCTTTGGCAAATTCTGTTCTCCTTAAGTGGCATAGCCCATGTTAAGTC

A\_14\_P132994 CCTTTGAGAACACGACACAACGAACCTTTATATTTTACCACTTCCTTGAATAGGTAAGACT

A\_14\_P111737 GAAAACGTGCTCACCTTTTACTGCCAGTAACTCCAGGCTTTGACATC

A\_14\_P130818 TGTTAATTGGGGATTCTGCCTTTGGAGGATCGGATCAATCACTTTTCTAGAG

A\_14\_P137759 TTAATGTCTTACCAAATGCCTATGTTTTCTGGCTCTACAAAGCCCATTCACACACATC

A\_16\_P16848563

AATACCAGATTGTGAATGTAGGAGAAAGTAGTATTCCATTAGGAAGTCAGAGACTGTTGC

A\_16\_P18119476

AATCAAGAAGGAGACAGTTTCTATCCAGATTTGAAGACATATATGGTGCACAGATAAGGC

A\_16\_P19181701

ATTTCCAGACTCAATGAAGATGAAAGGAACACTCATGATAAAAGATTCATACACTCCCTC

A\_14\_P111755 TAGGTCAGTGGAAAGTTTCTGCTAACTCTAGAAACACTTTAACAACTTTTGTGAGGCTAAT

A\_14\_P101853 AAATAGTGACTTACGTGTCAACAGAAATAAGTTTTCTTTTCCCATGGTCAGAGGCATAAT

A\_14\_P114980 TTGTGTGAGTGTTCCCTATAGATTATTTCAAATAATCCTGAAATGAACGCTTTGAGGTGC

A\_16\_P17387445

TAATGTCTTCTTCATCAGTAACATCCTAATGTCCTTTAAGTGTTAAACCCATCCCTTTC

A\_14\_P200482 CTGCTGCTCTACTTCTTCTATGACCACTTTGTCTATGTCACCATTGGGATCTTT

CUST\_1438\_PI426210822

TGGCACTGTGTTGCAATCATAGTTTCATTGTTCTTTGTATTTTGCATTTCAAAAATAAT

A\_14\_P104461 GAAACAGATCTTCTGCTGTTTCAGGAATGGGATGGTTGTAGTTTTACTCTAGGATCA

A\_16\_P03807294

CGTATTCTGTTTCAGAATCCCTGAGATTACTAGAAGTTTTAGAAGGTAAAGCAACAACCTTC

A\_16\_P19296146

AAATAGTGATAAGTTTTTGTCTAAGTCAAGTTGACGTTGAACATAATACCCGTGACGGTG

A\_16\_P01648431

AGCCAGGGATATTGTAAGAAAATGTCATAAACTTGTACATAACAATGAAACGTGAGGC

A\_16\_P18891519

TTTGGATCCTATACGAAAGAACAGAAACACTGAATATAGCAAGTTAGCATCACCAAAGG

CUST\_2468\_PI426210822 CAAGTGTCTAGGGAAGCTGGAATAAAGCAGTCACAGTTCTTATTTGTGACT

CUST\_6960\_PI426210822 CAGAGACCTGAGAGAGGTAGTTTGTGAGTGTGTATCCCTGAGATACGTA

A\_18\_P14135249

CCAGGAAAAACAGAGGAAATGGGAAATAAAAATGAATTTAGGACATAAACTCATGGAGCA

CUST\_9177\_PI426210822 TTGCCATTGCTGTCAGAAGCAAATCAAATCACTCACCAAGAGCTCG

A\_14\_P118839

AAAAATAAAAAAGAAAACCTTTTGGCTTCTCTGTAGATAAGAGGTCCAAGATGCAGGTGGGA

A\_14\_P139034 AAAGTCCTATCAGTTGTTGGCAGATGGTGTAAACTCTCTGGATTCCACATCTTTTAAAT

A\_16\_P17392066

AAAAGCAGTCCTTTAATCTATACCGGGAGTAGTTGGTTAATATGATGTAATTAGCAGGGT

A\_14\_P122578 AAGACTCGGCAGAGGTGACTTAACTATGGAATAGCACAAGGTAAGAGGTAAGAT

A\_16\_P20288428

ATCTCTGGATAGTGTGTTTAGTTTCATGTATCACAAATGGCAACTAATCTCAAAGCAGCA

A\_14\_P113113 GTGCATTTAAGTCAATGGTTGTTAAAAGAAGTTTCCCGTGTGTAAATCATGTTTCCCTT

A\_14\_P104161 CCCACGACCAGATGATTTTTGTCTAAGGAATCTCAAATTCAAATTCACACTAAAATGCAAA

A\_16\_P21360397

TTTTGTAAAGTTTTGATTGACACCAATTTGATTGCAAAGAATATAATGACAGCCCCTCGG

A\_14\_P131487 GATACTCACCAAATCAATTATGCCAATGTTATTCCAGCCTTGCATTATAGGGAGAAAAGA

A\_14\_P108111 CTTAGGACAACCTACACCTTTGCCAACCTGGGATTCAAATGAAAGTGAAAATG

A\_14\_P105172 TTTCCAGCACACAGACTGTCAAATCTTACTTCTAGAGAAGCCAGATAGATTAATAAGAGT

A\_14\_P114376 CTTTCACTCAGTTAAATACCAAGTTCACATGTGTGAAAAATTCATCCTGCCCTTAGTAAG

A\_16\_P58424099 AGGAAGCACAGCCTTCAAGCAGAGGTGCCATTTGGAAGCACAGAG

A\_14\_P123021 AAAGTTAATAGAAATGTTTGGAAATTTCTGTTGTTTGGAAATTATCCACACCACAGTTCGCC

A\_14\_P106676 CTCACAATCTAGGGAGGAAGAGATGAACAAATCCAAAGACAATTGCAATGCATTATGATA

CUST\_2783\_PI426210822 ACATCCTTCCCTCTGAGGTTCCCTCCCCTTCTATTTCCCTGCTTAT

A\_14\_P106787 CTATCCAAAATCAGCAGACAAAGTGACAGACAAAACAAAAGTGCCCTCTAG

A\_14\_P101714 AAGAGAGGTTTCTTCTCTCTCTGGAGATAAAGATTTGTCCCAACTTTTGTACTTTTCAGT

A\_14\_P111949 GCATCTGAACAAATTGAGAATTTGCCATCACCTATTCAAAGGAAAATACTCCTTTTTTCA

A\_16\_P19784065

AAAATCAGTCTGAAGATCAAAGGTTACCATAACATTTAACTCTTCTACCAGTGTCAATCAA

CUST\_303\_PI426210822 ATTTGCATGGGCCACAGGTCAAAGCCACACTGCCTGGGAAAGGAAT

A\_14\_P126784 TTTCTCCTTTTTTAGAGATTATGCATGATGTGATAAAGAAGGTCAAGAAGAAGGGGGAAT

A\_16\_P16897525

GCAAACACATTCATCAATGAAACTTGTTTAAAGGACAGCATTAATTCAGAGGTTTCTTGCC

A\_16\_P01166910

GCCCTCTTTTAGAGTTTTTTCATGTCAAAACCTAAGAACAAAAGTTCAGTAAAGTGCCTC

A\_18\_P11615788

ATACTTGTGTCAGTAACCTCATTCAAAAGCACAAATGTTGAAAGTGATACTAAGGGGGAAAAG

A\_14\_P200423 AGAGTGCTTGGCCATACCTCAGAAGATGGAGGAGTAAAATGTCTTTTTCTATTTGAAG

A\_16\_P20361937

ACTTGCTATCTGGACTTCTATGTTGACTTTGCATAAAGTGATTAAATCTGATGCTCTCGC

A\_14\_P119543 TAGCAATGAGTTTTGATCTTTTGGGGACCATCTAGTAAAGTTTTTCATAACTTACTGACCC

A\_14\_P113970 CTCATAAAGATGCATGCTTGACAAGTATTCTGCTTCTCTTAGGATGTGGAATATGAAGTG

A\_16\_P02528568

ACCCACAGTAGAGTATCGTGAAAAATTCTCCATAGAAAAGATTAAGTTGTATTACCACA

A\_14\_P113753 CTATTCTCAAATACTGAACTCTGTGGGAGAAAAGCAAAAATAACCTTTACTTGCCCTCAT

A\_16\_P03462946

CAAATTTCAAATGAATTCCAGTTCTCCAAGATGAGCAAAAACAGGGGATTAGACTCAAAT

CUST\_5571\_P1426210822 CCATGTTGGTACCCAGGACTATACAGAAGGGTGGATCAAATCATGATG

CUST\_7487\_P1426210822 AGTGCTCTTGTAAAACTGTCTTGCCCTTGTCTAATTGCGTATTGATCACCG

A\_14\_P114406 ATTAGAAGTCACTTGCTGACTGTTCTTCATATCATGTTGGCCTTTAATATTGGCTTTCTG

CUST\_1835\_P1426210822 CCATCCTGTTCAAGGCTACGCAGTGACCGCTGGCCACTTCTCTCAC

A\_14\_P132971 TTCATAAACCTTGGTAGGAAATAAAACAAATTACTACAATGGACTCCAGGTCTGTGACAG

A\_16\_P19532140

AGGCTTTCATTACTTGAGTTTTACAACAGAATGGCATCATCTTTAGAATCAGTCCAAGGC

CUST\_4274\_P1426210822

TTTGGATGGTAGTGGTGATGTTACTTATTGATGGCACATTTGATGACTGTTAGTCC

CUST\_6274\_P1426210822 AGACTTGTGGAGTAATGTGTGGGAGACCCCTTCAGGCTGGTCCAG

A\_16\_P00626028

AACACGAATATTGTCATTTCCAATATCAAGGCTGTAACTAGGTTTCATTACAAAGTCGCG

CUST\_7464\_P1426210822 CAGACACAGAAAAGGTTGCTCAGTCAACAACCTTCTGCAGGCTCAAA

A\_16\_P21220715

AACATCAGATAATTCAGGAAGACCTTAGGATATCTCCCAATAAATGAATTTGCAGGGTTC

A\_14\_P133917 ATTCATGTCAGTGATGTCAAATACTAGGACAATGCTATAGTTGGCACCTTGCATTTCTAT

CUST\_8228\_P1426210822 ATAATGGTCTGGAATGGGCAGGGAACCATCCCATCGGCCACACTG

CUST\_5434\_P1426210822 AATGAGTGAGGTGAAGAAGCAAGAATGGTAGCTTGCTGAATTGGCAGTT

A\_16\_P02217562

TCAGTTGTGGTCAGAAGTATGAATAGGTGTGATACTGCTAAAAATGTCAAGGTGAGTTTT

A\_16\_P19342669

CCTCGATAACAGGCCATATTCATCATGAAGTCTTGTTTTGAAATCACAATTAACCTCCAC

A\_16\_P00685289

AAACCTCAAACATTTATGTTTCCCTTTCCAATATAAAAAGTGTTAATAATTTACCCACTT

A\_14\_P101932 ATTTATGTGTTTTACACAGTTTTGGAAAGTGACATCACACATATTAATGCAGTTGGGGGA

A\_14\_P200093 TGTGTCCACACTGTGATGACTATACCTTATTTAACTGCACACATTCATACATTCAATCT

A\_16\_P17032042

ATTACTCTTTTTCAACCTGAGTTAAGCAACACAAATAATCTGATCCAGATGCTACAAGCC

A\_18\_P11571509

AACGTTCTACAAATTGCTTTTCGACCTAATGTATGTAATGTATCATTCCATGCTAGCCAA

A\_14\_P118542 ATCTCATGCTTTTTATGTTACAGAAAAGGTGGTGCTCAAACCTAATGATGTTTCAGTAT

A\_16\_P21659683

TCATTTACTCATGATGTAAAAATGGTTAGTCTCCACTTTTAAGGCTCTAGTTCTAGTGCC

CUST\_3664\_PI426210822 CCCCTCCCCGCTGCCCCGAAAGATCAGGGAAAATAAGAAGAAATT

CUST\_1130\_PI426210822

TTCCAGAAGCTGTGAAAAATGTTTGTCTTTTTTTTTCTTGGGTCTGATTACAGGTATT

A\_14\_P124583 GCGGTGGAGCCTTTATATCATGGGAAGCACTCTCACTTATTAAGATCTTGGTAAATA

A\_18\_P22841548 AATTAGTTGCCATCTTTTCTTGGTGGCTGATTCTAAGTGGCTGAAGGAAACAC

CUST\_5460\_PI426210822 GTTTGGGATTTGAGATATCCATCCAGGTGTTACGTAAGTGCTGAGATTTTTAC

A\_16\_P03685069

CCCTTCTAATCAGTAACCTCAGTTCCTCTAGAAATAACTGTGTCGTCTGCTTTATATAGG

A\_14\_P137457 GTAAACAGTCATGCGGACGGATTCTTTCTTACAGGTTGCAAGGTCAAACTTT

A\_14\_P125425 TTTTTGTAATTATACTGCCTTGTTTTGGTAGGATTTAGGGACTATGCAGAAGTAGTGGGT

A\_14\_P108260 TCCCTTAGTGGGTTTTCTTGCTTAACAAACAACACTTTGCATAGAATTTGTTTGCAATCT

A\_14\_P113453 CAGGTTTAGAACAAGATTATGCCACTAGGGATGGAAAAAGAGATGTAGAGGAAGAAGAA

CUST\_5530\_PI426210822

AAGAAAAAATAAAAAGCATTCAAGACCTCTCAGAAAAATAGAAATAAGATAATTACCTGT

CUST\_7361\_PI426210822 AAGACAGTGGCGTGGGATGATGGCTCGCTGATGGGAGACAGAATTT

A\_16\_P02402727

ACACTCTGCTCTTTTACTTCAGAGAACGTGTAACAACCTGTTATTATACGGTCATGTCATT

A\_16\_P19344074

TCCTTCATTTCCCCTACTATTCGATATCACAATTACAAAGATCAGTCCTTCCAAGTAGTT

CUST\_6415\_PI426210822 GGCTGATGTTGGCGGCATTATTCTTAGGAGACATAGAAATGTTGTGGTTTTG

A\_16\_P01574568

CTGTGGTCTAAAGAGTGAATCTGCTTCTATAAATGCCTCTTTAATATCATGGAGCCATGT

A\_14\_P111102 CAAGAGGCCCTTACCTTCAACTTCTTCCCTTTAATGTTTCATAAACAAGCCATGTAA

A\_14\_P134032 ATTTCTATCGCAGGACGCAAAAGCCAAATGAGACTGACCAAAAAGGCAAG

A\_14\_P138886 CTTCTCTCTGATGATGCAGATTAATAACTTGAATGTTGAAGAGAACAGCAGTGGGGAT

A\_16\_P17444501

AAAATGACCTGGGATCATTAACCTTTTACCTTGACAACCAAAAATGAGTCTGTTCAAATGA

A\_16\_P01720888

TAAATAGTCCGTAGGGTGTAGATTGAGATTAACATCATCTATAGTGCGAGGGCACTTTA



A\_16\_P17178176

ATGGAAGTAACAGAACACTAACATGTGCAAGACATATTTTTACCCCTCAAAATGTAACGG

A\_14\_P121074 AAACACAGAAGAATCCTCTGAAAGGTTTAAACATTTCTTGGCATTTTCATGTTCTCAAAG

A\_14\_P119522 GTGCAAAATTTCAATCGAACAGATGATGCTTTAAATCTGTGAGCCTTCTTTTGTGGGT

A\_14\_P126770 GTATAAAATTTTTGGGGGTCTATATTACTTCTTGGGATGGCTTTGCCTTAGAAGGAATC

A\_14\_P104614 GGAAGAAAACGTAGGTCTTCCAAGAGATTCTGAGGAACATAAAATGTAGGAAGTTTTT

A\_14\_P114012 CTGGGTGACCAAGACCACTTTCGTTTTTTTTCTCTTTGGGATCCTCTT

A\_14\_P104107 TATATAATACAGCACTTACCCTGCTTCTTCTAGGCTATCAAATGGACCCGGTG

A\_16\_P03126082

AAAAGTAAGAAAAACCTCCCACTTATTAAGTTGTTTGTGTCAAATCTTCCATCATTCCCC

A\_14\_P118478 TTTATGCTCTACCTAAAACATCTGTCTCTCTACATTTCCCTTACGTATTTTTTGTCTGCT

CUST\_4616\_PI426210822 CTGCTTCTAGCTGATATCTCCCCTTGTCTCAGCAAGCTCCTCT

A\_14\_P117072 TTTCTTACCAACTGCACTTCACCAAAAGCACCTCTTCCAATAACTTTTACAACATCATAG

A\_16\_P02156025

ACATTAACCTCAAAGAAAGGTCTCAAATGTGTGTTAAGAATTGAGAATACTACCCTCAGGG

A\_16\_P39972398

AAAAAGTCTTCCAAAAGCATCAAAGCATAAAATGTATTAGGTCCCTTATCCATTTGCTCAA

A\_14\_P126428 CCTCTGTGCATCTCCAACATGGATGCTTTTCAGGGCATTTTAAAATCTTCCTTAAT

A\_16\_P18928072

CTCATCACAAGCCATTTCTCTTTTCTATCAGATAACATCCACTCAAGTATTGTCTTCCTG

A\_14\_P125572 TGTATTTGGCTATGTAAAACCTTTCTTTCTCGGGACAGTTGTTTATAAGCCGG

A\_16\_P01187094

TTTGAGATAGCCTGCTTGATTTTACTGAAGTCCAATCTGAGTAACTAGATTTAGTGTCCC

A\_14\_P124196 TTAATTAAAGAAGAATATCAAATAAACAGTGCAGGGAGTGCGAATATGTGACCGAGATGA

CUST\_8852\_PI426210822 AGAATAAATCAAGCCAGCAGTGCTGTCTCCCTGCTGACTGAAGGC

CUST\_3035\_PI426210822 CTTGAATCCCCAAAACAGTTAAAAAATAAAAAGGGTTACGGAGGGGATGACC

A\_14\_P116245 CTGGAGTTAACATTTTTCTTTTCAGATTCGTATTTCCCTAACATGAAAAGTCAACAATGAA

A\_14\_P133378 GCCTGGGTTTTACTTTAGCATTCTTAGAGTAACCAGGGATGATGATAATTTTCATTCCA

A\_14\_P102698 TAATTTTTTGGTTATTTTTGACCTTCACAGATACACCGAGGAGTTAAAGGATTTGTCCGA

A\_18\_P14669703

CCTGCAAAACTTAAGTGCTAGACTCTATAACGTTTCATAGTTAATAGACCCATTTGCAAC

A\_16\_P02161620

TCACTTTGCTAATTATCAATCCATTTAATAACCAATTCTCTAAAAATTTACCACCCTGCC

A\_16\_P18513312

ACTTCTGTTACAGAACTCACCTCATTACTTCATTCCGACTTGTATTATCATAAGTGGCTG

A\_14\_P101747 CTAGTATAACAATGCCAAAGCCATCCACAACTAATATCAAAAATTGTTGTGTGCCTCGA

A\_14\_P101580 TCTAAAAGTGTTTTCAATAATAATGCATTTATGTTGATTACCTTGTGGCTATCCTCTAC

A\_14\_P103534 TTGGATTCATTTGGAGGAATGGAAGAAAACTGTTGAGAATATTGGATGCCTTTAGTTTC

A\_16\_P01617804 TGTAATCTTCATATATCATCCTAGCCTTTTCTTCAATTACTTTTTTGTTCCTGCTCCTTCT  
A\_14\_P136899 TCTTCTTCGCCTTTTTAACTAGATAGAGTTTCTGACAGGAGAATTTATATACAGGATGTA  
A\_14\_P112163 GATATTCAACAAATACAAAGTATGACCCACACCAAATTAAGCAGAAATAGCAAGTCGTC  
A\_14\_P200793 ACAAAGAATTTTTCATTTGGAAGGAAGTTGGACTCCAGTAGTGTTTCCATAATTTCAATTG  
A\_16\_P16848777  
AAAAAAAACATTTCCCCAGTCTATTGAGAAACAATGAGATGCCTATGGTTTTGCTTAGG  
A\_16\_P19849781  
AAAACAGGTGACCATAGGTATCTACACACAGAAAATACTTCCCTGGAAAATATCAACTCA  
A\_16\_P00739879  
TCTCTTTAACCTTCGCTCAATACTGTATCTGAIGTGAATCTTCTTTATAATCGCCTCCTC  
A\_14\_P131485 ACATAATTTTGAAAACTGTTTGCTAATGTCTGGTGAGTAACCTTTGAAAGTGTCCCTTC  
A\_14\_P109087 CACCATCATTAAAGGAAAAATAATAACCTTTTTAGCCCTGCCTATCTCCAGTCTTGGGA  
A\_16\_P21578762  
AATTCCTTTGGCTTCCATGATTCAGTTCCAAGTCCATAATGTCCTTCTATCTTCATTTG  
A\_14\_P137025 CCAGCCTAATAAAAGTTTACATAAAATGTAAAAAACAAGCAAAGCCTCCTTTCTGCGGG  
A\_14\_P130621 AACAGATGTGGCATCTTTTGTA AAACTGATTCTTGGAGACTAAAAAGCAGTGGACTTAAT  
A\_14\_P136615 ATGTGCAAAATTCATATTTGTATCTGAGTATTTTTAAAGCCAGTTGGCACTGCCATTCT  
CUST\_4167\_P1426210822 GTTTATAATATCTAACCCCTCTATCAGATCCTAGGCCATTTGGAAGCCAGGAG  
A\_16\_P35375856  
AAAGGCATCCTATGGTAAACTGTTTTGTAAAGCAGGAATCCTTTTTTAAATGAACCAGT  
A\_14\_P135848 CTAGGA ACTGGTAATATTGAATCAAATCTTCTTAGCATTCCACTGTTCATTCCCTGGAT  
A\_16\_P16191306 ACTTCACTGCCTCTTCATAATAGAGTCCTGGGACCTTCTCTGTGTTAAGCATAT  
A\_16\_P20864281  
AGGGTCTCTCCATACAATCTTGATCCTTGTATCACAACTGATGATCTATGAATAGCAC  
A\_14\_P114270 CAAAAGGACACTTCAACTGTCCAGAGGGTTATTCAGGTATCTTTTTCTGATACCAATACT  
CUST\_732\_P1426210822 GCTTCTCTCACTCCCCAGCAGGGCATCTTCCCTCATGGAATCAGAT  
A\_16\_P16191096  
ATGGACTTAATGATGGTTAAATGGA ACTGGTGAAGAAATTAGCAAAAATGATTATGCCCT  
CUST\_3632\_P1426210822 ATTACCTTGTGTTGAAAGGCAGCTCCCTGGCTCCCTGGGAGGCCT  
A\_14\_P125902 CATGGTGATCAAGCAAATGCTAATAAGAGACCCATTTCCATCCTTGTCCCTT  
A\_16\_P01212863  
TATCATTTGTCACTGACCTTTCTCTACCAATTCTCTGTTCAATGGAAGACTCAAATTTCC  
A\_16\_P18946206  
AACACAGGCTCTCTTCAAAAATAAGAATATTCACCTTTTTCTACCTCATCTGGACATTGG  
A\_14\_P128515 GAGCAAGATTGTTCTCAGGAAGGAAACCATAAATATGGCATTIATGTAAAATCCTTGCAG  
CUST\_10257\_P1426210822 GACACTTATTATAAGACATCTGATCCAGAGCTGCATGTTCAACTCCATCAAGCC  
CUST\_1331\_P1426210822 CTCCATGCATTGAGTTGCGGATTGTGAACATTTGGAAACCAGTATTTTTTTTCC  
A\_14\_P139513 GTTCTTTGAATATTGGCTTACAAACCTCATATCAGGTGTATAAGTAGAAGGATAGTGGCC

A\_14\_P129183 TCAAGACCTCAGTTGCTACATTATAGATTAAGGATGAAAGACCATTTCTGACTTGCTGTT  
A\_16\_P00353026

TCCCCCAAATCATAATCAAACAGACATAGAACTAGAATGATGAAAGAACATTGAGGTC

A\_14\_P100438 ACTCCAATTATTGATCTCCACATACAGTTTACGGTAAAGGAAAATGGAATACATGCTCAG  
A\_14\_P111732 GCAGAGACATGTAATAATTTAAGGTAGGGCTAGAAAGATAAGGAGTAAAGTGTGTTTCAGAC  
A\_14\_P127494 TCAGGCTTTTTTTCCTACTACTGTAGCAACTGATATCTAAAATGAGTCTAGAGCCCTTTC  
A\_14\_P114279 CTTTGTAACCTACAACCCACAGTTTCGCATGTAGTGTAATACCTTCCTGTTGTATTTTTG  
A\_14\_P201725 CTCCGAATCAATGGCTTTGATATGCTAATTAGGGAGTAATTTAATTTCAAAGGCCGCAA  
A\_14\_P110738 ACCTTTTTGGTTTTTCTTCTTTTTCAAGAGACTGAAAGAATTAAGCAACGGGAATTTGC  
A\_16\_P19251385

AAGTTTCCACATAGAACTAGGTTTTAGAATAGATCGGGCAGTTTACTTCTATGTCAAGGC

A\_16\_P00819444

TTGAGGATAACCCCTATGTAAATTCTTTGCAAGTTGATACTTATCCCAATATCGTAGGCCA

CUST\_1749\_PI426210822 CTCCCCCTCCTCACTTCCTTCTCTGCTTACCGTTGGATTTCTTTTT  
CUST\_2396\_PI426210822 GTCAAGTGGAGGTTTCCAGGGCTCCTGGTTTTTCATTTAGGGTTATTA  
A\_14\_P117700 CATAGGTGAAGATTTTGCTCATGAGACCCCCATGACATAGATGGTGTC  
CUST\_7784\_PI426210822 GATACCAAGTGCCTGGCAGAAGTCATAGGCAACTCCCAACCAGAG  
A\_16\_P00685195

TTTCTCATTATTATTACCTAGTTAGTCTGAGAAAGAGAAAACCTCCATTCTGGATGGCCCA

A\_16\_P18880667

AAAAGTGGACATACGTCAAAAGTATTACTACCTCCATCATATGACCTCAGTTGCTCTCAA

A\_14\_P126496 TAAAACAATAACTATGTGGTCTTGCCCCAGCGCTTCTAACAATGGCTAAAATTCTTACA  
A\_16\_P17802273

CCCATCACTTCAATTTATCCTGTTAGCATCTCAAATTCAACGTTACATTAACATGGTTCA

A\_16\_P02550617

AATGTCGCCTGCAGTAAATAATTGTCTAACATTGGTATGAAATCTAATTGGCTTCCGCTA

A\_14\_P119641 TGCAAAGTCTTACTGTGCTCTAAAATATGCTCTTTATGACTTTGTTGGTATGGATGAACG  
A\_14\_P126992 ATCCCAAGAACCACTTGCAACAAAATTGTCTAGATATTGTTAACCTTTGCATTTCTGTGA  
A\_14\_P111555 AAAGATCCACCCAAGAATCAGCAACATTACTGAGGACTACAAGGAACCAAAATAAGA  
A\_16\_P03412400 ATAAATGCGGAAACAGTTAAATGGCGATGGGAATAGGATGGGAACTCAATGG  
A\_14\_P123325 TTTCCAGGTTAGGAGGGAAGACCTTTTTTATACAGGGATATCTTGTTTTTGACCACTT  
A\_14\_P110383 AAGATACACAATTTAGAGAGAATGAAAAGTGAAGGATCTACTTGGTTAATGGATTCAGCG  
A\_14\_P125107 ATGGCATTCAATTAGTTTTTATTTCTTGTCATCTCTCACTAGAGAAAGAGCGCACACTTC  
A\_16\_P02499033

AAACCAACATTTTTGACATGACTCTTCTCTTAAACAGATATATGAAACCACGTCTACTCA

A\_16\_P02997385

AAAACCTTGCTTTTTCCATCATGCTAACTACTGTTGAGGTTACATCTAACTTAACTGGG

CUST\_8320\_PI426210822 GTCCACGTCAATGAATGCCAGTTTTCCCAAGAAGCCCTCTGTGTG

A\_14\_P106992 GTGATTGGAGACTGGCTCAACCTCGTCTTTAAGTGGTAAGAACCATATAGAGAG  
CUST\_6583\_PI426210822 TGGCTGCTTCCCTTAATCACAGAGCCTTGTTTGAATCACTTGACTTTG  
A\_14\_P123750 TTTTGCTTATCTGTCCCTTCCAGGTTGAATTTAGATGAGAGTTTTTGATGCTTTTTGGC  
CUST\_5239\_PI426210822

ACAGGTACAGTTTATAATAAGGATTTATTTTCATAATAGGGAGCTTTTTATAGATTTTAAT

A\_18\_P15363762

ACACTTGATCAGTCTCATGTTCTTTCTTGTTCCTGTATATCTCATGAGCACTACTAGACT

CUST\_7610\_PI426210822 GCTTGCTAGTCTTTGACTTTGGGCTTTCTGTTACGACTGGTTGACTTAGATTT  
A\_16\_P00673326

AAGTTTATGAGAAGTGCCACTAGTTAACTTGCTTCCAATATGAAAATATGACCACAGGGA

A\_14\_P137813 CTGTGTCCAAATAAACGTATCAACCAATAAACTGCTAACTGGTCAATGATTAATTGCACC

A\_14\_P137470 GCAAAAACTGAGAGTTTTTGTATTATCGTAATGTAAGTTCTGGGTCTAAATCATGCTCC

A\_14\_P102064 AAAGGAAAGGCTTCCAAACTTTCCCTTGATAACATACCTAGGAAAACAGTCTTAAACCAT  
A\_16\_P37084550

GTGCAGAACTATCTTGACGACACTTTTGATTTACAAACAGTAACTCTTTCCAGAAAGTTT

A\_14\_P127339 TAATGTTGACATTTAGTGTCTATTTAGTGTCACTCCAACTACTGCACATGTGGTTTTCT

CUST\_2238\_PI426210822 ACTTTGGAGAGAGCATTGCCAGCCTGGACGATCTGGACAATGATG

CUST\_6945\_PI426210822

ATATATTACAAGCATATTGACAAAAGTCTTTGAACTCTTGAGGTGTTTGTATGATATTCT

A\_14\_P138992 GAAGAGGCACTCTGGATATAAATACAGTCCATGTCTCTACCAAATTTTCACAGATGTGTG

A\_18\_P14132878 GAAAATGGGAGATTTTTCTTGATTCCTGCAGTTGGCTTTGTGCCCTTG

A\_14\_P108995 CAAGTGCACTCGATTTTGCATTTTAAAGACTTTGTTAATGCCAGCAGCAAGTATGAAATC

A\_14\_P111940 ATTCATTCAGTAAAGTAAGGCACAAACAAATGAGCCTCTGTTCACTTTATTCAAAGAGTA

A\_16\_P15263607

TTTACGTGATTCTTTTCAGTAGTGGCATAACCTTTTGCTAATTCACACACATTTGTAAGGG

CUST\_10313\_PI426210822

ATTGACACATTACAACATCAGCAGCCAAAGGTATGTGCTAGAGAATCCTATTTCC

A\_14\_P132286 CTAGATGTCAGCCTATAGTTTTTTTTCTGGTTCAACACTAAAGTTTCATAAGGGCAGGATT

A\_14\_P200564 CTTCAAGCACACAGAAATGACTACACAGCCAGACTGTAGAAAACCTGGAACCTTG

A\_16\_P00685223 CTGGTTTTTCACTTGGGGTTCTCATTCAGATTCGTGATTCTGTTTACTGAGAGATG

A\_16\_P02835234

AACAGCCTAAGATTTCTCTCTATAATCATATTGTCTCCTACAGAAGATTTGTCTCTCTCT

A\_14\_P100547 GACAGCCTAGAAAGAGGAAGTGCCTGAGTTCCCTTTCTTTGTGCTT

CUST\_9056\_PI426210822 CAAGGTCTTGCCAGATCCCCTAGAGTGAACAGGGGATTCTTTATC

CUST\_6784\_PI426210822 CTCATAGGTTCTAAGAAATCTCCCCTCCCCACCTCATTCTGTTTTGTTTTTAG

A\_16\_P21545355

TTACTAGTGAGTAGGAACCAAAACTGAAAGTGTTCATGGACATCTCAGAACTAGATAGAG

A\_14\_P124364 ACTGTGAAGAAGGCTGGATTAGTGTAAATTCATAAAGTTAAACAAAGCAAAGTATTGTA

A\_14\_P112804 TCCTGATACTTTTTCAATTTCCCTGGTTGTAGCGCTGCGGTAAGTTTTAAATACATGT  
A\_14\_P139857 GGAAGACTCAGAAAAATATGAAATATTCAGCCAACCAGATAGAGAAGAGTTCTCTGTTTTG  
CUST\_5956\_PI426210822 CCCTAACCTTCCTCTCCTGTCTTTCTCACAGACTGTTTTTGAAAGGAATT  
CUST\_866\_PI426210822  
TCTAATTAATTGCATGCAGGACTATTTTTTTAATGTTTTATGAAGTTATTGCATCATCCA  
A\_14\_P134956 AACTTTTAACTTGACAATGCTGTGAGACATGTTTTGTATGTTCTGCTCTCTACTTCACTG  
CUST\_9061\_PI426210822 GCTGACCCAGACTCTGCCACCAAGTGATGGCCACTCCTTGGGCTC  
A\_14\_P117337  
AAAGGTAGGCAACAGTTTGCAAAATTTAGACGCTTATGTGTGCACAAAGGAAAAAAGAA  
A\_14\_P100238 TCCTTTGTCATCCCGTTGTGAAATAAGCAGTTTAAAGAAATTTGGTTATCTGCCTCAAA  
A\_14\_P127427 CTTTGAAGGATCTTTTTTTCTTTAACTAGATGGTCACCTTCTTCCCTACCACACATG  
A\_14\_P105276 AAGTTGTTCCACTTCTAATAGGGCTTGTGAGACATGAGTGATTTTCAGTCAAATAAGTAGA  
CUST\_9139\_PI426210822 TCAGCAGAGGAATGTGCATGCCACAGGGCTGCAGAAAACAGTTTC  
A\_14\_P139047 CTATGATAAAGTTAATTTCTTCTTCAGTCCTCCAAAACTTCACTGCTCAAGAACTGGG  
A\_14\_P133256 AGATACTATATAGCAACCTTCTGTGCCCATGGATGCAAATGAATGAATTGTCTTTAGGCT  
CUST\_7793\_PI426210822 AATTACCTTGTGGGTATGTCTGTGACTCTTGGGTGCCTGCCTGGC  
A\_14\_P202342 CAGAAGTAACAAGGTCTACTGGGCTATGAACAAAGAAGACTAGAGGAAACATGTGCAAAAA  
CUST\_9586\_PI426210822  
AAAATGAGAAAATAGTCAGGATGAGGGATGAGGAGTACACATAGGAAATTTTTGTGATTT  
A\_16\_P00685509  
CAACCCATAAAACATTTTTTCGAATGACAAAACAGAAAATGTATACTTTTTATAATCCAGTT  
A\_14\_P117959 AGGCACTATCTTCAGTTAAAAAATCCAGTTGCTTATCTACAAGGAATTCTACTGCAGTGA  
A\_16\_P00368115  
ACAATCTCACTCTCCCGTATCATGTGATTGAGTCTGCATATCTTATCTTTCCATCAAGTT  
CUST\_5858\_PI426210822  
GTGCTTAATTTTATCTTATCAGTACAAGCACTCATATAACCTGTAGGGATATTTGTGTAC  
CUST\_9023\_PI426210822 GAATGGATAAACAGTGAGGTGGTGGTCAGGTGGTGTTTGGGCTTC  
CUST\_3117\_PI426210822 GCTGGCAGGGTGGAAGACCTGGCAGTGCCTGATGCTGCAGGAATG  
A\_16\_P38578003  
CCCATACTAGAGAACTTATGGATAATTCTGGAGACTTGAATATCTACCAGCCTCAGTAAC  
CUST\_5034\_PI426210822  
TGTAAGCAGGACCAACTCTTTTATGGTGTGTTTTATACGTCTAGAGGATTTTTGTTGTTG  
A\_14\_P132668 TCTTTACAGATTTAACAACACTTTTTCTTGCCACTCATTGCCCAAACAAAATGCCAATAAC  
A\_14\_P135601 TGTCTGTGATGAGGATTAACAAAAATGGGCAGGTGTGTATTAAGACCTCTATACAGAAAG  
A\_14\_P121413 CAGTATAGTCTCTGAGGACATAGTGTGTATAAAATCCAGAAGAAAATTAAGCACCAAGG  
A\_14\_P118469 GTTTTTCTGATCTACAGAGTTCCAAAAGTGACATCCTTGGATACTGCAAGAGACAATA  
A\_14\_P128002 CCTTGTGGGAAGCAAAGGAAGGCAATGTCACCTTAGGTGACACTAATA  
A\_14\_P134593 CTATTGGAGAACAGAAGTTAAATATATTACCACATTTTTGGATGCTCTTGCTCTGGACTT

A\_14\_P101846 GATAATTTAAATGTGTCTCTTACAGGGAGCATTGGTGCCCTTCAGAAGATTTGTGAAG  
A\_16\_P20192682

CAACTTTGACCCCTACAGATTAAGATACTAGGAAACGGCAAGAATTATGGACAAAACTA

A\_14\_P124114 CAGCATGACTGAGTTCTTAGTCTGAGTTTCATTCTGGAGATCTGTGACCTCAT

A\_14\_P115816 ATCTAAACCCCAGAGCCTTCCAGAATAATAATTCAGGGAATGGTGTTCAAACATTC

A\_16\_P15012372

AAAAAGCACTAATTCATTTTCCTTGCACAACTACTTAGAAAAGATTGTAATTGCCTCCT

CUST\_7037\_PI426210822 CAAAGCCCATGGCCTTTGAATAGAGAGCTCTGTTCTGTTTGCAGTG

A\_14\_P123145 GTTTGACTGAAACACGCTTCTACCAAATACAGTATAAATAATTAGGTAGTCTTAATGCCT

A\_14\_P118991 ACACATCACAGAAATGCCTGCTCGTTTGTGTTTGAATTCATATACAAAGTTACAAAGTATTT

A\_14\_P123610 ACTCATTTATGTTGAATACGTATTTAAATTAAGACAAATGGAAAATTATACTTTGAGTAT

A\_14\_P113897 CTTTATTTCCAGCATGATGATTTTTCTTTTCTTCTGGTCCAGTTCTTCTTCTAACCGG

A\_16\_P20429835

AAATCCAGAGATAGAAAAATTATAAGACGAGATGTGCTATTACAATGGTGTTCAGACTGG

A\_14\_P103569 ACAGTATTTATTCAAATATCCACTGCCCTTTCCTACTGAATGCATCTCTACCAAATGTG

CUST\_2829\_PI426210822

CATAATTGTTTAAGATACTACAGTCTTAAGGAAAAAGCTTTCTGATAGTTCTGGGACTC

A\_14\_P121627 GTGTTTATCTGTTCATCCATATGGGGAATCATCTTCTTCATAATTTGCTCAACTGGAATC

CUST\_5353\_PI426210822 ATTCTACTCACCTCTCTCCCCCGCAGCCCCGAGGAACTCTGAA

CUST\_9237\_PI426210822

TTGTTAGATGTAGTGATACCTAGTGATTTTATAGTTACGACTCTGTCTGGCTGAAAATTT

CUST\_1948\_PI426210822

TTTTCAATCCATAGGTTTATATTTTCAGAGCTGACCGAAGATCAGGCACCTTAATTAAGA

CUST\_8723\_PI426210822 GAAAGCAAGTCAAGATTCCTTGCTTGGGGGGACAAGTTTATGTACCAATTAGC

A\_16\_P02192375

AAATCGATGGTTCTGTTTGTGAAGAAGTAGGAAAATTGCCTGTTACCCTAAGAAGTCTAC

A\_14\_P114682 CTTCTCTAAGTATTTAATTGCCATTCCTTCTTGAAAATCTTTCCCCCTTAGTATCAG

A\_14\_P130195 ACTAGACTGAAGCCCACAATCTTTCAATTACAGCACACTATTGAACCTTGAAGAGAAAAG

A\_16\_P16932978

AGCCATTGACTTAGGATCAGAAAAATGACATATAACTGCGACATTTTTACTTCATCCTCA

CUST\_5180\_PI426210822 CTTCCCTGTCCATAGTCCCTCCCTGCCCTCCCCCGTGATCTTGC

A\_16\_P00909707

CCGAGTAAAGTCATTAACCTGCCTTTGTAAGTATCTGTTTACATGATTTGGACTTCC

A\_16\_P17972174

ATTGTAATGTCCAGTGTTCATACTTTGCTTCCATATCACTTCTGCTAGCATTTTCTCC

A\_16\_P16574305

ACCACACCTTTTGAGTCTTTATGTCTCATAACCAGAATATTAGGTTTTCTCTTGCAAC

A\_14\_P132543 CTATCTTAAGGATATTACTATGCAAAGTAAGAGTTAAAACACTGGAGCAGCGATATTGAC

A\_14\_P114408 TCACTTGTGTTTGTAAAAATGTAACCCACAGTGGCATTGTCCACCTACAACGAAGTTAATG

CUST\_1548\_PI426210822 CCGTGTGGCGACTTCACTCTCTTCTTCCATCTCAGCAAACATTTAG

CUST\_9664\_PI426210822 TCAGGCAGAAACCTTTCTACTTTCTGGAGTTGCTGAGAAGGTTTCAGT

CUST\_1806\_PI426210822 ATACACATTAGAGGCTCTTATCAGCTGCAGGGATTATCAAGGATCCGTTCA

A\_14\_P102378 CACCCTACACTCATCCCCATCTCTACAGAAAATTAAGTATACATTCATAGTTGCTGTA

A\_14\_P137353 GGTGGCTGTAGGTTTTTTGTTTCATATGTTAAATACTTCTGTGTTTCTGTAGCACTGAGTT

A\_14\_P130430 TTTACCATGTTTACTATACCCAACCTTTCTTTTTTTGTCAACTTTATGGAAGTGGAGCCCT

A\_14\_P119334 CTCAATAACCCTAGCAGTTTAGTCACAAAAGCACCATTAATGGTATTTTCTGTGAGGAAAA

A\_14\_P136598 AAAACGAACAGGGTAGAGTTTTAGGAAATACCAGATGTTGCTGCGATTTTCTACAGTG

CUST\_3502\_PI426210822 AACAGAACAGAAGAAGGTTGGATGGTTCACCAAGTTGAGTGGGTC

A\_14\_P124984 GTCTTACTCTTTGGAATGATCTTTGACAAAAGTTTTAGTAGGCAGTGCCCACTTTTAATGT

A\_16\_P21576311

AAAAAATGGTGAGGAAAATAACCGAGAGCAACATTATGAGAAAAGATGAACAGACCCAAG

A\_14\_P102691 GGTTACAGCACCCAAGAAGATGAGACAATTTTGCTGTAATTAGAATAAACATCCAAGGTG

A\_14\_P122199 AACTTTGAAGCAGGGACTAGAGGAATAATAGATTTGGAGGAAGTATTTGAAGAGTGATGT

A\_14\_P130725 GTTTATTAATAAAGTGTAATAATGGGAAGACTGTGCATCGGTCTGAGTAAAGTGGCGAACT

A\_18\_P22842095

CTGACTTATTTTCATCATTAAGGATTTAAATGCAAAACCTTAAGATAGTCAGCCTTAGGGA

A\_14\_P134115 TTCAGAGGTAAACTGGCATATATCTTTAGTGTCACCTTCTATTCCACCTGTGAGAATTT

A\_14\_P106979 ACCCCAGAGAATTCCATTACATAATGATTTTGCCCTTGTTATAAATGTTACCCTAGGAAT

A\_14\_P103689 CTCCTCTTACCCCCGAGGATTGACTATTGACAAAAGTAGTCTACGAG

A\_16\_P20530658

AAAAACTGACTATAGGAGCCAAGACTAGTTTAGAGTGGAGTTTGAATATGAACATGCCTC

A\_16\_P00563603

GATGTTGCTACTGCTATGAGAAGATATGTCAAGCCAGAGTATACTGAATTTTGCTAGAGG

A\_14\_P122114 CAAGATACTGGGAAAGATCCCTGTTCTAGCATCACATTTTAATCAGATTTGTCAAAATCA

A\_16\_P18540712

AAAAACTATGCAATTAGTCTCAGACCAAATCCATTAATGAGCATATGGAGTTACCTAACA

A\_14\_P202551 TAACAATCTAAAGTTGGGGCAGGATTTAAGACACTTAGAGTCATGATTTTAAGAGTTGGG

CUST\_6581\_PI426210822 TTGAGACTCCTCTAAAAAAAATCTGAGTTCACATTCTGCCCTGGAAGTTGC

CUST\_8467\_PI426210822 GTTTTATAGAACCAAATGCTGAGACAGAAGAGGGGTACAGTTGTGCAAGTGAT

A\_16\_P01700930

GATCGTCTAAATATCTCGACATCCACTATTTACTTCACTCTGTATGTAGTTTCCCCTACC

A\_16\_P41843636

TCAGTTCACCAAATAACACAATTTACTCCCAAACCTTAATCAGCAAATAACATGTCTCTGA

A\_16\_P58424292

ATGTTATATGCAAATTTCTACACCATTTTACATCAAGGACTTGTGTGTTCTTGGGGTTTGG

A\_14\_P132521 CTTAGAATGATGAAAAGTTCTCTTATATGGTGTGGCTTTTTCTCAAAGGATGTGAGAC

A\_14\_P138029 CTGACATTTATTGAAAATCTGCCAGGTGAGTGGAAGGTTACAAGAATTCTAATCTGATTG

A\_14\_P136358

GAGGAGAGAGGCCAAAAATGAAGATTTGGGACAGAACACATTATATTAATGATGAAGAAGG

CUST\_2281\_PI426210822

GAAGTGAATGCCCTTCTGTATATTTCTTTATCCAGGAATGGATTTATTATCAAATAATA

A\_14\_P128316 ACCAATTGTTGAAATAGATGACTCTCACACCAGTTCTATTACACAAGATTTTCTGTGGTT

A\_14\_P115558 CATAGAGGACTGTTGTTTATAGAGAAAAGATTTGGGAAGGACTGTTTACAATGTGGGTCA

A\_14\_P134035 GAAAAATAAATTAAGGATATCAGATCTTAACTGAAACCTCAGGTGCTAAGCCCTTTCCA

A\_14\_P109847 AAAGAGTATAAAGCCTTTGCAAATGGCACATAAAAGGCAGAAAAACCTGGGTTACCTAA

A\_14\_P139387 TGACTGAAGATTTGTTTTCATGAAGGAACAAGTGCTATTCCAATCTAAAAGTCTCTGAGG

A\_14\_P125307 CTTCTTGTCTGTTACATTCAAAAATGAATTGAAACTCACACTATTTGCCAAAAAGTGGC

A\_14\_P114166 AACTTTGACTAAGTCAGTGTAGTCTGATTGGTAGAAAGAAGTATTTGAAAAGTGGGGTT

A\_14\_P113820 CTCTGACATTTTAACTGAGAGCGTTTCTCTTTTCGGGGAACCCCTAG

CUST\_7661\_PI426210822 GCAAAGAGGGTGGCACCCTGCTATGAGCTCTTGGAACAATTTATTTA

A\_14\_P115682 AGGTCTCTCTGTGGCATTCTATTTTGTTTTTATGCCTATACAGAAGCATTCTTCCATAGA

A\_14\_P111701 CTATGTAGGTGATGTGCAGATTGATGTGGAAGTGAAGAAATATTTTTGCAAAGCAGGAGT

A\_16\_P16497688

AAATAAAGCCATCACCCTACTCTAAGACCAATTTTGTGTTCCCTTATCAATCCTAGAACC

A\_14\_P108573 GATAATGAAGTGACAATGTGTATGAAATGTAAAGAACCCTTCAATGCACTGACACGAAGG

CUST\_7422\_PI426210822 GGTTAAGGGTCTCATTCTGAGAGTGGCTTTGGACAGCTTGAGAATC

A\_14\_P109020 GAATCTATGAATGAATGCAGAAATTGGCAAGATAATACTGCACCGATGGGAAATGATACT

A\_14\_P127512 AGAAGAAGGTTATCATTGAGAAGGGGTGGTCTAATATTTAAAAAGGAGACAATCAATGGT

A\_14\_P132264 GAGAGTTCTTTTACAAAGAGATCAAAACAGAGACACTGACTTTGGGCTAAAGGACTTTTT

A\_16\_P16396968

AGACCAACAGAAAGATCATCTCAGATATCCATGAGTTCATACATTACAACCTTCTGGAAA

A\_16\_P02320542

GGGAAGATCCAAATGGAAATTATACATTATACCTTTCAACCTTCTTCATTGGGAAATGCA

A\_14\_P122400 TAATGGAAGAACAGAGACTTGTAACCCGTTTCTTTAAGTGTTAGTAATTCTGATCCACGA

CUST\_6420\_PI426210822 ATGAAGGAGAGGCCCCAGACTGGCACTTTGAATGCAAATCTTC

A\_16\_P21509904

TCACAATTCCTAAATAGTCACAACCTCCTACCTAGAAAAAAAATTCATTTGTCAGGCCA

A\_16\_P16148902

CATTATGAGATGCGGACATACATACTGTTGACTACATTTGAAACTGAGATGATGCACATC

A\_16\_P00766507

AGTTCCAGAAATTACCAGATAACCAGTAGATCATCGTTTTTTTCATACCCAGTAGACCAT

CUST\_3773\_PI426210822 GAGGGCAGTGACCCTGGCTCCTATTGTCTCTGTCTCTATATCTATA

A\_14\_P106589 TGAAACCAAAGGTCAATCACATCTCTAAAAAATATCTTACCCCTGCAGAAACTGTCTACA

A\_14\_P116079 ATGAGGGATGTTGTTATCTGTGAGAATTTCCCTTCCCTTTCTGAGGAGAGAAGA



A\_14\_P136603 CTGTTCTAAACTTAAAAATCTCATTAAAAATCTCTCTCCTTCCAGGCTTTCCTTTTCAGCAG  
A\_14\_P127452 CTTAAGTTATCTGCACCAAACCATTCTGTGCATAATTTTTAAAGCAAATATATAGCGCCT  
A\_14\_P124051 CTGTGAAGACTGCATCAACTCCCTTGGAACTTATACTCTAGTTTAAGGAGAAGAAATATG  
A\_14\_P123839 CCAGTATGAACTCTGTTCTAGGGATTCTTTGGATCTAAATACTCATTTGGCTATACCAG  
A\_14\_P132672 TCTGACTTCAGAAATCCATACCCTTTGCTTTTTGTAAACACAAAATGTTTCCTTAACCTGA  
A\_16\_P38183846

AAAAATGATTTTCGGTTCATTCTCAAACACCTTTCAGACACTCATGATCCCATTTAACCTGA  
CUST\_1201\_P1426210822 TTCCTGTTTCTGGTTGGATGGGAAAAGCTACCAGAATAATCCTGTTGG  
CUST\_7861\_P1426210822 CATCTCTCAGATATGTTCTCTCAGTGCTGAAATGTGGTGTGTGATACGACAAC  
A\_16\_P15547674

AAGTTGTAGCCTTCTAGAACAAGACTAGTTTAGACAATGTTGAGATTAATGCTGCTGCAC  
CUST\_380\_P1426210822 CTTTTTTTCTAATAACACCCAGAGTGTCTGCCTGCCAGAGCCAG  
A\_16\_P15096266

AAATCCTTATTGAAGCAAACGAAAAAGTCTCTCTGTGATTTAAGATGACCTCTGTCCTAC  
A\_16\_P19811060

AAGATAGTCACTGATCAAAAAGAACCTATCAACTGAACTTGCCATGAACTGACAATGTG  
CUST\_3467\_P1426210822 GGGGAGTTTCAACTCTGGGGAAGGTGATCATTGGGTCATTAGTA  
A\_16\_P16750340

TCGAATAGTAGTAACAACGTGGATAGTATTCCTATGCCTTACCTCTATTTTCAGTGAAAC  
A\_14\_P103486 TAAGAAGAAACATCAGCAACAGCATACCATTATTCGTGGCTTAGACACTGGGAG  
A\_14\_P128693 AAATTTGTATGAACTTGGAGTATCTGTTGGCCATTACTATACATGTGCAAATAAATGTGG  
A\_16\_P00212172

AAGGACTTGTAAGCAGTAATTTTCAGGTGATCATTAGAGAAGGACTAACCAATGACACTT  
CUST\_5557\_P1426210822

GCAGTTCTTTCTTATTGTCTTTTTCCTGATTATGGGGAAAAAAAAAAAAAAAAAAAAAAGATA  
A\_14\_P121615 TTACCCCTGGAAGTGTTCAATTCAAGTCTGAGAGCAGATTAAATAATGAATAGGAATGTCA  
A\_14\_P103862 CAGAAAGTAATCCCAGCAGGAAGATAAGAAGTTTTACACTTTTTCTTTATCCGGGAAGA  
A\_14\_P125183 CTCTGTGTTTCTCTTTATGGGGTTCAAACCTTTCAAGGACCTCTCTCCAT  
A\_14\_P115659 TTTAGATTTCCCTCAATGATTATCTACAATTAACCTACACTTCTGGACCACCTGGCTAG  
A\_14\_P102811 GTCCCTCTGTGACATTTCTTTGTTCTTTCCCTGGAAAAAATCTCTTTTTAATTCTCATA  
A\_18\_P12987039

ATCATACTTAAATCCAAACTCCTTACTGATCAAGGACCTATAAGACGTCACCTCCTCAAA  
A\_16\_P39637838

CCAGAGTAGTTCAAATAGTCTTCAATATTCAAATTTGCCTCTAATATGCACTGTCTAGG  
A\_16\_P36096590

ACCTAGATTTCCATTTCCACATCTCATTATACCACTCTTCTGTTTATATAGTCTTCACA  
A\_16\_P00573324

TGTGGTTACAGACATCAACTGATTTTCTAAGTATATCCTAGTAACCCTTTACTCACTGCT

A\_16\_P17467495

AAATGCAAGTGAGGATATGTCTGGGATAAAGTGTTAGTAAACCATTGAATGACTTTTGGC

A\_14\_P138337 GAAGTAGGAAATTTTTATGTTTGAACCTGTCAGGGAGAAGCCAGAAGTAAAAGGACATTT

A\_14\_P201578 ATTTTCTTTCTTTTCCCACATGATTGTGGTTACAAAATTTGTTTCAGGGTCTGTTCTTTCA

A\_16\_P03228857

TTCTCCCACGCATTCTTAAATAGAATATTATGAACTGTTACGATAAACACCCTTTACAGT

A\_14\_P111990 ACTCTATCACAGTATGAAAGAAAAGTCACTTTTTCACATTGGACTCAAGCCGTTTTTTGCAA

CUST\_9441\_PI426210822 TATCTTTCTTAGACCTTTTCTAAGACAGACCACATCTGCCTTACCCGTC

A\_14\_P129190 GAAAATGAGTGGGACTTGTTTTGTGATGAAGAATTTTAIGTCTTAGATCTATAGAAACCT

A\_16\_P36159717

GAGCCTCTTTGTCTAAAATAGCCTTCCCTATTTTTACTTCCATTTAACTAAAAGCAGCCA

A\_14\_P200122 CTTTCAGTGACAGTTTTTGTGAAGCATTTTTACTGTCATTGCCTCTATTCTCTGCAATTT

A\_16\_P17891481

AAGGCACAGATGAATTAAGAAACACTTCCTGCTATGTATGATCTTTGTCCTTCTCATTCT

A\_14\_P122524 ACACTCTGCTAAATGGAAGTTAATGACTGAAAGTGAATCATGTGCTTGCTGTAAGGAAAT

A\_16\_P15451256

ACCAAGAGTGGACCTATTACAAAGATAAATGGGATTGATTAATTTAAGGCTGAGTTTGGC

CUST\_6641\_PI426210822 CTGTA AAAAGAGCAGTTGTTCCATCTGGTGCGCTTGCTGACTTTTCATT

A\_16\_P38576851

GACCTTCCTTCAAAGAATCATAACATGTTCACTGTCACATTACACTCATATATCCATAACC

A\_16\_P19811276

AGTTACTCCTGTGATATCTAAAAGTCTGATAATGCCCAAAGGATGATTACATGCTGGAA

A\_16\_P20210394

AAAAGATAGTGCCATTTTCTACCATAAAAAGGCCACTACCTTTAAACTATTTGTCCAAGG

A\_14\_P124786 CTTAGAATGACTTACAACTACTCAACAGCCACACCTTGTTTACCTGGCTATTCTGAT

CUST\_10099\_PI426210822 ACAGTGTTGAAGTCTCTTCCCTTTACAGAACCGTGGCTCTTGAAT

A\_14\_P118560 CTAACATCCGAACCTCTCAGATGCTTTTTCTTTGGATAACAACAAGACAGTGAC

A\_14\_P125941 CTGATATTTGTATTCATCTCATATAAAATCTTTCAAGCACACCTCATGTCTTCTTCTCC

A\_14\_P134616 GTATCTTCTGGTTGGAGGATATCAAGATGTTTGTAAACAGAAAATTGATGTCCAAGAGC

A\_14\_P124031 ATCTGCCATCTTTTGCCAATACTGATCAGTCTTAATTCATGTGATATGTGTTTCTCCTA

A\_14\_P118400 CTGAAAGATGACAGCCTAGTTCTCTTTGCCTTCATTATGATACTAACAAAAACCAGAAGT

A\_16\_P00277410

CTGGTGACTAGTGCAATTTCTTATGAATACAACTGACTCTAAATGCCTAGTGTAAGCCAA

CUST\_5913\_PI426210822 TTCGTTGGCCAGCACGTTTGCTGGCGCCCACACTGACACTCTGAG

A\_14\_P117445 AAATTTTTATTGATGACTGTTGGGTTGATGGTCTCTATCAAAAACCAGTAAGGCTTTGAC

A\_14\_P136365 ACAGATAATGTGCTGCTTCTTATACGCATGGCTTAATTTTTTAAAGGTTTCAGACAATGAG

A\_14\_P103325 TTTAGATACTCTTATAAAAAGCAGATAAACTTCAAGCAAGTTGGGATGGAGGGGTCTGAA

A\_14\_P119295 ATTCTATAACAGTGCATATGTGTGCATACACGAGAAATTGAACAAACACATTTAGGGGTC

A\_14\_P128931 CTACCAGAAGAAATTTAGGCCAGTTAAGACAGGGATGTTCTTACTCAATTGGTCATTA  
A\_16\_P19921233

ATCACAAATAGAACAATGTTTCCAAAGTCATGGTATCACAACTACTTTCTCCAGTTACCT

A\_14\_P121420 ACTCAGCATACTTTCATTAAAAATTTGGCACAATATGATAATTGTTAATATTCTGTTCTT

A\_14\_P117752 CAGACTATCCAGATCCTGTTTGGAAATTATGACCTTTTCTTTTGGAGTTAICTTCCTTTTC

A\_16\_P19925519

TGTTGAGAATAGCATCACCATACTGAGTTAGAACCTCATTTCACTTAAACTAAGTGGCA

A\_16\_P03513289

AGGTAATTTGAGAATTCGATACAGCATGTCTTATCTCCATTATTTGTTTCATGCCATGGCT

A\_14\_P134694 CTTTTTAGTGCAGACCAAAAAATACCTTACCAGATAAGGAATAGCCAGACCCTTAAAATT

A\_16\_P00684998

CCCAGTATTCCTTGTCTTAGACCTTGAATGTATTTTTTGCTGTATGTAIGCTTGAATGTG

A\_16\_P15858652

AACTCAAGTTTTGGCATTAAAAAGTGTATCCTCAGAGGTTTGTATCCAGTTGTAAGGCAT

A\_14\_P111109 CTACAAAGAAAATGTCCTTTCTTACATTTGGAAGTGGAGGGCAGTTCTTCTAGATGTA

A\_16\_P17286487

AAAGATAACACCTCCATAAATCAGTAGAAAGTTGGGTCAATAAGTAACGATTCTGGTTCC

A\_16\_P18065777

GCCAAGTGTACAGATAATACTCTACATCATAAACAAAAGTGCACAGTAATTGTCCCTGG

A\_16\_P15499772

AAACCTAAGAGTATCCACAAAACAGAATAGGGCAGAGGTTTTTATTACAGCAGTCATTT

A\_14\_P102437 CTTTTAAATATAAGGAAATTCGGCTTACCTACTTGACAGTGTTTGTCTCTCTCTCTC

A\_14\_P117467 ATTACTGCCACTACTTGGAAATTCTGCTTTTCTGTCAATTGACCTCTACTGTTTTTTCTTC

A\_14\_P108910 GTTGTCTTTTAAGGTGTGAATCCTCCTACACAGTTTTGCTACTTGGATTATCGATTTTT

CUST\_8242\_PI426210822 CCTTGACCCAAATGCAAGCTGAACTTTCTGGAGGTTACAGTTTCTAATTT

CUST\_280\_PI426210822 ACTCTGAGACCAGCCACTAAGAATCATGCTGTTTCAGGAGATCAG

A\_18\_P14903952

AAATTCAGAAATGCAACATAGAGAACTATATTTGCAAGTCAGGATAGATAGATGGCCTCA

A\_14\_P129352

GAGGAAAAAAAAAAGAAACATGTTTCAGGTCTGTGTCTGTGTAATACAAAGATGACTGCA

A\_14\_P122157 CACAAGATGTCTTCTTAACTTTTTTATGGAAAGTAGTTAAAGACAAGCAGACTGACCC

A\_16\_P20154283

TCCCTCATCACTATTCAGAAACATTGCCTTACATCCAGTTTATTAAGTCCATACTGCATA

A\_14\_P133930 TCATTTCAATTCTGAGAAAAAGATAATCCCAAATCCCTTCCCATGTTGCCTTTAAATCTT

A\_14\_P112865 AAACCTCATGTCATTTTCGGACCAGATTTTGAATTAGATACCTCCTTAGCCCCATTTTTA

A\_14\_P104262 AAGGTTTAGCAAGTCATGCTTGACCCTGTTAGTGCTTTTTTATTCTACATCATATTGAG

A\_16\_P01163208

AAAGCATAAGTTTTGTTCTCTAGAAAATGACATCAACTTTAGACGTCAGATTGCCTGTCC

A\_18\_P22840334 CATCCCTCCTTCCCTCTGTCCATCACAGCCTCCCTTAGGGTCAT  
A\_14\_P114606 CTCACAACCGTGAGTGAAAAAGGATCCATGTAGTGTAAGTGAAGTCATATAAACTTTAAT  
A\_14\_P113632  
TGCTAGACAGAACAAATCTTTAAACAGAAAAAAAAGCACGTAATCCTTCAGGCAAAGGA  
A\_14\_P103585 CTTGAGTTTAGTTCGTATTTGGGCATGCAGGGACATAAAAATACTTAAGAGATAACCACTT  
A\_14\_P117939 CTGTTACCTACCTTGCTTCAGTCAATCCCATTCTATGAGAAAATGATGGAGGG  
A\_18\_P14134553 TATAAAATGTAGATCAGATGCCTTCTGTGGAATGCCAGGCCTAGATTTGCTCTACA  
A\_14\_P106019 GTGAAAAAGAAAAATAGAATATGGCCAGACTGGCATTAGCATAATCACTCCGAAAACCTG  
A\_14\_P126172 AATTCCACCCCAAGTTCTCACTAATAATCATTCCCTATAGCCTCTAATGGGATCAACATAAT  
A\_14\_P115015 TGACAGGGGAAACTGAAAACATTCCTCTTTTCTTTTCTATGGAAAAGGATTATGAAGAGA  
CUST\_849\_PI426210822 GTAAATCAAAGGGTAGCCCAAGGTCCTGATTGAGAACAAAAAGGAGGT  
A\_14\_P116017 CCTCAATACTATAAAACAGACTAAGTAGAAGAAACATGCTCCTTGCTTCAAAACTCCCC  
CUST\_69\_PI426210822  
AATAGCTATTTTAAAAGAGTGGAATAAATGACATAATAATAATGGCACTAAATTGCTAAC  
A\_14\_P103376 GATGACTGGCCTTTCTCTCTGTTTTAGAGAAAGTTACAGATTAGACTATTCAGTTTAGAC  
A\_14\_P137945 AAATTTTCATGTCTATGTATGGTTTACTTGACTTGGAGAAGTAGAGAGAAGGAATCTCCC  
A\_14\_P201459 CCTTTCTGTGGTGATTTCTTGAGTTACGTTTCTGAAGCAGTTTGGAGTTTCTAATATTTG  
A\_14\_P126060 TGCAAACATATAGGAGTCAATATCCATAAGGAGGTTGAACATTGGGTAATTGTGAACTTG  
A\_16\_P19862939  
AGAACCACATATAACTGCTATAATCTTTTCAACATTAGGCTGACATAATTTGGATGCTCA  
A\_14\_P123210 TCAGAGTGAAACATCTTTCAACCTAATATCAGAAAAATGTGACATTCTATCCATTCTTCG  
A\_14\_P126247 TACCTTTTAAACTGACAAGGGCTTTTGCTGAAGAGCCTGCAATTAATAAAACAAATC  
A\_16\_P21531701  
TCAGTATTACATGTGAAGCAAACCAATTCTAGTCTCAGAAAAGTGATAGCCCTTGATGTT  
A\_18\_P14135710 CTCAGATGCTTCTCAGTGGGGCTGGGCTGTGTCTTCTGCCAGGAC  
A\_16\_P20328479  
CCGTTGTGAGAGTGTTTATCCGCTGTATTGTTTTATTTTTCTGTTTCCACAATTGAGAC  
A\_14\_P134043 TACTCTTTTTGTCCCATTAGTTCTAAAACAGTATCCACAATGCTGTGACTGCAAAGAAAC  
A\_14\_P111331 GTTGTGATCGGCAGAAGAAACGAGATTGAGAATCAGATTAAATTGAAATTAGGCAATTTT  
A\_14\_P116798 AACGTTATGAGCATTGCTTATAATGAACAAGAAGAGAGGAAGGACCTGCAATTTCAAAT  
A\_14\_P132898 ACTCCTTCTTAGCACTTCCTGTGCCAAGAAATCTGGAAGTATAGAAGTATTAGAAGATTG  
A\_14\_P122270 ATTTCAATAAATCATCATCTTCTAGTGATTGATGTTTACCAAGCCTGGTGTGGACCTTG  
A\_14\_P118876 ATATTAATAAAGAAAAATACAGTAGAGCACCAAATAGAATATTCTCAACAAATGTCTCAA  
A\_14\_P200271 ACTTATTGAGACCTGAGTCTGTGCCAGTCTCCATTATATTTTCTCCTCAAATATACCTC  
A\_14\_P126289 CTTTGTGTCGTGTTTCTGGATTCTTCCCCATTTTGCGTAAATATTGGTCTTATATAT  
A\_16\_P21579737  
AAAAATCCAACCTTCCAAACTTACATCCTAATGATCCCATGCATTCTTAAACACAACCTCTTC  
A\_16\_P21457818

AAAGTCCCTTTTGATTACATGTCCTCCTAAGTTCTAATCCGATTTGATCTAACTTTCTCC  
A\_14\_P102213 CAGAAACCTCAATCACAGCGCCAAAACCATTCCATACCAGGGATG  
CUST\_4151\_PI426210822 TGAGAAAGGGGAGCAAGCAGAGAGGGAGAAGAGGAAGAAGCCAAA  
A\_16\_P36230857 GAATATCATGTTTCCTCCAGGGAGGGCTCAGTGACATGGAGCAGT  
A\_14\_P133799 ACATGCTGAATATACTGTACAGGAATTTGCAAATCTGACTCCATTAAGAAGTCCAG  
A\_14\_P131634 ACTTTTCATCTTCAAAGTGATTAGACAGATTATGTGCCCAAGTTTTTATAAGGCTCAGCC  
CUST\_4339\_PI426210822 TTTTCTTAAGCAGGAAGAAGGGGGCCCCCCAATTTTAATTTACTGAAT  
CUST\_4298\_PI426210822  
CAGAGTAGCTCACCTGTGGGTCATGATGAGAAATAGCCACTGTATTTTATTGAG  
A\_14\_P113779 TCTGAAATAACTTAGTGTTTTCCCCTTTTGAGGATTAGTAGCAGAACTCTCTGATTCTCT  
A\_16\_P58424402  
GAACCTTCTCAACCCAGTCTTTCCCATCTCAATAAATGACAACCTTTTCTCTTCTAGTTAT  
A\_14\_P124576 ACCATGTGATATCCACTCTCATTGCAAAAACAGGAAATTGAGAAAGAGAAATGGAGTTA  
A\_16\_P19424154  
AACCAGTATCTTCCAGAAACCTTTGAAAAACAACCTATTTAAAACCAATGTCCCCTAGAT  
A\_16\_P18378578  
AAAGATGAGTGCCAAGTTTAGTCAATTTACCCTACCTGGAATACTATATACAACCTCTGGG  
A\_14\_P131193 TATGTGGGGCAACATTTCTCAAGCATTTTGTTCTCTAGGATCTTTACACACTCTTTTTTT  
A\_16\_P38377248  
CCCCAACTCCATAGATTTGAATTCCGGTCAATCTAAATCCTAAAAACATACCCTAAATG  
A\_14\_P126011 ATGAAGAAAAGGACTAATGAGGTGTAGATTCCATGCAACACGCAAATGAAAAATTTACGC  
A\_18\_P22840880  
AAATTTAAATACTGTGCTAGGTGCTGGGGTTATAAACATGAATTACATGATTAGGGCCT  
A\_14\_P103277 TTTGTTTCGTGTGCTTTTAAATTCAGGTAAATGTTGCAATAATCTGATGCAGAAGACTC  
A\_14\_P107738 CTAAGTGACGAAGTAAAGTTCTTATCAAAAATAATTTTGATGTCCCATTTGGCATGTCTGGG  
A\_14\_P111463 CTATTTCTTGAGCAGTGGTGACAAGATTCGATTTCTTCTTTGAGAAAGGCGTTTTTGATG  
A\_16\_P03356466  
AAAAAGGCTGTTTCTCTATTGATGTGCTATAACTCTCAAGTATTCCAAAAAGTCACTGAA  
CUST\_7092\_PI426210822 AGCTGCGATTTGTCTAAACAAGGCTTTTCCCTCAGTACCCAAGGATTCT  
CUST\_1267\_PI426210822 AGAGGTCTCCAGCAGGGCCTCTCTGGGGCTTTCCAGGTTTCCCTTG  
A\_14\_P125163 CTGGATTTTGGAGAGACTATGGATATGGCATCACCTGTATTTACAAAAGTGATCTTCTAG  
CUST\_8102\_PI426210822 GTGCAACAGCTTGGCCCCAGAGCATGAGGTTGATGAATTTGATAA  
CUST\_1542\_PI426210822  
CATGCACATTTGGCCAAATCTATCAGTCTTTTTTTTTTTTTTCCCTCTAGATTCTAAACTT  
A\_18\_P22840318 GATGTAGTTGCCAAAATGCTCGCCTTCCCTGGGTTCTGCTTTCATTAGTTT  
A\_14\_P105787 ACACAGATAGAAACATTTGCTTGCATGAAGAAAACCTTTCCACACTCCTATTTTCTTTCC  
A\_16\_P41585292  
CCCTCCATATCTAAGCATAACCAAGAAACAATTTATAGCCTAAGAATCTATGCCATTAAGC

A\_14\_P137401 AGCAATAGATAATACACTACCTAATTGTCCCAGGGATCAAAGACTCACTTGACTGATTC  
A\_14\_P139543 ATCTATGCTGATGTGTTGCTGTATAAGTATAGAGTTACCATACACACTGGCTTTAAAGGC  
A\_14\_P125328 TTCCAAATATTTTATCTTCACCTTTGCCTCTTGAATACCGCATGTCTTGTAGTGACAATC  
A\_16\_P03417617

CGGGTCACAGAATTTAATCAATTCCCCTTGTATTATCCCATTATGTCCCTTATAACAAC  
CUST\_3133\_PI426210822 CAGCTGCCTGAGGGCTTGGGATGCTGGCCATTTATAAAGCTGCTC  
A\_16\_P16660703

AAAAAGTGGGCAAAGTTTTTTAGATGAAACACAAGATGTCAAAGGCACATTTCTCCG  
A\_14\_P115006 ACTGATGAATAAATCTAAGCAATGTCCCCAGAAAATTAATCATTTTGTCTCTGGGCAGA  
A\_14\_P116638 GTCTTTGGGTAGGGGAAGGGTATTGAGACCTTTTCTAGTATGAATATTTTTAAGTTTGG  
A\_14\_P116916 TCCAACACTAGGATATAGCCCATGTGGGAGTCTCTGAAAATAGAGTCTGTCT  
A\_14\_P107135 GCACACAATTCAGATGTGAATATTAGAAAGGTTTCTGAACTGTCATTTGGTAATAGCCCA  
A\_14\_P132333 ATTGCTAAATAGTGCAGAAAAAGACTCCAGACATCTAATCTGGTTATATTCAGCCTCCTT  
A\_14\_P202088 TTGTTCCCTAATTTTCAGGAGTTTACTTTTAGGACTGTGGACATTCTCTTAAAGAGTTCT  
A\_14\_P106598 GGCCTACATTTCTGAATTATTGAGTCTGACTAGTTAGATGGTGATCACTTAATCTGGT  
A\_16\_P16191869

CTTAGAGGATGTCTAGTTCACCAAGAGAACAGGTGAAGAAGAGAACATTCCAGATAG  
A\_14\_P136970 TTTGTTCTTGATTCTTGTGTGTGCTTTCTCTTGTAGCAAAACAGTGCAGCAGACTT  
CUST\_5821\_PI426210822 ATAACTAGACAGGGCTTTGGCCAAGTGCAGGTGAAGTCTGGAGG  
CUST\_7373\_PI426210822 CACACAAAGTTGGCACTCCCTCCTCCACCAACCCTCAGCTAAAAG  
A\_16\_P16144211

AACTGTCCATGTGAGAAATAACTTCATTGAAAGTCAGTTTTTTGAAATGTGAGCATCTGCA  
CUST\_5249\_PI426210822

ATTTTAACTGTGATCTTATTTATTATGAGTATAGAGATAAAGGAAAAGGCATCCCCTTC  
A\_14\_P101973 AGAACACACAAGAAGCAGCGAAGTTTGGGAATTGGTAATATGAATTGTTAGAAGATCAAT  
A\_18\_P12433868

AAAGAAAAGGATTAATTTTTACTGTCTTTTTTTTTGTTTTTAGTTTTTTTTAGACGTTGGG  
A\_16\_P15862211

GGGCACACTAACAGAGATCAAACCTAAGTTTTTCCACTAACATCAGACCTTTGCAATTTAA  
A\_14\_P136041 CTTCAATTTTTCTTTTTTTCAGTGGCATTGGAAGTTTCACTTCTCCTCTATCTCCTTTTG  
A\_14\_P134799 GAACATGTGTCCTGTCTGCATGGAAACACATACCGACTTAATTTGGGTAAATATACATT  
CUST\_4739\_PI426210822

CAGTAGGGGAGATCATCACCTCTGTAATGGTATAATATGAACTCAGGAGTTGAGATT  
A\_18\_P22841712 AATGCCTTTTTCTCTTGCTGCAGGGTCCTTGTGGGCGCACCAAAG  
A\_14\_P125273 TCCTAATGGACTTATAGAAGACCGAGGTTCAAGTCTTTGCATTACATAAGAACAAAATCT  
A\_14\_P124848 CAAAAACCTAAGATGCTTATGGACTGAAAGGTTCAATGCTACAATACAAGTGGATACTGT  
CUST\_6782\_PI426210822 CTGCTGTTACAGGCCTGTCAGGACTTTACCACTCATAGGTTCTAAGAA  
A\_18\_P14133153

GCTTCATGCTAATTAACCTACCTGTTTTACAGGTGAAAAGATGTGTTGTCTCTAGGGAAAG  
A\_14\_P128151 CCCTTGGCTTCACTGAAACCATTCCTTCTTGTCTTAGAAAGCAATCAGAAATATAGTTAA  
A\_14\_P120867 TTACAAGTCTTATTCTTCTTGGTCAAGGCACTTAGGAAAACCCCATCCTTGATA  
A\_16\_P37084875

CACTCGCCTATAACTTACTTAATTTACGTCTCAACAAATATAGTATTATTTACCCACA  
CUST\_9768\_PI426210822 GAAGCCCTCCATCCAGCAGAAGCCTGGGTGAGATGTACTGCCATT  
A\_14\_P111146 AGATCAATGCACTTGACCCCTTTTATTTGATTATTCTTCTTCTGAIGTTTGGATGCCATT  
A\_16\_P19091233 AACTGGTTATCTTCCAAGTCCTTTAGTTCCTTCTTCTTATCCCACTAATTGCAAGTC  
A\_16\_P16825299

AAAAGATTCCCACAAAATCATTGGTCATTGAAGAAAACTGTTTATGTCCCATGTAGCAG  
CUST\_6577\_PI426210822

TAAAAATAACTTTGGAAGCAGAGATGTGCTGTTTTAGTCAAAGACTTTTTTAGCTTTGGA  
A\_16\_P21036709

AGCCGCCAGTCAAATTAGTATTTTAGATGAAGACTGCATTTGAGACATACTTGAACAACA  
A\_14\_P129055 CCTGTCTCATCTTGCTCTTCATCACACACGAAAGGAAAATAATCTGAGATGGTGTA  
A\_14\_P124087 TTTGGGGACCAACGGGATATTATTTACAGTTATTAGTAAGACCTACTTTCTGTGTA  
A\_14\_P123063 AGTGATGGCAAAGAAGAAAACAGATGCCCAGAATGAATGTGTTACAATATATTGCACA  
A\_16\_P15655594

ATAGGACTCTATACCATTGCATATGTCTACTTCAGAGGTCTAATATCATGCACTGTCCTG  
A\_14\_P112762 ATCTGTGCTAAAATTGTGTTTCAGTCTCTTCGCAATCTCTGTCTGCAAAGGCAA  
A\_14\_P200460 CACCTTTTTGATTATTTTGAACCAATCCCTTGACCTGTTGTGGAGAGAAAGA  
A\_14\_P130674 CTTGTTTTTAAATCTCCAAAGTTTTCAAGCACAATGTTTTCTGCCTAGAAAAACGCTTGC  
A\_14\_P129295 CCAGTGTATCCAGAAATCAACTGTGATATTTTGATAATGGTATGTGTTGAGTAGCCT  
A\_14\_P135672 GATGTTGATGTCAGAGGCTTGAAGTTCAATTCTTAAATGCAGAACTTAGTGTTTTAAGGG  
A\_16\_P58424323

CCAAGATTGAGGAATATTTGGTGCATGAAAGGAAAGGCTAAAATAAACAGGAGAATAAC  
A\_14\_P120296

CTGTGACAGTCAAGAAGCAAATGACTGTAATAGCACAACTGGAAACAGTTAAAAACATTG  
A\_16\_P19697295

GCCCTGATATTCAAGCAGATATAGACAGTTTCCTTAGTGATTGACTCCTAATGACTTTCA  
A\_14\_P200171 CCAGGAAACTTATGCCCCAGAATACAGAATAATTTTGCATACATATGAATAGTAGGGCAA  
A\_16\_P01784070

GTGCTTAAATTATGTGCTTGTAACAGAACTCTTGTGACATAGTTGCTGACTAGACCACT  
A\_14\_P110967 ACTATTACTTTCCCTCTGTTTTGGGGGAAATTATAAAAAGATGTCTATTTAGGTCATG  
A\_14\_P119802 ATCACTCTCTTTTGTGATGCAGCATCATGATTTTTCACAGAAAATTATTTGGCTCCAAGATG  
A\_18\_P12359076

TGCATGAACGACAGTAGATATTTTTACTAGCAGCAACTTTGTAGTTGATAATGGGTCGTT  
A\_16\_P15133571

TAGAAGCCACAAATATCCATCCTTATCTACCAAGTCTCTTCCTTATTAAATGTCTCTGGC  
A\_16\_P18560564  
ATCATTCTCTTTGACCAACTGTTTCATGAACATAATTACACATAATAGCAGGCC  
A\_14\_P130302 CAAAAAGAAAAATAAATTCCTTTGTATCTCCCAACACACTGCTCTCTCCCCTAAGATCTG  
A\_18\_P14131903 GGGGGTTTAAACACTTTTTTCAAAGATGAGAGATTTATGGGACCAGGAAAGGAT  
A\_14\_P124702 TAATGGTGTGTCAATTCCAGATGCCCAAATAAAAATACAAAATCAAGCAAACCACACATC  
A\_16\_P20908875  
CCCTCACTTACGAATTTTCCTAATCATGCCCCATAACTTTGTCCTATGAATTCACATATT  
A\_16\_P20169000  
AAATAGCCAGTTCCTGCTTATTAATACTCAAACACATCAATTATTCATCTGCACTTGGGT  
A\_14\_P127793 CTAGACATCATTTAGAAGCAGACGGGTTAAAATAGACAAGAAATAGCAAAGACACATCCT  
A\_14\_P102810 TAAAATGTGGTCCATCCTTGTGATTCTGCAAAAAAATTATGTTTCCTCCCCTTTGAATTT  
A\_14\_P119919 GTGTTATACCACTTTACATAAAATAATCTTAGACGGGAATTTTTAAATGTAATTTATTAT  
A\_14\_P201885 AAGGAGAATCCAGCCAAGCACAGTCTACGTGTGCAATGAAAACCAG  
A\_14\_P104280 CACAAAGTTCATTAGGTTTCAGACAGTAAAAAGGACGCACACTTTCTGGAACAATATACAA  
A\_16\_P16479707  
ATCTTAACCCATGGAATCTCTACTATAACTTGTAAGCCTCCTTCACTTGAAACTACAGTG  
A\_14\_P121003 AACATTAATACTAACAGCAAAAACCTTGAATACCACCAGTGGTTACTAGAGCAGTTGACA  
A\_14\_P120202 AAATTAGAGAGGTAATCATCCCCTCCAACACATCTGAGCATAAAAACGTATCATCAGAA  
A\_14\_P126801 GTTGAGTAGGGCTTTAGGTAAGTATGTAAGTAGGTAAAACCTGCTGATGGTAATTAGAGGG  
A\_14\_P106773 TTCATTTCTAGGTGACTTTTATACTGAAAAAGGCTACAATACACACTGGAACAACCTGGTT  
A\_16\_P39068466  
AACTTTCAATCCTTTTACCATGTCATAAAGCAAATGCTAACTCCTACTTCCTAAGCATCC  
A\_16\_P21683292  
AACACCTGAGAAACATTTGAGTATATTTTCAAATACTAATAATTACATGGTTTATAATTT  
A\_14\_P137729 TCATTCTGTCAATATATTCCTTGCTTTATCATGGCGACCAATGTGCCATAAAAATAAGC  
A\_14\_P137262 GCATAAATATGGCACATTTAGGGCTTAAATAATCTCCTGTTACTGTACCTGGACTTCAA  
A\_14\_P125664  
TCCGGAGTAGGAAAAAGGTTTAGGAAATAAACAAGTGGA AAAAATATCTGGAAAATGGAAC  
CUST\_3593\_PI426210822 ACTTGGAAGTGAAGCATTCCCATGCCTTCCAGACTCCTGGCTCT  
A\_16\_P03546270  
AAAGGTTTCTTGATATTACGCACATTTGTTGATTTTGCCAGATAGCAAGTCTCCAATCTA  
A\_14\_P135148 ACTTGTATAGAGAGGTAGGGGGAGATATAATAAGGGAATATGGTAGTGACGGAAAAAAT  
A\_18\_P14198788  
AAGAGAACTGTGTGTAATCTTAGCATGATAATCGGATTCCACTTATCACTTGGAAGTGTG  
A\_14\_P105224 CTCAAATAGCGGATCAGATCCTTACGCTCTCTTCAGAGACAGAACAAAACAT  
CUST\_1720\_PI426210822 CTATTGCTGCCTTGTGGTCCCCTCTTCCAGTTTGTGTTTTTCCTTA  
A\_16\_P17590890



CCCTCTTTTGCTACCATAATTGATACCTACTCAAAGTTTTCTGCATTTAGAAACTCTGCC  
A\_14\_P127058 GAGACAGTATTTAGTTCAGAAAAGACTAGTGGAGACTGACCCAATAGGACAACACAGTA  
A\_14\_P131696 AAAGTAACTTACAATAACTTCCCTAAAGGATTCCTGGTCACTGATTGTCTTGTCTTCTAC  
A\_14\_P133362 CAACCAGAAGATGTGGCAACCACTCCTTATATTTTGCTTGTGCTTTAATTGCATGATTTA  
A\_16\_P37509047  
TCCAAAGTAGTCTTCCCTACAACCAATTTCCCTTCTCTAATACATTCCCTTCTACGACAAAACA  
A\_14\_P107052 TAAATTGTGAATGCAAAGATAACATGAACTATTGTCCCAGGGGTCATTGCCTTTGTAAAT  
A\_16\_P00851224  
AATGGTATCTCTCAGGCAATAAACATCTATTACTGGGTCATATGTCATAGTGTGCAACAG  
A\_14\_P121798 AGAAAATGTGGTCTTACATGAAATCAGCGGAGCCATCTGTGTTTACCAAAAACAAC  
A\_14\_P109190 CTAGACAGACGTCGACACAAACTTTCAAATTGGATTGTCAGTTTCATCAAATTTGGAATA  
A\_14\_P102433 CATTTTAAAAAATGTATATAGAGAGAAGGAAGTTTCTCTCTCCCTGTCTCCTTTGGCTT  
CUST\_7081\_PI426210822 AGGCTGACTCCAGTGTGCTCTAATGCATCTTCTTTGCATAAAGAGGCTTAT  
A\_18\_P17026939  
AAAATGACATCATGGCAAAGTATTAATGTGCTTTTCTCACGTAGAATGTAGAGAGGGAAGA  
A\_14\_P115155 CTGTAGAATAGAATTCAACAGAAAGTGATCCATTTGGGCTCCATTCAAAAAAAGGCAAAA  
CUST\_3937\_PI426210822  
CTTTTAAAGATTTATTTATATTTAGCTCAGGCCTTAAAAGTTCCATGTACTATCTAAAAA  
A\_14\_P121018 GATGCTAACTGGAAAACATTCAAAGTAGGCAATATTGTATGTCCATTTGCAATCTGGAAC  
A\_16\_P15754037  
ACCCCAAATTAAGTCAGGAAAATATGTTGTAACATAACGCAACCTGTAATTTCAGTGTGCG  
A\_14\_P139962 ACAAGACTTAATCTGGATTTCCAGACTTTGCATCCTTCTATAGTCCTCATTCTTTTTTT  
A\_18\_P15564721  
AACTGACCCCAAACCTATTTTCAGACCATTTTTAATAACAGAACATTTAGAGGCTCTCTTC  
A\_14\_P133145 GTTTCCAAGTCACCCGTTTTGGATGTGCATTTTCATGTGACAATACAGATGACAT  
A\_14\_P201244 GGTGTTTCGCTATCTCTTGTGTCAAATCTGGTGAACGCTACGCTTACATATATTGTCTTT  
CUST\_7575\_PI426210822 CAATGCTTGTCCCAAAGTCTGCTCAGATAAGGGCCGTGTGAATAG  
A\_16\_P00685454  
GGGGCACTTAAAGTGGATTAATAATCAATATGTAGTCACATAAGTCTGCTAAGCCATCCTTA  
A\_16\_P01070632  
AGCCATAGACAAGTAGTAACTCTTTTCCACTGAATAGAGGACATTAGTAAGATGAGACGT  
A\_14\_P200418 GAGGAGTTTCTCTATGTCTCCAAAGTTTTTCATGACTTGACATTTCCAATTCTTTCAAAA  
A\_16\_P02304570  
AAAAACAGCCTGCTAACATAACAATATACCAACTTCAGGAAAATTAGTGTGGGCTTTCTG  
CUST\_1323\_PI426210822  
CAAATGGGTAATATGAAGGGAGATTATTAGGAAGAATATATGTTATGCTGTATGTGAATC  
A\_16\_P17100697  
AAATGGGATGAGGTAATAACTGCCAGTTTTAACCATAGACTATTTCAAAGACTCCCTG

A\_14\_P138478 TGATTCTGTTGTAGGTAGACTCATTTAGAGGCAGTCCTAGATGCTCTTTCTTGTCTATTA  
A\_14\_P138703 CAAGAAGTCAGTTCCAGGCATTTAAATGAATAACTCATGAATACCTTTGGGTCTATGTCA  
A\_14\_P134947 CACTTCAGCCCTCTTCCAGAATTTCAATGAAAATTGTCTGAAACTCTGAAATGCC  
A\_16\_P18386840

AAAAAAAATCAGATTAGGTTCCAAGCATTAAAGAAAGAAAAGGTTAGATCATGAAACACA  
A\_14\_P104515 CTCTTTCTAATTATACCTCCCTTCTGTCAATTTGAAAATGGGTGCGCTTTTTCTTACTACTTA  
A\_14\_P129976 AAATATAACATCATACCCATGCAAGAAGCAACAGATTTCTTTTCACCGTTCACAATATC  
A\_14\_P111422 ATAACCACCAAAAAAAAAAAGCCCTGGTAGTTTTTTGGCACCTTATGTTTAAATCAGATT  
A\_16\_P36230343

CTGGAGAATTTTGATATCTCAATATAATAAGGCAATGCAGAAAATTATTCATCCCCAGCA  
A\_16\_P40915326

AGCATCCCCTTTGATGTTAAGTAATACAACAAACTCCTAAATGAAAATCCACTAAGAGAA  
A\_14\_P129336 GTGGAATTAAGTCATACTTGCTTAGCAAATGCATTCCTGATTGCCACAAACTCAGTAAA  
A\_14\_P103566 CCATGATGTTAATCTTTCTTCACTGTTCTTGGTGGGTTTTCTAAAACCACTACACAAAGA  
A\_14\_P109351 ACGTCTACTTTTTAATGGTTCCTGCTATCCAAGGCGAATGATTTTGTATATCCCTTAC  
A\_16\_P02515896

GGCGGATACAGAATATTGTGCATCTCCTATTAGTTACTATAAAAATCTCACTGGAATCCCA  
A\_16\_P17829404

AATAGGTCCTTGAACCAAATTTAGTATCCCAGAATATGCATTGTCCTAAGAACTTTTTGC  
CUST\_2040\_PI426210822 GAAAGGCCCAGGTATTCAACTTCTTGGCTTCGTAGCCATTTGACTTTTT  
A\_14\_P119686 TACATCAAAGGAGAAAAGCACCTTCATCAACATGACCAGAGTGGATTTCAGACAT  
A\_18\_P10001390

CAATGAGTTGTCATTTTATCCAAATCTAAAAAAAAAACATACATACAGTATCAAGTTCTGG  
A\_16\_P20083400

TGTCCCTAATTCTCCAATTAATAACTACAAATCATTGTCCTCCCTTTTCAAGTTCACATCTT  
A\_16\_P20110242

TTAGCACCTTTTCATGACATATTCAGCATCCTGTAAATTGATCAGAAGACCAATTGCAC  
A\_14\_P100641 GAAAATATGGACTATGCTAACTTGGGCATATGGTCTAGTTTTTTGTCCCCTAACTTTTTGA  
A\_16\_P30952340 CATCCTTGTTGTGAGAGCAGACTGAATGCTTTGTTGCAACTCAACTTG  
A\_16\_P30952600 GTTGTGTTGTTTCTTCCACAGGACAGTTTCGTCTGTTCATCCAGTTCATGT  
A\_14\_P102565 CCATCTCGGCTTATGTCCTCTTTCACCAAAGAATGATACAAATAAAGACAACAAACAGAA  
A\_18\_P13009105

AGACATTTTTTTGTAGAGGAAAACTCTGAAGCACTTTCACACTTTGTTCAATATCAGGGA  
A\_18\_P15193116

CTCCAAGTAGGGTTAGGTATGTAAACAAGTGCTAACAGATTGATATAGGCTTTCTGCTTC  
CUST\_7720\_PI426210822

GGTCATCTTCAGTTTAAACAAACACATGTCAGAACTAGAAAGTTGGAAGTGAGACTTCA  
CUST\_2253\_PI426210822 CTCAGTGTCTTTGTTGTTTGCAGTGGAAGCAAACCTTGGGGCTG

A\_14\_P104346 AGGTATGTGTTACACTTTCTAACATGCCATTTAGAAAAGTGTTAGACTTTCTCACCTGCCA  
A\_14\_P126340 TCGACGCAAAAATAGAACATTTTGAGTGAAATTTAAACACAGTTTTTGAACGGTGCTGTTC  
A\_14\_P136122 CTGTCACCTATTTATTTTAAACAACGTCTTGTCCACAGATACCTGTCATGTTTGAAAACC  
A\_16\_P20046426  
TGGGATCGCATTTGAAAATAACAGTCATGCTAAGAATACTAAATAATGCTTCAACAAGGG  
A\_14\_P105929 GTTGAAGGATTGAAGAGTTCTAAGCATAAAATAAGTGCCATTTTCTGACTTCTTCCCTCCT  
A\_16\_P18070249  
AATTGACCACTTGAACACAATTCTTTCCCTCTTATTTCCAAATTCTATTCTGTGTAGCA  
CUST\_7662\_PI426210822  
GTGGCACCCCTGCTATGAGCTCTTGGAACAATTTATTTATAAGTTCCTTATAGCCTG  
A\_14\_P133727 GTGTAACATGTTTATTCTCAGCATATGCTTGTGAATGAACTAGGAGAGGGGGCTTT  
A\_16\_P19089855  
AGGGAATTACTAACACATGACTACTAAAATCAGCCTTTTTTCATTTCTGCTGTAACCTCAA  
CUST\_8168\_PI426210822 GCAGAGAGAGGGGCACAGAGCAGACAGGGACTCAGCAGATGTTTCAG  
A\_16\_P58424331 GCGGTATTAACACTCGTTGATGGCTTAGCAGGCATGGTGTCTGTAGAA  
A\_14\_P102797 TTGGCTTCTGTTTCTAGTTGAGGAGTTTCTTAAAAGTTCATAACAGTGCCATTGTCTTTA  
A\_16\_P03100415  
GGAAAACCCCATTAAGTGACTTCTTTTTCTTTTCACCTAACACATTGGCAAATAAAAAC  
CUST\_2686\_PI426210822 AATACTTGGAGTTGAAACAAAAGGTTGAAGGGAAGTATCCGACAGCTG  
A\_14\_P119254 ACAAGGGCCAGATATTAACACAATCACTAAATAAACATTAGATAGCAGAGCATCTGGCAA  
A\_16\_P02658517  
AAACCTGACCCCTCATATAACCTCAAAAGTTTCAAAAGTTCTTTAACCAGATAAACTCCA  
A\_14\_P105668 TATATAAATGAATGAATGAGTGCGTTTTGTAAAGGAATCTGGGAGTCAAAATCTGGCCAG  
A\_14\_P128365 CTCTCTTGGAGTCTTCATTGCTTAGATAGGGCAGTTCTCTTTTATTTATAGCCTAGGGA  
A\_14\_P100276 ACACCCAGTCCAATTGTTGGGAGAAAGATATTACATCATTTAAGGAAGTTGTTCAAAGAG  
A\_14\_P134191 ATTGGATCTGTGCCAGTAATGACAAAATTATTTTTTTGACTTGCTTGCCTGAATAAATTG  
A\_14\_P117343 CTAAGCATCAAGTATGAGAATGCCATGACAAAATTCAGGATGTTTGAATTATCTGCTCAT  
A\_14\_P101769 TAATACTTTAGAAGTTGGATTTATTAGGAGGGGAGGAAAGAGGGTAATGTTGCAAATGC  
A\_14\_P104493 AACAATTCATTCACACTCTGCAAATATCGGAAAAGTGGATTTGGAAGGTCCTGATAAC  
A\_18\_P15046629  
CCTCTCAATCTCACGTAAACAATCAGAACCAGACTAATGATTTTTCTTCCAACCTCTAACA  
A\_16\_P01766547  
GCTAGTCATTCAGCCCTTAAAATAAACATATTCACAGTTTTTTCTCAGTAGTAGTGGTCA  
A\_14\_P114808 GATCTGCTCAAGGTATTCCTTGTCATAGACCACAATAGGCTCGGATTCATTGAT  
A\_14\_P106747 GTCATTTGCTTCTTGCTGATCTTGACAAAAGAAGAAAAGGAAAAAGACTGGTATTACGCTC  
A\_14\_P124235 TCATTTTGAGTATTTGTATTAGTTACATTCATCAGATGTTCTTCTGAGGGCAATTATGT  
CUST\_10158\_PI426210822 ATTTGACCCTTTTGCAAACCGAGATGGTTTTGGAGCAAAGGGAAGT  
A\_16\_P01720931

TGCACCTGTGAATCACATTATAGATTAGGCCTGTCTTACCAAATGAGTCAAATACTGAAT  
A\_18\_P17185373  
AAATGATGCTCCTGAGAAAATGACATTCACTTTGCTAGATCTCTCAACAAATAGGAACGT  
CUST\_7014\_PI426210822  
AAGACAAAATACAGAATACAGAGCAGCAGTTCACGGGCTATAGCATTGAGGA  
CUST\_7068\_PI426210822  
CTTATCTGTGCAATACAACCTAATGTAAGTCTACTTTGTAAGTATTTGTTCTGAGATTAT  
A\_14\_P102556 CTTGGCTTCTGTTCTTCTTAGAGGATATGTTTGCATGGCAAATTGATTCAATGGTG  
CUST\_5654\_PI426210822 GAGAAGATCTGGGGAGGACCCATATAACCAGAACTCGGGAGCCAG  
A\_14\_P123962 ACCATCTTTCAAAAGAGCAGTCACTGAAGAGTAGAAGTGGAAAATCATAGTTAGTGGTAA  
A\_14\_P124591 ACTTTTGTCTCTTTTTAGGCTAGACAAACTGAAAGGCAATAAATCCTATGTGAACATGG  
A\_14\_P111736 TACTGCCTCCTCTGTGTATGAAAAAAGTCCTCAATACCCTATATTCCCATAATGACTTTT  
A\_14\_P137340 CTGTTTTTCTTTTCCCTTAGGTTCATTTTCCAGGGTAGAGGAAATAACAAGTTGTAGTT  
CUST\_6096\_PI426210822 CAAAACAGGCCATTGTCAAAACGTCCAGGAACAGGGATGAAACTT  
CUST\_147\_PI426210822  
GCAGTATAACCATCACTTCTTTTGCATTGTTACAGTAGCAGTAACAATTCAACAAAGTAT  
A\_14\_P126748 GATATAGCGACTAGTGTGTCAGAAATCTTCCAGAATTAAAGTGAGTGAGAAGTAGTTCTGCC  
A\_14\_P113929 TAACTTATTTAGGGATAGAAATGATTACCTGGCATAACCAATGATAAGGCTGCCAAAGAC  
A\_14\_P133207 TACTGGATTTTGTGGAAAGATTCCACAATCTGAGCATGTGAGAAATGGAAGACTTAATAC  
A\_14\_P105531 CTTATCTACATGCCGATTAATCCTGTTTCTGCCTGAAGCCAATAAATTTAAAATAGCA  
A\_14\_P121153 GCTTCGGCGGCTAAATGGCATTTTGAAGCCCAGTCATTCTCTAAAAAG  
A\_16\_P18000500  
GAACTCTCCACAATATTGTCCTAATCTCCCCTTATTACCAAAAATGACCAAGGTATCATT  
A\_14\_P126814 CTTGCCAAGGCTAAACCACTGCTTTTACATGCTTTTGAAGTTAATATTTTTTTTTTGCCA  
A\_16\_P17166932  
AAAAAAAACACTACAGTGAATCCTTCTTGAACCTCCTAATTTTGATTCTGTCTCAAAGGCT  
A\_16\_P03605463  
ATATCACACAGAGACAACCTTAGATCTTTCTTCTCAGAAGTCCAATAGTCTTCAGAGGAAC  
A\_14\_P133605 ACACTACCAACCTTTTTTCCATATGATCCAAATCATAGGACTGAAAATGTTCTCTCAGT  
A\_14\_P201161 GTTGTCAATCTGTGTCATTTTGAATATTGTTTCGACTTTCACTTGGTTTTATAACCATTGG  
A\_14\_P135974 ACATGATTTTTCTTTTCTGGAAAGTGAGAAGTTTTGCTGTGATTCTATCATTCTGTGGAC  
A\_16\_P16190993  
CTTGTGTTTTGTGTTCTACAACGAGAATTGATCATTTTTTCACTCTCACACAACCAAAAACA  
A\_14\_P201600 CCAAGTTAAAAGATTCTTTGTGGAGCCATGTAGATAATGAGTGATTCTGAAATGCAGTTG  
A\_16\_P16549063  
CCCTGAACAGATTCTGAATCCAACCTAAAGATCTAATTAAGTAACCCCAAGAAAATTTCCC  
A\_14\_P135745 CCCCCTTCTTCTTCTTTTATATACAATTTGTTATTGTCAAATAAAAGTAGGAAAT  
A\_18\_P27218367

TGGGATTACTAGGCTAAGATATCCGACTCATTGCCGAGCATAAATTGATTTATTCAAAGA  
A\_14\_P105736 GATGAAGCCACGTGACAGTGTATAAAGCAGTTTAAAGATCTTAATAAACGAGGCCCTC  
A\_18\_P14137150 ACAAAGACACACAGGTGGTGGCATCTGGGGGGTCAATGTGCATG  
A\_14\_P109700 GTGGCCATGAATTTTCATGCTTCTTTATATTTTCATCCTCCTCAACCTAGCCTAGATAAT  
A\_16\_P03171129 CACGGCCAATAAATCTGAGGTGCAACCTAATATCAAGGCTACAACTACAGAGAAG  
A\_14\_P124801 CAAGTGTCCCTTTCTTATTCCTACATAACAGATGAACCTTTTCTGTCAAAAACCTACTA  
A\_14\_P109556 TATTACAAAGATTGTAGCAAGTAGGTCTTAATCCAATGTGTTAGGCATGGGAACATTTGCT  
A\_14\_P117144 GTGGTAGGATAGGATGGTGTAAATAGTTGTTTCTCTAAGGGTTTGATATCAAAGCATTGAG  
A\_14\_P103654 AACTGGTTCAATTTCCATTTCTCTCCATTTTCCGTTAAACAATCAGGGCC  
A\_14\_P104214 TAATATTTACTTTTCATTGTGATTCTCAACAATCCAACCTAGCCAAAGAATTCTCCACTT  
A\_16\_P37917098  
GGGGGAGATAGTCTAACATGCATTGATCTAACATCCATTCGTTGATTTTCTTGAAGTAG  
A\_16\_P37873607  
GGAGAACAGGTGACAATATACACATGTGCGCTAATCGTAAAATGAGCATCTTAGTCTTTA  
CUST\_2799\_PI426210822 ATGGTGGGATTCGGATGCTGGTGTACAGAGGCTTAGGTTTCTAAA  
A\_16\_P17023364  
AAGCCACACACTTCAATACTTCACTAGATTTCTCCTAGAATGTGACATACAGAGTAAACT  
A\_14\_P135392 TCAGCACTTAGAAGAGACATTCAAATACATTTCAATTTCTGTTACCCAGATTGTTCCGAA  
A\_14\_P111695 AAGAAAGAAGGTAAGTCCTAAGATGTTTGCTTCTTATTCCTTGTAAGGTTTAGCCATGTA  
A\_14\_P200972 TGCAATGAGAAATTAGAGTTCAACTATTTGGGTTTTTATTGCCTGCTCTGCTAGTGAAAG  
CUST\_8043\_PI426210822 TTCCTTTTTCACTAGTATGAATTCAGCGTGATCTTTGATACAAGCCACCTGTCTG  
A\_14\_P131270 CTGCAGCGAGGTTGTGATGTTCTTAATAGATAGTCCTGTGATCAGTTTAAGGAACAAAC  
CUST\_9581\_PI426210822  
CCTAAACCAAATTAAGAAAACAAAATATATTCATGGCAATCTTGAAAAGTCAGGGAG  
A\_14\_P134121 AATGATCAAATGAGATGCATTTTGAAAATAAGAACTACCACACAAAGTGAACAGGAGAC  
A\_16\_P02661623  
TTCTCACATTTGATCATCTCTTACCAAACTCTTTCTTGAATTTCCACTATAACCAGCACA  
A\_16\_P21244763  
AAGCATTTATCCTTTGTATAATCAAAGGCCTTCATACAATAAACTACTGGGTTGGTGC  
A\_14\_P124546 TGGTTACAATTCAACTCCATTTTGCAGAATGGTAAACCAAAACCCAAAGATACTGGATAA  
A\_14\_P112921 CTCTAATAGGTTGTTTCTTTCTTATTTGTCAGTAGTAGCCATTGTTTCATGGAGCACATCTG  
A\_14\_P117019 ATAACATCTATTTAAGTCTCAGTAACATTACATTGCATTCCAGAAATCTGTCATTCCCCC  
CUST\_9450\_PI426210822 GTGGAGGTGTGGGAGAGGCTGGAGGGAAGCTATGGCCTTGGAATT  
A\_14\_P105250 AAAGAGCATTATAATTAACAGGCTATACCCTCAGTAAAAGGTGTTAAGTTCAGCAAAGGG  
CUST\_5350\_PI426210822 TTCATCATGGCCGTCTCCTCTCTGGGGCTGCTGCGGGAGATTTCC  
A\_14\_P138156 GGACCCTCTTAATAATTCTTTTAGGCCGCGAATATCGCTACTGGCTAATATTGTTAGTAA  
A\_16\_P18781928  
CTGCCTGTTTTAATTCACATGTCCTTTCTAAGACTTACAACCTGCATTTCTCATAAAGGA

A\_14\_P127565 TGAATGCAGCCACTTTTGGTTGGGTATATTTTGTACTGACTTAGTCTCTTTTCTAACTG  
A\_14\_P132649 GAAAAGAATCTCAGAGAACTCGGTGGGTCTTGTGTTTACAGTTTATTTAATGGAAAAGA  
A\_14\_P136854 CAGGGATGCAAATATGGTGTGATATCAGAAATGCATGTCTTTACTTGTAATAATCAGCCAA  
A\_14\_P123583 CTTCTGTGCAATATCTAGTCCCTACTCTAAATGGAAGAAGCCCTTGAGAAATACTTGAT  
A\_18\_P14134392  
TCAAAACTTTAAAATGAAGTGCTCATCAACAGTCATTTCTTGTCTACACCCTCCTGAATT  
A\_14\_P118390 CTGTCTTTGGAAAAGGTTGTATACTTCTTGACCGTGTGGGACTAATGAATGCTTCATA  
A\_16\_P15753051  
AAAAAAGATCCCTTACACACTGTTTCAGTCCTATTCCCTATAGTCTCATTCTAGCAGTTCC  
A\_18\_P15732212  
AATAACATCCCTATCATTATTTCATTGCAAATTGCTCAGGTTGTATATCACCCCTCCAAGG  
A\_14\_P124667 CTTTTACACAGTCTGCCATGGTTTTACACAGTTTAAAACCTGGAAGACAGATTCTGCTGAT  
A\_14\_P109666 GCAACATTTTCAAGGAAAAGAAAAGGGTATTTTTTTTCTTGTTTTGTAAAATGCCCAGGC  
CUST\_1865\_P1426210822 ACTGGAAATATGTGGGTCTGGCTTTCCTAAACTATAGTATCTGCCAAAAAACC  
A\_16\_P01572054  
AGTGAACCCATATCTGGAATACACAGTTCATTATCAGTCATTACGTATAACCACGAACCTC  
A\_18\_P22841086 TTTTCCTTATTGAAATTGCCAATGCCTGTTCTCTAGGTTCTAAGAGCAGCCCT  
A\_14\_P113975 TAAGATTTCCATAGGACATTGTGCCTTTGAACTTTCTGGACTTACATTTGGGTTCCACATT  
A\_14\_P123641 GTTACTGACTAAAGAAATGACCATTAGTTTCCTCTGGATGTGTTTCAGTCATTCTTGTGAA  
A\_14\_P124783 CTCCCTGCTGCTACCTGGTTTTATCTGTGCCTTAAGATAAATTATTTATCTTCTATGTGC  
A\_14\_P139548 ATGTAAGTCCAGTCAAAGCATTGGTTATCATGAAGTAACTGGTGTACTTCAGTATCA  
A\_16\_P21116887  
AAAAAGTGCAAAGGATTATATTGGAGACAGAGGGTTAAGACAATGACGCTAGGATAAAGA  
CUST\_4569\_P1426210822 GAAGCCAGGAGTCCAAGGACCCCTTGGGTTTCTGGTTTGGAGAAC  
A\_14\_P111169 CTAAGTCCATCCTAAATGCTGTGAAAAGTGATTTCCCTCATGTAAGTAAAGTCCAGCA  
CUST\_5454\_P1426210822 AAAGCTGTGGAACCACCTTTCACAGTGTTCAGACCACTGTAAGT  
A\_16\_P35544748  
AAATGTCATGCCTTTGTATATTTGCAGGATTTTAGACCTCATCTCATAACACAGATGGTCT  
A\_14\_P132388 GGTAGAATGTTGATTTGTCCTTTTCTTTGATAATGTGTCTCCAATCATCCCTACTTCTTC  
A\_14\_P136034 CCAATGACCAGGTCAAGAAATACTTCGTTACTTCATATTAGTAAGATCCGGGGACT  
CUST\_10267\_P1426210822  
TTGTTTCTTTCAAAAATTAACAGATTTTTTAAAATTGAAAATTGAATTTTCAAAAATTT  
A\_16\_P15857382  
TTCCTTTCCCATAACTGAATTCCTACTCAATAAGCACCTTAAAGATTCTAAGACAGTCT  
A\_14\_P130410 CGTTCCAACATCCCAAACCTTTTACACTTTTGTGTCAGACGAACTATTTTAAAAGTGAACAT  
CUST\_924\_P1426210822  
AGCTTCTAGATTATTTTTGTGCAGAAGCAGTATTCTCTGGTTCTCTTTGTCATTTCCCTTT  
A\_14\_P119538 TCCTTTGGGATTTTGTCCAAGACTCTGTAAATTAATTTTTCTGTGCCTGTTTCCTCATAA

A\_16\_P16191798 GAAAGGTGCTCCTTGACAGTGAGGACAACCTTAAACAGAGGTGTGAACATAAG  
CUST\_9622\_P1426210822

GTTGTGCTTTACAGAGCATTGGGTGAATAACTAGAAATATGCCATAGATTCTTGAGGC

A\_14\_P133726 TACTTATTCTTTGCAACAGGAGGTGGTATAACAGACAGAAATCTACAAAGGATCCTTGAG  
CUST\_8423\_P1426210822 GTTTTCTAGGGAAGAGCTAGCTGGAGCTAGATCTTCATACATCCTGTCAATG

A\_14\_P122320 ATGGTTCTCAGAGCATTGGAACAAGACAACAAGTTTTCCACTTGGAATACTTTTTAAAA

A\_14\_P136986 CTGAGGGACAACCCAAGAAATCACACTTTATGTTTTTCTTCTGCTTATTTTTTGAAGCA

A\_14\_P103892 CTGCAGTCTCTACAGGGGCTTAAAGAAATGTGAGTGTCCCCATTC

A\_14\_P110536 TATTACATTCTCATAGCACATGATGTATTGGTCCACATCCTGAAGAATTTCTGATGCAA

CUST\_7052\_P1426210822 CCCGGGCATCTTCATTATAAAAGCTTAGTCTTTCTAAATGCAGCCAAGCTCT

CUST\_5602\_P1426210822

GAGTCACAGACAGTCCAGGAATAATTTACAAAGTGAGATTTAGATTAGTGTGTAAGAATT

A\_16\_P15857025

AAATCCACAAGAAACGTTATAGGATAATGGAATGTGCAAAATTAATCGCTTTTCAAGGG

A\_16\_P16394022

AAGCATCCCAGTGGATAAATTCTCCTTTAAATACTCGAGTATGTTAATCAGTAAGGCCT

CUST\_9086\_P1426210822

CGGTTAAAACCAAGTTGTGGGAGGATGGATAGTCAGTAATTGTTTATCTGTGTGAT

A\_14\_P106215 ACGTGTGAGTAAAGGCAGAAGAATCACAGTCACTTATTTTTAAACAAAGTGAGTCCATTTT

A\_14\_P113026 CCACTCCAAACTCTCAATCATCTCCCACGTTATGTTTATAGAATGTAACATCTTTTCTCT

A\_16\_P16790941

AAACACCATGATAACCAGAATCACCATTTCTTTCACATCATCACTCTAGTAAGTTGCATCT

A\_14\_P132405 ACAGTTCCATATAACTTACATTTTCCATTGTGTCATTAATTTCTTCTCTGCACCCTGAA

CUST\_8976\_P1426210822

ATTTATCTTTCTAGAACTAGACACCTTAGGTCAGGCTAATCAACCAGCTGGTATCATTTC

A\_18\_P22841426

AGAGTTGGATTTCCACTGTGGAGCCAGGACTATTTATATCTTTCTTAGACCTTTTCTAA

A\_14\_P112501 TGTGGATCGTGGTCGTTATAACCCTGTGCTTACGATTTATGATGTATTAATGAATTATA

A\_14\_P125384 ACTTTTCAACCAATGGATTGCATGGCTTGGGACAGGCAGAAATTAATTATTCTATTGTTAT

A\_14\_P100037 CACACAATCCTCTTTTCTTGTCTTACAATGCACAAGGGTGGCCTC

A\_14\_P120506 TTCCTGTGTGCGAGTGGCAAATTTTTGAATGTGGAGAGGCTATTTTAAAGTTTAAATT

A\_16\_P01210553 CCCACTATATCAAATTTTCATTCGCTTTCTACATTTCTAATATACCTATTTTCGCACATGGA

A\_18\_P22840535

TCTAAGGGCTTCTCTTGATCTTTTTTATTTAAATCTTTGTCTTCTGAAGCATCTTAAAGT

A\_14\_P110704 TTGTTTCTTCCCTTAGATAACTCCTCTCCTTGTAATCTTTAAGTTAGACGATGGCAACTC

A\_16\_P18516810

AATCCTTGTCAGAGATTTGGAGTTGAATTAACAGAGCAGATGAATTAACACTACAGCCAG

A\_14\_P122856 CAGCACTAATCGCTATTTTCTTTGGAAACTTCCTTTGATTCTTTACCTCCTTCACCTTC

A\_14\_P114543 AAAATTGAGTGTGCATTAGTGCACCTTGAGTTCTCTTTGAATGCATCTAGAATACAAGTGC  
A\_14\_P110432 TATACGTCTGGCCAAAATACCGTGTTTAACATTCTTTAACTAGTAACAGTTCTTTCCCTT  
A\_14\_P115590 ACTTCTAATCACCATGACTCAGATACCACAATTCTTAAAAACAGAAGTGGTCAAGAAATG  
A\_14\_P109329 AGTAACTGGTAATACAGGTGTTTTTTTAGTCTCGAAACTGTCATCCAGCAATAGTTTCTC  
A\_14\_P121278 TAGACTGGTGTGTTACTAAGTGCATTATTTTTTAGCAGAGAGGTTAAGCAGGTGGTAAC  
CUST\_6218\_PI426210822 ATAGAAGAGGCTGGCCACGTGCTCATAGCGGCCTTCCTCCTGAGA  
A\_14\_P112180 CTCTTTTCTTTTGTGAGAATTAATGGTGCACATTCTGAAGGTGGGAAAGAGTCATTATTT  
A\_16\_P19045145  
AAAAGTCACCTTATGCAGTGAGAAATACAAGTATAGAATGTGTTATATAGACAGGTGGTT  
A\_14\_P112134 TCTAAAAAGAGCAGAGGATAGTCATTTTAGGACCAGAAGAAATCTATTCTTTTCTGCCT  
A\_14\_P111373 TTATCATATCCTGCTCATTTCATTTCATTGGTTCATTCAAAATTCACTGAACTGTGTGCCA  
A\_14\_P117669 GGGTATGAAGCGAGAAGAGTCTAAGTTTGTATCTTCCGTTTGAAAGGTAATTGTTTTTTG  
A\_14\_P116735 ATCTGTATGTCAGAACAAGATGCATTAAGAATCCACTGAAGAACATAAGAAATGGCACTG  
CUST\_62\_PI426210822 CACCTGAAGCACCTGGGGGTTTGAGGGCTTGAACACTTAGACAAA  
A\_18\_P14919553  
AAGTCACTGGCTATCAAGATCAGAGTGAATTTAATGAATAACATAGCCCAGGGTTATCTC  
CUST\_8787\_PI426210822 CCATTCTGGTATCCCTCAAATCCCTTGTATGACTATCCACAATTCTCCATG  
A\_14\_P118666 CTTGGGGAAACCAACATAGACTTGTCACTTTACCTTTATATGTTTGTGTTGCCAACTACAA  
A\_14\_P121541 GCCTAGGCATAATAAGAAAGAAAACAGAAAACAAAGCAATTGTTTTGCTCTCAGTCTGAGC  
A\_18\_P14136015  
ACGTGCCATTTAGTTGACCTTCCTAAAATAATTTTTTTTTCTGAGACATTCTGTGCCTCTT  
A\_16\_P39339599  
TCCCCTTGCTTTCTTATCATAACTATACTTTGCTAAATCTCCATCACTGTATCTCTGACA  
A\_14\_P133515 AAGATGTGAAGACTAAAGATGCTTTGGGCATGGCAAAGTGTCTACAGATATTAGAATTG  
A\_14\_P115321 CCCTTTTCTTCCAGAACATTTCTTCTTATTCTTGTGCAACTACAGGATTTGCTTTATT  
A\_16\_P16191740 GTTTGATGTCCAGTAAGCCTGAGCAGCCCTGCAAATACAGATGAGC  
A\_14\_P115812 AACAGATCTGTAACAAGAATAGACTGAAAAGTAGTCTGCATGGAGGTATGGATTTGTGGT  
A\_14\_P125947 ACACTCAAACACATTTTTTTTGTAAAGCAGAGGTGATCCAGAGATATCAGGATAGGAGATA  
CUST\_8986\_PI426210822  
GGCAATGGGTAATTGAATTAGCAAAGTAGACATTCAAACATTCTCTGAGTTTTCAAACCT  
A\_16\_P58424169 CTAGGACCTGAACCTCTGAGGAGGGGGCTGGTGCTGCTGATCTCT  
A\_14\_P103772 TCTTAAAATAATCAAGTCCCCTTCCAATCTTAATCATCCATCCATTGTTGAACCTGTTGA  
A\_14\_P109220 GAGTGATGTTCTACTACTGGGTCTGAAATACTTCATAATTCAGCAGTCCATTCTGAAAAG  
A\_14\_P137650 CTATGTGCTTAGAATACAGGTGTGGGGAAGAAATATACAGGGCAAACCCTATAAATTATC  
CUST\_1044\_PI426210822 CTAATATGAAGCCGACCACATCCTACCCCATGGCTTCTGCTACAT  
A\_16\_P02758750  
ACTGTTACCCAACCTTTTGTGATAATGGTGTCTTAAATGACTACTCTACGAAACCACCAGT  
A\_14\_P103370 AAAGCCCTTTCAACTAAGTTGCATGAAATGTTATTTTTCAGTTATCGTATCAGGGCATCTG



A\_16\_P00281572

AAAAAGGGGAATGCTGTATTTTTGGTAATATCCCAATGCCCTATCTAAAGGAAAGTCAAA

A\_16\_P41460279

GAGAAAGAGAGAACTCTGAACAAGGCTTCTTCACTTACAAACCTGATTCAATCCAATTT

A\_16\_P02023094

AAACACTGCGGCTATGTAGAATCTCACTTGATTGCTTTAATTGTTAAAGGTTTTGGAGG

A\_14\_P108889 ACATCATCTTCAGGTAGAAAGCCCAAATCATCTGCAGTTTGGAATTTTTTTAAAAACACC

A\_14\_P138062 AGAGATTTTAGATTTTAAGGGAAGACTCTGGAGAGTTATCACTGCCCTCACTGTTTATAT

A\_16\_P00685438

ACATTAAATCTAAAAATGTCTAAAAAGTTAGGACATTTAACCTATACTATAACAAGAAGTT

CUST\_312\_PI426210822 GGGTAAATGGTAGGGAGTGGGTGTGGAGCAGTAATGCTGTGCATA

A\_14\_P123989 TAGACATCCTCAATGTTTACCATCATGAAGAGCAGTGTTGCTGTAGACGTCCTTAAT

A\_14\_P102280

AGCGCAAAGCCACAATAGACTTAGTCACAGAATCATTACAAAACCTAAAAGAAAATGAG

A\_14\_P139119 ATCTGATACTAAATGCAATAAATAATCCAGATACCTAACCTTGAGTGGGAAGGCTGAAA

A\_14\_P133590 ACCTATTACTTAGCACAGAGAAACCTTTTGCTTGAAGGGATTTTCACATTTTATCTGAAC

A\_16\_P00685388

CATCATTGTTAAATATAGTTGTGGTTGGTAGATACAATACCGATAATAATAATGATGGTG

A\_14\_P110884 ACTGTGCCGTTTTTATTTTATTCCTTTTATTTTCCCCCTTTTCACAGAGAAATAAAGGTC

A\_14\_P116703 GGCCTCTCCTCTGTGAGAATTCAGCATTTTGCAACCATCCAAAAATGTT

A\_14\_P102376 ATGGAATTACTCAGGTAGGAAGGGACTGAAAATATACTGCTATCTGCTGTCTTGTTAAAA

A\_14\_P116151 AGTTTTTTTAGAAAACAGGGTCAGAAAACCTTCCTCAATGTAGTAGTCAAAGCATTTTGGC

A\_16\_P17252355

AATGAGCCAGTCCACTTAATAAGTTCATCTGTGTGTTTACCTTTTAGCAATAGTCTGACT

A\_14\_P135773 TGTTTTTACTGCACATTTGGGCACACAGCCATAAACTGCCTTGTATTAATTGCTTTTTAT

A\_16\_P16191932

GAAGTGTACATGACTTCTTAGCCCTCTTATTCACCTACCTAATAAATAGGCATGAAAGT

A\_16\_P21548870

CATGATCCTGGTTATATACATAGAGCATTTTCTAGTTACTCTACTATCCCACAGTCACC

A\_14\_P100509 TGATAGCACCATTCAAAAACAACATTGTAAGTGTATTAAAACAAAACCTTACTTGTCTGG

A\_14\_P131015 CTCCATATGAGAAATTATGGCAGAGAGCAAATATTTCAATTAAGATAGTTGACAGATTTT

A\_16\_P18720989

AAGTGTGACAAGGCCATAATCTGTAACAAGGAATGTCTATCATAGTCACAAAAGAGAACC

A\_14\_P114908 ACACTTGTGTAAATTTTCAGTTACTGGTCATAGAAGGCTTTCAATGTTGAGTGGCCTTTTA

A\_16\_P38904648

AAAACACACAGTGCTGTAAAACACAAATTACCTATTTCTTAAAGTGTGACATCAGCCAA

A\_14\_P119795 AGAGTTTTTGTGCAAACCTCTGATTTGGAAAATGTTCCCTTGAGTTTTAAACCCTGAGA

A\_14\_P128840 CTCGATACTTACAAGTAATAGGAGTAGGAATAAGCATTTCTTCTATATATTGATGGGCAG

A\_16\_P02718340

ACCATACTGTTCCGGATGATTTTCAAAAAAGTGACATTTAGCATTGATAAATGGCCGTC

A\_14\_P108078 CAACTCTGGACTTCAAGTAATTTGAGGGTCTTGCTATTCGAATCACAAAATATCACTGA

A\_16\_P18338927

TCTTATGAGACAACGATTATCCACTATGTCCATTTGTATTATCTGGCAAGAAACCAGTAT

A\_14\_P114742

ACAGTAAACAAGTTGTCAAAGATATAACCAGAGTCCAGAGAATAGGACACAACCTACAA

A\_18\_P16424809

ATCCACTCCTCACCTAATTTTCATTATTCAGCGCTAACATTTAAACAGTATTCTCTCCCA

A\_14\_P109526 TCTGGTCCTCCAAAGTGGGATTTTTCTTAAGTTCTGTCAATTGCATTTTATATGCTTCC

A\_14\_P135840 CTATAACTTTGGTGAATTAATAAATGCTTTCAGAACAGGGGACTTGTGAGAAGAAGTAAC

A\_14\_P122874 AGAAGAAAAAATGAGGAATGTGAAGGCACATGCTTGAAAGTGAAGGCCTACTG

A\_14\_P201758 TATTGATTTCCAGATACCATCTAACCTCCAATGAATGATAACCATTTCTCTGATAGAAAA

A\_14\_P118250 TAACTGTGACGTATACGGCATTCTGTAACTTTTTCAAACCAGGTAGAATGAATATGGCAT

CUST\_4120\_PI426210822

AAGTTTTGGATGAGCTCATTTTCATAAGGATTTATGTGCCTTATAGGCCAGTGTGG

A\_14\_P116901 TTCCTTGGAGAGATTTCTCCTACTCTTCACCTATTCACTTTCTTAAGCAAATGTTTTCTC

A\_14\_P110625 TTCGTAAACAGAAATGATATTTGCCACCTTTTCTTCTCTAAGGCCTAAAGAGATGACAG

A\_14\_P125049 GTCAGTGTGGGACTACCAACCAAGCCAGGTGATTTCTAAAAATGTCATAAAAATATTC

A\_14\_P101115 AAAAGTTCCAAGTGACCTTCATCATTTCCTCTCTATTTACATTTCCCCTAAATGATTTT

A\_14\_P138641 ATTTCTTATTCTATTGCTCAGGCCTCATCATCCATGAAGGCTCCTCTGT

A\_14\_P114831 AATTTGTTGAATGAAACAGTTGGGTATGTTTCGAAAGAGAGATGCTCTAGGAGGCCAAAAA

CUST\_6310\_PI426210822

CATTGCTTGTGACTATTTATGGCCGATTTGGTTCCTGAGCTAGAAACAGAAAAGTT

A\_18\_P10997673

TTTATCCCTGGCAAAAACATTAAGACTCTCCACACAGTTAATCATTCACTTCTTATGCTC

A\_16\_P15141087

AACTTGGCTCTCCAGTTAAGAAGAATCATTTTTTACACTTTAACTCAGACTGTTGGTGAA

A\_14\_P108682 CACCTGAACCTTTCCACCCTTTCTGTGATTTTTATTTGACTCAGGCTATATTCATTCAT

A\_14\_P107998 CCCTGCTTGTACATACATTAGAAAAGACCAGTCTTCCTGTGGAGAGTTAAAATAATTAACC

A\_14\_P128558 GAACTGCTGTACATACGTATCCAGAACCCAGTCAAAAAACACATTCAAATACTAATGACAA

A\_14\_P120170 GCAGACAAAGCACAGTAAACTGGCCACTAAATTGTGTCTGAACTTACTCATCAAAATA

A\_14\_P113699 ATTCAAGTAGGTGATTACCTGTGTCATTCATTGAGATAAAAGGCTGTCTCTTCAGAAGTA

A\_16\_P38116590

AAAAAACTGTTACTGCCACATTTGAAGTGGATTTGCGTGTTAGGACAAAGAATTTCAAGA

A\_16\_P00720459

ACCTGCAGCATAAATGAGATCCCAAGATATCTAGTGTCTTAGTTCAGTGCTTCTAAATGG

A\_16\_P02747039

ACTTTCTGTTACCTAGATCTAATCATGTGTGTCCTAACATCACATTGCTCCATAACAAGG  
A\_14\_P135102 TTTTATTTTCAGACCTAATTAGAGCCAAAACCCTGAATTCCATCTCCTATGTGTGATCATC  
A\_14\_P108905 ACTAGCCCCTATATTTTAATGTAAGAGTTACTCTGCAATCTAAGCAAAGCACCCAACAAT  
A\_16\_P00092670  
AAAAGTGGAAGGTGTTACTAGAACTCAAATGAAATTTACCGTATGTCCTTTCCCTTCAAT  
A\_18\_P13210552  
GCATGTAAGAGACGTTATTTCCCTCTATGGTATGCCTAATAGTTTATAAGTAGCCCTCTCC  
A\_16\_P03188449  
AAACACCTCTCAAATTGTGATTCCATCAAGTGTCTTCTTATTCATGTCCTCTCATGATAA  
A\_16\_P03619080  
ATCTTCTAATCATTTCCTGTGCATTACTTGATCTCTCTTCATTTCGACTAAAACCCCTTCT  
A\_14\_P119591 GTTAGGGTCCAAATCATGAGGAAAAGAGCCTCCTATACTAGAAAAGTCTCCTTGTA  
A\_14\_P114610 ATTTAATTCATAATTGTTTCTTTACAGGTTTCTTTACCTCCAGAAAGAAGAATATTGGCC  
A\_16\_P21616903  
GTCCTTTGCCACGATAATTTTTTAATGAGAAACGAAACAATTCCCATTTCTTTTTTGCAC  
A\_14\_P136239 CATTTCTACATCAGATCCTGTGGCCTAAGTCTTCTCCCTTCCCTTATCC  
A\_14\_P104393 ACAACTTACAATAGGGCATTTTTTTAAAAAGCAAACACTGAAATGTTGAGGTGCCACAAT  
A\_16\_P02840154  
ACATTTGGTAGCAGGATAATTAATTAGAGCATAGCAGATGGAATGATCTTACTGACCAGT  
A\_16\_P16957185  
GGAGTCCTGGAATCATATGTAATCTCATCACCCAATCATTGCTCTACCATACAACTTTA  
A\_14\_P202450 ACAGCATTTCGCAGGTCTGAGCCTATTTATAAACACTGTTTATTCATGAATTTAGCCAC  
A\_16\_P03459507  
AGAACAGAGTTGGGAGAGATTTGAAACTTCTAGAGGAGGACCTTGAATTTTTCTGAAA  
A\_16\_P01866890  
CCATCTATCCTACCTTCTGAAATCAGTGATAATCAAAGCCAAAATAGCATAACAACCCA  
A\_16\_P30952420 AGGCCTGAATTATGTTCTGATGGCTGACGTGGCCAAAAGGAGAA  
A\_14\_P139369 GCAACTCCCCAGAAAGACTGTATTTCTACAGATAAATATTGCATTGAGATGCCAAATAGA  
A\_14\_P137325 CAGTCCCTGGTAATACAAGCAGTGGCAAACCTTGTTGATCAATTCCAACATATAAA  
A\_16\_P17352673  
AATAAATGCCATACCCCTTTGATTCTTCATTGCCAATTAAGTCTACTCCACAGAACTTGT  
A\_14\_P115950 GATTAAAGCATCATGTTTTACAAATTTCCCTTTTCTGGTTACCCACAGCATACCAT  
A\_16\_P16215059  
GAGTTAGGTCATATCCTGCTAACAACAGTCTTATTGATCAGTTGTAACCCCATATGTTGT  
A\_14\_P123215 TGGCTCTTCTCAACACCCAGTTATTACTACTTTATGGCAAGACTTCTCCTTTATTGT  
CUST\_4520\_PI426210822  
TTTTCCATTTTCATATTCAGTTTACAGCTTGGCTGAAGTAGGGAGGTTATGTAAGTGG  
CUST\_7915\_PI426210822 CTTGTACCCTCCCCACACCCTGGGGAGACTTGCTGGTGGACAGCC

A\_16\_P00928470

CTTTCATCACACTATTCAACAACAGATACTCCTGTAAGCAGATTCATACCCAAGAAAAGC

A\_14\_P202497 CTTGACAGTGGCAGAAAATAGGTCATTCCCAGTAGTAGGGATATTAGAGATGTCAC

CUST\_6242\_PI426210822 CTCATCAGCACCCCTCCCAAGTTTGTCTGAGCCACCTGATATAA

A\_14\_P122312 TATAATCAGAGGTTTAAAAATCTATGGGATGTTTAAAGGGAGGTCACATCCACTTACACA

A\_16\_P17958949 ACGTTCCTTAATATACTCACATACTCTCCTACTCTATGTTCTATATGCCATTTAAGTCTT

A\_14\_P135086 CTTTCCTTGATGATCTAGAATTGTCCTTATGAATATCAAGTACTATGGTGTCTGTCTCTG

A\_16\_P36230711

CTCTCTGGAGTTAATAACCATATGGATCTGTTTTGCCTGATTAGAAGGGATTTCTAAAGC

A\_14\_P101676 AACTAGCAAAAATAGAGAACCACATGTGGTTTTTCCGGAGATTACTACTCACATCTATA

A\_14\_P103191 GCAACTGTGGGAAATATAGTCAGTTCACAAATCCCTGTAAAGATAGAGAATAACAACCTT

A\_14\_P104570 ACAGATTATAGTGTTCAGAAAGATGGCATTGATGGATTCAACTTTACAAGAACATCCAT

CUST\_1598\_PI426210822 CAGTGGTGTAGTGGGAAGGCAGCCCTCTGGGCGCCACTCTGTCTCT

A\_14\_P200011 AAGAAGGCCAGCGATGTCAACATCTCCAATGATAGGGCGAAAGAAG

A\_18\_P16628655

ATTGGTAAGGTCTGTATTACTCCAGATTTGCGAATATTCAAAATATGCCCTGTTTGATGG

CUST\_3375\_PI426210822 ACCTTCTGTGTAAAGCATATGGCCCCAGAGGTGACAGCTTTT

A\_16\_P03717971

TCTCCTGAATCTCTAAAGTCATCTCCCAATTTTTTTATACCCTTAAAACCTCAGACAAGCA

A\_16\_P15481125

AAGTCCTATACGTTTTTGTCTCCATATCAGGTATTCACACTTTATATCTTGTTCCTCT

A\_16\_P20408572

CAAGACGTGTTGTGTTCAATTAACCCTTGTGTTTCATGAATCTATAAAGCCATGTTTGG

A\_14\_P109251 GAAACTGCTTTGTAAACAGGGCCATGATGTGAGGAAATGGTATTCTCAGAAAG

CUST\_10004\_PI426210822 CAGGGACACACCGTGTGCCAGACCAGGGCTTGCCGTAACCTAACG

A\_14\_P106677 TATTGTCATACAGATTGATGAATACACAACAGCATTGTGTATATTCACAGGCCCAAACA

A\_14\_P131783 TAGAGTTTCCGCTTGAAAAAGAGTCCATGTTATACCGGGATAAATATAAGGATCTTCACA

A\_14\_P100732 CATGAATACATGCTTTTTGCAGGGTGAATACCTGAAAGACAATGGAGAAGGTAA

A\_14\_P100017 TTTCAATGCATGAGTAGTCATTTTTGTTTTCAATTTAAACCCTAGTTTGGCCCTTGGGTA

A\_14\_P102586 TCAATTATTTTTGAGGCTGAACTCCTGCTTGTACAGCAGAAACAAACATGTTCTTAAT

A\_16\_P40996294

AATCCAGTTTCCAAACTGTAATTCTAACTCTGATCTTCCATGTAAAAGCATGTTCTCCAG

A\_16\_P16684587

AAGCATAAGCGATACAACCTATTTGCAACAACTAAAAAGTTGTATGGGGATATCTGTCA

A\_16\_P00807839

CTAGGAACACCAAATTCGAAGAAAAAGGAGTGTGATTAATTAGCCATGAAGTGACCTAT

A\_14\_P116601 ATTAATTTGTCTGGCTTAATTTAATGGGGACTTCTGGGACCTGCAGAGACTGTAAA

A\_16\_P03810508 AAGTCTCATTCTTTCAAAAGGGAACTTCTGCTGTTTCCACGCCTAACA

A\_14\_P122414 GATAAATCTAAAGGATGGGTAGGATTTAAGTGGTAAGGGAGGATAAAGAGGCTATAACTG  
CUST\_1104\_PI426210822

ATCTGTATTGTCCCAAACAGAAGAAGAACAACAACTTCATCTTAAAAATAGAGGATGATATA

A\_14\_P128267 GCAGATTTATTAAGGTGCGACTGTTTAGCAGAACAACGTAGATTTTTTACAACGCTTTCC  
A\_18\_P22840321

ATTGTTTATGTAAAAGGACCATTTGCCTAATGTCCCTGGAATTTATTTGCTGGAGCATT

A\_14\_P134640 CACACAGGTGAAAAAACAAGCCATTTGCCCTTTCCTCTCTATACCATTTCTTAC

A\_14\_P105210 AAATGTTCTATTTCAAAAGGCAGTTTTCTCCAACCTACTAATGTTTGTGATCTGAAC

A\_14\_P125009 GGACTGTGTGAACCCCAAATACAAGCAGAAGAGACGCAGTTATAAGAACT

A\_14\_P116720 TTCTAAATGAGGTTGACCATGGAAAATTAAGGAGGTTATTGATGTTAGTTGCAGGTAGAG

A\_14\_P129588 ACCAGAAACAAAGAGTATGATCTAAATCAGAAGTTAGGAAGCCAGTGTGGTATAAATGGA  
A\_18\_P19751309

TTCACCTGCTTAAAAACATTCCAGAGTTTACCTTTCTACCTCATTTCCTACAATATTGCC

A\_16\_P01306215

AATGTTACCACCAACTACATAGTAATGCACACTTTCAAAAAATAAAGGCCCTGTCTAG

A\_14\_P132085 GACTGAAATTTGAACTGTGCTTATTAATGGAATAATTAGTCAGGTGCATGCAGATATCAT

A\_14\_P127958 ACCTTTAGTGGTTTCCACTTCTTCTAGTAACACCTGGGAGATATAGTGGATGCT

A\_14\_P124736 GTTCCTTTTTTCCAGACTGACGAGTAAAATAAGTCACTTTTCTCTTATAGCAGAAGTCT

A\_16\_P02985388 TATCCTCCTTAGTCATTGTATTCACTTCTCCTTAGTCATTGTATTCACTTCCCTGTAGTCC  
A\_16\_P18256518

ACTCTTTTTCAGATGTGACATATTTCCACAGAACTTGATTCTCATCTTTGCTATGACTGC

A\_14\_P114133 AAGTTTACCAGATAGAGATTTCTTTGCTTTCATTTTCTGAAAGAGCAGATTTTGAGGGGA

A\_14\_P138094 CTACCTTTGAAAAAGTCCTTCTCCAGCACTGGAAATAAGAGATTCAGCAACATAAACC

A\_16\_P16550701

AAACACACTGTTTCATCCCAATCCTTTCTTAGTATCCTTTAACTGTCACTAAACAACACC

A\_14\_P107049 CTCATATGGGCAAAAAGATCAAAATTCTACAGAAGAATCTGATGGCTAAATGGCTAATTT

A\_14\_P123788 GAAACCGCTTCTAGACAATCCTGTATTATTTAGATCCACATAGAGATACACGAAAACCCT

A\_14\_P200148

ACAGTCATCAATCCAAAAAGCACCAGAAAAAAAGTTAACTTAGATTAAGCCTGACC

A\_14\_P126150 ATCCAACTCTTAGACCATTGCATTTGCAGTAAAAGCAATCGTTTTTATCCTACTTCCCTT

A\_14\_P103779 CTGAACATGGATGCTGTCTACAAGTGTTCCTTTGTATTGCAAGGATGTTTGCAAAAAT

CUST\_6825\_PI426210822

TAGAGACAGTGTTAACTGAACATTTTTTAATTTAATGAGTTGCTTGTACTTAAGAAAAT

A\_16\_P21626151

GGTCACCACTGAATATTATGGTTCTGGTCCTAGATAATGGATAGATAATACTAGGCACAC

A\_14\_P102819 GTTTGTATAAGCCTAGATTTCTGGAAGGATGCACAAAACCTAAAAACAGTGTATGCTTCT

A\_18\_P14134772 CCTTTTGTGAGATCAAATACCTATGCATGACAGGCAATAAGCAGGCTCTTCAG

A\_14\_P113157 ACTTAAACCCTGGACTTGATGTGAACTTGGCTACATCAACAATTTTTACAGCAAATTGTTG

A\_18\_P22841420 AAATGGGTCAGGCTGGAGAATGCTGAGGTTTCCAGGCTAGTGGTTT  
CUST\_4027\_PI426210822 TAATTCTTCCCTGGATGCTGGTGGTCTCCAGAGACACAGGGGTAA  
A\_18\_P16260535  
AAACATCAAAGTTGCTTGAGTTTAGGTTGAAAAAGCAAACCATTCCAATTTCTTGTGCT  
A\_14\_P128980 TGAGTCATATGCCTTTAAGATTGAGACAGACTGGGATAGAGACTCTGTGATCAATACTAT  
A\_14\_P136111 GGTCATGTTACTTACGTTACTTAAATCTGACTCAACCTATAGAGACACACTGTGAGAGTT  
A\_14\_P202243 AAGGAGAGATTTTAAATCCTTAGTGCAATACTTTGGTGACAACCTGGGGCGAAAAGTTA  
A\_16\_P16198118  
CCTCATTTTGTTCAGTTGTTTTCTCCAAAACATTGTTTGCTAGTTTTTTCACACATGCC  
A\_14\_P127626 TAATTTTCTTCTTTTCAAAGATGCCACTAAATAGGCCACCAGAGAGTATCAAGTGAATG  
A\_16\_P00065903  
TAAAGACAGGTTCTATTTTGCCAAGGGCAGTAAAGTAAATCAGTAGTGAGACATGCCATAT  
A\_14\_P126693 GTCCATATGTTTATGATGACAACAACCAGGACTGTTTTCTTTTTACCCTGAAAGTCAACT  
A\_14\_P105508 ATGCAGTAGGAGGAGAGCAAAGTTGGAGATTTACTTTTGCCTCGGG  
A\_16\_P19623915  
ATAAAGCCCTAAATGTTGTGGATCTTCTGATAAATGCATAATTGAGCAAAAACCTGGACG  
A\_14\_P139651 CTAATAGCATTTCGTTATAATAGGGCTTCGTTAACAATATTAACAGTAATCGCTGACCTTG  
A\_14\_P115330 CTGTGGGTATTATTGCAAAGACGGAAATCTGATTCTATTTGCTCTGTAACAGGGTTAAAA  
CUST\_7797\_PI426210822 TTTTAAGGTTATGCCCTGGGCATGATCTGAAACCAGGAGAACAAAGTG  
A\_18\_P13227435  
GAGTCAGATCTTGTCTTAGTCGTATCTTCTCCTTTACACACTAATAATTCCCCATATCA  
CUST\_9113\_PI426210822 CACAACCTGGCCAAGATTTTCATTCACCGCAGACTCAGTCCTCATTT  
A\_16\_P02526471  
AATGCTCCTCTATTAAGTCTGCAGAAAATGACATTAAAGGTATTGGTTAAAGACACGGCT  
A\_14\_P128874 TGTGTCAGGTTTACATGCACACCATATTGCTTATTCTGTATTAGAGAAACCATTAGGCAT  
A\_14\_P108866 GTTATGTTAAGGACTTTGTCCTCATTGAGGACCAGTGCTGTTATTTGTCTTGATTTAAAT  
A\_14\_P116843 CTACCTTATTAACGTGAATAAAACCTGCATCCAGAGACACTTAAATGTTGGCCAATTC  
A\_14\_P133447 CTTGGCCCTGCTATTTATTTTTGTATTTATGTCCTTAATCTCTTCCACTGATGCATCCTCC  
A\_14\_P201186 TATCTGAAGACATGAACAGAAGTCAAATACCAGCCATATCAGTAGAGCCTTCCATTCAA  
CUST\_498\_PI426210822 GGATGCTTATTCATGACCCACTGGCTACTCTTGGGGGGATGCTAG  
CUST\_9224\_PI426210822  
AACTCCTAATTTTCAGTCTGAGGTTTCAATCAAAAATGTTAAATTTACATTCCAAATCCTA  
A\_14\_P101913 ACAAACCTAGTAATGACACACAGTGCTTAAATAAGTCTGACAACATAGATGGAAAGGCATC  
A\_14\_P201729 CTTGGCTTACTGTAGGCATCATCATAATTAATTAATTTTCACTGTGCTCTGAAATGCTA  
A\_14\_P123637 GGAGGATGTGAACCTTGTTCTGATTCTAAAAAAGAAATGAAATTCCTCACCAAAGAGGC  
A\_14\_P104489 ACTCTTCTAGTATCCCAATTTTTTTTTTCTTTTACTGCAACCAGTCAGAAATACATCTT  
A\_14\_P202077 ACTTTCTCTAGAAAAATCTAGAGTCTTAGCAGAGTAGGTAAGAGAAGATTCCCTCTGTG  
CUST\_8906\_PI426210822 TCACTGCCTCTCTCAGACTACTTCCCATCTGTATCGCTTTAACTCCAATAAA

CUST\_7678\_PI426210822 TCTTTCATGACCCCTGCTGGATTGACTACATGAGCCTCTTTCAGA  
A\_14\_P130189 TATAGTTTTATATGGATTATAACAACCACCATGTTTGCCTTACTTTAAGGAGTAAGAA  
A\_14\_P117826 ATTTACAAGAGGAGACACACAATTTGCCGGAATGATCAAACCTGTAATTAGTAACAAGAA  
A\_18\_P14341350  
CCCCTTCTTTCATTAACCTTGTCATGTTCTCTTTTTCTCCTAGCATTCTCGATACTGAAA  
A\_14\_P112801 TATAACTCACAGGACCTATTTCTTTGAAAGATTTGTGTCTCCTAAAGACATGGCATTTC  
CUST\_5871\_PI426210822 AGAAGTCTTTGCATCTCACATGGCTAAGAGACAGTACTTTGGTTAGGGG  
A\_14\_P116831 TCCTGAAATTGGTTAGAGCGCAATAACCTAATTTGTTCTCTTTCTTATACTCGCTGTTT  
A\_14\_P108379 CTCTGCTAATTAGGCTGCACATTTGAAATCTTAAACATGTGTAGAATTGTGAGGGATCTT  
A\_16\_P20150944  
CCTAGGTAAAATGTGCAGAATTCAGAAAATACCACACAGGAATTACAGAATTGCCATCT  
A\_16\_P01774538  
ATTCTTCTGCAACAGAATTCTACAAACAACCTTCTCATAGGTCATATACACATCACCTGGG  
A\_18\_P22839045  
AAGAGGAGTAACTCAATTGACATTCTTTGTCATTTAGCAGTCAGTTAATGGCCACTTACT  
A\_14\_P115891 ACATGGGTGTATACGTGAATTTTAGTGAATTGTGTGTAAATGTGAGCAGTGTGAATTTGA  
CUST\_2460\_PI426210822  
GTGGATTTTTTTCATTAACACAGAACTTAGAAAAAATTTTAAATGATGACGTTTGGCCAA  
CUST\_6397\_PI426210822  
GAATCGAAAACAATAGGCAGTCACTAACTAAAATGGGACAGCAAGACAGAAACAGT  
A\_14\_P129147  
ATTAAATGGCAATGCCCAAGGACAGAAAAACCAAATGAAAGAGAAAGGAGATTTCTATG  
A\_16\_P15796264  
AATGCAATCTGTCTTCTAAACATTTTTCTCTATGATATCCATGATAGTCCATCTTCCCA  
A\_14\_P113363 ACTACAAGTAACTACAAGTCTGTCTGCAGGAATATACTAGTGCTACAAACACTGGTTTCA  
A\_18\_P10462427  
ATGGCCATCAATATTAATAACCAGATTGTTCCAAAACGTCAGTCTTAATGTGACACTGTC  
A\_14\_P118437 ACTTGTCTAGTCAGTCCTCTACGGTGTATCAGAGTGGTAATATATCCAAAACATTACAA  
A\_14\_P135517 TTGTCTTGCAAACATCTGGGAGATGATTTCTTATTCTTTACATGACCCATCAAATGTCTT  
A\_16\_P17019764  
CAGAGCCTGAGACACTAATTACTTCTGCTATTGACCATATTGCTCCTTCTTTACATAAA  
A\_18\_P22841045  
GAGTATAAAAGGAATCCTGGCTGGGCATTGAGTGAATACAATCATAAAACCCAAATGATG  
A\_16\_P15434701  
GTAAACTGTCCATTTCTACCAAACACATTGAAACATAACAGAAATACAAACCAGTGCAGC  
A\_14\_P120508 GAAAGTAACAGTGTCTACAAAGGGCCTAGTGGTAAGGAATGAAACAGGGC  
CUST\_803\_PI426210822 CTGTGTTTAAAGTGCCGTGTTACACCAACCCTGACCGGAGATGCA  
A\_14\_P125488 GATGAAGTTCTTTTTGGGATTTGAAGTCTTGATCCTATGTAGCAAATGACACAAAACCTCAT

A\_16\_P03578848

CCACTGTCCTCTGAAGAACAGTATCTTTAATTTTTAGTAATAGATCATTAGAAACCTGGA

CUST\_83\_PI426210822

ACTAAATTTAGATCTCTGGAAAAAATTTGTTTGAGCATGGAAACAGGTTGGAAATATTG

A\_18\_P14793130

AGGTGCAATTTGAGAATGAATCTTTCCTACATAAGAAGACATTGTAAATATGCAGGTGGG

A\_14\_P134259 TCTTTCGATTTAAATCCTCAAGTGTTACAACAGTTAGATAGTAAACGACAGCAGGTCCAA

A\_16\_P18027724

AAACATCTGTGTGTATATCTCATCCAAACCCATTAATTTTCAGCAAATCCTCAAGAGA

A\_16\_P03798818

AAAACTTAATGTGAACCCTTCAAACACAATTAGGTTGATACTGAAGTTCCACACAGTCA

A\_14\_P134721 AGAGAGAATTGGGGAAACACTGCTTGAGAGAAAAATATTGAAATGGTTTTAAAAGGGTTT

A\_14\_P107202 CTTGTATTAGTCCATGCTATCAGTCTTCTTGCAGATTTTTTCACTGAACATTTTTCTTGC

CUST\_3012\_PI426210822 ACACAGCCTTGCCTTGTAAGTCAACTGTTTGTGGCGTTAAACAAGT

A\_16\_P17990584

CCAAATCACTTCAACATGAAAAATGCACAAATTTTCTATCCTCTCTTCTGTTCTACTGC

A\_14\_P201555 GACACAATTCAGTAATCTTTACAGTGCATTATTTATAAGACGCCACAAGTCACACAG

A\_16\_P17082781

AAACTTCAGTCTAACTTACCTCTTTTTGCTAGGCCTTAACCAAAAGATCTACTTTCTCCAT

CUST\_628\_PI426210822 TACCTGCAGATTACCCTCAAACATGAGACAGGTTTCAGAGCGAGG

A\_14\_P136985 ACAGCCTGCTTCTTAATTTTTAAAATGAGGATGAATGGCTTCTTAGAACGTGTTCTATT

CUST\_5609\_PI426210822 TAGGATTTGGGTCTCAGGGAATGGAGGGGCTGATGGATGCTAAA

A\_14\_P107744 TCTTCTCATTGTTGAGATGGCATCTCACAGTAGGTGAGGAACTTTGTAGATTTAATTCT

A\_14\_P115675 GATTAGGGAGAAAAGCAGTTTGAATCTAATATCTAGGAGCAATCATTTCCAGCAAAACTG

A\_16\_P18871056

AACTGGTGTGAATTTAGTGTGACTGATATGTGATGTTAAATGTCCTCCATTGAAAATCGG

A\_16\_P03160663

TATCATAGATCCAACATCAGCATTCATATTACTACCTTTGAACATACTAACCCCCAGTGG

A\_16\_P00426002

TAGGCACTAAAGAAGCATATGCTGAAGGGATTGGAATGAAATTGGATCATAGAGAGCATA

A\_14\_P124630 TCTACCAAGTGTGTGAACCTTCAAGCAATACCATTGCCAGTGTAATTTTTCTCAATCTC

A\_14\_P127753 CTGACCTAAATGCAAAAGCAGGAAGATGGTGTATCTGATTATCTTGAAATGCAGCGTTC

CUST\_798\_PI426210822 CTTATCGTAGGTTGTGACAGAATGCCTTTTTCTCTTGCTGCAGGGTC

CUST\_2895\_PI426210822 AGGCACCTCTCAATGTCTGCATATCTTGGGCTGAGTTTGTTAGCAG

A\_16\_P01638976

TCAGCGTTGATTTTTCTTCTCTACATGAAAACACTATGAGACTCTCATTTGACTGCAAA

A\_14\_P122246 GACATGACTAAAAATTACTGAATGACTGTGAATAGTTCATGCCTCCTTAACTCTGTTTCT

A\_14\_P120780 ACTTTTTAATTTAGTAACTCAAACTTTTTAATTTTAGAGTGTGATGTGAAGGATTATGG



A\_18\_P16702351

TTTTCTACAGAGATAACAACCAATTGCATTTCTTTCTTAAGAGCCAGTGATGAATGTG

A\_16\_P00010327

AGCACTTAACACTTAACAAATTACTCCTGATCACCAATACCTAGCAGATGAAGCATAACC

A\_14\_P106633 TAATAGAACAATCATGCCAACAGTAGACAAATGGTGCCATTTGTGTTGGAAAAGTAGTAG

A\_16\_P20548193

ATGTTGCTTTTCATACTTCACCCTTCAATCCTTATCTTCTCTAATTTATTGGACAGACCC

A\_16\_P01897561

AAGAGGTCAATCGAAGTGATGTTTACCACATTCTCTCTAAATGAAACTTACTCTGCATGT

A\_16\_P19401237

AAAAATGTGACAAGTGATCTAAGAAGAGGACAGCAGTAACTGTTACATTTGGTAATCCT

A\_14\_P132009 GGGAGATCTGCTTTTCAACATTTACCTGAACCTAAGAACACTGTAAGTTTCTATGTCTCTT

A\_14\_P104481 CTGCATTTTGTGTGGGAAAGAGTGAAAATTCTTCGAGATTATGCTGGCCTTATACTTTTC

A\_14\_P101781 ATTGGGGGAAGTTAGACTAGAAAGTATTATTATACAGGGTGATTCTTACGAAAGAAGACCC

A\_14\_P121229 TTTAACTTGTTCCTTTTCCATTTATTAGCCTACTCGCCCTCCTAATGGTCAAGGAC

A\_16\_P19050931

AAAACCATCTTGGTATGACTTCATTTTCTTAGAGACACATGATTGATCTGGCTATTGGTG

A\_16\_P17033806

ACTTGACTCACAACCTAACAGTCTGTATTATAGCACTGACACCTACAAATTTACAATGGCC

A\_14\_P201292 TGAAAAGAATGATTTTTTCATTACAGCCCCCAAAGAATCTTGTCTCGTTGGCTAAAAGTA

A\_14\_P111508 CTAAAATAATAAACTTCATGTGAGGCAAATTCACCTTAATTATTGCCCTTTGGGGTGG

CUST\_573\_P1426210822 GCTCTCCCTCCATTTACTGTAACCTAGGCTCTCCAGGATAAAAATTATTATTGCC

A\_18\_P14138687

AAGACTTTATAAGAGGTTAAAAGGGCAATTGAAATGTAGGATTATTTTAAAGACCTACGT

A\_16\_P01159675

AATTATGCTCCCTGTTTAAACCATCTAACTCAGATTAACACTATCTTACTTGACAGCCACC

A\_16\_P17717747

GCAAATTGAAGCCTGTAAAGTCCTTTTCTAAATCAGTTACTTGTCCAACATTTGCTTTCC

CUST\_6193\_P1426210822 CTCAGGCGTAAGCACAACCCATGACTCTGGGATGCCCTCAATTG

A\_14\_P126523 GCCTCTCGCACTTTTTAGATATTAGTGTGTTAAGATGGTAGGTTGTTCCCTTCTC

CUST\_8360\_P1426210822 CTTCTGACCAACTAAGCCCTGCTGTACACCCTGCTCTTGATTT

A\_18\_P15390907

AAAGTGTAGAAATTTGAGCATGGAACAGTATTGAAGTGGAAGGTTCAATGGTTACCATC

A\_14\_P123721 TACTGATAAAATTCACATTTGGCAAATGTGGCTTTATCATTTAGCAAATGGGTCCCTTGAT

A\_14\_P128349 TAAAATGGGGGGAAGGATTATTATTCATGTTATTTTCCCTGCCCAAGACTTTATTTAACC

CUST\_7876\_P1426210822 GAACAGGATGGGCCAAAATGGAAGCTGGGATCTTAAGATTTGAGACTT

A\_14\_P127612 TAGACTGGTTTTGTATTTAAAATGTGTCAATTGCTAAGAAATACCTGTGGCTGGTCTGTAAG

A\_14\_P119778 GAGCAGATTTGAAACAATGTTCCCTTGTGCTTTCTTATCTGCCCTTTTCTTTTCAATTTG

A\_16\_P17716866

AAAACCTCCCCTATAGAAATGCTTCGAAAGAAATCCATATGCTCTGATAAAGTTTGGCAAG

A\_16\_P18388086

AATATCTAGTTCTGTCTCTTTGTAATGGGAACAAAAACACTGAAACTGAGATGCTGACTG

A\_16\_P03609266

CCTCTCAGACTTTTCCTATTCTGTAAACAGGAGATTTTAACCAGGGTAACAACACTTTAA

CUST\_9677\_PI426210822

ATTCCCTTTGGTGTACTGCTTCTAGAGGCAAAGTTTACTGCTTTTACTGTCATGAAATAGA

A\_14\_P139312 ACAAAGTCTCAAATGTTGATCCACTTGGAGACTTTGAACAGCATATTGCTTATGGATAC

A\_14\_P121086 TGTAGGTTGTTTGTCTATTTTCAGAAAAATGTTTTGCACGTGAAAGAAAGAATAGCCCTTAT

A\_18\_P17038253 TTCCTGTCATCGAGAACCCTGAAATAACCCCAAGTCTTTCCCTTGAGT

A\_14\_P200378 ATTTTTGATTAGTTCGTGCATGGAGATTTGTTTGTAGATGAGAAACCTTAAGTTTGCACAC

A\_14\_P105597 GAGCACTTATTTCACTCACATCTTTACACGAAGATTTGGTGGGTGTTTACTTTGTTTTTA

A\_14\_P100787 GGAATCTACACTGCCTATCAGTAACACTTATCCACATACTTCTAGACAGTCATAGTGATC

A\_14\_P105905 CCAAACAGGTTATACATTAAGTCTTCAGTAAATATTAGTGTAAATGTATGCTGGCTGGGGG

A\_16\_P17759242

GCCTTTCTTCCTCTTCAATATTCAATAAATGTGTCACAGAACTACAGAAACCTTAAAGGC

A\_16\_P20830297

ATTGTTGTGAATTACCATGTAGATAGATGGAGTTACACTAGTAATTGTAGGATCCCTCC

A\_14\_P103206 ACATTGTTTATGCCCAAGTAAATTGATTTTCCATGCTACTAGCACATCCTAATCTGTGTC

A\_16\_P39741668

GACAGATCATCCATCTTTTCATCTGAACTCCGTATCTATAAATCCTGATTATCTGCCCAT

A\_14\_P126876 AAATCAGAGTTAGTGACTGCACTGCCTTCGAGAATATTTTGATAAAAAGGATTTTGGCAT

CUST\_331\_PI426210822

CCAGTATTCTTTGTCTTAGACCTTGAATGTATTTTTTGCTGTATGTATGCTTGAATGTGT

A\_14\_P133091 TTATACATTCCCTGAAACATTTTCATCTGTATCTGCCCTGTATTTTTCATGTGATATATAT

A\_14\_P110859 TGGTTTATATAATACCAAAGTCACATACAGGTAATTTCCACCATTGAACCTTCCCTGTTG

A\_16\_P18051015

AATCACTCTACCACGGATAAATTATTCCATACTAAATAAGTTGAATCCCTTCCAGCA

A\_14\_P139000 GATGTTTTGGATAATAAAGCATGCATGTGTTTTTCATATACCATTGCCTTGCAGATCAAGG

A\_14\_P130008 TAGTTAGGGTCTATTTTATATTTTATTGTCTCAGACTAAATTTTATTATGGCAGTGTTTCA

A\_14\_P132808 AAACCAGATCAGTAAGTCATTAATAAATACTAGGTTGACGGGCACTTAATTTGACCTT

A\_14\_P122240 ACCAGACCAATAGGTTAATTTCAAATTTTGTGTTTGGTTCAGGCTCATGATGACTTGTTAA

A\_14\_P127888

GGATCAAAATGAAGCAGAAGTAAAGAAACTAAGATTACGAGTGGAAGAATAAAGCAGGG

CUST\_731\_PI426210822 GCAGCCTGGGTACCTGCACCATTTGGGAGTCTTGCTTCTCTCACTC

A\_14\_P110700 CTTCAAAAGCAACTGTATTAAGGGAGTTACAGATGGATATATACAGTAAAATTGTTTAA

A\_18\_P22840675 TAAGTTCACAAGCAGGTGACACACTGGCAGATGGCAGTGTTGAAAG

A\_16\_P03200617

AAATGCCAGTTATTGCTATTCCAGTTACTTTAAGAGACTAGATCATCCTCAAACAGCAGC

A\_14\_P125144 ATAACCCTGCTACATTAGATGACCTGTAGAACATCTTTAATGATTACCTTCAACTCAGT

CUST\_5504\_PI426210822 ATTATAAATGAGTAGATCGGAACAGGGAGGACAACACTGTGAAAGAAAGGGC

A\_14\_P128593 CAAATCCTCTTCTTCATTCCCTTCTTCTACATTTTCATCATTTTCCAAAACCCTCTGAAA

CUST\_1141\_PI426210822

CCATTTTGTGTCCTGGTAATTAATGGTAATTTCTGTTAGTTTGTTTTTTAGGGTTTCTAA

A\_18\_P22839950

ATAATAATAAGGAATGGTCCTTTATCCAGGACCTCAGACTTTCTCAGTTACACAATAGCC

A\_16\_P02022430

TCGATACTTTCCTAACTCCACTCATAACCCAATAATGCACATTCAACTCCTTAGTAGATC

A\_14\_P111294 CTTCACTGGAATGCATATAAATTTCTTTGCTTTGCTGCAGATATTTTGCTTGCTAAGCA

A\_14\_P109653 CTTTTTTTTGTGTGCTAAACACAAAAGCCTCTTTTTGGTCATTGCACATCAAAGCATTTT

A\_14\_P101790 CTACCATGGTCTACAAGACTCTCTTCGCTCTTTGCATCTTAACTGCAGGTAATTG

A\_14\_P122346 ATATCTTCCCCTTAATGATAAAATCAGGATCCCTGATATATTCATCCCAAAGCAAACC

A\_14\_P138318 AATAACTGGTGGTGAAACTTGAGTTGTCTGTCCTGTAAGTCTTTACTATTAATTGGTTT

A\_14\_P138619 CAGGCAAGTGGGGCAGAAAAGGTTAAAATCACATTTGATTACAGAAATTTAGAAGATGT

A\_14\_P105762 AAGAATCCTTTACCTGACCAGTTTTACTGCTTCACTTCTATTTGAATTCCCAATTTCTTC

CUST\_6589\_PI426210822 TAGATGTCCCTGGCCTGATCCCTTACCCTTTACATATAAGGAAAGGAAG

A\_16\_P20781923

TTCTATAGGAAAAACATGTTTCACCTGATAATATGCAGATTTCTATCCCCCTTCAACACC

A\_14\_P110707 TCAGACCATAGATGTCTTGTGTTGACTTGTCTACTTTGCAGTTTACTGAGAAAAGTTCA

A\_14\_P119719 TCCTGAATCAGTTCCCTTGAAACTGTTTTCCAAGCAAATTTCTCTGAATTTGAAATAGCGAT

A\_16\_P18928713

ACTTCTCCAGAGAATGTGTATCAGGTAACCAACAATATAAGAGGTAATAGACAGCATGGG

A\_16\_P01352856

GGATCTTTCATCTAAGAAGAGACACAGCATACTATACCATGCATGTTAATTTCCATAGCC

A\_14\_P129305 AACTCTGCATTTGACCCAGAAAACATGTCAAATCCTATGATCTTGTCTAAAGTTCAACAA

CUST\_8212\_PI426210822 CACCCACCTGGTAGATAATCTGAGAAGTTTGATGACAAGTTTAAGCCCCATAAT

A\_14\_P200075 CAAGAACTGAGATATCTTGATTCCTAATTACCTGTGTTAATTCAAACTACATTTGGGGGG

A\_16\_P18136434

AATGAAACCTTCAACATATTCTTCCACTGAAAAAGCCAAAGTTCCATTTACAGACATGAAG

A\_16\_P16278195

AAAACACTAGTTGTGGATCTTCACTAACCTACCGGAAATTGATTTTCTTCTGTCAATTCA

CUST\_3230\_PI426210822 AGCTACTGTCTAGGCCCTGGGGATGCCACTGTCATCTTCCCTGAC

A\_14\_P123941 GATTACCTATAACAACACTGAGAGTTGATTTTTTAGTATAACCAGTCAGGCAGGTAAAAGGCG

A\_16\_P02394674

GCCTAAGCCTTATTACTCACATGAATCATGACGTTTAAATGCATTTACTAAGACCTTTCCA

CUST\_2170\_PI426210822 GCAGAGGTTTAGCTATAACTAAGTGGGCAGATGCCAGAAAGGAAGGAA

A\_14\_P131661 CTGGTTTCTGTATCCAAAGACATGAAAATTATGATGAACACATTTCAAACCTCCACTCCA

A\_16\_P18192770

AATTGAATCTTCTGACAAGAGTTCCTACAGATTCTCATTAGTCCAAATTGTTAGCCCAG

A\_16\_P19531818

ATTTTGCACATTTTCTCGAGTATGGGTAAGTAATCAAGTAATCCTACATACTGGTGGCTG

A\_14\_P127535 TTTTCTTTCTCTCTCTGCTCTCTCTTTTCAATAACAGCAATAACAAATCCCTAGCCTTG

CUST\_8502\_PI426210822 ACCATTTGGTTAATGCTGTAAGAAGACCTCTTTGGAGATGGGGAAGAGTTAA

A\_14\_P128893 ATTCTTCTAATTTACTGTGATTTGTTAATGGATGAATTGTATTTTGCAAAGATAGTTAG

A\_14\_P135954 CTATTTAATCCAAATTCATGGGATGAGGCATAAAGAAGATGGAGGGGGAGATTAGAAATA

A\_14\_P106323 CCAACTGTGTGTGTGTTTTTTTTAAGCCATAAAAATATCCACGATGTAGGTGGTTCATTTT

A\_14\_P105963 ATTTTGATTTCTTTTGTAAGCCTCTTCTTTCCACAAATACTATGACTGCTTTCTGGCCAA

CUST\_1748\_PI426210822 TTCTCATTGCATTCCTCCTCCCTCCTCACTTCCTTCTCTGCTT

A\_14\_P115873 CCATGTTTCATCTATCCCCTTCTGCATTCATTATTTTAATAGCATCCACATAAGACCACTT

A\_18\_P14362604

AACCCAGTTCTATCATCTATTACCCTATGTTGTTTTGTTCAGTTTCATACAGTCCCAAAC

A\_14\_P130386 TCTGTAGCATGGAGGGAAAGATAGAAGATGTGGAATGCAACATGTTTTATGTGTTTAAAG

CUST\_4252\_PI426210822

AATAGCAGCAAACAAACACCATAGTGGTGATTTTCACTCATGAAATTATTGTCATGGAG

A\_14\_P122968 GAGTTTGTAGTTCCCACCCCTGTAAGACTTGACACGTAGTCTTCATTTCTG

A\_14\_P104735 CTAATCCCATTACAGTTATAGAGGTAACACTTCCTAATCCATACAGGCTTGACTGTTA

A\_14\_P114459 AAATATCCAAAGCCTGATGCCAACCATAAAAAGTGTGATTGATTCACCTGTAAAACCTCT

A\_14\_P112603 ATATGTTTCTCTCACCTGGGTTTTCTTAGCCCTCTACTTTTCAAGACACCAA

A\_14\_P101436 GGAGGGAGCCATCTTCAAACATAAATTTGGTGAGTTTAAACAATCAGAGATTTGAAAAACA

A\_16\_P02334544

AGATTCTTTGATCTTGGCTTTCTGATCTAAAACTCTAGTTACCAACTTTAGCCTTCTCCA

A\_14\_P102032 GGAAACATATTCTCAGATTGCCATTATCTCATTATCCTCCTAAAACCATCTTGGCTAATG

A\_16\_P21190577

GGCACCAGGTAATAACCATAACTGCTACTTAATATAAAACAAATCCATTTTCTGTCTCT

A\_14\_P100516 CCCCTACTAAAGAATTCAAGAAGACGTTCTCTTTCTCAGCGCTTTGTAAACAAAT

A\_14\_P116659 AGAATCCATTAATACAGGGAAACATTCTGTTTGCTAAGACATTTGCCTTAGCCTTTCA

CUST\_9670\_PI426210822 ACATGTGAGTTGCCCTTCACACCACTCCCTAACACTGCCCTCAC

A\_16\_P02726077

AAAATCGCTTGTATTGCTTACTCCACAATTTCTTTGAATTTACCCATCCTAAAAATAGAT

A\_14\_P136821 ATAAACCTTAGCCATTTGGCCCCACTAGATAGTGTAGGGATCTAAACTAACTAGATAAC

A\_14\_P132622 TTCTTTCAAACATCATGGCCTCCCATCCAATCAACATCATCAAATTACATGTGTAATCAA

A\_16\_P15704633

ATACTTTAAAGTGAACATGCATAGTTAGCCACAAATCCCATTACTCTCCAATTCCAGGTT

A\_16\_P20204985

AAAAAAACCCCTCCAAATCCTAAATACCGCTTTCTCATAATGCATTAGGGGTTTGCTTTTT

A\_16\_P20171527

GAAGAGAAATATCAACAGTGTGAGATTTAACCGCCAAACTACTTAATATAACTTCCGCCC

A\_14\_P131822 ATTTTTTTCAGGCTTTCTGAAACCTACATGTGAATCATCGGAGGATATTTGCTGAATGAA

A\_14\_P125464 CTAATTCCTTAGTGAAAAGTCAGATGGCAGGGGTCAAAGAAGTTAGAAACATTCATAAG

A\_14\_P100478 GAACAAATTAACGAAGCATCCACAGATCCCTCAAACATTTTAAAAGGTCAGTCTTATGG

A\_14\_P110166 CTGAAAAAGACCCACTTTGGGAACATTCCTTACCTAACAAATCTCAACAATTATAAAAGGT

A\_14\_P117282

GGGAAAGTCCAGGAAAGAGAAGAGTGCTTAAAAAAAATTTAAACCTTTGCCATTAAAGC

A\_14\_P108069 ATTTGTAAATAAAAATAAAGTCTTTATTCTGTTTTTCTTGAAATGGCTTTGTAGAAACA

A\_16\_P00685406 CAGGAATCACCCCCACCCCCATTTTTGTTTAATGAACTACTATGTCCTTAAAT

A\_16\_P18420486

ACCATGGATGTCTACAAACCATTACTGACTTTCTCCATAGAACTGCATCAAATTTTACC

CUST\_6563\_PI426210822 TCGTTTTACTATTTACAGCAGGACTGTCAGAGAGGTTGGTCTTTGTGGA

CUST\_8641\_PI426210822

TAGCTACTGACCTCCCTAGCTTACTTTTTCTTCTATTGGACAGTCATTCTAAAAAACT

A\_14\_P125194 TACCATATTTGTCCAAGAAGAGAAATACAAAAGTATCTGCAATGGTGATGAGAACGCCAC

A\_14\_P108393 AGAGGCAGTGTGCACACACAAAGTAGATCTGCTACTGCTAAATTAATCATGTATACTTGG

A\_16\_P38766360

AATTTTTACATTCCCTTCTATGCTTCAAATTGTTGATGCCAGATCAAGAGTTCTACTGC

A\_14\_P133939 ACAGTTTATCCATTAATATTTGCTTGAGGTGGGATAGTGCTTGAATCCTTTCTTTGCAT

A\_14\_P134582 TAAATTCCTTGCCTTGACTGAAGATGGCTTGAGATTCCATGAAAAATTTTAAGCCTGAGAA

A\_16\_P03593313

AAAATTCACAACCTGCTAAAACAGTGTTCTTCTAGTGTAATTTTACCCTTAGAGACCTG

A\_16\_P20064872

GGCTTCAGAATTTATGGCAGTGGTTGAATTTATTCCAGAAAATTTGTCTCATGATCTGTC

A\_14\_P127190 ATTTTTAAAAGACATGATGAAATGATGGTTGCTACGGCCATAAAGAAAAGACACAGAGGA

CUST\_10433\_PI426210822 CCGAAGACATTTACATCTTTATCGCCTCGATCAAGTGTGGAGTCAC

A\_14\_P134036 GTAGTGCAGAATGTAACAAATCTTCTAAATGTGGTTATTCTTGGCTTTCTGCTCATGA

A\_14\_P135098 CAGATCATAGAGTTTGTGAATGTAGCGTATATACATCTCCTCCTTGTTCAAGTTCAGTCTT

A\_14\_P135454 CACACCTCACAGTGTTAAGATTTATATTGTGAAATGAGACACCCTACCTTCAATTGTTCA

A\_14\_P123659 CTTCAAAGAAAGATGCATCTAGTCAGTCTTCTTTACGAAAAGCAGTTCCTGTGTTTTAGA

A\_14\_P123394 AACTCTAAATTCTACGCAGAACTTATCAATCCCAGTGGACAATGTTGCTTTCTTCTCTA

A\_14\_P123554 CTAATAGTAAGTGCATGAGCCTCCATATGATGAATGGGAATGAATGGCTTTTTTAACTGT

A\_14\_P131250 CTGTTTCGCTCTAGTCCTTGTAATCTTGGCCTGTATATACTAGAAAATGGTATTTGGC

A\_14\_P119069 CTCCTGCACAGATATGTGGTTGTTTCGGTAAAACACACATTTATGAAATTCATCACTTTT

A\_14\_P132464 TGGTTTCTAGGTCATGCAGTTTTTGAATAAGATGGCTGGTAATGAATATGTTGGATTTCAG

A\_16\_P02019303

TGGGAATATGCATCTATGTGTTTTACTTTTCAGCAGATCAGATCTTACTAATCACAACCGA

A\_14\_P131974

ATTTTCAGATGATGAAATTGAAGGAAAAAGAACTTTTGGACTTGGAAAGAGAAACTGCACACC

A\_16\_P21047371

GCATGCCAGAAAAAATATTTTACAGTAACTATGGAACACAAAAGGTTTATTACATCCATAA

A\_14\_P104233 AAGACCACCACAAAATCTAAAATCCATACAAAACATTTATTCTGTCCCTGCCTGGAG

A\_14\_P123608 TGGTTTTCTGATTTTCATTTATGTCCCATTCATAAGCCATTTTAGGGGACTATATTCCATA

CUST\_3758\_PI426210822 CTATAGTGTGTCTAGACTGGGGTGGTGTAGTGGTCAGGCAAA

CUST\_457\_PI426210822

CTTGCTTTCAAGGGGTTGCATGGAATTTTAAACAACCAAAAATGAATTTTCGTGATAGTA

A\_14\_P116670 AAACACTCATCTCCTCTGTAATGATCAGATGAACTCATGTCTTTCTCAGAGGACAATAAA

CUST\_5288\_PI426210822

GCTTCAATTTTAGAATTTTCAGTTTGTAGCGTTATTTTTTTTAAAGCAGTAAAATTTTCAGC

A\_18\_P22839787

TTAATTGTTTTGTTATATTTTTTGGTGGCCTCCTACACTATGGAAGACTTTCTGAAAGCCC

A\_14\_P107545 GGAGAAATATTTAATAAAAATCAGAGTCGAGAGAAAAGTCACTTGCACAATTCATCTCCTAC

A\_16\_P01419774

AAAACATCTGCAATTGAATATGCAAGCCTTTAGAAAAGAGTATCTCAGGTGTATTTCCCC

A\_14\_P200190 TTGAGGGAGTCAGTAGAAGTAGTAGATAAGTTTTTATGATCCAGTCTCCTCTTTATGCAAG

A\_14\_P126816 CTACAGACATGAAGATGCTTTTCTGTGTTACAAAAAAGGATAGTTTAAATAATTCCTGC

A\_14\_P109117 CTCTATCTTGGTTTGTGTTTACTCGTCCGTAGAGAACCACGATTTATCTCC

A\_14\_P103834 AGCATCAGTTTTGGAGTAAAGAGCATTGGTAAGGATGAAATTTAGTGGTTAGTTTTGTGT

A\_16\_P18148837

TCTATAACACTGATGGAAAGAGACAGTAAACCTGAGGAAGCACAAAAGATAGGATCATTT

A\_14\_P132708 TGCCTTTGCCTTTTCTGTCTCTCCACCTCTAACCATAAATACAATTAGGTAAAGATTACT

A\_14\_P136578 GTCTCGCTTAAAAACACACACAGATCATGGCGTTACTAATTCCTATAGAGAGTCCAT

A\_14\_P135912 TACCCAAACGTTTTAGCAAGTGTGTTGAGAACAAAACAGCCTTTGAAACCAAAAATCTTTT

A\_14\_P127785 ACTGCAATCTCAGTCCCAATCTGGAATTCATATTTAGTTCAGTAGTTAACTTCTTCTT

A\_14\_P101146 CTAACCTTATGTAAATCATATTTATGCTAATTGAAGAGAATATATTTACCTTCAGGATAT

A\_18\_P10522842

AAAAATCTTCGTGTTATGCTAGAATCTGAGAGAGAACAGAATGTCAAGAATCAGGACTTG

A\_16\_P15001594

TACGCTACAGAGCGTAAATTCAGATTTAGAGATCTTATGTTCCATCATAAATTGGGCTGG

A\_14\_P200393 AAACCTCTCACTGCATCATCATTGTGCGAATCAAGTTTACTCAACAAAACATTGGTTATT

CUST\_7187\_PI426210822 AGTTCATTTTTTACTCTGGTTCCATCTCCTTCCCCCTGCACAC

A\_14\_P111506 AACTTTTTTAGTGAGGCAAGGGGCCCATTTCTAACGGAAATTGCTTGGTTTTATAG

A\_16\_P20390889

AAAAAAAAAAAAAGGCTTATTGACTCTTAGGGACCTTATCTGAAAGTGTCATGACCATGTCT  
A\_18\_P14135520 TTCATGACTATCTGGAGGAAAGAGAGAATGCGTGTTCTTAGGCCATGTTG  
A\_14\_P115837 CCGGTTTTGTAAAGATTTAAGTGAAGTACTAGTGATAGAACAAAAAGATTAAGTGGAGTAGG  
CUST\_676\_P1426210822 GGGCTGCGGAGGAAGCCACGATGTTCTGTAAACACATAGATACAA  
CUST\_8305\_P1426210822 GACGCAGCCAACCTTCATTCAGCTGGATGACCTGGAGTGTCACTTT  
A\_16\_P20232737  
GGCAGTTAGAAATGTGGTTATAGTTTTCTTGGCAGATAATAGTTGATGTCTCACAGAAACC  
CUST\_3396\_P1426210822 GGGTTATTACCTCCCACAGGACTGTTTAAAGCTCTGGAAGTTTTCTAC  
A\_14\_P106973 CAAACACACAGTTTCTGTGAGAGCAAAATTTGTCCCAGAGTTCAGATTTCAACAATTA  
A\_14\_P128964 ACTTTAAAAAATAGAATGGTCTCCTTTTGAGCAAATCTGTTTAGACTTAGGATTAGTAAA  
A\_16\_P18389300  
AAGAGTCACCACAACATAACTACTACCTTTTTATCTAACTTGAACAACATAACAACCTCTT  
A\_16\_P01246243  
AAACGTCTTCAGTATCGATTCTACCATCTTCTACCAATAATCTCCTGATTCTCCATTAG  
A\_14\_P115383 TGCTATATAAAATCTTGTCAGGTTGATGTAAGTTACTGGTTCAGATCCCATCTGTCAG  
CUST\_1379\_P1426210822 GTGGAAGGTGTGGAATGTGAACTGTCTAATCCAATAACACCCACTAACTTTC  
A\_16\_P17061801  
ACAGCATATTCTAAGTTAACGCCTTTCATGATCTAGTTACACCTGACCTAATATGTTCCA  
CUST\_8367\_P1426210822  
TCTGAATTGCTTCTCAGAGTTATTTTATTTTTCTCCTTTGCTTTTCGTAATTGGGTAGGA  
CUST\_10294\_P1426210822  
TAGCAAGAATTGCATACATAAAAACTTGAGCACATGAAAGCCACATGTAAGAGTGAGTTC  
A\_16\_P18849067  
AGGTATTCAACAGTAGCAAGTTACATCATTTTCAGAGTAGTAGCACATCTGTTTCTTTGCC  
A\_16\_P00898004  
GCTCGTACTAGAATGCCAACTGAATTAGGTCATTTCTCAATCTAGAAGATGCTTTTCC  
A\_14\_P125992 TCTGATGACAAATGGCACACTATGTCTTTTAACTGATTGCAGACCACAAATGTTTTGT  
A\_16\_P18194457  
ACAGCCATACTGCCTACATTTTTCCATCGACCCTTAACTATATTCCAAATGAACAGTATT  
A\_14\_P139313 ATGGTTCACCTATCGTTTGAAGAAATTACGAAAATTAGTCCTATAGAAGTAAGTTGGAAA  
A\_14\_P102019 CTTACTCTGTCCATTTATCCACAGGAAAGTGTATTTTTCAAGGAAGGTTTCATGTAGAGA  
A\_14\_P105633 TGAGCCCTGAAGGTAATTGTCTTAAAGCAATGGTAATATTAAGAGAAACACTCAAACCTGG  
A\_14\_P123349 ACTCTCTTCTCTCTCTCTACCTAGGTCTCAATTTAGTGATGTCTCCCTGTT  
A\_14\_P101778 TGAAGATAATAATTTTATTTTTCCACCAGTGTCTACTTTATGTGATGCTCACATCGGCC  
A\_14\_P107349 AATACCTTCTGGTTGCTTCAAAGAAGGCTCAGATTCATTTACTGCAAGTATAGCAAA  
A\_14\_P138903 CTTTACTTCAACTTTAAGAGTTATTAACCTCTGAGAAGTAGGAGTTGGTGGCAACGTAGTG  
A\_14\_P135489 ATCAGACAGTGAAGATATAACAAGATCAGCAAATCTAACTGACCAGGTATGCGCTTTTCA  
A\_16\_P17295646

TCCCAAACCTCCAATCATTAAACTTCACCTCCATACCTATTGAAATACCCTGAATCATT  
A\_14\_P103054 C TACTCTTTGTTTCATTTTATTTTCAGCCTTTAGAAAATAAGAGGGCCATATGACGTGGCAAA  
CUST\_3097\_PI426210822 CTAGGAGACCAGTGATGGTCCCTGGCTTTGACTTGTCTTTTGGAG  
CUST\_1222\_PI426210822

AACAAGTTGTCTTTTTATTGTGACCGAAAAACCTGATGAGTGTGGAATAGTTTGGG  
CUST\_6000\_PI426210822

TTTACTTAGGGCAATAGTGGTAGATTAAAATAGCACACGTTTTGCCAAGCTTACAAAATT  
A\_18\_P14133980

CTTCAAAGAGTCCTAAGACAAATGCAGGAGATAATAAGGGGGCAGACTGTAAAGTTT  
A\_18\_P13409265

GGGCTTCCTTTCATATATCACTACAGAGTTGTGATGGAAAAAATAATGCACCATGT  
A\_14\_P123817 TACTGCAAATTCATTTCCGTCGGAGAACTGGATTCTGGTTCCAACCTATTATGATCATAAG  
A\_18\_P12172336

CCCACAAATCAATGTCATAGCCTCTTTTCTCTTAATGAATATGCCTCCATAGTTTTCTTC  
A\_16\_P16191059

AAGGAGGTATTTTGTATAATCATGACTGCAAGCATTCTTTCTCCAAAGTCTTTTTGCA  
A\_14\_P120884 TTACTCTACTGGAAAACCAGTATTAGATTACTCACCTATCATATCATTCTGATGCTGAG  
A\_18\_P11102566

AAAGAAGTTTACATCCCCATCTTAATGGTAGAAGGCAAACCTAAATTGGTTCCAGATTCAT  
A\_14\_P118095 GTCAATGGCTCTCAAAAATTACCTAATAAATGGTCTTGTAACAGCCAGAAGTGTCTGAT  
A\_18\_P22841632 AAGGAAAAGTGGGACTGGGGAAAAGGCCAGTTATGTGAATCCTCTTAAAATAG  
A\_14\_P139471 AAGTGTCTGCTAGTTATGTGCATGCTTGAATGGAATCCACCTCATAAATTCAGTGTCT  
A\_14\_P106028 CTAATGATGATGGTCAAAGAAAAGATGATCACAATTGAGGAAGCACTTGCTAGGGTAAG  
A\_14\_P200435 CTTGAGGACTTTCCTCACTTAGGTGTATTATTCTAGGAGACTGTCCTTCCTTTTACTG  
A\_16\_P16753917

AGTGGTTCAGATGTCATTAATACTTGTACACAAAACAAAACCTTGATGAACTTCATGGCAG  
A\_14\_P103734 GCCTTGGCATCCTCCGTGGAAATGATATTTTTTATTTTTAGCACTATGGAGAGAAAGAAAC  
A\_16\_P16763906

ATGTGGTGTATCTCGTAATGTCAATAGTTCAACAGTAACATTCAACTGAACAAGGCCTAA  
A\_14\_P130823 CAACCTGATATTCAGCCTATAACTGGCTCAATACATAGCCTTATTTCTAAAATCATATT  
A\_14\_P128387 GCTGTGCAGACCAGTTTATAAAATCCAGAGTGGCTGCATGTAGAACATTTTTTTAAATCA  
CUST\_3300\_PI426210822

TAGAAATCTGTGTGTGTACCTCCTTTTTATTTTATGCAAATAGTAGTATACTGTGTGCACA  
A\_14\_P110889 TGCCACGTTTGTGTTTTTTTAAATTTTTTTGCAAATCATGGTGGAAACTTAGGGTCTTCA  
A\_16\_P20049786

ATCTTTCTGATCCCAAACCTATGTTGAATCCTTGCTATTGCATGAATGCTGAAGATAGA  
A\_14\_P105131 CTTACTGTCTCCATGGTCTTGGAACTACTAATTTTCTTGGGAATAAAGAAAAGAGATTGG  
A\_14\_P139054 TGATTGATTGATACGTTAAAGATTATTTCTCCTTCCTCAGAATGCTACACTTCGCTCAT



A\_16\_P16507975

TTCTACGATTTGGCATAGTCTATGAAGCAAGTAAACACCAAAATCAACACATTTCTGTG

CUST\_161\_P1426210822

GGACAAGAGGTTTCAGTTTTTCAAAGTCTCCATTCCATAAAGCAAATCTACATTTTGCAT

A\_16\_P01894435

AGTTCCACTGTTAGGTTTCAGAAACATCATTTCATAAGGGTATTTCAGAAGATAACGTCCT

A\_14\_P112247 CTTTGTTCATGTAAACTCACTAAACCCTCCAAAATGAAGCCATGAAAACATGAACAGAAAA

CUST\_10112\_P1426210822 AGCACCTTCACTAGGCAAAGAGTAGTAGGTCCCTACTAGGTGGCA

A\_14\_P135469 GCTGCAACTTCCAGATTTCTCAGAAGAATCATTGCCAAGAGCAAGTAAATATTTCTTCT

A\_14\_P138691 ATTACCGAGTAGCATAACAGAAGTAAACCAAGTTTTAAAAAAATGCACCGCAGTTCTGAA

A\_14\_P116756 CCTGCGGCTTTAAACAACCTGTAATACAACCTTTTTGAATTAGTTCCGTGTATAGATAATTAA

A\_14\_P111091 CCCAATCACCTAAGTTACTTGTCTCTGAATTGCCTTCAATTTGTCTTCACTTTCTAGAA

A\_16\_P20459387

TAGAAACACACTTTGGTCTCTCTCTCTTAAAAATGCAAATACTTCCTGTTACCTTTGGAG

A\_14\_P131272 CAAAAGCCTTAAGGGGGTTTCTCTCGGCTAAAAATTTTATTGAAAACACAAGATTCATTC

A\_16\_P15433708

AAATTGATCAACGTGATCCAAACTATGGTTATTTGATTCTATGGAATCCTAACTCACCGC

A\_14\_P134933 CTCTGCACCTTATTTCCCATCTGTGAAATGCCCTTAAACACCCCTTCTAATTTAATATT

A\_14\_P115630 AAAAGATTAGGAACAATCAAATCAACCAGGTATGCATCGTTCTCAGTGTCAAGTTAAACT

A\_16\_P17704453

CCCCATACCTTAGTCATAATTCTTATTCATTATCCATGCTAGAAACATGAGACTCATCCC

A\_14\_P131419 AATATGACATTGAAGCCAAATATGAAGTATTTGATGCAACAACCTGACTTCAGGACCCTTG

A\_14\_P122155 TATAGCACACAGGCCAAACTTTAAGAGTAACAGTGTGGCAAATGAACCTATTTACTCTTT

A\_16\_P36305790

AACACCTACAAACATTTTTAAATCCAAATTTGAGGGCTAGTAGATATAAACGAACCCACA

A\_18\_P21079106

GGTCCTAGTGGTTATGATTCTGCTAATGATAATGTTTGTCTCTTGCTTATGGATAGCCTT

A\_16\_P00375940

AACAGAGTAGCAGGTCTAAAACCTAGAACTCTTGTCTTAGGAAACAAAACGCATAGAGATG

CUST\_10161\_P1426210822 CTATGGCCATGTCTTCCCAGGAGGCCAGGACCTACTTGCTCAAG

A\_14\_P103058 ACCATTTGATTCAGAGCAGCATAAAAACTCAAGACACACATTTTCATTCAATGCACTTTC

A\_16\_P17983225

ATCTATAATATGGTTTTTTGGAGGATTGCTGAGGGACTCAGTAAGAAACAATAGTAGGGAG

A\_14\_P107588 CTGAAGGCTGTCACAGGTTGGTGGACTAAATTAATTTGAATTTTACATCTTCTTCTG

A\_16\_P19882372

AAAAAATCCCTGGTCTACTGTAACATCCTAATTGTAATCTAAGATAAACACAACACGCT

A\_16\_P36131029

TCAGAGAAATGTTCTTGCATTTGAAATCAAATCAACAAGTTTAATTGGCCAGAGAGTTCC

A\_14\_P110077 TTTTGCACCTGGTTTATGGCGATTGTTTTCTTGGACGGATAGTGTAATAAACTTCTCTG  
A\_16\_P16392877

AAGTCAGACAGTATGAGGTAGACTTCAAAACGTATAATACTATTTGTCTTTCTTCCCATT

A\_14\_P113931 TCCTGCCAAATCTTCAGACCATAAATGTTGACATAGTCCTGTATGTATTCAAAGAACGA

A\_14\_P200970 ACACCTAAAATGACATGTTGGTTCCAAATAGTAATTATATTCTAACTGGTGCTGACTTGA

A\_14\_P134609 GTTCTGTTCCCTGGCTGTCCATCTGAACTGCTTTTCAGGCTCATAT

A\_14\_P135961

ACAGATGCAGAGATGTAAGAAAAGGAGAAGAAATGAAAAGCAGAAATGGTTTAAGGGAAC

A\_16\_P20751697

TACGTGACTTCTAACATTTTTCTTATGCCCATTTTTTTTTTCACGTAGACGTTCTCAGAGC

A\_14\_P125020 CAAAACCACACACTGTTCTCATTAGTGTGAAGTGCAAGATTCTCTCTTCTATGCTAATTT

A\_14\_P132281 GTTACTCAATAGTTGTTTTCTTATAATTAATATCTGGACACATTGGGCTGCCATCCACT

CUST\_9675\_PI426210822 CATGGCAAGCAAGATTACTCCAAAAAATGCCACTTACCATTCTTTGGTGTA

A\_14\_P119482 ATGAAAAATCTTGCTCTTTCCATAGTAAAGAAGAATTAAGAGATGGACAGGTAAGCATGC

A\_14\_P111060 ACAGAATTAATTGGCATTACTGCTTAGTTCATGACTGGCTTTTTATTCTAACAGTGCACC

A\_14\_P111562 GGGGGTATCCAGAATTGGTTGTAAATACTTTGCATATTGTCTGATTAACACAAACAGAC

CUST\_4159\_PI426210822 TTTTGAGAACTTGTCTCTGGTATCCAGGAAATGGCCTCCCCAGC

A\_14\_P112704 AGTCCGGAAATAACATAGAAGCCTGAAAGATTGGTGCATGAATTCATTTATTCTATTCTGT

A\_16\_P16669386

AAATGGCCTTACCTCATACACTAAGTCTCTGGTAAATGGGTCTTAAGAACAATTGAGTTA

A\_16\_P15134568

AATCTTTGAAGTCACTTCTAGATTTACCAATCACTGGATTACAGACTGACAAGGCAGAAT

A\_14\_P126479 AACAAAGCCTAACACTCTTTAACATTTTTTCCACGTTGCATAAAGAACATGGCAAATACC

A\_14\_P129443 ATTCTCTGACTCCTACCTTTAGGAGAACGAATAAAGGCATCTTAAGGAGCAGTGATT

A\_16\_P18845493

TGGAATGTCAGCAAAGATAACACAGTATTCATCTCACCATTACTAAGGAAGAACTCTGA

A\_14\_P120299 GACAGATTCCAGAGGCTTGGTTTTATTGTGCAGTTTTCTTTGTCTCAATGAGAT

CUST\_852\_PI426210822 AGCATAACACAAGATGCTCTTAAGGGCATCGAGCCTAGAGTCAGAGTTT

A\_14\_P136146 AGTATTTTCCCACTCACATCTGAAAAAAAAGGATGTCTCCTCCTTAGGTCTGAATTTTA

A\_14\_P110252 GGGGAAGAGAATCAAGCCTTTCTTTCTTAACAGTTGTTTATGTCATATTTCTGGTAAGAC

A\_14\_P107371 CTATTAGAGTGTTATTGGTAGTGTCTAGCCTTTTCCTCCACGACATTCCTTGACTTAATC

A\_16\_P15526806

AGGCTATTTTCATGCCTGATAACTAGAGCATTAATCATCCCGTTAAAGATATGTGTATGCA

A\_14\_P112173 TTAACAGACATTTCTCAAAATTTGTTCTAATTTCCCAAGCATGTGTCAGCAGTCTCTGTAG

A\_14\_P109816 CTAATGGTTCCAAAACAAAATGATTAAAGTATTTGAATCCTGGAGCATCAACACTGCCTTT

A\_18\_P22841396 GAGATGATACAGTTGCTGTCTCCAGCACACACATGTTCTAGAGAATTCCAGTTTTAG

A\_18\_P22728513

AAGCCATATTTTTTTTTGGTGCTGGAATTTATACACGAAAATACAGGACGATCCCATCAAA

A\_16\_P00685533

CATCACACAAGTAGGAGTAAAATAATGAGTATTTGAATAATGCAACTAGAGTTGCGATCA

A\_16\_P15560659

AAAATGCCTTCTTAAAAAGACAAATCCCATATAGCACTGAATTACTCCAGTGACCTTGAG

A\_16\_P15880822

CTGCTTTGAATGAGTCCAACCTTGTGTTATATGCTGCAAAATCTGACCTTAATCTCAAGG

A\_16\_P20375665

AAATAGTTACTGCTTTTCACACTTGGTTTTTCACAGTATCCATCCTTTCAGGTAGACTTTG

A\_16\_P19530772

AAAATACCAAGATTGCATGATAATGAACAACATCGAAAGAAAACACTTGTCTGGGTCAGA

A\_14\_P123417 AATAAATGTTGATAACAGCCACTGGAAATTTGAAGCAGTCCTCATTCTTTTATTGTCCAC

A\_16\_P20610439

CGGTGTTTTTGGTTTTCTTATTTTTCAACAGGATTTCTTTATGCGTATATGATCATTCA

A\_14\_P122429 GAATTACTAAAGAAGAAATCTTCAGAATCGACCACATGCTCTATTCCACAGTTTGAAATC

A\_14\_P108124 CTTCAAGCACCTATGTAGCAAAAGCCATAAACCCAATTTATTTTCAGAGTAGTTTTTCAGA

A\_14\_P129687 CATCACTATTTGGTTTTTCTCTTTGGTCTCATTTAGAGCCAAGTTGAGAAATTTCCAGTT

A\_14\_P107320 TTTCTTGTCTACCTTCATCGGCCGAGGTAAAAGTGCTGAAACCATGTGAATAAAAATA

A\_14\_P121248

CACACACAAAAAAAACCTGTTACGAAATGCCAAACAACAAAATGTGTTCTACAGGTAG

A\_14\_P107311 CCTAAAATTCTGACAGGAGAGTCAACATGATGGTTAAGGCCTATTTTCATATTCAA

A\_14\_P129229 AGTTAAATAGGAAGGTCTAGACACAAATAAGGTGAAATGTCATTAACGCAGTCTCAAAGG

A\_16\_P30952525 CTCCTCTGTCCGTGGGGGCTAACGGAAGGGCACATGGGATGTCTC

A\_14\_P135609 CTGAACAAGTCACGTGCGTCCTTACCTTTATATATCATCAAGTTCTGAAAGAGTTAGAC

A\_14\_P200526 ACCTCTCCATGGTTCATTTCTCCCTAACTTTTCCTCTTGTTATTTTATGAAAATTTCAA

A\_14\_P102758 CTAAGGAGAAAATCAGCACTTAGAACTTGGATTAGATTTACCCAACCTTAACAGTAT

A\_14\_P120121 AAATCAAAAATTTCTTTGATGAACTTCGAATGAACTACATCAAGGAACTCGATCGTATCAT

A\_16\_P15997098

CAGAATTTCAATGACTCAGAACTATAACCACAGTTGATAATTAGGCCAGTTTCTCGAAGG

A\_16\_P17205046

ATCCACATCAAATGGTTAATGATCTCCAGTTATGTCTCTACAATTGGCATCATCAGTGAT

A\_14\_P127098 TACCCACAATGTAATGCCATTTAAACGAAACACGAACTATGTGCAACAATTCTGTATGT

A\_14\_P108788 ACTTTTCTGGGCATTAAGCATTACCATGGAATAAAGGAACAAATGAAAATTTGGCATACGT

A\_16\_P36230199

GGAAGTGGCACTGTGTTGCAATCATAGTTTCATTGTTCTTTGTATTTTGCATTTCAAAA

A\_16\_P17807240

ATTTCCAAATATTTCTCACCTTTACTACCAAGTCCAACAAAAAATGGTTTATGAGCGGCA

A\_16\_P03045605

AAGAAGATGAACTCAGTCCTACGTAGTAACAAGAATGTGACATCTATGTTGTTGCCAAAA

A\_14\_P116363 TACTCTAGTATTCCAGACCTGAAGAATCACAATAATTTTCTACCTGGTCTCTCCTTGTTTC

CUST\_2881\_PI426210822 GCTCTGCACAGTTTGGAAAGTTCAGTCTTCAGATGGAGGAAAGATG

A\_14\_P129492 CTTTTGAAACAGGCTTCTTAACGTATTCTTGTGAAATTTCTCATGAGCAGTTCATTTCTC

A\_14\_P119957 CTGCTGGACATTAACTTTGATATTGCTTCCACATGTATCTTCAAACATCCTTCTCAGAA

A\_16\_P30952327

AGGACTCCCAGGAGAGTGCTGATAAATATCTTTGATCATTGATTCATCCTAACTAGATT

CUST\_6998\_PI426210822 GACCAAGGCCATGCCTGCATATTCCTCCCTGGACCCCTCATTCAA

A\_18\_P10073704

AGCATGATTATAGATGACAAGTAAGTGTGCAAGTGAGTTAAAAGACTTACCAACTCTGCC

A\_14\_P105020 CACTGCTTCGTGTATCCTTAAATGCGTTTTTGTGTTTTTTTAAACCATATGGAGCCA

A\_14\_P136720 GCCTGCAAATATTATGTGTTTGCCTGCTGCAAAATTGAAGGTGTATTTTTATAGACAAGG

A\_16\_P37083887

ATTAAGATTGTCAGCAGAAAGTAAGGCGTTGTGACTTCAGATCTCAACAGTTGAGTATTT

A\_16\_P00000357

TTTGCAAACGAGTTAGAACATACGCATTTGTAAATACAGTGTAATGTTTGTGCTGGTGGG

A\_18\_P11803289

AAGAACATTCACAATCTTGTCTGAAACTATTTCTCAAGCCTTATCTCTACATTTTTCTGCA

A\_14\_P138895 ACAAAGGAAAATTGGGTCCCAATCACTGACAACATCTTAACTACCAGATGCTTTTTTAA

CUST\_9415\_PI426210822 TACATGGAATCATGGAATTTTCAGTTCTGCCAGTCCCTCTCAAGG

A\_16\_P21430585

ATTCATGTCACAGTAACTATGACCCACTAGTTCCAATTATATCACCCACTCTAACCTTTG

A\_14\_P100892 GAGCATCAGCACGAATAGACTTTGTAGAGGTAGTTCTCCCAAATATATTATGAAACCAA

CUST\_5708\_PI426210822 TCATCAAAGGTTAGACCATGTCTGAAAGTGACCTGTTGAATTTGCAAACTTC

A\_14\_P126351 ATGGGCAACACAAATTATATTGGGTGTAACCTTGCTTTGCTCATAAAAATCATCATGCATG

A\_14\_P121370 TTTTACTTAAATCAATGACGTAGTTACCTAGGGAAGACAAAGATGTGTTTCAGTCCCTGAA

A\_16\_P21554172

ACACGACAGTTTTTTTTTAAAGTAATACGTCATAGCCAATCAAATTCCCAAGCCAGAAA

A\_16\_P00685558

AACTTGAGGATATAAACCTTCACCTTATTTATTTTCAGACATATATAGTAAATCCTGGAA

A\_14\_P131837 ACAGAAAGTGGAAGAGAAAAAACTACTTGGCTCTACAGTCTTATTGTAAAATGTCTTTTGC

CUST\_4867\_PI426210822 GAGATAGATCCTTCCATTCATCAAGTGAATTTTAGAAGCCACACCTTTGGGTG

CUST\_830\_PI426210822 CTTCAATTTGGGTACATGCTGCAAAGCTGAGGGTTTTCGTGTGTATTTT

A\_16\_P01916101

CTTCGGCGACTTAATCTTTATCGACCTCTTTTAAATGGCAAAAATCTGATCAACTTCTC

CUST\_5267\_PI426210822 CTTTCTTCGGGTACATAGAGTGAGGGTGGGAATCAAGTCACTCAGA

A\_14\_P124790 AAACCTATCCTTGTTTTTATCCAGTCCCTGACAAGAATTTACAAAATACCGACTTGTGA

A\_14\_P124312 GTATCCAGATGTTGATCACCCTGTAGGAGCCTTTGCCGTTTTAGTTTAAATGA

A\_14\_P131488 CTGCAATGAAACCTATAAACTTTAACATACCTGGCTTTTTATGGGGAAGTTCTGTGAAATG

A\_16\_P16067575

AAACACTGTTAGAAGTCCCCTACACAGTTCTAATCCAATTGATCTATGTGCTGTCTTTT

A\_14\_P127263 GATAGTCCTTAAGGTTAAGAATGCATAATGAAAGCCAATCAGTAACCCATAGAGACCAGT

A\_16\_P17829857

AAAAATCAATCACTTGAAAGCATACGTCTCTGATTTCTATCCCTTGTCTTATAGGCAGGT

CUST\_4619\_PI426210822

GTAAAGCATAAGGAGAGGACTCAACAGTAAGGACTAATATTTGACAGTGAGGAGCA

A\_14\_P130609 CTTTCATCGTCTTCTAGTGGTGAGTCTCCCGATCCTACAATAAAAAAGAACAGAAACT

A\_18\_P14131885 CCACACTATGTTTTTCGTGAAGGCATAAGACCATGGGCCAACTTTCTG

A\_16\_P20362763

AAAATCCCATCTCCCTACAAGAATAAATGCTAACCTGCTACGAAAATTCTCAAGAACTCT

A\_16\_P02250159

ACACCATTTTGTGATTCAACTGCTTCTCTTAAGACAACCACATCAACTTTATCAACTCAA

CUST\_3102\_PI426210822 TTGGAAGCATGTGCCTCTGGGTCTGCAGTGATGCTGGATCACACT

A\_14\_P107118 AGGTAGCATTACCTTAGGCATCCAGTGACGTTGTAGAATATGTCAAATCGAGCAAA

A\_16\_P35884749

GGAACATAAAATCCATCCAATATACAGTTGTATCACCTGAAAGTCTACATTCACACTTCC

A\_14\_P125245 GTAGTTACAACGTTTTCCCATCTATCATCTTTCTCTCCTTACACACTTCTTTGGCATAAC

A\_14\_P137755 TCATGACAATTGCTATTTGGGTTAAGTTACTGCTACATCTTTAATATCCCTTGGGGTGA

A\_16\_P16492392

AAATAACAGTGCTAAAGAAGGCTTACAGATCCTTACTTAGAAAACCTGCTCACCTAACAGG

A\_14\_P124124

AGAACTCAACTCACTTTAAAATGGAAACACGCAACAAAAACAGATGCTGCTTTCTAGAA

A\_16\_P18996951

ACAGTTGAACTAGAAACACAATCTTATGCCTACAACCTGAAATATATGAAGAGCCGACCC

A\_14\_P106781 GCTCTCTCGTTCTTTTTTTGCTCCAGAGTAAATTTAAAATGAAGAAGGGCTGGAATAAG

A\_14\_P113064 AAGTCAGCATGTATGAGAACCAATCTATAAGAGTGTTCAACAAAGGAAGGCATTGTTA

A\_18\_P14602078

CCGCATTGAAAACCTAGTAACTATCACCCCTGAAATACATAAAACAAAACACTGATTTGTCC

A\_16\_P38036102

AACACCATTCTAGAAAATTAGAAATCCATCAGTATTACACACAAAGTTACCAACTGATCA

A\_14\_P124136 GGCTACATGTCTTTGTCTCAATGCTGGCTCCTGTTGAGTTATAGATTCTTTTCCTA

A\_14\_P100182 CTCATTTTACATTAACCATAACCCTTGTCTCTGTTCCCTGCTATATCAAATTGGACAGT

A\_14\_P131264 GTGCTGCTGTGTAACAGATTGCTGCTGACTTTGGAAGGCTTATATCTGTAACGATAATTT

CUST\_9498\_PI426210822

ATTTTGAGCACTATGGTGATATTTTCATTATCAAGAGTTCTTGGGAAGAGGCCGAG

A\_16\_P17367199

AATTTTTTGTTCAGCACACATAGTTGAAATCAGAAGGATAATTGCATGCACAGTGAGAA

A\_16\_P18311605

ATTTGACTTTACCTTGACCCAAGAGTAAATAACTGAACACCTATCTGGCATCTCATGAAT  
CUST\_4723\_PI426210822 GTGACCAGTTAAGCCCAGTGGGTGATGCCTTTCCTTTGTTACTTT  
A\_14\_P137604 AAGCAAAATTGGGATACTGTTATAGAGGATAATGGAAGGTCAACAGCAGAAAAACAATGG  
A\_14\_P201192 TCTTACTCATTATTCCAGGGATATTCTGTGCATTTACAGCCATAGACTTATGCATTCCCTA  
A\_16\_P21118317 TCATGGTGTGCATCCACACTATCCTTTGTAAACAGAGGTTTACACAGATACCATAC  
A\_14\_P127970 TTGATGAATTTACCTATTCCATTCTTCACGTTTCAGAATTGGTTCGACTTTGTTAGAAGA  
A\_14\_P111769 GTTTTTTAATGGTGAACCTTTCTGAGGATCATAGACGTTGTGTCTTACCTACCTTAAACT  
A\_16\_P15820551

ACATTAGGACTCAATATTGGGAAGGCAAAAAGCAAAGTTATCAAGAGATTTAACCCTTA  
A\_16\_P20316184

AACACGTTCTTCACATTTTTTCATTCAAATTCAGGTCACTGAATCTAAACAACCCACTTT  
A\_14\_P109352 CAAAGGGAGATATGATAAAGTTTGTATCAGGAAGGATAAGTGTCACTTCAATGAGATCC  
A\_14\_P135694 GACATAAGACTAAATTACACCTTAGACCTGACATCTGGCTATCACACAGACAGAATCCAA  
A\_16\_P16398415

TGCTGTGCTCTTTATAATCCTCCCATTTTTGCTAATTATGAAAGATATTTGTGCTGAGGG  
A\_14\_P101329 ACAACCAAAAGGTTCAATAAGAAGACCTTTGTTTTCTCTTCTGAAAGTCTAAGACAACAC  
A\_16\_P18162366

AATTTTTGGAAGATGTCAGGAGAACTTCTCAAACCTTGGAAAGAAATTGCTACACTCTACTC  
A\_16\_P19243906

GCTTAAAGCCATCAATATAGCAATTACACTTGAACACTGAAATTATGTGGTTATGCCTGG  
A\_14\_P137848 AAAATATAAATGTTTTCCCTTTGAAGATTTGTTTTCTTTCCTGCCGTCCTGACAGATCAA  
CUST\_9589\_PI426210822

TCTTCATTTTGATTGTATTGCTTTCTTGTCTTCAGGAGGGAAGATTTTGACTTCAAAAAGT  
A\_14\_P125849 GAGAACACAGTGCCAGATTATTTATCATTTTTGAATTTGGGAATTGTGATTTCTCCAA  
A\_16\_P15802982

TGATAGATTTCACTGCATAACATACAGAGTATACACTGAGGACAAAATACCAACTGGAGG  
A\_14\_P200056 CTGAGGTTCATTTTCCCATTCCTCAAGGTAAGGGTAGACTACCTAGGAACTTATT  
A\_14\_P117505 AGACAGACAGAAATGTGGCCTTCCCTAGAGAGAGAGACAGACGTTTTT  
CUST\_1174\_PI426210822 GTGTGGAGAGAGAATTTCCCTGCCAGTGTGTACTGCTGGAGCCCGT  
A\_16\_P16191537

TGATGAGCAAGTGGCAAATATTCAGTATATAGTGCAGATTGAATATGTTTCTTTTATGGG  
A\_16\_P16191461

TTCCTTAATTTAATGAAATGTATCAAGCAGAAACCCACAATAAGCATCATACTTAAAGGA  
A\_14\_P123290 AAATGAAACTTTCCTTTAAAGGAACAAGTGCATTTTTTAATAGATTCTGGAACCTCGGCTTGC  
A\_14\_P132865 GAAGCAAAATGAAAAATAAGCATTCAATCTTATCTCACCATCTCGCCATAGGTGGCTAAA  
A\_14\_P201293 ACATGTTATGTCATGACTGTGCATGATAAAGTCTTGCCTTTTAGACATGAACCTGATTCAG  
A\_14\_P111445 GTATTCACAGGTTTTAAGTGTATCAAGGCAAGTTAAGCAGTGTTCAAGTGAGAATCATCT

A\_16\_P16759714

TTTTAGTAAAGTTAGTCACAAATCAAATACTCGCTCACGTTACACTAGTTTTTCAGCCCCGT

A\_14\_P135384 CTCTCCAGTGCTCTTCATAACCATTTCCATATATCTGTGGTTTACATAGTTGCCATTTTT

CUST\_4853\_PI426210822 TAAGACATCATCAAGGTTCTCCAACCCCTGCTCCTCATCACACT

CUST\_4890\_PI426210822 CTTCCATGAAAGTTCTAAGGCTCATGGGTGAGGCCTAAGAAAGGC

A\_16\_P03652122

AATGCTACTTTTTGTCTCATTTTTGGAGTTATAAAACCATGTGGATTAATCCCAACCAGGT

A\_16\_P21631065

AAAAAAGATTTTACTTTTCATTGAGTCCTTCACCAATCCTGTAAGAATGACTTGGCAAGGA

A\_14\_P127472 AAGAAGAAATTATTCATTTTAAGAAAGAACTTCGAGAACCACAATTTTCGGGATGCTGAGG

A\_16\_P58424324

CTCAGTGGAAGTATTAGAAGACAATGGTAAATAATTTCCCAATGGAAGTGCTAAAAGACA

A\_14\_P107730 GTGATGTTATAAATAAAGTTGTCTTCAGTTTAGATGAGCCTTGGTAGGTAGTCTCGTGCA

CUST\_2216\_PI426210822

GGATTTTCTGAACCATGACTCCCTCTATCAAGATAACTCATATATGCACTTTGCAAAAACA

A\_16\_P35407491

TCCACTTATTCCAATCACTCATAGTTGCATAAGGAAAGAAGACTTACATTAGGCTTTGCT

A\_14\_P119476 GTATGAAAATACACTGGTCATCTTAGTGGTGTCTTGTGGGAGAGAAAACCTAAAGTATAT

CUST\_3156\_PI426210822 ATTTCTTCACTCAAGCAAACCTGGCTGCCAAGAAGAGAGATTGAGATGAT

A\_14\_P102320 TGATGGAGTTACTAATGCTTTGGAGACAGTCCCTAGGAATTTTTTTAAAATGTAGTGGTC

A\_14\_P133479 CTTAGTGGGAGAAAATAACAAAATCACTTTCCACTTCCTTTCATGCTCTGATGATGTTT

A\_16\_P03096692

ACACTCTCCTTTATAATGCCGATTCTCCAACATTTTAAACCTATGTCCCATTTTGATCAA

A\_14\_P120421 TTTCTTAAACTGAATTTCTTAGCAGACACGCTGGGATGTTCAACCATAACACACGTTT

A\_14\_P100245 TGGCTTTACTTACTAGGAAGCCTGGAATTCATTATTTTTTTTCTTTTATGTGCCACTGTG

A\_14\_P103709 CTCATGAGCAGGGAAAACCCTGCCTATTCGATTGTTGTCTTAAACTCTTTATTTATTGC

A\_16\_P01768247

ACTCTCAGCAATTCTCATACTGTTCTCCAAAACCTAAAAGGGTAATTTCTCCTAATTGG

A\_16\_P16149948

ATGGACTCACAAGATCCTATCATTCTACAGACTTCTCAAAGCAAACAATTCCCTATTA

CUST\_9406\_PI426210822 CTTGGAAACCACAGCACACATCTTGCGTGTGTTGATTACTGGCAAA

CUST\_8955\_PI426210822 TCCTCATTACCTTCAAATGGGGTGATGCACACACGAGTAGCATGAAATTA

A\_14\_P106783

AACAAAGAAAAATTCTGAATAATATGTTGTGGGACAAGAGGAAGATGCCAGTGAAGAAAG

A\_16\_P41327510

ACTCTACTCAATTCTAAGACACAATTATGCCTAGTTCGTTATAATCATAGAAAAACCCCA

A\_16\_P37544735

TGACTTGGTTATAAATGATTGCACTTTTCTACTATTTCTAACTACAGTATAGCAGTGCTG

A\_14\_P201392 CTCGTTTTAAATTCATGTTGATTCTTGTAAGCACTGGACTGTCTTCATCAAGTATTTCCC

CUST\_611\_PI426210822 GCTGCTTTCTGCCAGTAAGGGATGCGGACAATTCCTGGGGTTTC

A\_16\_P55127820

ACGCAAAAATAGGAAGCAGTGAGCCAACTCACTTTGAAAACAGATACAAAAGTTCTAAA

A\_18\_P15831421

AAAGAGTGAAAAATACAAACATTGGTTAGTAGTCTCCACTTTACAACCTTTGTCTCACCC

A\_14\_P200986 GTAAGACTATATTAAGTGCTGTTGAAAGAGAAACCCTAAGTTGTGCAGAATAGTCCCTTC

A\_14\_P137569 TCACTGACCTGGAAGAAAAGAGTTCCACTCATGAATTCTAAGGAAATTTATCCTCAAAT

A\_16\_P35529400

ACGATCTAATGAACAGAATAACTTTGACCAAATTTCCAGTTACTTTTTCTCCCTCCT

A\_14\_P112798 GGGGGGTGTTAATTTATGCACTTATAAGGTGTTTTCTGTGTAACCAATTTATAAAGTGCT

A\_14\_P109110 CCATTCAGTAGTATCATACCCCTTAGAGATTTCAACTTGGAAAACCTGAATAATCAGCCAT

A\_14\_P101788 TGACTIONGACTTCACAAGTTGACCATATGTTGTAGAACATAAACACGGGCAC

CUST\_1214\_PI426210822

AGCACTATAAAACATTAATTACTATTAACCAAGCTATGATATTTTAGGACTCCGAAATGT

A\_14\_P109782 CTCTGGCTTAGATCTACAGGATATTTACTGGCTATGTGGATTATCTCTAATCTCATCCTG

CUST\_10385\_PI426210822 GAATGTCAGGTCCCTGGTTTTTTTTCCCCACCGGAATTAATGGTAATG

A\_18\_P18462460

CTGTTGACTTTGGCTTATGATTCTATACAGCACAACTATACTAAAACCTACACCA

A\_14\_P105608 GAAAATTCTTAAATGAAGATGTCTTCTTTTCAGTCTGGCCGGGACCTTCAACAGTATC

A\_16\_P15915606

AAATGTGTTTGACATGTTTAAGTTGATGCAATTGGTATATCTGAAATAATTCCAGCCTGT

A\_14\_P107572 TTTTGGTGCAGTCCCTATCAGGGAAAGTTAAGAGGGACAATAATCTTCTCAAATAATGTA

A\_16\_P58424148 CTTATCTTCTTGGCTTTTAGCATAATGGCCTGCAGATGTCTGTGGGATAACTTAAGC

A\_14\_P117929 AGGCAATGCAACAATAATTGCAAGTTATTTAGTTAACATCCCAATCACTCTTCCAAGCAT

A\_14\_P133620 AACTCTTTGGACAGAATGTTTAAGAACCTCCTACAGCCTGATGCTTAACCCTTT

A\_16\_P15085755

AAAGTCTGCAGACTAATTAACCCCATTTGTTTCTGAGATTAATCACCTCAGGAATATTTGGAG

A\_14\_P131204 GCGATGCCAGTCATTCTTAGATAGAAAATGAAGATCACATGAAATTTGGAAAGAAGTTT

A\_14\_P138367 CTAGTTTTTCTTCCCTAGGGAAAATGTCATCCCACTTCAAATATCAACAACCTTTGACATT

A\_14\_P139024 AGAAACATTTACAAAATGCACAGGGGAGTTGGGATCCCCGAACATAAAAATTTTATAGTAA

A\_14\_P138914 CTTTTAATAGTTCATGGATCCTCACTCTCCTTGGTTTTCCAGCACATCGTCAGTTTAT

CUST\_5876\_PI426210822 CATTTGGCTCCCCATTTGAGTGGTCACTCTGTCTCTCAGAGCAAT

A\_14\_P116339 TCTATGGTGTATTTGTAGGGATTTTGCAGATACCTGGAAAAACAATTCAGTGACTIONTAAAG

A\_14\_P125234 CAACAGTCAAAGAAGGGAACCTCCCGGGAAGATCAGGTAACCTTCAAAAA

A\_16\_P18292471

GAGCATAACAACAATAAACACATCTAAAGACCAATTGTGAATTGTGAATCACCAACTGGG

A\_14\_P106296 CTCCATAATAGTGATAATGAGGCAGGAACCTTGAGATAAAAAGCAGATATTACAGGTTCC



A\_14\_P120346 GTCACAGAAGAAGTGGTAGCGTGAGCAAGTGTGCAAACATCCTATTTGTAAAC

A\_14\_P120948 GATGTGATTCAGGACACTTTCCATCCTAGGAATAAAGGGTAGTGCAATCATCAAGT

A\_14\_P118832 TTTCAGATGACCTTCAGCAAAATCCATTTTATTTTCTTGTCTTTCTGGAGTGTGACTTTG

CUST\_4655\_PI426210822 TTGCCCCATGTGTGGCAGCAGAAGGCAATCCAGCCCTCAGCCTGG

A\_16\_P16227360

AATTGATCAAAAAGTAACTTACCCTAGCATCCATATCTTCTCTTTCCACTCTGAAAGGCTT

A\_14\_P119008 GTTTTTCTTTTAAATATATCAGTGTGTTAGTTACAGGTCATCCCCAACTCATGACAACCC

A\_14\_P125727 CTATTTAGGGAATGAAAATGTTGGTTGAGAGAGGAAATTGCAGATTATCCCATTTCCATT

A\_14\_P126274 AGAATCTGTGTTTCTTGTGTTGAAAATCCCTGCACTTTTAAAAGTGGAAAAAGTCTTAG

A\_14\_P200866 CTCACTTAGGAAGGTATTTTCAGAAGGTTTCAGGATATTTTGAGACTGGTATATGGCAATTT

A\_16\_P17374075

AAAAAAAACCTCTAGATTTACACACGAACCATTTTGAATACAAAGTTTGCTATGTTGGGGC

A\_14\_P117974 GAGTCAGTGGTAAATAGCAGCAAACGATATAAAATACATTTTCAGAGGTGGAAGTATAGG

A\_16\_P18531358

TTCCAGTCTATTTAAACAGCCTCTTTTCCCTAATTTTCCCTAAAGCATCACTTACTCATGG

A\_14\_P200651 CTTAATCCATTTCCGTATTCCAATCCTCTCCTTTCCCAAATGAGTCCCC

A\_14\_P110636 TTGTTGTTGGATATTTTTGTTTCCATAAAAGCACATCATTTCAACCCTAAACCTGTGTG

A\_14\_P105201 CTGATGAAACTTACCAAGTGATATGTCTGGGCCTTTAAAACGTTGAGATCAATAAAGTTT

A\_14\_P103189 AAATGTTCTGAGGGAATCAGACACTGTAATTGCTCACACTGACTACTACAGAAAAATA

A\_14\_P136690 GATGTGACATCCTCAAATAACACTCTTCAAACAGGGAATCCTCAAAGGACT

A\_14\_P137501 AAGATTCCTTTGCTCTTCTCTTTTTGCAATAGCATATGCTTAAGCACAAGCAAGCATA

A\_16\_P17615426

CGGAACCCTTAGATATCAATGTCAGAACATACTCTCCTTGAAGACATTAGACTCAGTTTT

A\_14\_P113038 CCATCGGCAGTGATGCTCACACAACAATGGTCTACAAATAACGTTTGCAATAAAT

A\_16\_P03775374

ACCACAACAACCTCAGATTACATTTTAAATCTACTATCTATAGATCAATGGTAGCAGTGCA

A\_14\_P106139 ATGTGAGTAATTTCTTCAGGTTTTCCATGACCATGTCAGTAGGCTGATGTTGTTTATATC

A\_14\_P128442 AGCCAAATGAACATTAATGTCAAAAAAGTTTTTGTAATAAATCTGGCCTTGACCTGCA

A\_14\_P136669 GTTTTCCATGTTGGTTTTTTCATATTACCCTAGTTCTGCAGTAAGACAGATATCACCTT

A\_16\_P00685556

CTTTGGAGTGAAAAAGTGATGGATATTAAGAGCACAACACTACACACATTCGGATTCTCAA

A\_14\_P104263 AAAAGATGCCTTTTGAAAACCTTCTTCTTTACCCTGAAATTAGTTTTCTTTGCCTTAGCC

A\_18\_P15961033

CCAAGTTTTAAAAAGATGAATGTGGTATAATCAGCATTAAGTTTCCTGTTCCGGTCTGGG

A\_14\_P125487 TCAAGATCTTGACCAGCCTGAACAAATGTTAAAGACTTGTAGGATACAATCATTAGACCA

A\_16\_P36863139

GCACTACATAAAAAACGATGCTAGTTTGTAAACACCACAATTTGACTTTCAGCAAATGC

A\_14\_P109039 ACACATTTCAAAGTTCCTCACATGAATACTAACATATCCTGTTCACTTTGCAAGTTCCTT

A\_14\_P100586 GAGTTTATGCATTTTGAAGGTCCTGCTGAGTTGTATCCGTTTTGCTTTTATCTCATTAAC  
A\_14\_P108085 ATTGATGAAGCACATAGGTTAAAAATAAAAATTGTAAACTCTTAGAGGGCCTGAAACTC  
A\_14\_P138398 TCATCTTTCTTATAAACAACCTCATGCACATTCTGTGTTTGAGCCAAGACTAGTCACC  
A\_14\_P126828 AATTTCACTCACCCTAATTCCTTGACTTGGAAAGATTTTTCTTTTCACAGAAACAAGGT  
A\_18\_P11153110AATGGATTGTAGGGAAAGCAAATGAAAAACACCCTGAACATCATTGAACAAGTCCTTT  
A\_14\_P117943 CTTCGCAATGAGAAAAGCCACTCCAAACATCTACCAGTTACTTTTTCTTGATGATTAGTAA  
A\_14\_P133432 GTAAAAGAAGCTGAATACAGTTGGTAATAGAGTGAATACAATGAACAAATGGCCAAGCCA  
A\_14\_P111474 CAAATTCAGCAGATGCTAACTTCCACTCTGCGTCTTTCTCTGACACA  
A\_14\_P129017 TCTATAGTAAATATGTATTCTTTCCAAAATCAGACAAATAATAAACACTATAAATTGTTT  
CUST\_9740\_PI426210822 ACAGATGTGCAGTCAAGGGGAGAATGAAGACTCCTCGGGATTCTC  
A\_18\_P14133161 ACATGTGAGTTGCCCTTCACACCCTCCCTAACACTGCCCTCAC  
A\_14\_P107276 ACATTATCAGGTTCAAGTTCTTACTCAAGTCCATTTTTCAAGGCCCTGTAGACTTCTTC  
A\_14\_P120324 GGCTGAGATCAAAAGAGAAGTTTCCTCAATTCCAAAACAGGTTTGGACTTGATCT  
A\_14\_P120914 GTTTTGGTAACAGAGGAATGGACCTCAAAGTATTATTTCTTTGGCATATTTTCATCTGCTC  
CUST\_2491\_PI426210822  
CCCCTACTCTTGAAATAAAATGATGGAGAAAGATTTGGAGTTAAAAGAAAACCAAGTCCT  
A\_14\_P134219 AAAAGTGGTTTAACTCAGCCACACAGTAATCAAAAAGACAGGTGTAAATTAGCAGAACTT  
A\_16\_P03522345  
CACATAGCATTTGCCTGATTTCTTGTATGTTGCATACACGCTGGATGCTGATTTAGAAG  
A\_16\_P03808684  
GCGAAATGTGGCATACTTAATATTTGCACTTAAGGAAAGATGCTTTCAATGCCAACTGT  
CUST\_2733\_PI426210822 TGATTTACTCTTTGTTTTTGTGGGATGTCCTTGGGGAGCCACAG  
A\_16\_P19652600  
ACTCCTAGAAAAACAAGATGCTCTGATCAACAAATACATGTATAAAATCTGTTTGGTGCT  
A\_16\_P16191311 CCACCTCCCGACATACAGACTCCAGATGTGGAAAAAGCCCTTGC  
CUST\_4177\_PI426210822  
AAAAGTTAACTTCTTCCAGAGAGCTTTTACATAATTATCCATTTAATGTGTTTTTAAT  
A\_18\_P22840124 TATATGGGTGCTGGGCAAAGAGGAGCATCTGACACCATCTGCTTT  
A\_14\_P102859 AGAAGACCAGAAACAGGCCAAAGTTTATGGAAATTTAATATATGATCAAAGGGGCATTCA  
A\_16\_P41571022  
ACTAGATCCAAACGCCAGATTAACAATTCTTGACGTAATAATCATCCACTAATAGTCCCA  
A\_14\_P101070 CTACCTACCTAAGCGATGAAATCCAAAGGTGAATCTTTTGGTTGGTGATTTTGATGATAG  
A\_14\_P101774 ACTGTTTTATTTTATGCTTTCAGATATCAACATGGCAGGAGAGCCCAAACCATACAGAC  
A\_14\_P122315 CTACCTAGTGTGTGTTGCATTATTAACCCCTAGTTTGTAGTGTATTCTGGAGTCAAGTTG  
A\_14\_P108484 ACGTGTTTTCTCTTGTTCCTATCCTTCATTCCCGATTATTGCTTCTCTGATTCT  
A\_18\_P14135060 AGCCAGATGACCCCATGAGGACCCCTTTCTGTTCTCCATCATTC  
A\_14\_P122150 AATATCAACAGAATGACCCAGTTCTCTGTCTTGTAAATATCAGAGCAAATCTCCACATC  
A\_14\_P130397 CTTTTTTGGTTTTTCTGTCTTATTCTCTTGTGCTCAATCCTGTTGACCTTCTTAAACAT

A\_14\_P117672 GAGTGTGAAACAGATGAACAAAAACAGGGCTCTGATGAGAACATGTCAGAATG  
A\_14\_P118307 AGGCTTTTTTCTGGAAATTCCTAAACCAAGGCTAAGAACCACTGTTCTAAAAGAAGTAA  
A\_14\_P201031 TTTCTCTGGTATGGAGGTGACAAACGTGAACTTTACATAAAGAAAAAGAAACATTTGA  
A\_14\_P133317 GAAGCCAAAAGAGATGTCTCAACATTTCCAGAGGTATAACCAAACCTGCTAACTCATTTTA  
A\_14\_P130066 ATGGGTGTCAATGAAAATGACTATAACCCTGGCTCCATGAACATTGTGAGGTAAT  
A\_16\_P01717246  
AAACCCTACGCCATCTTTTAAAATGTTAAAATTCAAGAGTTTGGAGTGTTTTTTCACAGCG  
A\_14\_P101179 CTCACCTGGCTATACCTTGACCATAACCATATCAGCAATATTGACGAAAATGCTTTTTAAT  
A\_14\_P112097 CTATTTTTGCACCACACATTTGTATACATGCACAGTGTATCAGGGACATAAATGATCCTT  
A\_14\_P135153 AATAGGGTGTATTTTCATTAGATCTAATATTGACAGCACTGCTCTAGCATGATGGACATGC  
A\_14\_P100198 ACATTCCAAATGACTTAGGTTTCAAGCACAGAACTTCAGACACTGTGAAAGATAACATTT  
A\_14\_P102092 TAAAAATTTTTCTATAATCTTACCTCCCAGTCCAAATAATCACAGACATCTTCAAAGTTA  
A\_14\_P127557 AGGATTTTCCAACAGGATGACACTCTTAGGATATTCTCACTTTCTTCTAGAAATGGTAGA  
A\_16\_P17802024  
GTCCGGTTATTTTCCATTTCACTTACTTCCAAGACTCTTCGATATGCACCTTACATACTTC  
A\_16\_P17478739  
CCGTGGAAAGAAATTAGATACCAATGCTAAAGACTTACCAGATGGATATTCAATCAGTGC  
A\_14\_P137565 GTTGATGACAGAGTCCTTGAATTTGATATGCAGCCGGTAGTTAGAGATGGCAAT  
CUST\_8624\_PI426210822 AGTATCTGCTGTGCTGGGAGCTACACCCGGTCTCCATTCTGTTT  
A\_14\_P132859 AGGACGTATAGACAACCTATTTTGACCTTAGAGTTCTTCAGTCATACCTGAAGCAGTTTTT  
CUST\_829\_PI426210822 AGTAATACTAGCTGCCGCTTATGGAGGGCTTCATTTGGGTCACATG  
A\_16\_P36283190  
AAGTGTTCCTTTAATTTAAATCAAACACCCCATCTGATAATCACAGTCACTTAGCCTGAC  
A\_14\_P102653 AAGAACTTTGGGTCATGCATCTAATCCCTTCTAACTTCTAAAATGGAAAGTAGTTTTCT  
A\_16\_P16792495  
ACATGGGGTGAATTTCTTAAAAGGAGTGTATAGGCTAAATACAACCATTTGTTCTGAGTTC  
A\_14\_P136040 TCCCTCTTTTGTAAGTCAATGCCCTCAAGGAATTTATTTCTGAAAACCTTATGGCTAA  
A\_18\_P16730490  
AAGTGACGTTGGGCTAATAATCATCCTGCATTGACATCAGTATCTGAACATGTGCTTTAT  
A\_14\_P133055 ACGTGTTTTCCATCCCACATAAATACAGTATTTCCACTCTTATCTTACAACCTCCCC  
CUST\_1579\_PI426210822 GAGACACCTCCCTTTAGATGGGAGGAGAAGCTAGATTGATGGGAG  
A\_16\_P41564467  
TATCCAGTATGAATTGTAGGTTCCAAATGCATTGAATCATATCATCATGGTGGGTGTAGT  
A\_14\_P111948 GCTTCAGTCAGATGGAAAATTTGTTTTTGTCTTCTAGATGTCCTGTGTTGAAGGTTATTT  
A\_18\_P12084771 CTTATGTGCCAATCCAACCTTATTCCCATGTATGGTCTTTTCATTTAGCCAAGTGTAAG  
CUST\_529\_PI426210822 CTCTTTTGCACCAGGATGGGTCTTAGAGGGTGGATGTTCCAGATT  
CUST\_9828\_PI426210822 CCGGTCTCACAGAGGAGAGGCCTCTAACTGGCTAGAATGTAAATATG  
A\_14\_P138721 TGAGCGGATAGAGAGTTTAAAATCTAATTGAGGAGATGAGCAACCAATATGTGGGTAATT

A\_16\_P17328859

ACCTTCTGCTTTCACTAAAACAGTTCTCAAGTATTACAGTGTAGTTGCTTTCAAGAACGT

A\_14\_P104540 GACACTAATACCCCTTTGACTCAGACATGTAACTATGATCTGAGTTGGAACGATATTTGG

A\_14\_P117828 AAAACTGTATACCCCAGCCTTGTATTAACACTTTTTTGTCTAATCTAGGGGAAATTGCAT

A\_14\_P201328 ACAATATTCCCTATTGCCTAAAACCTCTGAACAAGACAATGTTTCAATTGCTCTGTCAA

A\_14\_P105951 TACTGTAAGCCATAAGATACCTGTTTAGGGGAAGAAGTCACTGTCCTAAAAATCAGAATGC

A\_16\_P03312583

AAGACATAATTCAGACTTGGCTCTTATTCTCAAGAAGTGGACTCTAGACTTTTAGAAGCC

A\_16\_P36230478

TGGATATGCAGTTATAAATGATTTCTTGTTAAGCATTTTTAAAAGGTTAACTTCTTCCCA

CUST\_6328\_PI426210822

AGTGAACCTGATTTGTTCCAGATGTCCTAAGATTTAGTGATTCCGGAAACTACTC

A\_16\_P01150490

AAGGCTGCCTAACTAATAGACACTTAAATCCAGATGAAGATTAACAAGTCCTCAGAAGAG

A\_14\_P200024 GCCCTCCAAACTACTTACAGGAATAACTGCGTAGACTGTATCTTTTGCTGCAAATATTG

A\_14\_P125529 CTTTCCAGTGGTAAGAGACAGAATTGATTAGGGAAATGAGGCAGATTCACTAAACTC

A\_16\_P17919489

AAATAGCCTTTTATCCCTGTTTACAAGAAGTTCAAATACCCTTCGTGATATCTCTCTTCC

A\_16\_P00334902

TGGGCCTTATACTTCTTTACTTTTCAGTTTCACTTCTACCATAATTTTCACCTTCTACCA

A\_16\_P19076182

AAAGCAAGAGACTGTAGATTGACTCAATAATTCAGGCTAATATAATCCGGTCATCTCCAC

A\_14\_P102860 TACCTGACCATAAACATGTCTGCATTTGAATTCTCTAAACCCTAAATCTGTGTCTATGAA

A\_16\_P21495252

AACTGGAGAACAAAGTTCTACCTATGGAAGAGAACAGAAATATTTATGAAGGCCAACACT

A\_14\_P110374 TTCAGGTAAATTAACCAAGGAGTCTGATTGCAGGAAGGGAAGAGCATGTAAGAAATAA

A\_14\_P138080 CTGAGTCTCCCACCAAGATTGGTTATAAGGACCTCAGGCCATTA

A\_14\_P124622 CGTAAATTTAAAAGTCAAATATGTTTAGCACCCACTCAAGGAGATACTCCCCTAAACAA

CUST\_7076\_PI426210822

TAAAATATTGACATGCTAAGTTTTTAGTCTTCTTTTTTTGACCTATAAAAAAGGTCAAT

A\_14\_P112940 TGGAAGTTAACATACTTCATTAACCTTTTCAGTTCTTGAAGATCAAACGGACATCGG

A\_14\_P202258 TTGATAGTCCTTCTTATCTTTCCAAGGGTTTAGTATTCAGTGTTCTGTTCACTTGCTGAA

A\_14\_P116732 CAAAAGTGAATTTCCAATCACAGCACAGATCCTTTAATGGTAAACAAAAGTGAACACCATT

A\_14\_P103301 CTCCACAGTTCTGGTTGGTTTGTCAAGGACGTTTTTAATCTCCATGGTAAAC

A\_14\_P108210 AATGATACCTTTTCATGTTCAATTTGTTTAGATATGCCACACTTCTGCCTGCTGTTGG

A\_14\_P112197 ACTGAATCTCTTCTTTTCATTTGTGATTTCTGACATTATAAGGTGGTTTGTGCAACACATTG

A\_18\_P22842130

TATTATTTCCATTGATATCTGAACTCAGTATAGAGATGGGACCATAAGCGATTTCCCAGG

A\_14\_P123098 ACTCTAAAGCAACTCATCCATACTGTCTTCAATTGATATATTAGTGAGGGAAGCAACTGA  
A\_14\_P138229 CTGAAAGTGGTCACAGCCGCATCTTTGAAGGTTAGCATAACATTTTGATATGCTTT  
A\_14\_P104904 TTCAACTGAGCAACCCAGAGATTGCCAGACTTGTGAGTTATGGTTTTAAAAATATTTCTT  
A\_14\_P129235 CAGTTGCACATGCCCTACTTTTTGCCCATCTTTTGCAAATCCCCTAAG  
A\_14\_P200298 ACCTGTTTTCTGTGCCACATTTTAAATAATCGTGTCTCTAAAAACAGGGTAGAAAAGGAA  
A\_14\_P115815 TAACCTGTAAAAGTTATTGGTTAGAGTCCTTAACCAGAAACAACAGACACTATGATACCCT  
A\_14\_P113490 GAAAGGCCCTTCATGTTATTTTTGTTGGAAACAAATCTATGGGTTTGGAAAGTTTTATAG  
CUST\_605\_PI426210822 CTTTCAGGTCCCATGGCTCCATTGGGCAAGCATTGGTCCCTAGTG  
A\_14\_P137237 TAAATGTGTTTGACACATCATAGTTTACAAATCACCTTCACTCATATTCTCTCACTACTC  
A\_16\_P18113521  
AATGTATCCTCATTCCAGAAAAATTAGAAAACAGACCAGCAATTTAGGAACTGTGTAGGC  
A\_14\_P136420 TCAGTTTCCCTTCTCTTTTGTCCATAACCCGGAGTCTCCTTATTTTCGAG  
A\_16\_P19862896  
AACAATATGGGGATCTTCAATGACATATGCAAACATGAATTCATGTATAAGGGTGTGGG  
A\_14\_P122214 AGTTGGCTCTGTTAGGCTGATAGCAATCTGTTTAGTTGAAAAGACATCCATTTTATCAAC  
CUST\_7969\_PI426210822  
AAGAAATTAAGTCACTTTGGTATTGGTATGGAGACAGATTTTCTAAGTTCAAATAGTATA  
A\_14\_P103470 CTTAACTGCTCCTCTAGATATTACAGAGTTGAAAACCTCTGAAGGGGTTGGCACT  
A\_14\_P134661 TCCCCCATGTCCCTTTTTGACTCAACTTATGCTTGTTTATTTTTTAAAAACAAAAGCCAT  
A\_14\_P126838 AGTTTACCAGAGCCAAAAATTTGTAGTAATTTGTTGTGACCGTGACAGAAACCTAAAAAC  
A\_16\_P00685058  
ACCAAGGAAAATACTCCCATTTTTAGAAATGGAGGAGCCATACGACTTAATGAATTAAGC  
A\_16\_P00901629  
ACTCCAACATTTACATTTATCTCTTGTATATGTGGCTAGTAACCATTGATCACCTTCC  
CUST\_4261\_PI426210822 GAACCTGTTGAGTCAAGATGGGCAGGGGATTTTATTTCTCTGGCC  
CUST\_5635\_PI426210822  
TCAATCCCTGTACACAGAATAGCGCTCTGAAAATTATAACTCTTCTCAGGCTTCA  
A\_14\_P105434 TTATTCAGTGTCTCATGGAGAGATGTCTGTTCTAAGTCCACTTAAATAATCCTCTATG  
A\_14\_P131205 CTGATGAGTTGAGTTCTGTCTTAATCTTCGATTTTTCAAGATCTTCTTTATATTCCTTCT  
A\_14\_P108448  
GGATACAGAACACATAAATGGAACACAAGAAAACAAACAAATGGGCATTTTCAACGCATA  
A\_14\_P134634 AGGAGTTGAGGTATGTTGGATAGATGGGGGAAAGTAAAAGTGATCTAATATTTGCACTAA  
A\_14\_P123086 CAATGGAATAGAGAAAACCTTACCCCTTTAAGGTGGCTCCTAAGTTCATCTGATT  
A\_16\_P19634042  
ATCCTCCCCACTTAGATCTAAACCAAGAGGCTATGTTAATGCACAAGTATCATAAATCAC  
A\_14\_P128675 CTCTAGACCTCATTGCATATCACTAAACTCAACCCAAGAGAATATTTAGTCATGCAGTCA  
A\_14\_P126028  
GCTGGAGAGTGAAAACTTTTGCAGAAGTAGAACACGCTAAAGCAGCAATACATTAAGT

A\_14\_P127082 ACCACTTTAATGCCAGTTCTTTCTTTTAGTTTGAAAAAGAACTTCAGAGAATTTTCGGAAG  
CUST\_416\_PI426210822

AAACAATGAAAACCTTTTTGCTCACAATCTGACAGGTGAGAAAATTGTGGGGTTCTAG

A\_14\_P117873 GTGGTCCATAGATCTGATCTAGTGACTTAGTTCTGCATGTATAATTAATTGGCAGCATGT

A\_18\_P15419249

AAAGGTGAGCGTAATCATTCTTCTGGAATTTCTTAGTCGTTGCAATAATAAGAATGGGC

A\_16\_P00685490

ACACAAATTTAATTAATAATCTTTTGAGTAACAGATAATAGGCTTAACTGGAAAACCTTGCA

A\_18\_P14135746

GTGGAAACAGAAAACACATTTTTATTAGTCATGAGCGTCACTTGGAGTAGAAATAGAGCC

A\_16\_P02253466

AGTGTTACAATGCAATTTCTCAAGCCATAAACTGGAGAAAGATCAAAAGAGCCTCTTGT

CUST\_5271\_PI426210822 ATGCTACCCCCTTCCCAGCTCTCCCTAGCTTTTAAGATCACATAAC

A\_16\_P00297486

AGGTAACAATAGATGCATGACAACCATTATTCAGGAATAGAAAGAACTATTGGCAAGGGT

A\_14\_P139366 CTATTAATTGCAAATGTAATGAGGCTGGCATAACTGTATGGAGGTTTCCCATCTTTGTG

A\_14\_P201204

GGGAACAAAAAACCATGCTATCACATAATACTATGATGAAGCAGAGAAAACAGCAAGCA

A\_14\_P139425 GGAAAAAACCCTGCTCCAAAAGAATGTGTTTTCTCCCATCTGGAAATCAACA

A\_14\_P119799 CTGTTTGCAGTTTTTAGCCTGATTTTGGGGTCTATAGAGATTGCTTTATTGGATACTTCA

A\_16\_P18193492

AAAGTCAGGGGAAAAAGCATATTCACCAAATTTTAGAATGTTATTCCATCTGTCCGCATT

A\_18\_P22839612 AGACTCTGAGTTGAGAAACCTGTTCTCCCTATCCAGAGCATACAATTCAGAAAATG

A\_16\_P00695397

TGTCTTACCAGCATTTAATTTCTCATAGACATACTACCATTCCCATATTTTACTTTTCGGC

A\_14\_P127772 CTGCCTAAGTGAACCTTGACCCTTGATCATGAAGATCTTGATGTTGAATGTTATTCATGA

A\_14\_P114586 AAGAAAACTCTGAGGCTCATTACCCAGATTTGTGATTGTTAACTGGTGTAAATGAT

A\_14\_P108859 CTCATAGGTTTGTCTTTTCACTTTTTAGAAAATTCTGCATCGCCAGACAAATATCCCAAC

A\_14\_P101297 CGTTACCTTGATAATCATAGTAGTCTGGGTTGTCTGCAAACAAAGATGAAAGTGGAATTG

A\_18\_P26795865

AATTCCCGCTTTACTCTTCTAAAAAATGAAATCATCCTTACTATCACCCCTAAGAAAATTT

A\_16\_P16140205

AAAAAATGCAGCAGTAGACTTCTTATCCAGTCCTAACTGTTTCTTGGATGATGTTTGTG

A\_14\_P101371 TTCAAGTTTCTAAAAATGCATCTAAAAATCCTCCTAAAAACCTGGACCAAACCTTCACAG

A\_16\_P19403667

TGCAGTCCCTATAAAGTCCAAACTTAAAGTGCTCTTTCAAGTTTTGCTACATAGAGATGC

A\_14\_P111944 TATATCCTCCATACTGCTGACCTTGTCCCTGTGGGTAGTTAGGATACTGA

CUST\_3053\_PI426210822

GCACGACTCAACTTTGTTGAGATGAGTTAAAATTATCAGACGAGATGGTTCCCT  
A\_18\_P15638920  
GCCTCAATAGTTGATACCAAGATATTTGTTTCCCAAAAACCTTCTTAGCATGCATTCAAGG  
A\_16\_P16046766  
TCAACATGTCATTTTCGTCACATATGCATATGCTAACATTTGAGATTTTGAGGTCCATTCC  
CUST\_2738\_PI426210822 TATTTATTGAGTTTCATTTGGTCATAAGACTGGGCAGGTTGATTTCTTCTGCCCT  
A\_14\_P127682 GCAGGGGGAATTTTTGTTTGTGTTTGTAGGTTCTCCCAAAGAATATTTGGAACTTTCA  
A\_16\_P20787382  
ACAAGCCAAGGTTGTTTAAATTATCCAACCTGTGACTATGATCAGAGAGCAATGACAGTAA  
CUST\_5877\_PI426210822 AAAAGTGTGTGGAACCTGTGAGAGCTCACGATGGGCCTGAACTTGC  
A\_18\_P17134661  
GAGCCAAAGAATTCCCAATATATGAAGAGAAAGAATCACAGACATAACTTATTCCCCACT  
A\_14\_P119450 CAACTTCCCCTTGTATTACTCACTCCTATAAGATGGAATTAAGTATGATGTTTCTGATGAC  
A\_14\_P131071 GACTCACTTTATCCTGAAGTCATCCAGTGTGTCATGCGAGTGTGTCATGTC  
A\_18\_P22843226 CAGAGACACGGGAGGGTGTGGCAAACCACGAGGCTGAGAGTGGAG  
A\_16\_P18823975  
AAGACAATTCAGCCAGAAAAACCAGTAAAGACCAAAAAGACCTAAATATGCCCTTAGTAAG  
A\_14\_P110364 GTTCTCTGTTTTAATGGTGTAAAGATTGTTTCAGTGGAGCAATCTGATTCTTTAAGGTTGA  
A\_14\_P100227 TTAGGTTTTTCCACGCAATCGATGGATTGTGTCCTAGGAAGACTTTTTCTTTTCC  
A\_14\_P113371 TTTTATTGTCCTGAGTTGTCTTAAACCTGCAAAAATATACTACCCATTTTTTTTTTTTCCA  
A\_16\_P21581340  
TAACCATTTGTTTTCAATCTATCGTTCACCAAATGTTCTCAACTATAACATCCAGGCTCAC  
A\_14\_P109122 TCTCTAAAAGTCTAAAGTCTTTTGTAGCCCTAAGTTTCTATGTTTTCAGTGCCTTGAAGAA  
CUST\_9397\_PI426210822 GAGTTAAAAGCAACTCATATGAAGGGTTTGAGGGTTGTGGTCAAGGCA  
A\_14\_P119691 CCATGCACTTACCTGAAATTCAGTCTTTGACGGAAAACTTGGTTTTCAATGATGC  
A\_14\_P111355 ATGGACACACGCAAAATCAGTGTAAAATAATCAGTGTAAAGTGGAGGCCACGTT  
A\_14\_P108420 TCACTGAACCGTAAAAAGTGGTTACAAGACAAAATAATGGATCTGTTGGGAGGATTAAT  
A\_14\_P139897 AATCAATCTAGGTTAGAAAACATCAATTTGCAAGAGTTCTATGGCTGAGGAAAATGGCAT  
A\_16\_P58424225 TGATGTGACCTCCCTGCACCTTCAATTTCTCACCTCTAAAGTTGGGATAATA  
A\_14\_P122191 ACTGACGTTTAAAGAAGAAGACGGAGAACAAATTGCATGTGGATGTGAACGTGT  
A\_14\_P202110 CTCACAACCTGGCATGGGATGAACAACTCATTAGAGAATGAATGAATGGAGTTAATCTTA  
A\_14\_P100076 CTACCTGACTTACTCAAGAAAGCATGCCTTCATACTGAGTTCTTGTATAAAAATTCCTCTG  
A\_14\_P102100  
CAGAGTCTAAAAGAAATCAGATGAGGCCCAAAAAGAAATCAAGCAGAAGCCAAGATTAAAA  
A\_14\_P117238 CTGATAGTATTTCTGAAGTTAGGCAATTAAGATTACTTCAACCACCAGATCTCCTCTGTC  
A\_18\_P16718566  
ACACTCTCAAAAACCTTGTGTTTACTTGAAAATAAACAGTGTGTCAGATTTTTTCATTAGGGGCA  
A\_14\_P137800 GTAAGGGATCACCGTTTTTCGAAGCCTCTTCATGAAGCAGCAAGTGAT

A\_16\_P16452495

AAAAAAATTTCTCCCTGCAAATTAAGTCAGAACACCTATGAAATTGGAAGGGTCTCTTG

A\_14\_P122000 TGCCCACCAGACTTAGGGCCTCTAGTAGGAAATAATCAAATCTATTTATTTACAAGTGAT

A\_16\_P02047762

GCTAGGTCTTATCACCATGTGCATCAGATATTGCTTTGCCTTTATCACTGATTTTCAGATG

CUST\_2094\_PI426210822

CTTGTTCAITGCCATCAACCCAGGGGCCTTTTATTAGAAAACATTTATTTTAAAAGAATA

A\_14\_P119503 GTCACTTGATCTTCTTGGTCAATGGTCAATGCTGGGAAATTATTATTATCATATTGTGCCA

A\_14\_P115544 CTGGAATCTGTGGATACATTATAGGTATGTATGACTCCTCCAGTCCCTAAGATATGTAGA

A\_14\_P138573 CAAACATCGGGAACCCCTGTTTTCTTCTGGGTGTGTCTCACTTAGAAATC

A\_16\_P02553896

AATCCCACATACAGTTTACTCATTGATCATTGCTCTTTTTTACATACACATATAGGGGGCT

A\_16\_P00785875

CATCCACACCTTATAACTTTCATGTAAGCCATTCTTTGATACATCATAGGACCTCAACAC

A\_14\_P109347

CAGGCCCAAGGTGAGGTGACTCACCTTAATTTGATTTAGAAAAAACAAAAACAAAAAGA

A\_14\_P116270 AGCAAGCATTGAGAAGAAAAAGAAGCAACCTCAGTAATTTAGAAATCATTTTGCAATCCC

CUST\_5479\_PI426210822 GGTTGGCCTGGGGACACAGTAAAGCATGGTATTATGGTAACTTCTACAT

A\_16\_P58424086

TCTTTGAACACCTACTTTGTAGCAGGCACTATGATGGGTGTTTTATAAACATTCTTTTGC

A\_14\_P137409 AAATCTAGAATACGGACCTAATTAATTGACCAACCTAAAGAGCAAATTCCTACTTTCAGG

A\_16\_P16575874

CAAGATGGTTTTCAACCTTTGTGATTTCTGCTCTATCTACACACCAACAATACTACCTAC

A\_14\_P108044 GGTCCAGATATTTCCAAGGCATAAATCCTTGCTGGAACTTTGGAGCAATTAATTAAT

A\_14\_P135750 GAAACACAGAAAACACGGGCAAGAGAGTTGAGGAACCGTTAAAGGATAAAGAAA

A\_14\_P115411 CATTTTTGATCAAATCTTCCATTGCATTCACCTTGTCTTCCAAATCCCATCTTGACAAAT

A\_14\_P121154 CTGAGATCTGCAATATATAACGGGACAGTCAAAGGGCAATGTTTTTCTGTAACATATTGG

A\_16\_P20368702

AAAACAACCACATGTTCAATCATCCAGAAAGAAAGTTTCTCAGTCAGAAAGTTTAGCAGT

A\_14\_P133780 CTCTTCATGACTGTCTCCAGCAATAGGATGATTTACTATAAATTTTCATCCAACCTACTTGT

A\_16\_P20987084

GTCACAATATGAAATTGCTTTTAATTGAGATGACCAACTTCCATTACATTGTTCAACCCC

A\_18\_P14288055

AAAATGGAGGAAACATAGCAACATCTCACATTTGTCTCTAATTATGGGTTCCACTGATGT

A\_14\_P104116 TAAACCACAAAAATGAGCAATACCCAACAATTGATTTATGGCTTCTACTCACAAGCCATT

A\_16\_P15059239

TGGGACCAGGTAATAAACTTCTATTTTTCTCTATTTTCTTCCCAAGAACTTTTGTATTG

A\_14\_P122816 CATTAAACAAGGGATGGGAAAATATATTAAGCAGAGGAGAAATTCTAAGGGATGACAACC



A\_14\_P122910 ATATCCATGTGAATGAATGGATTTCACCTCATCCATACTCAACGTGAATTCTTTTGTCTGT

A\_16\_P18090558

CTTATTGGCTTCATTCAACCATAACCATGATCCTTCAATTGCAGATAACCTAAGACCTTT

CUST\_138\_P1426210822

AATACTCACCTGGAGGAACTATGTGTATTTCTGCTATAGTAATATAGCATAGTATTTGT

A\_16\_P16191112

CTTTGAAAGACAGAACTTTCTCAAATGGGTAATATGAAGGGAGATTATTAGGAAGAATAT

A\_14\_P103528 TTTCTAACCTATCTCCCAGAATTTTCACCAGTCTCTTTTGTATTTCCTCTCTTAAAGG

A\_14\_P126829 TTTCTTCCTATTTTCAAACAGTTCTGTAGTTCAGGAACCTTGTCTGTTGTAGCAG

A\_14\_P131744 TTCTTAGAAAACACAACAAAACCATATTTACCATCACGTGCACTAACAAGACAGCAAGTT

A\_14\_P127779 ACATGCTCCTGTAATGCCGTGTGTTAATGTCAGGGAATAAATTCACAATCTGATTTGATT

A\_16\_P30952347 CGCAGTTGACCTGAATGGGGACGGCCTCTCTGACCTGCTGGTGGG

A\_14\_P117374 TAATGCTTTTTTAAAAATCTACTCATCTTGAAGCATCTTACAAACAAGGATGTTCAAGTCT

CUST\_5534\_P1426210822

ATTCTATCTGAAGTAGAAGTTGAATATTCCTGGACTTTAACTTTGCAACTGTAGAGGAGG

A\_18\_P22841392 ATGTTCACTCTTCAGAGCCAGGGACAATGTGAGGGAAGATACAATCAGTTAA

CUST\_7161\_P1426210822 CACGTGTATTCCGTGAAATGCTCTACCTGCTTTCTGTATCGGCTTTCT

CUST\_10413\_P1426210822 GCCAGCACCACTTCCTTTAAAGATGAACTCTGAACTTTGGAGAGTGAG

A\_14\_P116248 CTAAGTGTCTTGCTTCTTTCTATCCCTGCTGCACTGATTACACAAAATTAAGAAAGCAGA

A\_16\_P35052127

GAAATCCAACCAGCATCTTAGGTGAAAGGATCCTGATTCTAAACTTTTAGACACTATCTC

A\_16\_P18098022

AATGCCACTTTACTTTTAGATACTACATTCCATCAGAAAACCAGAATGACCTGAGTAACT

A\_16\_P02446597

GAGGTATATGTAGATGGCATATTTACCAGGATAGTGTTAGACATCTAAAGGCAATTCAGG

A\_16\_P20095481

AAAATGGAGCAACTAATCATGTAGCAATCCTTTCATACTCCCTACACTCGTATTCAACAT

A\_16\_P16294438

CCCAAAGCAATGATATTGAGTAAAATAATAGTAATCTGAAGAAGCATAACATATAGTGGCC

A\_14\_P111633 CTTTTGTATTCTTTGAATTGGATACTCTGTGCCACATCTGACCTCTTGAAAAATAAGAGG

A\_16\_P38253157

AGACGTTATGAACTATCCTCGTCTCATTTACATAAAACACAAATTCCTCTACCTCATT

A\_16\_P01247271

ACGTATCTACTTGTGAAATACCTTACCTATCCCCACTAGTCTATAAATCCCTAAGAGCAA

A\_14\_P136797 TCTTTGACAGATCATCTTGGACTTCAGGAAATGCAATTATGATAACGTTTGTAGACAGTC

CUST\_4318\_P1426210822 CTTCTCTTCTAGCCTGAAGAGCCCATGGAATGTCAGCTTGGGAAT

A\_16\_P30179444

GTAACCCTTGGCAATTCTAATTAGAACAGAAATCTTCTCCATTAGTATGTGCTTCCCAA

CUST\_7043\_PI426210822 GTTAAGCAGAGAAAACCGTCAGGCAGGAGAGGTGGGGCTGTATTT  
A\_14\_P106970 TCTCTTTGTTTTGAATTGTTAGCCTCTTAACCTAACCAGAACCGTATGTGTTTTTCCTGCA  
A\_14\_P124784 ATCAACCATGCTTCCAGTTGGTTCTTTGATAGAAACAGTGTATGTGTTTTCAATCTTACT  
A\_16\_P18270720  
CACCATCCTACTTCTTACACCAAAAACGTATCATAGCCATTGCTTATGTCTTTAACTGTC  
CUST\_2786\_PI426210822 TAATGTCACACAACCTCCAGCTCTAGGACAAATAATGTTGGACCCCA  
A\_14\_P132692 GCTGGATCAAGGGCAAAAACCTGGTCATTAAGTCATCTGACATTAAATCATTTAGCCA  
A\_16\_P03059666  
TTGGCCTAAATCTATAGTCTGAGGAAGCATATCACATCTTTATCATTATGACAAGCAGG  
A\_16\_P18739862  
AAATTCAGACCCTAACACTTGACTGAAAGTCTTTTCCTATACTCTATTCTGCCCTAATGC  
A\_14\_P200559 TATTTGTCTCTCTTACTTCAAACCTCCCTTAACTCCCACTTATCTTTGCCTTTGAAAACCA  
A\_14\_P112388 GATGCCCTCTCTTACTAAAGGCATGGAAACGTCTGTGTCAGAACGAAGTATATTC  
CUST\_8366\_PI426210822  
GTGAACAGCACCTCTGCATTTCTGAATTGCTTCTCAGAGTTATTTTATTTTTCTCCTTTG  
A\_14\_P138782 ATATTGTTTATTTTCATGGCCACCGTTGAGGGGAAACTGAGACTTGAAGTAGCAAT  
A\_14\_P110188 GTGTTGAAAAAATTGTTTCCATTCTGAGGTCTGTCTTGTGAAGAGGAAAAAATCC  
A\_16\_P17565854  
AAACCTGTGGTTGTGTAAGAGTTAACATAGTCTCAAAGCAGTTATTGAAAATGTGCCATC  
A\_18\_P11536812  
GGCTATATTAATACTGTCACTAGGAAAACCATTCAGAACAGATACCTTACCAATGCCAGT  
A\_14\_P117890 CCTGAGGGGAGAGTATACAGCAAGTTTCATTGTTTAAATTTCTCTAACTGTGAGTATTT  
A\_14\_P132535 ATTGGATGTAATAATCCTATTTGCGGATATGCAATATGGTAAGGGGATGGTTGTCTGTA  
CUST\_9171\_PI426210822  
ACTTCATTTTTCTAACAGTTCCTCAATTTAAACATCGAAAAGAGTGCTGTTCTTAAGGAA  
A\_14\_P134224 TTAGGCAAGTTAGGCAGCAGGAAAAAAGGGCCTACTGAATGCTAATAATAAACTTTAGTT  
CUST\_7905\_PI426210822 GTCTTGATTTGCTTTTCAGTACTCTGAGAAGCCCTGTGGTTTTGTGAA  
A\_16\_P21349921  
GTAGTAGGTGAACAAGAACAGTAAAATATCCAACCTGAAAAATCTGCATCCATGTGACC  
A\_14\_P127479 AATCCAGGATTTTAGACTCAAAGCATTTTTAGAAAGTCATTCAGTTCCAAAGCCCATATTT  
A\_14\_P118553 TTTATTGGCCCAGTGCAGGCATAATGCAATTGGCAATTTTTAATGTATGCAAATTTTCAC  
A\_16\_P18903174  
CCCCATATTCAGTTGTTTTGCTTATCTTAGTTCTTACTGTTATAGCCTGAGTTTTCTG  
A\_14\_P122476 GGACATGTAGTTAGTTACCCTTGTTCCTTGTTTTTTTGTAACAAACATGGAAAACCTGAA  
A\_14\_P121511  
GAATCATTGGGATGGCAAAGGCAAGAGTTTTCCCACTTCCTTAAAAGTAAAAAACA  
A\_14\_P117336 TGTTGCAGCAGCCACAGTCTCATAAATATCAGTATCAGATTCATAACAGGGTGC  
CUST\_6172\_PI426210822 CTGAAATCCAACAGGAGTATCATATCACCTTTTGACATGGAGGCTTCTTCC

CUST\_9094\_P1426210822 GGAGTCATTTTTTTTTGCTACAGTGGTGGAAATGGGTCAGGCTGG  
A\_14\_P126446 AATAAGTATTTGTTGAATGAATGAAATCCCTCAGAATGGGCTAACCACCATGCTACCT  
CUST\_7916\_P1426210822 AGACTTGCTGGTGGACAGCCCAGCCCTCACTGCTTCAGGCTTTAG  
CUST\_3392\_P1426210822 TCTGAAGATGCACAGCAGCCTCTCTGTACTCTGAAGACGCATGAAT  
CUST\_4700\_P1426210822 AGAGTGTGCTGAAAGGTGGGCAGAAGCCTCTCTGCCCTGGGGGAG  
CUST\_659\_P1426210822

CTCAAGGGCAATCTCTTCTACTGGCTCCAAATGAACATAATTATTTGTAATCAGTTTAGA  
CUST\_3178\_P1426210822 TAGCTAGCTGTCCACAGAGGAGGCAGCAGGCACCGCCCCGGCTTA  
A\_14\_P136200 ATTTTCACTGAGTTTGAGTGGGAATGGAAGTACTATATATCTTACCCTTCCTCCTC  
A\_14\_P119296 ATATCATGGCTATATTTTTGGTTTCTACAAGTGGCATCATGAACCTGCTGAATTCCAGG  
A\_14\_P117567 CTGGAGTAATTTTTCTTCAAACAAGCCTCCAAACTGACACCTTCAATCCTTAAACT  
A\_14\_P133764 CTTTGAAGAATGAGCACAATTCATTTTACAAAGTTTGCTGGAGACACTGAAGTGTTTGA  
A\_16\_P1522440

AAAGAATCCTGGAATAACAATCAAGATGTCTTTCCCTCACTAGTTCCTCAAAGTCAAAAT  
A\_16\_P36471598

AAGCCCAGTATAATGACATCAAAGAACAGTGCAGGTAAGTCAGTAAGATAGGTCTACTTA  
CUST\_502\_P1426210822 ATCACTGAGTGAACAGGGACCCAATGATTCTGCCAGGGACATTTG  
A\_16\_P20062934

GAAAACCTGAAAATTACCTACTTTCCGCCTATACATTTCTGTTTATGCCATTACCGTGAGC  
A\_14\_P128186 GGTCAAAGCAAATAAACACAGTTTATGTTTCAGCCAAATTATTGCATTCAAGAAGGCTGT  
A\_16\_P41162240

TGTTTTGGGAAAAAAGTCTTTCTGCTACTTTGTTATCCACATAAAAAAACATATCCTCT  
A\_16\_P19751024

AAGAGAGGGTAGTATTTAAGGATTGAGATGACACTTGTATGAATGAAATAAAGGCCAGGA  
A\_14\_P115819 TTTTTTAAATGGAAGAAGGAATCTAAGTGTTCTTCAAGGTGATGAACCTTGCCATTCC  
A\_16\_P19348651

AACTGAGCCAAACAATCATCTTTTCCATAAAATTGTTCTACCTAAGATCAGTGAAGACCC  
A\_16\_P15780329

GGTTCCTTAGCACAGTTATCTTGATATACAGCATGTGATACATAAGGTCAGAAACTGTC  
A\_16\_P01500298

CATGAAAGGCTATTGCACTACAAAGTAAACCCTGAATTCAATATGAATCCCCCTGTAATG  
A\_18\_P16838670

TTGAAAACAGAAATAAATTTCTTGGAGAAACTTGACAGTATTCTACACACTTTGCTCTTGA  
A\_14\_P112265 TCATGGTTATTTTGAATCTTTCAGGGCCTAGGAAAGACTCTTCAAACAATTTCTCTTCT  
A\_14\_P119523 GTGATCATCGATGTGGATATGCACATTTCTGTTCATCATCTCTGCACTCATTGC  
A\_14\_P105039 AAACCATGCAGAGAAATGTAATATAGTGAGCCATGTTTCTGTTTTCTGTTCTAATATTTTG  
A\_16\_P20511954

AAAAGATAATTGAGCCCTTTTTACATGCTCTTCTCATCTGTAGGCTAACCTCAAGTCAA

A\_16\_P17858925

AAAATCAGATTTGGAGACTTGCTATCTACCACAATTTGGAGATTCTAGTCAAAAAGCATGC

A\_14\_P128418 CTTCAGTCAAATCTGCAGCAGCATGATTTAAGGTAACGTATCAACATTTCTCTTGGGT

A\_16\_P19064296

AAAAATGGTGTTCATCATTGAGATGATCACACTTGATCCTATACCAGTGGCAAAGTTCTTT

CUST\_3160\_PI426210822 TCGAGTGCAGATCCAGCACAGACCTTGACGTGATTATTTTGGTCATT

A\_14\_P121565 AAAACTGGGAATTCTAAAACAATTTGCTTCCTTTATTTTCCTCAGTCAGTCCTATTTCCTC

A\_14\_P103245 GCACACCACAATTTACCAATTGAATTGGGTGTAGGTAATGTCCCTATAATCTTTCTATC

A\_14\_P122286 GTCTTCAGTCATTACTTCAGGAAGTTTTCCCCTATTATTTTTATCCCAACTGATTTCTCC

A\_14\_P120812 GTCTAGTTCCAATTCAACAAACATATGGACTGACGAAGAGAAAGATAGCACAAATTACCT

CUST\_3849\_PI426210822

AGAAGGAACTTTCCTTTAGGAGTGGTAATTTAGAAGAAAAGAACAAGCCCAATGAAT

A\_14\_P127578 CCAAGAAAACCTTAATATTACTTACCTCTGCAACCTTGAGAAATTCAGACACTCGTGTCA

A\_16\_P17539665

AAATTAACACTAGTCCATCCATATCCACCATTTGAACAGAATCTTAGACCAAAGAACCTCC

A\_14\_P104672 CCCCTGCTCTGGACCTCTCATTCTCTTCATTGGTTTATTTTTCAATGCATCTTTAATTT

A\_14\_P119238 AGGTAGCAGGAAGGTTTATATTTTTGAAGGTCTTAAAGGAAGTTAGGGGAATAGGAGATA

A\_14\_P127572 TAGCAATCCTAATTAAGATGAGAAATGGGGTAACTTTCACATGACAGTCACACATAACCT

CUST\_9902\_PI426210822 AATTGCTGTGGCTCCCATGGGAAACTACAGTACAGCCTCTCGAAC

A\_14\_P116005 ACACCAATAGCACCAATCTGGAAGAAGTATTTAAGTTGGGAAACAAGGTGAGATAATTTT

A\_16\_P17102832

AAATCTAATGTTACCCAGATACATTTCCAACCCACATATAGACACCGAATTTAACGATG

A\_14\_P131306 GGTTTCATGAGATCTGAGAGCCATCAGGAGTATATCTTTAACATTTAGATCTATGGGTTAG

CUST\_1992\_PI426210822 TAATTTGGAGGTCTTGGTGGAGGCCTTAGTGGGATCTGGGAAGAA

CUST\_6374\_PI426210822 TTCAGCTGGAGCTGGGCCAGACTACTAGGTTGTGTATTTAGAGAACTA

A\_16\_P17406688

AAAAAAAAAAGCCATGTAATCATGAAGAGTGAGAACCGTAAATAGAACAACCTTTCCTGG

A\_14\_P116280 TTCCAATATATCTAGGAGAAGAAAAGTATGGTCCCCCACACAAAGAATCATAACTTGAACA

A\_14\_P137013 GGCAGCAACTCCTTTAACCTCTAAATCCATTTGAGTTCCTGTGTTTATCATGCAGTATAC

A\_16\_P39695760

TCTTAGTGCTGTAATTGTTGATCCTGAATGAACCTTAAACAACTTCCGAAGAGATGAGACT

A\_14\_P121606 GAAGAACACTCATTTATTCACCAACTTCCCCTCAGGAAAAATATATGACACTGTAGGAA

A\_14\_P108790 TAAGGTGAACGGGCGAAAATGTCACCTATGAAATCTCTAACTTCCCTTTACACAAA

A\_14\_P123931 GCTTCAGATATTTTTTTGTTCTCCAACCTTTGATCTTTGTCTTGTCTGGTTTTGTCTTTG

A\_16\_P58424485

CTTAATAGTTACATGGATATTGCCAAGTAGCCTGAGTTCTCAGAGGCTTGATATCCTCAT

A\_14\_P113700 CTGTAGGCAAGAGTTATGTGTTTCAAGGATGTATAATGGAAAAATCTGTCTCAAATGAGG

CUST\_10150\_PI426210822 TATATAAGCCAGCCTGGTTTCTGTGGAAAGAATGAAGATGATGGGGTGT

A\_18\_P26794658 CGAAACACTCCTCTTGCCCCAGTAAAAGGATGCCCATTTCAATCTC  
A\_14\_P112808 AGGTATGTCCAGCCAATTTGTTCTGTGCCTCAGTTTACCTTTTTGCAAACTAG  
A\_14\_P117687 TAATAGTAGTATCTGGAATCTCTACTTTCTCTCCACCTGGATCATTACGCTTCAAGTCT  
A\_14\_P111678 GCCTAATTACACTTTTTATTACTTTTTAGTGGTTGGATTCATCCCTTACTGGTCTCAAC  
A\_14\_P107172 ATCTATATTCATACATATTATACTCTTGTGTGTAGTGCACGTGCTATTGGTGGTTTGTCT  
A\_14\_P107479 GCTAGTGAGTGGAGTTGGGTTACAACAGCATTATTCCAAAATGGAATTGGAAAATTATT  
A\_14\_P114746 ATCCATCAGTTTTAGCCTTTCATTTCTATTGCTTCCTTTTGGGCTTCTATTCAATTGAACA  
A\_14\_P104232 TTAAGTTTCTTACCTACAATGTCTATAAGGACACTGTAGATAAGTAGGCCATCTGGAGGT  
CUST\_4579\_PI426210822 CTTCTGCCAACCCTTGCAGCTATAGTGGAGAAAACTGTTTGGTAG  
A\_14\_P131738 ACATTGATAACCTTATCTACTACTGTGGGAATCCTGACCATTTGGAGAACTATTATCA  
A\_14\_P125762 AGCAGAAAAGAATGTCTTACATATAAGCACCTCAATAAAAATAAGACGTGTGAATTAAC  
A\_16\_P19830654  
ACAGATCTCTACTTGCTACACCAGATAATCTCTTGCTTAACTTATGTTCCCTCCAGAATGT  
A\_14\_P106568 AAGAGAGATAGTCTGGGAATCCTATAACAATATGAGTGTCTGATGTTAGTAAGAAACCCAG  
A\_14\_P201507 GTAAAACTGTTACCCTAAGGATAAACAGAGTTCAGGCACTCAAACCTGGGTCTAAGT  
A\_14\_P121385 TTTTTAATGTAATGCCAGGATAATGTCTTCTCTGAAGAACTGTTTCTGACCATAGGCC  
A\_16\_P00056166  
TCCCAAGTCAAAACATCAATAGATACCTATCATCCTTTTTCAACTAATTCATATCCTCCAA  
A\_14\_P133484 CTCTAGGCAAAATGACCTTTTCCTTCACCCTTCCCTGAGTAATGATTATCAGGATTTTTAT  
A\_14\_P126888 CCAACAAGGGGATGAAAATAGACTTAAGGGCTATAGCAATGTGATAAACATATTTGGGAA  
A\_16\_P36028070  
GGGTCCCCTACTAATTTTACAAAGATGCGTGATAATATCCAACATATGGCTTTAACTACG  
A\_16\_P36380997  
TGTCACCTTTAAAACCTCACATTCTCAAGTAATAACCTCTTACCTTATCTTCCTACTGCT  
A\_14\_P119089 AATTCTGTTTGAAATGGAATTTTATAATTTGGGGGCATATACTTCCCTAGTAGAACAAGA  
CUST\_768\_PI426210822 AAATGGCTCGTAGCTCAGCACAAACCGTGCCTGATTAGTGTGTTT  
A\_14\_P133247 ATAAAGGTGTTTTGGAATTCTTTCACATATTCAGAATCGTAGGTCATTCAGGCTTCTAG  
A\_16\_P58424513  
GAGTTCAGCATTGCTCTGTTTTTCAATTGTGTTCATTTTTACAACCTACCTTCTTTTTTGGC  
A\_16\_P21540226  
AAGATTGAGTTCAAGGTCATAAAACCTAGTCAAGCAAATCCAAGACTATTCCCTTTGAAGC  
A\_18\_P14056427  
CCTTCTGCACAAATACTTAGACAGTTCTTTGCAAATGAATAATCATACCACCAGAGTTTC  
A\_16\_P35184729  
TGGATCTAGCATCTTCATTATAATAGCACCTTAGCATGTAATTCAGTCTCCTCATGACAA  
A\_16\_P16294089  
AAAAAAAACCTTTCAGATGATTACCATGAACTCACACTATACCTTACAGTTACAGAAAAAGT  
A\_18\_P22843231 CTTTAACTCTGTGTCCACAAAACCAGACCTCCAACGTGGCGTTG

A\_14\_P139253 ACTGGTAAGCACTTTATAACATACCTTTGTAGAATGCCATTTTCCTGTGGTATTACACCA  
A\_16\_P01740736

TCCCAAGGGTATTCAAATCTAGGCACTAATCATCATGTAACCTTCCTTTTACTAGCCAAA

A\_14\_P104547 GCCAGCCACTCACTTCAGTAGGATCTCCTGGGTCTAGAGAAATAG

A\_14\_P201295 CAGGAAATTATAGCCAGTTGAACCCATATGTATGCATATGCCAACAAATTGAGTTTCCATA

A\_14\_P133093 AAATGCAACAAGTTGAACTCCAAGTTCTGGAAACGTTTACAGTATGAAATGCCTTTTAAAG  
CUST\_9514\_PI426210822

CATAGAGCCTCGCCACCAAATTTAAATTAGGCAAAGTTTCAAAGATTTTAGATTAGGCAC

A\_14\_P116722 CAGTTATTTACCCAGTCTCTCAACTGGCTTTTAAATGAAGCAATTTTCAGCATCAGATTA

A\_14\_P112114 CATTTCCCAATCTCTGCTTACCACAACTTAGAGACTTTTCTCTCCTCGATGC

CUST\_3735\_PI426210822

GCCACTGCATACGTGGGTGTATTTTTTAAAAATTGTGACACATCATCAAGATGGATATACT

A\_14\_P103208 CTTACCTCATAACAATGTGCAGATCCAGTGAAAACCTTTCCCAATATCCAGCAATTCAA

A\_14\_P134188 GGAGAAAACACTAGACTTAGAGTCAAGTCTTAATTCTGCCTTTGCCATTTAACTGCTCAC

A\_16\_P58424163 CTTGTTTTTCCCCTTACTGAGTAGCACTCCATTGACTGAATATCCTTGAGTTTGTTCAT

A\_14\_P110737 GACAACTTCATATTATCCTGTGTTCTTTCTGACTGGTAATATTGTGTGGGATTTTACA

A\_18\_P15208024

GGAATGCACAAAATATGAAGCCTGAAACTATAAGACCCAATGATCTGAAAAATGCTCACA

A\_16\_P18750316

AGCCAAAATACCTTAAATTATCCCACTATCCTAGAGAATACACATTATCTCAGGCCATGT

A\_14\_P121752 AAGTAAATAAGTGTTTCCTTTTATTTAGTTCTTCTCACCCTAAATCCAATACGAGTTCA

A\_16\_P00564304

CCACCGAATTACAATATGATTGTCATGGTATCCTATCAAACCAATCATAAAAGCCCATGT

A\_14\_P132200 CTTTGCACCTACCACATCCAAATTCAGCATTTTTTTTTACACAGGTGAAATTTACTGACAA

A\_16\_P39794746

GGAAGTGGACTCAGAAATAAACCTATCAATTTAATAAGTTAGAACATTTCACTCATGCAC

A\_14\_P130643 TGTTTTTTCCTCCTTTGTTACCTTTTATAGATACTTGGAGATGAAGTTCAACTTTTTTCA

CUST\_10386\_PI426210822

GTTTTTTTTCCCACCGGAATTAATGGTAATGGATCCTTTACTTTCCACTGTACATT

A\_16\_P00685076

CCTGGGAGGTTTATTTATTTTTGTAGATGAGGCTAACAGAGGTAGTAGATACTGCTTAGC

A\_18\_P14547977

AGCCATTTCTAACATATCCCAACTTAAATTTCTTAAATCTGTCCTATCTACATAACCACAA

A\_16\_P02785109

GGGAGAGAGTATGCATGATTGATCAGACTCAGCATAGATGTTTGCATTCATAACAAAAAG

A\_16\_P36230975

ATCAGGGTTCTCAGCATAAATGTTGACTTCTATTTTTGGTGAAGCAGAATATAACTTTAAT

A\_14\_P107767 TTTTGTCCCATCCCCAAGTTATAAACTATAATGCAATTCCTTTGGATTTTTCTTTAAA

A\_14\_P101839 CAAACTTGCCAACATTTCTGTTTATAGATTTTAGGTGTTATGTCTGTCTTGAGTCTTCCC  
A\_14\_P133778 AGTTTTTTAGAAATCACTTCTTTCAGCAATTCTCTCAATTCAGTTCAAATAGGATGCCCA  
A\_14\_P110096 TTAAACGAAGTGTAACCTGCCACACTAATACTTTGGATCTGGCAAATAGAAAGTTTCTG  
CUST\_2248\_PI426210822 GAGATAGGACACGTTTAGAGGTGCTCTCCCTGTAGACACGCAGGG  
A\_14\_P112676 AACTTCAATTGCTTTTTTCAGTTCGGTGGTAACTGCCCTCTTCCATTATACATAAAAAGA  
A\_14\_P124412 ATGTAACCTCAATCAAAATTGACCCCTACATTAACATTGATGCAGGAACATTCTCTCCTT  
A\_16\_P00806182  
TGCTCCACCTAAGTACTTTAGGCTTTTCCTACTAGGTAAAAACCAGATTACTTTGACAA  
A\_14\_P136727 CTGTGCCTTTTAGATTTTTCAATGGCAGAAACCCATGAGTTACAGGAGGCTTTAATTA  
A\_16\_P01801974  
AAACAGATTCAAACCTCGTCTCAATTAAGTGTGTGCTGGATAATTCTTGAATAGATCACA  
A\_16\_P00347285  
ACTCATATTCAATATGCGCCTTAAAACGACTTTAAATCTCTCTTGATTTTTTACCATTGA  
A\_14\_P106264 CTTGCCCTCCTGACTTCAGTTTTTCAATTGCTTTCTTTTCAAATTATCTTACACACCTCT  
A\_14\_P107108 AAGGTAGTTAGAGAAGAGAGTTGAATATGACCTTTGCATAGAAGGAGAAGTTACCTTGT  
A\_14\_P122613 TGCGTATATGTGGGATGTATGGGTTTCTTATTAACAGATCTGTGAGTTAAACTCAGGG  
A\_18\_P16982945  
ATCTTTGCTCCCTAAAACTCCTTTAGAAGTGGTCTCATGATAAAGCACACTCCATAAG  
A\_14\_P115083 CTAAACCACTGTTTTGTTCACCCAAAGACTCAAATGAAATATTTATCTTTTCCCTCCTGT  
CUST\_7078\_PI426210822 TACTTAATCTCTCTCCTACAAATACCAGCTTCCTTGGTGAGTATTGGGGCT  
A\_14\_P107514 GGCCAAGAGAATATCCGAACTTTAATTTTCAAGGAATTGAATGGGTTTGGCTAGAATGTGATA  
A\_14\_P102270 CTGGTCAGGTTTTAAAGAACAGTTTCAAGCAACCATGAATTTGTTTTCTGAACATATATAAG  
A\_14\_P128944  
GAAAAGAAATTGTTGACATGAAAAACACAGCAGTAACAACCATTCAAACTTCTGATCAGG  
A\_14\_P123691 ACCTAACACATACTGTGGAAAAGGAGTCTGCTTACTTACTGGAATTATGGTAAGTGTCTT  
CUST\_9107\_PI426210822 GTCTGAATCAGACTTATGTAGCACCAGGCAACCTTCAATCTCCTTTTGAAG  
CUST\_5706\_PI426210822 AAGGTTAACCCCAACGGGAAAGGAGAGGGGACTCATCAAAGGTTA  
A\_16\_P16191529 CTTTCACAGTGCTTCAGACCACTGTAAGTGTAGGGGAAAAGTACTGAGATTGT  
A\_14\_P103525 GGTCAAAGAAAACTCTTCATTTCTCCCTGATTCTTAAACGAAGGTGGTTAATAGAACT  
A\_14\_P129469 ACATACAGAAGTATGGCTCTGTTCTTTCTATACTGTATGTTTGGTGCTTTCTTTTGTCT  
CUST\_1644\_PI426210822  
CACCAGAAAGTCAAGCATCATCCATAGGGAACAGAAAAACAACCTATGAG  
A\_14\_P128997 AAAGGGGGGGAACAAGAGGAAGGGAAACTTTCTTTTTATTTTAAAAGTGTATTACTAAG  
A\_14\_P105706 GTTTAGAAATTATGGAACAGATGGCCTTACTTCAAGAAACGGCTTATGAAAGACTTTACC  
A\_18\_P17062650  
AAAGAGTAACAAGATGAAGGGGTTAGAATGATTTGTGATGGATACATTGTGCATTGGAAA  
A\_14\_P104359 TTCATCCTCAAAGGAGACTCTTTTGTCAACATTAATTTGTGCTTCCCTAACCTAAATC  
A\_14\_P131032 CTTTAAAACATGCACATAAATTGATATAAGAAGGCACCTTATGAAGTCCATACAGTCAAAT

CUST\_536\_PI426210822

TTTATGAAACCAATGGTCTTTTTTCATCCTGACTTGAGATGCTGAGTTTTCTTTCAGTATT

A\_14\_P133156 TTAGTCAACCTAGAAAAATTAAGTGTAAAAATTAGTCTGGTCCCTAGGAATCCAAGGTGG

A\_14\_P100324 ATCTCCTCCTCCATTTTGAATAGTATTATTACTTGGTCATCTGGGAACCTTAATGTTGG

A\_16\_P37059914

TGCCCAAATAGTTTGCTTATACCAGATGTTTCACATCATGAAGAGAATATGGATTTGCAA

A\_14\_P101939 ACATTTCTCCTTTTCAAACCAACACAGAAGAAATTTCTATCCCAATTTAGTTACTCTCCC

A\_14\_P106208 CTAAGTGAAGTACCCACACAGAAATTCACATGGATTACCAACTGGTAATTATGAAATCT

A\_14\_P102399 AAGAGCCCATTTGTATTATTTCACTGCCTAAATTCCAGAAAGCAACAAAAACCAATCAC

A\_16\_P21288802

AAAAACACAATGACGATGAATGTGATGATGGTTCAAATACACAACCTGAAGTTTAGTGGCA

A\_14\_P123390 CATTAGGTGACAATTTTAATAATCCTCTGTTTTCCGTTACACTTAGGAGTCTGTTTTCTG

A\_16\_P16191480

TGGGATACCAATGCAAACAAACATAGATTTAGTGGAAAATGACTCAACCAAGTAAGATTT

CUST\_10166\_PI426210822 CAAACCCTCTATCAGCTGGGGCTGTTCCAAGAGCCTGCTGCTTTA

A\_14\_P139501 CTGGTTAATGGTCATTTTACGGTCCACATACTACTCTGAAATCTATTAGAGTGTGGCTTA

A\_14\_P112753 CTTTTAAATTTCTGTTTCATCAATAGGATTCAATCAACCTGGAATCTCCTCTCTTTGTGCGA

A\_16\_P36351479

AAAGCCCAACTTTGTAACATAGAGCATGTTAAAATTTAAGTTAGAACTTCTACCCTGCA

A\_14\_P104820 TCCTTCTCTTGAGTAGGCTGCATAACATTTTAGTCACTTTTGGTTTTCAAAAATGTCTT

A\_14\_P114325 TTAACAAATAAACCGAATTTTAACTTGTGAAGAGTTGCACCTTATGGGTGAAGACACCA

A\_18\_P22840493 AAGGCACAAAAATTCTAATCCAAAGGCTTTGCCCGCCTTAAGTCCTTTTTTGAAT

A\_16\_P17008175

TGTGTGATTTTTCCCCTTAGCAATTATACTCCTCCACTGAAATCTATATGTTCCATACCG

A\_18\_P26794477 CAACACTCCCCATCTCATGCCATCCATAGGTGAGATATCCTCTG

A\_14\_P104736 ACAGTGGAGAAATATTTATAAACTTAATTTTGTAAAACAGAAGTCCATTCTTTCGTGCC

A\_14\_P121063 ATAAATGATGTGGGGTTTTGTTTTGTTCTCTTTCATCTTCTTGTTCATCCATAGACTGTAG

A\_14\_P139956 ACTTTGTATGGACATACAGATTCTGTGAACAGCATTGAGTTTTTTTCTTTCTCCAATACT

CUST\_4960\_PI426210822 ATGGATGAGCTAATACATCCATCATCCTATCTCAGGAGGATGCTTGGATTTGT

A\_14\_P115010 TAGAAGCAAGATGGCTGAACTCAATACTCATGTGAATGTCAAGGAAAAGGTAAGATCAAG

A\_14\_P122909 ATGATAACCACAGAACAACAGTATGCTTGACTTCATTCACCATTCCTAAAATTTAAGCC

A\_14\_P109761 CTCTGTGAGTGTAATAATTGCTAGATTAAAAGCCAGTGTGCATGGTCAAGATACTAGATCA

CUST\_7374\_PI426210822 CAACCCTCAGCTAAAAGGTTTCAGTGGAAGGGACTGATGCTGTCTC

A\_14\_P134701 TGATTCCTGAGCCTTAACACTGTGCTCTTTCCTTCTGTATATACCATGGTCTTACTTT

A\_14\_P117477 TGAGGTAGAGGTATTTTCGGAAGGAATATAGGGAACATAACTTATTATTCTCTGATTCCTA

A\_16\_P18823659

TTCCTTCTCAATTACAACCTTTCATCTTCCAATGTTCTGCTAATTCAAACATCACATCGT

CUST\_4370\_PI426210822 CAGGGGGAAGCTCTGACTAACTGATCTCTGGAGAGGAACACAGAT



A\_14\_P132938 CAAGTTCTTTCATTTGACAGAGGCATAAATCTCCACTCTATTACTTGAATTCACATCCCA  
A\_14\_P119777 TTAATTTTAAAGTCTACTAACTTACCCATATAGATAGGAGTCCCACATGTGGCCTGCAGC  
A\_14\_P113734 ACCAAGCCAATTGAAATGATAAGAATCTCAATATGGGAAGACCAATTGAAATAAGAAGGG  
A\_16\_P19262799  
TCTCCAGGCTCATTTAATCATCCACAAAGTCCCATACATATACTGTAGAGTTTTCAACAA  
A\_16\_P03458678  
TTTTATCAGCAGGAACATCAAGGCTTAACACTGAAAGTATCAAGGCAGAATGTTGAG  
A\_14\_P135183 GACTTTCTGGCTTTGGACACTCCCAATGGTATATTTCTTTGTGGTGTTTTTATATTTGGA  
A\_18\_P13675690  
GACTTTGCCTGGATGTAGTAATAACCTAACTGATTCCTAGTTAGAAAGGACAGCCTTAGT  
A\_16\_P19741567  
TTCCCTTACTTGACCTGTGATGAAAACTTACCAAATGGATTATAATATGCTTCTCGTGA  
A\_14\_P131359 TTGTAAGATAATTGGTAAGTTTTGGAAAATCTCACAGTGGCTGGGTAATTCGATTTCCCTT  
A\_14\_P121651 ATCCTGAAATGTCTCTTATGGAATTAGAAGTGTGTCCATTACTAAGCATACTGACCTT  
A\_14\_P125928 ATCGTTTTAGCCATGCTGTGCAATCCACAAATGAAAGTTAGTTTAGTGCTTTGTAAAAC  
A\_16\_P18194327  
GGCCAATTTGAACATTCTGACATTTCTATTACCAACGCCAATCTAAAATGTGAAACAGAG  
A\_16\_P00957722  
AATCAGGGAAGTCTTAGATAAAATATGAACTGTGGACTATGGATTTACCTCTGCTAGAC  
A\_14\_P129385 TTTGTGACAAACCAAAGAATAAGAGGATTTAGAACAGGACTGCTTTTCCCCTATGATTT  
A\_14\_P137279 TCATCCTCTAGGGTGTCTTGTAGGGGAAGATTTGGCAAACATGCTAAAATAATTACA  
A\_14\_P124395 AAGATAAAATTCTCACATGTGGCAATTATCAGATAGCCTGTGGACACTTATTCTCATGCA  
A\_14\_P108857 CCACCCGATGCTGAAAAGTTCACAAACCCACAATTCTAAAGGAATTTTAAAAGATTATT  
A\_14\_P139065 CATTTGTTGAAAAGGAGACAAAGCCATATCCCTTAGACTTTCTGTTGCCATG  
A\_14\_P118470  
CTCAGAAGAATTAATAAAACTCATCGAGGAGGTGAAGGTTCTGGATGAAGCAACATTA  
A\_14\_P121280 TGCCCTTATAAACTGGGTTTTTCTGCTTAAAGTCGGATTTTCATTTTGGCATTGAAGAAA  
CUST\_1829\_PI426210822 CTGCCATTTTTTCTGCTAGTTTATGTTCCAAGAGTAGGGAGCATGCTTG  
A\_16\_P00685337 GACATGAAATGTGTCCATAAAAGGCCACCTAGTCCCAGGCAGAT  
A\_14\_P126258 TTTAAGAGAGTTTTTAAAATACCTGGCACTGGCTATCTTAGCGATAAAGGCAAGACATGG  
CUST\_1926\_PI426210822 GTCTACAGTACTCATCTCCACCTATCCCTTTATCTTCTGTTGTAATGCCTGGTA  
A\_14\_P102157 ATATGAAATGAAACACTTTTTGGGTGCAAAGCAATTTCTTCCCCTTTCTAGTCAAGGTA  
CUST\_6105\_PI426210822  
TATGGCAAGTGAGCTTTAAAAAATTCTTTTTTTGATGCATTCCATCAGAAATCAGTGG  
A\_14\_P132829 AGTTGAGTGGGAAGAGAGAGGGATTGTAATAATCCATGTAATGGAATTTATACGGAAAT  
A\_16\_P02511360  
GGCCTCTGAATCTTCTACCTTTGTTCAATTTTCCAGTGTTTAGATCCGAAAACAGAATTA  
A\_14\_P126072 ATGTATTGGATCATGTAGCAAAAACACTCAATTCAAAGACAGTGCGTCTAAACGCCAG

A\_14\_P126197 CCATATACAGAATTAGGTGCAAACCTTTCTTCTGAAGAATTAGGTAATGCCCTTTTAGAT  
A\_14\_P105304 AGAAACAACCTCAGAACCGCTATGGAGAGGTATTTTTTCCCAACATTCTATGAAAACCTTAC  
A\_14\_P100897 ATCCTGGTGAATAAATTAACCCTCAAGGTAAAAGCAGAGAAGCCAGAGGC  
A\_14\_P113009 ATCCAAAATTCCATACCTGTCTAAATTTCCATTCTGTTTCATGTTCTGATTCTCTTTGC  
CUST\_6027\_PI426210822 ATCAATAATGCTTGAACAACCTAGTGTGGTGGCCAGGACCCAGTCC  
A\_14\_P113984 CTAAGTTTTGACAAATGGTGGAAATTCATTGTTATCAACAATGCCATCTTCTGGTTACCAT  
A\_18\_P14135661  
TCCTCCCCTAGAATAACAACATCATAACTGACTTATTTTCATCATTAAAGGATTTAAATGCA  
A\_14\_P124220 AGTCCTTTCCTTATTATCTGTTTTTGCAGGTTGCAAAAGGACTGTGATCATATGAAGATC  
A\_14\_P107797 CTAAACTACATCAGAGTTTCATAGTGGGTTTGACAAGTGGCATATCTGATTATAGCCGA  
A\_16\_P17600562  
AAAAAGCATGTGATACAGAGTAAGACAGCAAATACACAGTCACACAAGGTTTATGCTTGT  
A\_14\_P132271 CTTCAATGTCAGGTTTCAGGTTTTCTGGTGTCTGACTAATGAACATTTCTGAATTTAAAT  
A\_14\_P122589 AGAATTCTATTTGGAGAAGCCCTTCTCCATTGTCTCAGTCACTTCAGGGT  
A\_14\_P202339 TTGCAAACCTTTTTCTTGTATTTCCAATTCCTAGTTCCTCTTTTTCTAATTAACCCCCAG  
CUST\_1338\_PI426210822  
GAGCCATACGACTTAATGAATTAAGCATGTAATGCAGGCCAAGTAATTCAAACCCA  
A\_16\_P03500985  
TTCTCGTGTTTACCAATATCTTCATATCAGTTTGCCAAAGTAATTCTTGATACCACACCC  
A\_14\_P107569 TAGACTTTTTCTTAGGAGGATATTTAGAGAGGGAAGGGGAAGATTTCCAAGAAGTAAAT  
A\_16\_P21546230  
TAGGCCAAAAAGGAAAGTTAAGTTCTCAGAGAGAAAGTCAAAATCTTGTGAGCATACTTG  
A\_16\_P00423432  
CCCATTTTGAACAACAGTAACAACAAATATCTCTTAACAGTCATCACAATTCTTTGTTCC  
A\_14\_P110110 TAGTAGAAAGAATAAAGGGCTTTCTGTTTATGAGGATCAGGCTCATCAGCAGATACAAAA  
A\_14\_P129378 ACTTGATCATCGATCCATATGTCATCTTTTCTCTTAAGTGATAGAACTTGTTTCTCCTGC  
A\_14\_P120224 GATTGGAAGTGGGATTAACTCAGAATCAAAATTTTGTGCGATGGGTTGGAGGAAG  
CUST\_4398\_PI426210822 ATAATATAAGCCCAAGGACTTGGAGGGATGAGAGCTGTGATGCC  
A\_16\_P17712020  
CAAATGCTAAGAATAGTCACTCCCCTTGTATATGGTTTTCAATGTCTCTTTGCTGTCTC  
A\_14\_P129666 CTTTCGCATATGCGATCTACCTGTTACATTTTTGTCTTCCTCAGAGTAACTTCAAATCAT  
A\_16\_P38686856  
CAGCCTGTAAACTTGACTTTTAAAGACTCACAAATCCATTAACCTATCCCCTTCAGAGATTA  
CUST\_6201\_PI426210822 GGAACCTGGCCTGTCTTTAGGTGGAAACAAGTTTTGGAAATTCCTC  
A\_18\_P17387997  
GACACACTAAAGAGCATCACTTATTTCTCTAAATAACACTTTCAGTTAGTTGCCTCTTAA  
A\_14\_P111908 ACATTTTTGTTGTTACGAAATTTATCGTGTGTGGTATTGTCTCTGTTCAAAAATGAGG  
A\_14\_P125662 CCAGGACATTCTCTAAATGAGTTACAAATCAGTTTCTGGAAAGGAAGTGCTCCAT

A\_16\_P17696809

ACTTTTCTCTCCATGACTTTGATCCTTATAGCACAATTGACTTCAACAGTAGTTTCGAGA

A\_14\_P117740 GATGTTAGAAGAAATGTCCAAAAAGATACAGGTAGGTATAATATCACGCAACCACACTCA

CUST\_5211\_PI426210822

CAGCTACATATTGTTTTACCTTTGAAGAGAAAAAAGCATCAGTGGGGTTATGTGATTTTC

A\_16\_P02818890

TAGACTCAGTATCTCCTGTTTAACTCATATAGAAAGCACATCATATTGAAGCCCTCTGT

A\_14\_P138243 GGTTTTTCATAACATCACTATAGTCCTCAATAGGCATTTTTAGTTTCCTATCCGGCAGAA

A\_18\_P13944186

CCAGAAGACATCAGGAAGAAACCTCTATTTTCTCTACAAACATCCTTTGAGAACATTTCA

A\_16\_P19964231

AAAAACCGCAAGTATAGCATGAAATTGACTAGAAACCCTATTTGTCAGGTAATCTTCGCA

CUST\_2096\_PI426210822

TCAATATTATCTTGCTCTGTTCCCTCATCAGTTAAACAGTCTTAAAAGTTGTACCTTTTT

A\_16\_P00483964

GGCCTATGCATAAGTATGAGCGTATTACCGTCTATTACTAACATAGTGGTCAAAATCCAG

A\_14\_P113353 ATTTAGAGGAAATATCACCCCGTGCCTCTCTTCTTACTTTTCATTTCTTCAGTTTATAG

A\_14\_P103842 TTCTTTTTAGGTATAGTTTTTCTAATTGGGTTTGACATTGCTTCATAGTGCCTCTGTTT

A\_16\_P17059412

ATTAGTGTAAGAAAGCAAATCCTGGTATGTTGAAAGAGACTACTGAGGTTAAGGGTGT

A\_14\_P129192 AAATTATGAAAAGTTTAAACAACCCTGCCATGTTGCAAGTTCTTCTACAGCCCCAG

A\_16\_P18035568

ATTTCAAGATGACCCAGTATTTAGTGACTTTACCTAATGCTTCCGGTTGAAATGTTTCTC

A\_16\_P18592375

AATAGTCTCTTGATACAAGTGCTACTCATTGTTCTGATAATCACTGATCCATTAGGCC

A\_16\_P17263376

TGACAACCTACATAGTCTACTTTTCATCATTATCCCCACATTCCAATATCATAGCCCTTT

A\_18\_P16878550

AAAACCTACTAGCCCTACACTGATTACACATAAAGACTGGACTCTAACATTGCTCTGTGTT

A\_14\_P138173 CTCTGATGATATTCGACTTCTACAAGCAGAACAAAACCACCAGAGACCAGATG

A\_16\_P16710511

AAAACCCTTTGAACTGACAATCTTTTGTGCACTCAAATCTCAATACTGAAACCAGTAGT

A\_16\_P02528913

CGAAGATTCTCCTTAGGTAAAACTTAGCCATGAACTAACCCCTACAAACAAAAGTGTC

CUST\_154\_PI426210822 AATGCTAGGTGAGCTGATAGAGCATGCTGTTTCAGTTTGCAGCCACTA

CUST\_7823\_PI426210822 CTAGAGATGATGTCTTTGGTTTACTCTTTTGGCCTGTCCTACCAAGATC

A\_16\_P01412878

AAATACTTTTAGGCCATGTTTGCATGTAGATTTTCTCTTTAAACCTGTGCTTTTTGCCT

A\_16\_P00042692

TAAATCTATGTCTACTTCCATGACTTCGATTCAGTAAACACTCAGGGAGTCTTACAATGG  
CUST\_6850\_PI426210822 AAAGAAACAGTGCTGACAGGCCAGGAAGGTCAGAGACTCAGTGTT  
A\_14\_P124799 TTTTTGGGTAAGTGTGTGAAAAGGATTGGTAACCGTATTTGAAAATCAATGATCATGTGCG  
A\_14\_P110491 TGTTTCCAAAATTGACACTGAGATGAGGAAAAGACTATGTGGAGAATTTGAGTATTTCCG  
CUST\_6972\_PI426210822

TAGCCACAGCACAAATTCTATTTATTCTTGAGGCATTCCCTCTTTTATTTTCTTGGTCTTT  
A\_16\_P37784068

CCTCATGAATGGTAGACTTCACAACTTGTAAGTGAAATAACTAAGACTGTCCAGACTTC  
A\_14\_P124923

AAGAACACAAGGAACAGAAAGATAGACATGAAACATAAACCAATAATTGCCAAGGATGGA  
A\_18\_P18331191

ATTATCCTATAGTCTTCCCTATTTGGCCTAACTTGTGTAGAATCAGAAATACCATGTGCC  
A\_14\_P123639 TTGTTTTCTTCTTTGAGAATGTGCGTATGGAAGTGCAGACCATCCTCAGGATAAA  
A\_14\_P128583 GATCACAACAGGAACTGGAGAAGTGTGATTTATTACAGTTCTCAAATTAGAAACCTCC  
A\_14\_P201148 CCAAAGGCAGATTTTAGTTTAGGATTTGTGCTAACATGATCTTTGTGATAAGTCAGGTG  
A\_16\_P17288386

CTGTCTCTCTAACTATCCATCATCATGTACATTAGACTTTAGTAAGTCCTCGTAAAGGC  
A\_14\_P132753 AAACAGCCAACTACATTAGTGCTCACACTAAAGACGTAAGGACCGTATTTTACCTCT  
A\_16\_P36061110

TTCAGACTTCCAGTGATAAAACAAGAAATTGCTATAGGCCTTTAGACTTAAGAGTCACCC  
A\_16\_P17731293

AAAAACGCACATACAATTTTGTAAGATTGATTAGCCCCAAGTAAGTAGATTTCCCCTTG  
A\_14\_P110995 AAGCCCAAAGCCCCAAATAGTCCTTTGAATTTGTTCTCCATTTTTTCATTTATTTATTA  
A\_16\_P16799849

CCCATCCTCTGTAAATTCTCTCAACCTTCTCTCATTTTTTAATTTTCATACCAAGACCTAGA  
A\_14\_P129026 ATAGCCCTCCACCAAAATTGTATACGTTGATTCAAATGAACATCTATTCCTCTTTGCTT  
A\_14\_P118769 CTTTCCTTGTAGCAAAGGCTGAGTTTGCCTATTCAGGGACATTTATAACTATTTCAAACA  
A\_14\_P128293 ATGGCAGTTTTCTTTCAAAGTGAAAATATTTGCTTCTTTGATACTCCTCAGTGCCTTGCA  
A\_16\_P16338255

ACACCTTTGAAATCTAAGATATCCAGTCTGTCAAATAAGAAGTTTCTGACCCTTCTTTCC  
A\_18\_P16045387

AAGGGGGTCTTTGTAAATTAAGGAAGCCAGTGTATAATTAGCAATAGCAGATACAATGA  
A\_16\_P19224244

AGATGACTCACTCTTCTTAAAACATGTCCTATATGCTCTAACTACCAAATCATGCTGGAG  
A\_14\_P138282 GAATATACCTAGATTGGTAAAAAGAATAGGAGGGCATGGAGATATAGAAGGGACAGAATG  
CUST\_1704\_PI426210822 AGCCTCTGCACAATGGGAGCTTCGTCTTAATGCTTGAAAATGTCATCTC  
CUST\_7802\_PI426210822

AACCTTTATAAACTGCAGTCAGGACTGTTTTCTCTTCCTTAGTATGGATTAAACAAGAA  
A\_14\_P102114 CCTCTCTATACATGATCATAACTTCACTCTCTAGCCATTGTTTTTCACTAAAGGCAGTGA  
A\_14\_P126851 CCTCACGTTCTGTTATTAGATTTCTGACTTACACAAGAGCCTAGAACAGAAAGAAAGTA  
A\_14\_P133202 CCCCAAATATTTTCCAACAGAAGTAGAAAACAGGGCATATTAACAAACAACAAACCAAC  
A\_14\_P105945 TAAAAGTATCAGAGATCCCGATTCATTCATTCCTGACACCAAGTCACTTGAAAAAGCA  
A\_16\_P55126285 ATAGAAGACTTCTCAACTTGACAAAGACCCTTTGCCAGAAACCTATAGGAAACTT  
A\_16\_P16307491  
AAATGTGCCTTTTTGATGAGAACAAGCATTAGTTTCCTGCTATCTTGAGTATGACAGATG  
A\_14\_P114499 CCACCCACAAGGTCTCTAATAAATAGGGAGCAGTTTTTCACTTCATCACAATCTC  
A\_18\_P16654512  
GGAACAAAGGAGGAGTATAGCAAAAAGATACTAGCAGTAAGTATAAAACCAGGATGCACT  
A\_14\_P103357 CTACATATAGTCTAGAACAGCATGCGACATGTATCTTCTAGGAATATGTGCCAGTCTCAA  
A\_14\_P136607 CTACAGCCTAGTAATAGAGGAGGAGACATTTCTAAAATCGCACCCAGAACTGT  
A\_16\_P18031614  
TCTAAGTTAACCTCTTACCTAATCCAATGTTACTTTCCACCAGATACTTGAATCCCTTGA  
A\_14\_P129201 TTTCAAGCATAATGCATCAATCTGTATCCTCTAAGCCCTGCTTCCAGTCTATATAAACAC  
A\_14\_P119250 CTGTCTCAAATGCTGCTTCTGGTGCCTGGAGAAGTTCATCAAATTCCTTAATAG  
A\_14\_P119282 CACTTTTTTCTTTCCTATGTGTTAGGCCTATATGTTTCAGTTCAGCCCATTGACTTGA  
A\_16\_P19188043  
TCAGTGAACGAATATGTCTCCTCTGTCTAAATAATCCTTAATTACACCATAACGTAACCCC  
A\_16\_P37923439  
AGGACAATTTTTAGTATTCCTCAATGACTGTTTCTTCAACCAGTATCAACCACATTGTCA  
A\_14\_P108341 CTTTCATAGAGAAGACAATTACATTGAGCCTTGAATTTGAGTAAAATGGAAGGAAGGAAGC  
A\_16\_P03762699  
TGAGCCTCAAAGTCTTAGAACACTGATGATACATAATCCTACTTTATATACGCTATTACT  
CUST\_5396\_PI426210822 TCAATCGACTGTTCCCTTGGGGCTTGAGATTCTTGGATTCCAAAG  
A\_14\_P121908 CTGGACTGGGGCTATGAAACACAGTCACCAGCACTATACTCACTC  
CUST\_6443\_PI426210822 CTTGAACCACATCAGTAGAAATTGAGGCTATGGCACCTGGGATGTC  
A\_14\_P117171 CAGAACTCTATGCAGGTAACAGCAGAAATGATGGTGGTTTTTCAGGAACAACCTGAAAATAT  
A\_16\_P37007417  
GATCCATAAGTCTAAGGATGCTTTACACATATTTAGGGTGCCATTATAGATTACTGGGGA  
A\_14\_P117864 TTTATGTTTTCCAGGAATCTGAATTTCTGTGTTTGGAAATTTGATGAGGTCAAAGTCAACC  
A\_14\_P104127 TATAATATTCTCCTTCATGTTTCGAGTGAAGAAAACCTGCATGAAGCGCTGCTTACGAAGA  
A\_14\_P131841 CACATGCTCTTTAGGCATCCTCTATGACAATCCAAACAGGCTCTTTGGAAG  
A\_14\_P126096 GTCTCAATTATGAACTTCCCACTTAGAAATAACCAGTTGCATGTTCCATTTCAAACCTTC  
A\_14\_P107605 AGTGCTAGAGTGCAGAAAACATGTCCATCACCCCTCAAATGGTGACG  
A\_14\_P100860 CTTTTGCTGCTTATTTTTGTTTTTCAGTGCACTAATTTTGTTCAGTGCACTTTACGGGA  
A\_16\_P02155842

AGTGTAGTTTAAGCCATGATAACCACAAACTTTATTCATATTCTACCATTAGCCCTCTCA  
A\_18\_P14877191  
CCAGAAAGCATAAACTTAGCCATCAAAGTGTATCCCTAATAACGTTTTACATCTTTAGTG  
A\_14\_P125771 TGTGACCCTTGACTGATGGCTTCATTAGCATTGTTTCTTTTTGGATCCTTAATAGA  
A\_14\_P122660 AGTTTCCTAAACCCACATATATCTAATTATGCCTCCATATACCTAATTGTCCCTAGGACC  
CUST\_2208\_P1426210822 CCCAAGTTAGATGACTTTTCTGCCTTTGTACACCATTAACCCCT  
A\_16\_P01006791  
AAAGTTACTCCAGTGAAAGATCAAAGGTAGATATTGGCAAGTCTTCCTAATCTGACATGG  
A\_14\_P130267 CCGTAGGACTGGAAGAAACCTCAGTAATGGAATAAGACTTTGTCCAATAGG  
A\_14\_P127302 CGAGAATGTTACAGACCAGTGGCAGCAAGAGCATCTCTTCTTTATTTTGTATTATGAC  
A\_14\_P100718 CAATTTTCAGTGTTATCTCTTAATTCAGAGCAAGCCCTGCTTTTCTAAGGAATAGTCAGTG  
A\_14\_P200076 AAATGCAGCATTTTCAGCAGCCTTGAAATGACAAAGCCTGGAGAGTAGG  
A\_14\_P119623 ACATACCCACTCTTATTTTCAGTGCTGAAATTTATGAAGATCTCTGAATTCAGGTCTCAAG  
A\_14\_P112716 AACCCACAAGTTTTTCTGCAAATTCAGTAACAGGTTATAATTTTCATTGTCTTTGACTC  
A\_14\_P200325 GGTTACAGCAAATTACATGATGACCTAGGAGAGTTTCCATATGGTAAGTAAATAACACGA  
A\_16\_P41538201  
AGATGGTAGTATAAACACACACACTTAAATATAAATAACAAGTCACTAGAAGGTATGGGA  
CUST\_2198\_P1426210822  
GTGTTTATAGTGAAAAAGAAGACTTGGTCATGATAAAAGCCAGACACTCGTGGGAT  
A\_14\_P124882 CTGATTTGCTTCAACATTGATTTGGTAAGATGCTAGACACAAAATAATACCACAAACCGC  
CUST\_771\_P1426210822  
GGTATTCTTTGCTATAGATCTTCTGTTGACTGCTTTCCGGAAACAATGCATAAAACTGTA  
A\_14\_P201910 GTGAAACTTTAAACTACAGCCGGGATAATTCAGGACTGATCTCATTATCTTTGTAACCAT  
CUST\_1580\_P1426210822 CCTTTAGATGGGAGGAGAAGCTAGATTGATGGGAGACATCAGAACTCA  
CUST\_3884\_P1426210822 TCTGCTCTATGAATTCTGGGCTAGTGGGGATCATGGGGATTTTGTAAATT  
A\_16\_P39955749  
GCACTCTCATCAAACAAATCTCTTTGAAAATGCATTAGATAACACGGTTCCTTCAATTCC  
A\_16\_P19421019  
AACCCAGATAACTCCACAAGAATGTCTAATCCCAAGATAATTCTATCTGTGATTTCTCT  
A\_14\_P132937 CTGATTTGCTGCTGCTTTTTTATTTTTTAAAGGAAAAATTGAAAAACATTCTGAAGCCTGGG  
A\_16\_P15247423  
AAAGTGGAATAACGACAGACATCAATCTATTCTCCAAAGAGGTATAGCATTTTCAGCACAA  
CUST\_1229\_P1426210822  
TGTTAGACCTAAATTGTGGAATCTGGCTTTACTACTCACTTATTGCTATGATTAAACCTA  
A\_14\_P129063 ATCATGGTCTGCAAAATTTGGAAATTGTTTTAAAGGTGAACTTAGTGCAAGATGCATAA  
A\_14\_P131055  
AGAGAGAAGGAGGAAAAGAACTAGTGTGATAAAAAAAGAAATGCTACAGAAATGGGGTT  
A\_16\_P39142289

TAAGTTGTCTTCACATACTTCTCTGAATAGTTTGGTCCCACCAATAAACCTATCACTGTT  
A\_14\_P127292 AGATCAGTTTAAACATTGGAAAGCCCTGAATGTAAAATCTTTAACTTTCCCCCTTAAACAG  
A\_14\_P131726 CTTTTTACATTTGCAGGTTTTTCACGACTGAAAACAACATAGCAAAAATAAGCCAAGATGT  
A\_16\_P39971558  
ATATCACGTTCAATATTCCTGTTGATTCAGAAAGAACTAATGTTTACTAAGCCATCCCC  
A\_14\_P136647 CCACCAAAACATTTCTGAAGAATGACATTAACATGTTTCTTTGTGTGCACTCATGTATGC  
A\_16\_P17020832  
AGCCACAAAGAGATGTCTAAATATATTTGAACTCCACACTACAGAATTTCACTCCCTT  
CUST\_8534\_PI426210822 CCCTCTTAAATATTATTAACCATGCTGACCATGCCACATTTCCCCAGCATCTA  
A\_16\_P17766893  
AGGATGTCTGCATATTTCAAATGGCAATTCATACCTTCAAAAAAAGCAGGAAATGTTGG  
A\_14\_P103895 TAACATATGAATTATTGAATGTATTTCAAGGGCTTTCAGCGATTCTGGTTTCAGTCCTGG  
A\_18\_P16207443  
CCTCACTCTGGATATTCAATTAGTTTGGACAAATCACAATTGATGCCAATTAAGTCACT  
A\_14\_P118793 CTGGTTGCATAATCTGGGGAATAGTCATAATTTTCATGTGTTATACAGTTTAAAAAGCCTG  
A\_14\_P114088 GATTTAAGGAACTGTTTCTGGGATTCCTTCCAAATCCATTACCTGAAGAGAAATTCATAC  
A\_14\_P106822 AACAAACAAGAAAAGCAACTATTCTGAGACCTTTTCTGCCCATCAGTTAGATGATTTAGG  
A\_16\_P35881175  
GCTTTCCTCAGTTAAATACTAATCATTGAACTCAATTCTCTAAGCCTACAATTAGCCAGG  
A\_14\_P202365 CCATGTGACTAATTCGGTCTCTATGATCAAAGCCTTATAAGAAAGAATGACTGGTTGACC  
A\_16\_P02009760  
AATCCGTGAACACCATAATATCCTTAACTAGAGTTGGAGTTGATTCTATTGCCTGAACT  
A\_14\_P100597  
AGGAAAAAACAGCAGGCAGGCAGAAAAGCAAATTTTAAAGAAGAATCTATGTGCTAAGAA  
A\_14\_P103135 AGTGTGTAAATTCAAGGCTCACAAAAGATGTGCAGTGAGAGCAACAATAACTGTAAATG  
A\_14\_P107765 CTTTCACTTTTTTCCAACCTAGTTTCTAATAAGTGACCGTGACCCACAGTGCAA  
A\_16\_P00109951  
CCATCAATTTAACTCAATCTTTTCCACTTCTTACATCTATATCACAATCTTATCGCTGCA  
A\_14\_P128471 TAAATAAAATACATCCACAGCAGTTTACAACCTGCCATGATGTCATTTTGTGAGATGGC  
A\_16\_P39866695  
CACCTCTTCCCAATGTTATTTAAAACAGTAAACTATCAGGAAAGGATTTGAGGCTTTCCAT  
A\_14\_P137801 TTCCAAATCTCAGGCTTATGCACAAGATGGAAGAGCACTGTAAAATTTAAAAATGGACC  
A\_14\_P122263 CACAGTTCTCATAATCTCATTACTAGAGAGAAAAGGAGAAAGGGAAGCATCAAGGTAGTA  
A\_14\_P107994 AACAAAATGATCCCCTCCTCCCCAAAATTGCATCATGTATTTGTTCAATTTAACTTTTCAA  
A\_14\_P120337 CAAGATCTTTCCATCTCAGACTTTAATGGTCATCCTTTTCTATCTTCAGAAATGGGTATGT  
A\_14\_P115690 ATTTTTTTTTTGCCATGTGCATGGATATCTTTGTGGAATTTGTCCTAAATCTGGTGTGCTG  
A\_14\_P102332 AGGGATTGATGCCTAACTGATGGATTCTCTTTGAGACTATTTAGATATTATGTGAGCAAT  
A\_14\_P122796 GAAGTCTGGCAGGCTCGGAATTGTCATCTTCCTCAGGCAAATAGTTTT

A\_14\_P138391 AAAAGGTAATATTTTCAGGTGTTGCCACCTAAAATACTAATCTACATCCTCTGGCTTCATG  
A\_14\_P136503 CTATTCTAGGTTCTTACCTGTATATGTGACCCTCAGAATGTCCCTCTCCTCTAAGT  
A\_14\_P119914 TTACCTTGATTCCATATAAAACGGTTACTTGGAGTGTATTGGTCATTCTGTTCCCTGCTTC  
A\_14\_P125106 GGAGAGAAGCACGGATGAGCCACATGTTTAAAATTCTAGTTTGTAACATATTCAAGAGAT  
A\_16\_P15896330  
AAGGTTGGAATTTTCTGGATTGTTAACAAGATCAAAAAGCAAAGATATAAAGCCAAGGGG  
A\_14\_P106823 TAGATTTTTTTTTTCTTCCAAATTAATGACTATGACTTTTTGAATCCTCCCCTCCACTCC  
CUST\_7975\_PI426210822  
CAAACATAGGTA AAAAGATGTGGTGATTGGAGGCCAAAAGCTAGAATCTAAAAGACCAAGTC  
A\_16\_P20627273  
GATGGAGCAGTCTAACAGATAAGCAGTATGATTTACTAGCCCACAGAGAATGATTACTGG  
A\_14\_P121976 TGAAACAATCAACACATACACAGGAGGTTACTAGGAAACAGGAAAAATGTTTTCTGAAT  
CUST\_9119\_PI426210822 GCCACCCAGAAAAGCTCCCGCGGGAGACAGAAAAGTAACTTCTGAG  
A\_14\_P125347 CTGTTGGTGATGCATTTTAGCAAAAATCACACAAACCTAGAAACATGGAAATAACCGCAAT  
A\_14\_P101851 AGCACTGTTTTTCTTCAAAGTGAAGATTTAACGGTATCAAAGTAAACACAGGGTAGTGTTT  
A\_14\_P129754 GGCTATGGAAAAACAGTATTTTTGCTATTTTTAGAAAGCAACCACCCTCTCTTTCTGAGTA  
A\_16\_P18212022  
ACTCACTGCGACTAAATTTAACGCTTAATCATGTCCACCTTCTAGTCATCCTTTTAAAGA  
A\_14\_P117702 TTTAGAACATGGCAAAAAGCAGAAAAATTAATAATGTCTTATACCCCTTCCCCTGATG  
A\_14\_P129920 TGAAAGATTTTTTTTTTAAAGGGTAAATGATGGTAAAAAGATGGCCTTGAAATGGCCCCAA  
A\_14\_P123880 TCAATGTTTCAAACATGCTCAGAGCAAAAATGGTTATGTTCTCACATTGTCAAATGCACA  
CUST\_3630\_PI426210822 TGTGTAACCTTTAAGGAAAACCACACGGAGCCATTACCTTGTGTTGAAAG  
A\_14\_P138005 GCTGGTGTGATAGTGTGGTAGATGAGGATGTGGTATGTAATGAAGTAGATGGACTT  
A\_16\_P37561948  
TTGTCTTGTCTAACAACTTGTATACATTCTTTCAACTTCGCATACCACATTCAGACC  
A\_14\_P133147 TGAACCTCATGAAGTGTGTTTGTGGCACAATTTTACATTGGACTGAAGATGCTTTTATTCC  
CUST\_10212\_PI426210822 ACAGTTAACAGAGCCGCTTGCCCCTCAAATGGTGAAGCAAGCACT  
A\_14\_P122752 ACCTTTTCACTAAAGGCAGAAATAATTTTGGGAGTTCCATCTGCAGGAAAACAAATTATG  
A\_14\_P124300 CTGGAGTATACATAGGAAATTTGGTAACTTGGATAAGGCAAAGTCTTTTCCCTTTAGGAG  
A\_16\_P02302218  
ATTGTAATAGTGAACATGAAGTTGTTGGTGCTATCTGAGAACATCTGTATGGAATTCAGG  
A\_16\_P58424357 GAGCACTTGCTATGGGTATGCCAGACCTGGTGGAAATAGACACATAATG  
A\_14\_P107315 AAATTACTTTTAAACAAAAGGGATTTAGCAGAAGCACCTGGGAATCTATGGCATTGAGAA  
A\_14\_P126665 CCCTTATTACCATTAAAGTCCCCACATCTCAGTGCCTATCACTGCTTTTATCATATACT  
A\_14\_P114048 CTTGAGCAACTGGCATGCATTCCAAGAATCCTCATAACAGCCCCAT  
A\_14\_P104630 ATGTTGTTGTGTCAAGAATATAAAGATCTACAGAAAATGATGAAAGTGGTCCAAGTGGCC  
A\_16\_P02714432  
TGAAGTGTTC AAGGTA AAGGAAAAAATACAGTGATACATCATGACTGCTTAGTGTTCTG



A\_18\_P14133598 ATCTGCAGTTGCATGCGTCTGAATGCATTTTGTCTGAGTGCATTTTGCAC  
A\_14\_P103633 TGCTGTTGAAAATCAAATGAAGCAGAAAATACCATTCAAATGAGGCACAGCGATAACT  
A\_16\_P18554237 ACGTGCCTATCTTTATCCTATCCTCCAATTTTTCACATCTATATTTGTCTTTTCTGCCT  
A\_16\_P03733848  
ATCTCTGAGTGAATTCTTAGTAGACACATTGACATGGTATAAAAATACATCACACGGCTGT  
A\_14\_P116241 ACATGTATGTTAACAAAAATAAGGAATGTGTCCGATATATGCAGACTTGGGACAATTCTT  
A\_14\_P129624  
ACACCTTGCTGAAGAAAACCATGAGAAAATAGTTTTTAAAATCAACCCGGACAAAAAAA  
A\_14\_P117588 TTTTGAAAAGGTCATTAACCTCAGCGTCCAAACACTAGTCTGTGATCTTGTCTCAAATCTA  
A\_14\_P134359 CATATTGAGGTTATCAGAGTAGATGGAGGAAGTCAGAATCTCCAAAGTGGAGAATTTAG  
A\_14\_P112995 TTTGACTTTGAGTTTGTGGTAACTCCTGTGGTGTAATCATTGCTTCAGGTTCTG  
A\_16\_P17394801  
TTTGCCGACCAAACCTTTTTATAATCTCGAGACTAGATCAACCCTAGTGATTTTCATCAAAC  
A\_16\_P00331697  
AAAACATTGGCAGTAGAACACAAATCAGGACAGAGATAATAAACCTTCTCAGGCTACTTC  
A\_14\_P123747 CTCACATCCCTTAAATTTGGTGTGATGTTTAAAAATGTGCTTCTTTGTGGCTTT  
CUST\_4698\_PI426210822  
ATTCTGCCTATGACGCAGGTATAGAAAATAAAAAAGACTATGAAAAGATTAAAAAGAGCTC  
CUST\_2425\_PI426210822 GGGGACCATGCAGATAAAGGCAGAAGGAGTAGGTCAGACCCCAGA  
A\_16\_P21659580  
TGCAAACACTATCATTTAACACCTAGTTCACAGTCATAGATTATCCCCCTGTTTCTGAAT  
A\_14\_P102940 TTTTATGGAGTGAAGCAATCAGAAGAAGAGAAGTAGCACCTTTGCCCTTAAAAAATTTCA  
A\_14\_P137973 CTGTCATAGTCACTTGACTCAATCTGTTTCTCCTTGAGATCAGCCTCAAAACG  
A\_14\_P136207 ACTTATTCTGTCTTCATTTAATGAACATACATAGCCCTTACAAAATGCTTGGCGCAGTTC  
A\_14\_P131715 TTTTTCTCATTTTTACTTTGTGGGAAGGAGTATGGTTTTGAAAATTCCATGGATTTGGCT  
A\_14\_P111219 AAGCCACGAATTGAACAGAAACAAATAAAAGCAAAATGTTCGTTAGGCGCATGATTTAATC  
A\_16\_P38083186  
TGGGCTACTCTTGGATCTTACTTGATCTGCCTCATATCAACTTAATTTTTCTCAACTTCT  
A\_18\_P16095954  
ACTCAAGGTCTTGAAGCATTTGTTTAGGCTACAGTATATAATTGGCTAAATATTCTCCCC  
A\_14\_P132662 CTTAGTTTCTCCTTTAGTTTGAGAAAAGACAGACTTGGGGTGGGTTTGTTTTTGTTTTTT  
A\_16\_P39938516  
AGAGACCGGATTCTAGTCTATCAGGCTTTTTTATTAACCACTATAGAAGTGCTGACCATA  
A\_16\_P19712323 GTTTATTTTTACCGGGGGCTTTATTCTTCCATTGAGCCCCAGATACTCT  
A\_16\_P17977578  
AAATCCTGACATAGAATCTTCTAACTCAAGGTCATCTCTTTCATGATCCATGATGCAAGA  
A\_16\_P03302471  
TCCCTTTTCTACACACAATTCAGGTCATCTATGATTATGCCATCTAAGAGATACTGTGTC

A\_14\_P106337 AGTATTTTAAAGAAGAAATCGACTACTTTAATGTAGGCGGAAGATCCTATGGTAGAATCT  
A\_16\_P21231526

AAAAATAATGTGGAACATCATATGGCATGACCAATATTCAAAGCATGAGCCATTAGAACA  
CUST\_4849\_PI426210822 AAAGCAGGCTACCTATTTTATCCAGGAAGCAGACAGAGGATACGGATG  
A\_14\_P131057 CCTTGTTGCTTCATAACATTTAAGTCCAAGGAATATCCAGAACAGTTTTTTGTTTTTGGG  
A\_14\_P111907 CTTCTTTTGGTTTCAGAGAAAAACATCTCCTTAAAATGTTTATTTCCCAAGGATCTTGA  
A\_14\_P105319 GAGTAACATGGACTTGTTTGATTTTTGGTAGAACGTGGTCATTTTTTGTGTATAGATA  
A\_16\_P03016522

ACTTTGAGCATCTACAGATTCTTCACAAACAAAGGTATTCTTATGCATTACTTGACACAT  
CUST\_3431\_PI426210822 CTTCCCTTCGTGCTGTGTGCACAATAAGATAGGACACAGATGCAAAAAG  
A\_14\_P110986 CTTTTGAGTAGAGTATTTTACCCCGTTGGGGATCAGTTCTGTAAATGAAAATAACCGTA  
CUST\_2609\_PI426210822 AATAAGAGCATGGAAGGCCCAAGAAGAGTGGTCGGGCCATGACAG  
A\_14\_P200908 GTCTGTTTCAGAAAAAGAACTTAGAAAATATTCCTCACCCACCAACTCAATGTAGG  
A\_14\_P108437 CTCAAGTCCAAAAGACCCTTTAGGATCATTTTACAAATATTTGTTTGTGGCTCTGACTTT  
A\_14\_P200558 CATCTCACACACAATGACTCTCACAATGACCACATGACACTAACTAATCTTCCAG  
A\_14\_P104830 ATGGCTGCGAGTCCATGGTCAGAACTGGACGATGTCCTTCAAATAAAAAC  
A\_14\_P200187 AAGGATGCAAAAAGTGGTTTTCTGCTTTTCGATGATGCAATCATTGACGACAG  
A\_14\_P100838 ACAAAGGAATATAGTCTAAGTTTCCTTGTGGTCTTCGTAATCCAAGGGTAAGATAATGG  
CUST\_7691\_PI426210822 AGTGTATCATCAGGGCCTGAGCAAGTGGCAGGAGACAAGGTATAG  
A\_16\_P19810045

CCTGCTACATAAGGTCTCTACCATCATTGAACAGTTTTAGGTCTTTATTAGAACATGCACA  
A\_14\_P132471 ACAGACTCACCGTCCCTTGCCAATTATCATATTCATCACCCGCAAGATAT  
A\_14\_P103098 GCCTTTGTCATTTTCTTGCTTTAAAGGAATATATTCGACTCTGTCAGAAATATTACTCCT  
A\_16\_P02589709

GTTTTGTAAAGCATGTGACATAAGACCTGAAAAACATCAACTATTTCGTTTTGAAGAAGGGC  
A\_14\_P112299 CAAGTTTTACCTTGCTCTGAAATCCAGGAGTTCGGATGCTCTCAAGTTCT  
A\_14\_P117877 TACAAGATCCATGCAAGGAATCCAGTTACACACAAGACACATTTAAAACCTGGTTAAAAC  
A\_14\_P102917 CACCACTTATACTCTAACATTAECTCAACCTTTCTCAGGATGAGGTCTCTCACCTTAG  
A\_14\_P133736 TTGCACTCAATTACAGTGATTATTGATGAAAGCGATGCATGGATTTTTAATACTTCCTA  
A\_14\_P139023 TGGTTACCTTAATGGTAAGGTCTTCTTTTCCCAAGACAACAATAACCTCTATTGGTGTA  
A\_16\_P15649089

ACAGAGAAGACCACATTGTATGCAAAAAGAGTTTTAGATCAGGGCAACATTTCTAAACTG  
CUST\_9374\_PI426210822 CAAGACACCTTGCCTGTGGAGCCCTCCTGCCACAGGTAGAAT  
A\_14\_P129609 GCCCTGCCTTAATTTGTTCTTCTTTTCCATTTCTCCTTTGGACAACCTTG  
A\_16\_P03087690

GTTTATTCCATCTGATGAGCGGATTGTTTCAGAACTTAAAATGATTAECTCAGCCTCCGT  
A\_16\_P00936129

AAAACCACCTTTCCATTGAAATCCCAAAGAAAATAGGACATTGCATTTTTTTAGAGGTCA

CUST\_6623\_PI426210822 GGGAGCATCTGTTCTCACATCGCTGCCACTTGATCACCCCTTAGAT  
A\_14\_P125982 ACCTCACATGACACATTTTTTGTCAAATGCATTAGATGAAAAGTCTGACATGATCTTCA  
A\_16\_P00685128 CTATTATCTGTTTCAGAAACTGTCTGGGCAGAAGATAAATCCAGTGCTCCGGAT  
A\_16\_P02525590

AAAAATCAATTCAAAGCAAAAAGTCTGATGTCCTGTGAGTTCTTTTCACCTAGACACAGCA  
A\_14\_P120741 AGGACCCATTCAATTTTAACCCACCTTGCTTTATCTGTTCAAAGAGAAACAAATTCAGCA  
CUST\_3127\_PI426210822 GTATAGAGAGATGCCCCACACCCCATGGCCCAGAGCCCATGAGT  
A\_14\_P128274 GTAGACTTACAGTAATTTTCAGAAATACCCAAAGTCACAAGAAGTTGTCCACCTGATTGTTC  
A\_14\_P130851 GGTGGAGCAGTTTACATTTAATCTCAGGTATTTCGGTTTTGAAAAAACACTTCAGACATTT  
CUST\_1282\_PI426210822

ACACTATAGACTTGTTAAGCTATGTTTCAGTTTTGCAATTATAGATACACTCTGTAGACA  
A\_14\_P138445 CAAGCATTCTTTTTCTTTTAGGGATGTCTGAAAGTCACATCCAGTTACATTACTGTGTTC  
A\_14\_P102024 CTTAGGTATGTTTGAGTTCAAAGGAGGAAACCTGAGAGATAAAACAGTTTAGGCTTGTAT  
A\_14\_P119963 TCTAGTTCTGTTATCTGTTGATTTCCCATCACCTGACAGTAACTTTCATGACATAGGATT  
A\_14\_P115126 CCACAGATAAATGTAATGTGTATCATTACACTTACATTGCTTTTATCTAGCACAAAACCT  
A\_16\_P01404438

CTCCTTTTCTTGGCTTAATTGGATTTGGATCTCTAATTATACCTTGAATGACCCTGACAT  
CUST\_5854\_PI426210822 CTAAGACAAAATTGCTATCACTGCAAGCTCCTACCCCTGGCTAAATGCTAAT  
A\_14\_P131019 AAAAGTTGTTACCAAATACACATTTACATTGAATCATGTAGGATCTTGATGGGCCTTTG  
A\_16\_P00685312 GAAGAAGGGGCTGTCCTTTTGGGGGTGTTGGCCTGTTTCTAATTG  
A\_14\_P137055 AAATTCCTTTTGGCTGATGATCTTTATGGCTACTTTCTTACATGTTTTCCTCTCGAAAGC  
A\_14\_P114064 TCTCATTGCCATAATAACTTCTCCGTGATTCTGTTTTGATACTTGTCTGACTTGTCTGAT  
A\_14\_P201053 CTCACACTAAATAGCAAAAAGAACATCATGATTTAACAAAACAGGGCCTGAAATAGATTTA  
A\_14\_P108059 CTCTGTATCATATCATTGTGCTTGGTGCACAGTAATATTTGTGGAATTTTGGTGACCTAG  
A\_14\_P113782 TTTCTGAGACTATAATCAGAGCGGAGATAGAATCTTTGACTCTAGACTGTCACCTTACTT  
A\_14\_P130467 ATTCTGCCTCCCTTGATAAGGAGACGGTCACTCTAGAAAAGAAGGAAAACAT  
A\_16\_P00809624

CCCAAATCATAACAGAATCACAGACAATCACATCTCTAGGTGACTTTTTCATGTCAATTCAT  
A\_18\_P11852700

AAAAAAAATCAATAACACTCCTACAAGAAGATTTAGGCTACTATATATGCATAGCACAGG  
A\_16\_P20771208

AATCTGTAGTCAGTATTCATCCATCACTCAGTTTTGGTGTATTTTGTCTCCTTGGTTTC  
A\_16\_P20550437

AACCTTTCTAACTGAAAACAGGATCACTACTCATTTTCTCTTTCTACCCTCATTCAACAC  
A\_16\_P16887107

ATCCACTAAATTCTATTCAATCCCATCCTTACCAAATGTTTGTCTTCTTGCCACTGT  
A\_16\_P21545895

ACTAATTAATCTCCCTTCTACTTCAAATCAATCCTGGTTTAAACCCTTGAACAGTGGTTT

A\_16\_P19210036

GTGATGGACAAGAAGACTTATTTTCAACTATGATGCAAGAACTCTAAAGGGTCATGTGT

A\_14\_P110192 ACTTCAGATTCCAAACCTGTGTTGGAATATACGTCCTCATACATAGGACTAATCTTTCCAA

A\_14\_P133752 TATCCTCCGTGGTTTTGAGTTGAAAATAAGTTTTTAAAATCCTGTGAGTCAATGGTTTTGCA

A\_16\_P16109838

AAAAACGTCAAATGACATGTTAAGTCAAAATGGGGCTATTCCTTGATGTTTGCTTAGAGT

A\_14\_P126717 ACATCCTAGTTAGAAAAAAGACTCTGCCTAACTTCATGGGGTTAAAGAGAGGTTAA

A\_14\_P104140 TATGTTGCTCCCTTGAAAATCTTCCACTTATTTTCCTGTAAACTTCCAAGCCACAAATAT

A\_14\_P124429 CTAAAGTTCGTGTTTCTATATTGCCACTCCATATTTTTCAGTGTCTTTAGTGCCCATCA

A\_14\_P202462 GACTGAAATAAGCATTTCTCTTTTCAGACTCCCAAGAAGAGTCACCAGAAATCTCTG

A\_14\_P134972 CTCCTTGAAAACGCAGGAGAAATTTGCGAATTATCTCTCTTTCCACTTTGCTATAA

A\_16\_P36230267 CTCTTACTTCGGCTCCTCCTTGTGCGCAGTTGACCTGAATGGGGA

A\_16\_P19501820

AATGAAGCCCTTCTATTCCCTAGTAGACCTCAAAGTGAAGATGAATGGAAAGGAACAAAAT

A\_16\_P58424170 TGGCTCTGGGAGAATGGGGGGAAAATTGAAAACCTACAATTAAGTCTGTT

CUST\_3888\_PI426210822 CAGGATTTACAGCGGAATCCAAACCATGTGACATGGACCATTATCATTCA

A\_14\_P132904 ACTCTGCCATATTCATGCCCTCTTGGAGGTTTTTCAATGGATGAATCTGATGATA

A\_14\_P101128 CTTGTCTTAATACCATAAGGACTGGATGACTTCTCCTGAGATAGAACCGTTTTGGTT

A\_14\_P127749 ACCACAGGACAAGTCTGGCTATTTCTTTCTAAGATAAAATGAATCATCTACAAAGGACAG

A\_14\_P116591 TAGGTATTGGTGATCTCTGTATCTAGAGAACATTAGTTAGTCTCTGAGATGGGTTGAGAT

A\_14\_P113827 CTTTTGAAGACCGTAGTATGATATAGAAGAATGATCACATCACTGGTTGAAGAGTCAGTG

A\_14\_P123474 TTCCTTGGCTACTTAGTCCCGAGAGCCTAGATATTAAGAGATCAATGGGAATAAAATCA

A\_14\_P108684 GAGTTTTGGTTTTGAAATACCGTTTTTATTCATGATAAGTTGAGGTCACTTTTGGCACTCT

A\_14\_P122309 TTTCCAAGTGGTGCTATTCTTAGCACTTGATACCAAAGGAGAAGACAAAATGAGAAGAT

A\_14\_P133234 ACAACAACTTCCTCAGGAGTTCCATCTTCTCAACAAATATTTTCTAACTGAATCAGAGT

A\_18\_P13304079

TCATGTTTTATTTGTGGATTATCACTTCACTTAAAGATTTTATACAATGCCGTTCTAGCAA

A\_16\_P18392332

TTCAAAGAATCTTATTCCACCAACAAACCATACAAAGTTTTAGATCATGTTCTTGCCAGT

A\_14\_P134830 AAAACTCCAGCAGGAAGTAGAATCCTGGTGTTAATGATTTCTTCTGTCTTACTCATT

A\_14\_P119607 CTTACCATTTTCAGAGTTAGAAAACCTGAGGTGCTCCAAATCTCTCATTTGAGAATGTTT

A\_14\_P119534 GGCTGCGTCTCACCCACATACTTGAATAGATTACGGTATTCAATTTGTTTTAAAATCTCT

A\_14\_P127303 CACAAAGACACTGCAGCATATGCGTTCCCTTTGCTGAAAATGTTCCAAAGAAAC

CUST\_3750\_PI426210822 TGAGGTTAAAGGGTTTTGAACAAAATGGGCCTGATCTTGGGCTTCT

A\_14\_P138692 CTTGAAATTGTTTTAAGTGAACCTATGGCTGCGGATTTTTTACTGTTTTATCTCAGGGAGC

A\_14\_P132544 AAATTATAAACAGGACTTTGTAGTTTGGGAAGCCAAATTGATAATATTCTATGTTCTAAA

A\_16\_P02342057

AAGACAGTAACGGTCAAATGAAACATAAATCCATGCTAACGACTATGAAATCTTTTGGCC

A\_14\_P117982 ACAATTTGTGTTCTGCTCATTTAGCAGCATCTCATGACATTCAACCTCTGTCTGTC  
A\_14\_P138965 AGAGAAAAAATATTTTTTGGCTTAGAACTCTACCTGAAATCCCCTTCAGAAGAACTTGG  
A\_16\_P00093950  
GTTCCAGAGTAGAACAACAAGTGATAAATTGGTTATTGAAAATACATGAAACAAGCCCC  
A\_16\_P19742250  
AAACTTTACATCATTGATCTGCCACTAAAAAATGTTTGTGTAAAATTCCTGCCTCGAAGC  
A\_14\_P202520 TTAGCAAGCATGGCTTGGTATTTTCATTCTTGTAAGTCTCTTTATGAAGATTCTTGGGC  
A\_16\_P02015472 AAAATTTAACTGTCGGGTAGATAAGATGCTCACAGTATCTGGATCAGGGATTATCTCC  
A\_14\_P104731 CTGCGCTATATTA AAAAGGAAACAAAAAATTTATGATATCCCATCATCTTTGCCTCTCA  
A\_16\_P00905964  
ATATTCTGCGTTTATCTTTTCTCTTCTGAGGAAGCATAACAGTTGGGAGTTTCTCATTGTT  
CUST\_4994\_P1426210822 CCGTCTTCACCATTAATGGCCATTCTTCAAAGCTACTTTCATTCTGTGAG  
CUST\_7082\_P1426210822  
GTGTGCTCTAATGCATCTTCTTTGCATAAAGAGGCTTATTTACATGTCTTTTGGGGTATG  
A\_14\_P128993 TTTCTTCAGGTGTTGAGAAATCCAATAGAGACCTCTGCTTGTCTCCTCCTTT  
CUST\_8966\_P1426210822  
TGGTGATACGTGAAAGTATTTGTCCTAGGATTCATTAATATTATTATATTTTAGTCTTTG  
A\_14\_P133007 CTACCTCCACTTAACCCCCAAAAAAGAGTTTTAAACCCTCCTGTCTATAAGTA  
A\_14\_P122474 TATATTCACAAAAATTTCCCAACAGTTTCAATGAGTTCACACATCATTAAAGGAATCCTAC  
A\_14\_P110457 GAAAGGAAATCTGCTTTGGTGATGATCTTTCAGGCAATCTCAACTTACTTCTTTAATCAA  
A\_16\_P16112422  
AAAACCTTGACAAAGATTAACCTTCAAATTTGGTTAACCATGTCATATTCCTAGCCTGCCTC  
A\_16\_P00685369 CTTGGCTTCCAAACATAGCCATCCATTGGAGGTTTTATGTGGAAGCATCTTT  
A\_14\_P139652 CTTTGA CTATGCAAATGAGCATCTCTCCCTATGAGAAATTAGAGATATAGGGAATGTGGA  
A\_14\_P107271 CTGTTTATAACCTGGGATGGGGATAAAATAATTAGTCTAATTAAGGAACTTCACCTTGG  
A\_14\_P136405 TGTAAGTCTCTCCCTTAATGCTCAGTTCTTAGAAGACCGAGGTAGGTGG  
A\_14\_P201196 TCTTTCCCTGATAGTGGATGTGACAAAGAAAATGATATTGTTGATCTTTATGATGGCAGG  
A\_16\_P00685125 TAGGTCAGACCCCAGAAGATGGGACTTTTCTGATTCAAGAAGTTCAGTATCTTT  
A\_16\_P16769577  
ACTCTCCTATCTGACAGATCACTTATACTTTAACCAGTTCATTGTATCTTAACAAGGCAC  
CUST\_3931\_P1426210822 CTAGGCAGAATGAGCAGGGCACCAATCTAATGGCTCTTCTGGATAA  
CUST\_6178\_P1426210822 CTATGATAACTATTCTCTATTGCATTCGTCTGGACCCTTTTTTCCCCTTCACTAGC  
A\_14\_P102886 CAACCACTAGTCAGGGAAATATACAGCACAGTAATAAAGATGGGGAATAAATCTGTAAGG  
A\_16\_P17766723  
AAAAAATGCAAATCTTGA ACTAGAAAAACCAAGGTAGAAAATTCCTGGAAATCCAGCCA  
A\_16\_P58424512 TTTTCAACAAAGATGGAGTAGACCTTAGGCTCAGAGGCTTCCAAAGGC  
A\_16\_P17586446  
AAGGCCACATATCTTCAAACACATTATGCCCTTTAAATTTTCTCTCAATCCTAGCAA

A\_14\_P135492 AGCGCTCAATAACTTGACATCAATTGCTTCCAGTTCTGACTTTATTAGTAGAAAATTCTAC  
A\_14\_P133692 GTCCTAATTTCCACTTACGCTTGCTTTTATTTCATTGGCGAACTTAAATTCTAGTGACTCT  
A\_14\_P115724 TTAAAAACATACGTTTTACATTGCCAGTCATTAGCACTAAATAGGCCTCGGCTCTTTTC  
A\_16\_P00198430  
CTAAGGTTGACAAAACACAAACAGCATTACGTTCCACTATTGGTCAGTTCAGACTGAA  
A\_14\_P114260 GGATTTTGTAATTAACCCAGAAGGCCAAAGTAAAAGCATATTTTACCCTGCATAACTCTG  
A\_18\_P25836655  
AATTTGGCCTCAATCTGTATCTTTGGTGTATTAATCTCCTCATGATCCAGATAACCTCTT  
A\_18\_P22840132 AGATTGGCAAGGCCACTGAAATAGTGACTGGCAACTCGGTTTCTTTTC  
A\_14\_P106592 CTCCTAGTCAATATCCACCCCATCCAATTTATCAAGGAAGAAATGGTTCAGAAAATATTT  
A\_14\_P100803 TAACTAGTAATTCTATACTGCCACTCAGCAGTCTTAAAATCCCAAGTCTGATTGTGTAC  
A\_14\_P111446 ACCAAATTGGTAATTATAATAATGGTCTTGGAACCATGAATGGAATTCAGTTCAGACCC  
A\_14\_P128138 GGAAAAGGTAACACAAAGAACTTTGGTCTATGAAGGACACAAATGAATTCTCATCTTCAA  
A\_14\_P110341 CCCTTGGATTTATGAGACATATACAAACATGCTTATCATAAATGGGCTGTGACAGTCTTT  
A\_16\_P16527183  
AGAATGCTGCTTCTGCTTTTTAACATGCAAACATAAGTATGAGGCTTTTGCTATGAGTCA  
A\_14\_P132314 ATCTGCAAGGATTCGGAGTTGTGCTAAAAGGACTTTGATTTTTTTCCCCCTTTA  
A\_14\_P109116 TCACACACTTTTAGTGAAAATGGATTATTTTCAACAGCACCAAGAAGTCAATGGTGACTT  
A\_14\_P135539 CATCTGGGGACTCTCTGAAATGAAATAAAATGCCTGGACAATAACAAATGCAAAG  
A\_18\_P22842255 GTCATGCATTCACCCACAAATATCCATCTATCTCTGAACTAGGCAGAAATGAG  
CUST\_1399\_PI426210822 CTGAAAACAGTGCTTCATGCTGCCTGAAACAGGGGTGCCTTTAAG  
CUST\_4032\_PI426210822 GTAATGACAAAATGTGGGCCAGCGCCTTCTTGCAGCTGGGCACAC  
A\_16\_P20130519  
AAATGACGAATAAAAACCCAGATCTCAAACTTAACACCCAAACTAAAAGATGCTGCAACT  
A\_14\_P122862 CTGTATTGACTGTCTTCAAAAAGTGTCTGGAGAAATGGAAAGTCAGTAGCAACATTAAACA  
A\_14\_P119571 TTACTGTATATAGAAAAGATGTCCGCAGCGTTCAGTAAACACAGACACTAATGAGACTCA  
A\_14\_P110878 GGCAGCATTTATTACCCATTTGTAAGTTCATTGCTATTAACCTAGGGAAAAATTGGAAA  
A\_14\_P127155 AGTAGGGGACAGATGTCTATATTAGTGCCATTTTTTAAAAGATGCCAACACTAACAAAGG  
CUST\_832\_PI426210822 CGTGTGTATTTTATCCCAGGGAAACAGGTTTTTCTTAAAGGCACTAGGC  
A\_14\_P117149 GTAAAGTTGAATCTAGTGAAAATAATCTTTATTTGACATTTAGAGAACAGGATTGTGGGG  
A\_14\_P137375 TAAATTCCTGTCTTTGTCTTCTTGGAACAGTCTTCTACTTGTTACAGGATCTTCTATCT  
A\_16\_P17425941  
AAAAACAGTTTTTTTACTGGCTAGGAACTAAAATCTCTGACCAGATAAGGGTTTAACCGG  
A\_14\_P112037 GCTTTTTTCATTTAACTGATGCCTGCTGTCTCTTGTGAGTCAGTATAACCAAGAG  
A\_16\_P18232920  
TCTTGCCATAAAGTCTCACTACTCTTTGATTCTTACCACTATTAAGCATTTCAGACTTGGT  
A\_14\_P138483 TCTCCAAAACCTTTTAGTAAACTATTTTTCCAGCAATAAAAACCCACTTTAAATTCAGGCAG  
A\_18\_P22842641 AATCAAGGACTGCAGGAGGGGTGTGCTTTCCATCCACTTTCTATATTCTAAAAATTA

A\_18\_P14133135 CTGGGCTCTCTGGGGAAGGAGCACAGGCTGTGCAGTGAGATCAGG  
A\_14\_P119258 AGGGAACATAGACATACACAAGTTTGTAGCAAGATACGCAGATACAGAAATACGGACATG  
A\_16\_P37682025  
TCCACGTTCTCTTTTGAAAGATAAACATGCACTCTATAAACTTCATCGGACTAAACAACA  
A\_14\_P121730 TATTAACAAAATTCTCACTTTTGGCTTTGGATTGGCTTTGCAGGAGTGCAGATTGATCAT  
A\_14\_P119417 GTGGATCATTTACAATGCAGATTTACAGATTTCTCTCAGATTCACCTTCTCCCAATGAAT  
A\_14\_P131596 TCATCCTTAGAAAGTCTTTTGAAAGGTTTATCGTGTTTGGGTTTTTTTGCTCTACCACC  
A\_14\_P116097 CCAGTGCCACAGCATTGTGTTCAAATAAAGGGAAAGTCTCAGAATTATCTATAAGAAACA  
A\_16\_P36230632 GAGTCTGTGTGATACCCCCAGAGAGTTGACTCCTAATTAATTGCTAGTTG  
A\_18\_P17338418  
AATTGCCATTCATCAATGTGCTTCTATGTCTACTTGTCTTATAACACGTCATATTGCACT  
A\_14\_P139855 CCATTTGAAAGCCTAGGTGCAATGAGTGAAGAAATCTTTTCTTAAAACTCCAAATAGGT  
A\_14\_P133564 CCTACGTTCTGTGTTTACATACACAAGTAGCAAATTCGAGTATGCATAGTGTAGATGGA  
CUST\_1108\_P1426210822 TTGGTTTCAGAAACGCAAAGCATGTGTCAAGCCTGGGTTTCCACT  
A\_14\_P137869 TCAGAATTTCAATCACTGCTATTTGGACAATTGGTTTAAAAACAGAACGATCGATGGTC  
A\_16\_P21018962  
GTGTTCTCACATGGTAAAGATAAGGCATGTTCTGGATCTTCTCAAGAACCTTTGACAT  
CUST\_5793\_P1426210822  
TTAGATCAGAAGTGAAGATTTTCTGGTACAGATTTGGGTGGGAGAAATGAGCTAC  
A\_14\_P138256 AATAAAATCTCTAGGAAACTGTTTTGCTGCTGCTTATAGGGGACCTACATTCCAATTAGA  
A\_14\_P126255 CTCATCCATTTATCCATTCCTCATAATCCAGTGTCCAAAGAGCACCCC  
A\_14\_P109551 ACATGGCAGTAGATGAGATTAGGGATTGAAGTCACTTTAAGTCCAAGAAAAGTATTGAAG  
A\_14\_P138904 ACCAAACACGATTGTTGTTTCTTGGACTGCAGAAATTGGAAGAGTAAATTTTTGTT  
A\_14\_P126310 AAATGGATTTACAGCCTTGCATTTAGCAGTTTACAAGGTAGGACACTTTAATTCCCATAA  
CUST\_7993\_P1426210822  
GAGATAAAGGAGGACGACCACAATCCATGGACACTATTGCCTATAGTAATGTATGT  
A\_14\_P125010 CCTAAACAAAAGCCTTCTGGTGGATTATCTGGTATTTGGATATCTTTCATCATTTTGT  
A\_14\_P109424 AAAACAATGATTAAGAATGGGATGCATCATCCCTTTGACTTGTAGGTAAGACTTAATGGT  
A\_14\_P115652 ACCTATGGCAAGAGCATTGACCTAGTCAAATTTCTTCTTGATCAGAATGTCATAAACATC  
A\_14\_P136304 TTACTAATTGGTATTCCACAGGGACCAAAGTAGTAAAAGTTTTCTTGACAGCACTCTAGT  
A\_16\_P01246588  
AAAAAATCTTTTCTGCTGTTTCTTAGGTAAGACACAATCTTTGGACTCACTCTTGTGTA  
A\_18\_P22841890 ACTTCTCTGCTCTCCTTGGCCTTGGCCTCTTTGCTTTAGGATAT  
A\_14\_P107265 TTAAATCTGGTTTTAGAGCCCCTGTGTTTAACTCTCCATCCATTAAGAGATGATT  
A\_14\_P110524 AAAATTGGAAAGTAACACCATGAATAGTTGAATCTTTCATTTTGGGCTACAGATCCTTGC  
A\_18\_P13529607  
AGCAGAGTCATTTCCGATATCTAGTCTACATCGTGAATATAAGAAATATGTCCTCATCT  
A\_14\_P127812 AAAGAAAAATGAGTCCCTTCACTTACACAGATGATTTTCATTTTTCCAGTGCTAGTTATCC

CUST\_1767\_PI426210822

ACACAAGGTAGAGAGGAAAACCAAGGAGGGAAGCTGAATTAAAAGTATGCTTTAATTA  
A\_14\_P120908 AATTCCATGTCACATTTTCTACCCAATCATCTGGATTTCAAGATTCCTTTTAAGATCTCA  
CUST\_2858\_PI426210822 GAAGCAACCTGGCTTATATCTGACATTAGGTGGGGCCCATTTCAGC  
A\_14\_P114379 CAACCATCATTACATAACTGTTGAAGAGTTTGCATGCTGAACACTTCACACAATCTACAA  
A\_16\_P16564440

AGAAGCCTACTGGGATTCTGTTATTGAGATCTATCTGTATCTAAAAATGTGGGTCTCATG  
A\_14\_P139658 CTTGTTTTAGCATGGCAAATTTGGCGTTCACAGAATCCTTCTTCTGGCTATTTCT  
A\_14\_P123252 CCCAGCAATTGAAGTCTTGTGTGATTTAATGTCCACCGATTTTAACCTTGTTATTACTC  
CUST\_7694\_PI426210822

AAGAGAATGTCTTGACAGCTGGGGTCTGTAATTCATATGCTGTTCAAATGACAG  
A\_16\_P00888777

CTCTGTCCTAATCCTTATCATTCTCACCAACTATAGCAATACTCTCTGATACGCCTTCTT  
A\_14\_P103693 AAACAAATTTTCGTCGTTTACCTTTTGACCACTGCAGGTAAGAGTTTTGCGAGTTTAC  
A\_14\_P124654 TCTGATTCCTGGCTAATATTATTCTATATGTGTCTACTTCATTATCAGTCCCACAGTGG  
A\_14\_P124440 CGAAGGGATTTGTGTTTTTTTTAGGTTGGACACAAATTTTTGAGAACATAACTGCTAAGCA  
A\_14\_P113645 TTTAGGGATTCCATTTTACTGCACTTACTAGGTTAAAAACAGGAATGGCAAAAACAGGAC  
CUST\_10033\_PI426210822 AAAGAATAGCTGTCTCTCCTTAAGATAAGTTCAGACAAAGGATGGGTGCC  
A\_14\_P200205 TCCAAAATCATGTTGGGGGCATCTACATTTTCAGTATAAAAATTAGGTGAATTGGCATT  
A\_16\_P16339564

AAAATCTCATGTGGAATAGGGTAAGTTTGCATATCACTAAAAGGTGTTACCAGTTGACTG  
A\_16\_P00962102

CTTAGCCCTCTCCTGATATTAACAGACTAGCCAAAATCTGATCTAATTCATGCAGACCAT  
A\_14\_P124444 CAAGAAAAAGTAGAAAGTTCTTTGGCCAACTGCTTAGAAGCCCAACACAAC  
A\_14\_P110556 ATTTAATTAGAAGGAGATTCTCCAGGTCATCCTCAGACACTTTAATCTTATCTTTGCCTG  
A\_18\_P10834703

TCACTATCTGCACATGATACCTAAGTTTTTCTCAGTATCCAGAATGAGCATTACTTCTCC  
A\_14\_P100785

ACAAAAACAAAAACGCCAAAAAAGGATAATGAAGCAACATACAACCTTACTACAGGAT  
A\_14\_P201478 ACAGGACTTTGGAAGAGGACTACTTTGCCCATATGAAATAAACTACATCTCCTTTCTATC  
A\_16\_P20391348

AACTTAACCTTCTGAATCCTCAAGTAGCATTTTTATCACCCACCATTAGAAAAGAGATGG  
A\_16\_P36230203 GCTGTGGTTTGCTTCTCTCCTTCCCTTCCCCCTAGAGTATAAGAAG  
A\_14\_P108738 CTTCTTCGTTGTGATGCTGTGAACCTCTTGTGCATAAATTATCATGTGCATCTCTAA  
A\_14\_P101838 CAGTGCTAAAATGCAGAGGAATCTTCATTCAGTGAATATTTCTTCTTTTTTTGGTGAT  
A\_16\_P17567812

AAATTGTCGGAGATCTAAACATTTGCTACCTCATTATTCATGACTGAACCTGATACCTGT  
A\_14\_P109869 AAAAGGTGGTGATGTCTGGGTTGTAGCCCAGAACAGAATGACTTTAAAACAAC



A\_14\_P133060 GTAACCAATTCTGTTTTTCTCCTTGTAAGAATGCTGAGATGTATAAACTGTCTTCAGAGCA

A\_18\_P22839792 CTGATGTGGCACAGGTGGTCAGTGGGGCAGGGAAGACAGAAAGAT

A\_16\_P15008404

CATGTCCCCCTTGATTGTAAATTGCTTCTGTTCTGTTTATAAGTAAACTGTGCATGACTC

A\_14\_P120847 TTTCTCTTCCTTTCCTTCAGCCAAATTTCAACACTAACTTTGAAGACAGAAATGCATTTG

A\_14\_P110517 GTGCTATCATTTATCTTGGCTTATAATATCTGGGGTTTGATTGCCTTGTGAAATGTCCAA

A\_14\_P106322 CCAATTGCTTGAATTCCATCATCCACTGTAGTAAGCAGTTGTAAAATGTGCATGTAAACA

A\_14\_P121638 CATTTTTGATCCAGGAGAGGAGTTTGGGAGACGTTACCATATAGTATATTATACTCTGCA

A\_14\_P126064 ACCATATCACTCGTAGTTTCCGATCACTAATCACTCAACATACTCATATCTTTTATGGCC

CUST\_6646\_PI426210822

TCTGTGGACTATCATTTAGAATGATTAGAACTTTTTTCTTCCTGGGCTTAGAAAACATGT

A\_14\_P126741 ATTACAAGATCAACAGTTTACTTACATCACTGTAGTTTATTCGGTTGAGTTTGGCTAACA

A\_14\_P122707 CAGACTTAAGTAAATCCATGTCCGGGAGGCAGAACTTGAAGCACAACCTAAC

A\_18\_P22842102 AAAATCACTTTCTGTGGAAAACCTTCACTCTGCCACCGATGAGCA

CUST\_7019\_PI426210822 CATAACGAGGTCATCTCTGCTTTCAGGGAGCTCTCAGAGTCTCAG

A\_16\_P03701706

TCATCCCCAAACCCCTTAATTACAAACACTTAATCACTAAGAAGCATAGATTTTCATAAGA

CUST\_5506\_PI426210822

TGAAAGAAAGGGCATCAGCTAATAATAAGAGTCCAGTAATTTTCTGGTATGAGTGAAGTA

A\_14\_P138603 CAGAGATTATCTTAAATAAACTGAAATTTGTGCCACACGGACCAAAGTCTTGCCACTATA

A\_14\_P108704 TTTCAGAAGTAACACAAGGAGGTATAATTCTTCTTACATGACAAAAAGTGGCCCCAATTT

A\_16\_P00075045

AACAGAACTGATATAGTCCTTAAAACAACCTCTTTGGCATTGATCTCCATCTCTGGTAT

A\_16\_P00848512

TTAAGTTTTCTCACACACATTTCTTAATGCGTTGATGCTTCTTACAACCTTATTGGCCTG

A\_18\_P16933035

AAATCAGATGGGTAAAAATGAACCACAGTGCTTTAGAAAGAATGTAGAATGGCCACATTA

A\_16\_P30952418 ATTTATTGGCAGGCCTGAATTATGTTCTGATGGCTGACGTGGCCAAAAAG

A\_16\_P01151328

CTAGACAACAAAGGCCTTTTAGTCATTGCAATCTTGTTAGTCTTTTCTGAGTAGTCTCAC

CUST\_6938\_PI426210822

AAAACAGCAATTTAATAATTTCTCTTTTAAAGGGGAAAGGGGGGAGTCTTGATTTTAAA

A\_16\_P18971680 ATCATGCCATGCTAATCACCTACACGAGTAAATTAGTCTTGTCAAGAGCCATTAAGGT

A\_14\_P115696 TAGAAGTGCAATTCATACCTGTTTTAGTAAATAGTGTGTTGTGGGCTTTTTGCCACTCCTTT

A\_14\_P107726 TTTGGTTTTACAGGAAGCAGATTTTAAAGTTCTTGGATGCTGAAAAGGACATTTCTGTCT

A\_14\_P121034 CCTTTTTCAAAGATCCAGCGCTTGTAGAGTTTGTAGTGGTCAGTCTTTGCAG

A\_14\_P107549 TATCAATACAGTGATATTCACCCTCATCGATCCTTTTGAACCTTAGGCAAATGTTCTGGTT

A\_16\_P30952438 GTGTTTGAAGCAGCCTACAGCCTCAGTGAGCATGTGACTGGAGAG

A\_18\_P22841787

CAGTAACCCAAAGACCTGTTAATTGATGGTCTAAACTCCAGCCTCATATTTGACTTATAC

A\_14\_P122836 AATCTTTTTCTGGATTTAAGAAGTTGTGGAGGTAATGGAATGGCTTTAGTTGACTTGTTTC

A\_14\_P117123 GGACGTAATAGCCACATTGGTTGTTCACATGTCAACTTCTTTTCTTTCTGTTAAATCTCT

A\_16\_P19309648

GCATTCAGTTCCAATTTATCATCAGTAGCAAATAAACTCTTCCATGTGTATAACCAGTCC

A\_16\_P01374278

AATTAAGACCTTTAGTTTCAGGATTGCACTAACAGTTTGATAGTTACGGATGACTGAGGA

A\_14\_P111177 GTGCCAGTTGTTTTACTGAAGCAAACAATGACAGCAAAGGTCTACTGAATAAATGAACTA

A\_14\_P137151 ACTTGACTTACGTCATTCCAAGAACTCTAGTATAAAAATCCAGTGACTTCTTAGGATCCT

A\_14\_P103606 ACAGGTGTTCTTTATTTTACATGAGGGCTACTTTCCAACCAAATAAAGTCAATTTTTCTA

A\_14\_P103411 GTAAAACACATGGACACAGGTAAGTATGCTGTAAAGCAAAAATCCCCAAGTCCTACA

A\_14\_P128346 CAAACCTCATTTTCTAAAAAACAAACACAAAAGCAACCTTGTATGCATCCTTGCATGTTC

A\_14\_P111354 ACTTTCTATACTATCCAGACGTATGTCTTCCCTGTCACTACTTGCTTGGCACA

A\_14\_P104187 CAGTAGAACAAGCATGGAAGTCCAATTTGCACTGCAAAAAGAGAGACACAACAG

CUST\_640\_PI426210822 ACACCATGACAGCAGTGTCAATGCTTTGGAAAAGCAAGGTGATTGAAG

A\_16\_P02762555

GCTCAGTATGTCAGCACATTAACCAAAGTCAATGTATGCCTTAGAGGTAATTGGTTCTTA

A\_14\_P106315 GACTAATTGAAGAATAATTTGAATTTTCTTTGGCAATCCAGGAGAGGAGAGATTTGTGCC

CUST\_3844\_PI426210822

ATCCAGAAACAGTGGGCCTTTTATAAATTAAGCCTGCCATTCTCCAATTGCTTAA

A\_14\_P137480 CAGACCTTGTCTGTTAAAAATGAAAGAAAAAAGTAGAGGGCAGAGTGGTGACTACAG

A\_16\_P16191969

CGTCTCAGTCTGTGTGAGAAGCGTGCATGAATTCTTGCTATTTTCTTGATATTTTCAAAT

A\_14\_P105085 CTTCTTCTTGGAAGGAAATCCCGTTTTTTTTCTAGACAGACACTTTGGTGCAGA

A\_14\_P105270 CTTGGAAGCAATTAAGAAAACCAAGATAGAGCAGGGGATTATGCTCGCTC

A\_16\_P02035747

AACTGAATTCTGGAATCACAGATCTTCATATCATTCCAACCAAACCTTTACTTTAGCAGC

CUST\_268\_PI426210822 GAAGTTCCCCCGTTCAAGGTCGTGCCTCATGGGGGCCAGGTGAC

linkerATAACCGACGCCTAAATAACCGACGCCTAA

A\_14\_P117674 CAACAACCTGTCATGCAGAACTGAGATAAAAAGTCAATCCAGAGATTCTCTGCTTA

A\_16\_P17736126

AAACAGTGAAATGCCATAAAAATAACCTCTCTCGAAGTATATTTGGCCTCACAGGAAA

CUST\_6385\_PI426210822

GATTTTCTCTAATATATTTAGAATTGAACCTTTTTGGGTACAATATTCTTTTTTAGTATT

A\_14\_P131494 TGATGGCAGTTTTTGGCAATGACAATGATTATCCAACTTCCAGTTATTAAGCAGTCATT

A\_14\_P118905 ACACTTATGCCCAATAGGCCACTTACATTGAATAAAAATATGTGGATTTTGCATCCTGTTT

A\_14\_P114718 ATTTATATGTTGGCTGAATGCATTGGAACTGGTAATCTATTTTCTTATAACTGTAAAGA

A\_14\_P115211 CTTTTCAAAGAAAGACACTTGAAATAATGGAGGATCCATTCTTTTCTCTGTTCAGATTGT  
A\_14\_P112151 CTATAATAGCACAGCATTTCAGAACGTTGGCCTGTAAGAATATGATGCAACTCTGTAACA  
A\_16\_P40639535

AAATGACTTTTGCACAAGTTTCAACCATCTTGAATGTGTATCCATGAAAACAAACCATCC

A\_14\_P137778 CCAACGCTACAGATATGCCAATGAAAAGTCGTTTACAAAGGATCACAATTCTGAATAAGT  
A\_14\_P119955 AGAAATAATCTTTGGTATGACTCCAATTGTGAGATCCTGCTGTGAATCAAAGAAAGATTG  
A\_14\_P125076 GACCCTGCAATGTAGATATTCTTTCTTTTAAAAGTAGTAGAGTTCAGAAGGGGCAGAAAT  
A\_14\_P125491

CTGGGCAAATAGAGAGGAAGTCTGGAAAATCATGTTAAACAAGGAAAAGACATACTTAAG

CUST\_2606\_PI426210822 AGAAGAACTCCAGGGAGAGCACATATCAAGAGAAGAGACCTAGGAGA  
CUST\_10203\_PI426210822 ATATGAGAAAATTGTGTATGTCTGTTACGAGGGTTCAGGGAGCTGCTCTTTG  
CUST\_3873\_PI426210822 AATCCGCTTTCTGCTTTCTTAGGCACTAGGAAGGCAAGGAGATACTTG  
A\_16\_P19426111

ATGTCGGTGCTCCATATACATCCAAAAGCGTAATATTGAAAAACAGATTCTGACCTTGG

A\_18\_P27169945

ATCAGGAAGAGAAAAATACCATTAGAAAGTTTACTCACCTACTACTGATAAGGCCAGGAC

A\_14\_P137284 AACTTTCCACAGGTCTAAAAATTGCTTCCATTTTATAATTTGAGGTGTTGCATGGGAATT  
A\_14\_P139146 CTACGAAAGACAGAATATGCCATTTGATGAACTCAGAGTTAAGTGAGATTTCTCCTGTTT  
A\_14\_P202197 TTCAAATCTATTGATCCTTAGGTTTATCCAAAGATTCTTTAATCCTGATCACCTCTCGGG  
A\_14\_P117288 AAAACCTTTTCTTCTTAGGATTTGGTGCTATGGAGAAATTTTTGGTAGAATATAAGAGTGC  
A\_16\_P21581155

GTGAAGTGCTTTAGTTACAGGTGATCTATGTTCCAGGATTGACATGATATCAGCATAACT

A\_14\_P104318 AGAATGTGTATACAGAATGAAGTAAGACATGGAGGATTTGATCCAGAAAACCTTTGAGAC  
A\_14\_P115500 ACGTAAGTATTCACCTTACCTGCTTTTGTATCAACAATTATTTTCGAGGTCTTCATCACTGCT  
A\_14\_P129614 CCATCAAATCATATATGTTGACCTGTCTGAATTATAAACCAGCCTGACCTTTCTTTTACG  
A\_14\_P130155 ACAGTTATTTAATAGATCGACACAGACAAATATCCTCCCCAGAAAGGATCCTCTATTTT  
CUST\_818\_PI426210822 GAAGACCGCGATGATGAGTGGATGGGGGTGAGCCTGGCCCCGACAG  
A\_14\_P202373 AAAAGTGGCATGATCCTTTGCAGAAATGACTACATTAGGTAAGACTTTGCTGTCTTTCC  
A\_14\_P118671 ATATTTATGCCACATGTTCTTTCTGGGTAGAGAAGCCTGAAGTTATTCTGTTTATCCTGA  
CUST\_7359\_PI426210822 AGCTCTGGAAGTACTGGATTAACCCCACTGAAGACAGT  
A\_16\_P18474058

AGTTCCTAAGGCCAGTTTTTAAGTGGATCTGTATAGAGAAAATGTTACCATGAGAATCCA

CUST\_6896\_PI426210822

CTTGTC AAGTTAATAGTAGCCTCAAGTAAAATTCAACCCTTAGATGTTTATAGTCATCTT

CUST\_7764\_PI426210822

AATTTTGACTCCTTCAACAGTTAACTGATCTAACTCTGCCAGATCCAGATTTATCAGTG

A\_14\_P109703 GCCAGATCTCTAAAACTATCTTTGTTCTTTAACTTCCCTGTGTCTTTTAAAGGAAGGCTT  
A\_16\_P00685178 TAGGTAGCATAGATGGCCTGAATGTTTGGTAAGGGGTGCTGGAAACTAG

CUST\_1733\_PI426210822 TTGCTTACTGCTTTTCATGAGTGGTGTCCCCAGAATCTGTGGTTG  
A\_14\_P132836 AGAATTTAGGGATGGTGATAAGCCAGGAATTTAATAATTATTCTCCTCCACCTTTA  
A\_14\_P126805 AGGAAAAAGTGTGGATAGTTTTCAATTTCCCTGGTAAGGACTTTGAGCAGGTTTC  
A\_16\_P18310558  
ACTGAAATCACTCTACATTACACCTCTCACAAAACCTTATTACTTCCAAATTCAAACCTCT  
A\_16\_P19749610  
AACTGAAACCAAAGACAAAGGAACTATGGAGGAAAAAAGATTTAAAAGACATTCACTGGC  
A\_14\_P127861 CTAACAATACTCACTCTATGATCTTCTTCCCTCCACCTCTTGTGTGCTACTGGAGTG  
A\_14\_P133539 CACACAATTGTCTCTTACAACCTGAAGGGACATTTAAACTGTCAGCCTAATAATAAAGTAG  
A\_14\_P135623 TATCTTAACTAAAAAGCAATACAAACCTAAACTGTCAGCAATTATTCTGTTTATAGTGCT  
CUST\_8221\_PI426210822 AGAGATTATCACCAGATGTGTCTCCAGTCCCTGGCTCACAGGAGGA  
A\_14\_P115922 CTCTTGGCCTAAAGATCCAACATGTAACCTCAGGGGAGTCCCTTCATTAATTAATACTACT  
A\_14\_P129865 CTTCAAGGAAATTAACAGCCATCAAAACAGGTTTAAACAAATGCCTAATGCCTATCGTTT  
A\_14\_P120287 ACGCCATTTCTTTCCAACCTTAAATCCTTCAGTAACAACAAACACCACTCACTTCAAGAT  
A\_14\_P137166 GAGAAAATAAGGGGTTAATAATTTATCCCTGAAGGGATTCTGTTATTTTGTGCCATTGCC  
A\_14\_P104765 TGCCAATATTATCAATGGAAAGCCACATGCTGCAGATGTAACCAATGAATTGGATTAAG  
A\_14\_P128856 GACTCCTACAACTATTATGCTCACCTGAAAAAGTGACTAGTGACTATTCTACATGACT  
A\_14\_P109091 GGGTCCCTTGAATTATAAAGAAATGCATGTAGACATGTATGTGCTTAAAACTCACACAGT  
A\_14\_P120342 GCAGATTCTAAACAGTGGGGCTTTGTAAACCTTTGTTGTTTCAAATACTGTGGCTT  
A\_16\_P01660657  
AACACCATTCCTTTTAAAGTGATCAATTGCCTTTACAAAATTCTACAATGGTTCCCTCATGG  
A\_14\_P125681 ACGGAAATAAAGTGTGGATTATTTTTATTGATGCCTAATTTCCACTGGCAAAGAAGTCAG  
A\_14\_P116408 CAACAGTTACAGCAGAAAGTTTTTCATGGAGAAATGGAATCACACTTCAAATGATTTTCATT  
CUST\_9685\_PI426210822 GATGTAGGATGAAGAGGAGGGTTGTTGAAGGGTCATCACCGCCCC  
CUST\_5758\_PI426210822  
GAAGGACAATTTGTACAGACCCTGAGATAGAAGGATTCCTCAGCTTTAATTTTCATGAA  
CUST\_2437\_PI426210822 GTTGTGAACTCTGGTTGGTTGAGGGGGCTGTTTTCTAGAGGGGAG  
A\_16\_P38233280  
ACAGCAGTTCCAATCTTGAAACTGGCCAATCTGAAAAATGAAGAGCAGATATTGAAAG  
A\_14\_P133169 AGTGGGCGTGAAAGGGTTTATTTGTAAGAGATATTGCTGCTGACAGAATTTTATCTTTTT  
A\_14\_P110675 CTTAGAGGCCTCAAAACGCCATAGGCTAACAGTTCATCATAAAAACTGAAATAAATCAAT  
A\_14\_P114033 GACCCTTAGATATGAACATATCTTGAACATCCAGAATTCAGTTTACTTCATCTGTGAGG  
A\_16\_P18577258  
CCCACATAAATCTGACATAGGAATTACATTTGGAAACTGGAATAACATGCTTTGTCTCCT  
A\_14\_P138534 TGAATTCCTTTGTTACTTTTACTTTTTGTAGTTGTGTGAATTACGTGCCTGAGCCTGAGAAC  
A\_14\_P133594 ACTTGAGCAGATAGAATAGTCTCTGAAAATTAATCACACCGTTGGCTACATCCATTTTA  
CUST\_1902\_PI426210822 TGTAGAAATGGTAAAAATGCCTACGTCTAGTTCACAGTGATGCGGGTGC  
A\_14\_P127414

CTACAAGTGGAAAGCATGCTATCAGAAATCAAATGGAACAGGCTAAAACAGAGGATGAA  
A\_14\_P101719 TGTATTGGTGTTTAAACTTCAATTTCTGCCTTCTCTGATTGTTGTCCTTTCAAGAGTTCT  
A\_14\_P115858 CATCCATGGCTACTGAAGAGTTGGATAATTTCTGCTACAAAATTGAATACATGTTTGTCC  
A\_14\_P113710 ACATTTTATATTGGAGGAAAAGGTTCACTGAACAGCCCATCACAGATTTTGTAGTGTA  
A\_16\_P35353999  
ACACTCATACCTTTTACACTGAGTTCCTCACATACACATTATCTCAAAGCATCACTTTGA  
A\_16\_P00011664  
ACATTTCTTCTCAAAACTTGGATACTATGAGGCCTTTGGAATCTTTTCTGGGACTGATT  
A\_16\_P02197547  
CCGACTCACTAGTGATATGTCAACAATAAACTGGATTGTCATCTTTGTAGAGCAGTAGT  
A\_14\_P136321 CATGTAACCTGTAAAACCTTCTTTGGGTAAGCGATTGTTGCTACTGGCTAATAAGACTTG  
A\_16\_P21254356  
CGGGTATCATTAAAATCAGAATAATGTGAAGTCGTGCATAACAATGACAGATATACAGAC  
A\_14\_P131090 TTTTATCTTTAATTTATTCTAGGAAAGAAGTTGATGGCAGAAAGGGCACTACAATTAGCG  
A\_14\_P127733 TCTCAATAAAATGTTTACTGTCTTAATAGCCTTTCTAGTCATCTCTTTACGGGCTTCCA  
CUST\_7362\_PI426210822 GATGATGGCTCGCTGATGGGAGACAGAATTTCTGTCTCTCCTGTC  
A\_14\_P126277 GTTATTTATGGATTAGGTTAGTCCCTGATAGTTCCTACTTTGTTGACCTAGGTATCACA  
A\_16\_P21387807  
TGTGGCTTTGCATTTCAGATAAGTATTCATAATTGCCTCAGAAATCGATTACTGCATCTCA  
A\_16\_P00685311  
AGCAGGAAAAGGTAGATTCTTGCCTTTTAGTCTGTCAGAATGACACTTTATTAGATGCTT  
A\_16\_P00852548  
AAGTGTGCATAGTTCAAAGATGCTTTAATGACTCTATCACGGAATTCAGTAAATCCACT  
A\_16\_P36174059  
TCACTACCTACATTACACATAACTTTCTGCGACTCTAGCATTGGTCTTATGATTTTGT  
A\_14\_P200614 CAACAGAGATAACCACGGCTTCCAATGCAAACAGGAAAGGATTCTCTATAGAAAAA  
A\_14\_P135218  
GCAAAGCAAACCTTTGCCTTTCTCAGGACTCAGAACTATGAAATGAACAGAAAGAAATCA  
A\_16\_P03611973  
TATGCAATCTTTACCCACAACCTCTACTCACTATGTCTGATCACATTCAGCATTTTCCTAC  
A\_16\_P02017065  
ACATGGCTCTTTTTATCGTCTACTCAAGATAATACTGAAATACAATCGGGTGTTAGTGGC  
A\_16\_P18676280  
AAGCACCTAGTAACTAATCAGCAATCTGATAGACAACATGCTTATTATCCTCAAGGACCT  
CUST\_2744\_PI426210822 ATGAATTGGTGGAGGTAAATGATGCAGGAGGTTTGACCAACTGCATG  
A\_14\_P129323 TATTCTTAGGCTCATGATGCACATGGCTCACCCGTGAATGGTTCAGAAAAATATTATAAA  
A\_14\_P109569 CCAAGAGGTCATTTTCGCTTCAGGCATCCTTCATGTTTCAAATCCATTTTTAAATAAATTG  
A\_16\_P16891804

AATCAATATGCCCCACATAACTTAAAGTTCCTTTTTGTTAGGACATCATGAATTGCACA  
A\_14\_P113758 CATTGTGACTTAATTTTAATCATTTGTTTGCTGGTCAAATTTCTACAAAACACTCGGGCCC  
A\_16\_P39433444

ATGTAAGGTTTAACTGCCTCCATTAACAAGATAAGCCCTTTTCTAAGATTTTGCCACTG  
A\_14\_P111705 CTCTGCAGGTGAAACATGAACTTGAGTATTTCAAAGTTCATATTGCTGAACGTAAAATCC  
A\_18\_P13358344

AATTTCCCATGACGTTACTTCTAAACTCTGAAGAGATTGAAAGAATTATCCCTTCCCTAC  
A\_14\_P100543

CTAAAGAAAAAACTGAGAACATGACAGATTCAGAGTGCAGAGATTGATGGTCTTGAAAAG  
A\_14\_P114607 TTAGGGCAGAGGCAATAAGTCAGAAGTCTTGAAGTTGAAATAGTTATATGTGTGTCATTG  
A\_14\_P121283 GATTGATGTCTACCTCTATGAGGTAGATATTAACCAGACAAGTGTCTAGGAGAGTGAA  
CUST\_9743\_P1426210822 CCTCTGCAAACCTCTGACAGAGAAAAGGGATTTTGGAACATGACACCT  
A\_14\_P109149 CTGGACTATCTGGCTGGTCCAGCCACTCTGTAAAATGACATTAGTAACAATAATATCTAC  
A\_14\_P128272 GAGTGGCAGGTTTATTTTTTTTTTATAGCATTTCTTAACATAAGCCAGGGGCATGCTATC  
A\_14\_P131990 ATTACCTCTTCATTCTCCTCATCAGGACTCCCCTTCAGAGACTGAAGAT  
A\_18\_P20213229

ATCTGGAAAAGCCTTTTCTTTTACCTATGATAGGGAGTTTTGGTGATGATAGGTTGTT  
A\_14\_P200197 AAAATAACTGGGGATGCTTTTATTTGAGGCCAAAATATTCACAGGTCATCTAGTATGGAA  
A\_14\_P135323 ACTTAAGAGATTTGAGAACTTCATAAAATCTCGTCCTCCTTTTGATGTTGTCATTGATGG  
CUST\_5023\_P1426210822

ACTCCAGACACTTCACTGAAACTGTGTGAATCATTTTAAACAGGTTTGTCTTG  
A\_14\_P101867 TGATGTAGCGATAGCGGTTGTATTTCCACAGGTTATTTGAAATGGATTCCATATCTAAGT  
A\_16\_P38271039

ATGGCTGAGGACTTTATTTACAAAGGATCATGCAGTTGTATTATTACACGCAAAGCATCA  
CUST\_3585\_P1426210822 CTTCTGTTTGATCTTCCCTGCCTGTCTGTGGCCTCTGCAGTTTAA  
A\_14\_P107774 GGTATACAAGATGGGGTTATTTCTACTTCAGACACGTAGGATGAAACAAATCTAAGAGAG  
A\_14\_P136390 TTTTGCAGGACTTTTCTGACAATTTTTTTCATGTTAATTATGCATGTGATGAACTTTAGAA  
CUST\_7521\_P1426210822

GAGAGCATGAACAAAGGAATGTAAGATGTAACAGAAAACATACGTGTCTCACACATGAG  
A\_14\_P135749 CTGTGATAAGATCTTAAACATAATAAATGCAAATAACACCCCTTCCCTCAGGTTGCAAACC  
A\_16\_P35632671

CCTTCTACTTTGTGCATTTTTAAATCTAAAATTCTCCAGATTACTTAGCAGCACAGCCA  
A\_16\_P18861503

AAACACCATTACAAACTTACATTGAGTCGACAAAGGTTAGAAAAATATTGTTTTGGCGG  
A\_14\_P124451 CACCTGCTGACATGATGGACATTAATAAAAAAAAAAAAAAGCCAATAGTTGACCTTCAGTTCA  
A\_14\_P114721 GTTTACCGTGGTGAAATTGAACTTACTCTGAAACAGATGAAAAGGGACATGCAAAATTG  
A\_14\_P138344 ATAATCCCTAACTTTGGCAAAAACACCACATACCCAGATACTTAAACACATATCCTACC  
A\_14\_P202313 CAATGACTGCCCTATTGAACATACGACATTTTCAGATCCTTACCTTTTATGTGTTATGATT

A\_14\_P138199 TAAAGGGTTTTCTGAAGACCATTTCCCAGAATTATAAGAAAAATCCTGTCCCCTAAGAAA  
A\_16\_P19558817

GGGTAAAGTCTAGTTAGTCCTTCACATTCAAAGCATCACCGTTTAAAGTGACTTAACAAA

A\_14\_P127863 ATTTTGATTCCAGTGAAAGTTCTTACCTTTCTCTTTTGTCAATTCTCAACCTCTTACCTGA

A\_14\_P129495 GGCCTTTGCTAGACTTATTTAAGCGTAACCTCTTGTGATTCAATTTACCTTTTTGCTTG

A\_16\_P01898181

AAGGACTCTCTATGAATTATACGAGATTTTTACAACTGTAGTTTCGCATCTTCACACCA

A\_14\_P110319 CTAAGGAACAAAAGAGTGGAGAATCCTTTTTGGATATGAGATTGTAACTTCTCTTGAGG

CUST\_2844\_PI426210822 CAAGATGCAAGTTAGAGCAAGAGTGATTCAGAGCATGAGACAAGTGGTAGAG

A\_14\_P124097 CTTCAACTGCAATATTTGTATGCAACTACGGACCTGCGTGAGTTATTTTCTCTTAAAAAT

CUST\_8576\_PI426210822 CACTTTGGCCTTATGGGACTTTGAATGGAGCAGGGCTTTCATTCT

A\_16\_P16662976

CACCAGTATTAATAATCCTTCATTAACAAATGTTTGTAGTTCCCCGTAGATTCATGAGG

A\_16\_P16136916

ATAATTCAGGGGTGATTTATTCACATTTAACAATCCAGACATTCAGTGAAGTCTCTCACC

A\_14\_P123285 CTAAAAATGAAAATGTTAAAAGCCTCAGAGGTTATATCTGGCCATCAAAATCAAGCCTCT

A\_16\_P39861897

TGACAATATTATAGTAGGGTTAAGAAAAGGTGGAAAGCAAAATTACTTCAGCACAAACAGGA

A\_14\_P125489 TGACCAGTCTTGGGATATATCTGCAAAAATGAAAGCACAAATTAAGTAAAATGAGAGAGGG

A\_14\_P118304 CACCGTCTCTTTAACCAGCGACATATTACTAGGGTCATTGACACTAAAGAAAGAAATGA

CUST\_1243\_PI426210822

AACTCATGCCATGTTTAAATGTTCTTAAATTTGGGATTGTTGAAGTCTGAATTTTACTGT

A\_14\_P112682 GCAAATCAAAGAAGATAGGTTCTGGACATGTGCCTATCGTTTGTATTATGCTCTAAAAGA

A\_14\_P121877 CTTTAAAGTCACTGAAATGTTTCAAATCAGCCCCATTCCTGAATTTGGAGAAAGTATCT

CUST\_6270\_PI426210822

AAAAAAAACAGTTGCTCATTGGCTTTTTATTTGCCCTCTTGGAATTGCAGAGGA

A\_14\_P134469

TCAGATGCCCAAAGACAAGAAAGACCTGTAAGAAAACAATGCATAAAATCCCTAAAACAA

A\_18\_P10704774

GACTGCACATGCTCAAATATATTGCCCTGGTTATTTAAATGTCTATTAAAAGTGTTC

A\_14\_P113343 AGGCACTTACAGAAATTCAGAACTCCTGAGAGAAATGGCCATACTTATCT

CUST\_5859\_PI426210822

AGTACAAGCACTCATATAACCTGTAGGGATATTTGTGTACATGTGCATGTGTGCATATAC

CUST\_8177\_PI426210822

AGAGCCACGCATTTTCCCAAGGAATAATGATCACAATTCCTATTAGAAATTTAATAAAGT

A\_14\_P202527 TATGGTGTGAGGAACCAAATGGCCAACAATTTAAATATGCACAAAGGTCTCTCATTATT

A\_16\_P00293299

AGACCTGGATCAAACATTACATACTTTGTTACATCTTTTTGAGAATGAGTTGGAGTGAGG

CUST\_5902\_PI426210822 AGCAAATATATTGAAATCTCCTGGAAATTTGGCTCTCTCCTTGACCCAGT  
CUST\_9266\_PI426210822 TTTTCTTCTCAGGACTGTGAAAAACCAGGAATTTCTTGCCTAACAGCACAC  
A\_14\_P121305 TCTTAGCAGGTAACCTTCCTTTCTCTCCAGACTGAGGAATCAGAGTT  
A\_16\_P18640006

CACCTGTTTCTAACCAATTACTTGTAAACCCTAACTCGAAATTAACCGTGTCTGTGA  
CUST\_7795\_PI426210822 CCAAGAAGACATGTGGCTCCATGATGACTCTGCTTTTAAAGTTATGCC  
A\_14\_P101712 CTTTTAGATGATCCAGAAAGTTCTGTTCTTCTTAGAGTCTCCTCAAATGAAAACACATC  
A\_18\_P14945996

CATTTCTGCCATATTCTCTGACTATTCAATCTGCTTTCTAACTTCCACGAATCAACTGAC  
A\_18\_P18169396

AAAAACACCTTATTTACCAGATGAAGAAAAGATGGACATATTCTGATTTTCATGCCACAG  
A\_16\_P00652699

AATCTCCAAATGCAAGTTATTTTTACCACGGCTAGATTAATTACCCACCTGTCTTTTACC  
A\_16\_P36239990

GCCACCATGACTTAAATCATCTGTCATTTTACTACATGGGCTTGTTATATCCTAAATCCG  
A\_14\_P101816 CCTTTGGGTTATCCACTGCCTTAAATTTATACCTATTTTCATGTTTAAAAAGATATCAATC  
A\_14\_P125894 CACCTGAAAAGATTCCTAAATTACAAAAAATGGATTTCAATTTGGCAGTGTGCACTGTTC  
CUST\_9490\_PI426210822

AGAATCCCTTGTGTAGATGAAAAAATAATCACTGGGCATATTGCCTTCCATTATAGGA  
A\_14\_P121253 ACCTAAACACCTTCTGAATTTTCACAAAATAGTTCACCTCTCTCTAACTCTTGAGCAAA  
CUST\_5798\_PI426210822 AGCGGACACTGAGCTGCTATTTCTGAATCACATGTCCCCAAAGCT  
A\_14\_P108643 ATGGAAGCATTGTTAAGCGTAGGTTGGATTTTCTCTTCATAACCAATACAGGATTCAATT  
A\_14\_P107536 TAACAAATGACATTTGATCTGTTTCAGCAGGTGGTCCATTATGGCTGACATGCAAAAT  
A\_18\_P22841777 GTAGAAATGTTGATCCCTTGCAGGGAGAGCCATCCCTGCACTAGC

A\_14\_P100038 GAATTGACTAAAAAATTGCTCCTGACCAACAGTTTTTAAATTCAGTCAACTTCACAGGGA  
A\_14\_P121249 TTGAATTTCCATTACATCATCAGACATTTACAACAACCAACAAGCCGAAGGAAACCAATA  
A\_14\_P115204 CCAACATTTCCCCATCTCAATTCATTAATAAATAACGAATTACCAACAACA  
A\_14\_P105904 AAAAGAGGAAGTGAATATTCTAAATGGACTTCAGTATGAGGGAGGTTCTTCTGTCTAAAC  
A\_16\_P00798597

AAACAGTTTGAGACAACCTTTAAGTTAAATGAGGCTCATCAAAGTTAACATGTAGGGGAGG  
A\_16\_P16569751

AAAGAACCCTCACTTACAGTTTGTAAAGCCATGTGTTCTTCTCAAACGAAATGTGAAAGA  
A\_16\_P02349703

AAAAAGGTCAGACTTACATTGAAGTGCTTAAAGTGGGATAACTAATACCAGGTCCACTATG  
A\_14\_P110946 AGAAACTGCTCCTTATGTGCAGACAACATTGAAGGAAAGACATTTGTTTCAACAGTAAAT  
A\_16\_P38150183

TCACTTTGGACCATTTCTATCAAGTCTCATACTCGAAACATAAATGAACTATCCAACAACC  
A\_14\_P200402 CTACAGGAAAAAGATAGGCATTAATAAATAAATAAATGTGACGCTTTCCTTGGAGCAT



A\_14\_P103639 TCCGTGTTTAGGAAAATGCAAACAAGACCAATATCTTTCAAAGCAAAAAGTAAAAGCCC

A\_16\_P17693040

AAAAAGTTACACCGATAAGTTCAACAAACTGTCCATTTTTGATATTTGCATGCTCCCCTA

A\_16\_P19655176

AAATGGCTACAGGTAAAAGAAGTGGTGTTCCTGAATTCATAGACTCAAACAGTGGTTAT

CUST\_2344\_PI426210822 TGCTGAGCTCAGTGCCTCACCTGCAGGAGACAGGGCTTTGGGAGG

A\_16\_P15333750

CCATACCAGAAAACAGTTTAACTGCAGATCAAATTGCTAATACGATTAGTGCCTAGTGGA

A\_16\_P02308707

AAGAACAAGTGAAGATCTACCCAAAATTCTGCTTAAAGACCTCGAAGATACCAAATACC

A\_14\_P115938 AATTTGAAAGGAATGTGGTAAGATTCAGTTGTCCTGTTGAATTTGTGAGAGATCGTTATT

CUST\_8342\_PI426210822 ATGAAGTGAAGGAGATGGGCCCAACTCACCCATAGGACACAACAG

A\_14\_P132716 CTTCTGTATGTAGGAGGTGGAATGAAGTTTTTCATATTTCTGACCTTTGGAGAAAAGTTTG

A\_14\_P129720 GTTTTTACGTCATGGATCCTATTTCTCACACATTAGATGGAGGTTAGTGTATTTTCGTTA

A\_16\_P36863994

ACATACTGCTATGTCCCTATTTTTCAATGCAAAAATTTTAATACCACCTAAAACCTCCACCT

A\_14\_P106796 AATGATCAGTTAAACCTCTGTGTTTCAACAAATATTGAATGTCTCAGACTGGCCTCTTTT

A\_14\_P134488 AAAAGAAATGAAAACCAGATGGTCTATGCTAAGAAGTGAAGGCATTTTGTGTCTTCAGA

A\_14\_P102945 TCTACTCTTCAGACAACCAACGGCCTATCAAGTAGTGTCAATTTATGGAGAAAAAAAATG

A\_14\_P122929 CTTTCATGGTGAAGGACTGAAGTATGCTACATATCTCAATTTAAATGCTGAAGGAACATTT

A\_14\_P138393 ATAAGGGAAAATATAGTCAGTAGATAACGATCCAGATCTGACAGTTGGATTAACCATTTG

A\_14\_P126697 TCTTTAAAGTTAACCAGACTCTCCATTGCCTTCAATTTAATCCAAATTTACACTGCTGT

A\_14\_P105464 TAGAGTTTCTGGCTCACCTTGTCATCATAGTGATTCTAATTTCTTCTGAGAAACACATGTC

A\_14\_P139399

TAAATCTGTAGGTGTGTCTAACCGGCAGAATAAGAAAGTAGAAGAAGAAGAAAAGTTGCT

A\_14\_P124174 CAAAACCAAGTAAAATCTCCTGCTTATGGATTCAGTTACTTCTGACTTCAAAGCAAAGAC

CUST\_1418\_PI426210822

AAGAGTTACAATTGGGTGTTTAGTCTCTAGAGTCAGTGGGATGGATATGCTTTTTG

A\_14\_P130913 ACTTTTTTTTTTAATAGGGAAAATTTGTTGGCAGATTGTTTGCAGGGTTGTTTTGTGGTG

A\_14\_P107957 GGGAGAAGAGAATGATGAAGGAAACCGAAAAATTGGAAATTTTGATTGTGAATTTGGTTC

A\_16\_P16737813

AAGTAATTGCCTTGCTGCTACAAATTTGGAACCTAACATTTTGTGGGCCTATTTTTGCT

A\_16\_P36546352

AACAGGGATTCCTAGAAATCTAAATCATGCCCTTTAAAAATTTTCGTGTCCAAACCTGATA

A\_14\_P123719 TTAGGCAAGAGAAAAGGAAGTTTTTTTTTTGCTAAACAGGAGTAAATGAGAGGTGGTAACT

A\_16\_P19311268

TAAATCATAATAGAGTCACTGCAGTATTTCACTTGGAGGAATCAGATGTATGCCTAGGTC

A\_14\_P107844 GTTGACAAGTCAAGTGCAGTAATGATGTCATGGTAACCAATATGTTTCCAAACTTTCTTA

A\_14\_P117592 CTGACCACGATGAATTTTAGCCATATTCTTCTCTTCTAAACTTTCAGCCTGAGAAAAAGA  
A\_14\_P138664 TTTCTAGGAACAGTCTTCAGTGTTCATCCTTTACTTGATTATCTCAGAAATGTTGGAGG  
A\_14\_P103020 CTGTGATGAATTGGTGAGAAATCCATCTGTAGATGACAAAATCCAACACTTCAGATTAAG  
A\_14\_P114094 TGAAATAAATGAAACAGAAAATGATGGCAAGACTGCTAAGAACATCCTTTGCTTTGCTCT  
A\_14\_P128090 GTTGACTCAGGAGGCCATTGATGAAATTA AAAACTTCTCTTCCTTTGTCTTTAACTCTTT  
A\_16\_P19319019  
ACAAACCAAGATTAAATCCTCTGAAGCATAATGTTTTATAAAGACACAAGTGGCAACTCAA  
A\_14\_P105895 ATATGGCTGTGGGAAAACACACCTTGGAAATTCATGATGAGACAGTCCAAC  
A\_18\_P16261534  
AAAAGATCAAGAACAGGCAAATACCTTCTGTTTGACCAGTATTGTGAGTAAATAGGCCTG  
A\_16\_P15628906  
AGAAATTACCCACAATCCTATCACATATGCTGAAGTGACCTTTTTTTTTCTATAGGCTCT  
A\_16\_P37231672  
ACACACGAGTATTAATGAGGCAGGTTTAACTCTTACTAACAAAATACTACCATCTTTGCA  
A\_16\_P15519828  
AAAAAACCTTTTTGTGCACAGAATATGAAAAAGGGACTACACAATAAGCGAGAGTCTTCG  
A\_18\_P14136405 CCTTGGCTCTAATGGCCTCAGGAGCACATCATGCTCAGACTTATTT  
A\_14\_P103908 CTCTATTTTCATCTTTTCTGATTCAGCCTTCAGTTTATTGACGACAATCTCATGTTCCCT  
A\_16\_P03658436  
ACTCCATACTTGTAATTGGACAGTGTATTTCTTTTCATTTAGAAATGGCACAGCAGATGG  
A\_14\_P110971 GGATGATGTTGACAAACAACCTTGGAACAAAGTGAAGTAAATTCAGGAAATTAGATGAA  
A\_14\_P130866 CTACACCTGCTCAACCACTAATTTAATGAGAGAATGCCTTAGAAATTGCAACTGGTAAAT  
A\_14\_P136455 TGACACGTGAATGCCATTTGGATACATATTCTAATCTTTCAAGTAGAAAGGACAGTCAGA  
A\_14\_P123428 GGACATATAGTTGCACATATTTGGTTTTCTTCTTTCACACTGTATTGAGACACCTTGCAA  
A\_14\_P127242  
CTCAGACTCAGGTCTTTTAAAAAAGATAGAAAAAGGAAGTCCTCATAGCAACTGGT  
A\_16\_P19597043  
AAGAGCATATGCATATTTTTCCAGGTTAATCATCTAGTTCAGAGTCTCCATAGATGTGG  
A\_14\_P135106 TTGTAATGTCCTTACTGTAAATGTAGGGTTTGAAGTCAAGACTGACCATAAGACTTCTGT  
A\_16\_P35566606  
TATGCCAGTTTTATAGGTCCCATACATTTCTTAAATGTTGATGAAAATCCTTAGCCAC  
A\_16\_P21078683  
GGTCAATCCGAAATATTTCAAACCGCACACTTATTTTAGAGCCATTTGTAAACAAGAGC  
A\_14\_P104528 CTTACAACCTCTTTAAGTCACCCATCTTTATCTCACACCTTTCACTCTTAGTAGACAAC  
A\_14\_P105949 CAGACTCTAGAATTAAGTGCCTAAATTTCCCAACTAAGTATGTTCTCTAAACCACTCG  
CUST\_6513\_PI426210822  
GTAGCATTTGTAAAGAGATGACACCTTATGTTCTAAATATTCTCCCAGTATTCTAAAATA  
A\_14\_P112172 TCATCTAAACCACTAGGAATTTCAACTAGAGGGGAAGAAAATGTTAATGTAACAGACCAC

CUST\_8819\_PI426210822 ATCCTCAGACACACAGTCACCCCTTGTATCTCCTGGGGATTGGCT  
A\_14\_P127910 CTTGAAAAAACATCTTCAGGTCAAGCCAAAGCAGAAATATATGAGATGAGACCTCTCTCA  
A\_14\_P114021 TCAGTTAAATCTATGACAAAGGATGTGATCATCACTAGGAAAGCAGTCAGGTATTAGACA  
A\_14\_P117016 CACCAATAACTGAGGATTGCTCAGATGCTTTTTCAAAGTGAGAGAAGGTATTTTAGCAAT  
A\_14\_P134780 AACTGGGCAGATTAAAACCAGGCAAGTCAAACAATATTTTTTATCATTACAGACCATTGG  
A\_14\_P139854 GCGTTGGGAGGGGTTGATTTAGATTCCATCTTATATAAAAAGACCAGAACATTTTTGATT  
A\_16\_P18158589  
AATCTTACTCCATCATGAGATCAATCATCTGGAAATCTTGATAGAAAACCTACAGCCACA  
A\_16\_P19863613  
AGTAACAGTAAAGTAGTGCAGTCTATGGTCTTAAACACGAAGAACATTTCAAGACTACCC  
A\_14\_P119227 TGAGTTTACTTTTCGAATTTGGGGAAACAATTAGAATGTGAATGCTCAGAACATGTCAACAG  
CUST\_4499\_PI426210822 CTTTGTTCAGGAGGAACTCTGCCAGTGGAACCCCATGTCCCTTA  
A\_16\_P01362695  
AAGCATAGCATTGTCTTTGACTAATGAGACCCTGATTCATTTTGACAGGAAGACAGATG  
A\_14\_P107550 TGAAAACCTGTTGTGGATTAATAATGGAAATGCCAACTGTTGTGTGTTACTCATTTTCAGTG  
A\_14\_P134148 AATTAGCACCCATTGTCTTTATGCTCACTTACCTCTGCGTATTGTTGTTTCTTCATAAAT  
A\_14\_P113461 TATTATCAACTGTTTCCACAGATGCATTCTCTTGACTAATCCCTTCCACATTTTGTTAG  
A\_16\_P02028688  
GAGTGAATCCTCAACTGCATTTTCAATTACGTATAGAAATTTCCCTTTAGAACCCCTCAGA  
A\_16\_P15955123  
AGCATAATCCTAATCTTTTACCCTATTCCTCACTTATCCTCACTACTTTGTCACTCT  
A\_14\_P103850 GCGTGTGTATTCCAGATTCCTAACAGTTAGGTTATTTGCTACTTCTGAAAATGTGAGTT  
CUST\_5843\_PI426210822  
CAGTGCGTGACTCAGGTCTCTTGATTCCATGGTGTATTGTTTTTTTTACCTATTAAACAAT  
A\_14\_P106769 CACCTTGAGAGAGTTGGGTAATGATTTATCTTTTTGTGAAAAGTGTGAAATCAAGAATCTGT  
A\_14\_P106728 CTTTGGAGACTATGGCAAAGATATCACCTTCTGTTTTGTGAGCATCAAAGAGTTCATTAA  
A\_18\_P12056361  
ATTTGACACCTTGAGATTTTGTCTACAGAAAGTAGCAACATCATCCTTATACAAAGACCC  
A\_14\_P110521 AGCCAAACAGGTCTGTGTAATCTACTTTCAACTGTTTTTTCCCAAATCAATACTTACACT  
A\_14\_P130146 CCTCCATCCTCCTTTTAGGAAGAAAACCTTGGATACACCTTCAACAATCAGAACTTT  
A\_14\_P108864 ACATATTCTTACTCTGGTTGCCTTCAGCGGAACTGAGAAACTTCCAAAAGGTT  
A\_16\_P03191319  
GAGGGGTTACATTTTATGCAAGAGGAAAATGAACACTGACATGTATAGTAAATCTGGTT  
A\_14\_P104192 GTAACCAAAAAGAAAGAAATGTGAATCACACCACCTCAAAGATTTTCATGGTAAATCAAAT  
A\_14\_P106573 GGTGATATTTCTGGGGGAGATAAATCCAAGAAAGGGTAAAACGGAAGAAGATTT  
A\_18\_P14132730  
TTTGAGAACCACTACATGACTTCTTGATAAGATTCTTTCAACTTTACCCTATGCCTGGAT  
CUST\_1051\_PI426210822 CTTCCACCTCTATGCACCACCAGCTGAACATTTCCCCAGCTTTC

A\_16\_P31307581

CCCAATGAAATCAGATCAAATGTTACCATACAGTAGTCTTACTCAAGAATGTCGAAGAGA

A\_16\_P15989026

GAGCCTAATCCAATATACTCTGTCCACATATTTCCCTTAGCAACAAAAATGTTTTTCCCA

A\_14\_P122007 AAGCACTGGAGTGTTAGTGATTACTATGAAAGTCAAACCTTCTATTGGAGAAAGAGTTGGT

A\_14\_P122133 CACCCTTAGCATAGGGAATTTCAAATAGACATTTACAGTTGGCTGCTTACAACATAGTT

A\_14\_P127018 CTAGAGGCGATAGATATGAAGGTAACCTCCAGATTTTCAAGGTTCTCTTTTGGCA

CUST\_8181\_PI426210822 CTTCCATGATGTTTATAGTGGTAGGTTTGGTCAGGGCCTCTTTCCTG

A\_16\_P02634743

CCTTCCCCTTCAGTAATAGTAACAATTTATTCCTTTCTGACAAAATGGTAAGCGTCTTCT

A\_14\_P201463 CATAGATTTTGCTTTTAAATCATTATAACCCTGTCCACTGGTATCTGTGGCTCAGTGAAT

A\_16\_P02574975

TATTGCTTCAAATCTGGAGTTTTCTATTGCATTGTGTTCTCTATTTTCAGCATCTCCC

A\_16\_P00007895

AAACATCACTAACCAACCTCAAGAAGTAAACAGTATGGCTGGTTTTATAAGTTGGGAATG

A\_16\_P15967391

AACCTACCCAAAGTTAAGAAACCTTAAAGACAATGCAAAATCAAACCTGTTACATCCTGT

A\_16\_P39752742

GCCCAGAAAAAGAATGATTTGACTTTTCACTAATAACATCACAGAAAATGATTCCACACC

A\_14\_P103199 TCTGTTTTATACGTGTGTGGCTAACACCCTAATGTATTCCTGGTATTAATAAATGGGAACA

A\_16\_P35944905

TGTCCTTCATGACAATCTTACTATCCCAATGAGTGAATGACTATATGACAAAACAATCTT

A\_14\_P126573 GAAAAAGTGTCCTCATTATTTGAAACTTCATTCCTCAAGTAATCTTTGCCCTTTTGC

A\_14\_P104909 TATTCGATATCACTTTTGTTTAACTGCTTATGTTGCCACTTTGAACCTGTCTCTTTTCAG

CUST\_577\_PI426210822 TGATTTAATGCTAAACTGACTGTTCTCAGGGTTAGCCATGCTACCCTCC

A\_14\_P107050

CAAAGAAAAGAAGGAAAAGGAGAGAATCTCTGAGAACTACTCTGACAAATCAGATATTGA

A\_16\_P17574778

AGCATAAGTTAGAGTTTAAACCCAGAGAGAAACGATTAGTATCAACACGTATGCTTTGTGG

A\_16\_P03659412

AAAATGTAACAGGAAACAATCAATCACTACCCGATATCACGATCTTTCAATGACTGCTTC

A\_14\_P135463 AAATCATGATGAAGTGTTGGGATTATAAACCTGAAAATCGCCCTAAGTTCAGTGAACCTC

A\_16\_P18669801

AAAATCCATCAACAAGGACTAAAGTCAATTCTTCCAATGGTAAAATGATCCCCATTCAAG

A\_14\_P103868 CATGCCTTAACAGAACCCAGATGCCTTAAAAGACTTTTACAAAATGCAAATTTCTGAT

A\_14\_P138195 CTGACCAAAAAGATGCTGTATGACATGGAAAATCCACCTGCTGACGAATAC

A\_14\_P121077 CTTAAGACACCATAATTTTAAAGCAAACTTCCCCGAGGTAGGTAAAATGTGAAGTTTAGG

A\_14\_P135124 ACATCTGTATTCTGTAGTGTTAAGGGATCAGATCTTGATCCTGAAGAACCAATCAAAGTT

A\_16\_P21645369

TCCTGTTTCATGCATTACACATAAGATTAGACTTACACTCCTAAATTAAGCAAGCAGGTCA  
CUST\_7656\_PI426210822 TCCCATCACAGTATTCCACCCAAATGAGGCAAATTCTTATCCTTTCAAGAC  
A\_16\_P19254295

AAAACTAAGGAAACACTGAAACTCCTTTTTCCATAAAGTCACTTCAGAATGCCCTTAGA  
A\_16\_P19469357 GCAATTCCTCCACATATTCACTCATTACTTTTACTCATTATTTACTCTATAACCGCCCA  
A\_14\_P105870 CTGTCTTCCTTCTTGAAGGATTTTCAGCATCTGTTTGGTCTTTATCTAAAGTATCTTCCAA  
A\_16\_P20232489

AAAAGTCTATCCACCAACTAGTTAAGTTGTTACAGTTTATGGGGCTCTAAAGTTTTTGGG  
A\_18\_P17041792 CAGTAATGACAGTGCAGTAAAAAACCTGATAAATCCCCTGTCATCCC  
A\_14\_P136314 TGCCTTGTCTCAAAAACCTTCTAAAAGCCAGATTGTCAAAAGCAATTTAATTTTTGGAGG  
A\_14\_P135397 CTTTGCAATTCAGACATAGCCTGCGTAAATATGGCCTTCTTTTGTGCTGTTAATGG  
A\_16\_P16931260

AATCTAGGTGAAGATATCTTGCTGTTATTCTCTTGCCAACACATCTTATTCGTGCTACGT  
A\_18\_P16340422

ACGTGTTTCCCAAGAGTTAGTCATGTTTGCTCCTAAAACCTTATTGTAATCGAGGAATCTA  
CUST\_8015\_PI426210822

GTGCTCTTTAATGTTTTTAATTTAATTCAGATCTCCTCCCAGTGCTGACTCTACACCAG  
A\_16\_P21094080

AACCTAAACGCTCATCATCTTGCTATCCAGACTTTCCTTGCTTAAGTGCTAAATGTTTAT  
CUST\_9643\_PI426210822 CCTTCAGAAAGAAAATGAGTAGGCTCCGGAGACGTTTCATCTGTCTTC  
A\_14\_P200013 CTGTCTGCACTCTATGAGGACTCAAATATTAAGGAGATGTCTCCAGAAAACCTAGAC  
A\_14\_P112980 ACGGATGTGGGTTCTAACTATACTTTCTCCCCAAATAATCAACTAGTTGCTTTAATGACA  
CUST\_3927\_PI426210822 GCTTAGGTCAGTGTGGACACAGTGGCAGCAGTGGACAAGGACAAG  
A\_14\_P100713 GATGCTTTTCTTTATTTTTCTCTTTGTAGGGAAACTGAACAGCCAAGACTCCTATAACAA  
CUST\_7060\_PI426210822 AAAAGAGCTCTGCCTCCCGGAAGGTTCCAGGTGTTGGGGTAAATA  
A\_14\_P131667 ATTCTTTTCTCTTAAAGAATCGTCTAGAGTCGTTGAGAAAACCTGAAGGCTTCCTTACAAG  
A\_14\_P130078 TTTTGAAAGGAGGATAGGAAATAAATCATGGTTTTGTCTCAGTCCTAAAAAGTTCGGAA  
A\_14\_P134443 CTGAACGCTGATGGGCAGTGTCTGATTAATCGAATGAAGTAAAAATAAACAGGTTTTAAC  
A\_16\_P19136449

ACACTACCTTTACTTTGTAGGCAGAAGATTCTCTTTGTAACAAGAATGAACAAACCATGG  
A\_14\_P120726 ATGTGTGGGGGACATAGCAAATGTTTCATTGCAGTATCTGTAATGAGGAAACCAAAAT  
A\_16\_P19564691

AAAACCTCTGACATTCTCACACTGATTATATGACCATCTGAATAAAGTGGAATGCAAGCC  
A\_14\_P108271 TCAGTGAAACTTATTTACCCGTGTTTTTCACTTACATATTTAGGTGTTTATAATACAGAT  
A\_16\_P19933268

ACTCTTGCTATTCTCACATCCTAATGCAAAAATCGAAAACCTAACCAACTTTTTGTTTGTCT  
A\_14\_P100558 ACATGGGAAAAGATCTGAAGGCTACTGCATAAACTGCTAACAACAATTATGATAATTAAT

A\_14\_P131599 AGAATTAGTAAAACTGGCTTTTTTCCTTACACCCAATTTTTGCCTTCTCATTCTCTCATG  
A\_16\_P00628077

AATAGTCTAACCTAGAACTACCAGATCTTTGGCTACAATGATTCCCTCCTTCATTGTCAGT

A\_14\_P124222 ACCTTATATGAGGAATAGGAAAGGGTATCCAGTGTATATGCTCTTTTCTTCCTTCAATT  
A\_18\_P13383358

AATGGTGCTTTTTTAATGGAACGTCAAAAGTTCTCAGATCTTCAATTGTCTGCAAGACT

A\_14\_P128262 TGTGGGTTTCATGACTTCTCACTGTGAAGAAGTGCATATTGGCCATTTAAGATTTTTTAAA  
CUST\_9045\_P1426210822 TCTTAGAAGTGCCTGACTGAGCCTACAACATGGAAATGCCATTTCTT  
A\_16\_P20175183

GAAGGCCACTCTATCAGAATATCAAAGTGTTTCTCCTTAATCACAAAGAGAAAACGAGTT

A\_14\_P135064 AACTATCAAGGTAAAGGAAATTTACCAATTAATACAAAGTAGTAAAATTCAAAATCACA

A\_14\_P134974 AAGGTGCAAAGTTGTGTTTATTTTTTCAGATCTCTAGCAGAGAATACTCTAATCCCATGAG  
CUST\_6234\_P1426210822 TTATTCTGTGTGGCTGTGTGTGTTGGTCCCTTGCCAATAATCCTAGA

A\_14\_P139494 ACCTATAATCAGGCATTTCTTTACTTTAGGGTTATTTGTCATGTCAGACAGCATGGACTT

A\_14\_P104384 GTAGTTACCTGATCCATCAACATCCCGAGCAATCTGAAAGGCAGAATTTTAAAGAAAAAA

A\_14\_P123745 CAACATGTAACCTGATACTGAGTTGAGTATCTTCTTCTCAAAGACTCAAACACTGCAAC  
CUST\_4774\_P1426210822 CAGAAAGCACTCTTCTCTTCTGCCTACAACATCCTCCTCCCATC

A\_14\_P200486 GTCATGTTTACTAAACTGGGCAAGCACTAATATTTATAAGGCTTTTCCAATATGGGTTGA  
A\_16\_P38515598

TAATGACGAATCAAGGTTGAATGAACAGAGATAAGTTGACAAATAGCCATACGTAAGCCA

A\_16\_P00685210

TGGTAATGGAATTGGTTGTATATTTTAGTATGATAGTTCTTATAGATGATAAAGACCTCA

A\_14\_P106722 CACAGACAGTTCTACTGTGGCAACACAGTTTTCCATAATAGAAAATCGATGAACTGGAAA

CUST\_681\_P1426210822 CCCTTATCTCTAGCCTGATTTTCCATTGCACAGGATTTGGGAAAAACCTT  
A\_16\_P17694582

AAACTCACAAGATCAATTGAAAGGGCAAAATAACAGTATTTTATCAATACTCCCCTGGCC

A\_16\_P39250272

TCCATGTGAACTTACTTTCTCTAGTTGCTGAAGACAAAAGTAGTCAACCATATTTCTCTGA

A\_14\_P129682 GCCTATTCTGTGGCTTCAACCTAGAAATTTCTTTTCTTTTGATGTTTACTGACTTTACTC

A\_16\_P00017478

AAGCATAAGGAATAAACATGAGCGTTCTAAAAACAAGTTGATATGTGGAGTTGAGGAG

A\_18\_P14418358

AAAGACCTTAGTTACCCAGGAACATCTATTTCTGTTTCAGAGAAGAAAAATAGCGCTTATGA

A\_14\_P127907

ATAAATATGAAATTTTACTCGACAACAGAAAAGGAGAAACAGGAAAAAAGGTGCCTCGAG

A\_16\_P36913901

TTTGATCCTTGACAATTTGTCCACTATACTATCCATTTCTTGAACCATAAAGCCATCTGC

A\_14\_P103517

GATTA AAAACAGCAA AATTGGAAGGAAAGAGACTTCTATGGCTAGGAAACTGACATTAGG  
A\_14\_P101649 TGCCCTCAGGTGGCACACAAACAACATTTATTTTAATAATTATGGATTGTTTTAATGCA  
CUST\_10259\_PI426210822 AACTCCATCAAGCCTTGCCACTTTCCTCATCGGTAAAATTGACCTTAAAATC  
A\_16\_P19562778

ATTCCA ACTAAAGCATGTTATCGACTTGACTTAGTAACCTTTACTATGCATCTACCTGGC  
A\_14\_P101386 GTTTTTTCCTTTTTTTTCTTTATGCTCATCTTTAATGTGACGGTAAGTTCTGCCTGCTTT  
A\_16\_P16473861

AAAGGCCTCACTAACATGAAAATTGTTCTGAAGTGCAAAAATGTAGATCAAGACACTACG  
A\_16\_P01086879

AGTTACCCATTAGTCAAAAACATGCATCATACTGAACACTGAATACAAAGGAGTCTGAA  
A\_14\_P126975 CTAATTTTAGAAACATGCCACCATACTAAGTAAGCAGGAGGGCAGAATTTTCTAACAT  
A\_14\_P106946 AGAAATCAGTCAGGAGAAATAACTAAAGAGTCAGGATTCAGGCTTACATTTTCATGTGATG  
A\_16\_P02127282

ATTGAGTGTGTATTTTCATGATTGAGGGAATCTAGTCATCTAGAACATGGTCAGAACGTGT  
A\_16\_P35518649

GCACTACCACCATTATCAAAAAGCAGTTATTGATCGTTTCATTAATTAAGCCCATGTGA  
A\_16\_P31945167

ATCCATCAGGTATCTTTCTGTGATTTTCATTTTGGAAATGATGTTTTAAAGGCCTCTGACT  
A\_14\_P105933 TGATCCATTTCCGAATACATCTTTTGCAAATACTGAAAAGGAGAGTTTGATTTTTCAGT  
A\_14\_P134976 GCCTAACTATGCAATTCATTCACTGTTGTATTGGGTTTTTCTGTTTCTTTGTCTATTTGT  
CUST\_4500\_PI426210822 CAGTGGAACCCCATGTCCTTAGCGCAGCCCTGGGGGTTATCAGG  
A\_14\_P118779 AAACGTATCCTCATGCATAAATCTCTTTGGTTATGCAAGACTTTGTGTCAAAGAAGATGC  
A\_14\_P119088 AGGTTTCTAATTA CTGAAAATCAGGGGAGGAAAATTAATGTTGGAGAAGGTTGGTAATC  
A\_14\_P119840 ATGCAGAAACGAAATATCGTGTCTTGAAGATTGATAGAACAGAACCAAAAAGATTTGGTCA  
A\_16\_P02020073

ATTCAGGTAACAAAGCCATTTCTCTTCTTAACCTCTACTGTGGAAAGTTATTGACTTA  
A\_14\_P115466 TACTTTTCATTGTAGTCTGAATTAGGTGACTTAGATACCTGGCAGGAAAATACCAATGCA  
A\_16\_P00685553

GGATAGTCAGTAATTGTTTATCTGTGTGATGAGATAAGGTAGTCCCCTGCTGTAATGAAA  
A\_14\_P127296 CCAGCCTCTGGCAGAGAAACAACTAAGAGTATCTCTTCACCTGTTTCAAAG  
A\_16\_P18846778

AAAATGCATGTAGGTAAAGTCCTTTAGAGTCTCCTATATTTTCATCTGCTTATTAGGGCCG  
A\_14\_P129979 TAATCAGTAGCAACGATAAAAACA ACTGTAGAATATTAGGGCACATTCCTTTCCTTTTCACAT  
A\_14\_P115214 CTGAGTAAATGTAGCCCAGTGCTGTATTTTAAACAGTCCCTTAAGGTAAAGTGATTTGTC  
A\_14\_P134706 ACCCTCGGTGCAGAAATCAGAATATGATTTTTAGGTTTTTTTTCTATGTGGTTAGTGAAA  
A\_16\_P01001125

AAATAAACACACAGTAAGAGCAATGTAATTCACCACTTTCAAGTTTGAGGTCATGGAGAG  
A\_16\_P15280058

AAATGTTTCTTTAAGAGACTCATGTGAGAAAGCAATCTACACATTCTTTAACCAGCCTGG  
A\_14\_P202253 CTACAGTCATCTCTATAACCATATAAAGGGGGATGCGTGCAGAAAATGACTGAAAAAAGA  
A\_14\_P121708 TTCCTGGTTAGTAAACTGGGGTGTATTATCACCAAAAATTACCTGCTTATTAATCCCTAAC  
A\_14\_P134686 ATTACTAACTTCAAATTAATAATATACTCACTTCATCAGCCACAACTCCTTACTCAGACC  
A\_14\_P119009 CAGATCTTCCAACCTTCTCAGAGCAACCGAAGTCACTAATTTTACAGACATCCTG  
A\_16\_P20779909  
AAATGACTGACATAAACCCCATCTTAGTGAGAATAGGTTGCCAATATAACCACCTTTTTTC  
A\_16\_P01474386  
ACAACCTGAACATACTGGGTCAATTTGTAAAACACTGTATGAAAACTTCCTCCATCTGG  
CUST\_2949\_PI426210822 GAAAGTATTACTCGGGGCTGATCAGCTTTTCCATCACCATGACATCATT  
A\_14\_P124446 TTTTTCAGATATTGATGAATGTTTGAATCCAAGCACTTGTCCAGATGAGCAGTGTGTGAA  
CUST\_2479\_PI426210822  
AATGAAGATAAATGCATGAAGTAGAATAATTTTCAGTCTGGTTAGCAATCATCACATCCA  
A\_16\_P18130072  
GCCTCATTGATGTATTGCTTAGACAGTGTTAACCTATTTGCAAACCTTTAGATGTAAGCCC  
A\_14\_P116101 TAAAAAGATTTTACTCATTTCAAACACTACCTCATTCAAAAAGGCGACCATAAATTCCTG  
A\_14\_P108883 CCTGTTTTTTGGCCCCAGAAAATGCAATATTTTGACACAGAAAAAACATTAGGATGAGT  
A\_14\_P134506 TTATTTCAAACATCCTTGCAACATTACTGAAGAAGACTATCAGCCACTAATGAAGTTGG  
A\_16\_P00685014 CATAGTTGGATAATTGGTTTGGACTTAGCGGGAATTAGTGGGCGATGGAATTAC  
A\_14\_P138032 GGTTTTTCATCCTGATTCTATACTTTGTGATTGACAACTTTGTGATAAATCGCAGACCATG  
A\_18\_P13100551  
AAGAAAACAATGATCCCAATCACCTTTACTGAAGCAAATCCTATCCTCTGGTTCTATCTT  
A\_14\_P126153 TTATGCATCTGTCATAGAATAAAGGATTGCTGGTATTGGGTAAAAACTTGAGAACCCTG  
A\_14\_P201704 ACTTTAAAAAATGAAACGAAAGTGACAGAGTGTTCTAAGTCAAGCAACCTTTTCAGATGG  
A\_14\_P101797 ACAGGACCACTTCCCTAAAATGTATCAACACCTTAAGCAGTTTCAGGTTATTACAAAATT  
A\_16\_P00837527  
ACTCCCCTACTAAATCCTCACAGGCTTTACAATATCTGAACTACTCAGTCTTCAGTTTAC  
CUST\_3764\_PI426210822  
AAGATACAGAAAGATAATTGCCATATATGCTATGCAGCCAGTTCCCCTACCTCATG  
A\_16\_P18608923  
AGCCTTTCTGTAGATGTGTAACCTTATTAAGCCAGTCAAATATTTGTTCCATTTTGCCTCA  
A\_16\_P58424461 ACTTTCTTCCTTGTAGCCTCAGTGGCCTCCTTCTGTTTCCTTGAAAC  
A\_14\_P122970 TGCCTAATGAGTTACTTAGATCTCATATTCACCTAACACACGTGAAATATCTCATCCAG  
A\_16\_P58424276 GTGATTCTGGGACTGCAGTTGCTTTCCATTGCTGCTGCTGCAATT  
A\_14\_P124166  
GAGAACTACAAAGTTTTTACTTGTCTGAAGAAATGAGAGAAATCCAACAAGAGTTGTT  
A\_14\_P105082 GCAGATGTTTTCTTTAAGTTCTATCTGAATTC AAGGTCAGGCTGTTTACTCTGGATAAA  
A\_16\_P21163276



AAATCAGACATTCTAGAGTCTGTCATGAAATGCTACCAAAGTTTTCTTTTGCTTAAGGGC  
CUST\_7564\_PI426210822 AGACAGGGCTCCATGAGCTGACAGGTTGATCTGTGGAGATACT  
A\_14\_P124102 TAAAGAGTAGTTTTTGTGGGGGGAGGAGGATCCATTATACTAAAGACAATCCTTCAAATA  
A\_16\_P02930363

ATGGCACTATTACTGATGTTTGTATTGGAACCTGTAACATATTTCTGATTGACCAGCCA  
A\_14\_P116918 TAGATCTTGATATGTATATGGAGAACCTGGAGTGTGACATGGATAACATCATCAGTGACC  
A\_14\_P105223 GCAGAAGGCTATAAAGCAGTGTTACCTGTCCTTCATATTCAAAGCATTGACATTCAA  
CUST\_9170\_PI426210822

TATGGTGATATATAAAGAAGACTTCATTTTTCTAACAGTTCCTCAATTTAAACATCAGAA  
A\_16\_P19361173

AACTCCAAATCAAATCTATGAAGAACAGTGTTACGTATAGTATAACCTGGCCCGAATT  
A\_16\_P00200710

AACACCAATTGAGATCCTAACCCAGAAATCAAAGTCTATCCCATTTAACACAATACCTAC  
A\_16\_P16410932

CCCGGATTAATGACAAAACACTATCTTATTCAAACCAAGAATTATCTACAACCCCTCCTTC  
A\_14\_P103491 CTACAAGATTCTTTCAACACTATGCCCTCAAATGACTGTTTCATGTATGTGCAGACATA  
A\_16\_P16683247

AATGTTGAGGTCTAGAGAACAAAGCAAGTAACATGTGGATTAGATGTGCATTCTGTGAAG  
A\_14\_P127048 AGAGATGCAAAGAGTCTAGCAAATTATTTCTAGCATAATCACACATTTAACTTCAGACTC  
A\_18\_P13150594

TGACACTCCAATATGCAAAAACACTTACCTTCATTATTGACAATTATAGAAGCAGTTCCTG  
A\_18\_P22840683 ATTCTGGTGCCGCCTACCTTTTCTCTAACATGAGAAAACGCTTATGGAGATAATC  
A\_18\_P22842113 CCATGTTGGAGCCAGCCATGGTCTGCAGAGTTCATTTCTCTGAGT  
A\_18\_P22841639

CCTAAATCTGGTTTTAATCAATTTGACTTACAAAGGCACAGACTGTGGTCAACTCCTAAT  
A\_14\_P139614 GATACTGAGCATGGTAATGTGGTTTGGTATGAGGTAACCTGTTGGAAAAACATGAGAATAT  
A\_14\_P110723 GGGCTTTTTGGTAACATGGGAGTGCCTAATGTTGCTTTTGTATGTCAAGTTGAAA  
CUST\_3536\_PI426210822 TTTATGTGACCTAGTGCAGCTCGCCAGCCCACGCTGATGTGTGTAA  
A\_16\_P16881050

TCCAAGAATTACTATTTAACATGCAAAAACAGGTTCTTACACTGGATCCCTTCTATGACAC  
A\_14\_P116632 ACAGTTGCACAGTGCTTATGTCTATAATATACATGAATCTGAATGTCCATCAGCGAGATG  
A\_16\_P03740472

AGTCATTGTTTTTCATTCACCCTTATTTGTGTCAGTGTATTGCATTACTATTCCTGTTGGC  
A\_16\_P16123291

AAGGAAATCAATGTCCTTTGTCCCTAATCCACATTAATCATCTTAAAAGCACTGAAGCG  
A\_14\_P101875 CTGTTAATAGGACCAAGTTTAAACATTATAGGATGAACTGTTTCTTTTACCCAACCTGGGCA  
A\_14\_P103460 ACCGTGAGTTGCTATGTGGCTATGGTGATTTTCATCTTTCTGATCCTTGATTTAACTATAA  
A\_14\_P105587 TAGTAAAACCAACACAGTGAAAACCACGAAGAGAAATCGGCGATAAACCAGAATGTAA

A\_16\_P16191054 ATACAGAGGTTTCATTCTTGCTCCTGTTTGCATGCAAACCTGTTCTATTTCTGTTTTGCA  
A\_16\_P21457373  
ACAGTTTGTCTTCTCTGGAAGTATCCTTATGTCTATGTCTCAAATGTTACTCTGATGGCT  
A\_14\_P115375 TAGGGCAGGTGAAGAAGTAACTTCATAAATGCTTTCCAATAAAATTATGCTTTACAGGGG  
A\_16\_P17370843  
TTTCCACTGACTTCATAAACTTCAGCATTAAAAGATAGTCTTTAGAATCCAACCTCCCTGC  
A\_16\_P17564450  
AACAGGTGAAAACTAGTCTGGACTTGAAGCATCTTCATAAGGCTTGCTATTCTTTTAC  
A\_18\_P16817341  
AAAAAAAACACCCATTTCAGACATTGGCATTTAATATAATTTTTGTCAAATGAGTCCGTCA  
A\_16\_P02985313  
ATTTTATCGGAAACAGAATTCTTCATGATGGCTTTGCTTATCTCTGACATGCATTCTGCT  
A\_14\_P101265 GTAGAGGGAAAACTATTGAATGTGAGCAGTCATTGAAAGATGTCTTCTTTCTCTTGTCTT  
A\_16\_P16191277 CTACCGTGGTCATAGTTTTGTTGAAAGGATAGGCACTACAAAATGTTTGATCACCAC  
A\_16\_P30524775  
AAAAATAAAGCCATTCTCCATTTGAAAATGTGACCCATTTATTTGAACTGAAAGGCATCA  
A\_14\_P133010 AGAATGCATATATCACCTTCTTATGGCCACCTGATACAGACACTGCAAAAATGTAAAAGA  
CUST\_8739\_PI426210822  
AACTTTAATAATGCTCCCTTAGGATTCTGAGAGAAAGTTGTTAGATTTCAGACCAAAAAGT  
A\_14\_P139518 CTGATCTGTTTGTCTCTCAACAGACACCTTTGTTCGTTTACTCAGAGAACAGAATAAAA  
A\_14\_P201126 TGTCGAGAAGGGTCTTTGTTAACTGGCATTTTAAGGTTTAATCTTAAAGATTACGCCCT  
A\_16\_P00122210  
ACCTTGCTAGACTCAACATGCTAAGACTGACTTCTACATCTGAACTATTCCATTGAATTC  
CUST\_6398\_PI426210822  
ACTAACTAAAATGGGACAGCAAGACAGAAACAGTTTCCTATCCCTGTAGGAAAG  
CUST\_2731\_PI426210822 AGCAGATGTCTGCAGTGGGAGCAGAATGGTGTGATTTACTCTTTGTTTT  
A\_14\_P106038 CAGGGAATATTTCCCAAAGGTTTGATTTAGCAAGAGGAGCACAAGTCAGC  
CUST\_2403\_PI426210822 ACGTGGCTTTTAAAGAAATGTGCAGACACACGTACATGTTTGTTTAGACAGAGC  
A\_14\_P104661 GAATACATGAATGTTATAATGTTAAATTACTAACCTTTTAAAAATATTAAGCATTGCAAT  
A\_14\_P110982 TTTGGAGTTGCATAAAAGTAGGGTTGTGGATTTGATTGAACCATACTTAGCAAAAAGTGTT  
A\_16\_P19296678  
TTGGAAAGGACCATTTTACAGTTTCTCAATTCATACATCACTACCACAACAGATGTTCTC  
A\_16\_P00458005  
CTGAGATTCCATCATTTAAAACTCAATTAACCTGAGTCCTCAAGTTACTCCAACTCCT  
A\_18\_P14135735 CCACACACACAGTATCTTTTACAGAATCGCATGTGCTGTGATGCCATCTC  
A\_16\_P16191606  
AAAGAAAGGCAAAAATGCTCAACCAAATGGAACCTTTTTGAATAAGAGTTGACAGATTGCTC  
A\_14\_P105078 ACTTTGAAATGCTGGAAAATATTTCAAGAACTAGTGGAGAGAACTCTAGCACAATCCATA

A\_14\_P138426 TCATTAGAATTTGACACTTTTGAAAAGTAACCTAAGTTGCAAAAATTTCTGGAGGTCCT  
CUST\_5683\_PI426210822 GGTGCCAGCTGGCTTAACATGCCATTATTTACAGCTCTAAGGTTTATTTTCAT  
A\_16\_P20139722

AAAATTTACAGATTGTGCAGATCACTTTTAAACTCACATAGGTCCGGTGTCTTTACAGTG  
A\_14\_P104603 ATCTCAAACAGTTTATGCTTCCAAGTGGCAAAAAAATAAAGTCAGGAATTTCTCAGGT  
CUST\_2065\_PI426210822 ATGGGGAGCTCTGATCATCGGACACACACCCCAAAGCATGTCATT  
A\_14\_P128605 ATGAAGAAGAAAAGATCTTGAAAGTTCAGGCCTCACACAAGCCTTCTGAAATTCTG  
A\_16\_P19005976

AAAAGGAAATTGCCAATTTACTTGCTTTTTGCCTACTAAAGAGACTTCTCAACTGGTCAT  
A\_14\_P120320 CAAAGGGTGAATGCGTATCCACCCAGAAAGGTGAACAGATTTACTTCTTAATAATATATC  
A\_14\_P138343 GCAGTAGCAAATCCTTCATATGGGAAAAAACAGGTTGTCAGAAATAGTGATCAATATCCA  
CUST\_3481\_PI426210822 AGGAAGAAGTGGGACATGCAAAGGGGCTCTTTATAATCTGGTCTGA  
A\_14\_P202186 TGCTTTATGTGATGGAATAAATTGTTCCCGCAAGCAGCAAATGTAATGAGTTTAGTGCTA  
A\_14\_P109164 TTGTTTTTAGGTTTGCAGATTTTATCAGGGGTATGCTGAAACTAATTCTTCTCCTCCTGT  
A\_14\_P115613 ACAGAATATTGGAAGTGTAAAACCAACTGCATTAATAAGATGTGGTATGTGGCAGTGAC  
CUST\_1546\_PI426210822 TTATGTATACTGCAAGTTGGCATGAACAGCTGGGCAGGAGAGTGC  
A\_14\_P134714 TGTCTATAGTGTTTACTAAAAGCACATTATGGGCAGTTGTCATTTTAAGGGCAAACAGAG  
A\_16\_P02114978

GCCACAGAGGAAATTAAGTCTAATTATGTGTGTCTAAATCACTAAAAATGGGTCCAGT  
A\_16\_P35650446

CCAATGACTGAAAACCTTGAAAATTCCAACTTCAACTTTCAATATTATGACAGCCTCTCC  
A\_16\_P40327080

TCTTCATAAATGTCTTTCAATGTCAATTGTGCTCAATGGTATCAAAAATCATCAAGGCCCT  
CUST\_1864\_PI426210822 CAAAGGCTGGACTGGAAATATGTGGGTCTGGCTTTCCCTAAACTATAGTA  
A\_14\_P132757 GGATTTTTTGCCGAGTATAGTAAAGTGCTTTGATATTCTCCAAGAGGATTCTTTTCAGGT  
CUST\_5025\_PI426210822 TCCTTGGGCCCCAGATAGTACATTGGCATTGTGAATCATTITAGATGAGTT  
A\_16\_P15802427

AAAGATCCCAAACATTAGTCTGAGTCTCTTTTTGAAACATCTTGCTACAAACAATTGGCA  
A\_16\_P20052106

AATCAGAATACCCACAGATTTACTTGTCCCAACATGAATAGACTCACATTTCTTTGGATT  
A\_14\_P133915 AGTAAAAGGCACAGATACCCAGTTACTATATACTCAAGACTATGTTCCCAAGAAAAC  
CUST\_1890\_PI426210822 CCCTCCTCCCTAACACTGATGCTGTGGAAAGAGGTTCTTCAAAC  
A\_14\_P121707 AATAGATGACTTGACAAGGTAGAGATCTGATATTTTGAGATTTTGGAGACCATTTCCTGT  
A\_14\_P115569 GAAGTCTTTAAGTTCCGAAACCAGCAGAAGATTGCGAGTCAGTAGTAAGTGATG  
A\_16\_P15036280

AGAATGTCTTCTTACATACTACCGGCTGCTTTTAAATATTGTTAACAGATCCCCCTTAA  
A\_16\_P20484553

AAAGGCAAAGAAACAAGGAAAAATCACCAAACCTCCACTATATGTGTGATTTCTACCACA

A\_14\_P118152 TGTGGCTGGCACATTTATCCATCTGTTTAAATTACTTGAAAATGCTTTTATAGGTGAGCG  
A\_16\_P20342329

TGTTTTTAATGCTGATCATAAACCACTCAATCCATCAGAGAATCTATCAAAGTCCGTCAG

A\_14\_P126716 AATTTTAAACTGAATTATGAACCCAAACCTCAAGGTTGGGGGAGATTTCAATTGAAAATG  
A\_14\_P137631 TGTAATATCCAAAGCCACCGAGAAAGAGACTTTCCTGATAGTAACCAAAGCAAACCTAA  
CUST\_7686\_PI426210822

ATATTTTCTTAGTTATGTATCATGTAGTCTTCCTTGATTCAAGAGTACCATGACTTGTGT

A\_16\_P16001834

AAACAGGATCTTAAATCTCGTCCCAAGAATTTGATAATGACAATACCAAAAAGGCCATCTT

A\_14\_P116507 TTATAAGCAATGACATGAACATAAACTCACATCACTGGGACTTGGGCATTCAAACATGAA  
A\_14\_P122259 TGGCCACCAAAAAGTAGGAAGAATTTTTTTTAAACAGATGGTAATAATGAAGGGGCAAAG  
A\_14\_P200947 TTGAGAGTGAAATGTTTTAAATATTGCCTGGATTAAAATTGGGTAAGGAGGTCAGCACT  
A\_16\_P21245765

AAAAGCCATTTTTACCCATCTCTTTACATCACAAAGCAATTATTTCTCACCTGCCACTTT

A\_14\_P106481 AAATCTAACATTTTGTAGTAATTGCTCGCACATATAGTGCCTTGGAATGCAGGCCTCAT  
A\_16\_P20824084

GGGCCAGATAAAGATAAACTGCTTCATCACTGATAATGTTAAGTCCAGTAGTCTTGCAAT

A\_14\_P201063 AAAGAATGCTTGTGCTAGTTAATTTCCCTGCCAAAGGGTTCAAAAATTAGTAGTTTTGTTC  
A\_14\_P111882 CTAACATGCCAAAATGTTTAGTGTTACGTTTCATTGTGTGTCACATGAAGTGCTATCATCT  
A\_14\_P201921 TTTGAGTAGACCCAGATGTTATGATAATATCTAAAATTTCTTGGAAGCTATTTCAATAAT  
A\_16\_P18191382

TAAACAACGCCATTGTGAATATGGAGTGAGTCAGAGTCTTTCTACAAATGCTTGAAAATC

A\_16\_P38170387

GATGATTTTCAGCACAGTTTAGGAATTGGTCAACTATTGAACACCTTCCATTTTTCTGCT

A\_16\_P16711208

TGAGCCTAGTCAGAAGGATATAACAATGTAATGAGAGACTTAGAAATCAGAATGCAAGGC

A\_16\_P15708350

AAAAGTCCCTTTTATATCTCTCAGAAAAGCAAATTAGTCCATAAGTAACTCCAGGCACGTT

A\_14\_P125005 AGACACTGACATTTATCACAGTGTCTAACCCAAAGTAGATTTCCATAAAGGTTGATAGGA  
A\_14\_P132000 GTCAGACAGCAACTCAGAGAATAACCAGAGAACAACCAGGTATTTCAATGATTTCCAT  
A\_14\_P106246 TAATACTCTTACTTTTGAAGGCACTTGCCAGTGCATTATTGCCATTTGGTTCTCTAGAAA  
A\_14\_P124558 GGCTTTGCATCAAACCTGTGCTTATCACATTGATCACATGATAAAAAGGGAATTTTGTTCAT  
A\_14\_P125450 CTGTCCAAATCAAATTAACCTTTAGAGGCATACAAATTCAGATGTTTTGCAACAGGCTT  
A\_18\_P22839221 CTCTTAAGGGCATCGAGCCTAGAGTCAGAGTTTGCTCCTGTGAAAATATTTTC  
A\_16\_P36141085

TCCCCAAATAACTCAATGTTCAAATGCTAGACTACCCATATAACATAGGATCATCTGAGA

A\_14\_P102463 GTGGTGTTTTATTCCTAAAACCATATAGGATCATTGCAGAACATGAAGGAAAAATGGGTAG  
CUST\_5406\_PI426210822 TCATCGAAACACTGAATGCAAAGGGTTAGCAGAGTGAGCACAGATGTT

A\_16\_P41658928

ACATAGAGTTTTAGTCAACATCCTATAGTCCATTTACCCAACATCATTTTTGTGTTCCACC

CUST\_3494\_PI426210822

TTGAGGTCACATTGACTGTTTCACGTTGTACTTAGACATGCTGATTAACCTGAG

A\_16\_P19693676

AATGCATCTCCATATTCTCAAATCAGACAGCATTGAAAACTACACATTCAGGCCTTTT

A\_16\_P21424502

ACCTATCTTTCTCAATAGTTATTGGACCATGATAAGTGATACCTCAATACCACATACCCC

A\_14\_P110622 CTTTAGTTTTGAAACATCCCTTCTCACTCATTAGCACAATCCTTTAATAATGCACCTTGG

A\_14\_P103122 TGGATGACATCATGATTAATTTCTTGTCTGTTTCATCAAGGCCACTCAGTAATAACCTCC

A\_16\_P19603637

TATGTCTTAGAAGAACCATTAACTTTACAAAGCCAGTAATTTGAACATAACCAGGGAGC

A\_14\_P128800 TGTATTGCTGTCCTTGAATGCCATAGTCAAAGAGAGTTTTTAATAGAACCATGTTGGTTG

A\_16\_P18104410

TCCATGTATAAACAGATCTCCCTTTACTCAACTCTAACTTTCTTCCTTTCACTAACTGC

A\_14\_P135651 TTACAAGTAGGGAACACATTATCTTCATCTGTGTAACCTGTGCTGCTTTCTGGCTCAT

A\_16\_P21366844

GCGCTATTAATCCCATTTCTAAACCTCTTCTTCATGCAATAATGTTAAAACAGTCCTTCCA

A\_14\_P117427 GAAGATCTAAAACCTTCCAGAATTTCAAGTCTTTGTTTCCCCCTAGCAATTAAGTTCAAT

A\_14\_P133435 CTAGATACCTCCACACATCCATACACTGTGATGAGACCTAGAATCATCTAGAACAC

A\_14\_P125350

TTCACTCATGTTGGGTCTAGAAGAAAAACATGACAAAACAGAAGTTGAGAGAAGCATTTT

CUST\_8767\_PI426210822 GAGGATAATTGCAACAAGAAGTCTCCCCTGCAGCCAGCTTATTGG

A\_14\_P108540 GCAATCCTGTTATTAATAATAGTGGCAGGGTCAGATGAATGGCACATTATAAAGTTGGTT

A\_14\_P124669 CTTGTTAAAAGGAGGACTGTGTAGACAAAGTCTTTGAATGAAAATGGCCTGTTGTATTT

A\_14\_P129100 GTTCCGCACTTCCGTGATGTTGTTCAAACCTCAGATCTAACACTTCTAAGGAAAG

A\_18\_P16534651

AACCTCTCTTTACAAACAAATCTGCCTTTTCCAGATACTAAATCTAACGAGATGACACA

A\_14\_P136746 CTTGACACATGCTCTGTAGGTTGAACACATAATCACAAATATTCTAGCAAATGCTGCCTT

A\_16\_P02634036

TGAGAAAGCCTTATATCCCATTTTCATAAGAAATCGGTCTAGTAGTTATGCCTCAACCAAA

A\_16\_P16309774

AATTTATGCCACATATCAACTTTTCTTCTAGGCTTTCTTCAGTGTATTCCAATGTTGGCC

A\_16\_P18931752

GGAGTATGTAATTGTGTGATAGGTGGAAATTCATAAGGAGAATGGATCAACTACAAGTGG

A\_16\_P17422896

ATATGCTCTACAAAATCAGTCTGCTTCTAACATTGTTCTCAACCACTTAAGAGTCCTT

A\_16\_P01703739

ATTTCTCATACCAGGTCTTTTTTAACAAAAGCACATTCATAATTTTCCTCCCAAAGCACC  
A\_14\_P137062 TCTGACTGTGACACATTGGTCAAATGAACTTTCTGTGCGGAATTTATTGTTTAATAAAT  
A\_16\_P16070429

AGATTGTTGTAAAACTTGCCTTATGAGAAAAGTAACACATTCGATCACTGTCCATAGGTC  
A\_14\_P102123 AACATCTTTTAAATGTGGATAAGGGAGGTAGGTAGAGGTTTGAGAATTTTGAAAAGGTGA  
A\_14\_P132666 CACATTGAGGTATGAAGGTCTCCAGTAACCAGACTCTCCTCTACCTTGTT  
A\_14\_P106059 CACATCCTGATTATTCTTACTTAGCATTGAGTCCATGTGTGACTGCACTTATAATACCAC  
CUST\_4143\_PI426210822 TCATAATCTCAGCAGGCTCCTGTGTCTGAGCTAATTTCTGTATCCAGGT  
A\_14\_P115189 CACTGCTTTATTTTCAATAGATTAAACCTGATTTCTGAGAGGTCCTGAAGTTGGGCTTAT  
CUST\_5878\_PI426210822 CTGAACTTGCCAGGGACTCAGAGAAGTGGTCTGGATTTGCTTGT  
A\_14\_P127079 ATAACACTCAAAAATACAGGTGAGGGGGATTCTGTATATTCTTTCTAGGAAATCTGGATG  
A\_16\_P36841395

GAGCAGAACTTGAAACCATTCAACTTAAAGAAGACTTTCCCTCTCTTATGTGAAGTG  
A\_14\_P103309 CTATTTTCCTCTCCCCTAATATCCTTTCTTCTCTCCTGGACTATAATCAGTCTTCAGG  
A\_14\_P122467 ATATTGGAACCTCTGTGAAGTCAGATTAATTGTATTTTGTAGCAGTCCAATCCAGGAGAGA  
A\_14\_P130168 CAACGCTAAGTGTCTATGAGATGTGGTATTTGTTGTGTATGCAGTAGCCCAAATAGT  
A\_14\_P101743 CTTACAGAAAAAGTCTCTTCTTTCATCTGAATCATCTTCCAAAAGATTTCTCTGTCAAA  
A\_14\_P100533 GAGAAGGAAAGGAAAAGTCAACAAGAAGGGACTCAGCCAACAACAGTG  
CUST\_6141\_PI426210822 ATGTAGGTTGCATTTTCTCTCCTTGGAGAGCCTCAGATTCAATGGTGA  
A\_14\_P123012 GTATAATACACATGCATAGGCAGCACTTATGTATGATTTTCATGCAGAACTGTGACAGTCA  
A\_16\_P03137188

AGTGATCTCACTTGACAATAAACCCCAAGAGAACTTAGAACCTAGTATCCAAAAAAAAC  
A\_14\_P119528 CAGTCTTTCTGGGACCTGTGATCTAGAAGACAGGAGAAGATGAACACA  
A\_14\_P200416 CTTACGGCCTTCATTTTGTACTAAGTTATTTTCTGGAAGAACAGCAAAAATTTTCAGGT  
A\_14\_P130628 TGTTTCCAGTTTTTTTACCTCCACAATAGAAAGGAAATCTTAAGTCCACTCTACTGTAGCA  
A\_14\_P116987 GGCTGCTTTTTACTAGAAGGTTGCTTTTATGAGCATATTTATACTGCTGAAGGATGAGTG  
A\_14\_P129849 ATCTCAAGAGTATGTCTGCTATACTGAAGATACGATTTTACATGTACGGCCTAAAAGT  
A\_14\_P126482 CTGTGTAGCATAATGTTTGTTTTCCATGTTGATCTGCAAAAAGAGAGAGATGACAGAAAGA  
A\_16\_P20824381

AAAATGTTGTTCTTTAAACACTTCGGTCTCAAAATTTTTGTTTCATTCACAGGTCCATTGC  
CUST\_5161\_PI426210822

CTTTCTGAGCTTTGCCTTTTGTAAATCTCAGTGCTTCACACACATCAGACAAAGATATT  
A\_18\_P14135854

GACTGATGTCTTCAGAGCAATGCAAAAAGACAGTGTTTCCATGAAACAGAATAAACTAGA  
A\_14\_P137675 AATTCTAATTGATATTGTGAGGACTGGGCTTTCTTTGAAGAAAGCCACATTTTTTGAC  
A\_14\_P126637 TATGTAGGTGCTTCTTGGTCGCACTCATGCATTGAAGGATTCAGAGTAAAATTTCTAAAA  
A\_16\_P16306285

ACTCTGATAATCCAATGTAATCCACCTTCCAAAGAATTGTAAACCCAGACCAAATTACAA

A\_16\_P03717294

TATGGAAATTTTGGAAAATACACAGAAACAAACACGATGACCTGTATGCACTAGCACCA

A\_16\_P18718546

AAGGAGTTAGTGTATAGAAGGAGTCATTGATATCGGAGCATGTTAGCACAATAGACCTAA

A\_18\_P14363738

GCCCCAAATAGACATCATAGCAGCAGAATATAATAACAAAAACCCATATACACTAACCAC

A\_16\_P36946874

AAGAAAGATTCCCTTTGGTCCTCATTATCCTCATTCCCTTACAATTCTTCTCACATTTCTC

A\_14\_P120743 GATTGATGTTCCATCAAGTATACGTGGAAAGTTTCAGTATAACCGTTAGGACACTGTAAA

A\_16\_P17215500

TTTTACATTAAGTGTGTCACCTAAATTCAAACCTGCAAATCCAAATCCACTTCTGGGTTA

A\_16\_P17505558

AATTGACTCAACCTTTTGGAAAGAAAGAAAAGTGGAAAGTTAGACTAACTTCATAAGTGGGG

A\_14\_P201922 AAGTTTCTCACATCACTCAGTCAAACTGAAAAGACTGCTTGCTTTGGAGGTAGTTTAG

A\_14\_P118251 CTCACTTCTTCTCACATGCGCAAAAGTAGTCTTAGGATTTCTCATTTTCTTTTTGAGTC

CUST\_2727\_PI426210822 GTGAAGGCCAGGGCTCCTTAGAGGTAAAAGGGTCTCTTTGTGAGG

A\_14\_P116089 TTGCGTCCATATCCAAAGTTCTGTTATTCAATAATGTCTTTGTCCATTCGTTCTCTTTT

A\_14\_P102266 CATCCATGAAACAATTTATGGAAACTTTAGGGAGCATTGAGATCTAGTTTCTCTCCCTA

A\_16\_P02963987

AGAAACTTTTCCAGCAATCCTCTACTACTGGTTCACATACTGATCTGATATGTTAAAGCC

A\_16\_P20926695

ATTTTCGATGTTTCAGAATGATCTCCCTTTAATCCTAAGACTACAAAGTAAGACACCAGGA

A\_14\_P136387 AAATTTTTTTCACCTTTGGAGGAGAATATATTAGAGTTGTGGGTAATTTTTTTCACAGCCACC

A\_14\_P128596 TCTTGCTGTGATCATGGCAGTTAACAAAGTAAATGCATCTGAATTTTCCAAACAGGATGA

CUST\_3499\_PI426210822

TGGAACAATCACACACAAATGTTTATATCCACATACAGGCCCCATATACAATGGG

A\_14\_P111878 CCATTTAAAAAATAATCTTTGTCTGCATAGCATTGGAATCAGCCTTCAGGACTTCC

A\_16\_P02886463

AGTAAAGAATGCGATCTTGCTCTAAAAACGAAGTCTGTAAAACTCTGACGTATGTGGTAA

CUST\_7041\_PI426210822 AATTCTCTAAAGGGAAAAAATAATGAGGTGGCTGCTCTCTGGGGTTAAGC

A\_16\_P02089288

TGCCTCACAATATAATTCCATCTGCAACATACATTTAGATATCCATTAAGAGTTTGGCCA

A\_14\_P131248 AAGGAAAAAACACATATATTCACCAGTGGTTTAAAGGTGGTGGGAAGATGCATTGG

A\_14\_P115907 CTCTCTGCATTCCCAAATAGATAAGAAAGACAGGAAGGAGGAGTATTTTTGTGCCT

A\_14\_P121478 ACTCTCTGGAAGAAAACCTCTAAAGAGATGCCACCATAATCAGAAGCAAAATT

A\_14\_P112266 CACTGAAAGGCTTATTACATTATCTTTGTGTAGTTACTCTCCAGTATAAACCCCTGTGATG

A\_16\_P16162589

GACTCAGTTCTCTGCACATATTTTCAGTTTCCTTTTCAGATCTATTTTTAGCACTATCACCC

A\_14\_P108892 TTCATTCTTCTCCTTTTTTCTTTTGTAGCCCCATCAGTAGCACCTTTAAATGTCACT

A\_14\_P124865 CCTTATCATATTGGCATAACAACATTTTCTGTGTCAAAGAGTTCTGTGCCTTCCTCAT

A\_16\_P38429088

AATCAGCCTCCACATAATTA AAAACTGATTGACATCTGTATAGTCACAGACTCCTTGTGC

A\_16\_P00311136

CTATGCCAGACACAAATAATGACACTGATACATGAAGTCACTTGATTCTTTCTGTCTC

A\_16\_P00685577

CAGGCACTAATTTTAATGATAGAAACCAAATGGAATGATGCTGGGTCAATTTACTACTTAG

A\_14\_P134000 GCACATCAAACCTTTTACACGCAAATATAGCCTTGAAGTGGACAAGCCAAGATAACTTTAA

A\_14\_P201872 CTTTTTGTATTGTCAAGTCTCTAACCCGAACCAAACTCGATCTGTAATAACAGTAAACG

A\_16\_P02457477

CACACCCTTTTCAGTTTATGTTCTCTTGCTGTATTTTATGAATGCTCATTAAAGCCACCT

CUST\_6126\_P1426210822 TTTTATGAAGGGAAAGACACCCTTGTTTAGTGAGCACTGACCAAGCACTA

A\_14\_P101385 TTATATGGATTTCATCTTTAGGCAATCCAATGGTGTGAAGACTTTTAGCAGTTGCAGTTTG

CUST\_862\_P1426210822 TTTAGCAAAGGGAGCCAAGAAGGCAGCACTAGAGCATTGTGGATAA

A\_16\_P16499032

CTAGCCCAAATGACTTCTTCTATTTCAACTCCACTATCATTGCATTTAACTGGTCACAC

CUST\_1385\_P1426210822

GTAGAAGGATTAGAAGTGGATTCTACTCTACCTTGAAGGGATTAATGACAGTCACAGA

A\_18\_P22842828 CTCAGCAGGCTGATTCTTCCCCTCTCCTATGAGACCATCCTCCAT

A\_14\_P116696 ATTATTCACCTCTCAAGAGAAGTGGCACTTGAAAGGTAAGTGACCTTTGTTTTGAACA

A\_16\_P02591874

CTGATTTCTAATTACTTTCCCTGACCATGATTCTTACCTAATCCTTGCCTATCTACTGCT

A\_14\_P136349 ATTGTGATTATTTTTGTTTACCAACATAACCTAAATTAGAAGTCTCCATGCGGGCTTTCA

A\_14\_P137616

AAATAAATACATCTGAAGAAGGATGATAGATAATGGAAGAGATGGTGAAGGAGAACAAGG

A\_14\_P200777 TCGGTTCACTCACCTTTTTCTGTTTGAGAGATGTTTGACTCAATTTTTTACCTGTTGAAA

A\_18\_P14134910 GGTTTGATGTCCAGTAAGCCTGAGCAGCCCTGCAAATACAGATGAG

A\_14\_P119137 GATTCTCTGCACAACAGGAAGTACCACATTTCCAAAGAATGGAACTGTATACACAATA

A\_14\_P103318 ACATAGGTGATTTGCATTTGGGGACCTTGCAATATGAGAAATGCATGTGTTTAAACAGT

A\_14\_P134911 CAATGGTGGAGTAGATCCGGGATTTGAGTAACAGGTAGACAAGCCAATG

A\_14\_P128946 CCCTTTTGATCTCTCTTGCCATACTCCTCGAAAAACACTTTATATTTACCTTTGTATTC

A\_14\_P201883 GTAGATCCTTAGTGAGTAGGAAGAGAAAATGTATAACCAGAACCCTCTTGCTTATCTGAAA

A\_18\_P16340710

ATGGCTCATCCTAACTAAAATCAGTTCTAATGCCTACAAAAAAGCACTTTTCTATTTTCTT

A\_16\_P15150730

ACCCACATGCATTATCAACTCCTATCACATCATCTTTTAAATACTTGATATCTGCCCTT

A\_16\_P18327405



AAAAGGGGAACAAAATATGAGATTGTTAGTCACATGATTCCTTACCGTGAACAACAGTT  
A\_14\_P117126 CACAAAGGCATCTGGTTTAAAGCAGACTAGCAAGGATAGGAAGATTCCCTG  
A\_14\_P135353 ACATTGGAATTAAGTGCTTGGATGTTTTTCCCCACTTTAAAAAACTTTTGAGGTTTT  
A\_14\_P137772 TTAGGTAAACATAGTTTAAAGGAAAGTCTTCTTCCCATTTCTCCAATCCCAAAGACATGA  
A\_14\_P123082 CATGCAAACCAGGATTAATCTTCTCCTTACAAAAGAATTTTATTATACTGCACTGATTC  
A\_14\_P107470 TAGATGTATTCTTGGGGAAGTATTACAAAAGAAGCCTATTTTTCAAGCCAATCTGGAAGT  
CUST\_8504\_PI426210822 GAGATGGGGAAGAGTTAATTACGAACCAGCTCCTGGGATGGACTT  
A\_16\_P01012782  
AACCCAGTGCTAATGATACTGCTATCCAAACAACACTACATATACCAACGTGTATTTTCGG  
A\_14\_P100477 ATCTTTTTTCGTAATGTAGCCGATCCAGTGCACCACTCACTACTGTATTTACCTACAAATC  
CUST\_1336\_PI426210822  
CAGCTAAACCAAGGAAAATACTCCCATTTTTAGAAATGGAGGAGCCATACGACTTA  
A\_16\_P15104167  
ACACCATAGTAATTCTTTGTCCAGCAATAAAAATACCACCATAGCACATACATTAGTTAC  
A\_16\_P17593336  
ATGGCATTTCATCCGTTTATGCACTCCATCTTGTATTTAAAGGGTAAACCTGGTATTGTG  
CUST\_6021\_PI426210822  
TTATATTAAGATGTAAAATTCAAGGCTCAGTATAGCACCTGGTGGCTAAAGCTGCCTC  
A\_18\_P14137707  
TTTAGTCAACGTATTAGTATTAATATCATGGCCTCTTTTCTTCTCATTTTGGAAAGGGGAA  
A\_14\_P121078 AGTTTCTGATCAGTATGAAGGCTACCTTCATACATGTGTGATCTTACATACATGTGTGAC  
A\_16\_P19408775  
ATTCATCTTAATCACTTTATGGATCCTGAAGCAATAGCACACTAATTTTTTTGACCCCC  
A\_14\_P121394 GTGGGTAGAAGTGACTTTTGGCCCTTAACTCTTTTATAGTCTGAGAAGAAGGATTACTATG  
A\_14\_P101417 TCCTTTGCTTCCCTCTCCACAATGATTTTTTAAGAAAAATCCCCATGATTCTTATTAATGG  
A\_16\_P18183897  
AAAAAATACAGTGGCACTCTAATCAGCAGTAACTCATGCTCAAAAATGCTCTTTACGGAA  
A\_14\_P116319 CTTTAGAGCAAGTTTCTGTTTTGAACAGAGTCCATTGATGTGCTTTAAGAGATTGCTGAA  
A\_16\_P16106325  
AACATCTACCATGAATTGAGGTTTGTCACTTACCTACAAAGAGTATCCCAATTTTGATGGC  
A\_14\_P120877 TCTATTGGGCAGACACCCTTATAAACTTCATGAAGGAAGAATATTAACACTGTGCATTTT  
A\_14\_P111640 AGTCCACTCACCTTAAACCAATTGAACAGTTGCTTAGATTTATCCAGAAGATAACAAAAAT  
A\_14\_P116008 CCCTAATATAGTCTCTGAATTTTTACCATTGTGGGTTTTGAAATTTGGTGAATTCAGT  
A\_14\_P115861 ACTGGATAATGAGAAGTAAATATGCCTAATTGAGTGTGTATGGGGAATGAGGTTAATGCT  
A\_14\_P107683 TGCAAATACAACCTTACTACTTCTGTTACCTTGAACCTTGAAAAAACAGTGTCTACCGA  
A\_16\_P16805686  
AACCAACTCAAAAATGTTATGTCCTGTAGTCTTTTTTATTTATTAATGTTGCCGGTCTCT  
CUST\_5465\_PI426210822 TTTTGATTTAAAACACGAACCTTCTTTTCAACAACAAGTGCCCCAGGAGA

A\_14\_P121774 GTTCTGGGGAAAAGCAGAATAATATTTGAGACTAAATAATATACTATTGGATACAATTAG  
A\_14\_P116991 CCCTACTTTAAAAATAGTCAGAACTTCAAACATGGACTCCCAAGGAAAACAAACAGTC  
CUST\_3763\_PI426210822

GAAGACAAGGCCACGGAGGTCAAAGATACAGAAAGATAATTGCCATATATGCTATG  
A\_14\_P121045 AAAATGCAGCCAACTCACTTCAATCAACTGGAACCTCCCCAAAAGGTATAG  
A\_16\_P21229743

AATCTTTTTTACCACAATCTGAACCATGAAATAAGCACATTGAAAGCATACTTCTCCTCAG  
CUST\_9699\_PI426210822 GCACTCTGTTAATAGTGGCTGTCATTGCATAAAGAGATGGCCAAGGAGAT  
A\_14\_P112208 TACATGCTTTAAAAAATCTCATTTTTAAGGTTAGTCATGAAAGAAGATGGTGCCAACCTG  
A\_16\_P19680444

AACAGCAAAGCATCTCATTTTTCTTTTTGCTACTTCAGATACATCAGACTTCCAGACAAG  
A\_14\_P101864 CTGTTTATACTGTCTAAATCTAAAGATCTCGTCACTAACTAGGTCTCTACTGAGTGTGGC  
A\_14\_P113082 CTCATATATTTTTGAATTTGTAAAGACTCTTCCCGTGTGTGTGGATTTTGCCTGTAGG  
A\_14\_P127773 AAAGACCTGAGATTAAGGTTCTTTTATTTTGTGGGATAATATTCGCCCAAATTGGCCATA  
A\_16\_P00345385

ACTCCCTGCCAAAAAATCATTATTTGCCTTGTAGACTTTTATGAAATCATAGTAGCCTGC  
A\_18\_P13468682

TGCCACATCAGATCATCAATGCTCTTAACCCAATGTTCTCTGAATTGTATCAAATTATCC  
A\_14\_P127541 CAAGGCTCGCAATTTTGAGAGAGTTTTGGGAAAGGTATGGGAAAGGTAG  
A\_16\_P17469597

TGAAGTAGGTTATAACAGGTCTTTTTCTAAGCCCAATGCATATGATCAGTGAAATAGGAGT  
A\_14\_P100415 CAAAGAGGCTATAGGGGTAACACTATCACTGACACTAGGGTAGAGACTGAG  
A\_14\_P136675 CAAATGCACTCTTCCATTCCAGTAGGCATGTATAAACTAGAACGTGAGATTTCTAAAGCA  
A\_14\_P106583 TTCTTTGAAACAGTCTCTAGAGGTGACTCTAAGTATCATTCTGTCAGACATAAGAGGAC  
A\_14\_P200092 ACATGCCTGCGTTGATCTTATTGGACACAAACACCTGTGGCTTCTC  
A\_14\_P122900 TTCAAAGCGATTCCATTTGGAGGAAGGAAAGAATGAGTAATGCATTATATACCAAGATCG  
A\_14\_P114964 TTACTTTAAGGATCAAATCCTTAGTTTGAGAGCAGGACAGATGAGCATAGTTTGTCTTGT  
A\_18\_P13365260

GCCAGGAAAACCTAATAAATTATTGCCGTAAATATGCTGTAAACATAACTTGACCCCTCA  
A\_14\_P111012 CACTATCGAGTCTCATGGGGTTGAAGCAAGCATTTTTTTGGCTTATATATAAACACAAATG  
A\_14\_P106885 ACAAAGAGAAGCACCTGAACACACCTTACATAGTGGCCTGTGACC  
A\_16\_P00881430

TCCAGTTTTTAACCAGTGATCCAGATATATCTCATTCCTACCCAAAGATAAAAATAGCACCA  
A\_14\_P134659 TCTCTCCGTTCTCTCCTGGCTCCGCTTTAAAAAAATGTTTTTGTAAATATTGACCTGT  
CUST\_197\_PI426210822 GCTAGAACCTGGAGTCTAAACTCGTCCCTCACCCGGGTTGCTCTG  
A\_14\_P120673 CTCTTTGGATGGGAGTCTGGCAAGAGGAAATTGGAAGATAAAATAAATAAAGTGAAT  
CUST\_7085\_PI426210822 GCTTTGTAGACATTACCCTCTGGAGTGCCAGGTGCTTTGTGAATT  
A\_18\_P13932876

CTCCTTCACTTACTTTGACCTGTTACTGACTATTTGATACATGCAAGAATTACTCAGCCT  
A\_16\_P00685393  
TAATGAGGATTCCACCCCCCAGAAATTAAGTATTTCAAAGTATTTTTGCCTATGGAGATT  
A\_14\_P134571 TGACATTTCTGTAGTAGGAATGAATGCAACTGACTAGCAGAAAGATTGTTTACTCCAAGT  
A\_16\_P19897009  
AAAAAACCCCTGATACAATTGAGTTGGCTGACATATAGGCATAAAGTCTGCTGAACAGATT  
A\_14\_P131608 TCCAAAAGCAGCGGGCTTTGTATTGTCTGAGTGCTTGAAATGTTTCACAATTAATAATTA  
A\_14\_P102920 GTGTGTTTTATGTGTGGAGGTGTTTTAGTGTGGGTTAATCCTAGAAAGTCAACACAAA  
A\_16\_P02837304  
GTGCCTATCCATTGACTTATCCAACCTTATTTCCAIGTTAGATACCAGCAGTTCAGAAAC  
A\_16\_P21564674  
CCTCCATAACATCTGACCATTTTGATCTCTACACAAGCACAAAATTCAGTAGCCTTTTT  
A\_16\_P00011128  
CATGCTTCCACAAGTTCCTTTGATTATTTAGAAAAAGGCTTACATAATTCAACCCGAAGG  
A\_14\_P103533 GAAGGATATTCCTCTCTGTGCCATTCTACTACTGGCTTGTTTGGGTTTAATACAAT  
A\_14\_P119289 TCCCGTTAATTTCTTGCAGAAAAGTTAAGTCTAATTGCCATTGCCATAAATTTGCCT  
CUST\_1585\_PI426210822 AGTGTCATTATGTTTGCCGCAGCAGCTGGCAAGTCAGGCATTGGG  
A\_18\_P14596428  
AAAAAATGAAAAGCATGAACACAGTTGGTCAGTTATAAACATTACATAGACACCAGCCA  
A\_16\_P38144693  
ATGATACATTAAGGCCTCAGTGTTACTTTAATCATCTTGGAATTGTCACCATGTTTGCC  
A\_14\_P135891 ATCACTCCAAAATGCAAGAACTAAATTTGAAAGAGTGCTTGGACATGCAGAACTGAAATA  
A\_16\_P03075935  
TAGTGGAGTTGTTGATGAATAGAACCAAGACTAGAACAAATGTATCTGCCACATCAATGA  
A\_16\_P01799905  
GATGAGACATTGACTTTCATTTCGCTATTCTCCAGAACAATCCACTATTCAGAAAGAAAAGC  
A\_14\_P126543 ATCCATCTGCCAAGTCTCATTTC AAGGAACTGGAAGTTGTATTTGGTTGTATAATAACT  
A\_14\_P104724 CATCACCCCTAGCAATATGTATTAAAGTCTGAAGTGTGCCATGGAAACCTCAGT  
A\_14\_P124938 TGGGCTTCTTGGAATGATTTGATATTTGATGGTTCCAAACAGCATCAAAGTAATCAATG  
A\_14\_P133684 TGGCCTTATGTTCCCTCATTTAGAAGAATCAAACCAAAGGCATTAGTATGTATAATGG  
A\_14\_P139064 CTTTTTCCCCCGAAAGCCTCTTTCATGATTTTCATTATGGTTCAGAAAAGTAAAGAAAA  
A\_14\_P131153 GTGAGGTTAGTTGACAATCTCCTGAAGTTAGGATGGCATAAACTGATAAGACTAAAAGTT  
A\_18\_P18190853  
ATGTCATACCCTAGGATTTTTAGTTCCAAGCCTCAGAAATTCTCTTTCAAGAATCAGATC  
A\_16\_P02843356  
CTGCCTTGCAATACCTTATATACTGATGACTCATGCAAACCTAAACAGGTAGATCTACCAG  
CUST\_1021\_PI426210822 ATCTGGATGTGCAGAGACATGCACGGGAACTGGGGCCACTGTCAT  
A\_14\_P110947 AGAATGTGAACAAGTAAACTATGCAAAATCTCATTCTGAAGGACTTTACAGTTGACTGGG

A\_16\_P18159905

AACAAGGAGAGATTTTTCTGAAACAACCCATTA AATCCCCTATGCAAAAACATTAGCCTA

A\_16\_P03234929

AAAAACATCTTGGTCAAGCATTCAATCATGAGTTACTTTTTGAGTTCTCACCTCTTTTGG

A\_14\_P137144 CATTGTTGCAGTTTCTTCTTTGTGCTTTTCTGGAGGTGAGAAGAAAAGACAAT

A\_14\_P134581 AGGCCATTTATGAAGTTAGTATTTGAGCCCCATAAGATCTTTAAAAAGCCTCCAATCATT

CUST\_4916\_PI426210822 GAGTATGATATAGTGTGCATGTGTGACATGCTGCGAGTGTGAGGAATGC

A\_14\_P135387 TTACATAAACCTACCATTCCGGTAACCATGTGAAAGGATGGACCAATATCAAGGTAATTT

CUST\_10429\_PI426210822 ACAGATGAAATAAGTTGAAGAAACCTCATGTAATGAATCCACCAGGCTGGCA

A\_16\_P39622637

AGTCCTCCACCTTAAATAATCTCATTTGTAACCCAAAGAATCTCATAACAGGAAACCTTTT

A\_16\_P02168216

AGACGCCAGTAATTCTTAACTAGTTATGCCTAACATCAAATAAGAACCCCTCAATTTT

A\_14\_P124304 CTGTGCCTGCTGTTATTATCATTTGTTGCTGTAATTATGCTTACAACATGAAAGAACTACC

A\_16\_P37935939

ACATTGACATGCACCAAAAATGATTTTATCCAATCCAATCTACATTTCCCTTCATTCAAT

A\_14\_P131988 CTGTAACTCTCCTCGGGCACTTCTCTGGCTTGATAATCCAATTCATAATGATAGATG

A\_14\_P120313 GTTCCCTGTCTTTGTCCACAGATACCTGATGGATCCAGACACATT

A\_14\_P134376 AGCGTTCCTCTTTTGCTAAAAAACCTGATTATTTTTTCAAGGAAGCGAATACTACTATT

A\_16\_P01118100

GGATCTGACTTCCTAAATTATTGGCAGGCTTAATTTACGTAACAAATGAATGTTCCACCT

CUST\_10376\_PI426210822 GTGGTGCACAGACAGCACAAATCCATGGGTTTGAGAGAAAGATGT

A\_14\_P101899 CATTATATGTGAAAATAGCACCTTAAACAACAAAATCTTTGTTTGGAGGTAAGAGGGT

A\_14\_P114390 CTTTTATAACCTGTGAATCAGCCCAGGATCGAGTATGAGGATTGAGACGG

CUST\_2087\_PI426210822 ATTTCTGAGCGGCCACTACAAAGCCCTCCTGTGACCCTGTTAGCT

A\_14\_P138464 AACAATTAGGAATTTTTTATCGTTATAGATGTTGTTAAAGGACTCCAGTAGCAAAGATCA

A\_14\_P133414 CTAGAAATGCCTTGGTAATAAGAACTTTCATCAGCATCCATGGTGAGACATCTAGAACAG

CUST\_5662\_PI426210822

TTCACTAGCAGATTCAGCAGAGCTATAAAATTTAAAGAAATGTGTTCTGTAATCCCTCTG

CUST\_345\_PI426210822

GGAAGGTAAAATATAGACATGAAAGGGAAAAGCAGTATAGCAAAACTTTGAAAGGAAAAG

A\_14\_P139933 CCTTAAATCACAGTGCTATTATCATCTCTGGAGGACCTAATTCTGTGTATGCTGAAGATG

A\_14\_P125630 GAATGTTTTGATGTTTGCAGTGACATCGATTGTGAAAAGGTTAGCCAGAAAGGAAAC

A\_14\_P112816 ACTGAATCTTCTGTGAAATGTTTACTGCAACAACACTAAAACTCAAAAACAATCC

A\_14\_P134231 TATGTAGTTGGTTTTGGATTGATCAGTTTTGGTGAATGCTTTGCTGATATCTTGATGGC

A\_14\_P133417 CAGATTTTGTGCAACCAAAATTCAGTGAAGATAGACTAGCATGCTAAACTCATCGTCTC

A\_18\_P17162450

AAGAGTCCAGAATGTCCATAACTATAGGCCTGTAACCTAATAATCCTCACTTATTGTCTGA

A\_16\_P15611739

GCCTGTAGAATGAACACATGAAAGCATTAAAGGACATTATGATAATTTTCAGGATTTGCCCA

A\_14\_P119744 ACTTCTTCCACTAACTATGATACCAGCACAACCTTCTACTGACTCTAGCCAAGTATATTCT

A\_14\_P138962 CAAAGCCACTTGTAATAAACACCCACATACAAGGAAAGGCCAAAGCAGG

A\_14\_P112749 GTTTCTAAGATCTCCTACACTTCTGTTTTTGGCCCTGTATGAGGCATTTTAAAGTTTGTTT

A\_14\_P116947 TTTTGCAATCTGGAGCCTGTTCTTGTGCAGTTGATTCATGTAAGTATTTTCATTCATTAG

A\_16\_P02139095

ACAATCTGGATTCTTGATGTAGTATAGCATAGAAACGTATGAACTCACAGATTACTGTCC

A\_18\_P11415657

ACCCCAATCTTAAATGTCTCTTAAATCACCCATCACATATTCAATACTTACTCCTAACCC

A\_14\_P112223 CAGAAGAGGGAATGGTATTGATGAACTGTGAAGTTTCAAATATGTGTGGATCTAATTTGC

A\_16\_P18090976

CCTCATCAAAATTTTAAACAGCATTCCAATACTTACCATCTTTCACATCTAACTCTTTCAC

A\_14\_P110409 CTTGTGTTCTCAGAATCTGATGCTTTCTGATCAACAAAACCTGAGCAAGGAAGATCC

A\_18\_P22840861 GAGGTGACTTTCTATTTACAGTTATTCATTTACACTGGGTTTCATCTATTAATATATACTG

A\_16\_P15599848

AAAAGGCAACACTACAACCTCTGTCCATCAAAAATTGAACAAACCTGAATAGGAAATAGGA

A\_14\_P105990 ATGATTGACAGCAGGACAAAGTGTTTTCTGGGTGAAGTTTATTCTGTTTTTCACATCTAG

A\_16\_P21615739

AAACTAATAGAAGGGTCGATATGATGTCTCTATGGTAATTATCATGCCACTTCTCCTCTC

A\_16\_P58424343

ACATAGTCATCACGCTATACATTCAATCTCTAAATTTTTTTCATGCTACCTAACCAAAAACCT

A\_16\_P16191561

TTGCCTTTCATTGATTCTTGAGGATATGAATGTTTTAGAAAGCAACAGTGTATGCCTTGA

A\_16\_P19554610 GATAGGAGGTCCTGCGCATTGCTTTCAGTAACTCATCTCTGTCAGGATTAACCTCTAT

CUST\_451\_PI426210822 GGTGACATGCTGCTGTTTCAGGAAATGGTCTCCTGATAACTTCTATTGTGAT

A\_14\_P137535 GAATGCTTGTAGATGTGGATTCTGTTAAGGATAAAGGGAATGTTGACTAAATTGCAAAGG

A\_18\_P13930125

AATTGGTGAGAAGGAATTAAGACACTGAAATCAGTCATGGAAACAATCACTCTGTTCCT

A\_14\_P106897 GAAAAATTGGCCTTCAGACTTTGAAAAACATATTATGCAGACTTTCTCATTCAAGGCTGT

A\_14\_P122501 AAATTTAATCTTATAAAAAGTTCTAGGATGATTCATGCTACCCTTCCTTCCCCCAAATCGT

A\_14\_P128713 AAAACAGAACGCACCTCAACAGAATAAAACACTGATATAAACATCAACACACTGATTTCTA

A\_16\_P16249098

GGAAAACATTCACACACATTAACAGAACTGCATCTTTTTCTTCAGTAAAATCAGGTCTTCC

A\_16\_P20375396 GCTTTCCTGAGTTCTAACCAAGAACCTTGTCCAAACTACTTCTCTGAAGTCAG

A\_14\_P139562 ATCTTTGATGCCTTTTAGGAGAACACTTGATTAGCATTAGTGTCCCTAAGTCACTAAAGAG

CUST\_1903\_PI426210822 TAAAAATGCCTACGTCTAGTTTACAGTGATGCGGGTGCCTCTATGCTAAT

A\_14\_P132199 ACTCATGAAAGTCAAGGATGAAGATTTTCAGTCTTGTCTCTTTTTCTTTTTCTTACT

A\_14\_P123845 CGGAGGCATTATGACTCTGCCACTGCAAAATCTACAAGGTAATCCATAATGTC  
A\_14\_P132154 CACTTCAGATTTGCTGACCATGAAAGAATATCACTGTTTGCTGCAATTACTGTGTCCCT  
A\_18\_P22840355  
AAATGCTAGGGAAAACAAGAGAGGGCAAAGTTTTATAGAACCAAATGCTGAGACAGAAGAG  
A\_16\_P19757782  
ATGTCCAGATATTTACCAAATACTCTGCTTTCATTACTGTTTCAAGTGTCAAAGTTCAGG  
A\_14\_P105676 TTGACTATTTGGAAACCAAGCATCATTAATAATTCTCTCAAACCTAATTGCGAAGAATC  
CUST\_5304\_PI426210822  
TGCCCAGAGCTACTGGGACATGTAATAAGAAGCTGCTTTTCAGACTTCTTAATTA  
CUST\_6861\_PI426210822 GTTGCATTGTCTCTGATCTCCTTGAGAGACTGAGATAGATGGATAGGCC  
A\_14\_P109221 AAATCCAACCTTCTGTTCTATATAAACGCATACAACCTCACAGAGATTACTTTCCCTTTGGC  
A\_16\_P15410017  
ATTTTCCCTTATTCTCAGGTCATTCAGCATTCAAAGTCCAGATGACAGAATCAGTC  
A\_16\_P03583641  
AAATCTCCAAGAACAGAACTTCTCTTGACAGTGCATTCTGTTACCTTCAGTATGAAAAC  
A\_14\_P135316 ACTGAGATTAGTAAGGGGTTAAGTGAGGTTTCACATGTAGAAAAAGGCCACACTATTTTT  
A\_18\_P13166759  
AGTGATCTCCAAAATACCAGATGTAACAGTAAAACCAGATAATTCAAAGTCATCCCAGC  
A\_14\_P111247 CACCACATAACTTCCTAATGTCTTCAAATAGCGAAAGTGCTAGCCGGAAACTG  
A\_14\_P130357 CAGTGCTGAAAAAGGAGATGAGGAATATGATTCATGTAAACCTAATCAGTTCTTAAAACA  
A\_14\_P111548 TTTGCCTCCCTATGCATACATATATCACACAGTCTCAAAGTGAATATACTTACTCTGTGC  
A\_14\_P102126 ACAAATAGCACCCCTGCTCCTTCACTTTAAATCATATGATGTTTTCAACGGTGTAATAGAG  
A\_16\_P00806516 GGCTTTTGAATTCCTGCCAGTTGAAATACTTCCCATAGCAACTGACTCTCAAAT  
A\_14\_P135580 CTATCCCACCAATTTTCATATTATTTTCATGTGACCCTTGAGAATGTATTGCCATGTCTC  
A\_14\_P105180 CATGTGCCACTACGTCGTGAGTCTGAAGTAAGGCCTAGTGTTTTATGAAGAAAAA  
CUST\_4353\_PI426210822  
AAGAGCATGTCACATTTAGAAATACTGTAACCTGGTTGCTGAGGTTTTACATATATTCTTT  
A\_14\_P121049 ACTGTAGTCCTTGAAGAAGCCAAAGAGAAGTGGGATTGTGAATCTATTTGTAGTAAGTAT  
A\_14\_P137053 ACAAAGAAGTGGCGATCAAAAAGACTGAGCCCAGAATTTGCTGAGAATGTC  
CUST\_6103\_PI426210822  
CAGTACCTAAGAAAGCATCACATATGATAAAGAAAAAGACTATGGCAAGTGAGCTTTAAA  
A\_14\_P105894 TTCACCTCTGGTTCATTTACTTGAATTGTGTCATCTTCAGGGTAGAAGTAGATTTTATAG  
CUST\_3628\_PI426210822  
GAAAGAATGAGGGAATGACTCAAACAATTTCAAGAAATGGTTCAAGGCTGTGTA  
A\_14\_P120448 AAGTGTACCCGGTCACTTTAATTCAGTCTAAAATTTAAAGTCTTCAGTCTCCACATTC  
A\_14\_P115420 GTAGCAGACTTGAGTTGCTGAAGTAAGGGATCCACAGTTATGGTTACAGG  
A\_14\_P201466 AACCTCAAGTGTAGGTCTAATTAGTGTCTTGGGATCCAAAGTTAGAGGAAAATTTAGAT  
CUST\_7157\_PI426210822 TTTCTTCTTTCTTCCACGTCTCTGAAAGTCCAGCTTCGTGTGGGA

A\_14\_P119942 GGTATGGGCATTTTTTTTATTTTCTGGAGAGTTAACAGTTATTAGCCTTTGTAAGAGGCTT  
A\_14\_P121224 TGTTTCAGTCTGTTGGAAATAAGAAAATCGAGACAAAATATCACAGCCGTGAAACTGGT  
CUST\_6853\_PI426210822 AAAGACAAGTGAGGAAGAGGGGTGATTGTGAACTCAGCAGGGAGA  
A\_18\_P22841262 AATTTGAGACATTTTCAGGGTCCCAGTTCCATCCCCTAGGAATCTGTAAAG  
A\_14\_P110727 TTAATGTTCTACAAATACAAAGTAGGGCCAAAGTAAACCTTCTTGAAGGGAACATTGGTT  
A\_16\_P00494880  
AATCACTTTGCTTCAGTCTTTCATATTAGTCTTAGCATGTGTTATTGCGGATGTCTCCTG  
A\_14\_P132220 ATTATCCAGGCTTTACCCACAATGGGAATAGTTTTCTCTCCATATAATCATCAACCTAAC  
A\_14\_P103231 CCTTCCCCTAGGATGCAATCTCCAGAAAAGATAGCATTTTCTCTTCTAAGAGTA  
CUST\_1772\_PI426210822  
TTTCTCATTTTATCAATTGTTGAAGTTCAGATGGTCAGGTAGAAATGAGTGTGATGGAGT  
A\_18\_P15377280  
AGGCTGTTTAGGTAAACTAGGAGCAATGAATATTACAACCTTCTTTAAGGGCTAAGTGGAG  
A\_14\_P119980 CGGCCCAAGTAATAAACAACCTAATTAATAATAGAGGAAATTTTGGCAAGTGCTGTCTAC  
A\_14\_P138480 TTTTCTCTTTTTTTTTATGGTAGATATCCAGAGGAGGAAGCCAGATATTGGACCTACAA  
A\_14\_P106533 AACCTTATCCTACAGACACATAGGGATATACCCGAAGTCTTAAATACACAGATGCACTTG  
A\_18\_P13969187  
AAATGTTTCTGCAATGCATAAGTGAAATAAATACCAGGAAGCCTTATGGTTCGATCACAC  
A\_14\_P115324 GGATTTACTTGTTTTTACCATGTTGTCTTGGAAAGGATTTACTTCTTACAAGTCATTAGGCC  
A\_16\_P16780808  
AAATACCTCTGATGGTATATGGACTAAGGTAGCAAAAAGGGAACCTATTGAACAAACTGGC  
A\_14\_P138620 ACAGGGCAATCTGTTTAAATGACTAATTACAGAAATCATTAAGGCACCAAGCAAATGTC  
A\_16\_P19426393 GCTCATTACCTACTGCATTTTTTATTCATCTAATTTCCCACATGAACCTTATCTTGGCC  
A\_16\_P41718703  
TGACAGTGCTATTAAATAAACCATGGTCCTTAGAATTACAGATACTGCATAATACTGACC  
A\_16\_P02177606  
ACTCTACAGTCTTGGTTACAGACTTTTTCTAAGGCTTGGATACACTTCCTTTGAGAAAAC  
A\_14\_P135658 CTGAAGAAACACATACATAAGACAGTGTGGAAAACATAATATGCATGTGCTTCAGCCCT  
A\_14\_P108157 TCTATTGGCCCAAAGATATTGTATTCACTGGACAAGTTTATGATCTCATTCCAGGGTTAA  
A\_14\_P123461 CTTAGTTCAATGGCTGAAACACAGTCGAAAAGAATACTGTGAATTATGCAAGCACAGATT  
A\_14\_P117122 CTAATGAACCTGTTAGTGACCTCTCTTACTTTGACTGCATTGAGAGTGTGATGGAAAA  
A\_14\_P104788 TGCAGGCATCATAAGAGATTCTTCAACTTTTATTTCCATGTCAATTTCTGTGCGAAAAGGT  
A\_14\_P135037 CAAGAAGAATTGAAAAGACTCTATAAGGCTCAGGTCAGTAAATAAACTGGACATGAGTGA  
CUST\_6885\_PI426210822 GTTTTTAGACAGAAGGTTCCATACAGAACTGCATCTGGGCAGGAGAAC  
A\_14\_P106591 ACAATTCCTTTAGCCAATGTTACCGAAGTCAGTGTCAAGAAAACCTAACAGAAAAAAA  
A\_14\_P112495 CTTTTAACAAAGAAAGTAACAATGAACAAAAGGCTAGGATGCTGTCCCTTGAAGATTACAG  
A\_14\_P108781 AGAAAATGAAATGAAATATGATACCAATAATAATGAAGAGGAAGAGGGAGAACAGTTCGA  
CUST\_7735\_PI426210822 GCAAGGTATGTCTGGATGAGAGAAGGTCTTTGCCAAGACAAGCATC

A\_16\_P58424135 TTCAGACATGTTTACCAGTTGACACTCCCCTGCATTGCTTCTGTCTCTAT  
A\_14\_P113468 CATGTTTATGTAAACCAGTGATGCTGCAAAAAGTTACAGCCCCATAAATGAAGTTGTAGA  
CUST\_2300\_PI426210822 TAGCTGTTTTTTTACCCTCAGATGTGGCCATTGGTGCACCCAAGG  
A\_16\_P36323208

ACTTTATCACCACCATACGTTTTCTATATTCATTGGCTTTCAAGATGTTCAAAGACAGC  
A\_14\_P116493 CCAGTCCAACAAAAAGTTAAAAGGATGCTCATCTCTTTCTCGGCATCACTGAT  
A\_14\_P136294 GTATAAACATCAAAATCATAGGGACCTTTTTACAAACTACACATACCCCATATGCCCAA  
A\_14\_P125344 CATTACACTTGACATTTGGAAATGAAATCCACGTTTTTGTGTGACATACGGAACAAATTG  
A\_14\_P136681 CTTTAGTTAATGGGCTGGATGGAATATTTGCATCTAGAAAGTTCCCCTGATGTTTTAAAG  
A\_14\_P106906 GTATCGCAGAATATGGCCCTTATCCTATTGAAGGAGGACTCTTTGGATGTAAGT  
A\_14\_P117226 TATCTTGCCAAAAGGTAACAAAGAATCTGGAATGTTTCCAATACACCATATCTTAGGAG  
A\_18\_P16280508

TCTGTGTCAGTTACTTGAAGAAAAATTGTGCCACTCAAATACTCTACACCTATGTCTAGC  
CUST\_5846\_PI426210822 CTATGGAAGGTCTTACCTAAGCCAAGACTTTGGCAGGGATTGGATTG  
CUST\_4396\_PI426210822

CTTTCTTCTGTCTTTTGCAAAATCTATGACACTGTTGAATGAATAATATAAGCCCAAGGA  
A\_14\_P108172 GATTTGATACCCCAAAGATTTTCCATTTCCCTTAGACGTATCTTTGGATCCATCTTCTTTT  
A\_14\_P126360 TATGGCCCAATCAACAACATGAAGAATGTATTTGCAGAACCTCAGGTTTGTTTTTGAAG  
A\_16\_P19979344

AGTTTGGAGTTCAGGATAGAACTAGGAAAATTTTTACCCCAACTGTTTAGTTCAAAGCA  
A\_16\_P35334114

GGGCTTATAACTAACCAAGATATGGCGTATAACAATGGATATTTTTTACAAGGAGGACCT  
A\_16\_P00279722

CAGACTACTACAACCAAATATATCTTTTTCAGAATTCTACCTTTTTCAGAGCATTTTAGCGA  
A\_14\_P101155 TAAAGTAAAGCCAGTTTGGGAAGTTCCAAGCATTTTAAACCAACTGTGGTCTGTAG  
A\_16\_P20907399

ACAAGTAACCAAGAAAGGCTAGAAAGACCTAACACTTGACCATTTTACATGTGATGTTTC  
A\_14\_P130259 GCAGACAATGAGACACAATCAAATCACATTCAGCACAATATGAATTAAGCATCTGAGAGT  
CUST\_10013\_PI426210822 AGTCCTTGCTTTGCTGGACTAGGCACTGGGATGCAGCAATAACT  
A\_18\_P16903972

ACTATTTTTTCCCAAAGACTATAATACAAGAAGTTAATTTTTTTTGCACATGTATAGGT  
A\_14\_P124001 TCAATTCCTGACATGACCTTTTAAACAGGCAGTTAATGTTTTTCAATCTATGGACTTTTCTT  
A\_16\_P30952424 TCGTCACTATGTGGCCCATGTGAAGGTCAGTCCTCTCTCTCTTTT  
A\_16\_P15652195

AAATTGCCCTACAATCTAACACTACGAAGACAAAGATTGAACTTAGTGGCTATTTGCTCA  
A\_14\_P111862 AGGTCCTGTTGCCCGTGCCCTTGCAATACAGGTATGCCTAAATTATTTACT  
A\_14\_P110121 AGAGCAACCACTCCATGGTTTCTTAGCACCAGGATCTGTAGAGAAATAAATAGTCAATTA  
A\_16\_P02049664



ACCCACAGTCCTATATTCACATCCTTTTCATCTAAATCTAGTTGACTAAAGAATATTGGCT  
A\_14\_P201015 AACTTCCATAGCACTTGACTGTGCTGTTTAAATTTCGACCTAACATCTGTGATACATGTAT  
CUST\_4075\_PI426210822 GCTGAGAGTGGTGTGGCACCTTCATAGCTGACATCAAATGGATC  
A\_14\_P118275 AAGAGGATGATCAGCAGCGTCTGGATCATGATGATACCATCCTTCAG  
A\_14\_P135271 TTTTGAATGTTGTTACTCACTATCCATCTACTTGGCCAACAGCCTCTTCATAAACTTAA  
A\_18\_P14135724 CTGCCTCTGCACTGTTAGTCCTCCCTGACTTCTGCCCCAGGCTC  
A\_14\_P126485 AGGCTACTTTTAACTAAAATTTACCTACTATTCTGTCAIGGTATCTCCTTCTCCTCT  
A\_14\_P106066 CTTTCTGTCTCTATGTGAATGAATGACTGCAAACCTGAGAGGTATTTAAACATCCAACA  
CUST\_9305\_PI426210822 CTCCCTTTGTACCTCTCCCTTTATAAAGGACAGTGTTGGAGGAGG  
A\_18\_P22842473 CTTAGAGGAACACAAATTGCCAGACTGACAGTCAGATATGGAGACACCAG  
A\_14\_P125786 TTTTCTTTTCTGACAAGTGTTTTTGGAAATCGTCAGTGAGAAGTCCAGATACTCTCT  
A\_16\_P21367238  
GTAACAATTCTCCACTTCAGAACTTTTATCTCACAACCTTTATAGGCTCCAACAAAGCA  
A\_14\_P128411 AAATCACTAAATACTACTCTGAGGGGCTTAGAAATTAACAGGGTAAGTTGAATATCATCT  
A\_14\_P106967 ATTTTCATGGTGACATCCTCCAGTTACAACCTTAACCACAGACGACACTGACAAAT  
A\_14\_P100600 GCATCTTACTTGATGTTTACTTATGGGAACCCCTTCCAAACTAGATATGGCTTTCAGT  
A\_14\_P136215 ACCTTTAGTAAGCCTAAATATATGTAATCCAACGCACCTAAGCAGAAACGGTAAGGCAAG  
A\_14\_P130015 ATAATTTCAAGTTGCGTGAACATTGATTGCCCTGGAAAATATATCAGTGAGGCTTTCCTA  
A\_14\_P135843 CTGAAAGCCTTGAAGCCGGGAGTTATTCAAATCTTGGGAGTCAAGACAT  
A\_14\_P124904 CACTTCAGTTCCTGAGTCCTGATATACGTCCTTTCCAAATACCACATAAAAGTAAAATGA  
A\_18\_P26795630 CTCCTGAGGAGGGTCAACCCTGCGCTTACTCCCCGTCATACCCATC  
A\_14\_P122850 AAGTAAGTGAAAAGAAAAGAGACGTCACTCATAAGCACTCTGTCTGGAAATAGTCATTTG  
A\_16\_P19723614  
AACCACACTGTCAAAGAGTATAACCTCCTTCATTTATTATTTCTACAATCCCAACATGA  
A\_16\_P00685123  
ATGATAAGGGCAGAGATTTAAAAGAAAAAAATTTCTTTAATGGCAGATTCTTGCAGGCCC  
A\_16\_P02102899  
AACCCCTAAGTCCTTGCATAAGATAACCTCTTAGACTTTTGTACATTTTGTTCACACTGC  
A\_18\_P11655211  
ACCATCAGTTTTTCCATTCTCTCCTTGTGAATTAACCCATTATCAATACGGTCATCTGT  
CUST\_6786\_PI426210822 TGTTTTGTTTTTAGCCATTCTGGATTTCTGCACTCATGCATGCCTCATG  
A\_16\_P21198395  
AACAGGTGTTTCTCACTAGACAACAATGTCCGTTTACTTTAAAATTCAGAATTTCCCCAT  
A\_14\_P118493 CAACGTCTCAAATAATGTGAAATGTCACTTTTGCAGTTGACTGTATTAGCACTAAAGGGA  
A\_16\_P19374597  
AGGACTCCTTCAGAGATTAGAACTAGGCTTAAAAAATTGGTCACTAAATATGCCTGCAAT  
A\_16\_P30952294 GGCTTCTTACCGAGGTGGGTGTCTGTCTGTCTGGGCATTTCTGTT  
A\_16\_P20139028

TATAACATGCTCGAATCCAATGACAAGTGCTTCTAACAATTTCCAAGACTAAATACGCCT  
A\_16\_P00523328  
TTGCCCTCTGATCCATTATTATTCTTAACTTGCCTTTTATCATTCAACCAATCCCTACAG  
A\_16\_P15005041  
CCACTCTCAGAATAAGTTCCTTGCATTTATTCCAAATAATCTCGTTTACTCTCACCTGTT  
A\_16\_P19994266  
AAAAAGCAATCCCTTTTACTCCTCTATTTTCTATCCATCAGACCCATTACAGACTAGACA  
A\_14\_P202138 GGCAGAGACTAACTGGCTTCAAAATCCCTTTAAAGAAAGATGCTTCCGAGTAA  
A\_14\_P103867 TCTGAATAICTCCAGTGTTTCTTTGTTTGTCTTACTTTTCTTTTCAGACTTGGGTGTAA  
A\_18\_P13535609  
AAGCCCTCTATAAATTCTGTGATGTCCACTAATACATGCTATCTCCTTCTCTGTAGATA  
A\_14\_P131685 CTTTCTTGCTTCTCAAATTGAACATGGTCATCCATATTTTGCCCTCATGATTACATTGGTT  
A\_18\_P22841023  
AATTACATTCATTAATGTAGGCTCCATGCATTGAGTTGCGGATTGTGAACATTTGGAAAC  
A\_14\_P103985 GTTATGATCACCAGTGACAAGTGTTTTACCAACAAACACATGAGTCGGGG  
CUST\_3410\_PI426210822 TCATTTGGAGAATTCTCTGTTCCAATAAGTGGGATCCACATGGCTCAAG  
A\_14\_P111112 TTTGCCACACAGACTCAGAGTATGTATTACCTCAGTTACTTTTCTTTCTACTTCTGTTC  
A\_14\_P100475 CTGCAATAATCTTTAACATGACACATAAATTCAAGGAGAGGCATCCTCAGGCACAACAT  
A\_16\_P18041438  
AACCAACTCAACATCTGAGAAGTCCTATGCTAATCTCAAAATAGATGATCACTAAGGCTG  
A\_14\_P100009 TCTTCCCACAATATTACTTCCCTTGGCATGTTTLAGAGTGAAAATAAGTTTTCGTGGCTTTT  
A\_14\_P101444 AAAGCCTACACTGAAGAGATTAAATCTAGATTCGTTAGCCAGCCACATAACTTGATTCAT  
A\_14\_P123410 CTTTCAAACCAAATGAAAAAGTAGTGGGTCAGGTAGAAAGCAGTAATTTTGCTATTGGTT  
A\_16\_P19750359  
AATGTGTTGTTCTCAGATATCCCTTCACACTTAATTGCTTATTGAACAAAGTAGAACCCC  
A\_14\_P125578  
AATGAAGAGTCCATATAGTTCAATGAACAAAAGGGAAAGTTCATGAGGACAAAGATCACA  
CUST\_7000\_PI426210822 TCATTCAAAGCCAGAATCTCTTTCCCTGCCAGAGCAGTCCTTTGTC  
A\_16\_P39361539  
ACTGCCACCTTTTTACCATTCAAGATTTTACTGAAGAAATTATTTAGCCCCATAAGGAA  
A\_14\_P128025 AAATTCATCTGGAAAGTTCTGGAATGAGTGTCTATAACCACATGACAACCTCTATAGACA  
A\_14\_P122431 CTAAAACTTCGAGCGTGGACGCTGAATGGGTTTGTAAAGTTTCGGTAAGT  
A\_14\_P113514 AGTTGCTGATCTGGTAGATCCTATGGCTGATTCACGATGACAATTGTTATTA AAAAGAGA  
A\_14\_P122457 CATGCACATGTTAAACATGTGATAGGTTTCAAGTTGAATCAAACAAAGGGAGGAAAAATAGT  
A\_14\_P116042 TTCAGGTTATCACTATAATCTACAGGATGTCTTTCACTTGATGTTCTTTCTTGATTGCC  
A\_14\_P124831 ACTGTGACTGTTGGACCTGCTGTCTTTCTCAAGGGTTATATTTTTGTTTACATTTTACTT  
A\_14\_P134949 ATCAGGTAGAGGCTATTGATTAGATCATGCTCCTCTATTCTACAATGCCTTTTTTCTTGC  
A\_18\_P15138954

AAAAACCTTGATTACTCATGAATGTAACCTTACCAAGTATTCACTAAGGGGCCAAGGG  
A\_14\_P123449 TCTTGTGATAATATACTGGATTCTTTCTTGGGAGAATGGGATATGTTAGAATTGCT  
A\_14\_P130646 GGAACATACCGTTTCTGCTGTTGTAGCACAGATTTATGTAATGTCAACTTTACTGAGAAT  
A\_14\_P124279  
GTAAAGGAAAGGGGAAAAACACATTTTAGGAGAAAGAGGTAAAATCACAACACAACTG  
A\_16\_P00772204  
CAACTTATACCAAGACATTGTCCTATCCAGAATTTTCAGCCAATATAGCATATTCCCCAC  
CUST\_9162\_PI426210822  
CAACTATATTTTACTCAAGGGCATTATAGACAGGGCAATTTAACAGATGCCTGTGGTTAG  
CUST\_5486\_PI426210822 TCGGGGTCTGGGAAGAATTCAGGGTCTCTGTGCTTATTTGTT  
A\_14\_P108483 ACAAAGACAAAATCCCCCTCTAACTCTTAGTTAAAAGGTATATGCCAACCTGCAGTATA  
CUST\_3895\_PI426210822  
GACAACAGAAAACCTTGTTTTTTTCTGTGTTCTGGTGAAAGTCTTTTCTGTCTTTC  
A\_14\_P118048  
TTATGTTTGAAGTAGAAGAAAAGGAGCCCATGGAGAAAGAATGAAGATATTAGAGAGACA  
A\_14\_P124466 GTTACTGTAGACATGTTCTTCAATAGAATACAGTGGCCTCTATGGACTCCTAAAGAAAC  
A\_14\_P126191 CTTCTGTATTTTCAAAGACTGCCACGTGCCTTAGGAATACTGTTTTATCTCCATACTTTG  
A\_18\_P10632222  
AAAATCTTTTTTACCCGAATAGAGTCAAAGCAAACCATCCTAATGACCATCCCTCTGTT  
A\_16\_P17974121  
AACTCTCCATCTTCTTTTTTCGTGTCTTTTTGACATTTTTGAGCATAGATAAACCCAGGC  
A\_16\_P16468767  
AAGTAGCCACTAGTGATGTTCTACTACTCATTCTTAAATCACAGTGCCATCCTTAAAAGG  
A\_14\_P119568 CTTATTAATGGGAGACAGTTTAAAGCATATGTGTAGACATAACTGAGTTCTTCTGGAGCA  
A\_14\_P117180 CTGCTTCTACTGATTATGAACAAAGCACAGGAATGCAGGAGTGCAGAAAGTATTTTAAAA  
A\_14\_P132951 TCTAAGTTCACCCTTACTTCTATCAATGTCAATGTTAACTCTCCTGGTTAAACAGGGTTA  
A\_16\_P16200598  
AAGACAAATGTCCTCACCTTATGTAACAAGTCTCAGAAAAAATGTCCAAATAGTCAGCA  
A\_14\_P202396 CTTCTCCATTCCTGAAAGTTTATTGATCAAAGAAATGTTGTCCTGGGTGTGTTTTTTC  
A\_16\_P17586656  
ACCATTCACATACTTCTGATTTTTACTGATTGTAATGCTTACCTTCTAAATGCTGCAGGC  
A\_16\_P21397007  
TTTCTATTTCCCACTATCTCAGATCATATGAACCATCTCCTGTTTTGTAGTTAAGCACCT  
A\_14\_P114674 TCCCTAGGGAACAGTGGGTTTGGTAGAACTCTCTTCTAAATCTTTTTTCATAGAATTTA  
A\_14\_P139225 TTTTAAAGTGATTAAGCATTTTGTGTCCTTCTTACAGAAGAGAATGTCCTGGGTAGAAC  
A\_16\_P20793724  
GTAACACAAAACAGTTCAGATCCTACAGAATCAAGACATCTTCAACAAATAAAACCCCC  
A\_14\_P128630 TTATCATTTCCCTAATGATTGTCTTGAACTGCTAGACTAGAAAGAGAGTTGGAGCAACA

A\_16\_P03195637

AAGAGAAATTCAATGCCAGCATTCAATTCCTTTCATGTAAATCATCAAATTTCCAGGCTG

A\_14\_P124372 CAAAGAAATTCACCAGGATCACACAACCTGCTGATCTGAAAATGAAAATGTTTCGAAATAA

A\_16\_P37517728

ACCGCATTATGGCACATTACATCTTACATGGTTATTATTCTGCATTCTTCATCCAATCA

CUST\_4983\_PI426210822 AGGGGTAAAATGTCTGGTGCCATCTGTCACAGTAATGAGTTGTGCA

A\_16\_P36230479

AAGGGTTTACCACACTAGTCAGTATCAGTAGATTGTTGGGGAGAAATCTTTATGAAAAATG

CUST\_4910\_PI426210822 GGCGGCTGGTTAAAAATCACATGGTGTGGGCATTTATAGGGGTAATA

CUST\_5688\_PI426210822 AGAGTAGAAGAGGAGAGGGAGAAAGAGTCACTCCAGACGTCAGAAC

A\_14\_P117663 GGTAAGGCTTTTGTCTCTTAAGAGGGGGTTCCTGTTGTTCAATTTAATTTAATGG

A\_14\_P122859 ACAGTTCTTAGACACTTCATATGTAAATCTGGGCAGAGTAAGTTCTGATGTGAGGAAAAA

A\_14\_P123516 TAATTTGAGAACATGATCTGAGAAACCAGAAAGGATAATGGTCCCTCCCCTAATGTAAAA

A\_14\_P107427 AGCAGGGGAGGCAAGAAATGGGAAAAAATTGTCTTTTAAAAAGATTTACCATTCTCATT

A\_14\_P124345 GTTTCCATCACTCGCTAATAAATCAACAGAAACACAAATGGCTTGGCTCTCATGTT

A\_16\_P15468583

ACACCTTCCTACACATAATACCCCAATTGTTTTCTTGTAAGACCATAGATAGAAGTCACA

A\_14\_P133501 ACTTTCACCAGGTTTTCTTCCTTCAGCATAGTTGAGATGCTTTTATTTCAAATGCCTTAA

A\_14\_P133522 GAAAACATTTTTCTTACCTTAATGTCAGCCAGAGATGCCATTGCCACGCTATT

A\_14\_P201495 ACCATGCCTAATTAACACTTAAGTGTGAAAGAATTCTTGCAGTGGAGAGTAGGTAAGT

A\_16\_P16908381

AAATGAATTGTCCCTTCATACAATGTTCCCTTCCCAAATGTTTGTATCTGTTCAATCAGC

A\_16\_P16191091

AAGTGCTGGACTATTTATTTCTTAATCCCTCCTACTTTATTTGGACAGAAGTCTCACT

A\_16\_P00313561

TCCTTTTACTTTTACTAGTGACCAATCTGAGTTTTTTTCATTACACGGCAATGATTCACCA

CUST\_6659\_PI426210822

AGTAAGGGCAGATCACTGCTTGTCGTGTTAGTTATTATGTATGATGTACTIONGATGTTTCT

A\_16\_P41618514

AGCACAAAAACCCTTTTATAGCCTCACAGTAATTTTTGTATACTTCTCCTGACTTATGT

A\_14\_P103818 ATTTATCTGTAAGTGAGCCGTTGGGGAAGGATTGAATACAGAGACGCTGTC

CUST\_9633\_PI426210822

GGTGCCAATTACATGTTGAATTTTCATCTTCAACCCAACCTCTACTTACCTTTCAGG

A\_14\_P107704 CAATATAGAACAGTTAATCCCTGTGCCAGAGGCCTTAGATCAAAGCCCTTCTATAC

A\_14\_P126804 TATAGTGAGAGCAATTTTAGCGTTGATGACCAAGACCTTTCTAGGACAGAGTTTGATT

CUST\_2387\_PI426210822 TGGGTAAATTGTGAGATCAGGGCCTACACTTCTTCCACATTGCTCTTTAA

A\_14\_P133790 ACCAAAAAGAATGTTTTCTTCTTCATACCGTCCAAAAGAGATCACTTCTTTCATGATTGA

A\_14\_P104879 AACTGCTTACTTACTAATGTGGTCACATTAATGTTATAAATGCCTGATGGGGAATGTCTG

A\_16\_P02927237

AAGATTAGTCCAGCATTTAGGCAAGAAGAATGTTAGTCCAGTCATCTGCTACTTTTGCTA

A\_16\_P16189634

AATCTGTTGATCAGAAAAGAATGTCACAGGAGTAGATAAGGATCCACACAGTATATCCAC

A\_16\_P17920027

GTCATCCTTGAAGCCCTATATAATGCAGATGTTTAAACCAAGATGCTACTAAATACTCCCA

A\_14\_P115133 GGGTGGTGGACTATGTTTGTATGACTTTACAAAATTACCTTCCCAATTATGTTTTCTT

A\_14\_P124111 AACATAGTAAATAGATGCAGTGCTGACAGTGCTTTAGGACTGGAGCATTGTTTTGTATAA

A\_14\_P109535 AGAATCCATCCTTGAAAGGTGAAAGTTCAATAGAGTATCATGGTAGACATGGGTGTATA

A\_14\_P118044 TGAGTTTCAGATTTGCGACTACAAAATTAGGCATTTCTTTCTTTCTCCCTTTGCTTGAA

A\_14\_P107795 TAGGGTAGCCAGTCCTATAAACGTTTTTGCTTTAACTTTGATTCTTTGTGCTTTACTGG

A\_14\_P125105 TCAAAATGAACCATCACAGCAATCTGGCTTTTTGATTTGGACCCTCATTTCTCTTATAA

CUST\_835\_PI426210822 CCTCTCTAAGGAGCCACTTTTTGTGTTAACTTCTTCATGGCATAAGCTGTTA

A\_14\_P121149 ATAATTA AAAAGGTTTTAGTTGCCTTCATTGAAAAGACCAACA ACTACAGAAGAACTGG

A\_14\_P120956 GGTATCTTGCTGCATTCAGTTCAACAAAGTCTTCACTGTAATTCAGTGAAGTTGAG

A\_16\_P15536690

TTCTTCTCGGAAAGGTAAAAAGCATATATCATTATTCCTCTAAACAAGTGAAGTGGGTCC

A\_16\_P41631734

TCCTGTCTATTCACAAAATCATACTATCCTTCAATTCACCATAATGCTTAGACCTCCAA

A\_14\_P115867 GAGACAAAGTCTGCTGATCTACTGTCAAATACAATTCGTTTTCTTTACTTTGAGGTCA

A\_14\_P105980 CTTTCTTCTCAAAAACATTTGTCACCTATTTTGGAGTTAATTCAGAGGATTGCTCCAAA

A\_18\_P10026487

GGGGGAAAACTTAGGATACAAACAGACGTTATTTTCAGCAACTCAATCATTGTTTAATCC

A\_16\_P16241203

CCTGCCCAACTAAATTACTTAAATGGAACCAAAATAACCAAAATGATTAGCCTTTCTCAGG

A\_14\_P134702 CTGACGGGGTATTATCTTTCATTGTAAATGAGTAAATGACATCAGTCTCCTGTGAGGAT

A\_16\_P00455423

AATCTCACTTTAACATGTGTTTGTATGCTTTATCTGAGTTTTGGGTCACTTAAGGGAGTG

A\_14\_P109154 CCCATCGATGACTCATCGGAGGAGTTTGTCAATTTTGCAGCCATTTTAG

A\_14\_P133282 TCAGGAACCTTCTCATGGTCTAGAACCCTTTTCAACTGGATATTACTTTTGATTTTTCT

A\_14\_P106326 TTAATACACACTGTCATAGTCCTAGGATAGAAGAGTCCTCAGAACACTGCTCCAC

A\_14\_P117903 ACCTCTGGAGTATGAAAATAAGCAACACCATATGGTAAGTATAAGGATATCCAGTTGAA

A\_14\_P115821 AATGTGCCATTTTACACAACTTCTCTGTATAGGCCTCTGAAATATCAATAAGGCTAA

A\_14\_P106551 CTTCAAATCGTGTTACATCAAAGTGCAGTAACTGGCCAAGTCCCAACTATAATAAAGTA

A\_14\_P201429 TAAAATGAATGTGTCATGAGAATGGGCTTAAACACATCGTTGGTTTTGAAA ACTTCCATTTT

A\_14\_P112743 ATTGAAAATGATCCTGGAAATGGATTAATGTAGAGATGGCCCTGTTTTATTTTGGTAGAA

A\_14\_P116201 CTGAAGACATCCTTCTGACAATCATTGGTGATGCAAAGAATTCTTTTGTAAACAATAGT

A\_18\_P14120613

ACAGGTCCAATTACTAGTTCATATTGCAATGAAGCCTAAAAACACCATATTAACCCTGTA  
A\_14\_P114246 TTAGCACATCACTGGCATCATACAAAAGTTGGTCTTAGGCTTTAAAATGCTATGACTCTT  
A\_16\_P15454676

GTTTTAAGTTATGCAGAGTATCCAGGAATAACACTTCTCTCATATGAAAAGCAAGTGCCC  
A\_16\_P16360920

TTGCTTTCTCAATCATGTTCCAATCAGCATTAGCAAGATCTTTGTCAAATTTAAGGGCAG  
A\_16\_P18423561

AGATGCCATCTGGTTTAAAAAGAAGTAACCAACCAATATACCCTATGATTATAGCCAGG  
A\_18\_P22840876 GTGATTTTCAGCCCAGGCCCTGAACCTGTCATAAAATGTAATGGATGA

A\_14\_P125788 TTATATTTGAAAAGAAGTGATTTACAACCACTGTATTGCCATAGCCATCCCACAATGCAAC  
A\_14\_P121135 GTTGCTTTTCAATGTATTCTCCTTAGAGAATCATGAAAATGGCTTTTTACTTTAAAGGG  
A\_14\_P124416 TAAGAATAAAGCGTATTGTTTCAGGAAAGCAAATTTCCCTGGATTTCAGAGATTTCAAGGA  
A\_14\_P115096 GCTGCTATTGCTAAAACCTCAGATTCTTCCCTGAAAGATGGTCTTGTGTTTGTATTGTAT  
A\_16\_P19460270

ATAATGTATCCCTCCCTTTCAAATAACTCAAATAGGCCATGATATTACAGCGAATCCCT  
A\_16\_P00304675

ATGTGATTGCATCAGTGAAGAAGAACATATAACCACGAGTTAAAATAAATTTCCCGTGCTG  
A\_16\_P17425453

AAAAAAGCCGTGGAATTTGTCAAAGAATGAACAGCAATCATGAGAGTATGATATGCCTT  
A\_14\_P136886 GGATCCTGCTTTGTCTTATAGCACATATCCTATAGAATAGAGATCATGGAAGATGCATGG  
A\_14\_P120304 TAACCACTACAACAACATCACCTCATGTAAACCAACCTTAATTTCCCTCAAAGATATGCAC  
A\_14\_P100357 CTGGCCGCCTTTCCCTCTCAGGACATACTTCTGGAGATCAAAAAAAAAAATTACAAA  
A\_14\_P114654 GAAGGGTAATTTTTTTGTCAAATTTAACTTCTTTTTGCCTGAAAGCATTTGAGCACAGT  
CUST\_10117\_PI426210822 GACTTGGCCTGTGCCACCAGCCCCTGGCCCCACCTACGCATGCAC  
A\_16\_P16481265

AAAAGTAGTAACTTGGGACCTTTAATTTGCCTATCTACCTGCTCTCATTGAGTATAGTGC  
A\_16\_P15797827

AAAGATTAGTCATTAACACCATAGCAGGAACTTTAGCACTAACACCTTAGCATCATGGG  
CUST\_5652\_PI426210822 CAAAGATGCCTGTTAGTCTGTGCGAGAGGGAGAAGATCTGGGGAG  
A\_14\_P126997 TGTGGCCACTTTGTTTATGACATTCTCTAAGCCAGTTTCATTATTTTCTGTTGAAACAA  
CUST\_10336\_PI426210822 GAACACAAGACTCTTGCCAGTTGTTCTAAGAAAGCTTCTGCTCTTTCCC  
A\_16\_P03082640

CCTCCATCATTGGTTCATCCAAACTACTTCCCTAATGTCAGAATAAGAAACAAGTCTCTTT  
A\_16\_P35069118

TATCTTTAGCGGGATTGAATTGAATTTTTGCTGTTGAGTGTAATAGCCAGATCCTCTGTA  
CUST\_218\_PI426210822 GCGCCGAGGGGCGCCGGGAGGCTCCGCGCGCTGCTGCTGGCGCTG  
CUST\_6706\_PI426210822

GAGAGCTTCCCTGAAAAGTAGTTATTTACTGATAAACTACTCAAGAATACAAAAGTAGTTG

A\_14\_P113272 CAAATATAGATTCTCTTTCCACAGCGATATTAATACTGGGCCTGCTATCAACTTGCTAA  
A\_14\_P200817 GATTCCCACATCTTTACTAGTTTGCAGAAATAAGATCCTAGCATATGCAGTGTGTAGGAA  
A\_16\_P21392538  
GAAGACTGTGCACTCAAAAATAATCAATTCCTACTGTCCAGAATACTCACTGCTTTATCTCC  
A\_16\_P16097637  
AGAGTTCCTTCTATTCTGACACACATCTCTAAATCACATTATTACCTTGAAAAGCCAGCA  
A\_18\_P14137420  
ACAGATAGTTAAGAAAGGGAGATTAAGTTGGAGTTAATAAGAACTCTGAGAAAGAGGAGA  
A\_14\_P116443 CTCACTTTTCTTTTGCCCGCTTCAATAAAAGTTCTGAAACGATTTTCATATGTGCAATTT  
A\_16\_P02729945  
GTCTGCAGTGTATCAGAAAACAAAATGTCTCCATATGGTTATACAAATTGTTCCCTTGGA  
A\_16\_P21504546  
GGCAAACACCATATCCTATGCTTCTTTTATATCCAGAGGTCTCACATAAAACTGTTTAC  
A\_14\_P100374 TTGTTTTTTTTTTAGGTCTTCAATAAACTCATCAGGAGATATAAGTATTTGGAGAAGGCA  
A\_14\_P103132 AAATACAGTAAGAAGAGAGTGTGATTACAGACACCCTCTCTCTTTAGACTCTCACAAGTA  
A\_16\_P16191643 GCCAAGTATGTTTCATATACATTGATACTATTTAGTTGCATTTTTATATGCTTTAGGAGC  
A\_16\_P16191424 CATGTTGCACACCCCTCTCTACCTGCAGCCGCCATCCCCTAACAG  
A\_16\_P19487467  
AAAAACATACTTCTTCTGCAGATAACATTCTGATTGACAATTTTTGCTTACCAGGCTT  
A\_16\_P15306803  
AATAACAAAGTCTGTTGCTATACTTTTCTTGGAGTCTGTAACCTTTCTTCCAGAAC  
CUST\_6\_PI426210822 TCATATCTTTTAATGTCTCAGTAAAACAGCTTGAGCCCTCCCCTTATCACCTTG  
A\_14\_P101164 TTTCTTGTCTCAGTCAAGAATGGTATAAAGGGTTTACCATTTTGATGGTATAAAGTGGT  
A\_16\_P18679520  
ACCCAAATCTATAGCGTTTTTTAAGCCCTTTATTGATCTTTCACTGAAACTTCTTTCTCC  
CUST\_6101\_PI426210822  
GTAAAAGGATGCAACTATGTTTTGTCTTTTTGAATACTCACAGTACCTAAGAAAGCATCA  
A\_14\_P117381 GAATCTGATTCAAGTTAACCTTCTGAGTTGCAACACCAATACCCCAGATTCCTAAA  
A\_14\_P133776 CAAATATGCAGGAAGTAAAAGGCAGAGTTGGTAACCAAGGTATAGAAGCCATTTTCTAT  
A\_14\_P105059 AAATACAACAGTTGATTTCTGAAAGTCACATGTGCAGTGCATTCTTTGGAATCTTCTTTG  
A\_14\_P132500 ATTTTTCTGTGAGTTGTTTCTCTAGAAGTGAGGAATTGAATTATAGACCCAAACCCTCAT  
A\_14\_P104338 TATTCGTCTATGTATTTAATGAGCACCTCTTCAGATTGCCTCTCATCTTAAGATGCCATT  
A\_14\_P137713 TAGATGAGTTTAAATAGAGACTATTGAACCTTCTTCTCTCTAGTCACTTTGCCTTCCC  
A\_14\_P121348 ATCAGTATAAAACCTTTGTGAGTTTTTTTTTTTTTTTTCCGCATGAAATCTTATGTGGAAAG  
A\_14\_P111624 CTGAATTGTGGATGCTATACTGTGTGGCTTGAATTATTCTCTAGTGCAAATTCTGTAGTG  
A\_14\_P131251 GCCTTAAGGTAGAAGGCACATAGAAATAACATCTCATCTTTCTGCTGACCATTTTAGTGA  
A\_14\_P110730 AGAGGCATCCAGCAACTCTGAGATTAATTCATCATTGATCAATTCGTTATTGTTGGAA  
CUST\_5277\_PI426210822 ACTTGACTTCCCACCTTTGGGAGTCAGATGCAGTCCGCTGGACAG

A\_14\_P139285 ATCTTCCTGTTCTACCTCCTCATTTCAGACTGTAGGCTTCTTCGGCTAC  
A\_14\_P104212 ATACCCACAACGAAACTCAGACTCACGTGATGCAGAGAACTGGTTG  
A\_14\_P133438 GTGATTTACAAAAAGTTTCTTATTTCCAGTTTTAAAGGGGAAGGTAATAGATGCATGTGG  
A\_14\_P101382 ACTGCTCCAGAAGGGGAGTAAAAATTTTCGTTCTCCATTTTACAGAGTATGTATTTGAAAA  
A\_14\_P103200 ACATTAGGAAACATGCTAGAATTACCTGGAACCTTCATCATCATCTACTTCACAGGAATTG  
A\_14\_P129165 AGGTGTGAAGACAGAACCAAAATCAGGCAAAATGCTGATTACTTGGTATAGTTTATGTCAA  
A\_16\_P40418210  
AAAAATGACCATTTTAGACGACTCCTGACATAAACACAGAAAAATGCTACCAAATGTCTT  
A\_16\_P18323518  
AGTCAIGTTATACAGGTGTGTCAAAAGGTATCTTGGTCATTAAGTATTGTGCAGTGCATT  
A\_14\_P124476 ATGTGCTTTCAAATTGAAAAGTGATTTGAATCATTCCAATAACTACCACCTGTGTCACTG  
A\_16\_P40423211  
AACAAATTTGTGACTGGAATGATTTAAAGCCAATACACATGTTATGTAATCTTCTGCCCTG  
A\_16\_P18021049  
GCAGCCTACTTTATCTATTGCACAGTTCATAGGAAATGACCATTACTCAGATGCTTGTA  
A\_18\_P12173146  
GGATTCATCGGACTTTCAACTGTTTAAACCACAAAATAAGCAAGAATTCTCTATCACC  
A\_14\_P123001 TCTTTTGGATTGTCCCGGACTCTAACTAAAGTCCTCAGTTTCCAATCTGTCT  
A\_14\_P127707 AAGATCTTTGAAGAGCAGGGCCAGACTCAAGAGAAATGCAGCAAGGAATA  
A\_14\_P107325 CATGGAGTTAAGACGCTCCATATGAAGCCTAGCCTGGGATATCCGT  
A\_18\_P14132927 AAGGAGAAAGGGGTGTCCTCATCCCCATGTCTAGGATGATTTGTTT  
A\_14\_P119612 AAAAATCCTCTGGGATTATGTAATTCTGAACTGGCGTCCACATTTTGTGATTCTGTAT  
A\_16\_P03013991 TCTTTCTGTCCCAGTTACAAGGAGGAAATGGAAAGCAAATGAGAAAAGTCTAGAT  
CUST\_3875\_PI426210822 CTGGAAGGTGGCAGGGGAGCATGGAAGGGAGGAGTCCTTGTCCAT  
A\_16\_P19170684  
TTGACTTCCTCTGTCTATTTAGCAAAAGCAAATCCCAATAGATATAAAGGCTCTCCTTT  
CUST\_629\_PI426210822 AAACATGAGACAGGTTTCAGAGCGAGGTGGGCGGCTGGAATGGAGC  
A\_14\_P129209 GTGCATGACCAATGTATGTCTATGAACACTGCATTGTTTCAGGTGGACATTTTATCATT  
A\_16\_P36230858  
CCTTTTCATCCAAACACCAATTCATGAGTTGTTTTTATGCCATGAGGTAAATTCTTTCTT  
A\_14\_P136573 CAAAACCTCTAGATTCCACAGTTTAATTAGACCGTCAGAAAATATTACCAATGGAAAGG  
A\_14\_P116035 ATTACAGAGATTAGTGTAACCTCTTATACTGCGGTAGGCTAAGCCGCTATGATCATAGTA  
A\_16\_P16191373  
GTTAGGATCAAGTGTGGTGTAAATAAAATATCAGTCCCAAGAGTCACCTTTGCTGATTTTT  
A\_18\_P22839934 CTTGGTCCACCAATGTCTGTTCTGACCAAAAAGGACTTCTGTGTTGAGTTTAAATTA  
A\_14\_P129422 CCGTGAGGTGGGAATGCATGTAGTCTACTCAGCAAATGTAAAAAACTGAATATAAGATTT  
A\_14\_P109240 ATAGGGCACTAGGATAAAAAGAAAGAAGTATCTGTTGCTTCTCAATGGTCTTTTTTCCACTA  
A\_14\_P124335 AAGATCCTCAAAGTTCTTAACTGAAGTCAAATTACAGAAAAGTCTGAAGTCAACATATGG



CUST\_5867\_PI426210822

CAGGGACAGGAAATAGTAGAGTTCAAGGAAAAGTTAGGACAAGGAAAATGAGTCTTTA  
A\_14\_P127967 CTTACCCAGTGTTCACAGGGCTTATTTTTATAAGTGCAGATATCATATCTATGGAGAAA  
CUST\_9024\_PI426210822 GGTGGTTCAGGTGGTGGTTGGGCTTCAGTATGTGGAATAGCTACTAT  
A\_16\_P16191882

AAAAAAGTATCCTATTGTAAAAATTGTTATTGTCTCCCTAAAAAATCCAAGAGAATCAA  
A\_14\_P126809 ATAATTTCCAACCTGCACAGATCCTGAACAACAAATGAATAACGATGAATGTCTTTTTGG  
CUST\_5746\_PI426210822 AAGAGCACTGGGCTGGGAGTCCCATGGGGCCAGGGCCTACCAAG  
A\_14\_P130925 TCATCTGTGGCTCTTAATACTCAACCTAATTTTACAGAAGTCTGGGATACAAAGAGACTA  
A\_14\_P137495

CTTCAAAGAGTGTACATGCTTATCGAAGAGTGAAAGTGGAAAGAATGCAGAAATGAAAG  
A\_16\_P03213883

GTGCCATCATAACCATAACATGAAGTTGAAGCATTCTTAAAGTGAATACCCATTCCACATT  
A\_14\_P129825 CTAAAGGTTTTCCCCCTATGACAAAGCACTAGCACTTTCTTTCATGATAATTCTCTACTT  
A\_14\_P123743 ATTATTTACACAACTACTCCCTGAGATCCTACAATCCGCTTCATTTCTAACTGCTAATG  
A\_14\_P138639 CAACAGGAGAATTCAGAAATTACAGGTTGGAGCCTGAAGATGTAGAATTTTGCCATATAA  
A\_14\_P103342 AGATCTCACTTTCTAGGTAAGTATAATGTTTCCTTTTCTTACATACCTGAAACTGCCTGTT  
A\_16\_P15487227

ACACATAAGAAAAACCAGTAATCAGACATCTAAGGATTCCAGATATAAGCACTCTCCTGC  
CUST\_5462\_PI426210822 AGTTCACAGTGCCCACTACACATCAAAACACACCCTCTGGGGAAT  
A\_14\_P103518 TTATTAAGGAGTTACACATTGGATCATCCCAAAGCCAGTTCCTTTTCATTTATCAGGT  
A\_14\_P201975 AGTCTTATTTCCCTTACTTCCAAGTCCTTGAGATGGGAGGAAGTAACCTCTTTT  
CUST\_7931\_PI426210822 ACCTGTCTTCCAGGGAACCCATGAAAAAGTGGGCAGCTGGAAGG  
A\_16\_P19068800

AAATTCTTACACCTGATCAGCATACTTTATCCAATTTGAACATGGCTTTTCTGATCTCA  
A\_14\_P129790 ACCATGTCCCTTACGTCCAGTGCCAAGCAATCTGAGATCTAGACATTAC  
A\_14\_P135027 CTTTTGTCTTTAAGAAATAAAACCATTTTTTTAAGCCCCAAAAGGTTGCAGGAAGGTGG  
CUST\_3164\_PI426210822 CTTCAAGTGAATTGGGACCTAGAGTCATTTGGATACAGTGGTTGCTTGG  
A\_14\_P132359 CAGTATAATGCATCCAAAAAGTCCCTAGAACTTGTTATGGACATGTTCAAGAGGCTTAAA  
A\_14\_P139809 GTAGCATCCAAGGACAAAAAGAATGTTTGGCAGCAAATCTTGGCTGTCAATTTTAAAG  
A\_16\_P33568742

AAGGTGTAAGTCTTAGAACCCTTATCCCTTCAACCTTAAAAATTATTTACAAGCCCAG  
A\_14\_P132254 CCTTTTAAAATTATTTGCAGGAGAGGGCTGCTCACAATTTATATGGCCAACCTTGGTAAG  
A\_16\_P17239252

ACCACATGAATACAAGACTAAGTTGCTACATCAGTCATAAAGGAACATCATGTTACCCTG  
A\_14\_P124298 CAGTCCTGGGGAAAATGATTGTTTTTTTTCTAGAGTTAATCTTTTTCACTTGAAAACCTGC  
CUST\_6772\_PI426210822 CATTGCAGAGCTAGGGTGGGTGGAATGAGTCAGTTTATTTGGCTG  
A\_16\_P15163737

TACCCCTTCTCATTTTAGTAGTTTCCCATATTGCGAATCCAATGTAAACTCCAATTTTT  
A\_16\_P20303922  
ACACTTCTCCTTTGCTTTTATGTTTCCTAAGGCAGTTTATTTAAATAAGTGTTCCCGCATG  
A\_14\_P109282 GTTGGAAAAGTTTATGCTTTTGGTTTTGATCCAAGAGGCATAAATTGTCAACATGCCAAC  
A\_14\_P109855 TCTATACATATCGAGTCAGGTAATCTACCTGGCTATTATTCTCAGAGGTCCTCAATACCT  
A\_14\_P137893 GGGAGAACAGGAATATATTTAATATTTGGAAAGAAGCACAAGGCAGTGTAGATCCAGGT  
A\_14\_P126484 CTTCTTTTTAAAATCAAGAGACTTCGAGCGATCCCAGTTTCCATTTCAATCTGTATTAC  
A\_14\_P201657 ACAAATGAAGAAAATCTGAAAATCAATGGAAGCACGAGGACATTCCTAGTCATTTTCTCA  
A\_16\_P00685139 CTCTAGATCAGTGATTAGGCCAAGAACGTCTTTGAGCCATTTTCTGGTCTC  
CUST\_6928\_PI426210822  
TATGAAAAGCTTCATTTGTGTATTCACTGCGTTTGGAAAGGAAGGCTATGTTTTGCTTT  
A\_14\_P134942 TTAAGTGTTGATAAATGAACTCTTGCCATATCCTTTTTCCATGCAATGACTGGCTATGTTT  
A\_16\_P15226698  
TGAGTAAACGATCATCAACCTCTCCTAAACATGTTAAGAAGTTCATTTCCGTCTGAATTG  
A\_14\_P201833 TCTCTTAACTGTGCATTTTCTACTTTGCTTAGTGTTTTGCTCTTGGTTGACATTCAC  
A\_14\_P107309 GAGATCTTGGAAATGGGAACTACAAATAAAACAGAACACACAGACGTTTATCTCCTTGTA  
A\_14\_P120275 TCTCATCAGATGGAAAACCATTTGAGTATGACAACCTATAGCATGAAACATCTAAGGTAGG  
A\_16\_P18545973  
CATACTAGGTGATTCCCAAAGAAAATGGCTAACTCATGTATGAACTAAACCACTACCAAG  
A\_16\_P21256017  
GCTTGCCAAATTACTCTGAAATTACATTTTGTGTCCATCTGTAGATGTAGACCAAGGAA  
A\_16\_P01675517  
TGACCCTACTTACCACATACAGATAACAGAGACTAGAAGAACAATTTGATCCTCTTCATG  
A\_14\_P107176 TACAGGGGTCTTTTCTGCTCCTGTCACCGCTTAAACTATCAGATGGTT  
A\_16\_P58424242  
GCCTGGCAAAGTGTTAACCTATACAATTGCCAATATTGGAAAACCTGGGATACTTTGTTA  
A\_14\_P139707 TAATACTGACAACACTAATCATCTTTTTTATGGAGTGTTTCCTTGGTGCCAGGCAGTTC  
A\_18\_P25145702  
GCAGGAAAACCTATACTAGACAATACTATCCCAAGTCTCATATGTAAGAAACAAAGCCA  
A\_14\_P138630 CTCTTGGTAAAGTCTATCATCGTCGTCCTGCACTCCGTCATCTGTAAAAGA  
A\_18\_P22842654  
TCTGAAAATAATTCGTTTGTGACTATTTAACAGAAGGAAAAACTTCCTGAGTGAGCATCA  
A\_16\_P01917875  
AAAAGACAGGTTGATCCAAATATCACTAAGAATCAATGCAAGTCATTGAGTCAAGAGGAG  
A\_14\_P107413  
TGGAAAAGAGAAGCATGAAAAAGGTGCTCAGAAAACAGATTGTCAAAAAGTAAGTCTTAC  
A\_14\_P100261 CTCACCTCTCTGTGTAGTGGGGAATGGAAGAAATTAAGTATATAATCCAGAAATGAC  
A\_18\_P17831843

AATCTGTTTCTTACCAGCAGGAGTAGAAGTCTGAACATTTCTCTTGGTATCATTCTCTT  
A\_14\_P116710 CAAAAATGTATAGGGCTAGAAATCCTCAAATTTGTTGGAGTCCCCTAAGATGTAACAAATG  
A\_14\_P200636 ATTAAGGATGATAACAGTATTTGGAACCTGAAGACCTGATGGGAAAAAACCTTCAAGTTC  
A\_14\_P113079 TAGTTGTTACGACCAATCTTTCATACTTCTTGGTTAAGAATCTGTCCGGTTCTAAAGAGT  
A\_16\_P19971729  
AAGACTCCCCAAAGTTTAATTCCTATCTGCTTTTTATTGGACTTCTACATATGAGGCTCT  
CUST\_6856\_PI426210822 CTGATCATGCTCTAGCGCACAGAGCACTGTAAGCTCGTGAGGAAT  
A\_16\_P01523083  
AGCCCTATCTCCAACCTTAAATAATGTTTGCAAGTTTCTAGTTAGGCAGTGAGACAGAAAA  
CUST\_6765\_PI426210822 CAAAGGACTTTGGCTCTTCTTGCCTTTGTCAAACAGCCATGAATTTGTTTG  
A\_14\_P104778 TAGATTTAAGCCTTTTCAGACCTGTTTATGCACCTAAGGATTTTCTTGAGGTAGGTTCTA  
A\_16\_P19698908  
TTTCAATACGTCAACAAAGTTAACTGACCCAATACAAGATATGAACCCTAGAGTCTCAGA  
A\_14\_P129362 ACTAAAATTGGGAACTTATTTGCAATTTTGTACCCTGACCACTAACTAGTGATTCTTCTC  
A\_14\_P120698 CAGTGGTCCAGGTGAGCAAGTTCACAAACCATTTCAGGAAATAAAGACAG  
A\_18\_P16629413  
AACAAGCGCTAATTCTACATCTTAAGACATAGTTCAACAAGCATATGAGTTGAGGTCATT  
A\_16\_P17464991  
AAAAGAGGAGGTCGTCATATATACCAGACTAGTTAACACATAACCTATCCTAACTGAACA  
A\_16\_P18335949  
AAGACCAAGTTACAACTACTCCTTTTCATTCTGCATACATTCTCTATACCTGTTGACAA  
A\_14\_P139428 GTTTCTGGGCTATACAGATACTAATATTTACACATTTGTAGTCTCCACCTTGTGTCATC  
A\_16\_P15774142  
AAAGGAAATCAGAGTTACAGTTTATTCAAGCAAGATCTCCATTACAGACTTAAGTGGCCT  
A\_14\_P106079 ACTATACACATCCAACAAACATTTTATATTTGCCCATCATCCTCTTCAAGCATCTCAGAG  
A\_14\_P102753 GCTTCTCCATAAAGAAAAATCCCCAATAAAAGCAAAGGCAGAGAAGACAAAGAG  
A\_14\_P126818 GCACACACAAGAGTATACAGAATAATGGGAAACACCCTTATCATTATCACTCAGACTACA  
A\_14\_P118540 CTACTIONCAACAATTTTCTCCTAGAGAGTAAAGTGAACCTTCATAGAGAGTAAAGGGAA  
A\_14\_P114749  
CAAAGAGAAGAGAAAAAAAACCTTAAGGAGGTTTCATTGTTTCACAGCAAATAGGTCTGCT  
A\_14\_P125258  
GCCATAAGAAATAATTGGAGAAAGAAGGAATTGGGAATTGGGAAGAGAAAAGAGAGAAAA  
A\_14\_P108340 CCTCATCCCCAGAAATTATTTTTCTACACCAAATTGAGCAATTTGACCAAGATTTCTAGT  
A\_16\_P16372528  
GCACAGCCAAGTATAATAAATTAACCTCAGTCCACTACAATCATGAATGATTTCTAACACC  
A\_14\_P111919 CCTGGCCTAGACCTCTGGAATTGAGATTAACAATTTGGAGTTGGATACCTG  
CUST\_3854\_PI426210822 GATTGCATAGCAATACTGCCTACCCAGAGTTGTTGTTCCCAGGCTA  
A\_14\_P118287 CTTTGGAAAGTATGAGCCATGCTTCTCTCAAACATTTTCTGGTTTATTTTATAGGAACCTG

A\_14\_P200169 CAAAGGCAAATAATGTCTCCATAGAATCACTTTCCAATACAACGGCTCTTTTCAGAGC  
A\_14\_P102845 TTTCTTAAGTTAGCCATTCCCTTGAGTTGAACCAATCTTTCTTCAGATGACTATCATTAG  
A\_16\_P15126656  
TTTGTTCATTCAAACCTAAAATGTATGAATCCGCAGAATTTGATGTCAAAGAAGCCTC  
A\_14\_P200237 TTTAGGATATGAATTTTTTTTTCTGCTGGGTAGATTGTCCAGTGACTTATGGCATGAAT  
A\_14\_P116423 AAGACAAAAAGGATTTGCAGTGCCGTGATCTGCTAGTGCCTTAAAATACTGC  
A\_14\_P108819 TGCAAGGATAGGTGTTTCACAATGGAATTTTCATTTGCTTAGGCTTTTTATTCTTCTGTG  
A\_14\_P104172 TTGCCTCTATACCAGACTCAGTTCACTGCAAAAATTAAGGTTACTACCTTTTCTGTTA  
A\_14\_P105640 CTCATGTCAATCTGCCAATAAATGTGGTTTTTCAGAAAATGGCAGTGATACAGAAACTAG  
A\_14\_P104857 AGTGAAGGTGCACATACATACTTTCTTACAAATACACACAAGTGGCGTATGTGTATATAT  
A\_16\_P00011400  
CCAGGCTCCATAAGAAATCTGCTTTCAGAATCAAAGACCTGAAAATTAGAAATGCTTTTC  
A\_14\_P122001  
GAACTAGAACAAGAAGCACAGGAAGTGTATATCCTGTGGCAAAAAGTTAAGGAAAATAGT  
A\_14\_P120390 CTTTTGTTGCAGATGGAAGAGAAGAGGCGAAAATACTCCATCAGCAGTGAC  
A\_16\_P36230534  
GTGATGCCTTTCCTTTGTTACTTTTCATGCAGACATCTGGAAAGAATTTGTCAAGAATTA  
A\_16\_P02417113  
CCTGCTAATTCTTACCTTTACAATTCAAAGAAGTTTGACATATGCAGTAATCCAACCTCC  
A\_14\_P137078 CAACATGGGTATGAAAAATAATAACATGGGAAGATGGTATCTATCATTTGACGGGCTTTC  
A\_14\_P128359 CAATAAAGAAGGTAATGGGCACCAACCTTCTTTGATCAGAAAATGACTTGTCTTGT  
A\_14\_P110685 TCTAACATGCTTGTATTTATTATATTAATTACAAATGCCTGGAGTTACATTTGCTTGT  
A\_14\_P127852 CTGTAAACATGATTTGAAATTTGACAGCAGACTTTGTGGATTTTCATTAGTGTTAAGGGCT  
A\_14\_P133712 TGATATTACATTGGGATATTTGAAAATAGCCTTTAGTGACCAGCATGTGGGTCTTGTTC  
A\_14\_P117224 ATCTTCTTGAGGGCTTCCTTCAGTATTTTCATTCTAAAAGATAGCAAAGTTAGGGTTGGA  
A\_14\_P128565 TAGGGAAATGGGTTATTAAGCATTGAATGGTGGTCTCTTCAAATTACACGTCAGATAATG  
A\_14\_P128413 TGGCATCTATGAACACAACCACATACTCACATTTGTGCCTAATGAAAATTTTACATCAG  
CUST\_8752\_PI426210822 AGTCCTTGCCAAGTCTATGTCTTTTCTGAGAATTCTCTCCCCCTTGATT  
A\_14\_P120590 AGTTATGTTGGATCCCTGATGTAAAGTTTGACAGTGTATGTTGTGTTCAAATCAACAGT  
A\_16\_P39244204  
GTGTGATCTGCAAATGTTCGATCGTGTGTTGGTTACATTTAATAGAGGAGAGGAAAATTTCT  
A\_14\_P200991 AGACTCCCTAACATTCATAACAATGTTTTATCCCAGTATCCATTGGGAATCTGGAGTATA  
A\_14\_P107644 CAGGATACCAAACCTGGAACGTGCTCTTCACATTCAATATATCCAGGTCTTGCAT  
A\_16\_P16746907  
AGGCCACAATAACTTGAACCTGATACTGGTAAGCCATGTCTATAATCTCAAGAAAAATGTT  
CUST\_9881\_PI426210822 GGATGGAAGCCAGGCCCTAAAAAGGTTAAATAAGCAGTGCTAGGCATTATAA  
A\_14\_P114211 ATCATCCTCAGCACCTCATGGTTTTATAGCGCAGTTTTATAGCCAACATACACAGT  
CUST\_8798\_PI426210822 ATAAAAATTCAAACCTGAGCAGCAAATCCTGTGCCTCTTCATCCAACCCC

A\_14\_P111626 ACGATGACCCCTGAAAGGTATGAGCCCTTCTTTCTCATCACAGAGATTAA  
A\_16\_P18930135  
CTTCTGACACTGTTTTTCCATATGTGCAACTTGTAAGAATGAGATTAATCCTCACTGCA  
A\_14\_P120794 CTAAATGATTTGGGGACTCTAGGAATATGGGCAAAAGTAAAACCTAATTTACACAGATG  
A\_14\_P139447 GGGACGCAGTTATTTTTGTTTGTCTATTCTAATTTCCCCCTCCTTACAAATGCAA  
A\_14\_P129266 TTACCAATTTATCAGTCCCATGATCTGTCTTCACCTCAGAACTAAGTGGAAGAAATAAGT  
A\_14\_P117048 CTATCAGAGAAAAACAGAATTTAGGGCAAAATATTACTAAAAGATGCTGGGCCATCTCAT  
A\_16\_P36959322  
CAAGGAAACTCATTAGCCTAACTAGTCCTTCATCTACCTCTATTGCAAAAGGATTCTTTG  
A\_16\_P00343228  
CTGTAAGTGTGCTCAAAGATTAATAAATTACCCCAGTTTACAGAGTTACCTTACCCAGC  
A\_14\_P106724 CTCAGAGAGCAGCACAACCTCATCTCTGTGTAAGACCTGAAATTCCTTCAG  
CUST\_8100\_PI426210822 CTGATGGCACTGAGGAGCCACTGAAAGTTTTTGAAAAGGGGAGTG  
A\_16\_P02056673  
AAGGTGTAAGTTAGTATGTCTTCAGTAGGCTAGACACTTATCTTAGTTACCCACAACAGA  
CUST\_8774\_PI426210822 CCATCATGAACACATGCTTCTTTTTTCTCGCCTTACCCTCAATTTTTT  
A\_14\_P132304 CTCCAGATCACTGATTTTTCAAACATTTCTTCAGCAGCAGAATTTCTTTCTTCCAAAGAA  
A\_14\_P108823 GTCTGCTGTCTAAGTGCTAGGATTTTATCCTGATGAATAGACCTGATTGTAGAAGGAATC  
A\_16\_P16480723  
ACTGAAGTAGAGAAAAATGCTGATATTGTGCTTGACATGTGAATAATGATGCTTTGCCCT  
A\_14\_P116027 ACTGAAGTAACTTTTTTCCCCTGAGAACAGGATCATTTGATTTTTTGAGATGTAAACCTC  
A\_14\_P104454 CTTATTCGCTCACAATGCATGCCAGTTAGATATGGGTATTTAGCATGCTGTATTTTAGGA  
A\_14\_P115066 CATCTGCACCCTGTTGAGTTGTAGTTGGATTTGTCTGTTTATGCTTGGATTAC  
CUST\_10219\_PI426210822 CAGCACCTTCAGGGTGGGCTCAGCTGGCAACAAAAACAGAGATTT  
A\_14\_P128140 CTATAAACACCAACCAGAACATCGAAAAGATTGATTTGCTTGTTCATTGCAAAACCAAG  
A\_14\_P117720 TGGATGAGTGTGTATATCCTTTGATACTTATTGGGGATATGGACCCTTAGTTATGTTTCT  
A\_14\_P111165 TGTGGACATAGATA CAGAAGACCCTTTGAGAGATCTCTTTCTGAAAGGATCTAAAATGAT  
A\_14\_P112661 CAAACTCCAGTGGCATGAAGATCTAATTTTCAAAGGGTAAAACTGCATGGCATATATA  
A\_16\_P00960821  
GGCACACAAATCTACCTTTATTCTAAGCATACCCTTTTTCTAAGTCTCATGAATCCCAA  
A\_14\_P121319 TCTTTTTATTGCTTTCTCCAGCCCAAGAATCTATCATTTTGAAGCCAAAGATGGCCTTA  
CUST\_1764\_PI426210822 GTTGTCTAATGACTTACATCTTTAGCCAGGGCATCTTCACATCTAGCTCCAC  
CUST\_4652\_PI426210822 AAAGAAAGCTTTGGGGCAGTTTCTGCCACCCAGTTTTTATGAACAT  
A\_14\_P124857 AAGGGCATGTTTCTGCTGCAACTAATTTTACTACTGTTGTTTCTATTGCATCAGTAAAGC  
A\_14\_P138348 TTCCATGAAGACAAAATGTAGTTCTTCGGTCTTTCTTTATTGTCTCAATAAAGGCATCAT  
A\_14\_P111991 CTCAGCCATTATATGATGAACGATCTTTGAATTTGTCAGAAAAGGAAGTATTGGATCTCT  
A\_14\_P114430 CCTTGAGACTTTCTGAGAAGTTTATTCTTCTCCTTATTCTTAGTGCCTTCATCACTCTGT  
CUST\_1163\_PI426210822 GTAGTGAGAGGGCTCTTGCTGTGCTCTGTTGGCTTTAGGCATCT

CUST\_10201\_PI426210822

CTGTTGTTCCCTAGGAGTTTTCTGGTTGCTTTTGGATACATGGTTATATGAGAAAATTG

CUST\_3598\_PI426210822 CTGACTTTCCACCACCCTGACCTGCGATTCTCTCTGCTAACCCCT

A\_14\_P107887 TCAAATTCAGGAAAGGAATGGGAGACAGAGACGCTTTCTGAAAAAGATTTTTTTCATTAG

A\_14\_P102204 GAAATGAATTTTGGTATGAACATTACCTTGACATCGACCCAAAGACATGACTTCAATTTT

CUST\_5393\_PI426210822 TGACGCTGTGTGCAGAAAAGCCAAGAGCTCCAGGGCTGAACAGAT

A\_14\_P130910 TCATAAAACAACCTACTCTGGGTTTTAAGGTCCTCGTTCCACTGATCATCCTTC

A\_16\_P21446775

ACCTCATTATTCACATCAGTTCCTTATTCATCTCAGGCATATCTACCTAAGCAACAACAC

A\_14\_P201266 TTCTAATACTTTCCATATGTTCACTATTACAGAATCCTGCAATATGTCTTGGAAGGTCT

A\_14\_P117997 CAGAGTTTGACATTTCCCATCATCGCCATTGCATTTGGGAGATTTTATTTTTTTAGTAA

A\_18\_P10856090

GAAGTGTTCTGAAAGTTACTATAGGCCTGGTTATGAACAGTATGCATCTTTTTGTCTACA

A\_16\_P19137671

ACAGTGAAGTTCCATTGACAAATTTCTCTTGCCTAACCATCTCAGTATGACAATCAACTG

A\_14\_P106394 CAGTAAATAAATGTCCAGGGATATTGGGGGCTGGGAAGTTGAATAAATGGTCTAATCTA

A\_18\_P14136126 ATAGATGCATAGGTGCAGGTGGTTTATTTGAGTAGCGCCCCAGAAAGTAAG

A\_16\_P19725619

AACTCTGCAGTATCAAGTGGAGATTTACGTAAGAGGAGGTTTAGATGGTTAATGATAACC

A\_16\_P16203325

CACAGACTATCAGGTAGTGTCCATTTATGAACCTCTCTATCATCTTCTTGCATACAAACA

A\_14\_P125490 GTCCATATGACATAGTTTTAAATATTTAGCCACATAATGCTAGGAAAGAAAAAAACGGT

CUST\_4627\_PI426210822 CCTAGTCATCTCCCTCAAGAATTTCCAGTTACTTCTCCTGGAAGATC

A\_16\_P19775043

TAATACTTTTCGTAGTCTTTTACAGGTAATCATGGACATTCTCTACCTAATTCCACACTGC

CUST\_3563\_PI426210822 CAGGCTGAGGAAACCCACCCCTTCGAAGCAGCCATCCATAGGTAG

CUST\_8345\_PI426210822 CATATCTCCTCACTCTCTGGTTCTACCTCCAGAACTCTTCTCTGC

A\_14\_P118194 GATTTTCTACTTGGCACTGGGGCAGTGTATTTATGAGTAAAACATTTCTTCTTAAAATGG

A\_14\_P114456 ACTTTGACTTAGGTGCTTTGGGATCTAAGTGTGGTTTGTGACTATCCCCATTATTT

A\_14\_P118938 CATCAGAGATTTTCAAATAAATGGGCCCAAAGGGCTGAAGTGATAAATACTTTATTGGAG

A\_16\_P02862351

AGCCTTGAGACGTTACAATTTGTTTAACTGTAGTAACTCCCTCTTTAGTGTTACCCAAAA

A\_14\_P200722 CATTCTAGGCAGGATGAACACTGTAGTCAGAAGTGCAAGTTCATATGACATTGTGAAAG

A\_14\_P134122 CTGGAAACCAGTGTAATAAATAATTTCCAAACCTGATCTGGGTCAGGTTTTTACATTAC

A\_14\_P114425 CTGGTTGCCTCTGTTGTATAAGATTCAGGGAAGCATTTCTTAGGGATAACACCATATTTT

CUST\_8550\_PI426210822 GACAACCTGCCTGGCTATCGTTCTGGCTGAGTGGACCCTCAGATAC

CUST\_2342\_PI426210822 GTTGTCATTCGTGCCTCAGATCCCCTCTCTACTGGCCTCCTGCTG

A\_14\_P202447 CATGTTTGCTTCTTTTCAAAGTGAACCTACCATGGAAAAATTGTTCTTCGTGGTCAGATAA

A\_18\_P16113335

GAATTATCATCCTACTAAACTAAAACCTTACCAGTTACGAACAAAACCTGAGTGATTCCA  
CUST\_4503\_PI426210822 CTCAGATGCAGGAAGTCCCTCGCCTCTGCTGTCCTGCTCTGCCCA  
A\_16\_P16544034

AAAGTGCAGATCCTAACTTTTTTTTCATGCAGTAATCCTCAAAAAGGTAGACGTCTACC  
A\_14\_P118109 CTGGCTTGAGTGCGGGAGAACACTTTTTAAAGACTCACCTTGAA  
CUST\_5170\_PI426210822 GAAGTGTCAAATGAGACTCTGCAITGAACTCCCCATGCCTCTCC  
CUST\_8734\_PI426210822

TCTTAAAAAAAAGTATCCTATTGTAAAAATTGTTATTGTCTCCCTAAAAAATCCAAG  
A\_14\_P118944 ACAAAGATTGTGGTATAGATTTTTATCTTGACTCATCTCAAACACTTTCTCCCATTCTTT  
A\_14\_P113030 ATGTCCTTATTTTTGCTTCTTGTCTAAACAGGACAATTACTTCTATGGTCCATCTAAGCC  
A\_14\_P132631

AGGAGAGAAACAGTTCTGTGAGTGAAACAGAAGTATGTAAACTGCTTGCAATCTCTAAA  
A\_14\_P100274 CCAGCATCTCTTCTGAATGGTGCCTGTATCCTACTGTTTGTAAATATTTCACTTCTTAA  
A\_14\_P112702 ACCATGGAAAGCAAACTGTAAGAGAGGACTACTATAGTTTTGTTTCTCCTCCTTCTTA  
A\_16\_P01582561

AAAGGGCTCCATGATTTACTGTTAGTAAAAAGAACCGGTTCTAACAGTATACAAATGCC  
CUST\_7375\_PI426210822 CTAAAAGGTTCAAGTGAAGGGACTGATGCTGTCTCCAGATGCAGA  
A\_18\_P14244909

AAAGCACAATACCAGCAAATCACTACCTTACCCTTTTATCCAAATCTAACTTTTCTTA  
CUST\_5422\_PI426210822 TGGCAGCTGCACAGAGCAGAAATAATGGCCAAAAGTTGAGAGAG  
A\_18\_P12208474

ACATGGAAGTCACTTTATCCTACTCCATACATCTGATTTCAACATATCCCTCATTCTGA  
A\_16\_P03543944

AAATGAAGTAACTCGAGAAATCCATTAAGCCAGATTAGTATTGAACTCCAGTCAAGACC  
A\_16\_P38629893

TCATTGACATTCCTAATTAAGAGTAACACACATAACAACCTAAATCCTTAATTTCTGC  
A\_14\_P138081 ATTGTAAGTAAATTGAGCGGAGGTTGAAGAGACGTGGAAAATGAGCAAAGTTGATCTT  
A\_14\_P133779 CTTGGTAGGTTTGATCGCTTCTGATCCTGTTCTGCCTAGTTCTGT  
A\_16\_P20208945

ACATGGTGTTACTCACTATCCAAACCTTCACTATTCAAACCTCAAGAACCACATAGATTGA  
A\_14\_P101376 AATTTTGTTCCTTAAGTCTCTACCTCACTCTATGTTGTCTTGGGTAGGTAAGAATTGAC  
A\_14\_P128385 TTTCATTCTTTTCGTCAATTTGTAGACCCCGTTGATAATCTCATGAAAGTGCTGGAGAT  
A\_14\_P124512 ACACACAAAACCTCAGGGTGGGAACCTTGATTTAGTTGCTTCTTTCTTGGTTAAGTTATTTA  
A\_14\_P100828 AACTAAGGATCATGTATTTTGAACATTACACACCTGTGGTCAGTGTTAAGGAAATTGCT  
CUST\_9442\_PI426210822

AAACACTGGGTGTTTTAAAAACAAGTTGTTTGAATGACTTAAAGAGATTACATCCAAATT  
A\_14\_P110002 TAGTCAAGATCTTTCCCAATTTCTGCTGTATGATTGGACATACAACCTGTCTTTCTTGTG

CUST\_4629\_PI426210822 CAGCTCCACCACCAGGTCAGACAGTACCCTTGGCAACCTGTGGAC  
A\_14\_P102798 CTAGTTATCTGTAATTAGCATAACATGGTTAATCATGAGCACGCTAACTGCAGGGGGAAAA  
A\_18\_P21455053

AATTACAAGAACTAGCCCCATAGACATAAATATACTGGACTGAACTAAAACCTGCACTCA  
A\_14\_P102694 CTCTTGCACATTTTCTTGCAAACCTCAGGGTCTGCATCAGTCTACAGAAATGAG  
A\_16\_P02763628

AAAATCCTCACTACCTGATTCGTATCTAAAAGAGTCACACAATTGCTTTGTTTTGGAGTC  
A\_16\_P18329800

ATTTCCACATTCATTCTCATTCTTCTATCCATCAACCTAAAACAAGTAAGTGGTCATTGG  
CUST\_6256\_PI426210822 TGTGAGACTTGGGTTTAACTGACCTGTCCGTAATCATTTTGCTGAAATTG  
A\_14\_P101671 CTCTGTTCTTTCCCATGTATAGGTGTCACCAAGAGTGACCTACACAC  
A\_16\_P03115093

CTATCATGGCATCTTGTTCCATCATAGCACAGTAACCATAATAGATCCCATCTGTTTCC  
A\_14\_P118215 GTCTCACTCTATTCTTAGGCACTAAAGCAATCTTCAACCGAACTCCTCTTTGGA  
CUST\_4056\_PI426210822 ACACCATGTGGTCCAGTCTGACACAGGCTGATCCTTTCCCTCAG  
A\_14\_P116122 TCATGTAATGACATGAATGACAGTATCATCCATTGGACTGAACACCCGAATAGTATAGAG  
CUST\_7141\_PI426210822

ACTTTAGAAGATAAGCCAAAAAATTTGACCTTAATGAAAATAGAGGATTTTTAATGGAGA  
A\_14\_P118827 CTTGAGTCAGTCATCTTGGCTACATCGACAAAAAGTCCAACCTCAAATGGTGATATCT  
A\_14\_P117751 ATAATCGAAAGAACATCAGGGTGAGCATAACTAGCCATTTATTCATCCATCTAACCAACA  
A\_18\_P14132336 GAACCTTTCAGAAAAACGTTGCTTTCCCGATTGAAGTGATTCCCATGTAAC  
CUST\_9148\_PI426210822

TTTCCAAATTATTAGACACTTAAATTTTAAAGGACAGTAAGTCCCAAACCTGTGAGAACT  
A\_14\_P131669 GCATATAAATGATGATCCTGTATTATCAAGGACAAATGCTGTATAGAATCCTGTGGCACC  
A\_14\_P128163 CACTTCACATTATGAGTATTGTTTCAAAGAGAAGCGATTCATGGAATTAACATCCAC  
A\_14\_P127685 GGATTGGCCAGGTCATTTAAAAACATAGTATTAAGTAAAAGAATGTTTGCACGAGTCAGG  
A\_14\_P139020 TGACCAAATTGTTTTAATACGCATAGACTGGTGACATTTGCACTGGAATCCTGTAATAGA  
A\_14\_P115534 GCTGGAACAGCAGTTCTTACCTCTCTAGAATCCAGGTTTAAAGGTATATAAGTAAGAAAG  
A\_14\_P126594 TATTCTCTCTTTTTAATTAATAAGGTTCCCAATATCAACTCCAAGCCCATCACCATTGC  
A\_14\_P117494 CTCATTGCCACAAATCAGGCTGGGAAATCTAGATATTTAAATAAGTAGTTTGTACCAA  
CUST\_3855\_PI426210822 AATACTGCCTACCCAGAGTTGTTGTTCCAGGCTAGGGTCCAACT  
A\_14\_P129585 CTGATGCTGATCATGGAGACTTTTATTATTGAGACCTCCCTATACTTTGGCACTTCAAA  
A\_14\_P137021 TCTGTATTATAAATGGGTCTCTGTTTTTTGGTCACTTTCCAGAATCTGATTAACCTGGAG  
A\_14\_P120021 CTCTAGTATTTCTCAGCACATACACAGAAGAGGGAATTAATGGTCTTTGATACCCCTAA  
A\_14\_P106791 TACCAGCCTGAGATATACTAATTGGTCAGAAGTGAAAAGAGAGGAAAAGAAATCTCAGTT  
A\_16\_P18256320

TGCAATGAGATATGAGAAACGAAAGAAACAAAAACTGTCAAATGAAGATATGCCAGGGTT  
A\_16\_P18209944



CGTAGTTCCAAAATTCAGAAAACCTCTACAATGACCTAACACATACTATAAAGCGTAGCA  
A\_14\_P118755 CTTTAATCTCCTTACTTGGGAGTTCCTGCTCATTCTGGAAATGTTTAAATAAGCAAGTC  
A\_16\_P20781052

ACTATATGGCCAGTTACTTGACTAATCACTTAACACGAAATCTTCAGGAGTGTCATCTGT  
CUST\_4081\_PI426210822 CCCAGCCATCTTCTGGTGCATTTCTAACATACCCTTAAAAGGCATAAAAAAGTG  
A\_14\_P100938 TGCAACAAAAATAGAATAGACCCAAATTCCTTTCCGGTGGAATTAAGAGTGATCACTGATT  
A\_14\_P102931 AGCAGTATGATATTACTGTATCGGACCTGAATCAGCCCATGCTTGTAGTCTGTAAAG  
A\_16\_P35654972

AAGAAGCATAAAGACTTGCTATCCACCAATGGTTAGGATTTAAAGAAACGCAAACACTTG  
A\_16\_P01415626

GACACTGAAAGTTCTAAGTATCTGTAGCCATTACACATCTTTATCTTCCCTCCACAAGTGT  
CUST\_10202\_PI426210822

TCTGGTTGCTTTTGGATACATGGTTATATGAGAAAATTGTGTATGTCTGTTACGAGGGT  
CUST\_2694\_PI426210822 CACTGTCTTCTGCAGAGCTCTTTTGTGAGAGGAGGATTCGGCCTC  
A\_14\_P104288 TTCTTATTGCCTATCAAGATTCAAATAATGCTCAGAACACTCATGGCTACTGGGTTTTTTG  
CUST\_349\_PI426210822

TGTATCTTACGTCTCTCTTCTCGAAGAAATTATTCTTTGTTACTTAATTCAATATTTTGC  
A\_16\_P37673158

CGAATCTACATCCTGAGTTTTATAAAAACAGTGTTCCAAATAACTCTACCAGTGAAGCCA  
A\_14\_P104041 CTCCAACAACCTATCTGGTTCCCCAAAATTATATAAAGAAGTGTGGTGGCTTTTT  
A\_16\_P18767974

CTCAGGTAGTTGAAAACAGTTGCTTAAAAAATTGAATCTCTAGAATTGTAGCACGGGTGT  
A\_16\_P17023562

ATGGTCCTAGAACCTTTATTTTGTGGAGACGTTACTTATTCATCTTTAACCTAAGCACA  
A\_14\_P131157 CTATATTGAAAAAAGGTTATCTTTCCAAAATACTGGCCTTTTTGAAACGTGAGGGAAGCA  
A\_16\_P03801979

ACCTGTGCCATCAAATAATTAGCAACGGATTTCTAAAAAACATTTGCTCAGGTTACAGA  
A\_16\_P36230987

CAGATACAATCCAAGGACCATGTTTTGTCTCATATGGGGGCTATTCACTCATTTATTAC  
A\_14\_P135702 AAGCAGTATGGTAAATACCATTGCATGCATTTGGGTTTTCAACATGTTAAGGATTGAAGA  
A\_14\_P112813 ATCTCTAATCTACATTTACATGGGAAAAAAGCAAGGTGAAGTCCAGTTTACAGACTTACC  
A\_16\_P16505146

CCCTGATTCCAAGTTGATCTGCATCTATATGAGAAAAATCTACATAGTCCCTTAGCGATA  
A\_14\_P108865 CTGGTCAGTCTGGTCTTTGAAAGTATTAGAATAACAGAAAGAGTCTACTCTTGACGATGA  
A\_14\_P102486 AATCAGTGCAAACCTAAAAATGATTTTCTTCTAGTGCATTAAGAAACTGAGCAGGCT  
CUST\_8291\_PI426210822

AATCTTGTCAATTCAGAAAGGTAATCCCAGTGCATATTTCTCCATGCAGCTTATTGAC  
A\_14\_P122676 AAGTAGTGGTCATTTTGTGTCAGTGGCAAGAACTTGGGTGAAATCTCAGTTGATC

A\_16\_P20025303

AGACATAACTGATAGAACTCAAGCCGTCAAAAATTTCAAGGTCTCAAATCACACAATCTG

A\_14\_P118298 CTTTTCTTGAAATCATGACTTGTTTCTAATTCTACCCTCAGGGGCTGTAGATGTTG

A\_16\_P18079633

GGCTTTTACTCCATATCACTAAATCGTTTTCTAAGAGTTTAACCAATATTTCTGCCACC

CUST\_2834\_PI426210822

GTGCCAGCTCATCACGTAGTTGGACTCTGTTAAAAACATTTTTAAAGAATGAAGATTAA

CUST\_5753\_PI426210822

TCTAGTTTTTCCACAGGACCATAAAGCAAAAATTGGTGCCGGGTTTGTATTTAAAG

CUST\_9602\_PI426210822 TGATGTGTTTCAGCAGCTTTTACCTGCGCGGAAGACACAAGATCT

CUST\_4090\_PI426210822

TTTAATTAGGTTGTGGTACAAGAGGAGCAATTAATAAAACCTTCCATTTCCACATCTACT

A\_14\_P126323 ACGCAATAAATGTTTATTGATGGTGAAGATGAGAAAACCCTATTTCTGCTGATCTTTCCT

A\_14\_P108118 AATTAGCACCTCTTTTTTTCACCCACTCCTGAATTTATGAAATGAGATACATAAAACAAA

A\_14\_P113643 TTTTCAATCTGTCAGATTCTAAAACACTAAATTCTCCTACTTCCCGACCATGGATTAGC

A\_14\_P119815 CTTCTAACTGTCCTGGTTTTCTTCTTGGATTCTTCTATGTGTGTTTACAAAACATACAC

A\_16\_P19682232

AATATGCCGCACTTTACTATTTTGACATGGTCTGGAGATGTTTTCTACAGTTACTGACAA

A\_16\_P37205741

ACCTAGAAAAAATTCAGTCATCTAGTCTACAATGCTACCATACTCTTAATACAGTTCCA

A\_16\_P00685179 ATTGATTTATTTCTTGGGTGCAATGAAGGGCTCTTAATCTTCTGCATTTGGACACTTG

A\_14\_P132442 TCTGCCAAAAACAAGAAAACAGAAGCAGCCATAGAGAATTAGGATCTTATTGCTCTAGAT

A\_16\_P02765891

ATTGCTTCAAATCTTAGTGGGCTTTCTGATATCTTTGCTTCAAGTCAATTTCTGCAACT

A\_16\_P16191833 GTCAAGTCCACGGTCATTCAGTGCCGCTGGCATTGTTGGAAAGCA

A\_14\_P105481 TGCTCATAAAATAGAGAAGCAACACGCAGGGAATATTTATTTCTAAGGAAGCAGTTGCAT

CUST\_542\_PI426210822

ATGAGATAATTCTAACATAGACACACTCTTCATTATGTGTGGCCTCTAACATTTTTGTTAT

A\_14\_P100685 CCAAGGATCTGGCATAATGTTTTTGTGCTTCATGTTTATTTTAGGAGAGTATTGGGGA

A\_14\_P105613 CTATGCTGATCATCAAACAGAAAACCAATTATGAAGTATGAAGGCTCACCCTAAAACAGT

A\_14\_P126582 CATGATAAGACGTCGGAAAAAGTAAGTCCAGGTGATATAATCCAATGCATCTTGCTTAGA

A\_16\_P15264986

AAAACATACTCTTCATAGAAAGATGGACTCAAACCTGCTATTTGGATTTCAAACCTCCCA

A\_14\_P135216 AGGTTGAGTTTATGATGTCCAAGACAGAGTGACAGATCTGGAGTAGAGGAAAG

A\_14\_P126572 CTAGTTTTTCTCAGAATGGCTGATGCTGTATATAAATCAAGCCAAAATGGCATTGAGTA

CUST\_376\_PI426210822 GACCAGAATATCCTGGACAATGTTCCAGATGACGTTTGTATCAGCTAGGATAC

A\_16\_P20775600

AGTCACTCCTAATTCCTACTACAGCAATAGAACGATGCAATGTCTATCCTCAAATCCTAAGA

A\_16\_P17692696

AAAACCCATAACATTTTGTGTTTTATTCAACTCTGCCTTATTAATCCTCCCTCCCAAAGG

A\_16\_P36493825

ACTTAAGGCTCATTCTTAAATTCCACATGCTCATAACAATTGAGTGGTCCATTTGTAAGG

A\_14\_P119627 TCATTTGTGACACTCAGTATATGTTCTGGTCTCAGGTAATAGCACCTTATAAGAAATCTA

A\_14\_P126184 TAATGCATAGACATTCACTCTGAAAGTTAAAGGATTCCCTTTCTTCTCTCCCATGTGTTTG

A\_14\_P100354 GTATTTTGTATTGTTCAATGATATTAAGTGCATGCTAGACTTAGGAGTGGGGCAGGATC

A\_16\_P00685366

AATTTATTCTGAAATTCCAACAGGAGTATCATATCACCTTTTGACATGGAGGCTTCTTCC

A\_14\_P100508 AATTTTTTTTTAGGAGATAAGAGAATCACACGAGGTATGACTTCTGCTGAGACAAGAATGC

A\_14\_P132743 AATATGACCCCTGATCTTGCTTGGATGGGAGATTTGTAAAGTATTATGAAAAACACACTT

A\_16\_P17358744

AAAACTCACAAGGGTTTGTATGATGTAATTCCAAGGAACTAACTATTTCCAGGTATTCC

A\_16\_P16864437

AATTCATCTTACCACCAATCCACAATAACATACAGAACTTTAGAACACAAATCATTGCT

A\_14\_P107735 TTAAACACTCCACATAAAAACATGTGCACCCTCTCCTTCTACATTTAATCATTAGTAGTC

A\_14\_P112719 GGCCATGTAAAAAGAGAATTAACCTCTTGTGCTTTTTGTATACCTGTATGCGTTTGTGT

A\_16\_P01882672

TGCATTGCAAAAACATTAGCAAGTCCAGTATCTTATATCCATCACTCTTTCTTCACATGA

A\_18\_P22840306

CCAGAATGATTGCACTTGGTGAATTGGATAATGCGGTATGTCTGTGATTGTATGTTTTAA

A\_14\_P120825

ATAAGTAAAAAATTGATGCAAAGGGAAAACGTAGGAAAAATAAGTCGAAGCCAAGCGAG

CUST\_4560\_PI426210822 CTCTTTCATCCCTCTATGGACTGAGACATCTCCCTTTACACCAGTTTTTTACTT

A\_16\_P18522496

CCACCATTGTTGGATGAAGAATATAAATCTCAAAGCAAACTTTACAACCTTCTGTCTTG

A\_14\_P114842 CTGCCTCTCTTTGTGTCTATTTCTGCTTATCAATTAGTGATTACGTATTGAGCACCTA

CUST\_4183\_PI426210822

CAGTATGGTACATATGAAGTACATACCAAGTACTACCTGATTCCAGATATTAGGAAAACA

A\_16\_P35981508

CTGATGCTCCAATACAATTGATTATCTCAATCCAGAACTACTCTAATAGCCCTACACGT

A\_14\_P114053 ACCATCACTCTTGACTCTGGTTTGCTAACCTTTTATTTTTTGCTTTTCACTTTCAGCAGA

CUST\_5583\_PI426210822 TAGGGTACATAGTCTGGGAGAAGACGGGTTCCAGGATAGGGCTTT

A\_16\_P00304995

ACTCAAGTCTCCTCATCTATTTCAAGTTCTAAAAGGTTGCATAGATTAAATACCCACACCA

A\_14\_P113538 GTTGTCTGCATTCAAGTTTATGCAACTAGAGTTTCTTCAATATTTTCTAGGTGTGTATAG

A\_14\_P126377 TCAAACCACCAACATTAGCCAGAATAGTTTTTCAACAAGGTTTCTTTTATTTATTTAGC

A\_16\_P15532355

AATTTGGGCCTCAATATTAATTCATGCTCATCTGATGTATCTCTTTCTCCTACAAGCAGA  
A\_14\_P100269 TCATGGTTATATCCAAGAAAGCATAAAATAACCAATGTCCTGATATGCAATCTGGATGTG  
A\_14\_P113737 ATGAATTCTGCAATTATTACAAGAGTGAAGATACTCGGCAGGGCACTTTCCATGTC  
A\_14\_P124925 ACATTTTGATGCTTTTTTCCCTATCACAGCGCATTTTTACTCAGATACATGATCTCCTT  
A\_14\_P122699 AAACCTGGGGTTCTATCACTTGCATCATATGTTTTACTTGTGTTGGTTCACAACATCAAT  
A\_14\_P120168 ACCCAAGCAATTATCTGTATTATAATCCTTCCTCCTTAGTGGGTATTCTGAAAGTGTA  
A\_14\_P127173 TTGTGGAAGAGTTCCAAGTTTTATCTCTGTCTAGTTGGTTAAACATCATTCTCTTTT  
A\_14\_P108142 AAGGCACCTGGGCTGTTTTCAACTTAACATTCTAAAGACAACAAATATAGAAGAACAGTT  
A\_14\_P111045

GAGAGAGAGAGTTCTGTGTAACCTTAAATAACAAAGCACAGTCTGGTAAAACAAACAAA  
A\_14\_P124378 TGGATCATGATTCAGGAACATGTCAAGTCTTTTCTTGGTAAAGTTGTGTCATCTAAGAAA  
A\_18\_P22843023 AGACACTTCCTGCCTCCACCTAATTCAGGGCTAATCATAACAGTCAGAG  
A\_14\_P132302 GCCAAAACACTGAACTGGCTCTTATGTCTGCACAAGCCTAAAACCAAATAGTAAAAC  
CUST\_1941\_P1426210822 TGACTTCTTCATGATCATCAGCTAGCATAAGCACATCTGCTGTGCACCT  
A\_16\_P41883816

GGCTGCAGATTTTGATATTACAGAAAAAACATGCATCATAGAGTTGGCTCCACATATCC  
A\_14\_P105282 ACATGGATTTTGTAGCCCATGTATGATTGCTGTAATACAATGTGGAGAAGATGTATCTGT  
A\_14\_P105233 TACCAAGTGAAGAATTCATTGTGTATTTATTATTCACAGTTAATCACTACCTACCAAATG  
A\_16\_P19650719

AGCAGTTGGAAATTTGACATTGACTCCTATAACAGTCTTATGATACCATCACTTTCCCAG  
CUST\_8137\_P1426210822 ATAACATTGAGACTGAGCAGTTTCTTGAACCTCTCCTCTCAGCAGCC  
A\_16\_P18815225

AAAAAGATTTCAATCAGACTTAAGGCAAACACTTCAATTCACTCCATACTGGTGAACACT  
A\_18\_P22842088 ATGCTTTTGTCTTTACTGCCATCAGTGTCTCTCTAAGGGAGGGCG  
A\_14\_P138415 CTTGGAAAGAGAAAACACGTCTAAGGAAAGTAGAACAGTGTAATCTGAATGATTTGTCC  
A\_14\_P126021 AAAAAGATACATTTAGCAGAGACTCCAAGGAGATTCCAAGTTACTGAGATGTTCTACTCT  
A\_14\_P123733 TTTGCAGGAAGTTCTGCTTTGATTCCTAGATAATTGCTTTATGAGACAAGCCTGTGTTTA  
CUST\_7530\_P1426210822 AGAGTTCATTTCTCTGAGTCCCTGCCCCAGAGGCACATGACATAG  
A\_14\_P132114 TGCATCTGTGAATAAAGACTAAAAGGGCACATGGAGAAATTAAGAAGTTATGTTAGCCTT  
CUST\_2636\_P1426210822 GAATAAGGTCAGGGCGAGGTTTCAGTTTGGGATGTGGATGAGGATG  
A\_14\_P107167 CTGTAAAGGGTGCATGGCACTAAACAGCCCACAGTCTGCAAAAAGAAT  
A\_16\_P16414821

CTATAGTTTCTTGTCATGTTTCTCAGATACCACCCTAAGAACTAAGAGCCAGAAGAAACC  
A\_14\_P121802 GTTATTTTCATGTGTCTATCTTACTTCTTTCCAAGTCCCCTCTGTTTTAAATGAAACTCC  
A\_16\_P16191697 ATTGAAATTGTTTGTACAGTCGGTTTACCTTCAACTGGTTTCTTCTGTTCTGAAG  
A\_14\_P120816 CAGTTGATCAGAAAATAGATGAAATTAACAAGGAGATGGGCAGTCTTTTTTGTATGCCAAA  
A\_14\_P134774 CCTGCCTAACTGCCTATTTATCCCAAATCCATATATTTTGGAAACATTCAGTATTGCA  
A\_14\_P101752 CCAGTGTGGACTGATGACAATGACTTTTTTAAAATCTGAACACCCAAAAATTTACACAG

A\_14\_P134343

AGATACTTAGTGGACAAGAGATCACAAAATAAAACACAAAATGAGACACGGATGAGTTCA

A\_16\_P19920573

AAAAAAACCATTGACCAATATTGATAAGATATCACAAACCCAAGAGTATATGCCTGAAGT

CUST\_4758\_PI426210822 CTATTCCTGTGCTACACTCGAGCCAAGGTGGCCTCTTCCCTAGCC

A\_14\_P115791 AACTCGAGTAAAGCACATGAAGCCTTTAGTATTGAGTCTGGAAGACAGTTTCAGTTATAT

A\_14\_P135506 GAGAATTAATGGATTTTATGCTCTGCAGATTAATTCCTTGGTTGATGTAAGTCAGCCTG

A\_14\_P117841 GAGTCCAAATGTGAGTGATAATCGGCAGAAAATCTGGCAAAAATCGGATTTCAAAG

A\_14\_P133327

ATAAAAAGTTTTTGAAGAAAGAAAATAGAACATGGAGGAGCCAGCCTCAGAGATGAGAA

A\_16\_P17604611

TGGACATCCTCTATTCATTTACACAGGACTATAGCAATCATGTAAGCCTACTTTTTTCAGA

A\_16\_P02533244

CGGGAGCATCTTTAACTACAAATGATAACGATCCCTTATGTTTCGTATCCACTTCGTAATA

A\_16\_P20259267

AAAATAGTTCACCAATAATACACTCAATGATCAGGCAAAATTCACATCGGTATCAGTGGC

A\_16\_P17372124

AAACTCATTTTCCACTGACTATGTAACACAAGTTAAGACTTATAACAGATGCCCCAGTGA

CUST\_10165\_PI426210822 AATGTGTTTGCCAGCCCTCTGAAAAGGGCTGCCTCAAACCTCTAT

A\_16\_P01973724

AATGACCCTGAGTAGAGTTACATATTTTTTCACACCTCCTACTAAAACCTCAGCAAATGCTT

CUST\_2442\_PI426210822 GACCATGGAGTTCCTAGATTTACTGGGTAAAACCTGTTCACTCCTGTCTGTGA

A\_18\_P13426726

GCTATAAACCAAAAAACTCTTCCAAATGCAAAACATTGATGATTTGATTTCCCCACTTGG

A\_18\_P22841101

TGAAATACTTGCCCAACATGAGAGGTTTAGAATGTTCTGGTAAACCACAGTGTTAATAAG

A\_14\_P128875 CGCTCTTGTGAAACTGAAGACAATTTCTTTTCTGTCATAAAACAAATATTGCTCATCA

A\_18\_P10619298

GCCACTGATTGTGAAATAATCTGAAGTTTGGAGGTCTCAGTTAATAACCTATAGGTGCTG

A\_18\_P16349792

CACCAATTATCTTGTGATCAGAGTTCAGACTAAACAGTCAGAAAACAGTGTTTCAAACCT

A\_14\_P139997 GTTGTTTTTAACTGCCACCTAGCAAGTGCATTTCTGGTTACTCTTATGAAATCTAAACA

A\_14\_P102582 GATTGTAGAGTCAGAAATGAATTACCCTGCATTAGAGATGCTGGATGATACAATAGGTTG

A\_14\_P129380 ACCTTGTCATTCCAAAGTCTGAAATTTTTACTATGCATGTTGAACTGACCAAACAATTCC

A\_14\_P106664 AACAAAGCGATATATTTCTCCTTCAAGACAGATCGGCACGGATATTTAACATATAGATGAT

A\_16\_P03225661

AGATGGATGTTAATATTATTTGGAAACATTTTTCATTTATAGTATTGTGAGCAAACCATCA

A\_14\_P123766 TCAAATTCCTCTGGACTAATTTGACGGCAAAAATGATGGAGCAGATAAAGTGATATCCATA

A\_16\_P15849644

AATTAATTTGACATGGCTAGGTTTATTGTGCATAACCAAAAAGTGAGAAGGTATTCCCAGG

A\_16\_P20390156

ATGCCATGTTACAACCTTGTAACCGTCATATTATGTAGCCACTTAAAGGATGAAGTAGGC

A\_16\_P16618926

AAACACTCATAACCCTTTGTAACTTTCCAGAAGCCATAATCCAGAAGTAAAACCTGAAT

A\_16\_P58424286

CAGATGTTTTAGAGTTGGCTGAGGTGACAGTGTGGCTGGGCCAAT

A\_16\_P20946094

ATCAGAAGTGGGATTCTCATGCATAGCATTACTATCAGATATATTAECTCCACAGAGGC

A\_14\_P121474

AGGAGTAACATTAGGGTCTACCTCTACCTCAATTTAGTTAGCGATTTACTACAATTCAG

CUST\_1397\_PI426210822

GCAGTCCCAGCTTGGGAAGGCGGAGGCTGGCCTGAAAACAGTGCT

A\_14\_P130363

AGCATGACCTTTAAACACAATTGGACTTAAGACAAATTTAGTAAATGCAGATTTCTGGGG

A\_14\_P200861

TCTTTAAATTCCTCAGTGAAGCCAGGCCTGGATAATAAACTTCATGCTCAGTATATCAT

A\_14\_P113413

GGCAATTGCTGTTTTTGCATCAAGATATCTTACATCACCTGTGTCTGGAATATTAACC

CUST\_1213\_PI426210822

TACTTGTAATTAAGGGCAAGCACTATAAAACATTAATTACTATTAACCAAGCTATGAT

A\_16\_P17443252

TCAGTTAACGAAAAAATGTAGGTGTTTACATGAATGCAAATCACAGTGAGTTATTGGGGC

A\_16\_P18130478

TCAAATGATGAACTCTTAAAACGTATCCTGAAGTCAAGTAAGTTGTTGAAGCCAATGTCC

A\_14\_P105529

CAACAGGAGGATAAAATCTGGATAGATTAAGACAATCCATTCTCTGGCCATTTTCATCTAT

A\_16\_P00107122

AAATCTAACAGTCATACGAAAGACACTTAAAGGAAAAGGAATTTAAACTAAGCCCCACA

A\_14\_P132035

ACCATTATCTTTCTGATGATGCTCTGAGAGATTATCCTTATGGCTGAGATTTATGTGGTT

A\_16\_P00474049

GCAGCATGTTATTTCTTTGTTGCTTAATCTTGCTTCCTACTTCTGTTTGTGCTATCAA

A\_14\_P120901

AATATACACAGAGACAGGTGCTTTAAAAAAACAAAGCAAACCCTGGGATCAACTTTATTG

A\_14\_P134511

TCCTGACACCAAAGTCTATAATGATAACTGATGAAAACAGAGATTCATCATCACATCCT

A\_14\_P103332

CACACGCGGCAAAGAACCATGTTAAACAATTAGAAAGCAAATAAGCATCATAAACTC

A\_14\_P112705

ACTTTAGACTTTGTGAGAAATTCATAAAGGTGGCTGAGTGGATTTGCATGCTTTAGAACT

A\_14\_P101500

CAATATTATTCTCAGCCACTGTAGTTTTTTCATTTCTTCCCATAATCCTCTTCCACTCAA

A\_14\_P104848

ATTTGTTAGGTTTTGTCCGGTCTTAACATTTATTCCTTACTGGATCATTACCAAGACCT

A\_16\_P20879399

AAAAACACCCTTTTGAAGATATCCCATCAATCCTGAGTCTGATTTTCATCTCGTCTTAT

A\_16\_P00347177

AACCAAGGTTTCATACTACATTTCTTGTCTAATATACTCCTATAATATTTGCCTCCGACA

A\_14\_P100529

TGGAATGGCTAACGTGAAGCCTGAATTAATGTGGTTTTTTAGTTTTTACCATCACCAATT

A\_14\_P202058

GAGCATCTGTCCTTTCTACCCGTTCTTCTTTATCTTTAGTGTTCAGTAGCAGC

A\_14\_P139458 CAAATCACAGTGCTGTTTTTAATGCCTGAGAAATGCACTTTAGGGGTAGACTTATACCTT  
A\_16\_P17626303

AAACTGTGCTTCAATTATCTTCCCTTAGTAACCTCAGTTATCTTCCCTGATTTCCCAAAC

A\_14\_P200956 CTGAATCTTGGATATCAAATCCAGTGAATATTGTATCACAATCTAGACTGGGTAGTCCTG  
CUST\_2219\_PI426210822

GTTTTATAAACTTGTACCAAAAGGCACAGGAAAGAAAAAATAGAAAAATGTATACCCTTT

A\_14\_P133696 TTAAAATATTTGTGACCATAAGTAGCATAAATTCCTAGTTCCACCCTTGTAAGTGCCC  
CUST\_17\_PI426210822 AGTGTGATCAGGGCTTAGTGTCCCTGCTTCTGCCACCTCCGCAACT

A\_14\_P110846 CTCCATTCTGCCCTACATGATGGGTAACCTGTGATCTTTCTTCCCTGTTAG

A\_14\_P114967 GATGTTCCCATCAGATTAGGCTCCTGCCTTTCAGTGTGATCCTTGAAA

A\_16\_P16822954

GTTCCAGCATATAAAAGCCTTTCCAAAAGTGATCTCTAGTATACTTGGACAGTCAACAAG

A\_16\_P17877434

GTTTAGATGAGCATGTTCTACTGTTAGAGAACCAAGGTTAGATCATTGTCTAGTTGGCAT

A\_14\_P130413 TTCTCTCTTTCTTTAAGGTCCAGTTGAAAAGTGAAGAATCCAAAACGTTTGCAATGAAGA

A\_14\_P128063 CATTGAGACATATCCTGCTCCGATGTGACTATTTATGCATAAACAGCAGACACTGAC

CUST\_8642\_PI426210822

TTACTTTTTTCTTCTATTGGACAGTCATTCTAAAAAACTCACCTGATTTCCAGGAATAA

A\_14\_P132509 CTGCTTACCTTCAGAACTCATTAGCAAAAAGTATATCGGCTATACATGTTGTCTGCCTTT

CUST\_9016\_PI426210822 CATTCTCCTACTTCAAAGCTTTCCCTGGTTCCTATTACCTTCTGGGTAAC TA

A\_14\_P135579 GTCTGAAACTTTCATCCCACTACAGAAACCAGATGGAATATCTCACAATCAAATAACAGA

A\_16\_P18584883

ACACATTTTTTCATTCCGTTATCACCAAGAATCATTTATTGAACCATGATATACCCCACT

A\_14\_P125587 AGTCTTTGGATTACCATATCATTGTGAATCTTGGAAAGAGTCCACAATCCTTAAACAAAA

A\_14\_P119173

AAAACAAAAAGCCCAAGTTTATCTGATTAATAATGTGCTGAAGAAAGCAGGAAGTGAGGA

CUST\_9997\_PI426210822 GTGTTTGTTTAAAAAAGCATGGTTGCAGGAGATGCTGTTCATGGGTGG

A\_16\_P00924375

GACTTTTCAAAGACTTCCCTCAATTGGCCTTAGGATAACATGCAAATTTACACAAGAGGATC

A\_14\_P105335 TAGAGTAACGATTCCAATGAGTCTGCCAATACTGGTGACATAAGCATGGTCC

A\_14\_P100186 ACCAGGATTAACCACATTTGCTCACATTTCTTTAAAAAATAGTGATTTGCATCCTTGGATG

A\_16\_P03771768

TGTGGACTATTAAAGGATTA AAAAATGAATTCAA ACTAAGTGCGAAGAGATAACAGGTTGC

A\_14\_P117831 TATTACAGATCCAAAGATCTAGAAGGAGCCCAACATGGAAAATAAAACATAAAGCCCCTA

A\_16\_P00685225

AAGTTTATTTTACATTTATGTGAAGTTTATTTTTGGTTCTGATATTCTTCATAGGGTAGA

A\_14\_P119967 ACAGTTTGGTTGTTGCTGTAAATAGGGTAGCGTTTTGTTGTTGTTGTTTTTTCATGCC

A\_14\_P130329 CAACAACCACAAATTTAAAAAAAATTTCTCCCTTTGGCATAACCTAATGTTCCCTGACACT

A\_14\_P131404 AACTTTACCTCTTGAAATGATTCACCAGCACTCCAACAAGTTCTCCAATTCGAC  
A\_14\_P122306 AACCTCCTTTAAGCACACACAGGACCATGATGTCATATATCCTATGTCTTTTCATAATAT  
A\_14\_P103381 GTGACTAAACCTGATCATTATAAGTTCTGTTCAGGCTTTTTTGGCCTAGTCTGCAGT  
A\_14\_P112370 TACTTTTATTTCTCTCACCTATAGGTGAAGTATTTGACTATTTGGTTGCACATGGCAGGA  
A\_16\_P01731798  
ATGACAACAGATGTGTATCGTAGGATTCCATATATGGGGGTAAAATGTATTTGCAGTTGA  
A\_14\_P138763 GCTTTCAACAGATTTCCAAGGAGTCTCTGAGTAAAAGATTGAGAGCCATTGCAAG  
A\_14\_P135842 AAAACAGAAGTCCTCTAGAGAATCCATTCATAATGAACTGTTCTTTTCAGTCAAAACAT  
A\_14\_P112236 CTCAGTGATACAGAAACAGGCTTTTTTTTTTTCTAACAAGATCCCAAACCTATTCTGTGT  
CUST\_643\_PI426210822 TCACCTGAGCCTGATGGGGAGGGGAAGGTCCTTTCTCTTCCAAAC  
A\_16\_P19664168  
AGAATGATGGGAAAATAAGCCAAAGAATTGTGAGAGTAGAACTAAAAGTGCACAAGACAG  
A\_16\_P15503375  
CCTCACTCTCCTTATCAACTATCCAAATCTTATCTACTCTTTAAAGGCCAGATTTCAACC  
A\_16\_P03578358  
ATCTGTGAGGGAGTTGTAAAATTATTGGCACCAAAAAAGAGATATTGCACCTAATTGCTG  
A\_16\_P21486107  
ACAGGCAGACCTTTCAATATTATTGACTTAACATCCTAGACCATAGTGATGAAGACTCAG  
A\_16\_P18874589  
AGAAGGGGAAGTTAATGTAAAGCCAGAGGGAATAATCTATTCATGAGTTTTAAATACCGT  
A\_16\_P37027436  
TGCTTATCTTTCTTTGTTGATTTTTACCTCTCCCTAAACTACATTCCACACCATAACACA  
A\_18\_P16190686  
AACACGATTCACGAGAGATATGTGTAGTAGGAGTGCCAATACATAAAAACACAAGGTGAAG  
A\_14\_P137029 CTTGATCTTCCTACCCTGAAAGGGAAGATTGAATGATGTTTTTAAATCCTTTCTTCTCT  
A\_14\_P113112 CTCATTCCAGTCCTCATCAGGAGTTAGACAAAGAAGCAACGTTCTACTTTGTTTTTTAA  
A\_16\_P19758410  
AGACTGAAGTCATTGCCTTACACACAAATAGACATACTGAACTCAGAAGAACACATACTG  
A\_14\_P131201 CCCCAGATTTAGATGAATCCTTCTTTTCATGCTGATTCTGTTTTTTAGTCTCTTTTTTCACT  
A\_16\_P15610741  
AGGGGGACTACTATTTTCTATCACCTGAAAATCTCGATGAAAGTGTTTTAGCCTAAAGAT  
CUST\_3305\_PI426210822  
TTCTTTTTCACTATTCCTTGATTTAATTAACCTGTCCAGGTGGTCTTCTATATGTCAGTT  
A\_14\_P122557 TTTTCTCCCTTGATTTTCTCAATTGGGAGCCAGAAGTTTTCAAGCGATAACAACAA  
A\_16\_P02444256  
AGATTCTCAGTCCTCCTTATGCAAGATACCTTATGTGCTTCATCTCAAATCCCAATTTTA  
A\_14\_P117540 TTATTGAGTATTGGCCATGATGTTACAGAGACGAACATTCAGTTTTGAGTCACTTCTACT  
A\_16\_P15603437



AAACATTATGAATTAGTTCCTCCCATATGTCTCACCTTAACCACATCCATTCTGAAAACG  
CUST\_3963\_PI426210822

AATCTGAAATTA AAACTTATGGTTTTAACCAATAAGCTATAAAGCTGTTGAACTCCCACT  
A\_14\_P127620 CTATTAGACGAAATAACAAAACTTTTGTCCAAGGTTTTAGCCCTTTTTATTGACCTTCT  
A\_16\_P17971839

AAAAATGTGGAATAACCAGATAAAGGACCCTTAATTGGTTGTAGAGGAACAACCTTTTTGG  
A\_14\_P127880 AAAACAGAACCATTTACTTTTCAGTTCTTCACACTTTGAGGGAACCAGTTTATTGTTTTCA  
A\_14\_P132025 GAGAAGGTCACCTCACTGAATTACAATAACATCAAAACTTTTACATGGGGGTATAGGGTAT  
A\_16\_P18268437

ATTCCTAGCAAATCTTCAITGTATAGTGTGTCAGCAACTAGTCTCAAGTGTCTAACGTTCT  
A\_16\_P37913083

AACCTCTTCCATGGAATTTATAATTGCAAAAAATGAACGTAAGGATTCTACACCTCAGCA  
A\_16\_P02623450

AACCCAACCTCTAACTAACAATTTCTCCAGCATAAAAAATGAAACATCAGATTCGTTAGCC  
A\_16\_P03550833

TCTCCCAGGAGAATTAAGAGATTTTTTTTTCTCTTTTCTAAAGGGAACAAATAAAGGCC  
A\_14\_P120581 GTTATTTAGGGAATAACTCCCAAAAATATCTCGCTTGGTGGAAAACTGCGGAAAAAC  
CUST\_5487\_PI426210822 GAAGAATTTCAAGGTCCTCTGTGCTTATTTGTTTCTGAATTGACCCAGTGA  
A\_14\_P135544 ATATTTCTGGTGGACCCATCGCTTTCAGTCAACTTTATAAGAACTAACTAGACCTACCA  
CUST\_7767\_PI426210822

TTTTGCAGTGGTTTTATCCATTTTTCAACATCACTTTCATTGATTTTCATGAAAGTCTGCA  
A\_14\_P122981 AGGATGGCTCGGATGTCCTCTTCCAGTAATGTCGACTTGACATAATAAACAAAAG  
A\_14\_P137412 AGATTAGCACCAGGGCTAGAATTGTGATTTGCCATTCAGTCATTTACATACATTTACTA  
A\_14\_P136184 GTCAGATTTGCCAGGCATTGTTTGAAGTTCTTCCCAGCCCAGAAA  
A\_14\_P122108 CTTTTCTTTAAACAGAGGTGAAATATCTGTGGCTAAAAAGTTTGAGATTTGTGATAACT  
A\_18\_P22841216 CTTTCTAACTGCCTCTGCATTTGGAAGGGGTCAAGACTCGTTTCATAGTTTTTT  
A\_14\_P103716 GTGGAAACATGTATTAAGGAAAGAGCAGTCACCTAAAGACTCATCAGTGTGTTTTATTGAT  
CUST\_109\_PI426210822

CAACCTTTTGTAACAGGCTGTGTAAGGTGCTGATTCAACCAAATAGTGGATAGTAT  
A\_16\_P01649196

ACTTGCCTTTCTCAGAACTAAAACCTCCGATTTGAGGTATCAGTAACAAAGCCTAAGAAC  
CUST\_7856\_PI426210822 CACTTGCCATCACACAGCTATGTAAACACCTATGTCTCTGCTGGGA  
A\_16\_P16251972

TCTCAGTCCTTAAAACTTTGTCAGTCTACTCAACTAGCCAGAAAGAATATCTGTTTCCA  
A\_14\_P116515 ACCAAGTTGATATAAGATGGTCAACTAAAATCTCTTAATGTGGGTGCTTGCTCTCTCAG  
A\_14\_P131729 CTATTTGATAGACCAATGCACGTCAAGATGGTAAGTCAGTAGGATCTTTCTCTGTGA  
A\_16\_P20088316

TCTTTTCTCGAATGGTCAAAGTCAACTAACACATATAATTCCTAGTATTCTGCCCTCACA

CUST\_8425\_PI426210822 TCCTGTCATGTGTGAAGACCTGGTAAGATTTCTGGCTTTTTGTTGGC

A\_14\_P128182 GAAGAGGCCATTTTTCCCCCTAATGCGAAGCAAACCTGGTGT

A\_14\_P201315 GCCCTTTACAAGCCAGTTCTAGTTTTCTATTTTCATTTGCACTTAAACACTAATTCACCC

A\_14\_P124325

CTTTGAAAAGAGAGGAAAAGGAAAAGTAGTAGACCATCTCTCCTACTCTACACTAAGAGA

A\_16\_P15524189

AACGACTGTGGATTACCATTCTTGACCTCATTACTTTCTATCCCCAAATATTAATCACTT

CUST\_8229\_PI426210822 ATCGGCCACACTGTCTGTCTGGGTCAAGTCCACGGTCATTCACTG

A\_16\_P36230284

ATTGGATGGGTCACTGGTTTTTTCTTACGAGCATAAGGTAGAACTTTTTTGGAACTAAAT

A\_16\_P19571438

CAAGAATAATCAATGCAATGTCATAAGCCAAGTCAGAAAACGATAATTTCCCATGGTTC

A\_14\_P111499 GAGGTTCTGTGCCACATGGGAGTGTTAACAAACGTAATTTTATTCCAAAAGATTCCAA

A\_16\_P21458768

CTTTTATACAGCATGGCCCAGATATACAAGTCAACCTCTTCCACTTCATACACTGATTT

A\_14\_P128945 TAAACAAATGAGTGAAGTGTGATGAGTGGATGAGAATGGACACAGGAAGTAGATTCTTCTG

A\_14\_P114681 TAACAAACATTAGTCAGTGTATTCAAATGGTAACACAATCTGGTCAGCAACAGAGGAAAAG

CUST\_694\_PI426210822 CAGGGTCCCCTCCTGCTTAGATAACCTATGAATCTGTGTCTGTGAATT

A\_14\_P132059 CGTTTTCCATAATACTTTTCATAGGTTAATCGTTTTCAATTTCCCTCAGCCAGAATCAAGAG

A\_14\_P121556 TTCTCAGAGAGGAAGATTTTCATCATGCCTAAAAAATTAATGAAAACCAAACGGTTCTGG

A\_16\_P16571591

ACGAGGGCACTCAAGAATATTCAGATGGAAACCATCTTAGATCTAATTGGCTCATTAAT

A\_14\_P124640 CATTAGAATTTAGTGGTATAAAGGATTAGGTCCCTTTTATAGGCCTGAAGTGGCTGTAAG

A\_18\_P22840309 ATTTCTTCACTCAAGCAAACCTGGCTGCCAAGAAGAGAGATTGAGATGATG

A\_14\_P121985

CTGACTGGGACGCAAGACAGATCTAACTTTAGACTGAAAGGAAAGAAGAGAAAGATATAA

CUST\_419\_PI426210822 CTCAAATGAAATTTAAGATCTAGGCTCTGATGGGGGAGAGGCTTGTCC

A\_14\_P110448 CTGCTTAATTCAGACTTTGAGGATGTTTCAGGAACAGGTAATGCTTAGATTTGGTGTGATT

A\_16\_P16157638

ACCTGAAACTGAGTCTAAAACCACTTCTCTCTACTTCTCTTGTCTTTTTTCATTTAAACA

A\_14\_P113911 ACAACTAATCGACCTTACCCTTTCACAATCTGCTAGCAAAGGTTATGCAGCG

CUST\_3584\_PI426210822 AGGAGTCTGGGGACTGGAGGTTCTCTGCACTTCTGTTTGATCTT

CUST\_537\_PI426210822

TTTCATCTGACTTGAGATGCTGAGTTTTCTTTTCAGTATTTTTGTTGATTCAATTCATTTA

A\_14\_P134293 CAAAATGCATGTGTGCCAATTCCAAATAAGAGACTCTAAGTGGTCAGGGTTGT

A\_16\_P00685241

ATTTTGGATGGTAGTGGTGTGTTACTTATTGATGGCACATTTGATGACTGTTAGTCCAT

A\_14\_P102853 AAACCATGGATTAGTAAAATCTTCCATTTTACAAATGAGAAGAGTGAGGACTCAAGGTCT

A\_16\_P18032513

CAGCACTTGAGATTCATGTAGTTAACGAAGTCCATATAGTTTTGTGCTTTTACCATGGTG

A\_14\_P139201 GCAAATTATTTAAAAAATGCCAGCCAAGGATTCCATACAAACTATGGTATAGGAAGAGG

A\_14\_P113336 GAATGTCTCTTATGCAATAAAAGCAGCAGCAGAGAGTTGGAGTCACCTTGAC

A\_14\_P116948 ATGGTATGGTCTGAGAAAGCCTCATTAATTATTCTTTCAATGGCTGCAAACAAAAACA

A\_16\_P16386132

AGGCCTTCATTATCACCTAATTGTGTTCCCACTAAACTCTCATTAATTAGCCACTCTAAA

A\_14\_P101887 AATTGATTGTGTTTGGATATGTGCCGAGAACACTACAATAAGGTTGAGACCATATAGAG

A\_16\_P01878833

CTGAGCGCTCTCATACATAGTCCTCTGTTGAGACTTCTGTTGGTAAAAATTCTGTAATGA

A\_18\_P13125106

TGAATGTGCTTCTATCGTAAGAGACCAATAATTCAACCTTTTAATCGTAGACAGTTCCAG

A\_14\_P125516 CTTACAGCATAGTTCAAAGCCTTTCCAACTTTTCCACCTGATCAACAGAGTTAATACA

A\_14\_P202452 ACAGTAGGAGCAGTAGGCAAATGTCAACTCTCTAAAGATACTTAATAGCATCATTGTTGC

A\_14\_P110579 CAAGCCTGTTTTCTCGATCTGGACTTTGTCTTAGAAAATTAAGAGACTATTCTTGTGA

A\_14\_P130409 CTATTTTCTGGCAAGCGACAATAACTGGATCCAAAAAAAAAATTAACCATGAGGAATTGG

A\_14\_P200978 ATCCTGACTCTGAAGTTGTGTCATAAGTCAAGAAATAACTTTCTTCAAACCGTTTCCAA

A\_14\_P124569 CCTTTAATTCCAGACCACGTGATTACAACCTCCCATCGCCAATTATATTCATAATTTGAA

A\_14\_P133120 ACATAGGATGGGCAGTAACAACCACAAATGGGTTATGTTCAATTTGAGATTACGAAGTATA

A\_14\_P126894 CCCGAAACACTGAAGCGTCTTTTTGTTGTTAAAGGTAAGTTGGGAATTTCTTGTGATAAA

A\_14\_P130841 GGTTTTGATTTCAATTGGATGAGGGTCTGTGGCTACAACACGAATACCTGAAAA

A\_14\_P119194 ATTGTTTTCTTACAGAATGTTTCATCCATTTGTGGACCAAAGATGGAGTTGGTTTTTA

A\_14\_P108092 AGAAGTCCCTTTATAGGGATGACAGGAAGGAGAACTATGGGAGTATTACTTCCAT

A\_16\_P39754128

AGGTCGCATAAGAAGCAATAGGAACTTTACTAAGTAACAGAGTTTTAGATACCCAAAGCA

A\_14\_P118658 ATAATTAAGGAGAAGAAAATCAGCCAGTGGCTGTTGTTTTACTCAGCATCTTTCAGATAC

A\_16\_P18863292

AAAAGAACATGAAAACATTGCAGTTTCTGGTAATCTCCCAAATCATGTGCTTGTGAGTTC

A\_16\_P15394100

GCACCCAATTTACTCTCATCTATAGTCACTACTTAATCCCTGCTTTTTCTAATCCTGCTT

CUST\_4262\_PI426210822 GATTTTATTTCTCTGGCCCTGAGGTCAATTTGTCTTGTTTAAAGAAGGGGCA

A\_18\_P14132324

CCAGACATGCCAGGATGTTTCTTTTTAATTCTGTGCACTCATGTTTCACTTCAAATTAGT

A\_14\_P133250 ACATTTCTTCTGCTTTTTGGTTTTAAGCCTATATTTGAAGCCTTAGATCTCTCCAGCAC

A\_14\_P133784 TGTGTTTGTATGTGTGACTGAGGTTCACTCCCAGCATTCTGTTTAAATTTGGAATTTAT

CUST\_5835\_PI426210822 ACTGCATTGTGTCATCTAGTATTCCAAGGCTTTAGTCTGTCCACCCTCC

A\_16\_P01421028

AAATTGGTCCACTGAAATAATGACTCAAAAATTGTGGTAAAGTTTTAAATATGCGCCCTGC

A\_14\_P117922 ATGCTGGTAGATCAAGTGGTCTGAAACTATGTAAAATATTTTTGAGTTGGCAACTCTTGG  
A\_14\_P103809 CTTTCCTCTAATCATCAGGAAATATTCACCATCTTCACTGGCACCTTTAAGTCTTTTTAC  
A\_18\_P15826834  
TGCCGAAGGATACTGTTTACATTCATGTATAGCATGCAATAGGGATTTTGTTTATCTGGC  
CUST\_500\_PI426210822 GGATGCTAGGGTTCTGTTTTCTGGAGATGTTTGATCACTGAGTGAACAG  
CUST\_1627\_PI426210822 GCACTTGGGTGGGAGTTTGTTCAGCACGGACTTCTGTTGTAGATC  
A\_14\_P201491 AAAATCTAAACCAATTGCATATTGAAGAAACCTAAGAAAGCCTGCTTAAAAGCCAACACC  
A\_16\_P30952385 GTTGTGTATGGGCTTCAGCAAGTTTCTGAACGCTGTAAACTTCTCATTTTCAGA  
A\_14\_P114572 TTGTAGGATAATTAGACTCTATTCTCTTCCAACATCGTAATTGGCATGAGATGCGTGATC  
CUST\_6684\_PI426210822 ATTGAATTCCAGCAACCTTTGAAACCTTTGTCACAAGGAACCTTAGGTTT  
A\_14\_P130949 GGCTAGAGCAGGTCTTCATCATGCCTTGTCTTTTTTAACTGAGAAAGGAGATTTTT  
CUST\_3980\_PI426210822 GATCAGAATGACTTCACCCAGACTTCTGGACCTGGAACCTCATTCTC  
A\_14\_P127545 TTGATGCTGTGTATTGTCACCTCGGTTGAACTTCGAAATATGTTTGGTGAAACACTTCATA  
A\_16\_P15111310  
TGTCTTTTATTACTAGTTAAGTTCTCTTCCACTGAAAGAAAAAGTCCAAATGAACCCA  
A\_14\_P103153 CTCTTTCTAGAACACTGGTTAAGGCTTCTGTTTATCACACATAGGCCACACA  
A\_16\_P36168102  
AAAAATCCCGATGTAACAACAATATTGCAGTTTCCACATTAGTAATTTAGGACAACCTACA  
A\_14\_P121376 GGGGAAGCAGTGTGACATTTATATGAAATATATGAGGTGAGAGAGATGTAATACGGGAAAC  
A\_14\_P110999 GTGTTATACTTTATTTTAATTAGTAATTATATACAGTGTGCATGGTTCTATCCAATGACTT  
A\_14\_P138559 CTTTCCTTTTCTCAAAGGGCATGGATACACCTGGTTCTCAATGCTCTCTTTT  
A\_14\_P102284 AGAGGGGGAGGGAAAACAAGTATTTTCATAGGATAGTGCTCATTGTTATGATTTTCATAT  
A\_16\_P00685632  
GAATTTGGATGGAAAACCTGATCCCTAGCAAGAAGTCTGCTCTGTATCACCTTTATATAG  
A\_16\_P16191799  
CTACCAAACATCATTATCCGGCAGAATCACTAATTTTATCACTCAATAATTTTATGTATT  
A\_18\_P17042933  
AAAAGCCACTCTGATAAAACAACCTACAATGGTGAAGTTAATAGGATCCACAAATGACTC  
A\_14\_P201566 AATACAATTTCCAACATCATCTTACCTTTTTCTGCTGGGCTCAAACAGTCACTGTGAA  
A\_16\_P16191406  
AAAACAAATCAAGCATCCATTCCTCTGAGAGGTTATATAATCACTGAGAATAGGCTTCCA  
A\_14\_P119925 AACGATTCACGAATTATTTTGACATATATTAAGCAATGACTTCTCCAGGCCTCATACTGG  
A\_14\_P107502 GGGGCCTCCCTTTATCTTCATGAGGTATGGTTATTTGTAATATGCTGGTTTATTTTAACT  
A\_14\_P122632 GTAACCTTTTATTCCTTGTGTGAAAATCCAGGGCTGTAAAGTTTGTGGCAGGAG  
A\_16\_P17680361  
AACATGTATTTGTCTCCCTTGATAAAACCTCTGACTCATCTTTATCATCCACAGCACTAT  
A\_18\_P14886635  
AAGTGTTTCGTAGGTTTCAAATGAATTGTGCCTGTTTCATACATTTTCGTGGCAAAGTTA

A\_16\_P02129404

AAGTGACTTGCAAATCCACTTTCATCTGCCATAGCATGTTAAAAGTTCTCAAAAACCACA

A\_14\_P115450 TCATGGACAGCAATATTATAATAGGACCTTGATATTAAGTGAGGACTGCTATGAAGGCCA

A\_14\_P111608 ACTCAACAGGGTATACAACAAATAGCAAATAATCCACTTTGAAATCAAAGACAGGTTCCG

A\_16\_P16261604

CCCATTGCATAGTAAGGGTTTTTCCACAAGTTCTATTTCCAATAACTCTTTTGACAAAGCC

CUST\_1196\_PI426210822

GCAGAGACTCTAAATATGTGGGGATCTCTCCAAAATGTCTCAAGCTTTTGAATTCTTAA

A\_14\_P118552 CTACACTTTGTGGAGAACAGGGATCTCTTCTAACTTTCTGAAGTTATTTTCTTGTTCCACA

CUST\_10268\_PI426210822

CAGATTTTTTAAAAATTGAAAATTGAATTTTCAAAAAATTTCTCAAAAATCTTTGAGAAAA

A\_14\_P201627 AATATGCACTCTTTGGAAAATTCCCTTATCGATATTATGAGAGCAGAGCATGATCCTCTT

A\_14\_P122941 AAAAAAAGACAGCCCTGAAGTATATTTTGTGCTGTGAGGGCAATATGTGTAATGAAA

A\_14\_P135296 TCATTTTTGGCTATTCCAAAAAAGCATATCGTGGGGTATATCAGAATTCTTCGGACTTTC

A\_14\_P135079 CAAGAAAAAGTGGGTAATGGTGCCCATGATGAGTTTGCATCACCTGACTATAC

A\_14\_P113429 CTCTTTCTGGACTACAAGACTGAGGTAAGATAGATGCTTACTAGTTTCAGAGATAGACAC

A\_16\_P18114635

ATGCACAATATCATATAAAACACAATACCTTTATCACAAAACACAATACCTTTCTCACCT

A\_14\_P106947 GGACTCTTAACTCCTTCTTCTTTACATTTGTTGTTGTCATCATGAGGCATGTTAAACCTA

A\_14\_P123769 TTTTACTCAAGATAAAAACCTATGACCATTGTGTGAACATTACTGCTTCACCTCCCTCTC

A\_14\_P125249 GTGAGGTGAGTGTTACCTAACTGAAAACCTGGAATGTTTGTGGGAATATTTTCAGAAA

A\_16\_P37274344

AGGGTCTTTTACGTATGTTCTTCCAGGTATTCCTCAAAAATAAACTGAATCTCATAGCGA

A\_14\_P135531 ACTTCAACAAGCCCAAGTTCCTATAGCCAAATTTTTTAACTTGGCAAAAAATAAAGGACC

A\_16\_P16481983

AAAAATGGATTCCCTGACTATGAAATGACTTTTTTCTTGCATCTACTTTCTGTCTTCCAT

CUST\_2569\_PI426210822 AGGTATGAGATGATAACATCCTGGGAGCTTCTAGGTAGGGGTTGG

CUST\_3812\_PI426210822 AATATTGAGTGTTCCAAAAGATTCGTGAACTGCATCTCAGCTGGGTGG

A\_16\_P19064562

TATGGAAAATGTTTGATAAGCCAAAAGGAAAAAACTGAAATCTCCCACAATTCCATCAGC

CUST\_5567\_PI426210822

AAATTCATCAGAACTCTCTAGGTCATGTTGCCAGATAACATTAGGGTTCCACTACT

A\_16\_P32319853

AAGTCCACAGTAGTAAATACTCACGTAAGCCTTAAGATTAGATCTTTTCGTTTCAGTGGTC

A\_16\_P58424564 ATAGGAATCAGAACTATGATTGCCTTTGTAGGTGGGGGGAGTGGGC

A\_14\_P134708 ATAATCTCTCACCTAATGTAAGTTCACCTAGAAAAGTCATTTACCAGGAGGTTTCATGAGA

A\_14\_P122744 TTCCTAACTTCCTCAGGACCTAGGTCACCTTTATTTAAAAGGAAGAATTCACTCTTTTTTC

A\_14\_P103918 ATTTGGTCTTTTGTATGATGGTATAAATACTAAGTGAGGCATTATGTGAAAAATGAATATT

A\_14\_P118164 AAAGAAATGTCTATGACAATTAAGTCTTCTTCTATTACACTGAAGCCAGGCGTCA

CUST\_1101\_PI426210822 CATTTGATCAGCTCTGGCTGGGCCATGTAGGGAAATGAAACTCTG

A\_16\_P16599208

ATGGCTTAGAATTGCTCAAAATTGCTTGACATTTAGATTGTGCTTCATGAAAAAGGAGGA

A\_16\_P00654199

AAATTGACATTGGATATCTAAACAAAATGGGAACTTACGGGAAAGATATTAGAGGCTCGG

A\_16\_P00685102

CGTTCTGCTTTTGAAATAGGCCATGACCTTTCTTTATACAACCTATTCTACTTCTTGCCA

A\_16\_P15276082

TTCTGCTAACTGGTCCCTTAGAAGAAAAACGCAACATGTTTCTTATCATGCTCCTAAAC

A\_16\_P16541974

AAGGCCTTTCTTATCAGTAGATTCTCCTAAGCATTATGAGTGTAACAGGATGGAATAGG

A\_16\_P19483414

GGAGTGGATGACAAAGATAGGGAAGTAGTAGAAGACCTTTAAGAAATCAGAGGTTCTATT

A\_14\_P131592 TCTGCCAATACTTTCTATCAGTCTGTCATGTTACTGTCTTTTCTCCATACAGAAGTTT

A\_14\_P108961 TTGTTTTAGAAATAAATTCACCTTCCGGGGCTAAAAAATCCTAACCATTTCCTACTTC

CUST\_1001\_PI426210822 TCACTCGGTGACGTGGGGCATTCCATTCGACCCCAGAGTGGTTAT

A\_14\_P101617 GCATTGTTTGCTTCATGACCTAAACAAATACTGGCTTTGAAGTCTAGGTTCTATTTCTA

A\_14\_P100251 GGGTATATATTGTCTCAATAAAGTGGACCTATCTGTGTGTCCTGGACACAGTAAATAACA

A\_16\_P19781107

GCCACCATCTTTAATGTTTACCTCAACAGATTATTATGATGTGTTCCCAGTAGATATGCC

A\_14\_P119565 CTGGGTAATCAAGATAACTTCTCCCGAGTAAGAAGTGTCTAAAATTAGAAAACGATCCTT

A\_14\_P111278 TGCAGGAGAATCCACTTAGAAGCCTGGGTAAAATTGTATTACATGATCTTGGGTTT

A\_14\_P125050 AATAGGAATCTTGCAAGGTAATTCTTATTTGCAAGTGGGTTATGTGTTCACTCTCCTCTA

A\_14\_P111490 CCTTTTGTCTTAAAGTAATAACCATTATGCTTACGAGTCATAACATAACAGGTTAGGGAG

A\_16\_P15398429

ACTGCATATGAGACTACCTACAATTAAGAGCAGTTTGACTAAATCACTTACTTGAGCCCT

A\_16\_P15936618

AATATCCCCAAGAGTCCTAAAATTCTTTACAGTCTTCTCTTTACAAACGCAGGAAACTTC

A\_14\_P201048 TCATATACCCTATCCTGGTGGAAATGACCCTATTTGATATGCTGTCCCTTAAAATAACTT

A\_14\_P102261 CTGAGTCACAATTGTTTCGGAGTTTTTCAGTAAAGAAATGTATTTTTGCACCCATTTTTTC

A\_14\_P200302 TTATAATTTGATACTTTCATATTTATTGTGGGCCGATTATGGTCAGGCATGTGCTCAACT

A\_14\_P139584 TTAGGATGCACTTCTTGCTTATTCAATAAAGTTAATAATTTCTAATTTTTCTACTTTTTCA

A\_14\_P112546 AAAACAAAAAAATGACCCACCCTGACAAAACCTACCCATATATGAGCATCAGTAAAACG

A\_16\_P17119575

AGGTTAGGATTTACACAATGCATTTATTTTTCTCACTAGTTATGTTTGACAATGGGGCT

A\_14\_P129432 AATCCAAAGACAAAGTTATCTCAGATGAAGATGCTCCTAGGAACATTACTGAAAGTTTTCC

A\_14\_P101981 CACTCCAGCCAACAGCAAATTGCATTTCTTCCTTTCTTTATCACTATATTTCCATTTTG

A\_14\_P103536 TTTTTTTTTTCATATTTTAGGATGCCAGAAGCCTCAAAAATGGAAAACCCCCTGTGC  
A\_14\_P132052 ACCTGGGTACAAAATGACAAAGGCTAAAGAAGTTCGAAATGTTAATATTTTCATGCAGT  
A\_16\_P02052945  
CTTCTCATCTCCAATCCATAATAGCCTCTAGATGTAAGTCTATCGTTGTCTTTTCTCT  
A\_14\_P123744 AATTAACCCAGTTGGTGATGGAGAATTACTGGAAAGTTATAAGAAACATAGACACCTACC  
CUST\_6631\_PI426210822 TGTAGGCCTCAGGGCATTCAATTGCTGTCTATTTTTTCGTTACAGTATGGATG  
A\_16\_P16006744  
TTCCTAGGACAATACGCATAACCAGATCTTACTTGATTCCCTTGCATCTATCAAAAGTCAA  
A\_14\_P128670 TTTAAGTAATAAAATGGGAAGTGTGTTCCAGTGTCAATGATCTCACTGCACGTATCC  
A\_14\_P135907 GTAAATCAGTCATTAATATAACTTTATATTATCAATGCTCACACTGGAGTTCATAAAATA  
A\_14\_P128826 GTAAAAAATAAATGGCTTTATGCTCCCTGTTTTACATATGCAAATAAGGGGCTGTGTGAT  
CUST\_180\_PI426210822  
TTTAGTTAAATCAAACACCAATGCTATAATTTTTAACCGATATCATTTTTAGGGTTTGGT  
A\_14\_P202160 ATGGGAAATAAAAGATCTCATGAAAGTTTTAGTAGGTAAACCTTGTGAAGTCTGTGGAGT  
A\_14\_P139620 CGAGGAAGTCACCATCAAACCACTTTATCTACAGTTAGCATAAGATGTGAGAAGTGT  
A\_16\_P21258057  
TTTTAGGGAGGTAAGAACACAATAGGTCAGGATCTGTCATATTAAGTGGTCACTGAT  
A\_14\_P133080 ATCCATCTATCTGGTAGACTAGAAGAAGACCAGTGGATATCTGAAGCATTACTGGTG  
A\_14\_P124365 CAGATTTGTGGATTTGTATACGTATCTGCGTGTGATTATATGTAGGAGTTAACATCAGCA  
A\_14\_P105758 CCTATGGTTTTACTGATTCAAGTATAACCTCTTTAATGGCATGCTCTTACAATGCATGGAC  
A\_16\_P02218040  
CACACTTTTCTTCTCTAATCATCTCCCTATTTAACACATCACAGGAAAGATTGCTGAAT  
A\_14\_P133150 CTTTGATGACAGAAGGCAAATAAATTCTACAGCACTCATTTTTAGCAAGCATGGAGTTTG  
A\_14\_P109788 CACAACAAACGAACTCCATCTAAGCGATCAATTATCCTATCGTGGAACCCAAA  
A\_16\_P17809311  
TGATCTCCTTTTGATAACAACCACAATAATGGGTCAGATTAATTGAACACTGCAATGAGC  
A\_16\_P17281674  
GGCATTGTATACCCAAATCATATTCTGTATCAGCAATTTAAGGGGATTTCAAGAGCACTT  
A\_16\_P17651731  
CAGAATCCTTTTGAAGTAGTTTGCCCATCTAATTCAGTTTGTTAATACCTTCAGCCATCT  
A\_14\_P132875 AGTTATTTACAATGGCTTTAAATGACAAGGCCCGGCTATGTGCCAGAAACCT  
CUST\_6045\_PI426210822 TGAATTTGGTTGGCAAAGGCATAGTGGCTCCAAGCAGAGGTAAAC  
CUST\_8332\_PI426210822 TTATAAGAACAGAGGAGTGTGAGCCCCTGTGAGCCCCACGGGAG  
A\_16\_P15660446  
TCCCTAAAGATCATTCCAATTTTAGTCTAGTATACAAGTATCCCATTAAAGAACCAAGGC  
A\_16\_P17430989  
GTAGTGCACATTTACATCTCCAAATGTTTTAAGCCAAATTATAATTGCAGACAGCCCTT  
CUST\_7724\_PI426210822 CTGACCACAAAGATATTCTGTTCCCAAAGAGCACCATATTCGTGGTCAAG

A\_14\_P121073 CTTGTGGCTTTCTGTCTAAAATTCACCTTAGGCTTGGTAATATGAAGTTCTTTACCACTT  
A\_14\_P200870 TGCTTGTGATAAACTGTCAGGAAGCAATGTAATACAGTTACTAAATAGTGCAGACCTCTG  
A\_16\_P16814360

GGAAATTTTCCTTCTCATCTGTATGCAATGAATGATAGCACTTACCAACAGATACCAAGAC  
A\_14\_P127881 ATTCTCTATGGGAGGATGCATGGCAATACATTTAGCATATAGAAATCATCAAGATGTGGC  
A\_14\_P129515 CCAAATAAATTCATGGCTTTTAAAATGTCATAGAAATGTCTATTTCAGGTATCTTTTTTT  
A\_14\_P115684 ACATCATCTCATTTAACCTTGAAATAACTACACTGCCTCTGGATCTTCCATTCAAAGTCG  
A\_16\_P00431573

ACATCACTTTTGATATCAGCATTACTAGATCTACAAGTTAGACTCAGTAITGCCCTGCT  
A\_16\_P40826529

CTCAGCCTGAACTTATTCAAACCTTAACTTACTCGATTTCACATCGTCTTGATGCTAACAA  
A\_14\_P100010 GGAGGGAGACAGCAGTTGATGAGGATGGTAACAAAAACCAAAAAAGTTACCATTTA  
A\_14\_P116563 TTAATACTTTTATACCAATGTATTACATTCTCTGGATTATCTAAGCAAGGGGCCAGTCCG  
A\_14\_P100934 ATGGGCTTTAGAGAAAAATCTTGACTGTCTCCGCTTACAGAAGTTGTATATGCTCATTAT  
A\_14\_P116956 GAGGTTTGATTATATTTAAAAAATTGTCAAACAAATTTATTTTTCTGTAGGAAATTGGA  
A\_16\_P15540528

AAAAACAACAACCATTCTTTTTCTCATGGACAATCATTTATTTACAAGCCAGTGAAGTTCA  
A\_16\_P58424424 ATTTATAAGCAGGTTACTGCCGTAGGCACCTTGGGCTTGTCTTCCT  
A\_14\_P120451 CTAGAACAAGCATTCCCTCAGTCCATTACAAATCTTACACACTTATACAGTAGCCTCTCTT  
A\_16\_P02729255

TTGGCTCATCATCTCATAATCCATTCTCATTGATCTATGCTCCATCCTTATTGGAAAATG  
CUST\_5736\_PI426210822

CCTCTTCTGACTAATTAACAGCAACTAAAAAAGAAAAATGAAACATAGAACACAAAAAAT  
A\_16\_P36230668 GCCCTAACCTTCTCTCCTGTCTTTCTCACAGACTGTTTTTGAAAGGAATT  
A\_16\_P00372572

GATTATCACCTTAAAAATCCTGGATCATTCTCACTTACTGGTATTACTCATGCACACCC  
CUST\_7200\_PI426210822 TGCCCTCAGAATGCTACTGAAGATGGTACAAAGCTGAAATCATCAGAGTTG  
A\_16\_P21270561

CCTTCCAATGTTAGTCTTTCAAGTGAACCTACTTTCTTATTAGCAGTCACCTAAAAACAA  
A\_14\_P138134 AATGAAGCATTCTTCTTTGGAATAAGCAATCTACTGTTTCATGAACAGAAGTTGGGTTCA  
A\_14\_P106793 ATGTGATTCAAGAACCCAAACATCTTTTGACATAAAGGGAGAAAATTGACATAAAGCGAG  
A\_14\_P129315 TCTTGATTTCATCATCATCTTCTCTACTGGGTCTCTTGTTTTCTCTGAAAGAGAATTTG  
A\_16\_P01043879

GGTGTCGTATATCACTAGTGGAGTTTCTTACCTACATTTAAGTATCCTCACTAGCCTTCA  
A\_16\_P17392721

TCGAGTCCCTTCATCATTCATAAACACATTAGGTGCAATTTACTGCTGTTATTCTTGGG  
A\_16\_P03635894

AAGGGCCTATTCCATATTCTCTACACGTTTACAATCTCACAAACCTAAAATATTCACCGA



A\_14\_P120904 GAACGCTGAAAATAGCACGTCTTTTTCTTTCTTTGTGTTCAAACCTATTTTCTTTCTTCA  
A\_14\_P102875 TTCAGAAAATAGTATCAATAGTATCAATATGTTTGACAGATCCCTTGACACAACCTGGGGA  
A\_14\_P111164 AGTTTATTAGTCTTCTCACAGAGGATGTTGATGTGCATGGATCACGATTTTATAAACACCC  
CUST\_4612\_PI426210822 ATACCAGGAGCAAGTGGAGCTGGGGAGGGGACTCACATCTCTGTG  
A\_16\_P30952551 TTGAGAATGACTCCTCTGACAGGCCTCTTTTCATTTGCAGGTGGG  
A\_14\_P119856 ATATTTGAAAACCTCAACAAACATGCATTTCTCTTTCTAACGGACAGGTAAATACACCA  
A\_16\_P21277038

CTAATCACGAACCAATCAGAATAGAGTTCCTCCAATTCAAGACACTTCATGACCTTAC

A\_14\_P114981 CCATTCTTTTCTATTTCTAAAGCACACTGTCTTCTACCTTTGATAAGATGGCTAACTTCA  
CUST\_64\_PI426210822 ACACTTAGACAAAGGAAGGCTCTAAAATGGCCCACTGAAACATGCAGA  
A\_14\_P102718 CTAAAAATCTGTTGGGGGTCGTCAGTTGTCAGTTGGGATCCCCTTTATAATTAA  
A\_18\_P14134550

TGGTATTATAAAGTTGCTTTTACACTTACAAAAGTTAAGAAGCATGGTTCTGACTTTCC

A\_14\_P132642 CTGTATCCTTCTTCAGTTTCATCTAACGTCACAAAGAACGCTGCTTTCTCCAC  
CUST\_6413\_PI426210822 GATTTTCATGAAGGCATTTACCCTGGCATTGTACCACTAAAGGCTGATGTTG  
A\_14\_P128860 CTTCCATGTCATGTCTGAGACCTTACAAACTCAAGTTCCCTGTAGGTGTA  
A\_14\_P131989 AAATTTTAATGCATAAGGCACAGTGAGAGGCTGGAATCATTAAGCATCCTCAAACACAA  
A\_14\_P202513 CCAGAAGAGGTAAATGAACAATACTTCTTACAAGAGGCCATTTAAGGAATCTGGTGTA  
A\_14\_P102996 CAAATTACAGGAGTCAGTTTGTGTATTTGCTTGATGAGAATGGCTTCTATCACTTTGGTT  
CUST\_3377\_PI426210822

GTCATATCACTCAAGTCATGCCTGATACACAGATGTTTGATTATCAGAGTCTTTTTTTCTT

A\_14\_P122336 TCATCGAGGGAATAGACACGATCAATTGATTCCTCAATTCTTGAATGCAAATCTACTATG  
A\_16\_P19164343

AAAAAGTGAGTTGCCAAATAATGTGTAAGTGTGATCCTCTTCAAGTAAGCCTTTTACCTG

A\_16\_P16964162

AAAATCAAATTGGCTCAAACTAACAATCCACAAATTTGTAGACTAAATTGAGGCCTGGG

A\_14\_P131600 ACGTCTATCATTTCTTTGTCTTAGGAATGTCACCAATAACAAATGCTCAACTTTTCAGGT  
A\_14\_P117624 AGTTTGTGATTCTTTATGATACATTAATGCTTTTCATTTTCTAGGGGCTTGGATGTGCAT  
A\_14\_P139920 TTGAGTGAATGAAAGACACTATGAAAACAACAGGCTCACTATAAAGATTCGTTGTGCGTTG  
A\_16\_P15876417

GCCCAGTTACATTCTGCTAGTCAATCAAGTCATCCAATCACAAATGCTTAGGAATTTTAA

A\_16\_P16191758 TCATTCAAGTGCTCTTGTAACAACTGCTTGCCCTTGTCTAATTGCGTATTGATCACC  
A\_16\_P16909912

GTCAATTTCCCTAATAAAAAACACATCTAGCGCATTTATATTACAACCTCAACCTTACACA

CUST\_7705\_PI426210822

GTAAGGTTCAAGCTGACTCATCATTGAGTGCTGCTAATAAAGTGTGTTGCTGAGAATG

A\_14\_P123056 TCCCCCAATTACTACCATAAGTGTTTCGTTTTCTTACAGACATAAGTCACCTATTTAACT  
A\_16\_P00993203

TAGCAAGCACGATTATAGATGTAAAGTCCCACATGTAAAATTATATCCTCCTGCTTCCAC  
CUST\_3400\_PI426210822  
AATTAGTACAGAGTGAAGTACTGCTGTGAACAATCTGGTTTTCTTGCTTTGTGCCTTG  
A\_14\_P121182 GACATCAATTTTCTAATGCTAGGCTCTATTTCCACTCATCACCATCATGCAAAAATGCTAT  
A\_14\_P113996 TAATAGTGTAAATTAACAATAGTACAGTGCCTATGGTGGGTAAAGAGGGTTCTAGTGC  
A\_14\_P201650 GATTACATTCCCCTTTTTATTTTTGATCAGATATCTGCTGTGCTTCCTTCAAACCTCTGAC  
A\_14\_P127617 CACCAAGAAAAAAGTGCCTTGCCCATCTTTTCATACTGAGAAGTGGAGAG  
CUST\_6471\_PI426210822  
ACATTTTTTAATATCTTCACTTTGGTGTATTATTGTCAAATTAATGCAATAATGTA  
A\_16\_P17565199  
AGGGATCCATTTTCATCATACTGAGCAAAAATTACCAAGAGTAAAGTCAAATTTGGAGCAG  
A\_16\_P18718696  
AGATCCATTGTTATACTTGTACATTAAGAGCCTCATGATCAGATTTTGCCTTGTGCTTA  
A\_16\_P21222091  
CAAGTTATTAAACTACCATGGACTAGTGAAGTATGACCCATATCCATATGACCCACCTTA  
A\_14\_P108079 AAAAAACAGCATTGCTTTCTGAAATTAGGGCCCAATTAATAATCAGCAAGAATTTGATCGT  
A\_14\_P200591 ATCCAGAAAATGTTTTAATGATTAATAAAACAATTGCCCTCTCCTCCTTGGAGCCC  
A\_14\_P122379 TTTCTGAAATAGAAAACTGGCATTTCGTATCAGATAGGTTCAATCTATCTGCGAGATGGT  
CUST\_4747\_PI426210822  
TGAAATGAGGCTTTCAGTAAACAGAAGATGGGCATTTTCATCCTTTCTCATTACTGA  
A\_14\_P126968 GGTGAACCAATGAACTGCACATGTTCGGTAGTGATGAGTGAATTAATTTCTGGTATATTGA  
CUST\_9777\_PI426210822 TTAGGTTACCCACTGCCTCAGACTGGAAGCTGGCTTCTGGCCAC  
A\_16\_P35296899  
AGATCCTCTTAACCAGTATCAGTATAATTGTTCCCTTTAGATTTATTGCTGTCACCCCAA  
A\_16\_P16921234  
CTGTCCACCAATAATTTTTTTCCAATACAACCAGAAGTAAACAAATCACAAAAGGGGTCT  
A\_16\_P35557422  
AGCCAAAATCATGTTTCTTCAATAAAAATCTTGCAAGCATCTCTTCTAAACACAAAACCA  
A\_18\_P16745676  
ACCTGATTTCCATACAAGAACATCACAAAGTTACATTTCTTAATCTCTTAATCCCATGCA  
A\_14\_P105839 GAAAACAATAGTCATAGGGCCTGCTTTGTCCCTATTTAACTATAAATGTTACACATTTACA  
A\_16\_P02109098 TGTTGTTAGTTGGCTGGTCTTCAAACTCTCATGTTTAGGGTTGACAATGTTGG  
A\_14\_P113222 CAAATTATTCAGTGTTCTTGCAGTTTCACTGAAACTCAGCCAATATCTGATCTGAGAACA  
A\_18\_P12275458  
CTCTTCTCTCCGTGCATTATATTCAAACATGTAACCTCAAACAGAACATACAAGCATAGG  
A\_16\_P00072251  
AAAAACTCACGAGTCCAATAATAGATATCTCCACCGCAAGAGATATATTTAAACTCCCC  
CUST\_7273\_PI426210822 TTAAGTGTCCCAAGGCCAACCTGAACCTTGGAGCCTTCATTTA

A\_16\_P19897871

AGCCTACTTCAATATCCATACAACATATTATCTTTTCACTAACCCATCCAAATTTAACCT

A\_16\_P37991211

AAGCACCCTGAAATTTTCGTAACAGTGTTGATTTGTCACCTATATGTCTATACCCAATGT

A\_14\_P200831 ATGCATTAAGCCAGTTCCTTTGCAACTGAAAATTACCTGTTTCTCCTTCCCTTTTAC

A\_18\_P25583551

AAAGAAGTTGACATGTTTTTGGAAATGGTCATACTAATTGCGTTGACATAGTGATCAGGG

A\_14\_P111132 ATAGACAGAACCAAAACCTGAACAATGAACAATAACAAGCATCTAAACCTCACTGTTTCTT

A\_14\_P106095 AGGTTTTGGAGAGACTTATGATGAAAGAGAAAGTCTTTATAGGAGACAGTCCTTGGTAAAG

A\_14\_P134414 TGACTIONGAGGCAATATTCTACAAGTTTCTCTAGTTTCCACTGAAACTGGAACATCTGTAT

A\_16\_P58424194

CTTATCCCTAACATCAGGGATATTTTCTGAGAACAAGGACATTCTTTTACGTAACCATAG

A\_14\_P104497 TCTTTGTCTGTAAGAGAATCCACATCTATCATTTTGGTCTGAATTGGAACCAATGTTAGA

A\_14\_P102937 AAATATCGAGACATTTATCAGTGCTTCCCTTACCAGTATGACATTGTGCTATTGTTTGC

A\_14\_P202200 ACTTCAGCAGGTTACCTTCAGTTATGGAGTCTGTAATACTCTGTGTAAGAATCATTTCOA

A\_16\_P40184418

TGCTTTTCTATTTGCTTTTTGACTACAATGCTTGATTATTAACAAAACAGTCTCTGTGAGT

A\_16\_P15224602

AAAAAGGGCATATTAGGACCACAAAAACATGAGAAACCTAATTAAACAGACATGTAGGCC

A\_16\_P20946317

CTGTGCTTACTCCTTTTTGAACTGTGCTTAGCAATCAGGATTTCACTTAATCAGTTCAATG

A\_14\_P131925 TAAAAAAGAGATCTCACCCTTCTTGTCTTCTGGGCTTCATTAAGTTTTTCAGTCAATTCT

A\_14\_P131562 CTCAGAATATGAGTTTCAAAGACCTTTGGAAGACCAGAACTTTATGTCATATCCCTACTT

A\_14\_P125364 TTTTCAGGCTATCTTTGTCACGAGTGAATTGTTCTCAGTTTCTCGGTTTATGTGCT

A\_14\_P108693 GACCTCACTCAAATATTTACATCTCTCCTAATATTTAAATGATGAAGCAGGCTCCTGCAC

A\_16\_P03618825

AAAACCTGGCAAGAAATGTTTTCTGATTTAAAGCCAACCTGTCTAGAGTGATGACTGTTAG

A\_14\_P106968 GACAGTGAAGCCAACCTGTCAAAATGAATTCAGTCCTAAAAATTAAGTATGCTTGCTGAG

A\_14\_P118608 TGCATATTTGGGAACAGCAAGCACTTAGTTTGAGAAAATGAGGACTTAAAACAGTTGAAT

A\_18\_P14129359 GTTTCCATTTTCATATCCAACAAAATGCCTTGGGACCATGGCTTCAATCACATTACAT

A\_14\_P101685 GTGCTTGTCATAGTGCACTCATTCATTGTGGAGAAGTGAACATCCTAGAAAGAAATTTA

A\_14\_P116989 GCGGTCGTTGGTATACATCATACTTTATTAGTGAATATCCCTCTGAAATCAGCAACAAT

A\_16\_P15857748

AACAAGAATTGGTAAAGACAATGATAGTGGCAATGATAGAATTATGAAAGTCCGGAAGGC

CUST\_1182\_PI426210822 ATGGTGGAAGACCGTGGGAGGGGCTGTGGGTTGAGGACGGCTCT

A\_16\_P15103836

TTCCTCTTTTATAGCCCTTGTCAAATTTCAAAGCAAGTCGTAAATTCATTAACCTCGTAG

A\_16\_P01783538

TGGCATTGAAAGTCAAAAAATAAGATTACCCGTTTCTCTCATAAATTATAGGTCCCTCGT  
A\_16\_P18023254

AAAAGAGAAACATGACTTTATCCATTTGCAAGATAAGAGATAGAAGCCAGATAAGAGGGA  
A\_14\_P120286 CAGACTCATTGGTAATGAATATGACATAGATCCTTTCTCAAGGATGCCCTAGTCTAAT  
A\_14\_P123822 AGTCAGTTGGATAGATCTGGATTCTATTCTTAGCAATTCTGTGATCTTGGGCAATTTACA  
A\_14\_P109074 AAAC TAGGGAAGAGAGACTGAGTTATGGAAAGGATGCTACCATTTTTCTCAAAGCATG  
A\_16\_P19669692

TCGTAACCAAATTTTAGAACCAACAACCTCATACTTCTGCTTAGAATGAACCTTCTCATC  
CUST\_9817\_PI426210822

TACTTGCCTTTAAAATGCTCAATTTAAAAAATAGTAAAACGTAGAAAAGAGAAAATAATAT  
A\_16\_P02508104

ACTAGCATGCTCTAATTTTTTCATAGGTGGTTGTTCTTATGAATATTGATCTGCTTCGGCA  
A\_14\_P129124 AGGACTAGAGGATTACTTTAGTGAAGATTCTTAGGCAGTTTTGTAACCCTTTTCTCAA  
A\_14\_P106807 ACAGGACTGGTGAACCATCTCTACACGATATTCATATCTAAAATTGAAAAACAGACCATT  
CUST\_3365\_PI426210822

GAAATTTCTTCCATGGTTTTGTTTATCACTTTTATCATGGTCCATTTTTACTCTAGGAGT  
A\_16\_P16403259

CCTGCTTTGCTGTGAAACACCTCAATGTCATGACTTCTCTGATATGTTCTTTAATTAAT  
A\_14\_P129022 TCAGTGCATATCTATCCTTCATGTGCTAACTTGTATAAAAGGTCAGTTAACTGCTGAACC  
A\_14\_P112572 ATCTGCTCTTGCTGGGAGTCAATGTCAAATACATAGTCAAAAAGTAAAAGCCTTATCTTTC  
A\_16\_P37425649

TCCTTCCATCTCAATTATCCATCACAAATAACACCATAAATCTTCAAACCATGTATTCCA  
A\_14\_P138733 TTCTGTGTTATGATTTACATTTTTCTTTATTTTCAGGTAAGCCAGCATGATTCTATTTTTG  
A\_16\_P17658044

TTTAGTGCCTTTTAAATGCAAAGTGACAGAGTATAAACCGATCCCACAGTATAGTAGATG  
A\_16\_P17966172

GTAGACTGTTATGGATAGATAAAATGCTGTTCCACCAATTTTCAGAAGGATATATTGGGT  
A\_16\_P02553251

GGCTCATTTCCTTTACATCACACTGACTGTCTAAATCATCTCCTTCACTTACTTGAATG  
A\_14\_P125677 GCAAAATTACCTTTGCTTCAAATTTCCAACCTTGGAATGTTTCTTGAGTTTCTACAGGTA  
A\_16\_P17026183

AAGAGTTCTCAAAGCATAAGGTTACCATATGGGCATCAGAAGTTTTATTCAATCCAAACC  
A\_14\_P126659 ATGTTTTAATAAGAGTTGAACGCACAAATTTGGCTTCTTGCAATGTTTACTTCAAGCAGT  
CUST\_3355\_PI426210822

CTATTAATATACTGTTGATGCCCTTTTAAACTGGTATTCTTTGAAGTCACACATGAT  
A\_14\_P129984 TTACTTTATCTTTTACCTTTTTTCTTAAACATCTGAAGCAAAGTCCCCACCTGCCAATGC  
A\_14\_P114411 GGCAACAATTTCAAGTGTTTTTTACAGTGATTATAGGATGTTCTTGTCTTCTGTGCAG  
CUST\_462\_PI426210822 TTGAGTCTTTGTAACATCCTGGTGAGTGGTTTTCCAGTTTGCTATTTGGG

A\_14\_P108557 TCTTTGTCTTATGCACGTAGTCTGCCTTGTGTTGCAAATAACATTTCTGCTATAATCAC

A\_16\_P03147056

ACTTTTGTCTGTGCAATCATACTCTTGTAATCTGCTTTTCATATCCCTTGAGTTGTTGC

CUST\_6955\_PI426210822 CTTACAGACAGTCTGGGCTTCCACTGCCCCCATGCTCTGCCTGTG

A\_16\_P02119608

AAATGTGTGCTCTAATCACTAAGGTGTCATGAACTCAAAAATTTAACTGGCAGTGAAGAG

A\_16\_P01306371

AAAACCCTAGAACCTCATTACTGTGGATAAAAACATAAGCCAAAACCTTCTTCTAGATCC

A\_14\_P139766 AAGGGAATTCTTCCAAGTTACTCCTTCCAATGTGTGAAAACCTTCATTTACTTCCTAAATC

A\_14\_P139509 AATCTAAGTGTACCACATCTCAGAAGAATATCATGTGATGAACTAAAGCACTGCAAATT

CUST\_6241\_PI426210822 ATACTTTTCTTGTGCTGTCACACACCCTCTCATCAGCACCCCT

A\_16\_P17991716

AAAAACTAGAGCGAAAACCTAGAGGAATGTCACTACCCAGAAATACTTTCTAGAAGGTCAG

A\_14\_P111869 ATTCTGGGTATCTGGCAGATGTGTTGCAACACATAACAAATATTCATCATAGAGCCATTA

A\_14\_P129769 ATAACACGCACAGAGGCAAATACGAATTTACCCAGGAATTGTGCTCAAACATTA

CUST\_9533\_PI426210822

TACTACAAATGCCTCATTCTGTTATCACGTTGAATTTCTCAGCATCTTCTATATCATTTT

A\_16\_P16768771

CCTCTTTCCCTAGTTAAATCTCTAATGAAGATCAGTCCTAACATATTACAGGCCTCAGAA

A\_14\_P121558 AAATATCCCTAGTCATAGAGGCATGTAAGTTTGGAAATTAGAGATGAACAGGATTTGTGGA

A\_14\_P120238 TAGAACCTCAGTTCTTTTGTAGTAAAATTGATGAAGAGACCTAACAGAGGGTTATCAGAGT

A\_16\_P20454595

CCTGAAAGCGATCCATAGTTATGTTTCTGATTTAAAATTTGTATCTTCCACATGAACACG

CUST\_9306\_PI426210822 TTTATAAAGGACAGTGTGAGGAGGACCAGGCCTGACTTAGAGC

CUST\_5378\_PI426210822 AACTTCACACAGAGAGTAGTATGAAGTCCTCATCTCTGCACTTGTGGC

A\_14\_P106280 CTCCTCACCTCCTAAGGTTCCGGAAGAGAAGGTCATTGTTTTTGTG

A\_18\_P22842114 AAATCTTTCAAAGCACTTTTTTCTCAGGGCCAAGTGGACTCTTTGGG

A\_14\_P119637 CTGTTGCAAAACACTGTGCTTTCGTATCTTTTCTTTCTACCTGTTTGGAAATGTGAAAAT

A\_14\_P200518 CTCTGCAACAATTTCTGGTTACTGAGGAAGATATCAGGAAACAGGAAGGGAAAG

A\_14\_P112963 GCCATTTGACTGGCAAACATATTCATTACAGTTTCAAAGAAAACACCCTATTTGACTCA

A\_16\_P21629293

AAACATCTTATCACCTTCAAACCTGTTTATGTCTGATTGAAATGCTCCATGTGATTCTGC

A\_18\_P22842110 CACTAGTGTGATGAAGGACGAGGGTCTCACCTTTCCAGTCCTTG

A\_16\_P15242657

AAAAACTTGGGATAAACATACAGTCAATTCCTTCAAATGACCAATTGGATTAGATGCCCT

A\_16\_P58424493 ATCTGTTGCTTCCCAAACGTGTGGCCTCTGGTTGGTTTCTGGAAC

A\_14\_P103418 TATACATGCAAAGGAGAATGGGCAAATCCAAATCAGAGTGAAGGATTTAATCAATGTCT

A\_14\_P116220 ACATTC AACATTTCTGTCATTTTTTGTGTGTGATAATCCCTTCAGGTCTATCTTTTCAAC

A\_18\_P14132146 TTGTTTCAGAGGGGCAGAAGAGAAACTCCTGTGAAGGGAAAACATTTAGAAG  
A\_14\_P120120 CTTGATTCTATTAATACCAAGCCTGTGTGAATTGGAGTGGAAAGCAGAAGTGCT  
A\_14\_P110504 CATTCCAAATGAAATGTTTTTAGTCCTTGCAGACAGCCCTAGATAATACTCACAGTGAAA  
A\_16\_P37151257 TCATGATAAAATATTATATACTTCATATGTAAGCAGGCCCTCCTAATTATATTAAGTTGT  
A\_16\_P19913867  
AATCAAACACAGATTAAACACCCACATAATTACTTTTTCGGATAGTTTCTTTGCCACTGCA  
A\_14\_P137700 GGGCTCTTTGCCATGGGAGATTTTCATGATTATGAGTTCAAGTATACTTACCTTTCTATT  
CUST\_4423\_PI426210822  
TTAGAACCAGAACAACATTTTCATTATTTTATGTTAAACGGACTCTCCTGCCCGGA  
A\_14\_P137799 GACGTAAACACCTTTGATATAACTGTTTACTTGTGCAAGGGAGAAGACTCCTACAAC  
A\_16\_P20888592  
TACGTTTCTGACTCTACCAAAAATTCACACTAATCAGTTGATGAAAAAATGCCCATTCCT  
A\_16\_P16665049  
AAACACAAACTGTAGGTATATTTCTAAGGAACACTCACAAAATTTCTCAGCAGACATGGG  
CUST\_9372\_PI426210822 AAGTGTAAGCTCCTTGCATGACAGGCAAGCTGGGTAGATGTAGGT  
A\_16\_P17431850  
TTTACATCTTTTTGCCCACGTATACCTAATCCTACAGTTTTTCTACATTAACACCTCGG  
A\_16\_P00719701  
ACCAATTTAGCCACATATGCAAATAGGAAAAGGTCTCTCTTTTACTCTAAGTCCCATCTT  
A\_16\_P19624355  
TTTAGTCCTGGTCAGATATCTCCAACACCTTTACAGACTCTTTACAACCTTTCTTTTCAT  
A\_14\_P200354 GTTTTTCGACACTGGACTGGAAGAACAAGTCTATAAAAATAAAAATGGACAATTAACAGTG  
A\_14\_P136402 CCAGCCTACAAAATACTAGGACCATGGGCATTAAGAGTTCTTAAGAATATACTTCTTC  
A\_14\_P123883 CTTCAAGCAAATACAAACCAGATCTGAACACATGTGAATATTTGGGGGAAACGTCAA  
A\_14\_P138998 TTTTTTGCATCCTAGTTTGAGGGAAAAAACTAGAATTTGGTTGTTGTAGTGGGGTTATTG  
A\_14\_P122638 TCTTGGCAGCGTAACATACAAATTAGTATCTCTTGCTACTTATTCTCCAAGGAGAACTG  
A\_16\_P36231015  
CCAACAGCAAAAAAAGTTTTTGTTCCTACCATGAATAAAAAGTTGAAACATTCTTGAAC  
CUST\_4535\_PI426210822 GGTCCAGACTTTCCTTGCACACAAAGCCTAGGCCTTTCCTATCAG  
A\_16\_P21612731  
TTCCAGATAGTCTCTTACATCTTATCAGCCTGAACAATATTATTGCCTGCATAGATTCCC  
CUST\_9783\_PI426210822 CTGTTTGGCCTCCTCAAAGGCCCTTGAGACAGATCCTCATACT  
A\_14\_P126254 CATCATCTATTCGAGTCGAGAGTATTCAGTTATCAGCCTCAGAAATCCAGAAGGAAC  
A\_16\_P00685220  
AGTTCCCAACAATTAGATAGGAAATGAACTGAATGGGAGTTCACATTTTATCTTCAGGAA  
A\_14\_P121994 TGTGTCAATTATCTTTGGGGCTGCTTTTACATTAGCCATGCCTACAAAAGTAAGTAAAAG  
A\_14\_P132547 GGGCCACTAAACCAATTTTAAAAGGCAAAAAATTTGGGCCATTTGTTGGTGATAAGAAAA  
A\_14\_P131491 ACCCGAGAAATGAGTTTTTGTCTTCTACAATTATCATCTCTAGGCAGTATAACTATGGGAG

A\_14\_P105047 GCAATAATTTTAGGACAAGCAAAAACCTACATACGAGAGGAAGTGAATTGCCAATATTG  
A\_14\_P129376 ACTGTTAATGAGGCTGGAGACTTAACAACCTAGTTTTAATTCTGACTGTATGTCTCCAAA  
A\_14\_P100927 AAGAAGTCTAAGTTTTAAGGCTTGTTATGGAAAATTGGCATAAATCTCCCTCGCTTTCAA  
A\_14\_P125022 CCTTCAAATGAGATAATAAAAATTGCTTTTCAATGAAATGGAGGGAATTGTGGCCTCTC  
A\_16\_P2166335  
TTTCTGTAGCAGTCCTCTAACAAGACAAACATTTTTCAACATGCATCTCCTTTTAGTCC  
A\_14\_P102031 CCCAGATTTTAACACTGCTCCTAGGAAAAAAAAAATATTTCCCTTTTATGATGCCACTTCCT  
A\_14\_P106667 CCGGGAATGAAAAATGGTTTTAATTCCTCCAGCAGCAATAATTTGATTCTTCATAA  
A\_14\_P109711 GGCATAACATGTCCTAGAAAAATAAAGATTTAGGATACAAAGGAGACACAGCGGCAG  
A\_14\_P127294 TTGCAAGGAAAGGAACATGTTTGAATTCAGATGTGTTCCCTCAATGAATCACGTAAGTTT  
A\_16\_P17126418  
AGGATTTTCATTGCTAACTCAAATTGCTAGTCTTCTAGAGTTTTTCATTTGCTACCAAGT  
A\_14\_P110944 ACTTACATTCTCAGGTATGCTGGGAAGTTCTCTGGTATCAGGCACAGTAAAATAAGAAT  
A\_16\_P20889854  
AGAGGTATAATGTATGAGGCCCTGTATAGATACTGATTTTATCTTTAAGCAAGCGGTTGT  
A\_14\_P137517 GACCTCGATAACTCTCCCCATTGCAGGTCATGCATTCAACTAATAAAATTAAGTATGG  
CUST\_3173\_PI426210822  
ACTTTATAACCATGAGAATGTTTATTTCTGGCAGTTACTGTCTGGGCTGTAGCAGA  
A\_14\_P104699 CATTCTTTATAGTTTTAAACGTTTCTGAAAAACTGCTTTCAATATGGCCAGAGGCAT  
A\_14\_P121242 TCAAGATGGTAATCTTATTACCTGCTTAAACAAATCCCCATTTAAACCACCAAGAGGTTT  
CUST\_6559\_PI426210822  
GAATAAAATTTCTTGAAGATTAGAAACACTGTTCCCTCAATAAATAAGCACCCCTGGAATG  
A\_14\_P136591 CTCTCTTTGTATTTGTCATTGCAGATGGCGTTAATGATTGCTTCAGTTTGAACCTACCC  
A\_14\_P130214 AAAAGCAAAATCCTCTTATCTTCTAGATATGGGAGAAAGTGACATAGGTTCTAACCAATC  
A\_14\_P135470  
AAGGAAATAGAGAAATTGAGAATAGAACTGGATGAAAGCAAACAACACTTGGAACAGGAG  
A\_14\_P101418 AAAGGGAATTATACAAGGATATCTTTATGAGTTGCTGCCAAATTTTGTCTAGACCACGG  
A\_16\_P18542061  
CATGTCTTACCACTCACTATGTTTCTTGCACTGAATATTGAGCCTTGGATACTTTTG  
A\_14\_P121623 CAAAGCACTTTTTTTTTTGACATTTGTTTTGCCTGCTGCTCTAAGATCAGACCAGACAT  
A\_16\_P20087750  
TGTGGTCTACAGTGTCTACTCCTATCATAAAATATGCAACAGTCACAATAAACGATGTTG  
A\_16\_P19076048  
ACAATTGCCATTTAATTATGAAGTCCATCAGTATTGACAGAAGACGTTACAGTGAAGTGC  
A\_16\_P16191986 GTCTCACAGAGGAGAGGCCTCTAACTGGCTAGAATGTAAATATGTGTCCTG  
A\_14\_P104457 CAGTAAAGGACTGAAGGTCAGGATTCCAGGCTCAATATTCTTTATTGATAAGCATTAGTG  
A\_14\_P119952 GGCTGTGAAAACAAATCATTAATAAGTGAGAACTGTTGGTAAATGTTGAGTCCCCTAG  
A\_14\_P202168 CACTCTCACATGAATGCTAGGGTTTGTGTTAGTAGGAAAGGAACTTCTTAACCAAGCATT

A\_16\_P58424503 TAATTATACCAGAATGACAGAAATGAACCAGGACCGTCCCCAGGAAACC

A\_16\_P18467017

AGACTTGCAAGCCATATACTGTTACTATACTTCATGAATTCTTCCCTCATCTATTAGCAA

A\_14\_P112797 TTTTCAAGCCAGACAGTCTTCAGCAAAGTGCTCCATTTAACATCGAAAATCTTTATTTCT

A\_14\_P124389 ACAGAGAGGGGACACATTTTCTGTGAAAATCTAGGTATTCTTTTACACATTATAACTCCG

A\_14\_P138407 CTCAGGCACTTTTAGGGTGAGGAACTTAACTTTCTGACCTGACTTAAAATGTTACTAAA

A\_14\_P118283 TTATAACTAAGGTGTAGAGTTAGGTAAGGGTGGTCAGAAAAATTTGCAGGCTAAGGAAAT

A\_16\_P16258544

TAAAAAGTGACCTGGATACATACATATCTCTCCCTGAAATATTGCTAGAGCATACCCT

A\_14\_P130241 TGGATAGCAGACCTTCAAACAGAATTCAAGTGAACCTCTGTAGATGGACAAGGATATTTAA

A\_14\_P125430 CTCCAGAATATTTTTTTGACCTTGTCCACATGAAGTGAAAGGTTTTTGAACACTTCTTCT

A\_14\_P124371 CTGTCTATCCCTAAATACCAATGCTGAAAAATATGTAGGCTTATTCTAGTGAAGGCAGGA

A\_16\_P00127260

CCTATCATCTGCACATAATCCTATTCTCTCCATTATTGTCTTAATACCAAGAACAGCACA

A\_14\_P110356 GAAATTCCTAATAGCAAGACCAGCGAAGCGGTTGCACCCTTTTCAATCTT

A\_16\_P18351192

AAAAAGAGTATTTGATCAGTGACCAACAGTTAAAACAGACTATCACTAGGAGGCTTAGAA

A\_16\_P00806830

CTCAGTCCTATCTATTCTGTGATTCAAACCATCAACATTAACTTTGGATTCCAACAACCT

A\_14\_P131934 TGTTTATTCATCAGCAGGGCTATCTTATACTGGTCATAGTTTTCTATGGCTCCTACTCTT

A\_16\_P16309102

ACACCTTATGGATTTGTTAGCATAGTATCACCACAAAATCTAGAACACACTAAGAGGCT

A\_14\_P117817 CTTTTTGAAACTGGCTCCTATTTCTTCTACTTGGATGGGGAAAATGTTACTCTGCAG

A\_14\_P136057 CTAGGGGAAAGGCCCTGCCAATGTTAACTTTTAAAAGCATCTTATCTAAAAGAAAGGC

A\_16\_P19485824

AACCAAGAACAAGTGATTTGCTATACACAAGTAAAGGTGAAGGAATTTGAAATGTGGAA

A\_14\_P112672 CTACAGCCATGCTCAGAAAAATACCATATACACACCATGTTTCTCACAATTTTCAGAGAAT

A\_16\_P38153938

TAACATGTAATCTAGTCTTTGCTCTACTACTAATTGCTGGGGAATATGATACTGGCTGGG

CUST\_1321\_PI426210822

AAATTGATGTGTTAAAAAGCTTTGAAAGACAGAACTTTCTCAAATGGGTAATATGAAGGG

A\_18\_P21172437

AAAAAAAACCTGTTAATATTTGAATGACCTAGTTGAGCAACTATAACAACCGGATGAAAA

A\_14\_P117143 CCTTTGATCTCATGACCATTTGCCTTCTGAACATACTTTCTTTTTTTCTATTTTGGCCTA

A\_14\_P100232 ACAATTCACCTCAACTGCCTAATTGTTTCTTCATCTATAAACCGAGTCCTTGTGCCTAGA

A\_14\_P104834 TGTGCATCCTTATTCTCTATATTTTTCTTCCCCTCCCCTCTAACTTCTTCTTATAAACT

A\_14\_P201951 CTGGGCCCTTAATAAAGAAAACAAAGATTATTAACATTTTTTCAAAGTATTTGGCGGAG

A\_16\_P19220206



AAATGCAAAGACTATCCTCATTCTCTTAGCCTCCAAAACAAAGTCATAAATGTTTCAGGC  
A\_16\_P17919161  
TGCCATTTTCTCTGAAAACACTATCACTGCTACATCCAAAAGACATATGTGACATTTCGAAAG  
A\_14\_P118715 TTTTGCAGAGTTCTAAAGTTCTGTGCTTCAGACAATGGATGAGCAATCACAAG  
A\_16\_P01731850  
AAAGACACATCTTTCAAAGGCACATGTCTAACATCATTCTCTTCATGAAACCTTCCCT  
A\_16\_P16170563  
ACCAGCAAGACCTTCTATTCTCATGAATTCTTCGCTTTCATTTTTTAATAACAAGGCTGC  
A\_14\_P127483 CTGCTTGACGATATCTTTCCACAATAGTTTCCAAAGTGAAGTTTCGAAACAGACCATTG  
A\_14\_P119756 AATTGTTGCAAGGGCAAAGATAACTCTTAAAAAACCGTCGAGATTACAATGCTCTAGAAT  
A\_14\_P128634 GCCCAGTCTGATGCAGTCAGTAAACATTTGCCAAGTGAGTGAGTAAATGAATC  
A\_14\_P112451 ACTTTTTCTTTCCTTCTCTTATATGTTTTATTATAGGAGTGTACAGGGCTCACTGCAC  
A\_16\_P03497989  
AAAATTTTTAATTGTTCTTACCTATACTCTGGTAATGCCATCGAAAGAAAATTCGTTTCAG  
CUST\_645\_PI426210822 ATGCCCTTTGACATGACGGAGCTTTCACATCAGAGTTCTCACTTCA  
CUST\_192\_PI426210822 CGTGGCTACTATTGTTATGAACAACAACAGCCGGCGTTTACTGAGCA  
A\_16\_P16191171  
TTCTCCCTAATTGCAGAAAACATGATCCAGTTTTATAGTTTTTCCTTCAGATGATTGTGA  
A\_14\_P116472 AGGGATGGCATAAAACAAACAGTTAGCATTCCACTCACTGGATTTAGAGAGCAT  
CUST\_9742\_PI426210822 GAATTAGAAAGCCCAGCTCATTCCCTCTGCAAACCTCTGACAGAGAAAGG  
A\_16\_P30977912 AAGGGCAATGTCATTTTCAATTATTCCAGGAGACGTAAATATCGGTGGATAACGCAC  
A\_14\_P139536 TGTGTTGTGGTTCATGATTTTGAGTTGCTACTTTTTATTGTCATTTTCTCAGGCTCTCAAT  
A\_16\_P17387409  
CTTCTCCATGTCCTAATCTTAATCACCCAGAATTACACATTTAGAAACACTTCTTCAGT  
A\_18\_P22841756 GTTTCTAATTGCTGCACCCTCCTCTGCCTCCACCCATGCCTCAGT  
A\_16\_P16652385  
GCCCTTCTTTTCTCTACTTTGACAACCTTCTGATAACCACATGCTTACAATTTTATGACGTT  
A\_14\_P108625 GCAAGTTCCTGACATGCTTTATCATCTTCACTGGGTATTTTCTTCAACTTTAATTCTC  
CUST\_3245\_PI426210822 GTTTCTGGTTTATGTGTTCTTACCTGGATGACAGCTGTGCTCATCTCTAA  
A\_16\_P20329259  
AAAAATCTGAAAATCTGATATGCTTTGGAAATCAAAGGTAAATTTTATGTCCCCTGGGGG  
A\_14\_P104512 TTCCCAGGCAACTTTTCAAGCCCACCGATAATCAAGAACTTAGTTTTATTCAAATTGT  
A\_14\_P116932 CTTTGGCTTTGAGAAGTGTTTTTAAACAAACTTTCCCGAAGCAAATTTGGTTTTAGAAAGT  
A\_14\_P110519 ATATTCCTGTCTAGTCACAAGAGGTCTAATCTGTGTATGGCAGTGTCATTGTTTCATAAT  
A\_16\_P16456961  
ACTGCATCAATCCTACATAATCAGTCCTTCTGAATATCATAATGTTCCCTGCTGCTATTCC  
A\_16\_P16191089 AACTTTCAGCATTTTCATGACATTTGAGGTCTGACTTTCCTTCCCATGTGGT  
CUST\_5932\_PI426210822 CTCCACAGATAGGCCAGGCCAGGCACAGCCAGCAAGCTCTCTG

A\_14\_P111493 AATTGGTTGAAAAAATATTTGATATAGGCAGATTCCATTGGAGAAATTCACCTTCCCCT

A\_16\_P17186205

AAACCTAGTTTGCACAATGCTAATTCACAAACATTTTGGATTTCAGTTACGGACCTCTTT

A\_16\_P16191220

CTACACCTGTGTAAAAACAAACAGAACCTGCATTAGGAATGGAAGTTAAACTTTATCCAT

A\_14\_P137548 TATACATAGGGTAAGCGCAGCCATTTTGGATTTTGCAGTTAATGTCTTATTTTGGCTGTG

A\_16\_P01408362

ACAGTTCATGCTCTGTAAACATATGTCGAAAATTAATTCTATATGCTACTTCCCCAAACA

A\_14\_P118993 TCGACCTTACTTCTGGTGACTATTTCTCCAATCCCTGTAAATAATCTAGTGGGTATT

A\_14\_P115423 CTGGAAAAAGAATCACAATGCAGGGCATTACTACTTCTGTTTCTCTGACATAATAACAGT

A\_14\_P112601 CAAAGAGGCATCTCCTTTTAGTAATTGTGAGACTTCAATTTTTGCACTACTAAAGTCAGT

A\_14\_P105760 TTTTGGAAACAGTCTTAGTCTTTTAACTTGGAAAGATGAGGTATTAATCCCCCTCCATTGC

A\_14\_P106869 AAATTTCTTGTTTTTACCTGATTAAGATGGCAGAGCATGGAGTTTTCTACTTAGTTCCA

A\_14\_P124203 CTCGAGCCCTATCTTCTGCATTGGTTCTTATCTCAGATTTATTCTTCCCTCCAG

A\_14\_P104266 TTCACTCTCATCCCATGTCATTAAGGGAAGGATAGAGCAATTTGGAAAAATGCTTTTAAT

A\_14\_P121783 CTACAGTTCAATCTCGAATGTCTTTTGCAGGTCGCCAGAAAAGGGGTT

A\_14\_P132599 GATGTCTTTTGCCTTATTTCTTCTCTCCTTCATTCATTCTCATGGTCATCATTTAG

A\_16\_P01105355

TAGATCCTAACTGATTGCTTTAATTGTGCACCTTAGCAGAAATATTACTTTCCCCTCGTT

A\_14\_P126141 TCTAAATCCTACCCATTTTTCAAGGTCCAGCACAATCATTGCTTATTCTTCAAACTCTT

A\_14\_P135863 TATTTGGAAGAGAAAACATGCCTTTCTTTGTTGAATCACATTAGTATGATGAGTGAGTCA

A\_18\_P18218993

GCAATCCTAGTAAGTTGTGTAGTAGTTTCTCTAACTAGAGTCAAACATGACAGAGTCACC

A\_14\_P100000 TTTTCATTTGGGTCCTATTATTGTCCCCAGAAATTTTCAGCCTCATGACATTTTACAAATC

A\_14\_P119458 GCTTCAGATGATCCATCTTCAATTGAACAGTATGAGAACCAGAACATATGAACTTCAA

A\_14\_P122553 GACACAGTTTGTGTTCTGGCCCTGACATGAAACAGGTAATCAAGTAAACGTATATTTTA

A\_14\_P113439 AAGACTCTTTATGAAGAAAAGTTCTTCAAAAAGAGGGCAGAGTCCCCAGTATGTAAA

A\_14\_P105585 CAGCAAAGATGAGATTAGGGGTTTCTAAACAAAGAGAAACAAGGGCATAATATTCTCACA

A\_16\_P16105221

AAAGTGCCTATAAACCATTTGCTGATAGAAAGACAACCTCTTGAATACAAATTGACTCCC

A\_16\_P15665387

TGCAACCGAGATCAAATTATAGTAGACTCATTCAGACACAAAGAGACAATAGGAGGAAA

A\_14\_P200748 AAAGAGACTCTCCTCTCTCCACTCCTATAATTATGAGGAACTTTTATTCAACTCTGAAAT

A\_14\_P116868 AGAGAGGAGAAAAGGTATGAAATGAGGAAAGTGTTATTTGCCACAGGAAATATTGGATTCC

A\_16\_P19752461

AATTATGCAGGGGATTAGACATATTATGAATAGTGAGGAATCTGACAAATCTACGTGGCC

A\_14\_P112791 ACACTGGAATCTGGTTTTGCTACATTCTATTCCACAATCCCAAAGAAATGCTATTTCAATG

A\_14\_P102579 AAAGTTGGGTATTTTGCCTGCAATCTGATTGGCTGAATTTTCATCTTCATTGTCATCAG

A\_16\_P21521049

GGGTCTGTATTGATGTCATATAGTTCAGCCTATCACTAGTTCTTTTGTCCAGTCAAACAA

A\_14\_P106539 AACTTATATCCCTTCTTGAAAACATCCCCAAAGATAGTCTGTCAGAAATCCTTCGGT

A\_14\_P136422 AACATCTTGGTTTGGAGAACTTGGATCTCTCTCTTTTAAAGGCTCAGTAAATCAAAATCA

A\_14\_P118831 GGACCTTCTGGGAGCAGGTGCTAACATAGTGTTTCAGAATCAATATGTGAGA

A\_14\_P138477 CCTTTTGTCTAGTGAATATAAAATGTGTTCCAAATATATTCCCTTCCTCCTATTGCCTGC

A\_14\_P117768 CCTTCATATTTTTCTTAACCCTTCCTTTCTTTAATTTTTTCTGTGGGGGCATGTT

A\_14\_P130577 CTTTTAAAAGTGGGAAAATAGTTACCTCTCCGCGAGGCTTCAAACTATCAAAAAGGTTA  
CUST\_407\_P1426210822

AGGATCAAAAGGAGAGGTAAGAAAAAGAAAAAGAAAAAAATCAACCCATAGCATATGTG

A\_16\_P18405034

AAAAATAAAATGGATCACCTTACAAAAAATGGATCCTCCTTCTTCAAAGACAAATGGGGC

A\_16\_P03286229

TCTATAATCCATTCCCCTTCTATGTATGTCCTCTCCTAAGTAAATCCATCATTCCAAAGG

A\_14\_P101827 GGTTCAAGTTGATGTGACTACTTTATTGGTATCATCACATCAATTTGATGAATGGTCCTG

A\_18\_P13304203

ACTATAAAAAAATCTAACTCATCCTGATCATTTTTAAAAAAGAAATTATTGCAAGTAGA

A\_14\_P106824 AATATTTTAGTTCTTCCGTAAAAACACGCCATCTACGTGTTTCCCATCTTCTAAGACACT

A\_14\_P112570 ATTTTAATGGTAGACTGTAGCAAGAACATGAAGTAGGTCAGTTGAAGAAGATAAGCCTGT

A\_16\_P36158302

GGTCTTGTCCAATACTCATCTAGTTGCCCTCATTATTTATAATTCTATGACCAGATGCCT

A\_14\_P125200 GTGTTAGACATGCAATTATCATAAAGACTCTATGCGGTGGATGACCAGATCATACAAATC

CUST\_7648\_P1426210822 CTTTTAGTTTATCTGATCTGTGCTCCACACCTTTCAGACTCCATTTCCATGAAT

A\_14\_P105236 AGAATATGAATTGGATACTCTGTTTGCAGTTACATACTGGTAACTGTCTGAATGGCATGT

A\_16\_P01850541

CCAAAAGATTAATAATCACATCCCTCTACATTTCAACTGTAAGCCTAATTCAGTCTCTCCA

CUST\_2960\_P1426210822 GACCGCGGAGCCCGGGCAGCTGATCGGCTGCTTCCAGACATGTC

A\_14\_P107916 TGCCTGGGCAGATAAAAATCAGACATGTTAATAGGAAGTTGTTATGTTTTGTTTCCCCT

A\_16\_P16631074

AACTAAAGATATCAAGATGAATGGTCTACCTTAGCATCAATGTCTTCCTCTACTCGTTGC

A\_18\_P22841550 CAGTCAACAACCCTCACAAAGCAAGAAAGGGTGACTGAACTATCCCAAAAATA

A\_14\_P132916 CAAAAACAATAACTCAAAATATCACTAACAAAATGGCACTGACAGAACCTGGGGTTTTTA

CUST\_7480\_P1426210822

ATTAAGTAAAAATGTCAAAAACAAATATAGGAGAAAAGTAAGATAATCTTGGAAGGCAA

A\_14\_P134731 AATTTCAATGGGTTATTCTATAACCAATCCAAGTGTTTACATCCAAGATGTCACAGAGGT

A\_14\_P200771 TGGACTGTGAGGCAGTATTTATTGCCATTTTCATAGTCAAGGATTTGCTTAGCATGAATA

A\_14\_P128731 GTCTTCAACTCTTTGGGGAACACTCATTTGGTTACCCATTGCTCCTATAATG

A\_16\_P19423350

CCTCACTCTTTAGTTACATGACTCTCTTTAAATCTACTGAAATTTACGTATCTCCCTCCC  
A\_14\_P139067 TGTCTGGACATATCCATAGAGCACGCATTTTAAATCTGAAAGAATATATGTAGTCTCCCC  
A\_14\_P118693 CTAGCAGCCGGATGGATGGGATCTACAAACACCGAACATCTCTTAAAATG  
A\_16\_P03215066  
ACCCATTACACATATAATATCCATTAACCCGATCTAATGACATCAGAGTGATCATGGTT  
A\_16\_P21094261  
AAAAAATGGATTGAATCCAGTATATGAAGGACCCTCTGTAATAACTATGCTTTCTCCCAG  
A\_14\_P137474 ATTTTAGTTGCTGATTAAAATGTGGCAACTCCTATGGACAAAGAGTGTGTTTGTCTCA  
A\_16\_P19026284  
TCTTCCCAGAAAGCGTTTATGAAAATATCACTCAAAAAGTTCTATTCTAGACGGTGTGG  
A\_14\_P128876 TACAATTTATCTTCTTACGTTGTTTTAGGAGTTGGAACAAGGAAGATTCCCACCTCTTTT  
A\_16\_P01882038  
AACCTCTCCGTTTTTCTTATCTTCAGTTTTTGGCAAGATACACTAGATGCACTCTTTAACA  
A\_14\_P108450 TATTCTTTTGTCTTTTCCAGAATTTTCCAATGAGAAAAGTGCCCTGTAAGAAAGATGCTG  
A\_14\_P100210 ACCTAGTATCTTCACACATCCTTTGACAGTGACCATTTATTACACACATCAGACTGG  
A\_14\_P130103 CTTCTTCTGTTGAACCATTAAGAAAAGATGGCGAAAAGTCAACATAACTAGAGACCTCAT  
A\_18\_P15536040  
TTGCCAAGACCAAATAATTCCTAAACTATTGTCTGCTATGCTTCCTAAAAGTCACTTCAA  
A\_16\_P00685529  
GTTGATGTGGGAACCTCAATTAATTTATAGTGGGACTGCTCACATCCCTATGAAGAAAAT  
A\_14\_P200545 CTGAGGAGTAGATGGGAATTTGAGGGAGAATACAGAGATACTATGAACGTATTTGACATT  
A\_18\_P15415826  
GACAGATGGCATCAATATCCTCTAAGACAGCAAAGTTTCGATATTCCCAAGTCACAAAA  
CUST\_76\_P1426210822  
TCATCATTTTAAATATTTTATGTTTTGCTAAGCCATAGGCTAGCTTTAATATTTCAATTGA  
A\_16\_P37063836  
AACCAACGTGGTTCTCTTTTTTTAAACATTCAAGTATGCGAGAACAAGAAGTTTAGGTGT  
CUST\_332\_P1426210822  
CCTTGAATGTATTTTTTGCTGTATGTATGCTTGAATGTGTTTTTTTACCCAGGCTTGGTAA  
A\_14\_P102391 CCATGTTGTTTATCTGAGGCTGAAGAAAATTGACATTAAACTGATGTGGTTTTTGTCTGT  
A\_14\_P121383 ATTTTCAGGAACCATGCTGACATTAATTTTTTGCCTGTTTGTTCATGGAGTCATCTGAA  
A\_14\_P121884 ATAGGCTGTCTATACTCTTGACTACACAGCAATGTCTTAGTTATTAGGAACCAAATATTC  
A\_16\_P01080034  
GCCTTACTCAAAGAATTGCCATGAAAGATCTGATTATACCTCCCTTTAAACAAGTCTAGG  
A\_14\_P107180 ACAGGTGTAATTTGACAACGCTTTCTCAAGGCATCAAGTTTTAATTTTCATCTTTGCTTT  
A\_14\_P129265 ATCCTCACATCTTGCAAATGCATTTACATTGTTCACATGATTACTCCTGAATTTTGGTTA  
A\_14\_P117113 TTTGATGGGTCCCTGTTTGTCTTTTTTCTTCTCTAAATGAAGAGCAAACACT  
A\_16\_P01770759

ATCATACCTACACCTTTGACTTCTTTAGCACCTTTTCATTATCAATTGAACCAGCCATCT  
A\_14\_P127203 TTTGCAAGATGTTACATTTTCATATTTTGGGTTTGTGGTGGTAGAATACTGGACCATGAT  
A\_14\_P103347 TATGCCCTGGAATTTTCAAATCACAAATATGTAAACAACGACAAATGTGCCCAATTCA  
A\_14\_P121097 AGACACACTTTTGGGTATGGCTACACAATGTGTTCAAGTCAAGAATGTAATAAAAACATC  
A\_14\_P117874 ACATATTAATAGTGATGGAACCTTTAGCAACATCGTTTTTTCCCAAAGAAACATGACTCC  
A\_14\_P136447 GGTGAGAGGCTGCCAGTCATTTACTATGTAAGTGATTTTAAGGAAAGAACTTTTCTCA  
A\_14\_P119749 CTATTTTCAACAACCTTCAAATGTAAATCCAGCCAGCCTGTCATCATGAACATCCTTATT  
A\_14\_P200157 CTATTGTCTTAGAGAATGAAATGACATAAGGTGATGAGGCTTGGTGTATCATCTGAGACA  
A\_14\_P128450

TAGTGTGAAAGGAAGGAGAATACAATCTAGGCCAAAGAGTTAATAAGCAACAGCCAAAGAT  
A\_14\_P122552 CCTCTTTACTAAAAATATACCTGAGTCATTTACTGCTGTTCCTCTTGGCATAAGCACT  
A\_14\_P100651 TTATTGCATTTAACTGAAAGGGCACTGTTGGAACAGGGACAATGTAGTAAGTTAACTGTA  
A\_16\_P21599891

GCTTTCAGTGGAAATCAACAAATGTTTTATTACTTACTAATTCCTCTAACAACAGAGCC  
A\_16\_P18158832

AAATGAAGGAAATGATACTATGACACAGACAACCATTTTTCAATCAAGTTATTCTGCCAT  
A\_16\_P03506006

TCTGCCTGATGATAGTTTTGGTGCTATGCCTAACATTCACATTTACTTATATTCCTAGGG  
A\_16\_P41867000

TACCATGAAACTAAAGCAGAGACATTAACCCAAATTTTCATTATAGAGGGAAATCCAACGC  
A\_14\_P103225 ACTTTATCGCCTTTCTCAAATTCCAAGATTCTCATCACATTTTTTTCTTCCCAAACCTCT  
A\_16\_P00473561

AAAAACCATTTCAGAGATTGTTAGATCTACGTAAACTCCCTCATTACCAATTCAACTTCAA  
A\_14\_P109482 TTTTCAATCCCTTAGATTTAAACTCAGTGTGGAGAATCTGTGATAAGCACCTTCCAAATT  
A\_16\_P58424617 CTTAAGATAAGTTCAGACAAAGGATGGGTGCCCTTAATCAGGGTGGG  
CUST\_6158\_PI426210822 ATGTGGGCTTTCTAGGAGGGGGCAGCAGATGCCTCTCCTCACATC  
A\_14\_P130956 GCTACAGATCCAAAACCACATTCCCAATTGGTTTTATTAGTAAAACCAATTACATTTGA  
A\_16\_P02564087

AGAGATTTCCACCATCTAAATAGAACTGCATCTTTTCTGTCTTCTTTCTTAAAGGTCC  
CUST\_8689\_PI426210822

TCAGTTGATGTGGGAACCTTCAATTAATTTATAGTGGGACTGCTCACATCCCTATG  
A\_16\_P00067574

TGACGAGGCAAAAAATATAATAGATAGGGTTGATCAACTTCATTAGGATGACATTGGCCT  
A\_14\_P107677 AGAAATGATGGACATTCACCAAGCAAGATGATAATGAGCACCATCCCTAATATGT  
A\_16\_P03085085

AGTATGTGGATTGACTGATTGTATTTAGGAACAAAAACAGACATTTTAAACACCTGTGCG  
A\_16\_P19569515

GTTGCTGATAACCATCTCTGTTGATTCTAAGTGAATTCTGATGTAAAGACATGCATGACC

CUST\_2645\_PI426210822 AGGCTGGATGTCTGCAGGGGCAGCCGTTGATAAAGTCCCAGGATT  
CUST\_2571\_PI426210822 CCTAACTCTTAAGCCTAAGGTAGGGGTTGGGGTAGCCTAACTCTTAAG  
A\_14\_P131410 CTATGCTTCCAGGGGGAATGATTCACAACCTGGGAAACCTAGACTTTA  
A\_14\_P112186 ACCTTTTATCCATTTAGGATTTTAGGTGATATGTATGCATCTAACTTTTCGGGGATGATGG  
A\_16\_P01106792  
TGCATAAAGATGATCCTCCTCATACCTCTAACCAATATCTATGTCACCATAAGAATGTC  
A\_16\_P00348512  
AGCCTTTATCAGAACTGTAAGATCATCTTGTTAAGACTCTCACATTATCTAGTTGTGCAG  
A\_16\_P18222843  
GTCTTCGGCTACATTTTGACACATGTATCAGGGTAGTTTTGCATAAGTTGTTTCATACTTC  
A\_14\_P103605 TTAAGTTCAGAGAAGAGTTAGGGCATTTCCTTCCTGAATAGACCATCAACACACTATT  
CUST\_7202\_PI426210822 AATCATCAGAGTTGGGCCAGAAAGAAGTGACACAGAACATCTAAGGCATATC  
A\_14\_P117743 GGGTGCTTTGTGCATATTTGTTGAATGACAGTGAATAATTTCTAATATAAACCCAGACC  
A\_16\_P02094184  
AGGCTAGGAAAGAATTAATGGGAGAATGCAAAAACAATCAAAAGATCTGAATCACAACCT  
A\_14\_P134362 AGTCTACCACCTATTGACACAATGGATTCTACTTCCATAGCAGTATCCCTAATCAAAAAT  
CUST\_7676\_PI426210822 GGATACAAAGAAAAGCACCCCTCTCTGTGACTTCTCAGATCCCATCTG  
A\_14\_P107114 CTGACGAGATTGGGAATAAAGAGGCATAAAGAATTCTCTGTGTGTATGTGTGACCAA  
A\_16\_P02309290  
CCAGAAAGCATTTAGAGTTAATCCTACCATTCTGGAATAGCAATAAAACTTCCTGAGGAA  
A\_14\_P132334 AACTTTTAATTTTGTGTTACAGAAAAGCAAAGCCCAAAGAAAACACGATTTACCTTAAG  
A\_14\_P130083 AGTAACACCATTAGTAAATGTTTGCTGAATACTGGGGGTTTGACTGTAATTCCATTTTCC  
A\_14\_P103786 CTCCAGGAACCTAAGAATTTAAACTTGACGATAATGAATTGATTCAATTTCTTGCAAG  
A\_16\_P35681678  
CCTATCCAATACCATGTTTACCATAAATCCCCTTA ACTATGAATAATGCATCTACACTCC  
CUST\_4313\_PI426210822  
GATCACAGGCAGTGTAATTTTGAAGACCATAAGGTTGGGCATACAGCATAGAG  
CUST\_7180\_PI426210822 ATTCATTCTTCTCCTGGTGGGGACTTAAGGTTGGAGGCAGCAAAA  
A\_14\_P105401 GGTATGTGTTAGTGCTGAGTAAAACCCTGGATAATAAAAACATGCTTTGACTTGCAAAGA  
A\_14\_P126478 CTGGTTACCAAATCAACGTCCATTTTCATCATCTAAAAGGAATTCCAAACCTGTCTTCTGAA  
A\_14\_P114857 AAGAACAGTAGAAGATGTAATACTTACATACAAAGGTCTCTACATGTGTGCACAAGTCGC  
A\_14\_P112924 TTGATGCACACTGCAGATGAATGTTTACCCCTGCTGTAGATTTAAAGAACAGCATAGATA  
A\_14\_P112367 TAGGTTTCCTCTGATCACTTTGAACTGCTTATGAGTGAGCATCATAGCCAGAACTAA  
CUST\_5224\_PI426210822  
ACACTGATTTTCTTACCCTTATTTCTGCTCTCATGACAGAATTTCTGGAGTTCTTTG  
A\_14\_P138762 CTGGCTTCTTTCTTGGCAGATAAGTGCATGACGGAACAATAGGTGAGC  
A\_14\_P135990 TATCCTCTGTAAATGATGCTGCTACTAAGTGCAGACAGACCTCAAGGGAAAAAAAAAAAAAG  
A\_14\_P106307 TTGGTGAATAGAGTCTATGGCTAATACTGTTTCTGCTATATAAACTGAGTCTCCTCTTC

A\_14\_P132150 CTCTTTAGTAGAGATTTTATCATTTCCTGGGAGGTAAATACAGATACACCTTTAAGGAGGG  
A\_14\_P114735 ATACTTGTAGCACCCAGCAGTATCCTGATCGAAATTTTTAAATCTCATAGTTCACAGGAA  
A\_14\_P130188 GTATAAAAAATATCTCAACCTAGGGGAGGGCCTTGTTGACTGTTTGAACATGGAAAC  
A\_14\_P101948 ACTTAAAAAACAGAAAAATTGCCAGTTTCACATTCACTATCTTTATTGATGGGTTCAAGT  
A\_14\_P117698 ATATATGTTCTTGACTGTCTGCAATTCCTTCTTTACTGATTTTGCAGGTGCTTTTTTGC  
A\_14\_P123757 TGGACAACAGTCAAGAGCAAAGTGTAGAATATCTGTTCTTATCACAAAGGAACCTTACACTT  
A\_14\_P200994 TTTAGAATGAATAATCTCCAAGCAGTGTCTTGCAACTGTTGCAAGGACCATGTAAATT  
A\_18\_P11754966  
AAAAAATACTGAAGCCTCTATACTGTCTGCTTCTGAACTACTATTCACAGCGGATATCCA  
A\_16\_P38203094  
CCTCTTAAATGTTGCCTTAATTACTTAACTTGACAACTCTTAGTCTTGCATTCTCTAACG  
A\_14\_P134159 TTCTGTCACTGAATTATCTCCCAAGTGCTGGCAGACTGAATGTTGATGTCATT  
A\_14\_P114708 TGTTTCTTTTTTGTGTTAGAATAATAACCTGGAAAGAGCACTGGATTGGATCTTTAGCC  
A\_16\_P03808674  
CACAAAGCAGTGAAACTGTCCAGAAAATGTCCCTTTTTATTCCATACGCAAATAAGTAGA  
A\_14\_P106587 ACAGACTGCACACTAGATAGTAATTCTTCAGGTCTTTTACATAACCACCAAGAAACAGAT  
A\_16\_P38084613  
ATTACACATAAGACTCACTCCAAACACATTTTCTACAGTAGATTCTCTAATTCCGATTGA  
A\_14\_P120961 TTTTTATGCGCTTTTCAACTCGGTCTTTACTTAGTCTTGTGGTGGCTCTCAGTTTT  
A\_16\_P37280941  
AAGTTCTGTGGATACCCAATACCCTTTAAACACTGATTTGATGTTATTGCTTCAACCAA  
A\_14\_P108787 GGTGACACTAGTTTTTCTTCACTTATAACAGAGCCTTATAATGTAAGAACCTTTCTCCCTG  
A\_14\_P110130 CAGTAACTTCAGAACAACATAACATGATTAGCCAAACAGAAGTGAAAAGATAGCCACTGT  
A\_14\_P104609 CTTCTCTCAAAGCCCAAGAGTCACAAAAGTGGTTTCATTTAATAAATAATTTGCTTTGCTC  
A\_16\_P00387742  
CCAATGGAGTGCATCATCATAACATTCAGAATCTTCTACTAAACAATGCCATAAGATGTC  
A\_14\_P117704 TTATTCATTTCAATTTAGATCTTGACCTTCTGTCTAGAGCCTTTGCTTTTTCTCTCCATG  
A\_14\_P126525 CAAGCGTTAGTTGTGAAGGTTTATTTTGTGCAAATCCCAGTCCTGCATGAAAATG  
A\_16\_P58424143 ATTTAGGAAGTTAAATGTCAGTGATCGTCTTTGCAGTGGCGATGCATAGTTCACATG  
CUST\_980\_PI426210822  
TAAGTGATTCAAGTTTGCGAGCCATAAGAATTGAGTCAGAACTTTAAAAATCAATTATTT  
A\_14\_P109374 CTGTCTTGCTCTATATTGTTAAGTCTCATCATCTACTTCAGAACTCATCTGCTTTTTGGCA  
A\_14\_P107504 GATGAAATCACTTGCATCCATAGAACTTTATCAGGGCTGTGTGAGAATTATCTGAAGAGA  
A\_14\_P202035 TTTCTGTTTTAAGTGAGATTTCCAAGTTAATTTAAGTTGTGTGGAACAGGACTCCCTT  
A\_14\_P128511 TCTGTTGAAATGTGGGCTTACTTCATTTATTTCTAAGGTAAAAGACAGCAGACTGCTACA  
CUST\_8141\_PI426210822 GCTCATTAGCTTTTTGGAATGACGGGAAGCCTTTTGATGTTTGACGTCTTT  
A\_18\_P22841946  
TGAGTTAAGAGTCCTAGACTTACTTAGCAAGTCCTCAATTCTGACACTTATTATAAGACA

A\_14\_P118994 TAGTTCATTTTCATTAAGTGGCTACATCCTAACATATGCATTTGGTCAAGGTTGCAGAAGA

A\_14\_P123765 GAGTCATTCCTTTTCTAACTCTTCTCCTGGTTCATTGAATATTGGACAAGTCCTTTTTTTC

A\_16\_P16951100

GGATACAACCTGAATCTGAATGAATCTTTCTCCCATGATGAAACAAAAAATTCCAGCACAA

A\_14\_P124083

CTGGAGAAAATGGGAAATCAAAATTGTTGAAAGGCAAAGGATTAGAGTTTAAAATGGACC

A\_14\_P108371 AGATAGTTCACGGTCAAGAGGTTTTGATGTATAAAGAGATCCATTTCTGAATGAATGTT

CUST\_6534\_PI426210822

TTAAATATAGTTGTGGTTGGTAGATACAATACCGATAATAATAATGATGGTGTAATGAGA

A\_14\_P117094 AGTGAGAAATATAAGGTGGTATCTCCGGGCTAATCTAATTTTGGTTTTGGTCTTAAGATTG

A\_16\_P39201728

AACCCATAGTCCTGTAATTAATCTGTATCTCTTCAGAAGATTATGACCCATCCAAAGAA

A\_14\_P111513 AGGCATTTGAGTTTTCTGCTTCACTCAAGGACACAGTAATCTTCTTTTTAATATCCTGCA

A\_14\_P120880 GTATAGTAACTATTCTTACCGTTCTCTGGATGTAAGTCTACGTCTCTTCTCATCCTGTGT

A\_14\_P129903 CTGCATCCTACGTTTTTATATGGAACCGTTTTATCACGTTTCAAGGAATAGAGG

A\_16\_P18599583

AGATTAACCTGGTGAAGTATGAGAAGTCTGTTTTGAATCCCGAGTAATACTGAAGGTGATT

A\_16\_P20847335

AAGTCATTTATCCAGTGCTTCAATACATGCAATCTTTCAAAAGAGTAACCAGACACAAGA

A\_14\_P125843 CTCGAAGAACTTCTTATTTGGCTCATGAAAATATTCGTGCAGTTTATTGAGTAGTTTTGGG

CUST\_5173\_PI426210822 ACATCATCCTGGAGTGCTAGGGTGACCCTAGCACTGTATCCAGCT

A\_16\_P17815552

AAGCAACCAAGTTGAATAAAAAAGTCTTTAGTCCACAATGAAACATTTGAGCAGATGACT

A\_16\_P58424466 CTGCAGCAGTGCCTGGATGTGTGGTAGGATCTCAATCTTTGTTGAATAAACTAA

A\_14\_P100931 TAAGGTAATTTATCCCTACCTTTATATGATGGCTGTGGATGAATTAAGACTCCAGAG

A\_16\_P00343442

AACTGAGAATGAACAACCTCACAGTCAAACCTAGATCAAACCTGAAGCACATTTGGAAACTC

A\_16\_P03488216

GCAGGCTGTGTTATGAAAAACGAATGATAACTGTCTAATTGTAATTGGTTGGTTATAGCC

A\_16\_P16181257

CTTAAACCTTAGTCTTGACAGTGTGGTTTTGTCTACCTTAAAATCGTTGATATATGCACC

CUST\_1161\_PI426210822 TTTCTAGAAGACTGGACTGGACGGGTGGGGCTGGGAGGATGCCGG

CUST\_10334\_PI426210822 GGAACCTCAATATCTGTTTACAAAACCTGGCCTTGAGGATTGAAGCTCAGAACAC

A\_14\_P110714 TTGGGCTGTGTTATTACTCTTGTAAAGATCAATCGGCCAAGCACTTTAGGTTGAG

A\_14\_P123622 GATGAAAAACTCCCTACTCTAGGAACAGGGGAAATGGAATTAGAAAACTACTTAGATG

A\_16\_P41771854

TGCCAAAAAGTCTGCTACTAGTCATATTTTACTTCCGCTCAACAAGAACTTTCCTACCA

CUST\_8351\_PI426210822 TTCCTTGTGGCCTCTCCTAGGTGGACTTAGGGGATGACAAATAAT



A\_18\_P14132683

AGAATCATCTGGTGGCAACATATAATTGTCCTATGGTTGTAACCTTGATAGTGCTGTTAC

A\_16\_P00376064

CTATTCTTTCAATGATCTGTCCTATCACGTTTCAGTAAAATCAGTTCACTATTCCCCAAGG

A\_14\_P106964 CAAGGAGTAGTGGTTTTAAAGAAGTGTAAAGCATTCCAGTAAAGTAAGTCCAGTTGGTAT

A\_16\_P02887096

ACTGAATTCCTCATTGTTTCAGACCTAGCAACTATTTGTGGATTATTCCTATCTTTTCGCT

A\_14\_P121064 AGGGCTCAGAGTTTACAAAAAAATTTATTTGTGTCTGAGAGCCACGATTGAGAACATTAA

A\_14\_P122308 CAATCATTACTGATAACTGGTATCACTCAGGTATCCACTTCATTCAAGACTTCCAAAAC

A\_16\_P17499416

CTTTGGGTGATAATAACACATACACATAGATGAGACTATGAACAAATATTAGGAGAAGCA

A\_14\_P106107 GGTGAGAGGGGACCAGAATCCTGTTTACAATACATTCAATTTATATGTAACCTTTTCTGGA

A\_18\_P22842127 GTATAAGAGCCAGACCTGGCACTTTAAACAGCCCAGCAAATAACCCAAAA

A\_16\_P00685442 AAAGAGATTTTTCTCTCCAGCAAAGTAGTAAACAGGCTCTCTCAAGCATTTCATCC

CUST\_9710\_PI426210822 GAGGTTCCCTGGAACCTCCCTCTTGGTGGCTTCCATACCCCTCACT

A\_14\_P127442 GTGAGTGAAGTTGAAATAAAATCTTTAAAATTTACTATATTGCCAGTGGTTTCAACAG

A\_16\_P00685472 TAGGAACTTTATGGCTCAAGCCGAAGGATTCCCCTCTGGGAATA

CUST\_2608\_PI426210822 GGGAGCCCTGCCCTGAATAAGAGCATGGAAGGCCCAAGAAGAGTG

A\_14\_P113205 CCATCTTTAAGTTCAACATTTGGAATGTTTCATAGGCTTATCAATATGGCCAGACGTAGAT

A\_16\_P03810244

AATGTGAAAGTCGAGGCATCAGGAAGTTAGTTTAAATGGGTTGCAGAAAATCTAAGAGC

A\_14\_P135857 TCTCAGCCTTTTTTCCATCCTTAGAATTCAGCACATAATTTGGACATCAAAGATGTCAAT

A\_14\_P120327 GTCTGGAACACAGTGCTTAACAACAGTAATGCCAACTATCAGTGCTAACATAAAAACATT

A\_16\_P03072747

ATGACTCAGCCTCATATAGAAACCTCACTCCATAATCTTCTGCAAAAATTAGCACCAAATT

CUST\_2271\_PI426210822 AGGCCAGCCATCCAGACGTCTTTGATACCTCCTACCACTGGCTAC

A\_14\_P120329 GTGGTATTTTTAAAACGTAACCTGGAGTCACAGTGAATGTATCACTCTGCAACTTGCTTTAT

A\_14\_P109024 CAAGGTGCGCAGATAGAGAATGTAACAGGCGCCGAAAAAGACAGC

A\_16\_P17511592

GAATAGCCCATTCTTTTTAGTTTCGTTCTCCTACAGTTGAACATTGATTAGAAATGCACA

A\_14\_P107708 AACTTACAATGGGCTTGGTAAGGTTAAGGAAATATATAAGGGATAATGCTTGCAACCATG

A\_14\_P102884 TCCAAAGGCTCTGGTTTTTTTTTACCCATCTTTGCTTTTTTTAACATTTACAGTTTGTTAG

A\_16\_P36231020

GTAAATTTACATTCCAAATCCTATTACCTGGAAAAGGGATAAATCTTTGCAACCCACCA

CUST\_7489\_PI426210822 TATTGATCACCGAGGTTCTTGGCATCGGGCTTTTCTTTGATGTGTG

A\_16\_P21570177

TATTAAGATGACATCAGTAAGACAACCTTCTCAGGACTATGCTATATGCCATCTCCTCCT

CUST\_7244\_PI426210822 CCCAGGGGACATAAGTACAAAGTGAATGAGGCGATGTCAGGATC

A\_14\_P100660 CTTGTTGATGTATGTTTATCCATTAGGAATGAAATCATGTTGCTCTGCCTTACAGAGGAT  
A\_14\_P135944 ACCAAAATAGGGGACTTGTGAGACTTGGATACATATCTTAGATTTAGGGAATTCTGATG  
A\_14\_P129780 CTACACTGGTCACTAGAATGCCATTCCACAACCTTTCTTTTAGTTTTGTAGAGCAATTAG  
A\_16\_P00913809  
AAAGTTGAAAAAGGGTAAAAGTTTTTCAGGAATATTCGGGCTCTCTATTGCTAAGCATAGC  
A\_14\_P121944  
TGCTGGAAACAGTGAAAAACAATATAGAGTGGCTAAAACAACATAGAAACACCATCAGAG  
CUST\_824\_PI426210822  
TCAACACGAAAGGAATTTCTAACACTGCAGAGGTTTTGTTTTTGTCAATTTTTCTTTAA  
CUST\_1317\_PI426210822  
AGAATAAAGACTGGCAAGCTATTTTTCCCCAGTATTTTATTTTCAGAGCTAAGCTAAGGA  
A\_18\_P14790139  
ATCTTTTTATCAGGCATACACCATAGCAACTTTTTCTTTTGTATCCAAACCACCACAGT  
A\_16\_P03074147  
TCTTATCCTGTTTACATCACACCATCCTTTAAATCCATCTGAGATTTCACTTTTCCACAA  
A\_16\_P36803954  
AAGTAACTCTGTTATTCTGAGCATTAAACTTCAGTGGAGGTTATAGTTACCCTTCTACCC  
A\_14\_P110142 ACAAGCGTTTTGAATTTACAGTCATGAAGGAAATGCAAAGATGATGTCTTCATAGCGAA  
A\_16\_P16408157  
ATGCATTAAACTCAAAGTCCTGTATTTGTGAACACTTGTTTCATTACCCATTGCTGTAGC  
A\_14\_P102662 CAGCATGTCTGGGATAGACTGGTCTAGAATAAAAATGAAGTTTCCATTGCTTTGTTGCT  
A\_14\_P133713 CATCTCTGTGAATATGAATTCCTCCTTCAAAGTCATCATTATATATAGGAGAGCACT  
A\_18\_P20496958  
AAACTGCTTCTATTCAACTGTTTTGACCTCAAAGCATCCATTTTCATAAGGCTCCATTTTA  
A\_14\_P111353 CTTTGCTGAGAAATTGAGAAATCTTCTTGGTTAGAGTCTGAATTACATTAATGGAGG  
A\_16\_P21080779  
AACTTGTCAGCAGAATAAAAACACGAAAGGAAGTATTATTAGGGAGAGGTTGCAAATCTG  
A\_14\_P129719 AAACATTAATCCCTTCAGATGAGAATAAGACTTATTTCTTCCCAAAGTGACCATTCTCT  
A\_16\_P16096501  
CTGGACAATACTGAGCAATCTACAGATATCAACGTAGCATAATTTGAGCCTCCTTGTTTT  
A\_16\_P01941493  
AATTACCCAGAGATATCCTATTCAATGAACTGTGTCATCATATCAGAACCATTTTCACAGG  
A\_14\_P201472  
AGAAAGAGGAGACTCACAGACTTAAAGTAGAAGCAAACAAACATGATGGCATGCATATA  
A\_14\_P132240  
AAATCAACAACCAAACGTTACCCAAACCACCAAACAAGAAGAAGACTAAGAAAGTTATA  
CUST\_7013\_PI426210822 TGGTCCCTCACTAAGACAAAATACAGAATACAGAGCAGCAGTTACCGG  
A\_14\_P115448 CTACTGATTAGTTCCCATTAATTACGAAGTGAGACCTTAAAAATCCACAGAACAGAGTTG

A\_18\_P14135496 CGACAGCCCAAGGCTGATGGCCGTGTGTTGGTAAGTCCCTCCTGG  
A\_14\_P132465  
TTAAAACTGGAAGTTTTTCTATAGACTCAGAAGACAAAGCCTAAAAGAAAAGGGGGGAA  
A\_14\_P117530 TGGTCAAATATCATGGCATCTGTAAAAACCACATCTCTAAGCATAGTTAATGAAACCGGA  
CUST\_8374\_PI426210822  
CAATTAAGATGTAGTTCAGAAAATTATTTAGAAGGGTTCAAGTAACACAGACCATGTAA  
A\_14\_P201765 ACCGTAATTCTCCCTTTTCTTCAGCCTAAATGTCTTCTTCTCTCAAAAATGTTATCAAGT  
A\_16\_P03506411  
GAGCCAAACCCTTTAGGTAAATATTTACGTATAGATTCATTTGTTCCCCTTATTCCCAGA  
A\_14\_P200829 ATTAACTGTAGTTTACTGCGATTTGCAAATGCCCTAAAACCCAGGCATTTCTATTATG  
A\_14\_P109882 CTTGGAGACCATGGTCTTTCCAATTCAGTGAATTTTTTTTTTTTGAATGGCATTCAAAC  
A\_14\_P128544  
AAGTATCTAAAGGAAAAAAGGGTTGAAAATCAAAGAGAAGGTTTTATCAGGGGGAGTTTG  
A\_14\_P120579 CCAGATGAGTTGTTCTAGAGTGAATACCCTGGGAACAAATGGTCTGAAAAGATC  
A\_14\_P126159 GTCAAATAGTAGTAATCCACCAACCCAAACATTTGTCTCTTGTAAAACTATCTCGTCTGT  
A\_14\_P200323 CTTGCGATAAATCCAGTGGGATGAGTTAGTGGCCTAGATTCAGATCTAATTACAATTTAG  
A\_16\_P20362646  
GACCCTCTAAGTTTCTATCAATTGCTCACTCTAAATCCATCATTGTCCAATGTGTCAAAA  
A\_16\_P00961158  
ATAAGTTCTGGGTTATCATGGTTATGACTTCCTCTGTTCTCAAAGACATTCATCCATGTT  
A\_14\_P122775 TTGGTTTTTGGTTTTTCTTGCCGTGGTGCAAACTGTAGAAAGTTGCTTATTCATC  
A\_16\_P00684981  
TTTTTTGGTGAATGTTCCATTGCATCTGAATGATATTGAAGTGAACCTTCTCTTACCTGCA  
A\_14\_P102022 AGAAATAGCACTGCTGCCATGTATTTCCCTCACTAAAAGCAGTGTGTTGTATGATTCATTT  
A\_14\_P132268 GACCAAAACGAATCGCTGAAAAAAAAAAAAATCCAGCAACCTTATATTTTACACACAGCC  
A\_16\_P01683005  
CCTGAACCTTGCCAAATATGTTTTTTTGAACAGTTGATCAAACTCATCAAGCACAATGT  
CUST\_3234\_PI426210822 TGCTTTGGGGATACTTGTCAGGCAGAACCTTGTTGGAGTGACTAAT  
A\_14\_P102328 GAGTGTGTTACAATGGCAAGTTTTAACGGTTGAGTATTTTTACCATGATATGTTTGGTGC  
A\_14\_P136807 ATTGATGGAATAAATGCACAAGGAATGACTCATCTTGAAGCCCAGAATAAGATTAAGGGT  
A\_16\_P00423953  
GGCTTTGAATAGTTTGTGTTCCCTTAATTGTGTCCATAAGTTGTAACCTTGCCTGACAAGTA  
A\_16\_P01536784  
TAAGATGAAAATTCAGTACTTGTGCACTGATTGTTTCAAGATGGAGAAAGCCGAATAAAGT  
CUST\_1605\_PI426210822 TCTTTGAACTCACTGCCTGCCTTGTCTGGAAGTTCAGCTGTTTG  
A\_14\_P125400  
CACAATAAAAGCACCCCTCAACCAACATAAAAATACAGAAGTGAATACAAAAGATCTGG  
A\_14\_P132369 TTAAATTTTACGTCCCAAGTTTTTCAAGTCTGAATTCACACAAAATTTCTGCTTG

CUST\_6524\_PI426210822 GTATCTGTGATTTTTTTTGGGAAGCTGAATCCTTACTGAGGGCATGCTGCC  
A\_16\_P38912163

ACAGGACAGAAATACATATCCCACCAATGATATATTACAACCTTACCTTGATCTTCTTCTCT

CUST\_10239\_PI426210822

AAGTCATTATCTTTACTTAAGGGGATGACAAAAACCTTGCTAAATTTAGTTTTTCACTTC

A\_14\_P132147 TTTTCCTAAGGAAATCAAGTTTTTATACTCTTCTGCAAGTCACCACAGTAACATGCTGTG

A\_14\_P104020 TTACCTCAGACTCATCTGTAGATTCTTCAAGGGACCCAGTTTCCTATAAAGCATAGAAA

A\_14\_P136502 TAGATGATGCAAGTTCAGTTCAGTCACCAATTTCCCGTTTCTATACTTTGTCAATAAAA

A\_14\_P103412 CTCATCAAACCTTTTAGGAATCAGCAACAGCAAGAAAGAATATAGTGTGGAGTCATTTGA

A\_16\_P03068525

CGCTATTCAAAGACAAGATGAAATGCACTGTGAATAACCAGCAATCAAAGAAAATCATGG

A\_14\_P121794 CAAAAATTTACAACGGCCATATCCTACTTTTGCAAATAGAAAACAGTGTTCTTCAGCAT

A\_16\_P20179195

GGACAGCCCTTTCAAAGTGTTTTCCACTGCTTATACTGATGAAGGTAGAAAAAATTTTC

A\_14\_P111998 AAAAGATGAAAACCTTCTGTCTAACATTGAAGGGAAGTGTATACAGCCTCAGAGCAATCTA

A\_14\_P111855 AATAACTTTTGTTTTTTTGAAGGTGCCAAATCAATCATTTCAGGAGTTTCCAGAGATCACA

CUST\_9417\_PI426210822

CAAGGCCAGCCATTATCATAGAAAAATCTTCAAGTAAGTTGTGTTGTTTCTTCCAC

A\_14\_P101475 CTTGGGTAAATCATTTTGCTAACTTGGATCTTTGCTATCTCGGCTAACTTTGAATAGTCT

A\_14\_P132797 AACCCTTAACTTGTGCCTAGAACTACAGCACATATAAAATATGTAAACACCAGCCTGTT

A\_14\_P133197 GAGATCTTTTACCTGTGCTTACTCCGTCTGCGTTTTCTCCATCTACG

A\_14\_P111606 CTAAAGGATGATGAACATCAAAGAAGAGTCATACAGTGTGGCAGAAATTACACGAGGAC

CUST\_4077\_PI426210822 ACATCAAATGGATCTCCAAGCCCAAACACTAACAGTGGAACCAGCTAT

A\_16\_P20528703

AGCAGACTTCAGTTAAGCATCTCAAGGTAAAAATCATTTTTTCAATGTATCAGAACCCTCC

A\_16\_P21105833

AACTAAAAGATAAATAAACAGACAGGCGGATTTTTTTGTTTTTTTTGCAAGGATACGTCGGG

A\_14\_P108818 CTTTATGAGATTCAAATTCAGTTCCAACCTGGGCTTTGTCCATTTCTCTGGCTTTAGC

A\_16\_P19953595

AATGTCATGGTTTTGCACATACTGAAACACTTAAACAGGAACATTTTGCTATACTGCATCC

A\_16\_P39556458

AACATGAATTCAAAACATCTTTACTGAGGAAAGCAAAATTGGTCTTCTAGCAAATCCAGG

A\_14\_P103806 TGATTGATATTCTGACCTTATTTCTTCTTTAAAGAACTTCTTGCAAATAGATGTCCCGAT

A\_16\_P18565037

AACACCAGCCATAAAAACAATTATTGGGTCACAATTGTATACTGGTTGACTATCACGTTTC

A\_14\_P107996 AGAACTTCTTATTTCTACATACAGTGGGGCAAGAGGTTTTAGGTAATGTGTAATGTGAC

CUST\_2613\_PI426210822 GCCTGGCACAGTGTGAGCACTTCATTTGTGTTCAATCTTTGTTATTTGTTTTCTTT

A\_14\_P114512 CTTCTACATTTCCCCTAAGGGCCAACCTTAAAGTTCCCTTGAGTCTCTTAAAGTC

A\_14\_P130981 TGAAATGTGACTGAAGCATAAGAACAACACTGAAGACTGCAAACAACCTAATTCATTT  
A\_16\_P41592263  
ACCTATCAATCGATAATGCAAACCTCTCTAACCTAAGGATTCTGCAGATTTTACCTCACTT  
A\_18\_P14022959  
GTGACATCACAGTCATTAACAATAAGAAAGATTCTCCTGGTATCTACAGGTGTTTCATTGG  
A\_14\_P201484 GCCTTTCATCTCATTTGCCGTTGTCCAAATTCTAATTTAAAACCTCATGTGTTACTTGCTG  
CUST\_7933\_PI426210822 AGACGGCCTGGTCAGGGCATCTCGTCCCCTGGTGCCTACCGTCT  
A\_14\_P100915 CTATTAATGCAGAAAATGAAAGGATTGGCGAGTTATCTTTGAAACTGTTTCAGAAGCGAG  
A\_14\_P117692 AGGGACATACTCCTGAACTTACTTCATTTCTAAAGAACGGAGTATTCTCTTGTACTCAT  
A\_16\_P41870802  
AGCATTTCACTATTGCCACATTTAGTTAACCTACATTTAACCTACAGTGCCTACAACCTT  
A\_14\_P139018 CCATATATTTGGGAGAAAACAACCTACCTAATTTCTCTAGCAGTGAGTCCCTCAGAAAAGT  
A\_16\_P17828110  
AATCACGTTATCAGAAACCATCCATTACATGACAGTGAAAAATAATGCCAACGTTGGATT  
A\_16\_P18553366  
AAACTGTAATCTGTATCATCTCATGGGTAAAATGCGAATGAGTGGTCTAAGAATCAGTCA  
A\_18\_P17039736 TACGTATCTCTTCGAACTCCAACCTGTCACCGTTTTAGATCCAAACCC  
A\_16\_P36230928  
GCTTATGATCATCTTCTTCAACCATAAAACATTTTTTCGAATGACAAAACAGAAAATGTA  
CUST\_2579\_PI426210822 TTCATCTGTACACCCTGCATTTGTACCTCCAGTCAGTCCACAACA  
A\_14\_P116210 CTGGAAGAACCCTTGGTTTTCAAATATATCCAATACCTAGGAAGAGACAAAGCCAAG  
A\_16\_P58424325  
CAATTTACAATCACAATAAACCAAAAATTATCATAGACACATCATTTTTGAAATGTCAGTGC  
A\_14\_P119600 CAAAGTATTTGATGACTCACCTACAAGGAAAAAAGTTTTAGCATCCACATATTTGTAGC  
A\_14\_P132066 GCCTGTAATTCTCAAATAATGTTTAGAAATGATCTGAGGAAAGTTTTGCTGGAAGGATGAG  
A\_14\_P202422 TGAGACAATAACAACCCTAAATGTAGGGTCCAATGCAAATCAGTTATTATGCAAAATGCC  
A\_18\_P22842098 AAGGATGAATGGACATGTGGGTGTCTTCCGTGGGAGTTACCTGGC  
A\_16\_P18805702  
AAAAACACACAATCCAGAACTCTCAATATCCACACATAGTATGTTCCCATTAATAGCCC  
CUST\_3913\_PI426210822  
CCTGTTACTGCTTTCATCATCACCTCTCACTCTCATTTTTCTAATAAGCCTGAAAAGC  
A\_14\_P137443 GACATATTTTCACATGTTCTGTTTCATTAAGTGTCAGAGTCCAGGTATGAAACAACGAAC  
A\_14\_P112758 ACTTAAGCAACAGAAGCACAGATAGCCAGAATCTTTTGCAAGTTGTAACCTTACACAGA  
CUST\_3626\_PI426210822 TCTGTTGCACGTGCCTGTCCAGCTTACTTAAAATATGTCAGAAAGAATGAGG  
CUST\_5853\_PI426210822  
AATGTTAAATAGTGATGCACAGTGCCTAAGACAAAATTGCTATCACTGCAAGCTCCT  
A\_14\_P129189 GCGGGACCAGGGAGAATTAATAAAGTTCTGGACTTTTGCTATATGGTGCTTT  
A\_14\_P105200 GTTGGAGTCAGGTTTTAGTTTAAAGCCACTGTGTATTATTTCAAAGTGTAACCTACAGTGGT

A\_14\_P137104 AAATAAAACAAGGCAAACACTTACCATCTGGCATCCTTATTCTGTTGATACATCTCCCAA  
A\_14\_P118787 CTTTCTTCCCAGAGGAACAGAAGAAGTAATGTGCTAGTAAATGCACTAATTCTGTATCTG  
A\_14\_P107300 CTTTCACCTTTGTATCATCCACGATTTCTTTCTTCAGGAAATCCTTCTCTTTTACAC  
A\_14\_P121093 CTTCTGAACTCATCCCATTGCAGAAAAGATGGATAAAATGGTAAATTCTCCTTAATGTC  
A\_14\_P116078 AGCATTTAAAACAAATTCTATCTTATTTGGTCTCCCCTAAGGGATAGGCACACAGGTATA  
A\_14\_P110916 TAAATCCAACCTCTCAGAAAAAATGGAAAATTATGAACATAACCACTTGTGCACCCTAAC  
A\_18\_P16015063  
AAATTGTCTCCCAACTGTTTTGATTCCATAACACATAGACCTCCTGATAGTTAGCACATT  
A\_18\_P22841789 GTTATCACCTTCCCTTCAAACCTGGGCTGGGAGGGCATCCTTGCTT  
A\_14\_P121503  
AGGAAAAACATCTTGATCTGGAGAAAACTGGATGTTGGTAGAAAAAGCAAGAGTTTGT  
A\_14\_P101073 TCCTCTCAACTCCCTTGGTAATCATGAAGATGAAAATATTTATGGACAATTTTCCTCACT  
A\_14\_P121401 GCAGAAAAGATTCCGGGATTTACTGATCTCCCCAAAGAAGATCAGACATTACTTAT  
A\_16\_P16738544  
TGATTAATGCATGACCAAACCTAAACATAACCACTTCAGCCTTTAACTTTCTCATCTGAC  
A\_14\_P119838 AGGTCATCTAGGAGGACATTATCTCCAGGATTAATGATCATTTCAAACACCTAACAAAA  
A\_14\_P107676 AACCCAAAGAGACTTCTGTCTGTGGAGTTTGTATGGCAGCGTTACTTAGAC  
A\_16\_P00917147 CTCAGATTGCCTCTCGTGCTTGTGTTACAGATTCTTGATGATTGGTCATTC  
A\_14\_P101054 TTGTGGTCTTTAACTGAGAAGAGAGACTTCCCTGATGTAGTCTAGCACTGACT  
A\_14\_P113422 CTTTTATCTCTAGAGACTACAAAGCAAACCTCAAGAGGTAACACATCAAGGTGAAAGT  
CUST\_3587\_PI426210822 GCCTCTGCAGTTTAAACAATGACTGTCACTTAAACCTCTTCTGAAGAGCTTGA  
CUST\_2710\_PI426210822 TATTGTCTGACTTCCGTTTGTCTGTGGCCAGATTTGCTCTGGAA  
CUST\_6980\_PI426210822 GTATACAACTAAAGAAAAAGAGAAAAGGTTTCGCTGGGCCAGAGAGTGGCTA  
A\_14\_P120971 TACTTGCACTTTGCTCCAGCCTTTTCACCAACCTTCAAAAAGTTTTCGTAATTGATC  
A\_18\_P18603880  
AGCAGCACTTTGTTTTTTTAAACCTAACAGCAAGATGGTATTACAACACTTTCAGAAGGTG  
A\_16\_P00961620  
ATAAACTTTCTCTCTCCAACATATGTGCTCATGTATCAACATCTATGTTTCTCCTCCCA  
A\_16\_P18001603  
ACCTACAGCCTAACATATTCCTCCTTTTTTCAGAAATTTCCAGATACATCACAGTCATAGT  
A\_16\_P17435961 ATCCTCTGATTGATACCTTTCTTCACTTATTCCCCATTTTCAATAATTTGCCTCATCTGG  
CUST\_5657\_PI426210822 AAGAAAATCCGGACACATGCTAAGGCCACGAGAGCCTGTACAGT  
A\_16\_P18284199  
AAAACAAAACCTAGAAATGGAGGATGTGTTAGTCAATTGTTATATCTGGTGTGTCAGCAACC  
A\_14\_P132756 TTGTTGTTGCTCTACATCCAACCTTCACTTTTCTAAGTTCCAGATGTATGTTCTATCTCT  
A\_14\_P124478 GTTGTTGAGAACTGAGCGCTTAGCCAGGGAAATATCTGCCGTCAC  
A\_14\_P123312 CTATCAGTAAATACAGTGTGTTGGCACCTTGCTATTAGTTCTTTTCTTACCTTTGCCTTT  
A\_14\_P130845 ACTGATGTAACTCCATCTTAAACAGAGGTCATCTCAGAACAAGCATGAAACCG

A\_16\_P19412904

AAACAGATTCTAGTGTCTTAAGGCATACTTCTCCAATACAATCATTCTGACACCATCACA

A\_14\_P107922 GTCAGTTGTGAGCAGATTTCTTTTATGTGTGTGGTTCTCCATCATATTTAACTTTGGATG

A\_16\_P01734945

TTAGCCATACTACCAGTAATCCATCACACCATAACTGTCTAAAGAATTACCAATGGGCA

A\_16\_P03045468

TGGGGAATCCTTTAGAGAATTCAGTTAACTCTCAACAAACATAGGATCTAATTTGACAG

A\_14\_P116759 CTCTCTCCAAATTTATCTGACCTATATTCATTCTGAAATGTCATGCTTCCTGGGATATT

A\_14\_P136792 TAAATAAATAGTGAACGGATTGTTTCTGCCCTAAGATGAAATCCACAGATCTTATGCT

CUST\_3514\_PI426210822 GGAAAGATTCCCTTTCAACTCAACATGTGTGAAGCACATGAACTGAAGCA

CUST\_9512\_PI426210822 CCTGGCCTTCTGTCAACTATCAGTCTGAAGGGGAATTTCCATAGAG

A\_16\_P19146409

AGAGAAAACCTAATTTGAGATCTTCTAGACAATCACTGATTGCAAGACACTCACTCTCAA

A\_14\_P117470

AGAAACACTTCTAATGAAATCTAAAACCTCAGAAGCCCTGTGTGTAAAACAGTCCAAAGCA

A\_16\_P19908615

AGAATATGTGTGTAATCATCAGAATCTGGGATTTTCAACTGATAAGCCTTTACCCTCTGT

A\_18\_P15581460

CCCCAAGTAAAATACACTCTAACTAAATACATTATGTTGGCTATAATACCACACTTAGG

A\_16\_P16010211

AAATGACCACTTTTGAATACGATTGTAACGACACATACTAACGTCTATGACTTTCCAGCC

A\_14\_P106920 CTAAGGACTGGACAAAACACATTTACAGGTTATGTAGTCCAAATCTACTCCTAAAAAGAC

A\_18\_P14132753 CTTTTATAAGTATTGTGGTTCAGGAGCAGTGGAGGTGATGTCTGCCTCAG

A\_16\_P15815289

GGGAGCCATAATGCTATTCATGAACTCTAGAAAAAGTAAGATTTGCAATTAGGTGATGCA

CUST\_5015\_PI426210822

CAGCTATTTCTACTAACAGAAAGTGAGTTTATGGGATACCAATGCAAACAAACATAGATT

CUST\_8260\_PI426210822 GAGAAAACATTCTCCCCACCACCCCCAGACACTTGATCATGTAAT

A\_16\_P02773057

AACCAACCTCTTTGATCTTGTAATTCAGAACTAATTCGTGTAAGTGGCAAATAGCAGG

A\_14\_P131774 CTAGAGACTGTGCTCTTAACCCCTAAGTGATTCTTCTACTTATTTTTATTATTAGTTTTTC

A\_14\_P121833 CCTTCAGTTGCTCTTGATCTGCTCCAAGAACTATGCCATCCTATTAATAAAAAAAAAAAGTTT

A\_14\_P126320 TTCCAAATTAATCCCAGACCCCTAAAATATTGACAACCTTGACAACCCC

A\_14\_P124674 TTATTTACTAGCCTCAATTCTCTAATCTGCAAAAATGGGCAGCACACTTCTGTATCCACT

A\_16\_P03654734

ACCCTGAACAAAAACCTAAATATTTGATTACTTCCATAACACTATACTATCTTTACCA

A\_14\_P128454 CCATTGTAATTAACCTCTTAAAGAAAACCTGAGTTCCATTTCTGCATGTTGCTCAGACAAGG

A\_14\_P136693 CTGAGAACGACAGAGCCCAAGACTTCAAATCCTAATGCCCATCCAAA

CUST\_5541\_PI426210822

TTTCAATATTTATAATTAAGCCAAAATCAGAGCTATGGTGATAGCATAAAATGCAAATGT

A\_16\_P39851048

TTCAGTGCCTGCTAATTTTCAACTTTATCAGATTCTCACTTCACATTATACACCAGCAGA

A\_16\_P00703929

CATTTGAGGATAATAGGATACAGGCCTTTGTTGTAACACTAGTCAGTTTTTTACTTCCCC

A\_14\_P126176 CTATTCTTTCATTGGCTCCTCTTCTCTAAAGATCCGCCCCCTGTTAGT

A\_14\_P133583 CATTTATATCCTGTCAGAGTTAACTATCTCCAGGGAATATTGGTAGTGTGTTCAATGGAG

A\_14\_P137882 AACATTGATATTCTATCGGGACTTTTGTCTGTATTAACAGATGGGCACTTGTCTGCTA

A\_14\_P200778 CTGTAGGATTTGCGTTTATGAAATGCTGACTTTATCATATGCCTCAACTTGCTAGACCTA

A\_16\_P03704942

CATTTTTCTTGTFTTTGTCAACTTATCTATCCTTAACCATTGCTTCCTATATACACACAGG

A\_18\_P22842093 TGTCCCTGTATGTCTGTTATGTTTATTCTGAATTTTCCTTCCTTTTTCTCTCCATGCTT

A\_16\_P01927412

AAACCATCTTAGCCTAATGCCATTACCCCTTGAAATGATATAACAACTTCCTGGTTCTG

A\_14\_P108675 GAAAACAGGATCAACAGAACGAAGGGCAGGCTAATTTCCCTATTACAAATGTTTTTCATTT

A\_16\_P02183614 CAAGTTACCCAAAGCAGGACGGAAAGGAACAAAACAAAGAGTTAGTGAGT

A\_14\_P127822 CATCTACACAGATGTCTTAGAGTTTGACGATGGTAAGAGGCCTCCAGTCT

A\_16\_P00184926

AGGTGAATTGGATTAACCCTGACATTATTTCCCTAATTGAGTATATCACAGCAGACAGAA

A\_16\_P01590859

CACCATTCTTCTCAATTCCTCTATCCACAGTGTATCTTACCATTTCCACTTTAATTAGA

A\_14\_P119240 CTAAGATGTGTTTCTCTGCCAGGTATTGGTCATCATTGATGTGAAGCCGAAG

CUST\_9188\_PI426210822 GAAAACCTCTGGCAGCAGATCATCCATCAGGCTTGGTCCCAAGTT

CUST\_4527\_PI426210822 CTGTATATTCAAGTCGCCTCTGTGGCTGCCAGAGTTGGGGAGCTG

A\_14\_P116950 ATCATCCTTTTTTTTTAAATATGATTCACCCTCAAAAAGATGAGTGGCTATGCCAGATCCA

A\_16\_P41862864

TTTTTCAGTCAAATGCCTTGATGAAGGACATAACGAAACATGCTTAATTCCTCACCATAT

A\_16\_P19342549

GCAGTCAACTTTGTAGAGAACTATATGAAAACAGGACAAGATCTTAAACTGGAATGGCTG

A\_16\_P03012106

AAAATCTTGCTCACATACTTCACGTAAAATAAGAATGACATCTGGATAACCATAAGGCGGA

A\_14\_P109202 GTTCCACCACAGAAGCTGAGGTTTTCTGTTTTTGCATTAAATGGACTTGCTTATTTTTTCAT

A\_14\_P123929 CTGTTTTTCATTGTTCTGAAGATGGTCAACTATCGACTACACAGAGCACTTGATGCT

A\_16\_P03455922

AAATAGCCAACAGAGATTCAAAGAGACATGATGAAAGAGTTCCTTGGAGAGACATGAAAA

A\_16\_P58424199 GTGACCTCACTGACGAGGTGTGATTTGAGCAAAGCATGGAAGGAG

A\_16\_P17838804



AATGTTATTTACGCAAACCTTTTTAGGGAAGTCAGTTACACAAGGTTGAGGTTTCATCTGAGG  
CUST\_837\_PI426210822 TTCATGGCATAAGCTGTAACTCTGAATTCCGTCCTCAGCACAATTAAGCATCTC  
A\_14\_P125084 CTGTATTTCTTTGCCTGTTGCTCAAATGGGGGTGATTATTTATAATTGTGGGTTTAAAT  
CUST\_516\_PI426210822 TAAAGAAACCCACACAGAGTCAAACCTTCTGCACCAGTGACCAACAATATGT  
A\_16\_P00034214

AATGGTTTTATAGTAAAATCCTTATTCCTTTCAGGGTATTTCAGTGCCTATTTCTGACCCC  
A\_14\_P129044 CACTGTCACTTCATTTCTAATGCTTTCGCATTGTCTAGAAAAGAAAAACAAAGATTACAGA  
A\_18\_P14134134 CTGTGCATATTCCTGTTGCCAGTTGAGATGTGGGACTGGTATTTTCAGG  
A\_16\_P16191695 GTGTTTGTATTTCTCACCTGGATTACCTGTGGCCCTTGCATCAG  
A\_16\_P17918690

ACCCATACATTATTCCTCAATTTAAGAGAATGGAACCTATGATCAAATCAACGTGTGCA  
A\_18\_P16760089

GTCACTCAAATATTAACATCCATTCTCTCTTAAAGGTCACTTCCTACAAATAAATCCCAC  
A\_16\_P19036137

GCATTCTTACCAAGCGTTAAACAACCTAATATGAATTATCACTCATAGCAAGATCTGGGCC  
A\_14\_P138549 TATAGAAACAGTCTTCATATAAGGTGATACCACACATAGTAACACTGGGTTTCAGTTGCC  
A\_14\_P119661 AAAAGGCCCTTAAACAAATTCAGTTCCGGTGACATCCAAAAGAGCATATTA AAAAGCAA  
CUST\_1624\_PI426210822 AGATACTGCTTAGCAGCAAGAGAGGATTTGGACCAGCTGGGCTGG  
CUST\_8060\_PI426210822 AAATTGTCTGGCTGGGCCACTGCTGCTTTTTGGACATGGTGCTGTAT  
A\_14\_P138406 CAACAGTGCAGTGATTTATTGACCAGACTTTGCAGCAAGAACACAGCGAAG  
CUST\_3327\_PI426210822 AAGCCGCTGCTCATGCGATATGCTCTGCTCACACAGATGGCACTA  
A\_14\_P127391 CTTAATCCTCCTCTCTCAGCACATACTGCTTTGCAACACCACAGAAACG  
A\_16\_P00685411 ACAGAGTGATAGAGGAGGCCATGCTAGGAGAGAAGGGAGAACAAG  
A\_14\_P109570 CTTCTCTCTTAATTGAGCGCCTTGCATATAAGGAATGGTAACTGATGATTCTAACAGTA  
A\_16\_P01506080

AGCACAGATTTAAACTTAGCAAATTTTGTACATAAACCTTGAATAGACAACCAAAAAGCCA  
A\_14\_P200229 CTATGACAGAGTCTGAAAATGATCAATTACCATAATGAATTCGATTGGAATGGGCACTGG  
A\_14\_P136994

AATAAAGAAACACCAAATGGAGAGAAAAATATGGAAAAGTCTGGGAAATGGGAAGACAAT  
A\_14\_P118492 TAAATTTAACCATACACACCAAGGCTTTTCTTATCTTCTTCTCTAACTGGTGGGTAGAA  
A\_18\_P15349240

AAATACAGACAGCAGATAGGTTTTAGTGCAATCTTACACAGAAAGCAAAGATCTAGGTGC  
A\_14\_P116390

TGTCAGGGGAAAAGAAAGTTGAACAAGAGGAAAAAGAAATTGCACGTAAGGAATTTGTAA  
A\_14\_P104089 TCTTCTTACAGGGCAACATTTTAAAGTCCCCTTTTGTTCATTCTGAAAGAATAAAAA  
CUST\_8178\_PI426210822 TCATGTTACCTTTCCAGAATGATCTCACAAGAATCCCCGTTCTGTG  
A\_18\_P15302336

ATGTGAAGAATCACTTGCTAAACTTTCTGATTTGCTAGACTAGGTTTTCTAAATTGGCC

A\_16\_P15261968

TATTACATGACCTAAATCTACCATCCTGTTTTGTCTTTCATTAGTCCACTTCACACACAC

A\_14\_P116728 CTATAAATAAAACCAAGACTTCCGTTCTGGCTCTCACTCTAGTTTCCTGGTGCATT

A\_14\_P111974 GATTTTGTGGATTTCTGTAAGTGAAGTAAAGTGAAGTCAAAGACATGTATGGTAAAGCCTCT

A\_14\_P103598 AAAACAGGAACCCCTCAATGCTATGGGTGGAACTAAGAAAAAAGGAAAAGAAAAG

A\_14\_P132650 CTTAACTACTGCCTCCTCATTTCAGTATGTGTTCTAAGTATAAAAAGTCCTTGGTTCT

A\_14\_P108979 ACATTAGGCACACTGTATACAGATTCATCTTTACTTGACCTTGCCAAAGAAGTATGCA

CUST\_3806\_PI426210822 CTTCTCATGGATGCAGCAAAAACCCAGTAGGATGCACCTCTCAAG

A\_16\_P19138075

GGCCTATCCTGAATTCTCAAGCATAAACTACCCTGATTCTTAATCTTAGCCTTGCAATAT

A\_18\_P17388414

AGAATTAGGTTGGTTAGCAGGAAAAGAAAATGCTTACTGAGTTGACTGAGGTTTTTGATG

A\_16\_P01165504

CAGTCACCATAAAATACTAGTCCAAGCATTATTCCAAATACAAATATCCAATTCTAAGCA

A\_14\_P137408 ACTTAAGCAACAAACATGGTTCTAGGGGAAAAACAAGTAATTGACTAACTGACCTTTTGA

CUST\_187\_PI426210822 GGTGGGGGGCAACGGGAAGTTTTCAACCATTATCCAAACTCTGTT

A\_14\_P137979 GGAGTCTTATCCATGTATTTTTGTGACCTTTAAAAGTTGTTCAAGGACTGCCTTCATT

A\_16\_P15807437

TAACCTCAGACCGCTATTGTTCTTTGTATCAACTACCCTGTTATTCAAATTAACCCAAC

A\_14\_P101594 AATGCTTGGGCAGGAGCATTTCAGAGGATGTGTATTTGGTTTTGTTAATATTCTATTTCTT

CUST\_905\_PI426210822 TCTGGCAAGGACCAGATTGTCAGGCTGGTCTGGCAGGTTGACCTT

A\_14\_P107070 CTGCTTCCTTTTACTATGCTGCTATCTACCATATATGACCTCCAGTCAAAAATTTCCCTC

A\_14\_P116458 AAGAGATTTTTATGAAGCCCTTGCTGTGTGTGAAACACCACAATCTCCGTC

A\_14\_P126720 GTGGTTTAATTTGCCAGGGTCATAAGATACTTATAGAGCAATGGGAGAAGTAACTGTAAG

A\_18\_P13711261

CTGGACTTGCTCTTCTCCTAATAAATGGACAGTGATCAATGAATTACACCCATGAAATAG

A\_18\_P21339816

GCATAGTTATGCAGTGTGTTGTAGACAACCTCATTCAAACACATTCACTAGTATTTTCTAC

A\_14\_P129793 CTGAGGCAAAACGAAAATCAGGGCGGATGATATAATTTTCACTTTCTGATAAAAAGGAAT

A\_14\_P127947 AGGAACTCCACTGCTATAAAGCAAATGTCATCTGCATTACAAAAAAGTTCCTAAG

CUST\_9044\_PI426210822 GTCAACAGACAACCTTTAGAAGTGCCTGACTGAGCCTACAACATGGAAAT

A\_14\_P132440 ACTACTGATGTAACCTTAGACAAAATATTCCTCTCGATCCCTAAAGAGAGGGAAAATCCA

CUST\_4675\_PI426210822 AGGAGCTATTTAAAAGGGTTGTACCTTAGGTGACCCTAGGGAGAG

A\_16\_P18549564

AAAAATCTTTATGAATTTCTAGGTTAGATGCTTCCGATATTCTATTTCCCTGACAACCAA

A\_14\_P136732 TGTTGTTTTACTTGTGGTTGTTTTGTCTATTGATTCCACGAAAGCCTCAGCACTAACTA

A\_14\_P102862 CTTTACAGAGTTCCAAAATCTGCATGTTTTTATGTCTTGTTTAAAAGGGGGTTGGTAAT

A\_14\_P135081 TCCTGTAAGTAGTCTAACAATTTCCAGCCCTTTTTCTACTTGATGTTGACAAGAAATT

A\_14\_P133502 TTGGATAACAACCTGGTAACAAATCCTACTCTGGCTTGGATAATAACTGCTAACAAATGCT  
A\_14\_P124939 CTCTGCTTATTTTCATTGGTTGCTATGAACACCTGCCTGAAACTTTTACTTCTTACAAGAA  
A\_14\_P123543 AAAAAGAAGGGATTCCATTTTCAATACACATTTATAACTCCTGCCAGTAACAGACACTGT  
A\_14\_P139309 CTACACTAAGTTTTATCACTTCCTACCTGATCCTCACATCCCCATTTCTTTTTCTTGTAT  
A\_16\_P36567113  
CTATTCCTTGCTACTCTGAAACATGTTGCAATCTTGACCTTTATATTTGCCACCGTTTT  
A\_16\_P21558489  
AACATGTTTCTCTGTGGAACATAAACATAGTCCTCATAAACTCAAGCACTAGAGGTGAC  
A\_14\_P112209 CTGTCTAAAATGAGTTGTGTCTCACTTACGCAGGTTTTGATCTTTCTGATCCTGAAAA  
CUST\_9843\_PI426210822 ACAGCATCCCTAAAATAATAAGAGATGAAGCCCACATTCGGGGGAAGT  
A\_18\_P26795169 CATCGTTGCCATGACCTCCCCTACCTCACTCCCACACCTGAGAG  
CUST\_3698\_PI426210822 TCAATGTTACAGCCATTTATGTCCCCTCAGATGTTGGGTTGGTCC  
A\_14\_P113994 AGAGGACTAGAGGATTCTGTTCTTTTCTTTCCCTTAGGAACTGAAATTAGCCTAATTAG  
A\_16\_P00685627  
ATGTTTGGCTCACAGTGAAGAAGCATGAGGACAAATACACAGACAACAAAAACATTTGAT  
A\_14\_P104789 GCACTTTTAGGTAAGTGGACTTCTGTTCAATTTGCAGAGAAATCTGATAAACTGCACATTT  
A\_14\_P105503  
CTTCAACAAACACAGAAATGGGAATTTAATTGCGAGTCACCAAGAAAACAACAAAATAGC  
A\_14\_P111417  
AAATAGTCAAGTTGCTACTGGAACCCCATTTGCAGAAAATAAAAAGGAAACAGTGTAAGAA  
A\_16\_P15659273  
ACCTCCACAAACTACAAACAAAACCTTTTGATGCTTCAAATTAGTCCATACCAGAGTGTTT  
A\_14\_P104500 GATATGTATTGCTCCAATTTCAACTTGCTACTTGATCACATTTACAAAACCTTCCCCAC  
A\_18\_P25342829 AGGAATTTACTGGCAGACAACGAACATCCCTTGAAAGCATCAGAGCATTAAAGAAA  
CUST\_2697\_PI426210822 GATGATGGGGCGGGCTAGGCTTTTCTTCTGTACCATGACCAGGCG  
A\_14\_P105150  
ACAGAGAAAAATTTGGTTCAAGGAGGCTGTATAGGAGAAAAGAGATGTCAAAGTTTATGA  
A\_16\_P03705284  
ATGGTTCAAAGGTCAAAGTAAAGTCTGATAGCATGATTGATATATGCAGCCGAAAAGATT  
A\_14\_P129840 GAAAGAAACAAGTTACGCTTTGCCACTATGTTTTGTTCCCTTAAAATATAGGTGCAAGTGC  
A\_14\_P137974 TGGAATATTACCAGACTTGACTGAATTTTCTCTGGATCTTACCCTTTTTTCTTTTCTTGA  
A\_18\_P22841731 ATTAAACCCCAAGAACAAGATAGAACCAGTGTTGATTGGAATTCAGAGCACGTGAT  
A\_14\_P118397 TCACATGAAAGAACAGCATAACATTAATCATCAAATGCATATCAGAGCAAACCTCTAGGC  
A\_14\_P130108 ATACGAGTCCCAATATGCCATTACATTTGTTTATGGGAGATACTGCAAGTTTAAAGGTAA  
A\_18\_P14133536 CCAACCTCAGTATCTAAGGGTTAAGGGTGTGCAAGAGAGTGCAATCAGTATT  
A\_14\_P116090 GTAGTCAATAATTGACTACAGATACTTGAAAGATGACTCATCAAAGCATGAGGGGGAATT  
A\_14\_P125315 CTAAGTTAGAAAAATTTTGTGACTGCCATTTGTAAGATATGGAGACACATAAGCCAGCCT  
A\_14\_P136255 AACGGAACTCAAATTTCTTGGTGATGAAACCCATAATAGAGATAGAGACATATACCAAGCA

CUST\_591\_PI426210822

AATAGTTGTCAGCTGCATAGTTGGATAATTGGTTTGGACTTAGCGGGAATTAGTG

CUST\_4699\_PI426210822 GTGTGAGTGAAGAGGTGGGAGAGTGTGCTGAAAGGTGGGCAGAAG

A\_16\_P03241705

CTCACTGAGCACACCAATATCATCACATAGAATTATCACAGAGAACTGTATAAACTTAGT

A\_14\_P116243 AATTTTCCTAAGCCCCTCAGCCACAGATATATAATGTGTAGTTTCTGAATGAGTGAATGA

A\_16\_P00764858

GTCCTTCTTAGTCAACTCATATTTGAAGAGTCACATATCATCTCCTATCACATACCAACA

CUST\_3150\_PI426210822 GAGTGGCAATAGTGAAGTGCAGGCCAGAGGAAGGGCTGTTTCTAT

A\_16\_P02446001

TGGATAGACTTTAATATCCAGATAGACCATCTTTAACATATTAATAAATAGATATGAGGGA

CUST\_8623\_PI426210822 TCACCACTTGTGAGTGTATGATGAGTATCTGCTGTGCTGGGAGCTA

A\_14\_P126302 CTTATTTCTGGGAACAATTTATTTTGTGCATCTGGAAGCAAGGCAGAGAAGACTACTCATT

A\_14\_P121885 AGTAATTATGCTATCTACAGGAGGCCAAGGTTTTTCACTTGGTAATTTAATTCAGCAAGC

A\_16\_P01397873

AACACGCAACACTCTATTAACGCATGAATGTATTCTCACCGAACAAGATTCAAACAGTAT

A\_14\_P139908 CAAGAGATGCTTGCTTGTCTATTGCTGATGGTTTCTAACAATCATCGGCTTTATTTTCATT

A\_14\_P201516 ATCCACAGAGAAAGATGATCCTCGTATTTCAACAAGTTTCACTTTTACTATTCAAGGCTT

A\_14\_P200218 TTCTGGTGCTCTCTGAAGTTAGGAAGTATTTAGAAGAGGAAGATTTGTGCTTCCAG

A\_16\_P30952660 CATCTTTATCGCCTCGATCAAGTGTGGAGTCACATGCTAATGTGTGCTAAAGAA

A\_14\_P126321 CTTCTTTTACCATGCCGGCATTAAACTTTTCTCAGTCACAAGTAGTAGAACATTAATCT

CUST\_4086\_PI426210822 AATTTTGGATAACCAGCCTTCTTCAACCCCTTACATGCATTAGAACTTC

A\_16\_P19891523

AGTTTCCAGAAGAAATTGTATGCATCGTAATGTAATGTGCAACTCCTCATAGTTTTGTGG

CUST\_7765\_PI426210822

TTAACTGATCTAACTCTGCCAGATCCAGATTTATCAGTGGTTTTGCAGTGGTTTTATC

A\_14\_P107906

AGAAAGAAGAAGGAATATTAAGATCGGAGAGGAAGTTCAAGAGAGAAAAGAGTTTTTCTC

CUST\_4932\_PI426210822 GTCATCCAAGAGGGCCTCAAGGTGCCAGAGAGACCAACTGAAAA

CUST\_7119\_PI426210822

AATGATTGATTATATCCTGTGTCAGCTGGAATCCTGCGACATGTTCTAGTTTCCTA

A\_14\_P113094 AAAACATCATTACTTCTCAAAGGCAACTTGAAGTACTGAGTCTCCTGCAATTTAAAATGACC

A\_14\_P122390 AAGTTCTTTTGTCTTTTGAACAGTAATTGGGAACCTCTTCTCTTGTCAATTCCTTTAC

CUST\_10172\_PI426210822 TTAGAAAACAAATCTGTGAAATGGCTCAGAGAATGTGTAAGGTTTGGCAACCC

A\_14\_P139132 CTCCATGACTGTGTGTTGTGAAATAAAATGGTGAAAGATCACGATTAGCAAGTGTTTTCT

A\_18\_P16256109

AAACCATGCAATTACACACATGAAAGAAGTTTTCTGCGTCAAATATTTTTCATTGCTCCAG

A\_14\_P115920 AAACCTATTGCCATTAACAAGGTGCAGCCAAAACCTGACATTATTCATGTGTATAAATCCT

A\_16\_P38941347

ATGTTATTTTCCCCAGTTATTATGAAGCCTTCCTGAAATGAACTTTAAATATCGGCCACC

A\_14\_P133758 ACTGTAGGTGAACCTAAATCTAATATACCCACCTTTACTACTGCTGTATCAGTGATCTTTC

A\_14\_P119941 AGAGATATGTGGAGAAAATCATCATTCATGAAAAATACAACCTCTGCGACAGAGGGGAAATG

A\_14\_P120377 GTGGCCCATGGATATCCATTCCTTCTCTATCAAGATCTTCATTTTATAGAAAAGAAAGTG

A\_14\_P139697 AAAACAGGCCCAGAAACCAGACATATATTGATTGAAGTTAAGGGAAAATCCTTCCAG

A\_18\_P13854123

TCAATTAATTTGTTTTATTTTATTCCAATGAGGTAATAAATGCATCAACCAAAAATGCAGA

A\_14\_P125229 CCTTAGGAAATGATTCTGCTCCATAGGATATTGTTATCATAAACTAGCCAGAGCCATTTTC

A\_16\_P16579532

GTGTTTCCCTTTTAGTTACATAACAGACACTCATTACGGAATTGAACAGTTTTAGACCCA

A\_14\_P105948 TGTGCTAACTTTTGCCTTTCAGATTTTAAATACGGAGACTGGAGAACTTTAATCTTACCC

A\_14\_P129760 GTGAAGAACTCATCAACCAGAGCCAGGTTGAACAGGTAGAGAAGCAG

A\_14\_P130029 GGCATTGAGAAAAAATAATGAAGGCATTTTACAGTCTCTAAACATCTTTAAGTGCCATG

A\_14\_P110897 ATGTGAAAGGTTCACTACTAGTAAACTGCAGTCCTTTGAGGATTTAGCCAGTATTTCTAC

A\_14\_P110810 GTAGTGAAAGCCCTCTTCTGATATGCTATCATGAAGTCGCACTAGAAAAAATAAGAGAA

CUST\_4152\_PI426210822 AAGCAGAGAGGGAGAAGAGGAAGAAGCCAAATGAGATGGTTCGTAATT

A\_16\_P16191356 CCAATTCATATGGTCATTGCCTCTGGCTTGTGGCTGATCATCTTGTCT

A\_14\_P138342 AAACCTGACAATGATGTTCTACCTACTTGTACATGCTCATGGAAGACCGTGCAGTATT

A\_14\_P135282 TTATCATGTTAGAAAGTTTGCCATCTGGCCTGGAAGCAACTATTTTTAAGTCTGTTTAGG

A\_16\_P19818139

AAAGAATGGGATGGTCTATAAGAAGAATCGCAATAACATGGCATAAGAACTCAACCTTTG

CUST\_10358\_PI426210822 TTAAGGGTTTTCCAGTATGACTTGGGAATTGCAAGCTGATGATACCATGGTA

A\_14\_P136164 ACTCATCAGTAAATCAACCTCATGTTCTAATCTTAATATGTGTCAGACACCCACAAAAGC

A\_14\_P107818

GAAAAGAGAGGACAAGGAAGAAAATGAAGTGTATAAGGCAGAGAAGACACTAAAGACTAA

A\_18\_P15129593

ATTTGAGGCTGATATTCCTGTTCACTTCTTCTACCAAAATTTGATCAATAGGACCTTTGC

A\_14\_P119722 CTCTGTTAATTTGTCAGTAAGGTCAATTTGTCTGCTCTACTTGGAACATATGGGTTTTGAA

A\_16\_P15751512

AAATGCCAATGCTATAAGGAATACCATCAGTGAACCTTATCCCAAAAGGTTATCTGCTACA

A\_14\_P115031 ATCCTTAGTTAAGAAGAGGCAAATGTTCTTCTCCATTAGCAGCATCATTTAAACAGATG

A\_16\_P18023353

TTGGGATTAAGGTCTTCACACTGCATACTTTTCAATAATCACTTAGAAAGTCAAGAAGCC

A\_18\_P11977812

TAACCAGGAAAATACTCAATCACCTATATCTGTAATCCCCATCATAGTTTTTTGTCCCACA

CUST\_10068\_PI426210822

TTAAAGTAGATGAAACCTCATCTCTCTCCCATAGTGTCATAGATAAAAATCACAGTTGAAC

A\_16\_P21586826

ACCTTGACTTTGACAGAATTTACTCAGGACTATAACAATCATGATAAAGCCATAGACCCA

A\_16\_P41728449

CCAGGTTGATAGGACAGAATCAGTTTTAAGAACAACCTTATCTTATAGTCATCCCCAACAC

A\_14\_P201572 CATTATAAAAGCCATGGTTCCCCTCCTTCACATAGCCCTTTTGGTATTATTTGTAATCAT

A\_18\_P13077067

GCCCATTTTCATTCCATACTACTAGCACAAATATAAATACTATATCCACCATTGTCTTGTG

A\_16\_P19173919

AACATGTCAGTTCAGATGCAAAACCTTCATTCTATAGCCAAAATTTTTGTCTCTTGCTC

A\_14\_P124806 TGCTATTGAAAACCTTCTAATACAAAAAAGAGAGTTCCTGCGACAGAGGTTTACAGTGAT

A\_16\_P15962231

AAGCCTTCAACAATATAGCAACATTCCTAGAATCCTACTAACTTCAACTCATGAATGGGT

A\_16\_P33580345

AAAAAAGACAGGATTATAAAGAGATATCAAAGCACGATTTTAGATAACCTAAACGGCCCA

A\_18\_P14138676

TGCTCAGATAACATATTTATGTATCGCTTTTTCACTAAAGAGAATCTGACGGCATCTGGA

A\_14\_P132811 ACTGAACAAGATTTGAGATATTCAAGGTGGACCTTAATTTAATTCAATCAAACAAGCGGG

A\_14\_P121548 ATTCTTCATTATGGACAGGCCATTATGAAAACTCTTGAGGGTTGATTATATTTGTGCCT

A\_14\_P120104 TTCTTATTTCTGTGCGTTGCAAAACCCCGAGAGAAATCCACTAGCGTC

A\_16\_P00783820

AATGGAAAAACCAAAAACGACCATACCTATTCTTTTTCGCAGCAACGTTATTAACGAAGTG

A\_14\_P129958 CTTTCTTTTCACATGATGCCTTGTTCTACGGAAACCATTTTTGTCTTGTTTTTAGATGA

A\_14\_P116038 TATTTAGATATGGTGTCTTTTTCTGTTTTTGGGGGGGAGTTTTGTTGTGTTTTTTTAAA

A\_16\_P18026211

AACTTCCACATTACCAGTGTAATTCATACCACAAAGCAATTCACTTTACCTTCTAGTTGG

A\_14\_P109382 ATGTCACTTATAAGGGGAGAAGTGTTCTTAAAAAGTCAACCAGAAAACCTGTTATGCCTTT

A\_16\_P18357095

AATGGGAGTTAAGTTACCTAAAATTGCATGAATCACAAGACCTTTTTTACACTGCAGACAG

A\_14\_P130781 TGCTGTCACCTTCTATCTCCCATGATTCTGTTGGTTTCTTCTGATATTTACAGCATAAAT

CUST\_10360\_PI426210822 GATGATACCATGGTACCACAACCTGCAGTGTGGCAAGCCTACCAG

A\_14\_P135339 GTCTAGTCAGGGGGAAAGCCAAGGCAACCAATATTTTGGTTTTTATAATTTTCATTTGTG

A\_18\_P17179246

AGCAGAACTTTTTATGATGACACTACGGGTTGAAAAAAGGCATAGTTTTGGTTTTATGAA

A\_14\_P131671 CTCATTGCTAGCAATGTCCACTCCTTTAAGTGATTCGAAATGGCTCAAATTTCCAC

A\_14\_P111976 CTCTGTTACTTGGAGTGTAGTATCAGAAAACTAGGACATCGGTTTGATGTAAGTAAGGA

A\_14\_P137916 CTGCAAAGCCTGAATTTTCTTGAATAAAGTGTTACTAATGAATTCCTTCTCCTGCTCAGC

A\_14\_P117100 ACAATAACAACCACTGCATATCAGCCATACTCATGTTCAGTCTTTCTGACATTCATTTACA

A\_14\_P101919 CCATAAATTTGATGGTAATGCTTCTAAATACTTGGCCTTTGGATTCTGCCTGAACTAGAA

A\_14\_P117560 CTGTGATTTGTAAAAATAAAATCTTTAAATCTCTCGAGCCCCACGTCTCTTCTTTTCAGAG  
CUST\_4232\_PI426210822 TTTAATTGTCAGAACAAAGTGAAAGCGAACTCAGAGTGGGACTTGGGATG  
A\_16\_P00907342

CTATAAAGACGTCTTTCACTCCTAATCACAATTGATTGTCAATTAGACCCCCATTTGTG  
A\_16\_P18889997

AAACATCCCAATCCAAATTTTAGGAAGAGGTATGTGATGACATCAAATAGCACAGGACA  
A\_14\_P200801 GGGCTTGAATTTGAAGCATGCTGAAACGTGTGTCTTGTAAACAAAAATGGTTGTTTATA  
A\_14\_P201036 ATCATCTCTTTGCCATACTGATCCACAAAAGTTTTTCATTCAGGTGATAACTCCTAAAA  
A\_14\_P128540 GTATTTAGTGTCTCTGGTTCTAACAGCATAATTTCTTTCAGCAGTGTCAATAAGTATGGCT  
A\_16\_P03748788

ACTTCTATTTTGCTTTTTCCAATGCAAATACACAGTCTGATCCCTTAAATACCAGAAGCG  
A\_14\_P129302 CTGGTATCAAATATTTTGCATAGATCTTAAGGTTGTTTCAGCAGCCACTTCAAAGAGACTG  
A\_14\_P122499 ACATTTCTGTCCTGTATGTATCCAGGGTTATAGGACGTGATTATAGGACACGCATATATG  
A\_14\_P120620 ACAGTTCAGGCATCTCAAGATGAAAATTTTGGTAATACTACACCAAGAAACCAGGTTATC  
A\_14\_P132572 CCAATGACCCATTTCTGGCTCCTCAGATGAGGAAGAAGAAGAAGAG  
A\_16\_P15832556

ATCCTTGCCATCATTAAGAATAATCCAGTGTAAGTCATTTCTAAACTACTTCACGGTGT  
A\_14\_P131566 TATCACTTTTCAAGAAGGCAAAAACCCCCACACAATCCTATTGTTATCTTCTTGACTAAA  
A\_14\_P106071 ACATTTGGCTTCTATTTTCATCTCTTTGAATGGGTAACATGTAATCTTATGGTGTCCCTT  
CUST\_1740\_PI426210822 TGAATTCTGTACCTTGCTCAGTCTCTTCACATCTTTAGTCCTGATAATCCC  
A\_16\_P00685428 TTTGCAGTGACTCCCCTCAAAGGCAGAATGCAATTCTCTAAAGGGAAAAAAAAT  
A\_14\_P112386 CTGATATCTCTCCACAGGACTAGGCTCTAAGCCCCTCATTTCAATGAG  
A\_14\_P125329 AACTTTATGGAGGCTAGCCAACTACTGACAGATTCTAGTGCTAGAAAAGAAAATACCTAC  
A\_16\_P18375686

ACTGACACCCGATAAATAACAATTACAAATGATAGGGACCAGTAGAGATTCTCACTATGT  
A\_14\_P106988 AGAGAAGAGACTGCATTATGCTCCCCTTACCACATCCCCTTACAAGTAAATGTAAAAATTC  
A\_18\_P14965298

ATGCGAATGTTTGAAGAAGAAATAGACTACCAGCAAATATAACTCGTTTGAATCGTGGC  
A\_14\_P131601 ACATTACGAAGACATTCCATTACAGAACAGATCCAGTGGTTGCAGATTACAAGTATG  
A\_14\_P117656 CTTGGAAGTCTCCTCAGTTCGAACAGACTGCTTATCTTTCTTGCTACAGATC  
A\_16\_P17998154

TCAGAATGTCTGCTAAATCAACTTTTTTTGACTGGTATTACTCACGTTATCTATGGAACGC  
A\_16\_P18500997

ACTGCACTCTCATCAATTTGCTCTCCTTCTCTAAACTCCTAATGATATTTCTCATGACAG  
A\_14\_P124764 GGATAACAATAAGATGACAATTTTGATTCCAGTTCCTACTTGACAAAGACTAAAAGCACCC  
CUST\_5614\_PI426210822 CAGTCTGAAGCCACTTGTTCACTGGCTGAGGAGTTGGATGTGATT  
CUST\_9613\_PI426210822 TTGGAATGCCTGATCCTGCGAGTCACTGCAGCCCCCATCTCATAA  
A\_14\_P125100 CTGTCTCTGTTTTTTGACATTCTCCACTGCATGGCTGAGAACGTGAC

A\_18\_P22839783 CTTGAGATGATGGAGAAGAGAATTTGGGATGCATGGTGTGTGCCAAAGAATAAAT  
A\_18\_P11657933  
CGATGCTCCCAAACTGATAACAAGATGTATGCTTTATTGAGAACAAGATTCCAACACTT  
A\_16\_P01748101  
CCCCATGATTTTTGTAAACTCTACAACACTCTCAACACATCAATAAGCAGTCTGGATTTA  
CUST\_3530\_PI426210822 AGCTGGCAGTTGATGCAGGTATCAGAAGCAAGTGGGCCTCGGAGG  
A\_14\_P117653 TTCACTCCGGAACCTTCTGATAGCAAGACCAGAGAAACATGATAAATTAACCAAAGACTA  
A\_14\_P110464 GCACTGAAAGATTAGTTATAATCCAACGTGAACCTGAAAAGGGGAAAGCAAGCGATATCT  
A\_14\_P113839 TTAAACATTTCAAATCCTCCTCCTCCTATGGGTTCTCTCTTGTAAATGTGATTATAIG  
A\_18\_P12594721  
AGTTTCTATAGTTACTTCACAAGAAAAACAAGGGAGAGTGGAAGAGGCTAACAGTCAGA  
A\_14\_P138613 TTCCAAAGATGCATATGATTATAGGATTATAGGAACTTTGAGGAAAAGTGCTCTAGGCAAT  
A\_14\_P116301 CTGCCACTATAATCATGTTTTGGCTGAACATATTTCTTGCTTGAGTTTATGTGGCTTTTG  
A\_16\_P15704801  
ATCGTATGTTAACTACATGACTGCTTACCCATTAGTCTGAATTAACAAGTTCCTCTACCC  
A\_16\_P15274163  
AAAACAGGTTCTGGTTCTACTTCTTCTCCTGTAAATAATTCAGCATGTGAATAATGGGC  
A\_16\_P35833441  
AGTCCTCATGTTAATGATACTAACGATAATGACAAACCAATTTTCACTGAGGTCCACAGT  
A\_16\_P16988005  
AAAATGTCCTACCTTTACCAGAAAATAATCTGTGATCACAAGTTTTGCCTTTCTTGCTT  
A\_14\_P123714 ACTGCACTGGTCATTGATAAAGATGTATTCAAAGGCTCACTGAAAAGAGTCAAAAATATT  
A\_14\_P119769 CTGTGAACTTGATTCCAACATGCTTCTAAAACCAAGTGGACAGCCTTGTTGT  
A\_14\_P138984 TGAATAATCCAGTAAAGATTTAGATAAACGCGTTAGGAATTCAGGGAAAAGAACGGCCTA  
A\_16\_P03326208  
AATGTCGTTGTCCAAGAGATATGTTGAAACCCAAAGAAGAATTGACCTAAAACCATGTAT  
A\_14\_P116903 TATATACAGTCTTAGAAACATTGAGTTCATTTATGGGGTCAGAGAACTCCCAAGGAATA  
A\_18\_P16460028  
TACGTTATGAGTCGATATTTCTTAAAGCATGTCTACCTTCCATAATGCCAGAATTCCTCC  
A\_14\_P130732 AGGATGAGAATTTTAAAGAGGAAGCATGGTATCTCTTGTCACCTCAGCAAAGTGATCTT  
A\_18\_P14136159 GATTCCCATGTTTGCTAGTTACATATGGCCAAGCCCTTCAGCCTTTCT  
A\_14\_P123920 CATTTAAATATCCAGGATCCATCCCCAATAGGGCGTCACCATAAACAACACTATCTTAA  
A\_14\_P127273 GCGACTGGACTGCTATTGTA AAAAATTCTTTTGCAACTTTTCTTTCCATTCTGTATTTGT  
A\_14\_P110954 GAAATCCTTTGCTTGATTCCATTTCTTGTTTCCCAAGGGCTATATATGCCAAACTTTTAT  
A\_16\_P21221282  
TTTTAAAGGCTTGCTTAGTTGATACAAATAATGCTCTCATAATATCCTCATCTGTGCGCA  
A\_14\_P128201 ATCTAACCCCTTCCTAAATCCCCCACCATTAAAAAAAACCTGTTGTAAGTTTAGAATGCAA  
CUST\_8693\_PI426210822



ATCACTGACCATAACAGGAGCTTAAAATTAGACATAAATGGAGGAATGAATTGTTTTCCC  
A\_14\_P122762 TTGCTTTAGTTGCTAGAATTTTACCCGAACGATGCAGTTATAGATGAGGGACCCTATAA  
A\_16\_P00994845

TAATTCCAGTGTATTAATACTTCACAAACTTTTGGAACCTCTTGTTTTCCAATGACAGGTG  
A\_18\_P11512454

ACTACCAATCTACACTTAACATGACTAGTATCTCCTTGAGTTATCTCCAGTCTTTGTGGC  
A\_14\_P134716 TTTTCAACGTCTACTTTTGTATTTGCAGAACATCATCAAGAAGGTGATCGGGCAGAA  
A\_14\_P113189 CAAGTCCTTTTTCCGCTTTTGACCAGGGCTTTTCCTTTCCAAATCTGAT  
A\_18\_P22842665 TTCTGACCAACTAAGCCCCTGCTGTCACACCCTGCTCTTGATTTA  
A\_14\_P119771 GCAATTTTTTAAACGTCAGGACTGTCATCTGTGGAATCAATTGAAAAGGGAATCAACACT  
A\_14\_P201935 TGCTCTTTACATAGGGTGGAGAATTGTCATGTCTTCTCTAATTTTTCCAAGTAAAGTGGT  
A\_16\_P19804719

GACATCAGGACATCAGTAGACATCATCAGCATCAGTTACAGATACCCAAAGAGTAATAAG  
A\_14\_P123262 GTTAATAGTCTGGGAGTGGACTCTCAAGAAGTCCGATTCTGAGAAAGGC  
A\_14\_P124916 CTTCTATGGGAAAGACCAAGTGATTTCTGGAACCTCATAGTCACATATTACAATCTCTTT  
A\_14\_P115467 ACAGAAGCAAAATCAAACCTGCTATTTTCAGCACTCCTGTTTTTAACTTGGTGTCTTTAGT  
A\_14\_P136657 AAAAGTTGTTTGGAAAGAGAGAAAAGGCTAGTAAGATCAATGGTGCTTATTTCTGTGAAGG  
A\_14\_P107437 CCCAGATCGCAGTATAATACCTTAGCACTGGTAATTGATCCAAAAGGAGAAAATTCTTTC  
A\_14\_P107533

ACAAAGAGTTTGCAAAGAAAATCTCAAAAAAATTTTGTA AAAAGGTGATCACTGCCCCACC  
A\_14\_P129132 CTCCTCAAAACTAAGACCACTGTTATTCTTACGCTGGATTTCTTGAATTGCATTTTTTCAG  
A\_18\_P16594193 CCTACCTCAGTTTACACTCTTCTCTTTCATATCATCCATATAAATGTTGCCTCTCCTCAT  
A\_14\_P115763 ATAGATGGGGCATTTTAACTGAAGTATAGGGATAGTTTTAATAGGTGGAACCTGGCAGAAA  
A\_16\_P15018747

AACCCTTCCTTTAAAAGTTCCTACATTCCACTGTAGGTCAATTACACTGTAACCTGAATT  
A\_18\_P22840726

CCAGTTTCAGGGACAGGAAATAGTAGAGTTCAAGGAAAAGTTAGGACAAGGAAAAT  
A\_14\_P116482 CACCACAGAGAGATACATGATACCATAACACATTCTTTGAGTTTTCTTGTGTTGTGTTTGA  
CUST\_8513\_PI426210822 ACGTGAAGGACATTCAGCCAAAGGGACAGTTTTTCCATAGATAGCTTGA  
A\_16\_P20787201

TATTTATTGCCCTTAAATAGTCTCCTATCCAATCGTCTTGTTATTCAACACACCACTGGA  
A\_14\_P131825 TGGCTTTCTTCATACTTCTAAGTATATTTGCTGGAAAGAAGTTAAAACAATGAACAAGCC  
CUST\_5679\_PI426210822 GCATGCATATAGGAATATAGCTCATGCTATGGAAATCCACTGTTTGCACAGCCT  
CUST\_10160\_PI426210822 CAAAGGGAAGTGAGACTGCTTGGCCAGCCCTATGGCCATGTCTTC  
A\_14\_P122959 CTGTGGAAGGTTACACATCAAAATTTGGCCTACAGATTCCAGAATTTATGCAATAGATTC  
CUST\_5754\_PI426210822

ATAAAGCAAAATTGGTGCCGGGTTTGTATTTAAAGGGAAACCAAGAGGGTTTTTTTTAT  
CUST\_3979\_PI426210822 GATTGGGGCTCCAGCAGGATCAGAATGACTTCACCCAGACTTCTG

A\_14\_P110360 TTTGTTGTTTCTGAATTTCCACATGTTCTGAAGACAAATTTTTATAGCCGCTTATGGCC  
A\_16\_P16192025

TTGTTTCCCTAGGAGTTTTCTGGTTGCTTTTGGATACATGGTTATATGAGAAAATTGTGT

A\_14\_P130381 CTGCTTTTATAACTCTCTTTTATTCCCTTTCTGCCTCTTTGAACATCTTTTATTTGCCC  
CUST\_3413\_PI426210822 GAATCACTCTTTGAGTAGTAGCTGGTCCCTCAGTCTACCCCAAAGA

A\_14\_P118034 CTCATCTTACATAATTTTATTATTTTCAATTGCTGCCCCGTCAATCTCAGGTGATGGTTCC

A\_18\_P22841903 GATTTTCAGATTGCACACTTGGAGTCAGGGCAGCAGTTTGGCTCAG

CUST\_3103\_PI426210822 GTGATGCTGGATCACACTGCACCTGATGCCTTTCTCAGTGGTCTA

A\_14\_P107117 GTAAGCCCGTAAGAAGATAAAGTCAACAGTATTTTCTTCCTTCTCAGTGACAGATTCCA

A\_16\_P18224592

GAAATGCAAATATTTGTCCTTGAAGTCTCTGTAGTCATAGGATTAGCAACATTATGGGGC

A\_14\_P113049 CTTCCCTTTCTCACAGGCTAATTTTGATAAACTACCAGCAAACATGCTTTGAAATTATC

A\_14\_P122813 TATTTCCCTTTAGAAAAGCAGCCTCCTTATGTGTAAACTATAAACCAATGCAACCCTCACA

A\_14\_P106545 AGGACTGATGGACATACATTATCTGAGAAAAGAACTACCAGGTAAGACCAGTCTTTCTT

A\_14\_P101480 TTCTAGTTCTGAGGAAATGAAGAATGGGATTTTGTAAATCCCGTAACATATCTCGTCTTG

A\_16\_P16378588

AGGGGAATTTCTTGAATATCAGAGCCATTCATAACTGAGGACATAACTGGAATATTTGG

A\_16\_P38183115 TGATGACAGCAACTTACATCCATATAATATCTTTGTCCATCCTATTCTATCTTCCACCTT

A\_14\_P103112 ACTCTTCATAAAAATGTGAGAAAAGCACAGTGGTTATAAAAACAGAAGGGTCTTCCACAA

A\_18\_P25891818

ACATCGCCAAAGATATGAATCATCATAGAAAACAACGAGAGAAATACTACTACTCTAGGA

A\_14\_P103511 CTCTGGAGAGGTTGGATTTTGTCTTTGTAAACACATGAATCCTTATGATAAAAGTCTGTC

CUST\_2852\_PI426210822 TTCACAGACTGCTAAGCATAATTAGAATGAAGGTCTAGGCTTAGCCATAGCCC

A\_14\_P129864 ACGCCTATTTCTGTTTCCATTATTTTCCCTGCTCTTAATCAGGACTGAGACTTTTCAAAA

A\_14\_P111661 AATAGGCCTGAGTCTTCTCCAGTATATTTCCCTATGTGCTTCTTAAATCTCTCATTTCCCTT

A\_16\_P19564646

CCAGTGAATATCACATAATTGACTCCAACCTAACCCTTTTTAACCTTACAGCATAGACCAC

A\_14\_P108102 AAGCAGTGAGGAAGTTTAAAGATGCATGAAATCTGTAAAGTCTCAGAACAAGAATTCTCC

A\_14\_P124895 CTGAAGGTGCTTCTCTTGGCGATTCTTATTTTAGCCATATGTTTCATAGGATTTCTGTAGGA

A\_14\_P118237 ACTTCCCTTATCAAGTAGTGTGGATACATACTGTCTGTTACTTAGCAAATACTGAGTG

A\_14\_P123382 GAGATTCCGATAACAATTAGTGCAAACATTTAGAAGATAAATTGGCCTCCATTCCAAGGTA

A\_14\_P136818 GTTCTGCTAATGATTTGGGAAGATTAAGTGGTATTTCACTTAGTTGATTGTGGGACAGAT

A\_14\_P119746 CTTCTTTTTGATCTGCTGCTATGACATTTCCACTCACTTGCTTAAAACAGTTTCCTTTTT

A\_14\_P134287 TAATACCAAACCTTAGCCAGTCTAACTGTAACCTCAGATGATAATCTGACCACTTCCTGGTA

A\_16\_P03430126

CAGGTGGTGTATGTCCAATGTAAGTATCCTAAGAGCATGTGAAATGAATTTTTGGTTGG

A\_14\_P106400 TATTTGGGAATTGGCCCCAGTCAATACTTGAAAAGAAAATATTGTTTGTGCGAGTGTCTAT

A\_14\_P137557 GTGCAATCAAGCATGTAAAACCTATAAACAGTGAATGTTCCCTTGTGTTTTTTGGCAAAA

A\_18\_P10781005

CACACCCAAAGTTCAGTAATCCAGTTGTTGCATGATATTCAATTAAATTGCACCTTTACG

A\_18\_P22840868 CTGGGTTCTTGTCTCTGACCAATCCCAGTCATGGCTCTCCCAT

A\_16\_P19626025

AACATCAGGATGGCTATGTCTAAAAAATAGGATGAACAATAACTAACCTCTTCAGCCTCC

A\_14\_P112099 GTTATATTTGCGACAAGTAGGATACTTGTGGTTGACTTCTTGACTGATAGAATACCTTCA

A\_16\_P15093138

TCACCCTTACCAACACTAGATATAACTGTAAATACATAAATAAATCAATCTCTGCTGGT

A\_14\_P114792 GAGCAAATGGGATGGTGCATATGATCGGAAAATATATGGTAAACTAAAACCTACCATTCA

A\_14\_P135298 TGGCTGATTTGGACTATAAGACCAAAAGGAGTGTGGCCAGAAGCAAGAAATAA

A\_14\_P135910 TTACTATGACATGAGGCGGCTGTATACAATTTTGGGGTCTTCTCTATTTTACAAGGTAAG

A\_16\_P15589507

TGCCCCATACTAGGCTATGAAATAGAAGATAGGATTAATAAATAGACCTGGACATTTCTGC

A\_16\_P16843776

GAAGTTCAAACACATCATCCATAGCAACTTGAAGTAGACTCCTATTCTGTTTAACCATGC

A\_18\_P22840134 TAAGAGAGGAAGCAAGGTGGGGCAGGCAAAGGGGTTGCTGAGCAT

A\_14\_P114907 CAGTTTTCTTGGGCCTCATGGTAATGTTACGTGGTTGATACCAAATGA

A\_18\_P10526611

ACCGAGCATCAACTTTTAATTACCAGCAGTTACTTTTTTTTTAAAAACCTGCCACTTGAGA

A\_14\_P201697 CAATCATATGGCAGCGCCAATATTTTCCACATCATATAGGTTTCAAATCACCTAGTCATT

A\_18\_P19003338

CTTCCCATTACTGAATCTTGCACTTTTGTTAATGCCATGACAATTCTCAAACCTCACCATC

CUST\_8791\_PI426210822

GAAAAATAATTGCCTAGTTCCCTCATGTAGAGAAGTTGAGCTATTACCTTGACTTCCC

A\_14\_P137346 CAGTAATGTATTTGAAGGAAAAATACCCTGATTTGAAACCAACAGCAGATGTTGCAAACCT

A\_14\_P116928

AAACAGAACTTGAAGAAAGGACAAAAACAAATATAAGAAACTGCAGCAAATGTCAGCAGG

A\_14\_P118603 ACTCCTCCTGAGACTTAGGGATTTTCAAACCATTTCAAATAGAAAATGAAAGTGTAAGGA

A\_16\_P20311340

ATCCAAGTATTTCCACAATTTCAAGTTCAATCCTATCTTCAAATTCAACCACCTTCACTCA

CUST\_5722\_PI426210822

CGTTAGCCTCTCTTTTCTTATCTTATGAGATAATTTAGGAAATCAAGTACAAGGCCCTTG

A\_14\_P130627 TGATGTTTGGCATTCTTAGATGTTATTTCAAGGGTATAGGCATATTGTTGGCATCTAGGT

A\_14\_P115230 CCCACCAAAGCATAAACATTCTGAATAGAAGAAGAGATGTTCTATGAAAAGCAATGGAAG

CUST\_8816\_PI426210822 TTCAAGACCCAGTTCATATGTCCTCTCTGTCAAGGCTTCCCAGAT

A\_14\_P200223 ACAATATCTAAAAAGAAAGTGACATGAAGGAAGCAATCTACAACCTTCCGCTTAGCG

A\_14\_P113485 GAAGGAAGGAAATACAGAATATTATGGCCATGGGAAAGAGGTGTCAGTGTGAA

A\_14\_P121014 TTTCTCCTGGGGAGAGAAAAGTATGGGAATATCCATCTAACATTCTGACTTTTTTTTTTCTC

A\_14\_P111819 AGAAACTGGGGCCACAGAACTTCATTGATGAGACCAGTGATATAGAAAATTTACTCAAA

A\_14\_P128280 AGGGGAGTATCAAATCACCAGGGAACCTCTTTGAAAATCATTACCTTGATTATTTTTTTT

CUST\_9309\_PI426210822 CTGATTCCATAAGGGAGGCTGGAAAACCCACGTCTGGAGAAGTA

A\_16\_P18103972

AGGCTAGACTACACACATCTTTTTTGTGACTATAATGAACTGAACTGAAAAGGCTTTCCT

A\_16\_P18864406

AATCTTACTTCTAGAACGTAGTCACTGGTCATTTCTATGCAAATTTACCCTCTTCCAGT

A\_14\_P137657 TTCCACTTCCCTTTTGTGTTTTATATTTTCTCCATCTCTCTTCATCATAATTGGCACGA

A\_16\_P17731119

ATTGTGTTGTCATACAATGATGTCCTGAAGAGTAACTGATGTGTCAAATACAGTCACCTT

A\_16\_P58424366 TGGAGTCTATGTCCTCTTGCTGATCTGTGAACCCGGATAAGGAAATGATT

A\_16\_P02621035

CTCAAGGAGTTGACTCTAATAAAGATGACAACACAAAAGGAGATAGAAGACATCACATCC

A\_14\_P134133 TTAAATCTTCTTGTTTAGGTTTGTTCGGACAGTGTTACCATTTTCTCAGGAATTTCAAA

A\_14\_P123604 CAAATGTTGGGCTCATAAATGCAGACAATGGGAGATGAAGATTCCCCAGAATATA

A\_14\_P100502 AGAGGAGACTCAAATCTCCCTACTGTATACTCAAAACAATGTGACTTCCTTCCATTATAT

A\_16\_P02865765

TGATAGACCCACCCTATAGAATTGTGATAGACACACCCTATCCATCTAACCATTAATAGA

A\_16\_P21523620

AGTTCAGTTCTTCAGGCTTCATTTTGTGTTTTTCTTTTCATCTTAGTCTCTAACTTGTGA

CUST\_142\_PI426210822

AAGACTTTTTTGAGGCTTCTGAAAAGCCAATGTTGTTTTACCCCAACATTTAATCA

A\_16\_P15227765

AAGAGTAAGAGAAGTGGA AAAATACCTGACTGTGATACAATCTCCAAAGACAAAAGAAGG

A\_18\_P22840115 GGGGCTTCAGGGCGCTCAAACATCTGTCTTGTGAAGTTCTGTCT

A\_16\_P16141203

TGTGGACATCATTAGACAGTAATATCTCTGTGACCAAACATATGTATTCCTGACCAGAAA

A\_16\_P19971394

GATGCAGTTCTGTTATCTCATCTTCACAATTCATCTGATAATTTAACCATACCCTCCTC

A\_14\_P122875 ATAGTTTTCTCTCATACTTTCCCAACTTTGTCTCATTCTCTCCTGAACTCATATGAATC

A\_16\_P18881837

AACCCAAGCATCATAACTCAATTGAAATCTTCACTTTTTCTATTGTCACAGAAAGGCACA

A\_14\_P103725 CTGATAACAAGAAAAGGAATCTTAAAATTATAAATTTGCTGTAGAAAAGATAAAAAACA

A\_14\_P117670 CTTCAAGTTCCTGGAGTTACAGAAGGACTTAGTAGATGATTTTAGGATACGATTAACACAA

CUST\_8247\_PI426210822 GTTGATCCCTTGCAGGGAGAGCCATCCCTGCACTAGCCCGCACTG

A\_14\_P123958 GGTAAGATAATTATTATAGATAACTCAGAGCAAGCAGACCCCATCTTTCTTTGTCTAGGG

CUST\_9882\_PI426210822

CTAAAAGGTTAAATAAGCAGTGCTAGGCATTATAACATCAGTATTGTGCCCAGTCACTG

A\_14\_P130699 TCATGATAGTTCATTAATTTCTCGAATAGGTGAACAAACAGATGTAATGGTGGGAAAGCA  
A\_14\_P127321 CTTGATTTCACTACTTCTACTTCCCTCTCCTAACTGGATTAGATGGCAGTCTATGAAATCC  
A\_14\_P126683 ACGAATAGGAATTCCATTTTTTTCATCTTGCATCCGTGCTATGACGTCTTCCATCTAAAC  
CUST\_8499\_PI426210822 AGACATATCTGGAGAGGCCAGGGGACCTGTGATACCTGAATTTCT  
A\_16\_P18527317  
AAACAACACTAGATGACAATTTGGTCTTCACAAATCCCTTTTAGTCATTACCTGGATAGAC  
CUST\_4953\_PI426210822 GCACAGATGCTTGAAAATCAATGGTTTCTTGACACATCTTGGCTTGTGTGA  
A\_14\_P105626 AAAACAGAGAATGGCATACTGTCAAGCACCTAATGTTTTCTGAGTAAACTCTTGTTTT  
A\_16\_P39207872  
TTTTAATCCATTATCCTCTAACGCTATAGTCTGTGACTTTCCTTACTTGAGTCTAGGTGG  
A\_16\_P02311484  
AATGGCAATACCTTTTTACTCCTTAATTCCCTTCTGTGAGTCATAAGAACCATATCGACT  
A\_14\_P126308 TTGATCGATAAAAATGAATAAAAAACACTTCATGAGCACATCCCATGACATGCTGCAAGT  
A\_16\_P15975873  
ATCACTGCCGAAATTAATTTCTTTCTAGCAAGACCTCAAGTTACTATCACTAAATGGGCA  
A\_18\_P14133387 GTAAGGAATGCTTATCCTGGAGGGCTGGGAGTGATCCAGTGTCAT  
A\_14\_P139103 ACTCTGAAGAGTTACCTAGAAGCACCTTCAACTACAGACCTGGAGCATTCT  
A\_14\_P134529 ACTTTAATTTTTTCATTTTTCTTTTAGGATATTTAGACCACCCTTGTTCACGCAAACCAGA  
A\_14\_P124606 CATTGAGGACGTGAATGACAATGCACCCTATTTTCTGCCTGAGAATAAGACTTTTG  
A\_14\_P112245 CCTCTCAAACAGTTTATAACCTAAGGGATGTGAAGAGGGAATAAGTAAACTTCATCAGT  
A\_14\_P115584 GCCAGACTGATTTCTGTAATAATTGCTTGGTGTATTAATGGGTGCTCAGTATATTGATGG  
A\_14\_P103279 GACCCATACAAAACCAGAGTAAGGGAACCTCTATTGAGACTGATTAACATACTAAGTGTC  
A\_16\_P16532852  
AGATTGAATGGATGCCCTATTGCAATAACTATTCTCACTAATGAACCGGCTTGTTTTTCAT  
A\_14\_P114740 GATGCTTTTCTTGAGTTCTTGCCAGCAAATTTTGGCAGGTAAATTATGGTTTCTTCTAAA  
A\_14\_P202388 AAAGGTGAAAATCTTTCTCTGATCAATGCCTCCAAATTGGGCATCTACTTTTAAATACTC  
A\_14\_P134442 AAAGAGTTGCATTGTGAAGTCAGAGGAACATAAAATCAGAAGTTTTACCCAATGTCAAAC  
A\_14\_P100378 AAATGGACATTCCCTTACTTGGCAGCCACAGTTCAGATGGTAGTGATGATT  
CUST\_5259\_PI426210822  
TTAGAAGATTTTCCCTAAACTAATTATCTGGCTTAATGCTAACTGCTTATTTGCTGACCT  
A\_16\_P39092801  
CAACACAGACATCTCAATTTTACTGAAGAAAATCCCTACACATTTAACATGTTGGTTGCC  
A\_18\_P22840336  
TGCCACAATCTCTAGAATCTTCTAAATCAGGAAATTTTAATGATTTTACAGCAGTGAAA  
A\_16\_P21084494  
GACTTGCTAATAACCAAAGACCATCCAGATATTCATGAGCACTACTAAACGATCATTGCT  
A\_14\_P101077 AAAATAAGGCTTATAAAGTTTCCAGAGAATCACTTATGCTTAGGACATAGCCAGTGGTCT  
A\_16\_P18299663

AAGACTTGGAGGTAGAGTAATGGGATCTAGAACTTCTTTGTATTAGACTTAGCAGAGACA  
A\_14\_P118103 TTTGGGTTGGCCATAAAATTGACTTTGGAAATGAATTTAAAAACATATTTGGGACTCCA  
A\_14\_P103335 ATTCATTGAAACAGGCAGGTTTTATTTTTGGTCTGTCCAGCACTAAATGATTTTCTTTTG  
A\_16\_P00685398

GTTGCCTTGTTCTTTATGTTAAAATGGAACCAAATCACTTTCTGTGGAAAACCTTCACT  
A\_18\_P11798845

AAAAACACCATTTCTAAAAACGGAGACCTAGAAGCTTAGAGCGTTAGTAACACTGTAATAA  
A\_14\_P129595 CCACAGGCACATGTAAGCATTCCATGTTGTATTATTGCAATACTGTGAAATTCGTCTTTT  
A\_16\_P16691929

CCACACGACTAGACCCTTAACATTCCTCGTAGGTATTTTATTGAAGTTATTCACTCTTCT  
A\_14\_P126686 CTAGAGTTCCACCTCAAGTCTCAGTCTCTTTTCCATTTCCAATATTAATTGCAGTAGTTT  
A\_18\_P12168053

GCTTTCACAAAACCATGAGGTCAGTTTATCACATTTGATTGTTAGACGTTAGTGGGATTC  
A\_14\_P102820 TTAAACAAACAGGTCCTTAGCCCAAGATCTTTCCTATCATTGGTTTTAATTTGAGGCA  
A\_16\_P40506724

AAAATTACTGAAGACATCTGTTGCTTCAGAAAATTTAGGGAGTAAATCAAGCATGTCCGGG  
A\_14\_P123393 AACTAGACTTTCAAGGAACACGTAATTCCATTGATGCATATGCTATTTCTTAGTGGGTTG  
A\_14\_P201949 CTGCATCTGAATCTTCTAAATCACCCATGGCTGGTAAGATCATTTATACTCTAGTGACAA  
CUST\_377\_PI426210822 ACAATGTTCCAGATGACGTTTGTATCAGCTAGGATACAAACATGCAAGGGAC  
A\_16\_P39860486

AAGAGTTACTTAAAACTACCACAGTTTATCATCCTGTATCACAATTACTAAGCCAGTCA  
A\_14\_P111401 TTTCAGGAACTCTTCCAGTTAACAGACAGAGTGTGGATCATTGCTAAATACTTCACT  
A\_16\_P38106599

CCAAATCTATCTGTATGTTCCCTAAAACCTAGCACTTGTATATAATTGTTTCACACCACTCCC  
A\_14\_P123130 CAGTGCCTCCTCCCTTTCGAAGTCCTTAAAATGGTAGGTATATTGATATCTTATGAATTG  
CUST\_1484\_PI426210822 ATGGCTGTGGTTTTGCTTCTCTCTCCTTCCCTCCCTTAGAGTATA

A\_14\_P100954 CTCAGTGTGACGCTTACTGGGATTATTATCATTGCTCAAAAAAGCCATTTATTTACC  
A\_14\_P116001 AGGTAGTCATTGATACAGACATCAATATGGTAGTCACCCCTCTGGAATCTGTTAGA  
A\_16\_P02786472

CCATTCATCTTGCTAACACTAACCTTTGCAATAACTCCAATACTGTTTCATGAGTTTCCAA  
A\_18\_P22841599

TTTTTAGATTTAAGCAGCCCAATCAAAGCCAGAGATGGAGGGACAGATTAGTATTGAAAT  
A\_16\_P16611056

GCGTCAAAGGTTTCAGTATTGTTCACTAATGTTCAATTGTGCACTAATCACTCTACAGAG  
A\_14\_P133073 AAAGCACAATTCTCCTAGATAACAGCCCTACGAACAGTAAGCATATCTCAAATGAGAAAA  
A\_14\_P137839 GAGAAATGGGATAGTCTCTTGGAAATTGATTGTAATGGGATATGACATCTGTCAATTGTCAA  
CUST\_3714\_PI426210822

TTCTATGAATAACTTGGCTTTATGCCTTCATATACCTTTTCTCTCTACTCATGTAGAAAC

A\_14\_P133541 TCCCTTGCTATTGCCCTTGAACAGCCTTTGTAAAGTCATTGAAGGCTTACATTAATAATA  
A\_16\_P16793998

CTTTGAACCAAGTCTCCTACTCTTTCAACAGTTGCTCAATATTCCGTCATTGAAATAGAG

A\_14\_P137152 TATGCAAATGTGTTGTGTGTCCACACACACACAAACAATCTTATTTGATCCTCACTTTAG  
A\_18\_P15928983

AAAAAAAGGCGCTGATATATGCTTTCTGTAATTTGACTCAATGGGTTTTTGAATCCTTCA  
CUST\_5245\_PI426210822 TTCTGGGTCACTGGTTCGTCTTTTCTGCTGTGTTCAATCTCCAGTAAAATA  
A\_16\_P19138459

TTCAAAAACAAGTTGCCTTTTTGATAAATCTGATCTGTCCTCTTCATCTTACCCAATAAGGC  
CUST\_3703\_PI426210822 GGTGTGGCTTGGTTTCTCATACCTTTTTATTTTCAGTCCCTGGTGTTTTTG  
A\_16\_P15504959

ACAGGCCATTTCATTTTTCATTTTTTAACAGCATGCTTTAACAACAATGACATTGGATCT  
CUST\_3098\_PI426210822 GGTCCTGGCTTTGACTTGTTCTTTTTGAGAGGTTTCTCATCCTCT  
A\_18\_P14988284

AAGCCAATTAACCTAATAAAAAACATTTTCAGCCCTAGTTTAAAGTTTAGAAGCCACAGGA  
A\_16\_P19779046

GAAAAGTGAGTTGCTTATACTACCACATGACTTTTACGTTTATTTCTGCCATTCAGAGCC  
A\_16\_P19164052

GGTGAGACAACCCTATTATAGCCCTATTACAATAAACAGGAAAATTTTTGCAGCAGTCTC  
A\_14\_P119712 CTGGACAGAAAGAAGTCAATGTCACGAAATGATTTTCTATTGTAGATACTTTGTCCCTTG  
A\_14\_P121359 TTTCTCCAGTGATCAGAAACATTGATATCAATCCCTATTAAATTAGTGGGGGGAATATTA  
CUST\_1401\_PI426210822 TTCCCCTTGCTGGCCTTCAGCCTGGGCCAGAAGTGGGGTATTCTTA  
A\_16\_P18661271

TAGCACCTTAGACCAAAAGAGATCGGAAAATTGAGTTACCTGTATAATCTGGGCATAATT  
A\_14\_P139587 AAGGGATTCTCATCTTGTGACCTGAAAAAAAATGCTGGTAATAGCCACTTAAATTCATC  
A\_14\_P110233 TACTTCTAGAATGAACCTTGTCAAAGACTCTAATGTGCACTTCCTGCTTTTATAAGAGTG  
A\_14\_P136668 TGAAAAGCAGTCTGGAGATTGTTATTGCTATTTGGATCTTTCCTTGCTTTGCTTTCCCTTT  
A\_14\_P105022 ACAATTAAGTATTTCTGAAGTTATGTTTTTAGAAAAAATTACTACCAGTATAAAACCTCT  
A\_16\_P19933819

CTATTTGAGAACCTGAGAAACCTAAAGACAGTCCCTTTAAAAATCCTCAAGCACACATTT  
A\_16\_P03798871

GGGAGACTGAAAACACTCAGATGGTAGGCAAGTCATAATTGTCAATCACAACTCAAAAAT  
A\_14\_P114362 ACATTGGTGCATTGGATCTCACTTTAGATAATCCCTTGATGGAAGTAGAAACATCAAAAAT  
A\_14\_P123589 CAAAGCAAATATGGTGGCAAAATGTTAAAATGTGAGAAAAGTGGCAATAAGTATGTGGGT  
A\_14\_P123742 ACCTACGTTACCCCAGTTTTAGGATAAATAAAAGTTTTCTCAGAGTTCTTTTCCATTTTG  
A\_14\_P119058 AAAGAAATTTGATACATTTATTCCACTTGAGCCTCTTCCACAAATCCCAAGTGAGTTCT  
CUST\_2601\_PI426210822

CCATCTGGCTGAAGGTCCATCATATAGACTCTGCTTTTCTCATCATTCTTGTATTTT

A\_16\_P16933893

AACATGGAATGCAAATGTCTTCTTAAAGTGCCTACACTGATATAGTTTACCTACGCAGTC

A\_14\_P104189 ATGGGGAATAATATTTGGTTAAGGCTGTTGAAGCCCTTGCTTTTGAGGTTTTACATTATT

A\_14\_P124617 CACATCATAGTTGCGGAATGTGCTAGTGGTTTTTGTCTTGAAGTTATCACCATCTTGAT

A\_14\_P119179 GGAGAATATTGAGAAGCATCTGAAATGGTAATGCTTGTGATACACAAAACCATGACAAAC

A\_16\_P01833969

ACACTCACATCCAATTTGGAATCATATCATTCCCAGACTGATCTATGATAATCTGCTTCT

A\_18\_P26792384 TATCACTGTTCTTCTGTAACCCCATAACTCCTTCACCTCCCCACC

A\_14\_P135466 AAAGTTCATTGTCATACATAGAGGTGTCAATATCCTCAAACAGGCCCTCAAGC

A\_14\_P131618 GTGATTTCAATTTAAAGAGATTGTATGCAATTTGTGGCTTTCCTGATTTCTGAGTCTGTGTT

CUST\_8152\_P1426210822 CACAGCAGTGATCCCAAGGCTTTTGTACCCCTTGGGAAAGGAAG

A\_16\_P16878571

AAGGAAAACAAATCTGATTATCAAACACACGATTACTATTCTCTCATCACCGGATTACAA

A\_14\_P134498 TCTCCGACGCTGAATTATCAGGGCATTCTAAATCGGCTCAAGCAGTT

CUST\_602\_P1426210822 CCACTGCTTAAATACCAGGAGCCTCAGTTTCCCAAATATAAGAAGAGCTT

A\_14\_P200005 CCTGTGGTTTTTAGTAAACTCTCTCCAGTATCTACCACCAAATATAACACATCTCAGAG

CUST\_2767\_P1426210822 CTTACCACGACTAAGTCACCTTCCTCTCTTGCCTGCAGAGCAAG

A\_18\_P13556858

ACCTGTCTTAAAGAACATAGTCTGCCATAAAAACAATATTGTATGCTCCGTTTAGAGA

A\_14\_P110204 CTCTGTGCAAATTTTGGAGGATTGTCATTAACATCAGTAAGAGTCACTGTAAGTGTGCT

A\_16\_P01555940

ACAGTTCCTTGGTCTAATCCATCCTAACCTAAAAAGAATCATAGTCAAACCCATATTGGC

A\_14\_P110200 GCCTACACCTGTATACTCTGCTAGACCCTAATTCAACATATCCAAAACCTCTTTATTACT

A\_14\_P110598 TTGTTTTACTCTGATGAGTTTGTTCCTTTGCAAGTATATCTTCAGGGAAGGTGCTTTTT

A\_16\_P19473524

TCCACTATCAACATACCTCAACTTCTAAAATATGACTCCCCTATAAAGATGAAACTCCT

A\_16\_P30952516 ATTGAGACAAATGTTTGCTTCTCAGAATGGCAGTGACCATGGGTGCTT

CUST\_136\_P1426210822 GGAAAAAGTATGGCTCAATACAGGGTCCAGAAATACTCACCTGGAGG

A\_14\_P133460 GAAATAACAGCATCATTGCTTTTCGATTATTGGTGTGCTACCCTCCATTTTATTACATGC

A\_14\_P128120 AATAAAAAATTTCTTTACCGCAACATGACCTTCCTCATGGCTGAGATAGTTGTGAACATC

A\_14\_P130160 ACTTGATTATCACTTGCTCTGTAGAAATAGCAAGAAAAAATGCCTTTATAAGTAACACA

A\_14\_P118022 CCATGACCCTGGCTAATCTCATGACCTCTTAGCCTTGGCTTATTCATC

A\_18\_P11577394

TGTAAGGCCTTAGAAAACACTTTCTCCATTCTCATTCTTACTACTTAATCTTGACCACCT

A\_14\_P103959 ATCCTCTATGTCAGAACCATTCAAATTTAGCATCAATCTTAATACGTTTCCCTAAGCCAC

A\_16\_P01235560

ACCTTCAGGCATACTTGACTAAATAAAATCCTCTTTTTGCTAGTTCCCTTTTCTGCAAAGC

A\_14\_P131000 AAACAGGGGGCTTTATAGGCTGAAAAATATCTTAGACTTCAGAACAGAATACCAATCAAA



CUST\_6088\_PI426210822 GCCAGAGATCAAGCCATAGGAAATGCTGTCTGTGACCAGGATTCAT  
A\_14\_P101630 GGTATCTGTAAAAACCTTAAGAATAGTTACTCTTCCCAAGAGAATTACAGCGTCTAAGGG  
A\_14\_P138472 AATATTTAAACAGCAGCGCTTTGAAATTGAGGCAGCCAAGATATAACCTAGTGGAGATAT  
CUST\_8339\_PI426210822 ATCCTGAAGGTCCAGAGCTGGGAGAAGCCGGGCTGGGGCCAAGA  
A\_18\_P22840671  
AAGGCCTTTGAAATAAAGTGTTTATTTTCTTTCTTTTTCTCTTTTTCTCTTTTTGGGAGGAAGAGC  
CUST\_10193\_PI426210822 CCAAGAGACCAGATGTCATGGTGTGTCCAGCTGGTCCCTCTCAC  
A\_16\_P16953901  
AGACATGACCGTAGACAATAGAAGACTAGATTGCCTATCAATAGAGCAAAGGTATCACTC  
A\_14\_P201709 ACAAGGCTCATATACTGGGTATATAAAGAAAATGTATTTAAGCACCTTTCCTCCCAGGAA  
A\_16\_P00685508  
AAAAATGGATGAGTTGTTGTCTATTTCGGACTTAGTCTCAAAAATCTGCCATTGTTGTGTTTT  
A\_14\_P115570 CAGGGAATATAATCAGATAGATATTACCCTGGGTCATAATAAAAGCAGCCTAACATGGGA  
A\_14\_P128215 AGGGAAAAAAGACCATTGCTCAGAATGAATGACAAAAGCATTTTATTGAAGATTCACCTG  
A\_14\_P139299 CAAGTGGTCCTCTTGTTTGTATCCTCTTACCTTGAATAGTAAGACAGTGCAAAAACCTAGA  
A\_16\_P18097616  
CTCACCGTTACTCTTTGTAAATCAAACGTGTCTATCAATACCATGTTTATTAGACCCAG  
A\_14\_P201575 ACTGCAAGGGATACCGAAGACTCATAAATGAGTAATTAAACTGCTTTAATAACACCCAGA  
A\_14\_P139219 TTTACCTTTGGGACAGTTAGATGTGCACAAATGCACCATGTGTTTAAAGATCACC  
A\_14\_P118325 GCTGAGGATGTGAGATCTGAACTCAGTAAGAGATCATAGACCTGAATTGCTACAATATAT  
CUST\_5024\_PI426210822 AATCATTTTAAACAGGTTTGTCTTTGGGCCCCAGATAGTACATTGGCATTGG  
A\_18\_P22841645 CTCCTTCTCCCCAAATCCTCAAGTCCTGGTCAGTTTACTCTAAATCAAAG  
A\_18\_P17402499  
TGAAATGGAGGAGAAAGAAAAACACTTTGGATTGTTTCAGGTGAATTAGCAATTCTCTG  
A\_14\_P107424  
CTTGGGAAAAAGTGTATTTATCAGCAGTTAGTGAGAGGAAGAAAAATCAGAAGAAGTTCA  
A\_14\_P116766 AGTAGAATTCAAACACTATCTCTTCGAAGGTTCTAGCAAGTCTCAAATTATTGAACCCAG  
A\_14\_P136651 ACTACAAACACCTTTGAGCACTTAGGCAATTTTGGTGATATCAACTCCTTGAAGTAATAC  
CUST\_6066\_PI426210822 AAAGGGAGAGAAACCAGATTGTGGAACACTTATGAGTCTGGACTTCATCTT  
CUST\_687\_PI426210822  
TATTGTTGTTAGAACCATTGAGTACCTTGGGCTTGGAAAGGAAATAATAATTCAGCAGG  
A\_14\_P201238 CTCAATCAGAGATCAAATTCACCAACTGCAATTAAGCACTATCTTAGATTTACTCCTTCC  
A\_14\_P100781 AATATAATCTCGAACAGTCACTGAGCCTTCAATTTCTTCCATATATAAGCAGTTGGAAGC  
CUST\_8655\_PI426210822 ATAACACATCTGTCACAAGCTTCATGGCTTATGAAGGGAAGAGGGTAGTG  
A\_14\_P101139 TGCCCCCTCGGCCTTACTATAATCAGAAAGCAAATTTCAAACCAATCTGATTCTTAAATT  
A\_14\_P122566 ATCTTGCTTAACTTTTCATGGGAATTAACACAGCCACCGACAAGATTTTATTTGGTTGTAA  
A\_14\_P135165 AAATATCTATTTTGTATCCCCAGAGGGTTTTCTCAGTGTGACTTTGAAGAC  
A\_14\_P113943 ATGGCCTGGCACATTATAAGTAGGCAAAAATACTTTATGCTACTTTATGCAGTATTTAGC

A\_14\_P115246 CTTTCTAAAACCAGTGAGAGCACACACTAAAGAGAAATTCTATAACTTTAATGGGGTAAC  
CUST\_3653\_PI426210822 GTGCTGGTGGGTCTCCTCCTATTCTCAGAGCAGAGAGCCACGAAT  
A\_14\_P100030 CCTGAAAATAATTTTTTAAAAAAGGCCTTCAGTCAGAGTTTAAGACAATGGTATGCTAAA  
A\_14\_P136369 CTCCAGAGGTGAACAATATTTTCATCAAACAAGAACTTCCTACACCAGATCTTCACTTT  
A\_14\_P117175 GCTGAGTTAAATCCTTAAGATTGTTGATTTTGTCTTCGGTATCACTCTGTTTCTTTGAGA  
A\_14\_P134918 AAAGCAGTGGGAACCATTCTCCAAAGAATAATTTTATTCAAATGGGGAAGGGTTAG  
A\_14\_P121886 GTTCCTTTTAAATCAAATCCAGTGTTGTTCTAAAGACTGTAGACCAAATTCTACTGTGGC  
A\_14\_P134085 ATCACTAAAGGTCATGGTTCTCTTCCTTGTTTTCTTAGACAAATCACTCCCTGTATTT  
A\_16\_P00632494  
ACCTCCCCAATAAAGAGATAGATGCCAAAACCTTTGAGTTATTTATGCCAGTGCTATATC  
A\_14\_P116021 CTAATAAACACAACAAAGTATGCGAAAAGCACTTCAGTTTTTCTGCATCTTCTCCAAGAC  
A\_16\_P20259799  
AATAACTAACCAGTCCATAAAACCCTAACTACTGTTGTATACTCAGTCACGAAAGGTTGC  
A\_14\_P115642 TAACCAACCAAAAAACCTCTGTTCTCATTTTAGTTTTCTACCCTTATATTAATAAAGA  
CUST\_1965\_PI426210822 TAGTTCAGACTGTCATCAAAGTGACTGCATGCCCTGTCTCTCTGC  
A\_14\_P127060 TGAGTAGTGATTATTTTTTCTCTTATCAGTATGAAGAGAGGGATACACTGGCTCACAGT  
CUST\_2461\_PI426210822  
CAGAACTTAGAAAAATTTTAAATGATGACGTTTGGCCAAGACAAGTAATAATAAAGGAG  
A\_16\_P15097329 TTAGATTCTGGCCTTGTCCTCAAATGCCAATTATCTTCTTCTGTCCAAACTCTTA  
A\_14\_P116791 TTTGGGATACAATCCAGTGTTTATTACAGATGGAGGCTCAGTTTTCTGGAAAAGAGT  
A\_18\_P22839945 ATGGGGGGTGGAGGGAGGATGAAGGGTGCTCTCTGGCTTCCAAAG  
A\_16\_P21590714  
AAAAGGAAACAACATTCCAGTTTGATTTCCTGTTGATACAATTATCACTGTGGCCATCTA  
CUST\_1435\_PI426210822 TATATTTCCCCAGGGCCCTTTTTCCCCTTGCTGGAGTAGACT  
A\_14\_P103308 CTTCTGCTTTTCAGAAGGAGGCGGTGTGATGCAAGGAAAGTTACAACT  
A\_14\_P113584 CTGAACAGAACTGGTCAGTAACTTTTAAACAATTCATAGGGAAATAAGAAAGTTAGAAGCA  
A\_16\_P18076412  
AAGAATTGGCTTTAGGGAAAATCTGTAACTTAGCAAATGTTGATACGCAAAGAAGCAGG  
A\_16\_P00071399  
AGAAATGCTGGCCTAAATAACCTCTAATCAGTCCTAAAAATATGATTCATGTGTGTGGCT  
A\_14\_P118225 GGAGGAAGTTTCACTGTAATCTTCATGCCTTATACAAAGGTAACCTTTGCCTTTTACTTCA  
A\_16\_P16056445  
ATGGTGAAACTTTTAGTATGAGGCCTTATGCTCTTTAGAAAACCCCTTTACTTTTCAAAA  
A\_16\_P20190307  
AACCTAAACCTTTTTAAACCTATGCTGCAGACATAATTTCTACCATCTTCTAGATCTCA  
A\_14\_P129642 TTTCTTCATTTGTTTCTTATTTTAGGAAGACCAACACTGTCATCTGAAGTTGGAATCAT  
A\_14\_P104226 TATGACTCCAGTTTCTTTTACCTGTTTCTTTAAGTTTCTTCTTACTGGCTATTGGGAAG  
A\_18\_P22839416

GGGAAATTGACAAATTCATCAGGTTCTTTTATTTTTAAACATATAGCAAATTTAAAGACT  
A\_16\_P15458068  
AGACAGTAACTGCAGTCAATGATTAAGCAATGTCCCTCTAAAATTATCCAAGGGCTTATT  
A\_14\_P115761 GTGTTTAAAGGCCAAGCAAATCTAAACACATAATTTGGGCCATACTTTTAGTCTGGTAG  
CUST\_9713\_PI426210822 CCACTGCTATGGAAAGTTGTATTCTCAGAAGGTTGCCCAGTCCATC  
A\_14\_P114420  
TGAATGAAGAAGAACAATCATGAAATGGAAGAAGGAGGAAGAGCATGAAGGATCTTATAA  
A\_14\_P128543 GTGCAATTTATCTTTATATAGGAATACATTTCTAGGGCTTCCTTCAAGCCCACTCTCTTC  
A\_14\_P103086 GGAAGAAAGGAAATTATATTCTGGTTTTTATTGCCTTAGTCAGCATGGTTTATGGTGCTG  
A\_16\_P15259323  
ACATCCTACATCATGCTACATAAGAAAGATTTAACAGCCCAAACAATAATCATGAGATTT  
A\_18\_P13075383  
TTTGACATCATCTAACGCTACAAACTCTATCGACCTTTTCATAATTGCTTCCTGATGACT  
A\_16\_P01453025  
ACTATCTGGGTATGGAAAAGGTTACTAGGCAAGATTGTGATTGAAGAGAAAGGATAATGA  
A\_14\_P102727 TTGAAAAGGCATTTGCCAAAAGATTTGGACGATCATTCCAATACATGCAATATGGATTTTC  
A\_14\_P128194 TGAAAAAAGAAGTCTTTGCTGTTTATAAGAATTGCATTGAAAAAGAGTGATCCCAAGGGC  
A\_18\_P10550201  
GCTTTTTGAACATTGTCTTCCAATTACTTTTCATCACCCCTTTTAATTACTTACAAACCC  
A\_14\_P124519 AGAAAAGCCAGTATTGCTTGTGCTCCTAACAACTGTCTCTTGGTAAGTTAACTCTAA  
A\_18\_P13693108  
AATTTGAGCGACTTCAGTAGTATCTCTTAGTCTACGCTTTTCATACACAAAACACTGTGG  
A\_18\_P22841413  
ATTTCCCCACCTGAAAAACAATGGCCAAAATAATGCAGATATTACACATGAACATTTGC  
A\_14\_P117870 CTGGACAATTCCACAAAGGATTTGACTAAACATTAAGTCGTGAGACTCAATTAACAT  
A\_16\_P36369164  
CGTCGTATCTTCTAACAGTTTTTTTTCCATAGCCAGAATATTGTTTCATATTGCAACCCAGT  
A\_16\_P17800693  
AAGTTCATTGTAGCAGATGTGTCAACTGAAGATCACTACCCATTAATAATCAAACAACCAG  
A\_14\_P114760 TTAATTTCTAAAACAAGCAATTCAAGAATGTGGTGGTCCTAAGTGACTGCATCTATGGAG  
A\_14\_P112978 CTCAAGAATGTCATTTACTTTGAAACAATCCCAATCTTCATAAACCTAACAAGAGACCAC  
A\_16\_P02368291  
CTCATGCATATCTGCGGTTTTAGAAAACACTCTTAACGAACAAAAAACCTATGGTCAGT  
A\_14\_P139252 CTGCATTTTCCAGGCCTTAAACCTAGTAATTATATTGTCAAGATAATGGCCTCTGTATCT  
A\_14\_P138934 ACCATATTCCTCAGAGATTTGGTTCGTGATAATCATGGTGTTATCAAATCAGATACTCT  
A\_14\_P106419 CTTCACTTCTAAAGTCCCAGGAACCAATTCCTGATGATCAAAGGTGAGTATAAGAGATT  
A\_16\_P36141916  
GCTGACACAATTCAGAATCTGACTTTGTACTGATTGGACTTAAAGAAGGTCATGAGTAG

A\_14\_P137915 AGAACCTGCAGCAAAAGCAGTTTTGATTTTTTTCACTTTTTAGAAAGTTTTCCCATGTGA

A\_14\_P113072 CCTGCAGTCACACAAAGTGTTTTTCCACTAAGACTCAGTAAGTCAGTTTGGTTTTGTAT

A\_18\_P13425289

AAAAGATCATTGTCCATCTAAGGAATAACATTGCACTATTATACATCAATGGCACCTTTC

CUST\_7808\_PI426210822 ATTCAAGCTGTTGACTTATCTAGTAAGGGGTTCTGAGTGGAGCACCAC

A\_16\_P18837636

AAATGCAACTACTCCAACCTCTAGCATATTTGAATTTTATGTCTGTATCCCAAATGGCTGG

A\_16\_P17361461

AAGCAGAAAGATTCTACGATACATCTATTACTCCCCTATTATGCACTTGAACATCCTGT

A\_16\_P30952624 ATATTTGGAAGAAAAAATCTTCTCCAGATTTTTTCGGAGGCCCCACTGATGCT

A\_14\_P117830 CTGATAGTGTCACTACTTGCTAAAACTTTTCAAGTTTCCAGCATCTACCCATTAAAGT

CUST\_7617\_PI426210822

CTTTATTCACCTTTGGAAAAATGTAAAGATTAGTCCTAAGCAGGGTTGATTCACCGCACTA

A\_16\_P00238795

CCTGTATCTTGATCTGTTACGAAGCATTCTACTTGTATGTCCTCAAATTAACCCTCATA

CUST\_9380\_PI426210822 TACCACTGGCTTGAGGTTCTGGCTTCTCCCAGACCACAGTTTTT

A\_16\_P16672766

AAAGTCCTAGGTTAGTCTTACTCTCATACCACAATTTTCAGAAAAGTCCTTCACTGTCAAT

A\_14\_P100815 CTATCTACAACCAAAATGTAAGCCACTGTCTTAGATGCGTCTATTACTTGTGGCTACTCC

A\_16\_P41863103

TGCTTTTGCAACATGGAATAAGTCACCTTCTAACTACCTAACTACTAATTGTAAGAAGCC

A\_16\_P18942670

ACATGTTTTGAAAATACCAGGTATTGAGGAGTATGCAGAGTAGTATAATAACCCAACCCT

A\_16\_P02447502

GAAAGTCAGAATCCTTTTTACTCAATCACATTTTCGTTACTTCTGCTAGATAAGCCAGTCC

A\_16\_P16957032

AAAATATGTTTTCCAAAGAAGAGGAATGTCTCCAGAAATTGTCTTAAATTCATCCCCTCAG

CUST\_10043\_PI426210822 AAGCCCCTTCTCTCTACTTGGCTACACATCCGCATCATTCTCTTC

A\_14\_P103104 TGGGGCAGACGAGAAGTTCTGATAATAGTTTTTAGGGAACATGATAAAATTCTGACCTTA

A\_16\_P01239601

AAAGCACGCTCGAGTATTTTTACTGTCTGCACACTATTTAACCTCATGTCTTATTGTGTA

A\_16\_P20239014

AAACAGCAGATTTAATGACCCGGAAATTAECTCAACTAACTATGCCTTGATCTTGTGAAA

A\_16\_P17294619

ACTGTCTGATCCTCAAACCTTCTGATTGTTACATCTTCATTTTGCTGCTACTGATAGACT

A\_16\_P00838246

CTTGCTTAAACTCAACTAATCAAGATGGTAATTCCTAAGTAATTCATGGTTCCCTAGCGG

A\_14\_P105881 CTTCTTGTAGGTAAGGC AAAAAGCAAGCAAAGTATTTTAGGCAATCCCATAACTAAAG

A\_14\_P132789 GTGTTCCCTGCAGAAATCCTATCCATTATTTTTTCACTGCCAGTCCTTAATGAAGTCTC

A\_16\_P19316692

AAACACTCCACTGAAAACCTAACTTTGGGTTTTGTAAAAACAACCTGTGCAGTTAGATGACT

A\_14\_P201668 CACCCTTATAAAGGACTTAGTCCTGAATGCACAAATTGATCAGATAGTGTATTATGCTCC

A\_14\_P130801 CCACTTATAAAGAGAAAAGCCCAGTGGCTGAATTAGAAATCTGAATTGAAATCAGGGATT

A\_16\_P16585820

TCTCTGTCCCCTGTATTATGTCTTTATTCTTTCCAAATCACCAAATATTTCCAATACCCA

CUST\_10178\_P1426210822 TCCAAAGAAAAAAAATGAACAGACACATGCCCATGTGCTTGCACACACA

A\_14\_P127179 ACCTGGTTATCTTTCAGAGTGTCAATTGTAAATAATCATTTTCAGTAAGCAGTGATGGCTG

A\_14\_P129328 CTCAAACATCAATAAGCAATATTTTATCACATGCCAGCAAGTTTTAGATCCAATGTGCC

A\_14\_P127732 CTATGTAGACGCAGTTCCTTCAAACAAGTTATATTTACTGCTTCCCCTTCTTTTGTGTGAC

A\_16\_P37999166

GTTGACAGTTGGTAGCCAAATCTAATAGCGCAAGTTTGAAATTCATTTTTGAGGATTCTG

CUST\_7787\_P1426210822 GTTGCTTAGAGCTGGGGACAGCTTAGATTAGCCATATCTCCCCAAAATTT

A\_14\_P112018 ATGACCCATGTGTGCTTTGTAAGGCACCAGCCACATACTGGAAAC

A\_16\_P16097743

AAAAATTCTCAGACCTCATGTAACCACAATTCAGGAAAACCTTTGAAAAAGATGCTCAAG

A\_18\_P22841035 GGCACCTTGAGCAACATGTCAAAGGGCATCCCAACTGGTTGTATTATTTA

A\_14\_P124812 GAAGCACTGTGGTGACTGGTGTGTAGATAGAAGTTGCTGAGTTAAACATTTTTGTTTTAA

A\_14\_P135710 CTGTGCTACAAAGAAAATAAGATGATCTATCAGAGAGCGACCTGGAGGACTACTTTAAAA

A\_14\_P133847 TCTAGCAACCTCAACAAAGGGCAGGAAGATATGACATTATGATACAAGAACAAAACTCA

A\_14\_P119938 GTTAGTTAGTGCATATTTTTTCTGCAATTTGGGAGGTGTGCTGTTCTTGGTTTCTG

A\_16\_P17792613

AAACAATGATCGGGAATAGAACAACCTGTCATACTTCTAACCCCAAGGATAAGTTTTTCAG

A\_14\_P130636 GAAATCCTAATCAAAGGTTAGGTTATTTGGGAAAGAGAAAGAGCAGGTGTCAAAGATTT

A\_18\_P22842843 CAGTTGGCTTTGGAACCTTCCCATTGTGTCTGGTCCTTAACTAGAT

A\_14\_P122043 AACATGTATGGTATATTTGGGAGGTGATAAAAAGGGAAAACCTCAGTCATTTTTTGTGGCT

A\_18\_P15825880

AAGTCCCAAAGCCTAACTAACATTCTATAGTCCAAACAGACACAGTATTATTGGGTTCTT

CUST\_9762\_P1426210822 TTCCTTCTATTGAGACAAGTGTGTGATGTTGACTGCAGAGAGCATCTTGC

A\_16\_P20323940

AAAACCAGAGATAATGACTGAGCGATGAATACATGAAACCTGTGACATTTTCTTTCTTTT

A\_18\_P22839954 CATGAGGTTTAAATCAGGGAGAGCCGTGAAGTATGACACAAGGAGAGTCATTA

CUST\_3912\_P1426210822

TTAAGCCTCGTTTTAATTTTTTACCTGTTACTGCTTTCATCATCACCTCTCACTCTCATTT

A\_14\_P126114 CTAAACTCCGTGGTCCCCATTTAATTAATCGAAATGACTTTTGTCTGCTGGTAATTTAC

CUST\_9336\_P1426210822 AGCTGCTCCAGAGCTTCAGTTGCCCTGAAGCCAGCTACAGCCTC

A\_14\_P113102 AAAAGAGGTTTATGATGATGTCCTTCTTCTCCTGGCCAAGAAGGAGAAGGTAAT

CUST\_7125\_PI426210822

AAGCCCTTATTTTTGTTTTGTTTTATTTTAAGTCAAAAAGCAATTTCTACCAGTAAGAGAC

A\_14\_P111110 TGTGATGTTCTGCCTAAAATAAGCCTGTTTTTCATTTCTCTCCATTTCAATTTTCTGCTCT

CUST\_9152\_PI426210822

TTCTAATAGTTTAACTTGAGGATATAAACCTTCACCTTATTTATTTTCAGACATATATAG

CUST\_7408\_PI426210822 TTAAGTTTTCTAGCCTCATTTATTTTAGAAGGGGAACTGGAGGCAGCTTGGA

A\_16\_P19433399

ACTGCTTTGTAGACAATTACCTTTATGCCTGTTATTTTCAGTGCTTAGATCCTTCCCATT

A\_14\_P110853 TTCTTTCTGTCTCACTTGACAGTATTTTAATTACCTGTATACCTACAAAATGCCTGGGGA

A\_14\_P123955 AATGTCTGACTATCCTGCTTGCAAATGGGGCTGACATCAACAGCAAGAAT

CUST\_1461\_PI426210822 CAGTCCCTTCTTCTTGCGGTCTCTGTGGACGGCTTGTTTCTTTT

A\_14\_P121425 TAATCAACACACTGGCTTATTTTGTTCCTCACTATTAGACGCATGTCCCAAAC

A\_18\_P22840362 ATTTGCAGGTGGGCCAAGAGAAGGGAAACTGCTCTTTCCAGAAAA

A\_14\_P201845 CCAGATACAAAGATAAGCAACACAATTCGTGGTTTTACCAATTCTATAAATAAGACCAGGA

CUST\_9478\_PI426210822 CAGATATTTGGAGTTGGTGTTCCTTTTCTTCCCTGCCTTCTGG

A\_14\_P115576 ATTTTATTCACCTGGTTTTGAACTTAAGCAAAGCCTTCTTGTTGGAACAGGTGC

A\_14\_P123491 ATGGCTTCAGAGCGATAATACTACTATTATCTTCTTAAACCAGGAAAAAATAAAAGGGGGG

A\_14\_P107211 AGGTTTCACTGTTATCCACACTTTGGCAATGATTTTTCTTTTATGTCAAAGGATAGTTCC

CUST\_6156\_PI426210822 TAAGAGTTGACAGATTGCTCATCCTTGCCCTCCTCAGAACAAGTGTTT

A\_14\_P118821 TAATGTATGCACAAGTAATCACAGAATTTTAAACATCAACCTTTTACAACCCATTCAATG

A\_14\_P108351 TGAGCAAAATACCATCTAAAAGGAGAATGTGAATAGTTGTATTTTGAATGATGTGTCAG

A\_14\_P104177 GGCACAGATCAGAATATTCTACTACAGTTAAAGTAGTCCAAATTGGGTAGGACTTGAATC

A\_14\_P119656 GATTAAGTGCAACACAGACATTTTCATTGGCGGAGTCCCAATTATGATGATGT

CUST\_8122\_PI426210822

AGGATCTGTAGCTTCAATAATATAAAAATTTCTAGTTTCTTAAATCACAAATGTTAAGAT

A\_14\_P101848 TAATTTATTCATTGTATAGAAGTAATGGGCAGAGTCATGTATTGATTAAGTGATCCAA

CUST\_6138\_PI426210822 TGTTCAATAGCTTTTCTCCTGGAGACACAAGCAATCTGTCCTGCT

A\_14\_P118889 ATGAGATTTACACAGGGAAACCCTAATTAAGAGGTTAGTCTCCAGTTTAATTGCCTTCAA

CUST\_1604\_PI426210822 CTAAACAGGAGGTCTTTGAACTCACTGCCTGCCTTGTTTCTGGAA

A\_14\_P201423 CTTTTGTTGGTTGGGTTTTGAAGTTTTGGTTAAAGGAAAAATGCACATTGGAATAATCA

A\_14\_P112820 GGGCCCATGCACCTGCTTTTTTAAACAAGTTTTTAAAACGTAACCTAACACTACACTAGTAA

A\_14\_P117316 TGAAAAGTGTTTTGCTTCTGATCACCAGGTTCCATTAAATTTTCATAAATGAGGCTTCATC

CUST\_6963\_PI426210822 GGAAGGACTGCCAGTGAGTCTACTCCCTTCAGTATTTGTGAGAT

A\_14\_P137952 TTTTATTGAGGCAAAAGGCATTCTAGTTGTTTAAAAGACTAACCTAGGCAGGGCATAAAG

A\_14\_P107877 ACATACAAAATCTAATGGTAATACTTACCTATCAGCCCCTTCTCAAGAGTGAAGGTTTT

A\_16\_P16191945

TGTTTTAAGAAAAGAATGATAATTGGTGCATAACTCCCAAGTCACATATACAGACCAGGG

A\_16\_P30952642 AGTATTTTTATAAATATAAGCCTTTTATACTGATTATGTCTTTTATATTTGTATCGATGT

CUST\_3232\_PI426210822 GTCATCTTCCTGACTTCTTGGAGCTTGTTCATGCTGCCTGACTC  
A\_14\_P122402 TATATTTTATGTTTCACCCCTCTAGGACAAGCATGACTTTCAGGACTCTGTGAGAATAACG  
CUST\_4161\_PI426210822 ATAGTCCCAGGGAAGCCGTCTCATGAGCCCCTCCTTCTCTTACT  
A\_18\_P10566469

AAAACCCCTCCACTTCCTTAGAATAAAATTCCCGTTCCTCATTTTTTTTTGTGAAAGTTTGC  
A\_18\_P17167856

TAAGATTAATTAGCCTGAATGAATCAAGATCGCATTCACTATTAGGGAAGGGTAAGCGAG  
A\_16\_P19567870

GTTAGCCACTCTGAGAATCAATTTTCCCACTTGATAAATACCACTTTCTTCAGACTAAA

A\_14\_P107527 TTTACGGCTGCTCTAACAAAAGCTGGAAGATTTGTTGTAAGTGTCTTAAAAATAGTGCGA

A\_14\_P107750 TTTGTCCACAGGGGAAAAAAGTAATCAAATCATGCCAGTTAGAGACTTTTTCAAGTTAAG  
A\_16\_P18090786

AAAAAATGGTGACTCCATAAGGAACACAAAAGCCTTTAAAGAATTCTTGCCACATCTTC  
A\_14\_P100479 CAATTGTGTGTTCTGGAGACAAGCACATGGTGGGTGGTGATCTTACAAATA

A\_14\_P133944 CATAAAGAGCAAGATTTTTACAGAAATTCTCCCTCATCCCATGGTAGATCTGATTTCTCA  
A\_16\_P35618533

AAAGGAGAACTTTTTAATGCCTTACCTGTATTTAGAATCTGTTCTAGTGACAACACCTCC

CUST\_6427\_PI426210822 GGCTGAGGAGTAAACACCATACCAACATTTCTGGGACAAAATAGCCTG

A\_14\_P125199 AAGGTTTAGATTTCACTGAACTTCAGATTTTGCTAAACTTTCCCTCCCACTTTTTAGTTC

A\_14\_P105887 GTAAGATGAAGAACATCCAGAAGTGAATTCGGAACACAAGAATGACCTGGAAGATG

CUST\_1493\_PI426210822 ATTTTGGCAACCCTTAGAGGTGGGACTTCTGGAGTCCCAGATACT

A\_14\_P122867 AACATTGTGATGGTCGTTGAAATTAATCTGTTTGTGTCATAAGATTTGTTGCAAACAGGC

A\_14\_P117087 ACTTTTAGGCCGCTCAATTTATGAATATTATCATGCTTTGGACTCTGATCATCTGACCAA

A\_14\_P131568 GTGCTTTCCTTTATTTGGACAGAGAGAAAATTCATGAACCCTTTCAACATGCCTAATCTG  
CUST\_5537\_PI426210822

ATGTATAATCATGACACTTGTCTTGGCTCAACTGTGAGCAATAATCATGAACCATAATAA  
CUST\_4\_PI426210822

TAGTCACTTTTCTGTCTTGAGGCACACAAAAAACAAGGTCATATCTTTAATGTCTCA

A\_14\_P105857 TATTTGTAGGGAAAATTTAAAGTGGTTCTAAGTATTTTCCTGTTTGTCTGGCACCAGGT

A\_14\_P200623 AAGTTGTCCTTTTCTGGTTTCGTGTTCCACATGGAACATTTTGATTATAGTTAATCCTTC

A\_14\_P117783 GAAAAATCAGGGGAGGAGTTAAAATGAGGATCATAATGTCTCTTAACTGACTCTCAAAGA

A\_14\_P200156 CAGATATGATTATCTATGTTGTGGACAATGGACAAGTGAGTTTGTAATTTGTATGTGTT

A\_14\_P102094 CTGATTTACAGATTTTTAATATCCACCTTACGTCAGGGAATCCAAGCAACCGACAG

A\_14\_P117489 TCCTGGGAAAAGGAATATAAATGACAGCAAGACACATTTTAGTTGCTACTAAAGAACAGC

A\_14\_P135435 CTCCATCTATTAGACTGCACCCTAGACCTTGAAAATCTTATGGCTTACACTAAAATAA

A\_18\_P14532431

GGGAACAATCTAAAATACTTAGCATTATCAGTTGGAATAATTAATGTGCAGGACCAGG

A\_14\_P123205 TATTTGTTAAAATAACACATGTTTCTGGTATTTCTGAGCCTGAGTCAGAATCTCCAGAA

A\_14\_P134485 ATTTGCCGTTTGCTATTCATGTTACAGGTATTATATGATGCTTCTGGGGTTCTTGAGAAA  
A\_14\_P108569 CTCATCACAAAGAAAAGTCCATCTAGTTTCAGAGTTCAATGAATAAGCCCCGAAGTCTTAA  
A\_16\_P02407273  
TCTCACTTTTCTTTACTCATTCTCACAGTCTTGAAATTTACAACCCTTAAGTCCACAAGG  
A\_16\_P01499906  
GAGAATTGGTCCTCTTGAATATGCTTTAAATAAACACTCTCTCTACAAACCATCCACTCC  
A\_14\_P135447 AGAGCCTTCCCATCTATTTAGTGGGCTATATAATTTCTAATGAAAGCCGGTTATTGTCAT  
A\_14\_P122961 CAATCAGAAGATTGGAGACATAACCTTTCAAGGTCAGTTAGAAAATCCAGAGTCAGTATC  
A\_14\_P109126  
GGGAGAACAGAGGTTAGAATGAGAAAAAAAAAAACCAAAAAAACTCAGTGTGAGAATTCTC  
A\_14\_P114772 GGACTCTACATCATGCACTTACCTTTACAAACAGAGATGTGATCTTCTCAGAGGTATTAT  
A\_14\_P201370 CTTCTAACCTCATAAAACAAATCATGCATGAACACTAAAGGTCATTCTTTCCATCACTGC  
A\_18\_P14131305 CTAAACATCTCTATCTCCAACCTCGGAGATGATGCCTATGATGCCAACGT  
CUST\_1798\_PI426210822 AGGGAGTCGTTGACTTGCCTTTTCCCTTCTAACTACAAGTTTTTTTGCC  
A\_14\_P103281 GGAAGAACATCTGGAATTTATTAATATGCCAAGGGGCTTCTGAGACTTAACTTTCTATG  
A\_14\_P122537 CTGGTGTGTTTTTTCCATATACAAGAGAGGTGAAAAATCTATTTCCCTAACTTCCATGCAG  
A\_14\_P131146 ATCAGAACATGAAAGCATTCCAGTTAGGACCTTGTGATATTGAACTAGAATAAGCAACC  
A\_14\_P125003 TGAAATGATTCCACAAAGATTAAACTGGCTATCATTTGTTGATTTCCCCCTTCTTACATT  
A\_14\_P114951 TAATAAATTTGGCTTATTTGCTTGGAAAGTGATTATACCGAAGGAATACCAACTGTGGGTT  
A\_14\_P117800 ACAACCTTTGGCTGGATGATTTTCAAGGGTTACTTATTCATTCCCTTACCCTATATTGAGT  
A\_16\_P21403624  
AGGTAGGCCTGTGTCATAATTCTAATCTCGTTTCTTTTGCTTATGTAAAGACCTAGTGAC  
A\_14\_P125041 CTTGGAGCATGCTTAAATGGTGAGCAAAAACCAGAAATTTAAGCGAATCATTCTGAAGC  
A\_14\_P201716 AAACAGAGAAGATCTACGTGTTAGATGGGACACAGAATGACACAGCCTTTGTC  
CUST\_5733\_PI426210822 TTCTTTTCTCTGACAGCACCAGCCCCTTTATTTGAACTTCCCTAGCTGT  
A\_14\_P129438 ATTAGGAACCTCTGCTTTCTTTCCAGATGCGTCCAGGACTAATTGAGAGATTAAG  
A\_16\_P02340932  
CACTCAACTAGAATGACATTATGTAGCCCAAACCTCTAAAAATGATGCATATCCCTCAGAA  
A\_14\_P116361 TTTGTGATGGTGACTCCAGGAAGGAAACTCACCATGACCCTGTATATACATAG  
A\_14\_P116554 GACTAGTCTCAACACTGGATCAAGGTAATCTACCTATATTCTATCTGGTTGCCAAAAGAA  
A\_16\_P00010205  
TATTACAGTCACGGCAATAACTTTAATGATGACAACGACTTTTTTCCCTCAATTAGGTCCC  
A\_18\_P14134527 CTCCCTCTGGAAATGAAGGGTTTGGTGTGGTCAGAGGTGGCTATC  
A\_14\_P202218 CTTCCAACATGAAGCACAAGAAAAACATGCACTACCCTTTATAATCAGACCAAGACTAA  
A\_16\_P21542404  
AAAGGTGAGCATTGGATTCATAGAACCAACTTGTTTTAAAAAAGAGTAGAACTATGGGGC  
CUST\_2047\_PI426210822 TGCCCTTCACTTCCCTTCTACTAGTGTCTCCAACCTAGATTTACCCTGTATCAT  
CUST\_10146\_PI426210822 GAAAGTTAAATTGCTCAGAGGTGCAGGAGGGATAACAACCTTTGTGTGTGAC



A\_16\_P03595389

ATCATCCTTGAATCCACCCACATTCCAAATTCATTCTCAAAAATGAGATTCCAAATTTCA

A\_14\_P112106 CTCTTTTTCAAAAAACAAAACCACTTAATTTTTTTCTACCTAAAACCATAACAAGAAAA

A\_14\_P127280

GAAGTCCACTGAAAGATCCAGAAGAAAAAAGATGATGGCTAAAACCTTAGGTAAGTAGAGT

A\_16\_P36496277

AAAGCCTCATGAATTCCTTTTACATATTTGCCATTAACCTCATTTTGTTCATAGCAACCTCA

A\_16\_P16262364

ACAGCCAAATACCAACTTTTATTTTCATTAGTCCATGTCCACAATTAGTCCACCAATTTGT

A\_14\_P132850 CTCACAGTAGCCTTAGGGGAATCTAGAGCAGGCAAATGGAAATGCAG

A\_16\_P00100480

AAACTTTCTCCTGCCGTAATAAATCTGTGAATGGAGCATAATCATGTCTGAAGTTGCATA

CUST\_4067\_PI426210822 TTACATATGGCCAAGCCCTTCAGCCTTTCTGCCCCACTTCCAGTTT

A\_14\_P106092 TTTTGTGAGAACGCATGATACCCATTTGCTTGTTATTATAGGAGGATTGTAGATAAGGTT

A\_14\_P139888 ATTCAAGGACTGACCCCTAATACAGGTTCTCTGTTTTAAATATGTAGCCCAGTAAACTAAA

A\_18\_P22841102 CAACTATCAGTCTGAAGGGGAATTTCCATAGAGCCTCGCCACCAAATTTAAATTAG

A\_14\_P138676 AGGCAAATGTGACTATACCCACACAGTAGGTGCAGAGTAAATGTAGTTAAATGTTTCAAA

A\_18\_P15596973

GGTGAGACCCACTAGTGTAACCATCTGAAAAATCTATGGTTAAAAAGCCGCTATTAATTA

A\_16\_P19538118

GCTTGACATTTTCCCAGATACTGCCAAATTTCAAAAAATACTCTAGATACTTCAAAGCCA

CUST\_9359\_PI426210822

AAAGTGAGTTAACTGGAGTAACTCTTTTGAATGACAAGCTTCCCAAAGCATTTAAAATG

A\_14\_P102050 TTAGATTACATTCCATCAAGTAGAAATTTAAATATGGTCCCAGAAGGGCAGGTGAGTTTC

A\_16\_P15447966

CAGCCAAACCTTTAGTTTTTCTCAGATAGTCCATTTACCTTTATCCTGAAAATCGTGACT

A\_16\_P18076887

AGGGAATTGTGTAACGTTAACATTGGTAACAGGTAAGATGTAATAGTGCTGCCTACTG

CUST\_8368\_PI426210822

TATTTTATTTTTCTCCTTTGCTTTTCGTAATTGGGTAGGAAATAGATAAAGACCTGATGG

A\_14\_P138765 CTCAAAGTTTGAATTCATGGCACTTTTATCCACTGTGACATAGTTTTGAGTGACTAGAAC

A\_14\_P126030 GCTTCTATTTCTCCTCTTTTAACTCAGGCACTTTTTGGCTAGAAGTGAATGCATTCTATT

A\_14\_P120979 ATGTTTCATCAGGAAGTCGGAACCTGTTCTCCTTTCTGTTTTATAACGATTTTTAAAGACTG

A\_16\_P03603412

GCCTCAACTACAACAATCCAAACTTTTTGGTTCATATTGCATTTTTCTTTGTTATCCTCCA

A\_18\_P16457341

GATTTTCATCCACAGAAATAAACTCTCTAGATTCACTCCAGAAATATCACTTGCATGCTCC

A\_14\_P200408 AAAGTACTTCCCTGAATGTATCCACTGGGATAAATTTCTCAAAAATGGAATTGGTAGATCA

A\_14\_P139643 CTTCTCTATTTGACTCAAGAATTACTCTGGGGTGTTTTTTCAGTAGGTTGTTTTCACTACA  
A\_16\_P38389677

AAAACCTCTAACTCATAGAAATTCAAGAAGTGTAGCAAGTCATAATTTATTCAACCTCCCT

A\_18\_P10599217

CTTGCCACTCATGTCTTTATCTCATTAAAACCTATTTTCTCCTGAATATTGACCACAGCA

A\_14\_P119930 GATCCGAAACTATCACAGTGGAATGATGTAGAGGCTTATGAGTATCTTAACAAGGTAAG

A\_14\_P120146 CTTTTTTGCTTGGCCTGTTTTGCTTTCAGAGCCTGAGATGGACGTAAG

A\_14\_P133059 TTTTGTGCTTCCATACATTCTGTAATCTCTATTGCTTTTTTCAGGCAACGTCTGAATAGG

A\_14\_P111484 AGATGTGATTACTTCCCGGCAAATGGTTGAGTCAAACCCAGTATAGCAATG

A\_14\_P116520 CATCAGAGAAAGAACCATCAGCATGTCTGCGGCCAAGTTCTTCAACAAT

A\_16\_P36838703

GCTAGGGACAAAAGTATGGTTTTTTTTAAGTGTAATCTAGTGCACATAAAATATCCTGGGG

A\_16\_P15263658

AAAGGCAAAATCTTGGTCATATGACATTCCTGCTGAAATATCTCCAACATCTTATGTTGT

A\_16\_P37047943

AAAATGCACGATTCTATTTCCCTTATTTGTGCTAAGTCCATTAACAAATCCACGACTGAG

CUST\_6332\_P1426210822

ATTTGAATTCCTCTGTTAGCTGGGAACCAGCAGTTCTTTTTCACAGTTAAACAGAT

A\_14\_P135981 CTTTTTGTCTTTCAATCTTGCCTGCCTAGAATCACTCAAACCTTCTGTGAGAGACTATAT

A\_14\_P134510 CTCAGTAATTTTTCCCAAAGCAAAATCTTAAGACCAAGAGCAAAACTGGAAGGTTTTTCT

CUST\_84\_P1426210822

AAAAAATTTGTTTGAGCATGGAAACAGGTTGGAAATATTGCACCCAATAATAACAGTTTA

A\_14\_P105940 ACTGCAGAGAATGTAAGTTTCCATATTCCTCTGGGTTCTCATTCATTTTTTTTCTGACAA

CUST\_9615\_P1426210822 ATCTCATAACATGATGCCCTCAGGTTTACGCCACTTGTGGGAACA

A\_14\_P131575 ACTAAGAAGCAAGCACTACCTTCTAACCATCAAAACATATCCTCTGATTTTCAGGTATTTA

A\_18\_P13055982

TGGCATAGTTTAAAGCAAAGCATTGAAATTTCTGAAGTCCCTCATAAGTTGCAAACAGTTG

A\_14\_P122801 CATGTGTGTGAGCCACTGTAACCTATGTGTATGAACATGGCAGTGTCTATGCCTAT

A\_14\_P124231 CAAGAAACACTTTCCCTTGAATTCCCAAAAAAGTGGGCAAATACACATGGAGTATAA

A\_16\_P31233547

ATTTCCAGTTCCACAAAAGAAAGTAATCAAACAGATGTTCCCTCCTTAAGTCTTAAACCAC

A\_18\_P10922140

AAAAATCGTTGCCTTCATTCTAAAACAAATGCTGCCAAATTTAATTTAACCGATGGCTGG

A\_16\_P20364403

CATCCAAACTTGGTGCTAATTCCTTAAGAATTTGAAAAAGCCTTTTTCTCCAACAAC

A\_16\_P38658267

AGGAAAACCTTGTTAGATACAGCAAACCTTAGATCATGACTTCTTTCATTGTTCTTCTGGG

A\_16\_P35974361

GTGGCCAGTAATTACACTACAGTTGTTACTATGCATTACCGAAACTTCATTTTTTGACCA  
A\_14\_P118532 CTCCAAATATTACCTTTCTACCGGCGCAAAGAATAGAGAGCGATGAGCAG  
A\_14\_P127922 ATGAGAATGAACTCTACAATCAGGCTCAGGTCCAGCGACTTGAACATCTTAC  
A\_18\_P13126952  
AAAAGTAAGTGGACCAAATAACACAGAGTTACCTTTAATGTGAACCCCATTTTCTAGACG  
A\_16\_P21380337  
AGACAGTAGGAAAAGATACAGGTTTATTGTGGACAGTTAACTTAGACAAGGAATAGGCTG  
A\_16\_P16191599 CTAGGTCAGAAGTGAAGTTTGTCTGTTTTATGAAGGGAAAGACACCCCTGTTTAG  
A\_14\_P100792 AAACCAGAACTAGGACAGTAAATGGAAATGGATCTGAGATGGACCTTTAAGATGCAAA  
A\_14\_P139946 AGTAGATGAGTCCCCCGCTGTTTTATACAGAAACTCCTGTAGGAAAGAC  
A\_16\_P01187971  
ACACCGTTAGGCTCCATATTTCTACCTCAATGATATACATAAAGTGCATGAAATTCCACT  
A\_14\_P120697 CGCCCCTTGTGCACAAGATGTTTAACTCTTCTTTCCGTCTTTTCTAAAATAGTCA  
A\_16\_P03635519  
CAAATTTCTGTGATTAATAATGAATTCATCAGTTCCTCCAAGTCTTTGAGCATCTGTGGTG  
A\_14\_P124079 GTCCCTAGATTCAGCCACATCAGAAATAAACTGTGACTACACTTGGCTGTG  
A\_16\_P41295808  
AAATATCTACCAAACCACAGAACTCTATGAACTTCTTGTTACAGTTACTCATTCCAGCA  
A\_18\_P14806270  
TCACCCAATAAAACATCTGTTCTTCCAAATCATGACATTAATAATGCAATAACCCTTAC  
A\_14\_P117630 GATATTTCTGCCTGTGATTCCAAATCTTCATGAATGTCTTCCCTGTGAAGAACTCCTTG  
A\_16\_P18021295  
CCCTCCAGTTTTGTGTTAAATAATTCATTGCAATTGAGTCTCAGTAAGAAACCAAGGACA  
A\_14\_P109880 CATGGCAGGACAAAAGTCACTAATGTTTGGCAAGGAGATTTTTCAAAACATCAATTAGAA  
A\_16\_P15224484  
AAAACAGCCCAATGTTTCAACTCTTTTTTTCAAGAATCAAAAACAATTCCTGAGATGGA  
A\_14\_P112324 AAAACTTTTAACTGCTCATTGCTTTGCTTACACAACCTCAAATGCTCTTTGATTTCAAGCC  
A\_16\_P21040942  
TGAGCACATCAGGAAGTTTAGATACCTGCTTTGTCTTTAGTAACTGCTTTTAATACGTT  
A\_14\_P137516 CATGACTTATTTTTTCTCTCAAAGCCCCAGTGAAAATGCAAAGAACTCCACTT  
A\_16\_P03708025  
GGAGAACTTCATTGTTACACCATCTAAAAAGATGCATAAAAACCATGGTTGTCTCTGAGA  
A\_14\_P101430 CATTCTAATGGATAATGAAATGGTAATGGATAATGCAACAAGTATTTCTACCACTATGGT  
A\_16\_P02353731  
TATACAGCAAGAACAACCTTCTAGGATCTGTGGGTCTCATTTAACAAGATGCTCTCCAAAAT  
CUST\_2910\_PI426210822 ACAGTGCCTACTTGGTCATGGGAGTGTTTCAGGACCAGCTCATTAG  
A\_14\_P200647 ATGAATGCAGATGCAGTGTCTCATAGAATAACTGTTTCTGCACTTTTACAGACAAATCT  
A\_14\_P135328

CTAGGCAGAAAACCTGGATAAAATGACGAAAAGAGAAAACCTGTCTACAAAAGCATCTATGGT  
A\_14\_P132862 TTTTGTAGTTGTTTGTCTGTTTTGTAAAGAGAATCCTTATTGGACACCAGTGAAGGTG  
A\_18\_P22841596

ACCCTTTAATAGGGAAGGGTTTCTTCTCCTATGAATTTTTACCTCACTTTGTGTCTTTT  
CUST\_8725\_PI426210822

TTATGTACCAATTAGCTCAAGGCTTTGGTAAAATAAATGTTTAAATATGTAAAATTTTAA  
CUST\_10111\_PI426210822 CTTTATGCTTGCAAGATGGCCAGCACCTTCACTAGGCAAAGAGTAGT  
A\_18\_P16741853

AACTGAGTTTTTTTTGATGGCATAACAGGAATACCTGAATACACAGGGATCTGGATAGTTAT  
A\_16\_P19141485

ATTTTACCATCCCTTTGTAGATTTGTATTGGCCCTAGTTCATTGAAATCTCATCTGTGTC  
A\_14\_P109536 TCTCTCCTACCTTTCAGAGAGTTACCCATTAAGTGCTGCGTTTGGTTCTT  
A\_14\_P109237 ATGTCTTTGTTGTTGCAGATACAGATGTGGTGTATAAAAGCGAGAATGGACATGTCATTA  
A\_14\_P117855 CCAACTTTGAATAAAACAGATGATGTCCTGTGACTGCCCCACAGAGATAAG  
CUST\_9609\_PI426210822 ATCTGCTCTCACAGGAGGCTGTTGGTAGAGGGGTGCCTGGGAGCA  
A\_14\_P134562 CTATGAAGAGAAGTTCTTCCACCAAACATACAAAATCAGGATATGCAACTTATAGAGTTC  
A\_14\_P138995 CACTTGCCATTTAGTGTTAATAGATACACCACCCACCTTAAGTTAAGAATCGAAATTGCT  
A\_14\_P107086 TATCCCATCATTAGGTATAACACTTTTGCCTGCAAATCTATCAGCAACCTCTATTACCCA  
A\_14\_P112984 TCATTGTAAGGATTTTCTTTTTAAGTTTGGTTTCACCTCTGCCTCCGAATTTTGTATGCA  
A\_14\_P112328 TCTAATTTGTGCTTATTCCTAACTAGTTAAAGAGCGAGTTTTGACTGCACTTTACCCCTT  
A\_16\_P19015044

CCATGAGGCCTCAAAATTAGTCATCAGATTTTACCACTCTTTCCCATATCTACACAAAAT  
A\_14\_P202123

ACTAATTAAGGCTTCATCAAAAAACAGGGTAAGGAAAAACCAAGACCAACATGACAT  
A\_14\_P130489 GTAGCGTTAATCATCCTCCTCTGTTTCTGGAGTATAATTATCATCATTCTTTGCAGTCAT  
CUST\_10318\_PI426210822 GCCACATCTGGCCATGTTTTCTTAGCCAACCACATCTTTATCGCAAAA  
A\_16\_P19894311

AAGTGAACAGTTTGCCTAATCATCTCCCTAATATTCTTCCAATCTACTTATGTCCATGT  
A\_14\_P106199 GCCTTGCAATCGTTTGCCTTGATGTTATGTCTAAAGCCCCACAATTCTCTAAAAA  
A\_14\_P106387 GGAAAAAGTAGAAAATGTTAGTGAAAACAGGGTTTAAACCCTTAGGAAATTCATTTCTGT  
A\_14\_P105803 TAATCATTAAGGAGCAAATGAAGAGACATGTATATGTGGCCACATTCAAGACCAGTTAT  
A\_14\_P124245 GAATTGCACATTTATGACTGTCTTCTGTGCGACTGTCATTGTTTGTTTAACTGTTAGACA  
A\_14\_P136167 ACACTTAGTATGGTATTCCCAGTCTGAACATGTGTTCCCTTCTCTG  
A\_14\_P128419 GAAATTTACCATCACAAAATACTTTTCTCCTACTGAAATGAAAGTTCTAAGCCTGTGTTGT  
CUST\_8871\_PI426210822 ATGCTTCGGAAGCGCAAAAACAGGAAAACGCTTTTTCTGACATACACC  
A\_16\_P41001815

AAAAGAAAAAGCCCTGCTTAATAATGTAGCAACAAATATTTCAAACATACCCAGAAAAC  
CUST\_9001\_PI426210822 TACCTTTTAGGTTTTTTTTTTTTTTTACCCAAAAACCACACTGGGGATGACTCCAG

A\_14\_P120399 ACTGGAGATAAATATGCTAAAGAAATACTCTCATCACAGAAACATTGCAACATATTATGG

A\_18\_P10525078

AAATGAATATCCCTTCAAGACTTAGGATACCTACACTGAATGTTTCTACCTCCTTCTCTC

A\_18\_P11537194

AAAATGCCTGATGCTATTTAATGGACAATGTTATAAGCAGTAAAGCCTGATGATCTCCGA

A\_14\_P102467 ATTTTTAAATACTGTGTTTCTTGTGATCGCTACATACAGTGCTGCTCAGAGGCATAAAGT

A\_14\_P126491 GAACACATTGGGCGACTTCTTAATAAAATCCTTGAACCTCTGGAAAGTTCATATGTCTCTA

A\_16\_P19759202

ACTTCTCGCTGTATTGTCAGAATAAAAACATGTAATTGAGGTTCCCTTGTAGGCTAAAGGT

A\_16\_P16540054

AAGAACACAGAAAATTGAGTTAGTCTTTTGAAACCTTGCATCCATTGTATCTGAATGCCA

A\_16\_P39073325

AATAAAAGCAATGGTTTAATTAGGCCTCAGGATACGAAAAATATGGAAAAGGCGCTTCTT

A\_14\_P115930 TTTGTTTTCTCACTACCTATTTAATCCATAACTCCCTAACCTTCACTGCTCCACTAAAA

A\_16\_P18300075

AAAGTTTTGCCAGCAATTAATCTCCTTAGCCGTTAGAATAGATTATACACCAGTCCTTGG

A\_14\_P124587 TGTTAGAGTGAGGGAAGGCTGAAGACACTTTATATAATTGGACCTAGTTTTGGTGTATT

A\_14\_P121180 ACCTCAAGCACCAAAGGAAGTTTACTTTCATCATCCTCAGTATAGAAATTTCCAAAAAGA

CUST\_533\_PI426210822 CATTGAATCCCTGGTTCACAGCAACAACCAGATCCACGATTTTTG

A\_16\_P38852890

AAAAAACTGACATATGAGGTATTTTTATACCGCACAGTATAAAATGATATGAGGCCTCTC

A\_14\_P133001 TACAAGACTGATTGCTTGTATCAATTAAGAGAGGTATGGAAATTGGGTGAAACCTCTAGT

A\_16\_P35990357

CCTCAAAACCTTAATCACCTCCATTTTCATTCAATTGCTAATCAATTTTCATAAGTCTGCC

A\_14\_P114318 AACAGAGGGTATGGGTATGCGGACTACCAGCAAAAAATAGAACTTGATTTTTTTTAAAG

A\_18\_P14136413 AAATTTGGTGCCTAATGAACACGGGGTCTCTTTTCACAAAGCAAAAGACCAT

A\_16\_P21435426

AAGCACAATAACCTGAACTATCTGAAGAAACAAGCATCATAGAGCCATAATTGCTGTGTT

A\_14\_P125521 TTAAATGATGAGGCAGAATGGATCACCCCTCTCACCACTATGCAGGAT

A\_16\_P02952966

TGGACCTCAAACCTCAAGATTCTTTTTCTCTACACTTCACTACTTTAACTCTCCTGATTA

A\_14\_P111495 CTACAGGAAGTTGTTTCAGCATATTTTCAGAGGTTCCATTAGTTTCTCATCCATCTGGT

A\_18\_P12784988

ATTGACCTGTTGTTAACCACAAAACCTGATTGAATTCTACAGATCTTATGCCTAGGCAGTT

A\_16\_P01597392

GATCTTCCATGGCAAAAATATATGAGGAAACTAACGAAAGTGTTTTTACTATGCAGAGGC

A\_16\_P03002795

AAACAGGCCTACTCATTTACTAATTCCTCTTCTTTAGGTCATAGAATATGGAGCACTCAC

CUST\_5070\_P1426210822 GATGAGAGGTCCTCAAGGCAAGATGGATAAGTAGGAATAAGCAGCCTTGT  
A\_14\_P109853 AGCATTGAGAACTAAGATTTAGCAGAAGTTTAAGCCAGATTTCCAGTTCATCTCTCTC  
CUST\_6458\_P1426210822  
AGATTTTGGTGAAACTCAAATTACTTGGTGAGAAAAGAAAAGCACACATATGTTACGCTT  
A\_14\_P103898 CTCATTTTTGCTTGCTGAAAAATAAAAGTATCACAAAGGAGAAAAATTGAAGTGCCCCAGT  
A\_18\_P14270424  
CCTCCTCTAATGTCTCGTGTTTTTTCATTGTTTTATTCCCATAGTATCAGATACACCATGA  
A\_16\_P00805070  
TATATGACATTCAATATCTCTGATGTCCTCATCACCAAATCATAAAACCTGACGGAAGGA  
A\_14\_P108537 GTAACATAATTGTAAGTGGAGTGAAGGTGTTTCATTGAAGTCTCCTATGGAAGGTAACATT  
CUST\_3644\_P1426210822 TATTATTCTCAGGGATTTGGAGGGTGCAGAGGTAGATGAAGTAAGCAAGC  
A\_14\_P117821  
ACACTATTACTAGTGAGCCTCCAAGAGAAAAAACTCTGTAATGGAAACACGTAGACAAAA  
A\_14\_P128567 CTTTTCTTTTTAGATAGTCTTTTTCTTCTGTCTGGCTAGCAGGTCTGACCAGCATTTTAAT  
CUST\_4386\_P1426210822 ATTAGAGTTGCTGGGCAGCCTGGGCTGCCTTTTAACTTACGGGTC  
A\_14\_P129755 TGAGTCTTCTCCAAGTCAACATGACTAGATCCACCTCTATGCTTACTCTGAGTAATC  
A\_14\_P106745 CTTCAAACCAAAAGTTTCTGCAGTGGATGTTATTTCTGTTTTCTTTCAATACAGGAAC  
A\_14\_P101074 TGCCTTCTAATTCTTGACACAAATATATAATGACCATTTTAGATCGGGGAACCTCCCTTC  
A\_14\_P135243 CTATTTTGGAGTCACTGAAAGTCTTGTGAGGTAAGGCAGGGTATAAAGAAAGAAATGAT  
A\_14\_P137738 CAGCAGGAAGGTCAATAATGTGAGAATGAAAGTTTTTCTGGGTCAATTATCAAGAAGCTTTT  
A\_14\_P123138 AAAGTGGATACAGAGACAACCTTTTTCTAGAAAGTTCAGAAAAGTGTATTTTGGAGGACGGA  
CUST\_8094\_P1426210822 ACCTTCTCAGAAGAAGGATGGGGAGCACACAAGCACAGTGGGAAT  
A\_16\_P17341946  
ACAGCACATGACGTAAACAGATCCATTGATATTCTGGTCCTTACTTAGAAAATCCTAAGA  
CUST\_8979\_P1426210822  
TCAGTTATTGTATGACTACTATCTTTATTTCAAACCCTGAAGTCCTAAAATTAATGTCAC  
A\_14\_P122293 TTTCATTAAAGAGTCACTTGTCCAAAATGTTTCATCTCCCTTTCTGGGATATTTGCAGA  
A\_16\_P01412603  
AAAGCCATATCAGACCATATAAAAGACAGGCTAGACAGTAAGTAAACTTGTAACCATGCC  
A\_16\_P36632274  
ACAGGGTGAAATAGAAGGTGTTCTGATTTTATAGAAACGGATTGCAAGATAGTCATAGCA  
A\_14\_P115406 AAAAGTATCCCAAGTCTTGAAGATAAACTGTTAGTTTTATGGGGTCGCTTTTACTCCTAC  
A\_14\_P104227 CAATAAAAGACAAGTCATATCAGGAACTAGTGGTTAGAAGTGCTAAATAGATGGGCAGC  
A\_14\_P108075 CCTGTGATATCATTAATGACATGACTACTTCTTAAAAATTCACACCTGGATGCAAAAACC  
CUST\_5387\_P1426210822 GAGCAGCCCACACGCACCCCGCCGAGCTCACTGTCTCAGAATGT  
A\_14\_P117370 ATCTACTACTAGAAAATGAGACAGGACAGAAGTATTCTCACCTAAAACACTGGATACAG  
A\_16\_P18153551  
AATAACGACCTAACTGTCCTTTAAGCCTATGTCCCAAGAATCAGTTCCTCAGATATAATC

A\_16\_P18157250

TATTCAATTTGTCAGCCAATCACATTAAGTCTATGTCCAATTGATTTCCCATATGCCTGC

A\_18\_P15800771

AAAAAAAAAAAAAGTCATCTACCTATAAAGTCACTCCAATTTAAGGCTGATCCTATCTGAGG

A\_16\_P03604862

CGTGTTTCATGAAGATAGTTTAGGAAATGGGTGTTTAACTGATCACAATCTCGCTGAAAAT

CUST\_5564\_PI426210822

TAACCTGTGTATATATACACAACAGTTTGACACAGAGCATCTCACCTCTTTCATAGGAAG

A\_14\_P101093 TAAAGGTGATTTTCAGGTTTTCTCTGAGACCATTTCTTCGAAAGAGTCAGATCATCAAT

A\_16\_P18034658

AAATGCATTTATGTTCTTGAGCCTACTTTCTAGCCATTTCTAATCAGAGACTACCACGTG

A\_16\_P40018271

CGCTACAGATACCATTTAAAGACACATGAAATCATACTCACTAGTTAAAAATCCAGCCAC

A\_14\_P104156 TTGACAGGATAATAATCCCTTAGTTGTCTCCAAATTGCCCGGTTCCCTATCC

A\_14\_P113041 TTTCTGCTAGATATCTCTGAAAGTGTGAACTTCGATGAGGAGACTGATGGAATATCC

CUST\_7948\_PI426210822 CTCCCTGAGGTGAGGAGTCCTCCCACCCCCTGCCTCCCATAGCAG

A\_14\_P108263 ACCTTGATGAGGCTGAAAAAATATTTCTGTTTCTTTTCTCCATATCTTCTTATGTGG

CUST\_6810\_PI426210822 AGATAAATTAGTCAAAGAGATGAGAGTTTGGGGCTTCAAGTGTCCGAGTGTC

A\_16\_P35113860

AGTTGAATGAGAAAAGACTGCAGAATCAAATGCTGAATTATGCTTTAACAATTAAGGAGA

CUST\_7523\_PI426210822

TACGTGTCTCACACATGAGAATTATTGTGTAGAAGCTGTTTCCCATTTGAGACAAAATAA

A\_14\_P131036 CTGAAGACTCTGAGATCTGGGATTCCAAACAAATATACACTTCCATTCTGAACTAATCAT

A\_16\_P02761878

CCTCAACTTATCAAGAAATCACTAGTCCTTCAAAGTCAGATGTTTCAAAGATTGCCC

A\_14\_P127567 AACATAATCTGTGTCTGCATCAGCGATATTTCTGGTGACCCAGCCAGAAAT

A\_14\_P139612 CTGGAATAGTCACACTTAAACTCCACAGTTTCTCTGGAGCAGTTGAATTTAGAAAGAAAC

A\_16\_P16621365

AAGCGACATAACTTTACCAAAGACGACATGAGTAGATCCTGATCAGTTACACATCACTTC

A\_14\_P125879 TTCAGGATAAAGCCAAAGTGATGTTTCTGGGAGTGATATAAAGTGTGTAATGTTACCAGT

A\_16\_P21337914

TGTAAAGGGTTAACCTCTGAGAGATTACATTGTATTACAGCGCTCTGTTAAAGTTTGAAT

A\_14\_P135418 CAAAACAAGGGAGTCGTGGTCAATTCTTCAGTGATGGTGAAATTCCTCTTTC

A\_14\_P115589 TGGTAGAAACACCCTGTGTCTCATTTTCGTTTCATTCATATAGTAGGCTACATCAGTTAAAA

A\_14\_P119318 TGAAGAGGGTATTATGCTCTAAATATGTGACTTTCCTGAGAGCATATAGATCCATTTCCC

CUST\_433\_PI426210822 CCGCTTCCTCATTTGAATTTTTCTAGGGAAATGGCATTTCAGACATTGTTCC

A\_14\_P123746 GTGTAGTTTCTGATGGGTGGTGAACATCAAATAGGGCCATTGTAATTAATCTATGTTTGA

A\_14\_P104312 TCACATGTAAACTGCAAGGAAGACAGTTGTTTTAGATGTTCTGTTTCAATACTCCCTA

CUST\_5790\_PI426210822 TCCAAGAAACTGATCCTCCTCTGAACATGATAGCTGGACTAGGCTAAGAAT  
CUST\_5952\_PI426210822 AGGGGCTCAGGGGAGGAATTCCTACTGATTTGCAAGAAAGGAATT  
CUST\_1087\_PI426210822 CTCCTACTTTATTTGGACAGAAGTCTCACTGGCTTATGTCCACATTGCCTT  
A\_14\_P129193 CATGTGAATTTGTTTTCCATTTTCCTTGTGTTGACTGACTGGCTATGTCTTCACTTTTTTC  
A\_18\_P16234926  
AAGTCCTACCGTCTCTTACATAGAAAAATCTGCAACACTCCTTTTATCCTGTCAATTGTAA  
A\_14\_P120016 CCTTCAGGATTTTTACAACCACTCTCTCATTGTTGGTGATATTAATGGCTCAAATACTT  
A\_16\_P02218844  
AAATGATTGGAACAACACATTTGCATTCTCACATAGACTATATTTTCGCATCACTCTTGGC  
CUST\_9435\_PI426210822  
CTTTAGGATGCCATCATTATGTGAATGTTTCTGCTATGATTGTCCAAAGGGAAAATG  
CUST\_1234\_PI426210822  
AGGTGTCTAACATATCCTGTTTTAGTGACTAGATAATGAAGGGTAGAAAGCTGGATATTC  
A\_18\_P17038578 ATAGAAGGCACCTCGTTCCCTATTGCCCTCACTAACTCCCGTGA  
A\_14\_P131385 GAGAGAGGACATGTTGACAGAAGTGAGGTAAATTAGAGAAATTTCTTCAACTTCAAATCC  
A\_14\_P135175 AATGGAGTTAGAGTGAACCTACCAAAAAAGAGATGGAAACAAGTTATCTCTCTTCGTTTC  
A\_14\_P120176 AGAATCATCACCGATAACATATTTTCAGGAGACAAAAACAAGAGGTGCATTGATTTTTTCC  
A\_14\_P127727 GAATGAGATTCCTTCTTCTAAATAGTGATTGGATAGAACTTCTGGTGTTTGGATACGAC  
A\_14\_P109278 AACTAATTTATTTTCTTATTTAAACAGGCACTCGTCTGCGAAATGTTCTGTTCTTTTT  
A\_14\_P114255 CAAGAATTCAGAAAGTGTGTTGGTTCCTAAATATTCAGAGAGTTCTACTAATGGGGTGT  
A\_16\_P17001400  
ATCCTCGACATGGATACGTTTATTCAGGTTTTTATCCAAAATGAGATAAGGGCTATGCAA  
A\_14\_P129901 GTTTCTCTTCAAAGCCTCTTCAGATATTTTAATTAGCCACAGAGGCGGGTTTTT  
CUST\_2743\_PI426210822  
TTCTTTTAGGAAATTACCCAATGAATTGGTGGAGGTAAATGATGCAGGAGGTTTG  
CUST\_3840\_PI426210822  
CATGCAGAAATAAAAAGCCCAAATTCAGTGATCTAAATCAGGGCTCAGATGAGG  
A\_16\_P00639849  
TCGTGTCTTACCACTGTAATCGTTTTGTTGAACAAGAGTTTTTATTGCTGAAAAGACATCA  
A\_14\_P121057 TAGGAAGATGGAATGGGTAGGGCCTTGGTTTCAGAATTTATAGGACAGATTATAAGAATT  
CUST\_7538\_PI426210822 TAACTTCAAAAATGGCAGTGGCTACATTAGCTCTTGGGACCAGTGTTTCA  
A\_14\_P132238 GAAGATCCTAGAACTTCTGCAACTCACTGATTCTCCTCTGTGGTGAAGTTTTTCTTAT  
A\_14\_P124863 GGAGAGTTGTATTATTATTTGTAGATGAAGAAAACGGTTCTGTCCAACCAATGCAGAAT  
A\_14\_P118226 ATCATCGATGCTGTAACCTGTCTGGTAGAAATCCGTGTTTAAGTTTTCAAAGCCTGAC  
A\_16\_P35742979  
AAATCTCTCCCCAAAACAATTTTAACGTTCAAAAACAGAAGTGCCTGATTCTCAGTTTC  
A\_18\_P16310728  
AGCCTAAAGGTTAATGTTGGTAAACAGAAAAAGATGTGGTTATGAAAGGGTCATCTTGAG



CUST\_7649\_PI426210822 CTCTTCAGACTCCATTTCCATGAATGTTTTGGGAGAGGTGAGGAAGAA  
A\_18\_P15522837

AAAAACCCTCAATTCCAAACATAATCAATCCAACAATGCATTTTTTCAGTCCACAAGAGAA  
A\_14\_P100472 TAAGTAACATTTTTTCTTCTTCACTCACTAAACCTTTACTGAACTCCAACCTAAGTGCCC  
A\_14\_P200501 GATTTTGTGCTGGGCAACTTCTTCTGCATTAGGAAGAAGCCCAAAG

A\_16\_P02721335  
AAAGCAGGGATTATAACTTCAATGGAGCAATGTAGACAACCTTCACAGAGAACATAAGCAT  
A\_14\_P121174 CTACAGCGACTATGATATGCCTTTGGATGAAGATGAGGATGTGACCAATTCCA  
A\_16\_P18738075

AACTTGCAGTAATCGTTATACTTTGGAAGGTTTAGACAGGAATAGAAATGAGGGTAGTCC  
A\_14\_P103120 TGGCAAAAAAGTTCCCTTTTCATGTTTTAACAAATGCTTCCTTCTCTGCCTCAAATATCTA  
CUST\_4126\_PI426210822 CTTTTTGGTGGGAAACGTAAAGGCCAGTCAGCTTTTGGATGAATTTTCAA  
A\_16\_P19615564

ATCTTCTATTCTCGCAGATTGTCTCATTAACCTTGTTCGTCTCATAGTAACAACATCTCC  
CUST\_10040\_PI426210822 GAGGCTAGGAGACAAGGCTGGGCTTGCCCTCACTCCCTGTCGCCCC  
A\_16\_P00149595

ATCAGAATGAGTAAGATTACGCCATGAAGTTCTTAGAAATACAATTTTCCACCCATTGCC  
A\_16\_P18145042

ACTATTTCTGTTAGAGATCAAAGTCACTTCTGTGTAATGATAGCAAATGTGAGAACCA  
A\_14\_P133733 ATTCACTTGTTTTATAAATGTCTGACCTGTCTTGAGTAAGTTTGTGCTGTCGTCAATCTT  
CUST\_5976\_PI426210822 GGCAGGCTGCCCTGATCCAAGTGAGCAGATAGTCTCCTTATTGTT  
A\_14\_P133490 TGCTAGTTACATAATTGCTTTAATAATTTAGTTCTAGAACTGGGGAACAAAAGTGACCCCC  
A\_14\_P105879 TTGGAATTCCTACCTGCCTTTTCTCCTTAATTGTTGCCTTCTTTGAACTGTTG  
CUST\_75\_PI426210822

TAAACTGCCTCCAACAAATATCATCATTTTAATATTTTATGTTTTGCTAAGCCATAGGCT  
A\_16\_P21434380

AGCCTTGCATCATAAGTAAGCCCTAATTCTGCAAAAATTGAGTATTGTTTCATTTCTGA  
A\_14\_P109755 CTTACCTGTGCATACTCTCTTTCAATAGCAGCCTTCTTCTGACTGAATGTCCTAAAAATA  
A\_14\_P131008 TTGTTAATTAATGCGAAGAGTTAGACACATCTCCTCTGAAACCACGTAAATCCTCCTA  
A\_14\_P128631 CATGGCATGTGGGTTATAAACGTTGCTGTCAAAAAGATTTACCAGGTCTACACCATTAT  
A\_14\_P123676

AGGCAACAAAAAGAAAATCAGAGGCAAAAAGATTTAGACCTCGGTCTAATTCAACTGAGTA  
A\_14\_P122804 CTTCTTCTTTGCCCCATGGTAAGAGACTCAAATTTATTCAGATCTTCTTCAGTAAGG  
A\_14\_P133102 TGTGGTTTTAAACAAAGAAATCATTGTAGGTGAAGTTGAAATCTCCTTTGTTCTCTTCCC  
A\_14\_P123888 GCTTAAAGCAGGCTCTGGAGTTTGCATACACAGGACAGGTATGGTATTAATGT  
A\_14\_P201054 ATGCTCACAGAGACTTTGAAAACCGTGATCGGTATTATTCAAATATATGAGCACAATGAC  
A\_18\_P14134624

TTCACACTTTTTTCTTCTCTGAGGTATGCTGTTTTTTGTCAAAAACAGAAAAACACACT

CUST\_1549\_PI426210822

TTCACTCTCTTCTCCATCTCAGCAAACATTTAGATTGTGTGACAACCTATGGCTG

A\_18\_P22840701 AACAGAACAGAAGAAGGTTGGATGGTTCACCAAGTTGAGTGGGTC

A\_16\_P21362380

AACAGGAACAGAGTGAGAAAACCTATGGTTACATTTTAAGACATATAGGCAGCAATCCAAA

A\_14\_P112812 GGTTTATTTGTTTATATTCACAAGAGAAATGGGTTTACGGATGGGAATTTTGTGCTTTCT

CUST\_4529\_PI426210822 CTGGAGTGATAGAGAAGGAGTTGGCAGCATTTAGAATGGAGTCAGGA

A\_14\_P106263 ATTTATTTCCCACTTAGGTTTTATGGCAGGCACACAAAAGAAACCCTCAGATGG

A\_16\_P21374699

TGACTATGTGACTACGGATTACCAGTAACCTTATTAACCTACGCATTAAGAGAAAAAGCC

A\_16\_P03763212

AAAAAGCACCATTGTCCCTAAATATTATGACCCTGGAATATAAGATTGATGCCTAAAGCC

A\_14\_P110515 TTACAGCCTTCTTCTGTGTGTTTATGTGCATATATGTAGCCATAGGGAAAAAATCAAAA

A\_14\_P102642 CTGTGTGCTCCAGCCTCTTCCTATGTGTGTAACCTTCAATAAAACCAAGCAAAG

A\_16\_P00685176

TAAGATTGTTCTTCTATGTTCCCTGAAGGATTTTTCAAGGAACCTTTGAAACCTAAGTGGCT

A\_16\_P58424423 CCAAGCATGCTGGACAAGGAGGCTCTAGGAAGTCAAAGACAATGT

A\_14\_P127516 AGGAGTTTTTGTCTAGGAACTTAGTAGGCTTCCCTGTTATGGTTGCACTCAG

A\_14\_P123624 ATCACATAAACAATGACTATACAAGACTACATGTGAACTGAGTTCAGGAATGGCCAGA

A\_14\_P136856 CTAAAATGTAAAATATATATTTACCTGGTTGTGTTTGTGGGATTCTTGGGCGTGGTGATG

CUST\_6761\_PI426210822 GAGATGTACAGCTCTATGGCCCTGGAGTCAAGGTAAAGCCTCATT

A\_14\_P110157 CAACATATAAATGCTTCAAGGACATGCTATACGTGTTGCTACCCCTTGTTCTCTAAAGAA

A\_14\_P134760 TGTTATTGGTATAGCCATGGTAAATGTGAATGTTGGCTCTCCTCTTTGCTTTTTCTGAAC

A\_16\_P01449825

TCAAAGCAGCACAACCTTAGGTTTGAACACTTTTTTTAATGGTATTTCAATAGATCCA

A\_16\_P21478468

TGCTTTCTATGATAATGTCTAAAGTCTTAGCATGACCTAAAAGATTCTGTATGGCATAACC

A\_14\_P138902 CTTCTCTTTAGAAGTTCTTGAACCAAATTTATGGTTCAGTAAAGCCAGTGATAGGAT

A\_14\_P116874 TCTTATTTCTCTCCACTCTCTCTAGTGAACATTTTCATAGATACTTCAGAGGCTACTCT

A\_16\_P19366604

AAATGACCTAGGCAAATTAACAACATTTCCCTCTACAACCAAATGTAAAATAGATGCCCC

A\_14\_P121266 TCCCTTGTCTTGGTCAGGACATTTTCAGCATCATCAAAAATCCCAATAAAAATACCTTTT

A\_14\_P123842 ATCAGCACCAACTTTCTTTCTTTATGTGGGTATTCAAAGGAGTTTACATAAAAGGTTTC

A\_14\_P118747 AACCTTGCATCTTCAGAGTCACAAATCATATTTCAATTTGGCAAGCACACATTTTTAGTGA

A\_16\_P34852300

ACATTGAGTTCTAGACCAACATACCTGTTTTTGTGAGTCTTTAACATGCTTCATATCTTGCC

A\_16\_P21661712

AAAAAAGCAAAGCATTTGTAATGTTGACCAACAAGAGGTATTGAGGTGCTAAGATGAGAA

A\_14\_P200285

TTGACTTGATTTGGTCCACAGAAGAGTAAAAAATAGAAGGAAGTAGTATAGGAGACAGCA

A\_14\_P100321 GTCTGCACAGTTTAAAATGTCTAACTAAACAGTAATAACTCGTTTCGACATTCGTTTGA

CUST\_4866\_PI426210822

TACTTTGTGTTAAACTCAATTACAGAGATAGATCCTTCCATTCATCAAGTGAATTTTAGA

A\_16\_P16510297

AAAAATGGAACACTCTCCCTCAATTGCTTTAATGTAGATAACATCCCAGAACTTTCAAGA

CUST\_3473\_PI426210822 TTCACAGAGGTATCAGACAGGAATTCCTCACTCAGCTTGCAGGAATTGA

A\_14\_P133142 CTTTGGTCTCTTCCACTTTCTGAACCCGTCCAGACACAGTTTTGTCT

A\_14\_P129951 CAGAAAGAAATCTCACCCCTGTAGAGACTGCAGGAGTCAGTGCTCACTTAAAA

A\_14\_P119328 CAGTGCATGCCTCTGACATTTAAAATTCACATCATGAATACCAAAGAGAATACTTGGAAA

A\_14\_P101666 ACCTTGATTGCCTTACAAAGTTATTTGTTTACAAACAGCGACCATATAAAAGCCTCCTGC

CUST\_4506\_PI426210822 ATGGGAGAGTCTGCCTCCACTGGGCAGTGCTGGCCTGGAGGAAAC

A\_14\_P108572 AGTGGATCAGTAGCCATACAAATATACTGGTAATTTATGGTCATTCCTTTTAGAGGGGAT

A\_14\_P130119 GCACTGACTTAAGCACCAGGAAAATGCTACTCACTTGGAATTTAGAATTATTTGATTTGG

A\_16\_P17208796

AAAAAAAACATGTTCAATACCATTGTTGTTTGAACAGGTAACAGAAGTTTCCAAATGGGA

A\_14\_P108888 CTGGAGACATTTTGTGACATGCATACAGATAGCATGTGTTATTTAAAAGAGTTGCCTATT

A\_16\_P19426616

AGATTTAAAACAATGCAGTTCTTAAAACACCATGTCTCAAATTGCTACCAGACTACCCTG

CUST\_8697\_PI426210822

TTCTTAAGTTGGGGCCATCAAATCAGTCGATATAATCCAAAGCTAAAGAGTAAAGAAATT

A\_14\_P114468 AATAGCAGCAAGTGCTCAGTTAATTGGTCAATAAAGGGGAGAAATTTGCTTACAAAAAAG

A\_18\_P11518373

TCAACTTCTAAACAATGTCTCACTTATCCCTTGATCCTTAAAATAATAAACCAGCCCTGC

A\_14\_P100894 TCCTCACTCTCCTCTTACTACAAAATGAAGTCCATGTGGCTCAATGACTTAATTACAAAA

A\_16\_P01395894

TTGCAAGCATGATTTCTTGATTTTCCAGGACAGACAATTAGAAGCAGCAGTTTAGTAAAG

A\_14\_P104466 AAAATGCATGCCACAGCATTAATTTGCTATGCTAAACCGATGTTGACAAACATAAACCAA

CUST\_5802\_PI426210822 ACTGTAAGAGAAGCACAGCCAGCCCCAGCGTCCTTACTCTGACTC

A\_14\_P127634 ACTAAGCAGTTATATCCAGGGCATATTTTCGTTGATTGTAATTTTGGGGAAAGTTTTCCA

A\_14\_P116198 GATCTCTTAGTCGAGATATTTGTGGGAAGAGACTTGGAAAAACCATTGAAAGAGTTAAGA

CUST\_11\_PI426210822 AAAATGTCAATCCCTGTCCTTTCCACCTTGCCTTTGCAGTCAGAA

A\_16\_P18329382

TTTTGAATGACCAGAAAAATAGACTAACTCATCATGACCAAATCCTATAATGGCCACGC

A\_14\_P200600 ACCTTCACTCTTGCTATTACTGTTTTACTTGAAGGTGATTACCCCTCAAAAATGAAAAC

A\_14\_P105515 ATGAGTTGACAATCTGGAAAACATGACAGATGAATAGAAATAATGGCAGTCCCTCGATATC

A\_16\_P01762524

GGTGCTAGTGAAAAGTTAAACAGTATGGTATTTAGATGGCTCAACTGACTTACCTATGGT  
A\_14\_P201059 ATAATCAAGTTTTTGGCACACAACTGTTATTGTGATTTAATGTAATTTTTTTGAGAGAG  
A\_14\_P104590 AGTTATGGTTTGAGTTTGTTCCTTTTTTCGTTAGTAAGGCCACATTTTTGTGAACATTT  
A\_16\_P00396164

AAAACATCCATCCTTCAAATCATTCCACAGGTTAAAGAACAAATGTCAGGTTACACTCTT  
CUST\_182\_PI426210822

TATCATTTTTAGGGTTTGGTTTCCAAAGTTGGAAATCAGTGTGTTTTAGATCAGTGGTTT  
A\_14\_P200262 GCGGGGTGGAAATTTTATATAAGGACCTTGTTAAGGCCAAGAAAGTCAGTTTAATCT  
A\_14\_P115458 ATGCTTCAAATTCTGAATCCCTAGAGTTAAATGGAATGTTGTTATGACTTAGGATGGGTT  
A\_14\_P102784 GCGGAGTCTCTCTTTTTATGTTGCTTTGATTTCAAGATCTCTTAGATATACTAGGTAGT  
A\_14\_P102101 ATGAAGCAAATATGCTCTTAAATTTTTTAAATTTTTTCAGCACATGAGACAGCCTTCTCCT  
A\_14\_P201974 GCAGGAAGTGACTAGAATGACAAATCATCAGCCAGGAAAGAAAAAGATTTTGTCTTTATA  
A\_14\_P109442 CTGCTTCAACAAGATATTTACTAGTATTAGACTATCAGGAATACACCTTGCGAGATTAT  
A\_14\_P101037 CTACAGTATGTTTGAAGGGAAACAAACCTTTGAAAATTGTATCAGTCCTACTGCACATTC  
A\_16\_P03224289

ATGAGTTCTGTTTCTTAAACTGGATGTTACTGAGTATAAGCACCTCTGACGGTTCTAG  
A\_14\_P103194 CAGTCCTGTTGGGGCAAAAAATGATCCTTAAAGCATTAAACATTGTCATCTTAATCCAA  
A\_14\_P130839 GAACATCCGCAAGTTACATGTTATAGCACACTCACATACGCACAAAAATCCTATATGCTAA  
A\_14\_P116797 ATAAATAGAGACCTGTAAATGATGAACAGTGAACCTTGGTGGAGAAGTGAGATGGGC  
A\_14\_P134089 CTGAGGGGCTTATCACTGGAACAGTCCTGACACAGTTTGATGTAAGTAATATCATTATAT  
A\_14\_P106016 GCAAACACTCAGTGAAGAAGTGCATCTTCTTACTCTTCATCAACCGTAAGTTAAAAAGA  
A\_14\_P109844 AATGTCAGGAATTCCCAGAAGTAAGACCATCTTTGGGACAAGAGACAATGAAG  
CUST\_10098\_PI426210822 AAGACAGCGGTTGGCGGGGACAGTGTGAAAGTCCTCTTCCCTTTA  
A\_14\_P114899 CTTAAAATATCTCTTATTGCAGCCTGGGTAAGCACACATGAAGGGGCGTTTTC  
A\_18\_P22839615 GAGTGTGAGGAATGCCAGAGGGAGACCCACGAAACTGCCCTGCAG  
A\_18\_P14017883

CCCTGCCACTTGTTACTCTATTACTTTATTCCACATGTCATCTGTTACTTTGGAAAAACA  
A\_16\_P19032129

ATTCTTCTTCCAGTGTATGAAGTCACTACCCCATTTTTAGTCTATAAACCAAAGAAAGGA  
A\_18\_P14170925

AACTCCAAGTTAGGCTGATACTCAGGAACATGCACTATTTATGCTTTTATGGTTTTCATGT  
A\_16\_P17620642

AAAATGAAAAGCAAGTAAGAAAGGGAGACAAATCTACATTCCATCATTATTTTCGGAGCCA  
A\_14\_P110939 GTTAATAAATGACAGTCATTCTCCAAAACAATGTTCTCAGTGGGGAGTTTAAGAGATTGG  
CUST\_4925\_PI426210822

ATAAAGTTTCATAAGTCTTATATGGCTTTGAACAAAGCAAGTCTATTTTTTCATCATAGTA  
A\_14\_P124154 ACTATGCAGGTTGTTTTAGGTATTTTTGTCTAAGAATGTAAATGTGAAAGGCTGGGAAAT  
A\_14\_P101931 ACTCAAGGCTTTGAATTACCTGAGAAGTTCAACTAGTTTTGCTTTAGAGAGCATCAGTTA

A\_14\_P119875 ACTCTGCAATAGTCATACGAAGTAGATGCCATCCAGATCTCCCCTTTAGAGT  
A\_14\_P134075 ACAAAGATCTGTGTTTCTATAAAAACGAAAAACAAGACTCATCCCCAGAAGTCCTGG  
A\_14\_P110834 AAACAAAGTTTGCGATGCTCATAATCATCTTCAGCAGTGGCAACATTTAACTTTTTGAGT  
CUST\_10190\_PI426210822 AGAATCACTGTCTAGGAAGCAACCCAAAGGCCGCGGAGTGGGTAG  
A\_14\_P137646 CTTTTCTAATCTGAGAGGTTTCATGTTGAAGAAAATCAGTGTGGGGTTGCAGGA  
A\_18\_P22842075 GATTGGTGCTAGGTTTCTCCTGGTCTTGGACGAGGTTGCACTTTT  
A\_16\_P18328789  
GACTTACCAAACGACTTCAAATTTAACCTTTGCAATTGAGTTCAACATTCTCCCATCAT  
A\_16\_P16582625  
ATTATTGCCAAAAAAAAGTGAAATAGAAGTCCTGTCAAGCATACTACAGTTCCAAGAGGG  
CUST\_9074\_PI426210822 TCCCAGAGGCCCTGAGAGATAAGCAGCCATGTCATGAGAAGCATT  
A\_16\_P17800876  
AGCAAACAGGATACCAAATTATAACGAGACCACAAATTCTTATCTGCAGAATCCTCATGT  
A\_16\_P19707930  
AACTACTGCTCTGATTTAGGGAATAGTCAAGTCTTTAGTTGAACACTCACCTTAAGAACC  
A\_16\_P02924132  
ATCACTGGTTCTTATTCATGGATGCCCTTGTATACTGGTTGACCAACATTTTGAACATT  
CUST\_3309\_PI426210822 GACTAGTTATCTTAGTTTGCTTCTCCAGAAGAGGCTCCTCTTCTCTCCC  
A\_14\_P129016 ACTAGGAAAAGGGCTAGTCTTTCTGTGAATATACATGAATTCTTCCTATAAGATGTGGGT  
A\_14\_P132788 TTGGCACTCTGGCCGAATTCTGCATTACAAACAGTGATCTCTATGGAGATATAGATTATA  
A\_14\_P139704 TTGATCAAGACTCAGAATTTCAACTCCAGTAGCCCTTTATTAGGTTTTAGAAGTCAATG  
CUST\_58\_PI426210822 AAAAAGGAGCTGGCTAGCCGGCCGCTGATGTGAGAGTGAGGTCAT  
A\_18\_P10844933  
AGTTCTAATTCAGACTCTTTGCTTCATAACCATTCTTCTCATAATCAGAGCCTGTAGTGT  
A\_14\_P112990 GAGTGTTTAGTCACTACTTTCATGATTATATCCCATATAATATAGACGTATCCGCGGGC  
A\_16\_P03425624  
CGGTTAGCACAGTAGATGCTCAAAAAGGTATCTGTGACAATATTTGTGTTGCAAATGATG  
A\_16\_P20465924  
AGTTCTCTGCATGTCTACATCTATTACTTAACCAAGAACAACACTCATGTATTCTGCCTTCC  
A\_14\_P102735 AAAGAGAACTTGTGATCAGACAAAACACTGAGAGAGTAAGTGTCTCACCTGTATTTGCATTA  
CUST\_1939\_PI426210822 TTGAAGGACCCTTTTTTTTTGCAAGGCTGGTAAAATGACAGCTGACTT  
A\_14\_P133767 GGATCCCGAGGGATTACTTTTTAGACCTTCTTTACATTCAGAAAAGTAGTATAGATTCA  
A\_14\_P101860 TCTCATCCACCTGAAATTCGGTTTTCTTCCAAATTAATTTGTGGTAGAAACATCCTAT  
A\_14\_P120404 TTATTAAGCCATAACCATCTTTTAAGGTTTCGTGTTTAAAATCATGCCAGGCTGCTATC  
CUST\_6587\_PI426210822 ATTAAGTGACAGAGGCCCAAGGTTTGGGGATTGGCAGAAGTTTAG  
A\_14\_P200759 CTGAGATCTTATTAACATTAGTTGTCACTTTATTGGTTTGACCTAAGTGACAATATGCTG  
A\_14\_P101446  
AGCAAAACACTGTGAAACAAAGAGGAGAAACAGCACTTTAAACTTTTGCCACTGTATTAA

A\_14\_P117867 GGGCACTCTTTATTTTAAACCTGTCTAGACTGTGTATAAAGTAGTAAAGGGTCACTGAAG  
A\_14\_P128938 GACATAAATTCAGTTAGAGATAAACTTACAGTCAGTTTAATGGCCTTTTCTGGAGCAACC  
CUST\_8887\_PI426210822

CCAGAAAATGAGTGTGATTTACCCTTTGATAAAAGGGAECTAATAAAGCAATATATGCAG  
A\_14\_P200098 TGTGGCTTCACTCATGAAATTTACTTCAGTTAATATGAGACTGGGGGTTAAGTTGTA  
A\_14\_P133899 CTGATCTCATTGTGCACCTGAACAAAAAGCAATACTTAAACTGAATTA  
A\_14\_P106874 CTGGAAAACCAATTAGCATTCTTTTATACTGGGTGTTAATACTTGGGCCTTAGAGCAA  
CUST\_257\_PI426210822 AAGGGGTCCAGTTGTCCCCTGAGTCCGGAGGGGTGGGCCTAAGAA  
A\_16\_P19610099

CCTTTCCTTTTAAAGACACAACCATCTTTACTGTAAGCCTTTAACAAAACACCTTGTCTG  
CUST\_340\_PI426210822

GAGTAGTTTTGCAAAGGGCTGCTCTAGTGCCTGAAAGAGTATAGAACCTACAT  
A\_18\_P14134939 CTTGGTCCCAAGTTCAGACCTGGGTCTTGACTCCATGACTGTT  
A\_16\_P32194009

AAGAGAGATGATTACTGAGGTTTACACGTCATGTATTTTAAAAACACACTTTGTCCCTG  
A\_16\_P02464808

TTCAGTTGTTATTAGAGGTCGTCGTTATCTTTCTCATGAGTACTAAAGCCTATTATCCC  
A\_16\_P19522127

AAATGTGTTGAATCCCTACTGAACTCATTCTTTCCAATAGAAACGAAGTCATACATGAGG  
A\_14\_P137120 CTGGGAACTTCCAGAATCAACTGTTATTGATGAAATGTCATAACAGTAGTGCTATTGCTT  
A\_14\_P137732 ACGCTATATTGGAATGGAACCACAGTTAGTGCAATCATATTATATTTTCTCTGGTGCCT  
A\_14\_P123930 ATATTGCTGAAAGAAGGGAACAAACAATAAGGACCTATAAGGTGTTACAGTTACTCCAAC  
A\_14\_P137437 TCTTTTCTATGAGTCTCCATTTTCATTCGAGCAATTCTGGCAGGTATATCCAGTGAATAT  
A\_16\_P38056960

AGTCAGACATAACAATTGTGCATTTCACTTGAAACTAGTATCTCGTTGATTGCTACCA  
A\_16\_P16076858

CTCCTACCAGCAAGTATTCTTCATGTCTTGGATATAGCAATAACCATCATTACTTCTGGA  
A\_14\_P133878 CAACCTGTTGTCTTCAAAAACATCAACTCCAGTATTAAGGATTCTGGCATATTCTTTT  
CUST\_4748\_PI426210822 AACAGAAGATGGGCATTTTCATCCTTTCTCATTACTGAGCCTTCCTCAAGA  
CUST\_4587\_PI426210822 GTATTGTCTCTCTAAGCTGCGGGGAAAGGGAAGGCAGCAGATTGG  
A\_14\_P124499 ATTTGACTCCATGATACTCACCTGATTTCTTGGCCCCAGCATCAGAG  
A\_14\_P113269 CATAGGAAAACCATTACAAGCAAAATAACAGAATGAGCATTCTTAATTTGGGATGCCAG  
CUST\_313\_PI426210822 GTGGGTGTGGAGCAGTAATGCTGTGCATATTCTTGTTGCCAGTTG  
A\_14\_P131214 TAGAGTTGCTGTTAGGTCATCAACAGTAGCAATACTACGATCATCTCTTGAAGATCAAA  
CUST\_10021\_PI426210822 GTGGGAAAATAAGCAGGGTTTTGTGGAGAGCAGCTTGTAAGTTTTGTCA  
A\_16\_P18555883

AACCCGCTCAACTTTAGTAATTCCATCTACCTTTGAGTAACTTTATCATGCATTGCCTA  
A\_14\_P129511 TTTAATTGTTATAACCGAATCAATTATTGGAAAGTGAAAAACACCTCCCGGTCACACAAC

CUST\_9502\_PI426210822 AAAAATTAACACACATGGGAATTCCACAATGCCCTTCTCCCTCCT  
A\_16\_P02372495

AGCAGAGGTCCTTTTCAGTTTGCAAACAGTAGTATACAAACTTGGTCCATATCAAATACT  
A\_16\_P36146612

TTGGCTTTTGTATTCTAACCTTATTGTCTCATCTCCCTCTAACACATGATACACTGCAAG  
A\_14\_P109317 TTGCTGACCTCTTTAACCTCACTTTGTTGGAGAAGGCAGTGATCGATTTCTTA

A\_14\_P135051 AAGGGAAATCCGATATGATTGATACTTCTTAGGGTCATCTGCATATAATTCCCTCAAATA  
CUST\_4347\_PI426210822 TATCCTGAGTCATATTTGGGAAGCACTGGGCTCTGCTTATGATTCTCAC  
A\_18\_P22841254

CATTAACTGGTTATCCGATTAAAACCTGGCCACTCACATGGATTTATTTTGTTCAAAGGTC  
A\_14\_P138806 CCAAGATATTTTATTAACTAAAGCCTTCCTTAATTATCCCTACCCCTCTAACCCCTCGAAAG

A\_14\_P124906 GTATAATTACTCCTTTTTATTGCAGTCTTCAGTTCACGATCTTCTAGTTGCAGCGATGAG  
A\_14\_P124311 TTCTTGATCCTTCTTTCTTTTCATAACTTTGGGTTATGTTTCTGCTACCAGCAGAG

A\_18\_P22842285 CTGCCGGGCAAGGAACCAGCAAAGCCTCACTACAGAGTGACAATT  
A\_16\_P02021722

GTGAACTCACGAGAAATATGCTTCAGTAATCTTCTGTCTTAACAAAAAGGCTTTCTCCAA  
A\_14\_P122717 TCTGTCTATCTCATGAACTCTCCATAAATCCAAGAACTGCCTGTAGTTTTCAAATGACA

A\_14\_P120537 ACAAATGACGATGCACTTTACTAAAGAATTCATCATGGGATTCCTATAAGTGGTGATTT  
A\_14\_P110702 TCAATGTGCTGTCCTAAATATGGTTTGTGCACTACTCTCAAAGGTTAAGAAGACACTG

CUST\_8790\_PI426210822

GACCCTTCTTAGCTAAAATGAAAAATAATTGCCTAGTTCCCTCATGTAGAGAAGTTGAG  
CUST\_5078\_PI426210822

TATTTACCCCAGAGGAAGATTATTTTTTTTCATTCTCTAAATTGTTTAATTAATAACTCATA  
A\_14\_P115111 AGTATGCGTTCTTCAGCATCATCAATGTGCCTTCAAGGACAATCTGTGGT

A\_14\_P118072 ACAAACACTAGTTAACATATTGTCAAACCATCTTTCTCTGAAGCCTACAGAGATTTGGCTC  
A\_14\_P109684 CTACTCGGTTATAGCACACATGCTGACTTCGTCCTTGAAATGAACACTGCAAA

A\_14\_P119753 GGCAGTTCTCTGACACACCAAAGAAATATTTAATAAAGGACATAGAATAAAGCCAGTGA  
CUST\_10059\_PI426210822 GCTAGTGGGGGAGAAAGATGCAGGATGGTGGTTTAGGGGATACTG

A\_18\_P22841559 AAATTAACCATAACACGTATTGTTTAAGGCATTGCCCTCTTGCCTGCAGGCT  
A\_16\_P21561406

AATTGAGCAGAAACAGTCTATTACACTTTGAGGCAAGAATCAAGTTACAAGGAAGTAGGT  
A\_14\_P124522 GAAAAATGTGTTCTCTAAATATTATTTTTACCTCCTAAAGGAGGAAGAGAAAGGATCTTG

A\_16\_P20321593

AACATATTCAGTTATTTCCCTTCTATGCCTACATATGCTATAAAAAACTTCACACACGCA  
A\_16\_P39055416

TTGAAAGCCTTGAATGGATATAAGAAACGAAAGTAGGAAGATTTACCTTCTCATTACGC  
A\_14\_P118681 CTCAGGACAAATAGAGAAGATTGTTTTGAATCTGAGTCTGAAGATGAGTTCTATAAGCAG

A\_16\_P58424164

GTGGTTTCATCCATCCTCTTGTGACAGAACACATGACAACCTCTTAGTCTTCTTAACAAT  
A\_14\_P123016 GAAAAATGGCACCTCCAGTTAGATTGAATTTGGTTTACACTTTTAAAGAGTGAGCAGTATG  
A\_14\_P130255 AATTAAGTAACATGACAAGGCGACCTCACATGAAAGATCAACATACCCACTTTATTACTG  
A\_16\_P19307609

TCCAATGCCTTTAACCCTAATTTGAACCTAAACTGATACTGAAAGAAAACCTACCAGGAC  
CUST\_4116\_P1426210822

TGTGTTTCTGTTGGAAAGAAAGGTTTGATTTTGGAAAGTTTAAATGTACTGCATGATGTT  
A\_14\_P112156 ACGTGGTATAATCTGTAACCTTACCCATATTCTAATGCTGCACCTTCTAGCAGAAGATTC  
CUST\_2547\_P1426210822

GTGACAATTCCATGTTCTTCAGAACCTAGAGCATTTCCTCAAGAGTCACTGAATTC  
A\_14\_P117034 TTTGTTTAAACCTACTTACCTTTTCCCAACAAATACATGCAGTTTAAATGGGAACCTGTC  
A\_14\_P116474 TATTTTTTATGTCCAGTCCTGAGCAGAACCGGCTTTCAGAAATGTGAAGAAC  
A\_14\_P201609 CTGCAAATTATTGGGGAAAAAATAGGTATGCAGAATGAAGAGGGTATATATGTTAATCCA  
A\_16\_P18680543

ACCCAAAAGAATCCCTTTATTATGATCTTGTCTTCTTCTACCACACAATAGTCAGTCTGA  
A\_14\_P139270 TTCATGATTATACTTACCATAACAGTCTAGCATCAGCAGTAAGCCCCGCAATTGAGATAC  
CUST\_3248\_P1426210822 CAATACCTTGAGAGCACAGGCCTTTTGTGAGATCAAATACCTATGCATGACA  
A\_16\_P17475322

TTGCCTATGTTTTATAGCACCTAATAAATTGTCCAATCCCTTAAAAACACTCCATCTGCC  
A\_14\_P103667 ATGGGTATGTGTGGTGCATTTTAAAGAGATTCTGGTGAACCTAACAAGGTGTAATAATTGT  
A\_14\_P117017 TTGCTGAACATGGATATCTACATTATACCGCAGAGTATTTGAAGTCACACTGTAACCTCA  
A\_14\_P111003 ACTTTGAGTTCTAAGGTTATAAGAGGCAATATCACCAATTGTTGGTCAAGGTGATCTAGA  
A\_18\_P14790801

AAAAACAGGGATCATTTTTTTTACTTCAACCTGCATGAAGAATTAGTTTTTACCGAGTGGG  
A\_14\_P106342 GAGATTATTTCTTTTACAGGAAAAATTATGTGTGTAGTCTGTGTCTCCAACCCAGGTAATGA  
A\_16\_P18798654

AGTGGGAACCTAACAGAATTCCTTTAAATTGGGACCAACATTAACCTTAGTGCATTCCAGAA  
A\_14\_P101663 CTAGTTCCACTAATTTCTAGGAGTAACTTCATTCTGTTTGTGTCTCTTTGGTTGCA  
A\_16\_P18146385

ACTGATTATGACTAATTATGGCAGATCATGACCATTATCCAAACAAAGATAACCCAGGGT  
A\_14\_P127397 ACATACTGAAATAACTTCAGGGGAGAATACTTTACAGGTAAAAAGATGGACGAGTTCTTG  
A\_16\_P21407886

TGTATACATCGACTCACAGAAGTATTTGAGTAAGCCTAATCATTGTTGAACTGTGATGGG  
A\_14\_P122265 CTTTAGGGAACCTATTTCTATAGGACGAGAACTCACAAGTTCTGAATCTCTGCATAAAGC  
A\_16\_P17056312

TGCTACCACAATTCTTCTAACGTTGACTAACATTTACCACACTTTCCATAATGACAACCT  
A\_14\_P119120 ATATCTCACATTTGCATTATCTGCATGAGAGAAAAAGGGATGGAGATGCACCTAACTATG  
A\_14\_P124170 TGAGTATTAGGTGGGTTTGAACGTGTTGGTGTAGTCCATAAGTGAAAATATATTCCTCT



CUST\_2121\_PI426210822 AGACACTGAATGCTTTGTTGCAACTCAACTTGTTGCAGATGGGC  
A\_14\_P133507 CACTTTGTCAGAAGGGATTGAGTCTGCTAACTTAACTTTCCTTGATTGAGGAATACAAA  
A\_14\_P119605 CCAAACAACCTTTGGAGTATATGCCTATAGAGTTCTTTCTACCGTAATCCTCTTGGTTATG  
A\_16\_P03425864

AGATGTCTTCTGCTAGAGTTAAAAATTTCCACGGAATTATCTCCAATCTCCTCTCACAG  
CUST\_6636\_PI426210822 AACATCTCTATCTCCAACCTCGGAGATGATGCCTATGATGCCAACG  
A\_16\_P21659063

GCCATATCCCTAATTCCACCTAATTCCAACATTTTAAAATTGATTTTCTGAGGCCACTAC  
A\_14\_P120845 GGGATTTTTTTATTCCATTAAATGTTCTTCTTGCAGGTTTAAAGACTTATCCTTGGGCAA  
A\_14\_P127070 GCATTACATACCTTTTCTTTCTGCAGAAGTAGTTCACATAATGCACCTCAATGTGATCAAAA  
A\_16\_P00685279 AGGTTATAATAGGGAAGGGATGTGTGATCTTTCCTGAGAAGTGAAGGCATGCTATTAA  
A\_14\_P201050 ATTTCCAGGTCTTGATAGAAATTTCTTTAAGTGTCTTCTCTCTCAGAAGTAAAGCCTC  
A\_14\_P129299 CCAAGGACGTGGTGTCCATTTTTTTGAATTTTATCATCTTCACCCATTTCATTTT  
A\_14\_P201158 ACCATATGCTGTTCTGTTATAATGATTCTTATAGTCAGAGATCTGTAGACTGAGTGAGG  
A\_14\_P125255 AAATACTAAAAGCAGACAATATTTTGTCTTTCTCCACTATTTAGACCACCAAGGCTTGG  
A\_16\_P16474072

GCAGACTAATGGACAGAAATAACTTCATCCAAAAACAATCTAATAACCTCCCCTCATGA  
A\_14\_P112089 CTTTAATACGATTGGAAACATTGAAGAGATTGCATATAATGCTGTTTCCCTTACCTGGGA  
A\_14\_P121608 ACAATATTTTCCCAATCTACCTACTTTGCTTCTGAAAATGTTGCAACAATACACTTCA  
A\_16\_P30952571 TTAGTCACCAAGTTCATGGAGCCCACTACTCTGTAAATTGTTGTGGATTTGTCTTT  
CUST\_8491\_PI426210822 ATCGACTCTCATCTGGTGGTGCAGAGATGTTTCATGTCCAGGAAAT  
A\_14\_P113857 ATCAGGTCTGTTCTGTTACTGTTGGTCTTGGCTGAAAAAAAAAATGCTTTTTAAAAAA  
A\_14\_P202060 AACACTACTAGTTTCTTTCCCAAAAAAATTAACCTTTTATGGTTTGTGGTTCAACAC  
A\_14\_P113697 TTATAGGAAATCGAACATCTTCTTGGCAACATATTATTTCCATCCAGTTTTACCTGCTGG  
A\_16\_P40074166

ACATTACCAACCCTCTTGTTTAAATGTAAAACCCATATTGGAGGTTTACACCAATGTGAT  
A\_16\_P00685302

TCTCTTCTCAGATGTCTAGTGTTTATTAGACCTCCATAGTATCTTCACCAACTGAGAAG  
A\_14\_P119029 CACATACTGGCCTATAGTGCAAAAGAGAATATGTATATGTTTGTCAATGAGAATGGCTGG  
A\_16\_P21485080

AAGAAAGAGACTCTGGAAACTCATTATCAGGTCTATCAACTCTTGTATTTGTTCTCCCAG  
CUST\_9921\_PI426210822 GTAGTTCTCTCCAAATGTCAAGCCCAGGCTGGGCTCCATCATGCT  
A\_16\_P16625131

AAACAACCTTCAAATACTCAACTCCTAGCAAACATATGGATCACTCTCTTTTGGAAAGGAG  
A\_14\_P117994 AGCATTTCTTACTTTTCATTTGCTTATCTCCATTGGCGAAATTATTGGTAATTGCAAGCGA  
A\_14\_P105212 ACACACACATAGTTTTCTTTTGTGTCATTCCATTGTGGAAAAGTTTTCAAGAGGATTGTT  
A\_14\_P127495 AGCATGGGATATGCAACTTACATGGTGAGACCAGATTTAGGTAACATAATTCATGCAT  
A\_14\_P133268 CACTTCAACGTTTGGATGTCTATGTGAACAACCTTATTGGTCTGTCCAAAACTACAATAT

A\_16\_P01642024

AAGCATCTGGCTGTTGAATAATGGAATGGCTTAACTTAGTTACACCCCAAATATCTGAAT

A\_16\_P20351038

TAAACAGTAACGCATCTTAAACCATCATCTCGATCCTCTAACTTGCTCTTTTTTCTCTCT

A\_18\_P13672322

CACTTGTCTATCCAATAAACCAATCACTCAATTATTTTACTCATAATCAAGTTTCCTGCC

CUST\_2162\_PI426210822

CAGTCCTCAGAAATATGCCAAATACATAGAAAATGTGAATAACAGCTCTCTGGATAGATG

A\_14\_P119801 ATGTGAAAGGAAAGGAAGATCATTTTCATGCCTTGTTGATAAAGGTAAGTTCATAGTAATT

A\_14\_P138525 CTTTCTAACACAAGACAGCATTCCTTCACTCTACTATTTGTTTTTCCCAAACAGATAAGC

A\_18\_P22841022 TTTTGGAAATTGTTCTAGAAGACACCAGTGAGGCAGGGGGAAGTAAGAATG

A\_16\_P15318362

GACCCCAATCAGAATCTTATGACTTCAAATCCTCACTCTCTCTATTTTATCACACTACC

A\_14\_P139162 TCACTATTATAGTTCAGCGAAAGAGCCTCCGGGATAATTTTTTCTTTCAGTTCATAACA

A\_16\_P02874497

ATCCTTATGAACCAGTTTTTTCACATATTTTCAAAGTCCTCAAATATATCATCCCCCTCA

A\_14\_P103240 GGCAAAAAAAAAAGAACAGATTTTAAATGGCATTGATTTTCTAGGGCAGCACAAACTGATT

A\_18\_P22842262 CTGAGCCTCACTGCTTGAGCCTTGGCTGGATTAGGGAAATGTCTC

CUST\_5191\_PI426210822 TATTCTTCCCTCATTGGATTGCCACCATTCTTGTAAGGGCACCTTC

A\_14\_P125132 GAGACATAAATGGTGTGTCTTTCCCTTACCAATGATTCCTTTAGTGTTATTCACCCCAAAA

A\_14\_P118244 TTGTATGCATATGAAAAACCATGGTGGGATTA AAAACAAGTGCTTCCCTTTCACCAAGATT

A\_14\_P133659 GTCACCATTACATTGTTCTTGGATTTTCAGGTTGCATAAAAATACACGTCTTCTTTTTTGC

A\_14\_P139245 ATTCCATGACGCACTTTCTCGGTTCTCAGAATCCTACCTACTTAGTAGC

A\_18\_P10111359

TGCATCTACATCAGAGACATCTAGATTAACACAGTATGTCTAACTCTCTCTTCATGACCC

CUST\_7500\_PI426210822

ACCCTTAGCTACATCAGGCAGTTTATGAATGGTGTTTTTTTGTTACTGTCATTTGTAATAG

A\_16\_P55113301 AGAAATGGAGAGCGGGCACACTCACGCAAAAATAGGAAGCAGTGA

A\_14\_P111179 AACAGCGTCTTCCAAAAAATTTCAAATCGGGCTTAATGCCAATTACACGATCATAATCC

A\_14\_P200394 ATTTTCTATAGCCAAGGTTTAAGCAGCAAAAATGAGACTGCACAAGACATGCTTTCTA

CUST\_8836\_PI426210822

CTTCTTTCTGCACATGTATGAATGCAAGCTGAATAGTCAAGTTCCTGAAATGGGT

A\_14\_P130657

CAAAACAAAAACAAACAAGAATTAATGATCATTTACCATGGAGGGCAACAGAGTAAAGC

CUST\_3881\_PI426210822

GTCTCAGAAATTCCAAAAGACAGCTTATGACCCTGCATTTTTGGTTAAAGAAAGGA

A\_14\_P117773 ACTTCTCCATTATGTTTTTGTGAGGCTAATGTTTAAATTGGCTGGCATGTCCTGAATAT

A\_14\_P124330 CTTCAACAAGATCACCTTTGTCTTCATAAGTTTLAGCCAAGATCAGCATTCAGTTTTCTCG

A\_14\_P124165 CTGCCTTCATCCATCAAGAAGTCCTAGATTCTATTTGTCTGATTCTGGTTATCATTCAAT  
CUST\_3905\_PI426210822

GTGATATTTATGTATATGCTTTTTAAGGACTACAATCCTTAGTTTCCTACCTACTCAAGG

A\_14\_P114472 ATGGAAAACTAACAAGAATGGTGACATTAGGTTTTCTGTCTTGAACATGCTGCTTACA

A\_18\_P22841935 ATTGTTTTGTTTCTGATGTTGCTGTCACTCAGCACCGTTGCCATTGCT

CUST\_9000\_PI426210822

CAAACATAGCTTTTAGATCATACCTTTTAGGTTTTTTTTTTTTTACCCAAAAACCACACT

A\_14\_P119763 TTTGTTATTCTTAGAGATGAACTCAGAAGCCCAAGTAGAATAGATGTGATACCCCTTGTC

A\_18\_P22840282 CCATCCTTTTTTCTCTTTCCCTTTTTCCCAGTATTCTTTGTCTTAGACCTTGAATGTATT

A\_16\_P16509520

AAGTTCATGAAAGCCAGTTATTTTCTCCGATTTCTTTACAGTCACAATGTTGAACAACCT

A\_14\_P101394 ACTACTACAAACAAAAGGATGATGATGATATTTGAATAAATGAATAAGGATTATACTCAA

A\_14\_P114439

ACAACATAAAACATAAAAGAAAATACTGTCCACATCCACTGTTTACAACAAGGAAGAGCA

A\_14\_P125608 CTTTAAAGCATTTTTATTTTTGGAGTTCCACAGTTAGGCTGGTTGTTGTAGTTTGCAACT

A\_14\_P125274 AGGAAGACAGGTTTCTTTTCAGAGTTTCACCTTAGCCAGAATTTTCTTATCAGTCATAT

CUST\_9196\_PI426210822

CATGGAGTATAAGGCTTATTTACTCCTTAAGTCTTCCTATTTCTAGTCACATCTCATT

A\_14\_P114384 GATTCATCATTTTTAGAAAGCATCAGCAGTTGAATTATCTTGGTCCGATTGGTTCAAAGTT

A\_18\_P10006640

AAAAGCCACAAATTTAGATGGGGATACAGTAAACTTCATGAAGTAGTCTCGCGTCTTATC

A\_14\_P108466 GCACACACACAAAATCTTCACCAAGAGAACAGCAAACTAATAAGACATTACCTTTGGTTA

A\_18\_P22841381 ATTGCTTTTGCCATCTCAGCATTTACCCGCTGTCTCGGTATGAGATTAT

A\_14\_P121883 CCAGGCTGAATGTAATTGTCCTCGATGAAGCCATCATCATCCTCATCTTC

A\_14\_P136078 AAAGGATATGCCTGTGTGAAGAAATATCACGATACCAAAGTCCAGATAAGACCAATTTAC

A\_16\_P03598414

AGCCCGATATAAAGTCAGAGTAAGGATTTTCATCAAAATATTAATTCTGCAGAATGGCCT

A\_14\_P133359 GGGGTGAAAATTTAAATTCAGAAGAATTAGGTAAGATACCATCACGAGTGCAAAGGTAGA

A\_14\_P105045 GTCTGGCCTCGCTGTGATCTGATTTGGGATTAAGGTTTGGAAATTTAACAACCTTT

A\_16\_P01068976

CCTAGAAATCAGTTGTATAGCCCAAATGTTACCTAGACTACTAATGAACAGCAAGGTCT

A\_14\_P134425 TTTTTGAGTTTCATTACCTTTATCAAGAGATGCTCCAGCCATATGGTAAAACTCAATGC

A\_14\_P132690 AACATCTCGGATCCTATTCAAATGTCAACACTAAGCAAGCGCAGGAATTTAGTTGAG

A\_14\_P135864 TTCTCTTAATGCATCCTCTTCATTTAGTTTGGGTCTGCATTCTTAACTTTAACCAGTCAC

A\_16\_P36231055

ATTAGGCAAAGTTTCAAAGATTTTAGATTAGGCACCAAATGTTATGGCCTTGGAAGGAA

A\_14\_P133653 AACACTTCTTTTCTTTAACCTCTTTCAGATTGAAGACATCATTACAAAGATGCAAGATGA

A\_14\_P118468 CATATAAGAAGGGTCAAAGCCATCATGCTACATTAGGCCCTTTGAAAAAAGTATCAGAA

A\_14\_P107603 AACTGATTTCGGCTACGGTAAAGTAGTAAACAGAATCTGCATGAATTTTTGGAGAAGTTAG  
A\_14\_P134579 GAAGCGAGAAGTGTTCTAGTCTAAGCATAATAAGGTGATTAATCACAATGGACATGTG  
A\_18\_P16437853  
GCAAGCATTCATAGCATAGTATATCATGTAGCAGGGTTTAAAATAAGCATAGAAGAGGGT  
A\_14\_P100072 GGAAACATTGCAGATCACCCAGTCTTAAGGTTTCAAAAACCTCTTTGACATTAGATTTAC  
A\_14\_P130352 CGACAGCAGAATAAAGGCAATAAGATGATTCTCTTGCCCCTTCTTATTCTCCT  
A\_14\_P103677 CTGAAGGAAGAATTGAGGTTAGAAGAAGCAAACTCGTGTTGTTGAAAAAGTTGCG  
A\_14\_P124299 CTGTGCTCAAAGGTCACTGAGCGGCAGTGATTATGTAGCATTCTGCATAA  
A\_14\_P123645 TTAAAATTTGCTTCGTCTTACAGACCATTGTGATGAATGACTGTATTATCCGAGGGGATC  
A\_16\_P00192831  
GAACGAAGTTTCCCAAATAAGACTGATTCATGAGTTCTCCTTCAATATCCCAAGATCTAA  
A\_18\_P17118634  
ATCCTTGCTCTTACCTGGTAACTCATTACTTGTCTTATACATTCCACTTGACTTGTCT  
A\_14\_P112579 CCCATACTTTTACAGTTCTAATGCCACCTGTCGTCTTATCATCTGATTGCAGACAAA  
A\_16\_P16191049 CATTGAGTTACAGCAGACAAGGGCCAGCCAACTGCTCTTGTGT  
A\_16\_P00898228  
AAGCACCATCTAACATTTGGAGTTAACATACAGCACTTGTA AAAACCTGACTTAGAAGT  
A\_14\_P127111 CTCTTCAACCTCTGCCACTGTGATAGGTTGTAGTATCAGAGGAGAAATAAAAATCATATG  
A\_16\_P39923927  
TGTCATATGCAATAGCAGAGTGTA AAATCTCTTGACTTAACTACATACCATAGAAGCCAC  
A\_16\_P15143738  
AGATTCAGCAACATTTCTTTCTTACAGCATTGGTTTTCAAGTTTCAAAGTAAGCACAT  
A\_14\_P121779 CTGTTCTGAGTATGTTTAAACCCTGCTAGTATTTACTGAGTTTTTCTACATATGGGGC  
A\_14\_P137518 AATTTACAGAGTAAGCAAATGGACAAGTCACAAATTTTAAAATCGCTCTCCTCTTTGCAGA  
A\_14\_P132820 ACGATTCAGATTTCGCACTGTCTGTGATTTTTCATAGTGGTCTTAATCTACTCAGTAGC  
A\_14\_P109182 CCGTCTGCCAAGCAACACAGACCACAATTTCTACTTTTGATGATTCATGTATTATTT  
A\_16\_P20316649  
AGCAAAGCACAATTCATAAAAAAACCAGTTTGATTACACAGACATTACCCATCTGAACA  
CUST\_6357\_PI426210822  
TAACCATATGGATCTGTTTTGCCTGATTAGAAGGGATTTCTAAAGCATGATGAGATGG  
A\_16\_P00685626  
TGATGTCTATGACTTTTTCTTAATTATCCAGAAAATTCTGGCCAAGCACCTTTTCTTGCA  
A\_14\_P127124 TTAACACCTACTGGTATACACTTGTTTTTGAGAACTGTCCAAGATCATGTCCTTTCTACT  
A\_14\_P104223 CAAGAAGTTGTGAGACAGTCACAAATGTTACTCATGCAAAAAGAAGTCACAGATACTTTTC  
A\_14\_P128987 CCAGAATTGACCATCGTTCCTCATCGTTACCTAGAGTATGAGTTTTTCAGGTTT  
A\_14\_P138677 CATTATTTGTTTTTCTCCTGAAATCAATATCCCTCAGTAACAAATTCAGCAGGGATGCC  
A\_14\_P133814 CTATATTAGGCAGGAATTTACTAGCAGGGAGTATTCAGAATGCCATTAACATCAGTCTGT  
A\_16\_P01189000

AAGCAACTTACCACAACCTAACTTCCAATTTATTGTCTCAAGTTTGAATTACTGGGCAAGG  
CUST\_2771\_PI426210822 GCTCCATCAACATCACAGCGCCTCAGTGTACGACGGACAGCAGC  
A\_14\_P119278 TTACTTTTTTCCATCTGTTCCCTATATTACAGTATACCTGCTTCTACGGAATCCCCGTT  
A\_14\_P106954 CCAAACAGGGATATGAAAATAAAATATATAGGAAAAACCTGATTTGATTAGGCTTGTGCT  
A\_18\_P13704664

AAAATCTCCTCTGTCTCAATTAGTGAATCCAGTTAGAGGTTTGAACCTATGATTCTACCA  
A\_16\_P01727740

AGACACGCACAAAATCATTCAATTTTTATGCCTGATAAATCTCTATTTTTCCCTGAGGACAC  
CUST\_3615\_PI426210822

TTGAACTTGAAAGGAGAGATTTTTTCCCTCTTGTAATAAATCAAACCTTTTCTGAATCTG  
A\_16\_P02276566

ACCCCTATCTAAGTCAAGTATCAAAGATTTTTCTTCATGCCATTACTACAGAAACAGGGT  
A\_18\_P15306673

AGGATCTTCATGCATGCAAATTAATTTAGTGTTTTCCACTTTGACAATGTGACAGTAGGC  
A\_14\_P105409 ACAAATGTCAAATTTTGGAAAGTATATCAATACCAATGCTGTATGAGTGGGCTGAATCCA  
A\_14\_P105696 AAAGAGTTACACTCACTTTATTAATCCAGATGAGCCCCGGGATTTGGTTGGAATTAAT  
A\_16\_P15837312

ATTTCTTTCTAAGGTAATATATGTGAGAGTTGTAGAATGGTAGCATTCAAAGTAAGTGGT  
A\_14\_P119791 TTTATCCAGATTAATATAAGTGAAAGCCTTTAAATGCAGGGACGAAAGGTATCCCTAGAA  
CUST\_7883\_PI426210822

CAGCAGCTACCAAACATCATTATCCGGCGAGAATCACTAATTTTATCACTCAATAATTTTA  
A\_14\_P137085 CCTAGAAAATTGTGGTGCAACACCCATGTCATTATCGTCCTTATAATTTTTTCATAGGCTT  
A\_14\_P101510 CAGGTTATCGTGTGAAAATTGAATTTATTTAAATTCGAGGACCAGCAGAGAGGTCTTCTA  
A\_14\_P110836 CCTTGCTGGCTTATGCAACAGAATAAAACCTAATATCCTAGGATCAATGAAAAAACGACA  
A\_14\_P118452 AGAGAAGTAAAGTGACCTGCTTAGTGCTTAAACATCAAATAACTTTGCTAATCTGCCTCT  
CUST\_3696\_PI426210822 CAGATTCCAGCCGTGGCTTTGCTGGGTCAATGTTACAGCCATTTA  
A\_14\_P104913 TAGTTTTTACTTCTTGCAACCATGAAGCCATACATTGGGAAGTATTTTTGTTTTGTTTTGT  
A\_14\_P104582 CGCGTAAGATAGCACTGTGTTTTAAACTGTTGCATTACACTGCTTTGCAATGATGTAAA  
A\_14\_P137985 TATTCATGGAAAGGACAACAAGGAGTTCAAATATTAGAAGTGGTGTCTAATGTCCACTTC  
A\_14\_P111592 ATTTCTTCATGTTTCATGGGCAAACCTTCTCTTTCTCTTGTGTTAAGGAAGCACGTC  
A\_14\_P128807 TAGCATGGATACTTTTGGAGTAGTCATTTTGCACAAAATATTCTTTTCTACCAGGCCAGA  
A\_14\_P129929 GAACTTTGCTATTTCTGTGCTGAAAGTGTGGTGAAATTTGTAATCTTCTCTCAGGTTGTT  
A\_16\_P20509391

ACTATGGTCATATCTTGAAGTGACTCATAAAATTAACCTTTCCAAAGACTCAAAAGGAAA  
A\_14\_P125886 CTCTCTAAGGGATACGAAATCTGATTTTATCCAAAGAAATCACAGCAGCCTTTGAAAGAC  
A\_16\_P02561846

GTCCATGTCATATACCAATAAAAATGGTAACGCTCCTTAGATTTCATCTCTTCTCCTGGATTC  
A\_16\_P00403691

AAAACTGGTAATCCCATGAGATTTACCAATGGCATAAAGTTGTAAAATGAATTGGGAG  
A\_14\_P131435 CACCTCTTTTCCAGGCTGAGAAGTCAGAATAGTAATCTGAAAATAAATCCAAGAATCAAT  
A\_14\_P111585 TTCATAAATGGTATTGCAGGATAACCCAAAGCAAGAAAAAGAATTGCTGATGGTTTGTGA  
A\_18\_P22841096  
ATGACTGCCTTAAGGGATGGGGAAAGGGTTAGAGAAAGCAAGTATTTTATTAGAAAGAC  
A\_14\_P123667 TGGTTTTTCATTGTTTTTAGTGGTGCAAAAAGCAAACCATATCTTACCGTTGATCAGATG  
A\_16\_P41864696  
TATTTAGCAAGTTCTGAGAACAACCTATAGGCTACATTCCTCACATTTGCAAGATTTCCC  
A\_16\_P16805560  
AAGCCCTTAATTCTGCTACTTCTTACCCTTGAGTTATAAAACAGGCTAGGATTATGGAG  
A\_14\_P128392 CCATGTGCTTTAACGTTACGGTAATACTTTACTTTAGGCATCCCTCCTGTTGC  
A\_16\_P15533678  
GACAGGCCTTAAAAAAGTTGTAGTATACCCAAACGCAAATTTACACCTTGATTTACACT  
A\_14\_P135715 AAAGCCAAGTATGGTTGGAAAGGAGAAGGACTGAGAAAAGACGATGGC  
A\_16\_P20710061  
ACTCCCACTCACACAATAAAAAGACCTGGGTAACATATGTGTTCTCATTAGCCACATAT  
A\_18\_P18695476  
GATGCCTACTTTAGACTATCACAGAATGACAAACCTCTATTGCATCAAACCACTGAAATT  
A\_14\_P110970 AAGTCAAAATCTAAATGTTGATTGGGCCTATTAGTGTGTTGCACATGAACACATGGCTATT  
A\_14\_P117715 ATGTTACTCAGAAGATTTACCATCAAAGTGGCATTGTTATGAGCGATTACCTTGAAAACG  
A\_14\_P131691 TGGTGAATCATAGGTCTCTTGCCCATTCACAATAATTGGTTCTTTATCCAAAATGGCTA  
A\_14\_P110508 TACCCTAAAATATGCATTCCTTTTGCCAAAAAGATTAAAGTTCCAGGTTCTTTTGTGTCC  
A\_14\_P201232 ACTTGGTTTCATTTGCACAGGCTTTGCCAAACTTTAATTGAATTCAGAGAGTTCTACAAA  
CUST\_828\_PI426210822 CAAGAGGGGAAAGTAATACTAGCTGCCGCTTATGGAGGGCTTCATT  
A\_16\_P16191991 AAGTGGTCTCATTTTTCTTTCCTTATCACCAGGGAAGAGCCAGTAAGTAATTCATT  
A\_14\_P112645 CAGCACGAGATACTTTCTGTGTCTCTTTTTTCTTTATAAGAAAACCTGGAGGTGGA  
A\_14\_P115379 AGTTTATACAGAGAAGCAAAGCCTGAATCCAAAAGAATGCTTCTACTGTGTGAATTTTCC  
A\_18\_P16452201  
GAAATCGGATATAAATCACCAACCTTTTATCTCACCTGCAGATTCATATAACCATAGGACG  
A\_18\_P17146528  
ACCAGCATAATCACACCATTAGTCCAGATTGTTTCACATATTTAAAAAATTCTTAGCGCA  
A\_18\_P16005214 CCTTCATACTCTTTCCATCCTATCCATTCATCATTAGTTCATCTACCTTATTCATCTCCC  
A\_14\_P104841 CTCCTACTTTATAAGTAGTTCATCATGACCTCTTCCAGGATACACTAATCTAACAAGGT  
A\_16\_P15723094  
AAAATTCAAGTCCTAGAGAATTTGGAGCAGAGTAGTATGAAAACCAAGACAGAATCATGG  
A\_16\_P38257306  
ACGTCTCCAACCTATAACCAAAGTTGAAAATAGTTCTTCGAAGTCGAAATTATGAGACTCAA  
A\_14\_P115644 CTGTGTAGGTATTTTTTCTTGTGTGTCCATTATAATTAATTAATTAATGATTAGGATCATT

A\_16\_P16681879

TGCTGATAGAGAGGAAATTACTCATGGAAGAAATATCTCTGATGCATAACACACAGTCTG

A\_16\_P00685273 CTTTCATGACTCACTGTGATCTACAACCTCAGAGCCAGCCTTAAAGTG

CUST\_219\_PI426210822 GGAGGCTCCGCGCGCTGCTGCTGGCGCTGGTGGTTCGCGGGGATCC

A\_16\_P02672899

AACAACCTACTAATCTAACCAATTTCACTTTTGCTGATTCCATTCATCTCTACCTTCAGA

A\_14\_P124976 AAGATACATTAACCAATCAGTGTGTTACTCTGTTCAAAACAGAACTCATAAGGCAGAC

A\_14\_P127931 GTTCTTGTCACTTCTATCATTCTTCTGCTGTTTTCTTATGACAAAGACACACTCCAAATG

A\_14\_P101604 GGCATTCTCTGGGTGTTATATTAGTCTTGACAGTAGACGTTTTCTACCCTTTGATAACTA

A\_16\_P18881240

AATACTCATCAGAAGTCGAAACTAGAAATGAAACAGGCTTTTTTACCCTAAAGGTTTCTGC

A\_14\_P115926 ATGACATTTGTGTAATTTCTTCTTTGGGCTACTCAATTTGCTTCTTGTCTAGTTAGGATGT

A\_14\_P116462 CGGTGTATTTCTCTACTTACCTGTAATAATGCTTTTGTCTTAATAGGGTGGTTCTCTTCC

A\_16\_P15926984

AAGTTAATCTTCATGTAGTTGGCCTCATTTTTGTTCATCCTAGAATACATTCTCAAACAGA

CUST\_7133\_PI426210822

CTCTTAGAAGTACCAAACCTTACAAATGGGAAAGTGGATGCTTAGAATGGCATGAATGTT

A\_14\_P138627 GTTTCAGGATTGTAGGGAGCAGATTCTACTGTTCTTAAAGGACAGTAATGCCTTTT

A\_14\_P107850 CAATAATTTGAAGAAGAATCACATGTGTGTTGTTAAGTGAAGCAACCAAGGTGCAAGATT

A\_14\_P103312 CTTTATGCCATCATTAGTGGTTAAGAAGCAACGAGCAAAAAACCTTTCTGTAGGCTGA

A\_14\_P105030 CTTTGGAAATCCAAATTCAGTGTAAAGGTTTTAGTTGCTCAGTTATGACCCAGGTATCA

A\_16\_P37295657

ACCCTTCCTTCACTTTATCACTTCTGCAATTACAATTTCCAAGAACTCTACTTATTCTAC

A\_14\_P131096

CTTTTGGAGAAAGTCAAAGTGAGGATGAACAATTTGAAAATGACTTAGAGACAGATCCAC

A\_14\_P123050 ATCTTGCCTAATGGACTAGATTGGACTGTATCAACATTGATTTACTCCACTTTTTATGCC

A\_14\_P131473 CTCACCTCATTCTAGGATGAGAAAACAGGGTTAAATGTTGAGTCTTACAGGGTTAAATAT

CUST\_3482\_PI426210822 CTTTATAATCTGGTCTGAGGCCCTGTAAAGAGCCTCCAGTGACT

A\_14\_P111481 GTCAGAATAACAGCCAAATCCTCACCTATTTTCCGAAACATTCTTCTGATTATAGCGTCT

CUST\_10377\_PI426210822

ACAAATCCATGGGTTTGAGAGAAAGATGTAAATGACAGCAAGGTAGAATGCAGA

A\_14\_P101331 ACAAACTTTGATGGAGAATTTACACCACGCTGGAAAAATGCCGGTTATGAA

A\_16\_P58424157 CACTGCATACGCTGTGTGACTACCACCCACCACAATAAAGAATACTT

A\_14\_P129764 TGTTTTCTTACACTTTGACCTCTCTAGGATAAAATGTCTGTAAACAGATGAAAGGCTCAA

A\_14\_P106889 TCTGACTTTAACACCCTAGAAACCCCTCACAGTTTAGAGTAAGTATCTCAGATTTAG

A\_14\_P132655 GGACAACAGGCAACATATATGAGAATGGTTTTTGGGTCAGTGTGTTTTTAAAGTCATTT

CUST\_5731\_PI426210822 CATGTCTGGTTTAGCAGCTTTTAGAAACGTGGCTGGCATCCTTTTTCTTTT

CUST\_614\_PI426210822 ACACACAGTGAAGAATTTGACTCATGTAACCAAAACGTGGGTCCCTG

A\_14\_P110274 TAGAGCCATTTCAATATGTTAGTAAAGCCGACTAAACAACGACACCTGCACGAAAAAG  
CUST\_10338\_PI426210822 AGCTTCTGCTCTTTCCCAGTCATTCAAACCTGCACCACCTTATCGA

A\_14\_P111163 CTTGCCCTTGTAATTTCCAAGTAGTGAAGGAAATTTCTGGACCATTAATCTATTTTTG  
A\_14\_P104804 CCTAACCAAACCTCCTGGCTTTTCGGTATAAAACAAATCCTTTCTAGAGAAATAAAGCATTC  
CUST\_7613\_PI426210822

ATTTGTTTATTTAGCTTCTTAATTTTCATATCCTGTGGTCCTGAAGAGGACAATCACCAGG  
CUST\_8540\_PI426210822

GCCTTTTTTTTTTCCTATGGGCAAATCATCTATTGACCAAAACAAGACATTTAAGTCACT  
A\_14\_P107410 AAAAATCCTCTCTCCTTTTTCAAATAATTTGTGGGCATTTACTCTTCAGAGAACTTGAG  
A\_14\_P116178 GAAGAGCGAATATCCTGACTTATTCGAGTGGTTTTGTGTGAAGACACTGAAAAGTGT  
A\_14\_P101308 CTTCTCCCCTGTTACCCATAATTCTTGCCTCTTTCCATAATCCGTGGTTT  
A\_14\_P117697 CACCAATTTTCATTTGCACTTGAATGTCTACCCCGTTTTACTCTATTGTATCTCCTTAGA  
A\_14\_P101571 GTTCTTAGGGAAAGGGCAAGAGAAATAAATTTCTCCCTCATACTTACAACATAACAATGA  
A\_14\_P119732 GAGTTCAATTATGCTCATTAATTCAATTTGAGGCAGGAATGTGTGTAATAAACGCTGGC  
A\_14\_P133448 TTCTGGGCTGTCTATGACTTACGATATCACCTCTTCTTTTTAAATGTCCAAGTGGAATA  
A\_18\_P22841278

CCCAAAGCATTTAAAATGTGTCTTATGGTTGTTTTAAGAAAAGAATGATAATTGGTGCA  
A\_14\_P101052 ATTTTCTGTCAGGACTTTTACACACACTATAACCTAAGCATTGCCCAATGACATCTCATA  
A\_16\_P17949732

AAAGTTTTCCCAGTATATCATGAGTCTCCATTGATTCAAACCTGGTCTATCTGTTTTCTGG  
A\_14\_P119096 AACGGTGGTCTTTAGATATTTTGTCAACAACCTAAAAACAAGAAAGACAGTTCATTGATTA  
CUST\_4681\_PI426210822 AGTGTCCAATGCTCAGGAAGCTCCAGGGAACCTTCAGTGTGCCT  
A\_16\_P17299126

CATTGAAGCAGCGTTCATAAATGATCTACAATTTGAGATAGACTAATTCAGACTGCTCCC  
A\_14\_P105622 CTAGGAGAATTTTTTTTTGTGCGATGTGTTAACCATTCTTTTTTCTCCAACCTGCATTCTACT  
A\_14\_P125065 ACTGTATTGATTATTTCTGGCAACATCATTGTGATTTTTGTATTTCACTGTGCACCTTTG  
A\_14\_P117897 GTAATTAGACTATAATGGTGACTTTTTAAGATTCCCCCTTCATTTTCAGCCGTTTTCTGTGA  
A\_18\_P14041145

ATTATGTTGAGGGACTCCACTATAAATTTGAAGACACCCATAATCCATGTATCAGGCAGA  
CUST\_7201\_PI426210822 TACAAAGCTGAAATCATCAGAGTTGGGCCAGAAAGAAGTGACACAGAACAT  
A\_14\_P124465 ACTTTTCTCATGGGCTAGTGGATATTAATATTCCAAGTGCATGCTCATATTTGCCAATCA  
A\_14\_P125921 GCTGTATATCAAAGGCAAGTGGCCATTCATCAATAAAAGGCATTAGTTACTTAGCCTTT  
CUST\_3372\_PI426210822

TAATAATACAGGAATTTAGTATTAAGAATGTAGTAATTAACCTCCTTTTTGAAAATGATTT  
A\_16\_P18489811

AAGTTCTTCTGACCATATATTTGCAAATATTGCACCACATATCTCTCTACCATCCCCTC  
A\_14\_P108443 TCAGGCTTTGGCTCCAAATGTTTGGCTTCAAATATGAAAAAGTTACATGAAAGATGAAAC  
CUST\_6248\_PI426210822 CAGTAGTCACTGGCCACGGTGAGACCTGGGTTTAAACATGACCTGC



CUST\_2654\_PI426210822 GGAGGGCTAGGAGACCACGCATGTGCAAGCACACATAGATATATATTG  
A\_16\_P18535025

AAAAATGTAGCCAAACATATCTCCACCTCCTAATAACTATGTGGATCAGAGGAACTGAAA  
CUST\_5413\_PI426210822 GGTGCAGGACGTCATCAGCCCGATCGTGTGTTGAAGCAGCCTACAG  
A\_14\_P117063 ACATAGTCAGTTAATAACATCCCATCTGGAGTCAAAACCAATAAGTGTGTGTCATGCTTA  
A\_16\_P02776336

AAACATACACCCTAATGCATGTGTATATGGGGATGAAACTCTGATAGCAAAAAGACTTGT  
A\_14\_P111759 GGATACTTAAAGACATGTGGAATAACTATGAGAATTCCTGTTCCTGGAAAGTTTGTCCCTC  
A\_16\_P20009783

AGGAGAGTGACATTTTATCCAACCTATTGTAGTCACATTAGTTCATAGCAGATGAGATCA  
CUST\_4995\_PI426210822 CCATTCTTCAAAGCTACTTTCATTCTGTGAGGGATGGCCAGACA  
A\_16\_P16191232 ATTACACTTTGGAGTGGGAGCCAATTCTTAGGTTTTGTTAATAACCTGATGGCAGAA  
A\_14\_P109495 GGGGTGGTGGGTATTTTCATTACATAATTGTCAGATTACTTTCATAAACAATGGAAACAGT  
A\_16\_P19551704

AATGCTTTTTTACCTGATCTTTGGCTACATCACATACATGATCATCAAATCACCCCTGAAG  
A\_16\_P02951117

ATGGGAAAAACAACCTGTTTTACTGCTCTAGAATCTAACAGAAATCATAATGTCACCCCTGG  
A\_16\_P00685365 TGTAAGGGACAGTCACACTCTGGGAAAGACATCGAAGGGTGACAT  
A\_16\_P21539731

AAGCCTTTTTTAAAAGTCCAATGCCCAATATTCATCAAGACTTTGAAATCATAACCGCTGAT  
CUST\_7864\_PI426210822 TCAGGGCGCGTTCTGAATCCTGTGCCATTTGCATGTTACATACAT  
CUST\_7246\_PI426210822 AATGAGGCGATGTCAGGATCACCTGTGCACATTCTGCTTCTCTCC  
A\_14\_P116634 AACCGAAAACCTAACGATACTGTTTCTATAGAGAAGATCCCACCACCTGACAAATATTACT  
A\_14\_P129577 CTCTGTTGCCAAAATATACTAGAAGCACTGAGCCTCCTCATATCCAAACTAAATGTTAGA  
A\_14\_P131579 ATGTCAGTTCCTTTTTGTTAGCAGGCTTACACACATAAATTGCCTACTAATAAGCAAAC  
A\_14\_P118258 GGCATGCTGCAGAATACAGTAGACATTTAATTGATATCTGCTGAAAGCATTATTTTCCCA  
A\_14\_P117722 TAATGACATTTAAACCCAATTATTAACAGAAAAGGATAAGAAGTGTGGTTTCTTGGCCT  
CUST\_1427\_PI426210822 GATGCAGGATTTGTTTCATTGCTTTGCACTAGTCTCACTCGCAGCC  
CUST\_1048\_PI426210822 TGATCCCTTGCTATGAAGGTGAGCATGGATTGATTTTTCCTCATCCC  
A\_16\_P01667051

AAGATCTTGAGCCCTAGATGAAAACAAAATTTTCTATCTTGTAATTCACATGTCCTGCCT  
A\_14\_P100523 GCCCAGTCCTAGAACAGACAATTCAATTCATAGCGTTACCATAAAATTAAGTGTCAAAAAA  
A\_16\_P03743239

AAAAAAATCCTTCCAAAATGAGGATACTTTTCTTGCTATAAACCCACCACATCATTACC  
CUST\_6327\_PI426210822

GTCTTTAATCCAGTTGTTACAGTGAGTGAACCTGATTTGTTCCAGATGTCCTAAGATTT  
A\_14\_P110837 CTTTTGGTTAAACTTAAATGCATGGTTGGAGATGTTATGGCGACACTAAACAAAGTATTCC  
A\_14\_P132677 CTTCTAGTAGTATGTGCTTTCACCATCAGTTTTTAGGGGAAGTTTTCAATCATCAGTTT

A\_18\_P13614097

TCCAGTTAACTCACAAACATACTTCTAGAACCTAACTTGCTTTTTAATTAGAGACTGCCA

A\_16\_P15108396

GAATGAAGATTGAAGATTCATGGATTTGATCCTGAGATTTAGAAATGCTTTTCTGCTGGG

CUST\_4813\_PI426210822

CACGCCTCATCAACATGAGCAGTATTAGTCTTTATCTCTGACATCAATCAAACCTTGAAC

A\_16\_P01184417

AAAAAACACTAGTGAGTTAACCAAGATCAGATTTATTCTCTTAAAACGTTCCCATACAGT

CUST\_8238\_PI426210822

AGAAAACAGAGTGCATACCTCTTTGATAGTGGAAAAAAGATTTACACAATTAGTTTAGAT

A\_18\_P22840301

ATCTCTAGTGGCATGCTCCTGGGTCTACTGATCCCCTTCGAAGGC

A\_16\_P36141825

TGCCACAAGTATCAAGTAAACTTCTTCGAGAGTATAATATAGATTGTAAAGCAGCACGTT

A\_14\_P136036

AAAGAGAATTCACCACAGTTCTTAGTAAGATCTCAAAGGACAGTAGGGAGAGTCTTTAAA

A\_14\_P136838

ATTCTCATTTGTTGTAGGAGTGAGGACCTAGAATTTAATGTCTAATATGCGGTGTGAAT

A\_16\_P21347286

GCAAATTGGGCAAATTTCAATATCCCCTGTCTACAGTTTTTTCAGAACCAAATCCTTAAAG

A\_14\_P137283

TGGCTCTGAAATATCTGACACAATGTAAACATTGCAGGCACCTGCATTTTATGTTTTTTT

A\_16\_P18176827

ACGAAACAAAATCACGTGTCTGTGTATAGTGTCCATCTTCTTAAGAACAATGCTACTTT

A\_14\_P139841

AAGAAGCCTGTAAACTCTCTTACAAATACATTTGGTTATTCACCATGAGGTTAGCAAAGC

A\_16\_P41349476

CGTTTGCCAAAAAAGAAAAGTTCCTTAAAGACGTTTTAAAATGATTACATTATTGCGGCA

A\_14\_P119632

TGTCCTGCTTGGAGAGTGACTTGTAAGATGCTGAATTATTCATGATAATACAGTGAATGT

CUST\_4988\_PI426210822

CTAGACCTCAGAGTGACATCAGGGGGCGGGGACCTGATAGATGTG

A\_16\_P15120952

TGCAAACCTTCAAATTCCTTAGTGATCCACTTGTAATGATTGCTTTTCTGAAAAAGGCTACT

A\_14\_P138850

ACCTGTAAAGCACAGGGTGAGATATAAATACAGTGACGTGCTTTTTCAAACCTATTTTCTG

A\_14\_P129882

AGAGCCAATGATTACTTAGGAACTGCGAAAGAAATAACGTATCTTTACGATGGAGAGATT

A\_16\_P16094476

AAAGTGATTCAAATAACAACGAAAACCTTCTTGATCTCAAATTCCTTTGTCCGAATGAC

A\_14\_P126654

ACTAACTTGTGAAAGTTTTGTTTAAAGTTCTAGTAAGAGAAACAAGTGAGTGTAGTGGGTT

A\_16\_P19899355

AAGCACATCATGATTTAGAGCAGAAATACTAGAACAGAGACAGAACTTATCCACCAAGTT

A\_14\_P102812

GTATTCTACCCACCAAACAATAGAATATAGATTCTGCCCAACATAGAGCAGTCACAATA

A\_14\_P136467

TTTGAAGAAGTGTAATAACTTTAAAATCACTTCAGAAGCATCTCCTCATGTGCATGACGG

A\_14\_P100590

CCATCTGTGGAAAATCAATCATGGTGATATGGTCACTTTCATCCAAAATGAGATTAAATT

A\_14\_P132327

CTCCAGAAGGAAGTTTAAACATGTTTTCTGGAACCTGTTTCTTCAGACTTCAATAAAAAT

A\_14\_P107648 TCTTCAAATTTTGGTATTTACCTTTCTAAGCCAGAATTTAAGAAGATCACAGAACTGAC

CUST\_215\_PI426210822 ATTCCGCCCGTGTCCAGGCGCAGAGCTCCCCGCCCGGGGAGCTTC

A\_14\_P200931 CTGGTCTCAGGGATTTTAGGTCTGTAGAAGTGTTATTATCCACAGTCCCAGTTTT

A\_16\_P17898633

ATTCCCTTCACTCCATAGTTATTTATTGCCAGAACTAATTTCTAGCCTTTATGAAGCA

CUST\_1618\_PI426210822 AGCTTAACAAAGCCTTCGGAGCTATGGATACCACCTGAATTTTAGCCTG

A\_14\_P104139 CTCGTTTTCTATTTTTCTTCAGATTTTCAAAGAAACAGCCAGACGATGATTCCGCTC

A\_16\_P00685226 TTACCTTTTCTAAACTTCCTGCATTGTCTCCTTTTAGCCCCACAGTTGATTCTTATT

A\_14\_P130447 GAAAGGTGGGTATAGAGAGGTGGAACTTTCTTTATTATGACTCTACCGTTATCTTATG

A\_18\_P13060381

CTAGGAATGAAATGATTGCGATGAGAGACAAAAACAGGGAAGTTGGTTAGATTTGTGG

A\_16\_P20137489

TGAGGTCATGTAATACACAATCATTCTCTACCTGACAATAGAATACAAGTGCTTTTCGA

A\_14\_P136178 TGTTCAATTATAAATCTCTTTCTAATCCTTTAAGGTTCTGAAATTTCTCAACAGACCCTC

A\_14\_P100805 TGAGGAACTTTTAGATGGAGCAGGTGTTATTATGGACTTTCAAACATCTGAAGATGACAA

A\_14\_P123513 ATCCGTGATATTATGTCGATTTTTAACTGAGGGGAAATTAAGTAGTCCAGCCTAAAATGC

CUST\_8074\_PI426210822 CAGATCCAGCATGCCTTGAAGCAGCATCTAGGTAGCACTTGGCTG

A\_16\_P35747584

TGACAAGCATAGATCTCTACTGTAGCACGTTTGTATTTGACTTCATTTCGCTCTTTTATGG

A\_14\_P117471 CTCTTCATAACATGGGCTGCATGAAATCAAAGCAAAGTTTCCCATTTCTACCATATATG

CUST\_10246\_PI426210822

ACTGTTGGGAATAATATTGTGCCTCTAGGGCATTTAGAAGATAACATGCTTTTTTCTGG

A\_14\_P103705 GCAAAGAGAGATAGACTAACTCGGTCTTTACCAAAGTTCAAGGATTTTCTCCTTTGCAA

A\_18\_P14137119

TTCCCAAAGCAGACAAAGAGAAAACACATGGGAATGGTAATTAATGAGTCCATGTTTAA

A\_18\_P12362357

CATTTCGATTCCAAATAAAGTCCTAATCACAACCTACCACTTACTAGAAAGTCACCCAA

CUST\_274\_PI426210822 CTGATGCTGGTGCTCTCAGCATGTAGTTATGCAGGAGAGTCACTG

A\_14\_P118426 CTTGTATTGTGATTTGATTTTAGTGGAAGATGTGGTTGGAAGTCACATAGAAGATGCAGT

CUST\_5800\_PI426210822 AAAGCTGCCCTGGCCTTGGTGACCATGGCACTGTAAGAGAAGCAC

A\_18\_P22841717 AAGAACATCTACTATGAAGCCGACCACATCCTACCCATGGCTTCT

A\_14\_P114004 TTTTCTCCTTTACAGTTGTGTTTCGATATATACAGAGACAGTAGGGTAAGTAAAACTCTT

A\_14\_P106903 CACCGGGCAAGGTGTTACAATATTTTATGTTGATAGACTTGGCTACTATCCTTACATAGA

A\_14\_P133228 TGGGCTTAGGAACAAATCTCACAGCAATTCTTTCTATGTATTGGAGTGGGATTTTATTTT

A\_14\_P100214 TGTTTTGCAGACTTATTTACCAAGCATTGGAGGAATATCGTAGGTAAAAATGCCTATTGG

A\_18\_P13166390

AAAAATCTTATTAGCCCACATCTATTGTCCATCCCTAAATTAATTTGAATGTAGCCCAA

A\_16\_P21495882

TCTTTTGAGGTGTGCACAATATGCTTCTTATTTTAGTCCTTGGTCTTTGCTAGATCTCAT  
A\_16\_P15808943  
AGGCTTCACTGGAATAAAATATTCGAGCATTAAATTGCCAAACTTTCACATGATGACTTGC  
CUST\_10281\_PI426210822  
TCTTCAGACTCTAAAAAAGGAAGACATACATCAGTGGTAGCTCTGATCTCCCAT  
CUST\_7858\_PI426210822 GGTCCCCACCTCTTCTGAACTCTGAGCTCTACGAGGACAGCGATT  
A\_14\_P128255 ACAGAAGTGACATGTAAGATGATACCCAGAACTTAAGTAGTTTCGAGTTGTGTTTGATC  
A\_16\_P18968624  
ACAATTCAAAGAGTTGCTACTAGGTGAACAACAGTGATATTTAGGATTTTTCAGGGCAAC  
A\_14\_P108635 CTCCTGAACACAATTAGGCGTGACAGTCCACAAATAAGAAAGAACTGGAGAATTAATTA  
A\_14\_P201082 CTTATTTCCCAGCATTCTCTTACAAGTGTTTGAAGTGCCAGGCAGACAAAGTATTTG  
A\_16\_P15262635  
ATGGGTCCATTAAGACATGATTGAGACAAACATAAAAGATATGCAGAGAGTCAAACCTTC  
A\_16\_P30952293 AGGCTGGGATAGCGGGCTTCTTCACCGAGGTGGGTGTCTGCTGTC  
A\_16\_P30952477 CTGCCTTTTGTGCAGCCGGCCCATCTGTTGGTGCTTTTTCTTTCA  
CUST\_3966\_PI426210822 TAGTTACCTTTTCCTAAACTTCCTGCATTGTCTCCTTTTAGCCCCACAGTT  
A\_14\_P101601 CTCTGCTACCGTCAGGAAAACATTTTCAGAATTGTTCAAAGAATCCATATCACATTCTTT  
A\_14\_P114232 ACTTGCTATGTGTAAGAAAATTGAGCATTCTCCTTCAATTCACATATGATTGTGGGCT  
A\_16\_P00685010  
TCTCTTGTTACTTGATCTGATTTATGAAACCAATGGTCTTTTTTCATCCTGACTTGAGATG  
A\_16\_P03800710  
CCATTCCAGACAGATTTGTTCTAAAATCCTAAATAATAATAAACACAACACATCTGCCCA  
CUST\_5263\_PI426210822 CTTCTGTTTTCTTTAATTTACCCGGCAGCTGCTGGTTAGCTA  
A\_14\_P118357 ACTTTTTTCCACACTACATCTAGGTATGGTTTCTAGTGGTAATAGACGTGTCATCCAAAA  
A\_14\_P127431 CATGGTATACTTTTCCCCAGCCTATTGTCTTGAGATATCTTCTACAGCCTAAATTTGCTA  
A\_16\_P03108116  
GGTTTGCCAACTCTAAATTGCTATACAAATAAGTCCTGATTATGTGCACTGAACAAAAGG  
A\_18\_P15509910 ATGACCATACCCAATCTAAACACTTAAACCCATCTTTATATGGAGAATCGGTGAGGC  
CUST\_5968\_PI426210822  
ATTCTGTGGTTTTAAAAAATGTATGTTACAAAATAATTATAACAAAAGCTTTGTTGGGA  
A\_14\_P129307 CACAGTTTTCTGTTCATGGTAAATAATCCTGTCTTTATGCTTTGTTGGAAGATTTTTTC  
CUST\_2586\_PI426210822 TTGCTGAGGCCCGTGCAGTCTGCATCTCTCCTGCAAAGGCCAGTG  
A\_14\_P202016 CTTGTCCTGTGAGTTAGTGTTGGAACCTAAGGTGAATTTCTTAATCCTTGATAGAATTCCA  
A\_16\_P38970775  
GAAACAACATAATTTAGACTCGAGACAAAATAAACTCTTCTCTACTTAGACTTGACCCCA  
A\_14\_P138304 TTTCCACAACCCTATCTTAGGAAACGTTGGAAGGATTAACAAAATCCTATTTGCAAATCA  
A\_16\_P17885091  
ATCAGTGCAATTTTCATGCCTACAGATTTTCAGTTTCTAACGTTCAATGACTAAATGGTGG

A\_14\_P132960 GTATATAGTCAGCCATACTAGAAATCTGCCAGTGTCCGGTAATGAATGTTTCAGTTGACAAA  
A\_14\_P135935 AGTAACCCAAAGGAAGGAAGGACTGAGATAACTACTAATGGATTACTTAGAGCGTAAGTCATT  
A\_14\_P124152 CTTTAAATGAACTTGCCTAAAATCTTAGGTCATACACAGAAGAGACTCCAATCGACAAG  
A\_16\_P16191674  
ACAAAAGTAGTTGAATAAAAAGTGTGCCACAGCCAAATAAGCATAGAATGAAGCAAAAACA  
A\_14\_P129578  
CTCTAGCACAATGAAGAGTAGAAATTGGAAGGATATCAAAAAGGGGAGAAGCAAAAACAAT  
A\_14\_P115505 CTTTCAGTTACCTTTGAAAATCGGGCAGATTTTCCCTCCATATTGAAATGCATCCATTTC  
A\_18\_P14138049  
TTTGACACAGAGCATCTCACCTCTTTCATAGGAAGGAATAAATTCATCAGAAGTCTCTAG  
A\_14\_P120982 CTCATAGAATTGCCACACATGGCCAATAATCCCCATTTTACATGCAAAGTTATGATAGGA  
A\_14\_P127920 TTGTATACGTATTCCAAAGCAAAGATTATTGCTGGAAGGCCTTAATGGTAATCAACTCCA  
A\_14\_P126385 GGAATGCCTGTTTACTATAGTGTTCATTCCACCTGGTCAACAAAACAATTTAAGGTGAGTA  
A\_14\_P131288 CTTACAGTTATAGAGGACCTCAGGATTTCAATTCCTTTTGTCTCGAGCAGCATGAATATA  
A\_16\_P19744618  
GGTATTTCTCGTTATCAAGCATAGGTGGTATAGTAGCAGAAGTCAAAAATCATACTGTCC  
A\_14\_P120978 AGGTTCTAAATTACCTCTTTCTGGAAAGATGTTGTTTTTGGTGAGTTTGACGCTTTTGG  
A\_14\_P135615 GTTAGACTCTGATGATATTTACTATCTGATTTGGGGATAAACCAACCCACTAGGTCAGAC  
A\_14\_P114536 CTAAGAAATGTATGAAAATGTATAATACTGGGGAAAAGTGCCTAGCAGATAGCGGAAGCA  
CUST\_397\_PI426210822 CTTCTGCTCCCTCTCCTGGGACACATCAAGACGGCTGTGCTTAG  
A\_14\_P119850 ATAGTGAGTTCTGTGTGTTTAGAAACACAAGAGGCTGTGTGTCTTAGTGTCTGTTTTGTA  
A\_16\_P18290063  
AAAAAGCCTAGTAATACGTGACCTTATCAGAGAGATTTATGTTTCAGTTGAAAGCCAAGTT  
CUST\_3384\_PI426210822  
TTTTATGTTTGTACATTGGTTTCAGAGGACTCTGTATTTTACTGGATTTTATTGGATAGT  
A\_16\_P00767240  
GCATCTCCTGAGTATAAATTGTATCCTTGCCCATCTATGTCATGAACTTTCCAAAAGATG  
A\_16\_P17980427  
TTGTTCTCCTCTATGAAACCACTAATAGCCTAATAAAGAAATATGCCAATCTGCCAACCA  
A\_14\_P124699 CTGATTTGGTTTACTGGCTGACATAAGCAGATAATTGAGACTCTTACTGATTTGCTGAA  
A\_14\_P104991 GGAAGTTAAAAATTTGGGGATTTTTTAGATGACAAGTCCAGACTTTCAATATGACACCCA  
A\_14\_P111488 CTGTCACTTACTGACTGTCACTCATCAATCCCTATTACCACTCTAATAATATGGGTTGAA  
A\_16\_P18548435  
AAGTCCACTGTAGATGCTTAGTCAATTCTCCTGCTTAATTTGTGTGTATTTCGTTTGTCAI  
A\_14\_P100994 AGCAAACCTACAGGCTCCTCTTTTTCATGTGTCTGCGAACTAAAATGCTTTTTAAAAT  
CUST\_5718\_PI426210822 ACCTTGTGCAAAAAGTATGTGTGGGGTGAGAGGTGTTTAAACACACC  
A\_14\_P201402 CAAATACAGAATATGCTTGTGTTGTAATCGAGCCAAGAAATTTGCAAGGCATGTATCTG  
A\_14\_P117860 CCAAACCAAACACCTACTCTATGGTATTTTCTATGTCAGCATAAGACAAGGTGTGAAAAT

A\_16\_P00721547

AAAACACACTTTCTCTCCACGTAAACAAATGAAAGAATTTGACTATTCAGCAAACCTGCCT

A\_14\_P130485 AAGTCACCATACCTCCTACAACATGCCTACAATCCTGTGGACTGGT

A\_14\_P127982 GAAGACCAGTATATCTAGATGAGCAAACAAAACCTTCAGTTGATTCTGTGAACACTGGAGA

A\_18\_P13079225

ACACCATTTATACAGACAAACTTTTCAGTCAATTCATTACAAATAGAGCAGGCTCAATTCA

A\_16\_P01423350

CGCGTTCATACAGTTTTAGGCAAAAAGAAAACCTTGACATTTTAATACACCTGTGAGTCCTA

CUST\_9950\_PI426210822 ACTTGAGTAACTGAGATGGGCTACAGTCCAGAGTAGCTTCATCATAACTTCTC

A\_14\_P121563 AACTAATTTTCTCATGGTTACAGAGCAAACCTTATGGTAGAAGTATATTGGAAAATTCAAG

A\_14\_P134413 AGATGTTTTAGACATGGATGATATTCAAATGACAAGTAGAGAAGGTAGCCTAAGGGTGAT

A\_16\_P18614278

AAAGTTGCCACATTTCTAAAAATGCTGTAATTCCTGTGTTTCATCTTTCCTGTTCTTCTCA

A\_16\_P02570724

CCTTATGTGCTTGGTCAAAAATAAAGAAGCCCATTTAAATATTTGTGACATCAGTGGAGC

A\_16\_P20260087

GCAGATGGTATCCATACACAGTTTGATTTGTTTAGAAACCTACATAAAGAGCAGCATGTG

A\_16\_P17847483

AACACAGCATAACAAAATACTCTTTCTCCTTATTCTCTCTATTGATGTTTCTTCTCCCA

A\_18\_P12324621

ATAGACCTTCAAAAACCAATTCAAATCTCCAAGAATCCAAGTCAGAAGAAATTGCTGCC

A\_14\_P108777 GCAGCAGTGCTATTGGATCCTTGATGCCAGCATGGACAATTTATTAECTATTCTTTATTT

CUST\_6244\_PI426210822 CTGATATAACCTCAGGTGAACAAGAAGGCTGCCCTGTGGCTCTTC

A\_18\_P13088645

AAAGTCATCACGCATTTATTGAAGTCTTCCTAATATGGTTATGCTCTACTGCTACTGCAT

A\_16\_P21224356

AGTCTTTTAAAGCCTCATTGAAGCAAATAACTACCACTGAAATTTTAAAAGTCCCTGGGA

A\_14\_P114744 CTTATTAGCCTCTGCATCTTGGTCAATTACCTCATGTTTTTGTGATTATCTATCCCTT

A\_16\_P15807973

ATTAGCCACCACTTTATAATGTGAGAGCCATTGAATTAGGTATCCATTAGTGTCTACTCC

A\_14\_P125390 TTAAGACCAAGTCCATTGGGCTGTTTATGTGCAATGATTA AAAACTGGGAAAATTTAAGG

A\_16\_P19480369

TCCCTTTACTCCATCTCCATTATGATGTCTCTCAAGATTACACCATATAACAAAACCTGGA

A\_14\_P117824 ACCACCTAACAGTCTTTTAAAAGCCTAAAGACAGGAACATTCTACCACTTAATATGGAAG

A\_14\_P129092 AAAGTTAAATGCCTGGGTATCTATTTTCTGGTATAGAAAGCAGCAGACACAATGCATTA

A\_14\_P109944 ATGTGTAAGTTTTTTAAACATCCCAGTGGCCTCCAGGATGGAAATCTCATTGTTATTC

A\_14\_P113899 GTCCTGTAATTTTAAACGTTATTTTGTGAGTGGCCTGGCTAATGTTATCTCTTGGGAAGAACA

A\_16\_P58424511

TTTAACACTTCTCTATCACCAGCAAATCTCCCTTTTCAACAAAGATGGAGTAGACCTTAG  
A\_16\_P18291307  
ATCAGAGCCCAAACCATTAAGGACTAACAGATTTGACCAAGAACCATAAACAAAGTAAA  
A\_14\_P128380 GAAACCTGTATTTCTAAGTTGGCAGTAGACGTTAAATGAATTGATTTACTTTGAGAGCGTA  
A\_14\_P102793 ATGTCCAGTCACTGTTGAATTTCTCCAACACTACTAATTCTAGAGAAGAATCTAGATCCCAC  
A\_18\_P22841434 CTTTTCTTGCAGAGGGGAGAAGGTGAAGAGGTTTCAGGAGAGAAAAGTATATG  
A\_16\_P01505638 ACCCTGGTGATAAAAATTTGTGAACCTCAAGAACGTGTATGAAACTGTGTGTCCACATT  
A\_14\_P128897 TTACTIONCATCAAATTAGCAAAAACCAGAACTTACATTTACATTTGGCTGGGCAAAAAGACA  
A\_14\_P123848 CTCAGGCTACAAGAAATTGATCAAACAGGGTAATGAGACTATTTCTTCACAGAGGTTATT  
CUST\_9313\_PI426210822 TGGAGGACTATGCCTCTGCATATGTACCTGTCTGTGTTTGTATTCTTCAAAAATG  
CUST\_7898\_PI426210822  
CAGTTGGACACAAAATAAAAATGTTTTTCATCCACCTGTCTAGATGCCTTGAAATGTTAG  
A\_18\_P22843219  
AATTAGCAAAGTAGACATTCAAAACATTCTCTGAGTTTTCAAACCTCAAGGAGCGTGTGAC  
A\_14\_P115216 GGTCCCTCCAAGTTTAGATAGGGGATATCCATGACCCTCATAAGAAATAACCTACAA  
A\_14\_P125979 AGAAGTCATATTTGAGTTAGAGCCAGATGAAAACCTCAAGAATTACCAGTTATTCCACTG  
A\_16\_P17528734  
CATCTTGGGGCTCATTTTCATCTAATAGCCTTAGTATCCTGTTTTCAAACCTTAAAACACAA  
A\_14\_P111035 TCTTTCATAGAATATTGAAAGGAAGCCATTTGTAACCTGATATCAACGCTCTCCAAATCC  
CUST\_7105\_PI426210822 TATCCTGTTTTCTCATTTGCCCGTTGAGCACTGAACGACTGGAAGTA  
CUST\_8681\_PI426210822  
ACCATTAGGACATTGACTTCAATATGGCATGAATACCAACATCTGTTAGAATATTCCAAG  
A\_14\_P100540 GATCAACTCTTATTACCAAGCATGACATGTTTCATTTTGCAAGCCACTTTCTAATTCAGC  
CUST\_8281\_PI426210822 CGAAATCCAAGGGAAAATGCTATCAATGAACGGATTCAGCTTTCAAATGCCTA  
A\_16\_P00685022 CAATGTGATCTGTTTGGGAAAGTGCTTGCTTTGATTTCCAAAGGGCTGTG  
A\_14\_P137892 AAAACAAAACCAACTCAGACCAGAACTGTTTTCTCAACCTGGGACTTCCTAAA  
CUST\_7189\_PI426210822 CACACATGAGTCAGCTCCAGGAGGACCCCGTGTCTTTGACTCTTC  
CUST\_7266\_PI426210822 CACCATAAATCCCCAGTCATGGTGCTGACCTGGCATGTGAAGCTG  
CUST\_8219\_PI426210822 CTGGGATTAATAATCTCAGCTGGAAGTTGCTGGGCCAGAGATTATCAC  
A\_16\_P17087425  
AAAAATCTCGACTTTACAAATCAGTCCATGAAATTCCTTCAGTCCTTTAGTCAGACAGAG  
A\_16\_P19594509  
CTCCACTTGCTAATGAAACTAGACAACCTGAAAGATCTCCTACATTACCTTCTTCATCACT  
CUST\_7687\_PI426210822 TGTAGTCTTCCTTGATTCAAGAGTACCATGACTTGTGTTTGTCTGACTCCAG  
CUST\_6860\_PI426210822  
ACTGAATTTGGCTAATAAGATGTTGCATTGTCTCTGATCTCCTTGAGAGACTGAGA  
A\_14\_P128284 AAACACGTCTTGACTTGCTCTTAAAACAGAGATATGTGAAGGAGTTTCAGCATCAGATTA  
CUST\_2864\_PI426210822 TTTACACTCTAAGGGTGTGTTTCCCCGATAATCAGGCTTAAAGGGGAT

A\_16\_P16191762 AGTCCTCACCAGCATAAGAATCCCAGAGAAGGCATTTTTTTTTCTCACATACTCTAG

A\_16\_P38107915

ATCCAAGAAATGGCACTAACTAAAACAACCAGATCTGGATTTCAAACATGTATTGTGCA

A\_16\_P21304864

ACTAGCCCTATTCATAGATTAATCTTAATGCCAGATATTTTCATTGTAACAGTTTCAGCCC

A\_14\_P139335 ACATTTACAGATCGACTATTTCCCTTAAACCTCCTAGAAGAAAGTTTTTGTGGGGAAAGAT

CUST\_5597\_PI426210822

GAGGAGTATTTTAAAAGACTATAAAGCTGGAAGCAATTCAATTGTGTGTCTACTTTATGT

A\_14\_P115141 CTGGGAAAAAGATTAGAAGACATGGGAAATGTCCAACATTTTACGTGTAGGATTTTTTTTG

A\_16\_P16684297

TGACATACATCACATTTTCTGGACATCTCTCATCTATTCCTATGACTTAAAATTCCCCCT

A\_14\_P116860 CAACATGTGTTCAAAGTCAAGGATATGGAAAACCTGGAAGATGTTTTCTACCAAATGATC

A\_16\_P03624052 GTTGCAGTTGGTCCTTATTTATTCCTCCAGCATCTTCAATATCATCCCACATATGTTCT

A\_14\_P128769 AATACAGGTAGGAAATATGTGAGATGTGAATCTGTCTTTTTCTCCTGAAATTGGCTACAAC

A\_14\_P101518 GGCCTTGGACAGATATATGCTCTATTACTGAAAAAGAGATGTGAAAACAAACTCAGGTT

A\_16\_P17427885

AAAGTAGAGACTACATTCAGTTGCTTTTTATAAGAACCTGATGCATTGGATGATCCTGGA

A\_16\_P03028841

TCAACAGAAGATACCAAGTCTATAGATCTAAGAAGAACCCATCTTGACTTAACTCCTTGC

A\_14\_P119344 TTTTGTTTTAAATTGAGTAGAATCAGCAGAATCAGGAGCACTTCTGTATGTGAGAAAACGC

A\_14\_P114618 ACCTTGTATGTTTCTTTGAAACCTATCTGCCTGAAGAAGTATTACAAACATATCATAGCA

A\_14\_P101499 AAAGAACAGATCATTTTCAGTGGGACCTATTAGGAGAAAAAGTATGTATGTTCCCTAAAAC

A\_14\_P114455 ACAATCTGTGGGTAAACTGTGTCCTTCGTTATGTCTGTTAATACTGCAGAAGAAGCATAT

A\_14\_P128624 ATGTAGAATAAGTTTTCTTACAGGGTTAACCATTTTCATCTTGCCATTGGATACTGGGAAT

A\_16\_P00009371

CATGACATGTAAAAGCCGTCTTGATACTATTTGATATTCAGTGCTAACAACTCACCACC

CUST\_10438\_PI426210822 GTACTTTTTCATTGGAAGATTCCCAACAAGAATTTGGATGGAAAACCTGATCCC

A\_16\_P36664479

TCCATCTACTCCACTTTATAAGCAAATTTCTGTGAATACTTCTAACTCTCACCTACCTCA

CUST\_10144\_PI426210822

GCATCTCTTCAAGACAATCATAAAGGCCTGTTTAGGAGGAGAAAGTTAAATTGCTCA

A\_14\_P111388 CCTCCCGATTCAGAAAAATGTAGAACATTCAGACCTTCAAATCATCATTGTATCCACTT

A\_14\_P137585 CACTTGCTGTTTGATTCTAAGTCTGCTCTATGCCAGAAATTAGTGAGAAATCCAAGG

CUST\_1668\_PI426210822 ATCAAAAAGCAAGCCTTTCCGGCGAGAATCTAGTGGCTTTTTCTTCC

A\_16\_P02766760

TATTTGTTCCCATGATACTCTCTACACATACCCCATTTACTGAAGGTCTCATTACACC

CUST\_3283\_PI426210822

AGAACTCTGAGAAAGAGGAGAAAGAAAAACAGCAAAAGTTTCTTCTTTATCTGGAAAATA



A\_16\_P00481922

CGGATGATTTCTATCATGTTTGTTCATCATAGAGGGCTGAATAAATAGCATCTGACCTA

A\_16\_P15150633

AGTTACCACCATACATCAAATGATTTTCCCAAAAAGATAACCCGTATACTGTGATTTCGTG

A\_14\_P136595 ATACAGAAAGGTGATCTTTGACCAACTCACCACACCAATGGAGAAATAGTTGTTTCAT

A\_14\_P114149 GTATTCTGATTATAGAGAGGATTAGGCTTCTGCAGCACTGTGCTAACATTTTGCAAAGG

A\_16\_P15297284

AAAATTGCACTTGATTAACCTTCCATTAATGTCTCTTTCTTCCTCTTCCATCTCCATT

A\_14\_P110336 AGTGTCCCTGCAACATATTAAGTTTTACATGGTGACCAGAAAGTTAAATAAAACATCCCCT

A\_14\_P121203 GGCTATATGGTAAAGTTGCTTACAGATTCTCGTTTGCAGAAAGAGGAACATGAATTCTT

CUST\_1762\_PI426210822 ATTGTTGGAAAGAGGAGTTAGTTGGCTTTGACGCCTGTTGTTCTAATGACT

A\_16\_P16307625

AAAAAACCCATAAAGCACAAAGATACCTAGTCCTTTATTGGCTTAACTTTGGAAATGGCTT

A\_14\_P200030 CACTGTATGGACACAAACTGCCTGTTATATGCATGGACATCTCTCATGTAAGTAGTTTAA

A\_14\_P109297 CATATTTTTTAAGCAGTAGTCTCAGTTTACATCACACGTTCCCATCAACACAGTCCATT

A\_14\_P128821 AATAAAAGACACTTATTGGAGGAGGTAGCAATAAGGAGTAAGACATGTCATTTGTCCTCA

A\_14\_P101058 ATTACTTTCTTTTGACATGATTCTAGAGGCAGATCACATTGTTTTCTTCTGCATGCTT

A\_14\_P132107 TATAGAGAGTGAGGAGATTGCAGAAAAAAAAAAGGCAGATACATGAAATGTATGCCTTTCC

A\_14\_P100795 GTTTCTGTCTCATGATCCTCACTCTAATTCAGCAACAATAATAGTAACAGTGTCTTGTGC

A\_14\_P119739 GTGTCTTACACATCTCCCAACAGCCGACTTAGATGTGATCCGTTCTC

A\_16\_P38122913 CACTCTCCACCATCAACGGCAAACCTATGAGCCATTAATGGCAAACCTATGAG

A\_14\_P127708 TCTTTTAAGCCCTGCTCTTTCTCTGAGAACCAAAAAGATGCCTTGAATATTTATTCAGTGA

A\_16\_P15195108

TCAACACGATGAAATAACTCCTATTCAAACCTCAGAACATTGCTTCCTTATATCCTGTGCT

A\_14\_P111482 CTTCTCAAAAATGTTAATCCTTTTCTGTTCTCATCTCAGTGCATCTCAGATTTCTCTGC

A\_16\_P36230603

TGCAAAACCTTAAGATAGTCAGCCTTAGGGAAACACTGAAGAATTTATTTTTAAACACAT

A\_14\_P105113 CCAAAAGAATGCAGTTGAAATTTAACTTTATTATTTTCTTATTACAAAAGCAACACATA

A\_14\_P115414 TTTCATCAATACAGTATAGCGACAAAGCCAGAGGGAATATAAGAGATGTAGGCAATGTA

A\_14\_P120378 ACTCACCTTGCATATAAATCAAAGCATCATAAATTTTACCACCTTATCAATGGTTGCCT

CUST\_6444\_PI426210822 ACCTGGGATGTCTCCTTGTGACAGTTACGCAAGAAGGAAAGTGAA

A\_14\_P114800 TCCATCTTCTGACATACAACTGAGGTCATGACAAGGAAAAAAAAACACCACATTTATCTAA

A\_14\_P105054 CTCCTTCTCCTTATTCTGGAGTGCACATCCAGTAATTAAGAAAACATGAGTGAAGAATG

A\_14\_P110314 GGGGCCAAAGAGCAGTTGATTTTTTTTCAAAGTCTAGTATTTCTCTGAAGATTCTACATC

A\_16\_P21093267

CTTGGTTATTTGCAGGGATTTCAATTTAGTGATCTGAATCCAGAGATTGTCCATCAAAGTC

A\_14\_P202107 TCTACTCAAGTAAGTCAATGTTTCTGTCTCAACTGGTTGATTGGAACAACATACAAACTG

A\_16\_P19323808

TCCAAAGTCAAGACTTACAAGATCCACAAACCTAAGTAAAGTAGACAACAAATGGTGAAC  
A\_14\_P115160 TTTTGAAGTGCAGATTTCTGGCTTCTTGAGGCTTTGAAGGTAAAGGCTTC  
A\_14\_P111160 GAAGAAGATTTATCTTTTCTCTACAAGAGCAGCCCAGGAAGAAAGCATCAGGTAAG  
A\_16\_P39547742  
TGAGAATTTTGAGTGTGTCAGTGATCAACAATTAACCCTACGTCTCAATTCATCATAAGCAA  
A\_16\_P01222684  
GCAGGAATATAGGCAATACTTTAGTCTTACTCAGCAATCGTTTAAGAACTTGACAGGAGA  
A\_14\_P108988 AATTTACTTTGTTCATGTAGGAACAAAGTAGGAAGTATTTATGTCACTCGGTATGGGAC  
A\_14\_P128117 GATGATGTCACCTTTGCTGAATTTAAGGTCTCCAGGCTCTTTTCCTTCATAGTTGTATA  
A\_14\_P121199 TCTGGCAACATACGGATTTAAAATGAAATAAGTTCTACTTTAGCACAGTCCATTGGGATG  
A\_16\_P18224333  
AACTCTAGCCATCCTTATCACAAAGAATTGACCTTCCAAATCGAATCAGAACCTAAAAAT  
A\_14\_P101819 GAGAGAGAAAGGACCTTCTCAGTCTCACGAGAACTAAAAAGTTGCATAAAGTTAACTAT  
A\_14\_P111140 CACAAAGCCCTTTAAAAAACACTTATTTGCAAAATGAAGTGTCTGAAAAGCCTAACTGGG  
A\_16\_P17634840  
GCACAGCCATACTTAAGTCATCATCAGCAGTCAAATTTTTTCATTTCCAGTCACAAATTCT  
A\_18\_P15448191  
AGAATCTCTGACACCAGTATTACTTCTCTCCCGATTAGTAAATTTGTTTGCTCCCATTTT  
A\_14\_P105230 GAAATAGGTAATCACATACAGCCAATACATATCAGAACTGATTCAAATCAGGGCTATGCC  
A\_14\_P126893 TGTAATAAAATGCAAATAAGCCTTTACTGTTAGCACTTGCCTTCTAGTGATGGCTCGAA  
A\_14\_P125187 ACCTCATATATGCTCCGATAGCATCCTACATGTGTAATCACATATCCTTCTGTATGTGAT  
A\_16\_P39069885  
AAATAGTCTTAAAATAACCTCAGTTAATCCTTTGTCTCCATGAATACCATCTACCCTGTT  
A\_14\_P117876 ACCACATAATGAAAGTGCATGGAACCTATTTGAAAGGGTAAGAGGTTGTTTTTGCTTTTTT  
A\_16\_P20664058  
AAACTGAAAATTGTCAATCCCATGATACTGTTCCAAACCTATAAATCATTGCTCTAGGCC  
A\_14\_P115689 CTTTCTTAGCAATTTCTCTTTTCTGAAACAGTGAAAATGTAACTTTAGGGTAGCCTCTG  
A\_14\_P101541 TATCAGTAAAAAGGCATGTGATTTTTTACATTCACAAAGGAGGAAGCGGTCAAGAGAAA  
A\_14\_P134804 GAAGAATAAAATGTAAACTATTAAGTTATGAGATCTTTTTTGTCCCCCCCAGCCATTT  
A\_14\_P100333 CTGTGGATTCAACTCTGGCCTGAGATTGATTCCCTTGAGATAAGTTGTTTTCT  
A\_14\_P132835 TGTATGACTTTCTAAATCACTTCTGAGACTTAGTTGGAGACAATACAGCAGAGTTGTTGT  
A\_14\_P139627 TAACAGTTAAATTCAAAATACCAGTCCAAACCTTCTCTTTTCTTCCCCTCAAATCTACT  
A\_16\_P20563641  
TCGTTAGTCTTTAGTAAACCAAACCCAGACATTGTATGTGCTGTTTTGCATATTGCTACA  
A\_18\_P26181138  
AAAATACTGTGGTGATGTTAAAGAAAAGTTCCTAGGTTCAAAATTTGGCACAGAGAGCAA  
A\_16\_P17747681  
ATCTTGAGTTTGCCCTATTCATGACTTTTTCAGTGTCAATAACAAAAACACGAAGACCAAT

A\_14\_P123853 CTTGCTGGAAGATCGAGTTTTAGACGCATTTTTAAAAATCTTAAAGACTAAAACACTTCC

A\_14\_P136376 CTTTTCTGGTTCACAGGTTTCAAACCCTCATATCCAAAGAAAGTCATTAGAGTTCTCTA

A\_16\_P02892653

ATGGACCTTAGTTTATGAACCAAATTTCTTTGCACCAATACTTAAGACAACCCAAGGAAT

A\_14\_P109029 TCAATGTAATGTGTGAGAGTCACTGTCTTTACGTTGTGTTTCGTTTGTGTTTAGTCTCA

A\_16\_P35621551

TGAATCCCAAACCTTTTATCCGAATAACTGTGATCGATTATGCTTAACTGAACTACTCCA

A\_16\_P35882344

ACTTCACAGATGCAACTATGTCTACCTATTTCCTAACACAAATCCTGATGACTTGTTACA

A\_14\_P116597 TTTTAAAGGATTTGCTTGCTTTGATGGAGGAAAGGAAGCCTCATTCTTCCCAA

CUST\_5848\_PI426210822 GATTGGATTGTGCAGCCCATTTTTGTAAATAGCATTGCCCAAGTTAGGGAA

A\_18\_P22841634 ATCAATGTGCTCTCTTGGTCCTTCCACACCTGAGGCAGCCTGTAT

A\_14\_P108489 GCATCATGTCACTGCAAAGCCGTTGCAGATAAACTTTGTATTTAATTTGCTTTGGTGAT

CUST\_4406\_PI426210822

ATATCTATTTTCTCATTTTGCATTACAATAGCATCTAGTAACATTCAAGCCTCAATTAAT

A\_14\_P118366 GTGTGTGTTTTAAGTTAGTTTGCAGAATTACTCTCCTATGATGGCACAGAAATCACAAGG

A\_16\_P15030174

TTGACTCCTACATTGTTTCTCACAACATCTCTTACTCACAACATCTCTTACTCTAGAAGG

A\_18\_P14134110

AGCAAACATTTCCAAATAGGGATTGACTTTTTAAGGGGAGGAAGATGGCTAAATGTATATG

A\_16\_P00928508

TCCCCTCTCAGGTAAATATGCTTTCCCAAATAAAGGAATTAGTTTTCACTGTAACCTCTG

A\_14\_P117815 TTATCTTACTCTATTCTACCCCTGACCTATGTATGCAGGCCACCTACCTCTATTTTATTT

A\_16\_P16191482

AATTAAGTGGTGTCACTACTCTGATCCTTCTTCCACTGAACATCACATTCTTCATGAGAAT

CUST\_70\_PI426210822

GGAATAAATGACATAATAATAATGGCACTAAATTGCTAACATGTACCAGTTGCTTCCCTC

A\_14\_P101112 CCGCATATGTCAGGTGTCTTTTTCTTTCTTTTCCAAAATGTAGTTGCACAAATTCTGAAT

A\_14\_P202412 AAAATTGTGCGCATCTGCAAGTTAAAACCATGACATATAGCAGGCTAAAATTGAACAGAA

A\_16\_P16982083

AAAGTGTCTCACAATGAATACATTGCTATTTCTCACCATTAGGTATATGGTCTCAACCCA

A\_18\_P11126172

ACAAAACCCAGCAATTTTACCTTGATGTTTTTTAACTAAATCCAATCTTCATTCTGCTT

A\_18\_P13243370

CCACTACAACATGAAGAAATCTCTTAAAAGCACCATTAGAATATAGCAGAACTGACTGGG

A\_14\_P132803 ATCCTGTAACATTCTGGAAGTAAGAAGGATCACTTGTTAAGTCGCCATCTAGTAGTTTAT

A\_16\_P00966196

TGAGCCCAAGCATTAGATAAAAAATCATTCCTTTTCTATCTTCTTAGTGAACACTTTTCA

A\_14\_P100569 ACTTACTATCACTCGTCCTCCATGTGACAGAAGACTCAAGTCTTTACTAAGATTTACATT  
A\_14\_P114407 GATCTTCTGAGTTTCTTCATCAAAGCCAGATTTGTGCAGCCTGGGAAAATAGAAATAA  
A\_14\_P127963 TCATAAAATTGCATTTACCTTCATCTCAAACACACTTTGCCTTTTGACACACCATAGGA  
A\_14\_P104862 TGGCATAAACTCTTTAGTTCTCAGACTGCTTACTCATAAGTTCTTCTTGAGAACTTGTCA  
A\_14\_P104207 ATTGATCTGAAAGGACAAATGGAAGAAATACAATGCAATGTTGATGAAATTTATCCTCT  
A\_14\_P202428 CTGCAACTAAGGCAGTTGGGCAGCAGTAGAAACAAAAAGTTGATATTTATTTCTTTTCAG  
A\_18\_P17039638 CCTGTTTCTCATCTGTTCTCAGAACCTTTCTCTCAGCCACTAACCTTTAGGATAAA  
CUST\_4584\_PI426210822

GACCAATCTGTTTTCAAATACAAAGCTAGTAGTTAGAATAACCAGGGGGAAAAAAGCATA

A\_18\_P12841778

AACCCTTTGTGCCCTCTATTACTCAGAAAATAAATTAATTAGAACCCTCCATTTTCCAA

A\_16\_P03646697

AGTAAGCCTAAAAGCAAGACATGATTTTCTAAAATTGGCCATGTAAAATCAGAGAGGTG

A\_14\_P118891 CTAAACATTCTCAACAATAATTATAAGATTCTGCAGGCGGACCAAGAAGTGTGACCACA

A\_16\_P39314902

AACAGGCTACTAACTTCTGTGGGAATCAAAAAAGAATGTAGTGTAATTTGTGTCAGGC

A\_16\_P03279363

TGGTGTTCCTGTTACATTTTACAACCTTTCATATGCCACTTAAGAAATGACCTCTCTAGA

A\_14\_P123715 CTATTAGAATGATCCCTTATTCATTTGAAAATTGGCATGGGATTTTGACTATCTGCCGAG

A\_14\_P108187 CGTGCGAAAAGATGGGATATTTGAATTGTGCCCTGGGAGATTATTAGTAACTACACAAT

CUST\_9844\_PI426210822 AAAAATAATAAGAGATGAAGCCCACATTCGGGGAAAGTGACAGGGC

A\_14\_P122840 CAGGATCTCTTTATTGCACAGACTGAATGGCTTTACATGTTTCTAATGTGAATTAGGCAT

A\_18\_P15041967

TCAGAAATTCGACTAATCTTTCAAGATCCACTTCAAAGTCCTGTATCTAATACTGCCACT

A\_18\_P10532453

GCGATACACTGTGCTTGAATCCATCACTGAAAAAAAATAATGTTTCGTGGAAGTGTCTTG

A\_14\_P119106 ACCAAATGGCAATGGATTTTCAGCACAACTTAATACTTTCTAACACTACAGCAATAGT

A\_16\_P21377288

AAAACATCAGGATTGTGTTCAAACATTTTTTTCCATGTTATCTTTCTACTGCCTCCTTG

A\_14\_P126725 GGAGAAATGCAACACAGAATATAAAATCAGGCAAACAAACACTAGTCACCATGGAAGT

A\_14\_P115504 ATGCTTGTAACATGGAAATAAGAACCGTTTCTAACTCACAGTCTTATGCAGATTCATCTG

A\_18\_P14132314

GATTCTAAGTGGCTGAAGGAAACACCAGGAAACATTCTGTAAAATGTTTCCTTGGAAT

A\_14\_P102187 GAGAGAAATTCAGTTTTCTTCTTTTTCTCCTTCTCTGTGGAATCTTGGATGATTCTTTCT

CUST\_3217\_PI426210822 AACACCTCCCTCAGCATCGGGCTCTCCATGCCCTGCCTGACCTTA

A\_18\_P14133155 GCATGTGCAAGCACACATAGATATATATTGCCATCGTTCCTAACCTCCTAAG

A\_14\_P110824 GTTGATATGTCAATGACTAATTAAGGGGTTGTCAGTGTTACACATCATTGGTTAAATT

A\_14\_P126023 CACAGATTGAGGAAATAATTTCTGGTGGGATGATCAGTGAAAATTTTATGGAGAAAGTGT

A\_14\_P101414 AGGTCTAGGACAAGACCAAATTCTTGATACAGACAAATAATGTTTGCTCAGGCTCATGTA

A\_16\_P16612985

ACATTTCATAAATCCTACCTCTTGTCACCTATGCTTCTACCTTAATCCACTGACCTTCAAAA

A\_18\_P22839606 CATCTTTTTCTCCCCATGGCTTGGCCATGCCACAGTGGTCCCTCG

A\_16\_P02350259

GGATATGGCCATACTAGTGTGTATGATGAAATAACAAAGTCCATTTATGTTTCATGGAGGG

CUST\_4570\_PI426210822 CTTGGGTTTCTGGTTTGGAGAACAGGGTGGATGGTGCCTCTGAAG

A\_16\_P19850004

AATAAGACCGTTTCTGATCTCATGATTCACAAATACCCAATCTTGTAACCACTATCACC

A\_16\_P19914946

AGTTTCATCCGTTTCTGGTATCAACAAAATCAAAGCGTCTAACTTTTTCAAACACAAAAGG

A\_14\_P118781 CCTGCATCCATATTTGATTCTGCTAGTTCAATGTCTTATCCTCCACTGTTTTGAATAA

A\_14\_P136485 CTTTTCTTAAAGCCTGTTCTGTGTAAGTGGACTCACCGTTTCAAAAAGTCACATAATTA

A\_16\_P30952302 CTTTGTGTGACTGTGGTTCTCATTGCATTCCCCTCCTCCCCTCC

A\_14\_P138133 AATTAGGAAGGGGAAGTAGGATAGGGGACACGATTACGTTCCCTAAGTGAAG

CUST\_2156\_PI426210822 GAACAACATGGTTCAATGAAAACATTCTGGTGCCGCCTACCTTTTTCTCTAA

A\_18\_P15065066

TGCCACTCCTACATATTAATGGAATGAAAACCAACTTAAGAATTACTTCAGGTGTCTGG

CUST\_6306\_PI426210822 TCCCATAGGGCTACCTCACCTCCCAGGAGAAAAGATTCAAAAATCTA

A\_14\_P202114 ATGTTAACCGGCTTTCCAAAAGTAATGATCTTCTAGCACCACAGTCATTTTCTATTTAAA

A\_14\_P134320 ATCCCTATTCTAAATGCTTTGCTCTGAACACAGTTGATGCTAAATAAATGCTTGTGAGTG

A\_14\_P108385 GATGGAGCAGGAGATCTCTTCATTATTAATGAAAACACAGGCGACATACAGGC

A\_18\_P14135924 TTATGATTCTCACGTTCTGGTCTGTGACTGAGGAGACGTGCCATGAT

A\_16\_P15567948

TGATCGTCTACCCAAAATCATAAAAACGGAAAGTGCTTTTAATTATACCAGGCTCATCAC

A\_14\_P136131 ATTTCTTTTGTCAACCTGCATCTTTAATGGTTAATTCAAGCAGAATCAGCGAGGTGAATT

CUST\_3900\_PI426210822

TTAAGAGTACTTTTTAAGTTCCCAACAATTAGATAGGAAATGAACTGAATGGGAGTTCAC

A\_14\_P100320 CGGCCAGTTGTGTGTGATCCACTGTGCACATTCATTTTATTATTGAGAATATTATGTTTT

A\_16\_P20187123

ACCTAAAATTCCCCTAATTTGCTTTTCCCAAAAACCTGTATCTGTCTTGAATGTTAGCAC

A\_14\_P116761 AATCTGTGAACAATTCCATTTTTTCATCAGATAGCAGAACAACCTACAACAGCAAAACCTAG

A\_14\_P138875 CACATGGTAGCCAAAGTTACCTGCTTTTAAGTAATAAATGTGAACACCTACTGCTATCAC

A\_16\_P02427121

CTTCATCTTACACTCCCTTCCTAAAATGGTCTCATTTTGTCTGTCTCAGTATCCATGTT

A\_14\_P101623 CATGAGGGCTCATGGAAATGCATACATAACTGCCACATATATAAATCAGCAATGATTTT

A\_14\_P123147 GAGAATAATTGACACCCAGCAAGCACAGTTCTTGAAGCAGTCTGTGCATTC

A\_16\_P03267089

TCCTACTCTGTGTTTATTACTTCTTTCCATCACTTAAAAACAAGTTCCAACATTGTCCCA  
A\_14\_P104048 CTTAGCAATAGATCTCACCTAACAGTAGGATCTAAGGACAGGCCCTGCTTAC  
A\_16\_P21035534  
AAAATAGCCACAGATCCATAGTTCAGGTTGAAAGTCACAAACAGTAGCCTTTTTGAGAAA  
A\_16\_P17900145  
AGAGGGACTTGTGGGAATTTTTTCTCTTATTTAGAAATAAACTAAAAAGGGAAGCA  
A\_16\_P01129765  
AGATGATGTTTTGACGTTTTACTTGACTTCTGATCCTAGTTCAAGAGTAGCAACTAGCAC  
A\_14\_P119436 AGATTCATGATGAGATTTTCAGTGTCAAGCATGGATGCTTCTAGACAATAATGTTGAATG  
CUST\_6214\_PI426210822 TGAGATTTTCCAGCTTCGACTTTCTAGATGGTGAGAGGATGGGGAT  
A\_14\_P129501 TATGATATCAAAGTTAAATTTATGATGAATGACTAACTGGACAAAAGTGAAGCAACCAC  
A\_18\_P14688813  
ATCTCAAGGACCAAGGAAATAATATGCAGCACTAGATTTTATTAAGCAAACAACAGGCCT  
CUST\_6538\_PI426210822  
GTTGGATGCATTTGATTAACACTTGTGCTAGCCTTTACTCAGGCTAGATTTATGATGG  
A\_16\_P00685133  
GTTCTTCAGAACCTAGAGCATTTTCCAAGAGTCACTGAATCTAGGTATGTCTTTCTCTA  
A\_16\_P18930292  
AAAACGTATGCCAAATAGTAAATGCGAACTCTGAACCATTTTTGATCAAGGTCTTCACAA  
A\_16\_P17168477  
GAAAAACATCCTGGTTAACAAAATATGACACCTAACAACTTTGTATCCATTTCCACCTGC  
A\_14\_P105329 CTTGGTAACTTCATCAATCCTCTATTTATTCAAACCTAAAATGGTGCTAATGGGTCTGCA  
A\_14\_P134008 ATTCTGTCCCTTTTGAGATTACTTTGCATTAATATGACCAACCACTGCGATCAATTTTAT  
A\_18\_P24671437  
TACTGCGATCATCAACAGTTTGTTATTTAAAACCTTCTACACCCATCTTTGATCTGAAG  
A\_14\_P201941 CAGAAAGTGGGTGATAAACACTGAGTATCTCAAACAAATTTATCTACTCAAACATGGGG  
A\_14\_P130840 ACATCTTATAAGACTTTATAGGACTAAGGAAGTTAATCCATCCTTAGCAGGGATGCCAGA  
CUST\_998\_PI426210822 GAGCTTAGAAGGCTGTGATCTTATCATAGAATGATGTCAGGGAGAACCAGG  
A\_14\_P121685 CACATGAACCTATTGGCCATTCTCTTTTTGCTTCTGGGATTGTAATCTGTAAAATCCTT  
A\_14\_P111199 AAAAAAACTCTTCGGAATAAAGAGGGCTGTAAATTTTGAATTCCAGTGTGATCCTTTT  
CUST\_6359\_PI426210822  
AAAGCATGATGAGATGGGGAAGCACAATTCAAACCTACATGGCATAGTAACTCAC  
A\_14\_P201762 TCCCAAGGCTACATAATTACAGTGAGAACTTTAAGAAATCCACGTTTACGTGTGTTCTTT  
A\_14\_P138388 TTTAAAAGGTAAAAAGGATTTATGGTGAAAAATCCCCAAACATCCACACAGTTTCCCTT  
A\_14\_P121682 CTGCAAGTGATTGAAAGTATAATGCGTTGCATGGCAATCTGCTAAAAAGTGACAGAATAT  
A\_14\_P115026 GTAAGCCTTGACGTGCTTAAAGAACAGGTTTCAGATTATTTTCATATCTGACACACAGATC  
A\_14\_P125535 CTCATTCTATGCCATCTGCCATCGCCTTTTATTTTATAATCGACATCAATAAACTCCAT  
A\_14\_P121255 ACAGCATATAATGGTTTTTTGTCCTGCAAAGATGAGGTTGATGTTGTTCTCTGCCAATT

A\_18\_P15362659

TCACCACGACACATTATATATGCTACTCCCATGAATAATTGAAATTGTATCCCACAGAGT

A\_14\_P123975 TTTTACCCTGTGTCAGGGTGATGTAATGAGAGAGTAACAAAGCAAATCTTCTTCTTAGA

A\_14\_P109118 ACACTGCTGAATTAACCTGTTTTCCATGAAAATGTCCACAATCTGAAACATATCCAAGCC

CUST\_3488\_PI426210822 CAGACACTGGACAGACAACCTCACAGCTCCTGCCACAGTACAGCAT

A\_14\_P127254 CTTGAAGAGCCACAAAACCTTCTTCCAAAATACTGAAACTTCACAGTAAACATCTTCAT

A\_16\_P03549788

CATCTGTCCAGATCAAGTTTAACTCACCTACTCTAAGAACTGCTCTCCACAATTATTTTG

A\_16\_P15422228

TCCTTTCAATTCATGAAGGTTTCAGGCTCTCATTTCCTTATAGTCTTTGTCTACTGTAT

A\_14\_P126764 GAGGCGGAAAAGAAAAACCAAAAACCTCAAATAGTATGTCCTTTTCTTGAATTGAGTTGC

A\_14\_P113107 ATATTATTTGCAGTGGTAAAACCTGCATCATTGAGGGTTTCCCACTTCAGGATTAAATTG

A\_16\_P02018422

AAAGGTATCAACTGACTTGAATAATATGATCCATCGGCTTAACTAAGAACTTTGCCACA

A\_16\_P19376388

ACGCACTCACAAAATACATAACAAGGTTCTAATATGAGATAAGCATCTGCATTGATCAGA

A\_14\_P202468 TTTCGACCATTCATTCAGATATAATCCACACACTTTGATGTTACCACTTGATACCAACAC

A\_16\_P15849145

TAAAAATCTAGTTCCAAATTCATACTTCCATCCAAAGTCTATGCACATTCCCAATTCCA

A\_18\_P22840723

AAAAAAAAAAAAAGATAATCTTCCAGATGTTGGCTCAGTTTGAGGAGGAGGAAAGATTCTG

A\_14\_P106550 AACTGGCTCTGGAATATAAAGAAGAGTAAAACAGGCACTTCTCACAATGATAATGATGAG

A\_14\_P118017 GAACATGTCCAAATCCATGTCAAAGTCTTATGACTGAAAAATGCCTTTTAAATTCCTGGAA

A\_14\_P115640 TAAATGGTTGACAACCTGTTCAAATAGGATATTACTTAGTAGAACTTCTCTGATGGGAA

CUST\_4487\_PI426210822 TCTGGTGCTGGAAGGCTCTCTTGGGTTCTTTGCCAAAGTTCAGAT

A\_14\_P117476 TGACAATCAGTTGTTGCCTTGCTGAGAAGCATACTAATCATAATTCAGTCTTCTCTAGAG

A\_16\_P41770027

TGCCCAGCATTATGGATTTTATTTTAGAAAAGCCCTTGATTATGTTATCTTTTTCTCATG

A\_14\_P139662 TAGATCTTAAGTGTGGAATGCATCTATCCAACATAAATGCCCATGTTGAAAGAAGGAAAG

A\_14\_P129439 AACTCTACTTACAATAGCATGCATTATCTGCCACAATACATGCTACTTTGCTCTTCAGAC

A\_14\_P127022 TTTGGGGCTGAGGATACTTTCTCTCCATAATTGAATTCCTTTGCTTTAGAGATTTCTATGG

A\_14\_P138117 AAAAGAAGAAAAGTTAGAAGAGCAATATGTTTCCTTCTCTGTAACAGTGTCTAACAGTG

A\_14\_P132012 TCTCGACCCGAAGGTTCTTCGTATTGTCCACCGACTCAGTATTTGAT

A\_14\_P122594 CATTTTTAAGTGTCTCTGGCTCATTTTAGAGCCAGGTGACTTAACAAAGGTTTCATTTAC

A\_14\_P132483 AAACACAACCTCCACAAAACCTTGGACTTGTGAGTTGCCAATTCATTAAGAATATTGATCAG

A\_14\_P127849 GCATTTATGGCTGGAGAAAGCGCTGTCTCTACTTGTGTTTCTTCTTTTACTCATCA

A\_18\_P22841401 CATAACTAGTGAGCCTGTCTGCTCTCCCAAGCAAGTCTGTGTTTAAA

A\_16\_P03004640

TTGGACAAGGTTAAACATACTTTATAGCAAATCCCATTCAATTAATAACGCGAGTCCTCC  
A\_14\_P112374 CAACCCTATTGTTTCCTTTTCATTTTCAGAACAAGCAATCAAGATAATTTGGCTCCAATT  
A\_14\_P137674 CCTGGCCAAAGACAGATAGATGTCTTTAATGAGCAACAATTAGATCAGAGGTTACAA  
A\_14\_P130316 TATTTATTAGTTATGCAGTCCCCATACCATTAAAAGGCCTTTATAAGTTGGTGAGGCATC  
A\_16\_P19953452

AATTACAGATTGTTTCCCTCAAAAAACACATACATGGATGACCAACCTCTAGTGACTTTG  
A\_14\_P200911 TTAGCAAGTCATTAATCCTCAAAAATAATTCTTGAAGACACTTGAAGTCCCACTATTAC  
A\_14\_P115691 ATTTGCATTTTCCCTTGAGGTTATGCATTTACAAATCCAGAAGTTTTTCTTTGAGAATT  
A\_16\_P21561827

ATCACCTTCAGCCACTATTAACCTCATGCTTAAAGATCCAACCTCTCAAATATCACCTTTGT  
A\_14\_P135878 GGTCTTCTCAGAAAAATTTGTTATTGTGTTATAGTATAAGTCATTTGCTGTTCCCAGA  
A\_14\_P136161 GTATAAGGCAAATAACACAGGGAGACTTCCCAGTGATACTATTAAGAGTTGACATTTCCG  
A\_18\_P22839799 CTATCTCAGGAGGATGCTTGGATTTGTGTTTAGAAATTGGGTAACCTCAGTTGTTTCAT  
A\_14\_P122502 AGCACATATCCATGTTCCCAAAGGTTTGCATCTCTAATAGAGTTAAAATTGCACTTATGC  
A\_14\_P101228 CTGGCCAATATTTTCTTCAATATTCAAGACGCAAGACTTACAATGCATTCATCTATTCT  
A\_16\_P02992133

TCTTAATGATCATTAAATTATAATTGCGATTGACACTTGCTACGCTCTGAGTCAAAAA  
A\_14\_P112709 GAAAATACAAACAAGATCCACTCACCAATCCATTTATCTGTTTTGGACCAGGAAAGATC  
A\_14\_P101087 GATGGAAACTCTCTATTGCCTATAACTGACACCACAATTCTTTACTGGCATTTACAAT  
A\_18\_P22839988

TGGTTTAGGGATATTGACTTTTTTAAAACCAAGATATATAATTGTTCAAATATGTGATGCA  
A\_14\_P109902 AATTTGCATCTGGAACCTTAGCAGTAAGACAGCCTGGAAAATGTATTTAGTGTCTGATCT  
CUST\_6993\_PI426210822 CTTGCTGTATGGGATCAGGCCTGAAAAGTGAGTTAAGTCTGTTGGTG  
A\_16\_P01062907

GGGATGAGAACTGACATACACGTAGACATCTATTCCATTTACATGGCTCTTAATTGAGTT  
A\_14\_P104797 TATCATCTTTGTCTGAAAGAGCAAAGGAAGTATTCGTTATATTAATGATGCTGGCGACCA  
A\_14\_P100206 CCTCCCTCTTTTTTAATGTAAAGGTTTTCTCAAAAATTCTCCTAAAGGTGAGGGTCTCTT  
A\_14\_P114010 ATTTCTCAATGTCTGTAACAGGATTAATAAGAAGTAGTCTCTCCATTCATTCCAGTCC  
A\_14\_P120519 GGTCACCTGGAAAATAGACGAATGACTTGATAATGCATGAGCAACATTAGTTTCAACTTT  
CUST\_884\_PI426210822

AAACATTCTGTAAAATGTTTCCTTGGAATGGCAGGCCAAAAACAAGATACAGTGAGTG  
A\_18\_P22841091

AAGAGGGTATGAGTGTTGAAAGAAGGAAAAGAAGAACAGGGGTTGCACAGAATATA  
A\_16\_P01131121

AACCCCAAGTATATTACAGAAAACCTCAGAAAGGATAGCATCAGATTCTACAAGATGAAA  
CUST\_2998\_PI426210822

TGGAAATTCACCTTCATTTAAATGTAATCTTTCTTACTTCAGGGCAGTTGTTTCAGGGAAGT  
A\_14\_P201525 CAGTTGGCAAACATAAAGCCTAGACTGACGGCCATGAAGAGGACTC



A\_14\_P114824 CTCACCACTTCTATGCTTACAGTGTTTAAATTCTCTGGCATGAAACTTTTAGGCTTGAAA  
A\_14\_P134678 GCTCAATAAAAATTTTGTATGTTCTTAATGCTGCTTATCGGGTGCTATCTACCCCTCACAC  
A\_14\_P105107 TTTCTAAGAAGAAAATGCAACTTCCTCTCTGCCATTACTTAGCAAAAAGTGTATCCCATTC  
CUST\_5059\_PI426210822

AATGTTCTACCCTTTAATAGGGAAGGGTTTCTTCTTCCTATGAATTTTTACCTCACTTTG

A\_14\_P105066 CAAAGGCCTAGTCAATGGACTCAAGGCAGGACCAAGTAAGTATATCATGAAACTT  
A\_16\_P19663737

AAAAAGCAGAATGAACTGGAAAAGAAACACAGAGAAACATTCGATAATCATTCCACCAAC

A\_14\_P124753 TGCATGTAATGACTAGTTGGAGGTAGCAAATTTCCCTGTGACATGTATTTACTCTGTGT  
A\_16\_P15286557

AAACGTGAACTCCATTTGACTATGCCAATAGAAAAATAGACCAGTTAGTTAAGGACACT

CUST\_921\_PI426210822 GTCGCCCTTTTCATCAGACTTGCCAAGGCTCAGACAACAAATAATTT

A\_14\_P127471 CAGCCATCTGCACAGAGAAGATAAACATATAACGATTGAGGATTTATGGAAACGATGGAA  
CUST\_10319\_PI426210822

CCATGTTTTCTTAGCCAACCACATCTTTATCGCAAAAAGAATGACATTTCAAGCAGTAG

A\_16\_P00685484

CAGTTGGACACAAAATAAAAATGTTTTTCATCCACCTGTCTAGATGCCTTGAAATGTTAG

A\_14\_P120693 AATACATCTTGAAACGTCTTTGTGAAGGCTCTTAGTTTTAATGCATGGATGCTGTTATTT  
CUST\_4477\_PI426210822 TCTCTGACCAATTCCAGTCATGGCTCTCCCATGGGGTTTCACAG

A\_14\_P105034 TTTTCCTTCTTCTAAGTTCACGGGGCTTCATTAAAAACACTATGCTTATATTTGGGATAA  
A\_16\_P18981118

TTTTACCTGACATTTCTAATGGCATTAAATCAATTAACCGATCAGTTATTTAGCCCCCTCCT

CUST\_2977\_PI426210822

GGTATGTCTGTGATTGTATGTTTTAACATTTTAGAGAAATCTGAAAGTTAATGTGCTGG

A\_14\_P115090 CTATGAACACTGGCACCTTGAAATTTATTTCCAACCCTCTAGAACTTCAAAAAGATACAA

A\_14\_P136631 GTGAAACATTTGAGAAATTAGCAAATTTTCCACTTCCAAGATCTTGCTGCAAAGTGATGA

A\_14\_P120219 GGTGCCAGTATTTCTTGTGTATGCCCAGAAGTATTGTGGCTCTTTGTTAATTGATTAAT

A\_14\_P105400 ACCATGAAAAAGTTGAAACAGACTTACACAGTTACATAGGCATATTCTCCACAGAACTGC

A\_14\_P132697 TTTATACCCGCTTTTCCCAAACCCCAGACTTAAATAAAAATGTTTCGTTGTTAGAAATGA

A\_14\_P123813 AATTCGCCATCGAGATATACATGCTTCGGTTCATTTTTGCATTTCTGCACTCAATGAG

A\_14\_P122503 CGAAATCATCAATAATTACCTTTTCTTCCGCTAGTCAAAACTCAGTGAGAATCCACCAT

A\_14\_P110031 ATAAAATTAAGATTAACACATTGCCTCAGATGACACACAGAGCATGGACTTGAACCTAGG

A\_16\_P00685219 AATCCGCTTTCTGCTTTCTTAGGCACTAGGAAGGCAAGGAGATACTTG

A\_14\_P103443 GCCTCCTTTTATCTACCATACTATCCAGGGGTCTTTTTTCTTATTTTTGGCTAGTGATA

A\_14\_P131128 TTGTTACTCTTTCTCATGGCTGACCTTCAGCATAATAGAACAGGCTATTACTGAGCATT

A\_14\_P121674 TGGTCCTGCAGTGTGCTGTAAATCCCCATTGGAGACTGCATTAG

A\_14\_P117809 AACCCCAACTTCTATTCATTAATACTTAGATGCATGTTCTAAATACTGTTTTCTGTC

A\_14\_P122061 TTAAAATACCAGTAAATTCAACAGGAACAGACAAGTTAATGACAGGTGTCATTAGCCCTG

A\_14\_P128706 CTAGAAGAACTTCAGATGTCTCTGGGACTTTCTGCAAAGTCAATAGTAATTCTCCATTT  
A\_16\_P20117248

ATTGCAGATTACACACCTAAACTCCCTATAGCAATCCCAGAGAAAACCTAACATGATGAA

A\_14\_P127356 GTTGTGAACGTCCAGCCACAAAACCATAAAAAAGGTAAATAAAACAAACCCAAAAGGA

A\_14\_P137826 ACTGGGGAAAACTGGTTGTGTTGGATTGCATACAGAAAGCCAGATATACTGTATATTAT

A\_14\_P132860 ACCCAACACAAAACTAAAATCTTCTCAGGAAACCCTTAGACCTCAAATTTATCCTAGAA

A\_16\_P16190994

TTTTTCACTCTCACACAACCAAAAACATGAAGAAAGTTAAAAGTCTCCTTCAAATCTCCC

A\_16\_P03746128

ACCTTTCTCTTTTCTAAACCAGGCTATACAGTTTAAACACGGTTATAAGATAAGGTCCCAT

A\_14\_P100866 TGATGTTTTCTAAGGCCCTTTTTCTAGTGGTGTCATTTTTGAATGCCTCATAAATTAAT

A\_16\_P20793229

ACGGTTTAAATGGCAAGTCTCAGTTTACACAATTACTTAGTGATGCACCTGATAACAGAA

A\_14\_P200033 GCTTCTTTTCTCTCATTTCATGGAAGGACTTCGGAAATGCCTTAAGTTC

A\_16\_P18977293

AAAGTATTATAACAGATTTCAAACACTGTTTCCGGTAGCATCTCTTAGTAAGGCCAAGG

A\_14\_P100851 CGAGATGTATTCTCAGAGCCCAAAGACAAGACCTTTGACAGATGCAGG

CUST\_7766\_PI426210822

AGATCCAGATTTATCAGTGGTTTTGCAGTGGTTTTATCCATTTTTCAACATCACTTTTCAT

CUST\_7503\_PI426210822

CTGGTATGGTACATAGTATGACTATGGTAGTCCAGTATTGGATTCCATAATTTAAATAAC

A\_16\_P17055455

AAATTCTTAAGTCACAGTTTGTTC AAGGACAGTCTCAGACAAAATAGCGTTCACTAAAGG

A\_16\_P20093936

ACAAACGTTTCTGAAGCAAAAGAAAATGTATCACTGTAGAGAGTCTAGGACCTTTAGTGT

A\_14\_P104939 CTCCTGGCAGGGTATCAGAAACTCGTAGGTAGTTTCTATTAATAGATTGTTATGGAGTCA

A\_16\_P18153932

AATGTCAACTCATCACATTTTCAGTTAAGCAGACATCAAATCAAATGACTCATGTACACAGA

A\_14\_P201378 CACTGTGTCTCCATCTCAACTTATCCTTGTCTGTGAAATACAATTTTCATCTACTAGGC

A\_16\_P36231101

TCCCAGAAATAACCATGATGAGCATAGTATTGCCTCATTTTGACCTTTTTTCTCTGCATAT

A\_16\_P19570888

TTAAGTGTGTTGCTACATCTTATTTAGGCATAACCACAACATCTATTTAACCCACCAACGG

A\_16\_P19750471

CGCCACCCTTTAAAGAAATTTCTCCTTTATAGTGTTTTACAGTAACACCTTAACCTTTTGC

A\_14\_P137775 GATGTTATACTTACTTTTGGAGTCTATGCATGGGTTGGACAATAGTCAGAATGAAGAAGTC

A\_16\_P00124386

GTCATGACTTTTCAGTCTGCTGTTTGTAGCAAAATTTACAAACACCTAGAGGTAAGAGAAGAG

A\_14\_P116350 CTTTTGAGGTAAACAAGTGAGAAAGAAGAGACAATAAAGTGATCTTTCTTTACCATCTAC  
A\_16\_P19740543

CCTAACATCTCAAGGATCCTAAGTTTTACACCTTAATTTTCATGTTACCAGGAACTACAGG

A\_14\_P135182 ATTTCCAATTAAATGTTATACAAAATCTTGACTGGGAGTTCTGCGGATTGCCAAAATCTC

A\_14\_P108792 CGCACCCCTCCGTTCTTTCTGCATAGACTCACTTGTTAAATAGCAGTT

A\_14\_P123680 TGTTGTTAGGCAGCAGAGGCCTTTCTTTATAAACTCCATAATGACCTAAAACAGATTTG  
CUST\_411\_P1426210822

TGCTTACATCTAACTAAAAATTATTGCCTGCTGAAGAGGTTGAATTGTCTTTCTACTCAT

A\_14\_P136524

GGAACCACTGCTACTCTCTAAAAAAGGCAAGCAGATAAAAGAGAACACGAAAAATATTCC

A\_16\_P18174193

ATACTAGGATAGACTATGGAAGATGTGCTTACTGAGTTCTTACCCTCAATGTCAAAAACC

A\_18\_P14746970

TATCTGTGCCAGAAACATTAAATTGATTGCGTCTTTCTGATCATCAAATAGACAGGTTGG

A\_16\_P19807473

AAGGTCTACATGGTATGGCATTATTTGCAGTCATGATAAATCTTATCTGCCCTTTGGTA

A\_16\_P17439820

CCTGGAGTTATCTTTATCACCTCTCCTCAAGTTTTATCTTGCACCATATAAGTCACATTG

A\_16\_P19623555

ACGTGAAAATCTAAATAATCCTTACCTTCCTATCCTTCTATAAGTATCACTGCAGCACAT

A\_14\_P105944 GAGGTCATTAAAAAGCCTGTGGTGAACCTACACCGACATAAACCTTTTATAGAAACAATCA

A\_16\_P20368816

AAGAGACTACCAAGGTGTAATATTATAGGAGCAAAAAGGTATCACTTCTTACTGGGG

A\_14\_P104910 ACTGGACAAGTTGGTAGAGAAGATTAAGAAGTTACCCTTACTCAAGGGCCATC

CUST\_5252\_P1426210822

GAAGATTTCTCGTTTCTAGGAGTGTCTACAAGATTATCATAGGTGAAAGTAGGGTTGGA

A\_16\_P37431659

AGCACACAAAATCTTCAGTAGTTTCATGTCTCTTAGAAGCCATTCATAATCTACAGGT

A\_16\_P03649137

TCCTACCACCTATTGACAGTACTCTGATAGCCTTTCATTACACATTGCATTTTGATGTT

A\_14\_P133164 AACGTTGGCAATGAAAGATATGTCTTTGAAGCAGTAATTCGATGGATAGCACATGATACA

A\_16\_P19308469

AAAAAAACCACCAGGATTAACAACCTCATTAGATTTCATGCTAAATGTCTGATCATTGTG

A\_14\_P202557 ATTTGTGAAAGCAAACCTCCAAATATTCATTTGTAAGCCATAAGAGGATAAGCACAACCAT

A\_14\_P121162 ACTTGTTAGTATAGGTATGTAAGCAGTGCTTTAGTTCTGCCTGGTGTAGTTAAATCTGGA

A\_16\_P21661102

CCTTCTCACTCAGATGAATCCAAAGTTTTATGCTTATACTCACTGGTTCTCTATTGTGTG

A\_16\_P16514585

ATTACCTGAATTTACCAATTCTGTAAATCCAGTCATTGCTGTATACTTTTCTAGCCCTGA  
A\_14\_P201695 TAGTCACAAACCTGTGTGGGAAAAATACCACTAGCAATAGATTATAAAAGGCCACTGAAA  
A\_16\_P20587611  
AAAAGAAGTGGCTTTTTTCTAAGGTTAATAGCAGATTGTTTCGTAGTTCATACCTGAAGGC  
A\_16\_P16632388  
AAAAAAAACAACAAAATATCTTCCACCTTTAAGACAATCCCTAACACTGCTCAAATAGA  
A\_14\_P108236 CAAAGTGCCCAATATACAGAAGAGTTGAGTTCCTAAGTAACTCGCTCAGAGTCG  
A\_18\_P14624068  
TCAACCAAACACTGTAGGTAAGTTGTTTTAGTCTTCATATCAATGATGCGCTCACAATT  
A\_16\_P00018114  
GGCTGACAATTTGGAGAGAGATGAAAAATACCACAATTGCTTACAATAGAACCTGACAAA  
A\_16\_P36195989  
AGTTGGGCTATTAATCATACATTTACATTCGAATCATCATCCAATTTCTCAGTTGTCAGA  
A\_16\_P17143357  
ACTTCTGATATAAAGACTGTGATACTATCCTCCCCTATCATTACCTCAACTACTCAGTGG  
A\_14\_P118140 TTATGTTCCCATTTTATCCTATGAAATGCTAGAGGTTTCCTTTCACTATGCAAACCACTG  
A\_14\_P111126 ACTTCTCTCCTGATTATGTCATTACTIONCTTCTTTTCATGACTTTTGTTCATGTCTCTCA  
A\_16\_P00340136  
CTCCTCCTGGCTTTCTAAATAACTTTTGCATCTTTCTAGTCCTAATCCTTCCCTTTAAAA  
A\_14\_P111178 CTACTTTCTTTTACCTCCGAAATATATACCCTTTATATCTCTTTCCACTGCCTCCAGGAA  
A\_14\_P139771 GAGGGCATTAAATTGCTGAACTCAACCAAAAAAACATTTCTTTTTCTGCCTGTTCAATTTATC  
A\_14\_P116880 GACATGGGGCAAATAGGAATCATGAGGATCTATTTGCTAGATCTGTGTATAACCACAC  
CUST\_8750\_PI426210822 CCAAAGCTATCTTACGGGAGTTTGCAATGAGAATTTCTTTGCCCATGGA  
A\_18\_P22841013  
TTAGAAAAATACATTAATTTATTCAGACACTGGAGGCTTGGGAGTAGTTTTGCAAAGGGC  
A\_14\_P105412 CTCATATGCTTGAAAACAGAAATACCCACATAAATGACCTTGAGATTCTGATTGCATCA  
A\_14\_P105284 TTGTGGCATTATGAGTAGTTTTCTGAATTTTCTTCCCTTTTTGATATGTCAGACCTGT  
A\_16\_P19881029  
CAACCATCCCTTGAAATAATCCTAATCAATCTTTTAAACCAGTAATACACAACGTTCTCTA  
A\_14\_P125981 CTTGTCAAAGTCTGTTTACTAACCAGAATTTGGTTGGTCACATGTGTAGACTCTGTAAA  
A\_18\_P13621937  
ACCAGCAGATATATAATCCTACCCAGTATCATCCTATTCAACATTAAAGCAGAAAGTTCA  
A\_16\_P16186162  
AATTCAGCATGTGTATCAGCATTTGACTGCTTAAACCATAAACTGAGTTAGGATCCCAG  
CUST\_364\_PI426210822  
CCCATAACTGAGCATTTCTCTCAATTTTGTAGACCAAAATTGTCACATAATCGGAGGA  
A\_16\_P18342224  
GGACACCATATTTGACCAAGAAGCAATATCTACATCTTTTACCCAATAACAATGAACACC

A\_14\_P101645 CTTACTGGTTTGTGTTAGGCAATTAACAGAAAGATCTGGGACAATAGGCATCACAAAGT  
A\_14\_P127059 AAGTGGTGGTGTCTTTCTCAGTTTATATAGTCACATTTAACTCTTACTGGAATGGAGGGA  
CUST\_3522\_PI426210822

GAAAGTATGGAGCAAATAAGAAATGTGGGAAGAGAAGAGGGCAAATGGTAAGG

A\_14\_P106910 ATTAGACAAAATTCCAAAGCAGATTTAAAATTATGCCATTCTTGGTATTTCCCTGGCTGGG  
A\_14\_P119715 ATTTCCCTGGATAACTTGATTGTCTTCTATGTCCTGTCCTATCTTCAACCAGTAAGTAAAT  
CUST\_6642\_PI426210822 GTTGTTCATCTGGTGCCTGCTGACTTTTCATTATTGCCTGGAATAG  
A\_14\_P116067 ACTGTAATAGTGTGATTACTATGCTCTAGAGAAAAGTCTACCCCTGCTAAGGAGTTCTCA  
A\_16\_P58424563

TATATATGCCTAAATATAGGGCAAGCCCCAAATAGCACATCCTCCATTTCCCTAATTAGA

A\_16\_P30952618 GGACAGACTGCCTTGGGGTCACAATGGCTGATTCTTCAGCACTTC  
A\_14\_P201785 TGGCTCACTTTCCGAAAGATGGAAACTGCTGGGAATTTATTATTTTCCCTCTCTATTTAT  
A\_14\_P125569 CTTCCCCAAAAGTAGAAGAAGTGCTATGATTTAGAAATGGATGGTGCTTCTCTATTTAT  
A\_14\_P132832 GAGCACACCAGAAGATAACACCTTTAGTCTCAGTCTTACCTCTTTTGCAAAAAGCATTAT  
A\_14\_P123396 CAGACATCCTGCCTTTGGCCAGATCCTATCAGACATCCTGTACTG  
A\_14\_P126188

ACAATTCTCTGAACAAAATAAAAATGCAAGGATTTGCTCAAGGAATACAAGAAGGGAGAAG

A\_14\_P104440 ATTGAAAATAAATCCCCTACTGTAACTCTAGATACTGCTTACTATTGTGTGATGTGAT  
A\_18\_P22841709 GATCCAAAAGCATCTTCTCGGGGTTTCTGGGAAATTTCTCTGAAGATCT  
A\_14\_P200202 ATGGGCTGGAGGAATTATCTGATGCCCTAAACTGTATAGGAGGTTGTCAG  
A\_14\_P121818 GAGTTGCAGGCAGAGTGTTTTAAAGGAGACAGAATTGATCATTATCTACCTTTCTTGAA  
A\_16\_P00613071

CTGCTAACTCTAGTGACACCTTCTAATCCACTTTGATTACAGACATTTTGGTGTATCACC

A\_16\_P58424460 CCGTTGCTGCCTCTCTGAACATGTGTCCTGTCACTTTCTTCCTTG  
A\_16\_P36579106

CTAAATCCAAGTAAATGTGCTAGACTGAATCTCGAAACCCACTTTTTTTTCAGATGCCTAG

CUST\_9956\_PI426210822 AAGGAGAAAGGGGTGTCCTCATCCCCATGTCTAGGATGATTTGTT  
A\_14\_P123699 ATTTTTCCTTATTGCCATCAGTTCAACCTATTTGTGAGGGGGTGATTTTACTTTGATTT  
A\_14\_P200506 ATAATTGGATCTCTGTGGATTCTGTACATCTGAAATTAACCTTGCAAAACTTCCTGATT  
A\_14\_P130547 TAAAGACCGTTCTGGTAAGATAAAGTGTGTGCCAACAGTTTAATTCAATTTTCACATCAC  
A\_14\_P103730 AAATTTTCAACATGCTGTCATGGTCCCTCAGGAATTAGTCTTGTTTTTTTTCTCTGAAAAAC  
A\_16\_P21659167

TAAATGATTGATTTCCGCTTCTATCTTTGTGTTTCAGACAAGAGAGTTCTACCTGTTTGAC

A\_18\_P23423426

AAATTAACCTTTGAAATGAATGAACGTAGCACAAAGAGTTATATTCTGGTCCCTGAGAAGCG

A\_14\_P132699 AAGAAGAGGACTATATGTCTGATTCCTTCATTAATGTCCAGTAAGTAAATGTGCACACCC  
A\_14\_P136357 TAAAACCAGGGCTCTAATTGGGACGTAGAAATATTTTCATTAGACACCGATTTCTCTTGT  
A\_14\_P101657 TACACTTTTGTGATGGGAACGAAGAGGATAAAACAGAGACTATAGATTACAAGGACCCGT

A\_14\_P104135 AAGACATTAACCACTGCTTAATACTGCTACTGATGGCAAATTCTTAAACTGGGTTTCATTT

A\_14\_P106325 GGATTTCCATTGTAGGTCTGCTCATTGTGTTTTTCAGGAAAAGGAAGGGAAAG

A\_16\_P00685521

TCCTATGGGCAAAATCATCTATTGACCAAAACAAGACATTTAAGTCACTCAGATTCTGAA

A\_16\_P20235776

AAAAATCTGAGCACTTTTCGAGAAGTTCATCTGTGTTAAAAAGCCTTGATCTCATCTTC

CUST\_3622\_PI426210822

CTCTTGTTAGCCTTTTGTGAGTTAATTCTTTGTTAATAACAAAGAGCTGCCAGATGGTA

A\_14\_P122649 AAATCATTTTAACTGCAGTCTCACCTTACACATCTCACCAGCACTGTAGTTCATTAGTG

A\_16\_P18773751

TACATCACTGTCAAAACTGCTTTCTATACGTATCTGCATTTACACATTAGTTACCCACGC

CUST\_10140\_PI426210822 TAAAGGAAGAAAAGTCCAAATGAGTCCCCTCTCCTTTCTGCAGC

A\_18\_P16694304

AAGTGTCCAGTTTAACTCACCATAACAGAGAAAAACATTCACTAATCAAGGCAGAGACTG

A\_16\_P02498753

AAGGAGCAAAAGATTCCCTATGCACAGATAGTTCTTTATCTTTATACTACGTAAGAGGCC

A\_14\_P107351 TGCTAAACTGCAGTTTTCACAACTGGGGGTTTACAAAAAAGTCTGAAAAGATGAGTATTT

A\_18\_P22841643 GTTAATTTACTCTCTGACAACAGTGGAGACACCACATGTCAAAATGTCAGAATGGG

A\_16\_P17883710

ACCAAATGCTACCCTAAAAACTTCTCTGTAAAGTCATGACAATATCCTCTTCTTGCAACT

CUST\_6100\_PI426210822

CAGGACTGAAAATTCATTTGTAAAAGGATGCAACTATGTTTTGTCTTTTTGAATACTCA

A\_16\_P39973432

TTCTTATTAAGGCAAAATCCCTATTAGGCTAACACAAGAAGGATGTTGATTGCAGTAGGA

A\_16\_P39059572

TATTTGCAAAGCCACATATTAGACTCACTTTCTCTTGAAGACAGGACTATCTCAGCATGA

CUST\_9555\_PI426210822 GCCTGCCTCTGAAGGCCACGGGACTTACCTGTTTGTGTTGTCAAAG

A\_14\_P135855 TGTCTATTTTGATTATTTTAACTCCAGGCTCATGTGGCCTGGAATATGCATTACATC

A\_14\_P113236 TTATACATGAGGCTTAATTATTCACAAGAGCAGGAACCTTTACTAGGAGGACTCATTCCAC

A\_14\_P120057 TGTATCTAGTTTGGATCATATATGAACAGGTGATGATTGCAGCACTAGACTATGGTCGG

CUST\_7332\_PI426210822 GTATTGGGCACAGCCACGAGTGTATCCCAGGGAECTCATGTGAG

A\_14\_P132559 TTTGTCAATTCCTAGAGTAACCTAGAGAGAGATTTCCAAGCATTTCCCATGAACA

A\_16\_P16191865 CAGTGCCCTTGGTGTCTGTATTGCCTGTGATCATCATCCATAGAGCATAAT

A\_16\_P39066666

AGATAAGCATTGGTCTTCTTAGGATAGTATGCCATATGTTAGATTGCCACTGAAGTCTCT

A\_14\_P200381 GTAGAGTGGAACACAAAAATCTTTGATGTGGGCACTGAAGTCTTTATATCATATTTCCCA

A\_14\_P125239 CTACAAAGTGAGGCAGTCCCAAAAGATTTTAGGTTTGAATTTTATCTTACCCCATGAAT

A\_16\_P00439521

TTCAACTTCCATTCCCAGATATCAAGGCAAATTAAGACACTTAGCAGAATACTTTCAGG  
A\_14\_P127003 ACAAGATTTATTCGAGGCAGGGAGATTTATTTAGCACATTTATGCTCAACAGAGAAGACA  
A\_18\_P14099642

TACTCACACAGCATTTAGTGTATGCCATTCTTAGTCTTTTTAATAGCCTCGATGTCACTG  
A\_14\_P105265 GTGGACTCCCAAATATTTGGTCCTTGGACAGCATAATGAAAACTCCTCTTCTATATAAA  
CUST\_6010\_PI426210822

AGTGTTTTAGGGAAAAATAACAAGAAACAAAAATATATGGATTTGTTTTGTCTTGAGGC  
A\_14\_P100614 TGCAAAACCTGGATAAGAAGATTGATGTGATTCGTAGAAAGTTTCAAAAATCCAACGTT  
A\_18\_P15516829

AAGTATTCTTACCTCCCAGGTATTTGATCTCATCATACTTTTTTCATTGTCAGCAGCAGA  
A\_14\_P101720 AGGTAGGAGAAAGAACTACACA ACTACACACAGAATGCTTGGATTATATCCTTTGGTAT  
CUST\_5704\_PI426210822 GAAGTCTGGCCTTATCTGTCTGTCTCAGGCTTCTTCTCCAAGGTT

A\_14\_P116007 TGAAGTGTAAACACTGACATATACCCCAGAGAAAGGCATTAGATCTTCATGTCTATCA  
A\_14\_P117116 AAATAGTTACATACTTACTTTTTGTACCTGGGACTCTGCACACTTTTGATATAGTTTGA  
CUST\_10414\_PI426210822 CTTTAAAGATGAACTCTGAACTTTGGAGAGTGAGCTACAGAGCCGAGCAATA

A\_14\_P138108 CTAGCATTTGGTGGGAAGATTTCTTAGATTTTTTCATGTTAGTGCAGTGTGTTGCCAAATTT  
A\_14\_P135635 CTCTGCCTTACAGAAGACTAACTCTGCCACCATCTGTGAAAAAATACACACATG  
A\_16\_P18824161

AAAAAGGTAACCAAAGTCAGACCTAGAATGGGATTTAAAAAACTCAAACCTTCATGCC  
A\_14\_P107663

TTGACCTCTGCAACAGAGTCTAATGAATCAAGCAGCACA ACTGGAAGAATATAAAAGAAA  
CUST\_4069\_PI426210822 TTTCTTTCTTGGGTGGGAATGCCTTGAGCCTCAGTTAATTGTTTGAGTTTT  
A\_14\_P112666 ACTTTGAAATCCTTTTTCTGAACGAACTGAAGGAGTCCAGAGTGAATTGATAACTCTAA

A\_14\_P118737 CCAGGAGGTGACAAGGAAATACCAGGAAATGACGGGACAAGTTTG  
A\_16\_P30952457 TTTCTTCAGAGCATTGTTCTCAGGCTCCTTTTTCTTGACCCAG  
A\_16\_P01367104

AAGAGCCTGTCTATTTTTATTACAACCTACTGTGTCTTTTTTGAAA ACTTCTCACTGGTG  
A\_14\_P105802 GTTTGTATGCACGACTTGAAGACACGC ACTTATCATT CAGTGGGTAAGTAGAACTAC  
A\_16\_P18323102

ACCATAAGCAGCAAATAGTCTTCAGTATCCAATAGGCAAATGTCCTATGATTTCACTCT  
A\_14\_P129707 ATAAATAAAGCCAAACAAA ACTGTTTCTACCGCTGCGGTGGATGATTTTTTAAAGGCATC  
A\_14\_P100181 CTCATCTAGTGAGACAGATTCCAAACACAGCCATTATGATGGCCACCTATGAATT  
A\_18\_P13104356

AACCCTACATAATGTATCTTTCCACACACTCAATTCTCAAATACATCCAAATAGTCTTCA  
A\_16\_P01032730

CGGTTGCTTCTATCTATCAAGTTCCTTAAAAATACAGTTCACACATAGTGCTCTAGCCAT  
A\_14\_P105183 AAGATATTCTGTCAATTTAACCAAGTCATTTCTTCTTAAAGGCCTCTGGTTACCTTTCTT  
CUST\_2709\_PI426210822 GACTAAGGTGTTGGCCTTCTTTTCAGGCACTGCTATTGTCTGACTTC

A\_16\_P30952384 CGGTTGTGTATGGGCTTCAGCAAGTTTCTGAACGCTGTAAACTTCTCA  
A\_14\_P138385 CAAAGGTGATGAGAAAAATCTCATGCAAACCTCCGGGCATACAATAAAAATAACTCAAAT  
A\_14\_P109961 ACCTGTGAAATAGAAAATAAACCCCTAGACAAAAGACTCCAGAATACTGAGATGCAAATGT  
CUST\_7791\_PI426210822  
TGAATCCATTTTAAACATGGGATTTTATTTTTATTTAAAGAATTACCTTGTGGGTATGTC  
A\_14\_P112428 GTCACTAGAAATAGACTTACTGACATACACACGCAAAAGGCTATACAGAATCCCCTAAAG  
A\_14\_P123000 GTTACCTGATTAACACAGTTCCTTATTGGTGAGGGATTCTCTACTGTGGTCCTT  
A\_16\_P41647032  
ACCCAGAACACTCATACTCAACAAGTCCCACAATTAATTCATTGTCTTTTTCTCAAATAC  
A\_16\_P39874098  
TGCATTAGAATTGGTTTTCTAAATCTTGACACTATAGAAATTTTGACCAAGTGATTATTT  
A\_14\_P115829 CTCGTCAACGAATTCATCAACAGGCAGAAACGCAAGGAATTGTCCAATAG  
A\_16\_P18194649  
CCTTTTAAATGTGTTTCATACCATCGAATTTCAACAATCCTCTCTTAAAAAACCCGTCCA  
CUST\_1055\_PI426210822 CAGATGGTCTCTTGGTCCCCAAGGCCCTGCCAGAGAAGAGGCAG  
A\_14\_P105835 TGGGATTTAGGTATACATTCCAGAAAGGTTGAGTTAAATTC AATGCCAAAAATCACCTTT  
A\_14\_P112286 CAAAGCAGCCATTATCTAAGAAATATCACTAGTCTTTCCCGACATCTCCCTTGAAATCAT  
A\_16\_P17014283  
ATCCTTGGTCCCACATTTTAAAGAGAGAAATAGCAATAACTGTTCCAATTTTATCTCCTGC  
A\_18\_P22840511 AATATCTAGTGAGGGAAAGGGGAGAGGCCATCTGGACTGGAGATT  
A\_14\_P117167 TTTCTGCCTCAGATATAGAGTGGCATTAGGTTTTCAATTTTCTGTTCTAACCCAAAGTAGA  
CUST\_432\_PI426210822 GAAGGTGTAGGTCCGCTTCCTCATTTGAATTTTCTAGGGAAATGGCATT  
A\_14\_P131700 AGACTTACGTAATTTGTAGCCCACCAGGATTTTAACTTCAAATACCACTGTAATCTTGGT  
A\_14\_P101928 TGCTCCAACAACCCATTTGCCTGACTTCTATGCTTTGAGTGTATTAATATTTTGAGGATA  
A\_18\_P22841586  
GGTCAAGGTTTTTCATAATTGAGTTTTAGGGGGGCTAATTTTAGACTTTCTGAAAATCAGT  
A\_14\_P118076 CTTATTTCTCCGGCATCTTATAAAATTGTTCAAACCTACAAAAAGTGAGAAGAATCATAC  
A\_14\_P119268  
TAATAGGGACAGGAGACAAGCAAACTCCCCCTAAGTTAAAAAAGCATAACA  
A\_16\_P30952228 CTACGCAGTTCTGGAGCATTTCCACGACAACACGCGCTGGTGAGT  
CUST\_1787\_PI426210822  
AATTTAAGAACAGACATAGGCTGTCTTTGCTTGTGTAGATGACAATTACAAGACTCTTTT  
A\_16\_P19805461  
AAAGAAAACATATGAAACAACCTCACCTGTGATAGCAAATCTCTTTGAGTCAGAACCTTCC  
A\_14\_P110279 AGGCGCTCTGAAAATCTTTGAAGACACATGAGGATATTGTAGCCCTTTTTCTCCT  
A\_14\_P126352 GGGGTTAATTAATAACAGATGTAGGTGGGACCACTGGATATTCAAAGATCTTTGGAAATA  
A\_14\_P101823 TGTGATTTAACCAAGAATGCTGATGTTGAATTTCTTTGGGCCTAGAATACTTTGAGAAAG  
A\_16\_P01333278



TGCCAACCAATTGTATTCTTATAATGCTGCTTGTTTTTTCCAAATCAATTAACACGTGCC  
A\_14\_P138370 AATCCCTCAAGGAAAAGCAGAGACTAAATCAGCATCACCCCACTTAC  
A\_14\_P138023 TCATGCAGATTACGTAATCAGGATGTATGATTTTCCAAGCAGTTCATGAATCCTGAAAAC  
A\_18\_P22840357 TACAAAGGTTTCAGTGCTTCACAAAGGAACCTCTTCAAGTCAGGGCTTAG  
A\_16\_P58424474 GATGTAGTTAAAGGGAGGGTTGGAGAGTGGGCGTTTTTGCAAACTATC  
A\_18\_P16378618  
AAAAAAAAGAATCCTGCCTAGAAAACAAAATTTACACATTCATATGGTTATCTCTGGACG  
A\_16\_P20881116  
AAAGGTGAGGCTACTAACAGTCCTATGAATATACTGTGTCTACCACTTTAGATCACATGA  
A\_14\_P111938 TGGGTGATTTTTCTTATCTTTCCATTTGGTAATTCTAGGTGATCTGGTTTAGTCAGCATG  
A\_18\_P15969228  
CATCCATCGTTGGTATCAAATAAATAAGCGTTAGCAGTTCATAAAGACTCTGTCAGCAGA  
A\_14\_P115846 AATAAACCTTTAAGCAGTTTTCAAAGTCAGGTTAACCTGATATGTATCCTGGAAGGGTA  
A\_14\_P118628 CCGATAGGTGTGGCAGACCAAATGGACATTTCTCTAAAAAACAGTATATATAGTCTGTT  
CUST\_946\_PI426210822 ATCCTTATACCTTGAAATGTGTGTCAGATTCTAATATTTGGAGTGGGACAAGGCC  
A\_14\_P201992 GAAGAAGTAACATTTTTGCCAAAAGATGACTGGGGTTTTCCGTTTGTTAATATTAAGCAC  
A\_16\_P20954036  
AAACGTATAATTGACATTAAGCAGGAGTTACCTCTATCAAGACAATGAATGTGGATGGCA  
A\_16\_P58424523 GTTACCTGATTTATCTGACTTGCTCCTTACCTGTCAAAGGTGGGTGCTC  
A\_14\_P107120  
GGAGAAGACCAAAAAATTCAAACCTCTGGGGAAAAAAATTACTATGAAAAAAATCAGGGG  
A\_14\_P120883 GATCTGGACTCGAACTCCTTTGAACTGGACTTACAGTTTTCCGAAGATGAG  
A\_14\_P135875 ATAACAGGCATGTTCTTGTTTTTCTCCTTAGGTGGCCATAAAAGTCATTGATAAGAAGAGA  
A\_14\_P103274 CTGCTTTCTCATAATAAAGACTATTTGCATTTGACATCTGTTCCCTTTCACCGGCAAC  
CUST\_4360\_PI426210822  
TTTTAGATGTTCTAATTGATACCAGAAGCAAAGACGTAGAAACCGTCATGTTATAAACAT  
A\_14\_P123575 CTTGTATGTTTCTTTCTAGCAGAGCCACATTTTTAAGGCAAATGAGTTTGAACCTCAGTA  
A\_14\_P201296 TAAGAAAAGAAATTAATCCAGAATTTATTGCAACAATCCACAACCTCGAATTGTTTTT  
A\_14\_P108453 ACCAACACTTCTGCTTCTTATTTGGCATAATGTCCAAGTTTCTGCTGTGGTAACATTT  
A\_16\_P00333217  
ACCTTCCAAGATATGCTGTTTAAATGCTCTTTACCTCATCCAAATTTGTCTACTATGGCA  
A\_16\_P00380366  
GAAACCATGTTTTATTCCAGTTACCTCTGCTATCTTTTATCCCCAGAATCTCATATAGGC  
A\_14\_P122393 TCCATGAGAGTGGAATATTTGGTTCTGGAAGACCTCCTATTAGTAGTGTGTTAATCTTTT  
A\_14\_P110795 CAAGGATTCCTTGAAAGAAGACATTCAGAAAGCAGATCTTGTTATTAGTCACGCAGGTA  
A\_16\_P19647957  
ATAGTTTCATCAAGTGGATGTTAAGGTTTCATGCTCTCTGATTCAGTGAAGGACAAAATC  
A\_14\_P111203 TGTGGTGATCTGGCTCTGGAGGTAAAATATTCAGAAAAGGTGATTTATGATATGTGTTTTG

A\_14\_P137417 TTGCTTCTTCTGCATATGTGAACCTTGTGAATATACAGTAAGTGGTAATGGGTTTTTTCC  
A\_14\_P131843 AGTCAATAAACAGCAAACAAATCATAATATACAGACTCTGGCATCAGACTGGCAAACAGA  
A\_14\_P129612 TCCCATCATACCTGTGTTTCCATTTCCATCATCCTTTGTTTTATTTCTTATTTCTGCT  
A\_16\_P21603386  
CTCTGAAGCAGTGTTTTCTCTATCCACTTCATGCTATGATGCTAGTTCTTCTGGAATATT  
CUST\_6590\_PI426210822  
CCTGATCCCTTACCCTTTACATATAAGGAAAGGAAGCTGATCACATGAACAATAAA  
A\_16\_P40579846  
ACAAAGGAGTTTAGAAATCCAGGCACACCAAAGATATTACGAATGTTTAAGTATAACTGA  
A\_14\_P102306 GATGATGGATTTGTGGACATCCTAGAGAGTGACTTAAAGGTAAACAGCCTTGTC  
A\_14\_P110644 TCTTCTTTTTTTTTTAAACAAACAAAACGTATTCTCCATGAAATCGCCCAGTGCTTTGGT  
A\_16\_P17216047  
ATTTTTGTGCCCAATGTAATCATCACAGAACAATACTACTTTTGACCGGTAATGAATGAGC  
A\_14\_P114478 TCTGGCTAAGTGAGACATTATTTTGAATTGAGACACTCCTCCTTATATGGTCAGGTTTT  
A\_14\_P116968 ACAATTTGAGGAGTTTACTTACAGATTCAGAATAAGTTCATGGAGAAAAGTGCACATCTG  
A\_16\_P20018145  
AACTGGTCTTTACTATTCCCCAGAGAACAATATCACTACAAAGCACTAAATTACCCCAAT  
CUST\_2234\_PI426210822 CATTTTCTCCTCCATCCTGTTTCCCAGGGAGCCCTCGAGGAGCAG  
A\_16\_P02972996  
AAAGGAAGGCAACTAGACTTTGAAGACAACAACCTTTTCAGAGAAAGTAATGCTCTACTC  
A\_14\_P127577 CATCCAAACTGTGAAAAATGTGTAGCAGACATGGTTCCTTAGTGTTTCCCTCCATTTTATA  
CUST\_3995\_PI426210822 ACTCATCCTAGGGCATTCTGCTTGGCAGTAGCAGATTCTAGATTGT  
A\_14\_P135076 ACTTGGTATATGTATGTTGAGAAATCCCAAGGTGAATCAAAGGTCTGAGGTATTAGATGA  
A\_14\_P135876 GCTTCTAGTTGAAAATGAACTACCTCCACCAGAAAATATAGAAGTCAGTGTCCAAAATCA  
A\_16\_P20089675  
AAGATGAACTAAGGTTACAAAATCATCAGTGCTGATCATGAGATTTTTCCAGGTGATGTG  
A\_14\_P129512 CTTTAAACCATGAATGAGGGCCATTGTTGTGTAATTCAAGTTCAGACATGTTACAGGAT  
A\_14\_P139048 CTTGAAATGATTTATGGCTAGAGGGAATCTGGGATCATTTAAATCTGTCATAGAGGAA  
A\_16\_P17810024 TATGTGGAAGGTCCTCACTTCTCATTCTGCAACCATCCGCACTT  
A\_16\_P01581136  
AAAAGGAGAGTCAATGTATTACAAAGTAAGCATATTCCATTAAAACCTGCAATTCCACCAT  
A\_14\_P133857 CTTTTCTGTCCAGAGTACTGTCTTCTGCTTTTTCTGTGTTTTGCAATT  
A\_14\_P109663 TACCTCCTCCATTTTCTAGTGCAAAAATAACTCCCTAAGGAAGAATTGTAGCAATGTAA  
A\_14\_P122642 GACTGTCTGCTGCCATCAATCATGGAATTCTCACTGTCGTTTTTCTCACAG  
A\_16\_P41024956  
CAAATTCATTTATTTGCTCATTTCTAATCACATCCTAGGATCTCATGCTCTCTTGATGG  
A\_14\_P108747 TTATACATTTCTGCCACCTTCTTTGAAAATCTGGCCTTTATTTCAGAGAAAAGACTCTTCT  
A\_14\_P121715 TATAAATGCAAACATCCTTCCACTGCTCTCAGTTCTTCTGTCTAGTGACAAATCATCTG

A\_16\_P20374933

CCAGCCTTTTAGCATTGTTTTATGTCCATATAAACTTCTTCAGTGTAATGTGTTGTGTG

A\_16\_P01917763

AAACCCACTAGGTAAACTAGGTAACTCAGGTTGTGCTGTTACTTAAACACAAAAGTGTA

A\_14\_P103935 CTTAGACAAATAAAGGCAAGTGCTGCTTCATAAGATGAGGTTCTTAAAACTGTGGTTCA

A\_18\_P26731679

AAATGGTGATAAATGCAGGAATTACTCACAGGATCTTTTCACATATTTTCTCAAGCC

A\_16\_P17108841

AAACGTTTTGCAACTCAGAAATATTTTCTGACCTCTAAAACCTGAACTTGACATTGCTGT

CUST\_10215\_PI426210822 ATGCAGAAAAACATTGACTCCATTGGCTTGGAAGTGAGTGTGGGG

A\_16\_P21541975

GTGAGCACATGTTACTCAAAATTCATTGATCAATTCAGGAAGCATTGAAAATTGCCCAA

CUST\_8626\_PI426210822

CTGTTTGCCTAGCTCTTATACAAATAGGCAAGAGTAAGTGTTCCGTATGCCTTCT

A\_16\_P20623112

AAATCCCTCCTTTTCTAAACCATAGCCAAGTCTATTACTGTTTAAACAATGACCATCTTGG

A\_14\_P105517 GGCTCTTGCTATATAATAGGGTCGATCACAAACATCTGGGAAGTTTATACCAATTTAAGTG

A\_16\_P18869976

AACGCCTTCATTCCAATTAATTGTCCCTTTTAACTCTTTCAGTATTTCTACTTAGCAGC

CUST\_6776\_PI426210822 TAGAAGAGAGCAAAGGAGGAGGGGCAGGAGAGAACCCGGTAGGAT

A\_14\_P200254 GTTCCAAATTAACCTTTAGAAAGAAACCCACAAATAAAGCAATTCATCAAGGCTGTTCT

A\_14\_P136683 AAATACCAATATAGAGCCTGCTTTTCTTTTCTGATGCCTTGGTAAACGTTTTTGGAGAAA

A\_14\_P130871 TTCTGGTAATATTGCACAATATGGGGCTTGAATCACATGACATTCAAAAATAGGTTTGGT

CUST\_4703\_PI426210822 TTGTATTTGCTGGCACTGGGGAGCCATGGAAATTTCTGTAGGAAG

A\_14\_P132747 TGGCAGAGAGAAAATAGTGGGAAAAAAGTATTTCCAACAACATCCTCAGAAGAGTTATAG

A\_16\_P16648484

AAACCATGAAATGGAACGATCAACCTTGAATAACGGAGTTTATTCATAAGCAAATGAGCC

A\_14\_P129313 GGGTGAAACTATTTCCCCTAAGACTGTTCAACTTGTAGATACATCAACTTTGAAATTATT

A\_14\_P105167 AGTCTAGAGAATCTGTAAGAACAGCCTAAGAGATGATTGCCAATATTTCTGTAGCACTTC

A\_16\_P35699543

ACTAACTGACAGAATCTCTACCTTTATTAGGCCAGTTTAGCCATATTGTATCCCAGAGAT

A\_14\_P128855 GGTGTGGCATGGTAGAAAATGTTACCATGCTATTTCTTTTGCCTTTTTCTACTTAAAGAG

A\_14\_P107220 CTTGACTGGAACACCCGATCAAATGCATAAGGCTTGGACTGAAAAACAAAAAG

A\_14\_P105216 ATGCCTTAAAAAAGCAACTTATTACCTCATCTTCTGTGATGTCACCTGTTTGTCTTT

A\_16\_P18813395

AACAACACCCACTTATAATCAAGCATCACTACCTTTCTTTGAACTTGTAAGCATTCGTG

A\_14\_P130483 CTCCTGTAGAAAGCCCTGGTCAGTGACCAGTAGGTATAAGTGACTC

A\_14\_P138987 AGAACGAGTATTTCTTTGATCGGCATCCAGGAGCCTTCACTTCCATTTTAAATTTCTA

A\_14\_P105809 CTAGTGCCATCATAGGAATCATATTCATCAAGGAAAAGTGGAACCGAAAGACTTTCTGA  
A\_14\_P127680 ATAAGTATTCATGTTTCTGATTTCCCTCCATTAAGGGAAAATCCAATGTTTGGCTTGG  
A\_16\_P02100628

AAACTCAGTTAGACAATAGAACGGCATTGGAATCAAGGATTCTCTCGTTGGAGTCAAATC

A\_16\_P00572557

ACAGATGTTTCAATAACCTAACTGCTAGCAAGTATTACCTGAAATTTAACCCGATTGTTT

A\_14\_P121991 AACACTTTTGTATTCTGAAACCTGGTAGAAAACCATATCTCGAAGAAAGTGTTAGTT

A\_14\_P104283 ACAACTTTTACCTGATTGATTTATGTTTTTTGGTTTGGCCAGATATGAICTAATGGTG

A\_14\_P120031 TAGTAACAATGAGGACAATAACTTCTTAGAGCACCTTCATTCAGGAGTTGAATCACAGTT

A\_16\_P37251673

AACCACATTAGCACGTCTACTCTTGAAATATTATAAAAACCCCTTGCAAATTTTCTAACAA

A\_14\_P201451 TAGACCTCACTTTAAGCCTGCAAAATTGTTATGAAAATAATACTCCAGAGGCAGGAAGAA

A\_14\_P129771 AATATTTCTTGATTGCACTCCAGGATGTTATCGGCTTCAATATGGCTGGTCTTGATTAT

A\_16\_P01649062

TGAAGGGTCTTACTTTAAATAAATACTGGCTTCTTAAGCATTAACTGTCCACGTAGAGCC

CUST\_5625\_PI426210822 AGTTGACTCCTAATTAATTGCTAGTTGGTCTCAGCTGCTGAAACAGAGGGTA

A\_14\_P200193 CTGAAGTTCAGTATCAGAACATGATGGCTATTCTTAGTAATCGCGGTGATTGATAACAAC

A\_14\_P109056 TCTTCAGATGCCGAAAGTTCAGTATAAATCGAACTGTAAACCATCCACATTTGCATATCC

A\_14\_P121724 CCAGTGGAAAATTAAGTAGATGTAGACTTCTGTCTACCCTTTGTTCTTTTCTCTTTGA

A\_14\_P137088 CAAAAACAGGTAAAAAATTTTCTTATTTCTCCACTGACCTGTTTATATGTTCTCTCTGC

A\_14\_P122544 CTCTACTAGGCTCCGTAAGACCATCTTCAGATTGCTGACCTAGGGAG

A\_14\_P201387 GACTTAACTATTAATAATTCCTGATACTGAAGGCAAAGGCAAAGATCTTCCACGCATCA

CUST\_6344\_PI426210822

TACCTTAATTATCTGAATGTTGTTGCTAGGGAAACCACTATTTTGGCTCAGATCATCTTA

CUST\_2536\_PI426210822 TCTGTGAAGTAGTAGTGGGAACCCCAGGGCCAGGGATTTATATGG

A\_14\_P110253 AATGCTGTGACTCAGAACATTTAAGAGAACTTCGTCTGTAAGTAATTTGTCTTAAAGCCC

CUST\_1455\_PI426210822 GGTAGCAGTGTTGTGAGCTGAGGGGGTGGAGGAGAAAAGCTTATC

A\_14\_P134134 CATAGCCAAATAACCACATAAGCACGAATTACTTCAAAGGAAGGTGATTTAGTCTGTCT

A\_14\_P115647 GAAGTATATAATATCAGAGGGTTATGAGGAACTAGAGACTGAGTTCTACTCTTCTATG

A\_18\_P22840902 GTAGTCCCCTGCTGTAATGAAAATGCACAGACAGTTCATGAAGTGAGGAATTAG

A\_14\_P125544 AGAATTTAATTTAGAGTCTTACTACCCTCTGGGTCTCCTGTGATCTTCATGTTTGTCT

A\_14\_P122279 CTGTAGTTCGTCAATTTTATGCTTGAAAAAATCTGCCCTTAAAAGTGCAAGTAACTCTGC

A\_16\_P01419552

TCCTGGTGTGAGAAATTACTCAATTCGAAAAATAGTAGTTGTATATGTTTCGCTCTAGCAGG

A\_14\_P114906 ACGTGGAGTCTCAAACATTAATAATCTATTTGATAGGCTCAGGAATCCTGTGACATAACA

CUST\_4883\_PI426210822 AGGATGTAGTTTTTGGCAGATGTCCTTTGTAGGGTTCAGTATTTCTCACTCAC

A\_16\_P01113776

TTTAAAAGGCTAGTAAGGTTACCTGATGTATTTCCGGCTTTGATTCAACTTCTTGAAAG

CUST\_7419\_PI426210822 CAGGAAGCTGCTTCCCTCCCAAGGGAAGGAAGCCACCAGTGTTC

A\_14\_P114551 TTTTCTCATAACCAGTTTACTCACCAGATCACAGTCACCCAGATCTAATTTCTCTAATGA

A\_14\_P116070

AAATATTTTGGGTGAAGGGAGGTTGAAGAAGGAAGAGTAACATTTCAAAAATGTGAAGTT

A\_16\_P17500148

AAAGAAAACCATTTTTCTAAGGCAGTGCAATTCTTATTCTACCCTCAACTTTTGACTTCA

A\_14\_P129286 CTCTCCTTGCATAAAACAAGAGCCTGACTTGTGTGAAAAAGTGATAAGAAGATATTCAGT

A\_16\_P21626347

CCTGCCAGGTATCTGTTTATCCTACATACTTCCACAACCTCAGAAATAATCAATACCTTGT

A\_14\_P113598 AGACTCTGCGTGGCATTAAAAACAAAGAATTAACAAAAACCTCCTCAGGAATCATTTC

A\_16\_P36468276

AACTTCTAGGAATTACCAACCCTAACTGGATCATTGAACTCTCTGAACTTACTATCATCG

A\_14\_P115032 ATTCTTCTTTTACGGGTCCTTACGATCTTGGTGAAATTGATTAATTCCACATTTAAACTG

A\_14\_P130191 ACACATATGGCTGTAATGACAATTTGCCAAATTTTCAGAGATCACAATCACAAGGATCAA

A\_14\_P104499 TTTGGACACTGTTGATTTAAAAATCTTATTTTCAGGATCATAATTACGGAGCCCCCTCCT

A\_16\_P02484230

AGTATTCACATAACCTTCAGTTCACCTTACATTCACATAATACCTTCAGTTCGCTTAAA

CUST\_5003\_PI426210822 CTCTGGGTGTGGATGGGGGCATCTGTGTAATCTTTATGGCTATATTT

A\_16\_P16191340 CTCCTCCTATTCTCAGAGCAGAGAGCCACGAATGGGGCACTCGGG

A\_14\_P120710 GGAATCAGTAAAAAATAAGCAGTCTCTGCCCTACAATGCTATGTCATATGTGGTAACTA

A\_16\_P21217141

AAAACACAACATGTTGCTATCTTTTTTTCCTTGGATATGTGATTGTGAATCACTAAGGGGC

A\_14\_P112900 CCTTCTTTGAGAAGAGTAAAGACTCCTTGTATTATCCATGTTTCAGATCCAAGGATAAATGA

A\_16\_P03747490

TCCAGTTGATCTTTTAATCTTCAGAAATAACACCAGAAATCAGTTATGCCATCACTTTCC

A\_16\_P21527575

AAACTCATCTTGACTCACACTGTATCTTCTACTTGTAACTGATGTGATCATTCTCAA

A\_14\_P138633 ATTTACAGTTACCTTCTGTAAATCTATTTTCTCATCTACTGAATAGAATCAGGCGCCCT

A\_14\_P138946

CAAAGGAGATCATAAGAAAACCTCCTGGGAAAAAAGTAGAAACAGGTCAGATAGAAAATGG

A\_14\_P102147 AGGATTTACAACCTATAGGATCATCCACCAAGAGTTTAATTGACGGTGATGCTAAAAGACA

A\_14\_P122329 AAAGGGTATTACAGAGATGAATCATGAGAATGGGAGTAGAATTAATTTGTTGTGTGTA

A\_18\_P14136130 TTTAACTAAAAAGGAAGAATTGTCTGTGGCTTCTTAGAAAGTGGTGTGTGGACAGG

A\_16\_P19743745

AACTATAAATGCCACGTCTATTAGCAAACCTACAGGTCTATTCTTCCCAACGTTTGTGATCTG

A\_14\_P126233 AAAGATGGCTTTAAAAGTGCTACTAGAACAAAGAGAAAACGTTTTTCACTCTTTTAGTATT

A\_14\_P135522 CTTATGTGTCTTGGAAACAAGAGAGTAATGTTAAAACCATAACCACACAGAAAGGGCTTTA

A\_16\_P16762106

AAATCATCCTAGCCTTTTCAAACATCTTGCATTCTCCAATATCCCTCAGTGAAAAATGAA  
CUST\_3198\_PI426210822

TCCTTTTCCCTGGAAGTTTTCTTGCCATATATGGTGATAAGTGACTTTATCATGGAAG  
A\_14\_P119335 CATTGTGAGTTACATTGCATATAGTGTATTCTAAGGGCATCACCCAGAGAAAAAGGACG  
A\_18\_P14137168 AGTCCTTGCCAAGTCTATGTCTTTTCTGAGAATTCTCTCCCCCTTGATTTC  
A\_18\_P14976532

GCATGTGAAGAAACAGATCATATCAAAGGAGGATAACTGTTTTAGATAACTGCTGTGAC  
A\_14\_P118595 AGCAGTGACTTCTCCTGGACTGAACTGAAGAGACTCAATGCTGGAT  
A\_16\_P17665793

CCTACACAGATGGCATAATTATTGGGCTTGATCATTTTTTATCCCTTATTCACACAAGACA  
A\_14\_P121388 GAGTCCCTTTACTACACAAAAAGCCAAAGAATACAAGAATACAGAGACATACTTCCTGA  
A\_14\_P132495 GCTACAGTAAGAAAAAATATGTGTGTAAGTCTTTTCACTCTCCTGCTTGGCCATGACA  
A\_16\_P17545550

AACTCAGTCCCTCTATGTTCAACACTTTCCTGAACTTCCATCTAAATAATAGACTGTGA  
A\_18\_P15727810

AAGACATGATTGGACCAGAAAAAGTATTATCCCTCACTATCACTTTCCTGGACATAAAGA  
A\_16\_P01644062

CCTGCAAACCCTGTGATTAAATCCCATGATTCTTTTACAACCTCTAATTACACACCTAATT  
A\_14\_P136051 TGTCTTTATTTTTATGTTTCTTGCGAGAAAATGTGGGATCAAGAAAAGGACCATTTGAAAA  
CUST\_494\_PI426210822 ACATCTGTCTTGTGAAGTTCTGTTCTGCCTGCTTTCCTGGAAAAGTTATTGAAT  
A\_16\_P37210100

CAACCTTTCCTACCTCAAATATGCCAATTATTCCAGAAAATTCTATTCAAGCCCTCAAAA  
A\_16\_P17696614

AGTTTTGCTAGACCATCATATTGTAGAGCCCTCTTTTATTCCAATTGTTGAGACTGATGT  
CUST\_538\_PI426210822

CTGAGTTTTCTTTCAGTATTTTTGTTGATTCAATTCATTTATTCATCAGACTTTGAGTGTT  
A\_18\_P13405219

TTGGACAGTCTATCTTTTAGCCCTGACTAAGTATACTCCTAGCAAACTTGAATTCAGAG  
A\_14\_P123485 TAAAGCATAGTATTTACCAGTCTTGTACCTAAGTCTAGAGTGTTCATCAAGAAACAG  
A\_14\_P132270 GATGTTAGGAAACCTGCTGTAATTAAACATAAAAATGTCATTCAGGGTTTCCTGACTGCTA  
CUST\_1670\_PI426210822 CTAGTGGCTTTTCTTCCATCTGTGTTCTGCCTATCCTTTGTAAAGG  
A\_14\_P116640 AAATCAATGATCTCTGATTCTGAAACAAACAAGAAAATTGTAGGGAGAGCATTAAAAAA  
A\_14\_P122807 AATGCACCATATTTGCTTCTCCCTGATGCTTGCATGTGAGACATAACTCCATTTAC  
A\_18\_P10827329

TGCTTAGAATTACCCCTCATCTCAATCATACATCCCCTTAAACTCCTTAAATCTAGCAA  
A\_14\_P114089 CTTTCGAATATGAATCATGTGCTTTAGGTGGGAATTGTGAATTCTGAAGATACAGATGAC  
A\_14\_P109559 TGAGAATAAACCCCTCAAGAACTTCTCAAAGAAAAAGCAATTCACAAAGGTATGTCCAT  
A\_14\_P124541 CTGTTGAGATTTCTAGGCAGCCTTGACTTAAAACAAGTAAAATCTGTTCTCTCCACCT

A\_16\_P03136955

CCAGTGCTCTAAAACATTCTCTATTCCAAGCCATCATCTACAAAATCCTTTACATCTCTC

A\_14\_P102271 CATTCTTATTATTCTTATTCTCTTGGCGTCACATGCGTTTAGTGGATCTGGAAATCAAAG

A\_16\_P17254314

AAACAGCCTTATACTGATCTAACATTCAACAGGTGCATACTATTCTGGTTTATCAGCC

A\_14\_P109111 CTTTTTAAAAAATCATTCTTGTTTAAAGGCATGCAGCAGGAGATTGTAGTGAAGTCTCTGC

A\_14\_P114992 ATGAACAGAGACCTGTGATTATCCAGATTTTACAGAGAATTGCTCTCTGCAGGGTATA

A\_14\_P119508 CTCAGAAGCACTTACTTCTGGAACAGAAGGACCTGTAGATGTGGAGTATCTTG

A\_16\_P16579313

AACCATTCTTAAATAGGTCTCAGGATCTCTATGTGCGCTTCCTTATGACAGAACCTATTTCC

A\_14\_P200770 CTGGAGAGGAAGGCATTTTGAACATCTATCACTATTATATTAGGAACTTCACATGAACCA

A\_14\_P116532 AGTTTATATAACCATGTGTTAACTGGTCCTCTGAGTGATCCTGCATGATTGATAATCCACA

A\_14\_P130684 TTTCTTTCTGTTATGTGCCACATTTTTTTTCTTCCAAAAGATACTCACTTGTGGTAAACCC

A\_14\_P132306 ACAGAGTCTGGCTAGATATTTACCATCATTTTTCTTTTTAAAGGCCTATTGGAAGAAAGC

A\_14\_P136646 GGGCATGTGGCTTTAGACCTTCCATTTAGTTATAAATGTGTTCGGAATGTCCTTAAAATA

A\_14\_P125541 GATACAGGGATCAAATTTCTACAGGCTTCCAGAGATTCCTATAAAAATGGAGTGAAGGTT

A\_16\_P01400579

AAACACGAGATAGGAAACACTATGGTCTACGATGAATTAGACGCACACAAAAGAGAAATT

A\_14\_P111788 GAAGTCCATGTCTCAAGGATGTCCAGACTAAACATCCAAAAGAGATAAGAACTATTTGAT

A\_14\_P101078 GCATGAGCCTTGCCATAAAAAAATACCTATATATCTCACAATGCTGTTTGGTAAAGCCTT

A\_14\_P122527 CTTCTGCACTTGACAAATTATTTTCATGCACGAGGCCCTTGAAAATGTTGACAGT

A\_14\_P123599 CATTAAACGTTACGACCGTGAAAATATGACAATAAAAATGATAGCCGTATGGTCGCAAATTTG

A\_16\_P18717506

ACAGTTGAGGAGAATAGCAATTTGGGAAATACATCAATGATTGACATGGGTAAAAGAGAG

CUST\_2967\_PI426210822 ATTTCTTCTTGCCCTCCTCAGGCAGGGTCTCTCGTTGTGACTCTTG

A\_14\_P100482 CTTAAGAAATGTATAAAAACTCCAGAAATCCCTTCTAAACATGTTAGGAACTGGGTCCCC

A\_16\_P18337896

AAACATCCTCTTCTATGAGTGAGAATCTTCTGTTTTGTAGTATGCTGTCATTCTAGGAGC

CUST\_4946\_PI426210822 AATGACCACTACTCCGAGCATGGGCTTTCTTCTGTTTGATCTCGTT

A\_14\_P102671 ACGAGTGGGCAGGTTTGTGTGAATGAGAATAGAAAATCACATCTAGAAATGTTTTACTTT

A\_14\_P129481 CTTTCCACTGAAATCTTTAGGATGAAACTTCCAAAGCAATGACAAATCAGTCAACAAAAG

A\_14\_P105624 GAAAATGATTTTGGAACTCACAGATGCAAGTATGCCGGTCATCTGCAAACCTCATA

A\_14\_P138816 GTATTTCTCACTTTTTATAACTTACTTTGATCCGGCCTCTCTTTGTCTCGCTTC

A\_16\_P17718781

TCTGACAATTTGCTGGTTTGTATAAGTTTGTAGTTAAGACACCGTAATAATGTCCTGCAGT

CUST\_680\_PI426210822 ATGCATGTGTGTGCATGCCCCCTTATCTCTAGCCTGATTTTCCATT

A\_14\_P200750 ATGTATTCTTTTGTGAATGACAAGTGCGTTTCTTTCCAGTAGGCCTATATCCAAGTTATC

A\_16\_P20124665

AACGTTCTTTCCAGGAAATAAGATGTGAGCACCATATGTAAGGAATCCATTGAAACCTAC  
A\_14\_P116150 ACAGAATTGGATAGTTTTCAAAGAACAGGCCGATAGGTGTATGAGTGGTAAAAATGCAG  
A\_14\_P130122 CAATAGGGGAATAAAAAGGCTGATTATCCCTATCATCCTTACCATTTACTGAGAACTAAA  
A\_14\_P130337 TCTCATTTTAGTATCCGTGTAAACTTTATTGGACAAGGAGGGTGATAAAAACTGTGCATG  
CUST\_9807\_PI426210822 GTAGTCTGGGTTCTAGCTGCCACCTAAGAAGCTCCATTGTATACAC  
A\_14\_P140003

AGCAGCAAGAACAAGAAAAGTTTTAAAGAAAGATGTTGCTTACTATGAGTGTCAAGGTGA  
A\_16\_P02343335

AAATTTTCAGGGTTCTTAAGTTGTTTCTCAACCATTCTTCTAGCAAAAACAATGCCAGTC  
A\_14\_P135404 GAAAACCTTCTTAGCCTACCTATATACTTTTCTCCCATAGCATTATATCGGCAACTCTGT  
A\_16\_P21063771

CAATGCATAGTCCAGACTTAATTACATGACAGACAGAAAAGTATAAGAGGAGGAGAGAACA  
A\_14\_P137959 TTGAAAGTCCTTTTCATGAATACATCCATGGCTAATGAATTCCTTTACACCACACTGGAAA  
A\_14\_P120574 GGATTATTTTGGATAATGACAGTTGGAAATTGCCTGCTGCTTCTCAAGTTTAATTTTCCT  
CUST\_4996\_PI426210822 GGATGGCCAGACACGAGAAAGCCAAGCAGGGATTTTCAGTTACAG  
A\_14\_P119650 CTACAGAATTACTAAGACTGTCATATGGAAGGTGCTGCTCTGTGCAGCAATCTC  
A\_14\_P134475 CTCTGAAAACACATTAGAAAAGTAGTCACCTGACAAATTCTGTCTGCTGGTTTCATTTTC  
A\_14\_P131265 AGTTCAATTCCAATCATGACTCATTGGCTTAGCCATCAAAGTTTATCTTTTCCTTTTGAAC  
A\_14\_P139790 TTTCTTAATCGTTCAGAGTGTTTTTCTTTGTCCCAGGTTTATATACCAAGAATACGGG  
A\_14\_P110215 ATGGTGATGGTAGAAGAGTGCTTCTTTTCTGAATCTGTTACTCTGGCACAACAG  
A\_14\_P131998 CTCTCAGTAGCAGTTTTGAGCCTCTGAGTGTTTAGAAAGAAAAATTGGGAAAATATGAAC  
A\_14\_P111236 TTTGTGTGAGATCTCTTGGTTATTAATCCACGTTGTAAGAGAGTATAACAGGACCAACT  
A\_14\_P119806 TCCTTTTTCTGTTTTTCTGGTCTCAATTATGCTGTTAATTAATTCTCTGAGGAGGCATAC  
A\_14\_P115746 ATATCAGTTTCTGCTTATCTCTCTCTTGAAGTGTGAAATAAACCCCTTGAACCTCATAGTG  
A\_16\_P41777870

AACCCAAAGAACTGTTCAATTCAATTCTGTCTTTACTCAATGTCTCACATTGCATCTT  
A\_16\_P01649564

CTGTCTGATCCAAGGATCTGTCAATCAGAGAATTTTAAAAAAGGTGAAACAGTTCACACA  
A\_16\_P17220645

ATGGAAAGTAAAACCACATCCATCTTGTTTTGAAAAATCCTGACACCAATATAAAAGCCC  
A\_14\_P102195 CTGTATGCTGACCAGAGTTTTTCTGTAATATCTCCCGATATGCATTTTAAAAGCACAGTG  
A\_14\_P105466 TATAGTCTATTTGCTTGGGAATATTTGCTTGGGAATAGCCAAGCAAATTCCCATCACTTA  
A\_14\_P111563

GTGATATAAGGAGAAATGCTACATAGAACCAAAAATAAGAAAAAGGAACCATCCGGCAAC  
A\_16\_P03772170

TGGGGGCATACAGAAATTATAATTCATGACTAACATAGGAAAAAAGCATCAACTCTAGTG  
CUST\_2002\_PI426210822

ACTTAGTGTATAATTGTCAATTATCTTTTTGAATAAAAAATGCATCACCAAACCTGGTTTTG



CUST\_3353\_PI426210822

TGACTTTCTATTTACAGTTATTCATTTACACTGGGTTCATCTATTAATATATACTGTTGA

A\_16\_P00685603

CCCATTTGCTTAAAAAAGATCAGAAGGCGAACTATAGAACAATTCTTCCTTCTTTTCCTC

A\_18\_P22840688 AAGCATTGTCAGGATATTTGTGGATGTCTGCCTGTGGAGTGGCAC

A\_16\_P18320075

AAACTCAAGTTCCACTTTTTGACACAACCTGCAAATCTGTTTATGGTTCGTATTAATCTTCA

A\_14\_P114897 GGATCCCACCAAAGGAACTGTTACATGCATTATGGTGAGTGGTTGATAGTTTTTTTT

A\_16\_P17010842

ACTCTTGCTATGACACCTCTACAATTGTAAAAACCACATTAGAGTTCTTCTATGAGCCTC

CUST\_8544\_PI426210822 CTTTTCTCTTTACTGATCATCGAGCCAAGGAAAAGCCACTGGAA

A\_14\_P202018 AGCGTGGAAGAGAAGTTTAAAGAATGAACCACTGAATGTTTCGCTTTTATTTTTAAATTTA

A\_14\_P138526 CTGTGTGACATTAGGACTGAAAATTGGTAAGAACTTTGATTTTTGCAGCATGATTCCATT

A\_14\_P132360 CCAAATGGATCTCTCTTCAATAACAGTTCTCCATGAGAACCTATTCATGGTTTAAACAAAC

A\_14\_P111955 CTGCTCATCTGAACAAATGCCTTTTGTATCAATCATTTAGCACCTCTAATTTCTAGGCTT

A\_14\_P121583 CTTTGAAGAAAGGTGGCGTTTTACTACCAAATGATCTCCTTGAAAAAGTGGATTCAATTA

A\_14\_P119496 CTATCAGAATTGCAGCGATTTTCCCCCTAAATCCTAACAAATATAGGAATGTTCAATTTGCA

A\_14\_P105610 CTCTCCAGACAGTGGTAATATTAGCAATCTGACTTCTCTTTCAAACAGAGAATACAGAA

A\_18\_P13417399

ATTCAGCATGTCCAATATTCATTCCAATAACGTCATATTCTCATCATTGCACCAACTTCC

A\_14\_P201432 GCATTCAAACTTACCGAACAGAGACTAAATCAAATTCAAACTTACGGAAAGGGACAAAAT

A\_14\_P129863 GGAACCAGTTGACATTGAATAAAAAGAACATGACAAACCCACACTGGCATTGGATA

CUST\_9304\_PI426210822 ACTCACACTGCAGTGCTTTTCTCTCCCTTTGTACCTCTCCCTTTATAAAG

A\_16\_P19802055

AGTTGTCCTGAATTGATGAACGAGTCTCTTTTTAGTAAATGCTTCTTTTAAACGGTCATGG

A\_18\_P15975171

AACGCTCTCTATAAACTTTCACACAATCTAAAGGTGTTTTTGTTCATAGTCAGTTGCCT

A\_14\_P104907 TTTGTAGACACAAGGAAAACAAGTTTGGCTTCCCTGGTCTCCATTTCTTCA

A\_14\_P110595 TCTATGACTTTCTCTGTTTGTAGTTAGACTAATAGGATAGGAGCCTGCATAAATATGGGGGA

A\_14\_P128034 TTGAGAAACCACAGAGTTTTCTGTTTAAATGGAAGAAAGAAATCCAGCCTCTCTCC

CUST\_5339\_PI426210822

CCCCTATCACTCTCTTGGAGAAGTCCTGTGTTTTATTTATGCTGAATGATTGAATCTATT

A\_14\_P124885 ATTATACCTACTTTCTTTCCACAGACTGCTTTTCTTTTAGGAGATCATTTAGTTTGTGCT

A\_14\_P107733 CATCTCTGTTTTTTTCCCTTTCAGTGTTCAAGGAGAAACCTAAATATCCCCCAG

A\_18\_P22841429 TTTTTAGAACAAACACGATCTTCCCTGCGTGATTCTTCTGAATGCCTGGC

A\_16\_P20366364 GCTTGGCCATATCTCTACTGCTATTTCAATTCATCATTCATTATTTCACTTTACAGACCCC

A\_14\_P133553 CCTTCTGTTTCTCAATAAAGGCGAATGTTGCATGTAATTGTTTTAGGAATCATGACGTT

A\_16\_P01550528 TTCCTTCCCTTCTAATATGCCATAATACGCTCCTAATCTTTATGATTTGATGTTTTCTGCA

A\_16\_P30952661 TTTATCGCCTCGATCAAGTGTGGAGTCACATGCTAATGTGTGCTAAAGAAGTGTAA  
CUST\_1757\_PI426210822 AAGTGATCATGAACAGGCGGTACACCTACCTGGGTGAGTACTCAG  
A\_14\_P110612 GAAACAAGAAAAGTAAAATAAGAGAAGTCTAGCATCTGATTGACTGTTCCCTTTCTTTTA  
CUST\_9204\_PI426210822 CAGCCATTGTTCTCCACTTCAAAAATGGACAAGGAGGAAAGGTGAATTG  
A\_18\_P14134543  
CTCTCTCTGCTTTCTGAAAGTTTCCATTATACTGCCCTGTTGTCTAAAATTAAGCCAATT  
A\_14\_P110882 AAGTTCTGGCTTGTCAATTAATAATACAGAGTTCCTGTTTTACATGAAAGGGAAGGATA  
A\_14\_P111246 TAATTCTCAAAAAATGCTGCCAAGAGCCTTTCTAGAAAACATGGCTTATATTATTGGTT  
A\_14\_P109350 TGGCAGGAAATGGCTACAGAAAGAGGCTTGTTCGGGTTAGAAATGTAAGTA  
A\_18\_P15078003  
AAGTCAACTCTTGAGGTAGTTAGGATGAGAAAATATGCAAATTAATTAAGTGCAGCATGGACC  
A\_14\_P136904 ACCTGGAAATGACACTGCTACAACCTCACACCACATTTCAATCAAGGTCCATAAATAAAAA  
A\_14\_P134685 TATAGGGGCAGGTGATAAAAAAATTTCAATTTCACTAACTCTGACTACAAAATTAAGCTT  
A\_18\_P22843229 ATTTTGGAAACATGACACCTGGCAGGCATGGGGCATGTTTGACAT  
A\_14\_P108809 GTCCATTCTGCTTGAGAGCATTGTATCTGATCTTGAAAAATCTCTTGGAACAGGTTTATC  
A\_16\_P58424116 GAGTTCAAGTCCCGGCTCTGCTACTTCTCTTATTAACAGTGTAATCTCAGAT  
A\_14\_P134927 CTAACTCTATGATGTTGTCACGCTGACATGAATAGAGAGGGTTTTGTTTTTTAAGCCAAA  
A\_14\_P132742 CTAAGTCCAGGTGTTTGTATTTCGGGCTAGAAAAGGCAATGTCCCAAGT  
A\_14\_P130667 TCCATTCTGGCCTTCATTTTTTTCAACAATCCTTTGTGGATTGAATGTGGAATGAATAAT  
A\_14\_P102674  
ACTGGCAGTTAGAACAGGAAGGAAGTCAATGAGAAAAAAAATGTTTTAGACCTACTTGA  
A\_14\_P124740 ATGCCTCCTAGACTGCCTTTTATTTTAATTAAGCCTGAAGCACCTTAACCTTTGCATTTCT  
A\_14\_P124652 ACTTTCAGTATCTGTTTCGTTTCACAAATTTGTTCAATGACCAAAAATAACCATGCATTCAGC  
A\_14\_P202205 AAACGTGTTTCAATCAAACTGACCATGAGATAAAGGAAAGAGATGTGGCTTTTGTGATA  
CUST\_5549\_PI426210822  
TGATACAGTAGAGGAGTTAACTAATAATTTGCCCATCAAAATTATGGAGGTGAAGGAGT  
A\_14\_P200074 GGGGAGCAAACCTCTATTGACTTAATCCACTATAGTTCATCTTTTGTCCACTCTCAGTTAT  
A\_16\_P21219283  
ACCAATTACTTCCTTGTCTCAGTGTATTTTTACCCACTAGAATCACAAGTGACATCATT  
A\_16\_P00011351  
ACTTTTATGGGGAAATAAACGAAACCAGTTCAATGATTGATATTTTCAGGAGTAGTGGCC  
A\_14\_P104278 CATGATCAGGACTATTCTAATTTCTCTTCATCCATGGAAAAAGAGTCTGAGGATGGTC  
A\_14\_P108957 GCAAAGATCTAATTCTAAAGGATGAATACTTCAGGAGGATAAGATCATGGGAAGAAAGCA  
A\_14\_P131688 CTGTTTTTGCTTTTTTTAACTGATTTATTTAAAATAAGCCTAACTTTGAAGGCTGCCAC  
A\_14\_P135479 AGGGAAACAACAGAGAAAGTTAAACCACCCAATTAATCTAATTCATGCTAACGATCTG  
A\_16\_P02240957  
AAATGCTATGGACAAAATATCCCTCTGACAGTAAATTCGGAGTATTCTTTGAGGCATACA  
A\_14\_P130252 ACGGTCTTAACTGCTGGTGATTAATCTTGATTACATCATGCAGTCTCTTTTTTGAAGAC

A\_16\_P15703157

GTCAATACAAAAGTCCTTTCTTACAGTCTGACCTAATACCAACTTCACCCTATGTTTTCA

A\_18\_P15948888

CCAGAGAAGAATAGCAACACAAATCCTATACGATATCTTACGGTGATATCTATAGACCCC

A\_18\_P16366839

ACTAGGTTCCCTCACCTTATGTTACTAACTAACCCAAGATCTTAAAATCAACTTCTGCCG

A\_14\_P120504 CTATGACACTCATGAAATTGAGAAGGTAAGTATTCCAAAAAGAGGGTTTCACTC

A\_18\_P13269857

AAAGTGGAATACTGAGTTGAATTCCTATGTCAGAAGTTGAGTAAAGATAAGTCACACCCT

A\_16\_P16353557

AAATCAGTGCAATTCATCTACTCTGCATTGCTGAATTAAGTCAGAAAAGTCTCAGGTC

A\_14\_P116575 ATTTTAGATACAGTCGTTGTTTCTTGAGTGTAGTGCGTTTGTTAACTTTTTCCACCTGGT

A\_14\_P104231 CTTCTTATGAGGAACCTTATCCACTAGATCAGTAAACCTGGATTCTTAAGTA

A\_14\_P101338 TTGGCCCCAACAGTAATTATCAAGATGTTGAGACCCTCTATAACTTCTAATCAAGTAT

A\_16\_P00004729

AAATACTATCAGAGAACTCCAGGGTAGAGATAAGTTGAACTCCTGCATCTCTTAGACATC

A\_14\_P114124 TCAGGAATTTCTTTGGATTAGAATCAGATTA AAAACTTGCAGTTTGCTTGGGATTTGAGG

A\_14\_P134243 TATGATTGCAAAATGAAAGAATTGTTTCCAAGAGAACTAAGTTAACCGCCCTAGAAAGAC

A\_16\_P19464763

AACATCTGCTGGACATGCTTACTCAA AATTGAGACAAAGTATCATT TTTTCATCCATAGCC

A\_14\_P122946 ACCTATACAGAATTATGCTGATTCTGCAAATTGTGTGTATGTAGGAAAATGCTGGAAGGA

A\_14\_P115825 TATGTTTAAAGACACGTCACTTCTTTAGTGTGCTGGTTTTTCTCTATGTAAACTGAGGA

A\_14\_P114585 ACCTTGTCTACAGGTAATAAGAAGTAGGTATATAATGGGCAGATGAAAGCATGGATAGCA

CUST\_1207\_PI426210822

TCAGTCAGTTT TTAGTTTGTGTTTGTCTGATGTGAGAACATCATTACCTACCATATGTTCTT

A\_16\_P03304074

TCTGGTAAACTCCCTTAATTGACAAAAATGCTGTTTTTCCAAATCATTTC AAGATGCCTG

CUST\_5030\_PI426210822

GACACTTCTCTTCCAATAAAAAGGCTTTTACTAGATGTTTCAGTGACATAAAGTTGAAG

CUST\_1041\_PI426210822 TTTCTGCTCTCAACTGCTCTCTATCCCTTTAGGCCTGTGCTCAT

A\_16\_P16191441 ATTAGAAGCCCCATTTGTGTGTCTCAGCATGGCAGGAAGGTCAAA

A\_14\_P136625 CTAAGACCCAAAAAACACAAAGTCTCCAAATTTTCTTCAGCCTGCTACTTAAAAACCA

CUST\_9332\_PI426210822 TTTTCAGCAGAAACCAGGAGCACTTCCAGGTGCAGAGAAAAGCTTA

A\_14\_P130446 TAGGTTACAATCTGTGGGGATCTTTTAAAGATTAGAGGGCCTTATAGGAGGGTC

A\_16\_P40402283

GTGCCACCTTAAAACTTAAATCCA ACTGAGACAGAATTTTATTTAGTGAAATGCTCCCC

A\_18\_P15277594

ACAGTTTTGGAATTACACATGTTGTTT CATACTAGCGCAGAACATAAACTATTGTCCCCTA

A\_14\_P115801 ATTTTCACTACTAGTATAATGTCACAGGCTAACCTTGAGCCAGATGAATGGGAAGTTATT  
A\_14\_P135741 GTGACTGATCACCTGAGAATATATCCTGTCTTCTAGTGATTTGATATCTCTTCCCTTCTCT  
A\_14\_P110792 CTAGTCAGGTTTCACAAACTCCTTCCCAATTCATCTCATTACTGCAAAAAATAAAGACTG  
A\_18\_P14924186

CTGCTAGGATTA AACCTCCATCAAGATCA CAAGTAAGGCATGACTAAGTAAAAACCTACT

A\_14\_P119647 GCCACATTACCTCCAAAACAAAAGCATCTTTTTTCCCATGTGAAAGGTCTAATTCTGTAA  
A\_14\_P123103 TATCTGTGTGCCTTAGAGACAGACACATCTGCATCCTTGGAATCATACTGGTTTTAT  
A\_14\_P115465 ACAAATGAATTTGTCATAATTTGAGAGGGAAATGGAGCATTGTTTGTATCATCTGGTGA  
A\_14\_P114759 AGAAAAGAAGTGTGCGGAAAGTAGATAACACATGGTACTGTCAACAGTCTATAGTTCTT  
A\_14\_P112519 TAGGAAAAGCAGGATCTGTCACTTATCCAATTGACTATATCTAGGAGGGGATTGATATAC  
A\_14\_P139158 ATTCCATACCTGTTACTCCTTAACCTTATCAAAACTTCCCTGTTCTTTATCCCATTCTTT  
A\_16\_P00379822

TTTCTCCGGTATGTCTTAATTTACTCTGCAGCATGTAGTAATCACATTCTGAAACGACTG

A\_14\_P129222 TGCAGATGAAATAAAGTGTAATCCTTTATTAACATCTCTTTGCAGTGTCCCAATGAGGT  
A\_14\_P100810

GAAACATGGGAAAGTAGCAGTATGAACAAGAGTAAACAGGTAGTAGAAAACAACAGCAT

A\_16\_P01936709

CAAGCCATGAAATGTTAAACCAGTATCCTTGAATAGCATAGTCCCTATTCTTTCCAAAA

A\_14\_P110382 ACAGACAAGGAGCGAACTCAGAATTTCTTTTCTTTTGTCTTCTCAATCAGTGATCTTAA  
A\_14\_P113366 GCACAGAAAGACACTCCTTCAGTTCATTCACATCTAGAAAATAAGACAAGAAAACATCTC  
CUST\_5942\_PI426210822 GTTGTGATTCCTCAGCCTGATGGCCTAATTGCCTTTGCCTTTTC  
A\_16\_P16060806

AAAAATCCCCTTTTAACTTTGACCTTCATATCCGAGAAGTATCAATAAAGAGCCAGAC

A\_18\_P17040694

ACCTCTAAAAAATAAAAAAGTAAAAAAGAAACACAGCCTTACAGAATTCTAGGATAAAGA

CUST\_1861\_PI426210822

CAAATTATTCTCGTATTTATTTCCCCAGTGTTTGTGAGAAGGAACATTGGGTCCCA

CUST\_372\_PI426210822 CAGCTTCTCTCAGAGTACTTGCTTGAGTGGTCCCGCTGTCAGTGT  
A\_14\_P112375 TCCCTCATCTTAGCACAGTGCCATACTCCAATAAGCATACAATAAAGAAAGTAAAAG  
A\_16\_P20763330

AGGCCACTAGACAAAATTATCATACTTCAATCATCAATGTCCAGAGTAATGAGTCAA

A\_16\_P16191552 AGTAAATAGTTGAAAGAGCCCTTCTGGAAGAACACAAGGCTAGTTCCTTTGG  
A\_16\_P18142144

AATTCTTTTACGGAGTCCAAATGGTAGTTTACAACACCAATTTAAGCCTTATCGCATGAG

A\_14\_P131873 CTTTAGTCTAAACTTCAAATCTTCAACCCTGTTCCCTAATCCAACACATTCCCCAAAT  
CUST\_4431\_PI426210822 AGAGGGATCAGCTCTTGTTTCTTGGCTTTGCTCTTTACAGCCTCTTAG  
A\_14\_P106770 TAACTCAAAAAGTTACCTTTTAAAGAGCACAGGCTTTGGATTGAGATACAATTGCTCAGA  
A\_14\_P112829 GCTATATTTATCAACAGAATTTGCTTACAAGTGCTGGGAAGAAACATTTTCCCTAATGGCC

A\_14\_P103992 TCTTTTCTGATATAGCAATGTCCTTAGTGAGTTCTATTTAGGTGTTAAGCATAACAGCCTT  
A\_14\_P128863 TATTAACATCATCACCTAATGAACTGAGCCACCCAGAATTTGGGGATAAACTAGAGATTA  
A\_18\_P24091069

AAAGAAGCACAAAAGTAATTCAGAACTGACAGAATCAAAGCAGAGAGTTTAAGAAGTGGG  
A\_16\_P19044419

AAAAGGATTCTATTCAGAGACTATCCAGAATTTCCATTTACTAATCAGGCCTTGTGCTGT  
A\_16\_P30952458 CTCCTTTTTCTTGACCCAGGTCCCAAACCTGAATGTGCAGATTT

A\_18\_P14134917 AATGCCAGTTTGGGAGACACAGTGGAGGAAGAACCTGTTGTTTCTT

CUST\_2937\_PI426210822 TTGCATTTTGCACTCTGACCCAGTGCTCCTGTGTTTCCATGGTTA

A\_14\_P117731 AACTGCAAGAATAGAGACAGAATCAAGTAGCCTCTCTATGTTTCTCTGCATATGTATTCC

CUST\_4078\_PI426210822 AACACTAACAGTGGAACCAGCTATTGCTGCTTCTGGTGTATCATCCAAATG

A\_14\_P139552

ATCAAAGAAGGCCAAAAAAATTTGTTTCATGGCATGCCAAATTAGAAAATGAGAAATTGGCGG

A\_14\_P138715 TAGTGATCTGAAGCCATAGTCAATTTTCAGACTTTCGCAACAATGATTATTCTGCTTTTGG

A\_14\_P132610 CATCAGATCCCAGAAACCTTTTATCGACTTGTTCAGTGATGTTTAAAGAATTGCAGG

A\_16\_P30952576

TGTCTTTGTTCTTAATTCATTGGAAATTTTTCTGACTTTTCTTCTCAGGACTGTGAAAA

CUST\_2995\_PI426210822 GCTTGTCTTCCAGCAATGTGTATCTGTAGCCATGACTTTGCTTAAAGCGAA

A\_14\_P138704 CATCAGAGAAGGAACAGTTCTAGAAGGTGCAGGAGGTAGTAAAAGAACAGAAAAATCAT

A\_16\_P16191490

GGGTTGGGGATAAATATGTTAGCCAGTAAATGCCATTTATTGCTTTAGATGTCATCTCAG

A\_16\_P36580826

TGGACTATCTTGAACATTCCTCACATTTTACACAACGATTCTATACTTTCCACGAAATG

A\_14\_P115823 CATTTGTTTTCTCTTATCTTGCTTTATTAGGTCGGAGACCATGAGAAACAGCGTCAAATC

A\_16\_P41689685

CCCAGCCATCTTAACTAGTCTCACTTTAATTACTTTTAGTAGGTCCTACCATACTGTGAG

A\_14\_P201634 TTAGAAGTTTATAAAGTAAAGACCTGTAAAGCATGTGGGTGGAATGTTTCCATGCTCTTG

A\_14\_P120546 AGTTTATTCCAAATATTTGGTTTCATTTCTTCTCTGATCTTCTGTAGCAATCTTGCCCCCT

CUST\_8493\_PI426210822 AAATGGTGGTGAGTTCTCCATTTGTTTTCACTATTGCTTTCAGCTTTGAGCC

CUST\_4783\_PI426210822

TTCTTTTAACTGCAATTAATGAGTGGGTGAAAAGAGTAGGATATAGTAAAATGCAAATGCTAG

A\_14\_P114045 CTGACCTTCTAGTTCTAATATTCTAGGAAACCAATTGCTCTTAATGTAACAATGATAAGG

A\_16\_P01625705

AACAGTCTCAGGTCTATAGCATGTCTAAAGCAATCAGTAATCACATTTGGATGTTGTGTT

A\_16\_P03277568

GGAAGCATTATGAACGATCTTAATACCCTCTCCCATGTCAATTAACCTAGTCACGAATGA

A\_14\_P201276 TCTTTTGCAGAAAATTTTGCAGTTAGCAAAAATTTGTAATGATGGGAAGGGAAAAACCTT

A\_14\_P104121 TTTACTAACTGCCAAAATCTTGAGTCTAATAACCAACCCAACTTGAAGAGATCACTGTC

A\_14\_P131995 C TACTGAGGAACAATTTAAGAGTATAAATGTAGACCCACTTGATGCAGATGAACACAGTC  
A\_14\_P124712 GGGTGACCACTCAGATTAATTTGGATTGTATCTATCTTACTGAAGCACAATTTAAGGGAT  
A\_14\_P104105  
TGATGACAAAACAGTTAGGAGCCCATCTGGAACAAC TAAAATGACCATAAAATCAAAGA  
A\_14\_P121426 TGCCCAGAAATCTTAGGAGTCTGCAGACACAAATTTAAGAACCTTCTAAGTTTGATTAC  
A\_14\_P133735 CTGTCCTAGACCAGACTTGGACAAC TACATGTTATTTTATGCACTAGTAACAGGTTATCA  
A\_16\_P36827177  
ACCATTCATTGTTCTTTTTACACCTTCACAATATCTCTTTCTAACAACAATATTCTGCCC  
A\_14\_P118121 CACCTTGTTTTAAACCTGAATCTTTTTTTCTTTGGATAAAAAGACTTAGATGCACCCTGGA  
A\_14\_P109170 AGCGAACATCTTTCTTACATGAACAATGCTGCTCCCAGTAACAGACTGTTTTATATACAA  
CUST\_6116\_P1426210822 AAGTGCATTTCCCAAAACTGTTGGCTAGCTGAGGGATGAGAGCTC  
A\_16\_P19051544  
TTCTAATTTGAGACATTTTGCATATGTGAGGTTTGAACGAAATGATATTCCCTGCTCACC  
A\_14\_P120361 CCAGAGTATCCCTCTCAGGGAACACATCTGAATAAAGGCCTATGGAAATATAATACATTA  
A\_18\_P12152634  
AACACTTAGGTCAAAGGAAATTTTCTGGAGTCATTAAGTCTTCAAATGAATTGTGGGC  
A\_14\_P129288 ACTCAAATCCAAGTG TAAAAGTAAAATGATTTGCTTTCGTTTTGTTTTCTTGCTTAGGG  
A\_16\_P00905332  
AGAGCATTGACATCTTAGAAACTTTGAGCATT CAGATCTACCTATAATTTCTCTGGACA  
A\_16\_P18101626  
AAGCCCAATTTGATATCTTGATGCCTTCTAAATTTTGCAAGCCCATATTCAACTGTCATT  
A\_14\_P110006 TCTAACTCTGTTAAGACGTCAATCTGTAGGGAAGGGTCCACACCAAG  
CUST\_4861\_P1426210822  
ACATGAGGCTTAGAGAGATGCTAACTAAGTAGTCATGAGTCGAATCTCCCATTTAGT  
A\_14\_P125917 CTCAGATACTGTGATGGACCAGTCCAAGACCAATGTTTTTTTTCTTCATTA AAAACAAA  
A\_14\_P127500 CTACAAAGTAGTTCCTGTTTCGCTCTCAGAGGTTTATTTACTCCAGTGCAATATGAAGTT  
A\_14\_P103025 GTTTTGTTTCAGATCATTATGTAGAAGTTCTGGAATGCAAATACAGTGTGAAGAGAACC  
A\_14\_P122209 AGAATATCTACCTATTGACTTGTAGGATAAAAATCCTGCCCTAAAAGATTT CATGGCCC  
A\_14\_P129027 CTTGCAAAAAAATGAGCACCAAACCTGATATGATTCAAAGTGTGTTGTGGCTTGAGATC  
CUST\_1870\_P1426210822 GGGCCTGAATTGTGAACTACGCTTGTTGGTTCTTTATCATGAAGGTACAG  
CUST\_132\_P1426210822 GGAAGCTTTGTCAGGGAGAAATTAGCATTTC CATCGGAGACCAT  
A\_14\_P139534 GTATTCAACACAACATTGACTACCTAAAACATCTCTCAAAGTCAAAAAAATCCCCAGTG  
A\_14\_P118684 CAGCAGATCTCCTGAAGGTTCTAGATTTT CACAACCTGCTGATGGAATAACAA  
A\_16\_P58424606 ATTTGTTTGCCAAATACTCCCACCATAGCCATTTCAA ACTGCCATTGCAAT  
A\_14\_P108505 GACTAGATTTCTTAACATAGTATAACCACTGTCTTTTGGGTTTTTTTTTCCAAATCTCCTGG  
A\_14\_P104388 CTTACTGTAATACAATCAAGGCTAACAGAAGAAAGGAAGGAAGGGATTATCATGGA ACTT  
A\_14\_P129529 AGGAACTTCCGGTCTAGATGGCAGAAGATCTTCTAGTTCCTTTATTA AAAACAAACAAAA  
A\_18\_P11123380

CTCTGCACCTCACTCTTATGTAGAACTTGACTGACCACAAACACAAATGTTTTAACATT  
A\_14\_P200077 ACTACTCCCAAGCACTTTAACATATTGGGCAATGCACTGTTTCATTTAAAGATTTTCTACC  
CUST\_3430\_PI426210822 GAAGTGGGGGAGCCAGCTTCCCTTCGTGCTGTGTGTCACAATAAG  
A\_14\_P139984 GAGAGCGCTCGTGAAGTGAATCAACTGCTTCAGGGAAAAAGAAAAAAAAAAAAA  
A\_14\_P138750 CTGGGGATACTTTTGAAGTTTGTGAAGATGAAAGAGATTGTAAGTAGTCTCAAACCTTTC  
A\_14\_P100447 CCTTTATAGGTCACCATTTGCTGCTGTGACAGACTATTCAGTTACAAGAAATAATGTTCAT  
A\_14\_P113332 ATATAGTTGCTATGCCCTGTATATTCACCAGCACTCAACAGTGACCAAATAAAGTCATT  
A\_14\_P120014 CCACTTCATGTCTAACTAACTGTTCTTTGAAACATCTCAGACTCTAAAAGATGTCCCAT  
CUST\_2513\_PI426210822 GAAATTCCTCAAGACAACAGAGCCAGGAGGAAGTAAGGGAATAGAAAGAAG  
A\_14\_P124121 TTTCTAGACCAAGTCACAACCTTCTATTCCATGCTTATTCAGGGGCCTGAAAGAT  
A\_14\_P138545 GTAAACATAACTTTTCAGGCTACTCTGGCATAAGGTTTCAATGTGCCAAACAAAACCTAAGA  
A\_14\_P138616 ACTTTAGAAACTGAACCTTCCCTAATTTACCTGATTGGATCTCATTCCCAGATGAAATGAT  
A\_14\_P123003 TGCCCATGTTCAAATTGGGTAGAGAATGTATTTCGAGAGTGTCTGTTATTTTTACTACAGT  
A\_14\_P135654 CATTTCCCTCTTCCATTTGTTCCACACTTATTATTTGTTTATTGAAATGCTCCACTTGCT  
A\_14\_P111638 TGTTTATACACACACACAGTTTTGTATATACTTGTTCACTCGAAGAGGCTCCAACAACCTT  
A\_14\_P125210 TGTGTCTAGATTTCTGTCCATGCTAGAGAAGAAGAAGTATATAGTCAAACTCTCCCATCTG  
A\_16\_P17360774  
AAAAAATAATGCATGGCAATATCCTTAGTGTTAAAATTGCTCATTTCACTCTCTAGCCT  
A\_14\_P131141 GTGACAATGACAGTTAATGCCGCCTCTTCTTGTTCACTTCCCCTTTAGAAAT  
A\_14\_P116120 TTTCTTTTAGAATGATTACGGACCTGAAGCCAAAGAACAAGATGCGCTAGTGGA  
A\_14\_P134903 TGCTCACTCTGGATTATCTCTGGGTCTCATTTTCATATTTCCCTTCCCTTTATTACCATAC  
A\_16\_P03573169  
CCCCAGAAATGTTGTTACAATTCACACTCCGTTAACATTACAAGGTTTCCATCCTTATTA  
A\_16\_P16575815  
GCCAACACCTTTCTTTAGTTAAAACAGTTTTATCTATGCAAGCATTCAAAGACACTTTCGC  
A\_14\_P118760 TGGCAAGGGCTTTCAGGGTATTTTTCTCTTCTTTATAAAAATGAAATTACTTTTCCCCTG  
A\_14\_P102441 CATATTAATATTTCCCAACTCAGTTGACTTACATGTGACAATAAACCTTGACAGCAGGT  
CUST\_3780\_PI426210822 TATTTTTCAACTACCATTAGCCCCACTTTGGCAAGGCCAGGTGGG  
A\_14\_P136747 CTCTTACCTCCCTTTAAGAAAATGTTCTCCTCCTTTTACCCATGTGGATTACAAAAGATA  
A\_18\_P22841211  
TATTTTCATGCTTTAATTAATGCTGGGTTGAAGGCCTAGGATTTATCCTGTTGGTCTAGT  
A\_16\_P17325193  
GCCTTCCAATTATTAAGACTCTTAACACTTTGTCTCATCACAAGTAGCAAATATTGTCCA  
A\_16\_P02018254  
ACTTCCCTTGAGGAGAAAATATTGTGCGTTATGGAATTTTATACTCTCAGCCCAATGACTG  
CUST\_3030\_PI426210822 CTGGGTCATCTGCCTTCTGTTGCTTAGCCATCTTGCTTGTTCATT  
A\_14\_P123460 ACTTGCCAAAACAATATTAACAAAAGTGGATTCAAAGGTAAGAGGATAGCAGTTTGCTGAT  
CUST\_9360\_PI426210822

ACTCTTTTGAATGACAAGCTTCCCAAAGCATTAAATGTGTCTTATGGTTGTTTTAAG  
CUST\_5186\_PI426210822 ATAGTATCTTCACCAACTGAGAAGGTGCCCATCAGCCTGAGGAA  
A\_14\_P137298 CTCAACAGTCACACCTTAAATATGTCCAGCACTTCAGTTACACAAGGTTTTTATCTCTAA  
A\_16\_P19310863

CACTGAACTCATTGATCCAGGTAGTAAATAGCATAAACTTCAATGTTTGGTCCTAAGTGC  
A\_14\_P124301 ACTTTAGAACAGGGATCTGTGAAACAAGTCAATTTTTACTTGTGAACGATCAGAATCCAA  
A\_14\_P124567 CTTTCCAGTTCTACTTGATATCGTAAGAAATACTAAGTCACCCAAAGTGTAACACCTGTT  
A\_16\_P15172957

ATTGCCATACTCTTATTGCAATCAGTAGCCAAATTGTCTGTTTTAAACCAATGACCAGAC  
A\_14\_P117178 ACAACAAAAACAAACTACTACTTACATCATAAGTTAGTGAGTCTGCTTCATTGGCCACC  
A\_16\_P00691580

TTGTGGAGCCTCTAAAAAAGTTACATGAATACATGAGATACACCTGAGATAGAGCCC  
A\_14\_P130617 ACTGCATGAGGTTTTTTGCAGCGTGCATGAGTTTTAGTGACCTTGTTATTTAAGAAGTTA  
A\_14\_P138331 CATGATGAAACACTGAATTCTTTTCTTAAGGGCAATCAAAGACAATGATGTTTTTGGGAG  
A\_16\_P03592295

TTTTAGGCATTCAGTCCAGATACAAGGATTATGAACTTAAAAAGCAGCATCTTAAGCCC  
A\_18\_P22839595 CTCCATCTGCCACATGGGTTTCATAGATAAAGTCAAACATCCCTTTACTCTAAG  
A\_14\_P101812 CCAGGAAGTAACATGTTTCATCATCATGGAAACGCCATTAGACTCTCAAATGTTATAAAAG  
A\_16\_P16688625

AACGGTGGTAAAAAACTGAACTGTATGGGGTTATCTCAAAATAGTAGTGTTTGCTTACC  
A\_14\_P111675 GCCCCAGAACAACAGTTTCACTTTGTGGCTTTTAATTATTCTAGAATTTAACTGCATCT  
A\_14\_P139840 CCTGTGGTTACATGCTTATTTTATGGTTTCCTAGGTTCCCATTAGTTTTACGTTCCCTAA  
A\_14\_P108588 CTTATTTTGGAAATACGGGTTGCGATCGAAGTAGAAGTTGATTTTGTAGCCCAATCTG  
A\_14\_P101893 CTGGATGTTCTTTAAAGTTTTTCGCTCCAGCATCAGGAAAGTTCTAAATATATGTAAGTGT  
A\_16\_P02311750

AAAGGGATAACAGAATTGACTTCTCTCAAAGCATTAAAGACTGATCATTACATCAACACCC  
A\_16\_P01651155

CTTAGTCCAAACCCCTTAATATCCCTATTCTGTGTTCCCTATAGCATCTATCTATCACAGG  
A\_14\_P200669 ACTCATATAGCATATTTCAAAAATGTTGTCAATTCATTAAGGCCTCTTAAATAGACCACTA  
A\_16\_P02158127

AGGAGCGGCAGTAATTTTTTTTCTAATAAATCCATTTACAAAGCATCTGGTCTCATTCA  
CUST\_8808\_PI426210822 ATTTTCTCCAATAGCCCCCTCATCCCTGACCTTGTCTTCCAGCCTC  
A\_18\_P14156998

CCCGAGGAGAGTTCATGTATACGTTACACATTATAGGGTTCACTTACATTCACAAAAAAA  
A\_14\_P126434 CAAGTAATAGAAAATTCTGTTGCAGACTAGAAGTTTGCACCAGAATGTTGTTTTAGCAGA  
A\_16\_P16958981

GCACAACCTTGTGAGGTATATATGAGTTTTAACTATTTGAACTATCTGCACAACCGAGA  
A\_14\_P129460 ATCATTATGTGGTAATATTTTCTGAACAAGAGCATAGGCGTTGTCAGGCAAAAATGTCTA



A\_16\_P02000024

AAAATGAGGCTAACCAAGAAACATTTGACATGGATGATGTTACAAACACACTATGCTTCA

A\_14\_P125427 ACCCTCGAATTTCTAAAATGAACACAATCTCTTTTGTCTCTTTGGAAGCCCATTTCTATA

A\_16\_P01663221

AATGAAAAGCAATCCAAAGTCATCTCTAGTCCGTAACATGCTCATAGTTGATGTTCTCTAA

A\_16\_P17207052

CAGCCTGGAACATTATGATCAAGAGCCTTATTAACAGAAGAAATAATGAACGTAGACACA

CUST\_9571\_PI426210822

ACTATCACATATGAAGAATGAACTAAACACCTAACTTGGAAAGTAAAACCTTAAATGAGGG

CUST\_6788\_PI426210822 GCATGCCTCATGTGACCAGGGATAGGCAGGGAGAAAACTCAAGG

A\_14\_P131296 ACATGGTCTTTGAACTCTCGTGTGCGAAAGAGTTGAACACAACCTAACTTTAATGTGAAAA

CUST\_259\_PI426210822 GCAGCTCTCCCCATTAAGCACCATAAGCCGAGTGGTACAGAGCT

CUST\_3077\_PI426210822 CCTCTCATTTATTTGGCAGGCCTGAATTATGTTCTGATGGCTGACGTG

A\_14\_P139028 ATTATAGTTCCAGAATTGTGGGAGTTTTTTTTTCTGAGAAAATCATTTTTAGTAATTATT

A\_14\_P107337 TAATTGAGGGGTCCTCTGGGAATACAGTTTACTACAATAAGTTTTGAACCAAAGAGTGTA

CUST\_2090\_PI426210822 ATAGATTGGAGTGTCTCTACCTCTCTCCCTCAAACCTCCCTGGGT

A\_18\_P22841762 TTCAGTTATATGGGATTTATCCAGACCTTTGGATGTTCACTCTTCAGAGCCAG

CUST\_5384\_PI426210822 GACTCGGCTGTTTGAGCCACTTTCCTTTGACACGTCTCAGACTTG

CUST\_2086\_PI426210822 CTTGGCATATCACTGGGGAAGGATTTCTGAGCGGCCACTACAAAG

A\_14\_P116905 TTCTACACTATGGTCACACTCTTGGTTACTCATAAACCATAGCAGGTGAATAATACCTCA

A\_14\_P111245 ACTCTAGGATATTCGAGGTAGTCAGATCCAGCCAATTCAATCAAATATTTCTTTTGGAG

A\_14\_P130229 ACCAGAAAGAAGCCAATCCATTTAGGACTGTAAAAATCAGGAAATACTTAGAACAGCACT

A\_14\_P106012 TGATGAGCAATTACTTTGGCTTATGTGGGATCTGTTTCATAGTTTAAAGTCCCTTAAAAGA

A\_18\_P13284971

AGGTCCAAGGTAATCATACTGTTTATAGATACCACACTTGAGTATATGCATTACGGGTAGTA

A\_16\_P17338714

AAGTTCTTTTCATCCCAGAAGAGTGAAAAAAAAGAAAATTCTAACCACATGTTACCACCG

A\_16\_P00685446

GGCACTCCTCACGGACAAGTTCAGTGTGTATTTACTTTTCTGGATTTATTTTCACAAA

A\_14\_P122773 CTCAGTGGTTGTCAAAGGTGTATGATGACATTGGTTCTTGCAAGTGTCAATAATAATG

A\_16\_P00486151

ACCAAGACTATACCTAACCAACCTACTTTTACAAAAGACAAAAGTTAGACCAAACAGTCA

A\_14\_P121500 CTCTGATTTCTTATTGATGGGTTTATTTGCTTTCTGCCTCTTGTCTGTGCTTTGCAG

CUST\_5922\_PI426210822 GCTCTTCTCTCCAAATCCACTGAAATGAGCAAAGCCATCTAACAGTAGTGA

A\_14\_P125454 TATTCTTCTTCTGTGTGTTTTCTCAACACTTTCTGGGTTATTTTTCCATTCCTTCA

A\_14\_P132249 CTTTCTCTAGTGTGATCTACAGCAGCAAATTATGACCATTATAGATGAACTGGGCAAGG

A\_14\_P127858 CCCCTTCACCTTTTATTCTGCCTTTTTCAGTGATTTAATTTTTTATCTTATTTTGGCCATTT

A\_16\_P15965374

AGTTGTCAGTAAAGGTCTCCATTGTTATCAAAGGCACCTTCTCTAGAAAAACGTGACTATT  
CUST\_5375\_PI426210822 GGCCTTTAGAACCTCTACTTCTTTGAACACAGTGCTACTCTGCTCCAAA  
A\_14\_P108424 CTGTGATCAATCATTCTTTCTTGACGTGTGCCATGCAACCCTACAAAATAGAGAAG  
CUST\_2081\_PI426210822 AACTCGGTTTTCTTTCCTCCTCACCTCTGTGATTTCAACCCTTTC  
A\_14\_P135810 CGACCTTATCGTGGGCAATGAATACTATTTCCGAGTTTACACCGAGAACATC  
CUST\_2075\_PI426210822 CTCAGCCAGTGAGCGCAGCCAGCAGCTTGGCTCTTTGGGTCTTTG  
A\_14\_P130763 TCAGAGCAAGCACGGGAAATGATGAAAACATTACAAATTGTGCTTAAAACCATATAACA  
CUST\_2642\_PI426210822 TAAGAGAGGAAGCAAGGTGGGGCAGGCAAAGGGGTTGCTGAGCAT  
A\_16\_P35487690  
TTTGTTTATGCAAGTCCCAGTAATTCAGTCTTTTTCACTATGCTTTGTAACTACCACCAC  
A\_16\_P16453290  
AAAAGTGATGCTAAGTGCTGAGATAATCTGTACACCATTTAAGTAGGGGTATTGCAATG  
A\_14\_P129744 ATTTAGTCTTTCCATTTTTTTCCTTCCAATCTTTTGAAAGTAGTTTTTCCATGCAGGAGGA  
A\_18\_P13309668  
TGTAGACTTTAAACTTCTAAACCTCAAGATATATTCAAGAAGTGTGCAACAAATCTGGG  
A\_16\_P01728571  
GCTTGTTAGGATTGATACCCATTTAGTGGACAATCTCATCAATGTTTGCATGGAATGTAA  
CUST\_4122\_PI426210822 CTTATAGGCCAGTGTGGGGTAAGGGGTGGAGAAGCTTGCCTCCTT  
A\_16\_P38318324  
AAGCCCTGAAATACAAGATAAGCCCTGAAATACAAAATAAACCCCTAGTCAATGAATTCTG  
A\_16\_P21428038  
ATCCTCCTTGTGAGACATAATTTAATGCTACTGTTTTGTACATACTCCTCCAATTCCT  
A\_14\_P118292 CTTTTGCCAACTTTCCAATTAAGGTTGACATTCCTGCATAAGCATTCTCTGTGAAAAT  
CUST\_2423\_PI426210822 CAAAGCATTTCTCTTGTCTCCACAGTGAGGACATCAGGAAGTGAG  
CUST\_7254\_PI426210822  
TAATGTTTTACCTATGGATGTCAGTTCTACTTCTCCTTGGGGCTTTAACTAAAAAGG  
A\_14\_P132018 AACTCCTAACTTTTAATCTATTGCCTTCAATTTGCAGACTGTTCAATCATTGTTTTCCCC  
A\_16\_P30952614 CTGCTGCTGGCCGTGCTGCTCTGGAAGGTGAGTCTGGTGATTGCA  
CUST\_3619\_PI426210822 AAGAGTCTCTGTAAATCCACTGAGCTGGAATTTCCAAGCAGGTGT  
A\_14\_P103254 CTTACAAAATTACACCAGCCAGAAGACTTAATTTAGCCTTAAGGAATAGGGTTCTCTGTT  
A\_18\_P22607477  
TTCGTGTTAAAGAAAACATTACAATATTCTCAAAAAAATCCATATCCATCACCATTGCAT  
A\_16\_P17442069  
AAATACTCTGGTATGCCATTCAACAAACTGATAGACGTTCTCTTCTTATTTTCGGCAGTA  
A\_16\_P16459214  
AGTGCCTCTTATGATCTTACACCTGATAAATGAATGAGTGACTGGATATACTGTAGAGT  
A\_14\_P116167 GGGAAATACACACAGTCTTCTAAGACTTGAAACTAGATGTTCTAATGGAGAGGTTAGTA  
A\_16\_P16573991

AGATTCCCATTAAACTCAATGCAACTTCCATTTTAAAAGACTTCTAGGACTCTTACACCC  
A\_16\_P02810681  
AACTCAGAGAGAATAAAACTGGAACTATAGTCATTCTCAGTTCATAATGCAAGCCCCAA  
A\_14\_P102705 ATTCCAGGTTAAACTCTACAAAAATGTTTTTTTCTCTTAACTTGCCATGCTCACACCTA  
A\_16\_P01592468  
TCACTTTTAAGCCCTATACAATACTCCCCATGTCATAAATTTTCTAACTCTAACCCATCT  
A\_16\_P21531899  
AGTCTACCACAATTGGCTGTTTTTAATTATTTCCCCATTAACTCATTATTCCTTGCCAA  
A\_14\_P105813 GTGTCTACAAGATTATCATAGGTGAAAGTAGGGTTGGATGCAGAGAAATAGTAAGAAAGG  
A\_16\_P18086737  
GCTTTGTCATGTGGTTCTACTACGGTATACCCCAAGAGTAACTTGTATATGAGACCTTAG  
A\_14\_P101452 GCAATGTAACATTAGCAACCCACGTCAGAAGATTTGTTTCATTAGCATAAAGCATTTCAGA  
A\_14\_P116926 TAGGTGATAGTCAATAAGTGGTATGGCCCACTATCTTTCTCTTTTTCTTTTTTTGTTGG  
A\_16\_P00502625  
TGTCTACGTTTAATGCCAACTTTAACATCTCCAAATTACCCTAATAAGGCTATGACCTGA  
A\_14\_P101205 TCAATTAATCTTCCTCACTCTCTCAGCCAGTTTATTTGTCCATTTGAGTCTTAAAGAGG  
A\_14\_P134855 GGTCTTTACTCTTCAACTGACAACAGTAAATATTTTGAATTTACTGTGATGGGACGCTTA  
A\_14\_P119020 TCTATTTCTGCGTAACTACTATTGATTAAAGACATCACCCATGTAACCAGTCACCTAAG  
A\_14\_P109787 CCTTTAGAGACTGTTGTGATGATTAGGATTTAACCTTTGTATTCCCAAAGGACTTGTTG  
A\_14\_P117518 TAAGGTGGAAGTCAGCAGAACTATCAATCTGAGATACCATATGCAAGTAAATTACA  
A\_14\_P119098 TTATAGATATGACTGGCTCTTTGGACCTGTGATGTGCAAAGTTTTTGGTTCTTTTCTTAC  
A\_16\_P18738772  
AACACCTTCTAGTAAAATACACAGAATGGAATACATGGGCTAATTGTTCACTAAGTTCCA  
CUST\_7834\_PI426210822  
TAATTAAACTGAGGTTTCCTCGAGTTCCAGAGTACATTTTTGAAGACATTTATTTACACAC  
A\_16\_P15823848  
AGGCAGGATCAGATACCTTTTTTAACCATTACGAAGAAAAACCAACACATGAACTATCTC  
A\_18\_P11014816  
ACAAAAACATCAAAGACCTTTGCTTCTATTGACTTGGCTTTTGCTTATTTTCACTAAGGT  
CUST\_8404\_PI426210822  
CACATGAACATTTGCAGAGAATCCAGTATAAAGACATTTGTAAAAATAAAGATGGTAAT  
A\_14\_P108222 GAATTGTTTTGTTTGTCCGCAGATACAATGGCTCAAATCATGGCAGAACAAAGAGT  
A\_14\_P127426 CTGGGAAAACCTCAGATTCAGCCATAAGGCTTTTTCTATAGATAGTGAACATTTTCTC  
A\_14\_P200250 TCAGCCCATTTTATAATACAGATGACCGGTCTGAGTCTAATGGATGATCAAGTTTAAGAT  
A\_16\_P01481417  
TAACTGACCCAATGACTATGTCTATAATGTAGCAATCCTTTCTTTAATAGAGCCGAGAC  
CUST\_7292\_PI426210822 GGAAACAGCACATTCTTGTGAGAAGATAGGTTTTGGAAAGTCCGGAGTAG  
A\_16\_P00685155

GAGCAGGTTTACAACGTATTTTCATAAAGCACTTTAAAATAGGAGTTCTTCCTGTCCCTAA  
A\_16\_P30952350 CATGTTTTCTGAGATCAGGGATGAGGGACAGGTCCTGTCTACATCAAC  
A\_16\_P00685403

AAGCAATAAAAAAGGATGACATGAGGACTATATTGTGGAAGGTAGAACTGGAAAACAGC  
A\_14\_P128011 ATAAAGTATCAACGAGCCTAACATTCAGTAGCACTGTTCTACCATATCGTTAGCACTCAA  
A\_14\_P101742 TGAATAATTGTCTTTGCAGTGCTCAAGAGCGCTGTATATAAATGTTACGAACTGAAAAT  
A\_18\_P10009303

CCTCCGAGTAAGTATCAGATGAGTTGCTAATGTTGGAAAAAAGCGAGAAACATGCTT  
A\_16\_P30952316 GATGGATGTTTTTTTTTCCCTTCCCTTCTTTTTCAACCGTGTGCTTGGTTTC  
A\_16\_P00871245

AGAATTTTTCAAACCTAATGTCCTCATGTCTTATCACCTTGCTTATAATGCCCTTCATTCCC  
A\_18\_P22840712

CAAATAAATAAGGTTTTACTTTTTCTTTGGGATTTCTTAGCATGCCCGTTGGGACAAT  
A\_16\_P17215942

AAGGGGTTTTTAAAACAATTACAACATGGATTGAGCAGACCATACTACTTTCAAGAACCT  
A\_14\_P202543 TCTCTTTGAGGATTATCTGCGGTGCCTGAAATCTAAGCACTACACATTTTAAACTCAAAT  
A\_16\_P15351883

AGTCACCTTTTAACTCTAACATGAAGAACACAACCTGATCGTAGACTGTAAATCTCATCCA  
CUST\_1157\_P1426210822 AAAAATGGGGGACTAAATTGAAAGTTTCTGTAGTTCTTGGCCCTGTAAGAGG  
CUST\_9273\_P1426210822

CCTAATGAACCGCACTTGTGGATGCATTTAGAAGCATTGAAATTGTTGACATCTG  
A\_14\_P124469 AAGAAAAGGCAAATAAAGACAGGGTATTTGCAAGGTAAGCCAAATCTGTTTCATTGTTTG  
A\_14\_P109580 CACACACATATGTTATCCACAAAGTCAGGTGAATGTTATCCACAAAGTCAGGTGAATG  
A\_16\_P03212604

ACACACACGCTATTTTCATAAGTAATATCAGGAGGTTTCTACACTACTTCAGAACCCTACT  
A\_14\_P119320 GAATGCCTTTGAGATTACCCGGTTTATTCATTTACCTACGTTATTTATCAAGAGCCACAC  
A\_14\_P126149 ATGTGTGCGTTTGTGTATTTACATGCACACGTATGTAAATCACAGGCTGCGTTC  
A\_14\_P116296 ATTTCTGTCATGTTTATATGTCATGGGTTTTTATTTCTTGCCATGGAAGTTGAAAGTGG  
CUST\_9917\_P1426210822

ATCCATCAGTTTGCAACCAGAAAATCGTTCAGCGGAGCTTATGTATTTATTTATTAGTAA  
CUST\_9065\_P1426210822 CCACCATTTTCATGGTTTCAGTTTGCACAATGTCCTCTTTGGGGTAAAG  
A\_16\_P58424265 GGCAGGGATTTCTGTTGTCCTGGGCACACAGAGCATATCTGCAAG  
A\_14\_P126452 ATACTCCGTGATCTTTCTTGATGGCCAGACTGTGTAAAATTCATACAGTGTTTACTACAG  
A\_16\_P39924975

GCACCTAAGACTATGTTATCCACCTCTATGACTATACAAACCTATGCTTGACACATAGAA  
A\_14\_P117359 TCTTTTCTGGGAAACCACTTGCTTTTGGAGACTGAAAATAAATCAAAGGTTAAGAA  
A\_14\_P109996 GCACTAAACATCGTGGGGATCTCTTACGGAAAGTAGGGGTAAGTTTCAATTATTTA  
A\_18\_P14773553

AAAAAGAAGGGAACAATGTAGAAGGAACAATTGATGAGTAATTGAAGGGAACAATTCTGG  
A\_14\_P132148 AATACTGCCTAAAAATGGTTTAAGCAGTTAATACATCCACAGTTTCTGATCTCAGAGGCA  
A\_14\_P127554 CACCAAAAGGAAAGAAAATTTGTTTTGCTACCTTAGTTTTTATAATCTCAACCTCTAGAG  
A\_14\_P103860 CATTGAAGATAATCGATCCCAAGATGATTAATAATAGGGTTTCTGATGGATGTTGAATGGC  
A\_14\_P132227 TCATTTAGATAATGTTTCCAGATACCTCCAAGTGAGCGTGAATATCAGTGTTTGAGCAAT  
A\_14\_P115365 CTCTAAGGACCTGTTTTGCTTCTGTTTAAACCAAATGGGCAGTCTGTCATTACA  
A\_14\_P126056 TGGAGAAAGATGTGTCAAATTTGGGCATGGAATAAGGTATAAAGTAGGGAAGAGATGATA  
A\_14\_P109403 AAATATTTTTCCAAGAAATTTGCTGCCCAATTGCTCCAAATCATAAATAACCCACTCT  
A\_14\_P122614 AAGGTGAAAATTAACCTTACCTCATAATACCACTGTGATATTGGCAAACCTGTGAGTGAT  
A\_16\_P17014191  
CCATGCCATTGATAGAAACCAAAGTCCTAAAAAATTCCTCTAAAGCCATAAATGAACCAG  
A\_14\_P123987 CTACTTTATACAAAGTTACCTGGGTATGGAAATTTCCCATGACAGTTCAAACCTTCTTC  
A\_14\_P128047 AGCAGCAAGTTTGTCAAGAGAAAGTGACCTGGATTAAGGATGATGAAAAGGTC  
A\_16\_P03234806  
AAAAACTCACGATCTTCCATATTGGTGAACAAGAACCTAAGGTGAACAGTTAGCATAAGA  
A\_16\_P03294682  
AAGTCAGAAGTTCAAAAAAGAGAAACAGAAAACATTAGCACCTTTATCCTACTGACCTGC  
A\_14\_P111931 ACTTCAAAGTTTTTCATACACTCATGTTCTATTGGCAGAATGGAGAAACTAACCCATTAT  
A\_16\_P20935501  
AATTGCTCTAGAAAACAGTAATGAGGGAAAGCAAACAGAAAGTCATTTATGGTCAACGAAC  
A\_14\_P108036 ACCTCTGAAGTCTTGCTTCAGTCGCTATTAATATTACCAAGTAATAATAACAGCACAGGC  
A\_16\_P16332351  
AAATTCAAACCTGGTGAAGATAGGCTATGTTGAAATGCATATCAAACCTCCTGCCTGATC  
A\_14\_P109131 GGGATCCCCAGTCCAGGAAGTTGTTTGAGGTGCATCATAGGAAATTAT  
A\_16\_P02713901  
GCTGGATTATATAACCAAAGATCTTTATAACCTGCTCACAATTATCTAAACTCACAGGGC  
A\_14\_P128315 CTCTGATGGAAGGTATGGCTGAAGAAATAGGGTAAATTATTTAGATACTAAAGTGCAGGG  
A\_14\_P123434 AGAAGTAAAATGAACTAAAATTCATACTAAGATGGTAGTCCCTTGCTGTATGACAAGCCT  
A\_14\_P134908 CTACATTTGGTTCCTTGGGTTTTTCAGATGCTACTTCATTAATCATCCACTTGTCTGC  
A\_16\_P00685526 CTGTTTGATACTAGAGTCTAACTACATGTCATGGACATTGTCAGCAAACCACCCTT  
A\_14\_P123160 CTTGTGCATTTTAATCATCATCTGGAAATCGTTCCTTGGAAGATCTGTGATTTGATCTAC  
A\_14\_P100462 GGGAGTGTTATCCTGTGCGTTTTAAATGGGAAATCCTTCATTATTTGTGTTAATCCAATT  
A\_14\_P137620 CTTCTGAAAAATTTATTTACTGTGACTGTGATCCGCAGGAGCCAATTGATGTTTATCTA  
A\_14\_P121010 ACCAAGGACAAGTGCTGGTTTATGCAATTGAGCAGTAGAGGATGCTGTATC  
A\_14\_P132499 TCATATTCAGACCAGGTAAGCCTCATTTCACAACAGTCAAATTTGTTTCTTTAAAA  
A\_14\_P133475 ATGTGTTTTCTTTTTTTGGCACTCAGATGAGTATAGGATCAAACCAGTGGAAGAGGT  
A\_14\_P121208 TATTCTTACAATATCCCTAGAAGAGATTCTTTGCTCCTTTCCAGTAAGCCACTCTACTA  
A\_14\_P123644 TATTTCTATAACCATTTTCTTACACTAAACACAGGATCAGGATCTGAAAGAGACACGGTC

A\_14\_P130898 GGGCCTCAAATGACAAATTTGTCTCTAAATCTTCCTCTCATTAGAAAGATATACACCCT  
CUST\_1242\_PI426210822

TGTAGATGACCTAAAACCTTTAACTCATGCCATGTTTAAATGTTCTTAAATTTGGGATTGT  
CUST\_2230\_PI426210822 CTATGGGAGACCATCCTGCTAAGCAGGTAAAAGGGACGCATTTTG  
A\_14\_P108761 CAATTTCCATGTATTTAGCGTCCAAATTGGTAGAGGTAAGCGAAATTTTTGTGCAAGAAT  
A\_14\_P104678

TTAAAGAAAACACAGAACAAGTCCTAAATCAGACAAATTGCACAAAAGAGAGAGAAGAAA  
A\_16\_P00685109 CTCTCTGGATAGATGTTTAGTTTTATCTTTATCCAAATAGTGAGAATATAATTTTCATATT  
A\_14\_P103903 GGATGATAGTGATGCAGGAAAAAAGACATCTGTGCAAACAGCAATGTATTTTAAAGTTGTC  
A\_14\_P101857 TCTTCTTTCTGTCCGTGTCTTCTTCAAAAAGTGTCCCAGCATTGTGCAAAAATTTT  
A\_16\_P37321596

TGACCATAGATGCTACTTTTTCTCATCCATAATGCTACTGCTTAAAAATCCTTTAACCAA  
A\_14\_P115206 CCAGAACATGTAGTCAGCAATCATGGCACTCCTAAGAACAAGGACAGATTAAAAAAA  
A\_14\_P113234 CCTGCCTCTGTTTAAAATCTCCTGCCTGGGAGATATATGCTTATTCATTATGTTCT  
A\_14\_P119032 ACTCCTGAGATAAGAGAACATTATCTTGACTCTAAAAAAGACGTAGACCGTCATCTGAAA  
A\_14\_P129948 CTTTACTTACTTGACTGGATTGGACTAAAAGCACTGATCAGAGGCCACGACATAAAA  
A\_14\_P126559 TCAGTCTCCCTCATCCACTACAAGTTCTGTATTATCTGCTGATGGAAAATTTTTATTCAIT  
CUST\_8667\_PI426210822 TGATAGCTAACAGGGAGTGAAGGGCTAGAACTTTTTATTCCAGGTGAAAGTACT  
A\_14\_P117286 AATATTCACCGTCTGGAGTTAAAATTCATCTGTTATATCCTCAGAAGACTCTGGTGAAC  
A\_14\_P125290 CAGGCTTGTTCCATAGAAATGGTATTTAACATTTTTTAAGACACAAGTCTGGAGGAGATG  
A\_18\_P10385255

CCCCCTAGGATATGTCTAGATATGGATCTTTGACCATTAATCTCATGTACACCTTTTTTCTT  
A\_14\_P133869 TACACGTCTCTTATCTCTGCAGTGTGTAACGGAATAGGTATTGGTGAATTTAAAGACT  
A\_14\_P132691 AAAGTGATTTGTTCAAATTTGAAATTTGAAACTTGACATTTGGTTCAGTGGGCCCTATGTA  
CUST\_10185\_PI426210822

ACTGTGACATCTCGAGACAGAGACATGCTATGTAATAAGTCAAGTAACTGAAGAGA  
A\_14\_P117823 TTATACCCACACAAAAACATTCTAGATGGATAAAAAAGACCATGCATACCAAATGGATG  
A\_16\_P16410362

ACCTAATCCTATCAGTGAGCATCTAAAGATACATTTTTCTCCTTCTACCTATGATCGTGA  
A\_14\_P101912 CAAAGAAGTTATTGACAAATGCCAATCATTCAATCAGTTGGTGTATCACCAAAACGAGAT  
A\_14\_P115698 CTATATTACTCTAGTCAAATTTGCCTGAGAAACCCAATTGCTTTTACCATCCCAACA  
A\_14\_P105122 CAAGACTGACTATTGATTTGATTGATTGTAGTCTACGGAGATCTCCAGGAGTGAATTTTT  
A\_18\_P16715369

CTGAATCATGTTGTAAACTGAATGCACTGATTGATACCTCTCTAAACACTAATGTTGTGA  
A\_14\_P119119 TGCTTATTCTGAAACTCTCAATGTGTCTCTGAGAGAGGGCAAATATTGGACATTTGATAC  
A\_14\_P110078 CCAGTGGCTTTTCTACATGCTGTCTTTCTCCACACAAGATTAGACAAATAACAAATATGA  
A\_16\_P19881751

GGAACACTATCACTTGAATTTGCAATCTGACATTTATACTCTGCTAATCTACCTTCAGGG

A\_16\_P18239224

AAAAAGTAGTCACACCTTGTAGGCTTATCAGACAGTTGCAGAAGTAAATAAGAACGTGTT

A\_14\_P106717 TGCTGATGTTAAATTAAGTACCCCGTGTATGTCATAAGGTTTCTCTCAATTCTGTTTACA

A\_16\_P38653898

CCTCAATGATAAGAGCAACTAATCCCTATACTTCACTACTTTCCTAGAATCCCTGTAACA

A\_14\_P103045 CTATGATGGCCATGAAGGCTGATCCCTTACTAAAGTCTCTGTGGCTACT

A\_16\_P35863269

ACAACCTCCAGAAATGTAAGTATCAGCCTTCAGAATCAAATTCACATCTCAAAGTCTCT

CUST\_8489\_PI426210822 GTCATCTGTGCAATCTCTTCCCTAATCGACTCTCATCTGGTGGT

A\_14\_P113271 AGACAAAGTTCTCATATGTTGCATTACAGAGTTTTCTTACAAGGATTTATCCACCTACCC

A\_14\_P104518 CAGGCCAAAATCCACTACATCAAGAACCATGAGTTTATCGCCACCTTCTTT

A\_14\_P135766 AAAGAGCGATATGGAAAATCCCTATTTTCATGATATCAGAGTAAAGTTTCCGACACATGATT

A\_16\_P19221767

GCCAGTTAATCCTCTTAATTTCCCTAACCTCATTACATTTTCAATGCTAATTTCCACC

A\_14\_P127684 TCCTGAGAAGATCCTGTATTCTTGGGGAGAGTTGCTAGGAAAATGGTAAAATTTTATTTT

A\_14\_P105877 AAAAGTTTAAACACGTGAATGTATGGAAAAGCCCTTAGAATTTGGATCGTATCATGATGGT

A\_14\_P126443 CTTTATGATTTTCATTCACACCTCTTTTGCAGAAGTCGTATCAAAGGAAAAGGGAAAAG

A\_14\_P119441 CGTGAAGCGCATCTTGTATATTGCTAGTTGAATAGAGCCCAATTGGCGAGTTATA

A\_14\_P139710 CTTGGCAATGATGACTTACACTGCCTAACAGAATAGCCCATTTGGAATTTCTCTGAT

A\_16\_P19750942

ATAGACCAAACCACCTTTCTTATAATCTCACCGACTGTGTATAATGAATGGCTGTCCCTT

A\_16\_P00684987

TCCTGCTATAGTAATATAGCATAGTATTTGTAATGAAAATTGTATTCTAAACCTAAAGA

A\_14\_P110557 ATTTCTGCATTTAAATGCAGTTCAATTTACCTGTCTTCTTTGCCTCAATGAGATTTACAGC

A\_14\_P138678 AAGACTGTAAGTTAAACATATCAGGGGAAAGCCTTGTTTCAGGCTAGCGTTTCATGTAAT

CUST\_4364\_PI426210822

TTTAGCCCACCCTTTGAGAACCCTACATGACTTCTTGATAAGATTCTTTCAACTTTAC

A\_16\_P17559296

AAAAAGATTACGCATTGATTAAATAGACGTCACCAATAGGGAAAAAATGCTTGGAAAGTGC

A\_14\_P139332 TATGTGATCTAAGAAAATTGCTAATCTTTCCCTGCCATTTTGAGAAACACAGTCCAAACA

A\_16\_P21081598

CCCAAATTCTCACTTATTGAATTCCTCACAGAATTCTACTTCCCACTACAGTTCTATCA

A\_14\_P107534

GCTAGGAATGAGGATGAAATGTGAAGTTAAAGAAATATCAAATGGAAGCAGTAGGGAGA

A\_14\_P107880 CTGTCCAAGGCAAATTGAAAGGAACAGTGGAAGACAAATAAAGTTGCTTTATGATTACAC

A\_16\_P00421491

TCAGCCAGATGTTTAGTATCTTGTAGATGGAAGGTTAACTTGATTTAGTGCTTAAATGCA

A\_14\_P100541 AGGTAAATGCCTTACTTTGTAGCCAGGAGCATGTTTTTTCTTGTCACTTGTCTATT

A\_16\_P16733836

AAATATTGACTACCCAACCTTTTTAATTATCCCCAAACTTGTTTTTTCAGAATCGGCCACC

A\_14\_P116589 TGCAAGCAAAGAACCCATTTGCCATGCTGCTATGAAGACTACTTTTAGATCAACAATAAA

A\_14\_P136433 CCATCTACACTCTGCCTCAGACTCCATTTAAGGACGCTGTTGTCATTACTATG

A\_14\_P130414 TATCTCTCTCAGTATGATTGTGTCACATTTCTTAATCTTCTGGAATCTCTGAGAGCAACG

A\_16\_P18798811

AATTTTTATACTGTTTGAGCCATCTATCCAATTGTCTCACTTTAAAAGCCACATAGCCGG

A\_14\_P128707 TCTAGAAATTGCACTTCTATAGACTCTCATGTTTCCTCAAATCCTGTGTCCAAATGGTAT

A\_14\_P110209 TCGTAAGTCTTACATTTTTTCTGAATGGAATATGGAATTGGAGTTTAGGGGATTTTGCT

A\_16\_P34915638

TGACCCCTCCAATACTGAATATATAATGTATAATGAGTATATTATAGACTGGTGTAGATG

A\_16\_P03616570

TAGGAAAAGTATAAGCGGCTGTGGAATTTAGTAATTCAGTGCAACAAATGTTTGCTGAAC

A\_14\_P139195 AAGCAGAATGGGCACCTTATTTATTTGCTCCAAAACCTGAATAAAAGGCAAACCTTAAACAC

A\_16\_P21672158

AAAAAGGAGAATCAAGTTCCCAAAGATATCTGAAGCCACATCATTAAATCACATCTTTCT

CUST\_9910\_PI426210822

ATCAAGAACATAGTGTGCTCTAAGTTTTTCAGTACACTTTTGTTCACTTCATGATATT

A\_14\_P110779 GAATTCCTGCATGAACTGAATGTTCCATTTTTCAAAGTTGGATCTGGAGACACTAATAAT

A\_14\_P134748 TACAGGTTATATCAGGTCAATTCTTATCAGATAAGAAAATTGGCACCTACGTAGAGGTGG

A\_14\_P103077 TATTGTGTGGTTTTACTTTTGTGCTGGTATGAATTCGATTCCATTTTAATGCATCCTGTT

A\_18\_P16475773

CGTCATATGATTCCCCTATACTACTGTTTTAACTGTTTGGAGATCCATATGTCTGTTGCA

A\_14\_P130597 CAAATGTATCACAAGAAGCAAAGGACTATCATGGACTTATCCAATGGAGAGAGTTACAT

A\_14\_P113270 CTGTAAATCTGTGACTTCTGCGACATGGGATTTAATTTGGCTAAAGCACCC

A\_14\_P110716 TTATGTAGGAGAACATTACTGACTATTATGCAGGAAGAGGGAGAGAACAATGTAGAGGAA

CUST\_3889\_PI426210822 GAATCCAAACCATGTGACATGGACCATTATCATTTCAGCTGCCACCT

A\_16\_P17122354

AAAATCACCTGTCAACAATACAGTAGATCCCATAAACTGGTCTGATAAAAATGTGACACC

A\_16\_P41329709

TGCACTATTTTCAAATCAAATCCATCTCCTTACATCGTATTTTCAAATCACTTAGCCA

CUST\_5469\_PI426210822 TTGGAACAGGCCCTGGGGGAGTGAGGGAGGACACGTGGTGTCTAA

A\_16\_P31230317

GAGACTTGAGATGCTTTGGCTGATATTTACATGTTTTTCGATAAGAAAGGGATCGCTGATT

A\_18\_P14137612 GATGGGCAAGCACTTCTATCAGATGCTGGTTCTGTTGTAAGACATCATCAAG

CUST\_6611\_PI426210822 CCCGTGCTTCAAAGCAAGGCCATCATATTTCTCATTGCACATGTT

A\_16\_P35297373

GGTGTTCGTGTCATAATTACCCCAAATGATCAGAAGTTTCTTACACAAAATGGGATGCTTG



A\_14\_P138449 GTTGGTTCCTTTCCCTTTATTGTTGAATGCTCCCATTAAATGCTTTATGGCTTTTACTGTGT  
A\_16\_P16191341 TTTATACCTTTATTCTCTTTAGTTGACCTTTTAGATACTTTTCTAACCATGCCCCCTCC  
CUST\_1671\_P1426210822 GTGTTCCCTGCCCTATCCTTTGTAAAGGCTCTTCCCAAATTAACCAT  
A\_14\_P119052 TCTCTAACTAAAAACCAAAAAAGCCAAACATATCTTTCTGCTCACTTCCGTTAGTCTTCAC  
A\_14\_P137983 TCTATACACATTTTCACACTTGAACATCTACCTATTTTGTGTTTGTCTTTAGGGGGATGAGG  
A\_14\_P127933 CTCAAGGCAAAGGTGGGATATCATGGCATCTATCTGGGTAAGTAAAAATTAAGCCTT  
A\_16\_P00500417  
ATAGAGCCAATATTTTCTCACACAGTAACTTGGACTCATGAATTACCTGCTCAAACATT  
A\_16\_P16644246  
ATCTGAATCTGATCTCAACACTATCATAAGACTTTCTTTTGCACATAAAACGCTGATCA  
A\_14\_P104749 TCTTCCCTGGATTAAAGACCAGTTAAAATATGGATCTGTAAACTCAAGGTAAGAGCACAA  
A\_14\_P136600 TTGCAAGAAAGGCATGGACATTTAGTGCAGTGAGAAAATGAATGGACAGAAATGTTTTAA  
A\_16\_P01164850  
TCATTGCAAATCAGTGATTTTTATCAGGCAAGTAAAAATAACAACCTTCTAATAGTGCTT  
A\_14\_P114043 AGAAGAAATTCTTCCTCATTAGAGAAATGAAATGCAGTTGTCTCAGATGCTAGTGAGAGA  
A\_14\_P200349 GAGGACTATAAAACATCCTTCTCTTATTCTCCATACTGTCTTCTACACCTTTAAAGCCTG  
A\_14\_P124942 TCTTTTCTTCTCAACTCGTCTATGTTTTTGTGTCATGGAGTCTGCACTGAAAAAGAAATT  
A\_14\_P137379 AATATTTCAAATAACTATAAAAAGAAGTTAGAAGCAGGTGAATTGCCCCACAGAGGGGA  
A\_16\_P16192030  
AAATTTCTCAAAAATCTTTGAGAAAAATTGAGATGGGACAAAGACTCTGTGCCTTGTTC  
CUST\_1413\_P1426210822  
CATGTCAGAAATTTATGAGGCTGAACTGGTGGTGTGTCTTGCCTATAGTTTCATT  
A\_14\_P109229 CCTCATCAGTAGTCAAAGCATTCTCCTTTTCAACATAAACCTTCCAAAACATCATTT  
A\_16\_P02380972 CTCCATTTCCACACATCTTTTTTATACACCATAGCCCATATTTTCATACCACATTGTCCTT  
CUST\_6457\_P1426210822  
AACATACAACCTTTGGACATCAGATTTTGGTGAAACTCAAATTACTTGGTGAGAAAGAAA  
A\_14\_P117797 AATCTCCAATTTTCTCCAAAATAGACCAGGAATCACTTCTGTGAACTTTACAATCTCT  
A\_16\_P16191667  
TTGCCTGAGAATTTTGGCTTGTTTTTACCTTGTGACTGACTAGGCTTCATTCTCTTTATT  
A\_18\_P22839596  
TAAAATAGGAGTTCTTCCTGTCCCTAATAGTATTATTCATCACTTCATTCTTGGCCTGGG  
A\_14\_P105458 AAGGAATCTGTTACCCAAAAGATTGAGAACTACTGTTGACAGATCTCTCAAACATATTCC  
A\_14\_P200324 CTAGTATGTTTTATTATTTTATGGGTCTTGAGTGCATTTGAAGGTGTCCTTCAGTTCCCA  
A\_14\_P108113 GAGGGCAGGAAATAAACTCAGGCAGGCCTATAAGAAGGAGTTGTTTCTATC  
CUST\_4650\_P1426210822 GTTTGGGTTTGTAGGCAGGATGGCCATGTATGCACAAAGAAAGCTTT  
A\_16\_P15384110  
TGCTGCTACTTTTGTATTTAATCTCCTCCTTCATACAAAACATAGTTGACCTTCTCAGC  
A\_18\_P13699283 GTCATGTCAGGGAGGCCTATTCTTTCTCTAAGTCCCATCTTCCAGAAG

A\_14\_P129259 GGCTGCCTGAAAAATTATATTACTTGCTGTTTACTTCCCTTGATGGAGTTTTAGGCATTA  
A\_16\_P01730976

AGAATGAATGGGTTCTCTAACTTAACACAGAGAATAAGACGAGTCTGAGAGAGAATTCTG

A\_14\_P118567 CTCAACACAGGCAAATTTCTAAAAAAATTATACCCATCATCTTTGACTTGCACCTTCAGC

A\_14\_P105297 TCGGAAATGAGATGTTTTGTTGGTAGGAAATGGATAGTTATTTCCAGGTTTTATTGCTGT

A\_14\_P101079 ACCCAGACACACTACAAAAAACTCATTTCATAACACAGTAAGGGCAAACATTATTCATGTA

A\_16\_P18962909

AAATGGTATGGAAGGTCTCAAGAAAAGTTACACACCTTATCAAGTGGAGTCACAACATAG

A\_14\_P122145 CTTCTTGTGCAGGGTAGCATTTTAATTCAGTCTCTAATTTTTGCCCCTTCTGTTATTGTA

A\_14\_P125819 CAGCCATAGCAAATAAATTTACACAGAGAGACCTGAACCTGGAAATTATTGTCCTT

A\_16\_P00354812

AAGCCAAGCCTTATAACATCTGTCAGATGCTAAACAATCCTACCAAGAAGTAATGCCAT

A\_14\_P137232 ATTGCGGTTTATCATTTGCTTCACCCATTTTTCTACTTGGACGTTGAATTCATGAAAAC

A\_16\_P00132500

ACTGCCATTTGTTTCCATAAACACCTGAAATCTATCCTCAGTTGCCATTTATAATTGCAG

A\_14\_P108696 TTGGATCCTTCATGGAGATCTTTCCATTTCTTAGAACATTTGCAGAACAACGTCTAATAC

A\_14\_P124198 ATACTTGAAGGGAACATTTTCATCCAGTGAACTCATGGAAATTCAATTTCCCTTCTTCTG

A\_14\_P202296 TACCTGAATATATTTCTTGCTATAATTGTAACCTGGCTGTAGGGATCCGAAATCTACTTT

A\_14\_P121395 ATCTTAGACTTCTCAAATGAGATATTGCTGGTCTCTAGAATTTTAGGATTTGGGAGGCTA

A\_14\_P200467 ATTCTGGGTTAGCCAGTCCCTACATTTTTTTTCACTGAATTTATTGCTCCTGACATTCTAG

A\_14\_P111952 AGTCCCCTTTTCTTTTATAAATGAAGAAAAACAAAGGCTCACTCCAAGAGTCAGAC

A\_14\_P125191 TTTTAGAATCTTATTATCACTCTAGAATCAGACTTCTCTGCTCCGTGATTCCAGAACATC

CUST\_4744\_PI426210822 AAATGGACTATGTGGGAAAGCGGGACTCTTATCCTTGCAGAAGTCA

A\_18\_P16043218

AGTAAGTCAATATAAAAAGTATATAATTAATAACGGTGATTAATAGAAAAATACAAAGAT

CUST\_10293\_PI426210822

AGTGCCTTACCTTGTTGTTAGCAAGAATTGCATACATAAAAACTTGAGCACATGAAAG

A\_16\_P18182607

AAAAAGATTTCACTAACAAGACTGCAACCTATATTTGTGGCTATGAATTTCCCAGATTGC

A\_16\_P58424393 TCCAGTTAGGCTTTTCTCCCATCGTGCCACTTCAGCAGTTCTTAT

A\_14\_P105467 CACCTTGATATTTTTTCTCCCCAGATACACCTATGAAGATTATAAGAACACTGCAGAAT

A\_14\_P135551 CCCTCTATATAGTCACTAGACCCTGAATTTGAAGTCTTAGTTTTTCGAGTTAATCTTCCC

A\_14\_P133877 AACTGGAAAGACACACGCAATTCTGTAAATCACAAATTTATAAGCAAGCAGCAATTGAACT

A\_18\_P22840141 GTCCCACTTGTCCCTCCCACCCCTTGCTTCTCTATTTTCAATT

A\_14\_P129777 TCATTGTAACTTTCCATCTGCTATTGGAATCAAGAACTAAAACTTATCAGCAGGCAGCA

A\_18\_P14132345

TTATTTTTAGGCAACAGAACCCATTTCTAAATTGAAATATGCTTCAGTTGACTCAGGGGT

A\_14\_P138857 CTTTCCCCACTTTTCTCTCTATTTGTATTGTTAGCCATCTTGAAGTGATGTTGTTTAAAC

A\_14\_P117148 GAGCCAACACTCCTATGGCTCTTCTCAGAAGCTGGGAGTTATTTTTTAAATATATCATCGC  
CUST\_5610\_PI426210822 GATGGATGCTAAAGGTCTCTCACGTGGCTGAATATCTAGTGAGGGAAA  
A\_14\_P113925 AATCCAAAGTATATAAGATTCCGAGCCAAGTGGACCACCTTAATAAAAAAAAAAAAAAGCGG  
A\_18\_P18303780  
AATGACTTTAAGGTTGTTCTAAGGATTGATGACATTCACATTTGTAATAGTGCCTCCGC  
A\_16\_P16191447 ATAGGTGACAGATATGAAACGATAAATGTGGAGGCAGGGAGACCAGGTAAG  
A\_16\_P03128747  
AAGAATTCTAATCATTTTTTCATTGCTCATCTCCAAACTTCTTCAACTATCAACCAAACCTCA  
A\_14\_P107350 CTCCTTTGTTTATGGTTTTATTGGCCTCTTATCAAGCAGTTACCAGTTGAAGCCCATAAT  
A\_14\_P200225 GGAACCATAGACAAAGGTAGATAAGGCAACTAATGTTTCATGATCAGGAGGAAAGA  
A\_16\_P40248434  
ACTCTTTCAGGTATCTCTAAGATAAACTAGCATCTGAGATGGTTCATTCAGATGGATCTC  
A\_14\_P101268 GAAAACAGACAGGTGTCAATGAGCACCTCTGTTGAAGTGAATATTAACAAGATCTTCA  
A\_14\_P112356 TGTATCAAGCCTAGATGTTTTATACAGATGCCATATAGTGTATGAGCCAGGCTGTTGAA  
A\_14\_P108251 AACACAATGCTAAATTTTACTGTCTGTGCTTCTAGGCCTATTGGACATACGTTGATAT  
A\_16\_P01208083  
AAAACCTTTTCCCCAAGTTAGATAATTCTAGTTGCTAAGAATTTTGGCTCATAACCTGC  
A\_14\_P130017 ATTTCTGCACCATGAAATTAATCATCTCATTCCTGAAGATGAATGTAGGACCAGACAT  
A\_14\_P110602 GTAAAACGACCTGTGGCCTAAGTCAGAAAGTGAGTGAAGGAACCTACAG  
A\_14\_P112726 TCCGACATGATTTACTCAACTTTTTCTTCTACTCTTCTTTCTTCAAACAACCCAGACAAG  
A\_16\_P40116679  
TTCAGACTTCTCTCCTATGAATAACCCCTTAGTGTCAATATTGCAATCCCTATTATGGAT  
A\_14\_P200857 AATTTGACGGCGAAGTGTTGTAGAGACCGTCTCCTTGAATCATTGCAAAG  
A\_14\_P124200 TCTTCAATTTTGTGAGGCTTAAGTATTTACAAAACCTCACATGCTTGCATCAAAAACAGA  
A\_14\_P119648 CTCCATTCTCATCAGTCAAATCTTACCCTACTCAGAAGATGATCAAAAAGCAAAACTAA  
A\_14\_P128479 ACAGAGAACATGCTAAAGGATCCCATCTCTATGAAGTTCATGCAGTTATGAAAGTGTC  
A\_14\_P125703 GTTCTTATTTGGATATTTGTTTCTTTAGGCCTGTCAACTACTTGGTCCCAGAATTCCC  
A\_14\_P122095 CTTGCGGAAGAGATTCTTATCATGGTTCATAATCATCTTCTTCCACCTCCTCATAG  
A\_14\_P136667 AAAAGCAATCTTACCGTAGTGCAGAGTAGACGCCCAAAGACAAAAACGAATAATCAG  
A\_14\_P117152 ATTACTTACACCAGTTTGTGAGCATTACACCTGAATTATTCTATGTTTGGTGGTATGTC  
A\_16\_P03192846  
CACGTGTTGATTTTTGGTTCTGGAATTCTGATCACCTTATTTTTTATTGTAAGCCTGGAA  
A\_14\_P112875 GGACAGCACAATCCAAATCTGTTTTAATTATTTTAAACATGGCATAACACTATATCGGGG  
CUST\_10051\_PI426210822 AGAATGATCAGCCACCTCTGATTCCTGGTCCCACATATCTGGGAG  
A\_14\_P100387 TAGCCACAAGTTTTTATACCTAAAGGATAACGGGAGCACCACACCAGG  
A\_16\_P01860902  
AGAGAATACCCAACCTAATCACAATCAACAACAGAAAGTTCTAGTGAAAGAGAAATGGTG  
A\_16\_P40061488

CCTGTATCATCTGGCCTATAAATAGAACTCCCCAGAATATCTACAAAGTGGTAATGCATT  
A\_16\_P40212924  
ACTTCCATCATATCAGTTATTTCCATACCATCATAGTCTCAAATACTGCTCAATGGACT  
A\_18\_P22840466 AGACGAGAGCAGATCTGACAGAGAAAAGGTGTTTCAGCCTACTTGGATTAAAC  
A\_14\_P125667 CACAAAACAGTGAGAACTCCTGTGTTTTTACAATGTGTTTTGGCTTACAAAGTATCCTC  
A\_16\_P02186332  
CCTTAGAAATAGACCTTAAACTTTGCCTAAATGTAGCATTTCAGTTATGAGTAGCCCAGGT  
A\_14\_P109608 CTTCTTTGTGGCTTACACTGGAAATTAATGAAAGCAGTTTTTCTCCTAAGACTTTTGGTTT  
CUST\_10363\_PI426210822 ATGTTAGTGAGCCAAGGACGAGAGATGCCGAGTCTCTCAGAGCAT  
A\_14\_P124952 ATGTTTCTCTTGCTACCAAACAGTCATGTATTAACCTCTTTGGATGATGAAGTTAAAG  
A\_16\_P20274873 CTGCTTGCAAAACAACAGGTGAGAAGAAGCCATAGGGTGCCACTC  
A\_14\_P131222 ATTTTCAAAGCAAACCAAGAAATCCAAGTTTTAGCAAGGTGCTCATTCTCATGTTGAAT  
A\_14\_P136389 TTAGGCAAAGTCTATAGTCAGGACACCTTAGTGTCTTTCAGAAGGCAGGTAAACATATAA  
A\_14\_P113552 TTCAAACATGAACATTACCACATGTTTGAAAATAGCGAACACAAATCTACAGATGAGAA  
A\_18\_P14130895  
ACTCACATGGATTTATTTTGTTCAAAGGTCGCATCACACAATAATCATCAGTCTCTCATG  
A\_14\_P107938 AATTTCTTAACTGGATACAATTAGGTGGGATCACATCACAGAACCCATAATGGTAATCAC  
A\_14\_P101299 ATTACACAATTTTAAAAAGTGAAGAATATCAAGTGACCATACATACAAAAAGGTGGG  
A\_14\_P103955 CAGAAAGGGAAAGAAGAACTCACTGGCTCAGAATATGACCATTGTTTATAGTTTACCTAC  
A\_16\_P16191947  
CCTCAACTCTTTGTGAACATGTCAATATCAATATCCAAATATCTGGCTCTAACTGCTTGG  
A\_16\_P02367847  
ACATCTCTCATCAGAAATGTTACCTTGAGTCTTTATCTAGATGCAGTTGCTGTTTACAGC  
A\_14\_P101422 GATTTTCAGAAATGTCATTCTAACCTTGATCTCTTCGAGATGCCTGTTTATAACACAGCAT  
A\_14\_P118021 ACATTTTTCAACCACTCCCTGAATATTTCTGTTGTATTATCCACATTGTGATCAGTGGCT  
A\_14\_P126349 TTTTTTTTTTCTAATGGGGTTCCAATTCCCATGTGTCTGATATTCATTTGAAATGA  
A\_14\_P135425 AATAAATGAAGCAAATAACCATGATTATGGCTCCCATTAACAGGATATATGGAGACAGCA  
A\_16\_P35741597  
GCTGCTAACTTGACCTTATGTCTGTAATGGTAAAAATGAATCCTGATGGACTTCAAACAA  
A\_14\_P114098 TGTTTTGGAACTTACATTAAGAAACACTTTAGTGCAACGTTAGCCTACACGTAAGTTCC  
A\_14\_P131124 GTGTGAGTGCTATCACATAGCACCCATGCCAGGCTGTAATGTTATTTATTAATTTTTTGC  
A\_16\_P19988446  
AACTGTGGATGCAATATCAAACCTCGTCTGTGTATGTAAAAACCTATGCTCCATTTATGCA  
A\_16\_P18059451  
GAATACTGAGCCTAAAACCAATTCTATGCAAACATCACTAGTTTTTGCTTGTATTCCGCC  
A\_18\_P10240138  
TGCTGACCACAAGACTAATCACTGTGAGATACTTTAATTTTTGAATGACAAACAAGTGCT  
A\_14\_P119696 GACCAAAAAACGAGAGTCAGAAACATTGCATACTGCAGGATAAGAAAGAAAGTCCAA

A\_16\_P37231444

AACCTGTGAAACTGAATACTCCAACCTTGACAAGGATGACTTAAAAAAGATCAGGCAAAA

A\_16\_P18160176

AAATGTAGTCAATCACTGGATGCTCTCAAGTCAACTCTAAATGTTCTGAAATCAGCCTA

CUST\_5079\_PI426210822

TATTTTTTTCATTCTCTAAATTGTTTAATTA AAAACTCATAGTTCATGTTAAATTTGTTCA

A\_14\_P201968 GTCACCAAAGTAAGTGTATTGAAAATGTGACCCATCCAGGGTTATAATGAGAAGTGTTA

A\_16\_P01342381

ACTCTTGAATTGATCTAACCTTTGGCCAAACATATCGATATGACTGCTTAGTTCAGACTT

A\_16\_P18723661

AGGGGCTGACTATAGATTCTCAGTGCTAATAGTTCACATGGAATTTTTATTACCGTTTCC

A\_14\_P107169 GATGTGGTGATGCTCCTCCTTTATCTTGGAATTGAAGTAATTCGCCTGTTTTTTG

A\_16\_P02215827

TGAGATAAAATCTCCCCTGTGTGTAAGGATACCAATTGAAATTAGCAACCAAAGCCAAA

A\_14\_P124492 TGCATTTTTGCATAACATTAAGGAAAGACTCGTTCATGAAGCCAGTATTTGCGATTGTT

A\_16\_P00403649

TGAATATGCAAACCTGTCCTAATAAAAACCATTTCTACCCATGATCATGACTTCTTCTCC

A\_14\_P128157 CTGAGAAGATGGAAAATGGAATTAATACAAAGTCTGCCTACCTCTTTGCTTTATTAATCT

A\_14\_P123682 ATCTGGGAGATACTGTCTTTCTACATCAATTCATGCTCAAACCTTTATGACAAGCATTCA

A\_18\_P11209850

CAATGAACTATGATTCCCCTAAAGATTTAGAGCACCATTTAGTATTTTACAGCACCCAGGC

A\_16\_P01412332

AAATGACAGAGTTACATCTTACCCCTGAAATACGTAGATCTCAACCAAACATCCCTAGATC

A\_14\_P133894 CTTTGCTGCTCCTGTAAGAAGATAGAATAAAGACATGGGTTTGTGAGCACTAGATTTTC

A\_16\_P19375068

ACAAGGACCTGTATTTTTTTTTATGCCAGTAACAGTGACTAAGACATATGAGCATCCATCA

A\_14\_P107506 AAGAGGGTCTTACTGTCAAAAACATGAACTTAACACCTCTGAAATTGAGGAAGAAGA

A\_16\_P02566102

CCACATCAGGTTTTCTTTTACGTAATCTCATCCATAATCTCTCTTATCTTACCAAT

A\_16\_P40413727

CCCTTTCTGAAAATTATGACCATTAAGGATTACCCCTCTAAAATAATCAACCAACCGAAA

A\_14\_P112622 GTTTTGAAAAGTCGCTGTGCATGGTCAAGTGCCACTGGAAAGAGAAG

A\_14\_P134020 CTATAAAGAAGACAATAATCGACATAGAACAGCATCCAACCTGATTTCCCTTGGGAAACA

A\_14\_P139139 CAGCATCTGTTCTCTGTCAATTTCTGATAACAGTAAAAGCCAGCATGGAAAAAACC

A\_14\_P121614 TGTCCCTACAAAACTAAATGCCTTGGGTTTGTCCCTATAGAACTCTCTTGTATCTTA

A\_14\_P123727 CTTATGCAGGGTATATGGTAAGAATATCACACTTCCCTTCTGCTCCTCATGCAAC

A\_14\_P124290 GCTAAGTGAAATGACTACGTTTCTCTAGACAGTGGTGGATGATATTCAACTTGCAAAAAT

A\_14\_P111962 CCACAATCGCTAACCATTTAATGCCATTAGATTTTCCCACCCTTTTTATGAAAGTTAAT

A\_14\_P137846

AGACAGAAGAGAAACGGATAGAAGGCAGTTTAGAACTTCTAGATCAAAGAGACTTTTTTG

A\_16\_P41808290

GGATATTTGTAAATGATTTTGTCCACCTTCTCTGATATTTTTAGCAGTAGTGTTAGTCCA

A\_16\_P17519156

AAACACTGAGACTTTGTTATTCTCTGCAACAAAATCATTTATAACCAAGTCAGGTCTGGAC

A\_14\_P123831 ACTTCCTATGTCCTATGCCACTAAGTCTTCTCTCTCTCATTAAAAATCTCTGTTGTT

A\_16\_P15220570

AAGTCCATGTAGAAATTCAGACTCTCAAAGTCTTATACTATTTATGTCCTGGCCTTGG

A\_14\_P103267 ACAGATCAGTGAGTGTGAGCAGTAGTGAACACTAACAATGCTTTGTAATTCATCATATCC

A\_18\_P22841760 GTGTGGGATTATTTCAGTCCAATTCTTCTACTTTTTTTAGGCCTCAGCATGGGATTT

A\_14\_P136175 CAATTGTTCCATCATAGACAGAAATATAAATTAAGGCACAGGGTTTTGTGGTGGTTTTGTT

CUST\_8786\_PI426210822

GCAAGTTCTCTTTGTTAAGCCATTCTGGTATCCCTCAAATCCCTTGTTATGACTAT

A\_16\_P03027521

CCTGAAGCCAAATAAGACAGATAAAAAATTCCTTCTAAAAGCAAGACAAGTACTGACA

A\_14\_P100337 ATTCAGGACACAGGGAAATCAGGGTTACAAATCTTCTTGATCCACTTCTCTC

A\_14\_P118596 CAGTCATCCATTCACACACCACTTCAATGCCTCATATTCCTGACAGTCTTATTCTAAAA

CUST\_6334\_PI426210822 AGTTAAACAGATGAGGCAGGAGGAGGGAGACTGAGCTGCCTTGAG

A\_16\_P02624541

TCCTCCCATTTTCATATCTCCATACAAAAGTTATGTCTCTAAATTGCATATTCTGCACCC

A\_14\_P121595 CATGAATGACTATTATGATGAAATCCACGTCTTGATGGAGTTCTGTGTGCCTTTATTCCA

A\_16\_P21468462

AAGAACCTCCAATAACTTGTAATCTCCCAACATTTACTCCTCATACAAATTGCTTCAGA

A\_14\_P135640 TCTCTAAATGGTGACTTCTTTGCTGTAGACTCTGACTTAAGGCCTTCGCATTTTC

A\_14\_P129029 ATGGATAATTCTGCATCACCACACCATAAATATCATTAGGATGGACACCATGCTTTATTC

A\_16\_P36996914

CAGAAAACCTTTGGCCTTATATCACTACTACCTACTTCAAATATTTTACAGTCTGTGG

A\_14\_P112513 ACAAAAACGCATTATTTATTTTCAAGATGAGGGCTCTCTGACCAAGAACTTTGTGAACA

A\_14\_P102805 AGTTCTAATTTATCAGAAAATTGTGTTTTGGGATTGAGTTCTTTGTCTCAGCCCAGAATC

A\_14\_P117661 GCCTAGTAGATGACTATTGTTTCTAATGACTGTAACATCACTAATTGGCAGAAGGTTTAC

A\_14\_P121505 AATAAAAGTCAACTCTAAAGACACTCGAGGGAACAAATATGGATTCATAGACTCTCAGAG

A\_14\_P118389 TTAAGGGAAGGCTAAAACCTTGTCTGATATGTGATAAAAACCTTGAACCTCAAATTGCCTCCT

A\_14\_P127310 ACGCTGCGGGAAGGAAAAAAGATATCACAATTTAAACCAATCTATTGATGACTGTCAAGT

A\_18\_P16734337

AAAATCTCCCAGAATGAAGTCATATTGTGTTGGCAAACCTTAGTCATAATCCCCATTTCTCCT

CUST\_2023\_PI426210822 AAACTGCTTTTCTTCCCTGCCCTACTCCTTACTGTCTGTGCCCT

CUST\_6890\_PI426210822 CTTAGGCAGAAGTGAGCCTCATCCCTCAGTGCTGGGACAGATTAC

A\_14\_P120257 GGTGAAGGTTTATACGTTATACACAAGGCCAGGTAAGCGCTCATAATTCACACATAATAA

A\_14\_P103614 AATTCAGTGTGCATGAAGATCTAAGCATTTGAGTGAATATAACGACTCCAGAGATCAGAT

CUST\_9429\_PI426210822 AGTCTCTGAGCCAAGATGTTGGGTTTGTGGCAGACCCAAGACTAT

A\_16\_P16191751 GTTAATGTTGAGGCAGCCCACCCAGGTTAAGGGTCTCATTCTGAG

CUST\_9696\_PI426210822 TATCCTGGAGGGCTGGGAGTGATCCAGTGTCATCTCGATGCAAAG

A\_14\_P129729 CATCATGGGAAGGAAGCAACTTCACACCTGGCCTTTTATAGAGGAGAT

A\_16\_P17176590

AATGCCCTAAAAACGTAATATGACATTTACCACTGAAAAAGCGTTATGATTCCAGGTGTC

A\_14\_P108159 ACAAACCTCAATGTCTAGGTTTGTCTTGTCTTCTACAGTATATGGCTATAAAAAACCTTCCGG

CUST\_9511\_PI426210822 GTGATTCTTCTGAATGCCTGGCCTTCTGTCAACTATCAGTCTGAAGG

CUST\_3960\_PI426210822

TTTCCTGTTATTCCATATTCATGCAGGTCTTGCAGCCAAGGATTGTTACATTAAGATC

A\_14\_P129842

AAAAGAAACCAAAATCCAGAGAAAAAGAATTAACAAGATTTAGGAGCAAACGAGTTCAGG

A\_18\_P16316189

ACTCATGTCCAGATTTTTGAACCAACTCAACCTAAGTAAAGTCCTATCCTTATGCTGAG

A\_14\_P129640 CACCTAAAATTCAGTTGGACCACATATATTCATCCAAAAAGCATAGGCTTCTGTGTAGAT

A\_14\_P100430 ATTCATATATAACAGGCAGTATATTATAGGCATCATCTAGTTATGGGAATGGGAGGGGCA

A\_14\_P112739 CTATTCAACCAGTTGCACAGAGTGGAATATAAGGAAAAGCACATAGAACTTCATTCACT

A\_14\_P116344 TAGGCAGAGGTAATATCCTAATTGAACAATAAGGAGAACCAAATCTTAGTCACCAACGT

A\_14\_P139654 TGTTAGTTAGCACTGTTAGTCTCCTCTTTTTCTCATGTTTTTTTTCTATGGGGCTTTAGAA

A\_18\_P14134505

ATGTAAGATTATTTTTACTTATTTTTAAATCTTTCAAAGCACTTTTTTCTCAGGGCCAAG

A\_14\_P139641 GAGGCCAAATGAATGTTTGAAGTAGGTATGCTTTGTTTCCAGAATATTCAAAAGTTAGA

A\_14\_P114564 ATCAATAACGTTGATTTGCACAAAACAAAGGGTCTTGAAATCTGAAAACCAAAGTCATAT

A\_14\_P122334 AGCATACAAGTGAGCCCTTCTCTGCTATAAAGGAAACTGTCCATAAATCACTTAAAATGA

A\_14\_P123277 AATTAAGTAGTATGCTGACTTGGCCTGTTCAAAGTTCATGCTAGAGTGCTTATTGGTAT

A\_14\_P127256 TGCAATATTTTTGCTACTACCCAATAACTATGCCACTTTGGGTAATTATTGGGAGTCTCT

A\_16\_P01567131

AGAGCCAGTGATTACAAAAGAAACCTCTCCTTATACCTTCATAGTAGTTTATTGTAGGCA

A\_16\_P02634606

ACTCTTGTTGACTCTTTACTCCAAGTTCATTCTTCATTGCTAATGTCTCCAAATAGTGCT

A\_14\_P139987 GGGTCAGGTGGTCTCTATTATTTGGGGTGTATGATATTAAGTCATGAATCCAATAAACT

A\_14\_P111196 ACAAACACTTGCTTTAAAAGAAATTTAAAATTATAAAAACCTCCGAGCATTACTATCATG

A\_14\_P107192 AACAATTATTTTCTCATTTATGCTGAGCCCTTACAGGATTTTGGAAAGTCAAAGGTGAAC

A\_16\_P17943564

ATGACCTATCTTCCCTTTATGCCTTTTGTATCTTTTGTCAATTACCCTGTAAATGTATGCC

A\_14\_P112929 TTACTGTTTACTGTTTCTTGGTTCTGTTCTATTTGTTGGGTGCAGTATTAGTTTGGATCC

A\_16\_P21598182

CAAAAAAATACACACACTTTAGGATTGAACCTAGTTGTCTTCAATTTATAGGGCCTGCC

A\_18\_P22839774

ACTGCCCTGTTGTCTAAAATTAAGCCAATTAGAGAGTCCTGCTATTAATAAGCAACAGTT

A\_14\_P111066 ATCAAGATATAGGTGAAGATTTAGGTTTTATCATGTGAATATTGTGTGGTAGTGCACATT

CUST\_10383\_PI426210822

TAAGATCTCTCAAGATACTAGGTTTATCAAAAGCCAAATAAGCTTGGGGAATGTCAGGT

A\_18\_P26792696 AGCACTCACCACCACGTCAGAGTCCAACACACGTTCCACAGGAC

CUST\_4084\_PI426210822

GCATAGATGATGGCTGGAAAGATTAAGTTCTTTCTGGTGGCTTCTTTAATTTTGAATAA

A\_16\_P17617399

AAGCCCTCTTATCTGATTCTATATTTGGTCTTGTCCACCATGAAAACTATGCTCAGACTT

A\_14\_P106297 CTAAGTAAATAGGGAGATGTAAAGCACTAAACTAACCCTATTAATAAGGAGAGAACC

A\_14\_P110899 CCACCTAAGTTCTTTTACACAAGAAAACCTTCTTGGGGTAAGTATAAATCCATCCCATGC

CUST\_8246\_PI426210822 CCTTGATTAGCAGTAGAAATGTTGATCCCTTGCAGGGAGAGCCATC

A\_18\_P14132860 GATTAAGCAGAGGTGAGGTTAAAGGGTTTGAACAAAATGGGCCTGATCTTG

A\_16\_P38676374

AAATTCCTCACAACAGATATCTTTGCACAATGAAAAGATTTTTTCAAGCCCTCAGTTTG

A\_14\_P130905 CTAGATCCTGGCCTCCAAGATTCTATTTCTCCATTATATTCTAGAACCTAAGTTTGGAAG

A\_16\_P15079562

AAGGAGCATATGCATTACACTTACAGTCAGTAAACAGGTATTTTACAAAAGAGGCAGAGG

CUST\_9036\_PI426210822 CATAAGCGATTTCCCAGGATGATGTGCTTGGAGCATGACACTTAGAAAAAAG

A\_14\_P121777 TTCTTAGATACTTAAATGTGCCAATGCCTAAGTCTTGACTTGCACGTAGTCTGTCTTAG

A\_14\_P122800 ATGCTTCTGTTATGTCAAAATTGTGAACATTTGCCCTTTGTGGATAAAGTTCTCTTGATG

A\_14\_P200627 GGTGACCAAATCTGTTTACTGATCCCTGATAGAGGTCACATTTCTTTGAGCAAATATTTA

A\_14\_P105057 CTCATTTCACTTTGTTCTTTTGATTTAATGCAAGGAATTAAGGAGCAGAAAGGGAT

A\_14\_P132140 GCCAGGCCTGTCTTTTTTCTACTAGTGATATGAACAATTTAGTTAGCAAGACAGATAGGA

A\_16\_P00685448

TTTCCTAAAAGTTCTTGCAAAAATGTCATAGAGTCTGATTGGTCCAATTGAGTTAAGCCT

CUST\_10284\_PI426210822 AAGAGATTACGCATAGGCTGTGTTAGGAACAGGACTGGAGACCCT

A\_16\_P16173790

AAAAGTAGTCATTAAGATGTGCAATCTGTATCCGATGTATATCTTCAACCTAGCCCTTCC

A\_16\_P16905240

AGTCAATCTGCCAAAAAATAAATGTGCCTAAATTATCAAAATCACCTATGTTCCAACCGT

A\_16\_P30952400 CTTACCACGACTAAGTCACCTTCCTCTCTTGGCCTGCAGAGCAAG

A\_16\_P30952411 ATGTGATCCTGTGACAAGGAAAAGAGGTGGCCTCATCACAGTGTG

A\_14\_P122886 CTAAGGTAGTCAAAAGAGAATCAGTCTTGAACACTGGATGTTTATGAATAGACCTTGGT

A\_16\_P37838345



CCCTAACATAAAACAAAACAATCATTTCCTAAAAATAGTCAATATACAGTGTGCAGTGC  
A\_14\_P139250 ATAAATTACCGACAGAAACCATAAAGTGGGTGGGGTTTACTGCTAGTAAATGACTATTA  
A\_18\_P12317848  
TGACACGTAGTATACAGAATCCTCAGTTTACTTACACTCTTCTAATAGTGCCAAATGTCA  
A\_14\_P128640 GTTTTGGTGAGAAAGGAAATAATGGAAGTTAGAGAGGATGAAGTCTTTGAGCCAATGTG  
A\_16\_P15923043  
GCTGCAAATGGAACGAAGTAAAAAACTCCCTATCAAAGTCTATGGCCATAATGTGATT  
A\_16\_P03022464  
CCTGTCTTTCGGATATATGCTCCTCTCTCAAGTATACATGAACTTTTAGCAACCTTTCAT  
A\_16\_P17734208  
AGTGCCTATTTCCCTTTCAATACCTAAGCCCAAGACTACAAGTAAAAAAGGATCTCCATTT  
A\_14\_P201667 CTAAACTCTGTGGCCATTTCAAGTTGAAAAATAAATGGTTATGTGGATGTTTTGAAGACAT  
A\_14\_P101629 CTTACAGAGTGTGAGGGCTCAGTTGTATAGAATGTAATGTTCTCCTCAAACATTTATGTT  
A\_14\_P115813 TAGTTCAGGAAGTAAGTAACAGATTATTATTTTTCTCCCAGTGGCAGGGTCACACTATTT  
A\_14\_P110102 CTTTGTCCAAGGCAAATTGTAATCATTAGGTCTACTACCCAAGGCTGCTAAATGAATAT  
A\_14\_P129096 AGCAATAATGGCTACTGAAAAATTAATAGTGTGCGGCTTTGAATGAAAAAATTCCTTCCC  
CUST\_4606\_PI426210822 TCAGCAGCAGTCATTGGAGCAGGGATCTGGGGAGGCTTTTCACGT  
A\_16\_P15144546  
ACTCTATCCACTTGTCTTCATAAAGCCTTTTCATATGCTTACATTGCTCAATCCCATTGT  
A\_14\_P120279 AGCCACAGATTATGACACATGCTAATTATTATCACTGTAGGTTCAATAAACTGGGGGTAG  
A\_14\_P134885 TGTATTTTTATTCTATCGGTGAGTGAAGTGGTGGCTCTTTTGGAAAATCTAAGGTATTC  
CUST\_3666\_PI426210822 GAAAATAAGAAGAAATTCAAACCTTGTTTTGCTCCTCATCAGCGACAGTGGT  
A\_14\_P120875 ACCTATCTCTGATCTTACCCTCTAACAATTCCCAACAAGAAATGACTCCATGATAGTGAT  
A\_14\_P119059 AAAATCCATACAACCTTCAGATGGAATGAGCAGTATTTCTGAAAGAGACTTAGCGTCATCA  
CUST\_7288\_PI426210822 TCAGACCTCCTTGATGGGAACATCATCACCTTCACGCTTTTGTCT  
A\_14\_P102246 ACACTTTGTTTCTGAATGAGTTTGTGACACATAAACTTGGAGAATGGAATTATAGCCTGG  
A\_14\_P112521 ACAATCATTCCTTGTGCTTTTAAATTTGGAGATCCGAGAGAAAACAGCCTTTTTGTTGC  
A\_14\_P128172 TTTGTTACCCAAGAAAGCAAAAATGCTTTGTGACACAGGTTATCTGTAGTGCTACTTAGA  
A\_16\_P38431159  
GATCCCAACTCCAAAAATTTAGACTTCCCTTGTCATTTAATCTCTAGTCCCCTATTTACA  
A\_18\_P14136298  
ATTCATCATGTGAGATGATAAGTGTCTTTCCTTGAACCAGTTCTTCTTCTCCTCCTAG  
A\_14\_P116108 GATTCGCATAGGTGTTACTCTTCTATATTTCTCTCTAACTGCTGACTATAATATCACTTG  
A\_14\_P100599 GAGAAACCACCCTACATATCTGGTGCTATTTTCATCCATCTACAAGCAGGAG  
A\_14\_P119342 TGCTCCATAATCATAGGCAGAAAAAGATAGGGAGTGCAAATATTGTAAACATCCAATGGA  
A\_14\_P201610 GTGGACCTCACACCTTTAATTACTGGATACAGAAAAAGATACCTGAAGTATTGAAAGGGA  
CUST\_7280\_PI426210822 GAAATGATGACCTGAGAGTGTGAGGAAGGGGAGAGCCAGGAGCTG  
A\_14\_P131437 AGAATCTCAACTTTGATTTCACTCGGAGTTACCTGGACTTGATTGTAACCTTACACCTC

CUST\_1880\_PI426210822 TCATATCTCCCAGGGCTTGGAGAAGTGGAATCTGGATTCTGGATTA  
A\_14\_P201851 ATCCTCAGTATCTAACTCATTGCCTGGCATGAAATCTACATAAACAACAAACGTA AAAAGG  
A\_14\_P135792 TGATTCATTTCTTCATTTCCCTTCATGTCTACAGGAATAAATCACAGAAGGCTAGTTCTGG  
A\_16\_P15628480  
ATAAAAATCTCGACATGGATACATAGTCATAGGGTGAATGTAAAAATCATGGACTGAAGGG  
A\_16\_P17846649  
ACTGAATAAGAAGACTGTTGACATCCTGTAACTTATACTTTATATGCAACCCCTTCACGG  
CUST\_8101\_PI426210822 ACTGAAAGTTTTTGAAAAGGGGAGTGGCACAGTGCAACAGCTTGG  
CUST\_9499\_PI426210822 ATTTTCATTATCAAGAGTTCTTGGGAAGAGGCCGAGAGGTTTTTTTTTAGCACTC  
A\_14\_P107270 TTTACCCTCGCTATGACTACAGAGTTTCCTGGGACCTCCTCTCTTT  
A\_14\_P135333 CACCCATTTTCTTAATTAGAAAGGGAAAAGACTGTGGCCTTGGGAGAGTTAAGAATAGTA  
A\_14\_P115162 TAGAGGTTGTCTATGAAAATTAAGTGGCTATGATCGACCTTGCAGTAAACCTGAAAAGATT  
CUST\_5641\_PI426210822 CTGTTCCCTTCCTGGGAAGCCGGCTTCCTGGTGTGTGAGGAGAG  
A\_16\_P16230288  
CCATTCGTATGCTCAACCATATGCAATATTGCCTGAATGTGAAATCTTCTGTAGGAAATG  
A\_14\_P119196 GGATAGCCTGTGAAGATTTCAAGAAAAGCAAGGGACCTCAACAAATTCACCTTAAA  
A\_14\_P109341 GGATGCTTATTTTAATGACGCTATACTTTGGTGGTAGCAGCATTTACTCAGTCAACACTG  
A\_14\_P102728 GAATGGCAAAGTCCACTATTTTCATACATTTGTTTCTCTATAACCTTTTTCCCTCAGAGC  
CUST\_5146\_PI426210822 AGGACCAAATCTTAAAACCCAGGGGCCCTGGGGTGATTTTCAG  
A\_14\_P132280 CTTCAAATAGAGGCCGATTTCTTGGTCAATGAAGAGA AACTTGGTCATTCAAATTTCTTA  
CUST\_9826\_PI426210822 CATTTCAGGAGGCAAGAGCAGCCTGCAGAGAGGCTGGGGACCACC  
A\_14\_P136023 CTTTACTCACCCAATTC AATACAAGTGATGCCAAGTGACCAAATATCAACTTTCCCATC  
A\_14\_P117281 CTCCAGACTTCCTCTTTGTTTCTTTGTTGGGGATTTGTTGAGGAGAG  
A\_14\_P122925 GCCCCCCCTCAAATACTTCCACATAGTTCCATAAAAATAAGTAAATAAAGGAAATATCCA  
A\_18\_P16180029  
ACTGCATGCAAATCATCCAGA AACTTTTTCAAACCCTTGAACCTATTACATGTAAAATCCA  
A\_14\_P130709 TCTTTCTCCATATTTTGACTCTTTTTGCTCTTTCCTTCACTTGCAAACATAGTCAGGTTT  
A\_16\_P16894772  
CCTCACTCCTTTAAATTGGTCCAAATGTTCTAAAGAAGGCACCATTGATTATTTAAACGC  
A\_14\_P200209 CACCTACTCATCCAGAGAATTTAAATTGCTTTTTGTTCA TTTTCCATACTACTCCCCACA  
A\_14\_P115655 ATACCCCCATTTGACATTGACTTACCATTACTGATTTTCAGGGAGGTCAAACCTTAGT  
A\_14\_P129962 CAGTGGTAAGGTGGCAGAAGATGAGAGGAAAATTA TTTTAAATCAATGCAGAGCACTTTA  
A\_14\_P102741 AATAGAGGAATTTTACCATTTTTGTGATAGTAGGTGACCTCCACTTTCCTCTCTTCTGAC  
A\_14\_P111084 CATGAAAACATTTTCTCAGGAGAAGGCAACTGTGAAGTTGAGAAGTCTGCTTTCTAAAC  
A\_14\_P122143 ACATGACCCTAAAGGATGAAAGAAAGGAATTTAGAAATCTCTCCTCATTTCTCTCTCTTT  
A\_16\_P58424394 ACCAGTGACCTCCAGAAGGCTGATTTCCAATGGCCAGTTCTAATTTATTC  
A\_14\_P106857 ACACACTACCTCTTTCACTCTTTTAAATCTCTATCTATAGGCCATTAGTTTCTTGTGATT  
A\_18\_P23434627

ACAAAAACAAAAACGAGTCTTTCAGAAAGTAGCCGATTCAAAATTCAAATGCACGTCTTC  
CUST\_7508\_PI426210822 ATAACAATGAGCTGTAAAATACGACCTGTGGGGTGGGAATGGGGA  
CUST\_3405\_PI426210822

CATTGCTTTAATCAGAAATAACATATCAAGGTGGCCCAAATTGTGTCACTATTCTTTCCCT  
A\_14\_P101892 AGTCCCAGTGATGAATCAGGCTTTGTATACTATATGAGAGAACATTACCTCCATAGAACT  
A\_14\_P135494 AAATGTCATGGCTTTACTTTGGTCAATTAAGGGGGGAATTTTTTTAAAAAATGTGCCTT  
A\_14\_P117068 ATAAACAGGGAATTACACAAAATATTTTATGGCCCATTTGTAATAAGGGCCATGAAGGGA  
A\_14\_P202143 CATTCTTGGATAGACTATTAGATTGGAATATACTAGGTAGACAAACCTTTGCTGTCCAC  
A\_14\_P106500 TGGAAAACCTGAGACTAGAGGTGAACTAAAAGTTGAAAACTAGTTCTTGATTGCCTGCTA  
A\_14\_P135002 AGTCTGAAATCTCCATGAATCAAATTCTCTTCATTGTCATTATCGGGCAAGTTCTTCATT  
A\_14\_P101513 CACAAAATTACTCCCTAACAAGAAAATTGAAATATCCAAGGCCAAGTTCAAGGTAAAGAC  
A\_14\_P115265 CACTTTTCCCTTGGTGAAGTGAGTTTACTACTGAGAAAGTAATCAAATGCTAAATCATG  
A\_14\_P113146 GTTGCTTGGAAAACTCCGAGATGTGATTGCTCAGTGTATTCTCCC  
A\_14\_P131794 GACAAAGTCAAGGAAATCAAATCTTCAATGAATGAAAACTCAGTGCCATCTGGGG  
A\_14\_P137555 AGTATATTTACAAATGAGACATTGCATGAACGGTCTTAGGAAGAAAGTGCCTGCTAAATC  
A\_14\_P105598 CACGCTCTACTGCATACAGGAAAACCGAGGAAAATGAAATTGGGAAGAAG  
A\_16\_P37755895

TCTTCAAACCTGTCACAATCTTTTCATGTAGTCCATAACCTGTAAAATTCACAGCCTATG  
A\_14\_P125064 TTACACAAAGGAGACTACTTCTGAGTGAAGGATCTAGTTGAATTGTGTAGCCTTTTCTAG  
A\_14\_P114652 ACCATTTTGGAAATTCACAGTAATAGGAAGCACAGAACAGTAGGTAATTGGACCATAGG  
A\_14\_P130662 AATATTGCCATGGACAAATCTGATTTGATCATTGAAGGGACAAGCCTCTGTTTTAGAATT  
A\_16\_P19934091

ATGATGTTGAATAAGTATGTCCTCATTAGCCTTCAAACATTCTCACATTGTTGGACTGG  
A\_14\_P117132 AACATGATCAAACCACAGCAGGAACCACAATAAGGAACAAGACTCAGGTAAAG  
A\_16\_P19256327

TCTGTTGCAAATGGAAGTTGTTAATGAGACTCAACAAGTTAGTGGAATGTTTTGAGTG  
A\_14\_P119389 AAATGGTTATTCTTAATAAAAGGTCATTCCCTAATTGGTGGATGTTGGGTGAGAGAACAGA  
A\_16\_P01791176

AAAGTAAATACAAGTGAGCCTACTAATACATCAACCCTGATTGATTTTAATTTTCCCAC  
A\_16\_P21458402

AGCGGCAAGACTTTCCTAATTAACCTTACATATGCTGGTTACTTTGCTATAGGGATCAAAG  
A\_14\_P121310

GCAAGGAAATTGCAAGAATAGAAAATGAAAGAGGAAGTAGAAAGGTTTGCAGTATAAGAA  
A\_14\_P139622 ACATTTTGTGTGGAAATGTATCCACAGGCCATTTTAGTTGACTTGAGAAATCAAAGTTA  
A\_14\_P111096 ACCCAGGTGGCGTCAGTCACTGAGTATATGGTGGAGATAATAATACTAGTTGTTGAGATA  
CUST\_8075\_PI426210822 CTTGAAGCAGCATCTAGGTAGCACTTGGCTGGCAGCTCCAGTGGA  
A\_14\_P133818 TCCTTACAGGCAAGAGAAATATGTGTTAAATTCACTCGTGGTGTGGACTTCAAT  
A\_14\_P131495 AACATTTATATCTTTCTTTCTGTTTCAGGTGCGTATAGCAGCAAATTCATCATTTCATGC

A\_14\_P121917 AAAAAGTTTTTCAGTTAGAACAAAATGGAAAACAGAACCACACAAACTCATCATTATGT  
A\_16\_P18682495

CAAATTTTTCTGATAAACCCCTCTCATCTATGTCAGTCATAGTTCAATCAGAAGCAGACG

A\_14\_P100595 AAATCTATTAATGGTAGCAAAGTGCATAAGACAGGGATTTCTTTGAGATGAAAGGAGTGC

A\_14\_P127456 GCTTGGCGACATAAACCTCATACTTGGATTTATTCTGCATCTTTCCACCTC

A\_16\_P00799708

ACCAGCATCCTTGATAACAGTTTACCACAATGCATTAATAAATCATAGAACACCAAGGA

A\_14\_P111453 CCTGCATTCTTAAGAGAATGTGAGTAAATATGTTGAGTGGCAATGGTCAAGTTCAATGAA

A\_14\_P134015 CCCTTCATCCAGTCTTTTAATTCTGTAGTGTTTTACAACCTGCTCCATCTAAAACCTGGAAC

CUST\_3151\_Pi426210822 CAGAGGAAGGGCTGTTTCTATGGTGGCCCTGAGGGTTACTGGGAA

A\_16\_P20344523

GGTATATGGCACTATTGTTAAGACCTGAATTAGACCTGCTTAGATATCCCAATCTGTGAA

A\_16\_P20863822

TAAGAAAGATTGAATGCTTAAGTTCAGAAGGTTTCAGACAAGAAGATTTTCTACCTGCCAC

A\_14\_P134531 CAACCAAATGTAATTCGCCTTGATACATTCAAGTTAATTGATGCTTGTTCCCTACTAG

A\_14\_P112071 GAGTGTTGAGAAGTCCCTCCATATGCCTTTCTCTCCAGAAACAACCTGTGTTTATATAAAA

A\_18\_P14644205

TCAATTGCATTCCATTGATAGAATCCCTTGATTCAGCATATTCTATAGCCACTCCTTGAT

A\_16\_P03487895

TACTACGATCCTGCTTTTAAATATCCTCTGCTGACGGTTACTGTTCTGAAGAAGTAAT

A\_18\_P17379992

ACCAGTATCTAAAAGATCAAATAACTCTTACAAACAGACAACAATCTAGCCTAGGAGA

A\_14\_P139731 CAATTGCCTAGAGTCTTGACATTGGATAAGCATAACAGTTCAACATAATGTTGGTGAAA

A\_14\_P101118 GGATGGGGCACAATTTAAGTCTCTTTCAATCTAAAAGGGGAAATGAGTTGAAGATTTA

A\_14\_P130456 GAATTACCTGGGATTACAGACTAAATCCCAGTATGAATTCCAACAAGCAGAATTC AATTG

A\_14\_P114008 CGACAATGTCATGCATGTATTTAGAACCTTGGTGTGTATCTTAGACTATGCCAGATTGTA

A\_14\_P136749 TGTCAGAGGAAGTGTGTGTCTAATCTGTCACTTTTTATGGAAAAGCCACTAGATTTTACA

A\_14\_P133099 CCACCTGATTTTAGAAAATAAAACAATGCTGGTTAATTTTTTCAGTCTTGTTTGCTTACAT

A\_14\_P105151 ATTTGGAAGGATGTTTACCAATGTATTTGTGGTTTATCATCGGATAGGAGATCTCAGTTT

A\_14\_P129557 AACAAAAGATTCTTCAATGGACAGAATTGTACCTGAAATATAGCAATTTGGCAGAAGCA

A\_14\_P128481 GGTATCTCCAGTCTATTATAAACTACTTTACAGAGATCCTCCTCAGCCTGAGAGATTTT

A\_14\_P127604 CTTGAGTTCTTTTAAAGGAGGGTAAAGACAGCAGAAGGAGTGATGATGTTAGATAATGTT

A\_14\_P131944 TCCAGCAACAATTTATATCTGAAAAATGTTTCCAAGCCAAAAACCTGTAGCAAATCGTCA

A\_16\_P00907455

TTTCATTAACAAACCTATAACATTACGTGCCTCATTATGTATTTTCGAGACTTCCCCTGC

A\_14\_P105292 CTGTGAACTCCTTGATGCCCTGTAAAGGCTTTAAAATACAAATATCCTAGTTCTGAAAA

A\_14\_P111038 AACCTTACTGAGGCTTTCGTCAGATACTCGTGATAAAGCACCTTCTTTTTGTAATTTGC

A\_16\_P16960288

AGTGCATATCATCGTCATTTCATCTCACTTTTCCTTCTAACATCAAGGATCTATACAAGGC  
A\_14\_P105790 TGATTTATTCATAAAAAGCCATTATTTGTGCCAAAGAAGAACTGAGCCGCTGGCTTTTTTA  
A\_14\_P101363 GACACGAAGATGTGCATTGACAGAACCATAGAGACTCTACAAATATTCATTATCCTTCAT  
A\_14\_P117407 AGAGTATTGGGACTTTGGAGGAAGCCAGTGCTATCAATATTTACAAGCATAAAGCC  
A\_16\_P41251123  
ACAATCTCAATCATTTCAGTAAACATTTAAGTAAGTCAGTCTCACTTACTGTGGATTCCA  
A\_14\_P139363 CAGTAACTTGCTTTTTAAAGTCCACTAAGCAATCTGTGGCTTCTGAAATGGAAACAAAAG  
A\_14\_P116072 GAAATGTCACTAACAAAAAATTACATTATTTGTGGGAAAGATGGGAAGATGACTGCGTGT  
A\_14\_P200272 CTGGCAGAGTTTATTGACTTTCTGGACAAGAATGATGAGGAGTATATGAAATACCTGGC  
CUST\_8119\_PI426210822 ACTAAATTCAAGAACACCCCCTATGTACATTAACAGTGCTGCATAGCTTCAGGA  
A\_18\_P12198319  
AATGAAGAATCACTACTGTTATGGCCTACATTGTAGACATTGTTCTTTACAGTCAGACCA  
A\_16\_P15235057  
CCGGGTATACTTTGAGATAATTGGGTCATATTACTCTCTCTAGTAACAATACTCATCACAC  
A\_14\_P106186 AGAACTGATGCTCTTACCTTGTTAATAATTCCTCCGTTTTCAACAACCTCCTCAGCAC  
A\_14\_P200481 CTATGTCTCCATTCATGAGTAGGAAAATTCCAGTATAAATGAGAATCTCAAATCATGGCG  
CUST\_4187\_PI426210822  
TAGTCAGTATCAGTAGATTGTTGGGGAGAAATCTTTATGAAAAATGCCACTTTTCACTCT  
A\_16\_P00238229  
TCCCTCCCATATTTTCATACTTCAGCCTGTTGATATTTTACCAACCTTAAAAATCCACTT  
A\_14\_P100094 CTTTATTAGGATAAGAGATGAGCATCTAATTCTTGCTATCAAATGTGGTGAAGCCAGTG  
CUST\_9544\_PI426210822 TTAGGTCATAAACTACAGAACCCTTAGGTCATATATTCTCACCGGGCGCTTGTTT  
A\_14\_P132279 AACCTATTCACATATATCTTTTAAATTTCTGGTGTCTTTGAGGATGGGCAAACCTGAAGGT  
A\_14\_P112789 GATGTGAAAACCAACAAAGTGAGCAGGTTTATCACAGACACGAGAAAGGCAT  
A\_14\_P110033 CTTTACGCTCAGCCTCCTACTGGTTTTTCATTATTAGTGAAATGTCTGTTAGTGCAATATG  
A\_14\_P201829 AGTGTTAAGTCAGAAGATTGAGTAGATGGCTACTGTTTGCTTAAACATAAGTGTAAAAAA  
A\_16\_P00235540  
CTAGGGACAAACCCGAAGTAAACGACTATACTTACCTCAAGTTGAACTTTTCAGAGAG  
A\_16\_P20371706  
CTGAAATCCAGGGCATTGACAAATGAAAGTGATTATCACTGTTTAAATTCCAAGTTCTCC  
A\_14\_P128433 AAGAGTCATGCCTACAATTGAAACAGGAAAATTAATCAGTTCAGGATCTCAGAAAGTGAG  
A\_14\_P115314 AGCAGTCTATGACAGAAAAAGTGATAGGCCCTCTTTCTACAAATATTCATACAAGGACTT  
A\_14\_P127475 GATCTGATTCCCATCATATTTTGCTCTTCTACTCTTATCCCCTAGACTTCCATTTTCTTT  
CUST\_1181\_PI426210822 GCCTCTAAACCCACTTCTTGTGGGATGGTGGAAAGACCGTGGGAG  
A\_14\_P113742 CCAACTTTTATTGACCATTTACTATGTATCAGAGTTCCTGCCCTGAAGAAGTTAAGTCTG  
A\_16\_P16367305  
CAGAGATTTCCATAGGCAGAATAACATTAGAGATTACGTCATTACAACAGATAGCCCTCA  
A\_14\_P107236 TCATAAGAGGTTCTAACTTCTGTTGACAAAGGAAACACATACTCTCTCATTCAAGGCTTCT

A\_14\_P118652 CAGCAAATTTCCATAAAAAATAAATTATGTCAATGTAAGAAGGGTGTGATCCCATCGGT  
A\_14\_P102781 AGACAGTGTCTTCATCTCATTAGATAAAGGAGGCTCAGAAAAGATAACAGTTTAAGACCT  
A\_14\_P102069 AAGCATTCTAGATGAGAAAAAGAACTTAAGTGTTATTTCCCCCTACAGTTTTGAAGA  
A\_16\_P02658035  
ACTGAACTTCCCCTGTAAAATGATCCACATTCTACATGGCAATTACGTTTTTCAAATCT  
A\_14\_P117753 AATACTACTATCTAGCCTTCTCCAAGATAAGTGCTTTGGTAGGCTAATCTTTCAATGGGT  
A\_18\_P14375740  
ACCTTGCTCCTGATTAACTTAATTATCACCAGGCTAAATATAGATCGAGTTCTACATGGA  
A\_14\_P132536 GGGTCTATTTTAAGACCTGGATTGAACCTTCAGTCATTAATGTGATTTGAGGCTGTC  
A\_16\_P03435271  
CCCCATCATAATTCTAAGCAATCATTTCATGTTTCCAACATCTCTTATTGTCTCATCTCCA  
A\_18\_P11903891  
ACAGAAATTGCCAACTTACTTTATGAAAAGACACCTGAAATGATGATGCATGACCATTGT  
A\_16\_P15550756  
AAATATCAGAAATCTCAGATAGTGCTTCAGACAATGTGTTTATGTCCGTTTCATCTCCGT  
A\_16\_P16480112  
CCAGCCTTAAACAAGATCTCAACATTCCTGTGAATTATAATGCAGTCTTCTAACTCATGC  
CUST\_4351\_P1426210822 TGAGAGTGATGATGGTGATGGTGGCAGACAAGAGCATGTCACATTT  
A\_16\_P00748742  
AGGTTAGTGACTCTCCTCTATACCCTAAAACACAATCTTCTATCTTAAGATATCCCACCT  
CUST\_7671\_P1426210822  
GATGATGTATAAGTCCTTTCAGAGGGAAACTTTGAGTATGTTAAGACCCAGGAA  
A\_16\_P15220727  
TACTCTTCAATGAACTAAACGACTCCTTTAGAAACTACAGACCAAATAGTATGAGGGTGC  
A\_18\_P22839414 AGAAAGATTTGGAGTTAAAAGAAAACCAAGTCCTCTTGCCTGTGGACAAAGCAG  
A\_14\_P127741 ACCTTCTAGGCATCACAGTATTAAGAACCATCCATAGTTTATTGACTGTTTGCAGAATTC  
A\_14\_P110838 TCTAAAGACTGTTAGTGGGGTGTAGTTGATTTTTCTGGTATACTGTTTCTTGGCTG  
A\_18\_P10353913  
AACCCCAATTCTACATTAACTCAGGAGTATTTTTTCATTTTTGCCCTATGACACTGAACA  
A\_14\_P112120 ATGACTTCTGATCGAGTTTTCTCTTTGGGTAACCTCCGAGGTGCGTATATTATTAATTCTT  
A\_14\_P114584 ATTCCGCCTTTTTTTTTTCTAATGGGGAGCAAAAAGAAATTCAGTGTCTTTAATAGTGA  
A\_16\_P16191724 CCAAAGTGCTCTTTTCAGTCCATTGTTTTTCTGAGATGTAATGACTCAAGGGTAAAT  
A\_18\_P10892520  
AAGTTGCTTATCTTGACAACTTTTCTAGTCTCAGATCCTAAGATAAAAATGGCTGCTCCC  
A\_14\_P104054 ATCTCTGGGATGTTTTGAATGAGAGAGGCTGAAATAAATGCATTCTTCTGGATTTTTAT  
A\_16\_P18089354  
GGCCAGATTTAGAGCAATACCTTTTTATGCCAATGATTATAAGCAAAAACAACTTTGACCT  
A\_14\_P122839 AAAACGCATAAAGTGACTTTAAAACAGACATTCTGTAAACTCCAGACCTTTGTTCCCTTC

A\_14\_P127335 CTAAATGGCCATGAATAGAAAAACAGAGATAATCTCCTGTCCTATCTCTGAGTCTACTTG  
A\_14\_P137922 CCAAATAACTGCTTGGTTGTGTAGTTTCTCACTCTTCAGTTTCTTTAAACATGTAAGCAG  
A\_16\_P21671228  
CCTTCCATTACCATAACATTCATGTTACGTTAGTGCTGTAATACGGAAACACATATACA  
A\_16\_P15717408  
TATATATGCAGGAATAAGTCAGAGAGACCTAAGACTCGAATGCTTCTTATGGCTTCTGAA  
A\_16\_P35198280  
AAATGACCTGTAACAAATGTGGAGAATAAAGAATGCCAAAACAATGCTATTTTTCTCAGT  
A\_16\_P03200031  
AAGAAAAGAAAGCGTGTAGATGATTTACCTCTTAAGTCTCAATCTCATGGTGAAACTCCT  
A\_14\_P115522 TAAAAGGGTCCCAGTGAGAGTCATCTTAAATGTATTACCAAGAGAATCATATGAATCCA  
A\_16\_P02989704  
TTAGACAGAAAAAATATCACTCCTCACTATGGAAGTTGAAAAAGATGAATACCCCCAGC  
A\_14\_P120629 CTTACAGTATGAGAGAATCGTTTGGTTCTCCTAATATAGTGTTCCTCGATCACTTTGA  
A\_16\_P01019049  
AAGACAGCATTTAGATTGAGAAGAGACAAGTAAGGTTTGTAGAACTCTATCCTGGATCC  
A\_18\_P22841607 AGTAACTGTGGCAACCATAGAAGAGGCTGGCCACGTGCTCATAGC  
A\_14\_P138796 AGTAATTTGGAAAAATCCCAAGGTTGAAATGTAACTATCAGGGAACAACGAAAAATGCTT  
CUST\_8596\_PI426210822 ATGGGCTTACTCGCCCTATGGGCCCTGGGCTGTCACCCTACCTAC  
A\_14\_P130459 AATGTCTGCGCTTAGGTAAAATAAAAGGAGGAGAGTCATGAAGATTTTATACAGTGGTCA  
A\_14\_P127480 AATATCATTTGGAGTGGGATGTGTCTGTATGACTGGAATCGTTTTCTATTTGTAACAGA  
A\_14\_P125153 TCAAGTCTATTGGACGTAATTCGGGAGATTAGGTTTATTGAAAATATGGCTTGAGGCTAT  
A\_14\_P104958 ATGTTTGAATCCCAGTTTGGGTGGTAGAAGTGTTCCTATTTTTCTAAAACATCCTCTCT  
A\_14\_P106466 GGCATTCTGCTTTTTCTCTACTAATCTTGAAGTGCTCAGTGATTTGTGTATTTGTGTCTTT  
A\_14\_P115184 TCCTAAACATTAGCATGACACCTTAAACAGAGCAAACCTTTCAGAACATGTTTGATGAGAG  
A\_16\_P58424303 ATTAGTGACCTTGTTAAAACCAGTAGGAATGGGGTGGCAAGAAGGAGAGTA  
A\_16\_P01657141  
AAAAAGCAAAAGATTTACCTGAACTCAGTATTCAACCAAAGTTGTTTACTCAATGAGGG  
A\_16\_P03754683  
AACTTTGACAGGCAATATTTATCTGGTCATTGGTGCAATTTTCATAGACCTAATTATGGCG  
CUST\_2266\_PI426210822 GCTTGTGTTGAGCCTCTTCACCTCGCTGCATACACAGCATAACAGAC  
A\_14\_P136353 CTATGGACTCCATACTGTTGGATATATTGTCTCTTGTGTCTTCTGCTGACTGCAGATTAA  
CUST\_4669\_PI426210822 TCTTCCAGAGTCTTGGAGAGCACAAAGATGTGTGTTGATGTACAGCTTAAAG  
A\_14\_P111155 ACATAGAAGCACTTTATCCATCATTGCAGGCTCTTCAGAAGGACTATGAAAAATATGCTG  
A\_14\_P105436 CCGTCGACTGAGACAGAGTTCTCACCTGTGTAAGGAAAAAAGATG  
A\_14\_P113162 AAAGTGAAGGCACATAAAACACCACTCCAAAATAGACGGTAGGTTCCAATGCATA  
A\_14\_P108331 ATCCATATTCTTTAATATGGAAAATGTTGGGATCCTCATAGCCACCAAAAATCAAGTGA  
CUST\_9121\_PI426210822 ACAGAAACTAACTTCTGAGCTGTGACTCTGCCCCCTGGGGTTGAC

A\_14\_P126535 CGTTGATCTTGAGTCGACTTTTGTGACCAAATTTGGAAACAATTGCAGTTTGAGA  
A\_14\_P113803 TGATTAGCATAGTGTTTTGGTAACTTCTTGACAGTGTCAATGTCCATTTCTTCATCATCT  
A\_14\_P132178 TTGGGGTGGTGAAAACTTGAGATCTCATACAAGGTAACATTTTATTTCAACAGATGGAA  
CUST\_6933\_PI426210822 CAGAGCCGCAAGACTTGAGTGAATCTGTGGGGGGAATTTAGAAAA  
A\_14\_P127585 ACACCAAATTTTAATGCTAACATTTGGCTTAGTCTTTGGTAATCAGATGTCCAAATTGGG  
A\_14\_P102891 AAAATTAACCTTGGGCATTTTGATCTTGGACTTTTTTCAGTTTGACTTCAGACTCTCCCA  
CUST\_8692\_PI426210822  
AGAAAATATGCACCTGATACATCACTGACCATAACAGGAGCTTAAAATTAGACATAAATG  
A\_16\_P21081823  
AAATTGATCCAGTGTGGTAACAAGAATGCTATTCTCCTGTTTGATCTCTTAGGCTTTTTTC  
A\_16\_P03153995  
GCAAAGGGAAACATATGATTTATAAAAACTAAGCCTGTATTGAATAAGAGCCTGCATTGC  
A\_16\_P02711265  
AAGCCCAATGATGTCACTAAATAGAGTTCAACTAACTCAGGCTATTGATGAATGTCAAGA  
A\_16\_P20956688  
ACTTGGACAGAACACATATGAAGTCACAATCATCAAATACACCAAGTTAAGGTAGAGTCA  
A\_14\_P113224 ACTAGGTTATTTAACCACATTGAAAGACTTCATCTGAAAGGGCAACGTGAAAAGTGTTAT  
A\_14\_P112759 TCCTGTCTCCTTTATAAGGCCACAGATTTTATCTGTAAAACAAAGCACTACTTTCCCTGA  
A\_14\_P103106 ACTTAATCCTCTGTCCCCTTAATCTTCTATGCCAAATGTTTACAGCACCTAAATAGAA  
CUST\_2500\_PI426210822 AAGTGATATCTGGCCTAGGTCAAATTCCTGGGTGGTGGAGTAGT  
A\_16\_P02940090  
ACAAGGACATACTTCATGAACCTCTTCATTGCAACTTTACTGTATTTTTTCCTAACATCCC  
A\_16\_P21612255  
AATGCATTTGAGCAGACTAAAGATGAAACAGAGATTTTTTCATGTCTTTTGACCCTGAGA  
A\_14\_P101420 GCCATGTCGTCCTAGAAGGGTCCAGAAGATTATTTTACGTTGAGTCCATTTTAAATGT  
A\_14\_P117338 GTTTTTGCAAATTGTAGCAAGATGTGAGATACAGAGAGACAGATGTTATCTGGGTCAAAC  
A\_14\_P106163 AATGCCCTAATATAAACTGACTCAGTTGAATACCTAATTTGCTGAGACCTCAGCGTTTTCC  
A\_14\_P116600 CTCCTTCTGAGAAGGAAGTATTATTGAGCCTACATTGTGTTGGGAGGGAAAAC  
A\_14\_P123986 TGCGCTGTTTTTCTTTTCATCTCCATGTTTTGGTCTTTTTTTCACGTATTTTATCTTCTCC  
A\_16\_P15245983  
TCCTCTACATTTCTTCTTACAACAGTTTATGCACATTA CTCTAAAAACAACACATGGAA  
A\_14\_P100111 TATCTTTTGTGAAAATTGAAGAGGTCATCGGAGCAGGTATGGCTCTTCCCT  
A\_16\_P17361826  
ACGTCTTTCACCTTCCAATAGGCTAATAACTACCAGAGTTTTTAAAATCAGCACGATCTCAA  
A\_18\_P13683842  
AAAGGATACTGAATTGTAGACAACTCCCACAGACATCTTGAAAACATATTTCCAGCAT  
A\_14\_P107979 TAATTTTATGCATATTACTCCCAAGTATTTTAACTTGTGGAGAAGCAATATCTGGAT  
A\_14\_P113859 AATAATGTGAGAAAAGGCCACTATGGGAGAGGATAATCTCATATGTTGAAAACGGATAAC



A\_14\_P106595 AGACAGGAAACAGTTTAGGGTAAGAAATGCTTTTAAAAAATCATTCTCACGCCAGATGAA  
A\_16\_P20779379

AAAACCTGGGGACTGATGATCAAAAAATTACCTGGACCACAATAGATTAAAGGATACTACC

A\_16\_P02857907

AGCCATGTTACTTCTAAACTGGATTGCTATAACAATTGCCTTTTAACTCATCTGTCTCCA

A\_14\_P121412 TACACCCTGATGTTTGGTAAAGAGAATTTACTAACCCCTTGGTTCGTTCTATATCTTTCA

CUST\_3013\_PI426210822 TGTAAGTCAACTGTTTGGCTGGCGTTAAACAAGTTGGGGCAGATGG

A\_14\_P118479 GTATAAGGGTGTGATATTTTTCAACAGGAAAGAGAGGCACACCCATTGATCATGAATAT

A\_14\_P108758 CCACTTTTTGTCTCATACTCCACACCAAGAAGCCTGTCTGAGAAC

A\_14\_P129369 TATGGATGCTCTCCTCCTTGCCTATTTATTTTTGAGAAGTTACTCTCACGGAGC

A\_14\_P113314 GGTGATTGTAAAAAGTGAGGAGTTGATTTAGACATGTTCTGTTTGAGGTGATAGTAGGAT

A\_16\_P21476962

ACCATAACAACAAATTCATCATAACAGTGAGTTTTTCCTTCCATAGATCTGATCCACTCT

A\_14\_P127855 TATCTTGAGAAATGTCAATACTATCTTAACGCAATTGCCTCTCAAGGGTGGTAAAGTCTT

CUST\_8365\_PI426210822 CAGTAGAGTGATTGCTGTGAACAGCACCTCTGCATTTCTGAATTGCTTCT

A\_14\_P137246

AAGAGTGCTCCAAAATAGAAGTAAAAGAAGAAAGCCCTCAATCAAAAGCAGAAACAGAAT

A\_14\_P136650 AGTCTGCAAGGAAGAAATGCTTTACTAGGAAGAAAAGAGCAGCATTTTAAATTGAATCCT

A\_14\_P108533 TGCCCTATTTCTCTACCTGCTAATGAAAATGCTTTTTGAAAGTTTGAGTAACAGTATTGG

CUST\_5778\_PI426210822 AGTTCAGAAATGTCACCTCCTGTCATCCAGACAGGATGCTTCACCAT

A\_14\_P113305 CTCACCAACTGGTGCTTTTTTTTTTTGTGGAAAAAATATTCCAATAATATATTAAGCAATT

A\_16\_P03805858

TAGAAGACTTAACTCACCAAGAAAGTATGCCTCTAGACTGATTATGCCCTACTTACAAA

A\_16\_P00685421 CTCTTGGAGCCAAACGAAGACTGAAGCCACAGTGTGCATGTAAAG

CUST\_4884\_PI426210822 TGTCTTTGTAGGGTTCAGTATTTCTCACTCACCCCTTTAAGACCCCTAAA

A\_14\_P123093 TAATTTATCAATGACCAACTGCATGTCAGACACTTCCACAAAGGTTATGATTATATGATT

A\_14\_P132802 ACATGTTATTATTATTATTAGTGCATACACCAGATTGCACTGTCTCCAATGGCAAATGAG

A\_14\_P107919 GGATACTTTGGTTTTGCACATTTTGCCACACCTTTTCTTCTTTTTCTTTATCTTTCACT

A\_16\_P21170111TTCACACAACACTCTTCAAAAATCCTGCTATTTGTGTAAAATGTTGAACACCACATGACA

A\_14\_P108218 ATCAAACTGTGCATGCAGGTTGATGAAAATAACATAAAAAATAGGCAAGCAGCCAATCAA

A\_14\_P103204 TATCTTTTTTTTTTTCAAGAATAAAGGTTCTCTTCAGTTTGAAGACAAATGGGATTTTAT

A\_14\_P134765 ATAGGCACGATTCCACGACTCCCAGCCATAAATTTTCATAATGAAGTTGAAATTAAGAT

A\_16\_P36230591

CATTCACAATCCTATAAATTA AAAAGCAAACA ACTTCTGGGTCACTGGTCGTCTTTTCTG

A\_14\_P101443 TGAAATTGAGAGTCATAAATACTGTGGGTTAGAATAAAAACCATTTGCCAAAGCAACACT

A\_14\_P123091 ACTCTTGTAATTTGAAATGTATTTCTTCGAAACCATCCTGGAAATTAAGCAAAAAGGAGGC

A\_14\_P114298 CTCAGTATTAAGCAACAGAAAATGAGACTCATCGTAGACTCAGCATAGACCCATCACA

A\_16\_P03303601

CCCTACAACATGTTCTCTAAGATGCACTTTCACCTAAGTCTTTTTCTAGAGCAA  
A\_18\_P17103290  
AAAACCTCGATGCCAAAAGTAAAAGTCTAACCCCTCCCATGTAATTCTATACTTTCTGGCA  
A\_16\_P02991594  
GGATGTTCACTAGGATAACTAATTGACCCATAATATGGCATTATGGAACCTAAACCCAGCC  
A\_16\_P39324410  
ATGAAGAATGCTCACATGGATCTGATATGTCTGGTTTGCTATATTTGGATTTCTGAGTGA  
A\_14\_P202220 AATTAAGAAGACAAAATGAAGATATTGAGCCAACATCCTCAAGATCAAATGTGGTCAGAG  
CUST\_5501\_PI426210822 CAAGCACAAATGTTGATGTCTGTGCCTTCTGGTACCCCATGCAAT  
A\_14\_P103061 CTTAATTACCTGCTTAGTTTCAAAGTTAACAAAACAGTAGCCTCGAGGCTGTCCCT  
A\_14\_P120592 ATAAGCACAGAAGCAAACAAAATGGAAATAACCATTTTGAACCTCCAACATGAACAACCT  
A\_14\_P201404 ACTGTTTTTTATTGGACTCTGCTCCCTGAGGTAAAATCATGTTGAAAACCTAGTTTCAA  
A\_14\_P110719 ATGTGTTTGCACAAAACCTGGTGTCATTACAACCTAATAGCCTTAAAAAGTCTGTTGGTGAT  
A\_16\_P30528576  
TAAGGAGTGCCAGACTTATCTTTGATGGGAATACAGTATGAACCCTGCTTGATGTAAAAT  
A\_14\_P103321 TTGGGATGGGATATCAGAGGAAGAAGCATAACAAGTGGGAAAACTGTGATTAGAAA  
A\_14\_P119407 CTTAGTTGACATTTACAGCATGCCATTTCTGACTATATAAACCTCTATTCTCAGGAGGAGA  
A\_14\_P137348 GATTTTCTCTTGCTTTTTTAAAAAATAAACAACAAGGTTTGCTTGTCTCTCTGCCCTGC  
A\_14\_P104174 CATCATCTTCTCTAATCCGTCATAGGTAATTGCTATATTCCACATCTTAGTTGACATTC  
A\_14\_P124423 ACTATATTGTCAGCACTCATGCTGCCTTAGCATAGAGCCTAAATACTTTAAAATTCTGCC  
A\_18\_P14131924 ATACAATCAGTTAAGTGCTAGTGAAACCAGGGTCTGAATTTGGTTGGCAAAG  
A\_14\_P124846 ACACACGGCTGTGACTTGATTCAAAGAAAATGTTATAAGATGCAGTAAACTAATAACAG  
A\_14\_P108433 ACAGCAATTACTCTGCTAATGGCTTCCACATTCATACAGGATTTCCATCTAAGAGAGAT  
A\_14\_P100847 CTATTCCTTTCAGAATCCATCCAGTTTTGATCCTAGTATGCTGCTGCAAAGATTTTCAGT  
A\_16\_P00685266 CAGAGAAAAGCCAACACCCAAAGACACCAGTTCCAACCTAGGTGTG  
A\_16\_P03047270  
AACAACTAAAAACCTCAGAACATTAATTTTAAACACTGCTGCATCTAACATTTTCTTCA  
A\_14\_P201591 AGCCTTGACTTTTAACTGATTCTGGAATACTTAGAGGTAGAAGATGAGGTCCCTA  
A\_14\_P127411 ATTTGAACAGGTTTTTAAAATGTAGCAAAAATAAATGATGGTAAAAAGGCAATAAGGGTG  
CUST\_6432\_PI426210822 CTCTTACAGGAGTGCATGCCCTATAGACAGAGGCTCATGAACTTGTG  
A\_14\_P119644 ATCTACATCCTGTCCTCTGCCAAAGCAAAGGAGCATATCTTTATTGAAGGAAATAGTTTA  
A\_16\_P17422401  
CCAATAACTGGACTTTTTTCACAAATTAGTAGCAGATTTGATTAGATGCCCACTGAATGCA  
A\_16\_P20374420  
AAATTACCTGTCTCCCTACAGAAATTCATTAAGAGACTCATGCTCAGACTGTTGTCTG  
A\_14\_P131048 AGTGTC AAGAGGAAAGGGAAGAAATGGTTTAATATCCAGCGATGGTTGCAAAG  
CUST\_3359\_PI426210822  
TTTTGTCTTTATATTTGAGATGTGATTATAAAGATCCCTTCTGCCTCAAACCTTGAACCT

A\_14\_P102382 TCTCATGGCAAGAAAATTATTATGTATTCTGTGGGGACACATCTTTTTTCATAGGCCACTA  
A\_14\_P112724 TGTC AATATAAAAATTAGCAGTATGGATGGGGAGAGGAGGGCTAACTCATGATACAAATAG  
A\_14\_P107390 TTCTCTCTACTCCTGTGACGATCTGAGTCTGATTTGAATTGGAATGTAGAAGACTGAT  
A\_14\_P124941 GATCACGGTCCAAGATGTGGAAACAGATAAGAATTAATTTAACAATCCTGGATAACGCTG  
A\_14\_P100406 CCTCAGCACCTATCCCTTTTCCTGCAGATGATGGGAGAGGAATATAA  
A\_14\_P202329 CTCTTTTCTGTTTGTATAGTTGATCAGATGTTTTGGGAGGTTATGCAGTTGAGAAAAGAG  
A\_14\_P201200 TCTTATTAGTTACTGAACTTGGAGGCAATATTTTTGGTGTCTCTGAATTCAGTTCCATC  
A\_18\_P14132756 TTCTCATAACCTCAGTGGTGAGCATCTTTCAGAGTTTCTCTGTCTCCT  
A\_16\_P00508804

AAAAGGCAAATCACACACAAAATTGAAGTTCAGGGAGTTTCTATGGAATCTAGGGTTTTTC  
CUST\_2136\_PI426210822

TATGTGATATCTGTCTTGAATAAGCTCAATGGCCATTAATGGAAAGTTATATACAATGT  
A\_14\_P120628 CTTTGTCTCTGAAATCATCGGTATCTACTACCCAAGTGATGAGTCTGTCCAAGATG  
A\_14\_P121221 TAGGGAACAAGTCTTATCCAGGAGAACATATATGTGACAAAATACAAAGCAGCAAGTGCT  
A\_14\_P112202 AAGTGTCTGCATTTTTTCATTTTTGAGTAGGTGAGAATTATTTTTTCAGCCTGCTCAGATCAT  
A\_14\_P125558 TCCATTGCTAAAAACAACAATGTGTAAAGTCTGAACTTGGATTCCCTCAGAAAAATGTA  
A\_16\_P39600120

GCGTGCCTTAATCATGATGTATGGCCTGATAGAACAAATATTTGAAATGATAACTGGCAAC  
A\_14\_P128781 CTATAATTTTAAAAGTGCAGAGTAAGACAAGCCAAATTTTCTTTATTTATTTCCACCT  
A\_14\_P120010 ACATAGCAGCCCAGTATTCCAATAGAAATTCCTGCATAATCTAATGCCATCCATCTTC  
A\_14\_P129218 TGCTGACTTCCCTCTAGTGCAGAATCCTCAGGATATAACATACTACTACATGTTACCAGT  
A\_14\_P126298 AGAACAAACTGGAAGGAACAGTATGGACCGAAATTGATGATACAAAAGTCTTCAAATTC  
A\_14\_P116542 TGTTAAAAGCGTAAATAACGGAAACAGTCTTTAGAGCCAAGACTCCGGTTTTGAATTTGTA  
A\_14\_P130544 ACCTGAAGAATTTTTGTTTTTACTGATTTGGGTGTTGTTGGAGATTTAGTTGGTGATGT  
A\_14\_P103384 ACAGAACTCAACTTGTTTACAACACTAGATAGGTTGACTTAATACCCAAACTAGCACTTGCT  
CUST\_7719\_PI426210822

GATATGGAGACACCAGGGTCATCTTCAGTTTAAACAAACACATGTCAGAACTAGAAA  
A\_14\_P101873 GAAAGAAGTCAGATTTCTCATCAAGTATGATTCACATATTTTGGCCTGAGGAGTGAAAAG  
A\_14\_P115222 CTTTTCTGTTCATCTTTGTTTCTCTCACTAAAAAATGGCTAGGATGCTTTGAGACTTT  
A\_16\_P00303168

ATGGCTTATTAGACAAAGAAGATTCTCTGGATGCTATTCTCTTTCACAGTAAAGGTCCTC  
A\_14\_P133129 TTAATTGAGCCTGTGCCTACATTTTTTGCATGCAACATGGAAATTAACAGCAGAGTGATAA  
A\_14\_P113100 CTGCTGTTCAAAGATTGCTAGTGATTCTCCATACTTACTGCTTAGGCATTTTTATGACTC  
CUST\_2358\_PI426210822 AGGGATGCTCTTCCCAGGGTGACAAGCTAAAAGTCACCCAAGGAG  
A\_14\_P129370 CCTGCAAGCGGGCTATGGTTTCATTGCCCTTCAGTAACTCATAACAT  
A\_14\_P107815 TTTACAGAATTGATATATAAGGAAGTTATGGACTTGGAGGAGAGAACCAAGAATGGAGTT  
A\_14\_P125082 TTACTIONCTTTAAAGGTTGAGTTGACTGCTTATTGCTTTTTGTGACTCAGATGTCTTCTT  
A\_16\_P21545755

GGAAACATTTGATAATGACCCAGTCCTTTATAATCCTCTACAGATCACCAAAGGTATTC  
A\_16\_P03111739

AACCCATTCAAATCTCCAATTTTCATCCACCATCTAATCTGTTAATTCCTTTCAAATGC  
CUST\_1460\_PI426210822 CACACAGCAATAGTGTAACCGAATGCCAGAGCAGTCCCTTCTTCT  
CUST\_82\_PI426210822

TTGTTGCTTAAAGCCGTTTCACTAAATTTAGATCTCTGGAAAAAATTTGTTTGAGCATG  
A\_16\_P58424590 GCCCTGCTCAAATCCTCCAGTGGCTTCTCATTCCTCTTAAGGTAAA  
CUST\_4297\_PI426210822 CTTGTCTCCAGAGTAGCTCACCTGTGGGTCATGATGAGAAATA  
A\_14\_P102028 AGAACTTTCATACTATTGGCTGCGAAACCTGCCACTCATATGCGACTC  
A\_14\_P106939 ACCCAAGTAGCAGAACTTTTGGGAGCGTCTTAATAGTTTCGATTAGCATAAAGATTTT  
CUST\_1967\_PI426210822 CCATCCTTCTCAACGAATCTCCACCTCCAGAGAGAGCAGATCTT  
A\_14\_P107946 ATGGCAAGTTTTTGGTAATGATGATTCAATCATTTTTGGGAAATTCTTGCCTGTATCCAA  
A\_18\_P16978317

AAAGGCTGTTTGATTAGTATTTTCGTGGATGACATAACTATAGACCTCTTAATGACTGTTA  
A\_14\_P109198 ACTGTCCCATTAGGGAGTCTAGAAGAGGCACTCTATAAAGATCAATATGCAG  
A\_14\_P117364 GAAATAACTTGATTCTTCTCGTCTCATTTTAGACAGTGCTAAACAGAGTTCATGCCACTT  
A\_18\_P14192417

AAAATCCAGAAAAGCCTATAAAAGAATAGAAAACCCGAATACGTAACCTCCTCCTGTGAC  
A\_14\_P126653 TAACCTCAGTTTCCACTATTAAGAGTATCTTTTGACGTCTGCTTGGAAAATGAATAGT  
A\_14\_P201652 CTATCTCCATAGAATGGCCTAATGCCCATGTCTAAATCATGTTACTCTCATGCTCAG  
A\_14\_P115300 TGGAAGGGCATGTTTACAGTAGATGTTTAAGCCAAGATTTTGTATTAAGGCATCTCTCAA  
CUST\_8176\_PI426210822 GAACATGTACCCAAGAGCCACGCATTTTCCAAGGAATAATGATCACAATT  
CUST\_9960\_PI426210822 TTTTCCTTCAGAGCCTCTCTATTTCATCAGTAATGGTATTGGAGGCTTTAGCTGAT  
A\_14\_P109184 CCAGTATCTATGGCCATAATAACCTCTACTTATTCTACCTTAAGCCTAGGTATACCATCC  
A\_14\_P101783 CTAAACTTACCTGCTTGTAATAAGATTCATACAACGAATTTCCAGTGGGAATCTGTAAAT  
A\_16\_P00685361

AGAGTTTGAAACAAATTGTTCTCCTTCTCAAAGTGGCAGAATGGTTAGAATCATCAACT  
A\_14\_P126281 TCTACCATTGTCTCTCTGCATTCCTCATTCCACCAAAGAAATGGCACTTTA  
A\_14\_P117694 AGGGAAGTCCAGAGACACCTAGGAAATGATTCAGATGGTTTGGTATATTTAAAAATTTCT  
A\_18\_P22842678 AATAACTGTGCCCTTCCCTGCACTTGACCGCCTCACCACCTAGCAATA  
A\_14\_P100353 GCTGTCACCTTTCTGCGACGCAAATCCTTTCTAACTCAGTTTCACTGTTT  
A\_16\_P01777846

CCTGTCTAGTCCTAGAAGATTGACTTTCTTAGCAGATTGACTACAACAGACCTTTGATAT  
A\_14\_P125380 TCCCGATGTAACCAATATCTCTTTGAGATATAAGCATGAAACAGTTCTATGGCTTCCAAA  
A\_14\_P100327 AAATCCCTGACTCCTTTGCGAGTGGTGTAGACATGTCCTAGATAACCCAA  
A\_16\_P17390012

GCCCCATATCAGAAGTTAAAAGATAGGAAGTCAATAGAGCATCTTAAGCAATTCAATGC  
A\_14\_P134515 GTTTGGGAAGGGTAAGAGAAATCCAGTTCTATTTAAGAGAAATCCAGTTCTATTTTTGCC

A\_14\_P100322 CTCTTGGCCCTTCATGTTCTCCAGATAATAGAATCCTAATATGTTCCATTGATACTCAGT  
A\_14\_P108205 ACACCCTCGAATAATGACGCATACCTATCCTACTGTTACTGATCACCTAGTAATAATCTT  
A\_14\_P121218 AGAAAGTAGGCAGGTTTGATACTCCTTTAACAAAGGAAGAACATAAATCCCTTCTCATT  
A\_16\_P20652769

TTCCAAGCAGGAGAATAAAATAGAAGGTATTTCAAAGAGCAATTATAGTAGGCATGGCTT  
A\_14\_P121560 TAAATATTTGAGATTGGAGATGAGATTTGCAGACGATACTGTATTTTCAGTGGGCAGAAGT  
A\_14\_P133332 AAAATATGATATGGAAAATGACTGTATCAGAGGCACAAGATCTTGGCCCACCCAAAA  
A\_16\_P35742239

TTTTGGTTGTCACCCTAAATTATTCAACATGCTTACATAAGATTGGAGAAAGTGATCGCG  
A\_14\_P115268 AAAGACTGAAAACATTGCTCTTATAGTTTTCGGGAATTTTAAATGCCCTAAACAGAAAC  
CUST\_3094\_PI426210822 GACAGCCCTTTTATTTATCTTACTGTGTTGATTTTCAGCCTTTAAGGGGGGTC  
A\_16\_P16697108

AATTGCAGGAAACCTTTTATCAGGATATCAAGTATGAATCTCTTACCCCACTATTCACT  
A\_16\_P20029242

GCCTTTTCTTCTCTTATGCCAAACATTGAAGATCATGAAAATTTGCTTGCTTCCAAAGAA  
A\_14\_P130880 GTTTTTGTGCGTTTCTTATTGTGCTATACCCTGTGAACAAAACAGGTTCCAGCAT  
A\_14\_P129121 TGCTTGTCTGATAAGTTTCATCGTTACTTGGTCTTCTCATAAACTCAAATGACCTGTTC  
A\_16\_P40012575

TAGGCAGGCTATATCAAAGAAAACCTCATCTAGGACATCTAATGCTTACTTCTGAGGTAGT  
A\_16\_P20027809

AATGTGATTGCTCTTACCATCTATTGCCTAAAACATCACAGTAAATTCCAAATTGGTGCC  
A\_14\_P118984 AGTTTGATGACATGAATACCAGTTAAGACACATTGTCCCACTCACTGAAGATGAGAACTC  
A\_14\_P103289 GGTCATGCTCTTAAACCTCAGGTTTCCTCTATTTTTACATCATTTTTGGACGGATTAAAA  
A\_16\_P35705285

GCAGAAAAACAATAGTCAGAGATAGGCTTAAAGATCCTCATGTTTCATGTTTCAGGTATGG  
CUST\_5674\_PI426210822

TTTTAGTCTAATGGTAATTTTTAACTATGTTGAAGCCATACACTTTGGGTCTCCATTGTG  
A\_14\_P105816 CTCCCTTAATCCTGGATTACATTTAAACCTGTTTGGGTGGAAAGATGTTCTGTTTATGC  
A\_16\_P18409473

GAACCATTTCTCTCACATGAGTTTACCCTTCACATCAGCAAATTTGCATTTTAGAGAAG  
CUST\_7995\_PI426210822 CACAGAAGTATGAACATTGGAATGTTGGTTGTTTTCCAGCTGGTAATGCTAC  
A\_14\_P137112 ACATTCATCTAGGGTCTTTCCTGCAGTGTATAAACTGATTAACACAGAGAATTATCAGGT  
A\_14\_P138356 TTCTTCTAAACTTCTGAATAAATCATGTCTTACACTGAAACATCCAAGTTGAAGGAGGG  
A\_14\_P114140 CTGTAAGTGAAGTAGAACTTGTCATTGCATTGTGCCTGATGTCTACAGATATTTGG  
A\_14\_P116377 GATTTTAAATGCTTCTCATGACAGCATCCTTAGTTATGCATGGGCTAATTGGAAAAACAAC  
A\_14\_P138726 CTCACCTTTTCTTGGAGTGACAAGAGAGACTTCCAGAAGGCATGTTG  
A\_16\_P16682168

ATTCTCAGCATATTCAAGCAGTCACAAAGGTATCTGATAAAAGATCACCCCTCCTTAACTT

A\_14\_P127834 CACAGGTATGAACACATAACATTCATTTTAGGAAAAGGGTCTCCAATCAGGAATCTAATG  
A\_16\_P16942627  
TCGTAGTGATAAGGGCAAACATATTGGAATCTGATCTTGCATGAATGCTAACTTTGTGAT  
A\_16\_P01632197  
TTAAGTATCTCATTTCAGGATTCCATGAAACATTGCTTCATTTCTCAATACGTCTGTCCCTC  
A\_14\_P123197 ACCAGAGGGTGTAAATTAATGTGCATTACTACTATCATTACATTCTCTCCCATAACAGTTT  
A\_14\_P108565 TGTGATATATTGTTGTGGTAAATCTTTCATGGTTTCTTTGTGCGTTGACAGGTGATTTGGAT  
A\_14\_P100937 CCCGAGTCTCACTCTCTGTTCTTTTATTTCTGTAGTAAACTCTCTGGAGGTGA  
A\_14\_P107934 CACAAATAAAGAAAGCACCTGAGGGCTATTACTGACCACAATTCAAATGAGTATTCACAA  
A\_14\_P111026 TGTTGAGATCTAGATATTCCACCTAGAGTAGGTGTTTGACAATCTATAATCCCAATGTCC  
A\_18\_P13859005  
TGTCTTTCATTTACTAGCAGAAATAAAAATCTTAGCCTTGATTTAGTAAATTCCTCCATTT  
A\_18\_P14134347 TTCACTGCCGCTTTCATTCAGCGCAGGGACTGATTTTCATTGTGTT  
CUST\_4424\_PI426210822 ATTATTTTATGTAAACGGACTCTCCTGCCCGGACCCAGGCCAC  
A\_14\_P115158 TACTTAGTATCTGTTTCAATAGTGTCTTCAATGCCTTTAGGGAGGGATAGATGACCTCAG  
A\_16\_P01851954  
ATCTCATCAGTAAACATAAGTTACTCCCAAGTTGGATCTATTACTGACCATCATTGCTCC  
A\_14\_P105103 TATACATACGTTATTTTAAACCTCCCAGCCCTGTGAATTGGTGGTGGTATTATCCATAAT  
A\_16\_P16708965  
TCCTTTCTTATCCTTACTCTTGCAATAACAACCTAGCATTACTGTCTTTAAAATCCACGGC  
A\_16\_P15348075  
AAAGTCCCTTCAGAAAAACATGTGACCTTGAACTTTAGAAGTATACCCTTGAAGATCAA  
A\_14\_P104657 ATTTTCTAGGGATGCGGTTTAATATTTTCATGTGATTCCTAAAAGAATCTGAGGCTCAAG  
A\_14\_P115568 TCTTAAACAGAGTATGCTTTTAGATATCTTCAGTTCCTGCAAGTTTGTGGGGAACTAGAA  
A\_16\_P16751597  
ACTCTATCACCATAACTCACGATTCAAATTTCTCCCATTTTCATTCAGTCCTTGTCAAAA  
A\_16\_P01955507  
TCTTGGCTTCCACCTATAATTAATGATCTCCATCACCTTATCTTACACACAACCATTTCT  
A\_14\_P101120 GGAATTATTTCTAGGCTCTTTTATCCTCCCTCACAGTTAAGAACTCATAAGACTCCTAAC  
CUST\_9422\_PI426210822 ATCCTGCCCTAAGGGTGGTGGAAATAGCTCATGGGAACCCAGAAG  
A\_14\_P127217 CTGACAAGGCTATTAATTGCTAGTTACGTCCTACATTAAGTTTGTGTTCCCTCACATCTTC  
A\_14\_P136037 GAAGAGGCTGTGGATGACAGACTATTTTGGTCCTTGTGATTAGGAACTTTTTATAGTCTC  
CUST\_3961\_PI426210822  
CATGCAGGTCTTGCAGCCAAGGATTGTTACATTAAGATCCAATCTGAAATTA AAACTTAT  
A\_14\_P106673 CTGCTGGTGAGGAAGCAATTGCAGGATTTTTACAAAGTATAATGAAGTTAGAAATGGTTC  
A\_14\_P100705 TATGAAGATAACGCCTTCCCTAAGTCACATATCAGAATAGGAAGATATGCCACTAACTTC  
A\_14\_P106492 GAATTCAGACCTTTTGAACAGTAGGAATGAGTCTTGCAGTAGAGATGAGTAAGAAGG  
A\_18\_P25322196

AAAACTGGCAATTGTTGAATAGCCAAATTGGCTCAGAATAGATTCAAAGTATCACTCCAA  
A\_14\_P135563 TTTTACTTATTCTGGAAGATCTGGCTGAAGGATTATTCATGGAACAGGAAGAAGCGTAAA  
A\_14\_P128409 TCTTAGCACTTACCTGTCAACACAACCTTTTCCAGATACAAAGATAAGCAACACAATTCGT  
A\_14\_P201805 TATGTTAAGTATTGATACTTACCCAGCACTCGGAGAATACTGAAGTGCTCTCTTCATCAT  
A\_14\_P117456 AACTCTCTGTATAACTCTAGTGAATCCCCAGTAAGTGCAAATTTAAATGGTGACCTGTAT  
A\_14\_P118327 CTTTCTTATGCAACTCCAAATCAGTCTCCCAGATCTGTCTTTCCCTTTGT  
CUST\_9477\_PI426210822 GTCAGTTTTTCTGGCAGGTCAGATATTTGGAGTTGGTGTTCCCTTTTCT  
A\_18\_P22842269 GGTTTCCCTCCTCAGCCACCATGGCTTGAATGGCTGCATTTAGAA  
A\_14\_P101383 GAAACTATTTTTCTCAACATAATTCCAGTTAAGACCAAAGATGCAGTTTGCAGGTGAAC  
A\_14\_P122220 ACAACTGAGGTAATTATTTACAATGATGGGTGGCTCAGTGAGATTCTGATTGCAT  
A\_14\_P100916 CTGAACAATTTGTTGCTGAATACGAGGCAGGAATATCTGCATTGCTATTATAAGAGGTTC  
A\_16\_P02929332  
AAAAATCTCCCCTACCTTACCTTATCTAGAGTAAGTCCTTACTGAGATGATCCACTACAT  
A\_14\_P133634 TCCCTTTGAAAAGTATGCTAGCAGACAAGCATTGGTTTTATGAAAGAGGCACTCTTATA  
CUST\_6367\_PI426210822  
CAGTTATGGATTTAAACAAAAGCAGA ACTTAATTAATGTTGCTGTTTGGATTTTTTTCA  
A\_16\_P18698002  
GAGGCTTTCTAGAATTACTCTTGTTTCAGCATATTTTGTGAGCCAAAGATTAGTCAGAGG  
A\_14\_P121367 AGAGTGAAATAAGTGACAAATAAATAGGTTTTTGTGCTATAACGTGGCCCTTTCCTTACTCC  
A\_14\_P139087 GCTTGGAGCCTTTTTACCCCTTCACACTCTAAAGTAAGAATAGTTTGAATTACAAAGAA  
A\_16\_P20753546  
CCAGTCTCTTTATCTTTCTAGACATGCCCTTTTACATAGTCATGATATTGAGTGCAGCAA  
A\_16\_P16718877  
TTCAATTCCGAGAGACTATGATAATAAGCCAACTGTTTACCTATCATCCTCACCTGTAAC  
A\_16\_P00685497 ATTCAAACCTGAAAATTCTCATTCTCTTGCCATTTCTTGGATCCACAGAACACTCG  
A\_14\_P106634 CTGAATGAAATCTCAGATGGCTGAAATGTTAGAGAAACAGAGCACCAAGTCCC  
A\_14\_P135304 TGAAATCTATCTCCATGACAACATTCACACAACAGGAAATTGAATTCTTACAAAAACATG  
A\_14\_P133264 GTATTGTCTTCTATTTCTGCATCCTGTTGCCTCCTGGTTTCGATTTCTTGGAG  
CUST\_4518\_PI426210822  
CCATTTGCCTAATGTCCCTGGAATTTATTTGCTGGAGCATTTTCCATTTTCATATTCA  
A\_16\_P16818194  
AAACACGGTAAAATGCAAATACTCGAAGATCCATGAATCCATGTCATTTTTTATTGGGAG  
A\_16\_P18131192  
AGCCTCTTGATGATATCTTCAATAAAAATACCTTCTCATCCCCTTAAACTCTAACACCTT  
A\_14\_P127267 CTCTCCTGCTTGACACTGACTTACTACTTGAAACTTTATTTATTGCACCATGTTGGTGT  
A\_18\_P14529129  
TCCATTGACCTAAACATTTTCTGAGCAGACATATTCCTTACCTACATAAAAACCTCTTTG  
A\_14\_P127930 GTGGAATATCATCCACTCTTTCCCAAATGTGTGTCATGTCCTGTGTG

A\_16\_P20866267

CTTCTCTAGGCCCTAAGAATTATTACCTCCCCTTTCTAATTCTAGCAAACATGGAACATT

A\_16\_P21547937

AAATTCCTACATCCACAAAGTCATGAATGTCATATTTTCCCAATAGTGAGCAAATGTGC

A\_14\_P122617 GCTGGATGTCATTACACAGAAAATAAACTCTACCTGGTTTTTGAATTTCTGCACCAA

A\_14\_P123279 TCTTCCACAACCTGATGACACCTGCTTACAAACTATAAATTTCTCTTTCCCTTTTCAA

A\_14\_P108875 CAATCAGTGGTGATAGGCTTACTCATCAAATCATGGATCTCAACCTTGATACTATGTATT

A\_16\_P18830016

AAAACCAAGTATGACCTTTTCAGAGCATCTACCTCTTTTTGTCTTCTCATAACACAATGC

A\_14\_P113197 TAGACATAACAAAACACTCGGCATTTCAAATGTGCTGTCAAAAACAAGTTTTTCTGTCAAG

A\_14\_P105903 ACTTTTGTAAATGACTGTGAAATACACTTTTCCCTCACTACGACTGCTTCTTTATTTGCTG

A\_16\_P15802340

ACGTAATGGCTTATAATCAACTTTTAACTACTCAAACCTGTCCTATGCTACATTCAATCCA

A\_14\_P112381 CTTTATTTCCCTGCTGTGCTGAGTGAATCTTTTAGCAGACTTGCCGAAACAAG

A\_16\_P01788180

TGGAGACATAATGTCATCTTTAGCATCTGTTGTTACTCTACCATGTGATGAATAGGATGG

CUST\_5397\_PI426210822 ACTGTTCCCTTGGGGCTTGAGATTCTTGATTCCAAAGGAAAGAA

A\_14\_P116833 AACAGAACTTGAAAGTAATGGGGGATAACTGCAATGCTTTGAACTGTAACAATGTAAACC

A\_14\_P129349 ACCTCCCTTTTTTCAGCATTGAAGATAATGATGATGACAGCAAATGGCAGATCTCTT

CUST\_2282\_PI426210822

TATTTCCCTTTATCCAGGAATGGATTTATTATCAAATAATAATAAGGAATGGTCCTTTATC

A\_14\_P137142 CTCACCTTTAAAATGTCCGACGTCATGGTTTTTATGTTGTTATCAGCCGG

A\_14\_P138166 CTACAGAGAATAAGTTCTACAGTCATTTTGTCTTCTGCCTATTTCCCTCCAGATTCAAAGGC

A\_14\_P124053 AGATGGACATTGTTAGCGTTACTTCCATCACTTTTCTTTAGTTTAGGAATATGCCACAGA

CUST\_6544\_PI426210822

AGAATATTATTAAGCACCATCCAAAAAATTATCTGGATAGAAGAGGAAATTTTTGCTTTA

A\_14\_P123032 CTCCAACATAGTATTATATTTTTGTTTCCCTTTCAGTGACTCCTTAGGTAAGTCAAGCAC

A\_16\_P01843968

TGAACAGCAGATCTTTATTTTCCGTTCAATTTCTTTCACTAATTCAGGTTATCGATTGCCA

A\_14\_P119628 TTGGTTTACATTTAGATTTCGTCTGTGATGGCTGTTTAAAGAAAAGTGCACGAACTAGGAA

A\_14\_P133970 CTGTTTGCAAACCTTCTACCTTTGTTTTCTGGCTGTTTCAAGAAATTTTTTTATGGTAA

A\_16\_P41407842

AAGACACAACATTGCATAATATTAAACTTCCGTAGAAGAATTACAGATCTTTTCCACCCA

A\_14\_P119038 CTAATTAATTAATGAACTCATTAACATGTTCTCCTGCTGGGCTGTAGTTAGGGCCAAATT

CUST\_5096\_PI426210822 TGTCTGTCTCTGTTATTGCATCAGGATCTCACATTATCCAGTAAACCCAAATGC

A\_14\_P122349 AATAAGACAAAAAATAGTTCCAGGAGTTCTCACTCAACCAATTTGCCTTTCTTCTTTCTG

A\_14\_P115918 CTCTTAAACAATGTTAGCAGTCTTCAGTTCAAATACTTTTGTGTCTTCTGGCAGTATGT

CUST\_7907\_PI426210822 GTTTGTGAAGAGCCTCTTGGCTTTCCTTTGACCTTGGTTGGAAGC



A\_16\_P18672960

AAAACAGCCACGAGTATTTGAACATGAAATGACACACAATTATTGACAGAGCAACCATTT  
CUST\_8273\_PI426210822 TTGTGTTTAGGTGAGTGAGTGGCCTCCAGCATCTAGAAGTCGATATTTG

A\_16\_P03616140

ACAGGCATCAATATGTTTCAAGTTAGAATTCATGCATTGCTAGTGTTAAAGAGAAGGGT

A\_16\_P17122305

ACTTCAAATGCAACATAATCCAAAACAGAATTGAGAATCTTTCCTTATTCCCATCTGCC

A\_16\_P16421771

GGTATAGCACCCCTTATGTTACTAAAGCCTAGTCTAACACTGAACTCATGTTCTTGATGAG

A\_14\_P101148 CCCTGTTGTCAGTTGGAAAAGAAATTAACCTGAAGGTGGTCTAGTTCTCATTTTTAGAAA

A\_16\_P01863523

GCATAACCTTAAATCCAATCCTAACCCCTAAATTAACCTTAACAAGCAGAACAGTGAC

CUST\_2983\_PI426210822 TTGTTTCTCTCTTCCCTTGAGTTGCAAGAGATCAGTACTTCCGGATCAGTAC

A\_14\_P102197 ATTTTACCCTCATAAAGGCAAAATCAAAAATGATTAACACGGCTTTTCTTTCAGCAGGAT

A\_16\_P03807725

ACACGTAAATACTGTGATGATAAGGGATCACCCCTTCTTTTTTGGCATAAAACCAAAAAGA

A\_14\_P111813 TGTAATGTTAGTCACACATCTCATTGGACACATTGTTAGAGTGTGTTGTCCATGTTTTC

A\_14\_P132857 CTAATGGCTTCTTAAAGGTAATAAAACCCCTCCAACGTAATTGGTCAGATAAAACTTTTT

A\_14\_P138444 GTAGCAAACCTGCTCTAAATGTTTTAGGGTAATTTCTTTGTATTTTGACGTCTTGCCAGT

A\_14\_P101588 ACTACACAACCTGCTTCTCATAGTAAAGCACAAGTGTGTTAATTGCCAGGAAGAATAACAA

A\_14\_P110071 CTTTTAATACATCACGGCTGAATTTCTGGGAAGTCTGATTGTGTTTCTGAAATAGACTTG

A\_14\_P130885 GCACTCAGACCTACCAGAGAGGAAAACTTTTCTTTTTTCATTATGTAATTCCTCCCTAAT

A\_16\_P01166993

TTCAGGCTCCCTTTAACATACTATCTGACTTAAGTATTCACAACCTTTGATAACATGGCCA

A\_14\_P129507 CAGGATTTGGAAAAATGCCACTGATTTTCATGATTCATATGCACACCCATGGAAATAAACAA

A\_14\_P130043 GGGGTATGACAGTGAGAAAGAGAAAAAAGAAGAGAAGAAACCAATAGAAACAGGTTC

A\_16\_P17042269

ACTGATTTGCTGACAATACCATTAAAGAGCCCTCAAATTATTCCTCTAAGGCAAAAAACC

CUST\_428\_PI426210822 GGGAGCCCTGCCTTCTCATAACCTCAGTGGTGAGCATCTTTGCAG

CUST\_2355\_PI426210822 AAGAGAGCTTTGGGCACAGTTTGGGGGCCACATCTGAGTCACAAG

CUST\_2506\_PI426210822

TGGTCATGGAATTCAGGAAACATTTCTCTAAATTTTATAGTCATCTTGCTTTTGAGAAAT

A\_14\_P122990 GAATATTTGGAAGAAATAAGAGAATCCACAATAGAGACCTTGCTAAGTAAACGGTGGTG

A\_14\_P101145 AAATCAAAGGACTTAGAAGATTCAATTTACTTATTTGTGTTTGCCAACGTTGAAAACAT

A\_16\_P21694327

CCAGTTCCGAAGAATAAATTTACCCAGATAACAATACAGAAAACCTTCACATGTCTCTCCTT

A\_16\_P16581530

GAGAATTTCTTCCATCGTGTAAGTTAGACTAGTCAGAATGTGCATCTCAGTTTTAGGG

A\_16\_P21479550

AAAAACAAGGTTGTCCTTGGAGAAGTAACTCTCTTGTCAAACTTCCACTTGCATAACTT

A\_16\_P37996846

CCACTGTGACTATACATGACTAAGAAACCAAATACATGCTTCATTGCTACATACCCTTGT

A\_16\_P00438389

ACGTCTTTAGTTAATGCATAGAGCCTTAAAATAGTTCTTGACATAAGTCTTTCCACTCCC

A\_16\_P01921194

ATCAACCATGCTCACTTTAAATTCACGACTTTTTTTGAACCTACTGAACAACCTGAGACAA

A\_14\_P102494 AAAAAACTAGAAATGACAAATATCCTGCAAGTCTAGATTGTTGAACATGCCTGATCAGGT

A\_14\_P124608 GTCCTCCTTACACTGAATGTTGATTAAATGTATGCAAATCTGTTGCCTTTCCTAAGTTTG

A\_18\_P22840534 GAGCCCCATGTTGCACAGGGCAACTATGTCACTCATTGGAAATTA

A\_14\_P133521 TGTGTGGTTTTAAAAAGATTACAGAGAACCAGATTCTGGATTTTCAGAAACTGCTTGTCTT

A\_14\_P107171 TGGGCCAATTTATGATTATGAATTTCTTAGATGATGGAGTGAATACGTGTAGAGGGAGAT

A\_16\_P16557663

ATGGCTAGGAAAGGACTACAGATACAGTGGATACTCATTAAAACACCTGTTGATTTCTAC

A\_14\_P118413 CATGAAGACTCTGCATGAATCTCTTTTCTTCCCATTTCCTCAAATATGAAAATAACTTGGT

A\_14\_P111861 ACATGATACAGAGGTAAACCGTTATTTCTTCTTCAATACATACCCCTTAAATCCCTT

A\_14\_P201643 AAGGAACATCTTTTGTGTTTTGCCATCTAGTAATGATTCTCCAAACTTCCAGTAACATATT

A\_14\_P135913 CTACAGTAAGTTTACAAGCCACAGTTCATGGTCCCTTCTCTCTGTAGAAAATTCTAGTTA

A\_16\_P32383980

GCCTCCTTACAAAATTTATCACAGACATTCAACATCTAAAACAAGATCTGAACTACCCA

A\_16\_P17609238

AGATGCCCAGAAAACATATAAACCCACCTCTATATCATCTTCTTCTTTCTAACTTCTGC

A\_16\_P00685309

TGTTTGGTGAATCCTCTTTTAAAAACACTTAGAAGATTTTCCCTAAACTAATTATCTGGC

A\_16\_P02585702

CATATGAACAGACTTGATTTATTCCAACCTCACAAAACACTGATGTATAAGCCAGTTGCCA

A\_16\_P03808740

CCTGTCTGGAAACGTGTTAATGATCTTAATATTTAGGAGAAAGTGTCTTCAGATGGAGAG

CUST\_9062\_PI426210822 CAAGTGATGGCCACTCCTTGGGCTCCCACAGCCAGGGTTCCTGAC

A\_14\_P117497 CAGTTCTTTTGCTGGGTCAGCCTTTATGCCAAGGTAGGTCTTAAGGAAATTTAC

A\_14\_P108395 ACCTCAATAGATTTTAACTCTCCTCCATCCTGATTTTGTGGTTACTGTATAAACTGACC

A\_18\_P22841242

AGAAAATATTTTCAAAGACAACCTGTATTCTCCAGGGAAACCTGAGATGAAGACCAAGGT

A\_16\_P39685867

GCATGAGAACTGAACTTCTATTTCTGTGCAATTCAATGTTATGAGGAAGAGTGATGCAT

A\_14\_P106650 CCAATTTTGTGGAGGTCATTTTATTTTTGACGTTATGACATAGGCAAGTAGAAGCCTCTA

A\_14\_P110526 CTCTATGAGAAGATCTAGATTCTAACATCCAAATTTACATTCACAGTCTCTGCCAGGGTA

A\_14\_P114475 TCTTTATTGGCTTTCTTTTTTGTCTTACCAAAGAGCAGAAAAACATTGTGTGAGTGCAG  
CUST\_7565\_PI426210822 TGACAGGTTGATCTGTGGAGATACACTCTGAAGGTGCTAGACTAGGAA  
CUST\_4316\_PI426210822 GTTTTTCTCTCCTCTGGCCTCTACATCACTAAATGGTCACTTCTCTTCT  
A\_14\_P119261 TCAGGCTTTCTGGGCTTAAAAAAAAGTCCTGTTTCTTGGATATTTTAATTCAGTCTGCA  
A\_16\_P17415423

TCAAAATAGCCTAGAAAAATTTCAAAGTCATCATGACCAACTGATCTTAAAGATGCCCA  
A\_16\_P02067805

AGGTGTCAGAGGAATAAGATACGATGCTCTAATAGGTTTCAATGACAGAATGTGAGAAAG  
A\_14\_P123314 CTACATACCAATATTCCATTTATATCTCTGTCACTGACCTCTTAGGAGACCTAAGGTAAG  
A\_14\_P139236 CTTTTCCAGGCACCTTAATTTCAAATATCCACATTCCCATTCTTTCAATGCCAAATAT  
CUST\_1666\_PI426210822

TTTAAAATGAAGTGCTCATCAACAGTCATTTCTTGTCTACACCTCCTGAATTATCAAAA  
A\_18\_P17038999 CAGCACCATTTTTACTCCCCTTTCCCAAGCAAATCGTGCATTTTTGTCTAA  
A\_16\_P18040421

TACTTACCGTTATGATTAGGCATCTTGAACTCTAATGAGTCGCTCGAATTACTATTGCT  
A\_16\_P16759577

CCCCAAAATGATCAGAACACTCAATTACACTTAATCTAATAAATTCAGGTTATGCGGCA  
A\_14\_P128504 CATAAAATTATAAGATAAAGGGTTTAGGCAGACCCTTGGGGAATAATAACAATTGAGGGG  
A\_16\_P17190858

TCTGCCTTCTTTGTTTATGCTCACATCCTTTTTTTCTAGCCAATCATATGTCTCAGAAAC  
A\_14\_P118204 TGCCCCTGGGCTTCATGTATTAATGAGCATTCAACAAATAGTTCCTGGAATTAATTAGTA  
A\_16\_P21450530

AAAATCTCCCTTTTTACAAGACTTCTAGGCTAGTCAAGAAGAAATAACAGTGCTAAGGCA  
A\_14\_P119893 ATGTCCACACACTCTTAGGTATGAATTACATAATGGCATGAATTCATGTTTCTCCAGAAG  
A\_14\_P122526 CTGTTCTTATTATAATTTAAGACCCGTGGACATCTAGAAGTTCAAGGAAGTTTCCGAAAA  
CUST\_7297\_PI426210822

CAAACCAAGTTGAGTGTTGTATTTACTTTTTCTGGATTTATTTTCACAAATATTCAGCTCA  
A\_16\_P03641827

AACTGCAGAAGTGCTATCAGATTTACAGGGACTAAAATTAGAACTCAAACCCCTTCAG  
A\_14\_P108843 CCCCCATGGTGGTTTTTTTAAACACTTCTTTTCCTTCTCTTCCCTCGTTTTGATT  
A\_16\_P01117617

AAAAAGAAACAAAGGCAAGAACATTCATACATCGGTTTCCAGAACAAATTTGTCAACAC  
A\_16\_P39278974

TGCGTTGTAGATCACATTATCCTAGAAAGCCAGAATAATATGAAATAATCCTTGACAGCA  
A\_14\_P201574 TAATTTTAAAACAGAACCACAATCATGCCTATGAAGTGTTTTTAAGCCTTTGACTGCCCT  
A\_14\_P131920 TCTCAACCTCTTTGGAATCTTCTTCATCTTGGCTGCCCATGAACATTATTCTATTGAT  
A\_14\_P112562 TACTAAAATGTAATGATTAGGATGAGGTCTGAAGGATGAATAGGGGCTGATGCATTGAT  
A\_16\_P18238574

ATGCTTCTCCTAACTTTGTAAAACAGCCTCTGCATTAAACTTTGCTCAAACATTCAGTTG  
A\_14\_P116878 TTGTATTTGCACTTCTTGTTTGAAGGAAATACATACAACACAGGTAGCGTCTCTACACTT  
A\_16\_P00685487

TCTCAAAATTCTCAAAACATAAATACCTGTATCCCCTTCATTTTTAAGAAGAGTAAAGA  
A\_14\_P131513 CATGTCATTGTGATTGTAGGTGTCAAGCATGTATGTAGTAAATCTAGTGAAAAGCCTTTT  
A\_14\_P115521 ATATCTTTGACCAATTCCAGAAAGAACTGACGCTCATTATGCTTTTTTCAGATGGCACTT  
A\_16\_P16191659

TCAGGGCATTTCATTGCTGTCTATTTTTCGTTACAGTATGGATGAGAAAACCCTGTATCTA  
A\_14\_P137465 GAAAAAGTCAAAGGGCTTTTTCTTCTAAATTTGATGGTTTGCCTTCTTCGTGTCTCTAG  
A\_14\_P105910 TGGATCAAATTTTTAGATAACCTCGCTAGTCATTTATGAGTTATTGGAAGGCAGACACCA  
CUST\_4795\_PI426210822 TCCTAGCCTTATTGGATGGAAAAGAGGGAACAGTGGTTCCTTTCTTTC  
A\_16\_P36230571

TTCTTTTTACTTCCCTACTTGCAAAGACTCTGGAAATGTAATGATGGTTCAGAGTGTTCGT  
A\_16\_P19800561

GGCTTACCTTATAAACTCAACCTAATCAATTCTCCTACTTCTGATCCTATCTATGCTCCC  
A\_14\_P126847 CTTGTGCAGGACCAAAGATCTCAGATTGCTATAACTGAAGGTATATTTGAACTTCCAAA  
A\_14\_P128372 ACAGAACTCAGACTAAAACCTCGTCTTTCCAACCTCGCGTATGTATTTGAACTTTCTACAA  
A\_14\_P113183 CCCACTTTCGAATTGCCTTTCAAACACAGTTTTTATTAGCAGTCTTCTTGGTTTGGAT  
CUST\_7140\_PI426210822

TACCGTTATCATTTTTCTTACTTTAGAAAGATAAGCCAAAAAATTTGACCTTAATGAAAA  
A\_14\_P126839 TCCTGGCCTTATCTCTTGATAGAGGATCATCACTAACTTGCTCATTCTCAAGAGTATTTA  
A\_16\_P01306311

ACTATCGTCTTACCACTAGTAAGAACTCTGACTCCTACAAGTATATTCTGCGGTCAAAC  
A\_16\_P03471449

AAAAGGTGTTCAAGACATGTAGTTAGATGAAAAGGTAAGTTTCAATACAATAGGTGGGGC  
A\_14\_P119030 CATTTTCATGGCTCCTTTTTAAAATCATCTGCATGACACATCCTGTCACTTAACAGTATTTG  
A\_14\_P118182 AGGAGTTGATGGCAGTTTCAATAACAGGTCAATTGCCGAGAAAAGGTAAGTTTAACTTTA  
A\_14\_P132719 TGCTGAAGTTGAGTCATCAAAGAATGCTTCAGAGGACAATCATTCTGAGAATACTTTGTA  
CUST\_317\_PI426210822 ATGTGTCTGGGCTGCTGAGCTCAAAGTGCCCTCTCTTGTCTGAT  
A\_16\_P16399318

CCCACTCCTAAATCTTAGGTTCAAACCTAGGTAGTTGTCTCAATTTTGCTGAAATAGTCC  
A\_14\_P112692 ATAACATCAAGGTAATGGTGGTAAGAAAAATAAAGCAAATTTAGAAGAACAACCTAGAGT  
A\_14\_P135167 GGTGTGTTTACTATTTAGTCGTTATGGTCTGTCTGGTTTCTAACAATACAAAAACCACCA  
A\_18\_P11560301

AAAACCTTTGATCAGAACGATCTGTGGAAGAGTAACTCCATTTCTATATGAGTGAGTGTC  
A\_16\_P17487919

CCAGTTCTTACTCCAAACCTATTAGTCCATACTGCTCTTCTTGTATTAAAGCCTGTAGT  
A\_16\_P39409005

TGGAATGCACATCCTTACATAGCAGACTGCACATTTCAAAAATCAGTTCAAAAATCACAAAT  
A\_18\_P16135422 TACCCAGAGTGGAATTTGTTTCTTCAGTTCACTGAAGTTCAGTTCTTCAGTTCACTA  
A\_16\_P19356925  
CACAAACAGTGAAACAGTTAAGTAGTCATAAGCACTAGATTTAAGCCATCTTGCAGAATGA  
A\_18\_P14778778  
AAAAGACCTTTCCAGTAATAAACTCTTGAGATGCTTAGAATTATTGCCACCCTTTGATGC  
CUST\_9032\_P1426210822  
TCAGCATAATGCCGTTCTCTAACATACTAATAGCACCTAATATTGTATTATTTCATTGAT  
A\_14\_P109973 CCAGAAGAAGTTCTGCGGCGACAATTCTCTAAAGCAGGGCTTAAGTC  
CUST\_1656\_P1426210822  
TACTCTTTCTAGAACTAGCGTGGTCTCTTATGCAGGACAGATGAGTGTA AAAAAGAATG  
A\_14\_P105252 GTGGCAAAAAAAAAACTTCATGGTAATGGCAATATCCAAAGCATAGTTGAGTAAAAGCCAT  
A\_14\_P125386  
AACTTGAAAAGAAGAGAGATTCTGAAAAATAGTCAGAAAAGAAGGGTAAATGGAAATGAT  
A\_14\_P132303 AATCTGTCTACTTTATTGTTTGCCTTTTCCCCTGGTTTTTGTGTTTAAAAATTGGCC  
CUST\_6080\_P1426210822 AAAAGTCGAAGCAAAGGGGTCACAGAGAAAAGATTTCTCTGATGACTGTGTA  
A\_16\_P00346036  
AGCCAGTTATTCAAGCAACTATGTGCCTTTATTTGTTTATAAGATACAGTCCACAGCACA  
A\_16\_P01809575  
AAAAAGATGAATGTCCATCCAGTTCATACAAACCGTAATCTTTGTTTTGGTAGAAGGGAT  
CUST\_8724\_P1426210822  
TTGTCTTGGGGGACAAGTTTATGTACCAATTAGCTCAAGGCTTTGGTAAAATAAAT  
A\_16\_P30952587  
CTAATGAACCGCACTTGTGGATGCATTTAGAAGCATTGGAATTGTTGACATCTGATTTTG  
CUST\_8811\_P1426210822 GACCATGAATGCTGCTGAAGGCTCTCACTTTGTACTTCCCTGGGC  
A\_18\_P22841376 CTAAACCACTTTGAGAAACACTGTCCTGGAGGTAAGCAGCCCCT  
A\_14\_P128602 GGGGAAAAC TAGTTCTGTGGGATTTTAAAATGTGTTTAGTGAAAAAGCATTTTTGCCAT  
A\_14\_P121759 GATTCTTCTTAGTGAATTATCCAGAAGGCGTATCCGTTCTATCAACAACTCATCCGAAT  
A\_16\_P19003802  
CCTGGCATGTTTGATTTTATGAGTCTGTGAGATTACTTAGTATATAGTGCACCCCATGTT  
A\_16\_P02979576  
ACCATCCCGAGATACTCATAGAATAATTCACGTTATTGTTGCTTAATCGACCGAACATTT  
A\_18\_P22840139  
CTGTTGATGCCCTTTTAACTGGTATTCTTTGAAGTCACACATGATAATGTGTTCTGTT  
A\_16\_P01278953  
CCTGCTAGACACTATCCAAAGTTAAGTTGCTTTTATTCTGTTCTTATTTTGCCCATGTGC  
A\_14\_P114359 AGCAGCACAAATTGGAACCTTACCTTTCTTGCCCAAGTCAGAGATTTTATTGAAAAAAA  
A\_14\_P122395 ACAACGCTCTGAAAAATAGTTTTGTCCCAAATCCAGCGCCTAGGGT

CUST\_2913\_PI426210822

CAAGCTGCTGTAGCCTCTGTAAATACTGTAGGAAATACAGACTTTCTCTGTAGGAG

A\_14\_P110114 TGTGCTGTGGATGAAATCTTATTAATAGATGTGGGAGACACTAATTAGAACCACAACT

CUST\_10352\_PI426210822 GACAAATACACAGACAACAAAAACATTTGATGTGCCCATGACAGCTGGGT

A\_14\_P132624 CTTACGAATCTTGTCTGAACAAAACACAAGACCCTGCTGTAAAGTTTTATCTGCAATG

A\_16\_P00081182

TCCTAGTTTCCATTTCCCAATCATTACTCTCATCAATGTTGCCATCCTTTTTGTTAGTTT

A\_14\_P106501 CTTACAGAGTGTGGAGGATATTGTCAAGTATAGTTTTGTTAACCAACAACCTCCTATGCAG

A\_18\_P17401005

TGCCCTTAAACCTATCTTTTTTTTAGATTACTCTCACAATTGGCATATCTGCACAAAAGGA

CUST\_2836\_PI426210822

TTTTAAAGAATGAAGATTAATTTTTGATACACATAAGAATGAGAACTATTCTAGAACTCTC

A\_14\_P129076 CCAAAGTCACTTTAGAGTTATCTGCAAATGATTAATTGTTGGATTTGCTCTGAGTCCCTG

A\_14\_P132821 CTCACTTCAATCGTCTTGGCAAGTAACTGTGTGTGAGGAAAATTATACTTGTATACTTCA

A\_14\_P110990 TCAAGTCCTAAGGGCATGGTTAGAGATCAGAGTATTTAACTGAATAGGAAAATACTTTG

CUST\_190\_PI426210822 GTGTACGAGACCAAGTGACTAGAAATATGGAGGGGTGCTCTGCTCG

A\_16\_P20118826

TAGGAGATAATCAATTACCACAGTTAGGGTTTTACAGTCATTTGCATACTAGACCAGCAG

A\_14\_P104619 CATCCCTTGCCGGAAGCGCAAAGTTCTTAATAATTTGACTTCCAAGTTCAGAAATTTA

A\_14\_P139928 AACTGGTGTGGAAAAGGTTTCTATTTTATAAAAAGAAAGTATCCAGAAGGCTAAAGGCAGT

A\_14\_P102410 TTTCATAATGAAAAATGAAGAATGAAACTGCCAAAGCATAGGACTGTGGTTTACTTTGGG

A\_14\_P116496 CCAGTTTTTAAGAAGAAACAACCTTTTGATCCTTTTGGATATCTTTTATGTGTCTCCCCCA

A\_16\_P37318950

AGAGAGGTTTCAGTTTGACTCAGATTTTCAGGAAAAGTCAGTTATGTAAAATTCTCCTAGAA

A\_14\_P104690 AACACAGGCTAATTTTCTTTTCTCCTTTTAAAAAGCATCCATGTGCTCATAAGCAATGG

A\_14\_P133562 ACTTGCCTGTCAGGGAACTTCTCTGTTTTATTCTCTGCAAAAAGATAAAGATAAAATGT

A\_14\_P139032 CTGATGGTTACAAGGCTTTCTTTCTATGCTGATAATCCCTGTGGAAAGAAAACATTGTG

CUST\_8935\_PI426210822

CGATCTTTTCTTTCTGTGCTTAAGTGATACTAGGTCAATCTTTAACTTCTTGCTCCAC

A\_14\_P118701 AAGTGTAATGATTTTCAAAAACAGCCTTGCTCTTTCTGTTACTCCCTCCTGATCATTAA

A\_16\_P38912217

TCATAAAGAACAACCTTTCAGCAAAGATCAAGTCTCATCTCTATGATTATCATACTCCCCCT

A\_18\_P22842291

CGCTTCTTTTTACTGGTCCACAAGACTTGGTTATTTTCTATTGACACTATTTTCAAGATC

A\_14\_P108117 GAGATGTGCAGTTATCAGTCTCACAGAATATTCCTATAACAGGTAAATCTTCAAAGTTTA

A\_16\_P03771106

ACTTCCCTTCAGTCCAATTAGTTCAAAGTCAATTCCACTGTATCAGTAATAGTTGCTAG

A\_14\_P123023 ACTGCATTATGAGCATGAATTTGTGTTACATGATTCTATTCTAGACTCGGGAAACAGCAA

A\_14\_P115770 ACTAATCCAAACAGTCATGGTTTTGTTCAAGATAGTCAGTATTCAGGTATTGGCAGTATG  
A\_14\_P127551 TCATTGTAGAACAAGTGAGGACAGCACGCAGTGAATCTTTTAAAGAAGGAAAAGAAAAG  
A\_14\_P122404 ATCATCATCGTCTATGATTTCTTCTTCAGCAACATCCAGTGAACCTCTCAGTAATCATGTC  
A\_14\_P115065 TGTTTGTGATTTAGATTTGGAACAAATTCAGTGAGGCGGTTACCTATTTAGTCAAAATGC  
A\_14\_P131782 TTGCAATCCACTGAGTCCAATAAGATCATTAAATTATTTTGTGACCATTAAGCACTGGTC  
A\_14\_P115782 GTAAACCTTTTGGTGTGGTTACAAACATACTGAACTTGGATACTTGATTGTTTGTATGGTT  
A\_14\_P202568 TTGAAACAAAAGAAAATCCTAAGTCTGACACACAATGTCATGTTTAAATTCCCCTTTCTCC  
A\_14\_P113438 CTTTCTAGTTCCATAGTGGAGACCAATAGTTAGATTTTGGTCTGTTGACACTGCTTTTAT  
A\_14\_P130870 CTACAATCATACCCATTTACTGTAGGTTTCAGAGAAAAGAAAAACAACCCTCACCTTTTCT  
CUST\_8653\_Pi426210822 TAGCCCCTGAGCACAGGTCTAAGATTGCACCAAGATAACACATCTG  
A\_14\_P134587 GTTGTAGGAGATTTTTGAAGACAGCGTCTTATCGTAATACTCCAGAATATGGAAGAACTC  
A\_16\_P19798054  
AAAAACAAAGGGAAATTGACTCTGGAAAACCTGTATTCTTCACAATCCAATTCATGAAGCC  
A\_16\_P01096843  
AAACTGTAGGAGATAAGACTGAAAAAGACTTAGAGGCAAAATACATATCAATGCTTGTCA  
A\_16\_P17057342  
AACGTCCTCCTCATATTCCTTGCATCTTATCATCATATTAACCATGCACAATCTTGCA  
A\_16\_P00350153  
ATGTTTTCCCAAAGTCTTCGTCAATGTTAATAGTTTTCTGCAATCTAGTTTATCCCCACC  
A\_16\_P36230073 GTCTAAACTCGTCCTTCACCCGGGTTGCTCTGGATCTTACTGGTT  
A\_14\_P105789 TGA CTGTTTTTGGAGATCATGAATGTTTCTACAACACTGCTGCATTCATTTGACCATTG  
CUST\_5195\_Pi426210822 CCTATTTTTCTTCTCAGCTTCCCTATGCCTCATGATGCCAGGCATA  
A\_14\_P108762 ATAGGTATCCTGAATAAATGAGA ACTCTAGAAAATCAAGGTTTCAA AATTCTACCCTTCC  
A\_14\_P131872 TTTTGTGAATATTTGAGTCGTGTTTGTAGTTCCCTGTATCAGGGTCTGTATTTGTTTCAA  
A\_14\_P134595 TAACATTCTGACCAAGAAGTGTCACTTCTTTTCAGCCCCTAACATGGGAAAATATATTG  
A\_16\_P16003572  
ACGTTAGCAATATTGGGATGAGTTGAAGA ACTTCTAAAAAGGTGAACTAAGGACGTAAGA  
A\_14\_P133179 CTGGTTTCATGATTTCTTTTGGTCTGTAGGCAACGCGGTAAAAATATTGCTTCCG  
A\_18\_P10144354  
AATCTGTCAGTCCATAAAGAGTCCAAAAATGTCTGCTAATCCCTTGAATTTTCTTGGAAAT  
A\_14\_P123627 AAGAGTGTCAAAAATGTCCTCGGCATTTGTTTTCTCAGAAAAAGAATTTAGATATTGGAG  
A\_14\_P122593 TGAAATGCTAGTATAAAGGTTATTTTTTTTTCTTTCCTAAATAACTAAAGTGAGGTGTAGA  
A\_14\_P124113 CTCCATCCACTTTATACTTTGTCATCTTTATTGTTGTTGTTTCTCGTGACATTGACCTA  
A\_14\_P127125 GGTAACACAAAAATCTTTTCGAAATATTTGTAGTTTTTACAGGCGGCGTTGTCTTTGATAG  
A\_18\_P16723308  
AGGAAAAAAGAAACTGCCTCTAATTGCTTTTTTAATCCTTTTTATCAGCCCAATTGCA  
A\_14\_P110422 ATTATGAAAAATAGCAATTACCCTTTATTTTTCAGAATCACGAGCCACCATTACAAATGT  
A\_14\_P102008 AAATTAGACTTCCTTGCAGGCAGTCTATCAGTGATATCCAATAAAGACTCAATAATGGCT

A\_14\_P116519 AATGTAATTTTGGTCTCCCAACGTAATTACACTGTATCTCACTACAGTCTCTGAAAGGAA  
A\_14\_P123155 CTGAACCCAGAAAATTAACCATACAGACGCACACAAAACATGAAGAAAAAATGTCCTAT  
A\_16\_P17295788  
AAAGATAACCCCATGACAACCTAATCAAAATATTTCCAGCATATTAGTCACCATTACCAT  
A\_14\_P122314 TCTCACGCAAAACAAACTCAACAAACTCTCTTGCATCAAAAAGATTGCATTGTTCTACAT  
CUST\_3681\_PI426210822  
TGTGTTGGAGAAATGTGGCATGTGGCAGATGTATCCTTGCTTGTTTAATTAATGA  
A\_16\_P16811398  
AAGAGTTGATACCCTGAAACAATTTGACCAAACTTGAATAGGCATAGTGATGTTGCATT  
A\_16\_P19150651  
GTTATGGCATGGATCAATTAGAAGGGCAGAAGTTTACAATAAGATCAAGAGTTACCAGTG  
A\_16\_P15634431  
GGAGAGAATAGTATAAGCAAGTGAGATGTAGACTAAGCAAAATTTAGATGGAGAAGCACA  
A\_14\_P124562 TGTCAGAGATGTGATTCATCCATATGCTAGAAACCAACAGAGTGACTTTTACAAAATTCC  
A\_14\_P100605 ATTTAACCTATGGGAACAATGTTCTTTAATTAAGTTCTTTAGTTTAAAGTCACTGGCAAG  
A\_16\_P39942678  
TTCAATGACCCCAATGATATCTCTTGAATGTCAATCTTCCTACAACAAAAGCAAATT  
A\_16\_P03269708  
GCAACCCTAGGATTTTTTTTAAATAGATGCTGCTTGCTATGTTTTCAAACCTTTTTGAGCC  
A\_14\_P134512 TAGGACTATGTGCATAGACTACTGGACTCAAGAGAACCTAGGAAATCAGACTGCTA  
A\_14\_P109069 CAAGGACCACAGAAAGAGCCTGATGATTATTCTAACTTTGTAATCGAGGATTCTGTAACA  
A\_14\_P119767 ACTCTTTCCAGTAGGTGATGTAGTCTCTGAGAGTCATGTGCTCTTTGGG  
CUST\_1884\_PI426210822 GAGGTCAGGATGATCAGGGAGCTGACGAACTTTCCAGTTGACTAG  
CUST\_7734\_PI426210822 GCTGGGACAGGCAAGGTATGTCTGGATGAGAGAAGGTCTTTGCCA  
A\_14\_P102316 ACAATCCTTGCACATGACTTTAGTTCTTTTATTAATGTTTTTTGAAGGGATGTAGTTCCCA  
A\_14\_P130997 GTTAATCATGAGAACTGTGGTTGTCTTTTCCATGGGGCTCTTCACCT  
A\_14\_P136782 TCACTGAATTACAGAATAAGCAAAATACTAGGTAAACAGAATCACGCTTGGGGGCTATAT  
A\_14\_P120343 AAGTTTCAAGAAGGTTCTTATGGAAAAAAGGCTGTGAGCATAGAAAGCAGTCATAGGAG  
A\_14\_P116712 CTTTTAATATCAACAGGAATACTGGTCAAGAGTCCACATTATGCAGGTTGTAAATGGTAG  
A\_16\_P36230107 GACTGATTTAATGCTAAACTGACTGTTCTCAGGGTTAGCCATGCTACCCTC  
A\_14\_P139076 GTGCAACAGACAAAAGATGAAGAACCAGTGACCAAATCCTGTTAGTAGAAAACAGAA  
A\_18\_P11055233  
ACGGACTTTAAACTCAATGGATATTCTAAATGCCCTTAATTTATTTTCCCCTCTGTCCTT  
A\_16\_P39014334  
TGAAAAGTGGGAGAGACTCTTTATTGATCACTGGCTGATTTATAATCAAGTATTAGGGGA  
A\_16\_P36670143  
AAGGTAGGAGATAACAAACAGTTGGTAAAACAGAACTCTACGAACAATAGCATTGAGACT  
A\_14\_P135932 TGTGAAAAAATTGCCCTAATGTAGTGATGGTGTTTTTTAAAAAGCACCATTTGGGAAGT



A\_14\_P134454

ATAATGAAATAATAAAAGGGAAAAAAAAACCAGGACAACCTTTGTCCCTTCAAAGTAGAGG

A\_18\_P10139031

AAACACTTCAAATTTGGCTTCAGACAATTACTCAGAAGAGAGAAGAATACTGTGACCTTC

A\_14\_P202199 GGATAAAGTTCTTCCCTTTATAAAACGTAGGTGCTTCTGTCTATTGGTCACCCAAGTAACA

A\_16\_P17847719

AATAGATGCTATTGAGGCTCCTTATTTCTACTTGGCTATGCTAGATAAGAATCCCTGTT

A\_14\_P115958 AATCACCATCCACTGGAATTCATCAGATTTTCTAACAAGATGTTAGAAAAGTGTCTAGG

A\_14\_P115863 ACAGTCCTATCACAAAGCAGAATAAAAACATGAAACCTATAAATGGGAATGCCATAAAGT

A\_14\_P117866 GAGGTAAAGTGAAGAGGAGAATCCGAAGTTATTGTGGCTTCTTCTTATTTCAAATAGT

A\_14\_P128072

ACAAGAAAGTATATCCTAGCACATTTGTGTAGTAGAAAGGTTAGAAAAACAGGAGGAGG

A\_16\_P16763192

AACACTGATGAGTCTACAAAGATGACTATGAAATGCACATCTTTAGTCCTAATCCCTCTC

A\_16\_P02282423

GCCTTGACCATGATAAACTTTAAAATGAAATCACACAAATCATAACTTCACCATTACCGG

A\_14\_P114537 CCTAGTTGAGATAGATCTACGACAGACAAGTAGATTTATCCTATGATAGATCTGTGTGGG

A\_14\_P105641 GGTGCACAGTCAGTTGATGAATTCATGGCATTTCATGTTTGTTCATTTTTTTGTTTGT

CUST\_8487\_PI426210822 TGTGTGTGTTCCACACCCACAGGTCTACAACACTGGCCCAAGCAC

A\_14\_P201736 GTATAAATATTGTGAAGGGAAAACTCTACCTGTCAAAAACAAATGGACTCTGGCCTTTCTA

A\_16\_P37494877

GGTTGGCTTGATGAGACTGCTTTGTAAATCACTTCTGTAATTTTACCCAGCAAAAATCT

A\_16\_P21482571

GCAGTGGAATTAGTCAAAGGACATGTTTTTCAGATGACCTTATCCTGAATGTGACTTATT

A\_18\_P22840843

CATACGACTTAATGAATTAAGCATGTAATGCAGGCCAAGTAATTCAAACCCACCCATG

A\_16\_P00403120

TCACACAACGCTTATTACCTAAACCTAATTTCCAAGAAAGAAATCGTTATGATCACCACC

A\_14\_P138657 ACTTCCCTGTGAATACAAATTCAAAGAAAATCCACTCAATGCATCTAAGGAGACTGCAA

A\_14\_P123256 AAGATACACATAAAGTAAAGGTGTGTTACCATTCTAAACCATCCATGTGCACAGATGACA

CUST\_4064\_PI426210822 ATGACACCACCCTGTGGGATGAATGGGGATTCCCATGTTTGCTAG

A\_18\_P15514999

AACTCTGCACCTATAGAGAGATTCATAATTGTTCCCTTTTCCATATTGAAGAAATCCCGT

CUST\_5491\_PI426210822 CCTGGACATACTTTCCACAGTGAACCTATCTCTCATTCTGCAAGTCT

A\_14\_P201383 ACTTGAGAACTAAATATTCTACCCAATACACAAAAGGTAACCTTGCTTTTATCAGCCTGC

A\_16\_P16666067

AAAGTCAACTCAGCATCAAATACTGAGCGATATTTGGTTAATACTGGTTGGAATGCATCT

A\_18\_P22841750 TAAAATGTCTGGTGCCATCTGTACAGTAATGAGTTGTGCAAAGCCCAATG

A\_14\_P108613 AAAAATCTGGTATCAGAAATGAACTTACAGGAAGAAATACAGTCAAGTAGCCCAAATGCC  
CUST\_7089\_PI426210822 TTTTGTGGAGGGGGCAATGGGCAAGGAAGCATTGATGAATTTT  
A\_14\_P109368 AGCCAATGAGTTGCTTTTACTAAAATGGTAATTGTGAAACTCCATATTCAAGAGAGGG  
A\_14\_P137737 AGGGTGGTTATAATGTCAGGTTCTGTTTATGATGTCTGGATGCCTTGAAAATTAATCATT  
A\_14\_P126945 GTCTTGACCAAAGTCAGGCACACAGATTGTAACATTTTTCCCATGTTTCATCTAGAA  
A\_14\_P122305 TCAGTGCTGAATTAGTGCCTACCTCATCATGGAACATCTCAAGTGAACCTCAAC  
A\_16\_P41644646  
AATGTCTGTCCTGAATTAACCTTCATGAAGGCTTATGATAAACATCTCCCTAACCCCTTTTG  
A\_18\_P13239397  
CCCATCATCCAATCTAAGAAGCAAAACATTACTAACCTCACAAATTGTTAAGTCACTCTG  
A\_16\_P00023631  
CTTTCCAAAGAAAACCTGTAAAGGTCTCAGAATGCTATTTTCAGTAGATCAGGCTTTTCAGAG  
CUST\_5089\_PI426210822  
AGAGTGTTCTGCTATAAAATCCTAACAGCTTAAACAATCTCCTGGGATCATATTGGCAA  
A\_14\_P121954 AAACCTCATGTCAATGGAAAATCAACCTGGACTAATCAAAACACCTATGAAGAAACAGGA  
CUST\_9692\_PI426210822 GAGGAGACAGAGCAAGTGGACAGTATGTCTATGTCAAGTGAAGGTGC  
A\_14\_P138435 CTTTTCCCAAACATCCCTGTGTTGTGCTTCCGATCTCAGCAAAT  
CUST\_566\_PI426210822 CTTTCACTCCCTAACACACAAGCTGGGGACCAATGTCACTCCAAG  
A\_14\_P111259 ACTATCTTTACCAAGATTCTTGATGTTCTAAGGTGTTTTTCAGTTTCAGAGATGTGTTGC  
A\_14\_P114827 ATATAAGAACAGTCCCACTCTAAGGGTATTGGAAGTCTTAATGAATGACGTAAAGCCAAT  
A\_16\_P03235563  
AAAAAGATTACCTGATGCATAATGTCCTTTGTGATGTTATTAAGTCCTCCCAGGTAGC  
A\_16\_P40662709  
TCACAAAGAGTTGATGTGTCATATACGGTCTTTTCTAAACTACTATTCCAAAAACGCCT  
A\_14\_P138970 TTTGTATATATCACTCTCTCCCTCTCTGAAAGACCAGAGATTGTGTATTTTCAGTGTC  
A\_14\_P122718  
CTCCAGAACTTGTTAAAAGAACTTCCCCATTTGAAAACAAACAGAACAACAGAAAATA  
A\_14\_P126802 ACCACAACCTCTCAACTCTTGTGGGGACATGCTACTATACTCCAATTATCCACAAAATA  
A\_16\_P38184757  
CTCTACCTTTAACTGAAGATCTAGAACCATCCAAAGTTAATCATCATTGTTAGCACTGGG  
CUST\_2372\_PI426210822 AGCCTGCCTTTGTCAGCACGCAGGCTGGCTCCTTTGCTTTGACAA  
A\_18\_P21406694 CAGGGTCTCAAAAATATGATGTGTATTTTCATCATATATATAATATAATCGTATACACACA  
CUST\_6315\_PI426210822 GCTTTCTTGAGCTGTCTGCCCGCTAGCTTTGATGAAATGCACATA  
A\_14\_P114730 AGACTTACCTCGTTCATCTAGAAGAATATTCTCCATCTGAAAGATCACAGGTGAGAAGTA  
A\_14\_P101117 TTTTCTTTCCCATATCACATCTTTGAATTCTGAAAGGGAGGCTTTTATTGTTGTTCTACA  
A\_16\_P16809999  
GTGACCACAATTCTCCTGTTCTAAATGTGAAGATCTGTTCTGCAAACAATCATTTTAACC  
A\_16\_P20823546

AAAAGGTAGAAATCCTGTGCTAAATTTTCATTATGTTCTGACTGCTGGTCTAAGATGTGGT  
A\_14\_P119310 TTCACAAACCTTGAGTATTTTCTTAGTTTAAATGCAGTGCCTCTCTCCATAGAGAGTCAT  
A\_14\_P102907

CTGTTAAAAAAAAAAAAAGTTCAGTGTGAGGGAGGGAACATGGAAAAGTCAAAGGTCTATTA  
A\_14\_P131031 ATACAAATATGGCCAAAATAAGGCAGGATGTGGTATAGGACAACGCAAAAATAATCCATTT  
A\_14\_P201655 CTATTTGCATGGGTGGATTATATCATGTTAAGGGAATTCTTTATCTCAGCAGAGGGGAACA  
A\_14\_P109228 CCTCAGAGCCTCGGTGATATCTTCTGGCTTGAAGTTATTAGATCCTTCTAGAG  
A\_18\_P22841015 GGAAATGGAAGATGTGCTGGGCTTTTTGCTTTGTTAAAGTTGTCAGAGTGT  
CUST\_5142\_PI426210822 GGGAAACAGATGCTTTCCTATAACTCTGAGCACTGAAGCAGCTTTGCT  
A\_14\_P100917 CTATAAAGCGCCAACGAAAAGGAAAAACAGCGTGAGCAGGGTATGACAAG  
A\_18\_P12352208

AAATGAAAACAGACCTGATGAAATTTGGAGTCTAAAATCAGTCCCCATACTAGAAAGGAG  
CUST\_8087\_PI426210822 GGAGGTAGCATTAAACAGAGGAGTCTGTTTTTCAGGCTGAAGCAACATG  
A\_14\_P126758 TTGTTTTTAAAATAAACTTCAATTGGCAAAATGAAACCAGCATACCCAGATTCTTCTACT  
A\_14\_P119990 AGTTGACTGATCTCTTAGGGAGAGGAAGCCCTCATTAAATTTGTCTAAGGTAAATTTAACA  
A\_14\_P124891 AAGACTATTTTTGGCCTCCAGGCCCTATAGAGCAAGAATTTAAGAAGTAAATAATTTGG  
A\_16\_P02100962

AAGCACTTATACAGTTCCTACTAGATGCTATCATCACAAATGTTTGCTAGATCTTTGTGCC  
CUST\_7460\_PI426210822

CACCTGAAAAAATTTTCAAAGGGAGAAAAAGAATGAGCAAACTATCCTGTAGAGGAGAG  
A\_14\_P131674 CCTATAGATATGAAATGTTATCATTGCACATCACATGGACAGGAATGAAGAACTGGGAT  
A\_14\_P122673 GTGGTCAAGGACAACGGAACCTTTCGTTGACTTCTGCAAAAATAATTCAGTTTTATATTT  
A\_14\_P124176 GTGGTTACCTTGTAGACATCATGATGATCAACAATGTGGTCAAACTCTTATAGATGTCA  
A\_14\_P131013 CTCAAATTTTGGGTCTTACCATGGTTTCAAGATGCCCAATAACTTCAAAGGTGTATC  
A\_14\_P115869 ATGAGCCTCTTCTAATTTTCATGTTATTAACAGGTTTGCAGTATCAGTCAGTGCTTGTC  
A\_14\_P113668 CACATTAATATTGCAGAGGCAGATACATAGGATTATGTAAGAGGAGTTGAGGAAAGGTCA  
A\_14\_P102099 ACATCCTGATGGACAAGTCTAATTCCTTACAATAATTCACCCACCTGAAGGAAATC  
A\_16\_P15008538

TGTATGTATATTTACAGACTGTTACGATGCTTCTTACCCTGAAATATTCAAACGCCTGCC  
A\_16\_P20770458

AAACGTCCTTTTGTCTTTACTGTCTCATATGGCTTTCTTCTGACTATACAGAAACCATA  
A\_14\_P133794 CTCTGGGAGACAAAGAAAGTATGTAAGAACTCTGCTGTAATGTTAAAGCAAGAAGTAGAT  
A\_14\_P115378 CTATAGAATAAAGGAAGACAGACACAGAAAACACAGCAAAGGCTTAGCCATGATCAATTT  
A\_14\_P100465 AGAACGGTAACTGTCACCAGGATAATAAAGCACAAAGATATGCTAATAACGTTAACAAAA  
A\_14\_P200360 TAGTTTATTGGTTTCTTCTGCACTTAGGGTTCTGATATTGAAGATGAGGACATGGAAGAA  
A\_16\_P16081279

CGGCTCACCTCTTCATATGATTTGCTCAGATTAATTCTCCAGTATTTACATTCTCAAAG  
A\_14\_P123709 CCACTTTTTTATTGCACTGGCTTGAATACAGTAGCAGTGTGATAGAATCATTTTATTCA

A\_14\_P138092 TTTAGTAGACATTAAAAGTATGAGGTTGGACTGTGAGTTTGCAGAACTTAAAGACGTCCT  
A\_16\_P41703025  
GAAAATACCAACAAAACACTGAGGGGATATTTTGATAAACTAAAAAATTAAGCAATGAACA  
A\_14\_P111044 TCTGCCAGTTGGTTTTATTGAGGTTTGTGGGCTTTTTTAAAAAAGTCCCTCAA  
CUST\_7620\_PI426210822  
CAGAGGGACACGTTAGGAACGAGACAGCTTATTCAAGTGCTTTTGAATTTGTAT  
A\_14\_P108445 CACTTCTCTAGGATTCTCTTTTAAAATATAAAATCTTCTCTGGAGGTGGAAGCCCATTCA  
A\_14\_P101473 AGAGAAGCAAACAGATGTATTTGACTGTATTTCAAAGGCAGTGACTGTAAACAAAACCTGG  
A\_14\_P137385 AATGTCAGTGCAGAAAATAACCTGCACTTCTCTTTGTCCTGGTGAGATATAATGCAGATT  
A\_16\_P38500926  
ATTGCTACTCAGTCCAAATTTAGGGTTTACAACCTAAACTAATAACTCACTGGCACCT  
A\_18\_P22842107 TTGAGAGACTGAGATAGATGGATAGGCCCTAGGTCCTTATTTCCCTCCATG  
A\_14\_P103435 CAATAAATTCACGTGAAACAAACAAACATACTGCATGGCCAGGAGACAGATTCACAATC  
A\_14\_P117851 CCAAAATAAGTTTTAAAAATATGTAGTTTATAGACTCCAGAGCAATGGGGATGTCCCTTC  
A\_14\_P126034 CTGCAGACAATCTAGACAAAATTCACGACGAAAATGGAAACAATCTATTACATATTGCGG  
A\_16\_P36372434  
ACTGATACCATGAGGCCTTTACCTAAAACTACTCATGTATTGTTTTGCAAATCTCTGGT  
A\_16\_P00666367  
GAGTAATCAACACATTCCTTATTTTAAATGCCTAGAAAGACATTAGTTCCTGCATGG  
A\_14\_P135381 GTGGTCTTCTCCGTCTATTCCTTCTTTTCTGTATTTAAGGTGAGTTTCCAC  
A\_16\_P20963078  
ATACGGCTCATTATCCAAGTATTTACACCATTATGTGTTTAGGGAAGCAAAAGTCATCCT  
A\_14\_P106154 TCTTCTAAAAGGTCAGATGGTTTCACAAGTAATGGGCTAGTGGGATTTGTATGATCTAAT  
A\_18\_P22840543 GTCTGCTATTTCCACTGAGACTTGCTGTGTGTGTTCCACACCCA  
A\_14\_P117516 TCTGTCAATTTCCAATTTATAATAAAAATTCAGAAAGTGGGGAAGGACAGATCTTCTGGGC  
A\_14\_P128455 ATAAGTAGACCCCAAGCATCCTTTTCTAAAAAGTGACTIONAAAATAAGCCAACAGACTCTC  
A\_14\_P132720 GAGAAAAACAAATGAAAACCATCCTTTGCACTTGACTTTTAGTGCAGTGATTCTGGAAA  
A\_16\_P58424114 CAGTGGCTTGTTTCTGTTCATGCAGTTTTCTGATGCCAGAAAAGTG  
A\_18\_P14136590  
TGGTTTTGCTTTTATATTTGAGATGTGATTATAAAGATCCCTTCTGCCTCAAACCTTGAA  
A\_14\_P120974 AGGAGTTTCACTTCATCCCTTTTCAATTTTGAAGGTAGGAGTTTTTATGATGTCATTGGTA  
CUST\_9928\_PI426210822 TGCTGCTGGCCGTGCTGCTCTGGAAGGTGAGTCTGGTGATTGCAG  
A\_14\_P129872 GCACAAATTTCTGGCTCTTCGACACACTCATCAATATCTAAAAGAATCACATGAGTCAAA  
A\_14\_P116508 TTTTAACTCCATCCTTTTTTTTTTTTCTTGGTGGTTCGAAGAGTTTTACTGATTTTTTAA  
CUST\_6358\_PI426210822  
CTGATTAGAAGGGATTTCTAAAGCATGATGAGATGGGGAAGCACAATTCAAACCTACAT  
A\_14\_P133387 CCTTAGATAGCACTGACCTAGTTTTTTGTGCTCATTTTTAAAAACCGCAATGAAAGACCTA  
A\_14\_P101406 TTTTTTTTAACTTCCCTTCCCAATCTAGAAGCGTGCTCAAATAATTAGCCTTGATTGTGT

A\_14\_P137217 CCCGTGTTGAACATGAGTCCTGTAAGAAAATACGAAACAGCATTAAATTTTCTACTGAGA  
A\_14\_P118629 CTGTTCCCCTGTGCAGTGTCTACTATTTATCTACAAATTAGAATTCAAAGTGAGATAGCG  
CUST\_324\_P1426210822  
AAAAATAATGCTTCTTTTTCTCCCTCACCCACCATATTGACTTAATTTTTTCTTAGATTG  
A\_14\_P109157 TGTGGGGTTTCAGTGTGCAAAGTCAAAGACCAGGTTGTCAAGGATAAAT  
A\_14\_P104165 AGGGCAAATTAGTTTTCAAACCTCAAATCTTTGGTTTTCGGATAACCTAGAAGAGTTAGA  
A\_16\_P15755518  
AATATTGCTCTTCATAACTGGCTAACGTTTTCTCTATCCTCCATATCCCAATTTTCAGGA  
A\_14\_P140002 ACTTGAAGTATATTTCTCCCTGTCCCTCCTATATAATTTGTTTTGCTGACTGTAGTT  
A\_14\_P113052 GCATATACTGAGTATTTAGAAATGTGAAGGACTAATCCAACAAGGAATGCTGTCTGGGAG  
A\_14\_P106021 TTGAGATAAATTAGGAATGGCTAAGTTAAAATTGTCTCTGCTCCAGACTCTCTCATCTGC  
CUST\_4302\_P1426210822 ATTGTATGTTGAGCACCTAGAAAACATATGCATGTGCATGATGAGCACCCCTGTA  
CUST\_1058\_P1426210822 AGCAGTCCCAGGCCTTTCCAACCCTCACCTGACTTGGCTGCAGAG  
A\_16\_P03520414  
AGTCCATCTCTATAAACGTATCCATAGATTCTCACAGAGAAAAAGATATGAATGCTGGT  
A\_14\_P125299 GTTGTATCACTTTTAGGATTAGGACAGGGCAGATAATAAAAAGTTCAGTCAGTTGGTCAT  
A\_14\_P116745 ATTGAGGGAGATGAAACTTCTACTGAAGCAGCAACACGCCTGTAAGTTACGTAAT  
A\_14\_P101094 GAAAAAGAAATAGGTCAGTCTTTAAAATAATGAAACCCCCACAGGCTCATAGATATTCCG  
A\_16\_P00723299  
CTCCTAAACAAGCACAAATATGCAAAGTTGACTTTTTGATAATCCCTTTCACTTGTGTCC  
A\_14\_P112910 CTTGCTAACTAGATAACTATTCAGGATTTCCCCCAAAGAATTTGGACATACATTTTGTGG  
A\_14\_P118193 GTTAGTGCACAAATTGGTAAATCATAACAGACTCGAGAACACACGCCTATCCTC  
A\_14\_P100414 AGTTTTTGAAGTTAAATAGTGAATACTTTTTTATTGAGAAGAATGCATTTTTAATAGAA  
A\_16\_P21527741  
CCTTAGCATGCCTAGTGATTTGTAGTTGTGTGATATGTAATTCATAGCCTCCAATGTAGA  
A\_16\_P40685886  
CAACCTTGCTAAAAAGAACTTACCGTAGAGAACTTAACATCAGTTACCATAGTTGCTG  
A\_16\_P03580535  
CCAGATGCCACAGTTAAATTAGCAAAGAACTCAAATAACCCTGAATAGAAGAAAGAGGA  
A\_16\_P41618901  
GCATCGCGTAACAATTATAACCTATTTAGATCCAAGATCCACTTAAGACATGTTGACTTC  
A\_16\_P16259968  
ACATCAAGCCCATCTTTATAATCCCTTGCTCATTCTTTACTTTCTGTTTATGCCTTTGC  
A\_16\_P21320479  
TAACAGCATAATCAGAGTGAACCTCTATCTTGAATCAGTATAATTTCCAGTGGCACCTTG  
A\_18\_P12066516  
ACATCCTGTGCATCAGTAAAACCAAGTGTGAGTTATCCACACAATTAATCAAGTTCTCACT  
A\_14\_P135178 CTCTAAAACCTACCTGAGTCCCCACGCTCAATTGTAGAGCAGGCTAATTA

A\_18\_P16325219

GAATTCTACCCAGTTAAGAAGTGCATTTGGTTCTTCCAGATGACAATTTTCACTGAATTC

A\_14\_P201066 TGATATAAATAAGTGTCTAGTTAACCCACAGATTTGGTAACATTCACGCCACAGAAAA

A\_14\_P105889 GAATTGCTGCCACTGAAGTTGTAATGGGAATCAATCAGGATATATTATGCTGTTGTATT

A\_16\_P02128124

CCCTAATAGAGTGGATAAGAGATCAAAGACTTGAACAAGATCTATGCATTGCCTTGAAAC

A\_14\_P118288 CTGTTTCCAGTGATAAACTCAAATAAACAGAAATTAAGTGAAAAATTGGGCATTGGCCC

A\_14\_P101018 ACAGACTTTAATGTTGCAGAGAAACAGAAATGCCTCTTGTTCAGAGTCTTTGTTCAA

A\_16\_P02551989

AAAAACAATCCCCAACACAATTCATGTTGTCGTTAGGCATAAAAAAGGTATTTTCCAGAG

CUST\_3043\_PI426210822 ATTCAAGACTGTGTTACAAAAGTTCTGCCATCTGGCATAACACATTCAGGTATGG

CUST\_9527\_PI426210822

TCTTAAACAATTATTGTATTGAACTAAAATAAACTAGGTAGTTTGTTCACATAACAAA

A\_16\_P00909981

ATCCATTCACCCATCAACCTAACTAACTTGTTTTCTCCCATGTAACACAATACTTATCC

A\_18\_P14137558 GCTCACCATGGGTGGACTGAGCAGACGCCTGCCCTCACACACAAC

A\_14\_P134989 AAAGTGTAGACATGGTCCAATTATAGGTGAGTATCATTTTGTGTGCTTGTGTAACAGTGA

A\_16\_P01497240

CCAATCCCCTTCAAGTATTGTAAGGATTTAAAATCAGTATTGCTCCATGTTACACCACT

A\_16\_P39620931

GACATCCAACACCCTTTTAAATGTTATCTAGTCATTCAGAAGTTAAATAACCCAGGTTGC

A\_14\_P126909 ATTCATGTTTTTCTTCTTCTCCCTGTGGAGTATAATTTATTGACTGCAGATGGAAGCACAT

A\_14\_P126198 GCAGGTTCTTCTAGAGTATCATATTGCCTATCTAAAGGTTTGTATACGGTTCATACTATA

A\_14\_P133141 TTCAGAATCCCTGTTGTTAAAGCACTTTCCAAAATCAGTAAAGTGCTGAACAAATGCTAA

A\_14\_P111529 ACCACATTTTCATTCAGATAAAAGAAATGACCTTTTGAAATCATGGGCATCAAATTTGG

A\_16\_P18751262

ACTTCTGTGTTGTGCAATATGAACTTCTCAGCCTAACAATCAAAGTCCTGCATCATTAGT

CUST\_107\_PI426210822 CAGGGATTGTTCTTGTTCAGTGTGTAAGTTGCATGCCAACCTTTTGTA

A\_14\_P137269 ACTCATCAATGTAGCGTCGACTATGATAATCTTCTCATTTATAGACCTGCTTTCCAAAT

A\_14\_P133071 CAGTCCATGCCAAAGTAGTATAAAATGAAGCCAGAAGTCTTCAAAAAGAAAACATTTTCC

CUST\_3678\_PI426210822 CATTTGTTCTCTTTCATCCTATACTTCCCTGGGCATGATACCCTTCTTTC

CUST\_6676\_PI426210822

ACTTAGTCTTACTATTTTATAAACTCACTAGCCTCCTGTATCTTGCTTTGCTCCCC

A\_16\_P16191915 CACTTTTGTCTCCCATGGTCTAGGCAGGAGTCATTTTTTTTTGCTACAGTG

A\_14\_P131099 TACTATGAAAACCTGAAAGGTTGAAATCTGGTGGTTTACCTAACCTTTGAAAACGTCAAT

CUST\_1974\_PI426210822 CAACTGTCATTGCCAAGGTGACTGTTGCCACACAAAGAAAATCCAAAC

A\_16\_P19295924

ACTTTTCTCCATGATTTGTCTATTAATACCTTTTCTCCCAAATAACTGAAACCTGCCCAA

A\_16\_P41477963

CATGTTGTATTACCACAATTACCCACTTTCTTTATAAAGCGGTAGTAAGTCTTTCAGCCA

A\_16\_P00311243

TTATGGCTGCTTTTATTTTAAAGGAATCTTACCAAGTGCTATCATTGTAGAGTCCCACCT

A\_18\_P17384769

TTTTTTGGAAGTTTGTGTAATTGCTCAAAATCACAGACATTGAAGTTGAGTGCTTCATGG  
CUST\_4407\_P1426210822 TATGTATGCCCCAGGACAGAGATTAGGCTATGGTGGGCATTTGAG

A\_14\_P137307 TTGTTTTCCAGGTGCGATTTGAAGGTTTAAACAGGAAACGTGCAGTTTAAATGAGAAAAG

A\_14\_P138461 CAACATCAAGTTCCTTTGTTTTATTTACCAGATGACCAGGAATCATAGATGAGTTTGGCT

A\_14\_P109438 CTAGCCTTTTATCTACTCTACATCCTCAAAGTAATCTGCGTTTGTCAATTACCTCCATGA

A\_14\_P132823 CTTGATTCTTATGGCAGTCACTATCAGTGGTTATTGGCCAATATTTTAGACGTGTCTTTT

A\_18\_P22839944

ATTCTTACTTACTGTAAGTTTGGCCTTCGTATCAGTTCCTCCTCTCTCAAACACTTTCAT

A\_16\_P19987526

GTGCAGATTGGACCAAATACAAACCTCTAACAGTATCAGTTTACTCATTGCCATCTTGAT

A\_14\_P116572 GAATGTCTAGCCACAAATTCTCAACAGAAGCGTATGCAGAGTGTATCATTAGATGGC

CUST\_5658\_P1426210822 GTAAATAGTTGAAAGAGCCCTTCTGGAAGAACAAGGCTAGTTCCTTTGG

A\_14\_P105349 TATCTGGGATGGGATTGGGCACCAAATAAAAATCTGAGTAATTGGAAAAGGG

A\_14\_P111988 GATCTGTTTCCTTATACCAGATCCTCAGTCTCACTAAAGACAGCGATATGGGAG

A\_14\_P139779 TTGGTCTTCAGAGGTGGTTGTTTTAGAGATAGGATAAGAGGAGACTAAATATTCTTGGTT

A\_14\_P128845 CTGTATTACCAGTAGACAACACAGTAAATGCCTGGCACCAAAGTGCACTAAACAAA

A\_16\_P16067808

AACACTAATCCTTACCTATGCCTGTAAATAAGCCACTAATAACACTTGACTTCATCTGGC

A\_14\_P115862 ATCATTCTACATTAGCCCGAGGGGTTTCGCTCAACACAAATATTAGAATATACTTGAGATT

CUST\_7519\_P1426210822

CCAACAAAGGACACTGAGGCTACTCAGTAATTATTAATGAGAGCATGAACAAAGGAAT

A\_14\_P108209 ACTTGTGGTTTGAATAAAGTCAACCATGTCTTTTTTTCATTCTTGGGCATACCTTGATTTAT

A\_16\_P03070647

GGCAACTTTTAAACCTCAAGGTAATTAGCAAAAACCAATCTCCTTTAAAGAGACAAGTTGC

A\_14\_P102737 CTTGAGTAAGGGGCTCATTTTATTTTATTTTTTCTACAGACTGCAATCAATTGAGGGATG

A\_14\_P136463 GTTCTTTAATCTGGAAACATCATTTTTGGTGTCAAGAATGTTCTTTTGTAGGATCCCAGT

A\_16\_P18307879

AAGGTTTATCAAGCAGCAGAAGATATTCTCCACATGATTTTTTATTCAAACACTCTCTCC

A\_16\_P02333343

TTGAGGAAGAAAAGGCTAAATCATGCATGTAGGGTCATAGGAAGAACTAAAGGCATAATT

A\_14\_P113361 CAGGTATTGTGTGTATGCATTTAGTTGTGCACACACAAATATGCTCCTATACTGGCATT

A\_14\_P125280 CTTTTCTATGACTCTATGAAATGCCACAAAGTTAACAGGGAGGTGAATTTTACAAAACCTG

A\_16\_P16442484

ACTCCATGGAAATATTCACCAATGTAAACTGTTCTTTCTACCTAGACTGGAACCTAACCT  
A\_16\_P15013319  
ATGTCAAATAAAAACTCAGACTAAAAGAGATGAACTTCCCCTTAATATACCGTGATCGCC  
A\_14\_P135206 ACATCCCATCAATGCATTTATCAAGCAAGTATGGTCCATTTCTTACAAAGAACAATTCC  
A\_14\_P139798 ATTTTCATTTTGGGAATGAGAACGTTCTTAATTTGTCCAATTTCTGTTCTGCTCCATTCT  
A\_14\_P115231 AAAACGGATGTGCATAACAGAAAATGTCTTCCCTTGGGATTTTTCTGATTGTTTTGATTA  
A\_14\_P104598 TTCATGATCCCTTTCTCAGATGGATCAACTCTGCTTATCCTTGAAGACTTCAAAGAAAT  
A\_14\_P202525 TCAACCTCCATAACAAGTTAGGTATATCAAATACTGCTGTAAAACCCATCCAGCAAAAAC  
CUST\_5048\_PI426210822 CGCCCAAATTAAGTGGTGTCACTCTGATCCTTCTTCCACTGAACATC  
A\_16\_P16191048  
TAAATTACAAGTGGCAATTAGTCACTGTGCTGATGTAAATTTGGAGTTGGTGGGAATTTT  
A\_14\_P123978 CTGAAAATGCAAAGAGAAGGGAAAATGCCTTAAATTGTTCTGGCTAATTTAGAAGCAGCA  
A\_14\_P133496 TCTACAATTAACAATATTTCCCTCTTGGCCGTCCATTATTTTCTGAAGCAGATGGTTTCA  
A\_14\_P128249 ATTTATGATGTATACCAAACCATGAACAGTAGTAATTTCTGGAAACAGGTCTGTCTGATT  
A\_14\_P137265 CTCAATTTAAACTGGCATCCAGTAGAGAAGCAACAACCTCACCTCATATAATGTTTTCCAA  
A\_14\_P126022 CTCCCCATTCAAAAACCTCCTGGAATCTTCTTTATTTAATACTAAATTCCTACTAATGGTG  
A\_14\_P129456 AGGAAGAACCATGTTTTTCTATCCTTTGAGACAGTGGAAAATTATTTTGGTCTCCTCTAA  
A\_14\_P127041 AGGGAGAATCTGACTACAGTTTCATATTCTTCCCAGAAATCATAACAGATTTCTCCAC  
A\_14\_P102287 CATTTGCCAGGATGTATCTGAATCTCCTTGGCAGCATCTATTACCGTGAAAG  
CUST\_1202\_PI426210822 GGATGGGAAAAGCTACCAGAATATCCTGTTGGAACCAGGAAAAACAGA  
CUST\_1977\_PI426210822 CTCTTAGAACCTTGAAGCAGAAATAGCTCAGGGTGCTGCCCTAAAGTT  
A\_16\_P39579553  
CTCTCCTAATTAAAAACACTTCCAACCTCAGTAACTGTTATTTACAATACCTCCCCTCAGA  
A\_14\_P139767 GTGATAGGACATGAGAAATAAATTTCCATCAAGTGAATCTACCGTCTCATGATGACCAC  
A\_14\_P100184 TCCCTCTTTCCCTTGGTTATTGTAAATGGAAACTTTTTCGGCTTGATTTTCTTAGATTTT  
A\_16\_P17691892  
AAAGAAAAAGTTCATGACCTTGCTAACCTGTTCTTAAGTCTGAAATGCTCCACTAGAATG  
A\_14\_P133729 GAGAGGTGTGCCTAACAAGTGAGGTCAATTTATGGACATTATGTTCTCTGTGC  
A\_14\_P124171  
GAGGGTGGATTGTATTGGGTCAAGGAGTCAACAGAAAAAAGTTGAAACAACAAATATAAA  
A\_16\_P16504888  
AAAGAAGGACCAAATGAAAGTAGATGAGATGTGAAATCAAGGAGTCAGACTATCTTCTGT  
A\_14\_P111392 ATGTGACCTTTATTCCTCATGTTTCTCTGACTTGAGTGGGGGTTTTGGAG  
A\_16\_P00911659  
ATCAACGACTTCCTTTGAATGGTGCTAACAATGCATTTTACGGTTAGATGTAGATTTTG  
A\_14\_P135776 TTAGCCAATGAAAAAGTAGAAGAGTTCACCACATTTGTGAAGGTTTGAATTACTTGTCGT  
CUST\_3123\_PI426210822 CAGATTAGAGATGAAGTGTCTCCTGTTAGTGCCAGAGCAGAAGAATAACAG  
A\_16\_P00685576



AAACCAATAGTAATAATGCTTAGGACCTCAATAAACTTCAGTCCTGTCCGTTTTTGGTG  
A\_14\_P105966 GCCAAGTTAAGTTGATCTGTTACAGGACTCATTATCCTAAAAGGGTCACTAATGACATTT  
CUST\_4582\_PI426210822 ACTCCATAGCCTGAAACCATAGCACCTGATGAAATTGGACCAATCTGTTT  
A\_14\_P136814 TTTACAAGGAAAAATCCAGGTAAGTTATGAAAAAATGGTTGTGGGGCATTTCACC  
A\_14\_P132043 TAGAACTGGAACATATTTCTTTTAGTCACACTGTAAACCCTTTAGCCTTCCTGGTTATCA  
A\_14\_P103414 AAATGCAGCAGAACTTACATTCCAACCTTAGAGACTCATAGTGAGCACAAGGAAAG  
A\_14\_P113560 GAAGTGAGCACTAAACAAATACTCCCAGGCATGGATCATTACAAATGGAGGTG  
A\_14\_P103837 TATGCTATGAATGGGGGAAGAAGACACAGTATTATTTACAGTGTGAAATTTCTTCAGCA  
A\_14\_P111757 AGACTTGATTGTGAGTCCGTGTTATATCATCTGGTCTCATTGATAGGCGGGATA  
CUST\_7700\_PI426210822 GAGTTGGGTCAGGAGAAGGAAGTTAAGATTGAAGGAGAACATGCAGAG  
A\_14\_P113621 CGGATACCATGTAAGACACTAACCCCTATCCATGTTATGCCAGGTTTAAGGTTTAATTTCA  
A\_16\_P01007238

AAAGTCCTTTGAGGGTAATTAGACTCATACTTAAACCTGAATAAAATGACAGCCAACACC  
CUST\_9703\_PI426210822 CTCCTTCTCCCCAAATCCTCAAGTCCTGGTCAGTTTACTCTAAATCAAAG  
A\_16\_P03487508

AACAACACAACATGCTACTAACATACCGACTAATAGGATATGAATTCATTACTGGGCAGA  
A\_14\_P201621 CTCGACATATTCTTGACGAACAGCAAATATTATCTGATTTCTAACATCAGCCAATCTAAA  
A\_16\_P02750926

CTTGAGGGATGATAACAACCTAAGGGCTTACAAATGATTTTCAGAATACCATGAACCTGTGTA  
A\_14\_P111183 GGCCGGAATATTCTGATGGGTGCTATAGAATATAACCTCCAGTTCTAGACTCTGAAT  
A\_16\_P01246367

AACCAGCATCAGAATCAAACCTCTCTGTTTTACTCTAAAGGCTCTAAGTAATGTTAACCA  
A\_16\_P20531603

AAACCACAGGATTTACATCTCTCGTAGCATCTAATGAAATACCAGCAAGAATTGTGTGTT  
CUST\_5949\_PI426210822 TTGGAGCTTGGGAAGAACCCTTCCCACGCTGGAGAGCTGGCTTTTTT  
A\_16\_P58424528 CTTTATTGTCTCCTTTCTTTGCTCTCTCCCTTCTCCACTCTCCAGT  
A\_14\_P121237 TCCTATTGTGAAATAGTTTACTGAAATAAGATCTTCCCAGAAGCCCAGTATGTGAAGCAG  
A\_16\_P18304325

AAACACGGAATTGCTTTTTCTCTGTTTGTAACATCTTACTTATTAAGCCAGGTAGTCAGGA  
A\_16\_P40327681

AAAAAGTTGGGTTACATATACACGTTCTGATTAGCATAGACATAGAATTTTACATACGTA  
A\_14\_P117026 GTGAAAATACTAGAAGCCCAACAATCCAGATGTAGCAACCTAATACTCAGAATCACAAAA  
CUST\_1629\_PI426210822 GACTTCTGTTGTAGATCCCGGGCACTCCTGCCAGCTGCTCATGC  
A\_14\_P201438 TATGAAAATACTAGTCCATTTCTTAAAAAATGAAAGTTTCTTAATTATTGGGGGGAGGGAGG  
A\_16\_P01888364

GTCCCAAGTAATAGCATATCCTATTTATTTTACCAACTTATATAAACTGAACCCTGAC  
A\_14\_P108578 GGTATGGAAGATGCCTCATTCGTAATGGAACATTATATTGGACCATGTTGGGTATATTGA  
A\_14\_P110956 CTTAGCCATGACTGAAATCCTATATTTAGCAATTTCTTTTTTAATTGTTGTGCCACCTC

A\_14\_P136660 GTTGCTGACCGCAGGAAATATTTGTAAACGTAATGTGCAAAGCAATTAAGTATTGAC  
A\_14\_P109396 ATTATAGTTTGCCTAAATACTTTCTTTTATAATCATTGTATCATTTCATCTTAAAAGGAC  
A\_14\_P115677 ACAGAAAAAGAGATGTATATTTAAATGCCATTTTGGGGGCTTCTCTTATACTCTCAGGAG  
A\_18\_P12745044

TCTATCCACACGATTTCTAAAATGCCTTCCACTTTTTATACCCCCACTATAGAATTCAAC  
CUST\_7699\_PI426210822 AGATAGGCAGGGGAGTTGGGTCAGGAGAAGGAAGTTAAGATTGAA  
CUST\_5050\_PI426210822 CTTCTTCCACTGAACATCACATTCTTCATGAGAATCACACCAATTGTCCTCTG  
A\_16\_P19296848

GGTAATTTCCACCAGATGGTCAATAATGTTTCATTTCAGATCACATATTTTAGATCGGGAGA  
A\_14\_P120392 AAAATCAGATCTAATGAATCCTGGAAATGAACGGACTTAATGGGCAGCCCATACT  
A\_14\_P109421 TTCCTTTCTCTTTGCCAGCAAAAACGATTATGTGATTAGATATGGTAGTGATAGCCTCT  
A\_16\_P01563156

AAAACACCCAATCATTAGTTTCTCCATTACACATTTCTAATTTCTTTTTCTTCCCTCGCC  
A\_14\_P125744 CCACCTTTCGTTCTTGGCCATTTTATGATGAAAATTCACATTCATTAAATTCTGCTTTT  
A\_14\_P120898 CACAGAGTTATCACAGAGAACTGACTCCACAACACCTGCTTTTCTCATTTCAGAT  
A\_18\_P17366233

ACCAACCCTTAATTACTTCTTGCTTTCAAATCTTCAGTAACTTAACACTCTCTACAGTCT  
CUST\_5293\_PI426210822 TAAGGAGTTTCTCTGCTTAATTGCAGTGCTGAGCTCAGGGAAGCTG  
A\_16\_P18978380

CACGTATCTCAGCCTATATCCCTTTTTTCATGATCATCTTACCTCTGACATAACTCTTTCA  
A\_16\_P58424345

GGGGGAGCAGAGGGAAAATCAGAGTTTTTATGCAAGTAAAGTTACATTGTGAACTTATAA  
A\_14\_P108837 CAGGAGAGAAGTGTCTGTCTTGACATTAATGAACATCTCTGGGAGATAGTC  
A\_14\_P138925 TAAACAAGCATGTGTCACTGGAATGCATAAATTCATCAGTTTGGAGTAGAAACAGTCATC  
A\_16\_P15216422

AATCTCCCCTTGATACATAAAAAAAGCAGAGGTATATGTCCAAATACTGAAGAGACCAGG  
A\_18\_P22841609

CCTTAATTATCTGAATGTTGTTGCTAGGGAAACCACTATTTTGGCTCAGATCATCTTAGT  
A\_16\_P01423888

CCCTCACATTA AAACTTGCTTTCAAATCATCAGATATCCTTCACTGAGAATTGAACATGC  
A\_14\_P114617 TCCTTCCCGATACATTCTGGCTCTTGTTTGTATGTCTCTCAAATTA AAAACATTTTAAAGT  
A\_14\_P120371 TCGACCTTTAAGATCCCAGAGTTAATAAACCCCATCAGATAGTCTGAGAAAAAGTGTC  
A\_16\_P00685252 AAAGGGACTTCGGCGGAAGCCATATGACCCACCTCTGTCAATTTA  
CUST\_4822\_PI426210822 CTAATGTTCTGTGAGGGTGGAAACCTAACCTAGAATTTCCCTGTGG  
A\_14\_P113715 CTGAAGAACCTATGCAGCAAGACAATCGGAGAGAAAATGAAGGTAAGAGAACTGAATAA  
A\_16\_P02201942

GACTTTTACCTTGAAGCAATCTTCTTTTACATGACAATGGATTTAAATGCTAGGCTGGCT  
A\_16\_P58424407 CGTTCACATCATAGCCAATGCGAGCCTCCTTTAAACACTAACGTCAAGT

A\_14\_P117321 GTTTCGATTGGGGTGAGTGCTTGAGTTTAAATAATAGTGGCTTATTTACATTCCATCACA  
A\_14\_P114914 AGAACAAAATTATGAGAGAGTTATCTACATCATTGAGAAAATCCTCCTGCCACTACCAAC  
A\_14\_P105197 TGTCCCAAGAACATAACAGTGTAACAAATGACAAATGTTTTTCATCTGTAGAAGTAGTAA  
A\_14\_P101811 GTATAGGTGAAAGCATCACAGGTTCTGTATCTTGGATTAATAATAATAGCGAGTCACATTG  
A\_14\_P111663 TGGTTTATTTGTAATAGATCGGGTGCAAGATTGCTGTTGTGATGTTTATTTACTTCCTGG  
A\_14\_P123221 ACTTAAATTGTGTGCATTCCAAGCAACAAAACCAATAATCTGTAGGTTGAAGGTTGTAGT  
A\_14\_P127275 AGGTAGTAAATAGTTTGGCAAAAAACTGAAGATAAAGTGGCAGTGCTGAGTAATCATGGG  
A\_18\_P10303961

CCACATAAAGTTTTCAAATACAAAGTTTTACATTAATAAAAAACACTAAATAAATCTAGTATCC

A\_14\_P119087 CACTCCTTGTTCTCCTGGCACCAAGATTTCCAGATTTTTATCTTCTAAATATTTCTCTAACC  
A\_14\_P123499 CTCAACCTGAATTCCTGAAGCAGCCTACTAATATATATGCTCACGAATCTATGGATATTG  
A\_14\_P136671 ATCATGTCTACAGAAAAGCACAAAGAAAATTATCGTGGGGGAATTCCTCAATCTAGTAGGAG  
CUST\_1754\_PI426210822 GAACCATCAAAGTGCTGAACCTTACGGACAACACCTATTTAAAACCTGAACGAC  
A\_14\_P113442 CTAGTTACAGTTGCTTGGCTGTAAATAAAATCTCCCCTGGAATGAAGCATTTTAATTCTGA  
A\_14\_P103706 TTTTCCAGTGCAGACTCTAGGGTGAAAAAAAGTGTGTTTGTGGCTGGA  
A\_14\_P137654 CTTCATAACAGGCAACTACTTGAAGTTTTTTTTTAAGGCTTTCTAGGCTTTCAGAGGATTC  
A\_14\_P108877 ACTTAAAGGTTGACTTGACTAGCAAACCTTTAACCTCAGTTTTTGCTTGATCCAAGTCAA  
A\_16\_P18140575

AATTTAGAACCCATAGACGATAACTCACAGAAATTAACCTCATTTTCCCAAATACGCTAC

A\_14\_P109451 GAATTTCCCATAGATATGCAACCAAATCCAAACCTGAATGTTTCTAAAGAAAGTCTTTCT  
A\_18\_P22840485 ATGTTAATTACCTGTCTGTCTAGGGAAAGACTCTGTAATGTGTGCCTCTTAGGAG  
CUST\_6363\_PI426210822

ACATACATATAGAATGTTCTGTTTAATATTATTGGTTTTATGCAGTATTTGAATATATAAA

A\_18\_P15885295

AGTGAGTCTAGATCGTTTTTTGACAGTGAAATCAAATACCATGAATACGTTGAGGGAGTAA

A\_14\_P114165 AGCACTGGATTCTTTTTGTCAAGGGATGAATTACTTTGTAATGGCTACTCATCTAGTGATT  
A\_14\_P122835 CTGTTGACAATCTAGGTCTTTTTGATGAAGGGTTGCCTGAATATCTTTTTACTCACAGA  
A\_16\_P37434115

ACTGAGCATTTTTTCCATAATAGCCGAGCAGTTTGTAAATTATATCCACCACTGAAGAGAAA

A\_14\_P126785 GGTCAGGAAAAATGTCCATGTGTTCAATTCTGATTTTCTTATTTCTTTCCCACTTTTAGG  
A\_14\_P121572 GCAGTGTTCTAAATAAACAGGATCTGTATTTCTTGGTCTGATGATCTCAGGGTTACAAGG  
A\_16\_P18763267

AAAAACCAACCTATTTTACACAGGTGGATTTTGTAGTTTCACTAAAGTGCTCAATGTCAGG

A\_16\_P30530288

TGTGTCCAAAATGTCTAAACTCTTATTGTTTCTCCCACTTATCCACAAGGATCCGAAAA

A\_14\_P107438 CTATAAAAATTCCTTCACCCATGGCCCTTTTCTCCTACAATGACTGTAGAAAATTAGAAC  
A\_18\_P14132084

CTGAGGTGGTAGAATTGAGGTGAATGAAGTCAACCACAGTTTCTAATGTCTTCTTATATG

A\_14\_P135577 CACTAGCATCACCATTAGGATTTTCAGTTGCTAACTGTGTGTTCCCTCAATTTGTTTTTAG  
CUST\_525\_PI426210822 CCAAGTGCTGTGATGTATGTGGATCCCAGAGTAAACTTGGTGTGTG  
A\_14\_P113671 AGGGTTTGTCTTTCTGAAGACTCAGGATTCACCTTTTCAGATGATGTCTTTCTACTT  
CUST\_3395\_PI426210822 TTGCTTGGAGGGGACTGGGGGTTATTACCTCCCACAGGACTGTTTA  
CUST\_6063\_PI426210822 TGTCTGGAATGAAGGAGGCAGTCAGGAGAACACAGTGAGAGACAG  
A\_14\_P131093 ATATAATTTGCCATTGCTGGGCAAGCAAACATTATCTTCAAGCATTACCTCCAAC TAGAA  
CUST\_5586\_PI426210822 GTGAATAGTGGGATTGCTGCTAATGCTGAGATTGGATTGGGATTCTGG  
A\_14\_P200721 CCATGAGGCAATCCCAATTAATGTCCTTTGTGTATTGATCCCTTAGCATCTTTATTAC  
A\_16\_P00791849  
ACAAAACCAATTCCTCTATTAACACCGTTTTGTTTCAGTAAGGTTATAGCACAGTTCTG  
A\_14\_P110658 CTTTTGTGTAGAAACATGACACACTGATTTCTCATGTTGAAGGCGAAATTAATCTAGCC  
A\_18\_P22840501 ACTATGTGGGAAAGCGGGACTCTTATCCTTGCAGAAAGTCACTATGAAATGAG  
CUST\_7860\_PI426210822 CTACGAGGACAGCGATTAACATCTCTCAGATATGTTCTCTCAGTGCTGAAATGT  
A\_14\_P116973 ACAGAGGGAAAGAAATGATAGAATTTACCTGTCTCTGCACCAGCATAGTTGGAAAA  
A\_14\_P119693 AGCAGCCCTATGAATTGGGATTGGGTGCTCATTACAGTCATTTACATATAATTTACATA  
CUST\_7156\_PI426210822  
AATGTAGGTTTCAGAATAGTTTCTTCTTTCTTCCACGTCTCTGAAAGTCCAGCTTC  
A\_16\_P03784874  
CCCCATTCTTTCTTACTTTCAAGGTCCATATTAAGTCCCATTTACATCAGAGTTCTCATA  
CUST\_7763\_PI426210822  
CTTAAAGTAGTATCCAGGAGAATTTTGACTCCTTCAACAGTTAACTGATCTAACTCTGCC  
A\_14\_P111372 AGAGATTATGTTCCACCAGCCCAGAGATCAATCTTTTCTATTGACAACAACAAAGGGAAAA  
A\_18\_P17382325  
GCACATCTCTGTGTAATACCAAATGCTAACAATTACTGTTGTCATAAATGAAGGTCAGCA  
A\_18\_P22841608 TAACAGGCAGCACACATGTGGCAGATCGTAGCAGCGGGCCCTTGC  
A\_16\_P58424559  
AATTACTCTTATCATCAGTCTTCTTCCACCAGATTA AAAACACCATGAGAGTAAAGGG  
A\_18\_P14062998  
AAAGAGTGCCTTTCTATTTTGATTTGTATTGGAACAACTATATGGCATACTGGCTTCG  
CUST\_9269\_PI426210822  
ACTTTAGTGCTCTTGCTAAAGAAGAAAGTCGTA CTACTATAGACATTTACATGCTGCTGAACA  
A\_14\_P201004 TGTGCTCCATTGAACTTTATAAGAGGAAGTGTCCATTTACCTCTTGATATTGAGGATGA  
A\_14\_P116711 AAAACTTTAGCAAGAGTAAGAAATGAATTCTCAGTCACCCTCTTTTCTCTCTCCCTACTA  
A\_14\_P117535 GAGAGAGAAAAAATAAACTGTATTTGGCTGCAAGAGTTGCTGTCCCTGTTTTCTGAG  
CUST\_705\_PI426210822 GCAATTAGTCACTGTGCTGATGTAATTTGGAGTTGGTGGGAATTTTTGGACT  
A\_14\_P129533 CTCTCAGACAAGTTTCTCTTTCCCTCTCTTCTCTGTTTACAGATAATGCTACAGAG  
CUST\_2340\_PI426210822 CAGATAGAGATAAACTAGTTAAGGGTGGAGGGTTGGTTGGTTGTCATTCGT  
A\_14\_P135582 CAGTCAGGCTGCATACACAGTGAGAAAAAAAAAAGACTCATTTTCTTAGTAAACACTGC

A\_16\_P00685423

TCTGTCCGCCTTATCTATCTTCACTGACGTGTATTTCTTATTTTCACAAAATGAAGCCAT

CUST\_9242\_PI426210822

GAGATTTACGTCTCTATTGTAACTTTTGTGTTTTCTTGAGGAAGTGTCCACATGACTTCTT

CUST\_1854\_PI426210822 GCCTTATGGTGTCTTCAAAGAATGGCATTAGTGCTGTCCAACCTTCAA

A\_14\_P119362 AATTCTATGTGAGTCAGATTAATAATTTGTTTTCACTTTCAATAGTGTTAGGATAGGTG

A\_16\_P20876994

AGAAAACACAGTCCTTAATCCAGAAATTGTGAACTCTAAATACAGGCTTACCAGAAAAGC

A\_14\_P117531 TGCATATGAGCAGAATTAATTAACATTTGCCTATGACTCCAACAGTCCTCTGTTTTAGT

A\_14\_P123359 ACCTTCATGAGTGAAATTGAAAGTGATAAACTAACTAGTTCATGCCAGTAATAGACCC

A\_18\_P17426922

AAAGTTGGCCTCTATCCTAATGACTCAAACTTGGTTCTTAACTACCATGATTGCTTTTTG

A\_14\_P106153 AAAAACACAGCCTATTCTGTTTTTCGTAAGGAGGAAAGACAGTAATCCACTTTTCTGATAC

A\_18\_P14135578 GCAGTGCATCGTGGAAGCAGGAGACCAGTGAGAAAGCAGTCTTTT

A\_16\_P21498744

CTTTTTCAGAATCAATGCATCATTCTCAAGCATAGTAGCAACGTATTTGGTCAATGGTT

A\_14\_P103076 CTGCTTTTTTCCCTATCCTGACATACTTTATCTTTGGAACATCAAGACATATCTCAGTTG

A\_14\_P100331 CACTCTAGACCTTTCACAGACCTTCCATAAATCAGTGGTATTAGTAACAACACTCCTAT

A\_16\_P00372286

ATCTTACTCAGGTAATGCATTAACTCCAGATCACTACAGAGAACATTTCAATTCCCCTT

A\_14\_P106576 TGATTCACAGGAGAACTAGACAGACGAAAACAACAGCAAGAGAAAGGCAG

CUST\_230\_PI426210822 GAGAAGGGAGGACGCCGTCCGGGGCCCGCTAAGGTCGGGGTCGGC

A\_16\_P39303291

AACTCCAAAATTTTCAGTTTCTTTCACGCTTAGGTAACAGTTCAATGCAAATCCAGATTGT

A\_16\_P02282307

ACCAACCAATTACAAAATGACAAGATACAAACATATAGCAAGCATACAAATTCTCAGGA

A\_14\_P123738 TTGTTGCTTGTGAAAATGGCTTACCTGTCCACTTGGATCAGTCAATTTTTCC

A\_16\_P21490873

TGGAAAGACTGATGTTAAATATCTTGACTCCTCTAAGATTAGGTAAGTATTGGGCTGAGG

A\_18\_P22840341 AATTCTCTAAAGGGAAAAAAAAAATGAGGTGGCTGCTCTCTGGGGTTAAGCAG

A\_14\_P110321 TCAGTGCAATTAAGATGCTGTTGTGAGTGCACCTTCTGCTACCTGATTTAAATAAAGTCT

A\_14\_P114106 TCAGTAATATTTGCCTGTTTGTGTTAGAACGCACCTCTAAGTATATCCTAGGAGAGAGAT

CUST\_374\_PI426210822 CTGGGCAGTGAGAACTGTCCCATGGCTAGATGGACCAGAATATC

A\_14\_P110344 CCTACGGTGTTCACCACCATCAACAACCTTTACTTCATTAATTCGATATCAGAACCTTAA

A\_18\_P22840508 ATCAAAAACACACCCTCTGGGGAATGCTGCCAAGAGGTTTTGATTTAAAAC

A\_14\_P108597 CTAATCAAAAATTTCTACGTTAGAGAGACTGAAAAGACATCTAATTTTCATTGCTCGGCAGGT

A\_16\_P20527856

AAAAAATCGTTCATCATTGTGCAAAATTTCAAGTCCACTAAACGATCACAAGCATCCTG

A\_14\_P102047 CATTGTTCCTCCTCCAACCTTTTGTCAATTTAGGAGAGAGACTCACCAGAC

A\_16\_P02162872

AATCCCAGTCTTGTGCTATTTACCCCATCTAGTAAGACTTATTAACCACTCTGTAAATC

A\_14\_P111216 AAATACAGTGAACCTACTTCTGGGAAAATGGAAGCAAGGAATCTAGAGGTATGGTTTATC

CUST\_7524\_PI426210822

ATTATTGTGTAGAAGCTGTTTCCCATTTGAGACAAAATAAGAAACACTTGTGTAACGAGT

A\_16\_P16372176

CACCATCATCTTAGAACACCCTATTATGCCTTAATTGGATTACTTAATTGTGTCTCAGCC

CUST\_9066\_PI426210822 AATGTCCTCTTTGGGGTAAAGGGGAGGACAGATGCCAACAGAAAA

CUST\_8721\_PI426210822

GATGATCATAATATAAGAGTTAGAAGTCAAGAGAGATGGAAATGAAAGCAAGTCAAGATT

A\_14\_P127619 CTGGAGAAAGGATGCTTTCTTCCATTCTCCAAATTTTTTTGATCCAAGTAGATTAAACAC

A\_16\_P00685031 GGTTTCGTGTGTATTTTATCCAGGGAAACAGGTTTTCTTAAGGCACTAG

CUST\_4466\_PI426210822 GACTCTACTGGGCTCTCCCTGCTCCCATGGAGCCTCATGCTGTC

A\_14\_P200838 ATTTTGCTTAAACCTGGGCAAAATTATCTCATTACTTCAACAAAAGGGCCCCATTATATC

A\_14\_P115334 AGTTGTGGATAAAAATGGTGGAACACAGGTCATTTTTAGTTTGTGCTTGGAATATGACTT

A\_16\_P15609102

TGACTTACTAGATGCAATGCCCTATTATAAGAGCCATGGATAAATAAGTGTGACATTGGA

A\_14\_P119366 AGGGTAACAAAATAAAGGCATTTTTCTTTTAGGGAGGAAACAGTAAGAGCAGCAAATAA

A\_14\_P136912 CCCCAAATTACATAGGCACGTATGGCATTTCTAGACCTTCAAATTAAGTACTGACTAAGATATC

A\_14\_P139007 CTGAAGGAGTAGGACAGAAGAAGTGTCAAATTTCTGGAATCCTTAAAGCCATGTC

A\_14\_P136050 AATGATGCTTGAGGTTTACAGAAAATATTAATTCCTGATCTGCTGCTATAAAGCATGCC

A\_14\_P115350 ACAGTTTTTAAAGTCTTAAGATACCACAAGAGACATTTGCATTGTCCAGAGGACACATTT

A\_14\_P131692 GTCAGGAGATGGAGGATAACTTTTCAGTAAAATTGACTTGGATTTTTTTGAATTGCCACA

A\_18\_P17265204

GTGGACACAAATGAAACAAGAATTAATTGCACAGACATAAATGAACTTATGAGGGCACAG

A\_14\_P202559 GGGAAAAGTCTCCATCTCAAACATATCATCTCTAAAATGAAATACAGCCAAGATGCTCA

A\_14\_P124386 TTAAGTTCAGATTGATTTATTCACCAACATAATCAATTCCAAATCCCTGTCAGACCTGGA

A\_16\_P36141454

ACTCTACACTAACTTCTCCAACATATAATCACAGAAACAACAATAGTTACAACAGCA

CUST\_8324\_PI426210822 ATGACCCCATGAGGACCCCTTTCTGTTCTCCATCATTCCCCACCTT

A\_16\_P35636373

TCAATCCCATAACAATTCCTAGTTTCTAAAACACTCTCAAAAATCCACTTGAGTAGGCTT

A\_16\_P20978740

AGAGGAGGTATTTTCAAGCAAGACTTAGCATTAGACATAAAATCAAATAATATGGACTGCA

A\_14\_P133386 TAAATATCAAGTCCACTAATGCCACATTCATCATATAGATGGTTACCGTGGTTCTCTTCT

A\_14\_P114092 GCATTTTTGTCCAGATATCCTTGTATACTCTTCCAAGTGGGATTCCTAATTTGTAGCATT

A\_14\_P100702 CTTACAAACTGGAGTCTGGGCTGGATAAATAGCATATCATAAAGGTAGATGATATCACAT

A\_18\_P14235590

AAAAACTGATGTGAAAAGAGATCCGAAAATAAGACCAAAAAATTACGTGACTCACTCACC

A\_14\_P129465 CTCTGAAATCTTGCTCAAATTATCTAAGTAGTGGTCTGATATTGTGTGGCACAAGTCTTC

CUST\_144\_P1426210822 CAACATTTAATCATTCCAATATTCCTCTCTGCAGTGAGGCAGGAGGGAG

A\_16\_P00977882

ACTCTGTTGAACTGACTTTACCCAATCATCATCCATTTTCATAGAGATTTGCTCCGATATG

A\_18\_P22841726

CAGAAGGGGACACACATTGAGAAATTTCCAATCAACAAATATTTATTTATTGAACACTTA

A\_14\_P200195 CCACTGGACTTTTCGGGAACCATCAATCTGTTTCCAGACATGGATTAG

A\_14\_P119789 CCCAGATTAAGACAAATGATATCCTTTTGTGTCACAGAGGACATTAACGATATCCTTTTG

A\_14\_P120147 TTTTACAAATGAAAGGTTTACTTTGTCTGGTAAAAGAAAACCGTCGTTACTTCCAAAGGC

CUST\_2296\_P1426210822 CAGGGACTCAGACATGACAACCAGAATTAGGGAAGCTGCACTTGTATTAT

A\_14\_P133391 TTTATATTCTAAAAGAGATCTGATTCATTAGGCATTGGAGAACACAGCAGGACAGAGGAA

A\_16\_P00685588 CAAGTATTGAAGGAATTTCCACGTGGACAAGGAAGATCAGGCATTCAAGAT

A\_14\_P108242 TGGATTTAAGAGAGTCAATTTTTAGAGGGCTTGAATTTGAGGATACAGTTGCCTTCTAAG

A\_16\_P16652472

ATGTCATATTTGGGTAAGTGATAAGAATAGAAAAGTGGCTATGCTAGATATTGTGCTCCCC

A\_14\_P108937 TTCACCTATTCAGCCAAGTGGATTTGACTGTGTTATGAAATATCTTAACATGTCAAAGCC

A\_14\_P112489 AAGGTCATATTTTATTTGTGAAAGTCCTTCTCTAGCCTTGCCTGAGCCTTTCTAAAAT

A\_14\_P101641 CTAGATTGGCTGTATCTAGATCTCCTCCCCAACTTAGATACAAAACCTATTTTGTCTTCTT

A\_14\_P124685

GTAAATGTAAAGACGGCAAAAGAAAATGAAATTAGGCAGATCCAAGAGCCTTTTCCAAAA

A\_14\_P103193 CGAAATCCATTTACGAAATACACAGAAATTTGGCTATAAAAAGGCATGCGGTCCAAGTA

A\_18\_P10760090

AATTATAGCCATAGACTTAAGACCCTACTGAAAGAAATTGTCCCCTACAAGTTATCCTCC

A\_16\_P02023238

ATTCTATAGCCATCATTAACTCCAAGTTGCAACTAACATTAACCTCAACAGTTCTTGGT

A\_14\_P111684 GAATAAAGATACCTGATAAGGGCACTTCAAGAAAGGAAACAGTTTAAGAATGTCCTTCAG

CUST\_8336\_P1426210822 ATCATTTCCAGCAAGTCCACTTGGTGTAGACTGTGGACCTCATGA

A\_18\_P14137983 AGACTGATTGGCTGATTTTTGGACCCTCTTTGTCCCATTCTAGTCAGGAATTAT

A\_16\_P16944398

GCTGATATGGAGAATGCAAAGATTAAGGACAAGGAGAGTTATAGACCCTAGCAGAT

A\_14\_P115477 AACTGAGTATTTAAAGGAAGCAAGATTGGAATTTACAGGTAACCATAACCTCAGTCTT

CUST\_6062\_P1426210822 ATGAAGATCTGCAGGTGTCTGGAATGAAGGAGGCAGTCAGGAGAA

A\_14\_P134681 CTTTCCAAATCTCTAGCAAGAGCATGTAGTAAACGCTCCTTAAATGCCTCCCT

CUST\_8213\_P1426210822

ATCTGAGAAGTTTGATGACAAGTTTAAGCCCCATAATTTCTTTGAACATTCCATATACCT

A\_18\_P11950419

AAGAACAAGTGACATGTCAGATAACCAAATCTTCTACCTAATAGTATGTGTCAAGGAGAC  
A\_16\_P02740400  
ACCTTTAGAGATCCGTTCTATTAATGAGGCATGATATTGTTACTCCAATTGTGCACACAA  
A\_18\_P23445719  
TGTCTACCTCGCTATTACAATGCTTTGAACTTTAGTTCCCCTTAGATTGTAACTTCTG  
A\_18\_P26792747 ATGCTCTGAGATTAGACCTCTTTATCTCTTCTCCTCACCTCAACCTCAAGC  
A\_16\_P16191696  
CTTGGATTTTAAATCTTCTAAAGCAGCACAGCATCTCTTGAAAAGAAAGCCATGAAAGA  
A\_18\_P22840475 CTCCCCCTCACTTCTTCTCTGCTTACCGTTGGATTCTTTTTG  
A\_16\_P01536288  
TTCCCATTTTTGCAGCAATTGTCTATGTCTACTCTTCAATGAACTATTAGCCGAAATAGCA  
A\_14\_P121636 CTGGGACTGAGAAGAAAATAGCAATTGCAACTCAAAGCAACTATTTACACACATTCAATG  
A\_14\_P109081 TAATTGGGCTGATGCCTCCCTGTCCAAATAGGAAGAAAAGATAACTCTATCTTTATTTGA  
A\_14\_P121830 GTAGATAATGAGGCTCTTGAGCACTAACATGCACCCATTCAAAGTCATCATAACAGATC  
A\_14\_P105925 GAAAAAATATAGTGTTATCCTATAAATACCTGCTGGCTGGGAACTGACAGAGGACTGA  
A\_14\_P112108 TGTCTTTTCTATTTAATGGAATTTCTCATTTCCTTTCTGCCAAAAGAATCCAATTT  
A\_16\_P16095482  
AAAGGTAAGAACCATTGAGAAACAGTTTCCATACCTTGTTGTGCAAGACTTTGAATCTGT  
A\_16\_P20949954  
ATCCATGTGGATGTAAACCATATTTTCAGTAGACCAGACTTTTTGTCTAATTTTCCCAGTG  
A\_16\_P03471164  
AAAAAGCCAGGAACATAATTTTCATGACAGTTACATTTACAATATCCTCCTCATCCTGCC  
A\_14\_P108606 CTCACAATGAATGTGTAACAGCCATTCATATTTACCAATGATCAGTCCCTCAAAAAGAGGA  
CUST\_6841\_PI426210822 AAAACAATGGCAGGGGGCTAGGTCCTGACTCTTTCAGACTGGGCA  
A\_14\_P137329 CTTTACAGAATTTCCAGGTTTTCCCATGGAAGAACTACAAAATCTTTTCTGTTCATGAT  
CUST\_4133\_PI426210822 ATGCCACAGTGGTCCCTCGGCTTCAACAGTCTTGCTTGCTTACAT  
A\_14\_P117199 TTATCTGCGTTGTGACCACAGAAGAATGAAAATTATTTGCAGTTAGAATCAGGATCCATG  
CUST\_1139\_PI426210822 GCTGGGGCCAGTGTGGAGCACACATCTAGAGTCCTCCTGCCTGAG  
CUST\_4022\_PI426210822 GAACTGATGATTCTCAGAAGAAGCCATGAAGGGCTCGGCCATAAC  
A\_14\_P122303 CTTCCACTTACCTATAGTAGGGTCATGATAATCAGGGAACTGATGACTAATAAACTGCAT  
A\_14\_P121995 AATTAACAGAAAGCAAAAACACTATGATATAACTTTAAAATTAAGGTTTATATCACTTT  
A\_14\_P130536 AAACTTTGTGTTTTATTTGCCTTAAGATTGTCCTAAAGCAGTTGGATGGGAAAAGAACCA  
A\_14\_P132840 TTTTTGTGAGAAAGTAAGTTTGAATGTGTAACACTATGACTTCGGCTCCTGAGAACTAGAA  
A\_14\_P101866 CTGACCAATAGAAATAGATCTGATGATAGACCTAGATCTGTAGGCTGGACTCCAAAATTT  
A\_14\_P126776 AGAAATGAGTTCTTTTATATACTGTCAGAAGGCAACACCTAATTCCTGTTGTGGTATTC  
CUST\_9646\_PI426210822 ATAAAAAGTTATCAGGTGAGGCTGAGGGGTGAAGGCGCTTTCTCT  
CUST\_1852\_PI426210822 ACCATGTGTGTGTGTGTAATTTATAAGACTGAGCCCTGGCCTTATGGTG  
A\_16\_P20621134



AGTAACACACATACACCTTTGTTTTCTGTTCCACAACACTACAGATATCTTTGGACTTCAGT  
A\_14\_P115020 CATGTGTCGATGGCTTGAAACAATTAGGTTTCACTTTGTCTCTGTCAAAGTATAAATGAC  
A\_16\_P00685445  
TCCTGAACATCGGAGATAGATTCTTTATCTGGGGAGTGACTACATAATTTAACCATTTGT  
CUST\_1849\_PI426210822 TGTGAGTATACTCACACTCTCGATTTCCCTGCACACTCTCATCTGAGGTT  
A\_14\_P107617 CTGCATGATTTCTTCTACGACATTTGTAACAGACACAACGTATATAGAATTTCAAGTTTGG  
A\_14\_P103431 CTTGCTGATCCTAAAGCCTTTCTATGCAAAAAGTAGCGGAATGCTATTGAATGTAGGTTT  
A\_16\_P00685340  
CAGTGTGAATCCAATGTCAATAATTGTATTTTTTAAAAGCAAATATCACCAAGTCCAAGA  
A\_14\_P125976 CTCAGGCCTGTAACCTTCTGGAAAAGATGATTATTCAAATAATGTTTTGGGGTAACCAGT  
A\_16\_P01947940  
ATGGCTTAGGTTTGCATTTTTCTAACTCTTCACTCAGATTTATACTTCGCCACACTATCA  
A\_16\_P37750541  
ACAGCACCTATTTTATGGAACCTTAGAAAAACCTGTAGAATTTTCAAATTGAACCCAGGA  
A\_14\_P120074 GTGTAACCTGATCTGGCTGGCGTTAATAAAATATTAACATGTGCCTCTTGTGATCTGC  
A\_14\_P100835 ACATCCATTTCCAAGATCAACATTATCTCGAGAGGGAAAAGTAATTTTTTACATTCCATTC  
A\_16\_P41599800  
CCCATAAGCAATTCTCTAGAATTATTTTGAGTGCTCAGATTATAGATTTGCCCCCATACC  
CUST\_7854\_PI426210822 TTGAAATTGCCAATGCCTGTTCTCTAGGTTCTAAGAGCAGCCCTCA  
A\_14\_P134298 ACATTTGGTTCACAGTGCTCTGTTTAAGATGCCACAGCATGTAATCTACTTGAGAATATT  
A\_16\_P15149173  
AGCGCAGATAACACTAATCCTCTCCTGTTCAATCTAATAGCGTTACTGTGGTAAATAAGT  
A\_18\_P22605007  
GAATTTTTATGAGTTCTCCAACATAATTCAATGACCAGGTCAGTTTTTGTATCCAGGACAG  
A\_18\_P12991707  
ACACAGACCATGTCATGGATGAACAAATGAATTTCATAGTGCATTTTGAATTGGATGAGTT  
A\_16\_P58424200 GTTCCTGGAGGAGGGCTCAGACCAGTGTCTGAGTGTCTGGTGTGT  
A\_14\_P112796 GCCCAGAAGTAATATATTTTGAGGGGAAAAAGTGCTGCTTTAAGGAGGTATATGAACATC  
CUST\_3658\_PI426210822  
CTCAGCATCCTGAGTTCCTTTGGGTTACTAGTTCATTTTGGAACTTATTCCACTAT  
A\_14\_P101373 AATCAAATTCAGTGGGAGGAATTGGAAGTGACAAGGGAAAGATAGTGAAATAATTTCTCA  
A\_18\_P14134862 ATCAAAGGCTGTGGGCATCTTCATCGTATGGAAAAGTAAATTCAGTGGCACAT  
A\_16\_P02595627  
ACAGAAAGGTCAATTAGATGAGCATCCCTTAAACTATTCAAAGTCTCACCTACAGAATGA  
A\_14\_P110741 GTGTGGGGGCTAGATTCATTCACGTGCTTCGTAATGAAATAATCCAAAAAATAGGAC  
A\_16\_P18988725  
TGCATTTACCAAAGAAAAAACTTGAAGTGAAGTGAATTTATCCAGGATTGACTAGAGTGGA  
A\_14\_P130883 CTTTTTGCTCCCCGAAAAGGTTTTTCCATCAAGGTTTTTCCAAAGGACAAG

A\_16\_P20542139

GATGATGATTCACTCCATAGTTCCATCATGTATGCATCTCTAACCAGTATAAGCAAAGCA

A\_14\_P113145 ACAAAGATTCTTTAGAGGCATATTCATATTGCAAGGCTCTGCTGAAGTGGTCTAAATAA

A\_18\_P22839594 GTTTTGCAGGCAGCAGGCACACAGGCTGGACATCCTTTCCCTCTG

A\_14\_P129575 ATGGTGAAAAAGTTCAAAGACTCCAAAAGTGTATTGGTAAGATTTTCAGTTCAGTATGTA

A\_16\_P16355236

AAACACCAATAAACATCCTCCTGACAATAGTCCATTAGCACAGTTCTGTTTAACCATGTA

A\_16\_P39252504

GGGCACTGAAATATTCTAGAAAAGTCCATAGCACATTCTGATGTTTATACTCTAAGCCACA

A\_14\_P127720 CTTTTAGAGGAACTGAATCCAAACATTTTCTCCAGCCGGACATTGAATGTTGCTA

A\_16\_P38225338

AGTAGGGCTCTCAGAAAATACTTTCCAGTTGTCTAACCTTGAATGTTATTAACCTCTCTA

A\_16\_P39004576

AAGCATGTCATATGGAAATATTTGAGGAGTAGAGAAAAATGAGTGATTAAACATGTTTGA

A\_18\_P22841721 GACTTCTGGAGTCCCAGATACTTGAGCCTCGAGGGAGCAGATTCT

A\_16\_P19563001

AAACTGAAGAATGAAAGGTTACAAAGAATTCTCCTCTAACTTTGCTTCTATACCCTCACA

A\_14\_P200808 CTGTTCTGAACCTGGCTTTTCTAACAATGGAACAAACCTATACTTTACAAATCTGCTGAC

A\_14\_P105773 TCATTCAACAAATATTGAAGAGCACCCACATACCTATGGTCTTGGATCTTACATTCTAGT

A\_14\_P124653 CCTTTCATAGTCACAAGTTTTGTTATTTTGTTTTTTTTTGGGGGTGATGGTGTAATTGTT

A\_14\_P125557 TCTTTAGGTTTTCTATCAGATGTTCCACGTAATAATGCTGGTAAGTATGGAATAATTAAG

A\_14\_P101001 TTCAGGAATGCAAGAATAAAGAAAAGATGAGTATAACTCTTCTCCATAGCATGGAGACCT

A\_16\_P58424239

CTGGAECTTGAGGTTAATTCCTGCTTCAAAGCGTTGTTAGGAAGATTGAACAAAATAATG

A\_14\_P139358 TCCACTTGAACCTCACCTTACATGAAAACATAAATGACATCCATAGAACTCAGATCTA

A\_14\_P130563 GAAATCTCTCCTACCTACTAGAAAACGGCTCATCAAATTACATCATTAGCCCAAAAAGTT

A\_14\_P120876 AACACGCTGTATACCTAGATGATGACTAAATGCAAATCCTTGGGCTTTGGTTTTTTTTCT

CUST\_2348\_PI426210822 ACTTACGAATATGGAACTATTTTGCCATGAGGCATACATAGTCTGAGGGGCAT

A\_16\_P03015543

TAACAGTCATCTTAACTCTCCTGTCTTACACATTGAAGTCTCTGTTTATTCCACTCTGAC

A\_16\_P58424437 ACTGAAACTCAGGCAGGGTCCCTCAGAGCGTGGCCTCAGCCTGAT

A\_14\_P135464 TTTCTTGTTTCTTATTAGGCCTCAGAAAGAAGTCAGTTAACGTCACCCAAAAGCACAAA

A\_16\_P01463892

ACCAACATCTCTGTTAGCAGAAAACATGAATTGCTATTTTAAAGTTAAACTGCTCCAGTGC

A\_14\_P114120 ACTCTTTGTTGCTCTTGACATACATAGTAACCCTTGTAAGTTGTAAGTTTGCTCCTG

A\_14\_P129226 AGCACTGTTGAAATAGAATTAATGGGTCTTGAATTCATTTGTGATTGGAATCAGAAGTC

A\_18\_P12106782 AATGCGTTTGATGCATTCATTGAGGTAAGAGACTTTCAATCTCTATTAAGGTGGCCTC

A\_18\_P25712518

CCCCATTTATAGCATACTCCTACCAAAAACCTATCACATATTGTCGGCATAATCCTAAACCT  
A\_14\_P124141 CTTTTTTGAAGGAAACAAAAGATGAATAAAAACCTGATTCCCTGCCTTCCAAGGGCATATC  
A\_14\_P108164 TTCTCATCTGTTAATAATTTAAATCCTTTCTTGCAGCCGCAGTCAAAACTGCCAC  
CUST\_7139\_PI426210822  
GTGTTAACAGGTATTAAGTATACCGTTATCATTTCCTTACTTTAGAAGATAAGCCAAA  
A\_16\_P01752434  
ATTGCTCCAAATTTACCTCTTTTCATCACCATAAAAATCTATATCCCATGATAGGCAGGC  
A\_16\_P03387295  
AACTGCTCTTTCTGAATGATTATTCTTCTGCTACTCCATATTTTTCTACCTTCTAGGCC  
A\_16\_P16990302  
TCATGCAATCGTTAATCAAATGCAACTAGGTTGGAAGAAGATACATGCTTATTGCTTTGC  
A\_14\_P127126 CATTCCAAACATAAGCAGCAGTTTGTTTTCTCGCACAGTAAAACATGATATTTCTATGGC  
CUST\_3290\_PI426210822  
ACGCCAACCTTAGATATGAGGTCTTCTGAAAACCTTTTAAAATTTGTTTATTTTTTGAATC  
A\_16\_P18916403  
AAAACATATTCATCAAGGCAAAAATGCTCTAGCATTCAAAGACAGAAAGTGTCCCAAACCT  
A\_14\_P134543 TTCTTATCTCAATTCAGGGACAAAGAGGGATCCTTTATCTTGTGCTGATTCTTTGTTTT  
A\_14\_P124884 ATCAAATTTTTACTTCTGTCTATCTCCAGAGAAGAACATTAGAGCACTTGATGTCCTTT  
CUST\_8197\_PI426210822 CTGCACAGTGGCAACACGGAGCGCTCTGAATCCCTGCATGACAAC  
CUST\_3445\_PI426210822  
TATATTGTTAGAGAAAATCATTATTTTTAGTCAACGTATTAGTATTAATATCATGGCCTC  
A\_18\_P14134453  
CCTGAGTTCCTTTGGGTTACTAGTTCATTTTGGAACTTATTCCACTATTGAATTATCCGT  
A\_14\_P137788 AGCGAGACCTAACAATTTATTAATACTTCATCTCTAAACAGTGGTGGGCACTAGAGTTT  
A\_16\_P02040793  
TGCAGGTTCCACAATTCAATAAACATCAGAGCAAAGGTTATTTTAAACTCCGCAGTTAAA  
A\_16\_P16455210  
AAAGAAAACACAAAGCACAAACTCATACTTTTTTTTCGGACTATAAACTACCTCTCAGCC  
A\_16\_P16757195  
CCATTCCTACTAGCATTATTTCCATAAGCCTCAAGGATTTTACATCTCATAGTCACCAGA  
A\_16\_P16898707  
ACCAGAACGTGATAAGAGTTAACATGGGATAAATTGCTTTTTTTGGACATTTGACCAAGTA  
A\_16\_P02353011  
AAAGAAAAGGTAGTGAGTAATTAACACCCCTTAACTTCCAATAATGACATAAGTGACCCC  
A\_18\_P17963397  
CCTACACTCTCACCTAAACATCACATGACATATTCTGCTTCAGTTTTTATCTTTTCAGTCG  
A\_14\_P135858 GAGCCCCACCCACAAATATACCACAGTCACCATTAACGTCATATTTATTGTTATTTAACT  
A\_14\_P133178 AAGAAAATTTGGGCTTACCTGAAAGTGCAAAATTTATTGTCCAGATTAATCCCAAAGTCAA

A\_16\_P58424260

CCATCCTACCTTGACAAATATACCTTTATAACAACCTTGGAAGCCCTAGGTTGAATTTTGA

A\_16\_P00777371

TCAAATGCTACATTTCCACATCTTACCTATGAGACCTACCTTAGCAATCTAAACTGAGTG

CUST\_9099\_PI426210822 AAAGGAAGCTTCCCTCCACCTCTACTCCTCTGTGACTCCTGCC

A\_14\_P127447 GGTTTTTTTCTCTCTCTCTCTTTTCAGGTATGGAAAAATTGTATCTACAAAGGCAATTCTT

A\_18\_P22840284

GCAATGATGTAAGTCTTAAAGGGCTAGACAAGGATCAAAAGGAGAGGTAAGAAAAAGAAA

A\_14\_P102850 AGATCTTGGTGGCCTAGAATTTCTTAGTCATGGGAGTCTAGAATCATAGATAGAATGCTT

A\_14\_P130746 CTGATTGCAATACAACCTCAAGTATTTTGGATGAGCCTAAAATTTTGAAGAGGGAAAAAGC

A\_14\_P109193 AGAGGGAGACAGATATGAGGGGATTTTAAAAAGGTGTGTATACTATAACAACTCCTCTG

CUST\_1268\_PI426210822 CTCTGGGGCTTTCCAGGTTTCCCTTGGAGCCAAGAATTTTAATCTTG

A\_14\_P122483 TTTGGTGAACCTGGCTTTCCCTCAGATGGACTGACTTATTACCTGATTTTAAAGTGTGAAAA

A\_14\_P105287 AATTCTTCATGGGGCAGTGCTTCCCTGCCTCTCTCATAATTTTTTTTTCTGTTATCATTAA

A\_18\_P22842094 CACACTGCTTACAAATCTGGAAACACCTCAAGGGAAAAGTGCCCATAAATGTT

A\_14\_P114958 CTTGAGAATGTCAAAGTCTGTAAAGTTTCTTTCCACTGCTGCATACAGTTTGAGATAAA

A\_16\_P15337695

AAAAGGGGAATGTTTATTATATGGATGCAAGGGTGATATAAACTCAGTGGCAAGAATGC

A\_14\_P118989 GGAGAATGGCAATGACAGAGTAAGGGAGAAAATGCTCAGTTTGTAAATGTTAACCTAATA

A\_16\_P17593118

ATACCATATAGTTAGCACAAATGGACAAGTCCAAAGTTAAGCAGACCTGGATCTTATCTTC

A\_18\_P16891253

AAGACAGGTTGTTAAGATACAAAGGGCAAGTTAAACTTTAAAGTGCCTATAAGAGAGGC

A\_14\_P133351 CCTCATCTATGGGGTAGTGCTTATTTGGAACAAAACCTATTAAGTCAGCAACAGTATTT

A\_14\_P115061 ATTTAAGGCAGAAATCATAGTGCATATACCTGCAGAACACATTTTTTTCTCTGCTGTCAGA

A\_16\_P21239989

AAAATTTGTTCCCAAACATTCGTAGGACTACACTGTAGCAGGAATCTGAATAGAAAACAC

CUST\_4469\_PI426210822 GCTGGCTTTATCCCGCTGAGCAGTGGGACAGAGGACAGGAAGATG

A\_14\_P106183 ACTTTTCTTCAAAGGTGATTTTAAAGATGCTCAGAAACAGATGCAACAGCAGGAG

A\_16\_P02053770

AGCATTCTGTAGTCTCCTTCATAGTCTTAAAGCAATCATGCCATTACTTGTGTATCTCTCT

A\_18\_P10715448

AGGCTACTGCAACCATAATTCCAAACCTATAACAAGACCATTTTCACTTACAACCTATAGA

A\_16\_P03124676

TTAGTCTTACTTTGAGGGCCTTATAGTTTAGGAAGTATAAATATCTAGGAAGCCCCTGGA

A\_14\_P139238 CCTTTATTTAGAGCAAAAATTGCAAAAATCCTGGAAGTTCAGAAGAAACACTTAGCACCT

A\_14\_P115604 CCAAGATCTCTTATGCAGTTCACAAAATGGAAGGAACATCTTTTGTGTTTTGCCATCTAGT

A\_14\_P130075 ACTTTGTAGAATACAGCCTGATGTGCAAACCAAAGTGGTGATATTGTTAAGATTCAGTG

CUST\_844\_PI426210822 CTGACCCTGACTGGACAAATGGGCCCCAGAGGGGCTGAACCCCTTG  
A\_14\_P127865 GAACACCCAGACCCTATCTTTGACCCCAAGGAAAAGGATCTGAAC  
A\_14\_P127033 AACTTCAACTTCTCAAAAGTCTATGGTAAGAGTATTCAAGTCCCCTTTGCTTCTTGATTT  
A\_14\_P128001 CTATTCAGCATCAGGCACTCTTATTGATTTCATGAGGAACATTACTGCTAATCTGCTGTTA  
CUST\_2508\_PI426210822  
TCATCTTGCTTTTGAGAAATATTTCTTTCCACTAAAATTTAAGAAAATAACGCAGTCTT  
A\_16\_P00685624  
CCTTTCCAGATTGTTAACACACTGTCTATGTCAAATCCTTACACTAGCATAGTGATGAGA  
CUST\_4635\_PI426210822 CCAGATGGGAGTCCGAAAGCTACACAGAGCAAACAACCAAAAATTGA  
A\_14\_P139080 CTATTGTGTATGAACCATCAGTAATTTCCAGTTCATTGTGGCTAAAGATTCTGGGCTAAT  
A\_14\_P110334 GTCTAAATGTCTCTTCTTTGACTTACTATGTGGCTTATTTGTTTCTGAGGGAGATTTCAGT  
A\_16\_P16769084  
AGGCCGTTTACCACATATTCTCTAGATTCTGTGCAAAAATAAACACATTGACAGTAAGTTCC  
A\_14\_P133697 TGGTGATGTATCCTAAATTAGGATATGTCATTTATTCAAGAAGTGTGTTGTGCAACTGGA  
A\_14\_P100063 GGAAAACAGAACTGAAGAACTACCTACTACAAAACCAATCTAGAGTAAGTTTCCTCTT  
A\_14\_P139036 TTCAACAGGTTTTGCACTGATTGCAAAAATAAAGTCCTCCGAGCATACAATATCCTTAT  
A\_14\_P119445 CTGTTAATAGTCACTCCCTCCGTGATACTTCAAGCATTTTATTTTTTTTTTAGTCCCAAGC  
A\_14\_P109983 TTCTACCTTCTTCACTTCTGACATTTGCATTAATAACTAAGTGGTGTATTTAGGCAGCCA  
A\_14\_P131196 AGAAGAAATGAGAGGAAGGACTTCTGTTTCAACATTCCAGGGTATAAAAACCAATTCTGAA  
A\_14\_P135608 TTCAAACATCATAAAAAGCCTACACTCACTTGATTTCACTTCTCCACCTACAACCTACTA  
A\_14\_P112611 AAGGTTTTGTTTCTTTGAACTTACTCTGTTTTGATGCCAAATTGGAGACCATTTTCTTGT  
A\_18\_P11706343  
CTGGGCAAGAATTAGAGATGAAAAAATTACACTACACTTTGAATCCCTACACTCAGATG  
A\_14\_P106380 GGCTGTTTTTATAACGGCGGGGTTACATTTGTCGTGATCAACCTCTTTTTTAT  
A\_14\_P200821 AAACAAATTAGTCAATGGCAGCACAGAAAAAAGATAAGCCATATGCATAGTGACAGAGTC  
A\_14\_P109827 CCAGGCACCAGAGCAAATAATTCCTCACTTCATTTCAAAAAACTAAAAGCCTTATGCATA  
A\_16\_P40510940  
ACACGTTGTCAATTAATTCAGTCCAATCCAATAATTCTAAAACTCCTATCTTGTGCT  
A\_16\_P02404578  
ATCGTTTTGTGAGAGTGAAAACAATGAGACGCTAAATGAACCATAGTGAGGCTGTATTTTG  
A\_14\_P118950 CTCCAGAAGCCTAAATTTTGATGTTGTGTTACTTGTCAAGAAAGAAGCAATGTTCTTCAG  
A\_14\_P111366 CAGAGTTGGCCACTTCTCATTTTTGTCAGTGATAAAAAACAACCTACCATCTATTACCTTCA  
A\_14\_P104933 AATTTTACCTTCCTTTGTTCCAGTCCCTCGAGATCTCATTAACAAAAAGGGAAATTAGTA  
A\_14\_P104586 CTGGGGCTATGTAGACTACATCTTTAGGTCAGAACATCTAGATTCACAGTATCTTGTATG  
A\_16\_P02779499  
CATGTTTGTGACAAATTCGGTTAACATTGCCCTAAAAGATTCCATTAACCATAATTCTG  
CUST\_2982\_PI426210822 TCAGTTTCTGTGAACTGTGGGTTGTTTCTCTCTTTCCTTGAGTTGCAAG  
A\_18\_P22840293

TATAGGCTGTCCTGCCATCTCAGGTCTAGACAAGCAAATCAAGTTGTATTTTAAAGTTT  
A\_16\_P19922112  
AGAAAGTTGCTGCTTAAACAATCTCCAATATTTGATTTACAACCAATGCTTCTGCACC  
A\_16\_P03434788  
CACACACGCATAGTAATTACTGCCTGTTTTTTGAACTTGAAAAATGTTAGCATCAAAGGG  
A\_14\_P105205 TCTCCAAATACATACAGAAGAGACAGTATGTTAGGCTGTGTCTACACCTGCATTGAATAT  
A\_14\_P201465  
TCACACAAATCAACTGATATACTAATCCACACCAAAAAGAAAGAACTCACAAGAAAACAGT  
A\_16\_P16370789  
AGCATACACATCTCATACTGAAAAAAGCAAATGTCAACATTATTAACCAAGGGCTACAAA  
A\_16\_P20957980  
TGGTATTCCTTTTCACTCCAACCTTTTTCTATCATTACACTCACTGCTTGGACAATTTGA  
A\_14\_P129986 AAACACAATATTAACAAACAGATGCTGGACTTTAGTGCCTTAAAGTGGCTTTAAGGGATG  
A\_16\_P17349170  
ATAGGCAGTGCTCATTGTAAATGTCCCTCCAGTAATCTAAATCCTAGAGATAGTCAGTGTT  
A\_14\_P115419  
GGCAGGACTCTAAGTGAGGACAAATGACAAGAAGAGGGAGAATTTAGAAAATAAGATATC  
A\_14\_P202430 AAAAAGTCAGTTACCTAAATCACCTGTAACCCTGTAAGATCCATTTGCAAAAATCCAGAA  
A\_14\_P105979 CAAACTAATTACCTCACTCAGAAGAAGTGCAAGATTTAACAGTCCATGCTCTGCAG  
A\_14\_P101538 AACTGAAATGTCTTTTCCGTATTGCAAGTTAAAACCCTGTGTTAATTCTGCTACTAAAA  
CUST\_8179\_PI426210822 CCTTCCAGAATGATCTCACAAGAATCCCCGTTCTGTGCTTTCTCA  
A\_14\_P124534 ACTGGTTGTCTAGTAGAGGTTTTTGCCCCTCAGTATAAACTGTGTCCAGA  
A\_18\_P10607720  
CCCCAATGATCAAATTTGCAGTTAGTCATCAACATTTACTTGTAGTTAGAAACCTCTGCA  
A\_14\_P120109 TCAGTTGGCTTCAACGTGGTAGAAGTTGTTGAACAAAAATTTTGGCCACTTTATTTTATT  
A\_14\_P202122 AAATAAGACTTTTTCCACAGGAAGTTCCTCTGGTATTCACTCAGCCCCTGTAAT  
A\_14\_P114995 GTCTTTTTGTCTATTTCCTTTTCCCTTCTCCTTTACCTACTTCTCCAAGTTAAACCAAT  
A\_14\_P101183 TATTTATTTATCTGTTTTTTTTATAGGAAGTCTGGCTGAGCAAGGTTGGAAGCCCTAGTT  
A\_14\_P106895 CTGAAGTTAGGGTTTATGATGAAAAAACTTTACAATACTTCTGGCCTTAGGGTTTCTGTG  
CUST\_10055\_PI426210822 CATCAACTGTGGAAGGGAGGAAGGGAGTTGGGAGGGAGAGAATCC  
A\_14\_P119581 GAGAAATTATTCAATTGGATTTATTTGCCATTAAGAGGCATCTTTGAATTGTGGGAGGTGT  
A\_14\_P133144 GCTGTGCTCAGCGCAGAGAGCAGAAATCAGAAATGGAAACTGAAAC  
A\_14\_P137841 AAGGACAAGTAAAATAGTATTTCTTGGAAGACAGGCATTTACCAATGCACTGCATCTAG  
A\_14\_P200179 TTTCAGATGAAGAACTGGAAGACAACCCCAACCAGAGTGACCTGATT  
A\_18\_P16373196  
AACCCCTCCTTTTAATCTATTCAGTTGTAAACATCTTTATGTTCCGGTTTAAGATACACCA  
A\_14\_P101682 AGGCAAGAGAACTAATTAGGTTATGCCAGCATGCTCAAATTTATTAAGAGGCTCACAAAG  
A\_16\_P01282221

TTCAGATAACCCTAATCCTCTGTATGAGCCTTAGTTGATTACACAATAGTATTCCTTCCC

A\_16\_P01468291

ATCTCTAGTCCTTCAGATTGAGATTTACCATCTTTAAATTCAAAACATCGGAAGGAGCA

A\_14\_P113509 GAATGACAAAGTGGGTTTGAAGACTGTCCTCAGTTACCTCTATGTCAATCCAAC

A\_14\_P104800 AATTACCTCATAAAGATGTATCTGAACACTCCCTAACAAAGAAAGCACGTTTTTCTCTATT

A\_14\_P119262 TGTCCAATGCTTCCCTGAGGTCAAGAACAAAATAAGGTTTTATAGTCTACTTGTATTTCAG

A\_14\_P124590 AATTTACATTCAATTTTTCTGTACAGAACCAAAGCCACCAAATTCTAATGTGAGGAG

A\_14\_P116112 GTATACACATTTCCCTTCCCTGGCCTTGCATGGCCTGTTTATTTTTAAAAGTGCAAACCTT

A\_14\_P103075 GGTGAGGTATCTCTCTGACACCTTAAATTCACCCTGCATGGAATATAAAAAATAACAAGT

A\_14\_P102748 GACCCCATTCATGCATTGGTCAAGGAATTGGTGCACATATTCTAAGTTATTTTAGTATT

A\_18\_P14394106

AAAACCCTGCATTTTAAACTGAACCTTTCCTATAGATTTCCCTCTGTCACCTTTTGAAAT

A\_16\_P58424281 TGCTAGGAATACAGTGATGAGGAAAAGCAGACATAGACCTTACCCTTCTGAAAGTT

A\_16\_P17941133

CCCCTGAAAGATTATGCCATACTATCATGATATAGCACACCAAGATAATAGTCAACAAGC

CUST\_8249\_PI426210822 GTGGAATGAGTCTCCAAGCATTCCCTGCTCCTGAGCTTTTGGCATT

CUST\_125\_PI426210822 GTCTCTGCAAACCGGGCTCTCATAATCAGTGGGGAGTGTCTAAAC

A\_14\_P136934 GAAAGCAATGCATTCCTTCCCTTTTCAGTCAATTGTAATCATGAGACCTTTTAGACTTAGC

A\_14\_P131621 ACAGAATCTTTTTACAAAGACACATAAGAAACAAGCAGTGTGGCTGCTGGAGAGTAAG

A\_14\_P118338 GAGTAATCTGAACTCATCCATTTTTAGTTTGAATGTTGCAACCTGCACTTTACCTCATA

A\_16\_P03542958

ATTGAGCATCCATTGATAACTCTCACCTAGATCTGTCATTCTCTTTGAAATCATTAGCCA

CUST\_9627\_PI426210822 GAGCATGTTAGCATGTTTCTAGGACCAGCCACATCAGCCAGACCT

A\_14\_P139077 ATCTAACCTCAACACATTTGTGGGTTTTTCACACAATTCTCATAAGCATTGGTTACTTG

A\_14\_P104599 TAGAGAATTCACCAAAGTAATCCTCTTTAGAAGGGCATCTTGAATTATATTATCCATCCG

A\_14\_P118003 ACCTGTGTCAAATCCGCACAGGACTCAATATAGCAATTTATTCTTGATGTATGCAATTGC

A\_14\_P122017 CTCTCCATCCTGCTGAAAAACCAAGATGATCTTGATAAAGCAATTGACATTTTAGATAGA

A\_16\_P41454597

GTTTGACAGGTAACAAGTAGATCAAGTAACTCCATACCTTTAGAGAATTTCCACACGATG

A\_16\_P19774127

AATCCTTACCCAAATCTTTGTGATTCCATTTTAGGTATTTATACAGCGCAAGATGATCCC

A\_14\_P107417 ACTGGACATATACAGAAAAAGATAACAGCCAGGCAATGTGACATAGGCTAAACACTAAAT

A\_14\_P102380 GAAAAACTTGTGAAATATTTGGATCCCAACGACCTGGGGAGAATCAACTTCAAG

A\_16\_P20135715

GACTCCTGATTTATTGCAGTTTTGGTAATTTACAGCAGATAACAAATTCTCAGAGACAGC

A\_14\_P111050 GCTATGTATAAAACCTGATTTTGGAAATAATATCAAAAATTACACGTGTGGTCCCTTTGGG

A\_14\_P110068 AGTGAAAACCTTTTAAAACTCTCATTGGAGTAAGTCTTTTCAAGATGATCCTCCACAATG

A\_14\_P113427 ATAAGTCGCATTGTTTTGTGGTTTTGCTTTTCCCTCTACTAAATGATGTGCCTGCTGTT

A\_16\_P15007436

ATTAATACGTGCATATCTACGTAGAGATCCAACCTTTTGATTTACACATGTTACCAGGGAGG

CUST\_7659\_PI426210822

CTACCCTAGAGTCACCTTTTTTGATATATTTGCTTTTTTATTTACTCCACCAGGCAAAGA

A\_14\_P133861 TCCCTTTGTGTTTATTTCTTTTGAATTCCTGGGTAGAAGTGGATTGCAGATGCTAGATTT

A\_14\_P107113 TCACTTTAAGTTGCTTCCGCAGTTTTTCTATTTCTTTATCCAGATGATCTTGATCTGAAA

A\_16\_P00685118 GTTTTTTTACCCTCAGATGTGGCCATTGGTGCACCCAAGGAGGAT

A\_16\_P01978019

AATGCAATTATAGTCCCTCCATCTTTATAACAAGGCAAGAGATAGTAATGAGGCACTTGC

CUST\_9299\_PI426210822 ATTTTCAATCTGTAGCCGTTACAGCCCTCACACACCTGAAGAGAGC

A\_14\_P134185 ATAAGGAAAAGACAGAGTTCCAAATTTACTACTGGGCATTTCTTCTTTTACTATCCCAA

A\_14\_P137647 CATTTTTTAGCATCTCTTAGTGACCTTTGCTTTAGATGAATATGCAAGATGGGCTGATGC

A\_16\_P00710958

CATCCTTGGTGACTATTCAGATGCAATTCATGTGAAACTACAGACTCCATCTAGAAAAGA

A\_14\_P131362 CTTATAATCCTGATGAAGAAGAAGATGATGCAGAGTCCAGGGTATGTAATTTACTGAATG

A\_14\_P102409 TTAAGGAATCTAGTCTCGCTGGAGATTCCATCCTTCAGATGAACTGATGAGC

A\_16\_P00456589

GTCTCTGCAGACAGTAAGTCTTTATCGGGAAAGTGTTTACTCATAAAAAACACAGTGAAG

A\_14\_P114096 TGTATTAATATGTTTGACTGGGAATCAGGGAGTGAATGGCTAAAGGAATAGATGAGTGTT

A\_14\_P126487 GAAAGAAAAGTTACATACCTGGCTTTCTTCCGGAGTAACTTCTGAGACTCAGGATA

A\_14\_P131392 GAAGTATAATCTATAGGAGGCGCGATGGCAAGTTGATAAAATGTGACTTATCTCCTAATA

A\_16\_P21508940

GTGTGCATGTTTACCTATTTAGAAAGGGTCGTTTAGAGATTATAAAGCGCTTAAAATGCC

A\_16\_P39704785

AACCAAATCCAACCTGATTTTGGATCACGTCTATGACTACCTTATAACCAAACACTTAAC

A\_14\_P120438 GGGGACAGATTTTTTAACTACATCATTAATTTCCAAAGACACAGCCATTGTTCTTGAAC

A\_18\_P11292435

AAAACTCACATTGGTTTCCATTACAGTCTTCCACACGTAGAAAAATGACTCTGTCTGAAA

A\_14\_P125718 GACTCATGAATTCTGTCGGGTCCCAAATACGTGGTCTAAAGTCTTTG

A\_14\_P136322 TCAAATTCCTCATTACACAACAATCTTCAAGTGGATGAATGACCAAAGTTTTTTACCAC

A\_14\_P134944 GTAATAAAAATTTTATGCCACACTTCCCAATGTCTGCCATGTTGCTGTATATGTTTTA

A\_16\_P19656602

ATATTGAGTTTCTGCAATTCCTTACGTTGGAATCCTCAATAACCACTTTCTACCATCTCAC

A\_16\_P17703229

GGCATGGTGTCTTAAACATAAGGTGGATGATAAACATCAAAGCAGGTCCTATTAATGCTA

A\_14\_P117363 ACAAGGTATTTGTAGATTTATTTAATCTTTCAACATACCTGATTTCCCGACACTGGATAC

A\_16\_P00617158

AAATCACAGGTAGAATAATAGGAGAAGAACAAGAAATTGTCTGAGTTTAGTGCAAGGAGAGG



A\_14\_P102826 AAATTTAGAACTAGAAAAAATCTGGGAGTCCCATTCCCTTCATTTTTGGACTAAGGTAAC  
A\_14\_P202238 CAGTTCCTGTGCTCACTATTTAACCCATGTCTGACTTGATGCTAAGGTTTATATCCTGTA  
A\_14\_P131060 CTGGTCATAAAAGAAAAAACAGAACCAAAAAACAGTGTCTTCTAATTCCAACCTCGTTTC  
A\_18\_P11802967  
AAGAACAAAGACCATGATAAACATAGCCACAGTGATTTTCATACAACCTTCCACTGATGAC  
CUST\_979\_PI426210822  
ACCCACAAATTAGATAACAATAAGTGATTCAAGTTTGGGAGCCATAAGAATTGAGTCAGA  
A\_14\_P113540 ACAAAGCAGTGGTCTACAGTAACACCATCCAGTCAATTATTGCTATCATTAGGGCTATG  
A\_18\_P22843019  
GACCTACCCTAGAGTCACCTTTTTTGATATATTTGCTTTTTTATTTACTCCACCAGGCAA  
A\_18\_P22841076 CGGATGGGTAATGAGGATTCCACCCCCCAGAAATTAGTATTTCAAAGTATTTTT  
A\_14\_P102336 CTATAAATTTGTAACCTATTAAGCAGCACATGGTGAGTCTGTCATTGGCAACTATGGGAA  
A\_16\_P02234453  
AATCTTACAGCCATACTTTATCGTCTCCTATTCTACAGTGTCTATGACTTTTGACACT  
A\_18\_P26972590  
AAAGCAACAGAGAGATAAACCTCAACCATCAAAATCTTTCCCTAGAATTCCACCTAAAAA  
A\_14\_P139649 TCCTTCCATTGAAGAAGTAGGAAAAACAGTTACAGCACTGTTCTGAACTCATCAAAAATG  
A\_14\_P111319 TTAAATGTCAAGGTTGACTTTTGTGTAATGATTCTGCCGAAGGACTTTGGAAAAGTAA  
A\_16\_P18413656  
CAGAGTGATGATTAAGTAGGGCCAACTAATCAAGAGACTGAATGTGAATGTTTATGAAAG  
A\_14\_P120095 TCGGGAGAGGAAATTTAACATTTCTGGCGTATTGAGAAAACAGTAATACTAGGAATATTG  
A\_14\_P113249 TCCAAGTCTCAGATCTTCTGTTTTTGAAAGAGAAAACACTACAGCATTTATACATCTACC  
A\_16\_P03369657  
AAATCCATAGATCATTTCATAGTAAACAAGCAATCCTATCTAACCTTTTTTCCCTTGCT  
A\_14\_P136221 ACCAAAATTTATGCACTTACTTTAAGATGTTCTTCTTGAAAGGGTGTTCAGGAAATTCT  
A\_14\_P122858 TTTTTGTGGTTGGTAGGCTCATAAAGAACTCTCAAAGGAGATCAAAAGGCTGAAAG  
A\_16\_P36230760  
TAGAACAGTATATTCCATTGTGAATTTTAAATTCAACACACAGCCAACCTTGCCCTCCATT  
A\_18\_P22841200  
GATGGAGTTACTAATGCTTTGGAGACAGTCCCTAGGAATTTTTTTTAAAATGTAGTGGTCA  
A\_14\_P139296 TCAGGAGGAAAGTATTTCCAGATGATTTCCAAATGATGAATCACAACCTGCATCAAATAT  
A\_16\_P19138875  
AATTTGTGCATATCTCTGACATTGCTCATATCATTCTCGTTACACCCATCATCTCC  
A\_14\_P134784 CTTCCAACAGAATATGAATAACTCATAACTCATTCTACCTTCTTATTGATTTGGGACGCT  
CUST\_10205\_PI426210822 CTGCTCTTTGGAGCTGCAGGACCAGCAGACACAAAAACCAGAAAG  
A\_14\_P101673 GTTTATACTGTAATATTTCTGGGCTTGATGTTTCTTCTCGATAAAACAGTTGAGGTGGCT  
A\_16\_P17483902  
GAATCCTTAGACCTTGTATGACTCATTGTGCCATCAAAATTTATTTTCTGAGCCTGTCTT

A\_14\_P107296 AAATCCAGACAATTAAGAGATGCTCAGCAGGATGCAAGAGATAAAATGGAGGTAAGATTA  
A\_14\_P134744 CAGATTGAGGAGTTACATCAGACCTATATGGAGGAACTTAGGAAATTTGTTTGAGGAACA  
A\_14\_P108841 ATTAATTGTTACTGTTATTTTTAGAACTTCAAGTCTGCAGAAGTCCAGCAGCCTGGG  
A\_14\_P112825 AGGTCCCAACAGAACCATCTTCAATCTTTACTGGATGAACCAATGAACTGTC  
CUST\_5872\_P1426210822 CTAAGAGACAGTACTTTGGTTAGGGCCTGGAGCTTTGGTTTTGATG  
A\_14\_P101643 GCCATCATTACACCGGTAACATGAGAGGCTTCAAGCACTAGGTCTCAAATA  
CUST\_8316\_P1426210822 TAACCACACACAGAATGAATCCTTTTCGATGCCTGGTACTCTGCTGT  
A\_16\_P19411081  
TACCAGCATATCTTTCCATATTCGAAGCCAATATTTGTCTCTCATTAATTCCCGGAGTA  
A\_16\_P00679451  
AAAAACACCACTCATATCCAGGTGCAACTTGAATTAGTTCCTTTACCAATCTTCTCAT  
A\_16\_P03593782  
CTGACAAAGCCACCGTTTTCTTTGGAATCTCATATTTTTATATGAACAATCCCAGTGTGTC  
A\_14\_P139359 TCTCAGATTTACTGAGGTTTATCTTCTGGTGGTAGATTATCCATAAGAAGAGTGATGTGC  
CUST\_4366\_P1426210822  
TAAGATTCTTCAACTTTACCCTATGCCTGGATCATGAAAGAGGTGTTTCTAGAAAGC  
A\_16\_P21041995  
GGGCAATGTGATCCATCATTAAGCAATTCGTTTCATTAATTTTCATTATCCTTTCTCAAACG  
A\_14\_P112279 TATAAATTGGGTGTTTTTTGACAAAATCTAAGACCCTCAGGGAAGTCACTATGTCACTAAC  
A\_16\_P02045182  
TACCAGCAGAGAATTATTTAATCATTTGCCCTTAGTTTTATCTTGATCACTCCTAGCGT  
A\_16\_P00051672  
GCAGGGTCAGCATTTATACTGTATGATTCAGATTTGCAGAAATAAACTTTCTTCCACA  
A\_14\_P103251 GAATGGTGATCTCGCCAATATTGAAGGCATCTTGAAGAATGATCGAATAGATTGTTCTAT  
A\_14\_P114131 GATGGACAGTTTAGGATAATAAGGGACCAAATCTGCATAACTAATTATGAGTCTGCACAG  
A\_14\_P201735 TTTGCCAGAAGAAACAGAAAAATGCACCTTGAGATTTGTATTGAAACCTTACAGTGGTTTTG  
A\_14\_P137981 CACAAAATCGCAGTTTATTACCAAACCAACATTTATTGAGAACAAAAGGAACCAGTTG  
CUST\_3858\_P1426210822 AGGCAGCGTATCACACACTAGTTGTCCAAGAGATGGAGAGAGAGT  
A\_18\_P22841353  
TCATCAACATTTGGTCTAGGATTCACCCATATTTCAACTGAGTTTTGAATACTGCGAAAG  
A\_14\_P139733 CCAAATTAATTTACATATCTATAATTTGCTACACAAACAACCACTTTCCAGAGGCCTC  
CUST\_296\_P1426210822 GGCTGCTGAGAAAGGGCGGGCAGCTGAGCAGGCAGCCAAGCCAGC  
A\_14\_P101856 CACATCTGTGGGATTTTTGAAAACTGAAAGAGATGAAGGTAGCACTGAAAGGCTA  
A\_14\_P111394 GCACTGTGATTGGATGAACTGATGGGGATGACTGGATTGGATTTTGAC  
A\_16\_P19079472  
TTTTGCTTTTACTGCCATATTAACCATAATTCTGCACTATAAACTCTTCAATGCCTCAC  
A\_16\_P02450848  
TCCAGATACAACAAATATCATAATAGCCCTACAATTACAAAATACTCTTGATAGGCCT

A\_18\_P16034238

TGAATCTTGTCTTTATCTCTCAATCCCTTAAATCCAATTTCAAAAATAAAAAGTTGCCTT

A\_14\_P125716 CATTCCAGGACTCCTGCATTTTTTCCCTTAAAATTCCCAAATGGGGATGTGATT

CUST\_6211\_PI426210822 CTACAGATACCATATTTTCAGGGACAGCCCCTTCCCTCCTGAGCAG

A\_14\_P111580 ACCTTACAAAATCAAAGGCAGAGGGTTAATTCATCCTCTTTTGTAAAGGATTGTAGCAA

A\_14\_P114889 TCTGATTGTCAAGAACAAGGAAGAATATTTGTGTATGCCATTAGCAGCAGCAAACATGTA

A\_16\_P18594799

AGTCAAATTTCCATCCTAGATAATCCAACCTATCCACATCTTTCAGTCCATCATCAGGAA

A\_14\_P139298 TGAATAAAGAACTCTCTTCCCTGCATTTATTCTATCTCCACTTCCCTGGTTTTATTGTG

A\_14\_P104694 ATTTTGTTCCTGTTCCCATGACACAACCTCCTTTGTCACTGTGGGAAAAAAC

A\_14\_P103423 GCATTTTATACTCCCGCATAGATGCTCACCAAATAATCCTGTTGTTGATGACGATAATAG

A\_14\_P121495 GGAAATATAAAGGGACAACACCTAGTTTGAATCAACAAATGGAGAATCTATGACACTTC

A\_14\_P139988 TCTGCTTTTAGCACTTTTTTTTTTCTTTTTTCTCCCAAAGACTTCAAGATTCAAGTGA

A\_16\_P40290028

ACCTTTTCGAAACTAAAGAGCAATATTCTTCGCATTTGACAAAGAGTAAAGGGACCATTT

A\_14\_P116528 CTCTAGGCTAACTAAGATGTCCTCATTAGGCATTCACATAGCACTCTGTATGTTCATTTT

A\_16\_P17993076

GACATAGACCCTTCATAAAAGCCACTTTAAAACACTGAAACAATTACATTTGATGCCTCA

A\_14\_P106468 AGAACCCGTGAACATTAATTCTCGATTTACATAGTGAGTAATTGAATAATGAAGGGCTG

A\_14\_P114476 GGTCGTCCTAAACCTTCAAGTCTCTGGAGAATGCTATTGAATGGAGGTAAC

A\_14\_P126375 GAGTAGTCCACCAACAAAGCGTATATTTACTTCAAAGACAGAAATTTAGCATTCTATGG

A\_16\_P15655960

AAAAACCTTGAGAGGCCTAATATGAGAAAAGTTTATCAACCAGTTATGGGCTCTAATTCC

A\_14\_P200204 CTCATACTTATGCAAGGAGTTCAGCATGATCTGAGGGAGACAGATACAGGA

CUST\_1050\_PI426210822 CTACCCACCTCATGCCCTAAGCCCGCCTTCCCACCTCTATGCACC

A\_14\_P100691 ACAGAATGAAGCCAACAAATACCAGATCTCAGTGAACAAATACAGAGGAACAGC

A\_14\_P117879 TCCAATGCTCTTTAGAATGTTATTACGAATAGAAAGATGGCCAGGATGACCTTTAGTGTT

A\_16\_P01781691

AAAGCAAATGTCTTGGGTAATGCTTCACTCATCTTCTCGTTTTATCTTAGAACCTGAATGT

A\_14\_P121530 AAAATAAAACCATGCTCAAAAGAGGCAGGCAGAGGAGCATAAACATATTTTTAAGTGAGT

A\_16\_P16192045

ACGCATGGTCAACCCTCAGGGGAAAACCTGTTACCTAAAGTATTTTTATAAATATAAGCCT

A\_16\_P18858078

ACCAGAAAAATAATGACTCAACAGTAACATTTCTTCCCTCATGAATACAGATTGGCATGCC

A\_14\_P108808 TACATTTATAAAGATGTGAATACATTTCTGCTCTGGCTGAAACTGCATTTTGGGCAGTTTC

A\_16\_P16647838

AATTGATGCTGAACTAATACCATTTTTGAGACCCTGAAATTACCACATGCATTGCAATGG

A\_14\_P138683 CACTTCTAAGAGATCTTCCCTTCTAGGTCATTCCTTACCTATCTCCATTTTTTCTGAATT

CUST\_585\_PI426210822 CTTGCAGATAAAAATACCATAATCTACTCTTGCAAATCAGGCCATCCTGGGGT  
A\_14\_P130988 AAACGTATTGATTTGGGGAGCCTCTATGTTGATTTCAAACAGATTGTCTCCTGTGTT  
A\_16\_P15945972

AATGGAATTTTCAGTCTTCTCCTCTTAATCCCCTTATATGCAGAACACTAAATAGGATGGA  
A\_14\_P130855 ACTCCTGACTAAATTAATATTCCTTCAAAAAAAGTGCTGCTTGTGTTTACGGTTTCTGCAGT  
A\_14\_P130605 TATGAAAAACAAATTAACCATCTCCTTACCCAAATCTTGAGAGGAAACAGCCTCCC  
A\_16\_P18585127

ACTAGAAGAGGCCCTTTAAATGTATCTCAAAGACAGTTTCACAAATATGCCAGAATTCCT  
A\_16\_P17142141

TGAAGACTTTAGACCCAATTCTAACCCCTACTTGTGATCTGATACTTTATGACTGTCTCAG  
A\_14\_P201819 TTACTIONTCAAGCACGATTTCTTTTCAGTTGGAAGTGTGTTTTCGCGTGACCTTATCT  
A\_14\_P122160 CACTATCCCATTTACCAAATTCCTCTAAGAATTGGGATCCCTAAGAAAATCCTG  
CUST\_2992\_PI426210822 AGAGTCTGCTCAGCAGCTGCCTCCACCACATTGGTTCACCCA  
A\_14\_P118161 CCAGGTGATTCTCATCTAAATGTTCAAGTTAGCAACTTTAAATCTGGAAAAGGAGATTCT  
A\_14\_P108284 AGACCTATATGAGGTGCTTGACTTAGTGTGAGTGTGTTTATGATTTAGCCACTTCACATAT  
CUST\_6419\_PI426210822 TAGATTATTAAGAACAGTTACCTGTGTCATGAAGGAGAGGCCCCAGAC  
CUST\_6319\_PI426210822 AATGGCCAAGTGTAACAGGCAGCACACATGTGGCAGATCGTAGCA  
A\_14\_P116977 TCTAGTTTAACTAAACACTTGATCCCCCTCAGAATCCTAATGAGACAGTCATGAACAGAAA  
A\_16\_P01543793

CTCACACGTATTTTTGTGATCCTATGTGCTGTAGTCATACTCTTCCTAACGAGATCTTAA  
A\_14\_P115775 GAACTATTTATTTATTTAAACCTGCACAGTGGGTTTAAAGTCGCATCTTGAGATTGGAGCA  
A\_14\_P137193 ACCAGTTAGTCAATGCCATTAATCAAATCCTATAGCAGAAAACGCATGCATAAGTCTGA  
A\_16\_P30952373 ACTCCATTTCCCTATTATCTGTTTCAGAACTGTCTGGGCAGAAAGATAAATCCAGTG  
A\_14\_P126457 AAAGCAAACACTGTCCTAGATTTTTATCCTAACTCTTTCACTTTTCAGCCATCTGAGGT  
A\_16\_P41041999

AAAAAAAAGGGCCCCAAATTTGATTTATTTCCCATCCAAGTAAATTTTAAAAGGCTGCC  
CUST\_4784\_PI426210822

TGGGTGAAAAGAGTAGGATATAGTAAAATGCAAATGCTAGTTTAGTAAATGGCATAAAGA  
CUST\_6231\_PI426210822 CAGACAGGGAGCCATGTGTGGTTTCCCTTGCTAAGATTTTTGCGAGT  
A\_14\_P135561 TGGAACCATATCATAGGTAACAAGTGTGTTTATCCCTGCAAATTAAGAAAGAGGGCCAT  
A\_14\_P117287 TAAGCAAATTAGCATAGCCATGTTGTTGTTGTTTCCGCACAGACATCCTTTTTGAAAAT  
A\_16\_P18164389

CAAATGCAATGAGCCAATATTTTTTTCACATTCTCCAACATATAGATGCAGAGATGAGGC  
A\_14\_P123218 CTGTGATTCCTGTAACAAGTGAATCAGCCAAATGATATTTGCCATCATTCATTGCTCTGT  
A\_14\_P110090 CTTCTTCAGACAAACAGATGGATACTTCATCATTTCTGTGATTATCCTCTCCTACTTCA  
CUST\_4453\_PI426210822 GCTCACTGCCCCATCCATGTTGCACACCCCTCTCTACCTGCAGC  
A\_14\_P105678 GGGAGTTGTCTTAATGCCGAGGTTAAATAGCAAACCCACTATTTTTACTTGTGTTGATG  
CUST\_1900\_PI426210822 CTTCTTGGGGAGGGGCTGCGGGCTACCGGCATCTCTGTAGAAAT

A\_14\_P101198 TAACAAAGGTGCTGTTATCAGAATAGTCTTCTGGGTATAAATTAATAAATGACTGAAGTTC  
CUST\_794\_PI426210822 AATATGATTTTCAAAGTGAGCACTCAGAGAGCCCACCCGTGGTTG  
A\_14\_P116940 TTTTGATCTTTGTGAAGACTATTTTAAACCTCCATTTGGACCATATCCTGAAAAGAGGTG  
A\_14\_P115109 CCAAATCCCTTCTGTTGATTCTGCTGACAATCTATCTGAAAAATTGGAAAGGTATGTTCA  
A\_14\_P112074 TGTCTATCAACACTGGTTAATCTGGTGGCTAATAGGCTTATGTATCACTTAGGTCTTCAA  
A\_16\_P58424556 CTTCACTTCAGCAAGATCCCCAGGGATTCCCTTGTCTGTTCATATTTAAGAAG  
A\_14\_P106815 TGCTAATTCCAGGCACAGCAGAGAGTTTACTCACTATAACAGAGAAGAGCAAACAA  
A\_16\_P58424390 CAATTGTTGCCTGTCGTGTTTTTCATTAATTGTTGCCTCTCTAATGGATCATTCCCATTA  
A\_14\_P101252 ACATTTTCCCTAACCTTTTCCCATGAACCAAAGAAAGATTAATAATTCCAACAGAAGGAA  
A\_16\_P18194860  
ATGCATTCTCAGGATACTGTGTTTTGTAAACATCAAGATGTTGAATGTCCACAAAGTTGAG  
A\_16\_P02208070  
ACCTTTCAACTAGGCATCTGAAAGTGTTTTATGGCGTATAGATAAAAATAGACCCACTGC  
A\_14\_P121523 ATAGACTCTTGTGTGGTAATTGTTACTAAATTTGCCCTCTTCAATCTGTAGACTACCAT  
A\_16\_P21196563  
CTTCCTAGACTCAGAACATTCAATCCCAACTACTTTTTCTTGCTGCTCATCTAACAATTT  
A\_16\_P15903519  
CTCGTTTAACTGACAGTAGAATCTAAGAATAACGGCAAATTTCTGTCTTATCTGGAGGAT  
A\_14\_P133895 CGAGTGTTCAATAATGGTTTTCTTGAAGCGCCGAATTAGTAACAAGTTCTGAACTAATGA  
A\_14\_P106426 GATCTAGTATTTGCAGTTCCATGTGAATTTGAGAGGAACACACGTTCTTTAATTGTTTGG  
CUST\_5336\_PI426210822 GATATCTGGAGTTCAAGAGGCGTTTTCTGGAAACAATTTGTCCAAAGGCT  
A\_14\_P131912 CATGAGAAAGTTCAAGCAATCTCAATTTGTTAAACAGCCATCATCACAAACCTCAAGTTC  
A\_14\_P130971 CAAGACACTTTCTGCTGGAGGTTGACATTTGTTTTAGTAGTTTATGTTGATGCAAAGATC  
A\_14\_P125525 GTTGAGAATTTTTTAGTGACCTTGATCAAGATATGCACATTGTCCATTCTGTGAGTCATG  
A\_14\_P131797 AGAAGTGTCTGAGTGGATTAGGAAAGGTAACCTCATCGTTTATATGCACTTGTCTG  
A\_14\_P105109 AGGATTTATGTCACAGTAGAAAGTAAACAACCTAACGCAGAGTCTCACATTATTTTTCCC  
A\_16\_P00778758  
GGTCAGACACCATTAGGTTTTGTCCAACTAGAGAAGTAAAAAATGCCAATAATCCATCT  
A\_16\_P36230431  
GGTTTAGGAAATGGTGCTATGATATAGATTAGTTTTCTATGAATAACTTGGCTTTATGCC  
A\_14\_P115063 GAAGCAAACCTCTAAAATTATAAATGACAACCTGAATTATCTATTTTCATCAAACCAAAGTT  
A\_14\_P122090 CATAAGTTGTCTAAACATAGGGAAGAGCCACTGTTACCTTAACTTTATCATCATCGTC  
CUST\_4488\_PI426210822 GAAGGCTCTCTTGGGTTCTTTGCCAAAGTTCAGATGTCCCCCTTT  
A\_16\_P16263887  
AAAGATGATTTTGCAGTGTCTTTTTTTGTGCATAGTATTAACATTCTCACAAGCACAACCA  
A\_16\_P32194502  
CCCAGGTTAGGAACTTTAAGACATTTTGTGACATTTTCATGAATCATATTTGCACACACT  
CUST\_7855\_PI426210822 GGTTCTAAGAGCAGCCCTCACACTTGCCATCACACAGCTATGTA

A\_14\_P136271 CTCTAGGGTAGAAAAATCATGTCAAATCTAGATTATGATCTGAGTCAGTGTCAATGCCTG  
A\_14\_P107006 CACTACAGCACTGATCCTGTTGCATAGCAATCCTGAGAAAACCCAGAAA  
A\_14\_P101211 ACAACCTATGTGAAATGTAAATCGAGACCTATAATTCCTATAGCACCAAGTTTGAAACCC  
A\_16\_P16020742  
GCCCATAACTGTAAACACCCCTTTTATCTACTATGAATGCAAATTGTTAGAGTGGTAAC  
A\_14\_P116837 CTTCCGTCATCTTGAATAAAGTAGTAATCCACTGCACTGCCTAAGCGCTTATCTTCAT  
A\_14\_P101926 AACAGTTGTGGTGTCTGGCTCATGTTGTTTTTATTAGTAACAATACTTGTGGTTTTGGA  
A\_14\_P112721 ACTATTGCTTAGGATGAGGCTCGATTAAACAGGGGATCGATTAAAGATACATGTTTTGA  
A\_16\_P21587195  
ACAACCTAAGCCTCATTAAACCAAAGAAAAGAAAAGTAGCATTGTCCTAGTTTTTGCTCTGC  
A\_16\_P18747806  
CCCCAACTCAAAGATAATAATTGTGGATAGCAGACTTTTACTGACAATCCAACATCAGA  
A\_14\_P111704 CTCTCTTAATTGAGCATTGATAAAGGAGAAAAGGGAGTTGAATAGCAATTTGGTCACAAAG  
A\_14\_P103480 ACTTCAAACGGAGTGTCCATAGGAATTATTTTTTCACATTAATCAGGAAAAGTTGCCTTTC  
A\_14\_P132466 TGTGATAGCCCAGGAAGTAGAATCATTGTTAAGAAAAGTTGCAGGCACCAAATTAAAAAA  
A\_16\_P00685083  
GAAATAAACTTTGGGAGTGAGAGAACAGGGGATGTTGATTGATTTCCATTATCGTATCAC  
A\_14\_P121448 TTTCTCTTAACTGCTGCCTGCTTATTTTTCTTAATACTGGGACTGACTTACCTAGGAAT  
A\_14\_P200818 TTGCACTCTATTTTTCTTTTTGTTCAATACTCCCTCCTCCTATGAGCATACTTAACTCT  
A\_14\_P117202 CTGTATTCATTAGACTTCTGTGTAGAAGATTCTGCCAGGAATCACAATTGTTATGCTAG  
A\_16\_P20204093  
AGCCCTATGCTACTTCTATGCTTCAATTACCTAGAACATCCTTATGCTTTCTTTACTGCT  
A\_16\_P18925660  
AGACTCTCTAGGCTTTCAAATGTCACAATGCCTTTTTATTACAAAATCATAGCATACTCT  
A\_14\_P122833 CTTTCTCCCAGGATACATTTTTTGAGGTTGAGAGGATACTTGTTTATAACTGAGGATTT  
A\_16\_P38100370  
TCCCTTGATATCACATCAGTATCTAAAACCTAACATACGTCAAATACTCCTTTGAGGTCA  
A\_14\_P121811 CTTTATTATGGCTTGTGAACTGCTGGAGTCTGGCTTTACCTTTTTGTATGTGAACAAATC  
A\_14\_P109917 AAAACATTATTTTGACCCATGATACATTTTGAGGCAGAATGATTCAGACTTCTGATGGCA  
A\_14\_P202310 GGGCTCATGCATTCTTTTTGAGTACTTCTCCTTGATTAAGCAGTTTCTTATACTCCCAT  
A\_14\_P113957 AAATTATCTATGGCTCAGAGCAAATACCAAACCTCATGTAATAGTCAAAGGACTGATG  
A\_14\_P104717 TTGCCACCTTTCCTCCTCCCTATGGCGTTATATCACAGTATTGAAAATTATAAATTCACA  
A\_14\_P127148 TTTTGAAAATGTCTAATTTACAGCAAGGGCATAGTTTAGGCACAAGAAGGATAACTGGAG  
CUST\_1266\_PI426210822 CATGGCTGTAAGGAGGAGGCCAGAGGTCTCCAGCAGGGCCTCTCT  
A\_16\_P01679648  
CTCACAGATCCTGGTTGATGTCATATTACAGACAATTACAGACATAATTAGCCCCCATTC  
A\_14\_P133356 TACCTAAAAGCACTGCTTGTTTTTCCATTTTCCTCCTCCAGTAATTCTTTCAAACCTCTCAT  
A\_16\_P15866660

CACAATCTAACTCTCAAACAGGTTAAATCTAAACTCTCTACACCTTTATCTAGCAAGTGC  
A\_18\_P14137149 GGCACCAATCTAATGGCTCTTCTGGATAATCACTTCACATGGGAATCCTAG  
A\_14\_P109637 AATAAATGTGGGTTTTTCCCCTCTAGTAGATATCAATTCAGTAATGCAGCATGTGACAG  
A\_16\_P15911150

AATACCCAGACTTCAAAACTACCATATCAGTTTTAACTTCTGAATCTCCTTCTACATGGG  
A\_16\_P02306232

TACAACCTTAGGTCTAATACCTTAATCTTCACACAGTTCTAGATCCACTCAGATACGCAT  
A\_14\_P121128 AAGCGAAATAATAGCCTCACTATTGTGCTTTTCTGAAATTGGAGATGAAGAAAGGTTAT  
CUST\_7526\_PI426210822 GAAACACTTGTGAACGAGTAGATGGGCTTCTCTGGGAGCACAG  
A\_14\_P115771 AGTCATCCAAAAGTATGACCTGGGGTCTCTTCGATTAAATATAIGTTATACAGAAGACT  
A\_16\_P00644660

AAGAAGGAAAAAGATGTCTCTAATTTACCTGTCCTAACTTCTACCTCTAGACTTACCACC  
A\_14\_P110149 ACTTCTTTGTGATTCTTACAGACAGGGATCTTAATGCTGTAAGTGTGTTAAAGTCTGCAA  
A\_14\_P121648 CTTCAAGTTCTCAATTTTTTTCAGGGATTCTTGAACCTTCCATACTTGCTCATCAC  
A\_16\_P15273514

AGGGCAAGAAAAATCATTGATGAGACTAGTCACTCAATACATAAGTAGGTCTGCAGTTAC  
A\_14\_P120196 CTTTTCTTTTTCTTTTTCTTTCTCCAGAGACCAGCACTGCGATATCCTGAACGTTT  
A\_14\_P122052 CTGTATCGGAAGTTCTCCATTCAGAATCTAGTGTGTTGGTCAGATAGAAAATCATCTAC  
A\_14\_P107122 CAGTTCTGCACAGCATCCATGCAAATTTGTTTTGGAATACATGAGTTTGTCAAGAATATCT  
A\_18\_P21333374

TATTTCTGCATATGACTCTCAAAAAAAAAAGCCTCAGGAATAAAGTCAGATGACATCTCGG  
A\_14\_P111552 TCACATCCGTAAAGCCCACTGATTCTTTTACTACACTTTTTATGAGAACAAGACATTTTC  
A\_14\_P137645 CAGAAATCTGTGGTTCAAGATGGTCATTGCAAACCTTAACCAATCTCAGCATTCTATTCTG  
A\_14\_P123272 GGCATTTTGGATGATTTTTGCTCCTAGGGTTTGAATGCTGCTTTGTTTTATGAGAATAAA  
A\_14\_P115760 AGGTTACTCTTAGGCATACTTTCTGCTTCAGTTTCCCTATAACATGAAAGTCCTTAAGAT  
A\_14\_P129645 CTCATGCATAAAGGGGAATGAATGTTCTAGAATTTTCCCAATCCTCTTACCAACTCTC  
A\_16\_P41212734

AGATCTCAAGGTTTTTTCCCACTGATTCTCTAAGTCTTGGCCTTATCTAACACATGAAAC  
A\_14\_P138011 GAAATATTTTAAAATTTCTCTTGACACAAACCTTGGTCCTGGTCCTTTACCATTTTGGAG  
A\_14\_P100799 GAAAAGTCACTCCATATATCCGTGAAGTCAACCAGTTCCATCAAGGAGAAAGTC  
A\_14\_P132646 TCAAATGTGCCTTTTTTTTTCCAAGTCTCTCCTCTAAGACCATGCTGAAATTGAAGAAATT  
CUST\_1891\_PI426210822

CTAACACTGATGCTGTGGAAAGAGGTTCTTCAAAACTGAAACCAGATAAACCAG  
CUST\_8894\_PI426210822

TAAGATGGGTCCAAGAGCTAGAACCAGAATTTAAACAAGCAGATAACAATTCCAAGG  
A\_14\_P129662 TAGGAAACAGACAGCATGAGATACTAAAGTTAGACAACAGGAAGAAATCTGGGTAGCAG  
A\_18\_P16635042

TGCGCCTTATCCCAAATAGAAATTATCTTTTTCAAACCTACCACTACCTAATTGTTTTCCGAA

A\_14\_P119738 CATGCAAGTCATTATATTCATTTTAAGGCATAGAATGTATAATATTGTGAGAAAGGAGGC  
A\_14\_P115713 CTCAAAGACTTCAATGCTCGATGCTTCCTCCAGCATGTTCTGAGATC  
A\_14\_P120928 GTATGTATTACTCGGTTCTTTACCTACCAAGTCTTTTGCAAAGACCTTTCATTCTCTCC  
A\_14\_P135770 ATAATTATGACTATTCCTAAAAGTAATGTGCTCTCCCATTACAGCCTTTGCGTCTCACAG  
A\_14\_P138007 AACTTTCAGATGAATGCTTACTGTGGTATTTGGAATGTATGTATCTTCTGAACCCTACAT  
A\_16\_P17364221

AAAGAAAACGTTGATCTCTATTGACCGTGATTAGTGGAACACATCTAAAATTGACTGACC

A\_14\_P112455 AGATTACGTTAATGGATGCCAATTATGTCATGGATGAAACTCTAGGGACAGCAACATTTA  
A\_14\_P125874 ACCTCATAGAGTGGCTTAACATTTTGTATGAAGAATCTAATATTGTCAGTCCCAATGG  
A\_14\_P101488 CCTGCAGGCTTATATATTGTTGTTTCTGAACTTGACAGGAAAATTGGCTTTGATTTTGT  
A\_14\_P103856 AATACTCTAGAGTTTCAGACTAACTTGATGGAATATTCAAGAGGCTTGATAAGCCCTGAA  
CUST\_3887\_Pi426210822 CGTTGAGTTTTGTCTCAGGATTTTCAGCGGAATCCAAACCATGTGACAT  
A\_18\_P14135769 TCTAAACTCCAGCCTCATATTTGACTTATACGGGAGGTCTTAATGTTTCCGGCTTATT  
A\_16\_P00685578

TACTGTTCCATTTTGAGCACTATGGTGATATTTTCATTATCAAGAGTTCTTGGGAAGAGG

A\_14\_P110081 ACTCTGGAAACCCTTCCAATGATTGAACCTCTCTTGCACTTGAAGTGTGATAATA  
A\_14\_P109059 CAAATGGAATATTCTGCATTGCCTGGAGTCATAAAGATTCTAAAAGAATAGCAACCTGCA  
A\_16\_P19774177

AATTCCAGACATAGTTGAAGTTACCTAGCATAGACATCTAAAGCCATATACTCCAGGGAT

A\_16\_P20366109

TTTCTTTTTAAAGAAGGCTACAACACAACATACTACTCTGAAGTCGAATTCAAGAGCC

A\_18\_P22840481 CTTGGTCATGATAAAAGCCAGACACTCGTGGGATGGCCTGTAGGATATA  
A\_14\_P138561 TTTTCTGTTCTTGCCGTTGGCATTGTTTGAATCTCACCGGATTTATTTGTTAATACTT  
A\_14\_P135075 GTCTATTCTGCCTATATAGAGATGAATCATTTATTCTTGGGCCATGGCAACGTTATTTGG  
A\_14\_P119972 GTTGGTGAGCATACCTTGAATTCATAGGATTCTTCAATGATCACTTCCAACCTTGGTG  
A\_16\_P16944079

AAGTTAGCAGATAAAGACTACCTTTGTAAAGAATGACAGCATTCATAACTAGCCAGGTGG

A\_14\_P120720 CTTTGGGGAGCAGATTCTACATCTTATTCATCTGGAAGAAACCTCCATCATAAT  
CUST\_4634\_Pi426210822 GATTCCGGTGGCCAGGGACCAGATGGGAGTCCGAAAGCTACACAG  
A\_14\_P111455 GGGAAGAAAACTTTAATTTCAAACCTGAGGGAGAATTCATTACATTGTGGTTCATCCGAA  
A\_14\_P127697 CTGGAGTTCAGAAGTGGTATTTGGCAAACCTCTGAGAATCTAAAGAGTTGATTATAGTT  
A\_16\_P41624904

TCAACACAAATGCTTGATAACATTCACAAACTAACATCAGAAGATAACTTTTCATTTCT

A\_14\_P102866 AAGCCCAAATATATTAATCCTGCATTCAGCAAAGTGGCATAAAAATCACCTGGTAAGTAT  
A\_16\_P21427495

AAAAGTGTGCCTAGCATCATTAAGAGTCTGTGGTTAAACATCAGGAATGAAAACCTCTAG

A\_18\_P22839791 GAGCAGCCTTTTAACAGAAACACGCGTAACTTTCTGAGATGCACTTC  
A\_14\_P133611 ATGATAACTTACTGCCTCAAAGTTTCTTGATTTCTTTCATGTTGATTTCTAATCGTC



CUST\_6354\_PI426210822 AAATTTTAATTGAGGTGCGTTACAGGGGTGCACTATGATCTCTCTCTGGAG  
A\_14\_P132582 ATTGGCTTATAAGGCACAGAAAATCTACGTATTTCTTGCCTTCATTTGTTTTGGAGAGTT  
CUST\_7696\_PI426210822 ATATGCTGTTCAAATGACAGGCCTTTTCCCCACACCTGTGTGTATTC  
A\_16\_P01417884

GGAACTCCAAGCATAAATTTTCATTACCCCATAGTAAATCATCTATGAGAAAGAACGCAGA  
A\_16\_P19117505

AGCGTCTTCAAGTTAGAACTGGTAGTATCTCCATAGATGACTTTCCTGATGTTTCAAAC  
A\_14\_P122486 AAAAATAAAAACCCCTCACAAAGTCAAGTTTACTCAGTAGCCAATAGCCTAAAATGAAATT  
A\_16\_P16281500

AGCACTATTGTCTTTCTGAATCAGTCTTGAATGTGATCATCTCTCTATTCTGAAACCCAT  
A\_14\_P104428 TTTGGGCCTAGAAGAAAAAGATCAGTTGTATCAGTCTAGCAATGAATTAGAAGGTTCAAG  
A\_14\_P102447

CTGAACCGTTCAAACCAAGGAAGGAAAATTATAGCATCAAAGGGATTAAACTAGTGA  
A\_16\_P03219454

AAGACTGCTGTTATCCCATACAAAACATGGTATTAGTCCTTTCCAAGTAGGTTCTGATTA  
A\_14\_P201880 GTTGCTTTCTTGCCTGTCCTGCTTAGTTTTTACTTGCTGGATGATACCATAATGTATCAA  
A\_16\_P19747927

GATATTTCTTTTATGCTTACCTGTGATGATTCTGCAAAACCTCTTTTCTAACCCCTGAGAA  
A\_16\_P36230765 CAGCAAAGCCTCACTACAGAGTGACAATTCCTGGGGTGCCCTGTG  
CUST\_1610\_PI426210822 TCTTGCTGACCTCGCCACTTGGGCTTGCCTTTTCTGTGAGCTGTT  
A\_14\_P126185 GTGAGCAGGATATTGACGGAAGTGGCCTTTCTTTCTTCTTGACTTTGAG  
A\_14\_P139438 CATTGGAGCGGTGAGTTTGCATTTCCAAGGCACAAGGTTATCCTAAA  
A\_16\_P21531964

AAAGTCCTTGAATATCTGAACTTGCATAACTGAACTATTCTGTCTGAATACTCATCGG  
A\_14\_P115967 AGCATTTTGAGTAATAGAGGAAGTTTCTTCCAAATGGATGAGGGAAATAAATGATTTCCC  
A\_14\_P101798 CTAACAAAGTTGGCAAATATGAATTTTCATCATGAGATTTTCCAAAGCCAGAAGAAAGA  
A\_14\_P138769 AAATCAGAAGTGTAACATACAAACCTAAAATCTTTGACGCTGCATCAATCCCATTCT  
A\_14\_P107650 ACCCCTTATCAAAGGAAAACAACCAATATTTGTTTACATTTGATTAGGACATGCTGCTG  
A\_14\_P135259 AGTAATGCTGTGATGTGAATAGATACATTTGGTCATATTTTGAAGGGCTTCAATGCTGAC  
A\_14\_P124937 CTTACCATTTTGCAATCCCATCCAGAGTTGCTTGTGATCTTTTTTCTGCATTTTCATTGAT  
A\_14\_P139492 GCCATATGTTACTTCAATATTCTCTGACTTAAAAAAGCAGTGGAGTCCATGCTATATGC  
A\_14\_P103714 CAAAGATGCTCCCATAATACTCTCAGATAGTGAAGAAGAAGAAATGATCATTTTGGAAACC  
A\_16\_P01958066

GCCAAGGCCTAATAAGTTCAATTTTTTTCATTCAAGCACATTAATGCAGTCCTCATGAGAT  
A\_14\_P104330 TACAGGATTTTAAACCATTTTCCCTTCTGTTCTTTGAGTTCTCTGTTCTACAAACCTTCT  
A\_14\_P102553 TTGTAATATATCTAATTGCAAATGGTGCTGTGGTTGGCACCATGCAAAGATAACTTGCAT  
A\_14\_P129068 GTCTGTGAAGGGCACAAAATGAATTAATGTAATTCCTTAGTCTTTAGGAGCCTGTTGAG  
A\_14\_P131895 CCTTAAATAAGTAAGATGGTAATGGCTCTTCCTCTTCCTCTTTCACTTTGGCCAAAATCT

A\_14\_P138865 CTCATGACTCTGGGCTACTCTAGTGTCTGCCTCAGATTTACTGTATTTAATAAGATGTTT  
A\_14\_P109041 TGACACGATTCTTTACCAAATTGGATGCAGACAAATCTTATCAATGCCTGAAAGAGACTT  
CUST\_9157\_PI426210822

TAAATTTAGCAAATTTTGGTGGTCTTGTFTTTATAATTCACTATTAATAGATTAGCATTGT  
A\_14\_P120048 GATGCCTTTTAGTGTGTTCGACTCTTTGAATCTTGAAGAAATCTATAATTCAGGTAAACA  
A\_14\_P200096 CTCACCCTGTTTCTTTCTGTGAAGCGAGAATGTCTGAAAATAAATAGGACCATGC  
CUST\_7098\_PI426210822 CTGGCAGCAGCCTCACTCTTGGGGTTTTCTCTCTGGAATTAATTT  
A\_14\_P104077 ATCAGTAGTATCTGTCAGGAGACAATAAGAGGTAAGAACATGTTTGCTATCATGCATGAG  
A\_14\_P106959 GTGACACAGTTTGTCAAATAAATCTTTTTTTTTTTTTCACATGCTGAIGTTGCTGCCGAT  
A\_14\_P139983 CATAAAAACAGTGTCTTTTTTCATTGCAGATTCCAACAATGTCTCACCCATCTTGGCT  
A\_16\_P19725665

CATCTCTACCAATCTTTCTTGACTATCACTCAATACTGTCTAATAACCTCATGCCAAAGT  
CUST\_3020\_PI426210822 CAGAATGCCCATTCAGGTCACCTTCCTCTCTGCCTGTTTCATACCT  
A\_14\_P120469 ATAACCTCCTCCCTAACAAAATACACATCACTGAAATCACTACAATTTGGACACCTAATC  
A\_18\_P12433221

GGGATCAATGAAGTACTAAATATGAAAGGAAACAGGTATAGAAGTCTGACTTGGGTTTT  
A\_14\_P126581 CTTGGAAGAATGTGATAGGTTAACAATAATGGATGAAAGCAGTTGAACTATTTCCGGACAG  
A\_18\_P22236059

AAAAAATTGCATTCAATTTGAGAGCGTTGAGAAAATTCTGAACCCAGGTTAAGATCAG  
CUST\_7966\_PI426210822

GAACTCTCAAATTTCTCAAACATAAATACCTGTATCCCACTTCATTTTTAAGAAGAGTA  
A\_16\_P00003777

AGGCCTCAACAAAGTAAATTGTGAAAACATTTCCGGTATGACTTACTTCAGAATTTAACT  
A\_16\_P01363161

AAAAGCCACTTCACAGAATGAGTTGTTTCATAATGTAAAGTGTTCATAACTCCCAAGAGAC  
A\_14\_P137610 CTATGGAAAAGTTCATATGAAGAAACCAGGCTATGATCTACAACTGGCAACAAATTTGT  
A\_16\_P21376903

ATCAAAAACAGTGAATTCTGATAAGACTAGACGCATGTTACTCTTAAATTGGGCTGTCTCC  
A\_14\_P109845 CCTTCCAATCACTTTAACCTCTCCCTGATTCACCCTTTCCAACTACTC  
A\_18\_P20511409

CCTGTTTTACTGAAATTCCTTTTTACCACTGATAATTTTGGATATAAAACCCCAAACCA  
A\_14\_P120290 GCAAACCTGATATGATGCCTTCTATAAAGGACCTGTTTCCCATAGAATCTCTTCTCTAAT  
A\_14\_P136170 TCCTCCTCATCTTTCTCAGATTTCTGAATGTTCTATTACAAATGCATAAATATTGCTAGA  
A\_16\_P18652704

AAAATCCAAAAATCCTACAAGATGAAATTCCTTGACCTGTTTACTCAGACATCCCTACTT  
A\_18\_P14359682

GATTCCAAAAAAGCAATCCTACAGCAAGTTTCATCCAATTCATTTTTTACAACCTCCGA  
CUST\_7943\_PI426210822 ATGCAGCGTGGGATTTCTTTTCATGAGGTCAAAGTCAAAGGTAAGG

A\_14\_P133056 CTAACCTTCTTCATGTCGTATGGGTCTACCCCCTACGTATCTGTCCCTAC  
A\_14\_P132586 AAAACATTGCACCTCTGGGATTCTTAGATCCAGTCCTTTAATCAAGGATGAATATTTTCT  
CUST\_9190\_PI426210822 GGTCTTGACTCCATGACTGTTGGCCAGTGACCTAAGTTCAGTCT  
A\_14\_P123562 TGTAGGACCTCAACTCTCTATGTTTGCCAGTGGTTTATTTTACAGGTAAGTAGTGTAATC  
A\_16\_P35019226  
ACCAAAGACATCCAGAACTTTTTAGTTTAAACGTGAGAATTATTCACCTAATTTTCCCGCA  
A\_14\_P128661 CTGTTGGCTATGATGGGTGTCATTACTGTTAGTTATCACATTCTGGGGTTATTACATGAA  
A\_14\_P134800 GAACAGAATAGTTGAGGGCTCTGAGAGATTTTTTTTTCCCCACGGATG  
A\_14\_P127750 TTTATACAAGGTTTATTTTCTCGTAGAAAGGTCCTAGGACTGGCACACTCAATTCCATC  
A\_14\_P131143 ATCAAGTGAAAATTTTACCTACCCTTGACCTTTTCAAATCAACTACCCAATACACATTT  
A\_14\_P115883 ATGAGTATATAGGAAAATAATTTCTCGACTTCCTTCTCAAACACCTCCAATGTGACAGCA  
A\_16\_P20628585  
AAAAATGAGAGATGGTTTTCTTATAACCCAATTTCCAAAGCCTTTTATTACAGAGCGTCA  
A\_14\_P127277 AAGGCTCAGAGGAGCCAATAAACCTGTAAATGAATAGACGCATGTTTGAGTGAGTAAAT  
A\_14\_P133923 TGAAACCTCATACTCTTAAACCTATGGACCTCATTCTTCATAGCAACAATTCTGAAGA  
A\_14\_P136888 TATCTGCTGGTAAAATGTTTGACTTTGTTGCTGTAATCAGGTGAGCGTGACTTTGTAAAG  
A\_18\_P16350523  
AAACAACCATGACATTTATCCTACGGACATTCTAATGCTGATAGTAAGGTTAAAATCCCC  
A\_14\_P123158 CAGGAAGGAAAAGAAGAACCACAGAATTATACAGATAGTAGTTCTCTCTACAGAGTCC  
A\_14\_P133601 TCAGTCGAAAAGTAAAATATCAATGATTTGGGGGAATATTTTCTCAACCAAATAAGGGGG  
CUST\_7425\_PI426210822  
GTAGGTGACAGAGCAAAGAAAACCTTTGAAAAGTTTCTCTTAGAGCCTAATAGCAATAAC  
A\_14\_P123882 CTTTTTTTTCCACTGAGAAGTCCTTTCCATTACAAGAGGTTACAACACGGGGTTTTTA  
A\_18\_P22841878 AGAAGAACTCCAGGGAGAGCACATATCAAGAGAAGAGACCTAGGAGAG  
A\_16\_P02308668  
AAAACCATCTCTGATACTCTAATAAGCCATTCTGATTTTCAAATATTATCAGCAGTGCAG  
A\_16\_P15548924  
GAAGCAGGAAAATCTTCTAAGGATGATCGAAATCTCCACTCTATAAACCATCCCAATTAA  
A\_18\_P27284294 GTAGTGACCAGTTCCCCCAACCCTGACTCCCCTGCAGGATGGGGC  
A\_16\_P00685073 AGATATAAACTGCCAAGTCTGCTTTCAGACACAGGGAGTGTGCGATGTTTTTAG  
A\_14\_P116660 ACACACCCCAACACATTGGTTCAGCAAATACTAAACTGCTTCAAAAAGCAGC  
A\_14\_P108901 CCAGATCTCTACTCTGATGATGAAGTTGAAAACATCATAAGCAATGTGAGGAATGAAGTC  
A\_14\_P131472 AAAAATAAAATCAGAATATGCCCGCAAATGCTGGGGAGAAGAATGTTAGGCATTTTATTG  
A\_18\_P16319444  
TCCTTTTAGAAAATCCCCATACATTTAATAGCCCAGTTATAAACATACTGCCCATGTAGG  
A\_16\_P36234083  
TCCATCTCATCAAGCAATTTACCTGAGTATTTCTTTGAAACAAATAATATGCCCTCTCCA  
A\_16\_P16172199

AAATGAGTATCTTTTCAAGAATGAATGCTGACCTGAATATAATGTGGAATTACCCCTGGGC  
CUST\_493\_PI426210822 GCGCTCAAACATCTGTCTTGTGAAGTTCTGTTCTGCCTGCTTTCC  
A\_14\_P132247 GACGACGCAGTTCCACAGTCTGATGGAGTTTCGAGGAATTTATAAGTATTTAATAAAACAT  
A\_16\_P00881969

GCGGAACAATGAGTGTATAGTCATTTTAGGCAGCACTAAAAAATCACATGATGGAACATT  
A\_14\_P125590 TGGCAGAGCAATCTGCCGCACAACTGCAAATTAATTAACACTACACAGACTAAAAACTAT  
A\_14\_P104747 ATTATAGAGAAAACATTCATCTAAAGCAGCGATTTTGAACCCTAGTATGTTCCAGGCTCA  
A\_14\_P122916 TTACAATCCACTGAAAAGAGATAATTAAGTCACCACAACCTGGTCAAATTACCTTGTTTT  
A\_18\_P22839935

GACACACTCTTCATTATGTGTGGCCTCTAACATTTTTGTTATGCTCTACATAAATCTGCA  
A\_16\_P01198581

AAACTTACAGTTATCTGAGCAGTTCTTTCCATCTAGACATATGCCGACAACATAGCATTG  
A\_14\_P138838 CTTTTATGAATATTTAACCCACCTGGTAAAAAATGAGAATTGTATTCAGGAGGAGCATCA  
A\_14\_P123613 TCTTGGTTCAAAAACATTTGTTGGAGTAATTC AACATTCTTAAA ACTATCTTCTCCAGAAA  
A\_14\_P137376 TGTCTACTCTTCAGTAAGTGGTCAAAACCTGGCTACTGGAAGGAAATGCAAT  
A\_14\_P120334 TGCACTCTGAAATAAGTGATTTAAAAAGAAAAACATGATACAGAGATCCCATCCTGACCT  
CUST\_4611\_PI426210822 TCTTCATTAATGTACGTTTATACCAGGAGCAAGTGGAGCTGGGGAGG  
A\_14\_P136532 ATGTGCCTCTTAACTTTTTTAGCCAGTATTTCTAAAGGAGACTTCAGATTGTTCTACTT  
A\_14\_P201539 TCCAGGAATACATACTCTCTTTTGGCCTTTCAGAAATCATTTCCATTCTTTCCCTCCTATA  
A\_14\_P109141 CGACAGTGTAAAAACCTTTCAGCATTTTGCCATCTTGTGACAGTGTTTAAGTATTCAAACA  
A\_16\_P15485301

GCAGTAGCACCAATGATCAGTATGACTACAATGCCTTATCTTAGCACAAGGACATTTTTTA  
A\_14\_P121837 CTAGTTGATAGAACTTAGCCTGTTAGAACTTGAAGTGGTTTTGAAAAATCAAGCCAATCC  
A\_14\_P112107 CTCAACTCTCAGGAGGGACAAGAATTCAGTATAACCTGCCTAGTGGATGA  
A\_14\_P133500 ATAAAGGATGCACCATGTTTTTGGTTGCCTCTAGGCTGGAATTTAAAACAAAAAACA  
A\_14\_P129464 TATTATTTAGACATCCTCTTTTACCCTTTGAAAAAGGGACAAGAGAGATTGGCATTCTTT  
CUST\_6198\_PI426210822 CCAGCACACAAGTTCTTCCAGGTTGGGGGATTTTATGTGTGTACTT  
A\_18\_P15061629

CAACATTGAGACCTACTAGAAACAACAATACCTGCTTACATATGTTAATTGTTTGCCCA  
A\_14\_P137419

ACAGGAAAACAGGACATAAGTCTGCTTTCCTTAAAAGAAAAAAGTTAAGAGACAGGACAA  
A\_16\_P21598965

AAAAGGCTTAATTCATGAAGTTGCTATAGGTTTCTCTTTCTCAAAGTGCTCACATGAGG  
A\_14\_P123059 TAAATCTTGCCACCTATTGGTAAAAAGGAAGAACTAAA ACTAAAAGGTGTTTGCCGTTCT  
A\_16\_P03638830

GCCAAAGAGAAGTTCTTTATAGCGATCAGATTGACCTAAAGAAGAGTTTTCCACATAAA  
CUST\_10221\_PI426210822 AACAGAGATTTGCCAGTGTCTTCTCAAAGCTCTCCCAAGGCACC  
A\_14\_P132574 GAGTGTCTTGATGTCATGTCTGAAGCAATGAAACCTGGAGAGAGCAAGAAAAAAT

A\_16\_P20891954

AAAATATACTACCCCTATCAAGGTAAGGAATACCCCTAAGCAAAGTAGTCTTATTGTGCC

A\_14\_P111001 AGTTAGTTAAAAATCTCTTTCTCTCATGCTTACCCCTTAATCCTTTTAGACCTCTGATGG

A\_18\_P14241953

AAGACAGATCATCGTTCAGTTCTAATGCACTAATTCATTTATGCTTCAAAATGGGCTTT

A\_16\_P01639919

CCCATGCTTTTATAAACCTCTGATACACTAACAAATCCAAAGAAAAATTGAAAACAAGCG

A\_16\_P01005510

ACAGTCAGTCTAACCAAACTACATGTATAGTATCACTTTAGCCATTTACATTATTCCAC

A\_14\_P118420 TGGTGTATTTTAAGGAAATAAAGCAAAGTTGTTTTGTTGGTGGGGAAATAAATTTGGGGC

A\_14\_P126923 CTGTTGTATAATTAGTTCTCTTCTCATCCACACCATAAACAGTTCAAGAAAGGGATGA

A\_14\_P128524 GGCCCATGCTAAAACCTTATATCTAGAAATACGGCAAAACAAAATGAAACAGATCTCTCCT

A\_14\_P124480 AGGATATACAAGATAAATAAATTCTTACCAAGTGTCTACCAAAGGCCAGGTTTGGGACTA

A\_14\_P200383 ATACCACATTACGGTGGGCACCATCATCAAAGATCACTCATTTATCAGATGCCTAATTA

CUST\_1046\_PI426210822 CCAACCTCCAGGCCAAAGGCAGGACGCTGATCCCTTGCTATGAAG

A\_16\_P16621450

ATGTTGCATTCTCAACCTTTCTTGATTGCTAAAACTTGAAATCGTTCACCATTAGTGCT

A\_16\_P01266554

AGGTGTGGCTATATTTCTCAGTGGCTCATTGATATTACTTCATACCAACTTGGAAGAAA

A\_16\_P01677114

AAAAAAACCAAAGTTGTAAGTGCTGATGTATAGGCACAATACTTAGGCTTCAAGGACATG

A\_16\_P18996053

GGCAATGATAACTTCATCCCTAGTTCATGCAAAACATACTCAGGAATTCTACATAGTGCT

A\_14\_P101365 TTCATTCGTTCTGGATTTTCAAGGTTCACTTTGAAGGAATGTGACAAATCCAACCTCAA

A\_14\_P111032 TAATATCTGAGGATGACCAGAAATGGTGAGATGTATGTTTGGCTCTGCTTTTAACTTTAT

A\_14\_P118091 CTGCTGAAAATTTCTTAACATTCAAGCCGTTTGGAGTAACTACATCTAGAAAGGCCAAAAC

A\_16\_P00511213

GCCAAAACACTCTTTTTATAGGTCAACTGTCTTTGATGAGTTTCCATAACCTACAGAACA

A\_14\_P112972 CTTAGAGCCTCTCAAGATATTCTGTATCCACTAAAACTAAGGTTGCTATGGAAACCATG

A\_16\_P19789155

AAGGCTAACCCCTGATCTTAACACTGTATCAATACCTTTTCTTGGAACTCAAAGACTCTAA

CUST\_5624\_PI426210822 TGTGTGATACCCCCAGAGAGTTGACTCCTAATTAATTGCTAGTTGGTC

CUST\_10373\_PI426210822 ATTGCCATCCTGGGTCAGGATGAAACGCCCGTTCTAAGTGAGAAT

A\_14\_P122012 AACACATTTCAATTATGTCTGATCATGTCTGTGAATTACAGGAAGTTCTCAGAAACCTTT

A\_16\_P39681866

TTGTTAAAGACATTTCCAGAGATACCTATTGCTGTCAGTTATATCACCTGTTCCAATGCA

A\_14\_P134727 TACCTGTGATTGTTAATAAAGTAAGTGGTAGGAGTGGGGCAGTTTTTCTCTACCTTTTAT

CUST\_8211\_PI426210822 CCACCTACCCACCCACCTGGTAGATAATCTGAGAAGTTTGTATGAC

A\_18\_P22840660 TCTTTTGAAAATACTGTGAGGAGCCATCTGGCTATTGACCACTTCTTCCTTC  
A\_14\_P108313 TAAAAGTGTATCTTGAGTCCCTCGTGCATCTGACCTCCTCCCACAAAT  
A\_14\_P112052 GTTTGGGTTATTCCAAGTGTGTCTTATTTAAAATTCCAACTTCAATCATGCCAGTCTCT  
A\_16\_P20844045  
GCAGGCCATTAAACTATGTTAACAGTCATATCAGTTATGTTCAAAATGCTGCTCCTTTGT  
A\_16\_P20800685  
AAATCTCATTGCCCAGCATCAATTACCTACAATGAAGTATCTCTTCCACACACATACTCC  
A\_14\_P111359 ACATAGGAGAGCGGTAACCTTCTGCTGAGCAAAAACCACATTAAACAAACATATTTCTAG  
CUST\_9721\_PI426210822 TTCACAGAAGGAGTGACCCCGAACAAGTATTGAAGGAATTTCCC  
A\_14\_P108041 CTGACAAATGTAATTCTGAGAGTCCCACACATTTCACTGTCTATTTCTGACATGATGAAA  
A\_16\_P00482788  
AGCAGGCTTTTAGATCATTAAAACCAACCTATCATACTATAGATGCTTCATTGCAGACT  
A\_16\_P36230593 ATAAATGTTGGGGTTACCTCCACATTTCTTTCCTTCTTTGGGACCCTATACT  
A\_16\_P17905375  
AAAAAAAAGTCTTCTGCAATATGACTGTCAGAAAATATGAAACCTCCTACTGTGCAAA  
A\_16\_P03456081  
ACGAGATCGAGATTATTAACCTGGACTTATGAACCATCAGAGAATGAAAGCACAAATTGC  
CUST\_4687\_PI426210822 GCAGGATAGGTGACAGATATGAAACGATAAATGTGGAGGCAGGGAGA  
A\_16\_P17126300  
ACACCCTTTCAATTAAGCATGTCCTCTGATCATTTTTCTCTTAAAAAATCAGTGTGTCCA  
A\_18\_P11518058  
AAAAATCTCAAGCCTATAGAATCGGATACAATTTAAACGATCCCCAGCATAATTTTGCCC  
A\_16\_P16191862  
TGCACTCTGTTCTTTGGGCTCTGAGAAACAAATCCTTTGGATTTTCAAACTATATTTAG  
A\_14\_P109940 CTGGATGTGTAGGTGAAAGAATTACCCAGATGCAGAGACTAACAATATTATTACCACAG  
A\_14\_P119377 ACTCTTGATGTTTTCTCATTGGAAGGATAGGCAATGAGATCAGAATCAGATTTAGAGACA  
A\_14\_P113683 CTTCAGGTGCAGGATATCGTCAAGCCAAACACAGCACATACTTCATCATAACA  
A\_16\_P21453370  
GTAGAAAATACAGTATCCCTACATAGTTGTCATCCAGATTCAACGTTTCAACACTCTGC  
A\_16\_P00685422 GCCTCTGGCATTGTTGTAACCTCAGGCACCTGAGCATAACTAGTGAG  
A\_14\_P117693 GGTGTCACTTTTTAAACCACTGTATAGAAGGTTTTTGTAGCCTGAATGTCTTACTGTGAT  
A\_14\_P113851 CTATTTTGAAGATTACCTACTTCCCTTTATCTTCATTGGAAGATAAAGTCCCATCACCAG  
A\_16\_P01184948  
AACTAAGTCAATCTTTTCCTACAACCTCAGCCTAAACCAACATCCAAGAGAACGATTTTT  
A\_14\_P130184 CAAAGACTGACCAACTTACCACAGAAGGTTTCCTGGAATCTAGAGGAAAGTT  
A\_14\_P136190 ACATAAGGGACCCTTGGCAGAAAGAGACTTCAAATCAGGTATGTTTTTCTCTCT  
A\_14\_P105552 CTATAGTATTGCTTCAGTGCTACCAAAATGAATATGGTGGGCTTGGTAAGTGTTAATCTG  
A\_14\_P131515 ATGGTAGAATCTAGCCATGAATTGCATCTTCCCCCGTTCAATTCAAGTAGATTTATTATC

A\_14\_P125008 GAAGTGTTTTCTTCACCTCACAGAAGAGATTACTTTTCGCTTTTTTCAACTATCAGTTGAG  
A\_16\_P20160706  
TGCTGCAACCTATAGATCCAAACACAGTTCAATACATCTTTTTTTTTCTTTGTCCAAACTG  
A\_16\_P16153938  
AACATGTTCTCAAACCTCATGTCTACTTTATAATGCTACCATCAGAAGTGATCAAGGACCA  
A\_14\_P104256 TCATATGTAGAGGCTCAAGCAATCTATTTCTTCCCTGGACCTAATTTTCATAAGTTTGCTT  
A\_16\_P39068704  
AAACCAATTACAGTTCATCCTAACTCCAACATAGCATAACTCCTATTAATGATCACTTTT  
A\_16\_P15822437  
GTTGCAACAACCAGTCATTCAATGTGTATCTTCTCAGTCTATTTTCAGCCTATTCAGTCTA  
A\_14\_P138321 AGAACTCAGAGTTCATGCCCCCAACTTTGACCTCTTTCTACTTTATATTAGAAGCATATT  
A\_16\_P16496247  
AAGGACGATTCTTTCTAATCTTTGGTAAGCCAGTTTTTACAGAATGAAATGCTCTTGGAT  
A\_16\_P03591623  
GCAGGGAGAAAACTTACATATTTTTGAAGTTCAAATCAACCACATGACTATAGGAGGGTT  
CUST\_9473\_PI426210822 AATGAGTGTTCCATGCAGACTTTTATGCTCTACCCACAAGATAAGTTGTCCAAG  
A\_16\_P00685251  
CTTGTTTCTTGGCTTTGCTCTTTACAGCCTCTTAGAACTTGAGTTCTATCTGGATTTCAT  
A\_14\_P114002 GACAGGGTGGAGTATTTGTTGTCCTTATGTTAACCTTGTCACCGTTTTTCAGAAA  
A\_16\_P00685389  
TGTCTAAGACTTAAGGAAAATCTAAGTGATCCAACAGAATATTATTAAGCACCATCCAAA  
CUST\_5559\_PI426210822  
AAAAAAAAAAAAAAAAAAGATAATCTTCCAGATGTTGGCTCAGTTTGAGGAGGAGGAAAGAT  
A\_14\_P137677 GTTAGAAATATGATTTTTTATTGATAGGCATGGAAAATAGGTTTGGTTGAGGATGGCGTG  
A\_14\_P127247 GATGGCCTAATTTCTGGGGTCGCTTTCTATTGGGCACTTCAAACAGT  
A\_14\_P139903 AGCATCACTATCTGCCTTGTTCACTTATTTGCTTATTGTCTTCCTTTATATACATGGTCT  
A\_14\_P118672 CTCGATTTATTTTTTAAATGATCTGCTTCTAATAGTGGATCTCTCAAAGGGCCGTGCTG  
A\_14\_P123380 CTAATTGGGTGAACAGAAAAGTAGTAAAAGGAATTCCACATACACTCTGCTTTGAAGGTAA  
A\_14\_P123466 TAATTTCAAGTAATTCTTGATTTTATGTTTCCCTTGTAGGGCACAAATTGGTGCTAGCAA  
A\_16\_P00685429 AAGAGATGTGAGAATTCCGTTGACACTCACTGACCACCTAGAAACCAGA  
A\_14\_P137889 GCGGCGCGTTTTAAATTTCAATTATTCGACCTCTAGAAATCGTCAGACACA  
A\_14\_P106101 CTTTTGCTTTTTATGTGTGATCTGTGTAACTTCTGAGGATCTTCTGGCCATTTGTATAA  
A\_16\_P16586819  
TAGAGAAGCCACTATTCCTACTTTTTTCCATGATTAGAATTACACAGACTAGGAGACCC  
A\_14\_P136518 CAGAAGATGCATGTAATAGATGCCACCTGGGGACTTTAACTGAGTTCAAATTAGTTTTTTT  
A\_18\_P15470971  
TCAGCGAATCTGTTATCACTCTTATACTTAAACGTCTTTCAAATTTACTCCTTTGGCATCT  
A\_14\_P125607 ACTTGAGAATTAGAAGAGATTTCTTCAGGATGCGCAATGCTACGATTCCTTAAAGTTCTA

A\_14\_P105029 AACAGAAATGCATTTGTAGATTCATAAATCTGGCATTTTTGTTTCAGCACATCAGGAACTG  
CUST\_3741\_P1426210822 CTTACCCTGAAGAGCTTTGGAGCCCACAGCAGAACTCCCAGCCAG  
A\_14\_P138301 CCAAGTTCAAAGAACCCTAGCACAAATTTGCTTTGGGATTTTCTTTTCTGGAAAAAAAAA  
A\_14\_P121588 CTGGTTTATTTACTAGTTCTGAGGATCAGTGTCTAATAAGCAACCTCTTAAGAGGATCA  
A\_14\_P133469 ACCTTTAAAGACTGTCTCTTAGTAACATAATTCTCAGACTGAAGCAATTTCTCATAGTCT  
A\_18\_P14841742  
CAGTTGTATTTTTACATTACCCCAAATACCTGTGAGAACCAATTAGTCTCCACAACCTTGC  
A\_16\_P15497637  
ATGAAGTCGTTGCTTTTATTGTTGATCTCTATGGACCTAGCATATAGCAGAAACAACAGG  
A\_14\_P125554 GTCCTGGATTATAAATATAACAATACTTAAATGGCAGGGTTGATCTGGTGACAGGTGTCT  
A\_14\_P131735 AATCCAGTTCTTCAAGCCATAAATGACCAAGATCCAAGCAATCTGAATTTGTTTTGTGA  
CUST\_4895\_P1426210822 CTTTTGATGGGCCGGCTATTCAGAGGTCAATGAAATAGACATGAGTACTCTT  
A\_16\_P16191651 GAATGAGTTTTGAAGGGATAGGAGTTGCTGGGTTCTCATACCAGCACAG  
CUST\_5906\_P1426210822 TTTTTCCAAGACTTCCATGATATTTCCCTGATAATCAAGGAAGGGAGTGTG  
A\_16\_P16336438  
CATTAAAGAACTCTCCTTCTTCTAAACACTCCAGATCTTCATTAGTTACTCCTAATCCCC  
A\_14\_P138504 CGCTTGTAGAAAAAGCCTTATTTGTTTGGTGGTATTCGTTATCAAAGTGCTGTTTATCAG  
A\_14\_P128833 GGCTTACTTTTCTTTGAATACATCTATTGCCTTGAGAATTCATTTTACACAACACACTG  
A\_14\_P130645 CTGTCAGGGTTACACTTATAAATTTGATTCAATCCTTGGCAGGATGTCTACAGCATTAT  
A\_14\_P133529 CTTTTGAAAGTCACTGTATAAACCAAGTCTTAAACTTTGTGATGTCCCATCTACTTCCG  
A\_16\_P15298869  
ACCACTACATTTTCACCCAAGGTTGTTCTAATAATCCCATGAGGTAGTAATAGTCATGAA  
A\_16\_P16191195 CTGTTGCAGGAACCTTTGGCACCTGCATACCCACTGACATTCCAG  
A\_14\_P107288 TGTTC AACCTTTCTATATACTCTGAGTTCTAACAGCATAACCCAAAAAGTTCAAGTCT  
A\_16\_P58424372  
TAAGTTATTAAGTTGTCTACCTTATTTAGTCTCAATGTCTTTGCAAAATGGGGAGGAGG  
A\_16\_P39161740  
ATGCCATTTTAAATCCTCTAACCAATATGTTTCACTATAACACACCACTAAACCTAATGT  
A\_14\_P111885 TTTTTGTTTTTGTCTTCTGCCAGGTGGAACACCTACATAATTTTCAATTTTGTTCGGTTTT  
A\_16\_P00759559  
AGGGTGATTAGAAGTGCATCTTTTTAACTCGAGGATTCTCAAGTATGCATTCAACTTACT  
A\_14\_P135420 GAAGAAGTTATTGCTCACATTACATTGGCTGTAGATCATCTCCTTGCTACAGTATTCACA  
A\_14\_P135690 GCCTCCAGAATTGAGGATGACAGTGAGGTAATGAGGAAATGATTTGAAAATATTATGGA  
A\_16\_P35867728  
TTGTTACCACATCCCCTATAAGAGATTTGGCTTTCCACTAAAAAAAAAATTTTGGTCCAC  
CUST\_9983\_P1426210822 TGGAGAACAAAGCCTGCTCAGTGTGGCATCTGAAAAGACAAGG  
A\_18\_P22843576 AGGCTAGTGGGGGAGAAAGATGCAGGATGGTGGTTTAGGGGATAC  
A\_14\_P121289 TTTTTTGCAGGATACAAGACCTCCTGAAAGGAATTTCCGGGAAGTTCAATA



A\_14\_P134505 CATGAGCCGAAGAGAGTTTGTCCACATGAAACCTACAAAGAATGAAAACCACTTTT  
CUST\_6302\_PI426210822 AACACCATGCTCACCTTTTCTCCTGCTGTCCCTAGGCTGAGCCTG  
A\_14\_P136309 ACATCCTGTAAGAATCACTCCATAAATAAGGACTTTTCTTACTAGGAAGGAAGTCTTCCA  
A\_14\_P133890 GTAGAAAAAAGGGTTATATGAAGAGTCACATAATGGTGCTTCATTGTCAACAACCAACA  
A\_14\_P129334 TAAATTCTTGGGAAGCCTCACTTCCTTGTTCATTTACAGATGTATGTGGAAGAAACAT  
A\_14\_P125305 CATGTTTAAAAGACCAGAGAGACAAGCATTTTGCCAAGATCTTCCAGGGAAGAT  
A\_14\_P134690 ATGACTTTGCACATTTTTGCTAGCAGATGGATTTTTATCGCAAGTAGCAGTATTCACATC  
A\_16\_P41003167  
CACACTCAATACGCACCAAACCTCTTAGATCTCAGATTGATTCTCACTAGTCATTTGAGAA  
A\_16\_P15685293  
AAATCTCACCTGGAAGAACTATGAACATCTCTTAATTCAAGATCCCTTTTTCTGTAGGC  
CUST\_7303\_PI426210822 ATCCCCCCCCACACACATAAATAGAGAACAATAAAAGATAACGTCGGA  
A\_16\_P18074862  
GTGAATGTAGGTTATCTCAACTTTCTGAATGACTGAACTTTCAAGGCAATCATCATCACT  
CUST\_7382\_PI426210822 GAACTGAGCTGGTTGGAGCTGGGGAGGGGGTGCGGGAGGTACTTT  
A\_14\_P114189 AGAACTATTCAATATGTTTTTGGAAACAATTCTTCATTGAATAGCCTGTTCCACACCCTGA  
A\_16\_P00231997  
AAACCAAAGGGCAGAAACATTTTTAGGAGAACATACAAGAGGGAATGGGAATTTGTATTC  
A\_14\_P128760 AGTGGTGACTAGTGGAAGTTAGCAATAAGAAGTGTTCATTCAAGTCTAGACTGAGAA  
A\_16\_P00684993 CGGTTTTGGGGAACCCCTGAGGAAGGAGTATAGCCTCTCCAGCGC  
CUST\_4935\_PI426210822 CTATGGATCCATGAGCTCACAGACTCCCCTAACGTCCATGAAGAT  
A\_16\_P58424101  
GGGAGGCCACTGAAATCAATTTTTGGGTATTACATTTTAACTAGGGAAAGATATGATCAGA  
A\_16\_P19951141  
CAACTGTCTTACCAGAGAATCATTGTAACAGTCAATCTACCAAAGGATTCTATGTTTGG  
A\_14\_P117292 ACAGAAATCTCCATTTTTTAACTACCATCAGACATGCTCTTTAAGATGTAGAGGAAACA  
A\_14\_P202120 CTGCAAATGGACTTAGATCTAGTAATCAATTCAACAGTCCCTGGTTCCATCAAATAACA  
A\_14\_P115072 TTACTTATATTTCTGCACTTAAATGTGCATCAAAGAGGATAGCAACATGGAAGGCCTGAT  
A\_14\_P115725 TGTGCAATAATTTATTTTTAGGCCTTGTTACTTTCTTCTTAACTCCTTTCTCTGGACA  
A\_18\_P14135911 ATAAATAGAGAACAATAAAAGATAACGTCGGAGGATGAACCCACGAGCGTGGTTTTG  
A\_16\_P15560511  
ACAAATAGCATCAGTTTGTTTTTCTCACTTAAAGTCTCCATAACCAATGTAGCCAATGAC  
A\_14\_P106687  
CTAGGGAAAGAGTGAGATTCTTCAGAGAGAAGAATGTAAAGAGAATAGTGAGACTGTAGT  
CUST\_9447\_PI426210822 CTTCTCCTCCATAAAGTGCAGTTGGCACCAAGGCCTCAGAGACAC  
A\_16\_P21048231  
AATAGATGAGTCAAATTGGTTTTCTCTTTAGGAAACGAGATAAAGATTATCGGGAGGTG  
A\_16\_P03698720

ACGAGCACTTTATACAACCTTCAAATATTTTCAGTTCTGCACTTAAGTTTTATTGCCACCC  
A\_14\_P102090 CTTCCCTCTCTCAGATATGCAATTTTCATCAGCACCAGAAAGTTTTGGGAAGTTTTT  
CUST\_1228\_PI426210822

GTAATTATGATGCCATGGTATGTTAGACCTAAATTGTGGAATCTGGCTTTACTACTCACT  
A\_14\_P107920 ATCTCAAACCAAAATGATCATATGCCTATATGGATATGTCCTGAGTGATTTGCCACATA  
A\_14\_P135917 TTTGTATGTTAAAATCTCTTGGGCTTTACATTCCATGGAAGAAATTTGGGAGATGCTCA  
CUST\_5043\_PI426210822 AACTCCAGATTCCCTGCACTGGAAGCTGGTGTGTTTTGTGTTTGGAA  
A\_14\_P137658 TAGACAGGTTGGGAGTATTTAAAGCGCTTTACAGTTTGCAAAGTAGATTCCTGGTC  
A\_14\_P100403 TTAATCTGATGGAGGTAATGCTGTCTGATCTATGAAAACAATCTTTCTACACCCAAGAT  
CUST\_2356\_PI426210822 ACAGTTTGGGGGCCACAICTGAGTCACAAGAGCTGCCCTAGGCTG  
A\_16\_P17054199

AATTGCGTCATTATTTGGGTCATTGTCAAATCAATGCTTTAGTTCTCCATATGTTAGCCA  
A\_14\_P201308 CTTTTGTTACCTCTCCACTCTGTAACCTTTAGTTTCTGCTCAGATGGGTAAGAAGAGAG  
A\_14\_P120702 GCACTTATTAGTATATGATTTTACCTGTGTGCATGATTCAGGGCAAGATCTGGTTTCCTC  
A\_18\_P13866063

AGAGCCCTATCTTCAGATTCTCAACTTTACGTTAGTTGCTTAGCCATATATGAAAACCAA  
A\_14\_P100386 AGTCATACTATTCTCTATGCACACTACTCATACCCACGTCTTGACTCTGTTTACATCTTT  
A\_16\_P40072912

CCTGTCCTCTATCCTTATCTTAATCTTTCCAACCTACTATTATGCTCCAAGAGTGTTACC  
A\_16\_P02042485

AAGTTGCCGAATTTCTGTCACTTATTTGTTCTGTCTTCTTTTAAGTTAGCCCAGAATCTC  
A\_14\_P138465 GAAATATGTTACTACAGGAGTTTCATGAAAACCTTACCCAGAAATTGCAGCAATGCTTTGC  
A\_14\_P112673 TTTACCAGTCAAGAAGTAGTGCTGATCAGTATTCAAAAGGTTTCACTTTAACCTACTCA  
A\_14\_P131389 GTAAGTTTGTATAGAAGTGAGCAAGAATGATCGTGTGCATTTCTTCGTAGTGTTAGCAC  
CUST\_10213\_PI426210822 AATGGTGAAGCAAGCACTGGAAGGTTCCAGAAAAAATGCAGAAAAACATTGA  
A\_16\_P18842587

AAAAACACTAGTTACCACTTCACCTAGAACTCTTTGCTTATATCACCAGAGACTTAGAGG  
A\_16\_P00685250

TCAGATGGGAAGATTTCTGAATGCTGAATAGTTTGTAAATATCCTTCAAAAAACCAAACCA  
A\_14\_P136494 AGAGAATATCTCTCTGTGTTTAGATGAAACTGGTCCATTTGCTTCTAAGTGTTCTTACCT  
A\_14\_P202066 AGACTGTGTTGTTAGTTATCCCTCAACATCTTCTAAGGTGGCAGGAAATAATATTGGAAA  
A\_16\_P19366241

ATTCCTCATTGCAATATTTTCTGATCCCCTTATTACCTTTCTTAGACACCCAATACCAAC  
A\_14\_P128608 GCCACTTCAACATATACTTCAAATGTGGTCTCTGGATTCTGCCTACAAAAGAAACAGAT  
A\_14\_P122532 CATGTAAACATCCGGGAGGTCCTCTTGAAAATAAAATTCAAAATGTGTCAACATTTGG  
A\_14\_P133288 ATGTATCTTCCCTTGACCATCTTATCAGATATTATTTTCTAGAAGCAAGTCTGCTGTCC  
A\_14\_P125167 TTGAGGAAGAAGATAAGGGCTCTGTGTTTAAAGTATTTTGGAGATGAAACAGAAGGCACATA  
CUST\_8156\_PI426210822 GATCCTGCTGCTTTTGCAAACTGTGGATGCCCTGAGGGACTGAT

A\_14\_P138052 TATAATTAGATCCAAAGAAGTGGATGACAACCTATAGTTAGGCACAGGTCTGGAGTAGTG  
A\_14\_P131454 TTATCACTAACAAGAAAAATGACCAGATTAGATGTTCCATGCATCCTGATGTGATGTGGC  
A\_14\_P128096 TTATCCTACTAAGTTAATTTTTCAAACCCTGGGACTCTATACCAGTCTTCATTAACCCCA  
A\_16\_P17754046  
ACAGGCAGTAATTCTACCATGTTTATTTTCATACCAAGACTATTGAGTGCTATTGAGGGC  
CUST\_4051\_PI426210822  
CACCTCCAACCACAATTCTTGTTTTAAAAATGAAAATAGAGTGAAACAGAAATGGTAGA  
A\_14\_P111314 TGGATTCAGACCCAAGAGAATAAATTCTGAAATGATGTCCAGCAACTGTTGAAGACT  
A\_14\_P103748 AGTTCTGTTTTGAGAAACACTACAGAGGGCTTGATGAGATGTTGGCCAAATCT  
A\_18\_P22841554  
TATTATTACTTGCTGCTGAAGTAGGGAGTTGGCAAATGGGTGCTAAGTTCTAGGTAAA  
A\_14\_P118221 TATACTCCAGCAGTATGTCTATTTTTTAAGAATGGTTTGACATTCAGGATAGGCCAAAGCA  
A\_14\_P115247 ACAGAATTTTGAAGATTTTCAGTCTAGTTGCCAAATCTGGCTCCTTTACAAAAGAAATA  
A\_16\_P18070040  
AGTTTAGTAAACAAAGGCAATCAGGATTTTCCAAGCAAAGCAATTACCATGTCTAGCAA  
A\_14\_P125473 CTGAATCTCCCCAGATGACTTAATGAGAAAAAACTGCTAAAACATGGTATTCATATGGG  
CUST\_8193\_PI426210822 GATTCAACTCTAAAGTGGAACAGAGAAAGCCCACTGCTGGACAGC  
A\_14\_P201628 ATACTTCCGGATGGTAAGGGAGATGTTAAGATGATTTGTCTTGAAGAATGGTAAACTTTT  
A\_14\_P108918 CCAATTAAGATCATTATTACAAGAAATTTCTGCAGCAGGGTTCATTCTGCCAAGCATT  
A\_16\_P21427302  
GGCTCAGTTCCTAATAACACATATCAACTCTCTATGTAGGTCACTCTTGTTTCATTAGTA  
A\_18\_P14042474  
TCACCTCTTCGCATATTATCAAACAATCCACATTTGACTTCATAACATTTTGAGACAGTC  
CUST\_8568\_PI426210822 GCTGTAGTGAAGAGGCGAGAGTCCCCAGATACTTGTTTCAGAGGC  
A\_16\_P01020318  
TCGTCAATGTCAAATATTGAACCTGTGAGAGTAAAGTTATGTCCATATGCACTATGAGACG  
A\_14\_P109207 AAGTTCAAAAACGCCGACCTGAAATAAGTAGGTGAAGATTGTGTGTATGTGTTTAAAAACA  
A\_14\_P116654 CTTAAGGAAGATGTTAACACCTGTAATCCACTAAGGAACTGAATGGCAATTTGCTCAATA  
A\_14\_P107209 CTTGTATTCTCAACGGAGCAAGAAAGCCTGTAATAAATACCTTTGCAAATACAGAACT  
CUST\_6217\_PI426210822 CAGTAACTGTGGCAACCATAGAAGAGGCTGGCCACGTGCTCATAG  
A\_14\_P122415 ACCTGAAGATATAACAACCTTCCAGCACATCTAGATCTGTAGTTCTGTGCATTTGATCAAT  
A\_14\_P131764 TCACTGAGAATTCTGTCATCAAAGGTTTGGTTTTCTGTAGGAATGAAAACACACAGTATC  
A\_16\_P18865739  
AAACCTTGGGACTAGATTTAAGAACTTGAGCATAACACCAATTTGACCTCATTGAGTAAC  
CUST\_3330\_PI426210822 AAGCTGGGCTTTGGAGACCACGCTGGAAGTCAGCTCACTGAGTGT  
A\_14\_P130897 CTCTCCAGTGAATAAGCAACGATGAGTGTTAGGCTGTTTATTCAGATACCCCTCAC  
A\_18\_P19542417  
ACACACATATACCAAGGTCAAGTAGACAATAGTAGTGGTAACCATTTATTCAGTGAACCA

A\_14\_P100136 ACACCCATTTCCAAAAACAATCTGATATGGCTCATTATAAAAAGCACAGGTGCAGTAAAA  
CUST\_8084\_PI426210822

TATGCCAAAGCATAGATAGGGTAGACTTCATTCCCATTGCACAAAATCCAGAAGG

A\_14\_P118052 AGTCCAGTGCTTTTTAGTATAGGTATTGAGGGCTATGCTTTGACTTGAAATTCCTGTAA  
CUST\_5558\_PI426210822

TTTTCTGATTATGGGGAAAAAAAAAAAAAAAAAAAAAAAAAGATAATCTTCCAGATGTTGGCTCA

A\_14\_P111558 CTGCCATCCAGTAGCAGTTAGTCTTCATCCCCACGTGAACAAAATG

CUST\_7306\_PI426210822 CGAGCGTGGTTTGTGTGGGAGGATGCTTGATCCTGGGCTCGCAG

A\_14\_P139535 CTTATCTTTCAAGAAGTAGGCTAAGTCCCATACCTTCTTAAAACCTCCTCAGACTACTCT

A\_14\_P109094 ATTCAGTACAATCATACTTAAAAGGGAATATTTTTGTTAATGTTTCGGAAGCCCTCCACA

A\_14\_P107200 CTACCAAAGAATCACATTTACATAAGACCTTTATATGTATAGCGATTTGGGGAGAGAGGG

A\_18\_P14134377 CCCTGGGCTCACTTTTTGCTTAGAAAAGTCCCTGATGGAAAGGTTGAG

A\_14\_P101947 ATCATACCCTAACTGTATTCATCAACACTTAGAGTAAGCAAGGCTCGCTGGAGAG

A\_14\_P115887 CTAATTGGATAGTGTGCATTTGAGACTCTGTCTGACTTTCGTTTCATATCTTCTAAGGTCA

A\_18\_P10673427

AACACTAACGGGACCATTAGAATAAATGAATGAACCTAAGATCTTCAGTCCGACTTGATT

A\_14\_P128759 TAAGGCTGCTCCAGCAATCAGGAAAGGAAATGCTATACTTCACATAGAGAAAAATAGG

CUST\_9249\_PI426210822

AACGTGTCTGTGTTCAAACTCATAAGAATGCTTTCAGAATGCAAAATTTAAGTTTGTGG

A\_16\_P02835850

CAGGCACATATTACAGAAATAGGAACATAGGGATCATGATGGGAATTTGAAACTTGTTGA

A\_16\_P31273322

AGCCTCCAAAAAGTTGTGCTAGTGTGTGTTTCAGAATTCATTAATAATCTATCCAGCATTTC

A\_16\_P15504834

GCCACATTTCTACCTCTTATCTCATGAAACAAAACAATGATTTAAAGACTGGGCTAACAG

A\_18\_P10011464

AACAAACAAGACCCATTCAATTTCTCCAATTATACCTGGAGAGTAACTTTTGCTCACTC

A\_14\_P132686

TAAAGGATTGCAAAAAGAGAACACAGAAACATGACAGAAAAACAGTTATTGGTCTCCAGAT

A\_16\_P02629619

AACCAAATCCTACATGATTCTACCACAAAGAAGTTTCATTCCCATCTTTCTTATTTCGTGT

A\_16\_P19460107

CCCTAAGAATATAAGGCTAAACTTCTGAAAAATCCTGTCTTATTTTCAGTTCTCTTGGACC

A\_14\_P101731 ACACCAGCACAGGTATCAACACCCCCAAGTTCTTTTACATCCCAAA

CUST\_9649\_PI426210822 TACTGAGGCCACAGAAGAGGAAAGGACCCCTGAAGCCAGAAACT

A\_14\_P200316 CTGTCTTTAATGACCTGACTTCCATTGACCCTGTGAGTTCCTAACAGTAG

A\_14\_P100908 GTTTTGCATCTTACGCTACAGGTATTTCAAGCCAACAACGATGCAACTGAGG

A\_16\_P00932436

TAGACATGTAGCATTCTATCTTTAGCCCTATCAAATTCTCAGTAGATTTCAATCCATGCC  
A\_16\_P37209144  
AAATTAATCCTGCTACAGGATCGTATCTTATGGGGAAGAGTTTAGAATCCAGTCAAGACT  
A\_14\_P122405 TTTGTCATTTTACTTTTCATGAAAACCTTCACTGTTCTCCTTAGAGGCTCCATATAGAACC  
A\_14\_P111441 TACCATGGAGAGATGCCTCTCTTATGTCTTCAGCCACTCACTTATAAAGATACTTATCTT  
A\_16\_P17414202  
GCTGTATAATGACTCTCAAAGTCTTGTGTTTTGTAAGGTAGCATCTCTCAAATCAACCAGG  
A\_14\_P113295 ATCATCCATGTTTTCTGAAGGCTGCTGTAAAAATGCAAGATACTCTTCACTGGTGAC  
A\_14\_P128499 TTCAGAATCCTCCTAAAAAGGCCCCACTAGTGTCCACAGTGATTTATTGTATATTAGAAT  
A\_16\_P21525978  
GCATTTGGATGCTCTGAAAAAGTATACTTGTCAAGGAATAAACATAATGGGATGGCAGT  
A\_14\_P121921 CCATTTTGTAGTCAGATTCTAAAATCTGCCACACCTCATCTACTGAAAGGATGTAGAAT  
A\_14\_P134465 GTGAGACAGCACTTTAACCCTAGATGCAAGAACTTGGAAATTGATTTGTCTTGTAATG  
A\_14\_P113816 TTGGGTCGTCTGCTTCCCTTGATTTTTCTTCCTTTTTTTTGTAATATTGAAAACGACGAT  
A\_14\_P114603 TGACCCATGCTGTCTAATAGGCTAAGAATAGGGATGTCGTATGTCTATTGTGTATCAAAA  
A\_16\_P00685514  
TTCCTTGAGAATTGTCTGACTACTTATTTATTGGTATAATGGTTGTTATTGTGGTTGTCC  
A\_16\_P00640991  
CCCTTATTCTTCAAATCTTTTTTCTACGGTCCACTTACATTTTTTGATAGCAAACAGCCT  
A\_14\_P135590 CTGTTCTTCTAACTTCATCAATCCAAGACTCATAGGTATTTTGGAAACGAACTGGAAATTC  
A\_14\_P128692 ATGACACCACCAAAAAGAAATCCAGGAAGAAATAAGACATGAATTTTCTGACTGATCTT  
A\_14\_P121307 GGCAGTATAGATGCTTTTACTCTTGTAAGTAGGAGACATTTTTCAAGTTGTGTAGCCATG  
A\_14\_P124981 CTGGGGATTTTATCTGCACATTTCTGAAAATCTTACTCTTCAGGGAGGATGCTAG  
CUST\_8865\_PI426210822 GGTGATGGGTTGTTACCAAAGTCGATAACAGGAAATCTCACTGAGGATAAAC  
A\_14\_P116620 ACCTGAGATTTCTTCTTTTTGATTTGGATTTTGAAGGATGAATTAGTTTACTAGCCAGAGA  
CUST\_7640\_PI426210822 TTTCTTTGTCCTGCTTCTCCAAATTCCTCAAGTGCATGGGTAATCA  
CUST\_3040\_PI426210822  
TCATATTTCTATAATGAAATACATACCTATCTATTTACTTATTGACTCTGAAATAACAGA  
A\_16\_P20013060  
AAAAACCTCACTAATGCAGTATTCCTTATTCCCAAATTTACTTGTCTCTGCTAATTTAA  
A\_16\_P18225623  
CACAGATCACAATCATTATCATACTTCTTCTTCGCATCTCAGATAAAACCTACCCCTTC  
A\_14\_P129415 TTAATTGGAATACGGCAAATTTCTGAATTTTTCTGCCGTCTCTATTCCAACCTTCAGAGTT  
A\_14\_P128103 TACAATCTCATTGTCATCTCGTCTTCCAGAAAACCTGAAGAATGAAAACCCACC  
CUST\_5248\_PI426210822  
ATTTTAAAGTAGCTTATAACATTTTAACTGTGATCTTATTTATTATGAGTATAGAGATAA  
A\_14\_P111597 TTTTTCTGAAGTTAATCCTACAAGATGGAAGGAATACACTGTTTCTTATGCCTCTACCCA  
A\_16\_P15800463

AAGTGGGACTATTCAAGAGATAACTATCACACACTTGCAAATTATACTATGCCTTGGTGC  
A\_16\_P00732865  
GGAGCAGAACTCAAATTACTCTACCAAACCTGAGCATTATCAATTATTTTTGACCCACCT  
A\_14\_P102082 CCCCCAACTTCTTTCCCTCCAAGTTCATTTAGAGACATCTCTAAGTAAGAGATCTTTTAAG  
A\_14\_P139367 ACAGATACCCCTTTCCCTGGAACCTAGGTAATTTTTTTCATTTTTTAAGTAGGTCAAACAG  
A\_14\_P104842 CTGTTCTTAAAGAAACCTCATCTACAGCATATCTGACTGACACACTTGCTAAACTAAGCA  
A\_14\_P110930 TCTGACCAATACCTTTGCTTTTCTTCTCCAAGTATCCTTGCTTGATTACGTTATCAAGTT  
A\_14\_P123980 CCAGTAATAAATTGAGTATCAGATCTAAACTGCTGCTAAGTGTTTCAGTTTCTCTCCCAAG  
A\_18\_P14133798 TGATTACAAATATGTTATACCTTGCACCTGTGTCCTGTATGTCTGTTATGTTTATTCTGA  
A\_16\_P01006409  
AAAGTGGGAGATGAAGTATACCCAGTTCCTTGACAATCTAGCAGCAGATAATTGATTTTGT  
A\_14\_P125629 GATAGAAATTTCTTTCTATTTTGTCTCTCCCTCTCATAGCCTGAAAGAACACGTTAAGT  
A\_14\_P106685 TATATTCCTGATATTTAACAAAGGAAAAAAATTCTGCAGGGGAGAAGTTTCTGAAAGAT  
A\_14\_P134391 ATTTGGAGGAAATGGGGGAATTAATATAATACAAGCCTTTTGGAAAGGTAAGTTGCGTTAA  
CUST\_2901\_PI426210822 TGTGGTATTTATCTGCTGTCTTTCAGCTACATGACCTGCTCTCTGA  
A\_16\_P40225498  
GAATTAAGAAACTCATTACCCTTATCTACCTACTACTCCTACCTTATCTCATGTTCC  
A\_14\_P105425 CTGGGCCAATAGCACATACCTTATATATGTTAGTGACTACCATGATATGAGAAAAGACGT  
A\_14\_P103353 CTGACAAATATCACGTGGTCTCTGGGGCTGATGATTATACAGTTAAATTATGGGATATTC  
A\_14\_P101587 TTTTTGTGTCTGTCCCTCTTCCATATTCTCTTCCATGGCTACCTTTCTTCAGTA  
A\_14\_P104480 TTTTCTGGTTTTGTTTTTCCCTCAAACAGGAAGGGGATGATTATGAAGTCATTCTTAACA  
A\_18\_P14133479 AGCCTGATGTAAAGTTGAGGAAACGTGTGTGGTCTCATCGTGGATAGAATAG  
A\_16\_P15832675  
AAAACCAATCAACATATTCACCCTTTGTTACCTAACATCTTACTGGGTTTTAATCTGGCC  
A\_14\_P136173 TTAGCATTTATTATTCTTTCTAGTTATGTGACAGGCACTGGCTGATGACAGTGACTGTGC  
CUST\_5266\_PI426210822 GTGCCAGGGTTCCAGGTCCAGCTTTCTTCGGGTCATAGAGTGAG  
A\_16\_P20034311  
AAAAATTCCAGAATCTACTATGTAAAGGCTTTGACTTAGTGCACCTATGAATGGCAAAGGG  
A\_16\_P21543827  
AAAAAACCTCACTCATGTTACTTTTACCCCATATCAAGTCCATTCAACCTAAAATGTGT  
CUST\_10189\_PI426210822 GTCCAAAAAAGGAATTTGTCCAGGTCCTCAGAATCACTGTCTAGGA  
A\_14\_P200028 AAAAAGATCTCATGATAAGGAGGCAAACGGGAGAAGCAGAGGAACAAAAAAGAG  
CUST\_3193\_PI426210822 ATGAGGGGCTGGGCCTGCTTTGTTTAGGCTATCTTTAGGTATTTTTTTCTT  
A\_14\_P109712 CTTACGCCCTCTTTCTATTGGAATTAGATGATTTCCCTTGGTTCTTTCAATTTCTGAGATT  
A\_14\_P116763 GAACACTTTGGCTTTGAGTTCATTCCGCTCCTGAAGGATCTGCTC  
A\_14\_P127805 TTTATCACTGAAGATGTTTGTGGATTCCAAGATAAGCAAGAAGCATTGGTCTTGTCTTTT  
A\_14\_P101152 CTTCCAAACGAGACATCTTACTTCAGGTGGTAACTAGTGAAGACCGTTTTTATTTTGTAA  
A\_16\_P20075819

CAGTTAGTCTACAGCAGATCTTGTAACGTTTCGACTGAATTCTAGTTCCACTAACGATAAG  
A\_14\_P131951 TGGTGCTGTGTGATACATCCCTTATTCGTATAAAGGCTGCATTTCTTTTACTTTGTTTTTC  
A\_14\_P125987 TGGGAAAACACATTATGTAGCACTGAAAATACCTGTTCTTTTGTGATGCTCTGCAAGTAA  
A\_14\_P110841 GCTATGAGTTAAAGAATGCAGGATAGAGACATAGAGTGATATACCCCAAGGAGGTAAAT  
CUST\_8870\_PI426210822 CAAGGACTAATTGTGTATGCTTCGGAAGCGCAAAAACAGGAAAACGCTTTT  
A\_14\_P138983 AGTAACTGACTATTGAGATCATGGTCTTCTTGGAAAGGAATAAATGTAAAAATGTTGCTCA  
CUST\_6898\_PI426210822  
TAGATGTTTATAGTCATCTTGGCCTGGCCATTAAGATGATGAATGAACTTGCTGCT  
CUST\_7992\_PI426210822 TGAGGGTGGAGATAAAGGAGGACGACCACAATCCATGGACACTAT  
A\_16\_P01834550  
AGCACACAAAAATGGTCAATTTTATGTTCTGTTTGATTACAAGTATGTCCAGATCAGAGA  
A\_14\_P135963 AACGCCACCTTTTCTCTTCACGATGGTAAATTAAGCCAATAAAATACTTCTCAGCATCAG  
CUST\_3690\_PI426210822 ATTCTGGATGTGCCAGCACTTTTCTACTCATCCCCAGTTATGGAAT  
A\_16\_P18211403  
AAACCCATCTATTTTCAGATTCCAGTTCCATAGTTAATCATTCAACAGGGGCTATTGCTAAC  
A\_14\_P202231 CCTGCATATGTTTCAGAAATGTGCAGAACAGAAATTAAGTGAAAAAGCCAGAACAGATACT  
A\_14\_P135732 AGACAACGTTGATGTTTGGTCTAGCAGTGTTGCTAAGTATTTTAAAAGCAGCAAAGAGTA  
A\_14\_P124425 ACACCATATAAGCACCAGTTTCGAAGAGCACCGAATATACTTCATAATGAAAAGAGAAAAG  
A\_14\_P114624 TTGCAAATGCCAAAAGGGCTAACAAATGATAAGATACTTTCACCTCCAGAATTAATCTCCT  
A\_14\_P133887 CTAAGCATTGCTTCACCTGCTTCAAGGCTGCCTTTCTAGACTTTAAAGACTTG  
A\_14\_P110079 TTTTAAATTCTGGGTGCAGAGGAACACAGATTATCAAATCCAGTTGGTATTTCTTATGCC  
A\_16\_P15753693  
CCTAATGTGCCAATATACCAATGATGAAACCATTTGCATCTGATTAACCTCAAACCTCTGA  
A\_14\_P137553 AAAGCAGGCAGAAGAAATCTTGAATGCCATACTACCCCAAGGTAAGAAAGTA  
A\_14\_P117077 CTGCTTCTAGAAATTTCTCTCGTATTCTATTTCTGACATAGAGATTGCCCATTTTTGGT  
A\_16\_P01862000  
AACTCCAGTGATCTTTGCTTACTTGTAAACATTCCCTTATTTGCCCTTTGTGTTACCATTT  
CUST\_8364\_PI426210822 TTAGAGCTTGTTTTTGAGACAGTAGAGTGATTGCTGTGAACAGCACCTCTG  
A\_16\_P00685074 AGAAGAACAGAAGACCTGCTGAAATCCAGGCTTTGGGATTTAGAACCTG  
A\_14\_P129753 CTCCTTGTTCTGAGAGTTTATAACTAACTACCTGGGTACTTATTGTTTCAGGTAACAA  
A\_14\_P110864 CACTATAATATATGGGCATTACTGAGAGATACTGCCCATATGTTGTCCTCGTAAGCAAGG  
A\_14\_P120797 GCGTGGACAAAGAAAGGATCCTCTTAACTATTTCAGGATGTGATGGTAAGATCAGTT  
A\_14\_P137898 CAACTAAAAGATACAGAGCCTTCATTACAAACATACCTTTTGTGATGTGAAATGGCAGTCAC  
A\_14\_P108257 TGTTGCTTAATAGGAAGCAGGAAAACCTGGCGTTGATAAGATAGGAGATTTTAGTCGAAA  
A\_14\_P121590 CCAGACACATGCACGGTCTTCAAGTGTATTCTCCGTCACCTCAG  
A\_14\_P130342 CTCTTCTGACAAACAGTGACAATTCTGCGTGAAATAATTCTAGATTTCAAGACACAAGT  
CUST\_438\_PI426210822 AACACATATATGAGGCCTGAGTTCCAAGGGGATCCAAAAGCATCTTCT  
A\_16\_P02845549

AGTTTTAAAAAGAGTGTGTTTACTAATGTGAAGTGAGGCTTAAAGTTCAAGTGTCTGCA  
CUST\_2821\_PI426210822  
CAAATGTTCTACCTTATTTAATATGTTTCATCCTTCTTGGCTGTCTCATTGGCAATTTCTC  
A\_14\_P102923 CTAGCAGACTACAGGACTCAGAGAAAATAAAGTAATTGACAAGGAGGTTCTGATAGTCAA  
A\_16\_P02597768  
CATGCTGAGTCCCATAGATTCTTGACTTTTTTCATAACTGCAAAACATTACACTAGACCAG  
A\_16\_P21436291  
AAAAAATGACTATCTCCCTTTGGTCAATCTGTAGTGCCTAAATTTGTTGAAGGCTGTG  
A\_16\_P16106731  
AAAGCCCCCTGATAATGATTTACCAAAGGAACAGAAGTAGTATTAGACAAAAATGGCATC  
A\_16\_P01760990  
CACCAGACTCAATAGAAAAACCCAAAAAACTTTTAGATGTAAAACCTCCATGACTTCA  
A\_14\_P113141 AAAGACATTGGACGTTCTTTCTAATTTCTGGATATCAACCCACGGAACCACAAG  
A\_16\_P21429110  
AAAAGTTTTCTAATGTATCTCATGATTTGCAACAGGAACTAAAGTCAAGTGGCTCTCAC  
CUST\_52\_PI426210822 ACCTTGAGGAAATCACCAAAGATGTTTCAGGAGTCTCCCTCTGATG  
A\_14\_P126341 AAAATACACATTCATGCTTACCCAATCTAAATATGGAAGGACCTCATGATCACTTAAGTT  
A\_16\_P21070976  
TCAGTCTGATCAGTTTATGCCTCTTCAATCCTCCAATAGTTACCTTTAAGATGAAGTGAA  
CUST\_3654\_PI426210822 CTATTCTCAGAGCAGAGAGCCACGAATGGGGCACTCGGGGCCGTG  
A\_14\_P202475 CTTGACGAATACGCAGTAATTATTTTGCAGTTGAGTTTCTTCATTGGCAGAAAATATGC  
CUST\_4734\_PI426210822  
AAATAACATTTTATGTATTTTGCATGTTTCTCATAAACTGATTGTGCATTCTAATTATTT  
A\_16\_P02832735  
TCAGCACAGGTTATGAAATGACAAAGTATCAACTATACCAAGAAACCTATATCAGGGCTG  
A\_16\_P00815132  
AAAAACTGGGGTATTGATCATAAGAACTTGGAAAGACAAGGAGTATACTTCAGAATGATCC  
CUST\_7726\_PI426210822 CATATTCGTGGTCAAGTAAGGCCAGAGTCTAGACTGACATCAAATGCTTGTATG  
A\_18\_P22842642  
ATATTGTGGAAGGTAGAACTGGAAAACAGCAAAGAGAAAATGGTTCCAGAATAATTGGA  
A\_14\_P138324 ATTTACACCTTCATGTGGAATATGATCGTCTCAAATGTCTTCTAGATGCACGGAGTATAT  
A\_16\_P20812079  
AGATCTTGGCTATCTTCCATAACCATTCCCTAAATGACAATAAGAGAATGTTCTACGGAA  
A\_16\_P00685092 GGAAAGACTGAGTGAACAGAGGAATGAACTTTGGATCTGGACCTTTAGG  
A\_16\_P02771712  
GCTCAGTGTCTATCTGTTAGAATCACCATAGCCTTTATAATCACACCTAAGATACAGATCC  
A\_14\_P118601 GAGCCACGGACGTCAGAATGTAAAATCTTAGAACTCAAATTCACCTAGTTTTTAAAAGGT  
A\_14\_P128867 CTCTGGGTTGATCCAACCTTTGCCAAAATAAAACTTTTCGTAAAGATCCATCTAAATTAG



A\_14\_P118391 TTGTTGTGCAAATCCCCAAATTTCTCACTAATTTTTGTTTTTTTGTGCATAACTTGGATG  
A\_14\_P130100 TGGTGCTTCCGCTTTATTCTGATTAACCTTTTGGTTACACACATTGAAAAATGACCTAAGA  
A\_14\_P103203 AAAGAACTACAGCAGATTCTCAAACCACAACATCTAAGTCATTACAGAATCAGTCTCTG  
A\_14\_P136535 CAGGGAACGTCTAATAATGGAATGAACTTGTCTGTAAACATCCAGTTTAGACATGCATC  
A\_16\_P00685086 ATCAAAGTGCTGAACCTTACGGACAACACCTATTTAAAACCTGAACGACGAAGTGAT  
A\_18\_P22842487 ATTTGTTTAGTGGTTGGGGTAACACGGGTGGTCTCACTCGGAAG  
CUST\_5921\_PI426210822  
TACAACAAAAGTTGTCAACAGGCTCTTCTCTCCAAATTCCTACTGAAATGAGCAA  
A\_14\_P139010 GTTCCTGGATAAATACCTCCTTCTGCGAGCCTGGAACAAAATTAGAGAAATGTATT  
A\_14\_P138234 CAGATGCTTTTTTACAAAGCAGTATATTTTCTTCATCTCTCGGCAACGGACATTG  
A\_14\_P122814 TTTGAGCAACATATGTCTACTACATCCTACAGAAGAAGAGGAGATGCTCTTACTCAT  
A\_14\_P104168 CTCAGAATGACATATCCCTATGTGTTTGTTTTTTAGTTGACTTCACGTAAAGGCATGGT  
A\_14\_P133221 CAGGATGAAGACTCCAGTTTTTCTTCTTTTCTGTTGCTGGAAAGCAATCT  
A\_14\_P109491 ACATGGAAAAACAAATCAGAAAGGGTCTTGTTTTTAGACCAAATTAACGTTGCTGAA  
CUST\_3046\_PI426210822 GAGTTATTCTTTGCAGGAGAGGACCTCAGTACAGGCCCTACCGTG  
A\_14\_P136198 TTGTTCAATGCATGTGTCTGTGTGAATGATTGAAGGCATTTCTAACCCATTTTAAAGATG  
A\_14\_P124713 GAAGACATGAATACACTGAGAATCTAACTATGGGTGTTGTGTTTCAGGATACCATATAGG  
A\_14\_P200425 CTTCTTGCTGAGAAATTTCTCTTCTCATTCTCACTCATGTTGCCTGCA  
A\_16\_P02836315  
CCAGTGGGAAGTTAATTTATAAATAACTGAACTGAGAGAATCTTATCTAATGGCTCAGCC  
A\_14\_P116285 ATATCATTAAAGGTATCAGGAAATGTTCCACTCATTGTCTGCTTCTCCCACCATATACCA  
CUST\_2138\_PI426210822 GGAGCATATGCACATTTTCCCAGGGAAGCAGAGGAGGACACAATG  
A\_14\_P108208 TACTAGTGTGCAGGTAATACTTTAGCATTTTGAAAAAATACTTTGGTTTGGGATACT  
A\_16\_P16190995 ATGTGAAGTTATGCTAAGGAGATCGGGCTCCATCCTATAGGCAGGAGTA  
A\_14\_P105441 TCTTTAAAAGGGCTTGGATGTTGATGCTGAGGTCTTTTACAACCTTCTTTAGAGTTTT  
A\_14\_P135819 ATGAAATAATTCACCCACCAAACCTATATCAAAAAAATCTGTCAGAATCACAAGTTGAA  
A\_16\_P03604476  
ACTATAAACTGAAAACCTCTGGTTTCTGTCCAAATTTGCAGAGTAAATGTTGAAATGCCCA  
A\_14\_P140001 CAATACTTTGGGAGGATGATGATGACATAGAAACAGAATTAGATCTGGATTTGTCCAGAT  
A\_16\_P21596684  
ACCCACACAGATATTTTATGACACAAACTTCAAGTATCTTCTTTGGACAATTTCTGGCAT  
A\_16\_P19598566  
AAGCCCTATCTATTGTATGCTTAGTGTCTAGAAGAACTTTTGTCAAATCTCCAAGTCAGT  
A\_16\_P58424139 CTGATCTGACTTCCATCAGTGTGGATTGGTTTTGCTGATTCTAGAACTTCCCTATGAAT  
A\_14\_P117844 TAGATCCCGTATTTTACTGGCTGGCTTGTATTCAGGATCCTAATGATGCCTGAATATTTA  
A\_14\_P134521 AGAAAACCTGAGTATCCCAGGGCTTAACTTTTTTACAAGAGGATAACCAGGGGAAT  
A\_14\_P129623 CTAAAAGAACTGAACATAAAAATCGACAGTGCCTTTGCAAGTAAGTTTTTTCAGAACTGACA  
A\_16\_P17253728

AAGTCATCTGTTTCAGTCTATCTTCTCAAACATCTTTCTGTTTTAAAGCCATTGTATGCCC  
A\_16\_P17845058  
AAAAGAACAGATGCCCTTACTTTTCAGTCATACCTCTCAAATCCTACAAATCCTCTTATCT  
A\_16\_P02035970  
ATCAAGTGTTTTTCTAAAAATCCCGATCCATCATGTTTTATGTCAAAAACCTTGAGTGCC  
A\_16\_P21588540  
CCTCCAAATCATTTTTTTTTTTGTTTAGATGGTTGGTGTGAAAAATCTAACATGCGTGTGC  
A\_14\_P139847 TGACTCATCACACAAAGAACAAGAACATTTTCCAIGTATAAATGTTCCCTCTCTCAGTCTC  
A\_16\_P19844746 AAAACCAGACCATGATATCACTCATTCTTGTGTTGACTGACCTTTAAATGCAAGCCT  
CUST\_2591\_PI426210822 GGCAGAATTACACTTTGGAGTGGGAGCCAATTCTTAGGTTTTGTAAATAACCTG  
A\_14\_P106362  
ACAACAAATCTAACAGACTGCAGATTACTGAAAGTAAGTCTGAGTGAAAGGAATCAGTCA  
A\_14\_P125774 CTCGAAGAAAGTGCTGTGACTGTTATGTTTGATAAAGTGCAGTTTCAGCAACAAGTCA  
A\_14\_P109612 GATTGTTTAAGGTCTCTCTTCAAAGATTATAAGAGTAACCCGTTTACTGCACCTAGTGAG  
A\_16\_P20206128  
GCTAAGACAATCAAGGTAAGCATAAAAACTGAAACCAGATGAGATTCTCTAGAGCCCAT  
CUST\_909\_PI426210822 GTTGCACCTCCAGTTTTCCCGAGAAACAAATGATACTGGATGTA  
A\_14\_P103549 AATGAATGTGGAAAAAAGTGAAAATGAATTGCCCAAGTGTTCCCTTTTAATTAAGTGGC  
A\_14\_P135013 TTCTGATACAAATGCAGACAGTTTCCCAGTTGTCAAAATTGAACATGATACGAGGAAAAT  
A\_14\_P101721 ACTCTCCTATATACTGGTGAGGTATAATTTCTCAACTAGCCTCACTGTTCCCTAATGAAAT  
A\_16\_P17148643  
AAAAGTCAAGAGATATTGCATGTCTTCCCTACAATTTGTCCTCTCACTAAAAGAACAGGTC  
A\_18\_P13078500  
AAAACATCTTCAGATTGTGAGACTAATACCATGAACACCCTTCATATTAAGTCAGCGTG  
CUST\_4815\_PI426210822  
ACATCAATCAAACCTTGAACACCATCAGCATGGGCTTTAATGAAATTCTCACATATGTATC  
A\_14\_P105998 ATAATGTGTGCTGGATCCTGAGGCTTTTTTTGTTGGCTCCTCATCTATCT  
A\_14\_P200140 TCACCTTCAGTAGGTAAATCCCTCATGCGATTTTTTACTCTTAACACATTTTAGGTAC  
A\_16\_P18923959  
ACTAGATCATATGCAGACCTAATTTTCATCTGAGTCACTTCTATACTCTCCTGTCACCAA  
A\_14\_P130452 GTAGAATGGTCAAGAAATCTAAAGCATTGGTTTTTGGAAATCACAAGTATAAGCCATCATGG  
A\_14\_P114201 CTAATTAATGGCAGATATTACTTGCAGAAAGTAAAAGAGAAGACTGACAGAGCCAGGTC  
A\_14\_P137424 TAACTGCAGAGACCAAAAATGTTAAGTCTGGAAATGTTTGGTAGGCATCATTGCAATAAAA  
A\_14\_P124269 AGGTGTTAACCAAATGCCATTATGGAAGAACCTTACTTCATGGAAGCAGTCTTAAAATTT  
A\_14\_P101825 TTGGATATCTCTTTCTCTAACTCCTTTAGTTGTCTGGCTTTCAAACAGTAGTTTAGGTGT  
CUST\_817\_PI426210822 TCCTGCGGAAAGACCTGCCGGGAAGACCGCGATGATGAGTGGATG  
A\_14\_P116810 ATCCCAAGTTCATCTCCACCAGGACATTCGAAAGCGAAACTATGTG  
A\_14\_P114331 GGATTGAAACTTTTTCTAGAACTTTTTAATAGACGAGCCCTCATAAGTAAGATCCAGGCAAC

A\_16\_P20389533

AAGAACCTTAGAATGTTAGAATCCTTAAAGTCTGTTGCTTTTATCATGTGTTCCCATGGC  
CUST\_4314\_PI426210822 GTAGGTGCTCAATAAGTGCATGGTTGATTAGCAGGCCTCCTTGTTTTTC  
A\_14\_P127429 CTTGTTGATTTAAAAAGTTAGGCTGAGCCTTGCTATGTCTTCTAGCAGACATCTAGGTAA  
A\_14\_P118429 CTACATCTGCAAGTGCATAAAGGCTTCGATCTCATGTATATTGGAGGCAAATATCAATG  
A\_16\_P16172286

TCCAGGGGTTTTATCATAAACACAGTATGTCTTATCTAGGTATTCTTATGCTTCCACAGC  
A\_14\_P123596 TGTCTTGGGTATGGATGAGGTAGAAGCCATAAGACCCTGTTAAAATTAATATTCCTTA  
A\_14\_P105140 CTCTTTATGTGAGACTTGAGTGGCTCTGAAAAGAGCCTTTGAGTTTTAAAGCACCTAA  
A\_14\_P101201 ACGTGGCTCCAGTTTATCAGTATGAAATCCATTAGGCACCAAATGAAAATTACTATATGG  
A\_14\_P121679 CAGTTTCTTTACTTCAACAGTGCACCAATATTCTTTCACAGGTAAAGTTTTGCATAAGGG  
A\_14\_P106646 CTGTGACCCTGGAGATGAGGTTTTATCTTACAACATCCTCTACAGCAAGTG  
CUST\_1698\_PI426210822

TTATTGCAGTGTGCGAAACTTTAGAAAATAAAGGTAATCCAAAAGTAGGGATTCCCTGTTG  
CUST\_2566\_PI426210822

TATTTTCTCATTCTAATTATTCTCTATCCCAGAGTTTCTAGCTGTGGCCTTGAATGGCTT  
A\_16\_P15502969

AAAAACTTTCCAATGTCTGATTTCAAGAAATTCTCCAACTCATATCCAGCGACACTCTT  
A\_14\_P126882 TTGCAGTGGTGGTCAAAATATAACCATGATGGGCAGAAATTTTGATGTAATTGACAACCTT  
A\_14\_P115877 AACGACCTTAGTGTGACTGTCATTGAAAATTGTTGAATTAGGTGTTCTGAATTAAGG  
CUST\_6515\_PI426210822

TCTCCCAGTATTCTAAAATATTCTAAATGCTAAGGAAATAAACACAATTTTATTATAAT  
A\_14\_P109447 GAGGAAGGAACTACTCAGGGCCCATTAATTAATGAAAAAGCGGTAGAAAAGGTAAGTATA  
A\_14\_P135636 CACCCCAAATGACTTAAGGGTTAAAGATTATAAGGAAACAATTTTACAAGGCAGTCAT  
A\_18\_P15661368

CCCCTCATTACCTAATCTCACTTTTCCATATGTAAACCAATTTTAACCAGAAACAACGC  
A\_14\_P124242 TCATTACAGAAATGCTGGTGTAAAGGTGTTGAGAAGACAATGGAGAAAAAATGGAAATACT  
A\_14\_P119620 GACTTTCTTCTGGTGTATGGGGATGTCATCTCAAACATCAATATCACCAGAGC  
A\_14\_P116938 TGAATTACAATAAAGATCCCATTAATATAACAGTCTTGATGACTGGAGGGAACCAGGATA  
A\_14\_P122923 GAAGAGGGAAATCCTCATCATTATTTTGTGGCAACACAGGTGATACTACTTTTAAAACCA  
A\_16\_P41654165

GCATACTTCATCACATGAGTAGACACATTTGTGAAACGTATTTACTAGACTGGTGCTTCA  
A\_16\_P19518122

AAAAAGTCACAGTTACTAATCCTGATACTGGCCGATATGTCCATAAAGATGAAACCATGA  
A\_14\_P131803 CCACATAAAGAGAAAACCTATGGCCTCAAATTAATGTTTAAATCATGTGATTAGGCAGAA  
A\_14\_P121875 GAGATCCTGTTAGCCCAAACAGCACTTACTTTATCTTCAGTCTAACACTACTGCAAG  
A\_14\_P113969

TTTCTACTCCGTCGACACTAAAGAAAACAAACAACACTGAAGAAAATAAACGGAAACCAA

A\_14\_P104285 ATAGTCTGCTTCTCTCTTACCATGACGTGATGGACAAGGTATTCCCAAGAG  
CUST\_6733\_PI426210822

ATCTTCTCTGTCATCACACAGTCCATTAGTTATGTATTAGCTTCTAAGACTGAATACAAA

A\_16\_P16204734

ATCCTTAGACTTCCAAATTGTCTCCATTTTAAGGTTAGAGCATCTAAAAGCAAACCCAAG

A\_16\_P15081431

CTCCCTAACCTGACATTCTAAATACTGGTAATCAGACTCTAAACTACCTCTTTCTCTGAA

A\_14\_P115649 ATGCAATCCTATTCTGTAACCTAAGGACACAGGAATAGTGTCTTCTCAAACAGGACTCTC

A\_14\_P200876 TTCTGGAGCACTTACTGTATGCCAGTTGTATGTGCAGCATGTTTTTCATATGTAATAATTGT

A\_14\_P104264 CCATCATAGGGGATATGCTTTCTAGGTTCAATTAATCATATGGGGTTATGCTTTTTCTGT

A\_14\_P108821 TCAGTGTCTAGGTTTGATAAATGATAATGCTGCGTGCCAAATCTTTTATCCCTATGCAT

A\_16\_P17440701

AGGCACCAGAACTTATGTATCCTGCTGTTTAGTATGGAACCTTATCCATTAATAACAACA

A\_16\_P16602563

CAAGTAACTGAGGACAACCTTCATAAAAAGAATGTGGCTTATGCTAAGAAGAATGCAACCA

A\_14\_P114623 GGTTAGAGATCTATCTGTAAGGTTCACTTTATGTTAATAGCATTTCAGAGCAGCATGAAGA

A\_14\_P111615 TGGAAATGAACCCTCTACAACAGGAGACACCATTACTCAGTAAATGCACATGTAATAATA

A\_14\_P127786 ACAGAGAGAAATAGCAAAGGCTGTCCATTTTTATCAACTTCTTCTGATTTGACTGTTGTT

A\_16\_P15637844

AAACAGTCTGACTCTTACTGTGATTATTGCTACCCTAAGTTCCTATAGTGCTTTCTGAGT

A\_16\_P18562998

ACTCACTGTGTCACTTAACACTGTTAAGAACAGCAATAAGGATTATAACTTTTGGGAGGA

A\_14\_P119754 CTAGATTCTCATGAAGGATTGTTGAGTCACTTTTACCTGGAAACTTTTGGTTTGGAAATT

A\_16\_P16976433

CCTCAAAAACCCAGACATTATCACTATCTCACCTGCATTCTAATTTCTTCACCTGATTT

A\_14\_P115207 ACAATGTTCTGCTTTTTGTCTTTACCTATCCTAATAGAAGAGGTTTCAGAAAACCTCTCAGG

A\_18\_P22840296 GGCCTGTCGTGAATTCTGTACCTTGCTCAGTCTTTCACATCTT

A\_16\_P16486376

AAGTATACTCTTACTTGTCTCCATTAGTCTCCTTGTAATCAAACTATCACCTAGGCCAG

A\_14\_P135406 GTTCACATTCTTTCTTTCTCTGCAGGTTTTGCATGCAGAAATGTGTCAGTCTG

A\_16\_P01099558

TTTTACCCATCTCATCTGTCTAAACTCCACCTAACCTCTAAAATCAACCATATTTTCCTG

A\_16\_P19060366

TTTTTCCCCTAATTCCAAAGTCTTTACCAAATTTCTTTATAATTTGCCCTACGCTTC

A\_14\_P109870 CTTTAGAGTAGAAAATTGCTATCATTAATTTTCCTTCAAACCTTCTCTGCCCCCTCTTGC

A\_16\_P00685012

TCCCTCCATTTACTGTAACCTAGGCTCTCCAGGATAAAAATTATTATTGCCAACCTTTTA

A\_16\_P00367343

ATGTTCAAACATGTATCAGTGGTTACCTATGCTTTCCGACAGAATATTCCTACAAGAGT  
CUST\_8783\_PI426210822 CTTTGGACAGAATACAATCGAGATGTCTCCCCAGTACACAGAAGTCT  
A\_18\_P26979724

ACAAGTTGCATATTCACCTTCTTTATATATTTGTTTTACGTCAAGTTGTCTACAATGGCA  
A\_14\_P106802 TAAAGAAAATATCTCTGTTATAAAGAATCAAGCATGAAAATAACCACTTCATGAAAGGCA  
A\_14\_P110184 ACAAAGAGTAGGATAGATTTGTTGTGACTGGTGGATTATCTTCTAATGTGAGAATTGTAG  
CUST\_1517\_PI426210822 ATACTAGCCCCAGGGTCTTCAAATGAAACCCATCCTTCTGACTC  
A\_18\_P14134547 ATAGGATGTCTGGGACATGGGAGGAGGCCATGTGCCTCCTCAATT  
A\_14\_P127297 ACGTTGTTGCTTGTGCATAAATTATACACAATAGCATAAGCATGCATCTCTGCCAAGATT  
A\_14\_P202521 GGCTGTTTTTATTGGGGGAATAATTAAGAATTGACTCAGTATAGACATGGAAGTGAGGAA  
A\_14\_P200477 TTTTGCTACGGTTACAATTTTGAAATATTAAGTCTGAGCCTCAAAATCACCTTTCTGTCAA  
A\_14\_P127032 TTAGTCACAGGTCTTTTATTATTCACAGCATAGACGCTTAACAAAGGCTGGGCAAATATT  
A\_14\_P115199 TAAAGCCATCTCTAACAAACTCTGATGAAGAAACAAAGCAATCTCCATGTCCAAAAGAAA  
A\_14\_P133315 AGTTGCAGCAATTGTTATTGTTAATTGTTTACCTACACTTTTTCTCCCAAAGCAGGATGT  
A\_14\_P129242 CTTTACTACCTTCAGAATCGTGAGCCAGATCTGTGTCCAAAACTTCCTCTTTC  
A\_14\_P111986 CTTTCATCTTCTCCCTTTGGCTGCAGATCCTAATTATCTCATGGCTAATGAAC  
A\_14\_P114782 CTACGTTTCACTGGTATAATGCGCCTCCCAAGAACTGGTTTAGAAAATTACGTCAAA  
A\_14\_P123620 CTGAACAAAACCATAACTTCACAGATCATTATCTAAATGTGGCCTTTGACCTTTCTCAAG  
A\_14\_P105149 CCACATCTCTTTTGTGAATTCAACCCTTTCCCAAAAATCCTAGGCAAG  
A\_14\_P138127 AAAATGGCTCACAGATGTTCTGTCTCAGAAGATATCAGAAAAGTGGAAATAAAGGTGTA  
A\_14\_P119359 TGCAGATTGACTTTTACATGCTGTGTAGTATTCCTTAGGTGCAATAGATAGAAAGTGAGG  
A\_16\_P18736282

ACACATTTTCTACACCAAAACAGTGCTTTAATTGCAGGTTACTTTTTCCAGTTCACCTTGA  
A\_14\_P134871 CTGGTTGCTCCTTTCCCTAGTTTTGCTCATTTAAGCCAAAAAAGTTATTTCTGAGAGAG  
A\_14\_P118598 GGGAGGTTGTTGGGTAGCAGTAATAGAGGTCATGGTTGACATAATAGGACTTTT  
A\_14\_P111011 GGAAGTGTTTTGCGCTCTTAAAAATAACTCTTATCTCTCAAGGTCTTTCCTTTTGTGACT  
A\_14\_P133200 GTAAAGAGACATTGCAATTTCCACCTGTTGATTTTCTTTGAAAGTTTGGATTAATACTTC  
A\_14\_P117632 AAAATTATGCAATGTTACAAGGTCATCCAAGACATCTCTCCTACAGAAAGAAAAAAGGC  
A\_14\_P129972 CTGTGGTTTGGTAAATTTTAGGCAGAGAGAAAAGAATGAGCAATGAGATAAAGTCTGTTG  
A\_16\_P02271147

ATCACTGCTCTGCATTATAATAGGTGTGCTATAGTCAGGTAAAGGTAAGGATTGCTGTTT  
A\_14\_P200371 TTTTTTGTGTTCTGTTACCACATTTTCTCATTCTCTTCAATCTCCAATTCCATGTCCAT  
A\_14\_P201795 TTTGTGAAGTGCCAAGGTCTGGAAATCACTGACCTTATAATCCCATTTTTTTAAATCTCA  
A\_16\_P01654685

TCCCTCAACTTAATATTGTTCCCAACTTAAGATTGATCCTTCCAACAGATTTATAACCAG  
A\_16\_P20760745

AGAGTCTGTTTCATTAATTAGCATGGACAGCATAAAAGCAAAAACAATGACACTCCTGTTC  
CUST\_10147\_PI426210822 GGAGGGATAACAACCTTTGTGTGTGACTGGCACCTTTAAGAAATACCTTCAG

A\_14\_P109947 TCCATAACATCTTCATTGTGTGATATACTTGGGGAAAGTTCATAGTTCTGGGTCTCTAG

A\_18\_P10219562

GACTCAGACAAACCTATGACCTCACACAAATCTGTAAC TTCATGTATCACAGTCTCTATA

A\_14\_P107544 ACATTGTTTCTGAAAATTTTTTCAGTGGGTCAA AACTGAACTTTTCTGCCACTGATATGT

A\_16\_P03809624

TTTCAAGAATCACATTTTGCCAAAATTGCCAATGTTTGCAATTACCTGTGACAGGAAAT

A\_14\_P109995 TCTAACTTTTGATGAAACACTTACTATTCTTAGGCAGCCCATGAAA ACTACTGGAATGAG

A\_14\_P133874 TATGTAAGCCACAACAGCAGACGTCCTATCCTTTTGCTTTTGT TTTTAAGGGATCAAAA

A\_16\_P01933619

TCCCCAACTAATTTGCTTGTAACCTTGTAAC TGGTTAAACTGATAATACCTCACATGTCT

A\_14\_P128099 TGCGTAAATTGCAAGGCTGATAACTCTTATTGT TAAATTGTTCCCTCGATTCAACTCAGTGA

A\_16\_P19743041

AAATTCTCCTATTCCCTAGGTAAACATGAATACTGCTTACCCCTGTAGTTTATGATCAGCC

A\_14\_P102970 AAAACACTTCTTGTCTTTGACAGCAGTTCGAAA ACTTGAGTAGGACTGTTTTATAAGAGT

A\_14\_P109469 ATCCTCGTCTTCTTCCCTGGGCTTTTATTGAGACAAATTGCCCTAATAAAA CAATAAGAAT

A\_14\_P119937 AACACCAGGTCAACTTTTCTTCTAGTAGTTTTGTGACTTTGGTTTTCTAATGCTTACATC

A\_14\_P122500 GTTATTACCTGTTTCCTAATGGCCCTGATCCTGTTTGCTTCTTCTCCTTC

A\_14\_P105431 AATCCAGCAAGTTTTAACTTGGCCAAAATCCACCAATCTTAAACTTTGTGCACC

A\_14\_P202034 CTTATCTTTTGAGTTTTATATTTCCCTTGCTCCCTCTGTTGCTGGGATATGAAATCTCCA

A\_14\_P130689 CAGTCCCAAACCTAAACCTCGGGTATGAGAAAAGCATTGAGATCTAGCAATAG

A\_18\_P17046274

ACTGTGTTGCTGTAATGAGTCTTAACTCTAACTACTTCTCACAAATTTTTGAGCATGGGT

A\_16\_P03803015

GTCCTAAACAGCATATTCCACAGATACACTATTTTGACACAGGAAAGTAATAAAGGGTCA

A\_14\_P134791 TGGAAATTGAGAATAGTTATTTCCAAGGGGAAA AATACATGGACACTTTTTGAGCAACA

CUST\_1076\_PI426210822 CTTAGAACCTTCAAATGCCTGGGCATCGAGGACAGTCACTAATAGTGATT

A\_14\_P137206 TGCCTAGCCATAAAACAGGGTGTTTTAGTATCTATGCAATCTCAGCCGAACTTAAAAAAA

A\_14\_P201738 CTTCCAAGTAGGTAAAATTCCATGAACAGACAATGTTAATTTTCTTAGGTCAGCATCCTG

A\_18\_P22839213 TCTTGAAGTGAGAGCATAAAGGAATGGAGGGCATTGTTGCCATTTTC

A\_18\_P13171323

AAGGACAACGAACTAATTTAAAGTTACAAGGGTATTGATCAGAAAAAGCACTGAGCATCC

A\_16\_P00925579

CAGGTGTCATTAATTTTCTCATTCTCTCATATGCATTGAGTAACTACCATACAGCAAGCA

A\_14\_P113120 TGACCTGGTTTTGTGCTGTTAAGTTTTGAATTTGAATCAA AAGACTAAGAAAAGATGTGCC

A\_14\_P123886 GAATAATCTTCTCTCCTTTTCAGGCAATGAGACCATCTGCCACCAAATATCTACAT

A\_16\_P19343484

GGCTCAAACGATATGTCAAAAACATTGTCCAGATAAGTAGTATAGGAGTTTTGAGGAAGC

A\_16\_P18447102

AAACTCAAGTTCAACACAAAATCCAAGTGATCAAATGTTTAAACCCTTTTATCCGCAGTT  
A\_16\_P58424348  
CTTGTGTTTCTTGCAGAGTGGCTAAATTCTAAGAACAAATGCCCAAGAAAATTAGGAG  
A\_14\_P123237 TTCAAGCATGATGATAACAGTTGATGATGTTCAAGCAACATTTAGCCAGCATTGCAAAAAT  
CUST\_3571\_PI426210822  
GGAGATTTGTGTGAAGAGGGTGACAGAGAGTTGCTTCTTTTAAAAAAAATGTATTAAGGG  
A\_14\_P200219 TAGTGCACAGTGAAGTTTCTGTTTCTTATCACTAAAGACTGAGGTGAGGTTATGAACTT  
A\_14\_P112055 CTAAGAGAGATGTGGAAAAGCAACTAACAAAGAAATATGAGCATGTTTGAAGTGTGCGCC  
A\_14\_P131249 TCTGCCGAACACTTACCACAGATGAAACAAGTTGTCTTTAGAAATTTCTTCTTTTTTCTGT  
A\_16\_P19525074  
GCCTCATATAGTCTATTTTCCCAACCATTTTGTAGTCTACACAGGTTCTAGGATAGTT  
A\_14\_P114725 GAAGACAGAGAACACGCATGATTGATATGAAGGTGTGTAATCAATCAGCATTTTAACTTC  
A\_16\_P18544942  
AAAATACCTTCTCAGATCCAATAGTAGGCAAATTTGAGTAAATATACCCATGCTAGGAGA  
A\_16\_P16686880  
GCCTGGAAAATAAATGTCAATACTTGTGGTAGTTTCTGAAAATTTAAAAGTGCTAGCCCC  
A\_14\_P123257 ATTCTCATACTGCTTTGTGGGAATAAATCATTCTCTGCTTACTTGAAACAGCATCGTC  
A\_14\_P117246 GGTGCTTAATTGGTGAGTTCTCTAGATGCCTCTAGTTAGGCATTCATCTTTATTTATTGG  
A\_14\_P105986 ATACCACTCAGATCAAGGCTCCTTATTAAGTTGAGAACAGCCTCTCTTTTCATTTTATGTT  
A\_14\_P107574 TACTACCAGCAAGTTGATCAAATTTAACTATGTAGCAGTAACCAGACACACTAGACAGCA  
A\_18\_P22839229  
GGCAATATAGTGTCTGATCCAGAAAGCAAGAAAGAAAAGGCAGAAAGTCTGAAGTTTTAT  
A\_14\_P112775 CAGCAAAGAGGGTAAATAGTAACCGAAATGTCAAGTTGTCTCTGGCTTAAATTAAGCAAA  
A\_18\_P14132755 CCTGCTGTCTCCTGGCTACTTTGGACTTTGGCCTCCGCTTCAGTT  
A\_18\_P22839978 GAGTCTACCTCACAGGTGTGCCTGATAAAATTTTTTTGGGCAGTGTTTTCCCT  
A\_14\_P112490 CAAGAAAAAGAAGAAGAAAAGTTCCAAGAAACACAAGCGACGCAGGTATTGTCCTTT  
A\_16\_P36510870  
TCCTCCTCTCTTATGTAAGCGATAAGCACCATTAATAGTCCCTGTCAGTCTTGATTAAT  
A\_14\_P103479 CTTTTATACTTATTTATGATGGCCTGTGAACAACCTCAAGGATTTTCTGGTTGGAGACAG  
A\_16\_P18449335  
TCCCCATTTTACCTATACTTGCTACTACCTAATTAGACTGCTCTACATTTCTATCACACT  
A\_16\_P16191222  
TCTGGTTAGCAATCATCACATCCATTTAGGATTAGGACAATTCACACAATAGAATAGGGT  
A\_16\_P15932387  
AAGTAATCACGAAGAGTGTAAGTCTTTTTGATTGGTAAGTCTGGAAAAACCACTGTTTCAAG  
A\_14\_P138868 TGTCATAGATGACTCAGGGACTTCAGGACAGGATAAAACAAAATAACTCCTTTTCAA  
A\_16\_P00327646  
ACAAGGAAGCAGAGTTGTAAATCGGTATTAGAATGTGATCAAAGGAATGTCTGTATGCA

A\_14\_P132687 ATATCGAAAGGGCTGAGGTTTCATCAAACCTTTCAGAAGCCTCTTCTCCTAAAAACAAATA  
A\_18\_P14139256

ATGTAATAACTTCAGTCAACAGTGATATCTTTTCCCTGAGTTTCTCTTGCCCCTTGATC

A\_14\_P121499 TATATAAGCAGTCTGGTTTAAATACTTACCTTCAATCTGGCTAGTTTCTGAGCACGGTTT

A\_14\_P108265 CCTTGAGGGTGCTGTGACCTTTTACATAGGGTAAAGTTTTTTAATGGCACTTGATTATTA

A\_16\_P15263482

AGAAGAAACTATGAGTGAAACGATGAGAAAAACCTAATGCATGATGTAGAACTGAGTGGT

A\_14\_P137814 ATTTCTTACTAGATCCAAAGGCATACAAGACAAGCAGGAAATATATAAGGAACTCCATT

A\_14\_P115019 CATGTGAAGACCAAGAACCTGCCTTTACATCCTGCTTGACTAACAAAATCTAAATATGAA

CUST\_3862\_P1426210822

GAGTCTCACAAAACCTACACCCATGCTGCCCATGGTTTATGTTTAATGAATGAAATG

A\_16\_P17063420

AAAGGGTGTCTAAGTTCAACACAAGAGTTCAACAAGAATCATAAAATGATGGCTGCATAG

A\_14\_P115687 CTCATTTCTCCGGTTTATATTTGGTGCTATCAAGGTGTATGCACTTGTGCTAAAAGGAA

CUST\_8745\_P1426210822

TACAAGAACAAATTAATCTAATCTTCATAATAATTTCTTAAGGAAATTGAGGCAAGGAAG

A\_18\_P25505095

CGGCCTATCTCCCTATTATAAGACATTGCATTACACTGAGTTTGTCTTTACAAGTGCAT

CUST\_10401\_P1426210822 ATCGAAGCTGAGAAGAACCGGAAAGAGAATGAAGACAGTTGGGACT

A\_14\_P201554 AATGGAGTTTATTAAAAACCTCAAGCCCTTAAAGCACCATGATGAGTGACAGAAAATTACCT

A\_16\_P00654876

ACAATGACTGTGTTACTGTTTTACTTTTTAAGACCAGCAACCATTTTATAGTGGGGACAC

CUST\_3671\_P1426210822 GTTAGCCAGTTTCCTCAAATTGGTCAGTATAATCCTACCTCTTGGAGCGATAG

A\_16\_P02581612

TCCCAGCAATTAATACTAATACTCAGATCATCAGAATAGGTTGAAATTTCACTGCATCC

CUST\_7365\_P1426210822 AACTCAGCTGTCTGGACAACAAAAGTGGGAGCTTTTGTGTCTAGAAGT

A\_14\_P134867 ACTGATGTCAGAGTTGCCAGCCAAGATAAGATTGCAAAAACAATTTTTTAAAGTGGCATA

A\_14\_P201487 CATCAACTCATATAAGGACAACAGCAATGATTTTCATATGCCCATCTGCTTTGATATGAT

A\_16\_P20289671

CATCCAAAACCTTTATAGGAGACCTCTTGTTCTTACTTCAGCCTAAGACAAAAACCAGATA

A\_16\_P15612304

AGTGATTTGACTAGAGACCTAGATAATGATTAAGAGCAAATATCAGCAAACCTACTCCCC

A\_14\_P132854 AGTATGTCCTATGTGGTCTCCTCTTTTCTTGAGTGAAAATCTCTTTTCTCTGATGCTTT

A\_16\_P02232668

TTCGTTGCACCTTTTTTACTTTTTATGAACTCAAGCGTTACACAAATTAGGCTCCTAATAT

A\_14\_P114712 CTCTCGTTCTGCTTTAGAGAGGAACTTGGGCTACAAAAGAGATTGGAACCTG

A\_14\_P135689 GTCTCCCTTTTTTAAACTCATGAAGGTATCTCCACATTAGATTCCAAATCTGAGAACCTTC

A\_14\_P110580 CACACATGATTCAGGGATAATAATGCAAATTATTGATGTTTCCTGGACATTTACAAACCA



A\_14\_P136576 GATGTTTTGTATTCTTAGGTTGTAAGGGAAGCCATTTTAGAAGACTTGCAGAAAATTGGG  
A\_14\_P139671 TTATTTTGTCTATTATCCCATATGTAGGCTATCACATTTTGCCTCCTAGCCTTTGCCTAC  
CUST\_8422\_PI426210822 TATTGCAGAAAACCAAAGACACAGTTTTCTAGGGAAGAGCTAGCTGGAGC  
A\_16\_P17715305  
AAAGCAGGGCCAATATACACATCTCTGTAAAACCTTTTTGGAAGGTATATCAGTCTTACCA  
A\_14\_P136203 CTAAGTGCAGCAGAGAAAGAAGAGTCTCCTTCCTCTTCCTCATCTGTTTTGA  
A\_14\_P111863 CTTTATGAAGTCCAAGTCAAGTTTATGATTTCCCTAATATCCTCACAAGGAATTGGGATG  
A\_14\_P128853 CATTAGAAAATTGGAGAGACATGGTGTTTTGAGAAAATGTTACCTTGTCTATGCAAAAAC  
A\_16\_P15347299 AAGATGAATACACTCATTACTGGTTTCCCAACATGATATAAACCTAGGACTTCACCCC  
CUST\_5556\_PI426210822 GAGAAGTTCTGGGAGAGCAGTTCTTTCTATTGTCTTTTCCTGATTATGGG  
A\_14\_P129203 CTTTTTATTTAAGAATATCATAATACCTTACCTACTGAAGCACGAACTGTTGTAATGTCA  
A\_14\_P137098 TTCATTGTCTACTATCCTCCAAAGAACATGCTGACATTTTAAATTTGATGGACTGCTGAG  
A\_14\_P124779 CTTTGTGCAAAGCCACTTTCAAGCACAATATAGGTAAGATGGGGATGTGTTTAGAATGTA  
A\_16\_P02393380  
AAAGGTTAGCAGCAACACTTTTCCTAGTAACCTAGATCCAAATCTCTAATGATCCCATAG  
A\_14\_P134827 TACATAACCCCATGCTGATGGGTTTTATTTAGTATAAAAACATCCATCAAACACCAGTCTC  
A\_14\_P118078 TTGGGCAATAGGTGGGCTCCAAATAAAGTTGCATAGAAACCAAGTTTTTATATGTCAAAT  
A\_16\_P00733745  
AAAACAGCAAGACTAATCCTATTTCCACTTCTTTATCCACCTTTAAGAGTAACCTGCTGT  
A\_16\_P00685143 CTTTGCTTTTATCTCAGAGGCTGGCACATTTGTAGGCAGGACTGTGAG  
A\_14\_P103493 ATAACCTTTTCGGGGAATTATAATACTGTGCTCAGCCAAGAAAGCAAAAATACCAAAAACCT  
A\_16\_P21198866  
AAAAAAGTGATCCCTACCTTATCTCTTAGTGATTGAGTCAAGAAATTATCGTTGCCATT  
A\_14\_P118274 TATTCAAGTCTGATTTTGGATTCCACTGGCTCTACTTTATTTGCTAATTGCACAGACGAT  
CUST\_9270\_PI426210822  
GAAGAAAGTCGTAAGTACTATAGACATTTACATGCTGCTGAACACAGAAATACTGAAAAAGGTA  
A\_14\_P103252 ATTCCAAATCTCCATTTTTGTATGCTGGCAGATATAACAGTGCTCTCTAGTAATCCTTCT  
A\_14\_P121733 GTTTTTTCCGGAGGAAATTAAGCAACCAGGCATCTGTTTATAAATCCCTTTTACC  
A\_16\_P00533794  
AAGTTGGACCAATTATATGCTTACCTATGAGAATCTGATTCGGGATACAGAATATGAGGG  
A\_16\_P01973952  
AAGCCACACTCCTATCTTAATCATACTCAATAGGCAAACCTCAATGGATAAAGGGAATT  
CUST\_5354\_PI426210822 CGCAGCCCCGAGGAACTCTGAAGAAACACAAGCTTCTGTGGCCCC  
A\_16\_P20432194  
CAGAAACTCTCAAAAACCACAAATCATTTCTTGTCTGACAACCTGATCTACCAACTCTG  
A\_14\_P117788 TTTCATTCTATGAGAAGAATTATGTGTGTGTTGGTAAGTCGTCCATAGGTCATACATTTCC  
A\_14\_P118257 CCCAGTGACTTTATGCATCTTATAACCAAGAAGCCTTCAGTAGAGCAAGTCTGAG  
A\_14\_P125676 GGCATTCTCTTACAGATTTACAAATACCGTTACTGCATCTAAGAAAATGAGCAGCATTCC

A\_16\_P20561919

AAGGGACCTGTCATATTCAGTAAAGAAGCGAATTGAATTA AAAACACAAACCTGACAGAA

A\_14\_P116338 GTTCTCTAACACTGACCCACATGTAATATGTTGTCAGATGTGCACATGTTTTTAAATAGT

CUST\_250\_PI426210822 AGCACTTCCCAGTGACACCGCCGGTGGGGCAGGTAGTTATCTCTT

A\_14\_P129356 GAAGTGGTGATTATCAAAGAAAATAATGTGCATTTGAAAGTTCAGGCTACCTCTTGTGAG

A\_14\_P138003 CCTTTCCACATTGTTTCTATTTCTTTATTTTGATGAACTGTTCAAATGTCATGGTAAAT

A\_18\_P15711528

ATAAAGTGGTTCAATTTTAGCCTTTTTTCTAACACCTAGCAATGTATGACCAGCATCTCC

A\_18\_P14134932

GTAGAGTTCAAGGAAAAGTTAGGACAAGGAAAATGAGTCTTTACAAAGCAACCAATTCCT

A\_14\_P112355 TGAGGCTCTCATAAGTGCCTACTATATTTTCAGGGCACATGATTTTACCAAAGTATGTAAC

A\_14\_P125931 CACATATGCTTCTTTAGTTCTAAAGCCTCTAACTGGGCTTTGATCTGTTCAAAGTATGAT

A\_14\_P112780

AAAAAAAACCTGAATAATCATTTTGGGGAAAACAAAGGACAGCCTAGGGAGACTAGATACA

A\_14\_P137185 GAAGGATAACACCTATTCTCTCCTTACCTAACTCTAATCCTAATAGGAGCCAAATGAGAT

CUST\_2363\_PI426210822 GAAGCTTGTTTTCTGGACCTCGGAAGCTAATCACACAGTGAGGC

A\_14\_P116399 ACCCTATCATTATATTAAGGTTAAAAAAAAGAGCCCACTTCGGCAACCTGTAAGAAGT

A\_14\_P118385 CATTATTGTCTGCATAATCTTTAGATCCAGCACACACTTACTGATGAGATACTCCTCAGT

A\_16\_P17622657

AGCCCCATGACTAGTAGAATAAATGTTAATTGCAACTTGTCTGATTCAATTTCTCCTACCT

CUST\_2842\_PI426210822

GTGAAGGTAAATTGGCATAGCTGAAGCAGAGAAGAAGAAACCAAGATGCAAGTTA

A\_14\_P126209 ACATTTACATATTCTGGGACATTACTCAATTTGTTTCCTGGCTTTTAAACAGCACTGCAAAT

A\_16\_P18430148

AACTGATGAATTGGAATCAAATTATGTTACCCGCTTTTAACTAACATCAGGTGGAGTGTC

A\_14\_P128659 CTGCTAGGTGTGCACTGATACATCTGTATTTTTGCAACTGTTTCTTTTCCAGTCAAATAT

A\_14\_P138935 AACCAGGAAAGCAGATGTATCTCTGGAAAAGGAACTCCAAGGAATGAGCATATTTA

A\_18\_P22842086 AACACCTAACCTAGAATTTCCCTGTGGATCACTCACCCCAATGATG

CUST\_9884\_PI426210822 AGTATTGTGCCAGTCACTGCTTGGGCTTGAGCAAGGGGCTGGAC

CUST\_4902\_PI426210822

CTTGGGCCATATGCTTATCTGAGCTATAATATGATTCATATTGAAAGGAGGGGGACT

A\_16\_P36230785 ATGCTCTGCCTGTGATGTGTGGTGGCCTCTGGCATTGTTGTAAC

A\_14\_P201360 AATAAGTTCCAAAGTTACCCAAAGTCAATTTCCAGTTCCCTCATATGTCATTTCTTTTGTGAG

A\_14\_P108511 TTCAACTGTTATTTGAACTGTTATTTTTCAGGTCAGCATCAAGAGCCAAATGTGAAAGTCA

A\_18\_P22841250 TGGTTTAGGGCTGAGGCTGTAAACCACAGGGGATTACCTATGTTTATCT

A\_14\_P104179 GATGAACTTACTCGTGCTTTTTAGTCTCCCGTGTGAACTGAATTGTTCTGTATTTTATCT

CUST\_5712\_PI426210822

AATTTGTGGGGGAAAATGCATTCTAGGCTTCTGAAACCCTTTTTAGAAAGAAA

CUST\_4350\_PI426210822 TCTGTGACTGAGGAGACGTGCCATGATGAGAGTGATGATGGTGAT  
A\_16\_P16566768

AGGAATTCTCAGATTGATCTTTTGGCTGCGATTGTATCTAAATGTCACATTGTTCACTTG  
A\_14\_P111192 CTCCTTTTCTCCACCAGCAAAGTCGACCAAGAAATTATCAACATTATGCAGGATC

CUST\_2877\_PI426210822 GATAGGAAATGAGGTGGAGGTGAAAGGTCAGGTAAGTGTGGGGGC  
A\_16\_P19250633

TTGGAGTTGTGACTAAGAAAGTTAAGTATCTATCTGAGTGAGTCATTTGAATGGCAGAAA  
A\_18\_P14133518

TCTTACGTCTCTCTTCTCGAAGAAATTATCTTTGTTACTTAATTCAATATTTTGCAGTC  
A\_16\_P21619059

AACAGAAAGTGAGCCATTTAAATGGAGTCTACAGTAAAAATGATGGAATGATGATGCTCC  
A\_14\_P116975 CTGATGAATTTACTGTCTCCCAGGAGATTCTTGGTTCCTAATTCACCTCCTCATTTTCTGTA

A\_16\_P30952623 CTTTGTATCTTCCATATTTGGAAGAAAAAATCTTCTCCAGATTTTTTCGGAGGCCCC  
A\_14\_P116015 TATCCCCGGTTCAATTTTGTATTTCTGCCCAATTTTTAAATCCTTGCCATTCATTTCCAA

CUST\_7536\_PI426210822

AATCCCAGAGAAGGCATTTTTTTTTCTCACATACTCTAGGTCTCAATCTCTTAACTTCAAA  
CUST\_4735\_PI426210822

TGCATGTTTCTCATAAACTGATTGTGCATTCTAATTATTTAGTTTGGAAAATGTAGTCTC  
A\_14\_P117075 GGACTTTGAAGTTCTCTTCTGAGAGAACCCTCATGAGAATATTTGCATAAATTCCTGGAAG

A\_14\_P134152 AAACATAACGTTACTTACCTGAAAGTCATCGTAAGGGAAGAGCAGCATCTCCC

A\_14\_P119625 AGAATCTACTAATTCTGTTTTCTTAACTTGTGTCCTACTCTCCTCTATACCTCTTCTCCC

A\_14\_P124139 TTAACTTATTTGGAGACTTAAGTTCTTGATTTATAACATGAATCAAATGCGAGAACCAGG  
A\_18\_P26792484 CTCTCCTCTCTCCCCTGCACCCCTTAACTCTGGTCCTTTGCAGGA

A\_14\_P109222 TTCTAAAAGGTTTGTCTTTTTAGGTTGCTTATTGAGGGCATCTCCTAAATGTATGTTGC

A\_14\_P125156 TGATCTCCAAACCTTTTACCCAAAATTTTAGAAAAAGAATTAGGAATTTTCAGTTGCTCA  
A\_18\_P12742892

GAATTAGAATGCCAAACAAAATCATCCTCTCCTTATGGAAGTTAAATTCCAAAGCAACA  
A\_16\_P15093810

AACGAATGCATGTATTGTTTACTCTTTGCTTCCTATTGAATATTTGCTCCCTCTTGCTCT  
A\_14\_P112588 AAGCCTGGGTCAGTATATGGTTGACATTCTTACTCTCAACACCTTGGCT

CUST\_1007\_PI426210822 GTGGGTTTTGATGGCCTCTCAGGTAGGAATGAGAAGTTTTAAGATGGAAAA

CUST\_6769\_PI426210822 GGATAAGTGCTTAAAGGTACATGGATGAGCCTCCAAAGGATCTGATGTCA

A\_14\_P109667 GAGTGTCTCTGCATAACATACATCAAGCAGCCTTTTTCTTTTTTTTAAATCAGAGATGCCT

A\_14\_P120082 TGGAGAAATGTATGAAAGGATGATCACAAACATGTTTCATATTTTACCAGGATGGTGAAA

A\_14\_P112405 ACCTGATTGACAACCTCAAATATATGGCTAAGGTTGTAGTGGGACTAAGTCCACATAT

A\_16\_P17683006

AGTGATATGTGCTGTCTTCTGAATAACACAATGAATAACATCTAAAACCTCCTCCCATCA  
A\_18\_P15652474

AAATACTTTCCTTCGTCTAGTCACTTTTTACCCTCCTACTTTGTAAACATCCTAGAAGCC  
A\_14\_P113479 GGGCTACTATTTACATGTAATTTATTCCTCCCATCACTGAAATTCATGACCAATGTA  
A\_14\_P122940 AAAATTAAGACAAATTTCAAGTGTGGCTGCCTAACGTGTTTTCTGGCACATATATTTCCA  
A\_16\_P18487590  
AGAGGCATCCTGTAACCATAAACCATGTAAAATCCAACCTCCTGAATCATTTCAAAAATT  
A\_16\_P31225027  
TACTTCTGATCTTCACTTATGCATTTACAGTGGTTTTTATAGTCATCGCCCCTTTAAAGT  
A\_16\_P36183220  
CCCCATCAAATGAAATTGAAAGGACAATCATTAGGCATACATAGTAGATAAACTAAACGA  
A\_16\_P18096995  
AATTGCCATATTAATGTGTTTTACCTTCATCCTCAACTAATGGGACCATGGAATGAAGT  
A\_14\_P134308 TCCATGACTTACTGTCAAATTTGTAAGGACATGCTCAAACCCACAGAGCACATTTTTAA  
A\_14\_P202291 CTTGGAAGTCACTAACTCAAATCATGACCTTTCTACCTCAATTCATTCTGAACATTTCTG  
A\_16\_P20207412  
TAGTGTAAGGATACCCTTTAGACTGTAAAGAATGCTTAAGGGTAACGTAAGAACCGC  
A\_16\_P00015999  
GTTAACACCAGAGACAATTCCTAGCAGATTTCCCCAAACATACTTCAAACATCGATAATG  
A\_14\_P135587 ATAATTTACTTATTTCAAAGCACTTTAACCATAACAAACCCAACACCCACTTTCTTCA  
A\_14\_P129031 GGTTCAATGTTTCCACCAATCCAACCTTTGAGAATCCTGTTAAAGTCAAGGATAAATGTAA  
A\_14\_P131403 CTTTCTCATATTTGATACTCCCTGCAATCTGGCCACATTTTGGAGAATCTCTCTTAAGTT  
A\_14\_P112169 ACGGCTTTTTTTGACACAATTCAGGATTTGTGGGATTTTCAAATAGTAACATTCTGGCT  
A\_14\_P114123 ACAATTCTCCTCCAAGTTAGACATTGGTAAAGTCAGTGCACCAGAAAAAGCATATTTACC  
A\_14\_P110146 ATGCTCATATGTTCTCTTGGGCCCTAAGCAGATTAAGAACAATTATTAAGCCCAAGTA  
A\_16\_P03586365  
TTTCCTACAACCATAAGTCAAGACCCCAATAAAAGTTTTCTTACAATCTAGTTCATCCTGC  
CUST\_7030\_PI426210822 ATGAAGATTTGCCTTCATCCAAGGGGAATGTCTGTGTGAGACAGTG  
A\_14\_P115679 TAAGAGGGTCTCCCTTACCATCAGCCTTGAAGAAAATGATGGTCACATTCATTTAT  
A\_14\_P110043 TAAATGGATAACACTTGAGAATAAGCCCACTATTGTTTAAAATGGCAGGAGGTGATTCAC  
A\_14\_P129243 GATTCAGCAATGGTGGAATGGAAGACAGAACTGGAAGAGAAAAGGAAAAGAT  
A\_16\_P20265397  
AAAATGTTTCACTGAATAAGACCACAATTTGGTAAACAGCATCTAAAAAGTGTCATGTGGCC  
A\_14\_P112123 TTGAAATTGTAAGCATCCGGTCAGTAAGAATGCCCATCCAGTTTTCTATATTTTCATAGTC  
A\_14\_P131171 TAAAATGAAAATGTTGCTGCTGTTATTCTCTTTCCCTGGGAAGGCTGGG  
A\_18\_P22841194  
GAAGAAAGTTAAAAGTCTCCTTCAAATCTCCCCATAGTGCCTCATCCTCTTACTAA  
A\_14\_P127448 TGTTACATGAAAGAACTTACTGTCCCTTTTCTGCAAGTATTTGGAGTCAGAGATTCCTTA  
A\_14\_P104702 TGGTAAAACATCTAGTTATTCACATGTAGTGTATTTGGGGTGTGTTATGGTGTGACTGT  
A\_16\_P02635021

ACTTGGAATGCATGTGTTTCAGAAGTCTAGTCTCAAGCCAAAAACAATCTGTTTCGAAATAG  
A\_14\_P121372 CTTCCAGAACTAGAGATGATGTTTCAGACAACCCAGTAGGTATACATCACATACAATGTAT  
CUST\_1909\_PI426210822 ATGAACTTCATAGTCCCTGTCAAGTCTTAAGATGACCCCTCCGCAA  
A\_16\_P03741159

ATCTTCTAGCAAAGTTGCCTAGAATGTGGTTGTAAATGACTGTTCATGTAGTAAACTCTGC  
A\_14\_P110325 ACTTAAGTGATCACAAACCTACTGGAAACAATATAACCCAAACATCTCTTTCCACACATT  
A\_14\_P112278 AATGATTTGCTTTTTTTAATCCCAGGATTTCCCTCAAATGCTACTGGAGAACATTCCAGA  
A\_14\_P128203 GTAAAGATAATCTTCTCCCTCTCCTGCCTTAGTCTAGGTCAAGTGTGAATTTAAGGTAT  
CUST\_3505\_PI426210822

ATCTTGGATGTGATGTTTTCTGTTTTCTAGTGGCATAGAACTAGATAAAAAGGTGGCAG  
CUST\_1775\_PI426210822 GCGTCCCTTTGGATGGAGTCCTTGCTTTCTGATCACAAAAGTGGT  
CUST\_842\_PI426210822 ATGGTGGGGCCTCCCTCCTGGAAGCCGTTGTAGGTCCTGCACAG  
A\_14\_P102591 CTGTTGTGCTTAGAGATGGTTTACCTTCTGGCTTCCAGGTTCCAAGT  
A\_14\_P121806 ACTACTTCTCAATTTACAAACGCTACATCCTTACACCCTGATCATCAATGCCTAAATAT  
A\_14\_P104188 CATGTCTAAGGGTCTCTGGCACATGTATATTATATAGGTCCTGCTATCAGAGAGATTCAT  
A\_14\_P122534 GTAACAATACCTAGTGAGAAGATGCATCTGAACTCTAAAAACCATTTACAGTTTGCAGC  
A\_18\_P22840692 GGGGAGCCCTGCCCTGAATAAGAGCATGGAAGGCCCAAGAAGAGT  
A\_14\_P124228 AACAGATTGTTCTAGGAAAGAAGGTTGTTCTAAGAGCAGAGTTATTCTTTAAGGTGGCT  
A\_14\_P111280 ACCAAATCGCCCTCCAAGAACAAGTAAAGCATAACGTGAAAGTTTTTTTTAATGTTAC  
A\_16\_P01883348

GCATGATGCCTATATCTCAAACCTACTTTACAGACAAAATTACCCTCTACAACCTTTCTGGG  
A\_18\_P16336269

TGGAGACACAACACATTTATTAGATGATCAGTTTTTTTTTTTCTGTTATGTCAATGCTCA  
A\_14\_P106512 ACTTTACCCATCCTGGAGGAATTTTTTTTTTTAATTTAGCCACAAACCTCTTTCAAACCT  
CUST\_6352\_PI426210822 AGAAATTCAGTCCCAGGAATGATTTCCCTGACCCACTGTAAATTTAATTGAGG  
A\_14\_P107210 TATTAACACAATACAACCATATAGCATAATTGTTTGGGGCAATTCCAGAACACTCCCTGA  
A\_14\_P135023 ATTGGATCATTTCAAAATTAGCATTACCTTTGCTTAGTCCATCTGCCTTTTCACTGGTA  
A\_16\_P00685408 CATTCACTGGGTTCCATGTAAACGACACCTCCACAGAATATAATGTGAGTG  
A\_14\_P126369 CCTAAGACAGCCATCTCATTGTTGCAGATTTTTCATTTTGTGATTTTAAACTGCCTCCTA  
A\_16\_P15611880

GTAGATGGAGGAATACACATGAATTACCATGACAGATGAAACCTACAGTTAAGAAATGCC  
CUST\_6347\_PI426210822 GTAAATGCTTTTTTCTCTCACTTTTTGAGCATAAACTGGCCCAGGTGGGTA  
A\_14\_P113681 CTTAAGAAATGAAAGTAGAAAACATGAATGAGACGGTGCTTAAACAATTATTGACCTAAT  
A\_14\_P116553 GCTCAGAAATATTTTATATTCTACTGACTGGCATGCTTGTGAAACCATTTTCCATTTGCC  
A\_14\_P130057 GATAGTATCAGGTTTAAAGAGCATTAGGTTGCATGAAAATAGGCCACTGCATTTAGACATC  
A\_16\_P19030073

GTTCTGCAAATGAATTTGGCATTGTTACCTAAAGGAGAAGGAATGGATGAAGTGAGTAA  
A\_14\_P114829 TACATTTTCTTTTATTTTTCCCATTTTTGTAAGTAAAACAGTGAGTCTCTTAAAGACGC

A\_16\_P19774536

CCCTTAAAGACTATAAAAACCACTTTATTTCCTTCAGATACCAGAAAATTAGGCTTATAGGG

A\_14\_P119900 CTCCAACACCAGAGGATGCATTTTCTTTTTAATTAACACTAAATTTTCACTGCCCAAAT

A\_16\_P17575250

AGACTCCTCAATCTGAAGTTTCCCTACCAAAAATACGTTCTTTTCTATGCATATCTGAGA

A\_16\_P00766755

CAGATGTTGACCATCCAATAAATGACATCCATTCCCTATATTACCTTTCAATATAACTCC

A\_14\_P113436 TTTCACATTCCATGGCTACTGATGAGAAAAAAGGATTTTTTAAAAATCTGCAGGGATGAGA

CUST\_4800\_PI426210822 TTTGCTGAACAGAACAGCTCTTAAACCAGACCTTATCTGTTCCATGGGT

A\_14\_P136465 CTCATTTACATTGATATTGTAGGACTTGCTCAATTCAAGAAAACCTTGGACCATCCTGG

A\_16\_P36738765

CCATTCTCTGCCATTTCTTAGATTCCCTAACACTAACAATAATCCTTTCTTACTCCCACAG

A\_14\_P102010 TTATGTTTAAATTGGCAGTGGAGAAGACAAATAGAGTTTACAGGGGAAGAGGGAAATGTT

A\_14\_P132604 ATGATTTAATTTGGGGCAAATTATAATTGATTGGGATTCAGAGGAGATGAATGGGGTTAG

A\_14\_P100033 ACAGCAGTTGCTCAAGAACAAGTTATTCTCCTTTTTCATCTCGAATACTCAGAATATGTG

A\_14\_P111829 TCAAACAAGTAAAGAAGACCCAGGAAGTTACAAATAACAAACCTACACATTTTTTCTAAA

A\_18\_P14351548

ACCAGTAGGTGTTAATTGATAATTGGGCTTTATGGAACAAGATTACGTTTTTACTGTGCA

A\_14\_P117546 CCTACATTTTCAATCTGTTACTTATCTTGGATTAACTTTTCTGCAAACCCACCTACATGG

A\_14\_P118580 TCCAATGGTATCAAATACCTGTTAGAATGGCGTGTCTGCTATAATTAACATGGGCAATT

A\_14\_P115087 AGAATGCAAGAGATACACAGGCCGATACAAAACAGGTTAGGAATTGGCAGT

A\_16\_P16700311

AATCTTTTGGCCACTACTTACTCAGATTACGCATCTACTGATATTCTCATTGGTGTCTAGG

A\_14\_P123267 CTGGTTATAAATTCTCTTTGTAGCAACAATTGAGTCACTTCAAAGGAGTTCATTGAAGG

A\_16\_P20163465

AAAGGGAATGTTTTGCATTTTTCTAGAATTGATGAAACTGGTCAACTGTTACTCACCCCTC

A\_14\_P138107 TAGTTTTTTGTTTATTTCATTCGCTTTCAGTCTTTTGAATCTCTGGCGGCAACTTAAAGA

CUST\_2213\_PI426210822 AATAGGCACAGTGACGTCTGCCATCACAGCCACCCTCTGGCCAAG

A\_14\_P100549 GAGAAAAAGTATCCAGAAGGCTGAGCAGGTCTAAAAATGAACCAAGAAAAACAAACGT

A\_16\_P18227888

TCAACTCCGTTATTTACTCACATTCAAGAAGTTCAAGTATGACTCACATGAAAACGTTCA

CUST\_7337\_PI426210822 GTTTCAGGTGACCACAGAGGGTCCCACCTCAGTGTGGACATTTT

A\_14\_P201220 TTCCTCTCATCTCCTTGTATCATACTGGTAATGAACCTTGATGAGTTTTGGATAGATGAA

A\_14\_P121183 GACTACATAAACCTCGATGCATTTATCCATCCCAGAATTAATCCCATCCAAGCG

CUST\_1445\_PI426210822 GGTCTGTGGAAGGTCTCCAGCAATGTCAGCCTCACATGTGATTAAT

CUST\_3125\_PI426210822 AAGAATAACAGCTGCTTCTAGATGCTTCAGGGCTGTGTATAGAGAGATGCC

A\_14\_P136124 AATCCATATCCCAGCATTTTTTCGGATTAATTTTGATCACTATTACCCGGTGCCATATATC

A\_14\_P130448 TGGCAGTCCCAGTTCTTTCTATGAAATGAAATGTAGTTGATGCCTTTTTTTAGTGTATGTG

A\_16\_P15234173

GGGAGTTTACTGCTTAGTAAAAATTTCACTTCATTGCTCTCTATTTCATCCCTACCATGTG

A\_18\_P16810920

AAATGTGACCATACTTAAGGAAGAAGCTTGGCTTCAATGTTTTTAGGTCAGATTGTCAAGC

A\_14\_P127145 GTCAAGGAATCTGAAAAAGTATGTTGCAAATACGTAGTTGCGTTAGGGAAAACGTCTG

A\_14\_P130376 TTTTCTGCTCCCCCATATAAGAGAAAAGCTTGAAGTAGATAGCAGATTGACGTTATGCTTT

A\_16\_P16251595

AAATGACCTCATCATGGAGTAACTTCATCCTACGGTTCAATTACGTATTCAGGGCTATT

A\_16\_P40053805

AAAGAGATGCAGACTCTAATTGCTGATTAACACATTGTTTTTCTCTAAGCCCTTCACATG

A\_14\_P107769 CTTGTTTTAAGTAGCACCCAACATGTTATGACTCCTTGTCTCCATTAGGTTAAACTTCTT

A\_16\_P21364078

AAATGCAACTCTCTCCTTAACATCAATCTACTGAAACAGAGATTCTAAGATGCGGAAACA

A\_14\_P131663 TTTTTTTGAGGGTTTTCAAACATTTTGAAAAGCATTACTTTTTTTGACCACGAGCCATG

A\_16\_P03808022

AATTGTAATTCACTGTAATACTTGAATGCCACAAGCTGTAGTGCTTCCATTATCGCTGACA

A\_14\_P120177 ACTGTGACTTTATTTCTTCACTTCCTTCTACTGCTAAATTTCTCTGATTCAGAGTTTCGG

CUST\_5702\_PI426210822

GTTTGAAGTATGTGTGAGAAAAACAATAATTCACCCTTCTCACTGACCAGTGG

A\_14\_P129712 TGTCTTGTGTTTTGTTTTAGAAAGCCTTGTTTTTATCTTTGCATCTGCGTGTCTCAGTT

A\_16\_P36230288

TGGTGACTACTTTGTCAACCGTCTATGCTAAGGCAAAGGAATATGTTTTAATATATAATC

A\_14\_P128444 CTATACATTTGAACTATTTCTGCGTAGTACTGGAACCAGATTTAACTGAATTGCCCAT

A\_14\_P122219 CCTAAACACTTTTACATAATTTGCACATCAAATGTGCATCTATTTTTCCCCTGGAACCAT

A\_14\_P115792 CAACACCAATAGAGATTGCTTTGTGTATTTTGTAGGGTTCTCTGTTTTGAAGACAGAATT

A\_14\_P120384 TAATTCAGCAGGAGCATTGGATAAATCTTAGAACGATCTATCCTTCCACTCCCAC

A\_14\_P116708 AATTTCCCTTTTAACTTACTTGTCACTTGAACATCTTCAGGCTATTTGTGAATGCCAAGA

A\_14\_P124322 TATTTTCCATGTAGTAACTATTAACGTTCTGGGGAATTAGTGCTCTGTGTCACACTTTGG

A\_14\_P139640 AAGACACTTCTCAACCATGGAAAAACATCTGGATTTTCATTTGGTAGTTTAAAGGTTTTTG

CUST\_3471\_PI426210822

CAGTTCTTACTGCTGTCTGAGAATAAAACATAATATCTTTGGTCTTCACAGAGGTATCAG

CUST\_90\_PI426210822 TGAAGGCTTGGCGATAGTATTTGCCCTTCTCTGAACTTTCTGGAT

A\_16\_P01537298

ATCTCCCTACATAGCCTGAAATTTGTTGCATCACTTTGTCACTATTAGATCACATCCATT

A\_14\_P118188 CTCAGAAGTAGGTGAGAATTATGATCTCTAAAACGCAGGTGCTGATTTCTAATCCTTCTC

A\_16\_P39974007

ATGCTGTAGTGTCTCAGATCTAAGGATGTTTGCAAAAATTCATTTTCTCTCCCTTTAG

A\_16\_P03596296

AGCATGACTCACAGTATCTTACACACCTTGGATGTATATACGCACTTCTTATGTTCGTAAG  
A\_14\_P100513 AAAAAAATACATACTCTGTAAGTATGTTACTTTCCTGTCCAAAAGGTCCAAGTGGAT  
A\_14\_P113015 AGAGGAAGAGGATGAACTAAATCCCGTTTTCTGAGGTAGTATTATAGTATTCTTTGCCT  
A\_14\_P114518 GTGCGACTGGAAAAGGGAACACAGTGAAGAAGACTTTCACAATATTTTGTATGATTTTTT  
A\_14\_P103449 CAGTAGAAGAGGACATATACCTACTTGAAAAATTTTGCCAAGGAGCAGATGAGATGAAAT  
A\_14\_P110601 CTGGGTAACTGCTCTAACATGATCGATGAAATTATAACACACTTAAAGCAGCCACCTTT  
A\_14\_P131016 ACCTGTAGGGGTTGATCATTTCCTCTGTGACGAAATTCAAGTAATTCCTAAAATTTAGAG  
A\_14\_P138225 CACAGTATAATGGTCACTTCTTAAAGATGCAGTCAATATCACTGTAGTGGAAATCCATTCC  
A\_14\_P124212 AAAGAATCAGTGTCCCAGAAGATGTTTATGACAAGGGTTGCGTGAAAGACGTA  
A\_14\_P117117 TTTCATCTTCAAGTTCCTGAGGTAAGACTCTACCAATCCTTCAGTATACATGCTGAAAAT  
A\_14\_P131939 CTTGGTCACTTGAATGTTAATTTAATCCCCAGGCTCTGGTGCTGAAACATATTGTATAC  
CUST\_5720\_PI426210822 GGACAGTGTCTGGCTGGGGAGGAAACGTTAGCCTCTCTTTTCTTA  
A\_14\_P119547 ACTCCTTCAACTTTCTATCTAGGAAACTTTCCTATACAAGTTGCTAGGCTGTAATTCAT  
CUST\_8120\_PI426210822 ATGTACATTAACAGTGCTGCATAGCTTCAGGAAGCCCTAGGATCTGTAGC  
A\_18\_P13338810  
CCAAGGAACAAGTATTTAGTCATGATTGCCACTCGTTATAGGCTCTGTAAACAGTGTA  
CUST\_10225\_PI426210822 CACTTAACTTGGGATGTGCTAATTTCCCAAGTGTAGGGGACTTTG  
A\_14\_P126738 ACCCAACGGAAGATAGAAATGACCGGTTAAGAGATTCTTATTTCTTTACCTGTGAGTG  
CUST\_2406\_PI426210822 AGGGCTTTGCCTGTTAGTGTGAAACATTTCTTCAGTGTTTCCTACAGTGT  
A\_16\_P15807478  
AGTGTTAAAGGAGATGACTGCCCTATAACCTATGTTTTGCTGAATGTTTACTATGAGGTT  
A\_14\_P116534 GATGACTCTTCTTAGTGTTACAGATCACTTTTCTCTCTCTTCATCCAAGTTTACATTT  
A\_16\_P15711058  
AGCAAATCCTCCATTTTCTAACCTGTCATTACATCAGTAACTATCCTATCCAAGAATCA  
CUST\_6399\_PI426210822 AGCAAGACAGAAACAGTTTCTATCCCTGTAGGAAAGAGAAATCTCGGAG  
A\_14\_P120793 CTGCTAACTTTCTGGGTGAATAAGGTTAATTCATAGGCATTTAGGCTATGTCTGGAGATA  
A\_16\_P20425521  
ATTTGAAACCTCTGAATTTTGTGGACATGTAAGCATTCAAAAATAGAGACAGATGTCA  
A\_16\_P20902743  
TCATGTATGTGAATAAGACAAGCCATCATATGAGTTGCACAATCCCAAAAGACTATACT  
A\_16\_P41109733  
TGTGGAGGCAACAAATTTAAATAACCAACACAATGAACCAAAATTATCGATTCTCTGAG  
A\_14\_P108473 CAGGCCACTGATTTATGTGAAGATCCAGGGTCCCTCATGAACAAC  
CUST\_6831\_PI426210822  
TTGGCTTTTGTGACTCCTGATTTTTTTTAAATAATGCTTGTGATTTTTTTTTTCCATTT  
CUST\_442\_PI426210822 GAGAAGCTGGCAAGGGTGTGTTTTCTGAGCTAGTGTGAATGCT  
A\_14\_P104401 CAGTTCTGCTTTAGATATGCAGTTTTGATCACAGTGTAATTTTCTTTGAATCCAGCCA  
CUST\_5045\_PI426210822 CCTCTGCCCTCTGTGTCATGCTGCAGTAAAGTATGGGTCAACATC



CUST\_3709\_PI426210822

ATGAGACCCAGATCCCTGTCACTTGACAACATAAAGAATATTATTCTTCATACCAGCAT

A\_16\_P15250704

ATATTTGCATCACTGATTTTTTCCCTAACAACCCTATACCAGCAACTTAAAGGCTTATCC

A\_16\_P58424181 TTAAAGACATACTAGCACCCGCGCTGGAACCTTCTTCCTGATGCAACCA

A\_18\_P15703829

AAGTCAGAGAAAGACTTCTACTGTTGCACTTATCACAAAGATAAGCAATCACAAACACAGAG

A\_14\_P106656 TAAGAAAGTGCCCTGGTCACATAATGGTGGTTCGATTTTTAGAGACTGTGCAA

A\_14\_P126825 AGCAGAGGGACCCACAGTTTCATTTCAATGGAACCAAAGGTAAGAAGAA

A\_14\_P136925 TGAAAAAAAAAAGTGCCTTCAGTGACCAAACCTGACCTGTGATTTAATCACTAGATCTGATT

CUST\_6816\_PI426210822

TGAAAACCTATTTGCTGGCTGGAATATTTGTACTTCACAGTGATTGCAAGAAGCAGC

CUST\_8944\_PI426210822

AGCCCCTCATATTAGCCTAGCTTATGTTGTTGTGATCATCAGACTGTTTCTGTTTT

A\_16\_P16902554

AGACCTCCCTAGACTCTAAATGTTTGACCTTTGACTTCTATTTCTAAACTCTGCTAGAAA

A\_16\_P00685559

CAGTTCCTCAATTTAAACATCAGAAAGAGTGCTGTTCTTAAGGAAATCATCAAGAAAGAC

A\_18\_P22843022 CTGACATGTATATGGTGAACACCAATTTACTTAGGGCAGTGCCCCCTACT

A\_14\_P139050 CTACAAGGGACCTTGTATTTGTTCTGAGTATTTACTGGCTTACAACATCTTTTGAATTA

A\_16\_P03679892

ACACCCAATGAATCTTTACTAAAAGCACCAAAGTAATATGAGGCAAGGAGATACTACACA

A\_16\_P02572303

AGCGTATGGAGAAGAATTGTTCTAAAAGTTTACCAGGAAAGATTAGGATGTCACAGATCT

A\_14\_P135005 CTTCCATAAAATTTTCTCTGCTAAGTGGAAAGAGGGTCTTAGAACTCAGAGGAATC

A\_14\_P111518 CTAGATTTGTCCATTTTTGCGTGTTAGTAGGGTTTTGGAGGACAGACATATTTCTAACAA

A\_14\_P139021 CTACCTTTCCAAACGCTGCTGCTGCTGAAGATACAAGAAGCCTTGTTTT

A\_14\_P117315 CTTGCTAGTAACAGTGGCCTTTATTATTTTCTGGGTAAGAGAAGCAGCACTGCTTTTATG

A\_14\_P102825 GTTATACCTTATTGGTGTGGACGTTGTCTAAATTTCCGGTAGCCATGGCACAAGAATA

A\_18\_P16393523

GACTCTCATAGCACTTCACAAGAATGAAACACCATACGATAGAAAAGACTCATCTCAAGTC

A\_18\_P22839050 CTTTGAGAATGGGTAATCAGAGGGGAGGAAGATGGCCTTGGCATAT

A\_16\_P03449763

AAAAGTAACTGTTTCACTAAAGCCTCCAGTATTTACTGAAGACTGTCAGAATCATCCTCC

A\_16\_P21354411

ACTCTTAAAATTAATCCAGAATTTGAACAAGCCTATAACTTTGAACCTATGGATGTGGAA

A\_16\_P01414352

ACCTTTTTCGCTCATCTTCTAAATACTTGATTTCCAGACACTTTAATTCATAGGCTTGCA

A\_14\_P101317 AAGGACAATGAAAAAGATGCTGATTGTCATTCTGTCTGGTATTGACAATCAGGAAATTA  
A\_16\_P02138653

GCGAAAACACTAGAACTATAATTTGACATGTTAATCATCTCTACCTTGCTTATCTCTGCATG

A\_14\_P125623 ACCTTCAAAGCACATGAATATGCCTTTTCTCCAACATTAATGAACTTAGGATCATCATCA

A\_14\_P201058 GCAACCCTAAACAAAGTTTCTGCTAGTTGGTTGAGACTCAAATCTGTAAACAAATTCAT

CUST\_1595\_P1426210822 GTGCTCATGGTACAGCAAAGTGGGGACATGGTGGGTGTACAGAGT

A\_16\_P17100550

AACTACCAGTAACAAGTCGAATCTCTCTCAACAGTTAGTGTTTCATGAATGTCTACTTTGG

CUST\_5737\_P1426210822

GCAACTAAAAAAGAAAAATGAAACATAGAACACAAAAAATTCCAGGGTGAAAAAGGAGAA

A\_14\_P135149 TAATCAGATAGGTAAATAATAGCAGTTAGAGCAGAATGAAATGGTGTAGCCAAGGGCAGA

A\_16\_P03425992

GTCATTGCAAAAGTAGAAAGTGACCAAATTACAATGACAAACAAAACCTCGGATCTCTACC

A\_18\_P22839044 GTAGAAGATGCTGAGTATTTTTCTAGAAGACTGGACTGGACGGGTGGG

A\_14\_P128977 GCATTTGAGACACAGTGTTAGACATTTGATGCATTCATGTTCTTTTCGATTGTCTTACAG

A\_16\_P19046139

CCCAGAATAGCAACAGTTATCATTTAAAACCAGTGGCTTCTATATACAGCAAGTGCTTCT

A\_14\_P121161 TAAGAAAATCTTCTTTGGCTTTGGCTAAGAATTCTTTCCTGAAAGGGAGAGAGGG

A\_14\_P110705 CTAAGTCAAAAGTAAGGACTTTCAAAACTAGATGCTCCATTCTCAGAACTTGTTCCTTGG

A\_14\_P124705 CTGACACAACCTTCTTGTTCAGATTGTCTCTACCTACTTGATCTTCCAGAAAAAGATGA

A\_14\_P131740 CACTTCCATTAGCATCTGAAGGTGCATGGTAATCGGCTCTGAAATAAGAGTCAAAAAT

A\_14\_P116835

AGTGAAAGAAAATGGACAAGCAAACATTAGCCTGAACAAAGGCTAAGTTCTGTTTTTAAC

A\_14\_P104714 TCTGATTAATTTGAACCTGAAAGTCTAAGCCCAAGTCATAGTCCCTATTTGATTTAGCCA

A\_16\_P37934650

AAATGAAACACTTAGTTCCTCTCACATCTCTTTAGGCATCTGTTACATCTTGAGTGAGTC

A\_14\_P100459 ACATTTTAAATAATGCCACATGGGTATTGTTTTCTGGTTGAGCAATATGGAGTTTCAGAG

A\_16\_P58424071 AAGAACTGGCCTGGAAGTCTAGGATGGATAGGATTTTGCCAGTTGAAG

A\_16\_P18683539

AATCGATCTTTTGAAATGGATGTCAGTTTAGGCTCAAACGTGTGATTACCTAAGTTCTC

A\_16\_P19606333

AAATCAGGTTTGCAGATCAAAGACATCACTGAGTAACTTAATTACCCAAGATTCTCAACC

A\_18\_P22840352 AAGAATATACCCAGAACCAAGCCCTATCCTTGGGGACAAAGAGAAAACATTC

A\_14\_P139390 CTTTTTCCCCCTTACCTTGTCTCTCTCATGTTTCATGATCTGTGTCATAGATATTTCTT

A\_14\_P123185 GGAACAGTATACCCACAATTCACCCAAAGACTCTACAAAATAAATCTTTCTCTCCATCT

A\_16\_P21403305

CCAATTACAATCCATAAGGTCACTAAACTTCCCATTAAATTTCTTTTCAGTGTAGGGCT

A\_18\_P22840514

AAAATGTTCACTTGCTCCAAGGTCAGGTATTAAGTTAGCAAAGTCCTAATGCTTTTGCTA

A\_14\_P114639 GACAAGCACCGTGTGGGTATTACTCATTCCGCTCTACTAAGGAGG

A\_16\_P16031579

AAGTGTCTGCCTCATTAAAATTGTCATCCCTGGTTTACTATTTCAAGTGCAGTATCAACT

A\_16\_P19252945

TGCATTATCAAAGAACTCCATCAATGAAGACAAAACCTCTATTGCATCCCTAAACTGATCC

A\_14\_P201569 ACACACATCTCCATACACTGGACATAGTCTACTTGCAACAGATAGATTTCACTCTCTAT

A\_14\_P103668 TGCATAGTTTCGGTCACTAAAGGAGGTTTTAAACAGTATAACAGGTAAGTCTCCATATG

A\_16\_P18866203

AGCCTGTCTCCATTTTAAGATTCAAAAAGAAGCAACATTTTAATTCCTTCCAACCTTTGCA

CUST\_5570\_PI426210822 TTGATCTCTTCACTGAGCCCATGTTGGTACCCAGGACTATACAGAAG

A\_14\_P101057 AATTTTATTTACGAAGTTAGACTAAAAGAAGAAAAAGAACCCGTTATGAGCCTTGAAAAA

A\_14\_P133350 CACTATTCAAATCTGCATCAATATAACTGGATAGAAGAAAGCAATGGGCAGACTTCATGT

A\_14\_P106443 GGAGTCAAGAGGATGCAAATTCCTTGTTCCTTGAAGTGGATCATTCTCATGTTGTAATA

A\_16\_P18138144

AATCAAGACAAAAATCAATGAACCAGGTTATCTGTTCTCAATGACTCTTCCAAGATGTCA

CUST\_391\_PI426210822 TCCAGAGCGGACGTCTTTCACACCCACCCCGTCCCCTCCTCCTT

A\_16\_P35945513

AACAAGCATCCAAAAAATTTGATAAAGTAACAGTGTTTTTTTCATAGCATACCAATTTCTT

A\_14\_P129558 CTCAGTGAATATTCAGGTCATATGCATGCATATATTTAGACTGGCAGTGTGTGCAATTG

A\_14\_P124032 TTGAGAGAGTTGGAGTTTTAGATAACTGAATATTTGTCCCCTATAGTTTGGGGAACAAAG

A\_14\_P117569 TGGACCTAGAGGGGAATGCAGATTCCTTTTGTGGAGAATGTTTTAAATATTTTCAGTA

A\_14\_P128178 TAGCAGCAAGATTCTGGTAACTGAGAAAGGTAATAGCACTTCAAACAGGAACAGTTTAA

A\_14\_P120394 CCTTCTCTACTTAGTTCTCTTAGACTGATGCTCCCAAGCACTGACAAAGAAGTG

A\_14\_P126510 GATTTCCCTCCCTCCATCACCACCAGTTAGTTCTAACTTGTCTATAATTTAGAATTCT

CUST\_9904\_PI426210822 TCTAAGTGACACATTGAGCTGAACACTTGGAAAGAAGAGCTGCCTTACATG

A\_16\_P03035573

AAACACATGCCTCTATAAAGGATAAGTTCTCAGCATACTTCAAATTGGATACAGAAGGTT

CUST\_7165\_PI426210822 ATTAGTTTTGGCTTTGGGAAATGAGGTTTCTTTGACTTGGCTGGAAGTATACAG

A\_14\_P201792 ATTACTGGGATACATAACTTGTAAGTAAAAAGGTCACACTAGAATAGGCTGGAACATGGT

CUST\_1348\_PI426210822

TTTGAGGTGGATAAATGTTTTGTTTCAGTAGTGGAGAGGGCACTAGCTATTGTAGT

CUST\_6638\_PI426210822 CAACGTGTCCTTCAATGTTTCCCGGGAGCTCTTCTTCATCAACAT

A\_16\_P21494299

AGGCCAGATGAGGAATAATAGAAGGTTTAAGATACTGGATAATAAAAAGGTGGACTGGAT

A\_16\_P00685328

TGTCTCATCAGAAAGGGAGGCATATTTGATAGCAGGAAAAAGACAACCTTTTTTTTCATTA

A\_14\_P201672 GGGTATTTATCTCATTTCATCCATTAGCACTGTAATTGCATTCTAGGGAACCTCAGCAATT

A\_16\_P21383851

AAAATGCTACTTGCTCATCTTCTGAATCCTTTCTAAGTTCTGCTGATTTTTGTGACTGTC

A\_14\_P118955 CTGCATAACGTCTCAGATGCAGACACTTCTGACATACAGAGGAAGAAAATAATGAAGATA

A\_16\_P36150419

TGTTTCCCAGACAATTCTAATCGCCATAACTTTCTAGTGAAACTGAAAATTTCTTGAGGG

A\_14\_P106521 GAGAGTTGCAGAAGTATCTGCATCACATTTTCCTGACTTTCTCTATTCTGAGTCATATTC

A\_16\_P17708573

AGGCTATGTCAACATGTGAAAGTCACATTGAAGATTTAGAAACTCGCTATTGTTGCTCACT

A\_14\_P134052 AAGTTCCTGGAATAATATTAGTCAGAGTAATATAGGATCTGCAGGAAGTGTCTCAAGATA

A\_14\_P112158 CCCTGGTTGCTTTGTGTCTAGTTTTCTAGACCCTTCAICTCTTACTTGATAGACTTACTA

A\_16\_P03588381

GCTCATCTCATACCAAAAATTGCTAATTATGTCTCTAGTAATATGGTTGATGTCCAGGAT

CUST\_1373\_PI426210822

CTAAACCTGCCCTCTTGACATATATATGAAGGAATCAGGTTAAAATAATAGTAGTGCCCT

A\_14\_P129798 AATCCTAACTCTAACCCCTAGACCAAGTCTGTAGCAGTAGAAATCCAGAAAATAATTCCT

A\_16\_P16182656

AAAAATTAGTGACACCCTAAAAGGTAGATATGTCCATATCTGTTTAGGTCAAAAAGAGGCC

A\_16\_P36231077

TATTAGATGGAATCAGAATCGGGTGGAAATGTCATCTCACTGTCCACAGATGTTATTCTCT

A\_14\_P135313 TTCCCATTTTTGTGAAAGCAACCAAATCATGTATATATTAGTAAGTGCACGCACACATGC

CUST\_7587\_PI426210822 GGGGTTTGCAGGTGAGAAGGAACCTTTCACCATGAGTACATTTCTATG

CUST\_7054\_PI426210822 AAATGCAGCCAAGCTCTCCTCTGACAAGAGATGTGAGAATTCCGTT

A\_14\_P113805 GCTCCACCTCCATCTCTTATACCAACAATAGAAAGGTAAATCAGTATGGATACTGATTTT

A\_14\_P201181 CATTCCACGCGTCTTTGCAATAATTACTAAATTAGTCAATTGCCACCTCTGTAAACAAAC

A\_14\_P114691 ATCAACTGAACATGATCCGAGCAAAGAAATATTCTCTCTTTTTTTCATTTCCAGTTCATGG

A\_14\_P131882 GTCTAAATCCCATTTCATGTCATTGTTTCCCATCGCTCCCAAAAAAAGGCTG

A\_14\_P115343 TATTTAGAGAGAAAAACCATATCCTAAGGGGTTGCCAAATGAACGTAACCTTCAGAAGGTA

A\_16\_P18703944

AAGGAATTACTTGGCTACAACATATGCAAAAAGTTTACCTTGATTAGAAAACATCCTGGTG

A\_14\_P122144 TGCTCAGAACAGTAGCCAATAAAGAAAATGATCATCAGCAAAGTAACTTTTGAGCACTGA

A\_14\_P125011 TGTTATCCACAGACATTTTTCTGTATTCTGTGTTACGGTAATTTTACCATCCTGTGTA

A\_14\_P201024 ACAATATACATGAAGTCCAAAGGGAAATCAGAGTCTTACAATAAAGGCTTTCTGTAAGGC

A\_14\_P130796 ACCTGAACTGATGAAATTCTTCAGCCAAAAGTTGTTTACATGACATGTTAGATCTTTACT

A\_16\_P17030219

AAATTCAATCTTGTCTCATGCTCTCATTTTTCTTTGAAACACAAAATCCATACTTGGCTGC

A\_14\_P133518 TAATGAAACGGTTTTGACTTGGATATGCTGTGCACATTCAATGAACTTAAAGGAATTGTTTG

A\_14\_P112658 TGGTGTCTTTCTGAATCTACAAGGAATAACGATAGTGATAAATCAATGAACACCACCAG

CUST\_1882\_PI426210822 GATTAGCCCAGATGAGCTGAGACCACTGGTAATTGGAGCCTTCAG

A\_14\_P107631 TCTCTCTCAGTCACAGACATAAATTCATTCTTTTGGATCAACACTTTTACTCTCAGGGTGA  
A\_16\_P01434189

GGGCTACAGAAGTGTAATTATGGTATCTGCTGTTAGAGATCTCTGTTTTTGAAGTACT

A\_16\_P16975318

AAAACAAAACCAAGACTCTGTTCTTCTCATCTCTTTGATTGAGTTATCCTTTGCTAGGTG

A\_14\_P108928 AAGAAAGGTCGGAATTTCTTTTGGGTCAATATTTTAAAGTGTGTGAGGAGATGCTCAGTA

CUST\_6439\_PI426210822 ACACCCCTCAGATTCACAAGGGTGGTATCTTGTGTGTTTCCTTTAAGTTAT

A\_16\_P17269474

AAACGTCAAGGAGAGTAGTTAGAATGCATGTTGTCCCTTTAGACACATTGAAGACATTTA

A\_16\_P03012235

CCCACCTTATTTGGCTATTTGAATCACATACAAAGTCTTCCTATACCCTAAAAGTCTTT

A\_14\_P106541 TTTACAATTTGTTTACCTGTAGGGTCAACTTTTCAGTGGATCCAAATGGACATTCATTTTG

A\_14\_P135982 GAAGATTCTCCTTAAACATGTGGAATATTCTCCAAAATTTTAAACATTTTACTCCATTG

A\_14\_P127216 TTAAATAAATTAAGTCTGGACTTCAACTCACCCAGGAATCCCTAGAGAAATCTAAGGC

A\_14\_P107474

CAGAATAAAAGACTATACTTAACTTTGAAATCACCAGGAAAAAGGCTAGGAAAACAGCCC

A\_14\_P201122 CACACTAATCTTGATGATAATTGGCTCAATTTTACAATACCTTCCTAAAAAAAATAGAGC

A\_14\_P138487 GAAAAAGAATTCTGTAGAATGGATGTTACAGGAAATGTGCCTGCCTGAGTAGAAAGAG

A\_14\_P137740 TCCTAAATAGAGTCAACAGAAGAACAAGTGTGAAATGGCTATCACTAATGGAGTCATT

A\_18\_P22840507 CAAGATCACACAGATTCAGAACCCTGTGGAAGATCAGGAAAAACTGTG

A\_14\_P122380 GTTTCGAATGTTCTTTACTCTGCAAATATGTTTGTATTAAGTGTACATAAGATGATGT

A\_16\_P15800815

GGTCTGGCACCATATGACTTCCTGTTTTTAGAGTTTATGTCAGTTACTGTGGTAGAATTA

A\_14\_P119299 GCCAGATATTTCAATCTTTTTCTTTTTCTTCCCAAACATGATGCCAAAACCTGGGAAATA

CUST\_3316\_PI426210822 CAAGCCTCTCAGCTATAGGGTGCCCAAGGAAAATGGGAGATTTTT

A\_14\_P105671 AGCCAAGATGGTAAAGCCAATTTGGTTGCAATAGTGTGCATAAGGATAGAATATTACCATC

CUST\_92\_PI426210822

CTGGATATCAAAGCCACGTGGAAGTATAGCTTGTCTTATGTATGAAAAACAGGGC

A\_16\_P17622468

AAACTGGCACTCTTAATTGCATACTAGACACAGGATCTTTATGATGTAAGAGCAGACAAG

A\_14\_P122295 ACTAGAAAGCCAAGGTCTTTTATTAAGGTCCCGACTGGTTTTTCCCACTGTATTT

A\_14\_P131668 GAAAACAATCCTTGCTCTTTGAGATATGGGAACAGTACTTCTTCTTTGGATGTTT

A\_14\_P109601 AAATAATCAGGAATTAAGTAGGTCAGGGTCATGTCATTAGAGAACTTTACCATCAGGCAA

A\_14\_P139487 TTTTTTTAGGATGTGATGTGTTCAATTTGTTCCACATCAACTTGGAGTCTTCAAAGTGAAG

A\_16\_P36230168 AAGATGACATGTTGTGACAGGGACACATGATGGTCCCTGATGATTCCTCTATATATA

A\_14\_P109743 GATCATCTAGAAGAATTTGGGGTCCAACTTTGAGGCAGAGTTCTGGGTATAAATGTTA

A\_14\_P115672 CCTGGATTTTCATTATAAAAATGTCATTGTAGGGAGTAGAGACTCATATCATGGCCTTTTT

A\_14\_P134739 AAGTAATACAATCAAAGATGTTTTTCAGTCCAAACATACCTGCAGAAGGGAAAACAATCC

A\_14\_P122412 GTGCATTGATTTTCAGACACAAAGACCATCACCACCATGGCTGAAGACAT

A\_16\_P01330169

ACCTCACCTTTGTATTCTACCCACACTCATATCACTAATGGATGTAGTCAATTCTTGAAA

A\_14\_P125532 GCCAGTGCTTAAATTTTATACCCAGGAATTGTTTGGCTTATTTCTACTTCTCTCTTTA

A\_14\_P110500 TTTTCTCCTCTGGGCAGCAGCAGACACATTTGTCTTTAAAAAAGAAATTTATGTTTAC

A\_16\_P39698926

TTTACAGGTCATTTTGTGTCAGTCCTATGATATGAAACAGCATTCTACCAAGGTTTTTCGTG

A\_14\_P117553 CGGTTGATCATGGGGTTGAACACTGACAGTAAATTGTTTGGGAAGAAATTGTTTACTTAAA

A\_14\_P130406 TATTTTTCTTTTGCAGATGGTGATGCCAGTCACTTAAGGAACACCTTATTGATGAATT

A\_16\_P40225684

TTTCTCCCATCATCTTTTCATTTTCTCCTGACTCATCAATATACCAGCATAACATAGGAT

A\_14\_P123284 TGATTACAACCTTTGATATGAAATTAGAAGTTCCGCATGAATTCAGTCTAAGGAGACCACT

A\_16\_P00057959

ATCCATCCAAATCACATACCTAGGCTCTATACACACATGATTTCTTGTGAGAACTTTTTCT

A\_14\_P134415 TTAACTCTCCATAATTGATGCCTGCAGTAGTGTAAGGCATTTTCATACTAGTCTCCTCTA

CUST\_8704\_PI426210822 CAGAGAGGCAGCAACCGCAATCAAAGAATAATACCAGAGGGTG

A\_14\_P134408 CTGTTTTTCATAAGCAGGAAAAATAAACAGAAGTATAAAGGAATGTGTGCAGGGGGTTCTG

A\_14\_P202451 TGCAGAGACGGCAGATGGAAAATATGCTCAGAAGTTGTTTAATGACCTTTTTGAAGATT

A\_16\_P01947461

CGCTACATAAACACCTTTTTCACTTACAAGTTGCAGAGAATTTAAATGTTACCCCTGTGT

A\_14\_P109760 GTCTCTGAAAGGTGGGGTAAAGATAAAGCCTTTCAAATTTGAGGAAGACCTTC

A\_14\_P106624 ACTTTCAACTACCACCTTCAATGTTTTTGGACCACATATATTTTTCCCACTCTGTAAAAC

A\_16\_P16243867

AAATCAGAAGAATTCTTTGAAGATTAGTCCCCAAGAGAATGATTAGAAACAGGCTCAGAC

A\_16\_P19368759

AGCCCATCCAAATATTAGTTCTACCATGAAAACCTTTTTATCAACTGGATCTCTGCTTGG

A\_14\_P119416 GAGGGTAAATGGGGATCCAGATGAGAAACGGATGCGGAAAAAAAAAG

A\_14\_P124104 TAGAAGTGCCATTTGGAAGATTGAATGGCCATAAACATTTTCATATTCATTAGCCGAT

CUST\_6865\_PI426210822 GGGTGATGATGTTGGAAGGGAAGCTCATTTTTGCTGTTTCTAAGGAGTAT

A\_16\_P00147089

CCTAGTCAGTCTGCAGACATTTTACTCCATCAAGGATTCCTACTGAATTTAGTGAAAGAA

A\_14\_P135893 ATATTCATAAAACCAAGCCAGGCACTTCTTGCTTGAAAAATGTTCTCTCCACTTATTAG

A\_18\_P11807757

AAACAGTTAGTCACCACTCTTCTATATCACGACACTGCTTTTTTTTACAACCTTTCTGT

A\_14\_P100972 GCTTATTTAAATGGTCAACCACATGGTAATGCTGTAAAAGACAGCCAAAATCTTCTACC

A\_14\_P201076 ACGATGACTCCTAACAATGGAATATGGCCTGGGATGAGGATTAAGTCTTTTATTATA

A\_16\_P20245894

ACGTCAATCTTCCAAAAATACTATCTCATTCACTCTCTTTACATTCCATTTCATCCAACA

CUST\_7672\_PI426210822

CAGAGGGAAACTTTGAGTATGTAAAGACCCCAGGAAGGCTTATACTTGATCTTT

A\_14\_P111424

ATCAATAAGAAAGAACCAGTCGAAAAACGGGGTAAGGATTTTCAGAGAAAATACAAACATC

A\_14\_P121605 CAGATTTGCGTCTCACAGATAAAAATCTAGTTCCCTATGGACATCCTCACGTTTCAT

A\_14\_P117631 TCTTTAACTATTCATACACTTTTCGAGTCTACAAGAGTGGTTCAGAGGGTCCAGTC

A\_14\_P201218 ATAGATTA AAAACAGACCTAACAGGTCACAGAATCTGAATTTCTCCTCTCCACCTTCTAA

A\_14\_P102508 ATGTTTGGTGAATTGAAAGTCGAACCTGGTATTTCCCTAATTCAGGGAACCATATATTTGA

A\_14\_P121436 GACTCAGCCAAGATTATTTTTAAATATTTCCCATCTTATGACCTATCCACCACTTTGGC

A\_14\_P124194 CTCACAATCAGGCAGATGTGCCATTGAGAAATAACACTTAAAAGTCTTTCAAATGCTCAA

A\_14\_P113694 TTAACATAATCCCCCAATCCCATAACAATTCATTTTCAGAAAAGTATTTAGGGACTGTGCT

A\_16\_P15533780

AATCTTATTACCACATTAGCCTCTTACAAGATGACCATTGGAAAGATTTCCACAGAAAG

CUST\_8453\_PI426210822 CAGAGAAGCACACTTTGTGAGAACCAATGGGAAGGAGCCTGAGCT

CUST\_1290\_PI426210822 TATCTGCACAGCAGTTTGTCTGTCCATGCTTTGGTGCCAGTTATTTCA

A\_14\_P139653 GAATCTTGTAACAAATGTTGCTCTTCCTGTGAAATCTGAACTTCACGAAGCAGACAA

CUST\_5238\_PI426210822

CTGGGAAATAGGTTCTTGCTACAGGTACAGTTTATAATAAGGATTTATTTTCATAATAGGG

A\_16\_P00432213

AAGAGCCTACTGATCCAATTTCTACGAGAAATGAAGACTATCAAGCATTCTAAATTTCT

CUST\_3683\_PI426210822

ACAATTCTGTTTGGTTATCATGGGTAGACTAATACCTGTCAGATCATATAACCCGAC

A\_14\_P122401 ACAAATTACCAAGATAATAAATATTCAAATTGCACAGACCATCTGCCCTGAACAGATGT

A\_14\_P103396 ACTATAGAAACCAAAACAACCTGTTGATTGAAATGTCTTCCAACCTCCCAATGAATTTCT

CUST\_1329\_PI426210822 CGATTGGTGGTCTGCTTGAATTACATTCATTAATGTAGGCTCCATGCATTGAGT

CUST\_5760\_PI426210822

CAGCTTTAATTTTCATGAACGATTTGCCTTTTCATTGATTCTTGAGGATATGAATGTTTTAG

A\_14\_P137946 GGAAATTTTTTTTCCAGACTTCCTAGTCCTTACCCTAGCATCATTCTAAAAGGTGTTATT

A\_14\_P138058 CTGCCTCTCTTTTCCATTCTTGCCACTCCTTTACGAACTCCTTTTGCTTTT

A\_16\_P20049880

GCTAATGATTACCAGAGATAGATCTACTCAAACCTGCAGATAGAAATCCTCTGATCATGCC

CUST\_1525\_PI426210822 GACATGGGGGGTGGAGGGAGGATGAAGGGTGCTCTCTGGCTTCCA

A\_16\_P15116270

AAAAGAATGCATTACTGAGATATCATCAATTGTGTTCTGTCATTACATGGCAACTCCACC

A\_14\_P104037 TGAATTTGGGACATAATAACAGCAGTGGAGTAAGTATTTAGAAGTGTGAATTCACCGTGA

A\_14\_P113069 TTAATGAATCACCCTGCAGATGCTGTCATCCTATTGTGGAAGGTGAATGAT

A\_18\_P26794214 CTGCCCCATCTCCTCATCCCCACTCTCCCTCCCTGGAGTTTCTG

A\_14\_P130654 TTTAAGATCCATTTTCATTACTTTAACCCCTCAGCGTTCTGAGTATCTTCCCCAAATCTGT

A\_14\_P102707 AAGAATGGGAAAAGAATGGCTCCCTGAAGAAAGAAAGGCTGGGAATACAAAATA  
CUST\_1866\_PI426210822 CTTTCCCTAAACTATAGTATCTGCCAAAAAACCCACCCCTGGATCTAG  
A\_14\_P110715 TCTTGGTGACTTCAAACCCACCAAGTTGAATACAGAAAGGTAGAGATGGTTATAAGAATA  
A\_18\_P22839943 CGGCTTGTCTTTTTGGATGGTAGGAGGCATCCAAAGCCTCTTTTAG  
A\_16\_P00685602 GATCATCGCCATCAGTTTGTGGTGGGAATCCTCATCTTCCTGCT  
A\_14\_P201694 ACCGCCTACGTGTCCTCTAAAAGGTTTTTATCCTACATATAAACTTTTTACAAGAGTTGG  
A\_14\_P118733 TTCAGAGTTCTCAATTTGGAAACTTTGGCAATATACCTGCTCCAATGACAGTAGGAAATA  
A\_14\_P135647 GGGAGCAAAACTACCCACTCTACCAAGTTGGAAAAAATGAAGAATGCTTCAAAC  
A\_14\_P123203 TTCAGAACCACAAAACACTGTATATTGTA AAAATGTCCCGTTTGCTTATGCCTGAGTGAA  
A\_14\_P103537 GACTTACAAGTTACTCAAGAAGACTGAGTATGTATTTTACTGCTGCCTGCACTTCTGAATA  
A\_14\_P135241 CATTTCCCTCTCATCACCATGCACATTTTTGATGGACATATTACTTAIGACTCTTTGTTC  
A\_14\_P107453 AAAGATTGCAAAACACTTTATTTCCATCACATATGTGCCAAGACTTGTGTTCTGTATCCA  
A\_14\_P109281 CAGGCTGGCAAGAAAAACTTAAACATTATTTACTCAGCCATGTGCGAGTTAAAACCAATA  
A\_14\_P135423 ACATACAGAAACACTATGCACAGACACATTTTTCCACATTATGTTGCTGCTTCAGTAAAG  
A\_14\_P117002 CCAGGAAATATGAAGAGATATATCCTCCTGAAGTAGACGAGTTTGTCTATATCACCGATG  
A\_14\_P108558 AGAATAGATGCATTTATGTCTTTTCTGGAAGATCTTCTACGCTTCTTGTCTCAAAAC  
CUST\_6778\_PI426210822 ATGGAAAGAGGCTGCCCATGTTGAACAAAGGGCCAGTAACATTC  
A\_16\_P20008929  
ATCAACAGAGGTCTATTGAGGTAATAAGAGGTCTAAGGTAAGCATATGTTCAAATCCTGG  
A\_16\_P20171132  
GCATTACTGTTCTTTAAAGTAGATGTAGAATTCAGGTCTTCGAGATTTTTTACAGAGGGA  
A\_14\_P105723 ACAGTAGTTCTTTTGCTGCTAGTATTGCAGTTTCCTTTTTTCTGATCTAGACTTGTGAC  
A\_18\_P13168348  
CCATCAAATGCCATTAATCTATTGCTTTCTAAATCCCTCATCCTAAATACAGAGACCCA  
A\_14\_P108317 ACCTCTTTGAAAAATACCCCTTTTTAATTGTATCAAGAACTAAAACCCCATTCCTGTTT  
A\_14\_P120312 ACAAAGTTAGCGTTACTTTTTAAAATGAAGACCGTGATATAAACTGGTAAAAACGGGCC  
A\_14\_P108104 GAAAACCTACTAGAAAATCTGGATAAACGGATGAACTGGAAGTGGCCACTACGATTTTAA  
CUST\_3054\_PI426210822 GATGAGTTAAAATTATCAGACGAGATGGTTCCCTTGTGTTGGGCATAAACCATG  
A\_14\_P100603 ATTATTCTATCTCCCTTTCTTTCTGTGAGTTTATCCAGTATCCATTTGCTGCTTAGCCAA  
A\_14\_P107414 CAAAAGTTTTTAAAATATTGTGCAGGTTAAATATGTCACCTGTTGGCACAACCTGACTGG  
A\_16\_P21256817  
AAAATACAAAGATGAGACTCAAAACAGACAGTGGTTTCATATCAGTTAACCGTATGGTCC  
A\_14\_P113393 TACCTGTGTCTCCACTCTGGCTTTATCAATTAAGTCTTAGCATCAGCAATTAGCC  
A\_16\_P36960024  
AGCCCTTACATCTGACAATTTCTTTTGTGATTTCACTACAACAGGAATGTCATCAAGG  
A\_14\_P135957 AAAAAGAAAAAGAAGGTGTCCTGCTTTTCCAACATCAAGATCTTCTGCTGTC  
A\_14\_P138990 GTGGATTACAATTATAAAAATGACAAGATTTCTGTTTTAACCTGTGCAGTTGTGGGTATGT  
A\_18\_P16224964



AAAACTGGGAAATTTTGGAAAATCACTGACATTAGCAAAGGATTGACAAAACCTCACA  
A\_14\_P112361 TAATAGTTCTTCCTGCTTTCTGTTGTGCAGAGGTTACAACCTTTGGCACATACTAAGAA  
A\_18\_P15913909

CACCATCACAACACTTATAAGGAATTCTACAGGTGTCTTTTCATTAACCTAACCCATCTCAG  
CUST\_712\_PI426210822 TTTCAGCAGTTTAGACAGGGCAAACCTGCTAATTCTTCTCACCTGTGAAAACA  
A\_14\_P102154 TTGGATTCCCTGGGATGATTGTCACATCAACTGCTCAACTGTGGATTGTTTTTTA  
CUST\_7570\_PI426210822 GAAGTTCAGCAGTAGCTGCCCTGGCCTCTGTTCTCAGTCCACAG  
A\_16\_P17845060

ACATCTCTGCCATTCTACAAAGTCTCATCAAAATGTCTCATGAAAAGAATTTTCGAAGTTA  
A\_16\_P19662665

TGACAGTCTTGTGTTTTACATTTAGCCTTATATGCTCCTTTATGAGTTCTCTGCAAAGCA  
A\_18\_P16483275

ACAAGGCCTTTGTAAAAGATATCCCAGCATCTTCTTGATATTGAGTTCAGTAAAGGAAGT  
A\_14\_P138628 TGGATCTTCTATACTTTTTTTGTGTGCTGCCATAGATATCTGCCATTGGTTGCCAAAAA  
A\_14\_P112244 GGCAGCAGAAAACCTCATTGTCCCTTCCTCTAATTAATAAAAAGATAGAACTGTCTTTTT  
CUST\_9343\_PI426210822 TTTATTTTCCTTTTGACCTCAAGATCTGGCCCCAGACAAGGGAATTTGA  
A\_14\_P133314 ATGCAACCCAATAGCATAAATGTCCTTTTTTCCCCCAAATATGGTCTAGATGAGTTATTA  
CUST\_4416\_PI426210822

CTTCTTGTTATTGTTTTTCTTCCTGAAAGACAAAGGGAGTTTTATGCCATGGTATTTTTGA  
A\_14\_P110312 GATATAATGTCACACTTAACCAGAGAAAAAGTAGGCAGACTTGAGAGATTCCTAATGGAC  
A\_16\_P20759080

CCAGTGACATCTAGATGTGATTAGAAACTCTTACCATTTCACACTTGTAAGTTCAGGAC  
A\_14\_P111027 GCCACTTCAATTGGATTCAGTTCTGTGCTCGATTGGCTAATTACTTGTATTCTCTTCTT  
A\_16\_P15984344

AATTGCGTTGCTAACTTTATCTGGGAATTCCTACTCTAAAAGCCAAGTTTCATTCTCATG  
A\_14\_P110537 TGCCTTGAGTCACCTTTTCATACAGTGGTCTTTTAGTGCTTTTAGAGTTATGAGTTAAGT  
CUST\_8008\_PI426210822 ATACTTTGGCTTACCTTGGATGGCCATGTATTTCTCTCTCTCACAGCC  
A\_14\_P134519

CAGCCCAGAACCCATGTGAAAAAGACAGGAAATAAACACAAAATTACAAACAGCATAAAA  
A\_16\_P30952397 GAATTGTGCTGTTTCAGGGTGAGGGATGGAGCCATTCACCATTTCAT  
A\_16\_P31679346

CCTGAACAGTAACTGATTTGACAAGTATCGACACATAAAGTTATGGCATCAGCATTCTCT  
A\_14\_P139769 AAAGAAGAAGAAGATAGGTCAATCCCTTAAAATGGTGTGTATATGCCCATATGCATTTCT  
A\_16\_P36406190

AAATGATATGCAACTTATAACACAGCCATCAAACCTATAACACAAGTTTCTCATTCTTCTGT  
A\_14\_P121452 CTTTATCAAAGGAGAGTACAGAACAAATGTTTGTGTTGTAAGCGTTCCAAGTATTTTGC  
A\_18\_P22841041 CTGTCACTACCATGCTGCAGTGAGCATCTTGGGTACCTAACTATTAATTCT  
CUST\_8873\_PI426210822 GACATACACCCCAAGTTTCTTCAGACCAAAAAGAAGTGCCTCAATGTTGTTA

A\_14\_P105912 ACTTGTTTTATTTCCTTTTCTACAATGTATTGTTCCCTGGGGACAGTTTTTGCCCTTCTTAG  
A\_14\_P101908 GGGTTTTTTTTTCTCTCTTTGCAGAGAGACAGCACTTCCCAAGTTCCCTTTC  
A\_16\_P00685630 CTCTCAGTAACTGGTATTCCTCCAGCACACAGTCTGGAAAACACTACAC  
A\_14\_P136295 CTCTGGCAAAGGTAAAAAGAAAACCTCGAAAATTCCAGAAAAGAAAATCCCATATTTTTCT  
A\_18\_P16813055  
AAGTGGATAGTAGGTGTGTCAAGTAAACAGATGACTTCTGTTTCTGAGTTAGCCAATGT  
A\_14\_P117893 CTTAGAATCTGATCTAGTGTGTTTCAGTCTCGATCCCTTTTGCTCATAACTTTCAAAACTC  
A\_14\_P201136 GAGGTGAGCAATTCATATTCAAAGGTTGCAAAGTGTGTAATATATTCATGAGGCTGGA  
A\_16\_P21192497  
AAAATTGCATACTTGTCTGTTTTCTTTTGCTCTGTTGCATATCCTAATGACTTCACCCT  
CUST\_5919\_PI426210822  
CATGAGCAGTGACAAGGAAGAAGTTAATAATGAGTAAATTACAACATAAAAGTTGTCAAC  
A\_14\_P104322 CTATGCTCTATGCTCTTCTTTCTTAAAAACAAGGAAATGGAGGCATTGAGTTGTTAGGAA  
A\_16\_P01250246  
ACTTGTCACACAGAAGTTATAGAACTCCTACTGAAGGTATTGTATGTTTTATGTCAGGG  
A\_14\_P104088 GGAATTGCACAAGGAAAAGAAGAGAAGCCTTTACTTTGTAAGTAAATTCTCCAGAGTTG  
A\_16\_P03714810  
AACCCCTTATTCATCTGGCATATTCCTTGACTTATCTAAAATTTCTTCTATTCTGTGAGCA  
CUST\_6237\_PI426210822 TTAAGTGTGGGCCAAGCCAAATTCGAAGCAGCGCAGTTGTTTGT  
A\_14\_P128907 GGAATCTTTTTGTAAACAATACATCTCTGAAAAGTCCTAAAATTAAGACCAGTGCCCAAG  
A\_14\_P202514 CTAAATGTTTTTTTTTTAATGTCTTTTCAGTTTTTCTTGTGTGAAAAATGAACTTTTTGCC  
A\_14\_P139357 AAAGGGAAAAAGGTCAGGCTTTGAAGTGGAAGAGGGGAACATCATCAC  
CUST\_7172\_PI426210822 GCAATGATTCACCCAGCTTTCTAGTATAAAAACTTCCTCTGGCCACC  
A\_14\_P113302 CTTTATACTATTGCCAAACGAATCATATTAAGTTGTGCTGTAACATGTGTTGCATCTGG  
A\_16\_P15929015  
AAGCAAGTCAAATTCATGTTCCCTTAGTTCCCTTACAGTTTTTCATCTTCTAATGCTGGCCT  
A\_14\_P138424 GCCTTATAATGGTATTTCTTTACTTACCAGGAAGGTTGTGCCATTTGTTCCACGCAAATA  
A\_16\_P19050838  
ACACAGAGCCTATCTATTTTCAAGTTTATAGGAGAGTGATTTGATATAACCCATTCCTGC  
A\_16\_P31433969  
AATGGATTACGTTATGCCGAAACAGAAACATCAAACCTGCCAACGTTTATAAAAAAAGAGG  
A\_14\_P114423  
TGGAATAAAGGTAGATAAAAATCTAGGCTTATGAAACAAGTTGAGCAGAGGTAGGAAAGG  
A\_14\_P134910 ATGACAAATAAAAAGACCGTCAACCCTTATACAAATGGTAAGTAGAGATTGGCCTTTTAC  
A\_18\_P14134538 CTGGGAAGGAATGTGACATGGAAGAGATTTCCCTTGTCAAATAGAAGACACTT  
A\_14\_P112556 ACGGACAGCATAAATACTAGTGCTATTATCGCTGATAGTATGAGGAGGAAGAAGAAGAAAT  
A\_16\_P15568274  
ACCAGCCTTACCTGATTACAAAGCCTTTAGAAGTTACATGAAAAAGAGACATTAAATGCT

A\_16\_P00685276

CTTCATATGATCTCCAGAAGCAACTTACATGTAGACATTTTTCTGAGAATTCCAGAAAGA

A\_14\_P202214 CTTTGAAGCTGGAGGTAAGGCCTCTCAAATGACTTGAAAATGTTTCTCTTATCATTGC

A\_14\_P137317 CTACTACCCAAATTCTCCAGAATGATCTAGTTGATGTCTCTGACCTCAAGACATTATTGA

A\_14\_P101395 CTGGTTCATACAACATTGGAGTGTGTGAAAAAAATATGCCCGTGGAAGGTAAAAATTAA

A\_14\_P126109

GACTTGAAGAGCAAAGAAATTAAGAGCAACACTGAATGAACTGGTTGAGTATGTTTCA

A\_14\_P116516 TCGTAATCAGCATCCAAGTGTCTGCTAGCAAACCATTTCTAATAATTAATTTGGCCATCA

A\_14\_P131059 TCTTTCTCTTTTAAAGTCAGTTAAAGTCTTGTCTAGAGAATGCTTGAGGACTTCCCTGAA

A\_14\_P101067 AAATCCAACATTTGCAAGAACAAGCCAGGAAGGTAAGGAATGACTGTTAGACAG

A\_16\_P02367750

AAAAAATCTGAGCAGAAAATACAAACAATGCTTTGTTTCCATACAAAACCTTAGCCCCTGG

CUST\_6243\_PI426210822 CTCCCAAGTTTGTCTGAGCCACCTGATATAACCTCAGGTGAACAAG

CUST\_241\_PI426210822 CTGAACCTCGCAGGGCCTGGAGGAGTCGGGGCACTGGAGCTGCAC

A\_14\_P118297 CTAAGAAATGTAAGGAAAAATGATAAGCAGGAGTTTTCAAGGAGCAAATAGTCTTGTGGG

A\_14\_P105562 CTAAATTTTCTTGATCTTTTGCTATGTTGGTAATGGCAGCACATACACTTGCCAGAAGTT

A\_14\_P137083 CTGATGGAGTTAAATACAGTGTATGATGAGCAATCTATCCCTTCTCATCTGTTCTCTGA

A\_16\_P00081650

GCAACACATGCAATCAAAGGTTGCTTCTTCTTAGAAGAAGATGGTGAAATCATTAGTCA

A\_14\_P102788 TTAAAAAAAAGCAAGTGTGCTTTTGTCCAATTAGTGACCATATAGAGTTGGAACAAAGGC

A\_14\_P103317 CTTTAATATTTTTATTTTTGGCAGCCTTAATTATTGTCCTTGCTAATGATGACGGCCCTGG

A\_14\_P124266 CTGGTATGGTTCAGAGCAGCCAAGAGAAGGATCAAAGTATTTGGAAATTAATTGTTTTT

A\_16\_P16445148

AAAATGAGCATCTTCGAAATGACATTGACTAGAGTGCCTATTTTTCAAACCTGGGATTCC

A\_14\_P109274 CTATGGGACTTGAGATGATACAATTTGTTTAAAAATCTGCTAGGCATGTGAGTCACAGTT

CUST\_2331\_PI426210822 AGTGGGTCAGAGACAGAAGGGGACACACATTGAGAAATTTCCAATC

A\_16\_P17585421

AGAAGCCTTTTGTCTTAGATTTGCAGCAATTGTTTACACTAGAACTATAAGGAGGAGAG

CUST\_569\_PI426210822 TTTTCCAGTTGGGCATGGACTCCACCAATTTCAATCTCTGACTT

CUST\_1153\_PI426210822 CAGGGTGGGAAATAAGGGATGGATGGGGCTGGCATGTGGAGTATT

A\_18\_P12019910

CACATACATGGAATCTAGAAACACTTTTAATCCACTATTTCAAATGCCTAATCCCAGTGC

A\_16\_P20630124

ATTGATCCTCCACAATTGAGACTTTAGCCAATATGTGCTATTTGATTCCAAGATGCTTTT

A\_14\_P110513 TGTTAATCTGCTACTCTTCATTTGTCCATCCTCTAACAGTAGCCATGACTCAAACC

CUST\_5555\_PI426210822 GGAGCCTGAGAGAAGTTCTGGGAGAGCAGTTCTTTCTTATTGTCC

A\_16\_P39218605

AAACAGAAGAAGAATGCTCAGAAAGTCATCAAAGGACATTTTTTCTATGCCATTCACT

A\_14\_P110363 AAATAGATTACATTACCTTTCTAGATTCTTGCCAGAGATACTTCTTCAAAATTTTCCACT  
A\_16\_P16022218

AATGAGGGAGGACTATAGACTAAACTCAAACTGACTGAAATATTTTACAATTGCAGGCA

A\_14\_P136587 TAAACTCGGACAGAACATGAAGACCTTTATCCTATGAGTGTATAGCCCCAACTTAATTTT  
CUST\_7866\_PI426210822 CATGTTACATACATGAGCTTGCCATCCATGAGTGTGGGGACAAGAC

A\_14\_P105836 AGTTTACTGAGTTTCACTGAACCTGGGAGAACTGAGTGTAACTTCTTGGTAACATATAA

A\_14\_P121764 TTGGAAAATTAAGTGATATATCCTGAAAGGGACAAAGTATGGGCTTAGAACCCATGAG

A\_14\_P105775 CTTGGCTGCCATTTTTGATCTGAGTTGAGGGTAACTTATTTGTCAAATTAATTTAACA

A\_14\_P103160 ATTGTTTTTCTTCCCTGTTAGGTATTAATATAGTAGGGAAATAAACTCAAAACAAGTC

A\_14\_P124529 GAAAGTCTCACTACCATAAAATTAATGGTTCAGCATCAGATTAGCATTGCACTCAGTAGTC

A\_14\_P126759 GTGCAAATGCCCTGGATTAACAGTGGATATAGATATGTTGCTAATGACTAACAATTCTT

A\_16\_P17915378

TCAGACTTCGCCAAATATTTGAACACATTACATCTCATTTTCCATAACTCTTCTCTCAGT

CUST\_5986\_PI426210822 CACAGAATGGCTTCCTTTTGAACAGTTCCTTCTGAAAGACTGTTTTAGCCTT

A\_14\_P117080 GAGAAACAAATCAACCACGATTGTATGCATTTTGATGTGACAGGGAAATAAAGTAAGGTA

A\_16\_P55109335 GTTAAGATGCATGGTGACCCCACTTAATGGCCAAAATACAAGGAAGGCTT

A\_16\_P00433564

ATCGAGACAACAAAGAGAACAAATTCTTTTACAGGTCACAACACTAGTTTCATCACAGGAAG

A\_14\_P118896 CGACTTTAACTTGTCAAACACTAATTCAATCTTCAGCCATATTCAATCTTCCACTGGTTT

A\_18\_P14053205

CAGAGAACTCTCCTTGTGTAGACTTTAATCTGACTCCTTTAAAATAAATCCCTGCTAACC

A\_14\_P106933 TAAGATGAATCTTGGCCCTGTCACAAACATTGCAACTTTAAGAAAACCTATAGATCCACTG

CUST\_4750\_PI426210822

GAATTAAGGTATTTCTCCCATATTCAAGGACTTCAGTTTCATTACCTGTCCAGAAAACCTA

A\_14\_P105214 TAATCTCTTCATAAAAAAGGAATATTTTACCCTGATTCTAGCCAAGGTCTCAGAAGTGG

A\_18\_P19646561

AAAATCAGTCCTGGCATAATATTTCTTTAAAGACTGATCCTGTAAATTGTGGGGAAGG

A\_16\_P02228925

AGAGCACATCATTTTCATTCTCATGTCAATTCTAAAAGCAGAGCAAGTTATGATCAACCCTA

CUST\_5234\_PI426210822

TGTTTAAAATTATTTTAGAATTTTCTTCTTTGGCTTTAATTTAAATTTTTGTTTGTTTAC

A\_14\_P133940 AATGAGGAGTGCTTTGTAAAGAACAAAGCCCTAAAAGTGCAATCCATTATTATCCTACTA

A\_14\_P201227 TTCTATTTGCTATTTCAATATGTGACATGAATCTCTGAGGCCAGCATGTCACACGTATAC

A\_14\_P129079 TGAAACTATATATGTCCAGATAAACTCAGCAAAGTGCCCTTCTTGCATTTGTTTCAAGA

A\_16\_P01728413

TCTGCTCTAACTCAAGATTTCTACCTCCAAGATAACTACTTTTATCCTTCGTGGCTAAAC

A\_14\_P124830 ATACAGCCAATACTGTGGACTTACCTTAGTATCTTTGATAACTGTAGATGTCCAGCCTTC

A\_16\_P39928378

TCCACTACTAGGACAGTTACTGACAATAGATAAGAGAACAGATGAGACATCAAGATGCTT  
A\_16\_P01070546

CTACTAGAAGACGGTATTACCACTTCCTATCCTACGAATTACACGCTACTTCTGGTTTTG  
A\_16\_P15936530

ACTCTCTGGCAAGTAACTACAATCTATACTGGTAGGAAAATCAACTGTCATGAAAAGCAC  
CUST\_6431\_P1426210822 GGGGAAGCTGAGAGCAGCCTCTTACAGGAGTGCATGCCCTATAGA  
A\_16\_P17829090

CCCAGACTGTGAGGAATAAGCCAAGTAATAAGCAATAACAGATGGAATATTGAGGTTATG  
A\_16\_P38874278

AATGCCTTAAGAACTGATTGCTGTAGACATCAGTCAAATACTTTAGGATGAGGCTGTTT  
A\_16\_P38065503

TTAAAAAACCACATCTTCCATTTTAGACATACCATTCCCATTCAATCCATATGTCCAGT  
A\_14\_P121754 AAATCATTATCATCATTGTGATCCTGGACTTGTGGTATCAGAAGTTTTCTGGTTGGATAT  
A\_16\_P02682444

AGGTTTCTGTTTAGATGTTCCATTATTACTCCAACACATACATCATAAGTATTAGAGCCA  
A\_14\_P110152 TTTGGTATACATTATATCACAGAACCTTGGACAACCTGGACCCTGTCCTTAATTAGATCTT  
A\_14\_P136006 GAATACTGGAATAAACCAGAAGAACTAAGAGTGCATTCACCCTGGATGGCTG  
A\_14\_P201502 ATAAACTCATTGCTATATAAGCAAATACTGGTGATTTGGCGACTGTAGCAGACACTTGT  
A\_16\_P01570049

CCAGCAAATACGTTATGTATCCTAAAGTGTCTGCCTTATGATTACACCTTACTCCAACCT  
CUST\_7712\_P1426210822

GTGCTTCCAAAATTTATTTGAATTCTAAATTAACCTAAGTGAGTTAACGTGGAAGCCGCTT  
A\_16\_P16497051

AAACCTAATGTATCAGCGATATCACATATCCAAGAGAGTATATGTCATCTGTGTCATCTT  
A\_16\_P36787787

AAAAAACTGGCTCATTGATTCCTACTTCAATTCTATAAATTATTCTCTAGGTGGAAAGGCA  
A\_14\_P113854 ATGAGGAAAGAAGTCTGCAAGGAGAGGAGCAAGAATGTGTCTCATAATTCTTTTATATTG  
A\_14\_P101467 CACAATCACATACACCTAACCTCAACGATATACAGAGAAAGTTTTGATACTAATTTTCA  
A\_16\_P01051832

CCCTGATGGCTTAGAAAATTGATATACTAGCACACCTGATCTATTAATCACTCACAGCAA  
A\_14\_P133924 CTTTCAGAGTTCCTGACTGCCTATACATTACATTGTTCAACAAATGTTACTTAGGGAAA  
A\_14\_P105534 CTCACGCACACACAAAAGGAGAAATGTTTCAAATATGTCTCTCGTGAAATTCCACTTTT  
A\_16\_P36499494

GATAGAGGATTTCTGAGTTTTTCGTCAGTAAAGTCTTGAGTGCTCTAGAGAGAAATAGAA  
A\_14\_P120736 ATCTCACACAACAGAAAATCTCAAGCCAAAACAGATTTATTTCTTCCAAAGACCACTAAC  
A\_18\_P22840875

AGTTTCCATCTAATGGTGAGGTGGTAAAGGAAATAAACTTACCAAAATAGAAGAGGGAG  
A\_14\_P136419 GACAGAGGTGTTAATCTTGAGGGTCTAAGATTCCTCCTGCCTATTGTG

A\_14\_P128664 AAAGAGACTCGAAGTGTAATGAACACATCCAATCCAAAAATAAGGTAGGCTAGATTGAG  
A\_16\_P02990830  
ACTCCAGGAAATCACTGTAGTCCTTTTAACTGTTACTGATTTGCTTAAAATGTGAAAGGC  
A\_16\_P15904946  
AAAAATGAAGAGAGGCATCAATGTAGTCAACCTTTGCTTATATCTGTTCTTGAGGGAATG  
A\_16\_P20353086  
AACCAAACCTCGTCTAAATTTATTGATTTGACAGGTGACATCTCTTGAAATAGAGCACACG  
A\_14\_P130036 GTTCTAAAGAGACAGAACTCACCATTGGACTGGTCTTCTCCATAGTTTTTATGGGAT  
A\_16\_P17793809  
AGAAAATGTCCAATCAGATTCAATCACACAAAGCATTACTATTTTCAATCACTTGCCCA  
A\_16\_P58424623  
ACCTTTGTGCAAACTATAATAGTAAATAGCACCGCTTCCTAAAGACTCTTTACTTCCATC  
A\_14\_P110013 AAGAGAACATAAAAGACAATACCTGTAAGGTAATCCAGACATTCTAGCAGTTTCTTCTCT  
A\_14\_P126595 GTGAAATGAGATGTGCCATCCTCCTTGCAAAATGTCATTCCCCATTGAG  
A\_14\_P130661 CCCGGAGAGAACTCCAAAACAATCTGACGTCTTCTTTAGACATTCCAAG  
CUST\_1529\_PI426210822 GCAAGACTGCCTACCTTCCTTTCAGAACTGCTGTTTAAATCCAAAGAGAAC  
A\_14\_P112973 TGGGCAAACCTTGTTTATTCTCTACTAACTTGGTTGTAATCTGTTAATCAAAGTAGACCC  
A\_16\_P18304488  
GGATGGGAAAGTATTAGTGAAATCAGCAGATTGATCAAGACATATGGAAGGCATGAAAAT  
A\_14\_P118125 AACCAAGCAGAAGGATGATGCAATCTCTGACATAATTAACCAGGGTAAACCACAATAAGT  
CUST\_578\_PI426210822 GACTGTTCTCAGGGTTAGCCATGCTACCCTCCCTACCTCCACCTC  
A\_16\_P17822265  
AAAAGCACATTCCATACACTCTACTATGGCAGAATAAGGAGGTTCCACAGATAATTGAGAG  
A\_14\_P128574 AAGGCTAGAAGATGCAAAGAAGGACTTTGAGAAGAAATTTCCGGGAAAAGACCAAG  
CUST\_953\_PI426210822 AGCCGAACTCATTGGAGAGATTGATGGAGTTACTAATGCTTTGGAGACAG  
A\_14\_P103388 CTAATGCAGATCCCTCTGATTCCTAAACACAAACCCTAAAAATGAAAGCAAGTAGGAAA  
A\_14\_P127926 AAAACCTGTCACCACTAAATGACACTCTACCAACAAAAGAAGTCTTCTATCTCAAAAAT  
A\_14\_P134564 CATGAACAGCGACTAGTTAAGTGGAATGAAAAATGCTAAAATGGGATACAAAACACTGTG  
A\_14\_P129086 ATAGAGTGTTTACTAGACTTGGTGCCTCAGACAGAATAATGTCAGGTGAGTTTTTTGTTT  
A\_16\_P17730145  
AGCCCCTGACTTAATTTTGTCTTTCTATTTGAAACCCCTACCATCAATTAAGATTTGCT  
A\_14\_P135280 TCTGGCCAAATGTGACAGATGCAGATCTTAGAGGACTTACAAAGCACTATATTGGTAATT  
A\_16\_P00684988  
CTTCTGAAAAGCCAATGTTGTTTTACCCCAACATTTAATCAATTCCAATATTCCTCTCTG  
A\_14\_P107995 CAAAGGGAGGGACAATCCCATATTAACAATGAGCAGCATGAAAGGAAAC  
A\_14\_P132051 GATAGTGTTCAGATTCTGAGTCCTCTGAACTTTGACCTCCAGAGTTATTAACATCAAAA  
A\_14\_P119223 ATGGTCATCTCTAAGGCCATTTCTTTGCTCATGGTCATATAAAAACAGGTGAAATTTTGT  
A\_18\_P11098035

TTGCATGCTCCTTTATAAAGAGTGTAGAGTATTTTCACTCTCACTGAAGTCTTTAGCAAT  
A\_14\_P109425 CTTCAAATAAATATTCTATACAAAGAAAACCTGTGGCAACTTTGTGGTGGGGTGGAAAT  
CUST\_5857\_PI426210822

TATTTTATCTTTCCATGATTGTGCTTAATTTTATCTTATCAGTACAAGCACTCATATAAC  
A\_14\_P116352 ACAGAATTAAGGGAAAATCCACCAGTAAAACCAGACTTTTCTAAGGTAATGTTCTTACTA  
A\_14\_P200016 GGGAGCAATTAAGGAAGGACTTTAAATCCTTGGGAGATCTTAAAACATTGAGTTCTAAGC  
CUST\_6664\_PI426210822

TTTTAGAGTAAATTAATTTGAATGAAGTGAAGTTTATATAGCATGACTCAAAGGTACAGT  
A\_14\_P126856 ACTATTCAAAAACGACATCTGAAAACCTCATATGGTTCTAACTTTTATTATTAGGTCAGAA  
CUST\_9132\_PI426210822 ATGTGCAGAGCAAGGAGGAACTCTGCTCCCACGCCTGATTTTAAT  
A\_14\_P116504 CATAAGAGTTTACTTGGTAAATACTTGTGATGAGGACAAAACGAAGCACTAGAAGGAGAG  
A\_16\_P17013167

CAAATCAGCATAGGAAGTAAAAGAAATACCCCAATCTCTCTAAGTAACAACCTCTAACGGG  
A\_18\_P14130469

GGTAGATCTACAGTTCCAGGATGGGATACTTTTTTAAAAAGTAAATGTAAATGTATTGCC  
A\_14\_P111473 GAACTAAAATAGGTGATCTGTTTTAGGATGGCTTGGAAGAAAAACAACCTAAATTTGTCA  
CUST\_617\_PI426210822

AGCTTTGGCTTTGGGATCAAATGCTGAAAGCAAACCTAATGGGTTTAAAGTTTTTAATC  
A\_14\_P104597 TGAAGGGGTGAACAAAATAAAGAGGGCTTTACTGTGCTTGATCAGACTTTTGAAATTTTA  
A\_14\_P132228 ACCTAAGCAGTCTTAAACAAACTGAACTCTGTTTACTTTATAAAAGAAACAGACTGCCAC  
A\_14\_P136990 GGCAAACCTTCCCTAAGGTCCCTCAATAGATTTTCAATGATTCACATCTGAAGTCTCTTAA  
A\_14\_P120659 CTTGTGTGACTTCTCACTGAGCACTCCTTTACAGACTTACAAGTCTTTACTCTGTG  
CUST\_4134\_PI426210822 CTCGGCTTCAACAGTCTTGCTTGCTTACATCTACTAACTGGGCAAGA  
A\_16\_P02491491

GCATGCATCTAAGAAGATTCCTAAGACATCCCAATTTACTGTTCTAAAATAGCCACTTCC  
A\_14\_P117483 TGCTTACCAATTCCTGAACATTATAACATGCACTAGGGTTACAAAGAATACAGCACACAT  
A\_16\_P17393538

ACCGACATGCTAGATTAACCTACCTTGCTCTACAATAATTTTTTGGTTACAGCCCATTA  
A\_14\_P139396 CTTCAAGAGATCATTGCTTCTAACTTTCACATACTCCTCTCAAGAGATTCAACTGCATTC  
A\_16\_P17185727

CCTTACCCAATGTTCTATTTTAAACCAGATTAGCATCAACAAAATAAAAACCACTGTTTCA  
A\_18\_P17651896

AGCCAGCACTGTTATATCCTCCCAATTTGGTTCTTACATTACTTCACTCTTCAGAACAT  
A\_14\_P106149 ATGATGATGCATGAACAGAGACTTTGTTTCCATGCTGTCTTTATTGGAGGTCTGT  
A\_14\_P132663 TCAACCCAGTAGTATCTTTTCATTCATCACTGATATTACGTGACTCTTTCCGTCACATAA  
A\_14\_P113704 TATCCAAGAGAATAAACTCAGTTTTACACCAGCCTGAACAGCAGTCAAAGATATTCTCTT  
CUST\_906\_PI426210822 GACCAGATTGTCAGGCTGGTCTGGCAGGTTGACCTTGGCTTAGTG  
A\_14\_P114799 ATTAACCTGGTAAATGTGGAACATCTCCTTCATTAATTAGTCTCAGGTCCTGTTCTCTCTG

A\_14\_P131627 TTTGCCATTCTAGCAAATAGCACAGAAAAACACACATGCCTATTTCTAGTTTTCTCCATC  
A\_14\_P109267 TCCAAAAATATGGTTACTCCTCCTACCAACAAGTGTTGTTTCAGTAAAATACATCAGAGCA  
A\_14\_P103441 CTAAGTCTGCTCCTATTCCCTTCATGATACTGGGCAAACCTATCTGTATTTTTATGTTACC  
CUST\_2503\_PI426210822

TTTCAAGATGGAGTGGGGTAAGGTAAGGAAACAACAGTAAGAATTTGAAAAAATCCAG  
A\_14\_P132146 ACATAAACATAACCGTTCATAAATGGTTATATGCTTCAGGAAATCAATGTGTATTTTTGGA  
A\_14\_P105849 TACTTATACTCTATAGGGTCGTTGAATAAATGGCTTAGAATGTGGCTGATGGCTGTGTG  
A\_16\_P15718805

AAAACCCATTTTCAGTGAGATATGGACATGGTTATTTCTTTTTACTCAGCAAACCTCTAGGC  
A\_14\_P125679 GGAAAGTTCTCATTTAGTTGCAAGACCACAGAAATCTTACTTCACGGTATAATTACAGGT  
A\_14\_P101711 CTAATAGGCTGCCATAAATTTCTTAATTCTCTTTCACTTTCAGACTCGATCTACCCATCTC  
A\_14\_P102558 GAACTTGTTTAATAAATGGGAAACTGACCTTTGCTATACTTTTCCCACGTGCTTTCATT  
A\_14\_P127811 AAAGTTCACAGAGATTTGTTAACAAGAATTGAACCAAGCCACCCATTAGTTCTATGAATG  
A\_14\_P110230 TTCTTCAGTCTCCAAGAAGAGTTTTTAGACAAACACACTGATGAGAGTGCTTTCAA  
A\_14\_P119991 GAAAAAGTGGTTTGAGGTTAATTTGTTTGTGATTAACCTGGATGCCTACTCTGAGAGTA  
A\_16\_P01213975

ACACATAAGTGATCCATGATTTTTTGCATCTCTTCCACGTATACCTTTTCTTGATTGCTC  
CUST\_9438\_PI426210822 CACGTCAACAGAGTTGGATTTCCACTGTGGAGCCAGGACTATTTA  
A\_14\_P121354 GGGTGTAGTCCCTTAAATGTGTGAGATATTGGAAGAGACGTCAATTTACTAATTCTGAAC  
A\_14\_P106333 GACAAGGAGTAATTCAGAAGCGTGCTTTAATTTCTCAGAATATTAGGAATTTGGGAGGAA  
A\_14\_P132995 GTTTATGGGATTGTCTTTTTCCCTTTTTCCCTTAGGAACCACGTGAATGTT  
A\_14\_P115016 TTAAACATTTATAAACTGATTCCTTTAGGCCAACTCTCACCAAGCAAGAAGCATTTAGCG  
A\_16\_P20322932

ACAGGCACCATTATATTATGCATGCATTGTCTAAACAGATTTCCCTATACAGCACCATGTG  
A\_14\_P129272 GTGATAGTTACCCTGGTCATATTGGTTGTAGTTGACTCACGGTTAAAAAACAGAGGT  
A\_14\_P135835 GGAAGAGATGAAAAGAGAAAGGCAAAAACGTCCAGAGACAAATGCAGAGACAT  
A\_14\_P126541 AAGAAAGTCCAGATATCTCAGGTCCTGTGAATAACTTAGTTTCTCTCGCATACTCTGTTT  
A\_18\_P14132983

TCACTTTGTGTCTTTTTAGGTTTGTATTGGAACCTATTGCAAACAGGTCTTGGCTTATCT  
A\_18\_P14830483

ATGTGCATGGAAATTTTGAAGTAAGCAGTAGAAGAACTTGATAGTAAGAGCACAACAGG  
A\_16\_P18931719

AGACCACAAATGAGAAATACCACTTTACATGTGCATACCTTAATGATGACCTCTTCTTGA  
A\_16\_P18993574

TGCTAACACCTGAACTCAATTTTTACCCCTAAAAAGACATATCCACTTATCTTCATTGGT  
A\_14\_P120588 AGAGGAAGGAACCTTTTTATTCCTAAATAGTTCATCTCAGGCCCCCAATTCTATTTA  
A\_16\_P35022496

ATTCTTCACATGTTTTTCCATCTGAGATATGCAATAGTTCTCCTAATCCCAAGAAATGGC



A\_16\_P03035400

TTCTCTATGTCCTCTCTAAAACCTTGTGTCATATTCTTGTAAATTAAGTCTCCCTG

A\_14\_P107468 CTGTTTCTGCTTTCAAAAATTTCTGTTCAAATACTCAGATTGTGATCTCCATGGAAA

A\_16\_P00633021

ACCTTGGCTTTAAGATATGCGATCAAGACATACGATAGGGGAAAACAATCAATGCTTTAT

A\_14\_P116684 CTTGTTAAGCCACAGGTTTGAAATGAAAAGTCTTTACTGTTCCCTTAAGGAAATGTATT

A\_16\_P00678577

ACACAGATTAATCATCATCCTGAGTTCATAACACTCTTACACTCTAATCATGGTCCATGC

A\_14\_P116685 GAACATGATGGAGGCTCATTTTTAATGTCCAAAGTGGACCAAGATCTCATTATGACTC

A\_16\_P16703279

ACTGATGCTAACACTCTTTTCTAAATTTGCTAATCTAACCTACTTTTTATCTACCCACGG

A\_14\_P111930 ATAGATCATATTAATAAAGAGAGAAAGCCCAAACCAAAGGAGGTGAGGCCACTGTG

A\_14\_P120660 CTGCAGGGAAAATCAGAGATATTCTCCATGACCTAGAAGAAATTCAGGAAAAATTACAAG

A\_14\_P125784 ACTGATGTATTAATCAGGGAGTCTTCTTACACTTTTTGTAAACTCTACATTGCCTAGCAC

A\_14\_P136490 ATGCCACATCGCAGGAAGCCTCAAATTTAACTACCAGAAATATTCTGAGAAAATAAAAT

A\_14\_P108122 CCTCATTATGAGAATTTATGTCCATCACTTTGCTTGATGTGATAACAGTGACATGCTAAA

A\_16\_P00736251

ATTGAAGCATTCCCAATTA AAAAAGCAATCACACCTCAAATCTTTTATACTGACCTCGT

A\_14\_P111579 TCCAACATGAAAACA ACTCCCTTTTAACATAAACTTTTTTTAAAGGCCCAAACACATCT

A\_14\_P124518 ATTATAAATAGGGAAATACACAGCCTCCCCTACTCTGGGACTTTCTATGGCCTAA

A\_16\_P03713639

GGCACACAGTTTAGTAAGAGGGGAGATATCTATGAAACTAGTTCTAATTCAAGGCACAAA

A\_14\_P102766 GGCAGGGAACGAAGGCAA ACTTTGTAATTTCTATTCAATTTGTGTA AACTTTTCCAATTC

A\_14\_P105413 AGAGAAACTTTAGTATGAAACCTGTAATTCTAAGAATTTTCTTCTGTCCTGAGTCTGGCC

A\_14\_P103062 CTATTAGATGGCTTGGTCTTCTCCCTTCTGATCTTAAAAGGTTAGATAGTATAGCAGAAC

A\_16\_P15933039

AATCACACTCCAGAGACA ACTAACAGTGA ACTCAGATTA AAAAAAATCTCTCGACAATGG

CUST\_2757\_PI426210822

CGTTTTATTAACAACAACTTGCTTTTATTATTGGGACGCTAACTATTAATTTACTAGGC

A\_14\_P130313 AACTCTTTGTAAATCAGACGCTAAGACTCCAATGTCCACATATTTGCCACATTTGTTAC

A\_16\_P19954533

GAGATACCACCTTAATTGTGAAGTAAACCCTGTATCTTTTTAGCATTGATCCTCAAGTT

A\_14\_P105247 GTCATCTGGTCCAAGGTAAATGATACATCTAGTTATATTTCTGAAGAGCAGAGTGTGAA

A\_16\_P02476066

TGAATTAAGACCAAGTTCTAGATGCAATAGTGTTC AATGGATAGGCTTTATTCTCACCT

A\_14\_P123674 CGGATCGCTTGTA ACTTGATGATACTGTTTTTTTTGTTGTAAGACTGAGAAAACCCTGTAT

A\_16\_P18654109

GCAGTCATGTATAGCACACTTACTTTACGAAAAGAAATGAAAACATGTTAGAGGATCCAC

A\_16\_P18940101

GGCAAAATTATAAATGACCACCTTACTGTGAAATATAGATCTTGAGCATTTTGAAAGGCC

A\_16\_P02365877

AAGCACTTTCCTCCATAATTTAACTGTATCTTCTTAACCTCAAATTCTAGACCACAAA

A\_16\_P32247434

TTCACCTTTTTCCTTGGTTAGCATGATGTTCTCTACAACCTTCTTTTAGACTCTGCTTCCTA

A\_14\_P130773 GAAATCCTTCCTGCTTCTTTCTGGATTCCCTACTGAATTCTGAAGGTTCTAAAAGA

A\_14\_P118576 ACAGCGTGTCAAGAGAGCATCGTTAAAGATAAGGTATTCTGGGGTTTTTTTTAATCATTT

CUST\_8864\_PI426210822 CTTGCCATGGCAGGGGTGATGGGTTGTTACCAAAGTCGATAACAG

A\_14\_P130723

TGAATAGAAAACATGCAGACAGAAAACTATCATGAAAATTTAAACATGTGAACAGAGGG

A\_16\_P18713683

GACTCTGGCTATAATTCCAATGTCTGATTCTAGAACCCTACAATGTAATAATATAGGCCCTC

A\_14\_P121870 TTCACCAATTTCTCCTTTAGCCCCTTTATGACCCTAACAAATGCAAAAATAAGTAATTGTC

A\_14\_P137852 GGCCCCTAAATCTCAGCCTTGGAGATCTTTTCATGCAACTGTAATTCAAATTTAATAAC

A\_16\_P17465780

AACAAGTGCCAACCTCGAGTTTTTAAGCCTAAAGAATGACAAACTAAGAGGTCTTCTAAAC

A\_18\_P22841078

TGAAGACGTTTATGAAACACCTCCCTTGTTTTTATTATGTTTGTGTTCTTCTTATATTTT

A\_14\_P110691 GGCAAGAGACCAGGCTAAGTCACTTCCCTAAAGGATCTTATCTCAATCTGATTT

A\_14\_P114696 TTTAATAGGAGACTCCAGCAAGAAAATTTGAAGTCCCACTAGAACATGATATTATTGGGG

CUST\_3964\_PI426210822

TTTTAACCAATAAGCTATAAAGCTGTTGAACTCCCACTGGGATGTAGTTACCTTTTCC

A\_14\_P100236 CCTATGCAAATTCCTAAGAAGTGTGATCCTTTTTCTGATTCACTCATTCTAATCACAG

A\_18\_P13569918

AAAAATACACTCCTCCAGTTTTATCATGCTATCTTGATTTTCTTGCCAAAACCTCAAAGG

A\_14\_P130433 ACAGTAGTGGTGATTAGACTTCAAATCTTTTGTGATATAGGCAAATGTTGAGAGGTCTTC

A\_14\_P103929 TCTCTTTATTTTCCCAAATCTGTTAATAAACCTTTTGACAGTTGAGATGGCTGTGACGTT

A\_16\_P00910666

AGACTTAGTTTTGCCCTGAAAAAATTTAGATGATTCTGTTTGCCTAAATCTCCTACAGC

A\_16\_P17221365

AAACCATAATGTATTGTTACCTTCTCTTCAAAGTTACCAGTAAGCAACCTCACTTTTGGG

CUST\_8761\_PI426210822 CACAATGTGAATCACTTATTTTGTGTCGAGCAGCAGTTGACAGTGACAC

A\_14\_P116615 GTAAAAATTTTGTGTTTTTGTTTAGGCAACTCAGCATATCTGCCACCAAAAATGTAAAGA

A\_14\_P135056 ACTGGAATTAAGGATTTAAGAGATCATGGTGTGCATGTTCTAGGGTAAGTGAAAAGAT

A\_16\_P00045852

GCCTTTTACAAGATACACAACCCATTCTACACTCAATTGCGTCCTATAAATCAGGTTAAC

A\_14\_P111273 CCCCCCTCCTTCAATTGCTTAATCTTGACAATTATTGTCCATTCTTTTCAAATTTCTCAAC

CUST\_8637\_PI426210822 CCTGTTTGATACTAGAGTCTAACTACATGTCATGGACATTGTCAGCAAACCACC  
A\_14\_P121554 CACATAGTCTTCCCAGATTCACCAAGGTTAGGTTTTTACCATATTATCATAGTTGTGTGT  
A\_16\_P16191848 AAATCAGCATCCTTTTCTTCATTGCTTACCCCATTCATGCTTGAAATGGGATTTCC  
A\_16\_P16462613  
AGCAAATCCTACAGAGATCAGTTCATTCCCTTCTAGTAGTCTTTTTGCTTGCAAGTCTAAG  
A\_14\_P109638 AGGACCTAGATGGGAAATGTCTCTGCTCATCCGACCTCTCAAAAC  
A\_14\_P100574 AATGAACATGTTTCTCTTGTTTCTAAACTCCATCCTTAATGAGCAACACTGTCAGGTAG  
A\_14\_P125053 GCTCTGAGAGGAGAAGAAAGTTAGGGAGTGGGAACCTTCTACCAG  
A\_14\_P103836 GAAATGTCTTCTAGGGTTGCTATGCGAAAGCAAGACTGTGGTTTCATTCCAATTT  
A\_16\_P02356961  
CCTGTCCTACCTGGATTACACAGGTATATTGATACCTACTATACGGCAGACATTATTCTA  
A\_18\_P10885205  
TGCCCTTCTTTTTTCATACTATCTACTCAAACCTGCAAATAATCTGTTTCACTTCCATACCC  
A\_14\_P134473 TCAGTTATACCTCACCAAATGGTCAAACAACCTAGGTAAGTTCTTAAAATACTGGTTCGAGA  
CUST\_6434\_PI426210822 AGGCTCATGAACTTGTGCTTGCTGACATGTATATCTTCTTCAGTTGGTCC  
A\_14\_P112651 ATCTTTCCTTTGTTTCTCTGCTTCAGTTCTCCCATTATATTGCGAGTGCTAGATATGAAA  
A\_14\_P136331 CCACTAGCCTCATGGCCAGAGAGAATTTCAAATATGCAGGTCATTTAGTAATAATCTAC  
CUST\_5637\_PI426210822 CTTCTCAGGCTTCATCAGCAGGCCCCCAAAGAGACCTGGCTACAG  
CUST\_3174\_PI426210822 TTTATTTCTGGCAGTTACTGTCTGGGCTGTAGCAGAGGACTGGGC  
A\_14\_P111114 CACTTCTGCTGCACTGCTTTCAGCATGCAAGTAGGTATTTTCAATTAACATTCAGAAAAGT  
A\_14\_P138129 TTAAAACAGCCATTTTTAAAGGGAAAAAACCCCTAAGGTTGGGAGATTGAGAAATACT  
A\_14\_P123263 ATGATTAAGAATTTGTCATGTGGACTTAATTAGGTGGTTAGAGAGAGTGGTAGTCTGTGT  
A\_16\_P03434375  
CACTAAAAACTGAGTGTCTTGTCCCTTTTGTGAATAAAAATTCCAGCCAGAACATTTGTT  
A\_14\_P105832 TTCCTCTCTAAAATAAAGACCCTTTTTCTCTGATTGAAGCCAAGAAAAAGGATCAAG  
A\_14\_P128625 CACAGATCACTTTGTTTACTTTCTCCACAGATAAATATGCTGGTGATTGAACTGAAATCC  
A\_14\_P124682 TCATATTTCTTCTTAAGAAGTCTTTCAAGTTCTTCCACCAAAAATGTTGACACGTCCTCTG  
A\_14\_P113707 TTGACCTTCAGTTCTTTTCTAGGTTATACCAAAAAGATTACAAGACAATGGCCGCTTTAGC  
A\_14\_P127589  
GAGAAAAAAAGGTTGGCTGGAGAAAATTAAGTTTCACAAAACCTCAGAACAGATAGCAGAT  
A\_16\_P03561976  
GGCTCCTTCCATTAATAACTCTATTGCTCACAAATTTATAGATTTCCATTTTCACCCACC  
A\_16\_P16192922  
ACATCCTATTATAGCAGACTAAACCAATTCCTAACAGATACCTTTTACCCGTATGTATGAA  
A\_14\_P102282 TAGAATTACCTTTCTGGTCCTTTAAAATATCAGTGGACCAAATTCATCTTCTTTTTTGT  
A\_14\_P117187 CTCACATAGAGTTCGTGCTTCTTACAGGCTTGTTTTTGTCTCACTTGTGTTATAATCTGAA  
A\_14\_P129148 AGTAATGTCGTGCAAATGAAAATGTGATACAAGAACTAATGGGGACTAACTCCTCAGTAA  
A\_14\_P136965 TTACATTTTAAGGGGACAAAAATGAAGACCGAAAACCTAGGGATAGACTTTTCTGGATTAG

A\_16\_P00685401 CATCATTTTGTATCTCTTTGCCATTGAATTCCAGCAACCTTTGAAACCTTTGTCAACAAG  
A\_14\_P120775 GACATGAAAAGATGCAACAAAAGTTGCTAAAGATTGAAACATTAGATGGCCCCTAAGGAC  
A\_14\_P137481 AACAAAGGAGTCGCTTGTCAAGGATCTGGTTAGAGAAGACTAGGGTCTT  
CUST\_8854\_PI426210822 TTATCAAGGAGCCCAAATGTCTTGTGCTCACAGCTGCTGTGACAT  
A\_16\_P15212024  
AAGACACAAAACCTAATGTGCTCAAATATCCTCTCTTGTGTTTGTGAAAAGTTGTCTGGAG  
A\_14\_P124358 AGGATATTGGGCATGAAATTAAGAGATGACACCCAGAAGTTCAATGTGTATTTGTTGATT  
A\_16\_P00591573  
TAAAGACAAATTCTCAGGTGTATGAAGTCTTCCCTTCAATATGACCAGTAGCAGCCATAT  
A\_14\_P123902 GATTTAATGAAAAGTCCCAATTTCTTTGCAGAGCATTTTAAGGAACTTTACCCACTGGAT  
A\_14\_P136820 TACCTAGATATTTGTGCCCGTCTGGATTTCTTTAGATGTTTTATTTTCAACAGCGTCC  
A\_14\_P106675 CTCAAAAGTCTTCTCAATGGCTGTGATCTGGCTATCCCTGTCTTTGTATATTTCTTC  
A\_16\_P18504380  
TCCCAAATCCTGTCCATAAGTCATATATCTGTGTTTAAAACTTCCATAAATACCTGCAA  
A\_16\_P15570126  
AAAAGAGGCTCCCTAGTTAATTTACACTTCCTCCATACATTTCAAAAAGCAAGGTGT  
A\_18\_P22842104 TTAACAACCCACAGGCCTAACAGGACCAACATGGGCCTGTGAAAT  
A\_18\_P14133385  
GGATTGTGAACATTTGGAAACCAGTATTTTTTTTTCTCTCTGAATTGCCTTCTGTTTAGA  
A\_14\_P113212 AAGGCAATTAATTAACCTTCACTCTGTCCCTAGGTCTAACAGTAGGATTTAGATAATTTT  
A\_16\_P03225827  
AAACAGTCCAGAGTTTTAAAAGAGATTCTACCACAACCTTGATCCGAAAATAGTCTGCTCT  
A\_14\_P105801 ACCAATATTCTAATCCTGCAGTAAAAACAGCACTATTAGACAGGAAGCCAGAAGATGTAG  
A\_14\_P103031 ACATATAGTTAGATAAAAGATGAGAAGATTCTTCTGGCATGTTTCTGTTGGCAAAGGGA  
A\_14\_P127552 TGAATCCACCTCTAGGAAGCCTGTTATTATCTTGGAACAACTCATCTGCATATGTATTT  
A\_14\_P201644 CTGTGTTTTTGATACTGATATTTTCTATGCTGAATAGTTTTCTTACTTTTCAGGGAAGGT  
A\_16\_P17175788  
AAAGCAAGCCAAGACACATATTTCAATTAGAGAGTTTCTTTTCAATATTTCTGGGCCTTT  
A\_14\_P201011 CTGAGGAGAGAGCAATGCTCATAGTAGGTGAGAGTATCATTTGTAGCATTTGGAAAATA  
A\_16\_P00685495 AAGAGATGCTACTCAAGAGAGGGCTTAATTTGGAAGCCAAGTGGATGGATAG  
CUST\_6410\_PI426210822  
ATAGTTTTTATTATTTGCTTTCTAGGACATGGCCTTAGCCTTCAATAACTGTTTGTTTA  
A\_14\_P121620 TATTGATTCTGATTATGAGAAACCTGAAACTCCTGAGCGTGTGCTTAAAACCAATTTGTC  
A\_14\_P121299 AAGAGAATACAAACCAAGACCAAATGTTTCTCTCATCCTTTTATACCACCAAATCTCTCT  
A\_16\_P01034422  
TCCCTTCATCAACCCTAATACTACTATCACATCATTCTCAAAAACAAAACCTTTCTGTT  
A\_14\_P116687 ACTTACCAAATATTTCCCTCCACTAGCATATTTCTGTACCAGATAAATCATCCGTTCT  
A\_18\_P16126210

TTTAAAAAGTTAGTTCACCTGAATCAGAGTTGTTAGATAAGATCTTGTCTTCGTGAGAACA  
A\_14\_P133943 ATACGGAACAGCCAGATCTCTATTGCCTATGAGTCTAAATGACTTACAATTCTATCATCC  
A\_14\_P138797 GATTGTTCAAAACTGAATTCCTCAAATTGAGGGGTATGATTTCTTTATTGTCCTTGGTG  
CUST\_3075\_PI426210822 CCTCATCACAGTGTGTCGGTCCCTTCTGACATTTTGACCTCTCATTTA  
A\_14\_P111554 GAAAATAAAAATGCACTAAGGTTGGGTAGAAGTTCTGTTTGCACCTACTAATTGTGACAG  
CUST\_1781\_PI426210822

TTAATTAAGGCTCAGAAAAATTTCTCTTGCTTTCTTAACTCTTTTAATCTTCTGGAAAG  
A\_18\_P15651552

AAACAAGAAAGAACCAAAGGTCAAGGAATTCTACTTCCCAAAGCGAGTAATCTTTCTTAT  
A\_14\_P103988 AGGTGTCATCTATTTTTTTCAAACAGAAGGCCAAAAAAGCTTAGGGAGAGGGATTCTATTC  
A\_18\_P26177238

GCACTTTCAACTGAAAAATGAGCATCCTAAAGCACTAAAATACTCTTGAAAACCAACCTG  
A\_14\_P138412 AAAGCCTTCAAATCTGAAGAAAACATACACCCAGAATCACAGTTAGGATCTAGATCTTCA  
A\_14\_P201701 GAGAAGGTGGCATTAAATTCACGTTAGGAAGAATCCCTAATTGGTAGTTTTGCTAATTC  
A\_14\_P139416 TCGCAGTTCAAACATCAACATAAAATGGCTTTGGAATTTTACCATTTCAAATTACCCGT  
A\_14\_P113385 ATTCTCACTATACTCATTTAGAAGCAATTGACCCATCTTCCTTTCCTTTCAGTTTAGCAC  
A\_14\_P136106 AATGGTAAGTCCTCATTATCTGCAACTTCAGTGGGTTGTCAAATTCATGTATTGTTTGT  
A\_14\_P100511 TCTCCTTCTGTTTTAGGCAGAATATGAAGTTACTCCAGATGAAAAACTGGGAGAGAAAAG  
A\_16\_P20256494

ACACTGCAGTTTACTACCATTTATAAGCACCTTCATGTATTTTCGTCACTTGAGTCTCAG  
A\_16\_P30952281 CACATCCTACCCCATGGCTTCTGTACATCATCCCCTCCAACCTC  
A\_16\_P58424187

TCGAGCATTTAGTATGTGCTGGTTACTGTGAGTCACTACATGTGAGATAGTTACTGTTTT  
CUST\_2862\_PI426210822 CTATCCTCCATCTGCCACATGGGTTTCATAGATAAAGTCAAACATCCCTTTACA  
A\_16\_P00312521

GTGCAAATGTTCTGATTGGGATGTAACACTCATCCATCTAACCCCTCTAATGTAAT  
A\_14\_P132203 CTTGACTAAGATGATCAAGAGATAGAAGCACTAAATGGCAGACCATTGTTTGCTGAATCT  
A\_16\_P17856979

AAAAATTGACAAACCAACTTTGCTTATTTGGAAACTATCCCTTACAATTCTACAGCCCTT  
A\_16\_P40562185

TTCAACTGAAGTCAGGATTAACCAAGACAACATGATTACATACTTGGCAAAGAGATTAC  
A\_16\_P01207983

GTTGTCCAAAGAGAGTTTTCTTTTTCTCATCAAACACTACAGATCAGCAATGAAATCAGG  
A\_14\_P119345 TTCTTGTTCTTCTATTTTAGCCTCTTTGTGAATCTGTTCGATAGTTTTAGGCCCTTGATC  
A\_16\_P35144159

ACACTGCTGGTTTAAACCTAATTGATGACTAATGTTGTAATGCATCTGAACCTACTACTGA  
A\_16\_P00685281

GTCAGACACATTTTTCTAGTTTTTCTAGTTTTTCTACCCTTCAAATACTTTGTGTTAAAC

A\_14\_P114188 AACCTACTTCCGAAAGTTCTATGGAAGATTCACCTACTACAGAGCGATTGAATTTTGACA  
A\_14\_P110107 TGGATTGTTCCAGGAAAATTTTTAGCATTTAGTGGACCACATCCTAAAAGCAAATGAG  
A\_16\_P41747010

TCCCTGTATCTTTCATTTTCCTGTATATCTAAAAGCAAGATTAGTTCTAGACCACCAACC  
A\_14\_P106809 GTTTTGAGATATCAGAAGTGGATGCTAAAAGCCTGATGTTCTCAGTGCAACCTAAA  
A\_14\_P202499 GTGCATGAGAAGTCTCTCCAGATGTAAATATATAACCGAGTTTGAATTCTGACACTTAG  
A\_16\_P35668270

AAACCACTCTGTCCTAGATTTTCAGCCTGAAGAAAAGTTGTTAGAATACACATCTTATCCT  
A\_16\_P19426191

AAACTCTAACAAAAATGTGCCTTATCACTTGCTTTCTACCTTCATCTACCTACTGCACAA  
A\_16\_P19701585

AAAACCATCTCAAAAAGTCTCCTCTCTTTTATTTCTTGACATATCTCTGATCTCCAATGGC  
CUST\_5071\_PI426210822 TAAGTAGGAATAAGCAGCCTTGTTTTGGGGAAAAAGAGGGACAGACCTA  
A\_14\_P132981 AACCGCATCCAGAATGCTTTTAGTTTGTGCCACAAAATATGAAGAAAATGTTTTAGTTT  
A\_16\_P18774026

GGCTATTAACCAACATAACTCTCACTCTTGAATTGTAGTATTA AAAAGCCCACCAATCTG  
A\_14\_P105693 AGTAAATCGCATAAATTAGGACAGTCTCAGGCTAAGTGTTTCATTCTGCTTTTACTCCATT  
A\_14\_P100312 TCATCCAGTTTATCTTTACCCCCATTAATGCATAGAATTGAATTCTCTAATGGCACATG  
CUST\_2365\_PI426210822 GAGACCCAGCTTCCCCTCCTCCGGGGCCCTCCCAGTGTTTTGTT  
A\_14\_P118948 AGACACACATTTTTCTAGTTGACATAAATCTTGGGCGGTCCTAAATTTTAGAGCCAAATT  
CUST\_6115\_PI426210822 GTTGGGTGGTGGGGCGAAGTGCATTTCCAAAAGTGTGGCTAGC  
A\_14\_P109241 TAATTCCTGCCATCCTCATTTACAGCCCAATAAAAATGACAGGATTCGAAAGAAATAAAT  
A\_18\_P12318737

AAAATCAATTTTCAGGTGTTTTCTCCATGTATTTCCCACATCTCAATATTAAGGCCCACT  
A\_16\_P16489273

AAAAACATTCTCCTTTTTACCTTCTATAGTTTTCCATGAGGCATAATCATACTCTCCC  
A\_14\_P200222 GTCTTCTGTCTACTCTCCAGAACGGCCATGATTTCCCAATTCTTCATTCT  
A\_18\_P17364440 CTGACCTGACTCTAGTATCTCCCCACTCCTATATATCATGCCAGTGATCTTT  
A\_16\_P15920813

ATTATTTGGCTCCCTTCATTTTTATTGCTAATCTAGGACATCTCTTGTATGGACTGCTGC  
A\_18\_P22841617 ATTGAATTCCAGCAACCTTTGAAACCTTTGTCACAAGGAACCCTAGGTTTCA  
A\_16\_P02718700

ACCGTCACGTCTATATTGTCAAGAGTAGTGTTTCATTTTATCATGCAGTGTCTTCCATTATG  
A\_14\_P111568 TGTTTCTTGCTTCCAGTCAGGGTTTTACTATTCTCTAACCTTCTGCAATATAGAAGTTGT  
A\_14\_P130116 CAGTGTGGACGTCGCTGCTGCTATTCAACTAAAGACAAATTTTAGTAAATTGAAAGAGAT  
A\_16\_P18539196

ACTGAATAGGAACACAATTAGTTTACTTATGCCAACTCGATGTCATATACAACCTCTACT  
A\_14\_P200645 ATCAAAGGTGGGAGATAAAAATGATAGGGTTTTACGTGAAAGGTATCCTAGAACATTTGCT

A\_14\_P109336 TATCTTTTCTTCCATGTCTTTTCATCCTTACAGCAAATACTTCCCTGGACAAGAAAGC  
A\_14\_P104196 CTATAAATCAAAGTTTCCCTTGACAGAGCACAGTGCAATTAACACAAATGTTCTCCTAGTG  
A\_16\_P00768062  
AAAAATTGTGAGTCTGAGATTTTAGTAGCCTTACCGAAATAAACTTTGGATCATCTGCA  
A\_14\_P134003 ACGGAAAATTGCAGTAGATGAAGAAAATGCTTTCTTAAGGAAAGAATTCAGTGACTTGGA  
CUST\_3700\_PI426210822 CTGCCCTGTA ACTCCATCACACCCATCTGAAGTCCTGCCTGGTAG  
CUST\_4155\_PI426210822  
TAGTGGAAGTTAAATAATGTTAAGGATAGGAGGCTTGTCCTCCATCATGATTTAGTAT  
A\_16\_P19115561  
GCCATGTTGACTACAACAATAGCATTGCTTATGGTTCAATCTGATATGTCTGTGTGAATG  
A\_14\_P104823 ACGGTGAATTCAGCCTTGCAAGTATTTTTTCAGAGATGAACAGAATTTAAAGTGTTAGAA  
A\_16\_P21467329  
AGTCTTTCTACAGCCTGAAATTACATAGCCTTTTCTTTCTCACAATTGTTCCATTACT  
CUST\_8427\_PI426210822 TTTGTTGGCTCTGCCCTTCTGACCTCAACTTCAGAGTTGCAGATT  
A\_14\_P102156 CTCCCTTCAA AATTAACCTTTCCAGCGAAAATATAATTTACACAAAATGAACCACCAAG  
A\_14\_P113417 CTACTCATGTAAGATGGCAGGAGACGACAAACACATGTTCAAGCAGTTCTG  
A\_14\_P128900 GAGAGACCCACACGGCACACCTTGTGTAATGTGTGACTTTTTGTTTTTAATAGAAAA  
A\_14\_P110520 ATCAGATAGAAGCAGGGAAGGTAGATAACTTTTAGGACCTTGATGTGAGGAAAAGATAAA  
A\_16\_P01255356  
ACTGAAACAAGACACTATAGAACCTTAGAAACATTTCTGATATGCCCAATTCAAAGTCA  
A\_14\_P126378 GTTCGAGATCCACGCTATAGAGAGGATCCTTGCAAACAGTGCAAGAAAAAGTAT  
A\_16\_P03282681  
TTTTCAACTCTCAGAAAAGCAGATTTTCATGATGTCATACAATGTCCTATTCCACTGTCAG  
A\_14\_P100671 CAAGAGCATCATTTTCGTAGAGGTCCAGCACATGTTAAAGCAAATAAAATGTAAAGCAACA  
A\_14\_P133650 ACCTGCTCCCATGTCTGCTACAGA AACTTTTATGTGTTAATGTTAGTTTCTACATCTCTTT  
A\_14\_P115578 CTACAGACACCCAGAACATCTTCTTCATGAGCAAAGTCACCAATCCCAA  
A\_16\_P18089917 CCTGTGTTTGCTAATATTCTTGTGTCATCTTCTTAATTGTTCTTGCTATTTGCCATCACCA  
A\_14\_P126129 TACGCTAGTATAGACGGCAATTCTATTAATCAGAATATGTGATTCTCAGAACATCCCCAC  
A\_18\_P15447085  
AGGAGCAAGTCATTCAA AATCCTCTACTGACAGATGATATCTACAATAATTTCTTCCCCT  
A\_16\_P01830742  
CCAAACCCTTACGAATTA AAAAAAATGTAAACCCTACAAATTTCTTAACTCCATCTGCA  
A\_14\_P118834 GCAACAAGCAAGTGACTGAACTGAGCCCAAATAATTA AACTCTTTGCTTAAATAACTGC  
CUST\_743\_PI426210822 TAGTGACGATGTCCTTTGTGATATCTGCCAGCCTTTGCTGGAGTC  
A\_14\_P119500 GTAAGTCGTTTGTGATACA AACTTAAGTGAAACATGCTTGCACCTTCTATTTTGGGGGTTAC  
A\_16\_P00197971  
AACTCCTCTTGATCTTTCAACACATTTTTTCTACTTGGAGTATTTAATGACTGGCACTCC  
A\_16\_P17273450

AATGGAGTTTAGAAAAC TACTTCAATTAGCACAGGACTGAAAAATTCATTGCCGAGTGA  
A\_16\_P16179019  
AATTAGCATGAGACTCAGAGATAAGATATCCCAAACACAATCTGTTAATACCCCAGGATC  
A\_14\_P132725 TCGCAGGGAAATGCAAACCTATTCTCTTCTTTCCCTCAAGGTTTGGTCTTGTATTTTAAAA  
A\_14\_P104594 ATCAGGCTCTTTATGGTGCATGTGCTAAAGACTATAGGTAGGCCAACTTCAATTTTACAT  
A\_16\_P19057513  
AAACCTCAGTAAATACAATGATCTCCACCTCACTACAACCTTACACATACGTTGGTTTTCT  
A\_16\_P03624601  
TGTGACTAGTCAACAATCTTTTTGCCACATTTTACAGAGATTAATACCTTGTGAGAACC  
A\_14\_P109285 GAAAACCATGTTGAAGTAGAGGGGCAATTTTATTCTCTTAGTAGTGAAGAGAGAAGTCAT  
CUST\_916\_PI426210822 GGGGAGGGGAATCACTTCTTGAAATAACCACTGAACAAACTCTGTATAGG  
A\_14\_P124774 ACTATAAATGTTTGCATTGAACCTTATCTAAAAGATGACTAGTGGTCGTGTTTGCATGCC  
A\_14\_P101136 AATAAGTGTCTTCCCTACTTCAAGGTAGTAAGGATCTCCTGTAGCCTATTA AAAAGGAGA  
A\_14\_P115194 TGCACACAGACCTGTTCCCTAGGGACAAACATTAATTCTCAGAAAGTTTAAATCTACTTTC  
A\_14\_P125715 AAAGAAACAAACACCCCCAAGAAGAAGGAGAGTAAAGTCAGCATGAGCAAAAA  
A\_14\_P109908 AGATGTTACAATAATTTCAAAGCACAGTGTACCCTGGAAAAGTCACATGGCAAGT  
A\_14\_P123337 CAGGCTGATGTTGTCAAAGTTGT CATAGGCATCGATAGATGCCCTTAAGC  
A\_14\_P123891 ACTTAGGTTGGCTTAATTTGACCTGTGTTGACAATAGTCTTACTTTAGAAAAC TATGCC  
A\_14\_P139730  
TTTTATTTATGAAAGATGGAACAAACAAGAGAATGAAAGGATGAGTGTGCAGAGGGCAAA  
A\_16\_P00685049 TTAAAGTCTGCAGGCTGTTGAGACTATGGAAGAGAGGGATGGTGGAAATT  
A\_14\_P202252 CTGTCTCACTTAATTTACATTTAACAGTGTATTA ACTGGGTGAGGAAGAAAGGCCAAAAC  
A\_16\_P00381376  
ATGAAAACACCCTGATTGAAATACAAAAACCCCTTTAGTTTACCATTTATCCCACACTTG  
CUST\_8574\_PI426210822 AGAATGCTCACTGGGTCAGGTGTGATTCAGAGCTCATGACGGTTT  
A\_16\_P00174384  
TGAATTA ACTAAAAGGCTTCTATAGAACAGTTCAGCAGTAATTATTCCTCTTGTCCCCA  
A\_14\_P109361 TTAGGATGAGATGACTGTGAAGCACAGGGTTCAATATTTGGAGTCACTATAGCATAATGA  
CUST\_9735\_PI426210822 TCAGGAGCACATCATGCTCAGACTTATTTGGTGGTCAGTTGGCTT  
A\_14\_P201772 CATTATTTT GAGTCGATTGGGTAGATCACAGAGTAAGCAGAACCATATATCTGCCAGTTA  
A\_14\_P128476 AATTGAGTGT TTTCTAAAGAAGTAACAAGGGCTGGCTAATTTTGGTTTTTTTTTGCTTGCC  
A\_14\_P121527 GGATGAGGTCTTGAAACATTTTTCTCTCACATCTCAACTCAAAGAATTTTGGAAATGTA  
A\_14\_P104522 TTTTAAACATTACTGCTTTTGTCTGAATTTTTTGTGCTTTGTGTTTCTGTCCCTCTGAGTC  
A\_14\_P113176 TCAGATTAGGGGAGGAAGGTCA TTTGTGCAGGAAAAAAGCAGTTCTAAGC  
CUST\_6107\_PI426210822 AGAAATCAGTGGAACATTTTCATTGCTGTCTGGCTAGCCA ACTCCGATAAAA  
A\_14\_P124020 GAAGGTCATGGATTT CATGGTTAAAAAAAATAATGGCACCCCAATGAGATCACTAATATG  
CUST\_1875\_PI426210822 TCCATAGGTTGTCTGATGGGAAAGACTGAGTGAACAGAGGAATGAACTT  
A\_16\_P00685042 CTCTATCCCTTTAGGCCTGTGCTCATCGCTGGAAGAACATCTACTATGAAG



A\_16\_P39449817

AGATTGGCATTCTCTTCTAACTACCAGATATCAGCCATATTCTATAGGAACCCATTGTT

A\_14\_P117322 CATGTTAGGTGATAGGTCCATTTGGCTGACATATTTGGAGAAGAAATTAACCCCTTAAG

A\_18\_P22843033 AGATCCCACCAGGGGCAGATGAGGTGTCACATTGCATCACATCAC

A\_14\_P116231 TCTACTGCAAGGAGGACTTCTTCAAGTAAGTCAGAACGGTCCGTCT

CUST\_9585\_PI426210822

TAACATAATTTAATATGCCAAAAATGAGAAAATAGTCAGGATGAGGGATGAGGAGTACAC

CUST\_8456\_PI426210822

GGAACCTGTTCCCTATGAATTCATGGCATAATAGGTGTCTAAAAAATGAAAGACCTCT

CUST\_5503\_PI426210822 ACCCCATTGCAATGATTATAAATGAGTAGATCGGAACAGGGAGGACAACA

A\_14\_P108435 TTAGAAACACAAGGATCCATTTTCAAGTAATTTCAAAGAACTATGTTGCTTTCCCCACC

A\_14\_P114380 TGGTAGGTTTCTGGATCATAGTTGTAATCTCATTCATCCATCCCTGATGAAGAAAACT

A\_14\_P132911 CTAGATAGACACTTAGGGTTTTGATGAATGGAGATTAGTTGAATGGCATTTTGTGTGAAG

A\_18\_P10035623

AAATCCTACCTTTCGGGGATATCTTAAATCCAGTCTCTTACTGCATGTCTCTTCTTAAA

A\_16\_P17938521

AAACCTGGTTGCTGATACACTTAAACATTTCTTAGAGTTTCCCATTTGTGTTTCTTGCT

A\_16\_P37685151

ACAGGGCCAATAAATGATAGGAAAATCTCAAGCATGATCTTTACCATCTAAATCCCATTC

A\_14\_P103820 CTTCTCCACATTGGCTTTCAGTAGTGCCTTCAGGGTGTCATTCTC

A\_14\_P113101 CTGATCTCCAATATTTGTTTTCTTTAAGCAAACAGCAAATCCAAGTCTACACTGGGTC

A\_14\_P105991 TAGACATTTTAGCACCTGTTTCTTCTGTAGCCTCTTCAAGGAGTTTCTCTT

A\_14\_P129574 ATGCCCTATTTCTGAATGCATGTTGTTGAGGTTGGATCAAGATGCTGAATTAAGTATTT

A\_16\_P00095354

ACCATTTCTAAGTATTCTGGCATCCCAAATTAGAACTTTGACTTACTACTCCTGTGACA

A\_14\_P114353 TTATTTAAGAGTTCCTTCTGCTGCTGAAGTTTTGAATTTTGTTCCTGGTTAAGTTGGTTA

A\_16\_P02826023

CACTCAAGAGAATCAGATAAGAACAATAAAAGACTCTATTCCATCTCATTATTTCGCACAT

A\_14\_P103439 CCATATCATTTTCCAGACAGAGGTTAATTGAAAGGACAAGTTCAACATACTTTAGCCAAG

A\_14\_P123666 TTCTTTCAGAGTCTGTTTCGATTTGATACCTTTGATAGCCTTTCACTAAGTATTCCAGC

A\_14\_P115416 CTTCTAGACAATAAGCAGCAAGTTAGAGACTAGAACAATTTACGGATAAAAGACACCTG

A\_16\_P00016115

TAACAATTACCACCATAAAATAAGAAAACGGACCCAGAATAGAATTTGAGGCAAGAGACC

A\_14\_P118933 TATATCCTGTCTTCTCCTTGTCTTTCACAGTGCTGTTTGGAGAATCACACGTTT

A\_14\_P129308 ACTTCTCTACTATGAATCAGAGGATGAGGTTGTATAATTCAAAGCATTGCCTTAGTCTA

CUST\_8564\_PI426210822 CTCTGTGTTCTTATAAACGATCACCCTGAGCCCAGAATGACAACAAGAGT

A\_14\_P133313 CCTTTAAGTGAGAATAACTAGATTTTTTTTTTTTTTCTTCAACGCTTCCCTAACCTGTGT

A\_14\_P119677 CAATTCAGTTTCATAAAGATGCAGATGTTGCATTCCTGTAGATAACCACTCTCCTTAAAA

A\_16\_P20663793

TCAATTACCTTCAGTCTTGCATAACTAATCCTATAATCTCCATAGAAGTTACTGCCCTGT

A\_16\_P00757570

AAAAAAAAAATGGAACTATCATTCTAATCTTTCTTCAGAGAAATAGGCACAAAGATAGCA

A\_14\_P201286 TTCCCTAAAGTCACCAGTTTTCAACCTGTCATGTATTCTTCAATCTGGACTTTAAAACT

A\_14\_P102523 TTAAACCAGGATCTTAAGGTGCACATAAACATGTATTAGTTACAGAATGTTGGGAGGACT

CUST\_4093\_PI426210822 ACTTCTTCCCGTGTGATGATGGCTAAGTGCGCAGAACATGTGAAAT

A\_16\_P17073394

TTTGTCCCAACTTTTAACTCTTATTCAACTCCAATTACTAACCTCAATCTTTCAGTCCA

A\_16\_P20643178

AGAATCATAGATCATAACATATTGTTTGCAAATTGCTTTTTCTCACTTTCAGAACCTTGA

A\_14\_P137208 ATATGTCCCATAAATCCCTTTTAAACATAGATTATTCAGACACTGTTGTTTGCAGGGTAGG

A\_18\_P14136359 CTTATACCTGGAGCCTTATTTAGGGGATGTTCTTGCAGATAGATGGGGAGAA

A\_14\_P108037 CTTTCTTTCAATTACATGGCTAGTAGTAGGTAAGTGGGACATGGCATTTTGAATCACAA

A\_14\_P109392 TCTAAGTTGGTTGTGGATTTTCCCAATTTCCCAATTTACCTCCTGTATGAACTAATTA

A\_14\_P201280 ACTAAGTTCATTTTTCTCTGTTCTTGGCTGCTCCTCTAACCTTGAACCTTATTTAGTCAG

A\_14\_P136404

CTTAAGAAAGAAAATCAGAAAACCTGGGGCAATCCAGAAAACCTAGACAAAGACAGAGATT

A\_14\_P109006 AACATCAACTTTGGATGCCAAAGATGAGTGCACAGAATATTCTGATTTAGAAATCGTGAT

A\_16\_P15623712 CCAATTCCTATATGCTATTCTCCATATCACACCCTACTTATTTCCAGACCTCATACTT

A\_14\_P102232 GAGGTATAGAAAGCCCCTTCTTTGATTTCTGGATAAGGTGATGTTACACATTAAGATAT

A\_16\_P18770899

AACTTTCTCTGTTTCTGCTAACTTGCCTAAAACCAATAATTCTGGCATGTAAGGTGC

A\_14\_P123908 TAAACAGGTGCAGTATTTTACATCTTGCAGTAAGTCAACTCATGAGGCAGAACTTAAAA

A\_14\_P107184 ATCTATATGGTAAATTTGGAGCATGGAGAATTACCAACAAAGAGCCATTGACTTGGGTTA

A\_14\_P131365 TTCATTTATTTAAGGGACCTTCTTAAGGGACTTTTATGGAGTGCCTATTGTATACCCACA

A\_14\_P116988 GTCTTGATTTTCAGACCATGCATGGAATTTTGGAGAGAAGCAAATTTTGCAAAGATATGA

A\_14\_P127539 TTCTTTCAGGAGAGGGAAGTTGGATTATCAATCTTTTGTAAATGTGTATGGTGATATTT

CUST\_8279\_PI426210822 ATTGCTGCAAACCTGAGCTTGAATTTCTTCTCACCTCTTATGTAGCCTCCG

A\_16\_P19474198

AAAGGCCACATCTTTTATTCTAGACTCTCTTTCAATCAGAATGAATCCAGTGATAGCCAT

A\_16\_P30952230 TGAATACTTAGCCATCTGCCTCCTATTTTCTTATCGTAGGTTGTGACAGAATGCCTTT

CUST\_2920\_PI426210822 TGGGCTCCTCCAGGAGCAGTTTACAACGTATTTTATAAAGCACTTT

CUST\_7347\_PI426210822

TAAATAAATAATCTCATTTTCTAAAAGTTCTTGCAAAAATGTCATAGAGTCTGATTGGTC

A\_14\_P109159 TGAACACGTTTTTCTTATAAATTAGTAATCATAGGGCTTTACCATGGGATGAGTGGAAT

A\_14\_P102916 TGGATTTTTTTTTTGGAGGGAATGATCTTTCAGGAACTCTGAAATAAGCATTGAGGTATTG

CUST\_10029\_PI426210822 ATTGCCATGGGTCAAGGTAGGACAGGCAGGGTTTTGCTGACCAGTT

A\_14\_P115173 ATTAAAGTCATCTACCGGCAAGTTGACAATCTTGTCCGTAGGAAAAGGAATCTTCAT  
A\_14\_P105462 ACTGCATTAGACTATGGCCTAGGTTTTGTTTTATTTTCACTTCTTATTTTTGCCTCTGTC  
A\_14\_P139226 GAGTTAGTCCTCTAGAATGATCACGCACTTTAAATACACCTGGACTTAAGTAATTCCAGA  
A\_14\_P131787 TATTAATGACAAAGGTTTATGTCCTAGATCAGTTCTTCTTTAACTTGGGATCCACGGATG  
A\_14\_P134289 CGTGTGTTCTGTAGCAGTTCGGGTGAATATCCAATGAAACCATGTTCTGAAATAA  
A\_14\_P102164 ACCATTCTCTCTTTCTTATATTTGCCTTTATTGCACCCCTTAATTTCTTCAAACCTCTGT  
A\_18\_P11613762

AAAATGGAACATAGTCATTGGACCTTTTCAATTTCCCTATGGTAACCAAAGACCAAACCTGT

A\_14\_P122451 CTGAACATAGTGTGGATATAGATGTGGATATTGATTGGCCTATTGCAGAGCAAAGAGTAT  
A\_14\_P104642 CCATCTTACATAAAAGGGAAAAAAACAATGATTTTCCTCAGACTCCACTGAATATGGCT  
A\_16\_P03338154

CTTGCAGAATATGACGCTAAAGTTTTATGGGACCTTTAATTTTGTATCCACCTTCTCAGT

A\_14\_P108575 ACTGTAGACTCAAAAACCTCAGATACAGTCACCAGTTAATATAAAAACCTAGTGGGAGACTC  
A\_14\_P106099 CTTCTCGGACAAACTATTTAGTGGAAAAGGCTTACATTTTCAGCCATCAGTTTTAGATTT  
A\_14\_P122568 TCAAAAGGCTTCATCTGTCTATTTACAGAATAGCAACTATTTTTCTTGCCACAATGACG  
A\_14\_P134773 ATCCATAAAGATACAGTTTAATATGTCCTGTCTTTTGGGACTGATGTAGTGGCTTGAGAA  
CUST\_9391\_PI426210822 TCTCCTTAATTCATAAGCCAGATATTTACCCCTTCCCCATCTCTCCATCAG  
A\_14\_P125861 GGGTGTCTCCCACAAGTCATTTCTCTCAGAAGGATCATTACCTAAAATAGCAGAA  
CUST\_5457\_PI426210822 TAGCAGATTGTGACCCATGCCTTG TAGATTAGAGTTGTAGACTGAACCACA  
A\_16\_P01359640

TCTATTTGATTGTATGACACCAGGAATAAACAGAAGCAAAATGATTCATCTCCCAGAAGG

CUST\_4771\_PI426210822 ATCTACAACCTCCTCAGAGCCAGCCTTAAAGTGGTCTGTGGATCAG  
A\_18\_P13244566

CCCCACATATTTCAAATACTGTTCTTCTTCATTATTGTCCTCTACCATAATTAGCACGT

A\_14\_P130683 GAGTCAAACCTGTTAAAAGGTTAGTAGAGATGGGTGTGGGATTACAAGGATATTCATGTTC  
A\_14\_P138221 GATGGAGGGAGGACTTCCAAAATCCTACACTGCAACCTGAAATAAAAATGATACATTTAAA  
A\_16\_P17904346

ATGACAAGAGACTAGGAAAAATGATCTAGGAGATCCAGCATAACATGATATAGGTAGTGCA

A\_18\_P11848822

ATGCACACTTTAACTAAACCTGAGGAAAAGATTCAAGTTACTGTTTTGGGAGAAGGTATG

A\_14\_P107759 TTACAACACGCATTTTTCTCTGACTAAAAGAGGCTAGCGGAACCATGATTATTGTTAACA  
A\_16\_P17682306

AATAAGCCCTGTCACTTAAAATAGAACCCTCTACCTACAGATTATGTTTTCTTTTGACC

A\_14\_P115451 TTACAAGAAAACTACAACCACTTAAAAAAGCACAACCCCAATAAGTGGGGTGATTAT  
A\_16\_P19506829

GACATCCAGAATTGAGTTTACAGAACCTAATGTACCTACTTATATAATTACAGCAGGCA

A\_14\_P106916 TTCTAGTTACCTTGACCATGAACTTATTTATTGCCAGATATAGTGCTTTGCCTGCCAAAT  
A\_18\_P14132120

AAGTGGATTTGGCGATCAACCAAAGCAGAATAAAATGTTTTATCCCAACCTTCCTTTTT  
A\_18\_P26792470  
ATTAATAAACGTGGGAACCTTAATTTAACATGATGTCAATAAACATGATTATGGTTCTTC  
CUST\_1083\_PI426210822 GTAGTTTCAAGTTTTCTCAGCCTAATTTGGGTAAGCTGGAACCTGCTCC  
A\_14\_P104643 ACAGGCACCAGGCAGAAGTTCATCATCTTTAGACTTAAGGAATTAACAAGGGT  
A\_16\_P19245604  
AAACTCAGTTGCAACATGAATTATACTCTCTCTGAAACACTAATTCTTGAAGGGCTTGC  
CUST\_1483\_PI426210822 ACAGCTGGCATACTGACATGGCTGTGGTTTGTCTCTCTCCT  
A\_14\_P138099 TGGGGTGGGGAAGTATTGACTTCATCATCGTTACTTTTTTTTAGTGTTAAGTATTGCTT  
A\_16\_P00298655  
GAGAACTCAGTCATGATATTGAGAATAATTCCGTGTGTATAAATTCCACGAGACAAGGC  
A\_14\_P102139  
CCTGCAAAACACATAAAAGGGAATGGAAAAACATTCTTTAAAATACACTGGGAACAAGAG  
A\_16\_P16406933  
GAGGCCAGTAATATCCAGTAACTTCATAGTCTGTTCTTATTTGCTTACCTCCATTCTTGA  
A\_18\_P16049111  
AAGAGTTAGAATGTTTCATCTATTACTGAGCCCAGATATGTAAGTTGATGGCATTTTGTT  
A\_14\_P104321 TTGGTTCTGGATATCATTTGCATCTTGTGGCTCAGCAAACCCTTTTATTTTCATGTTAAA  
A\_16\_P02574063  
CAGGCACTGTGATTAAATCTTGAACCTGGTCCTAGATTTTTTAAAAAGATTGCTGATCCCTA  
A\_14\_P111867 AAAAATATCCACTGCTCTACTCTTCGGCCAGTGGGAAGAGTGCATTTTTTAAATCAAAAATA  
A\_16\_P17939645 TTGTCTTTTTTTTAGAGGATAATGTCTACCTACCTTCCCGTGTATCTATCTTCCCGTG  
A\_16\_P01539300  
GATCCCTACCAAAATGCTTCTAGACATTACCACAAATATGCTATCCTTTACCTACAGAT  
A\_14\_P115988 GTGCAATTGAGAGGAAATTGCCCAATTATTTTGTGCTTCACTAACAAAATGCTTACTGT  
A\_14\_P201311  
AAGGAAAAGAGAGTTTGGTTTTATTAGCCAGAAAAAGAATACAAGAAGAGGATTTCCTGG  
A\_14\_P135661 GATGTTGAATACATCTAATAGGTATGGGCTTCCTGTTCTAGGGGTGAGTAATATTCCTAT  
A\_14\_P132419 CTTTTAGGGTTTTAGGAAGATTCCCAAATGGCCACAAACCTAATAGGGC  
A\_16\_P40749674  
AGCATTTTCTCAACTAAGTGTTACCTGGTAGACATACAGAATTCTTGTGTAGCAATACCG  
A\_14\_P137436 CAATTAGGGTCTCCCTGCTGAGAATACAAGTGAATCTACAATATGATGTTATCAGCATT  
A\_16\_P00685017 TTATTAAGAGAGGCAAACCTCTGGTTAACACCATGACAGCAGTGTCAATGCTTT  
A\_14\_P108442 CATGGCAAACACTTCATAAGGTATAGGAGATATTCAGTGAATTATCACAAAGCCAAACCT  
A\_14\_P105317 TTTTACTTCAAATCTCCCAGATCCTGAAGTTATTTTTTATACTTTTAGGGCATCATAA  
A\_14\_P112959 AGGTCTCCCCAGCACGTGTTAATTTGGTTAATAAACTGTGGATCAAGGAG  
A\_14\_P139976 TTCATGGCATATTTATATCAGACCTGCAATGTAGAAGCCTTGAATGTTTAGAAGTTGCCT  
A\_16\_P39746888

CCTGACGTAACCTTCCTTTTTACTAGTCCTAATTGCTTATTTCCATTCTGAATCCACTTCA  
A\_14\_P119689 CATTACCTTGGTCAAAGGGCTTGTGGGATTCCAGTTTCTGAAATAATCATCCTATATAA  
A\_18\_P13442696

AGACACTATGATCGATAAGTCAGGATACCTAATTCAGTTTTATACCTTTTGCTTGCCTCA  
A\_14\_P118199 GAAACACCAGGTGCCTGGTTGTCTCTATGTCCTAATGCATCACTAGC  
A\_14\_P130296

ACCAAACCTTACCTTACTTAATGGAGAGGGAGCACCAGATCTAAAAGGCAACATAAAAAAA  
A\_14\_P117615 TTCAATAATTATTTCTGACTTGTGGTGTGCCTCATCAGATTCCACAAAATAAAGGGGA  
A\_14\_P139778 CTCTCTTTCATTGCAGACGAACAGGAGGCATTGAACTCAATCATGAACGATC  
A\_16\_P16851080

AAAGAGAAAAACATGCAGAATCCTTACCATATCGATGCTAAAAAGAAGTCAATCCTCCTT  
A\_16\_P38222998

CTGCCTAATCTAATGACATTCTAAGGCCAAAGAAAAAACTGATTTTGCTCCCAATTCTTG  
A\_16\_P03586240

GTATTCCTAGCAGCCATAAATCTAATGACGCAGAACTATAGCATTCTTGTATCATCCACC  
A\_14\_P111703 CTCACCTTATTTAAAAATTCTCAAAGCACACGTGAACTGCATACTTTCAGTGAAGAGA  
A\_16\_P00685259 CTCTTTGCTTTAGGATATGATGCCCAGAAGGGCTCGAAACTGGCAT  
A\_14\_P106529 GAAGTCTGTATCATCTGCTTCCAAGTCTGTTATGTCCAAATATATTTTAATTATGCATTT  
A\_16\_P40976872

ACTATTGTCAGTTTCCTTACACTGTTTGATCTCTTGTCTTACCTGCTTCACTAATTTTCT  
A\_16\_P16845807

ACCCAGTATTAACCTTCACCTCTCTAGAAGGATTAGTAGTTGACCACCTCTTAAGATACT  
A\_14\_P104906 TCCTGGAACGCTTTTTATTGGGTTAGTTTACACAAATTCCTTCAAAGTCTTGTCTCCAA  
A\_14\_P101736 AAACCAAGGAAATTCCAAGAGACGGATGCTTAAATCAGAACACTAACTTCCTAACTTATG  
A\_14\_P117231 ATTCCAACATAAACCAAGGAATTATTTGTGAGAATGCTTTGTGATATCTCAAGCCCCTTT  
A\_16\_P17164548

TCCAACCAATTGACCAATAACCTATTAGACTTACTAGAAATCCAGAAACACCCTCTTAGA  
A\_16\_P17775663

GGCTGGATATAAAGTAAGTGCTGGTTTATACCTAAGTCTTAGGATCACAAGTGTTAGCATG  
A\_14\_P107490 GTAGGTGGGTTTTCTGGAGATTAGTAGATACTGTATAGAGTTGTATACATAAAATTGTGT  
A\_14\_P111645 ACTAAGGAACAACATTCCCTTTGAAAGGACATTATTTGCCTGTTGTATTTAACTTCACAG  
A\_14\_P108925 ATGTTGCGGCTTATTTTCACTAATCACATCTCATAAATCACTATAAAAACAGGTACGGC  
A\_16\_P16532205

AAAATCCATGCATCACACTGAATTCTAATCCATTCCCTCACTTAAACCATACGAATGCTTC  
A\_14\_P116379 CTAATATCTGTCTCTTTTCCTTCTAGGACACTATTGAGGACAAACTTGACACCAAACACT  
A\_16\_P17155037

AGAAGATCTGACAGCATGTATTTGATAACAGTAACTGGAAAAAGTAAACCACTTGTGCC  
A\_14\_P102858 ACCAGTTAAAGTAAATAATTTGGGACTTCAAATGAATTCCAACCCTCCAAAGTTGAAATG

A\_14\_P132751 AGGCTAATTCTCTAAGTTCCTATTGTGTAAATCAGAAAGCAACCCTTATCTGCTAAATGA  
A\_16\_P15252034

GCAGTGCATCTCTAATTGAACGCTAGATTTTAACTTCTAAAAAATTGCTGTATGTGCCCC

A\_14\_P202549 TTCCTGAATAATTCATTTGTCCATGTGTGTATACGTCTGTGTGAGCATATCTTTACCCT  
A\_16\_P15017772

GGTGGCACCATCTTTTTTACACCTAAATGAACAGATTTCAACAACAAGATTTCTAAGTGC

A\_18\_P21780115

CCCCTTCTATTAATCTTCTGTAAAGTTGATCTTTATAGCCATCTAATCCATTCAACCCGC

A\_16\_P19655348

CCCCAATTCACAATCCTCTACTTCCCTCACTTCAATGTTCCCTACATTACACTATTGTAAA

A\_14\_P114186 CAGACCTTTGACTTCCTGTTTTTGTATGAACCTAGTGAAAGAAAAAGAAGTGCCTTTTTTAA

A\_14\_P118502 GGAAGTCAGATCTTCATGGTAAAAACACTTTTGCATGAGATACACAGTCTTACATCTTCT  
CUST\_6907\_PI426210822 TATAACGCCAGGTAGAAAAGCCTCACCTGGCTGGAAGCCCACTCG

A\_14\_P103209 ACGCCCCCTTATATTAATAGTTTTATGCTTCAAGAAGGAGTCAAAATTTCAATTTGTCAA  
A\_16\_P17279281

AATCATCTTTATTTGTCAAGTCCTGTATAAACCATGCTCAACAATAAGTTCTCCACACCC

A\_16\_P02718308

CACAGAACACACATTTCACTTTTGTCTATTAGGCTCAAACCTCCAATTAGGTGTCCTAA

A\_14\_P130653 GAAATCTTTTTTTGGTAAGACTTACCTTTCTCTTCGGCATAATGACTATGTCGGTGAAGC  
A\_16\_P02393766

CTACCAGAGGACTCATGTAAAAAGATAAGATGATACTCCTTTACTTGCATGTTTTGGTCC

A\_16\_P19858301

AAAATCACTTCTGAGAATTGCAAAACATTCCAGTCCAATGTAAGATGTGTTCCCTCTTTT

A\_14\_P103889 ATTTGATATTCAAAAATTTATAGGAAGCCCTTCAGAATGTAAGTTCTGTGAAGGTGCGGA  
CUST\_9134\_PI426210822 GATTTTAATGAGGGATGGATGCATCCTGCAGGGCTCAGAGGTTCT

A\_16\_P00194444

TGTCGCCAACATTTATAGGAATTGCGTAACAGATATTTTAGAAGTTAATTTCTTCGGCAG

A\_16\_P18162311

GATGGTAAGATGCAGGGATATTATAAGACTATTACTGGGATATCAAAGCGATTGCAGGAG

A\_14\_P124401 TTCTTTATATAATCCAAGGAAAGCCAGGTGATTCACCAACAACCTTTCTACTTCTAACAC

A\_14\_P102053 AAAATGTCTTCCCTTCAAACCTTCAATTTGCAGACATCTGGCCTAAGAAAAGAAAATCTCT

A\_14\_P118968 CTTAGTTCTTCAAGGACATGATGTGGAAGTCATGACTTGAGTAACTTCAATAGCACTAAC

A\_14\_P108488 CAGCATGCCACAATCTGATTGCTGACCTGGATGGAACAGAGTGAAATAAAT

CUST\_4457\_PI426210822 CCTCAAGTCCCAGCTGCATTACCAGCCAAGGATGTGATGCATAGT

A\_16\_P21624120

AAAAAAGAATCCCAGGAAATATCTGCTTGGAACCTAAGGCTTTACTAGGCAAACTGTTT

A\_14\_P110772 CTCCTTTTGTGCACATGTCTATTTGCGCATTTACAAGTAGGCATGTGTGTAAGTATTTAC

A\_16\_P00645534

AACTAAAGGGATGTGATGAAAAATTCCCCTAGATAACCTAATAGACTTGGAGGTCAACAT  
A\_18\_P22841213 CTTATCACACACCATATGGCTAGCAGACAGTGGGGCCAGCATGAG  
A\_16\_P15618321  
CCAGTCTTATCAGAATAAGGGAATTCTAGGATTCAGGAACTATAGACCTTGCTACTTCA  
A\_14\_P103877 AATTAGATCTTGCCATTAGAACTCAGTTAGGTTGGGCAGATAAGGCATAAATATGCAA  
A\_16\_P18482837  
ATCTGCTTTCCCATTCATTATACTTACAGATCGCTTCTCTTGTATAAGTTGACAAACCCA  
A\_16\_P20658342  
CCATCTCCATTGTTGTCAGAAAAGTCACAATAAAAAGGTCCATATTGTCTAGTTCCATA  
A\_16\_P02305535  
AGCAAAAATCTACAAAACCTCCAGTTTGTCTTAAGAGTGCAATCATAGTCATTGTGTT  
CUST\_8047\_PI426210822 GCTCAGAGGTAAGGGGGGGGTTTAAACACTTTTTTCAAAGATGAGAGATTTA  
A\_14\_P123006 AGGAATCTTTTTGAGTGCTTTAATTTTTGGTCTTTAGAATTCTAGTGCTCAAGTTATGA  
A\_16\_P39963689  
ACAAGTTCATGCCCTATAATCAGTTGAACAAGTCCACATAGTTCTTCCATCTTGTCTATG  
A\_16\_P18531879  
ACCTACGATGCTAAAAAGTAAAGTTCCCTCGTAATGAATTTGTGACTCACTAGGTGTTTT  
A\_16\_P37667203  
TCTTCACAATATCCATGTGACCACTATTCTTTTTCTAACTTAAACTCACATGCAACCACT  
A\_16\_P00009821  
AACATGTTGCTGTTGCTATTTTTGTTCAATACAGTAGGCTTTTTCAAAGAAGTTATGGGCC  
A\_14\_P137671 GCAACAGTAACTTTCTTTGCTAATATCATGGATCCTTAAAAGTGACTCCTGAAATGAGCA  
A\_14\_P130310  
CTATGACAAGAGAGGAAACAAAAAGTTAAACAAGCAAGCCTGCCATAAGTGAGAAGGTAA  
A\_14\_P114734 CTCAACAACCAATTCTACAACCTTTTCTTAGCCTAGTTTAGTTTTTCTCATTGACCTCACT  
A\_16\_P19126547  
AAAATTACTGCATTATCCTTAACTGAAACACCACTCAAGGTGTTGTTGGTGTAATTTGCA  
CUST\_4931\_PI426210822 GGTGTCTCAGCAGATACTGAGTTTTGCTGCCCTGTCATCCAAGAG  
A\_14\_P113727 TAATTCAGCCTTGTTTTCACTCTGAATATCTTGTAGATCTTGGCTTTTCTTTCTTCAG  
CUST\_2755\_PI426210822  
AGCATCTGGTGGTTCATTTATGGCTTCAACCAGATGCGTTTTATTAACAACAACT  
A\_14\_P128244 GACAGGCATTAAGTATTAGAAATTGTTAAGTCAGAATGAGTGGGTCTGGGTATTTACT  
A\_14\_P102148 CTGTGTTTGAGATTTTGAATGCTAATTTGGTGAGGTTTACTCATCCTCTTTGCTGATCTA  
A\_16\_P20620281  
CCTCTTTTTCTCAACTAGTCTTGAACCATAATAACCTAGAATGAGTTCAAATGAACCGG  
A\_14\_P110104 CTAGAATCCAAGTTATGAGTAATGGGTTAGTAGTGAGTTCACAGGCATGCAGAAGAATAA  
A\_14\_P135154 AACATTTTTCTGAGTGCTGACATTTTTAGATTTTCATCAGACATCTCTGGCATTGACTGAT  
A\_14\_P107306 CGTTCTTGTCTCACTAACTCTCTGTCAGTTAGGCATCTCCACAG

A\_18\_P16215626

CTTTCTCTTTTCCTTAACAAATACAAGAGCCATACCATGTAATACTGTGCTATGTGCCCT

A\_14\_P113198 ACAATCATGAGTGGCCATCAGATTTTGAGAGATGCTTTCCACATCTAGATAATTTTGTTT  
CUST\_8413\_PI426210822

TTTTAATTCTGTGCACTCATGTTTCACTTCAAATTAGTTATTTTCAGCTATGGTCAGATAT

A\_14\_P101298 GATTTTAGAATAGAAGCCATGAATGTAATCCTGTCTTTACAACCTAGCGCTGAGATGATG

A\_14\_P116985 CATGTTAAAGGGGTCAATTTGCTCTAATGTGTCTTTAGTCTTGACTATCTTCCAGTGAAT

A\_14\_P101092 CAAATAACTTCTATAACTTACCCATCAGTGATCTTTCCCAATTTCTTGGAGACTTTCAGGA

A\_16\_P21265989

AAAAAAGAACCCACAGAGTTAAAAGTTGGAGTGTTTTTTGCTTGAAATGTTCTATTGCA

A\_14\_P138458 AATACAGAGTGTGTCCCTGATTCTGGGTTTAACTGGTAAGAATCTTACAGAGGAC

A\_16\_P32481954

GATCCGAAAACCTTACCCCTTTACAATAAACTCAAGGAAAGCAAAGTAAACTCGAGGAAC

CUST\_6490\_PI426210822

TCTGGAAGCTTCATGTAATAACTTCAGTCAACAGTGATATCTTTTCCCTGAGTTTCTCT

A\_16\_P16970043

ACAGTGGTATCTCCTTAGAACAGATTAAACCTTCATGCATTTTAACGTATTCTCCTGAAA

CUST\_10030\_PI426210822 TCAAGGTAGGACAGGCAGGGTTTGCTGACCAGTTGGACTTGAGAG

A\_14\_P136678 CTCGACGGTAGAAATGCTACATGCTTACACATGGTTAGAAAACCTTTAGCATCTCTATAGT

A\_14\_P107712 TACCACAGAAGCACCAGAAGAAATGCCAGGATTGGGTTTTTATATTTTGGTAAATTTTTG

A\_18\_P22842270 CTAAGTGAATAAGCAAAGTGCAGCATGAGATGCCACCATGTGCTGC

A\_14\_P125848 GTTCAGTCCGCAATTATCCTACCTGAAAGAGAGCACAACACAAGAGGCTTA

CUST\_3880\_PI426210822 CTTTCTGCTTGCCCTCAGTCTCAGAAATTCCAAAAGACAGCTTATGAC

A\_14\_P118679 TGTCTTCTTATGTCTGCGCATGTAACACTGTATCTGTAAGTGTGTAGGTTTCATGTAGTTT

A\_14\_P201175 GATCATTATGCAATCATGCCACCTTTAGAGCAATTCATGGAGATACCTAGTATGGATCG

A\_14\_P114236 TGAAACCAGTGCTAAATGGAGGTAATAAAGTTTGTAAGAGCCCAACCACCAG

A\_14\_P126240 CTTCCAAGATATTACTACCATCTGCCATTAATGTTTCATCTGAGTTATTCCTCATCAGTGC

A\_16\_P01094411

AAGTGATGCCTTTGGAAGATCTCTCACTAGGTATATCCCTTCAAATAGAACTTACTCATG

A\_14\_P117868 CATAGGTATAATCAGAGGATATCACTCGCTATTCCCAATCTAGGAAATACTAGCCAGCAA

A\_16\_P18124924

TTACATTTACAGACTTTCAAGAACCTTTGTAACCACTCATTCTTAATCTCTTATCCCTGCC

CUST\_4981\_PI426210822

TTGGTTTTTTTTGCATGGTGTAGATTTAGAATATAACTTTTACAGGGAAGAAAGGGGTAA

A\_14\_P113633 CCAGATTTTCTACAATGAACATGACCTCATAAAATCAAGAGTGTTTTTTCGTTTGTCTGT

A\_14\_P113845 GAAGATGGCCAGTCAAGTTAATTTCTCACCTAAAATCTAATTAGAAGGGTCCACATACTTT

CUST\_8155\_PI426210822 GAAGTCAGGCTGTGTGGGCACCTGATCCTGCTGCTTTTGCAAACCT

A\_16\_P37850226



AGTGCAAAGGCTTTATGATTGATCATCTACATCTATCACATGATTATCTTCTGGAGGTGA  
A\_18\_P22842307 AGTGTCTGGACCTGTCTCAAAGGCTGTTTGCCCTCCTCAAAGGC  
A\_14\_P107373 GGATTTTCGCCTAAGTGATATTACAGCCACCTCATTCTTCTAAAAGTGGATATTTTTCTGT  
A\_14\_P123125 CTGCTTTCCTAAATCTGCCATAATCACCATTAGTGAAAGGTGTCTTGTAACCTTAATTGCT  
A\_14\_P122091 GTTTAGGCTCCAGTGCAGCAAAGACCCTAACATCCTTAAGTAATGCTGAACT  
A\_14\_P129770 ACAGGAATTAACCTGAAGAAACGCAGTGAACAATTTTCAGACCTTAAGCCTATTACTACA  
A\_18\_P14899271  
AGAGCACTAAGGTGAGATTAAAGTAAAAGTAGTTCCTCCTAGATTGACACTAAATGGTGC  
A\_18\_P12132699  
ATTAGGAAAACATCACAACCTGCATTTGAAGAAAAGAGTAACGTTCAACTTCTAACGAGG  
A\_14\_P130126 ATGAATCAGGTATTTGTTTTTCAGGAATGTCACGGCACAGAGTCATTTAGATTTAAAGGT  
A\_16\_P16086835  
CACCACAAGCAGATTAAAAGGTATACCACATTAAGAAGACTCCTTATTGTTCCAAAGCAA  
CUST\_2259\_PI426210822 TCCATCATGCTCTACCATGTTGATGGGGAAATGAGTGAGGAGAGAATT  
A\_16\_P20918895  
AACTCTGATTTCCCAAATCTTTCCTATTCTTCTCAACCTAATTCAACAATGGAACCT  
CUST\_9854\_PI426210822 CCCGCTGAGCTCAGTGTCTCAGTCTGATTCATAGTCAACAATAAGGTTTAG  
A\_14\_P108405 CCTCAGACGAATGTGAATATTCAGAAGGCTCGATTCTCCTAGCAGCGTTTAT  
A\_14\_P200711 CTCTACACTTTGTTGAGATTAAGAAAATTAACAAAGGCTGTTTAATGGTGCTCTCACCAG  
CUST\_2597\_PI426210822  
TTTCATGATGTCATCTTTGCTCTCTTCATTATCCTGAGCATCTTACTTTGGTTTGTCAG  
A\_16\_P17369847  
GTTGTTAGCAACTAAGTCCAAAAACTCATTCTTGTATCTGTGGTTGATCATACTCAAGGG  
A\_14\_P131007  
TAACGGTAACCTACCAAGAAGTAATACATTAGTGAAAGCAAGGTCACCAGGAAAAAAGTA  
A\_14\_P128609 TTTAGAGTGTTGGTTTATCTTTAATATTTTTATAGCACCCCCTAAGATCATCCCAGGGGA  
A\_16\_P03663092  
ATCTGCTCCAAATACAGTAAAATTTTGTCTAGCATAGTCATGGGTAAAATGGACTTGGG  
A\_16\_P00072385  
TGTTTCAATCAAAAACCTATGTTAGACGCTTACTAAGAATCTCATACTTCTGTTCCTCA  
A\_16\_P58424389  
CTCCCAGTCTTTCACCCACTTCTATTTCACTACAAAATAGAAGCAATCACAGAGGAATT  
A\_14\_P123658 CCCTGTTCTTATAGCGCAAAACTGTTAATTCCAAAATTCTGTCAATTCTAATGCTGTTCTT  
CUST\_5124\_PI426210822  
TTTTGATGACCTTTTTTATTACAGGTTTGGGAGCAACTACTTTCTTCACTCTCTAAACTG  
A\_14\_P127731 CCACATTCTTTAATTACTTACTTTTACAGAAGACCACTGGTCTGGTGGGGAAG  
A\_14\_P105489 CTCATTCTTCTGAATCTAATATCACTAACTCCTAGACTTTTTCCGTTTTCTTTGGATACA  
A\_14\_P113425 CTGCCAATTCTTGGACATTCAGGAAACGCTTGTGACATTATCTTTTTTCTTCACAATCT

A\_14\_P112170 AGTGCCTCTGGCCAAATGCTCAGCACAAATATACTTATAGTGATTGCACACTTCATT  
CUST\_7445\_PI426210822 ATTGAAGCATGAGATAGGACGAGAGATTCCCAGGACCTGGAAGAC  
A\_14\_P118015 TGCTTCCCATGGACCCAGGAAATAAGGCATATATACAGTGACTAAAACAAAATGAAAAA  
A\_14\_P137823 ATTTGCATGTGCTTTACATATCATTTGCTCACACTGCTGTAAACCTGACAGCATATTCTC  
A\_14\_P119281  
ACTGCAAAGGAAGAAACAAAAGGGCTCTGAAAAAATAATCCGATTCAACAACCTTTATGC  
A\_14\_P135233 GTTTCTTCATGTATGTCCTCTATTTCCCATATTTGAGGAGTATGAGTCTGCTTGAGTAAC  
CUST\_9669\_PI426210822 CCTCCACAGTCTGCCACATGTGAGTTGCCCTTCACACCACTC  
A\_18\_P26795549 CTCTCTCACTTCTCAAATCTCTTTCTTTTTCCACCTTCTAGGTGTCAAAGACAG  
A\_14\_P106105 ATAGAAGTCTTACAAAATGGGTTGAGAGTTTTTGTTCATTTTTATCATATAAATGGG  
CUST\_1102\_PI426210822 CATGTAGGGAAATGAAACTCTGGCCCTGTTTATATCTGTATTGTCCCAAACAG  
A\_14\_P117086 AAGGTATGCTCAGGGGTCTGTGTTCCACATTGAAAATTAGGTTTTGTCTTTTAAAGAATT  
A\_14\_P126660 GAGGAAGTGGCAGTCAAACCTTTCATTACCAAAGTTGTTTCATGATTCTTGATGTTC  
A\_16\_P19784491  
AATCTTTCCAAAACCTTTTTGACACTTCACACTGAATCAACCTATAAGGAAACTCAGGGTT  
A\_14\_P136182 TATAGAGAACTAATAACTGGCCACCAAACCTGTATTTGCTTCTTTTCCTTTCTTCTCT  
A\_14\_P126610 AAGGTCTTGGATTATGAGAAATAGTTGGCAAGAGATTGCACCTTATTACTGTATACCACT  
A\_14\_P138302 GAATGTGAGCAAAGTTTTAAAGTTACCTCGAATCTTTGCAGACTCAGTATTTGTTCTGTC  
CUST\_2212\_PI426210822 CTGAGCCATGCATGAATAATAGGCACAGTGACGTCTGCCATACA  
A\_14\_P138440 CTCAAAGTTTGCATGATAAGCCATATGGCTCCCTACTAATAATGGTTACCGAAATGATG  
A\_14\_P115913 TGAATCTTATTATCAGTAACTTGAAGAAGTTCAATTAATGGTGGGGTCAAGGACATAGAC  
A\_16\_P41871183  
GGGCTTCATGCATATTTACATAAAAAAAGGTAGGGTTCTTATTATGGTCCTTGTTATGGG  
A\_18\_P16168032  
AAAAAGGAATTCCAAAATTACTTCACTCTGCAATCAATGAACCAGTGAAAATTCACCTGC  
CUST\_7290\_PI426210822  
ACCTTCACGCTTTGTCTTTAATTTGAGAAGCTTATGTGGAAGGAAACAGCACATT  
A\_16\_P41087272  
CTCGTTATTACCAGTCACATCAAGCATAAGAAATCCCCATGATAAAGGACTAGTTACACT  
A\_14\_P108608 TTCTCTATTCTGAAGCCTTCTACTAAGACCTGTAGATCTTCTTCCATTTGAGGTAAACTC  
A\_14\_P115897 CTTTTCTGTTGTGAACGGTCTCTTGGGGTAGATATTTTCAGATTATGAATCTAGTGTCAT  
A\_16\_P17078358  
AAACCCAAATACCTACATAAGACACTCGCTTTTAAACTCTTAGCACTACTTTTCGGGAATT  
A\_14\_P117998 AATCTAGTGAAATAAACCGTATGCAATGGACCATTTTAGTGGCTACAGTGATTTGTTAAT  
A\_14\_P100043 CACACACTTACCCACAGTAAGTTCGCTTCTAAACTTTCAAAAAGTTTCACGTC  
CUST\_5057\_PI426210822 GCTGCCCTCACACCTGCCCTTCTATAGAATGTTCTACCCTTTAATA  
A\_16\_P19079570  
AGGATCGGATCATACTTAGTATTGCTACCAAATTTCCAATATCACTTATCTTTCTGCCGT

A\_14\_P105884 AATAACCATAGTTCATTTTTTTTCATCAGGTATGAAAGTATCATCGCCACTCTGTGTGAG  
CUST\_9932\_PI426210822 CCTTCCAGGGAAGAAGGAGTATCCTGTTAGAGCTTCCTTCATGG

A\_14\_P133824 AAAAATAAATCACTTGGCTGAGGTGACAGAGATTCTTCTTTTTTAATGAGTTGGACTCAA  
CUST\_2543\_PI426210822

CCAGGGTCTTGGTTTATAGCTTACCAAGTATTTCCATGAATTTACTGACTTAAATATCTG

A\_14\_P128243 TTTCTGGGCACCATTTTAATTCCTACTGAGGAATAGAAGTTTAAATTAGGAATGGGACAAA  
CUST\_7831\_PI426210822

AAAAATAAGGTAGCTGAGCAGCTTTTGAATGATCAAAAAGTACTGTTGTCTTAGGTCAAAGC

A\_16\_P38388551

CACCACACTGTTTATTTTTCTTCAATTGCTCCACAAACATTAGGTTTTATAACAGCGTTCA

A\_14\_P100672 GGCATTAAGAAATGCAAAACAATAATTCGTGTTTCATCTTCCCAAACCTTTTGATCCAGTG  
CUST\_2780\_PI426210822 GATATTTCCGATGTTCCCTGTCGCTGTTCCCTCCAGCTGGTTTTG

A\_14\_P130906 AGACCTGAACCTCACTGGAATCAATGCTTAGATTGTGTTTCTTATCTTTTTACATCCCTTT

A\_14\_P106283 ACTTTTTAACCTTTAGGCAAGAAGCAGTGTAAGAAATATCTTGTCAAGGATTATAGCCC

A\_14\_P135087 CAGCCTACCAAAGAGACCATCTTCTCTAGAAAACTAACAAGACTGCCATTTAATGAT

A\_14\_P113165 AAGATGATCTCCACTCCAAAGAGAAAAAGGTCTAAAAGGAGTAAAGAGAGGTCTT

A\_14\_P123274 TGCAAAGCGTGATATGTCTGAACTATTTAAACGGTTGGGTTTACTGATTAATTTCTCCTC

A\_14\_P102212 CTGCTTGGCTTAATGCCAAAGAGTGTTCTTCCAAATAAAAATGGTAAAGACCTTTTTTCT

CUST\_639\_PI426210822 AAACCTCTGGTTAACACCATGACAGCAGTGCAATGCTTTGGAAAAGC

A\_14\_P116163 CTGGTAACAGAGACCAAAATAGTTTGGAGACTAAAGAATCATTGCACATTTCACTGCTGA

A\_14\_P103050 AGGGTTAAAAAATCCCAATTTAGAATTCTAACTATCAATGCTGTCTTGGGAGAGCACAG

A\_16\_P01683225

TTTGCTCATTAACCTATTATTCATCTACAAAACCTACTGTTTCTTGAGAGTCTGCTGT

CUST\_1814\_PI426210822

CGAAACTCAAACAACCTTACAATCACTTTAGGGTTAGAGGGTGATGACAAGTTTGG

A\_14\_P125953 AGGGAATCAATCCAGAATTCCAGTGTTTTGCTGAAACCATATTTTTTGTTTTAAGCCA

A\_14\_P102045 ATTATGTTTTTAACAGAAGAAAAGACCTCTGCCTTGACGCGTGAGACAGATTTCTATTC

A\_14\_P119706 CTGCATCTGGGCATAAACATTAATCCCCGGGATCTTCCTAAAATATTAATAGAAACCATC

CUST\_29\_PI426210822 AGAATCACTATTACCTCCTCAACCCCAACTTCCTGCAGGAGCTAG

A\_16\_P19878548

AGAGCCATTGTTGACATTTATGGATAGCAGATATATTGTTTAGATCTCTGATTAGCCCCA

A\_14\_P133437 AGAGGCAATATACACCATGCCAATAAGATACCCAACTCATTATTCTTTGGTAACAGTCAA

A\_14\_P108246 ATTACCATTTTTACTTTTTATTAGAATTGGCTCAAAAAGAACCCAAAGAGGGCAATGCTCA

A\_14\_P123706 TTTCTCATAAACACAGAATAGCAGCCCTCCCTCCTCTTAAATGCAAATAAAATCCTTTTT

A\_18\_P14131925 AGTATCTGCTTGCCAAAAATAGGGCTACCTGCAAAATGCTTTGAGCACTGT

A\_14\_P117446 GTGACAAGATCTCCAGTGAATATTTCTTGATTTATCCACAGACACTGTGATGGAGTTTAT

A\_14\_P135854 GCAAAATTCTCAACAGAAAAGGATGCTGTCTATTTGCACTGAAAGTAAAGTTTATTCCTT

A\_14\_P102567 CTGTCAGTCACTGATAACTTACATAACCAGTGATTGATGAGAAAATGTCAGTGCAGACTTT

A\_16\_P03554898

ATCCATGTCCTTGAACTAACTAAACAATTGCACCATAACTACATCAAATTCAGTCCCAG

A\_14\_P102575 ATCTAGATTGCAGACGTAAATTCTCATCAACCAAAAACACCAACTTTCAAAACAAACAGT

A\_16\_P01180131

AAAATTGCTATGCTCTACTTAGTGGTCACTAGAAATTCCAGTAGTCTGAGGATGTAGAGA

CUST\_5776\_PI426210822 CTCTGGAACTTGTGTGGGGCTATAGAAGGAACACCAGTTCAGAAATG

A\_14\_P103461 AAGGTAGTATTTCCACCCAAATTATTGTAGTTTTTTGTCATTTTTGGTGTGGCTGAAGGTA

A\_14\_P113749 TAAGTTCAGAAAGAAAATTGTAGGAACTGTCTTTCTCCTTAGAGTGCGAGAGTATTCTT

A\_16\_P19660712

AAAAACCTCTCTAAACAAATCATACTTCCAGTCCTGATCTATCTTGCTAGTGATAAGCCC

CUST\_1862\_PI426210822 GTTTGAGAAGGAACATTGGGTTCCCAAGACTGGTTCAGCCCAAAG

CUST\_4139\_PI426210822

TTAGATGGGCTCAGGAATTTTGTGGGAATCCTTTTGGCCTTAAACAAAATAATGATGAG

A\_16\_P02145976

TTCCCATCACAAAACACAACTTATTTCCATTTCCCCCTATTTTACTCATCTTCAATCAG

CUST\_183\_PI426210822

TCCAAAGTTGGAAATCAGTGTGTTTTAGATCAGTGGTTTCCTGTCTTCTAAAACCTA

A\_14\_P110529 TATTAAGTGTCAATGAATGGGACGAAGAGAGCCCTACTACTACTACACGTTTCGAT

A\_16\_P41817619

CTCATCATTTCCCTTCCCTTAAACCCATTTAAAATACTTTGCCATATGTTTCAGACAGTTGG

A\_16\_P16178497

AAACACACAGAATGAACTCACTATAACGAATATAGTTCCACATATATCTCTCTCCACGGC

A\_14\_P133229 CCCTTTCCAGGGCAGTTTAAATTGGTATCATTGTAAAAGGTCTTTTCCATCACC

A\_18\_P16553457

AATAACCCAAATTGAACTTGACTTCCCTCCAATTCCTTGAGTCTATCATAACATCCTTCCA

A\_14\_P123490 ACTTCATTGTCCTTTCTTTATTGCAGTCAGAGTTTTCGAAGCCTTTTTTTCATTACCCTA

A\_14\_P131397 CCATTTAGTTGGCAGACAAATAAACCTGATTTAAACCAGGCACACAGAGAATATAGGTAT

A\_14\_P135208

GTGAACAAGAGTGAGAAGATGCTGTGTTAGGAGAAAAAAGAAAATAAGTAGAAGGTAGCA

A\_16\_P15378776

CATCTTGCCACAATTTCTAAGAACTACTGTCTAGTCAACTGGAATTCCTTTTACAGACTG

A\_16\_P40941822

TTTATCTTATCAAACCAATCCCATTGCTTTACACCTACAAATTTCTCATTTGGCCTGCT

A\_16\_P40974014

CCTCGCAATTACTTTCCATGCTTCGTATATAAACAGACACCAAAAATGTAAACTGTCCAA

CUST\_9998\_PI426210822 GTTGCAGGAGATGCTGTCATGGGTGGGGAGAACCCTGAGGTCACC

A\_14\_P137497 TATTTAGGTGTAGAGTTCGGTGTCTCGAATGATAACTATTGATGGGAAACAGATAAACTT

A\_14\_P101284 TATATAAGGAACTGCCTTATTTTTGAAGTTGCTGGTTGGGATTTCTCTGTTCTTTCAGC

CUST\_5000\_P1426210822 TTTTCTACCGGGCACATCTTTGTGCGCAGCCTGGTTTGAGCTGAT  
A\_16\_P37356341

TTCATGCCCTTTGCTATAGATTTCCAGTTATGACTAAGCAGGTATTAGAGGGTAATTTGGC  
A\_14\_P131586 AGCAACAAATTAATAATCTAAATCACAAAAGTAATTATCCAGTGTATTTCAAGTGCATTTT  
A\_14\_P133873 GTCCTCCCTCTTGGTGGTGGACAGATTCTTGATTTATTTATATTAGTGTGGTAAATTGAA  
CUST\_957\_P1426210822

TGTAGTGGTCAGATTGACATGTGTGTATATATAATGATAATCAAGGCTAAACACAGTCTT  
A\_14\_P126550 TCAAATGCTCTTTTAAGGCATGAAGATTCTTTTCTGATCCCCACATATGAGCATATGGTA  
A\_16\_P38241513

AAAAGTCAGATACAGCAATTGTTTTGGAAATATCCATCATAGTCACCTGATTGCTCCTTC  
CUST\_565\_P1426210822 CAGCCTCTGACCTTTCACTCCCTAACACACAAGCTGGGGACCAAT  
A\_16\_P01952742

ATGACCAATTCAGTATGCATGATATCTTCCCAACATAATATTTGATTAACTCGGCCCA  
A\_14\_P137747 GTAACCGTCTGTTTATAACAAGGGTCACTATTCCACGAGAGGCCTTACAA  
A\_16\_P01661355

AACCATTGCTACTCTGCTATTACCTACAACCTGCTATGAAATCTGAGTCCAGGTCTATTTT  
A\_14\_P131591 TCTGGGAAGGAGAGAAGTCAGACAGACATAAATGGTGATGATGTTTTATGGTTAGTAAAA  
A\_16\_P00685265 CCCTTGGAGGAGAGAAAAGGGTGTCTTCTCCAGCCCAGAGAAA  
A\_16\_P01884533

TTCCCTATGAATAGCAGACATCATTTAATCGGTTTTCCAGTCTCATAAATACACTGCCAT  
A\_16\_P20184030

TGCTGACATCAACAATAGTAGCATACCTTTTTCTCACATGAAACATACTTTCAGGTCTT  
A\_14\_P117071 GACATCTGACATTCTAGATTGGAGTCTTGATTTCCCTTCCAGTCTAGATTTTTTTAAT  
A\_14\_P200767 ATTTAGAAAAGCCAAGATAAAAACCACAAAACCTTACCATGGAAGTTTAGGGGTCATCTA  
A\_16\_P39640995

AACTGATAGATCCCCCTTAAAATTGAAATGTGACAGCCTCAAACAAGTAACTCATTAGG  
A\_16\_P19593937

GCCACACCAAGTATTATTCATAACCTCTCACAGTCTCAATAGTAAGATAGGAACATGCAA  
A\_14\_P128246 GATTGCTGAAATTTACCAAATGTAAAGAGGCAGATACAAAAGGCATGCATGCAAATTGT  
A\_14\_P130020 GATAAATGTGACTCCTCTTCTCCTTCACTGCATTTTGATAACAGACTGTCTAATCTAGTG  
A\_16\_P16763515

CCTGTCCCATCACTAACTATCCATCATCTAATATAATGAATTCAATGCTCATGACCTAGG  
A\_14\_P101818 ATTCGCTCCTTATTAGGGCGTGAGTGCTACATTCTGAAAGGATTTATTTTGGGAC  
A\_14\_P133206 CTTCTAGCATGACCTGGAAATTTACAAAATAGAAAACAGGCAACAGTGTATATGATCA  
A\_16\_P15883182

AAATGTGCATTCACATCCATACAGAGCAAACAGATTAACAATAAAGAGAGTTTCGAGAACC  
A\_14\_P124687 TACATACTCTGTGGATATTGGATGTCATCATCTTTCTCACTGATTTTTCTTTGGACTCC  
A\_14\_P135805 AAGCACTCTGCTTCACTGAACTTGAAACATTTTAAACATCAGATTCTTTTAAAGGCGCCTT

CUST\_1024\_PI426210822 ATGTTTAGTGTGGCAGAAGGACGATCCAGGCCTGCATCCTGGCTG

CUST\_1244\_PI426210822

GTTCTTAAATTTGGGATTGTTGAAGTCTGAATTTTACTGTGCTTTAAAATTGTGATGGAA

A\_14\_P129240 CTTACTGGCACACTAGTATTATGTGTGTTAAGGGCAAGTGACTGATTATTTTACTCTCCA

A\_16\_P15181266

ACACCATCATTCAACCAGAGTTACAACATTTTGCCTTGCTATGTCTATCTTAACTGTCAT

A\_16\_P18752216

ACCACACATTTACTTGTCTTATGTGCACATATGACTCACTAAAGATGAGCCAAAGTCTTG

A\_16\_P19341858

AGGGCTTTTACAAATTGAAGAGAACAATCAGTGCTATAAACCATAACTAACCTACGTCA

A\_14\_P100617 TACCTTTCTGGTTTTTTTTACTTTCAGTCTTCGTATCTAATTGGCAGATGTAGTGACAGGAT

A\_14\_P124062 TGATATGGCTGTTCCATTACATCTCTCTAGAAACCTTATACTTAACTCTCACCTAGTGGT

A\_14\_P111584 CTCTATTTGCTCCTAAATATCACTTTGTTTCTAGGCCCTCAGACACTTGTCAATATGCTA

CUST\_4154\_PI426210822

TGAGATGGTTCGTAATTGATTAGTGGAAAGTTAAATAATGTTAAGGATAGGAGGCTTGTCC

A\_16\_P17582807

ACCATGTCCTTGCCTTATTCATTTTTTTCATTTCTCAGCAACTTGTTAAACTCATAGATGGT

A\_14\_P201062 ATTAATGTTCTGGAATGTTCCCAAGGAAATGAATGTTCCATTGAACAGATGGAACATGTT

A\_14\_P116800 ATTTTTCTCCAATTTCTGACTTACAGGTTAAGGAATTCATTTCCGAGCCAAATGTATCT

A\_14\_P104095 CTAACTAAGGAGGATTCCATTTGATTTTCAGCAAACAAGTTTTTGTCAAATATGGGTTCCCT

A\_14\_P106695 ACATGATGCAAAGATGGAAAGAAGGGCATTACTTTCAGTTACCTAATACATCTCTCATTC

A\_16\_P19182882

TTACCAGAATCTTTAGACACATCCTGTATGCTTAACTGTGGCTTTATGCACTTCTAGTTG

A\_18\_P14131216 CTCGTAACCTCTCCTTTAGACACACTCCTCTATGGCAGACAACCTTCTGATACATTCAAT

A\_14\_P124355 TTCCATTGTGCTTTGAATGGAAATGTGTGTAGGCTGAACCAAAAAGTAGGGTTTAAAAC

A\_14\_P137597 GATTTTCAGCATGCTCATGGGTTACAAGAATTGGAATTTATTCGAGGACATTCTGATACA

A\_14\_P201206 AAAAACCATGAGGATTGTGCAGTAGGAATTTCCATTTTCATCTTCAAGAAAGATGATTAGG

A\_14\_P110639 CCAAAGGTCTTTTCCCCACCATCTTTAAATCAAAGTTGTTTAAAACAACATTAATTTTAA

A\_14\_P136306 TTACCTACTACAATATTACCTGGCAAACCGCTCCTTATCGTTAGACATCTGATCATCATC

CUST\_421\_PI426210822 TTGTCCTCAGGCAGGCATGAGTTGTTTCAGAGGGGCAGAAGAGAAA

CUST\_5627\_PI426210822 TGAAACAGAGGGTATGGAACATAAATGAAACAATCATGGGAAGTCCTGGC

A\_14\_P135532 TGATTTCTGAACTGCCAAAGGAAAATAACCATGATTTGCTGCTCAGAGTTTTAAAACTG

CUST\_6466\_PI426210822

CAGTAACATAAGCAAGTATGTATCATTAAGATTTATCACAAATCAACCATATTATATCG

A\_14\_P127371

TTCACTAGAGAGAAAAGTTTAAAGCAAATCACTTGATGCCGAAATCAAACAGCAAGCAACA

CUST\_8409\_PI426210822 ATCAGCATCCTTTTCTTCATTGCTTACCCCATTCATGCTTGAAATGGGATTTTC

A\_14\_P119768 CAGCCAAGGAAAGGGGCTTTTCTGATAAAGACAAGAGTTGGTTAGAGAAA

A\_14\_P101638 TCTCCTTCATGCAGGAAATTTACATGCCACTTATGTGATAGAAGTTTCACAGAGAAGTG  
A\_16\_P00020739

AGAAAAGAAAAGATTACTAACTAAAAGTAAGTCCTTGATATCAGCCAGATGACACTAAAT

A\_14\_P108802 ACGTATGTGTTATGTGTGTTTCACTTACCGCATACTGGAACCTTTTCATTATATTCACGGT

A\_14\_P105975 CAGTAAAAAATTTTGACCCAAAGACACGGTAATCTGAGTTTTAAGATTTGGGGATTTGAT

A\_16\_P35879837

TCCTTCACTATGTCACCTTTACCAAGTATCAAAGACTGATGACAAAACCAAAGAATAGAC

A\_14\_P130106 AAGGGTCAAGATTTTTTTTCTTCTGAAAATTATGTTCTGAGTTAGGCAGAACATAGCCATG

A\_14\_P133257 TGGGGGTAGATTGTGAAGACATTTGCAATATTCTATCTCCCTGACATTATAATTGGGAAA

A\_16\_P20239735

GGCCACATAATATGAATGAAGGAACAAATCACCATAAGAAAAAAAAGTGCCCATTTTTGT

A\_14\_P124487 ACTGCCACTCCTTTCTTTCAAGGACAGTGTTTTTTGTAGTAAAATCACTGGTTTATACAA

A\_14\_P110407 CTGGATAGATCAACTTGGAAAAGGTTTCATAAAGTTCATTTTCAGCGGTAACAATATATCG

A\_16\_P16386240

AAAAAAGAGTGTATGCCAAGACTGGTATAATTTAACATCTTTATACGTGTTTCGGGAGGG

CUST\_6037\_PI426210822

ATAGCTGTTCTCACAGGAACCATCAGAGAAATGTTTCATTGATACTTAGATAACAAACCTG

A\_16\_P18128266

CATAATCCTATGATTCCTTACCCAAAAGACTGTATAGTCCCGTAACTTCTCTATCTCCAT

A\_14\_P116959 GAAAAGAGCCTTTGGGTTTTAAGACTGATGAAAAGTGACTTTACATTTACGCTCTTTCT

CUST\_2916\_PI426210822 TTCTAGATGAGCTCCGGGCCCTTGTGTGGCATGCACTGTGCTTA

A\_14\_P135898 GAAATCTGATCAGCAACAGTGATTCAGCATGGCTGCAAGTGAAGCCT

A\_14\_P127337 TGATTATATGGTAGTCTTCTGAATATGGTCCTTTACCTGACACATATGCACCTCATCAA

A\_14\_P109769 AAATGGAAACCACTTTTCAGATGCTGATCAGGTTTGCAGTCCAATTTTCTAATAAAGTCTT

A\_14\_P120781 CCAGGAAGCCTAGCAGCATAGAACATCTGGAAGAACTCAGCAATTTCAAT

A\_14\_P107462 CTGGTAACTGATGAGAAGACAGACAACTTTGTAATGATTGGCGTTTGTGGCATTTT

A\_14\_P131266 AATGTTCTGTAACTTACCATATATTTGGATTTAATTGCAGTTGGTGGTAGGAGTCAAAG

A\_14\_P136411 TTAATCATTCTGTAATTTACCAGCCAGAGTCCTGTCATAGTTCGTTGAACAAACTTTCCA

A\_16\_P01389350

TGCTTCACTATCATCCATGTCTTGAATGTATGCACAATCCCTTCATCAATAGAGTAATCC

A\_18\_P22841209

TATTCTACTTCTTGCCAGAAGAAATGAGACATTCATGTCTTTCTGACTTCTCCATTACCT

CUST\_6227\_PI426210822 AATGACATGGCTATTTCCCTTGTGACTGGACGCAAGGAAAGGATCTAT

CUST\_6949\_PI426210822 CAGCATCTGAATTTGGGGAATTGACATATACAGATGCCCGTGGAAATTTAACAG

A\_18\_P22840695 CCTCACCTATCTGTGCCTCGTGTCTCTTCACTTCCCTTTGTTCAC

A\_16\_P03087247

AAAAAGAGGTAGCCCTAAAATGTGTGAGACATTAAGGTTGATTGTAGAAGATACACGCA

A\_14\_P126911 TCCAAATAATAAGTATTGCTTCCAGAAACATGAAAGATAAGTGTGTGTGACCTGGAATGC

CUST\_5605\_PI426210822 CCACTTCTGGCTGAGGAGAAGATGTTCTATGGAGAAAAGGAGAATTGG  
A\_14\_P126314 AAAACGCGCACTAATGATTCTGTTTATTGAGTTATATATGTATATATTCCGTGTTTCGCTT  
A\_16\_P16509971

ATATGACTTACCCAATGTTGATTCTGTTTCCTCAATCATCATGTCTACTTGCACCTCATGT  
A\_16\_P18404582

AATCAAGAGCCTGAATAAGCAATACCCAGCATAATTTTCATTGACCACATTCAGTCTATCA  
CUST\_2257\_PI426210822 CCATCAACTCTCCTTGTTTCTGAGCCTTTGATGCTCCATCATGCTC  
A\_14\_P124703 ATAAATGAGCCATCTGAGTCAACAAATAAGGTGGAGATGTGGAATTATTCCTTCTGTAAA  
A\_16\_P58424385

CTAATATCAAGACCCTTTCTCAGTGTGTGAGGTTTCAGAAGGATGACATATTTGACAAC  
A\_14\_P102595 CTAAAATCTGTTGAAATGAACTGATCTGTTTCATCTCCAAAGAGCAGACTGCAGAAAT  
A\_14\_P115711 CTTTTACATGAACCTAATCGCTAACCCAACCTCTAAACCAAACCCAAATCTTATTTCTTGG  
A\_16\_P15874645

AATGATTGCCACTAGTCAACAGAATCTCTTGAGTATCTTATACCCTAGCATGCATGCTC  
A\_14\_P139257 ATTTGTTTGGTCATTGAGGGTTTGTGTTTTCATCAATGTCTTTGTAAAGCACAAAT  
A\_16\_P01752883

TCCCTGCCCAAACCTATTATGACCATTATAAATTTCTCTGTCTAAACTATCATGATGCTGGA  
CUST\_1465\_PI426210822 CCTCTTTTAGGGAAGATTGGTCTTCTTCCAGGAGACTCCACACTG  
A\_16\_P20239471

AGAGCAGTGTTCAGAAGCTCATAAGCATCAAATCACCTCCTATATTTGGGTATGAACAT  
A\_14\_P110951 TAAACAGTCACTGAAATTTTAATTAAGAGTGCCATACCCATGAGGCTGGAAAAGTATGTC  
CUST\_2105\_PI426210822

TATTCCTACTTGCTTGGCCTTGTCAAATGTCTGATATAAGGAGCATTTTTTATTATGGTTG  
A\_14\_P123154 CAGGCTTACAAGTTCAAGAGGCAGAAGGTAAATTCCTGCAGCCTTTAAATGAA  
A\_14\_P123118 GTAACATAGAAATGTTTTGTGTCTTTTCAGAAAATTATGCAACACTTAGAAGGAGAAGGCC

CUST\_1389\_PI426210822 TGATCTAGATTTGATTATAGGAGCCAGTCAGGGGCCCCCATTTGTTT  
A\_16\_P58424074 TAGACTTATTGTGCAAGGCTGTGAAACTTAAGCCAAAGGATTCTTGCTTGCATAG  
A\_18\_P22842454 CTTCTCCTGAGACACCCGGGAAGGCTGAGTCTACCTCACAGGTG

A\_14\_P105007 ACACATATCCTTTCTGTTCTTGCTGGAATAACTCTTCATGATCTGAGATAGAAACCATGA  
A\_16\_P03755643

TGCTATGGTCATACGTCTACATACCTTTGCTTCCCTAACATAAAACATCCTTAGAAACCTC  
CUST\_177\_PI426210822

GGAGTTAAATTCTCTTCACCAGATGCCAAATCCTACGTTTTTTCTTACCACATCATG  
A\_16\_P00013746

AAAACCTGGCACTTTCCCATTTATTTTCATCACAAACAAATAAATAAGAGTCAAAGCGCCC  
A\_18\_P11313810

CCTGCAATACATCAACATTTACTACTCAGTCAACTTTGAAACAGATCTGAAAACCTAGCG  
A\_18\_P13948099 GTGGGGCCTAAATTCATCCTGCGGGATCCCAGGTCAGGAACAAG



CUST\_3186\_PI426210822 TCAAGAGCAGGATGCAGTCTCTACTGCAAGTGGAGCTTTCTCAGT  
A\_14\_P133031 AAAATAATACCTTTGACTTTGTGTAAAAATAATGCTTTTGACTTGTTCTTTGATGAATGT  
A\_14\_P125494 AGATTGCAGGAGCCATCGTGTGGGGAGAATTTAATAAAAAGCCCTTTTGAAAAT  
A\_14\_P101240 GAAGGGAAGACAAAACCTGGATGTTCTTTCTTGTGGATAGAACCTTTGTATTTGTTCTTT  
CUST\_9437\_PI426210822 AAATGGTCTGGAAGTACACCCACGTCAACAGAGTTGGATTCCAC  
A\_16\_P17453166  
CAGTAGTTTACTTGCCGTAAGAATCACATCAAACATTAAACCTTTCCACCTTCATTTTCC  
A\_16\_P15791094  
AGGAAAAGTGATACTAGAGACTTGAAACATACTACCCTCAATGACAATAGTGATGCATGC  
A\_14\_P136085 AACCTTAAAATATAAAAACGTTCCAGTGTGCTGAAGCCAAGTATTACAGTAGTTTLAGGGTT  
A\_14\_P113958 CCCCATGTAAATTTTCATGATTGCTTTCCGTGATGTCATTTTGAAAGAGGACAGA  
A\_16\_P00685522  
TGGATTTTCAAAACTATATTTAGAAATTTTCATAAAGTCTGTAACAGACTTGGCCCTAGGA  
A\_18\_P22841432 AGGAGGCTAGGAGACAAGGCTGGGCTTGCCTCACTCCCTGTCCG  
A\_16\_P16711196  
CAGAAATGGCACATTATAGATCATTTGTTCCAGTGAACAATAACACGTATCACCCATGTT  
A\_14\_P126005 GACAACAACGGTGCAGTCAAGTTTCCACAACCTGTGTAATTTTGTGATGTGAGATTTT  
CUST\_6846\_PI426210822 AGTAAGTGAGGTCTTGACTGAGAGAACAGAGAACGAAGAACAGAGGCTA  
A\_14\_P130086 ATGTAAAAATTCATGCCTCATCACTTCAAAAACAGGAAGTTAGGAGAGTATCAATTTCCCA  
A\_14\_P114597 CTTTAAACAGGACCTTTGCCTAGGATCTTAATTTTCTATGCTATTTTGGATGCTCTGTT  
A\_14\_P112852 GGTTTAGGTGTAAAGTATGAAATTATCAGCATACTAGAAGGCTTTGGTGTGCTTACATGC  
A\_14\_P109668 GACTTTTTTGGGCTGAGAAAAGGTCATGGATAGTATTCAGGTTTTTAAGTTAAGAATCTGG  
A\_16\_P21587350  
AATCTGACCCATAGATCATGTTGCAACAGAAATCTACTTTAGGACATAAAAACTGGCCTT  
A\_16\_P16404596  
AGATCCTCAACTGCCTAAATTTAGATTGGACATTCATATTCCTGCACAAATGAGAATGA  
A\_14\_P113478 GATATCTCAATATATGAATCCTCCAGCAGTGTGTTCTCTCAGAAGTTGTAGTGCATTTTG  
A\_14\_P128000 TTACATGTTCCTTTTCAACTCTTATTATGGTGCCTATTCTGGATTTCAGAGACAAAGTTC  
A\_14\_P124763 TGCTGCTTGATGGTTGGATTTTTATTATCCATTACTGCTAAAACATCCTCACTGATGTT  
A\_14\_P116755 GACTCCTTAAATGTAGAAAAAGCCTAAAAATCCAGTATATGTCCATTCTTAAATTGCC  
A\_16\_P01023838  
AAAACAGTGTTAGGATCAGGGTCATATCACAGGTCAAATGATAATAAGAATTTCTTTGCT  
A\_14\_P120758 AATACCAAATAATGAATAAATCATGAAGAGTCTGTCTTTTGTGGGTTTTGATGGAGCC  
A\_14\_P122424 ATGATTTTTATTTTCAGCGAAAACCTGAACCACCTAAGATTTTCCGTGTGAAACCAGTTTT  
A\_16\_P03555808  
AAAAAATCCCTCATAGACATGTCTGTTCTTACTCATTATCTGTTATATCTGGGACTGGGG  
A\_14\_P202484 CCTAGCAACCAAGAATTTGTCTTTGTCTCAGCAACTAAAGGCCATTTATGTGGAGTA  
A\_14\_P129583 CCTTGTTATGCTATTTTTGGAATCCAGGAAATTTGATCAAGCATCTTGTTAAAGGAACTC

A\_14\_P103646 ACAGAATACTCAACTAGGAATGAAAAGATTCCCAAAGAAAGATCTGGACTTTGTCCACTA  
A\_14\_P136245 TTATCCTAGGTGACTGCTACATTGAGAACTTGGTTGATTCATCATTAGTAAGAAGTAAG  
A\_14\_P106708 TGCAAATTCAAACAAGGAACCTCACTGTGAAATAAATTCTACACAGTTATCTGAGAGGTG  
A\_18\_P15885174  
CCCCCTATTACCCATTATTTACCATGAACCTAATTCTACAGACATACTAAAGTTCTTTGC  
CUST\_221\_P1426210822 CCGCGGGCGCCTACAACCTCGACCCGCAGCGCCCCGTGCACTTCC  
A\_14\_P127721 ACAACTGTAAGTCTTTAAGATTATTTAAGAATCTACCTGTAAGAAAGCAGTTTTACTCA  
CUST\_3454\_P1426210822 GACTTGAGCAAACCTTTTGACAAATAGCGCTCTCTTTCTCTCTTGGGCG  
A\_16\_P18446167  
TGCTTTTTGTCTATACTACAGAGACATCACACATCTTCATATTCAGGCCTTTTCACGTT  
CUST\_9410\_P1426210822 ATGATCTGCAAAGAATCCTTAAGAGAGACCCTAGTCTGTGTTTATGTGGGTG  
A\_16\_P19073827  
AATTCCAGCATGTAGTTTCATTTTCAGTTTCCCCTAAATGTATGCAGATTTGACAGATCC  
A\_16\_P40258222  
TCAGTCATTCTCAAACCTTGTCTCATATCAAACCATCACATAACATAAACTCATAGACTC  
A\_16\_P15682188  
AAGGAGTTACTCATGTCCATTATTAACAGCACAGCCAGAATATATGTGATGCATTACCAC  
A\_18\_P10384810  
GCCCTGTTTTACTTTCAAGCCTACACACAATAGACGTTATTCCAATTTTAAATCCTCTT  
CUST\_5864\_P1426210822 TTTGTTGGATGGAAATTCAGCAGCACTGGAGGACTAGACAGCTAGAAAA  
A\_16\_P16246988  
ACATGCTTATCCCACATCAACTATTACCTCAGATAAATTCATTATCCATAATGCATCCAT  
A\_14\_P201816 GGATGATGTTTCTTGCTAAACAGAGGTTTACCTGGTTGAACACCAGAAAAAGTAGATG  
CUST\_41\_P1426210822 GAGTACACTGAGGCTGCCTGAAAGAAGACAGGGAAGAAGCTAGAA  
A\_14\_P108658 TGTTTTTCCAGACATTTTCCGGGAAGATCATACTGAAATTTTGGTATGAGTGTAATTC  
A\_14\_P124129 ATTTCTAGTAGTGAGGAGAGTTTTGCCAATTTCAAACCAAACAATGTAGGGTGTCC  
CUST\_583\_P1426210822 TCTTCGGAGGGCATTGTGTCTGCTCTTGGCCTTGCAGATAAAATA  
A\_16\_P15177422  
AACATTTGCCACATTTCAAAAAATGACAATGACAGACGATTCTTTTTTGGCATTTACCCTT  
CUST\_9658\_P1426210822 CAAAAATCAGAGGGATCTGGAAACCTGAGGGCTATAGGCTGCGTC  
CUST\_7150\_P1426210822 TGTTAAAGGCCTAAAAGGTTGCATGTTACATATAGAACAAGGCCCTGGGAAA  
A\_14\_P133709 TAGTGGTGGTCCCCTGTAAATGGGAATGTGCATCTGAAATACTTAATTAAGTAAATG  
A\_18\_P10888733  
ATCCAGACCTTTTAACTTATCTGACTATAGCCCATCTAGATAATTGTTTCCTTGCAAGCC  
A\_14\_P135860 TGCATTTCCATGTGTCTAAATCTGCAAAGTGGATCTAAACATTTCTCTCTCTCCATAAT  
A\_14\_P138106 TAGACATTGTTTATAATGCCTCCCTACATATGTAAAACACAAAAGTGGATTGGAGACACA  
CUST\_4524\_P1426210822 CCTAGTGTACCCACCCCTTAGCCATTCTGTCAGTGGACTGAGTGC  
A\_14\_P132482 GTCTCATTTCTTCCCTTTGTTCCCTTAGTCATCCAAATAAGCCTGAAAACCATAAGAGATA

A\_14\_P101283 TAATGGGTGAAATGATGCAAGATTTGAGAAGTCAGTGTGAGGCAATGTATAGGTCATTTA

CUST\_8127\_PI426210822 TGCTCATTCTTTTCAGGCATTGGTGAAGATATGGTCTGACTGCCC

A\_16\_P00388665

AAATTGGATACCTCAATCACATCTGTCATAGGAATCTTTTAAAGCACCAAGACACTTGAC

A\_14\_P135205 AACTCCAGTTTCATTCCCTGCCTTTTGATTCTGTGAAACCCCTCAATCATTATAATGATTA

CUST\_269\_PI426210822 CTCATGGGGGCCAGGTGACAGCCAGGCCGGGGTTGATTTTATTG

A\_16\_P17823392

AAAATTACCCCTTCATTTTCATCACTAATCCCGTAACTCCCTTAATTAAGTCAATGGTAGC

A\_16\_P18782530

CATCCGATTAATCAAGTGTGTTACAGAAGTGGTTTTTAACTGGCAAAAATGAGACAG

CUST\_8526\_PI426210822 AGATGTTAACATCCCTCATGATGTTCCATTCCAGTTCATGGCATCC

A\_14\_P102910 CTTTTACCATATGCTTATCATCTAGTGCATAGAACCCTCCCTGTTTGTCAAAGCACTCTAA

A\_18\_P22841604 ATGAAGATCTGCAGGTGTCTGGAATGAAGGAGGCAGTCAGGAGAA

A\_14\_P107787 GGAAAGCCCAGGATACTGAACCATAGGAAATGGGGTTTTATGTTTTTTATTTATTTTGGGA

A\_14\_P113397 CTTCTGTAAACCATCCTCAGTAACAAGATAAAGGCTTTCTATTCAAACATTTTTGACTC

A\_16\_P41733761

AGTCCTCTTCACTTTTCATGCTTATGTTATCCTCTTATTAATAAAGTAATGCCAAGCCCA

A\_14\_P134487 AAAAGGGAAGGGGGATGTGATAAGAGATAGGTAAATGAAGTGCCTAAAAATTAACATTC

CUST\_7913\_PI426210822 CAGCCTAAGCTGGCTACACTTGGAAACCTCTCCTCACCTTGTAC

A\_16\_P20221151

AAGTCCTCCCTTATGACTAAAAGTAAAGAGTAAACCAAAAAATACTGTCTCAACCCTTGG

A\_14\_P202019 CCAACAGTGTGAGAAGTCTTTACAGCATAAATTCATTACTCAAATTGAGGGCAAAGATGTG

A\_14\_P127463 GACACACCTATGAAATCCATGATTATATTGACATAGAGCCTGCTACTAAGTCAGTGACTT

A\_16\_P41331094

AAATGGGGGGTTTTAACAAAATAGGATAACTCATTGGATGAGATAGCATACGATCACTAA

A\_16\_P16582532

AAAAGAACTTCCACTTTAGAATCCACATTTTCAAAGGCTTCCGTTATTTACACCATTGC

A\_14\_P117671 TAATACTTACTTTCTACTGTTGCTCCTTCGTTTGGATTTGAATATCCCTCTCCTTTCCG

CUST\_10250\_PI426210822

GACTTGTCTCATGGGTTGCTTATTTTGAGTTTTTATTTTTAGAGAACTGATATTTTTTC

A\_16\_P16099065

AGAAATTACTAGAGGAGTCTTACCTATGCTATGGCAAATCAACCTAACAACTTTAAGGCC

A\_18\_P14413394

AAGGACAACTCATCAAGAATTAGAAGACATGTCAACATCTTATCTTGGAGTTTTGTGGC

A\_16\_P19272934

TGTTTTAGTGTCAACTTCAGTGGTTTTGATTACAAAGTAAATGACCAGATCCTAACTTGCG

CUST\_1089\_PI426210822 ACATTGCCTTTGGGCCTCCCTGGGTTTTCTAGGTTTCAAATTTT

A\_18\_P17124219

TGCTTTCTCACTATCAAGAAACAGACATTCTTCCATCTAGACTAATATGATCTCCAGTGG  
A\_14\_P126994 CTGCTTTCAGAAAATAATTTGACCAGTACGTATACTGCCTATGAATGGTAACAGGAATT  
A\_16\_P18183561  
AAAATCCTTTCAACCTCACATGTATTTTTGATTCAGACATCTCTGCTCATGATACCTCAG  
CUST\_1931\_PI426210822  
AATTTTAAAAACAGGAATAAAGGAAATATTTCAAGAAACAAAATACTAGCTTTTTTCTCAG  
A\_14\_P121126 TCCAACCTCCTTCTGATTCTATCATACTTTTTCTGGAAAAGTTTTTCCCAGTGTAAGAT  
CUST\_1316\_PI426210822  
AACTCCTTGGTGAAATTCAGAATAAAGACTGGCAAGCTATTTTTCCCCCAGTATTTTA  
A\_18\_P11577420  
TGTGCACCTTGAATTACTTGATGCAATTCTCAATACATGTATTTTTTACCAGCAAATGCGA  
A\_14\_P115997 ATCATTGAGAGCCACAAAAGGCAATCCCACTACACTTTAAGATTATGACGAAAATATTT  
A\_14\_P134313 GAACTTTACTTTTTCTTCTCAACAGACTTTGCAGAACAAAATGAAAAATCAAAGGGACC  
A\_14\_P121571 ATATCCTACTTTGGCTCTGCTAACTGGACCTGATAACTCAGAAATAACCTAGTTTATGAC  
A\_16\_P00685425  
ACTTTATGAGCACTCTTTCAATTATTGTTTTATATTACACCAGTAATTTTTAAGTAGTGT  
A\_14\_P100518 TCTATATGAGTCTCACATGTAGAATGTCCTCAAAGACCCTCAATCCTTTACCAACTGT  
A\_14\_P101514 AATTATGAAAACCACGTGTTATATCCTGTTGCTAGTCTGAGTCATTTGGAATTGTGGGTA  
A\_14\_P112639 ATTTGATTTCTTTTTCTTTTTGGACGAATCAGTCGTTTCTGTTGTGATTTATCGTGGTGTG  
A\_14\_P134704 GTAAAATGAGAGTGATGGTGATATCTCTGTTCTCTGTTTCATCCCATGATTTTTTTGAGAG  
A\_16\_P38603732  
AAAAAACTGCACAACAATAGTAAAACAAGACACAATAATAGTAAAACCTAACTCAGAGA  
A\_16\_P37501129  
GCGAATTACACATCACTATAACTATGAGCCTACGTTATGAAAATTTGAGATAACCACATG  
A\_14\_P202530 CTTTAGCCTCTTTAATTAATAAATTGTGCAGAGAAGACCTTTGAGGTTTCATGAGGATATTT  
A\_16\_P17500752  
GTGGTTTGTACAGAAATTCCTTTCAATGCTGAGATTTTCAAATATATTGCAACCATCGAG  
CUST\_4483\_PI426210822 CTTATAACTGTGGTGTAGACCTCAGTCCAGACACCCTCCAAGAGATAC  
A\_14\_P124739 TAAAGAGAAGGGGCAGGTACAGACTGATGGTCAAAGATCTGAAAATCAAAG  
A\_14\_P129114 ACTGTAATCATGTGGGGCATTAGTTTTTTTTAAAAAGATGATCAGTGTGGCTTTAGGATCT  
A\_14\_P131508 TGTCGAATGAGAGAAGAAGACTGTAGCATTGGAAATAAGGTAATGCTCTGTTTGAATTGTTG  
A\_16\_P16351810  
ATGTGTGTTGAATCACTTTCCATCAAAAAACGTTACTTCTATCTGACATTGACTCTACCC  
A\_16\_P00685534  
GATTCAGACCAAAAAGTATGAAATCTTACTAACTTATTACAGATAGGTATAGTGCAGAGA  
A\_16\_P17295994  
ACATGAATTTTAAACACCACCTATACTTCAATTTTTATTCATCTTCCACTATTGACCACCA  
A\_14\_P128022 CACTTCCCTAGGCTACTCCCCTATGAAAATATTTTTGATTTAGTTGGTTCATTTACATG

CUST\_3877\_PI426210822 TTGTCCATCGTGTCTCACCATCTGAGGAGCTGTCATCCTTTATTCA  
A\_14\_P138812 GCTTTTCTGCCATTTTTCGATTTTAAATGATGAGGGGCCTAGAATAGCAAAGGATCG  
A\_14\_P139426 AACTTTTCTTCAAACTGTGACTTTCCACAAGTCTAATGATTGCTGAGGATAATGGTGAA  
A\_16\_P16215372  
CCTACCTAGAATGGCAGTATTTCAACCTAATGAAGCAGTAAAATAAGTCTCCAGGAGTTA  
A\_16\_P00642064  
AGCCATAAGAATCCTTATATCTCCAGAAATAAAATTCCCTCAAACAAAAATCTTGTCCCA  
CUST\_4871\_PI426210822  
ATCTATAGGCTATTGTGTATAACTGGAGGGTAGCAGAAAACAAGTTCCTTGTGAGATC  
A\_14\_P119505 GATGAATGTAAGTTTCCACATTGTTGCTGTTTCTGCATTTAAACATAATTGGGAACAAC  
A\_14\_P126916 CTTATTTATTTAGGTAGTAGTCCCCCAAACCTGAATCTAGTGAAAGGTGGCAGACATTTT  
CUST\_4509\_PI426210822 CTCCTGCCCTGGGCTCCAGGGCTCTCGATTTTGGGGTAAACAG  
CUST\_1287\_PI426210822 GATAAAATGTAGCCAGGAGACCAATCTGCTCTAGTCTGGAGTGGCTG  
A\_16\_P58424382 CGATAAGCAAAGCCAGAGAAGGGTCTACCCCTGATGTTTAGATTCTAGTAG  
A\_14\_P115187 TTCCTAAAGGACAGATATTCACACATTTTTGGGATTATGAAATTCAGCAAGTCTTGGCT  
A\_14\_P114469 AGTATTAACACATACCTGTTTTAGGATGTATTGAAAAGAATCCTTGTGGATTTCCACTTG  
A\_16\_P15749896  
TCTGAATCTCATTTTTTGTATTATTTTCTTCTAGCAAATAATAGGTAGCAATTGTCTACC  
A\_16\_P20634579  
GTGGTCCTAGGCTCTAAAAAGGTTATTCTGTGTTTCAGCATGTAATTTCAAATACCCAAT  
CUST\_6316\_PI426210822 CCCCCTAGCTTTGATGAAATGCACATACACTGCTTGCATTTTCTGTG  
A\_16\_P18413122  
AGACAGAAATTTGGCCAGTCTTATGTTCTGACATCCAAACTATATTAGGTGAACTCAGT  
A\_18\_P15284791  
AAATAGGACCATGCTTTTCAACATAGACTACCCATTAGTTCTCCGTTAAATGCACTAAAC  
A\_16\_P20080522  
CTAAGGCCAATAAGGATAACATTATCTACCCAGAGAGTTTAGAAGAAAAGTAGGAGTCCA  
A\_14\_P108139 TTCCTCCTCATTTTCCATCTTACAAATCATCAATATTCCTGGATGTAGGATCATGTCTGT  
A\_14\_P134553 ACCATTATCAGCAGAGTTATAGCACTGATAAAACAATAGTAATAGTGGCCTCTAGCCTGT  
A\_14\_P114532 AGTATTTTCATTTTTTGCAGATTTTAGGTGATGGGCAAGTCAGAAAGTCAGATGGATATA  
A\_14\_P106707 GAAGGTGAGGATTTAATGTTTTGGAAAGAGTGGAGGGACTGAAAAAATCATGATCTG  
A\_14\_P126996 TGTAATGGAGATTCCCAGGAAGCGTTAATTCATTTAGTAGCGTTGACATGTTTCAATTTT  
A\_16\_P19718511  
AATCTACATCTGCTGCAAAATTCACTTTTCCAACTGTATTTTTCTGCAACGGTGTTC  
A\_14\_P101679 ACCTTTATTTGATACTTTATAGGTCATCATATGACAAAGGCTTTGCCGCAGTTCATC  
A\_14\_P137349 CTTACGTCAACACATCTGAGGTCTCGTCATAAACACTGTTTTAAAAGTAAATTGAAACCC  
A\_14\_P127913 GAACTTAATTTTTTAAGGAACTCAAGACGACAACCTCCAAGTTTTCTTCCCAATATCCA  
A\_14\_P131612 CTTTCTCTGACTAGTAAAATTTCTTGGGGATACCACAAAGGATGTTAGTTTCTCCAATA

A\_14\_P100852 TAGGGTAGAGTGGCATATTTAATATGCAGGCCAAAAGTTTGGATCGTTGATTAAAAGTCA  
A\_14\_P112196 GATTGTGTAGTTTTTTAATGCAACAGAATAGGCTACAAAATATCAGAGGGGATTTCTCTT  
A\_14\_P119902 CTAAGAAGAACATTTTAAATATACACTTACTTTCTGACTGTCAGCAACGAGTGGTCCCAG  
A\_14\_P114699 GTAACACTGGAAGGAATTTTAAATTTTTCTAGGACTTGCCTGAAACTTTCCCGAAACT  
A\_14\_P114217 GAAATTTAATTGCTATTAACAGGAGGAAGGGGAGAAACATGTCCATAACCTGTATGTTT  
A\_16\_P00685357 AGAAAGGGAGAGAAACCAGATTGTGGAACACTTATGAGTCTGGACTTCATCTT  
A\_16\_P03713286  
TTCAGAAGTGCACTTTTTAGATGAACTCATTGAGAACAACATTGACCATACATTTCGTCC  
A\_14\_P102585 ACACAGGCCAAAAGGAAGGCTCCTTGAAATTCAGATACAATGATGCCTAAAATAATTAAGT  
A\_16\_P39312597  
TCATCCTAGATGAACACATTTCCCATTATCCATCCAACACTAGATAGCCAGTTTAGCATTTT  
A\_18\_P14132713 ATTTTCATCCTTGCCTCCGCTGATGTCTAATTCTGGGATAACGCTGG  
A\_14\_P115215 CTTTAGCCCCTCTTTGAAAAATTTGCTCCAAGAAAAAGAAAAACACGTTTAAACCAGAGATA  
A\_14\_P117609 AAGAGACTTTCAGTCTAGAGAGTAGGCAGAAATGTATTCTCATAAAGCCACTGGTATTACA  
A\_14\_P121345 CTTATCTCAGTTCTCTTCATTCTTATGCTGAGAATTTGACTTCTCAGAGTTTTTTGGGCA  
A\_14\_P201028 ACGGGGTGGGGGTAGATGATCATTATTGCTATATTAATGCCAATCAAAGTGATGTTATAA  
A\_16\_P21639150  
ACTGGTGATAATCTGAGAACTATAATACTAACACATGTCATGGATTCCCTAACTGCTCA  
A\_14\_P129982 AGGGTAATACATCTTCAGCAGTCTCCCCTGTGTATGACTAGTTACTATTCTTTCATAGAA  
A\_14\_P131342 CTACAGTGCAAGAGTGGCTTTATAACAAGATGCTCTAGGCAACTGTATTGGTAAGAG  
A\_14\_P135785 ACTTTCGATGATTGGACTCAGCCCAGATAAAGAGGTGCTTGTGACAG  
A\_14\_P116672 AACCAACTCTATACTAACCTGTGGGAAGAGAGAGTAAGTTGAATTGTCAATGGTGAATG  
A\_16\_P17041349  
AAAAACGAGGATAGCAGTCTTTTTACATGTTGATAAGGTTAATCAAGGCAACGTCATTGC  
A\_16\_P03406704  
TTCACCATGCGCATTTTTCTAGTTACCTTTCAATCATGCTTCTCAACTTTAGTAACGCTAA  
A\_16\_P02829321  
ACATATCTCCCCTATCAGAATACGAAGATGAGTCTAATACATGTGACTGTGAAATCAGGT  
A\_14\_P132940 GTAGTTTCAAGTTATCAACCCACATTTCCCACCCCTACATTTTAAAGTAAATTTTCAGTGA  
A\_14\_P101261  
ATGAAAGGCAATAGAATTGCAAGGCTAAATGGGAATAAAAAGGGAAGGGAAAAAGAAAA  
A\_14\_P101693 CTTATGTTTTTCCCCTAGAAAATACCCTGTGATTCAGACAGATGATGAGCGAGAAC  
A\_14\_P130879 CTACCCAATGATGGTCTTTCTGAAAGATTCTCCATTCATTCCATAGAACTGGATAGGTT  
CUST\_4481\_PI426210822 CCAAATATTTAGCTACGGCCACACCAGCCCTTGTTCTGCTTATAACTGT  
A\_18\_P13773952  
TGCTACAAAATTACATAGAATGGTTAGTTTGGCAAAAAATAAATATCACCCTAGCACCA  
CUST\_9775\_PI426210822 AGAAACACAGAAGTGAATCAAATAGTGTGGTTTAGGTTTACCCACTGCCT  
A\_14\_P126611 ATCTTGTATGATCAAATACTTCACTTTTGAATGAAACCCAAGTTAATGTTGACTGGCCC

A\_14\_P105738 GCTTGTCCGACCTGGAAGTCCTCATTGTTGTTATAGATGATGGCATTCTTCTG  
A\_18\_P15129245  
TCCATTGATAATGTTTCACACTTCTATTAGCCACAGTGAATACATCTTTTCCAAGTAGGC  
A\_16\_P18756946  
AATGTCACCTTCTACCATGATACCCTATCTGCTCATCCTATCATACTTGTTCACACTTGTGTC  
A\_14\_P116980 TCTTGCCAACGATGCATTTCTAAGTTTCTCTTTTAAAGAAAATTTCTGGGTCTGAAAAG  
A\_14\_P115732 TCAGAAAGGAAAAGAAAAAATGACACAAAATACCCTACCATTAAGTGGATTGCCAGTTTC  
A\_14\_P108491 TTTGGAATATGATGACACTGGAGCCCTGGTTTGCAATTTATGAGTAATAATGATGATGAC  
A\_14\_P129915 AACTAAAAAATATTTCAACTTGATCTCAGCAGATGAGGCTGTATTGAAAGTGGGTAGAG  
CUST\_4140\_PI426210822  
GTTTGAATCCTTTTGGCCTTAAACAAAATAATGATGAGAGAAATCTGCCTCCCAT  
A\_16\_P19038348  
ACAGATGCCTTATTTCCAATATACCATACTTCCGCTTTTTATCGTTACTTCTGCCTTTAA  
A\_14\_P105580 TACTTAAAATCATTTTTCCCCATACTTACCCAACACAGGTTTTAAGAAATTCTTTTCGT  
A\_16\_P03014853  
GAGCCCATAGAAGACTGCAATAAATCCTCAATGGAAATTTTGTCTTTAGTGCCTGATAT  
CUST\_10366\_PI426210822 TAAGCTTTGGGCTACAAACGTTGCTTCACTGTTTGGTGGTGATGACTA  
A\_18\_P22841223  
GATTCCAGATATTAGGAAAACAAGACAGAAGGGTTTACCCTAGTCAGTATCAGTAGAT  
A\_14\_P107694 CACCTGCTCATGGCATACTCTAGATACGTGGTTTCTAGTCCTACTGTCTG  
CUST\_9556\_PI426210822 CACGGGACTTACCTGTTTGTGTTGTCAAAGCAGAAATGCCCAACATTTTG  
A\_14\_P135071 AAGGTATAGCACAGATGGCAGGACCTCATTTGTAAGTATATTATATCCTATTGTT  
A\_14\_P106686 AAAATCTGATCTAATTTAGTAATCCTTCTTCTTCTGGTGTGATTTCACTAAATGAATAG  
A\_18\_P26461684  
AAGTTGAGCATGTATGAGTTCATCATCTTCAAATTTCTACTTTCCTACATCTTCTTAGGC  
A\_14\_P122126 GTAAAACAACCTCCGAGGGGTTAGTGTGCTTATTTGTAATAAACACCTTCATAAAGGTA  
A\_14\_P104273 CCTCAAAACCTCAATGTTCAATTCTGCTCCCTAGATTATAAGTAAAAACAACAAGCAA  
A\_14\_P120160 AAAGAAATTTAAAATTTCACTTCTTGCAGATGGCAAGGATCTTTCATCTGGCACCTATA  
CUST\_10039\_PI426210822 GAGTGAGTGGTGTGCTTAGAGGAGGCTAGGAGACAAGGCTGGGCTTG  
CUST\_6273\_PI426210822 TATTTAAAACAGACTTGTGGAGTAATGTGTGGGAGACCCCTCAGG  
A\_14\_P112687 CATGGATTCCTTGTGTTTCTCTGCTATAGCCAAATATATGTGCACGTGTATGTGAG  
A\_16\_P38201988  
TGACACTTTGGCTATTAACCTTCTGGAATCAAGAACATCATGTCTATTGACTAATCATGG  
A\_18\_P22842081 ATTCACAGTCATGTGTGGCTAGGACACCATGTGGTCCAGTCTGAC  
CUST\_6501\_PI426210822  
CAATTTATTTGGTATTTTTTGTCTCATATCTCTCATAGAAAGACAACAGATGAGCAATTTT  
A\_14\_P134960 TAGGACTTGGTGTGTTTCTTATTCAAATCAAGTAGAACCTCAGCAGTCTGACTTCACATAT  
CUST\_307\_PI426210822 AAAAGGTGTTTCTAGCCTACTTGGATTTAAAACGGGGATGAAGAAAAGCTGTG

CUST\_3265\_PI426210822

AGATGTTTCATAAGATTGTTCTTCTATGTTCTGAAGGATTTTTCAAGGAACTTTGAAACC

A\_14\_P103658 GCATGGGTCTTATTTGGCACACAAGAACTGATGTGGAAATATAATAATGTGGTGCATAT

A\_18\_P25060029

CGTGCACTGTATTTATGATCCTACTGCTGTTACTATCTGTGTTACTTAAAGCCTTTGCTC

A\_18\_P17741044

GAAAACCACTCACATTGTTCAITGTTCCCTTAGATATCACACATTGAATTGTCACCACTCTA

A\_14\_P120583

AAGGATGATGGAAAACATTGAGGAAAAATTTCTTCTGGAAAAGAAAGGAATCAAAACTGA

A\_14\_P123137 GTCTGGGCTTGAGAATCAAGAGATCTCTGTAAAGATGCACCTCATACATTTACTAAGTAA

A\_14\_P106705 CTGCCATAGGTTTCTCTGCTATTTTAGATTTTATTCTGTGAAAATATATCCATGGAAT

A\_16\_P01811890

ATTGACATCACCTCTATACGTTTTTCATCAACAACCTCTGACATTTTGACATGACAACCTTG

A\_14\_P126264 AAACCACGTGATGTGCTTATTCTCCCACACGACCGACTTTTTGCT

A\_14\_P117036 CTTCAAGTATGAATAGGGTCATGAATGTCTTGGGTAGAAGTTACACACATAAAGGTGAAA

A\_14\_P119315 GATTCTCTCCAAACACTTACAGCAATCTTGACGTTTCATCTGAGCCATCATC

A\_14\_P108462 GCTACTTTTACGAACGCCTCAACATGGATTACTGGAAGATCCTGGCG

A\_16\_P15509372 GTGGATGAGCAGATGCTCAATCTTCAAAAAGAACAGTAGCCACTTTGCTCAT

A\_14\_P101526 TATTGCAATTTACTCTTGAAGCAAGTTACAAAAAATTCATTTCTTTGGCTTCGGACAGAA

A\_14\_P117598 ATACAAAGAAAATACTTAAAGGGATCAATAATGGTGTCTTCTGGTTGCAGAATGCGAAGT

CUST\_2493\_PI426210822 TAAAAGAAAACCAAGTCCTTCTGCGTGTGGACAAAGCAGACCTTCAC

A\_14\_P137479 GTGCTTGCTCAAGTCATGGTTTTGCCCTTTAGATTATTTCCCTTGAAGTGCCTT

A\_14\_P124482 CCATTTGGCCACACTGTCATAATGCTATGCAATCCCATTTGTTAATTTTTTAATAACCCAA

A\_14\_P122878 AGGCGGATCTGATGCTATGATATTTATAGAACACACATATCACATTAGCATCTTGCCATG

A\_16\_P03381857

CTGGTCCTTAATGGTTATCATTTCCAAGTTTATCCTCATCTAATTATGACAACATGCCCA

A\_16\_P00502105

GAGATTGTGCACTTTATATGCTTCTTGTCAAACTCATTTGGTATTTGAAATCACAACGCC

A\_14\_P135306 GTATAAACGTCTGGAGATGAACAGCAACCCTCTGCACTTCAGGGTATCTT

CUST\_8591\_PI426210822 CTCTCCACACCCTTGGGACCCTCAAATTTGTTTCTCCCTCTCTAAC

A\_14\_P131961 CTCAGACTTAAAATTCCACATCAAGTGTTCATTAAAAGAAGATAAGGCATTCTGAGTGC

A\_16\_P21425933

AAGAATTAATAATCCTGAAAGCCACATATTAGTCCTTAGCAAACCTATCATACTGCCTCCA

A\_14\_P103133 TAATGAATTGAATTAAGTTGGTTTTTCGGATTCACCTTCTGTATATTTGCTGCATGTAAA

A\_16\_P18255957

AAAACCAGAATTGTTGAATGTCAAACCTCCAGTGATAACCACAAAAATGTGAGAACAAGTC

CUST\_8959\_PI426210822

GATCATTATTGCTGTTTCTCTGGCCTTATATTAATAGTGTCATTGCAATTGAAAAATTA



A\_16\_P58424098

TATTTGATTTAATCTAGATAGGAGGGTCAAGAAAGGTCTGGGACCTTTTCGACATGATTAG

A\_16\_P15831669

AACTTCCTGTCAATAGCATTTCAGTAGCAAAGATTGTTTTCCAGATAAACACATACCTGG

A\_14\_P120128 CTTTCAAGATGTTAGAAAGTTCAAGCCAGAAGTTTCTTCAGGGTTTGGTCTATCTCATTG

A\_14\_P100383 AGAAACTCGGGTTTCTAACTTTTAAAGTGGGATTATATGTCTTCTCCAATATATGGGCTC

A\_14\_P114116 AGAAAGCCACAAGTGGAAAGATTTCAAACCCAATTCCCTTGAATTAGAGAGAAATTTA

A\_14\_P100775 GCTCTCTTGGTGATGGTGCTAAGGATAACTGGTGCTAGAAGGCAAC

A\_16\_P15820296

AACATTACGGGTTTTTCAACTACTTGCCTACTCTCTTCAAAAATGTAGCCTTACTGAAGT

CUST\_1251\_PI426210822

CATTTCTAGGACAGTGATCATTTCAGGGAAGGAAATAGATTACCCATTCAAAG

A\_16\_P16426894

AAAAACCTGGTCACAATGTTTAACTCTACGAGTGAAGAATGTATTGAGCACCACCTTATA

A\_14\_P127937 CTTCTGATCAGTATTACAATTCCTGACCACGCTACATGGGTTTGAAAAAAAATCAGTT

CUST\_7835\_PI426210822

CGAGTTCCAGAGTACATTTTTGAAGACATTTATTTACACATGCAAAACTGAAGAAGTC

A\_14\_P119836 GTTTATGCAAATCATCAAAGGGATTCCTTGAGGCAAAAGGTTTGAGTCTGCAGTT

A\_14\_P104033 CTGCAAACAGGTTTATTAGCAGAACATGAAATAAGAGACCCCAATAAGCCCTATTTATGT

A\_14\_P113181 CACAGATATGTGTATCTAGATGTTTCTAGTTTGTGTCTAAAAAGGGCGAATGCAACAGC

A\_16\_P17048138

AAACAATTCACGTTACTTCTACTGACAAATTTGCAATGTCACAATTTACCCAGACTCTGC

A\_14\_P200415 ATAAGGTTTTATTTTGAAGTCAATTTGATGAAAGTCATTTGAAAGACTGAGGAGGGAA

A\_14\_P113818 TTCAGCAGATCAGATGATACTTACTCAGAGCAATTTCCACTCCTTTGCAGTAGCATATTA

A\_14\_P128166 TAACTTGAAATCCTCCTTTAATAAACTACAAGGCTTCAGACATCTATCCTGCTTCCCAA

A\_16\_P02668585

TGTGCCATCCTTTACTACTTCACTCATCTAAGCATAAATATATGAATACCTGCCTCTGAG

A\_16\_P02600440

AGATTCTTGTTTTTAATTGTCACCTCAATAGAGATACCTACAGCGATAACTTCACAGGCA

A\_14\_P102492 ATTAATAGATCAAGTGAATAGTTTGACCAAAACTTCAGATTTGGGGGCTTTGGATTCTG

A\_16\_P01353264

AGTCCATGTCAAGTGAATTTGAAAAGTGAAGAGAACTCTAGTAACATCGAATGACCAATG

A\_14\_P114496 ACCTAGGATAATATGATACTGCCTCTATGAAACCACCTGGTCAACCTTTGCTTAATTAAT

A\_14\_P202523

GTAATGAGATTCTCAAGGCCTGAAGAAAAGATAACAAACTAGACACAGCAATGAAAGCA

A\_14\_P130266 TGAGATACATGGTTATTATGAACAAGAGGCTGCGTATCCAACCTTGTCTGGG

A\_16\_P01835269

CCACTTCCATTCACAATTTTTGACCTCGAGTCTCAAAAATCATTCTAGAATCCAGTCAT

A\_14\_P111749 CTGTTGAAATTGTTACTTCAACTTCTGCTGGTAAGTTGTTACTTTTAATATTCTTTCAA  
A\_14\_P119192 AAAGTCACAGATTGACACTTACTTTTCATTTGCTTGAAGATGGACTTGTTAGGTTCAAGC  
A\_14\_P127264 ATAGAGTGAAGATAATATTGATAAGCAAATGAACATCACAATGGCCCTAACATGGGCTG  
CUST\_7592\_PI426210822

AACATTTGACTCCCGCATAACCTTTTCATCCAAACACCATTTCATGAGTTGTTTTATG

A\_16\_P37699099

CCATTTTTCCCATATGGGTTATTACACACGTGCTTGAAGAATAAAAAACGGTTGTCATTT

A\_14\_P122060 GCTTAGGGTATTTCTACAACATCCACAGTTTCGGATTCTACGTGGTAACTCAG

A\_14\_P105128 GTTTTAAGAGATCCCTTCCTTCTTCGGTGAATGCAGGTTATTTAACTTTGG

A\_18\_P20378373

AAGGCAAGTATTGAGGTCCCTTCCTTATGCATTTCTATGGTGTATGATGACGATGAAAT

CUST\_10409\_PI426210822 CACTGATGCTGTTCTCTTCTTCATTCTATCAAGCCCAGGTGCCAG

A\_16\_P02845480

GAGCAAACCTTTCATGACATATCCTAACTGCATCCTAAGATTTCCATCCTAAGCATTTTGC

A\_16\_P18965056

ATTCTCATTGCGGTTAACCTCATTTTGAATTAATACTGGTGTTAAGATATTTCCACGTC

CUST\_8604\_PI426210822 TCTTTTGTGTTTGCCCAAAGCATTTCTTGAGGTCCAGCTGTCTGTAAG

A\_16\_P21520649

ACAATGACTCATTAAACTTAGGTTCTGGTAAATGGTCTTCTTCTAACATATGTGACGGGA

A\_14\_P138184 TGCTTCACCCAGTCCTAATAGTCATGCTTAGTATAAACCATTTCATGTCATCACGATTATC

A\_16\_P16768295

AAAAAATCAAGATGGTGAATACAACCTCAGGAACACACATGTATTAAGGCAGGTTTGACA

CUST\_2633\_PI426210822 AGTTCGGTACATGGGCTGGGGGCGAGGGGCTCTCATCTTCTGAG

A\_18\_P22842653 GTGTGGACATTTCCATGTGTCTCCTGAAACCCTCTGGTGAGCAT

A\_16\_P00996046

ATACCTGTCCAGTCATCAAAGTCTACAAGTTAAACCTAAGGAAATTACATTGACCACTCT

CUST\_7887\_PI426210822 CAGTCTCTGTGTCTACTCAGAAAAGACTCATGCTGTGCAATTAGAGTGTGG

CUST\_6077\_PI426210822 TTGAGTTTGCTCCTCTCTCCAACCATAACAGTTCCTGCTTCCCTG

A\_14\_P103909 TACATGGGGGATGATTTTGGCACTTTTTCAAAGAATTTGTTTCTGTGTATCTGAATTTGC

A\_16\_P41330916

TTACCTTGACAATGAAAGATTCAAGTCATAAAAGTCCCTAAATTTTCTCTACCAAGGGCC

CUST\_2229\_PI426210822 AAATGCATCTCAGGCTATGGGAGACCATCCTGCTAAGCAGGTAAAAG

A\_14\_P132029 GTAATGAAATCCTCAGTGGGCGCAAACATTTTAGGGCCAAGAACATTGACTT

A\_16\_P17877886

CTTCCATGAGAACTTCAGTAAAATCCTGCATCTTCCAATACTTGTCTTGTATCTCAGAG

A\_14\_P105817

AAAAAATCCAACACCTTGAACAAGAATACAAGAAGGAAATAAATGACAAGGAAAAGCAGG

A\_14\_P137200 TATCATCAACAATAAAAGGGCTATTGTTCTTCCATAACCCGATTTTGGCTTTCTTTCCCA

A\_18\_P16718188

ACCCAGGTTTTCAAATGTTAGCAATACTAAAGGGTGCACCTTATACAGATGATATTGACCA

A\_14\_P125647 CCTTACTGTATGATGGTAGACATATAAAATAAATTTTTTACAAAGATATTTTGGTTGAGA

A\_16\_P01278783

TGGACTTGCTAAAAATGCCTGTATTTCTTACTTGCTCAACATAAATCAGTCTCATAACCCT

CUST\_9427\_PI426210822 GACTTGGAGACCTGGAGCTGGAATTTGAGGGTCAAGACAGTCTCT

A\_16\_P19819680

AGCCTTTCAAACCCTATGTTTTTAAACTGCATTGTCACAAGTTGAAGTTTACCGAATGT

CUST\_1940\_PI426210822 CAGGGCTGGTAAAATGACAGCTGACTTCTTCATGATCATCAGCTAGCATAAG

A\_14\_P137957 TGGAGCAAGCATTTTGAAGACTTCAACGTATTGGATGGAATTTTTCAAAAATTTACCAT

A\_16\_P00582112

GAATATCTTTCCATGTCTGCAAATACACTCCTATCCCATTACAATTAAAGCCTGACAAGC

A\_18\_P16838748 CTGTAAACTATGCTTATATCGTCTTTACATCCATAATTCTCTATAICTTGTGCTGTCTGA

CUST\_6083\_PI426210822 ACAGTTGGTCCATGGTGTGTGGCTGGAGGCCTCTGAATACCCAC

A\_16\_P03302599

GTGCACTCTAATAATCTGCAGTCCCAAATTAGTTATGGTTATTGATAGTGTGGCCTCTT

A\_14\_P130722 CTAATCCATTCTAAGCATACCATCAGGATCACTTGAGTCTCATTCTCATAAAATAAGCCG

A\_16\_P01557195

CCTTGGTATTTTCATCTTGTTCACCGAAATAAAGTATCAGCAAGAGAATTTCTGATAA

A\_14\_P111851 ACATTGTGAAACATAAAACAACATTATAAAATGCCAGGAACATATGTCCCAGCACACTTG

A\_16\_P30952628 ACTGATGCTGTTCTTCTTCTTCAATCTATCAAGCCCAGGTGCCAGC

A\_14\_P110633 CAGGCTGAGAAATTTCTTATTGATGGGTCTGCTCATTTCCTGCATAGGAAGAAATC

A\_14\_P111564 ATTCACATCTATCTTGTCTCAGGAGTTGATCTAAGACAGGCTCTAATTGCACCTTAATA

A\_14\_P201711 ACTGATGCATCATAGTTGACTTCCACCAGTGTTTTAATTGTTTCATGGTTGCAGATATAA

A\_16\_P20261200

AAATGGTTGACCAGTTAGAGACATAGGAAAAAGTGGAATATTGAATTTGCATTGAAAGGG

A\_14\_P131206 TTGGCATTAGATGCAACAGAATCGATGAGTCAATTTAAATCGTTTTTTTTCCCAGTCTCT

A\_14\_P134103 ACATGAGAAGGATTTTCAAGCACACTTGCTTCTAAATTAGCGATGTCATCAGTCTCATTT

A\_14\_P110577 GAGGGAAATCGGATTTTCTTCACTCCTATGAGGCGCTTTTAAAGTGTTTGATTTTTCT

A\_14\_P121518 TAGGTATACAAGTGGACAAAAAAGTTGCTCATTTATGCAATCAACAAACATCTCTGGAT

CUST\_3350\_PI426210822

TACAGTATGTGAGATGCAGTTTGTAGCAATTGCTATGGGTAAAATTTTTATTTTAAAGAGG

A\_14\_P122179 GATGGTGGCATTTTCAAGATGTGGCAAGAGGATCTTGAAGTCTGGTAACATT

A\_16\_P58424275

TAACTGCTGCAACAAACCCTCAGTTTTCAATTACTTGACCTACTAGATGTTTGTTCATTG

A\_14\_P128480 TAACTATGATCTTTGTATATCCCCTGCAGGTCTTTTCCCATGTGAATGTTTCATATGACT

A\_14\_P104146 TTTTTAAAAATTGCATGCTCCTGCTAAATAGGAATGCCTTTGATGTTTAAATGTGGCTCC

CUST\_5950\_PI426210822 CTCCCACGCTGGAGAGCTGGCTTTTTTGGAGGTGGGAGTAGAAGC

A\_14\_P139529 AGGTCAGTGTCTGTGTATTCATCCACTTTCTTATGCTGCAGAATATAGTCGGAGAC  
CUST\_7635\_PI426210822

CTTTTTTAAGCTTGGAAGAACAACCTTAGAATAGTGTAGGCCTTGGCTTCCACATG

A\_16\_P17027724

AGAAATCCCGATGTAAGAGCATAGACACACTAACCCCTAATGTATGTTTGTACTGGATTG

A\_14\_P115122 ATAATGAATTGGCTGACAAGACAATTCAAGATGGCAGAATGGAAACATGGCAAAAAGAAG

A\_14\_P135074 CTTTAGCAAGCATTGTTATATGACCCAAAAGGATCTTTAGGCAACTGAGAAAGTTTCTGA

CUST\_466\_PI426210822 CACGCGTGAATCACTGTGTTGGGAGGGTGTGAGATGTGCTCCTTG

A\_14\_P133051 TGACATCTGACAGATGAACACTTTCAGCAAACAGCAAATAATAAACAAAGCATTGTGTGT

CUST\_9046\_PI426210822 CCTACAACATGGAAATGCCATTTCCCTCCAAGCCGTTTATCTGACCA

A\_14\_P200830 TTAACAGTAATTCTGACTAAAATCACAGCAGTCCCTCTGGTAGAAAGGCAGTAAATTCTT

CUST\_3440\_PI426210822

TGTCACACTTATTCCTCTGTCATGTATGCTTAAAGTCTGTTTTAGATGACCCCTTGTA

CUST\_3021\_PI426210822 CATTCAAGTCCCTCCTCTCTGCCTGTTTCATACCTCCCCTGGTG

A\_14\_P126419 ATGTGAACAAACAAGTGAGAAAGAGCACACATATAGCACTTATTAGGCATCTGGCATT

A\_14\_P125219 CGGTAGGTAATGCTGTAGCAGTCTGACGGCTCATTCTGAAATAAATACATAAGGAG

A\_16\_P39431284

AGTTCCTTTGGCATGAATATAGTATTTTGGTTTCAATTTTCATCCTTACCCTACGCAAGAT

A\_14\_P114356 GGGATTACAGATGGAGTTGGAAAATCCAATAATTTGCACGATAGCAAAAATCATCTTGAT

A\_16\_P58424531 TTTTCTTACATCTGACCTGAAATAGGACTCAGGCTAGAGAATCCAGCC

A\_16\_P20912761

CCCTCTCTCATACTTTTGGGAAGCACTATTACAACCAATATTCAATATCTCTCATGGC

A\_14\_P201689 CTGGAGTTCTTTCAATCTCTTGTTTTCTTCTGCCTGAACGAAAAATTTAACTTCGTTGTT

A\_14\_P135705 AATTTGGCCAGTTATCCAATTGATGAACTAGTAGATAGAGCCAAACAATCTTTTCAAGGT

CUST\_8652\_PI426210822 AGCCGTGTAGCATAGCCCCTGAGCACAGGTCTAAGATTGCACCAA

CUST\_4798\_PI426210822 CATTGGAGACTCCTATTTCTCCCTCCGTGACATCTTTGCTGAACAG

A\_16\_P20780109

AAATTCATTTTTCCCGCTAGAATTTCAACAAGGTATCAAGTTCTCCTACCACTAAGCAAG

A\_14\_P102075 ACAAATAGTTGCAGTTTTCTTTTTGTCTTGAGTATTAAGTAATAAAAATCAGCCAGTC

A\_16\_P18293661

AGTTCAAATACGTCCCTCTATGGAGAAAACAACCTTTAATGGTTACAGTCTATCAAGATCA

A\_14\_P101606 TTCAGGGGAGATAGTTGGGATAGTTTGTAGTTTTGCTTAGGTTATATGTGTCTGTTTTCT

A\_14\_P118176 GTATTTGCCATACTAACCAGTTCCAGCAGAAAATGAGGTCGTAGCAAAAAGCATCA

A\_16\_P38151201

AAATATAGCAGATGATAAATACGTGCTTCTTACTCTCATAACTTGTTCATACAGAGCAGTC

A\_14\_P108062 ACCTAGAAGAAGGTCAATATCTACCTGCTGAAAGTAAAGAGATGAAAAACATCTCTCTGT

A\_16\_P01984391

AGAGTTTTGTATTCCCTTTTTGTAGAGAACCACAAAGCATATCAAAACGTCAGTTTTCAA

A\_14\_P124633 CTCTTCTTAACAAACAATAATACTACTCAATCCGGATACTGAGATTGGAGAATGGGGTTC  
A\_16\_P39279421

ACTTATGTCACTACATTGCTCCATAGATTTCCTTATACAGCAACATCCCTATAACAGAGCA

A\_14\_P119138 CGACAAAGGGCTTACTCTAGGTGGACTGAAAATTCGATGTTTCCAATTCAAAAC

A\_14\_P130809 ATGCCTATGGACTATTTTTTAAATGCCTACTGTGAAGACTTTTGTGCATTGCACAACCTT

A\_14\_P131806 AAAAATAAAATGGAATTTGATTCTGGAACATGGATCATTGTCTTTGACTTCCATCACC

A\_16\_P40431993

AACTTATGAACTTCTCAAAAAAGGTCAAACCTGAATTGCAAACCTTTGTATTCTCACAAACA

A\_14\_P125360 TTAGGAAAGTGATTCATACAAAACTCTTCTTTTAGTGACCCCTTTCGGTTGATCTTCT

A\_16\_P02558516

TCTGATGCTGCTTTATTGCATGTTAATACTTCATTACTGGACCTGATTCTGTTACACTCG

CUST\_1496\_P1426210822 GAGCAGATTCTGGTCCTCACACCAGAGGAGGCTATTTCTACCTGC

A\_14\_P123717 GTGGAACCTGAACCCTAACCTGTAGGTAGAGGATTCTAAATTTGAAACTCTTTTCATAAA

A\_16\_P17313238

AACTGCATCATTGGCCATTCTTGTCTTGTCTTAAATTAATCCCAATATCCAGAAGTTG

A\_16\_P02871353

ACAGCAAGGAGTTCTTATTCTTCAGTCTTCTCGAATAACTTTCAAATCACCAGTAGGATT

A\_16\_P00685367 AATTGTCTTACAAAGTAACTCAGGCATTGATGTGGGGTAGAGACAAGCCCA

A\_14\_P136275 CTAAAGCAGAGAAGAATTGAATAGTCAAGTTAAATATAAATCAGCCCTCAGTGTCTCCAG

A\_14\_P124527 TTTGAGGGAGTTATGGATGGATAATAATGCATTACAAGTGTTACCTGGGGTATGTAAGTT

A\_14\_P113600 AGTGAAGACATTTCAATAAGCATCAAGGTCATTGAACATTTTGTGGTGTTCGTTATGACA

A\_16\_P16711049

CTCCGCTCCTCTAATTTGTAAGTTCTACTCAATGAAATCTCTCCTTTTGTAAACAGACT

A\_14\_P116739 CTGGTCAGTGTGGCAATTCTCCGCAGGTTTTCCCTGACTTTAATAAA

A\_16\_P17692255

AAACTCTATCAAATTTGAATGATCACACCTGCTTTTTTGACATAACACACTTCCCAAACAG

A\_16\_P37308178

ATTTGGCAAGATAAGTTCAATTCCTTACATACCTTTACATCTCCAGACAGTCGTAT

A\_18\_P14137349 ACTCTGTAGTGGCATCCTCAGACACACAGTCACCCCTTGTATCT

A\_14\_P118872 AGTTGGATTTCACTTTCATGTTGACCAATCACTTTTCTCTTATCCTCAGTTACAGACTG

CUST\_8123\_P1426210822

TATAAAAATTTCTAGTTTCTTAAATCACAAATGTTAAGATGACCATATTATCTTCTAAGC

A\_14\_P119291 CTGGTGCTAGACCAAAGAGAAAAACAAGAAGTCTTATGATTTAACTCCGGTTGATAAAT

A\_14\_P122776 GTTGGTGGCTCATTGGATACTCAAGATAAACTCCAAATGAAAGTATAATGGTGAGGACAA

A\_14\_P106729 AAGATCTCTCCTCTGCTCTTATCTGCAACAAAAGACTGATAAAAATGAATCTGACACAGA

A\_14\_P139845 ACCAGAACAATACTGTATCACTAACCACATCCCTAGGAATTAAGTTCCTTAAGGGTTTA

A\_14\_P111627 ACATGAAAGAGAGTGAGATTGGATTTTTGTTAAGATGAAAGAAAGGAATCTGTTCCCATC

A\_14\_P137725 GATCCGACTCACCAATACCTGCATCTCCTTGTCTACGCTTTCCAC

A\_14\_P133663 CTTTCTTCTCTCTACCTTAGACAGATTTTCATGAAGCAAATTGCTTATTTCCCGGGAATA  
A\_14\_P139919 TAAAAAGATCTGGGATAAAACCAGACTGAAAGGAATACCTCAGAAGAGATGCTTCATTGA  
A\_16\_P00247158  
CCCTGGAGTGTTTGTATTTTTAAAAGTCTATGGGTTAGATTGATGCTTAGCACCAAAAAGA  
A\_14\_P103981 ATGACAGAGTTTTTCTTCCTGTATACTTTGCTCTGTAAAGCCAAACTTCACTTCTAGCAA  
A\_14\_P109360 CTGTGGAAGAATTGCTAATTACAGCCACCATAAGGAAATATCAATGATGGACGTCAATAT  
A\_14\_P201416 AGTCAAACCTATGCAGGAATCTCTGCCTTGTGCCAATTTAAAATTCTGAGTAATTTAGAA  
A\_14\_P120184 ACAAAAAACTGGAAGAGGAAATCCAGACCCTTCGAGTTTACTACAGGTAATAATCTTTTT  
A\_18\_P22841925 TTATTAAGAACCTGTGCTCACCTCTGACACCTCAGTTGATTGGGGAAATTTG  
CUST\_2323\_PI426210822 GGAAGTGGTGAGTTCTGTTTTTTGCCGTATCAGCTTGGTGTTCATCTT  
CUST\_7183\_PI426210822 ATAGTCTGTCTGCTCTGTGGGGTGGGTGTGCCATTTGGGGGAAAT  
CUST\_8210\_PI426210822 ATACACTCCTCCCTCCTTGTTTTTCTCCTCTGTCCCACCTACCCAC  
A\_14\_P127576 AGAAGAAAGATTCCTTCTGGGAACTTATGAATGGGACTTGTTTTACTGAATTAACTTA  
A\_16\_P00685334  
TATTTTCATTATTATATTTAAACGTCTCTGCAGAAGGAATGGAAGGCTAAGAGGGTGGGA  
A\_16\_P15558514 GGTAACCCATCCTCATATTTGCTATGTATCATTCCCATAAATACTACTGGTCCCTGTATT  
A\_14\_P100277 CTCCCTAATCACTGAAATCATTGTCTTAGTCACCCAAACTATTTTATATTACTCCCCCT  
A\_16\_P16998034  
ATCAGATCGTCATTGGAAGTAACAGATCACATAATCTCAACCATTAACTCTTGTTCATCCA  
A\_14\_P124610 CATGTCTTATCTCTTTAAACCTACTGTGCTTTGACCCTTCTTTCTGCCTCTCTC  
A\_14\_P136292 AACAGTAAGGAAATGGTCCTTAGAAGGGATTGTCTGATGTGCTGGATTTTAAATAGAAT  
CUST\_3358\_PI426210822  
AATGTGTTCTGTTTTATTGGTTTTGTCTTTATATTTGAGATGTGATTATAAAGATCCCTT  
A\_16\_P21498771  
AAATGGAGAGGAGGTTGAACAAAATATGTTCTAGTCTTTAATTCGGGTCCTAAATGAGAC  
A\_16\_P16244947  
ATTACTGTTACTTCTTTGCTTTTTCATTGTCCACAAAATCACATATAGGAATGCACCAGGC  
A\_14\_P108072 GGAAAATTTCATACCCTGACATCACTTCTAGATGAAGTTGTCTGAGACAGTTAAGAAAG  
A\_14\_P100432 TTTGGATATATGAGAAAGCCTCATATGTCTTCGATTTGGACATATCCAGAACCATTTTCC  
A\_16\_P03030918  
GGTATTTCTATGGCTACCAAGGATATCAAGTTCCATGAAATTTGGCTTACCAAATCCTAA  
A\_16\_P58424103  
TTTAGTCATATTAGCCACATTTAAGTGGCTCAATAATCACAAATGGTTACTGGCTACTCT  
A\_14\_P119483 CTGAAAGACGCTTGCTGCACAACCTGTCAACAGACTTCCAACCTACTGAG  
A\_16\_P01860694  
AGGGCTACAGTCTGATTTTCTTAATAGAACACATTACACCATTAATGGATCTCCACACA  
A\_14\_P132557 TAAATTTGAGCAATAATCTGAGCATATTTTCAGCCAGCATCTGTCTGTGTTCCACTTAGTT  
A\_14\_P107705 ACAGTAATTCTTCGACACTGGGAAACATAACGGATTCAAAGAATTCTTCATCTCAGATT

A\_14\_P107866 CAGACCAATATATAGTGGATACCTTTTGTATGTATGCACAAGGTGCAGTGTTGGAGATAA  
A\_14\_P129140 CTAATTGACCAATCTCTAAAAGTTGTTGATTTAACAGTCGAAAAAGGGGTGAGAGTATCC  
A\_14\_P138864 ACTGATGTGGGTGTAAGTTTTATTGGTGATAAAGGCTTATTCTTGGTCTTAGTGTTTTCT  
A\_14\_P110205 AACTACAGGCCATTTTACCCAAACTCATACATTCATTCATTTTAAAAAGTGCATCCTTGG  
CUST\_9338\_PI426210822 AGCCAGCTACAGCCTCCCTTGGGGAGTGGAGCCCACATGGCTCCA  
A\_14\_P110225 CTAAATTTTGTTCAAAGCCTAGGAGAACCTGCTGTTTATGAACATTCCTGTAAAAGGAAG  
A\_14\_P120522 TTTATTCCATTTGGCAACCCTTATGCATTGAGGTGTATTTTTTCATCCATCTCTATGCTAC  
A\_16\_P40927262  
AAATGCTCATAAACCCCAAACACTACAGAAATATTAGATAAGAATTGCCTTCTACCAACACT  
A\_16\_P21137656  
AAATCTTCTTGTTCCCTTTTGTAACTAGATAGCATCGACATTCAGTAGAGTCAACTCAGCC  
CUST\_3055\_PI426210822  
GATGGTTCCTTGTGTTGGGCATAAACCATGTGCTTTATAGAAGTCAGTATTACA  
A\_16\_P18869675  
AAATGACACAATTTGGCAGTAGACTAAGAACATCATCAGTGATCCTGAGATTACCTTCAT  
A\_14\_P135327 AAAGAGGCTTGGGATAGGTAATTTATTATGACTATCTTCACCCTTTCTCTAGTGTTAGGT  
A\_16\_P15006551  
AACCTTTTTTAAAGATTAGTGCTCTCTAATACCTCAGGGTTTTTTTAAACACAGCAAATGCT  
A\_14\_P106051 AAACTTTTAAATGCTGGTTTTATCTTTGCCAAATATGATGCTCCTTACTTCAGTCCAGGT  
A\_16\_P21506653  
AGCGTATAGGTAGTGAGAAATAAGGTAGCACAAATAGAGGGTTGAAAAGTATACAGAAGT  
A\_16\_P20815066  
TCCCCCTCATACCAATTTACAAAGACTTCAAATCATAATCCAAAACCTTCTCTCTTTTCGTT  
A\_18\_P14137009 CAAATGCTGCTGCTGATCTCCTGGCAAGCCTCCACAGATAGGCC  
A\_14\_P131954 TTTGCTCAGTATCTATTTTTTAAATGTCTCCGCTTGAATTATCCAGGCTCCCGTTCATTAA  
A\_14\_P117480 CCATGAATACCGCGGAAAAAAGGAATATAAGCAGCAAAATTTGCTATGGACTTTCAATTT  
A\_14\_P127832 CCTGCCCAGACTATTTTTGGTAGCAAGCGTGGAATCAGATCTGAGAA  
A\_16\_P03481256  
GGCTGGAGTTCTCTAAAATTGACCACTACCTAAAATTGACCACTACCCTATGATATCTTA  
A\_14\_P201151 CTTCTTTTTTATCCCTAGCAATCTGATTATTCAATGTTTCCCATGTTCTTTGCTTTCT  
A\_16\_P30952358 AGAGAGCATTGCCAGCCTGGACGATCTGGACAATGATGGGTTC  
A\_14\_P127343 GTTTTTTCTAGGAACACATGTTATCTTTCCACTTACTCCATACTGCTTTGACATTACCTG  
A\_14\_P126347 CCCATTTCCAGAACTTCCCCTCTTTTAAACATGGTTAGAATCATGTAAAATAAGGGTAA  
A\_14\_P120307 GAATATTTGACTACTCGCCTTTAGATCCAACACAAGATTTCAACACACAGATGTAAGTGC  
A\_14\_P122357 AGAGATTCTCCCAACACGAATTTCTTTTGATATCAAGAAATGAGTTGTCCACAAAGC  
A\_18\_P14134572  
ATTTATATCTTTCTTAGACCTTTCTAAGACAGACCACATCTGCCTTACCCGTCACATTA  
A\_16\_P19213066

AACAAATGCTTGAATACACTTTCTTCTTCTGCATCTTTGATATTTGCCAGTCATCTCTCC  
A\_14\_P107137 ATGCTGGTGCACAGTAAAATCAGTGATGCTGGCAAGAGGAATGGTTTAATTAACA  
A\_14\_P112248 AACACCCCTATCTTCTAGGATTGACACTGGCTGTCAAACCTCATCCTTCAA  
A\_14\_P110871 TTTTGATGTATGTCAGCAATAATTCCAGAAACCAAACCTTTGGAGAAGATAGGAAAAGGGT  
A\_14\_P138232 AATGACCATGTATCTTAGATTCCCTGGGCAAGCCAATAATATTTGGTGACCATACATATT  
A\_14\_P100054 GTTTAATACTGTGCGGTAGGAACGAAGAGGAATTTTAATTACTGACTCCTAATTGGATGG  
A\_18\_P22841293  
CCCTAGCCATGAGAGTGCATTATGTTTTAAGAAATGGTCTTCAGACTCTAAAAAAGGAA  
A\_18\_P22840738 AAACCGCTCAAGATGGCACCAGGTGATAAACAGATCCACTTGCTAATCT  
A\_14\_P116752 CATGTATAAATCCACTCATACTCTCCTCAAAATTTTGAATACAAGGCTTCCTGTGGAT  
A\_14\_P115580 CTCCTGCAAAGGTCTTTAGGTATCCTAGGAAATATGAAATAACAAGAACTCAATGGATGT  
A\_14\_P125859 AAAAACTGCTCTCTGCTTAGGGCAGTAACACCCCCAAAATATCCACTGTAA  
A\_16\_P18025481  
ACCATATTAATAATTGGATGAATCATTCCATACCCACAGATAAGATTTTGCTAGGGGAAGGG  
CUST\_6455\_PI426210822  
CACATCACAGGTAATGAATGAGGCTCATTTGCACAACATACAACCTTTGGACATC  
A\_14\_P108154 TTACTTCACCTTCTATTCTCTCATCTACTTCGATGTGGCTCCTCATTTGGGC  
A\_16\_P15654832  
GTATGCAATATCCAGAAAGAGATCCTCAATGAAATCCTTTTGACTTCGAGATAAACTGC  
A\_14\_P109446 CTTGAGCAATAATTAGATTAAACCAATCAATATCCTGCATTAGGCCTCTGACTATCTACT  
A\_14\_P137949 ACCATAAAAAAAGAGGCATTATCACTTTGAACAGGGAATGTGATTTGTGTGGTATAACCA  
A\_16\_P19803869  
TTCTCTATGTGCTGTTTATATGAATGTAGACTGGTTCAACAATAATACTGCTGTCAGCCC  
CUST\_1233\_PI426210822  
TATTCTTAAATATTCTCAGAAGGTGTCTAACATATCCTGTTTTAGTGACTAGATAATGAA  
A\_16\_P15712572  
AAAGTGAGAGAGTAGACATGTTTCTTTAAGTTAAACAAGTGAAGTCCAGCATAATTCCCC  
A\_16\_P02866659  
AAAAAAAAGGTATTTATGAAGCAGAATCCATAGGATGGTTGATCAATTGAGCATATGAGA  
A\_18\_P22840283  
TGTTACTTAATTCAATATTTTGCAGTCTAAGATATTTGCTTCATGCTAATTAACCTACCTG  
A\_14\_P138132 TTTTTCAAAAGGCAAGCAATACATACTTACTTGGATCAGATTTAGAAAATGTGTCTCTGT  
A\_16\_P21270751  
TCCAAACCCATATAATTACTCCCCATGATCTACTCAGTTTAATCAGATTCTGCAGGTAA  
CUST\_9914\_PI426210822 TACAACCCTTTCAAGACCTAGGGCTTGGATTTCAAGTGCCTTTTCAG  
A\_16\_P19671497  
AGAAACCAAACCATAAGTTCCTGACTAAATTGAACAAACTAAGGCAGACTTTTACCAACA  
A\_14\_P202075 CATAGCCTGCTCTTTGAAATGAAAACAAAGGCATTTATTGGGGCATAAACTAAATTCAT



A\_14\_P128745 TTCTGTCATACATTGATGATGTTTCTGCTGTGACCCAATAAAAAGGCAGTTCTAGGTATAA

A\_14\_P113661 AAAATCTACCTGGAAAACATTACCCTTGGGATATTTTTGTTTTCTTTGTCCCTCATTTTTCT

A\_16\_P03730958

AAGAATATGGAACAAAGTAGGCTCAATAGACTAGTTACCTTTATAGGCAACTCTACCCCA

CUST\_6921\_PI426210822 CTTGAGTGAAACTGCCTGGGAGACAGGCTGGGCGCTTCCTGCGGC

A\_18\_P14137238

TTACTGTGTTTCATGTTCTCCCCTTGGCAACAGATAAATTAGTCAAAGAGATGAGAGTTT

A\_18\_P12063763

GCACCAATAATGCTAGATGCTAGATTCAAACACTACAGGATAACTATTTTACAGACGGCCAA

A\_16\_P20429611

ATGTTAGCCTTTTTACAGAGAATACAACATCCACAGTGTTTACATATGGCATTGGAGGT

A\_18\_P11304931

AAAACCAAGTCTCCTAACCAAACTGTCAACTCTTAATGATGTCTTAAACATGACCCAGAA

A\_16\_P41768890

CGCAATACTGCTTGTTAATCTGCTACTATTGAAAATGTTTCACTACCTCTAACTTCACCC

A\_18\_P14137779 GTCCGCTGAACATGACAGTTATCCTGGCTTCACAGTAACCTTTCAGAG

A\_16\_P17214334

AATCTAGGACCAGATTTTCAACCTATAAACTCCAGGAAATTTTTCAAGAGAAGTATGGCC

A\_14\_P100296 ATCTGAGAGAACATTGACAGTTTTCCAAAACCTTCCTGATTAAACATTCATTTCCCTTTT

A\_14\_P130314 CTTGACCATATGTCACCTTACATTTTTCTCAGGACCAGGATAAATCTTCTTCCTTACAA

A\_16\_P01849575

AAATGGGTGAATTAGCATAATGACGAATGCATATCGATCAGTGTTTCAGAAAACCTGCATG

A\_14\_P202061 CTTAGTTTGATGTTTGCATACAGTCAAACAAGAAAGAAAATGAAAATTTCTCTGTCAGC

A\_14\_P123532 AAAACAGAGTTCCTGGCCTAGGAAGAAGTCTGGAAAGATATACTCCATAATACAGTATG

A\_16\_P03605348

CTCAATTTTCAAAGGATAATTTGGTAACTCCATAAAGAAAATCCGTAAATAAGAGAGTGA

A\_14\_P133058 GTTTTTTTTCTATTTAAAATAGACTCCTGTTCACTGCTTTGGTTTTCCCTGTCTTTGTGCT

A\_14\_P123233 GCTGAGAGGTAGGTTACTGGTTTAGATAAGAGAGACTATGGCTACACTTATCAATGTAGT

A\_16\_P17740249

ATGTGATTCACCTTTATCCAAGATGAGTTCTACGATTTTGTGGTCTATGCTGTTAGTTGCC

A\_14\_P128299 TAAGAATAATTTCTGAAGCAGTATTTGCCTCTTCTTCTTTTCAGAGATGGAAGGATTGTG

A\_14\_P114542 TGATGCTCTTTTCCTTGATTTCTTGCTTAGTTAAGCAAGCAGCATTTCACTATTCCTCAA

A\_14\_P103306 CCTTTGAGGCATTCCTATGGCTTAGAGTTGTAGACTTACACTCAACCCT

A\_14\_P123181 CTGTGACTTTAGCCTGTATTTATTGACATGCTGATGCTCAGATATTTGAAGTCTGAACTG

A\_14\_P116193 GCAAGCATTTCTCTGTTGACCATGGAGTGATATAGAGATACATGAGCCTTGATGTAAATA

A\_14\_P123389 AGAACCCAGGCTTTTTGTAAACAATGTGTTTTCTTGCCTAAATTCATTTATCTGGCATCAT

A\_16\_P19045712

GAGCAAATGAATACATAAATGAACTACTCAGGGACCTTATGGAAAAAAAAAAAACTGTTTA

A\_14\_P139901 ACAAAGTATTAAACGTGGACAAAGATGTAATTGGTAATGTCACAAAAAGGGGCTCCAATA  
A\_14\_P101309 CTTGAAGGGACATACCCTTTCTAGACACTACCATTCACTAAAAGAAAAAAAAATAAACAA  
A\_14\_P129146 ACTTGCCAGAAAGTCAGGAGTTGTTCTTTACTCCTTTCTCTCTTTATACATATGTATGT  
A\_16\_P41749264  
AAAAAATCCATTGATCTACCATGGTGCGTTAAGTTTCCAATTCTCGGGAGTCTTCTTAAA  
A\_16\_P17007448  
CTCACTGGAGAATAATGTATCACTCGCAGATATTGAAACATATGTCAACCCTATCCACTT  
A\_14\_P125421 ATGCAACCCCTTAATTGTGCAGATAACAAAAAAGTAAACACAGAAAGCCAAGTTTGCTT  
A\_18\_P15024886  
ATCATGCTTATGAAACCCCTTGTTAGACTTAGTTTGTTCCTTTTTCAAGATAGCACC  
CUST\_6596\_PI426210822  
AAATATTCCATGGAAACCTTGGACACTGTCTGATGTCAGGACTACTTATGAATGC  
CUST\_3024\_PI426210822 GATGTCATTAAGCCGGAGCCTTCCCTAATGCCTGACTTCACTTACTTAAAT  
CUST\_5940\_PI426210822 CTGTTAACTGCTGGCTGCCCCACCAACAAACTGGAAAGAATCTCC  
A\_16\_P00996349  
TCCAACTTTGAAATCACAGAACTTCTTATGACACCACAAAATACATACTGACCTTCCAT  
A\_14\_P202397 TAGAAATCAATGGGGAATCTGTGGATTTGCATATGAAATTGGGAGATAATGGAGAAGCAT  
CUST\_1715\_PI426210822 TTAGGGTTGTTGTCAGCATTGGTGATGGTTCTGGGGCACAAACAT  
A\_14\_P117549 CGGAATAGAATTTACATATATTCACATAAATTCATGCATCCAGTGGAAGCACTGACCT  
A\_14\_P200603 ATAGTCTAGGAAGAACCCAAATAGTGAATTTGCCCTGAGTTTATACTAATGTGTTCCGTG  
A\_14\_P130018 ACAGGTAAAGGGGATACTTATGTCTGTTTAAAATCAACGCAAAAATCAAACCCAGAGATC  
A\_16\_P21205734  
AATTCCACTCTTTTAAAAGCAAAAATTCCTTACACAAGTCTTGGTCATTCAATGTCTGC  
A\_14\_P116139 ATCCCTGAGACTCTAGGAGTTTTCTAATAAGTTGGAAGTTATGATTTCCACTACGTGATT  
A\_16\_P17266388  
AAAACCTCAGAGTCTTCTTAATCCTGCTTAAGAGAGGTTTATGATGCTAAGGACTGTCAA  
A\_16\_P02189809  
AAATATTGTTCTGTATAATTCAGTGGCCCGTTTTATAAACATTGTGGTTCTACCTTGGGG  
A\_16\_P16181033  
ATTAGCAGTTTCAAAAAGACCCTGAAGTGTAATGGACTCTGAATCCTTGCTCCATTCT  
A\_18\_P22841404 ATGGTATGCAGCCAGTCCAGCCATCTGAAGCAGAACGAAAAAATGGTAT  
A\_14\_P118180 CAATAGGCTGTGGCAATAAATAATGTCACCAATCTCATCAACTATTAAGTGGCCACAAGA  
CUST\_7810\_PI426210822 ATCCACACAAGGAGTGGTACTGCTTGCCAAAGCCCATGCTCTGATA  
A\_16\_P36519424  
ACACCTCAACAGTTTTAATGAACACAGAGAATTCTCACTATGCACATCTATAGTTGCTCA  
A\_14\_P127762 CACACACCCTCCACCAAAAACAAAACAAGCAAAAACCTAACAGACTTTCAAATAGTCTTTA  
A\_14\_P134499 GAACAGGCATGGTTTTAAATCTTTTTTCTTGGAGAGTAAACATTGTACATTTCTGCCTCT  
CUST\_8746\_PI426210822

ATCTTCATAATAATTTCTTAAGGAAATTGAGGCAAGGAAGAGTTAGAGGGAAGGCCAAG  
A\_14\_P103752 TCTCCCCTTTGGACTTGATAAACGCAGTCCCATTCAATTAATCTCCAACCTAGAAAAT  
A\_14\_P123207 TTGGGAGAAGAGATGTTAATTTGAATTCTGGTTCCGGCTTCAAGCAAAATATTACTCTT  
A\_16\_P36989840

TTACAGTGAACATATTTTACGCAAGATGGACTTAGTCACAACCTAGACATAACGAGCCTG  
CUST\_6382\_PI426210822 TAGGGCTGAGGCTGTAAACCACAGGGGATTACCTATGTTTATCTGG  
A\_14\_P112061 ACGTTCTAAAAAAGTAGCCTTTGTTTGAATGATTTCCCATGCAGTATCAAACCGATGATT  
CUST\_3089\_PI426210822

TGGAGCTGGTGGAAACTATTTTTATTATGTATTATGTGTGCTCTTCCAAAATTTTATTTT  
CUST\_6806\_PI426210822 GGATCTGCATTTCTGGTAGAACTAGTCTGTCTGCAGCCTTACTGTGTTT  
CUST\_8969\_PI426210822

GTCAATATGAAGAAATACTCAATAGTAAATCATAGCAACATGATTTAACATGAGATATAA  
A\_14\_P139913 ACCAGGGGTGGTTTTTTTTACAGAGACACTTTGAAATGAGTGATAATATTACAGACAACAT  
A\_14\_P116386 CTCTAATTCCCCAAACCTGAAACTTCATACCCTGGGATTCTAATACCTATGTCCT  
CUST\_5588\_PI426210822 CTCTGGGGACGGTGGAGCTTGAATGCTACAAGCCTCCGTACATAC  
A\_16\_P41885096

TGTGAATAAGGTATGATTTACATATTTTATTCTGTAAACATTCTTGTTGAGAGTTGCCA  
A\_14\_P116188 CAGATAACAGACACCACACTGCTTTGTAGTCTATACATTTATTGAGTAAAAACAAAATCA  
A\_14\_P104091 CTGTGTAGGTTTACATTGCCTGAGAGTAGGAAAAAGTATTTTCATCCTGAAGACCTAAT  
A\_14\_P101066 AGATTGGGTCTGTACTGAATGGAATTCATATGGCACTCAGTTGGTCAC  
A\_16\_P17837453

TGGGTTCTTCTGATCATTACCACAGAATATAACTGCATATACTTGATCCTAAAGCAGCAC  
A\_14\_P118849 GATCTTACCACATTTTCCATAGATCACAATAACTGCTGCATCAATTCTGCTTCAGTTTT  
A\_14\_P112936 ACAAAAATTCAGGGACAAGAACTTGCCTTAGTTCACTAGAGACTCAGCACTG  
A\_16\_P19249465

AAAGTCTTATGCTTTAAAGGTGATCCAATGTCCTTTCTATCCTGTTGCACTACAACCTCTG  
A\_16\_P21179885

AAAGGCTAAGGTTTTTCACTACCTACAATATGCGTCTCTTGATAAAAATTTCCAGCCTTT  
A\_18\_P14959011

TGCAACTGTTTATACAGCATTGAAATCCTAGACTTTTACTCCCATGAGACTACCATAGT  
A\_16\_P20423658

ACACTGAGGAACAAAAGAAATGATCCCTTGTCATCTAATCTTAATAAGAATGTGGAAGGC  
A\_14\_P128052 TTTTCCACTTGATTTTGTGGCTTTAAACATGCCAGTAAATAGTTGTGTTTGTTCGGTT  
A\_14\_P114571 AAGAAGGTATAGAGGAACAAGTTTTAAAGACTTGAAGCAGGTTTGTAGCCGATACAAC  
A\_14\_P108903 CCACAAATCTGTTTTATCCATTTTACCACTATGCTGTAAAGCAATTCAAAGAATCATTC  
A\_14\_P109093 ACAAGGAGGCCAAAGGTTCTATTATTTATTGATTTCTACCTTATGTGAGGTGTGAGGAA  
A\_14\_P103907 TCTAGGAATTCATATGCATGATACCATTGGATGTTACCTGGATATAGATAAGGGACATG  
A\_16\_P18440826

AAACGATAAGTCATCCAGAAATTGAACTTCAATCTTGTTTCCAAAGAAACCAAGAAGACC  
A\_14\_P109897 TGCCTCCTGCTTTAATCCAAGCATTAACTTCATGCTATTCTCTTGTCAAAGAAATTTGA  
A\_14\_P132296 ATAAACACCTTCGTTTTACTCCAAGGGTAAGAATTAACCTTTGACTAGGAAAATCAGTAAT  
CUST\_2564\_PI426210822

CTTGTAAGGCTGGAGGTGCTTAGTAAGTGGAAATGCTACCTTATTTTCTCATTCTAATTAT  
A\_14\_P133368 CTACATATACGTAACAATCTCTAGATTTCATGGCAGGGAGCAGGAAGTTTGTAGATTGAAA  
A\_14\_P118721

ATACATTTTGAGACAGAAATTCACAACGGTCAGTAAAAAGGTAAGTCAGCAAAGAAAATG  
A\_18\_P12031881

AACTGGGAATAAACAAAAGGACATTGCTTCTAGATCTCACCTAGTTCTTCAGAAAGTTTC  
A\_14\_P117418 CGTAGCATCAATCACATGTTCAATTGTTTATTCGGAACATGTAGATGCCTCGATTCTAGAA  
CUST\_5656\_PI426210822 AGGAGCTCCCTTCCCCCTCAGAAGAAAATCCGGACACATGCTAAG  
A\_16\_P01185392

CCCAGTAGAGGATGAGATATGAGAAAGATATTGAAAGGACTTAAATACTAGGAAGCAGCG  
A\_16\_P39399378

ACCTCAGGAAAAACCACATCTTCAAATTCATCTAATCTAGTGTCTTCAACAGTCAATGAG  
A\_14\_P122530 AAAAAAAAAAAGAGCACGGTAATAAAATTTCCATGAAATATTTTGTGTAAGCGCAGATAA  
CUST\_3870\_PI426210822 GCTGGACAAGATGAACTAGAGCCCTCTTGTGGTCCCATCATTAG  
A\_16\_P16892395

AATCTCAATTCATTTGCTGTAGTTCACATTTCAACTCTATATCAGTTCCTGGAGAGAACC  
A\_16\_P16559066

AATCACTTATTTGCTCACTTTTCTTGTCTATGCTCTAGAATGCACTTACTGCTTAAGCGG  
CUST\_3586\_PI426210822 CTGCCTGTCTGTGGCCTCTGCAGTTTAAACAATGACTGTCACCTTAAAC  
CUST\_392\_PI426210822 AGCGGACGTCTTTCACACCCACCCCGTCCCTCCTCCTTCTCTG  
CUST\_6727\_PI426210822 GAATCACCCACCCCCATTTTTGTTAATGAACTACTATGTCCTTAAATCT  
A\_14\_P120543 CTTACCAAGACAGGAGTATAAGCCCTGACTTATCCAAGCCAATATGGCAAGAGTTATAA  
A\_16\_P36613544

GACATTTTTATTGCCTATAAAAGTTAGGTGGTATTTGCCTGTATAAATAGTGCCCTCCT  
A\_14\_P113057 CTTAACTGCAAGCCTGTTATTTAAGAGAAAATGGCCTCTGTTTCTAACATTGTCAGTTCA  
A\_14\_P120562 TGAATACAACCTGGAGGAACTTAATTCATCTTGTCTGCTACTTCCATGATGCTTTTCATTAG  
A\_16\_P00685414

TCATTTACTCAGAAGAGATATACTGATCACCTACTTCAGACCAAGATTAAATGCTGAGGG  
A\_14\_P119986 TGAAAAAGTCACTGAATCATTATTTTAGAACTGGAATAACACCTGAGATCTAGGCCAGCA  
CUST\_7574\_PI426210822 CATACAAATAATTGCACCCCAATGCTTGTCCCAAAGTCTGCTCAGAT  
CUST\_8611\_PI426210822 CTTGTAGCTAATGTCTCTGAGCCCTCTGCTGTGCTTGTATTTACCTTAAAAAC  
A\_14\_P201086 CCAAGACATCACTGAAAAGCAAAAATCAACACTGACCTTACTTTGGGTTTGAATATTT  
A\_14\_P109789 ATATACAAATTGCCGATCAGGTGATAAGCCGTAATTTGAAGCATTACACTTTTCTGAAA  
A\_14\_P100356 GGACGCATATCATTAAAGGTTCAAGGTTTTTTCTTTTCAAGGTGAAATCTACATTCAGTGA

CUST\_10113\_PI426210822 C TACTAGGTGGCAGGCCCTGGGCAAAGGGACAAAGATAAATAAAC

A\_18\_P16673229

AACACCAATCTTCCTGTAGATTCTGAATGAAATCATCCTACTTTTCTACCCAATTCTTC

A\_14\_P108061 AACCTTTTAAATGATTTCAAATTCTCCACAGATCTCAAGAGTTTACTCCTCAGAGTGGAT

CUST\_2337\_PI426210822

TTAATTTTAAAGAGGCAGCAGGTAAATGCAAGTACAACCTTCTACATGAATAATTGTCCTTG

A\_18\_P10850315

GAAGAGAAACATTTCAAGTGGTAAGGTAGAATCAAATGATAAAGGCCTGCTGCTTTCTT

CUST\_4425\_PI426210822 CCCAGGCCACGTTAGCATCCAGAGTGGCATGCAGTGGCAGAATT

A\_14\_P125631 TTCAGATGTCCAAGAGTTTTGATCATCCAATACTCCACACATACTTTGGGCATATAATCA

A\_14\_P114081 TTATTTGTGTCCTTTTCTATTTCTGCCCTCTCTTTCTTGTCTCCAAAGTCTTTAACCT

A\_14\_P107771 GCTGTAGGAATTGGCACAGTTCACCTGCACCAGCATGAAGATATCCTC

A\_14\_P100468 ACATACATTTCTGTGGTGACTTTTCTTACACCCTCTGCAGATATTTACTGTAGTGAGTT

A\_14\_P115515 ATTTTCCAATTCCTTTATCTGCATTTTGTAATACCTCAAATAGTGGAAGGCAAGGCCT

CUST\_4356\_PI426210822

CTGAGCTTGTTTTGTCTAATATTGCCTGTGCCAACAGTATTTTACCAGAATTGAATGAAA

A\_16\_P18855165

AACTGAATGTTGGCTTATCCCTAGTTAAACTCAGAAGATCTCTAATTTCCCAGAAGTCAT

A\_18\_P22840708 CAGCAGAGGCCCTTTTTGGGGGCAGGAGGGATTGCATAGCAATAC

A\_16\_P17103431

AGTATTTCTTACAACAATATGACCGTGGAATTTGATTACAAAAACACTCCTGCTATCCCC

CUST\_539\_PI426210822

TTTGTTGATTCATTCATTTATTCATCAGACTTTGAGTGTTGACACTCAACACTGAAATGA

A\_14\_P135077 ACGATTAATGTTTGGAGATACTCTGGTAGATGTTGCTAATTGTGAGAATGCCTTCATTC

A\_18\_P25916560

AAAACCAAAAAACACAAAAGAATAGGCCTGATTATTCCTATTTTGTGATTGGAGTCCTGG

CUST\_10402\_PI426210822 AAGAGAATGAAGACAGTTGGGACTGGGTCCAGAAAAACCAGTGAG

A\_16\_P20769577

ACCTTCCAACGTATAAGACTTCCTAAACGTATACCTACTTCTAGCATCTCCTTTCATCTT

A\_16\_P17756732

AATCACTATTAATTGACCATTCCACATTAGTTTCTCCATACCAATCTTATGCTAGGCCT

A\_16\_P17694956

AAAACCTCTCACTTCTAGGGAATCATTAGGGTTAGAGACTGGTAATGTGATAAGAAGAGTC

A\_18\_P15402035

TCACACACAGTTATTGGACATACTAAATGCCATGATATTTATGAGGCCTACGGTAAATGA

A\_14\_P100717 TTCTTGTGGACCGAAAGTTTCAGCCCTATAAGCCTTTTTACTATATTTTGGACATCACTT

A\_14\_P102243 CTGCACTGAGTAAAAAGCCCTACCTATGTTTTGTTTCTATCTTTGCACATCTCTTTGAAA

A\_16\_P15972417

AGCCCATATGAAGAACTAGTAACAGAAAGAAGATCAGTTTGCTCTCTTAATTTCCATCCT  
A\_18\_P12588448  
AAAAATGTTCCCCATGTCAATAGATGGTAATTGTAAAACACTAAAACCTGATGTCCAGGGT  
A\_14\_P107830 GTGATAACATCTACTCAAAGAAAACGATGCTCCATTTTGTATTGATTCATCTCTGACACAT  
A\_14\_P108384 CTAATTTCTTTTCTCAAAGAGTGTCCCTTCTTCACACCTACTCACTTTACAACCTTTGCT  
A\_14\_P129977 TATCCAATGGAAAGGAACCCAAATACAATATGAAACACCTTCTAATGTTCCCTTCTCAGA  
A\_16\_P19394488  
AAGTCCTGGATCCACAAATACAGAAGGTTCCCTGTATTCCAATTAATCTTTCTAGTAACT  
CUST\_9209\_PI426210822 TCTTGAGAATGACTCCTCTGACAGGCCCTTTTTCAATTTGCAGGTG  
A\_16\_P18367979  
AAAAAACACCATTCTGCTTAATCAACATTTACTCCATCAGAATCAATATCCTGCAGAGGG  
A\_16\_P03530666  
TAGCATTGACTCTGGAATCCTTCTCATCATGATTTTCAAATAGCCACTCAGCATCAAAAT  
A\_14\_P127621 TCATTTGTGGATTACATCAAAACCAAGCCTATTGTATTTGAAGTCTTTGGGCATTATCAG  
A\_18\_P22842657  
AGTTAACTGATCTAACTCTGCCAGATCCAGATTTATCAGTGGTTTTGCAGTGGTTTTATC  
A\_18\_P26795194 TATTCATGACCCCTAGCGTAACCATACAGTCCCCTACCCATGAGC  
A\_14\_P108301 GGAGCAACTCATTCCAGCATCAACAATAAGATAACCTTTAAGTATGGCACACTTGTATTT  
A\_14\_P123878 AGTAACATAGATGACAATTCAACGTGATGTGGTGAGTGCTGTAATGAAAGGAATAAATGC  
A\_16\_P19914526  
CCAGTGGAGCCTAGAATATTTTCTTAAAAGCAAACCTTCCAATATGAATCCAAAGACATCA  
A\_14\_P130788 TATAATATCCGTGTGAAAATGTCTTATGCATATCAACAAATGGTATGATGGCTCCCCTTT  
A\_14\_P128740 CAACCTTTATCAAGTCTCTACTTTCATGGAAGTCTTAGATGGGGGGAAAAAAA  
A\_14\_P128937 GAAACTGCATAGTAATGAGACTGTGCACACTGATGTTTACAAGATTGAAAGAGTCTTTCT  
A\_16\_P17466782  
ACCCAGAGTTTTACAAATATTTACAGTCATCTATGCCAAATATCTTTGTGCTGAGTCCCA  
CUST\_6159\_PI426210822 CTCTCCTCACATCCCAGCCACGCATCAAGGATGAATGGACATGTG  
A\_14\_P117261  
GCAGGGGAATAAAAATGGTAATAATAAAAGAGGGAGATGAGGTAAAAACAGGTTGTTAGG  
A\_18\_P22840855 CTTTATCTGTCCCTTGCCCTGCAGAAGGCCAAGGCACCTTGAGCAA  
A\_16\_P19455465  
TTTCGACTACTCATATCATCCAAGGCAGTTTATCTTTTGTCCCTACATTAGCACTGATAGG  
A\_16\_P16691833  
AAAGGCATAACACTGGATTA AAAAGTAGACTGTTAGGAGTCACACATCAAGATTCTCTCA  
A\_14\_P102848 CTCTGCTATCTAATTCCTTTCCCACTTCTAACTCTCCTGTTTGTCCCTAGTATAAATAA  
CUST\_2452\_PI426210822  
TTTAGTACATATTTGGGAAGAAAGATAACAAGCTAAATATGTTCTTAGAATTTTCAGCCAGC  
CUST\_7241\_PI426210822

AATTGATGGCCATTTTTTGTTCATGCATCTTCTGAATTGGTATGTTTTTCTGTGTTTCAGAA  
A\_16\_P01664464  
TCATAACTGTTGCTATTATTTCAACCACTACTCATACTCTAATACTACTACATCCACCAC  
A\_16\_P15654136  
AAATCTTCCCATCCAAAACATGATTAGCCACTCTATTTTTGTAAATTTTTGCCTGAATGA  
A\_18\_P14136533  
CAGTTTGTAGCGTTATTTTTTTTAAGCAGTAAAATTTTCAGCGACTATGGTCTGTGCCAGA  
A\_14\_P114566 CTGGATAGTCCAGGTCTAGAACAATGATAGTATTTTCAGCAGTGGAAATCAGATCCTAG  
A\_16\_P37938801  
TTTCTCCACATTCCAACCTACTTTACTCTTTCCAACATTTCCCTTATAACAAAGTCCTCA  
A\_14\_P123440 AATAGGAGGAAATTCCTGGAGAAGGTGTAGATAGAGAGAATGTTGTATGTAACCTCTGTTT  
A\_14\_P100856 CGAAGAAATATCAAACAGATCACGGCAGAAATCACCAACTCAACATGATTGGACAG  
A\_14\_P113391 GATATGGACGGATAAGAGATATTGATCTGAAAAGAGGCTTTGGTTTTGTGGTAAGTATTT  
A\_14\_P130079 ATTCAAATTCAGGAGCAAACCTTTGCTGAGTCACATTAGGGGGAGGGTAATTAATTAATTA  
A\_14\_P104016 TTCCAGTGATATTAAGTGACTGTTGGCATTGAAGAGTCCCAGTGAATTACACTTTATGA  
A\_14\_P139801 ACTCTTCCCAATATGCAGATAATTTGATGCTCTTTTTACCATAAAAATATTGCAGGGT  
A\_14\_P135697 CAATAGTCTACCAAGTCCAAGACAGTGTCTTCTGCTGACTCACACACCT  
A\_14\_P131331 CTTTTGTCTGGTCAGAATGCCTCTTCGATTACAAGGAAATAAAAGATGATTCCTTATGTC  
A\_18\_P24017881  
AGTTTCAACACCCTATACTCATCCTATCAGAATAGCCTAAATTTTTCCCATCTCCCAAAAG  
A\_14\_P135736 ATTTTAAAAAGCATTTTTTTGCACCTTGGTCAGATCTTTTTCTATCACTTTGCAAAGGCGCC  
A\_14\_P100313 CACTTCTGATGATGTAGATAAATGACAATGTAGATAAATTGGGAGCCAAAGGTTTTTCAGG  
A\_18\_P10245386  
AATCGCCAAATAATGAAATCACCAACTGGAAATTAGAAGTAAATGGTCATAGCAAACCCT  
A\_14\_P106078 TTATCAAGTTTGAGGTATTCACGACGTGAAGCAAGTGCAGCAAGGTCAATAACAAA  
CUST\_206\_P1426210822 GAGGGGGCAGTTCGGGGCGCCCCGGCGGGTCCCAGGGGCTGACTC  
A\_16\_P16509675  
GGAGAGGTATAGTCTTTAGGGAAAACGTTTATGACAGACAATACTCATAATGCCCATTTGG  
CUST\_7548\_P1426210822 TGAAGGGCTTGGTGAGAGCAGCCAGGTCTTCTATGCAGTGATCAG  
A\_14\_P129365 TCTAGTTCCTTAATAGCAGAGAAATCTGCAACAGGACTTGATCCTATGATGTTCTAAAAA  
A\_14\_P132926 CCAGGAAATCTTGCCTCAGAGCCAGGTCTCCTAATGTAGAAAATAATATATTTGTTCTTT  
A\_16\_P01167900  
AGCGTAATATGGTATGGGTTGATTCAGAAAAATCAAGATGAAATCTCAGAACCAACTGTC  
CUST\_4708\_P1426210822 CCAGGGGTATTAGCCCTGAGATACTGCTGCTCTATGGGATTTT  
A\_14\_P105327 GAATGTAAGTTTGGTTCTTCTTTTTTCCCTTCCCAAGGTCGAAGTCATGTATTAGAAGTTT  
CUST\_1873\_P1426210822 CAGATTGAGTAGGTACAGATGGATCAGGAACCCACATTTTTAAGAAGCTCCAT  
A\_14\_P131584 AGATTCAAGTTCTGAAGAAGAGAAGAAACCCCAACTAAGGCAGTAGTCTCTAAAG  
A\_14\_P120627 TGACAGCATCACCTTCCTATTGCATAACTCTGGAGCACTATGTTGAAAGATGAAAATAAA

A\_14\_P131781 TTACCTCTCTCTTTGTTGAGCCCTTTTAATTTTATGTGGTTCTGGGGTTTTGTTTGATAA  
A\_14\_P124956 AAGAAAACAAAAATCTTTTCAGCACAATTTTTGTGTTTTTCCCCCGTTCATCCTTTCTTG  
A\_14\_P136359 TATTTCTCTAGGGACCTTTAACCTTAATGTCAGGGTGTGATTTGACAAGCATCTCTAAA  
A\_16\_P17006310  
TCAGGCATAAAGTCTATAACCTCAAGAACATGAACTGTCAATTTATACTACCGTGGACTC  
A\_18\_P14139083 ACTCTTGACTTTCCAGCATGTTGGCCTGTACACGCAAAGGAAGA  
A\_14\_P100219 GACATCGAAGATATCGTGTCTCAGGAAGATTCAAAACCACAAGATAGGCATTTTGTAAGA  
A\_14\_P106934 ATTCTTTTTGATCCCAAACTTCAGTTTCAGAATTATTTGCCATTTTGAGACAGTGGGTT  
A\_14\_P129816 ATGCACCAGTTTAGCCTAACCAACTATTAATAATGTTGAAATCCTTCCATACTGGAAAGAA  
CUST\_8190\_PI426210822 AAAACAGACTGAAGGCAATGAGGTGCCATCTGCCCTTGGAGAAT  
A\_14\_P123950 TTCCTGAGAAACCACTTACAGTCTTTTTTTCTGGGAAATCCAAAATTCTATATTGACCAA  
CUST\_4847\_PI426210822  
TAACTGCTCAAGTCTTTCTTAGGTCTTATGATGGAAGTGAAGCAGGCTACCTATTTTA  
A\_14\_P119550 GTTTTTATGGACCACATGGACTTTTTTCTACCAGTCCTTGCTTTTTTAGACCAAATAA  
A\_14\_P113495 AAACCTGATTGTTGTAAATGGTAATTGGATAGCATAGTCATGGTTGCTGGTTTATGGATT  
A\_14\_P107255 CGTCTTTCTCTTACCTCCTACTTCTCTTTCTTGTAAATGAACTCTTCACCTTTAGGAGAC  
A\_16\_P03199892  
CTCTCTGATGTTCCAGGATTATCATAACTCTTAAAAGGTCAGTCCGTAAAAATACCCTCT  
A\_16\_P18907124  
AACACACTTCATTGAACTAGCAGAACCCAAATTTTTGTTCCACCCTATGTGTATATAAGGA  
A\_14\_P125734 CTATTACAGAAATATCATAAAGAAGTGAGACCTGTTTACAACCTGGACCAAGGCCACCA  
A\_14\_P136507 AAAAATAAATGGACTTCCAGTCTTTCATTTTTTCAGCCCAATGCTCAAAGGCTGAA  
A\_14\_P129012 TCTTATGTCTAGAAGTAAACGTTTATGATCTGTTAGAACACTGCCTGTCTTTAAGGTGGAC  
A\_14\_P115408 AAATTCTTTTTAATCTCATTTCTGTTGGTGAGGCCATAAAGTGACTGGAACATCTGAAAA  
A\_16\_P00915729  
TAACTGCCTATCTGACTACAAAAGACTTATTTTCTCTGATATCCTACCACTTCCCTGAG  
A\_14\_P134594 AACTCTCACACTTTTCTAAATATGGTTTTCTGACCACCTGAATGAATCACAGATTCAAT  
A\_14\_P124321 TCTGTGAAACGGTTTTCTGTTTATGACGGTGTGTTGAAATTTTGAAAAATACCACACA  
A\_14\_P133578 TGATGGGGAGAATATTAGGGGATTTGTTTCAATGTTTAAACCAATCATGTATCATCAGA  
CUST\_2079\_PI426210822 TTACCAAAGCTCAGATGGGGAGATTGGCAAGGCCACTGAAATAGT  
A\_14\_P126230 ACTAAGAGGGTTCTATTTAGATCCTTGAGTCTATCAAAACCTGCATTTCCAAACTATGCT  
CUST\_358\_PI426210822 AAAGTCAGCACGGACTCTGCAGGCGGCAGAGTAGAGCGTTCCCAT  
CUST\_4651\_PI426210822 TTTGTAGGCAGGATGGCCATGTATGCACAAAGAAAGCTTTGGGGC  
A\_14\_P200266 GTCCGACCTCTGCTGTATCAGGATTCGATTCTTGGTGTAAACAAGACAAC  
A\_14\_P133679 GGCAGTTTCTCAATCCTCTCCAAGTAATATATATTGAGCAGAGGTAGGATGCTTTG  
CUST\_7378\_PI426210822 ACAGAGGGAGGAGGGAGGGTCTCAAATTA AAAAGACAAGAAAC  
CUST\_3015\_PI426210822 GATGGCTCTGCTGACTAGGAATTTGCCAGCTCGGCATGGCAAGAT  
A\_14\_P106413 TTGTTTTTTTTTCTTAAGTTGCCTTACACTATTGATTCTACACGAGCAGATCTCAACACC



A\_14\_P127550 TGAGGGCAAGGATGTTCTTTCTGTTGAAGGAGAAAGTTTATATTGATGGAAAGTCATTAT  
CUST\_8333\_PI426210822 CTGTGAGCCCCACGGGAGGCACGCTGCTCCCTCACTGAGCCATG

A\_14\_P123668 TACACACTGAATGAATGAATGGATGTCTATCACATCTTTGGGAAAAAGGACATTCACAAT  
CUST\_5714\_PI426210822

AAACCCTTTTTAGAAAGAAAATCATGGTTTCTCAAACCTCTTCAAGCTTATTGAGTTTTCT

A\_16\_P18978567

TCTAATGCTAACCAAAGTGCTTTTTCTAAACTGCTAAGAATGGACTGAAGATTCTGCTGAG

A\_14\_P102140 CTGTCTTATAAAGTAGCCGCCAGCCATTTGAGTTACTTTATAACTCGAATCCAAATTCAT  
CUST\_22\_PI426210822 ACTCCCCATTGCACTCAGCAGATGTGGCCACCTTCCAGTATCACT

A\_16\_P03808047

TATACTTCGGGTCTTATAACTTGAAAACCTCTTCTTCTTAAGACAAGTTCGTTTCAGCCGT

A\_14\_P118277

AGAAGGGAAGGTGATCATAAAGGAATTGCTAAGAAGAAAAAGAATGCACACCTAAAAACA

A\_14\_P138915 TTTTTCTTTTAAAGAAATAGGTTTGTGTGGGCTGCCCAATACACTGCTGTGTGAAATTA  
CUST\_986\_PI426210822

ATTTCACTCTATTTAGAAACCTGCTATTTTAGCACAAAACAATATCAAGGAGAGGAGTGA

A\_14\_P123857 AAGACAGAAACATCCTCATCTGAAACTTGGGATTCCTACTCAGTTGCATTTTAGATACTA

A\_14\_P120426 CTCACCACAAATAATTTCTCTTAGTCAAATGATAACACCAATGCTTGGGCCACAAG

A\_14\_P108858 TCCACAGGCATGTAAGTGTAACGTTTTAATTTCTTTTTATGCCACAGCAAAGGATGAAT

A\_14\_P103292 AAATGATCCAGGAGGCTAATATAACAACAGTGCCAATAGTGACTTATAATTTATCATAAC

A\_14\_P107638 CTGTCTTAGTGTGCCTCAGTTTATCATATCAACTGTAACCAAAGCAAGGAGCACTG

A\_16\_P18219501

CTGCCACTGTAACATAGAGTTAAGCATCTTACGTTGTCTCAAATTGACTGATTGCTAGAA

A\_14\_P123231 CTGGCAACCGTATATCTTCAAAGAATAGTTCTGCGGTATCCTAAGAGACCATACAAAAAA

A\_14\_P106469 GCTATTCTCAGCCTTCTCTTAGTGACTIONGACAATATGAATGACAGTTCTATTCCGATAA

A\_14\_P124319 CCATCTACCCTGACCTTTGACCCTACAGCCTTTATCCTTCTTATCCAC

CUST\_8920\_PI426210822

TGAAATCCACTGGCTTTTTATCATGAGAAGTGAAATTGTTTCATGAAATAATGGCAGCCT

A\_14\_P131323 CTTATGTTTTATGTCAAAAGTGGGAGAAAGGGGTCAAATATTATGAGGAGAACTATGTCC

A\_14\_P117170 TTCCATCTGATTGGAATCTTCGTTTCAGATTCTTACTCTTCTCCTTAAGGAATCTTA

A\_18\_P14136309 CCCTGTTATTATTCTCAGGGATTTGGAGGGTGCAGAGGTAGATGAAGTAAG

A\_14\_P123311 TCATTCCACTAATGTCATCATCAGACCCAGCCTTGAGAATTATTATGAAGCAAGAAAATG

A\_18\_P16391049

TGTTATTCACTACTATTCTCCACTTTAGGCTCATAGCAAATTGATGCCGTTATAAGGGTG

A\_14\_P136935 AACTCACAGTCAAGCAGATCATGAGTAACACAATCTGAACTTTCATGTAATGTGAACAA

A\_14\_P116753 CATGCACTGTCTACCTGGCAACTCTACTGTCTGCCCACTTCCTATT

A\_18\_P22842457

CATCTCAAATGCCTCCACAAATTTCAAAGAAAATTGTCAAGAGAAAAGTTAAGCACCTCA

A\_16\_P19457344

TGACCAACATTTTTATTTCATATCTCACAAGAAATCCAAACAAAAAGAATTCCTCACCTG

A\_14\_P138828 TGGAGAAATCAAGTCCTTGATCTTGAGATAGAGGTAACAATTCACACTTTTCCTTCC

A\_14\_P126569 ACACTCACTCTCATTGTTATCAAATAATAATGAGGTAGTTAGGGCAGACCTAGTCCAGAA

A\_14\_P138254 GAAGGTAAAGGAAACACTTAAAATAATGACTGGGGTACTGGTATTTATACGCCAAGAGT

A\_16\_P17036636

AAGTAGAGTTAGGTTTACCAGCAAACATAAAAATTCTCCTTTAACCTGCATTTAGGTCC

CUST\_9652\_P1426210822 CTTTATGGAATCAGCTCTGTTACTGCAAGACATCCCCTCAAACCTCC

A\_14\_P111320 TTTGAACCAAAGAAGACCAAATAATCTTCACGATATACTTCCAAGTCCGAGTGTTCATT

A\_14\_P133801 TCTGACTCATCTGAGTTATAITTAGTTTTCAAGTGGCAATAAATTTATCTACCTTCTTAA

A\_18\_P23594170

AAGTCATGTTACGTTCTTTCTTAAACACAATTAAGTGGAAATTGCTTGGTATGTGGATC

A\_18\_P22842830 CCTTTTGTGCTCTCCCCACCTGGGAGCAAATGCCTAGGACTTT

CUST\_5275\_P1426210822 CATGAATCTTCTCTACCCTATTGCTGCCTATCAACTTGACTTCCCACCTTT

A\_14\_P110155 CTAAGAGTGTCTTCTTCTTCTGAATGAATCATTTTTAGCAGTTTCTGGGTAT

CUST\_1785\_P1426210822 TAGCTATCAGGCAGAATGACTGGGACAAGGTCCATGCCAATTT

A\_16\_P20831198

AAAATGTCACATTACGAAGTGGATTTTAAAAGACTCTGAAGATTACTCCTGAAACTTGGC

A\_14\_P113087 GTTTTATTCTTTAAATCACATCTCAAAGGCCACCAATGGCTAGTTTGGGATCTTATTC

CUST\_6512\_P1426210822

GAGAAAAGTTAAGCACCTCAGTAGCATTTGTAAAGAGATGACACCTTATGTTCTAAATAT

A\_14\_P103601 CCGTGAAAGTGAAGACAATTTGTATCTCAGCACTCTACTTGCATTCAAGATATCTGATAC

CUST\_5080\_P1426210822

TTGTTTAAATTAATAACTCATAGTTCATGTTAAATTTGTTCAAAGTTTCCATCTAATGGTGA

A\_14\_P201243 CTGCTGAGTTTAGAGAAGGGCAGAGATCGTAATGAATTATAACAGACTTAGGAATGGTA

CUST\_3707\_P1426210822 GTGCTCCAGCTGATCATTTTTATGGGACAGTCTTCTTCTGATGAGAC

A\_14\_P113283 GATTTGCTTTTTTAGGAAGCCCCTTAAACATGCACTAGCAGAGTGCAACACATG

CUST\_4185\_P1426210822

TTCCAGATATTAGGAAAACAAGACAGAAGGGTTTACCACCTAGTCAGTATCAGTAGATT

CUST\_894\_P1426210822 AGAACTTGAGAAGTGCCTGGGGGTGTAGGCAAGAGACCAGTATCC

CUST\_3834\_P1426210822

AGGGAAATAATAATGGGATAGAATAACTGCAGGGAGTAGAGAGATGAGAAAACATTAGAA

CUST\_1364\_P1426210822 CCATAGCTTTGTGATATAGGCTGTCTGCCATCTCAGGTCTAGACAAG

A\_14\_P105500 CTAAAAATAATCTCTTCTTCTTTAGTGGCAGGAGATGCCAAAGATAAAGACATCTCCTG

A\_16\_P18079784

CGGAAAAAATTATCGAGTTAGTCAAGTGCATTTTTGTCATCTTCAGTTATTTCCACTCC

A\_14\_P118718 CTGCTTTGAGAGGTGAATATATACATAACTTCCCATCACTAAGCAAATGAGCAATCTGCT

A\_14\_P101377 ATACCACAATATACGCCAAGAGTTGTATAACATATTCTCCCTGAGCACCATGATTTGC

CUST\_9971\_PI426210822

AAATAAGACAACACTAATTTCTTTGGGATTACAAAATAATATGTATGTATTGACCTAACATA

A\_16\_P18378772

ACTCATTATGTCTGATTGCTAATTACCTCTTTGAATGATTCAAGTTATGCCTGCTACTAGA

A\_14\_P106613 TAGTAAAACAGCATGAGGCTTTGAATACCAGCCCTGGCTATTTAAATTGTTTACCATAGT

A\_14\_P115563 AATCATATTAATTTGGACCCATGGGATGAGTGTTTTATTTCATGCTGTTTCCAGGAAGG

A\_14\_P131211 TGGCTGCAGAACATTTTATTGATCAAAAAGGTGCTTATCCAAAAGTCTTTCTCTGAGAAT

A\_16\_P19219471

CGATCTCCAATCTGATTATCTGACTACTGAGATGTGTATAGTTCAAATTAATACGCCCA

A\_18\_P12230151

ATCCAACCTCCATTTAACCTACTTCTCTATTCCATCTAAAAACATACTGACTGGGCTCA

A\_16\_P17884610

ATCCACCAAATATCCACAGAACAACATGTTACTGAGAATGATAAAATGCCTGAGTCTACT

A\_16\_P19506245

CACCAGGACATGTGATACAGTGAAACTATTCCACTTATAGTAACAGCACTTAGTAATTGC

A\_18\_P17321852

TGTCTCGATTGCATGTTATCTTGATGTCCAGTATGTTCCATATAAATTATACTTTCCAGA

CUST\_208\_PI426210822 CAGACCAGCGCCGCCCGGCCGGGACCCGCTCGCGCAGACTTCTC

A\_16\_P16191108

TGGTTTTCTTGGTGATTACTGAGTGCTGTGGCCTATCACAGAAAAAAAAGTCATATTTTT

A\_14\_P120141 ACTATTAAGTGATCTTCTTGGGTGACACATTGTGACTTTCTAAAAACCTTTTTGGTGC

CUST\_9280\_PI426210822

CCAACCTTTGAACCTCAGGTCACCTTTGCTATTATGAGTTTATCACAGGTGGTTCATTA

A\_14\_P130124 CTGCCTTCAAACCAAGCACTTTGAGGTAATAAAATGCCTAGTCAAATAAGTTATCCTCA

A\_18\_P22842446 ATTAGTAGTTAATGCACGTATTTGTTTATTGTTTCAGCGGAGGGTGCAGGACGTC

A\_14\_P102547 CTTGAAATACAAAATGAGCAATGACTTGTCTGTTCTAAGCCAAACCTAATCTTCTTGCAC

A\_16\_P00158316

TACTGGAATACATAGACCATGTAGTATGGAATTTGTAGACTATGAAGGGGTCATTGATGG

A\_14\_P102138 CAGTTTCTTTCCAACCTTTGGTAGAATATATTGTTGTCCTGCTTTTATTCCTGCTGCCTTA

A\_14\_P129735 CAACAGACTGAAAACCAAATTCAGTGTCTGCTTCTAAAATAGCATCCTGTGTAGAAAAA

A\_14\_P128831 AGAATTACAGTTATGGAGGTGTGATTCAAGGATGACCATAATCCATTTTAAAGAAGAGGTA

A\_14\_P104962 GCTGGCTAGTAGTTACTATTTGTGAAGTTGGATTGATTGGTTTTTGAACAACCTAAAAAG

A\_14\_P132129 CTGCCTTGTCTAAAACCTGGGATCTTAAAAGTGTTATTTTGGCTTTTATTTTTTAAAAAA

A\_16\_P16114509

GACCAGACCATTTTAAAGTAACAATACCTATTTTCCCTTGATGACAAAACATTTTCGACCAG

A\_14\_P111368 TTGTATTATTGTTTAAAATACTTGGTATTCTTCTCAATGGGGATCCTCCCTAGAATGGGC

A\_14\_P134392 TGTGTATTTTCTTGCAGAACTCTCAGAAATTGAGCCCAATGTATTCCTTCGACCTTT

A\_14\_P112848 CTATCTGCCTGAAAGTGGAAAAAGGAATTAATGAACCTGTGAAGTTCAGTTCTGTAACCTA

A\_16\_P19528663

ACTCAGCCCAAATCCTATTCTTTTCATCAATCTAGCAAATTTTACCCTTTTACCAGAC

A\_14\_P107858 AAAGAAAACATATCTGGACAAAATACACCAAACCTGTCTTCTTTGGCTGAGGAGAGGAT

CUST\_1084\_PI426210822 TAATTTTGGGTAAGCTGGAACCTGCTCCTTCTGTAAGTGCTGGACTATTTATTTT

A\_14\_P126135 CATCTGAAATTCCAAGGATACATGACAAACCTGTTTCCATTATGTGCTGGCGTTT

A\_14\_P200701 CACAATGTAAGCAGGAGTAAGAGTAAGAACTCAAATTCAGAAGCCACTCATAATAGCAGA

A\_14\_P201933 CATAACGTTATATTTCCCATACAATAGAGTGAGACTAGAGGACTATCTTTTGAACCAG

A\_14\_P129368 ACATCTTAACCATTTTGGGTGTCATTTAGTCAGTCAGTCATGAAACAGTAATATGGAGAC

A\_14\_P100992 TGTTAACACCCCAAAGCATGGGTAAGGAAGAGGCTTTATGGTAATTTACTCCATT

CUST\_1997\_PI426210822 GTTAGAACTGCTGTACGCCAGCCTAGGATCCTTCCATGTTGTTCT

A\_16\_P17150649

AAGTTAAGGTCAAGTATCAAGCCAATAAGGTCAATAATTACATCCCCCTGATCACTATGA

A\_14\_P128095 ATTTTCGATCTCCATGAACTTAACATCGTCCCATTTTTCCAGTTGTGTTTGAATGTCTAG

CUST\_7219\_PI426210822

CTAAAAAGTTAGGACATTTAACCTATACTATACAAGAAGTTATCAGCTAAGCAAATAAAA

A\_16\_P19872513

AAAGCAGATCCAAGGTTACATTTAGTCTCCATATCTAACATGAGAATCTCTGGTTTTCCA

A\_16\_P58424510 AACGTCTCCAATCCTGCTAGCACATCTTTAACACTTCTCTATCACCAGCAAATCT

A\_16\_P19901122

AAATGTTGATAGAGAACCGCTTTTCTAAGAAAGATCTGAATATTGGCCTTACTCTGCTCC

A\_14\_P109740 GGAAAATAACATTGAGGCAAAACTCCAGGTTAGATACCGTTGTATTATGAGATCTCCAA

A\_14\_P100349 CTTACGACCAAAGGCACTAAGGCACTATCCACAAAGGCTTTTTTTGGTTAAA

A\_14\_P107008 TAGATTTTTAAGACTTATTTTTTCAGCCAAACCTTCTTATCACTGGTCTGGGAGAACTCAC

A\_16\_P00685474

CGCATAAATCAAGTGTGCTTTTTCATCACTGTGTTTTTAAAAATGTTAACTGATGATTTCC

A\_16\_P01533084

AAAGTGGAGATAGTGTTTTTAATTCTGCCCTTAACCTAGACAAAAAAGTGCCTCATCAAC

CUST\_10073\_PI426210822 TTTATGTCAGAGTGTGCAGTCTGTTGAGGCAGTGTGTAATGTGATAAGGG

A\_16\_P37312025

GCCACCTCTTATTTCCAAGTTTTTCAGGCTTTTATGATAGAAAATTGCTCAAACCTTACACA

A\_16\_P58424458 TTATTGATTGGCAATAGCCTTCTTCATAATTGGTTTCCGTGCTTCCACCTTTACCT

A\_18\_P22840498 AAAATCTCCCTTCTGTCCATAATTCAGACTACGACAGCAATTAGAGGCA

A\_14\_P111910 AAATCCTGATGGCTTGAGGATTTTCATTTCTCCAGCCCAGAGCATATTAGCATAAG

CUST\_5741\_PI426210822

AAGTCCCTAGAAGAGAGTTTTGAGCTGAAATGAAAAGTTGTGATTATAGAGAGACATGAA

A\_18\_P17212657

ACCTAGATTTCAAGTCATTCACCTTCAATTCCTGAATTGCAATTAGATAGAGTATAAGCC

A\_14\_P130142 CACACCAAATTTCCAAGCAGCCACTGATTGATTAGTTTATAGGGACCTATAATTATGATT

A\_18\_P13525350

AAAAGTGACTCTTATCCAGACTCCTTTAAAAGAAACACCTTTATTGCAAGATCACACGTG

A\_16\_P18152977

GTCAACAAGGTCTATCAACCAGTGTTACAAGTATGTATGTCTAAGACACCTCAAGGTTAT

A\_14\_P110359 AGAGAAGTAGCAGCACAAAAGGAAAAGATCGATTATCATTACATGCTGAATGTCTCAAG

A\_16\_P15013573

ACAGATGTCACATAAGTGGATTGACAATTGCATTATTCCAGATTAGCGTATGACAGATGG

A\_16\_P16724625

CTGGTCTCTCCAAAATAACAAGAGTTACAAGGATATACTCACATGGGATTATTGCACTG

A\_16\_P39763466

CCCATTGTCCAGTTTTATAACCTAGACCATTAAACCCCTTCTCAGACTCTAAATGTTAAGA

A\_14\_P201080 CCAAGATAGCATCTGAGTGCCCAAACATCTAAGGGAAAACAGACATAACAAATTAATAAT

CUST\_93\_PI426210822

CGTGGAAGTATAGCTTGTCTTATGTATGAAAAACAGGGCAAGGCAACTTTTGAAGAAT

A\_16\_P00725270

CCCGTGATAGACTTACAATCAGTTCACCATAGATACAAAATTGGGCACAATTATCACTAC

A\_18\_P22840489 ATTGCATTTTGCACCTCTGACCCAGTGCTCCTGTGTTTCCATGGTTAG

A\_14\_P116041 ACTAATGTCATAGATATCTATGCACCAAAGTGAAGTGGCTTTCTGACATTAGCCAAATTC

A\_14\_P133357 TGTAATGGAATTGTTCCAGCACATCTAATAACAGAAGGGTGGTTGTATTTATTGAACACC

A\_14\_P139232 TTACAGACATAAGCAGGACCTTGGCTGCATGAAGTTTTAACATGGTAAAACCTCATTGTAT

A\_14\_P104792 CTTTTTAATTCTGATCTTCATAATCTACCCCTGTAGGGAGTTTAACTGTTTAGGCCACAA

A\_16\_P17830984

TGCATATACACAAACCACTATCTTCTCAGCATGAGTATTCAAGATACGTTCCCTTTATCCC

A\_16\_P02254197

GGGAAGTTTAGCACTGGTATCTCTAGAACACATAGGTCATTGAACAATGTTAGTCTCAAA

A\_14\_P130499 CTCTTAACGCTGCTGAACATAACTTGAACATAATGCTCGTATGGAAACCCCTTTTTTATCT

A\_14\_P110891 CTATAAATGAATGGAATCTTGCCAATAGGCAAGTGATACTTGCTGTCTTCCCTTTTTTAA

A\_16\_P15434543 AATCGCATCCATAGCAAATCTGCAGGTAACCTCTTTTTTACAGTTTCCTGATTGCTTT

A\_14\_P136096 AAGTGCAAAATTCATTCAAATGTTTTTTGAAAAAAGTTGAGGCCTGAAGCAGCAGTCTAC

A\_16\_P15114336

AACATGCCTTCTCATCGTAATTTTTTCCACACACATTTTTTCTACACCTGTTTATTGTGT

A\_14\_P128619 CTTATATATAAAAACTTTTCCAATTTCTATCAACCCACTTGCAGAAGTAACCCTTCCCC

A\_16\_P15928050

AGGAAACATGTTATGGAGTCCATCTTAGAGAAAAATCCTACACTGATAACCAGAATACCA

A\_16\_P21456329

AAACCACAGCAGGGTTTTATAATGTCAGATCTTACAAGGATAGAAGTTGCCTCTCTTAAAA

A\_14\_P133746 GAAAAGTTCAAATGTTTTCAAAGCCAGCAATTTACTGTCTTTAGCAAATCCCATTTCTAC

A\_14\_P122627 ATCTGTTTCAGTAGCAGTCATGGATCTCTAAAGAGACATAATCACTGGCTTTAGAAGTAAC

CUST\_6645\_PI426210822

TTCTACAAGCACTAATCCTTTCTGTGGACTATCATTTAGAAATGATTAGAACTTTTTTCTT

A\_18\_P13325389

AAGTTTCCTAAGTGTCTACGTCTATAATACGAGCATTGAAATATCTTTCTGCCTGATCC

A\_14\_P114060 CTAAGGTTAACCTCTATCTTGATTTTTCTTTTCAGAATCAAGCATTATGTTTATCAAGGCA

CUST\_4897\_PI426210822

AAATAGACATGAGTACTCTTCACAGACCTTACCGTCTAATAGGAATGATAGCAAGTGAAT

A\_16\_P37671764

TTCCACTGATCTTCCTTATGTCCATAAAGTCTATACTCTTTACCTCATCTATGCCATACA

A\_14\_P131445 ACTGAGTCTTTCCAAAAGCAAAGGAATACATGAAACCCTTTCTTGCTTTGTGAGTAAATA

A\_16\_P01684350

AAACTCTAGAGGAATTTGAGAACACTGATACGCTTACTTCACAGAAAACCTGAAGTCTGTT

A\_14\_P116211 CAGAAGACACTGCATAAAATTAATGTATTATCCAGCCAATGAGAATTTGGGGAACAGTTC

A\_14\_P119958 GAGTTCGAGGAATTCCAATAGATAGGCTCTAAAACCTATCGATTTGGAAATCGCAGTTCT

A\_16\_P18798094

CAAATCCATACAGCAAATAACAAAAAGATCAGCCTCTTAGATACAGCAACATTGGGAAGA

A\_16\_P00175274

TGGCAATCCACATCATAATCATGATTACCATTTCATTGAAACCTTGTATAATCCTGACAC

CUST\_9207\_PI426210822 CTCTACAATAAGAGGCTCCAGCATCATGATTCATTCTTGAGAATGACTCCTCTG

A\_14\_P103391 TTTATTAATGTTACATTAACACGAACTACAAAGAGACCTTTTCGTATGTCTGATACCAAAG

CUST\_1216\_PI426210822

ATTTTAGGACTCCGAAATGTTAAGTCAATGCATGTGATAAAATCAAGTACAGAGATTTCT

A\_16\_P02696332

ATGGCTACACCAAAAAAATACCCAATTTGAGTCAATACATCTAAACCTTCCTCCTTTTGT

A\_16\_P58424347 ATTGGAGGACATCTCTGAGGTTTTACTGTGCATGGTGACTCACGTAG

A\_14\_P101206 GGGAGAAAATAATAACAGAGTATTCTGTGCCACTGATGATTGCGTATCAATCAGGAATTA

A\_14\_P120701 AGAGAAGGGCATAACAAGTTAGACAGAAGATTTCTTTAGACACTTTAACTCACAACATG

A\_14\_P117421 CTGAAAAATGAACTCTTAGAAGCAAAACGTAGAAGTGGGAAAACCTCAACAAGAGGC

CUST\_157\_PI426210822 ACCTTCAGATTCTTCTTGAAGTGAGAGCATAAAGGAATGGAGGGCAT

A\_14\_P137407 TAAAAGCATAACAGATTCTTAGGCCTGATCTAGGTCCAGATCCTATTTAAATCTCTGAAGG

A\_14\_P114627 ACTGAATATAGTGTATTCAACATACCTTCACTGACAGCATGGGGTTTAAACAATGCAACAG

A\_14\_P126700

CAGAAAGGGCAACAGAAAACCACATGAGGCAAAATAATTTTGACAAACTGTTATGAAATC

A\_14\_P109764 CCCTCACTTAGTCTAAATGTAAGGTGTCACTGTATTACGAGACCTTGAATTAATAAGCCA

A\_16\_P00913492

AAGTGAGGAAAATGGATTCAAAAATACATACTTCCCCAAGGATACAAAGTAAAGCCATCA

A\_14\_P124038 CTGCACGTATTCATCGACCATCTCCCTGTTAGAATATACATTCCCCTCTCTC

CUST\_4399\_PI426210822 GAGCTGTGATGCCACATGTTTTAGTGTGGCATGTTTCCCTCATTT

CUST\_10119\_PI426210822 CTACGCATGCACTGTGGTGCTACTGTTTACCTAAATCAGAAAGCCCTTATC  
A\_18\_P22839797

CTGGAGATTAAAGCAATGGAAAGACTTTTCATGATCTAAGAGTGATCCAAGAGATAGTGG  
A\_14\_P101949 CATTGAGGAAAGTAGATGTCTTTGATGAGCAGGCTGAAGAAAGGAATGACAATCTG  
A\_14\_P131922

GAAAGAAAGGGCTTGCTAAGAAAAAAGGGAGTAAAAATGATGATAGGGAAAGTGTCTAATG  
A\_14\_P100757 ACAGGAGTAGAGTCAGTATGTTTGATTATTTCTGATGCTCTAAAAGTGTATTTCCTCCCA  
A\_16\_P16191176

AAGTTACAGCACAGAGTTTTAAGAGATTGTCCGTAGTTCAGACTGTCATCAAAGTACT  
A\_14\_P101143 GATTCTCCTTTTTATGAGTTAAATTATTTTATACGAGTTGGTAATTTTTGCTTTTTAATA  
A\_14\_P130055 GTGCTTCTTCCAAGTCTCTATTGCTATCAGTAAGCATAACATGTTTGCTATGAATGAAGGA  
CUST\_7577\_PI426210822

CGTGTGAATAGACAGGTCTTCAGTTCAGAAAAGTGTATACTCACACAGGAAATA  
CUST\_7341\_PI426210822 CCCTTTGGTGTCTGGAGCCATGGTGGCTGGTTGTCCTTCCCCTT  
A\_16\_P19963481

AGAATCTCATAAAGCAACTGATTAAAAACACATACCAGACACTCTAACCTCTTCTTTCCA  
A\_16\_P01249924

ACTCACCCAGAATATTACCTGTCTTATATCTTTGAAGCACATACGAAATAGCCTTTGTGA  
A\_18\_P22839223 TGTTCTTCCCTCACAGCCGAAGTCAATTTGGAGAGATTGATGGAGTTACTAAT  
A\_16\_P16114913

TTTACCAGAGTAGAAGACTAGCAGAGCATCTATTTACAACCTCTCAATTTATCATGGAG  
A\_14\_P104306 CATATGGTTACATTTAAACCCTTTGAAAGGTCTGCATCCAAGATCTAAACGCATTTCTTCC  
A\_18\_P14589668

ATACCGAAGTCATACTTGATTACAATAAAAATGGTTTGTGAACCACCATACTAGTTGCC  
A\_16\_P16191193

CTCTAACATGAGAAAACGCTTATGGAGATAATCAGTGGAAAATGGGATGAAAAGTGCAT  
A\_16\_P16191933

GGAAGTCACATAATGTAGGAAACGTGTCTGTGTTCAAAACTCATAAGAATGCTTTCAGAA  
A\_18\_P14134875 CTCCAATCTTTTTATTTCTGGTTGGGAAACCCTACACAGACCAGTGTCTGT

CUST\_693\_PI426210822 GGAATAAGCTCTCCAGGGTCCCCTCCTGCTTAGATAACCTATGAAT

A\_14\_P200903 ACAAGTCAATTCATCTTTCCTCTGGCTTTCAACTTTAAAATGTTTTTCTGAGCAATCTG

A\_14\_P119560 AAGTAAGTGGGTATACATTTTTACCGCAAATGTTTTACCACTAAGACCTTAAGAACTTA

A\_14\_P133749 AAAAAGAATCTGGCCTTCTTGAGGTCTAGACTCTATATGCTGGAGAGAAGGAAGA

A\_14\_P202042 CATGGTAGTGACACCTGTAGTCACTTCTGGTTTTATTGACCCAAATTTAAAAACTCCTAT

A\_14\_P102696 CAGTCCTTAAGTGTGTCAAACATTACGGTATGGTTCTTGGGATCAGTGACTA

CUST\_1519\_PI426210822 GCTTCCCAGTCCATGGAGGATTACAATGTAAAGCTCCTCATCCTG

CUST\_9199\_PI426210822

TGCATGTTATATGCCATCTCATCAATTATTGGGGGACCTAAGATCCACATTTTCTATTAT

A\_16\_P01171126

AAGATTTGAAATGGGAAAGTAGACATATAGGACACAGAATGAGAAGACTACTACCTGCAG

A\_16\_P16952444

ACACACACATTCTAAAAAATCTGCCAGAAACATATTGTTCCACCCTAAGAGTGTAATGACA

A\_16\_P32316793

AACTTGCTGGACCATTACTACCTGTCATTATGGGAGAAAAGGTATATTTTTGTGATTTGC

A\_16\_P21626237

TTCGTTCTCATAACAACCTGTAATTTTTGTCAAAACATGCAATGTCCTAAATGCTACCACGG  
CUST\_9182\_P1426210822 TTGGTAGCAAAACTCTGGCTTTAGAGTTGGACCATGAGCAGTCCT

A\_16\_P00816004

AAGAGAGACAGATTTACCGATCTGATTGACCATAACTCAGACTACTCATTAACTTCAAG

A\_16\_P58424447 TTATTTAGCCTGTTCAAGTCTTCTGCACTCCCTTCTTCTGGGGATACTTTTCTT

A\_16\_P18399697

AATACCATAGAGCCTGTAGATATCCAAATACCATTTGATGATAATGATTATGCCCTGGGC

A\_16\_P20709486

AAACAGGAATCCTACATTTCTCCAAAAGTGAGACATAATCTAAACTATGGCTGCAATTGG

A\_14\_P116412 GTTATGACTTATCTCTATCAAATAAGGGCACATTTTCAGTGGCCAAGAACTAAATGTCGTT

A\_14\_P109078 CTTCTGACTTCCTTTTCTCTTTCCAGTTCTTCCATTCTCTCAGGGC

CUST\_10191\_P1426210822 CCAAAGGCCGCGGAGTGGGTAGGATCCCCCAAGAGACCAGATGTC

CUST\_964\_P1426210822

CTCCCAGAATGCTTTTAGTTTAGTATGAAATGCAATATTTGGATCTTCTAGGAATTTTCC

A\_18\_P26795246

CCCTTTCTCTCAAGACCTATAGATGTCTGTATAAAACCAATATATACTTCTACGTAGCC

A\_14\_P135066 GAGTAAAACGATCAGCAAACACATTATTTGGAAGTTCCAGTAGTTAATGCCTGTCAGTTT

A\_14\_P114645 CATAATTTTTCAAGATATTACTCCTGGAGCCTTATGTTTTTTTTCTCCCGAAATCCTTGC

A\_18\_P25044874

AAAAATCACCAAAATCCAATGAATTTAGGGAAACCTACTGCATTTCAACTGAATGGTTCC

A\_16\_P18080577

CCTGCCAACTTAGTTCAATTACTCAAAACCTTAGACATACTGTTAAAATCTTTGCTACCC

A\_16\_P16351696

AAGGAAATTTTACCCAGACTATAGATCACTCGTTTAACTTTTCTCATGAGAGTCTTCTT

CUST\_3667\_P1426210822 CAAACCCTTGTTTTGCTCCTCATCAGCGACAGTGGTAGGGAAGAT

A\_14\_P139362 TCTAAGGATGGTGGGGTATAAAGATGGGAGTAGAACTCCGACTATGTCTAAAACATATTA

A\_16\_P00685358

GAGAGGAGAACATTGAGATGGTATAGGTCATTTTACCCTCTATTCTCTCAGTGAAAG

A\_16\_P18412546

CCCTTTTAACTTTACTTCAATTCCTTAAAGTCTTTAAAATCTCAGTTGGCATCAAAAGT

A\_16\_P19257898



CATGTTTACAACGGTCACTAATTACAGAACTCAGATTTAGTATGTTTCCAATCCCCTTT  
A\_14\_P113589 TGAGTTCATCAAGGCAATAGGACTCTGTATAACTATCCTCATTGCTTAAATTC AAGGGT  
A\_14\_P112512 GGTCCAAAGTCCCAGAAAAAGAGGGATGGGACAAAGAGAGAAAACATAC  
A\_14\_P131594 ACATCACAAGCAGGTAGGAAAGGAAATCTTCTAATACACTGTGATCCACTGAGTATTAAT  
A\_16\_P01578412  
ATTTTCCCAATGCTTTTCTAACTGCTTACACAACCACTTAATATATGGCTTTCCATGTC  
A\_14\_P121362 TGATGATGACGATGACAATGATAAAATTCAGATGACAGGGTAAAAACAGTTTTCTATCC  
A\_14\_P136883 CTTATTCATTTTGGTGGGATTTATAGGAGAGTTCCAAAGTTTTTCAAGGTGAGGACTTTT  
A\_14\_P129926 AAGCAATGGCAGCCTGAAGATCATCTTTGTTATCATGAGTAAGGTCTATAACTTCTGTAA  
A\_14\_P116176 TCAAAAAACTGTGCCTCACTCTAGAATCTTGCTTAGAAAATTCTGCAAAAATAAAGGCCA  
A\_16\_P01722923  
AACTGACAGAATGACCAATTTACTATGGATCTTTTCTGCAATATCTTTTCATTTCCCTTCT  
A\_14\_P135529 CCTACTCTGGACTCTTCCTTGATCCATTTTTTTTTTTAATACGGAAGTGCATATGTTGC  
A\_16\_P00685499  
CTTCAATAATATAAAAATTTCTAGTTTCTTAAATCACAAATGTTAAGATGACCATATTAT  
A\_14\_P138187 AGCAGCCAACAAAATCTCTTAAAATCTCAGAAATGTTCAATAAACATTTGCAGAGCGAGA  
A\_16\_P03269588  
ACAGGTCTTCTAGTCTGATCAGTGCAGTATTCACATTTATTATATATGTCTGTTCAGGCC  
A\_14\_P107798 CTTCAGGCATTTTCAAAAAATTCATTTTGTATCTTCGCGAACACTCACATTAAGATCC  
A\_14\_P111941 CTGAAACAGATTCCTTTAGTAGACTTTCAAAGCCTCCTGATAAACCTGATGAAAAACATC  
A\_14\_P111741 AATCCCCTATTTTCGATGAAAATTACAATCCTTGAGAGATATGTTTTCCATGTGGCTTCT  
A\_16\_P01883249  
ACTCACAGGAGTATATTTGAGTAAAGGCAGTGTTCCTTATTAGAAAGAGTGCAGGTTTT  
A\_16\_P00685148 ATCAACATCACAGCGCCTCAGTGTACGACGGACAGCAGCCTGTG  
CUST\_7170\_PI426210822 AGAGCATGCATACTGAGCATCTGAGCTTTTTTTAAAGCAATGATTCACCCAGC  
A\_16\_P38831131  
ACTCCGTTCAATTTACATTACATCATAGGATACCCAAAGATGCATAAATAGCAACTTCCCA  
A\_14\_P102865 CCTAAAGAGAAATTTCTAGGCTTAAGTGTAAGAAAAGGAAGTCCAACCATAGTCTCATGT  
CUST\_7878\_PI426210822  
ATTTGAGACTTTATTCTGTTTGCAGTGGGGACAGACATATTTTAAAGAAGCTTCTCTG  
A\_14\_P117608 CTTCTGAAGTCTATGAACAAGTGTATGAAAACAAATCATGATCACTCTTAACCTTCCC  
A\_14\_P116892 CTTTACTACTTCTACAGACTCCAGCAAGTCAGCAGAAGCCAATCTTAAATCTAGGTAAAT  
A\_14\_P116700 CCACTTTGGCAAGTGGCAAGATTTTGGTCATGATTTTGTATGGTCATAATAAGAATT  
A\_16\_P00180491  
AATACTGCTAGGGTCAAGTATATATCCAGCACTAAAGACCTATGTATCTTTGTTCAGCCTC  
A\_18\_P16216461  
ACACACCATAACCAATAAGTGACGCTCAAGAATATAGATTTTCAGGTAATTATGGCAATTCC  
A\_16\_P16246613

CCCAATCTTTGATGCATTATGTTCTACTGTCTGCTAAAACCATCATCGTAGCCTTTTAAT  
A\_16\_P00732931  
AAAAACACCACCCTACATGTTTATTAATCAGTTTTCCAAAAGTAAGTTGACAATGGGTCC  
A\_14\_P107729 GAAAGTGTGCCAGAGTATGTGCTCACAAAATAAAAACTATTACCATTACCCAACACTTCA  
A\_14\_P100155 CTCGATTCCCTCAGTTCAAACCCGAAATCCAGGTCTATGAGAACATCCATTT  
A\_16\_P16191774 ATTTCCATGAATGTTTTGGGAGAGGTGAGGAAGAAACCTTTTCTGCTCATTGTT  
A\_14\_P111073 ACTCTCCAAAATACCTACTTGCTGCCATTTTGTGGCATGATAGTGAGAATAGATATTAGG  
A\_14\_P110346 ACCATTTGGGGTCTCAGTTCACTCTTTCCTTGTTTATTAATATCAACTTTTCTGCCTA  
CUST\_4998\_PI426210822 ATTTTCAGTTACAGGTGAGCATCCGATCTGCAGCCAGGGCTTTTT  
A\_14\_P139343 CATTTCTTGTTGGCTTGCACCTCAATAGGTTTTAAAGGACAACCTGCAAAGAGTTTCTTGT  
A\_16\_P16614558  
AAGATAATGAGCCATTTCTTAAAAGCGTTCACCTAATCTTAAGAAAGGAGGTAGCCATCT  
A\_14\_P109840 CCACTTCTAGGGACACTGGGGAACCTTGTTAAACGTTGACATCAG  
A\_14\_P125282 CAAATTCGTATGTCCAGATACCATTTAGAAGCAAACCTCTGATTTACATTGAGGCTGAA  
A\_14\_P113117 AGGTCTCTGTGGATGATTGACTTGGCGTGTAAGTAACTGAAAAACAAAACATCATTTTAA  
A\_14\_P201369 AAAATGACTTGAGCAATCTTCGTTTTTATAAGAATAAAATTCATTCAAGCCAGATGGTG  
A\_14\_P121821 CTCAAAAGGATACAGTGAAAAATATTCCCCTTACTTCTCTTCCCTAACCATCCAGATTTT  
A\_18\_P22843574 GTCATTTACTACTTAGGGTCAGTTTTTCTGGCAGGTCAGATATTTGGAGTTGGTGTT  
A\_14\_P106662  
AGAAAGGGTTTCAGTTCCTTGATAAAAAACAAAGTTCAGGAGTGTTCCCTCAAAATGGAAAA  
A\_14\_P109014 AAACGTGAAAATTTTGAATATAGTGACTACCTTTCCCTTTCTTCGCCAGTTTCATCCAAG  
A\_14\_P118166 TTTTATGCTCTCTCTTATCCTGGAAGAAAGCAAAGCATGACTAGGTGAGATTATGTGTT  
A\_16\_P02518288  
AGAAATCATGATTCCTAAGACTTTCCCTTAACAACCCTAGTAAACCTAGTAAACATGCCGA  
A\_14\_P114811 TAGCACAGTCTCTTTAAGTGAAGTCTCCTATCCCTGATATTCTGAATTTCTCTAAACCAG  
A\_16\_P00733949  
AAAAAACAACACCCTTAATGTTTTTCATATGGCACATAAATTTTACAATACCTGCAGGAA  
A\_16\_P02273356  
AAACTTCTCTTTGTCTTCTATTTCTGTTCACAAATCCTTAGTTCTGAGTAAATGCTGCCC  
A\_18\_P11458038  
AAGAAGGGTTTAATTCGCTTCATAGTCGTATAATACTGTCTTCACAATTCTGCCATGCTT  
A\_14\_P108851 CATTTATTGATTTTCAGAGGTGACTTAGAAACACAGGAGGTGTCGTGATAAGTAGTAGAGA  
A\_16\_P15674025  
AAAAAATAATCATGTCAACGCATACAAAACCTGAAAGATATTCCTGACCACTTGAAGGG  
A\_14\_P125138 GGCTCCCCGGAATTGACACACACTTGCCTTTTAAATTGATGAATAGTATTGATCAATAAA  
A\_18\_P16264876  
ATGCTTGGCAAATACTACTACCTAAATCTCAATCTGTAACCAGGAATTTATGTAGCACCC  
CUST\_5575\_PI426210822 GCCTAATTAAGTGGAATCGCTGCACAGACTGTGTGTGTAACATGGAGA

A\_14\_P107675 TAAGAACAGAAAGGTTTCTAAATGCCAGACTTTTCCTTGAGGCATTATACTGATCCATTG  
A\_16\_P16191472

CATATGTTATGAGGAAATACACTGTTTCAAATGCAGTTTTCTTTGTGGTGTCTCAGCAGA

A\_14\_P127837 GGATGCTTTACCAACTACTCTTTCTGAACAGCAATTATACCCTCCTAACTAGACTCAATA  
CUST\_1685\_PI426210822 TGAAAAGATCTGTTTCTGAAATATATGTGGGTGACCAAGGGACGGGG

A\_14\_P134767 TCTTGGTCCATGAAATGTAAAGGTATAGTAACCACTGAACTAGAGAAGTAATCTTTTTTA

A\_14\_P138544 TCTGCTTCTCTATGGTGATAAGATCTAGGGGATCAGAGATCTTCTCATAATAATCAGCAT

A\_16\_P16191657 GTCGCATCACACAATAATCATCAGTCTCTCATGCACTTCATCCTTGTCATCTTCA

A\_14\_P132769 AAGTATACAGGCAAAAACACTAAAAGAGAGAAGGTGATCTATTCCCTAAACACTTGCTCA  
A\_16\_P00969297

ACAGCATCCCATTTTATGTTATCAATCTAACGTCCTATGACTTCCCAACTAAATTCTGCTT

CUST\_5309\_PI426210822

CCTACATGTCCAAATGCATTACTCATCCAAAATAAGATATGCCACGACTCAGGTTT

A\_14\_P118301 AGTAAGGTAACCCAATGACAGCCATGGGGATTAATGCAAAAAGTGAAATACTCCAAAAAT

A\_16\_P16191442 AAAGAGGTGGTGAGTCTTTCTAAATCCTGAGTCAAGATGCTTGACCACTTATTAGG

A\_14\_P133533 ATTTCTCATACCATTTTGAACACATCACTTGCTCTTGATTTGATGGACTTAAGGTCTC

A\_14\_P115908 TTCAAAC TAGGTCCTTTATTTTTATTTATGCATGACTCCCCATAGCAAAAAGCAGCAGTA

CUST\_245\_PI426210822 AAGGAGTATAGCCTCTCCAGCGCCGCTGCGCGGGGTGGGGCTCCC

CUST\_3222\_PI426210822 ATGACCTGCCCTTTCTCCTGGAACCTGCTCCTTACACTTCTTT

A\_16\_P17076625

ACCGGATTCTGTCTTTTACACAACCTCACAGTTAATTTGAATAGTGTTTTCTTAGTCCATC

A\_14\_P114984 CTATCTAGGGACGAGATCTAGAATCAACTGAGAGAGATGCTTAAAAATCACCAGTTACTT

A\_18\_P13849723

GGGGATAATGTTTGGGAATGAATTA AAAACTAAAAAATGAAATGATACAGGGTGACTCCC

A\_14\_P200923 GAGTAAAATCAGTTTTGTAAATATGTAAATATGTCATAAATAACAATGCTTTGACTTAT

A\_18\_P17313827

ATCAATTCCTATATCCCTCGGTATCATAAATTC CAAGAATTGTGTGTAACATCCTCTTCC

A\_14\_P117889 GACAAGCAAGA ACTAAACCATCTTTATGTATTAAACCA AATTGACAAAAGCGTAAGGGTG

A\_14\_P138832 GTGATCAGTTCCTCAAACTGTGAGTTTT CAGTCATGTTGTTTCTTTAAGTTGGTTTAGC

A\_18\_P22841290 GTTGTGAAGGCCACTGCTAACCAGGACAAAGGGGGAGCATGGGAG

A\_14\_P106034 AGGTTTTATAAATATTTACTGAACAAA ACTCTGCCTGTAACTGGCTGACACAGAGCAAG

CUST\_4738\_PI426210822 CTTCCCTGAGGCAGTAGGGGAGATCATCACCTCTGTAATGGTATAAT

A\_14\_P134344 TTTGCGCTCAGAAGTATATTC AATGATTTCCCCAGAAAATTCCAAGTCATCTCCTAATAC

A\_14\_P134843 ATAGGTGTTTCCAGATCTCATTACTGTTATGCACACATTC AAATAAAAACCAACAGAGTC

A\_16\_P17343832

AAATAAGGGTGAAGTGCTAGAAGTTTTTTGATCAACAACTTTGACATGGCTTTCTCTGT

A\_16\_P16191725

CAGAAAGAAGTGACACAGAACATCTAAGGCATATCATAAACCATTTCTGACCCTGATCTC

A\_14\_P132167 TCCAAAAACCAACTCAATTACTTGAATGTCCTCTGTTTCATATTCTCAAACCTCCATAT  
A\_14\_P111725 ACTTAAACACACTCAGCCTCACATCTTACCCTGTTCTCTTTATTAGGGTCTGTTTATAAA  
A\_14\_P125109 CTAAGCCTCTAAAACAACAGTTCCTAATTTCCCTCATTAGGAACTCCGTTGAGAATAAGAG  
CUST\_5144\_P1426210822 CTTTGTCTGCCTTGGCCGAAACATCTATCCAGGACCAAATTCTTAAA  
A\_14\_P120309 TTCTGCCAATATTATACATAATAGGATTCCTCAAAAGACAACGAATGTTTGGATCCTGG  
A\_14\_P119231 GAGGGAAAGAACATGCCGTCATGCACTTGTCTATGCAAGATTCTTTAGTCATT  
A\_14\_P117550 ATAAATATTGCGCCGCCCTTTCCAGGGATACTCTGTAGAATTAGTGTGCTTAATAATTCT  
A\_14\_P112650 CATAACCATTCTTTGCTGCACAATGTCAAATGCTGAGGGAGCAAACACAAGA  
A\_14\_P105774 AACCTAAGAGATGGAAATCCCAACAAAAATATTTGGAAAGATAGACTCTGGGATAGTT  
CUST\_1036\_P1426210822 CTTTCTGGTCCCTCTGCTCCTCTCTTCTCCCACAGAAAGAAACAT  
A\_14\_P126449 AGGGACATTTTCTTTTTCTAGAGAGGCCATTTCAATCGAATATCTCATGGCCTACAG  
CUST\_3223\_P1426210822 GAACCTGCTCCTTACACTTCTTTGCCTTGGTTCTTATGCTCACAGAAG  
A\_14\_P122513 GTCAAGTATGCTGCAGATCAGCACCAGATTCTCCAGTTTTGCACATTTATTGAGAA  
A\_14\_P136042 AATGATCCTTGTTCCAAACACTACACTTACTTTTGTATTACCTTCTTGTCCCTTTGTCTT  
A\_14\_P102390 TGTGGTTATTGATTCTCTAAAATTAAGTGAGGAGATGAAGCCCAATCTAGATGGTGTGGA  
A\_14\_P122368 ATTTTGTAGAATCTGTGTCATCACTAATTGGGGATATTTGCATTTCAAAGAGGCAGAGT  
A\_14\_P116964 CTATGTTCAATTTTCCAGCCTGGAGATTTGCTCTTCTCTTATTTTCATTTACCACTTCATG  
A\_14\_P113870 CTGACAGAAGGTGGTGAAGTAACTAECTTGATACCAGATATAGCAACTGAACTAAGAGAT  
A\_14\_P132761 CCAAGGGTTCAATGAAATACTCTTCATTATCACTTTTTATCATTCCAGCCTAGAGAAAGC  
A\_16\_P00318255  
AACCTACAAACTCTAAGAATACCTTGTATTTACCCCTATGATACCAATGAATGCATTGCA  
A\_14\_P105784 TTCCCATGTTCTGGACATATCCAATTCTAGCACATCCACATTTTTAATAACTTAGTGAT  
A\_14\_P134060 ACGTCAAGGTTAGTTCTCTGAACTTTCTCATTCCCTATGGATGCAAACACTGTATCTAATT  
A\_16\_P17692833  
AAGTCACTAAGCAGACTTCTAAAATTTGTAGCCAACCTTAAATGTTGACCTCTGTGGATGA  
A\_16\_P02939626  
AAACTGCAATGCTAAAGTCTGTAAAATCTGTGCAAGTAAAAATCACCTATAGAGACGCCA  
A\_14\_P100309 CTTTTCTGGAGATTCACACAATATATTTTCTGGTTTCAGATCACGATGAGCAATGCCT  
CUST\_9765\_P1426210822 CTAGGTCTGGAGTTGAACCTCCTCTTGGATGGTATTGACCGAGCT  
A\_14\_P111848 CAGGGTTACACCACTGATCGATATAGTCATTTGAGCATGTCCATAGCATGTTGTTT  
A\_14\_P107465 CTTTGTTTTATTTTCCATGTTATTACTTGGAAATTTCTTTTCCCCTGGACCCTCCTAAGTC  
A\_16\_P17264851  
AAAAAATTATTCCAATTCAGGGGAAGTATCTCATCAGAGTCTTTCACATAGCCTGATGC  
A\_14\_P202173 AAATATTAGCATATGAAAAATTACCTTGCAAGGGCAATGATAACGAACACCCTGCTGTTT  
CUST\_5115\_P1426210822 CCTATTGGCTGAATGTCCACTTCTGTTCTATGCACTGTGCTAAAGGGT  
A\_14\_P129590 ATGTCAAGTCCTCCTCAATACTACACCATCTACCCTCAAGATAACTCTGCATTTGT  
A\_16\_P18298454  
ACTGTATTTTAGGATAGCGTCATAGGACTTGATAGACAGAAATAATTTGCCCTCATCCA

A\_14\_P105381 GATAGCCTAGGGTTTCTAATAGAGCATAATTCCTCCTTTCTCCTAGTATATGATGGTAG  
A\_14\_P135721 TGAGTGGACTATATCTCAGGTTTTCTTTTATAGGCATACTGTAAAGCGGCATTCTAAAG  
A\_18\_P14754637  
CATTGCTTAATCTTAAATTCATGGCACTCCACTATCAATTGTATGCAAGACCCTCTCTTA  
A\_14\_P112948 CTCTCATACTGTTAGTGATGTCTGGCTGTTTCTTCATGTAACCCACTTTAGGTTTACATT  
A\_16\_P15718917  
AAAAGTCTTTTCAGTAATGTGAAAAGTCAACCTAAATGTGAAGTATTACTGCTGCTCCTG  
A\_14\_P118519 ACCTCCTGGAAGTCTCCTTCGCACAATGCGTTAACTTTACTTATATTTACTGTTAATGTT  
CUST\_7370\_PI426210822  
ATTTAAGCACAGCATTCTTTTCCCATGTGTCAATTTTTCAGCAGTTAAAAATCCATCAGCT  
A\_16\_P00648741  
AGGACCTAATATAGTTCTTCTGCAAACTGATTACGTTACAAGGGAAAATACTCATTTCGA  
A\_18\_P14136399 GGCTTTGCCTGTTAGTGTGAAACATTTCTTCAGTGTTTCTACAGTGTTCTGATTT  
A\_14\_P108226 GGTGTTTCCCTTGTATTATCTGAGGTGGAAATCATTAAAGGTTTAGAGTAACGATGTGTTT  
A\_14\_P118940 TTCTACTTCTGGCACGTTTTCTTTCCTCTCTAGTATCATCATATTTCAAGCACCAATCAT  
A\_14\_P201317 TTTCATACAGAATAATGTGATGCAAAACAATTACACAGTAAACTAAACTACCATATGGCT  
A\_14\_P119484  
CTGGCAGATGTTACCACAGGACAAAATTAGAATGTGTAACCTTGTA AAAACAGCAGAGAAAA  
A\_18\_P14132066 TACCGGGCATCTCTGTAGAAATGGTAAAAATGCCTACGCTAGTTCACAGTGAT  
A\_18\_P11069618  
GGGATTCTAACTTTTACAATGCACCAACTATGTTACCATTCCAATACTTGTTCTTCTCCT  
A\_14\_P200170 GCTAATTGATTGCATAGAACCTTGCTCAGAATAACTGAATACCTTAAAGGATTGCAGATT  
A\_14\_P130025 AGTTATTCCCATCATTTCAAAAATGTTTGGGAAGGAATGATTCTTGACGCAAAAATCAGTTGA  
A\_14\_P106723 TTCACATCCTCATTCTTATACTGCTTTTTCGTGGCCACTTTGGACAAGGTAAG  
A\_14\_P121467 AAACCTTCTTCCAATACAACCATCTATGGGTAACCTTAAAAAACACAAGCACAGATCTAT  
A\_14\_P129910 AACCTCCTACATATGTTTTCTTAGGAAGATTCTTCCCTATCAGTTAAAAAGGTAGTTACC  
A\_16\_P18330333  
AAAAGTCATTAGTGGCATGTTGATGATAGAGTTTCGATTACTATGGTAGCCTTTCAACCA  
A\_16\_P38463570  
TGGTGAATCACAAAGTGCATCTCTTTTTAGGTTTGTAGCAACATCAACTCCAAATGTTAA  
A\_16\_P36307163  
ATAGGTTGGCAGTTATCTGAAACAAGTAGTCTAATAAAGAAGTATGCCCTTATGGCTAGC  
A\_14\_P108898 CTTTTACAGTGACACGTTGTTTGTCTTTTTTAAATCTTGATTTCCATTCAGCATGTGGGA  
A\_14\_P114894 TCTTATTTTCCCCTCCATAGCAATTCCTAGACGATCCCAAATATAGCAGTGATGAG  
A\_18\_P11711584 TATGCAGAGAGGGAAGGAATAGGGTTAGTAACAAGAGAATCTGAGACAAAGGC  
A\_16\_P03661839  
ACATTTTTTCAAAGACCATGGAAATAAGACACAATCAATACACAGTTTGAAAGTCCTTCCC  
A\_14\_P102666 TATTTGTTAAACAAGTAGTGTGTTGTGTGAGCCTTGGTGAAGACGCTCAGTCGTTTTAAATA

CUST\_6050\_PI426210822 AATGTGCCCTCCTTTCTTGTTC AAGCCAGGCAAGTGCTAGGCACT  
A\_16\_P17834869

ATGCACTTTCCTAGATTCTCAGTTAATTCAAGATTACACCCAAGCAGAAGATTAACACT  
A\_16\_P41849842

TTGAACCCCATCTATAATTCTCAGTTTAAGAATGCTAGTTTTGGAGATAAGAATGTGCC  
A\_16\_P15850820

AAAAAGAGCACATTACGTATTCAAGACCTGGCACAAATTCATTAGTGTGATTTACCTTGC  
A\_16\_P39482996

TCTCTGAACATCAATTTAATCTGCAATCAATCCCTAACAAATTTGTCCATGAGTCAGAAGC  
CUST\_6147\_PI426210822 GTGAATAGGAACTCATCAGAAACCTGGAAAATGTTGTCAGAACATTAGCCGTG  
A\_14\_P119276 ATTGATTTTCTCAAACCTGCACTTTGCAGATAATGGCCACCTAGATCAAAAAGATAAGTT  
A\_14\_P106073 AAATGATACTGATGGCAGACAGTTGGAAATTAATAATTTTCTGATCTGCACTCAGGTTT  
CUST\_1544\_PI426210822

TCCCTCTAGATTCTAAACTTATCTCTTAAGAAGGTTATTCCTTATGTATACTGCAAGTTG  
A\_14\_P104976 CTTTATCAAAACTGAGGAACTATATTTCTGCTTCTGCTGATATCTAAACTGGGCCTGA  
CUST\_2957\_PI426210822 CTTACCTCATGGCCGGCTGTGGGCAACTTGGACAGCCTGATCCAC  
A\_14\_P118261 GGGAACCAGTGGTTCCCAATTTTTTTAACATCAAAAAGAAGGATCCCATATTTTGAAAAA  
A\_14\_P129423 GGGCCAATGCTAAGTTACAATGCCAAATTTTATTTTAGTTGGTAATGACTTGGACCATTT  
A\_14\_P117683 GTTTCTGCCTCAACCACGGACCAATAATATGAGATCTTTGTTACCAGTTCTAC  
A\_14\_P127735 AGCAAACTGAACCTTAACAAAATTGCTGTTGTCATGTTCAACTATAGGTTGTTTCTGCA  
A\_14\_P109520 ACTGTGAAGTTCCTAAACATGTCTCTTCCACTCTTTGTCTAAACTTTGTAACGTAGATGC  
CUST\_4301\_PI426210822

TAATAAGAAAGGGGTTAAATAAATTGTATGTTGAGCACCTAGAAAACATATGCATGTGCA  
A\_14\_P133193 TATATCCAACACTGCAAAGCATTTTTATGGACAACGACCACAGGAATCTGGAATTTTATT  
A\_16\_P00926382

AGAGAGAATTTGCTGACATTAATGTGTGAATGGCATCTATACTGGACACTGCCTTAAGAA  
A\_18\_P14136196

AATGATAGAAACCAAATGGAATGATGCTGGGTCAATTTACTACTTAGGGTCAGTTTTTCTG  
A\_14\_P134168 ACAAACAATCAAACTGCTCATAGACCATACTCTAGGACTTTGTTCCAAAGACAACAAT  
CUST\_7556\_PI426210822 GTCTAGGTAAGAGGAGATTGGAGCTGACCTGTTGAAGCAACAAAGAGA  
A\_14\_P126190 TGTAGACGATGGTATTTTGAAACCTCACTAAAGTGAAATTCATGTGAAAATTGCAGGCAA  
A\_14\_P118805 GGCATTTTGCAAATGTAGTTGGTTTAGTTTTGCTAGTTAACAGTCAGATAAAGTAGGCCT  
A\_16\_P58424571 TTGCGTAGCACTGCAGCAGTTGTTTTCTCATTTGTCTTGCAAGTGAATATTCAT  
A\_18\_P15124120

ATACCTTTGTCAGAAAACATTGCTAACATCCAACCTTGTTGATCAACACTTTCTCTCTCAC  
CUST\_6378\_PI426210822 GTGGTAAGCTTTGAACAGAAGAAAGCGTATCATAGGGGATGTTGAGCTTGT  
A\_14\_P133027 TACTTTGGGATTCAAACCTCTTAGACTTCTCAGGATTTTGAATGACTGGACTATAGAT  
A\_14\_P107017 CTACCTTGACATAATCATAGAAGCAGCCTTCAGAAGGCTCCAGGTCAAAC

A\_14\_P201499 GGGACTTTCTAACATGACCCAGTTGTCTTGGTGCAAGACTTTATTCTAACATAAATAAC  
A\_14\_P121457 CTTCTGTGTTATTTCTGACTTCTTAACACTATTATGTTTATGTTGCACATTACTGAAAGA  
CUST\_4105\_PI426210822

TATTTGCTTTTTTAAAAATAATGTAGTTTTAAAGAATTCTTGCTATTTAATCTCAAGCCC

A\_14\_P109187 TTCAGGTTACCTGCAAGGAATATGGTATTTAGGGTAATGAGTGATACTTAACCCAAACTT  
A\_16\_P17823253

AAATCCCAAACACTCAAACAAATTTGATATCCTTCAACTGAAACCAAGTTCTGTGACATC

A\_14\_P112007 ATCTCCACAGTTGTTAGAAAAACATTAATAATCCATGCGCCGGGCTCTCATTTC  
A\_16\_P16102672

TCTCATTAAGGTTCTCTTTCTTTAATACATTGTGCAGCCTAATAGTTATCAGCAGCCCTG

A\_14\_P127669 ACTTACATTGGCCCTTGATACTTGAGTCTGTGGATCTATCAACCTGAAATTTTAAAAGAT

A\_14\_P113991 TGAAAAGAGCCTTTTGTTTTTTCTGACACAGAAGTCTTTTTACCAATGACAACCTTAAGT

A\_14\_P200084 TTCAGCCAAGAGGATGATAGAGAAGTAGACAAACTCTACTGCTTTCCACTTGATATTGT

A\_14\_P119561 TCCAGATGAAGATTTAAAGACTAACTGGTCTAAAACAAAGCCATACAACCTGCATTTTCCTT

A\_14\_P101036 CTGGAATTATTGTGCATGTCTCTCTAGGTATACAGCCTTGCTTTTTGTGAATTCAATT

A\_14\_P116197 ACAGCAAGATTTTAAAGATATGACAAACTACACATTCTACAGTTGCTGCCAGCAGAGAAA

A\_14\_P114783 TCTACACAAAACGATCAAATACTCTGGAAAACGTCTTGGTTTCTGTCTCAGAATTGTA

A\_14\_P124886 GAAAAGAAGTGGAAATCTATGGCTTTAAGGCATTGAATACCTGGCTTCTTACCATTAGA

A\_16\_P15584710

AACATGTAACCTCTTAGTGATTAGACTGCCCATGAAAATAGACACATATCCTAGCCTCTA

A\_14\_P107805 AAGTTTGGTCTCTGCCTTTGCCAGATTTTGCCACATCTGGAACAAG

A\_14\_P109307 CTTTAGTTGGAATAGACATCCTGTAAAATGGATCTGGCCTGATCTTTAGATTGTAAATGG

A\_14\_P138197 CGCATGACCCATTTAGCACAGAAGTTTTTCCCAAGGCTAAGGAT

A\_14\_P127983 CTAGACAGAAAGTCTGAGGTGTATTTGTGTTGGATTTAGTAAGTCATCTGTGAGATTCTG

A\_18\_P13981976

CTGCAACAATTCTATTACACTGATGTTTTTTGAGCAACATACCATTTTTTACTGCCTCCC

A\_14\_P137315 AGAAAAACCTTGTTTCTTTTCTTTACAAAATCTTTTCTAAGGACGTAGGGAATGAACGC  
CUST\_9590\_PI426210822

CTTTCTTGCTTCAGGAGGGAAGATTTTGACTTCAAAGTAACAAAATATTTAAGAAGGG

A\_16\_P20310423

AACTTCAAACACAGTCCATTTTGTAAAGTCTCAAGAAACAGTAGAAAAATGTCCCAGTCA

A\_14\_P131639 TCTAAGAAAACAATAATTACCCCTGTGGGATCGTCATGATTGCCATGAATACTAAACACT

CUST\_4206\_PI426210822 GAAAAATCACTGTTGGCCCCACCCTCTAGCATTGGAAGCTTAACA

A\_16\_P18155585

GCAGATACGGTGAATTTTAAATGCTTCATGGTAAAGAGAATAGAGTGGAAGTGAGATGC

A\_14\_P121540 GAAGAGGGTGGCATATAAAGCAGGGAGTAGTTACTATAATCACACACAAAAATAGATACC

A\_14\_P139859 CTAACAACCTCTTATTATGCTGATCTATAAATATAAACCTTCTGGCTGTTTGGAGAGG

A\_18\_P22840490

TTAAAATTATCAGACGAGATGGTTCCCTTGTGTTGGGCATAAACCATGTGCTTTATAGAA  
A\_14\_P118442 CTCATCAAAACAGAACATGGCAGTTTTAAGTTGATAGGGCTGATGCCGCATAAAATC  
A\_14\_P101031 TTGATCTTCACTATTTCCAGAAGCCTTGAAACCTAGGCAACAGTTTCAATATTTTCTAGT  
A\_16\_P38774632  
AAAGCCAAACCAGACCTTAATTTCTACCTGAGTATGAACCACCTTCAAATTTTCAAGAAT  
A\_14\_P139838 GGAGGCTAAAGGTCTTTGGTCATTACTAATAACACTCTTTCAGTATTAACCTGTATGTCC  
CUST\_1951\_PI426210822  
TCTTTCAAGCATCAGGTAAAAAGGTGAGGTTCTTGGTATAAGTGACTATTTTTTATTGA  
CUST\_9969\_PI426210822  
GTGAAAACAGCCTCTTAGAGTATTATAGATGGATATTTTAAAATAAGACAACCTAATTTCT  
A\_14\_P134996 TACATGCTGTTTATGTTTCAGAAGACAGAGAGGCTGGCATTATCCTAGGACTAAAATAAG  
CUST\_8077\_PI426210822 GAGGGGCGTTCAGGTGGGTGAACAGGGAGACACAAGCTTTGATTG  
A\_16\_P01891118  
TACTGTTGCTACCCTACTTAAATGAATCTCCAATGCTTCCTAATTGTTACTTCTTGGCT  
A\_14\_P118302 GGTAATGTAGACCTAGAAGCAGTTAGACAACCTCTAGTTATTAAGTCAGGTGTGGTTGTC  
A\_14\_P119144 TTTTATTCTGTTCAACAGTGAGGAAAGAGAAGATCATAATCAGCCTGAGATCAAACCTGAC  
A\_14\_P110072 CTTCAAGTTTTCTAGATGGGAAATATCGAGACAGTTATACAAAAGCAATGACAAGGAGGAT  
A\_18\_P10821762  
TCCTGGCTACTTCATAGACTCTTCCACCAAATTTACTTTTCTCACACTTGAACACAA  
A\_14\_P117218 GGTCCTGACCACATAAAGCATATATGTTAGACAATAGTTTTACCTCTCTTCTGGCACAAA  
A\_14\_P126403 GCCGTGGACAATTTTCTATTCTATTATATATTTTTCACACCAATATGGACACACCCAA  
A\_14\_P110638 GGGGATTCAGGGGTGGGGAAGACAACATTTCTTTATAGATACACAGATAATAAATTCAA  
A\_14\_P129974 AAGAATCCTGTCCAAGGCTTCCTCTTCTCTGAGGAACTACATTTCTTTTTTC  
CUST\_9542\_PI426210822  
AAAAAACACACTACTAGGATATGAAAACTTCATTCTGGGCCTGGTTAGGTCATAAACTA  
A\_16\_P02499269  
AACAAAAGTTGGAGTTGAGAATATGTCAGAGTTTGAGATCTAATGAACATCTTCACAGGG  
A\_16\_P16852183  
TGCTTCTCAAGATACAAATCTCTCTCACGTATCCTAAAAGTCATAATGCCAATAAACCTT  
A\_16\_P16827120  
ACCACTACCAATTACTGAAATGTTACAACCTACCCTTTCTATTCAAGTCTTGTGTTCCAC  
A\_16\_P16828540  
AACAACTGAGTGAAGATTTTTGCATAGAAAACATTTTCATCAATCTGACCTATTGGCCA  
CUST\_1778\_PI426210822  
AGCAAATAGAAAGATAAGAAGTAAAGTAAATTATCATGACAGATGGCAACCTAATGCTGAAGG  
A\_14\_P127005  
AAAAAAGGTTGTGTAAGAATAAAGTGGCCCAGAGAATGATCATGAATGCTAAAACACAGA  
A\_14\_P104313 TCGACGAACTAACCTATGCTTTAAATTCCTCTTTCCAGCCCCGTGAGT



A\_14\_P202315 CACGTTCAAATTAACCTCTCCTGTTCTTTTCCTTATGTTATAGGGTGATCGCACAAAC

CUST\_6447\_PI426210822 CAGAATGTGGATCCCAAGGGTTGGGTAGGGTTTGTCCAGAGCCTT

A\_16\_P15158645

TCACTATAGACCTGGTAAACAATCAATTACAATCCCATCTGATATAGTTGTGACCCTGTG

A\_16\_P00369637

ATTGTCATCCAAAGCACTTCAATAAAATCTCCTTTTGTATTTACCTCCTGATAACCGCTC

A\_14\_P116630 CTGTGTTGTTGAAAACATACTTCTGTGTTTACACTTCAATAGCCAGATTGGGAGTGTTTT

A\_14\_P117976 AATTATATGCTTTAGATCTCCATTCAAGGTCTTCAGGTCACCAATACATTAAGCAGAGCAG

A\_14\_P101710

AATCTTGAAGAACTCTGCAACTAGAAAATAGAAAACCTGCAAGGAGGAAATAGGTGAAGAT

A\_14\_P113880 GATGTCCCATTAAGTCCCTCCTTGGATTATGAGAACTGAAGAAGGATTTGATTTT

A\_16\_P17260942

AAACACACAAAAAGTGGATCTTGACGAATTTCTTAAACATTTTTCTCATGCTTGGGTAAC

CUST\_175\_PI426210822

TGTTTTATTGATTTACTAAAATTACACAGTTGTTTCGGGCCTGGGAGTTAAATTCTCTTCA

A\_14\_P119077 ACACAGTCGCATAGTGTATCACTTTGAGAAGTCTACAAGTATAAACTAAGGTGATGCCAA

A\_16\_P01690805

TCCCTTCTACCCTAATACCAAAAATAAACAAAAATCTTCTCTAAATAAGACTCACTTGGGA

A\_14\_P129978 CTAATTTCTCTGTGCTTCAATTAATCCTCTTAAAAAGATCCACGCTGAGAACTAAGTATGC

A\_14\_P117379 CTTCAAATGTGAAATAGTTCAATAACACAATGACACTTTGCCAGTGTATTAATCTGATAT

A\_14\_P125118 CCAAACTAGAAGGGAAACATGACCACCACCTGACTTGTGTCAGAG

A\_14\_P137750 CCACCACGAATTTAGAGATTATTACTTTGTAACAATTTCTCACAAATGTCAAGTCTTCAA

A\_14\_P118343 GAAATATTCTGTCTCCATCTCCACTTGCTAAAGTTGTTTCCATCCTTCAAGACTCAAATA

A\_14\_P202189 CTGTTTACAGAACAGTGGAAAGAGACTGCAGCCTAAAGACTTTTAAAAATTAAGTGGCATC

A\_18\_P22841932 GTCTGCTACATGAATAGGCGTCAAAAGTTGGTGGTGAGGAGTTTGCTTAC

A\_14\_P120269 AAAAATATACTTCACTGCCCTGAAAAACAGACACAGGGAGAGTTGGTTGTCTCTT

A\_16\_P40051869

AACAGCCAATTCATAATCATGTGTATACTTCGCAAGTCAACATATTCATCTCAATGGTCC

A\_14\_P132980 ACATCTATTTGTGAGAGACCTCTTGAAATTGTTTAAATGGTTACATCAAGAGTTTAATAT

A\_18\_P22839941 GGCCTAGGCTGTGGAAGGTGTGGAATGTGAACTGTCTAATCCAATAA

CUST\_9890\_PI426210822 ATGGACATTCCAAAGAGATGGCAAAGCTTGGAGAAAGACCTGTGG

A\_16\_P18513128

AGAGCCTTTCCATGTAAATACTTGCCCTAATAACGTATCTTGTAGGTTCAATCTTTTGCA

CUST\_2619\_PI426210822 AAGTCCCTTACCCTCTTGGAAAGAGATCAGAGGTGGTCACCCTCAG

A\_16\_P00685516

CACCAAGCAGCATGTCAATTCCTTCTCTCTACTTATCCTTTTTAAACATTTAGTTTT

CUST\_8278\_PI426210822

ATATAAGCAACATTGAAAGCATTGCTGCAAACTGAGCTTGAATTCTTCTCACCTCTTATG

A\_14\_P133456 TTTCTTTCTGAGCATTGCCCTTTTCTCAGGAGAATGCATTTTTGTTCAAGATTTTCTT

A\_16\_P18890159

AAAATAAACAGCATGGTCAATAAAACTGGTGGTGTATTTAAGTCCGTCTGTTATCTCCC

A\_14\_P105185 TTTTCACTCTTCTGCAATTTAGGACATTAACCCATATGTCAAGGTCAATTGCATGCAATT

A\_16\_P03368551

AGCACCAAGATTTCTTTTAAATTAGTCCCTTCATTGAAACTCATACTCTTCCACAGTCTG

A\_16\_P18525794

CTGAAGAAGCCAACACTAGTTCTATAGAGCCAAATTTTATCTCAAACCTCTACTTCCCAGT

A\_14\_P122734

TATAAAGCAAGCATAAGAAATCATGAGCCAAAAACAAGAGTCAAAAAGGCATGGGAAGT

A\_14\_P108006 TGGATTTTCGAAGACTAATATTCCTAACCCCATTTAGAAGCCAGATCTGACAAGTAAACA

A\_16\_P02133219

ATACACATGAATCTATTGAGCCCTATTCTGTATGTGATGCTAAATAATCCTCCTAGCCCT

A\_16\_P21560685

AACTTGACAGATTCCATTTTTCTATGCGTATCCAAACCACATAACATAAGCAAACAGTGG

A\_14\_P125512 AATGTTGGTGGTAAATATGTAAAGTTACAAATATGGGATACAGCAGGACAAGAACGATTC

A\_16\_P21684384 AAACAGTGCCATCACGACCCACTTCTACAACCAAGTTACCAAAATTCACAAAAC

A\_16\_P20972423

GGGTGCATCTGCCACTTAAAAATACATTCCAGAGAATTCCTGTGTATAACCATCATTTA

A\_18\_P14666189

GGCATACTTTGTATTTAACCAAGACAATCTTCAGACTCAATTCCTATTACCAGCCATC

A\_16\_P20281522

TTGCAGTTTTTCTAAGATTCATACCTATAGATTTACTTATACACCTGCTCCAAACTACCT

A\_14\_P114317 TAATTTGTTTTGCTTGCTTTACTCACTTTCATTTGGAAAGAAAGGGACCCTTTTGTAGAC

A\_14\_P200297 TCTCTTCTATGACTTCAATGTATGTCCTCTCATTACAACAGATGTTCTTAGATGGGAAT

A\_16\_P15532849

ACAAGTCTCGACATTAAAACTACAGGTAAAGATCACAGACTACTTCATGTTTGGACATT

A\_14\_P117239 CTAGTCGAGCATTATTCTTATAAAGCAGATGGTTTTGTTAAGAGTTCTTACTGTCCCATGT

A\_16\_P36230676

GAATTTGCTTTTTCTTATATTAAGATGTAAAATTCAAGGCTCAGTATAGCACCTGGTGGC

CUST\_2173\_PI426210822 GGGATTGTTAGAGCCTTATGTTGCGTCTGAGGTTTTTCAGGCTCTTC

A\_16\_P16191582 AGGGGCTCAGGGGAGGAATTCCTACTGATTTGCAAGAAAGGAATT

A\_16\_P00152842

TGCTTTATTGTTGCTTAATTCCTTATTGTCCTTACATGGAAAACCTATACTCGTGGAGG

A\_16\_P02445562

GAGTGATACTTGTTGAACACATAGGAAATTTCTAGCCACTTGAATATGCATATTACTCCA

A\_14\_P120182 ACTCATCTTTCAACCAACAAAACATCAAGATTTCCATCCTCCATACATGCCTTTTTTTAA

A\_14\_P107684 ACATACTGAAACCTATAGAAAATAAGACACCCACACATCTGTACATAGATGTAGCAGAG

A\_14\_P116757 ACATAGCCAGATTTTCATTGAAACTTCTGTGGAGAAGGTTTACTGTGTAGATTTTTTGGTT  
A\_14\_P108266 ACACACATTCACCTCATATTTCTAAGAAATTGTAGAGGCTCTGGATGATTTTACCTTCCAAC  
A\_16\_P15114793

ACAGTTACAGAGTTACCAATATTTCTCCAGCAGAATTTCTAGACATAGTGAAACTCTCCT  
CUST\_903\_PI426210822 AATGTCTCAGTGACCAAAGGCATTATGTGGACCATGGACCCAGCA  
A\_14\_P139033 GCTTTTTCTGTTTTAGTTGTTTGATCATGTGAAGACTGGAATTGAAGATGTTTGTGGACA  
CUST\_10\_PI426210822 CCCCAGGATGCTTAGTCATATCCAAAATGTCAATCCCTGTCCTTT  
A\_14\_P101622 ATCCCTTCAGAGCCTTAAAGAATTAATGACCTTCCTCTATAGGTTCTAAGGTA AAAATTG  
CUST\_9993\_PI426210822 CTGCCTCTCAGGGGTGTCCTGTCTCCTCTGCACAGCCCCTGCCTC  
A\_14\_P116692 GGGATGCTTAGTCAIGATGTTTTGGTCTAGTGGATAATCTACAAAGAGGGTGGTAA  
A\_14\_P108220 ACCAGTCATTAGGGTATAATAATTGGGATACGAGAGACTAGGGAAGTCTGGAGTC  
A\_14\_P104704 CTGTGGTATGACAAAACTGTGCCCAAGTTTATTCTGATATATACCTGAATGAGACTAG  
A\_14\_P130133 GTAAGTGTAAGCAAACCTCTCCTATGAACACTCGCTCAAACCAGCCTTTCAGAAT  
A\_14\_P117176 GAAAAATCATTATTTTTGGATTCTAAACCCTCTCTGAATGCAACAGAACAATGCAACCC  
A\_14\_P132205 TCTATGTTTGCAACACAGTGAGTGCTCATCATTATGAGAAGCAAATTCAGTAAGTGAGA  
A\_16\_P01793329

GAAATGCCCTAACCATTTCATCCATGTTCTATATAGTTCATGTCAACCTGATTCCCTTTTA  
A\_16\_P01144042

GCATTGCATCTTCCAGAATATTTCTTTCAGTCTTCACAATATAGCAATGACTATTTCCCCG  
CUST\_9568\_PI426210822

AGTCTCTTTCCTAACAAGAAAATGTCAGCCTTACGAGTCAGGAAAGCTTTTTAC  
A\_18\_P14185250

ACGATACAGACTTATATGAAAAGCAATATCTTCCCAAGTTCTATCATTGTATTTCATGGC  
A\_14\_P101304 CGTTTGCTTTCTTTGTATGATAATCAAATTACTACAGTTGCACCAGGGGCATTTGATACT  
A\_16\_P01567929

TAAGAACCCTACTTATAAGCCCTATTCAATTCTTACCAGGATAACCTTTGTCTCCTCAAAG  
A\_14\_P200198 CCAACATTTACCCAAAGGATCAACCAATTTTACACCATTGTCTTCCTTAAAAGAAAAAC  
A\_16\_P18444908

AAGCCCACTCACATTAATGTCTTTCTATTTACCTTCATATTGAATGCTTCTACTTTCCC  
A\_18\_P15932489

GTCTCCTTCAGTTTTAATATGATCCCAAATGACTCATACCATCTAGACAACACATGGAAC  
CUST\_1957\_PI426210822 TGTGTTTATATGGCAGTGCTGTCTGCTTGTGGTGTCTTTACCTTCTCAG  
A\_18\_P12658345

CATTTCAATCCAACCTAACAAGATATTTTCTCCTCATACTACTGATACAAACTGCAGGA  
A\_16\_P37085224

AACCCTTACATGCATGTTACTTGGTAAAACAAACTGAGATGTTTGATGCTTTCTTTGAGA  
A\_14\_P122283 GCAATTCTATCTCAAAACTCACCTGTAGTTCCACTTGTGAAACAAATTACTGCAAGATCT  
A\_14\_P138289 AGTAAATATTAGATAAAAAGCCAACAATGTGGAAGGAAGATGTCCAACCTCAGTGACTGAAG

A\_14\_P128832 TTTAAGCCAATTGGTGGGGAGATTGAAGTAACCCCTTCTGCTCTAAAACACTAG  
A\_14\_P104808 GGGGACAAGGCCGTTTCTTTGTTTCTGAGCATAAAGAAGAAAATAAATCTTTTACTAAGC  
A\_14\_P120677 GCTCCGATTCTGACTCTCAGACCAAGAGCATCTTCGAGCAAGAACTAATAATAAT  
A\_14\_P100078 GTAGCAACCCTAGTTCATGGGTCCATCAGACATATCATCAGCCTATTTCTATATTATCAG  
A\_14\_P135379 TTTTAAATTTTAGGGATTGAGTGTTGCTATAGTGGGACCCACGTTTCAAGATTTGGC  
A\_16\_P01208794  
TTTCAGAGGAAAATTGACAAACCAAACCTAAGTAGCAGTAATTCATCCTACTACCAACAGC  
A\_14\_P114110 GATGATAGCAGTAAAGGATGCACATCGTCATGATAGGTAAGTTGTCCCACTTGATTTATA  
A\_16\_P02426765  
AGACGATAATCTGATTGATTTTGGCTGAATATCACCTATCTCATTGTAAACGTCAICCTCA  
A\_18\_P11105413  
AAAACATCTGCTGAAATAGCCATACTATGAAATTCCACCAGGATGTTTCAATAACACTGG  
A\_14\_P118202 TTAACTCAGCATATCCCACACGTGAATCTGAGAACCATTATGTAGACGCTAACA  
A\_14\_P126451 CTGGAGGTTACCTTTGCAACCAAGAGTGTTATCATTCTTTAACAGTTTCTTCAATTAGT  
A\_14\_P110955 CTAATGACCATAATCATAGTAAGCAGTGGCATGACACAGATATCAAAAAGTTGAGTGGCA  
A\_14\_P124625 TTGCATGTCACCTTTAGCAAGTTTAGCATCTTAGGCTCACAAATAGGTTAACTTGTGTT  
CUST\_9961\_PI426210822 TATTCATCAGTAATGGTATTGGAGGCTTTAGCTGATGAAGGTCTGTCTCTTCCTT  
A\_14\_P110782 GTTTCAGATTGGGAGACTCCATCTAAAACCAAGTGGTCACTTCTTATGGAAGATATTTTT  
A\_16\_P37750408  
TGCTCCAACCTCATCAAATATCTAACTCCTGCAATGTGTATTGTCTTATGCTTGACATCAA  
CUST\_9353\_PI426210822  
CAAGATTATTATTATTCAAGATTGAAAATACAGCATATCCTGATACATAAAAACCCCA  
A\_14\_P100688 CTGGTCACCTTGTCTACCTGCCACAGCCCTATTGTGAATAGACTCTAATAG  
A\_18\_P11094568  
ACCAATCATTACACCATTTTAAGACATCCTCATTTTTTTTTCTTATCTTCATCCCTGTTGT  
CUST\_3176\_PI426210822 AAATGGCAGAGTGCACCCGTAGGATGAGTGCTAATGGCCTAGCTA  
A\_14\_P121127 GTTGGTTATTATTCATTGGCTGCTAACCCAGGAATTTCCCAGCACTTCT  
A\_14\_P118615 TTGGATTTTTAAACTTAGAAAGGACTTTTTAAAAGAAGTCTTCCCACTTCCAACCCAGAGA  
A\_14\_P133457 CATCTGAACCTCGACGCAATCGATCAGAATCTGAATCTTTAATGGGTGTTGAT  
A\_16\_P19328183 CTTATGCTCCTCTTAAACTCATATTAACCTTCTGGCTCTATTTATATCTGTCCCTCCCA  
A\_14\_P110301 ACCTTTTAAAAGCAGGAGTCAGTTGTAAAGTAACCAACCCAAAGTGAATGAATATATGT  
A\_14\_P104430 CTCATCATTTCTCCAAACTGACATGCTACAGAAATGTCTTCCAAAAAGCGTTAAGTTTTTC  
A\_18\_P17347909  
TGTTCTGACTCCTAACTCTAATAAATGTTGTAAACGCATTATAAATTATGAGGATAAAC  
A\_16\_P00931357  
AAAAACTGCACTTCATATTACAATAGGCTAACAATTCAACATATAACCCATTCCAAGACT  
A\_18\_P22843230 CTTGTCAAATGGACAAGGATGGAAGGGCATTTCAGGAGGCAAGAG  
A\_14\_P108872 CTTTTGGAATGGCTGTTGCATTGACAAGGTTTACAATTGAAAGCGTAAACTTGATCAC

A\_16\_P17500067

AAGCATAAGAACCACACTAACTATTGCTAGCATCCCTATTTTGGTCATCTGTTCAATCAA

A\_14\_P116327 CTTTCAAATGCAAATAAATTAATTTTTTTGTTCTCAGAGGGAAACCCCAACTCCTCAC

CUST\_6342\_PI426210822

GGGACATGGACGTGCTATTTTTTTTAAAGTAATACATATTTACCTTAATTATCTGAATGT

A\_14\_P136059

GGTGTGAGTCTAATAACCAAAAAGAAATAGTGGTGGTAATAAAAACAAGGGAACAGATCTGA

A\_14\_P118928 TTGGCACCTAACAAATTTTTTATGGCCATTCCTTTATCAGGTGTGTTCAATTTCTTGA

A\_16\_P17354356

GACCGAAAAGGACTTTATCTTTACTCATCCCTACCAGATTAGATAATCACGTGGAAAACCT

CUST\_6308\_PI426210822

GAAAAGATTCAAATCTAGGAGATTCATAATTTCAATATATTCATTGCTTGTGACTATT

CUST\_6475\_PI426210822

AAACTTGGTTAAATTCATGGGCCTAGAAGATCAACATCAAATCTTTGTCTTCAAGACCT

A\_16\_P16996580

TTGTGTCTTACTTCTTTTTACTTATCCCATGATTGTCACAATAAAGGTTTGTCTCACATCA

A\_18\_P20176881

ACTTGATGTATATACTGCCCTTATGCTAAAAAAAACCTTGAATAATCATAATCGCACCTG

A\_14\_P103649 ACTCTGGACAAAAGTGAGAGTTTGTAGGTCAATGTTGGGAAAATTTTTAAAGCAGAATACA

A\_14\_P139016 TTAGGTGGTAAACAACCTGTTGGCTTAAGTAACTCATCCAAGGCTTCATGGTTAATAATTC

A\_16\_P01292590

AAGTCACCTGAAAACAAGAGAAACAGATATCACTTTGCACAATACTATTGACCTATCCAA

A\_14\_P137900 TGA CTCACGGTGAATTC ACTGTGGAAAAGGGTCTTAAACAAATTGACGAATATTTTTTCG

A\_16\_P15248988

AAGTTACCTTTTTTCGAAGTTCTCATCTGCACTATCATAGACCTTAAGACAACGAAGCAA

A\_14\_P131271 CTGGGTGAACTTCATCTTTTATTTTTTCTGGGATATCTTCTCCATAACCTATAACAGGA

A\_16\_P17218125

AAACAAAACCTCACGTGTATTTTATCCTTTCAAACATTCGAACAATCTCATGGTCACAGGT

A\_16\_P17929463

AGAATGTGGTCTTCTCAACTTACGGTAGGAAAAGTCAAGAATAACTTAAAGGCTGATAA

A\_14\_P201198 TACAAAATAAGAGAATGAGTGGGTCCGAATTTTAGACAGTATTTTGAAATAATGGGTAGG

A\_14\_P115538 CTGCATCAAGGGCCAGTTATCCTGCAGCAGAAGAATTATTGTTATTGTTACTATTTGTTT

A\_14\_P122495 TTAAGGGGGAGACTATTCTGGAGAATATAGAGTTTTTTGGAGGATACGGATATGAAATCTC

A\_14\_P121391 GGAAAAGAAAATCTCACGTGTTTGTTCCTTGTGACTTCAGTGAAGTGGAGATATAAATAT

A\_16\_P17024320

AAATATTTGTGTATCCCTGATCAAACAGACATCTAATGATAGCAGTCATCTCTGGATGGC

A\_14\_P112399 ACAGGATTCTGGGAATTAGTGACTGTAAAGAGAAAAGGAGTAGGAAAGATACTTAGGTAT

A\_16\_P16854071

CACACCATTTCCTTCATTCTGAACTCTTAACTGACACATTTACAGAACCTCTTACAA  
A\_16\_P38265622

AAAACCTGAAATGCCATATTTATCACAACCTTAGATAGTCACTGTAAGTCAAGGTTCCCTC  
A\_14\_P120306 CTATCTTAGGGACCTTAACATTCTGATCATCTTTATCTTGCTCAACTCTTCCCCATACTA  
A\_14\_P114975 ACTTACAATTAGATAGAGTATTTGTAATTTTGTATTAAAAACCTTCAGCAGCCTCACTG  
A\_16\_P03331570

AACCCCTCCATGAATTGATCAATTACTGAACTCCACAAAATAAGATGAATCCGTTTACA  
A\_14\_P102473 ATGTGTCCTGTTCAAATTTTTTAATGTCCTCCTTGACAAGAATCATCTGTTCTTTCAGGA  
A\_16\_P03474400

CGACCTTTCCTTAACTGTAACAATCTACTTTCCTTAAATAACCAGAACTCATCCACTTTT  
A\_16\_P16731227

CATAGATGCCAAATGACCTAACTGAACATTGACTCCTAAACATATATTGAGACCAAAGGC  
A\_14\_P122780 CATGGTTAGACGTAACATCTTGTGTGTTTTTCTTTAAATCAGAGAGGAGAAAGAAAGGAC  
A\_14\_P102656 CTATAAAAAAATTGAAGCAGATGATTGCTGAAAACCTTAGAATCTTCTGGACCAACCTGA  
A\_14\_P106519 AAAGAACAGCAGTGTTTTCAAATAATGCTGGATAAGGCTTTGTTTTTTAAAGGTAGTGGA  
A\_14\_P135486 TTCCTGTTGATAATTTTTGGTCCCATCATCTCTGTATTTTGGTTTTGCAAGTTTAGATCAC  
A\_14\_P102509 TTTAATCTTCCCTCTACCTCTTTCATCTATGACTCAGTGTTTCAGGAATTTGCTTGTTAA  
A\_14\_P116509 GTAAATATTGAGAAAAGTTAAAGAATAAAGACATTTCTTTTGGAGTTTCCATATCTTGGG  
A\_16\_P02910911

GAGGTTTTGCTGGGATATTTGCTACACTACTATCATTGCAACAAGTATACCTAAGGGAT  
A\_14\_P102909 CTCGAAAATCACAACCAAGAAGAAAGGCAACCACTGAATACAGGAAATACAGTATTGTTA  
A\_16\_P01430857

GGCTACTGTGAATTTCCGTTTCTAGGATCCATAGAACTAGCACAAAGTTACTAAAGTCAT  
A\_14\_P109772 TTATGTCACAACAACAGAAAAGACTCCCAAAATTTAGGTTTATTTGGGGGAAGGTAATA  
A\_14\_P122471 CAGTGTGTTCAAATTGTGTATGTTCTGGAAAGGAGTCACTTTGTCTACTTGAACCTTAG  
A\_16\_P03364595

AAATCATCCAAATGCAAGTGTTTCCTCGTATTGCAATCTCACATTGACTAGTGTGTGTTG  
A\_16\_P19073414

ACCTACACATCAGAAAAAATGGCATCCTTTCATCTACTGTTTACTTTGTCTGAAGATTG  
A\_14\_P119365 CTAGAGGCCTTATATTACCACTAGATACTAGGGATAGATTGGTGGTAGTGAAAGACAGAA  
CUST\_2835\_PI426210822

TGGACTCTGTAAAAAACATTTTTAAAGAATGAAGATTAATTTTGATACACATAAGAATG  
A\_16\_P30952527

GTATGTGATTTCAAAGAATCTTAGAATATATATTGCATGACAGGAAATGGAGGTCTGCTA  
CUST\_8429\_PI426210822 ATTCTCTCTAGTGCCAGGCCACCAAGCAGCATGTCATTCCTT  
A\_14\_P110605 AATAATGTTTATGTTTATCACATGCCTTGCACTGTGAACACAAAGATGAACAAGACTCAG  
A\_16\_P03665750

TTGATGCTATCCTCAGAACAAATTTTCCAACAGATGATAAGTCAATGAGAACACACTGAG

A\_16\_P16191167 TTATGGTGCCTTCAAAAAGAATGGCATTAGTGCTGTCCAACCTCAAATCCCAA  
A\_14\_P121691 ATGAGATGACACCAGTTCTGATTCTTACATTTAATGGAAATGCCAGAGAGACTTCATTAC  
A\_14\_P124445 GACAGAACTGTTTTACTTATGGAACCAAATGTTGAAAAAGGCTTTGGTAGTAAAAGTGGT  
A\_14\_P111996 TCAATCCAACACTCTCTCTCAATCCATAACCTATGAGCATAGCCTTGGAGAAATAAAAA  
A\_16\_P00685625  
TAGAGAATCCTATTTCCCTGTTACATCCTTCCACAGTTTCATGATTACATTCTCCTTCAT  
A\_14\_P110821 TGGTCAAAGGATCTTTCAGCAACACTCTGGAACCTTCATATGAATGTAACAAAATTTTCAGT  
A\_14\_P101019 TTCCAGATTAATGTGTTTTCCCCCTTCAGGTCATCACAAAGACTAGTCATTTCAATAAAT  
A\_18\_P26984465  
TCAGTCCCTCATCAAATTACAGCACATTTTCAATGCTCCAATTATGTCACTGTAGAAATG  
A\_14\_P120445 CTGATTATGTAGATAACAGAAGGACAATTTCCCTTCACAAACAGAAAAACCTGCACCAATG  
A\_16\_P20234310  
CACTCAGTCAATTTTCCCTTACAAAACAGACTTTGATAATGATTTGCCATTAGACTTCCC  
A\_14\_P118341 ACTAGCACACTACCGGAAAGACAATACCTCCTTTAGTATTCATTATTAACACTGCCAT  
A\_16\_P21132554  
TGCCTGTGATTACCTATAACATTAACCTCTGAAGAATCAATTATAATCTCAGCAACCTTGC  
A\_14\_P120855 CTAAAGTCAGTGTGCATACATATCATCATTCAAGGTTAAGTAATCCCAGTTCAACAACC  
A\_16\_P00510617  
TAAAATGTCTCAAAAAGTTTACATGCACTCAAAGTAGGTTAGAATAAGGAATCCCTGGAGG  
A\_16\_P36214511  
AATTTCTCTGGTAATGACAATCCTTTTTTCCACTTACCCATAGTCAAAGACTTGCATCAA  
A\_14\_P109137 CTTCACTCCTTCTCATGGAAGACTTTTTGTCTGAGCATTGATAGACACTTGGTAAC  
CUST\_5149\_PI426210822  
ACCTGTCATAAAATGTAATGGATGATATATTTTTAACTGCTGAGACCAGAGAGTTCACAT  
A\_16\_P15614018  
ATCTGAATGACAGCAAAAACACTACATTCGTTAGTGATATGTAGAGCAAGGACAGAATCAGT  
A\_14\_P133427 GATACATCCATATGTTATTGATACATCGTTGCTTTATGTCAGAGAGCAGGGCAGAAGATT  
A\_14\_P138870 ACAAATGTCCTATAGTATGTCCATGGGAAAAAAATGGGTTTGTGGCAAATACTTTTAGGA  
A\_16\_P39189528  
ACGTTTGAAGATATCCACTGATATTCATCTAATGGGAGTTATTTTAGTAGAAGTCGGAGT  
A\_14\_P112411 GACACAAGGGAATATCTCTCATCTGCCACACACACATAGAGTAGTTAAACAATATTCAAG  
A\_16\_P02711524  
AAAAAAGAAAACCTTCGAAGAACTTACACAGGAATACACAAACTAGCATTGTTGGGACTCCT  
A\_16\_P00685212  
AAAAGAGTGCTCAACTCAAGATTAGGAATCTATTTTTCAACTACCATTAGCCCCACTTTG  
A\_18\_P22840735  
TGTTTCATATACATTGATACTATTTAGTTGCATTTTTATATGCTTTAGGAGCAATGGGAA  
A\_14\_P106091 CTAATGAAATTACTTTTCATTTTCAGAGTTTTGAAGCACCATGTTGTTCCGTGTCATCTGAA

A\_14\_P103702 GGTAACGACCACTTGTTCCTAATCTGCCTAATACCTAGAGCCAAATATTTCTACAGTTG  
A\_14\_P125856 CTTTGAAGTAATTTTCAGTTTTATTTGCTCGAAAGAGAGAACACTTGAGTTTTTGCCCTG  
CUST\_3016\_PI426210822 CTAGGAATTTGCCAGCTCGGCATGGCAAGATCCCTGAGATGGCAG  
A\_14\_P134751 CATCATTGTTACAAATTGCAACCGCTCATATTCAGTCCTAAGCAAGTTTTCTTTTCTT  
A\_14\_P124605 TTGCCACTGCAAGATGTGAGTCGTTGCTAAGTTTGAGGGTCACATTC  
A\_14\_P138713 AACGTGGAAATCTTGTTCGTTGTATGTTTAGGGGCAAATGTTTTAAAGTTTTGCCTAAAT  
A\_18\_P10065510

CATCCCACAACATATGAACCTTTTGTCACTTACTTTTTCTACATCTTCTCATCTCCATT

A\_16\_P18867664

AATCTTCAACCATATCAGAAGACACTGTAACCTCTGAACTATAACCATACAAAGAAGGGTGG

A\_14\_P111875 GTCTATAAGAGAAAACCTATCATAAGCCCAATTTTTTTTTTCCACTTAGGGTAAATGTTT  
A\_18\_P22842280 CTAGAAGATCAACATCAAATCTTGTCTTCAAGACCTAAGGGAATCTGGATGTGCC  
A\_14\_P104463 CATTTCCGAGCAAGTAAACATGGCCTTTGTTTTAATATTTGTTAAGTCCCTGCCG  
CUST\_9598\_PI426210822

TACAATGGAAATTTTGCCTTTGGGAATGCTCTTAATATTTATCATATCAAAGTGATGACC

A\_16\_P18079934

AAAACCCACACTTTATGATTGGAGTATCAAGTATCAAGACACCTTAACCTAACAATCAC

A\_14\_P108576 ATACAAATACTTACACGCCTTTTAGGAAATTGATGTAATCCACCCAAATCTAAGAAATAA  
A\_16\_P00850203

AACTGTCTGTATTACCTTTAAACCAACCAATTAATCCATCAACTAACCAGTTTACACCCC

A\_14\_P125549 TCAAGTGAGAAAATTTCACTTCTACCAATTTTCTGGGGTTTAGTGATCGATGCCAGTA  
A\_14\_P112246 AGCATATGCCCTGACACAGTTAAATGATTAACAGATTACTCCAAATGTCTTTGGCATAGA  
A\_14\_P130493 GACCCAATCATCTTCGCAGTTCTGATTACCTGTGATTAAGAAAATAAATAAGAACACCCA  
A\_14\_P122206 TCTTCTGTTGATGTTTACTGTTTGTGAATGTTGTCTGCTCTTCATTAGTATCATCTTCA  
A\_14\_P107191 TACTTTGTTATAGGAGAAGAGTCTAATCAATGTGCCTTTATCCTAAGTGTGACTGTGGTG  
A\_16\_P20876160

AATGAACATTCAGAGTGCTCTAAACCCTTAAATATCGCCATTTATTTTTTCTGTCCCA

CUST\_9339\_PI426210822 AGTGGAGCCACATGGCTCCAGGCCTCCCGAAGGATGTGGAGCAG  
A\_14\_P109573 CTCAGATACTGCAGTTTTTTCTCCCTGTCTCAAAGCGGTTGTTAGCAAAGAAG  
A\_16\_P03605532

GAGAACAACAATAATTTTAAACAATGGCCTTAGGGAAGAGACAAATCTGTCCCTTTATTCC

A\_16\_P18423349

CCTTCCATTTCACTTCCCTATCTCCTCATAGAATAACCTCCCTAAATACAATCTCACCATA

A\_14\_P115611 GAATCGATAATTTGGAAATAACATATTTTCTACGGGTGAAAATAGCCAGAGAGCAGGAA  
A\_14\_P108458 GGTCAATCAGTTGGCCATTATAGTATTCTGGGTGTCTCTTTGAATATTATCAAAGATGT  
A\_18\_P12769179

GCAAATTCAGACTCTAAACTATTCATACACTATCTCAGAAAAATTAACACTTCACAGCCC

A\_18\_P11814598



AAATACCACACTGAGAGTTAAAGACGATGAAACAAAGTTTAAACCGAACAGAATCTTGGC  
A\_14\_P107868 TCAGGGACATGGATTCTCATTATGCGCGTGTTAAGTAGACAAAGACAGATATATATGC  
A\_14\_P139835 GTAGTTATCGTAAGGGGCCATGTAGTTGGAGGACTCGATGTCTGCATATTT  
A\_14\_P137446 AGGCTAAATACAAGACCCCGTTACCAATTTAATAGTAGTTTTCAAACCTGTCTCCTCATA  
A\_14\_P127627 TTAAAGCCATATTTATCATCTTTTCTCCAAAATGGCTACCTTGCCTGAATCCCAATTTCT  
A\_16\_P01472260  
GTCGGACACTTGTTCCTTTCCCTCTTACCATAGAATAACGTTAAACAAAAGTGGAAAAG  
A\_14\_P137878 GTTCTGTAGCATTAAATGCCTGATCTCACAGTATTATGCTTCACTAGAAATGAAGGGGTAA  
A\_14\_P115754 AATGTTTCTGCATGTGTTAAGGTTGACACTTCTGGTTTTTTTCCCTCCCTTTATATTAGA  
A\_16\_P17333162  
AGTTTATGCAGAACCTTCCATATCTCTCATAAAACCAGAGCATTTCATAGAACCAGAAAACA  
A\_16\_P20261927  
ATTGAGTATCTTTACCCTTTCCCTTCACAACATTATCAAGATCACTGAGTTAACCCAGGTG  
A\_18\_P22841233 TACAACATCCTCCTCCCATCGGTATGCACCCCTTCCCTAGGAGCCC  
A\_16\_P17005980  
AATGATCAAAACAAACCCCACTCTATTGTGAATCATCTTGACGAGAATGATCCATGTCTA  
A\_14\_P136080 CAGGTGTCTTTATCCAGGGCTAATGAAGCATTAAATCACTATTGCCAGGAATTTTTCTA  
CUST\_4624\_PI426210822  
TAAATTTTTTAAAAATTAAGTCTTGTTGAAGAGTGAGTAGAAACCAGAGTGGTGATAATTT  
A\_16\_P36449528  
ACCCCACTAAATTAAGTGCTTTGTCCTTAGTATATAAAAAAGTGTGGAAGACCATAGCA  
A\_16\_P16094744  
ACAGCACCTTAAGTATCTTCCCTAGTGTTGCATAATATTCAGATAGCGTTTTGTAATGGTCA  
A\_16\_P20969632  
CTTCTGAAAACAATGTCTGTTCCACTGTGTTATTCCATTACATCAATCATAACCCTGTGA  
A\_14\_P111248  
CTGAAAATCTAGTCGAGTAGGAAGATCCAGGAAACAATGCTTCAAAAAGACTGTTACAAA  
CUST\_1320\_PI426210822  
ACTACAGAAAATAATTGTAATAATTGATGTGTTAAAAAGCTTTGAAAGACAGAACTTTCT  
CUST\_8416\_PI426210822  
TCCTTCTTTTCTATGTCTTCAGGTTGTTTGGTGAATATTGTTCTTTTTTTGAATCAGGAG  
CUST\_4845\_PI426210822 ATTCAAGGTGTGCTGAGCCCAGTCCAACTGCTCAAGTCTTTCTT  
A\_14\_P133791 AATATTCTGTGCATATCTGACATACTTCTTAAAAATAAAGCATGTCGTCTGCACTGCCCT  
A\_16\_P02131797  
TGTGTAGAAGTGAAAGAGGTGAATAAGTAGACTAATCCAGAGATATGAATTTGCAGGCTG  
A\_14\_P105435 TCCCGCATCTTGCTTTTGAATCAGTTTTATATTTCCAAAGTGCCTTCTCTGTTTTATTCT  
A\_16\_P40323859  
AAGAATCTGCTTCTAACCCAGTTTGTAAAGTGTTCAGAGCAATTCAAGAGATTCTGACATT

A\_14\_P111055 CTTCTCTGCAATCATGTCCTTCCTTCGTCCAAAAAAGATCTAAAAACAGGAATAATTGAG  
A\_14\_P119758 ATCCTTGGTGATGATGTAATCAACTTACCATTGTTGATGGGCAGATAATTGCATTCAAA  
A\_14\_P104251 AAATTTTGCTTCTCACATTAGATGTTAACGGAAGTTTAATTTAACTCCTCCCACCAAGC  
CUST\_7833\_PI426210822  
GTTGTCTTAGGTCAAAGCTAATTAACCTGAGGTTTCCTCGAGTTCAGAGTACATTTT  
A\_14\_P200575 CCGAGTGGAAAAAGAAACAGAAGTTTCTAGCACTGTGCTATTTATGTAAATGAACACACA  
A\_14\_P115833 TAAACTTACCTGTGTTTATCTTTCAGGATGCTTAAATGGCAGAGGCCAAGCC  
A\_14\_P131138 GCATGATAAAAATTATCTGTGAGTGGAATAGCAATCCCATATTAGATGGAGGCCTGTAG  
A\_16\_P19728407  
AGCATAGAGGGAAAATAGAATGACCAGGATTAATTTGAGAAAAGTGAGTATTGCGTCTACA  
CUST\_3073\_PI426210822 TATGAGATGTGCATGTGATCCTGTGACAAGGAAAAGAGGTGGCCT  
CUST\_9344\_PI426210822 TCTGGCCCCAGACAAGGGAATTTGAGGTTTTACTGTTTTGACCTT  
A\_16\_P01782981  
GAAACCCCTCAAGACCTATAAAGTCTATGTTCCAAGATCATCAGAAGTAACCAGCATTAT  
A\_16\_P58424582 AAAAGGCTTGGCCTCTTCAAGGCACTGAAAGACCAGGTAGCAGGAA  
A\_14\_P130921 AAACAAAGACAAAAAAAAGTGAGGCCAGAATAACTTCGTCCTGTTTTACAAATACTCTGC  
A\_16\_P20079681  
AAGAAATCATAGATATGTGTTTCAGTCATAGTGAAGTCTGCTAAATTCCTGCCTTCAGACA  
A\_16\_P15853768  
AAACGGCATTGCAAAGTTTTTCTAACACCATACATGAATAACTCGTAAGCAATCAAGACA  
A\_14\_P126853 GGAAAATAAACTTCAATTCCATTTTCATAACTTAGTCAAGAATGCTTGATGAAGAGGCCT  
CUST\_4420\_PI426210822  
TTATCAGATGGGAAGATTTCTGAATGCTGAATAGTTTGTAATATCCTTCAAAAAACCAA  
A\_14\_P120716 GGGTGTCTTTGCTTTCTTTCCTTCAGGAAAGTTTATATGGACTATAATGCAACGACTC  
CUST\_6757\_PI426210822 GAATAGATAACCACTGCATCACACCAGGGTCACCATTCACACTGG  
A\_16\_P02050032  
AGGCTCAGTATCATTTAGTATTACAGCACGATTAACAAAACCTTGATGGATCTCATCTTCT  
A\_18\_P14139224 CCTCCAGGGCGTCTGGAGCATGCACACATGTCCTGTGATTCTTTA  
A\_14\_P129040 CTTCCAATTTTTAAAATCAAATGCCAACTTTCTGTTCTTACTTTTCTGCAGATTCCTC  
A\_14\_P128577 AGACTTTAATCCCCTATTGCTAGACTATCAGTTTCTCATAGGAGTGCAGTATGATCTAAC  
A\_14\_P200147 CCCATTATACTAACCCTGCCTATTGGACCTTCTGATGCAAGGAGCAGATTAA  
A\_16\_P37530764  
TGAAACATCACCTTACTTTTTGAACAGAACACAACTTACTTAGATCGATGCTTCTTCTGA  
A\_14\_P200883 AAAAGATCTACTTCTGGCTGTATGTATGGCAAATGAGTGTCTGAAAAATCCTCCTTCTA  
A\_14\_P108463 TATGAACTACAAGTATTTGTGAACATTAGCCATCCAAAATCTCTTCTCCTTCTCCCTAACCA  
A\_16\_P18065452  
ACAAGAGCACAAATTATATTCCTACCCTGTTCCAATATAGAGTTGCCTAGTCAGAATTGTT  
A\_14\_P135740 GGTCGGAAGTCCACAATACAAACATGTTTCCAACACTTGTATTGGAAGATAATTTTTGTT

A\_16\_P17151488

AGCCCAGGTTTCATAAATGTCCTCATCGATGAATGGAAGTATCTGTATTCAAAAATGAAC

A\_14\_P102657 CTAGATTAACCCCTTTTCTCCAAAACTATAGGGACTGAGTAGAGATCAGTTAACTGTCT

A\_14\_P131784 GTATTTTAGTTTCTGCACCAAAAAGGAAGGGTTAGGGTGATTTTCGATGCAAATTAATTCAT

A\_14\_P101119 TCATGTTTTTGCTTCAGGGAGTTATATGGGCTAATAATCTTAAGCCAAAATCTTGTCTGG

A\_18\_P22843227

AACAATCAGATTTTTAACCACATAACGTGTGCACGGTGGTAAATTTAACTGATGGAGAAA

A\_14\_P124147 AACTGATTATTTACCCTGTGGTATTTTGTAGCCAGATTAGGATCTTCTCAGTTAGGTAT

A\_14\_P136159 AATTTTGACCTGCTTTAAGATGGTTATCAACAGAGGTTTCAAAAAGTTCAGCATTCTGAC

A\_16\_P18541717

AACAGTGACTCATTAGCCTTATTTTGAATACATGTAACCTTATATCTGATCCCTGGCCAC

A\_14\_P124084 AACTGGCAATGTTTCAGGAGGACGTTGCTGTAATAAATAAAGTTTCATTGAAAAGTTTTTC

A\_14\_P135998 AAACCGGGAGTCTGATCCATTTTGCCTGAACGATAAGAAGAAATAAGAACTTTTTCTTAA

A\_14\_P200834 ACTTTTGCAGTATGAGCCTTTTAAATGTTTTTCTGTTCTTTCTTCTTCACTGTAGCCT

A\_14\_P119378 ACAGCCCCTCAGATGCCTTTCCCTCCACCTTTTTTTTATTTTTTAAGAATCCCAAATA

A\_14\_P200632 ACATGGATACCTGACATTTTGGTAAGTTGAATATATTATTTTAATTCATTCTTGTTTTT

A\_14\_P114500 CTTACTTATCTGAATATCTGTGCCTGGGAGAATGCAAAAACCTTTCAGCGAAGTAACAAAA

A\_14\_P112683 ACCTGAGTTGGACTTTTTCTTCCAGAGCAGAATAAGAGAATCTTATCTGTAAGTAAAGGA

A\_16\_P58424570 AGAACTTCTTGAATCCATGTTGGTGCTGAAATTTGATTGGCACACACCAAC

A\_14\_P132830 AACAGCAAATATGGCAAGAGACAAGGCAAGATAAAATTAAGGGAAGTGAATAATTTACCA

A\_14\_P131812 TTTAACTCTCAATTGGAGGGGGAAATATCATTCTTCCATTAGGTTATTGCACAGCATTTT

A\_16\_P02038127

AACTCTATAGAACTTCCCCTAAAAATTTCTAAGTCGTCAACAAATCCACATTGCCAAA

A\_14\_P124998 TCATCTTTTCTCTTTGTTTAGAAAAGCATTTCATATTTTCATGTCCAAAGGAAAATGCATC

A\_16\_P02358833

TCTCCTTGCTAATTACACACATGTTTCTAGATACTCTCTCAATTCTGGTTGTCTTCAAGC

A\_16\_P00299192

TGAATTTCCCCTCAAAACAAACATAACCATGTTCTTTAACATTTACTGCTAATTTGCTCCA

A\_14\_P133463 TTCTTACTTTCCATAGACCAGTGACTGTGGACTGCTGTATCTTACTGTATATCTCTTTCT

A\_14\_P136130 ATGCCAAGGATCTCCAGATATTCTTCTTCTCCTTCAAATTCCTTCCCTGAAAAAC

CUST\_3572\_PI426210822

TGACAGAGAGTTGCTTCTTTTAAAAAAAATGTATTAAGGGCTATGTAAATAAAAAGAAGA

A\_16\_P37357810

CACCCAATCATTTCAGAAATTTAAAGCATCCTTCAAGTTCTATATATGTGGTCTCGAGA

A\_14\_P106789 ATAAGCAGATCTATATTGGCGTTGTTGAGAATGGGCACATAACTTGCCAATCTGAAAAAA

A\_16\_P15714571

AAAGTTTTGCATCTGTTGACATATTCTTCCACCTGTGAATTTAACTGGCTGTGTAACAA

A\_14\_P117310

TGAGAAAGAAGAGGGTATCAAAAGAAGAGAGTAGAGGAGAGCATCTGAGTAAGATTCTTA  
A\_18\_P13863546

ACCATATTCCATTAGTTTCCCTAGACCATCCTATGACTTCTACCTTTTCCTTACATTTCA  
CUST\_8307\_P1426210822 ACCTGGAGTGTCACTTTCAGCCCATCAATATCACCCCTTCAGGTAC  
A\_14\_P121720 CTACCCACATACATTTGAGATTTTATGGCAGGATCCAATAAATACATTCACCTTAAGGCT  
A\_14\_P201347 GCGTAGACAATGTTTCTGTTTGTAAAGAATACACATGTATTTGCTTACAAAGGCCAG  
A\_14\_P200210 TCCCAAATGAAAGGGGAAAATAATTTGTGTTTCAAATGCATTTTGGTTTTGTCTGGTGA  
A\_18\_P21067100

AGCCAGCATCGTAGAACTATTCCCTATAGTAGTCATGGACATTGTAAATTTTTTGATCGC  
A\_16\_P15557524

AAAAAAACCCTCAGATTTTCTTCAAACAGTCTCCTTACAATCAGAAAATGGAAGAGGATG  
A\_14\_P124729 GCTTAGAGCCTCAGAAGTGGAATTTGGAATTTCTGAGAGAACAACTAGAAATCTAGGAAT  
A\_14\_P127671 TTAAATAATAGAACTCAAACCAAACGGGCTCTTGTATTACACTTCAGAACAGGTCTTCC  
A\_14\_P104912 AAAATCATTACTGATTTAACAAATGAAGAATTCTATTGTAATCTTTTATCTTGATGAAAT  
A\_16\_P18870402

TATCATAGCACAGTAAATGCCATCTAAGTCATTTAATGCCAGGAGAAATATAGGAGTGCC  
A\_16\_P00685052

TGCCATGGTATGTTAGACCTAAATTGTGGAATCTGGCTTTACTACTCACTTATTGCTATG  
A\_14\_P104552 AGTAGGTTTGATTTTTAATACCCCAAATGTCAAGTTTAACCACAAACCTGGTCAAATTCC  
CUST\_6061\_P1426210822 ATGTGAGCAGAAGTATGGAGAACAGGACTCCCATGAAGATCTGCAG  
A\_18\_P13170689

ATTTTGTCTCAACATTCAGGTATGATTTGCAGATGACTGATAACAACCATCATGTTGTGG  
A\_14\_P136192 GAATAAGGAAGAAATATGCAGTTTCTATTTGGTCATTCAGGATTGGTAACATTCCTTCAG  
A\_14\_P118081 TTTCTCTATAACCATATCTAAAGATGGGTTTGGAGAATGTGTCATCCTTAAGGGCTAAA  
A\_14\_P104096 TTATTTCCATTGCAATGATGAAGATACCTGAAAGTTTAAAAAATGTCACCTTGCCTGGG  
CUST\_10391\_P1426210822 AGGATGTTTTTCTTGCCAGTGTCTTCTAATCCGAGGGGTCCTC  
A\_14\_P117827 TATAGGTAATTGAGGTGAAAGCCAAAAGAAGAACTGGACCACTTAACTTTGTGACTTGTA  
A\_18\_P13912173

AAAAACTGCCACATATTGTTTTTCAGGCATATTCCAAATGTCTAAGAGATTTATAGAGCCA  
A\_16\_P20344959

GGCTGAATATTTCAATTCTATGCGTATACCACTGTAAAGAAAACCTCCATTTCTCTCTACT  
A\_14\_P119908 CAGCACCTCCCTCTTTCATCAATATCCCTGAATAGTTCTTACTAGAACACAAATGATACA  
A\_16\_P15231305

GGCATGCAACCTAATTAGACTGATAGACCTAATGTAATCCTAGGAACTCACACTACATTA  
CUST\_8486\_P1426210822 TATTTTCCACTGAGACTTGCTGTGTGTGTTCCACACCCACAGGTC  
A\_14\_P201577 CGGATTTATTTTTTAACACACCCCAAATCCGCAGTCATTAAGTGACAAGACTTTTGTTTTC  
A\_16\_P39757755

CCCTCAGAGTAGCAAATAAAAACAAAAGCAGTTACCTAATTTGGTTTATTCACACACCTC

A\_14\_P134961 AATATATTTTCCCAATTGAGACCACACAGTTCAAAGAAACCTGAACCAAGTGGAACCTC  
A\_14\_P116707 TGTGGATAAATGTATCGCTTCTGTCTGATGATGTGTTATTTCTCCTTCAAACCAAGATG  
A\_14\_P127736 ACAGACTATTTTTTGACAACATGTATGCCTTGGGTGGGAGAAAAGAATTTAGTTACATCT  
A\_16\_P40572874  
TGGGAAACAATTGTTTAGAGTTCAAACCTATAGGAACCTCATTAATTTCAATCCACACCT  
A\_14\_P133638 GCGATCCACATGGTCAGATGCTCATCACAAAACAAATAAAACAATTTACATGAATGCTTT  
A\_14\_P132096 CTGAATTTCTCCCTTTTATTCCAATTCACAATTTTCATGGCTTTTTGTGTTTGT  
A\_16\_P17592750  
TGCCTGTGTATTATAACATCACCTTAGTCCTTACTTGTAGAAGAGCACATAATAGTCCCT  
A\_14\_P102450 AATAAATTGTGTTAAATGGTGGGGCTTCATAGTGATTTTGCTGTTGATGTTAACGGTAG  
A\_16\_P00295787  
GATGAAGTGTCCCAATAGTTAAGGTTTTCTGATTGCTAACTCTCATCATACTACTTTG  
A\_14\_P133373 ATATGGTTTTTACACTTGCTTACTATAGGTGGAGGAACTGCAATGTCTGGTGGAG  
CUST\_8254\_PI426210822  
ATTTGCAAATTAGCATATTTTTGCCTCTGTTTACAGCTCTATTTTTAACTGTATCATTTA  
A\_14\_P100431 TAGTAGCCTATGACATAATTCCAGACCAGGTGAATCTCAAGATACTAATCCTCACATCAT  
A\_14\_P200582 CTTGCACTGTCAATTTGAGCCAAATCAGTAAAGTTGCTTCTACAGAAACAATTGAGTTTA  
CUST\_2950\_PI426210822 ATCAGCTTTTCCATCACCATGACATCATTCGACATGGCAGGGACA  
A\_16\_P16278589  
AGGCAATGCAGTTAACCTTTAGCAATATAGAGCACTTAAGAGTTTTGCAAGCCTTGTTTT  
CUST\_8004\_PI426210822 GTATCCGCAGCCCAGCGTGCCTCCATGTCCTTCCAACCCTGAG  
A\_14\_P120266 ACCAGAAGAAACAAAGGAGGTTTATTTCTATAGAGAATTGTTGGATCTCAGGTCCAAAAA  
A\_16\_P03094834  
AATTAGGGAACCTCAACTAGTTCTTTGTTTTATGTTAGGAAAAATGGGAAACTACACCGC  
A\_14\_P125632 ATTCTTCTAACCAGTTTCTGAGTATGAGACCATCAGAGCAGTAACACTGAGTAGTAGTAA  
A\_16\_P36484755  
GTTTACAGCATGCATAGTCTATTTGTATTAGTCATGTCCATATTTGCAACTCAAACACAGA  
A\_14\_P110530 AGTTTTGTGCTTATAGTGAATCGGATCTGTAAGTTGACCACAGTTTACTGGTTTA  
A\_14\_P134675 AACAGTTTACTCATGGCTAAAAGTACAGGCAAGTGTAATAAATCTTACTCTTAGTTC  
CUST\_7978\_PI426210822 CTGGGTCATACACTCAGATCATTTTAATCTCCAAGGCTCTTTGGTCCC  
A\_14\_P100505 GATACAAAAAAGTTTACTCCACTCACCTGTCTGTTACGTTTCATCCATAATCCTCGTAAT  
A\_14\_P200339 AAATGTTTCAAAGTCACTCATACTGAAATCCAAGTTGTGTTTCTTTCATATCGGTCCAG  
A\_16\_P01635487  
ACCATGATTTACAACCTATCTCAAACCTAATACACCTCATAAACTGTCATACTGGTCATA  
A\_14\_P116709 ATCTACGGAAACAGAAGACGAGAACTTTTGCTGTAAGTTCAAAGTTACTTCTATGTCTA  
A\_18\_P22843207 ATATTGGGATTCATCTGTGGCAGTTTGCAGAACATATCAGGGGAGAGAG  
A\_14\_P101367 TGAAACTTTTCTTTGATTCCGCCATAGTTAGATGGATCCATCCAGAGAAGAAATTC  
A\_14\_P128130 CTCCTCTTTCTAGTCATACAGTTTGTCAAGAAAGAAAATAGTGCCTACACCTGTTTTGA

A\_18\_P13972213

TCCCTATTATAGTTAAGGCAACCATTTTTCTGATTCCAAACTAAAGACTTGTGATGTGA

A\_14\_P139521 CTATCGATTGTAAAAGCAAATCCGTAACCTATGTGCCGGGGTCATCATGTGTTATAAATG

CUST\_3798\_PI426210822 TAGTGGGAGGTTTTAACTATCTGAAGATCACACAACCTGTGAGAGCCCAG

A\_16\_P16248029

AAAAAGGCTAACAGAATAGGACAATTTAATCACATGCCATTATGTTTCATAGGGGTTTGGG

A\_14\_P122739 CTCCTCAAACCTCCTTTAAAAGTGTGTTAGAAAAATAAGACTTCCAAGTTGTTCCCAATG

A\_14\_P104729 CAAATAAGGAGCGAGGTTGTGAAAAGTGGAAAACAAAGGCTCTTTTCAGAGC

A\_14\_P103003 CTATTTGAAAGTCAAGTTGAGAACAGGCTTAGTCAGCAATATGAACCAAAAAGTTGCATTC

A\_14\_P200464 TGAGAGAGATTACCTTTTGTCTGGTCATACAGAAGAAATCTTTCAAAGAGTTCAATGTTGG

A\_18\_P14132495

GCAAGCAAAAATAAATGTTATGGATGGGATAAAGAAATGTTACAATGAAACCAGGAAATC

A\_16\_P03251837

ACACAAAGGGTCCTATGTAATTCACCTGATAACATATCATAAAGATCTTTGCCAATGTCC

CUST\_2514\_PI426210822 CCAGGAGGAAGTAAGGGAATAGAAAGAAGTCAGTGTTGAAGCTTTTGTCC

A\_16\_P19697994

ATACGTGTCAAGATTCAAGACTGCATCTTGCTATTCTGCTTTAGGAATTCAGTCTGCTAG

A\_14\_P111576 ACATCTGTGAAAAATGACTGGTCTAAGGGAAGTGTATATACCACACAAAGTAGATCATCT

A\_14\_P115176 GACTTCAAGTTCAGAACCAAAAAGCAGAGAATCGTTTCATGTGACATGATGTTTCTATAG

A\_14\_P103420 CACCAGAAGAAAAGGGCAACTGAGATCCTGAATTTGCTGTTGAAAGATCTG

A\_16\_P18577330

CTTTGGTCACGTATAAATGCAAAATGAAAGAGGGTCATTCTAAAGTCGTGAAACTGAGAGA

A\_16\_P20860119

ACACTACCACAATAATACGTCTTCCTACAGGTTTACAGGAATCAGTAACTGAACGTTTCAG

A\_16\_P16191308

TCATGCCTGATACACAGATGTTTGATTATCAGAGTCTTTTTTCTTTCTTGTTTCCTGTGG

A\_14\_P127679 CTGTGCCAGTTTGCTCTGTCTTCTTGCTCTGTTCTACATTCAAATTTATAGAATCAAAA

A\_14\_P138583 AGACAAAAGACACATCCAGAATATTTTCCCAACGGTAAGGAGATATGGCAAAC

A\_18\_P11966711

AGCAGAAATTTACAGGGGAAAAAAGACATAACTTTGGCAATTCTAAACTATACCCAGGC

A\_14\_P126045 CTCAATGGACCTGTTGACAATAACAACATTCAGAGGTAATTTTTTTCAAGGATGAGAGT

A\_16\_P02836140

ACGTTGAGTGAATATCAAACAATCCCGATGTATTCAGTAAGGAGAGTATTACTGCTTCTG

A\_14\_P119575 GTAAAAAAGGAGGCTTGCTTAACTGTCTATACCTCCAGCCGATTATAAACTGCACG

A\_16\_P16725646

AGCAACCTATAGGGAGATTAAGAAGACGTCATTGTAGTATACCTAAGTCCGCAGTCTAAA

A\_14\_P114506 ACCTCACATTTCTCTGTTTTTACAGTAATAAAAGACTAGTGGCCTTAGTGCCCATGC

A\_14\_P115638 GAACACTCAACTGTCAAAGATGAACTATGCATATCTCCATCTTTCTTCCCATCATTTGAT

CUST\_7199\_PI426210822 TGTCATTGAGTTTGGGTGCCCTCAGAATGCTACTGAAGATGGTACAA  
A\_14\_P139338 ACGAAACATATTCTTCAAATACTTGTATTCTTTTCCCATCTCCTCTGGATAAAAGGAAAA  
CUST\_5638\_PI426210822 GACACACAATACAGCCCACACCTCCAGAACCCCGGGGCTTCTTTC  
A\_14\_P107884 AGTCTTATATGTAAGCATGGCAGAGAGAAGCCGAGTTCTTGCACAGAATCTTGAA  
A\_14\_P107338 TTAGCAGGGTGATGCTTCATAATCATGTATTATTCCTACCTCTAAGACACCAGTCTGTAT  
A\_14\_P111556 ACTGAAGGGGATCAGAGGTGTCTATGCAAATGATATGCAAAGTCCATGCAAATAA  
A\_14\_P122234 TTCTGCTGCAGCCTAGCATCATTAACAGAGAAGAGTTAATGAATATAAAAGCGTAAAGGC  
A\_14\_P100528 ACTTGTAATTTTACAGATGGCCCTATTGAATTTCTTCTTCCCTGATGAAAAGCCATACT  
A\_14\_P135616 ACCCATAATCTACTTGTTTCTAATCTAGTGCAGGTTTAGAAGCCAGATAACTTTGCTTGT  
A\_16\_P03739305  
GAATTTGAGATGCAATGATAGTGAGATCATTCCGAGTCATTGATATTACTAGAGGGGACT  
CUST\_801\_PI426210822 CAAATACAGCCCTCAGTGAAGTCTCCTGGGGCTGTGTTTAAAGTG  
A\_18\_P15552806  
AAAAAACTGGAAGATTCTCTGACTTGTAGATTCTGAAAATATAGGTTCCCTGGTCCTAC  
A\_14\_P113682  
TACAGAAAAAGAGGGAAGAACTAAACAAAACACCAGGAATGGATCCTTATGAAGAGAT  
A\_14\_P131530 ACATTTCCGAAACAGTCTCCATCTACCTAGGCCTCTACAAGTAAGTAAAACAATTTTAG  
A\_14\_P115492 CTTAATAATTGTGTATTTAATGGAATAATTTTACAGTCTAATTTCCCATTTCTTTTCCTTA  
CUST\_9470\_PI426210822 AAATGAATTCCTGAATGAGTGAGGGGTTGGGCATTCCCTACTCAG  
A\_14\_P110219 GATTTCCATTGATTTGTAAGACTATGACCCTTACTGCAACTTTTTGTCACTGGCAATTAG  
A\_16\_P19346165  
AAAAAGACAGTTTTTTCATGTTTCCCATTGAGTCATCTCTCACATGGAGTTCCTACTAGAGAT  
A\_14\_P109965 TGAGAATCTAGCCGCACTTCAAAAATGTGTGCAAGTGTTTATTTGGAATCCCTTCTATTT  
A\_14\_P128439 TTATATGTAGGTGGACAAGGCTTAGAACTGAAGCACAGGCTAGAAATTCATTCATTCAAT  
A\_14\_P123398 ACATCGCCTCTTGCAAATAATTTATGAAGATGAAATGCTTTTGTAACTTCCTTACCTCT  
A\_14\_P111735 TGAACCATATGGAAAATAAATATCTCAACCATCGACATATGCTTTCTTGAACCTGCCTTC  
A\_16\_P39228751  
CCTTCCACTCAGTAGAAATAACGCCCTTATTTTGAAGTTGTTTACCACTCTCATAAATGT  
A\_16\_P02722120  
TATAATTGCAAAGAGAGACCATTACAATTTTCCATCATCATCCTATGATCAGAGAGCACC  
A\_16\_P18729152  
AACTTTCAACAATCAGTAGAGAACACTTCATTGTTTGCAGAACTTCTAAAGGTCTCAAGG  
A\_14\_P202164 TGTAGTGCACACTGTGTTTGGAGTGGGTTTCAGAAATAATTTTATTCTTGTCAAAAATTCCG  
A\_14\_P117649 AGAAATTTGCATTTCTTTTTTTTACAGGATTTTCCCTCCTGGTGAGTCAAATGAACAAGA  
A\_14\_P128732 AGCAGTCATGGGACCCAGGATAGGTAAGTCCGAACAAATTAAGGAAG  
CUST\_7213\_PI426210822 GATGAAGAAGTAAAAGTTTGTGTTCTGGAGGGGTGGGGCTTCAATCTA  
A\_14\_P133075  
TAAAGTATCAAGAAGACAATAAAGAAAAGGGGAAAGGGCACTAAAATAGGAAGAGAGGAC

A\_14\_P136156 AAGACGAATCCATTTTACCTCCTCATATTTACACTTAGGGATGTTTGTCCATTCTTACT  
A\_18\_P14771424  
AAATTTTGTGTCAAATGGAGATCCATACTCAGAGACATCAACATTCTACAGAACCACAAC  
A\_14\_P109675 CTGGCTGCAAAGTATTGGGTTTTTCCTGAGAATAGTGCTTTATAGTTGATTTCCAAGTTA  
A\_14\_P132484 GATTATGCTTCTACTTCAGCATCTGTATCAAGACATAGTTCCAGTGTGTCATTGAGTTCA  
A\_14\_P101807 TTGCCATTAATAGAGACCTCAAACACCGCCTGCTAAAAATACCCGACTG  
A\_16\_P35573168  
AAGATCTTCATAACCTCAAAAAGTGAGTCATCAATACGAGGCTTTTAGAAACGATTCCAG  
A\_14\_P119054 CTCTAAACCCCAATACTTAAAAGTCTAATTGCTGTCCTGTGGTTTTATTAGTCTGATAG  
A\_14\_P127527 CTCTCAGAACAGAGGAGAGCAAAGGGGAACCTACTGATTTCAACAAAA  
A\_14\_P200121 AAATCTGATAGGACTGGTATTCATCATTTCCAGTTATTTCAACTGCAGGACCACCTTAAA  
A\_14\_P101470 ACTTCATAAAGGAAACTGCGTATGCAGATTCAGTATTGTGTATCTTTGGACAATTAGATG  
A\_16\_P33665764  
AATCACTGTTACCCTCGATAACAATAGTATGTGGAATGAGTTCTATCATCGAAGCACAGA  
A\_14\_P104968 CTGGAGAGGATGGCTAGCCTATAGAAGGTCTCATATTTTATGCTAAGGAAGGAGTT  
A\_16\_P36770302  
TGTGTCCTCAATGAGAAAGAGATAGTTATCATCAATGTGTTCAAACAAAAGGGTAAGTGA  
A\_14\_P106772 CTTCTTAGGATCTAAAGGACTTTTTGGTCTAGCAGGTAAACCTACTGAAAAATAAGACC  
CUST\_3985\_PI426210822 TCATCTGTGTACAGAGTATATTTTCCTTGGAGGCAGCTTTGCTGAAGGC  
A\_14\_P104022 TGAATGTGCTACATCTCTAAATGCCGTTATGGAAGACTTGTGATATATTTTGGTTCCCAA  
CUST\_1027\_PI426210822 CAGTGTCTGTTAGCAGAGCTGCCCTGCCTCATGGTGTCTTGCCTG  
A\_14\_P119675 GCAACCTACGTTAGACCTCTATTGTTTCACTGAGCACACAAAAATCTTTCCTTTGAAATA  
A\_14\_P124130 TTCTCCTTATTGTAGGCCGAATGTTTACCGAATGCTTTTTAAGAGCAAAGCATATGAG  
A\_16\_P03225647 AAGTTTGTCTTATATTTTCCACCTTCCTAATACCCACTCTTCCTTTTTCTGAAGTATT  
CUST\_6266\_PI426210822  
GCAGGCTGATTGCTTTTTAGGATTCCAAGTTTCAAAGGAAATCAAATCCAATGTATTTA  
A\_14\_P120903 ATGCCACCAAAAAGAAATGAAAAATACAAACTTCCTATTCCATTTCCAGAAGGCAAGGTT  
A\_16\_P15992779  
AAAGATGTATGCATGAATGGAAAGTATTAACCCCAAGTCTTTAATGGTAGGGAGAGGTG  
A\_14\_P117405 CTACTTTAGGTATTATTCTGTCTCCAGAACTCCACATTGACCTAGACTCACAACAATATC  
A\_14\_P109410 GAAGACCTTCTTCGGAGGCTAAAAGTCAAAAATGTATAGATCAAAGGTGAGAAGAATT  
A\_14\_P136874 ACTAGAAAACACTGCAAATCCCTCACAATGAATAAATATTATTCCTGCGACTGTAAGTGG  
A\_14\_P114666 CTCTGTTTTTCTCTATTTTACGTTGTGGCATTGCCCCACCAATTTTATTTGGAAATAAG  
A\_14\_P135993 CTGAGTTTGACATGGAAATTGAGAGTTCAATCTTGAAATGATTGCAATGGTGATGTTTGA  
A\_14\_P134638 TTTGTTTCTGTAGGAAAAGCAAAGGAAAAGGATTAAGTTTCCTAATTGTTGAGTAGACAC  
A\_14\_P133225 TATATTCTATTTCAGAAATGTCTTACTTGCCAATTACCCTTCCTGTCATACACATAGGGACC  
CUST\_5963\_PI426210822 CTCCTTTTTCTTGACCCAGGTCCCAAACCTGAATGTGCAGATTT  
CUST\_9769\_PI426210822 CAGCAGAAGCCTGGGTGAGATGTACTGCCATTGTGATCATATTCTCA



A\_14\_P137545 CTCTATAGTCTCCTTGTTTTAGTGAGCACTCCATAAATGTTCAATGAATGAATGATGGCC  
CUST\_10231\_PI426210822

GGGTTTCCTGGCATGTGTATGAAGAGTTACAGATTTAGACCATGTATCTCTTAAGC

A\_14\_P100398 CTTTTTCCCCTCCAATAAATGAAAAGTTAAATTGGTTGTGCCCATCTCTGTATTTTCTC  
A\_16\_P15104881

TCCTACTAGTTGCCTGTATAAAACATCACTCACAAGACTGTTATCAGTATCCAGAAGCAT

A\_14\_P138240 TAAAACTGGAAAATCTTTGTATAGGGGCTCCATTCATTTGACTCAAGGTTATAGACTTCC  
A\_16\_P16290368

ACATTTAGGGCACATTCCTTAAACATGAGATATGAACTGCAATTAATCAGCACTAGTAGCC

CUST\_357\_PI426210822 ACAGACCCCAAAGTCAGCACGGACTCTGCAGGCGGCAGAGTAGAG

CUST\_7232\_PI426210822 GTTCTTTTCTGTTTAAAGTGGGTTCTCAGAAGTGGTTGCACCTTCAGCA

A\_14\_P132884 CTTACCTGGGTTTGTCTTTTCACTTTTGTCTCTTGACTTGTCACTTAAAGTCTTCAG

A\_14\_P114221 TTTTTAAAAAATAGGAGTTGAGGAGCAAGCGTTTTCTAGTGAAAGATGAACACATCAGC

A\_14\_P202369 TTAATGGAGACCGAGAGAGTTTACTGCTAGATGATTTCTGAGAAAGTTTATCGTCTTCTA

A\_14\_P118754 TGAAAATTTTTCACCCATTTCAAAGTAAGTGGGTTTTTACCAGTTAAAGCAGAAAGTGT

A\_18\_P14132290

ATGCTGGAAATTTATTTTGGATCGTAGAAAACTTCATGTGGTGGGAAAATGTTCACTTG

A\_14\_P126301 CTGCAACTCCCAGTCTCTCAGGAAACATGGCTAAAGTGAGAAAGACATTAGAAT

A\_18\_P14133800

TCAGTTTGAAAAAACATAATCATTGTGCAATGACAATTTGAGACATTTTCAGGGTCCCA

A\_14\_P132954 ATTAAATGCTATCGTTGATAAACTTACGAATCAACATGCAGAACTCTCCGGCCACTTCTT

A\_14\_P118454 CCAAATCTGGAAGCAAAGTCAGGACCACTTGCATATTGTCCACCTTTTACATAG

A\_14\_P133773 ATTACATTTGTGGACACCAGTTTGGTTGAAGTGGCCCTACTACATTTAAAGAAGAA

A\_16\_P15996443

CACCACTCAATTTCTGTTTAGGTCTGTTCAATGCATCTTACATTAACGTTAGTGACAA

A\_16\_P16206334

CCATCTAACTTCATTTTCTACAATATCCCTACCTACATTAATACCTCATCCACTCAACA

CUST\_6430\_PI426210822 CTTGGAAATGCAATAGCAGCTGCCTTCTAGGTGGGGAAGCTGAG

A\_14\_P136557 CTGATGTCATCTTTGGACAACCTTGGTGAGTAATAGATAAGTTGGGTAAAAAGAACAAGCA

A\_16\_P21561220

GCACTGAAACGTGAATTATCATTCTACCCCATCATTGCATTTCAACTAACAATGAACTCT

CUST\_9964\_PI426210822 AGCTCCAAAACAGCACCAGGGACCATAACTGCAACTTCTGACAC

A\_14\_P110985 AGGCTTAATTAATCCTTCTATGTAGTCTCCGTTAGAGACATTCCTAAGTCCTCAGAGTA

A\_14\_P105097 AATTTAGCCCTGTTTTACCTTGTCTCTCTCCTTTGCGTTGATTTTCTCTCTTCTAA

A\_14\_P114395 AGAGTGTCTGCTACATTAAGCATTTCTTAAATAGAATTTTAAAAAATGGGGCATTGCCA

CUST\_4493\_PI426210822 GCACAGAGATGAGGGTGGCCTCTGGGTGAGAGGGCTTCTGTTGA

A\_16\_P03101404

TAGAACGATCTAGACGAAACACTGAACTTAATAGCAAAACCACTTCTTTTCGAGGGAAAAC

A\_14\_P129644 TGGAATTATTTGGTCAAAAGAAATGAATCTCTATGGCTGTTCCCACATATGACCATTTTG  
A\_18\_P14136778 GTTCCTGTAATTCTGCCAGGTGTTTCCTGTCAATGAGTGTGCTCTAG  
A\_14\_P114386 CTACAAACAACCAGTAAATTAATGTATAGCAAGCCACCATCAATCTTCCCTGTGTGTG  
A\_14\_P138386 CGTGTTCCATTCATGTAGATAAGGAAGATATATCTTCCCATTTGCATCAACATGCTTTC  
CUST\_5166\_P1426210822 GGCTGATCTGAGCCTTAAGACTTATTTGTGGAGACCTTGTGCTGTTCT  
CUST\_2352\_P1426210822  
TTTTATTAGAAAGTACATAACAGGAGATTAATAAACTTCGGTGATTCAGCCCACAAGGC  
A\_16\_P00017737  
ACCCTTAAGGTCTTTTTAACTGGTAATTGGTTTCCTATCCATCAATCGACCATTTCCTTAA  
A\_16\_P15951374  
AAAGCCTAGTAATGAAGATATGACTTTCATTTGCATCACACTTATCACTCTACTCATGCT  
A\_14\_P121916  
ACGTAAAGGAAAGAAGAGTTGTGAAAATGTAGTCTGTTGATCAGTAGAGAGAAACCAAAA  
A\_14\_P105761 GTGTTAATGGCTGGCATTAAATAAGGGATTCCTCTACAGGGGATAGTTTTTCTTTTCTTA  
A\_14\_P108342 AGAAGTGTGTTCAAACCCATCGAGGCACTCCTTCTACAATGAGGTAGA  
A\_16\_P38436215  
AAATAGACCCAAGTCAAACCTTATCTTACCCCAGTATTTTACATGGCGATGGATGTCTTG  
A\_16\_P18537315  
ATGCTCAAAACATTTTTTTAGTGGAAGGTTTTAATACGTCTGTAATTTCTCCGGTGTCTT  
CUST\_3206\_P1426210822 ATAAGGCACATCCTCCTGAGGGGAGGGCAGGTACTTTCTCACGGC  
A\_14\_P138841 CATGTCGAGGATTCTTGGAAGCCTTTTGCAGCGTGTCTCTTTGC  
A\_14\_P103047 CTTCAAGCAACTCCTAGTCCATCTGCAAAGCCATCAAATAGGCTGAAAAAAAAAAAAATA  
A\_16\_P20032029  
AATCCTTGACAGAATTTGTAACAAGAAAACGTCTATTGACTTTCTCAACTTAGAGCCCTG  
A\_14\_P128271 GTTTTTTGTGCTCGGGGATTCACTTGAAATTCATATTTACTTTGAGCCAACATTTTCTC  
A\_14\_P118809 GGGTGATATCTTAATGAGGATTCTTTACATCATGTAACTGGATATAGGAGGAAAGAGGTG  
A\_16\_P17616244  
ATTGTCCTCTATAGCCTACCTCAAATCCAATTCAAATCAATAAAAGATTGTTGCCCACTG  
A\_16\_P16191671  
CATGGGCCTGTGAAATATTCTAATGGGTAAACTAAGAAAAGCATGACTAAGATACAGAGG  
A\_14\_P124211 GGTTCCCTTCTCTTACCTTAATTGCTATGTTGTTGGATTTCAGTAGCACCCTAGT  
A\_14\_P134195 CTTTGAAGTTTATAAAAGTTTGTTCCTCCCAAACCCAAAGCACTTTTAATCAGGTAGTT  
A\_14\_P132957 CAATGCAATGCCAATCAGATTTTGTCTTTTTGAACCTGGAAAGAAGACATATTTCTGTAGT  
A\_16\_P17633317  
AAAAAGTAGGATCTGAACATCAGCAAAAAGTAGGAGAAGTATTAATAAAGCCTGGGAGAC  
A\_16\_P16668555  
TCGTCAAAGTCAGGTTCAATACTATATGGGAAGCCATGATATAAGAAAACTGTCATCCA  
A\_14\_P126600 GTAAGTGAAGTGCACAATATCAAAAATATAACCAGACTGCCCCGAGAGACAAAGAAG

A\_14\_P123343 TAAGAAGAAACAGAATTATGTGTATATATGAGAGAAAGAAACAAGAATGCGTGAATGAGG  
A\_14\_P109650 ACGTTCTAACCACAAACAAGGGAGATTTTCTATGAGTCACCGGGATTTTGC  
A\_14\_P118088 TGTGGAGAAAATCAGACACCTTTTCAGTAAGCATTCTTTTGTCTGTGATCATGTTCA  
A\_14\_P129429 CTCAGCAAAGGAGAACATTTTCTGAAATCCTTACCTCTCTGTCTCCAAATATAATGTCA  
A\_14\_P127170 CTTACTCCTTTGCAGTTTGGTAAAATGTTTTATCACTGCTGCTGGCTGTGAAGAC  
A\_14\_P111072 CACACCTTGTCAAAATTTTCTCCCTAGAATCCTAGACTCACTGTCTGATCCG  
A\_16\_P19306946  
GGACACTTACCTATAGCCATTTTCTACAAGAAGCACATATGATATAATACGTACCTTGG  
A\_14\_P121727 AAATATTTAAACATGGAAAACGTGAAGACTGTTTGCCTATGGTAAGGTTATTTTTAAG  
A\_14\_P120879 TTATATTGGCGCTTTTAACTCAGAGTTTTAAACCCAGGAACAGAGACTCCTAGTTG  
A\_14\_P110735 TAACAAAGAAGCTGGCTTAATCAGAAAACAGTGTGAAATCTGCATGCTTATGCAACTCTC  
A\_14\_P105841 ACTGAAACTCATTGACATAGGCAACAGTTGCAGGTAAATCTCATTTTGATTAAGAAAGGA  
A\_14\_P135643 CTGCAGTGA CTCAATCCTCGTTTCTGTTTTACTGATTACAAAATATAATCGTGTTTTGG  
A\_14\_P129804 CCTGGAACCTTGATATGGATCCATATAATGCAAAAACTTTCATGGTAGAAGGATGAATGC  
A\_14\_P201365 ATCGTGCCATTTCACTCTTTGTGGTCCCTCAATTCATTTTCTAATTTGTTGATCGTGTC  
CUST\_633\_PI426210822 CAACATCTCTGAATGGAAAACACATGAGAGGCTGCCTGACAGGATG  
A\_14\_P121361 AGATAAAAACGCCATCACTCACTGTGCAAAGGAAGGGTCAAGGATAG  
A\_16\_P02233762  
TCCTAACTCAACAATTCAAATTTAGTAACAAATTGTGCGTATGATAAATCCACTGGTCCA  
A\_14\_P201310 CTCCCACCAAACACTTTCTTGATTGTTATTTTTGTGATTTACAGTGAAGTTTTGTCTCAC  
A\_16\_P01804418  
ACACCAATGGCTGTAATTTTTATGTCTCTATAGTGCAACTTTGTAGGTTTTCTCATCGCA  
A\_18\_P10378375  
ATGTAGTTATGCAAGTGCCTTAATTTTATGGAACATCCTCATGATTCAATCTGCTGCTC  
A\_18\_P15830087  
AAAATGTGCAGATGTATACCCATAATCTCAATTTCAAGTGTCTTTATCTCCTTATCCCT  
A\_16\_P00085425  
CAGTCACTTTCTTTTATGATCTCCTTACCTCAATACTCCTACATACAGACATTAGCCAG  
A\_14\_P135787 CTAATCACACATTCTATGGCAACCAATTCTGTATAATTGCTTGAGTCTTTAAGGTCAT  
A\_14\_P126964 ATACACATTGACAACATATTCAGTTTCAGGTTTCAGATCTTTCAGCACTGTGCTAGTTTC  
A\_14\_P137575 GACTTTGGAGAGATGAAGCCGTTTGTGATTTTCTAAAGAATAAAGAAAACCCCTCATAT  
A\_16\_P16689142  
AAAAAGACTGTGCTTTATTTTTTTCAGTCGACTAAGCAGTATGTTCCCTGGTAAGTCGTAGAA  
A\_14\_P107067 ACATAGAAGTATTTGCTAAATGGACCACAAAGACTGTCCCTCAAGTCTTGTGATTCAAAA  
A\_14\_P127320 CTTATCCTTGGAAAGAAACGCAGACATGTGAAGAATCAGGGACATGGAGA  
A\_14\_P130998 CAATTGAAATCTTTGCCCTGCCAGAGAGTTGCAGTTATTTGTAATTATAAACAGTAAGT  
CUST\_7414\_PI426210822 AGACTTCTCAGCATCCCCTGCTCAGAAGGGGCTCTCAGAGTCCAT  
CUST\_8363\_PI426210822 GGGAAGGATGGGGTTAGAGCTTGTTTTTGAGACAGTAGAGTGATTGC

A\_16\_P18414161

AAAGTGTGCTTGTATTGAGTTAGGGTTAAGACATTTGGAAAACAACCATTGTAAGGA

A\_14\_P138339 TGTTCAGACAGAGGTGCGTAGATGGTATCTCTGGGGTCCAGATTTTAAA

A\_14\_P102001 AAAAGGGAGGTTTTTCAGTATTCAATTTCCACAGTAATAAGTTGGTTTTAACGCATGCTC

CUST\_2909\_PI426210822 CTTTATTTCTGCTTTAGAAATGGGAGACCACAGTGCCTACTTGGTCATG

A\_14\_P201135 ACTAGAGTCCAACAACCTATAAAGTATGGAGGTCTGTGTCAACTTCACTTTGTAATGCCT

A\_16\_P16119218

ACAACAGACCTATTTAACTCAAAGCCAGCATCTTTAGTAACAGAAAACTCGTTTCCTCT

CUST\_4825\_PI426210822 ACCCCAATGATGGCATGTCTTGCTCTGGACCCATGATATAATGAT

A\_14\_P108254 GTAGAAGACCAAAAGGCCAATGAGACTTCTTTCCTATTTGAGATCGGATTTGAGAATG

A\_14\_P130724 ACTTTAGGATAAAGTATTCAGTTATCAATGAGTCTTCCCTCAATGGTGTATGAGGCAGAA

A\_14\_P200027

CTTAGGAAGGAAGACTCACAGAAGTTGAACCAAATAATTGAAAATGATAGGAAGACTAGG

A\_14\_P139663 TTTGGGAGACCATGAAATTAGAGGCCTTTGTCTATTTTCAATTTGCAAAAGGTATCAGAA

A\_14\_P131660 AAAGTGCTAGTCTTTTCTGTCTATTTAAGGTGATGCCTGATATTGTCATGTTACAGAGGC

A\_14\_P139198 CAGATTCCTTATCTAAGGAAAGTTTTAAAAGCCATCTCCAGTATCCATTCTTTATGGCAG

A\_18\_P22841243 ATTTGCCCAAAGAGACTAATCCAGGACTAGAACACAGGCACTGAGTTTCAA

A\_14\_P105274 GTCAGTCAGTGCATTTCTACTGAACTTCATGGTTTGTATTATCTGTCTCAAGGTGAAAA

A\_14\_P127101 TGGTTTATTAATAAGTGAAGTAGAATCACAGAAACGGTGCGATGCTTACATGTTGACAT

A\_14\_P108406 ACATACCCCTCCTAATTCTTCTGGGTAAATTTCTATGCCCATTAACCTCTAGACATACATT

A\_14\_P122068 TTAAGAGTAGAACAGATTGTGCTCAAACCCTGCTGTTTATAATTAACACGTTGCTTCCAA

A\_14\_P125566 CCAAAAGTTGACTTCTGCTTTTTCAAACAGGTAGTCTTCTTCCACCTAAATCAGATG

A\_14\_P104361 TGCTAAACAAGTGGTGCTGTTTGTTCATTGATACATGTTAATGAGAATGAAATGGGGACTA

CUST\_2486\_PI426210822 GTTTTAAACTGATCTACTCTGAATGGCTTAGCACCAGGAGGGTGGATTTG

A\_16\_P16881775

AGGATTACCACATCTGAAGGAGAATATAAGCAGGTTTAGAATAGTCAATACTCTCAGGAA

CUST\_5735\_PI426210822

AACTTCCTAGCTGTTTTCTGCCTCTTCTGACTAATTAACAGCAACTAAAAAAGAAAAATG

A\_14\_P202059 AGATTTGGTTCTCTTTCTTAGAAACCCATTTAGAAAAAAGGAACCAGATCTTAACAG

A\_18\_P14136754 ACTTCTCATGGATGCAGCAAAAACCCAGTAGGATGCACCTCTCAAG

A\_14\_P121930 GTGTCTGTGAGTCTCATGAAGACACACAGAAACATACACATTATAACTGCTAGACTAAGC

A\_14\_P119382 TGGGAGCCAGAAGTTACAAAAATTATAGAAGACTACCTAGGCATAAAGTCTATCTCCAAG

A\_14\_P108497 CATTTGACCTACATACTGTAAGCAACCTGTGCCTTTTTTCAAACACTGACTCAAAATT

A\_14\_P138913 TCTCAGGATCTCATCCCCACAAATTTCTACTTCTCGAAATCTAGTATAAGTATATCACCTG

A\_16\_P01269131

AAATGACTCAAACCTTCCATTACTGAAAGTTCCAAATGTTTCTTTAATGGCAATCACCAG

A\_16\_P37025717

TTGACTCATTGAGACACATCTCTATGTAAAGCCACTTTGATGTAAATGTCCCATCTGTAA

A\_16\_P16191414

CTACATGACTTCTTGATAAGATTCTTTCAACTTTACCCTATGCCTGGATCATGAAAGAGG

A\_14\_P125656 AAGTCATGGCCTGAATCCTTACCTGTAAGGCATCAGAATGCAAATGAAAATTAACCTAAT

CUST\_2827\_PI426210822

AAAAAGAGCTTAGAAATTTCAACATTGAATGAAACCATACCATAAACTTGGGAACTGGT

A\_16\_P20984019

AAAATCTGTGGTCAAGTTAAGAAATGTTGCTTGGTAATCCTTGATCTAGTTTCCTCACAG

A\_14\_P103429 CTTTCATTCTCTTCTTATCCATTTTGGTTCCTCAAGCACAAGGGGAGAACT

A\_16\_P01180019

TTTCTGATGACTGCATCTACAAACATGTTTCCTAAGAATTTAAATGGTTCATGCACTGCC

A\_16\_P16901060

TGCACTATCTGGTAAACTCCCAAATTTCTTGAGCATTATTCTAGAATCTAGCCTATGAG

A\_14\_P107075 TACACATGTTGTCTAAAGCAATATTCAGGGTATTACTCCTTTCTTTTTTCCAGCCTGCA

A\_14\_P138511 AGTTACTGCAAAGAAAGTGATGCACAAACATGTGAAGTTGAGAGTAAATCTCAAGCATTT

A\_14\_P201422 TTTTTTCCAGTAATTTGAACTCAGTCTTGAAGTCTTACAGTGACAGTTCAGAGCCTTAC

A\_14\_P116439 AAGTTTCTATCAGTGTGGATTTTGTGATGAGCCTTAATTCCATCATCTCCATTCAACAAACA

A\_14\_P134813 TTCTTTTCTACAGAAAGATGTAGCACTTAAGCCTCAGGAACGTGTGGAGAAACG

A\_14\_P118623 CAGCGTTTTATTGACCCTCTGGCTAAAGAAGAAGAAAATGTTGGCATAGATATTACTGAA

A\_14\_P136602 GTGCTTACAGGAAAATGTTTAAACAATACTGGCATTTCAGTTCCTCATGTTTTGAGAGC

A\_14\_P102620 CTGTGATACATCCATAGTGGATAAAATAAATGCAGGCCTTGGAAAATAGGCTTCCATTAT

A\_14\_P122969 CACTGTGCCAGTCAGTCTGCAGACCAAACAATAAGACGGTAACTAAAAGTAACATAC

A\_14\_P107433 TATTTTTAAATAGGCTATTACCTTGTTCGATACGAGTAGCCAGATAGAGCATCTCTCCCT

A\_14\_P131821 ACTGAAGAAAAGAAAGGTTGAATTTACTAGGTGTGTGCTCCTTTATAAGACCCATTCTAG

A\_16\_P17496514

ATGAAATTTAACCTTTCTACCATGGTATTTTGGCTAAACTCTGAGTATACCCCTGTCAGCA

CUST\_3438\_PI426210822 TAAGTTTTCTGAGGGCCCGTCATGTCTCAGACTGTCACACTTATT

A\_14\_P110180 AGGCTTCCAATGTGGTGGCAATAAATGTCCCAAATAAATTTATAACAATTGATTTTCCCC

CUST\_2533\_PI426210822 CTCAGTGCATTTAGTGATGTACAGATTCAGACCCTCTTGGACTCAGATACTTG

A\_14\_P106299 CTAATCCTTGCCTGAGCCTCTAGTGAATTAATAAAGGCAAAAGGAACAAGAACATTTT

A\_14\_P132734 CTCATGTTTTGGTTCTTTTATGCTAAGTTTTACTTCAGCAATTTCTTCTGATGTATGGCCC

A\_14\_P127459 CGTTGACATTAGACCAAATACTTTTGTGATCCCAACTACTCGTTTTGTTCCTTTTCTCCTTT

A\_14\_P114058 ACTCATAAACTAATCTAGGAAGATTTGTTCTTACTTGCCCCAGAAAGGAACAAATTCT

CUST\_9315\_PI426210822 GTATTCTTCAAAAATGGTGCTGCAGACAGTTTTATTGCCTGTGCCATACTTGC

CUST\_9480\_PI426210822 CATTAACTGCTAATTCAGACCTCCACCTGGGAAGTGAAAAGAAAAGTGGTT

A\_18\_P14137183 TATTGGCTGAATGTCCACTTCTGTTCTATGCACTGTGCTAAAGGGTGGGA

A\_14\_P110351 AAATGATGAGAGGAAAAAGTTGCTTTGACCTTTCAATCCACTTATGAAGCATGGAATTAG

CUST\_342\_PI426210822

ATAGAACCTACATGGGGGTGACTTAAAAGGATCACAAATACTCGTCAAAATGAGTG

A\_14\_P134258 GTCCTCTTGTCAAGGGTTGAGACACTCTGATTCTTTTATCCTATTTTTAAAAGAAAAGTT  
CUST\_8722\_PI426210822 TAGAAGTCAAGAGAGATGGAAATGAAAGCAAGTCAAGATTCTTGTCTTGGGG  
A\_16\_P17560861

AAAAAATTCCTGTAGAACATTGAAGAAGTCTGAGTAGTCCTTTGTCATCTACATAGCAGGCA  
A\_14\_P113626 GACAGTGTCACTATTTTACAACACAGTAAAACATGGTCCCCACTGGTTTTTTAAGAAAAT  
A\_14\_P114948 CCTCTTCTCATGTTAACTTTATTCCAAGTATGTAAATGCTACCAGAAAGAGTAAAACATG  
A\_14\_P106295 CTTAGTCTATTATCCTAGTGGAAAATTCTTTGCTTTTGACACTTTTAAACAGTTTTAGAC  
CUST\_5377\_PI426210822 CGCCCCAAACTTCACACAGAGAGTAGTATGAAGTCTCATCTCT  
A\_16\_P00000776

AGTGTCAACAGTTCTCAAATTCAAATGCCCAAATGACCATTTTTAGTAAGGAAGTCTCAT  
A\_16\_P00685607 CACCTAGCAATAGACCTGCAGGCATAATGGAGGGTGGTGAGTGCT  
A\_14\_P101310 TCCAGTGTGCGCAGATTTTTGTGTAACCTGTGATATTTATGAGCACTTGGTGGTGTA  
CUST\_242\_PI426210822 CCTGGAGGAGTCGGGGCACTGGAGCTGCACCCCTCCCCGGTTTTG  
A\_18\_P14134010

TAAAACCAGAAAAAATGCTCACAGAACATACTAGCCCTTCTCTCTTGGGATATTTTCATG  
A\_16\_P21439651

ATATCGTTCCTTAATCAAAGCAATGTTACCATAACCTCTTCTTTTAAACCCTTCGTAGCC  
CUST\_1608\_PI426210822 GAAATGTGGTTGAAGGGTCCAGGCCAGCGCGACTCCCCCTCCTCTG  
A\_14\_P119216 TTTATGACTTAAAATTCACAGTGCTGTCATTCTTGCCCAAACGAGACCAATTTCTACTT  
A\_14\_P116170 TTCCAGAGTCTACCATGGCATATACTATATGCACTAAAATTCCTTGCAAACAGGAAGACTG  
A\_14\_P111321 AGTTCTGATGCTTCAATGAACAGTAAAGAACCATCTCTCTTTGTCCATTAGTTTTCTCAC  
A\_14\_P124320 CTGGTTCCAATTTTATTACTTTAATTGCTGCTAATTCACCAGTGTTAACATTCCGTGCCT  
A\_16\_P02103120

AACATCTTACAGAAGATACCAAAGGTCCTATGTTAGAATTTTTACAAACCGACTGAGGGT  
A\_16\_P19415708

ACATGAGAAGATACAGATTCCTCAATAAACACATACCCTCTGATTAGAATCCAGTTTGGT  
A\_16\_P02419029

AAAGAGTATGTGATTGAGAGATGTCAATATCTGAGAATGATATATCAAGACTCCCCACCC  
A\_16\_P03034834

AGATTACTTTCACTGTCAAATCCCTACTATTTCTCTCAATACAATCTGCTGTTTCACCCA  
A\_14\_P201749 CTATGTAATAAAAACTATACTCTGTGTTCTGTTAATGCCTCTGAGTGTCTACCTCCTT  
A\_14\_P202142 GGCATACTTTCACCTTCATCTGACTTGCCATACAAGGTAATTGTCGCTTTGGATTTAT  
A\_14\_P121001 GAGAAATACTTAGGACCCATCTACACAAAGTTGAACTAGATGCAAGATAGCAGATAGCAT  
A\_16\_P35693648

CCCAAGTTGAATAGTCTCTTTCCAAATAGATCAGTTCTGCAATATCTATAACTGTGCCCT  
A\_14\_P133260 TATTAGGAATTGAATGACCTTCATATAGAAGCACTTGCAAGTATAGCCAATTGCCTTGAA  
A\_16\_P19319348

GACTTCAGTGAGAGTGAAAATATGAGAAAGGTTAATGCAGACATAAGGAGAGTAGAGTCA

A\_14\_P202239 ACATTGTGATTTGCAGCCACCTAGCACTAAAGCATAGAACTTAAACACGAATCCCTAAAT

A\_16\_P36838281

TCCATCTCCTCATTATCTCATCCTTTTCATCTGTTCTTTATAACCAAACCCTTTGCAAA

A\_14\_P120096 TCCCTCATTTCAGTTACGAATGTTCTTAGGGAATAAGTGTAAAGTTCTGGAATTGTATG

A\_16\_P21450321

AATGCTTTGAATTCCTTGTATATTTACCCACGTTAGATCTAGCAAACCTACCATCCCTCAT

A\_18\_P13180411

ATCTCCCAAATAGTCAGAACCAATTTTACCTTCTTTCATTTCAAAGATTACCCTAGGCC

CUST\_3830\_PI426210822

ACCATTGCAAACCTTTGACATGTGAGAGTTTCCAGAAATACAGAGATTCTTATTTTAATCC

A\_14\_P129237 CTTAACTTTAGTTATTCTGACCTTGACCTCTGTCTTTATCCCAATTGTGTTTTTACCTGG

A\_16\_P01297586

AAAAAAAACCTCTGTCTTCTAGCAACTACATCAGTTCTTGAAAGGATATTGAGGCCTTG

A\_16\_P36230880 ATGATGACTCTGCTTTTTAAGGTTATGCCCTGGGCATGATCTGAAACCAG

A\_14\_P114161 TGTGGCATAATGGAAGTATTTCTCTTAAAGACTGTGCAGTAAGACCAGAAGTATCTCTG

A\_14\_P138274 TGATATCTCAGTTTGTGACACCTTGAATCAAACCTTTGGCTTTCTTTTTTGGTAGGAGAAA

A\_16\_P01567067

TGTCATACCTTATTGTGTCAAAGTTCATCCATTCTACACTTCTACATCTACATCCCATCA

A\_14\_P120765 AAAAAAGAACGATCCTCCACTTGACCAAGAAAAAGTGATTCTCCAGAAAGCA

CUST\_1231\_PI426210822

AAATGTAAATTTTCTAATTAATTTTCAAGCAACATAATAGTATTCTTAAATATTCTCAGA

A\_14\_P135053 CTCAAGTATGAAGTAAAAATTCATTGAGTTATACATATAAATCAAATTTTCATGATACAAC

A\_14\_P101686

TAGTCCATGCAGCCACAAAAATACAGAAAATGAAAAGCCAGAGTGATCAAACAATTTCAA

A\_14\_P138930 ACGGTGGAACAGAGAGTCAAATGACAAATGTGAAGTGGTTATTTGAAATAGAGTCTCTAT

A\_18\_P17570764

ACTTTTCCATGCTGTTTAGAACCTACTATGCATTCTTAACTGATTTACATTACTCCGCAA

A\_16\_P38385191

CAGGCATTCACACTTAGACATCTTAACAACTTGCTGTTAGATCGAATCCAAATTCTGTT

A\_14\_P131355 TATCCTCTTTATCCTGGGCAGTAAATGACAAGATTCTTGTCACCTTGATTGAAAGGTTAGA

A\_16\_P19532549

AAAACATGGCCTTATTTTTGAAATCAAACCTTCAGCATAAACACATGTCCCTTTTGTGC

A\_14\_P101103 TCCATTTCCCTTGTCTCAAAAAAAAAAATACTCTATGGGTCTGAATGGCAATATGTCCCTC

A\_16\_P58424122

ACCACTTGCTCTTTCTGAGCAAAAATATTCCATTTGTAAATAAATGGACAGAGTTAGAGT

A\_14\_P100104 ACTAATTTTTGACTCCTTTTAGTGACCCATGCTAATAATGTGGAACCATCTCCTATTAAA

A\_14\_P114978 GGAAGATTTTTATTTTTTGGGAACCTACCATCTTGCAATTCTGTCAAGCACATTAAGTCT

A\_14\_P127319 ATGCTTAGGAGACATAAAATAACTTTTCCATAAAAAGTCAAGCCAGAAATTGGCTTCAAC

A\_14\_P130404 ATAGTGGCAAAAGAATTGAGGATAGCACAAAAGTAATTTTCGTTTCAGGATTGGTTAGGA  
A\_16\_P17501772

AGGATCCAGCGATAACTTGACTTAAAGTTCTATTTGCCAGAATATTCAGGGTTATTGACA  
CUST\_722\_P1426210822 CCAAACCTGCTCTTGTGTGGGTGAGGGAGGCAATGTGATCTGTTTG  
A\_14\_P131622 TAATAGTTGGGAAATAGGATCTCAGAGAAGAAAGAGTAATAGGAAGGCTGCCTTATGGTA  
A\_14\_P102834 TGAAAACAGATAGGCAGGCTCTAAATTGGATAGTTGAGAATTTTATTTCACTAGGGAGGA  
A\_16\_P41580219

AACACCTTCAAATGTGAAACTCCCACTTAATTATGTTGCCATTACATTTTAGTCCATCCT  
A\_14\_P130780 CACAAACACTGCTCTACCAAGTCTGCTATGATGTAATTCTGACTCGTGGATGTG  
A\_14\_P123997 AATAACAAAAAACTCCAAGAACTCTAGATAGTTTGTCCAGGGGACACCTATAGGTTATG  
CUST\_1061\_P1426210822 GTGCTTACCAAGCATTATGAAGTCTCAGGGACCGAAATTCACCAAGC  
A\_14\_P124539 CTTGCACTGTCTGTTTCCTTTGTGGCAACCAAACTACAAATAAGAACAAAAATATAGACT  
A\_14\_P124112 TAAAACATTCTGTTAGAAAAGAAATGTGGATCTCGCACCCAGAAAGCCAAATGAAATTC  
A\_16\_P01807747

AAAACATCTCCTTGCATGTTTAAAACAAAACTCACTCTGGTAGTGTTAACTTTCCATGCA  
CUST\_7090\_P1426210822 ATGGGCAAGGAAGCATTGATGAATTTTCTGAGACAGCTGCGATTTGTCTA  
A\_14\_P105970 CACCCATTCTTTTTAATCCCCAGAGGCATACAGATGAGCCCCAGT  
A\_16\_P15650063

GTCCACCAAATATGATTTTAAACCCTCTCTCTATCCAAAATAACCACTACTTAGATTGGC  
A\_16\_P36508721

TGCAGACTACTAATCGTTTATTTGAGATATCCGATCCAATTTTAAATTGCCACAACAACA  
A\_14\_P133383 CGTGTCAGGTGCTTGCTCGAATATTAAGCAACTCTAAAACCTGTGTCAAAGCAAA  
A\_14\_P138088 GTGCATGTGAGCATGCACAAGTATCTTTGTGTATTTGAATATCTTAGCAACCTTAGCAAA  
A\_14\_P120250 GAAGTCACATTGTGAAGATGGACTTGATTGTGTCTCTGTTTCTTAAGTAAAGCCTGATAT  
CUST\_1933\_P1426210822

AAATACTAGCTTTTTCTCAGAGTTGAATTGTTTACTTGTAATTTGGAAGCTTCTTGGGTC  
A\_18\_P22841708 TAAATGGTAGGGAGTGGGTGTGGAGCAGTAATGCTGTGCATATTCTTGT  
CUST\_9349\_P1426210822 GTCTGTAAGGCTTTTCTCACTGATTCTACAACCGTGGGGGCCCAT  
A\_14\_P133038 TTAGAGCAACTTCTCTTTTCACTTCACCAAAAACAAATCTAAGGTTTCTACATGTCTC  
A\_14\_P123655 AGGATCAAGGGGAGACTTGATTAATAAACTGTGGGATTAAAAACCTTTGTCTTAACAGAAGT  
CUST\_858\_P1426210822 AGACAGAATTCTGTGTTACCACAGATCAGTATCACAAAGGAGTCATTTCTGGG  
A\_16\_P00932601

AAGACAGACATATCTGAATGAGGACATACATTACCATGATTATCTAGTCAGAGCCACTGT  
A\_14\_P111879 ATCAAGAAGGTTATCTCACTTTGGTCCTAAATTCAGTGGATGCTCCAAATCCAAAGA  
CUST\_5646\_P1426210822 CAGGTGCTCTGCTGCCTTTCCACATCCTTTTCTGAGGGGGGTC  
A\_16\_P20223175

ATGGGTGAGAACGGATCATTAGTATCCAGTTAGAACATCTTCCTAGAAATTGCTCAATAC  
CUST\_10050\_P1426210822 AAGGACTACTAGCCACAGACGCAGAATGATCAGCCACCTCTGATT



A\_18\_P17316531

AGTGTCCAGCATTTATTGAACTTCATTTAGGCTATTTCTACCAGAGTTATCATTACCCCT

A\_14\_P108647 TGG AATGCAA ACTAAAAGTTGGAGACAACGAACATTCTCTAATGTAAACATACTCTGTG

A\_14\_P123617 AAAAGATGAGAAGTTAAAGACTGTGGAAGAATTACTTGAAACTGGACTTATTCAGGTGGC

A\_14\_P201820 TTCCTTCTCATTGGGTTGTAATTTCCATAACGGGTTAATAGAAGACTGGATTTTAAGGT

A\_14\_P134912 GTCTGTGTTTCTATTGGGATTACTATAGTGACTTGTTAATTCGCACTAGTTCTTATGTTC

A\_14\_P134273 CTCTCGCAAAAACTCAAATTTAGTGCGACTTAACCTTTCTGGGTGTTCTGGATT

A\_16\_P16320401

AGGAACCATTAAGACAACAACAAACATACCCTCTCATATTGCTATATTTCTGTGTGCTTCA

A\_14\_P109545 GTCAACACTTTTCATATCTGAATGTCTTTGCCCTTACAGATAGATGGCTCCCAATA

A\_16\_P21096862

TCCTTGCAATAGCAGTAGTCTTTCAACTTTTAGGACGATGACAACAAGATAGATCATAACC

A\_14\_P106848 CCTCGAGTTTAGGGATTCTCCTCACTTCTAGCCCAAACCTTTGGATAAACTAACATA

A\_16\_P37811349

CAACAGCCCTGAACAATATAGACATTAGAAGCATTTTTTTCTTTTACCTTACTACATGCG

A\_14\_P122081 CCTGGAAGATGATATGGACTCCCATAGTTTGAGACTCACTAAAATTTCAAATGTTCTTC

A\_14\_P114697 ATTTAAAAGACTTACATCATTAGATTGAAACAATCGCGTCATTGCAAAGAAGGCTTCTG

A\_14\_P132071 AAACAGGATTTTGAATATCTGAAGATATGTCCTGAGGGAATCAGAGAACAGAGTTTAGAC

A\_14\_P103030 CTCTTGACTTTAAATTAATAATTTGGGGCTTTTGCCTCAGCACTATTATTGGTTAGTGGG

A\_14\_P105566 AATTGTCCCTACCAAGAATACAGGATTGTTCCAACCACAGAGGTGAGTTTACTGTTTT

A\_14\_P131535 CTTAAATTATGCAACTCGCAAGATGTAAATGTCATGTGGACACAGAAAAGGGACAGAGA

A\_14\_P102471 GGAAAATGACAGCCTTCATTTCTCTGAACATACTGCCTTATGGGACAGATCAAGTA

A\_16\_P19164487

CCAACATTCAATAAATCCAGATGACAGGTTACAAAACACAATCAATGATCCACACTTCTC

CUST\_3436\_PI426210822 GAGAATTCCTGTTTTGAGGAAAGATTTCGGAGCCAGCTAAGGTTTTCTGA

A\_16\_P18593339

ACTTCAGGCAGTATTTACAATCAGAACACAGAAGTTACCTAATTCTATGCAGTTGTGAGA

CUST\_3669\_PI426210822 GCACGGAGGTTTCAGTGGTTGTTTTTCACTTTTCTGTTAGCCAGT

A\_14\_P117185 AGTGAATTTTTATTTTTATTTTCCAGGTCTACAACCTCGAACAAAGACAGCCAGAGTGAAG

A\_14\_P112616 CTGACTCTTAATTTGTAAATAGGCTCCATGAAGTTGTCCCTGGAAGCAGAATTTATTTTC

A\_14\_P119048 AATGTCATGTGCTCAGACACTGTGAACATTTTGCTTGGTAAGTTTCAAATTCAACTCTA

CUST\_9603\_PI426210822 GCTTTTACCTGCGCGGAAGACACAAGATCTTTGGAATCAACATACACATC

A\_16\_P01260898

ACCCTGACAGTGAATATACTATCTTCTGACCTCATACTGAAACAGTGACAACATCTATGT

A\_16\_P16191471 ATCTGTAGGTGGTGCATGAGTATGATATAGTGTGCATGTGTGACATGCTGC

CUST\_9220\_PI426210822

CACCAGTTTTCTATTTGATATTTATTTTCTTAAATCTGGTTTTTAATCAATTTGACTTA

CUST\_2805\_PI426210822 TAACTGTCCCTGCCATTTTTCTGGCTGGGGAAAATCAACTTGCTAG

A\_14\_P131964 ATGGGACAAATGTGTAAACTTTATTGAAAGTGCCCTCCCTTATGTTGTTGGAAAGATG

A\_14\_P123893 ATGGGGGAGACTCTAGCATTGAGCATTACCTTAGTTTTTGGTCTTTAATTAATCATT

A\_14\_P113659 CTTTGATCTTCACAGAGTCAGGGCAAGTCTATATACAGGAGGACGAAGTCAG

A\_16\_P16236532

ATTACACCGGTAATTCATGAATACAGATCCTCTTTACAGATATGGCTTGATTCTCCTTGG

A\_16\_P02890055

CCCAATATTCCCCCTAATTTATGACCATTGTATGCACTTTTTCCATAAAGATCCTAAGA

CUST\_417\_PI426210822

CAATCTGACAGGTGAGAAAATTGTGGGGTTCTAGTTGTGTGTCTCAAATGAAATTT

A\_16\_P30952519 CTTGACTGTGGGTGGGGATGACAGATTCATGCTTTCTCTTTTCAG

A\_14\_P137731 CTGGTGATGCACAGATCACTTTATTTGACTGATTATGGTGACAATTATGGTAGTATCACA

A\_14\_P200555 CTTTGAATACAACGCTCAAAACTCATCTTGCCGCTCTTGCCTTCTG

A\_14\_P130069 CATCTATCTCACTTTCATATCCTCAATCTATAGGAGTCAGAACTAGGGTCAAATCTTGCT

A\_14\_P137150 TGAGTTAGTTGTTCCATCAGTATAGGAAAAGGAGAAAAATGATACACACCAGAACAATCC

A\_14\_P137832 CTGTTACTAATATGATTTTGGCATCACTTTTTAATTCTGACTTTGCCCTTAACGCTTCCC

CUST\_3493\_PI426210822

CCAAATGGAAATACAAATAATAGATTGAGGTCACATTGACTGTTTCACGTTGTACTIONTAGA

A\_14\_P109655 GATCTATGCTTGTGTTTTGTAATCCATATCATAGTTGCTTTCTTTAATTGTTCCCTC

A\_14\_P136089 CTAATTATATTTCTTACTTTACTCTTCACAGCATCATATCGGATTTGAGAAAACCTCACGA

A\_14\_P105898 AATGATAATCATTGGTTTTAATAACTCTAGTTTATGGGAGTCGAGGAACAGAACACCTGC

A\_14\_P131996 ATAGATAGCCTCAAAGATGTCATGCTTGGGATTGCTTTAAAATAATAGAGTGGGTGGTAA

A\_16\_P00685061

AAGGATTAGAACTGGATTCTACTCTACCTTGAAGGGATTAATGACAGTCACAGAAGTTTC

A\_16\_P02655348 TGCTCTAGCCCTATCTACTTTTATTTATTACCAGCCATTTCTAGTCTACTTTGCTTATGA

A\_14\_P108329 CACTATAACCTAATTATCAGCCCTGGATCAAAAATGAACATGATACTGGCTTATAGTATC

A\_14\_P200546 CACCATGACCTCTGACCTTGGTAATCCCGTTAGATGGTATAACTTGTGT

A\_16\_P02465691

GCACTTCAGGATGTGTTATTGTTATTACAAGACCAACCAAAAATATGAAAGGCTGTTTCC

CUST\_8903\_PI426210822

CAGATAACATATTTATGTATCGCTTTTTCACTAAAGAGAATCTGACGGCATCTGGAAATT

CUST\_5511\_PI426210822 AAGAGCTGGCTTCTGCCTACCCAGGGAACAGAGAAGCTGCAGCC

A\_14\_P124809 CAGAGGGCATCTAATAGAATAGTTGTGGGAAAGAAACGATGGACACATTTAAATTGATTG

A\_14\_P112477 ATATTTCAAGATATTTCTTTTGGGTTTCTTTTCAGTGCTAGTGTCCGCAAATGTTTCTCA

A\_14\_P117620 ACTGTAGGTTACTGTTACTAGGGTTCTGATGATCAGAAAACCTGTTCAATTTCTTTCTGTG

A\_16\_P02375679

ATTCTACATCTTGGCACATATAACTTACATCCATTCATTCATGAATAGTAAGTCCACGT

A\_16\_P00617710

TGGTCACTCCTATAGAAGATACATTTACAAACCTTCTATCAAGAACAGTTATTAAGCCCC

A\_16\_P18645052

CCAGCCCCTATCATTTTAAAGATGCACATGTTTAAACTTACCAGAGATAACAGCAAATCAA  
CUST\_7644\_PI426210822 CTTGCCAGCCCATTGTCTGCATTTGGCATCTGCGCTGGAGTCACT

A\_14\_P105846 TTGTTAGCATCTTCTGAAATCTTCCCCTTGTTTTGAGATGTTTAGATTTACAAACCCCA

A\_14\_P126778 GGCAGGAAACATAAAAATAATTAAGACACATCCTTGAGTTCCAGGGTATTATGACTTGGT

A\_14\_P117207 CACCAGTCCCAGCAAATCCTCTTTGTATTTATTTTGCTAAGTTATTGGTGGTTTTGCTT

A\_14\_P135020

GAAGAAAAGAAACAGTTGCTGAGTGGACTAGAAACAAATGGAAAATGACAAGTAGCATTG  
CUST\_7590\_PI426210822 ATTTCTGGCCAGGATTTTAGTAAGTACCTGAGCCCCTTCAAACATTTGACT

A\_14\_P103013 GAGTGTCTTGTAAATTGATACCTAATTGGCCTTGGTTGGGAACATAGCCATG

A\_14\_P101869 CTTCTTTGCTGGGTAGGTTTTTCATTGGGATTCGAGTTCCATCTTCTGTIAC

A\_14\_P103009 TGATGTGACTTCCATGTAGATATAAAAAATGATTGTGCCCTAACCAAACCTTCCTCAGATTG

A\_18\_P22841075 CCCCTTTCCATGTTATTTCTGCCACCTTCATCCTCTGATCATGTTTATTTTTTC

A\_14\_P126982 CTCTCATGGCACTTTATAATTGGAATTTCAAGTTACCTTTGCAGAAATGCCTTACACTACT

CUST\_2800\_PI426210822 CTGGTGTTACAGAGGCTTAGGTTTCTAAAAGAGGGGTGCTGCTTTG

A\_14\_P114062 TTGTGCCCGTGGTTTTTAAAAATATATTCTGTGTATGCTGTTTCTCCCTTTCAGATTCTAG

A\_14\_P137176 CTAAGTGCAGTAAAGTTGCTGGTGTGTTTCTTTCTCTGATAATGTCTGTGTTTTCTAAA

A\_14\_P103263 TAGTAAGAACTAGCAATTAGCCGTTATAGCATAATTACCTTTAATATGTCATGCCCCCCG

A\_14\_P113832 GTTGTAGAAAATACACTGCAAGAAAAGGAGCAGGTGCTTCAAAAATGTAACCCTG

A\_16\_P00245600

ATCTCAGACCAAATCGTTTTTCTCTAGAAATTTCACTGTAATCCAAACCAGTTGAACATT

A\_14\_P133509 GAAAGTGGGTTTGATGACAATGTTGTGAGGCTACAGTGAACCCAGATAAATTTATG

A\_14\_P118951 CATATTTAGAGGGACTACTCTTGGGCAACACTGAATTTCTCATTCTTGAATTCACTAA

CUST\_1725\_PI426210822 TGTAATGATCGGAAAACCATGTTCTAGAACGTCCTGAGAGGGTCTT

A\_18\_P14136149 GCAAACAGAAAATGTTGGTGCAGCATTTATGTCAGAGTGTGCAGTCTGTTGA

A\_14\_P104034 GAATTAACAAAACACCCCGAACAATAAATAGTAAACCGAATAAGGAGGAGAGAGGCGTC

A\_14\_P136969 TGAAGTGCATAACCTCAAAAAAAGTATCTGGTCTCCATTGAATTTATTTGAAGGCAGGAT

A\_14\_P118354 AACTCACATGGAAGCAACTGAGGCATTGGTGGTTACAAAAGACAATTTCTTTTTATAATG

A\_14\_P100893 GCTGCTGTTAGTTAATTACCATCAATTTACATAGGTCAGAAACGATGGACAAACCCGAA

CUST\_6418\_PI426210822

GGCTTTTATATTATTTGGCGTAGATTATTAAGAAGCAGTTACCTGTGTCATGAAGGAGAG

A\_18\_P14135409

CAGTTCTGCAGAAAGCCATGCCTAGAAAATTTATAATTACTCTGATACCAGATGGCTTTG

A\_14\_P127695 GGGGATGACACATTTTTATTATTTGCTTTCTGTTGTGGTATCAAGAATTACCGGCATATG

CUST\_6484\_PI426210822 TTTTTCTCTGGCTGGAATGTAAGTCCCTGTTTTTCTGCCCATCAATAG

A\_14\_P126604 AACTGCTCACATATTTTGCACATGACGCTGTGCTGCTCCTGATATTTTTCAAACCTG

A\_14\_P110496 TATTGGATTTCTGCTAGACTTCAACGAGGATTTTTCTTACTTTGGCAGAAATATCAAGC

A\_16\_P02537658

AAGTCAAGTAACTGGGTAAAATACTTGCATTCCTAAGGTAGAAGGTCAAGAAATAGGCTT  
A\_14\_P112110 AAAATTCCCCTGTATCCTGAAGGGGCACTAGTGTTCAAATATAGAAGATGCCAGTTTATA  
A\_14\_P130774 ACACAACCTGCCCATACCAACACACAAAAGGGACAAAATACACATATTAATGGGAATTATC  
A\_14\_P129763 AGGACAAGCAATAACTCTCTACAGGAATATATTTTTTAAACGAAGAGACAGAAGCTGTCCA  
A\_14\_P139352 GAATGGACTTCCTGAACTAGAGAACTTTATACAAGGCCTTATGATTTGACACGTCTACTA  
A\_16\_P19420675  
AAACTCTGATAGATGCACAACCTCTTATTCTAGACTCTATATTCAGAAATTTCCCAGATCA  
A\_14\_P119412 ACCTTTATTTTGCTGAGTTTCATTTGGATCTTCTTAGACACCAGATCAGACCAGTATTTT  
CUST\_7862\_PI426210822 CAGTGCTGAAATGTGGTGTGTGATACGACAACCTCAGCTACCCAGT  
A\_16\_P36231022  
GGTATTGAAGATGGAATGACAATGCTTTCCAAAGCCTCCTTTTTTTTTATCTTTGGTTACA  
A\_14\_P104476 TCGCTTTCTTGCTTCCAATTCAGCCTAGAAAGAAAAAAAAAAGCATATGTCTTGATACAT  
A\_14\_P124676 TTCTTCCCTGTGTGATTTTTGCCATCAAAAATAAAAATTTGAGACTCGTTAACCGAAGTCC  
A\_14\_P116373 AAACGCTAAAATCCTCCGAATGAAATAAAACGAAAACATACTGCTAAAGAATAGCCCCAA  
A\_14\_P102325 GTATGTGTCTATGTATGTAAGTTTGTTTTTATACAACCGACATTTGCAGAAACTGTCTC  
A\_16\_P38184867  
CGGATATTACAGTTTTGTTTTACTCAAACCTGATCATCAAGCAATAACCTGATTCCCA  
CUST\_951\_PI426210822 GCTGTTTTCAGAGAATGCTCTCCTTCTCCTGTTCTTCCCTCACAG  
CUST\_5221\_PI426210822  
AACTAATATATAGTCATATTAATCTCTAATCTGATTGAGAAATTTTCAGAAACAAGGT  
A\_16\_P16865544  
AAAAAAAAATGCTGCTGTCATGCTAATATTGATCACCCTCATGGTCTAAATGTGATGCC  
A\_16\_P19561883  
CCTGAAAGTAAACCACTAACGATTACTCATCAGTCAAAAATTTACATTTACCCTGCCCAT  
A\_14\_P201568 TCTTGGCTTGAAGAACAGTAAAATCACAGCGGAAAATAAAAAGAAAGTCGCGTTGTTATA  
CUST\_8701\_PI426210822 GTCAATAGGACAGACAGATGAGGAGTAGACCCCAAGAATCACCC  
A\_16\_P18694669  
GGAAGAAATCACATACCTCTAAATAGACATATCACTGACTACAAGATAATGAGTGCAGCA  
A\_16\_P16297276  
ACCGATATAGTATTCTTGGCTTTATATGCGTAAGAAATCCTGTTAGACTATGAAAGCACC  
A\_16\_P00685065 GTTTCTTTTTGGATGGTAGGAGGCATCCAAAGCCTCTTTTAGGGGAAGATTG  
A\_14\_P137170 GAGGCACAGACATTAGTATAGTCCCTTGAGAAAATTAATAATGCTACATCATGGGAACCTT  
A\_18\_P17317862  
ACCGTAAAATGTCTGAAAAATGCATTCACCTACATATGTTACTAACTTTGCTCTTCACCT  
A\_14\_P134051 CTACCAACCTTCAAATAAATCGGTCTCTGTGACCAGGTATTTGTAAGGTTAATTGAAG  
A\_16\_P18867301  
AGGAACATCAGAAACAATTACCGAAGCACAAAATTATAATCCATTGTCTCATCTATACCA  
A\_16\_P21276445

TCATTTTGGGGTCTGACATACATAAAGCATCACAATTCTCTTTCAATGAAATCTTCCCTT  
A\_16\_P20778926  
ATGATGGATACCTGGTAAGTAGAAAACAGTGTTGAAGATCCTACTACAGATGAAGACTTG  
A\_14\_P113122 TTTCACAGATCTGGTAATATTTTTTCATCTTGTATGCCATCCTGAATGGGCACATTTACAC  
A\_16\_P16075726 GAGCCCCTGAAAATCTTAATTAAGGAACTTCCAATGTATCACATAAGGCCAAAAG  
A\_16\_P02721993  
ATTGCTAGTTTCCAATCGTTACTCTAACACATCTCAGACTAACATGTTTACACTGCCTCT  
A\_16\_P20436696  
AAGTTTTTCATCACAGGAGTAAGATGATCAGATTACCACATGAGGAAGATAATCTAGCACC  
A\_14\_P201740 CAAAGGCTGTTAAGTATCTCACGCATGTGGGAATTTTATGTCTGGCTTAAATGAAGATTTA  
A\_14\_P109088 CTGCTAATGTCATTGTGTGTGTGTCAGTCTTGGACAGATCACTATTTACAGTGGAAATGTG  
A\_16\_P17427690  
CTACAGAAGACGATGCTTTTTCAAGAATAGACAATTCCATGTTCACAGATAGTGTAGGTGTG  
CUST\_1601\_PI426210822 CTGCTGTCTCCTGGCTACTTTGGACTTTGGCCTCCGCTTCAGTTC  
A\_14\_P124722 CTACTCCCTCACCCCTTGAATGGAGTAACTCATGAGCATTCCCAAATGAG  
A\_16\_P03411972  
ACACCCTCAAATAAATTAGAACCTGAAAATACCATATTTATCCCTCAGATACATCACCAT  
A\_14\_P129664 TGGCCTGAAAAATATACTTCAGTGTTCAATGATTTGAAATCTCTGAGATATCAGGGAATG  
A\_14\_P107258 CTTTATAGAGATTGCTCAACAATAGTATTGAAGCAGGTAAAAGAATTCTCCCTGGGGAAT  
A\_18\_P14134204  
GAGATTTGTAAATTCAAGATATTGATCATTCAAATGAACTTCAATATAAGCCATAGAGT  
A\_14\_P133566 GGCTCTTTTTCTCCTTCTGTTCTAAGATTTTCTGCAGCACTTTCTTCTCCTTCTTG  
CUST\_3090\_PI426210822  
TTTATTATGTATTATGTGTGCTCTTCCAAAATTTTATTTTACAGGGAGGAGCATATCCAT  
A\_14\_P100496 CTTCTTGATCTTTAATCTTTTAGCAACCTTCTGATACTGGATTTACCTTCCTAGGTGTGG  
A\_18\_P22843221  
AAGGCTTATTTTACTCCTTAAGTCTTCTATTTTCTTAGTTCATCTCATTGTCATGTTAT  
A\_18\_P14136738 ATCTAAGTAAGGCTGTTTGGGGCAATCTGTTGTTTCCCTAGGAGTTTTCTG  
CUST\_3600\_PI426210822 CTCTACCGTTCTCCCAGGGTGGGCTGTGGGCTTCTGGTGCTG  
A\_16\_P00685488  
AACATAGGTAAAAAGATGTGGTGATTGGAGGCAAACTAGAATCTAAAAGACCAAGTCTG  
A\_14\_P114550 TGAGTTCCAAGCCCATCTGAACAAAATCTAGAAACATTTCTTTCTTGTGACCTTATTTCT  
A\_14\_P135022 CTCGCCAGACATTCTGAAATCACAGCGCCTACTCAGCAGAAAATC  
A\_14\_P100572 TTTTGGCCAGGCATTTCTTGAATGTGCTAGTCCCTTTTTAATTCTCTAAAAGGAGAATTA  
A\_14\_P136756 CCACGAGTTTTTGTATGGAAGTCTTCCCACAGCACATCACATTTCTAAAAGAAATAAAGAG  
A\_14\_P200185 GAAGAACAGAGAAACGGCTATGAGAAAAAGGGCCGAAGAGTGAGAAG  
A\_14\_P127069 GCAGGTAGCCTGTCTTGCATCATTCTTGGTTGATCTGTAATTAACCATTATAAGTCATAC  
A\_14\_P112174 AGTAAAACGTATGTCTCTTTCACTCTCACCATCAGTTTTGCCTACCCTTTCTAAATGTA

A\_14\_P200090 AGGTCATGGAAGAGTTCCCCAAGTTTGACAATGATGAGGAGGATGAAAA  
CUST\_4846\_PI426210822 TGAGCCCAGTCCTAACTGCTCAAGTCTTTCTTAGGTCTTATGATGGAAC  
A\_14\_P200246 GTGGCCACTGTAACCTCAATACCCAACCCTGCATTTCTGGGTTACTT  
A\_14\_P126892 TACTTAGGAGAACTGGTGGTTTGAAAACACTAGTAGACACAGAGCACATAGTTTTGATTT  
A\_16\_P15791540  
AAGGTAACCCAGTCTAACTCAATCAGACTATCTCTTCTCAATACATGTGTTTTTCAGCAAA  
A\_16\_P20478565  
TCCAAAAACCTTGAATTGTTTACCTCTTTTCACCTGAAATATTCTAACAGCGCCTTATCA  
A\_16\_P02975478  
TGGAAGTAACAATCCAGTATCAATCCAGTAATGTGAATAAGATTAAAAAGGTGGCTTGCG  
A\_14\_P124317 TTTATTTTGGATGACAATGAATTGAATATCTAATAAGGAGATTAAAGATAAGACCCAATA  
A\_18\_P13036127  
AAAAAAAAACTTATGATTCTAAGTGTGAGACACCTTATAAATGTTAGGAATTAGCAGGGA  
A\_16\_P16191017  
GGTTTAGAGCAATGATGTAAGTCTTAAAGGGCTAGACAAGGATCAAAGGAGAGGTAA  
A\_18\_P16446566 ACTCCCTATCTGGCTTTATATCTTACGTGTCTACATTGCTTATGTTCCGGAATCTCTTACT  
A\_14\_P200175 CTCTCGGTAGGTTTGTAATACTTAACTGATGGTAAAATGTCATGAACCCCTACCC  
A\_14\_P121346 ATAATAACCTTAAATGATAAAAACAAGGGATACTCCTTCAGAGTGCAAAGCAGTCGCTTC  
A\_16\_P20207257  
GATCTCTGTTCCCTAAAGTCTCAGTCCATAGTTTTCTCCAAAATATTACCTCAAAGAGTGC  
A\_16\_P16910557  
TGGTCTCTCTTGTCATAATCTACAGCATTCATCCTCTATATTTACTGAGAACTACAACG  
A\_18\_P13668322  
TGACTGTAAAACCTCCCTATTATTTATGTTACTGAGCCATCTACAAATTTCCATCTCCCT  
A\_14\_P109269 GGTTTCAAAGCCATAAAGCCTTTTGTATGGCTTGGACCTAGTAAAGACATTGTTGAAAA  
A\_14\_P131711 TACTGACACTTTAGGTTTTGCCTGTTGAGATTAGGACCTCCTATTTGTATAGGACAATTT  
A\_16\_P41398122  
TGGTCGTATCTGTAAACTTCTCTTACATACCATTTGATAAACCATCTGATTTCCACT  
A\_16\_P18157911  
AAGATTTCCCTACTTTCTCTATTCCCATCATTACATCAAAGTTAATATGTTCCCGCCTTG  
A\_14\_P201971 GGATCATCATATCGCCGGCCAATGAGACGCTTGGTAGCATAAAATGTATTGTTT  
A\_14\_P137314 ATATAAAGGGCAAACCACTGGAGGATGCACACATTCATGCATTCAGTTAAATAATCATT  
A\_14\_P111217  
AGCAAACAGACTAAATGAGAACTCTTGCAAATATAACAAGAAGAGGATATGAAGGCCTGAA  
A\_16\_P20434012  
AAACCTAATGGCTTTTCCATCATGGAATCTATGATCTATCTTATCTTCAGTCTTCCAGA  
A\_16\_P41153744  
TTACATCGAGTTCCAGATACATCCAAGAACGATCACATTTTCCCTTAGAAATTCTAGAGCA

A\_18\_P14834533

AAGCCCTCATTCTTACAATACTCTTCTAATGATAGTTCCATCTTTATGAACATTCCAGGT

A\_14\_P103879 CATAACTAAGAAACCGCTAGCAAATTGTCCCTCTATGTCCCTGTATATCCCTGTAATA

A\_14\_P117041 GCTTGCTGATGAAGCAGTAGAGGAAGAAGTTGATGGCTGTGTTTCAGAAG

A\_14\_P131677 AAAACATGACAGAAAATCAGTCTTTACCTATTACCCAGGATATAATGAGCATCTCCATCC

A\_16\_P36230966

GAACGTGACCTGATTTCCAGGAGGTA AAAATTGTAGGGATGAATGATAATTTTCTAAGGAGA

A\_14\_P107501 TTCCTTATGATAGAGTTTATAAAAACAGTCCCTGTGTAAACTGCTGGAAGTTCTTCCACAGT

A\_16\_P02867572

GAGCCCAACTATATTCCTTCTCAACAGAATACTTTTCCCAATACCTCAAAGAAATGCAAT

CUST\_3343\_PI426210822 CAAAGGAAGGCACAAAAATTCTAATCCAAAGGCTTTGCCCGCCTTAAG

A\_16\_P02573185

AAAACATGACACCCAATAATATTCGATGTCTTTTTGATTCATTCATCCAGTCAACTCTCA

A\_14\_P128962 CTGCATCCTAAGTTACATTTTGAAGAAGACAGAGAAAGAGGAGCAGATGAAGTTGTTAAT

CUST\_6800\_PI426210822 CCACAGGATTAGAAGTATCTCTAACCTGAGCACCTCACTTTCTAGACTCCTA

A\_16\_P19875451

AGGTTGAGAGTATCCATAGTGTA ACTTGAAAATGACCCTTACTGAGAAATAGCATGACAC

A\_18\_P10301688

GGGCCTCTCTTCTTCTATTAAGAAAATCCTACATCTGTTATCTTTCTTGCCTACA ACTCT

CUST\_7562\_PI426210822 CAAAGTGGATGTGCCAACCCGAGGGAAGAGATTAGTAAGCTGCTG

A\_14\_P117313 TTTTGT TTTTACAGACTTTAATGTTTTTTCAGAACCTAAATATGCACAGATACATTCTTC

A\_14\_P124929 AAAGTCATTTTACCTTGGCTTAAAACCCTCTCTCAGACTGTTTGGTTTTTGGAGCATATTC

A\_14\_P114833 TTTGGAATAAAGGCAGAAATTTTTTCTACAGAGACTTGGTAGATGAGGCTAAAAACTACCT

CUST\_6396\_PI426210822

TCCATGTTTCACTGAAATCTGCAGGAATCGAAAACAATAGGCAGTCACTAACTAAAATG

CUST\_8314\_PI426210822 CTGGTGTGGTGTGTGTGTGAGATCTGTAACCACACACAGAATGAA

A\_14\_P137838 GGTCTACATAGCAGGGAAATTAATTGTTGCACTGAATGGACCAGATTTAGTTATTCCTG

A\_14\_P104215 CAGCCTCCA ACTCTTCTGCGGTAAAAATCTTGCCTATGAATCTTTTGGCATCATATATT

A\_16\_P15193097

AATTGCTCAGGTA AAAATAAGATGACTATTAGAGGCTCCTTTAGAAGAATAGCAAGTGCCC

A\_16\_P16965180

AAGAAGTGGTGTAACATCTATCTCTCTGGACAAGTAGATCAACAAAGCAATCCTGAATCA

A\_16\_P36230426

GATGTATCCTTGCTTGTTTAAATTAATGAGCCAAACAGTCCAGAACTTAGGTTACAACCA

A\_14\_P200835 GAGTGCCAAGTTTTACAACCAAATCATCTAGTGTATTGCAGTCATCTAAATAACAGCAGC

CUST\_7434\_PI426210822 CTCATTCCCTGGAGGCTGGTTTTGGACAGTGTGAGAGGCATCCTTC

A\_16\_P01229583

GCTTTCTCCTCTAAAGACTATTACTAATACTCCTAACTCATAGTAGACACATCTCATGCC

A\_16\_P19655068

TCTGACTACTCTGACATCTTCCCACAATATCAAGAAAAAGTATCCCCTGAAGATTTACAA

A\_14\_P139864 GTGGTTCTGGTCGGCATCTTTATTATCACTTTTTAAAATGATCTGGTCTCCTATGGATTT

A\_18\_P15904641

CTGATGGGAATTCATGTAATTGAAAGCGTTTATCCTCTCTTAGTAGAAAAATTGGGCACT

CUST\_10299\_PI426210822

ATGTCAAATCCTTACACTAGCATAGTGATGAGAAAGTGAGCCAGCTTTTGCTCTT

A\_16\_P00685182

GTTAAGTAACCTGACTCAGGCTATGAACTAGTGAGAGACTTCACTGCCTCTTCATAATAG

CUST\_3757\_PI426210822 AAAGCTAGGTTGGCAGATGCAAGCACACATGCCTCCTATAGTGTTG

A\_14\_P100120 AATGCCGTTGATCGTCATATTGAAAAATGGTAAAGGGGATAAGATTGCTATCATCTATGAC

A\_14\_P109465 GAATCAGCAGTCCTGTATCTATGAAGAAACAACCTGGAAATGATAGGTTCTTGAATTCCAA

CUST\_4923\_PI426210822

ATTGCTGTATTCTTGACCCCTGTACCACAACATTGTTAGGATAAAGTTTCATAAGTCTTA

A\_16\_P19563333

TGCTTTGATTCTTTAACGTTACCTGCATTAACCTCTGTAATAAATGACTACATGCCATGG

A\_14\_P139842 AAGTTACCTCAAGACTATGTATTCCCTATTTTGGAGTCAGTTTCCATTTCTACAGTG

A\_14\_P110272

TGTTCTTGAGGAAGAAAACTTATGAAGTGTAATACACAGAGTCATGAACACAGGCAAAG

A\_14\_P115610 CTTCAGAGTAATGTCTTTCATTCTAAAAATGTTACAGGGATTTTATTCCCAGACTGGAGG

A\_14\_P119903 TCCTGTTTTGTTTTTTTCATTTGCACTCTCCTTGTTTTCTCAGTATGTTTTCCACAATTT

A\_16\_P01596231

AAATAAATGGTCATAGTATTGTCCCAAGAGATTCATTTCTCCATCTACTGCTGTGAGAGG

CUST\_7315\_PI426210822 CCTCGCAGCCAGCTGAGGGAGCGCTTCTCTTTCCACTGTCTGATT

CUST\_4731\_PI426210822 ATGGCTGCTGCTAAGAACCTCATTCTTATAGGAAGGATTCAGTTCTTTCCC

A\_16\_P16770366

CATGGTTCCCTTCATTACATGTCAGTCATCAACATATCAATTTGGCTTATCTTTTCAGCAA

A\_16\_P03794516

AAAAAATGCTGAAAGTATAGTCTTTTGGAGGTCAACTAGATTCCCTCACATTTCCAAACCC

A\_16\_P02411952

CCAGCCTTATTTTTGAACGTTTCAGTCTTAATCTACTGGTAGATATTTCCCATGTTCCAA

CUST\_1291\_PI426210822 AGCTCCCTATTTTCATGAGTCTTTTAGCTTTGGTCCCAAAATTGAATTCTGCTCA

A\_14\_P100305 GTTTTGGCCAGGAACAGTAACACATTCATCTAATGGACTTAAATTAATTAGAATCAGGC

A\_16\_P02145516

GCATGCATAACCAAAGTATTCAGTAAGCAGTTTAGCAGTGATATTCTCAACAAGTGGAGT

A\_16\_P19165413

AACTTGTGCGGTATGCTTGCCTTTAATTCCTTGGTTTCTTGAATTTATGGGATCTCAAATT

A\_16\_P16191652



CTTGTTTGAATCACTTGACTTTGAAATCCCAGGAATGACTTTGCTGTGTGATTAAGTGA  
A\_16\_P18058401  
TTCCTATTTTTCCATCATCCTATGTCTTCTAAAGTCATCCTTAATTTTCATCACAGCACC  
CUST\_3435\_PI426210822 CAGTGACGCGTCGGTGCAGAGAATTCCTGTTTTGAGGAAAGATTC  
CUST\_3429\_PI426210822 AAAGTCGTGTTTGGGTGGAATCACAAGCAGGGGAAGTGGGGGAG  
A\_14\_P129685 CAATAAATAAGGAATAACTGAAACCAGACCCTTTAGGAAGAGACAGAAATTCATTACCC  
A\_16\_P15849541  
AGACTCAGACAATATCACTCAGTTGACTAGCAGTAGAGAATATTCAAGCCATCTTTCTCT  
A\_14\_P118785 AAAAGATTTTCATTTATTTTCAGTCCCAGAGTTTGAGGTTATAAAAGCCCCTAAAGAATCCC  
A\_14\_P117188 TTTCTTAAGTATGATTAGAAATGGCCATGTATCAATGCTACTCAGACTCTCAGACTGTG  
CUST\_7702\_PI426210822 TAGGAACTTTATGGCTCAAGCCCGAAGGATTCCCCTCTGGGAATA  
A\_16\_P00184829  
ATGACCAGGAACACTATACAATGAACACAAAATCAACTCTCTCTTAAGAATTCATCAACA  
A\_14\_P117244 ACCTGGAAATGATGAAAAGAAAATAAAGAAGATTCCATCCCTGAATGTAGATTGTGCAGT  
CUST\_5316\_PI426210822 ATTCCCATTCATCCTTGTGTGTGAAACATTTTTCCCCTCACCTATATGC  
CUST\_9830\_PI426210822 TGTAATATGTGTCCTGGGAGCAGCTGGAAAGGCAGGAAGGAGAC  
A\_16\_P21591919  
TTAAGACACTATCACACTGATACACAGAACCCTTAAGGAAGATTGACACCAGAAATTACCA  
A\_14\_P117822  
CAACATACTTACAGCCTTCTTAAAAACAGCAACTAAAAGCAAGTCACAGAAGGCGTAAAG  
A\_14\_P106103 TTTATCTTTGTATTTCTAGTGAATCAGCATGGACGTGTCCCATGAAAGAGGAAACACATA  
A\_14\_P133950 ATTGTCCGGGTAAAGTTATAATTAGGTTATCTCCAGCCGATACCGTAAGTTCTTTCACTAA  
CUST\_7173\_PI426210822 TAGTATAAAAAACTTCCTCTGGCCCACCCCGAGCAAACCCTCATT  
A\_16\_P17594867  
TATCAAAAAGAAAAATAGACCTCCCATAACTTTTCATGAAAAAGTCAATTTCCCTGCTCCC  
A\_14\_P133453 ACACAAATGTCATTGAGATGTGACTACTAGATTGCCAAAGGAGAACTTATTTGCATACAC  
A\_18\_P14134530 GCTGAGTTCTGAGAGCCATCTGAGGCATGGTTCTGCTGAAAACATTTATTC  
A\_14\_P100993 GAGAGGACTAAGAGATATGAACCTTTCCAAACTGGTATCTTCTCTGAATTCTTCTTTTT  
A\_14\_P201477 CTGTTTTGCATTTTCTATGTATGCAGCCATGTATTCATATGCAGCAGCCTGAGCATT  
A\_16\_P21625667  
ACAGTGATTCTCATTCTTAATATTTAAGCACACCCTAGTTCAATACCTCTTTTCATGACC  
A\_14\_P109467 CTTTTATGCCAGATTTTGGGGAACCTTAGTAAAAAACTGGCTGAGGTGTGGAAG  
CUST\_2326\_PI426210822 CATGGGAAAAAAGGAAGTCATGCTCTCAGCAGAAGCATTGTCAGGATA  
A\_14\_P136256 GACAGCAGACTATTGAACTGGGACATCACATCCTCAAAGCACACATTTTTTAAGGTAATT  
A\_16\_P30952494  
AAATACCACTTCCTTTTTTCACTAGTATGAATTCAGCGTGATCTTTGATACAAGCCACCTG  
A\_16\_P21157689  
ATGCTCACATTTGAAATTTTTTCCCACCCTACTATAGACCTCACTATTCTTGCAAAGAAG

A\_16\_P21198125

ACTGATCTACTTGTATCTAGTGCTATCTATCTCCAAAAATACCTGATCCTCATGGTAGA

A\_14\_P112614 GCTGAATGATGGATACTATGGTGTCCATTTGAACATAAGGTAAGAAGATCCTTCTAATG

CUST\_1451\_PI426210822 TCACTTTCCTGGGTATTTTTAGTCACTCACTTTGCAGAACCTTTGATGGTCTA

A\_14\_P120669 TCACACTCAAGTTTATGGGAACTGAGGTATAACATCCTAGTAACTTCTTTCTTGCAAACCT

A\_16\_P01579784

AAGATAAAGAGGCAATGTTTTCTAACACAAGATCTCACCTATTGGTAAGTCTTAAAGCCC

A\_14\_P127889 AGTCCAGTTAGAGAGTCCAGAGTCATCATTTTTAGCCTTGTCACAACAGACAC

A\_14\_P127383 CCTAGACATGGGTCTTAAGATCCAGTAGTCAGTAGGTCTGTTGCAAAGTCAG

A\_14\_P137175 ATGATTTATCATTTTTCCCTTCACTGCAAAAACTCCATGCTCAAACAATGTGAGTTTACAG

A\_14\_P132571 TCTTGAGTGCAGATGGTGATGATAATAAGTTAACTTATTCATGAACATTTCTCGATGC

A\_16\_P35873535

AAGGGGTTAAGAATTTATGTCCAAATATTCACAATCCAAGTCATGATATGCTAAGTGCCA

A\_14\_P121561 CTCTGCTGAGAACTCTTTTCCACTCCAGGTATTCTTTTGAAATTTAATTTTAACTCTG

A\_14\_P125114 GAAACAAGAAAATCGCTCACAAGTATTTTCATGGGCATCTGTATGACTAGAATTTGTTGCT

A\_14\_P108131 AGAACAATGAACCTAAGACCTCTGGAAATAGAGTAGATGATGATGAATTTGTTCTTGCTG

A\_14\_P129447 CTACAATAAACAGTAAATACTCACAAAAGGAGGGGCTTCACTAATAACTGGACGAATCAC

A\_14\_P112499 GAATCGGCTCAATTGGTCCAGCATTGAGCAGTCACAATTCTCAGGTTA

A\_16\_P36529467

TGGCACAAACAATAAGCATAACTGACTCTAATTCAAACCTGCAACATCTTTTTTCTGTTGG

CUST\_1419\_PI426210822

TAGTCTCTAGAGTCAGTGGGATGGATATGCTTTTTGCCAGACTTTTCACATTTAATATGT

A\_14\_P139687 GATGTTTCCTCTATGGCCCAGACTAATTTCCACCCAGGTGAAAATCATTAAAT

A\_16\_P16937260

TGAGCCACATATGAATCTAGAACAACGTAATATGCTGTAAATGATTACTCTCCAGACTG

A\_18\_P14132656

TATTCAGAGACTTTGCATTGTTTTCTACATGAATCCTTCCTTTGACACTTTGATCTC

A\_14\_P101612 CAGCATTGCAGTAAGAAGAATTCATATGTTCTTTCTTCTGATTTTACCAGCACATA

A\_16\_P02886137

ATTCTAGGAGGTGAGATTGAAATGAGTTGACTTAAGCATAAAGCCAAAATGAAACCAGTC

A\_14\_P135567 GGGCAAATCTGGATGCAACACTCTTGAGAATCTTCTTTTACTAGAACATAATTATTGGGA

A\_16\_P19142967

CAGTTACGCCAATCATTCTCATCAATTTCTTAAGAGAGAAAACGACTATTCCTGTACAG

A\_16\_P00781179

AAGCCTCAAAAATTCCTCATATTATGCCAAATGTATCCTTGCACTTGTGACATAGAGACT

A\_16\_P21660639

TGCTGCTCCTCAAATTTTTAGTTATCTTTCCAGACACATAAAAAGATTAACCTCAGATCCC

A\_14\_P116311 ATAAAACATTTATAAGAACAGTGAAACGCCAGGCAGATCCTGAAACAATGAGATGTTTCT

A\_16\_P30952585

AAAAAGGTAAGCCCTAATGAACCGCACTTGTGGATGCATTTAGAAGCATTTGAATTGT

A\_14\_P202417 TGAAAAAAATGTTTGGAGCCAAATTTTGCAGTGCACACATCTTTCACACTTCCATAACTA

A\_14\_P119819 CTCGGTCATAGTGGAGTATACACATGATAGCGACACAGACATGTTCCAGGTAT

A\_16\_P18000820

AAAAATATGCAGATACAGACTTTAGAGCACAACACTATTCCATCTGAATCAAGCCTTTTGCC

A\_14\_P119031 CATCGCCAGGCTGTAAGGTTTCTAAGTCACCCTTAAATTCATCTATAGTGAAAGAATATCT

A\_16\_P58424534 GTTGAGAGAGTTGGGTCTGAAAGATTGATAGTGTGTGCCATTGATTAGAAGGAGAT

A\_14\_P117538 GCAAAGTCAGCAGGAAATGATTATCCATTGACAGTTTTTCATGATAAGTCTTGGAAAGCATT

A\_16\_P00621517

GTGGCATTTAGTTTTCAAAGTTTCTGCAAAAATCTTCTACATTCCCCAAACATATCAAGAC

A\_16\_P16809080

ACCGACATCTGTAGAGTCATTCTAACAAATACCAGAACTGATAGCCTTTACACAAAAGAG

A\_14\_P101366 TTTAGTTCCATGACGCGGAATATCAATTTCTTTGGGATCCACAAAAGTTCATTGGTATTTT

A\_14\_P201226 TTGCCTTAGGAATATAGTCTTTCCTGGCACTCACTTAGCCAAAATCTTTCTAGAAGG

A\_14\_P109471 ATTAAGTTCGAGGTGGCTACCGATTTTCAGCACATGCACTACTGAAATTTACACAAAAG

CUST\_987\_P1426210822

GCTATTTTAGCACAAAACAATATCAAGGAGAGGAGTGAATGTGGTTTGCAGCAGA

A\_14\_P130591 TATCCCAGAAGAGTGGGGATTACTGTGACTATCTGAAGTTTTTATACTTGAATTTTTCTG

A\_14\_P122084 TTGATTGGATTTGCATCTCTTTGGCAAAGATGTGTAAATGTTGTCCTTGTTCCTTTAAAG

CUST\_8875\_P1426210822 CCTCAATGTTGTTAGACGCTGAGAAGTAATGATCTCCCCAGCTGTCA

A\_16\_P20210040

TCCTTCTTAGAGACAGAATTCATAGTAACTGCCTTAAACCCATTTTAAAGAGCGAAAAGG

A\_16\_P40079670

ACAACCTTTGAATATTTCTATGCAACATTTACATCATTAACAATAATAAGCACCTCCAC

A\_14\_P137707 GCAATCTATACCGATTATCTGGTATAGATTTTCTGCAAAGGAAAAGTGGTCTCTCAGAGA

A\_14\_P128188 TGACAGTGCCAACATTGGAACCTAGAAGTGTGACCAAATGAAATAGATTATTAATGGT

A\_14\_P125858 ACATACCAGTGCTTTACAGGGAGGCAAAATGATTTCTTTTTGCTTAATTGTGCTTGTTTA

A\_14\_P101627 CTAGACACAATCTTTGTTATGTTGAAATCTCTGACAATAAATTCACCCCTTTCCAGAGTC

CUST\_10019\_P1426210822 GCGCAGTAACTGCTCTGGAAACTGAGAAGAAGGTGCCATGAGTCC

CUST\_4372\_P1426210822 CACAGATGTTCCCTCCTAAAAAAGGACATGCTGGCCTTGCTTTCTTA

A\_14\_P100367

TGTCCTGAAAGATAGCCCTTTAGGCATGCACAACACTGTGAAAGAAAGAAAAAAAAAAATCA

A\_14\_P123052 CTCTTCCAGCCATTTTCTTGCTTTTGATTAATTTCTACTATGACGCCACATGCCTACA

A\_14\_P106271 CTCCTGTGTTTCATTGTGACCTCAATGTTATCATAATCTCAGGTTGCCTATAGGTATAAAC

CUST\_7884\_P1426210822

TATCCGGCAGAATCACTAATTTTATCACTCAATAATTTTATGTATTAATAAATGCTCATCC

A\_14\_P114546 AAGCCCTGAAAAGATACTACATTTTGGAAAGAAAATGAGGTCCACAATCTATCTTACCTT

A\_14\_P121103 CTATCCCAAATAATTAATTTTCCATCTTGAGAAGCACTGACTAGCAGCCTAGAGGAACAA

A\_14\_P131649 CTGAATCACTGTTATCATATTTGCAGAATTCAAACACTATGTTGATGACTGGCCTCTCTT

A\_16\_P01668323

GCCAAACTTCATAAACCAAAAAGCAGTCTAAATCTCCTATCCCATAATGACACTCACTTT

A\_14\_P115118 CTACATTTCCCAAAGTCTGTTCCCTTGGAGCACTTCCAGGAAGTGTTAATAGATATATC

A\_16\_P17125718

AAAAATCACAACTCAACTGAATTAGCATCCTTCTACTTCCAAATCCTGTAGTGAGGAG

A\_14\_P119294 TTTTGTATGTGACAAAAATTTTGTGGTGCTCATCTGAGAGGGTTTGAGCCATCTG

A\_14\_P106231 TCAGTCTGTGGAGAATCAGAGAGAATGAATTTGAATAATAAAAGCCAGAACAAGGCGATA

A\_14\_P132328 AACCTTGAAGAGGGGAAATAAATACCAGCACTAAACAGACCTCTTAGAGTATCCTTCTAC

A\_14\_P112864 AAACCCATGTTTCTTTAACAACAAGAAAACACTCCTCCTCATCTTTCTCTTTAATCTCA

A\_18\_P12311859

AATACCTTCATGGCATTAAAGCACAAAATCTGTTCTTGTTAACCAAACATGTTTGTGGC

CUST\_8440\_PI426210822

TATAAGAAAGGTGACATTATAGACATCAAGGGAATGGGTAAGTTCAAAAAGGAAGGC

A\_14\_P125923 GAAGGATGGACTATAACATTGAATCAATTACAAAACGCGGTTTTTGAGCCATTACTGTT

A\_16\_P17208197

AACCCACACATTTTCATTTCCATTGCATTTATTCTAGTTACCTTCACTGATAAACAGGGA

CUST\_7880\_PI426210822 TTTTAAGAAGCTTCTCTGGCAGCCAGCCAAATGGACTGAAGGGG

A\_14\_P118814 ATGGAAAAACCACAACCTGATATAGGGGAAGGTATATGCCATATGTGAACACACTAAAATG

A\_16\_P18981019

AATAGGAGAAGTCAAATATAGGTTTATTGACAACAAAGGCACTATTAATGTTGGACCGGG

A\_16\_P15792300

AATAGCACGTTTCAACTAGGAATCCATTCGTGTCTATCTTGGTAATCCTATACAGTCAGT

A\_14\_P129042 ACTGCTTTTTTACATGTGCATTCCTTCTTGTGTTAAGAACCATAAAAATTCCTGGAATT

A\_14\_P122695 CTGTAGCACTGACTTCATTAAGAGAGGAGGTGGATTCTGAAAATATATACAAGCAACAA

A\_16\_P20698958

CTCCTATAAATTTGCATACCCCAACATAATACTCCTCACCTATATGTATTCCCCAGTTGA

A\_16\_P19954623

AACCTATCACTCAAGAGTTCAATCACTGTCTCTTTGAGAATGACATAGAAATTCCTACCT

A\_16\_P37836841

AGAGCACTGACAGTTTTTCTCTCCAAATTTTTGAAACAAAGCCTATAAATGACAGTGAA

A\_16\_P35841778

TGATTTTATCAGACATTCCTCTTCTTAATGTGGATCAGTAGTTCTGTCTCATAACCAGCC

A\_14\_P107185 TGCTGCTATTAATTCCTGGTTTGTGAAATTAAGTAAACTAGGGGCCTTCATTCAGAAC

CUST\_5344\_PI426210822 CTCCCACCCCGGGAGTCATCTGTCCCTTTGCCTGGTCTCCCATG

A\_16\_P16097498

CCTCTCAGCACTTAATCTAAACGACCTGAAAGTAAACAGAAAGGAAAGCGTTAGATACAT

A\_18\_P22841402 CAAGGTGACTTCTGGCTTCTCAGTGAAGTCTGCTAATATTTGTCAGAGGC  
A\_18\_P15242729  
ATCCTGATTGGCTTAACTCTTAGTGTCTGTGAAATATCTTGCTAATATTTGTCAGAGGC  
A\_16\_P16540414  
AAAGTTCTCACGTGTTTTTAAGCCTTCTACCAGACCTTGAAGTATCCATTAAGTCAAAG  
A\_14\_P101021 CTGAGTCCCTGACATGCTCTGGTTTTCTCAGAACTAATTAATGTGAGAGCAAG  
A\_14\_P114683 CTTGAGCCGATGCCAGCCCTTTATAATTTCAAGACTACATTAGAAGACTATAGAAATAC  
A\_14\_P128260 TGTGACTTACTTTAGATTAAGATCACCGCAAGTGTGATCACAACCTCCCATTTTAATGCA  
A\_16\_P01845803  
TCACCTCAAGTCACTAATCTGAAGTCTCAATATCACGTCACTTTTTCTGTTAATACACCA  
A\_14\_P128736 CAAACGAACAAAACCTGGGGAAAAGGATCTACCTCATAGCGTAATAGACAATGACAATTA  
A\_16\_P18825277  
AAAATTCGAGGGTCATCTTAGAGATGCTGAAACCAAGAGATGTTAATAAATGAGTGACACG  
CUST\_4275\_PI426210822 CTTATTGATGGCACATTTGATGACTGTTAGTCCATGGAGTGGTGGGG  
A\_16\_P16919393  
AGCAAAGGAAAAACATCGATAACAGAATCAGTCATGAGTTTTGCATAAGTTTACAGCCTG  
A\_18\_P13632898  
AAATGTGCTTGAATAACTGTATCTGCATATGTCCTCACATGAATTCAACTTTGCCAAAC  
A\_14\_P139858 CTTTGGGAAGAAAAAGGGGTTAAGGATTAGAAAGGAAGAAACCTAAAATCTTGGCC  
A\_14\_P124244 GCGTAGACTCAAGCCAAGCCTTAAATTTAGACGGGAAATCTTAAGGTTTTACTTTGAG  
A\_16\_P00018420  
TAACCAATTATGATGTGTTAGCCTGAAGTTAAAGGAATGGAGAATTCAGTAGACCTACCC  
CUST\_8375\_PI426210822  
AAAATTATTTAGAAAGGGTTCAAGTAACACAGACCATGTAATGAAGAGGGTATGAGTGTTG  
A\_14\_P102593 CTGGCCCTTCTAAAGTCTGCTAAAACCTTATCATTGACAGATTTTGCTTTGTCAATCATA  
A\_16\_P21464716  
TATCATAGTTCACCTTTTTTGTGGCTACATTTTCTGTCTTGTCTGAACAATTCAGACC  
A\_14\_P136489 CTGAAAGTTAACCTCCAACCCAATGATAACTACTTTTTCTATGTGAGGGCCATCAATG  
A\_14\_P105326  
AAACTTACTCAGAAAGGTGCTCAGAAGTTGGGATACAAACAGAACTGAAATTAGAAGAA  
A\_16\_P02166255  
TGCACATGCCCATATAATCCAAAAACAGATATTTTAAGGAAGAGGTAGCATTAACTGGG  
A\_14\_P130014 ATTTTGTAGTCTTCAAAAATTAAGGAAGCAAGGGGATACATCCATGTTGAAACCA  
A\_16\_P18198939  
AATACCACATTACCATTAAACCATGTCAACCATACTGTTTCTTAACTGTGCCATCTTGAC  
A\_14\_P102730 CTGTATTTTTATGTTTTTTCAGATTCAAGTCAATCTGAAAGTCCCAGCCAGCCAAGTGAC  
A\_18\_P16735036  
AAGAGACCATTTCCATATCAATTAATGTCCAGAACATTCATACAGAGAGTTGAAATCGGG

A\_14\_P135759 AATGAGAAGTCTTATGAGGAAGATGGCTCAGGATTTAAGCAGAGAAGGACC  
A\_16\_P21144114  
AAATAACCCAAACTGAGAATGTTAAATCTCCCTTATGAGGGTTAGAAGTAGATAACTGGC  
A\_14\_P100018 TGTCTTGCCCAGTAGAGAAGTATGGTATTTGCATAGCATTTTCAAAGTTAGTCTTTTCT  
A\_18\_P10682425  
TCACAGAATACTTAACTTACCCTATCACAAAACCTCATCTAACCTGACTGCAGTTACTTGT  
A\_16\_P01854922  
TGAGTTGGCTTATAGTAACTACACTTGGGAATCCTAGATAAAAGAGAACGATGCATTCTGG  
A\_16\_P02240511  
GAAACCACAAAATAAGTGATACCTCCACCACTAGTAAAACCTTCGCAGTGACTTTCTAGAG  
A\_14\_P124748 ACTCTGTGGAAATAATATATGAGGGCACAAATATTAAAGATTAAACGTGGCTGAGGCTCA  
A\_16\_P36663657  
ATTCCTTTGATCAACCCTACTGAATTCATGAACACATCAGGCTAATATTTCCCTTTTCTG  
A\_16\_P00378939  
TACTATCATTTTCCCTATGTCACCATATCTACTCCTGAACCTTTAATCACTCAACTCCTCC  
A\_16\_P21498682  
CCTTTTGATGACAGCAATAATTACTCACACTTCTTCTATGTTCCCTCATAATACCCAACA  
A\_16\_P15610405  
AAAAATGACACAAAGCATGAGTCTTCGATGTCATTTCAATCATAATGCGAAGCAGTTCAA  
A\_14\_P110904 CTCCATTTTGCCTGCATGCAACGTGCACAGTTCTGATTTATTAAAGACATAACAATTATG  
A\_16\_P17742298  
ACCCAGTTCTGATAAATCAAACCATTTAGCATGTCTTCAAAGTCTATACATAGGTCCTT  
A\_14\_P103769 GGATGCACTACATTTCTGCTAGATTTGCTCAGTATAGAGGAAGAAAGCCATTTGTAAATT  
A\_18\_P15353956  
AATGGCTACCTGAATTAGCATTCTAGTGTCTATCCTTTTTTCTGAAATGTGCTTTGGACA  
A\_14\_P113355 GCAGCCCTAACAGTATGAAGTATGCTGGAATCATGGCAGAAATAATCATTGTGTTG  
A\_14\_P102158 GGGCATGTGTTTTCTACTGTTCTGCAATCTGCGTTTTCTCAAACCTATTACTTGTATTTCA  
A\_14\_P120820 TTGAAGGATTTGTCTCTGGTAGGAAACATACTCATTAACCTAATAGTGAATTGGCACCTCT  
A\_14\_P108521 TTCTTTTTTGGTAAAATTGGGATTATGACTAGGAATCTGTTTTTTGGAGTTTCCCAGGTG  
A\_14\_P127809 GGGAAAACGCTGTGAAGACTTCATTTTTGAAAATTTTATTACAAAATACACCCGAACCTG  
A\_16\_P16148534  
AAAATGCAGTTAATGGGAAGTCATCCATCTTCTGACATAGTTAATTCAGTTTTTGGCACA  
A\_14\_P108563 TGATCTCTTCCTGGTTTTTATTTTCAGGTTTTTATTTTATTTGATGTAATGGAGATCACCCCTGAA  
A\_14\_P112168 CTAGGTTTCTGAATTCTCAGATGAAAACATGCCTTCTCAATCCTGTCAATCTCCTC  
A\_14\_P131294 CTGCTAAAATCACCTACCTTTGAAGTTAGCCGAAGAGTTGCTTGTAGCAATTTCTT  
A\_14\_P112407 CAAAAACAAGTGCATCCAGAAAGAAACAATTTTGGAAATACAAAAGTCTGCTCTTCCTCA  
A\_14\_P119111 GTGTGACATGTATCTTCCGATGCAGAATTTTTCAGAGCAATCTCTGGATCCATG  
CUST\_8299\_PI426210822 TTAAATTGAGACAAATGTTTGTCTTCTCAGAATGGCAGTGACCATGGGTGC

A\_16\_P21510334

AAAGCAATCCTTAGCAACTTTGTTAGCGGTTCTCAGATATGACTACATGGATCTACATTC

CUST\_5905\_PI426210822

AAGAACACAGGAATTTCTCTTTTTTCCCAAGACTTCCATGATATTTTCCCTGATAATC

A\_16\_P17396719

ACCAAAACCCATCATCTTTCATTTCTATCTCCACTTTATCTCCATTTTCAGCCTCATATTC

A\_14\_P111255 GCAACGTTTCAGTTGTTTCTTTTTTTAAGTCTGAACTTTGGAGGACAGAAAAAGTGTGTA

A\_14\_P113738 TTAGTTATGGGTGAAGGTCCTGAGCGAGGAAGAGTAAAAATTGGTATGTTATATCTTTGC

A\_14\_P113021 ATAGGTTCCGTGTCTTTCACTTCCTCTTAGTAACCTATTATTATGCCTGATTCTCATGT

A\_16\_P20297520

AAAAAGTGTAAGATGTGCTCTTTGCTTAAGAAATGCGTAATTCATTTGTCAAGCCCTG

A\_16\_P00685378

AGAGCAATACCTTTCTTGTTAGTAAAATAAATCCCTAAATATTTGCCACAATCTCTAGA

A\_14\_P125748 AAAAAGAATTGTTGCAAGACAAAATCAGTAGCCCATGATGAATAAAAAGTGTAGTCACA

A\_14\_P138402

ATTATAGAAAAGAAAAAGATGACAAGTGGAAAAGAGGGAGCGAACCAGTTCCAGAAAAAAA

A\_14\_P138929 ACTCTAGTTTGTTCAGAAGAGATTTTGGGTAGACGTAATCTTCACCTTTCAAATTAT

A\_14\_P133348 AGATGGAGATTCAACTATGATACCCAATAGATGGAGACTGTTGCTGATTTTTTGGTTATC

A\_16\_P00685044 AAATGCCTGGGCATCGAGGACAGTCACTAATAGTGATTGAGTCAGTCACTATTTA

A\_14\_P137124 TTCCCCTTGCTTTTGTATTCTCTTACATACTTATTCTGAATCTGATGCCCTTGAACTC

A\_18\_P14750337

CAATTGGCCCTAAAATAGAACTGAAAAACAGGACATAGAATTTTTTACCAGACCACAG

A\_14\_P139476 TGTAATAATGGCTGAGCCATGTGCCGATTTCCAACATGATGAATCATTGTTTACATTTT

A\_16\_P15889390

AAAACAGTGTTTTTATTACCGACTGGAAGAAAGTTTATGAACCCTCCATCATATTTGGCA

A\_14\_P201199 GCAGAGGAATTTGTCTTCTTTAACACCATTAACCTAATAGGATTTTGCAGACTACCT

A\_16\_P40936907

GCTTTTTACAGGACAATATATAAGCCCATAATTGAAAGGACAGAAAAATTGAGTGTGCA

A\_14\_P113926 TACAAGTTAAAGTGAGACATGAAGCACACACAATATGGATTCTGAGGACAAGAGATGTAG

A\_14\_P125975 CTTAGAACTTTAAGCAACAAGACCACCTTCGAAACCTGGGATTCAGGAAT

A\_14\_P103754 GAAAAAATCCATTCTAAAATACAGAACAACTCTTAGGACCCCCAGTGTATATTCCACAG

A\_18\_P22842466 CAAAATGGTCAGGGAGGTCCCTTCTTAGAGATGAGAAAGTCACTCAGAG

A\_16\_P17071328

CTCCAGTAAAGTCAGTTGCACTGTAGTTCATCTTACTATTTGATATTTACAACCCAACCG

A\_16\_P00685537

GTTCTCTTTGTTAAGCCATTTCTGGTATCCCTCAAATCCCTTGTATGACTATCCACAATT

A\_14\_P101808 ACTTTCCAAAGGTATTTAACTACTATCCCTTCTCACTCCTGTAATTGACACCCTATTTG

A\_14\_P100566 TTACTTTTTATTCTTTTACATTTTAGGTGGCTGCCTCTTTGATGAGCCGTATAGCACATG

A\_14\_P108739 AGCATTACTGGGTTACTATGCACTTGCGACTGATTCTTGGCTTTTTATCATTGAACT

A\_14\_P103687 CTACAATTATTGGACACCAAATGTATATGATCACGCTGACTGTATAACCTCATGCTGTCT

A\_16\_P39325915

TAACAAGCCCTATTATTTTCATGACCAGTTAGCACTAAATGTCCCTAAGAAACCTCAAACCT

A\_16\_P39638425

AAAGACTCCATAAAAGGACATCATATCATGTGCTTTAACCCCAATTAATCCTCTTCACTC

A\_16\_P01414464

ACCAGACACCATATTCTCTAGGTCTTTACCCAATTTTCATTGAAACTACTTAGCATTCACT

A\_14\_P113472 ACTCTTCACCTGGATGATAGTATAAGAGGTTTTTCAGGCTTTAGATTCTATGAGTTATCT

A\_16\_P38074672

ACATCTGTATGTGCTCACTATTGGTCCTTTTCTAAAGATTGGTCTGCTGATATATAGGGT

A\_16\_P00685320

TAAAATAAACAGTCTTAGGGGTTACTTGTGACTACTGTGGGACTTAAACACTTTTCAGACA

A\_16\_P02937933

GGCCCGTGAAATAAATTATAACATCACTTAGTTTCCATGATATTCTTCTGCAACACTGCT

A\_14\_P115960

GACAACAGATCAGAGAACAACGAGAAAACATAAAGGAAAAGCGAAAGGCTATCTTAGA

A\_16\_P15580880

ACCACTTGCCCCATAATAAAATTATCCCCCTTGATTATCTTCTTAAATACTACTGGAGA

A\_14\_P200858 ACAAACTTTTGTCCAACATTAAGCCATACTCAGAACAGGTCAGAATCTATCCATTTTTAA

A\_14\_P111242 TCTGAACTAAAGTGACATTTAAATAATTTGAAGATATGACTGCTCCACCTCCTTTGACCC

CUST\_6658\_PI426210822 TAGGTCAGTAGTTGTGAAAGTAAGGGCAGATCACTGCTTGTGCGTGTAGT

A\_16\_P35491165

CACCATGTCACAAAACACATCTTATATTTGCTGGACCTTGTATGATCAGTAATTCCTACG

A\_16\_P01681728

AGTTGTGCTAGGAGAAATTGATGAAGTTTGCTTTCAATATTCAGACAGGATTTCTGGAAG

A\_14\_P114020 GCTCTCTCACAATGGTAAGTTTGCAATTTGTTTGTGTGATTCTAGGCCCTCCTTATTTT

A\_14\_P106543 GAAGCCTGTCATACATACAGTTCTGAAGAGAAAAGTTTATTCTTCAAATGAGAAAATGAG

A\_14\_P122671 TTTATATAGATCTGACACATTCAACTTGTGTCCAAACCTAAAAGCAAGAGAAGAGAGACG

A\_16\_P41418838

GACATCCTGGTAGAAATCTTAGTCCACAGTCAATCAAAAAGAAGCAAATATCACTACAGA

A\_14\_P123220 TTGGCCAGAAACATATTTTTTAAGTAATCCCTCACTGACAGGTTCTACAAGTAAAGTT

A\_14\_P104963 TCTTGAAGTTACTCTCTGCAGAGTATCTGATGCAACAAATTTGTCTTTGCTTGGTAATTC

A\_16\_P35741759

ACACTGTTTTCTTCAACATCAAAATTGCACACTTTTCTACATACTTACAAAGAGGCTTTC

A\_16\_P36230556 CTGTAGAAGGATGTTTTCTCTCATGGAAAACCCCAACTCTGAGCCC

A\_14\_P130707 TTACAGCCTAAACTGAGTAAATTTCTACCAAAAATCATTCTTCCCAGGTGAGTATAAAGA

CUST\_556\_PI426210822



AAACCAACAAGAAGATATCAAGGCTTTTTCTTAGATCTGCCAGAAGTCTGTAATTTGCTC  
A\_14\_P128646 GATTGGGAAAGGGATACCTTCTTTGTTATATTTGCTGGAAAAATACAGGCTTGTTTTCTC  
A\_14\_P112678 AATTCCTTGCACTCTAACCAGTTCTTGGATGCATCTTCTTCCTTCCCTTTC  
A\_14\_P117050 GTGGGCAAAATAGTAACTCTTAGACATCTGGCTCTGACAACGTAAAGATGTTAAAATTGT  
CUST\_6161\_PI426210822 AAGGATGAATGGACATGTGGGTGTCTTCCGTGGGAGTTACCTGGC  
CUST\_5888\_PI426210822 CAGATCTGGCAGCCTGCATGTCACCAGATGGATTTAGGTCACATC  
A\_14\_P101572 CTACGTCTCTTTATTTTATTAGAACATGGGCACAACCAITTTATTCCTTTTTTGTGGCTGC  
A\_18\_P12559831  
AAATCACAGGAGAAAGTGAGTCAATGACAATAACAAGAATCCTTTTCAGCAAGTTTGTCA  
A\_16\_P02946930  
AACCTGAAATGTATAGATTATCCATCTAAACCGTGATTTATTTTCATCTGGGGGTCATTGG  
A\_16\_P00685165 ACTTACATGGAGGAGACGTGTCTGACTATGTGGCCCATGTGAAG  
A\_14\_P126854 TTTGTAGTCACCTGATTTCTGGCCCAATCTTTAGAAAAAGTCACCCAAAGATACAATAA  
CUST\_1552\_PI426210822 CTCCAACAGGCCTGTCTAGTATTGTATGACTTGAGTCAATAGGCAGTGG  
CUST\_3397\_PI426210822 ACAGGACTGTTTAAGCTCTGGAAGTTTTTCCTACCTCCTGCAACTGAATTT  
A\_14\_P114667 CTACAGTGTTTAAAAACAACAATTCAGTCCTTGACTGTAGTAGTCATGTCCTATAGGTCC  
A\_14\_P104220 TCTGCTAAAATGGGCACCTTCATCAAGATAACAGGAAAGCAAACCTTAAAGTAACGAGATTT  
A\_14\_P128878 AATATCATGAAAGGGGGAAATGTAGTGACCAGTTACATTCTCTGCAAAGACACAAACAAA  
A\_14\_P106374 TTCCCGGCTGTCTTGCCACTTGTGTTACCTGTGAGGAAATCAATATTTAGTAA  
A\_16\_P15924782  
ATTGGCCTAGTATTCCATATTCCCATATCTCACAGTGTTATGATCTTCAAAACTTCAGCC  
A\_14\_P113096 AGAACTAATCATATTAGAAGGTCCACCAATAAAAAATCCTGAAGTCATAAACAGGTTCTT  
A\_16\_P00892159  
TGAAGTATGTTTTGGATGCATTATGAATCTTCAATTGACAGATTATTTCTTGCTCGGGGT  
A\_14\_P111811 ATTCAGACAATTGAGTTTGCTGAACAGCGGATCCCTGTATTAAATGAATATTGTGTGGTT  
A\_14\_P110539 CTAAGATTTTTTTTTCTTCTTTTGTCAAAGCAAACCTTCCATTCTCTGTGTACGAAGC  
A\_16\_P16191068 CATTTTGCACATGGGCAGTCTTGCTAGGAAAGGCTTGTCTTAAGTC  
A\_16\_P01957997  
AAAAGTGATCATCCATCAGTATTATTTTCTAATTGCCATCAAATGTCTATGACCCTCAGA  
A\_14\_P138602 CTTAGGCATGCAGGAAGAAATCCATTTCCATATACTGGTTACTGTCAAACCTATTCAACAT  
A\_14\_P132656 TGTTTGGATACTATCAGTGAATAGGTGGCAATTGTGAGAGAGAATTTTACGGAGAGAAAA  
A\_14\_P126682 GTAACCTACACTTGTATTTAAAACAACCTGCCATCTTTTCACCTTTAATTGATGGCACCTC  
CUST\_8294\_PI426210822 AACCTAAGATGAGAAGACACTACTATTTCATGCCTGGTCAGAAAGCACAGACT  
A\_14\_P138899 AAGAAGCCTTTTTTCCCAAGTTGCTAGAGATACAGCAGCCATTATTTTAAATCTATAACGCA  
A\_16\_P02872668  
AATCTGCTTCCAAAAAGAAGTTTCACCTTCTGTTCATCTTTTATTCAGAGTTAGACATCCT  
A\_16\_P16497404  
AAAAAAAAGCCATGCAAACATGTTAATTTTGTCCCTCTTTGATTTGCTATGGAAGTCTC

A\_16\_P03032802

AACATGCTGATTCAATAATTTCTGAAGTTTCACTAGCATTCAAATTCCTTCGTAGACCGCAG

A\_14\_P130497 CTTGTATCTGTAATTTTCCATACTACAAAGAAATTTGCTGGCCCTGACACATCGATTTTC

A\_16\_P00717305

ACAAACCGCATAAAGTAAATGTGTTAGTGAAGAACCCTTTTGTAAACTACCTATGGCTGG

A\_16\_P18302820

AGGCCAAAAAATTACAGAACTGTTCTTCCATTCTACTTTGCCTATACTAAGTGATCCTCT

CUST\_249\_PI426210822 CTAGGATATAGGGAAGAGGAAGGTGAGGGAGCACTTCCCAGTGAC

A\_18\_P15000636

AGTCTTCCAGAAAAATTGGTCAAGTAAAGAATGGTTACATAGGCAAATGAAAAGTAGCGA

A\_16\_P16277118

AAAGCAGGTTGATACAGAGTTTCTTGGAAAGATTCCCAATACCAATTTAGTAGAGGAAAG

CUST\_4003\_PI426210822 TCACCTACTAGTGTTTTGTTGAGGCTGCTGTGTAACCTTTGACTTTCTCTGC

A\_14\_P124572 GGAAATGTATTAAGGTGATCGTTCCTTTTTTACTCAGTTTGCTCTAGAAAGGAGAAATA

CUST\_9489\_PI426210822

TAAACAGGTTTTCTACACGTAGAATCCCTTGTGTAGATGAAAAAAAAAAATCACTGGGCA

A\_16\_P18703812

GTCTACTGAAGCCTTACAACCTGTCACATATACCTGAACATACCAATACACAAAAGTCCTT

A\_16\_P20613655

ATATTTCAAGTCTGAAACATGTCTAGAGAAAGGGTCTACTCAAATACACCATCACAACT

CUST\_6895\_PI426210822

TTCTGCTTTCTCTGGTGTCTCTTGTCAAGTTAATAGTAGCCTCAAGTAAAATTCAACC

A\_14\_P114454 GTAGCGTTCTGATTATTAATCAGCCTCCTAGACACTTCAGAATTATAAAAGGATGTGCC

A\_16\_P20883640

TGGCATAACATTTCACTACACCACATGGATAATTTTCATTTAAAAATTCTGGCCAATGCA

A\_18\_P24736495

CATTACCCGTAAGAGGTCTAGAATACTTATTTGTGTTGTCACCTTCTGACTACCTTCAACA

A\_14\_P118118 GGGCATAAACAAGACCAGGAGTGAATATGGCAGTGTTTTCTTATTTATTTAGTGTTTTCT

A\_14\_P201938 GCTGTAGTAAGGCTCAGATGGCACTTCAGGACCTTTTTTTTATTTCTTATTTTTGTTTTCTC

A\_16\_P17440469

TGTATCTTCTGAACAAACTAAACCGCATATTAATCACATTACAAATTTTTTTGAGGGCCGG

A\_16\_P39887604

GTTCTTGCTATCAAAACCTTCGTATAACCAATCCTGTTATGTTTCATCCAGTTTTTCTGCT

A\_14\_P126458 CTAGAGAAGGGTTAATATTAGCAAAGTTTTACTTTTTTTTTTTCTGCTCATAAATGACTC

A\_14\_P138709 AAGAGAAGAATATTTCTCTAGTTGCTGCCAGGCATCTACTTTCTTTTCCATAATTGTTGC

A\_18\_P16945767

GACACCACTACAATCACATCAACTCTAAATCACATACTTACCTTTTTATATGCTGCCTGGA

A\_14\_P102732 CATGTCTGAGTCACCTGAATTCCTTCACGTTACTTTCTGTTATCTGGAAAACCTGC

A\_16\_P02726559

AAATAAACCCATAGTCACAGTTCACAGTATCACCTCCATTGGCAATTTGTATTCTTA

A\_18\_P22606443

TGTCAATTAGAGTGATAACACATTTCTTTACTCTATTCTCATTATTGATCAAAAAGTT

A\_14\_P120429 GAACAGGAATTGGCAATTTCCAAACCTCAGGCCTGGATGATGTTCT

A\_14\_P122949 CTCATATGGGACTTTTTGCTACTGAACTATCTGACCTTTGACTTACTTTCTGACAGTTAC

CUST\_9112\_PI426210822 CATGTAACCACAGTCGGGAGCACAACCTGGCCAAGATTTTCATTCA

A\_16\_P00685045

TGTCCCAAACAGAAGAAGAACAACTTCATCTTAAAAATAGAGGATGATATAATCAATCA

A\_14\_P202492 ACTCACAAAAGCCTATTTAACCCACTGTATTTGGAAACTAACATCAACTTCACTCAGTTT

A\_14\_P108830 GGCAGAGAAAATATGCTGCTGCAACTTGTTTGCTTGAACAAATACTGAAATGATAAAAAGA

A\_14\_P111802 TGGCTACATTTTATCTGGACTGTGGGGGCTTCATAAATGATAGTTATTTTGTAGTTCAGT

A\_16\_P21152548

AAAGGGACTGATAGGATTATGAAATGCTACTTCTGAAACTTCTATCCACTTTCTACCCTC

A\_14\_P116471 CAGGCAGAAGTAAAAACACCAGATAAAAAGTGAGTGTGGAGAGGTGAAGACTG

A\_16\_P17211513

GAACCCTGACTTCATTTCTATTCCTCTTACTGCCAAATAAATATCACTCACAAACCTCAAA

A\_16\_P18901379

AAGGTA AAAAGTTGAAAAGAGCCTCACAAA ACTGATAGCAGTCATTATCTTTGTGGAAGAG

A\_14\_P133595 TGAAATTTCTAGAGGACACTAAGGATAGTTCCAGTATACTGCACTTCATGTTAATCCC

A\_14\_P116583 AGGCAAAATATTAATTTAGGAAAGTGGACAGAATGTGTAACACTCCAGCATTAGGATCTG

A\_14\_P108867 ATCTGACCTAAATCTTATGGTATTGTTTAGGCTGCAGTATAACCCTTAGCCCTAAGATTTT

A\_14\_P115893 AGGGGATGAAAAGATAACTTACTTCACCGATCATTCCATTCCACACATTGTAACTTTCT

A\_16\_P36230738

TAGGTTAGCACTCTCTCATAACTCAAGCCTGAGGTTTATTCTTTTAATCTTCCAAAAGCA

A\_14\_P101111 CTGAAAACCCATGTCATTATTCCTAGACTATGGATATAGAGGTGGCATAACGCTTGTTTAA

A\_14\_P112103 CATGACTAATGGATTCTCAAATGAGTTTCTGATCTTATTTAACTTCCAACCAGGCTCTT

A\_16\_P00908769

ACCTGTTTCAGAATCACACAAATAAGCATCAGGTATTCAATGCATCTCTTCAAGACCATAT

A\_14\_P114071 ATAAATTGTGTCTTCCTTACTGATCTCTGTAACCCAGTGCCAACATAAATTCCTAGTAGT

A\_14\_P105918 CTCTGCTCTTAAAGTTTGGCATTGATTCTTTAAAGATTGTGACCATCCCTTTAAAAGT

A\_16\_P02746696

AGCAGAACTTAAATGGATCAGAACTTGAGTAACCAACCCATAGCAATTTCCTTTTT

A\_18\_P22843205 GTTATCCCAGAGCAAAGGAAGGAAAACCTCCTCTGCACAATGCACT

A\_14\_P104632 AAATAATCACAGAGTCATTTTAGGAGAGTCTGAATTAGCATTTCACATGCTCCTCAACAC

A\_18\_P22842472

TTTATTTGAATTCTAAATTA ACTAAGTGAGTTAACGTGGAAGCCGCTTTTACCAGCCAC

A\_14\_P127582 ATCTGAACACAAGCAAATGAAAACAGTTCACCTAACACCCATGCAAATTATAAATTCCT

A\_16\_P03065559

AAACCACTACTGTTATCACCAAATGCCTTTCTAATTACTTGAACCATTTGGCAGTTTACTG

A\_14\_P129202 CTATTTATGGGGAGGAAATGCAATCAGATGATAAAGACAGTTGTAAAGCATGATGTGAGT

CUST\_8557\_PI426210822 ATAAAGTCTGTAACAGACTTTGGCCCTAGGATGGCCAAGTCTCCATC

A\_14\_P132886 CATACTCACTTCTGCTGTTTTGCCATTGCTCCAAGTTGGTCATAAATCTGA

A\_14\_P109364 GGAGGCATATAGTATTTGTCAAACAACACTGAAGAACATCATTAAAGGTCAGGCAGTTCAA

A\_14\_P132792 ACACAGGTTCCAGATGGATTTAAAGTAGGAAAAATACACCCCTGTATACTTGACAAA

A\_14\_P133717 CTACTIONAATCCTGAAGAAGAGGATGATTCTGACTATGGACAGGTGGTCATATACTTAACA

CUST\_3651\_PI426210822 AACACTGGCCATCCTTCAGCTCTTCTGCTTACAGCTGTTGTGCTG

A\_14\_P105937 TTTTGTAGAACTCGAGATGGAATCTGTAAATGAATCTTTGAGTCCTTGCTGGCCTTATA

A\_14\_P121744 TCATCCAAGGATGGCTTCTTTTTTCAGTAGTTTCTTATATAAAGCCAAAGGAAAATGGAGG

A\_16\_P58424547

GGACACCACAAAGTTTATCAAGATATACACAATTGGAGTTGCAGAGAAAGACGATAGAGA

A\_14\_P126626 CCGCTCAGTTGCCATTAATGGAATGTGAGGGTTTTAAAAATGTATTTATTAAGGACTCT

CUST\_9963\_PI426210822 GTCTGTCTCTTCCTTGTTCCTACTGTGTCCCCAGCTCCAAAACAG

A\_16\_P19887298

ACATGACTATAGTTCCCTGTTTCAGATTTAACAATGCAAAAAATCACTCTACTGGGCTT

A\_14\_P116854 GCAATCTAECTTGCAGTTATGAGTTCATGTGGGCAATGTTAAGTCATTTCAAGGTAAGAA

A\_14\_P135573 AGGCAACATTCTTCCGATAATTCTTCTTAACACTTAAAATCCATCTGCAAAGAACCTTTA

CUST\_510\_PI426210822 CCACTCTGAGTTCTACTGGCTCCCACCACTTATTTAGGAATCTCTGAA

A\_14\_P102752 AAAATTCTGAAATCTTAGTCATAGATGTGTATGTTTGTGGCAGAGAAGTGTGATGGCGAT

A\_14\_P103961 CTTCTGCAGTCTGATGTTAGAACTGTATTATAAAAAGCGTCTTGCTAATGTGCTTGGTTC

A\_16\_P18825924

AAAGATAGCAACCTGTTTCAGTTATGATAGACGATATCTGTGAGATAAAGACAAAGCCGTG

CUST\_10277\_PI426210822 ATGATGTTTCAGGGCTGGAAGAGGTCTGAGAATCCCATTTGATCTCTTA

A\_14\_P107339 TCTGTCCTGGAAGCAGAAGGAGTCTTTGAAAAAGGTAAGATAAACAGCATAAAGTCTTAC

CUST\_9414\_PI426210822 TGATAAAATTTTTGTCTGGGCTACATGGAATCATGGAATTTTCAGTTCTGCCAG

A\_16\_P16827418

AGCCGAAGATTAACAGATACTTTCTCACAAAATTTAGAGCACTTTGAATAGTAGGTCCCA

A\_14\_P105079 CAATCTGATAAGACATGTTTGGCCTTCATTTCTTCTGTTTTCTTAAAGGGAACATTGACT

A\_14\_P135996 ATTCTGGGATTCCTTTTCATCGTTGCTTTTTGTGTTTTCTACCTAGAGCGGAGAAAT

A\_14\_P129011 CCCAAAGAAGGAATAACAGAACAAAAAAGTCAACCTCTGACTACTTCTGGTTTTGTAAATT

A\_14\_P103207 TGTGACTCAGTACTTGTGTTTATTCTCAGAAACCAGAGTCCACAGCG

A\_14\_P120011 TGTTAGCCTAACAAAACCCTCCACAGGCTATCTGTCTATTTTCTAACTAAAGGTTTTGAAA

A\_14\_P137054 GAGAACTTCCCAACTCAGATTTGGGACAGGGAGTGTCTCAAAGAG

CUST\_8706\_PI426210822 AATACCAGAGGGTGCAGTAACAAGGCCAACAGAAGGCTTCTGAAT

CUST\_10181\_PI426210822 AATTAGAACCATGTGCCAATGACATTCAGTGGGGGCTTGTTTATGCTTG

CUST\_8187\_PI426210822 TGCAATACCCTAACTTCATTGGTCCATTGTTCGTGGAACAGGCAC

A\_14\_P137389 TGGTTGCAATAGAGCATGCTTTTGTATCATTGAGTTTTGTATTCTGTGCATGCTCAAAA  
CUST\_2968\_PI426210822 GTCTCTCGTTGTGACTCTTGCTTTCTTCTAGAGGAGACAGTCTGATGTAG  
A\_16\_P15854486

AAAAAGAGGCAAGTTAGTCCTTAGAAATGAACCTACTTAGCATCCTTAGAAATGGATCCT  
A\_16\_P15946364

ATAGGCACTACATATTGTCTTTCCATAGTCATTACTGGCCATACATGTATACTCTCCCTC  
A\_14\_P109930 GAGGGTATACAAGATATAGGCCAAAGGATAATTTAGGTTCTTATGACTGTGTCCTTGTTCC  
A\_14\_P118523 TGGAAAACCTGTGACCAGTAATTACCTAGAGAATCAGTGACAAAACCTGAGTAGCCTTAATT  
A\_14\_P109075 TTAGAGGAATGTTCTAAACCCCTGTCCAAATCCTAACCCCTCTAAAATTTCCCTTTATA  
A\_16\_P20096126

ACCCAAATTAAGAAGACAGGAGTGTCAATTAACCAAAAAGGAGAATATTGCTAAACGGAAC  
A\_18\_P13231877

AAAAACTCTAACCAAGTCTCATTAACTTGCATTGTACCTGAATTCTATAGTGAAGGG  
A\_14\_P117522 TAAAGTTTCTGGAACATAGGTGTTCAATAAATGACAGACGCTACCATCACAGATTACCAA  
A\_14\_P129916 CTTAGGAAGAAGACAGACTGGTTCATTGAATGCCGCCTTATTTATTTCTGGTGAG  
A\_14\_P105117 ACCCAAACCTTGAGAAAACCTGCCATAAGAATAGAATAACTGGAGGTTTTATTTCTTGCCA  
A\_14\_P127972 CATATGTATTCTGTCCAAAGGTGAAGAACATAATGTATTGAAGAATGTGGTGGGACTTA  
A\_14\_P201337 GCTTAGTGTAAGAACTCAGGGACGCTTTATAAAAGGATTTGGGAAGAATGTAAAATGC  
A\_16\_P16456113

TCTTTCCTGATAACATCCTTATTTCTCCATACTCTACACCTTATAAAAGCAACACTGCGG  
A\_16\_P20524039

ACCCTGCATGTAATCTTTCACTTTTATTTACCACCATGATGTATCAACATACACCAGGAA  
A\_14\_P131165 TTTCAAATATTTCTGATAACTGTTAGAGCAATGAATGAAGACCATGTCTTATAACTGT  
A\_16\_P02951324

ATGAAACAGACTCCCTATGCTCATTATCAAAAAGCCCATATGCTATCTTCAGTTCACATT  
A\_16\_P01809070

AAGTTCGGTAAAACATATCAACTCTGGACAAAGACTACTTCATCAAACGCATAAACAGC  
A\_14\_P131637 CATTTGATCAGGTCAACGATGACTATTGCGACTGCAAAGATGGCTCTGAC  
CUST\_460\_PI426210822

TCTACAAGAAGTCAGATGCTTTCACAGGCATAATATTCTTTAGTTGAGTCTTTGTAACAT  
CUST\_7293\_PI426210822 ATAGGTTTTGGAAAGTCCGGAGTAGACAGCATGAATCCAGGGTTTCTAAA  
A\_18\_P15049358

AAAAAATGACCAACGTAACCTACGGATGTCTCACCATAGAATTCGCATTTGGAGTCATT  
A\_14\_P116530 TCAGTGGATCTGATCTATGCTGTCTGCTCCCTAATTTTAGAGAATGTTCAAATATCTACC  
A\_14\_P125184 AGTAGGTGAAGGAACCTTTTGTGAGGGTCATGGTGACAGATTACAGGATAAA  
CUST\_9578\_PI426210822

ACTTATAATAAAGGTGCAGATGTAAGTACTGATTAGACATGCTGACATGTACATATAAAATATG  
A\_16\_P16440497

GGCTCAAGAAAATTCCAAATTTCTAATCCAATTCACACATCAACTCTATAGCATTGCACC  
CUST\_572\_PI426210822 TGTGGTGTGGATTGTACTGCTCTCCCTCCATTTACTGTAACCTAGG  
CUST\_4204\_PI426210822 GTAACCAGGGACTGCAACTTCTAGGGAAAGGGGAAAATCACTGTT  
A\_14\_P129569 AACACCCTCCTTTTCTTCAATACCAAATACTTCCAATAAAGAATGTTACTGAGCACTTG  
A\_14\_P119313 CAAAGGAAAACAAAGGGCCTGACAAGTATATCAAAATGAAATACTGAGTATATGAAGGGG  
A\_14\_P113836 TTGTATCCTTTTACAGGAAGAGGATGAAATGGATTCTGGCACGATGGTTCG  
A\_16\_P00332120  
AAAAAAATTACTTTGGTCTCAAACAGGTTATGCACAGATAACATGTGTCCAATCAGGTGA  
A\_14\_P115723 CTTTATTTAATGTCTTATAATTTCAAAGGTCCTTCTATCCTAGAAACCAGAGATGGGTT  
A\_16\_P03607322  
ATCCCCACTTGTTTTAAATCAATGCAACTTAACAAGACACATATAATCTGTAAGCAGGGG  
A\_14\_P126103 ATTTGCCATACTTGTCTCCTCTAGACTTCAGATCGAAGTAGACATTGCCTGTTTATAAAG  
A\_16\_P01797017  
AAGGTCTGTAGTTTTAGGAATGTCTCTGATAAAAGCAATGCTCTTACTCTCAAGCCTAG  
A\_14\_P128415 CTTTGTTCAGGTCCTGATCTAGAGATCTAGAAAATTCCTCTTCAGAACTTGTCAATTTAA  
A\_16\_P17702980  
AATAGCATCCCAATAGAAAACCTTACACTGAATGGAACTATGATACCTCTTTCTGCCTT  
A\_14\_P122338 CTTACACTTCATATGGAGTTAAACTTGGTCAGTGTTAATAAAATCAAACGTGATTCTAC  
A\_18\_P22839591  
ACACCCAAGTGGAGAAATTTTAGGAACACTATAATTCATGGATTTGCCATTTGTTTTTCC  
CUST\_5368\_PI426210822 CACCATGTGCTGCAGATGCTTGGACTGGATGGATACCTAAGTACC  
A\_14\_P113046 AAGCCTGGAGACCTCTCCATTTAATAAGAAATCTTCTGCTATTTCAATCTTCATGGAATT  
A\_14\_P103118 CTTACTGACCTTGAGATCAAAGTGAGCAATTTTCTTTGTGTGAAGGTAGTTCACC  
A\_18\_P15135293  
GGACCCTAATATTCGACTTCTGTAACCCCTTATATCCAATTGTTATGAACTCAAGTCTGTG  
A\_16\_P15171825  
AATTTGCGTCTTTTTACATTCTCAACACCTAAAACACCTAAAGCACTTAAGACACAGCAG  
A\_14\_P126910 ATAGTTCCAGGGTTTAATTAATGGCAAAGATTAAGAGTGATAAGAATCAGGCCCTGAT  
A\_18\_P13465266  
AACACTTGCTTAGCCAATTAACAGCAAGATTTGTCTAGTTTCCTTGTCTAAGTGAGGA  
A\_16\_P18602166  
AAATAAAAATTCCCCTAAATTGTTCCCAAATACCACAAATTCCAAAGTGATAGACCCAG  
CUST\_6353\_PI426210822 AGGAATGATTTCCCTGACCCACTGTAAATTTTAATTGAGGTGCGTTACAGG  
A\_14\_P116000 AGCGGAACAGAAATGTGACTAAGATCAACCCAATAGTATATCCTTCACTTCCTTTGAATA  
A\_14\_P118230 ATATTTTCTTCAAAGGCTTGTAAACCAATCATGTTAAAAGGAAATCTTGGTTTTGGT  
A\_14\_P119969 GAGGAAGGGTCAACAAAGACAACTTGTCTTGGGGTTTTAGGAAC  
A\_14\_P107360 GAGGTTATTATTAGGTCTCCACATCTCCGTCAAACCTGTCTGTAAGAACTCTTAAAATT  
A\_14\_P134483 CAGACAAATGTCAGTATCTAGAAAATGCAATCCTACTGCTCCTAGTATTTTCACTCTCAGA

A\_18\_P10556888

AAGGGCTATATAAAATCACAAAATGCATCCTCTTAATCACAAAACTCTGATCGCTGTGT  
CUST\_7039\_PI426210822 GTTCTGTTTGCAGTGACTCCCCCTCAAAGGCAGAATGCAATTCTCTAAA

A\_16\_P18252383

AATTGTTATTGGCTCTGTATATCTCACAAAGAGGTTATACTGCATAATTCACCCAGTCACC  
CUST\_7010\_PI426210822 AAGGTGACTTCTGGCTTCTCAGTGACTCAGCCACACTTCTCTTTTT

A\_14\_P107084 TTGTAACACTACAGTGATGATGCCAAAGATGACAGGGACATAAACAGGGGAAG

A\_16\_P01728689

CCCCTGGTCACTAAGAATAGTAACAGTAATCCATTTTTAAAGAATAGCAACCAAATGCC  
A\_14\_P103617 TCAACATACTGTGTCAGGTATACTGTTTTATAATTTGGTTGTTTTAGCCTTATTGCACAC  
A\_14\_P120273 TCAGGACAGTAAGCAGAACAATCAGAATGGAATTAATCTCTAAAAACGTGTTACAGTGG

A\_14\_P100142 TGATACAGCCAGAAATACTGCATAGGTTAAGCCTGAATTCTAGGTTTTATGGCAAATTGT

A\_14\_P108128

GTCAAGAGACTCTTACAACAAATCTAAGACACTGTCTAAATTGAGAAGGGTCAAAAACCA  
A\_14\_P122924 GTATACCTTCAAATTGCAAGTCATCTACTGCTGCCATTCGGCCAGTGAGT

A\_14\_P124270 TAATTGTGTCTCTTATTCTCTGTTTTTTGGCAGCATCTTCTCACTAAGTGGACCTTGATT

A\_16\_P19373840

TGAGAGTGTCCCTAATATGTCCCTACAATTATTCCAAATATCAAGATAGGTTCCAAGTCA  
A\_16\_P58424329

GATAACTGCAGCAAGTCTAAAAAGCAGCCAAGTCTATTGAGAAGAGGAGATCAATTAECT  
A\_14\_P124094 ACCATAGTGGACAGGAAGATGAAGAATGGCTTTCCAGGTAAACTCTGAAATA  
A\_14\_P130136 ACATCATCTAAACCTGCTATATCACTCCAAGTAACCTGGCAAAAAGTTAAGGTCAACATGA

A\_14\_P132317 ACTTACTCTGTATCCTTGGGCTATAAGGATCTTCTATTTTGAAAGCAGGATCTAAAGCAC

A\_16\_P00908229

AAATTCGGTGAATTTTTCTTCTAACTCTCGATTACAGGTCCAAATTAACACGCATTGCA  
A\_16\_P40450453

AGGAGTGACCACTAAACTACAAACACATATCATAAACCCCTTGAATAGAGTTGATGTCTT  
A\_14\_P120695 ACCTGAATGCTGCGACAAGCAGATTTTTGTAAAATTTTATATTAGTTTTTAATGTCAGTG

A\_14\_P132005 TAGCCTAATTCCTGCTACTACACACAAAAGGGTCTAGTGGATTTTTCTTCTTTGAAA

A\_14\_P109605 CAGAACACAAGCAGTCATCCTTACAAATCGTAGTTTTACCCAGTGATAAGTTTGTCTAA

CUST\_2763\_PI426210822

GGATATTTTCATGCTTTAATTAATGCTGGGTTGAAGGCCTAGGATTTATCCTGTTGGT  
CUST\_8553\_PI426210822 GGCTGCACTCTGTTCTTTGGGCTCTGAGAAACAAATCCTTTGGAT

A\_16\_P00339516

ACATCATGAGGCTCATCTTACAATTACCCAAAGAAAAGCATGTTTGAATTCCAGAATTCA  
A\_16\_P18151159 TGTGTCATATCCATCTTTATATCTTGTGCATTTCTACTTCTCATTCCAGATCTTCTCCA

A\_14\_P126464 GTGTAAAATTTTAGTTCTCCACCTTCATCTATGGAAGATAAATCAGATGTTGGTTATGGA

CUST\_8051\_PI426210822 TTAAGCTTTGATGAATCCCAGGATGCTGAGGAGGAAGAAATGGTTACTCA

A\_16\_P03702028

AGCCCAGTTCAACATTCTAGACATTAGAGGGTTAGAATCTAATTATCACATAGTTCCTG

A\_16\_P15292271

TTTAACCTCAGGAAAACAAAGATACAGTAGGCTCACTAGTATTTACCCACCAGTTTTTCAT

A\_16\_P16792410

CATGACCTCTCAGTCTGAATGAGTGCTATCAAAAACAACACATAATGTATCAGGGAAAAA

A\_16\_P02601315

AGACAGATCCCAAGAGATTTTAATGCCCATATTTTCGAAAATACAAATAAGCATTATTGCA

A\_18\_P14135734 CCTGGCATCTCTTCAAGACAATCATAAAGGCCTGTTTAGGAGGAGAAAGTTAAA

CUST\_440\_PI426210822 GCATCTTCTCGGGGTTTCTGGGAAATTTCTCTGAAGATCTGGAGAA

A\_16\_P02333992

TGCAAATTTCTCATATGCCTCATAAAACACTTACTCATCTACATCTAAAGCCAAGAACCA

A\_14\_P108951 CTAAAAATGCAAATGGGCCTCAAAAAAATTGACCTGGGCTCACAACATCAAATTTATTT

A\_16\_P17286610

TTATACATAAAGCACTGATCCCAACTACATGTGTTCTATAGTTTAATTCCACCTGACCC

A\_14\_P120186 CCACTTATTGATCAAGGTTATGCTTAGGCACCCATGTCATTTAGGTTTTCAAACCTTTATC

A\_14\_P108404 ACTTGGTCACCTTTCCAACCTGTGCTTTTAAACCACTACACTTTTAACTACTACTATTTCT

A\_14\_P133266 CTGTTACTGGAAAGATTTTTACCTCATTACTTCAAGGGCGTGCTCAGTATCTACAAAGAC

A\_16\_P58424229 GACTTGGGTTTCTCAGAGCATGGCAACCTGATTCTAGTGAGATTT

A\_16\_P17798212

AAAAAAAACCCTCATTCAATTCACACCACTCTGATGTTTTAGCCAACAGTTTTTTTCACT

A\_14\_P139479 GGCAGTTTCAAAGAGTATAGCCCGAACTCATTCTGGTAAAACAAAAGGAAAACATTT

A\_14\_P126012 CAACAGGATGCAAAAATTCTGAATACCCCAAAAGAAAAGTAGATGTAAAGGCATACTGTT

A\_14\_P115784 AATGTTTGTGATATTTTGCTTTTGCACCTTTAAAACAATAAGGCGCTTTCATTTTGCCT

A\_14\_P133494 AACAAAATTGCACTAACCAAAAATAACCCAAATTTAAGGACCAGAAGCATAAGCCATGAA

A\_14\_P136642 TCTCAATTCTATAGACTTTCAAGCCTATGTATGAATATGAAGGGGTTTTTTTTTTTTTGCT

A\_16\_P16471061

CAACATCCACAACCTATTTTTGCACATTTCTTACATGTCTACTTCTGTTACATTCCATGGT

A\_16\_P18294402

ACCTCCACTCTATAGAGACCCTGAAATTAGTAAGGATGTTTCATTAAAGCCATTGTGTTTT

A\_16\_P36230445

CACCTTTCACCATTGCAAACCTTTGACATGTGAGAGTTTCCAGAAATACAGAGATTCTTAT

A\_18\_P22843017

ACATGGATGTTTTGACAAAATTTCAAGGAAGCAACTGGCTTTGTAGTGCTTTCTTTTGTC

A\_14\_P132436 TTTAATTTTAACTCATGTTTCATCCTGCAACAGAAGCATTCTCTAGGTCCCAGTTTTCCA

A\_16\_P36989357

TTTGACCCATGAATGTTATGTCCATCACATCTTATCAGTTAATAAACCCACCAAGCAAAA

A\_18\_P22839423



TAATTAAACTCCTTTTGAAAATGATTTTAAAAGAATTCCCATAATATTCAGGTAATAGCG  
A\_14\_P132016 ATCATCAAACATTGTAACAAAGTAATTTCCAGAGCGTTGCACAAATATCAGGCCAATACA  
CUST\_1074\_PI426210822 GCCAAGGGGCACTTGAAGGAAAATGTATCCTCTCAGACTTAGAAC  
CUST\_6774\_PI426210822 AGGAACCTAGGTTGGAGCAGGGATGAGAGGGTAGAAGAGAGCAAA  
A\_16\_P17298901

ACACACATCACACTAGAATTTCACTTGATGGGCTGTATTCTGAAAACATCATTGTAGT  
A\_16\_P02338541

GGATAATGGGCTTTAATGATTTTCATCACCAAATAACCATGAGTATGTTCCCTCTCTCTGTT  
A\_14\_P129390 AATGGCCCCTAAATTGTAAAACCTGGAATGGCTTAATTTACACATCACTCCCTATTTTC  
A\_14\_P125983 GAACTATGGCAAATTCACAAAACTTATTCCGACATTCAGAGTTGTTTCCTCCATTTGCT  
A\_14\_P127024 TAAGAACTAGTATCATTTTGTGATAGTGCCTCCCTCTGTGTTACAAAACCTCATTATGC  
A\_14\_P137702 CTAGTTACACATGGAGACGCTTCAACTGAGAATGATGTTTAAACCAATCCTATCAGTGAA  
A\_14\_P129280 CTGTTCCATATATACATGCACACACAAAATAAGCCAGACAGATGGCAATTTGATCTTCC  
A\_16\_P02055131

CCTCTTTTCTGTCAAATTATCTCATGACCAGAAATCATTTAAATACTTTCCCATCCCTG  
CUST\_8443\_PI426210822 AAGTATTACCATGGCTAAACTGAAAGAGTCTACGGTGTACCCAGCATGCT  
CUST\_1652\_PI426210822 GTGGCGTGGTGCGGTA AAAACAAGAGCTGTTGGTTTTAAAGGTTTTTG  
CUST\_5553\_PI426210822

TTGGTTGAAATTA AAAATAAAAAGAAAAAATTGTTCTTAGATTGGGAAGATTGTCCAGGAGC  
A\_14\_P100059 CCCATTACTGGAAATGATCTATCCCTCCAGTGTCTTTTAACTTAATGTTCAAGACTTTC  
A\_14\_P108400 CAAAGGGGCTCTGAACTAGTGGCAGAATTGAGCACACTTTATCAGTGTATTA  
A\_14\_P109648 ACTATGCTTTTCTTAAATTGTATATCTGAGGAATGCATTGGTGGGAGGCTCTTGAAGATT  
A\_16\_P40518305

TTCCTAACTTCAGAAATCATCATAAATGTGTTGACCTTTCCTGATATCCTGCTCAATCT  
A\_16\_P03804679

AAAAATGATGTAATGATGTTTAGGGCTCCATGAAAATCTTCTTCGACCAAAAATACATCTG  
CUST\_10324\_PI426210822

TGTGGGTGTGCTGTGGGGATGATGTCTATGACTTTTTCTTAATTATCCAGAAAATT  
A\_16\_P16787536

AGTGGAAGTAACGTATTGCAGAATGTTCCAACCTTATCAATAATGTCTTATCGAAAGGGCT  
A\_16\_P15079045

AGCAAATCCTAAACACCTTCATAGAATAAGAATCCTCAGTGATTATGCTAACTCCTTCCA  
A\_14\_P202005 TTCCATGTGTAGTGAACCTACTATTCTGACAGCACTAACCTTTCTGAAGTATTAGCCTAT  
A\_14\_P124238 ATTTGCTTCTCTGCTGACCTTGCCAAGTTGTTTCGAGGTGGAATTAACAC  
A\_16\_P02597156

CAGTGCAAGGATATCTCACAAAATTCAAGAGCATATTAAGTCTCAAGTCATCCATCTCC  
A\_16\_P40215983

ATCCCCAGGAATTCATTTATATCATTTGATCCATATGGAAATGTTTCACACAATCCACT

A\_16\_P00938270

AGGTTTGTGAAATTTAGACACCACACATTTTCAGTTAAATGATACATTGATCCATGTCCCA

A\_16\_P00389581

AAAGCATAACTCCTCAATACTTAATTTGTAGCCTGAACATTGTATATGATTTTCCTGGGT

CUST\_4823\_PI426210822 ACACCTAACCTAGAATTTCCCTGTGGATCACTCACCCCAATGAT

A\_14\_P202532 CCTTGTTTTTTTGTGCTCTTCCTCGCTTAATAAATTTGGAGGAAGATCTGATCTCATTAG

A\_14\_P106603 AAAACCCATCTCTGCTAACCATACCCATCTTAAAGATACAGGTAAGAGGTATTAGTTGTT

A\_14\_P121256 CTTTCTAATCCTAGAGTGAATTACTTTGGGGGCCAAACAGATAGAAGATTCCCAAG

CUST\_4609\_PI426210822 TGGCCCCATTTCCTGCCTGACTGGCAGTCTTCATTAATGTACGTTT

A\_14\_P128405 GGTGACTGGATAGTTTCACAAATGAGTAATTTCCCAAAATGATTAATGAACCTTCCCAA

A\_16\_P02530543

ATGGTTTATACACCAAAGAGGTAGAAGGTTTTGCTAATCTGTATTAACAAAGCCTGGAGT

A\_14\_P134128 TATGATTATCAACCAAATTATACTTTGGAAAGGCAATCATCTCGTCCCTGCAAAGCAGTA

A\_16\_P00341652

AAGAAAAACACAGTGGGTAGATACACTTGAAAGTCACTTCTGAAAGAGACCTTGAAGAAG

A\_14\_P114738 TTTTTTAAGCACTGACAAATGGTTCTAAGTTTGAGAAGATAAACGGTAAACGTTTCAGGGA

A\_14\_P125002 ACTTAGTGACTCATTGGACATAGAAGGATTGGACTGAGTCAATGATAAATGGGATAATGA

CUST\_7255\_PI426210822 TTCTACTTCTCCTTGGGGCTTTAACTAAAAAGGAAGAATTGTCTGTGGCTTCTT

A\_18\_P22839957 GAGGGGGTGCCCCTTATAGGAGGGTGGTGTGGGCTATAATTTCTT

A\_18\_P14134439

AGTTCTCTGCCTCATATCATTTTCAGTCTATTTAGAAACCTGCTATTTTAGCACAAAACAA

A\_18\_P16381250

CTTCCCCTCCACTAAATCTACTCTCTATTTCAGTATCAAGAAAGACTTAATCAGCAGTGAA

A\_16\_P18551474

CCACATCCTCCATTTCAATATTCTCAAATCCAACTTACCCATATTTCACTGTTTCTGC

A\_16\_P38546223

CAAACAGAGGTTATAACTTGGCTTATAGATCCCTCACTTTACTATAAAAATCAACCCCCC

A\_18\_P22842275 GAGCAGTATGTGAGCCCTGCTCTCCTGCTGTGAGCAGAGCAAGAG

A\_14\_P103468 TCCCCTCTACCATGCCATCTTGCCCTGTATGATGTAAATTTTTATCACTAAAAATATCA

A\_14\_P118816 AGAATCAGAACCCCACTTTTCTCTGGTGTCATAGTGTCAAATTAAGACTCACATAAAAG

A\_16\_P35635421

AGCAATGACTATTACAATCTACTCAGCATAAAACAGGTTTCAATTAAGAAAGGTTCTGCAA

A\_14\_P115271 CAATTTTTTTGCTTGGCAAATGCCTACATGGATCTATGAAGGTTTCAAACAGACAAACAC

A\_14\_P202262 TCCAGGAATATATTTTGTCTAAAAATAGCAGTCAAATAACTTACCCTTTGCAATTGGCTG

A\_18\_P11862648

AAAAAGTTTCCACCTATCACTTACTCACCAGTAAACCATGGTGTATACTGTAACATTCC

A\_18\_P14135445 AGGAAGTTTGGCTTTGCAGAGTGAGGACCCAGGCAAGTTTCAATTTTTTA

A\_16\_P38485982

TTCAACACCTGGAGATGTATGATGTCATACTGAGAAAGCCATATTTTATCCACAGATAGC  
A\_14\_P131108 AAATATGATTTTGCTGTTGCAGTTTTGATACGTATTTCCAGTGTGTAGATCCGTTTCATCG  
A\_14\_P111778 TAGATGGAGGAGCATGTTGAATCAATTATTCCTCTAAGGATCTTGAAGTTTTGAGTGAAC  
A\_14\_P129527 AGAATGGATGATTCTAAGATCTGGTTTGGTTCAAGATGAATCTACTACGCACTGTGTAA  
CUST\_8097\_PI426210822 GGCGCTAAACCATGGGGGACAAAGGTCACCTAGAAAATCTGAACTATAT  
A\_14\_P113981 CTGCAAACCAAACATTATCTTTAAAGGTCAAAAGATCTTACTAGGATGATCTGCAGGCC  
A\_18\_P23434449  
ACACTGGTGCCTTTAGAATAGAAAAGTTGAGTCAATTCTGGAATCAACCTAGTTAACAG  
A\_16\_P02296844  
TTCTATTGTGACCTGGTATTTCTATTGTGACCTATTTGACCTAGACAAATTCCTTCTGCA  
A\_16\_P36231070  
GTCCTGGTCAGTTTACTCTAAATCAAAGTTTCCAGTCGTCATGATGAGTATGATCATCAT  
A\_14\_P136736 TTTGGTTTCAGTATACAAGAAGAGTCTTGGAGATGACATTAGTTCCGAAACATCTGGTG  
CUST\_8562\_PI426210822  
AGTAAATTCACTGGCACATCTCACTAAGCAAGTAGGAAAGCTCTCTGTGTTCTTATAAAC  
A\_14\_P110628 CTCTTACATCCATCTAGTGGATTACTAAATTTGTATATCCATTCCTCCGGCTCACATGGATA  
CUST\_9541\_PI426210822  
GCTGTTTTTTGTCAAAACAGAAAAACACACTACTAGGATATGAAAACTTCATTCTGGG  
A\_16\_P20766363  
AAATGACACAGCCATAAGAAAGTAGCATAAACACAATTCAGAATTCACAGGGTTTATCGG  
A\_14\_P134785 GAAGGTGTATGAACTGAGCAATGTGCAAGAAGATAGCCAACCAATGTGCTA  
A\_16\_P01809367  
AGACGTATTTCTGCTTCAAAGTCTTCAAAGTCTCCATGTTCTTTACATTCTTCAATGCG  
A\_14\_P122005 TTCCACTTTAAAACCTTTGCTGTTTCTCCACTCTGAATGATCTGCTTTTATAAGAGGACTC  
A\_14\_P114492 TTTTTTTTAAAGATAACTATCAGGTAGGTAACCAGGTGAGGCCTCAAGGCCTGTT  
A\_14\_P105792  
CTGTCACAACCACCACAAACAAAAATAGCCTTAGGGAAAAAAAGGAAAAAAATGAATAGG  
A\_14\_P115811 GAACACTGACATACCTGTAAAATGCAACTCATGATATCAGATGCGATTTTTGCATGAGGA  
A\_18\_P22840716 ATGAAAGTTCTAAGGCTCATGGGTGAGGCCTAAGAAAGGCATGTCAGTT  
A\_18\_P22842484 TTTTCTGCCTCTTCAGTGTTCAAACCCAGGCACAGGGACTGTGTT  
A\_14\_P202167 CACTTACAAGAGAGATACAATTATATAGGATCAAGAGGAGGCCAGAGATTGTAGAAGTTA  
A\_14\_P112485 AAGGACGCCAGAGGTCTTGCGAATATTTTAATTGGTTGACATTTGAAATTTGTTCTTAAAG  
A\_14\_P132124 CTCCTCTTTACTGCTAATCATAGCCTATGCACGTAAACATAAACAGCATGCATGTAAAGT  
A\_16\_P21569617  
GAAAAATCCAACATGTCTCTTGTAAAGACTTTTACCTAAAGCCTTTCTCGATCTCTGAACC  
A\_14\_P106842 TGTTTCCTTTAGGGAAGTAGAAAATAGAAGATCAAAGTGAATCTAAAGGAACCATGGACTC  
A\_14\_P117025 CTCAATGATTTGTTTGAATCCTATTTTCTTTTGGAAATGTTTCTTCTCAAACACCTGCTC  
CUST\_632\_PI426210822 AGCTCAGGAAGCAGCTTTGTTGGAAAAATGCAGGGCACTTAAACTG

A\_14\_P108945 ATCTCTTGGAGGGGAGAGTTCAGAATATGAGAGTTAAACTCCTTGAATACTTCATGTAA  
A\_16\_P35288841  
TTAACCAATTTGTCTGTTATCACCACAATAAGTTGACTGCAGAATTTGAAGTAGCAACTCC  
A\_16\_P19504392  
AGCCTGTTATCATGCACTTCTTTACCTATGAAATTTTGGCCAAATCTAAAGACAATTGCC  
A\_14\_P125493 CTGAGACTTTTTCTCTCCCTAAATGATGATGCACAAAGCAGATAAGCCTCTTCATAATCA  
A\_14\_P137220 AGTCATGAAAGTCTCTGAAAGAGTTTTTTTTTATCATCTGTTTGGGAGAAGTGTGGGATA  
A\_14\_P131219 ATTCAGGAAGGAATTTGTCATAAGTCATTCACCTTCGATAAGGGTGACCAAGACTTAT  
A\_16\_P00685135  
CTTTTGGCCAAGAACCTTCCATAATGTGCCATAAAAATATTTTATAATTTCTGCGGGTG  
A\_14\_P105748 AAACACAGTCCCTATGCTATCATTCCCTAAATATGTCAGTGTGTGGGGGTTATC  
A\_14\_P116546 GACAGTTTCTTGAAGCGAACTCGTTTGGTTCTTTTCTCTCCATCGCT  
A\_14\_P127364 TCTTTTCTCCCTCTTAATCTTTTAAAGTTTGCCAAAATAATGGAAAATCCTGGGATACC  
A\_14\_P121130 TTAAGGATTAATTGCCAGCAGCAATCTCTGTCTTTGTTTGTCTCTAATGGAAAACCT  
A\_14\_P105356 GAATGGTGGTTACTGTGTCTCCTTGATTACTGTTGATTAAATCCTGAAGAGAGATTTTCA  
A\_14\_P134828 ACTCTTGTCTTTGTATGTTTGTGTTGGTTTTTACTAGATTCCATAACCAGTTCTGGCAT  
A\_16\_P01682671  
TGCAATAATATCCATATGTCCAATTAATCAATCATCCTTAATGCTCCATCTCTTGAACA  
A\_14\_P103839 TGCAGAAGCAGGAGATGGCAAATTTTAAACCCTATTTTCAATCAAACCTGGAAAAAAAAT  
A\_14\_P201457 TAAAAAATGACAAATTCATCTGCTCTTGACTTGTGTGTCCTAAGATTTCCACTAAGTGT  
A\_16\_P02252716  
GTTCTTTGCTTAGTGCAGTCACTCTTCTTATTGGACATAAATCAAGTGCGACCTTATGC  
A\_16\_P01154142  
AAAGTTCCATACGACACTATGACATAAACTTTTTCTGCCCTAAGTTCTTCTAATCAATGT  
A\_14\_P135273 AGTCATAGATACAGAGGTTTCTCTGTAAGGGTATTCACCACAACAACGTTTATACAGTTT  
A\_16\_P58424388 GTTCACCTCTTTCTCCTCCAACCTCCAGTCTTTACCCTACTTCTATTT  
A\_14\_P101466 ACTTTTACCGACTTCATATGTAACCTTCTTGGGACTTGTCTGGATAATTCCTGTAATATAC  
A\_16\_P17112360  
AGTCAACTGTCAAAGACTTACCTATTCTCAAAGTTCAGTTCATACATTATCTCCTCCTCA  
A\_14\_P201544 ACCTCATAAGATGTTAGAAATAGTCTGGAGATATATCACAGCAAAGAAGATGGTGACCAA  
A\_14\_P116789 TTTAATATCCCTTTTCCCGTCTCGTCTCCTGACTTGCCTTTGGAAAAAATAAGATTATT  
A\_14\_P201849 TTTAGTTTTGGTAGATTTTTTTTTCTGACAATGTGACCAGACTGAATTTCTCATAAAGAA  
A\_14\_P128756 AACTGGCTTCATTAACAGTGATGGCCCTCACTCTGTCAATTTATTAATAAAAAATTA  
A\_14\_P108952 ATTCTTCAAGGAATTCCAACAGACATTTTACACAGATTTTCAGGCATATAGATGCTCAT  
A\_14\_P139451 CTGGATTCACACAACCTGGAGACCACACAGCAATGACACAAGCATG  
CUST\_745\_PI426210822 GGAGTCCCTTTGAGGGCCTCAGACTTCTGTTGTATGATGTAGAG  
A\_14\_P134197 CTCTGACTTTAGTGATCTTGACTTCTGTCTGCTGCTATAGACTGAACAATTATTGCCTG  
A\_14\_P122897 ACACATTCACTCTACCACTAAATTGTTACTGACTCCTTCTCTTCAGCGTTTTGTTAAATA

A\_14\_P105170 AAAA ACTGGGTTCTGTAAGTTATGAATGGCATCCAGGGATATTTGGGTTACTTTTAAGA  
A\_14\_P127847 AAACAAGACACTTTTCATTTGCTCAGAATGCTTGTGTTAAAGTTAACTGAGGTTACAAA  
A\_14\_P131689 CTTCATTCTCTATTTCCCTCCAGTGGCATCCAAGAAAAACATAAAAATTCCAAATCTCAA  
A\_14\_P115710 TGAAAGGAAGATATTA ACTAGGCAGGTAAGTCATCAGTTGGTTAATTTCTTTCTCTAGAAC  
CUST\_7242\_PI426210822 CATGCATCTTCTGAATTGGTATGTTTTTCTGTGTTTCAGAATGTCATTCCTCAGCC  
A\_14\_P108666 CTGTAGTTGCAAAGGCTACACCGAAAAGGTTTGTCCACCAGAGTGGAT  
A\_18\_P22840674 CTCAGTAATGCAAGTTCTCTGTTCCACGTTAGGGGTCACATTATGGTTAAAGACAAT  
CUST\_9766\_PI426210822 CTGGAGTTGAACCTCCTCTTGGATGGTATTGACCGAGCTGTCCCT  
A\_16\_P17901354  
AAGAATGCATGGTTTTACGTAGTTAAGTGCCTAGTGA ACTGTAGACATAGTAAGTCTCTA  
CUST\_2639\_PI426210822 CTGGTCTATTCCAGGAGGACAAGGGAATCAGGGAGAGCAGGGAAG  
A\_14\_P129052 CATTGTTAGAGAAGGAAATTAGCATGTGATTGGGGTGACCACATAAGTTATCATCAAAAC  
A\_14\_P105041 CTCACAATCCCAGACTGGTAAATAATGTTGCTTCTAGTTTTTTGCTACTTAAGCAGTGT  
A\_18\_P14133476 CCGGGGTTGATTTTATTGTGTATTCACCAGCCTGAGCGTCCTTAG  
CUST\_6805\_PI426210822 CTGTTTTCCGTATGTTCTAGTCCGGATCTGCATTTCTGGTAGAACTAGTCTG  
A\_14\_P139371 ACTCAGATATTAAGAGGAAATTGAGAAGGCTATGAGGAGATACCAAGATGTCAACTTTCT  
A\_16\_P18567997  
ACAGTCATTTACCTAATGCTCTGAACATCTTTCTTGAGATAAAGTAGTGCTGTGAACTGA  
A\_16\_P16986889  
AAAGTAAAAATCTAGGCTATCTTTCCCTTCTCTAGAACTGTATTTGGTCATCCCTAGGCAC  
A\_16\_P02287133  
CACACA ACTCATGCTATTCTGGTATCTTTGTTCTCAGTTTCTACCTAGTGA ACTCTTCAC  
A\_14\_P123783 ACAGAGAATGGGTAATTCAAGAGGCCTTTCTTTTAAATAGACTTTTGTGACCCACTAAT  
A\_16\_P58424255 TTAGTTCTAATAACTTAGGGGTTCCAGTGACCACTCCCCACCTTGCT  
A\_16\_P00685131  
TACTTTTCTGTAAATGTGAGGTGAGCAAGGTGTTACAGTTCACAATGGATCTGAATTT  
A\_14\_P100720 CTGAACTTG TAGTCAGATAAGAGTAAACCTTTGAAGTCCTAAAACGACAGAGGAAATCTT  
A\_14\_P118448 GGTGAATGGTTACCATGAGGATCTCTTCCAAGTCATACATTCAAAGAACATACTTCTTTA  
CUST\_8629\_PI426210822  
GATGTACAGCAGATAGATATTTTGGCAGAATGACAGAGAGTACTGA ACCACAGTCATTT  
A\_14\_P124629 GCCTTTTCTCTTG TAGTTAAATTATTTGAAGTGATTGAGACTGAGAAAACGCTCTACCTT  
A\_14\_P103791 GGGAATCCAAACTCTAAAAGAAGGACGCATTTTAGGTAAGATCTAGTGGCTAGATCT  
A\_14\_P134915 TTCCATGTATCAGAAAAGATCCTGCCAAAAAAGCCAGTAGTATGCTATGCATTTCTCTAAA  
A\_14\_P121966 CTTTATTTTTAAGGGTCATACAGCAATGCTTCATACTGGCTCATGGCATCCCAAATAAA  
A\_14\_P102872 TTTCA TTTCTTTGCAGAACTGAGCAAGGATGTTGGTATTTGCTCCGTTCTCAAG  
A\_14\_P126339 ATGCCTGTGACTCCACTTACCCGATAAGTTGCTCAAAGATTCAGCAAAGT  
A\_14\_P138530 GATTGTTACGTCTTTCTTTAATTCTGCCAAATAAGTCTTTTTTTTCCCCAAGGCAAATC  
A\_18\_P15970706

TGCCATAGTTACACGATTACAGTTAAAACAGTTCATTGCATAACTAGTTCCTTGAGGTT  
A\_14\_P139874 GATGAATGACACTCTCAGAACCCAAGGTCAGAAATGGGGAAGATAAACAG  
A\_16\_P15777962

AGCATACTTCATCCATGCCACATTCTAAGACCATTTTTCCATGACCTACACCTTTTTTTTT  
A\_18\_P22841716 AAAGTGCCATTACCCACCTCTAGGAGGGATGTGTTGTTCCATACAAC  
A\_16\_P18595637

AAAAGAATTAGAAACCTCCTATCAACAAAGACAAGTTTGCTCTATGTATCAGAAACCCCC  
A\_16\_P16191512 ATAGAGTGAGGGTGGGAATCAAGTCACTCAGATATTTCTCCCGAATTGAAATG  
CUST\_6476\_PI426210822 GAAGATCAACATCAAATCTTTGTCTTCAAGACCTAAGGGAATCTGGATGTGCC  
A\_14\_P115249 TTTTCTACATGCTTTCTGCACATTGACTACCAACATAGTAGTGTCTTTTCTGCAAATCG  
CUST\_3996\_PI426210822 GCTTGGCAGTAGCAGATTCTAGATTGTCTGTTTGCTGGTTTGGG  
A\_18\_P22840908 CAATAGAATCTTTCCCCCCTTGAACCTCACATTATGCTGAGATGTAGGATGAAG  
A\_16\_P16426344

AGTTCCATGACTCCATAAATCCCAACTCTCTAAGTTATAAATGTCTAGGTCTATCCCATC  
A\_14\_P102275 AAAACAGGAAATCCTACCCACTATATGCAACTAATTGTTTAGGAAGAATTCCTTCTAGGC  
A\_16\_P19935132

GCTCAATGGCCCTATAACATTATAATGTTTCTGGAATTGGATGAAGACTACTCACCTTA  
A\_14\_P115901

AGTTGGAACATACAAAGAAGAGAAGCCAGAAACACTCTCAAATAACTGAGGAAAAATTCT  
A\_14\_P117205 CTAAGGTCATTTTTTTTTTCTCACTGAAAGGGTGTGAAGGTCTAAAGTCTTTCCTTATG  
A\_14\_P137157 CTCTCTGTTAGTTCATACCATAACTTTCACGAAGACTTTCAGAGGCATAGGAAACATATG  
A\_14\_P133888 GATCCAAGAGATTATTTGTCACAACCATTTTCAGACTACAAAGAAAACACACACATTTTTG  
A\_16\_P16770995

AACCCTCAAGAAGAAAATCTGTAGATACATGAATGCTTATTCTTTTACCAATGTCCCCTG  
CUST\_1341\_PI426210822 AGAGTTCCACAACCTGGTTCAGCTCCTCTAAGTGACTTCTAAGTC  
A\_14\_P117151 GTTTCGAGGATGTCAAGTTCGGGCATATATCAGGTATATTGCTTTTGTGATGGAAC  
A\_14\_P108307 CTACTTTCAGGGAGAGGAGATTATGAACATATTTAAGCAACGTTTCTGTTGCTTTGAGAT  
A\_14\_P103664 TCTATGGCTATGTTGTTGTCTCTTATTTTTCCAAACGTGGAAACCTCTGTTTTGTAACCT  
A\_14\_P102942 TTCAGACTTTGATTATCTATTGGATTCTAAGCACTGGGTTACAGAAACAAGACAGAGTCC  
A\_18\_P13245966

AAGAAGAGAGGTCTGGTATCAAAGATTTGCTGAATTCACAATTGAAGAGGCTTATGTCAG  
A\_14\_P111805 CTATTTTCTCTCTCTGTGAAAAGGAAACCAGGAAATTGACTCTGTGCCTGTTTTCAA  
A\_14\_P134985 AGGAAGGTAATAATTAACCACTTACTGAGTTCAAAGCCATCTTGCTGTTATCAACAGCAT  
CUST\_3373\_PI426210822

TTAAAGAATGTAGTAATTAAACTCCTTTTTGAAAATGATTTTAAAAGAATTCCCATAATAT  
CUST\_4434\_PI426210822 AAAGGGACTTCGGCGGAAGCCATATGACCCACCTCTGTCAATTTA  
A\_14\_P125248 ATGAGGTCTGCTCCTCGTGCTTTGTAATAATCTAAATTTGGATGGAATTGATAAGTCACT  
A\_14\_P110722 AAACATTTTTTCAGTTGCCATACAACATGGTGGGCCCACTATTTGAATTATTACTAAAAGG

A\_16\_P00468263

ACGATTATTGCCCTACTTAAAAAATTGGCATTTTTTTTAAAATCTAAAAATCTATCTGAA

A\_14\_P138685 TTAAGCAAATAATTAGCCTGTGTGCAGAAGGCCACTCATGTAAAGTAAGAAAAATGCAAC

A\_16\_P15778076

GTTGTTCTCTTTGTAGATACGTATTTGGAACTGCACTTACCATATCGTGAATGAGGCTAC

A\_16\_P01880070

AATGGTGTTAGAAAGTCAAAATGCTCTCAGTCATTAAGAACAAGATTAGGCTCACCTGT

CUST\_6208\_PI426210822 ACTGAGGGGAGCTTTTCAGGGCCACCATACATGAGCAACAGATA

A\_18\_P10333082

ATTTGAGAACTCTAATCAGTTGGTCACAGATAATACTACCAATCTTGGTCTGAAACAGGG

CUST\_8426\_PI426210822 TAAGATTTCTGGCTTTTTGTTGGCTCTGCCCTTCTGACCTCAACTTC

A\_16\_P16817213

GAATGCCAGTTGCTTTAATTTTCACTGATAGAATCTGCTTTCTGTATCGTTAACCTCCAC

A\_14\_P111947 TCCATTTGCATTTAGCCAACCATGATCTAATGGTGCAGGTCTTTTACATTTCTAGAGTTA

CUST\_1381\_PI426210822 ACACCCACTAACTTTCCTAGACTAGAGTTGCCAGGCCCCACAACCT

A\_18\_P22841398 GTGTCTGGGGAAGGAGAGGAGTGGAGAGGGTCAACCGGAATGTAG

CUST\_9845\_PI426210822 GGAAGTGACAGGGCATTCTTGTGGAACCTTGACAGACTAAACTGTAG

A\_16\_P01405574

TTTAGAGCATCTGTGTTTACAGTATAACACAATGTGGCAATATTAGGGAAACGTGTCAGC

A\_14\_P118131 CTCCTTGCTCAACGTGTTTTTCATTTTCATGTTTATAACTAGGTCTCTCCTAAACTGGATTT

A\_14\_P118378 CAAATGACCTGGGAACTTGAATGAGGAATGGGATGAAGATAGATAGTGAGCAG

A\_14\_P116302 TCGTTTTCAATCATACTTAAAACACATTACCAAACTCCCCAAAAAATCCCACCTTG

A\_14\_P108386 CTCACACACAACGACAACCACTTCAATTATGAGAAGACACACAACCTTTAAGGTAAGCAA

A\_16\_P02318143

TTCAGAATTATTAACCTGACTCAATTAAGTGGAAAGTTGTTCTCATTCTCATTGAGCCTCC

A\_16\_P17045301

ACCCCTCTATAAGATCATATATCCAATTCATTCATAACAGAGTTGCTCAATATGTCCAC

A\_16\_P02216882

CGTCACATCAAAACATCCTACTATTGATCAACTTATTAGCATAAAAATGGTCCAATGGGC

A\_16\_P16941749

CCCCAAATGGAATCCTTTATAATGTCTAATCTCCACATACCACATTTAGCAACAAGGTAG

A\_14\_P121155 CAGACAGGGATTAACCGACTTGTGCTGGTATCTAGGTGCTTGGATTG

A\_16\_P18453468

AAACGTGAACAACAATCTTAAAGTCCGGATAATCTTCACTAGACATCCTATGGCAAATTC

A\_16\_P17086920

AACAGGACATGTTCTAGTTAACTTTACCCCATTTACACAGATACCATGTATACACCAACC

A\_14\_P127010 ACCTCAGAAAATCAACAACCTGTCAATTTCAATCTTATCTCAAGACCAACCTTCAGAAATG

A\_14\_P104228 ACATACTATCCTGTTTCCTCCTCAATAGAATTGCCACAACTGCATGCTAAATAAAGATG

A\_16\_P15237741

AAAAATGAACTGTATTGACTGATTAAACCAGAGTGACCTCTAGAAAAAACAGTGGGCTC

A\_16\_P16191631

CTCCATTACAGAGATAGTTTTTATTATTTGCTTTCTAGGACATGGCCTTAGCCTTCATAA

A\_14\_P124396 ATGACAAGAAGCCAACCACTAAATTTGAACTAGAGCGAGAAACAGAAGCTTCGCTTT

A\_16\_P01784775

AGAAGTGGGAAGATTAAATTTCTGAGACGCCTAAAACCTTTGAACATTGATCGTAACTAAG

A\_16\_P21483195

AAAAAGGCTAACTCATTGAGAGTGAATGATCATCAGCCGATGTAGTTTTCCCTAACATC

A\_14\_P104414 CTGCAGGTGGATTTGACCAAGAGATTTGGAAATCTAAAGAATGGTGTGTCAGTGATATAAA

A\_14\_P113044 TCGAAAGCATTCTAACATACGATTCATCAAAGGTTACCGACTAATTCAAGTTTGGGATTT

A\_14\_P105658 ATTTTCAGTGGTATATACCCTATTTCTCTCCAGATTACACATCCCACACAATTGAAGAGA

CUST\_2548\_PI426210822

CTTCAGAACCTAGAGCATTTCCTCAAGAGTCACTGAATTCTAGGTATGTCTTTCTCTAATT

A\_16\_P18891087

AAAAAAGCACTTTGCAGATCATAGCAATTACCAATATCCACCTCATCAATAAGTTCCAGG

A\_16\_P20336143

TCACTCGGTCTATTTTTCCCAATTATCAGTGTATTTGAACTCTATTACTCTACTCGCACC

A\_14\_P134119 TCTTGCTAACATTCATGAACAAAACAAGGTCTACAGCCATAAGAAATTTGACAAGGTGT

A\_16\_P16614343

AAAATAAAACCCATCTTGCAAGTTATGACCACCTATATTCAAATGGTAGCCTAGGACTGG

CUST\_6531\_PI426210822 TGGACGGATGGACAGACTTGGCTGCCCTATACTATTATCCTAGTCA

A\_14\_P134304 TGGGACATTTTTGGAGTGCATGAACATATGTTTATGAAATATGTTTGGCCATGGATTGCAT

A\_14\_P115309

AACAAGAACTGATGAGAACGGACAAGTGTTTTTTTGTTGAGTAAGTGTCTGCAAAGAAAC

A\_18\_P22841283 TGCCTGGGAGCAGGAGAGGGCTTCATCTTGCTGATTTCCCATCT

CUST\_3802\_PI426210822 GTGATTTTGCTATGCGCCAAAGCAGCTGCCTTGATCCCTCAGAGC

A\_16\_P16464482

ACAAGTCACTTCTCCCTACTGAAAGACATTAAAAATACATGAAAACCCTTTTCTAGATCC

A\_16\_P15972688

ACATCAACATAGGATTTAACCGTATTTTTGTGCTTACATCTAAATGGCCTCATATGCCTC

A\_16\_P15718459

ACATACAGTCAGAGTAATTATACTATCACTGGGTAAAGACAACCTTCTAGTGTGGGATCCA

A\_16\_P15570545

CCTCAGCACTTCTATAGCATTATCTGTGGTTCTCATCCATAACAACATTTTTGTTGCTA

A\_14\_P130426 TTACAAATACATCTTACTCAGAGTTGAGACTTCCCTAGGAAATGAATGAGATATGCAGGC

A\_16\_P00378040

ACTGACTATAAGCAAACCTTTAGTATCTAGCCCCTAGCATAATATGTGATTTCCCCCGAAT



A\_16\_P03492986

AAGCCCTACACTCCTATACAAAGTAACGTAGCAAAACTATTATTAATGGCAACTTCTGGT

A\_16\_P21455762

GTCCACAGACCATTCTATCAAGTGACAAATTCCTAGACTGAAATGACTGTAGATACTTTC

A\_14\_P103692 AGAGTAGGGGACTTGCATAATGAGCGCATTTTATTAAATAGATAGTTAACGCACTGCTTC

A\_14\_P137540 CTTTGATGAGTAAGGTCTTGACCCTCCTAAACAGTGTCTGGATCCTAGAG

A\_14\_P139758 ACTTTCTGGTGTATTTCTATAATCAGCGTGTGTGCTTAGCATCTTTAAGTGTGAGTAGAG

A\_14\_P123951 CCTAGGACTTATAAAATGGCTTACCGTTGACAGGTAGACTTGAAGTTTGGATTGAATAGA

A\_14\_P134856 CACTGCTTAGGAGTCAACATCTTCATCATTGGGCTTTCTTTAAAACGTGCACTTTGTAAT

A\_14\_P110470 CAAATACTAGAATGTCCCTAAAGTAGTGCCATTCGAAAGAAACCCCTAATAGGTCAGTTA

A\_14\_P104160 TGAATTTCTGCAGCAAAAACAGAAAACCATGACATACTGGAGTGTATTCAGTTTTGTATT

A\_14\_P125413 GCATCCGTGCTAATAATTACCATTTCAGCCATTGAGGAAAATGAGGTAGATTTATGCATAT

CUST\_2297\_PI426210822

ACATGACAACCAGAATTAGGGAAGCTGCACTTGTATTATTAATGTGGCTTTTTTAACCC

A\_14\_P105701 CTTTTTAAATGCAATTGACAGAATCCCAACAAGAATTACAAGAGGCATGTGTGAACTCAT

A\_14\_P110089 GGGGTATTTTCGGGGCAAATAATTAGAGAAAACGAGGATCACACAACAAAACA

A\_14\_P119649 GAGACTAGATGACTTTTGTCTAGGTTTCATCTCTGTGAAGTGGAGGGAATGGAAAAATT

CUST\_385\_PI426210822 AACATGGACAAAGCCGATTTCTGTCCCCTTCCTTTAGACATGGAC

A\_16\_P01418763

ACCTGATATTTGCCTTGAATTCCTGTTTTACCTTCACACAATTAATCTTGCCTTCACAT

A\_14\_P101982 GAGACCAAGAAGTTGGGGAGAAAAGGAAAAAGAAAATCACCTGACATCATCTG

A\_14\_P103740 ACAAGAAACCACCTGTGATACTTCAGTGACAGAGATGTAAATCAATAAATGATTTTGGGT

A\_14\_P111087 ACTGGGTAACACTGACCATGTCGTTCTGCTTGAGACAGATATTAGATTTTTTTTTGGAATT

A\_16\_P18646958

AGACCTACAATACATGCACATCATTTTTGGGAAATTCAAGGATATCAGATTAAGTAGCCCT

A\_14\_P103372 GCTGTTTCTACCACAACTACTACTAATTGTTTGGTCACCAGTATTAGGATCCTAGTTTG

CUST\_1512\_PI426210822

TGTGGTAGTAGCATGACTTTTTGGCTGGTAGTACATTTTTAGGGACTGTTTTCTTG

CUST\_7777\_PI426210822

TCTCATAACCATCAGCCTTGATAAATGCTAATGTAAAGTTCTCTAAGTTAAAGCCAGTGT

A\_14\_P136452 CAAAGATGAAACTGCCCAACTGACATAAAATACGACCAAACATCTGGCCACTAAATATTA

A\_18\_P22841018

AAAAGGACTTCTGTGTTGAGTTTAAATTAGCAACAGTAGCAACAATAACACCAAAAAGCAG

A\_16\_P16191274 GACACAGCCTTGCCTTGTAAGTCAACTGTTTGGCTGGCGTTAAACAAGT

A\_14\_P201899 GTTTATGCTTAGACAACCTCAGAACTAAAATTAATACTGGGTGGTGGTTCAGATCTCATTG

A\_14\_P108750 CATAAATCATTCTTACCTTGCTCTCTCTTTCTAATTCACTTCGCAGCCATTCAAAGTCAC

A\_16\_P03677119

AAGGCCTTTTTTCGAATGTTAGATTTTTCCAGAACATAGACACCTCTCAATATGGCTCTC

A\_14\_P115577 AGAGGTTCCCTTCAGGAGGATCAGGTAGGTGTCATCTTTCAGCAGAT  
CUST\_5445\_PI426210822 CAGCTCTGAGGCGTGCAGCACTGAGTGCGGTGCAGGAATATGCAA  
A\_14\_P110265 GGCCTTGAGAACATTTAAAATACAGAGCATGAATGAAAGTCATAAAAAATTCCTAGAAT  
A\_14\_P105924 CATCTTCTCCGAAGTTCCTCAGTGACATTTTGCCTTTAGCCAGTTC  
A\_16\_P17774578  
ATAGGAAACCAGTAGTTATGTCAGGTTGCTAAGTATTTCCCACTGAAGGACAAATATTC  
A\_16\_P21080876  
GATCCACTACCTAAAGAATGCCACTCTTAACAGTTTTTCCATTTAATTACCTGTGTCCA  
A\_14\_P112834 CTTCTAGTTGTAGTTATAGTTCTGGTTTTGGTAGGTTATGTTCCCTTCGATTTACCAATT  
A\_18\_P22842670  
GCTCTTTAAGGCTGCTAAGCAACCATGAATCATGGTTTTGCATTTTTCTAGATGGATAATA  
A\_16\_P00341470  
AAAAAGTGCTTCAATTACTATTACAATTCAGGTCCCTTTACAAATCTATGGCTCTTCCCG  
A\_16\_P15585347  
ATCAAGTGCCTGACTTAAATCCTGAGATGTAACTTCAAGAACATACTTAGTTCCATGGC  
A\_14\_P124209 CTTCAGAAGGCTTTAGTGTTCTTAATCTTATTAAGGATTTGCTAACCTTTGGGCCTAAT  
A\_16\_P02152747  
AAGGTTCTATATCTGACCTAACTCCAATAGACTTCCAGCAAGTTAAGTTCTGTTGATCAG  
A\_14\_P115085 GGGAGGTGACTTTGAGTTCATGGATGATGCCAGTAAGTAGTAGATTTGGGTATTT  
A\_16\_P21550805  
ACTCCTTCTACAGTGCATTCAGGATGTTCAAATATTTTTGCCTTATTAAGTCCATGA  
A\_16\_P36230801  
TTCCTTCAAATGAACCTGTTTGGATTCTCTTATCTGTGCAATACAACCTAATGTAAGTCT  
A\_14\_P130738 TTATCTGTGCCAAGGTGAAGGGGTTATGAACCCCATATTTTTGTATCTTAAGATTATTC  
A\_14\_P113761 GAAATGTTCTCTACATTTTGCCCAAGGAGTGGATGACTGCAATTTTACAGTTACAATTG  
A\_14\_P122254 GCAGACTATACAGGTTACTTACTCTGTCATGAAGGAAGATAAGAGCCAGCAATATGTCAT  
A\_16\_P37023824  
AAATATTCTTTCAGTTCAATTCCAACCTGCAAAATTTGTAGACGTCTCCTTCTTACCTC  
A\_14\_P100213 CAGCATTTTACACACTGAAACTATAATCAGAGAACTGGTGATACATCCAGATAGGATCC  
A\_14\_P127088 ATGGGATGGCTCAATTGCTTCAATTAAGTACTGACTACCATTAGTTGAGTTTCTACAATATGCA  
A\_14\_P115322 TGCCTGGCATCCATGCAGACTTCTGGTTTTGCTATTTTTAAATAAACACTTTTTATCGAA  
CUST\_5054\_PI426210822 CCTCTTCCATCAGGAACACTCACACAGTCATTCTCCTCACATACC  
A\_14\_P135569 TCCCCATTATTCTAGGCCAGCCCTTCTCCCTTATCCTAGTTTTAAACATGAATTTATAAA  
A\_14\_P118189 ACATTCAGGCTTTTGTCTTGATGCCCGTCTTTTGGTTTACGTCATCATTGTAG  
A\_14\_P134065 TAAAAATTTCTCACACCGGGGACTTCTAGGAAAATGGAGATCTATCCTCATCTATGTTAT  
A\_14\_P133858 ATCTTTTAAAACCTCACCTGTTGAGTTAGCACTGGAGTTGTGTGGAAGCCC  
A\_14\_P109230 GTTGATTTTTGGGATTGATGGGGGAAAATCCAAATTTGTTTGTGTTGCCCTTTTT  
A\_14\_P137947 TGACTATTGCATTTGAAATCTCTTTTCTAGATCCTGGAGTCAAATCTATGGCTGTGCAT

CUST\_6576\_PI426210822

TCACATTTTCATTTTCATTTCTAAAAATAACTTTGGAAGCAGAGATGTGCTGTTTTAGTCA

A\_16\_P30952588

CGCACTTGTGGATGCATTTAGAAAGCATTGGAATTGTTGACATCTGATTTTGGGTAAAAAA

CUST\_8710\_PI426210822

AAGACAGTGTTCATGAAACAGAATAAACTAGAGATTTGTAAATTCAAGATATTGATCA

A\_14\_P133831

TAAGACAATGAGACTTGAACATTTTTAACTAAACAGGAAACAGAAGGGCTAACACAGCAC

A\_16\_P17633532

AAACAGTGTCACTTCACAATCTCTAAGAGTCTCCCTAACTCTAAAATGTCCTCGATTAA

A\_18\_P22470805

TAAATGCAAGATGTGTTACTTCTTACGACTTCTCATCTCAGTAATCCTCAGACTCAGCAA

A\_14\_P104817 GGGAAAGCATCTCCTTGAATGAAAATCACAGACAAATCTATGCAGACCACTGAAA

A\_14\_P126359 TGCATTAATAATGTATAAAATGCACAAAAAGGCATAAAATGGGAAGGATGTATCCACCCTG

A\_14\_P107551 ACTAATTTTCAAATTGAAGATTTTCAGAAACACTGAACTTGGAAAGACCCTGAGAGATGAC

CUST\_5215\_PI426210822 ATGTTAATTGAAGAGTAATTGGTGCTTTTTTGACCCTCCTGAGCACTGATGCTT

A\_14\_P105994 AAATGCTGGGACTGAGGAAATAAAGAATGAAATAAATGGAAATTGGATTTTCAGCATCCTC

A\_14\_P112693 GCCTCAGTGGCATTGCCTACAATCATACTGAAATTCTAGAAGCGAAAATGGTTAAGTT

A\_16\_P35564679

TATGGACCTAGGCTTTATACATCAAGATCCACTGCTATTTAATGAGTTACTGCCTGATCA

CUST\_2373\_PI426210822 CTTTGTGACGACGCAGGCTGGCTCCTTTGCTTTGACAAAGAGAAG

A\_14\_P103000 TTCCTTATGATGACTTTAGATCTCTGTTTCTTGGAAATTCTAGAGTGATCCAAAGGTTTC

A\_18\_P15417208

AATTTCTGTTTGGTCACATCTCTCAATGTGTGAATCATCTGAAAGTGAAGTGAAGTGAAGTGAAGT

A\_18\_P22840287 GAAGCCGTTGTAGGTCCTGCACAGGCTCCCTGAGCCCGCTGTTTG

A\_16\_P30952312

GAGTGATTCCCACCAGATTACAAATTATTGCTTCATTGTTGGAAAGAGGAGTTAGTTG

A\_14\_P135828 ATCTGCTGCCTCCAAGATCAAATGTTTCAGTTTCTGCGCAAGAAAAAGAAATAG

A\_18\_P14135388

TTTGAGAGCATTACTTCTGACCTAAGGCAGAAACACTTAGAAAACAAATCTGTGAAATGG

A\_14\_P125780 CTTTCTGACTGCACAAGGCATCATGCAAGATGAGATAATTTGTAAATGCAGTTTTCATTTA

A\_14\_P130324 CTCATGGCTTTAAAGAAAATACCGATTTCAATGCCATCAATGGTAACATGAAGAGTGTAG

CUST\_4269\_PI426210822 CCTCCAACCCCATTTCAAATTTCTCTTAAGAAAAGGAAGGAGAGTTTG

A\_16\_P00690831

ACATCAAAAAGCAAATAACTGAACACACTAGTAGAAAAAAAGTGCATAAAAAGTAAGGCTG

A\_16\_P17918444

AAAACACACCCATTTCAAACAAACTAGATTGATGGCCTTAAAAAACTTGTTCAGTGGG

A\_14\_P115484 AATACACCTTCAAGAAGTGTAGGCTTTTCTTTTATTCCCATCAACAAACGAGAGGC

A\_14\_P117032 GCTTCTGGGAAAATCCCTTGAAGTGATCATTGCCTCCTGCTAGTCT  
CUST\_6322\_P1426210822 GTCAAGTCATACATCGCTGCACACCGGGGCTGTCTTAGGACATTG  
A\_14\_P101451 TTCATGATATCTGAATTTTATTTTAGACAATCCATGGACACAAGGGACCAATCACTGCAG  
CUST\_91\_P1426210822 ATTTGCCCTTCCTCTGAACTTTCTGGATATCAAAGCCACGTGGAAGTAT  
A\_16\_P21004926  
ACACTTGGAATTGTGAATACTTGGGAATACTTAACAAGTCTCCTATAGTATATGCCTCCC  
A\_16\_P20722563  
TACTTGCAITTTCTTCTTTTCCAACCTGTTAGTGAACCTCTATTCCAATCAGCATTAAAGCCC  
A\_14\_P120896 TAAAAAAAAACAACACCTTCTATGAGGGGAATTTAAAAAAAAAGAATGGGTTGGGAATCTCCT  
CUST\_6033\_P1426210822 CCTGGCCTCTCAAATAGCCTTTTGGCCGAATCCTCCATTAAAGA  
A\_18\_P15191176  
ACGATTCCATTAGTCTCACTTATCAAGGCCATCTAACTCTTTGTTTAGATAAGCATTCCA  
A\_14\_P102205 CATCAATTCGTCATCTTCAAACATTGCTAAAAGTTCTCCTGTCTGGTCAATAGAGTTGA  
A\_14\_P122511 TCTGATGTTTTGCAITTTATCTTAGGAACCATGGACACTGAATCTAAAAAGGACCCTGAA  
A\_14\_P100461 GGGGAAATGAACTCTATCCTAAAAATAATCTGCAGTGCATTTATATTGATGTGCAAGAT  
A\_16\_P00906116  
CCTTGATACTACTAGAGACATCCCCATGATAAAATGAAACAAAAAACACATAGGACCCA  
A\_16\_P17580711  
AAAGCATTTGATAAAAAGCCTAGATCTAGACTGTTTGAATGATGTGGATTCTCAACAGCA  
A\_14\_P130717 GGCATTTTAGAAACATCCCTACGTTCTGCAAAGAATCCCATTTTTTGTGACTTTCTTAA  
A\_14\_P108719 CCCATTGGGATTAAATATTTTTGAATAGGATACACTCTTGAGAACTCGAGAATGGACTG  
CUST\_8452\_P1426210822 GAAGCACCAGCCTGCACCACCCAGAGAAGCACACTTTGTGAGAAC  
A\_16\_P20843923  
ATAGACGTTTCATAGAGTCTTTCTCAAACAAGCCTTTGATATACTCGTTTTCTCAGCACC  
A\_16\_P16022347  
GGAATCCAAAATCTCTTATGAGGCATATTAGGTATCACATGTGACATAAGCAAAAAGCCTG  
A\_14\_P135975 CTTCTGACGTGGAATTACAACCTCTGGAACCTGCTTCTGTTTAAATCCTTTGCTGAATATTT  
CUST\_5026\_P1426210822  
AGATAGTACATTGGCATTGTGTAATCATTTTAGATGAGTTTGTCTCCTCAGTACAAATCGTG  
A\_18\_P22839802 ACTTCATCATGGCCGTCCTCTCTGGGGCTGCTGCGGGAGATTT  
A\_14\_P124931 ACATTAACACAACAGAGGCTTACTAGCAGGAATATTTTTTCCAAGGAAAAATAGGGTGT  
A\_14\_P125017 CATTAAATAAATGGAAGTTTCAGTTTCAGGGACTTGATGTCTGCTCAATTGTTTGAAGCA  
A\_16\_P02826449  
TGCAACATGACCATATTA AAACTTTAACCCTATTACATTTTCATTTCTCCTTCACCGC  
A\_14\_P123368 CTCAAAAAAGAAAAAAGGCAGTTTAGGGTATTTATCACACCAAAAATGGTTCCCCCTC  
A\_14\_P130389 ACTTATTTTCACAAGATCCAAAAGGGCCATCCTGAATCATAAATCCTGAAGAATTA AAAA  
A\_14\_P104929 TCCTGAAGTAACAGTAATTGAAGATCCCCAGTCAAATTTGAATGATGATGGTTTTACTGA  
CUST\_1237\_P1426210822

CTAAAATGATTTTAAGAGCCCTTGGCAAGTTATAATTTCTCAAATACTGTTGAAGATCAT  
A\_14\_P126336 TGGGCGTGGAAAGTGCCACTCCATGAAATGAATCTATATCATTTTAATAGCATATTCCTC  
CUST\_2210\_PI426210822 CCCCCTCCCTCTGTTGGTTAGTATTTTCTCAGGAAATTCATACCTGAG  
A\_14\_P130170 CTCCCATTTCAACTAAGTCCTGCTGCAGAATCATTCTGGCTTCTTCCACTATAA  
A\_18\_P14136761 AAAGCAGACCTTCACCATCAATGCTGGCTGGCTTGGCTTTAGAGTTAATTATT  
A\_14\_P131221 CTAATCCTTTAATGGACATGTCTTTCTTCTTAACTGGAATGAAACATCCACTCATTGCAG  
CUST\_3871\_PI426210822 AGTAATCTAGACCATGAAGGAGGTCTGGATCCTGGGGAGGGAATC  
A\_14\_P100064 ACACTTCTGGAAGTGTGGTCAAATAGAAAGAGAATTTGAAAACCTTTATATCGAAAAC  
A\_16\_P02729116  
GACTTCACTCCTAATACGTAAACATTCTAGATTTCCAGAAAACCTTACACTTTTTTCACCA  
A\_14\_P136545 CTAAGCCTCATAAGTCAAATCCTCAATTAGCAGATTTCAACCAAGTGAACAAGAAGCTTGA  
A\_14\_P116478  
ATTAGAGAGTCCAGAAAATTAACGAGAGAGTCCAGAAAATTCTCACAGCACTAAAGTC  
A\_16\_P03618476  
AAACCCCTACTTTATTTTAAGCCACTGCATATTGAGTTTTCTGATTCTCATTGTAAGCA  
A\_16\_P02516338  
AAAGGAGCATTAAAATAGTTTTTCTTAGGCCACTATAGAACATCTCCAGTTGAGAAGTGA  
A\_16\_P58424404 GTCCTTGACTCCTCTTTTCTAACACCCTTCATCCAGTCCATGAGAAAAAT  
A\_14\_P128144 CTGAAGAGTTTTCTCCGAGACTTTCTTTTCTTCCAGCCTGAGACAAACCAAATACAAA  
A\_16\_P19403054  
CCCAGTTGAGTCCCTTTATTCATACACCACTTATTGAACAATCTATGCACGTGTAAGTAA  
A\_14\_P117223  
ATTAGGAGGAAAGAGCAAAAGCAGTAACAAAACATGAATAGAGAAAAAATGGCAGGTTGA  
CUST\_790\_PI426210822  
TCCTTAAGCTTTAATATGCCTGGGAAAGATCTAACAGGTTTCACTTTAGGACCTC  
CUST\_1064\_PI426210822 CTTCTGGCTGCACTGTGGACAGATGTCCTGAGGCTGGGGGGAGAG  
A\_14\_P128991 TGGAAAACCAGGTAAGCACCGAAGTCCACTTGCCTTTTAATTTATTTTTTATCACTTTA  
A\_14\_P127054 CATAAAATGGGAAATGAGGGTTTTCTTTTCACTCTGTAGTAATAGGTAAACCCAGTATTG  
A\_16\_P20824541  
AAAACCTTTCCACTGAAAAATCCCTCTGATTTAAAAGTAACCCCTTTGAAACATAAGCAG  
A\_18\_P14135074  
CTTCAGCAGGCAAGGAAAATATTTATTTGAAGACGTTTATGAAACACCTCCCTTGTTTTT  
A\_14\_P107837 CTTTAACTGTGTGCCCTTATCTACCCTATCTATGTAGATGTGCCCTATCTATGTAAACTG  
A\_16\_P18861203  
AAAAGTCCTTGTGAAATACTTTTTCAGGACCATACTCTTAGTGCTAACCCCTTTTAAACAGG  
CUST\_4103\_PI426210822  
TTGTATTGGAAAAATCTGGGATTCTTTTTCCCTTGGTCATTATTTGCTTTTTTAAAAAATA  
CUST\_4530\_PI426210822 ATAGAGAAGGAGTTGGCAGCATTTAGAATGGAGTCAGGAGGAAGATTTCTC

A\_16\_P36083067

TCAGATAGAAATAGACTCCCCGCATCTAATTTATTCCTGCATGAATTTGTCAACTGTGCTT

A\_14\_P120008 ACTATACTAGGAGAGAATGTTTCAGAACTCCCTGATGAATTTCTAAGTGAGCAACTTGAT

A\_16\_P18123048

AAATATCCTAAACTGCTTCTAGAGTGAGAATCTCTCATCACCTACAGATAGTCTTGAGGC

A\_16\_P01166408

ATTACCCTATGATCACAAGACACAGATTTGTAACCCAAAGAAATCCATAAATCACAGAGG

A\_16\_P00042602

AACCTGAATTACATCCAAACCATCGATATTTGCAGTTAATAGCAAAGAGGCTTTACCTGT

A\_16\_P35495496 AGAACTGGGTGAACCCATAAATGTAGAGTTGGTTTTGACCTGAATAATCTGAGAG

A\_14\_P111193 CGTAAAACATATGTTGGTGATCAACTTCAAAGAACCTCAAAGGTAGGTTTCTACTAGAGA

A\_14\_P124056 GAGGGAAGATAAGTGATAAAGGGTCTTGAAACCAAATTATCTTCTCATTCTGAGAAGTGA

A\_14\_P200100 GATAGCACTTCTTTGCACTTAAGAATGGCATCCATAAGATTCTGTATTTGGCATTTAGA

A\_14\_P108332 ATCAGCAACTCAAGAGCATTGTCCTTTAAGTGAATGCTATCAAGGTTTATTCATTCATCC

A\_18\_P17362083

TCCTTGACACACTTTTTAGAACTAACAGTTGACAGAAATACCTCAGAAGAAACAGTCAAG

A\_16\_P33506577

AAAAAGTGTCACTGACCTTTTCATCAATCCTTGCTGACAATGTATTAAACAGTATACAGA

A\_18\_P10601866

AAGAAAACCTCCATCTATAGACTCCAAGGTGTTAAGTCCAAAATAACGTTCCCTCTGAAATC

CUST\_4811\_PI426210822

GTATAAACATCTGAATTCCTGTTAAACACTCCATGAACTGTTGATAATCCCTAGAAGC

A\_16\_P03366047

CCCATTTGCTTTTTCTCTTTTCTTTTATAACAGAACTATCACTTACTCTTCCTTTAGGCCA

A\_16\_P41705966

AAATAGGCTAAAAACCTAAGCCATTAGATCTCTGGATCATTCGACTTGTTTACTTGGTCA

A\_14\_P109489 ATATGTCAATTACAAAGAAATGAAATGTTCAAATTTATAAACCTGATTTTTCAATCA

A\_14\_P132179 AGTCCAAAGTAGAACTTGAATCCTTACCCTTCTATACCAGTGAATAAATGTGCTCATTA

A\_18\_P14139037 AAATCGAGTCCATGAGGCTGAGGAGGCCACTGGATGTCCAGTCTT

A\_16\_P16222875

TACCCTTATTTGCCACTTAAATCCATGTGACACTATATTTCCAACACCAACAATCACTTC

A\_18\_P14133174 CTAAGATGGCAGTTCCTTATCTCATGGGAAGGTTATTACTGGTTCTCATGAGA

A\_14\_P108063 GTGGGAAGGCCTGGTGCTCATCATCTTGATGTGTTTTATATTCTGATCATGAAGTAAG

A\_16\_P01131663

ATGGAATGTAGAAACACTCTAATTCACAGACAGACTCAACTAGTTTCAGAGTTTAGCAGG

A\_16\_P16657223

AACTGAAGTATGTCTGATGTTTTTGCTACTACCTCATCTTGCTATTGAAGCCACTGTTAC

A\_14\_P105997 GATTATGAAAATCCTGTGCTGCAGTGTGATTTTCATGGGAGAGGTTGGGAAAT

A\_14\_P200304 GATAAGGAGGATGATAATGTGTATGTTTATTGGAAGGGTCCTTTCTGTGAATCACCTTCT  
A\_16\_P36192705

CTCAACTGCAACAAGTCTTACAGAAAATAAGCACATCTCTATATTGTCATCTGCCCCGTTA  
CUST\_10107\_PI426210822 G TACTGAAAGCTGAGCAGAGCAGCTGGCCATGCCGCCGCATTAC  
A\_14\_P120865 TAAGAATTCTTTCAACAGTTATCTTGTAGACTGGTTCATTAACCTTTGCTGGCATGGGAAG  
A\_14\_P123628 GAAAGACTCCTCCTCTTCATACCAGTAGAACGTGTCAATAAACAGATAAAAAATTTATTCC  
A\_14\_P115076 GGTTCCTTTCTTAAAGGACTGATTTTTAGAACTCCACATTTGAGGTGTGTGGCTTTTGA  
A\_14\_P201043 GTTCATATATAACATCCTGTGTAGGTGTTTTTTTTGGTGAATTCTAATGGACATTGAAGAT  
A\_18\_P22840297 CCTTCTTTTTCAACCGTGTGCTTGGTTTCCGCCCACTCCTGTTTCCAG  
CUST\_3789\_PI426210822 CCAAATGCTCGCCTTCTGGGTTCTGCTTTCATTAGTTTGAGAGA  
A\_18\_P22842268 AGACAAGCAGCAATTAGGTAGGCTTCTAGGTCAGGTGGCCAGTTAG  
A\_14\_P132413 AATAGAAATGCCATTGTCAATGATCACCGCTATCTCAAGAATGCGGGCAATCTTAC  
A\_14\_P130444 GTGGCACCCACTATAAATGAACAATTCTGTAAAGTAATTGTGAAATCGTCAGTGGTCATT  
CUST\_1632\_PI426210822 GAGGAAATATATGGCTTCTCCCAGGCCACCTACATACCCCGTT  
A\_14\_P105584 GGACAGGAACTCTTCTCTCTTTTGTAAATAAACTTCCAACCTCCCTCCTCAGAC  
A\_14\_P135278 TAATCATTGCATCCTATGATGCCAACAAGAAAGGTATGTAATTCTCTAGCCTAATCTCCT  
A\_14\_P129005

CTTAACACAACAGAAGAGAAGGACAATGGGAATATTAACAAGCAAGAATAACTTTCCACG  
CUST\_3008\_PI426210822  
TTCTGTGTGGGAGCACTTTCTGTATGCATTATTTTCTTCTTAATAATGGCACCTC

A\_16\_P02040381

AAGCGTGCTAATTACCAAATGTCTGCATGATTAAGTAACTAGGAAATTAACAGGCCAAATACT  
A\_14\_P102086 AGTCAATTACAGTTGTTTAACTGTATCTGCATGGACATTCCTAATTACACCAACAGGACA  
CUST\_9268\_PI426210822

TTGCCTAACAGCACACTGTAACCTTAGTGCTCTTGCTAAAGAAGAAAGTCGTACTIONTATAGA  
A\_14\_P102172 CTTCCCTTCTCTCTCTCTCAAAATTATAGGAGACTTGTAGTTTAGTGTGGTTTTCTGTTT  
A\_14\_P107932 TTGTATTTATGCCTCTGTTACCCTTGGCCTAACTTTTAAAAGCCAATTTTGTCAACTGAT  
A\_14\_P111523 CTCCAGTATCATTATGAGGAATGAAGGGTTAGTAGCATATGCTTTGGAATTAGGTTACC  
A\_14\_P128604 TAACTCCTCCTGTATCAGCAACACAATAACATCTCTCTGTGTGTGGATCTGTGTATATAT  
CUST\_6680\_PI426210822

TATAACTTTTCAGAGGGTGTGAAGTCACATTTTTGACCACCTACTATACACCAGG  
A\_16\_P58424565

GTAGTTACTGGGTGACATAATTCATCAAACCTGCACCCTTTAGATCTGTGGATTTTAATGC  
A\_14\_P108667 TCCTTTTATGTTTCTGGGGCTTCTTGGA AAAAGATACAGGTTTCATTTTAGCCAGG  
A\_14\_P132636 TGATATGATATGGAATGACCCATATATTTAGTCTCTGCCCTGATTTT CAGATCATAGTGG  
A\_14\_P125867 ACTTTGCTCCTTATACCAATGTCTATGTTGCTTTCCATCCACAATCTACAAAAAGCCAA  
A\_16\_P00906830

ATTGAATCGCATGTTGACGTCTATTACGATGATTAATGTTCTTGTCAATCCCGTCACTAG

A\_16\_P36729612

AAATTATTAGTCACTACAAACCAAGAAAATACATACACCAAGATTCAAATATACCTCCAG

A\_14\_P101763 CTTCATCTTGCTGAGCAAAAATGAAGGAGCCTGGACCCAACCTTTGTTACT

A\_14\_P117789 TTTACAGATGGCTGCATTACAAAGTCCTTTCTATGGTGACAAAATGAATTTATACTCACT

CUST\_1893\_P1426210822 AAACCAGATAAACCAAGGCCCTGAGCTGGCAGGGAGGAGGGATCAA

A\_14\_P115093 CTACACTCTCTGATTTTGTGCTACTCCTTTGTAAAGTCACTGCCTTAAGGGG

A\_14\_P108885 CACTTTGAATCTATCTGCACCGTTTATTAGCCAGTTCTACAAGGAATCATTGATGAAAGT

A\_16\_P38478269

AGATCCATCATAAATGCTTCTTTTTTCATAAAGTCATTCCATATATTTCCCACCAGACACA

A\_16\_P01066433

ATGTGCTCCTACCTAATGTGACAACACTATGTTTCACACCTATGAAAACAATCTCATCTT

A\_18\_P23688479

ACTTCTCTTAAAGGTAATAATTCCTTTTCTATTGATCCAATCTCAAACCTCATGTGCTCC

A\_14\_P125039 ACTTTTAAAGACCCTCACTATTTCTAGAACATTTCTTACGGTCTTCACATGCTACATCCAA

A\_16\_P15059815

AAATCCACTTGTGTGTTATCAGTGTCCATGCTATTAATGGTCAGTATCTTCAAAAAGGC

CUST\_5717\_P1426210822 TGTCCATTGAAAACCTTGTGCAAAAAGTATGTGTGGGGTGAGAGGTG

CUST\_5251\_P1426210822

GAAAAGGCATCCCACCTTCTGAAGATTTCTCGTTTCTAGGAGTGTCTACAAGATTA

A\_16\_P20879222

AATTTCCATGCACTTTCAAATGACAAGACTCAGAAGCATAATACCAACTTCCTTTGTCA

CUST\_4965\_P1426210822

GAACATTACTCAAGTGCAGATAGGGAAACAGTGTAAAGAACAAAAAACTTTTTTTCTATCT

A\_16\_P38575806

ATGCTTCTTCTTTTATAGACAACCCAATCAGAATAGACATTCAAACAATTCATCTGTCCC

A\_14\_P131875 TATTTCAATGAAACAGCAGAGTCAATAGGAGGATTCTAGAGAGATTCATGCTGCTTCTAC

A\_16\_P30952370 AGTCACAGTTCTTATTTGTGACTGTGGTCTTTTCTGTGACTCCATTTCCCTATTATC

A\_14\_P127432 ATTAACATTAGCATAAATGGTTTTTAGAGGAAAAAAATAGCAAAAAAAATGGCAAAACT

A\_16\_P15345853

AAAGAGGCTACTGTGTAATGATCACTCTGACCTGAAGAACAGTTCTGATAATTCCTAAG

CUST\_4070\_P1426210822

CCTTGAGCCTCAGTTAATTGTTTGTGTTTTCTTGAGTATAAAAGGAATCCTGGCTG

A\_16\_P02535617

AAAAAGCAGACAAAGACTTTTGAGAGCGTAGAATTCAACAATGGCAGTTCATAACAGTGA

A\_16\_P02925601

TTTCCAAAGCCTGAAAGTCATTGTATATCCACCTTAGATAAGCCAGAAGAACTAACCTA

A\_18\_P14132941 CTTTGAACAACAACAGTAAGTGCCAGGGAACATGGACAAAGCCGATTTT

A\_14\_P201983 TGCTATACCATGCGTCTGTCGTTGTGCTTTTTTCTGTTTTTGTAGACCAATTTTTTACAGTT



A\_16\_P58424119 AAGATCTACTTAAGAGGTATGTGAGGTATAAAGTGCCTACCACAGTGCTCAGTCG  
A\_14\_P103608 CTGTCAAGTGCTGCTCACAGACAGCCAGGGATTGTTAGAAAAGTATGGTTATATACTATT  
A\_14\_P100005 TAGTCTGCAAACCTACCCATGAATGTAGGAGATCCATATCTGAGCAGGAAGACTT  
A\_16\_P03772344  
AATTCCACTCCCTATTACTTCCCTCATTTGACTGTCTCATACTAATTTGCATGACAGATCA  
A\_14\_P105414 CTTGGCTTCTCACTTCTTTGCAGTCAACCATTGATGAGGGATGTGTG  
A\_16\_P00622444  
CCCTAGTAAGGAAATACACTTTTACTCAGAAATACCCACAATTCCTATCAATCTGCCATC  
A\_14\_P123078 TGGGAACTGTTTGGGAATTGAATAGGAAGCAGTTTTAATTGGAGAAAATAGAAAATTGCC  
A\_14\_P108278  
GTAAGGCTACACAACCTCGGAAAATATCAGTTCTTCAGAAAAACATGACAAGAACAAGAA  
A\_14\_P131318 ACATTAAGTTAACTCTGAGTTTCTGGCTTAATTTAGTTTGACCATCAAGGCCTAGCCTA  
A\_14\_P100797 TGAAATCTGAATATATCGTCACTCACCATCTCAAACAACAGACGAACTAATTCTCAGAT  
A\_14\_P116986 CTAATTTCACTCAAAGGAATTTTTTTTTTAACTGTGAAAGCCTCAGCAGTCCTGA  
A\_14\_P111694 CCTCTGACTCATCACTGTGATCCTTCATTATTTTCATACATTTTGTCCAGATCTGTTTTTG  
A\_16\_P16192038 TTTGCTTCACGATTTGTGTAGGACACGTCTTATATGTGCATGCACTGTTGG  
A\_14\_P121957 GCCCTGATATAACTGGTAAGGGAGATAGACCTTAAACAGGTAATCATACAAAGTAGAGT  
A\_14\_P134962 AAGGATTGGCCACAACAAAAGTTACAAATCCTTGAACATATGGGGTTTCTTTATAGATCT  
A\_14\_P105010 TAGCCAAACTTTGTGTGGGACTTCTATTGTTACTAATTGTAAGGCTGTAACCTTTGGTTGA  
A\_16\_P16157904  
CTGGAACGCAGAATTATAAAGTAAAAGACAGTGTTAGACAATATTTCCAAGGCTCTCCAG  
A\_16\_P03287877  
GATCTCCCTCACAACATGTTGAACTAGATCTTAAAGTCACTTATTCATTTGCCGTTTCTAC  
A\_14\_P132824 ACCAGATCATCTAAACAACAGATTTTAAAGACAAGTAGTCATCGTAGCGCCTAGTAAAGCA  
A\_14\_P109092 ACCAGTATTTATCCTTAACTCTTGACCTTCTGAAAGGTATCTAGATGGGAATTTCAA  
A\_16\_P30952414 ATCACAGTGTGTCGGTCCTTTCTGACATTTTGACCTCTCATTTATTGGCAG  
A\_14\_P139038 ATAAAGGACCTCATCTTTGGTTATTAGTGGGTGAAAAGAATCTCCATCTGTTCCATTAAT  
A\_14\_P138908 AGGATCAGAGCCAGATCTTTAGACGTGATGGATTCCCAAGTTTCGTTCTTAAAATAG  
A\_14\_P104951 ACATGTCAAATTAATGCACTCTTTAAAATGATGGTGGTCACTTTTTGATCCATACTGCCA  
A\_16\_P00340491  
AAAAAAGTTCCTTTTCTGAAACTAGGCAGGTATTTCTTGCATTTTGTTCTCGTCTCTCT  
A\_16\_P00590323  
AAAAGTCACACTGATCTCTGTATTCCAACCTATCTTTGGCAATTCCTATGAAGTTACA  
A\_14\_P128638 GACAACACTGAAATTTTTAGCATAACCTTAAACCCACAGAAAAGTACTTCTGTCTATC  
A\_14\_P100065 CTTATAAGGAGATGCCACTAAAGTATCTGATTAGGTTGAAGCAGTGGTCAAAGCATCTA  
A\_16\_P19007031  
AGTGTTC AAGGTAACGAGTAAGTCAGAGAATCAATGGGATGGAACCTTATGTTAGGAAT  
CUST\_2435\_PI426210822 ATAAAGTAAGCATAGATGCTAGTGTGTCCCATGGTGAAGTTGTGAACTCTGGTT

A\_14\_P129582 GAAAAAATTTCTGTTGGACTTTTAGACTGAATTCCTCTGTATTAGCAAATAGGAGGCTGG  
A\_14\_P106884 AAAAATCAACAATGATTCTAAGCGTCATGGAGACTTAGGTATGCTCTCAAAAGTGAAACC  
A\_16\_P03123282

GCACAGTAGTTGCATCCATAAAGCACTTTTTCTTGAACCCCTTCTCATCTATTTATTTA  
A\_18\_P22842261 GTCCTCAGGCCACCCTAGCCCCCTGTTCTCCTGGCTGGCTTTATC  
A\_14\_P117502 GCTACATGTCTCAAAATTTGAAAATGTGGATTTTTTTGGTCCCAATTTTTCACTTTCCCA  
A\_14\_P108784 ATCTTGATATTGTTTTATAATAATTTGAAGTCTAAAAGACTGCATTTTTAAACAAGTTAG  
CUST\_1521\_PI426210822 ATCCTGGCCCCTGGACTTGGCTCCCTGAGGCCACCTCTCTCTTTT  
A\_14\_P132784 GCAGGGAAAAATAGAGGCAGTTTTTATGACTCAAATGATACTTGCAGACAAGCATTAACA  
A\_14\_P131236 TTAAGGCTTTCAGGGCTTTTCTTGGTCTTTCCTTAAAAAGACTTGGTAAATTTGCATGTC  
A\_16\_P18524339

GTGCCCCAGTTAAAATTTGTCTATCAATTCATTTAAGGGATCTTTTGTCCATACAAGTCT  
A\_16\_P40931853  
AGAGAACTTCTCGTGGTGATTTGCTGTCTGATTTATAATTGCACCCTTTTTTTAAAGCAA  
A\_14\_P105244 ATCCTTTGACTCGAGAAAAGGAGAAACTCTTTTTTCAGCATTAAACACAAAGACAGTATCT  
A\_14\_P106424 CTGGGGGTTGGCAGAAATGTGTGCGCCATATGTGATAAACATATTAATAGGTTTAC  
A\_14\_P134941 AAAAAAATTTCCCCTAAAGGATTTCTTAAAGGCCAAATGTTAGGCTAAATGTCCCTCATT  
A\_14\_P118419 AGTTTAGGATGTGCCTATATTTCTTGCAAATGAGTCTCCAAATACAAACCCCAAATCATT  
CUST\_2019\_PI426210822 ATCTCCCTCTTCCCTTCAAATGTACCTGGGTTTGAAGCCTAAAGG  
A\_14\_P129018 CTTCTTGAAAATGGGCCCTGCAGAATAAATCTGCCAGTTTTTATAAATGCTAAGATCTC  
CUST\_4709\_PI426210822 AGATACACTGCTGCTCTATGGGATTTTGCCCCTCATTACAAGCA  
A\_16\_P17883501

CGCAAGCCAATCTTATTTTTTACCCTTTGTATCAGAATGTTGCATATCCCAAGTCTTTCT  
CUST\_429\_PI426210822 CTCATAACCTCAGTGGTGAGCATCTTTCAGAGTTTCTCTGTCTCCT  
A\_14\_P134948 GTGGAGGAGGTCAAACCAAGAACTTTTACATTTGGGAGATTGAAATCTATTTCTAAAAC  
A\_14\_P116533 CTTCAGGAGCCACATAAACTACTTCAAATTCATCTCTCTCTCTAAAACAGGAAATGAA  
A\_16\_P19008628

ACATTTGGCTAAAGGAAACCTAGTAGAATACACGGTTTGAATAAAACATAGTCCGGAATG  
A\_14\_P128046 AACAGAACATGTGAGAGAATGTGAAATAGGTTCTTCTTATTGGCAGAGACTACAGTTA  
CUST\_5981\_PI426210822 GAACCGTACAGCGGCCTTCTGTTTCTCTTTGCCAACCTTTTATTTTA  
A\_14\_P127133 CTGCAGAAGGTGACATATGTAGCGAGTATTTCTAAGTAAGTTTCACTGTCTTTCTCCT  
A\_14\_P111672 ACGTAGGAAAATGTGAAATGTTTCTTACATAAAAGAACTCTCAGAAAATACCCGT  
A\_14\_P119931 AGGCTTGGGTAAAATCATTTTTAAATAACATATTAATAATGTTTGGGGGGACAACCCAGC  
A\_14\_P129954 ACAAACACCAATTTTATTATAAATATCAAGAACCTACAGGGTGTATGGGCCAGCATA  
A\_14\_P102814 AACTAGAACATAACCACTCCCTGACTGTATGCAGTAACAGAGCATTTTATTGGACTACATTA  
A\_16\_P02628560

CTCTTCTACATTTCTCTTCTTCTAAGCAAAGTAACATAAAACTCTAGACAATTGGCAGG  
CUST\_4295\_PI426210822 GTTTAGATTTCTTTTCTGGAGAGGTGTCCCAGACTGCTGTGCATAG

A\_14\_P124817 AGGGTAGAGTAGCAGCCTCTTTCTGTATCATCATCAAATTGTATTTAAGGAGCAATTTGG  
A\_14\_P114954 AACATAATATACTCTTTTGAAGAAAGCCATCTATTCAGGTATCATGTTGGCAAGCCAG  
A\_14\_P132921 AAGAAGTTGCTTCACCTCAGGCTGTTATGAAAGGTAAAGACAGAGAAAGATCAATTTTGT  
CUST\_9337\_PI426210822 AGAGCTTCAGTTGCCCTGAAGCCAGCTACAGCCTCCCTTGGGGAG  
A\_14\_P113995 TGTCATTAATAAAAAACACATGGAGATAAGTCTCACTACCCCTCCAGATTCGTGTCTATT  
A\_14\_P114510 CACTCTGAGTCATTTGTAAAGAAAGCAGAGCAATTTCAATTCTATATCTCCATGTGTGCT  
A\_14\_P105259 CAGCCTATAGTGGACAGATTCACCTGATGGACTCTTGGTTATTCATTCTAATCAGTTC  
A\_14\_P107626 GCATCCACTCCCCATATGTGGCTGAGATAACTTACTTTGACTGTCTATTTGGTT  
A\_14\_P120608 CTTTAATATGGAAATAGAGTGTGTCTGGGTTGACTATGCATAAATGCTTAATCGCATATGC  
A\_14\_P201384 CTCATCTAGAACATTTCTGATGTTCTCAACACAAACTTCTCCTCTGTGATGCTTTTTTGA  
CUST\_3446\_PI426210822  
TTATTTTAGTCAACGTATTAGTATTAATATCATGGCCTCTTTTCTTCTCATTTTGGAAG  
A\_16\_P17619221  
AACACCTTTTTCTGGATTTGCCTTCTAAACAATAATCCCTTCGAAATGACTTTGTGAATG  
A\_16\_P19591421  
ACCAATTTTCCAAATTCCTTATCCCTGGTATTCAAAGTCTCTAAAACTGTCTCAATCT  
A\_14\_P133750 GGCAATGTAGATAACAGGGAGCACACATCTAAAGTATGTGTGCTTAACATATGAACAGTC  
A\_14\_P138172 CTTGCCTTGACTTTACAGTCTGCATAAGTTTACAACCAGGAAAATGAAAGGAACAATTTT  
A\_14\_P106224 AGCACCTACCTGGCCATACAGATGATAATCAAATTCATAGATCTTGTGAAATTTGAAAG  
A\_16\_P19790104  
AAAACAGATGGTGTATCTACTTTTTCCCACTAAATTCTCTATGTTGCATCAAACCTCTGG  
A\_16\_P00154395  
CGTGGCCGATATTAACATTTAATTGACTAGAGAAACCAATCATAGAACAAAGCCCCTTT  
A\_14\_P100871 TCTTCTATCATTGATGAAAAATTATCTGAGAGTTCTAAAGAGGGTGCAATGTGGTTGGAT  
A\_14\_P102006 AACTTAAGAATTAATAGGCTCTGAAAAGCACCACAGGGACTTCACTGTAAGTAAAGTAT  
A\_14\_P112119 TGTCCATAATGAAATGCTGTCTAAAAAAGCCTTAGCCTCACCAAGTTCTAAATCACATGAA  
A\_16\_P18302508  
ACAGAAATCCTGCCAATACTTAAAAACAGTCTGCATTCTACATATCCGAGTTTCAGAACT  
A\_14\_P201257 TGGTTTTGCCATTTTGGAAAAGTAGTTCAAAGAAATAGACTCGAAATTTGAGCAGAAGC  
A\_14\_P117221 CTGGATTCACACAGGCAATGCACAGGTGAGTCACTATTAATTAACACCGTTTTAAAATTA  
A\_14\_P130559 CTTACTGGCTGAGAATCCTGCTTTAGGCTAATTCTCCAGATCTGAAAATAAAGATTCTAC  
CUST\_3601\_PI426210822 GTGGGCCTTCTGGTGTGAGCTCCCTCACATCTGAGCTGTCTTAG  
A\_16\_P03703359  
ATACTTGTCATATCCCTTTTCTAGGATCCTACTCTGAACTCTGTCTTTTTCATATCAAAG  
A\_16\_P19749700  
AACTGTAAAGACATGCAAACCTTCCATTCTTCTACATAGGATTGTCTGTTATCACTGGT  
A\_14\_P119533 TCACATGCTGGAACGCACCAATATGAAAATGGAATATCAAAGTGGGTAAGAACATTAA  
CUST\_748\_PI426210822 CTTTGCCTAGCTGGAGTGTTCAGGAGGAGCAGCAGCATTCCAAG

A\_14\_P138539 TGATTTATTTTAGTTCCATACTTGGAGGTCAAATTTGCTATGCCTGCAGGTATGAGACAA  
CUST\_6075\_PI426210822 TTCCTCTCAGTGAAAGTACGTTCCAGCTTGAGTTTTGAGTTTGCTCCT  
A\_14\_P119824 CTTTTTAAAGGAATTACAAGTGGAACCTTACATATATTTGATTTCTCTTATACCGCTGGAA  
A\_14\_P103365 AAAGCCTTCAGAGACACACAATAAATTTGGACCAGGGGATTTTTTAGTTATTAATGCTCT  
A\_14\_P130510 ATCTTAAGCATGAAGACAGACATGAACCTGAAAGAGAATAAGATATCTGTCAGCAAACCA  
CUST\_1674\_PI426210822 ATTGCCCTCTTGCTGCAGGCTCTATCCTCCTCTCTATTTTTTTTT  
A\_16\_P01492105  
CGTGCTGCCAAAATTATATCTTAAAAATATCCCAAACCATATAAGACAGAAGCCATTCA  
A\_14\_P130280 GGGATCTTATAAGGCTCTATCTGCATGAATCAAATCGAGTTTATCGGGATAAGATGGTAG  
CUST\_7650\_PI426210822 TTTCCATGAATGTTTTGGGAGAGGTGAGGAAGAAACCTTTTCTGCTCATT  
A\_16\_P58424472 CTGGCCCAGGCTCCTGTAGGGTTCCAAAAGAGTGAGTAGAAGTTC  
A\_14\_P122783 AGAATACAGACTGCTACCTCCCCGATGCCTTCAAATATGACTCAAAGGTAAATATTCA  
A\_14\_P100100 ACCCATTTGTGACAACATCTCTTAAAGTTGAAGGTCTACACATGTGTATCCATATTAGCA  
A\_16\_P19664056  
ACCAAGCCCATTTTTATTAAACTGCATTTCAACTAAACACTAAGATTGTTTTACCTCCGC  
A\_14\_P114330 ACAGGTCATATCTGAGGCATCAGCCATCGAAAACTTGGTAAGAAAATGATAAAATTCTG  
A\_16\_P37619552  
TGGATTCTACAACCTCTATCAAAAGTCCCAATACTCTAAAATATCCTTGCTTGGTAAACA  
A\_18\_P10526683  
TCCTCCCTTAGTTCTTCATTCCTCAAATACATAGTTCAAAGTCACAATCCTTCATTGAG  
A\_14\_P138425 TATGGCTTTTTTTGATAGTGATTGATCACATTCCCTTTTAGGACACTTTAGGTTGTCTGG  
A\_14\_P135923 TCAGAAGAACTTTACTTTGATGCAGACTTCCGTGTTAGGTTTTCTCCTCTTCTTTTTCA  
A\_14\_P100667 TATATTTCTATTTGACAGTGACGGTGTGGGCTATAGTCATTTGTATCCACCAGCAAATAG  
A\_14\_P119079  
ATTATCGGAGTGAAAGAGAAGACATTCGAGCAACTTCACAAGAAATGTCTAGAAAAGAAA  
CUST\_4106\_PI426210822  
ATGTAGTTTTAAAGAATTCCTTGCTATTTAATCTCAAGCCCAAACATGGTTTTTTAGTGAGG  
A\_18\_P16000240  
GGCTGCTGCTAAATATTATTATCTCTACCCACAACCTTCTTAGTATAACCGTTCCACTGAG  
A\_14\_P131361 TGCGTGGTCATAGAGTATGCAATTAATGATCCATAGACGCCATCATTACATAATACAT  
A\_16\_P02136532  
AGAACTTGCCGCAGTTTTTTTTGAATGTAACAACCCAGTTTAAATAAGAGTCTCTGAAACT  
A\_14\_P101173 AGAATAAGAGTGAGGCTTGGGATGGAGACATCATATTTTTCTTGGATAGATGAAAACACT  
A\_14\_P112230 ATGTAACCACTTTAAAAATAGTTACATTTGTTTTCCAGATTAAGTAAATATTTAGTTAGG  
A\_18\_P22841785  
TGGTTTTACTTGCTTTAAAATGCTCAATTTAAAAAATAGTAAAACGTAGAAAAGAGAAA  
A\_14\_P101619 AATGAATGAAACATCTTACCTCCAAATGATATCCAACCTCTGATGAAGGCACAAACTGGA  
A\_14\_P110415

TAAACACAGAGGTAAAAAATTCTTCAGATACAGGGAAAGTAAAGTTGGATGAGAACTCCG  
A\_16\_P36640387

AAATCCCATCTAAGAGAAGGTTCCCTATAGGAAATTGGCCCTTAACTCATACACAGATTA  
A\_16\_P16996410

AAAAAAAACACATTCAGCATATTCATGTAAGGTTGCAGAAAGATTCCTGAATAGGGCAGA  
CUST\_8112\_PI426210822 ATGTGACATGGAAGAGATTTCCCTTGTCAAAATAGAAGACACTTCCTGCCT  
A\_14\_P111186 ATCCTTTGCGTATAAAAAATCCATTTGACATAGGGTAGCATTCAACATTGCTAATATGGAA  
A\_18\_P17340740

AGAAAAATTACTTAGGACACATTAATTGACCCTTTACAATCTACGCAGTGATCTACCAGA  
CUST\_2125\_PI426210822 CCTCTCTGACCTGCTGGTGGGGGCCCCCATGTTTTCTGAGATCAG  
A\_14\_P138178 CTTATCTCTTAACTAGAGACTTAAACAGTGTCCAGGTGCCAAAAGGTAATTTCTTGCTT  
A\_16\_P17904092

AAATCAGCCTAAGATTTGTCCAAGTAGTCTCATAAAACATTGAGCCAAAAGGATTTGACA  
A\_14\_P109877 CTTCATTAGCATATACTGACATGCCAGAGATGTGACAATCTTTCCATTTTTTACATGT  
A\_14\_P102760 TTGAGACCATCAGATAAGGGATCAGATTAACATGTGGAAAAGAAGCCATGATAGAAATC  
A\_16\_P17717230

AAAATTGCCAGATTATTCTTTTCTTCTTGGAACACAGATTTGTTGATAAGTGCCAAAGG  
A\_14\_P105506 TCACTTCAGAATAACAGGGCTATTTATTGATACAAAGGAGAGGTGTTTCAGATCATCTTGT  
A\_16\_P36963852

TGCTGATAATCTCTGAATCAAACACTACTATTAGACTCGTAGCCCTTTAGAATCTCTTGC  
A\_16\_P18091186

ACTTGCAGTTTCCTTAAAAATCCCCTTTCAGATCATAACAATTCTTCAGTCCAGACAAAT  
CUST\_10430\_PI426210822 AAGAAACCTCATGTAATGAATCCACCAGGCTGGCAGTGGTGCATATAAA  
A\_14\_P122770 GGGTATAACTTTGCTTTCAAAAATGATTCATGATGTTAGTGAAGTGTGGCAAATGGCAT  
A\_14\_P116431 TATTTTAAACAGATAAAGTTTTTAAAAGGCAGGTGTGGCACTCCATGCTAATGTGAGTGT  
CUST\_4012\_PI426210822 ATCTGCTTGCCAAAATAGGGCTACCTGCAAATGCTTTGAGCACTGT  
A\_16\_P02034672

ATGTTTATGCAGACAGTTACGTTAAGACTTTGGATTTCTGTTTCTTAGTGAGCACTCTCG  
A\_14\_P135559 CCCCACCTTAATGTGAATTTGACTGATGAATGAAGAGCGTTTCTAATAAAGTTTGTCAAT  
A\_18\_P14135477 AATGTGAGAAGCCCGGAAATGATGAGGCAGCACTGGATCCTGCTG  
CUST\_5060\_PI426210822

GTAGAGTTTCTTTTTTAACTTATATGCACATTCCTTGTGACAGGCACAGTGAAAGATTT  
A\_14\_P117104 CTTGCTATAATCCTACTTCGAGTTCTGGAAAGAATGTGTGAAACAGTATTTTGGGCATTT  
A\_16\_P16638890

TACTCAGGTCCTAACACTTCTACTATCACTTTTGTA AAAATGACACTCATGCCTACAAGG  
A\_14\_P102330 CTGTTCTTTGATATTGCATATTTTAGGCATGATTGAACATGGTCTCAGTGACTGTTCTCA  
CUST\_5323\_PI426210822

CCCATCTTCACCTCCTCCCCTAGAATAACAACATCATAACTGACTTATTTTCATCATTA

A\_16\_P00685036

CCCCTTTCTTATGATTAGTTGAAATCTGAGTTTGAGCAAGTCTTGCTGTTTTTCAGAGAAT

A\_14\_P107865 TTCCCAGACTCAAATTTGGAGTTAAATTTCAAATATCTCCCTCTTCTGGAATGGTGTAA

A\_16\_P21522649

AGGCAGACCATTTTCTTAGTTTTTCACCATTCGAAAATATATATCCTATGTCCCTTCCAC

A\_16\_P16334934

CCTTTCAAGTGCTAATACCTTTTCGTAAATCCACCATTACAAAAATTGCTCCTACCGATA

A\_14\_P133618 TAAAGTAGAAGAGTGAATACTCCTACATACCTTTTTTGCCTAATTTTTACAGATTTCGAT

A\_16\_P16568335

AAACGTAAAACCTTTTCAGATCCCTCCAATTGCAATGTGAACTTTATGACCTTTATTGCA

A\_16\_P35236215

CACAACTCAGATAAACCCATGACCATAATTATCCCTTTTCATTTCTTATCATAACAGGTGG

CUST\_10371\_PI426210822 TAACATCAAAGGGCAGGGTCTTTTCAGAACTAAGCTAGAGGAAATTGCCAT

A\_16\_P20005894

AAAAACTCCATCAACTAAAAAGTCACCTGCAACAATTTTTTTTCAGAAAATACTCTTTGGA

A\_14\_P119651 GATAGTGTGGTTTCTGTCTCTTGCCATGTGCATGTGTATAAATGCTGCGGATT

CUST\_6390\_PI426210822

ACCTTTCTTGGTTAGTAAAATAAATCCCTAAATATTTGCCACAATCTCTAGAATCTTCTA

A\_14\_P131730 CTGTCAATGGAGGGACACTATCAGGCAGGTCACTATCAATGTGACAG

A\_14\_P128231 CTAAGCGTATTTGGGGACAAATGCAAATTTGTTCCAGGCCATAAATAACTTTTTAAAAAT

A\_14\_P129170 CCCAAATGGTCATTTTTACCCCGATTCTCTATGGTTACTAATAGTAAAAACTCCAGGAAA

A\_14\_P114016 GCCCTGTATATTGCTTCATCCTACTTTCAGACAAATCCATATTTTTACATCAAACCTGA

A\_14\_P101915 CTATAGCAGTAAGCAGAACAATATTACTTGGTGTAAGATACAGTTTGGCACTCCAAGTGT

A\_14\_P104948 ACAAAGTTTCCATAGCAAAAGTTCAATGAACAACACAAAATAAATTTACCAAATACAAA

A\_14\_P201096 GTGGGTAGTATAACCTTATGAGAATATTCTTTTAAGGGAGAGGTTGACAAACCACTAGTG

A\_18\_P15597295

TGCCTAGCATAAAGAATGTTCCACAGATTGATCATACTAAAAAACTGGCAGTCAAATTGC

CUST\_7988\_PI426210822 GGGAAACCTCAATAAGTGTCTGCCCTTGGAAAATGGATTACATGTGGAT

CUST\_8061\_PI426210822 CACTGCTGCTTTTGGACATGGTGCTGTATCCCTTGATGGAGTGGG

A\_16\_P21664488

GCCCTGCACTACTCTTTAAAGTTGAGTTACAAATCTGATTGCTAATATCCCAAACCATC

A\_14\_P119360 ATGGTTTTTTGTCAAGATCAGATTTACAGTGTTGTTCTGAAGAAAGTCCGAGAAGAGATT

CUST\_9952\_PI426210822 ATCATAACTTCTCCCAAACCTCATGGTGGTTTCATTTGGAGGTGGCC

A\_16\_P20302864

AGACAGTTGGGTTAGCAAGAGTTAAAGCATTTTACTGTTCTACGTTTATACTGTCCTACA

A\_14\_P121484 GAAATTCTAAGGTTACTGAGGTAGTCTGACCTTGGCTAAATTAAGTACTGAGAGCATTATATGT

CUST\_5507\_PI426210822

AATAATAAGAGTCCAGTAATTTTCTGGTATGAGTGAAGTAAATGGAAGAGTGTTAGTGGG

A\_16\_P15167627

AAATTGGAATGGTCCTAATAACTAGATCAACCAACCTTAATATGACTCTGCCTTGATCCT

A\_14\_P132457 AGGAACATCTCGAGATTCCATTACCTTCCCCAATCTTTTCCAGTTTCTCGTAT

A\_14\_P108589 AAAAAAGTCAACACTTTGGCTTATGTGGGTGTCTCATGTCCAAAAATCACTTTAAAACCT

A\_14\_P121343 AATATGAGAGGTCCCCTGAAAGGTATAGAACTTCGATGTGACAGTGTGTTTTATTATGA

A\_14\_P131421 GTGTTTTCTCCCCACTCCTCACATATTCGAGGTATATATCAGAAGTCAAAAACATCT

A\_16\_P41571608

GAGCCTGATTTATTGACCTATTTCCCTGTAGAGCAAAAACCTTATTGTAAACCCATCCCAT

CUST\_5493\_PI426210822 CCTGCAAGTCTGTCAGTGGCACAGATGTGGACTTTCCTTAGTGAAAAG

A\_16\_P21568899

AGATCTGTGCGGATATTTTAATTGTTCTAGACACAGTCATCAAAGAACTATCATGTGGGC

A\_16\_P18041282

GCACTTTGATTTTTGAACCAGTTCAATATATTACCCTAGTCAAGAGGTAGTGGTAATAAC

A\_14\_P127316 CCTGGAAAAGCCTGTCCTTATTATCAGGACGGATTTACTACAAAGTAAGGATATTACTGA

A\_16\_P15439362

CCTTTTGGAGAAAAGGCAAACACATTTATTTAACAGGAGAATCACAGAGTGAGCATC

A\_14\_P116372 ACGTGGCATGATGCAGGTTAACTGTAGTTATTATTAAGTCTGACTAATAGTAGTGTCGGT

A\_14\_P200535 GTCTAGATTTTCTTAGTTTCTCAAAGGGATGAAGGGTCCCAAACCCAAAAAAGAGATT

A\_14\_P110430 AGTGACTTGATTTTAATTTTAATTTTATAGGAGAACGACACATTGGATACAGAAGGGAGGT

A\_14\_P124289 TCCAGGTCATGTATTGTTAACATTGCTGAGGTTTGTTTAAATGCTTTGATTGTCTTGCAA

A\_14\_P126973 TAAAGATAACAAGGTGCTGGTATCCCTTGTAATGGATGTGATCTGTATGACTGATAACTT

A\_14\_P127235 TCTTGAAATAGAAAAAGCCTTCCCTTCCCCTTCTAGCAAAGAAAAATTAACCTTTAGCA

A\_14\_P120749 ACTGAATCAGATGCATTGTAAGTCCAAATATAAGTGACCTCTGAAGTTGTATATGCATCT

CUST\_6259\_PI426210822 TACCAGGTAGAGAACCTCTAGATTTTATGAGCTTGCTTCCCTGACTCCAT

A\_14\_P108654 GCTGACCATTAGAACACTCTCATATTTGTTTGCCATCTTTACCTTCAATATCACAATCAGA

A\_14\_P105942

GAAGTGCAAGTGTCTGCCACTGTGTTAGTTCTCAGAGAACCTTTAGTTAAAAAAGAAAAC

A\_14\_P110928 GCTTATGACTCCTCTAGAGTGAAGTTTGCTTAATCTTTTTCTCTGATGTCTTCCTTAGTT

A\_14\_P111787 TGCTTAGACCCCAGGAATACAAATTAACAAACTGCTAGACAAGACTATTATTCTGCTAG

A\_16\_P03204285

AAAGAAGGTCTCACTGTGATACACTTTCACTACGTTTAAAGGCAAAGAAAAGTTAACACC

A\_16\_P00685480

CAGTGAGGTATTGGGCATTACAAGAGAACTGGAAACAGAGTTAGGTAAGCATGTAATAT

A\_14\_P138194 CTCACACCTACAAATGGCCAGCCGCTTCTGATTCTATTACTTTTATTAATAGTGGGTT

A\_18\_P22841280 GTTTGTGGCAGACCCAAGACTATGCCTGCCTTGGCTTCCAGGCC

A\_14\_P115237 CTGCACTCCACATGCAGGCTTCCCTGTTTACAGAAATTTAAAAGATTTAAGATAAAGA

A\_14\_P129933 ATATTCACAAAAGTAGGGGTCTGTTTAGGGAGGCAGTAAGTAAGCATACTATTTCAAGTT

A\_16\_P17164476

AAGGAAGCAGCATGGTTATAAGTGACTAACACGATATTAGGCAATTTGTCCAAATTTCTC

A\_14\_P106731 TAATGATGAGACTATTGGATTTGAGGATATTCCTAATGGTAAGTGTCAATTCAGCACCTTT  
A\_14\_P135718 CAGAGAAGCAAGAATCACTGTGAGCAAGGAGTTGCTTCAAATTAATAGCCTTACAAATCT  
A\_14\_P122520 TTTACAATCTTGGTTAATGCTCATTCCATCACACGATACCATCATCTCAGATCATGTTCA  
A\_14\_P113066 ATTCTTTCTAAAGACTCTTTACTCCAAATACTTTTTTCAATCTGGTTCAGATGTCCCA  
A\_14\_P113437 CCCTTAGCACCAAATGTGCGGATTGCGAGTGTGTTGTATAAAAAACAATTTAAAAAAGGT  
A\_14\_P131159 ACCACATCAGAAGAAGAGGGGGGTGATGAAATTAACAAATAAAAAGTATGGGGAAAAC  
A\_14\_P201937 TAGTTGTAGTCTGTGAGAAGAAGATGTGCTCTACTATCTTGATGAAAACAGCAAAGAGGA  
A\_14\_P115736 ACTGGTTTAAGGCTGTTTTGTATCCTCTCTCTTTAGAGTTTTGCTTTTTTAAAGATGCT  
A\_14\_P102085 GGTCTGACACTACATGGTCAAATGGGTTTATAAATACCCATTTCCAGTATACCCTACAT  
A\_14\_P135471 AGATGTTTATTTCCGGTCTGAGAATCTCTCAATAGTTGTGCAAGATTAGCCTAGAAATAT  
A\_16\_P15052592

CTCCGTCTAAAACCTAATCAGCAGATTCCTAAAACAAATTCATCTTTACCTTGCATGACA

A\_14\_P134669 AGAACAAAAGGTGATACATGTTGATCAAATATTTTTCCATTGCGTCATGAGGGTTATCCA  
A\_16\_P20335612

TTTGCCTTCAGACAAAAAACTCGAACTTACATGTATAACACTTTTTTATGGCCCATCCT

A\_14\_P119776 AAAACAAGACTTTTCTATACCCAGAAATCCCTTTGCATTTCCGAAGATCAGATATTTTG  
A\_16\_P00685115 GCTTGTGTTGAGCCTCTTCACCTCGCTGCATACACAGCATAACAGAC  
A\_14\_P116633 TTGTTTTCACTAGGATAAAAATAGGTGTTGATCTTGAGGGTCTTTCCATTCCTA  
A\_14\_P104975 ATGACTCACAAGAGTCTTGTCTACCTCTGGTTCCTGTGCAGGTATTTGTTTTT  
A\_16\_P00685460

GCATTTTTTTTCTCACATACTCTAGGTCTCAATCTCTTAACTTCAAAAATGGCAGTGGCT

A\_14\_P139485 TATCAGGTATTTTATTTCCAAAGCAGCATCCCCAGTAGTATTC AAGCAGATATTGCATCC  
A\_14\_P117065 ATTATTCTTTTATTTCAGGTATTTTATTGCAAACCTGTTGGAAGAAGCAAACCGAGGCTCGT  
A\_14\_P136479 AAAATAAGCACCTGCAGAAAAAGATACAGTCTGGCAACTGCTGATACTATCAATTCATCA  
A\_14\_P121109 CTTCAAATCAGTGGAGAAAACATAACATAACCTACCAGAAAACATTC ACTCAACTGACTG  
A\_14\_P106530 TAGTGTTTTTCTGGATTAAGAGCGGTATGGAAAAGTTTCTTCCACCTATTTTCAGAAA  
A\_14\_P121988 CAGAATCACACAAATAAAAAGTCTTTTTTAAAAGTCTAGATCAGCCAGGCGGGTAACAC  
A\_14\_P135908 CTGTTTGAAGCAGAACTTTTTTGGCTTGCATGGAGTAAATCCTAATTTTCCATTGTAA  
A\_18\_P14136640 GCTCCTGAGACCGTGCAAACCTGGGGGATTTTCAGATTGCACACTTG  
A\_18\_P11841757

CCTCAGTTTTTCTTTTCATACATTACTACCATATCACAAAATAGGATAGCAGTCAGCCC

A\_16\_P17119532

AATAGTCTCTAGAAAGTCAACGTATCCAACATTTATGGAAAATCGACCACAACCATTTGG

CUST\_2084\_PI426210822 TTTGAGAATGGGTAATCAGAGGGGAGGAAGATGGCCTTGGCATAT  
CUST\_2293\_PI426210822 CGCTGAGGGATCTTGTCCCCAAATTAATGCTTGAACAATCAACAACCAATAAT  
A\_14\_P102381 ATTGTGGCTCATTGCAGTTGAAAACAAGACAGTGTGTTTGAATAAGGACAAAATTTTGCA  
A\_16\_P19138270



ATGTGCAACTGATTTCCAATTCCCTACTTTTACCCAACCTTTGTCACTTAAATGCAGTTTA  
A\_16\_P19278912 GCCCCAGAATATTACCTTTTTGCTTTTATGCTCGTGTTTCTACTTTATCTATCACCATCC  
A\_14\_P103841 TGCACCTTCAAACCAATCCTTTATAACAGAGACTAGACTAGCAGGTGGAGTGATATATTG  
A\_16\_P03800051  
AAAAGCCACTCTAAAAAGAAGACGAGAACACCATAACCAAAAAAACAGACATTTCCAAG  
A\_14\_P127232 TGCCCTAAATGTTTAGACTTTTTCTAAATAAATAGAATTAGATATCAAGCCACCGGCGGG  
A\_16\_P03621884  
GGAGAAGAACATGAGCATTCAATTAATACCAACCCATCTTTCATTAGATTCCCATCAACAT  
A\_14\_P105607 ACAGAGCGCTGTATGATTATAAAAAGGAAAGAGAAGAAGATATTGACTTGCACCTTGGGTG  
A\_14\_P201930 GAAATAAATTTGGCATTACCTCATGTGATTAATAAATCCACTGGACACTTTAGAAGTGCA  
A\_16\_P01672811  
GTTCTGCTACTATAACCAGAACTTCTCTAATTGTCATGTGCAAGGTATTTCTCCAAAAC  
A\_16\_P15846197  
GATCATTCTTTCTCAAACCTTCACTGATAAAACCTCTCTCTCTTGATAACAATGGCTGAA  
A\_18\_P22841355 CACTCATGATACATAACTTACAGGGAAAGGCCCTGACTCCCTTTTTGCATAG  
A\_14\_P112543 CAGCCCTGCTGGGAAAAATAATCAATGGATTTTATTTCCCTTTAAAGTTAAAGTTGGACA  
A\_16\_P37073840  
AAAAATGAGTCATTCCAATGCACTCCTTTTTTAGTAATCCCAAGAGATTAATGGCTGACA  
A\_14\_P120000 GTTAAAAATTGTGGAAAAAGTCTTTCATGAAGCCTTAGAATAAAAATTTTATCTTGTGTGT  
A\_14\_P103634 ACAAAGCAGGTTTCAGTGAAGCCATCTGGTTGTACCTAAAAGAGGAGAG  
A\_14\_P135287 CACAATTCAGGAGAGCAAATCTATGTAATTTCTTCAGCCAAAAATGTGTCAACAACCTC  
A\_14\_P120773 ACCAGAAAGATCGCTAGGTATTTCTCCAAATACCACATACTCTATCTACAAGCATAAAAC  
A\_16\_P20096719  
AATAAAAACAATAAAGTAGGCATCACTGGTATTCAACTCAGTTTTGAGATGGGGAAGGAG  
A\_16\_P19992222  
GCTGCCATTAATTACACTCTCTTATGCTCTATCATTGAAAGTATCTCAATCCAGTTCCCT  
A\_16\_P21384737  
ACTTTCTGAATCAGCCTAATACTCATTTTGACACTTCTAACTTATCTTGAAAGTCCCCGT  
A\_16\_P19623336  
AAATGATGCTCCTTGATACAAAGGTATGTTTCTGTATATCTCTTAACTCGATGGAGAGCC  
A\_16\_P15654588  
GCCTCCAATCTTACAGTTTTTGCCTTTATAATATTTTCTAATCTTTTACCCCTGAACTCC  
A\_18\_P14179324  
ACAGACAGAACGGATTCTCTTGATAACAATAATCAGCATTAAACTAAACTCAGGCCTGT  
A\_14\_P116237 GGGAAGGAAATTCGATCAGACAAATTTAGCAACATATTGTCTCATTTTACAAAAAGGCCT  
A\_16\_P17695068  
AAAGATGGTTAAAAGAGCACATCAGATGTCTTAAAGGAAGTCCTAACACTACTTTAGTGCC  
A\_16\_P18052387

AAAAGTTACAAAAGAGGCTATGAGTAAACTGGTAACATTATCAGACTGTTTCAGGGATCC  
A\_14\_P200699 CTGAGGTGTTAGTGAAGACTGAAAGTTTTTTTCTCCAGGTGTTTGTATTTAATGATT  
A\_14\_P124513 AATGTGCTTCTTATATAGATCTGCAACTATGTGGGACCAGCAAAGGTTATTGTTTCAGTTG  
A\_14\_P117435 ACATCTGCACCTAAACACTCTAAGAACTCCGATCATTAAAGAAACAAAGCCATATAACTTC  
A\_14\_P101595 GATGCAACATCAATTTAGAGTCAGGATTACAGTTATCTTTATAGTTAGCACCAGATGCCAG  
A\_14\_P104888 CTACAAAGTAAAAGTTTTTCCCTTAACTTAAAAGTTGAACCACTGTAGACAGTGATCACC  
A\_16\_P37580880

AACAGCAACAACAAAACGATTAGCAAACCAGTTTTTCTGTTATTTTTCAACCAATAGGCA  
CUST\_1603\_PI426210822 TTCAGTCCCAGGCTTTTGGCCTCCTTAAACAGGAGGTCTTTGAA  
A\_14\_P119316 TTTAGTTCTGCAACAGTTTAAACACCATCATTTTTACACCAAAAAGAAACCAAAAATCACCT  
A\_14\_P127700 TCTAAGGAGTGCATTTTGAGAAGTGTGGACATATGTAGGAATTTGTAATTCATAGGCCAT  
CUST\_9287\_PI426210822

GAGAGGCCACTTCCAACAAGTTGCTGTAAAAATAATTACATGTGAAGATAAAACTAAATA  
CUST\_1315\_PI426210822

GTGTCTGCCCAAATGCATTGTTTCTGTATTGTACAATTATCAGTTATTTAGATTTGCCA  
A\_14\_P137229 TAAGGGATATTATCAGATGTTACCAGGAGGAAAAAGGAAGATCTTTTGGCTAAACACTGA  
A\_14\_P109773 CTTGGGTCACATCCGTGGCCAAAGTAGAAATTAATAATTTTGCATGAACAAGTAATAACTT  
A\_16\_P19487043

CACCTCCTTAATCTTTCCAAGTAATATTCAGAACTTCGATTCAATTCAATCCCATGGC  
CUST\_1664\_PI426210822 TCATCAACAGCTTCCTTCAAGGGGGGTAGGATCTCAAACTTTAAATGAAG  
A\_18\_P19745385

TTGGCTGCACATGAATTTAAGGACATCTAAATTTCCAGAGCATTATCACTCATAAGGAA  
A\_18\_P14132243

CTCCTTTTCCCTGGAAGTTTTCTTGCCATATATGGTGATAAGTGACTTTATCATGGAAGA  
A\_14\_P117109 CAATGTTTAAAAAGAGAAACAACTGAGTTCCACTGAAATTAAGAGATTTTCTCGGTCTC  
CUST\_1759\_PI426210822 AGGTAAGAAAGGGGAAATGGGAGTGATTCCCACCAGATTCACAAAT  
A\_16\_P58424627 TTAGACATAGGCATTTGTGTGGAAGCAGGGCAGGGTTCTGAGAAAGTAATT  
A\_14\_P201712 CCTTTAGAAAACTGAAGATTACCCATAATCTCCTCTTATTACTTGAGGGCCTTGACTAT  
A\_16\_P18200308

AAAAAACCAGCAGATACTACTTATGAACTCAGCACTCTAAGATAAACCAATTAGAGGA  
A\_14\_P122180 TTTTAACTTCTTATGCTCTAGTTTTTTTCAAAGAGACATCCCATGAGTCTGTGGATAGCAG  
A\_16\_P18478440

AAAAGATCCTCCTAGATGTTTGAAATCACC AATTGTCACACTCTACATACTTTTTGTCCG  
CUST\_8744\_PI426210822

AGATACTGTATCAAGTACTTTACAAGAACAAATTAATCTAATCTTCATAATAATTTCTTA  
A\_14\_P118229 CATGGTAAAACCTTCAAAGCAAAGGACATGCCAATGAAGAGTAATGTTTTTCCATTTAC  
A\_16\_P18142066

CGACAGTAATAACTCCAGAGCAAACCTTATAAAACAAATTTAGAGCCTTTATTACCCAGG

CUST\_3357\_PI426210822

TCTTTGAAGTCACACATGATAATGTGTTCTGTTTTATTGGTTTTGTCTTTATATTTGAGA

A\_14\_P135543 CTTTCCATGCTGATTACTTTTTCTTTCCCTCAATTGTTGAAACACCATGTGTTTTTTCTT

A\_16\_P02137175

AATGCAAGATCAGTCTTAACATCAACCTCATATGACTTCTCTTTCCCTAAGACTTCATCCA

A\_16\_P00685264

ACCTGCCATAAAGAAACATGTTACTATTAAAGTATAACCAGATACTCACATGTGACATTC

A\_14\_P111116 CAAATGATCTGATGCAGATGTTTCCCTAACATTCAGAAAAGGAAAATAAAGGGAAGACAT

A\_14\_P126763 TTCTAGCGTCTTTTCCAAATCTATGATGCAATTAGAATGTTTACCTCTCCCTTCTCATC

A\_16\_P03099605

GGATGCGCCTTTTCATAAAGTTTCCCTTACATCTAAAGCATTACAAGATCATGGTAGAAG

A\_14\_P110035 GCCATTCTGTTATGTTTGTAGCCCCATGTTTATATTTTCAAGGATTCATTTGGATTC

A\_14\_P109195 AGCCATAAGCAATCTCCATAAGAAGAGAACATTTACAGCAGTCTAATTCAAAGACTGCATT

A\_14\_P116215 CTCTTTCTTCCCCAGAGGTTGGCAAGCCTTGTAATAAAAATTATTTTACTGAATCCATTT

A\_14\_P107681 TATGGCAAACAGTGTGACTGAGAAATCAAGTCACTTTAATCTCAATTTCCAGAAGTGG

A\_14\_P113316 GTAGTTTTTATAGGTAAACTTGGGATCAGAAAATCACAGGTCATGGAGTCAGTTCAGTTA

A\_14\_P132680 CTAACAGAAGAAAAGGAGAAAATAGTCTGGGTCAGATTTGAAAATGCAGATTTAAATGGT

A\_16\_P21605029

AAACAATACTGCACTTAGAATGACAACATTGGATCAGATTCACCCTTTATTCAGACTGAG

A\_14\_P200757 CTTATACTAGTAAGAGACTTAAGCAATGCCATGCATTTATTACAGGGAGGGATCCAGAAA

A\_14\_P111295 CTGATCCTTGATCATTACAGAGTGCTTTTCCATTCGTTATGTAATGTAATTAATTAGCA

CUST\_3146\_PI426210822 TTTAGGTTTCTTTGCAGCTTCTTGCTTTGGCTGAGAAGTTATCCTTTGTTCCCTA

A\_14\_P118720 TTTTTTCCCTTCTTCTTTTAAATGACTAATCAAAGTCAATATCACTAGTGCAGAGAGGCC

A\_16\_P02536122

AATGAGTTTTGCAGCATACTAATATTTCTTGCCAAATCACTAGTAGACTGAAGCACAGC

A\_14\_P130504 CGTTCTTTTAGGATGCCTCTACTTTTCAAGTCCAAGCACTTTGATAGGATAGTTAATTAATC

A\_14\_P124159 GACATGTGCACGGAAGGACTTTGTAAGGGACCAGGATTCTCAGAAT

A\_14\_P102719 TAATTTTTAATGTTTAACTAGAGACGGGGAGAACACTGACTCTTACTAAGTTATTCCGGG

CUST\_6064\_PI426210822 GAGAACACAGTGAGAGACAGGGAAGGAGAAAGGGAGAGAAACCAG

A\_14\_P119933 GAAAAGCATTGGTCATTGATTTTAAAACCGTAATTGGGGTCACAGGTCATATTCAAATG

CUST\_6807\_PI426210822 TTTCTGGTAGAACTAGTCTGTCTGCAGCCTTACTGTGTTTTCATGTTCTCC

A\_18\_P13536724

CTGAGTTTCTGTCTAATTTCTGTCAACAACACTTATCACAGAATATGCTATCTCTCCCAC

A\_14\_P202411 AACTATTAAAAATTCTACGTGCTTTACGATATGTGGAATCTTGACCTCACTTGTTCGGAA

CUST\_4363\_PI426210822 ACAGCCTTTAGCCACCCTTTGAGAACCCTACATGACTTCTTGA

A\_14\_P139740 ATGGCCATCTCTATACACAGAAAATTAGTGAACAAAGATGGGTCAGATTGCTTTATGTCA

A\_14\_P202552 TTTCTTTTTGCATAGCCCCATCTTATGTCCCTAAACCAAAGGAAAATTATCTACTCAGT

A\_14\_P106080 CTCTGATGGCTCTTTTCCAGGAATAAGGTCAAGGACATGAAGACTAAGGAAACATCAT

A\_14\_P124132 GGGATCCAAGATGTCTTGGTAACACATTTGATGATAGGGCTGGAGTAACA  
CUST\_6465\_PI426210822

CTGGACGTCTACTTCACAAGCAGTAACATAAGCAAGTATGTATCATTAAAGATTTATCAC

A\_14\_P104000 GTATTGACAGAAATAATCTGAAACGGTCACAAAGCCATCTTCCTTACTTTACTCCTAAAC

A\_14\_P129552 CCTAGAGAGATCTGCGGGTGTAATCTGTAGATCTGCACATCTCAAATAATGCTAAA

A\_16\_P21568666

AAAAAAAACCAATTCCACTTTCAAGAACAAAGACATAATGCTGCTCTGATCCTTGAAGTG

A\_14\_P134763 ACTGGCTTTGCTTTTATTTTATGGGCACTGTAAATTTGATATCGTCCTATTTACCTCTG

CUST\_3874\_PI426210822 TCTTAGGCACTAGGAAGGCAAGGAGATACTTGGGGCTGGAAGGTG

A\_18\_P11274087

AGACCAATTCCTCATTTTTAACTATTTATGACCACAAGACACTTTACTTTTAGGGAGCCC

A\_14\_P129104 TTAGGGAAGGCCTATTTGCTTTATATATCGGACTTAGATTGTGGTAATTGCTCTAGGTG

A\_14\_P127465 CTTCTGCAATCAATTCATTTATTTAGCAAAAAAGAAATTATGTGTGCCGAGAGCATGCAG

A\_14\_P126242 CTTCCAGCAGTTTCATATGAGGTGGTTGTGGCTTTTCTTAACTATATTGTGATTATCCAT

A\_14\_P130118 CAACTTAGGAATTAGCCTGAGTCCTTGGCTTAAATATATTTGTAGGAATTTAGGCAGGAC

A\_14\_P104739 TTCTGATTAAGTATTTTGTGGGATTATTATAGGATTTTAAAGGGGATTACAGGGCCTATG

A\_14\_P131571 CTGAGATCACTCTCTCTCTCAAAGCCAAAGTGAGTGCTGTCTTAGATTTAGTAATTAGAA

A\_14\_P136368 AAGGAGTTAAGGCAGTTTAAATTCAAGGATGCGAAAACACTACGTCTATGACATAAACATGAC

A\_16\_P00445407

GAGCCCCAAAGTATTTACAATAATTACGGTAAAGCCTCAATATATGCGAATTGGGTGATG

A\_14\_P110032 ATGCCCAGTGATTTCTTGATTGAAGTTTTCTGTAACTGCATCCTAAGGACATTAATCAT

A\_14\_P137542 TTGAAACTTTGCACAGGGTAATTAGTAGATTAAGCCATAGTCCGCAAGGTTTTTTAAGTG

A\_14\_P127860 AAACACAAATCTTCCTCCTTTTACACCTTTTATAGACCCCAGATTACTACAGATTTCT

A\_18\_P16877726

ATGTCTTAGCATTGCCATAGTTTAAAGTCCCACATCAATATTTGTTTATTCTCCAGCCAT

A\_14\_P107953 TGGGGATTTCTATAGGAGCAAAACGTTTCAGACCTAACGTGGGTGC

CUST\_8139\_PI426210822 CTGGCTTTTGCAGACCACTGGAAAGTATCCAGCTCATTAGCTTTT

A\_14\_P132217 AATCCCTGAACAATATAATCTACCTGCCATCGATGAAAACTCAAAGCCAAAGAATTCAA

CUST\_5355\_PI426210822 CTCTGAAGAAACACAAGCTTCTGTGGCCCCGTACACGTAGGACTA

A\_16\_P21022412

CTCCATAAACAGGCATCCCTCAGAATATAAACCTAATCTATTCCCAAAAAAGTAGTATAT

A\_16\_P58424338 TATGTGATGTGACGAGAATGTGGACAACCTTAAGGGGCTGGGAGA

A\_14\_P121491 CAGATTGATACTGGCTGCAGAATACCCATCAGTAACAACTATCTCTATGTTACCTAC

A\_14\_P107109 CATTCTGGAAAGGAAAGAAATGAGGAATCAGGACTATCAGGAGACAAGGTGAAAAA

CUST\_9546\_PI426210822

ACTGTCACTCAATTTCTAATATTGGTACATGCCATGCTAATAAGTGTGCTAAAATGGAT

A\_14\_P139578 AATTAGTGTTCGAGGAGTCAGCAAAATATATCAAAGTCTGACACTATTGGGTTACTCTGT

A\_14\_P126142 CAACATTATGATGAATGTCATGGTAGGGGCAGTTAAGAAAGCAAACACTTTTCAAAAAGT

A\_14\_P102476 TAGTAATTTTGACCAGATAGGATGGTAAGGTCAGTTAATGAACTAATGAACCTCAGGGTT

A\_16\_P00685193

TATTAAGCAGAAAATTTTAAAGTGGTTTTCTTCTCCTTTTCTTGGGTCTGCTTTCTTGG

A\_16\_P37016798

AAGTTAIGTTTTCTGTTTCTACCAAACACTGTGCAGTCTTTCTAAGCAATTCTGTTGACTTC

A\_16\_P00685151

TAGAAATTTCAACATTGAATGAAACCATACCATAAACTTGGGAACTGGTTAGTGAGGGA  
CUST\_3573\_PI426210822

TAAAAAAAATGTATTAAGGGCTATGTAAATAAAAAGAAGAAATTAAGTTGTAACAGTAAC

A\_16\_P00846177

ATGACTGGATACTGCACATTTTTATAACGTAGGCTTAAAGGAATTCCAAGTTTGGCAAC

A\_14\_P120841 GACTTCAAAGTGTCTTTTATAGACACTGGAACAGTGTGAATCTGGTAAGCATGTTTCA

A\_14\_P129789 GTTTTGAGGAGTTTTGGAGCAAGTTATCTCAAATGGGAATCTTGAGAGGCTC

A\_14\_P120857 TAGTGGCTGTTGCAACATTATGTAAAGAACAAGGAATAACAGTTGTAGGAATTTGCTGTG

A\_16\_P01423744

GATACAGATTGCCAACAGTAAAGAATAGATAAACCGCATACATTAGAGTCTTAAGCCCCA

A\_14\_P200127 TTCTCATTTGCCCTTTGAGCACTTTTACTTAAACTTGCTTGTAGTTGCTTTTTATCACTGC

A\_14\_P115228 CATTGGTGAGCACCTTTGCATTATGTTACGCCCTTTCCTTCATCACCTA

A\_16\_P17425121

GGGGAAAATCAGAGAATAGATTCCATGCATTGCTTAACATAAACAGTAATATTCGGGCTT

A\_14\_P102044 CATCAATATTCCTCTCACAGGTGCTCCCTTCAAACCTGGTAAATGAAGAACAAAT

CUST\_8222\_PI426210822 GTGTCTCCAGTCCCTGGCTCACAGGAGGACCACTTCTGATTAGCT

A\_14\_P107782 TTCAAATAGGAGCAGCACTTTGAAATCCTTTTTTCTTCACTGTGGATTAAAAACATCCAAG

A\_14\_P121410 AACCTTAAAAGTCAAACCAAATACCCCTAACCATCAGATTCAGTATGAAACATTGACGA

A\_14\_P114574 CTTTTCTAGTTTTTCTTTTCATAGAAGCGTATTCAAACCTTTTATTCTCAGCCCCGTCTA

A\_16\_P02195831

GATGACACTTAGATTTTCGAAGTTTCTGTAACTATTGTCTTCCTAATCAACACAGGCTC

A\_14\_P102938 TTTTGTATATGGTCTTCTTTGAAGAACTTACTTCTTGCAAGCCCTGGCATCTTCCAATT

A\_14\_P201775 TTTCTGGTCTTCTACGTCAATCCACTGTCGATCATCTCTGTTTACTACTACTTCATTG

A\_14\_P139879 AAACAGGAAGAGGTAAATGAACTTTATCTTGCTAATTAGTAGTTCTCGGTCTTTTCCAGG

A\_14\_P101289 CAAACTTACTCACTTTGACATATTGGACTAGGATTTGACCAGATTCAGATGATTCACAA

CUST\_660\_PI426210822 AAAGCAGAGAAGTAGCTTGATGCTTTGTTGATGGCAGCCTGTTGGT

A\_16\_P16191953 ACCACATGTCAAATGTCAGAATGGGGTTCAAACCAAAGACTACTCTTACAAGAC

A\_14\_P110505 ACCCAAAAATTTGCAATTCTCTTTGGAAAGTTGAAAGCACCTTTAAAAGCCACAATTTGC

A\_14\_P130249 TAGTTCATAGTGGACTCATATAAGTGGTAGAATCAAGTGAGCACTCCAAAAATAGTGAC

A\_16\_P00638627

TTCTGACTATACACCAATTTTCTCCTTAAACATGCACCTTCAAACCTTATTCAGCATAGGA

A\_16\_P19540647

GATCCAGAGCAACTAAGAAGAACAATAATCTCCTGTAACACTCATTGAACAACACTGAGTTTT  
A\_14\_P103346 GTGCACACATGTAATATCAAATTGACTGGACCTGTAATGTTTCCTTCAGAGCATTCTTAA  
A\_18\_P16928471

AAATCCCACCTTAATTGTGTGTGCCTTATGATTACAGACCATTAGAGACCATTGGTAAAT  
A\_16\_P18926753

TCCAAAAGAACTCTACCAACAGCAAATTTAAGCATCTCATTCAAGTTCACCTTGTAAGGAA  
A\_14\_P107194 AAATCCCTAATTGATCAGTTTTTAGCCTGCTTATGAAGGACAACTCTACATAAAGCCCTA  
A\_16\_P58424448 TTTTCTGCTTCCTTTGTTGGGGTCTCCTTATCTTGCCAACCTTTCAACATT  
A\_14\_P137586 TTCACCTGATATTGACAAACTGGACGTTGCCACAATGACAGAGTGTATCCTTTA  
A\_14\_P116057 CTAATATGCAGTCAGATATAAAAGTCCAGATTGCTTTGGAGAAGAATGTAGGTGGCAGAT  
A\_16\_P15713710

AAATTGACCTTCTCTCTTATTTTCAGAGCAACTTAATTCTGCCAAAGACCATCATAGAACC  
A\_16\_P58424150 GTTTGAGTGAGATGCCCATGAGTGGGAGCCCAGTTACTTCTAAG  
A\_14\_P105264 GAAGAATGTAAGTCGAACCTTATCTCCTTCCTTACATTTTCATTGTGTCCTCGTTTCTAAC  
A\_14\_P104039 TTCGTGTCTGTTTTGCTCGATTCTTTTCTAAGTTAAATAAATGCAAGCCTCTGAACTCT  
A\_18\_P22841068 TTATCAGGGCTATTTTCAGTCTTTATTGCAATGCCGTCTCTCTGGAATTCAGACATG  
A\_18\_P15520531

AGTTAAACTGTCTTTTGGATTTTCAGAAAAAGAGCAAGTAACCTTTATGGAGACTGAA  
A\_14\_P202133 CAAAGCAACCTGAGAATGAAAGTCCAATACTGGCTGCAATATTGATCATTCTAAGTTAA  
A\_14\_P111779 ACACGCATGGTCAACCCTCAGGGGAAAAGTGTACCTAAAGTATTTTTATAAATATAAGC  
A\_14\_P127956 AAAGGATTTTTCCCAAAAAGAACCAGGATTTCAAGATCAATCTATGAAACCTGATCACTT  
A\_14\_P125186 ACTGTAGCCTGCGTCATGGCTCAAGGATTCAATGCATTTTTAAGAATTTATTATTAAATC  
CUST\_3286\_PI426210822

ACATGCTAAATCTCCGGGTCATCTTGAGAAATCAAAGAAATAGCTAAGAAAAAACAGTT  
CUST\_3827\_PI426210822 ATCTACTTCTGTACTTGGACCTGGGTGAGGACCACTGGGAACATTT  
A\_16\_P16191738 TTCTCTTTCCACTGTCTGATTCTGGGTCTCTGCTTCTCATCTGGATA  
A\_16\_P00685416

CTGAATTTGGCTAATAAGATGTTGCATTGTCTCTGATCTCCTTGAGAGACTGAGATAGAT  
A\_14\_P108184 CTGTTCAATATTGAAATTTTTCTCCTTTGTGAAAAGCTCAGGTCATCTTCTGTCCGTGCT  
A\_18\_P22840350 TGATTTTTTAAATTGAATCCATTTTAAACATGGGATTTTATTTTTATTTAAAGAATTACC  
A\_14\_P118663 CAAGTCACACTCATCGGCTTCACCCTAATGTTTTGGTGCGAATTCCT  
A\_16\_P16408531

AACTCAGAAAGTGAATAATCAAGTTTTGCAAGTTCCTCTTAATGAAGACCTAACGTGTCC  
CUST\_3391\_PI426210822 ATTTGGGATTCTGTTCCGACCCCTCTGCACTCTGAAGATGCAC  
A\_14\_P136555 CACTTCATCATTGCTTAAATTTTCAGGTGTTCTGAAAAGCCTCAGATTAGTGGATTCT  
A\_14\_P201558 CCTTAGTGCAGCAATCTCAGAGAGTGGCAGAGATTTGCACTCACAATTTGTAATATATTA  
A\_16\_P16191754 CTATACCAGAAAGGAGAAGAGGGGGACTAGATGTTTTTTGTGTGGTAGTCTCTTT  
A\_16\_P18959398

AATGAACAGTTTCTGAAGCATGAACAAAAGTAAAATAACCTGTAGTGATTACCTGACCGC  
A\_18\_P26222179  
CGTTGACCCTCTATTTACTAGAACATAGATTCATGAGTGCAATATAGATTCATCAACCCG  
A\_14\_P110286 TCTTTCTTCACCAAGAAGCACAGAATTCTGCTGGGCCTTTGCTTGTTT  
A\_16\_P58424284  
TTAGCATTTGCTGAGTAACAAACCTTCCTCAAATTTAATGGCTTAACACAACAGCCATTT  
A\_14\_P200296 CTATCTCTTTCCCAGTGGGCTGAAAGATATGCTGAAAACAGCATGGCTAC  
A\_14\_P105728 AATATTTTCATCTAACAGTTGACACCAGAATCCCTGGTAGGGAAAATACCACTATGAGAT  
A\_16\_P03198342  
CCCCTTGATACAAGATGGCTGTATGGTTTTTCTCCTCCTTAGTGTCATTTTTATGTAA  
A\_18\_P22841203  
TCCTTCAGTCAGTTTGTGTTTTGTCTGATGTGAGAACATCATTACCTACCATATGT  
CUST\_937\_PI426210822 CTCTATGGCAGGTGCGAATGTAGGAGGGTTGGCAGGGACTGATGT  
A\_14\_P124992 TCAGAAACTGAAATAAAGCCTTTGAAAAAAAAATCTGAAAACATCAACCCCAATCAGA  
A\_14\_P128131 AGAGGTGATCTTGGCTTGCCCTTACTTAAAATATTTAATACCTTCCTTTGGCTTTCAT  
A\_16\_P02006832  
TACCCACATATACTCCCTAGATGACTAACACAAAATATCAGTCCCATAGTTTATCCAGG  
A\_14\_P201110 ACCTGAATGCTCTCATTACCATTTAAAATACAAAAGTTTGCATTTAATCACAGACCACC  
CUST\_9862\_PI426210822 TCCTCCCTCTCCATCTTTCCTAACAGTTCCTCACAGTTCATCTGT  
A\_14\_P102965 AAATGTGATCCTTGTGCGGCTCTCCAAGATCCAGCGAGATTTGTATACA  
CUST\_4730\_PI426210822 GAAGCCAGCAGGAATGGCTGCTGCTAAGAACCTCATTCTTATAGGAA  
A\_14\_P129337 GTCAGTGTCTTCTTTGCTGCAGATAGGTGTGTCCTTTTTGCAAATCAGATA  
A\_14\_P136352 GAGATTTTGGCACACTCGATCACACATCATGAGTTTCTAATCTCTTCCACCTGTAAAAT  
A\_14\_P104075 CTACAGGTAGTTCAAACAGGAACTGATTTGTCAAGATCTGATCTTAGGAATGCACTGTTT  
A\_14\_P107555 ACTCTTAACATCTACGATCTCAGCAATAAGAATCAAGAAGCCAAATAACCAGTTCTCACT  
A\_18\_P15587464  
TCCACATATCAAAAAGTAAACAGAAAGCAGTATTTCCGAAACCTTTTCTTTATAAGGAGA  
A\_16\_P01848596  
TCCAATTCATCCTATAGCAAATTTCCCTAAACTACAACCTATGCATGTCACTATCCTACT  
CUST\_2751\_PI426210822  
ATAGGAAATCCTCTTAAATGTATTCTTATCTCCCTAATAAAAATGGAAATTGGTACTTAAT  
CUST\_8615\_PI426210822 GAAAGACTATCAATTTTCACTGCTTCCCACCCACGGGGGTTGTGT  
CUST\_5726\_PI426210822 GCCTTATTTAGGGGATGTTCTTGCAGATAGATGGGGAGAAGTCTTGCT  
A\_16\_P37566951  
GTTTCAGTTCTATGCCCAAGAAAATCATCGATGGAGTGAAGTAATTGAACTATCACAGAA  
A\_14\_P116430 GGATTTACATCACTTGTATAGAATGCTCTGTTGATACTTGAGGGGAAGACAGTTAAATT  
A\_14\_P129072 AATGGACCCTTATATACACAACCTTCATGCTTGAAAGGTTAGATTCATCACTGCAGAAAAA  
A\_14\_P125379 TTGCAAAGTAAAATTGGCAAGACATATCCTTACAGGCAGAGAGGTAATACCAGTTATG

A\_14\_P107573 ATTGCACCATAAACTCTACTCCTTGATTCTAATGTGCACATTTCTTGGTTATGACTCTG  
A\_14\_P139325 TAAAGAAACCTGCTCATAATATTTACTTAAGAGATCTACATAGTTGCCCTGAGGAAGCCCC  
A\_16\_P17082903

AAACAAGTTTCCAAGCAACATAAACTATTGTTTCCCTCAGTAAGTGTGTAGTTTACGGTG  
A\_16\_P18845727

AAATTCCTCCCTCAACTCTTAATCTCAGATTCTACTCTGTCCTAAACTTTATAGCCCAA  
A\_16\_P21663013

ACTCTACCCTGAATACTGAAAAGTCAATAATGTCCTAACTTAACTTCCTCTTCTGTT  
A\_16\_P39181363

ATGGTCTCAAACTAGAACACTGGAAACAATATGTTATCTATGCACTTTTTGTTCCTCC  
A\_14\_P123938 CAGTCCCTTGATGAAAATACAACAGATTGTGTTGGCCATTAATCTTTATGCCAACTTG  
A\_14\_P202008 GCCTTGTGTCTTAGATGATATCTGTAACAGTTTCTGAATCCCGTTGGATAAACTGTAT  
A\_14\_P137255

AGTAAGTTAGTAGAAGGACAAAATCAAAACACAAAAAGATGGACCTTAACAGACCAGTGC  
A\_14\_P136117 AAGTAGTAATACAAATTCTTGAGAGTTATGTTGACATGGAATTTGTCAGCCGAAGTGCTG  
A\_14\_P139690 ACCTGTCACACATACCATGCCCTGGCTAATAGCGTGTGTTGTATAAATTAATTACAAAA

A\_14\_P137233 CCTCTTCATTACTGGAATGTAGTGTTCCTCAGAGGCCTGAGGTAATAATTCAAGAAA  
A\_16\_P58424078 CATCCTTTAGGAAGCAGATGCTAGGACAGAGATAGGAGTGTGAGAGAATTGTTG

A\_14\_P127118 CTGTTTTTGTTTTTTAAGATGAGGATTACTTACAAGCAAGCAGCCCTGATGCAGTGTTTA  
A\_14\_P105126 GAATGAGACCAGTGATTTTTAACTTTTTTTAGCCACAGACCTTTTGTTCAAAGGAAACC

CUST\_9987\_PI426210822 GTGTCCTTTATGGCTGGGTGTGTGGAACCAGACAGGGCACAGAGT  
A\_14\_P136927 GAATTGGTGGGCAACTTGCCTGACCTTTATCTGATTAATATAAGATCTATGTCCACATG

A\_14\_P111211 CATTCAAGGTAGTGGCCAAATGTAACACATCAATCATGGAATGATTTCTCTGCTAACAG  
CUST\_6090\_PI426210822 TCTGTGACCAGGATTCATGGATGTTTTTATTTTCTCTCTGGAGAGCATGAAT

CUST\_3017\_PI426210822 GAGATGGCAGAGGCCAGGGAGGCCATTAGAAGCATCAAAAATAC  
A\_16\_P00191704 TGTTATCCACTCCTATCTTTGTCCTTGTATCCTCTTTATTGTATCGCCAATCTCTTACTC

A\_14\_P114038 AAAATGCACTAGTTAAATTGGAGGTAGCACAATCATTTGTCTGGATTTGTAGGCTGGC  
A\_14\_P100776 CACTTATGTGGCTACTTCTTTTCAGGATGAATCTCACTTCCTCAAAAACAGTAGGACT

A\_14\_P107849 CTGGCTCCCTCAGTGTTCCTTTAGAGAAGGAAAATCTAAAGAAGTTCATAACACATTTA  
A\_14\_P138498 CAGCATGCTGTTTTCTCACTTTGTCTATTTGATGATGCAACCAGGAAAATCTTGATCAG

A\_14\_P132913 ATCATGCTAGATTTACAGAGAAGTTTCTGCATATCTGCTACTTGTTGCATTTTGGGTTCA  
A\_14\_P103943 TTTAATAGGGGACATGTGAATAAATACAACACAGTAAGTGCTACTTCTAGAACCAGGCTC

A\_14\_P110070 TTATGACCGCAAGTCAAACCTCCTGTTACTTTAACATGGGCTAAGAGATCATAACTGTA  
A\_18\_P18074160

AACTACATTCCAAGCAATGTTTTTCTAATCCATCATTACAGGTAATCTGGTATGTCCC  
A\_14\_P107721 TACCAAATGTGCCATTAAGATTTGGATGGGAAGTTATGGGTAATGAGAATATAATGACAT

A\_18\_P22839418 GAAAGTTTAATGTGCTGGCATGCACACACCCCGCTGGAGAGGAGC  
A\_14\_P119395 TGGGACTGAAGGGAATGCTAATACAGTTCCGAGATTTAAAAAATATTGGAATGTGGATA



A\_16\_P02910086

ACAGCATATCACTCTTCATGGATCAATGCATCATTTGAATACAGTCTTATTCTGCGTTCC

A\_16\_P18473365

AACCCAAATTACCCCCATAAATGTTATACCAATAACTATCCTATTTTAACACCAAGTCGT

A\_16\_P18316684

AACAGAGACAAAAGTTAACTCAGTTCAGTCCGATTAAATAGACAGCATCTATGTGTCCTC

A\_14\_P200104 GACATTCAGTTTTCTGTCTACATAATAAGTGGTATGAAATCTGCAGTCATCAGATCCTC

A\_14\_P200646 CTAGAATTAGACATGTATCCTGGTCTCACTGTGGAATATACTGGTATCTAGGGACTGTG

A\_16\_P21382884

CCCTTTTCGATTACTTCATCTCACCTAATTCCTTTTCATTTACATACCAGAAAGCAAGTGAA

A\_14\_P132276 CAAGCATGAACAAGTCCAGAAAAAACTGGGAGATGTGAATAAACAGTTGGAAGAAG

A\_16\_P16191715

CCAATCCAGTTCAGTTAAATCTGAAGTTTTTGATCAATTGGGTTGCTGAGATTACAACCTT

A\_14\_P135755 CATTATATAAAACCAATTACAAAATGTGAAAGTAGCACACAGACGAATACACACATACTG

A\_14\_P113882 GAACAAAGTAAGGGAATGACCTAACTATATGAAATGCATTTCTCCCACTAAAAGGGGCT

A\_14\_P124306 CACTCCCATCTCCAGACTGTAAAGGACCCAGTTCTTACAGTTCT

A\_16\_P01055820

CTTCATGCCTACTTGTCTTTATCATTAGCCTACAACTTGATCTAGACTCATTATCCTCCT

A\_14\_P122204 GAATTTTAATGGTGTGTTTTGGCATTGTTGTCAGTTTTCCCGATTGTAAATGAGTTCTGATAC

CUST\_5850\_PI426210822 CCATTAATTAAGCTTCATGGTGTTCCTCACTCAGTCACACTGTTGTCGCTCTCATT

A\_14\_P127408 TACCATTATTTTTGTTTTGTGTAGTGATGCTGGAAATAGTGACCGAGTAGTCATTCAGGA

A\_14\_P122997 ATGTGTCGGTTTTTCATGTTAATTATCATTTCCAAAGCCCAGGTATATCCCTCCCTAATGC

A\_14\_P103217 AAGTATAAGTGGGATTTTCACCAAAAACCTATCCTTCCCCAGACTCCAG

CUST\_882\_PI426210822 CTTGGTGGCTGATTCTAAGTGGCTGAAGGAAACACCAGGAAACATT

A\_14\_P138423 AACATGGCTTTGATGATAAACGACTTTACTCTAAAAGCGGCTGGAACCTCAGTGAC

A\_14\_P118510 TGACACTCTAGGGACTGATCCAATTATTACACCAAATTGTTCTTTTTTCACCCCTATATTC

CUST\_9959\_PI426210822 GAGACCCGGAGTCTTTTTCTTCAGAGCCTCTCTATTATCAGTAAT

A\_14\_P126353 CTCTCAAACCTCTGTATCCACAAAGAGGCTGTTTAGAAAGTTTTTTCCAAATTCTTAGTC

A\_18\_P17207124

GTGTGTTAGGAACGAGTTAGAAGAATGCCAGTGTATTATTCTCCTCAATGTTTGAGAAAG

A\_16\_P36810703

CCTTTCTCCATGAATCAGTGCTCTTCTACTTCCTCAAGATTATCACACAATGTGTCTATA

A\_14\_P133722 TCCCTTTCTTGGGAGTTTTTGTCCATATTTGCTCTGGAATAATTTGGCACTGATTATTAT

A\_18\_P14134350 TTTTGGAAATTCCTCAAGACAACAGAGCCAGGAGGAAGTAAGGGAATAGAAAG

A\_14\_P103920 GTCTGTAAGAAGCATGCTAAATGCAGACATCTTGTCATAGAGACTTTTCACTGCTAATGA

A\_14\_P114877 CTTAGACCAAAATTCACATGTTCCAGAACTTTTGAAGGAGGAAAGATATGAAAGCACAT

A\_14\_P134193 CTCTGTTGAATGTCATCCTTATTTTCCGTTGTCGCTTTGATTTTCATCTCTGTCTTGC

CUST\_1593\_PI426210822 CTTTGGGATTTAGAACCTGAGGGAAACATGGGGTGTTCAGCATGTG

A\_14\_P133660 ATCCCTCACCTTTCACTTGCAGAAAGCAGTATCATGAAATGGTTATTAATTGCTATTCTG  
A\_14\_P107026 TAATAACAAAAATTGAAATTCACCTTTGGGAGGATACTCAGTTCTCTCTGTCTTCTTATG  
A\_14\_P125143 TTCCACTTTTGGCAATGCTGTAAAGAAAAGATGGCAGTGTTATAATTTAAGGACTCCTAG  
A\_18\_P22841931

TCCAGGAGAACTTCTAATTTTCTGATAGTAGGTGTATATTATCAGGGTTCTCAGCATAA  
CUST\_6673\_PI426210822 CTCTAACTGCTGATAGCTGTTTCAGCTGGGACTGCTTGCAGCTTTTT  
A\_18\_P16403678

CCCGTATCAACTTAATTTCTAACCTTCTACCACTCCATTTCTAGATCATCCAAGGAATTC  
A\_14\_P135524 AACACATGAATCATGGAATCTTAGATCTAGAGTGGACCTTGCATCTCATCAGATCTTAGT  
CUST\_7388\_PI426210822 CTTTGCCTTTTGTAAAAAGCCTGTTCGAGCTTTCTTCCACAAGGGAGCT  
A\_14\_P115917 CAGAAGGAAAAAATGCTTGGTGATAATTAACAACACTTTTCCACCCATCAGATTGGCAA  
A\_14\_P115614 AATTGGCTTTAATTATTGGGATAATTATTATTTTAAAAAGAGAAAGAACTGGGGATGG  
A\_14\_P132513 CTTCCAGTCACCAGGAATTCCTGGAGAGTTTGAGAAAGCAAGAAAGATT  
A\_14\_P136412 TTACTCTTTATTGGCTGGTGGTAAATATGGGAATGCCGTCACAAATGTATAATGCCTAA  
A\_18\_P12234992

AAAAAAAAGGTTGGTAGAAACCCTTAATACAGTAGCCAGAGATTTTTGTTGTCAGATGCC  
A\_14\_P127504 TTTCAAGATTTTAGACCCTTTCTAAGTAGCAGTCCACTGGACCAAGATAATAGAGCCAAT  
CUST\_724\_PI426210822 CAATGTGATCTGTTTGGGAAAGTGCTTGCTTTGATTTCCAAAGGGCTG  
A\_14\_P121444 GTGACAAACACACTTAGAAAAGGTCTACCCTAAAACCAAGTCATCATTATGGAAATCCTA  
CUST\_3695\_PI426210822 ATCTTGGGTCACCTAACTATTAATTCTGGAGGACAGATTCCAGCCGTG  
A\_14\_P127532 ACCTGAAAAATACTGCCTTAGCCGCTGAATTTTGATAGAGCAATTCTATATTCCTGGTAA  
A\_14\_P136274 CTATTGTTTTCCAAACATGTTTTTCAGAATAGTGTTTCAGCAGGATGTAAAAGGATGCCAT  
CUST\_3711\_PI426210822

ATTATTCTTCATACCAGCATTTCCCAAAGCATTTTTTCAAAGGATAGTAACGACTTTTAT  
A\_14\_P202383 ATGGCAACCTCTTAAATTTATAGCATATCTAAATTGGCTACAGCGTTGCTGTCCGGA  
CUST\_8810\_PI426210822 CTCCCTGGACCATGAATGCTGCTGAAGGCTCTCACTTTGTACTTC  
A\_14\_P132657 ATGAATTGCATCAGAGAAATCCATTAGATCTGGGGAGATGATTAAAGACGAGGT  
A\_14\_P104311 CTTCTCTGATTCCTCAGTTTTTCTTCTTCTCCATTTGGCCCTTCGATTAGAAAA  
A\_14\_P121358 GTGACACAGAAACGGCACACTCTCCACATGCTTTTGAAGTATTATAAAACACTTTATTA  
A\_16\_P17609826

AAAAAAAATCCAGTCTTACATCCCATCTGAAACTCAAAACCCTAGAGGAATTCCAATTAT  
A\_14\_P113421 GCAAACCTGGTAATATGTAATACTACATACTCTGTGTCTCCATAATTTTACTGCATAAAGG  
A\_14\_P135713 ACATCATTCGCCTAACTCATCATGATCCAGAAGTAACTTTGATTTTGTTCATTCAACAG  
A\_16\_P18370557

TTTCTCCTAATGATCTCTGTATCCCTTTTACATACCTTGCAAATAATCAGTGATCCCCTA  
A\_14\_P138201 GCTTTTCTCTGCTTTTCTACACAGATGGAGTTTGATGAGAAGGAACTCCGAAG  
CUST\_3668\_PI426210822 TAGGGAAGATGCCACGGCACGGAGGTTTCAGTGGTTGTTTTTCAAT  
A\_14\_P135417 ACAATGGTAGCATCTAGGTTTGAGTAAAGTCCCTAGGTAGATCTTTTATCTCTTTGTATGC

A\_14\_P125862 CATCAATTCACTGTTTTTATTTTGTCTCAAGCACTGCAACATGGTTTTAGAAATCTGCTTC  
A\_14\_P114560 TCTTTCATTCCGGGGCTTTTCTGTTCTTGAAACAGACCTTTGTTCTTCTTTTTTTTTTAA  
A\_14\_P119234 CAGGTCAAAAAGTGGTAATTTCTGAAATACCAATGAAGTGTCTGGCAGTTTAAAGTAGTC  
A\_16\_P15213171  
CCTTTGGTCATATCATTCTTTGTCACAAAAATTCTTCCATGATCCTTTAGCCTGATCTTC  
A\_14\_P114402 CGGGCATAAACTTCAGAATCTTTGATCCTGGTCCAGTTATTACAGAAATGGAAATTAATC  
A\_16\_P17879503  
CTAGAACGCTCAGATAACTACACTTACCTACACTAAGAGTCATAACCGATGTTCAAAAAGA  
A\_14\_P107060 CAAAACAGCAAAAACAGGGCATCAGGAACACTCCCAGGAATTAAGTCAAC  
A\_14\_P116570 AAGGTCTCCTTAAATGGGGCTTGTTTTTACTTGTCTTATTTAATCCCCACTATTAGCAG  
A\_14\_P125930 ATATGGTAGCACTTCTTTCTCAAACCTCTGTTGATTCATTATTATGGCCTATTGAACAG  
A\_14\_P103186 GTTTATCTTCCAAGTCACTCTCTTCTCCTTGTCTTCTCAACAATTATGGTATGGT  
A\_14\_P136798 ATAATTCAAATAAAGGCTTTTATGGTTGTGTGGTTTTGTTTTTAAGGCTTTGCCCTTC  
A\_14\_P111428 CTATATTCAGTCTTTGACTCAGATGCCGAAGATGAACTTTGCGAATGTATTTATTGGTGC  
A\_14\_P124928 TTTGTTTGCTTTGGGATCTTGTGGATGCACTTAGATATGGAAAATGGAAGCCAAATTTT  
A\_16\_P37341109  
ACCATGAAACACAACTCACATCTTTCTGAATCATTTACAACCTTATAGCCTGTTCCCTT  
A\_16\_P00916421  
AACGAATATTTACAGAGGGTTTTTAAAACAAATCATCCCCTATAAAATCGAGTGTACCT  
CUST\_9348\_PI426210822  
TTTGGAAGTATTCTTCTTTTCACTGTAAGGCTTTTCTCACTGATTCTACAACCGTG  
A\_14\_P125449 ACCTCCCACCACAAGCATGGATCAGCGTTAGGAAATTAATAATGGTAATAGAAAAATT  
A\_14\_P116400 CTTTTCAATTGGTCTTCACCGTATCCATTCATTACAATACATGCCTCCTCCAAGTTTG  
A\_18\_P14556915  
AATCCTACCAAATCTCTAAGATTACACATTCAATTTTTCAACGCTATCCCTAGAATGGGC  
A\_18\_P14920477  
AAAAGAGACACCTAATTCATGAATCTGAAGTCTTGAGAATAGCACATTAATGCATGCCT  
A\_16\_P16257080  
ATGGTATGTGAAGGAACTGTATTCTAGGACAACCTAAGCATAAAGAAATAGTGGGAAGCAG  
CUST\_6137\_PI426210822 GAGGCCTTGTTCAATAGCTTTTCTCCTGGAGACACAAGCAATCTG  
A\_14\_P106220 CTTCTCATGTATTCTATCCATAACTGGGACTTTCATAATCACTCACTCACTCATTATT  
A\_14\_P116384 TGGAAACCAAATGAGGAAAAGACTCAATTAGAACTAATTAGCCAAGTCAGTGCTTCAATC  
A\_14\_P109916 CTTTTGGGGACACATTTTGGATTTTTTAAAAGTTGGGTGCCTTTTATAAACCTGTTCAAA  
A\_16\_P39431917  
TGTTACCACCTATACTCATCTCCTGTCAATTGATCTTCTCATATTTAATCTGCCAGTGAAG  
A\_18\_P22841552  
TTAGGACATAAACTCATGGAGCATATCCTTCAGTCAGTTTATGTTTGTGTTTGTCTGATGT  
CUST\_3511\_PI426210822 ATTACAATATTGCCTTTTAGCGTAGAAAAGCCCTCCTCCTGATGCTCTTGC

A\_14\_P107746 AGGTGAACAAGGCCGTTGATACCATCTGTTCATTTTTGAAGGAAAACCTGCTT  
A\_14\_P108965 TCACTTGATACTCAAACAACCCGGAAGAGTCTTATAAAGTCCATTTCCAGTGATTTATTC  
A\_14\_P110502 AGAAAATAAATCATCTGCAAACCTTAGTCAAAACAGGCATGTCATGTGGGCAACTTGTA  
A\_14\_P127637 AGCAGATACACAAAGAAGGACGCATGCTATGTTTTAGGTAAAAACACATGCATATCTTCA  
CUST\_2244\_PI426210822 TCGCTGACTGTCCATCTCTAGTGGCATGCTCCTGGGTCTACTGAT  
A\_14\_P201330 CACAGAAAGCCATCATTTTTTAAGCGCTTAAGCAAAGATGCTGTAAAGAAGAAGGCGT  
A\_16\_P17441491  
AGCCTAAATATTTTTAGTCCACATAAATCCTTACACCAGGTATCACTTGTAACCCCAAGT  
CUST\_7875\_PI426210822 AACCACAACAGAACAGGATGGGCCAAAATGGAAGCTGGGATCTTA  
A\_16\_P16162160  
GTGACCATCTAAAAACACTGACCAAGATACAGATACGATTGTTCTACCCAAAGTATGAAC  
A\_14\_P120083  
GGAGAACCTATGTGGGTTTAAAAAAAATTAAGCAAAGGCAGAATGGAATTGGGAAG  
A\_16\_P17800478  
TCCATCCACTCAGTATTACTTATCGTGTCAATCACTTAATCCTGCAGCATAAGTTCTTTT  
A\_14\_P134737 GGTTTGGTTCTCCCGAGAGGTAAAGAACGAAGACTTCAAAGACACTTTC  
A\_14\_P130420 AAATTATGGCTAACAAACGTGGGTTTCAATTTGACACTTACAGATGATTCTGTAGGCATATC  
A\_14\_P100512 ACACATAAAGGTTTTGTTTTGCTTTGCTTGTGTGAATTAATGGGGAGAAAATGATGT  
A\_14\_P116084 CACTTTTAGCCAGAGATGCAATATATCCCCACTACTCAATACTACCTCTGAATGTTACAA  
A\_14\_P117650 TAATGGTCAATTTTTTGTCTGGGTTCTTTGTGGCTATTGGATTTGTGATTTACAAAGAGG  
CUST\_5046\_PI426210822 CAGTAAAGTATGGGTCAACATCCCCAAAATGTGTGACTCGCCCAAAT  
A\_18\_P15083088  
ACACAGGACCTTTAATTAATAAATTCTCCCCATATTTTCTTATCCCCACATATGCCTATGC  
A\_18\_P17014817 AACGCTAAAGACCTCATACTGTTTAGTCCTCTATACATTTAGCCCTTTATGCTTGGG  
CUST\_9363\_PI426210822 AAAGAATGATAATTGGTGCATAACTCCCAAGTCACATATACAGACCAGGGTCC  
A\_16\_P03385069  
CCTGCCTTAACTCAAGATTGTCAATTAATTTCTTGTAGTCAGTTTAACCAGTGATAGCCTC  
A\_14\_P128744 AGGTGTTTGGAGAGAAATTTAGCGCATAAATTATGCTTCCTTCTTCTCAAACCTTCTT  
CUST\_8929\_PI426210822 CATAACACTTTTACAGGGATGACTGCCTTAAGGGATGGGGAAAG  
A\_14\_P100921 GGTTGGTTTTTTTTTTAATTAATAAAGTTTTGCATCTTTTAAAAAAAATCACAGCACTGGT  
A\_16\_P18256983  
ATGTAGACAAGACATCTCCCTATCTAAACAATCTGTTTTGAGATCGTGCTATTGTTGGAC  
A\_14\_P200791 CTTACAACACAAAATTGTCTTTTCACTAATGAGACTGTGTCTGAAGATTTTAAATTCC  
A\_14\_P102646  
AATAAAAAGAAAAAAGATGTAAAATATACACCCCAATCAGAGAGGGGAAGTGGGAAAT  
A\_16\_P19327291  
AACCATGCTTATTTTCCAGAATGTTCCATACATTTTCTACCTCTAAGTATCTGCAGACA  
CUST\_667\_PI426210822

CTAGGATGTCTTTTTATAACTTAGCAGATGGCATCTTTTCAGTGGCTTGTCTGAACTC

A\_14\_P117839 AGACACTGGAAGTGGAGAGAGAAAATGAGTTAGGGACACATGTATTTTTAAAATTAGAAAC  
A\_14\_P201223 CATCCATCATCTCCTATCAAATCTAGTCTTTAAGAACCCAGAAAAAGGCATTTTCTGCAT  
A\_14\_P116596 CAGTTTGATTTGGGCCCTGCCGTATTTCAAAGGAACCACCATTAGTTTT  
A\_14\_P139542 AGGGATGACAACAGATTGTGGTCTAATCTCACGATTTTTGCCTGAGAGAGAATT  
A\_14\_P109856 TTGTGCAGCACCCCTAGGAAATTAATACTCCATATACATATTAACACGCACACACTCTAA  
A\_18\_P13743465

AAATACCCCGATTATCTCAAAGAAGAGGAAAAAGCAATTACTCCGGATTTTGAAGATTGA

A\_14\_P123133 CTCCCTGGGTGTTTTACACGTAAGAGTTGCAAATATCTTTAGTCTTTTAAAAGTCTTT  
A\_14\_P134990 GATTTCACTCAAGAAATCTTCAAAGATGATCTTTGGGGAAGTCAGTATAGACTTAGGAA  
A\_14\_P106826 CTGCTCAGATTCAGATGGAACATAAGCAATAATGTTTTTCCAAGGTTTCTCTTCCTTTTT  
A\_14\_P105719 CTGACATCAGAAGGCTTGCTCACACTCTAGCAAATATTTAAAGCAGTTGAGACATTATC  
A\_14\_P107713 TTTCCCTTCAGGCCTACACATATCTTCATTTTTCTAAAAGAAAAAGAGAGAAAAGGGGA  
A\_14\_P132027 AGGCACAGACAGACAGGTCCCCACTTGATTAATGAGTCAGTCATTGAAT  
A\_18\_P22841051 CATGTGTGTTTTAAAGGATCCGTGGGTTTGTGGGGAGGGCTGCAC  
A\_14\_P117388 TGGTAATTTGTATCTGAAGGAGATTTTCCTTCTACACCCTTGGACTTGAGGATTTT  
A\_18\_P22842838

GGTAAAAAAAAGGAAAAAGGAAAGCATTGAATTGGTGTCTCATGACAATCTGGCTG

A\_14\_P126774 GTTAGTGTCTTGGGAAACAGTCTCTGCATATATCACCCTCTGAGTGCAGATATATTTAT  
CUST\_8478\_PI426210822

GATGCATGTTAGAAGTGTCTATTTTGTGAAATTTCCCGTCATTCAGTAGTTCACTTT

CUST\_2580\_PI426210822 GCATTTGTACCTCCAGTCAGTCCACAACACCCTGGGGACCGGGAG  
A\_14\_P124060 ACTCATATATAATGCTATCTTATTCTCCATTAATAAATTCAATGTTTATGTTTTGTGCCTT  
A\_14\_P100706 CTTGGTCTTTAGATATTGCACCTCCCACGTTCCCTTAGGTTAGTTTACTTAATTATCTACC  
A\_14\_P110596 TAAAAGTCAAGAACTAACAATTCACATCTCCACCTTCTTCTTTCCGAAGAAGG  
A\_14\_P115386 CGCTTCTTTCATATCCAGTGGGGACTTTTTTTGAAGGTAAATGCCTTTTCTC  
CUST\_1183\_PI426210822 CTGTGGGTTGAGGACGGCTCTGCTGCACTTCTGCCCTTTAGCCT  
A\_14\_P124756 AGTCACGTTCCGAGAAAACCTGGGATGAGAAAAGGATAAATTTAGCAATAATGATTTTTG  
A\_16\_P38231499

GGGAAGTTGGTTTAAAGATAAACAATTGGTCCGTTATCACTTGCATTACATAGGAACAACCT

CUST\_9260\_PI426210822 TTCTTGTGGATTTCTCTGCCTGGAATTGCCTTAGTCACCAAGTTC  
A\_14\_P129562 CAGCAATTAAGAATGAATAGTATCCTAAGGCCCTGTCAATGGGCTAAGCATGTTATTTTT  
A\_16\_P02024158

AGGATTTCTGGTCTCATTTTTGTTACATACTTTTTGCTGCATCAATGAAACAAACCTCTGAA

A\_16\_P18637831

CCCCCTATCTTTTTTCTATAACTACTCATGAACGATGGTATCTACATGTGTCAACAATGT

A\_14\_P125066 TCCAGACATATTTCCAGATATATTCCTCCTCTAACCAAAAATGTAGCAGAAAACGATCTT  
A\_16\_P36589805

ACCAATCAGCCATTTTTTCTATGCAAATCACAAATCTCATTATTATAATGCCTTCCCCTC  
CUST\_8536\_PI426210822 TTCCCAGCATCTAGGAGTGTCTCTTCCCTAGAGCATGCTTTCTG  
A\_14\_P117328 ACAATTACCAAATACAGGTATAACACAGTTGAGAAACAGAACATGAAGTATCTTGCAGGG  
A\_14\_P111279 CAATAGTAAACTGCATTATTGGGATCCAATTCTATTGCCTGTGTGTAACAATCCACTGCA  
CUST\_3597\_PI426210822 AGCTTTTTCCCCTGGGCTGACTTCCACCACCCTGACCTGCGATT  
CUST\_8133\_PI426210822 ACAGTAAAATCTCAATTGTTCTTCTTCCATCACCACCCTTTGAAGGTCTC  
A\_14\_P116324 CAAAGCCAATGTGATTTATTGAATGAAAGCACTGGACAATTACCAACAACCTTGTTCCTCT  
A\_16\_P18078766

AAGAAATATTGCCACTTATCTTTGAATTTTGATACCATCCAGTTCCTAGAGTTGTGTCCC  
A\_14\_P108160 TAGAAATTAGACAAGTTTGGTAATGAGATCTGCAATCCAAATAAAATAAATTCATTGCTA  
A\_16\_P15527426

TCTGTTCTGCCAAGTATCATAAACTAAATCAGCACTCAATTATCCCTTCCAAAAAACA  
A\_14\_P117913 AATATTGCCAGACCAAGATACCTAAACTCATGATGTCTGTGGTGCTGTAAAATTTATACT  
A\_14\_P106383 TTATTTACTGTGAAGTCAACTTCAGGAAGGGGTTTTCTGAGAGTCTTATGTGCTTGA  
A\_14\_P104545 GACAGAGGTAGGAGGCATCATTCTTTCTATAGAAAAAGATAAGATTCTAGGCCTCTAAA  
A\_14\_P109833 AAATCCCAGAAGAAATAACAGTATGTCAGCATTGTAGGACAGAAAATGTCCATGTCTAGA  
A\_14\_P129088 ACATATGGTTTCAGTTCCAAATTATCCAAGTATAACTCTGAACTTCCCTCAGCAAAGTCAG  
A\_16\_P20082599

AATTCTTGAACCCAAATCTGAATATGTGGCTTTTTCCAAGTTAAACTTCACAGTGAGCAT  
A\_14\_P106865 ACAATTCTTTTCACTTTTTGTGCTTATAATTATAATTTCTGCAGGGGCTATCTGATGGGTT  
CUST\_8812\_PI426210822 CTCACTTGTACTTCCCTGGGCCCCCTGCCCTTGCTAGTGACTTC  
A\_14\_P124004 TCCTTAACTAATCTGAGTCTTTTAATACCAGATGGGGACCCTGAGAATAGATTTCCCTATC  
CUST\_1942\_PI426210822 ATCAGCTAGCATAAGCACATCTGCTGTGCACCTGGCTCTTAAGCTTTTAAATAG  
A\_14\_P100334 ACAGTCATGATACCAATCACCAACATCCTTTGATAAGACCTTGGCTACTCATTATATTC  
A\_14\_P132332 ATAACAAGTTACTGAGTAATTGCTGTAAGAGGAGAACATCTTTGGAGCATCTAACCAACT  
A\_14\_P130421 AGGCCGCATTGAGATTTGGGAAAGTGTCCAATAAGACTACAACCTTTCAGAAAAATATTTA  
A\_16\_P00389529

AATTCTTCTTTCACTTAGATCAAATCCTTTTTATGAACCTAAATCAACTCCTCCTCCAAA  
A\_14\_P201813 AAATAAGTCACAGAGATAATTTGAAAATCCCCAGCACCATTTTTGCCAATAACTGTTTCT  
A\_14\_P116864 ACATGTGATGTGTCATATTACAGATGGGGTACAGTGGTTATAAAGAGTTATACCCTGAA  
A\_16\_P03562512

AAAGCGTGCTTTTTTCATCAATCTGACTCAATAGAAAATGAAGTCTACCGTAAAGTTGTGC  
A\_14\_P107699 CTGTATAAAAGCAAAACCCATCTTAATTCACATCACCACCAGTTTAACTTCATTAGTCC  
A\_14\_P114923 GATTGCCCTAATTTATGGTTACCTCAGGAAACCTTCTTTTGAAGAAGTGGCTG  
A\_16\_P00685590 GTCCTTAACTAGATGCACAGATGTGCAGTCAAGGGGAGAATGAAGACTC  
A\_14\_P116476 GCCTCGCCTCCTTAAAATCTATTTTACACTACGGTGTGATTGGATTCTATAAGATAAGG  
A\_14\_P118028 CTTTGGCTATAATTGATTTTAGTTTTCATTTTGCCTTACATGACTCCCTTGACTGAGATG  
A\_14\_P110126 AAGAAACACAAGCAAATATAAAACATTCAATTCTAAGAGAAGTTCATCAGAGACATCCTT

A\_16\_P20776842

AAGGCACATACTGTTTTTTCCTGGCAAATATGAACAACAAGCATAGACACTCGAAAAAT

A\_16\_P17131133

AAAAATCTACTTATGTGTGAGAAGTGAGCACAATTAAGTTTCTTTTATACGCCCCCTCAC

A\_18\_P13359685

TGCACTGATGTTCTAATAGCACACGATATTTGAAATGATGATTTATACTCCAGTCCTTCT

A\_14\_P110117 CCCCAACTTTTTGTTTGCTTGTCTTTTTCTTTTAAACGTAAGTGGAATCTACCTGTTA

A\_14\_P118661 ATCAGTTTTATTTTCTAATAGAGGAAGTTCCTCAGGAAGAAAAGAACTTGAGATAGGGT

A\_18\_P14135161 AGAAGAGGCTCCTCTTCTCTCCCCTAGATCCATAGTATCCTGGCT

A\_14\_P131116 GCAAAAAACAAAGCCAAGACTATCAAACTAAATGCCACAGAAGTTCCACATTTTGTGTT

A\_14\_P201373 TCCAGCAGAAGAGAAATGGGCTCCTGTTTCTGAAAGATAATGAAAATAGAAGACTTTT

A\_16\_P21346044

AGTTACCATCACAACCTGGATAACAATACAGGAAGTTACACCTTAAATCAGTTGCCAAGAAT

A\_14\_P105101 TAGAACTGAGGACCGACCAAAATTAECTATGTGTAGACTTTGAACAGTTTGCAGTTTGT

A\_14\_P127389 CTCATGGAAAAGCAGCACAGTGAGCAACAAGCAACAGTGGTCAGTAAATGTATAT

A\_14\_P137125 CTTTAGAAAGTTCACGGGTTTGTAGAATTGGGACTAGATAAGATTCTTGCCTTAAAGATC

A\_14\_P128104 ATGGGTCATATTTCTGAGCAAGGTCTTACCAGAAAAATTGTCATATCAAGATAGAACTCC

A\_16\_P17586870

AATTTTTACCAATTCTTAACTTCAGTTCAAGAGACGATTAGAGAAATTCCCCGAGACAA

A\_14\_P202353 ACATTGGGTTCTTACTTAAATTTGTCTTACTTGTAGATATTTCTTCTGAATACGTCTT

A\_16\_P00533986

CACACAGAATTGTATTTCACTATGACACGTCTATTCTACCCTAATTAATTTGCTATTTCA

A\_16\_P00685465 TTCAAGTGCTTTTGAATTTGTATTGGTTTTTTTAAAATGTAAGATTATTTTTACTTATTTT

CUST\_5670\_PI426210822

GATATACAGCTGGTGAAAGAAAAGGTGTCGGCTTTGTTGAGAAGTCTTACTTTGT

A\_14\_P125469 GTCCCTGTTTCCTTCTACTTTACCTCAGGTAECTCCATTTTATGTATCATTGGAGAAAA

A\_16\_P15236110

AAAAATCCATGCACAGGAGTTATCATGATAGAAACCGGCTTGATTCTTTTGATACTCTG

CUST\_3531\_PI426210822 ATCAGAAGCAAGTGGGCCTCGGAGGGGCCAGATGCCTCTCTCCTC

A\_14\_P138918 GGCACAAATTTCTCCTCGAAGTGCCTGTGTGCAATAGTCAAAAGCAAA

A\_16\_P02878400

CTCTCATCTTACCATAATCTTCATTGTTCACTTTGCAGACTAGAAACATCCATCTCAGG

A\_14\_P121408 GCTGTTTTTAACTGACTTTTGTCTTTCTTAGATCTGAAGAAGACACTTGAATCATGGGTGA

A\_14\_P126563 TTTTCAAAACCTAACAAAAGCCAATATCATTCTGAAGGTTACTTTTAGTCCCTGGAACGT

A\_14\_P132531 CTGAATAGATTTGCTGGATTTGGTATTGGACTTGCAAGGTAATGTTTTATCTAAAGACGT

A\_18\_P22605812 AATCGCTTTAAAATGTGTGCCCATGAATCTGTTCCAAGACCCAAGATGAAATTTTCAG

A\_18\_P15708999

AAAAATTGTTTCCAAGCCTTTTTTACAAATATGATACCCTCCATGTAAATCAGATGCAGT

A\_18\_P25691976

ACATGCTTTATCAAACATCACCAAATATCCCAAATCTAGTGAATAATTTTCTGTGCATGG

A\_14\_P202348 ATTAATTCAATAGAAAAATTGCTGACTCTTGGGACCTTTCTGTGTTTGGTTCTCGTCTTG

A\_14\_P200465 CAATACCAAGGGGTTTCAGCCCTTTTGAGGGAGAAGCAAGACTTG

A\_14\_P119907 AAACCAAGACAAAATAACACGGTTTATAATTGTATGCTGTGTGATCACCCCTAACAGAT

A\_16\_P18088579

AAATCCAGAGTATGAAGGATAGAAAATCAGCCAGAAGGTAAAGAAAATAGAGATGCAGCA

A\_14\_P115153 TTGCCGCAAAGACTCACTCTTAAATTTGAAAGAATACAGATATTTGGAGGGGGTCTTATT

A\_14\_P112111 AGATGAGTCATCCAAACCTGGAAAAATAAAAGAAGTGAATCACTACTCCAAGTAAGTT

A\_16\_P00910742

TGATGCCTCTTTTTAAAATCCCATAGCCTGAAAAACACTTCCTTAATGTAGGATCCAAAC

A\_14\_P125162 TGTTTTGAAGGAGGGATCAGTGTATAAAGATGTCATAAAAAATATCTCGGCCATTACTGC

A\_14\_P132883 CTTCTAGGTTGTGTTGATTACAAAAACACATTTCCAAACAGGTTTATAGGGTTTCCCAA

A\_14\_P131056 AAATAAAGGAATGATTTTGTAGGTAAGGGGTGACTGAGTGGTATAGACGTGAATGAGTA

A\_14\_P123790 CTAGCATTTTTCATTGGTAACGTGAATCTTTGTGCATCCTTAACAGACTTAGGGCTTAAA

A\_14\_P125598 TTCATCAGCACCATCTGCTAGGCATTTGTCAACTTCCTACGAGAAAAATTTAAGAAATTA

A\_16\_P20750033

TCGGTGTGAGTTTGAAACTACGTATCCTTATGAGCCAAGATATAGACTATACTCATAACC

A\_14\_P114837 GACGACCTCAGTGAGAGCAGTTGAGTTTATGCAGTAAGGAAATCTGCACAAAATTTAA

A\_18\_P22843036 CCTGAAGCCAGAACTCCCCCAAGGCAAATCAAGACTTTATGGAAT

A\_16\_P36230323 GGAAGGCTTCAAAGACAGGCTGGAGCCCCTAAGAGAGGAAGCAAG

A\_18\_P10895419

TATGCCTGATGATCTATTTTCTGATACGCCTGACAATTTCACTAGTTATTGCCCCGTAAAG

A\_14\_P115824 ATTTTTTGAAGATGTTGACTTCTTGTGTTGGTGCTTTGCATGGTGCTACTGAAAACCTTG

A\_14\_P107455 ATGTGGAACCAAAGTGCTAAGTGCATATTTCAAGCATCTGTTCTGAATATGTTTAAAGCC

A\_16\_P38488261

AACTCTTACTGCTCCTCTGAATCTTTTACAAGTTCTTCTTTTCTTACATATTGGCAACA

A\_14\_P200496 CTAAATGTGTTAACGGATTCCAAATTACTTAAAGCCTTTATGGGAACACGGTAGATTGTA

A\_14\_P200239 AAAAGTGAGCATGCTCAGTCTTTTCTTATCTACAATACAAAGGGTTTGTCTGAAAAG

A\_14\_P129403 GAAGCACTTCTGAAAACGATTGTGCCTTGACATTTACCTGTAAAAAGAAGTGAATTC

A\_14\_P127488 TTTTGTCTGTCTACTCTTCTATTTTAAACCTAACGGAGAAGAGGCTGAAGAGAAAGTCC

CUST\_4175\_PI426210822

TGGATATGCAGTTATAAATGATTTCTTGTTAAGCATTTTTTAAAAGGTTAACTTCTTCCCA

A\_16\_P19762572

AAAAGTGAAGATTCCAAACTGAACACCTACAATGTCAATGGACAGAAAAATTCCTTTCC

A\_18\_P11623037

AACACTAACAGATGCATCTAGATTTATAAGACTCAACTTAAAATCTCCATTATCCAGTGA

A\_18\_P14134949



ACTGTTTTATATTGTAAGCAGGACCAACTCTTTTATGGTGTGTTTTATACGTCTAGAGGA

A\_14\_P135662

TGGAAAAAGCAAAGAAAATGCAAAGCAGTTGCATCAAGAGAAGCATTGAAGTTATTTCT

CUST\_9\_PI426210822 CTCCAAGGAAAGACCCCGAGGATGCTTAGTCATATCCAAAATGTCAA

A\_14\_P108983 GAGTGTAATAACAGAAATTTACTTACAACCATTTTCATTTAAAGACACCCAGCAATCTGG

A\_14\_P125414 ATGTCACCTGACTGTTATATATTCGATCCAGAACATAAGAAGGTCTGTTCAGGATATGAAG

A\_14\_P125793 GAACAAAGGAATTATTGATTTCTTGGTTTAAACTTGCCACCTTATCCCTAGTTGCAATGT

CUST\_5448\_PI426210822 AATCTGCAATCCCAAGTCTGTTTCAAATCTTTTCTTGAAACCCAAGATCACCA

A\_14\_P131644 GTGCAAGTTTTCTGAGTTTAAACGTAACAATTTACCAAAAAGTGTGAGTGGCTTCTTTT

A\_14\_P136808 GTAACACGGAGGAGGATGTAAGAAATGGGAAGAAGGAATTCTGGAGTAAATAGGAAAT

A\_14\_P116181 TCTGTTTCTCAGAATTTTGATTTTAGTCTGAATGTTCTGATAGTTGAGGCTACAAAGGCA

A\_16\_P30912590

GTATCCACACCCTGTATTTTTATTTTTCCCAACCACATGTAATACTGTGCTACGATGG

A\_18\_P22840872 CTGCACCAGTGACCAGTTAAGCCCAGTGGGTGATGCCTTTCCCTTT

A\_16\_P19432538

AACCCCACTGAAGTTTCATCACTAAAAGACAATGTCGATATAGCATTTAGAATGTTTGCC

A\_14\_P201137 AAAATGTGACTATATTAGAACATGTCACACATAAGGTTAATACACTATCAAATACTCCAC

A\_14\_P107047 GAGACCAAAGTGTCAATCACTCTTCTGACAGAGGTGATAGCAGAATGAAAACTGAT

CUST\_10182\_PI426210822 TGGGGGCTTGTTTATGCTTGGGAGTAAATATTGGGCTGATGTTGC

A\_14\_P112319 TTATCGATAAAGTCCTAGACAATCCAGACTTGACATCTAAAGAATTCACAATGGAAGC

A\_14\_P116098 AAACACAAGTTGGTGGACTTTGTGATCCACTTCATGGAGGAGATTGACAA

A\_16\_P18437135

AGCATAGACTATCACATGAAGCAGAAATTTGAATACACCCTCATAATCAATCACATGGCA

A\_16\_P16191020 AGAACCTTCCAGGGCAAGAAGACAGTCTTGTCTCAACCAGTCATTAAC

A\_18\_P22840523 CTAATTCCTTATCTCCCGGAAAAGGGAAACCATCAGGAATCAGAAATGGAGAAAT

A\_14\_P116605 CCATCAAACATGTGTTTCTCGATTGTGTTATGAAGAAATTCAGAGTAGGAGATGAAACAG

A\_14\_P114933 AATGAGAAGATTAGAGAACAGATTAAGAAATACAGGCGCCATTTCTACGAGTAAGCAAA

A\_14\_P119904 ACTCTTTTTTGAAAACTTATTCAATTTCAAATAAAGCAGACAGCAGAAGGCTGGCATC

A\_14\_P139086 CTATGTTAATCATACCCTCAGTTCTTCACATGATATCATCATAAGCACTGACTTTGACCC

A\_14\_P122196 TTTGTTAATTTTCCGTTCTTTTTCCACCAACCCTTTTAAATTTTACCTTATCTGTGTT

A\_14\_P135777 GTAGACAGAACTCAAAAACATCTATCTGCTCTCATGCTTCTGTTCTTGTAGTTCTCAG

CUST\_1596\_PI426210822 ATGGTACAGCAAAGTGGGGACATGGTGGGTGTACAGAGTGTCCGG

A\_14\_P124924 CTTTGCCCTTGATGCACTGATGCCTTAAAAATTAACAAGGTCATTCAGAAGTAGATTACA

A\_16\_P58424568

GTCAGCAGTTTACCAGAATATATCATCTACAATTTGCCTAATTTAGTTGAAATGCAGAAC

A\_14\_P129748 TGTTATCCATTCTCCTCACAGTTTATCAGATGGTGGAAAGGAAACTGTAATTTCTAGAAA

A\_18\_P10613176

AGATGAATAGGACTAATGTAGAAAAACAAATCAAATGTCCTTTACTCTCAGTCAACCC

A\_14\_P127237 CTCACAGTTTGGCTAATGCTGGAAAGGTATCAGTCAGTGTATTTTTTACAGTTTCTTGA  
A\_14\_P119126 CACATCCATGCAGACATCCGCAAATAAAAATTTTACAAAACCCTGGAGAAGGTATTATTT  
A\_16\_P16326589

TATCTCACTCTACTCCTCTATTAAGAAGTCCTGTGTTAGTAAAGTAGATGGCTCCTTACG  
A\_16\_P16719690

ACGTTTTGCTCTTTTTATATGTCCCAAACGCAAATTTCTAACGTGACAAAGTAGGTTTCA  
A\_14\_P132261 GACGACATCCCAAGTAGGATTGCTGTTTTTCAGCCTCTGAATTCTTAAACTTATTTCTTA  
CUST\_224\_PI426210822 GACTCGTTCTTCGGCTACGCAGTTCTGGAGCATTTCACGACAAC  
A\_16\_P19007856

AAAAAATCAACTGAAGAATGATTTCTGATGCTGACAATGAAAGACACTTGCTTGGATGG  
A\_14\_P130848 TGCTGTTTCTAGCCACTTACTTCAAAGGACTATGGCTATGTTGAATCAGAAGCCATTAT  
A\_18\_P22841020 GTGTGGTGGGTGGTAGGAGGAGAGGGAGACAGAAGAGAAATA  
A\_16\_P38287416

AACACTAACTTGCTTTAATAACCCAACATCATATCTACAGAAAACATTCTTCCAACATCA  
A\_14\_P124331 TGTTGGGACGTTTCTTTTTTCATTTGTGTTGAGAAAACAATACGACAGCAACATTAAGAG  
A\_14\_P131148 ACTTTAGGTGTTTTACGTGGTCTAGAAATTTAGGCAATTCATAGTGTTAACTGAAGGGTC  
A\_14\_P107896 TACTCTTGTAGCAACTTTTTATATTTTCATTAAGAGGTGTCAGAGGCAACCAGGTATCTCTG  
A\_14\_P117410 ACTCCAGAAAATATGAATTTTTTTGAAGAGACCGTAGGTGTCAGTGCAGAAGATATTTGC  
A\_14\_P138830 ACCATCATAAACTTCAGCATGTTTGTAGCCAGTATCCTTCAGGATTTTAAACTCCAAAT  
A\_14\_P126253 GTGAAGTTGACTGAGAAATGCCTTAATAATGTCATTGAGAGCCCAGGATTGAATGTCAT  
A\_14\_P119782 TGGTAATAGAAATGGCTCAGGGAGGAATGATGCCCTTGAAGAATAAAAAATAAGAAAAT  
A\_14\_P112086

ACAAGTTTGACAAATAAGCAAAGGAAAGGATTAGAGGGCAGATGACTAAAATGTTGAGT  
CUST\_2600\_PI426210822 CTCTTAAAACCGGGGCCATCTGGCTGAAGGTCCATCATATAGACT  
CUST\_932\_PI426210822 CTCTCTGTGATCCTGCTCCCCACCACACACCATTCTTAGCAGCCA  
A\_14\_P132050 CTGCTCTGTCTTCTATTTTTCTAGTGTGGGATAAACTTAATAAATAGGTTGCCCTAGGTTG  
A\_14\_P113554

TAAAGGGCAGAACTGTTTAAAAAGAAAACATGCTGAAAAACAATCTGATGTTGGACTGC  
A\_18\_P22842679 TAGTCAAATGTCTACTCCCATCAACTGTGGAAGGGAGGAAGGGAG  
A\_18\_P13858484

TCACAAGAATATGTAATTTTTTAAAAAACAATTTAGAGCGATAGAACAGCCTTGAA  
A\_14\_P116834 ATGACCACACAAAACCTCACTGAAGTCACTCATATAGATAAATGAAGACCAGGAAGAATA  
A\_18\_P14134759 GCATGACAAAGGCTTTGGCCATCTCTATGGCAGGTGCGAATGTAG  
A\_14\_P129153 ACCATTCTTACATTAACATCAGTAGTCACAAATGAAATGTGCTCCTATAGCATCTGCCT  
CUST\_4334\_PI426210822

AAGGAACTACAGGTGAAACGTAACAATAGTAATTGCCTTACTTTATTTGCGAAGGGG  
A\_16\_P32381353

CTTGGCAAGTTGTAACCATTTACCTAATTTTGATTGAAGTATGTCGTGCACATGTTGACT

A\_14\_P138492 TTCTCTGTTTCTCAGAGCATCTTCCACTTCTTCCATCTCTTGTTTTTGCCAC  
A\_16\_P21314522  
AAAGGTCCAAAAATTGAATCCCACTACAAATACTTTTGCAACCAGTATCAAATTGTTTCCT  
CUST\_1872\_PI426210822  
TTATCATGAAGGTACAGGAAATCCAGATTGAGTAGGTACAGATGGATCAGGAAC  
A\_14\_P119035 TAGTCTGGTGTAGCAAAAGCCTTACACATAGTAAGTCCTATAATGCTCAGTCAGTTTGAT  
A\_14\_P100886 CTCTTGAAAAGAGGATGATTTACTTGCTTCTAAAACTGACAGGCTGCACCTTGTCCCT  
CUST\_2926\_PI426210822 CTTGGAGCCTCCTGGCTAGCATAGGTGAAGGTGGTGAATGCTTTG  
A\_14\_P132294 TTGCATCCACTTCATCGGCATTTTCGATCTGCTCAAGACAGTATCTGCATTTTTTATAAAA  
A\_14\_P119225 AACAAAGAAAAGTCAGTATTATGTTGTTCTCAGACACTTTGGCTTTTGTGGTCCCTTCTC  
A\_14\_P115564 TGTCTCCCTCCTGGAAAATAGATGGATAATTGGACAGTAGATGAGATAATGAGATGC  
A\_16\_P19058370  
ACCAGATCTCAAGATTTTCCGATGACCTAATAATCAAATAATCACCCAAGCATTGACTTC  
A\_18\_P12558242  
AAAAAGGACCACAGTTTGGAATTTGTAAAATCTGTCTAACATCAAGTGAGCCACTGAAGT  
A\_16\_P01989862  
ACCAGAACTCTAACTGTGAACCTACTAGACTTAACTCTTGTCTATCTTCAAAGACTCT  
A\_14\_P135867 ATCAAAATACTTGCTGGATGGTGGACTCAGAGACCAATAAAAAATAAAGTCTTGAACATC  
A\_14\_P123814 CCTGTTACATATGCAAAACAATGATCTCAAAGTTCACCAAATGGTTTTCTTTCAAAAAGCC  
A\_16\_P00685492  
GGCTTCTCACCCAATTCTTTTGCCTGTCATCTCACTGTGCTCTTTAATGTTTTTAATTA  
A\_18\_P10745622  
AAAAGGGAGCCTAACTTCAAAAAGAAGTCAACTTATACTCTGAAAATAATGGGAGCATC  
A\_14\_P120135 CTGATTGTAGTTCAATGCTCATTCTTATACTTACTCTCCTGTAGGAAAAGACATACCCAA  
CUST\_207\_PI426210822 GCGGGTCCCAGGGGCTGACTCCCGCCCGGAAGTGCGCGCAGGGC  
A\_14\_P104795 GGTAAGGAAAAACAAATTTACATATGTTGATAACCCATGAGGCCATCACTGTCTCTTA  
A\_16\_P00366854  
CTAGTGAACGATAAACCTTTGGTGATGCATTTTTTAACCTGTTTCAGTTATTCATCCCTCT  
A\_18\_P17411786  
CATGTATTCTCAAATACAAAAAATACAAAATAAACACAAAGAAGTAAAAGTCAAGATGC  
A\_18\_P13207466  
ACTTTCCTAGCAAATATCTTTTTTCTTTTACTCCGAAACAATTGACTAGAAACCTGC  
A\_16\_P16143798  
ACAACCATCCTTGAAACCTAAGACCAACACATACTCTTATGTAAACACTTGGATACTCTT  
A\_14\_P102029 GTCTTCATCAGAGAGTCCTCCTGGAGATTTGGGTTCTCTCTATAGCCATT  
A\_14\_P120158 CACCCATGCCTCAGTCACTCATAAGTATGGATACAAAGTCTTGCATTTCTTTCTTTAAAA  
A\_14\_P103150 TTTGCCAACTGCTTGGAGAATATTAACATTATGCCATTTCTGAACATTGCAAAGTGAAGT  
CUST\_10163\_PI426210822 CCTACTTGCTCAAGTGGCAAAGAGACAGGCTGCAGAATGTGTTTTG

A\_14\_P201159 AATACCAACTCATTGCAATTCTCTTCTTTGGGATGAAGTCACAAAATTGGAAATGATGC

A\_16\_P41843982

CTTCCCTTTTTCTCACTTTCTCTGACATCCTATTAACCTTTACACCAAACCTTCATAGA

A\_16\_P58424282 CTCCATGCATATCTCACTGTCCAACAGGCCAGCCTGGGCATATTC

CUST\_3284\_PI426210822

AAAGAAAAACAGCAAAAGTTTCTTCTTTATCTGGAAAATAACATGCTAAATCTCCGGGTC

A\_16\_P02456114

AACAAAGAACTCTACAAATTTTACCGAGCCTTTATTCTTAACACTGACCAATAACTGCC

A\_14\_P139026 GATGTGACATTTTCAGTATAAATAAATTGTATAAATCTATGCAGGACACGGCTCTGGGAGC

A\_18\_P22839969 GTTCTCAGATGTTTCAGAGAGGCTTCTCTCCCCTTCCATGAAAGTT

A\_14\_P128579 TGTGTGCTCCTGTTATTTAAATTTCCATATACTGAGTTCTGGAGGTGACATTGCTAATGT

A\_14\_P100023 GCACAAATTTGCATTTTTCTAGGAAAAACGTCCATATTTTACCAGAGTCTAATCCCAAAA

A\_14\_P105322 TGTCTCGATGAGCCTCATTTTTGTACCCAAATTTAATGATATTCAAAATATTCTACTTA

A\_18\_P15978042

TGCCGCTCACAAAAATATATTGAACTAACTCTCTTACTCTGATCTCAACGATATCTCT

A\_14\_P126366 CTCTCTTTGCTGTTTTTCAGTAGAGCATGCACCATTTTGAACGTGAATTTTCGGTAAAG

A\_14\_P129880 TCATAATAGCAATACCTAGTCATTGTAGAAAAATTGGGGACGATTAATAATTCCACCGTGG

A\_14\_P132031 GACTTTTCTACTTACTTTTTATGCCTTCTCTTCTTAATATTGGAGGCCAGAGGAAAGAT

CUST\_1372\_PI426210822

AGATGGATTAGGGAGAAACCTAAACCTGCCCTCTTGACATATATATGAAGGAATCA

A\_14\_P127387 AAATTCACCTTCTTCCAGATGCCAGAGTATATATGCATATTTGAACAGTCACCTGGATC

A\_14\_P102838 TTAAGCAGAGGAAGAACATTTTAAAATTATTACTTAGTGAGAGTGCCTGCAAGGGAAGG

A\_14\_P108482 CTTTTGGGTCCAGAAGACCTGCATATGGGCTGTTGACTCATGCAAAT

A\_18\_P16844710

TTCATCCTTTTTTCTGATGGACACATAAAAGTCAACATTTCTAACATTGCTGGACGTTA

A\_14\_P120115 CTTTCTCATGCCTTCTAGAAAAAGAGTAAACTGAAATAAAGCCTTTTCATTGCAGTC

A\_14\_P132356 ACCACAAATAGGAAAGATTTTCATTCTAGAATGAATAGAGCACATATTTAGTATCTACGTG

A\_14\_P123777 GTAGAATTTCTGCATTCTCCACAAAGGATGGTGACAATGTGATGACTTGGAAT

A\_16\_P20744286

TAGGATCTGCTGCAAGAAGATAAAGTGAGATTTTAGGGCTGAAGACAACATTTCAAAAATC

A\_18\_P26322448

AAAAAAGAAGCAAACACTTCTAAGACTTCAAATTGTGAAGCATTACGTTTGATCCTGCA

A\_18\_P22842286 AAGTCTTACCCTTTGTGAGTCAGGGGGCTTGGGCTGTCTGCACAC

CUST\_2180\_PI426210822 ACATTAATAAATGAGTGCTGTGGGCATTCAGTGGTGCCTGCCATTGTATT

A\_16\_P16226064

AACATAGTCAAAGCACTCCAGAATGAACTAATACCTAAACACATACCATATCCTCCACG

A\_14\_P201060 GAATATAAATAATGTCTCCCCAAAGATTTCTGCTGCTGTAGCATACTGTATTTTTATGGGC

A\_16\_P17835829

CCTTCTATAAATCAGTGCTAATTATACATGAGGAAACACAGATAAGAAACCCTATGCGTG  
A\_14\_P120943 TTACACAAATGAAACTATCGAGGCAGCAGACTAAGGTCATTATTATTATTTAGAAATTGAC  
A\_14\_P134953 ATTTTAAATAGAGCATACCTGTGTTTTATCTGCTGCCTACACTAACCTCTTCTTTGCTGT  
A\_14\_P117248 GTCTTTTAAGAGTCCTCATAGGCGATTATCTTGGGCCACTCATGATAATTAATCCATTAA  
A\_14\_P101624 ATTCTCTTCCCTCATTCTGTTTTCAAATATTGGGCATGAATAAACAGTTTTAGGCACAGA  
A\_14\_P122781 AACTTTCAAAAAATGCAGATCTTGCTCAGAATAAATCGTAACAATCTCAAAGTGCATTG  
A\_16\_P16683057  
CTAGCCAATACAGAAAGTTACATCTCTTCTCATTCAAAAGTTATTTCTTTACGTTGCTCT  
CUST\_7615\_PI426210822 GAGGACAATCACCAGGATTTAGGGGAGTGTTTTTGTCTTTATTCACTTTGGAA  
A\_14\_P106902 AAATGAATCGAGATTGCTTTAAAGTGAAAAGAAGGGAAAAGAGAGTTATCTCTTTTGCAGG  
A\_16\_P38360542  
CTCCTTTATCGTCTGTAACTCACAATACTCCTTTTAAAATTCACTCCATTGTCCATAGCC  
A\_14\_P100733 TTCATAGTTTATCTTGACTCAGAAGGAGGACAGATAACTACTGGCATGAAATTGAAGGAT  
A\_14\_P112063 CAGTGTGTGATGAGCATAAGGAATTCAAGGATGTCAAACCTTTCTACCGCTTTAGAAA  
CUST\_4148\_PI426210822  
GTAAGTCCTAAGATGTTTGCTTCTTATTCTTGTAAGGTTTAGCCATGTATAGTCATGTG  
A\_14\_P135331 AAATTCTTACTCTTAGAGACTCATGAATTAAGAAAGAGAATTCTGCTAACTCAGAGAACC  
A\_14\_P105018 AAAATGTTCTCTTTTCTGCACAAGTTCGCTGCAAACAGAAAATTCCTGTTTAAGATTAAG  
CUST\_4917\_PI426210822 GTGCATGTGTGACATGCTGCGAGTGTGAGGAATGCCAGAGGGAGA  
CUST\_10229\_PI426210822 ACTGGCTATGAAGTACTATAGCAGGCTGAAGGGGCTCGTGGGTTT  
A\_14\_P123598 GAAGATAATAGTAGTTTGAGTTTAGGACAAATTGACTCAGATATCAGTGGATCCTCCAGG  
A\_14\_P100052 CCCCTTCTGTGCATTTAGGTATCTTATGTTATTCAGGCTGAAGGAAAAGAGCATATTATT  
A\_14\_P125112 CTATGAACATAGGACTGATTTTCGGTTGCAAAGCACATACTTCTGTAGTTTTAAAGGAAGC  
A\_16\_P03124183  
ACTTTATGTGCACGATGACATTTTCAACTACGGAGCCATATTGAAGTTTAAACACTGCTA  
A\_14\_P115433 AAAAGTTAAATAAAAAGAAAGCGCATTGACAGATCATATTCGCAAAGAGTCCAGGACTGT  
CUST\_2889\_PI426210822 TTACCAGCCTTCTACTCTTTGTGCTGGCAGCTGCAGAGGAACCAT  
A\_14\_P124125 ACACTTGCCATTTAAGGTAATTAAGAAGTGTGTTTTATTGCCTTACTGTGCTGTGGTT  
A\_14\_P103742 TGAAGAATTCTAACACCTGATGCCTTTAAGTCATCTTCACTGCATGGGACTTAATAAA  
A\_14\_P135297 CTCTATCTAGAAGTTTGGTAAACACTTAGTGGTAGGTTGCTAGGCATGAATTTAGTCTCT  
A\_14\_P129449 TTCAAAAGATACTAGAAAATCTCCTTTTGGATCTGTTCTGAGAAATGGCTAAGGACAGTG  
CUST\_2241\_PI426210822 GTGCACGGAGCCCCTCCAGGTGCAGCACGCTGCTCTGTTTCAGAG  
A\_14\_P130865 AAAAATAGAATACACTTCTGCCTGCAAATTTGGGATTTTCCGTTTCTATCCAATTCAGAC  
A\_14\_P115048 CAGGGAAATGATGAAGACAGCACTTTAAATGGGAGGGATTTTTAAGTAAATGCTATTAGG  
CUST\_2715\_PI426210822 ATCTCCAGCATGGTGGCAGCAGTGGAGTCCCCTCACCTATCTG  
CUST\_5647\_PI426210822 CACATCCTTTCTCTGAGGGGGTCCCGTCTCTGCAGGCCCGTGG  
A\_14\_P137757 ATTATGCCCCAGTTCAGAAATTTGGCATTGATCTTAAACTGGAACATGCTTTTACTTTAT  
A\_14\_P122505 ACATTCATTCAAGCATGGACCAACACAGAGATGATTACGTTGCTAGCCTGTTATTACTT

A\_14\_P135000 GGGAAAAAGAACTTGGGAAGGCTATTTTACACAATTAATTACACATTGACACCACAGTT  
A\_16\_P03275705 AGCGGGCCCCATCCAGAGAGATGGAGAGGAAACACTTGCAGAAAAG  
CUST\_1298\_PI426210822

CATAGTAAGTTGCATGTCTATATATACATTATTATGTGCCTGTATTACTTGGCTGCTG  
A\_14\_P109858 ATAGATGCTTGTTAATAGAAAAAGTTGTTTCGTGACACAGTGTTTCAGTGGAAAACCAGATT  
CUST\_6412\_PI426210822

TTCATAATACTGTTTGTTTACAGATTTTCATGAAGGCATTTACCCTGGCATTGTACCACTA  
A\_14\_P128030 GATCAAGAAGTTGCAAATCTTGTGTGTATTATTAACGTCTCCTTTTTCTCCCATGACCT  
CUST\_737\_PI426210822 CTGGCTCTTTGTACCCTCCAATTCTTCAGGTTCTAGGTGTTGAGC

A\_14\_P136414 GGAAGCAGGGGGCCATTACCCAGATAATTTGAATAATTTCCCTCCATCCTAATAATATTTA  
A\_16\_P17250221

TTCTTTATCGGGACTGACTTTAATTTACACAGGTTGAAAAAATATCTACTCGTCCAGCC  
A\_18\_P12821637

TGGCTGATATACATTCAAATGCTTCACTTCATCTGATAATTGCCCATGACTAAACATCCA  
A\_14\_P121339 GTTTAATCCAAGGTGGCTCCTATAAATCCTTTTTGAAATGTTCAAGTATCTCTGTACAC  
CUST\_2672\_PI426210822 AAAGCGCTTGTGGTGTCTCCTTGGGTGCTCCTTTGCTTTTATCT

A\_16\_P03650003  
AAACAGAGGAAACCATCTCATCAAATCACTCCACATTTTAAATAGAAAAGCAGAGTTCCA  
A\_16\_P38540964

ACTCTCAGTCGCATAGATTTCAATTCGCTCTTGCTATCTCTACTAGTTAAATGACAGGTT  
A\_14\_P101055 CACTAAGTTTAAATGTCTCCCCAAAATTGATTATTGAAACTGTCCCTTTACTGGTTCCT  
A\_14\_P202455 AGAAAGAAAGAAGACTGGTGTATGATGTATTCTACTATTTCTCCAGAGCAACCTGGAA  
A\_18\_P11955786

AGGCCCATTTGTATAGAACATCTTACTAACTCTTGAAATTACCTCGAAAAATAATTGCCCA  
A\_14\_P106376 GATCAAGCCAACAACAGTGACGGAATGCCTCCATACATGTAAGTATTCTTTTAGGTTATT  
A\_14\_P104535 ACTCCTATGAGACCATCTTATTTCTTGCAGATGAATGATGCTATGGGATTTGAATTGCC

A\_14\_P106018 ATTCAAGTGGAATTTTCATCAAACAATACTGGCAGTTTGCAACATCTGCTGCTGCT  
A\_14\_P111037 ATGCCAACTCTCCTTATAGTCTCTATATTCTCCACCCTACACTTGCAGATAATTTGTTTCT  
A\_16\_P21052139

CAATGGTCTAGCCAACAATTACTGACATTTCTGTATGCTTGGCATCAAATAAGATACAG  
A\_16\_P18475275

AAAATCTAGACAACCTTCAGTCAAATCAGCAGACATCATCCTTACCTCTTCTTTAGCCTAA  
A\_14\_P104458 CTGGCAAGATGTGATAACATGATCAAAGAAAAATGGTCATTATACTATCTGGTCACTTAC  
A\_14\_P100152 ATAAAGCCACAACTCCAGAATACAGATTTGAATTTGAATCTGAATCTCGTCTGTCCAGT  
A\_16\_P39344494

GCATTCGTTTAGGAAGTAGTGATAAGCAAAAATGACTGGGTAGTTACCAATTGAAAACCT  
A\_16\_P19387802

AAAAAGCGATAAAATGCCAACCTATATTTATCTCTGTCTAAATTATCCCCTGGAGAGAAG

A\_16\_P01693442

TCCAGCATTGGTTAATAGTACTAGGATAATCGTTCATGTCTATTACATTTCCACAGC

A\_16\_P03418134 ATTTTGTGGGCTGTGGAATTTGTTTTGTGTTTTGCAGAATCACTGAGTCTTGC

A\_16\_P18540520

AACATGCCTGTCATCTATAATGTCTATGTTCCAAATGACTAATTCAACTGGTTTGTTCCT

A\_16\_P37795103

TTTTTGCTTCCAATTCCAACATAATCATTCTCACAACTTTTGTCTCAGTTCACCAAGAG

A\_14\_P109272 ATCCTTTTAAACAAATCCAACAGGAAATCTTGAGGCACCTTCTCATATAAAACACAAGA

A\_16\_P00654936

GTTGTGAGTGGATACATACCTGACCTCTTTGAATAAAATGCATGTTAAGCACAGTAATCC

A\_16\_P21377487

AACATTTTTGTCTTCAATCCCTAGATGGTATCAGTAACTCTACAGACTAACAGCAGTTCC

A\_16\_P16572616

ATGTAAATTGAGGAAAGATAGAACCTGCTTATTTGGACACTTCATGAAAATCGTGTCCACC

A\_14\_P104974 AATGAAATAACAAAGTGTGAGGTCTGTGGAAGTCCCTAGGACAGTATTTATTAATGAAGC

A\_14\_P119784 AATAAACTGAATACAATGTAATTTATACAGGTGACACCACACACCAAAAATCCTGCCCT

A\_14\_P200284 CTTAGGTTCAATTTTATTCTATGAGCCCTACATTCAACATTCTACCTACCTACACCCTCA

A\_18\_P14131027 GAAATACACCAGATAGACACATGTCTCTGAGACCTTTATGGTTCAAGAGGCAACATT

A\_14\_P103181 AAAGAGGGTTGTCCGTGATCCACAAGGCATTAGAGCATGGTATGTTTTAAGT

A\_18\_P22839049

CTGAGATAGGAACTTCACATATAGAGATTTCTAATTTAACATTGATGAAGATGCCAAGT

CUST\_8107\_PI426210822 ATTTCTTGGATCCACAGAACACTCGCCATTGTTGGGCAGACCCAT

A\_14\_P127392 CTTTTATCTTTCCCTAGTAGACACTGACCTGTGCTTTTATTAAGCAGAAACAGGATACTG

A\_14\_P130824 CTGTGCTCAATGCCTTCTCTGTGGTGAACCGGAAAAACATGTTTGTTTAC

A\_14\_P133041 GAGTCTCTTTAGAAAGTGATTTTTGACTGCAACAGGTAGTATAGGACAAATGCCCTAA

A\_16\_P02754172

TTTTAACCTTCACCCTACTTAATGGAAGATCTGAAAGCATGGATGAAAAATAGAGAGTG

A\_16\_P19186660

AGAAAACCCAAACATAGTCTCCATAAGAGCATCTAACTTTATTCTCCTTCTCTACCCTA

A\_14\_P112418 TTGCCAGATCCCTGATAAAATCAGTAGTGCAATTGCAACTATGATGATGCAAAATATCAC

A\_14\_P202204 CTGCAGCAATAATTAATCCACAACCTGCAAAACATTGTTTTTGTAGAGACAGCACACTTTTA

A\_18\_P22841558 CTACACCCTCCTGAATTATCAAAAAGCAAGCCTTTCCGGCGAGAATCTAG

CUST\_3716\_PI426210822

CTCTCTACTCATGTAGAACTCTTCTTCAGCTTCATGTTTTAATAATGGAAGAACTTAGT

A\_16\_P18212694

GGATGGAAGACATAGACTTTTTGATGCTTTTTTGTAACTTGCTTCTTGTAATGTGACTGCA

A\_14\_P105418 TTATTCTAAAGCAGGTGGCATATGAACGAGCATGTGGGTAATACACACCAAGTGATATAG

A\_16\_P03808860

CACCTTTCAAATTCCTTAAGTTCGAACCCTAAATACATACCTGAGTAACCAAACCACTAA  
A\_16\_P30952460 GCCTCATGTTATATTAGTGTAGGCCTCAGGGCATTCAATTGCTGTCTATTTTTTCGTTAC  
A\_14\_P126450 AATCTACTGCTATCACCATGATGAAGCACATAGTATACTGGAGTCCTATGAAAAGGAAGA  
A\_16\_P16336540  
ACCAAAAGAGAAGTCAAAAAAATTTGTCCCTCCCTGAAAGAATTATCACTACAGGCACTA  
A\_14\_P107476 AACTCCCAAACACACACGGAATAAGATTTCCAGTTTTTCTTCTCTTTTCACACAC  
A\_14\_P119486 ATTGTGCAAATTCTTGTCTTCAAGCATTCTTTTCAAATGTGAGGGTTTGTTTACCAGAT  
A\_16\_P20924941  
ATGCCTAAGTGGGATGTATTCTTCAGCAATCATGTTTAAGTCTGATTCACCGAAAAGTAT  
A\_16\_P16103695  
GACCTCATATCATCTTCTAGCCTCACTATAAGCAAATTGAGAAGTCAATCATTGATGG  
A\_16\_P15363192  
AAATAGTCTTCTCCTAAAACCCTTTTCATTCTATGTGATGGACAGATAAGAGATACAGGGC  
A\_14\_P115539 ACAAATTGAACTAGAGAAGCCTTCAATGATGATGTGAGGTGTTTTATTTGGTTTTACCC  
A\_16\_P35197824  
AAGAACAATGAACCTAAGTCTCCGTAGTGAAATAATCAGTGCCTAGACAGTATTGCTGTA  
A\_14\_P134967 ATTATTTTCTCTCCGCCCTACTACAATACTTAGGATTCAATGCACAGTGGATTAGTTCA  
A\_14\_P120760 AATCTTTTTCTTCAACTCTCATTTTTCATCATTGCTATGGAAGGTCATTCTCGGAAGACA  
A\_14\_P137888 TAGTTTTCACTAGTCTCAAGAAAGTCTGTGGCCTAAAGCATTAAAGATCCTTAGTCCTAG  
A\_14\_P117779 ATTAACAATGAATACATGAATTACCTTTAGTGGGCCCTTTATGTGGTCATCCTGAACTTC  
A\_14\_P117696 ACTAGGTTCTTCGCTGAATAGAATGCCTTAGTGATTCACATTTTGTAGTTAGGGTTAGAC  
A\_18\_P13248465  
CATGCAATCCTCTTATATCACACCTAAAACCATTCTACTTATTCATTGTTGACTTGGGCA  
A\_14\_P113175 TTTTCCACACGCTGCTTCTTACTGCTCGCCGCAATTCTGAAAAAAAAATTTTAAAGTC  
A\_14\_P131067 CCACTTTGAGGAAGAGCACTGATATACAAAGTATACAAGCCATTTTGTGTCTCATTAGAG  
A\_18\_P11230713  
AACAGATGACAACACATGAACATAACCAGTATATCCAACAGTTTTGGCTAATTGGAATGC  
CUST\_1441\_PI426210822 GATATTGCTTTTAATGGTACCAGAGACTTGCCAGGAGCCCAGGGG  
A\_16\_P38292337  
AGTGTAAGTAGAGAAAAGTATCAATAGAAGACGACAACATGATATCAGAAATCCAGCGGG  
CUST\_2154\_PI426210822  
TTTCAGGATCTGGAAGTACAAGTGTTCAGTACAAGTATTCAGCAAGAACAACATGG  
A\_14\_P132629 AACCTCTCTAAAGAGGAGGCAAGAGGTTTTCAATTTCTTCTCAGGGAAAAAAA  
A\_14\_P115294 ACTAAATTTGTCAAGTAGAGCCATTGAGGGTTTTTTTTTCAGGTAAAATGTCAGTAACCACA  
A\_14\_P139498 TTAGTAAGTCACCATGTGAGGACAAAACCTTGATGAACTGAAAAGGCAAGAAGTAGGAAG  
A\_14\_P111184  
GTGAATGGAGAAGGAGAAAGTAAAGGTTGTGATGATAAACATAGAGCAAGTTTTGACAAC  
A\_14\_P100388 TCCTATAGTCACTTTGTGGTTAAGGTATTCATGGTTTTCCAAAACAATTTTTTGTTCAC



A\_14\_P106338 GAAATAATCAAGCCAATGTTCTGCTTCAGAAAATTTTACTATCTCTTCATCAGACAGGCC  
A\_14\_P132141 TATGTTGGGGGCTTGGAAGCACTTGAACCTTTTTATTTTATTAACCTTGTTATAAGCAG  
CUST\_3106\_PI426210822

CTACAAATTAGCTCATGGTCACAGTTAAGGCATTTTAAAACCTGGTTGGACTAGATTCTTC

A\_14\_P106369 ACTTGGGTGGATTCCTTTTTCAGGCAGAATGGCTATCTAGGTAACCTTTCTTATTTCTTTA  
A\_14\_P136471 AGTTACTTTTTGTTCTCTTCTCTCTCCACTCTCCCTGAAATGAGAAGTGGAAGATAAG  
A\_14\_P105984 TCCAGTCATGGAATGATTCCTGTAAAGTAGAATTGGAATTCCTCAGTGTTCGCAAGTTT  
A\_14\_P111471 TAGACTTTGGGTTTCAGTTTTACAGGTTTTTACATACCTGACATCTATCAGTGCAGAAA  
A\_14\_P125591 ACTAACACAGTTCACCTATCTCTGCAACTGACCTTTAATTTGGTTGTTAATTTGTCCTT  
A\_14\_P131114 ACTGGGGTAGCCAGAAATACAGAAATGCTTTATTTCTGTGACTGCATTCTAAATCTAAAT  
A\_14\_P106077 ACTATACTAGTAGCAAGACGCTTCCACAGAAAACCTAACATTTCTCTTGTTCAGTTGC  
A\_18\_P22841390 CAGATCTGGCAGCCTGCATGTCACCAGATGGATTTAGGTCACATC

A\_16\_P17618996

TGCTATGCCCTGTAAAAGTAACTTCTAGCAACTAAACAATCTATCGTAATTGATTGCCTT

A\_16\_P39885651

GAAATGTCCCATCAGCATATCTAAATCCTAACCAGTATCTTCTAGCAGAAGTTTCGGTG

A\_16\_P20498535

GGCACTTTCAGTCTAGGTAAAATCTCACTCTATGGAATCTCCCTATTAAGTCTTGAATCT

CUST\_133\_PI426210822 CTTTGTGAGGGAGAAATTAGCATTTCCTCATCGGAGACCATGGGAA

A\_14\_P136501 CTTGCCCTGCTTTACAACCTGGCAAATATTCAATAACAATTCACCTTTCTTTTAGTCTAC  
A\_14\_P103673 GAGAGAAAATGGTCTCCAAATCCATCAATACAAACAATGCATTTGTTTACTCTCACAC  
A\_14\_P128118 CTGATCAATCTTTGTTTGGCAAATGAACAGAAAAACACCTTAGCATCAAATAACCTTCCA  
A\_14\_P115974 AATGGGGCAAATAAATAGGGACAAGGCTATAAATATCATTAATACCAGGTTTCAGGAGTTT  
A\_14\_P120618 TATCTTTTCTTGTTCAGAAACGGACTCTCTAATTCCCCATTGCTTGGCTATTCAATATA  
A\_14\_P131655 GTTCTAATATTTTTCTGTAGCCAAACACCCCTTTCTTTATAAACCTCTCATCCAGAAGAG  
A\_16\_P20077128

TAGTTCTAGAAATCACATGGCAGAAATTAATTAGTGCAGAGAAACTACATGACACCCTGG

A\_14\_P105808 ACAGATACTTCAATCACTGCTGATGGAAGACTTCGAGATACTGTAAAACTTTGAGAA  
A\_14\_P130967 AGGAATTTTCTCTTATGACCAGAAAGACATTAACATACACAAAGTTTGCAGACAGACCTT  
A\_14\_P119185 ATCAAAAATCAGGACATGTCGTTCTCCTTGACCTCCTTTATCTAAACCATAGGCAAT  
A\_18\_P14133526

CCATATTCATGCAGGTCTTGCAGCCAAGGATTGTTACATTAAGATCCAATCTGAAATTA

A\_16\_P15113315

AAAAGAACAATTTCTCTTTACCTTCTAAATCTTGGCAACCAAAAATAGGAGAGCAAGGGA

A\_14\_P121828 CTGATCTCATCCTCTGAGTTATCTTCAGACACAGAACCTATTATGAATCGAGAGTGCT  
A\_18\_P22840724 TGTTGTGAGGAGAGGATGAGGCCGTCATGGGAGCAGGTCTGACCT  
A\_14\_P111028

TCAGCAACTATGGAAATACTTCTGGCAAAAATAGGAAACAGAACAAACAAAGGAAAGAAAA

A\_14\_P100942 GGGTATGTTTGCCTGGAAGTCATAGATATTTACTGGGTGCTTTACTGGGTTTG

A\_16\_P01337715

GGAATAAGTGTGTAACCTGAACAAGAAAAGAGCACTGATCAAAC TACAAAAAAGGGAAC

CUST\_3328\_PI426210822 CTGCTCATGCGATATGCTCTGCTCACACAGATGGCACTAAGGAAC

A\_14\_P137509

ATTTTAAAAAATAAAAAGATGAGCAAAGGACACTGCAGTCAAGGAGCGAGAATGAGAACA

A\_14\_P201656 AGTCTGCTTCCGAATGAAAACCCCTTCATATTACAGTATTTTCAACTATGGGTAAG

A\_16\_P00685599

GTATTGGGGAGAGTTATTTGGGTAGCAGAAGACGCAATAGATGCTTTGAATTCTGCAAAA

A\_14\_P127205 AGACTACTCTGTTACCAGTCATGAAACATTAACCTACAAGCCTTACTTCTCTGTGTG

A\_14\_P123594 AATTCCTGTTTCTGGTCATTACCTAAAATGAGTGCTTTACTTGAAAATGTGTGGGTATTCT

A\_14\_P127592 ATTCACAAATAGTTCATTCTGAAAAAAAAAATGATTAATCCAATTACATTTTCCCCAAA

A\_14\_P118487 TAGAAGTCAGTTTTTTGGGTCTCAAGAACTATTTGCCTTTGGATGTTGTCTTTTGAAATC

A\_14\_P115621 AGATTTTACTCTGTTTCTCCAGACTTTATATGCTTCTCATTTTTCTTCATGAGGCTCTG

CUST\_7017\_PI426210822 CACACAGGCCATCTGGAAGCTTTGGCCTCCAGATGAGGACATAAC

A\_16\_P18938536

AATTCCTTAAAGACCACATATTCTTCAAACAGTCATACTCAGTTTCCATAACATAGACA

A\_14\_P107440 CTAAGGAGATGAGCCGAATTCTAGAGAGAAAAACTTAGATGAGAAGGAGATGGACAAC

A\_14\_P133690 TACTTGGTTTAGAATCTTGGTTCTGTCACTTGCAACAAAGTTTAGTTTATGCTAGGCACA

A\_16\_P20860485

AGTTGTGGCCAATTATATCTGATCACTTATGACTATGTCTTCCTTGCTTAAATGTTGTCA

A\_16\_P36469502

TTTGGAACAGAAAATGAATGCACATTCAAAATATGTCCACATACCAAATTTTTGCCAGG

A\_14\_P120664 GTGGCTGGGGGTAGACTTAATAAAGAGAGAAATTCAAGAACTGCTTGTCTTATTTAGG

A\_14\_P139040 CATTTAGTAGGTGGACTGATTCCATTGTGCCATGTTATAGAATGGCTTTCAAACTATCT

CUST\_10266\_PI426210822

ATTATTAATTTCTGTTTTATTTGTTTCTTTCAAAAATTAACAGATTTTTTAAAAATTGAAA

CUST\_8771\_PI426210822

TTTAAACAGCCCAGCAAATAACCCAAAACAAAAATGAACAATGCACATTTTTATCTATGC

A\_14\_P139681 ACAGTATATCTGAGAGTCTGTAAAAGCAGCATCTCAGCACTTCACGTAATCAATATGTGA

A\_16\_P00009054

AAAGGTCTGTAGCATGTATGTTTCATGTGTTAATGAATTCTGTAACCATCAGCCATTCC

A\_18\_P22840477 GAATGAACCTTTGGATCTGGACCTTTAGGGGTAGACCTGTGATAGAGTCTG

A\_14\_P105573 ACCAACTCTAATTCTAGGAGATCAGATCTTCCCTCTCAAATCTGTGGTTTTAAAATGAAAT

A\_16\_P17632359

ATCTCCACCTTTATTCTTTCAATTCTCCACATCCATACTTCCATGTGTCAGTCATACTAA

A\_14\_P106607 CTGTATCTGCAGGTTTCGTAAGCATAGAGACGATTTGAATATCTTCCAGTGATATCGG

A\_14\_P119272

TAAAAGACAAAAGGGTAAAGAAAAGGGTTGCAATGTTGTTTTTGAAGAAATGGCTTTAG  
A\_16\_P18921801  
CTATGGCCCAAGCATAAATACATTTCCAATACCTTCTGAAAGGCTTTTTAAGTTCCACAG  
A\_14\_P139427 TTAAGGCTTGACGCTTGAATGGAGTCTTGAATGAGGAAGAAGAATTGTCCAG  
A\_14\_P139114 GGCATCTTTCTTATACTCAGTTTTTTCTGCCTTAATCCCATTACCAGCAGTAACTCA  
A\_16\_P19988635  
GGCATTGTTGTTACATACTTTAGCACCTACTTACTCTAATTATCAACCAGTCATCTGTCC  
A\_14\_P126699 CTCTGCTCTAAAATTGTTGACATTCATGTCTCTGAGTTACAAAAGTGCTAATTCACTACA  
A\_14\_P137324 CTTGTGCTTGAGGATTGCTCATCTCCCATGAGGCTTTAAATCACTTTTTTGTCT  
A\_14\_P102972 ACTGTCTTAATTTGGGATGATGCATTTTATATTACATAAACCTTCTTTCTCCAAAGCGCCT  
A\_16\_P19801273  
TTTGCAAAATGGGTTATGTCTTACAACCTGGTCTTTTCATGCATCCATACTAAGTGATGAG  
A\_16\_P00605995  
CCCCAATTCAATGTATCAATTAACACTCACAAGATAGACAATTCTGACACTAGTCAAGGA  
A\_18\_P14132708 CAGTTGGGCATGGACTCCACCAATTTCAATTCTGACTTAGCGTTATG  
A\_16\_P21294782  
AAAACAGAACTACTACCTTTAAAAGTCCCTTTTTAAAAAATAATTCTGAGCAGTCCCT  
A\_16\_P00532291  
AAACACAAATGCTCAACTGATTTCAATTCATCCAAGTTACATATAACAACAAGTGCCTTCA  
A\_14\_P109171 TTCCCACTTTTTAGATACTGGGGAATATCAATTCATCCTGGTGAATTAATCTTGGCATC  
A\_14\_P129917 AAGATGGGAAGAAAATAGAACGAATGCAAAGGAGAGGAGACCAGCAAACAG  
CUST\_5865\_PI426210822 CTGGAGGACTAGACAGCTAGAAAAGCCAGTTTCAGGGACAGGAAATA  
A\_16\_P17873742  
ACCAAAGGATCAAGGTAAAGTCTAATATGGTGCTACGTTAAAAGAAGAACCTGTCAACTA  
A\_16\_P01880223  
AGCAGCCGTCAAGATTAATCAACCTATTTGTGATTTTAACTTTGCTGATTGGACTCAAG  
A\_14\_P113390 TTTTCCATCCATTATGCTGGCATCACACTCAATTTACCTAACAGATTTAGATTAGATCC  
A\_16\_P00461630  
AACATTGTTATTCAATTTGGCTTTGTCAAACCTCTGTAGCATCGTCAAATGTAGAGAGTTGC  
A\_18\_P22841259 GTGGCTTTGTGCTATTGGCATGGTGGGTCTGAAACTCTTGTAGAC  
A\_14\_P105873 TGAGAGAGTTAGCAATATTTTCCAAATGTAGGCTACTTCCACTCTGCCATTTTTAGTTTA  
CUST\_1770\_PI426210822  
AAAGCTGACAGTTGAACCTCCAGGGAAATAAACATTTTATTTTCTCATTTTATCAATTGT  
CUST\_3739\_PI426210822 CACCTGTTGAATGCCTGTGCATGCAAACATGATGCTGGGCTGAGC  
A\_14\_P113711  
CTAAAATTCTCTCCTGCCTTCTGTAACAACAAAACAAAACAAAAGAGGAGAAAGCAGATT  
A\_14\_P123602 GACACAGCCTTGACTCAATACATCCAAAACCCACCATCTAAAATAAACTTATTCTCACTT  
A\_14\_P110224 ATTGCCACAGTCAGAATCCAGTATGTGAACTAAGCAAATGATCAGAAATAATAGGTTTGG

A\_16\_P15723963

CCAACCACGTCTCTAATAAGGAAATACCAAAAATACTCTACATTCACATCCTAGAGA  
CUST\_1300\_PI426210822 TACTTGCTGCTGAAGTAGGGAGTTGGCAAATGGGTTGCTAAGTTCTAG

A\_16\_P15016856

ATAGCCATGTAAAGTTCTTTTCCAGTGTAATAAAGTTTCTCTGTATCCCACCTCACC  
CUST\_653\_PI426210822 ATGTGGGGTGGGTAGAAATAGGGCACGGGTGATGTATTTGACTACT

A\_16\_P18254696

AAAATGGAGCCATATGTGGATAAGGTGATTGAGTAAGTATCATGATCTCTTCATACCTGC  
A\_14\_P119876 GAGAGGTCACAGGTCAGCAAAAACAGTCAAAAACCCCCACAGATTTT  
CUST\_1691\_PI426210822 CATCTGTTATCCCCATGAGCCTTCATGACCAGTATCTTTGGAGTTTTGTCTATA

A\_14\_P106774 CTCTTGCTTTCAAATGTGGAGTCTCCTCTGTTGTAACCTCGTGCTACTAGTAAATTGTTTG

A\_16\_P58424459 CTTAGTTTTTTATAATACCTCTAAGGCCCTAGAAGATCTGACCCCGTTGCTGC

A\_16\_P41629438

AAATCTATTTCCCTTCGATTTAGTGCTTGGGTTTGTATATTCCGATGAACTGATATGCAA  
A\_14\_P123702 TAATGAGAAAATGAATGCTAAGAACAAGGAATCCTTACTTGAGGTAAGGTTAATTTTGCA

A\_14\_P135366 GCAAAAAGGATAATGATGGAAATGACTGAATTAGCATTGATTTGGACATCAGGATAGATG

A\_14\_P129137 ATGTTACATCAGGTTTTCACAAAGTGCTCTCCAGCATTCACTAAAAATGATAAGAAATCT

A\_14\_P127462 AAAAAAGTTGCCTTTTTGAAGTGATGTTTTTTGCTGTCTTCTTAAACACAAGGCTTTTTTT

A\_14\_P136884 GTAAGTCTATTGATGTCACACTTTGTGAAGTAGTCTTTGTTGCTTAAAAAGGGTGACAT

A\_16\_P16947622

ATTTACCAGATGTGAATTTCAAGTAGAGCAGTTGCTATTAAGAGTTGGTGCATGTTTCT  
CUST\_3263\_PI426210822

GAGGGAATATGCACATCAGCTTTTTCTGAGAAGCTGCAGATGTTTCATAAGATTGTT

A\_14\_P127976 CTCCAGATAAAAAAATCTCAAACACGATACAACATCCAGAGATGAGAAACATCTGGAAGA

A\_14\_P112653 TAATGCTGATGTTGTGCATAACACAAACTCTGTTCTAGTGCCATTTTCTATAAGCACCTT

A\_14\_P202305 AAGACTTTACTGGAGTCATTTCTACTCCAAGAGAGAATAGATGAACATCTTCATACCAAA

A\_14\_P126201 CTTACAGAATGACGTGGCCGCACTTCTGAAACCCATATCGGAAAAGATT

A\_14\_P105137 CATTTCTGAGAGTGAAGATACAGAACACTGCAGTCAGGGGAGAAAACATATTTTTTTTTTC

A\_14\_P123264 TGCAACTTCATCTAAGAGAGTGTTACATGAAATTTTCTTCAAGTTTTCTTTGGGGACAT

A\_14\_P122689 CACAGCAGAGACTGGAGTTGAGCAGACAAATCTTTATTCTGAGGCTAAAATATG

CUST\_7525\_PI426210822

CATTTGAGACAAAATAAGAAACACTTGTGTAACGAGTAGATGGGCTTCTCTGG

CUST\_1597\_PI426210822 ATGGTGGGTGTACAGAGTGTCCGGGGAGGGTGGGCAGTGGTGAGT

A\_16\_P15036083

ATATCTGACTTCTATCCGTATGGTAGACATCAATGTCCCAAGAAAGTTGAAAGAAAAGT

A\_14\_P131786 CAGAGGCATCAGACATTGGGGAGTGATTCAAACTTTTAAATTTGACAACTGTAAAAGAA

A\_14\_P119616 TTGCTGCTAGGAAAAAAGAAGTTCCAGAGTGTCAACCTATATCACCTAACAGAAATTCAA

CUST\_9989\_PI426210822 AGTGTGTGGCCGTGCCCCACTTCCCCTTATAGTCTGCATGCCCT

A\_14\_P128039 CTCCTGTGTCTCTTTTATTCTTGGCAGTCTCTCATCACTTTTGTGAACAAGCAC  
A\_14\_P104538 CTTCTACAACCTGAAATCTGTTTTTACAGTGAATGAAATAGAAGCCACTGCAATTGTCAC  
CUST\_10065\_PI426210822  
TTTTCCCTAAAAGTCACTATTACAAACAAAAATTCGCCTAACTAGAAGTTTTGTTCTATT  
A\_14\_P138840 ACTTTAGGATCAGATAACTTGAAACCTTTTAGAAGAAAAAGAGGTGAGAGTTTTTAGCCA  
A\_14\_P139013 TTTGGCCGGCTGTTTTCTAGTTCAATCTCAATTGCATCCTGGTAACTGGATATTT  
A\_16\_P21123418 AGGCTGAGACTGGATCTTGGGTCCTTCAGTAAAATTGGAGTGCATC  
A\_14\_P125075 AATACATGCACTCCCATATATATATGTGAGTGCGTAGAAACATCCAGAAGGATAGAAACC  
A\_14\_P137587 ATTAGACATTAAGTGGTTGTCCAACCTTCAACCACATCAACTACAAAATCCTGAAGTGAAA  
A\_14\_P130942 GAAAGGGTTTGTCCAAGGTCAGCAGATAAAGACTAGGACCAAGTCTCTAC  
A\_14\_P119385 GCCAGTTGAGCATTGCTTACTTATGGTTAAAGTGCTTCTTAAAAGAACCATAGTCCATTT  
A\_14\_P132478 ATTTGCTGCAGGTTTAGCATTCAAGGCTGATAAACTGCTAGAAATAAGCAGGCAG  
A\_14\_P201893 GAGACACTGATGTTTCTTCCCTTGCCTTCTTAAACAGCAACTCTTGGTGTATC  
A\_14\_P120536 CTTACTAGGCAATTTGGCATTAAAGAACTTTCCTCATAAACATTTACAAATATTCTGCTCC  
A\_14\_P129089 AATAAGTGTAGGAAAGTGAATGATGCGCACCTCTGCGAAACTGACAACACTAAATAAATA  
A\_14\_P107597 CATATGTTATGTGCAGACAGACGTTTTACTATAATGGTGCTTAAAATGGATCGCGAGTTC  
A\_14\_P113140 GAGGAGTTTTCTTCTTGACATTGTCATCTAAGTAGGTTGGTCCCAGGGTATAAA  
CUST\_8309\_PI426210822 TCAGGTACCCACTCCTGGAGACCTCCTCTGTCCGTGGGGGCTAAC  
A\_16\_P18172493  
GATTCCTGAACATCTGCCAGAAAGAAGTTGCTCATTTCAGTAAGTCAGTGATTTAAACT  
A\_14\_P129297 ATTTTGTGGGAATCGTCTACTTCCCTGCACTCAAGACCTTTTCAATGTCTTTATTCTGTA  
A\_14\_P201626 AACCAGAAGGCAATAGAGGGAGAGATTCTGTATTTAAATTTCACTAGTGGCTTTACTTTG  
A\_14\_P101212 CTACAGAACTACTCCTGGGACTTTAGCACGTTTCCTAATTGATAATCCTTCTGAAAAAAT  
A\_14\_P139753 TAGCAAAAGGCAAAATCTTGTGTATTAGCCACGTGAAGTATCATATGGCAATGAGAAATA  
A\_16\_P17171963  
AATTAATCACCTGAACTTGGATATAAATGACCACATCTGTCAAAAATCCTTGCTCCATGTC  
A\_16\_P39146844  
AACTTAATTCCTCTTTTCGAAACCAATTTGACAACACGAAAATAACGTAAAGCAGCCTT  
A\_14\_P107342 TGTTTGTGTTTACACATGGACCCTAAGTATTCCAAAGTGAATTATGATGTGGGAAACT  
A\_16\_P16287796  
AGGGATTTCACTAGATCATTCAACTCTTTAAAATTGTGGCCTAAGACAGATAGGAACTGT  
A\_14\_P107965 GATGGGCAATGAGTTAACTTCCTTTTGATAAAAATAAAATCGGCTGACTTCACTACTTCAG  
A\_14\_P135895 CTTCTAGTGTAAGTATAATTCTCCAGTATTTTCATGGGTCTGCAGAAGCCCCATCTATG  
A\_14\_P110099 ACTTAGCACTTCTCTGATGCATCAGAGATTAAGAATGTTTTTTCCCTTTTCCCTACCAAG  
A\_14\_P109055 AATTTTTCTGTGTAAGACATAGGTAATACTCCAGCCATGTGCTTCCCCTACAGTTTAAAG  
A\_14\_P120005 TGTAAGTTACATTTTAAAATAAACAAAAAACTGTTCTGGACTGCAAATCTGCACACACA  
A\_14\_P103407 GTTTGTGTTTGTGTAAGGAGATTACATCAGAAAGGGCCTAAAATAAAGGCCAAATC  
CUST\_7195\_PI426210822 CTCAGTTGGACTATCTGGACTTTTTGATTCTGCTTCTTCCCAAAGTGCTC

A\_16\_P58424210

AGACACACTGGTAGATGTTTAAAGTGTGTATGCGTATGTATGAGTCTTCAGTTTGAGTAGT

A\_16\_P38361714

ACTTGGATACAAACACATCACATTGCTAACATTCCCTTACTCCTTCTACAATGATAGGAT

A\_14\_P102761 GTTATAATGCACTGTAGATGTGAGTGATCGGTAACTTTAAAATGTCCCTTACTGTGAGC

A\_14\_P124448 GTTCTTTATAGAGCCCAAATCTTCCACCAGGTGTTCCGATCAATCCTATCAAG

A\_18\_P22839219

TCTCCAAAGTCTTTTTGCATAAAGATTTTCTAATTTTTTTGTTGTTTTTTGTTTGT

CUST\_2235\_PI426210822 CTCGAGGAGCAGCTGGCTCTGACTGGGGATGGTGCCTACAATGCG

A\_14\_P137538 ACAATCTGAACACTCTTTTCTATGCAGATGGTATGGTGTATGCTCTGGGGG

A\_16\_P03359514

CTGCAAAAGGATTCATCTACTCACATAGGCCTACATTTTTACTTAAATATAGATTCGCCA

A\_16\_P00679807

GGCATAAAGTATGGCTCCAATATAACTTTTCCCTGCTATTCTAAACACTGGTGTAAAGAGT

A\_16\_P02737952

AAAAAAAAAGAAAGTTGCATCTTAGAAAGGTTTAGGAAGGACAAGAATCATGCTTCCAGGA

A\_14\_P115007 CGTCTAACTTATAGGACTTCCCTTTATTACAAATTATGACCCACACGCAGTTTATTCTT

A\_14\_P138949 ATGGAAGCAAGAAAAAATAAGGTAGGCCACTCCTTTCTTTAAAGACCTTTTATAGAGT

CUST\_717\_PI426210822 TACAGCAAGGGGGAAAATTGATCCCTTAATGTGGCTTTCTTCTCACTG

A\_16\_P15817495

AATGTCACAATCAATCTAGACAGAGCATCCTAAAATCTTCTGGCCTCAATTGAAAGAATC

A\_14\_P126195 GCAGATATATTCTGTGGATCAAACCAGAAGAAACAGGTAAGAGTCATTCAGTTTTTTTTCT

A\_14\_P127921

GAAAGCATCAACAAAAGGAACCAAAGAAGTCAAACGAGAAAACCTCAATGCTCTGATAAAT

A\_14\_P102464 ATATTTGACATCTCAGAGAACTTCTGAAGAATAACTGTATGACAGACATCAGTAGTGCA

A\_14\_P120234 GCACAATTAATACATAAAAGGCATTTTTATGTGGCACACAGTCCATACCATATGACCCAA

A\_14\_P138672 TCTGCTCCCTGGCTGGTGGTATATTGTATAAAATAAGATCATCTTTTTCTTCTGCTTTT

A\_14\_P130989 AACATCGGGTTTTACACAACCTGTTATAGGCAAGGAAAGAACATTTGAGACAGAAAGTATT

A\_14\_P127570 AGAGGCAGAATTTGATTAAACCTGAAGATCTTCTAAAACCTAGTTCAGAGTAGATGGCT

A\_16\_P36019348

TGCCCACTTACTATAACACACTTATAACATGATAAAGAGCAACATAGGTAATGTCCTTGC

A\_14\_P121640 CAAGACACTAAAGAAGAAACAGTCGAACTTCTTCCAAAAGCCAGATTTATCTTCCTAAAG

A\_16\_P18776292

AATTCTTAAGCAGCATCTATTTTCAAGTAATTTCTCCCTTTTTACTTACTTGAATGGCCC

A\_14\_P110975 ATTACTGGGAAATTTTCAAAAAAATTACCAGAAAATCTGGCTCAGCAGATGCAGAATTCT

A\_16\_P16743616

CCCTGGGTATAGAAAGTGACAACCTTCTGCAGTTTATCATTGGAGCACATTATCAATTACT

CUST\_7153\_PI426210822 AAAGTCACAAGGCCAAATGGCATAACCAGGTTTTTTGGTCCTTGTTTAAGAAAA

A\_14\_P129487 TTAAAGAGGTAACCTGAATCCACCAATTGCTGAACAATGGAAAAATACAACCTCGAACAA  
A\_16\_P02944844

TCCCTTCTAGTTAAAGTCTACTAAACACTAACTTACTCTTTACTTTCTCAAGCACT

A\_14\_P101189 ACAAGATTTATTATCTTATTTTAAACTACAGAATTCCAAACACAAGGCAAACCCGGGCC

A\_18\_P22841938 CTCTAACTGCTTGGAAACCACAGCACACATCTTGC GTGTGTTGATTACTG

A\_16\_P58424334

TGTCTAGATCTGATAAATCAACGAGTAGTAGTATCAGCATGTTTTCTAGAGATATGGAAA

A\_14\_P133774 AATAGGGAGTCCCTTGGAGCAATAGAACATCCCATCAGTCTAAAAATGCTCAATTAGAA

A\_14\_P122151 TTTCTGAAGGACTTAAAGCCCAGTAATATAGTAGTAAAATCTGATTGCACTTTGAAGATT

A\_16\_P01485033

GCCTACTGATCCATAAGATGTGCTAATTGTTACCATCGACTACAGTTAACTTGAATTCCA

A\_14\_P109310 AAGGTTTATACGTTTCAATACATACTGCATTCTGTGCTACACAAGCCTTAGCCTCAGTG

A\_14\_P123379 CTGATACTGGAGCAAGATGGAGATATTTCCATTTTACTCAGCAAGTCGAAATCATTCAAG

A\_16\_P00692018

GGGTCTTAAAAGGTTTAAACGTAGTGAGAACTGGTTCAGTGATCCATGCTTGATAAAATT

A\_14\_P118594 AAGTTCATGCGCTTCATGATGATGCGAGCAGAGAACTTCTTTATCCTTCGAAG

A\_14\_P138551 GGGAGTATTCAGGTTAGAAGTGCCATGTGTTGACATTATTTAAGATACAGATCTGGTTAC

A\_14\_P137113 TTCTTCCATTCTGATAGTTTGCTCTTGCTGTAAGTAATACTCCCCAGAAAAGACAG

A\_14\_P135558 ATGTCTGTGCATCGTGTGTAATAGATCTGATCGAAGGGGTGTGCATACGAT

A\_14\_P109005 CCAAGGAAAACATCATATTGCTAATTTTGGATGGTCTTAGTGTCAGACACTTAATTGAGCA

A\_16\_P15337830

GTTTCGAGACACTTATAAGCAACTTTCTTCTTAGTTCACAATGTTCCATGAATGTCAGTGC

A\_14\_P109693 CTTGTGAATCATTTATAACTGCCACATCTCAAACCCTGTGTTTGCTTGGTAACATACGA

CUST\_2874\_PI426210822 AATGGAGAGTTTGGGGAGGGAAAAATGGGCAGGCCTTATGGAAAT

A\_14\_P107553 GATTGATACCTCCTTAGTGAGAAGGGGCTAGAAAGTAATATCAGAAAGTAACTTTCTCC

CUST\_8358\_PI426210822 CATGATACATAACACATGTCCCCAGCTCACAGAGGATGTGCCTTCT

A\_14\_P133602 CACACACACACTTACTTTCGAAACTTCTTTTAAATTAATTTCACTGACACTAAAAG

A\_14\_P201882 CTCTGCACTATCCTACATAGGTCCCTACTATCAGTTCAAGTTTCTGTTTTCCATTAG

A\_14\_P107467 AGCAGGTCTAAAATGTTACTTGCTCTTACACCAGGAGCATGGCAGAAAAT

A\_16\_P38013111

AAAAAAAACAGAATAAATGAGGCAACATATACATAATGAAGAGAAAAACGAATAATTGT

A\_18\_P13379011

ACCTGCATACATTTTATAGATTTATTTGATGAGCATCTCTACACTAAGACCACGAAGACC

A\_14\_P134430 CTTTGTCTGGATGTCATCTCTTGAAGTAGAAAACCTATGTGTTTATCACATTGCAG

CUST\_5851\_PI426210822 ATGGTGTTCACTCAGTCACACTGTTGTGCTCTCATTTGCCAATGTAA

CUST\_3291\_PI426210822

GTCTTCTGAAAACTTTTAAAATTTGTTTATTTTTTGAATCAGTAGTGTGTATAGTTAAAA

CUST\_8990\_PI426210822 AGAAGCAGGCGATAAGTCAGGGGGTGGGTCATGTTTACCCGGTTG

CUST\_4146\_PI426210822 AGGGAAAACCTTCATCATGATGGGAGGGAAGAAAGAAGGTAAGTCCTAAGAT  
A\_16\_P19012783

AATAAATTTGATGTTGCTCAATGGACTATTGCTAACTCCAAAGATAACAGCACTCTCCCT  
A\_14\_P134053 GTTGTCTCATTATTTTTAGACTCCCAGCAGGCTTTGGAAGGGATTAAGTAGACAAGA  
A\_16\_P00337056

AAAGTCAATCACCTGATGATTGTTTTTAAATAGCATCTCATGAACTCAGACTTACCCACG  
CUST\_1688\_PI426210822 AATTCTGAAGGCTCAGGGGAAGGTCAGGTGGGTTTCAGCAGTGAG  
A\_18\_P15835679

AAATGCCTCATTATTTCAACTCTGGGATATCATGAAGACAATAAGGTTTGACACAACAG  
A\_14\_P104873 TAAAGAAATCAGTTACTTACCAGGCTCACCTTTTTTCTTTGAACCAGACTTCTTCTTGG  
A\_16\_P20350449

AACCTTTTTCAACTTGATCATAGATGCAGACGACATATTATAATCCACGTTATCCTTGCT  
A\_14\_P116329 AAAAGAGTGATTTGGCCACAGATGACCCTTCTTTATTAAGGAGGCAAAAACAAAGTAA  
A\_16\_P00598901

TTTCATGAAAACCTCACTTTAAAAAATCCAGTAGCAAGTTGTCCTAAAACCTGCCTCTCTGC  
CUST\_3958\_PI426210822

AGTCCCAAGAGTCACCTTTGCTGATTTTTTTCTTATTATTCTTTCCTGTTATTCCATATT  
A\_16\_P18690961

TACAATGTTCTAGTCAGATTACACAGAAAGGGCACTAATCATTCTCTTCTAACTCACC  
A\_14\_P104129 AGTAGAACAAGTGCTAAACTTTGGTAAGTCTCTCAGGTATACCTTTCTCAGGGTAATATT  
A\_14\_P136553 TTCTTTCCAAGACAAACTGTTTCACAACAATCCGGAAAATATCCAAATCACAATTTGCTT  
A\_14\_P113420 AAGCAGAGAATGAAAGATTCTGAAAATAAAGGTAAGGGGCGGACTGCAGAAAGAT  
A\_16\_P01391816

CTTCCTAAATCTTCTGTAATGACTTAAGGCAACGTATTCTTTTCTCAGCACTAACCTC  
A\_14\_P117965 AAGGGGATTTTCATGTTAAAGAAAATGATTCACAGTTGTGAAATGGTTCAAACACGGTAT  
A\_18\_P14135034 CTTTGCTGGGTCAATGTTACAGCCATTTATGTCCCCTCAGATGTTGG

A\_14\_P117820 CTACACTGAACAATCTGGCTTCTTTCCACAGTGTAGCATTTTGCTTCTTTCACTTTTTTA  
A\_14\_P122301 TTAAGTGGCGCATAACAGCCTTCACACACAGCCTCATAATTAACATAGACATACATATG  
CUST\_6246\_PI426210822 CTCTTCACGGATGAAAAGCCAAAGGCAGCTGTGGCTTCGCTTTGT  
A\_16\_P16370431

ATGATCATGGCAGGACATAAAAAATCAAAAGTGTCTTAGAGTCTAAAGAAAGGTGCTGTG  
CUST\_9352\_PI426210822

CCTCGTCTGCTTGGCCTGTAACGTTGGCAATTATCATCATCATTATCGTTATTAATATC  
CUST\_8672\_PI426210822

AATATCATACCATTTCCTCCTCCTGCAAAACCAATTGAAAATATTGGCCTCTCT  
A\_14\_P132301

GAGAGAGTCCATCTAGAAGAATGTCAAACAAACCACTGAAGTAACGTGTTGACAAAATAA  
A\_14\_P116299 GATGTATTAACAAGACAATTTTGGCCACATATCCAAAGCCATGTCTTCCAATCAGCGTTAT



A\_14\_P134366 GAAGTGCAGTGGCAAGCCAAGACCTATTTCCAATACATTTGTCAAAACTAGATTTTTTTTT  
CUST\_8298\_PI426210822

GTGCAAGACTGGATTA AATTGAGACAAATGTTTGCTTCTCAGAATGGCAGTG

A\_14\_P101766 GTGTTCTTTTGGGAATGAACACTGTTTTCCATATCTGATCTAAATGTCCTCAGTCCTGATA

A\_14\_P201313 CTGATTTTCATCTTACTGTTCTCCATTTGCAGGTGAAAATGGAGGTTTCCTCCT

A\_18\_P14784465

TGTGTCTGCCTATTTCCATGATTCTAAACACACTGTAAGAAGCCATATCACCATTGAATT

A\_14\_P124530 CATCTATTGGAAAATAAACAGCATGGAAAAAATATCCCATTGTCTCGCACATTCTCTTAA

A\_14\_P110303 TCATCAATGTTGGCCTAGTTTAAAGTTCCAAGAACCCAGAAACAAAGGTTTAAATCATTTTG

A\_16\_P02019063

ATCCAAATCTACCCAGAAAGTCTAATTAATCCTTACGGATCTACTTCTAATTGGCTGCT

A\_16\_P41637097

GGCTCTTGACATGCTATATTGAAATCTGTGCAAAATTAGTCAAAATACACTACACACACA

A\_14\_P127748 TCAATGCCTTCATGTCTCAGCAAAGTATGCTTGGCTTTAATCTGTTTCCTTAAGAACTTC

A\_14\_P126408 CTCGCTCTTCTGTAAGTGTAACCTTCTTGGGTGGCTTTGTCCTATATTTTTAAGTCATT

A\_14\_P137780 TGATGAATAGACCAATGAGTAGAGTTTGGTCATGAGCCAAAGATGATTAAGTGAATGCTA

A\_14\_P115219 GAAAACCCGATAAAAATTCTTTATTGGGGGAGGGGCTCAAACAAGAAAATAATCAACA

A\_18\_P16801567

TGTATCTCACTAAAATCATCTCTCATTGTCTAGTCCAAGAAAACACATACTAAGCCCAGC

A\_14\_P202106 GACCTCATGAAATGAGTTGCAGCAGAAGTTTATTTTTTTCAGAACAAGTGATGTTTGATG

A\_16\_P21263512

CCCTCACACTTGGAAAAACAATTTTCTAAAATTAGGATTCCATCACCAAGGAGAAACATT

CUST\_7970\_PI426210822

TATTGGTATGGAGACAGATTTTCTAAGTTCAAATAGTATACTACAGCATCTTCAGACATT

A\_16\_P17675028

AAAAAGAACAACCTTCAGGTAGACTAATTCCAAGAGCCAGTTAAACTGAAATGGAAACTAGG

A\_16\_P00417654

AAACATAAACTTGGTGCCATATAACTGACTAGGCTGATGATAATGACAGGGAGAAGTAAC

A\_16\_P01230561

AATGCTCACACTTAACTCTACAATAACCAAGAACTATCTATCCCAGATTTTGTGTTT

A\_14\_P101028 GTATCCCTGAATTTACATACTTACGGCTCGTTGATGATCCTCATAACATTTAGGCCAG

A\_16\_P19102846

ATCCTGGTTCTAACTAATTGCACAAAAATTTACACGATTCTTGACCTCTTCAACACAGAG

A\_14\_P127295 GGACTGATACTTTGACTTTTTATCTCCAAGTCTTCATCAACTGGATCATTCCAGTTCTAA

A\_14\_P125410 GTCATGACCAAGTTGGTCTCTGCTCAGATAATCTCACTGCCTTCCAATTATATTTTATAG

A\_14\_P133246 ACTGCCATGACTGAGTTTTAAAAATTTCCAACCTTACTCTACCAGACTCTGTAAG

A\_18\_P22841754

TAAATCTCAGTGCTTCACACACATCAGACAAAGATATTTTGTGAGTGGCTCTAAAAATGG

A\_14\_P101095 TTTCTGTATCCACATGTGCACTGTATGAAACTGCTGTCCATACTCTTGTCTTAATTGATT  
A\_14\_P114150 TATTTTTTCCTTATGTGATTATTTTTGCAGAAATGACCGCTCCTTCATCTGTCCTGCAGAA  
A\_14\_P126638 TCAAATGATTCTTTGAAGGCAACAATATTAGGGTGTTTCATTTTGGCTAAAAGAACAGCC  
A\_14\_P123495 TTATAAGCAACAACCTTTCCCCCTATCTACACCTATTTTTCTTGTGCATGGTGTTTAAGGAC  
A\_14\_P107883 CAGATCAGATGTTCAAATTTTCAGATCTTACCATCATCCAACCTTAAACTGTTTCTCCCTCC  
A\_16\_P19253419

CTGAGATTGTGCTAAGTATAACAAATGTCTGAGACTCTGGATTTTCTACCTCGATGAGAA

A\_18\_P10645499

TGTGGGCACCTTATCTTTATGAACGGCATTAGTAAATTAATGGAAATATCCTTCAATGCA

A\_14\_P109318 GAAAGCCCTTTCTCCTATTTTTTTTTTTGGTGCCCAATCAAATACTACTTGTCTTTCAAG

A\_18\_P22843234 TCTTAATGTTTCCGGCTTATTGCCATATTCATATGTAATTCCTCCATTCTTTCAAGG

A\_14\_P108334 CTAGTGGCTTTCTGGAGAAATCTCCACATCTGCACCTGTTTCATTTTATTAATAAGAAA

A\_16\_P17729248

AACAACATGCCTACCGTTAATTTCTTAGGAAACAACCTTCGTGTGTTATGTTTTGAACTTT

A\_14\_P108904 AAGTATGAAGTGTAAACTCTTTCTTGGGCCACCAAAGTAACTAAACAAGAAATGCAACAT

A\_14\_P200607 GTCTCCAGCCCACTTGAAGAATTCACGGAGTTTTTCCGATGTGTATCTATATT

A\_16\_P58424384 ATGGGAGGATTTATTTACCTAGGCAGGGAGATCAGGAAGGATCC

A\_14\_P107254 ATACCCAGTAATCTTTTCGAGTCTTTCACAATTTTTTCTGACAGCCTCAAAGTGCAATAT

CUST\_6914\_PI426210822 TGTTTCTCAGTTGCTTCTGCAGGCCCTTCCCTTCTCCTTGAGAG

A\_14\_P133787 ACAGTAATTTTCATCTTTATGATTCTGACACTCAAATTGGGAATGTTACCTGCTTGGTTGT

A\_14\_P130031 AGCAAATAAAAAGAAAATTGGCCTTTGCTTCTTCTAGCCTCCCTTGCAAATATAAAAC

A\_14\_P108657 CATTGATCAGAAGGTGTATCAGGCTGAGGTGGATAATCTTCCTGTAGCCTTT

A\_14\_P114409 TGAGATGTTCAAAGACATCTTCTGGTGCTTCTTGAAAGACTTGATTTCTTCACATAGATG

A\_14\_P137319

ATGTAGAGAACAACTAAGAATGAAAGCAATACAGACTGCAGAGAAGGGTGAAAACCTGTA

A\_14\_P137007 TTTTTTTTTCTTCTCTAAGATCCTTTTTCTTTATGAACAGGGCTTCTCTCTTCCAAACC

A\_16\_P16987720

AGGAGCATTGTAATTAGTCTACTTGAGAGTCAAAGAACATAAATAACAGCACTGCAGGTG

A\_14\_P111418 CTGGGATAAATGTTTTGAAGAGTTCTAACTGATGCAGGCTAAATTTTAAAGGGCAGTGTA

A\_16\_P40360547

AGTTCTGCCTCACCATATATTTGCTCTCTGATGATTATGTTCAACAAGCATCTATGCAAAG

A\_18\_P22841030 AAATTCATACCTGAGCCATGCATGAATAATAGGCACAGTGACGTCTGCCATC

A\_16\_P16191662

TTCCTAACATATTTGAGTGAATTGAGGTAGTTAAATTAATTTCCACAAATTGAGTGAGTTT

A\_14\_P120778 AGTTGGTAAACCGAGAAGATGAGCCTTAAGAAAAAAGTATCAGGTTCCGTTTG

A\_16\_P00000465 GTTACTTTGACCTCATTGGCTGTGACTTCTGATTGATGACAACTTCAAGGT

A\_16\_P17495150

ACCACATCTCCAATGAAATTTGATAGTGCATACCAGAGTATCTTAGTTTTTAATCTCCCT

A\_14\_P119690 AGTTTTAAAAATAGAACAAGTCACACAGAACTACAAATTTAGCCCCTGAGGCTGATTGTG  
A\_16\_P39668843  
GTGCATTTCAGTCGTAATGTTTAAAGCCCCTAAATTCCTTCTGTATGTTCTCTAATTCCTAAA  
A\_16\_P03042271  
TACATTGGATGAAACACCATTTTACCATGACTTAGAAAATCAGGATACGGCTTAAACTGC  
A\_16\_P01816703  
TGGTCAAGTCTGAAAATAAGTTGTCCAGTGTGTTTGTATTACCTTAATATCTTCATCCC  
A\_16\_P17545841  
AAACTTGAACATAGCCACTTCAGTAGAATGACAGAACCTTACATAAAAGGGATGATGAGA  
A\_14\_P113903 TGTAGCAGATTACAGTGGACAAGATAATTTCTTACAACGAGTGGGACAAAATGGCTTAAA  
A\_16\_P17098223  
AATGAAGTGCATGGAATGATAGACAAGAGTTTACCTCCAAAGTTACAATAACCTGTTTGG  
A\_14\_P104001 TGATTCTGAGTGGTTTAGTTTTATTTCAGAGGAAAAGTAAAAAATGCCAAGAGATTGCCTC  
A\_16\_P16931581  
CTCTCAGACCTCCGTATTAACAGAAAATAATCAAAGCCCTCCAATCTATACAGATTTCT  
CUST\_5987\_PI426210822 TCTGAAAGACTGTTTTAGCCTTGGGGCCAGAAACCCCTCTATTAGT  
A\_14\_P115925 TCCTCACCTGTTTTTTTCATGGATCTTCAAGATTTCAATTTGTCTGTTGAAGAAGTTGCTT  
CUST\_3769\_PI426210822  
TATTTTAGTATGATAGTTCTTATAGATGATAAAGACCTCAGAAAAATCTCACTATGTCCA  
A\_14\_P129603 TGAAATCATGTTGCAAACCTATGCAGCAACAAACATATACTATTCTGTTTGCAGAACACC  
A\_14\_P130068 TTTGCCATCATCACTCAAATCTGACTCCACGACCTAATAAAAATAAGAGCAAGAAAAAGCA  
A\_16\_P40488602  
AAGAAGAAAGCATTAGACAGGCATTCAAGTCCTTAGATACCTTTTTTTCTAACTGGTCCTA  
A\_16\_P40963736  
TAGCACATTTCCAGTTTTTTAGCATTGTCATTTTGAAGTATAGTGTCACGACTTGAGGAAC  
A\_16\_P35571025  
AATGCCATGAATGACAAAATCCGCAAACAGATCAACATCAATAATCCCTTTGTTTTTCAAA  
A\_14\_P139450 GTCAATGAATGGGGAGTAAATACACAGATAATCCAAAATTGATGTAAGCATTGGAAGGGG  
A\_16\_P00369434  
ATCACTGACATATTCTGCCATGAACAGATAGAGATGCCTTCTTAGGAACATTCAAAACTT  
CUST\_7912\_PI426210822 CTGTGTGCAGAGTCCAGCCTAAGCTGGCTACACTTGGAAACCTCT  
A\_14\_P109429 TCTGTGAAGAGAAAACTTGCTTGTTACAGAAGCCTCAGAGACAGATTTTAATCTCAATG  
CUST\_5513\_PI426210822 CAACAGTTACAGAGGGGGCCAGAGTAAGAAGTGGGACTGCAAGTG  
A\_14\_P117971  
ACCAAACAAAAACACATTTTCTTTTTTGAAAAAAGGACAGAACAAGGGCAAAAATCAG  
A\_14\_P103906 TATTTTCTCTTACTGACAACAAGACGTGGGCTGAGAGTGAAAGGAACTGTT  
A\_14\_P103072 TTATATGGGGGAAAATATTGCTTTATGGGTCTCTGGCTGGGAATTATGAGTGTTATGTAT  
CUST\_4176\_PI426210822

ATTTCTTGTTAAGCATTTTTAAAAGGTTAACTTCTTCCCAGAGAGCTTTTACATAATTAT  
A\_16\_P00694195  
CACACTCTATGCATCATACTACCATTCTTTAATGCATTGTATTCAAATTCACCAGGTCC  
A\_16\_P01010403  
CTCAAAGGTTTTCAATCCTACTCTAACACACATAGTGAAGTAAGCCAAGTTTTCAACAGG  
A\_14\_P103845 ATGCTTATTTTTACCTGGGCTATCAGGAACAGATGAGAGATTCTGTTGCTCGAATTTAC  
A\_14\_P138268 TCCTCCTCCTCTTTGAGAAGACTAGAACCAGTTTTTAGCATTGAAATATCTACAACACAA  
A\_14\_P138955 CTATTTATGCTGCTACTGTGGGATGAAGAGTCTTATCATGAGACAGGAATTTTACAGACA  
A\_14\_P128438 CTTCAATTGCACTGGGAGGTAGTTTGTGTGCTACAAATCTTAACAACACACGC  
A\_14\_P129398 ACATAAGGTATGATTATAAAAAGTGACTGTCTGCAATAAAAAGAGAAGTTGTTTCAGGATATT  
A\_14\_P123535 TACATACACACGGCTGATCCCTTGAAAATGTTACTGAACAAGACAGCAAGAATAAAAACA  
A\_16\_P16895040  
TGTCTAAACACTCACAGGAATCTCTACCAACACTACAAATCATTGGAAATTTTTAGAGGG  
A\_16\_P03639380  
GAACAACCACTAACCTAATAACAAACGTAGACTTTTTCACTTTTTGTTCAAAGTTGGGGA  
A\_14\_P103255 TGGCTTTTGTGTTTGATGTGACTGGTCTATGTATGATGATTTAGTTCAGGTGATTGAAG  
A\_14\_P122755 GGTATATCAATTGGATTAGGCAACAATCAATATTTGTGGAAGTAAGTGGCCATCTGGAAA  
A\_14\_P137105 CTGCTTGCCAATTACTGTGACATGTTGCTAAGAAAAACACCATTAAGCAAAAACTAACC  
A\_14\_P110247 GTCTGGTTTCTTGGACTGCACCTTAATAGTTAGAATCCAGATGCAAAGGAAATAGATTCT  
A\_16\_P16191443 AAGGATTGACATCAGAGAGGCCAGGAAGTTTGACATTGGAGAGAG  
A\_14\_P130703  
AAATTAGAAAAGACAACAAAATTAAGCAGCGACCTTGAGATAGCCAACACAGAAATCTGT  
A\_14\_P103448 GACTGGAGAAGTGTGCTCGTGACACAAAGGCAACGAGCAATTAATTATTCATTAATAA  
A\_14\_P120333 AGCAACTCTTTATTGGGAAACTACAGTATCTGACACATTGAAAGTCAAAAATAAGCCAG  
CUST\_3882\_PI426210822 TTATGACCCTGCATTTTTGGTTAAAGAAAGGAGGGAAGTGAAGTGTCTGC  
A\_14\_P104639 GTCCATATTTACTGAGCAGGTTAGATACACCGAAACCTAAGACTTTGAAAAATAATCTGG  
CUST\_1914\_PI426210822 TACTTATAATTGATAGAGCCAGACAGCGGGACTCCTGGACCCAGTTTATAAA  
A\_14\_P127002 TCCAAACAAGTTTTTTCCATTCTGAACAAAATGTATGAGAAAAGACTCCTCTTCTCTCC  
A\_14\_P120125 TGACGTTTTCAAATACCCCAAACCTCAACTAAGATAACCTGGAACCTATTAATGGATAT  
CUST\_8765\_PI426210822  
CACATCAGAAAAGTCTGGATTTTATGACTTAGCTATGCTTAGAGGATAATTGCAACAAG  
A\_14\_P102790 GAGGGTGTAAGAAAGACTCAGAGGAAATTCAGGTATTCTTCTATAGGGCTCAGATG  
A\_18\_P17044234  
GGTATCTCATCCACTTTCCTATCCTCCAATCCCATTAATGTTATACAAAAACACGAAACA  
A\_14\_P136999 CTATCGCTGCCTGCAAATGTTTCGCCATCTTCTGGACAATCCTAAGAG  
CUST\_4929\_PI426210822  
TGTTATGAGGAAATACACTGTTTCAAATGCAGTTTTCTTTGTGGTGTCTCAGCAGATAC  
A\_16\_P02991500

ATAAGGCAGTCACTAAATAGTGAGAAAAGTCACCTATTTACTCATGTTTCAGATGACTCCC  
A\_16\_P35467019

AAGGGCATCTTTGAGATACATGTTGACTTCTAAAGACCAATAGTTCAATTTAATCCTCCA  
A\_16\_P18150936

AAAAAAAAAAGTGAAAGGTATACACCCTGTATCTAGTCACTTCAGGATCCACTAAACAAGC  
A\_14\_P134418 ACTTCAGTAACTTGCCTGAATTGAGAGAGCAAAACAGTCCGGAGAGAAAACCTAAAAT  
A\_14\_P128043 ATCTCTTTGATGTATGCAGGATACTGGACTTGATTGGTTATTGTCACTGTGTTTCCTTTG  
A\_14\_P120094 CCACAGTGATGTGGAGATACTTTTGCAAGTCTTCTCAAAGAATCTGTCTTATAGAACAT  
A\_16\_P03585347

AAAATGCAACCGACTTTCTAAGAAACCATGAGATTTCTGAATAAGGAGAAAGGGCTTTTA  
A\_16\_P30952233 CTATTTTCTTATCGTAGGTTGTGACAGAATGCCTTTTTTCTCTTGCTGCAGGGTC  
A\_14\_P113454 CTCTGAATCATCTAAGAGAATTCTCTTACCAACATCTGGTCAATAAATTCCTTCAAGACC  
A\_14\_P108008 AGTAAATATCACAGCCAAAGAGTTCCAGGCGAAGTGCAATACTTTGATTCCATGTTTTAG  
A\_14\_P124142 CTTAGTCTTGGAACCTTTGAACAAAACCTTTGTATTCTTGAGGTCAGATCTTCATTCTCT  
CUST\_8430\_PI426210822 GCCACCAAGCAGCATGTCATTCTCTCTCTCCTACTTATCCTT  
A\_14\_P100696 GTTTCTCTAATAGTGAATCAGAACTATTAAGTGGCCAAGATGATTTTCTTAGGCTCTG  
A\_14\_P130920 ACTACCATTACATTTTGTGTTTGGAGAATATCCTCTTCAATTATTTGGAAGCCTCTGGTGAA  
A\_14\_P115704 AAACAAGTAAGAGTGACGTTGGTTCCTTCATTGACGGTCATATCATTTGAGATGTCAT  
A\_14\_P110940 TCCCTGTCTAATGTCTATTCTCTTTGCCTTGCCTTACTTTTGTTCAGATCAACTTTAG  
A\_18\_P14986011

AACAGAATGTAAACCGGATACCTTCTGAGATAGGTTACAACCTTCATGGCTTCAAGTATTG  
CUST\_5119\_PI426210822 CACCAAAGAGTTCAGTCTAATTCTGGGGGTTGGGGATAAATATGTTAGCC  
A\_14\_P200143 CTCAAAAACTTTCACAATTTCTCTAAGGAAAAGCAGACAATCTTTGAGATGGCCTTCAA  
A\_14\_P134361 CTTTTCTCATCTTCTCCCACTCCTGTTTTTTTTGTTAACTCTTAATAATCTGACCCTACGA  
A\_14\_P136346 GCCATGTAGAGACGTCATCACTATTTATTCTGATTAGTTGCTGGGATCTGTAGAGTG  
A\_14\_P100456 CAGTGATAGAAAAAGACCATGAAACATCAAAGACACCCAGGGAGAAAGATGCTTAC  
A\_14\_P123523 ATACACACATTACTATAGCCAATACACTTACCTTGAACCTTTTTTGTGGCTTGCAACTTC  
A\_14\_P123497 TCCTTAGTATTCATTCATAACTCGACATCTCTAAGGGGGAAATTTGCAAGAGTCTTTTCA  
A\_16\_P00618064

ACTTTTCAACTGTAGAGATGAGCATTATGTAGGCCAAAACCTAAATATTTTATGTGTGGGTC  
CUST\_6435\_PI426210822

CTGACATGTATATCTTCTTCAGTTGGTCCCTAGTGAGTCTACCCAAAGTGAATTG  
A\_14\_P126407 CTCAAGATAAATATGGGTTAATGCCTGCATGATGCCTCTGAATTCAGGAATTGCAG  
A\_14\_P134187 CATTTTCTAATCTTAGCCACTTATCCCCAGTGAATTCACCATGTCCCCTTCTAAAT  
A\_14\_P108191 TGATCCTTGATGTGAGAATAACTGTATTCTTGCATGTTTCAGAATGTCCTTATGTTCTTC  
CUST\_8782\_PI426210822 GGGGATTATATGATCCAACCCTCTACCTTTGGACAGAATAACAATCGAGATGT  
A\_16\_P58424403

ACTTTTCTCTTCTAGTTATTGAATCCAAAATCCTTGAAGCAGTCCTTGAAGTCTCTTTTTTCT

A\_14\_P129646 CTATTGCAGAACATGTTTCTGTCTTTTGATGGCTGCCTATCTAATTAGAACTTTCTTAGG  
A\_18\_P22841107 AATCATAAAGGCCTGTTTAGGAGGAGAAAGTTAAATTGCTCAGAGGTGCAGGA  
A\_16\_P19429793

AAACTGACATGCTCTAATTTTACCAGGATAGACATAAACACTGCTCTGTTGTTTTTTCCC  
A\_14\_P105040 ATCGAGCATCGTTGCTTCAGAAATGAATCAACCAATGAACAATTACAGATACATTATAAGG  
A\_14\_P109731 GTAAAGTCAACAGAATGGGTTTCCTTGTGTTTCTGGTTTAAGATGAGAAGTCCCTGAG  
A\_16\_P00685147

GACTCCACTTATCAAGTTCTTTTAGGAAATTACCCAATGAATTGGTGGAGGTAAATGATG  
A\_14\_P119080 GAAACTTCATTTCTCACAACTACTCATAAAAATGACTGGGATCAGTGAAAGTGACTCAC  
A\_14\_P130573 CCAGTCTTTTCTTAGGCGATTTGTGTTTGTATTCTGATCTTTGTCTAGTTCTGTCTTTT  
A\_14\_P107444 TTAGAACACTCCCATGATCCGATGAGTGCTAAAAATATTTAAAAACTGACATGACACAGG  
A\_14\_P137286 ATAATCTATCTGAAGAAAATGAAGCCCTTGGAAAATGTAGAAGTAAAACCTCGGAATCTC  
A\_14\_P111623 AGGTAAACCCATCTAATCACAGACTCCTATTTGAAGTATTTGACGAAAATAGACTGGTAA  
A\_16\_P18157668

GATTTAGTAGCCCTGATCTCTGTTTATCATCCCTTAACCTTAGCATTCAAATGATTCACC  
CUST\_10279\_PI426210822

TACAACCTCCTAGCCATGAGAGTGCATTATGTTTTAAGAAATGGTCTTCAGACTCTAAA  
A\_18\_P22841067

ATATGGATTTGTTTTGTCTTGAGGCAGACTGGAAATGCTGGAAATTTATTTTGGATCGTA  
A\_14\_P125555 AGATTGCTGGACTCAGTATTATTCTGCAGCCATAAGAAGAAATACTGTTTTTATCTCCT  
A\_16\_P19012290

TCCCCTTTCTCATATATCAAAACCCATTTTAAACCTTAAAAGCACAACACTAAACTCAAGA  
A\_14\_P112181 CTCCCTGGCTCTTAATTCCCTTATGATATTCCTTTGACTCTAGACTTTCTTTTATGACTT  
CUST\_288\_PI426210822 CTTAACACTTGTCAAATTCCCCTTTTAAAGCGGAGCAGGCTGAACATTTTTCT  
CUST\_1834\_PI426210822 TTTTTCAACCGTGTGCTTGGTTTTCCGCCCATCTGTTCAGGCTAC  
A\_14\_P104950 TATGCAGATCAGATGTGTGAAGATTCTGCCCAATAGAGTTATGGAGGATTCTAAGTTATG  
A\_16\_P39345255

GACACTCCTAAACCATAATTCTACACTTTACCTAACCTATACATACTTTTTTAAACAACCTGG  
A\_16\_P02033513

CAACATTTTACAGATGCATACTTCTCTAATCCCACTTTATACCCCTCATCTTTATGGACC  
CUST\_7136\_PI426210822 TTGATCATGAGTGGGATCACGATGGCATTCACTCTTTCATTAGCAAAGTTAT  
A\_14\_P126246 TAGCCAAGCATTTTACTCACCAGTGTCTAGAAAACAGTTCAGTCAATGTGTC  
A\_14\_P129316 TCTCAGATGGTTGTCTTCCTTGGCAGCAACAAAAATAAAATGCTACTAAACTAGTTTGAG  
A\_16\_P02119142

TCTGGCACTGTATAACTCTCTAATTTTCCACACATGATATCATAATACCTCTAGTAGCAC  
A\_14\_P122167 CTAACACACTTCTTCAAACCAAGAGCATAACTTTGGCTTTCAATGAAGTCCCTAGAGAAAT  
A\_16\_P01739183

TAATAATTACCTGTATCTCAAACCTAACCATCCATCCTATGTTTGTTCGTGTTGGAATCCC

A\_14\_P106743 AAAGGTCTCTGTAAGTTACACTAACCTGATTCCATGACCCCCCTAAACTGT  
A\_14\_P104477 TTGTGTTTGTAACTCTTTGTAGAGGATTTCTGTTTCATTCTCAAGTAAAAAGGCCACAT  
A\_16\_P00184234

AAAGAGACAAATCCTTTGCTGATAACAAAAACACCTGGAACTTCCTAACCTTATGAGA  
CUST\_2082\_PI426210822 CCTCTGTGATTTCAACCCTTTCCTGCTCCGTTCTCCTTTGAGAAT  
A\_14\_P102151 CTGCAGATTATCAATGACCGGATCTATCCATATGCTGCCATCTCCTATGAAGAAT  
A\_14\_P134467 CCATTCCCAATTCTTTTTCTGGCTCCTGCATTTTAAATATTTTCTTCCAAAAGTTCACCA  
A\_14\_P122282 CTCGCTGGACTTGAATGACCTTTGAGTTAAAAATAATCCAAATCATTTTTTAGGTGCAGT  
A\_16\_P00233978

TAGGGAATTGATCAGTTGGTAAAATGGTTCATCTGCATACAAAAGTTCATGCATGCTGTTA  
A\_14\_P123634 ATGCTTTAAGAACTCTTTGTTTTTTAGGAATCTCATACAGCCATTCAGACTAAAGGGTG  
A\_14\_P109661 GAATTTGATACAGAGACCCATAAAAGCCATTAAAGAGAGTGGTTTCTGATTTTTTTTCT  
CUST\_6759\_PI426210822 GTAAACGACACCTCCACAGAATATAATGTGAGTGGTGTCCCTGGAGAT  
A\_14\_P132944 AAATGCCAAACTCAGTGCCTTTTAGTTATTTTGATATGTGGGAAGATCATGCATAAGGCT  
A\_14\_P125605 GCACATCTTATTTATCTTGTTACCTATAGTTTACTTTGGGTGATTGGAGGGGAATGACTT  
A\_16\_P00539976

ACTCCACCCCAATATAGAACACAGAATATTTGAAAACAGATCTGCTCTCATGTTAGGTAG  
A\_14\_P116451 AACTTTTCTCTTTAAGGATTCAGTGGCTTGATTCCCTGACATTTCTCTTTAAGAGGAATC  
A\_14\_P131229 TTGGGAACCAACATTTTTTCAGTAAAGTCTGCAATAATAAATTCCAACCTTCTGATCTCCA  
A\_16\_P20573912

AGATCAAGTCAAAGTGCATAAGGAAAAGAACCGTTTTAAATGCTGAAATCTCAGAGGTAG  
CUST\_1662\_PI426210822 TTTATAAACAGTGAGATACCCCTGGGAACATCTGGCTTATCATCAACAGCTTC  
A\_14\_P112016 CTGACCTTGGTATTCATGTATATATTTTCAGTTTGGGAAAGGAATCTACTTTGCTGACATG  
A\_14\_P136152 TACAGATTACAAAGCACTACTCAAACCTGAAAGCAGCATGGAGGATTTATATTTTCAGAAG  
A\_16\_P03650258

CCTCAAGAACATTTAAACTCAGATCATATCCTTTTCATTTTCATTTAATGTAGAGCCACCCC  
A\_16\_P18455842

AAAATTTCCCATCAGAGCCTATATGGTTAATCAAGAAACAAAATGGTATTGTCAACACGT  
A\_14\_P111881 CTGCAGTTTTTTTTGCGATTTTTGTGGATTTTCATAGCATTAGTTACCCACTCTTTGCTAAT  
A\_16\_P17494006

AAAAAAAATATTGTTCTCTACAATCCATGACTCATCCTTCTGTTACAGTGTTACCTGG  
A\_16\_P38181321

ACAACCTCCACTTATTACACTATGAAGTTTGTCTCAGATACTAAGAAAAATCACTGTGT  
A\_14\_P115137 ATCATTAGTGCAGTTGGAATGAATGTGTATAGGTCAGAGGTCTTCGTGTTACATTTTAA  
A\_14\_P200567 ATTCTTAAACACTCACAGACCAGGTATCTGTATCCATCCATTAATGGAGACGTTCTTAA  
CUST\_5294\_PI426210822 TGCTGAGCTCAGGGAAGCTGCATATCCAAAAATGAAAAGGAAACCG  
A\_16\_P00685434

TCTTTCATTCAGCAAAGTTATGTGTTAACAGGTATTAAGTATACCGTTATCATTTTTTCT

A\_16\_P17865637

CCTCATACCACATGATAACTCAGATACCAAATTGTAGAAGAATATTTTCCACCTGCACTG

A\_14\_P112171 TTTAGAGGAAAAACTGCTTGATATTAGAAAAGAAGAGATTGCGTATGTAGAACACTTTTTT

CUST\_5113\_PI426210822 TTTCTTAGGAATGGTGGTCTCAAATGCACCAGTGCCTTCCTATTGG

A\_14\_P104971

AAGTCAGTCCATGTTGTTCTGGGAAAATGGAAAAGTAAATGAAATAGAGAAAGAGACTGA

A\_14\_P127458 TCCCTTGTACCCCCCTATTAGATAGTCAATACAAAGTCCCTTGTATTAAGACATTTGAAA

A\_14\_P133253 GATTGTGTGGCTCCCACACACTGAGGGTGTCTGAACATTCATCAATAT

A\_14\_P113830 ACATCAAGAAATCCCCCAAGCAGAAAATCAACACGATAAGTTTGTGGAAAAGATGAC

A\_16\_P18508848

AATATAGGAATTCAGAGGAGAAAGAATTAGAAGCGGAGTAACTTACAGTTCAGGTAACC

A\_14\_P130173 AGAGATTTGCTATCAGTGGTGTCTTATACAAAATAGCATAATCTGATAACATAAGACATT

CUST\_535\_PI426210822

TCTCTTGTTACTTGATCTGATTTATGAAACCAATGGTCTTTTTTCATCCTGACTTGAGATG

CUST\_463\_PI426210822 GTGGTTTCCAGTTTGCTATTTGGGGAAGTGGAGGCTTACAGAGTTACAC

A\_16\_P18208585

TCCACAAATGGTTAAAATTCATGGGACGTTTCATAATCACTCACTAAGAAGAAACAAGACA

A\_14\_P139639

CTAAGACAACCATGGAAAAGTTAGGAAACAGCCAGAGAGAGATTTTAAGGAAGATTCTAG

A\_16\_P17587488

AATAATTGGACTGATAGTACTGATTCAGCACTTATGTGTCTCTTTTGAAGTCTCAGGAA

A\_18\_P22842097 GGTTTGGGATTTGAGATATCCATCCAGGTGTTACGTAAGTGCTGAGATTTTAC

A\_16\_P00720285

GATTTCACTTCATTGTTTTCGAAAATTCTGTCAAACATCAATTTCTTGTTTCATCGACCCC

A\_18\_P16731727

CCTGCCATTATCTTAATTTAAGGCCTCTCATCCCTACGTATTCTGTATAAAACAGATGA

CUST\_6722\_PI426210822 CTTTCTCCCCAGACCCCTGGCTCACCATGCCCCACATACTCACT

A\_14\_P113056 TGAAGTCAACCCCTGACCCCTAGGTTGACACATACTTACAGAGAAT

A\_14\_P133066 TCTGGTTCCACAGACTCTTCACTGATTACAAGTATAGATTTTGTAGTGTGACATCTCTAG

A\_16\_P20831599

AAAAAAGCATCCTAATCTACTCATGGGTTTCTACAGTTAGTCTTATGTATGATGCACAA

A\_14\_P114343 CATAATAATCGATCCAACCTCCACTATGAGCCAAAAATTCAGCCAGAAGTTGCTTCTTATA

A\_14\_P130620 CTACCCACTGAAATCTTGTTCAAGTTATTCTTTCTTTGGTCTCTACTTTCAGAAGTCACA

A\_14\_P120649 GCATTTTTGATACCTCATATTCTGTTTACACATCTTGAAAGGCGCTCAGTAGTTCTCTTA

CUST\_8715\_PI426210822

TATTAAGAATAAAGTAGGGGATTCGAAACTTGGATTTTCTGAGAATGTATTGCAGAAGA

A\_14\_P137850 TATTCAAGTCAACACACTGTTAGAAGAAAAGAATGACCATTCCTGTGCCAAAAGAACCT

A\_16\_P17129529



CTTCAAATCACTGGTCATGTCTACTAAGAATCAAATGCAGCCTATAGACTTTCATTGCG  
A\_14\_P106797 CTGTCACTTTGCTCTGATAGCATTATAATGATGATGAAGACAATTGCTAGGTTGGTGAG  
A\_16\_P02221843  
AAAACCTGTGTTGGGTAGTTGAAATTCCTGAGAATCTTGTAGTTACTATGCGCCATTATCT  
A\_14\_P125453 AAACCATCTTTTAAAGGGACTTCTGTGATGCTGGCTGTAATGTATGTGCATTATTAAGAG  
CUST\_5135\_PI426210822 AAGCTTCTCAGCTTCTGGATACCCTCTCAGGGCTCATGAAGTGG  
A\_16\_P18129627  
AAATCCTCACAACCATTGTTTTAATGATTTTTACTGGACCAGACCATATGGAACCTCACAT  
A\_18\_P16323382  
ATGGAACCAGAAAAAAAATCACAGACATCATCTCCTACAATCTCCTATTTAAGAGGAGC  
A\_14\_P201926 CTAGCACCTAATAGTTACTCAGGAAATAAATACATGTTTAAACAGGCCAGGTCGTAGAGAT  
A\_14\_P116939 TAATTCTCCAGTATTTCTAGCCTTCTTGAGGGTGGATGGTTGGAGCAATATTTTATTTG  
A\_18\_P16135683  
AAAATACAGTTTGGGATAGATGAATGTTTCAGCACCAATCATTTAAAAGGGGCTGTCTTAC  
A\_16\_P00914554  
GTCACTGGGTTTTAAGAGTTACAGAGACATTTTGCTAATCAGCATAGAAGTTTCTCCCTT  
A\_14\_P102645 GAAATTGTGTCAGTTTATTTACAGTTTCTTGGTAAACGTGCCTCAGGAGAAGTAGAATGA  
A\_14\_P201240 GACCAGACAAAATTTGTTACTTTGAGTTCTTTCCTAGACCATTAATAAAGGCGACCTCTA  
A\_14\_P139514 TACTTCATGACTGCCACGCATTTACAGATTGGTGTCAAAGACATTCACTATGTTTTTATG  
A\_18\_P14135610  
CTAAAGGGAGAGTTATTAATAGTTTCAGAAAGTTGAGGGAAATCATGCAGAGGTTCTCAG  
A\_18\_P22841066  
TGCATAGTGTATCCCTTACTTAAACTATGAGAGTTAAGTTTGGATGAAATGACATGAAT  
A\_14\_P200560 CTTCTTTCTCCATTTTCTAAGGAGATGATCCCTACTCAAGTGCAGAGCCC  
A\_16\_P17805740  
CACAAAGGTGTATCCATTAAGAACATTCAGCATGTCTTATCTATCTACATATCTGCCCTC  
A\_14\_P131632 CTGCTGTTGTTTTTTCAGACCTCTTCTCTTCTAGCCGCTCCATTTTTGG  
A\_14\_P128189 ACTTTACAAAGTAACACTGATTTCCCTTCAGTCCTGCTCTTTGGTGAGATGTTAATACTA  
A\_14\_P103043 TCTTCACCAAATTTCTCTATCACAAGAGATTGCAGACAGGTGTTGATAAATCCATACTAG  
A\_14\_P127893 CCTGAAATGGCTTATCTGATTTTCTAAAAGGGAAGAGAGTCTCTCTTTTATCTCCTCAA  
A\_14\_P105684 CTTCTATGGAGGAAAGGTCAAAGATGAGTATCTGCGTAGGTAGAAAACATTGATAACTTC  
A\_14\_P117899 TGAGGAGGTTTTAACTAATAACCTAGGAGATGAGACTGGGCAAATATTAGAAACTGATGC  
A\_14\_P201696 TTTTATGAAAATTCATATGATGGAAAAAAGGAGTGGCCTGTGGAAAGAGAATTATGGTC  
A\_14\_P128981 TACATTTCAAGTTATAAAAGTGGTCTCAGTGGTCTGTGAGTGTTCTGTATCTTACTGAGTG  
CUST\_1819\_PI426210822 CTAGCAAGGCTCTCAGAAAGCAGGAGACGTTGAGGCTAAGCCTAG  
A\_16\_P30952251 AGAACATCACTCCTCAACCCAAGTCTGGCTCTTCTCCTCTTTCTC  
A\_14\_P124205 AAACCTGAGATGATTTTTTCTTAAATAGCCTATCAAGACTCTTCCACCTGCTACTTCTA  
A\_16\_P17833846

AGCAAGAAATGTCAAAAAACCTGGAAGATAAACACAATTTTCATCATCTGATGCAAGTGC  
A\_14\_P110452 ACCTTTGATGAACTTCTTAGCAAACAGATTGGTCAGTTTTTTGAGGACATACTTCAGAATG  
CUST\_6381\_PI426210822 CATCCAATGGGCTAGAGCAGGTGGTTTAGGGCTGAGGCTGTAAAC  
A\_14\_P113475 AAAATACTTTGCTAAGCCATCCACCTACAAGGAAGAAGATGGATACAAAGACACAAAAAT  
A\_16\_P30952318 AACCGTGTGCTTGGTTTTCCGCCCATCCTGTTTCAGGCTACGCAGTG  
A\_14\_P128508 TCTGCAAGTGTCTCAGGAAGCCACTTAATCGTCTTGTAGCAACAGTT  
A\_14\_P200914 AAGGCCTACTTTGGATAATTCTAAATTTGGATGACATAAGCCTGCACTAGCAAAGTCTTC  
A\_16\_P00384287  
GCCTCATGACAAGTAGACTATTGTATAAAATACCACATCCCTAACACTAATCTTACCACC  
A\_16\_P00082484  
AACCACGCTAGTGTTTAATACATGACGTCATCCTAGTAAAAATAATAGTTCCCACAGGTC  
A\_14\_P136497  
ATGCAAAAGAGAAAGATGAAAAACAACACAAGACCAATTGGAAAAGCCTCAAAATGAAG  
A\_14\_P120532 CTGCAGCAGGAGAGATTTTGTAAACTTAAATGTAGGTTTGCGCCTTAAATAAACTGCAG  
A\_16\_P02567804  
AAAAGAAGGACAAAAGAGACATTTTGTAGACAGCCAAATGTAATGAATCAAGCCTGTTGA  
A\_14\_P136768 CTTGAAAGAAAGTTTAAAAAAGGAAGACACCCACAAGATAACTGATTGCCTATTGTCGT  
A\_14\_P101872 CTGACTGGTAGGAAATGTA AAAAGGCCATACATTTATTCTGAATGTTGGTATCTGGAAGA  
A\_14\_P138028 TATACAGTAATTTTGCCACATCCGACATCGGTATGTATTGTCTTCTCTCTAAAAGATG  
A\_16\_P20174404  
CTGTATCTTTTTAAAATGAGCCTAGGATTTGTTGTAATCAGGGAGGGTAACACACAGAC  
A\_16\_P21559008  
AACCATTTAACCTAACTAATCAATGACCCTATTGTTCAATGCCATATCTGCTCTACCCA  
A\_14\_P115793 AATTGCCACAAAATATACTAAAATTTATTCCGACCCCTGACTCGTTTTCTGTTTCC  
A\_16\_P01843472  
AAACACATCTCATGCAACCATGTAATGGAAGATTTTACAACCTTTCATAGGAATGAGGCAG  
A\_16\_P16155798  
CTTTGCTTCAGAACTTATTTCTCCCCTAGAACAATTTGTATGCCCTAGTCAGTATTCATG  
A\_14\_P136019 CTTATCAATCCCAAACCTCTGGGTGTA AAAAGATTCTACAGGGGTAATGTTTTATTATTCTT  
A\_14\_P135753 CAGAGGATGGCCCCAAAACCTGAAAAGGAAATGAAATAATCAAATATAACCAAATCCGAATT  
CUST\_9063\_PI426210822 CAGGGTTCCTGACAGCTTCCCCAGTCACCACCATTCATGGTTTC  
CUST\_6656\_PI426210822 TGCTGTCTCCAGCACACACATGTTCTAGAGAATTCCAGTTTTAGGTCAG  
CUST\_6229\_PI426210822 GATCTATGAAGAGAATGTAGCCCCGAATCCCTCCCTTCTCTCAACT  
A\_16\_P00709707  
AAAGGACCATAAAGGGCATTGTTTTCTAATTA AACACCAA AACCTTCAACTC  
CUST\_8399\_PI426210822  
CAGACACATTAATTTCTCGACAATAAGAGGCTTTTTTGGCATCAAAATTTAAAGCATTTC  
A\_16\_P02216560

GCAGTGATGGACTAATTAGAGGCACATGATAACAAAGATATTTCTTCTCTTCTCTCAACC  
A\_14\_P106442 CTCCCAGCCACAAATTCTTCATAACAACCTCTTTTTATTTTTAGATGAAAATAAAAAGGCT  
A\_16\_P17915973

CCTTTCTCTCTTAACTACCTCCTCAGATTACAATCTCTACTCCTTAAAAAAGAAAACAGA  
A\_14\_P120042 ATTCTCTTGATAATTAAGTGCTGCAAACACCCCCAAAATACTTGCCCTAATCATTTA  
A\_14\_P115150 TCTGTAACCAAATACTATTTCTGAGACCCTCTTGTGTTACAGTTCCTTTAAGCAAAAGA  
A\_14\_P138986 ATCTAGAGTTAATTAACCTTCTTATGACCTTGTTAAAGGGTCTGCTTCCATATGCTGCTT  
A\_14\_P201231 CATTTTGCTCATTTTAGGCATCGTTAAAGAATCTGGAGTGAAGCACAAGGGATTGATT  
A\_16\_P00443188

TTCTCAAGATTCACACCTTAGGAACACATTTTTATCACCTCAAAATTTTGATCCATCACC  
CUST\_5403\_PI426210822

CTTTGGATTCCCTGCCCTAACACAAAATCCATATTTATCTCAATGCAAAAAGAGATGTG  
CUST\_4806\_PI426210822 AGAGGTCAGGAGGAATAAAGCTAATGAGAGAGCAGAGAGTCCTTTGTCT  
A\_18\_P14133693 ACTCAGGCCCTTTTATGTGGTAACCATAGCAGAAAGGAACATAGTCTTGTTGAG  
A\_14\_P124772 TCATACCTTCTGTTTGATGATGAACAATTTGTTGTA AAAAGCATTTCGCCTCTTTCACAGA  
A\_14\_P139420 ATTTTCCCTTGGAATACTTCCACCATCACCAACCCTCTGAAAGATAAAAAAATGAGA  
A\_18\_P22841889

TGGGGAGAAATCTTTATGAAAAATGCCACTTTTCACTCTTTTTTTCAAGTTTGAAGTACTGAC  
A\_14\_P202196 GTTGATTGTAGAAGTTGAAAAC TAGGACTGTAAACAGTCTTTCTCTACCTTCTCTCTGTC  
A\_14\_P115305 ACCAGTGTGCAGATTGCCTTTACTTTCTTGCCATCTCATCAAAGGATTA AAAATATTTCAT  
A\_14\_P126988 TAAGATTGAAATTGGCTTAAGTTTTAGGTGCACAAAATATTCAACATGCCAGAGCATGG  
A\_16\_P20163200

GGGAGGAAGGCATGTATAGCATTGCTCAGATTGAGAAATAGTTCAGATCCAAATATTACT  
A\_16\_P21599090

CGAATACCCAATAAACATTTCTGCTAACACACGAATTTTACTTATTTACAAACCACTGC  
A\_14\_P115191 CTGCATAAAGATAAGTAATTTAAAGGTGGAATATGGCTGTGTCCAAAGTTGATCAAGGGA  
A\_18\_P14134426 AAATCTTAATGGCCAAAGCCATAGGTCCAAAACCCGGCGTTCCCT  
CUST\_4550\_PI426210822 CTAGGTTATGAGGGCCTGGACATTTGCCTGCCTGGGGTTTTAAAA  
A\_14\_P119513 AAGAGCAAAATGTTTTACAGAAATTTCTCTGGGTTGCATATTCTTAATTGCCTGAACTAC  
CUST\_5818\_PI426210822

ATAAGAGATGATGGCTTCTTAGATCTGTTTACATTTGCTGGAAAACTTCTTCCAGGG  
A\_16\_P01650096

AAAAACAATTACGTAACACCAAGAAGTCAGTTTTCTTACATTCACTCCAGGATAGATGC  
A\_14\_P123225 CAGAAGATAGGTAGAAATGATTCCAGTGGCCTCTTTGTATTTTCTTCATTGTTGAGTAGA  
A\_14\_P128818 GCAGTTTGATGTAATTCTAATCAGAAAGCAAAAAGGCTAGTTACCTGATGGTGAAGGAAA  
A\_16\_P21302199

AAACCTTTCGCTAGAAAAACAGCATCACCAAAATTAATCTGCTCCTTGTGTAACCTTGTTT  
A\_14\_P200458 AATAACCCAGCCTGAAGGAGACACAGCACAGAAAAACAGGATTGTTAAGAAC

CUST\_3466\_PI426210822 GCACAGGGGAGTTTCAACTCTGGGGAAGGTGATCATTTGGGTCAT  
A\_14\_P132741 ACAACTCCCATCCACTTTATTTATCAGAAGGCATTTAAATGGAGGAGGTTCTGATATAGA  
A\_14\_P115566 TTTTTTTTTCCAAATTCTCCACAAAGAATCTGAGGTCACCGATAAAGCAAGGTTGCATAT  
A\_16\_P01415268  
TTATTTCTGCAGTTACCACATATGTCTAGGTTTATCAGACTATTTATTTCACTCCAGGGGC  
A\_16\_P30952344 ATGGGCTCTTACTTCCGGCTCCTCCTTGTGCGCAGTTGACCTGAAT  
CUST\_2454\_PI426210822  
CTTAGAATTTAGCCAGCTACACCTGTGTAACAAACAGAACCTGCATTAGGAAT  
CUST\_10170\_PI426210822  
GTTTTTATTTGAGAGCATTACTTCTGACCTAAGGCAGAAACACTTAGAAAACAAATCTGT  
A\_14\_P113315 CAGTAGGTCATCACCCCAACGCTAGAGGAATGAGACCATATCGATC  
A\_14\_P131643 CTACTGCACTAACTCTGGATTCTCTAACTCTATACCTCTTGATATTTTATGAAGCCAATG  
A\_14\_P123076 CTGACATGATGCTTCTCATTTTTCTCTCTTCTAATGCAGGTCCAAGTTATGAAAGAAA  
A\_14\_P103081 AGATTTGGCTCCCGTTTATACAGTGTGGTTCTTCTTAACTTATTTATTTCTCTGGCTACT  
A\_14\_P121958  
TTTAACAAAGATGACATACCGACTGAGGCAGAGTGTAGAAGAGAATGAAACAAAAATGTG  
A\_14\_P105067 ACTTAATCACCAGAAAATACTGTTTCATCCAAACAGTTTCAGATTCTAGTCAAACCTGGTAGC  
CUST\_1921\_PI426210822 ACATTCCCAGGGATTGGGGCTAGTACAGACTTGATTCCCAAGGAC  
A\_16\_P19148358  
AACCACAGGATGCATTATAATCTACCAGTCAGCCTTTTTTATACAAATAACTGTCAAGCGG  
A\_14\_P116662 AAGAGTTTTCCAGTGTGTATTCTGAGGAATACTAGTGTTCTGGAGATGTTACTTAGTGTT  
A\_14\_P108926 TTAAGAGGCTCAATAAAACTTTGAGTTTACACCTTGCAAAAAGATTTGTATGCTACCTGG  
A\_14\_P132856 ACTAAACATTAGATAACCGAGGAAATGCGGATTGGCCTTTGGATGATTCATGAG  
A\_16\_P19570631  
TTGAAATTAAGTCCTAAAATCATAACCCACACCTTACTATAAGCCTTGTC AACGGAAGG  
A\_16\_P16722065  
ATCACCTCCATCTACTTGATTACTCTGGTCTTTATTCCAAATAGTAACTGCAATGTCAGC  
A\_14\_P122205 TTCAGTATGGAGTAGTTGGAGTGTATTGCTTAGAACAAAAGAGATGAGACACTAACACTG  
A\_16\_P01264757  
AAAACAGGAACTGAAGTGCTTTTTTCATTTTTCTCAAACCTTAGGGATCGTTGATGCAATA  
A\_14\_P132153 AAAGGTCTTTGGAAATCAAAATTTTTATTTCAGTAGAGCCAGCAATAGTTCCTCACGATTT  
A\_14\_P110593 CTTTTGTTTTACAGAAGAGGATGTGGAGA ACTTTGACGTGACCAACTTGTCTCAA  
A\_14\_P106623 TTGTTGTTACTACGGAATTGAGCCATCATTCACTCATTATCTATTGAGTGTGAAAATGC  
A\_14\_P137733 ATAATCTCCACTAGATGCTGGGAGGAAAATGTAATTTTTATTAGGGAGAAAACAAGCAAAAC  
A\_18\_P22841644 CAAAGCCCTTGCACAGCACATCCACGGTGGCACTCTGTTAATAG  
A\_14\_P137956 TTATTTCCCTTGAAGTCATGTCTCCATAACTAAAGCCTGTTTATATGGCAAATAACCCG  
A\_14\_P121924 AGTTCAGGTTTAGGAATAGCAAATGGTATAGAACAGTGATTCTCAAACCTTAACATGACC  
A\_14\_P102795 AAATTATTGTAACTTTGTGGCTTTTGGTCTGTGATGCTTGGTCTCAAAGGAAAAAATAA

A\_14\_P132435 AATGAGGGAGGAGATGGAGATTGCTGTTACTATTTTCATTAACAAAATTACCTATCACCTG  
A\_14\_P127131 GTCATAGTCTTAGGACATTAAGACACTGTGAAAGCCTTTTTTACAGTTGTGACAGAAGTT  
A\_16\_P18161262

AACACTCTAATTACATAAGCATAACATCCCACCTTTTATTGAACTGCCATTGTTATTGCCA

A\_16\_P19242125

TCCCACCTTCATGTATTTTCGAATTTGCATTTCTCTTTTATAAGGGAATTATCCTGTTC

A\_14\_P122802 CAGTGTTCAGTATCAAATCTAGTTTTAATCTTCTATAACAAGTCACCTTTTCTTCCCACC  
A\_14\_P135612 GAGAGACCAGTGAGTACTCTGATGTTTATTTAATGCATCTTAGTCCACACAGTTGGTA  
A\_16\_P37020421

TGACAGCAAACCTCTCAATCACCTTTTTTTCAAAGCAGTCCTTACACTTTCTTACTTGTT

A\_14\_P139625 TTCCATCATTATTTGCTGTCTTTACATTTGGTGTCAATCCAGAAATTTAGTCTGCTTCCT  
A\_14\_P118407 GAGAGAAGGAAACACTTAGAGGAAGTTCTGGAGATGAAGTAAGTGTGGTAGTCTTATTC  
A\_14\_P136552 GCCAAGAAAGAAAAATAAGTTCACAGAGGTGGGGTCTCTAGACAGGAGT  
CUST\_5147\_PI426210822 GGGGTGATTTTCAGCCCAGGCCCTGAACCTGTCATAAAATGTAAT  
CUST\_2394\_PI426210822 CTATGATCCTTCTCTTGCTGGAGGGGACACTGCATAGAAACCTGG  
A\_14\_P100914 TTTGTTCAATGTTGTCTTGCCAAAGACCTTTATAAACTTCCTAATGCCTAGAGAACAGTC  
A\_14\_P117992 GTTTGTATCTGCTTCTATTTGGAGGCTGGGGACCTCTCAAAGGTAATTTACATCT  
A\_14\_P115702 ACTTGTTGAAATCTTAGGTTCTTTGCAGACATGACCACTTAACAACCTGGGTTAACTTAAT  
A\_14\_P139121 AGACCTATACAAAAGGAAGTGTATGAGGGGATTTAAGTGCTACAACAGATGCAAACCTAT  
A\_14\_P102986 ATGATGATGGTTTTTCTACAGAAAGAATGGACACTTGAGAAAATAAAGGTTTTGTGGG  
CUST\_4058\_PI426210822 CATCCTTGGGGTCTGCCAGTCCCTTGGGCTCTGTTCCCTCTGATGTG  
A\_14\_P134332 TCCTCATAAACACTCCTTTGCAGCAGTGGTTTACAAATTTCACTTGATAATTTACATGGA  
A\_14\_P201903 ACTTGATTCCTTTACAACCTCCCATGCATGACTGATTAACCTCAGTTCAAATGTTAAGCATT  
CUST\_6295\_PI426210822 TAAGCCAAGAAGGAAAAAATTCTCATCTAAACCGCCAGGCTTAAAGGTGG  
A\_14\_P108090 ATTTTTCAAAGAAAAAACATAGTGGTTTATAGAATTGGTAAGTCCGGCGGCTTAAAGGCC  
A\_16\_P19975887

CCATCAAGTCACATCCTGTAATAGAAGTTTGACATAATTGTTACTGTCTTGGTGTCTCATG

A\_14\_P114250 TGTTATACTCTTGAATCCCTGTGGAAATCTACATTTGAAGACAACATCACTCTGAAGTGT  
A\_14\_P129536 CTGAAACACCCACATCTTAAAAAGAGAGATGCATTCAGAGTAGATTCTTGAGTTTCAAA  
A\_16\_P02372893

AATGGTGTGTTGAAAAGCATTTTCGATGGAAATTTCTTAGCCACAACCATAAGTGAATTGG

A\_14\_P110901 CGCGTTTCCAACATCAACTCCATTTCTCCAGTTCACAATATTATCAACTATTTCTTCTTTA  
A\_16\_P18733855

TAGGCACGTTCTATTCTACTCTAATTCTCTGCAAATTGGTATTCCATTAACCTGCATGTGG

CUST\_9796\_PI426210822 ATAATGAATCAGTGCCTTGGTTCAGGTGACAGGAATGCATGCATTCATGT  
A\_14\_P126937 CTCTACAGTCTGAGCGGAAAGGAGAGAAGGATGAATGAACTGAAACAAGTTG  
CUST\_4467\_PI426210822 ATGGAGCCTCATGCTGTCTCAGGCCACCCTAGCCCCCTGTTCTC  
A\_16\_P03757623

ATGTAGTGTGCCTTTAACAGTTTTATCGTGTTTCCTACGATTACCATCTTTCACTCTCTG  
A\_14\_P139279 AAGTCTCCCAAGTAGCAAACAAGGGACTAATTAGGCAACTCTCTATACATATCTACATTC  
CUST\_8735\_PI426210822

TTCTAATTTTCTGATAGTAGGTGTATATTATCAGGGTTCTCAGCATAAATGTTGACTTCT  
A\_14\_P139267 TTTTCTAACTCTGAATTGCTGCTAAGGTAATTTTGCATCTGCTGTGAATCAGTTTCCTC  
A\_16\_P03190179

TCTTTTGTGATACCAGTTTGTAAATGTGTAACCTGTCTGATCTTTCTTCTTTTCAGCACCC  
A\_14\_P116127 CAGGCACCAGAAAAGAAAGTCAAGTCTTGTGTGATAAAAATTCATCTTCATTCTCTACATTG  
A\_16\_P17743742

AAAAAAAAGTTACAGAAATGTGGATTTGAGGAATTTGTTCGTAAGGAAACACTGACATCCC  
CUST\_582\_PI426210822 CCCTGAAAGGAAAAGGGCTTCTTCGGAGGGCATTGTGTCTGCTC  
A\_14\_P119950 CTTACCAATATCGTTAATCACTGCTCTTATTTTGGAGACAAAAGGACCAACTTCACTGGA  
A\_14\_P136805 TTCATATGCATCTTTGTTTTTAAACAATATGCTAAACTAAGGAGGAACGGGATCCAGTCT  
A\_16\_P18295536

AAATGCAAGTCTTGTGCTATCTCAGAAACCTCAAGGAAGAGACTATAATTAGGCTTCAAC  
A\_14\_P111637 GAACTGGGTGATGAGCCTCTTTGCAGACAGATATTGTTCTTTCATTTTGTTTTTATACAG  
A\_14\_P113985 TAATTCCCCAGTAATTTGGTTGACATTGGGTTGCATTTTTAAACATAACTTTTTCCACAC  
A\_14\_P107378 GTTCTCTGCCTCAGAGGACAGTTGCACAGATGGCTAGTGTTAAATTTCTATAG  
A\_14\_P202159 CTTCTGTGATCAGGTCTCTTAATATTGATACAGGTTTGGCATTCTTGATAAAAGGATGCT  
A\_16\_P19993312

ATCACAGAACTTTTCATCTTTAATAACCCTTTCAGCCTAATATTTCCCTATTCTTCACC  
A\_14\_P110424 CTATCATACTTTTGCCTTCTGCTCATGAGGGGTGTATCAATTTCCACTCCC  
A\_16\_P17699771

AGTTGGCTCCTAGAAAAGTTATCAATGAATCCTGTTTGCAAGTAAACTCTGCACTAGAAT  
CUST\_10094\_PI426210822 TTTCTCCATTCCTTTCAAGGGGAAAGCCACTGAGTGTTACCCAG  
A\_14\_P110717 AGGTTTCGGTTTATTTCTTTAGAGCCCCACTTTTATTTGTATCTTTTCAGGTAATTGCATTG  
A\_14\_P107096 TTCTCTGGATTATTGGATGCCATTTGGGAAAATCACGAAATATGTCCTGATAAGTTTCA  
A\_16\_P18895643

AAAAGGTAAACCAGAAACATGGAGTTATCACAAAACAAGCATTCTCTTCTAGAACAGGAG  
A\_16\_P15662222

ATCCTGCTACACTCTAAGTTCCACATAAACTGAAGTCATGAATACTGTTGAGCATTAGTG  
A\_16\_P17827241

AAATCAAGCATTTTCATTTGGCTTAAACGCAAAAATTCTCACAAAACCTCTCCTAAGAACAG  
A\_16\_P17732373

AATCAGAAAGTCCATTTTTGCTTATGACAATCAAACCTTAACTTTAGCCTGATGCCAATCT  
A\_14\_P120687 GCCATTTAGTTTCTGATGATCATTTTCCTGCCTTTTTTTTTTGGGTGCAAAAAAATGGTT  
CUST\_2596\_PI426210822 TGGTTGCTCTAGTTGGTGCTTTTCATGATGTCATCTTTGCTCTCTTCATTATCC  
CUST\_9494\_PI426210822 TGCTTAAACATCTCGTTGTTGGATTCCAAGTCATCTGTACTCCCCAAAATA

A\_14\_P120535 AACAGAGGACCATCTGATGATTCATAGGCACAAACATGAAATGACTTTGAAGTTTCCT  
A\_16\_P19052882

AAAACCTGACCTGAAGAAAGTATGAGATGAATGAAGTAGACACACCTATGAGATCAAAGCA

A\_14\_P117701 CCTATTAAGTTGGTTTCATAATCTGTCAATTTGAAAATCCTGTATTAGGTGTTAAGACCCT

A\_14\_P118860 CTGCTGGATTAGAGTTTAGATGATATTTTCAGGTCTCAGGATCCTCTGAGCATATATCTT

A\_14\_P201945 AGAAACTTCAGAATGCTGTTTATAGTGAAGTGAAGTGTGTGAGTTTTCCACCTATTTTAC

A\_14\_P125769 AGAATCGCTTGTATAGAAGTTTTCCAGACATCACCTCTTCCATTACATTTACCTGTTT

CUST\_8209\_PI426210822 AAGCTTTAGCTGCAGTAACTCATACTCCTCCCTCCTTGTTTTCTCC

A\_14\_P105575 CTATGTGGTGTATTTTACTGGATGAAGGAACCATAAAGCCTACTTAAAGGTCAACTTCT

A\_18\_P13521458

AAAACAAAACAGCATTACCTTTTCTGAAGACGTTAATCTTCCACTCCTATCACTAAGG

A\_16\_P17491948

ATGAACCAACCATTTATCTCAGGAGATAGAAGTCAATCATACTCAATTACTCTGCTCAGG

A\_18\_P12046251

ATGCATAAACCTGGAACCTGTTTCTCTAACACGTATGAAGGATGAACCTTTGAATTGAAGG

A\_14\_P112047 GAATTTCTACATTCTACAGAGTTACCGGCTGAAGAAGGTAATCTTAACATGCTGTTTCTG

A\_14\_P121245 AGAAAAACAGAGTTTATAAGAAAAATTAGATGCCTTTACCCTAAAGCAGCCACTGGAATT

A\_14\_P138993 CAAAGTGTATTTATTCTGTAGATCTAAAGTCATGGCCAGGTGCAAAGAGTTTTGAATCA

CUST\_4020\_PI426210822

CAAGAAACAAAACCCAGAGTCAAGTAAAAGGATGCTTTTGGAACTGATGATTCTCA

CUST\_601\_PI426210822 CTTAAAACCCTAGAAAGCAGTCAGTATCCACTGCTTAAATACCAGGAGCCTC

A\_16\_P16482166

ATTTTCCCTGTCACCTATTTGTCTCCTTTAACTTTTATTTACCCAATACCAAGCCAATCT

A\_16\_P19011387

AATTCACCTAAGAACCTTGCATATTCCTCCTTATGACTTTGTTGAGCATATTACATGGCA

A\_14\_P127757 ACTTCAAACATGCTTGCAGTGCATCTAATATAGACCAAGCGAAGACATAGAAAACCTACA

A\_14\_P138554 AACTGGAAATTTGGCTTTATGCATAATAAGTCATGTGGGTAAAACATCCACATTGCAGT

A\_16\_P00264967

TGTGCTTGTATCTAATAATGCTACCTACCAATTTGAACACTTGATAGCCTCTAAAAGCC

A\_18\_P14135334 TGATGTTGAATGTATTAATTTGTATATTCATGAATCATATAATGAATCAGTGCCTTGGTT

CUST\_2343\_PI426210822 CTCTCTACTGGCCTCCTGCTGAGCTCAGTGCCTCACCTGCAGGAG

CUST\_3524\_PI426210822 CAAATGGTAAGGCAGCTCTCGGAGCTGGCACGTTCTTTCTCTCTG

A\_16\_P18223309

AAGAGACATTGCATTCCTTATGATGGTAAAGTGAACAGATACATCCTAAGTCTGCAGATC

A\_14\_P103800 GATATACTCAATTGTAAAAGAAAGCAGTGGTTTGTGAAGACCTTGGCTGGTAAGCACTTT

A\_16\_P15113055

GCTTCATCATATTAGCCTTTACCTCTCTAGACAAAGTTCATCCACCTATTTGGTAAGTCA

A\_14\_P138729 ACTTTTGAATACTCCTTTAATTTTGTACCTATTCTGCTGATTCCAAATGATTCTCCCCT

A\_14\_P118474 TTACCCTTGCTTTTCTTTTCCAGTATTACCAAAATTTGAAGTGACTTTGCAGACACCATT  
A\_16\_P01985351

AAGTTTGTAATGCCAAGCCTATTTTTTCAGTAACCATCCTTCTTATGATAAACAGCATGCT

A\_16\_P18598202

AAAAATGCTTTACAACACATTTCCCTATCATCATTACATAGACCCAATAAGGTGAGTGAA

CUST\_6297\_PI426210822 CTAAAGGTGGCTCCTTGTCAGTCCTGAGGTGGTAGAATTGAGGT

A\_14\_P121531 TGAATACATCTTGTTACTTCAAGAGTTTTCTGGCAGTAAGGGCACAATTGACTGTGATAA

A\_14\_P128374 TCGTCACTAAGTTAATTCAACATTGAAAGGGATAGAAGATGTTAATTCCACACACACGTG

A\_18\_P22840289 CTTTGTGATCTTTTGGGGCCAACCTTCCTGCTCTCAACTGCTCTCTAT

A\_16\_P19964944

AAAAAATATCATACTTAAGACCTGCATTTGTTCTATAACCCAGATCATCTTTTTAGAGCCA

A\_16\_P20363369

AGTATCAGTCTTCATCAGTATATCTTCACAACAAGAACTAGGGACAAATTACTGGCTG

A\_14\_P133865 TTCTCTTAGAAAATTAACTCCCCTTTGCCCTAGTTTTTCTTAAAGCATATCCTTGGACC

A\_16\_P20979969

CCCCAAATTTGGACCTTATGCTCTGTAGTTTCCTGTTATAACCAATTTGCTATTTGTGTT

A\_16\_P02990356 TTACTTTTCTGTTCGATTAGTGACCTCATACTTCCCCCATCTAAAGGACACCTTAG

A\_14\_P126249 GTCTGAGCACAACCTTCTCTTTGGACATGAAAATATAGAGTTCATACTGTGTCATCAGT

A\_14\_P134306 AGAGTCCTTTGCACTACTATGGGAATGCCACCATGTCTTTGATGAATAAGGTAATATACT

A\_16\_P01447965

AGTGGAATAGGCAATAGAGATTAAATGAAAGGTATGCAGAGATTTTAGTGACAAGGTTCA

CUST\_5705\_PI426210822 CTTATCTGTCTGTCTCAGGCTTCTTCTCCAAGGTTAACCCCAAC

A\_14\_P105386 GAATTTGATTGAAGCAAAGAATATCATTCCTGCACTGCTCCTTATTCAGGCAACAAATTC

A\_18\_P22842299 CTAAAATTAATGTCACCACAGCCATTGTAGTATGTGTTTCAGCCGCCTGTGC

A\_16\_P18507064

GAAACGAGAAGCCTTAGTAAATCACTTCTATGACAAAACATGGCATAAAAACTTTTCCCC

A\_16\_P21410044

AATATACTTCCCTTTGTTTGACTCATCACTTGGAAATTGTGGATGTTTTGACTTATTTGGGG

A\_14\_P137718 ACTAAAATAGACCCTAGATTATGACATACTGCAAAAACATCAAACCACACAATAGCATGTT

A\_14\_P138743 CAGACTCACGTGAGAGGAATAGCGTTTGTGTTTGGATTGTCTTCTGCTTTTCAAG

A\_14\_P109900 GAAAGACCAAAGAGGGAGAGGAATTATTTTGCTTAGTTATTAGAAGTAAGGGGAAGGAAT

CUST\_1832\_PI426210822 ACATTTTCCCTCTGATGGATGTTTTTTTTTCCCTTCCCTTCTTTTTCAACCGTG

A\_18\_P12768173

TGCCCAATTTTCAATATCAACTCATCATTCTCAACATTTCTCTACTACACTTTTAAAAG

A\_14\_P108612 CCTGCTTGGAAATGGATCTTTGCTTATTTGTGGTATAATACCAAGGAATATTCATACCAGT

A\_14\_P121992 TTAATAGACAACCTGAAATGGAACAAATATCCTGAACTCACCTGATCTCTTACCACTGAA

A\_16\_P16191926

GCTGTTCTTAAGGAAATCATCAAGAAAGACTAAGCACCATTGTTTTGTTTCTGATGTTGC



A\_16\_P00717251

TCCCTCACATATCTAACTAGGAAACCGTCATTTCAAATACTTCCTCTTACTATCCTGAAG  
CUST\_2258\_PI426210822 CTTGTTTCTGAGCCTTTGATGCTCCATCATGCTCTACCATGTTGATG  
CUST\_1963\_PI426210822 TATGGGGCCAAGTTACAGCACAGAGTTTTAAGAGATTGTCCGTAGTTCAG  
A\_14\_P108360

AGAAAGGAAGAAATTATACCAAATAGAACATTGTAAGCATTGTGGGGAAAAGGAGGGGAAG  
CUST\_4848\_PI426210822 TGATGGAAGTGAAGCAGGCTACCTATTTTATCCAGGAAGCAGACAGAG  
A\_14\_P134987 CTTTGTGTGAAATCTCAAACCTTTCACCATTCTCTCCACATGTTATCCTCATCTCATTTTT  
A\_14\_P133886 CTTGTGAACGCAGAAGGAGCAGGAGGGAAATATATTTTTTTTTTCTAAAAAAGGAAGTA  
A\_14\_P103887 TAATAATCTGCATCACAGGAATGCCTACCGCTTCTGTATCATTACTGGAAATACATCTC  
A\_14\_P201616 ACCATGTTATTTATGTGGTGGTTTTACTTCTAATTATGGCTCATCATGGCTGTTAGTGCT  
A\_18\_P22840531 CTTCAACCTGCTGTTTCAGGGCCTCTGCCCTCATTCCCTGGAGGCT  
A\_16\_P40368115

CTCTCCTGTTTACACCAAATCAAAATGTCAAATTGAAGTCATGAACTGCATAGTCTGTCT  
A\_16\_P17714540

TCCTTAAGCATTTTCCACTTACTACCCCTAGTTCTTTTAAAAGACTCGCGAATAGTAGTG  
A\_16\_P01679152

AAATGGGAAAATAGGGTGAATGATGAAAAACACTAAATACACACGGATGACATGGATACA  
A\_14\_P201639 TTGACAGTAAGGATGGAAACCAACATTTTATCGGAGTTCTTGGATGATAGGAATTTATCA  
A\_14\_P116357 TTACTTTGAACTTCTTGGTGCCAGGACTGGTCATTGTGATCAGTTACTCCAAAATTTTA  
A\_14\_P108390 GGATTTTATCTCTTTAAACAACATTAGGGAGACAAGACAGGAATTTCCCTACTTAAACAAG  
A\_14\_P121747 TGCCCAGCATATCTCATTTCTGTTTATCCATGGAAACTGTATAAAGATCACAAGAAATGG  
A\_16\_P16737395

CCCAATCTGAACGTTTTCTAAGATAAGCCTTAGTTTCTAGTTATGACAGACAGTAATGCC  
A\_18\_P22841541

GGGGTGACTTAAAAGGATCACAAATACTCGTCAAATGAGTGAGGAAGGTAAAATATAGA  
A\_14\_P139794 TTTTGTGTGCAGTGAATAATTTGCTCTGAGACTCATCTGGCCTTAGTTACCCTATTTAT  
A\_16\_P16350224

AAAAAGGGGATTTTCACTTACTTACACATAAGTTCTGGACATATTACATGCTTGGCACAC  
A\_14\_P104354 ACAATTCATTTTGGCTCACACCTACTTTAGTGTAATGTAGTGCCACTCTTAAACAGAAGA  
A\_16\_P20281330

ATTCATAACCACTTTCTTATTCTCAGATGTGATTATTCTCTACCGAGGGCTATTTATGCC  
A\_16\_P17286723

AAGGACAAACCTGTAACAACCTGAATTTTGGTCACTTCTAATTCTGCCTTTTCGTAAATGT  
A\_14\_P109247 CTTTCATATCTCAAAGTCACCATCATTTTACTATTGCCATCACTTTTCTATTTCCAAGGCA  
A\_14\_P101542 CAATTCATTGTCTCTTTTCAGTCCCTTCTGAAGGCTGCATTTGGCAATGT  
A\_16\_P21408562

AAAGACGAAATAGGACCTTATCATGCTCTTCCCTTTTAAACACAGCATAACAATAAGTCAG

A\_14\_P135460 GAGAATGGATCTTGTGCTAAAATTTGAATAATAATTCCTTGTTGGCCATTGAAGAGCCT  
A\_14\_P123194 TTTACTTACAGTTTGTGGGTTAATCTCCTCCTCCTCCCATAGGTTTCATCCATAATTTGC  
A\_16\_P39716864  
TTAAAATGCATAGGTTTACTCTGGGCACTAACCTATTTATTTGGTTTGTAGTCTCCGACA  
A\_14\_P116286 AGAGAGAAGGACTTCAGGATATTGTCATTGGAATCATCAAAACAGTGGCACAACAAAT  
CUST\_3831\_PI426210822  
GTGAGAGTTTCCAGAAATACAGAGATTCTTATTTAATCCTTTTTCTTTTTAACTGCAGA  
A\_18\_P15517551  
CCACCTATAAAAAAGACTTAAGTCATCATAAGCCAATAAGATGTGTAGAAACCTTATGGC  
A\_16\_P15840912  
ATAAATGCAGTCGAGTTGTCTCTATGACCAACTAGCCATAAGACCATTACTTTCTCTACT  
A\_18\_P14134874  
AGACAGCACAAATTCATGGGTTTGAGAGAAAGATGTAAATGACAGCAAGGTAGAAT  
A\_14\_P101286 TTTCAGGGTTGTGTTCCCAACCAGTTTCCTAAAGTTTTGGAATATACTTTGCAAATTTT  
A\_14\_P126079 CTGTATATACGTAGGAAAACATTCTTTTTTTGTCAACTTGACGTTGACAAACTTGGTGGAT  
A\_14\_P201362 TCTATTTTAATGAAAGCAGACACAGGCTATTAAGTGGGGAAATGTTGGGCTATAGTGATT  
A\_14\_P100167 ACAGGTCCACTATGTTCTGCCCTACCTATAACAATTTTAAATTCGTCTTCTACAACAGAC  
A\_14\_P124547 AATCAAAGAGGAATACAGTATATTGATTTGTCTTCTGATAGTGAAGATGTCGTTTCCCCA  
CUST\_2563\_PI426210822 CTTTCTCTGTCTGTTCCCTGTAGGCTGGAGGTGCTTAGTAAGT  
A\_14\_P120239 TGGAATGGGATAAAGAGAAGATAAAAATCAATCAAGAAAAATGCTTCCCCTTTGCTTGAC  
CUST\_7836\_PI426210822  
TGAAGACATTTATTTACACATGCAAAAACCTGAAGAAGTCTTTGGGGCAATAAATCTTTT  
A\_14\_P136020 TAATAATGATGAATAGTGCTCTGTTGATCAAAAACCCAAGAGCCACAAGCACTTACTCA  
CUST\_2894\_PI426210822 GCCTTCCAGGCACCTCTCAATGTCTGCATATCTTGGGCTGAGTTT  
A\_16\_P01644995  
CTGAGCAGACATATTTAGCACTCAGAATAATTAAGTAAGACATAGACTACCGGAATGAAGA  
A\_16\_P37751123  
ATGTGGCTCATAGACACTTTATTTCTCTGAAATTGCCTCTCAAGAAAAAATTGATCCTC  
A\_14\_P116558 TTCCTAGATTATTTCTCTGGTAAATCAAAGAAGTGGGTTTATGGAGGTCCTCTTGTGTC  
A\_14\_P117174 CCAAATAAAAAACCAGAATTCCTCTCCAAAAGGCTATCAGCAGGGTTCCTTCAATA  
A\_14\_P112385 TCCCTCTTAGATTGCTACCTGTTCTGATGACAATACACTAAAAATCTGGCGCTTGAAT  
A\_14\_P104237 ACTTCTCCAGATTCTGTAGTTTTTCCAGTAATTCAATTGCTCTTGCAACATCTGAATGA  
A\_14\_P124968 CTCAGGAAGAAACAAGTGAAGGTGATGCTAATGGTAAGTAGGGGAGGAAAG  
A\_14\_P119287 GTCACCTCTGATTACAATTCAGTTCAATTTCTATTGGAAGTTCTTGAATAGGGGGAGTA  
A\_14\_P101886 TGCCTTGATAAATGTTCCATTTGTTCTTACCATCCAGATTGATGGTATTTTTTATTTGGG  
A\_14\_P101916 ACAGGCATGCTAATATATTCTTTCTTGAGGCTCCTATTTACATCTCAGAATGTTAACAC  
A\_14\_P106614 CGAGTTGCTGACAAATTTGACATCCTGGAAGGCATCTATTGAACACAAAAAGGTAAATAA  
A\_14\_P125563 TCATATTTTGCTCACACTTAGAATGTTGAAGTCACATTACCATCCTTCTCAGACTTCTCT

A\_14\_P101204 GCAAAGAAAAAACCACCCCTTTCTATTTTTCTGGAATATAACCTGACAAGGAATTCTTC  
A\_18\_P14135288 CTGCAATATCCATGTATCCCTCTAACCTCCTGGGGCTGCTTTGTTACTAT  
A\_14\_P123925 TTTAATGTTTCTTTTCTACAGCAGAATCATGAGACAGACTTTGCCTTGTATCTACTTTTG  
A\_14\_P104347 GGTTTTACATGGTGGAAAAGAAAACATATTTTGGCTACTTGGGATTAATTGAAATGGACC  
A\_14\_P110179 TAGCCCTAAAAGAAGCCAAGCATCAGGTAAACCAGAAGTTTAATAAAAATGAGCAAATTT  
A\_14\_P118509 GGTGCTAGTGAGTGTATTGCTTAGACTGTTTCATATAGTGGAACATTTTCAGGCTTCTTA  
CUST\_4050\_PI426210822 AAGACTCCATGGAGCATGACAGGCATGCTGTGCCTGCCACAGCCAA  
A\_14\_P116279 CTGAACCTGTAATGTTTCTGGCATGATTTTATTCTTCAAGTGGAAATTCAGTTAGTTCCAG  
CUST\_3775\_PI426210822  
TCTGTCTCTCTATATCTATAACTTTTAATCTTGAAATAGTTTAAGATTCATAAGAAGTTA  
A\_14\_P133044 GATTGCCAGGTTTTTAATCTTTGGCCATTCTTGTAATCCCCTTGAGTAATAGAAGTATC  
A\_16\_P16585970  
AAATCATTACTCTTACCCCAAGTCAAGTTCTTATAAAGGATGTTCCAATATGCTCATGGC  
A\_14\_P100161 GCTGAATCTCTGATATCCCACACCTTAATATAAGATGTTGATACAGTGAAGACCAAACCTG  
CUST\_3258\_PI426210822 ATTTAGGGAACTTTTTTTGAACAGAACCATGTGTGACACTGTCAAGAAGGC  
A\_14\_P123344 CTTATTCCCTAATCCATAGGCTACTGCTCCACAATCATATACTCCTACTACTTCAGTATC  
A\_14\_P123595 TTCTTGAAAATAGGATTGTTTTGAGATTTTTATGCTGGCCAAATGAAACCTCCCTCAGTA  
A\_14\_P105376 ATTACTATTTCTAGCAAATATCGTTAGTGTCTATCCATCCCCTCTTCACTTGTGTTGT  
A\_16\_P00314265  
AAGTCAGGAGCAATAAATCTTTTCCAAGTTTTCCAGTTAGAAATCAGTGATGCACCTACA  
A\_18\_P17709782  
AAGTATACTCTAAAGATAGCAGATTCCATATCCATCACTGTCATAATCTGAGGTGCAAA  
A\_14\_P122268 ATAATTACATTTGTCACCGCTTTAATTGGATGTTACATGTCAGTAATGACTCATCAGCCC  
A\_16\_P03669507  
GGTTCCTTTGACTAAATATAAGTTCCTCAGCATGACTAATAACACAGGATATGTGCATCC  
A\_14\_P107415 CTTTGGGGAGGTTTTTGTATTGTGATGATAACTCACAGTTACATGGTGTTTTACCATT  
A\_16\_P20934713  
AATTGCTATGCCATGTATATTATGACCCTGTTTGTGTAAAACTACGTCCAACCTAACCAGC  
A\_16\_P19518692  
TGATATCTTCATCAACGACATAATGAGATTCAATCCCATATGTGCATCTAAGGACCACA  
A\_16\_P00685307  
AGTAAACATACCTCAATATACTTATTTCTGTTTGGGATTTTCGCCCCTCAAGTCCTCATT  
A\_16\_P36230824 GAAAAGACTCTGGCTGACTCCTTGTGATAGAGCAAACCAAGTTGAGTGTT  
A\_14\_P124964 AATAATAATAATAAAAACACAAAAGAATGACTGGGTGAAGTTGGGGTCTGCGTGTGCC  
A\_14\_P125304 ACAACATCTTCCACTTTCCC GGGAACATCCAATTCAAAAACATATTCCATTTTGC  
A\_14\_P130896 GTAACCTTTGTGTTGTCCACCTGAATAAGGGAGAATCCATGAGCAGCATT  
A\_16\_P20078830  
CCATTGTAATCTTCAGTGACTCATCTTTCAATTCTGTAACCTGTAATAAACACATGCACTG

A\_18\_P13345033

ATTTCCATCCTCTACTCAATACAGCACACTATTTTTTCATACAATTTTCCCACAACCTGC

A\_16\_P15375135

ACCTCTCCTTCTAAAGATCTACATACATATTACCTCCAGGCTAGTTTATATCCCAATCCA

A\_18\_P14075042

AAAATACCCCAAACAAAGGAAAGTAAAGACCATGTAAGGAATTCAGTCACTGGTGAACATA

A\_14\_P101188 GGAAGAAAGATTGGCAGGTAAATAAAATTATACCTGTCACCTGGACAAATTGTTTTCTCC

A\_14\_P120787 AATTAGAGTGACTCAGTTGTGTTATGTTTGTCCAGGACTTTCTGCTTTAATTCTGAAGAG

A\_14\_P117172 CTTAACAATTGAACCCTTGAATCAGAAAGGCAAGGTGAGTTTCTCAGAAAGATGTTGAAA

A\_14\_P125030 CAGAAACTGACAGAGATTCCTTGCTTTATTATATCTTACACCCAAATGAGGATGAGGTA

A\_14\_P102769 CTGACAAAGAAACCACCTGGTCCAAACCAGTTATTGTTTTCTTTGATTAAATTAAGT

A\_14\_P119535 AACCCCAAAACATATTTCTTCTCTAGGAACACTAGATCCTGAAGGTAATCTCTCAAAGTA

A\_14\_P103703 AACCCATAAAAACAAACACAATATAATGGCACAAAGCACTTGCTTTATTGCCAGAAACTG

A\_14\_P122962 CCTATATAGGCATACCAAATACGTTTAGAACAATACACTTTTTTCAGAGCCTAAATTAAGT

A\_14\_P201321 CCAATACTGGTAATTGAGCCCTGTAAGATATGTTATGGACCACTGTTGAAATATTTTCGTT

A\_16\_P15790857

GTGCAGAGAGACTTTATAAAATCAATGTGACTCCAAGAAAGTATTAGCAGGAATTCAGGC

A\_14\_P118688 TAAGAAAAGTTGGCATTTCAGTTTCTCCTTGAATTGAGGACAGTGTTTCAGGAGTATACTA

A\_16\_P02484521

AAAAGGTCCTGTTCTTCAGAATAAGCAATCTGTATTTTCAGTGGAATAACCTAGAAAAGCC

A\_14\_P118963 CTAATAAAGGAAAAAAGAAGGGTTTTTGAATTGCCTGACCTTAGTCTTGTCTTTCTGACT

A\_14\_P114156 ACACAGAAACAACCTTTTGGAGAAATTAATTTCTGAGTGTGACTTCTGAGTTTGACCTTTC

CUST\_620\_PI426210822 CAGTTGCTGTCTTGGATCTGGCTATAATTTTGCCTGTGGAATCGCTG

A\_14\_P202438 ATCTAATAATTTTAGGAGAGACAAAACACTTGGGGATGTGAAGTCTTTGATTTCTGACCT

CUST\_1165\_PI426210822 GCATCTCCACCTCCCTGTTTTGTGGTTTAAACTAGACCTACTATGGCTTTTA

A\_16\_P00190674

ACTATTTTTCACAGATCTCAACTAAAACCCTTACTTCACAAATGATTGTGTTGTGCTGAA

A\_14\_P133891 TAATCCTGCAACTTTCTTACAATCATTTTTCTGCCTATAACAATCCTGCTTCTTATAGGAT

A\_16\_P02518056

AAATGACCAATCTACTTCATTTTCACTACTGGAGAGATGAATCTGTTGTAATCGTGGA

A\_16\_P58424313 CTGCTGCTGGGTCCTGGTGAAGCCCTTACTCTCTTTCCACTAAA

A\_18\_P17183270

AGTTGTGGGTCTTTTATAAGGAAAAAGTGAATACTCCAGTGTCAAATAATGGGATTTCT

CUST\_10296\_PI426210822 CCACATGTAAGAGTGAGTTCAGGTGCTCTAAATCCTTTCCAGATTGTTAACACA

A\_14\_P139249 CTTTGTCCACACACATCTGTAGATGTAGAATCTGAATAGTCTGCAGGATTAATGTCC

CUST\_9900\_PI426210822 GGAAAAGTTGGGAAAACCTTGCTCATTGGAACATGGGCTCCAATT

A\_14\_P120791 TAACAACTCCACTCAAAAAATAAATGGCTATTAATGCACCATCCAGGGAACAAGAGC

A\_14\_P100250 TCTGCTTGTAGAATTCCAGATCACTCATGAATATCGGTATACTCTTTTTTAGCACGTGAG

A\_14\_P119635 CCCTCACTCAAGAAGTTTAAAATGAAGTGAATGGACAATTGTGAGAAGAAATGCTATTGA  
A\_18\_P14136357

TGCGAGCCATAAGAATTGAGTCAGAACTTTAAAAATCAATTATTTAGCAGTATGGAGTGA

A\_14\_P127450 TCACTCCTCTTGCTTTATGACAGTGAAGTATCTTTCAAGAACAAAGTTGGGATATTTGAC  
A\_16\_P01926320

AAAGTGAAGTCATATGACAGAAGGTAAATGGAGTTTAAGGTCTGTAAAAGTAGATGGCCA

A\_14\_P122563 CTCTTGCAACCCCTCAGCATCTATACTTCTGACATATTCCATCAACCTGTGTATTAATA

A\_14\_P111009 AAATGTCTCCTTAATGTGTCCTTCATGTTTCTTTTTTCTGACTCAGATTCTGGAAGA

A\_14\_P120477 CTATCAGACCTGAATTTTCTGTATACTCACATAGCAGGCAGATAGCCTCTAGTATTTTAC

A\_14\_P110132 CTTCTTGTGAGGATTATGGGTCTGCAATTCTACAGTTTCTTACTGTTTTGTATCAAAA

A\_16\_P19355711

AAAAAGATCTTGAGATGCTCAGAGATGTATAGAGATGACAGATTAATGGCCTTCTCACAC

A\_14\_P129025 ATTTACATACTTATCCTTGGAATACTCAGTTTTTGCAGGAGTTTTTCTTCTACTTGCCC

A\_14\_P130790 CTTCAATTGTCATGTAGGCTTCTATGTAGTTGATGAAGATGTCAAACCTCACTCATGGCTTT

A\_16\_P17516271

AAAAAGGAGTTGTCTTTTTATGCACATGTCAACTCATCCTGGTTAGATTGGAAACTCTTT

CUST\_8118\_PI426210822

TGAGAAAATGACAGTAACCTACTAAATTCAAGAACACCCCTATGTACATTAACAGTGCT

A\_16\_P21297156

CTTGCCCTGCTATATTGACTACCATTCAGTCTCAGAATTAATGTCATTTCCACAAAGAAG

CUST\_1505\_PI426210822 TGTGAGTGAGATGACATTCAGTCAGGTTGTGCCCCATCATTGGCG

A\_14\_P100766 AAATTATAGAGCAATTCTGAATAAACTGATCAAAAAACGAAGAAAGATGAGCGCGTGCGG

CUST\_7282\_PI426210822 GAGCTGAGTGGCAGCATTGCGGGAGGGCTCTTCCTCCCTTGGTTG

A\_14\_P134648 CTAATAAAGGGCCACTGGGATATAGACAAAACATTGGCATTTTTAAACATTTTGGACATA

A\_16\_P19899855

AAAGGATTCATGACTTTGTAAACCCAAGATACAAAAGTGTAGTTTCTCCTCTATTCTGCC

CUST\_8481\_PI426210822

TTCAAGTTGTGACCTTCCAGATCCGAACCTTAGAGTTTCTGTATGTGATTTCAA

A\_18\_P17042359 GAATTCACCTGCAACATCACACTCCTCAAGGAGACGTTTAGCAGACATTATCT

A\_14\_P105108 AACTCCTACTTCTAAACTTCAGTTTGTCTTTGCTTCTTGAAACCTAAAAAGCCTAACT

A\_16\_P20842937

AATCCACTCATAAAATGGACTCTAGGAACATTCTAAATCCCAGTTATGAGAAGTAGGTCC

A\_14\_P110302 CAAAATTGCTCAAGTATGTAAGAATCAAGAAGAATCCAAGTAATGTCCTCTCCTTTGTGG

A\_18\_P21867124

AAAGACTTTGCACTTCTTTAGTCTTAGCCACTGAAAATTAATTTAGGGACAAGAGAAGG

A\_14\_P135882 AGCGGAGTTTTGAATTGTGTAAGGATAGTGATTGAACAGAAAGTCATCTCTCCACAAA

A\_18\_P13542517

ACCATCTGTCTTTAATCATCCAAGCATATGTATTCCTGTCTGTCTTACTTTTTGCAGTA

A\_18\_P15983582

AACTATGCCTACCGAAAACGTAAATCTACTATTCAACTTTCTGGGGGATCAAGATTCATC

A\_14\_P111972 CTACTTTATATCAAGCACTGTGTAAGACTAAATGGATTAGGGACCTCAAAGTAACCTGCA

A\_16\_P40047974

TGCACACTTTTAGAAATACAGCAATTGAACCTTCATAAATATTCTTCTGAACACGTTGC

A\_16\_P18567302

AAATCTCCAGTAAAGTGAAGCATATGCTCACATCTACCATAGGAAAGAAATAGGAGTGTG

CUST\_1436\_PI426210822 AGTAGACACTCAGAACGGCAGGAAGTGGCACTGTGTTGCAATCAT

CUST\_319\_PI426210822 TCTTGTCTGATACAAGCTGGCTACTCTTTGTATTGGAGTGCTTGTCCC

A\_16\_P19113237

ATGGCTAAACCCAGTTAAACTCCCATTGATGATGCTGATTACTCTAGGATCTAATTTTCT

A\_14\_P114849

CAACAGGTGGACTTGTGAAAAAATTTTGGAGACGAAGAAAGATTATGAGAAATTGCAGC

A\_14\_P128473 TAGCACCTCCATTTAAAAGTTGGAGACCTCCACCTTCTTGTTAGTTAATCTAAATACAA

A\_14\_P122086 CTCTGATAAGGATATCCTGAGACCACATTCAAGATCCAAAACCTTTCTCATAGATGA

A\_14\_P132438 TAGAAGGGGAGAGAGATTAGGATTTTAGGGAAGAGGGGCAAAATTATAATTTCCATTTAC

A\_14\_P131977 TCGCTTATTTCTTATACCTGTTTTGTCTCTAATGCTTAGTGGTTGTAATTTGGGTGCA

A\_16\_P02346601

GCTTCCAAATCTGAAGGTATTTGTGCTGAAAGAATCATCTGTTGTGTTCCATGAGTTTTA

A\_18\_P14795784

AAAGGATGCGGCTAATTTCCAAACTAGATAGTGTCAAATTCAGAGTTGTCTACAGTAACA

A\_14\_P132322 TTACAGTTTTTTGAGGTGCCATTTGACTCAAACATGAATAGGACAAAGAACAGACCG

A\_16\_P18602791

AAAAACACATATGATTCTCCCTCTATAAACTCCTTCAAAGTTAAAATGGAAAACCTACCT

A\_16\_P30952379

GGCACATGAGATAAATGAAGATAAATGCATGAAGTAGAATAATTTTCAGTCTGGTTAGCA

A\_14\_P108585 AAAAATGAAGTATAATTACCTTTCCAAAGTCACGAACATCAAACAAGTCAAATGCCTCGA

A\_14\_P105310 CTCTTCTCCTCCTTATCCTAACAGTCTCATAGGTAAACTTAGAAGGAAGACAAATACT

A\_16\_P16280791

CCTCAATCTGGCCATAATTGCTGTTTTTCTTAGAAACTGTAAAAGGTATGCCTTGAT

A\_16\_P02129971

TTTTGAAGCCATCTCAGAGTAATACAGCAAGTAACTAACCAGTCTTACAGAATACCATCC

A\_14\_P115396 GATCTTCATCACCATCAACTCTTAAAATCCGAGACATAACCACGAAAGGAGCAG

A\_14\_P128241 GCTTTCTGGAAAACCTTACTTTGAGATGAAAACAGGCTACGATGGGCAGTTTCTT

A\_14\_P202170 AGATGGCTGAATCTTCCAAGAGAAACAAGGTTGGATAAGCGCTTCTTTTTTTTAG

A\_18\_P14136762 CTTCAACAGTCTTGCTTGCTTACATCTACTAACTGGGCAAGAGAGACCATTCT

A\_14\_P116246 CTTTCTAGGAAGGATGTGAAACACAGAAACCACACAAGGGGATATTTAACATCGTAAAAG

A\_14\_P112986 AAATGGCAAACTTTTATTGAACATCATGCTGAAGCCCAGAAGAAAATGCCATCTCC

A\_18\_P13489256

GCAATGTCAAGTTACAGCAAGGTTAAGAACACTACTTTGAATTAACGACTGAGATTAGG  
CUST\_73\_PI426210822 ACAGCCCTCACTGTTACTCATCACCCCTAAACTGCCTCCAACAAATA  
A\_14\_P130117 AATCAAATTGCAATGGGCAAGGAAAGCCAAAGAAGGGTTTACACAATATTCAATAAGCAA  
A\_18\_P25763557

GCCAGCAAAGCCATATTTTTTTGAGTTAGTAATTCCCAGATTTTTGTCAAATTCAACAGC  
A\_14\_P131021 CTATTGTGTTTTCTTTTTCACTTCAGAAGAGAATCCTAAGGACTAGACTCCGCTCAG  
A\_14\_P117882 TGTGCCCAAAGGTAGTAGGCATTAAGGTGATAGTTCATTCTCTATTTTTCCACATAAG  
A\_16\_P21093802

AAACGATGATGTTGATTTTCTCCCATTATTTTCACTGCTTAAAATTCTCATGGTGCCAGT  
A\_16\_P19892164

CTCCCTCAACTATGTATGTTGTAATTTACACTTTCCCTAAGTATCAGAAGCCTTGTCAGT  
A\_14\_P122899 ACAGAAGCAGACAAAAGACTTTCTCGTTTTGATATTGAGATGAGCATGAGAGGAGATATA  
A\_14\_P118392 CTATTGAAACGAATCGCAAAAATAATGTCAGTGTTCCTTTGACAAAAATGGGAAGG  
A\_14\_P109799 AAGATTCATAAGTGAATGCACCAAGATTTACTTAAGTCCAGACTGCTGGTTATTTAGG  
A\_14\_P131544 CTTGGATTTTTGAATTCCTTAGAAATAATTGTGGAAAGCAGGGTTTGTGTGAGAGAGAA  
A\_18\_P25991773

AAAGGCCATACTTAACCAAAATGTCCATGACTTCTTTCATTACTAACAAAAAATTGCCAA  
A\_14\_P126345 GATCACTATTCTCTTTTTTCCAGGTTTCTCTAGAGGACTTTCTAAAGAAAATTCAGCGAG  
A\_18\_P14139459

GGGCAGGGACATGGACGTGCTATTTTTTTTAAAGTAATACATATTTACCTTAATTATCTG  
A\_16\_P02089852

CACGTCTTTTGCGAATGATTAGAAAATCATGACATCTTTAGTCCTGTAAGAACCGACTTT  
A\_14\_P130744 TTTTGAGACAATTGGGGGCTTGGGATTATCTTTAATTCAATTCATAAAGTTGCAACACAG  
CUST\_6919\_PI426210822 ATTACCTGTGGCCCTTGCATCAGGGAGAGCCCAGCCTTGAGTGAAA  
A\_16\_P00812192

TAGCCATTTTCTAGCAATTTCACTACTACTGAAATCAGCATAACATTTGCAACCTGG  
A\_14\_P134226 ACTCATCAATACCACATTTCTTTGTTGATTCAAGAACCGTTAAGAGTGTGCTAATTCCT  
CUST\_2869\_PI426210822

AGAAAATTATTCATCCCCAGCATGTTTCTGTCACTTTCTCTGGCATTTCATATCTCAATC  
A\_14\_P133013 AAACCTCACAATCACAAGAAACAGAGCAATGGCTCACAAAGCAGAACTGCAC  
A\_14\_P101858 TTTACAAAATACTGTGGTGTGGTATCATATTGTAGGCAGCGTTAATGGATAGAGATGGAG  
A\_14\_P101359 TTTCCAATTACTGGGAACCGTGACAAAACTACCTTAAGGGGACAAAATAATTTCTAACA  
A\_18\_P22841773

GACCAATTAGATATGTTTTAATTTTTTTATGACCGGAATCTTTTCTTCAAATGAACCTG  
A\_14\_P101192 GGAATAAATCGGTAGCAGCATTAAAGGAAGAAAGGCGTTTTGCTGTTTCCATAATAAAA  
A\_14\_P132609 CTCCATGATCAGAAGGATGGCTACTGTGACAGGACAGCAAATACGGCAAAAATAATAAAA  
A\_16\_P17133992

ATCTTGAACAAATGCTCTAAGATGCATACATTTAGCAGATGGACTCACTTATCATGTGGG  
A\_14\_P122792 GATTTTCAGAACACCCCTCTTCATCAGAACGTATCCAGCCTGGGTT  
A\_14\_P106760 AGGCCACCTTTGGTAAACTTCTACAAGTGATTCTAATTATGAAGTGCTTTGCAAATCAG  
A\_16\_P16773353

AAACTGCCACATTGTTAAGAAAGAGACCATTACTGAAACATAAAGTTTGGCTTGCAAGTT  
A\_14\_P104902 CTGATGCATCTGAATGCGTTTCTTAATGTAGGTTCTGAAAAATAGACAAGGCCCTTTAA  
CUST\_7351\_PI426210822 GCATGCCACCTCCTAACGGGTTGGGAGTGAGGTGGAGTGGGGAG  
A\_14\_P111877 ACTTCCAAGGCCTTACATCAAGAACTCGCTGGAAGTCTTCCAAGGTAT  
A\_16\_P15414056

ATTTATGCTCAACAGAGAAGACAATTCCTCACAGAGTTCTGATCTCATTGCCATTAGAA  
A\_14\_P115729 ATACATGGTATTAACACCATGGATCTGAAGCAAACAATGCATCTGGTTAGCATAATTGG  
A\_14\_P115726 TATCTTCAATAATAAGACATCCTATTTTTGGGGGGTTAGGGATAGAGATAAATATGAAAA  
A\_14\_P106732 AAGCATCTACCAGCAGGGGCTAGCCCTTAACATCTACATTTTGATAAAAATTATACCAA  
A\_14\_P101724 ATTGCCCTGGGTTAGGGGAGAATAAATAAAAATCTGTGGCATCAGACAGGTATTAC  
A\_16\_P00562926

CAGGTAGATTGAAAACCCCTCTTATTTGTGCTTCTCTATAACCCAAGACACAATTTTCTCA  
A\_16\_P16191741 GTGACCACAGAGGGTCCCACCTCAGTGTGGACATTTCCATGTGTC  
A\_16\_P15153122

CTGTAACTCTCCCTTCACTAATTTCCCTTCATTGTAAACTCCTGAAATGCTAACCATCAA  
CUST\_8300\_PI426210822 AGTGACCATGGGTGCTTGACTGTGGGTGGGGATGACAGATTTTCAT  
A\_14\_P116717 TCACATCCACAAAGTCACCCCAAGAAGATCAAACCTGCTATTATAAAAGTGTAGAAAATGG  
A\_14\_P132873 ATTGATATATGTAGATGGATTAATGAAGGGTATATACCTTCCAACCCCAGTCACCTCAAT  
A\_16\_P16173313

AGACACTTGAGGAGAAAAACACGTTACCATTTTTTCAGATGACATTCGTAACTTTCTTGT  
A\_14\_P109803 AGAACTCATTCAAATACTTACAGTGAATGACAGAATGGATGAAAAGAAAGTGCCTTCATC  
A\_16\_P03221574

TCAACAGTCACTCAGGAAATATTTTCAGCAACCTCTCATAACATTGTTTTTCTTCCAAAAC  
CUST\_8796\_PI426210822

CCATCTAGGGTGTCTCTTTGCTCTCTCCATATTCTCCAAATAAAAATTCAAAC  
CUST\_838\_PI426210822 ATCTGAATTCCGTCTCAGCACAATTAAGCATCTCCCCCTTGTCG  
A\_14\_P116995 TGGTTTTTGGTTCAGGTATTTTTTGGATTAGCATCATCAACACTAGAACTCAACATGAGA  
A\_16\_P03678732

AAAAATGAGGTCATGACATAGATTTGAAGGCCAACAAAAATTACATAATCAGTGCTCCGT  
A\_14\_P115073 TTTTAAAGAAATTCCAGTGAATATGAAGGGCTCCTATCTGAAAAGATGCACATTTGGCTT  
A\_14\_P123593 AACAGAGGAAATATCTTGGGATATAAAGAAAAAAGATAAAAAATAAGAGATATGTCTCAT  
A\_16\_P16095640

CTGCCTGATTAATCTTGTGTTTTCAACGGATTTGTCTCAGTAAAATGCACATTACAGTGA  
A\_14\_P123519



AGAAAGAGAAGGTGGTATTAAGAAAACGATTGAAGTCTTGAAGCAACTTTTGAGTGATGT  
CUST\_6931\_PI426210822 ATGTCAACAGAGCTGTAGTTACGACAAGGATCAATTAAGAAGGACGTTTCCC  
A\_14\_P125456 TCTGCTCTATATAATGGGCTTCTAGGTAAGACCATAATTGAAGAAAGGGTCAAGGCTAAT  
CUST\_9373\_PI426210822 CAGGCAAGCTGGGTAGATGTAGGTGGGGACACCACAAGACACCTT  
A\_14\_P123792 ACACAGCATCCAGCACAGGAATAGATAAAGTTCTCTGAAGCCTATAAAAAACATACACAA  
A\_14\_P116469 ATACACCTCAGTTCCAAAGTTTACCTCTTCTAGTAAATTACACTTTCCAGAAACTATGG  
A\_14\_P202372 TTTTGATGGAAACATTACATTTTTGGAGTGAACATGTGTCAACATCACTGTGGAGAAAAG  
CUST\_5117\_PI426210822 ATGCTGAGATGAGTGTGAGTGGCCTCTGCACCAAAGAGTTCAGTC  
A\_14\_P115511 CTTATTAGAGATCTTGAAGTATGAATGGTTCCTCTTTGGTTCCTTTGGTTCCTGTCTAT  
A\_16\_P18105451  
TCTTCATGAACAATTTACATATCACAACCTCCAACCTAACTGATTATCCAAGAAACCCCAA  
A\_16\_P20743391  
GAATGTGTCCATCATTTTTCGTAAGTCTTAGTATGCAGAGAATCTCAGATAGCAAAGCAGA  
A\_14\_P100535 TATCACACTGGAGCAAAACTGGCTATTTCTGTGAATGATATAAAACAGGGTTCTCTGTAA  
A\_14\_P135824 CTGTCAGCAGTATTTTCAGAAGCATTGTGTTGAACACCTATTGCATGCAGATGGCT  
A\_16\_P17438480  
GGCAAGGATAGCATTATCACTTAGTTTATGAACTAGTGGAACAGTTTLAGGTATCTGGGAA  
A\_14\_P113717 TTTGTTTGCCCAACAACCTTCATATTGCCAAATATTATAGGTTTGCAGACTCGAGATATCC  
A\_16\_P16077004  
AAAACAGAATCGCTCTGTATAATCTGTGCTCCCATAAGAATTGCTACACTTCTCTTGAAA  
A\_14\_P131269 TTGCTATTTATTAGGGTTTATGACTAAGCCAGAAAATTATGAAGTTGGTTCAAGGGGGAG  
A\_14\_P124603 AACATCTCGGCACCTAGTAATGGTAAATTAGTCAATATTTGTTAGTTTCGTTTGAGATCT  
A\_16\_P02030182  
TTTGAAATCAGACCCCATTAATCAGAACTCCTCACACTTATAACAATATTTTACCATGGGC  
A\_14\_P131357 GGCTAAAATAAAGGACTTCTTTAAACTTACGACCTAATATCAGATTACGCCCCGAAAGTC  
A\_16\_P36571133  
ATTTCTTATCCATCTTCTCTGCATCATACCAATAACTTTCTTGACTTGCTAACTTTCCC  
A\_16\_P18591314  
ACCAAGTTGATGATAACTCATCTCAGATAACTCCTATGGTGGTTAATACTAGCATCCCC  
A\_14\_P111782 CTGTTTGGATTTCTGGTTTCTCCCCAGAAATAGTGTTTAGAAGGTGGCTACTTTTT  
A\_14\_P137135 ACCACCAGGCTTTTCCAGAAGTAATATTATGTGATGGCTAAAATACTGAAGGCAAATTTT  
A\_14\_P127635 TTAAAACAACCTATGGGTAACATACCTGTTTCAAGTCGCGTAGAATACTGATATAAGAAAT  
A\_16\_P02577367  
ACACCAGGAATGTATTTAAACTACCAGGATACTGTATCAGTTAAACTCCATTCAAACCCA  
CUST\_8184\_PI426210822 GATGATGGGTGGTCCTTTACAGGTGAGACATAGCTGCTGAAGTCTA  
A\_16\_P02393019  
TTGTGCACTAAGTCTAGAAGATCCTCTCTTTAAATACGTGATGATTCAGAAACATCAGGC  
A\_14\_P137128 AGTGTGAAGCAGCATGTAAATGATTCATTAATGTTTGGGAAGTTTCTGAAAGACATTTG

A\_14\_P108149 CCTCATAGAACGCATGTTTATTAACCAGATGTATTTGATATGCTTCAGTATACCTAAATT  
CUST\_3183\_PI426210822 GGAAGGGGAGTGGCAGCCGGGCCACCTCCTGGAGCAGGAACTGGG  
A\_14\_P139349 TGCACAAAAGTATATTTTAGTTTTTGGGAAGGAAGGAGATGGTGCAAATGAATTAGAGGGT  
A\_16\_P38204146  
TAAGATTCTCTTGGACTTTGAATCCTTCTACATTTGATACGACTTTTCAAACCACACTCC  
A\_14\_P106174 CTCTCAGAAATGATTAGTGATATAAGTAATCAATGGCCAATTAGGACAAGTTGAAACAGT  
A\_14\_P112669 ATTAAAAGGGAGAGATAGTTCCTGGACAAAAATGCTTTCCAATTTCTTTACAGATCCTGA  
A\_16\_P03767768  
TTTGCCCTAATTCCTCTAATACCTGATACCTTCAACTATTAATAGGCATTCACTATCCC  
A\_14\_P111847 AGAAGGGAACCAACATTTATACCTGACCAGATGGCTAAAGTGCTTTTAAAGTTTTGTTTA  
A\_16\_P21009457 AACCTGCTGAACTGATTTTCTGGTTGTGCCTTGTAGTTTGTAAAACATTAGTCTAGG  
A\_16\_P20623959  
TGCCATACCTAGAGATAATGTCTGCTAATTAATCTATCTTTCCAGCCTTTTAACTCA  
A\_14\_P117565 CTCAGCACTTAGGAGACACCCCATTTTATAAGTGAAAACAGGATCCACAC  
A\_16\_P03308804  
ACACATCACTATACGAATTAGAAAACAAATGATCCATAGATGAGAAGGTAAGTTGACACA  
A\_16\_P16192005 GAGAACAAAGCCTGCTCAGTGTTTGGCATCTGAAAAGACAAGGCTTCTT  
A\_14\_P126259 ATGACCAACAAGCACATGAAAAAGACATCGTTATTTAAGGCAGACTCTCTCCAATTATTT  
A\_14\_P116259 TCTCCTAACTTCAGAGACAGGGACTCTTTTTGGATCTCTATTGACAAGTAATAAAAGTCT  
A\_14\_P135830 ACGTCCATTATGGAGAAAGATTTGACTTACAGTTCTGTGAAAAGACATCTTTTGGTCATC  
A\_16\_P15210301  
AACATCAAAAAGCCTTATCATAACCCTGATGGTTTAAATCTTTAAACAGAGCGTAACAGCC  
A\_16\_P21660830  
ATGAAATCCAACCTACGAGAATCATGTTACTGTATATTCCCCTCTCATTCTATGCTTTCC  
A\_14\_P110600 GCCTTCTTTGTAATGCTGATAGCACACCTAGTTTTTCGGTTTTATAAGACACTCTATTTCAG  
A\_16\_P18384788  
TAAAATTAGTATGCATGTTGAAAACCTTGGATTCCCTGTAATTTACATCAGCCCTATGG  
A\_14\_P128597 TTGTTTTGTTTAAACTTCCGTCATATAGGATCTGAAACCAACAACCTTGTGCTAGATGA  
A\_16\_P30952645 ACTGATTATGCTTTTTATATTTGTATCGATGTTTTATTATTCTATTAAATAGTTATATA  
A\_14\_P105583 TGAAAACCAGAAGTTTAGGATGTTTGTGGCTTTGTTTCAGGTTTCTTTACAACCTAAGATGA  
A\_16\_P16069117  
GTCTGTAACATAGTAATTCTCATTTCCTGAATGTGAACTCTAATCCAAATGATCGACCA  
A\_16\_P00429717  
AAATCCCAGTTGAACTTGATATGACAGAGCAAGTAACTTAGAACAACACTGATTCTGCAG  
A\_16\_P00684996 CTGGGTATAAGACCGAGTGTGTCTGTTCTTAACACTTGTCAAATTCCTTTTAAAG  
A\_14\_P105359 ACTCTCCATCTGAATCTGCAAAAAGTATATGATAAAGCGATAAACCGAAAAACAGGAGTTC  
A\_16\_P1857776  
AAAAAGGCAAGGTATGACTCATCAGTTCCTTTCTCTTAAAGTAAATGACCTAAACACCATG

A\_14\_P125580 ACAATGTTCCATACGTTTCCACAAAAATATTGTAAGTGGCATTCACTCATTATGATCCAC  
A\_14\_P120379 CTAAGTCCCAGACCCAGATACATTTTGTCTTAATGCTCTGAATAAAAACTAAAAACCAGG  
A\_14\_P202495 TAAAACCACAAAATACCCAGAGAATTGTTACAAAATTTCCCTTCTTTCTCTGACTGTTTTT  
CUST\_10396\_PI426210822 CTTGGGGTGCACAATGGCTGATTCTTCAGCACTTCTAACTCAGCTTC  
A\_18\_P11862770  
TGAAATCCTAACCCACCTTCTAAAGTCTGTTTTCAAATGTGTAATTGCCTTAAAAATCCTCCA  
CUST\_6233\_PI426210822 AGATTTTTGCAGTTTATTCTGTGTGGCTGTGTGTGTTGGTCCCTTGC  
A\_14\_P131238  
TCAGGTTTTAAAGACAAAAGAAAGCAGACTCAAACACAGACAAAGCAGAGAAGAAAACA  
A\_14\_P138941 CACACACAAATGATACCTGTCACTCTCCACTGCCATATTACTATAATTCAGTCAAGTTG  
A\_14\_P136063 AAATGATAATGCAGTTGCACCTGAGGCTCCGCATCAATCCACAAAATTTTTAAAGTATTAT  
CUST\_5710\_PI426210822  
GTTGAATTTGCAAAAATCTTTTTTCAGTGTATGTTTTATTTTTGCAATTTGTGGGGGGA  
A\_16\_P18290944  
AAAGGTGTGATTACTGTGTCAGAAGGACTGAAATGTCTAAGGGTTGAAAAGAATTCATGAAG  
A\_14\_P139022 CATTATCTGGGACAGCAGAACCAGGTTTGGCTCAACAGATTTCTCTTTC  
A\_16\_P20498077  
GTAAAGTCCAGAATTAGACCTCAAATATATCCCATCCAAAATTATCCTCATCCCATCCAA  
A\_14\_P109031 GAAAATGACATTTAATGGCCAAAGCCTCGACTAACATTTACTAATGGCATCTCCAATGTA  
A\_14\_P118807 ACGTTTTATAATTTGGTTACTAGCCTTCATACTCATTTTGCCAACCAATCAACATAAAAC  
A\_14\_P100233 AGGGCATGAATAACTTGAATATTGAAGGATAAATGGATTTATCCCTATAGAGAAGTGGGG  
A\_18\_P16280395  
AAGGCATGCTGTGTAAGTAAACACTAGATTTAGTTGGGTTAGAAGGTCAAATCTATGGA  
A\_16\_P21371853  
ATGTCATGATTGCTTACATTGGTCTCATTCCATCAAGTAAAGAACCCTCATGAGTAGAAG  
A\_14\_P202188  
AACCAGAAGAAGAAGAAAAGAGGACTTCAAAGGTAGGACTCAAACCTTATCACATGTAG  
A\_14\_P201090 CATTTATTTGAAGAACTTTCCCTTGGGATCTGTCCAAATCCACTTTGATACCATTAGAAT  
A\_16\_P20013728  
GCTCAAGAATATTGCTCTCCTTTTTCAACTCTATTCCAGTAAGTCCTTCATCATGCTTTTT  
A\_18\_P13782374  
AAATTCCTTGGACTCTTCCAGATTCTTCCCTCAAATATGGAATTATCAGGCAAGTTGAT  
A\_14\_P137444 TTCTACAAGAGGAGTGCCTATCTCCAATTTGGGGTGAGGTTTCCAG  
CUST\_5004\_PI426210822  
TGGGGGCATCTGTGACTCTTTATGGCTATATTTCCAGAATATGCTTTTTAAAGACTGT  
A\_16\_P00417471  
ACATTGAGCCAAACTTTTTGTTGAACTCCTAACTAGATGCATTTCTTTGTCATCAACTTT  
A\_18\_P22842652 CAGGCCCTGGCTTCTCTTCTTTCCGGTAGATGAACTTGAGCACAT

A\_14\_P123601 CAGATTTTAATTTTTCTCACTTGTAAGTTATGGATCCCTAAGGCCCTAGGAGACAAACA

A\_14\_P123988 GTAGTCTTTGTGACTTGGCCTGTCTTGGTTAAACCTCTTTCAAGGTGAG

A\_16\_P19920733

ACCTCCTAACACATAACACTATTACTTTCAGTGAGACACAATTTCTGCTACATTTTCATCCA

A\_14\_P130161 ACTTTTTTACATTCATATCTTACCCGTTGTTTTGGTCCCTTATGGGTGAAGATCATGTAT

CUST\_6425\_PI426210822 AGACTTAACTGTAAAAGCTCCCAGCCCACAGAGGTGAGCAGAGGC

A\_14\_P137935 AACACATCTACTGCATAAAATCACATGCTGTGCACTATGACTATACTAGTGCTCCACTGA

A\_18\_P17312893

TTTTCTCATTAGTGACAAGACATAGAAGTTGCAAAGTAAAACAGTAACCATATGCTGATG

A\_14\_P128788 ATCAGACAAAAACCTAGATAACAAAACAAGCATAACGGGACATTTATGAAAACACCACCA

CUST\_3640\_PI426210822 GAGAGGTGGCCACAGTTCATGCACAGGCTCGAGTACAAGCCTTC

A\_16\_P17150377

AAAGCATGACATTCTGAAGTGAATACTTTTTCTAATCAGTCCTTGCTCTAAAATTGTGCCC

CUST\_9092\_PI426210822 GCAGGCACTTTTGTCTCCCATGGTCTAGGCAGGAGTCATTTTTTT

A\_14\_P134380 CTGTCTGAGCAGATTCCAGTCTTTCTTCTTAGATGCTTTGTCTTTATTTCTCCATTT

CUST\_9395\_PI426210822

TGGTTTTGATTCCAAAATGACTTCATTTAAGAGCAAAGAAAGAGTTAAAAGCAACTCATA

A\_16\_P16382430

AGGGGATGAGAGTAAATTCACCTACTTTTACACAGGAAAAAATAGATACGTATGGCCTT

CUST\_2544\_PI426210822

CTAGTGGGTACTTAATGAATATTATATAATGACTAATAAATATTTTCTGATTTAAATGTA

A\_14\_P128882 CCCTCCCTGTAAGTCTATTTAAAAACATCGACGATACATTGAAATGTGTGAACGTTTTGA

A\_16\_P58424100 CTAGCAGGCCAGGGCAATGTGCTGGAATTTTATTCTGTGTGTGAGT

CUST\_3529\_PI426210822 AAAACGGACAAAGCCACCAGCTGGCAGTTGATGCAGGTATCAGAA

A\_18\_P22840339 GTTTGTAAACTTTCTTGCCAAAGCCCTTCCCGACTGAGATGGAGTTGATATTA

A\_18\_P25731146

AGGAGCAACATTTAGTCTCTCATCTATCACCCGAAGTAGAGTAGATTTCCAACAAGTATCT

A\_14\_P113158 AACAGATATGTCATGGAAAGCATTAGAAAGTATGGTGTGTTTGTGTGCTTATGTTTCATGTG

CUST\_7790\_PI426210822

ATTGAATTGATTTTTTAAATTGAATCCATTTTAAACATGGGATTTTATTTTTTATTTAAAG

A\_14\_P113578 TAATCTGTCCCTCAAGGAATATTGAAAGCGTCATCAATGTCTTGAAGGAAATTACTGTATC

A\_14\_P113757 ATAGATATGGAATCATTTTATAGATATGGCCCAAAGTCCAAAGTCACACAACCTCATTAC

A\_14\_P116680 GTTGTAGAAAGAGTAAGACGAAATGGTTGGGAAGGAAATTTGGTTCTTGAGATACTGG

A\_16\_P18294066

AAAAAACTGACCAAAAAGGAAAAATATCAAACCTGTCTGATGAATGATTGCTAAGTGGAGG

A\_14\_P135564 CAAAATGGATATCTTGCCATTCATTATCCTTTGATTTAACAACCATATCTAGACCACCCC

A\_14\_P131422

CTTTTAAAGGGTGAGTTAATAAACAGCAACAACAAAGTGAAAGGAAAAAACTCACCCTCT

A\_14\_P116330 AACCGATCACTCCAGGAGGTTGACATTTTATTTTAACTGTATTTTGTATTCTAGAAAAGA  
A\_14\_P106669 AATTTACAGAAGGAAATATCTACATATTGCTCCTGTCAACTTCTGGGTATTTTCCCCACA  
A\_14\_P108605 ACAAACCTCTAGAGTCTACATGCAAGACTAGTAAAGTCTTATGGAGTCTTATGATGGATT  
A\_16\_P41033525

ACAATGTATGACCAAAAACAGGGATTACTCTTATGACTCAATAAACTTCCGAAATTGGGT  
A\_14\_P134068 CTAATCAGAAATTCTTGTATATCTGGGGAGAGGGGTGAAGAACAGTCAGCAAT  
CUST\_4962\_PI426210822

GATGCTTGGATTTGTGTTTAGAAATTGGGTAACCTCAGTTGTTCAITGGAGGAAAAAGTT  
A\_16\_P00685021

TGTGAATTTTTTGTGATTTTTGTAAAATAAATTACAAGTGGCAATTAGTCACTGTGCTG  
A\_14\_P104771 AATAATCTTCTGGAAATGGCTCTTGTAGAAAAAGGCATTGAAAGTGCTTCATTGCCAATA  
CUST\_3892\_PI426210822 GGGTCTCTGAGGATGGATGCGTGTCAATTCACACACCAAGTGTGTT  
A\_16\_P37240363

TCTATCCCTGCATTTATGAACTCTCTAAATCCCTTCTACTTAAACCACAGCACTAAAGC  
CUST\_3672\_PI426210822 AATTGGTCAGTATAATCCTACCTCTTGGAGCGATAGCTGGCTGGATTCT  
A\_14\_P115084 TCATAATTAAGTCTCAACAACCTCTAAGGGAAGACTCTTCCAGTCAGACTTTTTTCATTC  
A\_18\_P15244640

AAAATAACTTCAGCCAAGTATGTAGATCACTTATCCTTGAATGGGAATGATAGGTTGGG  
A\_16\_P15494527

TCTCTGTCCCTCTCAACATAATTTTTGTGAACAGGCCAAGTAGATAAAACAACCTCAAAAAA  
A\_18\_P22839937

TAGGGTTTCTAATTTAAATGAGAAGTAAAAGCCAGTCAACAACCCTCACAAAGCAAGAAA  
A\_16\_P58424131 TACAAATCTAAGCCATAGTTGTCTTCCCAACCCACTGCGGAATCCTT  
A\_14\_P119857 TGCCACATGGGACAGGTATTAGACTTGCATGTGTGATGCTGTTATATATGTATCTATCAT  
A\_16\_P02458971

AGGTGAATGATGAGAGAATTCAATCTCCTGGAATCAAAAGAACTTTTTGGTGTGTATTCT  
A\_14\_P200537 TGCCGTCTATAGTCTGCATTATAATCCGGTTAAAAGGAAGGTCCATGTTTTATTTTTCTG  
A\_14\_P137496 AAGCCTTAAACTGCATCAAGTCAAAGAAACCTGGGGCAAATCCTTAACATGTTTTT  
A\_16\_P21239529

CCAGATTCCTTGTAAGTCAAACCTCCTAAAGAATTA AAAACAAGTCATCACCTAAACGTCA  
A\_14\_P115148 GGTGCCAGAGTCCATAACATTCCTTGGAGAATCAACAAAGTCAGGAAAG  
A\_16\_P17173701

CACCGATTGACATATGGATAAGGCAAGAATTTTCCCAAATTA CTGACTACCTCAA  
CUST\_5438\_PI426210822 AGAGCACTGGGGCAAGTACAGGTGGTCCCACTCATCAGATTCTG  
A\_14\_P124785 GGCAAAGAGATGGTGGCCTTAGTCAATTTCTTCTATTCCTCTCTTTGAGTTAAAAATACA  
A\_14\_P134397

TCCAGCCCAAGAAAGAAGCCAATAAAGAGTTTTGTAAAAGTTGTTTCCAAGAAGATAAACA  
A\_14\_P133153 CTGCTGTCGTTTTAAATTCACTGTATTCTCTCTGATACCTGTGAGCAGCCAAG

A\_18\_P14135690

AAGTTCCTTTTAGGAAATTACCCAATGAATTGGTGGAGGTAAATGATGCAGGAGGTTTG

A\_14\_P117021 AACAGTTGTATTTTGCATGTCTTTGTTTGTAACTACTGAGCCCATACAAATCCTTGCACT

A\_14\_P200823 CAAGTGTGCACCAATAATCGTAATTATTGGGGAGTGATAAATGTGAATTGCAACTCATAT

A\_16\_P39070902

AGTCAGCACCTTGTTACTACTCAACATTCAGGTAATTAATATCCTCGATTAACACACACT

A\_14\_P120752 AGTTGAAGTTGGGAAATGAAAGACAAGTAGAAGAAGTCAATTTAGCAACATCCTTTCCTT

A\_14\_P127960 CTATCTCCCCATCCTGAAAAGTATCTAGATTCCAGTCTAGAAGTACTCCTGGG

A\_14\_P118163 GTAATTTTTATTAAAAAGGAGACTAAACAGAAGTCAGGGGTAGGTGGTTCTCCATGACT

A\_14\_P128510 TCCTACCTAGGGTTTTTCATAGCATGTGATTACAGTTTGTCTCCATTCTATATAGGAATG

A\_16\_P20757229

AACTCTAGGATCCCCTTTTAGTGTAATAACCATTTCAACATTTTCTGCAGAATCAGAGG

A\_14\_P201862 ACCCTTGTTTATTAGGACTGTTGTGAAAATGACGTAGGATCTGATAAGATGACTCAGTGT

A\_16\_P00685019

CTAGGATGTCTTTTTATAACTTAGCAGATGGCATCTTTTCAGTGGCTTGTCTGAACTCT

A\_16\_P03109221

TGGATAGATTCATACTACTCCATTATCACTAAGGTTTCATTTTATTTGCAAGCGGTTTTGC

A\_14\_P126425 TTCTCAAAGTTGATGAGATTCTCCACTAGTGTGTGGTTTTCCCTCATGAATGAAG

A\_14\_P117523 TCATCAACAACTGAGAAATCAGCCTTATAGGATGGCAGAGATGTTTTAGTGACATATAACC

A\_18\_P10664100

AAGTCACAAAATCAAAGTCCTCAACATTTGTCCTACTTCCATATTCACTGTTTCTAGCAG

A\_16\_P30952241 CTGTGTTTAAAGTGCCGTGTTACACCAACCCTGACCGGAGATGCA

A\_14\_P129246 CTCAAGACTTTGAAGTTAGAGAGTGTAAGAATGAGTCATGCATGGAATTAGGGTGTTAGA

CUST\_6688\_PI426210822 GTGAGTGTTAGCTCCAGAGTGGTGATGGAGCAGGGAGGTATCTTG

A\_14\_P130341 GGAAGGATTGAAGAATATTGATTGTCCATTCATCTGTTAATCCTCCTGCTTTTGTATCT

A\_14\_P112869

CCTAGAGAAAAGTTGTAGAAAATTGAATAAAGAAGGGACAAGGGTAGAAAATGCACAGAG

CUST\_8312\_PI426210822 ATGTCTCTCCTACAGAGGGCTAAGCTCTTGTGAGGAGAAACCCTT

A\_16\_P17193953

AACTCAAGAAAAAGACTTTCAGAGCCTAAGAAGATTAACATCTAGTTCCGGACACAATTA

A\_14\_P109829 TACTTTTAAAAGTGATCAGAGAGGCACTGTTTCATCAATACCCTGTAATGATTTGCGTTT

CUST\_662\_PI426210822 GACACTCAGGCCCTTTTATGTGGTAACCATAGCAGAAAGGAACATAGTCT

A\_14\_P138916 TGTTTTTTTTCTGTCCACGTTGGTCACCCCTTATCCTTATCTCTGCTGTCAC

A\_14\_P131641 CATTTTCAGATTATTTTTTTGAGCAGATTCTAGGGTTGAATTTTCAGGAAAGTGACTCCTTG

A\_14\_P112393 GTATAAGTTTTCAATAAATGCCTAAAGTTCAAGCATAGTATGGGGATGTCCACAGATTGT

A\_16\_P20440874

GTCTGCTGATTCTCTGTTTTATTTCCCTAGAGTGTCTTTTTATTTTATTTCCCTAGAGGGTCC

A\_16\_P18239574

ACTAACAATAGCCTAAAGGATTATTGCCTAGAGAGTAACATATGGAGTAATCAGGCAGGG  
CUST\_4246\_PI426210822 AAATCTCCCCTTCTGTCCATAATTCAGACTACGACAGCAATTAGAGGC  
A\_14\_P109408 CTTGCATGATTCAGTTCACAGGTGGATCATATCAAGAATGCTGGTTAATAAAGGCA  
CUST\_213\_PI426210822 CAGCCCGCCGTCCGCGCCCCGGTGGCGGGCCCCGACGCCCGCATTC  
A\_14\_P138068 CTGGAATTGGTGTAAAAATACTACTAAGAATCTCATACCTCTTTCTCAGAGTCTCATGCC  
A\_16\_P18363892

AATAGCCTGTAATCTTTTGCCTACTTCAAAGACTTCACCATTTTTTCAACACTATGACCC  
A\_14\_P201173 CTGTAGTATTCTGAAGCAGATTTTCAAGAATAATTTCTGTCCCTCTCTTATGTCCTAG  
A\_14\_P115579 CATAGCCATTATTAGTGGATTGGAAATGAAAATGAGTGTGCATTTTTCTCTCAGTTGCTC  
A\_14\_P107149 TGTTTATTGAAACATTAAGGGACAGAAGAAGAGTAGAGTGCATATAACCACTTGGACTTGC  
A\_14\_P104565 CTAAAAGGTAATATTATTAGGTAGTTGCCCTCCCCTTTGCTTGAGGACATTGATGG  
A\_14\_P120650 TACACCCTAAAAAACTGGGGCTAGGGAGTTGAAATATTTATAACTAAAGGATGGTCTTCA  
A\_14\_P122105 AAATGTCCAGGAACCCCAAAGACTTACTTTGTGACTTTGAAAATACGCAATAACCTG  
A\_16\_P17707244

AAAAAATGAAGTGCAAATTCACCAGTATATTCAGACTCTCTTAGATCAACAGACTTGGCC  
A\_14\_P138701 ATATTTATCATATAGAGCAAAGGAAAGTGTGGAAGTGAAGGACTCAATCAGGGTTTCGA  
A\_14\_P128116 AATCAATTCTCAGGTTAACATAAGATCACAATGAAGGTGTTCAATTCTGAAGTGAAGGCAT  
A\_16\_P40076653

ATGATCCTCCATGAATAAATTATCCTGCGGCTATGATATTTTTTAAAATTACCTCACACCT  
A\_14\_P136206 ACTCAAATGTGGTCTGCAGGCTTTTGTCTGTTGAAGGAGATCTTCATCTG  
A\_14\_P138594 AGACAGTGACTTTGACACGAAGTTGAAGCACCTTAAGCCCTGTATCTCCTTTATAT  
A\_14\_P107195 CTATCATCTTTGCAAAATGTTGTTTTCCAATTAATCAAAAATGGCCACCCAATCTCACTC  
A\_16\_P58424383 TTAGATTCTAGTAGGGGATAGACAGTCTCAACCAAAAAGCCCCACAAACAAAT  
CUST\_1717\_PI426210822 CAAACATGCTCTCAGCCCTGTTGACCATTTCCCCTGATCTAAAT  
A\_18\_P22840325 CAGCCGAATGTTTTCTGAAACACCAGTAAAAATCATCTGCCAGTCACTC  
CUST\_4438\_PI426210822 GGGGTCCTTAGTTTCTAGCAAGTGCCCTGTCCTGCTCTTGCCTT  
CUST\_359\_PI426210822 TAGAGCGTTCCATGTTGAGGGACCTGCGGGTGTACATCTCAAAG  
A\_14\_P124049 GAAAATTGGGCCTGAACACTTTTTTTCTGTAATCTCTGTGAGACTACTTACTACCTAAT  
CUST\_4468\_PI426210822 CCTAGCCCCCTGTTCTCCTGGCTGGCTTTATCCCGCTGAGCAGTG  
A\_14\_P110135 TCTGGTGTAAACGAAAATTTCCAATGTAAACTCATTTTCCCTCGGTTTCAGCAATTTTAAA  
A\_16\_P20768217

AAGAGCCAGAGACATTTGAGATTTTCATCCATAATGCTAAATTGATGTTATCAAGGTCCG  
A\_14\_P119983 CTTTATGTTCCCTCTGACACTATTTATATCAGCAAAAAGATCACTGTAAAATGCTGTGT  
A\_14\_P119573 AAAGAGGTAACCTCTGCAAAGAAATGCACTAATATGAAACAAAGTATCAACTAAAGCAGT  
A\_16\_P15640461

ACCTTGCTATCTGCTTCTAAAAATTTCAAGAGGAACATTCAATTTGGCCATCAATCAAGT  
CUST\_9972\_PI426210822

TTGGGATTACAAAATAATATGTATGTATTGACCTAACATAACATATCAATTACCAAAAAA

A\_18\_P22841273 CAGGGCTCATCGGCCATTGCCGAGAAACACATGGTTCTCATTAA

CUST\_9680\_PI426210822

CTGTGACTTGTTATTTATCATTATGTGACCAATTATAGTTACAATCATGTTCCATGTGA

A\_16\_P38914896

TCCCCTGAATTCCTCTAAATATAAAATGCTTTCATCCCAGAAAACTTGAACTCACGA

A\_14\_P202184 CTTCTCACTTCTCTTAGCCTTAGTGAAGAATTGAAAATGCATTATCCAGATTTCCCTGAT

CUST\_8676\_PI426210822

CAGTGATTCTAAAGAACTGACCTGATTTCCAGGAGGTAAAATTGTAGGGATGAATGAT

CUST\_4150\_PI426210822 TAGCCATGTATAGTCATGTGCCAGTCACCTAGGGCTGAGAAAGG

A\_14\_P107464 AGTCTTGTCCTATTTTAAAAACAGAATATTGTTGCTGTGCCTGGTTTCATTTTTTCC

A\_14\_P121363 GTCCCACCTAGTTTTATTTGAAAATCCTCAATTGGCCTCAGTCTTTTAACGATTCTTTT

A\_14\_P132967 TTTTCCATATCAAGTGTCTCGGGAACTCTAAAAAGCAGGAAGAAATCAGATTACAGT

A\_14\_P118572 TTAGCCCAATATTTTGGCCATTTCTTACCTCTTTCTGTAGAATTTCTTCTCGAACTTCAG

CUST\_5431\_PI426210822

CTAGACTGTTTTTCAGAGCTTAGATTGGTGGATAGTAGGTGCTTAATGAATGTTTTATTGG

A\_14\_P200803 CTCTACGGTGGTAGGGAAATACCTTTTTCTTTTGTTTTGTATTGTTTTCTTCATCC

CUST\_8549\_PI426210822 CATTAGAAGTGGTTTCCTGAAGACCTGGACAACCTGCCTGGCTATC

A\_16\_P00618673

AGATGCATGAGTTCTTAAAGTGAAAATGAAGTGTGGCAAACATAGTCTGATCAGGGAAG

A\_16\_P20247993

AAGAATGGAAGTAAGTTGTGTAGATGTTTCAGTTAGTCTAGGTAACCTAACCAATCGCACC

CUST\_8356\_PI426210822 AAACAATGGTCTTCCTCTCCCCAGAGTATTCTCCCAGCAACAGAC

CUST\_2592\_PI426210822

CAAGTTTGATGTAAATTTGGGTAAATTTGCCTCCCTAAAATTCTGCTTCTCAGTCTTGTG

A\_14\_P101235 CAACAGTTTAGCATGATACAACCAGGAATTAGGATTTAAAGGTTTCCAAGTTGTGGAATA

A\_14\_P108860 CAAAGTTGAATAAAAATAGGAAGCCATGTTCTCTGATGAAAATCTCTGATGCCTCTGTGA

A\_14\_P108289 GGTCTACCAAACGACAGAGTAGAATAAAATACTTTAATGTTGTGATGACACAAAGCCCCA

A\_14\_P112633 ACTTTTATTGTGCATGTAGTGGTTGGCATGCTCTATACTGTTGATCCAGAGATGAATAAT

A\_14\_P106023 TGAGGACAAATTATTTTGTGTTGACTATTGAAGGACCCAAAGAAATAATGATTCAAAGAT

CUST\_6894\_PI426210822

GGGACTGATTTTCATTGTGTTCTGCTTTCTCTGGTGTCTCTTGTCAAGTTAATAGTA

A\_14\_P104733 CATATTCTACCTTGGTGAATAACAGCGAGTGTGTTGCAAACATGAAAGGTAATGTCTCTT

A\_14\_P138447 ACATGCTCCAAGGTTTCATTTCACTTTAATCCTTCTCTTTAGTTTAAACAACCTACGTCTT

CUST\_3510\_PI426210822

ATTTTAGGTTTGGGACATATTACAATATTGCCTTTTATAGCGTAGAAAAGCCCTCCTTCC

A\_14\_P128184 GGCCAGGAAAAAATTTTATTGCTCATCTCAGAAGATTCATAAGACAGTGAGTGTGCTTTA

A\_14\_P136007 ATACTCCTAGCAAACCATTGAAAAGTGGTGTGTTTGTGACAGGAATTCACATCAGG

A\_18\_P22841021



TTTAGAAACCTGCTATTTTAGCACAAAACAATATCAAGGAGAGGAGTGAATGTGGTTTGC  
A\_16\_P17742922  
CTGACTTAGTTCAACAGATCCAAGTGAGTTTCAAAAATGTATATTTTCATGCCGTGGTTCT  
A\_14\_P130873 ACATCACCCTATCTTACATAGTTCAAACCATCACTATACTGATTCTCTTCATTCCTGT  
A\_16\_P00365494  
AAACTCAACTGTCCTGAATTTGCTGATTTAGAACTTCTAGGACTAGGACTCAACTGTAG  
A\_14\_P106738 TATAAGGTAATTGTGTGTGGGGAAAAGTGCAGTATTTACCTGTTGAATTCAGCATCTTGA  
A\_14\_P104882 TCTTTCCCTTTTATTAGTCATCTTGAAATGTATTCCTGGACCTGCAGCAGATTATAT  
A\_18\_P12343806  
ACAGACCTCCTTGATACCTAAACCTGAGTCAAAAAGAGAATTTGAGAATATGAAGACAGT  
A\_14\_P105795 CTTCAAACCCAGTATGTGCTCCACAATGCTGTCATAATCAAACTTCGTGGAAATTTT  
A\_14\_P118730 AACAAAGTAGGCATAGGTTCCAATGAGGTTTAGTAAAGGCTCCAAAGTGCAATCTATTTA  
A\_14\_P119188 ATATATAACCGTTCCTGCTGGTGAGAGCCTCTAAATTACACCTGAGAATGTAAACATCTGTG  
A\_16\_P20307834  
TTCAGTAAGGAGAGGGACTACAAATCAGACAATGATCTTCATATTAACACAGGATGATT  
A\_16\_P15625394  
AAAATAAGAACACCAATGAAGAACTGTAACCATGGAAACCTATGACTTTTGAAGCCAAAGA  
A\_14\_P102799 GTGTTTCAAAAATGTTGATGGTAATATGAAGTTTCTACACCCAGGGAAACAATTCAAAGG  
A\_14\_P118094 CTCAGCCCTTAACTGAAGGCATTAACAATAACATTAACATATTTTGGCCTCGTTTTCTC  
A\_14\_P112827 TGAATTACTGACCACCCATAGATGTCTACTGTTACCAGGTTTTACAATGCAAATTTTCAC  
A\_14\_P134274 ATAGAACATGACTCCAAAGAAAAGCAAAGGCTCATTAGCGAATTTGTCCAGATGTTTCT  
A\_14\_P123538 GGAAATTGATGTGAACAGTGCACCTGGAATTTTGAAAATCTTAACTTTCCTACACTCAAT  
CUST\_4661\_PI426210822 AAAATCAAATAACTGTGAACAAATGTCCCCTTCCTGCTGTGATACCTGCCATA  
A\_14\_P104960 TCTATGTATAATTTACCCCATCAGTTTCCCACAGTTCTGCAACTATAAGACACGGG  
A\_14\_P109978 TTACCATTTTCATATCCATTGAAGCCGAAATCTGCATAAGGAAGCCCACTTTATCTAAATG  
CUST\_7658\_PI426210822  
AATTCTTATCCTTTCAAGACCTACCCTAGAGTCACCTTTTTTGATATATTTGCTTTTTTA  
A\_14\_P109924 TCTTCACTTGCCAGATTCCCATTTAAATAAGACATGTATGAAGAACTATGAGAGCAAGAA  
A\_14\_P135499 TTTGCTCATTCCTCATGGCACAGTGAGTGCTTAATAAATGGCTATTGACTGAAATTAAC  
A\_14\_P111213 CTGCTCTCATGAGGAGAATGTATTTTAACTTGGGAAGAGTCATAATTCTGGGATGTTTC  
A\_14\_P115004 CATACTAGCATTATAGATTGAGAACCGGAAAACCTCCGAGAGGTCATCTTATAAATGTTC  
A\_14\_P129033 TTTATTAACCTGAAATGGTGGGTAGAAGCAGAGAAAAGTTGTCAGAAAAAATGACCTGTGT  
A\_18\_P22841268 TAATCATAACAGTCAGAGAGGGCAGGGAACCAGTATTGCAATTGTGAAAGGTT  
A\_16\_P18268300  
AAAGACCACTTTTTCTAAACTATGGGTTATCATGCTTGGTATTTTCTCCTATCTGCCTGAC  
A\_14\_P130112 ACCTTTTACAGGTAAGTGTTCATCGCAGGTAGATTTATGCTTGGTTCTTAAACTTAAGCA  
A\_14\_P137287 AAGTCCTCTTAGAACATTGAAGTGCCCTTCTCATGACCTCATGGTGAATAAAGTT  
A\_16\_P19354521

AACTCTTAGACAAATTTGATCATAATCGTTCCTATGTTTTGCAACTCATATTCCTCCCC  
A\_18\_P16678013  
ACTAGGCACTCAATCAAAAACAAGCAACTGTGTATCTCTAATCTTAACCTTTGCTAACCT  
A\_16\_P01784884  
AAAAAAACCACAAGGGTCTAATTCAGACTGCTGTCAATTAACACATAAGCCTTCTACAAC  
CUST\_2651\_PI426210822 CCTGGCCTAACTGATGTTAGATTTTGGAGTTACTTTAGGTTTTGGGTGGGAC  
A\_14\_P139266 TTTCCCTTACTTTTTAGGTTACTCAGAGAGGGCAATGCTTTACTATGAACTGGAAGAC  
A\_16\_P19836374  
ATGGCAGAAGCACATTAAATGAAGAATTAGAAAATGCACACCAAATATCAGACTCCTCTC  
A\_14\_P134835 CTCCTCAGTAACTGTCACCATAAGAGAACTGAGATCATAATTCATAAATATCCCAGAGAC  
A\_14\_P108755 CTCCCCAAATGCTGTTATTACATTGATTATGTGTCTCATAAATGAACATCCCTACCTCTT  
A\_14\_P122433 CTGTGTATGCAAATGGGTATTATAATGGTGCTAAAGCAGACCTGGAATAATTTTCATGGAA  
A\_14\_P126280 TTGGGGCCAACGGGGAAGATATAAAAACAGGAACAGATATTTAATGAAACGTCTTTTTTTA  
A\_16\_P16943925  
CCTTGTTCTGGAAATGTAAGGTTAAAAATGTAGATTAGGTCCTATTACCTTGAAGCAA  
A\_16\_P19127039  
ATGCTAGTCCTTGATGAAATGGAATCTTGATACTTTAATACAGAGTGGAACATAGTCACT  
CUST\_8630\_PI426210822  
GCAGAATGACAGAGAGTACTGAACCACAGTCATTTCCCTCTGTCAGTTTGTAATA  
A\_16\_P17445975  
TCCCCTCTCAAACATTTTATACTGTCAAACACTAATCACACATAAGGAATCATTAAAGG  
A\_14\_P115234 CTATTTATTTGCCTGCTATACTGTAATAATATGGGTTTACAATCTTTTTTCTATCGTAAA  
A\_14\_P125840 TACAAACATGAATAAATACATTCAGAATGTTGGCACCATGATGTTGGGCTTTATTTGCTT  
A\_14\_P131398 AGACATTTTTAAAGAGGCACATAAAATCGCCTTCAAATTTCTGGACTGCAAAAGATAGGA  
CUST\_4006\_PI426210822 AGTTCTCTTAGTCTTTGGCTGTTTTGTTGAGTGCCAGGTCATCCT  
A\_14\_P111858 ACAAGGATTTAAGTATTTCTCCAGTCTTCTAAAGTTCATAGACAAAGCCATAGATTGGGG  
A\_18\_P21192902  
ATTACCTGCTTCTGAAACCATAATATCTCGGCCTTTTATAGATCTTATAACAGTCTCCGC  
CUST\_3952\_PI426210822  
CATATCTTCAGAACGTCCAACCTTTAAATAATGGTTGGAGAAGCTCCAGGTTAAGTAGAG  
A\_14\_P124656 ATGTGATTTGAAATGATGCTGTATGCCAAATACATACTGAAGAAGATTTGCCAGTCTCAG  
A\_16\_P19038478  
TCTACCCTGACTCTAGATGATAATTCCAAATTTAAACTCCTAATTCTCAGTTACAGCCA  
A\_16\_P36230776  
ATTCAGACTTTTTATCAGGTAGGCAGTAAGTGAGGTCTTGACTGAGAGAACAGAGAA  
A\_14\_P116452 TCCAGTTTTTAATGTTTTTTCTTGTAACCAAAAATATAAACTGGCAGGGGAACGGAA  
A\_14\_P128067 GTTTCTTCACTCAAACGTCGATGGTGTGATAGATGGTGACTTTTTCTGTGAAAGAAAAT  
A\_16\_P03339798

TGCATTAGACGCTAATGACATACGATTTCTCACTGACAGATTTAACAGCATCAATAAGGC  
A\_14\_P200948 TAGTTACACTTAATGGGCCAAGCAATAGGGTGTAGCGTTTTTATAGAACTGATAATCAGG  
A\_16\_P35109115  
AACAGATTACCTCCAAACCATTTTTTAAAAATCGTCCCATATTTCTCCTATCCTGATTCA  
A\_16\_P21189857  
CAACCTTATGGAGGTCGTGTATAAGAAGATTATCAATACTACTGGATAGGTTTGGTGTCA  
A\_14\_P125974 GGCTTTCCATTTGGGCAAGTTGGGATCTATTTTTACTCATAATTATGATTTTTCTTTGGC  
A\_14\_P115278 CAGAGTTGGATTACAGAACTCCTATGAAATTGAATATATGGAGAAAATTGGCTCCTCCT  
A\_14\_P138928 CCGATAAAGGCTCTAATTGAAAATATAATGACACCTTTTCTTGGGCATGTTAATGAAGCG  
A\_14\_P111702 TATCTATTCTTTGCTTTTGTCTCAGGGCAGGAAGATCCCAACAGTTTGGC  
A\_16\_P16191211 AGATAGAGATAAACTAGTTAAGGGTGGAGGGTTGGTTGGTTGTCATTCTGTG  
A\_16\_P01630462  
ACTTAAGAGCACATTCACCTTCTAATTTTCAGGATCTTCTTTCATAGTCTTGCCATACCTT  
A\_14\_P124828 CAGGTGCTAAACAGAGTCTTGTGTTGAAGGCTGAGAGTTTTTTGTCTTAAAGATAGAAGAA  
A\_14\_P110065 CTGAGATAAAATGGATGGGTTTGAGAGTTGTTTGGGAGATAGGATTTAATAGTGTGTTGTC  
A\_16\_P20339971  
AAGCACATTATCTGAAATGACAACTGGTATCTTCATAGTCACATCCAGTAGCATGTTGA  
A\_16\_P20844730  
AAACAATGCAACTTTCTCATCTCAAAAGACATGACTACTTAACAAGGGGAATGTATGCTG  
A\_18\_P16722397  
ACCAGGCAGAAGTTAATTTCAATGAAATCCTATAAGTGAAGTATTAATCCATCAAGTCCC  
A\_18\_P22841383  
TTTTGCAAATATGTTAATTGAAGAGTAATTGGTGCTTTTTTTGACCCTCCTGAGCACTGAT  
A\_14\_P101689 CCACGATATCTGCAAATAAAATACTGACTTCTTCGATCTGCTGCATCTTAAAAGGGCG  
A\_14\_P108425 GTTGAGAAGAAGGTCTTGGAGAGAAGACTGAGAATCCAAAGAAGTTCAAGATC  
A\_16\_P18116689  
AAAAGGGAAGAAGGGAATTATCTGCAACAAGAGTTATTTGGAATGTGGATTTTAGAGACA  
CUST\_5209\_PI426210822  
ACAGACTTTTCAATGCAAAATCAAACCATTCCTCAAATATCCAGCTACATATTGTTTTACC  
A\_16\_P35517964  
TCCCAGATACTATATCAGGCAAGAAACCTATGAATGGATTCTACAAAATATCCCTGTCAC  
A\_16\_P55123166  
ATTAGAAGTGAAAGACAGTGAGCGGTTGTTTCATATCAAAACCAATGGGATTTAGACAAAA  
A\_16\_P15508694  
AAAAACCTGCCTGATGTAATATACTTCTCTTGTCTGAGTAATCCAAAATGGCACTGTA  
A\_14\_P101727 GATTACATCAAGGCTTCAAAAATACTCACATGGCTATGTTTTAGCCAGTGATGCTAAAGG  
A\_14\_P116521 TGATCCACATTCCTCAGTTAAGGACCAAGATAGAACTTTATATATACTCTCACTGAGG  
A\_18\_P22840536 CTACCGTCTGAGCACTGCTCTGAAGGACTCGATTGCCCGTGGAG

A\_14\_P104475 AGATTTTTGGGACCTGAAATCTTTTTTCATCCAGAGGTAATTTTTTTTAACGGAATTGTT  
A\_14\_P114344

ATAAAAAACCACTTAACACAGACATTTCTAGGCTGAAAAAGAGAAGAAGTTGCCAAGTGC  
CUST\_3428\_PI426210822 TCAAGGCAAGACTGATAATGAAAGTCGTGTTTGGGTGGGAATCACAAG  
CUST\_5036\_PI426210822

CTAGAGGATTTTTGTTGTTGTTGTTTCTTTGAGGTTTTCTCTGAAACTTCAGATTAAGGT  
A\_16\_P03266074

AAATGTAAATATGGTCAAGAAGATTGTAGGTGAAATCGAAGATGATAATGTTGCTAGGGCC  
A\_14\_P130441 CTTGTGTCCTAAAAATGAAGCAGTCTCTGGAAGATATTATTCTGGTTTATCTCTGTGAT  
A\_14\_P120755 ATACAAAACCTTAAAATTATGGCACACAAATATCACACCTTCCACACATTCTTCTTGGTAT  
A\_14\_P105269 AGAATTTAAAGTGGACAGATGCCTGTTGGAGTAAAATCAACTGCAACTTTTTTGATGTTAA  
A\_14\_P123454 ATATGTTAAAAAAAATCTGTAAAAATCCCCACTCACATCTCATGTTGCTGAGCAGGTCT  
A\_14\_P111912 TGATCCATCACTGTAGTTGGTAGATGTGTATAATTTACCAAAGGATTGTCCTTCATCACT  
A\_14\_P121357 AAAAAACAAAAAAACCTATATTCTTCTGTTCAAAGGTTCTCATTTTTCCCTGGGCAGTTC  
A\_16\_P19440807

ATCCCGTAGTTTCCATATATAGCGACTATCCTATGCATATCAGTTAGCCATACCACAATG  
A\_14\_P104674 CTCAATAAATAAGAGTAGTCACCATCGTCACTGTCAATTGTCATTACTGTTGGGTTTTTCAT  
A\_14\_P137122 CTCATTCTCTGTCCTGTTGAATAGGCTTCCGAAGATCTTCTCAAGGAACACTA  
A\_14\_P131150 AGATCTAAGTTTTTCATCATAAAGTTCTTACCCAGTGGTAGAACTAAAGTGGGTGTTCAAG  
CUST\_609\_PI426210822 TGGTCAGAGGTGGCTATCCTGGCACCAGCTCTTCCTTTACTCAAG  
CUST\_5838\_PI426210822 GAGATGCCTTTCAGTTCCCTTAGGAAACAAATTGGCCATTTGCCCAAAG  
CUST\_1489\_PI426210822 CTTCTTCACCGAGGTGGGTGCTGCTGTCTGGGCATTTCTGTTCT  
A\_16\_P58424475

TTCACAACTTTTGGAGAAATTTTTGGTTTTCCACAACCTAGTTCAGCGCTATTAGCATCTAG  
CUST\_2039\_PI426210822 GATACATCAGGTTCCCTGAGAAGGGACAGAAAGGCCAGGTATTC  
A\_16\_P40866908

TTCAGCAGCCATTAAGTCTTTACCTAAACATTTTACTCTTGGAATCCTACGTTGTTTCTG  
CUST\_4335\_PI426210822

GTAACAATAGTAATTGCCTTACTTTATTTGCGAAGGGTGGTGAACACTAATATGCCTG  
CUST\_7695\_PI426210822 TGTAATTCATATGCTGTTCAAATGACAGGCCTTTTCCCCACACCTGTG  
A\_18\_P14587468

GAGCCATTTCTTGAAACTAGCATCTTGTTACAAAGGCATAATGTTGAAGACTGAATCTC  
A\_14\_P121955 CATCTTCTCTGTCTCCTTTCTGTCTGGACTCCTTGAAAAAGTAATCTCCATTCATTAGT  
A\_14\_P126463 CTTGTGGAGTCACATTTTCATAGTGTCTCATCTCCAAATCAGATAAAAGTGGTATACAGGG  
A\_14\_P125032

TTAAAACACAAGGAAGTTAAACCGGAGGACACATCTGAGACACTGAAGAATAATCATAAC  
CUST\_5995\_PI426210822

ACACTAGTACATTTTAACTTATGATGGCACATGATCTTTCATTCATCAAAGGAAAGTAAT

A\_16\_P58424442

CTTCAGACCATTTGGTATATATAATTTCCAGGCCCTTCTTCACTGTTCTGTTTATCACTC

A\_14\_P121655 GATATGATGCAGTGTGAGTTCAATTTCACTGTTGAAATGGCAATTTCCATATGGTAAGAAGT

A\_14\_P109203 GAAACAAAACTCTGCAAGGAGAATACACATTGTCCCAAAGAGAACTTGTTCCTAACAT

A\_16\_P15017101

AACTTTTATCACTTTGCTGTATGAATAAGGCCACTGATTTTCTAGGTTCCATGTGCTTTT

CUST\_751\_PI426210822 AGTGAATGACTGAGATCCCAAGATGAAGGTGGCTTTCAGGGCAGA

A\_14\_P136008 TTAAACCCTTAGAGCCACCAGACAATGTCACCTTGACAACACAAGGTATGAAACATAAATA

A\_14\_P111371 ACCGAGCCTTCTGAAAATACAACCTGCTGTGTAATAAACCTTGTCTCTACTATTGTAA

A\_14\_P108619 CCGGCCTATTATTGTTTCTGAGTTAAAGATAAGAGCAGAGCAGGCATTACACAC

A\_14\_P114872 CTTCTATCTCTTTGCATAAAAAGGAGATTGAATAGGGGCTTCTTTTCGTGAATAAACAAC

A\_14\_P103941 AGCGGTCAAATATTATTCAGAAGCAATGGGAATATTACCAGAGAACTCACCAATATCACA

A\_14\_P101225 GGATTAATCTCTACCTTATGCCAAAGTATGGTGTATAATTCTCCTTTGCATACCCAAAA

A\_14\_P100791 CTTCACTGGAATTCTTCTCTCCTCCTGGAAACTTGCTCCAGTTGTGT

A\_14\_P110315 AACCCAAAATGCTTATTTCTTCTTCTTACTTCCCTCTCACAGAAAAGTCTTACGAATG

A\_14\_P121967 GTTTAAAATGTTCTTTTGTGAAATAACTTGTCCCAACATACAAGTGAAGTCAGAGGCT

A\_14\_P129919 TTTGCCTTTTTCCAGCAAAAACATATTATGGCTGAACGTAATGTGCTCTTGAAAAATGT

A\_16\_P58424375 CTACTGGTGTTTTATGGAACCACCTCTGGAATAAACAACCTTGCTTTCAAACCTGT

A\_16\_P18053798

CCCAAAGTTAGAGACAATCCAAACACTAAATTCAGCAAATATTTACTTGTGTGAGGTCCT

CUST\_10370\_PI426210822

TGTGAAAAGTTGTAAGACCAAATGTAACATCAAAGGGCAGGGTCTTTTCAGAAC

A\_14\_P102601 GACTTACACTTGTGCAACATATTACAAAATGGATGGAGCCAGTAATGTAACATGCATTAA

A\_14\_P133670 ACCTACTTTTCTGTCCGTTTCAGAACTTCTTATAGAAAAGACAGATCCAAATATGGCCAC

A\_14\_P131107 CAGTCTTATTGCACCATGAAGATAAATTTGATTCATCGTAGAGGGGATTCTAAGAAGAAG

CUST\_4245\_PI426210822 AAAAGGAAATCAGTTTGGTGGCAAAATCTCCCCTCCTGTCCATAATTCA

A\_14\_P112444 CTCCACTGGCATTTCAGTCTGACGTGGATAAAGAAGAAGATAAAGAAGAGGTATGTAATG

A\_14\_P103348 TACCAACATGTGCAAAGCAATAACAGTTCTGTTGAACTCATGATAGGTGCAGAAATTTCA

A\_14\_P115806 ACCAGGAAGAAATCAATTTGGAAAAAATGTAGGTAAGGTCCTTTGCCTCTATAGAAAGAA

A\_14\_P129898 GTCACAAGAACAAGAATCATGGAGACCACTCTTCTCTGTGTGTCTTATATACATGTCATA

A\_14\_P130268 CTTATGAAAATAAATGGTGGTGAAAGGTAAGTAACCTCTTGCAATTTGTTACCTCTGCTA

CUST\_4752\_PI426210822 CCTGTCCAGAAAACCTATGAGAACCACCATCACCTCTGGTTATAGATTCT

A\_16\_P15515066 GCTCCTTTCTAATCTTGTATTTCTTCCCTAAATAGCCTATATGCATAGTCCTTCTACCA

A\_14\_P128774 GATATAGATGCTTTTAGTTTGTCTTAAACCAGTTTTGTAAATGTTTACAAGGACCTCA

A\_14\_P107867 AGAAGGCAAAAATGAAATGAGCGTCACAATTAATTTCTGTGACAAATATGCACATGCTG

A\_18\_P14137082

TCTTGATATTTTCAAATAGCAGAATACATGATAAACTTGTAAGTCCACAGATGAGTCGGT

CUST\_10063\_PI426210822 CCAAAGGAGTTCGCTCCTGCAGGATTTTCATCGTTGTTAGTGCTGC

A\_16\_P21660324

AAAAAACTTCTGATTCTCTACTGGCAATACAATAAAGTCCTAAAACCTCAAATTAGGCAT  
CUST\_3424\_PI426210822 CTATGTTTTTCGTGAAGGCATAAGACCATGGGCCAACTTTCTGGGC  
A\_14\_P110926 TGATATAGAAGATCTATCTAACCCATACATAGGAAAATGGCCTTCTGACTTGAATGCCTC  
A\_14\_P124662 CATTTCATAGAGAGAGATGCCTACCTTCAAAAATCAGAATATTGGATCCTACATCCCTTT  
A\_14\_P126904 GACTCTCTCAACACAACCAAATCACTTTTTATGACGTGTCATTTGGACATTTTTTACAGT  
A\_14\_P111078 ATGAACCAGAGTTAATAGGTCATTTGGCAAGACAAACAGTAGTGGAAAGAGGTAAATTAT  
A\_14\_P122119 TTTACAGACATTTACATTCAGGTTGAGTTTGGCTGGATGAGAGTTCTGGTATGG  
CUST\_8779\_PI426210822 TGAGAGGTTCTTCTAACAAGGATTAGAAACCCCTCTCATGTAGGAAGAG  
A\_16\_P16715572

GACCACAGATAGCATTAGTCCTAAAAGACTCTTTAGGTCGGTATTTATTTCTCTGCCAAT  
CUST\_3037\_PI426210822 GGAGGGGATGACCTCTGGCACAGAAAAGCAGTAAAATAGGTGTATTG  
A\_16\_P15719200

ACCCTGACAGTTACTTATGAATTATACATAGGCAAGAGTCATCTGATTATACTCCTCCCT  
A\_16\_P19282070

AAAAAGTTCCAGTGTAGATTAAATGTCCCGAGATGAGTTGATTTCTATGGCCTTCCTTTT  
A\_14\_P114078 GGGTCGTATATCTGTAAGATGAAAATAAACAATGAAGAGATCGTGTCTGATCCCATCTAC  
A\_14\_P128949 AGTCAGGCTTTGTCTAATTGAGTTAATTTACAGAGCACCCAGTCATACTACTTATTATGC  
CUST\_5018\_PI426210822

TAGTGAAAATGACTCAACCAAGTAAGATTTACAAAACAAACAAACAAAACACTGTTTTTCAT  
A\_18\_P22840145 CCTTTATGATTCGTGTGCTGGTCTTTCTTCTGGAGGGCTTCAGTATTATC  
A\_16\_P00685426

CACTTCTTTTTTCACTCACTCTTCTTTCTGGTCCTCACTAAGACAAAATACAGAATACA  
A\_14\_P139229 CTGACAAAGTCCTGTTTATATGAAATATTGGCCCTTTTACGTTTTTTTTTCATGTTGCAGGT  
A\_16\_P16472232

GAGATTTTTATGTTGCCTTGATCTAAGTATGTATGACCCTATTATCCAGTCCAAATCCCC  
A\_16\_P02907632

AGGAAATCACCTACTGCATATTATTTCTGGTTTAGTTCTCTGAGATTTCTTCTTCACCCT  
A\_16\_P37676939

GGCTCTAGTTCAACTCTAAACTCTTTTTTCGTCAATTAAATAAGATCTACTTTCAAGCCCT  
CUST\_8535\_PI426210822 ATGCCACATTTCCCCAGCATCTAGGAGTGTTCTTCTCCTAGAGCAT  
A\_14\_P135121

CAGACAAAACATGGACTCACAATCTAAACTCTGAAAATGACAGAAAAGGAAAACCAGTG  
A\_16\_P16562485

GGATGTCTCAGGGTATTTTTAAAGCAGCCTTTATCTTGACTACCCTTCAATACAGATATA  
A\_14\_P129473 GTATAACTTTGCAGCCACTTTGCCTGAAGACTACCATCCTGTTTCTTCTG  
A\_14\_P128065 CCAGAAAGCACCCAAGTCTTAACTGCAATCATTACTATTTTTATCAGCATCTAACACTCA  
CUST\_5138\_PI426210822 TCAGGATTCTTCTGTAAGCAGAGAACACTGCATGGAGCCCAGA

A\_16\_P00685263 TTTTCCTCCATGTTCCAACAACCTTGTTAAGTCTGCTTCTCCATTCCATTCCCTTT  
A\_14\_P131879 AGTTTAAATGCCCTCACTATCTTTGGGTTACTAATACTAAGCCTTTCTGGACTAAGTA  
A\_14\_P136284 GTATATAAGTGCTTGAAAAACATATGCCACATGCTTCAATGAGCAAACATCCAAAACCTGG  
A\_16\_P17996356  
AAGGTAACCTTTATCCTACAATTCCACTTGAGATACATAGTGTATACCCCTTACTACAGT  
A\_14\_P135861 AGACAGTTTCGAAGGCGAATGTTTCAGTCTGGCAAATATGAGGGTAAAAATGC  
A\_18\_P14132445  
GTGAAATGCTCTACGACTGTCAGCCAGGATTAGTAGTTAATGCACGTATTTGTTTATTGT  
A\_14\_P115518 CTCACCTCTGGAAAACTGTAAAAATTGCAAATAAAGGAATTTGGGATAAGAGGGCATAT  
A\_18\_P19611931  
GCTTCCAAGAGTCTACTTTAAACACACACTTAAAGCCTAAGAAAGTCTAAATAAGTCCCA  
A\_14\_P107853 TCAAGTATGATGATATAATCTGTGATGTTTCAGAGCCCTGGCTGTTGTTTCACATGATAATT  
A\_14\_P114805 GAAACTAGATTCGGTGCCATTTGTATCTATTGAATCTCTGGTTCCCTTGAAAATCTAGAT  
A\_16\_P16030402  
AGTGCCTCTCCTTGATATTTTATGCTGGCAAACAAAATAGGTTGTAGATAGGATCCAT  
A\_14\_P119435 GCTTTCTTTTCTATGTCCTTAAACCCTTTGATAATGTTACTGTTTGAGAGTCCCTGAAGC  
CUST\_1501\_PI426210822 CTACCCCTATTTGATGATTTCTGTAGGAGTCTGCTTGACTCTGAGACCTG  
A\_14\_P139053 TCTTAGACATTCAGAGACTGAGATTAGGAGGCCTAAAAGTATCCTTTTCAAACCTTCACT  
CUST\_9097\_PI426210822 CTAGTGGTTTCTTCTCTGACCACAGTAAGAGGAAAGGAAGCTTTCC  
A\_18\_P11549550  
CATCGAAGGTCCTCTTATGAATGCCTAGAGCAACTTGATTAGAAAATCCATCTTTTATACC  
A\_14\_P124954 TCTCTTTATTCTGCATTTATTGTGATTTTTGGAAACAGGTATCAACCTTCACAGTTGGGT  
A\_16\_P17340095  
AAATATTACTCATCCATTGTTAATGCTCAGAAGTTCCATATTTTCATACCTCCGACTGCA  
A\_16\_P02066516  
ACATTGTAGACAGTTATTTTACCTGTAAACCAGATGACAAGTCTTTACCCAACATCTCCA  
CUST\_292\_PI426210822 GTTGAAGAACACATCCAGATCCCCACACTAGGCACCAGGCACGC  
A\_14\_P128318 ATCAACTTTTACTATTGGCTGACTCCAGTCATACTGTGATGAAGTTACATTTGACCATT  
A\_16\_P00116019 GCCCCTTATATAGACCTCTATTATCTCACGTATTACCTGACATTATCATGATGGTTTGCC  
A\_14\_P125697 CATGAAGATATTGTAGATGAAATTGAGTGCATTGAGAAGACTCTTCTGAAACGTCGCTCA  
A\_16\_P17434715  
TTTCAAGAAGCATAAATCCCAGAATGATCGAAACATCTCTTAGATCCCAGAGTGACTTAA  
A\_14\_P103176 GACAGCCAGTTCTCTCCTCACTTATCACTTTTTTTTTTTTTTTTGGACTGTCTAACTGGC  
A\_14\_P122447 TTAGCAAAGAAAAGAGTATGTGCTATGCCCTGAAGGCAGGAAGTATAATCCTATGTATTG  
A\_14\_P126282 CTACATATGAGCCCTCCAACATATCACAATTTCAAAAAGAACTTGCATCACAAGCCTTA  
A\_16\_P58424092  
CCAGAGGTAACCATTATCCTGCCTTCTAACACTATAGTTAAATTTACCTGCTTTTGAAC  
A\_14\_P111634 AATGGAACACATGATTCTCGTTTAAAGGAGAAAATATCTTTTGGTTTTGCTTCTCTGATG

A\_14\_P139930 TCTCTAAATTCACCCTGTATTTGACGGTGCATGCGAATTTGTTATTTATGCTTAAATGCC

A\_14\_P105001 CTTCTACTAGGTTGGCTGGGAACATGTTTCTAGGAAGAGAATCAGCAATTG

A\_14\_P110998 TGAATTCAGCAAACTCCGATTTGAAACGTAAAACTACTTGTTCATGGTTGTTGCA

A\_16\_P20051250

TTGTCAAATTGCTGCTTCCAAAAAGATATAGGAATGAACATCCACTATTGGGAAGAGTAG

A\_16\_P00690480

TCCACTAAGGATCTCATGATTCCATTTCAGAGATAAACTGTCATGTATATATCGAGTTCA

A\_18\_P22839775 GGTGGTGCAAGGAGGATGAGATTAACCTTTGAGAACCCACTTGTCTAAA

A\_16\_P02766126

AAAATTTGAAACGCTTGTTACCAGAACTTCAAACATGTAACCTTCCAGTAGATAAGGGCA

A\_14\_P135977 TAGAACAAATCTTTATTTCTACAGTCACAGCCCTTTCAGACAACATAAAACCAAAGACAA

A\_14\_P103371 AATGATTTCCAAGGGAACCTCATGTTCTTTCTTAAAGGTAGAAGAGAAAAGGGAAC

CUST\_2695\_PI426210822 AGCTCTTTTGTGAGAGGAGGATTCGGCCTCCTCCCTGACGAGGTG

CUST\_4796\_PI426210822 GATGGAAAAGAGGGAACAGTGGTTCCTTTCTTTCTGCCACGCCTC

A\_14\_P136224 ATTAACACCTTAGAGAGATACATTATCAAAAAACAAAGTGCCCTAAGGGACTAGGTCACA

CUST\_6365\_PI426210822

GCAGTATTTGAATATATAAATATGAACATAAAGCCACGTACAGTTATGGATTTAAAACAA

A\_16\_P40266776

AATTGTCTGGCAGATTACAATGAAACCTAATTCAGAGAATTATTGCAGGTATGCTTTGGG

A\_14\_P101427 TCAGTATTGACATGAAAAATGCCACTTGTGTTGTGCTGAAACAGGTATGCTGATTATGTA

A\_14\_P126055 GTTAACCCACCTAATAAACATAACTCTAATTCTGAAATTACCTTTCACACTATATGACA

A\_18\_P21331942

ACCCCATGTTCTTCAGTTAATCATTTTTAAAAAAGCATTGGCTAACACTATTGAAAAGATT

A\_14\_P120902 GCCGTCCCTCTGATGTTGTGTCCTTGCTTTGACTACAAATAAAACAAAGAACATT

A\_14\_P103951 AACTCCGGAGAGCCAGCCAAGAGTAGATTCTTTATTCATTTCTTTTTTTTTCTTAAAA

CUST\_7250\_PI426210822 TGATCTCACCCTTGGAGCCTAGTAAAATCCATGCTACTGTTCTGCAATTG

A\_18\_P22840665 TAGGGCCATTGGGACTGGCCAGAAACAGAATCCTGAGCAATCTT

A\_14\_P123087 TATAGAAGCCCACAACCTGAGGACACCATTAGGTAACCTGCCACTGCATTAAG

A\_14\_P137624 ATTGACTATTGGTGCTTGTCCAATGTCTTCTGGCTAAGGAGGAGAAAAAAGAAAGATTT

CUST\_5250\_PI426210822

TATTATGAGTATAGAGATAAAGGAAAAGGCATCCCACTTCTGAAGATTTCTCGTTTCTAG

A\_14\_P100989 GTTTTCAATCCCAGGTTGAGCCCTTTTTTATCAATCTTGCCTTATTTGATGTAAAGAACA

A\_14\_P134348 ACCTGTCTTGCCTGCAATGTCTTGTCTTTCATTTTAATGAAAAAAATCCCAACTTCAAAA

A\_16\_P15535772

TCCAGCCCTGAAATAGTAAGACTCCAAAAATAACTCGCTTCTATAAAAACTGCATGAAGA

A\_14\_P139066 GTCAAATCCATTCCAAGTTTGAGTTGTGAAATGAGATGAAGAATTATACTACGCTGATCC

A\_16\_P18825468

ACAAGTGATATTTCCCGTTTGTAAGACATCATCTAAAGGTTTCAGTGATCCATAAGGAATA



A\_14\_P116809 CTAGCAAGCACAGTGTTAATTTTAGAAATTATAGAAGAAAAATCAGCAAGGAGTGTGGG  
A\_14\_P105953 CTGGATTAAATGCAAGAGATGATCCCAGCCAAGTCTATCAGAGCATCTAATGTAAAATTT  
CUST\_677\_PI426210822 AGCCACGATGTTCTGTAAACACATAGATACAAGCACATTCGCCGCGTG  
A\_16\_P18324189  
AGGCCGTCATTTCTTAGAAACAGAGCACGCTATTGTTTTATGCTGATCAATGTTTTTTTTT  
CUST\_8136\_PI426210822 TTGTAGATTTAGGGGGACATAACATTGAGACTGAGCAGTTTCTTGAACCTCTC  
A\_14\_P122652 AGGTGTTTATAGTCGTGATTGCTTAGATACGTGAGTTTAAATATTGCGTGACCTGCAGAG  
A\_14\_P138586 CTATTTAATAGATGGTTTACATGCTCATCCAGGTTTGCCTTAAATAATCCTACACCATT  
A\_14\_P125618 GTTTTGTCTTTTTGTTTGTGTCCTATTGTTTTTATAACCATGGGTTTCAGGTTTCAGATT  
A\_14\_P113387 CAAAGTTTTCCAAGAAAGAAGTGCAAAAGCCCTTTCATTAGATCATTTTGGACATAGAA  
CUST\_1970\_PI426210822 TGAGTACAGGTAGCAATAAATGCTTCTCACTGAGCCTGTTTCACCAGC  
A\_16\_P20672207  
CCACTCTAGCATGGCAAATAAATTTGTAAACACAGAGATTAAACCTCTGCAGTAGTGTCA  
A\_16\_P15484322  
AAAATCGATCCTTGATCCTATATTTGGATTCCATGGTCTTATAAGAAAGCAACCACTGTG  
A\_16\_P16325309  
ATCATCTCACAATGGAAAATAATAAATTTCTGCCACCATTATCTGAAATATATGGGCCCCC  
A\_14\_P133973 GGGAATTCACGTAAAAAGATCAGATTAAGGTAAATTTCTTTGTTCTGTATTGCTGCTGTG  
A\_14\_P133568 TCTTTGAATTTGACTTTAATAGGATTTCAACAGTGATTTGGGGACAGGCAATACATTTCA  
CUST\_568\_PI426210822 ACTCCAAGGTTGGACCCTGCCCCCGTGCCTCTGCTTTTCCCAGTT  
CUST\_9562\_PI426210822  
ATAAAATAAATCCTCAATACTTCTTATTCCTGGGGTAGTAATTTTAATTAGATTCTATT  
A\_16\_P36230155  
AGATGTTAAAACTGATTATTTTCAAAAAGCAATATTTTAAGAAAATGCATTCCTACTGGCTG  
A\_14\_P137851 GATGCTCTCCAATTCCATTTGCTTTTTGTTCTGCCACATGCTGTCTAC  
A\_14\_P123626 CCAGATACCTGTTCTGTTTCCATCTCTGTCTGAGTATCTGTATCTGAGTCATGT  
CUST\_4622\_PI426210822  
GATAGAGTTTTTTAGGCAGGGGTCACTGTTAAGGAAGTTTGTATTTTTTTTTTTAACTTC  
CUST\_9131\_PI426210822 TAGAAACCTGAAGCACCGATGTGCAGAGCAAGGAGGAACTCTGCT  
A\_14\_P107333 GACACTTATTCTTTGGTAAGTAACAGAAGAATTCCCTACAGATGTCTTCTCTGAATGTT  
CUST\_6151\_PI426210822 TAGCTGGCTTTAATGGTTGCTGTTTCTGGAATCTCTGGCTATAGGAATGG  
A\_14\_P137358 ACATATAACCTCCTATCACAACAGGCTCATCTCTTTAAATATGTAAGAGATTCTGAGG  
A\_14\_P116556 CCTGAAACGTGCATGGTGGAGAAAATGAACTTAACTTTCCATGTAAGAAAAGTTAATTGT  
A\_16\_P30952617 CTACCCAGGGACAGACTGCCTTGGGGTCACAATGGCTGATTCTTC  
CUST\_3135\_PI426210822 CCTGTAAAGCCATACAGCCCCGCCCGTCAGTCTTAGATTACATT  
A\_14\_P118177 AAGCAGCATTTTAAAGAATCTCTTTACATGTCAGGATACTGGAGAAGAAACTCTGAGGA  
A\_18\_P15843638  
AATCAAGGCCTTCAAAAACCTTCAGTTAATCCTTAGAAACTATCCCATCTGTTTACTCCAG

A\_14\_P129907 TAAAATTAATTTTTAAAGATCTCTTAAAAAGCAGACACCAGCCCCAATCTCAGACCCCTT  
A\_14\_P136810 GTGCAGATGAAATGTCCTGCTCTAAATTAGGCTTACACTTCCTTTGGTCATTTTTAAAATG  
A\_16\_P40460705  
ATGCCCATCACATTCAATTCAGGGTAAAAGATAAGGTTTTTACTAGTTAAACACATCTGT  
A\_14\_P105692 ACATCAAAAGAGTATGAAAAGTGGCAATTAAACTTGGCGACTAAACACAATTTTCGCTTTG  
A\_14\_P110241 GATTAAGAAAGTCTCTCTAAAGAGGAGAATCTTCGCAATCTGACATTCATTGATGTCCTT  
A\_16\_P20468236  
TAACTCACAGATTATTCTGAAATGCCAATTCCTCCTTTATCAACAATTCCTCTAACCTCG  
A\_14\_P124163 ACTCACCGATACAAATGCTTGAGATTTGGTTTCATTCAACTGAAGTTGCAATTTCTTTTC  
A\_14\_P130278 GACACAAACCGGTATCTTTACTTCCATTTGCAGGTATGTTTCAGGAGAGAGTAG  
A\_14\_P135334 ATGTCTGTTATTTTGGTGTCTCCTTTTAAACTCTTGAGGTATAGTTTCAAGAGGGTAAG  
A\_18\_P17385399  
AAAAACGCACTGTAGTGCTATTTCTTCTTTTTTTTCTAGTCTCCTAACTTTTCCATGGC  
A\_14\_P110938 ATTATTTTCAATGAGGGGAAAAACGGTAAAACCTTTTTTGAAGTCATCAGACCTTCCATT  
A\_14\_P202003 AGGATCCATTTTCATCCTTGCCTACCATACCTTAAAGGAAAAGAAATTTTCCTAATTGTG  
A\_16\_P18752031  
ACTCAATCTACATAGTGCAGATTCTCTCAAATGGTGATGATTGCAATCTTTTATCCCCTA  
A\_14\_P100113  
AAACTGCAAACCAAAAACTAGTTTACAATACTGAAGTTATAGGAAACAAGCACAAAAGGC  
A\_14\_P135103 TTCAGTCTAGTTTLAGAACCATGGAATTTTGGTGGGTAATTAACACACACAGAAAATCCT  
A\_14\_P109366 TTTTCATGCAGTTACCATGAACTAATACTACAATAAAGGATGGTCTTGGGTGTCAATTCT  
CUST\_8684\_PI426210822 GTGCCAGGACTCATATTTTAGTAAACTGTAAAATCTTCCCTCCCCATGCTTGTA  
A\_16\_P02740008  
TTTTGCATTCAGAAGTAAGTGTTCCTGTCTTGTGTAATCTTTTGCCAAATCATCAGCAAT  
A\_16\_P18784949  
ATGTGAGTAACTCTTCTGTGTAAAGACCTCATTACAATGAAAGTATCTCCAGGCAATCAC  
A\_14\_P136090 AAAGTGCTGAAGGAATTAATTGCCCTATTAGATAACGAATACCTGGAGGAATGAACAGAG  
A\_14\_P107636 ATTTTCATGATTCCAATAGATGTTTAATTACTTATCCCCTTGCTCTTTACGCTGCCTTTT  
A\_18\_P15024606  
AAAAAAATGAAATTTTTGTCTCCATCGTTTTAGACACTACAATCAATTCATTTACTCC  
A\_16\_P02949484  
ACCAAAACCAAAGAAATCCAACAGAAAAAATACCAGAAAATATTACTATAGCCTGGACT  
CUST\_1545\_PI426210822 AAGGTTATTCCTTATGTATACTGCAAGTTGGCATGAACAGCTGGGCAGG  
A\_14\_P124381 GCCAGTTTATCAGGACCACCACAATGTTAATTTCACTTAAAGTTCACTGTGCAAGTATAA  
A\_14\_P109309 AAGAGAACATACATTTGTGTTTTGTGTGCAAGTATTCGTAAGAATCTGTGTGAACGTATGG  
A\_14\_P128235 TACTCTACATGCACGCTTTCCAAGGCAGAAAATCAAGATGTGATCAGTGAAATTTTAAAC  
A\_14\_P109652 TGTCTACTGGGCATGTGGAATAGAAATAATGTGTTAGGTTTAAATCAATGGAAAGGGTAT  
A\_14\_P105221 GAGAAGGCTCGTATTAGAAAACACACATACGTTGAAATTAGAACTAGCAATAGAAGAGGT

A\_16\_P03606402

ATAGCACCCCTCCTAAGTCATTTATCTCTTATGCATGGATTTTAGAGTAGAACCTCCAAAG

A\_14\_P119566 GGAGCATTGGTTTACTTTACACATTTTGTAAAGTCATGCATTAGTCTGGAATGTTTTGGTG

CUST\_3257\_PI426210822 ATCAGTGACACCCCTCTAGAGGCATTTAGGGAACCTTTTTTTGAACAGAACCAT

A\_14\_P133846 AAATGTAAAGTCCCACAGCAGTCCGGCTTTGACATTCCTGAGTATAAAAAGAAGTATACT

A\_18\_P15120272

TGTGAATAATGCTACCTATTCAATTTTGCTTAACCTAATGTCTGTATGAATACTACCAATG

A\_18\_P13003573

TGGTAGATAATTGATGAGTAACATAGATTCGTCAAACCTATCCGTTTCTCTTTTTGCAGGG

A\_14\_P135481 TAAACTCAGGGAGTGATTTTTTTTTCTCCATAATAAGGCAACCCATTACATGCAGACCTT

A\_14\_P137145 CTCATTTCTCATTTCTAGACAATGCCTTTTAAAATTACCTGTTCTCTCATTGCATCCTCC

A\_14\_P103756 AGAAAGATAGTCAGAAACCAGGATGATGCATACATTGAGGTATGAAAACCTCTGAGATTGA

A\_18\_P22842290 AGATGTCCTCTGCAAATTGTCTGGCTGGGCCCACTGCTGCTTTTG

A\_14\_P102406 CAAAAAATACTTCATTGGTTGTGAAGGCAGTCCTACTGGAGCACTAAAATGTCATTTATC

A\_14\_P139434

GAAAAGAGGGCAGATATGGAGACAAAAAATGTTCTTGAAACTCCACTATTTCAAAGA

A\_16\_P16196767

TTGCTGCAACCAGTATTTTATATATCTCCTAGGAAAGCATTGATCCTTTAGGTCTGACAG

A\_14\_P111268

GCAATTTATAAGAGAAAAGCATAAGAATTTCCCTCAAAAAGTGAAACCAATGGGGAAAGG

CUST\_3803\_PI426210822 AGCTGCCTTGATCCCTCAGAGCCCCGGCATTCTGCCCCGGGGTTT

A\_14\_P117266 GCATTTATTTAGTGACAAAAGACTGAATACAACCTCAAATTCTAATTAAGAGGTAATAGCA

A\_14\_P137967 AGGATCATGTAAATGCTCAAAGATGTAATGTAGTTCTTTGTTCTGCTTTCTCTTTTCAGT

A\_16\_P01771462

ACTACCAATTAAGTCTTCTCTCTATTTTACATGTTTACACATTCTACTGCCTCAGG

A\_14\_P103604 ATCACAAGGACGTTTCTCTACTTATTGATTCTAGTGATGATACAAAGGACTTCATGGGAAA

A\_14\_P109691 CTTTGTGGTTTACGCTCTCATAACCTTGTGGTTTTATAGTCCTTAAATTATTGTAGCGCA

CUST\_3344\_PI426210822 CAAAATTCTAATCCAAAGGCTTTGCCCGCCTTAAGTCCTTTTTTGAATGGAG

A\_16\_P02698503

AAACAAGAAAGCATCTTTTCACTGCTATGGAAATCCAGAATTCTTTATAACCACAGGAGAG

A\_16\_P02425137

AAAAGTTGCTACTCGAGTAATGAATGCCCTATTTCTGTTTTTTTTGCCGAAAGTTAAATG

A\_14\_P114732 ACCTTGTAGAAATGCAATAATCTCTGCTCCCTCATCTTTTTACATGAGAAGGTCTCTTTA

A\_16\_P00493789

AAACAATTCCATCAAGGCATAAATGAGTTGACTCCAACCTACTGAGATAGAAAATGTCACC

A\_14\_P126495 CTTGAAATAGAATTTCTGGCTTCTAATTGTCCATCAATAATCTCTGCAAGATTTGGCCTC

A\_14\_P130739 ATGTGTTGCAATATGCTTGCAACTTGTGGAAAGAGTATTCAACACACAGTTACTTTATCT

A\_14\_P128671 ATAACAATAAACCTTGTACATACCACTGATGTTAAGGTCATAATCTCCTGCTGTAATCA

A\_14\_P106493 TTGTGTTGTCTTCCATCTAGATCTAGTATAGAAACGCAGGTCAAAGGTAGGAAGATAGA  
A\_16\_P03138870

GACCTGGAATCTGAACATACTGTGAACTACTCTATCAACTCAATGTTTCCACAATAACAA  
CUST\_4113\_PI426210822 TTCAATGAGGGGAAGACACTCTACTGTGGTTCCATTTGCTCTTTGAAAAC  
CUST\_3541\_PI426210822 TTTCTTCTGCATTCTCTGCCTATTGCTTGAAGGACAGTGTGTCAGCA  
A\_14\_P202033 TTACGAATGCCTTTTCTTGTGTTGTAATGTTTAGCACATGTATGACTGTGTTTCATGTGC  
A\_18\_P22841207

TGTTGCAATCATAGTTTCATTGTTCCCTTTGTATTTTGCATTTCAAAAATAATGATATTGC  
A\_14\_P116419 GAGGGCCTATAAAAATAATTCCTTCTTGCTTACAAAGTTCAGCAAATTCCAATGTTTTCTG  
A\_14\_P120709 TAGGCTAACTGAGTTTTCAATTTGGCCATTTAGATCATGGATAAGCAGATGTTTATGCTTC  
A\_16\_P15719999

ATATTTTCCTTGACAGATGCGTATTAAGTGTCCACTACATATCACCAGGATTTTGCAAGA  
A\_14\_P137218 GATGTTTTTCCATCTAAAAAGCCTAGGGTAAGCAAGAAGTGAAGTGCGGTATATAGTTTT  
A\_16\_P38372237

AAGGGATATCATAAGATTCCTCAAAAAGTAATCTCCAAAATCAATGCATGCCATTCAGCAA  
A\_14\_P102411 CTACCCAAAGGAGACTAATGAACTTCAAGCAGAATGCTGCTCCATTTGGTTAAATACTT  
A\_16\_P19817046

CACAACACAAGTTAAGGATCAGTATGTTTTTCCATTACCAAATGCATTTTAGGGGCTACT  
A\_16\_P36191720

ACCAAAGGAAGCAAAGATTACAATAAGCCTTAAACTCATTTAAATCTCTCCCCAGAACAA  
CUST\_8343\_PI426210822 CCAACTCACCCATAGGACACAACAGTCCATATCTCCTCACTCTCT  
A\_16\_P01693093

ATTCAGTTACTCAGGACTTTTTGCCTTACAATAGGTTTAATTTCACTTCTGGAGCAC  
A\_14\_P131906 CTGGAGAGGTAACAATCCTGAAAAAGAAGGGTTAACTTAACAAGATGTGACATTTTTTTGT  
A\_14\_P135012 GGGTCTCAGGCAAGAAGAACTTCTAGATTTTTTTGTCAGTTTAAATTTCTCATGAAAATAT  
A\_14\_P131216 AACAAAGAGTAAGAGAGCGTTCTCAAGTTCCAAGGACAAAACCTTTCACTGAAAGTAA  
A\_14\_P129371 AATAACCTTGAGATCAATGGAGTAGCAGATCGGTGCCAATACTTTGGAGATAAC  
A\_14\_P138427 TGAAAGAATGAATGCCAGGAGATACAAGCACTTTAAAGTCACAACAACGTCTATTGAAAG  
A\_14\_P100363 TATCTGCATGAACAGTATCAAGTTTAGGTTGATAATGATTTCACTATCCCATTTGGGCCA  
A\_14\_P200529 CTTTATAAGATGGGTTGTGTTCCCTGGCTCTATTTAACGGATAGTTCCTGGATTGTTAAAA  
A\_16\_P02476614

ATGTGGAGTCCAAAGTAGATAAAGGCTAGTGTTAACAGGAACTCTATTATTACGTGTTGG  
A\_16\_P19430274

GGTTCTTCCCCTGTATAACTACTGCCATGTGATATGTATCTAAAGCAAATGAGGTTTCT  
CUST\_116\_PI426210822 CCAAGAATGAGAGAGGATGAACTGACTTTATGGGCCTTGCTCTTTT  
A\_14\_P132724 TACTTACTGTTATCTTACGAGGACAGTCATTAGAACACAGACCACTAAGAACTGTGGAAA  
A\_18\_P22843578

TGGTGGTGATGACTATGTGAGAAAACTAGACACTTGTCTTACCATATGTGAAAAGTTGT

A\_18\_P13868193

AAAAACTTCCTTGGGTCATAAGAAAAAAGGCTTACCTGATTTTCCAAAAAGTGTTTCTCC

A\_14\_P200503 ACATAGGAATTTGAGAACCACTTCACAGGAAGAGGGAAACAGCCCAATATTTATTTATGT

A\_14\_P201339 ATTGTCATCAACCTCACCTGTTTTTAGAAAGCAAATTTGCACCCAGTTAAATCAGACATA

A\_14\_P202429 CTTGTAGGAAAATTGGTCTTACTGAGAATTCCTTTAGAAAATAGTCTTTTTACAAAGCAA

A\_16\_P18165184

CCACTGCAGGAACAATTTATACAGCCAAGAAGTAATTGAACAGATTTAGATTTGACCACA

A\_14\_P124734 ATGTCTCCGTAGATAGGGGGAGCATACTTTTATATTCTTCTGTTGTGGTTTTAAAGAA

A\_14\_P202535 CATTATTTGGCTTTCTTTTTAGGGTTGATTTCTTTATTCCAGGAGTCTCTGTGGTTGGT

CUST\_2803\_Pi426210822 CTCAGAATTGAAAAGAGGGCAGGCATTGTCCTGACAGCTGGTAACTG

A\_14\_P137368 TTCAAATGTGAATTTTTATTAGAATAATAAATCCTATTGCTGCCACTATGTGCGTCCAAC

A\_16\_P39295569

GCAGTCTACTATCCTACCATCATATGTGAAATAGAGGTCATTAAACTTTTCATCTTCAGGT

A\_14\_P113228 AATTTGAGGTTACCTATTATACTCCCAACTTGAAAACTAGCAGTATATTGAGGTGGCTA

A\_16\_P18199371

AATTCACCAGACACTTTGAATAGTCTCAAACAACGTTATCTTCAACAGTTCCTCTCTCAG

A\_14\_P137961 GACGGTGTATGTTGCTTTTGACATTAACATTATGATCATCAATATTATTGGGGTGTTC

A\_14\_P125830 TTGATTAATGACTGTGTATGTCACCTCCTCTCCTCTACAAGACAAGGATTGCATTAGAT

A\_14\_P128342 TGAACTTTTCCCTCCAGTCTTGATGAGAATAAACTTACCTCTCTCCCTATGCTG

A\_14\_P123957 TTCTCCAGGGATTTAGGAAGTAATAAGATTGAAAATCTTCCACCGCTTATATTCAAGGAC

A\_14\_P110683 GGCAAGTTTTACCATTGTATTAATTACACCACTGGAGAGATGTTTGATGTAAGCGTGGT

A\_14\_P121035 ACAGCAATAGTTCTGAAAAGTTCAGAGATCCCTTGATAATATGATCGAACTTTTAGGG

A\_16\_P16570130

ATACTTCATGCACAAAAAGACACTTCAGTCCTAAACCTGTATTTTAGTGTTGTGAACTCC

A\_14\_P117578 TGCTGAACACAATGCCATCACGATTCTGACCAAGCAGAATTCTGTTAATAAAAAGAAATCA

A\_16\_P36230212

ACCTGATCTATGTGTTGCAAATTTTTTCATCAGCCTTTTTCTTATGTTTTAAGTTTGCCT

A\_16\_P00250293

ACTGTTCCCTATCACAATAACGTAAAGGTCCTGTTATAAATTTCCCTTTGTCAGAGCAGT

A\_14\_P115385 GGGAAATAATCTTAAAGTCTATCAAAAAGCCAAGAATAACTACACTGTTTGCAGGCACCA

A\_16\_P16191385

AGAGGAGCAATTAATAAAACCTTCCATTTCCACATCTACTGTGAAACTCTGTGACTTCTT

A\_16\_P00220693

AAAGACTCTTTTGTGAGGATCTTACTTTATGTCTTAACTCTGCAGAATGAATAATGTGGG

A\_14\_P137450 CTAACATTAAACTATTTTCAATGCAGGAAATAAATATTTCCCAAAGAGGAATCCCCCT

A\_16\_P15738429

TGTTTACCCTGATAACAAAACCACTCTGAGTTTTTGTGTTGAACCATGAATAAAACTGCAC

A\_16\_P03511386

CCTTGTCCCTCATTTTCTATAGATCACTATCACCTTCAATAAAAAGTCCTGATGCCTTGAG  
A\_14\_P117533 ACTTGGGTTATTCATCTTTCATCTCTATTCTTTGGGGTAGCGACTAATTGATTGATTAAGG  
A\_18\_P22841412 ACTTGGTGTAGACTGTGGACCTCATGAAGGACACTGTTTCTTCTTAGTT  
A\_16\_P02506454  
CCTAGAGTCCCTTAATGATCTCAGTGAAAGACTACATTGTAAGTATGGAAGAACACCTTT  
A\_16\_P36306542  
TAGACCTTGTATTTTGCACAGTCTACCTCTAAACTTATTATCCCATTGAGCGTCATAAGG  
A\_14\_P109216 TTTATTCTCTGCTAGGCGCATTTCTGAATCTGAGATTTTCTGAGAACTATCTGGATTGT  
A\_14\_P111076 AAAGTCAATGGAGATTTGTTTTTTTCTCACCAACAGGAAAACAATTGCTTATCGAACTCT  
A\_16\_P15333281  
AATATTGCCATCAAAACATCAGTGGAAGGAAAGTTCTATATCTGAGGGTGAAATTAGGC  
CUST\_6104\_PI426210822  
CATATGATAAAGAAAAAGACTATGGCAAGTGAGCTTTAAAAAAATTCTTTTTTTGATGCA  
A\_14\_P108553 CAAATGTCTTTTTTCTTCTGAGATTCAGGTGATACAAGGTCCCTCCTAATGTCTAACTTC  
A\_18\_P22842077 AGTGATCTAAATCAGGGCTCAGATGAGGCTGTTTGTATTGCACGGTAGGAATATAT  
A\_14\_P132804 TGACAATTGCTAAGGTCATTCCATTAATCACATACTGACATAGCATGGTAAAGCCTGTAT  
A\_16\_P55112190 AACATTGATTAGCCCTCATAGTGGGTGGGGATTCCAGAGTGGTT  
A\_16\_P20756571  
AGTAAGACTGCTAAAAACCTGTGAATGTATTGTGGATACTTACTTGGGAACCTTGTGTTCA  
CUST\_2970\_PI426210822  
GAGGAGACAGTCTGATGTAGAAGTAATTCCTTTGGGGTAATTTAAAATGTCAAAATTTA  
A\_14\_P125365 ATTATCTGCTTCTTGTTCCTTCTTCTATCAGCAACAACCAATTTTCTTCCATAAAA  
A\_14\_P126623 AATGCAGTTTAGTATCTGGGGCTATGGGAGGTTTTTATGGCTAGAATCTTCTACAAATAT  
A\_16\_P19451913  
ACAGCACAATATTTAATCCCCAAACAAGTAAAGTAAGCCTGATATTAAGTACCCTGTCT  
A\_18\_P16720968  
AAAAATTGGATTCCCTCAGGCTAATCCCTTCATGGAAATTAAACTTGGCACTCAGAAAG  
A\_14\_P115594 ACAATAGCCTCTAAAAATATTACCCATGGGCAGCAGTAGTTCGATCTGCGC  
A\_14\_P135485 TAGTCAATCTCTAGGTGTTTCAGGTGGAACAATCTTTTAAAGGCATACACAGGCATATTG  
A\_16\_P21472456  
GTGTGGTCTGAGTGATAAATATATTTTTATCCTAAAACAAAATGATTGGTTGCCTTAGCA  
A\_14\_P133392 CTCCACATTCAGTAAACACCCTTGTTACCGATGAAGACATTATTCTATTTTAGTCAATG  
A\_14\_P115962 ACCAACCCCAAGAAATTCATATTTCAATATTTTCTCCCTTCTATTTTGCACAAACAAGATCC  
A\_14\_P108207 ATAATTTTCCACTACTTAGAGGTTTGCAAATGCATCATTTCTTCTGCTGAAGGTCTGTT  
A\_18\_P14135764  
CTCTTTGCTCTCTCCATATTCTCCAAATAAAAATTCAAACTGAGCAGCAAATCCTGTGC  
A\_16\_P01846574  
AAGGAACGTCTTTGAAATATTTGGTAGATCTAAGGCTGAATACAGACCATTACCAAAAAC

CUST\_5757\_P1426210822

CATGGTTTCAAATCTGGAAGGACAATTTGTACAGACCCTGAGATAGAAGGATTC

A\_16\_P16191930

CCCTTAGACTTGTTAGATGTAGTGATACCTAGTGATTTTATAGTTACGACTCTGTCTGGC

A\_18\_P22841749 GACCCCCCTATACCCAGTGTGCCAGACATCATCATGAGATGTAAC

A\_14\_P134577 CAATTACACAGTTACACAGTAAGAGCACCAATAAAACCTGAGCATTGTGATCCCAATTTCA

A\_16\_P02293468

AGGCTCTTTTCCTGTATAACCACATTTCCCTCATTAGTTCTCACTACACTGTATGGCTATTTTC

A\_16\_P19973107

AAGCCGTAAGAGAGACGTATAGCAACCTATTCTGAATCAACTTGTTCAATCTAGCAATTC

CUST\_3702\_P1426210822 TAGGCAGCAGACACTGGGTGTGGCTTGGTTTCTCATACCTTTTTAT

A\_14\_P118777 AATGTGACAGTAACAGTCAATATGAGAATTTTGGCCTAAGCAACTCTATGAATGAAGGTG

A\_14\_P127075 GAGGAAATAGGGGAGAAATTTGTGAATGAAAATAATTCTCCCTTTTACCTTGCAAAAAGTC

A\_16\_P02029621

AATCATTTTCCAAGAAGTTACACAAGTCAACAAACAACAATATTCAAACCTCTGGCACTG

CUST\_8\_P1426210822 CTTATCACCTTGAGAAACGCCTCAGGCCTTCCTCCAAGGAAAGAC

CUST\_4851\_P1426210822 GATGGGCAAGCACTTCTATCAGATGCTGGTTCTGTTGTAAGACATCATCAA

A\_14\_P105278 ACCATCTTTATGGTGCAGACTAATATCTATTTTTCTGCTGTTACAGAAGAAGTGGGAACA

A\_14\_P125873 CTTATTGTTGGCACGGTTGATGATATCTAAGCACTCATCTTTATACTCTCGGAGGATGA

A\_16\_P36569206

GAGCCCAATAATCAGATTACAAAATTCACACCTACCATTAATTCTACTTGCAAACCAACA

A\_14\_P100075 TCTGCTTGCTGCCAGTATAACATGCATACAATATTTTCTCAGTAGTCACGATCATCTTTG

A\_14\_P123672 TGTAGACTAACGCTGTTTACACCCTTGTTCTGTCAAAGCAATTAAGATCACTTGTGTTG

A\_16\_P01427229

AGGACTCCACGAATTAATGATTCCATCAGAATTTGAAATCAAACCTGTAAAGCAATCCCTT

A\_16\_P02471535

AAACCTCTTTACCCAAGTGTAATGTTTTACCCTTTAGATCCTAGAATGCACCTAGCATT

CUST\_8804\_P1426210822

ATAATTTCTCTACACCAACTTCTAGTCCTAATAATTTATCCGTATAATGCTCAGAAACAC

CUST\_9640\_P1426210822 GTAGTTAATCATGCCCTGGAAAGCTGGCCTGCAGAAAGAAAAGGAATTTATC

A\_14\_P102973 AGTTCTATAAGGCATTGACTAAACGTGCTGAGGTGCAGGAAGTGTGAAAGTTTTT

A\_16\_P15836311

ATTCCTGGTCTCAAGGTAAATTGCAAATTTCTAAACACAGCACGTAATGTCTTTCTCTG

A\_16\_P01055497

GGGAATTCAGTCTAACAGAATTATAGCATCCAGATTTAACCAAAGATGTGAAGGTAATCG

A\_18\_P16258121

AAAACACACAAACATTTAAGCAACATATAGCATTATGACGTTACCCTTAAAATAATCTCT

CUST\_8888\_P1426210822

ACCCTTTGATAAAAGGGAACTAATAAAGCAATATATGCAGGAAATGCAGAGACAACCC  
A\_14\_P114306 CTTCTCCATTAATAAATCTTATATAACCCTGAAAGTCTGCCGCTGTATCTCTTGTCT  
A\_14\_P123900 TTAATGTAAAACTTTGGAGAGCCTTTCAAATGTTTATTGAAGGCCCGTCTCGCTTC  
A\_14\_P138844 TAGACTAATGCCACTACGGTTCCAATTCATTTTCTCTTAAAGAAGTCTTAGGATTCT  
CUST\_5240\_PI426210822  
GGATTTATTTTCATAATAGGGAGCTTTTTATAGATTTTAATATCATAGTTGCCATTTAAAA  
CUST\_1284\_PI426210822 ATAGATACTCTGTAGACAAGTCCCAGTAGGTACAGAGGGCAGACC  
CUST\_3608\_PI426210822 TTCAACTGTCCACCCTGGGAATAGGACCCCAAAACACTTTATTT  
A\_16\_P00685601  
ATTTATTAGTAACAACAGTCTGGATACTTCTCTGTAGTTCTCTCCAAATGTCAAGCCCAG  
A\_14\_P202185 CTGTTACCTCCACATATAGCCTACTAAATAGGACTTGAAATCAGAAGTTCTTGTCCACA  
A\_14\_P106882 GTCGCTGATGTATGAAGAATTTTCTCTTTGAAAGAAATTTGAGAATGTTCCACCTTC  
CUST\_10241\_PI426210822  
TAAATTTAGTTTTTCACTTCTCATTCTGATTGACATTCTATTAGAAAATGTTAGCTAG  
A\_14\_P125208 GTGTCAATGATGCAATGACATCCTTTCAAGAATAGTCTCAGAATTTTGTGTCTGTGTCA  
A\_16\_P00370220  
AGCAGCCTTATTGTGTAAACTCTGGATTTAGAACATAAATACAAATGCTCCTGTGAGG  
A\_18\_P17044137 CTAGTTTCTGCCTGAGAATCTCCCGAGGTCTCCCTGAACACTCA  
A\_14\_P103815 TTGAAAAAGTTATATAATGAAATAAAATTTACTTGAAGGGAATATCATGTAACAAATG  
A\_16\_P16027230  
GGTGACTCAATTTTCAAATCAATTCACACTAACTTTGCTATCTTCTTCATACCAAGC  
A\_14\_P110898 AAATGCCAGGTTAGAGATTAGGACTCTTTATAACGGCCCTTATCTTTTACATTTGGTAA  
A\_14\_P115656 TAAGAGAACTGCGTGTATTCATTTCTCACTCAGGGCTGTCTTTAACTCAGTC  
A\_14\_P121825 CTCTCTACATTACTCTTATACAGGCTGTCATTGGACCATGACTTGAGAAATTCTGCTTTA  
A\_14\_P104441 TTCAAATTGACATTGGACACTGGAATTGAGGAAGAATTAGAAGCAGTTGAAGGTGAAC  
A\_16\_P00685183  
TGGATAGTGAATTTCCATTTAAACAATGGAAAAGATTTTCATTTAAATTTATTGAG  
A\_14\_P201897 CTGCATTGGTTTGATATGTTTAAAGTTGACTTTAACAAGGGGTTAATTGAAATCCTGGGT  
A\_16\_P15851340  
GCACCTTCAACTCCTAATTACCAGCAGAAACATTTCTAATCATAGGCTTTGCATGTTTTT  
A\_14\_P123291 GTATAACTATCCAGAATCATTATCATCCATATGCCAATTTAAAAGGCAGAGGTATGGGTC  
CUST\_6770\_PI426210822 CCAAAGGATCTGATGTCAGCTGATTCTACATTGCAGAGCTAGGGT  
CUST\_8393\_PI426210822  
AAAAATCGGTTATTTCAACAAGCTACATAATTGTTTAAAGGCTCCACTGCCATTGTACACA  
CUST\_2059\_PI426210822 ACCGGTTCACTTCTGCTTCCGTTTGGCTAGAATTTGGTCAGATAGTT  
A\_14\_P102013 TTAGTGAATTAGAGCAGGAAAATGAGGACACAAAACCCAACCAAGGCG  
A\_14\_P109040 CTGACCTTTTTCAAATTTTCACTCCAAGATGTCTTCAAGATATGGCATACTTTCACTT  
A\_14\_P100099 TGAACCTCCAGGAACGTCCAAGTGCTTTTTTTGAGATTTTTTAAAAACAGTTTAATTGA



A\_14\_P114065 TAACCAATGTTGAGAAAATTTCCAGGGAATTGCTTTAGAAAAGACAGAGTATACAGAACCT  
A\_14\_P202030 CACAGTTCCTTTTTCTCCATATTTTCACTCTCATCTTACGTCTCTTTTTTAACCATCCTA  
A\_14\_P132969 GATTTATCCGCTGATTCAGATGAAGCCCTTCGAGATTCAAATCGATGAGATTGTC  
A\_16\_P19148698  
AAAATGCTTCTTATAGGCCGTATGCAAATATAGAGAAAAAATCTTACCTTGGGATGGGG  
A\_14\_P134482 ATTAATCTAGAGGCAAAAAGGATTCCAGAATGGGAATGGGAATAAGAAGAATGTTACCT  
A\_14\_P112752 AAATCCTCTAGCAGGTCTAGCATCTTGGTCATCTGCAAAAAGAAGCACGGTTTAATTAT  
CUST\_9504\_PI426210822 TCCTTTCCATGACTTTGCCTTTTCAGTCCATGAGCTACAATGAAGTTCTACAA  
A\_14\_P127428 AGGAGGTAATCCAGAAAATTTGGAACCTCACTATAAACCACACATGACATGATTTACCAAT  
A\_16\_P37013199  
AAACCTCAAACCTATCTTGAAATCATGAGCAATATTGCTATATCCACACTATTACTGCCCA  
CUST\_8669\_PI426210822  
AGGTGAAAGTACTGGATTTTTGAAAAGAACTCTAGTGTTAGTCCAGAAGAGATATAAAAATA  
A\_14\_P108855 TTTTCAATTTCTTGCAAGAACATCCCTTTATTTTGATGTATGAAGAACGTGCCGTTGAG  
A\_14\_P121300 TTCCAGGAAGACAATGCTCTAGAAAATTCACACTTATGGATTCATAAGAAAAACAGAGAGG  
A\_16\_P17436497  
AAAATAACTCCAATGCAAAAAGTGAGCATATGAATCAGGGAATCTTTCCTTACAATGGGA  
A\_14\_P130226 TGAAGTGAAGCAAAACAGGCCAGATTTATGGTTTTCTTTGCAGTCAAAAATAACTTTTTCTG  
A\_14\_P112505 AAAACAGAATTAAGTTATTGGTCTGAAGTGAAGTCAATTTAGGCTCTATCAAGGCCTA  
A\_14\_P113411 TATTTTGTGACCAGGGATGTGGAAATCACAGGCCTAGTCAATAAAAATATGTGCTTTAATC  
CUST\_2802\_PI426210822 CTTTGGCAGCTCAGAATTGAAAAGAGGCAGGCATTGTCTGACAG  
A\_18\_P15488017  
AATTTTCACATTTCAAAGTTAACTCAAACCTGTGCTATCAAAAAATCCCATTGTCCCAGG  
A\_16\_P15652041  
CATCCTTTATCTCTACCCTGTAAATATTGTGCTTGAAGTCAACATTTTCTAATCTGGCCAC  
A\_14\_P103320 CTATCCATACAGGTGACCTGAACTATATTTGCCAATATCCTTGCTTTTCATTCTGTTTTGT  
A\_14\_P201354 GTTGCTATTGTTAACCTTAAAAGTGAATTTTGTGTTGCTAAGAACTGTGGAAGTGCAGGAG  
CUST\_1559\_PI426210822 GGAAGGGCCTGAAGGGAGGCCTGGTAGGAGGCCGTGATGTGGTAG  
A\_14\_P118734 CTTGCCAAGATAACTATTTGCACCACTCATTTATGACCTCACCAGTAACCACATTAAAAA  
A\_18\_P14133316  
TATTTCAAGAGAAAAAGGAGGCCAGAATTTATAGAATCTAAAAATAGCAGTTGAAGTGCA  
A\_14\_P104979 AAACGTTGCTGTAAGATGAAGTAAGAGAGGGACAATGTTTTAATATGAAGTCTTGAAAGG  
A\_14\_P138754 TGATCCAGCACACAAGGCAGGCAAAGAATTTTCTCAACTCTTTTTATTAAAGTTAGAAAA  
A\_14\_P202385 TTTTGAAGTTGTCAATTGTCAGTATTTCTTTTCAAACCTGCCAAGTGCAGTCATTGA  
A\_16\_P21591996  
ATCAACTTACTTCTGCAATTTGGAATTGAATCTGAAAAGAGAATTAGACCCAGACATCTT  
A\_16\_P01644921 CTTTCCCAAACCTTCTGATCATTAATGGGGCTTTCAAAAACAAGTAAAACCTGCAACCAC  
A\_14\_P201132 TGCTTTATCATCGCTATTAAGGGTGGCTTTATTTGTTATAAAGCCTGAGGTGGCATTATT

A\_16\_P00088004

AACAATTTAAGGGTGGTCAGTAAGAGTAAGTAGCAATTCAAAGATATTTGCCTCATGCGT  
CUST\_9128\_PI426210822 TCTTCACACCTGAAGCACATTAGCAACACTGGCTGGGCTGGAGCT  
A\_14\_P135444 GTAGTAACTACACCTTTGAATTTAGGACAGTGGCTCACTTTTTTGTGTTGGTTTGT  
A\_14\_P118120

ACCCGAGAAGATGTGAACTGGAAAAGAATAAAAAGGGAAACTTATAAGCCATGGTATAAA  
A\_14\_P133345 ACCTATTAACGCTAATGCAGTAGACCAGCAAAGCGTCTTATCTAATGAGCACATGAAG  
A\_14\_P134426 CTGTTCCATATGGGTAGTTAATGGGGTTTACCTGTTTTACTTTTTGGGTATTTTTCAAATGC  
A\_18\_P10447145

ACTCAGGGTATTCACTGTGATGAGTGATGTGAGGTATGGAATCAGAAAAGATTTTAAGAT  
A\_14\_P130488

TAAGAGCAATGAAAAAGATTAACATTGACCACTGAAGTGATGTGATCAGAGTAAGGAAGG  
A\_14\_P108722 ACCACCAAATAGACAAAGGATGGCAGACTTTTCATAAATACATATATCTAGCAATGGCCA  
A\_14\_P113154 TTTATTTCTAGCCCAATCAAGCATCCTTTTTGGAAAGTCTTTCTCCAGTTTCAGAAATG  
A\_16\_P15963747

TCACCTTTAGCCTCAATTATACCTCACTAATAGAAAGAATGACCCAATTATAGAAGCAGT  
A\_14\_P106599 AGATGAAAGCAAAGTAGCAGTTTTTTTCCCTACCAGGCATCATCAAGTAATGAAATGTCTAC  
A\_14\_P102627 ATTCTTTGAAACCAGTAACCCTTCATCATCCCAAAGATGATCTAGATAAGATACCATCAG  
A\_14\_P126175 AACCATTTTGTGGTTTTTCAAAAATAATTGGAGGATACTTTGAGGAAATGTTGTTTCTCG  
A\_16\_P37776587

AACTCTTCATTTCAAAGCAATCTGTAGACATTACACCTTTAATTACAGGAGACCTCAAGG  
A\_18\_P22840281 GTTTCTATAGTGGCCAAGGGGTCCAGTTGTCCCCTGAGTCCGGAG  
A\_14\_P104784 CTATGATCCCTACCAGTGGCTTACTATTAGAATCTCTTGCAACCAGTGTAGGAGTATATAA  
A\_14\_P117326 ACATCTAAGTAATGGGGGAAAACCTGTGCAAATTAATTCACATACATGGTTCAGAAAATT  
CUST\_3975\_PI426210822 GTTTCTTTGGGTGGGGCTGTGCTCAGCCCTTCCGGGTGGTGAAGG  
A\_14\_P126873 ACAAGACATTTGATTTGACTTGTCTTTTATTTGACAGTGTATGTAGTAAAAATGTCAT  
A\_16\_P02698149

TCCCTTAGTTCAGTAAAATGTTCAACCAAATCAATTTAATCCTTTATGTCAGAACAGCCA  
CUST\_4330\_PI426210822

ATCTCCAGATGTGATTTATGCCATATTACATTCCAAGAAGGGAACATGAAGAATGTTTG  
A\_14\_P124283 ATCCTAGGGAAACACTCAAGAGGTTATCACTACATGCTCGCTAACCTGGTAA  
A\_16\_P58424254 TCTGCCTTTTAGTTGGGTTTCAGTCAGAGGGGAGCACTGGAAAAAG  
A\_14\_P134637 TCTTAGATATCTATCATGCTTTCCGGAAGCAGTCCCACCCAGAAATTATTAGTTATTTAG  
A\_16\_P17138797

GGACAGCCATATCTTGTAGATTTAAGGCATTTACCGTGTATATGTGTTAGGAGTCGTTTT  
A\_14\_P131135 CCTCAAAGCATTTCCAATTCTAGGTCTTTTAAGACACTATGCCAGCCAAGCAAAATATG  
A\_16\_P21585839

ACTTTGAAAAATACACTGCTGCTGAATAAATCACCTTCCGATGTTACTATCTTTAGGGCT

A\_14\_P102740 CTAGATGTCTTAATTCCCAAATAGGACTCGCTGCTAACTCTTTGGGCATACCTTC  
A\_14\_P126517 CTCGGTTTATAGGTGTAGTGCAGACTCTACTGAAATCCAGAGAATTATCCAATATGGCA  
A\_14\_P130233 TTTTTCATTTTGTATCCTTTATATAAGTTGAAGCAGTTGGAGGAAAGGCCTTGCCATGTA  
A\_14\_P109538 ATTCCAACCATGTTTTGTTGAGCCATGATCTTCCCAGATACATGAGTAGATTTTAGAAT  
CUST\_2001\_PI426210822  
TAACTATCCGAATAGGTACACTTAGTGTATAATTGTCATTATCTTTTGAATAAAAAATG  
A\_18\_P11685338  
ACTCTCTCGATAAGCCCTATTATTTTCTGAAACCATGTTACATTATAAGAGGCTGGAAG  
A\_14\_P138960 ACAGTTGCATTAATAATAATCTAAACAGGACCAGCATCAAGGGTCATATAACAGTGAAGC  
A\_16\_P17882499  
GAGTCCATGAAATAACATCAGTCTATTACAGTAGTCTTAACTGGTCTCTATGATCCATCC  
A\_14\_P200811 TCTACCCACCTCCTCAGTATAGTTTTAGATTTTCTATTGACTTTTTTCCACCAAGGAAAC  
A\_18\_P14134605  
TTTCCATCCACTTTCTATATTCTAAAAATTACCGCTGGATTAAGCCCAGTCAAGAGAGAA  
A\_14\_P106985 ACTTACCTAAAATTGTTGTTAGGTCTTGGAAAGACTTTTTTGGTTACCAGATTCTTGGTTG  
A\_16\_P16624173  
AGCCTCTGAGATGTATGACCTTGCCTCATCTATTCTGTTGATTAAGTTTACCCAATAAAT  
A\_16\_P36085513  
GCCACCTTATCTTCATTAGGCCCTCTGTAATTACATACACTTGGTCAAGAATCTCATAAT  
A\_14\_P105907 CACCTGTCCTTTCCCATAGTTACAATTTCTTATACTTGAATCATATACTACCTGGACAAG  
CUST\_4605\_PI426210822 CCATCTGAGCTCTGGGTCAGCAGCAGTCATTGGAGCAGGGATCTG  
A\_14\_P200819 GACCTGTTCTAAACTTTGCCAGGAAATTCCTAGAAAGCAGATGAGTCATTATGTTCT  
A\_18\_P12797234  
TTAATTTAACTTAAATCTGAAAATGTCAGTCTCAAATTACATATTTTAATGACCACGTAA  
CUST\_1118\_PI426210822 TACTTTGGTTTTCCAGAAGATGACATGTTGTGACAGGGACACATGATG  
A\_14\_P126874 ATCACTGACCTTCAGGCATGAAGATTTTCTCTCCTATATTGATAAGGTAGGCTGGT  
A\_14\_P103630 TTAAAGTTTGCCAGGCTTTCTATTTGACTTTTTTGGTGCAGTTTTAATATCCATGGTGGC  
A\_14\_P101937 CCTTTTTCTTGCCACAGATTATAGAAACCCATACAAAAAATGACTGATAATGACTCACC  
A\_18\_P14132494  
CTGCAGAAAGAAAAGGAATTTATCTCTGAGAAGGCCTTCAGAAAGAAAATGAGTAGGCT  
A\_18\_P22840873 GGTGGCCTCTTCCCTAGCCCCACACATACTCTTTGTTTTTCCATT  
A\_14\_P112146 ACTGGTTAATTTCACTAAAACCAGAAATTAGTGGAAGGCTTGATTAAGGGAGGCTTTATT  
A\_18\_P16722477  
AAAAACCGGGCTCTATGTTTTTATATATTGGAATTGGTTCAGATTTAAAAGGCACACGCC  
A\_14\_P132399 TAAAATGGTAGGTGGATGCCTTCTGTAAGGCAAAGAGAAAATCTGATCCTTAATGAAGTA  
A\_16\_P16317608  
CCTGCTACGTTTCTACTAATTTACCATCGCTTCTTCAAAAAATTGTGTTTCAGAGTGCTAC  
A\_14\_P116742 GGAGTTCTAAAATGACTGATGCAATTCTAAAGGCCTAAAGAAATTTCTCTGGGTTTTG

A\_16\_P20081454

AAAAAGAACAAACAGAAAGTCTAACCCCATAGTAAAAGTATACTTCCTTAGGCCATTCTCT

A\_18\_P15309376

TCAGGAATACTTACAGACACAAAATATGCCATGAAGTGATTATACAGTGAGACCTCTTTC

A\_14\_P200312 CTCTTGGGATCATAACAGTGTGATTCCTTTTTGGTGGAGTCTTTTCCTCTCATTTTATTT

A\_14\_P127631 AAAGGAAACAACTGCTTACGGTTTCATTTCCCTAGAAACCCAGATGTCTATTTTAATGCAA

A\_14\_P104591 ATGCTTCCCCTCAGTTTCAACACTTTCACACGAATTATTTTATGCATACATGACACATT

A\_14\_P131756 ACAACAGGAAAGAGACATAGAGCATGCAATTTCTTCAACACATGCCATCGATTACTATAA

A\_14\_P104972 TGAAGTAGGATGAACTTTGGGAGCCATATGTGATTTCAGAATGAAAAAGTTATAGGCTAC

A\_16\_P02464077

GATCACTGTGACTTTGTAAATGCCAGTATTTCTCTCCTATCCGTATCAAGAACACTGATA

A\_16\_P36046279

ACCTTCTTGCTGCTATAAACAATATATTGCACATGGGAAAGATAGTTACGTTATGCCTGA

CUST\_10298\_PI426210822

AGATTGTTAACACACTGTCTATGTCAAATCCTTACACTAGCATAGTGATGAGAAAGTGAG

A\_14\_P121935 GTAAAGGCAGCAGTAATGCTAACGCTAGCAAGTAAACTGAAGCGTGACGATG

A\_14\_P114405 ATAAGTGTATTGAGAAGCGTTCTTCCTCCCTCCTTTGCAAGCGCAATTAATAATGT

CUST\_4695\_PI426210822

TGTTTTAAATAAGGTATATAGTGAGAAAAGTGAGCATTGGAGTCTATTTTCAGTTATGTGT

A\_14\_P110550 GCCTGGTTTTTTTTTTTTATCCTAGATTCAGGTGAGTCACTGTATTTGCAGTCTACATCA

A\_14\_P139989 ATAATGATTTGTAAATGCCCTTGATTGTGGGCAGTTTATCATGGAAGATTCTTCTCAAGT

A\_14\_P123767 ACTCACGGGAGAAAAATAGACTTTATTTACAAGTAATAACATTTAGAAAAGATCCATCCC

A\_16\_P38893286

CCCCTACAAAAAGAGTTTTAGAAACTACCTTAGCATCTACTTATAATGCAGCCAAGAATG

CUST\_4888\_PI426210822 GTTGAGGGAAATCATGCAGAGGTTCTCAGATGTTTCAGAGAGGCTTC

A\_18\_P22840856 TTGTTTGGACCTGCTATCCATGCATTCAAAAAAATGGGAGGTTTTGGTCAAGTAAT

A\_14\_P127959 AATGTATGGGAACTACCCATGATGATGTAAGAGGAAAGAACATTTTTTTGTGATTCACCA

A\_14\_P130303 TGCTTACCACAATATCTTCATAGGCATTTTCTTCTAAAGTGCTTTTGGATCCAACTTG

CUST\_1853\_PI426210822 AATTTATAAGACTGAGCCCTGGCCTTATGGTGTCTTCAAAAAGATGGCATT

A\_14\_P138614 GCAACAATTGGTATGCAGGTTTCATTTCTCCTAACTTAGATCTCAGAAGAGCACTTAAT

A\_14\_P107399 CTGGATCATTCCAATCAATGATTCTAAGACCTTCATCTTTCTGCTGTAAAGCACAGAAAT

A\_14\_P137728 CTAAAAACCTCACTGATCCAAGAGCACTCTCTGATAATGCTAATTAGAAATACGCTTGC

A\_14\_P107045 CTCTGGCAGATGTCCCAATCCTGGAGGTCATCCATTAGGAATTAATTTCT

A\_14\_P202112 TTCTTGATTTAAGGCTAGATTTACGTAGTTCGGCTCAAAATGGCCAAAACAATCATTCTC

A\_14\_P114471 TGGAATCTCTATCTGAATGATTCACCCCTGAAAAACTTCAGAATCTATAGCCTGGATAT

A\_18\_P10361476

CGAGCATGCTCTGTAATAACAAAAATCACAAAGTGTTGATTCCTAATCCGTATGGCATTAG

A\_14\_P107724 CTTTTCTCCACTTCACCCTTAAATAAGCCAGGATTTTAGGTATGATCTTAAGGAGAATGA

A\_14\_P110153 GTATGGTTCACCTTTTTTTCTTTTACTTGCATGGTTTTTTAAACTTCTTCTTTGTGGCATT  
A\_16\_P17895186  
GCCTCTTCACCTTTCTAAAAGTAAATGAACCCAAATCTTTCTTTTCAAATGGCTATGAGG  
A\_14\_P102060 TGCAGGCTTCTAGAACATCTGATTCTACGTGTTTCTCCACAACAACTTAATCTGTTTTA  
A\_14\_P125944 CACTCACTCCAAATCCGTCATCTGAGCAATAAATATTCACCTTTGCTTCTTACTACAAAG  
CUST\_8195\_PI426210822 CTAGTGTGGCCAGCGTTCATTCATTCTCCTCTCTCTGCACAGTG  
A\_14\_P126974 CATTATATCCTGAAATGAAGGATGAGTTCGAAATGTTCAAAGAGATCGCGTTTGTAAG  
A\_14\_P118024 GGGACCTGTGTTAACTTCGGACTTCTACTCAATTTAGCCAAACTAATTAATCTATTGTTG  
A\_16\_P41773968  
AATTCAGCAATTTGTCTCACATATTCTTTCACGTTTCAGTAATTTGTCTCACCACAAGTCC  
CUST\_6866\_PI426210822  
GTTCGAAGGGAAGCTCATTTTTGCTGTTTCTAAGGAGTATAATTTGAGTTCCAAATTA  
A\_14\_P127498 GAACATTGTCTCAACTGGACAACTGAAAGTTTTTCGCTTTGTTTACAATGCTCTATAGTG  
A\_14\_P122479  
TGCCCATGATTTTCAGGAGGATGAAGAAGAAAGAGAAACAGAATATTAAGCAGAACAGATA  
CUST\_2812\_PI426210822  
GGAGCTTTATGCATATTACTAGGTGCTTCATTTTTATTTTAAAAGGCTGATTTAATAATAG  
A\_14\_P120909 TCTTTAAATTCCTTCAAGTGAAAGTTGCTAAGTTAAAGAGAGGCCACTTTTGTGAGAAT  
A\_14\_P101402 AAAGTTAGGGAAACACACTACATTTGACAACCAACATTAATTTGTAGTTGGTCTAACC  
A\_14\_P112274 TACCTATCTTATCTAGGTAGTATGTCAACAAGAATCTATCCATTCTAACTGTGCCACA  
A\_14\_P128245 CTAACATGGGGTGATTGGGTGAGTCTGTTATTTTCTGATTTTTTTCTCCAAAGACTTTAT  
CUST\_5258\_PI426210822  
GAATCCTCTTTTAAAAACACTTAGAAGATTTTCCCTAAACTAATTATCTGGCTTAATGCT  
A\_16\_P17623269  
ACTCTTTCGACTAGCACTTTTTTCAAATAGAATTCTACTGTAATACCTGAAAATGGCATGC  
A\_14\_P133643 TTTTTTCTTAAGCCATCTGGAAGTTCTACTGATAGTAGAACCTACATCTTCTGTCTCCC  
CUST\_2335\_PI426210822  
ACTACATGCTGACTACTTCCACTCATATGTATTTGTATTTTAATTTAAGAGGCAGCAG  
A\_14\_P130712 CTCTCCAAGTGGGGATTTATTTATTTGTCTAGGGACTTGTGGCTTATCATCTTTATGAC  
A\_18\_P22841940 CTCAGTGTGCGTGTCCATGTCCCATTAAGATGAATGACCTCATTGTGT  
A\_18\_P15686851  
AGGCTGAAATCTAGTTTAAATCACATCTGCTTGAATTGTTGTGCTCTTAGATACGTTCT  
A\_14\_P118417 CTGATTTTATGATGGAAGTCTTGATCTTGCTCGCAGAATCTCCAAATTAGAGTCCAATTT  
A\_14\_P112115 ACTTCAAATTAATTGCAAGAAAGTATGAAAATCTAGGGTTGCTGTTCTTCTTTGGTGCCA  
A\_14\_P137602 CTGGTAGATGGCAGTGGAGAAAATGATTTTAAATGAGGCATAATCAGTAAATAGCAGGTT  
A\_16\_P01878436  
TTGATAGGTAGCAAATTCGTTCTAAGTATACGTTGCTCTTTCAAAGAACACTCGTGGA  
A\_14\_P107327 AGGACCTACAAAGGGAGTGTGCTGTAAAAAGTTTTCTTATTCTATAGAATAAATGGGTGC

A\_14\_P113356 TTTACTTACCTCACTGAATTGGAAATGATCCAATAAGTAGTGTTGGAATAACTGGCCATC  
A\_16\_P00042482

CTCTTTCCCTACACCATAAAGGTATCTCTATTGATTTCTTTATCTCCGTAGTGATCCACG  
CUST\_8994\_PI426210822

GCCCAGGGATGTAAGTGAACATAAAGTCAATGAATAACACAGAAACGTGAGTTA  
A\_16\_P35636488

AGTGCTGCTCATAGTGTGATTCCATAAACTCAGTAAACATTTCTTAACAAAATCATGGCT  
A\_16\_P20863429

TGCTAACTCAAGATAAGATGCTAATCCTTTATAGCCTAATAGGAATCTCATAATCCTCCCC  
A\_16\_P19140856

GAGACCTAAGGAATATGTTGTATTTCATATTGCATATCTTTCTAAAAACCCAGGTGTTGCC

A\_14\_P105661 CTATTTGTGTCGAGTATTTATTTCTTTGCTGTCTAATTGCTCCAACCTCCCTAGACGTTAG

A\_14\_P117964 GATTTTGTACCTTCCTTTACCAAATAACTAGAGGAATTGCAGCAAGGAGTTATGGATTA  
A\_16\_P00346057

AAGGTTTTCTGCACTAATGATGCTTAGATTTTTTTAAACCCATTTTTCTCTAACTGCATGA  
CUST\_1530\_PI426210822

CTTCCTTTCAGAACTGCTGTTTAAATCCAAAGAGAACATAGACAGTTGGCAATATAGTG  
A\_16\_P01354933

AAAGTGAACATACAGAATGCCTTACAAACACCAAATGAAGGAATAGTCACCAAATGTGA

A\_14\_P119978 TACTTCCTCGACCCTATTTGGCTCTCCGAATGTCTGCAGAGGATCTTTAATATTA

A\_14\_P128674 CTCCTTTCCTAGTGAATCCAGTTTCTTTCTTAAAGATTTCTTTCTTTTTGTCCATCTGT  
A\_14\_P112510

GTCGACGATTGAGGTTTTGAAAGATATTCAGGCTCTAAAGAAAAAAGAGAAGCGAGATG  
A\_18\_P15262957

AAGGAAAACAGCCCTTTATACTCTTTGACCCCTATGACATATGTTAAAAAGCAGGAAGAAC

A\_14\_P136254 CCACTCCAATCAGAGGTTCTCTAATATTACTACCAATTCTTCCTTGATTTCCCAAATAG

A\_14\_P130208 CAGCCTGCTGCATTATTGTGGCCATGTTTGTGTTAAATAGAAATACATCCTTCTTTGT

A\_14\_P102178 GTATATTCATACTTCTGTTAGGTAACAGGGTAGGTATGTTAGGTAACAGGGTAGGTATGG  
CUST\_7469\_PI426210822

AACTCCTAACATAATTGGAAGTTTAATATATTCCAACAAGTTCAGAACAAGCATACTAGA

A\_14\_P109767 CAAATGTTTTGCTGACGTTACTTTCATTTTCATCCGGCTAAATGGATAACCCCATTTTTTG

CUST\_5663\_PI426210822 TATAAAATTAAGAAATGTGTTCTGTAATCCCTCTGGGAATTCCCCACGGGC

A\_14\_P110420 ACTGAAAACTGATCAAAAGCCATATGCTGCTCATGTTTCCTAATACTCTCACACCTTTA

A\_14\_P127128 TAGAGGGTGGTGGACTGTTTTTCTCCAAAATTAAGACCCAAAATAAAATGTCTGTCTTAT  
A\_16\_P00685605

TTATTTAATCCACATCGCCAGATAGATTCTTAATTCTCCTTTTTCTCCAACCTCCAACCTCC

A\_14\_P104348 AGAGGCTGTGGAGATGAGGGAGTGACTGCTATAAATAGTGAAAATACTAAAAATCACTGA

A\_14\_P116267 CTCAAATAACAGTCTTCAAACATACTACATCTGATCTCAGAATATCCACAGTGTTCCAA

CUST\_4787\_PI426210822 AAGTGTCCCTGGACATCAGTCACGTGGCTGTGGAAGGGAGACTTA

CUST\_552\_PI426210822

CAGTTCAGGATGGGATACTTTTTTAAAAAGTAAATGTAAATGTATTGCCATATTTCTCT

A\_14\_P107662 TCTTTGACCAATGCATAGTTTGGCAGAAAAATCAGCCGTTTCATTTAGAAGAATCTTAGCA

A\_18\_P17346169

TGATACAAAACTCACTTAGCACTTCATCATTATAAGACTCTCTAAGGACTGATCCCACC

A\_14\_P120470 AAAGATAACCAAGGCTTCTTTAGGGATGAGTCTTAACCATTCAACCACTTCCC

CUST\_10235\_PI426210822

TCAGAGTCACTATCTTTAGTTTAGTGTTTATCTTTAGTCTTTAGTTTTTATATTTTATCT

A\_14\_P201601 GGTTTAAAAACAGGAGGAATGGCATCTCATTAATCCTGTAAATGTCACCTCAGTCTTG

A\_14\_P101910 AATAATGTTAAGCAACCAAGGCAATAATGGTTTTCTTTTCATTCTGGTTTTCCCAAATTA

CUST\_1265\_PI426210822 CAGAGGACAGCCATGGCTGTAAGGAGGAGGCCAGAGGTCTCCAGC

A\_14\_P107538 ACCTACTTTCAATAAATTCTGGTTTTGTGTTTTCTTTTGTAATCACTGTTCATCCTGCCT

A\_14\_P200873 GATATGAAGATATAGACGAGATTGCTCCTCACATCATCTATTGTTCCATCACAGGTATTT

A\_16\_P00685096

AGGCACCTTAATTAAGATCTTTCAAGCATCAGGTAAAAAGGTGAGGTTCTTGGTATAAGT

A\_14\_P115283 GAAAGAGACTGTGAATCTATATATACCATTTCTGGGACGAATTCATCTTCTGAGGCCTC

A\_16\_P20875297

AAGTAGAACTCCCTCTAAAATCATTCTAGTCCAGTTTGTCTATCCTAAAATCTCCCAGAC

CUST\_1294\_PI426210822 TTCTCACTGAAATGTGACTGTCCCATGTTCAAGGTCACCTTTTTTTTTTCTGA

A\_18\_P10561351

AAAATGTGCCCTCTATTGTTAATGATAGAAGTCTTTAAAAGCACTGATGTAGTAACCCCC

A\_14\_P122450

GCAAATCTGAGTAATGAAGAGAAGCATCCAAAAACAAAGAGGAGGATTAGAAACCTAAGA

A\_14\_P130650 CATTATACTCCCAGTTTACTCATACATATCGACCTGAGGTGCAAATCCTAGAAGAATGA

A\_14\_P135251 TTATCTTCTTTCCAAATCCAAAAAGATGAAAACGACTGAGATACTTTCAAAGACAACC

A\_14\_P120045 CTGGTCTGGCAACAAGATTCTTGTTTCTATGAAGGTGTAATGGTTAGTTAGACTTTGTA

A\_14\_P114858 ATGACTTATTTTTCCCCTTAGAAAACAAGTTTATTCGGGGATTTTTTCTCTCCCACTTT

A\_16\_P36293688

CCTGTATTCTTACCAGACAAAAATGAAACTGTTTCCAATAAACTAGCCACTACAGAGGA

A\_16\_P30952303 CTCATTGCATCCCCTCCTCCCCTCCTCACTTCCTTCTCTGCTTA

A\_14\_P104427 CTCCAAATCTAACAAAATTAAGATCGCTGCAGTGTTCAAAAGGACCTTGACCTTGTT

A\_14\_P117373 TAGATAAACCTATCACTTATCTTTTCAGCAATTCAGAATTC AACCGAAGTCCTCCCATACA

A\_16\_P00685098

TGAAAGTTTCCATTATACTGCCCTGTTGTCTAAAATTAAGCCAATTAGAGAGTCCTGCTA

A\_14\_P135047 GCCCATAGTGTGCATAGTCTTCCTTCATTTCTTCTGTGGGGGAAAATTATCTTTA

A\_14\_P200184 ACTGAACTTGCTTTTTTTTTCCGGTTTCTACATGCAGAGATGAATTTATACTGCCATCTTAC

A\_14\_P136713 TTTCTTTTCTTGGAGGTCTTTTAAGAAAGCATTTTTCTGGACCTTTAGGTTTCACCTAGA

A\_14\_P124426 GGCATTATGAAGTTTAGAAGTGGTCTCCAGGAGTAAATGTAGTCTCTGTATAGGTTTATG  
A\_14\_P120920 AATTCAAAATGTTTGAAGTGGGAAGCAAATTTACCACCAAGTCAACCTTTTCTCCTGTTA  
A\_14\_P104369 TTTAAGGTGAAGTTATTTTGGCTTAGGGACTACAAAAGAGAAGGTAATTCCTAGGGAAG  
CUST\_1088\_PI426210822 GACAGAAGTCTCACTGGCTTATGTCCACATTGCCTTTGGGCCTCC  
A\_18\_P22841626 GTTTATTTGAGTAGCGCCCCAGAAAGTAAGAAAGAAGGAAGAAAAGGAGGGTATG  
CUST\_9528\_PI426210822  
TGAACATAAAATAAAGTGGTAGTTTGTTCACATAACAAATCTACATTCAAAGACATGCA  
A\_14\_P100079 CTGCTTTTAGAAGTGTCTCTCCTTCCGTTGGAAAGAAAGGTGTTTGTTTTGG  
A\_14\_P112873 CATTAGAACCTGTAGAAAGAACATGAGGCTGAAAGTAGAGGACATATTCATTAAGGACTG  
A\_16\_P19727087  
AAAACCTGACTTTTTTCTAGTTTCAAGTGGTATCTGAGTTCAATAGAATGTGAAGCGCTC  
CUST\_1676\_PI426210822  
CTCTATTTTTTTTTCTTTAGGTAAGTCTGGCTTTTGCAGACACTTGCTCCCTGAGAAT  
A\_14\_P119305 TGTCTCATGAAGGCATTTTTTGTTCAGGGATGACTGAATAAATTTTTTTTTGTGGCGAG  
A\_14\_P115196 ATCGTTCAGGCCACAGATATGGAAGGAAATCTCAACTATGGCCTCTCAAA  
A\_14\_P123884 GTTTGAGGAATAATACAGCATATTGGCTAACATCCCAGTCTGATCTTTGCTTAGGAATTT  
CUST\_8244\_PI426210822 AATTTTTTCGTTTTTCAAGTGTCTTCTGGGTCTCAGCCTTGATTAGCAGTAGAAAT  
A\_16\_P02255163  
AGTTTCTACAGTGAAATCTCTTTAATACACAAAATCAGCAGCATTACAATTATGCCTGGA  
A\_14\_P121729 TTCCCTTCTATATTTCTTTAAAAGATAAAATTTGCCTAAGGCTAGGAGCCAGGAAACCAG  
A\_14\_P111943 CTCTGCATCCATGGTGGTAACTCGGACATTGATCTGAAAAACAGAATGAAACAAATTAC  
A\_14\_P107728  
TCAAAGACCAAGGTATTTCTTCTGCTTCAAAGAACAATAATTGGGAAAGAAAACCTCACT  
CUST\_8960\_PI426210822  
TGGCCTTATATTAATAGTGTCAATTGAAAAATTAGAGTAAATGAACAGAGCCTG  
A\_14\_P114288 TCTCCATAACTTTCTTGGTTGGCTCAGAAATATTGCTTTTAAAATCTGATTGGGTCTCTT  
A\_16\_P16862672  
TGGGTTACAATAACATGACATCAATGCTGATAAACTGACTGTATTTCACTATCTCACTG  
A\_14\_P138880 CATTTTCTATCATAGCAATGTTGTGGAAGACACAGTAAGCCCAAATTGAGAAATCAGAGA  
CUST\_9135\_PI426210822 CAGGGCTCAGAGGTTCTGTTTCTCTAAACCCAGACCAAATGTGTTT  
A\_14\_P111188 TATTCTTCATTGATGACACGCTCCTCCACAGTATCTTCAAACACTGAAATTTGGAGAAA  
A\_16\_P03707282  
CAACTGGCTTTTATTCCATCCTAATTTTAAAGCATCCCATGTGATCAATAACCAACCATTTTC  
A\_16\_P41025926  
ACCTCATTTTTGTGGTTATGTAGCCAAAGATACTTAGTTTCATAGTGCCTGATTCTTGCA  
A\_18\_P22842111  
TTATCTCTCCCTCACAGCCAAGCCAACCTCCTAACATAATTGGAAGTTTAAATATATTCCAA  
CUST\_3084\_PI426210822 ACTTACATGGAGGAGACGTGTCGTCCTATGTGGCCCATGTGAAG



A\_14\_P104564 TCTGGGAGGCAAGAGAAAAACACATATTCCAAAGCAAATATGAACTCTGTTTAGATAGG  
A\_14\_P113610 ATTATTATTATTTAAACACTTACTTGATCACCTGGTTTTCCACCTTCTCCAGGAGGCC  
A\_14\_P107488 GAAAATGTAAAACATTGCCCATGTAAAACATTGCCCTTTATAGAAGGGCAATGTTTTA  
A\_16\_P00611541 ACTCAAGTCTTACAATTCTCCCCTATTCCCTACCTAGAGTTTGTTCATTCTCATCTTCC  
A\_14\_P110764 CTATAGAGGAATATCCCTGCTTAGAGTTTGAAATCAGTTCTGTTAGGAAATAATGTTTGT  
A\_14\_P113404  
ATCTGAAAAAAGAAAGTTTGAACAAGAGACCAACTCTGCTAAAACTCTGTTCTGG  
A\_14\_P120954 TTTCTGCGTAGATACAAAAGGCTTTTTACCTGGCCAAATGATTCATGCGGGAATA  
A\_14\_P113936 GTTAATAAAATAAGCCAGGCTTGCAACTAAGTATCTAACTTTACAGGCCCACTCACATTT  
A\_14\_P117645 ATTACTAAAAACATTTAAGGCTCAAGGGAATTAGCCTGTGGCTTACATGATTAGAGTTTC  
A\_14\_P107057 TGGTGAGAAGCACTTACAAAAAGAAATGGACTGTGTTAGGATTGCACATTTACTTTGTT  
A\_16\_P41142571  
AAACGTTTTGGATTGGTTTCATTTAATGGCCTCAAAAACACGTGTTAACATTCTCCAAAT  
A\_14\_P119352 TAGAGAGTGATGAGGAACTTAGAAAAGATTGTTTGTATATCTCTACTGAGGGTCTGGAAC  
A\_14\_P104760 ATGCCTTGTAAGGAATTGAATTCAGAGAATTCGCCATAAATGTCTATGAACTGGGAAAA  
A\_18\_P22003952  
AAATCCCTTAACAAACTGCTCAGTTAGCATTAAAGGAGACGTCCATACATAAGACTGTTAC  
A\_14\_P126578 TGATCAGAAAAAAGTTGTCTTATTTGCTCACTGCAAAAATACACATGGACTGGTCAAT  
A\_14\_P104358 CAGGATCTCATCAACTGTCTCAGGGAACTCATTGATGCTTATCACTGACT  
A\_14\_P129392 CTATAGTTTTCTATAAACTGTCCTCAGGGGAAGGGCACATACAACCTAGAATAAAGAAGT  
A\_14\_P106552 CGCCATTGACAAGCAATGGGGAAGAAACAGAAAAACAAGAGCGAAGA  
A\_14\_P125809 GAGACTGAGAGTTGGGAGGCAAAGAAACAAAATCGGATTTCTCAGAG  
A\_16\_P01432460  
AGTTCTAGCATACTCGAATTTTAAACAGATGATGATGTTTCAAACCTATTAACCATGTGCCT  
A\_16\_P00276178  
GGGCCTTCTTTCTGATTTCCAGATTTTAAATAACAGGATCTAATTTCCCCTGTAAAATCA  
A\_16\_P16120593  
AAAAAACTTCTCCCCGTATCTTTTTCAAATAGGCAAGATGCTGAAAAAGAAAATCCAGC  
A\_14\_P200041 ATGGAAATCCTTCTAGAGAACTAGGATCATGGCAAAGAGTGTACATACTGAAAATAAT  
CUST\_5020\_PI426210822  
ACAAACAAAACCTGTTTTTCATCATCTTTGGTTGTAGTTTTATAAAGAATGCTGGTTCATGG  
A\_14\_P121938 GGGATAATTTAACCAACCATCAACAACCTGGACAACCTTATTTAACTCTTTGGTGAGTGTT  
CUST\_7971\_PI426210822  
TTCTAAGTTCAAATAGTATACTACAGCATCTTCAGACATTCATGGAACATTGTAGTATGT  
A\_14\_P114689  
AATGTATGCCTGAATAGATAGAAAGGAAAAAAGGGAAGGGTCTACAAAAACAAAGTCCAA  
A\_14\_P103027 GAAGATTAAGTCATACTTGAGCAATGAAGATTGGCTGAAGAGAATCCAGAGCAG  
A\_16\_P36897923 TTATTCTATATTAATTTACAGCCTATAGTGTGCAATTATATGGAAAATAACGTTATGTCCA

A\_14\_P108525 AACACAGACTTTATTGTCTAAAACCCAGAAGTAATACAGCATCACAAAAACCATTACTGGC  
A\_16\_P02811346

ACCTCACAGATATAGAATGGTCAACCAATAGAAAACTAAGATGGAACAAGGTATAGCAT

A\_14\_P113370 AACCTGGAATAAGCCTGTTTTTTAGAAATGCACCCTTTATGAGAATATCTGATTTGCTGT

A\_14\_P111090 AGCAAGAACTAAGTGAGATGGATGTGGTATTAAGTAGATTCTCAAATGATGGCAAATC

A\_16\_P15831347

AAACTACAGATGGGAAAACAGATCTCTTTATTTGCACATCCTTCTCTTTATCTGAATGGC

A\_14\_P132258 GCTACGTTTAAATCCTAAAGACAGCCTTATCATTGAGTCTCATTTCAATTGTGCGACACAT

A\_18\_P15270057

TAATCGGCCTCATACACTACTATCCATGCAGGACTATCAATTTTATCATGTAATTCCTC

CUST\_7789\_PI426210822

CCCCAAAATTTGTATTTTAAATTGAATTGATTTTTTAAATTGAATCCATTTTAAACATGG

A\_14\_P200784 TGAAGTCTTTAGACTCTCCGTCAAGAATAGACATTTTTGGGCAAAAATGTGGATTTTCT

CUST\_6584\_PI426210822

TTAATCACAGAGCCTTGTTTGAATCACTTGACTTTGAAATCCCAGGAATGACTTTG

A\_14\_P111888 GAAATAGAGGTAATGTGAGGTAATTGAAAGCACTCCTTCAAGGACTTTAGGAATTACACT

A\_16\_P58424429 TTAAACCAACTACTACAGTGGGCAATGGGGCTTATTCCTGCAGGG

A\_14\_P114164 GAAATGCACTTTATAATGTGTTTGAAGCAAACCTCGCCTCTCCTACAACGGTAAG

A\_14\_P101352 TATTTTTGTTTTACATAGGGAGAACCTAAAGAAGTAGTTAAACCTGTGCCATTACATCT

A\_14\_P112125 ACACACAGGGGCTTTTGAAGCAACCACAGTAATACAAGATGAAGATTATATGTTACAAG

A\_14\_P136812 CAAAATACCTCCAAATAATCTGGGGAGTGCTAAAGTATCATGGATTATATCTGACTCAGC

CUST\_876\_PI426210822 TTCGTGAAGCCTGTTAAGGGTTTTCTGGAACAAGCTGAGCATCTTTTG

A\_16\_P35287192

CCTTAAATCTTCCCAAAAGTCTGTATAAGGTTTCATGGACATTACCAAACCTAAACTGCCT

A\_14\_P202424 CAGTATTAGGCTATCAACCACTGTTTGTGCTGACTGAGAAAAAATGAATGACCAATAGAAC

A\_14\_P115665 CTCTCCTGCTATTTTAAATCAAGGCTGGGGAAAATAAAGGGATTTTACAAAACAAGACAT

A\_14\_P119716 AATATAAATTTTGAACAGTTATAGAAAATAAAGATGGCCTTTGGGTCAATAACAGAACAT

A\_14\_P104293 TAGAACTCGGATCTCATATTCGGTATCTGGATCTAAATGCCATAATTTGTAAGTTGGAGC

A\_18\_P22854755

TATTCACAAACCAATATTCAAGTTCCCATCAACAAGATGTTTTAAAAACACAGTGGCTGC

A\_14\_P110165 AGGTGCTTGAAAGGAGCGAGGAAGGTTGACAATATGCTTACTTTATCTGGAAA

A\_14\_P111804 ACCTTCTCAAGGACCCAGTAGAAGACAACCTCCAATTCAAAATTATTATTTCTTTTAC

A\_14\_P116669 TAAATGTGAATGTGAAAATAAAAGCCTCACAAAATTCCTCTGCATGAACATCTCTGACT

A\_14\_P103611 TGTTAATCCTAATGGTTTCACCTCCTTTCTGCAGATTTTTTCAAACCTATTCTTAGAAAA

A\_14\_P112430 ACTTGTCTTAAGTATAACAAGGGATGTATTTTTTTGTTGGGAAGTGACCATTCTAGGCTT

CUST\_2879\_PI426210822 GTGAGGTGTCCTAGAATTCAGCAAGGAAGGCAGCCTCTTGGCTCT

CUST\_4072\_PI426210822

ATAAAAGGAATCCTGGCTGGGCATTGAGTGAATACAATCATAAAACCCAAATGATG

CUST\_825\_PI426210822

ATAGGCTTTCTCTTGCCCTTGACTTTTATCAGAAGCTGTACGAAGATTTTTGTTATAAAA

A\_16\_P40540151

ACAACCAATTAATAAAAAACTCCTTACCTCGAAAATCTAGAAATCAAATGCAGACGTGTC

CUST\_6144\_PI426210822

GCATGCCAGCAGTTTCCTAAAATGTAATATCATCACTATTATTGTTATTATATGAGGGAA

CUST\_8106\_PI426210822 AAAATTCTCATTCTCTTGCCATTTCTTGGATCCACAGAACTCGCCATTG

A\_18\_P10776745

AAAGGACCATTAACCTGTTTTTCATGCTTCCGTCCTACTACAAATGATGAGGAATTCATTTGA

A\_16\_P17568597

GATCCCTAATGTCACTATGAGAGACTGATTTATGTAAGCCAGATACAAAACCTTCATCTCA

CUST\_5621\_PI426210822 AGTTAAGAAAGAGCTTGTGTCAGGGGCCTTTGCAGGTGAGTCCCT

A\_14\_P133616 TTTAGTTTTCAAAGTTGGATGTTGGTAACAAAAAGAATGAGGTGGATCTCAGGACTTCA

A\_14\_P132505 CTCCAGCCAAACCTATGCCAAATGGAAACAGGTCACGTGTTTTCTTCTTATAAAAATATA

A\_14\_P110921 TGTCATCTGGAAAGCATAGTGCAAGGTTGTAATCCATTTATTGTCTCCATTCATAATA

A\_18\_P22842834

TGGTGAAGCAGAATATAACTTTAATAATGCTCCCTTAGGATTCTGAGAGAAAGTTGTTAG

A\_14\_P101160 TACCAGGAAGCTTTTTTTTTGGTATAGAACTATCTTTTTAAAAATTTACCCTTGACAT

A\_14\_P108708 ATGAAAACGAAGCCAAATTTCCCACTGAATCTCATTTCATATATCAGACTTTCCCTCATG

CUST\_6035\_PI426210822 ATCCTCCATTAAGAAACCTTCGTTGTACTTTTGGGCCCATAGCTGTTCT

A\_14\_P118435 GTCTCGTTGCTTGATAAATTTTTACCGCGTAAGACTCTGGTCTATCTAATGACATTTGAT

A\_18\_P14585102

TTCATCCACAAGTATCTGAAGAGTATTATGGATCCTCACTGAATAAATACCTTGCTGCTG

A\_14\_P133945 CTTCTCATCTGTCAGTGAAACTCTTTAGGAAATTCCTACTACTACTTGACACATAGGAGA

A\_16\_P03700611

TGGAATACTTCAGTGAACCGTATTTTAGTCCTGCATAGAAGTCTTTTTCCCTTGCTATT

A\_14\_P112769 AGAGTCCCAGGAGTTTCCAGGCTGTAAAAACCTAAATTGTATAACATTACTCACAATAAC

A\_16\_P16033594

ACAAACCATCTGACTTTTCTTCTCCACTCTTATATTTCAACTACCAAATCCATGCCTTT

A\_14\_P119309 CATGAATGCTGAAATGTTTGGGTCCACCTATTGTGATTATACAATAGAGATATGAATCCA

A\_14\_P120321

TAATTGAAAAAATCAAAACAGCAAGAAGGGCTGCCACATAAGAAGAGGCTTAGAAGATTT

A\_16\_P58424230 TAGTGAGATTTCCGAGAGAGTGCGGTTGTCTGGCACTTCTGTGAT

A\_16\_P01294516

AAAGTTACACATCTGTGCTAAAGTTTTCAACCTCTTTTCTATAGAACCCCTGCCTATCTT

A\_14\_P107367 AGAAGAAGTTCATTAAGGAAAAAGCATTTGTTTCAGGACTTTAAAGGTTGATAAGCATGGG

A\_16\_P39533322

CTGACACAACACCTTTGAGATCTGGAGATAAAATAGTAAAGTGTAGATGATAGATTTAGT

A\_16\_P16644251

CCTTCATTAATGAGCACTTTACTAATACTTAGGTCCACATTTTACTACTCTTGCCTCCTG

A\_14\_P125254 ATGAGAAGTTCCTACCCTGTGCAATGAATAACGAAAATGCCAGATTACTTACTTTTCAG

A\_14\_P100593 TAGCAAAGGGATAAATATTTCTAGCACTTGGCTAGAACCCATCTTCTTATAACAACAG

CUST\_9075\_PI426210822 CTGAGAGATAAGCAGCCATGTCATGAGAAGCATTGGACTCCGGTA

A\_14\_P202415 ATCTTTTCATCAGCAATTGGAAAGTCATGATAATATGACGGTGGCTTTTTCTCTCATAT

A\_14\_P119765 CTGTTCCATTTTCTTCTTTTGTTCCTGAAAGTCTCCTTGGTCCTGATTCT

A\_16\_P17026673

AAGTCAACAGTCCAATCATTATTGCCACTGAAAGTCTAATATCTTATCTGACAGGTTGT

A\_16\_P41237146

AATACACAGGAAGTGCCTATTATCACTGCTTAAGTATCAATCCTCTAACAACCAAAGGAG

A\_14\_P122569 ACTCACTTTGTGATGGGAAAATAAATTATTTGGTCTGGACAACCTGACAGTGTTACTATT

A\_16\_P17839659

ACACGAAATCTGTTGAGAATCAAATGCTTGTAATAATCTGTCTTTCCCATTTAGCATCC

A\_14\_P119431 ATCCTATTGAGTTTGAAATTTATATACTCTCTAGTTCATGTCCTATCAGGGCTGGGGAG

A\_14\_P201614 CTTTGGTAATATAAGGAAGTCTAATAGAGCCAGGGCTGAAATATGTTCCAAACATCTGCG

A\_14\_P124649 GTATCAAGGAATAAATGAGATAATTGATACGTGATTGCCAGTGGTTGTGCCTATGTCTAG

A\_16\_P37667490

CTCCACTACCATTACCAAATTCAGAAAATGCTTCTCCTTTTCAGAATATACAACCAATCCT

CUST\_6294\_PI426210822

TTTCTGGTGCTAAAGAACAATTTACCTCCTAAGCCAAGAAGGAAAAAATTCTCATCTA

A\_14\_P128898 GAAATGTCCTCACCTATGTTTGTGCTTCAGGTAAGTCAAAGATGTTTGTCTATCTACT

A\_18\_P14520359

ATCAGATCCGAGGAATATCAAAATACTCTTGTCTGAAATACATCGTGAAACTCATCTCC

A\_14\_P202017 ACAAGCCCACGTATCTACTTTCACTTGCTCATCCTTGCTCTACCTCAAC

A\_14\_P103640 CTTGAACATATATCTTAATGGCTGCCAAAACCATGTCTTAAGTGACAGACTGTCTGATTT

A\_14\_P115549 TTAGCAAGACAAACCAATGAAACCATTTAATTTAAAGGCTTTTTATTAGGAACCAGGGG

A\_14\_P116768 AAGTGCTGACAATACTTTTAACTTGTTTCATATTCCTCCAATAATTCCTGCCGAACCTTAA

CUST\_6255\_PI426210822 CCACGTGTGAGACTTGGGTTTAAACGTGACCTGTCCGTAAATCATT

A\_14\_P110866 TTTCATCTAAACTGACTTGGAAATTTTCTCTCTCTACCTAAAACGAGAAGGGAAAGAG

A\_14\_P118334 CAGTTTGTCAAATGCTTCTTTACAGATTGCTTTGGCTAAAGTTGATTTTCCACTTCCCT

A\_16\_P16736043

ATAACTGAATGTTTTCCCTTCTCATATAAGCACTGTTAAAACATGAATACAGCCCCCTTGG

A\_16\_P58424166 GATGGTGGGGCAGGTTTGGAAATAGACAATGACTGTTACCTTAGTAAGT

A\_14\_P120826 CTGACAGAGTATAATTTCTGATTTGCCAAGGCTGCAAATACCTGACAGATAGTAGTTTTTC

A\_16\_P00208025

TCACCAGTATAAGTTACTTAGTCTTTCTTGACACCTTCTCATTACACATTTGGCATCACA

A\_14\_P114055 CTATGAGATCTGGTCAGGACACTAACTGGACCAGATCTGTTATTTGTTTTGAGTTTATAG

A\_14\_P128939 CTCTTCTTTAAATGTCTGATACATTTGCACATGCAATTCCTTTCTTACCACAATCCTCAC  
A\_18\_P14135947 CTACATGTCCAAATGCATTACTCATCCAAAATAAGATATGCCACGACTCAGGTTTCC  
A\_14\_P104392 TATTATCCTGCATATTTTCATACATCCTGGTCTGCTAACTAGCAGTTTATCAGCCATGAGT  
A\_14\_P109571 TATGCTTTACACTTACCAGTTTGGCTTGTGCTTCTGCAATTTTTTCGGTTATTCTCTTC  
A\_18\_P22842837  
GTGTGCTTTCAAAACCATGGAGTATAAGGCTTATTTTACTCCTTAAGTCTTCTTATTTC  
A\_14\_P130681 TCAGGGAATGATCTCCCAGTTAAATCTCTTCCAGAAACAAAGAAAAGACATTAAGATTG  
A\_14\_P120099 CTGAAAAGCAGGATATTATGAAGGTATTGTGGGTTTTCTTCTCCACTGTGGAATCAAA  
A\_14\_P134138 TTTATTCTGTATTTCGCAATGCATTTATCTTTCACTGCTCAGTGGATGAAATGACACCTTC  
A\_14\_P115943 AGCAGAAAATCATTAGCATTTCCCATCATTTGTTTCATATTTGTGTTTTCTGACAGTTGCC  
A\_18\_P17382835  
TCTCCTCACATGAGTAAACTAGCCTGTATCTCGATTATGTTTCAAATCTTCCATCAATGA  
A\_14\_P201638 TCAATCACCATAAAAAGAGCCTGCTTTTTTCTTACATCAGATAAAGGTGCGTTTAGTCTACT  
A\_16\_P15663429  
TAAACAAGAAGCAACAACCTAATCTCCTTTCAAATCCACACTGTCCTTAATTTATACGGC  
A\_18\_P14133377  
GTAGGTGTATATTATCAGGGTTCTCAGCATAAATGTTGACTTCTATTTTGGTGAAGCAGA  
CUST\_5210\_PI426210822  
TCAAACCATTTCCCAAATATCCAGCTACATATTGTTTTACCTTTGAAGAGAAAAAAGCATC  
A\_14\_P117163 GCTTGCTCTTAGTTTAGGATGCTTAAAGCCCAGCCAAACAAAATTACAGACATACTTTTA  
A\_18\_P22842115 TTTCCCTTTTTTGGCCTCCAAGACAGGAATTCTCTGGCCCTGCTGA  
CUST\_7164\_PI426210822  
AGCCAGTTGCAGTGACAATATTAGTTTTGGCTTTGGGAAATGAGGTTTCTTTGA  
A\_14\_P113025 TAGGCGCTTTAGCAGCAAGTTTGAGTTGAAATGAAGAAACGTTTTTCTAGAATTTCAAAG  
CUST\_487\_PI426210822 CTCACTTGGTCCACCAATGTCTGTTCTGACCAAAAAGGACTTCTGT  
A\_14\_P127287 GGGGTATGCTGCTTTGGAGAACAGAGAGGATTCTTTTTTGTAAATTTTTCTGTAAAACCT  
CUST\_7312\_PI426210822 CTTAATGGCCAAAATACAAGGAAGGCTTGGTGTCTCCGCAGCTTC  
A\_16\_P01680616  
AAGACATCAGACTTTCTTCTAAGAACATACAGGTGCTCTACTAATTGGAAAAAGTCACCA  
A\_16\_P01501107  
GGCACTTGACTTTTTATTGCTAAACAGTCAGATTTCAAGAACCTAGTCTGCTAATGTTCC  
A\_14\_P102414 TATGAAATTAAGAAGAGACACCTGTTTTCTACAACTCGTTCCTGATCCTGTGAAGAAT  
A\_18\_P25916367  
AAGTCTTAACCTGAGCATTAAATACGGACCATACACATGTAAATCACGGATATACAGTGC  
A\_18\_P22660104  
TTCTTCTTAAGATAAAACCAACCCATTATGCAATTCTCCATGACATCTTCTACCAGTTCC  
A\_14\_P136181 CTTCAATCTCTAAGAGGGGGAAGGAACCTTACATGACATCCTACTGGGAATTTG  
A\_16\_P17900078

CAAATGCACCTCATATTACTTAACACCCAACCTGTATTAGTCATTTTGATTGTCTTCACTG  
A\_16\_P19939350  
ACCAACTTTACCCTCATGTATTCTACTTCTCAGTTTACAAACACTCTAGAGATTGTAGCC  
A\_18\_P22842848 AGTGTTTTCTCTAATCCGAGGGGTCCTCCAAGCCTCCCCAGCCCT  
CUST\_4649\_PI426210822 CTTCTCCATTCCATTCCCTTTCCCGGCGTGGTGGTTTGGGTTTGTAG  
A\_16\_P02354763  
AGCATAAAGGACATAGAGGAATATCCCTTAACAGTTCCATAAACATCTGTTATCCCAGTC  
A\_14\_P117391 ATAAAACGAAAAATGTCCTGAGTTAAACAACCGTTCTAATGCCCTATCAATCTGCCTTCA  
A\_14\_P135512 CAGAAACCTCATAAAGTAGATGCAGAGGGCAGTAAGATATAACTCAACTTTGAAAAATGT  
A\_14\_P127323 GCTTTCCACTTTCCTGTCTCTGTGCATTATGGATCTTCCACAGAATCTCAC  
A\_16\_P20391647  
AAATGACCAGTTTAAACTTCCATTCCAATGTCATGGTTTATATGCCCACTCATATACCTC  
A\_14\_P103422 CTTTGCATGTTTTTAATGAGCATTCCGCCTACTTTCCTCTTGCTGGCTGT  
A\_14\_P118067 ACTGTGTCTCAATCAATTCTGTATTCTTTTGGACTCGTGTCAATTAATACATTGTCTGT  
A\_14\_P128360 TGAAATTATGTGCACAAAAGGCGCCTCCTTATCTGGGAGTGTGAACTAAATAAATAAATA  
A\_14\_P133222 CAAATGTTACTTGTTCACGTTTCTTCCATGTCAGGTTGGTATCTCTACATTTCATTTT  
A\_16\_P19035566  
AAAATCAGTCCCATTTTTTTTTCTGTCTCTGAATGCTTCTGTGAGAATTAATAACCAGGA  
CUST\_2233\_PI426210822 TTCCTGTAATTCTGCCAGGTGTTTCTGTCAATGAGTGTGCTCTA  
A\_14\_P115982 TTCTGCTAATCCTACATTCCAAGAATAAAAGTCTTCCCTATGCGTTCCTAGGCAGAAG  
CUST\_4977\_PI426210822  
AGCATAAGAGGGAGTAATTGACATTCTACATGGCAAAAAGACCCTTGAAAGATAACAGAT  
A\_16\_P17491505  
ATCCCCACTGTAGGTATTACTGACTATTCTGATTATTGACCAAAAATTGCCACAAAAATGG  
A\_14\_P120922 CTATGCAAATATGTAAGATCTTATTCAGTCATCAGTCTTCGGTTTTCTTCCCACTTCCTT  
CUST\_2931\_PI426210822 AAGCCTAAACTTGCTTGTCAATCTCTGGAGGCTGGGAATCAAGCT  
A\_14\_P120089 AGTTTGTCTCAAAGTTTGACCTGATGTTTGGGATTGTTGAGTGAATGTGAAACT  
A\_14\_P139467 ATAAAGTTTAATGCCATTAAGTTTTACCCAGAGCCTTCTGTAGCCAATTCTGGTATATG  
A\_14\_P114671 CTGTCTCATTACCTGAAGGGTGACAAGAATCTAAGGAGATAGTATACATGAAAGTGCTT  
CUST\_3450\_PI426210822  
TAATGAGAGAGTCATTTTCTCAGTAAATATTTGATTGGCCTGAAGTTAAGTGGGTAGGC  
A\_14\_P125627 CAGTCACCATGTTGCATGTATTCTGCTGCTTGTCTGAGTTCTTAAGACTTCTAATATT  
A\_16\_P36056370  
ACCCTTCTGCTAAATCAATACTGAACTTGACTGATTTCTAATTGACTCATTATGTGCAGT  
A\_18\_P11822269  
AAAAAAAAGATAGTTTTGCCATAAATACACCATATTTACCCTATAGATGATCCACTCT  
A\_16\_P58424412 CTTATTGTAAATTGCACCCACCTCCCTTGTAAGTCTGGCATGTTCTATCTTC  
A\_14\_P126493 CAGAGCCATCTTGATCTTCAGGGGGCAAATTAGTAGCCACAATTTGCT

A\_14\_P201498 GAGCACATTTTACTACAATTGATTGAAATACAGGCACAAAGGAAATGAGAGGTTGATCAG  
A\_14\_P126939 CTTCTGAAAGCACAGTCATGCCCAACATGTATGATAATGTAAATAAGTTGAATGCGTCTT  
A\_16\_P16621210  
AAAAAGGCTCTGATAACTGGAGTTAAACTCTTGATGTAAACTATTTGCTTGGATCCCTTG  
A\_14\_P104437 CCCAACCATGATACAACTGTGGGTTCTATAGTGAAGTCAGTCTCTGGATTAAATCT  
A\_14\_P125087 TTTCTACACCCTGTGGTTGCATACACATTTTATTAAAGCAGATGGATTACCCAATTTACA  
A\_14\_P110865 CTTACCTCTTTGCTGGTGATGAACGTCATAGAGACATCGTCACTGACAGT  
A\_16\_P00685091  
TTTATTCATGCCCCAAATTATTCTCGTATTTATTTCCCCAGTGTGTTGAGAAGGAACATTG  
A\_16\_P03067908  
GTTGAGGACATGCATTTTAGGCTTAAATTCCTAGACTAGCCCTTTAATAAATGGACCAG  
A\_14\_P108579 CTGTGTTTCTTAATTAGTATACTAACTGCCCTGGGGCATGTAGGTAAGTGTAATGATGT  
A\_16\_P20391120  
AAAAAATCAGACTTTTTCCATTTCTATCCGTAAGTGTCCATATTCCTGTAGACCTGGATG  
A\_16\_P17057747  
AGGCAAAGAATTACTGAGCATACTACTGAATCCTGAGTCAAAAAAGTTTACTGCAATTGT  
CUST\_2088\_PI426210822 CCTGTGACCCTGTTAGCTGCAGGAAATAGATTGGAGTGTCTCTA  
CUST\_166\_PI426210822 ACGCCCTTCAGGTCAAGTCTCTGTAAAACAGCTTATTCTGGCAACTAG  
A\_14\_P123810 GCCACCTTACCTTGGCTGTCCAGAAGTCTGTTTCTTGAATTTTATTCAATTTATAATGTT  
CUST\_8380\_PI426210822 AAATGTTCTTATCACCTCTGGGGAACAAAAGAAAGAAATCTGAGGGTATGC  
A\_16\_P41136060  
ATTCCTTTATCCTCTGTCAAACATGACCTGAATTATGTACATAACCATGTAGCAACAGA  
A\_14\_P114641 AGAAACGAGTGTCTGTGATGTGAACAGCACCTTCCCTTGTTGTTCTTATTTATATTTTATT  
A\_14\_P134614 CTCAAAAGAGAAAGTTCATCTAGAAATCTCAAAGCCATGTCTCAGGTGAGATGATGTTTC  
A\_14\_P132901 TAAAAATAAACTTTGTTTTTGCCTGTGTTTAGTACAGATCATTTTGGCCCAGAATGGAG  
A\_14\_P134764 ATTTGGCTGACTGCATAAATCGATGGAATCCATCACTTTCTTTTGTGCTACAGTTATGA  
A\_14\_P202201 TTTTCAGATACAAATTCATCTAATACCTGGGGGTGAAGAGAAAGATATGCCTTCACTTTTT  
A\_14\_P105652 CGCATACTTGAATGTATGTGCGTATTTATTGCTCACGTCTGTGCCATGTTGTCAATG  
A\_14\_P103619 TTATTTAGTTCCAAGCCTCTCAAATATCCCAAATTTTCCAGTTTCAAGAGTTCAACAGGA  
A\_14\_P108922 GGACAGTCACTGTCAATAGTGTGCCCTGTTATTTTATATTATCAATAGCCACAGAAGAC  
A\_16\_P17472173  
AACAAGTTGTCTATGGCCTTATGAACTGGATTTTCTCATGCTTCTAAACAAACTTTAGCG  
A\_14\_P100771 AAGACTTAATTTAAGTGAAAAACAACCTTACAAGTCCATCGGTTTCCACATCAAGGCTCTT  
A\_16\_P19648925  
AATTCCTTAGTAAAGTGAGAATTTCTACAGCATGAACATTAACATTTCTGTGTGTGGC  
A\_16\_P17979035  
CTCATGAAAAATGTTTTTCACTGACTGATATGAACCCAAATTCATCCGCACTCTTACCAT  
A\_14\_P136429 GGATAATAATCTGGCTTAGTTGTCTTCTTGCTGTGATTACTGACCATTTGGAATGATTG

A\_14\_P123917 TTTAATCTCTCAAATGATTCACATGTAACCTGGAATCTTGGCCCTGCTTTTCTCATGAATT  
A\_14\_P133707 TCTTAGTTCAATTCAGACCTGCTTTTAATTATCTCGCATTCTCTGAGCCAATAAGGAAA  
A\_14\_P200353 TTATTTTCCTCTTCGTTTCATGAAACTGCTCTCATCATTTTTATATTGTTCCAGGGAAGGA  
A\_14\_P200452 GCGGTAGTAAACCAATATACTTTTCGTTATGCTGTCTCAGAAGCTTCTCACAAAGTTCC  
A\_16\_P20523242  
AAAACTCACATCTGAATTAATAATCCCCACATTCCTTTATGTGTGCTAAATTGTAGGGCA  
A\_16\_P02728728  
TGCCTATGTTTCAACACCATTACTGAAGAGTTACCCATAATTTCTCTGAGATGTCAAACCT  
A\_14\_P134806 AGTATATAATGAGAGATTATTTTTCCCCATAATCCCAAAGGCATATATCACTCCAGAAA  
A\_16\_P20027340  
AAAAAACTGCTCTTGCATTGTTAAGTGCCACTACTGAGTTTAAATGCACTCCTTTTCAAA  
A\_16\_P17994418  
AGAAGAAAATCCTGGACTAGTGAGATATTTCAAGCACATTATCATAGATCCAGAGCCTTC  
A\_14\_P125942 CTGAGGGTATGAAGAACCTGGGCTCTATGCTCACTTGAAAGTGACAT  
A\_18\_P16313871  
AGAAGCCTCCAATTTTAGAACTAAAAGAACCATATTGTAGAGATTTTCATGATCGCCAAGT  
A\_16\_P18408393  
AATTGTGACGAAAATCTCTTTTCAGTAGATTTGCAGAACATTAAATCCACAGACGGTCTC  
A\_14\_P138120 CTAGACAGTTCAAAGAGTCTGCTCATTTTTTTTTCTGTCCACACAGATTAACACATCTG  
A\_14\_P133459 TCATTGCGTTGCACCATAGATACATGGGTTTACAGCAACTTAGAATAAAGAAAAGAGGAA  
A\_14\_P200454 GTCGGTGTATAATAATGATCGTTGGGTGAGGGAATGAATGACAGATAAAAATACAGACAG  
A\_14\_P116730 CATTTAAAAGTGTAAGATACAAAGCATGGTGGAAATAACTCAGGAGTCAGTCCACTGAA  
A\_14\_P202460 CTGGCATATTAGCAGACGTGGATTACAGTAAGGAAAATCTAAAACAGAAGATGTATCTGG  
A\_14\_P116764 ACGTGAATTGTGAATGATAAAGATCTGGGTATACATGAAGAGTAGTTCCAATTACGAGTA  
A\_14\_P119067 AAACCTAATGCTATCTATATTCTCCATTTCCCTGAAAATAACAGGTGAATTTTTGGGCC  
A\_14\_P136149 TGCTCGTGGATTTAACATTAGGAGTGTTTCATTGTGTGAATGAAATCAAGACTTCTACAAC  
A\_14\_P120058 CTATTGCTCCAAGTATGTAATGACTGCTGATTCAATCTGATCCCAGGTAGAATTCAGA  
A\_16\_P16191801  
GTTTAAATTGATTTGGGCTTTTAGGGGTTTTGTTTCATTGCTATTTTCTAAGTAAGAGTG  
A\_14\_P132777 AATATCCAAATGCTATTCCCCACATCTACTTACAAAGAAAACCTTTACTCATGTGGAGAA  
A\_14\_P117601 TGGTTGCAACTCTATGGTTGTTATTATTGTTGCTTTAAAGATTTGGGTTGTGAAAGGTGT  
CUST\_3368\_PI426210822  
TAATTCAAATTTTGGAAAGCAGCAAGATTTCTCTGCAATCCTCTCTAGTAGATAATAGTGT  
A\_14\_P135073 TAATACTGGGCCCTGAAATGACACCCAATTTGTTAATGGAATTATGAAGAACAGCAATAT  
A\_14\_P200719 CTCAGTCTGTTCTACAGTAGAGGAAATGACTTGGAATCTTTCCCTATTAGGAATAGAGAT  
A\_14\_P111918 GTTTCTCTACAAGATGGAGAGTCACTTAATAATCTACATGGAAGGGGGGAGAAAATAAAT  
A\_14\_P116487 GGTCTAACACATCTACCATAAAAACCTGGAGGAGATATGTGTAACCTGGTTAATTTGG  
A\_14\_P128530 CTCTCCCTCACCATTTCTACTCCCTCATATTTCCCTGCCTCTTTCTAAAATAAATTAAT



A\_18\_P14911631

ACCCTGATAGAATCCTTTGACAACTGAAATCCAACTAGAATTAACAGGCCAAAGCAATCT

A\_14\_P133213 CATTTTATAAATCGTCCCTTAAAGATTTTCAGATATGGTGTGGAAGATTTCCGGGAAGTTG

A\_14\_P122285 GTAACCAGAACAACCTTGATCCTATACTCCCACTGCTTATTATCCTTAATTCCAATTGGTT

A\_14\_P115242 ACGAGAAATTCTAACAGCACAGACTTTAAAAATAAGGGCAGAAATCCTCAGCCATTTTGT

A\_16\_P38107427

GAACCCAACCTATTGAGAAAAACACACCTTTAGAAGTCTTTACGAACACTATAGACACTC

CUST\_2267\_PI426210822 CTGCATACACAGCATAACAGACGTCGGGAGGCAGAGCAACCATGTC

A\_18\_P22840878

AAACACTTAGAAGATTTTCCCTAAACTAATTATCTGGCTTAATGCTAACTGCTTATTTGC

A\_18\_P22840158 GGTGGTGGTGGGATTACATGAGGGAAATGTGAGAAGCCCGGAAAT

A\_14\_P104049 TCCTACAGACCAGGAATGTGTTTCTAACAAATGTATCCATTTTAACCATATTCAGGACAA

A\_18\_P24817366

AATTCTTAGCATCAATCCCAATTAGTAGACGTAAACGAGGTAATGTCTTCTTCCCTCGTTT

A\_14\_P106039 GAATCAGAACTGTATGTCACCCCAAGGGAGTATAAATGGACTGGCAGTATTCT

A\_14\_P124688 GCATCTCTGGGAAGCCCCAGAATCTCAGGATTTGTATATCATATGTTCTTCAGAA

A\_14\_P134063 CTTAGCAAACCTTTAGTAACATGTAGGTCCCAACTTCTTGACTGTTTTCTGTAGATTTTC

A\_14\_P133431 AAAAAATTTCCCTGCGCTTAGATTCTTCTACTCAAAAACAAAAGAGCCAACAGAACAG

A\_16\_P02066943

AAAGTGTTTTTGAGCAATTTGAAAGTTCACACTGTCTTCTCTTGCTAAGAACCGATTGTA

A\_16\_P39628749

AAAATCTTTATTAATGTCCAACCTACCTACAGATAGACTCTTAGGCTAAAACCCTCTACAA

A\_16\_P00164682

ATGACTCCAACAACCTGAATTCTTCCCTGTTATACTGTTACCTCCCTGTTAATAACCAGAAT

A\_16\_P01348644

AAAATCCTATCCTTTAGTCTCCACCATTTATTATCTCCAAAACCTATTAGGTCCCTGGTG

A\_18\_P17379373

CACCACACACTATTCCAATCAGCAATAAGTAAGAATCACCAGATAATATTCCAATCTGCA

CUST\_4832\_PI426210822 CAACAGAAGTGGTTCTCCCGTCAGGTTATAATAGGGAAGGGATGTG

CUST\_7680\_PI426210822

TACATGAGCCTCTTTCAGAAGTTTGACTAGCAAATCAACAAAACAGTTCACCCT

A\_14\_P104562 TTCCTAAAAGATTGTATTGATAAATATGCTCATCCTTCCCTTAACGGGATGCATTCCAGA

A\_14\_P105819 TGGAGACCATCAAACCTTAAAACCTGTGAATTTTCAACACTATTCTTACCCAACCTTTTCAG

A\_16\_P03756241

AATTTTGTAAATTCAGTCTCCTATGCATACTACACTCCTACAGATCTTTCCTTACCCCC

A\_14\_P133117 GGCTGAAACAGAGAAAGGAAATGGATTTTACTCAAAAACAGTGACATAAGGAGCATATAC

A\_14\_P112754 CAAGGCTGTGTCTGATATTCTTGAGCCTGTTTCGAGTTTCTTTTCCAAG

A\_18\_P11359494

AGTTTTCTCATTCCCTCTTTAGCATTCTCACCTACTGTAAACATACTCCCCATCTCAACT  
A\_14\_P132640 CTTTTCCACCTGGAGTCCTTGGGAATACCGGACGTGATCTTCTTTTATA  
A\_18\_P22842459 GATTAAGCCAGTCAAGAGAGAACCAAGTATCTGTATGGTTCAAGTATCGCTG  
CUST\_5433\_PI426210822 AATGTTTTATTGGTGGGAGAATGAGTGAGGTGAAGAAGCAAGAATGGTAGCTT  
A\_14\_P104014 TGTATCATCTCCTTTTTAAAGTGTCTCTTCCCTATAAAAGCCTTTTCCCCAAAAAAGTCT  
A\_14\_P129943 CCAAGAATTA AAAAGTTAATTGATACCTCAAATGGATGCTGGTCACAAAGCATTTCACCAT  
CUST\_7124\_PI426210822  
CTGTGATTTTCATGGGATAAAAAGCCCTTATTTTTGTTTTGTTTTATTTTAAGTCAAAAAGC  
A\_16\_P18610444  
ACTTTTGTATTTGGCCTCAGAAATCTTAGAACACTCTACCAACTCTGAAACATTTTCCTTC  
A\_14\_P126039 TTTCTATCCTAGTTCAGTCAAAGAGTGCTGATCCTTTGAAGTCAAAACATCAGTTGGAC  
CUST\_10207\_PI426210822 AAAAACCAGAAAGCACACTGTTCCCTTCGGCTTCCAGCCAAGCAAA  
A\_14\_P118291 TTATTTGGAGATTGCAGAGAAAGCCGGTAAAATACTGGTGATTTTGTCAACACTATGCTA  
CUST\_3281\_PI426210822  
AACAGATAGTTAAGAAAGGGAGATTAAGTTGGAGTTAATAAGA ACTCTGAGAAAGAGGAG  
A\_14\_P100469 TTCATTTCTTGACCTTTTCTCCACGGTCTCTGCACAATGTGAACAATGCTC  
CUST\_1326\_PI426210822 ATCTTTCTGTGGAATGGTTTTATCCTGGTCTTTTGGAAAGGGTACAGGAAG  
A\_14\_P128309 AACTTCATTTCCCTTATATAGAAATGTTTCATTATATAGAAGCAGCCCTCCTCTCCATCA  
CUST\_6536\_PI426210822  
ATAATGATGGTGTAATGAGAATTTTTTTAATGCAAATATAGTTGGATGCATTTGATTAAC  
A\_14\_P136806 CTTACTGCTCTTCTTCTACTTCTGGTGAGGAAAATACATGCCAGGAGCAAG  
A\_14\_P129038 TCAGCCAATGTTTTGTCTTTTTGGTTAAACTGCCTTAATCTTTAAAACCGCATATCCAC  
A\_16\_P30952355 CTACAATGCGCACTTTGGAGAGAGCATTGCCAGCCTGGACGATCT  
A\_14\_P104670 GAACATAAAAACATCTTTTCCGGGTGCTTTCTTCATTTGACTTTTTTCCCGCTAGTTC  
A\_18\_P16373628  
GCAAGAGTGCGGTATTTTTAAGACTCACTAGTGTGCTACTTCTAATAGTGCTTAGTCAGG  
CUST\_7507\_PI426210822  
GAAAGGTAAAACAATGGTAATAACAATGAGCTGTAAAATACGACCTGTGGGGTGG  
A\_14\_P137338 GCGTGTAATTAATGCTATCCTAGTGACATAAAACAAGTGAAACAGAGTTTCACAGTGAT  
A\_14\_P122735 GTGGAGGTTGGTATTATCAATAATAATGGGGGATATGCCATTCCCTCATTGCTTTTCT  
A\_18\_P15585500  
ATCCTTTGGTCTTCATTTTACTTCCCTTCTTGATATTTACACTTCCTAAAACACTTCCCG  
CUST\_9517\_PI426210822 AATTGTTATGGCCTTGGAAAGGAACAGGAAATGTA CTGATTTGGTATCGAGT  
A\_14\_P114444 ACAAGGTGGGATCTGGGAGAGAGGGACATTTCCATAATAGTTCCATAATTATTTTATGAT  
A\_14\_P108261 ATATGACATTTCAACAACAGTGACTAGTTGAATCCCTTGTAACGTAGTAGTTGTCTGCTCT  
A\_14\_P125675 GAACTTGGTCTGGCTTTAAGAATGTCCTCTTGGAGAAAATAACAAGAGTTTTAACACTTC  
A\_14\_P104695 TGCCACTGAGACCAACTGGATAATGCTAATATGCTTCCCTTTATGTTAATATGTTGGGAAT  
A\_14\_P116677 ATCTAATCACATAATTCAAAGATATAAAAATTGGAATGTAGAAGGTGGGGCAAGCCCCTC

A\_14\_P116698 TAAATATGAAAAGACACTACCTCCGACAAACACCCAAGTTACTACACACAATTCATTCTT  
A\_14\_P134257 TGTGATTGCAATGACAACATAACCAAGTATACACAAGGGGCAAGATTTCTTTGTTTCAGA  
A\_14\_P109754 TGTTGCACGCAGTAAGCACATTTAAGATCAAGGAAACACTTTATTATTCACTGGAAGAAC  
CUST\_408\_PI426210822

GAAAAAGAAAAAGAAAAAAAATCAACCCATAGCATATGTGAGTACTAAAACCGAAACGGG

A\_16\_P00914059

AAAATCACATCTACATGCATGTTGCTATCAGGATGTTGATTCATTAGTCATGCCTGAAGA

A\_16\_P19882236

ACTTTCCCAAGCATAATCTACTTCTAAATATTTTCTCCTAGACACTGAAAAAGCCTGGA

A\_14\_P123948 ACAAGAATCAAACCTGTATTAGGGTATCTGTGGGATTGTAATGGTAACTGAATTTTCCCT

A\_18\_P14226191

AAAATCTTTTCGGTATCCCTTGAAATACACAACAGTGGCTAAGAAAACATCTTTTCCGTT

A\_14\_P134393 ACTGCTTTCAACAACCTCTGGTTTATACAATTTATCTCAACATCTGCTGTTGATACATGGC

A\_16\_P16191249

GAATCCCTGAGTATGCATCTATTTCTTGAATCATGGCATCTGCTATAGGAAATCCTCTTA

A\_16\_P02491240

CAGATGTTGTTCGATGATCATAAATGAAGTCAATGCCTCTTAAAAATCTTGCCACACTCTA

A\_14\_P110708 GTAAGGGAGATTTTTAGCCAAAAGTGTCTCGCATCTCGCTCTAGATTAACAAAAACAAAA

A\_18\_P16542014

AAAACCTGCAAAATTAACATCCCCACATTACAAATCTCAGTGGATGGAGAATGATGATC

A\_16\_P16677222

AATGGTGCAGGCTCTAAAATAGGACACATCTAGTGAAATTTATGCTATAATTGACCCCAG

CUST\_3970\_PI426210822 TTTCACAGCCATTTCCCGTCAGAGTGGGGAATATTGACTGTGCAA

A\_14\_P122668 CTCCTAAAAGGGGAGTATCTGAGTTTTCTGAGAGTAGGTCAGTCATAATCTTTGTTTTTC

A\_14\_P116356 GTATACTGTAGGCACACTTTGCACTGATATATCATGAGTGAATAAATGCTTGCCTACTC

A\_14\_P112066 GTTTTAATTCTAGGGGGCGCATGTAGATCTTTTGTGATATATCTTTTCTCTTTCTAGTTT

A\_16\_P01761235

AACTAGACTGAACAGAGTCCTTATGAACATACTAGAAAGAAGAATTCTACCCTGATTGGG

CUST\_8172\_PI426210822 GCAGGTCTAGGGGACTCTTTTCTTCCGCCATGCAGGGTGAACCT

A\_14\_P107640 GCTGCCTAATCCTCTCTTTATTTGGTCTCTGCTGAAGCAGTCGTGC

A\_14\_P122636 GTTTTTCTGCTGTTAAAACCAAATGCAGCAACTTAGTTTAGCAGTTTAGCGTCATTCATG

CUST\_10130\_PI426210822 GCTCTGACACAAAATCCACAATGAGGGCCCCAAGCTAACCAGACC

CUST\_7372\_PI426210822 AGTTAAAATCCATCAGCTGAGGCCACACAAAGTTGGCACTCCCT

CUST\_8764\_PI426210822

TTTTTAAAGCCTGCACATTTACATCAGAAAAGTCCTGGATTTTATGACTTAGCTATGCT

A\_14\_P105589 AGTAACTCACACTAAATACTTACTTTACTATTGCCTCCTTCATTGCCTCTCAAGTAGACC

A\_16\_P40079398

GCCACAGACATCTTAAAATTCCTTTATGCCTAACAATTCTAAATGCTCAGAGTAGATCAC

A\_14\_P111929 ACTTTGAACCCCTTTCTTATTTTGATCTGCCATATAAAAGTCAAATGTCCATTCTGCTGA  
A\_16\_P16342190  
AGTCTCAGCCAGTCATATTTTATTATACTATAATGCTACCACCATATTTTATTGCCCCCA  
A\_16\_P03527952 CAGTTTCTGAGATATTTGTGGGTTTGTCTGTTTCTGCTTTCTGAGGTCCATC  
A\_16\_P20024596  
TCTTCCAATAATTGCACATATTCTGGTTGATTATCTCTTCTCACAAGTTGCTTTTTCTCA  
A\_16\_P40091654  
CGACTCCAGTAAATTAATATCACTAGATGCTATTCTCCATATAATGTCCACTTACAGCC  
A\_14\_P100225 GCATAGAAAATCAGCAAAGCAGTGCAAAGCCAGATGGTATGTATCAGTTTAATAAGTGGA  
A\_14\_P115977 GAACATTTAGTAACACCTATTTCTTGGTTTTAACATCACTGACAAAACCTGCCATGAACCT  
A\_16\_P00647195  
TGTGCGTATCTATGACTCAAAAATTAATACATTTCAAGGTAGGAAATATGGCAAATGAGG  
A\_14\_P132584 CTATTTCCAAAATACTAAATTCAAAGCATGGAGATGTGACTCTGCTGTGATTCTCAGGGA  
A\_14\_P101445 TCATGGAAGAAGAGTGTGATCCTCAGAAGGTTACTTAATTATGCATAGTGTTCCTATTGC  
A\_18\_P22842136 TTGTATTCTCAGAAGGTTGCCAGTCCATCAAAGGCTTTCCTAGATGCTAGTTATA  
A\_14\_P123654 TAAGAGGTGTTCCAGGACTTTTGGGACCTACTAAAACAATGATGGTATTTTAGATGT  
A\_14\_P126392 GAAATCTTCACTTTTCTATACGTTCAATGTGTTCTCTGAGTGTATCGCCATCATTGAAAT  
A\_16\_P40104000  
CCCCATCTACCATTTACACACTGAATTGCATTCTTTTGATCATTATTTCCATACCAAAGA  
A\_14\_P201288 CAATATGTGCTGTTCAAGACATGTTTTGAATCGCTTTGTTGTTTCATCTCTTCTCGGG  
A\_14\_P133584 CTGTGTCCAGCAATTTAACAAAGCAAATAAAGTGATGTCATATCACCGTCTATGCACC  
A\_14\_P138222 ATTCAGCAGCCAGGGAAGTTGTATGCCATTTTCAAAAAGGATGAACAATAATTTTCTTT  
A\_14\_P130412 CTACCATATTACCATATTCAATCCTTAAAGTCACCCTATGCCATCAATATCATCCCAAT  
CUST\_6724\_P1426210822 CCCACATACTCACTTGAATCAGTCGCCACTTAATACCAAAGCTGCCTTTA  
A\_18\_P14135008  
AATTTTAAATAATTACCCAGCATCTGGTGGTTTCAATTTATGGCTTCAACCAGATGCGTTTTT  
A\_14\_P131533 CAAAATGGGCTGCTGGACTAAAGGCTGCATTACCTCAGAACAAGGAAAA  
A\_16\_P02873502  
ATGTGTGTGATGTAACAGTGAGGTTTTGATTATCCGTAAAAACAATGAAGATTCCCCAAA  
A\_16\_P02416282  
GGGACTGCAATATGATACAAATCCATCCAAATAATCACCAAGATCTCTAAATCCATTCCA  
CUST\_8909\_P1426210822 CCTGGGAAATGGGCTTTGTCTGGGGAAGTTGTCTTTCTCTGATTA  
CUST\_899\_P1426210822 AGCTCTTTTGAAAGTGGTGTCTGGTGTCTGATAGAAAACCTAAGAACAAATGGA  
A\_18\_P14666512  
AGCCATGTGTTTTTTGTGTAATCCAGAAGTCTCGTAATCTAATATCTCATAAACTTGCT  
A\_14\_P200894 TATATTTATGAACAGTGGAGTTAGATACTGCTGTTATAAAACCTCCACACTTCTTCCAC  
A\_14\_P117064 TTTTTTTCACACTTTCTCCAGTGCTAAACTAAATGAATTTTGCTCCTGACCCCTAATTGA  
A\_14\_P108846 TTGGTTTTGGAGTAGCAGATCCTGTTCCATAAGAAAATTTTGAAATCATTGCTGTTTGTG

A\_16\_P18537629

TTGAAACATTAATGATTTACCTGGCACTAATATCTCGGAAGCACAATACTCAGTCGTAA

A\_16\_P21534472

CACCATCTGTAAGTATTATCAGAATCTTCTGTGCATTACAATATTACCTGCCTCCTGTTC

A\_14\_P116082 ATTTATTATCTTCAGCACTGCTTGTGCATGGCAAGACCATGACCTGTTTAAAAGAATAAT

A\_14\_P200109 ATGAATTTATCACTAGCAACAAGCAGATGGTATGCACTATGTGACTTCTCCATACAAGAC

A\_16\_P02974779

AAAATCCAATCTTCGAACTTTTCATCCAAGGCTAACTTTTGCTGAGAACACTTCCTTTTA

A\_14\_P112668 CTAGTTTTTTTCTTTCTTGTGTTTCAGTAGAAATACAGGAAAATGGTGATGCCTTACATG

A\_16\_P00493310

AACTCCAGATCCTAACGTATCCAGGTTTCAATAAACATGCTGACTCAAAGAAATTTTCTC

CUST\_4812\_PI426210822

TGTTAAACACTCCATGAACTGTTGATAATTCCTAGAAGCAGCATATTCCTGAGGTA

A\_14\_P106065 AGTGAAATTAATGACTTACCTTCTGGCTCTAATGTGGTATCCTCAACTAACTGAAGGA

CUST\_1888\_PI426210822 GCAGAGGTTAGGAGCTGCTGCTCACGTTTCTGGAGCATGTGCCTC

A\_16\_P15539993

AAAAACAAATTTTCAGAGGCCAGATTATCTTAGAATGGATTTAGAACCATTCCCTCCACTCC

A\_14\_P116902 ATACTAGTTTTTGAAATATGATTTGCAGAGGAGTTTAATAAAGAACTGGGCAGCCCCTT

A\_16\_P16163300

AAAAAGCCTTAATTCCTTTCTTCAAACAATCATGACACATTCCACACATGTTAAACCTGA

A\_16\_P16463883

AAAGCAAAGTCCTTCATAATCCTGTCATAGGTTTTGAACAGTTTGTTAGCATACGCTTTC

A\_14\_P129158 GATTTTCGTATGGAAATAATGTTTTATTAGTGTGCTGTTGAGGGAGGTATCCTGTTGTTCT

A\_14\_P111101 CTCCTCTGTTGGTGTGACTGTGAAGAATCAAGAGATGGTATACAATCCTAAAAGTATAA

A\_16\_P36230515 GGAAACGGCGAGGTCAAGTCAGCAGGGTGGATTGAGAATATGTAG

A\_16\_P03048099

TGTCAATACAGTGCCATCAGTATTACATGAGAAAGTGAAGAGTTATTCTACATCCTGGTG

A\_16\_P17100902

CCTAGAGCCTACCTTATTTTCTACAATGATGCTAAGTCCTAAGAATATTCACCCCCAAAT

A\_14\_P138817 ATCTGTTACAACCTTTTCTACCCAGTTTAGCAAAACACCTGTTTTATGCAACAATACATC

A\_18\_P22841765 CACCCAAGGACGTTTTTCTCTGTTGGGCAGACTCAAAGCACTGAG

A\_14\_P118525 AAAAGGACAAGCAATACTGTGTGTATGTTTCAGAAAACCTCTTTCTTCATTCCTATTTGCT

A\_18\_P16739590

AATTACCTACTCCAATCATCTTGGTGTCAAACATAACACTTCCTCTCAATATACAGGTGC

A\_14\_P131002 CTCTAAGTTCCTCAGGAGCCATTCAGAAAAGAAACCTAATAATTTACACAAATCACTGA

A\_14\_P122411 GTAATCAGGCTGCAAAGGCCTTTAGTTCAAGATGTTCTTCTATCTCTAACTTGICTAATC

A\_14\_P102580 TGCTCCTGACCTATGGAAAACAACCTTTCTTTCCAAGAAAATTTTTAGTCCTTTGGTG

A\_14\_P139303 CTGTGAGGAAAAGAAAATAGACGTTAAGATGTTGAGAAAATGTGATGGCTTACGAAGGAT

A\_16\_P02774090

AAATCGCTCTCCGATCTTGTAATACCAAAGCACCTCGATTTTCTTTTTAATTCAAACCTCC

A\_16\_P21301871

TCCTCTACTTTCAAACAAATTGTTTTCTGCTCCATCCTACTCAAATCACCATCTATTCTC

CUST\_5806\_PI426210822

TTGTTCTAAAAGAAGTAGAGTAAGGATTTAGTGAGAAGCTGGAGAAAATATTTTCAAAGA

A\_16\_P16335591

ACCCTAAACCATACTACTGCCAATATGTTGATCATTCAAAAATTCATTGTGTGTGCACACC

CUST\_9698\_PI426210822 AGCACATCCACGGTGGCACTCTGTAAATAGTGGCTGTCATTGCAT

A\_14\_P113311 ACATAGTGAGGAAAGGCAGGGCTGTCTTCTCTATCAAAATATGCTATTTAGAATTTTCA

A\_14\_P127234 GCCATAGGCCTCCTAATCTAAGAGTTAGAGACCTTTTACTCCTTATCTTTGTAAGCAAAA

A\_14\_P107023 AACTAGTCTGTGCTACTTTATGTCAATATAAAAATTTGGTAAACTAGAAGTAACTTGTTCCA

A\_16\_P03049067

CTTTCTTACCTAECTTCAGAACAAGACTGCGTATGCTCAGATAAGACACAGACTGTTCA

CUST\_3639\_PI426210822 TAACAATTACTGGGGTCATGCCTGGAGAGGTGGCCACAGTTCAT

A\_18\_P16711873

AGGGCCATAATTTAAATGAGAAAGAGAATCCAAGGATCACACAAATAAAAATGGCAACT

A\_14\_P130993 GCAGATCCATATTAAGAAATAGCCTGGGACTTCTGTCAAATAACTGGTGAGTAAATGT

A\_16\_P03315044

GCCCCAAGCACTGATTATAACACGGTATCCTCAATTTGTAGTAAAAAATGGCAATTATCA

CUST\_9662\_PI426210822 CTGGCTTCTCTCTACCTCGTGCTCTGGAGTCAGGCAGAAACCTTT

A\_14\_P122972 TCTATATCACAAACACTAATATGGTCACATTTTCTTCCCCTTTCCCCCAATAAACTTT

A\_14\_P104492 TATTCAACAAATGTTGGCAGATTCAATCAATCGTATGAAGGCATATGCATTTACCAGGT

A\_14\_P137012 ACAAAGGATGTGTTCAACAAAGCATTTCTGTTCTGTAGAGAGTTCCTGTAAACTATCCTT

A\_14\_P131844

GTTTCTGTCAGGAAGGATTAGGAAAGGTAACCTTAAAAAAGTCAAACAGTCGAACAGTTT

A\_14\_P111085 ATACCCCTCAGCACTGCTTGTTATAAAAGGAATGAAGAGTTCTCATTGCAAAAGTCATAT

A\_14\_P113530 TTAAACACAAAATCTAATGATTAGAACCAGAAGTTGAAGGCCCACTGAAGGAGTCCTTAA

A\_14\_P117101 TCTGAAACATTTTTTTTTCTAGGGAATCTGGAAACCCAGGAAAATACCAAATCCAGATTT

A\_16\_P16956857

TTTCAAGAAGTTTCGATGATGACATACAGCATGGTTTTCTGTGAAATATTGTATGAGTGGC

A\_16\_P16114319

TCCCATGTTATTCCAATACACTAATAACCTCCACAAATACAGATTAATCACGTTTCCTTC

A\_16\_P02920119

ACTCCAGGACTCATATCAAATCAAGTGATACAGATGAGATAGCATCCTATCATAATTGGT

A\_16\_P19923167

AACCCAGCAATCTAAACTACTGAGTTTTCTGTCTAATGGATATGCCTCCCATTTACTTTAG

A\_14\_P124247 TTTCAAAGTGGAGTTTTGGGTAGTAAACTTCTAAGTTTGCTTCATAGGGATGCACTTTT

A\_18\_P14138152

CGTGTCTGTGTTCAAAACTCATAAGAATGCTTTCAGAATGCAAAATTTAAGTTTGTGGGT

A\_14\_P117973 TTGAGCAGTTTGGAGGTATAATCACTCTAAATTTTCTGCAGCAATTCTTTTAAGCACTGG

A\_14\_P108960 ACAGTTTTAGATTCTTGGATGCTGAATGTTACCAGTTCTTTCAACTAGATCTGTGTAGT

A\_18\_P14763539

AAATTTTCCTCCTCTAAATGTCCACAATGCTTTGTAAATCTTTCAGGGGACTACCATACT

CUST\_7614\_P1426210822 AATTTTCATATCCTGTGGTCCTGAAGAGGACAATCACCAGGATTTAGGG

CUST\_4653\_P1426210822 TTTCTGCCACCCAGTTTTTATGAACATTCTCTTTGCCCCATGTGT

A\_14\_P121344 TATGATTGGTTTTTCAGGCATTATGCAGCCAATAGTCACAAACAAAACATTAAGACTTGGT

A\_14\_P130511 CTATGCTCACGGGAATGAAGGACAGGTTGTTTTATTTCAATAAGGTAAGAATGCTTTACA

A\_14\_P106100 GATGGTGGTAGAGGCCATTTGTTCTACATCTTTCAATGTGCATCTGAGCATTTTAAAATA

A\_16\_P01399127

GGCTCTAAACTTTTACTGACCCTTCCTTTATTTCTTAAATAGTCATTGCATACTCACCC

CUST\_7633\_P1426210822

TGCCTCAAACATTTGTTTTGACTCTAGCTTTTGCTTGTTCACTTTTTTAAGCTTGGAAA

A\_14\_P139161 AAGATGGCTAGCAATAAAATGAGAACAGTTATGCTCTTGGGAAAAAAGACATTGTTGAAA

CUST\_7956\_P1426210822 CAAATGTGAAAGTGAAGGACACACCACAGCCTCTGCACTTTAGCAC

A\_14\_P132398 ACATAAGAAAAAAAAGTGAATTGATGCTAATGAACATTCTGTGGTCAGAAACCCCTAGA

CUST\_7457\_P1426210822 CAGCCAGTCCAGCCATCTGAAGCAGAACGAAAAATGGTATGGAAA

CUST\_2782\_P1426210822 TTTTGCAGGCAGCAGGCACACAGGCTGGACATCCTTTCCCTCTGA

A\_14\_P138568 TTCTTTTCAAACACTGGAATCTCCCAGATCTGAAACTTCAGGAATAAGGGAGTGATTTTAA

A\_14\_P126138 CTCTTGAAGAGAGCATAATTGGAATGGAGAGGTGGGTAACATTCGCAAATTTTTTAAAGA

A\_14\_P126008 CAGGAAAGGTTTATTGGCTAAGCAACTGTAGAAGGTGGAGTGGGAAAG

CUST\_3865\_P1426210822 ATTAAGATAGGACAATTGGACAAAAAGGCTGGGCCTTCTTAGGTGGGTATT

A\_16\_P01690703

CATTTGTCCTCTGCAATGAGTAAATGTTACACTACAAAACACTCAGAAACTTCAATGG

A\_14\_P200571 CATTTGAATAACATAACAATAATTTATTCCATAGAGGGATAGTGTGGCATGATGCAGG

A\_14\_P126158 CTATTCTCAAGGACTTCTCGTTACAAAGGGAACCTCCAAAATTTTCTTTAAAGAGAAAGT

A\_16\_P15617783

AATTGGTAAATTCTCAGGCAAGTCTACAAAAGTCATTACCTATTTGAAATGCTGTACCCG

A\_18\_P15241182

AGGTCATCCTTATACAGCAGAGAAACACAATACCTTTTCCTCATTTAGAATATTCCCAACT

A\_14\_P138333 GGATAGTATCCTTATCATCTTACCACGTTATCTCATTGTTTACATTACAGAACAGGGTC

CUST\_1606\_P1426210822 CTTGTTTTCTGGAAGTTCAGCTGTTTGTGGCTGAGCAGGAAATGT

A\_14\_P139905 CTTTTTCTTATCCTGGTAGCAGGCTATGGAACTCAGTCAACTCCCCAG

CUST\_8599\_P1426210822 ACAGTTTTCTGACTTGGTTTCAGAATTCATTTAGAAGTCTCTGGGGCTGCTT

A\_16\_P39063315

AATTCCAAGAAATGTTTTCAAACACTCTTGCCATTTTAATACACCCATTGTGACCAAAA

A\_18\_P15777296

GTCCGGTAATCTTCATTTCTACAGCCAACATGTAACCTTCTTGAACCATATCTTAATTCCC

A\_14\_P130400 AAGTTTTTTTTAAAAACATTCCACTGTTTCTGTAGTCCCAGGAGCCTCTTAAAAGTAAGG

A\_14\_P119569 CAGGGAATTGGGAGTTGAAAGTCTCTGTAGCCATTAATTCGGGATATTTATCTTTCTAAA

A\_16\_P58424175 GTTGATTTTCAGGAATTGGGTTGTGAGATTATGAGGTCTGGGAAGTCTGAATTCTT

CUST\_2175\_PI426210822 AGGTGCTTATTGGTACCTGTTGCAGGAACCTTGGCACCTGCATA

A\_16\_P17041917

AAAACCTACTGAGTAAGAGAAACAGTCTTGCAATATCGAAAGCATATGAGTGACCTGCTG

A\_16\_P16869719

AAGACATTCAACATTGCTAAGGAAATATTTACCTTTAGAACTTGATCTAATAACCCCCCA

A\_14\_P127266 TTTAATGGTAATTACATGGAAGCAAAGAGTGTCTGATTCCCGTTTATGGTGTITCC

CUST\_8290\_PI426210822

TAAAAAGTCAAAGCTATGATAATCTTGTCATTTTCAGAAAGGTAATCCCAGTGCATATTTTC

A\_16\_P19217084

AAAGAAGAAGAGAATTATGCATATTTTCTGACGTTCTGAATAAGTAGTGCACCAACTGGC

CUST\_5148\_PI426210822

TCAGCCCAGGCCCTGAACCTGTCATAAAATGTAATGGATGATATATTTTTAACTGC

A\_16\_P01824663

AGTGTGAAACAAGACTTCAAATGTAAAGACCTTGAATCCACAACCTTTGAAACCTTTCTG

A\_16\_P02160232

AAAGGAAGCACAAATGCATGAAGAATAACTTGAACCTCATGGTTCTTTCAAAGTCTCTT

CUST\_843\_PI426210822 GAAGCCGTTGTAGGTCTGCACAGGCTCCCTGAGCCCGCTGTTTG

A\_14\_P116092 GAGAACCTGTAAGTATAATTTGTATGTAGTCAGACATTCTGTAGATCAGTTCCCAGCCAT

A\_18\_P14133933

AAACGGGTGCTTACATCTAACTAAAATTATTGCCTGCTGAAGAGGTTGAATTGTCTTTC

A\_16\_P01458973

ATCTCTTTGGCCCTTTTCATTATGACATTTTTACCCCTGATTGCAAAAAGTATCTTGTGTTC

A\_14\_P122408 ATGTTATTACATACTGGACTGTAACTTTTTGAGACTAGAGACCACATGTCACATTGCCA

A\_16\_P21558384

ACCCTCCACCATTTAGATACTGTTGCTATTGCCATATACCTTGAGGATACTACTTTTAGA

A\_18\_P22839579 CTATTGACCACTTCTTCCCTTCCACATGATGGCTGGTCTACCTACCTC

A\_14\_P129946 ACTATTCTAGGATGTTGGTTAAGACCACGTGGAGTTATTAATGGGACTCAGTTTAAGAA

A\_14\_P122701 CGCAACTTACCCTCTTTGGAATTTGTCTTTTTTCGCTCCTGCTTATTAAGAAGGAAG

A\_14\_P125666 TGACAACACTTTGAAATTGTAACGATAGATGGTGAATTTATGAACTGCCAAAAGGCATGT

CUST\_2187\_PI426210822 CACAAGAACTCCCCAGGCCTCCACTGGGCATGATGCACCCACAC

A\_14\_P200814 ATTGCAAATAGAAGTTAAGAAAATATTCTCCTTGACCTTCTGTTCAAACCTGTGAAGGCT

A\_14\_P132232 ATTTGAGAAATAATGGGGAGAGATTTTATGTTTTTCAGAATCATCTGGAGGCTTCTTGGGA

CUST\_10375\_PI426210822 AAGTGAGAATGTGCTGCTGACTGTGGTGCACAGACAGCACAAATT



A\_14\_P112461 GGAAATAGTTCAGTCCTCGGTAATTTGTCAACCTCGTGCTGGCTTTAAAATTCT  
A\_14\_P201133 TCCTCAACATGGCTCACAAATTTCTATCCCAAATCTTTTCTGAAGATGAAGAGTTTAGTT  
A\_14\_P126694 CTAGGACAGTATTGGAAACCCGTGACAGTGAGAGTAATTGACATTTAACATGATAGACTA  
CUST\_3219\_PI426210822 CTGCCTGACCTTACCTTTCTAGACCCATCTTCTGCCACCACATCC  
A\_18\_P14136951 CTGACTGCCTGTCAGGAAGTCAAGAATCCGAGTTTGGGGGCTTCA  
CUST\_8800\_PI426210822 CCCTCCTCATCATGAATCATTATCACTCAGGAAGTAAGGACCTGGTTTACT  
A\_14\_P119468 ATTAAGAGCAGATTGTTTCCAATAAAAGGCCACATTTCTACCTCTCTTTACAGATAGA  
A\_16\_P02596038  
AAACATCCTGTCTCCTATAATATGATTTGAGGGCCAAAATAATACAATTCACATCAGGC  
A\_14\_P129099 CTTTTAGAAGGCTTTAGTTTTAGAGTATCAGGGAAGTGGAGTATGAACAGCAAATAGCAG  
A\_14\_P123966 CTTGCTGGTTTCCATAAACCAAAACAACCAACTCAGAAATTCGTGGGAATACAC  
CUST\_8608\_PI426210822 CTAATGAAGTGTAACCACTCCAAACTCCCAGCCTTGGCTCGTGAT  
A\_14\_P101065 ACTTGCCTTATTATTATACAAATCACCAACAGGGAGATTGCAAAGCATTTCCTCAGGAAG  
A\_16\_P16191927  
CAAGAATTGCTTGTAAGGATGTTCTTAAGTGTGCTTTCAAACCATGGAGTATAAGGCTT  
A\_14\_P101775 ATCCACATAGAAACATTTTCAGCATAATGACCAATGAAAATTCCTGTTGCCATTCCAAGA  
A\_14\_P132993 TATCTGAATGTTTTATTCCTGTTGTTTCCTAAGTTTCCTTCAAACCTGTCTGCATCCG  
A\_16\_P03713366  
CTGGCTTTCCAATACTTTTCATTTTTGTCTTGTCTAGTCCTTGTCTACATTTCAGACTTA  
A\_14\_P136878 ATTACTATGATTATCACCTCCTGATAGTGAACATTTTGAGATTGGGCATTCAGATGATGG  
A\_14\_P200523 ATACTTGTAGACCTGTCCTCCACTATTCATTTTCACAGGTATTCGAAGGTTGTGTGATA  
A\_14\_P113055 TAAATCTCTTCCTTTCTAGGGGAACACTGTGAAGAACATGTTGCTTTTTTCAAACAGATT  
A\_16\_P02800598  
AGGTCTCCATTGAAATCATCTAACATCCCAGTTAGTAACTACTTAGCAAAGTTAGGAAGG  
A\_14\_P132189 CTAAGGTTGTCTTTTTATTTTTGTTTTCCACCATGCCTGAACCAGTCAAATCTGCTC  
A\_14\_P121028 CTATGTCTATAACCACACACTTATTCTACTTTAAACGGCAATGGGAGCAATAAGCACCTAC  
A\_14\_P139726 CTGTCAGTGCAAAATCACATTAAGTATGGTTTTTCTTTTCCCTGGGACAGAAAAAACA  
A\_14\_P121801 CTGTCTCATTACAGGAGGAAAACGACAATACTCATTCACTTTACATGGAAGAATGAAGACA  
A\_14\_P111409 TGGCAAATGGAGATCCCTAGACTTAAATGAATTATATTCTCAAAGAACCACTAGTCCAA  
A\_14\_P101281 CTTACCTTCAAAGTCACAGAGTTTTAATACAGCAGTATCAGGATCCAACAAGAGGTT  
A\_16\_P15771442  
ACGGTAACATTATCATGTGTGTCAATTTGTTTCAGTTAATCACTAAGCCACCCTATAATCC  
A\_14\_P138255 AGGGCTTGTGTTTTTATAATAGTTCCTCTTTTGTCTCCTGTGTCAAATGTTTCCTTAATGA  
A\_14\_P108816 TTGTTACTGCTTCAAGCCATAACACACTGCCTTGCATATATTAATGCCTTTCCATCTAAA  
A\_16\_P21468859  
AATCTTTTCCATATAACCTCCTTCAGATACAATTTTCAGGTCATTTTTGTTTCCACCTCCT  
A\_14\_P132329 ACCCACTTGAGTTCATGAGTTTCAGTTTGAAAGTGATGTAAGGTTTAATGTTTAGACTGA  
A\_14\_P128611 CTTTAGTCCTTTTAAGTCTGTGTTTCTGACCCTGGAGGAAAAAAGTTATACATACCTTGA

A\_16\_P41574202

TCCCCTCTCTTCACTTGATGATAAATTAGAAGCATCTAAAAAACCAATCATTCCCCAA

A\_16\_P16713761

AGCATCTTTCATTTGCTAAAGTATGTCTTCCAGACTACTAACAATTCCTTGGAGTGAACA

A\_16\_P00425672

CACCGGGAACAAATGATGATTCTGCATGTTATTCTTTTTATAACCATCTATTTTGACGGC

A\_14\_P118634 ATGTAGAATGGCACACAGACAGTTTTATAGTGGGTGTTTTTAGTGAGTAGTTTTCTCTG

A\_16\_P58424205 CTGTAGGAGGCGGTAGAGCAGCAGGAACGGGGTTAGGAGACTGAG

A\_14\_P202281 GGTGCAATGGTCATTTTCTACCAAGGAATTTTCTTCCACAGTTATCTTTAGCAGTAGTTT

A\_14\_P115259 CAAATGATATCATTGGAATTAATATGTTGGGCCCATACCTAGGGACACTATTGAAGAA

A\_14\_P124392 GTCGTGGAACAGAATTCACAGCCACCAAGTGGTTTATCATCAAACCAGTTAT

A\_16\_P00012252

ATGCACAGGTTTAAGGATTTCTTCATCAGAATCCCAAACAACACTAAATTTTAAAGGGCTG

A\_14\_P119884 GAGAAACACAAGAGAGACTACATGGAAAGGGATTTTGGGAGAACAGGAATAGTA

A\_16\_P03201224

ACTACAATGACACTCTCTTCCAATATCACTGTCATCTTTATCCTTTTAAACACCAGCAACA

CUST\_5933\_PI426210822 CAGGCACAGCCAGCAAGCTCTCTGGAAATATTTGGGTTTTGACAT

A\_14\_P138532 TTGGTGGCATTACATCAATAAGCCATAGTTTATTTCCCCTGAAGACATGTATTTGACTGA

A\_14\_P117514 ACTTAGGTGATTAATGAAGCAATACCTCACTGTGATTGAAAAAGGATCCATTTTACCAAC

A\_14\_P201707 ACCAATATCCAAAGATACAGAATGTGCCAACACCTAGTTAAAAATAGAGTCTGCATACCA

A\_14\_P121516 CTAAATCCCAACTACACTGTAAAATGGGACCAGGATTTATCCATAATTTTCAGGAGATGA

A\_14\_P108810 TGTTGTCTCTATGTTTCTTTTCCAGAGAATTAAGTATTGAAAATTGGATTATGCCTGCAG

CUST\_2728\_PI426210822 AGGTAAAAGGGTCTCTTTGTGAGGCCTGGAGGGGAGAAGGTTGAG

A\_16\_P58424302

GATAATATCAGATAACCTATAAAAGCAGGTAGCCCAGTCATGCACATTGGTGATCAATCA

A\_14\_P113731 GGCCTATAAAACCAGAACTTTAGAGTTTTAACCTCTCTTTAGCATAATCCGTTTATGGCC

A\_14\_P106182 ACTTTTTAGGAGTGATTCAAAGCACATTCACAGTAAGGAAAAAAAAAATGCAGCCTGTG

A\_14\_P103910 AAATCTAGACCCTAGGATCTTACTTTTTGGATGAATTTGTATATTTTCTGCTTGGGTCT

A\_16\_P18603030

CCCTTTTTTGAAGTGTGGATAAATCTAAAGCCTAGGAAATACATGTTGCAGACTAGTGAG

CUST\_10307\_PI426210822

CAAAGAGTCCTAAGACAAATGCAGGAGATAATAAGGGGGCAGACTGTTAAGTTT

A\_16\_P58424519 AAAGAGGAGCCTGGGCGCTAAACCATGGGGGACAAAGGTCACCTA

A\_14\_P105307 TCCCCATTATTAGAGATGTGGGTGGGTTTTTCTCTCAGTGATAAATAATGCAAAAATAAA

A\_16\_P20021300

AAAAAATCCAATCTTCTGCAGCGTTTCAAATTATCAGTTCTAATGAATTATCGCCATA

A\_18\_P13318250

GACTTCACTCCTTCACTATTACCAGAAGTAAACCACTACCCCTGTTAATGTCATTTTAAT

A\_16\_P03407800

AATCTCCCAAGTTTAGTTGAAGGTCATTTCTATAAACCCCAAATGAATAGCCCATAACAG

A\_18\_P13333424

AGCATCGTGATCTGTTAGTTGACTGAAAGTTTTTGCACCTTAAATGCCATTTGTTGCTAG

A\_16\_P17436286

AAAACCTATAACAGCAAGGGTAATGTTCACTCTATATGTCTACAAAGGCTGAACTTGGAC

A\_16\_P18514819

ACAGCGACATGATTCTATCAGTCAATTCCTTCATTTCTTCTTGTCTTTTTTGTCTGTTT

A\_18\_P12116655

GACGTATACTCATACGCACTTCTACTGGATTATACTCTCAGACTCTAAAAATACAGCCCA

A\_16\_P03406934

ATGCACTTCTGCCTACTAAGAGATCGTCTAATATTCTGCTATTGAGTTCAAGAGTTTTCT

CUST\_5394\_PI426210822 CTCATATGTTCAAGGCATGTTTGCTCTCCTCCCTTCTTTCCCAT

A\_16\_P18088007

AAAAAAACAATTACTCTTCTGGCATATTTTGAGAGGCAATCTAAACTAGCAGGAACGTGC

A\_18\_P22840530 TCACGGTTTAAAAGGCTGCATGCAAAACATTTCTCCCTGGTAGAAAT

A\_18\_P16727606

CCTTGCCACATTACTTATTTACAAAACCTTACATACTGATTCATCATATCCCCCAAAGTGA

A\_16\_P17068755

GTGTTCTAGTGGCTAAGTTATTTGTGTTTATCACCCAGATCTATAAGTTTGCCCAAACAG

A\_14\_P126643 ATCCTTTGTAGGGTTAGGAAAGCATCGTTGCAAGTGTTAAGTTTGTTTACCATATTTTCT

A\_16\_P02283931

GATTCTGCTACTCTACCCTACATGTGTTCTCATAAACTCCAATCATTTCATGTTCTCCAT

A\_16\_P01862029

GTCCTATTACGCTACTGAGATTATGTTATGGCATTGATCTATTATTACAGCACCCAGCAT

CUST\_1295\_PI426210822

CTGTCCCATGTTCAAGGGTCACTTTTTTTTTTCTGAGAGTAGAGCATGACATAATG

A\_14\_P124044 GAACATGACAGAGCGCTTCCATAGCCTGGTCACTTTACCTGCTTTATCT

A\_14\_P121635 TTCAGGGTTTTTTTGATTAACCTCAAACCAGAGAATGCCTGTGAACCCATAGTGC

CUST\_5386\_PI426210822 CAGACTTGCCCTGCTCCACTTGGAAGTCCTTGGAGCAGCCCACAC

A\_14\_P128485 GGTATTTATAGGACTGATCAGCAGGGAAAAATAGAATTCCAACAAATGATGATGGAGTCA

A\_14\_P128328 CAAACTGCTAATTGCTATCTACTTGCTGAGAACTGCTAACAAAGAAGATTGAAAGCACT

CUST\_10389\_PI426210822 CAGGAAGTCCATGCATTTTGAAAAATGTCTCCACAGGATGTTTTTCTTGCC

A\_16\_P37837473

AGACTCACTGCTCTAAAATACTCACTAAAGCATGTGACTTTTTGTGTCTTATCTTGGAAAGT

A\_14\_P137531 ATGACACATGCCTTGCATCGAAGATCCTACACCTCAGTCCCTAAAATTATACTTTC

CUST\_9354\_PI426210822

AAGATTGAAAATACAGCATATCCTGATACATAAAACCCCAAACCTTTATAAAACTGTAAAT

A\_16\_P15255231

ACCGACAGAATGTTCTACATAGTGACAAGTTGAACTCTTCCTAGTAGTAATTCCACCTAT

A\_18\_P17197938

ACTGAGTGATGAGAACCAATAATGCCTATAACCAGTAACAAACAAAAAGTATCTGTGACC

A\_14\_P139916 CTGAATTTTTGGAAATGTAATTATTAGTGTTCATCCCAAAGACCGGATCTCCTAGTTT

A\_18\_P22839608 GGGGCCCCCAATTTAATTTACTGAATGAGTTTAAGAACCATGGTGTATTTT

A\_14\_P101772 CTTCTTTGGAGTTTTCCCATCAGTCAGTATGCTTTTTGGACATAGAATTTAAGGAGTCTA

CUST\_8777\_P1426210822 GAAATTCAATGGTTGACTGTACCAAGCCAGCTCTCTGGGTGAGAG

A\_16\_P21576947

AAAAAAGTTCATACCCATTCCTCATAGAGTTATCCCATACTAGCACCACAATCACTGA

A\_14\_P103870 GTTGTAGAGACGTAGCAGGAGACATTTCTGGGAATATGGTAGATGGATATAGAGATG

A\_16\_P21580091

AAAGGCTATGGTGAATTATAGACTTAACTAAAACATGGACTTCTAAACTGGCTTGCATGA

A\_16\_P18300678

CACCTCCTCTTTATTTATACAACCATATCTACAGCCAAAGTAATCTCAATGTCAGTCACC

CUST\_7491\_P1426210822 TGATGTGTGCATGATCAGAACACACTAAGAGACAGCCTGTGTGCTC

A\_18\_P11662504

AAATACCTCTTTATGTTTAGTTTTGCAAACAAAAGGAGTCAATTAGTGAAGGCTTGGCTGA

A\_16\_P01616500

AAGGTGCTGATAATTTCTGAAATCTCTACTGCTAACTTTTGTCTGTCTGAACTAGGAA

A\_16\_P19765267

AACACAGAGGCAGGAATATATGCAGACTTGTAGACCTTAGTTTTCTCTTCAATTTATGGTG

A\_14\_P124861 TTCAACAATGTAAGTGAAAAATGTGTTCTCAAAGTGGCCACTATAATCTTTTGGTGGG

A\_14\_P134888 CGAACCAAGTAAAATATTCCAGTGCTTTTTCTATGTAGTCTACGGCTTTTCCATCAAGAT

A\_16\_P16191491

AACTACTTCTTCACTCTCTAAACTGCAAATCATTGAGGGTAATTGTGCTGGTTCAGTTA

A\_16\_P16191602 CAGCACATTCTTTATCTATGTAGGTTGCATTTTCTCTCCTTGGAGAGCCTCAGATT

A\_14\_P200965 GTTCAAAGATGCATTTTAAAGTGTAAGAATCTTAAAGTGGAAGTTGCAGCACTTTGCGG

A\_14\_P121681 CAGAATGGAACAGGCCGATTTTAAACATAAAAGAAAAGAAAATTAATCACCCTGTCTAGG

A\_14\_P138585 CTTGGAGCAGCATGTGAAAGTCAAGGAATATTTGTGGGTATTTGCAATTTTCTTTTTTTC

CUST\_8781\_P1426210822 TAGGAAGAGGTGGATTTGGGGGATTATATGATCCAACCCTCTACCTTT

A\_16\_P02344008

AAAAATAGTGGCCCAAATAGATTTCAAGTGGTGCACATTTAGACAAAGACTCTAGGAAGAT

A\_14\_P201529 GGTGTTCTCCTTTTATCATAAAATGATTTCTTATAGCAGTGGTGATTTAGAAACCAGGC

A\_14\_P117675 TTAATCTTGATTCCCAAGGCCTTCTTATTTGTGTCTAATTTAGCAGGACAAAAAGGAAT

A\_14\_P114637 GGTCAAACAATATTGACCAAATAATATCAGATTCTAGTGAAGGACACAAAGGGGAGCAT

A\_14\_P201737 ACACCCTTCAAGGATCTAAAAATCATAGCAATACTATTACTGGTGCTAAGCAAATTCCTT

A\_16\_P58424160

CTATCACCATAGATCCATCTTGCCATTCTAGAATTCACATTGGTGGGAATATACAGTA  
A\_16\_P16191566  
GAGGAATAAGAGATGATGGCTTCTTAGATCTGTTTACATTTGCTGGAAAACTTCTTCCA  
A\_18\_P13303972  
ACAAAGAGAGTATTCCATGAAAAAAAAACAACAAAGATATGAGAAAAATCATGAAACAGT  
A\_14\_P114091 CTGCAATCTTTCCCACTAGAAATGACCTTTTCTTTCTCTAATTTCCCTTCGCAGATTATA  
A\_14\_P132461 TCTTTTGTGAAATCCTGAGTTATTTTCTTGCTACAAACATCAAGATGAAGCCTTTGGAGT  
CUST\_4307\_PI426210822 ACTACATGTTTTCTCTTTCCCTTCTGGACACTACTGACCTCTCATTGTCATG  
A\_14\_P117412 CACAGGCTTATCAACCACATCAGGGACCCTGTCATTCTATTCTCAAAAAATATTTTTAAC  
A\_14\_P121095 ATTCCGTTACAGCAGAGCATCACCATGGTCAGGAGCAAGATTGATAGATTAG  
A\_14\_P113918 AGTTTGGCAGAAAATATAATTGAACACAATTGCATGTTTCACTTGAATGCTTGGGATAACC  
A\_14\_P120207 ATGCAAAATGACTTTTCCATATTCAACTGTCTCTTCGGCACTACTCAAATTTTAAACGAGT  
A\_14\_P113139 CTGTATCTTTTCTTATCCTCTGTATTTCTGTCTACAGGTTCTTATTTCCACACCATGGTG  
CUST\_2790\_PI426210822 AAGCCTCATTGGACCACAGGTCCTATGGGACTGGTGGAGATATAG  
A\_14\_P103002 CTGGATGGGAGTGAAAGTTGGCAGTCATTTTAAATATTACTCAATAATGTAGCCAGGAAA  
A\_14\_P136527 TCCCGAATCCGTTTCTCTTCACCTAGAAGAAGGTGAAGTATGAGAATAAAGTATTAGC  
A\_14\_P125348 ACAATTAACCCAAGGTCTCAGTTCTTTTGATATAGGAGATTTGGCTTGTATTGTGCAAG  
A\_14\_P126262 GCCAAAAGCATTTTGGAAAGTGTGGAAGTGCATCTGATGTGGAAAGAAAATTGATATTTAA  
A\_14\_P201376 AGCATGTCCTGTTATTCCAAGAGAATGGAGCAAATCTCTCTGTTAGTATTAACCAATTC  
A\_14\_P121323 CCATGGATAATTTCTCTCCAAGTTCTCTAATAAGTTCTGCTAGGTCTTCTGTATTCTGAG  
A\_14\_P125702 TTTTTCTTTGAAGACCTACATCCAAGACTTTACTGGGGAAAATGTCTTGCTTCTGATATT  
A\_16\_P02373741  
AAAAAGTGAACCTATAAACACCACATTCAAAAAGGCTTCTATTTTTGTGTTAACTGCTAAT  
A\_14\_P112364 CTGCATTCAGTTACAGTTCTCACACCCTCAAAAATACCTCTTTTTTGGTCTGATCC  
A\_14\_P128792 ATACAATAATGAGTCCTCTTTGTTGATAAATATACCTGCCTCGGGAGACAATGTTTGACT  
A\_16\_P00541703  
GCTCTAGTCTGACTCTAGTTTTGATTCCATCAACCTAAAGTATAGTTTCTACCACCTGTC  
A\_14\_P115057 GAGATCTGATCAAAGTTGAAAATATGGTGTGCTTTTATGAGTTCCTTATCCTGAAAAGTG  
A\_14\_P114128 AGTGCACATCTCCATTTCTGTTGACATGATGTCTCAAATCTCCCTTTTCCATTC  
A\_14\_P116094 GCACTGTTCTTCAAACGATGCCCTCGTCCACAGATTAGAAGATCAAATTTTATATTCTTA  
A\_14\_P120018 AGGGTTGAGTTTTGAGTTTLAGAGAAGAATAGAACGTTAAAGATGGAATGTCACCTGGATT  
A\_16\_P00685005 GATCATCTTTGCTCATACTCTGTAATCAGTGTGTGGAGCGTCAGGACT  
A\_14\_P119415 ATCCGTTCAAGTTCACATATTAATTTTCTGGGAATTAGAAGAATCATGAATGCCAAGCCA  
A\_14\_P137853 ATTCATCTTTCTAATGTCTACACCATATTTTGGATAACATGCCATCATCTCACATTGTG  
A\_14\_P122545 ACAACTCACACTCTGTGTTACAAGAATAAAATGCATTATTGGTCCTCAGTTTTTTGCCAA  
A\_14\_P103329 TTGCAACAAGGTGAAATTTTTAAAGCATATCTTGACTCTGGAAACCATATGTTGTCAGGT  
A\_14\_P102484 GAGGATGTCAGTATGACAATCTTTTTGCCTCATTACTIONTAGGAAATCATCTCAGCAGAGAAA  
A\_14\_P130104 TGCATAACTATTTTACCTGACTTTAACATGCTGGGATTACAGTATGCAAAAACCCCATTTT

A\_16\_P21692468

AATGTATGTCCTGCTTTTGATAAACTCATTGGAATCTACATATCCCCTGATATGCAAGCA

A\_14\_P135217 CTATTTCTTATTTGCTGGATGTCACCATGGTCATTGTTTCATGAGATATGTCACCAGGTAT

CUST\_6851\_PI426210822 AGAGACTCAGTGTGGGACTGCTGGAAGAAAGACAAGTGAGGAAG

A\_14\_P202470

GGCAGGAAAAGAAAAAAAATACAGAGGAACCTAAACCCTAAATCAGAGACAGACTACAT

CUST\_8572\_PI426210822 CTGTGGCTCCGCCCTCCCTTGCTCAGTAGGGCCTGAGAATGCTC

CUST\_9492\_PI426210822 TATTGCCTTCCATTATAGGACTAGACTGTGGGATCCAGGAAAATGTTGCTTAAC

A\_16\_P02951572

AAAGAACCCTATTGCTAATATCTTCTTTTCGTCATTCCCTCATCCATACTTACCCAGGAGA

A\_14\_P124009 AACGAAAGCATACTGAGTGTCAAAGTCATATCTGAGGAGAAGCAGTCAAGGATGTA

A\_14\_P119750 CTTACTTTTCAGATGAAGAAGACAAAAGATGGTCATTAGATATGCAGGTTGGATGTTTGG

A\_14\_P138070 TCAAATGACTCCAAGACAAAGATTCTAGTGACAATTTACTACAGTCAGTTGGACCTAATG

A\_14\_P114863 GATATAAGCCAGGCCAAGTGACAAGTAATTTTTCCATGGAAAGGTGATAAAGCAATAAAG

CUST\_4950\_PI426210822

CAAGTCCTCAGTGAGAGTATTTGTCACTTCTACTCTTGGTGTTTAATATCATCCC

CUST\_5629\_PI426210822 GTGTGCTGGGAAGGGAGCAATGCTGTCCTTGGACTGGTCACCTGA

A\_14\_P137494 GTAAACCAGAGTGGCTATAATCCAACCAAATTTTGGCATTGTTGGTGGACTGTG

A\_14\_P120205 CGTGTCTTTCTAGGAAATTCAGTTCATGAAGATAAGAAGTTTCTTGACAAATACATGCC

A\_14\_P122373 CCAAGACTTCTATTTGTATAATGAAACAGGATACAGTTGTACACTTTGAATCTGTGGTT

A\_16\_P18810635

AAAAAAAACCAACTCCATTTACATTTCAACATGCAGTTTTTTAAGATCTTCCCCCAACAC

A\_18\_P14137585

TGTTCAATTGATACTTAGATAACAAACCTGTGGTTCAGTTATATGGGATTTATCCAGACCT

CUST\_4914\_PI426210822

TTTTTTTTAAAGCTTCATGTCTCTGTTCTCCATCTGTAGGTGGTGCATGAGTATGATATA

A\_14\_P126612 ACTTGCTTTAAATTTTTCACTGTAACTGCAATCTCTGGCTTAACCTCAGTTTGTTTAA

A\_14\_P104433 TGAAATGAAGTTAGCATTGGCATGTTGATCAGGTAGATGTTCTCAGTGTGTTTGTATTGAC

A\_14\_P100985 CCTAAATCAAATACTCAGACTGTAATTAATAGGCCCTATTAACCAGCCCTTACCTTGG

A\_14\_P103125 CCTACAAGGGACTTAACATTTGATTATAAGGCAAACGTGTCCAGAGATTTTTAAATGAGCA

A\_18\_P16993864

AATTGGAAAATTTTCTCAGTGAGTCTACGTCTTTGGATTCATTTAGCAAACCAGTCTG

A\_14\_P133667 TATACTACTCATACACTGACAGTGATTTCTTCTCTAGGCATTTACGGTAGGGAAACAA

A\_14\_P111599 GGTCTGAACTTCTGGAATAGTCTCTGTGCTAAAATATTTCTTTCCACACTCAACAAACAT

A\_14\_P136719 GATTGTGTTTACTTCTCTTTCCAGTTTCCATCTTGCTGCTGCAAAAGGACAC

A\_18\_P15117890

TCACAGCATCAACATCTTGTCTCCACTTTTATCACCATTTGTAATTAATGAGTCACT

A\_14\_P128277 CACTATTACCTTTATCTGCTTGATCTCATACTGGATCCTCTTGATAGGGTTGCCAT

A\_14\_P106060 ACTGTGACACTACATTTTCCAGCAACAAGAACCCTAGTCACACTAAGTTAAGGAAG

A\_16\_P17335617

TGAGTAGAATCAGATCTGTCAATCCAATCATTGTCCACAACTACCAGTATTTCCCTAACT

A\_14\_P112927 ACTTGGGCCTTGGTGCAGGAAAGCAAGTTTAGTAGAATTATCTGATATTAGATGTCATTT

A\_16\_P16595418

AGGATCTTCATGAGTAAGCAACAGAATCTCATAAAATCCATATCCTATAGACGACACTGG

CUST\_5207\_PI426210822 TTAACACCCCAGCCCCGACACACACACAGACTTTTCAATGCAAA

A\_14\_P108051 CACAATCTTACCGTTAGCCATTAACAGGTATTTTTGGTGTAAGATTCTAGTAGGGTAATC

A\_16\_P16735309

AAAAGAGTCAACTTGATCTTTTTGACAGCCATTAAGAGAACTCTATCTCTTTGTTCCGTG

A\_14\_P122158 ACTGAAACAGTGACAGAAATGGAATAAACAAGTTTCCTGCCACTTCTATATAGACCTAA

A\_14\_P108376 GTTTTGTTCGTTGACAGGAGAGAAGTTTTGGAAGATGCTACATTACACATTTGTTTGATT

CUST\_6814\_PI426210822

ACCGGAATGTAGTGTCCATGGAATTTTTAGAACTCATGATGTTTTGAAAACATTTGCTG

A\_14\_P117730 AGCCCAGAAGTTTGGAAGATGTTTTACATTAACCTTTGAGAGCGCACAAAGTC

A\_14\_P105751 TTTTGATTGATTCTGTTTGCTTTTATGTTCTAGGGGAAAACATATCCATTTCCGGGGCG

A\_16\_P19706026

AGAGATGGCAATTTAATGATCATTTGGACCATACCTATTCCCTATCAACCTAACTGAAGT

A\_18\_P22841093 ATGAGGTGCTGTAGTGAAGAGGCGAGAGTCCCCAGATACTTGTTT

A\_14\_P200288 CGAGTAAAACCTGACTTCTGGATTCTCCTTGATGTCTTTTTGACACTAGTTTAGTTGTAT

A\_14\_P110007 GAAAATTAACCTTCTATTAATTGCATACCTGGGTTTTGCCTACTGAGAATCATACCCTGGAT

A\_14\_P101014 CTCTCCCCCTCAGAGAAGAAGAAGAAGAAAAGTCCAAGCACACACTAC

A\_14\_P100536 CATGTATTCTCGTCTTTAAGTTAATGGTCCAAAATTTTATTTGCCTAGTAGTGTCTTCTC

A\_16\_P16911572

AAAATCAACGAAGGGGAAATTTTCACTGTTGGCTAAAATGCAACTATTCAATTCATCCC

CUST\_8662\_PI426210822 AGTTAAAACCTGTATCTGTGAGCAGCTTTCTCACACTGGAGGAGAAGG

A\_18\_P10745817

AACCTTTTAACCCTTTCTGATAAGCCTTCCTATATCCTGACATCGATTTCTTTCTTTTAC

A\_14\_P119277 CTTCTTCATGCTAAGTCCCCACTAGTCTAGATTCTTAATAATTTCTATTCTCAGTGCTGG

CUST\_4326\_PI426210822 ATTTCTTAGCATGCCCGTTGGGACAATTAGGGAGGGATTCTTTCAAG

CUST\_7308\_PI426210822 TGTCCGCTGAACATGACAGTTATCCTGGCTTCACAGTAACCTTTCA

A\_14\_P138833 ACACAAAATTAAGAATCTTCCATAATTGCTTTTTGCTCAGTAACTGTGTCATGAATTGCAA

A\_16\_P30952603 CATGGGAACCCAGAAGAGGTGACGGTGAGTCAGCCACCCCAGGAC

A\_14\_P101333 GCCTACACTTGACTCACTTTTTGTTTAAATGTATTTTTGTAGTTCCTCATTCTGGAGGCT

A\_16\_P01762679

ACAGAATATCACCCACATTTTTGTTATTTTTTCAGTTTCCTCTCAATGAATGGAATCATCA

A\_16\_P36230137 CTCTGAGAATGAATGATCTGTTAGGAAGGCTGGATGGCATGGTGACAAG

A\_14\_P113195 CTGGGACTCATTCTGAATCTTGGTTTTGCTTTGATATGAAAGTAGGATTTTTGGATTTGAT

A\_14\_P116857 ACTCTGATGTAGACTATCTAAAAGATAATTTGGATAAATACATGTCCCAGTTTCCAAAAG  
A\_18\_P21943738

AAAAGAATGTCCCAATTGTTGAACTACCTCATGAACTACCAATGGTATACACAACCTTTCC

A\_16\_P15654436

AGAATACACTGAAACACAAAATAGCGTCTTGGTCTTCTTATCTCAACAACCTTGTTTGTC

A\_16\_P01989649

GTTTATCTCAGGTATCATCAGAAAACCTTCGTTAGAATTCTAGTAGATCCCAAACCCAGG

CUST\_1439\_PI426210822

AGTTTCATTGTTTCCTTTGTATTTTGCATTTCAAAAATAATGATATTGCTTTTAATGGTAC

A\_14\_P131972 AGACCATATGAACCACACAAATCCTATATAAAGGACCAAAGACAGGTGAAAATAGAGAA

A\_16\_P18657542

AAGAGTCAGAGATCATTGCAACAGTTAAATCCTTAAATGCTTGTCTATATACCTCTGA

CUST\_787\_PI426210822 TAATCCGCACTGCTGCTATTTTTTTTCTATTTGCCCTAAATGTCCATGCT

A\_14\_P115372 ACATGCAGATGTCGTTATAATTATTATCAATGCTATTCTGTCACTCCACACCCTGACTCC

A\_16\_P41832768

AAGTGACATGAACACACTATCCATACACCAAATCATGGGTTTGAATAGCATTTTATGC

A\_14\_P115407 GACATAAGCCATGATCCTTGTCTGTCTCTAGGACTGTATAATCTTATAGGATTTTCCA

A\_14\_P139145 CTGCCACCTCTAAAGTTGCTCTGTGAAGGAAAAAAAAAGGAATTAATGCTAAAACCTACAC

A\_14\_P138373 TTAATGTCCTTGACTTTCTTCTCTGCTTTAACATTCCATTCTATTTGTCAACTGCGTAAC

A\_14\_P201637 TTTGCTGTTTGCTTCAAATTGATCTCAGAGGCATGTTAACCAACTTTAAATATTGCCACT

A\_18\_P16352890

GGCAATCCATTTTAATTTCCCAGGTTCTGTAAAAAAGATGAAATTAAGCCTCTCCTCT

A\_14\_P126577 TTTTTATTCTCTTTCAGCACCCCTTACCCTTCTGAAGAACAGAAAAAGCAGTTGGC

A\_16\_P00685138

CTGTGACCTTAGATTATAGCCAGAGGCCATATGCAAGTGAATAATAATGCAACCAATGT

CUST\_5997\_PI426210822

ATTCATCAAAGGAAAGTAATACTAAGATTCTTTTTCTTCAGTTTGAGTTTACTGGAGGAA

A\_14\_P201896 GGGTTTAATATCTAAGATTCAAGTCTTTGGAGGCTGACCTAATTCAGATGAAGAGACAT

A\_14\_P116261 TTATCTGCTAACTCTGTTATTCTTCAAACACAAGTGGGTAGTGTCAATTTTCCTTCCTTC

A\_16\_P17206983

ACTTATCTATGTAACCTGTTTTAAACCAACTTTTCCCCTTCATGAAATCCACAGCCTT

A\_18\_P14137679

AAAAAGTTGAAACATTCTTGAACAACCTATATTTTACTCAAGGGCATTATAGACAGGGCAA

A\_14\_P128112

GGTTTAAAACAAAACAGAGGGAAAGATGAGTTTGGAGTCTTCTAAAAATCAACAAAGGAC

A\_14\_P113902 GGGCATTTACCATTCTTATAAAATGACACTTTTCTGGTCCTTTCAATCTTTTTIACCCACT

A\_14\_P107829 CTATGTCCACAAGCATTCTAATTTCTAAAGAGTTTTCTTACTGTAGTTTGCATCTTCCA

CUST\_9200\_PI426210822 AATTATTGGGGGACCTAAGATCCACATTTTCTATTATTTGGCCCTGTTGATGCT



A\_16\_P00237724

TTGTTTTCTCCAATAGAATCTCAATGTGCTCATAGTAATCCCTCATAAAGGCCTACTTGT

A\_16\_P02618890

TTGTGATTATAGTTGCTTTTTGCAAGTTTCTTCATTCATCCTATGTAGACAAGCCAGGCTA

A\_14\_P118007 CAATACTTTTCATATATTATTGATGGCTCCTTAATTGGGGATTCTAAAAGCCTCGCTGCA

A\_16\_P18806980

CCCTCTGAATTCAAAAAGTTTAAAGAAGTCTTCCCATATGCATACCTTACTCACCAAGA

CUST\_1147\_PI426210822

TATCCCAAAAATACAATGGACTTAATGATGGTTAAATGGAAGTGGTGAAGAAATTAGCAA

A\_14\_P112126 TAAACATGAGAATTCTCTGAGGTCTATTTCTTGACCCTTTGTCTCTTTTTAACTATCCC

A\_14\_P115892 AATATTTCTGAGTTTTTTTTATGAAAAGTGATAGAAGGAGAAATGGGGACTGGAAACTGG

A\_14\_P100295 GATTTCTCAAATCCCTGAAATCACAGGATTGCTACTTCCTTAAATATGATTGACTCCAG

A\_14\_P124816 TACTTTACCTCCTTATTTTTCTGAAAGTCTTGGCTAACCAACAACCTGGACTTTCATAGC

A\_14\_P106423 GATGAGAAGTCCCCAGAACTTTCAAAGAGGCGGTCAAAGCAATTATTTCTT

A\_14\_P112904 TTGTATTTAATGTTTCTGTTTCTTAGTCTTCCGTCCCCTTCTACTTATCCTGGTTGAC

A\_14\_P111622 GGATACTTACTTCAGGAGAAATCAATACATATTGGGCCTGAAGAAAAAAATTGAGGAGAG

A\_14\_P103932 TCAACTTTGCTACCATTATTGGAATGTAGAGTAAAGATGCTGGTATCAGGACTTTGGTTA

CUST\_7349\_PI426210822 GTCATAGAGTCTGATTGGTCCAATTGAGTTAAGCCTGGGTTCGCATG

A\_14\_P120077 ATTGTCTTTCTATGACATTAACACATTGTGATTTCTGGCCTTTGAGGGGTAGAG

A\_14\_P135924 ACATTAGCAAACTGGCAACCCTTTAAAAACAGTTCGAAAGCAACTGTGATATTTGAAG

A\_14\_P201217 ATGTTTGGATTTTCAATATCGACTTTGCTTAAACAGAGCCCACCTGCATAGTAACTGTG

CUST\_7387\_PI426210822 CTGCCAAAGAAAACCTCGCTTTGCCTTTTGTA AAAAGCCTGTGCGAGCT

A\_14\_P113653 TTTATCTATCACCTTGAATGTCCACACATCAGATTCATCTTTCTCCCCATAATGTCT

CUST\_3134\_PI426210822 GATGCTGGCCATTTATAAAGCTGCTCCTGTGCCTGTTAAGCCATACA

CUST\_7516\_PI426210822 GAACTTCTCCTTGGAGACAGCAGGAACTGTGTTACAAAGGCATATGG

A\_14\_P103686 AACTGCAATTGTAATGCCAGACAGAATAAGAGCAATGCATGTATCAATGACAATTGAGAG

A\_16\_P58424231 TTTACTGAGTGCTGACTATACCCAGGCACCAATTCTAACCTCTTTACCCAAG

A\_14\_P100160 CAACACAGCATTGCAAATTGAAAGATAAATCATTGCACTTGACAAGGATCCTTTTTCCAA

CUST\_6509\_PI426210822

TGGCTAAAGACATCTAGAGTCATCTCAAATGCCTCCACAAATTTCAAAGAAAATTGTCAA

A\_14\_P103088 TG TAGTAAGGTGTAGATCAAACAAAACATATCTCTGGGTTCTTCCAGACTTTCCATTAA

A\_14\_P116889 TTACCTATGTTGTTTTTCTAGGAAGTGTAGGGCTTTTTTATTGGGATTGCAGACCTATTG

CUST\_236\_PI426210822 GCCGCCAGCTAGACTCGGCTTCACTCTCTGAATCGAAAAGTAAC

A\_14\_P137292 ATCCATAGATTAACACGGTAAAACTTATCCCACTGCTTAGCACCTACAGAGCATTCAAT

A\_18\_P11168804

TAACGACATATGTGGTAAGTTATTCTCACCTCATGCCTATAGTTACCAGTGGAGAGACTT

A\_14\_P125499 AGAGGAAAATGAGAATGGTTGGGTGCTTTCCAAACATGACATTATACGTGTTAATACATA

CUST\_5645\_PI426210822 CTCTGAGGAAGCAGGTGCTCTGCTGCCTTTCCACATCCTTTCTCTC

CUST\_8038\_PI426210822

AAAGCTTATCATGCAAATGAGCTTCCAGAGGTCATAAACTGCAGAAGATGGAAG

A\_14\_P134922 CCCAGAAATCGTGGCTATTGTTATCACTAATTATGCTTAATTATGGTTGGCTCTTTGGAG

A\_14\_P100159 CCTGATTCTTGTTTTGGAAGTGCCCGTTGGAGAATGTTTTCCCTTTGGTT

A\_16\_P16706855

TTCCACTTTGACTACACATTGTAACATCTTCTTCCACTGTAATAAGACTAACCCAACACT

CUST\_8145\_PI426210822 TTCTGGAGCAGTCACACGATGACAGATGAGACGGTTGGGCCTGAG

A\_14\_P101113 GTTGTCTGTGCAGAGAATTAATTGAGAGTCCTGTAGTCACTGGAGCCATTG

A\_16\_P41669218

TTACAGAAAGGGATAAAGAAATCACTTTGCCAGAAAGAATAAACGTAACCTCTGACTAC

A\_14\_P127990 ACCTTGCTCTTGTTACAGCAATTTACTCTTTTCATTCTTCAAAGCAAACCTAAAACCAC

A\_16\_P58424456 GATCCTACAGAGTATCTCATAATCCAGCCAGTTCTCACCATCACCATTGGTT

A\_18\_P16674504

AAATTCAGTCTTTGGCCTGTATCCTGAAGTCAATTCCTTAGGAATACTTTTCTTCACTT

A\_14\_P111942 AAATCCTCTAAACAGTCAGACAATTCTTACTCAACAAAGGAACATAAAGGCTGTGGTGTG

A\_14\_P101852 CTTGGGTGTATGTTAACACCAAATAGGAGAAAAAAGAAAAAATATCTGAGGCCGATGTG

A\_18\_P17041078 TCTATTAGGTCCATCTCTCTACATCCTTTTACTTTCTTATCTCTGTTCTTATCTCTCTCT

A\_14\_P133233 AGAACCATAAATTCTAAGGTATCTAAAAACCTATGAGTATTTAATTCATAGAAAAAATGT

A\_14\_P119491 ACTACTCATCCAGTGATATTTGCATTTGGAAAGAGGTCTTCTATGGGCAGTATTATAAT

A\_14\_P118810 CAGACAACCTGTATCATCACCCAATATATGAAATTCCAACCTGGGAATTGTTCTAAAGGAAG

CUST\_6007\_PI426210822

TTAAAGAAGTTTCATAAATTTGCAGCTCATTAATTTTAAATTTTAAATAGGCCTTCCACAA

A\_14\_P120803 GTGTCTCCTCTAAAAATTAATTTCTGGTAACACACACAGAAGCCATCTCCACAGTG

A\_14\_P115545 ACTTTTGGTGTTAAAAAATAAATTTCTGTAAGTCTGTAACCTGGCAACATTTTACAACCCT

CUST\_9430\_PI426210822 CAAGATGTTGGGTTTGTGGCAGACCCAAGACTATGCCTGCCTTGG

A\_16\_P16191287 GAATTGGGACCTAGAGTCATTTGGATACAGTGGTTGCTTGGCCATTTTCT

A\_14\_P124216 AGTAACAAGCACCAAGAAATCAGAAGAGAGGTCTATGTAAATTAAGGGACTAGACTTTCT

A\_14\_P107982 GCCAGGAATGGACTGGCATTGGCCTTTGTATTTAATTTAACTCTTTATCACCCA

A\_16\_P01326068

GTGGTTTAGAAGGAGATAACTGTTCTTTAACACGGGTTTCTAATCTTGAAATTACACGCA

A\_16\_P41612093

ATCTTTAGTCAGTTGCTGATATTCAAGAAAGAACAACCACAGATTTAGAGAAGGTGCTG

CUST\_8046\_PI426210822 AGCTTCATTGTTACTGCTCAGAGGTAAGGGGGGGGTTTAAACACT

A\_16\_P18094727

AGGATAAACTTTTACCTCTAACTCTGATATGTGGATGCAACACTGTATAAGAATGCCTCC

A\_14\_P101227 CTAGATATTTAGGTAAGGGTTATGTTTTGTCAGAAGGGAAGATCATTTGTTAAGGCCGAT

A\_14\_P110044 CATCTCAGGATCAATTTTTGTGAAAAATGGCACCCTACTTCATGAATTTTTTTGCC

A\_14\_P109015 GGCACATTTTATTTCTAGTTTCACATTCATTTTCAGTCTAGGAGAGAGGCTTCTGCT

A\_14\_P109057 CTGGAAACAAAGCCTAGAGGATGTATACTTTTTAAGATGCAGAAAATGAAATGAAACCCC  
A\_14\_P128187 CTTAAAATGCTACATGAGGAGCAAATAGGAAGGTCTGTTTTGCAAAGCCATGACAATTA  
A\_16\_P38098958  
GGTAAGACTATGTCAAACCACAGTGTATAGCAGTTTTTCATTGACTCTCAGAATCCTCTAA  
A\_16\_P18123309  
ACCGGATTGAGCAACATTTACCAGTTTGATCACATTAAAGACCATTCAAGATACATTTA  
A\_14\_P123156 CTCAGAAGTGAAAGAACGACGAATTGTTCTCATTAGGGAACGAAAAGGTGAGT  
A\_14\_P135441 GATAGCCCCTATGTTGCAGTTAAAATTGTAAGGAGTTGGAACCTCAGAAAATATGAATGC  
A\_14\_P101330 AGTGGTTTCTTTGTATTCTAAATCTGTGTGTATCTGTGTGCACACACTTGTGCACTC  
A\_16\_P20125237  
CAGGTGGAATCTACAATTGTTTTATTGGGCTGGATGTAAAAATAATGACCTTGATGTTGC  
A\_14\_P103559 AAAAAGTTTGGAGATTCCCAGAAATGATAGAAAGAATAATGATCATTGGAGTGAAACCTC  
A\_14\_P122815 GACCCAGTTAGATGTATTTACACAACCTACCAAGGAAGAGATGAATCAATTGTGATAAT  
A\_14\_P138887 ACCCTTATGTGAATAGGACTCTGTTATTTATCATTGTCTAAGTTTATTGGGGTGGTGACA  
A\_14\_P104577 ACCTTTGTCCTTTATTTTCTTTTTTCAGTCGGATGTCATGGATCAGAATTTGTTAAATTC  
A\_16\_P20793133  
ATCCTTTCTTCAAAAATGAGATGATGATGCACTCAGATAGTCCTATGTAAGTTGACCTCC  
A\_14\_P114573 CTCTCTCGAACAGTGGTAAGACAAGATGGATTTGTAAAGCAGCAGAACAGAATCA  
A\_18\_P14135641  
TACCAATAACAATTTGAGAAGAAAGTTGACATTGTGACTCCTCTGCTTCACTTTCTTCAG  
A\_14\_P117262 AAATCCTGAAGGGGAAAGAGTATTTGCCATCGATAATTCTGGTCTGTGTGACTAA  
A\_14\_P125880 GTATCATGATGGAGTTTACCCATGTTAGGGGAGTTAATCTATTAATTATCAGTGGGACTC  
A\_14\_P117603 ACCGCTTGCTTAAAATTGTCAAGAAAGTGTGTGAATTAATGATGCATCTGACATATCGTA  
A\_14\_P114554 TAGACTTACAAGACTGCCAATTCCTCTGTCTTGCTTCATCATAAAAATTGACGCAATACAA  
A\_16\_P00719588  
GCCTGCACTCAATGAAAATTTGAGCATATTCACCATGAAATATAACGGTTAGCACAAAAGT  
A\_14\_P109968 TTTGGAATCAATGGGTAAATAAATGCTGCTTTGGGGATATTATCTCTGTTTGGTCTTGA  
A\_14\_P201783 CTCATCCTTCTTGATCTGATTCAGGGCTATTTCCATCAATTTTTCTGACCAAGAA  
A\_16\_P18602901  
AAATTCAGCATCTTCCCTACCATTCTGTCTTGGAAGTTTATTGCTACACAGACAAATC  
CUST\_4718\_PI426210822 CTCTGAGGGTCCCTCCACCAGGAATCTCCCACTTGAACCTAAG  
CUST\_8289\_PI426210822  
TACTTTTATAATCCAGTTTTTAAAAAGTCAAAGCTATGATAATCTTGTCATTTTCAGAAAG  
A\_18\_P11192842  
ACTGTCTTTAAGTTGAACCAGTTGTATAGTTTACCAATATTTAGGCCCAACTTCCTTT  
A\_16\_P17831396  
TCCTTTCCAACCAACTCTTTTTTCACTTACACATGACATTTTCAGATGCCACTAATATGAA  
A\_14\_P124302 CCAGTCGTAGAAGGGATTTTTAACACTACGTTACTCAGTTCTGTCTATGCATTTAAGAAG

A\_18\_P16121147

TTCCTGATCATAACATTAGAGGCAGACTAAACATATTCCTGATTGTCATCTAACACACCTG

A\_14\_P119068 TGTTCTCCATCCTCCATTAACACCATGTTAATAGAAAATTTGACCATTGTAACCTTCCCT

A\_14\_P113875 CTTCTTGGTGATAGAAAGACTTAACTTCCCTGGATCACAAACGATGATGCTAATAATCTT

A\_16\_P20819067

ACACTTCAAGTGAATCTGAAGATATCGGTTTGAGTTGAAGAAATGCTAAATCCCCTAGTG

CUST\_9216\_PI426210822 CAAAGTCTGGAAGAAAAGTCTTGGTAAGGATTTGTTTAGTGGTTGGGGTAACA

A\_14\_P139171 ATACTAGGTGTTCAAATCCCAAGTGATTATTGAATCTTAGGATTGAGTGTCTCCTTGAG

A\_14\_P117885 ACACCATAGCACAAAGTGAGTTCAGTGAAAAGATTTGATTATCTCTAAAGGTAGGTGTTTC

A\_14\_P106123 TATATTTATGTGCAGGGAAGAGTCTATTGCCAACTTGAAATGTCACATCATGAATGCTGT

A\_14\_P107872 TAAGTAAAGTCTGGAAGAGAGAGATGTGATTACCTGGTAAAGAGTTTTCCACTTGACATT

A\_14\_P105564 ACCATGCTCTTGACTTCGTATTCTTTACAAATCCCACCACAAAATGTTAAAAAATAAA

A\_14\_P104053 GGAGTAAGAAATAAACACCTATGACTCAAGTGGTGAAGACATTTACGTTCCATATAT

A\_16\_P15705386

GTGCAGTTTTTCATTGAAAGGGAAAGAGATATGGAAATTGCTGAATACTATGGCTACACA

A\_16\_P19309390

AAAGACACCTACAGGTAGATTCTCTAAATTCTTTTTGTCACCATTTCTGTGTATCACTACA

A\_16\_P00685261

AAAATTAAGTCTTGTGGAAGAGTGAGTAGAAACCAGAGTGGTGATAATTTCTGGTTCTCC

A\_14\_P126013 AAATACGGTAATAATAGAAGAAATACGGTAATAAATAGCCAAAGTGAAGGAGCACGGCCA

A\_14\_P131874 CAGTAGCAATCCTATGCTTACTTTTTAAACTCTTTTTTCTGGTTTCCTGCATAGTGTGCT

A\_14\_P109780 CCCTTCACCTGACTTACAGGCAAACCTTGTGTATTTTTTGTAGAAAATCTTCATATCG

A\_16\_P18095291

TAACATTTCTGGTTATTAGCATTTCCTTAAACTTCCTCAATAGGTCAAGTCTACGCT

A\_14\_P134236 CATGTATATTGACTCTGGATTCCTTGGTAGTGTGCATGGCAGTCTCAGTAGCAG

A\_14\_P120567 GTATATTTCCGGGCATAATTTTGAGAGACGCCAGTCAAAAAAGACTGTGTGAAGTAGAA

A\_14\_P107056 ACAATTCTGTGTTTGATTCAGTGCCTGAAAAGGAATCAGTTAAGTCCCTCAAAGTCTTTA

A\_14\_P130085 ACTCCAAAAGTTTTATACTCCATTCATGTGATAGAAAAGATCCCTAGTGAGAATGTAGAG

A\_14\_P104688 CAATCAACACATCAATTATTTTGAAGACAGAGAGCCAAAGTTCCTGAGGAATTTATTTT

A\_14\_P139382 CTGATAAAAAATATTATGGGAACTCTGCTATGTGTTATCTCTCAGGCTACTCTGGAGACT

A\_14\_P131518 CTTGCTCTATGGCTTCTTTTTTGGCTTCATTGCAAGATGATGCACTGGTAAGTAAAAATTG

A\_18\_P14916333

AACTACGTCTCAGGTATAAGATTGCAGTTACTGATTTAGACACCATAGGATTAGGGATGT

A\_16\_P15223350

AAAGCAGGATCAGATAAACCATACGCTCAACATTAAAAAAGATATTCAGATGGGTTGCTT

A\_14\_P109959 CAGAAGTGAGTAGGCAGTCAGCAAGCCTTAAGGATCAATCTCTGGAATATC

A\_16\_P19911057

AAAAGTATGTGGAAGATATCTCTGGAGTAAGTTACTCAGGCTACCTTTTAAACACATGGTG

CUST\_4380\_PI426210822 ATGGCTTTGCGGCCTTCAGTATCAAATGCATTGTGATTGTGCTATGAGAATTTT  
A\_14\_P122928 TACCAATAAAAATTGAAGTCAAGTGACATTCTATGACCTGTATTTCCAATGTGTCCTCCA  
CUST\_1684\_PI426210822

TCGTCTCTGCAGAGGGAGATCAACCTGAAAAGATCTGTTTCTGAAATATATGTG  
A\_16\_P38492865

ACACACCACTAATCTGTATTAAACACTACTGACCATGTAAACCTTTTATAATGGCTGACCA  
A\_18\_P22842831

ACAATCCATGGACACTATTGCCTATAGTAATGTATGTGGCACATCTGCACACAAAATTTAA  
A\_14\_P120012 TGTCAGTCTGACATTTAATGTCTTTCTATGGACAACATTAAATCTCCCTCCCTTCTGTAA  
A\_14\_P137874 GAGCCACCACCATACTAATAAGACATGACAGTCACAAGTTTCTAAGTTATAAATCCACAG  
A\_16\_P20217245

ACTTCATCACTTGATCAATGTTTAAACCAATTTTAACTTCCCTATCTCAGCATACTTATG  
A\_18\_P20344008

ATGATGGAACAGCACCTAAATTCAAATCTAGTCCTATGTGATTTATAAGTTTGTGTCCCC  
CUST\_6525\_PI426210822 TTAGTGAGGGCATGCTGCCCTAGTTATGATATTGCTCCTAGGAAGA

A\_14\_P136348 ATTGAATGTGAGTTCCACGTGATCATAGGACATTAGGATGCTGTGATGAGAAAAGAG  
A\_14\_P111361 GAGTAAGACGCCATATAAGATTGCTATGACTGATTTTGGTCTAATGCTTCACTCTAACAC  
A\_14\_P121553 TGGTCGTTCACTGAGGAAGATCAAACCTGGGTGTTTGTTTTAAACATTTATTGAATTTTCTA  
A\_16\_P19076708

GGGTATGTAAACAGATTTTTTACACAGCCTAGTTAGTGTTACAATCAGGTTATGAAGGAG  
A\_14\_P200089 GACCTGGAATTTACATGGTTACTTCTAACTTTGCCATTGGCTTTTAAACATTTTCGTGTT  
A\_14\_P125648 TCAACCTAGTATGGGTTATGTGGTTCTAATGAATCTCCACTTGATTATTGGTCCGTTTAT  
A\_14\_P122996 GCCTTTGATGTCCTAGTGGTGAGAAATAAGGATATCATGCTTTGTTAGGTCCCTATTATC  
A\_14\_P113807 CTGAGACAGATGATGTGCAAAGTGTTTTCTCACTGGATTTGCACAAGTTTGG  
A\_14\_P131555 CTATTCAAAGACAGCATCTTTCCATGTCTATGTTAAGAGGATGAGATGTTCCCTTATCCT  
A\_16\_P21541588

AGTAGAAGGTAGACTCTAGGATTATCCACACATAACCCTTCATGTATTTTCTGATCTCCT  
A\_16\_P19583449

AAACTGACAGATGGATACTTTGCTGAGAAAGGATTTTGTAATAAACGATGTTGCTCCT  
A\_16\_P18203168

ACTGACCTTAGTCTCAAACTTTCAAACAGTTCCTCTCTATATCCCTCACTTGCATAACT  
A\_14\_P136706 CTACACATTATTGTTAGGTCTGAGATAAGCAGTTGTTCTCAGACATCTCTGGACATTAA  
A\_18\_P15901499

TACAGAGATCACAGTAACAGTTTACCTTATCTCCAGAATTTCTAACTTCTCAATGGTGGC  
A\_16\_P18553759

ATGTAATCTAGCAAACATACCTTCCTTTTTTATTGCACCCATACAACTTATAACCACTGCC  
A\_16\_P37820942

TGGACTCCTGCTAAGATTAATTCAGTACTTACCAATTAATAAATAACAGCCCAAACC

A\_16\_P36484145

TCAGACTCTGTTTAATCTACACTCTTGACTTTTTCAACTTTATCCTCAAACCTACCTTCCC

CUST\_10424\_P1426210822

CACTCAAGCACTGATATCTGGCCTAAAATCTTGGAAGTACATGTCCATGAATACAAATTT

A\_14\_P109906 TAAAGGTGTCAGAATGTGTCAGAGAATGTGGTACTGTGACATTTAACAGAAGGCATTTA

A\_14\_P105052 ATATAGAAGCAAACAAGAAGTTCTGCAAACAAGACAGTTTGTAGCACACTTGCATACGT

A\_16\_P00636371

AAGACACTGTAAGTAACTCTCATTCCCTCCTTATGATTCCATTTACTACTGCCTAAGAGCA

A\_18\_P16118129

ACGTTGACTGGTGATTTATACCTTATACCCTCTCATTAAACACTCTTACCTAACTACGCA

A\_14\_P135850 TCTCTGCAGAATCTGTTTATGGGATCTGAAAAAGGTAAGATGAGTTTGTGTTGTTTGA

CUST\_4765\_P1426210822 CTGGATGTGGCCACCATCTGCAGGGGTTTCAGCATTGAGATATGAC

A\_14\_P132377 CAACAGTTCAAGCCATAAACTCAAGCATAAATTAGATTGTGTATACCCAGGGGCATA

A\_14\_P130135 GCTCTTGGATCAGACTTCTGTGCCCTTTCATCTAAAAAGCAAATTATCGTGATAAACTAT

A\_14\_P111286 CTTTTCTGACTCTACCCTAGTTGGGGAATAGTGAGAAGATATATTTGTGTGATATCTTC

A\_14\_P105522 TTAATTAAATGCAGCCTCCCTGTTTGTGGAGAAAGAAAAATTTTTCTTAACCCTATTGCC

CUST\_8589\_P1426210822 ACAGATTATAGGCATGGAGGGAAGGCTCATCTGTCATTCCCTCTCC

A\_14\_P107515 TACCAGTCCCAAGATTCCAAATATGAATGATTAAGACAAAACTTACCCCTTGGCTTC

A\_14\_P132511 TGCTTCCTTCTGACTAAATAACTAGCAGGAACCCTAAGACCAGTAGTTAAAGGACTATAT

A\_14\_P123607 ATAAAGTGGAAGGTCTCATCTCTAAATTTCTAGTAGAATCCAACATAAACACATACCCTG

CUST\_661\_P1426210822 TTTGTTGATGGCAGCCTGTTGGTGGGGCACTCAGGCCCTTTTAT

A\_14\_P100093 CGTATTTTCGTGATCAGGTATACTAATCCTTTAACACCAAGTTCGGAATTAACCTCACATGC

CUST\_1665\_P1426210822

GGGGGTAGGATCTCAAACTTTAAAATGAAGTGCTCATCAACAGTCATTTCTTGTC

A\_14\_P116962 GAAAACACAGATATAGGCAATAGTAGTGAAAGAACATAGACTCTGGGACAAGTAGAGCAT

A\_16\_P19658709

AAGTCAACAAAGTTTCCCTAACACTAAATCTGAGAATTACACATATCTAGTCACCGGCTG

A\_14\_P126026

AAAAGGAGCAAGAATAATGCAGACAATGCATTTTGTCTTTAGGAAGAGAAAATCCAGAAGA

A\_16\_P58424441 ATTTTCCACATATATCTCATTGGCCAGCACCATGCCACAAGGTGG

A\_14\_P131113 GAAGTTTTGCAACTTGTTTCATGCTGAAGAAAATGAATGAAAGCCTACACCTTTGATTTT

A\_14\_P109457 CAGTAGAAAATGTGCATCAGATGTTTATGTTTAAATTGGTTTACAGACTGTCTGTGGACTC

CUST\_816\_P1426210822 GCACGTCCTGCGGAAAGACCTGCCGGGAAGACCGCGATGATGAGT

A\_14\_P122267 CTTGTAAATACGGAAGCCTTAGGATCATTAGGTATAGCATCTTTGATATGGTCATTGAC

A\_14\_P201719 GATAAGGATCTTGGGAATTGCATATGAAGCATTTTTTGTCTCCTACAAACAAAGTTGAG

CUST\_8948\_P1426210822 CTTGGAACCACTAGCTACACAGAGGGGTAAATATCAGAAAATCCAAATTTGG

A\_16\_P00068077

ACATGATCCCATCTTAATATCTATGCATTGGGCACTAAGTATAGTAGTCTTTCTGTGGGT

A\_16\_P15991335

TGATCCTGGCTCTAGATTGTCATCTGATTACACATTGTTTTACCAACTTCATGACTGTTA

A\_14\_P130904 CAGGAGATTTTAGGGTTAAGAAGTGTATCACTGAAATACTTCATTCTGCTTGCTACTCTG

A\_14\_P118778 TTGCAATGTTCTGAGGCTGAAAATAGATATTCTGTCTCCAGAAAAGGAAGAATTAGGATG

A\_18\_P16343148

AAACATTGCGTTTTGGTATAACCTTCCAATTTTAAAGAGAAAAAAAGTGTGCCTATGTGGG

A\_14\_P135813 CTCCATTCTTCCAAGACTGCATGTCTGAAAATGCTCTAGATGAACTGAATATTGAATTGC

A\_14\_P138496 CTGTGTTTCAGTTTGGGGGACAAATTTATAAATGTCATATATGTAGACAAATGGATGCTTA

A\_14\_P113399 TCATTGCCACTTGTAGCCAAAAGACCTTTTTTATTACACCAAACACATGTCATTACCTAG

A\_16\_P18299246

ACTTCAATACTTGAATACACAAACTCACAGACTGTTAGAATCTATGGCTACAGGATTGCC

A\_16\_P18953679

CATCTGAACTCCTTTCTCTAATCTATCGTCTTATCTCTCCTATTCTCTCCCTAAACTGAA

CUST\_8776\_P1426210822 CTTACCCTCAATTTTTTTTTGTGGAAATCAATGGTTGACTGTACCAAGCCAG

A\_14\_P113714 CCTCTTCTAGATTTGAATAGAAACATATTGCAGGTTTCAGATGGCACCATTTGGTATTTTG

A\_14\_P200054 CACAACTATCACTCTGAATAACTTCTCGGTTGAAATTCGATGGAGTTAATTCGATCACA

A\_16\_P15870952

GAAGGCTTAGAGTTGTAAACACATTGTTAAGGCATTTCCAAGAAAGTTTAGTGCAACAGA

A\_16\_P00685160

CAGTGTTTTCTGTGTGGGAGCACTTTCCTGTATGCATTATTTTCTTCTTAATAATGGCAC

A\_14\_P129007 ATTTCCGTCTCCTGCTCAGGAATGTCAGTGCATAATAAGAGAAATAAAATGGATTTTGT

A\_14\_P102800 CTGTAACTCAGTGGTGGAGAAAACCCTCAACTCCAGTCTTTTTATGTAAAATTCTTATTC

CUST\_8251\_P1426210822

CTCCTGAGCTTTTGGCATTTTTGGTCAATTTTTTAAACATGAGGTAAGTACTGATGGAATA

A\_16\_P16030304

AATTCAGTATTGAGTTAACCTAGAGAAAACAACCATTGTGCATAGTTACTGAGGGAGTA

A\_14\_P122249 TTTCTACTTTTCATGCTACTTTGGTCTGAGAATAAAGGGCAGGTAGTCAATGAGTAAGT

A\_16\_P01185921

CTCTCCATAAATCATGTCTCCATATCATTGATAACCTCTAAATTACATCAGTCCCGCTT

A\_14\_P119682 CAATTGGCTTGTGCATTGATAATCTTTAATTTACTGTTTTAAGTTGCAGAGATGTGAATGG

CUST\_3748\_P1426210822 TTAGGAAAGGAGTAGAAATGGGAGTTGGGATTAAGCAGAGGTGAGGT

A\_14\_P124986 CTGAAATTCAGATGAAACATTGGACCACCTAAAATAGACCAAACCTGTGAAGATCTAAGTG

CUST\_6826\_P1426210822

ACATTTTTTAATTTAATGAGTTGCTTGTACTTAAGAAAATAAAATTATATGAAAATTAAT

A\_14\_P136474 TAGATCTCAGAAGATATCCAATCCTGTCTATAGGATGCAACATAAAATTGTCACCTCATT

A\_16\_P03254173

TTTCACATCTCTTTCGCATGTCTGTATAAATCCTCAATCTTTAAACGGTGCTTACTACT

A\_14\_P110674 CTTCTGATAAATGACGCCAAACTTGAAGTTATTGCTGATGACATGCTCGTCAAAGG

A\_14\_P112310 CTGGACACTGGCTATTATTCTTCAACCACAAATCAATACAAATCGAACAAAATACATGGT  
A\_14\_P107308 GACTGACCGAGTGCTTTTTTTTTTTTTTAAAGCAAATATTGCCTTTGGGCTTCTCTCTAA  
A\_14\_P122343 CTTTTACAAATGCCGACTTCTGGTTTGTGCCTTTCCCATATTTTATTAAATTCGTGTTT  
A\_14\_P120450 TAGAGGTCTAGATTCTTTGGAAAAAGTGAATGGTGATTCTCTCATCCTCAAGTTATTCC  
A\_16\_P17439576  
TGTCCTTTGACTTCACTACTAGAATTAGGAATGTATCCCCTAGAAATACTCACACAGAAC  
A\_16\_P17140377  
ACAGGAAGTCAGTATATTCAGAATGACCATCAGACTATCTTCGTCCATACTAAGCATCTT  
CUST\_1360\_PI426210822 AATGGAGGGAGGGTGTGTGACCCAGGCTTGTGGGGATGTTGTTT  
A\_14\_P127571 CTTAAGGAAACCTGTTTTACTTCTCTCCCAGATACAGAACTTCAAACCTGTTTATGGTTG  
A\_14\_P121599 GTCCTGACCAAGAGGACCAGACTTTGTTAATGAAGGTAGGTTATCAGATAAAGAACTT  
A\_14\_P100809 TTGGGTGTAATTTCTATGACAGTCCAGCAACATCAATTTAATACCTTTTACATCTCAACC  
A\_16\_P30952351 ATGTTTTCTGAGATCAGGGATGAGGGACAGGTCACTGTCTACATCAACA  
A\_14\_P136526 TTGGAAGAAATTATCTGAAAATGTGTTACTGTAGGAGGTGAGGGTGCTTTTAAGAAACAG  
A\_16\_P17242409  
TCCATCCACCTTTCAAAAAAATCATTCCCAACTATGCTAAGAATTTATTAATGAGTCCCA  
A\_14\_P120427 AAAATAACCTCATTTCACACAGTCTCAAGAAAAGGATTTCCCTTGATAAGATTACTA  
A\_14\_P135767 GCTCTGTTTTGAATGTGGATCACCCTCGGAGTTTACTAATGTTTACAAGGCTG  
A\_16\_P16983965  
CTATTGGCTATCAATGTTTTCCGGAGACTCTAAGAAGTGTGAGACATTTGAGCAGTGAAC  
A\_14\_P116679 ACTGTTGTATTTGAAGTGTTAGCAAAGAAAGAGAATTCTGGTTCAACAGAAAAGTCAGTC  
A\_14\_P104332 CTCTTGAATGGATACTGTCAAAGTTTATGGCTGATTGTCATATTTTCTTCTGTTTCCAGG  
A\_16\_P18683189  
AAAAAATGACAGCCAGAAATGTATGAATGCCGGATAATCACTTAAAGTCTTCACACTGTG  
A\_14\_P122523 TGAAGTCTTCAAATGTTTTGGCATTAAAAAGGGATACACCTAGTCAAAGAGTTGACAGTT  
A\_16\_P58424464  
CACCTGATTAGAAATATCCTACTACTCCAAACACCCTATCTGTCCTCTTTATCTTGCTTT  
A\_16\_P02026386  
AACGTATCTTCTTTACTCCCTCTAAGAAAAACTTGGCCAAAAAATCATCTACTGTCCTTG  
A\_16\_P16734958  
CCTGTAATCATGCTATCAAGACTGTCAGAAACATATCCCATTACATATCCCATACTCT  
CUST\_7320\_PI426210822 CACGGACGGGGTTTGATGTCCAGTAAGCCTGAGCAGCCCTGCAAA  
A\_16\_P17614343  
ATGTGGCTATATTAGTCCTGGTAACTTAAAGTATGACACAATTATTGGCAGTGGTCTTTTCG  
A\_18\_P22841538 AGCGTGTTAAGCAGCAGAAGGGGTCCCAAAACGTGTTTATGTTTAC  
CUST\_3656\_PI426210822 TATCTGTCTGTCTGTCCCATCCCCACTGCCTACTTCCCTCCAGAC  
A\_14\_P113706 ATGCTGAAGTCCAAATAAGCACACTGCTATTAATCTGCATAGATCTAGGTGTTGCAAAGA  
A\_16\_P40862594



AAACAAATCCTAGCCAAAAATGTTGACTTTTATGCAGAATTACTGACTGCCTCCAAATCA  
A\_16\_P21310040

GCCTAAGACATTTTTAACATCACCCCTAGTAGTAACATTTTGCCTATAGTCCTTATGTCT  
A\_14\_P114885 CCTAATCTGCCTTTTTTTTTGGGATTCTAGATTAAGCCTGATCAAGATGACAACCTC  
CUST\_4168\_PI426210822 CCATTTGGAAGCCAGGAGCTTATCCTCTCCTCTTTGTATCAAGCC  
A\_14\_P108554 CTATACATGCATGTGTATGCATGTCACATTCTGGCAATTATGTGTATCCTAACAAATGC  
A\_14\_P130663 TGGCAGCCAAATAAAGAAGAATCGTGGGTAAATAGAAGAATGGCTGTGACTATTTTTCAA  
A\_14\_P135568 TTTGTTCCAATACAGCAGATGAAATATTACCTAGATCTTGCCTTGGCAAGTAAGATGTTT  
A\_14\_P109960 GAGTGTCCCAGACAGAAACAGGTTCTTGGAGTGCTGAGGTATAGTTGTATTTATTTTT  
CUST\_5370\_PI426210822 ATACCTAAGTACCCCCAAACTGGCAGGCACATCTGCCTCTGGGGAA  
CUST\_778\_PI426210822 TGCCCTTCTGTCTTCTGGGTGGGTCTTGCCCCCTTCTGTAGCC  
A\_14\_P136262 GGTAAAGAATAGTTTAAAGGAATAATCAATGAATTGGGCAGTGATTACCTGGCATGATGCA  
A\_16\_P02648927

TTTGTTCCTTTTGATGATATCTAGAGAACTACGTAGAGAAGTTATAATGCTGGCCTGC  
A\_14\_P134982 ATACTTGATCTGATATTTGAACTCACCTTTTCAAACACCATTCTGGCATTGAAGACCAG  
A\_14\_P113640 AACTGAATTATGTCCTACTTTTATTTCTTCTCCCGTTTATGGGAATTCGAATTCTCCTGT  
A\_18\_P14131440 CAAACGAAGACTGAAGCCACAGTGTGCATGTAAAGGGAGTCCAAG  
A\_14\_P122021 AAAGAATGGAGGGGGGCAGAACTTAAAGATATTTATTGCCTAATGACACACACTAAATT  
A\_14\_P126193 CCAGATGCAAACAATCACAAAATTCCTTGGAAATTATATCTCAAGAAACACCAACAGGAC  
A\_14\_P121672 ACTTAACAAATACTTGATTTGTGGGGAAAACATCATCCATGTTCTCTTCTAACAGTTGA  
A\_14\_P125119 GAGAGTGGATTCAGTGTGTTTATACAATATCAAGCAGACCGAACTGATGATATTGACAGA  
CUST\_2445\_PI426210822 AATCTATAGATCATCTGGTTGGCTGGATGGAGAGGTAGTTTCCACATGG  
A\_14\_P109783 ATTCCATTATGATGTGGGAAGATGTTTTAGGGAATTCATGACCCTAATATAGCAGTTTT  
A\_14\_P125866 ATGGAGATCCTTGGCATCATCTCCACCATTTACAAATTCAGGGTAACTGAAATCT  
A\_14\_P125628 AGTGGTATGTGCCAAAATTTGTAATCGTTTTCTAACGTGATCTGGATAACATCTTAGATG  
A\_18\_P24088604

GAGACCATTAGAAACCACTTGAATTCACATCATGAAAAAAAATCCACACTGTAAAAAAGG  
A\_14\_P139960 ATGCAACCCTAGTCAGTCTCCCTTACTAGAAGGAGGGGTTTTTAATCT  
CUST\_1534\_PI426210822

AGAAAAGGCAGAAAGTCTGAAGTTTTATTTTCACTCTCAAACCAATAAATAGGAGATGCT  
A\_14\_P123288 TCCACGAGAGGCCAACTTTTCCAATAAGAGGTAGGTGTTCTCTGTTATTTTTTAAATGTA  
A\_14\_P106244 GGAATTTGTTTTTCCACCTGTCAGTTGGCTGCTTCTAATTATAATAAGGGGCTTCTAT  
A\_14\_P103538 GTGGCACTTCCTTGGGGACACTTTTCTGCGAAACATAATTCCTACAAAGAAATAA  
A\_16\_P19833920

ACACCTATCATGTTTACCTTGTTCAAAAAACTACTTACAGGTATCTAAGAGTTCAGGA  
A\_14\_P126348 CTGAATTATGGGAGAGAAATAAAAATTAGCAAAACATATTTGCAAAGTGGCTCAGGAGGA  
A\_16\_P18231831

TGGCATGAATACTGCAGACTAATCCTACCTTCAGAACATCGTATGTATTAAGGAATGC

A\_14\_P126035 CAGAAACAATTTAAAAGTCACATTTTCCTTAATCCTAAATCCGCGTAGGGTCATAACTGGG

A\_14\_P130519 CTTTATCAAATCCCAACTTACACAGAGGCAGGAAGCATTGGGAGCCAT

CUST\_6820\_PI426210822 TGTATATGATGGGTACTACCATGGTAGTCCCGACTCTGCCACACAT

A\_18\_P22839227 TGGAGTAGACACTCAGAACGGCAGGAAGTGGCACTGTGTTGCAAT

A\_16\_P17506432

AAAAAAAAAAAAAACTTCTGAGGGGTGAGTTTAAACTGTTTGCCATGTATCATATGACCTCC

A\_14\_P136415 CTCTCACAAGTGTGTGTTCCCTTCACTGCCTTTATTCTTCATATCTCTCTCTTTTCT

CUST\_7325\_PI426210822 GAAGTTAGGTCAGTTCTGAGGCTCCCCAGATGTGGGACACTCCT

A\_14\_P137777 CTACAGTCTTATTGCCAAATTAAGTTGAGAATCTGTGATCGTTTGGCTTCAGAAAGAGAA

A\_18\_P26797055 GACATCTCTGAACAATACCAGGCCTCTTCAGGATTCCCTCGCCC

A\_14\_P111191 AATGATGTCTTCAGGTGAGAAGTCTCTCACGTCCACCGCAAACCTCATA

A\_16\_P17494836

TCCCTATTTTCACAGCATACCATACTACTTTCTACAGAGTTTCCAACATTTTGCAGT

A\_14\_P103675 TTTACTTGTGGGTTGTAGAAATTACTTCCCATGGGAAACTAAAGCAATTCCTTCTTCAA

A\_14\_P129679 CTAGCAGTGAAGTGCATTTAAAACCTCAGGAATTGAGCGAACTCTCCCAG

A\_14\_P200382 CTTTTTCATTGTTGAAGTTTGCTTTGTGCGATGTGTGATTTAGGACTTCCCTCTGTTTCAA

A\_14\_P116734 GTCATCTATGAGATCTGAACAAATAGAGGAATTCTCTAGGACTGTATACTCTCTATTTTG

CUST\_1998\_PI426210822 CCTAGGATCCTTCCATGTTGTTCTCCCATCAAGTAGACCTTTTTGCAATT

CUST\_4838\_PI426210822 CAAAAGTAATCAGACAAAGGGCCATGTGGCAAGAGCTCTTGCTTCA

A\_16\_P16191375 ATCAGAATGACTTCACCCAGACTTCTGGACCTGGAACCTCATTCTCAG

A\_14\_P130240 ATTATCATTGAGCCTGGATTCTGTATCTATGGCCTCCTCACTGGTGTGATTGATA

A\_14\_P115362 TGTTCTAGAGATGCTTGTATAGGCTGTTAATTGTGATGAATAAACGTTCAACCCCTCGG

A\_14\_P100850 AGATATCCTCTGAGAGCCAAGCAAAGAACATTAAGGAAGGAAGGAGGAATGA

A\_16\_P00685114 CATCAATGTGCTGTGGGGAGATAGGACACGTTTAGAGGTGCTCTC

A\_14\_P100841 CACTCATTCTTCACTGTTCTTGTTGTGATTTTTCAATGAAAACCTTTAGAATTCAGGAG

A\_16\_P03809416

TGGATGATATGCACATCACATTAAGAAAAGTTTTAGTTTGTGTCTAAGTTCACTGCATAG

A\_18\_P11240836

AGATCCCACCTAAACACAATTTCTTTACAAACCTGTCAAAATTATTGAGTATCCGCTGTG

CUST\_4491\_PI426210822 CTAGTGGGGGATGGATGAGGGCTAAGGCATGCTTTACCCCTGGCT

A\_16\_P02510974

TACGAACAATTTTTGAGGTCTCCAACCTAAGTGACAAAGTATAGTTCTGAAATCAAGGCG

CUST\_3906\_PI426210822

TTTTAAGGACTACAATCCTTAGTTTCTTACCTACTCAAGGTTATGTTTTGTAGATGCTAA

A\_14\_P137642 CTTTGAAACTCCACCCTTCTCAGTTAAAAAATGTGCTGCTATTTTTAAGTGGGAGAAAA

CUST\_4011\_PI426210822 ATGGCTGTGCATCATCCACCCTGGAGTATCTGCTTGCCAAAAATA

A\_18\_P22841279 GTCTGTGTTTATGTGGGTGCCTGGGATGGAGAGGTATCTAGTTCAATGATAAAATTTT

A\_14\_P126216 GTAGGAAATAATTTTCTCTTAAGGATGACCTAAGAGAAAGTAAGGCCAGGGATAGGTATC

A\_14\_P139595 ACATTTCTATTTTTAAAATCTTCAAACCTCCACGGGGGGTGGCAAATGTTAATTCTGATT  
A\_16\_P17228332

AGACTCCTATGACCATTAACCTTCTCCAAGACAAATCCTTTGTGAACCAGATACTGAATAT

CUST\_66\_PI426210822

ACTGAAACATGCAGACACCTTGAGAAAAGTGTTTTGAGTTTTTCTTTTACTCCAATAAAA

A\_14\_P202320 CTTTCATTTGTGAAAACCTCTGTTTTTCTTAATGGCACCTGTTTATTTATCACTTGGCAA

A\_14\_P102352 TTTCTGCTTTTGTCTTTCCGGTTACTTTTTTAAAGGCTGACCTACTTACTGAAGATTATGG

A\_14\_P133043 GCTGTCTTTAGTGAGTGAGCAAAACCTCAGCCCTGCATGTTAAAGCAAAG

A\_14\_P137670 GAATATCTCCTCTAACTCAGCAACCTCCTTATCACTAAAGTTACCTTTAGACCAAGGC

A\_14\_P112530 CCACCCAGAGTTATCAACTCGTTGGAAAATGATGTTGAAATGTCACTTTTAATATTTAC

A\_14\_P136219 CTTGACTTTATAATGAGTTCACCGAGCAGAATGAACCACACTTGAAATCAAATACTTTGC

A\_16\_P20817692

ACCCTTCAAATATATGACTAAGCCTATTACATGAAGAAAATGTTGAGAATAGTGCCTCA

A\_14\_P125383 CTTTTTGCTACACTACATTGCATGTATTTGTTCAATTTTGTGATGAGAGGGGATAAGG

A\_14\_P127306 CCCTGTTTTAAATAAAAACGATTCACTTTTAAAGCCTATCAAAGGTCTGTCTGTAAAATGC

A\_14\_P101110 GTAAGCAATTGAGAAGAGTTTCTTATAGATCCATCAGGGAGTAGAAGAAAGATAGGCACA

A\_14\_P108012 GTGTGCATATGGATATCCATGTGCATTTTGGGTGGGAGAATAATATTATTTCAAGGAAGA

A\_14\_P120807 ATTTAGCCTAGTGAATCTTAGGATTTTTTCATCGGCCTTCAGTCACTAACTCCATGTCTTT

A\_16\_P21415914

CCATCTGATTATGCCATGAGTGAATATGTTCCACCTGATAACAAAATGAGTTGAAAGTCA

A\_14\_P134409 CTTATTTTTGCATCATAATGTCCCTGTCTCCCTCAGTGAGAAGGATCTAGAATATTACT

A\_14\_P126029 TCTGTTTTTCTTTTTGGCTGTTAATGCTTGTCTATAACATTGGAGCCATCACAGAATGT

A\_14\_P107834 GAGGGTGAGTTTGTGGGGGAAATTCATAATGTATACTTCCAGAATATTTAGAACTTTCC

CUST\_3432\_PI426210822 GTGCTGTGTGTCACAATAAGATAGGACACAGATGCAAAGCAGATCGCTAC

A\_14\_P200663 GACAGTTGTAGCAAAGAGTTGTAATATCATGGCAATCTCTTTCTCTGGGAACAATGAAA

A\_14\_P124819 GCTGCATTTCTGGATTTTTTCTTCATTAAGTTTCCACTATATTTTCAATTTTTGTCACTG

A\_16\_P03236825

CATTGAGTAACCAGATTCCATCTCCAATAATCACATCACAAACAGCATGAAATGTGAACT

A\_16\_P20258298

GTTTCACAACTGAAGACTACGATCAATGGGTAAATTATCTTACAAAGGGAAGGATCAGA

A\_18\_P14789527

ATTTTTGCTATCCGCATAAACCTTTAGTGAGTCTTTCAAAGATATGACCAAGTCCAACC

A\_14\_P112213 CTGGGGTAAATTTGGAGTTCATTTTGCATACTGTTGTTTTTTTCAAGGATTGTAGTCTCT

A\_16\_P39444686

TGCAAAAGTCTCATGATACATCTTTCTACCTCCAATTAATATAGCACTCTTAATGCCAGA

CUST\_7427\_PI426210822

CACTTGATAAGTGGTAGAGCCAAGTCAGTTTGAAAAAACATAATCATTGTGCAATGACA

A\_14\_P109212 AAACGTTTGGCACAAACAGCAAACCTAATGTATTTCAAGAAGAGATTCTTGCATGACATGA

A\_16\_P17683538

CCTCTTTGAACCACAATACATCCCATGTCTTACTACAGTATAGTTACTCTAAGTTAGGCC

CUST\_514\_P1426210822

CAGTGTTTCAGAATCACTCCTGGGTTTGTAACTTTATTAAGAAACCCACACAGAG

A\_14\_P122507 GATGGATTACTCCACAACCAGTGTTAGGAAAACCATTTCAAGGAATAACAGTAAGTCTTA

A\_16\_P19142464

GACCTCCCAAATAGTAACCACTTACACAGAAACAACACAGATTCTACTAAAATGGATG

A\_14\_P201013 CTGTAACCTCCATGTCCACACTATACTAGAGTATAGTGTGTTTACAGCAGGGGC

A\_14\_P134906 TCTACAATAAGATTACCTTAATCTTACCTCTGGTAAACAGAATTCCGGGCACAGAATCC

A\_14\_P133355 ACCTTATATATCTCTATGCTTTAGAGCCTATCTAGCAGGTTTGCAAGTGCTGAGTGAATT

A\_14\_P201715 TCACGCTGCATTAATTGTCATTTTTCTCTCCCATGTTCTTTCTCACTTTGATACGTTAAT

A\_16\_P01584433

AAGCCCTGAATATAAGTTACAATCAAGCCTTAACTAGATCTTTAGATGCTTAAACGCCACC

A\_14\_P131502 CAAGAAAAATCCCGAATGTTACCTTGATAGATAACTTCTGGCAAGAAAGAACAGACCAC

A\_16\_P19835390

AAAAATCATCCAGTTCTGATTTGGTCTTAGTCTGAGTTTGATAACTGGTTACCATTCTCTG

A\_14\_P119788 TATTCAGATGATCAGTGAGTTGAGTCAGGTTTTGGATTCTTTCTGACCCAAGG

A\_16\_P34777188

ATAATCTCAAAGCCTCTTTTTAGGTCATTAGTGTGCGTTTAGTGAGATAATGGACCCTCT

A\_16\_P00797791 CTTCGGCTGTTATTCTCATCAACCCCTCTCTATATTCTGCAAGACATTGAAATCTTTCT

A\_14\_P137277 CTGCACATGTAAACTTAAATATTTAAACTGAAATGGGATGTCTTATAGAATGATTTGGGG

A\_14\_P124715 AGTGGCACGAAGATATTACTCAGGATCTTCGAAATCATCTTGTTACAAAAGTGAAGTAA

A\_16\_P40032194

TCACTCTTGTTTTAACTCCATTATTACTGACTCACATGAACTACTCTTCCAAACTGTTCC

A\_16\_P19136241

TGTGATTCTACCAAAAAGTACAGTAAACAAGAACTTTATAGATCATTGTCCCCCTCC

A\_14\_P129294 ATTCAGAAATAGAAACTAGAAAATAGTTAAATAGTTACAAGAAGTTGCAGGGGGGCACGG

A\_14\_P130943 CCCTCTGAGAGGGCTTAGTCCTCATGAAAATGTATTTGTATTACTCTTGAAGTTTACTTT

A\_14\_P106540 AATGGCAATCTTGGCAACCAAAATACTTTCCGAAGCCTTTTCCAGGAATATCTGTAAATA

A\_14\_P124441 GAGACTGAGAAGTTCTGTCTGATTTATCCATACATGAGAAATGGAACACTTTTTGACAGA

A\_14\_P139680

GAAGATGAAGGAAACATGAGATGGAATACTCAGAGAAGTCTGAAATTTGGTAACAACCTTG

A\_14\_P108829 TTACGTCTTCAGAGTAATTCACCAGAAACCACTTTCTTTTCATACAACAGGTTTCACTAAC

A\_16\_P17148804

TTGAGCAAGTAAAGAGAATACAATTTCCCTATCCAGTTCCCTAAAATACAGACACCTCCCAC

A\_16\_P16191449 AGTGAAGAGGTGGGAGAGTGTGCTGAAAGGTGGGCAGAAGCCTCT

A\_14\_P134859 GATTATACCTGTTGTTTCTCCCTTATCTGCACAAGCAATTATCCCTTAAAGAACTCAAGG

CUST\_95\_P1426210822

AAGGCAACTTTTGAAGAATTGCCGTTAAGAGGTGCATTTAGCTGTGTCAATCATTTA  
A\_16\_P58424486 CTCATCTGTAAGGTGGGAAGTATAAGACCTACCTCACGGTGTCAAGTGTAAATAA  
A\_18\_P16653083  
GAGGATCAGACAGAACATCAACACAATTCCATTTTTTCATCTTATTCCTATACCCAGAGAA  
A\_14\_P139570 AAACAAAACCAAAACCTACAGGGACTCTTCATTTCTGGCCTGCAAGGAAT  
A\_14\_P130211 GCACACCAGATCTACCAGTTCACAGATAAGGACAAGGACAACGTCG  
A\_14\_P101456 TAGAAAGGCATGTAATTTGATCTGAAATATTGCGCAGGAACAATATCAAGTCTCAGGCAA  
A\_14\_P110823 TTTTCATTTTCTACACTTTTCAGAGACTAGGCATTGAAAAGACTGACCCACCACA  
A\_14\_P138147 CAGTTTCTGAAGTTTTCCCAAAGGGAAATAACCATTTAAACATGAGGGTCTGATAAATC  
A\_16\_P19774375  
TGGCAGACTACAAATCTAGATTATGAACATGAAGAATTGATATGAATTCCCACCACAGTC  
A\_14\_P201044 CCTGGAGTATTTGAGTTTTCCCAAAACTCCTATCTACCAATCTATCTGCATTTTTTATGG  
A\_16\_P19432994  
ATGGCATTGGTTAGGGATACATTAGGGACATATCTAAAGCATTCCAGTTATGCAACTTTT  
A\_16\_P15718364  
AAGACGTTTTAAAGTATATTTTCACCTGAACCACTTGAAACTTTCCATTTTGGTCTGGCA  
CUST\_7328\_PI426210822  
TGTTGTATTTACTTTTCTGGATTTATTTTCACAAATATTCAGCTTAGAATGTGCCAGGGA  
A\_16\_P18062630  
ACTGTGGGCAATAAAAAACGAATGATGAGCATTATCAAAAAGTTCCGTGTATAGTAGGG  
A\_16\_P02588096  
AAAAAAAATGTAGATCTGGATTACTCAGTGAATCCTCTAGAAGCCTAAAACAGGGCATC  
A\_14\_P106488 CTCTCCAGAAAAGATGTAGGAACACCTTGCTTACTAGAAAATTTTCTCTTCGTATCTGCA  
A\_14\_P123861 TATCTACACCAGGCCCTATGCTAGATAAACACTAAAATATGAAAATGAAGGCATAGCCC  
A\_14\_P100542 TCTGCCAGAAGGACTATTTTCTGAGAGAGTAGGCACAGCATCTATAAAAGAACAAATAA  
A\_14\_P120542 TAAATAGGTGGCGTTGCACCAATTTCAATTAATTGATCTGTGTCAATGTTCTAATGAGTGC  
A\_16\_P00685461  
AAGAATGTTGCTTGTTAACAACCTTTGAAGGCTTTTTAGCAAAAACAAAGTGTCAATTTG  
A\_14\_P115409 ACTCTTCTCTCTTGCATATCTGTTGTTCAAATTCCTTGGAATTTCCAATTTGCTAGCAG  
A\_18\_P11356424  
AAAAAAGAGTAAATGTAGCATAGAACAAGTGGATCACCAAATCACATTTTAAACAGGGT  
CUST\_3459\_PI426210822  
ATCCAACATCACTGAAGGTATGTATTTTTAACTCCTCCTTTAAAGTGGTTTTCCAAAGTT  
A\_14\_P115371 CTCCCTCAATGATCACAATCTAGACAGGGGACAGAAAATTATGAAAATATGACAAACAAG  
A\_16\_P17925571  
AAAGGAAAATTTCCCAAAGGACATAGACAGTAAAACCAGGTAACTATAGGATTTGTCTCC  
A\_16\_P39225861  
TCACCCTCATAATTAACCTCAAGTCAATTACACCATTCTGAAATATCTCCTCTTCTAGGCA

CUST\_8939\_PI426210822 TGGGCTGTCATGTGATTTTGTTTACCCGTTTCGGTTCAAAGACAGAA  
A\_14\_P125088 CTACGCTGATGCATTTGATTCCTATTGTGAAGAGAGTGATGAGGAGGAAGAAGAAATAG  
A\_16\_P19794233

AAAAAGTTAACTATGTTGTCAACAACATCACTTCCAATGTAGCCATCATCATATCTTTGA  
CUST\_9874\_PI426210822 GTGTCCATTTGCCTCATCCCCTGGCACACGCACACACTCTCCTAC  
CUST\_8006\_PI426210822 GTCCTCAGGCTCCAGGCCACATGCTAAGCCTCATGGCTATACTTT  
CUST\_4450\_PI426210822 CTTGGGCCCGCAGGCTGCCTCTGCACTGTTAGTCTCCCTGACTT  
A\_14\_P132373 CTTAGAACCAACCAATTTCTCATATTCCTCCATCACACACACTGGACATATAACATTAT  
A\_14\_P139448 GTCAACCCATTAAGGAACCAGTTCATGACTGAATAAATGATGGAGAAATTAGGCAG  
A\_14\_P128884 GGGGAGTGTGGACAACAGAGTTCGAATGGTATTAGGAATGTGATCTATCATAACAAAT  
CUST\_140\_PI426210822

TAATATAGCATAGTATTTGTAATGAAAAATTGTATTCTAAACCTAAAGATTACTAAGCCA  
A\_18\_P22840702

ACATATTACAATATTGCCTTTTAGCGTAGAAAAGCCCTCCTTCCTGATGCTCTTGCTAG  
A\_14\_P202209 GAGATTTTGCAAAATCAATAAAGGAAAATACTTATAGAAAAAATTATGCTACACCCTCTA  
A\_16\_P01977922

AAAAGTGGTTTTAGAATGTTAAATGTGTAATCCCTCTGGATAGTCTAGTTGAGTTGCCCC  
A\_14\_P126867 ACCAATAAGAAGATATAGATATACCTATGAAAAGACACAGGCTGGTGTCCACCACAACTTC  
A\_14\_P115154 GAATGCTACTCAAGTTCAGTTCTGATCTCACCAAGAAAAATAAACGGATCACACTGTCTA  
A\_18\_P22840356 TAGGATGGCCAAGTCTCCATCTGGATAGCCCAGCCTGTGATCAA  
A\_16\_P01764621

AACACTGGACACTATGAAGATCATAGATATTAATATCACATTTTGCTAACACAGTGTGCT  
A\_14\_P116652 TTCCTCCACAAGGACCAATGTATTTCTTTCCACTCTGGAAAGTGAAGCATCTTATTTA  
A\_14\_P133975 ACTGAGTTGTTTATTTCCCTTACAGGGATGAGAAAGATAGTCAAGGAGAAAACATGTTTC  
CUST\_282\_PI426210822 TGTTCCAGGAGATCAGCCTTCAAGAGAACCAGTTTTCAAAGCCCTC  
A\_16\_P00290185

TAGTAACACCTGAGTGAATGAGTAGATAATCCTAAATTGCCAAAATGACTACCTACCTGC  
A\_16\_P35881705

ACAGGTTAGAACCCCTAAAACAGATGTATCCCACCTATGTAATGGTTACTTTCAATATCT  
A\_16\_P40973292

TTCACCCTCCACATAAATTTGATCCCATAAATCTAGCAGTTTATACTCAAAGGAAACG  
A\_16\_P41646474

AACAAAATTACCAAGACATGCAAATGATGTTTCATATTGCAATGGTCATTCAGACTTTCT  
A\_14\_P138026 CTTAAGTCATACAAGTTTCCACTGCATGTAGAATAAGATCTGGGTCACGAACATTTGATT  
CUST\_5213\_PI426210822

AGTGGGGTTATGTGATTTTCATAGATGAACAATTTTGGCAAATATGTTAATTGAAGAGTA  
A\_14\_P122311 AAACCACTGTTCTATGAAGTCTCACGAGGCAAGTGCTCAAGGTAAGGAAAGAGT  
A\_14\_P127086 ATCTCCGGTCAAGGATCTGTCCCTTCTGCCTATTCCATTCCTAGA

CUST\_3393\_PI426210822 AGCAGCCTCTCTGACTCTGAAGACGCATGAATTGCTGACTGTTG

A\_18\_P12805151

CTGCACAAAGTCAGTCTTTATTGTCACCAATATCTCGCTTAAAAAATATCCCCTTCCTT

A\_14\_P120245 TGACATAGGGATTAGATCATTGGAATTTTAACCCACAGCACAAGTCCTTCAATCGTTTT

A\_14\_P101579 CTGTATTTATTTCCCTCCCTTTTTATGCCTCTCAAGTCTAGTTACACTGTTTTTCATGGA

A\_14\_P108066 AATCCATCAAAGCGATATTCTTCCAACCACCATCTTAATGTTTGACAGAAGGAATCTTAAA

A\_14\_P139043 AGAAAAAGTAGTTAATTATTATCTTACCACTAGTTCCTGGGGGTTGTAATACATCTCCTG

A\_14\_P102042 AGAATGATCTCCTCATAAGTTTACAGTATTCAGTTGCTCTGGGGCATTACCTTTTGATTA

A\_16\_P00001417

GCGTCTTGAGTTTTGATAAATCTATCCTTTGGCTGATTAATATGACTGAGTGGTGTCTTC

A\_14\_P112203 TTGGGTGAAGTTTCCTTCTGCCCGTTTTTCTTGACCTAGATAAATACTTTGAGAAAT

A\_14\_P112656 TTTAGGGTTCTGATTGCCAGTTATTTTCATCAATAAGTCTTGCAAAGAATGGGATTGTCA

A\_14\_P123621 GATAACAAAACCTCTACCATCAATAAATACAAACATGTAGCCACTGACTACTGACCTGACC

A\_14\_P110073 CTACCTTGCTACCCAAGTAGTCTAAACATTTTATCTTTATCAGGCACATATACAGTCT

A\_14\_P109330 ATGAACAGGATTAATTTATTTGAATTCATTCTTCAGTCACTTTGCCTTTTCTGGGCACTG

A\_14\_P122064 AAAGTAAAACCTACAATGATCAGAAAGCATGCTTTCTTCTGGCTTTATCATTCAACTTCC

A\_14\_P113567 ACATAACACAGCATAATAGGTAGAATCTCCTCATCATCTACGTAATTCTAAAGCCCATGG

CUST\_2302\_PI426210822 AAGGAGGATGACTTCGCAGGGGCGGTCTATATCTATCATGGTGAT

A\_16\_P00685506

CTCTTTGATAGTGGA AAAAAGATTTACACAATTAGTTTAGATCAGGTGAGGACCCACTGA

A\_14\_P132563 ACAATGCTACTGAAGTAAAAGTGCTTGAAGTCTTGTGAGCATTGGAGAATTACATTAGG

A\_14\_P116018 TTCTTGCTCCTTAATAGAATTAATTCCTAGTAATGCTCCCTTGCACTTTTTTCAGCACTT

A\_14\_P126290 CTGGGCTAAGGAACAAAAGTGCCATATCCTTAATTACCACAAATGATACCTAATTACCT

A\_14\_P134042 CGGGCGACCCCTTTAAGTTTAGAAATAATTGAAAGGAAATGTTTGAGTTTTCAAAGATCC

A\_16\_P15310201

GTGTATAAATTGTTTTCAAGTTGGATACTTTCAGACTGGTTCTATCTACCCACACTCACC

CUST\_8936\_PI426210822 ATACTAGGTCATTCTTTAACTTCTTGCTCCACCTGCTCTATCCCCAGCT

CUST\_9563\_PI426210822

TTCTTATCCCTGGGGTAGTAATTTTAATTAGATTCTATTGATTCAATTATTTTCTCCTGT

A\_16\_P19563574

AAAACAAGATCCAGAAATATCATAGGCAATCTCTTGAATGTTTCACATACACAAAGCCGC

A\_18\_P22841924 AGAATGTTGCCAACATTCTGGATACAAAGAAAAGCACCCCTCTCTGTGACTTCT

A\_18\_P22842284 CTCTTAAAGTTAATTTTTCACATCTTGTGTTGGATCCTCAGAGCCCGTGCTTCCAAA

A\_14\_P109687 CAAGAAACCATATTTGTTTGTAGAGGAACAGACAGAAAATTAATGTAGCCAGCCATTAC

A\_14\_P136680 CATCAGTGCAATCTACTGGCCAATGACAAGGTGGTTAAAATGTCTTTAGTAGGTAT

A\_16\_P15542520

AACCTTTCTACGTGACTCTACTGAAAACTCCTCATTGCAAATCAGAACTACTTGTAT

A\_16\_P39648255

AAACAAATCAACATTGCTATTAATTTTTTCCCAATATCAGGCTTAGTTACCAAATGCAGA  
CUST\_3381\_PI426210822

TAAGTTGATGAATAATAGGAAAGTAAATTTGTGGGGTCAGTTAAACCACCAGACGACAG  
A\_14\_P103886 AAAAGGCTCTGGATTTCAGAAATCCTCTTCAGAGCGAAGAAACATGAAAATATGAATGTAT  
A\_14\_P122439 ATGAAGTTAAGATGTGCATAGAGTTGGTGTGACTTCAAGGTCTGTGCTCCTAAATAAAAA  
A\_14\_P111590 TTTAGGCATGGCCATAAATACTCAACTTTAGAGGTAACAAACATCATGGATGCTTTTCAC  
CUST\_2186\_PI426210822 AGAAGGTGGACTCTTGAAGCACAAAGAACTCCCCAGGCCTCCACT  
A\_14\_P121626

AAGCAAATGAATTTTCGACAGAAGTAGAACGTGTATGGTAGAGAAAAGAAATGCAGAGTA  
A\_14\_P114775 CTTGTTTCGATTATGTATTTCTGTGGTATTTTTGTGAATGGAGTTGGAAGTTTTCGGTGC  
A\_14\_P125327 CTTTCAGAGAGGCTAGTGAAGAGGAGAGGAATGTAGGGTGAATTTGAAATGTGATTAATAG  
A\_14\_P122031 GGTTAACTCCTTAACCATATGTTAACTCCTTAACCTTATGTAGTTTGATAACTGGAGGACC  
CUST\_8946\_PI426210822

ATCAGACTGTTTCTGTTTTTTGGATTTTTGTCTTAAATAAACACCTTGAACCACTAGC  
A\_16\_P19431577

ACATTCCAACATTGAACTGTTTCTATAAAAAACCATCCCCATATAATCTAGGTTCTCCATC  
A\_14\_P118349 CTGCCCTAACGCACCTGCAAGATATGATACATCCCAAGTTTTATTCAACAAATATTA  
A\_14\_P117133 GCAGGGGATTATTTTTCTGGTAAAATATGATAAAGGAATGCACTTGACTGGATATCTCAGT  
A\_16\_P58424118

TTATTTAAGTTCTCTGTGCCTAACCAACCTCAAGGGTCTATGAAGAGGACTGAGTTAAT  
CUST\_5713\_PI426210822

ATGCATTCTAGGCTTCTGAAACCTTTTTTAGAAGAAAATCATGGTTTCTCAAACCTCT  
A\_16\_P00871748

AGTTATTCATGTGGCATAATCGGTTTTAACACTTAGTTCAAGGCTCACAAAATCCAAGTG  
A\_18\_P16132459

AGAATAGACGTAAGGATAGTCTTAAATTCCTCAGATGTCAAGGTAAGAAGAATCCGTGG  
A\_16\_P41616529

CAGACTGGCACCAAATTACTTCACTTTTCAGGTATGTTTAGCATTTTCGTCATCCTATAAT  
A\_14\_P102534 GAAAAGTTCATCATATAGTGGGAAAGACACACTAGTAAACAATTTCCACACAGGCAAATG  
A\_14\_P112567 TGCCTTTGACTTCGTTTTGTTCTATCGAAGCATGTGCAGAATTGTTAAATTTAATGTATT  
A\_14\_P130844 GAAACCCATGCTGTGAAATAGAGACTTTTCTACTGATCATCATAACTCTGTATCTGAGCA  
A\_14\_P115034 GCAGGAAAGGAGGAAGAATCCCTTTTGAAGCCTGATTTGTGTTGGA  
A\_14\_P110455 GCCCAGGCTAGAAGATGACAATCTACAAACACTTTTATTAGCAAAAGGAGTAAGTGCAG  
A\_14\_P122027 TGATCAAGGTAGTGTTTAACTGCCACATTCCAAAAAGTGAATTCTGATCAGCCTTTTG  
A\_14\_P135675 TATAACTGTCTTCTATGGGAGGAATGAACAGGTGTCTTTGGGACATACATACTTTCTATG  
A\_14\_P130237 GATCGACTTGCACTTCTGCTATTTCTACTTCTCTTGCTGTCTTTTCTTACTTCAAAAA  
A\_16\_P18159774

ATTCATCTTATGAACTGACCCCATAAAATTTCTTCATATCAAACAGTTCTCAACCACGTGG



A\_14\_P118507 CTGAGCAAAAGACATCAGTTACTGGTGTCTGTAGATAGGGTTGTTTTGTTTGTTTTAAAC  
CUST\_5569\_PI426210822 AGGGTCCACTACTTTAAATGCCTTGATCTCTTCACTGAGCCCATGTT  
A\_14\_P138901 GAGAAATGAACTTCAACTGGTTGATCTTCCAACAGGTTTGTTTTTAAAGATCCAAATAGG  
A\_14\_P125262  
TAAGGATAAGACAGCACCATTCACAAAAGAAAAGGAGAGAAGGAAAATTGAGATTCAAGA  
A\_14\_P104098 ATATTGTGGGAGAAGAGAAAAGGATGGTTCACAAGAACAAGGAAATCTTCTTTTCATCTA  
CUST\_6521\_PI426210822  
CACATTGCAGGGGCTATTTACATGTATGATTTGCATCATTGATTTTATGATACATTGTTG  
A\_18\_P16624617  
AAGAATGGTAAATGGAGATGCTTAAAGTTAGTATGCCTAAAGTTAAGATTGGTCCTTGCT  
CUST\_8590\_PI426210822 ATCTGTCAATCCTCTCCACACCCTGGGACCCTCAAATTGTTTCT  
A\_14\_P106547 CTACATATGGTGATTGAGAAAATCCAGGTATGCCACTGTGCACATTACTAACATCATAGA  
A\_14\_P139233 TTGTTTCTAATCATAAGGCCGAGTTTCCCATGATTGGTGTTTTAAAGTGGAATATTGATGT  
A\_14\_P139761 CTATCACTTAAAAACAGCCAGAAAACCTAACTGCATGTGTGACTGAAAATCAAGTTGTAA  
A\_14\_P127869 TTGTCCACATGATTTTCTACTGTATTTGGGAAAATTTCTTCTCGACCAAATATGGAA  
CUST\_1773\_PI426210822 TGAAGTTCAGATGGTCAGGTAGAAAATGAGTGTGATGGAGTCTTGATTTTCCA  
A\_16\_P38839881  
ATCCCATTTACAGAACTGATCAAAATACTGTTACTATGTCCAAAACCTGTTATTTGTCCCT  
A\_18\_P14131930 GCAATCCCAAGTCTGTTTCAAATCTTTTCTTGAAACCCAAGATCACCACAGATTC  
A\_14\_P118068 TGTCTGCTTTTCAGAAAACCAAGAAAAGACAGAAGATCAATATGAAGAAAATTCACACCT  
A\_14\_P106013 CCTTCAAGTCTTTCAATTTCCCTCTCTCGGCTCTGAATGATCCTCTTGATATCATT  
A\_14\_P202368 GATTAACAAGAATATTAGACAAAAGACTAAGTATCGAAAGACTATATAACCAAGAGATACA  
A\_16\_P17556305  
CCTATATTTCTCAGCATTCAAACATCATTTCCTTTTAAACCTTTTACAAATAACAGCCAGC  
A\_14\_P137171 CTGATAGTTTAGACTAATAAATGTGCAGCATTCTCTTGGTGACTGTTATTTGTCCAGCAG  
A\_14\_P136283 GCTTCCTTTGAAATGATTTCTCTCAAGAAAATTGTCAGTGTTTACTGAGAGCCTGTATTG  
A\_16\_P02237237  
AAATAGCAACAGTTCTATGCTCTGTGTAAAATCTGATGAGTTCATCTTTGGTTCTTCCTG  
A\_16\_P20390381  
ACCAGTTACCTGCATTCTAACTACTACTAGACATCAGATAGCACTTTACATATCATTACC  
CUST\_7155\_PI426210822  
GGTCCTTGTTTAAAGAAAACCAAATGTAGGTTTCAGAATAGTTTCTTCTTTCTTCCACGTC  
A\_14\_P103583 ACTTTGAGAGGCTTCTACATTTTCTTTGTGCTATAGTGATGAGAAGGAAAATGCTTTAGA  
A\_14\_P125559 AGTAGGAGTCAGTGGCCTTTTACATGTAGAGATTGTTTATTTAGCCCTTTTTAAAAGGTC  
A\_14\_P124224 GATTGATGTTACAAACCTCCCTACTCCTCGAAAATTCCTTGATACCTCTCACTATTCTAC  
CUST\_4596\_PI426210822 GACTCAGGAGTCTGACCAGGGGCAAGCAGGCTGCCTCTTGCTCCT  
A\_14\_P129572 GTTCTGTGTCTCTAACAATGTGTCTCTGCCTTCACTGTTATTACCACTAGTTTACTCTTT  
CUST\_10390\_PI426210822

ATTTTGAAAAATGTCTCCACAGGATGTTTTTCTTGCCAGTGTTCCTCTAATCCGAG

A\_16\_P19337259

GCACATTTATATTTTCATGGTTTCTGAATTCAAACCTGCAAAAATATCCAGATGTGGTCCGGC

A\_14\_P137499 TTCTGTATTAAGTCCCTTTCTATTTCTATTCCCCTCACAGAGTTTGCCTTTCTTAATAA

A\_14\_P126807 TGAAAGTGTGTTAAATTGAATTGGCTTTAGGATGTGTCCCAAGAAAAATGGAAATTCTC

A\_18\_P10460934

AAAGTGCTAGCATTCTTCAAATAACTAGCCAGGTTTTAATTGCTGTAAACCTAGGTTA

A\_16\_P01062465

TGCATGAAACATGTTAAAACATGTCAGTATTAAGTGAACCTTTTTTTGCAAGGGAGGAA

CUST\_2681\_PI426210822 GATAGGCACACGGTGTCTCCCATTGAAGGTCACAGGAAGCGATC

A\_14\_P120924 TTCAGTGATTAGTGGTAATGGTAAACACTGGTGTGTTTTGAAGTTGAATGTGCGATAAAA

A\_14\_P112396 ACACACAGATCAGTCATATTTCTCTTCCCTAAAATCAGAATTAGGCAAATAAAGACTCGG

A\_14\_P124042 ATGGAACCTTTGTTCTTTTTTTTCAGATCTTTCTTACTGGCTGCAGTTTGCTTCACCTTTA

A\_14\_P101955 AACAGAAAGGGAGGTCTTACAATGAAACAGGTTTATGATTAAAGATGTTACAATTAACCT

A\_14\_P112269 GATTTTATCTTCTTTGCTCCATTCTGTTCCCTTCCAGATAATCGTGTGTTCTTCATCAGGT

A\_16\_P16547515

AAAAAAAAAAAAAAAAACTCACTGTTAATTCACAAATGCCTATTTATCTCTAACCATGTGACT

A\_18\_P12262739

ACCATATGCTAACTTACAACCTTTTGCTAGGCTCTAAAACCTATGAATATGCCCTTTCTCA

A\_14\_P131185 AAATTTTAGCAATGCATTGTGAGTAATTTCTTCAGAAGAGCCAGCCAGTATTTCTCCTC

A\_16\_P20097442

CCAAATTACCCTCATAACATGCTACAATTTCCACACTATTTCACTGGTTAACTGATGGTT

A\_18\_P22840322 TTTCTTCTTGGCTGTCTGTGGAACCTGTCTCTACATTCTAACCCTC

A\_14\_P115740 ACATCACATTAATAATATCAAAAATTGCAAATAAAGCAACAGTCCCTGCTGACCACCCTTA

CUST\_593\_PI426210822 AATTAGTGGGCGATGGAATTACCACGGTCCAGATTCCGTCAGAAG

CUST\_3990\_PI426210822 ATGATAAAATGGTGTCCGTTGGTGAGCATCTTGGTGGTGAGGAAGTTTATA

A\_16\_P20370483

CAAACACCGGTGTAACCTTTTTGAAGATAACTCCCATTTTTACTCACGTCTCTTAGTCTTA

A\_14\_P137469 CAGGAACAGTGTATTCATAATGAATTCCATAATCTTGGTCGTGAAATAACAACACCTGGA

A\_16\_P15922762

TGTGAATGACAAAACCATGAAGTTCTCCATTTAGTTCTCAACAGACTACAACCTGATCTTG

A\_16\_P02046323

ACTTTTTCAAAGCACTAAGGATTCTTTAACTTACACTCTGAACTTCCAATAGAGCAGCAA

A\_14\_P104508 ACATACATTTCTTTCCCTCATGAAAATGGAAACAGATTATCCATCTGGTTCTGCATCTTC

A\_14\_P139609 ACTCAGTCTGCAATGATCTATTTTTGGCTTATGTCTTTTAATACTACTCTTTCTCTGA

A\_14\_P111432 ACCAATCCACTCAGAAAGCATCACACTTCTGCATAACTACAAAAATATGGCATTGATATC

A\_16\_P21613011

ATCTTGGTATCTGCAAACCTTAACAATGTCATAGAATGCCCTTTAATGTAAACTCAGAC

A\_14\_P120913 TGCTCCAGTAACTTAAAAGTCATTTCCCTTAAGAAAACAGATGACAGACAACTTGAGTGAC  
CUST\_503\_PI426210822 AATGATTCTGCCAGGGACATTTGAAGGGCCTCTTCTCACACCAAG  
CUST\_1859\_PI426210822

TAGGTCCAGTCTCAGATATCTTTGAGGCTTTATTCATGCCCCAAATTATTCTCGTATTTA  
CUST\_1600\_PI426210822 TGTCTCTGACCCCGGCCTGCTGTCTCCTGGCTACTTTGGACTTT  
A\_14\_P202121 GTTTTAACTGAAGTGTGAGAAGGAGGTTTAAGGCAAGTAGACAACATCCTGTTGTTG  
A\_18\_P14606538

TCCCTACCTTTGCTAGTCTTTTTCCATGTAATTACGTAAATCCAAACTACATAATGCTGG  
A\_18\_P17042647

ACCTCTACTTAGACAATTCCTTCAAATTTCTTTCCCTTTCTCTCAAGACCTATAGATGT  
CUST\_3144\_PI426210822 GGCTCTTCTTGCTAGGTCTGTTCCACAAAACCTTTCTTTAGGTTTCTTT  
A\_14\_P138991 AATATGCTATCGAACACCAAAAATGCAGGTTCTGAGTAAGTAACTGGCTGTAAATCTGAAA  
A\_14\_P100996 ACTAACTACTCTCAGATTATGGAGCGCTCTTTAAATATGTGACTTACCAGTTTTTCAGTC  
A\_16\_P00930657

ACAACCTTTGAATTGTCTTAACTGAATCAACAAACATCATTGTTTCCTCACTTCTCATTCC  
CUST\_2351\_PI426210822

TATCTATCCAGACCATCCTCTTTTCATTAGAAGTACATAACAGGAGATTAATAAACTTCC  
A\_18\_P22839965 ATTGAGAATATGTAGGGGGACGAAGCCAGGAGTCCAAGGACCCCTT  
A\_14\_P115201 TGTTAACCTCTTACTTATAAACTCTTCCCCTCTTCCTTTTCTTTTGTGAGATTTCACTT  
A\_16\_P00685387

GCCCCTAGTTATGATATTGCTCCTAGGAAGAATAAAATCTGCTTCACAATGTCCTTTTTTG  
A\_16\_P03323884

AGCAGTTAGAAATTCATCAGTTACACTAAGCAGCAAACCTTTTTTCATAGATATAGAGGGGT  
CUST\_1246\_PI426210822

GCTTTAAAATTGTGATGGAAAACTTCCCTATGGATTCCAAAGATTTCTGTACCACTCTAT  
CUST\_7824\_PI426210822

CTCTTTTGGCCTGTCCTACCAAGATCCAACCAGAATTTTGAAATTTTTATTTGAC  
CUST\_4909\_PI426210822 CATCAGTGTCTCTCTAAGGGAGGGCGGCTGGTTAAAAATCACATG  
A\_14\_P109625 ATGCTGATTTTTTCCCAAGTAAGGATTAATATCCAAAACAAAATGTATAACTACACTTG  
A\_14\_P107155 ATGGGGTGAGTGGAGAATAGCAATAAAGAGGAAGAGTAAGTTTGCAAAAATAAATACTT  
A\_14\_P124246 ATGATCCACATAAACTGTATCACAGAATTAATAATCTCAGACTCTGCATCCTGTTTAGGGA  
CUST\_8083\_PI426210822

AACATGACTGTGATCTAATAGAAGCCTATGCAAAGCATAGATAGGGTAGACTTCATTCC  
A\_14\_P103352 CAAAGCATGTCATCTTTTAGAATACTTACGGTAGCCACATTTTTTACAGCCTGCTCTGA  
A\_16\_P58424109 AAATGGTCTTTCCAAACTGTCCTTGGATCATGCTTCTCAACTGTGTAAGACTCT  
A\_14\_P134807 CTACAAACAAGAATCTGACTTGTGCAACAACAACAGCCATATTATTCGGATTTAGCCTT  
A\_14\_P117886 CAGTTGGTAAATAGATTATGACGTGAGCAGTGGAGGATTTTGTGTATCTTCAGAGAATAG  
A\_16\_P40586803

TTCCTGTAAATATTCTTTTTCCCTAACCAACCTTTAATATGAGAGACTGGCAGAATGAGGG  
A\_14\_P108100 GGACTTTGTTTTGTGTTCCAGGACAAGTGTTCACCTCACATCTGTAAAAACAATTTTAAGAA  
A\_14\_P127868 AGTAATACTAAAATCACTACAAACCTGAAGAGATGCTCCCCATACTATTGCAAATCACT  
CUST\_9448\_PI426210822 CCTCAGAGACACGGGAGGGTGTGGCAAACCACGAGGCTGAGAGTG  
A\_16\_P01523228  
GCCTGCACTTATGTAGAGATTTCGTTGGACATTCTTGTAGTATCTGAGATTACTTTTGATG  
A\_16\_P00251828  
AGACCACCAAAAAGCAGATTCTAATGAAAGATGAAATTTTCAGGTAAACAAAATGACTGCA  
A\_14\_P132467 AAGCCACCAAAAACTGTAAGCCTCAATCAACTGAGAGGAAAGCACAAGAG  
A\_16\_P30952533 TTGCTGTGTGTTCCACACCCACAGGTCTACAACACTGGCCCAA  
CUST\_9557\_PI426210822  
TACCTGTTTGTGTTGTTCAAAGCAGAAATGCCCAACATTTTGTAAACACTAATTTTTTTATA  
A\_14\_P118725 CATAAGAGTCTTGTAAAGGATCCAAAAGAAAGAGGGAGCAAAGGTTCTGACATC  
A\_18\_P22840891 ATCATGAGGAAGGTGGTCTTCGTGGGGTGAATATCATGTTTCCTC  
A\_14\_P136704  
ACCAGTCTATACAAAGAACTGTAAAGAGTTGACAGTTGACACTAGACAAAGTGCAAACCT  
A\_14\_P106260 GAGAAGTATCTTGTAAAGGAAGCAACTTCCATAAAAAGGGTCAGAAAGTCTGTTGACC  
A\_16\_P18088378  
AAATTAACCTTTGGTAATTGGACGCTCTAGACTCTTTCTCAAGTTGGATAGTCATGCCTAG  
A\_14\_P130439 ATCATTTTTAAAAAATGATCCCTGACTAGAGATAGCATGAGATTAGCAGGGCAAACCTGTC  
A\_14\_P126304 GGTTTCTCCTTTTTTTGATTACTCAAAGCCATGTTTTTTAGTGTCGCACACATTTCTACT  
A\_16\_P40100643  
AATGCTAGAGTTCTAGATGACGCATTAGTTTTAAATGTCAACGCTTAATGTCTTCACATGT  
A\_16\_P19206154  
CTCATGACCTACAATATTTAAGGCTCTGTTTGTATTTCTTGTAACCCATGCTATCCTGGT  
A\_14\_P118168 GCATCTGAAATCTCAAACATTAGGGATGCAGGAAGTTTTACAGTAGTTTCATTAAGACCT  
CUST\_8914\_PI426210822 CCTGCACTCTTGACTTTCCAGCATGTTGGCCTGTCACACGCAAAG  
A\_16\_P03057036  
CACATCTTTATGCATCTCTTACTTAAAGCGGAATCACTTAAAATCTCTTATCACAAGGGGC  
A\_14\_P121375 AGTCTATTCATTTCAAGTTACATGATGTGGGATAGAGTCAGTTCATCCTAGAAAGCCAAA  
A\_16\_P16947961  
AGGCATCTAAGGAATTGTTTTCTATCTTAGTCACCAAGTATGTCAGACACATTGCTTACA  
A\_16\_P18850353  
ATAATATGCTGACTCAATGGAATTCTCTAAACGATCTTCTGTTGTGAAGATAGTAGCCGC  
A\_14\_P126709 TCTTTTCTAAATCTATTGTACACGCGTTCTTAACTGGTCTCCATTCCTTTTTGGTCATA  
A\_14\_P135884 GAAAAGCCAGTTCTTCCACATGTAAACTACTTGAACCTCCATTTTCATCTTTTTTTCATACCA  
A\_18\_P11783665  
AAATGAGAACAACAATAAAAAGAGCCAGATTTCTATCCAGATTTCTATTGGGTCTCACTCC

A\_14\_P107770 ACATGGAATTGTCTTGCCAGTGGTTTATTCAGTAAAACTTATTGTTAGAACATTCTGGA  
A\_18\_P16294807

ACACCTTCTTTCTTCAAATCTCTAATTCCTCCCTAAGTATTGTCTAAATAGCCCCTCAAT

A\_14\_P130565 GAAATCAGTTGTAGGTCATCCTTTATGATGGCAACACACTGATGATGAAATTGTTGAGTA

A\_14\_P200291 CAGGAGCAAGAGGCATTGCATATCTACTGTCTTTTAGCGAGGACACTACTC

A\_16\_P19849337

ACCCCTCACAATATTCTACAGCATGTCTTACAATACTCATAGATAGAACTACATGAGCA

A\_14\_P128666 ACATAAGATTTAAATAATGCACCTATTTAAGACATGTTGACAAATTGCGGGTCTGGGACC

A\_14\_P128420 TACCCAGCATATGCAGATCTTTTATATTCAGAATGAATAACACATGTCCCCTCTATCTCC

A\_16\_P15117427

TCCTTGTTGCAAATGAATACACACTACCCATCTACATTCAGAAGTCAGAAACCTAGAAAT

A\_16\_P19014912

TACACCCAATGTTCTAGAACACCAATCAGATCCTAATGCTTCATACTTTTTAACCTGACT

A\_14\_P105669 TTTGAGAACGATCTTTAATGATGTCAGTCTATTGGCTATGCATATCTGGAGTAGTGAGA

CUST\_1143\_PI426210822

TTGTTTTTTAGGGTTTCTAATTTAAATGAGAAGTAAAAGCCAGTCAACAACCCTCACAAA

A\_16\_P15908198

AAACCAATGAGCATATGTCCATGAATTCCACTATTACCCTAACTAACCTGTTTCAGGAATT

A\_14\_P123354 TAATGTGACTATGCCTCATTGCATAATCTTTCTCCACCTACATATCTTGTTACCTGTCCAC

A\_14\_P135372 GGAAGCATTCCATCAGTGGCTGTATTGAACAAGTAATGTATCATCAAGATATAATCACCC

A\_14\_P130244 CCCTTGCCTGTTATCAGTCATCTTTATGCACAGTTTGGAGTCATGTTTATTTTTATTGTG

A\_14\_P118415 TTCTCCTGGCTGGTGCTTATGATTGCAAACTTGGATATGCTGTTTGAAAAAGAATTTAA

A\_14\_P137058 GGGAAAGGGGAGAAAATCATTATAGAATCTTGAAAAGAGGCTTAAGTTTTAGTGCTCCA

A\_16\_P00120622

CCCTTCCTGATTTGATTTTCAGTCCTTCATTGTTATTGACCTAGAGTAGTCACCATATTAC

A\_16\_P01855516

AAATTCACCTACACAGAAAAAGTCAATCATGAGTTAAAGACCCTACAATATTGCATGCT

A\_14\_P119671 AAGAGAAAAATGGGACATTTTCAAATGAAGTTCTTTTTTTTTGCAGAACTAAACACCCTGG

A\_16\_P02837514

CCCCTAATCATGCTACTAAGAGAAGAACTGTTTTATGACCCTTAGGTATTATGCAAACC

A\_14\_P109837 CTATTTTTCTGCCATGAGACTAGAGGTTGCTTGAGAACAGGAAATTGGATCTCTC

A\_14\_P105805 AGGAAGCCTTTCTTTTGAGAAGTCTTAAAGACTACCCATCCCAAATTCTAGGAAAAGA

A\_14\_P137920 GTTTGTTTTTCTCTTTCCCATCTCCTGGCCACCTGAAATTTAAAAAGAAAAATAAAG

A\_16\_P01908964

TGGTCTCTCAAACAAATCTTACACTCTTTCAACTAATCGAATAACATAATCCAAGCCAGG

CUST\_3833\_PI426210822

TTTTTCTTTTTAACTGCAGAAAGGAAATAATAATGGGATAGAATAACTGCAGGGAGTAGA

A\_18\_P22841720 GTTAATGGCCACTTACTGGAAAATGTTACTAGGCTCTGTGGTGAGTGTTGTTAGAAA

A\_14\_P113497 CATTCTAGCCCAGTTGGGTTTTGATTTATATAAGTAGTTTACACCTTCTCTTCATAATC  
A\_14\_P118696 TGCTAGGAGAACTAAAAAGGACAATGTCCATATAAGCATTCCAGGAAAGTTACCATAT  
A\_18\_P14137185 CTCTCCATGCCCTGCCTGACCTTACCTTTCTAGACCCATCTTCTG  
A\_16\_P19722500  
AGGAGACCACTGGAATTAATGAGAACTTTCTGGAGTTCTATGCATGAAAGTTGCAATAT  
A\_14\_P139637  
ACATGTAATCTTGGAACAGGAAAGAGAGCACAAAGCCAGAAAATGAAATAAACAAGTCAG  
A\_14\_P129225 CTATATCTCAAAGCAGTTGAGAGAAGAGGACCTATATGAATGGTTTTATGTCATTTTTTT  
CUST\_409\_PI426210822  
ATCAACCCATAGCATATGTGAGTACTAAAACCGAAACGGGTGCTTACATCTAACTAAAAA  
A\_18\_P22840304 CTTTCTGATAGTTCTGGGACTCGTGTGTCCTCCACATAATTAAGCAGTCTGT  
A\_14\_P138724 CTTTTCTAATGGTTTAAATTTCTGGAATTACACTGGGGTTCTTTTGCCTTTTTTAGCAGA  
A\_14\_P109148 CTTACAGGTATGCTATTAATAAACTACTTATCCTCTTCATCCTCTAGGTCCCACAAGCAA  
A\_14\_P131650 AATCCATCATACTTAGTGCCATAGAGTTTAGTAACCGTCCAGCAAGTGTCACTACTTTT  
A\_14\_P100056 TGTCCAGGTATCGAGGGTTCGTAATGGATTTAACTTAATTTCTAAGGGGATAAAAAA  
A\_14\_P118765 CTGGTAATGGACCAAAGACTTCCAAAATATATGTGTAATGACCTCCAGATTTCTTTATAG  
A\_14\_P200158 CTTATCTCAAATTAAGGAATCAAGAAACAGAAGGCCAGGGAGTGTGGTTTTGGT  
A\_14\_P107286 ATAAATAATAAGTGGATAGCCATGTTTCATGAGATTTTTTGGCATTGGATTCCCCATGTT  
A\_14\_P109068 AATGCCAACTCACTCTACTAAAAGGCTATTTTAAAAAACAGTTTTTCAAAGACCACCTT  
A\_14\_P104845 AATGCTGCCTAGTCAGATATCTACATTCTGATACCGGAGAAGGATTGTCTCTAAATATTG  
A\_14\_P105677 CAGCATCATTAAGATCATGGCTATTGTTAATGTGGTTCTCAGTATCTGGTAGAGCCTGT  
CUST\_1005\_PI426210822 GTAAAGAGGATAAAGTCACCAGGCCTGCCCCAGGGGGTGGGTTTT  
A\_14\_P114107  
GAAATGACAAAAGAAATTTTTAAAAATTGAGTTTAGGAAGGTTTCCACCAGCAGAGCGAG  
A\_14\_P137429 TGAATTGTGCCTCCATCAGTAGAATTTGCTTTTCTCTATTTCTGGTCATAAATTGGAACTC  
A\_16\_P00640078  
ACACTAACCGTAATTTTTAGTCCATTGTGCTATTTTGTAATCCATTACTCCCTACATGT  
A\_14\_P100453 GTTCAATTGATGGGCCAAACTGGAAGAACATGGAGGATTCATCCTAGAAAAAG  
A\_14\_P121379 CTGAAGGGATGGCAGAGAAATCATCCCATGACAACCCTGTATTGTTCTAATATATATTTT  
A\_14\_P105378 AGAATATATGAGGCTCATACTACCAGCCGAAACAAAAGATGACAAAATAGATGCCAAAA  
A\_14\_P200019 TTGGTAGACAGATTTCTTTGGCTGAAGGTTGTTTGGAGATCAAAAAGTGCAGATAGAAA  
A\_14\_P200362 CCATTCATTCTGGCTAATTGATTACAAGAATAACTGTGGATACGATCCCTTTAGAACCTG  
A\_16\_P17474647  
AAAACAATTTACCCTGCACATTACCATTAACCTTGAAATCCTCCTAGACAATACTGTGGG  
CUST\_3462\_PI426210822 GTTGCCATCCCCAAAAGGGAGCTTTTACGATTGAGAGAGGTGATT  
A\_14\_P118350 ACTGTAAATCCATTTTACCGTCTTAATAGAACTCCTCTGTTTTTCTCCCAAACACTACT  
A\_16\_P17087915  
GGAAAAAGAGTCAGAACCTCAAATAATTATGTTCTCCTTTAGGCTGCTATCCTATACGTG

A\_14\_P125408 AACTTCCCCCTAAAATATTCCTTACATGCTTTTGTAAATAAGACCGGAAAGAATTTTG  
CUST\_7994\_PI426210822

ACATTTATTAGATAGAGCCACAGAAGTATGAACATTGGAATGTTGGTTGTTTTCCCAG  
CUST\_895\_PI426210822 TAGGCAAGAGACCAGTATCCCCAAGGAGCACAAATATTGGATTCCAA  
A\_14\_P127200 TGGACTTTACCAACATAACCAGAAATGATCAGATTTTTGGCAGCAGACTCACACTTA  
CUST\_1577\_PI426210822 TGCTCATGACTCTCTTAGGGGATGAGTGTGCTTAGTGTAGGGCAT  
A\_18\_P14670776

GCAGGGAGAATTTCTTACAGTGTATTGATCCACATTATGAATTAGCCACCCAAAAGAG  
A\_14\_P123710 TCCTTTGCACTTTAAACACTGAATTGATAGGCGGTGATCTTCTTCAGATAAATTTGGTTT  
A\_16\_P16689429

AAAAGACCCAAATACACTTTTGGACCAACTCTAAGAGGCTTCACTCTCTGCTAAAATCTCAT  
A\_14\_P125089 ATCAACATGGAGTTTCAGTCGAGGTGAATTGCAGAAATGAATATGCAATGATTGGAAATA  
A\_14\_P100690 AGTTGTTCCAGAAATCTTCATTTTAAATAGAAGTGTTTACAATGCCTTTTTTCCCCCAGT  
A\_14\_P103795 TTGAGAAAGGATAATGAGAACAGGGAAATCTACCATTGGTGACAACAGTGACTTAATTAC  
A\_16\_P39088420

AACCCCTCCTCTAATGTAATACCCTTAGTTGCAATACTCTGATCTCATGGTTACTGATAT  
A\_16\_P01527676

GACTTCGCTCTATTTCAATGATATTCAGGTTTCGAGAGTAAAAAAAACGTTGGAAATGGG  
A\_16\_P16007524

AAGTGCAACTTTTCTCTTGATTATCTTGAAATGCCTTATCATCTCCACATTTGCTGTAGG  
A\_18\_P12784997

AATCTCCCTGAAGTGAATAAATCCACATATTCAAGCATTGGATTACAGTTAATGGGGTG  
CUST\_5175\_PI426210822

TAGCACTGTATCCAGCTCTTCTCACCTCTTTAGGAATTTTAAGCCCACAAATTAAGTA  
A\_14\_P123897 GTATGTGCTGAATCTTCACAGACTTGTCAATACACAGGCAGTATTCTAAAATAGCACTGA  
CUST\_6044\_PI426210822 AGTTAAGTGCTAGTGGAACCAGGGTCTGAATTTGGTTGGCAAAGG  
A\_16\_P36501692

TGCCTTAGACATTTCTACTAAACAAACCTGATACACCCTAACTCAAATGTTATTGATACA  
A\_14\_P111405 CTTGCCTAAGGCCTATTTACAATAATGTCTTAGAGTGGGTCAATTCCTTTCAACCATTAT  
A\_18\_P12262821

AATTGAACAGATCTTTCAAAGTCACCCATAAAATGCACAGTATACATGTTTAGGCTGACC  
A\_18\_P16129397

GGATTGGTTTGAGCAATACAATGGACTTAATTTTTTTTTTTTTTTAACCATACTTACAGTCA  
CUST\_3614\_PI426210822

ATGAGTAAAGAGTTAACGTATTGAACTTGAAAGGAGAGATTTTTTTTCCCTCTTGTAATAA  
A\_14\_P132256 TCCCAAGATTTCTCATGTTTTCCAAATTTTCATTTCCCTTAAAAAGCCTCTGCATAGCATTC  
A\_14\_P112267 ATCAATCAAACATAAATAGAGAGTTGAATTGATCTTAGAGGGAATGGGATGCAGCAAAGC  
CUST\_8354\_PI426210822 TCTAGAGAATGTGGCAGTAAAACATTTGTGGGCTCTGACAAACAATGGTCTT

A\_14\_P109736 CTCTTTTAAGAAGTAAAAAGAGAAAAGTGAAGTCACGTTACACATTCCCCTACTCACTGA  
A\_14\_P105568 ATGTTAAGGAATAAACCTCTTTTGATCAATGGGAATTACTGTGGGTCTAAGCATCTGATT  
A\_14\_P122173 ATGAAAAGACCTAGCAATACCAATGTGGAAATGAAGAATTTTAACCAAAGGGGCTATTC  
A\_14\_P126566 AGATAAGTAAGTGATCCCCAAAGTTTCCAAAGTTCTGTGCCAGAGAATGTGG  
A\_14\_P127744 AGGCTTTGTGGGATTCAGAAAAGAAAAGAAAATTTGCTCTCTCAGCAAATTATGACATCAT  
A\_14\_P104924 CTGATAATGATTCATCGGTTACCCATTCCCTCTCATATCGTTATGTTATCAGGCAAATT  
A\_16\_P58424607 CTAACTCTAGTGGGGTCCACAGTCTACTGGGGAACTGGCATTAAATCAAATAA  
A\_14\_P135597 CTGCTTTCTGTCCGGTAATTCATCCTTCTCTTCTCTGCTTAAAAAATCTCCTTTTTAAA  
A\_16\_P17209279  
AAAAAACAATGTTATTTTGAACCAATGTTACAGATGCCTATCCAAAATGGA  
A\_18\_P22177598  
AGACTAGCCTATTCTAAGTTTCTCAGATCCATTTTGTCTTATTACGTTTAAACACCTGCA  
CUST\_6225\_PI426210822 AGGTTTTATGTGGAAGCATCTTTCCAGCAGGCACAATGACATGGCTATT  
A\_14\_P109759 GAAGAATCGTAAGAGGATGTGATCAAGGCCAGAATTTAATCAATCTAGTCTTTACACAC  
A\_16\_P21222671  
TCAAAAGGCTTGTGATGTTATGCTCAACTCTACACAAAACCTTGACATACACCTTGCTAT  
CUST\_7101\_PI426210822  
CAAGTGAACCTCAAATAAAAGGAAGAGCACCTATGAGAGCTTTGCCTTTGACTG  
A\_14\_P139392 GTTTTTAAAATGGTTGCCTGGATACTAAACCTCTCTCTGTGACCATTATACACGCTTTAT  
A\_16\_P21531529  
AGACAAAAGGTTATTTTGCATGGCTCATTCAATAAAAGGAATTGAAACGTGAACTCAC  
A\_14\_P118480 AATATTTGTAACCTCCAATATTCTTCCTCTGAGAGAAAACCTTAAATCCTTTTGGCGCTCC  
A\_16\_P16281066  
AAGGGTATGCCTTTTATTATTCTCCATAACACCTTTAATTCACTTTCATAAACTCGGGC  
A\_14\_P129321 AACATAAGTAATTTCTTCTCCTTGTTCTCACCACAGTATCCTAAGGAATCCTTTCAAGAC  
A\_16\_P36230813  
CTGCCATTGGTGCTAAGACTTTTTTGGAGAAGCATATAGAAAGTCACCTAGAAATGCTTAC  
A\_14\_P202354 TGACAAGAGGTTGTTTTTGTCTTTGTATGGCTACAACAGTAACTTTGGGAAACCATTTAA  
CUST\_7371\_PI426210822 CATGTGTCATTTTTCAGCAGTTAAAAATCCATCAGCTGAGGCCACACAAAGTT  
CUST\_7275\_PI426210822  
CTTGGAAGCCTTCATTTACCATCAGTTTTTCTTTCAAACCTTCTGCAAGGGCATAA  
A\_16\_P19831336  
AAAAAACAATCAGAATCTTCAATCCCCAATTTCTTAAAGAAGTAATTCTCTCAGCAGCCT  
A\_16\_P41201955  
TCAAAATTTTCTATAGATCCTTCAACTAAGATAGCCTTGAACCTGAACTGAATGCTTAGGA  
A\_14\_P109659 CTGCATTGTAACTACAGCGGATGAAAGGCTGAAATATAGCAGACAGCAGAGTTAG  
A\_16\_P01472816  
GGTTATCAGTAAGTTGCATAATCTGACATATCTCCAAGTTCTCCAATACTACCTAGCCTG



A\_14\_P201155 CTTGCTGAAGTCCAAAGATTTTTATTGCTGCATTTACACAACCTGTGAACCGAATAAAT  
CUST\_8315\_PI426210822 TGGTGTGTGTGTGAGATCTGTAACCCACACACAGAATGAATCCTTTTCGAT  
A\_14\_P200563 TATTATAAAAATGTAACATAATTGTGATGGTGGCAGAAGCCTCACAAGGTTTGATGCCTCT  
A\_18\_P11799120  
AATCCAACCTCTGATATAAAGGCATGTAGTAGTCATGATAATCGGTTCACTATGTTGAGG  
A\_14\_P119751 GTTAAAGTATGTAATTCATCTGATCCACAGACTGGCTCATACTCGTGTATTTTACAACC  
A\_14\_P200073 GTTCACAAAATGGTGCCCTATATGGGGTATTGGACATAGATATTTTCACAATGTCAGTAT  
A\_14\_P103115 GAGAAAGGGAGGTCCAACCTCACCTTAGACTTCGTCATTTTGTCCCTC  
A\_16\_P02616219  
ACACACTTGAAAAATATTAGTTCTTCTCCTCACTCTACAACACTTTAAACCCAAACCTCT  
A\_14\_P105369 ATATGTTTGTCTAGAAGGCAAATTTCAACAGCAAGCAGACCAATTTACCTGACCTTAATAA  
CUST\_706\_PI426210822 GTAAATTTGGAGTTGGTGGGAATTTTGGACTCTGCTGTGTGGCC  
A\_14\_P101597 GTGCTCTTGAGATTGTAGGTGCAGAAACCAATATTAACACTTTTGATAGTGAATTTTGG  
A\_14\_P133530  
CTCAGAAATGCAGAGAAGAAAATTGAAAGCGTCAAAGGGAAGGTATAAAAACATGAAACT  
A\_18\_P22841920  
TTAACAACCTTTGAAGGCTTTTTAGCAAAAACAAAGTGTCAATTTGGGATTCATCTGTGG  
A\_16\_P37364794  
TCCCATCATCAAAGTTAAAGATAAAGGCCTAATATGTCTGCTCTTCCCTAAATATCCTGA  
A\_14\_P108200 ATTTATCTCATTTTTAGGCGACTGAGTCAAAGACCAACACCAGAAGAAGTACAACAACG  
CUST\_1095\_PI426210822 CTCTGGGAAACGTCCCCACAGAAGAGCCAGCAAGATCTCTGCAG  
CUST\_2739\_PI426210822 GACTGGGCAGGTTGATTTCTTCTGCCCTGAAGCACTTTGCTATTAC  
CUST\_5659\_PI426210822 AGAACACAAGGCTAGTTCCTTTGGCAAAAATTGGGCATCATATCAGAGCT  
A\_14\_P109124 ATTGGCTTGGATGCCTAAGTGTATGATGCTTGAAGCCTCAGAAAAGAAATAAGCATATTT  
A\_14\_P135723 GGTGGCACATTTTCAGAGCATTTGCAATATTAGTAACAAAACCTGCAACTACAACCTTTCTG  
A\_18\_P12711313  
AAATCCATGGTCATTTACCACATTACCTCAATACCGAAGAGAAAGTTTACGAAGTCTTTC  
A\_14\_P133139 ACGATTTTGATATTCCAGAAACATCTCAACCATTCGTTCTTCTTCTTTAATTTACAGA  
A\_14\_P200851 TGGCTATTTTTTAACTTTAATCCGGAACCTTGGAGTGACGTGTGGATTTTTTTTTAATGC  
A\_14\_P202399 CTTGTCCTAAACTGTCCAGTGTGAAGGAAGAGTTTGGTCTGTCAAGG  
A\_14\_P127803 CTTTGCAGATACTAGTAGGCCAAAACCTCTAGGCATAGTTAATTCAGATACTAGTCCAGAC  
A\_14\_P119406 AAAATTCCAGTCATTTCTTCTCAGGGTTTTAAGAAATTCTACTTACGGTGTCCTTTGGAT  
A\_14\_P126215 CCACCACCATGATGTTGAACTCAAACCCCATCTTCATAGCCTTGATCTT  
A\_14\_P125025 CGGTTTGGATACCTAATCAGGATTACTATTTTATGATTGTGCTTTATTTCTCTCGTCTCC  
A\_14\_P106241 TTTGTATCCACTGACACAGAAGGAGATTTTACAGCACACTATGTTTTGAGTCTCAAAAAC  
A\_14\_P137717 CAAGCACTGGAGCAAATCAGTGATTTTCAGGAACACTCATATTACCACAACAACCTTTAT  
A\_14\_P108720 CTGGTGAAGTCATTTAAGGCATGGGGTATTGGTCTGAACTCAGAATATTTAATGTTATGT  
A\_14\_P119376 GCCATGGTAAATAAACCCCTCATCTTGCCCAAGAAGAAGGACATTTATATGGTTATAAAT

A\_14\_P102359 TTATTGTGCTTATATGAGTTTTGTTGGCCTGTCCATAAATAAGTGGGTTTACTCTTGACAC  
A\_14\_P112014 AATCTGTTGAGATTTTCCTTAATAAATTATTGTTTGTGTATGCGAATGTATACACATAC  
A\_14\_P132491 TTGTGTGTTTTAACAATGATTTACACTGACTGTTGCTGTAAAAGTGAATTTGGAAATAA  
A\_14\_P129462 TGGCGATTATTGGTGTTTTGGTCCTATCATTGACGTTGGCTAAGAATTTAAATAGCAGTC  
CUST\_1253\_PI426210822

TTACCCATTCAAAGGTGAAGATTTTTTTCCCTTTAATGTTAAAAGTGGTCTCCACAA

A\_18\_P22841783 GAATGCCTGATCCTGCGAGTCACTGCAGCCCCATCTCATAACAT  
A\_14\_P104386 TGGAAACCAACTGGCAATGAGAAATTTAGCAATTTGAAAAAAGCATTTCCTTCCCTTATT  
A\_14\_P130963 TCCAGTTGCTTACAGTATTAAGAGTTTAGGACAGAGAGAGAATGGAAAGCAATACTAACC  
A\_14\_P121888 CTAAATGAGTTAGATGATTCTTTGGAGAAAAGTATCAGAGTTCCCAGTTATTGTGGAGTCA  
A\_16\_P58424183

AATTGACTGGGAACAACCTTTTCAAATATGAGAGTTGTTTTACAGAGTCATGCCTATGTGC

CUST\_7657\_PI426210822 ATTCCACCCAAATGAGGCAAATCTTATCCTTTCAAGACCTACCCTAGAGT  
A\_14\_P111382 TTCTGACCCTAAATCCTATGCTTTTACATAAAACTTCACATTGACCACATCCTGCTATT  
A\_18\_P10022805

TGCTTCACTAATATGCAATCCATAAAACACCATTACGAAAACCTATAGTCTGCCATGTTCT

A\_14\_P130333 AAAATGGCAAATGAACCAAGCAGCATCCCATCTTATATTTTAAAGTCTTCTCCCAAGTTA  
A\_14\_P125922 TGATCCCCCAGAGCCTCTCTTTCTAAGAAGAAATAAGAAAAGAATTGACAGGATAAACTA  
A\_14\_P201229 CTCTTCATTTTGAGAGAGAAGAAAACTGTTTGGAAACCACCCAATGATATTTTCTTTG  
A\_14\_P138538 TTTCTGATCCTCCACTTCATTATTGGCTTCAGCGTGCCTATGTCCATCAT  
A\_14\_P113476 TTTTAATATTGTTTCTTCCTCATCCCCTTTTCCCTGAATAAACAACAGCAGCAAAACCTA  
A\_18\_P22840351 ATTCTGGAGCAGTCACACGATGACAGATGAGACGGTTGGGCCTGA  
A\_14\_P128361 TCTGATGAAATATTTATGTTTGTCTGAGAAACAAGTATAAAACCTGGATCTCTCTGGG  
A\_14\_P122989 ATAACGCACCTTTTCTCAATGCAGGGAGCAGAAAAGAGAAGAACTCCCTTAAATTAATAA  
CUST\_5816\_PI426210822 GAGAGAAAGGTTTGAACCTCCTTTAACTAGGGAGGAATAAGAGATGATGGCT  
A\_18\_P22840884

CTTACGGCTGGCATGCCAGCAGTTTCCTAAAATGTAATATCATCACTATTATTGTTATTA

A\_14\_P125170 TTTATTGTTACAAAAACCATGTTATCACGTTAGTGTGGAATTCTTTAGAAAGCACCGGCTA  
A\_14\_P104558 TCAAAATTCAAAAGGGATGACTTTGCTACAGGATCAAATTTCAATGCATTCCATTCACTT  
A\_14\_P130138 GAACAGAGATGCTTTTTATGTGTTTTACATACTGCGTTGTGCACACATTGCCTTTGATTA  
A\_14\_P106756 TGAGATTGCTTACAGTTATCTTGACTTTCTTCATCTTGTTCTTCATGAGCCTTGGAAATG  
A\_16\_P20205735

AACAGTGATATCCTTCTACAACCTTTGAAGAGAAAACAGATTTTTTAAGCCCTATGTCCAG

CUST\_9922\_PI426210822 TGTTTTCACTGTTGCGTTGCCTCCTAGGTGGTCTTCGAGGCCCTG  
A\_16\_P20342071

ACAGTGGTGTTTATCTTGTATGCATTTAATTGACAGTCATGTAATGATTCACGCTCAAGA

A\_14\_P139541 TATTAAAGAAGGGCTGGCCTTGGCAGATACTTCAGAGAGAGAACTATAGAAGTTATACT  
A\_14\_P114794 AAGTATTCATCCTTCTGGCCAAAGAAACTGGCTACAATTCTGATTCTAAAGAAAACCTTC

A\_16\_P16981016

AAATTCTCACGTAGTGCATAGAATATTAACATGCAATGGTGAATTGATAAGGTCTCCCG

A\_14\_P130714 AAGAAAATCACCATTTAATCTATACTTGAGTCTTCTTCCATCAATAAGAGGCGTTCCTTC

A\_14\_P133330

AGAACTTCTGATTTAAGGAACAGACAGAGAAGTATATGAGATGGGGAGAGAATTCAAGAA

A\_14\_P115444 TTCAAGCCAGATAGCACCTGAGGACAGAACATATCAGGTATTGGTAGTGTTTCT

A\_14\_P123922 GAGCGTGAAAGCCAATCCAAGCACTAGATATACACTGATTGAGAATAGTGTTAATACTGT

A\_16\_P03497674

ATGGAAGACAACATCAAGTATCAGTCCTAATCAGAACCCTTATAGCAGTATTTTCATCCTGC

A\_18\_P13939044

AAGGCAACCTAATTATGTTCCAAAATATTCAGAACACATTGCTATTGGAAGACCGTTTCTC

A\_16\_P15968263

CATCACTCTAAAGTTTGTCATTTCTACACCCTCTTGTATTTAGCAGATCAGACACCTGAT

CUST\_6186\_P1426210822 AGATAAGGGATGTGTCCACAGCACGTCCACAGGCAGAGAGGATAA

A\_14\_P117009 GTTTCTGATGTGATCTTGTFTTTGTCTAGATTCCAGAATTCTCTGATGGTTTCTGGACT

A\_16\_P20559650

AACGCTTGAGTGTCTTTGATTTCTAAAAGATAAACTGGTTTCCTGTTAGGAAAATGCTG

CUST\_8062\_P1426210822 ACATGGTGCTGTATCCCTTGATGGAGTGGGCAGGTCACCTGCAGC

A\_16\_P36230734 AAAACAATCAGGCACGGGGTTTTATGCTGAACATTCCACGGTGCTTAGTTATTTAT

A\_16\_P15518845

AAAATCGACTCCATCACATATGTTCTGATCCTCAATTATCATATACATGTCTGTACCCCA

A\_16\_P40267979

ATGCTTACAAGACCAAATCTACTATCAACTCTTTTCATAATCCTCTGACTACATTTCTCT

A\_14\_P133124 CCCAGGTGAGTTAACTGTAAGTTGTCCCATTTGGTCATCTCAGGATAAAA

A\_14\_P111284 CTGAGACTAAAACATGACAGATTCCAGAAATGAACATAAAGCAGGTAATAAGTATGAAAT

A\_16\_P17703854

AAAGATAACTATCTGTGACACTGTAAATCTTTCTTTTCACGTCCTTGAAATCAAGTTGGCC

CUST\_1478\_P1426210822 GTCTGGTGGATTCCCTGAGACTTTCCTTCCTCACCCCAGTCTGGAT

A\_14\_P121629 ATACAATTCTGAAAATAATATTAACAGCACCCAGTCATTCTCAGAAAGCCGTCACACAA

CUST\_3132\_P1426210822 CTGCCAGACCAGCTGCCTGAGGGCTTGGGATGCTGGCCATTTAT

A\_16\_P17062854

AATGCCAAAATGATTTCTTCTGTGACAATGCATATCTCCTCAACTTTTGCAATTTCTCA

A\_14\_P117735 TGTGTTTCTTTATCTCTGGTTTTGATAGGGTTTTTACAACATGGTATGATTGGTGTA

A\_14\_P139571 CAAAATTTCTACAAAGAAGGTCTTCATACTTGGGATTCTTCTCTCCAGGGAGG

A\_16\_P40754406

GTAGTCCCTAGTTTTTATTTCACTTACACAAAATCTCCCTAATATCCCTGAATCAGACCAC

A\_16\_P21098423

AAAACACCCCAACCTCATTATGTGACATTATCTTCTCAATAGTTTTCTCTAAACTCTGC

A\_14\_P103465 CTAACACAGTAGAGTCTCATAATGCCTTGGCGAACACCAATTTGATGCTTTAAGATTTTA  
A\_16\_P16950148

GTCAATCTCATTCTTGAATCCATATCAAAACAGACACAATTCATCTCAGTGCATTTCTCC

A\_14\_P100578 ACATGGGCCTCCCTTAATTTAATATTCTTTGCTTTTCGGCTTTTGTTCAGATACTGTAT  
A\_16\_P20241591

AAACTTCAAAGGGCAAGTTAAAAATGTTTCCTAATTCATTTTCAGCCTAAACTGATCCCTG

A\_14\_P134358 CTCTTTTAGGGGAAAAATAAGTGGGTGTGTTTTTAAGTCATGGTTTAGTGGTAGGTAG  
A\_14\_P127615 CATCTCAATCATCTCAGCCTTCATGTGATTGCTTATTGTGTTTCTCTAGTTTTCACTGA  
A\_16\_P00654863

ACCACATCCTCAAGGATTACATGCTAATTGGAAGATAATATACTCCTCCATCAAAAACGA

A\_14\_P105410 TTTCCCACTGTCTAGAGACTCGAGTACTGTGGGAATGTGTGAAAATAATTGGATTTTTTA  
A\_16\_P00685407

CCCCTGCAATGGATTTTTCTGTCTTCTAATGCAAACTACTTTTCATAGATTTATTCTGGA

A\_14\_P131753 ATGCAAATCTTTTGTAATTTTCAGCCTGATAGCGCATATCAAGGTGGAGTCTTCTTTCTC  
A\_14\_P125891 GTTTAAGGCAAAGATCTTCTGTCTTTGAATTTAGATAGAAAGGGAAATTGCACATGGGC  
A\_14\_P127835 ACCAAACCTATAAAGCAATGTCTCCATACTCATGGATGAGTTGCATCAGAAGATAATTTG  
A\_14\_P100101

GAGAAGAACAGTTTTTTGAAAATTTCCATGAAAACAAAAAAATAAACCGGCAAGTTGACA

A\_16\_P18156974

TAGGAGCATCACATAGTTATTTTTGTAGCAAGGAACTAGAATCTAACCCCTCAAAGAGATGG

A\_14\_P105195 CTTTGTCAATTATAAAAAAATGTAAAAGGATCAGCGCCTGTGTTACTGAGGCTTTGAGG  
A\_14\_P104052 TAACTAGAACTGCAAACTATGCAGGAGATATCACCAGTGTCTGTATTTTTTTCTCCTT  
A\_14\_P107860 CCTCATAACATACCTGCTAAACACATCTAGTTTCTCATCATGAGAATTGAGATGCTGTTGC  
A\_16\_P16574140

TTCATACCATAAGCCATAATTAACATGTGTAGACTTCACTGATACTTTACCCACCAGAGG

A\_16\_P16755557

CCCTTGGCCACTAAATCTTAAAACCCTACCTTCTTAAAACCATTTCTTTTATATACT

A\_14\_P127520 CCTGCATTCTACCAACTCAAGAAGATCTTCCGAGCAAAGACGCAAT  
CUST\_283\_PI426210822 AAGAGAACCAGTTTTCAAAGCCCTCACATAGCTCTCGCCAGCTC  
A\_14\_P113745 TCTGCTGGAAGAAATGTTATTTTTTTGTTGGGGTAGAGTATTATAGAGGGCTTCTTAGTCT  
A\_16\_P01861963

AAATTAGGTCTTAGACACATGAATGGGACAAAGACTAAGTGTCAAATCCCAAACCTCAGT

A\_14\_P106206 AAACGCATTTTAGGGAAGCAGTGAATTTCTCCACTTGAATCAATCTACTGATTGATAATT  
CUST\_2205\_PI426210822 GGTCTTCATGTGTCAGTGATTTGGGGTGAGAGTAGGTATGACTTTTTTCC  
A\_14\_P113414 AAAGAGTAAAGGAAACCCAAGTCATCAAATACCTTCATGGCATTAAAGCACAAAATCTG  
A\_14\_P134565 TAGACATATTAACATTTTCTGTGCGCTGGGAAGTTTGTGTTTGGGTTCATGCTTTTAAT  
A\_14\_P116738 TTGGACACTATATTTTTTTCTAAATTCAACTTGAAGATGTGTATTTCCCTGACCTTCAA  
A\_16\_P18724122

GGCCATTGCTAAAATTATCAAGACAGTTCCAGAAAGATGAATGGTTTCAATTTGCATGAG  
A\_18\_P15993109

AAACTTTCAGGATTGCATTTACTTCCCTGTTTTCCACTAAATCTGATGCACAAGCAAATC  
A\_16\_P37702850

CTGTAGTTTGCCTGTAAAAACCTATTCATTTATCACTTCACCGAACATTATGACCAGAGT  
A\_14\_P115273 CACAAATCTTTCTGTTCAAATCCATTCCCTATTCCTTCCCACATATTACCTGGATAATT  
A\_14\_P118796 ATTTGTCTCCTTGCCGTTACAAGAAAGTAGTGCTGTTAAGTTTAAGCCATTTTTGAATGT  
A\_14\_P119470 TTTACTTGTGGGTTCTCAACTTTTAAAATGCCATAAACTTTGAAAGCGGATGGATGTTAT  
A\_14\_P127444 CTGTGCCTGCATTTGCCCTTCTGGCAATCTATTATAAATTAAGAACTGAATTGAAGGTA  
A\_16\_P38133887

TACGTGTCCTCTAAGTTATAAGTTCACAAATAAAAGCCCAAAGGAAGTTAGGTAGCAGAC  
A\_16\_P58424236

GAGTTTGGTTAAAAGGGAAAAGTAGAGAATGGATATTGGTTAGGCATATAGTCTCTGCCA  
A\_14\_P137599 TTCCCTTTTCTGAAAATTTTAAATTGTTGGACTGTGTTGTTCTAATATTTTGTATACAT  
A\_14\_P100437 CTTCTTTGGGTTAGGAGTGTTATTTCCCTTTTGGTTAAGGATCCTGCTCTGGAATAAATG  
A\_14\_P201814 GCCACTGTAGGTATAGATGACATCTTGTCCATAGATTGGCAACTGTTTCATAAGGATTAAT  
A\_14\_P112344

AACAAGAAACAATGTCTGTAAACACAAGGAAAGTTTTTACAACGCGAGACCAAGAAAAAC  
A\_18\_P11822633

ATAAAGAGTTCAGTCTGCATGATTAAGGGTTCATTCTAAGCAGATTATCACGTTGTAGGC  
A\_16\_P58424201 ATCTTGGGCTTCTAGGCCTTGGGAAGGATTTGCCTTTACTCAGA  
A\_14\_P113751 GTGTTGTTGTGTGGCCTGTTCTGAAAACATTGAAATCACTGTAACACTTTTTAAGGT  
A\_14\_P103901 CCTCCCCAGACACTACATAAGTATAAATTGCTAATGATTACTGATAAACAGGACACTGA  
CUST\_8726\_PI426210822

CATTACAGTCATTGCAAGAAAATTTATTGCTTTCCCTCAAAAATCATCACACAAGTAG  
A\_14\_P117052 GAATGGCCCTTCTAACTTAAAGTATTTTATCATGACCAAGTGGCTCTCATCTTTTGGAAAT  
A\_14\_P110679 ATAACTTTAAGACTCCACCCAGTAATAGGTCTAAAGCCATAGATGGGAATCAAGTAAAA  
A\_14\_P123373 GACAATTGCTTACTTTGCTGCAGATTTCTGTATCAACGGTGAAATTAGATGGAAACGTAT  
CUST\_3997\_PI426210822 TAGCAGATTCTAGATTGTCCTGTTTGGCTGGTTTGGGGGCTGCAGG  
A\_14\_P113924 CTCATTTCACTTCTTTCTACACAGTTCAAATGGGATAATGTATGTGAAGGTCTGTATCT  
A\_14\_P131049 TTTACACATTATTGTCTGCCTTCCCTTTTCTCAGTGGGCTCTTTATTTGTTAAAAAAGTGC  
A\_16\_P36575473

CAACATGCCCAAATTCTACAAATTATTTCAATCAAGACAAACATAAATATAGCCCAGTC  
CUST\_7636\_PI426210822

ACAAACTTAGAATAGTGTAGGCCTTGGCTTCCACATGGATGTTTTGACAAAATTTCA  
A\_18\_P13616678

AAAGATTAAGGCCAAATCTGAATTCCTATCCCCTAAAATACTGCTCCAGATTCTGATTT  
A\_16\_P17102762

ACAGTGCAAATAGTGACTTAATTTCTCCCTATCAAGGAATATCAACCCCAAATATACCGA  
CUST\_6951\_PI426210822 AATTTAACAGAGAATGTGAATGTACGGCTACAGTCCGTCACCATCCAGC  
CUST\_4900\_PI426210822

GTATAATAAATAAATAATTAGGGGTTGATTGTTACGAGTGCTATGAGGGGAATAGCCAGG  
A\_14\_P104581 TTTGGTGAAAATGTCATCTGCTACTGCAAATTTTACTGGACTTGTGGGCTTTTATTTGAA  
CUST\_6304\_PI426210822 CTTCCCTCTGTCCATCACAGCCTCCCCTTAGGGTCATTAECTCAG  
A\_14\_P127877 CACATCGATTTTGTTCCTGCAAACAATCATAATGAACATCCACTGAAACCTTCCTAAA  
A\_14\_P113946 TTCCGGTCCCTCAATATCCTTTCATTGGCTAAAATTTAAGATTTTGTTCCTAACAGCCCAGC  
A\_14\_P113912 ACTTACAAACAGGGTGACATATTTTGTAGACTAAGACTGGTCAGATGATATTCTTTCCCA  
A\_18\_P15901602

TCACCTATGAATCCACAGAATAATTTTCCTTTCACATGTCTATATTTGCATCTGCCTTGG  
A\_14\_P136531 GATGAAGTTCTTTGAATGAATGTATTCGATGCGACTGATCTGTGAGCAGAGCAAG  
CUST\_7818\_PI426210822 CTGACAGGCAGCAGAAGGGTAATCCATGACATCCCCTTCTGTAAAC  
A\_14\_P127207 ATTTTCTTACCATTGGGGTCCAACATTCACATTTATTGGTCTAAGGTTTTTGGTAAAA  
A\_16\_P41569554

ACATGCTGATGACTTACATTTCGAATTGGAATAGTGACCTTAGAAAAAATTTTGTCTGCA  
A\_14\_P103037 CTGACACTTGGGATTACGTCTCAATTCTTCTTCAAGGTCATAAATAAGTGCTCTTC  
CUST\_3523\_PI426210822 ATAAGAAATGTGGGAAGAGAAGAGGGCAAATGGTAAGGCAGCTCTCG  
A\_16\_P01602661

AAGTAACTCTCACACTCTAAAGCCTTAATCTGCAGTAAAACACAGGATTTTCGTCTACATC  
A\_14\_P121519 ACGTGTAAGATCTGAATTCTTTGTAAATGTGTCATTGATTAGGAGGCAATTACCCCAAT  
A\_16\_P18538576

AAATGATCTGGAGTGGTTTTCTAATAGTCCTGAAGAATAGAGGCAGTATAATTACTGAGGC  
A\_18\_P11098877

AATCTAGAGGGTGTGTTTTTACCAATCTCCCCTATGTAATTCGGAACACTTCATTTAG  
A\_14\_P134217 CAATTGAGAGAGAAGGGAGAGAAGAAACTTAGGTCAGAATAATGGAACCTTATGTTCT  
A\_14\_P121497 TTTTTGTCCTGGATAATGGAATGTTAAAGTATTCAAAGGCACCACTCGATGTAAGTAGCA  
A\_18\_P19543312

AAAAAAGTTAAGGCTGATATCATAAGTAGAAACCAAATTTGCAGCATACTCAGAGAATT  
A\_14\_P130367 GCACTTTATCTCAATTCTTAACTGCTGTGTTGCCTCTCACTTTAAAGATAAGAAATTA  
A\_14\_P139793 CTTTACATTTGGACTTGGACGCAAGAACTTCAAGAGGATGGAGTCACTTGT  
A\_14\_P108863 GATATTCGTAAGTGCTTTTCTCTGAAGTATGCCTGACTTTGGGAGCATTTGTAAATTGAT  
A\_14\_P120210 AAAAAACAGGTTAAAAATACGGAAGTTTATTGTAGGACACTCAGTGTGAATAAATGGAAT  
A\_14\_P201263 GCTAAATGCAGATTCTTTTTGGCCAAACGCACCGTTTTATTTCCCAATAATCTCCAT  
A\_16\_P36230895 ATTTCTTTTCATGAGGTCAAAGTCAAAGGTAAGGGACACAGACGGGA  
A\_14\_P123821 CAGATGCAAATATCAAAGTCGTCCAGAAGTTCAGATGTAAAGGAGGACGAGG  
CUST\_8108\_PI426210822 ATTGTTGGGCAGACCCATCAATGTGCTCTCTTGGTCTTCCACAC  
A\_14\_P109226 TTCATAGCCCCACAGCAATCACATTTTAAATCAGAAAGACATTGGGTCACAAGATTTT

A\_14\_P201033 ACCCTTGACTCACAGAATGTTTTGTGTGATGTCAAGTAGCAAATGCTTACATATTTCTAC  
A\_14\_P126739 CTCCATCTCTGAATAAGTGAAAGGAACATTTTGGCCTCTTTGATTATAAAGACATGCAAG  
A\_14\_P138673 GTGGTGTGTGTTTTAGATGGTCCCCATCATTTCCAATGTGGAGATATGT

A\_16\_P01332768

AATGCTGTAAAGACTGTAAAGGAAACCATCTTAGTCTACAGATGCTAATCAGTTGGTTGG

A\_14\_P131766 AGTGTTTTCCCTTGAGACCTGTGAGTTTTTTTCAGTGAAAAAATATTCAAAGGTTTGTCA

A\_14\_P126742 GTCAGTTACAGAAATATGACACTGACCCTTGCATTTACAAGTTGGTTCTAAAGAGTGGT

CUST\_7634\_PI426210822

ACTCTAGCTTTTGCTTGTTCACCTTTTTTAAGCTTGGAAAGAACAACCTTAGAATAGTGT

A\_14\_P128617 CTAAGAATCAAAGAAGCAGTTTATTCTAATTTACAGTCTCATCTGTTTCATAGTGGGGC

A\_14\_P126927 AATTCTTCAGCAAACCTGTTTCAGCAACACTAATAAAATTGCTTATGAGTTCCCCACCTTTA

A\_16\_P01693487

AAAAGCAAACCAGTATGAATGAATTCATAACACACACCTTATCCTTACATGTGACGTGTG

A\_16\_P17822851

CAAAGGCTACAAAAATCAAACCATCCACCTATGTAATGAACCATTTCTTATCACAGCC

CUST\_2217\_PI426210822

CCCTCTATCAAGATAACTCATATATGCACCTTTGCAAAACAGTTTTATAAACTTGTACCAA

A\_14\_P117417 ACTACTGGACAAATAATGACCTGTATATCCGTGCTGTGAATGCTGAGTTCATCTATGG

A\_16\_P15114597

ATGTTTCATGATTTCTAATTGGAACAAGGATAGGATAGCACTCTATATGCAGACAGAACCC

A\_18\_P14133663

ACAAAACCTGTTTTTCATCATCTTTGGTTGTAGTTTTATAAAGAATGCTGGTTCATGGACTC

A\_14\_P103540 AAGAAGGTTTCAATTGCATTCAGGTGAAATAACCACAAAATGACTGTAAGCCAAATGTAG

A\_18\_P22842138 GCAGGCTTCTTGGGAAAGCAGATATTGGAGCAGAGTCTCTCCTTTAAAAAATAAA

A\_14\_P101290 CTAGTATCTTACTGTGATGTTGTGCTGCTTAGAATTCTCTGTAAACCAGAGTGAGAGCAC

A\_14\_P112400 AAGTGAATAAAATGTCCACAAGCAGTGTGTCATGTAGTCAATGGCAGATTATTAATTT

A\_16\_P16564754

TTTAATTGCGTTTTTCAGTCAAAAATCTCAGTTATGTGGTTCAAATTCATGTTGCCAAGGC

A\_16\_P01409946

CTTCCTTACCACCAATATATGACAGATCAACATTTCAACCTAATTGCATCTGACTGACAG

A\_14\_P201075 GCGGTATAAACTTGTGCATCTTTAATATTGATGTTTGGCGTGGGTGTTTGGAAAGGTATTC

A\_14\_P124012 CTTTTGTGGTGATTCTCCTCATAGTTATTTTGGAAAGGAATCTATCATCAGAGCATGTCAC

CUST\_3807\_PI426210822 CAAAACCAGTAGGATGCACCTCTCAAGTGGTTGGCAGCTTTTA

A\_14\_P117461 GAACTCATGTTTCAGTTCGCGAACATTGACTCCTTACGAAAGTCACTTCATTCTAACTA

CUST\_5839\_PI426210822 GAAACAAATTGGCCATTTGCCCAAAGAGACTAATCCAGGACTAGAACACA

A\_16\_P00935341

CGGTCTGTATCTATGAGCAACTAGCAAACATCACTACTGTCAAATATCTTTATATCCCGT

A\_16\_P19000932

GCCCAAATAAGTTTATGCCACTTCTCTTTAAAATCCTTCAGTAGTTATCCTCTGTCAACA  
A\_18\_P22839761 CTGCTTCTGCTTGGGAATTCTGCAGTTGTGCCAGCAAACACCTG  
A\_18\_P13082267  
TGCAGTTTTGCATTGATTATGAACAGCCGTATCTATAGACATATTGATGAATCCCATGGA  
A\_14\_P115308 CTGCTTTTAAGTTTGTCTTGC GGAGGGTTTCTTCCATGAGATTTTCATAAACTATAACTG  
A\_16\_P00909229  
TTGTTATGTAGCACCTGAAGTTGTCAATAATGAAAAGTATACGTTTAGTCCCGATTGGTG  
A\_14\_P119219 CTGTATATTTGAGTTCACCAGCAATAACTCCCCACACTCGAAGCAGGTC  
A\_16\_P36425146  
CCCAAATCTGGCTGTATAACTACTCCATAAAGTGATCAAACACATTTATAGTCTTCAGGC  
A\_16\_P58424497  
GAGAAAGGATGGTTAATTTGCCTGACAACACATTGCTGGTATATATCTGAGCCAATAATC  
A\_14\_P106929 GGCTGCGTTATGAAAATTGCTTCACTTTGAAACTTCTGGTCTTGGTAATATAGAATTTCT  
A\_14\_P134013 GACACTCTGAGTCCTATTTGAAAGTAGTCCGGCTTTACAAGATTA AAAACAAATTACAGGG  
A\_16\_P37957704  
AGCACACTTAATAAATACACTCTTTGTAGCACACTTGATCTTTATAATTCCAGGAGTCCA  
A\_14\_P106075 CGTAAATGATTCATTTCTTCAAATGTCCTATGCTGTTTTCCAGCAGAATCTCCATTATG  
A\_18\_P10526657  
GCCAAGAGATGTTATAACCACATAAGCACAAATGATTCCCCTAAACATCCATTTTGTGAAT  
A\_14\_P119946 GTCATGTTTTCTCCTGCTGAATATTTCTCTTTGCATTATAGCAACATTCAGGTAAGCACA  
A\_14\_P100436 GCAACATGGCTTTTTGAGAGCGCTAGTGTTTTTTACTTACTGAAAAAATCATTCTTTGGT  
CUST\_904\_PI426210822 ATTATGTGGACCATGGACCCAGCAACCAGCTCTGGCAAGGACCAG  
A\_18\_P16739265  
AAGACAGGTTCAATTAGGATCAAGAAGAATTCCTCCATTCTAGGACTTTTTGGTTGTGTT  
A\_14\_P124936 TAAAGAGATAAAATAAGACGTTCCCTACCAAGTTACACTGCTTCAAAGTCAAATGCTTGG  
A\_14\_P129453 GAGTTTTCTCAAAATGGAGAGAATTTCTGCAAACAGGTACATCTGTTCTTCAGCAAA  
A\_14\_P133721 CTGCCAGAACCTGGTATCTGTATCTGTA AAACCAAATTA ACTTTTGCTTAAATGGGAAGT  
A\_14\_P106640 TATTTGTTTATTCAATTATTTACGCCGTGGTAAGTGTGGAGTTGCTCAAGAGCACAAATTC  
A\_16\_P39579783  
GGCAAACCCTAAAGTGTTAATGTGCCTCATATCTTTGCTACATCAAATTTTTGGATCAG  
A\_14\_P103140 ACCAACAATTTCAAGATGCCAAAGCAGTTCTAGAGGAAGATGAAGAGGTCAC  
A\_14\_P103822 CTGTGAAACTCTAAAATTGCATTA CTTACAGAACTTTGAGTTCTTTCAACCCAGACAAGG  
A\_16\_P21658932  
AAGGGTAAGAACAAAGATAAGCCTTCACATCTCTTTATATTCCTTCTCACTGACTTCTGA  
A\_14\_P131190 TATAGGTTGCTGAATAACCATCATGATGATGCCTCTAAATTCATCTGTCTTCTAGCAAAG  
CUST\_3515\_PI426210822 GCCCCTTTTTCTTCTGCTCTACCCTGCAAATCTTTTTCTTCTTCTAA  
CUST\_3553\_PI426210822 AGAATACGAGAAGCCAGCTTAGAAATTGCATGGGTCCTTCTGCATTTT  
A\_14\_P127066 GAGGTGGAATCTGTAGGAAAGAGAAAAAGCAAAGTCGTTCACTGACTGAGTAG



A\_14\_P132933 ACTTTTACCTGTGCCCCATCTACAAGACACTGACTCGTGCTGGTAT

A\_16\_P19474494

TGGCTGCTTAACTTTACTTTCAACCTATCTAACTTACACATTTAAAATTTCGACTCCCTTC

CUST\_3380\_PI426210822

TCTTGTTTCTGTGGCTTTTTAAGTTGATGAATAATAGGAAAGTAAATTTGTGGGGTTCAG

A\_14\_P100782 CTCAGATTCAATGCAGACCTTCTTGTTGGGCAGGTCAATGTCATACTTAACTC

A\_18\_P13720470

AAATCCCTGGTTTAAACAAATGAGATTTTCTTACCATAAGACTTAAGACACGCTAATGGGC

A\_16\_P00739560

GTGATGACGTTGTCAGTTAAGAATAGCCATCATTTGCTTAGTTAAGTGTGGAATTGTCCT

A\_16\_P36959721

AGTCATCCCAAAGTATTAGAGTCATCTTAAACAATCAGCATTTTTCAAGGCATCTTCAGG

CUST\_8462\_PI426210822 CTTACTGGTCTCTGTGACCTCCATCTTTTTCCCTCATTTCTCAGGAAATGATTG

A\_16\_P21132283

GTCCCCAAGTAGATTTAAACATGCACCTAAACCTTATTTACACCCTTATGATTTTCAGA

A\_14\_P125279 CTAGAGCAGCACATCCCCACTCAAGCCGTTTCTAATGGTAAATATGTCTG

A\_14\_P126214 TTCCCTAATAATGAGGATGATGTGGAATCAGTTCTCTTGTTGCAGGACATTTTCAGTTATA

A\_14\_P118599 AAGTAGTGTATTTTGATCTCCAATGACTTACAGTTCTTGAATTTTTTAAAGCATAACAAT

A\_14\_P101409 TTTCAAGAAACAGTCACATTGCAATTGCATTTGATGACACCAAAGTTAAAAACCGGTATG

A\_14\_P128685 TTAATAAAGGTCTAAATTCCCTCAACAATTAAGTCCAAATTAATAATGGCTACATCACT

A\_14\_P135468 ATTACCATTACTCTAAGAAATATACTCGAAATGACTCTTAGTCTCCTTTCCCCTCCCCT

A\_14\_P102842 AGCACAACTAGAGATCTGGTTGAATCACTTACATGTCATTCCAGACAGTAAAACTCTAAT

CUST\_8932\_PI426210822

GTATTTTATTTAGAAGACAGTTTTTCAGTTAGAAAGGGAGAAGACATCTAGAGTTAAAGTT

A\_14\_P120367 ATATCCAGTTTCAAGATAAAATGCATGCATTTAAATGCGGTCCATCTGGTTGAAAGTTG

A\_14\_P115229 GGTTTGTGTAAAGGTTTCAGTGTTTATAAGAGGGCTTTCCCTGTCCATTTTTATACTTGATC

A\_14\_P202101 TAAAAGAGAATAGTTTGGGAGGTGGGTGTTTCTGTGATTTTTTTTTCTTTTACAAAAAGA

A\_18\_P13319480

AAGCCTCTCTGAATTGTCTTTCTACCCATCACATGTATCTAAACTTGACAAAATACAACA

A\_16\_P03622064

TTTTCACTTTGAAATCACACAATCCTATCTTATCCCCTAGAACTAAGAAACAGCAGGTG

CUST\_158\_PI426210822 TCTTGAAGTGAGAGCATAAAGGAATGGAGGGCATTTGGTTGCCATTTTC

A\_14\_P138350 CTCATTCTTGGGCTTTGCGTAAGGAAAGAATGACTATGGTGAAGGTAATAGAAATTATA

CUST\_6977\_PI426210822 GTCACTCAGAGGCTGCCATGGCCTAAGACTGAGACAAAGAGAATA

A\_18\_P15389987

CCAAGCAGAATCCTTTAGAACACATTCCACATTAGTTTACTTTTACACCACCTACAACCT

A\_14\_P129601 TGCCATGAAACTCTATACACTGAAATGCCTGTTTACAAGCCTATATTAATCTGGACAAT

A\_16\_P41027362

AGTTATGTTGTGCCAATTACATCAGTTACTGTAAACAGAAGTTCTCTTTGTGTTTCCAGC  
CUST\_6675\_PI426210822

CCCCACTCTGTCAGTATATAGGACTTAGTCTTACTATTTTATAAACTCACTAGCCTCCTG  
A\_18\_P14589092

TCCAGTTTCTTATTGTGACAAATTCCATCGAAAACATATTACAACACTCAATGTGCTTTCCC  
A\_14\_P122215 TTACAGGAAAACATAAGAACTGTCAATCTTGAAGGTGGATCAGAATAGACTCACACAGT  
A\_14\_P104128 GAGAAAACAATAAGGTTCTTATGTCCTGTGTTTCAGGCAAAGAAACACAAGACATAGACAT  
CUST\_8928\_PI426210822 GACCTTTTCAGACTCCATACCCTTTTCACAGGGATGACTGCCTTAAG  
A\_14\_P106127 ATGCATTTACAGTTTAATAATCTCTAAGGTCCAATCTAGAACAGACTGTCCCTCAGCACA  
A\_18\_P14587324

ACTGAATTAGCCCCAACACTTTCATAAACAGCAGTTTTGAAATACCCCAGTTCATGAAAT  
CUST\_1308\_PI426210822

TCCTCTTTAACCTAGCTGTTTAAATTTATTTACATTTTTTCCCCATTTATATGGTGGTCC  
A\_14\_P138982 CATTAAATGTCAGAGCGACGACTATTAATTAGTCTCACCTATGAAAGAAATGGCCTCAG  
A\_14\_P104908 GGTAATAAAGCAGAGAAGAGATTCAGTATGGGAATTTCTGACAGGATGATCCTTTTCA  
A\_16\_P58424172 ATATTAGCAGAGCCTCACAGCAAGCCTCTGGCAAAAACAAGTGAGGTTT  
A\_16\_P18007335

AAAGTTAGGTTAGAGTCAAGAGATACAATGACAAACATGAGTTATATTTTCCCACTCCCC  
A\_14\_P125767

ACAATCAAATCACATGCTTAAAATCAAAGAAACAAGGTTGGCAAAAAGTGAACAAAGCCA  
A\_14\_P124726 GTTCTGTGCCACCTTTATGCTTCTTAATTCCCCAACAGGAGATGGCATT  
CUST\_5969\_PI426210822

TGTATGTTACAAAATAATTATAACAAAAGCTTTGTTGGGAAGATTGTTTAGGTTTTTTTTG  
A\_14\_P126445 ACAAACCTCATGTATTTCCAATAAAGGGTTTGTACTCATCTTTCACATCACACAAGG  
A\_18\_P22841201 ACAGAAACCTGACACTCTGAACTTTCAGCATTTTCATGACATTTGAGGTCTGACTTT  
A\_14\_P109473 TGGTGTCTGAATACAGTATTAAGAACCAGGCATTAAGAACCATTGTCAGTAATTTGTCA  
CUST\_199\_PI426210822 CTGGATCTTACTGGTTGTGAGACAGGGAGGGAAAGAGAGACAAAAG  
A\_14\_P201858 TCCCCATCACCTTTTCTATAGATTTCAATAGGTTCAAAACACAAGTCTCTTAAAACCAC  
CUST\_4233\_PI426210822 AAGTGAAAGCGAACTCAGAGTGGGACTTGGGATGGGCTTTGGAAC  
A\_16\_P02347921

GTCACCACTTACCCTTAACTGTCCATGACATCCAAAAGGAAGTAATCATATAAATAACCA  
A\_14\_P127662 ACTCTTTAATATCTACAGGGCATATTTTTAGGCTTAGAATGCCTGAATTAGCCCCAGATT  
CUST\_3171\_PI426210822

GCCAAGGTACACTCAAGGTGGCTGATACTTTATAGCCATACTTTATAACCATGAGAAT  
A\_14\_P102440 CCATACTAAAAGCATGCAATGACTGAGGTTTTCTCCTAACCTTAATCTCATCTTCTCAA  
A\_14\_P127988 CTTTTACCCATGCATTTTTACAAAGTTGCAATTTTCACATAACATGAGAAGGACCAATAA  
A\_14\_P135157 CCCTTGATTCAAGTTTACACAAAATGTGCCTTTGGAGACTATCCTGTTAATTTAAACAGT  
A\_14\_P114086 GTTACAAGCCTGTCATAGTTCTAATATTTAAGTTACAGGCTGCCTTAGAACGAAGAACTG

A\_14\_P120651 CAGAGTTGCTGGGTTGCCTAATTACCTCCAATATTTTTTCCTCTTAGAACAATAAACTG

A\_14\_P124340 GCCATATTTTTTCTGTGTCATGATTCAGTTTCTTACATAGGCAGTGAACCTATTCCTTTG

CUST\_3893\_PI426210822 AGGATGGATGCGTGTCATTACACACCAAGTGTGTTAGAGACAACA

A\_18\_P22840157

AAAATTTAAGGAAAGCAAAGACCTGCATCTGTCTCATCAGAAAGGGAGGCATATTTGATA

A\_14\_P124495 ACCTACAAATCTGCAGATACATTCTATTGATCTGAGACTCACACTTTCTCCTTTTAACTT

A\_18\_P14132521 GCTGTCCTCGGTATGAGATTATGGTGATGTTGAATGGGGGTCATTAGAAG

A\_14\_P137504 GCATTTAAGGAACACATTCCCTCATCCAGATATTTATGCTTCTTTGGGTTCTCTCTAGAT

CUST\_1599\_PI426210822 GTGAGTGGGAAGGCAGCCCCTCTGGGCGCCACTCTGTCCTCTGAC

A\_18\_P11097667

TTCATACTCCTTCCATTTACATAACCCCAAGAAATAAACTTGATAGTTTCCATGCTCCAAA

A\_16\_P17147843

GCCATGTTCACTCTGTTTTTGTATATTCATTACACACGTATAAGGAATGGTTACCAGC

A\_14\_P200212 TCCCACATCCCAGAAGAGGTGGGGGTATTCCCTAACATAAAAATGTTT

A\_16\_P01643791

TTTCATAGGATGCCTACATTTGAACATCTAGCCAAATTTTTAGCCGATTAGATTCCAAGG

A\_16\_P30952529

AATATATATTGCATGACAGGAAATGGAGGTCTGCTATTTTCCACTGAGACTTGCTGTGT

A\_14\_P121459 TGTTTTTCCAGAAACAGCATTAAATTTAAAGCCCTAAAGAAGGTTGCGCAGTTAGCAG

A\_14\_P107058 ACATCAGTTTTTCCATATTAATGCATGTATGTCCTGGTAATGGTTTTGTGGCAGAATCAT

A\_16\_P36230587 CACTGCTGCTATATTCCATGCTTTTGGACAAGAGCATGTTTCAGTATTGTCCAG

A\_14\_P132711 CTGGATCTTCCAGATGACTTGATTGGATACTTTAGTCTATTCTTAGTTTCGAGAAAAAGAG

A\_18\_P22842825

GCCAAAAAATTTGACCTTAATGAAAATAGAGGATTTTTAATGGAGATCAGAATTTTCACT

A\_14\_P125684 TGTGTTTGAATTACAGGTTCTCAGTATTGACCTATTTTCTTCCCTATATGATCCTGTCCCT

A\_14\_P112404 CTTTATTCTTACAGCACAGGGATATTAAGAAGGAGGGAAAACTAAGACCAGCA

A\_18\_P16788704

ACTCTCACCTTACCCAAATATATGTTCTCAGAAAACAATCTCATTAAGTAACTGCATCCC

A\_14\_P116805 CTTTTGGAATACCTATCAGAGTATATACACATGAGGCAAGTGAATAGTGGTTTTTGATG

A\_14\_P113320 ATGGGACTGTGTTGAGTAAGAGCCACATTTATTCTTAATTGGACAGAGCCTCAAG

A\_14\_P100405

CTTTCAGCAGGAACGACAAAATTCAAAGACTGAAAAGGAAATAATGGGGAAATAACCTTA

A\_14\_P136208 GGAAAGTTAGGATTTTAAGCATTCTGACAGCATACTGATTAATGTTAAATTTCTAACATT

A\_14\_P139804 AAAGATTCTGTTACCTACATCTCCAAAGATCCTATTAAGCAACCAGTGGGTATATTGGAA

A\_16\_P01861604

AAGTAAAGAAATGCTTAATCTTACCTTTTTGTGAATTTTCATATAGTGAACACGGTTTTTTGG

A\_14\_P134533 GATTAGTGTTGGTCTGAGAGTCCCTGCAGGAACAGTTCATACAAGATACATATGTAAGAAA

CUST\_6280\_PI426210822 GAAGGGGGCTCCCTTGAGAGAAATGGCTTTTCATACAAAATGTCCTTA

A\_16\_P02379163

ACTTTCCTATCATTGAGAATCTCATGGTCTCATATTCACAAGTAAACGTGCCTCTCAATG

CUST\_8801\_PI426210822

ATGAATCATTATCACTCAGGAAGTAAGGACCTGGTTTACTATCTGAGAACTTTAGTCCTA

A\_14\_P126251 GACAGTGGTTATTTTTGCTAAAGCAGAAAGGAAATGTGATACTATTGGGCTGTGTTTTGC

CUST\_579\_PI426210822 TACCTCCACCTCCATCAAGGCCCTGTCCAAGGTATCAGGTTTCTA

A\_18\_P15592045

AAAAGAGGCCATACCTAATTTTATCAAGAACTGAAGGTCTGTTTTATCTTTTTGGCTCCAG

A\_16\_P15449094

AAAATGACAAATGCCATTTCAAACAGACTTACAACCCATTTATATAGGCTTTCCCTGCAA

A\_14\_P104216 CTCCTTAAGGAAATGACTATGAGATATTTAACTTTGACTTTCCAGTGACTGACAGCCTT

A\_14\_P201355 ATCTCCATCTGAGCCTAAAGTTGCCACTGGCACCAATAGATTCTGTTT

A\_16\_P00685545 GTCCTAGGATTCATTAATATTATTATATTTTTAGTCTTTGGTCAATATGAAGAAATACTCA

A\_14\_P113673 CAAGGTGAAGGAAAATTCTCAGGATGACTAAACCACTACTAATAAATACCTTTTTGCCTGA

A\_16\_P18315506

TCCACCAACACTGTCATATAACCTGCTAGAACTCATGTTACAAGACTTTATGGAGAAAAA

A\_14\_P131917 GCAACTCATCAACTATCTGAAAGACAGCCTCTAGGTTTACTTCTGTCTTTGTATTTTCAT

CUST\_7401\_PI426210822 AAAACATTTCTCCCCTGGTAGAAATGCTGCATTGAGCCACAGCC

CUST\_1822\_PI426210822

TGAAAAGAAGAAAACAGATATATAGTATTTTCATACAGTACTTGTCCGAAAGAAGACTC

CUST\_4004\_PI426210822

TTTGTTGAGGCTGCTGTGTAACCTTTGACTTTCTCTGCTGTCTCCTATTTAAGAGTA

A\_14\_P131232 AATTTTACTTTATTTTTCAATGTTTTTCAATCACCAGTTTGACAATGGCATTGGCCCGTG

A\_14\_P110744 ACAGTAAGTTTAATCAGCAACTTGGATATGAAGTCTAAGTTAGGAACCCCTAATGACAA

A\_14\_P201965 CACAAAGAGGACTTAGGTTTCAATGCTGGCTTTGTGACATATGAGTGTCTTTAATACTTT

A\_16\_P17518501

GCATCTCCTATTTCTCTACCATCTTAACCAGAACTACACATGATTTTAAACTGCTCTTG

A\_14\_P120403 CTAAATTAATAAAGAAGATTCCCATTTCTCTCCCCATCGCACTTTCCACCTTAATTTTAT

A\_14\_P130157 GTGGAAGCAGAAGAATGGGGTAAATTTCTTACACCAAAAATAAGGTAATCACACATG

A\_18\_P25342639

CACTTGGCGTAATACTTTTCCTTTAATAACTCACTTGTTAAGGCTAAATACCTGTTGAGTT

A\_14\_P130032 TTGAAATTGTCAATCTATTGCCGCAATCTAAATTGATTTGACCCAAATGCCAATCAGTA

A\_14\_P128865 GGTTCAGTTAATTTTTAAATGCATCACTAACGTGTAAATAGTGACTGTTTGTTCAGCA

A\_14\_P106030 ATCTGTCCACCACTTATGACACTCTATTTCACTATTGTGTCATTTTGATGATAGAGGAGT

CUST\_8483\_PI426210822

CTGTATGTGATTTCAAAGAATCTTAGAATATATATTGCATGACAGGAAATGGAGGTCTGC

A\_14\_P115996 CTATTTGGAGAAAAATTTTAGTCTTTTTTTTCATTCTAAATATTTTTCTGGAAATGGTAGA

A\_16\_P00366935

AAGATAAGTCAACGTTGGGCATTTTTATCACTATATTCACATAGATGACTTGGTGGCACG  
A\_16\_P21412620  
ACTGCCATTTTTATGGCTCTAGAGAAATATGCTTCACAAGTTTAAACTCAACCTGGTTAGG  
A\_16\_P03119398  
ATACCTGAAAGTAGTATGTGGTATGTAACAAGCATCCAGTATTCATCATCCAGGTTTCGAC  
A\_16\_P00921367  
AAATCCAGCATCTCAATTATCATCCCCAAATTTCTATCAATATATGAAGATGGCCAAGGC  
A\_14\_P110805 TGGCTGCATTTAGTTTTATTTTTTCATTAAGCAACAGCCTCTTAAGGAGAAGATCTCTTCC  
CUST\_4112\_PI426210822 CTGCAGTTGAGAGGTACAAGAAATGTTCAATGAGGGGAAGACACTCTACT  
A\_14\_P200761 CTAGTAAAACCTCTTTGGTTTCTGTCTCTGTAAAAAAAAGTGTCTAATTGCATTTGGGCA  
A\_14\_P133782 TTGTGTTTGAAAAGGAAATACATGTCCCAGGTAAAAATCCAATCAACACAATTAGGAGTC  
A\_14\_P115177 AGAACCGACTCCAGTTGAATGTTTAGATTTTTGCTAAACTGTTTTCTTTTTCCCTTTTTT  
A\_18\_P13543989  
AAACTGGGCTAAGACATACAGAAATTA AAAACTCCTCACAAAAGAGAAGATAAAACTGCC  
CUST\_6701\_PI426210822 AAGCCTTTGACCTGGAGGGGCATGGCTTCAGGTGACCAGAACTGT  
A\_14\_P113308 AATTTATTTTATGTTAGGGATATGAGGCATCAATTTAATTTAAACCAAGTGCCAAGTGGA  
A\_14\_P139929 GGTATAAACTGGGAGTTCTAGAAGTTGGAGATAAAGGGGACATAAAGATGAAATCAAAAC  
A\_14\_P125179 AACTATTCAAGAAAACCTCACTTGACTTTTAGCCTGTGGTCTTTCCGAAAATTAGAGACTC  
A\_16\_P03463917  
TTCTTGCCCTTACAGTAAAATTGCAAAGAAGAGTAGCATAAGAGGTAGATCAGAAGACTGC  
A\_14\_P120414 CTTGGAATTTTTATTTCTGTATATGGCCACCACACTCTACTTCAAAGAATGTTGCTCTCA  
A\_14\_P117710 TGACAGCAGCGCTCGGTAAGTGTTCCTTATTGGTTCAAATATGTAACATAATGGTC  
A\_16\_P39905701  
ATATTTCTGTCATGGCTCATTCAAAGACTAGGACCAATGATGGAAAAATTACATATCCGC  
A\_18\_P22840482 TAAGCAGGTAAAAGGGACGCATTTTTGCCAGCAGGAGAGAGAAGTTTG  
A\_14\_P113201 ATTCCACCAGGAAAACAAGAACTGAAAACCTGAGCAATGCCTAGAAAATAAACGG  
A\_16\_P16988989  
ACGCCTATAAAATATGCATCTTAGATCATCTTCCGTTTTAGAAAATTGATCCCACCTGCT  
A\_16\_P19860346  
ACTCCTTTTTGTCTCCATCAATAAACTAATTTGCCTCCATCAATAAACTAACAATTGCTT  
A\_14\_P126436 TTCAGTGAATATTTTTATTAACTCTACTGTGGACAAGAAGCCTGTGGAAAGGTGTTTCG  
A\_14\_P102846 CCAGAAGGACATTTTTTCGACATGTGAAGAAAGCATCTAGGAGGAAAGCCAAA  
A\_14\_P138382 CAATGGATATGCTATTAGACACAAGTTCCTGTCTTTCATCTTCTTCAAAGCGCACAGATAC  
A\_14\_P135052 TCATGAATGGACACAATACATTTCCAAGCAGAATCTCTGAACCTTCCAAACTCATTAAT  
CUST\_10105\_PI426210822 GGTTGTTCCCAAAGTGTTCATAAACGTGAATCGTGACATGGTACTGAAA  
A\_14\_P107419 AATTGTTTTATTGTTGTCAGCGCTGCAGAATGGTGTGTAATCTTTGTATTCTGGAGAATT  
A\_18\_P16214336  
AATCAACCTAGGACATTAAGCACATTCGATTCATGTATACTGAGGAGATAGGATTAACGG

A\_16\_P16595243

TTGCTAAACCACAATACTCTAACCAGATGCTATTTACCTGTTTTTGGATCATTTCAGCAA

A\_14\_P138792 TTTCCGAGCCATACAAAGTTTACCGAATTGTTCCCTGAGGAAGAGCAAAAATGTAACAT

A\_16\_P16191587

TGATGGCACATGATCTTTCATTCATCAAAGGAAAGTAATACTAAGATTCCTTTTCTTCAG

A\_16\_P19856704

AAATTATAGCAACACCCTACTATACAGTTCACATCCAGAAATAAGAAAAGACCTACATCA

A\_14\_P124218 GAGTGAAGCCTTTTCTTTATCACTTCATCCAAATCATCTCCTATCTCCTGTGTTGAGT

A\_14\_P127986 ACTTTTCCCATATAACCAGCATTGTCTCTGCCAAATATCAGGGCTTATTCCTATTC

A\_18\_P14138233

TTTTTCCCCCTCTATTAATGCGTTAATTTGGAGTCTTTGCTTACTAAATGCTGTCTCC

A\_14\_P117190 AGCCTTGCCAATGATGAAGGAACATAAAATCACTTACCATTAAAATCAACTATGGTAGG

A\_14\_P132037 CAGTTTGATTTGGTCAAATTTAGGTCAGATTATTAACCTGAGAAGCACATGCATAGGCAA

A\_14\_P106317 CCAACTTTCTGACTAGATCATGGCTTCATACCTTGATTGCTCAGTCTGAATAAAAATGAAA

A\_14\_P118286 CAAGACTTGTTGATGAGTTGGATGTGGAGGAAGAAAAGATACAAAATAAAAATCCACTCT

A\_14\_P107876 CTTCACTACCCTTTATGCCAGGAACATCAGAAAGCCTGGGCTTTGAA

A\_14\_P131289 CTCAGAGATAAGCCACAGAGAAATGCTATTTCTACTCTCCTAAGATCTGGGAATTCACAA

A\_14\_P117589 TGAGTAGCGATTTTTCCACCCTATTAGGGGAAATAGTTGTATCTGTATACACTGTAAAA

A\_16\_P40260339

ACACAAACTTTTAAATTCATTGTTTGGATATAATGCTGAAATAACCAATGAAAACCATTG

A\_14\_P116721 CTGCCTATCTGACAGGTCCTCTTTTCTTTATAAAAATGAAAGCAAAAAGAAAAGGGGT

A\_14\_P111758 GAGGAAGTCATTTAGGAAATGTTCAAATAACCAATATGTGGAAATGGACACAGGGATCTT

A\_14\_P200208 GGATGCTCAGGAGAGATAAATGCAAATGCAAAAAGCTGTTTTATTTTCTAGTCCTTTGGTG

A\_16\_P00424606

AGGAAAGAATATTGCACTTTTATGTATCTGTTTTATTAAGTGGTTACTCTTCCAAGGACA

A\_14\_P125483 ATGTATTTAAAGAATCAAAAAGAGCAAAAATTTCTATGGGTCACAGGAATCCATCATTGCTT

A\_14\_P122041 CTGGTAGTCTGTGGTTTATGATTGTCTCCTTGTTTGTCTTATTCAGAAACATTCTCTCAA

CUST\_39\_PI426210822

TTTAGTGTTTACCCTTCCCTAAAGACATTTGCTTAGAGTTTGGAGTACACTGAGG

A\_14\_P125730 ACAGGGTCATTCTGAATCATATTAAGTAGCCATTGCAGTTCTTCATAACTTCTGTCCACT

A\_16\_P17893906

GGAGGATTGTTGTCAATTAATGAATATGGCCTACCAGTAGAAAACTTTAGTGCCAACA

A\_14\_P129327 TATTTAAACCATCATGGTCCACATCTTCCCTAAGACATAACAATGCCTAACATTGACTGA

A\_16\_P16191909 GGACAGAGCATCCTGGTGGGGATTTTCGAGATGTGCTTCTCAGAC

A\_14\_P110549 ATCACCTCAGACATCTGCATTTACTGCAACTTTGTCTTACCTATAAACTAATCCCT

A\_14\_P120179 AAAATAAGTTCCCCTGAAAGTCTTAACCAGGTTTACCTGGACAATCTGTGCAATATACTA

A\_14\_P100808 CTCACTAGGCTTCCACTTCTATTCCTTCTATGAAGTTTACAAAGTCTCCAGAGGTAA

CUST\_10204\_PI426210822 TATGTCTGTTACGAGGGTTCAGGGAGCTGCTCTTTGGAGCTGCAG

A\_14\_P126598 TAACGAACTGTGTTCTCAAGAGTTAAAGAGGTTGACTTTAGAACTTATAGGATGTGGAGA  
A\_14\_P128352 GAGATTATGTTTGTTCGGGTGAATTCCTGGACAAGACCGAGGATGACT  
A\_14\_P139520 AAGTTCACATTCTCTGAACAAGTAGACTTTCACAGCAATACAGAACCCTTGTGTT  
A\_16\_P38178602  
ACCGCATAACTCTTTCTTAATGAAGCATCTTCCACAATATACATTACCTAAACATCTGGC  
A\_16\_P02120093  
CACTGCCACCTCTTCATTATCATTCCCTTGCTATTATATCATTCCCCAAAAAACTCTACAA  
A\_14\_P123991 GGCAATATTGTATCTGTTTAGAAAATGGGCTTTTCCAAAAGCAAACAAAGATAGGTTCCCT  
A\_14\_P111682 TGAAGTTATCCCATCTCTTCTTCCAGATTTCCATGAAAGTATTTTTCTCACTCTCCAACA  
A\_14\_P110809 CTGAAGGGACTTAACATACTCTTAATGGCTTTCCTCTCTCTTGTTTTACCTTATGCC  
A\_14\_P137992 CATAAAGTTGAAAAGATAATAGGGGTGGGAAGGAGAACAGTCCGAGTTTGAATG  
A\_14\_P112228 GAAGTATTCTACAAAATCCAGGAAGATGTTTATGAGACCCTAAAGGATAGGTATTACCCT  
A\_16\_P16578775  
TAAGTGAAAAAGCCACAACCTTAGATATTTACAACCCATTTGAACTCAGGATTCATGTGC  
A\_14\_P139069 CACAGTTTGTATGTGCTCATTTACTCTTTTAAATGTTAATGAAAACATTTGTTGCTGCT  
A\_14\_P131736 TTATTTGCTAAATTATTCTCTTGAGCAAAGATCTTTCCTTGAGCACTAGCCATGGTTGCA  
A\_14\_P137564  
CTGAAGAAACAAGAAGAGAAATGCTCTTACAAGAGGAGGAGAAAATGATACAACAAAGAC  
A\_14\_P136565 GGGTACTATCTTTCTAGCCTACAATTTTTGTGTTCTCTCTGCATGCTATTCACACACTA  
A\_16\_P19232110  
AAATACTAGATGTAACCCGATGAGACTAGATGTTCCCTTCTGCTGTTAATGAAGAGGAAAC  
A\_14\_P136739  
TTCGAGAACTACGATAAAAAGCAAAGAAAAAAAAGTAAGGACCCTTGGTAACAACATGCT  
A\_16\_P18476100  
TGTGGTCATTAAGCAGAAGTCTCTACGCTATTTTTAATTGTTACTGTCATATGAGCCTCC  
A\_14\_P117394 CTTTTAAACTGTATCAATAGCAGTTCTTAAATATACCTTTCCCTGCATCTTGCCCCATGT  
A\_14\_P110872 ATTGGAGAGGAATTTGTTGGACAAGACAAGATATGCTTAGTAATATCCTAAGAAGATCC  
A\_14\_P114167 CACAACACTAAAACCATCCAGGAATATTTGGGTAAAATATAAGTCTCCTCCTTGAATGCA  
A\_16\_P18407661  
ATTTCTCACCCCTATAAGACTTTTCCCACATGATCAAACCTTACCAGACAGTATCCAGTTTC  
A\_14\_P128010 GAACCCAAATTGGTTTCTGTAACAAAAGGAATGTTAAATTCCTTTGCATTGAGACTAAGG  
A\_14\_P113770 TTTTATTGATAACCTAAAGAAACCAGTTGCCACTCACCTATAGGCATGGGGCTAATTTAA  
A\_14\_P101202 AATGTTAGTGAAGTGGCTTTTATGTGCCAATAAGTTGTGTTTAGCAGTCAGGAATAGAAC  
A\_18\_P22839392 ACCCAAGGCCAGAGGATGCCCAATGTCATGTGCACTCTATCTAC  
CUST\_1285\_PI426210822 AGTAGGTACAGAGGGCAGACGTGGGTCTCAGACTGATAAAATGTA  
A\_14\_P124596 AAGTTTTCGCTCCGTATCTCAAATGTGCATGAAGGAATTTAACTGCACGAGTGAAT  
CUST\_6803\_PI426210822 GGTTGGTCTGATAGAGCCTCGCTGAGGTTCTTATACAAGATCTAGTAGCATA  
A\_14\_P120355 ATAAGGGTCTATTAGCAGACATGCATGTATGCACTCATTAAATCACTTCATGTGTTGCC

A\_18\_P14132671

CTAGGGCATTTAGAAGATAACATGCTTTTTTCTGGTCTTGCAAATTACTTTTCGGTGACT  
CUST\_9129\_PI426210822 TAGCAACACTGGCTGGGCTGGAGCTCTGCTCCCAAGCTTCCTCTC

A\_16\_P30952462 GTAGGCCTCAGGGCATTTCATTGCTGTCTATTTTTTCGTTACAGTATGGATGAGAAAA

A\_14\_P137880 TGAAGAGGCCTTCTAGCATCACCTAAAGAATACCTGCAAATAATTTTAAACACACCAAT

A\_14\_P123763 GCTATATTCATGCAATCAAGTTAGCCCAACAAGGAAACCTCTTAGAAAAAAGAGTAGGTA

A\_16\_P03635188

AAACAATTTTTTAAGCAGTGATAGAATTTTCCCTCCAGATTTAGAAGGAATCGTCCCTGA

A\_14\_P137876 GTGGTAGTAACTAGGAATGTAAATTACTAAAAAGGATTGCTTATAATTAATAGTAATTG

CUST\_1211\_PI426210822

AGAAAACGAGAGCTTTGGTGGGACGATGTATAGGGAAAACACTTGTAAATTAAGG

A\_14\_P114034 CTTAAGTCTGGACTTAGTATTTGAATTTTCTCCATCGATTGCCATCTTATCTCTGCCTTT

A\_14\_P115106 CTGAATGTGAATGCCCATGCTATTGTTTATAAAATCACCCCTCCTCTTTTCTAACTC

A\_16\_P16191392 CCTCATGTGTGAACCTTAATATATTCTGCCAAATATTCTGTTTATAATATCTAACCTCC

A\_16\_P15249152

TTGAACTGCAATTTGAGCATATTTTTACCCTTCAGACATTACAAACATGCCATAACACCC

A\_16\_P37954201

GTCTTCTATTCCCAGATTTGCATTAGATACTTCACCTGATAATTTAATGAGCACACCTCA

A\_14\_P117439 TTATAAGGTGAAGTGGAACATAAAACCAGCAGCCACTAGCATCAATATCTATACTCTCAGT

A\_14\_P114209 CTCTTGCTTTTTTTAATGAAGGGAAGACTGGAAAAGGGAAAAGTGATGGCAATAAAAAGTAA

A\_14\_P200848 ATAGGGGATTGCTGAAAAGGAATGGCCTTCAAGACTCAAATAATATATGCTATATTGGTG

A\_14\_P112795 AACTTTTTTTTTTCATCTCTTGTTTAACCCTGCTCAAGTCTTGTCATCTCTTTCTCCTC

A\_14\_P135795 CCCAAAGAAATACAACAAACAGTAGAGGTCTAGTCCAAGGCAGAAGATATACAAAATTCT

A\_14\_P122611 AATATGTCAAGATCAAAGGTTTCAGTGGCTGTTTACTGGACACAGGAAGAATTCTG

A\_16\_P38133330

ATTGGACAAAAAGAAGCCTAATTCTGGGTCTTTCAATACTTCTCCCCAAGACTATTATT

A\_16\_P02893723

AAAACCTTAACACACTTCTAGACAATATACCTCAAAAGAGATTCTTCTACTTGCTTCACTA

A\_14\_P130232 CTGCCACTGGCATCCCATTAGAAAAGTGATGAAGATAGCAATGATAATGACAATGATATAG

CUST\_734\_PI426210822 CTTCTCATGGAATCAGATACAGACCCTCCAAGACTGACCTGGAA

A\_14\_P129060 CTTTAATTACAACCTTGGAGCAGCTCACCTGTTTTGCTGTTTCAGTGAG

A\_14\_P102864 CTTCTAGGCCATTATCAAGAGTCAGGATCTGTCATTATATTTGTGGATAAGCAGGAACAT

CUST\_989\_PI426210822

ATGTGGTTTGCAGCAGAAAAATAACAATAGATTGTTTTCTGTAGTTTAAATGTCATACGA

A\_14\_P200966 ACTCTCACTTCCCTTCTGAATAGAGGAGAGGCACTCAGAATAGTATTTTAGGGATATTAT

CUST\_5984\_PI426210822 ATGAAGGTGCTGGTCCTGATCATTAGCCTCATTTACAGAATGGCTT

A\_16\_P15113777

AAACCTCCCATCATATAGCAATGTCCAGAATCCCTAAATAAATAGAATATTTGCTGGCCT



A\_14\_P137311 TAGCATATGCCAGAGAAGTAGAAAGAGCCATTGTATGTCTGGGTATAATCATATAACCCAG  
A\_14\_P108993 ACAAATGCTTATCGTCCTACACCTCTGTAAAAGAGAACTTTGACAAAAAAGGTAACATCA  
A\_16\_P17876837  
AGGACCATTGCATAAGTTACTTGTTCAGTGTCTTTCTTTAATGCTTTAGTGTGCTTACA  
A\_18\_P22841710  
TGATTCATTCATTTATTCATCAGACTTTGAGTGTGACACTCAACACTGAAATGAATGAG  
A\_14\_P119511 CTCTTGAAAAAACAGTTGAGGTATTTACATAAAAAACTGAACAATCAGGTTAGCCACG  
A\_16\_P15798379  
AACGTTACAAGTGCCTAAATTACAAACATATTCCTACTGTCTTTTTAATAAAGGGCCAGCC  
A\_16\_P16407861  
AAAAAACTTCTACACTAAGACTTTACCTTGATTGCACATGAAATCTAAGCCCACCTTGG  
A\_16\_P17143727  
AAAATTGACAACACTGTTTGCATCCATAATTTCTGAAGTGTCCACTATGAATGACTCTTCCC  
A\_14\_P106503 TGCCCATGATTTGGAAAAGAGGCTTCTCTATAACCTTGAAGAAAAAATTATCTGCAAAT  
A\_14\_P115134 GTTCAGTAGTCACAGATGGAGTTCAGGACGAAGATCAAGACTAGAGTAAAAGTCATAAAT  
A\_14\_P139181 TGGGCACCTCTCTGGTTTTTAGGCTTTAAAGCAGATCCAAATGTTATATTATAGTCTTGT  
CUST\_1128\_P1426210822  
GTTGATCTGAGGTCTTTACACATTCTCTCATCTAATCTTCCCAGAAGCTGTGAAAAA  
CUST\_2307\_P1426210822  
TTATTAATACTAAAAAAGCATTCTTAGAATCCCAAGTTCGCTAACACTCAGGGATGCA  
A\_14\_P128777  
GAAAGTGAACAGAAGAACTGGAAAGGAAATAAGAACACTGGTTTTAGAACTGCTTTCT  
A\_14\_P123269 CTGTGGAGACACCAGGTAAGATTAATAAATGCTTTAACCAAGTCATTAGCAGAATGCTT  
A\_16\_P17621048  
TTTGTATCCTCAATCTGCTCATTAGTGAAATCCTAGGAACACTACGAAATACTACCTTCC  
A\_16\_P35680701  
TCATTCAGCCCTATACAACTCAGATCTTACGGAAAAATCTACTTTTAACATTTGACCCTC  
A\_18\_P19550117  
ACTGTTTTAAGTGATATTTGAAAAAGGAAGATACATCAACCCAATTAACCACATTTTC  
A\_14\_P116364 CTTCAAACCACCAACTTAAAGGTGTAGAAATAGTAAGCATAATACCGCCATAACCAGTTT  
A\_16\_P21340489  
AGAGGCTTTTCATTAGAACACTTGGAACGTTATTCAGATGAAATGTCAAATGAGCAGCG  
A\_16\_P00828375  
AAAGGATTTTCAGGTCTCTGTAGATAATTGTTGCTCAATTAAGTCAAAGGATGGATCACC  
A\_14\_P116136 TAGGGTCTAATATATTCACAAAGAGGTCACAGGAGACTTCTAATGATACCTTTTATGGGC  
CUST\_1972\_P1426210822 CAACATTACCCCTTCCCTAATCCTCAGCCCTCAACTGTCAATTGC  
A\_14\_P132660 GTTGCAGGTGATTTTCAAAGCCAAGTCAAATATTCTCCAGAATTACTCAAATACCGGT  
A\_16\_P38853476

CAATCTCAGTCGACATTCTAGGGAAACAATTCATCGATTCTAAAATAGTAGATCTTGGGC  
A\_14\_P121680 CTGGGAAACTGGGTTTCTCATTAAAGTTGTTCCCACTCTGTATTCTCTGTGAAATT  
CUST\_1025\_PI426210822 AGGCCTGCATCCTGGCTGCTGGCACTGCTCCAGTGTCTGTTAGCA  
A\_14\_P202386 AGTGACACTAATAGCCAACCTGGACCAAATCATTTGCCTTATCATTTCATAGTGTCCCTC  
A\_16\_P16056232

AGATTTCCAGTTAAAATGTAGGCTTGTTTCATGTATTCTTCCATTGTCTGAAAGCGAACAA  
A\_16\_P16488187

AGGTTCCCTATATGCACTACATCCTCCATTTTTTAAAAAGTTTAAATGATGCTTACGCGACT  
CUST\_1003\_PI426210822 GTTATTTACATGTCCTGGGACATGTGGCAGGGGGGCTGTAAAGA  
A\_16\_P00993182

AAAACCTCCTAGTATATTCCTAGCACTCTGATACCTATGATAGTGACATAAGGGCAGCC  
A\_14\_P119539 ACAAGAAACATCAAAGCGATCATACTTATGAAATAATGGTAATGATGAAGTTGCTGGGAA  
A\_18\_P13561106

TACACATGCACATAATCAAATTTCTTCGCATTAGTTCATTTCAAATCTGTCCACATCAGC  
A\_16\_P16191670 AAACCTTTGTCACAAGGAACCCTAGGTTTCAGTTCGACAGAACTTGACAAA  
A\_18\_P15209880

CTGTCAGTAATATCTGCAGTTACCAATAGAAGGTGTGCTATCTATTTTCACAGCAGTCTG  
A\_16\_P00584299

TGCTTTTGTAGCCATTCTTAGCATATCCTTAGTAGCAAGAACTATTTAACACCGCACTG  
A\_16\_P17213900

ACTCATGGAAAATTGCTATTCTCAGAATACCTTCACTACTTCCAAGTTGACTACATTCTC  
A\_14\_P124877 GTTCCTAGTCTAGGCTTGGTATCTGATAAGTTACCTGTAAATTATTGCAAACCTCCAGTC  
A\_14\_P114912 CTGGACTCTCTGGCTCTGCATCACCTTTCTCTTAAAAAGGAAGCAGAAAAAAT  
CUST\_4492\_PI426210822 CTAAGGCATGCTTTACCCCTGGCTCCCAGGCACAGAGATGAGGGT  
A\_14\_P119290 ATATGAAGGATTACATAACCATCTACTGCAAACGCAGCCTGGGATTTCAATAACTACAAA  
A\_14\_P107183 TTTCTCCTCTTCAGAGAGATTTTTTTTTTATAGCACAGATTCCTTTGCCCTTTTATCTCC  
A\_16\_P17897717

AACAAATCCTCTCCAGCATAATCAACTCTTCTTTACTGTCAATATGGAATTCCTTGTTT  
A\_14\_P132517 ACTGTGGGCATTTAATATTTAAAATCAAGAAATATTTCCAAGGAAATAAACCTCCCTCAG  
A\_14\_P103322 GTGAACTCGTCATGAGGGCGCAAGGCAATGTGTATCATCTTAAGGTAGTATTT  
CUST\_10228\_PI426210822 TAATGGAATAGGTAGGACTGGCTATGAAGTACTATAGCAGGCTGAAGGGG  
A\_14\_P134326 ATTAGTACTGTATAGGTCTCAACCTATGCATTCCTTTCATTGTTGCTGTGGAAACAAGCA  
A\_16\_P17833232

AGCCATACACCCATCTCATTAGGATTAGTTTTGTTAATCTATAGATCCACTTATTCGGCC  
A\_14\_P124815 CAAGCAACTTACCTTAAAAGTCCCCACCACCTCTTTTGATCCTCCTTC  
CUST\_6790\_PI426210822 CTGGGGTTATGTGTACATCTTCATGGTATTGACTGTTATGGCATGCATGGA  
A\_18\_P17015194

AAGATAGAAGAACAAAATTTACCCTAATGTAGTGTCTTTAGACCGTGCAATGTTGTGCT

A\_14\_P133881 CATGTTTTTCTTGAAGTAACGTGTCCCTCACTCTTGAGCCTGAAATTTCTGCCTTAAC  
A\_14\_P131971 TTTGGATTTTGATTGCCAACTGGTCTCCATAAGCATGATTAACATTTAGAAGGGTTTTTG  
A\_14\_P139699 TAGCACTGAGACAAATCAGGATATCTGAAAGGAGGTCTTTGTTGAAAAACAGAAATATGC  
A\_14\_P126148 GATTGTTGGTCTTCTCTTCACTTTTCGTCTTCTTTGCTTCTGATCTGTTATCAAGT  
A\_14\_P112191 GGCAAAGATCCTTTTAGGCCAAAAGACATTTTCACATCTAACAGTAACATCTCTGATGGTC  
A\_14\_P128033 AAAAATATCTCATGGCAAAGACATTATAGACAAACATAGCCAGTGCAACCTGTTCTACC  
A\_14\_P133192 AATTGTCCAAATGAGGCTCTCAITGTCTAGTGATTATTACCATTACTGCAGAACTCTGTGT  
CUST\_8144\_P1426210822 CAACTCTTCAACTTAGCTCATTCTGGAGCAGTCACACGATGACAGATGA  
A\_16\_P16863773  
TCCTATGTATCTTGTCTACTTCATCCACCTATCAACCTCTTTCATAAATGCAATTTCTCA  
CUST\_1008\_P1426210822  
GAAGAGGTCAGAGGTAGGCCATAAGAACGCTAAATGTTATCACTTACGAAAACAATG  
CUST\_8446\_P1426210822  
ATTGTTATAAACACACAAGTTAAGGGCAAGATTCTTGCCAAGAAAATTAATGTACGTATT  
A\_14\_P138257 ATGAAGCCCGGCTAGGTATAAAATTGATAAGATGCTTGTCACATTAATGGTGGTCTAATA  
A\_18\_P14133996 GTCTTGCCAGATCCCCTAGAGTGAACAGGGGATTCTTTATCCTCTC  
A\_16\_P03807008  
TCTCTACCTTACTTCTGCAATTGCCAGTATACTGTAAACCATTATTAGCCTTGACCTC  
A\_14\_P202338 ACCTGTAAGATTACTTAAGGGTAACTTAAGTGTTCGCTCAAGTGTGTTGTTCTGATTTTC  
A\_14\_P202503 ACAAAAACCAGTCATTTAAGTTCTTGGCAGTAACAACATATTTATACCTAGTGCTTCATT  
A\_16\_P36847181  
AACGTGACTTCCATTTAGTGTTACCCTCTGCTACTCTTGTATTACCTTTCTAAATCACA  
A\_18\_P20393293  
AAAAAAAATTAACCTCATCTTCTACTGGGAATCCTAGTTCCTTGACTCTTTCCATTCAGA  
A\_14\_P113901 TCTTTAAGAATCTCTCCTTACTGGTACAGCAGTCTTGAAATAGCCAGGTTCAATCATA  
CUST\_2393\_P1426210822 GTGAGAGCCCTCTGGGCATATGGCGGCCCTATGATCCTTCTCTT  
A\_14\_P129516  
TTTTTAGAAATATAAAGAGAAGGACAAACACAAACAGAAACACAAGAAGCAGCCAGAACC  
A\_16\_P01643673  
AAAAATCACACTTTTTGGGAGATGTTGTTCAAGAGAGAGACTGGAAAAGCATGACTTAGT  
A\_14\_P137393 CTCACCCTCATCATCTTAGAAGCATCAGGATAAAAAGGCTTGATTTCTTTGGTATAATCT  
A\_16\_P18310969  
GGGAAGATGGAATAAATCAATGGCAAATAGTGAAGAAGGAATACAGATATAACCATCCACG  
CUST\_7248\_P1426210822 GCTTCTCTTCTTTCCGGTAGATGAACTTGAGCACATGATCTCACCAC  
A\_14\_P110390 TTGCTTTTAATTTTCCCATCTGATTTTATCTCTGCGTTTCAGTGACCTACCTTAAAACA  
A\_16\_P00685372  
AGAAATGCTGTTCTTTCAGTTAACAGTTGTGTTTTTTTCCAAGAAAAAAAAGAAATACAAA  
A\_16\_P38524965

AGAATTGCTTGTCTAAACATCCAATCACAGAATCTTCCCTTTCCTGAAATTGATCACA  
A\_14\_P130692 TTCTTCCTTTACGAGTCTAAATGGCTATCAGGAATCAAAGACACATGGACTTTTTGTTAG  
A\_18\_P22839940

TCAAAGGTGAAGATTTTTTCCCTTTAATGTTAAAAGTGGTCTCCACAAGGGATAAAAA  
A\_14\_P109683 AACACATACATGGCCAAATGCAATACTGAAGAGACAATCATCTGTATCTTTTATGGTTT  
A\_14\_P113179 TCCTCCAGTTACTGACAAATTCTCCTTGAGCAGGAAATGGTATCTTAAAAGTCTTTTTAC  
A\_14\_P107334 CTCCAAGGTGAGAAAAGTGCATCCTTTTGTCTAATGAATCTGAAATTCCATTTTAAA  
A\_14\_P112708 CCTTTTTGTAAACAGAGGCTTTCATTGACCAGTTTTCCCTCCTTGTGACATCTAT  
A\_16\_P00148321

GTGCAGTTCAGAAACAATTATGCATACCATTAAGGATGTTATCAGGGTAACTTTGCAGTG  
A\_14\_P122322 GGCATATGTTATTGTGTCAGGCTATGTTAAACGGTTAGAGAGGAAGAACTTAGAAGGCAC  
A\_14\_P126606 ATGCTTAAGGAAATCTAAACATCACCAAATAAGGCTTGAGGCTTGTAATGCTTTTTCT  
A\_14\_P132411 GAAGACAGATGCTGATACATATAAAAATGTGTAGGATGTATATGGGTGTGTGTGCTGCAA  
A\_14\_P133420 TCAAATTCATTCTTCTGCCCAAACCTACCATTTTCAGTCCTTAAAATAAACAGGCTAAA  
A\_14\_P133829 AGAAATATGTCAAGTGTGAACGTGAAGATAAGATTCCCAGTTCTTGAAGGAACTCCATA  
A\_14\_P102880 TATATGTGTCATGTTATCGCACGTGAACCACTGCCTATGTTAAATAGGTTTTTCTTTCCT  
A\_14\_P131680

AAAAATTGCAATTGTCCAGCAAATGCAAATGTTTAAAAAGGAACTTGAGGAACCATGGA  
A\_14\_P121176 GTGAGTTCGGAATAATCACAGCCCGAAGAAAGCACCTTGTGGAAGAT  
A\_18\_P14789142

GGTCTCATTGCAATTATTCATCATTAAAGCCATCCTTAATTATTGCCATCACAGACCTA  
A\_14\_P201977 CTGCCTGGTCCATTTTCTTCTATTTGCAAAGTAGTGGTAACCATTTCAAGATAGTAACAA  
A\_14\_P111149 TTGTTGTGCAATCAGGGTTAAATAGGGTTAGTGTCTATAAAGGAGCACATTGTTCCATAA  
A\_14\_P100918 CATGTCTGAACAATTAGCCTGCTTCCTCTATACCCATATCTCACAATCCAGATTTATTTT  
A\_16\_P00629762

ACTAAGTTCTTCACTGTCCAGGTTGAATATTACAGGTTAAGACACAGACATTTTCAGAGTA  
CUST\_8303\_PI426210822 CTCTTTCAGAATCATGTCTCCAACCTCCTTTGTATATGGCGAGTCCGT  
A\_14\_P125261 AAGTTACTGGCATGGTTTGAGAGATAGAAGGAATTGATTAAGAAACCTCTCAAAGTTTCT  
A\_14\_P113792 TTTTAAAATTAGTGTTTTTCTAGTTTGCCTGATGCGTGTATGGATGTGTGTGAGTCAG  
A\_18\_P17392570

TGAAACCTCTGTCTCTAGTAATTTACCTCCTAAATTGACTTATTTCCACTGTGGCACTTA  
A\_14\_P119823 AACTGCAGACACAAATAGCAATTGCAAAGTCATCATGATAATTTGCATGAGTGCTTATC  
A\_14\_P201545 TCCTGAAATGAATCCTTTGTGTCAGCAGTTAACATGTTTCAGAAACAAAATTCAAAACCCAG  
A\_14\_P111665 CAATCATGTAGCCTGGTGTTCAGGAAAAGATCATAAAGCATCTCTAAGATTTCTTTCAG  
A\_14\_P117580 AGGCGCTAAAACCAAGCAGAAACGCAATGTTATTTACCATTATGACTTTATTCAGTGTTA  
A\_16\_P19006520

CATCCAATCCCAGAGTTTTGATGATAATTCGCTCCAATAACATATGTGCAACATCTATA  
A\_14\_P136492 CCCCATGACAGACATTTTTGATGATTATCAACAGAACTTTATTTCTCATCGGTTTCAGGA

A\_16\_P41115072

AAAAGTAAAGAACATTTTACAGTTTAAACAATCTCGCAATACCACTAATGATAACAACAGT  
CUST\_4937\_PI426210822 ATGAAGATCATCACCAGGATTTGAGGGAATGCTGTGGTGCATACTTTGT  
A\_16\_P16783837

ACACATCCAGGTTATAAACTTGCTGCATACATAGAACCAAACCCTAATTGTCTGATGATA  
A\_14\_P107974 CTCCTTAAAGAGAGAGACTTGGTAAATTATCTTTACCAGGTGTTACCCAAGCCTGT  
A\_14\_P133084 CTCTATCGTTGGCTACTATCTTCAGGAAATAATCAGTCCAGATTGAAGAGATGGAAAATA  
A\_14\_P135987

CATTTTTAGCGTTCGATGACAAATGAAAAAGAAGGGGAAAAGGCTCAGAGAATTAATAATG  
A\_14\_P100385 CGCTAGAGAAGCAATTTCTGACCCCTCTTTCTTTCTCTGGTCACTCAATTC  
CUST\_1609\_PI426210822 GACTCCCCTCTCTGCCCTCTTGCTGACCTCGCCACTTGGGCTTG  
CUST\_2295\_PI426210822

AATCAACAACCAATAATTTCTGGTATCCAGGGACTCAGACATGACAACCAGAATT  
CUST\_3650\_PI426210822 TATAGAATGCCTGGGAAATGCAACACTGGCCATCCTTCAGCTCTT  
A\_14\_P101269 CCACAACAGAATGATCTTGAGATTCCTGAAAGTCCTACCTATGAAAATTCACCTGAAAG  
A\_18\_P13086925

TAAGGCAATGATCAAGTCATCTTCAACTTGATCACAGACAATTTTGAATTTGTCTGTCCG  
A\_16\_P19080559

AAAGCCTAATTTGATCGTCAAAGTGAACAACGAATTTATTATTGTAGCAGAATCCACCGC  
A\_14\_P121962 TTTAGAGCAGTGTCCTTTTATTCCATGGAATATTATCCCAACAGAATTTTAACAGGAGGC  
CUST\_2750\_PI426210822

CTTGAATCATGGCATCTGCTATAGGAAATCCTCTTAAATGTATTCTTATCTCCCTAATAA  
A\_16\_P01697615

TCACTGCAGAACATAAAGACAATTTAGTCCAACATGTCAGAAATCTCACTTTCAGAAAA  
A\_14\_P106641 GAGTATTTTCTTAGGCATTTTGGACAATCTTTTTGCAGTAGGTTCCATAGGTTTTCCC  
A\_16\_P16191903

CCTTGGTTCTCAGAGTAGGCAATGGGTAATTGAATTAGCAAAGTAGACATTCAAAACATT  
A\_16\_P03712428

ACAGTAAGGAAACCACAAAGATAAACCCAAATAATAGAGCCAATTTCTTTTTTTCCGGG  
A\_14\_P120022 AATTTTATGAATCTGACAGGCAAGTAAACATAAGACCCTCCTATATTGGGAGACTCAAG  
A\_14\_P124802 GTCAGTGCTCAAGAAATGTCTACCAAATTGAAATTTAAATAGATACAGCCTGTGGGTTTG  
CUST\_9083\_PI426210822 TTGGGTTGTCTGCAACACATGAAAAAGCATCATGTCCCCTTGACTTT  
A\_14\_P133468 GTTCTCTTTTATACTCCCAAGGAGAGTTCGTGCATTCTAGTAAATGCATCATCTTTCTTT  
CUST\_9529\_PI426210822

TAGTTTGTTCACATAACAAATCTACATTCAAAGACATGCAAACAAATTTTCCACTTAGTC  
A\_14\_P120369 CAGTGAAACTGTGAGCATTTTCAGGATAGGGAGAAGTGCTGAACAATTTCAAAAATACA  
A\_14\_P113193 GGAATAAAACCCTAATTAGTTAGATTATTTCTCAAATTTGGAATATGTGGCTTCCTGGGGC  
A\_14\_P128051 CACTCACTATGCAAAGAAGTCATTCCTCTAGTTAGTGTTAAAACCAGTTATGGGTCTTC

A\_16\_P20887921

AACAAGTCATTTGCCTTTTTATTTCGGTGAAGTAATAGACTATGAAGAAATCTGGCTTGCC

A\_14\_P100165

GAAAAAGAACCCAAATTCCATCCAAGTTAACCAGCAATGACTTAAAAAGCAAGCAAAAC

A\_16\_P18161761

AGTGGAGGCAGATATATTCTTAGAAGACCTTACTCCTGAAATGGTTATACCCCTTACATA

CUST\_3304\_PI426210822

TTCCTGTTCTTTTTCAGTAGTTCTTTTTCACTATTCTTGATTATTTAACCTGTCCAGG

A\_16\_P19116643

AATACTGTCCCCTAGTTTCCATATCTAATTGCTAAGGATTTATGAATTGACATAGCCGGG

A\_14\_P122667 ACCTCCCCAGTTACGATTAAGATAGTAATCGTATCTGGATTGGCCTATTTTCATACAATT

A\_14\_P104829 AGAGATACAATACTAGATAAATTCACCCTAATGTGTGGCCCAAAGAATCTAGGTTTTCCA

A\_16\_P17927185

ACATCCCTGGAATGTAATATCCTAACACCTTCTTTTCATTCTCTCCATATTGCACATTG

A\_16\_P18226629

TCAATGCATGTTTATCAAGCATCATTAGGTTTTGACTCCACATAATGCTAGTCTCTGACT

A\_14\_P129061 AACAAATTCCTCCCAGAGGTTGAAAATATGACTGGTGACCCAAACATTTCTGTATAATTA

A\_18\_P22736957 AGAAACCTTCACTTTTCCTTCATACCCTAACAGACTTGTGTATATGCCATTTGTCCAC

A\_14\_P136302 GACCAAATATTCCTTTCCCAATCTGAGGTATTCTTGGGGCAATAAAATGAAGTTTCTAAT

A\_16\_P19617978

AACACTTTAAACACAAAAAGAAACCTTTCCTCAAACACTGTATAGTCGATTGCTGAGTGG

CUST\_9754\_PI426210822 TGGTTCTGCTGAAAACATTTATTCCAGCCCCAACACCCTGTCTC

CUST\_2420\_PI426210822

AAGAAAGTCAAAGTGAGCCCCTAGATAGCTGTAAACCTGGTTCTATTGTACTTTGA

A\_18\_P22841028 CTCAGAAAGCCCTCTTTCCTGCCCTGATATCCTTGTGAACATGACTTTTTT

A\_14\_P139166 TACCTTTTAAAACACTGTTAGTGTTCCTGTAGATAAGGTAGCAGGTATTTTTGCCAATG

A\_14\_P133677 GCATGGAGGGAGAGGAATAAAGAGAAACAGAGTCCAGGAAACACTGT

A\_14\_P136583 GTGTATTCATTTAACTGTTCAATTTGTATAACCCCGTTAAGAATACTGTCCTCCAAGTGC

A\_16\_P17130574

ACTTTACCCTTTTATCACATTTGTCTTGATTTCCTCTAGAAAAAATCTAGTCGCCTGAGC

A\_14\_P123995 TTAGGTTTCACATAACAATTAGACTTCCACACAGAAAAACAAAGCCTTTGAAAGACTTGCT

A\_16\_P18312630

AAAGCCAATTCTGTGTTACATCCTTGTGTTAGAACATTGTGCAATTCAAATAAGCGAGTCTG

A\_18\_P22842479 TAAGATTTCTGGCTTTTTGTTGGCTCTGCCCTTCTGACCTCAACTTCAG

CUST\_3191\_PI426210822 CTTATCACACACCATATGGCTAGCAGACAGTGGGGCCAGCATGAG

A\_14\_P113558 TTTCTCCTTTTACAAGTTGTTGGAGAAATTGTCCTTTTCATGATTTCAACTCTAATCCCA

A\_18\_P22841073 AGTCATAAGCCTTTCTCACCAGGAGCACTGGACTCTCCTTTAAGAAAGTTTTT

CUST\_6726\_PI426210822 TTACCAGGAATCACCCCCACCCCCCATTTTTGTTAATGAACTA

CUST\_3105\_PI426210822

ATGCCTTTCTCAGTGGTCTACTACAAATTAGCTCATGGTCACAGTTAAGGCATTTTAA

A\_14\_P132892 TGCTCCTTAAGGAGTCTCTTTCTTTAGTAGAATCATACCCTTTGCCTTAGTTTTGGTAAT

A\_14\_P139741 AGTCTCTTGAAGTTTCACATCACATGGTTTTTCAAATATCCTTTGTGGTTTTCTTTTCCAGA

A\_16\_P17829145

ATAAGATCCCATTTTCAGTTGATGTGTTTTGGAATACTTGCCTTACTGGTCATAATAGCACA

A\_14\_P126316 TTGAGTGATTCTCACTGAGCAACAGTTTACAGTTGCTAAATTGCAAAAACACAAGAAAGT

CUST\_3110\_PI426210822 ATTTTAGGATGCATTTTTTTGGCAACCTTTCCCCTCGCACTCTAAATAAACTTGC

A\_14\_P121160 GATAATAGTAAGTGGACTGCTTAAGTCTGTTTTCCCTTCCTAAGGCACATGTTCTATCAAT

A\_14\_P135350 ACTGTTACCACCATACAGGCGATTAAGAAGACCCCTATGCAGTAAATGGCTAT

A\_14\_P113368 CTCCCAITGCTTCTAAGTTTGTATTTTTTCACTGCATTTAGTGCAGAACTTGTTCATCTGAA

A\_16\_P19971106

GCCTGGTATCAGCATTATGATCAAAGATTACTTAGAACTGCTATAGATACTCCACATGCA

A\_14\_P129900 CTAAATACAACCTATCTCCCAAATTTTTGGGCCATACTCATTGGCAACAAACAACAGAATTT

A\_18\_P13181484

AAGTCCAACCTCTGGTTTATGCTCTCTTGGTAAAAATAAACTCTAACATTTGCAGAAAGCA

A\_14\_P108600 GTGAGTAGCATTTCCTGGGTTGAGTGCACAGGCATTTTTATTATTTCGAAATAGTTTAAACA

A\_14\_P202069 GAGATTCGGTGATCATATCCATATTTGACTGTTTCCTATTCCATAATTTGTCGCTGTCT

CUST\_7129\_PI426210822

CTTGTTTGCATGGTTCAGAACTAGGCATTGCAAAGATAACCATTTACTCTGATTTTCAGA

A\_16\_P30952619 GTCACATGACCTGATCACTAGCCTGTTCATCCTTGGTCTTTGTATCTTCCATATTT

A\_18\_P22841774 CTCCTAACGGGTTGGGAGTGAGGTGGAGTGGGGAGGGGATGGCTC

CUST\_1980\_PI426210822 GAGATTACTCTGCCTGGGTCCCTCCCCACCCTGTCCCTAATCCTCT

A\_14\_P100139

TCTTACAAAAAGAAAAAGGAACAAAGAATAAATAGTGACCGTGAAGAAAGGTGGTCTTGA

A\_14\_P106702 GATGACCAATGACTCAGAAGGGAAAATGGGATTTAAACACCCAAAGGTTAGTTTG

CUST\_523\_PI426210822 ATGGCCTTTCCTACCCCTTCCTATCTAGTGTCCAAGTGCTGTGAT

A\_14\_P136542 TCACTTTTAAGAAAAAAACCCCTGCAGCACATGCTAAAATAACACTAAGGAAGGGTTTAA

A\_14\_P132752 TAGCACTAATCACAGAAGGTGCTCTGACGGAGTTACTTTGCCTCAAAAAAAGTATTTTT

A\_14\_P116608 ATCTTTCAATCTCTTTCCCTCTTCTAAAATAGGCTCTTCTTAAAGTCTCTTTGATCCAG

CUST\_812\_PI426210822 ACCCTTTGAAAGCAGCCAGCAGAACATCACTCCTCAACCCAAGTC

CUST\_3694\_PI426210822 GCTGCAGTGAGCATCTTGGGTCACCTAACTATTAATTCTGGAGGACA

A\_16\_P40363209

GTGTGGCTGCTTAATAAGAATAATCTAGGATAGCACAAGTTGATCATTCTTCGTATAGCC

CUST\_327\_PI426210822 TGTTCTCCCCTTGATTTCTGTTCTCATGCTGTTGTTTTCAAGTATTTTCTCC

A\_14\_P110425 GGTGCTGACAGACATTTAGATATCTTTAATTCAAATTTCCCTCACTGAGGAAGAATTGAGG

A\_14\_P134907 AGACTTCTCTTTGAACACAAATGCATTAGCCTTGTGGCTAGAACACCCTCTT

A\_14\_P107477 CTAGATTGACAGTAAGTTTAAAAATGCCAGTTAGGCTGATTCTAATCCCCAGTGGCT

A\_14\_P118632 TAAGCAGTTTTCTACCAATTCTGGAAAAATCAATCTCACCTAGTGTCCTGATCTAGGA  
A\_14\_P132225 AACTAGTTGAATAGGAAAGATAGGATCTTGGTAGAAAGAGACTCTATCGAGTGAGATTG  
A\_18\_P13726005  
AGTATCAGTTTATGCCAAAATCCAGTCAAATACATGAGTCCTTTGCATACAATGGTGATC  
A\_14\_P138977 CTTATATTCCTCCACCTCTCATGGTGTGACTTTATGTAGATCCTTAGTGAACACATTCTC  
A\_14\_P120047 AAGATACTCACTTAAGACTATCTTCTAAGAATACAATTGAGGATTGCTCAATGGGCTCC  
A\_14\_P112836 TTTCTAAAGGAATTGGTGTTCCTGATCTGGTATAGTTTCTGTTTGTGGATTGTCCA  
A\_18\_P13300603  
ACCCAATTTTTCTGAGATTCTCAAAAAAATATTTTCTGATAAGGGCAAAGATTGTTCCA  
A\_14\_P136844 CTGATGACAAATCCTCGTAGAGTCCCATGTTTTCTATAGAAACCTTCAGGGAAGA  
A\_14\_P105417 ATTGACCTCACAACCGAGCAAATTGAAGAGACGTTAAAATACTCCGTAAGTAGTTGTC  
A\_16\_P00007806  
AAATCTGGCTAAATCATCTGTGCAATTGTATAAGAAGTTGTTAATCAAGTCTCGATGGGC  
CUST\_3704\_PI426210822 GTTCTCATACCTTTTTATTTTCAGTCCCTGGTGTGGTTCATCTTGTGGCA  
A\_14\_P131092 AAAAGAAAACCCCGTGAAAGAATACTCCAGATAAATGGAAAAGTTACAATTGCTCTAGGA  
A\_16\_P18253804  
AAAACCAAATATACATGTTTCCCCATTTTCTCTTACATCAAGCCAAATCTCTCTAGACCC  
A\_16\_P16888909  
AAACTCTTTTGACACAAGATGTCTCATTTGACTTTCACAAATGTCTCATTTGACTAGCCC  
CUST\_9702\_PI426210822 GAACCACATGAAAATGAGCCTCCTTCTCCCCAAATCCTCAAGTC  
A\_16\_P18381931  
AAGAGCCCTTAGAGTCTATCTATTCTAGACGTTTAAGAACTCATCATGCCAGTAAGAAGC  
A\_16\_P15958760  
TGTTGAAAGTTATTTCTGCTTCCATACAGTAATCCTCTCTATTAGACTTGCAGTAGTGCC  
A\_14\_P107425 ACATTGTAATGTTCAAGATACAATACGTCCTACTACCTGTGCTAACTGCGCTAATTGGATGA  
A\_14\_P129724 TTTTGGAGATACCTTTGGGCTTAGATTGGCATTGTTTTATTCTAAAAACCCAACCTCAGTG  
A\_14\_P121267 AGAGTTTTCTAGCACCATTGTGTAATTTATCCTTTTCCCCTGTTTTAGAATGACATTTT  
A\_18\_P11070171  
AAAGCAAATCATCATCAAATCTAGTGCCACCTAAAATATTCCCACAGTTATTCTCTGGC  
A\_14\_P110492 ATGTTTTCCCACTGGAATGTTGCCTTTTTGCTTACTGATATGTAAGCCTTCTTTTTAAGA  
A\_14\_P127653 GTTGCCATCTCCAGTTATTATCTAATCACACTGTTATTACCAGGTCATTAGAGAGGGAG  
A\_14\_P107668 TTAGAGTTTTAACCCTTCTGTAAACTCATCACCAACTGTTTTAAAGCATGACATCACCTG  
CUST\_9296\_PI426210822 AAATAGGCACAGAGGTAACACACTGACCTGAGAGGATGCAGGCAT  
A\_14\_P120422 TCTATCCACAATCATCAAAGGATCCCCAATTTACACCATGAGTTAATTCCTAGGTAATTC  
CUST\_6470\_PI426210822  
GGAACCACTTATAGCTGACTACATTTTTTAATATCTTCACTTTGGTGTGTTTTATTATTGTC  
A\_14\_P115914 ATATAACACCAATTCTTGCCCCAAAACAGAGTTTCTTGGTTATATCTTTGGTTGGCAAT  
A\_18\_P27216045 CTCTCAGTGCTTCTCTTCTTCCATCCATCCCTCCTAAAAGGATCT



CUST\_2470\_PI426210822

TTATTTGTGACTGTGGTCTTTTCCTGTGACTCCATTTCCCTATTATCTGTTTCAGAAA

A\_14\_P130424 TTTTCAGATGTGGACTTTATTTGGTTCTACAAGACTTCTCTTAACAGTCTTAGCAACCAC

A\_14\_P120616 TGACCTGTTCAAGGTAGGGAAGTGATTCATTAAGACAAGAATCATATGCAACGAAGAAA

A\_14\_P130903 ACTCTTTGAAGATTTCCCTTTCATTTCCCTTTTCTCTTCTCTTATTTCTCTAAGCCCCAA

A\_14\_P126519

GCAAGATGAAAAAAGCAAATAAAAGATACTTGGGAAGAAGAAGACTTGGAGGCAATTTT

A\_16\_P01297143

AAGACTCTGGTCTTTACTACTACTGTTACCAAGGCTAAGATCATACTGCTGATTCAAT

A\_14\_P116389 ACTTACTGCGGAGACATTTTCAAGTCCTTTTLAGGTCCTCTTTAAATTTCTTTTTGGAACC

A\_16\_P41874212

TAGAACTTTACTGCTACATCAATGAATGACAAGTCTCTCTATTTCAGCATGAAATCCCTGC

CUST\_4789\_PI426210822 GAGACTTAGGGTGTGGCTTTCCCATGGACCATGGTGGGTCTTTG

A\_16\_P37751597

TGAAGACACAAGAACTACATACTGATCACTAACCTCACAAGTATAATTAGACTCAGATGG

A\_14\_P105115 ATCCAGGGCAACAGTAAGCATTATAACGTGATCCACAGACATTGGGTCTAAAA

CUST\_9999\_PI426210822 CTGAGGTCACCCAGCTGTGTGGGATCCAAAGAGCCAGGACCTGAG

A\_16\_P20880232

ACATCAAGCATTAGATCAGAACCAGAAATATCTTTACCCTGAATGAGATCTTGAAGACCT

A\_14\_P102199 CTGAAGGTGAACTTTCCAGTGTGATAAAGTTGAATTCACACTGGACACATTCATTTAAC

A\_14\_P123708 CGGTTGGCCTTCTGGTCAGTTGGATAATCTTATATAAAAACCTGTTATTAAAGTTGATGA

A\_14\_P109646 AATTAAGAACTCTGCCCATGGCACATTTTGTAATAACGTGTGTATTTTTCCCCC

CUST\_6923\_PI426210822 AGTGAGGAAGTGGTGGAGAAACGCAGATGTCCATTTCAAATCACAAG

A\_14\_P137807 TGATGAATTGCTTGACTTAGCAAAGTTTCATTTCCGGTGACTCTTTATGCACACACAAAG

A\_16\_P58424134

CAAAGGCACTCAGATTTGAATTTTGATACATGTTGGCAAATTGCACTTCAGACATGTTTA

A\_14\_P136696 TTAAGAGTTGGACTTCACAGGCTCAATATCCACTGCTTGGTCCCTTCT

CUST\_6970\_PI426210822 TCAATGTGTTTGGATTTCTGTCTTCAACAGAGGTGCCACAGCTC

A\_14\_P124553 AAGAAGTAAAGTGGCTTGTTCAGTGAGCAAATAAAAAACTGTTTGCTTATCATCTTCC

A\_14\_P103102 CAGTCAACCACATTGGATAATTCAATTGCAATAAATTGCTTATTCTGTGCCATCTCTCC

A\_14\_P137347 CTTTCTAAAGCCATCTATTGTTGGCTGTAAAATTATAGCATGTTCTGCCGTCTCTCAC

A\_16\_P40410498

CTCCACTTAAACCAAGAATCACAGAACTTTTCTTATCACAAAAGGCAAAACAATTCGAA

A\_14\_P121893 GGAAATAACTTTGTATTATTTCCCTCAGCCATCATTTTTGGGGTAAGGGGTCCATAAAAA

A\_14\_P132575 GATATATTCACTGTGGTTTTATGATGATTTGACATTACAGAAAAGAGCAGAGAAGGGGCT

A\_14\_P202439 CTGAATAAAGACGATAACTATTTTCAAACCTGCTTTTCTTCAGGGACACAGAAGCACTTG

A\_18\_P24944641

TTGTTTLAGCATTACCATTTCTATATCAACCTACCTACAATACAAACCTACCTACACATAC

CUST\_5129\_PI426210822 TGAGAAGACAGGCCACTGTGGTTTGAGTAACTTGGAAATCTTGTG

A\_14\_P137396 GATTTTATTTTAAAAGATTTTCTCTGCTTTTCTTAAGCCACATGGGTGATCACGTGCCTT

A\_16\_P03747620

GCCTTGATTTCTATCAGTTCTCCATACTTGCCTAAATATTCTTTGAGACTGCTTTTACCC

A\_16\_P16191146

CATTTTTCAACTTTTATCCTGGGTTAGTCTAAATCATCAGAAAGCAACATATCCCATCCC

A\_14\_P132778 TTAAAGGAAACTTCCTGTGCAACCCAGATTATCACCTTTGAAAGTTTCAAAGAGAACC

A\_14\_P124759 TAAATTTGTATTTAATCTTTGACCTGCAATCCACAGAGTAGAATGGTGTCCCTAGGTAT

A\_14\_P108097 GAGTTTGCTTACCACGGTGCATTCTTTATGCACACTACTTAGATTTCTGTAGGAAAGAG

A\_14\_P104551 CATCCTTAACATTTTTACTTCTTTTAGGTTCAAATGAGCCTGTTTGGAAACAACCTCA

A\_14\_P109728 CTTGGGTCTGAAAGAAATCGGTCAACAGGACTGAAAGAAATGGACACAAAG

A\_14\_P135394 CAAACTTTGTGCTCGCTGTTACCCAGAGAATCAAGATCACATGTGAGACATTTAATAATG

A\_16\_P15967828

CTCCTTTCAGTTTTACATAAGACATTCCAACCTCTACATATAAGACAAGGCTCACAATGGG

A\_16\_P19654965

AGCCTATGACCAAGACAGTTTTACATGCTCAACCTACATTTACATATGCAGTTACAAAA

A\_18\_P14354039

AGGGAATAGTAGACAATCAAGGCATCATTGTATAGCAGAAAAGTCAGTAGGTAAAACAGG

A\_14\_P117304 TGATATACTGAGTTATTCTGAGTGTCTCTCCTGACCTGTTCTAGAAAATGCATAACTGCA

A\_16\_P02401232

TCTCTTTGGTCTACCAATATTTCTCCTCATTGGCTATCTAGTGACTGATTAACCTCACAG

A\_14\_P121882 ACCAAAGAATCTCTCCTTCTACAATGGGAACACTAAATGCTCTCAAGTTATATTTTCAGTG

A\_14\_P103775 TCCTAGGCAAGGAATTAACATTAGGTTAGGAGGTGACACTTTGGATACTTGTTTTTTCTA

A\_14\_P128353

GACAAGGAAATGGCTGATTTCTGAGAATCAAGTTAAAACCTCTAGACAAAGTAACCCAAA

A\_18\_P16974506

AGATGTGATCAATCAAAGTCACCCATCTTACCATATCCACCTCATTGTTCTCTAAAAAG

A\_14\_P122040 AATCTGGAAACCTTTTCCTTTACATTCTACAAGTTTTATTCTGCTCCCACAAGGCAATAA

CUST\_7113\_PI426210822 AAAAACCAGATCCCCTACAGAAATACAACACCGGTGACTTGCTG

A\_16\_P19516288

TAGGTTATAACATACCTGTGACATCATGAAATGCTGTAGTCAATTTGACATCATGGGG

A\_16\_P00685335

AAAACCATCTAGTTTGAAGTATGTGTGAGAAAAACAATAATTCACCCTTCTCACTGACC

A\_14\_P121007 TAAAGGAGGATCTAAAATTCATCTACACTTCAGGGGAAAACCTTAGAAGACAATCTTGACC

A\_16\_P21199276

AAAAAATGGCAGGGCTAAATGATTACATTCTTGGGTTATATCAGTGGGTTCCATTAAACA

A\_14\_P104786 CTTATTTACTAGTGCTTATACTTCATCTAGTTAACCTCAAAGGGAAAGAGCCCTGTGTT

A\_16\_P39650945

AGTCCCCTCCTAATAACTATTAACATGCCTAGTTTCTTCAACTTTTTCTACCTCAAGAG  
CUST\_977\_PI426210822  
TAAGTCCAAAACTTAGCAAAACCAAAACATAACTGATTTACCCACAAATTAGATAACAA  
A\_14\_P134363 ATAGATCAAGAAGTAAAGGAGAAAGCGGGGGGAAAAAACTTCAAAATTCCTTCTACATA  
A\_18\_P14779933  
AAGGTCCAGAAAACTAACACAATTTCTTAGAAGTCCAACAAATCACTTCAGACAGAGC  
A\_14\_P114461 TAAAACCATGTTCCACCAGAAGGAAAAGACAGACATAAACTACCTTTGATTTATTTCCCT  
A\_14\_P104148 AGGTTGAGTTTTTTTTTCTTTACCAAGCCCAGAAGTTTAATTGACATGTAGTTTGTAGGC  
A\_16\_P03435323  
CCATTTGCAGATGCCTAAAAGATACAAAAAAGGATAAACAGTGGCTATCACCCAAATTTG  
A\_14\_P121625 CTTATGTTGCCTTCTTTGCTAACTAAAGTTTCAACGGAGTGTTTACTCATGGCTCAATAT  
A\_16\_P00685542  
GCTTCCAAAATATTTTATTATCTGTGGAAGGAAAACATTTTTGGTATGCATGTCAAGTGC  
A\_16\_P21244434  
CCATCTCCATTGATCACTATAATTCACAAATTCCTCTAAAAAACAGAAACCACAGTTGA  
A\_14\_P139601 CTGAAGAACTGGTGTATGGAATCAGGAGGCCAGCATATTTATTTGTTTATTTACCTGAA  
A\_14\_P136871 AGTATTTTGAGTCTGGCAGTTTTGTTCTCATTAACAGATCAAGACAAAGGAAAGGCTAAG  
A\_14\_P124853 GAGGCTGTGGAAGTCTTTAACATATACCTAATCTGTCAAGGGTTTTACTTTCCCTGGTAT  
CUST\_3602\_PI426210822 CTCCCTCACATCTGAGCTGTCTTAGCACCTTCTTTCCACCTGTAT  
A\_14\_P121612 AACAAAATTATTATGTAAATAGTTGCGCACAGTGGTCTTATGCCTGAGACTGTGACAGAA  
A\_18\_P13190114  
CCCCTCAATTAATCTGTGCATATTGTGAGCAAATTCCTCATATGTGTGCATCTTTTCCGT  
A\_18\_P15064372  
TCCTCTTGTTACCTTTTGTCCCAACAAAAATCTCTACAATGAATTTGAATTCATCCCATC  
A\_16\_P19859512  
GGATAAACAGGATCACAAAGTTCATGACAAAAGCATAATAGAAGTCTCATAACCCTCTGG  
A\_14\_P119608 TTGCCGATTGAATCTGATTTAGTAAATGCAGTTGCTATGCATTAACCTTTTCAGGAGATGC  
A\_16\_P36230114 CTCCAGAGAATTTACCTGCAGATTACCCTCAAAACATGAGACAGGTTTCAGAG  
A\_14\_P118942 TGAATTCACCCTCTGTTTACAGATAACTCTTCTACTATTCTTAGGAGGAAAAAGAAATG  
CUST\_10339\_PI426210822 TCATTCAAACCTGCACCACCTTATCGACTTCCCCTCACGGTGAATG  
CUST\_1793\_PI426210822  
CCTAATGATGACACACAATGCTCTTTTCGCACTCATGATACATAACTTACAGGGAAAG  
A\_16\_P31951964  
AAAAAAAAGATTGTAGTGGTAGTCTAACTCCATAACGCTGAGGAAATACATCATTTTTCA  
A\_14\_P134802 CTGGGCAAATTCACAGCCTTTACTCTTCTAGTGTACTTCTTCTATGCATTTTTTTGTGA  
A\_14\_P112001 ACATGCATGAAGTTTTCCATGATAAAAATAATGGGGGAAGTGATGTGAAAAGTTTAGAGC  
A\_14\_P103177 CAAGTATTTAATTGCTTCTGTGCATCTCTCTTGGCTAGAATGAATGAAATAGGAAGTCAA  
A\_16\_P20595862

AATCGACAAACGAGAGATACACGCATTCAATTTGAAGTTTTGAAGACATTAAGAACCGAA  
A\_14\_P101730 GACCCCAATTGGCAGAAACACTTTTATCATTTTGAGGTAAAGAGACTTTAATTTTCAGTT  
A\_16\_P03439392

TGTTTACCACCTTAATCATCAATCCACATCTAGTCACAACAATAAGTCAGAAGGAGCAGT  
A\_14\_P109046 GAATACTTTACATATGCTTAAGAAGGAACATAGCCTGTTTGCAAACAGTGAAAACCCACA  
A\_14\_P120428 GCTTTAAAACCTTGAGGTGATTCATCTTCCAGGCTCTCCTTCCATCAAGT  
A\_14\_P129800 TGGAAGAAATGTTACTGAAGCAAATCTTCTCTGCTTAGATTCATCTGGCCTAACTACAAT  
A\_14\_P120102 CGTGGGGTTAATAAATGGCTTATCCTTCTCTCCACCCAAGTTTCCAC  
CUST\_7852\_PI426210822

TTCTTGAGACAGCATTGAGAAATTATTCTCTGGTTTTCTTATTGAAATTGCCAATGCC  
A\_16\_P17841866

TCCATCAGATTATGTTGATAACTCCGAATTCCACATTCTTTTGCTACAAAGATGCTTCTC  
A\_14\_P103936 ATTCTGAGGATGTCTATGCAAAGTTGGATTCTTGTTACAGTGTATCCAATCTGAAGTATT  
A\_14\_P106397 CTACCTGAAAAATAGGCACCTTAGAGTCACATGTGAATCTTAGACCACATTAAGTGGTCTA  
A\_16\_P18593587

AAGTCCTAAGTCATGCTACCTTCTAATCTCATAGAATCAGAGTAACTGAATGGATTTCCTC  
A\_14\_P104111 TTCAAGTATGAGTCAGAGTTAACCATGTAGAGGAAAGGAGAGGGTGAATGTTCTAGAAA  
A\_14\_P114111 TTCTGCTGAGACATACATTTGCAATGCCAACTAATGCAGGTTTATTGAGAAATACATGGT  
A\_16\_P02482205

GCAAAGATGCCTTAGTCTACCTGTTATCTGTTAGTATGGTGTTC AAGAGGAATAGAAAAGT  
A\_14\_P120060 AATAAAGAAAATCCACGTGATAAAGGAATATCTAAAGATCTAAGGGTCTGCATCTTTCTC  
A\_14\_P110232 CTTCAACACAATGGCTGATTCATCTTTTCTGTGCCAGTGCATTTTTATTACTTTGAAGTT  
A\_14\_P103145 CTCATGTGTCTCTTGTTTTTTTTTTTTTTCAGGGTCAACCAGGAACTAGAGGTTTTCC  
A\_16\_P01911927

GTGTCCCCTTCTCATAGTATATCTCCTAGATGAAACACTAACTATATACGAAGAGGCCAT  
A\_14\_P118134 CTCATAGAAAATAGAGGAAGGATGAAAGGGTCTGCGGACAATTTGGAGAAAGCATAT  
CUST\_7775\_PI426210822 GTTTGCTCACTGGTCCGCGTTCCAGTCAGCTAAGAGTCTCATAA  
A\_14\_P133626 GGCCATTATCCCTGATTCATATCACCTTTGATGACAGTAGTAATAATGACACTAATGGC  
A\_16\_P03750072

AGCACCTAACAAAAATGCAAGCAATTTCTATCAGTATATCTCCTAATCTCAGGTTTCCTT  
A\_14\_P100471 CTTTCACTCTAGCACTTGCCATACCAAAGGGCAATTATTTATCTACCTATCTGTATCTCC  
A\_16\_P18577384

AAAATTGTCATTAGAACAGCAAATAGGCCATGTGAATTCAAGTCACCCATTTTCATCACAT  
CUST\_6329\_PI426210822

AGATGTCCTAAGATTTAGTGATTCCGGAAACTACTCCTAAAGTCAAGGCTGATGA  
A\_14\_P120861 TATGACTAGTAGAGATATGTCATTTTGTGTCATTGTTCCCTGGTGGTCACGTGATAGATA  
A\_16\_P18746405

AAAAGTATGTGAGCACTTTGGATTATCACTACAGTTGAAACCAAGAACAAGCAATGTGAG

A\_14\_P124864 CTGTGGCCAAGGTTAACTGTATACAGACTCATTTCAGTATTTATGATTTTGCATAGTGGAG  
A\_16\_P00685483

GAGCACAGAGAGATGTTAGAAAATAATCATCATTGAGATCAGTTATATCCGAGACTGGA

A\_14\_P113658 CTAAAAGCCATGTTTTAACTTTCTAAAATTTCTCATCATAAAAATTTGTGACCATTAAT

A\_14\_P124822 ACTGCTGTGAACTGGGTCTCTGTGAAGATGAAGGACTTGAAGTTCTC

A\_16\_P19879775

TACTTTACCTGATCAATCATAGTTACCTCACAGATAAACCCCTACATTTCTATCTGCCTG

CUST\_395\_PI426210822 AAAGTGGTTGGGTGCACTGGCTTCTTTCTGGAGACGTGCTTCTCCT

CUST\_6279\_PI426210822 CTTTCCAGACCCAAGGGAATGGAAGGGGGCTCCCTTGAGAGAAAT

CUST\_10042\_PI426210822 AGAAGGAAGGTCAACAGAAGGAAGCCCCTTCTCTCTACTTGGCTA

A\_16\_P21382021

AACTAGCATTTTAAACCCATGAGTAAATGACACTTTTCTGAGTTTAAAGTCTCCCTTTTCGC

A\_16\_P15291453

AGCCAAAATTTCTCCAAATGAACATATCTCTCATTTTATTCTGAAAGTCCATGAAAGGA

A\_14\_P138556 CTAGTGGTATGCTTCACTTGGGACCCAGAGATACATGGGCATTATAGTTCAAATTATAAT

A\_14\_P105194 ATGTGCACTTAGCCAGAAATAGAGAATTTAAATAGTGGTGAGTCTACCAGTCATTCCATT

A\_18\_P23553273

AAAGGACAGATAGACTGGAACAAACCATCAAAGATGCATTTTACGAAAAACACAAGTTTG

CUST\_5236\_PI426210822

AGGATTGTAAATGAAACTATACTTGGCCTCAGTTTATTCTCTGGGAAATAGGTTCTTGCT

A\_16\_P16032051

TCCAGTTACAGATGAAGCATAGTATTCGTATGACATCCAATACTTTTTCACTGGTTAGCA

A\_16\_P17139679

TCTTACGATGTCAAGTTACTCTACCACATTTATAGACTACACATAGATACAGCCCCTCC

A\_14\_P127747 GAATATGACAGAGGTCATTTTCTGAATTATAGTTGTATAGGTTTGGCTTTCCTGGTGT

A\_14\_P119099 AGCCCTGTTATATTTGTTCTGTCATTTAAAATTAGGAACTCACCAAAAACACTGTGTTGGTG

A\_18\_P12434241

AAATGTCCCAATATGCCTCAATTCTGCGGAATGATTTTACTAACGACTACCTAAAAGTCA

A\_14\_P103166 AATTTTCTGATGAACGTGCTGCATATTTCAAGGTGTTATCATAAGGTAAGACTCAATTGCT

A\_14\_P123171 ATATACAAGCATGGAGGGGCACCACAGATTAAGTAAGATCAATGTTACCAGAACAATAA

A\_18\_P11719819

AGTGAAACTTGTAATGCCAATTGTCAATACTACTTTCCAGTCATATCATTTCTCCCAACTG

A\_14\_P119885 ACAGTAAGAATGGCATGAGGAGTCAATTTCTAATATGGAAGAATTATCTGCAGTGTAG

A\_16\_P03218766

GAGTCAATGCCTGTCTAGATTTACCTATAGACTTGACAACCTATATTGTTTGCCTGTGAGC

CUST\_4872\_PI426210822

GAGGGTAGCAGAAAACAAGTTCCTTGTGAGATCAGACACATGAGCTAAACATTTA

CUST\_7942\_PI426210822 TTCCTCAAATGCAGCGTGGGATTTCTTTTCATGAGGTCAAAGTCAAA

CUST\_7520\_PI426210822

CTACTCAGTAATTATTAATGAGAGCATGAACAAAGGAATGTAAGATGTAACAGAAAACA

A\_18\_P17306238

TGACTTTCTAAATCCCCTAACTTAAATGACCAGTTCAATTATACATTCTGCAACCCTT

CUST\_10337\_PI426210822 TCTTGCCAGTTGTTCTAAGAAAGCTTCTGCTCTTTCCCAGTCATTCAAACCT

A\_14\_P101803 AAGGTGGTCTTATGTTTACTTTCCTCACTTTGTTTTGTGACGTTTTGTTCTTATTCAGTGA

A\_14\_P133827 ACATTGTTTCCTCAAGGCAGAATTTTCCTGGTCTGTTTTCTCAGCCAGTT

A\_14\_P125568 GAGACTCTGTGCTGCAAGAGGATGGATTGAGAATAACTTTACTTGTTTTTTGGGGAG

A\_16\_P16928934

ACAGCATTCTCCTAAATTGATGATGTATGGTCATGACATGTTTTAGTTTATGCCTCCACA

A\_14\_P101837 CAATGGTCACCTTTTCATAATTAGCCACATCTTTAAGAAAACGGGCATTAAGATTCCTAG

A\_14\_P101415 GTGGTCTTTGAATCCACAACCTCTAGTCTGAACACAGAGAACACAAAATTTGTCTA

A\_14\_P106368 CAATCTTTGCTTTATCCTCCTCATTCAATGTTTCTGTGAGAGCAGAAAGAAAATGAAAC

A\_16\_P20231485

AAAAAACCAATGAACAGGATACAATTCGCCTTTTTTTCTTCATATACCACCACTCTAGGG

A\_16\_P16842660

TTGACTTCCATGGAAAGTTTTGTGTTAGTATGTGGTCCCATTTTTAACCTATTTGCAGAC

A\_14\_P130140 TTGGAACAGGAGGAATTGTTTCTACAGCATTTCCTGTTATACAAATTATTTACCCTGA

A\_16\_P03603060

AGTTTAGTCCTCACATACCTATGTTTTACATCAATCCCCAAATAGTTCTTTCCACAAAAG

A\_16\_P03662124

CTGCAACAAAGGTAGATACTAAGTTCAGCAACATTTGAAGAATCTACTAAAAGATGGGGG

A\_16\_P16191892 ATCTCTACTTGAGATCGCCCAGTAGGAATATTTTGAACAAATTCCTTTAACCCATGG

CUST\_2517\_PI426210822 ACCCTTGTGGGCCTTTTTAAGTTTGAGAAAGCAGTTCTTGTCTGGAAAATTT

CUST\_6836\_PI426210822

ATATTGACTTTTTAAAACCAAGATATATAATTGTTCAAATATGTGATGCACGTAATACAT

A\_14\_P101149 CTGCCAGACTTTTCATTTTCGATGGTAAGTGAATAGAAAACATCCAGAATCCTGTGAG

A\_14\_P109641 CGCTCAGAGATGCTGCTTCATTTACCCAGGAGGTCATATTCTTTATATATATTTTTTGT

CUST\_10108\_PI426210822 CATGCCGCCGATTCACAGCACCACACAAGCCTGAAGGTCTGCAT

A\_14\_P122525 ACAGATAATCCACATGTCAACAGGGACTACTTACGATGATGGAAATTTAAATCGGTATTC

CUST\_7540\_PI426210822 GACCAGTGTTCAAAGGCTAGTGTAGAACAACCTTGCCTCAGATGATTCAAGAT

A\_16\_P36230986

ATAGATGGTGATGTAGGAATCATGGCATCCAGAAAATGAGTGTGATTTACCCTTTGATAA

A\_14\_P121603 TGTCTGTAAACATCTGTCCTGTAATGGCCTTTAAAATGGCCTTTATACAAGTCAGTTA

A\_16\_P18998520

ACATTACAAAGCATTAAGTTGGATATTTAGAACTCGGCACACTAAATTTTCATCTGGGGCT

CUST\_7739\_PI426210822

GTGCTTTTCATCACTGTGTTTTTAAAATGTAACTGATGATTTCTGATCCTGAGAGTA

A\_14\_P139881 AAATACATGGATGAAGGAAATGACCCAAAAATATTTTGGAAAGAACTTGACAGTGTTGGAT  
CUST\_3108\_PI426210822

CTGGTTGGACTAGATTCTTCCCCCTTGACTACTTTCTATTTATTTTAGGATGCATTTTTT  
CUST\_1681\_PI426210822 GATCTAGCCTCCAGGGACTTGTTCAGAGCCAGCAGCTTCTGCCAGT  
A\_14\_P132673 TGTTGCTCTCTTGCCATAATCTTCTCTGAAGTAAAAGATCTCAAAGGACAGATCATT  
A\_14\_P118101 ATTTGATTACTCTTGAAAGGACATTCCATTGCTAAAGATTCAAGTTTCAGTTCCCTCAGCC  
A\_14\_P123656 CTGATTCTGTTCTGAGGAGACTTCGCAATTTCACTTTATATGTTTTAGGTATGGGTAAGG  
A\_14\_P111204 TAAACTTCAACTGGCTGGTCTTCACAGTAAATCCACCTATAAATTGGAAAACAGAAAGAT  
A\_16\_P16767922

AAGTCTTATAACTCAGAGCAGTAATCCAGAAGTTACCAACAATTTCCAACCTCCTATCCTC  
A\_14\_P132800 TCACACCTTTCCTAGGAAGTAAGCAAGACAAGCATCAGACGGTGG  
A\_16\_P19025001

AAAATTAGTTCCTGCATTGTATTGAGAGACATATCAACTGAACTCTAAGGACTGGTGAGG  
A\_16\_P40730036

ACACTTGGACATATAACCTTTTTTCTACAGCATCATGATCATATTAGCCACACTTTCA  
A\_14\_P120190 AGGTATTCAAGTGGAAAAAATCCAGTGAACCTCTAATAGATGGTTTATTGGAAACGCTCA  
A\_14\_P129620 ATTTGTCAGGCCTCTCTGACTCAAATGCCTACACCTGTTGAAGGATAA  
A\_14\_P122600 ACAGCAGTATTAATCTGATTCAAAATCTAGAGTATTCAGCATGAACCTGAAAGAGAGGG  
A\_16\_P00349900

TGAGGATAGAGTTGATAGCATCTTATGACCAGTTGAAGAATATAACCAGGGCTTATGCAT  
A\_14\_P137180 GTTGACCACAAAACCTTCTTTGTCAAAGATACACCTGTTTATAACACTTTGGGAAAGAAA  
A\_14\_P133597 CAGGCTGAACAGAGAGGCTTAACAATCTAGAATGCTATAAATCAAATAAACAAGACTGCC  
A\_16\_P00416914

AGATCCCAGAGGAACTATACTATTGTCTCAATTAGTCCAAACTGCATTTTTCTACTGGATC  
A\_14\_P110339 AGCCCCACCAATTAATCCTATACTTATAATTGGTGTGCAGCAGATGAATTTTTAGCCTTA  
A\_14\_P120001 TAGACCCTGGAATATTCTGAGTGATCAGTTCTCTTTTCCCAGTTATCTTTTTCTTACTCT  
A\_14\_P131614 TGTATTGAAAAAATTCCTAGTATTTTCAGTAAAATGCCTGTTGTGAGATGAACCTCCTGT  
CUST\_9763\_PI426210822 GATGTTGACTGCAGAGAGCATCTTGCCCTTGTCATTGACCTTCAG  
A\_14\_P135431 AAGAATAACTGCAAAGCAGATTAAGACCCATCAACAAAACGGTCCATTAACTCAAAAAGTA  
A\_14\_P128029 ACATTGCAAAATGAGACGATTGCCTACTTTCTCTGTTGAAATTAAGCAAGGTTTAGAGTT  
A\_18\_P14132440 CAAGAGGTTTTGATTTAAACACGAACCTTCTTTTACAACACAAGTGCCCCAG  
A\_16\_P36230379 GGCTTCAATCACATTACATGCTGTGGGTTTAGAGTGTTGGATGCTGGTTTT  
A\_16\_P16151727

CTTTTGTAGACCATTGTAAGCCTAGGATCATACCTCTTTTCGTATTTCTTCTGCAAAATGC  
A\_16\_P40309822

ACTCCTAAATGCTTAATGTTTCACAGATGTGTTCTTGTATAGTCAGTTTTGGATGCTGGT  
A\_16\_P19762271

AAAAAAGTGGCCATTAATAGACGGAACCTATACTGGACTAGTTGTTGTTTTAAAAACA

A\_14\_P137482 GACCTCTGGGTTTTTTCTACACAGGTGTATGATTTAATTTATGCAGGTCTATTCTCACTT

A\_16\_P16191334

CATAACCATTTTGAGGTCATTTAATAAGGGATTGCTTTCTGGATAATCTCGCTCCTTGG

A\_14\_P107450 TCAAAAGGTTCTGACTGAAGGATGAAAAATGTGCCAGGTGGAATCTTTTCTTTTTTAAAC

A\_16\_P01164569

GCTCTCTGTTATTGTTCAACTTCTTGCTAGATACCACCTTTCTTAGAAAGAACTATGCCT

A\_16\_P18764439

AGACCTCAGGATTGCTAGATATAACCAAAGGCTTACTCTTTACCTTCTAAAATTGCAGTC

A\_14\_P129638 TGAGAATTAATGAACTAATAAAAAGACAAAGGAGCGCCCTTTCCCTTTTAGGCTTCTTATGC

A\_14\_P107737 ATCCAGAGTTTCATTTTTCTGCAAGTCCGTCAGAGAAAGAAATGTAACAGAAATGTTATC

A\_14\_P201485 CTCGTAATATCCAGAAGATAATGCTGACATGGCCAGACTTGATTTCATCTTATAAGGT

A\_16\_P16162916

GCGGTAAACTTCAAGTTAGACAAGTCTATAATGTGACTCATGGAACCTTTCTCATGCTTTTT

CUST\_7731\_PI426210822 CATTATTCGATTCTTCCAACCACTGCACGTTACAAACAGGGCTGTAGC

A\_14\_P123191 GAACAAATACACCTCTTACCTGATGATTTTCATATGGGCAACAGGATTTATGTATTGCCAG

CUST\_9808\_PI426210822 TTCTAGCTGCCACCTAAGAAGCTCCATTGTATACACTGGGATGCTA

A\_14\_P119355 ATTGTCTTAGACTGTCAGTAAAGTAAAGCCTCATTAATTTGAGTGGGCCAAGATAACTCA

A\_14\_P106110 ACCAAACACAGAATTCTTATGGAAATTGGTAATTATTTGGCACAGCAGTCACTCAGAAAA

A\_16\_P03042865

TCTCATGCTATTGATCATGCAACAACCTGAAATAACCTAAACTACCACTCTGTTCCATTCT

A\_14\_P101920 GCACAATTTTGGATTCTTAAGTTTTTTGGGAGACTTCACTTTATCAGCAATTGCATTTGA

CUST\_10342\_PI426210822 GTGAAGATACCTGCTGGCTCTCTTGACAGTTCTCGTCTTTGGCTT

A\_16\_P15982344

CAGAAAAACCTCGAGAAAATGAATAAAAGACCCCTCTAAATCCTTACCAAGATTAGGCTA

A\_14\_P122790 ATTTTGGCAAACAGCAGAGATATGCTTTTCTTACCTCAAGGCTGAAGGATTTTCTTTTA

A\_14\_P137291 TTTTACTTACATTGAGTGAGAATCCCAGTTAAGGCATTTTTAAAATTCTCCTTGGCTTCC

A\_14\_P128700 GATTTTGTCTTGTAAACATCAGGGAGGTGTTTATTGACTGCAACATGAAAATAAGATGCT

A\_14\_P111341 TATCTTTTCAGAACTTAAAGGCTTCTTTCCGTCTTAATTCAGTCCTGCTGTTACAATGTGA

A\_14\_P115639 GAGTTTTCTACTCTGCCATTTGCCATTAAGCCTCACCTCGCTT

A\_14\_P111099 TAGTAAACATTTACCGAACATGACCAACCACCCAAAAGTGTGTTAAATACAATTTGGGAA

CUST\_6756\_PI426210822 TAAAAAGGAGCATAAGGAAGAATAGATAACCACTGCATCACACCAGGGTCAC

CUST\_8554\_PI426210822

TCTGTTCTTTGGGCTCTGAGAAACAAATCCTTTGGATTTTCAAAACTATATTTAGAATTT

A\_14\_P136551 CATATGCCAGGACACATGTCTGAGTCTGGATATGTGTTTATAACATAAACTAGACTGA

A\_14\_P104541 TTAACTGTAGATGACAACAGTGGAAATTAGACTGTGCTGCAATATCTTAGGGAATGCTAC

A\_14\_P114367 AAATACCAGGAAGCCATTGCTCATTTCTGGTGATGAAATATGCTCTTATTTATTTCCCT

A\_14\_P137923 ATATAAATGCAATTTTACATTTTTTCATCAGAATCACTGGGGGACTGAATGGTTGGTAGA

A\_14\_P106407 CTAAACTTTTATTTTCAATTGGCTTTTAGGTGGTGCTGGCTAGAGTGTATACGTTTGGAC



A\_14\_P112508 TGCTTTGAAGGCTTCTCCAAACGTGTCTGGAAGACTTATTTATCCAAGATCACAATATTT  
CUST\_4501\_PI426210822 CATGTCCTTAGCGCAGCCCTGGGGGTTATCAGGGTGGCTCAGATG

A\_14\_P125760 CTTGGGAATTATCCCTCTTTTTCTAGTCTGTGGAGACGGAGGGTTTAAGATCAATAT

A\_14\_P108681 CTGGATTGAAAATATTCCCAGTTCAATGGACAACAATTCTTGACTGAACCTAGGATGAG  
CUST\_3444\_PI426210822

GTATAGATTTTATTCATGCCTATATTGTTAGAGAAAATCATTATTTTTAGTCAACGTATT

A\_18\_P22840469

TAAAATGTTCCCTTGGAATGGCAGGCAAAAACAAGATACAGTGAGTGTCCCTATTTACAT

A\_14\_P132700 CATCATTAGACTCTAAGAAGTCCTGGTTGGAAGAGATGATCTGCCAGAGAG

A\_14\_P139717 GCCACTACTAAATCCTAGCACACTGGTGCAATCAACAGAATTTTTGAAATTCTCATTTC

A\_14\_P130198 GCAATGGAAAAAGTGGAGAGATGAAATTATTCTCAGGACAAGGTTAGTATCAAATGCATG

A\_14\_P201666 TTTCCACATCAGATTGAAATTAATACTCACCACACAGAATTCAGTAAAACCCAACTACT

A\_14\_P108751 AAATGTTTCAACCGATTTTACCCTATGTTTTCAAGGGTATTATAGAAGGGGAGGTAAGAT

A\_14\_P125844 AATTTACCTGTTTCATCTGTAGCGGGATCATTACCAGATCTGCAAAGACACATAAC

A\_14\_P107352 TATTATAACATTACAACAGTGCACAAGGAAAGACAATCCATAGCGAAAGGAACAGAAACC

CUST\_1689\_PI426210822 GTGGGTTTCAGCAGTGAGAGACTTGACCTGCACAGCATCTGTTAT

A\_14\_P125471 ACAGAATACAGTATTGTCATGGAACCAAGACTGACATATCATTCTGTGGTCAAATGCTAA

A\_16\_P00685199

TAAAATATGTCAGAAAGAATGAGGGAATGACTCAAACAATTTTCAGGAAATGGTTCAAGGC

A\_18\_P12095068

AAAACCACACTTACCTCTTACCATTTTGTCTGCTAAAATTAGATTAAAGTGTCTCTGA

A\_14\_P107742 AGTAAGTCAAAATCTTAGTAAACTCTATGATCACTTTGGCATTCCCTCCAACAACTCTGC

CUST\_9592\_PI426210822

AACAAAATATTTAAGAAGGGAATTCACATCTTTCTGTTCTAATTGGTATTCTTGCGCTAT

A\_14\_P129586 ATCCTTAATACATCACTCTGCATCTTGCTGATCTTTCACAAAACCAAGGTCATACCC

A\_14\_P133589 TAGAAACATTGGAATTACCAGAACAATAACCATGGTCTCCATCTCTGAATTCTAGACAA

A\_14\_P108213 ATTAGTAATTTCTTGGTGGCTTTTTGGGATCAGTCTCACTACTTCTTAGTCTCACCTTAA

A\_14\_P139128 TTCCCACCATATATGCAAATAATTTTGCTTTTTCCATGAATGGAGACCATTGCCAGATAT

A\_14\_P110611 CTTCTATTAAAGAATCATGCTGAGCACAAGATCAGAGAGGTTGTGACATTGCAAACCTC

A\_14\_P133188 GTCACAAATGGCTTCCATTTTGAGCAGCAAATTTTGCAAATTAGTTTGTGTTGAATATCGC

A\_14\_P113383

TACAAAACAACAAAATAAAGAGTTTTAAAAGTCTGGAAGGAAAGCAACATTTACAAGGGCC

A\_16\_P41845806

ACGAATGAAACCCCAAACTTGACAATTCACCTATAAAATATAAGAAAAGCCCTTGTCGT

A\_14\_P137344 CAATCTCAATACAGCCTGAATAAACCAAGACAAGACCTCTGGCTTGTGAGC

A\_14\_P124833 TCAGGTGTTTTTTTTTTTTTAAAGGCTGCTTTTTGTGGAAATTAATGTCAAAAGCCCATGCA

CUST\_4982\_PI426210822

AGATTTAGAATATAACTTTTACAGGGAAGAAAGGGGTTAAAATGTCTGGTGGCCATCTGTC

A\_18\_P22841195 CTAGGATATAGGGAAGAGGAAGGTGAGGGAGCACTTCCCAGTGAC

A\_16\_P00348612

CTCTTCATGACTTGCACTCTAACAAGTTCATTCTCACTCAATGTATTAGACCCAAGTAG

A\_14\_P137214 CTTTTCTTCATGGAGGTGTCTCATTTCATTATCTGTGAAGAACTCTAGCAATTAAGGCAT

A\_14\_P130431 ATTCTCATAAGAGCACAGGTTTTTGTGTTTATATCTTGACCCAAGACAATTTCCCTGAA

A\_14\_P133718 AAAATGATAATTACAGGTAATTACTGTAGCATAGACCTCAGTCTGTTCACCTTCCAACCT

A\_14\_P107279 ACTTTGTTTCATATCATATGTCTTTTTGCTCACTAACAAGGCTTATACTGGCTTAACCCT

A\_14\_P127049 ATTCCCTTCTACTACCTCCAATTCCTTGAGAATGTTTACATCTTGAGGATCAATAGATACA

CUST\_7919\_PI426210822 CCTCTCTTTCTTGGTGTGATTTTCTTAGAGTTTGTCTTTCTGAACCACCAA

A\_14\_P125837 TTTCTCAGCCTAAACTATACTGTGTCTTACAAACTAGATCCATTACCCAAATTCCAAGT

A\_14\_P135671 TATGACTTTTCTTCTCCTTTCTCCTCTTCTTTGAAAATAGAGGGAGTTCGTAATATT

A\_16\_P02097074

GGGGCTTGTTATCCATCTAATATACAAATTCTTCTCTATACCAAGTCATGTCTTGCCA

A\_14\_P121023 ATGTCTCTCAAACATTACTGGCAAACACAATGACTGCTTATGAGAAAATCTGCATATGTC

A\_16\_P36811041

TCGTAACATGCAATACTCTGAAACTTTTGAACCTACTTCTCACTCTATCTGTATCCC

A\_14\_P113003 GCAGTCAGTGTAATGATTTCTGTTTAGCATCTGACCCTCTTGACTTCTCACTTAAAAATT

A\_16\_P36369406

AGATACACCTTTTTTTAGAGCATTATCCCCTACTTTCATATGTAATTGCCACTTGACCA

A\_16\_P21298776

ATTGAACCCTTTTCTTTGCAATGCTTCATCTTTTTCACAGACAGAATTTCTTATGCCAAAC

A\_14\_P116052 CAATCTGTGCTTCGGTCCCGTAGTAAATTCTCCAGACTCATTAAGAACATACT

A\_14\_P139594

GAGGAAATAGGAAGAGAAAGAGTATCTGTGACAAACAAGAAAAAGGAACAAGAGACGTA

A\_16\_P37493451

TATGCTTCTCAACAAGTTCAGTCACTTTAGTCTACCTTAATGTTAACCTCACACCCAAAT

A\_14\_P116470 CAGCATGTCTTGAGTGATTTTATTTCTGGCATCCATACTTTGCACATCTTCTTCACTG

A\_14\_P117758 CCTTGCTCGCTAGAATAAACTGCTTTGCGCTCTCTTCTCTGTCTGAGAT

A\_14\_P136509 CTGTGATGCTACCACTGCTCTGTTCTTTCTAAAACATTGTCTTTTATGCTTGGTTTTTCAT

A\_14\_P127754 CTTATATTCAGACACATGGCCTTGAACCTCGTAATAACTCACACATGTAAGCCACAATAAC

A\_14\_P114297 AGGACTTCGTATCTTCTAAAATTGCTTGACTTGAGCAAGTTAAAATCTTCTGGAGTTTGC

A\_14\_P132755 TAGGGATTCTGTGAGAACTCCATTCCCTAATTTGTAACCAAATCTCTATCTTCCCTCCTAAT

A\_14\_P125370 TATAAGCAAATGTCAAATAATGTACACGTCCTTCTCTGTATAATTCTCTGCCTCCCTAG

A\_16\_P58424182 CAACCAGAAGGACTGCAGGGGAATTGACTGGGAACAACCTTTTCAAATAT

A\_16\_P02440107

AAGAGGGACATTTTATTGTTACATATTGACTATGAACTTAGGCCTTATGAAGTCCAGCCC

A\_14\_P115311 AATGCAATTTAGCCCTTTTAGTAATGACTATGCAAATAATCAGCCATGGGAAAGCCATTT

A\_14\_P118380 GAGGCTATGGATGAGTTTTCTTCTCTGGGAACCTTGCTCTCCTTATTGG

CUST\_7710\_PI426210822 TGACACCTCAGTTGATTGGGGAATTTGGGATGAAGTGCTTCCAAAATTTATTT  
A\_18\_P11432354

ATCGATTTCAACAAACCTTTCCTTAAACCTTTAACGTTACTCTTACAAGCAAATACCGTT  
A\_16\_P15841512

AAGATCATGCTTTGTTTCGGTAACTAATACATACTAAGGGATGATGCTGAAATAACTTGGG  
CUST\_1927\_PI426210822 CCACCTATCCCTTTATCTTCTGTTGTAATGCCTGGTAAAGTCTTACTGGGAA  
A\_16\_P03609470

CATCTGCAAATACCTTTGGAAAAATACACAAACATGCTGATAATCTCATTGCTTGTGGG  
A\_14\_P202272 ATGAATTGGTGTCCCTAGAAAATGATGTGATTGAGACAAAGAAGAAAAGGAGTTTCTCTG  
CUST\_2826\_PI426210822

TATTTATTTTATCATTTTTTTAAAAAGAGCTTAGAAAATTTCAACATTGAATGAAACCATAC  
A\_14\_P124077 ATGAAGTGATGTTATTTCTCGACGATATCCTTCAACATTATCTTGCAGCATTTTCATAACT  
A\_14\_P118042 TGCCAAAAGATACCTTAAAATATCCATGCGCATTATTTCTCTGTCCCTAGCCAAAATGTTG  
A\_16\_P16341248

ATTCCCATCAATAAGCCTAAAAAAAAGAGAAAAGTCACACTCTAAATAGCAGATCCTGGG  
A\_14\_P106549 TGTGCTTTTCTCTTGTGCTGCTGAAACTCACTATTTGCAAAGTATTTATCAGGTAGATGT  
A\_14\_P135656 TTTTCCTTTCCAGATACTGAGGAGAGCAGACAAAAATGGTAAGACCAAAAATCTACAGTA  
A\_14\_P121913 TCCAGAACATGTTGATTCTGGACGAGATATTAAGCAAAACTGCCTTAAAAAAAAAAAAA  
A\_16\_P36230338

CACCTCAAATGTTCTACCTTATTTAATATGTTTCATCCTTCTTGGCTGTCTCATTGGCAAT  
A\_14\_P124585 GGGAAATCTTTGCCTGACTAATAGACTTGGAGTAATGATGGTTATAACCTGTTGAGATTT  
CUST\_1683\_PI426210822 AGTGCGTGGGCTCGTCTCTGCAGAGGGAGATCAACCTGAAAAGAT  
A\_16\_P15663921

AAACTGCTTTCAAACCTCATTGTCATTTTATTGACGATACAGTCTTATCAGTTAGGGGG  
A\_18\_P22841618 AATTAACCTGGTCTTCCAAGTTGGGGTTTGGAGGCAGTAAAGCACCA  
A\_16\_P17971654

GGTCATGGTGTGTATAAATTCAAGGTAATGATGGTATTTGAACCCCATAGAAGGATATT  
CUST\_9901\_PI426210822 GAACATGGGCTCCAATTGCTGTGGCTCCCATGGGAAACTACAGTA  
CUST\_4290\_PI426210822

TCTTAAAACCTTGTCAACCAGTAGGCCTTCAAACCTCCTGCCCTTTAATATTTATTGAAA  
A\_16\_P16582731

AAAGAATTTTGGTCCTTGCTTAGGGTTAATCAAACAGGAATTAACCTTGCCTTTGCATAG  
A\_14\_P126585 GATCCCTTGTGAAGCATTTGAAATTACATTGAGAGCATTCTGAATTTCTTCACAAACTGT  
A\_14\_P109989 ACACATTTTACTCTTCCAAGATACACAGAGTAGAGAAAATTAACATTCCTGGCACTTACT  
CUST\_4604\_PI426210822 GGATCGGAGTTCAGGGCCATCTGAGCTCTGGGTCAGCAGCAGTC  
A\_14\_P102312 GTGCTTTTTTCTCTCTGCAATTACCTGTCATAGCATTTTGTGCTCACCACGAAG  
A\_14\_P139062 CTCATCCAGGCTGCAATGCAACAATGATATAATAGGATCAAAACCTTGCATTTAACAAAG  
A\_18\_P14399244

AAAAAGCCATTCTGAGTCTAATCTGAAGAGGATAAAATCAGATATGAGGAGAGAAGGGAT  
A\_16\_P58424344

AGCACAAGAGAGCATAATAAAGAAGGAACTCGTTGGTAAAGGTAAGTATATGGACAAAA  
A\_16\_P01472089

GGAGTGATATGACTGTATACAACAACGATAATTGCGACTATTACACATATTAAGCCCCCA  
A\_14\_P202266 GAATTTGCAATGAGCCTGAATTTTTGGGAATAGTTACTGAATACATGCCAAATGGATCAT  
A\_14\_P131651 CTATCCCAGAAAAACATCAATTTGATCTTTGCAGTGACTGAAAATGTAGTCAATCTCTAT  
A\_14\_P107674 ATTTATTTTGCAGTCACTTACTGTAAAGTGCTGTCCTCATCTTTGGTGCCATCAATGG  
CUST\_6550\_PI426210822

GGAAC TTTGAATGGTAATCCTAATGTACAGTGATGAATGAGGACAGAAAAACAAGTTCTAC  
A\_14\_P119167 GGGATGGAATAGGAAGGAGATGTATGCTCTTACTCTACATGATTTTTTTTTACTATGTGC  
A\_14\_P139039 CTCAACAGGGTCTTGAAATAAGGAAATGATCTTATTATCTTTAAAGATAGCCGCTGGCTG  
A\_14\_P127596

ACACCTGAAAATCAGATGCAACACTAACTTGCAAAGATTCCCACAACATAAAAAAGAAGT  
A\_14\_P116422 GTGAATAAATTCTATTTTTAGGTGACTGTCGTTTTGTTTCTGCAACATTTGCTCTTCA  
A\_14\_P201931 CTAACCTGAAGAATTTTTGGCAAATGGTATTCTTCCTGAGTGAATTAATACGTAGCCTC  
A\_16\_P18032311

AAAAAGGTAAATTGAAAAGCCCGTTATATAGCAAACCTCCATAGAACTCCACTTCTCTTCC  
A\_14\_P136787 AAATCATATCAATATATTACTCTCATGGAACCTTGCACATTCTAAGAAGGGTCATTTTTTC  
A\_14\_P134523 TGATGGCTAAACCAATTTCTTGAGGGATCAAGGAAAATAAGATGAATTTTGCAGATTTCA  
A\_16\_P16767578

ACCACTATTTTTGCCTGTAACCAAATAACTCAGATTATATTATCTTGAACACTGTGCTGC  
A\_16\_P17623521

ACTCAAGAGTGATTCTTTGCATGTTCTTTCACTAGATCCTAACTATAACAACACTGACTCC  
CUST\_6775\_PI426210822 GATGAGAGGGTAGAAGAGAGCAAAGGAGGAGGGGCAGGAGAGAAC  
A\_16\_P19966564

GGCAAATTTGGAGGAAATACTAACTTTGACACAGAAAGTTTAAACTGAGCACAGTGAGAT  
A\_18\_P15002585

AACCTAAGAAAGTCATGAAGTAACTCCACAGTATCGTGTATGAAATTCTATGCTAGGCA  
A\_14\_P114148 CTACAAGGTAAAAATTTCCATCTATGAAGTTTTCCAGCATCAAAAAGTGCGTTTGTTC  
A\_14\_P101927 GTGCACCATGAGAACTTCTGACCATGAGAACTTTGACTTCCGGATTTG  
A\_18\_P22839041 CTTCTCCAGTTGCCTCCCCTCAGTGTGTCTGCCAAGACCTGAGCC  
A\_18\_P22842126 CCAACAGAAGGCTTCTGAATAAGCAAGACTGATGTCTTCAGAGCAATGCAAA  
A\_16\_P00685554 GTTTCCAGGCTAGTGGTTTCTTCTCTGACCACAGTAAGAGGAAAG  
CUST\_3645\_PI426210822 CAGAGGTAGATGAAGTAAGCAAGCACTATTGTGCTTCTGTGTTGAAGTCAG  
A\_16\_P16191224

GGGTAAGGTAAGGAAACAACAGTAAGAATTTGAAAAATCCAGAATGGTCATGGAATTCA  
CUST\_4794\_PI426210822 GATTCTAGACTCCTTTCCCTCGTACCTCCTAGCCTTATTGGATGGAAAA

CUST\_9841\_PI426210822 CTCTGCCAAAGCATGGAGCACGCATCCAAGGGGATGAACAGCATC  
A\_14\_P105468 CTGCAAAAATAGTGTCTTTGGGAGAAAATAGAGTCTCTACATCGATACAAGAAAAATAGG  
A\_16\_P16026421  
ATAATGGTTATTCAGTCTCATGCTTACCATCCATTACGAATGTGTTTCTAGTGAAGACCA  
A\_14\_P121298 GG TTCAGGTCTGTCCCAAACCTCAGTTTATGATATTTGGCCCTAAAAGAGCAAAT  
A\_14\_P115485 TAGAATTTTCTAACGTGGTCATTACTTACATAAAGCCATAGACTGCGGGGATGAAATCC  
A\_14\_P125147 GCACTCACAACCTGAGAGTTCAGATACACTTGATCTTTCTTATCCATCTCTTCAAAAAA  
CUST\_1867\_PI426210822 CCAAAAACCCACCCCTGGATCTAGGGCTGCCTGAATTCCTTTG  
A\_14\_P127975 TGTTAAGTGATCACTTCTAGTATCCTTTGCCAATTCCTTTCTTCTTG CATCTGCAATCTT  
A\_18\_P12456157  
AATTGCTGAAGTGCTAAATTGAGTGTGACAAATCTAACAGGTAATTGCCAAGTAGGTTTC  
A\_18\_P10235237  
ATAGGATGAATAGGCATGTAGACATTCACTAGTCAGTTTTACTGTGTCAATAATGGCAGG  
A\_14\_P124251 AGGTTATTTTATCTGATGCTAGTGCTCCTGGTGAAGGAGAACATAAAATCATGGATTACA  
A\_14\_P131699 CTTTTGTGCTCTGTAGAAAAGTGCTGAATGCATCACTAGACACAACCTCAAACCTATTT  
A\_14\_P130750 CAGGAAATGTGATAGAATCAGTGGCAATCTCTGTGTTTCTGTTATTAACATAGCCAAACT  
A\_16\_P15114300  
GGAGTTAATTTTCTCATAACCCTTACCCAGTCTTAACAATTAATTC ACTGAAGCCCACA  
A\_14\_P115459 AATCTTATAAGTCAACAAAGTTTTAATGCACATGCTTAGGCTGTTTATGTTTTTCTTAGC  
A\_16\_P36329255  
CCATTCATTATTTTTGAAACCAGCCTATACCTTTCAATCCAGATAAATCGAATGTGGCAG  
A\_14\_P122469 TAAACTTAGGCTGTGATAAATTGGTAGGCTTATTTACTCTGTGGAAGAGAGAGAGAGA  
A\_16\_P36820358  
ATTTACTTCATCTCCATATACTGAAGACCGAGTGTTAGTTTCTATCATACTATGCCCGT  
A\_14\_P133800 TCCAGAAAAATCTTGCTGTAAGCCATCATGGGGAGAGTCATTAAAGGTAAGTAAAATCTA  
A\_16\_P19171528  
GTCTTGCAAGGTATCTAAGTGTGAATGAATCATCAACAAGAGACAGTCTTTTTTTAGTCC  
A\_16\_P18190182  
AATGAAACTGGATGTTGAAATTTGAGGTGAATAAATCATTGCTAACAGGACATCTCAGGG  
A\_18\_P22842453 TAGAGACCTTGGGTAAAAAGTCTTCTCTTTGAAAGCCCCAATCCAG  
CUST\_9724\_PI426210822 AAAAGGATCTGGGCAGAGAACCAGTCTTGGCCACAGATGGAAAT  
CUST\_5105\_PI426210822  
GAAGATCTGAAAAGAAAAACAGTAAAGAGATGTGAGATGTAAACACTGAAAGGAAGTAAG  
CUST\_5464\_PI426210822 GGGAATGCTGCCAAGAGGTTTTGATTTAAAACACGAACCTTCTTTCACAAC  
A\_16\_P16688728  
GCCTTCTTCACATCAATTCACACAAGTTGTAAATCTCAGAATATACGATTTCCCTGCTT  
A\_14\_P100656 TGAACCTAAATTACTATTAGCAGTAGTAGCAGCAATGACCCTGAACACTATTTTCCAAGC  
A\_16\_P19190289

AAGTCATGAAATCATGACAATGATTGCTTACTGTGGTTAGTCTAAAAAACTGGTCAGGAC  
A\_14\_P133901 GAGTAGGTCTTTTGGGAAGATTCCTTTGCTTTCATGGAGATGAGATATAATGTTGATTC  
A\_14\_P105525 CATAAAATTAATGAATTCCAACCTCACTTGGGAACACAAAACCTGCTCCTTTCCTTATCT  
A\_16\_P20051449  
AAGCCATTACTCCGAGTTTCTACAAAACCTACAACCTGAATTTCAATTTGATTTCTGACCAA  
A\_16\_P02237091  
ACAAATGACCACTTTTATTCCAGACATAGATCATCTGTTAGTTTTGATTTTAGCACATCC  
A\_14\_P122066 CTTCTCAACCTGGACCATATAGAACTTGGCTTTCAGCCTAAAGATGGATAAA  
A\_14\_P106841 CTGGGAAATGCACGTAACATCTCATGAATTTGTATAIGGTGGCCTGTGTTTCAATTTAA  
A\_18\_P13260611  
AAGTTTCGACGAGTTCTAAAAAGAGGTCTGAATTAAGTCTTTTCTCCAGGTCTAAGAC  
A\_14\_P124190 CTGCGTGCCAAGATCTGGTTTGTGCCAGGTTTCAATTTAATCAGAAAGTCTT  
A\_16\_P58424147 TATGGCCACAGAATCTTTGCCAGTCTGCTGCCTGAAACTTGTTATCGTAA  
A\_14\_P136362 AGGAAACTTTGCACTCTGTTATCTTCAACCTCTTACTCTACCTTCTCCCTAG  
A\_16\_P17379017  
AAAGAGGATTTGTAGGCTACTTTCTGAATGAGCACGTTACTATTCCATAGACTGAAAACA  
A\_14\_P129476 ATAATCTTTTTTTTTTCTTTAGTGGCTTACAGAAGAGACGAAATGTGGTCTGAGGGACG  
A\_14\_P115510 TGTCTAATTTTCAAGTTTGTTCACCATCTAAGTTGGATGTTTCAATGTAGCACATGGCT  
A\_14\_P201268 GAAGATACCCATTTATATTTTCTGCTTCTGATACCCAGTTATCTTTTCCATTTCTGCAG  
CUST\_4171\_PI426210822 GCCCACATGTTGGAGTTATAGCCCATCTTTGTTCAATTGATTCAGATTCAGC  
A\_14\_P132446 ACTATTATTAGTATCTGGAATCTAGCATCTCACGGAGAGTCCTTTGTAGGACATGGAATG  
CUST\_10011\_PI426210822 TCTCATTTTCGGCTCACATTTCTCGAACGCTTACTTTGCCCCAGTC  
A\_14\_P119598 TCCACAAGTAGTCCCTGGATTTCAATTCAGCCAACAGTTTTAACAATAGTTTCTACATTC  
A\_16\_P40232118  
AAACAGAATTATCTTCCCTCAAAGAACCTTTGTGGATTTTCTCTCATTGCAGGATAGTT  
A\_16\_P19655406  
TTCCAAACCTTAATCACCAAGATAAGCCCTAATTTCAATATCACTCCTCACTCTCAGAG  
A\_16\_P00413489  
ACCCATAAAAGCATCTTTGTTTCTAGGTTTCTCCATTCAAACCTATCCTACCCACAACCTAT  
CUST\_8531\_PI426210822 TATGATGTAATGTTGTTGGAACCTTAGCATGAGGTGAACAAACCACACAGGC  
A\_14\_P113143 GATAATTCATTTCTTTGTCTTCAGGCTTACAATGGCAACACTGCCCTCCATGTT  
CUST\_1218\_PI426210822 CAGAGATTTCTTTTCATCCTTTGCCCTTGAGACCACTGAGGCAAGAA  
A\_14\_P131819 AGCATTAACTGCTACTCATGAAAGTTGGAATAATTCTCTCTTTGAAGCACTTTAGAAGG  
A\_16\_P19968351  
AAATAGGTATGATACACCATCTGGCATAACATTGCATTGAAGGATACTGGGTGATAGACT  
CUST\_5680\_PI426210822 TCATGCTATGGAATCCACTGTTTGCACAGCCTGGACATTAGGTAATAGTTTC  
CUST\_6074\_PI426210822 TATAGGTCATTTTACCCTCTATTCTCTCAGTGAAAGTACGTTCCAGCTTGAGTT  
A\_16\_P15329028

AGATCTTTATCTTCAGCCTAACAAACGTATGTATGCTAGAGCAACTAACACTAAGGGTCTC  
A\_14\_P136703 CTTTAGGAAGTGACAAGGGTCTGTTGCTGCCATTGTTTCATTTCTCACTGAA  
A\_14\_P125723 AAGTAAGATGCTGTCTGTCTTTGCAGATTCGAAATGCCATATAACATCTGGTGCGAT  
A\_18\_P22150855

AAACCATTACTTGTCTTACATCACCAAATACTTGACCTATCTTTTCAAAGTCCATGTGT  
A\_16\_P36230874 AAGGTATGTCTGGATGAGAGAAGGTCTTTGCCAAGACAAGCATCTCTTGT  
CUST\_2453\_PI426210822

AAAGATACAAGCTAAATATGTTCTTAGAATTTTCAGCCAGCTACACCTGTGTAAAAACAAA  
A\_14\_P123244 ACAATATTTTTGTTTTTACAGATATGCAATATGATGAGGATGATGATGAAATCACCCCGG  
A\_18\_P26374791 GACTGCTAACATGCGTTCACACTGATGCACTTCGGAACATGCGTG  
A\_16\_P19078205

ATGGTCAACTCCAGTAAATGTTCTTGAAAATGGTCTACTCCAGTAAATGTTCTTAACCTG  
A\_16\_P03794328

ACTGCTGATGATGCAAACAGTATCTACCCACATTTAAAGTGAAGTCACTAAAGAACAACCTTA  
A\_14\_P137345 GAAATACCCTTACATTCATCTTGTCTGCAGATTTTCCAACCTTGTGAATAGTGGGTTTTT  
A\_14\_P130558 TGTTTTGCTTCTTTCAGTGTCTATAGGCATACTGGCACTCATTAATGCTTCCTAAAAA  
CUST\_739\_PI426210822 AGGTTCTAGGTGTTGAGCTCAGGGCAGTGGGAATTAAGATGGGAC  
CUST\_2671\_PI426210822 AAGAAAAAAAAAGCACTGAAAGCGCTTGTGGTGCTGTCCTTGGGT  
A\_14\_P129354 TGATATGCCTAATTAGAGAGGTAGAAGAATAATAGACAGAGAGGATGGAGACCTTCTTT  
A\_16\_P39584431

ACAGAGTAGTGTGACATTGGTGACAGTAGAGAACAATCATGAACACAACACAAAGAAAG  
A\_14\_P125141 GATGATACACATGTTATCATGCTGTATTTCCCTTCACTAATTATATGGGCTCGGTAAGGGA  
A\_14\_P102541 AACTAGACGAATTGGAAGGAGAGAAAGACTGATGGATGTTTTCTTTGTAAATGATGGATT  
A\_14\_P201987 CTGGATTTTGCAAAGCCCTTGCATTGTATGACATGAGGTTATTTAAGGTATAGTTTTGTC  
A\_16\_P02114848

TGCTACCCCTTACCCATAATCTTCCTTTATATGTAATTGACTCTAACTAACAAACAGTGCC  
A\_18\_P14136528 CCCACTGGTGCCTACCGTCTGAGCACTGCTCTGAAGGACTCGATT  
A\_16\_P16450433

AAATGCACCCTTTACTTTTACCAAATTGCTACATTTTGTGTTGAACATCAAAGGTCTTTGG  
A\_14\_P201021 CCACTGCTGAGACAGCACTATAGATTCTGTAATAGACAACTCCATCTACCTGAGTAG  
A\_14\_P122406 TTCTACTGTTGTTCTCAGGGTAGCCAGTCACTGTATCGATTTAATATTAAGTCTCATTCC  
CUST\_4073\_PI426210822 GCATTGAGTGAATACAATCATAAAACCCAAATGATGCTGTTGGCCTCATCTGAG  
A\_14\_P122169 TTTAAGCGCCACAATTTTTATTTTACCAAGGAGCAAACTGAGTAAGTTTCCTGACGAAA  
A\_14\_P201248 CTAAACCAGTTTTGTCCTTTAATGCATGTCAAATATTTCTCCCATGCTTCTCTTAGCAGA  
A\_14\_P120734 GTCTTCTCAGGGTCAGCATGATGTCTGGCACTCAAGTATATATTTTATAGTGATAAACA  
CUST\_4341\_PI426210822

AATTTACTGAATGAGTTTAAGAACCATGGTGTATTTCCCAAGCTTCGCTAGTGAAGATG  
A\_14\_P127728 AAACCTATGGAGAAGATAAGCCTCAGCAAATCACCCAGTAAGTAAGAAAACATAATTGCT

A\_14\_P121142 CTGAGGCATTCTGCTATGAAAAGAAATTACAGATGAAATCCATTAGTCAGACATTTCCAG  
A\_16\_P02839310

ACTGAACTTTTCAACACATTCTCAATTCCTACGAACTCAACAAAATAAGCATTGTGT

A\_16\_P36230044

GGCAGTCCATTCTTAACATACTTATGTAGTCACTTTTCTGTCTTGAGGCACACAAAAAAA

A\_14\_P134846 CTCAGGCAATTTGTTACATTTTCTGTTGATCTCTGAAGATGCAAACTCTGCATTATTTT

A\_14\_P133934 ACCTTTTAATTAGTCTAGGAAAATTCTGAGCCATCATCTATGGCCCACTCTTTCATTAG

A\_18\_P13314935

CCCTGAATAATGTATCTTCACCCTTGAATAAAAAATGCCCTGAATAATTTACCTTACC

A\_14\_P102308 AGTCTGCCAGAGTTCACAGCCTGAGTTTTTCTTATTAATAAAAGTTTGATAACTCATT

A\_14\_P105396 CTTCTCTTAAGTTGAGAGTTCTGTTTTCTCACAAGAGAAATGTAGATTCTGGAGAGAT

A\_16\_P30952468 AGAAGGTAAGGAGGGCATCCCTGTAAAAAGAGCAGTTGTTCCATCTG

A\_14\_P100229 CTTGTAATCTGTCACTGAGACCTTAGGATGGTTAATAGGAAAAGTTTACTGCAGA

A\_16\_P16009408

AAAAGGAGAAAAAATTCTGTCATCAGAACGAGAACAAGAACTTAGACTCTTGCTCCATC

A\_16\_P16789011

AGCCTGTAAAATCATAACCAGAATATCAAGCCATAAGAAAACACAGAAATTTTCAGGAGG

A\_18\_P13623721

AAGATTCATAACCTATCACCTAAAATCGTTACTACTTCCAATCAATTTTTCCCAATCCCA

A\_18\_P14136764

AAATACAATAAAACATGGTCAACCCTTGAAGCCAAGGGCTTTGCTAAGTCCAAAAAC

A\_14\_P200432 CACAATACCATCTTGAACGCCACAAAAAGGTTTGGTTTTGTTGCCAAAG

A\_18\_P14134021 TCTTTCTTTCTCTGTTGTGTGAAGGTCAAGTTGTCTCCTCATTTGGAGATCAGATA

A\_14\_P115635 GAAGAGAAAAAAGAAAGTCAGTTGAATGTAGCAACCTCTCCCTGTTGTGGAG

A\_16\_P18617144

AACTAGTCCCCAGACATTTCTAAATTACACGTAGTTACTTGAACAACATGTCCAGATTCT

A\_14\_P113549 GTGCACACAGGACTCTCATTACTTTTTTATGGAATCTGCAAGGTGTTTTTLAGGCTTTTTA

A\_16\_P58424301

TTCATGTTGCAGAAGAGCATGTGGAGTCGGAGATACTTTACAAGCATCTATGGAAAATA

A\_18\_P10735373

AAAAACAAAGCCTACTTTTTCAATGAGGACAATTATGCAGTATTCCCATAATGGCTTCGC

A\_16\_P02394071

AAAAGCCTTTCTAACGTTATTGCTCTATCCTATGCACTATATCTACTCATGGAAGCCTGA

A\_14\_P107368

CAAGCAAAAAGGAAGATACAACATGTTACTTGGCCCTGAAGAAAAGTTTCCAAAAATGTA

A\_14\_P129047 TTGCAGCATCAATTTGATACTGTCTGTCTTGAATACTCTTTCTGTAGTGCTTGCTTGTT

A\_14\_P200396 AATAATTTAATAGAGAAACAATGAATGATACTCTTTACTCAGCCTCCTGCAGGGAGGA

A\_14\_P127378 CAGTTGAAGTTGGTTTTTTGTAAATGCTTATTGGGAATTTCTAAAGCACTGACTTGGAGA



A\_16\_P35897447

ACCAGAAAAATATTTACCCTCAAATTGCTTCAATACTCCGAATTCATCAACAAAGTGTCA

A\_16\_P18855428

ATATCTTTCCCTGTCTCTGTAATTCAAAAACCTAAACCTTTCTTATAATCCCACCACTCC

A\_14\_P114918 CTTCTAGGAAGTAGATGTTCCATATCTTCAAATGCCTCCTCCAATTTTGTAAGAATGCT

A\_14\_P132848 ATGCAAGAAAACTTGGTGATATAGGAAGGAAAATGAAATGAACTTGCTGAATGACTGCA

A\_14\_P103022 CAGTTTTCTTATTTTCTAGGAACCTCCTGTAGAAAAGCCCCAAAACAAAACAAACCTTA

CUST\_5311\_PI426210822 GTTTCCCTCCTCAGCCACCATGGCTTGAATGGCTGCATTTAGAAA

A\_14\_P128570 CTATTAATCCGATTAGCGTTTCGCATAAAAATAGAGTCGCGGATGATGATGATGGTGATA

A\_14\_P113528 GAACTCTGCTACTGCAATTAAGCCGATCTTTACAATTCCAGGGAAATCTATAAAAACAGA

A\_14\_P102915 TTAGAACACCAATTCCTTTTCTATTAAATTTCTTAGACTTGACCCATCCCATTTCTCCT

A\_16\_P17748608

ACTGATATGTGGCCCTTTACTATGTAGCAATCTGTTTTTCACTACCAATAAGCCTATGC

A\_14\_P111652 AGCATATATTGTGAACAATAGTCTCAGAAGAGCAGATAGGTATAAATGTGGGAATGCAGC

A\_14\_P113456 CGAGATAACAGCACCTCCCTCTGGAACTTCTACAGAAGTCAGTTTTGTTTTCTATTTT

A\_14\_P104668 GTCTGGAAACAACCCTACCATAATAAACCAGTTTGTAATTCATGGGGACAGGT

A\_14\_P113765 CTAAACTAGGATTATACCATGAAACATCTTAAATACCAGGCTGAAGAGGGGTTCTAAGTC

CUST\_8326\_PI426210822 GCTGCCTCAGAGGATTTGCTGTGTCCCTTCTCCTGAGATTTTCT

A\_14\_P109435 CTCCCTATCTGACTCACCATCCACATTTTATTCATAACTCACACACGGCTTACTA

CUST\_2036\_PI426210822 ACAGGTTCAAGGCCTGAATGTCTGCTTGGATGTCCTTATCATAACAA

A\_16\_P18468395

ACAAAAAGAACAGAATGGAAGGTGATATGTTTGCATGTAGTAGAATAGGGGCTTCATAGA

A\_14\_P200386 AGCCACTTGGTCTTTTGCCTTACATTTATTCACTTCATTCTTTTCATCCCACATATTTACT

A\_14\_P115040 ACTCTTTCTTTTTAGGCTTTGGCATAGGATCAGAAATTCTGAAGAATCTAAGCCAGGTAT

A\_16\_P41897024 TTGAAAACGAAACAGAACCAAACCTCCGCTTATTGCTGCGAGTTTATCCAGG

A\_14\_P124960 GAAGTAATTGGATTTTCTCACTTGTAATACTAATCCCCCTGCCTCTTTCTAATAATTCTC

CUST\_8665\_PI426210822

CTCTTGTTAATATGCAAGAAGGGGAAAAGTCAGAAATGATAGCTAACAGGGAGTGA

A\_16\_P16191228 GGTGACAATTCCATGTTCTTCAGAACCTAGAGCATTTTCCAAGAGTCACTGAATT

CUST\_7471\_PI426210822 GCATACTAGATCTTAAGGCAATCTCATGGCCCTGCAGCTCATCCTTTTTT

A\_14\_P200009 AAAAGTTATAAAAAGAACTCTGTTACTACTGAATTTGCAGGTTTGACATGTTTATTGTATT

A\_14\_P111692 CTCCCTCCACCTTTGTAGATGAGTTTGTGCATCTGAGAACTTCTTGTAATG

A\_14\_P126415 CTTTTCAATTGTAATAAATTTTCATGAAAAAGGTTAAATTGCCCCACGGGGCAGGAG

A\_14\_P129985 CACTAGTAATAAATGCTAGGTTGATAAACAATTTCTGCCCATTATAATGAAGGGCT

A\_16\_P20001959

AAACTCTTCAGTCACTCAATTCTAGTGGCACCAATTTTAAACCAATTTGTCAGACAATTGA

A\_14\_P130040 AGCAAAAAATGAAAAAGAAAAATGATTTGGAGTGTATGTCCTGCCTAGAGTGAGTGTG

A\_14\_P123100 TACTCACTTTGATGAATCTATGAAGTATATTACAAGTGCACCGATGCTGAGAGCAAAGAC

A\_14\_P137212 CACTCCTTTCCCAAACACTATAAAGGGGAAGTGAAAAAATTCAAAGCACCTAGTGTATTAT  
A\_14\_P101802 AGCACAAATTTTACCAATCTGACCTCTTTGAAGTTGCAGAATGCTTTGAAATTCTAATGG  
A\_14\_P123129 ACCTTTTGCATGTTCTTTGAGATCTAGATATGGGTTAATCACTCAGATCTGTAAGAACCA  
CUST\_3842\_PI426210822 ATGAGGCTGTTTGTATTGCACGGTAGGAATATATCCAGAAACAGTGGGC  
A\_14\_P112598 TGGGCTTTGATATTTTCCAAAAAGATAATAACTCATTGTAGAGTAAGATCAGGACTGGGG  
CUST\_1771\_PI426210822  
CAGGGAAATAAACATTTTTATTTTCTCATTTTATCAATTGTTGAAGTTCAGATGGTCAGGT  
A\_14\_P137862 TACAAATTCAGTTATGTTACTCCCAGGAACATCATCAGCGGAAATGAAACAAACAAAC  
A\_14\_P109814 ACCAAAGACCAGTTGTAAAGAGGGTCTGTAAACATTTAATCAGTTTAAAATTGGCGGTA  
A\_14\_P132644 CTGTGCTGAGTTCAGCATTGCTTATTTAACCACTACATAATGACAGACCAGTTATTAGG  
CUST\_3922\_PI426210822  
AATAGCTTCAAGGAAGGAAATATATTTTTACATTGAAAGAAGAGAATATGAGCCATGTGT  
CUST\_2462\_PI426210822 TGACGTTTGGCCAAGACAAGTAATAATAAAGGAGTGTGTGGCCTTCAACT  
CUST\_2107\_PI426210822  
GAGCATTTTTATTATGGTTGTAACATAACTTTGTGTCCTCAGCTTGCATTTTTAAAAACA  
A\_16\_P19655995  
GGTTCATCACTTCGCTATATACTTTCCTATCCTTCATAATGCTCAAGTATTCCTAAACAC  
A\_14\_P118862 GTTTAGTTCTATCATGTTTTCTGCCAATTACCATGCATAGACCCTCAGTAGAATTGGATT  
A\_16\_P30952285 GCAGGACGCTGATCCCTTGCTATGAAGGTGAGCATGGATTGATTTTT  
A\_18\_P22841768 GAGTGAAGGATGGACGGATGGACAGACTTGGCTGCCCTATACTATTAT  
A\_16\_P15658171  
TGCCATAAAAAAATATGTAGCCTTGCCTACTCATGAATGCCTAACACAATACAGTGCAT  
A\_14\_P107287 ATCTTTTGACCCTTTCTAGAAAAAGACAAAGACTTATTCAGGCAACCAAGAAAGAATC  
A\_16\_P17824290  
ATTTGGTAGGATTGTAATTTTTCCGACAAATTGTATGATCGCTACACACGTTATCCTTCC  
A\_14\_P100763 ACCTGAATTTATTACAAAGACCTCAGTTATTTAAGTAAGGGATGAAGGTAGTTGTGGGAG  
CUST\_10335\_PI426210822 CCTTGAGGATTGAAGCTCAGAACACAAGACTCTTGCCAGTTGTTCTAAG  
CUST\_2314\_PI426210822  
TTTGGTGACTIONTTGTCAACCGTCTATGCTAAGGCAAAGGAATATGTTTTAATATATAA  
A\_14\_P117085 CTGATTGTTGTGTTTTATAAATCTTCTGTAAAGGCAGAAGGGTGATTATGAGTGGTTCAC  
A\_14\_P120612 AAAATCCTTTCAACAAAGACTTCAGGCACCACTGCATTCCGAAAGCCTATTTTTTAC  
A\_16\_P18300244  
AAAGGTAAATGAGGGTAAAATCAATACAAGATGGCTATCTATTTCCCATAGAGACACCA  
A\_14\_P122764 ACCCTTACATTGTGTGGGTAAAGATCAAACATCTTAACAGATGCAGGTTGTGAATACTA  
A\_14\_P120283 GTGTTACTGCAGTAATGTATGAAAATATGAAAGCAGCAGATGTCCAAATTACAAGGGCTG  
A\_14\_P122703 TGGAAATCCTAGGGTTTTATTCTTTTAGCAGGTTTTGTGATGAAAATGTCACCATCAAAC  
A\_14\_P122244 GTTGAACAACACTTAAGATTCCTTAAATATTATTATTTGAGGGGCTCCCATCTGGGG  
A\_14\_P201669 CACTTTCATTGAGGCAACTTCAACCCACTTTTCTGGTTAAGAGAGAAAAAAAATATG

A\_14\_P128500 AAGACAAGAGAACAAACCATTGTTGAACAATGTAATTAAGGTTTGGTGATGATGCATCTG  
A\_16\_P16901642

AATAGAACCGTAAGAATTGGCTACATAATGGAGATCCAGATACCTACTGAGATCCAAACA

A\_14\_P102839 GGTCAAATCATAAATATGAATTTACTACAAGTGCTACCTGAGAAAACAAAGTTGTCAAGC

A\_14\_P139327 TTATGGATGGTGAAGGGAATGGTATAGAATTGGAGAGATTATCTTACTGAACACCTGTAG

A\_16\_P02158760

AAGCCATCAACACGATTTTATTTTATTTGCATAGCCTTCAAATAGGAAAGTCTAGGTTCA

A\_14\_P107374 CTGAGAGGACTGCCACATTTTCATTAAGGAAGAGGGGGTGCCTAATCTATTC

A\_14\_P139228 CCATCTCAAATGTTCCCAAGATAAATTCATCCTTCAGGAAATGGAAATGAACTTGCTT

A\_14\_P116026 GAGGAAATAACAATGAGGAATGCTGGACAACACATAATTAAGTGCCAAGTGGTATGATAT

CUST\_6394\_PI426210822

TTTCACAGCAGTGAAAATTGATATTCATATTCCTAAATAATTCCATGTTTCACTGAAATCT

A\_14\_P136395 CTCTCCCTCGCCTGTTTTCCATTTTTTAGAATATATTCACATTCATCCTTCTACCTTAGT

CUST\_5775\_PI426210822 AACATGAATTACATGATTAGGGCCTCTGGAACTTGTGTGGGGCTATAGAAG

A\_14\_P126440 TTCTAACTGCTCAAAGTCTTGAGAAGGGAAAGATTTTAGCAAGGCTAGGAAAATAAAAAT

A\_14\_P102059 CCAGTAGCCTGGGTTCTTATTCTTTAAATCAATTTTTTTTAAAGTGAATGGGGTGGTCTTT

A\_16\_P18087620

AAAAGCAATCCTCATCAACTTCAGCCATTACAGATCATTTTTTAAGAGTGGAGTATTAGGT

CUST\_1062\_PI426210822 ACCGAAATTCACCAAGCCTCAGCCAAGTGACCTAACAGCTGCCTT

A\_16\_P58424250 AAGTCATGAGGCCCAATCCATCAGTAGAGTGGGGAAATAGAGTAGAAATAGATC

A\_16\_P00096921

TGCAGTGATTATGCTTCCTTAACCTACATTTCTTTAAAGAGCCTATGACATAGCATCCAA

A\_14\_P111106 CGTTGTGATTTCAAACGATTCCATACCATCTCCATCAACAATATTGTATGTGACTAAGCC

A\_14\_P131304 AAGTGTAGATATTTGAATACAAACATGGGGTTAGAGTCAGGGGACCTTATTAACAGTCAT

A\_16\_P01841987

AAGTAACCAAAACATCTAGTTTCCCCAAACAGAGATTCATCCAAAATTTTGGTCAGTTGT

A\_14\_P109377 CTCTATGAAGAAAATCCATTTCCATGACTGAAGCATTGGATATAAATATGGTGTCTCTGCT

A\_14\_P128923 CATCCCATATCTTTGATTCAGGGAATTTCTTTGGATGATCACTTACTCACAAGACTAAAC

A\_14\_P129850 CTGATAGACATTCCCAGTGTCATTATAATCCCCTGTGATCTAAAATACACCCTCAGTC

A\_14\_P138345 CTATGCTCTCTCTCCATTCTGAGTTTATTTGAGGTTGTCCTCTAAAGCAAAAGCATACTA

A\_14\_P138609 AACAAGTTTTAAGATGGTATTGCTCACATCACATGAACAGGTTGGTAAAAGGTCCTACT

A\_14\_P103821 CTATCTATTAATGTCACGGGAAAGTCAGTATTCAAGTATCTGACAACATGCTTCTGCAAC

A\_16\_P21695090

ATGAGAATGCCGATTTTATTGTTTACTGACTCACTTCCTTAGACTACAGAGAACAAACCT

A\_16\_P18658568

ACACTAGACATTTCTCCTGAATTACTATTTACTCTGTCCCAAATATTTTCCCCTAGA

A\_14\_P117197 TAGATACTTCTCCCTTAATTGTATATGAGTTGGATCATTTTCCCCTTCATTTTGCAACT

A\_14\_P113347 CTGCAGCAAACCGTTCTTCAAATCCTCAAACGAATAGCCATTCTGAAAGTG

A\_16\_P15118935

TTCACATTTGATATTTCCATAGTTCACACTCAAGACTTCTAATCAGAAAAACAGCCCCA

A\_18\_P22840349 GAGTTGGGTCAGGAGAAGGAAGTTAAGATTGAAGGAGAACATGCAGAG

A\_18\_P14132762 TTCTTGGCATCGGGCTTTTCTTTGATGTGTGCATGATCAGAACACACTAAG

A\_14\_P122289 CCAAGGGCAACATGCAGTCTTGGACTTCATTATCTTATTTCTATTACATAGTGCCTAAG

A\_14\_P119703 GACGTAGCATCTGTCTATCCATTCAGGAATTTTCGCTTGCCTCTCTCTTTCTTT

A\_14\_P101246 TTTGTCCTGGTCTTTGCTTTTACTGTAACAGTTACATTTTGCTGGCCTTATCCTGTT

A\_14\_P126957 CAGGCAATTATGTAATAAATACTGTCTGGTAGGCAGAAATATTCCAAATACAGAGCCCTC

A\_14\_P126309 CGTATATCAAGAGACCACAGCATGGAAACGTCAACAATTCATTATAAACACAAAAGGTGA

CUST\_9292\_PI426210822

AAGACTAAATGTGTTAATCTGTACAAACCTATCCACGTGTGAATGAATAACCTTAGAAAA

CUST\_5698\_PI426210822 CTCTTATGGGTATCAGCTTCTGGGTAAATACTCTTTTCAAAGAGGGCACCAT

A\_14\_P101884 AGGAGGAAATTGTTCCCTCGTCTGATAAGACAACAGTGGAGAGTATGCATTTATTTATTTA

CUST\_8824\_PI426210822

ATTCCTTTAACCCATGGCAGAGGTTGCCTTAATTTCAATGTGAGAATAAGAAGGT

A\_14\_P128106 AGAACTGAGTATTTTCATGGAATTTGTGGAATTTTACATACAATCCATGCAGGCTTCTCT

A\_14\_P135969 GTGAACTGCTTGACTTTACCACCTGAAGGAGTATTTACTGCAAGAATTAACAAAGCAG

CUST\_4248\_PI426210822 GCAGCCTCCCCTCCAAGGAGAAAGAAACCCTCCACGTGTTTTATG

A\_16\_P17021746

AGCGGGGATAGAGATTAATCATTAAATCTGACTAGGAGTTTTAAATTAGCCGGAAGATCTG

A\_16\_P20928818

ACACCCTGGAAATCTAGAGTCTTTGAAGTAAAATGATGATGACACCTTCTAAATTTACCC

A\_16\_P15035496

ATGTGGCAATTAAAGGCAAATGTATACTTTTTTCAGTCATGACTAGGGATTACTCTGCTGA

A\_16\_P17576649

AAAGGGGACACAACCTTTGTATTAAAGCATCCATACTTTATTCATTTCCATGAGTCCACTC

A\_14\_P200142 AATACCATCTGGGAGCATAAAGGTGACCTGAAGGTAGGGTGATATGTCTTAAAG

A\_14\_P134422 GTGTATACTTATACTCACCTGCAAAACGTTCCGATATAATCCTGGTTGATTCTGATGAAG

A\_14\_P115648 TGTTCTTGGAGCCACAGAAAAACAGATCTTACATTGTATGCCCATTTGTATGATGAATAAG

A\_16\_P03529994

ATTTCAATTGTAAGTGCACAGAAGTAAATATGGAAGGATGCTAAACTCATTACATGACCCC

A\_16\_P18430285

AATGTAGGGAGCAAACCATTACTTTACAATACAGAGGTTAGAAGTTCAGCATGTAGTGAG

A\_14\_P129792 TATACTTTCTTAATAAAAAGGAGAAAAGAAAATCAACAAATGTGAGTCATAAAGAAGGGTT

A\_14\_P101585 GTCTCTTTGTGTGATAATGACCTACACATGGACAGGGTCCAAACCATCTG

CUST\_7886\_PI426210822 GTATTAAAAATGCTCATCCCAGACCCTGCAGTCTCTGTGTCTACTCAGAAAA

A\_14\_P128348 ATCTCATCACTGTGCTGTAGGTCTCGTCACGTTGAAATCAGTCTCTGAGTATTTA

A\_16\_P15580153

TGAACAGTAGCAAAAAGAACCAAGATTAATAGCACTAGAAAGGACATATTAACACCGAACAT  
A\_16\_P17435884  
ATTTAAACAAGGAGTCCTTTACTGACCTTAACTTGGCTAACTAACTGCTTAAACAGTCCA  
CUST\_3086\_PI426210822 TCAGTCCTCTCCTCCTTTTTATCCTCAAACCTTGTATCTCTGCAGATGTTCA  
A\_14\_P136318 CTTTAGATGTGTCCCATGTGGCAAGAAAGGAGACAGTGAATTTTGTCAAACAATAAAAAT  
CUST\_6076\_PI426210822 TACGTTCCAGCTTGAGTTTTGAGTTTGCTCCTCTCTCCAACCATAACA  
A\_16\_P18256691  
ATCGTCCAGTGTCAAGATTTAACAGTTGCTTTTACGAATATTGAGTCTCAGTTATGTGCA  
A\_18\_P12131306  
CCCCTCTTTTTGTCTCATAAACACCTGTAAAAACCTGTAAATACTTATGTTCCGAGGAT  
CUST\_1932\_PI426210822  
AGGAAATATTTCAAGAAACAAAATACTAGCTTTTTCTCAGAGTTGAATTGTTTACTTGTA  
A\_16\_P17030818  
AAAGAGTTCTTAAACCCCTTTGGTAACAGATTTAATGGTCCTGTCTTCAATACATGATGC  
A\_18\_P17402956  
AGTTGATAATTTTATCACTTTTTTGTATTTTTCAAAGCACAGTTGATATAATCACGTA  
A\_16\_P00729240  
AAGGATCCTTCCACGTAGATACATGAATTTCCATTGTCCTAGTTAGCATAGTTTCATCTT  
CUST\_5975\_PI426210822 AACATTTCTGTGGCAGGAGAGGGCTGAAGGAGAGGGGCAGGCTGC  
A\_18\_P15060639  
GTGCTTCGGATCTACACAGTAGTTTTGCCAATTACCCTTCTAAGAAAAGCAATTTTCATAG  
A\_18\_P14674409  
AAACTGCTAGTGAGTTCAATGGTTAATTAATGATCCAAAGAGAATCCATCGTCAGCAAC  
A\_14\_P117931 CTGGTGTGTTTAAAGACAGAGGACACTGACTTAGGCAGGCTACATACTATTAGATTTTTTTA  
A\_16\_P21697128  
GTAAGCAAGTAGAATCAATCTTCACACTGATCCTATCTTTGAAGTCAATCATAACGCGTCT  
A\_14\_P126087 TGTGACGAGTGTGGATGCCAGTGACAAGATGCTGAAGTATGCACTTAA  
A\_14\_P117894 CTCAGGCACAGTGGTTTTCTGCCTAAAAGTAGTATATGAAGATGACTGTTAATAAGTCA  
A\_16\_P03793414  
CGAAGATCATCAGAAAAAAGCATAAAAGTGTCTCTTTCTACTGATAGCATCTCTCCCAG  
A\_14\_P114756 ATGTGTTATGTTAAAGTAACAGTAAGGTATTTGAAAGCACAGGCTACTGAACAGGTCCTA  
A\_14\_P138471 CTCTTAAACATTCAAGTTGATACCTATAGTTACAACAACCGCAGCAACAAGCCTGTGC  
A\_14\_P101935 GAAACACTCAGGTGCCAAATGAGAGGTAAAGAGACTCCATGCATTACTCAAC  
A\_14\_P102268 ATAGGGTTTGGTAAACATGACAGGGTTTGGAAATGTGTCACTAGAATAAAAAGACAAAGA  
A\_18\_P14132341 GTCTAGTATTGTATGACTTGAGTCAATAGGCAGTGGGAACCACTGTAAGTTCACAAG  
A\_14\_P112046 GGAGGCCAAACTTTTTTTTTCTTAAAACATTTTTACTTCTTTCAACCCAGAAACATCACCA  
A\_18\_P10511072  
ACGCTTCTGAATCATGATCCACATCTTACGATTTTCAAACCATTAATTTTTTTAAACCC

CUST\_9168\_PI426210822 TCACATCCTGTCCAGCCTTCAGCTACAACCAGTGTGATATGGTGATATAT

A\_14\_P200685 CTACTIONGAAAAAGGGAAAGCATTTCCTTGAGTTTGCCTTTTAAAGGAACTTACAG

A\_14\_P103956 AGCAGATCTGACAAGATCCATAAATTTTCGAGTTAAATAAACAGCGATACATCAAAACG

A\_16\_P15587925

AAATCATCCACAGTTCTACCCATTTAAAGCAACCTTCTATCTATGACATCAATTACCGCT

A\_14\_P132739 TAGGTTAGACCAAAGCCATTGCTTTTGAAGTTATTAAGTCTGTTGGTGCACAAAAAGAC

A\_16\_P02361491

GTTCTCATTCTTCTAAGACTCTCTAAAGAGCAAGCACTTTAATTTCTGGTATTCAAGGGG

A\_18\_P14347279

AAAACAGTGGAGAAGATTTTCACATGTCTAGAAAGGTAACATGTTCAACTTAGGTTTGGC

A\_18\_P22841615 CTACTIONCAGATGATCCCTGGTGTCTCTGTGCAACCCTCAAAATTTGTAGC

A\_16\_P39410115

AATAGCACAGTCAAATCCTATTTCCATTTAGTGAAGTGGATCGAAATAATGCAGG

A\_16\_P00184281

GGTAGGCTGAAATAAAACAATCCATTCACCTGTGACATTATAATGGCCCAGAGTTAACAAA

A\_14\_P124949 CTAGAGACAGCAATCAATATTTGAGTGTAAGGAACTGTCTGGGGTGATTCTTAGAAG

A\_14\_P127423 CATATGGCACAAACAAATCGTTATTTTCTCTAGGATACCAAGTTTCTCCTTCCATTAGA

CUST\_7230\_PI426210822

GGATTTAGTAATTTAGTAATGTTTAGTAATTTTTTCAACAAGTTCTTTTCTGTTTAAAGTG

A\_16\_P18923839

AATGAAAGGAATATGACCATTACTCCATCTGTCAATTTTCACTCATGCCTTTAAATGAGCC

A\_16\_P00685493

GTAGAATTCAGTGTGCAATATTAGACCATTGCCTAGAATTCACCATAATGGAACCCAA

A\_14\_P110092 TAAAATACATGCAGGAATGAATGATTACAGTTACATAAATTGTGCATTTGAGCAGGGCCAC

A\_16\_P16673177

AAGAGACCCCAATTAATGTCTTCTACTCTTGATATATCTGGCTCCCCATTTATTAACA

A\_14\_P131656 GCAGCAAAGACAATAAAAGGTGTCTAGAGAGGTCATATGTGTGTGGTCTGT

CUST\_4415\_PI426210822

CTCCAGTAATGAATTTCAAGCTTCTTGTATTGTTTTTCTTCTGAAAGACAAAGGGAGT

A\_14\_P101140 GTCCAAGAAACGGCATAATCTCCAGATGAATACACTATAAAGTTTACAATTAAGGTGGAT

A\_14\_P112389 AAATCTTTTTCCAAAGAGCAGCAGACCATGGATAACTTAGAGAAGCAACTCATCTGTC

A\_16\_P18937180

AGACAGAAGCCCAAATATTATGACCTTCATCTCTTCATACATGTTCTGGTAGGAGTTATG

A\_16\_P16588135

TCATATCCCCTTAAGTCTTCTACACATTGAGTATCTGGATTTACATCACTTCAGTCAAGG

A\_16\_P41246040

ACAACAACACATATCAGATACCATCCTGAATATAACAGTCTAAACCTGACCTAACATGGT

A\_14\_P129126 CTCCTGAAAGTCTCTCTTCAACTTTGTGAATAAAGCAAACACTTTGGCCATCTAAAAATT

A\_14\_P102418 TTTTCCTTGTTCGCAACGAGATATTTTTGATCCCCTCAGTAAGTAATATTCATTGCATCT  
A\_14\_P101660 CTGAAATCTCTACCTTATAAAGCCTCTTCTTTTCATTTCAAAGCATTATGCCAGAAGACCT  
A\_16\_P15249974  
TTCAGGCTTAAAATCACCAGTTCCTTAAAAAACTCCATATTTTCCCTTGGCTACCATACT  
A\_14\_P118945 GGGAGTTTTTAACAATTTTCTTAAACTGTGTTACAACACTACCCGTTCTTCCAGTTTTGT  
A\_16\_P02848567  
TCTTTTCCAGTCAAAGGATAAACCAGTTCCTCGAATCTAAATTACAACACTGCAAACACAACA  
A\_14\_P200400 ACAATTTTGGTGCCTCTCCTTTATCAAGATAACTTCCAGCATACTGATCTCACTTTGG  
A\_16\_P18818145  
CCCACCAGTTATTTTCATGTGCAACACTAATGACCAAATTTGTTTGATCTATTTCCCTC  
A\_16\_P00003452 ACAACGTCACACTCATTACATGAAGTTTCATGGTAAGTGGCGCATCCAAAAC  
A\_16\_P16798514  
GGAACATACATTCTACCTTATTTGACTAAACACTTATAGCAAGAAAGCACACTAATGGGC  
A\_14\_P113967 CTTTTGAAATCTCACAGAGTTCTGAAGTGGAAGGCCGATAAATCTCTTTCTTATAACTCA  
A\_16\_P21645113  
AAAAAGCCTGATTCAAACCTAACCTTTTTTTTTTCTGTTTTTTCCCAATATAAGCCCCCTCA  
A\_14\_P132925  
CACATGTAAATAAAATAGGAAACAAATTCCAAAGCACTCAAGAGAACAGAGTTAGGGGAG  
A\_14\_P119890 TACCACTTGAACCTTAGGGCAGCAGAGGATTAAAGCAATTATTATTGAAAGGGGTTTTATG  
CUST\_1707\_PI426210822  
ATTAGCATGTTTTGTGTTTTTATGTGATGACTTCCTTGTTAGTGTTAATCACTGTTCTG  
A\_16\_P20391867  
AATTCTGCAATAACTCAACTTTGAGTCTGGTAATGTCTCTATCAAATGCATACCTGGAGG  
A\_14\_P123253 GTCAGATTTTATTGCTAAAGGACACGAGGAAACTGTTTAACAATGTATGTGGTATGCCAT  
A\_16\_P19758981  
ACTACAAGTTATCCAAAGCAATCTTACTCATTATCTCAGTTGAACAGAAAAACCAGTCA  
A\_14\_P138822 GAAAACAAGAAAATGTTTGGGAATTTGTATATTGGGAATGGGCAGGTGTCTACATTCATT  
A\_16\_P16992677  
AACATTTGTAACCTCAGGCTAGATGAATAACTGCTGATTGACATCAAAGTCTCTCCAATGG  
A\_14\_P138275  
GAGGAACAAGAAGCAAAAATGGAACCTTAAACGCAGACTCAGCAGAAAGGTAATGAAATC  
A\_16\_P01206069  
TCAGACTCCATTATAAGTATAGCCTTCTTTCCGAATCTAATCAAAAATAGCCAAAGCACCA  
A\_14\_P108498 GCTGCTAGTTATCTTATCTCAATCTTAGAATGTTTAAACCGGAAGGGGACTTAAGAGATG  
A\_14\_P114474 TTGCCTAAGCCTTTATATTTTACACACCAAGATTATTGTGATTATTTCCACTTAGCAAGG  
A\_14\_P133965 CCCATATACTTTTGCTGAGATTGATGACAGTGAATATGACATGATATTGGCCAATCTGAG  
A\_14\_P128723 CTGACTAAGTAGAAGTCAGGAAACATATCTGAAGCCTTGCTTAAAAACTTTCCACAAAGT  
A\_14\_P136918 AATAAAAATTATTACTTTTTTAAACCACTAGGGAAGCAGAGAGCCGTTTCCCACCATGTGA

A\_14\_P112648 CCATAGACCATCCGCTGTCTTCCTCTGTAGAGTTAACTATTTTCTCTTTTATGAGGAAA  
A\_16\_P17142778

CCTCATTTTATAAAGCCCTTCACAGATTCTTTTTTCGTTCCAATCATCATTTCACCTTCCA

A\_14\_P104526 AAATGTTTGGGAATTTTCATTTCTGAGCATCCATCCCTCTCCTATGTGCTTTTGCATTTTA

A\_14\_P121219 TGAATCTGGGAATAACTGGAGAGATACTCCCAATTCATCTAGAATGACTACTAACAATGG

A\_14\_P137926 CTTTTAAATACAAAGAAGTGAGGATTTTGAGATTCGAGGAGCATAAGAACAACAAGAAGCC

A\_14\_P110246 ATTCTTCAGGACCCAAAAACCGTAAGAGAGTATTCTCTTTTCAGAATTTTCACCAATACA

A\_14\_P116371 TCAATTTTTTAATTTGTAAAACAAAGGGTTCATATCTGAGGCCTTTTCTGGTCTGAAGCG

A\_16\_P17579704

ACATACTTTCTTCTGTCTTTAGTTTTCAAAGGTCCCAAAGAAATCAAACAAGCATCCACT

A\_14\_P116019 CTATTTGGGATTCTAAGAGGACACATGAGTCACATAAGTGCATTTAACTCAGACAACCTTT

A\_14\_P107977 ATTTCTGAATCATCCATATAAAGTCATGGGTAGCAAGAACAGATAAAGATGTGGTCTGTC

A\_14\_P137360 TCACTTACACATTCTCTACTAAAGGAATTCTAAACCATTTTTGCATCACAGAGCAAAGGG

A\_16\_P01486976

AAAAATATAGTCAAGCAGGCAAATAAAGATACCTCCACTTTACTAGCATCACAAAGTAGA

A\_18\_P13433079

ATGGTTTGCCTTAAAAGGAAAAACATAAACTGCAATCTACAGTGTCTATTTCATCGTCCC

A\_18\_P24734938

AAAACCTCTTCTGAACTTAATAGTAACAGAATTGCATCTCATTCTTGTGCTTTTTGCCC

A\_14\_P134555 AGTGTATTATTTTAGTTGGTTAGTTGGTTTGTATTCCCCCAATGCAAAAAAGTAGAGT

A\_14\_P136506 TCTCTAGCCCCAAATACTAACCTTCTAAATCTGAGATCATCACTTCTTGCTTATTCCTGA

A\_16\_P02989865

AATAATAAATAACGTCTCTGCTTATCTTAGGACCATGTTCCAGTAAATGAGGACTGCAGC

A\_14\_P124733 TAAGGGATAGGAATTTCTTTTGCATTTGCTGAGTTTTGGAAAGGTTGAGAAATTGAGAGA

A\_14\_P105593 GGAAATTTACCGTATAATTATGGAAGATGAACGTATTTTCCCGAAGTCCAAAGTAACTG

A\_14\_P106453 AGAATTTTCAGAACTACCTGGGATCCTAAAAGAGTCTTTGTATAATAGTCTCGAGGCATG

A\_14\_P103970 CTGTTTTCTAAAAGATTCTGTTTTCTGCCAAAGTCATTTTGTGAATGGCCACTTTAGGAA

A\_16\_P19464679 CCACCTGTATCCTATCCTAAGTATGTTTACCTGTTATCTCATTCCCTTTATCCTTGTGCT

A\_16\_P16192026 AAGGTTCCAGAAAAAATGCAGAAAAACATTGACTCCATTGGCTTGGAAAGTGAGT

A\_14\_P132626 CACATCCCCTCCAAGCAGAGAAGAGAAGAAGGAGATGGAGAAATTGT

A\_16\_P35869282

AAATGGAAAATGTCTATCAGCACACATTAACCTCAACTTCACACAAGTGATCAATCTGGAC

A\_14\_P120212 GCACTCATTTTTGTAAATCTAATTTTGTCTTAGAAACAGCCTGGTTGTTTTCTTGTGCT

A\_14\_P106952 TGACACCTGGGCTACAGTTTCAAAGAAGTTCCATCTATTTAATCTGTAGAATTCAAGAC

A\_18\_P12604631

TTCTTTTTTTTCCCTTTCCTTAAGCCTGAAATTATAACAGTTCTCAGAAAGTAAGAACCA

A\_16\_P01117570

AATTGCTGACTATTGCTACACTCTATTGACATCCTTGAATCTAACTCAGACCGGTAGATA



A\_14\_P125537 GAAAACGCCAAGATACTTTGTGTGAAGCAGAAACACCAAGGTCTTCACTC  
A\_14\_P126207 ATCAGAAAATTCATGCTCGGAAGAATGCCTACAGGAATGAAAACCTTAATAATTGTGGGAA  
A\_14\_P126081 CTGGAAACAACCTGAAAACTGGGCAAATATAGAAAGTCCTTTGAAATAGGTTTCTGAGTT  
A\_14\_P109165 GTGGGTAAAATTACCTTCCCATTTATCACCATCAGAAACATTCTTCAGATCTAAATGTGG  
A\_14\_P201255 AACTGGCAAATGGCAAGTTAGTAGCAGGTTTATAACAAAACCTTTTAAATGTTTAAAGGG  
CUST\_5516\_PI426210822 TATTGAGGGAGGTCAGTGAAATGTGAAGGTTGGTATGAAGAAGGGTTAGA  
A\_14\_P125217 TTTGATGATTTGAACGTGAAAATGAATCCTACTTTCTGCTTTGAGAAAGATGTAGGGGAT  
A\_14\_P202044 ACTGCACAAATGTATTCCAAATGTTGAAAGTATGTGCTCGACTGAAAATAGGTTGGAGA  
A\_14\_P124872 TCCGTTGAATCGAAAAATGTCGAATATTACTTTTCTCAACTTTGATCCTCCAATTGAGGA  
CUST\_56\_PI426210822 AGATGTGGATTTGACAATTTACGAAAGCTAAGGTAGAGAGGGCCCTGAAAAA  
CUST\_6692\_PI426210822 CAGAAACGCAGATGGGCAAGACGACCCTCAGGGTGGCAGGAAAAG  
A\_16\_P41098443  
ACAAGACTTTAAGGGCTTAATTCTGTATGCTTGTGTTGCATCTTCTTAACTGCCTACTTGA  
CUST\_9986\_PI426210822 CTCTTAAAATGAGAGGAGCTGTGTCCTTTATGGCTGGGTGTGTGG  
A\_16\_P17208453  
AATCAGTTAGCAGTGTTTTCTCTAATTCCTTCAGTTAGTCTGATTATTCGGTCTCTTCA  
A\_14\_P105346 CTTCCAATGGAATCTGATTACTGTTTGGTATAAACTGGAACCTTTGCAACAACCTCCTCTAT  
CUST\_2350\_PI426210822  
TACATAGTCTGAGGGGCATTTATCTATCCAGACCATCCTCTTTTCATTAGAAGTACATAA  
A\_18\_P15511328  
AAATGTTTCATCCACAACCTTTCAGTTCTTCAAACCCAATCTTCATTCTTCTTCACTGAT  
A\_16\_P15541388  
AAAACCTCTACGCATTTAGAGATCCAGTTACCTTCTTAAATCACATGATATGCCTCCATAGG  
A\_14\_P126642 GTAATCACATAGCCTTGCCTAATTAGTCAGAAAACAAAGGATTAAGTGAGACAGTCACAG  
CUST\_25\_PI426210822 CCAGCCCTTGCCAGGGTGCAAGCCTGCCTTCAGGAAGGATGACT  
A\_14\_P118873 GATTCTGTAGTGTATTGATTCAAAGAACAACCAAGATCTCATGAAGCAGGTAAGCC  
A\_16\_P15895700  
AAAAACCAGACTATCAGAGCATTCTCAGGTAATATTCGAGGTAAAAGAGTATTCTTGGGG  
A\_16\_P00684991  
GGTTTCCTGTCTTCTAAAACCTACCTTACCTTTAAAGAATCTGTTGAAATCTGTGGATCT  
A\_14\_P139328 AAGGAGTGGCGTTGCTACTTACTGCTGCATCTGTGCTAAGAAAACCAAATATAATAAAAT  
A\_18\_P11869650  
TTCCCTTTGATGACTCAATTCAATACTCCACAAAGATTTTCATCCTAGTTCATGAAACGT  
A\_16\_P30952497 CTAGTATGAATTCAGCGTGATCTTTGATACAAGCCACCTGTCTGGGGAAGA  
A\_14\_P107318 AGAGAATTACTTCTTTCTGTAGTTAATAACACAAAGCAATCCTGTTTCAGGTTCTTTGGAT  
CUST\_2359\_PI426210822 TCCCAGGGTGACAAGCTAAAAGTCACCCAAGGAGCCCCGTGCTCG  
A\_14\_P109806 CATTCTAAATCTTTCGGGCGCGGAGGATGAATTTTTCTATCTTTTTGTTGGAATTAAGAT  
A\_18\_P22840127

AGTGTGGAATAGTTTGGGAGCAGCATGGCAAATTAACAAAGCCTGTTCAAGATTA  
A\_16\_P16491766  
ATTATCAGAACCGGCTTTGTTAGTATCATGCACTGGTAACCATCTATATTGATCACATGG  
A\_18\_P22841237 CAGTTCTCCGCTGGAAAAAGGGACAAAAGATTGCCCAAAGAATCAG  
A\_16\_P37116839  
CCTTCTACACACTGAACAAGATCTTACATGAATTCCTATAACTTCCTTACTTCTTACTCC  
A\_14\_P136263 AAGTGAGTGGCTACAGAACTGGATGTTAGGGGAGAATTAATTTTCACATTTTTGGTAATT  
A\_14\_P104419 CTTACCTTTATGATGGTTTGCCTGACTGGATACTTTCCCCACAAGGTTACAATAAATAT  
A\_16\_P03112975  
TCTTATTGACATGTGTATGCTGATTCATCCCAAAGAAATGATATGGACATTCCCAGAG  
A\_14\_P101474 CACTTCCTTTTCTTCATTGCAGAAAGAGACATCGGGAAGATTCTGATGTGGAAAT  
A\_14\_P122435 AAATAACTCACAACACCTGTAAAACTGTTACAGTACTGGTGTGTGTGATAGAGGG  
A\_14\_P115171 GGATAATCCATTCTGGCATGATATCAAAGACAGAGTGAGAAAATGAAAAATTTCTGTCCG  
A\_16\_P02040123  
AGTCTCTGTCTTTTGTGTAAAGCAGAGTCGATAATCTGTTTTCTCAGCATCTGTTCTGT  
A\_14\_P104959 CTACAGGCAAATATTCTTGTATTACAGGTGATCGGAGGATAGTATTGAGAACCAAGAG  
CUST\_718\_P1426210822  
GAAAATTGATCCCTTAATGTGGCTTTCTTCTCACTGGAGTTTTGTTTTGTACGTCATT  
A\_14\_P108890 TTTGTTACAGGGCATCTTTGCATTAATCGCCACTGCAGGACCAACATT  
A\_14\_P105025 TACCGTTTTCTTTGGGAACCTTCTTTCCCAAACATTCATGTAAATAATTTCTGCACA  
A\_16\_P37791856  
AATGGCATATGCAACACATTTACAAGTTGAACATCATTACCTTCAGAACAATCTCAAAC  
CUST\_1414\_P1426210822 GTGGTGTGTCTTGCCTATAGTTTCATTCAGCTCATGGGGTCTGAATTC  
A\_18\_P16412944  
ACTTTAAAGAAACCCGGGATTTAAAGAAAACAGAGTTCTTAGATAATGAATCACAGGCA  
A\_14\_P202379 GGCCTTGCAGAAATGCAACTTAATTTCTAGTTCTATCATATCTGTCTCCAAAATGGACA  
A\_18\_P11628322  
AACCATCTATCTCCATTTTACCATATCATTATCTGCTGTATTCTGAGTATTTGCACA  
A\_14\_P122951 TGCAGGTAAACAGTCAAGAAGAAAACGGCATTGAGTGTAGACTGGAACTTTC  
A\_14\_P119589 TGTTACCTGTGAAGACCTTCAAGGAATTGAATAGGAAAATACCTAGAGTTTTGTTTCTT  
A\_14\_P132815 TTACCTACTTACTTCTTTTCTTACCCGTCCTGTTATTGGGTGTCACTTCATTTTTCAACT  
A\_16\_P16104536  
ACTGCTAGCCTGAAGATTGTCTAATGAACCAAGAATAATTACTTGTGTTGAGAAGTCTGGA  
A\_14\_P200682 CAGAATTGGTCTTGTAATACAGACTTCAGGGATTGGAGGATTTTCAAAAACAGGAATGTT  
A\_14\_P128787 CTGGGGAACATACTTACACATTTATTTGCAGATAAACACAGAATTGCACACGTGGATTCA  
A\_14\_P113199 TTGGTTTTATTATCAGACTTGTGTGATCGATGTCAGAGTCTACAGAGGAAAATGTAGGT  
A\_16\_P40976177  
AGTTGCCTCAATGAAATAATGCAGTTTCTGCCTTTTAATAGGACATCTTTCATGCATACC

CUST\_7364\_PI426210822 TGTCAGAAGCCCTTTGAAGAACTCAGCTGTCTGGACAACAAAAGTG

A\_14\_P102357 GCCATGCTCATTATCGTCTGCTTCATCTTCATTAGCATGATCCTCTTCATTTCGAA

A\_16\_P00202930

AAATGTGGGGAGAACAAAATGACAATCAATCAGTGAACATTTGTAGACACATTTGGATTG

A\_14\_P135147 CTGGCAAAGTATCTTCCTTCATCAGAAATTGAGACGTTTGTCAATGATACTTTGAGTTC

A\_18\_P27181550

ATAGTGGTTCAAAAGTTTGAAGTAATCGTAGACATTGTTTCGATTTATGTCTCCTTGGACC

A\_16\_P19702765

AAAGGTCAACCCTTCATTAAACCCAAGAAAGAGCCTAATAATGACTATCTGCGCTATTTT

A\_14\_P100840 CTCTCCTTCATTTTCAACAGTCTGACCCTTTTAAATATTCAATATGGGTAGAGGGTGTA

A\_16\_P15534308

AGAAAACCTTAAGTAACCCGAGTAGATTAAACCTAGAAACAGATTTTCAGATGAACAGCCC

A\_16\_P02020811

AGAAGTGTCTCTAATATATACCTAAGAGAAACCATTTTGTCTAGACCTCTACTCCTT

A\_14\_P128613 ACCTCCCCAAGATATCCTATAATTTGCTGGTCAGAACATATTTTTCCTCTTTGGAATTA

A\_16\_P02554461

ACACAATAATACACACTCACAACCTGATGATGATGACTATGATTGGCAGTAATAGCAGTGC

A\_14\_P138050 CAGCACAAAGTTCAGAGAAATGCCTCCATCATAGCATGTCAATATGTTTCATACTCTTAGG

A\_16\_P21590652

CGGATTCCAACTTTTTTTTTAGCAGCCAACCCTTTATTCAAAGACAACCTTACAGGAATAT

A\_18\_P22842822

CAGCAATTTAATAATTTCTCTTTTTAAGGGGAAAGGGGGGAGTCTTGGATTTTAAATCTT

A\_14\_P133633 CAGGACTTTTCAGGCAAGCCATAAATGGTTGATGGATGAAAGTTATTTAAATAATCCCTT

A\_14\_P129734 TTACAATGGCATGGCCTTTGAGAAAACAGAAGTCATTTTACAAATTCACAATGTTCCCTCT

A\_14\_P139694 TCACTTTTCTTAAATACTTAAAGAAAATGTATGGTGATGCTCACACCTTTCCCTCCTACT

A\_14\_P130954 ACAGCAGATGATGACAATGGCTTCAGTATTGAAAACCTGACCACACTAGGCTAACAATAT

A\_14\_P107875 ATCTCCTATCTCTTGTGACAACATAGTTATTCTAGTTATTCTGCACCCACAATTATAA

A\_14\_P107358 CAGATAACTATTTAATTTTTTTTTAAGAAAGTTGGAAAGGTCTCTCCTCCAAGGACAGTG

A\_14\_P125945 CTTTTCTCAGACACCACAACCTCCAAGAAGGATCACTGGTCCTGAAC

A\_16\_P17473420

GAACAGCCATCTTCTGATTAAACATCTTCTCTCCTTGTTAACTCCTAATTCCCCATAAAA

A\_18\_P14042125

GCATCTTGCCTCATATGTCTCTCTGAATGTAAAGATTTTGCCTACATCTGATGAAAACCTG

A\_18\_P16358423

GACAGATGCATGATACTACTCGCTTTTCAACTAGAACACAGGAAAATTTATGGACATTGG

A\_14\_P125539 TATCTCTCCCTGCACTGATACTACATCTTACCGATTAAAGTTTTATAACACAGGGCTTTT

A\_16\_P18076247

AGGGGCTAGATGAAATGCTAAGTATTCAGGAACATTTAGAATAATTTCCAGAAGGTCCAT

A\_14\_P113888 AGCCCTGCTCTAGATTCGTCCTGGATTGTTATGGTTGTTTTTTGTCTTATTTTAAAAGA  
A\_14\_P123420 CAAGTTCTCTATATCCTTACATCCCATCAATATCTGTCAGGCATACTGTACAGTAACTACC  
A\_16\_P15106090

GCAACCTAATCTTTCAGTGCATGACAAGAGTAAAACTTCAAATCTCAAACCAGGTCTA  
A\_14\_P125091 CTCTGGATTGAGAGATCACGATGTAATTGTCAACATAAATGGGAAACCTATTACTACTAC  
A\_14\_P135184 GTGATAATGGAAATGCTTAAAATACAACCTTTTTCTGGCATGCTTTGCAGTGAAAGGTTCT  
A\_14\_P113965 ACTGGCAATTATTACTATGTTTGTGAAAGGATCCTGAATTCCTTTGAAGGAAAGTTCACA  
A\_14\_P131370 TAAAAAACATTTGGGTTTCATCTGAGTTATCCAAAATTGCACTCACTACCTTCCTTGTA  
A\_14\_P137944 GTTTGTGTTGCAAAAATGCATCTTCAGAGCATCTCAAGATAAAGTGATCTCCAATAAACAG  
A\_16\_P31437845 ATCTGCTCATCTGATATTCAAACACACAGTATTCGTGAATAAGTTGATTCTGTCCCC  
A\_14\_P108826 ACCCCTGGAAAATTAAGGTCAGTGAGGTAAATTGTCTTGATTAATTATATGACATGCAC  
CUST\_6467\_PI426210822

TATCATTAAAGATTTATCACAATCAACCATATTATATCGTAAGTAAAGTAAAACTGGTG  
A\_14\_P110822 ACTCTTACGTGGAGGATATAGAGTAATAAAACACGTAATTTATTTGAAAGCATTTATAGA  
CUST\_8072\_PI426210822 GCTTCTGGGGAGTTACAAGATGCCTTCTCCAGGGCAGATCCAGCA  
A\_16\_P20330015

AGTTTCCAGCAAACA AAAACTCTATATGGCCTAATTTTCAAGCAGTTGAGATTGAAGCAG  
A\_14\_P132431 TAAGCCAATTCAAATGTGTTTGACCCACAGAAATCATCCAAAAAAGGAAGGTTTACTTT  
A\_16\_P16191478

ATTCAAATTGAATAGGAACCATTTTTAATTTGGGGGTA ACTCCGTCTTACCATTAATGG  
A\_14\_P131505 CTGGTTTTTCAGAACCTGAAGAATGAGAGGTGTCCCTTTAAAGGTGCC  
CUST\_6226\_PI426210822 AAGCATCTTCCAGCAGGCACAATGACATGGCTATTTCCCTTGTG  
A\_14\_P136333 CTTTCTCTTCTAGATTTTATAGGAAGACGAACTTGTCCGGCTTTCAAGACATGGAGTG  
A\_14\_P139550 CTAATGCTTTGGTTTATCTTAGATCCCCTCTTTCACCTCTATCTTTTCACTTTCCTTGAA  
A\_14\_P124871 ATTTTTTCCAATCTTGCCTTGTATTA ACTAGAACCTAATTTGTCCATGAGGCTGAAGT  
A\_14\_P120452 CTGAAAAAGTAGTCTTTGATGAGGTGACAATGATGAAGTTCTCTCTGGCACTGCTA  
A\_18\_P22841898 CTGAGATGAGTGTGAGTGGCCTCTGCACCAAAGAGTTCAGTCTAATTC  
A\_14\_P120347 TGACCACTGGGAAAGGGAATTTTCATCTCTGCAACCTAGAAATTA CTACTCTTAAATACAA  
A\_14\_P124161 GAGGAGTGTGCTTTGACACAAATTTCTTCTCAAGAAGGTATAAACATTGATGGGATGTA  
CUST\_5455\_PI426210822 TTCACAGTGCTTCCAGCACTGTAAAGTGTAGGGGAAAACTAGCAGATTG  
A\_14\_P201449 TGCTATCTCAAATGTCATCTACCAGACTGTTGAGGGCAAGAGTAATTAGAAAAGAAA ACT  
A\_14\_P104730 AACCCAGAAACACCATTTCTCTCCTATTA ACTCCTATTTATTTTTCAAGACCCAGATGGAA  
A\_14\_P125668 ATTGTCTATCAGTGTAGAATTTCTTTCCCCCATTA CTACTCTGTGTTTTACATCGGTTGA  
A\_14\_P133079 TTCATTACAGCATTAGGCTAAACCATACTCAGTATCCAAACAGTGGCCTTTGACTATAT  
A\_14\_P201396 ACTTATCAAAGAGGACATCCAAGACATTATCTACAGAATGAAGCACCAGTTTGGAAATG  
A\_16\_P21470392

ACCCCTTTGATGTTTTCAATCTTGTCAATTCATATAGACCTCGATATTGTTAAATTGCCTCA  
A\_16\_P20796471

CAGTTACTAGTTCACAAGAGATCTGAATATCTACCTCCTATTCTAGTATCTCCCACAGCA  
A\_16\_P19093533

ACCCTTTTCTGATCACAGATTAAGCCAATCAACTTCAAACCTTATGAATAGAATCCTGTCC  
CUST\_4137\_PI426210822 CCTGGACCACCACTCTGATTTGGATTTAGATGGGCTCAGGAATTT  
CUST\_9755\_PI426210822 ACCCTGTCTCCCTCCTCCCTCCCCACACCTGCCTGGCTATTAG  
A\_14\_P100335 GTTCGCTTCAAGCGAATATCTGGGACATCTATTGCCTTTAAGAACATTGCATCAAAAATA  
A\_18\_P14136585 CATGGCTAGATGGACCAGAATATCCTGGACAATGTTCCAGATGACGTTTGTAT  
A\_16\_P16191769

AAGGAAAACTTCTGAGTGAGCATCAAATACTTTAATTACTTCTTAGGCTTCAGAAGGG  
A\_16\_P01400694

TTATACTCCACTTCTCCTATTGCTTAGAGTAAAACACCAAATTCTTATCCCTGTCTCCAA  
A\_14\_P125168 CTAGTCTGCAGATTGAGTTGGTAGGAGGTGTGATTTGTTTACATGCACCTTTGTT  
A\_16\_P02546865

CACGATTCCTCTCATAGACTGACTCTCTAGGAAAAGAATCAAGTAAGAAATACCCTCCTA  
A\_14\_P137084 CATCCCAAACCTTTCTATGATGCTTACATTTCTTATGACACCAAAGATGCCTCTGTTACTG  
A\_18\_P18521102

GACAGTTTCTGTGAAATTGGTGTTGGATAAAAATAAGAATATTTTTGGGGGGGCAATAAT  
A\_14\_P117485 TCTTTTAAATCATGTGTCTCACAATTCAGTTGTTGAGGAGTATCTGGTGGATCTAACAGA  
A\_16\_P00935274

AAAGGAAAAGCACTTTCAAAGACTTTTCAAACACAAAACACTATGCATTAGCCAAACCAG  
A\_18\_P14036993

TGCAGTAATAGATAACCCCAAACCTCTATGTAAACATAAAGTTATCCCCGATAAAGCA  
A\_16\_P18805251

CACCATCATCTACTCTTATCCCTCATCTTAGAGACAGAAAAGAATAATACGTGATCTGCG  
A\_14\_P109252 AATTAAACATAAACTTCAAACCTTACCCTTTAACTTGGCTCGAATTTTATTCGCAGTTTT  
A\_16\_P18819905

AAAAAGACGTTTTCTACATTGCTACAATCTTACGATTTTCATTGCTGATGTTTGAGAGGC  
A\_14\_P115835 GCAGACACAACCCAATAGGAGTCTTAATTTATTTCTTAACTTTGCTATGTAAGGGTCTT  
A\_14\_P200220 AGGGATAATCCTTCGGAAAAGTCTCTGGATTATATATTAAGTCCTGAGAATAACACGGAA  
A\_14\_P200489 GGACTTTTCTTTGATAATCTAACAACCAGACTCCAACTGAACAAATATGCAATGTCAGC  
A\_14\_P101923 TTGGTTGTGAGGAGGTAGAAATTGCTTTTTCATCATAATGGTAAGAGTTCAGGAATAATGC  
A\_14\_P201222 ATTTCTGTTTATTGGCCAATATGAAATGTTTGCAGAGCATCATAAACAACATAGCCCTG  
A\_18\_P11898002

AAAATATTACCAGTTACCCTAAGCATGGATTCTTTTATCTTCTTAAACATTGACAAGGGC  
A\_14\_P129757 CGGTAAATGAATATATTATTTTACGGTTTTCTGAGCAGAAGTTAGAAACACCGGATGCAA  
A\_14\_P200292 CTTACACAGTTAACTTGATTTTAAAATCCAAGGCCAGGAGAGAAGAATCCAAAAAGCAAT  
A\_14\_P130105 CTGGCTTCTCTGCAGTATCTTCTCCTCTTCTTGGATAATCACTGTCTTCTG  
A\_14\_P120497 GATTCCTCTGCTTTTCTCCTTTTTTACCATCTACTTATGTCTGAATCTTACCTCTGATCT

A\_16\_P20587540

AGAAGTTCATTTAGTCCGTTAATCCATTGGCAACTATCAACAGATATATCCTATGTGCC

A\_14\_P138852 TTTGACCTGAATTGAGGTCATGCTAGCCCTAGTTTTCTTTCTGCATATCCAGAAAATTAA

A\_14\_P116808 CATTATGACTCCATGGCAACAGATGATTCCCTGATTCTCCAGAGAGATTACAC

A\_16\_P00956477

TTGGTGGCATTCTCATATACAGTTGAATGACTCAGATAACATAATCGCTAGCCTAGTG

A\_14\_P120145 AGGCTTAAAACATCAAAGCAATTTTACTTGTGAAAATTTTCATCAGTTTCCTCCAGATG

A\_14\_P118885 GCTTTCACAGGCAAGTATAGAGTCAAAAAGAAATGAGAAACGGCCTAGATCTCAATAAAT

A\_14\_P104324 TCACAATTCTTTACCTGATTATTACAATTACCAATAATGAGTGCGTCAGCCAGAGACAAC

A\_16\_P15882102

GCAAATTTAAAGTTCTTACTATCTCCCACTGTTTGTCAATTTCTGAGTCTACCATGCAACA

A\_16\_P36230054

GATTGTGCATTGTTAAGAACCAAGTGGCTAAGTTCTTTAGGGCTAACTCCAAAGAAAAC

A\_14\_P104634 ACAAGGAACAAGTGTGGTTGTTAAGCATGGAAAATAAACAGTAAGTGAATGACATCAT

A\_14\_P109263 GATGAGAGAAAAGACTAACCTGGAAGTTTTCTTACAGAAATGATGTATCTGCCATTCTCT

A\_14\_P127209

AAGAAACAGAACAGACACAAGAAAAAGACAAATCTGACACAGGATTTTGAAGCAGGTC

A\_14\_P200742 CAAATTGGCCGAGATCCTTCTTTGGATTAAATATAACTTGGAAAGCGTCTTTTTTAA

CUST\_6277\_PI426210822 TCTGGACACCTCTTCCACTGAGGCTTTGTTTTTAAAGAGGACTTTCC

A\_14\_P102857 AGAAGACATGTTTTCTGAGAAACAGGACATACCTTTCGTAGAGGTCTGTATTTTTTTCT

A\_18\_P10575488

AAAATGTGTCTCTGACATCAAATGAACTCTACTGAGATTCCCTGTATTATGCCAAAAACC

A\_14\_P101257 GCAGGTCCCTATTATCATAAATGAACATAAAAGTGCTCTAAAAAACTCCACAGATGTGA

A\_14\_P120842 ATAAATGTTTTATTAGGAGTGTAATAAAGAATCTTTATAGATCTTTTGGAAACAGTAT

A\_16\_P01970402

ACCCATTCCTTTTCAAGATTCTCCTTTTCATATATCGTTTAAAGAAAATTGCTCAACCATCT

A\_14\_P114267 GGGTTTAAAGGAAATAACGTGCAATTGTTTGTAAAGTAGAATACTAGTGGCTAGGCTTTGTG

A\_14\_P114336 TGCAAAGATTCTGTGAAGATATAGAGATGATGATTGGATTCCAGCCTAACATCTTCTGGA

CUST\_6709\_PI426210822

AATAAAAAGTGTGCCACAGCCAAATAAGCATAGAATGAAGCAAACAATTTTTATAAATA

A\_16\_P00404352

GAATCTTCATAATTTGCCTGATGTGATTACTGAGTATGACGAGATCTCATAGTCCATGCA

A\_14\_P138069 CTCTTTGGGACCTTCGTGGACTTTGAATTTTTACTATTGTTTCATTGTGTCTAAAATCTTC

A\_14\_P129267 TGAAACTGGTTGTTGGGATTATTGCAAGGACTTGTTGCAGATATTGTTTCATTACATCATT

A\_16\_P03034098

GAGGATGTATTGTTCCCATTTTAAACCATAGAAAGAGTGCTATTGTTCCTTTTCTCCACAT

CUST\_7673\_PI426210822 ATGTTAAGACCCCAGGAAGGCTTATACTTGATCTTTGTATCCAGAATGTTGCC

A\_14\_P118763 TCATGTGAAACTGAAATTTCTTCTACAGAACAAAACTTTTTGGGGGCTACTTACCATAT

A\_14\_P118096 ATTTGAGATGATGGAACATCAAAAGCCAGGTTCTTTTGGATCACGAAGGTCAAACATC

A\_16\_P17643683

CCAGTAAAGTCTCAGTAAATACAACCATTACAACCTTCAGAATATTTTCTCCTACACGTGC

CUST\_2839\_PI426210822

TTTCTACTATTTTGGCCTTGAAGCAGTGTTAGACAACGTTCACTTATCGCTGTTG

A\_16\_P16191148

CCTATCCTTTGTAAAGGCTCTTCCCAAATTAACCATAACACGTATTGTTAAAGGCATTG

A\_14\_P115731

AGAAAGACAAGATAGAAGCCACAGAAAACCTCAAATCATTCTCAATAGTCCCTAGAAGAGA

A\_14\_P121890 CACATATAAGTTAAAGTAGGAACAGACCACAGATACTGCCAAAGAGAAGGGCATTATCAG

CUST\_459\_PI426210822

ATGAATTCGTCAGATAGTATCTACAAGAAGTCAGATGCTTTCACAGGCATAATATTCTT

A\_14\_P109376 CTGGTCCACCCAGGGTAAATTATAACATAAGTCTTCCAGCAACAAAAGCAGTTC

A\_14\_P122758 CTAGTGTGGTGAATAAGACATTCATAATAACCCTTGGCTCATAAATGAGAATAGAGGGAG

A\_16\_P19688449

ACAATGCAGTAATACAATAATTCCTTCCGGTCATTTTAGATACTCTCATAAGATCCCCGT

A\_16\_P19063005

ATTGGCATGGTAAAGTCTTTTTTGCATGGTTAGTGAAATAGTCAAATACAGGTTAGCATCC

A\_14\_P127507 CACATGGTCTGACACGTATTCTTGGTAAGAGGTCTTAGTCATACAAGGCATAGCATA

A\_16\_P37541182

TCGCAATGGAAATATAGTAATCCCCCTGATTTATAAGGATGTGTTGGTAAATAGTCTGCA

A\_16\_P15725577

AAAGTTCATTCGGGTAGAAAGATCAAATCATATGCAGCCATACTGGTTTAGAGTCTACTT

A\_14\_P111143 CCGGACAGTGTTTTTTTTTTTAACTCCTCTTCTCCTCCTGCAAAAATTGCAAG

A\_14\_P124074 TCATTAAGCCTTTGAGTAACGGCAGAATATATGGCTGTAGATCCATTTTTAATGGTTCAT

A\_16\_P35872291

ACAACACTGTATGTGGTAAATGCTTCACTCTGATAACTCAGTCACAGATTTAAAGGTGAA

A\_16\_P39137239

ATCCATAGGGCCATTATTTATTGAACTTTGCAACTCAGATTCAAAGTTAAAGCAACCCT

A\_18\_P22842486 AAAACTCTGGCTTTAGAGTTGGACCATGAGCAGTCCTGCTTGCTG

A\_18\_P11798495

AAACAGAGAAATGCCATCATATCCAAAGGAAGTAGCAAGAAAATTTGACTTTTCCAAT

A\_16\_P18870939

AAGTGTTATTCCAGAGATCAGATCTACGTCTATGTGGGAGACATACTCATTGCTCTTAAC

CUST\_7553\_PI426210822 GCAGAACATATCAGGGGAGAGAGGTGTGTGCAAGGCATCCACCAG

A\_14\_P111818

AAGTTTCTCAAACAAAAACTATGGAGAAAAAAAATATAGGATGAAGGGCAGTGGGGTATG

A\_16\_P16866828

GTTCTGCAAATACTAAGTAATGCCATTCCTCTCATTTAAAAATAACCCTGAACTCTCCA  
A\_14\_P133922 TTGTGATTATCTCTCTAGGACCGCCTGTATTTTCATCCTACAACAACACGCTTGATTA  
A\_14\_P126234 ACATCAGAAACAACAGATTATGGAGTCCAGGAGAAGATGTTTATATGTGACCAGAAGTAA  
A\_16\_P30952289 ATGGATTGATTTTTCTCATCCCCCTACCCACCTCATGCCCTAAG  
A\_16\_P00684985 TGACTTTATGGGCCTTGCTCTTTTGGAGGGATTAGAACTACAGAGATCACTTTT  
CUST\_5595\_PI426210822  
TTTGATAGCAGGAAAAAGACAACCTTTTTTTCATTAACCAGAGGAGTATTTTAAAAGACT  
A\_18\_P19607908  
AGTATATCCCCGTATCACTGAATATGAGTAAAACAATGGATAGCAGCAAGAATTATGGGG  
A\_14\_P117935 AATTTAAAAATGCATACCTGTTTTTCTTGAATTTGCTTTGGGAAATAGGTCTGCTGAC  
CUST\_3933\_PI426210822  
CTAATGGCTCTTCTGGATAATCACTTCACATGGGAATCCTAGGACTCCATATTATATTCT  
A\_14\_P101537 TGCAGCATATGTTTCACATACCTTTTTGAGATGTCCTAGTCTAAGTTTGAAAATTTCTTC  
A\_14\_P113481 GACTTTGAAATAGACTTTGACTAGCCCAGAGCACCCAGATTCCAGTATTCATGT  
A\_14\_P113392 AATAGAGTGTGGTGTGCATGTTTGTGAGAGAGAAAACACTTTTCGAGTGCCAGAA  
A\_14\_P128802 TCTTCTTCTCTGTGCATCTTGTTACTTACTGATTTGATAGCAGGATCTATATGCTTTGA  
A\_16\_P15189905  
ACTCTCATCCATTCTTGAAGACCAGTGAAAAGTCTCATATCTTCCATAAAACTAAGACCA  
A\_14\_P128765 GATCTTTGTGTTTCATTCTTTGTAGACTATATATGTGTCTATCTGCAGGTGCTCACAGTT  
A\_14\_P128534 CTTACTCAGGGAAGAATATTGAAGTGCAGCATTAAAAATACCCATTTATGTGTGAGGGAA  
CUST\_6139\_PI426210822 AAGCAATCTGTCTGCTGGGTCAGTGGCAGTCCTTGCATTGAGTC  
A\_14\_P136005 CTGATTTTTATCCAGAGTGCTGTTATAAAAGCATTAGGTTGGGAGTCTGAATTCTTGAA  
CUST\_8555\_PI426210822  
AAACAAATCCTTTGGATTTTCAAACTATATTTAGAATTTTCATAAAGTCTGTAACAGAC  
A\_14\_P127204 CTGGCTTAGCCATGATTAGAACTCCAATAGGTTCTTAAATGATGATAGAAAAGGTGTAGG  
A\_14\_P130368 TACTGCCAAGCAAGATCTTTAAAATGTTAGCATCCCTTAAGGTTTGGTTGAGGACAT  
A\_14\_P127548 CTGCCAACAGTGCTGACTTTCCTTTAACTCTGCTTTTACTGTCTGATTGTTTTTGTTTAG  
A\_14\_P118369 GCATAATGTAATGATGATGACCTTTGACCTCTATTAACATCTGCACCTCTCTCACAAAGA  
CUST\_3956\_PI426210822 CTTTGGGTTAGGATCAAGTGTGGTGTAAATAAAATATCAGTCCCAAGAGTCACCT  
A\_14\_P135733 GCAAATAACTTTTACCGCTTGTTCACTACTGTATCAGATTCCTGGTCATGTTATGCTTTG  
A\_16\_P17945900  
AAAAAGGGGTCTCTTGAATGATGAACACAAACCATAAGGTGAAATTGATGAACAAAAGTC  
A\_14\_P111369 AGAACTTACACTTAATGATCTTCTTAAACGCGTTTTGAAAGTCCTTGTTGAAGTATGCGT  
CUST\_145\_PI426210822 AATATTCCTCTCTGCAGTGAGGCAGGAGGGAGCAGAGCAGTATAA  
A\_14\_P100698 GTAAGGTGGGGGCTCTTTATGAATTCTGGAGAAATAAACTTCATTTGTTCTTCTTTG  
A\_14\_P108971 ACTTGGAAGTAACAGGACACCCTCGGATATGTTTTTATTTTTATGGTCTAGAGAGATGA  
A\_14\_P107981 GAGGTGCTTTCAATAGAGAGGATTATGTAACCTCATGTTTTAGTTAGGGGAGGTAACAGTA  
A\_14\_P113993 GCCATTTTAAATGGGTCACCCCATTTAGGATTAGTGGATCTCAAATTATTAACCAAACAT



A\_16\_P21242333

AGCGCTTAGTTTATATGGAGAGGAAAAGGTTTTAGAGTAAGATCAATCAGTAAGACCCTG

A\_16\_P16865083

AGTGCTACTCTTTCATACACTGATACTCTAAGTCAATCCCAACTTTATTGTGAAACCAGG

A\_14\_P138516 ACGTAGCCTTAGAGGCTGAAACAATGTAAGTGCACAGGAAACATTTATTGTAAGAAAATG

A\_18\_P14431274

GCATTCTCAGTATCCATCCATATTCCCAACTTTGAAATTCACATTCATATCCACAAGACA

A\_14\_P138608 AACAGGTTGACCTAAATTCAGTGTATTTTGTGTTTTCACTAAGTAGCCCATTGTTACCTT

A\_14\_P115116 CAATACCTGAACAATTTGCTACTCTCTTCAGTGTTCCTTGAGATTTCAGATTCTGGTG

A\_14\_P106681 TATCATTATCTGTCAAACCTTTAACACACAAACAGAACAACATTGCAGAGGGGCATAGTTCC

A\_14\_P128169 AGCAATATCTGTTTCCTATGGTGCCTAATATATGCACCCTATACCACTCTCTTGACAATA

A\_14\_P105545 CTTTATGCCATCATCTTGGAGCCGATTAATCCCAGGCACAATCGAGTTAC

A\_14\_P120692 CACCACAAAATACCACACCTATAAATATTTGGAAAACGTAAATGAACATTGAGGGGCTTT

A\_14\_P121644 AGGTGAGTCCTAGGTCCTAGATTTGGAGAGAACTATTATTAGAAAGGAAGGTGAGAAATT

CUST\_10263\_PI426210822

AATAAGTGAACATAACTGCATGTGTTTTGTGAATTCAAAGACCTCATAATCTTTTAAAAT

A\_16\_P21198767

AAAGGCATTCATGATACCCAGTTACTTCCTCTAATGATTGACTACTGTTGTGAAACCTAA

A\_14\_P117135 TTTTCTGTGCTCCAGTTGATGGAAAAGTGAATATACAGTCTTTAACTCCAACCTCATAAC

A\_14\_P120069 TCCCCCTATACATACCCACTAGTTGGAATTAGTTGCCTTTTACTATATGCTGTATTGAA

A\_14\_P114909 ACTTTTCTCTACAGAATTGGTTTCCTCCTTGACAAAAAATGTGGCTAGATATAGGTCCG

A\_14\_P111237 CTTTACATTATGGGGTCTGTAAGTAAATACATGGAAACCTCATCGAATACAAGCACGCA

A\_14\_P113131 AAATGTAGGTGTGTAACCTTGTGAGTTTCCATCTCTCTGTGACTTGTAACGCAAGATC

A\_14\_P200499 ATTATTTAAGAGAACGAAAAACCACCACCAGTTCCCTGTAAAGAATAAGTCACAGGTGCA

A\_16\_P19436249

CACTTCTAGGCTACTTTAGTCCTAACTTTTCTCAGTTACCATTATATGCAGTTCTCCCAG

CUST\_4533\_PI426210822 ATTCATAGATCTGCTTTGGGGCTGTCTCCTCCTCCTCAGCTGTAG

A\_18\_P14135953

GTCTTTGGTCAATATGAAGAAATACTCAATAGTAAATCATAGCAACATGATTTAACATGA

A\_14\_P103840 AAAATTTACAGTGTACAGAAGAAGGCAAATAGCCCATCACATAAGGAATATTTGCAGT

A\_14\_P115885 CCAAACCTATGGACCAAGATTTATCAATAGAAGGGTTGAGGGAAAGTCACAGCATAT

A\_16\_P19287543

ATGGTTCTTTGAAAGTTCTCCCTACTACAAAGTTTACTCTGCAAATGGTGAACATCAGAG

A\_14\_P138788 TCCTTTTTCTAAAAACAAGAGATTCCAACCTCATGAAGTAAGAGAAAATGCCACATAACC

A\_16\_P20301055

TCAGGATGACCTAGTCGCTATTTTTTGAGGCATATATCTATAATTGGATCTAATTTCCGGT

A\_18\_P10864572

GTTGACTGAAAAACCTGAAGAAACATCTATGCTCTTCCCAAACATCTAAACTTAAACCC

CUST\_7911\_PI426210822 TACAGCCTTTCTCTTCTGTTTCTCTCAAGTCGCTGTGTGCAGAGTC

A\_16\_P19849904

AACTAAGAGGTCTTGCTACTCTTTATCCAGAGCGTTATTACTGATTGCGATTACAGAAGA

A\_14\_P116283 CAGAGTTGATGAGCAAGAAAGAACGAGAGAAGATATCCATTCCCAGAGACAG

A\_16\_P17988626

AGTTGAAAGCCGTGATAAGAATCTATTGTGTGCTTCATTTATCACTACAGAGGATACCTC

A\_14\_P126668 GTTCACCAACATTTTTATTACTGTTGAAAAGAGGAAAAATGGTAATTGGAGAGACCACCA

A\_18\_P22843224 AAACCTCCATCATTTCCCACCATCCACCATGATCTGCAAAGAATCCTTAAGA

A\_16\_P01988427

AGTTCTGTCAATGGAATCGATCTCTAATTTAAAACCCAGGCTAGTATATTTCCCTACGTCA

A\_14\_P125286 TTAAATAGAATTTCTTAAATTGCCCTAGCACAGCCACATGCTTTCTCACATTTCAGTGTC

CUST\_10224\_PI426210822 GGTGTGTATGTCTGAAGGAGGCCTACTTAACCTTGGGATGTGCTAATT

A\_14\_P127969 TTTGCATGGTTTTTATTCTTTCTAATGGATCCTGTTTTATAATACTTCCAAGCCTGTCC

A\_16\_P16609276

TCAGGCAAAACAGTTCAATACCTGTAATTAGTGACCTTGTTTTATTCAAGTCTCCATCAC

A\_14\_P110158 CAATTTCTGCTAGGTAATTAACCATTTTCGACTCGAGCAGTGCCACTTTAAAAATCTTTTG

A\_14\_P104104 CAAAGCAAACATAGGCCTGTTAGGTTTCTGTGGCTACTGAATATTTGTTTCTCAAACAC

CUST\_7642\_PI426210822 GTAATCACCTCTGGTTCCTCGGAGTGTTTCGTGGCCAGCTCCTTC

A\_14\_P113575 GCCTCATCATCCATTTTTTAAGATACTAGCATTTTCTTGTTTGAAAACCTGGATTGCCTT

CUST\_1800\_PI426210822 TAACTACAAGTTTTTTGCCTGGTAGCATAGACCCAACAATCCTTCTACTCTGG

A\_14\_P116549 ACCCAATTAATAATCGCAAGTGTCTTTATTTGTCCATGAATACATTCTTTCAGTTGGTGA

A\_14\_P102503 GGGATTACGATAGATGTTTTGAATCAAGATGGTCTGCGGGGAAAAAAAAATAAAAAGGG

A\_16\_P00741489

TAAACCACTCTTTATAGCATTGATGTCTCTGATCTACCTGTTACAAATGAGGCATGAACGT

CUST\_4383\_PI426210822

GGAAAATTCAAAACCTTTATTAATTATTGTATTGGGGAAAACATCATGTTATTGAATTTTA

A\_14\_P115571 TTAAAAACGTTCCCTTCACTAACTATGTGGTTACCCTGGTAAAGTCAGAATACATGCTTGA

A\_14\_P101174 AAAATCTTGTTTTCTTCTCAATTTTAATCACCTAACCGCGGATCCATGGGATACAG

A\_14\_P134484 ACCTTCTGTATTCCAAATATGATATGATCAACCTTCATGGACTTGCTCTACTGAAGGAAA

A\_14\_P111825 AAAGTGCTGGTATCTACAACCTCTGGAGAACAGAAAGGAAAATGCTTACAATACGAGC

A\_14\_P200232 GTGAACTTCTGTCTATATTTTCAAGTGGAGATGAGAAACATTAGCGTTGGTTCTAGGATGTA

A\_18\_P14134815 ATATACTTGCCCCTTTAATTCAACAGGCACCTGTTGAATGCCTGTGCATG

A\_14\_P100348 TAACCATATATTGCATCTTTTTCCAGGATGGGTAAAAAGATAAAGAAGGAAGTAGAGCCT

A\_14\_P112113 TTCAGTTTCCCATCATCTTATGGGCCTTTGGACTAGGAAATTTTAATGAGAGAAAGTA

A\_16\_P38143556

ACCTTTTTGAAAAGCCAATTCAATCTCACACATTTGTCTCTTGTATAACAGAGCCCTTAA

A\_16\_P16197410

AGCAGCAGAAGAACCATTTTAGAAACATACTTTTTCTGATGTGATTCAAACCTTTGCTG

A\_14\_P110305 ATTGGTTTGTGCTGACAGATTCAAGTCTCAAATATTACAGAGACTCCACTGCTGAG  
A\_14\_P201129 TCAGAGAGTCGTTACCTGTCAAGTATCACCTACAGAATAAGACCGACTTAGTTCAAAG  
A\_16\_P36090883  
TACATTTTTCACGGCTAACTATGATGAACATACACAACCATCTATGAAGTTCAGTCTTGCA  
A\_14\_P103660 CTGGTAAACTTGGAGCACATATAAGACAATCAAAGGAAGTCTCCATATAAACTTCTCCAT  
A\_18\_P13154013  
AACATAGACATTTGCCTACATCGAATAGACATTGAGTATGCCTTTAAAGTAACCCCTTCC  
A\_14\_P104863 TTCATTGCTTTCACAGGGAAAGAATTACTCGTCCCCTGACGAGTTCTGTAT  
CUST\_827\_P1426210822  
AAGATTTTTGTTATAAAAGCGTAAGCTCAAGAGGGGAAAGTAATACTAGCTGCCGCTT  
A\_14\_P108842 GGAAATAGGAAGTCAACATAATGATGCTTATTCTTCTCTAACAGTAGAAAGTGGGGCATC  
CUST\_9347\_P1426210822  
TCACCGTAGGATTCCGATTTTTTTTGGAAAGTATTCTTCTTTCAGTCTGTAAGGCTTTT  
A\_16\_P01606427  
TAAGTGTTCTTCTCTGCATTTTCTATCATTGCCTCATAACAGTTCTAGGTCTAACGACAG  
A\_14\_P121903 TTATAGCAAACCTTGCAGAGATAGAATCAACAGACTTGGCAAATTGAGGGGATTTAAACTG  
A\_14\_P114327 CATCTGTAAAATGGGAACAAAATTAATCCCCACTTTCCTCACAGAGCCTGCATTTTA  
A\_14\_P102248 TAAGAATGGCAGGCACTTTCTTCTGAAAGCAGACGTGGAGAAGTATTATAACC  
A\_14\_P119921 TGCATCCCCATTATATCTTCTGTTGACTGCTTTTTTCTTATGTGAATCTGCTATTTGCT  
A\_14\_P201101 AGTGATTTTGAATTTTGTGCTATTTTGACCATGAGTAATCTCTGTTTGGGGTTAAGGTTT  
A\_14\_P126903 CAATATGCCCAAGGCAACCATTTTCAGGTTTTTCTACTTAGATTTCATGATCTATCTGACTT  
A\_14\_P138682 CTATTACTCAAGAAATAGTGGGCTGTGCCCATTTGGAGAATTATGCTTTGAAAATGTTTT  
A\_14\_P139955 GCACTTCCTTTAGGAGGAAGAGGGTGAGTTGTGATTGAAATGAGACGTTTATTTTTTTAA  
A\_14\_P129152 CTTGGACACCAGTTATTAGAGGATGAGAAAAGTAAATGAAATGTTCTCTTTTTTCACTTCA  
A\_14\_P103175 CTCCTCATTGAAAATATGATGCTTTGTAAAGAGATCCAAGTGCAGCCACCTTCTTAGA  
CUST\_777\_P1426210822 CAAACCTGCCTCTTCTGTCTTCTGGGTGGGTCTTGCCCCCTTTCCT  
A\_14\_P133809 CTAAAACCCTGCCACCTCAAAGCAATAATAAGAGGTAAGTCTTGTGGAACTACAGTATG  
A\_18\_P16264733  
AGTCCACGTCATGAACTAGAGATCACATAATAGAAAACCATATGAGACAGTAAAACCACG  
A\_14\_P100526 TCTCCCCTTTAAACTGGCATAGCCCAAGAACTTCGCTGAAAATAACAGAAAGAAT  
A\_18\_P14132273 GTGAACTAGAGGAAGGAATCAGAAACAACCTCTGGGCAATGGAATCACTTTG  
CUST\_3902\_P1426210822 TGAAGTGAATGGGAGTTCACATTTTATCTTCAGGAAAATGACCGCAAGAAGG  
A\_18\_P12377942  
ATCACACAATGGTTACACATGTAGAGTTGGGTAAATGAAAGATTTTTTAAAGTAGGAGGCG  
A\_14\_P139484 GTTTGGAAAAGCATGTTATAATATAATGTTTTTCACTATATGGCCTCTGTTTTGGTGTGTT  
A\_14\_P107460 CTAGTTTTGCTGGCCCTAATAGCCAGTTCATGGTGAACCTTAATTTTTTTAGATGTCT  
A\_16\_P00237818  
AAAACCTGAAAACCTCTAGTCTAACATTCCAAATGTTCTGTTTTTTCCAGTTCCTCTCCTA

A\_14\_P135725 TAAGTATAAAAGTAAAACTGAACATTGCATATAACCCTGGTCCATCCCATTTCCTGCAG  
A\_16\_P20497106

AAAACCCTACTGTTGGATAAATGTGGAGAAGGAGATTTATGTAAATCAACTGCATTAGGT

A\_18\_P16989170

AAAGGTCTGGTATACATTGGCATCAATAGACATTCAGGACAAAATAACTTTTGATTTGCT

CUST\_3568\_PI426210822 TTGGAACAATGGTGGGTCCAATGGTGGATGAATAGTTTATTCACATGCATC

A\_14\_P121701 CTTAGCGCATTCAATTACAAGGGAACAAGGCAACATACATACTACAGCCTTTCACATC

A\_16\_P17499794

CATTTGTTACGGTTCATGAAATATTCTTCCCAGTAAAGATACAAAATGCCAACCAGAAGC

CUST\_3635\_PI426210822 AGACACTTGATTTAGGTGAAGGGGGGCCCAAGGCAGTGGTGCCT

A\_18\_P14134779 AGACACGAGAAAGCCAAGCAGGGATTTTCAGTTACAGGTGAGCATC

A\_16\_P02745168

AAAAACAAAAGAAAATTGTGACCTTCCATTAGTTTCTTCTCTCATTAGTCCATGCACACG

A\_14\_P113351 CTTTGAAAGCAACAATTTTATTTACTTCTTGACGGTCCAAAGGGAAACTCTAGATGCTCA

A\_16\_P20793525

ACGTATTCCCACATATTACACTGCTGACAATTTCCCTAAGTTTTCTCTTTCACTTTGAAC

A\_14\_P102598 CTGGTGTCAATCGTGCTGATTTCTTTATGTGGTCAGAGCAAAAATTCACATTTTTTTAAGT

A\_14\_P123780 GCTTTCTTCAGTGTATGTTTGGAGAGAGTTTGAACATTTTTTTGACTCTTTTTTCATTGAGT

A\_16\_P19525599

AAAAGAGCATAAATCAATCGACACAAATATCCCCTTAAACCTTGTCTTTTCATGTCCAGTA

A\_16\_P58424258 AGTGAATTCTTTTTGTCTCCCTGGTTGAAGGAAACATCTGCTTCTGGC

A\_14\_P123947 ATGCAAGAAACGTCATCCAGCCAAATAGGTCCTGATGCTTCTTTAAAATAGGTCATAC

A\_14\_P114315 GTAAATACAGAGAGATACAGATGAGCAAGCCACAAAGCCAATTACATACCAAAGTTATGC

A\_18\_P11916125

TGGCTGCCCTTTAAATGATTA AAAATGATTGCTCTAAAAGGTATGGATTGTGAACACAGT

A\_16\_P00933518

ACACTGACATGAGTAATTGGTCCATATGATAATTCTCCTTGTTGTAATATGCCGTTCTCC

A\_14\_P109038 CATATGATTTACAGCATATTGTAGGTGGAAGTTCTGGTGAGTTGGACATTTTAGTATGGC

A\_14\_P115120 AGGATATTACCTACATGGTGGATAGGGAGAAGGTCAGTTTTGGATGAGC

CUST\_9847\_PI426210822 TAAACTGTAGCTGCTACTTTAACCTCTGTGTCCACAAAACCAGACCTCC

A\_14\_P201948 ATTGCTGTATAAAATTGTATCATGTTTTTACATGCTAGTTTGCTTATTTTTCTTTTCAGG

CUST\_6502\_PI426210822

GCTCATATCTCTCATAGAAAGACAACAGATGAGCAATTTTGGTTTTATGGTTTTACTCATG

A\_14\_P134993 TAAAGAAAGCAGAGTCTCTGCTTTGCCCATTTAATACTGAACAAAATGTAGTGCAACTGA

A\_16\_P16628656

CTATCCATCAAACCTTACATATGCCATTAAGTGCCTCTATCATCTTCTTATCCCGTCTTCA

A\_14\_P107495 ACCAAAAGTTTTCTGATTCAAGGTAAAAAAGCAGTTACCCACTCATGTCAATATCTGCTTT

A\_14\_P128386 AAATCTGCCATCAGAAGCACAGGAGCACCTTTGTAACCTCCTACATTA AAAAAAGAATCAG

A\_14\_P128586 GAGTTAAACCTTTTCAGTTTTAGTCCTGTTGCATTTTGGGTTTCTTGTCTCCAACAATA  
A\_16\_P15601723  
AGCCTTTCTGTAGCCCTAAAATTAGTGATCATTCTATGCTCCATCATCCTGAAATTGAAT  
A\_14\_P121838 TTTATAGCACAGTGGGATAAACCAAGGACAAATTCTTACTGAATAAGACCTCTGGTAGTT  
A\_14\_P132407 CTAACGTTCAATCAAGAATGTGCAATCGTCATAAAAAGTGAGAAAACCTCCAGGCTTTAGT  
A\_16\_P00480899  
AACCTACGACCTCTTACCTAGAATCATAAAGGATAGACATTGATGTGACAGTTTTTCTCG  
A\_16\_P37358532  
TACACCCACTGTAACTTTTCAGTTTAAAGATTTACCTCAGTCCTTATTTCTTTTGAGAGG  
A\_14\_P120513 CTGCTGAATAGCGTCTTCCTCTTCCTCACCTTCTACATCAAGAAGGT  
A\_14\_P110085 TGGTTTLAGGTTGAGGGATCAAACATGAGATAACTGAGTTCGTTTAAAATGTTCTATAGT  
A\_14\_P120730 CACAGTCAAACCAATAGGTAAAATGCATGGAAGTTGGGAGCACCAAAGATTATATTTATG  
CUST\_6685\_PI426210822 AACCTTTGTCAACAAGGAACCCTAGGTTTCAGTTTCGACAGAACTTGAC  
CUST\_10151\_PI426210822 CTGTGGAAAGAATGAAGATGATGGGGTGTTCCTTTTGAAGAAAGACAC  
A\_16\_P20304950  
GAATAACGTGACCCAGTTCATTTTTAACAAGAGCACTTTTGCCATCATGTGTCAAATTG  
A\_14\_P103998 GGAAAGTGTGTTTACACTGCAGAAAGTTTTGGTTGATAGCACAGTTGTTTTCTGTTGATA  
A\_16\_P36613837  
AGATATTACTTGTGAACCTCACTTTAGTAGATGCCTTCGACTGTTATTTACAATGCCTAGA  
A\_14\_P124080 CTGACTTATCCTATTAAACCTCCTCTGCTATGTTACACAGATTCTGCATAGTTTTTTTTTCA  
A\_16\_P21084134  
AATGAAACATATCCACCAAGTATGTCCAATTTCTCTGATGACAGTGCTAACTTACATGCG  
CUST\_8923\_PI426210822 CTGTGCATTGGATTATACTCAACCTTTTCTCTGAAACGTTGGTCTGGAG  
A\_16\_P01722875  
TTACCACAATCTATGGGAAAAGTAATGAAACATGCTGTTATCTCAGTAGATAGGACGAGG  
A\_16\_P18198824  
GGGGTTTACTTACATTATGAACACTCTCTCATTACGAACTATATCAGAACCAGAAGACA  
CUST\_10340\_PI426210822 CACGGTGAATGCTCAGGATCTCCTTGGCAACGTGGGTGAAGATAC  
A\_14\_P114299 AGTAGCAATAACTATGGCAATATATTGACAGATATCGCTGCTAAAGAAACAGCCAGACAG  
A\_14\_P133545 ATACTCGTATCTCTGATGCATTTAGTGAAAACACCATTAACAAGCCATTCAACGACGTTA  
A\_16\_P17218695  
TCCATGAACTATAAAAACTTCCAAGTAAAGCCTATCTATTCCCGTATCTTACCCTTCAA  
CUST\_8496\_PI426210822 TTCAAATTTGTATTCCACCCTACCCTGACATCCACCTTGAGGGTTT  
A\_14\_P114509 TTTGAGTTCTGATGATGACAAAAATATTTTGGCAGAGACTCCATCTCAAAAAAAAACAAC  
A\_14\_P103488 AGTATTTGCACAAGGTGATGCAGTCCATCTCTAACACTTGACTTTTCTCTCACTTCTA  
A\_14\_P128443 GACAGCATTTGAAGGACACATATTGCAGTTGCTTGGTTGAAAGTGCCTGT  
A\_14\_P135191 GAATATATTATCCTATTGGCTTATGCCTTCTAGACTGGAGGCGCTCTCTCCTCTT  
A\_18\_P13654658

AAAACCTGGTTCAAAAAGTATCCATTCAATATCTTTCTTCCATGCACTCTATATACCTGGGC  
A\_14\_P129884 ACCCTCATGGAGGATACATCAACTTCTAATTCATGTAGAATTTCCAGCAGAGAATACATC  
A\_14\_P116587 CCTGTTCTTGGAGAACATTTAAACTATAAAAAGGGCCTTTGATAAAAACAGATCAATTC  
A\_16\_P02719124  
ATTACTAGTTGCCTGTATCTCTAGTCCAACCTTCAGCCTTACTTATCCTAAAAGAACAAT  
A\_18\_P22843225 CTTCTGTGGTTCGTTCTTGTGATAGCATTGTCCTTTAGGATGCCATCATTATGTGAAT  
A\_16\_P00812743  
ACCCCCAGTCTCTGAATTTAACTATTAATAAACTGAAGTAATATTCTTTCACGACCTCC  
A\_16\_P15606197  
CCCCTTCTCTCCTTATTGAACTTTAGCATGCTAGACTGTCTTCATTATTCATGTATGGA  
A\_14\_P126673 CAACCTCCATGACAAAGGTTTTGATGAATCATCAGCACATTAATTTGTTTCTCTACATT  
A\_14\_P118249 ACTCAACCATCATTGTATTAGATGATACATAAGGAAAAGTGACTTAGGGAAAGTAAGTTCAG  
A\_14\_P138610 ATAACAAGTGAGGATGCACTATAGTAATGGCTTGCTTTTATCAACTACTCAGCAGATGTC  
A\_18\_P10594146  
TGTGAACATTTCAATAAGTAAAGTTGAAGGAAAATATATGTGGCAGAATGATCAGTGTGT  
A\_14\_P118845 TGCTCTAATGCTTTACTTCCCTTACAATTCTAAGTAGCAGTCTAATGAGATCACATAGGC  
CUST\_4124\_PI426210822 AGAAGGGTCTTCATTCCCTAGAGGGATATGGAATGACCCACTGCTTTT  
A\_16\_P19746155  
AAAAACAACCGGGTAGTCATAATTTCTCATGTTTTAAATCACTGAAATCTAGAGTTGCA  
A\_14\_P118959 GGCCACTTACCACATGATCATGATCACTAACTTCATTACAATCTCATTCAAATGTTGAA  
A\_14\_P103581 ATTTTCTTGAGAACAGAATAGCAAGCCTTTACATCTTCCCTGCAGGAGGAAATGG  
A\_14\_P124318 AAATTTATCCCAGCAATCCAAAATAACGTATCTGGATTCATCCTTTGTCTCTTGAAGGA  
A\_14\_P128716 GTATGGCTGATGGAAATTAGGCCAAATTATAAACAAATTATAAACCTACAGTAGCAACCA  
A\_14\_P115251 CTGATTTTGATAGAAAAATCCCCTTTTCTCTTTGAAGTTAAAGGAAGATACCAGAACCT  
A\_18\_P17407446  
AGTCACTGCTGTAAAGTTAGTCTATTAAGGTTGATTTGATGTGTCTTACGGTTTTTATCA  
A\_18\_P22842141 TTTAGGACTGGCTTTGGGCTCATGGTTTTTATTTGAGAGCATTACTTCTGACCTAA  
A\_14\_P124975 GAAAGAGGTTACTTTAAAAGTGGTGAAAGTGATGAGACCTATACGCCCATTTAACATGAA  
CUST\_6708\_PI426210822  
CAAGAATACAAAAGTAGTTGAATAAAAAGTGTGCCACAGCCAAATAAGCATAGAATGAAG  
A\_14\_P107461 CTCTATTTTGCATTAAACTGAGGTTTTCCAGTATGGTTAATCGGTTCCATAGATCCCAAT  
CUST\_8412\_PI426210822  
AGACATGCCAGGATGTTTCTTTTAAATCTGTGCACTCATGTTTCACTTCAAATTAGTTA  
A\_14\_P103788 GTTCTTTTTTTTAGGGTGAATCTCCTAATGGCTCAAGTGATAGAGGAATGAAATCACTAGT  
A\_16\_P15996277  
CCCCCTGTTAGTAGAATTTCCAAAGTTGATCATTCTTGCTATAAATGAACTCATTGCCTA  
A\_16\_P40459488  
CGCTCTAACTCAAATTTTTGGAGAAATGTGACATGAGACAAGGTATCACATGATGTTAAGA

A\_16\_P20932354

ACAGGATTAATTAGACACATGTGAACATTTTTGAGTTGCTGTATAGGAAGAACTGCGCT

A\_14\_P117861 AGGTGAATGGAAAGAGATTTTCTAAGTGAAAAGCCATAGAAGGAGTCATAAAGCAGATG

A\_14\_P104684

AGAAAAGAAAAAGTTTTAAAGAGGAAAACAGAAAAGAACTATGTTAGGATTCCAGCCAC

CUST\_9566\_PI426210822

GTGCCTTTATTTGGGAAATACTGTTAGTTTACCTTGCTATCGAGTCTCTTTCCCTAAC

A\_14\_P135279 TTCTCTTTCACTCTTTAATCATCTTGGAATGGGCTGAATTCAAAACCTGGTGAGAAATC

A\_14\_P121443 TGCAGGACGCTTTTAAGACTAAATTATCTTCTTAAGGTTTCACAGGCAGTGTGAATTA

A\_14\_P109734 TGATGATTGTTTTATTTCATTGTTTTGAGAAAAGGTGTTTGGATGGACTGGTGA

A\_14\_P132530 CTGCACTGGCTTCTAGGACATTTACCATTAGGAAGATTTGATCTAAATATTACCCTATGG

A\_18\_P11402760

ATCAATAGCAAGTCATTTCTAGTGTCTCAGCATAGAATCATCCTAATAATTCCTCCTGGC

A\_14\_P123081 ACACCATGTAAATCATACTAAGTGAGACAGAATATGGAAAGACATACGGAGTTCAGGATT

CUST\_3371\_PI426210822

GTTTGGGGAAAAGTGAGGTATAATAACAGGAATTAGTATTAAAGAATGTAGTAATTA

A\_14\_P111195 TAGCAACTAGGAAACAGGCTTTTGTGTAGAATTTTCAAAGCAAGACACATAATCTCATCT

A\_16\_P19880401

AGGGCATAGAAGTAACCTATCATGGCATGATTTTATTGAGTCTCAACATTTGTCAATCAA

A\_14\_P112886 TATAGCATGTCAGTAATTTGGTTTTTGCATATTTCCGTGGAGATCAGATATCCCAGACTT

A\_14\_P106536 TCCAGGATTTTTGTGTGTCTTTTTGTAAATCCATTTTCAGATCATGCTTGCATAGTCT

A\_14\_P108401 AGATTTAGTAAGTGGTATTTCCATGAGATACCATCTCGTGGAACCAAAAACCACTGTTT

CUST\_4519\_PI426210822

GGAATTTATTTGCTGGAGCATTTTCCATTTTCATATTCAGTTTACCTTGGCTGAAGTA

A\_14\_P200927 GAGAGAGTAACTAGAAATTAACGTGCCATCATCCTGTTGAGTTTCTTGATTTCTTCTTTC

A\_14\_P124905 TTTTTTCATAAGTCTATCTTGAGCATTTCCCTTTTATGCCGCAGAATACAAACCTGGGAGA

A\_14\_P100707 CATCACAGAGTGTTTTGAATTTTGGAAAGAAACAACCTGTTGTCTATAACTTAACGCATGA

CUST\_10248\_PI426210822

ATAACATGCTTTTTTCTGGTTCTTGCAAATTTCTCGGTGACTTGTTCTCATGGG

A\_14\_P124698 TCCTCCAGTATAAATCTGGCTCCTTATAGGAATGCACATTATTTTACAAACAGACCTGTT

A\_16\_P20127389

TGTTGTGCTCTCCTAATATTACTGCTTACTCATGATACATACAAGACCGTCAACATACAA

A\_14\_P126086 AAAGGAAAGATCTTAAAGTCTAGGTTTTAGATTTTGCAGCGGTGACATTAATGCGTGTT

A\_16\_P30952456 TCGGTGTTTCCTTCAGAGCATTGTTCTCAGGCTCCTTTTTCTTGAC

CUST\_5317\_PI426210822

TGTGTGAAACATTTTTCCCCTCACCTATATGCTGTTATGTAAACAAGTAATTTTTTAGG

A\_14\_P201800 TGAACTACACATTTCCACAGCATCAATGAGATGAAAATAAAATGGATATTCAGAAGCAGCC

A\_14\_P128728 GAAACTATTAATCTTCCAAATGAAACCTTTTATGTCATGGGTGTGCTGGCCTACATATTT

A\_14\_P118201 CAATTTCTGAGTTACTCTATAGATCACGTCTGCTATGATTTGTTACCCCAAATTGTCTAA  
A\_14\_P114261 AATTTGGGACTTTTCAGTGTATGCCATTACTTATGAGAAGTGCTTTAGTTATGAGTTGTGG  
A\_14\_P107888 GAAATGAACTGGTGAAGGGGTTTTGTAAAGTTTTTGCTTCCTGCTATAAGTTCTTTTCTT  
A\_16\_P03241470  
ACAAAACCCCTAACATTTAGACTTCTGATTCAAGATGGTTACCCTTAACACGTATGTTTGC  
A\_18\_P14136593 CTACAGTTAAAATCTCAATTGTTTCTTTCTTCCATCACCACCCTTTGAAGGTCTCTTT  
CUST\_200\_P1426210822 TACTGGTTGTGAGACAGGGAGGGAAAGAGAGACAAAGGCAGGGAG  
CUST\_9628\_P1426210822 CACATCAGCCAGACCTGGCTCTGTACAGACCCAAACCTGAGAATG  
A\_16\_P36094905  
ACCCAGTGACCAATATTAAGGATGCAGATAATCTACCAAATGAATCCATATTCTTTCCAC  
A\_14\_P134253 AGGGGTATATTGTGGATGCTCTACTTTTTCTTGGAAATGCAAAAAGATTATGCATATTTCTG  
A\_14\_P133372 CTAGTAAGTCTGATATATCAGCAGCACGAATCAGTGCATACAAACCTACCTCAAGCC  
CUST\_5031\_P1426210822  
AAAGGCTTTTACTAGATGTTTCAGTGACATAAAGTTGAAGACATAAATACTGTTTTATAT  
A\_14\_P133699 TGAAGTTAGCACATCTACTAATATGAAACCAAACCAGGCTAATCAGAGTGTGGGTATTT  
A\_14\_P100957 GAGGTCTCCATTGGGTAGATGGAAGTGATATGCAGCAGATACAATATTATACAATTTTGC  
A\_18\_P16276293  
GATGACAAAGGGAATTTAGCACATTTAATGAGACAATTGCTTATGTTTCGTGATGAGGTTG  
A\_14\_P202357 CTGCATTTAGGTAGCATCTGGAAAGAATCCAAACTAACATTCATCATAAATTTGCCTTC  
CUST\_517\_P1426210822  
CAAACCTTCTGCACCAGTGACCAACAATATGTGAGAGGATGATTTGTATCCTCAAATATTT  
A\_14\_P109702 ATTCTGCTTCAGTTTATCAAAAATGGCTTAACAAGAGAAAACAGTGATGGACCATGAAGA  
A\_14\_P109152 ACAATTTGGTCAGTAGGCCTTGAGGTAACCTATTGCAAAAATATACAGTGTAAGTTCAGTCT  
CUST\_9389\_P1426210822 GTCTTAGCTGTGCTCCCTTATACCCCTGCCCTTTCTCCTTAATT  
CUST\_8165\_P1426210822 GTGCTGTTGCCATTCAGCACTTGCTGGTTGAGAGAGGAAGGCAGT  
A\_16\_P37027145  
GACATTTACTTATCAATCCCTCTTCACAATACTTCCTCTTATTGCATTCCTGTGTTCTCC  
A\_16\_P16895609  
AATAGATGCTGATCACAGTTCATTAATCCCATTTACTTCGTTACTAGATGGTTGCAGTGG  
A\_14\_P122165 TTTTCCAGTAATTTCTGGGGGAAATCTGGGATAGTCAGGGGGTAAATCTAG  
A\_14\_P119107 CTCTTGCAAGAAAGTGGTTTCTGGAGAAGTTAAAGCCTGAAGGTATTATCTGCTTTGTTT  
CUST\_2670\_P1426210822 TTATTTACCTTGAAGTGAAGTGACAGGATTTGAACTGTCAGCCCTCAGG  
A\_14\_P101263 CTCCTCAATTATAAAGGGCACACAGCAGTTTCTCTACCCTAACATTAAGTAAACA  
A\_16\_P19833442  
AAGGCTCCATTTTTCCAAGAGAAGATTAATACCGTTCAAAAACCTGTTCTGATCACTAACA  
A\_14\_P126589 TGCAAGGTAGGAATGTTATCAGAAAGAAACACACATCCAAATACAACAAATGTGATTTTA  
CUST\_4294\_P1426210822  
GTTGCTCTAATATATATTTCTTGGTTTATGATTTCTTTTCTGGAGAGGTGTCCCCAGACTG



A\_16\_P16583304

GAGACTATCTGTCTGTCAAATCAAGGAATGGAAATGTGCTTAGTGTGAAATGCTGACTTT

A\_18\_P22840123 ATAAGGAACAACGCCTGTTCTCACTAAGAAGTGGCTTGGCATTCTTCTACTCTTT

A\_14\_P137614 CAACTGTAATAGACCAAATATATAAGTAAAGCCTACGACATCCCTCCCCTATGATGCAGT

A\_14\_P125924 AATCTGAGATTGGAATTCAATCATGCATCTTGTCTTTTACTGGCATCTCTGTTTTCAAGG

A\_16\_P19200138

AAAAAAAATAAACATATGCTACCAGTTTTTCGTAAGGTAAACGATAATACGGCCTTCTCTC

A\_14\_P109412 AAGTCACAGCAGACCAGCACTCAAACATATTTCTCTTCTATTTCCCTACTTTTTGAATAAAA

A\_14\_P116819 ACACACAAAATATTCTCTTAGAAAATAAAAATATAACGATGCCTTGGCAAGACACCAACCA

A\_16\_P16742997

AATTCACCCCTCTTAAAACCTGGTTCTGAGATAATGACCTTATTTTGCTAGAGCATGGTAT

A\_14\_P128750 AGAAGTTTCCATTTCTGACAGTCCAGCAACTCCCTGCTTGACTGAC

A\_14\_P123074 CTGGATTAAACTAATACCCTTGGCTGTTTTTCACACTTCTTATATCCCTCAAAGAGAGA

A\_14\_P136113 GACAGTATAATGAGACCATCATATCCTTGTCTGATTGAAGGTAAACTGTAACCTCCATGA

A\_16\_P01966937

ACTGCCTAAAAATTTAGTTCCCTCATTCTTACATTACTTCAATCTTAACACACTTCAACC

A\_14\_P116650 AAAAATAAGGTAGAAAGCACCCACCTTCCACATTGTTGTCTTCTGAAAGCACATG

A\_14\_P200738 CTCCTTAAAGCGCCAGGTGCTATACTGCTATGAGTTTCATATATAGTCTTTTTTAATCCT

A\_14\_P125810 TTTTACTTTGTAGGAGATAAAATGAAGTGTATGCACAGATGCTGGCATGCCTTTTTTTT

A\_16\_P03710407

CCTCTTTCCCTTAAATCCTTACAAGTCTTCCCTAATGTTTCATCAATCTAAAAGCCCTTGCT

CUST\_8613\_PI426210822 TTA AAAACAGAGCCACGGTGGTGGCCTGAGGAAAGACTATCAATTTTC

A\_14\_P129207 ACCTGCTTTATAAATATTTCTTAAACTACCAAAGGATTTTAGTTTCCACATTTTGCCTT

A\_14\_P103349 AGATATTTGGTCAATGGTTGCTTATTTTTTGGCGTCACCATAGGGAGAAATATGGTTAAA

A\_14\_P135952 ACTGCTTAATACCCTCCTTTCCCTTCAAAGTAATGCTTTAACCTACTTGGTTAAATTTGC

A\_14\_P124414 GTGCTGGAATCTTCTACGGGCCACCCCTTTATTAGCATAGGAAACG

A\_14\_P137143 ATGGTTCTGATTGGGATTTTTATCTACACTGCCTCTAAATACTTGCTTCTAAGACCCAAA

A\_16\_P20272396

AATACTTTGGGTAAATCTACTGTTAGTCAGAAAAACCAACTCATCAGTAATGTCCTGGCA

A\_14\_P139906 ACTCTGACCAGCAATTTTTTTTTCTCTTTAGTCCACCACAAATTAAGATGAACCTGAAGA

A\_16\_P19115806

AGTCTACAAATATAGCGTCACCTCAAGTTATGTCGAGAGTTCAGAAAAGTAGGGAAGTTA

CUST\_3786\_PI426210822

AATTGTTTTGTTAGAGTTTGTGGCTGACATTGATTACACTATGAGTCATGTGACATTCCA

CUST\_4046\_PI426210822 GAAACATTCCCCCTGGGCTCACTTTTTGCTTAGAAAAGTCCTGATG

A\_14\_P125507 TTCCCTTCTTTCCCTAGGGAATATCATTGTCTATGGGAATACAATTGATACTTACACCACC

A\_16\_P37551776

CAATGTTACAAAACAAAGACTGACACTAAACTGCTAAAAACCTGATTGTGTCCCTATGT

A\_16\_P16459919

AAAACCTTCCATCCTGAGAAAACATTTTTGTTATCAAAGACTGAAACAATAGACCCAGGC

A\_14\_P100987 GAACTTACCTCAAGTTTGGGAAGCAATGAATAATGAGGTAATTCCAATGAGTTGAAGCATA

A\_14\_P126544 TTGACAGGCTGCATAATAAATCCATAGGGCTCTATCTGAATTTCAACAAGGATTATTCAG

A\_16\_P16191046 GATGTTCTGTAAACACATAGATAACAAGCACATTCCCGCGTGCCACCTC

A\_18\_P15665674

AGCAGTTACATTTTTGCTCATAAACACCATTCAAAAAGAAGAGAAGGTTATGATCCCTGAC

A\_16\_P16577358

TACTTTTGTGCTTCAACTCTTTAATTAATGTGAACCCAAGACATACTATCCAGCCTTTCC

A\_14\_P100564 CCAAATATTCCTTCAATTCCTAGTGGTTTCTTGGTCTCCAGAATAGTTAAAAACAGAGAG

A\_14\_P129303 ACAGAGATGTATGTAACAAGGTGTTGATTGATAAAGTCCTCCAGTTGTATGGTTCTTAA

CUST\_3647\_PI426210822 CCTGTGTTGAAGTCAGGGAATAAGAATTTCTCTGTGCCACAAATAATGCTC

A\_14\_P122013 AATTTAGAAAGAAGAGGAGAATCGCTGGGTATAGATGTAAAACAATGCTTTGTAGGAAGG

A\_14\_P118526 AGTGATAAGGAAGGGCCAGCAAGAATGTCAGACATATGTCAATATGTGGTAGATATATTG

A\_16\_P16759922

AACCCCAATAATGAATAATTCAGACACTTTAATTCATCCCTTTACTAGAGTCCTTAGGTT

A\_14\_P136966 ATTCTAAGGTCCCTGTGTCTGTGACATAGACATAAACAGGTGTTATCTTGTATCTCATT

CUST\_9054\_PI426210822 GATTCACACTTCAAACCCACTACTTCATGAAGCAAGGTCTTGCCAGATC

A\_14\_P128162 TTAAGTATTTACTTTTATTTTCTGCGGTTCTAAGTGGGAGGTCAATTATTGGGATGTG

CUST\_7108\_PI426210822 ATGTGAAGTCTTACCCTTTGTGAGTCAGGGGGCTTGGGCTGTCTG

CUST\_1583\_PI426210822 GAGCCGAGGAGAAAGTGTTCAGGAGGGAAGTGTCAATTATGTTT

A\_14\_P119270 ACTCATTAGCACTGTGAGGCTTGTTTCATATAAGATGCTACCAAAAAAGAGAAAAGAGTCT

A\_14\_P101130 TACAATTCAATCCCACTTGGTATTTACCTTTAAATTTGGCCCATGGAGTATTTTGATGA

A\_14\_P108439 ATTTCTGATAAATCCCTGATAGAAGCATTGCTGCACCTCGGGTTTCTGAGT

A\_16\_P00025232

GCTGCTGAGGAATGGAATAATTAATAAATACTGGATTAAACACCAACTCTCCTTATTGCA

A\_14\_P112859 TAAGTGGGTTTCTTAAAAAATGTTATTAACACCAAAAAAAGTTGAGGTCATCTGGAGGGC

A\_14\_P123423 ATAGTCATCATTATTGCTTCAAAGAGACCTCTGATAGAGAAGAGGAAAGAAAAGGCTGT

A\_14\_P202276 ACTTGCCACGTCATGGAGGAACTGGAAATGAGACTTAGGAAAATGAAGTTTTATCATAAA

A\_16\_P02332105

CAACTCTGGGCATTTTGATTCTTTTAAAGTGTGAATATTCTATTGCTGCTCTCAAGGTGAG

A\_14\_P131619 CTATATGTCTCCAATAACTCTACAATGTGTGGATGTTTCAGCATATGACAGATACTGGCT

A\_18\_P22841034 GATAAAGGCAGAAGGAGTAGGTCAGACCCCAAGATGGGACTTT

A\_14\_P106005 CTATCTTAGACTCTTGGATTCAGGATTGGGATGTGGTGAATGCTGCCTTTTTTTC

A\_14\_P202055 ACAGATCACAAAACATGTATATACATTATTTAGAAAAGATCTCAAGTCTTTAATTAGAAT

CUST\_2147\_PI426210822 TTCTGCAGAACCATGAAAGGGACGTGACATGGACAGAAAGATGCC

A\_14\_P104922 GTGCGTTGAACATCAATCTGGCCACTCATCTTTTAAAAATTTATCTCACTACAGTTCTTG

A\_16\_P00685295

GAATCCAAATATTACGAGTGCAGATGCTGAAAGGAACAAAAGGAAATCTCACTCAGTCAT  
A\_18\_P14134992 TTTCCCCGTGGTGGACACACAGTGAAGAATTTGACTCATGTAACCAAAA  
A\_18\_P11096132

GTGCAAAAATAAACATAAATATTTTTAAAAAGGGAGGGAAAAAACAGAATGAAAAGGGT  
A\_14\_P112523 GGAATAAAATTTTTTAAAACCCTAGTGCCATATGATGAAGGGGCCCTGCTTTT  
CUST\_473\_PI426210822 CAGAAACAGAATCCTGAGCAATCTTGCCACCAGCTGACTCACAAG  
A\_14\_P136694 ATGTTGGTTGAATTGAGGATTCCAGAAGTAGCATCAGATTTGGAAGCCTTTGAAAG  
A\_16\_P15544384

TCCTTCCAGTTCTTTTAGCAACACTCTTTTGAAAACCATGATAATATGACGATAACAAGGC  
A\_14\_P137806 GGATTTTGACGATACCTCTGATAAGTTGGGTTTTTAATTTGCTGGTTTATCTTAGAGTGG  
A\_16\_P01821049

CCATTGCATCATGTTTGTACTGTAACCCTCAAATCTTTTTCTTGACCTAACTCTTAGCA  
A\_16\_P03738469

TACCCTTAAATGAGAGAAGTGAAAAATCTACCCAGTAACTAGCCTTATTCACCTGACAAA  
A\_14\_P103830 AGTTCAGTTAATGTCACCAGCACTGCCTTGTTAAGGTATGAGACCAAAACTAC  
A\_14\_P112623 CATGCCAGTCACCTACTGCGTAAGTGGACAAAGAGAAAGCAGAAGGTAAT  
A\_14\_P124879 GAATCTCTGGGTAAGGAACTTAAAGAACAAAATCATCTGGTAATCTTTCTAGAAAGGA  
A\_14\_P118099 CTTCGTCAAACAGAACTATTGTTAATTTGAACTCTCCATGGTCTTTAATGTCCTCAC  
A\_14\_P101315 CACTTTAATTTATTTATGCTGTAAGTTATTTTTGCTTCCTTCTCCTGGACCCACTTCCAG  
CUST\_4670\_PI426210822 CACAAAGATGTGTGTTGATGTACAGCTTAAAGGGGAGTTAATGGAGCCC  
CUST\_4892\_PI426210822

GGTGAGGCCTAAGAAAGGCATGTCAGTTGTCTATCAAGTTCATTAGTTTATTCAGC  
A\_14\_P109589 ATTGATTCTCATTCTGAGGCAGACCTATTAACACCATCCTGATATTGCTCTATAAGGATT  
A\_14\_P201559 CTCGATACTTTGTCCTTTAGTTTCAATTCAACCTATCAGATTTATCGAGCGCCTATTCTG  
CUST\_1286\_PI426210822 GTCCTCAGACTGATAAAATGTAGCCAGGAGACCAATCTGCTCTAGTCTG  
A\_14\_P130436 AAAAAATGGATAACGGGCCAATTTCTGGGCTTTACCCCCAAATCTAATTATGTATTCATA  
CUST\_5764\_PI426210822 ATTTTAAAGAGGCAATGAGCCTTTTCCTTCTCGTTTAGGCATGGGG  
A\_14\_P126456 CTAGAAGATCCAAAGTCTTTCAACAGAGAATGCTAATACCTTGCTTCTTTTGGTGTCTA  
A\_14\_P130598 GGAAAAAATGCAATTTGCACTTCACTTTGTTGGAATATCCCATAGCACTCAATAAACTC  
A\_14\_P113209 ACATGAGAAGATTAAGGTAGAGAGTGAAATATGGTCAGGACAAATGTGAATTTAGAGCCT  
A\_18\_P11624347

ACCCTTCATACTTAGGTATTTCTATTTGTCTGACTGCTGATTTGATTCCAATCCAGTGTT  
A\_14\_P101953 GATATGCAGACGATGAAATTGGCTTGAAGAAGAAAAAGCACCTCCAGACTATTTT  
A\_14\_P114961 CATAATCTATTTAGAAGATGCTCCAGTGTTATGAAAACAGCCTTAGGAGGCTGTATGACA  
A\_16\_P00991620

CAAAGAAGACGTGTATATGCATTAGATTCCACTGTGGTTATATGAGCATCCTAGGACAT  
A\_16\_P01844789

GTAAACTCCCGGTTGTTTAAAGTCATTAACGTTGTGTCGTTATGTCTAGTGTCAGGTTAT

A\_14\_P133029 TCAATGTAAAAAAGGCATATAGAAACAAATCAAACCAAAGAATCCCACAGTCTCCTCC  
A\_14\_P124250 CAGGACTTATGTGACTTATATTTTGGGGAGATGAGGGTTGGGTTTTTTTTTAAATGCTAC  
A\_14\_P108120 AGCCTGTCCTGTGTAGCCTATGACCCACTTAGTTGTTTTTTTACCCTCTT

A\_18\_P13899628

ACTGACAAACAACGTTTAGTTATTTCCCTTCAGCCTTATGTAATCAATAGTCCCGTTAGA

A\_14\_P104372 AACAGATATTCCTGAATTCCTTCCGCAGGATGTATTTGGGGGTCAATTCATG

A\_18\_P12785663

TCCTAATTTATCCTGTAGATCCGAAAACCTCTGAAACACTCCATAAAAAAATCCTTACCCT

A\_14\_P202111 TTCTGATGGATCCTAAGAGGCAGATCTTTCTAGATCAAACATGCTGGCAGTTATTGAT

A\_14\_P106327 TTCAAGATAACCCATGAGTATCAAATGCTACCCATTATCCCTTTGTACAATTTATAAAC

A\_14\_P131811 AGGAGGCTCCAGCGAGTGCAAAACGAAAGGCTTTTATTGAAAAATATCAAGTG

A\_14\_P106758 ATTCTTCAATGCTATGTAATTTTGGACTAAAAAGTCTGTTAAGGCACATGTCTCAGTGT

A\_14\_P108665 AAGTTGAGAATTTTAATGTGGGAAATGTTGGAATGTAGAAAATAAGCACATCTGCGAGGA

A\_14\_P104881 CTTACCGAAGTTAGGTGACAAAAGATACTTTTAGAGAGTTTCTCTTAAAGAGAGCACTGC

A\_14\_P120155 CTGATTCAGAGACAGATGATCAATGGAGGAACTGTCTTCTTCATTTTCACTGTCAAAAT

A\_14\_P104722 ACAGACATCTGGTCCCTAAATCCCAGGATGAGTGCTATTTATTCAGGCTAAG

CUST\_9805\_PI426210822 CATGGGTTCCCTTGAGTTTGTTCACTGCAGCTGAGGTCAGGTTAG

A\_14\_P101636 GACAAGGTCTATTTTCTTCCATAACACCTCATTATGTAACCCAGGTATGACTGG

A\_14\_P107218 GCCTTCTATTCCAGAATTTTATATTGCAATGTAAAGAAAATAAGTCTGGGCCAGGCA

A\_14\_P111220 TTTTACAATGATTACAACATTTCCCTCACTGCGGGATATTTCTGACCCGCTTTAGAACTT

CUST\_4878\_PI426210822

GCTTTTGGGAATGGTGTAGAAATCACGTGCTTAGTCTTGAATTATGATTCACCTTTACT

A\_14\_P106124 CTTCTTTCAACATGGAGGTGGTATTTGGTGTGATTTAAAGAAAGTTGATTCTACCAAGG

CUST\_4321\_PI426210822 CAACCACCATCCCTCTCCAAGAACCTGGCACAGTAAATTCATTA

CUST\_6573\_PI426210822 GAAAGATGAAAACAATCAGGCACGGGGTTTTTATGCTGAACATTCACG

A\_14\_P114396 CCTATGAAACAAGTCAGATACGTATTTCCCTTTCTGTAGGATACAGACACCAATAGGTAAA

A\_14\_P108876 ATAATAATTGACTCAAATAAAACAATTTACTCAGATCCAGCATCAGCATCTTGTCTTGC

A\_14\_P122018 GGCATTTTCAATTGCTAAAAACTCCCAGAAACAACCTTCATGTAACTGAGGCTCATAAAG

A\_14\_P111677 TTACCTTAGAAAATTGTGCATTTACCCATTTTGTGAATGTTTTCTTTTGAACATCTTCTC

A\_14\_P112730 TGAGTGATTTTTTCTAGCACTTGTTCGCTTTCACAAAACACTTTTGGATTTGAAAAT

A\_14\_P112867 ACCTAATATCCATACTTCCATGATGATGCTGTTTCAGAACAGACCAACATTTTTTTAAACCA

A\_16\_P36230182

TTTTGGAGAGAACCATAAAAGGCTAAGTTGATCCATTTAAAAATTCAAGAACAAGCCTCA

CUST\_4780\_PI426210822 ACATATACACATTCACATGTGTGGGGAATGAGAGGCTACATAGCC

A\_14\_P117095 TTTCTCACCAGCCTTTTCCCTATGCTGAACAAAATGTATGTGTTTTTTTACCATGAAAG

CUST\_121\_PI426210822

CATCATATGGTCAGTCCCTCATTTACATGGTTCTATGGTAACTGAGATAAAAATCTCAGAC

A\_14\_P120969 GTGCTTGTTTTGTAGTGCTTTTAAAATGGAGTTTAAACATTTGTGCCATAAAATGGCGTGTT

CUST\_6448\_PI426210822 GTAGGGTTTGTCCAGAGCCTTGGGTCCTTTCCAGAAGGAGCTTGG  
A\_14\_P126849 TGGTGATTTTATCATTGCCTTCATTAGTGTTACTGTTATTGGCTATGAGGTGTTCCCTTCA  
A\_14\_P122936 CTTTGGAGACTATAAAATTGAAGTAGATACCATAAACTTCATCCAGGTTTTTCAGGCTGTA  
CUST\_944\_PI426210822

GTTTATTTTCTTTCTTTTTCTTTTTCTTTTTGGGAGGAAGAGCAATCCTTATAACCTTGAAAT  
A\_16\_P18327923

CTGGAGACTAGCACTACATTTTAACCACTCTTGTAATTATGTCACCAACATGCTATCCT  
A\_14\_P201374 CTCTAGGTAGTTCCTTAGACTTACACTTTTGAAATGGAGCAGAATGGTTTTTCAGGG  
A\_14\_P101683 ATAAAGGCAAATAATCGTTTCTGGAGAGGTGATGTCTCTTTATCAGTTTTCCAGTAACAG  
A\_14\_P109166 GAAGTGCAGAGGGCAGAGTTCTATGACTTACCATCATGGACTACCCTTTAATTAAG  
A\_14\_P106364 TCAGCAATACATGGATGTCTTTCAGGGTCCAGGTTTATAGATCTACATTGTCCTTTTTAA  
A\_14\_P109534 CTCCTGACTGGAATATACTTTACCACTGCAACATCTGAAATGAAATCAGAAATGCCTATT  
A\_16\_P20614990

GTCGTGGTTTACTCTAATGATGGCATTAGTCTCCTGAATTTAACACAATAGAGAATGGG  
A\_14\_P106097 CTGAATCGCTTTAGTAAATAAAGGGTCTCCAAGAATAAATTCATCCGAACATGCATCCTT  
A\_16\_P02435064

GAACCCAAGTTAATATGGCACATACTATTTCCACTACTGATACTTCCACTAGACCTTTGT  
CUST\_3981\_PI426210822 CAGACTTCTGGACCTGGAACCTATTCTCAGAACCTTCCAGAAGAC  
A\_14\_P200130 TATCCTGAGTAAATATTTTCTATCCCCTCTCTATCCCTCACCCTGAAATAAAGGAA  
A\_14\_P123355 TCACTTAGACAACCTTTGACAAATCCATGTATTGCTCCTGGCCTTTGTTTTTGCATTTAA  
A\_16\_P18775238

ACTATCACGGCATAGTAATGACAATGAATTTTGATTTCCCGGAACTGATATTAGACTCCT  
A\_18\_P16450187

ACTGCTAGAAAAATCTTATATCCCTTCTCATATAAAGACCTCTTGAAGTATTGCAAGCCA  
A\_14\_P115902 CTATGTTTATTATCCTACTATCAGCACCGACATGCTCTCTGTAGTGAAGAATCAAAATAT  
A\_16\_P20226214

AAGGAATCCTTTAGACATCCAACCTACTCTATCTATTAAGGTCACTAACAGATCAAGTCC  
CUST\_9644\_PI426210822 CGGAGACGTTTCTGTCTTCGTGCAGCCATAAAAAGTTATCAGGTG  
A\_16\_P41685915

CTGTAACCTGGAAAATTCTGGACATGCTTCAAAATTGTCACCTATGCTTTTTATCCAGATGCT  
A\_16\_P01454867

CTCTTACAGACTCCAAAATAGAATGGCTTAAACCAGTAAGAATTGAGTTCTTCCACA  
A\_14\_P120530 CAGGTAGAATCTGTGGGGAAAATGTGACTTTTAAAGGGCTCTGTCTGTTTTTG  
A\_14\_P117436 ACAAAGCATATTGTTATCAAAGGAATCTGTAGTCACTAGCGTGAGCCAATGTGGATTAA  
CUST\_7169\_PI426210822

AATTAATAGGGCAGTGAGAGGAAAGAGCATGCATACTGAGCATCTGAGCTTTTTTTAA  
A\_16\_P16191144 GGCCTTGGGTGGGAGTTTGTTCAGCACGGACTTCTGTTGTAGAT

A\_14\_P112304 TCTTCAGCCTTACCCGAAATACTTGTGGTTTCTAGATCACCATCTTTAAATTTACTTCA

A\_14\_P108144 GAAGAAGGTCCATGACTTTGGCTTGTTGCTTCTTGCCATCTTCACT  
A\_14\_P122461 GTTTCCAATCTGGAAAATGGTCTTAACATATGAGTTGTTTTGCCTAGTTTGAAGAACATC  
A\_14\_P129631 CTCTGAAAACTCTTCAACACTGTTATTGTAAACAAAGGTAAGACCCATTCAATTCTCCTG  
A\_14\_P129264 ATAGGAGAGTCACTCTTTATACAAATCCTTCTGATGGTCTGATATATGTGTGTGTCTTTA  
A\_14\_P123189 ATGTGAATTTTAAAGAGAAAAGTGTATGCATGCTTTGGCTCAGCAGTTCTCTTCTTTTTCT  
A\_14\_P110060 TCGAACTGGTATGACTTAACATGGAGTAGCACAACAATTGTTACAAGGTCTCATTTTTCAA  
A\_14\_P111231 CCTACCAACTCTGGTATTGTTAAGTATGTGTATGTGTGTTAATGTTTGCCATTAAGGTG  
A\_14\_P129654 AAGAAGCATTTGCCTCCCTAATTTGCATTATTTTCATCTATGAAGCAATAGAAAACTGA  
A\_16\_P00129664  
AAAGTGGTCATTCTAGCAAGTAGCATTTTTGCAATCATAAGTGCTTATGTGAACCCAATCT  
A\_18\_P14040480  
AACTACTGCTTGATAACCAGATGACTTAATCTCTCTAACCATGATGTAATGAACCAGAGGT  
A\_14\_P138251 TGTTTTGATTGACAATACAAAATTAATAATTAGTCCAGTCCCTCACTGGGCTATCACAGG  
A\_16\_P30952625 AAAAAATCTTCTCCAGATTTTTCGGAGGCCCCACTGATGCTGTTCTCTT  
A\_14\_P107585 TTTTACAGATCATGTGAACCCAAAAGCATTTTTTCAGTGTTCTTCGCATATATTTGTCTGG  
CUST\_2807\_PI426210822 CAGCTCTAGAGACTGGATTAAACCCAGAACAAGATAGAACCAGTGTTGAT  
A\_14\_P131646 ACCATATGTTTGGAAGAATGATTTGTCATAACCCACTTTCCAGAAGTTGTTATTGTTCT  
A\_16\_P36230877  
TCAGTGGCACTCAAAACATTGTAATTATAATTGTCAAAGATATCTTAGACCAAAGGCAAA  
A\_14\_P107015 CTCCGTTTACAAGAATGCTGTGTGGGCTACTGCACCAATTTAACTGACTATTATGATTTT  
CUST\_5777\_PI426210822 GCTATAGAAGGAACACCAGTTCAGAAATGTCACTCCTGTATCCAGACA  
A\_14\_P106226 CTAAAACAGAACAGCGAAAGTATTGTAAAGTAGACATTGGATAATTGTTGAGCAAACGG  
A\_16\_P16569055  
ACACTTAAGTGAAGAATGATTGACAGTGCATCATAAACCATTTCCCATGATTCAGAAACA  
A\_14\_P127934 TCTAATGCCTGGGTTTATTCATCTTGATTCTCAACCAATATCTAGAGAGCAAAGGAATGG  
A\_16\_P02697560  
ATCTCTGTTCCTTAACCGAAAACAACCTCCATTTTTAAGTTACCTAAAGGCAAGAAATCA  
A\_16\_P19419925  
AAATGCTTTGCTAACAAAATATCCAGGGAGATTTTATCCACTTCTAAAGTCAAGCCACTG  
A\_16\_P15831531  
AAACTTCCTGTCTTTAACCTGCAAATCCCAATGAATTCTGGAGTTAGACATACTTGTTTT  
A\_14\_P118045 AATCATTGCCGTTGACAGATTGGAGATAAAAAAATTTAAAACATGGACATCGGACCATTT  
A\_14\_P201953 GGATACACACAGTTCTGGAGTCCATTGCAGACCAAAGTATTATTAATACACATGTTACTA  
A\_14\_P127188 AACACAGTAAGTATGAGAAATGACATAGGATAAGGTCAGTCTACACTTCCTTGCAGTATG  
A\_14\_P111258 CAGAGGGTGTTTTGGTGCTAATTGTGCAAATACTATGGTTAACCGTAACTTAGTTATTGA  
A\_16\_P21418907  
AGTCTACTACAGCATCCAAAGTAATCTCATATTGCCATACCAAGACAATTTTTCAATGCT  
A\_14\_P119191 CTTTCAATTCTACTTACGCTCCATTCAAAGGATCTAGAGGCCAAATGTCTGCTG

A\_16\_P16349438

TTTACCCTTTTCAGACAAACTATTGAAACTTTACAATCCATAACTACTTTTACCTCCCCCA

A\_16\_P20628454

ACAGACAAGTGGGTTTATTACAGGCCAAAATGCTACTTTCTCTATTTAATACCTGTCCTGG

A\_14\_P102686 ACTGCAATTCGGGAAATTTCTCTATTAAAGGAACTTCGTCATCCAAATATAGTCAGGTAT

A\_14\_P135094 TGTCTGTGCAGGAGATGCAGTTTTTGTGTAGAGAATGTAAATTTTCTGTAACCTTTTGAA

A\_14\_P119624 CCCTAGTTGTGTCATCATCTTTGTCATCCAGATTTTCATTGTCTTCTGGTTTTTTAATGT

A\_14\_P108725 TTTGCCTATAAAAGAGAAGAGAATATTCCAGTGGTTACAGTAGCCTGACATAGCATGAAG

A\_16\_P16799250

AAATCTTGAAATAGCCCATAACTGATACAAGGAACCCATGATATCATCAAGAATTCTGGC

A\_16\_P00019703

TCATGCTTTCTAGCCTTGTATTTACGTTTTTCAGCCTGTAGAATATCTGACTGTATTGCAC

A\_14\_P135193 TCAAAGATATAGAACCCAATGGTTTCACTGGACAAAATAAGCACTTCAATTTTCCAACC

A\_14\_P110797 AAGAACACAAATCTGGTTTTTCAGGCTTTGGAATTATTGGCTTTGTGTGATTTAAATCTGT

CUST\_5653\_PI426210822 TTAGTCTGTGCGCAGAGGGAGAAGATCTGGGGAGGACCCATATAAC

A\_14\_P101303 TTCTAAGATGGCATAGTGTCTTAAGACTTAGAATTTCTCTGGTCTTGGAGGATCACTCTA

A\_18\_P13647644

CTGCCACTATTGTCTAACCATTGACCAACTTTTCAGTATTATCTATTGTCTCTGCTACGT

A\_16\_P15416146

TCTCCTCTCAAATGAGTTCAAATTTAGTCTTCCTAACTTCTTTTCTATAGCCTCTTCCTT

A\_16\_P15623256

CTAGTCTTTTGCCTTTTACTTTTCCAATAACCTTCTAGTCATAGTAAATCAGCCTGCTGCT

CUST\_1907\_PI426210822

GAAAACATGATCCAGTTTTATAGTTTTTCCCTTCAGATGATTGTGATGAACTTCATAGTCC

A\_14\_P106527 AATATTTTTACATGTCATATATTAATATTTAATGAGAAACAAAATGTCACATAAACAGCC

A\_14\_P126070 AAAAATAATAGACTCGCTAGTCAGTAAAGATATTTGAATATGTATCGTGCCCCCTCTGGT

A\_16\_P58424297 CTAATTCTGCCTCTGCTACTTCAATTCCTATGCAACTTTGGGCAGGTTTCCCTAAT

A\_14\_P124208 CTATGATCTTCTCCCAAAGGAGTTACAGTTACCTCCATCTAGAGAAACATCTGTAGCAT

A\_14\_P115462 CTGCATTCATTTTTCTACATCTACTAATAAAGCAATATGCTATTGCCTGGCACATGGCTG

A\_16\_P18082315

ATGACTGTCCTAATCATATCTCAGGCTCAATTTTTCTTTCTTTTGGCAATTTTCAGATGGC

A\_14\_P137708 GATCACCCAAGCACATGCAAAAGGAATATAGTTATCTTTAGTGGGCTTGCTAAAGTATTG

A\_14\_P115045 TGAAACTACATGCTAGAAGTTGTATTCTAAGAATATGCTTGTGGAACACATCATGGGGAA

A\_14\_P100115 TTTCCATCTGACACGAATGTCATGTGGCTGAATGTGACTTTAATTTGTTTTTCTTTTGTTC

A\_16\_P00685150

GGTGCTTCATTTTTATTTAAAAGGCTGATTTAATAATAGAAAAGAAAACTCCAGGCAAAC

A\_16\_P58424174 GGGTCAAGGATCTGAGTGCATGTGGTTGATACACAAATGATCCCAAGA

CUST\_9013\_PI426210822

AAGCTGCAAATTATTTCTTTAATTTTGAGCGACGTTAATCCACATGATCTAAATCATACA  
A\_14\_P128911 ACTCTGGGAGGAGTTACTTGAAGTTCCAGTTGTTGTTTCACTGGAATAAATCTG  
CUST\_5421\_PI426210822 CTCATACTCAGCACCCAAGGTGGCAGCTGCACAGAGCAGAAATAA  
A\_14\_P104420 AAAC TTCAATAATAGGCAGTTTATGTCAGCACATGTAACGGATGACTTTTTGTTGTGGAA  
A\_14\_P201771 AATTTTTGTCATTTCTGAAATAGTACTCTGCCAGATTCTCAAAATTGCTCACGAGTTCA  
A\_16\_P16190988 GAGTTAAATTCTCTTACCAGATGCCAAATCCTACGTTTTTCTTACCACATCATGGTG  
A\_16\_P01415087  
TTTTTTTCCATCCTAACCATTGACTCTCTTTCCAAAATACCAAAAACATTTTCATAGCCCC  
A\_16\_P40094792  
GCCAGGCTTTATCTAAATTGATTTTCATCAGACTTGTCAAGAATTCAAATCATTTCCTGCTG  
A\_14\_P109134 AATGTGATGGCAATGAATGTTCAACTCCATGATCTCTTTACATACTGTCTTAAGCAGAAG  
A\_14\_P112026 CAGGGCTTCTATGTCAAAC TATTTGTGCCTCAATCAGGCAAAGAATATAAAGGAAGTATT  
CUST\_88\_PI426210822  
TTCAGTGGGAAAGTATTTGCTCAAATCTCTGCCTGCTATTATAGTTGAAGGCTTG  
A\_14\_P119143 ATGGATTCAGGAAAATACATACCTGATTGCACTTGCAGATAAGTGACCATAGGAGC  
A\_14\_P100545 CAGTAACAGCAACAATGAAAAATAAGATTGCAGGTGCATACCTTAACCTCCTGATTGGTA  
A\_14\_P117648 GTAAAAAATTA AAAACA AAAACAACCTACCCACAACGTGTTCCATTTGTCATGTTCTGGT  
A\_14\_P123718 AGCACTGTCACATACACACTCTTCTGAAATTCACAATAACCTTTTAAGATAGACAGGGTA  
A\_14\_P121646 AATGTGTTCTTCCCTGTAACATTAACAATAACTCCAGTTCCTATCCTAAAAAGGGCACTGC  
A\_16\_P01397650  
ACTATTGCTTGTATCTTGTAGAAGGTTGTATTTTTTGTCTTA ACTGTGTAATGCTCAGGCC  
A\_14\_P114292 ACATTCCTTTTATTTTAAAATGCTGACCACTAGATGATGAGGATAAAAATGCACGGGAACT  
A\_14\_P121377 CTCGTGTTTCGCTCTGTCTACATCTACAGATACTTCTTCCCTTGCGCAG  
A\_14\_P107290 AGCACAGTGGCTTATAAGGAACCAGCAGTGTTTTTCCCTGAGTAATTATGAACTTAGT  
A\_14\_P100674 ACTGGTTTTATCAAAAGTTGAGAGAAAACCTTCAACAGGTGAATATGCATAGGTCTATTTA  
A\_16\_P00864684  
ACTTCTTCATGTTTACAATTTCTTTTCTGCATTACGATTGGAAGATATCACTGCTCAGGCT  
A\_14\_P202431 TAACGTAAAATAAAAAATGGTTTCTCTCCCTCTATGTGCCAGACAATGAGGAAAAGAGA  
A\_14\_P121918 ACTTCCCAGGATATGACTTCTCTATTTCTTTGTCCAGGAGGAATATATTTATTTTCCCT  
A\_16\_P01190558  
AAACAGTAATGTGCACATCTATTTGTCTTCCATTCTTCTATTATGCCCATGTTAGCCTT  
A\_14\_P112422 ATGACACCAACTTGCAAATAACTTGGCGATTGACTTCATAGTTCAATGGCTGTAAATA  
A\_16\_P58424346  
TCAGAGCACCTAAGTATATAACAACACTGACAGATCTGCAAGGAGAAATTGATAGCACTAT  
CUST\_3322\_PI426210822 CCTGAATGTTTGGTAAGGGGTGCTGGAAACTAGGGCAAGAAAAGA  
A\_16\_P20881876  
AAGTAATTCAGTTGAAGTCATTCCTCTAATCATTA AAAACCCTGGTCATGGTATCATCTGG  
A\_16\_P58424376



TGCAGTATATCCCAAAGTAATTATTTGAGCATGTAATCAATATTTAAACAACCTGTGGAG  
A\_14\_P118027 GACCAAATCCAAATTACCTTCTTTTAAAGTCCATTTGATTGAGCCTGTCCTCTTGCT  
A\_16\_P21507536

AAAACCTGATGTTTGACCAAGGATTCTGTAATATAAGTTTGAAACCTGCTAGAGTTTTGCA  
A\_14\_P133187 CTAGACTCAATGGAGTCAGGGTTAGAGAAAATAGTTTCCTTCTCATCTACTGTGTCATAA  
A\_14\_P117329 CCTCATCCCCACACACCAAACATATTTTTGAAGGTCTTGAAGATCCAGTAGAA  
A\_14\_P125472 ATGTGGAACCTAGAAAAGTAGGAACTTGATTGGTCTCAGATTTGTCTTTGAAGATCAGTT  
CUST\_44\_PI426210822 AAAATTCATCTCCTGCCCACTCCCCTACTCGTAACTCTCCTTTA  
A\_14\_P200842 GGCTTGGATTATATTGTGGATAGTGAAAGGTGTGTTTACCCCTTAAGTCATCATAGTATG  
A\_14\_P105679 CTATATATTAAGAGAATAGAGTCACCAGGTAGGTAAGGGGCACTGTAGAATTCTCTGTCT  
A\_14\_P128123 GAATTCCTCTCTCCTGTTTACAGAGACCACAGATCAAGTATCTAAAAACATCCAATTC  
A\_14\_P138731 ACTCCTGACCCAAAAATCAGGCATGGCATTAAAACGTTGCAAATTCCTTTACT  
A\_14\_P119724 GGAAAGGAAGCAAGCAAGCAGGGAAATGAGACTAATATATTCCAGAAGTGTATTATGCAA  
A\_16\_P20032564

ACCAACCCTAATTCTCCATTTACCAAACAACCTCTACTCTCCAGTCTTTTTGAATTTTAT  
A\_14\_P136728 CTTGGTTGAACCCAGTCGCATATAGTTAAAGATACCTGAACCATAGAATATGGCAACC  
A\_14\_P122166 CTGACCATTTGTCTGCATGGAAGAGTTTGAGGACATGGAGAGAAGTCT  
CUST\_4682\_PI426210822 CTCCAGGGAACCTTCAGTGTGCCTGAAAAAAGTCAACCTGGAAT  
A\_14\_P128909 CTTCTTTTACATTTTCATCTGACACCCACTGGGCAAAGAAAAGGTCAAATACGACTATAA  
A\_14\_P125813 TCACCACTCTGGAAGCATCCACACTCAATTTCTAACCAAAAATAGCCTGTCTAT  
A\_14\_P122575 CTTGATTATCCATTCTGTTAGCATTTCCCTCCTTTGACTATCAGGAAAAGCAACAGTTA  
A\_14\_P125875 CTTGGCATTGAAAGGAGGTGTTCTGCAATGATTTTTTTTTCTTGTTTAGAGAAGTTTACTT  
A\_16\_P02030224

GCATGGATATTCTGAAAGCAAACTGAAATGTAACTTCAACTCTTTCTCACAGACACCT  
A\_14\_P201448 ATCAGTTATTTGTGAACAGCAAAAAGAACATAAGTGGTCGAAGTAGTTTCAGAAGAGGGTTA  
A\_14\_P126880 CTCCTGTTCCCTCCTATTATTAATAACTAAGTGAATTAAGGTTTAAGCACCTTTGTTTGCA  
A\_14\_P133825 GAAATAGGCATTTGAGGATTACATGTGGGGAAGTTTTGGTTAAGTATAAGTATGAGGTCT  
A\_16\_P02900030

GTCTACAACCTTCTCTAACTACTTCTAAACATAATCACGACTAATATATGAGCCAGTGCA  
A\_14\_P124614 CTGCAGTAACATTCTGTTTTCCCTCCTTAATCTTCTTTATCAAAGTCTTAATCCTTTGC  
A\_16\_P18998623

AAAACCTGCTGTAGTGTAACCGATAGAATTTGACCATCATTTCTTTTACTAGGCGTTTGG  
A\_18\_P14138043 TTTGCCCTGGGCCTGCAGTCGTGTTTATTTTCTTTTGACCTCAAGAT  
A\_16\_P21241988

TGTATAGTGCAATAACAGCCTAGGAGAATTAACAAGCATTTTGCCATCAATACTTATCCT  
A\_14\_P112093 GCCATATTTCACTTTCTATGTCTTTCTTCTCTGAAATCAGGTGAACATGCAAAATCAGAC  
A\_18\_P14218829

CAAGATACTCCTTGATTAACCTCATGTTCCAAACCATTTTATCTGCAGAAATCACCATCCT

A\_18\_P13499954

AAGCCACATTGTGTCAATTATCCAGATCCTAAACTATGACAATGTCATTAGAGGCATCAT

A\_14\_P115949 CTAATTCTATTCTGTGAATACTTCTGACTGGTGAGAGAAAAGACAAGAGTAGAATGGAG

A\_18\_P14136417

GCATAGTATTTGTAATGAAAAATTGTATTCTAAACCTAAAGATTACTAAGCCAATTGGCT

CUST\_4346\_PI426210822 CTGGGAATCTGTTTTCAACGTGTATCCTGAGTCATATTTGGGAAGCACTG

A\_14\_P110988 GAAGTCACAGAGCAACAAGAATTATACATCTTTGATGTCACAGATCAGAAAAGCAGAGTT

A\_14\_P137507 CTATAGAATCCCAGACAAATTCAAGGGACCAGGATTATCATTACTGATTCCAGTTATGTG

A\_16\_P16798925

AAAAGTAGGGGAATGACAAAAATTAGCAAAGGACACTAATCACAGTATGATAGGCCATTG

CUST\_10242\_PI426210822

CTCATTCCTGATTGACATTCTATTAGAAAAATGTTAGCTAGGAAGACCTGTTCTTTATTTA

A\_16\_P20515337

ACACTACCAGTATAGTTGAAACATTCTATGAACACTTCCTTAATAACATTCCCCCTCTCT

A\_16\_P35813965

AGCATGGATTCTGCCTGAGTTACTTCCCTTTTGAGAAATCATATCTCAAATACATAACCT

A\_18\_P17372593

AATGGGCAGAGTGTATGTATACATAAGTCAGTTTCAAATTTCTGGGTTCCCTCATCTACA

A\_14\_P127040 TTCAAAGATAACTTGTCTTTTAAAGCCACAATTTCAAACCTCTCTTCAAAGTGGAGCC

CUST\_5443\_PI426210822 TCACTCGTATGAAGTAGGAGTGAGCCTGTGCCTGATTTTGTGCAG

A\_16\_P03302414

AAATGGCTTGTTATTATATCCTAGAGGAATTCCATGACTCATTGAAAATGGCTTCTGTGC

A\_16\_P20362276

ACAACACATCAGACATTTCCAATTCTACCTCCAAAAAGAGATATGTGAACTGTTTCAGATC

A\_16\_P16191154 GTTTTGTTCTTCCATGTTTGCAGTGGACTGTAATGATCGGAAAACCATGTTCTAGAA

A\_14\_P135985 AGTGATTCAGTTCTCTTCAACCCGCATTGGCATTTTAATTACTGTTGGGTAAACTAATT

A\_18\_P14138205

TCTAGGAGTGTCTACAAGATTATCATAGGTGAAAGTAGGGTTGGATGCAGAGAAATAGTA

CUST\_6026\_PI426210822 TATCCTCTGTGGGCCAGTAATCAATAATGCTTGAACAACTAGTGTGGTG

A\_16\_P17832615 CTACTACTGGCATCTTACCCTATTTGTCCTGTCATGTATCTATCCCTTGATACATTCATC

A\_14\_P115024 TTCCAATTTTCATATGGTTTTGGGCTTCCACTAAAGTGTCTAGTAGATTAGAAGATCTCCTT

A\_18\_P14133119 CAGCCAGAGCACAGGGTATTATGGCCAGCAACTGGGTTTCTCAG

A\_18\_P11936056

AATCAAAGCATTAGAGAAGGGTTATTCAAAGTCCCATCATACTGATTTATTTCCCAAGCC

CUST\_4017\_PI426210822

TAGGTCAAGGTTTTTCATAATTGAGTTTTAGGGGGGCTAATTTTACTTTCTGAAAATCA

A\_14\_P118282 TTCTTAAGATGCTGAGGTATTATGGTGATAGGCATACATAGTCACCTGTATTGTCACAGT

A\_14\_P139791 AACTCTCCTCTTTCTTCTTCTTGAGAGAGACAAGATGAAATTTGAGTTTGTGTTTGGGAAAG

A\_14\_P131842 TTCTCGGATTAACCTTTAATTCACCCAACTAAGAAATTTCTCCAAGCCATAAGCATATGA  
A\_14\_P109911 AAAAAACATACCAGGCTGTAAGTCAATGATCTTTGAACTTTGTCTTCTTCAACTTTGTCC  
A\_16\_P20739086  
TTATTTCTTTAAATGTCTTTAGAAAGAACGCGTTTACTGGTTTACCACAATCCCCATCCC  
A\_14\_P109824 ATTAAAACATCATACAATTAAAGGCAAGCAACAAACAAGGGAAAGGTTTTTCAGCGTATGC  
A\_16\_P02220400  
TCCTGCATCTAAGCCTAATATATGGCATCAAAGTTCCTAATATATGGCACTCACTGA  
A\_14\_P127643 GTATACTGAAAGGCAGGGAACCATACAATTCAGTTCTGGATTTCAAGATCTTCAAGTG  
A\_14\_P118946 ACATCCAAGTCTATATCAITGTTATCTCAGAAATCTAACTCTTACACAGGCCTAAGATGC  
CUST\_2626\_PI426210822 TGCTCCAGAGATGAGGGATGGGGGATGAGGTTGGTGAGAGTGAT  
A\_14\_P129233 ATTTAAATAACAACCTTTCCACAGTCTCCATGTCCTGAATTGTTTTATTCTAAAAGAATT  
A\_16\_P01847105  
CAGAGTAGGTGATGTTTGTCTTGTCTGGTGAAACAAAGGTTATAAAAAGAGAACATGTTTG  
A\_14\_P200579 TGTTGATCACATACTGTTCTGTGTCAAGCACCCAGGCTTTTTCC  
A\_16\_P15843444  
AAGTCTTTTGAATCTTTCCCTGAAACGATCTACACCTGCATTTTATGTTGACCTCTTAACC  
A\_14\_P137017 AACTGTAATAGTCAGTGAGAGAGGTGAATTTCTGCTCCATTCAATAGTCCAGGTCTT  
A\_16\_P00685000  
TAGGATACAAACATGCAAGGGACTCAATTTTCTTTTTTCTAATAACACCCAGAGTGTCT  
A\_16\_P02750844  
CTTTAGAATGTTTTTACTCGACTATCACCAGAACTAACAGTCTACTTCTCAAAAGGAGC  
A\_16\_P18152520  
AATGTTTTTCTTGCTCTCCATACATATTTGAAGTGGGCAATGATATTCAACACCATGCAG  
A\_14\_P108291 CTTCACTCATAACGTTTAATAGTATCCTACCTCACTTCATTCACTTCCCAACTTCCTTTT  
A\_16\_P36864904  
AGGGGACAAAGATATACTAAAAAGTAACCTGGGTTATTAATCACACTTAAGTGAGCATCA  
A\_14\_P132069 AATTTCCCACTACTTACCTGCCAGAATCATTTCAGCAGTGAAGGATATTGTGATAAC  
A\_14\_P129924 AGTGCCTGAGTGTGATGTTTGCTAAAGGAACAGATAATTGCATCAAAACCTATTTCTAG  
A\_18\_P16527536  
AAAAACCCAGGTGTTAATTTTTGTAATTGACCTAACTGCCTCATTAGTGTTATTTCCCC  
A\_14\_P137937 TCAATTGGAAAAGTCAGAAATTGATTGATGGTACTGTTATCCCTAACCCAGAAAATGTCT  
A\_16\_P58424312  
CATTTCTTAATCTTCACAACAAGCATGCAAGGTTGATTCTGTCATCCCATTTTACATCT  
A\_16\_P01769709  
TTCATTGCAGACAACATAGAATTCTATTGGGCAGATATTATCCACTGTATCAACTCAGCA  
A\_14\_P103801 TTATTCTGCATTCCCTATATGTGAGTGTCTCAACCTAAGTAAAACCTCACTTCTGCTGTGC  
A\_16\_P17336047  
AAATTTAGCACATGACTTATGAAGATCAAGCAACCCAAAATTTATCTACTGTGGCCTTGC

A\_14\_P129436 TGAGGAGCCAAAATCATCTGAATTAAGTAGAGATCTCATTGTCCCTGACTCATGATAAT  
A\_16\_P17844796

GGATAACCCCATATATCAAAAAATGCCACTAGTTTCAACATAGACATAGCAGTGTATCCC

A\_14\_P200533 TGGCATAACAATTTAACCAAAGCCCTAAAAAGTCACCCAACTAGTTTTAAAAATTGTGTC

A\_14\_P126111 CTTATTATTCCATTGGACTGTGAAATAACGTTTCCGTCTAAACTTAAACCAGTGCCTTTC

A\_16\_P19639144

AACTGAAATTCCCATAAAGAAGTTCATGATTTATGCCCAAAAACCAAGATTTTCCTCGTG

A\_14\_P132864 GGATTACAGTGGGAAATTCTAGGTGATGGGTATATTATCCTTTAGAACTTTTCTGCAAC

A\_14\_P138617 CTTACAAAACCTAATGTGTGTAGTGTGCAAACTAGAACCAGTTATACTTTCATCACTTAC

A\_16\_P15220285

CAGACTCTAATCCCAATATCTCCCAGATATTCACAGATACCACATTCTAACCAGAATAA

A\_16\_P20515179

CCATGTCAATAAGCATTACAGTAGTAGGTAACAAAAGCAAATATGCATACATGTGTCACC

A\_14\_P127630 ACTAAAAAAGAGAGGGATATACAGTAAAGCAGTGATTGGTATGAAAGGAGCAGGGTTTG

CUST\_9570\_PI426210822

TCAGGAAAGCTTTTACTTTCACTATCACATATGAAGAATGAACTAAACACCTAACTTGGA

A\_16\_P19457770

TGCGTGTGTATCATTTTTTTTTAGGAAGAGACTCCAGAATATTAGCACTGCTTACATCCAA

A\_14\_P120655 ATGTATTGAAATCCATATTAATTTGGAAAGACGTGGAGAGAGGATGAGGTTTTGACATGT

A\_14\_P125415 ATACACTTTTCCAGATTTAGATAAAGGTGAAGGTTGTTTGGGGTTTGAAATGTTTTCTT

A\_14\_P123944 AGAACTTGATCTCTTAGCAATCTAAAGCAGTGGAATTGGTGTAAAAAGCAAGGAAATGT

A\_14\_P115417 CATGAATAAGTCTCAATGACGGATAGGCAGTTCGCACTTTCAGTTTATTCTTAAGGATTA

CUST\_581\_PI426210822 TTTCTAAGGAAAAAGGAGAAGGGCCCTGAAAGGAAAAGGGCTTCT

A\_18\_P14122332

ACACTCTTCTTAATGTCCAACCTTTCCAAAATATCGTATCTGATATCTACTACCTCTTCCA

A\_16\_P18537595

AAAAATGTTGAAGTTGAATCCTAGAACAGTGAGCATACCATTATTCCTTAAGAAGGCACC

CUST\_5134\_PI426210822 CTAAGGTCTAGGGGAAGCTTCTCAGCTTCTGGATACCCTCTCAG

A\_16\_P16372780

AAATGCAGTTTCTAGCAATTCTATTTGTGCAGGTATCCCTAATAATCAGTGACCAGATT

A\_16\_P01246654

ACATCTCATGTTTCTATAGTCTCAACACAAAACAGTAAGAGATATTACTCCTCCCTGTCC

A\_14\_P119562 GTAAAAGTTAAGGTGCAATCAGAAAACCTAAGTGTACAGAAATGAACTTATTGGCCACTC

A\_14\_P117406 CTCAAATGTGTTTAAAAGGAGAAGCAATCCAGTGAGCAGAGGAATAACATATGAATCACA

A\_18\_P22605645

TCACTACATCATGAAATCATTTGTAATGGTTGCCTAAGATAATTTAGTTTTTAGATCCCA

A\_14\_P102346 CCTGAAATTGACAACCTGATTTTCATTCCTAACCTGCAGTGTCCCTAAAATACTCATTC

A\_14\_P124138 CATAGATTTGAATATAACCTGCCGCTTTGCAGGTGTATTCCACGTGGAGAAAAATG

A\_14\_P134383 ATCTATTCCATTTTTTTTGCAAAGTGGAATGCCAGTTTAGTTTTCCAAACCTGTTGAGAAT  
A\_14\_P201761 TGTTTTTCATCTTTATAAAGTCAGAGTTGGTGTCTATAGGCTCTCTACTGCCACATTCAAG  
CUST\_8016\_PI426210822 ATTTAATTCAGATCTCCTCCCAGTGCTGACTCTACACCAGTCAAGACC  
A\_16\_P19850177

TCGTTCTACACTTTTATACATAACCGAATACATTCTCCACTTCAGATGAAAACCTGCCACA  
A\_14\_P118488 AGACATACAAGGAAACCATTCCCCAACATGGCAAAAAGTGCCAAATAGCAAATATATTTAA  
A\_14\_P131807 TTTGCACAATGTGCGCATGTCTTAAACATTCAATCAAACATCGATTACTTCCAATTTTTGCA  
CUST\_8656\_PI426210822 TGGCTTATGAAGGGAAGAGGGGTAGTGGTCTTTCCAAAGTTAAGTTTTACTCA  
A\_14\_P120917 CTTACTCAICTTTCCCTTCTGATTCATTTCAATCTCCTACTAAATACCTTCCTTGCAGGAT  
A\_14\_P128463 TATTCATATCCCTGTCAAATTTAGGAACTTGTAGCGAAGAAGGTGCGTCGTCAGTTA  
A\_14\_P106881 AACTCTATAGATTTGGAAGAGATTAACCTTCCTTGGCTCATATCTTTTGCATCTCACACA  
A\_16\_P02992222

CTACAACCTTATACATTACCACTACAACATTGAACAAATATTACTAGCATCAATATCACTT  
A\_14\_P135360 AATACACACACTGTTTTATTTGCTAGATGGTATATTCACACATCAGGAGGTGTCAGTGTAT  
A\_18\_P14393790

AAAAGAAATGCAGCAGTTTGCTTTGAAATTCCTTGGTTAGATGAAGAAATTGCAATGTGC  
A\_16\_P20015841

AAATCCTGTGAGTAAAATAAACGTCTAGGTAAGAAGTGTATATCCCAGAGCCAACACAG  
A\_18\_P16640655

CATCAGTTCACAGTATTCTTCATCAAAAATCATCACCAAGAATCTTACTAACAGACCACA  
A\_14\_P130272 TAATAATTATTGCGGTGATTTTCTGGCTTAAGCAAACATCTGCTGACCCCTAACAAAGTTA  
A\_14\_P101754 AATTTCTGCTCCTGCCTCAAAAATGTCCAGAACGATGTATGAATTTTAAACTGTTAGAA  
A\_16\_P20882487

TCCTAAATCTGACACCTTTCAAATACTTTGTATCAGTCGTTCCCTTAACTATTTGCAGCA  
CUST\_7920\_PI426210822

GATTTTCTTAGAGTTTGTCTTTCCTGAACCACCAAGATCTGAAAAGGCAGGATTAG  
A\_14\_P127588 GTCATGACATTTCCAACACTGTGTGAATTATCTAAATGCGTCTACCATTTTGCCTAGG  
A\_14\_P124962 CTTTAAACATTTGAGTTTTATACAGTTTCACTGAGGAGGCGTTAGCCAAAGGATGCTTTTA  
A\_14\_P137306 TGTTTGGTTCAAGTAAAGCGAGTGATTTCCAAAGGTCTCAAGTCTAATTTGGTATTCCTA  
A\_14\_P139004 TGCTAGAAACACTAACTTGCAATAAAGTGCAGTTTTTCATGCAAACCTTAGCCATCAGTTTT  
A\_14\_P117912 TTAGTCACTGTATATAAAACAAAAGAAGTCACAGTGTGCCTGGACATTATTTGTCCCAGAT  
A\_14\_P108967 TGGACTTGCGCTTTATATTTTTTTTAAACAAAATGTATTCATCTTTCTTGGAACTGAAAAA  
A\_14\_P201662 ACAAACGGGACACTGATCAAAATCAACTTGGACAAGTGACAAGAGTGAGTCTTAT  
A\_16\_P00788766

ATCATTAGGACAAGGTCAAATAATCCTCTAAGCAGAATTTCCCTTACATTCCCTCAACAC  
A\_14\_P108256 TGATGTATTTGTCTTTCCATTCCCATGATCTCTAGAATATAAGGGCATTCCAACACATTG  
A\_16\_P20889331

AAATGGAATTGTGAAATGGATGAGTCTGATATCGAGTGTTTTTCAATCTCCCTATCTGTGT

A\_16\_P21085212

AACTCTCTCTATTCTTTCCACCATATAGTCCTTCACTATCATGGAATCCTCATGTTTCAGG

CUST\_949\_PI426210822

TCCCCTTTCTTATGATTAGTTGAAATCTGAGTTTGAGCAAGTCTTGCTGTTTTTCAGA

CUST\_10244\_PI426210822

GAAGACCTGTTCTTTATTTATTGACTTGCATTTATTGAGAAGTGTGGGAATAATATTGT

A\_16\_P35261835

TCAGACTTGTGTTTATTAATGCAGAAATTATGAGGTGGTCTCTTCATTTGACAAAATGCCT

A\_18\_P14870503

CACTACCAAAGTAACAGACGTAATACAGCAATTCTCCTTTACCACAAAATCCTTCAATGA

A\_14\_P100123 TAAGAATGATATTCTCAGCACCAGCACATTAAGCACTGCAACAAGTTTCACAGAAGTATT

A\_14\_P139624 AACAAAACCTACAGTCAATTAATTTCTATCTTACTCTACTTCCAACCTCCAGGCAAGAAG

A\_16\_P16074053

CAGTGACTAAATCTGGTAGCACATTAGCAGTATCACTACTCAAGGGCCTATTAAACATCA

A\_14\_P113062 TGATGCTGTAAATGTTTGTGTCATATATCTGACTCCCTGTGATTTGATTTTCATGACCAC

A\_16\_P03108441

GCTACCTGGTTATGTAATTCCAAATTCATTCTCTTCTAAGACATACAATGGCACTCAAG

A\_14\_P138409 AGTGCATGGGCAGCATGCTTATTTAAACTGTCAACCATAACTCAAAGCATTCTAGTTTT

CUST\_7438\_PI426210822

GGAATGGTAATTAATGAGTCCATGTTTAAGGGGCACTTAAGTGGATTAATAATCAATATG

A\_16\_P40174807

CCCATGATCAACAGAATAAGTCATCACATGATCCAAGTACTAGAAATGTTACCTGAATCACTTC

CUST\_2062\_PI426210822

ACTTAAGAAATCACCAACATGTGTGCAGTTCAGATGTTAATACAGACACACATCTCCA

A\_16\_P36230611

GTCTTTGTAAACTGTGAAATGCTCTACGACTGTCAGCCAGGATTAGTAGTTAATGCAC

A\_16\_P00728906

TCTACTGTGACTAATTTAACACTTCTGAACATCTCGATGTAGGCTAGTATCTAATGGGCC

A\_14\_P118049 ACTGGATTTTGCTTAGGCTCGTGTGAAACTATAAATCTGCTCTACTTTAAGAAGCCTGT

A\_18\_P22839215 TCTGGGCAGTGAGAACTGTCCCATGGCTAGATGGACCAGAATAT

A\_16\_P15193656

AAATGCTGAATGCAGTTCCTCTAGAAAAAATGCTTAACTTTCTGTCAACCTTCTGGTTT

A\_18\_P22841588 ATGTTCAAAGGCTGTGTGAGTGAAGAGGTGGGAGAGTGTGCTGAA

A\_16\_P38540333

GACAAAACCTCAGCCATATAACTTGTTTCTCAATCTTCAGTCTTATTTAATAGGCATGGC

A\_14\_P124260 ACTTTTTGCATTGATCGTTATGAATACCAGACCATTTGTAAGTGTGGTTGAAGAGCAAAA

A\_14\_P124563 TTGACATGTCATTCATGAGAGGGACAATCAATACGATGATGTTGTTGTGAAAGTTAAAAT

A\_14\_P131652 AAGGTGGTTAGTAATCCATCTATGCATATCCAAATGTATTCCCATCTGTTTGCAAATGT

A\_16\_P20165883

CAGAAATGCTCAGTCATTTATAGCCACACGTTTTCTATTTTTTCACAAAGTGCCCTAGAAT

A\_18\_P22841567

TGTGAAAGATACAATTAATATTGCTTATTAATACTAAAAAAGCATTCTTAGAATCCCA

A\_14\_P126354 CTACGGCATTGCTCAGTAAGTTGAGGTCAAAAATAAAGGAATCATACTCTCAAAATTTT

A\_14\_P116247 CACTCAAACCTCCTCCTTATTTGCTCTTGTCATTTTTGGCTTCTAAATATCAAGAGTGTTT

CUST\_7742\_PI426210822 CAGCAAGAAACCCTGAGAATATTGAACGTCTTTGCCAGACAAGGAAAAGT

A\_14\_P133754 TGAATCTTTTCATGAGTTATTCATTGCCCCCTTTAATATAGCAGAAGGATTTGGTTGTA

A\_14\_P109271 CAGAAGACGAGGATATGGCTTGTTATTAATATTCTCTGCTTGATTGTTCTTTCTGTTCT

A\_18\_P14588981

GGGGAAAATCTCATGATTTCAATGCATAAGCCTGTATAATACCTTATTCATTCCGAATGC

A\_14\_P113871 AGCATATTGCTGTAAAGCCTTTGATTAAGAGATAATTCTTAATAAATGTCCCAGGTCCCC

A\_14\_P122131 CCTTTCTTAGCGGTTCTTACATTTCTCCAATTCAAACGCCATATAAATTACCTCCCTTAA

A\_14\_P129673 ATCCACTTTGGCAGCAAACTTCTTTAAAAAATCTATCCCCAAACAGTAAGTTGCTCTAA

CUST\_3460\_PI426210822 CTCCTCCTTTAAAGTGTTTTCCAAAGTTAGTTGCCATCCCCAAAAGG

A\_14\_P112671 CACATTGGGAAACCTGTCAGAACATTGTTGGGAAAATAAAGTGAATCAATAGAATGTCAA

A\_16\_P02951303

AAATTCTGCTGATTGACACTAATACCGGTATTTACCAATCTTCTGTAACGAGGTAGACTC

A\_16\_P40127409

AAACATGACAAAATGAACGATAAACTCAGAAAACCTCCCTAAAATGAATTAAGCCCCCTCC

A\_14\_P125060 AGGCTTTTATGTCTGTGCGAGTTAATAACAATTTACCTTTGAATTCAGCCAGTGGTCA

A\_14\_P113048 CTCATTGTTGGCTTCCATAGAAAATTATCTTGACATTGCATCTGTCCAGGCTAAATACAA

CUST\_1881\_PI426210822 GAATCTGGATTCTGGATTAGCCAGATGAGCTGAGACCACTGGTAAT

CUST\_1469\_PI426210822 TGGGCCTGCAAGGGATCTCTGTCCCTTCTGGAGTAAATGAAATAAT

A\_16\_P15132723

CAGCCCATCACCTTTATATTACCCATAGTCCTTTACATAGTATTCTACTCATAGTTGTGG

CUST\_9059\_PI426210822 CTTCTGACCATGACAGCTCCTTTCACTGAGGCTGACCCAGACTCT

A\_18\_P15474245

ACCTGGTAATATCTTCAAGGTTCTATTTAATACGTCATCCACTGGTTATTGTATGGAGC

A\_16\_P00444380

AGCCTAGTCTCTAAACCATTATCTTTGCTTAATACTCCTCCTAACTCTGAAATGCTAA

A\_14\_P102402 GAGGGGGAAAATGTGATCCTTTCACTTTCTCATTGTGGTGATACTAATTACATGTTTA

A\_18\_P16603972

ATTTGCTCAGTGCTAGAAATATTTGTTCCCAAAAATAGAGTATCATAACACACTTGGCCT

A\_14\_P109863 ATGGGATTTGCCATTTACATCTACCCACCCTCACTCCATTTATATTTAGTATTTATCAC

A\_18\_P22841649 TCAAGAAAGCCCATCTGCTGGCATCTCAGGCATCTTCTCATGCTT

A\_18\_P14133439 CATCCTTTCTCAACGAATCTCCACCTCCAGAGAGAGCAGATCTTTCT

A\_16\_P41352255

TCACCTGCACTGAATATAACTTACACCTTTTAATACAGGACTTATTTGACTTTCAAGTCA  
A\_14\_P100384 CTGGCTAGCCAAGATTGTTTTCTTTCTTTTATATGGGCTATGAGAAGGATCTGGTTTCA  
A\_14\_P120965 CACCACCATGTCTTTACATCTCTCATCAACTTGCTTATAGTATTACAGAGTCATCCTCAA  
A\_14\_P123090 GTCATCAATGACATCAACAAAGAGGAAAGAAAGCACGCGCACATCTCTGT  
A\_14\_P202086 TCTGTTTCAAATGTTTGACCTTGATGGCCTGCAGTGCTCTATCTCTTTTAIGTATTTTAC  
CUST\_847\_PI426210822 GCCATTCTGGGGAAAGAAAGGGAAGAAGCTGACTCATCTGTAAATCAAA  
A\_14\_P200917 ATGGCCATGTCTGTAAATCAAAAAGAACGTGAGATATTAGAGAGAAACGATTGTCTCAAA  
CUST\_1136\_PI426210822 AAGATGTACTCCTCAGCACGTTACCTGGGCGAGTGGGTGCAGTCT  
A\_14\_P133171 ATGAATTGGGTAGAGTCTCTGGAAGGTTTTAAGCCCATTTTCAGTTCTAACTTACTTTCA  
A\_14\_P111696 GGACTTTACTTAAACAAAACACTTGAATCTGCGGTCATCAAATGAGGGTGGAGAA  
A\_14\_P100638 GCAGGCTGGATTTTTTGCCTTGATGAAAAGGTAGTTAAATTTACACTTATTATAGCACC  
A\_14\_P125791 AAAATGGACTGAATTGAGAATGACAGACTCTGGGTCTCAAAAATGTTTTTTTTCCATAA  
CUST\_8218\_PI426210822 ATGGTAACAAGCAGCATGGCTCCTGGGATTAATAATCTCAGCTGGA  
CUST\_3864\_PI426210822

TATGTTTAATGAATGAAATGATGATTAAGATAGGACAATTGGACAAAAAGGCTGGGCCTT  
A\_16\_P16854543

GGGACAGATTCAGAAATATACAAACATGCCTAGTAACCAATTTCTGAAATTGCAATGCT  
A\_14\_P106554 GACTTTTTGTGCCTGCATGGTATCGATGGTATTGCTAGTTTTTCATTTAATTACTGTTCACT  
A\_14\_P119590 TGCTTCTGCAAACCATATTTATGTAAGCCACACAACATAAAAACCAACCTGTAAGTTTTTC  
CUST\_2621\_PI426210822 CTCAGCTTCACCCTCATCTATGTGAACCCTGATGCCCTAACCCCTG  
A\_14\_P107942 GACAAGACATTTATAACACAGTCGGGAAGAAACATTTCCCTAATTCATCTATGACCAAGA  
A\_14\_P201624 GAGACGTCTGATCTGGTAAGATGTTATCTCCCTCTTTTATAGGTGCATCTAAATTAAGCA  
A\_14\_P105820 ATCAATAAACTGCTCTCAATCTCCGGGTCTGTGAGTAACATTATCTGCAGCAAAG  
A\_16\_P41112722

ATATCACACCTAATCTCACCACTCTACCTCATAATCAGCATTGGGTGTTCTTATTTCTGC  
A\_16\_P19856988

ACACATCATCCCCTATTAACAAATGCACAGAGTATCCATCTTTCATCTACAAAGTCTGTT  
A\_14\_P126583 GTGATCGTTGTGCTTTTTTTTTCTGTGTTGGTTGCCAGTTTATAGTGCCAACAC  
A\_16\_P16705975

AAAACATGCTATACCCTCATTCTTGAATTTTGCACAATTTACACATATGGGCTCTCCTTC  
A\_16\_P19746691

ACATCCTTAAGAGCCTGAAGATACATGCCAATCTCATTTGCTTATGTAACACTACAAAAA  
A\_16\_P17973305

GCCAGGACATATACACTATCTTTAAAAATGAATCTAACCCCTTAAATGAAATCCAGCAGCC  
A\_16\_P18339312

TCTCTGCTTTAATCCTTATTGTTTTATCCCCAAATACAGACATATCAATCACACACTCTC  
A\_14\_P111781 CTCTAGGTTGATGTAATTAACCTCTCTGGCCTCCAAGGTAGTTTGATGTTAGTTCAATTT  
A\_14\_P128677 ACCTCCGAAGATCTGTCCTTATAAACAATTTGATGAAAAGGATCCATGGAGAAATTATCA



A\_16\_P41272794

TGGTCAACTAACAATTTTTATCTTTGTGGCTACTCACTATTATTCAGACCTCACTTTCCA

CUST\_3646\_PI426210822

GTAAGCAAGCACTATTGTGCTTCCTGTGTTGAAGTCAGGGAATAAGAATTTCT

CUST\_2520\_PI426210822 CCAGTGGTTCAGCTACTTTTCTGTAAATGTGAGGTGAGCAAGGTGTTT

A\_16\_P00685275 CTTATCTGTTCCATGGGTGCAGAAGGGTGCAATGTGAACAGAAACAG

A\_18\_P16029848

CAGCGAGGTATCTTTACCATAATACCATTTGACTCACATTAGTAAGAACTGCAGGATTCA

A\_16\_P00467932

AAACCCTAGCAGTGATAACTTGAACCCCATCTTAAATATGACCACACTGAATTTTTTAGC

CUST\_840\_PI426210822 CCTTGGGAGAGGAGGAAGCAGCTGGATGCTGTCCGAGCATGGTG

A\_14\_P137221 GTAAAATACTTCTGCTGCTATCCTAAACAACACTGGAGACAGTGAAAAATACTTCGGTTT

CUST\_5475\_PI426210822 CAGGAAGCTGATGGCTTCTGCCTTGACTGGGAAGTACAGACCTAG

A\_16\_P21615994

TTTATGTGGAATACCAGTATCTAATGAGACAAAAGTCCTTGGTTAAAAGTGTGGTGGAAG

A\_14\_P201617 TTTTGACCTAGAACCCAGAAAAGTATCACTCTTTAGCAGAGAAGTAAGCCTTAAAGTGTT

A\_16\_P35618008

AAAACATTTTTTCAGAGAAATTATCTACATCCTGCTGAGAATTTTTATGCCAAACTGCAGCC

A\_14\_P134793 CTTCTTCTCTTCTCGGTTCCCTACTGTGAAATCGCAGCGACATTTA

A\_14\_P124462

ACCCAAAAGTCGATATTAAGAGGGAAAAAATCAGAAGTCACTGTTTAAGGACCAGAAAT

A\_16\_P36965263

ATTGTTAAGCATAACGGTCAACATAATTGCAACAGTTGAACTTTAATCATGACTCCGAGC

A\_16\_P16887035

TTACTGCCCTTTAAAGAATTACTACAGAAAGTCCATTGCTTTACTTACTGGTCACTGGTT

A\_16\_P18766082

ACAGACTCACCTCATAATATATCTTAATTCCAGAAAATCACATTCCCTTTACTCTTTGCA

A\_16\_P03472279

CAGAGTCATGATGCATAACTACCATCCTTTAGATACTTCATTAGTTGGATGACCACTGTT

A\_18\_P15117149

TGTAGCCCCTAAAAAATCTCTTATCCCTAAAAAATCCTCTTTCTGCAGTAATTTTCCA

A\_14\_P116794 GAAATCAGACATTACACGTGATTGGACTTGTTGATGTCTAAAATTCAGTAAGCGCTGAAA

A\_16\_P41781820

ACTTAGGCCATTCAGATGTCATATACACCATAACCAGACAAAATCTCTTCTTTAGGCATT

A\_14\_P107508 ATTTCCATGGCACTATATTAATACTGTCTTACAGCACAGGAAATGGCAGCACAGC

A\_14\_P114377 CCACAGAATGGGATGTCAGTGCTTGGTTGTTTTTAAACTGTATTTTTAATTTTTCAAA

A\_16\_P20243358

GCCTCACAAAATCATATCCCCAAAGTTGTCATTAAGTCTAGAAATAATCACCTTTTGC

A\_14\_P100085 CAGAGAGGCACACGTCACATCTTTTGGCTTTGGACTGAATTTTAACTAAAATATCATCTTT

CUST\_8055\_PI426210822 AATTGGATTTCTTGGGGATGGTGGTTGCCTAGTGCTGCTTGCATA

A\_16\_P41845121

GATTGCTTTTAAGGTGTTCAAAAAGTGAAGATCAAGCATTGGATCATAAAGAGCAACAGAG

CUST\_7806\_PI426210822 CTTTTGTTGCCTCTCCCCACCTGGGAGCAAATGCCTAGGACTTTC

A\_16\_P58424221

ATTGACTGTCTCATGAAATAGTGAGTTTCTTGTACCAGAGAGATTTAAGCAAGAGCCAT

A\_14\_P106396 ATGTTTTCAAATGTATACTTGAAGATGTTTCTCCTTTCTCCATTCTGCTGTCAAGTTGCT

A\_14\_P122134 CTTTAAATTCATTTGCTAAACCTCTGTATAGAATTTGTTTTTGTCTCTTCCCAACCAGTT

A\_14\_P120223 CTGAAGCGACTTCAACTTTAATAGGATAATAACTGAGCAGAGTGTTCTGTGAACAGGATA

A\_16\_P02078513

AAAAAAAAATCCATAGGAGTTACCATCTTCTATTCACATTCAGCCAGATAACAGATTTCTT

CUST\_4768\_PI426210822 CATCTCAAGAAGCCCTTACGGATGCCTCCCTCCCTTCATGACTC

CUST\_9753\_PI426210822 CTGAGAGCCATCTGAGGCATGGTTCTGCTGAAAACATTTATTCCAGC

A\_14\_P120503 AAATCCCTAAACTGAAGGGAAAAAAAAAAGTTTTTCTTCGAAATTTACTTCCAGGACGTCA

CUST\_9852\_PI426210822 TTAGCACAGGGGGCTGGGTTTTACAGCTAACCCCGCTGAGCTCAG

A\_14\_P105460 ATAGGTCTTAGTGAAGTTTCAATCTGTGAGATGAGATTGTGTTGTTTCATTCTGTCCCTACA

A\_14\_P200053 TGGGAAAATAAAGTGTTCTAACACATTTTTTCGTATTTTATGACGTTCTTTCCAGGACGG

A\_14\_P201406 AGCCTCTCTATTTCAGTGGGATTAATAAGGCTAAATATCAGAATTTAAGCAGGTGAGTCAAA

A\_16\_P15942074

AAAAAGAACAACACATTTTCAGTTTCTCTATGCAGTGACAACCTTTCTATTCTAGGCCTAGC

A\_16\_P19953889

ACTTTAAGCAACTCAGATGTGAGATTATGTCCTCAATCATTTACAATCCCAAGCAGAGTT

A\_14\_P134566 ACTACTTTCTCTTCGTCTCCCCTCATCCTTCTCTTTCCAAATATTCCTATCATTAAAAAA

A\_16\_P01396459

ACATGGAACACACTGATTATCTTCCATTTCCCTAACAACTGTATGTAATCAGGATTGCA

A\_14\_P101596 GTTTTCTTCAGTATCGGAAAATACAGTTTCTAGTTTTAGTCCAGTAAGTGTCCAGGGATC

A\_14\_P102374 CTTAGAATATGCATCTAACAGCAACCAGTTCATGCTTTCAACATTTGGAGTTTTCTTTGC

A\_14\_P103424 CTTTAGGGGTAAAGTGGGGAGTGATGATACTTAGTAAAGTATCAAGAGATAAAGGAGTGA

CUST\_4258\_PI426210822

GCCAGAATTTATAGAATCTAAAAATAGCAGTTGAAGTGCAGCTGTGTTTAGCTTGTGAGA

A\_14\_P123077 TGAAAAGTGA AAAACCAGCATTTCTATAACACTTTGGGCTTTGGTTATAAGTGCCATCTT

A\_14\_P112241 CCACATCACCAACACTTCTTTGAATCTTTTTTCATGATGATATTCACCATGTGCGCAAAA

A\_14\_P138659 CATCCTGGTAGCAGAATTCAGATTATTTAGTGAGAAAGTCTTGACTTACACTGGAAATCC

A\_14\_P201228 CTGAGAAATATTCTTTTGGAGACATTAATCTCAAAAATAATCCCTTAAACGCATGGGCCAGG

CUST\_8845\_PI426210822 AGAGGGAGAAAAGCGTGTGTGTTTCTGTGCACAAGTTACTCAACA

A\_16\_P39927904

AAACCCAGTATCTTTCTCCTGTAAAGTTCATACAGACAGACTTCATTGAAATTTAAGGGC

A\_14\_P106257 GGCTAACGAAGGGTTTATAACAACAAAAAATGTGACCCTCCAGTCTGAATTCTGAA

CUST\_7322\_P1426210822 GAGCAGCCCTGCAAATACAGATGAGCCCAAGTCACCTGTACAGTT

A\_16\_P19221833

ACTCCACAGCCTCAATTTTTCTTTATATCCCATTCTATCAAATAAACACTCATCTTCCCAA

A\_14\_P111052 ACACACTGGTAAAATATGTCTCAAATTC AAGAGTAATGGTAACAGATGAGTTCCCTTCTC

A\_14\_P133909 CCCAATACTGGTAAAGATGTGTGTCTAATCCATATGGCCATATTGAACTTCAAAGTGTTT

A\_14\_P200433 TTCTTTGAAGTATCTCCTGTGTCCCTTTCACCAGGTAAAGACTGTAAGCCACAAATAG

A\_16\_P17189281

GCAGTAATATTAGCATATATGATAGACATGAGACACGTTTTAAATCAGCAAATTACCCCC

A\_16\_P18149188

GAAAATCTAAACGTAGGACAATGTCATAGGAAAGGTGAATGAGAGTATGATGCCCTGATT

A\_14\_P115990 CTCAAAACATTTCAAAAAATAGGAGGAGGAAGATAGACTAGGCTATTGTAGAGCATCAGG

A\_14\_P122016 CAGTCTAGATGTTTTGAAAAGGAGAAAACCATCAAATGGTCACATAAATTGAAGTCTTGG

A\_14\_P105152 GTTCCACTTCTCTACTGTTTCTGAAAATCTTGAGTAGTTTCCAGTAAAAAGTAGGAGGA

A\_14\_P138481 CTTCCAAAACAGTATCACCTGGGTTGATATCCATCATTGAGAGAATCATATTAATATCCT

A\_16\_P58424248 AGAAACATGTGAGACCTCTTAAGGGGTAGGCTCAGAACTGGCACTATC

A\_14\_P126315 ACAGGTGTCTTCTATTTGTGGCAAAGGATAATGGCTTTTCACTTAGGTTGTGACATAA

A\_16\_P40344830

AAGAAGCATCCACACTAAACTATACCTAAGGGCTTATAAGAGACGAAAAAAAATCCCTCA

CUST\_5765\_P1426210822 CTTTTCTTCCTTCGTTTAGGCATGGGGCTGAATGGAGCTGAAAT

A\_14\_P113860 CTGTCCTGTCTAGAGCCCAAAGGTGGATTAATCTGCTTCATTTTTTACTTTTTCAAATTTT

A\_16\_P19251654

GAAGCCATGAGAAATGATCACAAGTCCTGTAGATTCATAGGTGCCTGTAAATGTCATT

CUST\_2903\_P1426210822 TCTCTGAGGATGGTTTTGAGAGCCATAAGCAGCTGATGTTAGTCTTGTG

A\_16\_P20686258

CATTTTTGTTCCGTTTTAAACATTGCTATCAACCAGTTGGAATATAGGCCCGGAGTATC

CUST\_5067\_P1426210822 GAGAAAATGTCATGAGGGAGGAAATGCTGGGATTTGCCTTGACCT

CUST\_8636\_P1426210822 ATGGAGAAGGCCAAGCTCCCTGTTTGATACTAGAGTCTAACTACATGTCAT

A\_14\_P138174 GAATTCTGCCATTCTAAAGGGCACATAGGCCATTTCTAATTTCTTTAACTCATAATTC

A\_14\_P108526 CTGCATGTCTTTGCTACCAAAAATAGGAACCGTATTTCTACTAAAACATAGTTGGTTCTT

A\_16\_P58424561 GCCCAGTTCTGTGGCCTGCTACCTGGGGAGCCTCTGGTTGTAATT

A\_14\_P121539 GACAGTCATAGGATGCTGATATGTTTTTCACATATCCTGGCTTAATAAGAAGATGTGCAC

A\_14\_P135318 TGTCTCAACCTCCCTATTTTTCTTCATTTATCAATGAACTGGTTTCAGTTCAATTCTGCAG

A\_16\_P01026320 CCCAATATCCTAATATTACTAATTGTGCTATATTCTCTTCGTCACAACTATATCCTGGG

CUST\_9607\_P1426210822

TTATGAGCAATCTCTCCCTTAATTTCTGGATAGAGACTAATCTGCTCTCACAGGAG

CUST\_897\_P1426210822 AAGGTTGGGTTTGAAGAGGGAGAGGTGGGCTAGCTCTTTTGAAG

A\_14\_P107043 CTTCTTGACACGTAAAGGTTTACTTCCTTTCTTTGCCTTTCATCTGCAATCTTAAACAT

A\_14\_P124568 TAGAACAAGATTGAGGAGCCAGTGTGAATATTTTCATCTGGCATTCTTTTCTCTACTGA  
A\_14\_P117724 CACAGATGTGATGCTTTATAAGGTAGATTTGCATTTGTTAAAGGTCATTCTCCACTGAGT  
A\_14\_P106388 AAGTAAACCGTAGTTGCAAGAATATACCATGAAGATTAAGTAGGCTGGGTTTCATTTC  
A\_14\_P111124 CTTATTTGTGGTGTGCTGACCCTAGATAAGTTATTAATTTTGTAAATGCCTAGGCCAAAGGT  
CUST\_410\_PI426210822

ACTAAAACCGAAACGGGTGCTTACATCTAACTAAAAATTATTGCCTGCTGAAGAGG

A\_14\_P115276 TTCCCTTCCTTAAAGGTAAAAATAGTCAGTAGTAATCCACAGACACAGGCATAAAGATGT  
A\_14\_P116083 CCATAAACTATTACAGCCTCAGACTCCTCGTGGGTTGTTGTTTTTTTTTAAATGTATG  
A\_16\_P20234452

AAAAGTCTTACAAATCATGCTTCTAGTTGCCATCTTAAAAATTATGTGATGCAGTGTGCT  
CUST\_9859\_PI426210822 CATTTCACAGAGGAAGAGAAAGTTGGTTGCCTACGGTTGCACCAG  
A\_16\_P02480614

TATCCTATCAAACCTACTTGTCTTTGACTCACCTATTTCAATAGTGCTTTCAATCTCCCA  
CUST\_2999\_PI426210822

TGTAATCTTTCTTACTTCAGGGCAGTTGTTTCAGGGAAGTTGTGATCAGTAGAAAG

A\_14\_P123894 GCATAATAATAATGATAAATTAGGAACATCACAGACGTGTTACACCATGCCAGATGTG  
A\_16\_P17712767

ATCACTGTCCAATGTCATCATAATTTCACTGCCACTTAAACTTACACTTCAGCCATAGAA  
CUST\_1708\_PI426210822

TTTTGAAAAATGCAAAGGAAATAAACTTTGGGAGTGAGAGAACAGGGGATGTTGATT

A\_16\_P02168228

ATGGAAAGCATTCAATCTCTACTCTAAACCAAGACTTCTTCATCTACCTCAGTAAGAG

A\_14\_P102908 GTCAGTTGAGACCAACTGAAAAGTGATTGCTTTTCAGTAAGTAACCTTATGATAACACGAC  
A\_14\_P131968 GACAATTCTCAGGTTTCATGCAGTTGATCAACAAATGCACATTATAGCCTGAGGAACAT  
A\_16\_P17273781

AGGTGGTCTCAATTTACTATCAGTGTAGTCAGTAACCAACAATTACTATTACCCATTGC

A\_16\_P35538657

GACCGTCTTATCCAACCTATACATGCTTCTTACTCTAGAAATTGTTGAATGGAAGTGCTA

A\_14\_P123463 ATGCCACGCTGTCTGTCTAAATACTTTTCTTTTATCAGTGCTTACTAGATATGTCTGGAG  
CUST\_3464\_PI426210822 GTGATTATGAAAGTACGATAGCTTGCTCACCACCTCTCTCCTCTGCTC

A\_14\_P118126 TCTATAATTGCGCCTAATTTTATTACCGGAGGGACGTCCTTTACTTTCAAGATTCTAAA

A\_14\_P114432 TGGAATCTCCATTTGGGTGTATCTTGTTAATAAATTCTGCAGGAACTGTTTCTGTTTTCT  
A\_16\_P19948346

GCATGAAAACCTCTCAATCCAATTATTCCTATACGCATTTTGAACAAATCATTTTGGCCC

A\_16\_P00685612 TCATATTTGACTTATACGGGAGGTCTTAATGTTTCCGGCTTATTGCCATATTCCATATGT  
A\_16\_P00685315

CGGAAACAACAACAAAACAGAATAAAATCCTCTTTAACTTTGTTTAACTTGGTGTCCCA

CUST\_1961\_PI426210822 ACTCGCTTTAGGAGACATTCTGTAGCAAGATGAGTTATATGGGGCCAAGT

A\_16\_P19252044

AGTGCTGCATAAACCCACATTCAAAACTAAGATTTTATTTCTAGACAAACCTGACCTGTGA

A\_14\_P126052 ATGGCTCCAGGTTGCAACAGGAATAAAAAATGCTGGATTTAGTATATGTGGCTATTACAT

A\_16\_P00608642

AAAGGATCCATATCTCCAAGGTAACACCAAAATTCCTATTGGCTGAGAACAATTTGTCTT

A\_14\_P136579 TTATCTCTACTCTCTAACCTCTCATAACAGAGATTTCTCTGGGGACGTCTG

A\_14\_P126516

CTAAAAGTAAAAAATCATAGAGCCGATTTGGTGGTCTAAAGAAGAGAGTAACAAGGCAGT

A\_14\_P130028 TGGCAACTATGGTAAAACCACATGATCTAGTCATGATACTGAAGAATCCAACCAAATGAT

A\_18\_P23937642

AAATGAGCCAACCTGATTTCTACCAATTCTACATGCTTCCTACTTTTGTAAAATAACTCGA

A\_14\_P107951 ACAATAATAGCGAAAAGCATGGGCTTTGATATTAGACATGGCTATGCATCCGAATATCTT

A\_14\_P125394 TTCTGATTAATTGCCAAAAAATGATCATTGTTTCCTGAAAAGCACCCCTGAAAGAGGGAA

A\_14\_P133209 AAGTTACTCTTTTTCTTGTTCACAGGCTAAAAGGTCAGATTCCTGAAATTAACAGACTT

A\_16\_P16728147

ACACAATGCATCTTCCTCTATTGAGACTTGACAAGTAACACTTAGTTTCCCACATAGTTT

CUST\_5322\_P1426210822 CCCTACCCCATCTTCACCTCCTCCCCTAGAATAACAACATCATA

CUST\_7977\_P1426210822 TTCATCCTTTTCTCCTGCCTGGGTCATACTCAGATCATTTTAATCTCCAA

CUST\_7532\_P1426210822 GAGGCTCCAGACAACCTGACTCAAAGACAGAGAGGACCATAATACCA

A\_14\_P112210 TGAATTGAGAAAAACGTTGCGTCTTTTTTTCTAAATTCATGCATTCCAGTAAGTTGGGAC

A\_14\_P138757 TGTTACAATTAGTGACATCAATGTGTTTACGATCCTTCATCATTTCAACTCCCCTTTGG

A\_16\_P03028146

AAAATTACCAGGAAGGCTTTAAGAAAAGACAACAACCAAGTAGATTTCCATACTCTACCC

A\_14\_P119361 AGAAAATATCTGACTCTGCATGAGACTAGGCTTATTCTCATTATTTGGCAACTTACCCT

A\_14\_P124115 AAAGATGCAGCATGTTCGATATGTGAGGTATAGGTCTACTTGATTTAAATGGAGACACTAG

A\_16\_P18423896

CTTAAAGAGCACAGGGTATTTTCATGGATAAAGTCTCCAGATTGCTACGTATTGTCAGAG

A\_16\_P30952284 CAAAGGCAGGACGCTGATCCCTTGCTATGAAGGTGAGCATGGATT

A\_14\_P112527 TGGTTTCTCGGTATATCAGCCATGTTTTTCCATGGCAAATAAGTAAGGCAGAGTATTA

A\_16\_P03016372

AAATCAGAAACACGCTTGACTTTTACATGCCTCTTAAACTCATCTACCAAAGTTCCTCTT

CUST\_4264\_P1426210822 GGGGCAGCAAACATTTCCAAATAGGGATTGACTTTTAAAGGGGAGG

A\_18\_P12078230

ATAGCAATCCCAGAGAAAACCTAACATGATGAAGACCCATATTAATCTCCAGCAAGTTCA

A\_14\_P127633 CTTGAGAGACCATCAAGAATTGGATTTGGGGAAGAGGTGAGTATTTGCTATACTATATTT

A\_14\_P124182 TAGGTGTTTTCTTCTTTATCTTGTCTGGCTCACTGATAAATTTTCTTCAGTGTGGTAACC

A\_14\_P126110 TCTTTCTTCATCCTTCTTGCATCCATCTTCTTTTTAATATTTACTGATTTCTTAACATCA

A\_16\_P15070795

AATGAGAGCAAAGATTATTCATGTCAGTCTAACAGCAATTATATTAGTGGGAGAACAGTT

A\_16\_P18659822

AAAAAGGAAGTTGAGTAACACATGTAGAAAGGAAGGTAAATAATTATCACAGCCACCTGAA

A\_14\_P119714 CTCTTGTCTCCATCTAAAGTTGGCTCATGCAAATGTAGACTGGTTAGCCTTTAATATAC

A\_14\_P133476 ACAAAGGTTTCTAAATCCCTTCTTTTCTATGCACTTTTTTATTAAAGAGGTGGGGTCCC

A\_14\_P121551 CTGGCAAGGAAATTACCACAGTGACAACAATACACTTTCATGTTTTAAATCATCTTCAGA

A\_14\_P103492 ACATTCCCAACTGTAAATCCAGTTTTGAAGTTGCTTTTTGATATTCTGTAATGACCCATG

A\_14\_P105069 AGAAAAGAATGGAGGATGTCAATACAAACCTTGCTACTTTCAGCATTCTTTTCAATCTCT

A\_14\_P201847 CTCTCCCCTAAGATTAACACTTTGGCCAAAATTTGGCAGCATATTATTCTTTAAAGTCTG

A\_14\_P200322 TTCATTTTCTCAACCATTATGAAATACTGTTTCTGGATATGTATAAAATCTTTGTGAGCA

CUST\_10372\_P1426210822 CTTTTCAGAACTAAGCTAGAGGAAATTGCCATCCTGGGTGAGGATGAAAC

A\_14\_P117011 CTGACATGATATCCATGAAGGCTTTGGAGGTATCAGAGAAGCTTCTTAATAAGCACAGG

CUST\_8188\_P1426210822

GAACACAACCAAGACAATAGAGTGCCCTTGATAGATATGTACAGGGACCAAAA

A\_14\_P103158 CTATTATTTCTGTTTTTTTATTTTCAGCATGTTGGAACAGGATTCCAGGAGAATGAACCC

A\_14\_P115633 CTTCTTTCTCGAGCACATTCAGGATTTCTCCATTCTTGGGCTCATGT

A\_14\_P100055 AACTTACCTGATGTGTGCATTACAGTATCTTTTTGCATAGTCGGTCCATCTTCCAAATTT

CUST\_4381\_P1426210822

GTATCAAATGCATTGTGATTGTGCTATGAGAATTTTGGGGGGAAAATTCCAAACTTTATT

A\_14\_P116199 AGGAAAATACTACCTTTGCAGAGGCATGATTTCAACAAGCCATTCTCGTATGTAAATTTGC

A\_14\_P129681

ACAGATAGAGACAAGGGTTGAGGAAAGAGTAAAGGTGCATAGAAATCTGTGCTGTAAAT

A\_14\_P200909 TTTTCATTCCATCTGAATTTTACAAAGCCTCAGGTTTCATGCGTCAAAGATAGGGATAAAT

A\_14\_P137768 TGATGATGCTTTTGACCAGAGAGTAATGTGGTAAAAGAGATAGTGAACATGAGTTGTTGT

A\_14\_P115121 CTACCTAGAAGATGAGGCAGAGGAAAGAATCATTTTTGTAAATTCAAATTCACAAGGAC

CUST\_2286\_P1426210822

TACACAATAGCCATTGTCTATGGAATTCTCCCTGATGGAAATTATGGCACGTAGTTTA

A\_16\_P21081399

AACTGGATTTAAACTAGGGAGGATCAAAAATGTTTAGGTAACAGAACTAGCAGTCCAATG

A\_14\_P118930 ATTGTCTGCAATAAAAAGTGGCTCGATATGGCACGATATTGGGATGGTTGAAGA

A\_14\_P136043 TCCAGACTATGTTTCTACCTTGCTGGAAATATTAGATGTCCTTGATGTTTTTCTCATGT

A\_14\_P127859 GCCCAGGCAAACCTTAAAAACAAAGGAAGAGGTAACACTTAAAATTTATAGCACATACTGG

A\_14\_P133859 TGCAATGCAAACCTCTGGCTCATATTCAATTTCTCAGTTTCAATCCAGAATGATCAGGTA

A\_14\_P200182 CTCCGTTACTTATATACATGGAATGACACACGGTCTTATCCGTTGAAACTGTGATATGTA

A\_14\_P127183 GCATTTGGCTCCAAGACTGGGGACCAGAGATATTACATAGATTTTTTTTCGATTTTAGTAA

CUST\_424\_P1426210822 GAAGGGAAAACATTTAGAAGGGGAGCCCTGGGATCATAGGACCTG

CUST\_6553\_P1426210822

TGTTGACTACTAATAATGATTTTTCATATAAAAGCACAGCAAAGAGATCCATGTACAAAGT

A\_14\_P201836 ACATTGCTAGAATGAGTCCTGATAAGTTAACAGGTGAAATTTACATACACGTGACAGCAT

A\_14\_P138655 TCTACACTGTTCTATGCCCAAGTGTCTTCTCATTATGAACTACAGAGAAATCCTAGTTC

A\_16\_P02320942

AAACCTCCTTTTACAGTTTAACTAGACCTTGATAGTGGTAGAAACATACTTTTCATCCCC

A\_16\_P16761048

CACATATCTTTTCACCACAAACAGTTTCAGTCTTAAGATCACATGTTGCAATCCATGAGA

A\_14\_P119692 TGTCCCTCATCTCTGTTTTGTGTTATTATTACCCTTATTATCTATGTTACAAACCCAACC

A\_16\_P21425077

ATACAGAGAGTAGCCCTGTATACAACAATCATTCCCTAACTTGATAACTGAACATAGGCCA

A\_14\_P115078 ACAAGATTGTGTATTCCAGGGTGCTCTACAAAATTATAATTTCCATTATGTGCTACGGC

A\_14\_P202366 TTCATTTTTAGGATGTAAACAGTCTTCGACTTTCTCTTACGGATAATCAGATTGTCAGT

A\_14\_P102334 ATTTACCTTCAGCCAGTGCTGGTGATTCTGTCTTGTCTTCTATCTGTTTAAAG

CUST\_8708\_PI426210822

TGAATAAGCAAGACTGATGTCTTCAGAGCAATGCAAAAAGACAGTGTTTCCATGAAA

A\_16\_P38204683

ACTAAGCCTGATCGTATTGTTGATGGCCTAATTGTGAGAGACTCTAAAAGTACTTTTTT

CUST\_7716\_PI426210822 CGCTTGTGTCTGGAAGAAGGAAAGGGTCTTAGAGGAACACAAATT

A\_14\_P139278 TCGTCTGATGTGAACCATGTCTTGTTCATCCTTAATTTTGTCTTACGAATGGATTTTAT

A\_16\_P19404502

AGATCAACTACATGTCCGTATACTGCAAGTTAGAATTTAGTTAAGAAGGCCCTGAGTAGA

A\_18\_P16536129

AATGAAAGATCACTCCTGTATACTTCCATGCTCAACAATAACAAAATAAAATGCACCCCC

A\_14\_P101844 GGCATTATCTTTCCATATTTATGTTTATACTTGGGCCTCTTTCTGGTCTTTCCAAGTAGT

A\_16\_P01194110

CCAGGATGTTACCATGTATTGTTAAAGCCCAAACTAAGTATAACTGAACCCATCCAATA

A\_14\_P109539

ATAATAAGAATGTGCGAGAAGAAGAGTCCAGAGTTCACAAAATAACAGAGGTGAATTCCA

CUST\_8421\_PI426210822

TTCTTTGAAGTGGAACCAACTATTGCAGAAAACCAAAGACACAGTTTTCTAGGG

A\_14\_P126842 ACAGAGTCCAGGGAAAGACTTGCTTGTAACCTTATGAATTCTGGATTTTTTTTTTTTCTT

A\_14\_P116208 CCATACAGTAGGTCTGATTTCCCAATCTTGCCATATTTTTTTTAGGCATCTGGTTCTATTT

A\_16\_P00685597

TTATCACCAGGGAAGAGCCAGTAAGTAATTCATTGACAGGTAGCCTATAAAGAA

A\_16\_P18224427

ACTTCCATGTATGTGATTCCATTAATTTTCGCTTCTTCAATAAAAATTTTCAGGCCCATGA

A\_16\_P21381773

TTGAATACCAGCAATAAGCCAAAAAATGTCCTCCTCCTAAACACAGATATTATGGGTTTC

A\_16\_P19847722

AGCGGTTTTTTTAAACAACTAGTAGGCATTCTGGAAATATTCATGAGAAACAGAACGAGG  
A\_18\_P14134978 CTGGGTCATCTGCCTTCTGTTGCTTAGCCATCTTGCCTTGTCATT  
CUST\_148\_PI426210822  
TTTGCATTGTTACAGTAGCAGTAACAATTCAACAAAGTATGTATGTAAGTGTAAATTGT  
A\_14\_P202153 TGTTATTTCCATTCCCAAGATGTTAGTAGAGACGAAGATTTTTCAATTTGTCTCCTTGAT  
A\_18\_P22841352 GTTTGAGCCAGGCTTCTGGAGAATGGTGGTGCCTCTGGTGAAAAG  
A\_16\_P01363454  
CTAGAGATGAGTATCCCCTTTTATGCTAGGAATAAATTGTTTGCTAATCTGTGACTGGAG  
A\_16\_P36230358  
ACATACCTATCTATTTACTTATTGACTCTGAAATAACAGAGGTAGATCCTTCCAGGTTTA  
A\_14\_P119243 CATTTCAATTTTATGGGACTAGTCTGCTTCCCAGAATAATCATCAAATGCAAAGGAATTTA  
CUST\_5165\_PI426210822 GACCCTGAGGAGGCTGGGGCTGATCTGAGCCTTAAGACTTATTT  
A\_14\_P124658 GTCTTCCCAAATTTGGCATTAAAAAAGTGGCTTTTCTCTGTAAAGAATCTAGCATTGCT  
A\_14\_P120545 ATGTAATGATCAGAAATCCTTGCTAATCTGCTCCTACTTATTGGATGTTGGCTCTTTGGT  
A\_14\_P114001 CTTTGCTATCAGGGCTCTCACTATTTGAACTAAGACTGAATAGAGTCACAAGAGATACTT  
A\_14\_P118882 TCTTGCTTCTTTTTTTTCTCCTGTTCTCTAAAATTCTGAGGCCAGTATTCTTTGACAAA  
A\_16\_P00238841  
AAAAAAGGTCAAAGGAAAATACCAGAAGATGCAATATGCACCTCTATTCCTTAAGCCTC  
A\_14\_P139963 AGAAAGGTGAAGGTAGCATTTAATAGTGGTCTTGTGTTGGATTGTGAGAGGTTGAGAG  
CUST\_4104\_PI426210822  
ATTCTTTTTCCCTTGGTCAATATTTGCTTTTTTAAAAATAATGTAGTTTTAAAGAATTCT  
A\_18\_P11858251  
CTAGTATCCCCTTTCATGAAACACTAACCAATCTATATCAGTCCTTTAAACCCAGTGACC  
A\_14\_P122847 ACTTCCTCATCCTAAAAGTAAACAATGAAAGACGCTTTAGAATTCAGATCTTGGATTATC  
A\_14\_P116656 ACTAAGAACTCTTGCAGTTATTGACATAAAGAATTATTCTGCTCTGGTTAATTCCCATA  
CUST\_6364\_PI426210822  
GTTTAAATATTATTGGTTTATGCAGTATTTGAATATATAAATATGAACATAAAGCCACGTA  
CUST\_1420\_PI426210822  
ATGGATATGCTTTTTTGCCAGACTTTTTCACATTTAATATGTAAGTGTGTTGTTTAGGTTGAG  
A\_14\_P104713 GTTGAAAGTCGCTTTGATACCCAGATTTGAAATGTATAGGCTAATTTGTAAACGCCATGA  
A\_16\_P58424176 AACCTGGCAGTCAGTGTAGACCGTGCCCCAGAATTACCCCACAT  
A\_14\_P110799 AGAAGGGACAAATGGTTAAGACTTTCCTTGGAAATGGAAGTGGAGAGTTGTTT  
A\_14\_P137824 AACATTTCAAGGGAAAAGTTTTGGTTCTTTGTTTTTCTCCTATCGACGAATCTCAGAAA  
CUST\_6046\_PI426210822 AGGCATAGTGGCTCCAAGCAGAGGTAAACTGCTTTGGTTATCATTGAG  
A\_14\_P134489 ATCCCTTCTGAGAGATGGATAGTAAATTTTGACAAAGACCTTTCAGATGGTCTTGTTTTT  
A\_14\_P111690 TGGTCCAGTTTCATCTCACTAAAATCTCAGTAAAATTGCTTAAAAGAACATTTTGCCCCCT  
CUST\_382\_PI426210822 TATAGCTCCCCTGAGTCTTCTGGCGTCCCTTTGAACAACAA  
A\_14\_P129775 CTTTTTCAGATTAAAGTGGGAATCATGTGCATGGTAGTGACATTTTGGAGAGTTCAAGTTT



A\_16\_P00685618

GCTATGTAAATAGTCAAGTAACTGAAGAGAACTATAAACATGAAGTCTTGAGTTAGTCCA

A\_14\_P105726 GAAATTATTGCTCAAAACATCTCCACATTAATATAGTTTATTCAACGTATTTTCATTGAC

A\_14\_P105457 ACCATACTTGATGGTAAATTATAAGCAAAGTGCCGGAACAGCCAGTAATAGGTTGATAAA

A\_14\_P105771 ACCAGTTGTTTCGTTCACTCAATGGTAGTCCAATCTCTTACTGTTATTTCAGTTGTTTTTAT

A\_14\_P200038 CTTTGCCTTTTCAGCGCTACTCCTTGATTATGACAATGTATGCATTAGTAATAGCAGCAA  
CUST\_6657\_PI426210822

ATGTTCTAGAGAATTCCAGTTTTAGGTCAGTAGTTGTGAAAGTAAGGGCAGATCACT

A\_16\_P16484917

GCCATACCAATCCTTGATGCAACATTTTCATAATTGGTTTTTCATCTCTTTTTTAGGAIGCC

A\_16\_P17287265

ACTGAGTTTACAGATACTGCCAGAATTTTACTGCTACCATTTCTATTTCGCTTTTGCTGTT

A\_14\_P139003 GGCTAAGCAATGTATGAGATACAACATACAAAAGGAGGTATTTTCTTCCCATACGATAGG

A\_14\_P200515 TTAACAGCATTATCTGTTTGCACCCCTCATGGGTGGTTAACAACAGCAATAAAAC

CUST\_5810\_PI426210822 GAGATGAAGACCAAGGTGAGGAAGGAGCCAGCAGAGAAATCGAGT  
CUST\_9774\_PI426210822

TTTGCATTGATCAGAACATAAAAGTTTCCAGAAACACAGAAGTGAATCAAATAGTGTGGT

A\_14\_P132182 GCTGAAAAGGGTCCAATTAACAAATGGAGCCAAATTTTCTGCCTGAGAACTTG

A\_14\_P121859 ACACATATATGCACGTGGGTAAGTGTAAGTACTAGAAAAGGAGAAGAAGAGGAAAGTTATTGT

A\_16\_P35795741

TCATTTTCTAAAAGCCAAGTAACTTTTTACCTCAACCTTTACGAATAACACTTTGCCCT

A\_16\_P15312310

AGTTCAGCATTTTCCATGTCTAAGTGCATCAGTATTTAAGTTCAGTTCTTACTCTTGCCA

A\_14\_P130767 AGTAAAAAAGAAATGCGCAGGGGCAGAATTAAGGAATTTAGATTTTCACCTATGAGCAA

A\_14\_P133655 CTGATGTCAGTGCCATTTAGACAATGTGTGTGTATGCACATGCACAGGG

A\_14\_P104209 ATGCATTTCTGGGAATCTGATCAATTCTACCGCAATTCTGTTTTCTTTGTAAGATTAA

A\_14\_P132042 AAGAGAAAATAGACTAAAAGCCTTGACGCGCAATAGATCTACATACATCACAAGCACAT

A\_16\_P20345990

GAGGCAAAGAATCTAATCTCAAATTAGTCAGGGTATCCACAGATGACAATACAAGTGAAC

A\_16\_P16733464

AAGAAACGAGCCAAGTCTTATCTTTCCATCTGTCTATTAAGTATAAGAAGTTCCTCCAGC

A\_14\_P114520 CTCAGGATTATATTTGTAATCAAAAAAAAAAATCACTTGGCGCAGGAGGGAGAACTTTG

A\_16\_P16191189 ACTGAATGCTTTGTTGCAACTCAACTTGGTTGCAGATGGGCTCTTACTTC

A\_18\_P11284038

GAGTGGTCTCTATTTACCAACATGAAACAGAAAAATACCATCTCAGGCTCCATATTCCAT

A\_14\_P114822 AGGAAAAATCTCCATTTTTCTAAATATTTAGCCACCAACTCCTGAAGAGTCCTTTCAGAA

A\_16\_P19433681

TGAAGTCTGTTGCATTTTCATGATTCTCAAGTCTAATATGACATCTTATTGGCTCACTCAC

A\_14\_P139324 TTGTTACCTCCCCAGCCCTTAGTCTGTTGCTTAATTCTGTTTAAACATTTCTCC  
A\_14\_P133546  
AGTTCCAAGAAAGAAAGAAGGTAGTGGTATGTTATCTAGTAAAGGAGAAGGAAATGACGA  
A\_16\_P30952272 CTTTTGGGGCCAACCTTTCCTGCTCTCAACTGCTCTCTATCCCTTTA  
A\_16\_P00154158  
CAACTGATCACATAACCACTCATTGACAAAACAGAGATTAAACCTATATTTTTGACCCCC  
A\_16\_P35872087  
CATTACCTTCTCTTAGACCTAGATGGCAAATCATAGACATAAACTTGTGCATCCTAGAT  
A\_18\_P22839415  
CCAGAATGGTCATGGAATTCAGGAAACATTTCTCTAAATTTTATAGTCATCTTGCTTTTTG  
A\_14\_P200762 TGAGATGGGATTCATAGTCAAGAGTCAGGATACACTTTATTTCTCACAGGTGTTAGTTCT  
A\_14\_P119743 TTCTGTTTGCAGGAAAAAAGAGAAGGCATAGATCTAAAGTAAATGGTCTCCAAAGAGGTA  
A\_16\_P18969217  
CAATAAAATGAATAATCCTGCCATAATATGATGCCGATAACTGAACATGTATCCTGCGC  
A\_14\_P109062 TATTAGCATTGATCTAAACCACTCACTAGTTCTGGGGAAATCACCTAATGATTCTGCT  
A\_16\_P00236775  
TACCTGCTGATCCAAATACTCTAGGTTTTCTTTGCAACTGAAGATCTAAAAGTTCATCCTA  
A\_14\_P126414 ACTTTGTATCCTATAAGCGAGGGACTATAGGGGTTTTCTTTGTTCAAATTTTTCCCACATC  
A\_14\_P201986 ACACAAAAGAAAGCACAGATTGTTTACCTGTTGTGGATTTTATAGATGTAACAAATGTTTAT  
A\_14\_P126468 TTTCTTTTTAGGCAGTTTTATAACAATGACAGATCTGTTCTGGAAAATCATCATGCTGCGT  
A\_14\_P106456 CTTCTGATTGGCATCACTAATTAATCTTGCCTGTTCTTTAGCGATAAGATATATTCTGTA  
A\_18\_P12099807  
AAACTGGCTTACAATGTCTTTTCATTGAACCATATCTGATTGATTTTCATCTCCAACAGCA  
A\_14\_P132321 ACACATGTCAAAACTGTCAGATTGACTACAGATTCAAGATAATGAACAACCATGGTAAAC  
A\_16\_P00965968  
AGCAGTTTCATTCTTTTCTACTCAAAGCACATTGTTTCACATGTTTCACATTGCAAAGCAT  
A\_14\_P129296 GCAACGTTTATTATTTTGTTCATGACTAACATATGCGACTCTATTCCTTGGATGGCTTT  
A\_14\_P124025 GAGAGAAAAGTCCCTGAAAAAGGTATCATCTTCTAACGCAAGTGTGGG  
A\_14\_P102061  
AAGGAGTCAACACAAGTGAGAGGAAATAAAACATGACTGGATAGAAAGTAATGCTGAGAT  
A\_16\_P16784311  
GGCTTGTGCTAAGATATTACCTTTGAACTGCCTAATCTACACCTAAAACATGACAAAGG  
A\_14\_P115095 ACTCTGATTGCCTTATAAACTTCAAAGAATTCTCCTCTGCAATTGGTAAGATGATTTTTT  
A\_14\_P138846 TTTTCTTTTGGAGATGGGTGAATGGTGATATTCTTTTTCAGCAAATAGTATGTTAATGAAACA  
A\_14\_P100122 ACGCTGAGATAGGCTGATTAGAGTCATCACTTTCTTCCATTTCTAAGAGTAGTGATTTCA  
A\_14\_P200746 CTA CTCTTTTAGAGAGCCCCAGCATCTTTGATGTGGATTGGAGACAATTGC  
A\_16\_P20524774  
AAATGATAACTTGGAAAGTTGAGATTTTGTGCATAAGCACGTATAGTCATAGGCAGGTGGTC

CUST\_490\_PI426210822 GCCTTTGCCACCCAGGCTGACTGCCTGTCAGGAAGTCAAGAATC

CUST\_4387\_PI426210822 CTTTTAACTTACGGGTCACCTGGTTATTGCCTGTGAGGCTCACTG

A\_16\_P31222296

AGCATAACAGACGTCACTATGGAAAATAACCTTTCAAGAGTTATTGCAGCAGTTTCTCAT

A\_14\_P129506 CTTGAGCCTGACGTAGACTGTGAGGAACTAGGATTCCAAACCAGTTC

A\_16\_P21248742

AGCAGTTCATCTATCTTTTCACACACACCAAATTTAATCTTCATGTTAGACAATGATGGGG

A\_14\_P117869 GTCCTAACTCTAGATCTTGCATTAGTTCTACTTCTATGGACTCTTTTTGGGTTCAATCTC

A\_14\_P137527 CTTTATCATGCTAAGGGTCAACATATCCCCAGACAGAATCGTATTTTAATTC AACAGCAT

A\_14\_P111107 TTTTCTAGATGATTCTTTGGGATTGGGACTTAAACAATGGTATAAGCCTCATTATCAAG

A\_16\_P35647754

AAGCAACACTAAAATCATCTACTTACCTCCCTCAATAATTTCAATCTTAACTGTCGCT

A\_16\_P33810993

AAAATAGCACAAGAAACACTTACCAAATATAAGGTTATATCTTCCGCATATACAGGAGAA

A\_14\_P107261 TGTGTGCTTACGGAATGCGGAAGTATCCAGTCTACGTATCTCTATAAAAATTGCTTTCTA

A\_14\_P109210 GTTCAAGTAATTATGGCTCTCTGCTGTTTAGCCCATATCATATACAGCATAAAGCACACT

A\_14\_P202070 CGTCATGATTGCAACTGGGTGGGTCAAAGGTAAATAGGATGATGACAATGAAAAAT

A\_14\_P136588 AGAAAAGATGCTGCTAAAATTACTATGAAGTCTTTCCCCAAAAGGCATTTGGTTACATCT

A\_18\_P12434214

ACTCAAAACAATCCACCTGTTTGGAAATGTCTGTTGCTGCTATTGTAGAAGTTTCTTTAC

A\_16\_P21144840

TGAAATCTTTACTTGTTCACAAGGTTTGTCCAGAAATGAGTTGAACTTCTAACCCGATTA

A\_16\_P37086379

ACTAAAACATTCCTACATAGCACTTACATAACTTATCATTATCAACCTACACTCAGAAGA

A\_16\_P19839723

AACAAGAGTAAAATTCTCTCGATAAAGTCACATTCTCTGCAATTAGGACTAGGAGAAGCC

A\_16\_P18610182

AAAGAGATCATATCTGTGTTAAAAGAATCTACCCTCTCAGAATCCAACAGTCCATTCACT

A\_16\_P03610011

AAATTCGACAGTGAAATCTCATCCTACAGCATTGGAAAGACCTCTAATTTTGATCACAAG

A\_18\_P13802856

CCGACACAAATTTTCCTAGTGGATATAGACCTATTTTTTCACAAACGTAAGTGCAACAGT

CUST\_6925\_PI426210822 ATTTCAAATCACAAGGCGGCTTCAGTATTCCGCCGCGGGGCTCAG

A\_14\_P104606 AACATAATCATTGCGTAGATTTTCTTTGAATGAATGTGAAAACCTCATGAGGTAGTGGTCT

CUST\_1860\_PI426210822

TGAGGCTTTATTCATGCCCAAATTATTCTCGTATTTATTTCCCAGTGTTTGAGA

A\_16\_P00766676

TGTTTCTTTGTTACTCTCCAGTGGATACATCATTA ACTACACCTTTGACTACCACAAAGA

CUST\_9719\_PI426210822 CAGAGTATCTGTGCTGAAGAGGTCAAGACAGGTTTCACAGAAGGAGT  
A\_18\_P22842091 ATAAGCAATGCATGTAGCGGCTAGGGCACTGAGGTCCCGTGACCT  
A\_14\_P122253 ATTTCCACATAGAGTTGGACACCATGATTGCTCAAGGACAGGCAGTG  
A\_14\_P132497 CTATTCCAAGGATTTTCTGCTTATCCTTCTCTTGAAATGATATGAATACTGTCCCTTGGCT  
A\_14\_P102640 CTTTCTTGTAATTCAGAAACAACAACAAAATCAGGGGGTCGTCAAATACTCATTGAC  
CUST\_1966\_PI426210822 ATCAAAGTGACTGCATGCCCTGTCTCTCTGCCTCCATCCTTTCTC  
CUST\_7117\_PI426210822  
TCTGAAACTCTTGTAGACACCAAAGAAATTGGTAGGTTATGGAATGATTGATTATATCCT  
A\_14\_P103285 CTCTGCCCCACTTTAATCCCATTTGCTTACCTTACAAATACGAAATAAAATATAAACTCC  
A\_14\_P102775 CTCAAATGAATAATGTATACGAAGATATATCAAGGTAACATTTATATAAGTTAATGTAA  
A\_14\_P132518 TAAATGCTTAGGGCTTAAACAAAGGCATTTGCAAAAATGGATCAGGTTTTGTGGATCATA  
A\_14\_P134321 CTTGAGGACCAAACTAAAAGCCACATGATAAAGGAGAATGCTGATTTCTATTTATGCA  
A\_14\_P117838 GACTTCAAAGACTGAGATTTAAAAATCATTATTTTGCCACACTCTTTAAGGAGATGGGGG  
A\_18\_P16231620  
CCCTACAATGGCTTTTCTATGATTTCTCTACTCCATTCTAAACACTCTTCCTTGTGTAT  
A\_18\_P15902960  
GGTGCCTTACATGTAACACTCACAACCTTTTTTGATCCAAAATTTAGAACTTCACACG  
A\_16\_P20268645  
ATCGTCCCTAAATGTCCAGATCCACAATACACAAAATAAACTTCTTCAATAAAGTTCGCC  
A\_14\_P129579 AGGATGAACAGGAATTAGTGAAGCAATTCTCTATTGAGAAGGAGCAATTCTCTATTGAGA  
A\_14\_P119207 ACTATTTTGTGTCTTTGAGTGCTTTGGCTTCATGCTATAAATTGTGCTCTGTTTATTTC  
A\_14\_P108186 CAACTCCTTTATCTGAATTCACACCAAGGTATAAAGGACAATGGAAAGAAGAGTGTCTAA  
CUST\_4293\_PI426210822 GGAAATGAATTCTGTTTTTGGTGGAGTGCGTGAAGTTATTTCCCTCCATTAGTT  
A\_14\_P112011 TTTGAAATAAAGCCACGTGCCAGTGAATCCCAAAGGAACCTCAACTAAAATAAAA  
A\_14\_P116074 GTCCCAAACACATTACACTGAAGAGATTTTGGTGAGGAACTTGCTGGAGTTTT  
A\_14\_P120801 CAGAAGATTGTGTGTTTCTAGTATCTTTAAGTATCTGATACTCCCTCTTCTCCAGTTAG  
CUST\_4779\_PI426210822 CATGTGTGCACATATACACATTCACATGTGTGGGGAATGAGAGG  
A\_16\_P03671123  
CCTGCAACTAACAACATTTTCATAGTAGAAGGTAAGAATTGCAATACGTCCTTTATTCCCC  
A\_14\_P111497 CTCCATGTATGAGAACAGCCTAATCCTGGAGAACATTACTAGTTTTGTTTCATCTTCCTA  
A\_16\_P00702951  
TTATGACCTGTGGCAGTTATATCACAACATTCATTTCCAACATTGTCTAAAAATGAGGGC  
A\_14\_P129787 CTTTAATGCAAATAGTTTAGAAAAGAAAGGACCAGTCTTCACTTTCTGCATTATCCCCAC  
A\_16\_P00524466  
AAGTCTAGCCCTCCATGATACTTACATTCCTTCATAAATGACTTTGTGCGCTACATTTTA  
A\_14\_P123068 AGGGAATTAGAGGGCTCTGGACACCTTACCAAATATTTAGAAAATGAAGAGGTAAATTTT  
A\_16\_P31210167  
AACTGTGAATAAACTGTAGCCTACATTACTCATCCATTTTTGGATAGTTACCACTGGGAG

A\_18\_P22840468     ATTTCTGGGGACAGTGAACAGCAATGAGGACCACAGGGAAGATTTA  
A\_16\_P19840736  
      AAAGTTATCCTACTCCCCTCATATGAAAATGTCCTTTCTTTTAATACCTCACCTACACT  
A\_16\_P02053157  
      AAAACATCCCTTACAGTTGGTAAAACCTTACTGCTGAATCAGTTAAACAATAAGGCCTTGC  
A\_14\_P131301    TCTTAAAAAAGATTACCACAACAGATAAGGCACTGGTATGATGGCTTAATTTTGGTAGA  
A\_16\_P17892655  
      AGGCAATAGCAGACCTAGAGTAACATACCAAGTGTAGATAGTAGCCTCAATCAGTTCAAT  
A\_16\_P39911812  
      ACCTCACTTTTAATAGAGTCTCTAAGGAATGCTCTTAAATATCCATGACAGTGGTAGCAA  
A\_14\_P131750    TTCATAGGAATTGTGAACCAAATAAGAAGGAACCAAACACATAACAAGAGTCCTTCATGT  
A\_14\_P128484  
      AAAAATTCTATGAAAATTTTGGAAAGCAAACAGGAAACCCAGTTATAGGCAAGGGCAA  
A\_14\_P132962    TTTTCAATTCCATCCCCAACTTTTTCTAAGTCAAGTTCAGCAATTCAGAGGTAACACAG  
A\_14\_P103327    AATCATTTCACTACCACCAAAGTTATGCCAGTTTCCTTGCATTCTGCATATACACATTTT  
A\_14\_P107430    TTGCCCGGGCATTTTGGTAAAGTTTGAAAACCACTTATATTTATATTGGAAATTTAGGGCA  
A\_16\_P18941169  
      TGGATCTGTCTTACAAAGAAAAGCGATAACTTTCTAGTCTCTTATGCTGTCCAAAACCTCA  
A\_16\_P16677944  
      ACCTCATCAGGTTTTTTTCCACCATCACTACTAGTTACATAAATCCTACGTGAAATGCAGT  
A\_14\_P103647    ATTTGTGTGGAACCAATGTACATCATCAAATAAATTCTAAGAGTCCTGGCTTTGATTC  
A\_14\_P101835    AAAATAAAGGAAATCAGCACAGCACACATTACTCAAACGTTTCTGGACATATTATATGTT  
A\_14\_P118554    TTCCATATGGTTATACAGTCGAATATCCCCTTCATTTATCAGTAATTATCTTTCCCTGTC  
A\_16\_P40308998  
      AGTGTGCAAAATCAACATGAAACTCCATTTTAGGAAAACAAAGTAAGTAGCATTTCGGT  
A\_14\_P101041  
      ACATTCAAACAAAGAAACGGCAAAGAAGATTAAGGCCCCAAGTTCAGTAAGTAAAATCA  
CUST\_1536\_PI426210822    AATAAATAGGAGATGCTACCCTCCAACCCCATTCGACACCCTCA  
A\_14\_P107556  
      ACAAAATGAGCAAAGAGTGAAAGTCAGAGGAAAACACTGAGATAAAAGTGCATTCATCAA  
A\_16\_P03547069  
      CGAGGATAATGGAATTGGAGGATTGTAACTAAGTCGCATTGACTTAGAGATGGATAATG  
A\_16\_P01006729  
      CCCCTACTGATTTTTCAATTGGCACAATTCAAACCATTTAGTTACCTTTGCTTCTTGA  
A\_16\_P02323380  
      CTTGTATGAAAATCCCCATATTAGCCTCACTTAATCTCAATAGAAGCCTGCTGTTTACC  
A\_14\_P124018    TGCAAAACAGAACAAATAAAAATAGAACTTTGACACCCCTCAGCAGTGACTAGTTGCAT  
A\_14\_P120582    AAGATCAGTGAGTTTGAAGAGGAATGCCATGAATGCTAAAATTAATAGGCAGGAAACAAG

A\_14\_P132932 TCATGCATGCTCTACTTGAAGGTCTATTTCTATCTTTTCAATGCTACCCTTACCCACTAG

CUST\_3853\_PI426210822 CTTTTTGGGGGCAGGAGGGATTGCATAGCAATACTGCCTACCCAG

CUST\_5947\_PI426210822 ACTGACAAAATCAAACCACAGTTGACTTAGGCTTCCTTGGAGCTTGG

A\_18\_P22839426 AAAAATCTCACTATGTCCATGCCCAAGAGTTCCACCATGAGCACATGC

CUST\_4913\_PI426210822

ACTTGAAATGATTAAACCCTTTTTTTTTTAAAGCTTCATGTCTCTGTTCTCCATCTGTAGG

A\_14\_P107927 AGCCAGTCCACTATAAAGAGTGATGATCACTATGATTATCTCGACATTGACTTGAAGTAC

A\_16\_P21598330

AATCATCCTTGCTAATCTTCAAACGAATACTCCTGTATTTCTGAGAAGTTATTGGTGCCT

A\_14\_P115145 ACACAGCAGGCTGTAGATTGCACTATAGTGATCATAGGCATCTGATCTTAATGACTAC

A\_14\_P109888 CTCTGCTTCCAGATGGACACAGGTGTGAGCCATTTGTTTAGCAAAG

CUST\_3670\_PI426210822

TTCAGTGGTTGTTTTCACTCTTTCCTGTTAGCCAGTTTCCTCAAATTGGTCAGTATAAT

A\_14\_P108308

GAAACTCAGAAGAGGAGAGAAAAAGAGACAGGGCTAGAATAAGATTAGTATGATGTCACA

A\_16\_P19035804

AAACTAGTTTTTCATCAGATCTGTGTCAACTAAGCATTGGATATCTGAATTACAGCCAGAA

A\_14\_P118326 GATCCCCAAAATGTTTGAGTATAGATACGTCTGCTGATTCCCCTCATTCTTTTAGTGT

A\_16\_P36573960

TCATCTTCACTAGTTCCCAAGTTTTTGAACACATTCCTTTAACCTAAAACCTTCCAGTCT

A\_16\_P16923218

AACCTTTCCCGGATGATAATTCTTCACTTCTCTACCTATTGGAATAAAAAAGGCATTACC

A\_14\_P112828 TGTGAGGCTGGATGAAGAAAATTATAAACCAAATATACATTGGAGCCAAGGTAAGCCAAT

A\_16\_P37298650

CCCTCCATTCTATACCAACTTCCTCCTAAAAATAAAAGAACTAGTAACACAAAGACCCA

A\_16\_P02013639

ACGTTAGCCCTGATTTTCTTACTCTTGATTTTCATACTGTTTCAGTCAACATAGTTCTGGTT

A\_14\_P102496 GACACTCCTGAAATATGCACATTTTCAGAATGTTCTGCAAGAGCACCATTTCTAAAATT

CUST\_4673\_PI426210822 AGGACATATGAGTGCATCTCAGGGTGAAAGCTGGCTAGGAGCTAT

CUST\_9228\_PI426210822

CTTTGCAACCCACCAAGCACAAAGTAAAATGTTTCTTCCACTAGAATGAGTCTAAAC

A\_18\_P14136578 GATTTACATCCCGCCATACTCTGCTGTGAGAGAGATGGTATGCAG

A\_14\_P200164 AATATGGTGAAACCCAATTTCTTACATCATATCTGTGCTACCCTTTCCAAACAGCCTAAT

A\_14\_P137312 CTTTAAACAATGAGGTAAATTTTTCCCCCAGGCTTATGTGTTATGGACTTTTGTTTTTCC

A\_14\_P125225 TTTTGTGTTTCTCTTTAAAGAATGGTTATGCTCCTGTTGAATTTTTCTCGAAGGGA

A\_16\_P15369478

AAAGTTGCATCTTACCCTAATTAGGCAAACCATTTTACCATTTAACTTTCTGAGGCTTC

A\_16\_P19921152

ACATACTGCATACAACAGGTTTCATACTTCAGCATACTCAGTTAATGTGAGGGTCATTTTA  
A\_14\_P115924 TGACTGTGTATGGTCCAGATAATCTCTGGTGTAGCATAAGATTATGTTAGAATTGAGGGA  
A\_14\_P114358 TCATTAATTTCTTCTCTCTTAAAGTGACAACTTGGAGATGAAGGAAAACCCATCCATCTT  
A\_16\_P30952640 AAAACTGTTACCTAAAGTATTTTTATAAATATAAGCCTTTTATACTGATTATGTCTTTTA  
A\_14\_P139457 CTGTCTTTCAAATGTGTGCACTGACCCCTTGTGGATCAAATTTGTGTAAAATTTTTT  
A\_14\_P102347 ATTTTAATTTCTGCAAACCTCTATTTCACATTCTGCATTTGAGGATGCCTGTGACTTGG  
A\_16\_P00685242  
CTCTAATATATATTCTTGGTTTAGATTTCTTTTCTGGAGAGGTGTCCCCAGACTGCTGTG  
A\_14\_P202248 TTTTATAGATAAATAGAACATTCCAAAGAGATGGCCTCATCAGCAGTGAGACATCTTAGG  
A\_16\_P16471370  
AATAAACTCTACTTGAACCTTGAACCTACTGAGTCTCCATAGATGTTTCAGACCTGTGTC  
A\_14\_P114717 CTGAAAGGGCTTTCCCCAGAGGCTAAATTTATAATCTAATAACATCATTTTTTCATCTCCC  
A\_14\_P126124 TATTGATAAATATGTCCAGAGGACAACATGGGTTCTTAATGGATGGCTGAGTCCAAATAT  
A\_14\_P114072 TATGGACCACTGAAAACCTAGGCTGTCTAAGACACTTCAGAATGCAAAAACATGCAATTA  
A\_18\_P17383398  
TCCAAATATCAGTATTAGATAAACATCAGACTTTGTCATCAGACTTTGGATTTATGGGTT  
A\_14\_P120733 TCCCTAATTCAGACCCAGCCTCAAGAGGAAAGGGAGTAAATAAAAATAACTTGT  
A\_16\_P41912704  
ACAGCCATCTCTGTAATTACAATGATAATTGCTTCCAATGTAAAATACCACTTATCTGGC  
A\_14\_P114790 CTTTCCGAAGAGACAAACAGTATCTTACAAGAGTTGTATTTGACAAATAACAGCCTCACA  
A\_14\_P120987 GTAAATCTTCACTTTTCTTGAAATTGGTGAGAGATAAACTACAGGACAGAATGTCCCCTT  
A\_14\_P201537 TAAAGCCTACAGTTTTGAATACTACTGAAATGACAAGTTGTAAGTTGGGTCTCCAAAGCA  
A\_14\_P110746 TGTCATGGGTTAGCCATGGCACTGCGATTGATATTTAGTCCATATCTGTTGTTATATAAG  
A\_14\_P123467 CAGCCTTAAATTTTTCAGAGTCACTACACCGGAGGTGAGTTTACTAATCACAAATGCATTT  
A\_14\_P131528 CTAGGGTTAAACAACAGAATGAGTTACTTAGGGAAAGGTTAACCTATTTCCATTTCTCAA  
A\_14\_P107898 GCTGTATTGTAATATTACCAGGGTTGCAAAAAGAAAAGCCTAAAATGGAGACCTAAATGCA  
A\_16\_P01943010  
GATGGGCTATTTACAGTTCCTTCTCTTTACCTCTAAGAAACATACCAACAGACACTAAGC  
A\_14\_P133983 CTCTTTTATGCAGTGTGATGAAAAATGCACAAAAGCATATTTTACATGGGAAAAGCCAA  
A\_14\_P130065 ATCTGATGTTTTATAGGTGCAAGGTAGATCAGATTCAAGAGATTGTGACAGGAAATCCTA  
CUST\_255\_PI426210822 TTCACCAGAAGCCTTAAGAGAGAGACGTGTTTCTATAGTGGCCAAGG  
A\_14\_P114354 TGCTGCGGACAACCTCAACTGTCTACAATTATGATTACATTTGGGACTTTTCTTCTACC  
A\_14\_P119130 CTTTAAATTGACCTGAGAACTAATATCACAGCAGTGGCAATTCCTGTTTCTTGGATTACA  
A\_14\_P108990 TTTACAACACAACCTAGGCATTAACAAGCAAGGAAAACCTAGAAATTGAAATGAAGCGGTT  
A\_16\_P40104915  
ACAGACACAACTAGACCATGACCTTTAATTA AAAAACCACATGATCAACTTTCTGTGAT  
A\_16\_P58424593 CTCAGGGAACCTCTGTTCACTCCCATGCCTCTATCATGAGGATCTTTTATCAT  
CUST\_1382\_PI426210822 ACTAGAGTTGCCAGGCCCCACAACCTGCCCCAAAGTGTGTGTGGC

A\_16\_P00915394

GGCCATTAGTGAAATGAATCTGTCAAGCATTCTCTTTACCATGTTTTAGAAATGTCGTCT

A\_14\_P112737 CAGGCTAGATATTCCAAACAGCACCTACCATATGACTCAGCCTGGACTTT

A\_16\_P18199176

AAATGGAATCAGAACATCACCAATCTGTTTATCCTCTTTCCAAACTATGTCTCCTACTTG

A\_16\_P18447685

ATTCCCATTGATAAGAGACTTCACAAATTCGAAAATAGGTTGAGATCAGTAATCCAGGTC

A\_14\_P129227 GGTCTAAGAAGTTCATTGACTTCATTGACACATGTCTCATCAAGACTTACCTGAGC

A\_14\_P133485 GTGAATGGGTATCTTTCCCGGAATAATCCTAATTTTTCTAAGGGTGAAGTTTGCAAC

A\_14\_P102043 TTGCTGCCTCCATCACCAGACTTACTCTGAATCTCCTTATTATCCAGATTTTCTATATCA

A\_16\_P15940463

ATCTGATACCTTAGTAACCCAAGTAGAATGTTCTTTCTGACTAACAAAGACTCCATACC

A\_14\_P103483 AACACCCGATTTTAAAATGGCAATGCTGCTCTATTCTTTAAGTAGTTAGGGAGTCTCTA

A\_14\_P106055 ATTTAGTGAGTGAATATGGATGGTAGCATCCTGAATCTAAGTCCACTTAGGATAATCCTG

CUST\_8327\_PI426210822 GATTTGCTGTGTCCCTTCCTCCTGAGATTTTCTTGCCAGCTCATC

A\_18\_P13903519

ATCCCCTTTATTTGAGAGCAAATCTTCTGAATATCCATTCAATGAAACTCAGATACCCTC

A\_14\_P120671 AGAAATACAAAAATTGCGAGGAATGGCTGGACTAGTGAAAGTTGTGATAAACTATGGTTT

A\_16\_P02356134

ATTATTTTAAAAGTCCACACCCAAAATGAAAAGACCATAGACTATAACCAGGTTCTCACGG

A\_16\_P36998301

ACTCCAAATTTTTGTATTCTCACAACCTTGTAAGTGTCTCATTGAACATACCACACTTCA

A\_14\_P129841 AATGTCCCATAGAAGAGAATGATAGCAGTTAGATGTGAAGAAAAAGCAAGAAAACCTTT

A\_14\_P126267

CTAGAAAAGAAGATGAAAGCAAGGGCTTGCAAGAGGGAAATGAACATATTTTACTGATGG

A\_14\_P131859 TGAAAACCTTTAAAGCAGCACTAACAAATACCTTCCTGGTCCTAAATATAACTATATCCAT

A\_14\_P131935 ATCAGTAAAGCAAGAGTTATGCCAAATGCTCATAGTAGGAGTTTACTTCGACCTCTTTTT

A\_18\_P13362508

AATTGTGGAGTAAGAACCATCAAATCATGGGATTGTAGATTTTCTAACTGTTCACCTGG

A\_18\_P17123465

TACGAGCATTGCTACACTTATTGGTTCTCATCCATAGTTTTCTTAGCATAGACTCCACTT

A\_16\_P01159923

AAACAGAACTTATTTCTGCAAATCTAAGGTCCTCTCTGTTTGAATTAGAAGTCCTGCAG

A\_16\_P16125584

AGTCCTTGGTAGTAATAGGTCTGTAAAGAAGAAAAACATTCTGAAACTTCTGGAACCTTC

A\_18\_P22840326 TTAGCAGAGTGAGCACAGATGTTCTCCATTTGCCAACTGGTTTCTAAGAATATTTG

A\_16\_P01656082

AAGAGACACCAGTAATAGGAAATCAAAAATGGAACAATCAGAAAGATAGGAGAAAGTCGC



A\_14\_P125121 ACCTTTTAAGAATTTTGTAAACCGTTTGTCTGTCTTTTGTACTGTTTTATGGTGCCAAG  
CUST\_6019\_PI426210822

TAGTGGATGATCAAATCCATCTCTATTGAATTGTGCTTTTCTTATATTAAGATGTAAAAT

A\_14\_P129136 ATCTGAGCACTTACTGCATTCAGTTCAGTAGCAACAGACTGATCATTTGCTACAAGAG

A\_14\_P122631 CTTTTTTGGTCTTTGTATACATGCTGTCACAATGCAGTTCTTCCTTTGTCTCTTTATAGC

A\_14\_P120127 AGCATTTAICTGTTTCAGCACGATTAACCTGAATACCTGGTTCGCTACTAGGAGGAAAA

CUST\_9254\_PI426210822

AATTCTTGGTAGGATAAATTAGTGAGCTGTTTTCTCCCAGTTGCTTGACTTAAAGGC

A\_14\_P108729 CATGGGAAATCACTGAGACAATTGGCAAAGGAACTTATGGGAAAGTTTTTAAAGTATTGA

A\_14\_P126206 ATTTTTAAACAGAAGATTCTATTTTCATTACAAGGACTGCAGATCCAAGCCTTGTCACCTA

A\_16\_P18773910

AAATTATTGCTCTTTCCAGGATTTAAATACGGACACCATAGAAAAGATTGCTGTTGTCACC

CUST\_2134\_PI426210822 CACTGGGGGCAATGTTACCCAGAGGAGATGAAAATATGTGATATCTGTCT

A\_16\_P41239586

GAAAAAAGTATCATGTCAATGAATTTTTCCCGACTGAAGTAAGATCACATCGAAGCCAAC

A\_14\_P106389 TAGAGAATAGAGAACCATGTCAGAGCAAAATTTCTATCCATAAGGTCCATTCCTTCTGTT

CUST\_6768\_PI426210822 ATGTTGGACAGAATCCTTGGATAAGTGCTTAAGGTACATGGATGAGCCTC

A\_14\_P114036 GAATGTAGGAAGACTTTGAGTTGATGTTTTGATGGTCCAAGTATCTTAATGTGGGAECTA

CUST\_2997\_PI426210822

TGACTTTGCTTAAGCGAACTTGGAAATTCACCTTCATTTAAATGTAATCTTTCTTACTTCA

A\_14\_P135399 TGTCTGTATCCTTTTCTCCTTTTTCTTGTGATTCCCTCTTTTTTCTTCTGAGTGTTCATAT

A\_14\_P119204 GGTTTTTAAAAAGGAATGAATTATCACTTACCCATTGGCTGAGTTGGATCCTGTAACAAT

A\_14\_P130088 TATAATCTATTGAATGGTGCAGTTAGGTTGCTCCTCAGTTTTTCTGCCACTTCAAATA

A\_14\_P201454 TAGAGGCCAGAACAAGGTTCTACTCCCTGTGGTAATAAATGAAAAATACAAGAATAAAGC

A\_14\_P139243 GTAGTGCATGCTTAAGAGAGTTGATTCTAGGAGATTCTGATATGCTTGGGCTGAGT

A\_14\_P139105 ATTAAGTTTGAAGGACTGTCACGCAAACAAATTGGTCTTTCATTTGGAGTAATAGAGGAT

A\_16\_P17261231

CATCCTGTTGCCTAATCTTAGACTTGTCCATTTTGTGAAGCATTACCATTTTTGGAGTTT

A\_16\_P15019659

AAAACCTTTGTCATTTTTACCCCAATGAAGTAGCCTAGTGAAAAAGATATATGGGTCTGGG

A\_16\_P17429819

TCAAAGTCAACCTTCCATACTTCTATCTATTCTTGCAACGGATGTTACATTTACTGTGGT

A\_18\_P14133694 ACTAAATAGGGACCAAATAAGTGAGTCCATGCTTTGGAAATGATGACCTGAGAGT

CUST\_316\_PI426210822 TATTTACAGGGGTCCATGGGAACCCATGTGTCTGGGCTGCTGAGCT

A\_14\_P102314 TAGGAACGAGTGGAATATCTCTTTCTCATAATTTTTACGGTGGAAAGCGTTTTTAAAAGTA

A\_14\_P200488

GAAAACATGAAATAGGGAACTCCAGACTGACACAGCAGTTGTTTTTGGAAAGGAAATAAA

CUST\_7339\_PI426210822 GTGTGGACATTTCCATGTGTCTCCTGAAACCCTCTGGTGAGCAT

A\_16\_P03524252

AAAAGAGAAAGGAAGAAATCCCTTTTTAATTCCTCACTCTGATGATTCTACCCTTCATGA

A\_14\_P131928 ATTCACAGTGATGTCTGAGGAGATATTCATGATCTGAGGAGGAACTGTAAGGAAAC

CUST\_8803\_PI426210822

ATCTGAGAACTTTAGTCCTAATAATTTCTCTACACCAACTTCTAGTCCTAATAATTTATC

CUST\_1049\_PI426210822 ATGGATTGATTTTTCTCATCCCCCTACCCACCTCATGCCCTAAG

A\_14\_P201279 CTCCAAAGGTGGAATAGATAGTGTAGCCATGATCCTTGCTAATGGTGCATG

A\_14\_P107480 CTCGATGAAGCCCAATAAACCTCTTTTCTCTGAAATGCTGTCTGCTTGTGTG

A\_14\_P126795 CTAATACATTAAAATGAGGAGTAGGAGGAGGTCCCATGCCATGGGTCTACTTT

A\_14\_P137875 ATCTAGTCTCCTAGACCAACTTCTCAAGTTAACTAGTTTTGTGTATTTTCTTTCCAC

A\_14\_P105324 GGTGTTCACCGTAAACTGTAATACAATCCTGTTTATGGATTTGTTTGCATATTTTCCC

CUST\_8977\_PI426210822

CACCTTAGGTCAGGCTAATCAACCAGCTGGTATCATTCTCAGTTATTGTATGACTA

A\_16\_P20223783

TACTCCATACACCTCTTAAATTCTAACCAACATTGCTATTTTTATGCAGTTCTGCCAC

A\_14\_P113945 TATGCCACGAATATACCTGAGACAGAAGTTAAGGCATTAGAGATACTTTCTATGGGC

A\_14\_P110328 TCAGAAGGTCAGGCACAAAGTCACTCCTTGACCCTATTTATTGAAATATCCGTTTTTTT

CUST\_7821\_PI426210822 CATGAGTCATGAACCATAAGCTCAGCTCTCTTGTTCCCTAGAGATGATGTCTTTG

A\_16\_P16191457

AAAATGCAAATGCTAGTTTAGTAAATGGCATAAAGACATTGAAGTGTCCCTGGACATCAG

A\_18\_P12802140

CTCAACTAACTTCCCTATGCTCTTTCCTTATTACATGAATCACATTAGGTTAGGCTGTGT

A\_14\_P112997

TGTAGTTAATACTGGAAAGAGAATTGGGAACTCTGAACAGCAGTCTTAGACACAAAAACA

A\_14\_P114927 CAGACTTTGTTCTGAATTTCTCTTTGCTACTTGATAAACCTCTTTTCAGACCATGATGCT

A\_14\_P107832 CTCTAATTTTATTCTGGGATTCTGTCAATCTTGCAGTCTTCCACATCACAGAAAGAAGTT

A\_14\_P122643 CAGACAAAGATATGCAGATCTGCCTGGGAACTGCACATTATTGAACTGAAAAAGATAA

A\_14\_P107840 ACCATATGCCATTCTGTTTCAGCATGAAAACAGCCTTTTTTCTCATCATAAACGTAAT

CUST\_4178\_PI426210822

GAGAGCTTTTACATAATTATCCATTTAATGTGTTTTTAATGATAAAGAATCTAATAGTTA

A\_14\_P132910 CGTTCTAAAATGCACTTGTAGTTAATATCTTTGGAGTCTTGCTTCCAGGTTTTTGAGTTG

CUST\_5008\_PI426210822

GGAAGATAGTGACTTATAAAAACCTCAAACATTTATGTTTCCCTTTCCAATATAAAAAGT

CUST\_7697\_PI426210822 ACACCTGTGTGATTCAAAGCACCATGTCATGTTCTGTAGGGAGATAGG

A\_16\_P03023606

GTTTCAGAGAATGTTCTCAACCAGAGTAGATACCAAACCTGAGCAATACTATGTCACAAAGG

A\_16\_P16458349

AAAAAACGTCTTTAAAAAAAATAATCACTCCCCTTAATGATGAGTTTAATGCAAGGTCCT

A\_14\_P119426 CTGATACATTTAAAGAGTCTTAAAGAAGGAAAACGGGCTCAGCAAGATTGAGTCTATTCT  
A\_14\_P102481 TTGTTTCATCTCATGATTCCCTACATCTGACATAAGGAAAAGTAAGTGCTCAGAAAAATGTG  
A\_14\_P126852 AAATCTCTTTCTAGGACTCATCTCTGCTTCTACAATCAACCCAGAATGTGACTGTAAATG  
A\_14\_P112098 GATTATTGGCTCTGTGAAGTTTTGTTTTAACTGGCACTGTATGGGATCCTTTATCTTTT  
A\_16\_P17177864  
ATAACTCATGGAATACTGAAACAAAATGTCAAGCCGTTAACAGTTTTACTCTGTGTGCAC  
A\_16\_P17001526  
AGTCTCTTCCATTTTCAATATGTAAGTCTGAGGCATCCTTCTACTGATAACAGCCAAAACCT  
A\_14\_P121080 CCTGCCTTTCATTGCAACACGGTGTGTTTCATTTGTTTAAAACAGTTTAAATGAGTAAGTTT  
A\_14\_P117760 ATAACAATCCTCTTTTGACCTAATATCCCTCTTTTCTTCAGGATCTGACTTCTTGCAAT  
A\_18\_P16253036  
AAAAACCTCTTTTCGCCTATTTAATGATGCCTCCATTCTAAACTCTTTGTTCCAAAATTGG  
A\_14\_P109239 ACTTTAAAAAACACTGGACCCTTTATCTAAGTCTCTCTGGAGATGACAATGGTAAGAGG  
A\_16\_P21200296  
AATTTTATAATGATAACAGAACCTGGTCCGACTTCTGTGGAAAAGGATTGATCAACAAGC  
A\_14\_P201194 AGGCTTGATGAAGAATAGCATCAATTTAGAATTGGACTTCTCAAGAATTCATCTGTGTGG  
A\_18\_P15908009  
AACCCAGCAATGCCTTATAAAATATCTTCACAATGATTTGTCCAAGATTAAGTGGTAGCG  
A\_16\_P01892213  
CCTCATAGTCTGCATCTTCAAACCTTTTTCCATACTGTAAAACCTGTCTTCGCAAAAATCTCA  
CUST\_2775\_PI426210822 CTTACAGCTTCCATGGCAAACACGTTCCAGGAGAGATTGGTAATGA  
A\_14\_P106035 GACTTCTTGTTTCAGATCCTGAAACTCTTTATACTGCTCTTTATGTGGTTCTAATGCAAG  
CUST\_6575\_PI426210822 AGAGGAATGAGTTTTGAAGGGATAGGAGTTGCTGGGTTCTCATACCA  
A\_16\_P20896905  
CATCAACACCAAAAATGTCACAGTATCAGTGTTCTCAATAGTTCCAGTCACATGTTTAGT  
A\_16\_P20107037  
TACTATTCCCCCTTTTATTAATAAAATGGAGCAGACACATGATTAATAATGAGGACCAGGTC  
A\_16\_P19870716  
AAAACCCAGAGCAAATGTCTTTAGATTGTATGCATCATCTGTTACTAGCACTCTCGTTTT  
CUST\_6187\_PI426210822 ATGTGTCCACAGCACGTTCCACAGGCAGAGAGGATAAGATCCCTGA  
CUST\_8855\_PI426210822 CCAAATGTCTTGTGCTCACAGCTGCTGTGACATCTGGAAGCATTAAC  
A\_14\_P120231 AAGGATTTACTGTCCCATGAGTTTCAGGATCAAGAAACAAATAGTTAAATGGCATGTGAA  
A\_14\_P105862 CTCATTACTGACATCTATTTTTTGTCTGCTCTTTGCTTTTATTGATTTTTTTCCCCCACC  
A\_16\_P39623705  
GAATCACAATCCCTTCTTGAATCATTCACACTTTGTTGAAAACATTTTCTTCAAACCAC  
A\_14\_P104465 CTTCTATTTCTTGGAGACACATTGAGAGAAAAATGCAGAAATAATTTTTACCCCTGGAT  
CUST\_3088\_PI426210822  
GATCTCTGCAGATGTTCACTTGGAGCTGGTGGAAACTATTTTTATTATGTATTATGTGTG

A\_18\_P14137093

ATAGTCAGCCTTAGGGAAACACTGAAGAATTTATTTTTAAACACATAAAGATTGCATTCA

A\_14\_P134478 CTTTCAGCACACCACAAGGCACGATGTAAGAAATGAACAAATCAATAAACCTATTACTGA

A\_14\_P101285 TGTAGATGTTACATGCTCTTGCTGTTAAATACGATATATAGCCCCTTCTTTCTACCCCT

CUST\_1033\_PI426210822 ATGCACCCCAAGACCCTTGCCATGAACCTTCCTTCAGCTTTCTC

A\_16\_P01869401

AATGAGGATCCCTGTAAAACATCACTGAACATTAGAATGTAATTTAATGGCTGAGTGGC

A\_16\_P00408867

AATGCTAGATAGGACCAATCATCATCTACTAECTTACACAACCTGACATCAGTATTCCCCT

A\_14\_P115536 TGATATCTTTCCACTTTGCCTTCGGAGGAGAAATTACACACTAAGTTTATGTCCTTAGAT

A\_16\_P17470631

CTCAAGGTCTTTCCAAGTAGTCATTAGACAAACCATAACCATTGATTCTCCAGTTTTTTCAG

A\_14\_P106384 TGACTIONTTTTGTAACCTACCCTTTCAAAATGAAACCTTTAGCATGCTTTCATGCTTTTTGC

A\_14\_P100397 TTCTATCATGTCCTTGTTTCAGCATTCCAGACAAAATCCAATCCTTATGGTCTCTACAATA

A\_16\_P40310121

ACTCATGGACTCATGTTGATTGGTGTGAGAATAAAGACTATAATCAGTCCAATTCTGTGT

CUST\_103\_PI426210822 ACATGATGGCTGGTCTACCTACCTCAGTTGGCAAAGTCCCCTCAA

A\_14\_P125452 TATTTATAACAACATTTTCAGCGTGGCAACTGCAGTTTCAGAATGGTGGAAATTATACCAG

A\_14\_P118875 AGAAATCCGTTCTTAAGTGAATATTGATAGGTTTATTCTGCCATCTTAAGCATGCCTCC

A\_16\_P00866590

ACAAGCATATCTTTACTGCTGGGCTTTCTTAGTTGAAGTTCATTATGGAAACAGCAATTC

A\_14\_P100522 CGGTATATTCGGAGAGAAGACATGGTTTCTCTGTTTTATCATAAATCTTGGTAGGGAGAT

A\_14\_P129774 ATTTCTATGTGCGTTTGTAGACAGCATCAGTGTTAACAATTTTGGCAGCCGAACTC

A\_14\_P134402

GATTTTGAAAGGAAAAAACCCCTTGGAAACAGGTTTCATTTGGAAGAGTCATGTTGGTAAAA

A\_16\_P16191628 TAAACCACAGGGGATTACCTATGTTTATCTGGGGCAAGTTGCAGGATAAC

A\_14\_P136791 GTAAATTTTTTTTCCCAAGTCCAGACAGAGAAACAGCCAGTAACTTTTTACTTTTTGGATG

A\_14\_P137883 CTGCTGAACCCATCTGGATCATGCTGGCTTAAACTCTTCGTTTGTATCCTATT

A\_14\_P119567 TCAATTCCTCATCTAGAGATTCTGTCCCCTAGGATCATGTAAGTCATTTATGCTAGGTAA

A\_14\_P103949 AATATCCTTCTTTTTTCAAAGGATATTTCCAGGCTACCATCCTCAATCCAGATCATTCAA

A\_14\_P108305 ACTGATTATAAATAGTATAAAACATTGTTGAGGACTCTTCTTGGAGTTGCCATTTGGAA

CUST\_10273\_PI426210822 GTACCCAGCTGTGTGGCCACAGTCTAGAGCCTTGAATTCACCTTT

A\_14\_P135706 GATTAGATAGGAGGGTCTTTAGCCAGGGGCAACGTTTACAATATTTATCAG

A\_18\_P22841742

CACTTCACATGGGAATCCTAGGACTCCATATTATATTCTTATCCTGTTGAAAATTTGACC

A\_18\_P15772563

AACAGAACTTTCTATCTCTGGTCTCATTTTTTTCTAACCAACTTTAACATGTCCTAGCAGC

A\_16\_P00506763

TGTTTCCTGATAACATTTATTCTGATACTCTGCAACTCTCAACTCTTATGACAATCCCT  
A\_14\_P103261 ACATTTAACTTGATACTTACTCATCTGGATTCTTTCCTGCATTGGCATAAGGATTCTCTC  
A\_16\_P19874361  
AAATCCGCATTTCTCCAGATAGTAGTGATTTCAAACCAAGCAAAACTTATTCCCGTTTAA  
A\_14\_P108095 CTTGGCGGATTTTCATCATTGCTGTAAATGTGATAATTTTCAGTTCTATCTAGTCGGCTACA  
CUST\_9331\_PI426210822 TGAAGCCTTCAAGGCTCATTCTCCATGTGCCCTTTCAGCAGAAAC  
A\_16\_P20608202  
TTGGTATCTGTGTTGGATAAGAATCCTTAATTCTATAACCTGAATAGTCAATCTGCCCA  
A\_16\_P31224758  
TGCCAAATTCAACATATAAAGCAATTACCCACAATTTTTACCTTTCCAGTGTTTTGAAAG  
A\_14\_P131217 TTTTACTTGTAATTCCTTTCCAGCCCCATTATAATGGCAAAACACTGCAATCTGAATGT  
A\_16\_P18531598  
ACGTAATCTGGTGAATCACAAAATTCAAACCTGTATACTTGTATCCTACCTCAAACCCC  
A\_14\_P120328 ACATTTAAGAACAAAACACTTCAGACACATGCACAAAACCGGTTATATGACCTTCTTG  
A\_14\_P108939 TCTAAATAAACAGAGACCTTTTTCTCTTGGTTGAGCCTTTCCTCTCTTTTCTGTAACAA  
A\_16\_P38560876  
GTTTTCTCAACAACCATATAATCTACAACCTTCTATCCATAATATGGTCAACTCTGCCC  
A\_14\_P110260 TACAGAAACGTGAGAGGACAGGAACAGTTAGTCTGTGTAAATGTCTGAAATATATGTGAG  
A\_14\_P134001 CTACGCAGTAAAGTAATTGCAGGCTGTGTCTAACTACAATTTGCAAAATGGGATTTTGAAA  
A\_14\_P124225 AACACATTCCTACTGCTAGGATTCCAGCAGCAACTATCATGTTTATAAATGTAGCAAAT  
A\_14\_P112897 TCCTCATCCCCATTCTATCACCACAATTATTGTTATTATTGTCATCCTTATGGATGTTG  
A\_14\_P111400 TTCTTCAAATAGGTTATGTGGGTATGCAATTTATGTGCGAAAGCAACAAGAAATCTTAACC  
A\_14\_P133328 GACAAACAATGTTTTCCCCCTAAGATAAATTAATTACATTATCCTGATTGGAGGGCAGGA  
A\_14\_P129199 CACTGGCAAGCCAAGAATCAATCTGCATATGGATTTTCATTCTACCCAGTGTTTTAAC  
A\_16\_P00000136  
ATAGTGCAGAGATCAAGGAGTATGGACAGGACTTACAAGTTCTTACAAAGGGAAATAGAG  
A\_16\_P00685253 CTTGCTTCATTTCTGAAAAAGCAGGTTGTGGCCACCCTTTCATGAGC  
A\_14\_P134514 ACAAGATCAGTGGTAATTTGCTTTTTGGTAACCATGAGAACATTAAGCCATTTGTTTCTG  
A\_16\_P00470495  
AAAACCTGGACATCACTGAAATTTTGCTGATCACTATACTTAACTCTCTATGCTCTCCA  
A\_16\_P03424197  
CTCTGATGTTCAATTCCCCTACTTTGTATATTGAGTCAGTATGAGATGCGATTTGTTTGG  
A\_14\_P136633 ACAATTTAAAAAAGAGTAATACTAACATGCTGTGTTCTTACCCCTATTGTTCCAAAAC  
A\_16\_P20805954  
TATTGCCTATGCCTATGACATAGTAATACCCTATGACTCAAACCTACATTTCCCATTCAG  
A\_16\_P16577672  
AGGCTCTGTTAGTTTTTTCTATTTTCTGACAATGCTACTAGTTTGCAACATACCCTCGAAA  
A\_14\_P139180 CAGCACTTGTGTGAGTAAATATGAAGGATCCAGGGTAGATAACAGCAAATATACTGTTTG

A\_16\_P30952579 TTCTCAGGACTGTGAAAAACCAGGAATTTCTTGCCTAACAGCACACTGTAACCTTA  
A\_18\_P13084043  
CCAAAGCCATCCTAAATGATACAATGCTATTCAAGTTACTCAACAAAGACCAAATGCTCT  
CUST\_5313\_PI426210822  
TGAATGGCTGCATTTAGAAACAGCCCTTACTTCAAGCCCCTATTTCTTAATTATTTGTC  
A\_14\_P112148 TCCTTTCACTCATTTTAGTCTGTCAGGAGAAATCAGAAGAAGACTCTATGGATTATGGAT  
A\_14\_P109542 TCTTTGGATGCTACTTGAGTTAGCATCCTGCCAAGCAATATGAATTCTCCTTTTTAAATC  
CUST\_6798\_PI426210822 AGAGGAGGCCATGCTAGGAGAGAAGGGAGAACAAGCAGGGCAGGC  
A\_14\_P133771 TATCTTTACATAGCCCAGTTAATAATCAGGCTCCATGCTCTGCTATGAAATTGACTGTTG  
A\_16\_P02175724  
TGTGAATTGTAAAGCACATTCAAAAATCTAGTTGTTACCATCAATAGCCCTTGACTCTCC  
A\_14\_P127623 GGAGGCATACAAAAATATTTGTCATAATTACTTATGGTAGTGAGACTTGGGTGGGGAAAAG  
A\_16\_P36230905 TATATGGTGAACACCATTACTTAGGGCAGTGCCCCCTACTCACAG  
A\_16\_P03123240  
ATTCTACCAAATGGACTTCTTTTACCAAATCCTCTAACAAAGCAAATAGCAATAGAGCG  
A\_16\_P03315414  
AGCGTCCTGATTAAATCAAAGATACTTAGTCCTCTAACCTGAAAGTTGAGAGAAAAGGAA  
CUST\_8874\_PI426210822  
TCAGACCAAAGAAGAACTGCCTCAATGTTGTTAGACGCTGAGAAGTAATGATCTC  
A\_16\_P19299667  
GTTACCGGAGGATAATCATATGAACTTAGCAGGTAATGACTTCACATCCATCTCAAGTT  
A\_14\_P139142 GCTATGTTTCTTATGGATTTCAATTCAGTGCTAGTGATGCCATAAAAGGAGAAGGCTTG  
A\_18\_P16201648  
TGATCTTGGAGCCGCATTTTAAACAGTTTATTCCAAATTTACTCTCTTTGTTTGAAGTCA  
A\_14\_P100991 ACGATAAATTAATTTTTGAGGACTGTATATAGTGATGTGCTAGAACTTTCTAGGCTGAGTC  
A\_14\_P115654 AACTGACACAGAGAAGAACAATTTTCTCAGGCTCGTAGAGAGGTGGGATAG  
CUST\_9714\_PI426210822 AAAGTTGTATTCTCAGAAGGTTGCCAGTCCATCAAAGGCTTTCACTAGAT  
A\_16\_P16663802  
AAAACAACTTCCAATTATGGCCTCTCTAATCTATGAAGACACAGTCTAACCTTTGTTGG  
A\_16\_P21542139  
GCTTACAGACATCACTAGCAGTAATTATCAAATTCAGACTAAACCTACCTTTTGCTTCC  
A\_16\_P16531804  
GGCAGGATATTGGAGATAAAGAACGTAAGTACTAGCAAAAGAGCAATACTACTTAGGGGTTTT  
CUST\_2260\_PI426210822 ATGTTGATGGGGAAATGAGTGAGGAGAGAATTAGAAACCCAGACATCTTCT  
A\_14\_P131747 CTAATCACAGTCCAGAATTAGAAGACGACAGAGAGATTGAAGAAGAGCCTTTATCTGAAG  
A\_14\_P114795 AGACTAGGAAAAGCAAACAATAAACGAATACTCAAATGAATGCATCATAACGATGTCAGGG  
A\_14\_P104462 GGCCTTAAATCTTCTATGACAAGTTTAAAGTGCAGGATGCACAATGACATTTTAAAGAGGA  
A\_18\_P16006384

GGCCTTACCCAAAATTTTTACCCTAGACATTAGTATTGTATACATTTTACACCCAGTTCC  
A\_14\_P103278 ACTGGGCCAACACTGATGATCGTAATAGCCATATGCACATGTAATAGAAATTAAGAGTT  
A\_14\_P107948 ATCATGTGTGGTATATTCACAAATGCAGACAAAGAAAATTCTAGAAAGCCAGGGGTGAAA  
A\_18\_P12812354  
TTAATGCAAGAGAAAAAGATTGAAAACCTTGACCCTTTAGATTACTCCGAACCTCAATGA  
CUST\_299\_PI426210822 AGGCTGAGGCTGGCTCAACTGCCTTGGAGCTCTTTGACAGCTAGA  
A\_14\_P127562 AACCAACTAGAGAGGAATGAAACATTTAGTTGGCAATAAACTGTCCACATACATGTGTAG  
A\_14\_P124357 GCTCTGCTTTCTGGACAGATAGAATTACTCATGTGTATGTGTCAACCAACCAAATTAAT  
A\_14\_P109791 CTCCTAGAACTCGTGCCAGCGAGAACTTGGTAAATGTTAGTTGATTAAATATTAGTCAAG  
A\_16\_P03645713  
CACTTCCTTTCTTCAAATATGACTTAAAAGCAGACTTGAAAATGAATCAGATGACCCTGG  
A\_18\_P22839399 GACTGATGTGCCTTTGTGGCCGAAGCACCCGGAAAGTGCCATTAC  
A\_14\_P126469 TGGACTGGAAATCAATTTCCAACGACACCCATACTCAGCATTTTTTAAAAGTAATTTTGTG  
A\_14\_P129107 TAATTAATAATTCCTTAAGAGGAGTCACTTTTAAAACACTATGTAATAACCGCCGGGCGTGG  
A\_14\_P130952 TCACAGGCTACACATTTTATTGCTTCAGGTTTATTTTGCCTAAACAGGTATCACAATCC  
CUST\_1311\_PI426210822  
CTTGTAACACTGAGGGTAGTTTTATTCTCTCTTCATTTTTCTGTATAATTGCCCTTTTTTT  
CUST\_1239\_PI426210822  
AAATACTGTTGAAGATCATATTGGCACAATTTGGTTGGTAAGTGTTCCTTCCCTCTT  
A\_14\_P137138 CTGGGTGATGCGGTTTTTATAATAATCAACTGGGTGAGAGTGATGATAATAAAATTTGAC  
A\_14\_P120424 GTATTTTTGTTTTCCCCACTAAACCCACTAACTCCATTATGCTATGCATAAATTCATGC  
A\_14\_P103085 ATACACTTTTGGTTCCAGAAGTAACACTTGACACTCTTCTTGCAGAGAGGAAGAA  
A\_16\_P16191078  
AAAACATAACTGATTTACCCACAAATTAGATAACAATAAGTGATTCAAGTTTGCAGGCCA  
CUST\_2378\_PI426210822  
TCCCAAGCTGCTAATATGCATATGATAAGGGCAGAGATTTAAAAGAAAAAAATTTCTTTA  
CUST\_3282\_PI426210822  
AGATTAAGTTGGAGTTAATAAGAAGTCTGAGAAAGAGGAGAAAGAAAAACAGCAAAAGTT  
A\_16\_P00685111  
CTCACCTTGACTGTTTTCAAGGTGTAAATTGTGTTTATAGTGAAAAAGAAGACTTGGTCA  
A\_14\_P102493 AAAGAGAAACGTAAAAACAGATAGAGATTCTGCCTGTGCTTTTGTGACTGTCTCTAGA  
A\_16\_P36230499  
AGTAGCATATCTATTTTCTCATTTTGCATTACAATAGCATCTAGTAACATTCAAGCCTCA  
A\_14\_P117020 TAAATCAGTGGTTGAAGTGATTGAATACATGGGAATGGGAATATCAGTGAAGTATTTTGG  
A\_14\_P125645 TGATTAGGGGAAAACAGGTCCATCAGTTTCTCAAAAAAGTAAAAGTGGGTTATAATTGG  
A\_14\_P125019 CTCACCTTTTCATGATGATACCAAAGGTCTAATTCCTCACTTGTCTCTCTATTGCTAG  
A\_14\_P115525 CAAGATAGTCTGAGATTAGAGAGTGCTTTGACTAGACAAAACCTTAGAACCATTTCTGTGC  
A\_16\_P21508332

AAATCAAGCAAGGGCATTAAATTTTGAACATTAAACTCATGGTAACTGAATGCACAACAGT  
A\_14\_P107814 AATTTAGAGGGGACATACATGGCAGAAATTTAAGCAATGAGGAGATGATACAGGCAG  
A\_16\_P01331861

AAAACATCGAGTAAACTTTTCATCCATTCAGGGATCAACTAATCCAATCCATGAGCATCTT  
A\_14\_P103747 TGTATGAAACCAGTGCATGATATAAAACTATAAGGATTGCACTGAGGATCAGGAGACTTT  
A\_14\_P128180 ATGAAGTCCTAATACTTACAGTTGATTTCATTCAGTATTCGGTATTTTGCTCACCTGAG  
CUST\_4210\_PI426210822 TCCTGTATGGCCATTCTAAATCAACTCAGGTCTGACCTTTGGAAATACGTAC  
A\_14\_P116861 ATTGAGTTTAGAAGTGAGTGTAATCCAGCAATACAGTTTACTGGTTTAGTTGGTGGGTTA  
CUST\_4877\_PI426210822 GGCCTTGTGTTGCTTTTGGGAATGGTGTAGAAATCACGTGCTTAGT  
CUST\_2742\_PI426210822

GGACTCCACTTATCAAGTTCTTTTAGGAAATTACCCAATGAATTGGTGGAGGTAAAT  
A\_16\_P16191053

ATTTTCTACTCTTTGAACATCAGTGTGGATTTTGTGTTGAAGTCTCATTGTCCAAGACCTT  
CUST\_2769\_PI426210822 CTGCAGAGCAAGGCCTGTCATTACGGTGGATGTCTCCATCTTCCT  
A\_16\_P01810120

ATCTAGCAATTTCACTATCAACTCCAACAAATTCACTCTTAAAGCCAGAAAAGCATTCCA  
A\_14\_P129353 CATCTCAGCCATGAAACATTCATACTAGTGCAAGCATGTATATCCTTGTGTTAACTTC  
A\_14\_P124778 CATGGGAGAAGAGGCATTGATGAGGAAAAATCTACAAAGAAAGCAAATATCAATTTGTCA  
A\_14\_P104716 ACAAAAAGAGATCAAAAAGTCCTGTAACTGAAACTTCCCTCGCATCCTAACC  
A\_14\_P116228 CTGCTTTGAGATATGTATTTTCAAGTTCACAAAACCAATTACTGAGGCTCTATCTGCTAGGT  
A\_14\_P112821 AAGTAATTTAGATCTTGAATAGCAAGTCTCTTTACTGCCTTCTGGGATCATTCTTCAA  
CUST\_6376\_PI426210822 ACCTGAGAAGGAGGACAGGGTCAGATAAGGTGGTAAGCTTTGAAC  
CUST\_775\_PI426210822 CTTACTGCCATTTCCCCCGTGTCTGCACTCACACAGGCCCAAAC  
A\_18\_P22842495 GAAGAGGTTTCAGGAGAGAAAAGTATATGTGTGGGGGCGTCAGAACAT  
A\_14\_P133532 TTAAAAAACTGAGATTTGAGTTCTCTGTGTCAAACCACCATCTGTATTTGGGGAATTC  
A\_16\_P20481740

AAGTCTAAATCACAGAGCCTCATGATTAAAAACCCACGTATTTTAAAGTCTCACTTCGTG  
A\_14\_P118197 AAAAGTTCCACCAGAGACATTTATTCTTCTTGCCTGAGGAAGGTGAGAACAG  
A\_16\_P00685511 ATCATTTCCAGCAAGTCCACTTGGTGTAGACTGTGGACCTCATGAAG  
A\_14\_P131259

GGCCCAACACTCTGTGTTTAGAAAGAGAATTTTAAAACACAGTCAAAAAGAACGGAAATCA  
CUST\_4711\_PI426210822 ATTCACAAGCAGAGGGCCTACCCTTAGGCCCAAGTGTGTCAAGC  
CUST\_9205\_PI426210822 AGGAAAGGTGAATTGGGGTTCTACCACTCCTGCCTCTACAATAAGA  
A\_18\_P13977749

AATTCTTTCTGTGTTGACTTCATTAAGTTTCCGTTGAAGAATTCCTCTAGGTATTACCGTG  
A\_14\_P116500 GAGAAGAAATTGACCCCAAACATCATCTGCACCGATGACATCTTATAGGCAAA  
A\_16\_P18492045

AAAACACTCCATCTGAATGTTTTAGGGGCATCTTATATACGGAGTCTGTTTGA AAAAACG



CUST\_10067\_PI426210822

ACTAGAAGTTTTGTTCTATTTTAAAGTAGATGAAACCTCATCTCTCTCCCATAGTGTCAT

A\_14\_P126590 CTTTAATCATGTCCATAATTCACCTACTCTGGATGAAAATAAATTGTGCCAGAGGATC

A\_14\_P100580 TCCAGATTACTCAGAAATACTTCTTTTTTTGTAGAACATTTTTGTGGGCTCATGCTCTGTT

A\_14\_P127853 CTTGAAAAGTTTTTGAAGGGAATATTGGGAGGCGTTTTTTTTCCATGTTTAGATAGTCAC

A\_14\_P109678 AAAGTATTGTTTCTGATCTGGGATCAAGAACTTATTTTGGAAATTAGCACCCAACACTGA

A\_14\_P108982 TTTGCCTTTTCTGTTTCCTATATTCACATAATCAGAAGAGCCTGTTTTTTTTAAAGGCTGG

A\_16\_P01709038

CCCAAGTCTGCTGTTATTAATCCAGATACCGTTGACATAGAAGTATTGTGATCAAGTGTA

A\_14\_P137114 GACCAGTCACCTACTTTCTGATCAATAAAAAATGTCGACATGCATTTCTTACAGGGCT

CUST\_2066\_PI426210822 CATCGGACACACACCCCAAAGCATGTCATTGCCATATTGAAGTTTTATTGAA

A\_14\_P127823 TCTCTTGCATTGCAAGGGTAAATAAAAAGTTACATGCCTATCAGGAAATCAAGAGTTTCAG

A\_14\_P130258 CGAGCGTCCAGCATATATCAAGTCCCAGGCTAAGGAAATACGAAAAATCTAATACATAA

A\_14\_P116217 TTACTTTTAATTGCCCTGAAAAGCAAATACTTCTAACGGCAGTAATGTGACTATGACCA

A\_14\_P123135 GTCAAGCCAGCAGACATCAGGACTTACTTTCTAATTAAGCCAGAGTCACTTTAAAAA

CUST\_1094\_PI426210822 CTTCTGGGTACTGAGGTGACACAGGTAGGGTGCTCTGGGAAACGT

CUST\_2005\_PI426210822 AATGGCTCTGCCTTCCCGAGAACTCTGCTGGCTTGTGTTATTTTA

CUST\_2459\_PI426210822

ACATTATCATGGTAGTCTAGGTGGATTTTTTTTCATTAACACAGAACTTAGAAAAAATTTT

A\_16\_P16876684

ACATTGATCAGCCTTATTCTCATAATCCTCAAATTACAATTCTGATCTTGAACCCCAAGC

A\_16\_P16144786

ACTGATCATATACAGTTTCGAGATATTTCTATCCTCCTAATCCTTACACCTGTCACTCT

A\_18\_P17401494

CAACCTGACAGTCTTAATTGTTGCCTAGAGATGTTACAAAATTGGCTTTCTAAAGTCTGA

A\_18\_P14136561 GAAGTTCTCAAATCTCCCATTTTTTTGGAGACCTTGTCATAAAGAGACCTTGAGACT

A\_14\_P104130 TATAGAAGAAGAATCTTTTTTCCCCCTTCTTTTTTTGAAGGGAGATGAGGCAGTCATATT

A\_16\_P02446221

ATGCTATGTAGAGGAAAGTAATGAAGTCTTCCCAAGTATTCCATACCTACCATTTCTCAG

A\_18\_P22842082

AAATATTCTGTTTATAATATCTAACCCCTCCTATCAGATCCTAGGCCATTTGGAAGCCAGG

A\_14\_P121458 GATCTCTCATCAACAATAACACTGAACCCCTCCTCTTTCCACAAATTGACACAGATATA

A\_14\_P102483 ACTGGTTTTTCTTCACTTGTCAACAAAATGGAAATGGTATTTAAAATGGAAAATGGCAGG

A\_14\_P120009 AACTACTACCATGGGCAAAGTTCTTGTGAAATTACTTGGGAGTTCTCACATGGTAATTA

CUST\_6251\_PI426210822 AGTTTGCTGCAATTGCAGTGAGAGGGAAGGTACCTTGTAGAAAACCT

A\_14\_P104569 CTTCTATGTAAGAGATTTAATGTCCCTGACCCTTATCCAGAGTAAGTTGGATAAACCTTT

A\_16\_P18894964

ACCAGTTCCACTTTAATCAAAGCATTTTACTTGTACTTGTAACCAATCACCTATGAAACCA

A\_14\_P124746 CTTGCGTTATCACTTGACATCCCTGAAATCCATTTCTAAGGTAAAATGGAAGTCTAATTG  
A\_14\_P130742 AACTTTATTCAGCCATATAATCATTATGCTGGGTCCTGCCCTCTTTGCCAC  
A\_14\_P128886 ATTTCAAAGGCAGTTCTTTTGCACCTAGATCATTTTTGCTAAATCATTTTGGATGGGGAG  
CUST\_2599\_PI426210822

ATCTTACTTTGGTTTGTGTCAGGATTCTTCTCAAATAAAACACACTCCTCAACTTTTACAGT  
A\_14\_P102528 TGGAACATAAATATTTGTGCAGTGAGTGGGCATTTCTCTAGAAGTGTTC AACAGATACA  
CUST\_1166\_PI426210822

CTGTTTTGTGGTTTAAACTAGACCTACTATGGCTTTTAAGGCCACCATTATTCCTCAAT  
A\_16\_P39232723

ACAGCCATAATTTAATCAAATCCTTTTTATCAACGTGACTTCTTAGACATTCACCTCCA  
A\_14\_P133086 ATTTAGATCTTCACAGACTGGATGTTAAGCAAGTGGAAAGGCAGAACAGCCT  
A\_14\_P128250 GGAAC TATACTGTATTTTAAATTTATCAGGGGAACCCAATGTTCTGCAAGGATCATT  
CUST\_3738\_PI426210822 TTTAATTCAACAGGCACCTGTTGAATGCCTGTGCATGCAAACATGATGC  
A\_14\_P117305 AGTTGGTGATGATTTATTAGCCAGACAAGAATCAACAAACAAGTTCTAACATCTGTTCT  
A\_16\_P02380498

TTTTAGATCAGTTAGGGATGTGATGTAAATGGTAAATCCTTTAGGGAGGAAAAAGGCAA  
A\_14\_P122019 GTCCAGATTCCTGCATGGAAGAAATACCCTGTCGCTTCAGATATTCTTCAATTTTC  
A\_18\_P22841425

TCGTCTGCTTGGCCTGTAACGTTGGCAATTATCATCATCATTATCGTTATTAATATCCAA  
A\_14\_P105734 AGTATTATGACCTGAAGGCCTCAACATTTATCTGGACTGGAAATGATTTCGAGATTTGTG  
A\_14\_P100347 CCAGAAGTTATCTCAACATGCATTTGTCTTTTCATAAAAAAATTACGTAAAAATGCCCCC  
A\_14\_P109557 GTATACGAGATATTCAGTCTTCTTCCACTGCTAGACGAAAATGGAGAGAATTGATCTAGA  
A\_14\_P103521 GAACTTACCTGGGGTTTGGGTTGTGCATGGTTGTTTCTAAAAGAAGAAAAAGTCTG  
A\_14\_P105513 CTCCACTTTATTAGAATGTGATAAAAAATGAGACCTAAGTGGAAACAATCCCTGTCCATTG  
A\_14\_P100887 AGATACCTCAGTTGTCTGACTTTGCCAATTGCTTAATTTTCAGAATTTAAAAAGGGGAAAG  
A\_14\_P200068 CATTTCCTGGCCAGTAAGCACAGAACAGAGGGGCTAAATATTTTATGGTTTTATTTCAT  
A\_14\_P115382 AAGTATGGCGAAATCCACTAAATTTATTTAGGGGTGCTGAATACAATCGGTAAGCATTTT  
A\_16\_P00513145

GCACTGTTTCATAAAACCCAAAACCTTATCTTGATTCATGCCTATATGTTGACTGTCACCA  
A\_14\_P126439 CCAAATCACCTGTAAAAGATAAACAGCAGATCTAGGGCTGAACATAGAGAGAACTATC  
A\_14\_P201943 CTAGTATGAGTTACTGTTCTGCTTTACTTCACTGCAAAAATATCTTTTGGGTTTCAACAAC  
A\_16\_P02036085

AAAGCCAGATGTAGTCCATTATTTACATAAACTTCCAAGAATCTATCCTATGCGTAATGG  
A\_14\_P107292 TGACAAAAAAACAAAAGGTAACCTAGTCATTTCCATGGAAAACCAATTGAATTCGGTGAT  
A\_14\_P137972 TCATTTTTTCCCTCCCCTCTCTGCTATACAGGGAAATGATAAAACATTTTATATCTCCCTG  
A\_16\_P18464626

GTTGCTCTGATGCCATTATATATGCAGCAGTAATCAGTTACTGGTCTTTTTCAACTCTGT  
A\_14\_P102878 CAGTCTTCCCCTTGCTCATTGTATGTTGATGAGTTGATTAAGTCTAACAGATTCATCAA

A\_14\_P115059 TGTCCATTCTAATTGGTTAGTTTCTGTTATTACACTGATTGCTGAATAGTTGACACCCCA  
CUST\_8338\_PI426210822 CCAAGCGAGAAAGGATATCCTGAAGGTCCCAGAGCTGGGAGAAGC  
A\_16\_P02948988

AGTCCATGTGATTAGATGTTTCCAAGAGTCTGGAATAACATACCCCAAAGTGTAAATAGT  
CUST\_5312\_PI426210822 CCACCATGGCTTGAATGGCTGCATTTAGAAACAGCCCTTACTTCAA  
A\_16\_P58424399 ATTCCTAGTGATCGTTTCTAGTCTGTCCCAAATGTATCCTAGCCCAGACC  
A\_14\_P106876 CTTCAGAGGAGGAGACATCAGATTCTACAAAGTGGACTATCTACAAGAAAAATAGTCTTG  
A\_14\_P113725 GTCCTCAGCAAATCTTAAATTTGCATTTTCTCACCCTTTAAATTAGAGCCAGTTAGAGGG  
A\_16\_P16234231

AACATTCCTTGTCTCTGTAGACTAACAATACTTGAGTATTTCTCTTCGTCTGAAACCA  
A\_14\_P111226 GATAACGTTATTTCTACCCATCACTGGCACTTGCCCTTAATCCGAGTCATTTTG  
A\_16\_P02037984

GCAGTTACTGATTTGAAGCAACTAAACATTGGAGTGAAATCTTTATGATAGCCCACTTC  
CUST\_8747\_PI426210822 ATTGAGGCAAGGAAGAGTTAGAGGGAAGGCCAAGGTAAATTGGTAAGT  
A\_16\_P01340311

TAAAACCTGCACAAACCTTTTTCTTTTCCCTCTATTTGTCCTATCAAGTTATCTCAACCGG  
A\_14\_P112584 TGAGTATATTCTTGATCAGCCAGTGATTATCCACTCTCTACTGCCTTTAATTGGAGATC  
A\_14\_P111387 AATATTTCACTTTTAACTAACAGACCCCAAAAACTAAATCACACTCCTGTATCAACCAT  
CUST\_5488\_PI426210822 TCTGTGCTTATTTGTTTCTGAATTGACCCAGTGAGGTAGTCATCTACCCTG  
A\_16\_P21635961

AAATCCAACATCTCCATTTGATTCATTTACATTGCTGTCATTATAACCATGGGCTCAATT  
CUST\_1358\_PI426210822 CTTCCCAGGTCCCTCCACCCTGCACTTCCTGGACTTGTCATGGA  
A\_14\_P138590 GTTACTCTTAGACCTAGTCTTAGAACCTCTGAAGACACACTTTGTAATTTGTTGTTTGGC  
A\_16\_P36352387

AACATAACAGATGATACCATTTTATCATGCAAGGTATGGATCTAGGGAATGACCAATGGT  
A\_14\_P136953 TTTAGAATGCCATGAAATATCTAGTTGGGGCATTATCTGCCATTTTGCAAGGTAATCTTC  
A\_14\_P118585 TCACAGGGATCATCTACCTGCCTTCTGAGAACAATCTTTTGGCTTCATGTA  
A\_14\_P134120 GAATTTTCTACTTGCTTCAGCGCGGTTATGCATTTCCCTAGAAATGCTGT  
A\_14\_P109246 ATAGACTTCTCTAACAAAACCATGGATTCTAGGAGGGACTGGGAAAGAGAAAAAC  
A\_16\_P02181866

ACAGTCATTCTGTGATAGACGATCATTTCTGAAATCACATATAAGACTCTTTCCCTCTCTG  
A\_14\_P116154 AGGTCATCCACGATGATGAGAAGAACGTTTCAGAGCATCTACACAGGAG  
A\_16\_P01132506

TGCAAATTCCTACTTCATACTAACAACCACACAATCTTTACATTTCCCTTCATCACTCTCA  
A\_14\_P129355 CTTGAGGTCTCTGACATCTCAAAGATTCTGACATGTAGAGAAATCTGTCACTC  
A\_14\_P133585 GAAACAAGTTTTTTTATAGATTCATTTACTCATTTCTACACACCAAGCCTGTTCAAGGCCT  
A\_18\_P10835288

GGACAATTCAAGAGTTTTAGTCATTTTACATCCTTAAACGGTTATTCCACAAAAAGCAGCA

A\_16\_P15049024

ATTAGTTACACTTCTCAATTCCTGGCTTAAAAAAAAGACATTAAACTCCTACGGGCACAC

A\_14\_P130762 GCATGACTTGGATTAATAAATTTGCAAATACAACCTGGGTATGCTCACTCAGTTTGACCAT  
CUST\_5035\_PI426210822

TTATGGTGTGTTTTATACGTCTAGAGGATTTTTGTTGTTGTTGTTTCTTTGAGGTTTTCT

A\_14\_P117619 GGGGAGAGATTGTTGTGAAAATGCCACATGTGTTATTTACCTATTCTCCTATTAC

A\_14\_P120401 TCAGAAGTCTGGTTACGTTACTATTATAGGAAAGCAAGATCAAAGAACCTAACTCTCTGG  
CUST\_1140\_PI426210822 AGTGTGGAGCACACATCTAGAGTCCCTGCCTGAGGGCTGAGGG

A\_14\_P132608 CTCTGAAAAGATTTTCCATTTTAACTTACCTTTCTTCTGCAGGTAAAGATGGAAGCAG

A\_14\_P120937 ATAATATTTTTTCATTGTCGTCTCTCAGAGGATATGCCACAGGACTTCAAGGCTTCC

A\_14\_P202566 GACCACTTTAGAGAACAACAAAGGTTTTCAAAGTGAAGAGTGCACATTTCTTTAATGAAT

A\_14\_P108074 CTTAAGTAACACACAAATCGGGAACAGGAGGACAGAACCGTTGGCATT

A\_16\_P19133504

CAACGTGTCACTAAAGTAACTAGCCTATACTTAAACGCATAAGTTTCATCCATTCCATTGG

A\_14\_P113042 TCCACTGACTTCAAGACTCATCTTAGATGTATCTAAGGACCTCAGAGAAGGTCT

A\_16\_P01956205

CATTTTGTCCATTGTCCATTTCTCTTCATAGCCACTACACCTACTTTATTTCAGACCATTG

A\_14\_P134040

AATAAATAAGAGTTCCCTTGAAAGTAAAAAGGTGGGAGACTCCAAAAAGTGTCCATAACA

A\_18\_P12309290

ACACTCTTAGATGTTGCCTTCTTCTGAAGTAGATTTACAACAAGAAACCTAGGAAACACA

CUST\_1827\_PI426210822 GAGATGAGAGCCATTTTCAGCATGAGAAGGTTGACAGCTGCCATTTTTTT

A\_16\_P58424439 CTTCTGTCTTTCCTCTCAGCCTGTCTTCATAGGGGTTTTTCATCTCCATAC

A\_14\_P116877 ATTTCAATAGGTTTTGGTGAGTGAGTGTTTAGAATGGTGAGTAAGTGTTTAGAAAGTGGT

CUST\_1274\_PI426210822 TTGACGGCTTTTAAAGTGTGTAGTAGGTTTTCTTTGTAGCTACCTGTTCTGTTGG

CUST\_5185\_PI426210822 CTAGTGTTTATTAGACCTCCATAGTATCTTCACCAACTGAGAAGGTGCCCC

A\_16\_P37911472

GGTGAGAAGCATTTAGGCATTAGAGTCATTTTAAATCCAAATTTTCACAGAGAAGAATCCC

A\_14\_P130358 TGAACTAGCATTTTTTAGTGACCACTTAGTGCGGGTCCTAAACATACTGTCTCATTAAATC

A\_14\_P134155 AATGTGTATTTTGATACCCATTGGCATACTATGTATATTATTGTATTATACTATGACATT

A\_14\_P115780 GAATCAAAGGGTCTTTGTTGGGACACATACTGACCGAAGTGGATCTGTTTTAATTA

A\_14\_P121011 AAATAACATTTGAGCCAAGCATCCTGCTTTATAGACTTGTGATTCCTGTCTTACAACAG

CUST\_4645\_PI426210822 TAACAGTGGAGTTTGACTCAGATCCCCTTGACCTCACTTGGCTTT

CUST\_8785\_PI426210822 CAGTACACAGAAGTCTTTTTCCAGCAAGTCTCTTTGTTAAGCCATTCTGGTAT

A\_16\_P01482628

ACTCACCACAATTTTTCTAATCCCAATTCATATGATTCTATAACACACATAAAACAGAGA

A\_14\_P130315 CTGAATTCAGGCCAGATAATTGCTCTTTTTTCCCCAAGAAACATTTGAATTGTATTT

CUST\_1924\_PI426210822 ATTTTGCTGGATATTCTAGTGTCAGGGCACAAAAGCACTCACACTAAGATGG

A\_14\_P201215 AATTCTGCTGGGTAAATGTTTCAGCATATTGCCTAAAGGAAACTTACACATATCACTGTC  
CUST\_4725\_PI426210822

CTTTGTTACTTTTCATGCAGACATCTGGAAAGAATTTGTCAAGAATTATAATAAAGAATA

A\_16\_P15713439

ATACCCAATAATTTATCACGAAAAGGTTAATGAGCATCCAGATGAGATAAAACCCAAGGG

A\_14\_P107341 TCTGGCCATTCATTCAACAAGAAGAACTTGGAATTTAGATGTCTGCCATAACTGATTTA

A\_14\_P125509 AAAAAAGAAAAAACAGAGAACTGTCCCATGCTTCTCAAAGCCATTAAACTGCATTGCTA

A\_14\_P113304 ACCTGCTACATACCAGATCTATTACATGATAGGATGGAAATATCATGAGTCACAGGTAAC

A\_16\_P00685419 CTTATCAGATGGAAACTCGGCATTCCTCAGAGACCCTTCAGTGTTC

A\_16\_P36463925

AATGCTTACATGCGACTAAAAATTTGTTCCCTACAAGGATCACTATTATTTCTCACGCCTG

A\_14\_P133582 ATTACTGAGTGTGTTTCAGGAGAAAAGTGACACTTCCACAATCATTAGTAGTTCATAACC

A\_16\_P03102671

ATCACTCTTCTAAAACATTAGTGCTTCATCTCGATAACGAAACAATGTCAGTGCATCCTG

A\_16\_P17218016

ACCTACCATGTAACATAAATACTTGAGGAACAATGAAAAAAAAACCTTCACCCCTTATGC

CUST\_2837\_PI426210822

TTTTGATACACATAAGAATGAGAACTATTCTAGAACTCTCAAAAAGGGCAAACGAGTAAT

A\_18\_P10777906

AAATGATCAAAGAACTCTATACCTGAAAACCTGAACCTAAAATACTTGTGCCCTGTAAGC

A\_16\_P15022785

AGCCAGTCACCAAGTAGTTTGTATTTCATCTGCTATAATAACTTCTTTGCAGTTCACTGTG

A\_14\_P113611 TTTTATAAGGCATTTACCTACCTTTAACGCAGCCTTTTAGTTGGGACTGCACCTCATG

A\_14\_P119548 ACCATGGCTTTTTATTTTCTCATGTTTTGCCAATCAGCATTTTCTACAGTGACCAAATAG

A\_16\_P16702175

AAGAATGATTTGTGTGAAAATTCACTGCATCATGAGTTCATTTTCTTTCTGCCTTTTCCC

A\_16\_P38293383

GGCTTTCCATAATTCCACTTCAACTTTCAAATGCTTCATTGAAAAGTTCTGGGTTCTAAT

A\_14\_P101725 CTGAAGAGATACAACACATCATGCCAGGATTTCTAGTTGTTGGTGAGGCC

A\_16\_P03519072

ATTTTCCACTCTATGCAAATCACTCACTTTACGGAAATCATCTATCATATGTTCCCAAGC

A\_16\_P03061440

AAACCAAGATCTAGAGGGATTACAGGAACTATAGTTAACCTAACATCACATCTTGTTGC

A\_14\_P135006 ACTTTCTTTTCCCATGACCAAGTCTCTTTGCAAAAAGTCTTCTTAGTTATAGAAGCAAACA

A\_14\_P100773 GCTGTGAAACCACCAAAGTCACCAAATGAGGTTTATGTTTTGTTTTCCAAGTTAGATATT

A\_14\_P119095 ATCATAGACTGTTAGTTTTATTTTGGTCTCCTCATAGATGGGATACTCAGATGGGAATGT

A\_18\_P14480225

AAAGTCAATTGTAGTTCATCACTTATGCCCATACCTGACAGAATTATTACACCGTCACTA

A\_16\_P15323587

ATTCTCACTCTACCTCAAATTAGCAGCATAGCAGATAGTAGCAAATGTAATCTTTGGGG

CUST\_3727\_PI426210822

CCTACACTATGGAAGACTTTCTGAAAGCCCATATCTCATGCTAAATTTAGCTGGATTTTT

A\_16\_P19776955

AACTGCTGCTACATAACAGTTAGTGGAAGAGTTAAGGAGAAAGAGTATTAGCACATACCA

A\_14\_P105567 TCTGGAGTTCAGAGGAAGAGGTAGGACCAGTGCTTTTTTGTTCCTTTTGTATTTTTTG

A\_16\_P15676725

CTGTTTCCCTCCATTTAAGTGCACTTAAGATTTGTCTTTGTAACCTATTCCTTGACACCCTT

A\_14\_P126786 CTTTCATATGCTTGTAGGTGGAGATTATCTGAAAATTAACAACACTTGGAATATTCAGTCC

A\_14\_P139580 CTTTTCTGCCAGTTGGGCAACTCTTAGATAAATAATTTCTCCAATCCTTTCCCTGATC

CUST\_2582\_PI426210822 TGCCCGTTAGACAGCACGTCATTCCTGTTGGCTGCAGAGGTGAG

A\_14\_P130453 CTGCCTCAGTTTGGCAAAAAGTAAACTTTCCCTTTCCCAATTTATAAATAATCTGTCTGC

A\_14\_P108333 TTTCACCAGATTCTGGAACAAGTAATAAAAATAGTGCCACTACTAACCACACAACACTGTGA

A\_14\_P134501 CTTGGCCAAAAGTTTGTTTAGGTGATTTGCAGTGTATTTGGAGGGATTTTGATAGTAAT

A\_14\_P110267 CTGACATCTGCTCTCGAATTCGCATCCACTTATTGTCAGATGTGGGAAATCTATATAATT

A\_14\_P130165 ACTAAAGCAACACCAATTGATTTCCCTATCAACAGACTCCTTTTATAATCACAGTTGCTC

A\_14\_P136299 AATAGAGAGGTTTTCTTAATTAACAAAAGGACGTATGCCATGGAGAAACACACCCCG

A\_14\_P139547 AGTTGGGTGAGGACGATGATGAACAGGAAGATGATGACATCGAGTATTTCT

A\_16\_P00715832

CAGAGACAATCAAGTCCTATCCTACCAGATCAACTGAGAGATTTCTATTCCCTAAAGTTC

A\_14\_P114950 CTGGCTGTAGGAGTTTTTGTGGTTGATCTAGACAGATGCTAGATAATGAATAAAAACCTGG

CUST\_1934\_PI426210822

AGTTGAATTGTTTACTTGTAAATTTGGAAGCTTCTTGGGTCTTATTGTGTGTGGCTTTTTAT

A\_18\_P15690522

GTCTCTAGTATTTTCAGTAATCACCAAGGCTAATTACTCCATTTCAATTCCACATTCTCCC

A\_14\_P106242 TTGTTTCACTAAAATCAGTCTTTCTTTGAAAGGCAAGATGAGGGCAAATGAATTGTTG

A\_18\_P13493109

CCCCAATAAGTAGACTGCAATTTTTAAACACCAGCAACTCTTAATAAGCACACTTAGGTC

A\_14\_P108217 CCTGGCTTTACTGGTCTTCCTTATTTTTATTGTTTCTTTTACTGTGTGCTATTGCCAATC

A\_14\_P113448 CGAATTTTTTCAATGATTTCTCCACATCTTCTAACTTTGGAAAGGAGATAAGGCACTGA

A\_14\_P202073 CTGTGAATATACCAATTCCCCTTTACAACCTGATGCAGATCATTATGAAATACTGGAAGGC

A\_14\_P134377

CAACACCACATAGATATAACAGTGCAGCAACAGCAACCAAAAAGTCATTAACAAGAGA

A\_16\_P16158020

AAATGGTTGAGTTGCTACTGCATAATTCTGTGTTGGTCAAAGATGAGAACAACCTTTATCC

A\_14\_P106445 TTAAAGACTCTTTTTCTGCTCCAGCACACTGGCTAAATGAAATAACACAATCCTCTAAAG

A\_14\_P127338 AAATATTGTTTTCTGTCTTTTCAGTTACAGATGAGGACACAGTAAAGAGGTATTTTGCCA

A\_14\_P114862 TTCATTTAGGTTCTTATCCATTGGTGCTGGAAATTTAGCATTATGTGGCTCTTTACTGTC

A\_16\_P03575913

CCTGACACAAAATAAACCTAAATTCTTGGCCTTTAAAAAAAAGTCACAACACAAATGACC

A\_14\_P138954 ATTTAAGGAGAGGATTATTGTTGATTCCATTTACTCATGCTTGCAAACTAGAGACCCCT

CUST\_8204\_PI426210822 AGTGGAACACTGTGCTTCTCATATTTGCATGTGTAGCCAGCCAGG

A\_16\_P17013314

AAATAGCAATAAACTCAACCTCCCAATAAAAAGTTCTGCCAAATCGATTTGACTTTCCCAT

A\_14\_P123561 CTTATTGTTTGGCAGGTCACAAAAGAAGATAAGTCCTTCCAGAACATTATGCGTTGTTAT

A\_16\_P36231083

ATTCATAATATCAAAAAACACCTGTTTACTTTAAAGGGTTCCTACTGTATTGCTGCAAA

A\_14\_P133201 GGGAATTCACTGTATTTGAAATCATAATTCATCAAAATTTAGTTGGCCTGTTCCCGGA

CUST\_9198\_PI426210822

TTTCCTAGTCACATCTCATTTGCATGTTATATGCCATCTCATCAATTATTGGGGGAC

A\_18\_P16318629

ATTAGCAGTGGGATACTAGATACGTGAAGCCAAATGATAAGTGTGCTTAACATCATTGTC

A\_16\_P58424257

CTTTTAAACTGACCCCCCTTACTGTTGTAAATAGTCCCTTCAGTGAATTCCTTTTTGTCTC

CUST\_8952\_PI426210822 CACAAAGCAAAAGACCATCATTCTTCAGAAGGATCTCCCAAAGAATGCCAT

A\_14\_P119140 ATTTCTTCCAAATGCACAACCAATATTCACTGTCAAAGAAAAGTGCCTCTGAGCATA

A\_14\_P130822 GAATTGGACTTGGTCACGAAGAGTTTGTTCGATGAGTTCGGGAGAATTC

A\_16\_P19827829

ACTGTGTAGAGAGAGACTGTCAATTTGTAACACTTATAGGGCAATGAACTACTAACATCT

A\_14\_P113620 ACATCCATTCACAGTACTGTTGAGTCTAATGACAGACACCCAAGTGCT

CUST\_528\_PI426210822 CAGTAGGCAGCATTGCAGAGGGTCTTGGCACCTCTTTTGCACCAG

CUST\_5548\_PI426210822

GATTGCAAACTTGATGAAACAGGAAATCACTGTTGGCTTAAAATTGCAGAGGTCAT

A\_14\_P139524 CTATGAAAATACATCCTTACACGAAAACGTGATACAGTTTTTCTCCTACAGACAGGGTT

CUST\_8146\_PI426210822 GACAGATGAGACGGTTGGGCTGAGCCGGCCAAACAAACGGCAGG

A\_16\_P41416022

TGTTAAACAGGTGATATCCTCTCTTAGACAAACCATTCCTTCAATGCCTTAACCTAAAGG

A\_16\_P39336723

TAATCCAAATTCCTCCATCGCTAATTTTGGAGTCACACAAATTCATGCTGTTCCACCATAT

A\_14\_P122774 AGGAAAAAATCGATATGTAAACATCTTGCCTTGTGAGTGTCTTTAGTGTTCCTGGGAT

A\_14\_P129346 CTTACCCACTAAGAACATGAATGCGCTCTGTATTGTATTCAGCGGCGTCAATT

A\_14\_P122170 CTAAGAGTGACCTTTAAAAATGGTTTTAAACAACCCAAATTCCTCTTCTGTTGATATGT

CUST\_8872\_PI426210822

AAAAACAGGAAAACGCTTTTCTGACATACACCCCAAGTTTCTTCAGACCAAAA

A\_16\_P38426974

TCTGTCAAATCCCTTATCTTTACCCTAAAACCTAGACTAAAATCCTCTTCATTAACCCAGA  
A\_14\_P131102 AATGGTATCTTGACCAAGTATAGGAGCAAGGGTTCAATTCAGTTGTATGAACATGTTAC  
CUST\_2397\_PI426210822 CCTTCGCTCTGCCCTCGTCCCAGCCACAGCATACCTTAGAAATG  
CUST\_6717\_PI426210822 AAGAAAGTTGACATTGTGACTCCTCTGCTTCACTTTCTTCAGGAAGGAGT  
A\_14\_P116723 GTGTTCTAGATAAGTTAGAGAATTTGTCCCTAATTGGCTTACTGATAGATAGACCTGGGG  
A\_16\_P15651717

AAAAATGGTGAGAGCATTTCATATGAAACATCCTGTTTGATAGTGTGTATGTCTGTCTGCGC  
A\_16\_P19643948

ACCACCATCTACTTCTTTCCACCATCACTTCATAAAGGAATTTAACATTA AAAAGTAGGGCA  
A\_14\_P118808 AAAAACAGTGCCTTTTTCCAGCATCTTACTTAGGTGCTGTTCAAGTATCTTTCAGCATA  
A\_14\_P136230 TGCAAACATTTATAATAGACCAATAAAAAGTTTGGCCTGGGCTAGAGTTTGCCATTTGTT  
A\_14\_P131401 GTTGTGCTTCTTTCAAGTTCAAAGTGGGTAAAAGAGAGGGTGATATGATTTACTGGAAG  
A\_16\_P35419581

AAACACACAAGA ACTCTGTTACTTTAATGTCTAGGAGAAGTAGAGATTTCTGTCTGTGCG  
A\_14\_P124747 GCAGAATAGGAAGTGATATGTATACTACGACTGAATGGAAAACAGTAAGTGTGTGGACAA  
A\_16\_P19318592

AACCAGCCTATGGATCAATTTTTTAGTCTGATATGTGAAGTTTGTAAGCACAAAGAGGC  
A\_14\_P115497 AAAACAAGAGCAACAATAAGCATTGAATGAGACATTTGTGTTGCCACATACTGTCTTAA  
A\_14\_P130013 GAAGGAGATAAGTTACTCAGATATTA ACTGGTTGTAGGCAAAGGGAATAAACATGGTGAA  
A\_16\_P16632543

CTGTTGCCTCAACTAGTTTACTCAGTTCAAATATCCGTTTAGTGATTTTTGCAGCCATTT  
CUST\_2122\_PI426210822 CAACTCAACTTGGTTGCAGATGGGCTCTTACTTCGGCTCCTCCTT  
A\_14\_P102245 GCATATAAGGCTGGAACCTATCAGATTGAGGGAACAGCACTTCTTCAAGG  
A\_18\_P13086300

AACAGTTGTGATACCAACGATGAAAACCTGATGTCCACTTTTGAGTAGGATGTAAACTGTC  
A\_14\_P111227 CCTATGGTCCATTTGAATCATGTGACGATACTCTGTATCCTGTGTATTGTTGCATAAAAT  
A\_16\_P58424190 ATTTAAACCCGCAAGTCTGGCTCCTAAGACTTGGGTTTAAACCACTACATTGTAA  
CUST\_5458\_PI426210822

CTTGATAGATTAGAGTTGTAGACTGAACCACAGAGAAGGGTTTGGGATTTGAGATATC  
A\_14\_P104772 GAAATAAAATATGACCTCCTCGTGATTTTCAAGTGGAGTTATTGGCTTACACAGAACAAC  
A\_14\_P123150 AAAGAATCAGAATAATTCACAAGAGTTGCGATTAGCAAAGGACTCAGAGACTACAGTTTT  
A\_14\_P106913 TCCAGAGAGAATATTTTATGAAATAGTTCCATGCAACTGTTTCAACCAAGTGCTGTAGG  
A\_14\_P202371 ACACAGCATGGATACTGTAAAACCTTTAAGTGGGATCACATTATATGCAGATTGCAGATT  
A\_16\_P18940437

AAAAAAAATCCAGTCTGTATCTTATCTTCCAGTTATCAGATCTTTCTACCCATTGGCC  
A\_16\_P15801446

ACACAACAAGTTTCAAAGTTAATTGAGGATCAAGATTTTCTGCTGTTGTCTGGTAAGTT  
A\_16\_P18001382



ATAAAGGTCTTCAAGTGCCATAGAGTAAACTTTCCTGCAATTCTCTTCTTAGCATCCATT  
CUST\_7154\_PI426210822

CAAATGGCATACCAGGTTTTTGGTCCTTGTTTAAGAAAACCAAATGTAGGTTTCAGAATA  
A\_14\_P124973 CTGATTTTCCATGGTAGTTTTATCTTAAGTGAGCAGTCATTGAGATAGTTTTATTTTTTC  
A\_14\_P201290 CCTAGGGATGCTATAGATAGACTGGGTTTTCTCAAGAATTTTCAGAGAATTTATCGTGTT  
A\_14\_P102768 GTTTATGCTTTCAGTTTTGTTTTGTTCTTTTTTAAACACACATACACAAAATTCCTCCTGC  
CUST\_3934\_PI426210822

TCACTTCACATGGGAATCCTAGGACTCCATATTATATTCTTATCCTGTTGAAAATTTGAC  
A\_14\_P123165 GCTGTGGAAATGTAGAAGAGACACCATTAACCTGTCCTGTTTTTCTATTATTCTTAAGT  
A\_16\_P00685305 TGATGATATCCATTACTATATGTGCAATTGCTTATAAACTAATATATAGTCATATTA  
A\_14\_P127995 TTAGATCAAATTACTCATTAACAAGATGATGACCTTGAAGTTCCTCGCTATGAAGACAT  
A\_14\_P109510 CCCCTTTGGAGAAATATTAGGAGTTAGAAAACCTGCAATACAGTGATGCTTAGACTCATAG  
A\_16\_P18931106

ACGAACAGAACATTCTATACAACCTCTAGACATTATGATCACTTACGTTATTACCCCCAAA  
A\_14\_P107134 TCGCAGTGATATAAACTCAGTGGAAGTAACTCGGAAAACCTTCAGATTCTTGAATTTTTCC  
A\_14\_P117515 AATAGTGAGATCACACCTGGATCAGAAAAGTTATGAAATGCTGAGATGGCATTTTTTCACT  
A\_14\_P112689 TGGAAC TAGGGTATAA CTTCACTGTCCTTGGAGAATGGTGGATGAAATCTCAATTT  
A\_18\_P22839237 CTCTGTTTCAGAGGGGCAGCCTGCTCGCTGACTGTCCATCTCTAG  
A\_16\_P19941840

AAGGTTTACAAGTTGCATCATATCTCCACCTTCAGTTTATTACTCCTTTAGTCTTCCG  
CUST\_6903\_PI426210822 AATAATAAGTCTTTTTCCGCCCCCTTCTGTCTTTAATCCAGTGCCC  
A\_14\_P200364 CTTAATGATGACTGTTTTTTTTTGATTGCTTGAAGCAATGTGAAAAACACATTTACCCGGC  
A\_16\_P15670043

ACTCTCCACATCTACAATGAGTTATGTAAATCCTGCCTACCTAGTATTATCTTGTGGTTC  
A\_16\_P16696267

AAGCGGTTTATAGAAGACAAGAAAAATCTTAGTTTCAGTTTCATCAGAATACCAGCCTCA  
A\_14\_P111171 GATATGGTTAGTTTGCTACTTACGGGTGAAAATACATCAGTCCCTACCTCTAAACTTAAG  
A\_14\_P121937 TTAATGAACATCCTCCTTAGGTAGTAAGACTGAATCCTAAGTTGACGGGAAAAAAAACCTG  
A\_14\_P100445 CCTATCAAGACATTAGTTTTTTGTTTCTAATGTGGGTAAAATGTTTAGGCCAGAGGTTCTG  
CUST\_8081\_PI426210822

TTGACACTATTTTCAAGATCACATAATTTACATCACATAAAACATGACTGTGATCTAATA  
A\_16\_P16191936

TTGTTGACATCTGATTTTGGGTAAAAAAAAGGAAAAAGGAAAGCATTGGAATTGGTGTCC  
A\_16\_P01083336

AAAGCCACATATCTGCTAATAAGCCTTATAAAAATTCTGGACTTTTGCAATCTGATGACA  
CUST\_8067\_PI426210822 GCTTAATTTGGAAGCCAAGTGGATGGATAGGAAAGGGGATCGTGG  
A\_14\_P122912 ATGTGGAGGTAATGAATTTGAAAGATGTTCCAGTCAGGATTCAATCCTTGATACACAG  
A\_16\_P19648094

AAAACCTCCAAAACACTACTAGGGTGTTCACATGATTTAGGGATATGATATGGTAGCATGGGA  
A\_14\_P108245 TTAGTAGAGGAAAAGTTCTGATGTGATTTTAAAAACAGAATCCCTTCTCGCCTTACTTAC  
CUST\_10089\_PI426210822

CAAAGACCTGTTAATTGATGGTCTAAACTCCAGCCTCATATTTGACTTATACGGGAG  
CUST\_7868\_PI426210822 ACAAGACAGAGGAAGAAAACCTTGGGGGAAGGGCTAAGGAAAGGT  
A\_14\_P125820 GGTCCCATAGGTGTATGGGGGTCTCTATAGATAATATATGTGCTGTGTGTAATTTTAAA  
A\_16\_P20984727

ACATAGAGACCCAGAATACGTTATATGATGATCAGCCAACCTTAATCAAGGATGTTCTGTC  
CUST\_4955\_PI426210822 CTTCTTTATGTTTCAGCAAGGAACTCTCAGTGTGTTGTCCATTTCTTAGGAA  
A\_16\_P17164891

AACCAGAGATGTGCCTATACAATTTGTGTTTCATTAATGTGCCTCACTTTTTTTCTCAGTC  
A\_16\_P41450744

AAATAATCACTTCCCCTATACGTGATTGTTTCAGCCGTATAGATTCTGACTGTGACTCAT  
A\_16\_P19914041

GGGGCAGGTCATAAAATAAAGGATTACAGAGCAAAGATATTAAGTGAAAGAGAAGCATCAG  
A\_14\_P117469 GAGCCAGATCTCTGTTAATGAATTTTCTTTTCTGACATTTGTTGGTTTCTCGTTACAAT  
A\_14\_P103474 GAGAAACAAGGTGGTCACAGAGAGGCTAGCAGAAGATATAGGAAACCC  
A\_14\_P129399 ACATTCTCTTGTTCAGGTGATCATAACTTGGGTTGACTTATACATTTCTCGAATCCATCTA  
CUST\_8501\_PI426210822

CTGTGATACCTGAATTTCTACATTGAGACCATTTGGTTAATGCTGTAAGAAGACCTCTT  
CUST\_2357\_PI426210822 CCCTAGGCTGCGGCAGGGATGCTCTTCCCAGGGTGACAAGCTAAA  
CUST\_757\_PI426210822

CTAAACACCTTTTCCACAAATACATAATATGTAATGCACTCTATTCCAAGGCATGTGGGA  
A\_14\_P111708 ATCAGAATCATAAATGAAAGGAGGTATTTCACTGGTAGATGTGTCTATGCCTATGGAGAC  
A\_14\_P113134 TAGGTGAGGAAATTTCCCTAATAGTTACTGTTACATTTGTGTTTGCAGGCAGGTAACAA  
A\_14\_P111964 AAAGCCTGTTTCTATTGCAGATTTGTATCTGTGTTGAAAAGGCCAATGTTCACTTAATG  
CUST\_7077\_PI426210822

TTTTTAGTCTTCTTTTTTTGACCTATAAAAAAGGTCAATTATATCTTAAAAGTTTCACC  
CUST\_3116\_PI426210822 TTTGATTAGCTACAGAGTGGCCCTTGCAGCAGGCGCTGGCAGGGT  
A\_14\_P200487 TACAACATGCAGAAACAAATAAGCATGCTAGGTTTTTCAGGAACTTTTACAACCTTCATT  
A\_14\_P135186 CTCCAGTTCGGCATAGGTTAAGTTTTCTCAGCAATCTTTGGCTATAAAAGAAAAACAA  
A\_14\_P120356 CTTATTGTTGGTAGAAAAACAGGCTAACACTTTGAATAAACATCTCACAACTGCTGCTC  
A\_14\_P106130 TAATACATTACCAGAGGTTTCACAATTGTATTTCTAATGGGCCTGTTTCTTTTTCAGCAGG  
A\_14\_P105106 AAACACTTTTATTTAAATAAAAACCAGGAAAGACCCTTTCCCCCTTACACACCAGCACAT  
A\_14\_P125884 CTGAGCCTTTGCATTCATTAAGTATCTGTTAACAAGTACTGAAAACCTGCTTTCAAATG  
A\_14\_P130698 GCCATTTCAACAGTGAGCGAGTATTGGTTTTGAAAGTAAAATAACATTAATGAGTGGCTG  
A\_14\_P103697 CTTATCCTAATAATTACGAAACTATGAAAATTCTCGGCTCTCTCTATGCTGCCTCAGAAG  
A\_14\_P120566 TTCTCTGAGAGAAGTTAACGGATCCTTTGGGGATAAGCCTATGATTTTGATTTCTCATTA

A\_14\_P121290 AGGCTACACTTTGCTTTCAGAAACATTTGAAAGAGGGACATTTTTGCCAATTAATAGATG

A\_14\_P125832 TAAATTACTTGATTTTACGTAAATAAGATTTCCCTTATGGTGGTCCCTAAACTCCCCTGGG

A\_14\_P115240 CAGAAATACTTACTTTTTGGTTGAAAAGGTTTGTTCGTCATCCATGAAGTTGCAAGGTC

A\_16\_P03634946

ACCCAGTGTAGGTCACAATAATTTAAAGACACTATAGACATTTTCGACGCTATATAACAAC

A\_14\_P120988 TCTTCTGTTACTTCAAATTAGTAGGAACTTTGTTGTTGGATGTTAAGTGGCATGTGTGCA

A\_14\_P114029 CTCCAGATTCACTCAGATAAGGAATCAGTTCTCATTGGACACGGAATAAACTGATAAG

A\_16\_P35165983

AACTATTTCCCTACTGAGCCTTTATATGCTTGGACTTTTCTGTAATCACAGCATACTGTG

A\_16\_P36421438

ACCACAGTGACTACATAATTTTTATCCACATCCTAAAGCACTTTATTATATCACCCCTGCA

A\_14\_P116317 TGCTTTCTCCTATTCCTTTGCCACAGAACATTTTAGAAACTCAGAGAGAGGACTATTAA

CUST\_5016\_PI426210822

AAGTGAGTTTATGGGATACCAATGCAAACAAACATAGATTTAGTGGAAAATGACTCAACC

A\_14\_P123213 AGTAGTAACATACCTATAGATGGAGATTTGAAAGGGTATTTATCAGGTAGGTCCACTCTA

A\_18\_P22842300

TCCTGGAATGTATTTCAGATCAAAGATAAAATAGAGATAAATTTAGCAAATTTTGGTGGTC

A\_14\_P138898 CTTGCCATATCTAGTAAGAGACGCTAGTAAGAGACCCATTAAACTAGAAGGTAATGTCAG

A\_14\_P116149 ACTTGATTTATTAGGAAAGGGCTAACACAATATCACATTTGGCTAACCCAGATATAACCC

A\_14\_P107835 TTTCATCTTTCAGTGGGAGACACTAAACTCAAACCAGATATTCTGGATCCTGTG

A\_16\_P37090582

CCCAAATGGAAGATCTAGACCCAATACAACCATTAAAGTAAGGGAAAAAGCATATGATCA

A\_14\_P105901 TATCCTAAATACTATGAGAAGAAGGAGCAACTAATGATTTCTCTCAGCAGCGGGTAAACT

A\_16\_P00685579

ACTGATGGAGAAATCAAGCAATTTTCTGTGATCTTTTTTAATAGGAGTTTTAAAATGCA

CUST\_4968\_PI426210822 GGAAAAAATATTGACAGTGTGCCCAAGCTTCATGGTAGGATGGGTGTTAA

A\_14\_P138689 TTGTATTTGGGATCAAATAATGCCCTACTGATTATAACAATGATACCCAGTGCATCTCGTT

A\_14\_P121414 CTTACCCTGAAACATGCAACGTCAGCAGCATGTAGAAGACAAAGAAGAGGTTAT

A\_16\_P02207780

CCCCAAACACTGTAAAAATCATCATTTCAGTTAAACGTCACAACATAATCACATGGCTAAG

A\_18\_P22841904 TTAAACACACCCGGTGGACAGTGTCTGGCTGGGGAGGAAACGTTA

A\_16\_P01330521

AAACTACTGCTTGTTCATTGAACTTCCTGTTTGAAGTCATCTCTAGAAACTGTGGTCAG

A\_14\_P108687 CTTCCAGGACTCAAATCGTGGAAAAAGAAAAGTTCTTGTTCCTAGATTGAAACAAAAATT

A\_16\_P00685177

TGTTTATTTTTGAATCAGTAGTGTGTATAGTTAAAATTTTTAAATGGTTATAAAAAGTTG

A\_16\_P15850920

AGATTCACAGCATTGACACAATATGGGCATTACGATCTCATTCAAATTTTCTCCTTCTTC

A\_18\_P22842131

TGTGGGTTTAAAAAACAATTATTTCTCTTTGTGAATTCATCCAATTCTTGGTAGG

A\_14\_P130799 AGGGCTCTGCTTCTTCATGATTGCAATCTGTATCTTGTTCACATTTGAATAAACATTT

A\_14\_P102452 TATGGGACAAAAATGCTATAAATCAAATCCCTTGTTAGGGTTTTCCAGTGCGTTAAATGT

CUST\_2333\_PI426210822

AGAAATTTCCAATCAACAAATATTTATTTATTGAACACTTACTACATGCTGACTACTTCC

A\_16\_P02543757

CATTTGCACACACATTTCCCTTAGTTTTGATGTCAGTTGTCTCAAAAATTGTCCCAATTTG

A\_16\_P02229934

GAGAGAAAGTTATCCCACCTTATATTAAGCCTTACACCTTATCACAGTGCATTGGTTTTG

CUST\_7773\_PI426210822 TAATCAGATGTCTGCACTAGCAGTCAGGGACATTAGATAGACAGTTTGCTCAC

A\_18\_P22080216

GCAGGAAAAATAAGTAATCCCCTAGATATGCGATATCACAGGCTTATTCTTATGTGCGAC

A\_14\_P112903 CTTTTCTTTGTTAGTTGACAAATACATTTTCCGCATTCTCTCTATAACCCTCTGAAGTGGA

A\_14\_P105794 ATTTCTGATCTTTTCTCCCAGTGAGTTTTTAGCAGAAGACAGTCAAGAGAAATTTTGGA

A\_14\_P116061 CTCAGAACAGTGAGTGATGTAGGTAGTCAGTGTATCTTAAGTGAATAGTCAGTGTTTTGT

A\_14\_P103618 ACTTAGAGTTATATAAACCACTTCCCAGAGCAGGTGAGTTATTGATATACTAATTCCATA

A\_16\_P01872639

TTCATTCCTCATTTCAGTTACCTAATTCCTAATCTGCTTAATTTCCCAAACAGTGAAACCG

CUST\_7287\_PI426210822 CATGCTTTCAGAAGAAGGCGTCAGACCTCCTTGTATGGGAACATC

A\_16\_P36230187

GGTCCCTTGTAACACTGAGGGTAGTTTTATTCTCTCTTCATTTTTCTGTATAATTGCCCTT

A\_14\_P111561 CTGTTTTCCAGGTATAAAATGTCCTTTCCACAACACTCAGTGGCCTGCTG

A\_14\_P112745 GAAGAAATTTTAGAAATTAACAGAGCAGGTAGGAAACCTCTTAGAGGCATGTGCGATCTGA

A\_16\_P20000027

AATCAAATGTGATGTTGTGTCTGATCTTTGTCTCCTTTGAACTGTATAACACATTCAGCC

CUST\_492\_PI426210822 AAGTCAAGAATCCGAGTTTGGGGGCTTCAGGGCGCTCAAACATCT

A\_16\_P17057882

AAATGTGAAGTATGGTCAAGATTATGAAGACAGGCTATAACAGACATTTTGGGTCAAGAG

A\_14\_P119775 ACATTTCCATGTGAATAAGCCATCTTTTGAAAACCAAACGAAAGAATATGCACAATAAA

CUST\_2828\_PI426210822

AACATTGAATGAAACCATAACCATAAACTTGGGAACTGGTTAGTGAGGGAGGATTA

A\_14\_P139569 AGCAGCAGAGGTCTAATGGGGAACATCATTATTGAATTGTATGAGGTATGTAGCCAAA

A\_14\_P128016 ATCTGTGATATTTACCTACTGCAGAATTTTGGCTTTTGAAAATGGAATTTGGCTCCTTTC

A\_14\_P110053 TGCTCCGATCCATAGTCTAAATAATCACTTTTTTCTTCTTTAAGAAGGAACTCCACACA

A\_14\_P111468 GGCATCATGTTTTTAATGCTTTACGTAAGTTTGGCATCTGAAGTCTTCAATTCCTTTGAA

A\_14\_P121996 TGCAAAATCAATTTTTGATTCACGAATAGAGAGTTGAAGTGATAAGGGCTTTGGGTACT

A\_16\_P36519112

ATGCCCTTGGATTATTTACTTCTCTGTTTTTCATCAACATATGCCAAATTCCACTTTCAT  
A\_14\_P105358 CAGGACAGAAACGCCAGTATATATACAGGATATTTGAATAAGGAGGCATTTAACCATCGA  
A\_16\_P20026437

ACCCCCAATTACTGATACTCAGATAGAACTTGCATATTCATACCTTATAGACATCAGGGT  
A\_14\_P128775 TGGGTATACATAGCAAGTTCACATGAAACCGCCTGGGAGATTAAATAAGGTATAATTCAA  
CUST\_2102\_PI426210822

AATAACCTATTTCCCCATGTAACATTTATTTTCATGCCTTCTTGTGTTGTGAGATTTCA  
A\_14\_P128518 TACATTTTTCACTTCTTTAAATAAATTGCTTCTTACTCTTAGACGTTCCGGTTCACGGG  
A\_14\_P139565 AACAAAGTGAAAACCTTTCTCTAGGTGCTGTCCGATTTCTACATCAATTAATCCGTTTC  
A\_14\_P115762 GACTAGTTAAGTCTCCGAAAGATCTACTGAATGAGGAGTTCGTATTTAGACTTTTTTCCC  
A\_14\_P139787 TGGCCCTAATTATAATTGGCTCAATGGCTAATCATGCATAAACTTGGGATCCAAAATTT  
CUST\_4641\_PI426210822

GCCGGAACAGCATAAACACTGCAAAACAAATCCAGCTATGTAATCCCTTTATTTTAGTA  
A\_14\_P124288 AAAATGAAAGACACTTTGTGCTGTTGTGAACCAGAAAAATACAACCCATGTATAGACCTT  
CUST\_8788\_PI426210822 CTTGTTATGACTATCCACAATTCTCCATGCCCATGACCCTTCTTAGCTA  
A\_18\_P12389824

AAAAAAAATCATGTTTGTGTAACCCTTTAAGAAGAACTCCTCCTTAGCAACTCAGTAGGG  
A\_16\_P15117490

AGACCAACAGCATCATTAAGAACTTGAATCTCCTCTTCTTTCTTTAGCATCTAAATGGT  
A\_16\_P01896918

ACTAGGCTGCTTTCAAGTAGATATAGGCATTTTTTCAGAGAATATAAAAATGGCAGGGCAAA  
A\_14\_P114993 GATTGGCTGGTTAGTCAGTCCTAAAAAAGGTTAATGCCAGGTCAGTTATTAATCTCCAT  
CUST\_4240\_PI426210822 GTTCACCTGGAAATCTGGGTCTTAAACCACTTTGAGAAACACTGTCCT  
A\_16\_P01626880

AAGGACAGACCAATCAAAAGAATTACGTGCTCTTCTAGTAAGTGTTTAGAGACTGTTTCA  
CUST\_3965\_PI426210822 AAAGCTGTTGAACTCCCACTGGGATGTAGTTACCTTTTCTAAACTTCTCT  
A\_18\_P17380607

ACTGGCAGAAGGTGTGTTTTCTTAATGACCTGACACAACATAACCACTCTTTGTATATTA  
A\_14\_P114819 AGGACTATAATACCTTGGGATGTGGACACAATTTGTAAGGTATGAATATAATGGTGATAG  
CUST\_5930\_PI426210822 TAGAAGAAAGCCCTAACCCCTCTCCAAATGCTGCTGCTGATCTCC  
A\_16\_P30952442 CCGCCTCTGACACCAGTTCTCCGCTGGAAAAAGGGACAAAAGATT  
A\_16\_P17993501

AAAAGCAACATTAACAAAAACCACATGTGAGAGTATTTTTAGTATGGAGACCCTGATCCC  
A\_14\_P120315 ATCATGTTCTTAAGAAAGGTGCAGAGAAACAACTGAGATTTTGAATGAAGTTCTGTTC  
A\_14\_P103503 TATTTACGGAACCTCAAATACGTGGGCATTCAAATGTATTACAGTGGGGAATGAAGACT  
A\_14\_P120819 ATATCCTAAAATTTCTGAAGAACTGGAACACGTAGAAAGTGCAAGCAAAGGTAATTGAT  
CUST\_2587\_PI426210822 ATCTCTCTGCAAAGGCCAGTGGGCCGCCGCCACCACCCGTGAAC  
A\_16\_P02773221

AACCTGTTCCAATTATTTACCTCCTTCTAACAAAATTTTGATACATCAATTGCATGTGGA  
A\_14\_P115495 ATCCGAGCAAAACCAAAACAAAACAAAACCAAATAAAATGGTGGTTTAGCAGAGACG  
CUST\_10374\_P1426210822 GTCAGGATGAAACGCCCGTTCTAAGTGAGAATGTGCTGCTGACTG  
A\_14\_P132344 AAACATAACAAATGGACTCACTTCTTGCCGTTTGAAGTTCTGGACATATTCTTCGAACT  
A\_14\_P111339 CTGGAACAGTGATTTTAAATGTCCCTTTTTCTGGATCCCTTGTAACATGAAATCATTCC  
A\_16\_P01124950  
TCACCTTAAGATCAAACCACTATCAGTAACAGGTTCCCTCATATCAAACACTACAGTTTCTT  
CUST\_703\_P1426210822  
GTGAATTTTTTTGTGATTTTTGTAAAATAAATTACAAGTGGCAATTAGTCACTGTGCTGA  
CUST\_561\_P1426210822 GAAGGAAAACCTCAGTCCTTTTGCCCTGCCTCCTTCTCCAGTTGC  
A\_16\_P21424705  
ATGAAACATTGTAGGCCTTCATTAGAAAGATTACCTCAGACTAACTTACTGCTAGCCATG  
A\_14\_P110008 CTCATCTAATGGTTTCATCCTTTCAGAATCTTGCATGAGTCGAGTATTTTATTAGGGTTG  
A\_16\_P38300133  
AGTTTAAGGCTTATCAGAAAGGAACAAAGACATACCAAATAGACCATCCTTGCACAAAC  
CUST\_8370\_P1426210822  
AATAGATAAAGACCTGATGGGTTTATTTTCATCTTAGTTGTTTCTACTCTTTCCTACTCTT  
A\_14\_P200274 CTATGGCCTCACAGCAGTAGCAATAACTTATTGGGATAAAAGGGAGAAGCAGAG  
A\_18\_P13058381  
TCCATAAAGTATATGCACTATGTTGTTAACTACGTGTAAGACCAAGAAATATCTCCACCA  
A\_18\_P22842845 TTGTGATGTGAGAGAACAGGCTCTGCCAAAGCATGGAGCACGCAT  
A\_16\_P17445442  
CTCAACCTCAATATGTCATAACTCATCTCTTCACATGCTACTCAGATGTTCAACTACGAA  
A\_16\_P17348369  
AAAGATGTAGTCCCCAAAATCATCAAATCCATTGGTTGTTGCACTATCTATTAAGGCTTG  
A\_14\_P102551 AACTTGTCAGAGAAAGCCCCTCCTTCTGGTTTTTCATATTCGTTGTAATTTTCTTTACATT  
A\_14\_P133036 CTGCCTTTCGCTATGGATTTATGCTACAAAATCCATATCATTTTTCTTTCTTGGAAAGG  
A\_16\_P02075223  
CCTCATTC AATATGTTGATAGTAACCTAGGCCACTTAATACCAATTAAGACCCCCTAT  
A\_14\_P123649 CTTAGTGAGTGAAGATACAAAGACCAAGTTTTTTGAACAAAATGGGCCAGTTGACAACAT  
A\_16\_P01171615  
TTTTCAATTATCCAGATCCATACATTATCCAGATCCAAACCTTCTAGA ACTCATTTGTGGC  
A\_14\_P105865 GAAAAGTTCAATCACTTCTCCAAATTCTCCGAATAAACATAAGAAAATATCTCTCCCCAG  
A\_16\_P18997625  
ACAAACACCTGAAGTGAATGATACCAGTAAAGTTACCATCCTTTTTTCTGCAATGCTTTTT  
A\_14\_P109103 CACCTTATTTTACAAATAGAGGTCGCTACTTGACCTTGGCCACTATTTTCTTTTCTTCT  
A\_14\_P100241 AACAGCACATTCTTGAAGATCTTCCAGTCATGAGCAGTGAAACTAAGAGTTATCTAATTG  
A\_16\_P16681574

AGAACCTAACAAATCCCATGTCTAAAACCTGTGAAACCCATCTAGATAATGAAAATGGTG  
A\_16\_P19315089  
ACCATGGAATTGTAAATGTGTGCATAATCCCTCTTTGATTTTTGCTTGAGACCTAACTTA  
A\_14\_P123663 CCTTTTTGAAGTTAGGTAGATTCTGTGGTCCACATTTCCCATATTACTCACCTGAAAGTA  
A\_16\_P38365592  
ACCTGATTACCTCCACATATGTATAATGCTCTGAAGATGAACAGATAGGCAATGAACTTG  
A\_14\_P128431 TTGAAATCTCAATCACTTCCAGAGTGTTTGCTATTTTGGTTTGAGTCTGTGCTATGTAG  
A\_16\_P18959036  
AAAAAAGAAAGTGTTTCATTGCTTTAACCCCTGTTGCTACTATGTATTTCCACCCTAGAGC  
A\_16\_P40144497  
CATCCCTCTCCTACTACTTAGTGCAAGTCCAATACTGTATCTACATCACGCTTTAAGTC  
A\_16\_P02073591  
AAATGTTAGTCCCTCGAGAATATTACCATTAAATCTCCCATTACCACTAGTAACAGAGCC  
A\_16\_P02334338 CATTATCTGCCATTATCCTGTTGTTCTGTAAGATATCCCTATATCCCACCTATATCCCAC  
A\_14\_P114296 AATTACTCTCTTGGAAGTGGCAAAGGCATAATTAATATGGAGATTCCAAGGACTGTTTT  
CUST\_3049\_PI426210822 CACTACAAAATGTTTGATCACCACACTCGGCTACCTGGGAATAAAGGC  
A\_14\_P100700 AATTTTATATGTAAGAAATGTCGATCCTGATTTTCCCAAGGCTAGTGTTAGAGATGGGAC  
CUST\_9558\_PI426210822  
CAGAAATGCCCAACATTTTGTAACACTAATTTTTTTTATAACTGTAAAGATGATTATTCC  
A\_14\_P120214 TAAAATAAAGCAAACCTAACTGTTTTATTTTTCCTTGGACCATAGTGCTTCCATTTTTTCTT  
A\_14\_P112121 CTTGGAGCCAGGAGAACATGAGTATGAAATAGTATGAGTGCAGTGTGTGTGT  
A\_14\_P117434 TATTCAATGACCCAATGGTATCAAAGTGGAAGAGGAAAGTGACAACCTAGAGATTGATAAC  
A\_14\_P201690 AGTTATTTGCAATAAAAATGCTTTTCCTTCTACAGTCCCAAGTTCAATGATGTCCTTTACCC  
A\_14\_P121407 GTATTATAGTGGATCTTGACTATGCTGAAAACATCTTTAAGTGATGATGGCTATCTTTAA  
A\_16\_P20849548  
CCCTTCTTATGCCAAACAATTCAAATTTGTCTAGCCCTTGTAAATACCTTCAGAGTTTTG  
A\_14\_P104977 CTTGAGAATTGCCCTCAGTGAACATCTTAAGCAGGTAAATCCCATAACATCATGAAAATC  
A\_16\_P16803837  
ACCAATGGCCCTCATTCTAATAGATTAGTTTTCTAGTGTATCTCCATTCTTAGAT  
A\_14\_P117018 CTGAAAAGGGCCTTTGGTTGAAAATGAAAATAAGAGTGCAGCAAGCAGGAG  
CUST\_5136\_PI426210822 CATGAAGTGGCAGGCCTGCCCTGGGAAGGTCAGGATTCTTCTGTA  
A\_18\_P14134804  
TATTGCAGTGTGCGAAACTTTAGAAAATAAAGGTAATCCAAAAGTAGGGATTCCCTGTTGG  
A\_14\_P122229 TAACTTCAGTGCTTTTCTGTCTTTTTACAGGATGATGCAAATAAAAATGGTGGCAAGTGGA  
A\_14\_P118549 ATTAAGATGAGGTCTCAGTCTGCAAACAGTGACAATCTTGGTGGCTAATAGTAAGAATAA  
A\_16\_P37821973  
GCTGACTCTTACATCCAATTAATTCTGAAGCCTTTGAAAACCTCTGTTAGATGTTCTTCTCCT  
A\_14\_P116582 AGTGACTTGAGCCCAAAGGCAAGCGTATATCAAACGATCTTCTCCACATAAC

A\_14\_P132879 AATCAGTAAATATTTACAGGATGAACTGACGTCCACAAGTTTTTCAAATCCTAACTCCTG  
CUST\_5620\_P1426210822 AGATTGGTGTGCTGGGTATGGGGAGGCCAGTTAAGAAAGAGCTT  
A\_16\_P02468801

GGGGAAGTATAATAGCACAAAGAGAATATTGTCAGATGTAATAATTCAGAGCCAAACAGGG  
A\_14\_P110086 AGTCACCAACCTATTCCCTAGGTTTTTTAAACTTTAACTTTATTTTGGCTTGCTGATCCA  
A\_14\_P132024 GCATCTTTTTCAGTATGGCTGCAAGTAGTGCTTCCTGTCTGGTAAAATAAAGATTATTG  
A\_14\_P138975 TAATTTTTAAAAAGCCAGCGTTACCTCAGGATGATGTCCAATTTCAATGTAGGTGCAAAT  
A\_14\_P106177 GCCTCCCAATTCATTACAGTGCAAGAATAAACACACATGAATAAGTCAGAGACCAATTA  
CUST\_1405\_P1426210822 AACCCGAGGTCCTGCTCCCAACATAGACCACACCAAGTACAGTTT  
A\_14\_P116503 TTAAGATTTTGTTCATCTATTGAGTTCTTTTGGGTGATTTGTTTAGGAGGAAGTATCTGC  
A\_16\_P16880854 GGGTCCATGCTATCTTATATATCCTCTCAATGAATATGACTTCATATACTCATCCCTGCC  
A\_16\_P16191615 GACAGTGAAGGCACTGAGGCAGTAACTGTGGCAACCATAGAAGAG  
A\_14\_P125619 CCAGGATTAATAACATTAATATTATTTTTGTAGGCCAGCAGGATTGTCCAGAGGACCA  
A\_14\_P138193 TTGGGAACGAAAAGGACGCTGTATTGATTTTTAAGTCGCATATTCTTTAACTTCAATATT  
CUST\_9638\_P1426210822

TTTGAGGCCACAGAACTATAAAGATGAAGAACAGGAGAAACGTAGTTAATCATGC  
CUST\_8831\_P1426210822 GGGATTTGAACACATATTTCCCTTCCCCCTCAGTTTCTCTCACACAGA  
A\_16\_P01723690

CACAAAGACTAGGAGTAACAACTACAATACGTATATCGCCTTGATACTGTAAAAGTCGT  
A\_14\_P114383 ATCTGATGCATCTTGACCTAAAAGGGAGTGATATAGGGGATAATGGAGTAAAGTCATTGT  
A\_16\_P15133387

AAAAAACAGAGATATCCAGATCACCTGATTAATCCCTGTCTTCATTAAGCATTCTC  
CUST\_384\_P1426210822 ACAACAACAGTAAGTGCCAGGGAACATGGACAAAGCCGATTTCTG  
A\_14\_P133575 AGACAGGGGCAAAGATAAATAAAACAAATGCTATTTTAAGCCCAAGACAAGGATTTCAGA  
A\_14\_P121250 AGAAAGGTTTCAACATGCAGTCTTGACTTTTATGCTTCCACTAACATCTGAATGATTGAA  
A\_16\_P02044911

TCAAACCACCTTCTTATCATCAAGTTGCACACTCTAATTTCTTAGAACCCCTATTATC  
A\_16\_P19294834

AAAAAACTTCTCAAATTAGTTCCAGACTTCAGGAAAATGATTTCCACATGGTAAGGCC  
A\_14\_P109864

GTGGAAAACAATGCAAAAAGAAAAGAGGCGTATTTTTAAAGGCAGTGTTGGCAAGTTTAAA  
A\_16\_P18562879

AAAAATGCCCTAGATGTTAATGGTCAACTTCTAAAAATGTCAAGAATTTGCACAGAAGGG  
A\_16\_P19905414

ACCTGGTCAGTGCATAAATACACAACCTAACACAGTTTTTCTTTGTTCTTTTTTCATTGCAA  
A\_14\_P135994 CTGCAAGAGTTATGGAAAACCCCCAAAATCAAACAATCCACCTCTCTAAATCAATGAT  
A\_14\_P128239 ACTCAAGGACTATTAGACTCTAGTCTTTGGCTCACAAGGCATAGTTCTACTAACAATTCT  
A\_14\_P133931 GCGATAATCCCGTGATTCTCTATCCGCTGAGCGCTGTTGGATATATTCTCATTATATTTA



A\_14\_P112931 CTTTGTGAATAAAAGTTAGTAAAATTTCCCTCCGAGATGGCCTATTATTTAATTTGGGCG  
A\_14\_P122681 ACAATGGACCGACTTAATCCTTTTCGACTACCTGACGGCCAACTTC  
A\_14\_P134821 ACTGCCAGTCAGGTGGAGAATGGGATTATTGTGAATAGCAGATTTCAAATTTGATAAAA  
A\_14\_P115255 CTGAGAAACATACTTCTTGTCCCTGTCTACTCCTTCTTAAGGATACCAAGCAACA  
CUST\_1743\_PI426210822  
GTCTGTATAATAGATTCCATAATGCTGATGAATCTGGTGAAATCTGTTTTTGTGCTTAG  
A\_14\_P115303 GCCAATCTTACCGGTAGAGTAGTCAGTTTATTACAAGACAGATCCAGGATGGTG  
A\_14\_P114612  
GAGATCATACATGGGAGAACGTGGACAGAAAAAAATTAATACTACTGCAGGAAAGA  
CUST\_7018\_PI426210822 CTTTGGCCTCCAGATGAGGACATAACGAGGTCATCTCTGCTTTCA  
A\_16\_P21433193  
AAGTAACATCCGAAAAGATTTTCTTTAGTGGTTCAACCTATACAAACATACCACCCAG  
CUST\_2360\_PI426210822 AAGGAGCCCCGTGCTCGGGCAGCGGTCAGGGTCATTCTCCACGCAT  
A\_16\_P18142452  
ATCTCTGGAGTCTTTTAAACAAATGTAGAAATCACAGCAACATTTACCAGTGTGAATCCAC  
A\_14\_P100117 TTTTAAAAAGAAACCTCTCTCTAAAACATGATTTATTTCCAGTCCCCTGACCTGCAG  
A\_18\_P13339368  
AAACCCTTTTAAAGTGC GTTACTACATCATTAGTATGTGTTTCGTAGAAAGCAACCTGG  
A\_14\_P137773 CACAACAAAGGATTAATTGCTGCAAGGACATTCTTGTAAGGCTTTGATTAGTTTTCTTGT  
A\_16\_P16716163 CTTGCCATGTCTTCTAGGAAAGAAGTGATGCTGAGTCTGAATACACAGTAAAAGC  
A\_16\_P39598831  
CTCTTCTGAATTCAACCATCCTTTAATCATTCAACAGTCCTTTAATATGCGCTGAGACTA  
A\_16\_P31097891  
GCGTTTGGTCCAAGAATATGAAATCCTATCACCCGATCCTTTAATACAGAAACAAAACAA  
A\_14\_P123375 AAAAATCACAAATGGGATAGTCTAAGTGTTAAGCATTCTGCTTCCATGGCAGTAAAGTCA  
A\_18\_P14135305  
TCTTAAAAATACAAAAGGGACATAACTTCATCATTTAATTATATTAGGAGGTCCGTCA  
A\_14\_P102145 AGCCTGCTTTTAAAGTGATTTGAAGAGAGTGGCTTTGAAGGTTTCCATCCTTACT  
A\_14\_P122686 CCTCCATAGATAACTGTCATTCTAGCCACAGAGTCAAAGAATCAGACTATTACGTAAGAT  
A\_14\_P120806 ATACAGAGTCTTTTAGGAAAAAAATGAAGTTAACATTGTTAGATGGTGGGGAAAGTGGCA  
A\_18\_P22842106  
TACTTCAGACCAAGATTAAATGCTGAGGGGGAAGAGGAAAATAAGGCAAGAATATAAAAC  
A\_16\_P21589723  
AAAGCCTTACAACAATTTTCTTACAAATGTATGAGGGTAAAAACCTATAGCCAGTGGTG  
A\_16\_P21671977  
ACAGCACGAGAGACAAAAAAATATAGTTAGTTCAGAACTAGAATCAGAAAGCAAGACAA  
A\_16\_P18144417  
ACAGAAACCATCTCCAACATGACATGAAATCCCAAGTAAGATAACCTTGAATAAGTGCA

CUST\_6337\_PI426210822 GACTGGCTTATTTGCCTTGTTAGAAAGAGGATGGCCTTTGAAGCAAATATCG  
A\_14\_P134653 AGCAAAATGTTAGTTTCTCATTGTGAGTGATTCAAGAAAACAACGGTAACAGCCCTG  
A\_16\_P58424438 CAGCCTGATGCTGCAAGGGGGATCAGAGGTGTGAGTTACGCCAAG  
A\_14\_P101925 ACTGAGGTTGAAGTTGTGCTATAATAATCACACACAAAATTATCTCTATTTACCCCAG  
A\_14\_P112581 ACTTCCTAAACATCTGTCTGGGGTTCCTTTAGTCTTGAATGTCTTATGCTCAATTATTTG  
CUST\_10152\_PI426210822 GGGTGTTCCTTTTTGAAGAAAGACACCCCCCTTCCCTTATTTAG  
A\_14\_P116974 CTAAGTGGAAAATCTACCTCCGACAAGAGGAGATCATTTTAGATATTACCGAAATGAAGA  
A\_14\_P107125 TGGATTCAGGAAGATTGTGGAAAACTGCTGACTTGTGAGTTATTTAGAGAGATAGTTTC  
A\_14\_P114115 ATATAATCCTGAGGTGTTTGACAAAACATACCAATTCCTTGAATGACATCCGAGCGAAAGA  
A\_14\_P109777 AAGTCAAATCAAATATGCCACTTCCCACATCACAATGTGACTCAGACAATGAACATAA  
A\_14\_P124601 GTCAAAATGGCTTTGATCCTCTATGTTGAATCTTTTGCCTTGAAAGTTTAGTTTGCCAA  
A\_14\_P139464 CTATGAGGAGGAAGATCAACGAAGTCACAGGTGAATAGGAGTTTCTCTCTAAAGT  
A\_14\_P101161 AGGTCTTCTGTTCAGGTTCCGTCATCATCAAAGTCTAGAGAGCAGAC  
A\_14\_P100979 CCCATCTCTGTAAACCACAGCCATGTCCAGAATAATTCTACACTCCCAT  
A\_16\_P00365958  
AACACCTTTAAGGAAACCTAAAGAACTTTTACCAGTGACCTCAATATTGTAGATCAAGGC  
A\_14\_P123195 TATTGATTCTAAGAAGATAGACCAACTTTTTATGTCCGTTTGGGTGTTTGTGAGTTTGG  
CUST\_2089\_PI426210822 CTGCAGGAAATAGATTGGAGTGTCTCTACCTCTCTCCCTCAAACCT  
A\_16\_P03232883  
AAATCAGGGGGAAGAAAAAGTTAATAGTCTGCTCAAGATCTTTTTCAACACCATGATTCT  
A\_16\_P15823557  
TTTGAAATCAGCCTCTAACTTCTACAATCTTTTACCCCCCTTTAAGAACTTTGAGCAAA  
CUST\_8988\_PI426210822 TTTTCAAACCTCAAGGAGCGTGTGACTTCAGAGAAGCAGGCGATAAGT  
A\_14\_P100191 GCAATGGCATAAAATCAGGTGAATGATGAATCCAGAAAAGACCATAGGAAAAATAAAGGT  
A\_14\_P111062 GAATGTGGCCACCAATAACACATGCAATAAGATTTAAAGAAAATAGATTGTGCCCAATT  
A\_16\_P21246250  
ACCCAAAAAAGCAAAATATAGGAACATTAACCTACATTCTTACTGGTAATCTGATGGCA  
A\_18\_P11571934  
AATAATCATGCTACATTAACATCTTAACAGTCAAAACACGTCTCTAACTTCTTTTCCAA  
A\_14\_P201848 CGCATCCATTGCTATCACCACGAAAATCCATGATTTTGTAAAATTAAGAGCGTAGTTTT  
A\_16\_P00973016  
AGTCAGAAGACCTAGACAAATTATTTGCAACTCACATTTTCAAGGCTTATTTCTCA  
A\_14\_P107233 TCCTTTTATATGATGCTGCTAACTCAATAGAGAGACACCCGATTACAAATGCTATTGATG  
CUST\_1500\_PI426210822 TGGCTCATCTCGAGGCTACCCCTATTTGATGATTTCTGTAGGAGTC  
A\_14\_P133265 CGCATAGTTTGTAGGAAAAGTTTATTTAATGGGGAGACTAAGACGATGCAAGATGGTTAC  
A\_14\_P117369 ACCAAGATCTACCTAGTTGACCAAGCCATATATCTGACAGTCAAGTCCTATGTATTTTTT  
A\_16\_P15543755  
AGATCTGTCTCATCTCACTACTATGAAATATCCCTTGTGAGCAATTAATCCCTGTGTCTC

CUST\_8131\_PI426210822

CTATGACGGAAAGATCCTTAAAGCTCCTTATCTTGAAAACCTACAGTTAAAATCTCAATTG

A\_14\_P126465 TATTCATGATGTTCTGTGTGCTTTTCAGAAACTGTAGTAGAACAATTGAAAACCGAGTGC

A\_14\_P128778 ACACACTAATTTGCATTTTATGTGGTATTGATCTGTAATGAAGAGAGGGGAAAGCCTAAG

A\_14\_P106474 GTTTATTCTCAGATATAAAGCGAAGGCCACATGTAGTGGAATTTGCCAATCCATGTAAAA

A\_16\_P01621153

TCAGATGACCACTGAACTTCTCAATGTTGGCTTTACTTGAAGATAATTATGCTGCCTTAT

A\_14\_P138244 AGTAAAGAAAACCTTAGGATTCTAAGTGACAGCAGGTATCTTAGTAACTGGTTGGTGATCA

A\_18\_P17042802 AAAATGCATACCTTGGTCATCAGTGTCTCAACAATTCTCCATCCCACTTAAACAAG

A\_14\_P103506 ATGGTTGAACATGACTTAGCATGTTTGCTTTCTGCTTTAAACACTAAAAGTCCTTGTCTT

CUST\_1172\_PI426210822 GCAAGTGTGTTAATCATCATAGGGTGACTGACTTGTGTACCGGGAATAGAAT

A\_16\_P19509441

TTGATCATAGGACCAAGGAACAAGATTACCTCTACCTTACTATATTTCTTAAAGTGGCCAG

A\_14\_P133325 AAGAATCGCCGTGGATGCACACAAATAAGCGGCCTACAAAATGGAG

CUST\_9595\_PI426210822

TTTCTCAGCAGTCCATGTTTCTGGATAAAGTTTATGATTGTTAAGAAGTGTGAGTGCCTTC

A\_16\_P18189582

AAACCAAATTTTGCAATGTTTTTCATTCCCTTTCAGTCTAAAGTTTTTCATTCCCATCTCC

CUST\_5931\_PI426210822 TCTCCAAATGCTGCTGCTGATCTCCTGGCAAGCCTCCACAGATAG

CUST\_4544\_PI426210822 AGCAGCACTGGCCTTGAGGGCCATGTTTCTACCCCTGATTCCCAG

A\_14\_P103722 GTCCATCTGGGAAATAGATACAAATTCATCCAGGCTATAAAGACCGGCTGTCTTA

A\_16\_P16191438 CTCAAGAATTTCCAGTACTTCTCCTGGAAGATCCGCTTCCCTGTTTT

A\_16\_P21386285

GAAACCAGAAAAGATTTGCAATACTTGGGCATTTTTTAAGATTGTAATTGGCTACCCACA

A\_14\_P139156 TGAAAAATATTGGGGATGTTTATGAGACGATTGGTATGTCAGCAGATATGCTCTTTTGGGA

A\_14\_P138401 AAAGAAAGATGTTTCACCTTCAACCTCTTCCCAATCATTTTCACTTTCTTCTCTTCTTC

A\_14\_P115333 CTGGGTGAGCAATTATGCTGTTACTATGTATGAGTAATATCTACTTTCCCTGGGCAAC

CUST\_7317\_PI426210822 CTCTTTCCACTGTCTGATTCTGGGTCTCTGCTTCCCTCATCTGGATA

A\_16\_P21433769

AAACCCCTAAGATACTCAATCATGTGAGCACAAAGTTACTGTGTAATCTTCCATAGATGT

CUST\_2603\_PI426210822

TCTCATCATTCTTGATTTTTTAATCTTCCCTGCTGTGAGCTTAATCCAAAGGGTATTTTC

A\_16\_P18941083

ACCAAGTAAGATGGAAACAGTTAGTGTCAACATGATGAGTTTGTGAGATTCTATGTGACT

A\_16\_P18364671

AAGTCAAACCTTTCCTCATGTTCATATTCATAATCCCTTGCTATAACAATGCATCTGCTCC

A\_14\_P104085 TCTTCTGTTTTTCATATATCAACAGGAATTGGCAGCAATGAAACAGATTCTCGTTAAGATG

CUST\_10036\_PI426210822 AAGGCAAGATGCGAATTAGTTTGGCAAGAGGAGGAGCTTGGTGTT

A\_16\_P01222283

AAAAATGTGCCATAGAGAATACATTCATTTGGGACTTTTAAACTCTCCTCTTCCCTCAA

A\_14\_P127409 TACATGTTACATAGGAATAATCTAGCGTCCCTACCTGTGTAAAAACCAACTCTGGAATACT

A\_18\_P26792316 GGCACCTGTTCCCTCCTATCTCAGCCACTCTGCCACGTCTGTG

A\_14\_P118748 AGTTCGTATCATAATAAAGGAGCATGGATTATTGCAAGGGTCAAATGGCAAATAATGGTT

A\_18\_P22841229 TAGAAACCGTCATGTTATAAACATGAAAGCCCCAAGCAAACAGCCTTTAGCC

A\_14\_P107908 CATACTCACAGTTTTATGATGTCTGATCCAACTTGTCAATGACTAAATAGCAGGTGGTT

A\_16\_P00725395

ACCTTTTACTGAATTCCATTTCCAATGAACTGTCCTAAGACTCATATCTGATTTCCACAG

A\_14\_P201488 TGAAAAAGTATTGGTTGTTTGGAGTGAAAATGATGAGCACCGGAAACACATTATCCTAAA

A\_14\_P118279 ATCCCGGAAGAACAATGTTGCCATCCACATCCATTGTCTGCTCTAC

A\_16\_P18222879

TCTCAAATACATGCATCAGCCTTTAATCGACTACACACAAAAGTGGTATCCTAGACTTT

CUST\_10087\_PI426210822 CGGTATCACACTGACAGTACGGTGCAGTAACCCAAAGACCTGTAAAT

A\_14\_P121711 ACTAGTTGAGAGTTTGACTGTGAATTAATTTTATGCCATAAAAGACCAACCCAGTTCTGT

A\_14\_P138650 AATTAGATGGTTCCCTAAACAAATATCTAGTTGCACATGCATCTTTCCATTTCCCTCAT

A\_14\_P200361 TAAAGTTCATGTATTCAAACATGACATTATTCTCCTTCATGCCTTTCCCTTACAGGAAGA

CUST\_1425\_PI426210822

ATTTATTATTAATTTGTATTATTTCTTGCTATTATGAAATTTGATGCAGGATTTGTTCAT

A\_14\_P121751 CTTATAAATATATGGGATGCTGCTTTCTCACTCCATGGGCCATATGTTACATATGGATA

A\_14\_P112750 TCTTGTTATATTCCATGATTCCTACTTGCTCCACATGTCAGTTATGTATGCCTGCATTTT

A\_14\_P201324 TTAGTAGTAGCAGCAACAGAGTATGATATGACCCAAAAGCCATTGTAAAGTGCCACATTA

A\_14\_P113576 CTAATTCAAACCTGGATGTTACCTGTAAGTAACTAGGAATGTTGTTCTGGTCAAAGTTAAGA

A\_14\_P122122 CTAGACAGGTAGCCTCTTAAACGTGTTGTTCTGAACTTTGTTTTTTTCCACTACAGTCTT

A\_16\_P02721126

ATCACTTTCTGCCTCGTAGATAATAAATGATCCGAGTCTAAAAATAGCCATCAAGTTGGG

CUST\_3026\_PI426210822 ACTTACTTAAATGCCAGTGGGCTCGGGGCTACTTGTTACTGATGC

A\_16\_P17129305

CACCTTCTGCATGTATCTACAAAACATCTTCCTCTAATTGATTAATGGCAAGTCACTACA

A\_14\_P115847 AAAGGATGACAAAAGACAAAAGCACACATCGGTTAACATTTTTCAAGGAAGACCTTG

CUST\_7949\_PI426210822 AGGTGAGGAGTCCCTCCACCCCTGCCTCCCATAGCAGCTGGGGC

A\_16\_P19614414

GCCACACACAATATGATCTTCTTTTCATCCATATTGCCGTAGATCTATTTTCTCAACACAG

CUST\_4390\_PI426210822 AAAGCTGAGTTCGCTCAGAATGTGGACTGTTCCATTTTTCTGTTGTCC

A\_18\_P17040226 AAATCATTCATGCCCAAGATCAAACCAGTAGGCTTACCCTTTACCATTG

A\_14\_P106849 CAGTTCTGACACTGCAACTGCTATAAAACCAATAAAAAATACAATAGAAAGAGAGCGGGT

A\_14\_P123802 AGAGTTTGTGAAATGCCAACTAGAAGTACTATCATTGCACTTCGGATCCTATGTC

CUST\_10320\_PI426210822

CCACATCTTTATCGCAAAAGAATGACATTTCAAGCAGTAGCTTCTTAGATTTCCATTGAG  
A\_14\_P114575 GGAAATTTGTATTGCTGTAACATACCTCTAAAAGCCAGTCTAGAAGTATGGACCTCATCT  
A\_14\_P119091 CAGGTAACGATTCTCTTGTGTTGCTTCAAATAAGTCATCTTCATTGCAATCTGATGGTTC  
A\_14\_P124397 TAATGAACAGAAAGACCACGGATATTAGTGCGGATCGTTTGCAGATTCTTAATTGTATCT  
CUST\_5203\_PI426210822 ATTCCATGCTTTTGGACAAGAGCATGTTTCAGTATTGTCCAGGAGACC  
CUST\_1275\_PI426210822 GTGTGTAGTAGGTTTCTTTGTAGCTACCTGTTCTGTTGGGATCCTGGTTT  
A\_14\_P111104 CAGCAAAGGATGGGTAATTTGCAAATGAACATGGATAGAAGAGCAGCAAAGCAC  
CUST\_4401\_PI426210822 CATGTTTCCCTCATTTTTGGGGATGCCTTGGGTTGAAGCTGATTTTT  
A\_14\_P110771 GATGTTTTTCCCCTTTTAAAGTCTTTTCTGTGTAACCTTTACAATGGATATCTCTACCTG  
A\_14\_P106087 AGCAAATTTGAAATATTCTCACTAAAGTCCCATAAACTCACAAATGGTCCTCAACTTCT  
A\_14\_P115695 CATTTACATAGACATGTTTTTACAGGTGATTTTTCAATGTTGGGACTCAAAGGTGAAGAC  
A\_18\_P10185462

ATAGAGTCAACTCAAAAATAGTGTATCTGTGAATGCTTGATGTTAAAAGAGGCTATCCCC  
CUST\_1362\_PI426210822 GCAGCCCCTTGCTCTCTCTGCGCCTACCTCACTTCCCATAGCTT  
CUST\_1742\_PI426210822

TCTTTAGTCTGATAATCCCGTCTGTATAATAGATTCCATAATGCTGATGAATCTGGTGA  
A\_14\_P124648 GTGAATGCTCTTACCTCTCTAAGATGTATGTTTTCTTCTCTTTCTGATCTAAAATCACT  
CUST\_8718\_PI426210822

ACAAAAAAGCCAGTTAAACTTATTCCTTTTTTTAAATAGCAATCTGGAATGAAAATATCA  
A\_16\_P21563641

AAAATTCTACATGTGTTCCCTAAATTTAAAAAGCAAGAAACCAAAGTCTTAACTAGGAAT  
A\_14\_P101739 GCTTTCTTCCAGCACACAGATGAAGAAGGTTATGTTAACAGTATTTAAACACAATCATGG  
A\_14\_P105241 AACTTTGATTTTTCTAGGAAAGGTTTGTAGTGTTACAGATGGTTCCATCACTAATGGA  
A\_14\_P117493 TAATAGAAAGTATTAATAAATGTTGGGTCCCGAGCACTGCACCTCATTTAAACGTTTCCT  
A\_14\_P119577 AGTAAAATCAAGACCTAACTATCTGTGAGACCTCACTGACGATTTGCTACCAGATAAATG  
A\_16\_P36145029

GGAAAAACACACACCAATTAAGTTGACAGTGATCCCATATATTTCTTCTCTAATTTCCC  
A\_14\_P114676 GCATTTGTCGTAACACAGACTCAATTCTGCTTTTCATTGATGCTCCATTGTTATTTCTAG  
CUST\_3317\_PI426210822 CTATAGGGTGCCCAAGGAAAATGGGAGATTTTTCTTGATTCCTGCAGTT  
A\_14\_P112065 GAAGTAGTTTGTCTATTAGTTTGTCTATGGCAAGAACCTGAGGCTTCAGAG  
A\_14\_P132590 CACAAAAGCCAGTGTCATTATTACAGGATGGTCCATCTTGCATCTACTCTAATGTATGTA  
A\_14\_P136930 GTCTTCCAAGTTGACATGATGAAAAGAGAAACAGGATGGATTGTGTAATTCTTACTGTCT  
A\_16\_P01345188

GTGCACTCTCAATACACACTTTTTTTTCAGTAAATTTTACCTTACCCATAGACATAACCCC  
A\_14\_P123981 AAACCTGCAAAGACAATGTCTAGCACTTATATCTCCAGTAACTCCTGTCAAGGTTTATT  
A\_14\_P113625 ACAGCAGGATATTTTCAAGGCTATAGTAAATGGCCCACTCTCCTTTCTTTGGTTATATTAAT  
A\_14\_P110993 AAATGACTGTCCACTGGACTGAAGATGTTATAGCATCATATTTAAAATCTCCATGGGATG  
A\_14\_P132395 TGTCATATTGCCCTAATCTCTATTTTTTGATAAAATTGGATAAGGAGTGAAAGAGTATGCT

A\_14\_P131852 CCTCCTATACCTACACCTGTTGTAAAGAAACAAATACAAAACAGGATTCAGCAAAACAC  
A\_16\_P03544322

AAACTCACCACAGACAGTTAATGCTCAACCAGATTCATAAACCCCTGTTGTTTTCTACT

A\_16\_P03454624

TGGCAACATTGATTAGAATCACACTTGAAAAGTTTTAACAGGCTTATGAGTAAGGGACTG

A\_14\_P107993 TTCTTAATGGCTGGATTTTAAAACATACCTGAGGGTGCTTGGACAATGAAAATTCTTCTC

A\_14\_P200659 TATTCAGTATTGATCTGCCTCTCGTCTTGAGTGGACATGACTGTATTCCATTAATATCTC

A\_14\_P127523 GCTTGGTGTAACAAGCATGTGAGGAAAATATTTATTTATGCCTTTTCTGCAGGTGAAGAA

A\_14\_P201475 CTGATGCTTCAAAAACGAGAAGGTAAATATACCCCAAATGGATAAGGGATGCATTCTTAA

A\_14\_P113649 TAAGTAACAAGTAATCTCCATCTTCTCCAGGCTTCTAATCAGTTTCAGAACAGGAGTTTT

A\_14\_P134695 CTGCTCTTTGCTTCTCTTAAGGAACATATGGTCACTCTTATTTCTCTTGCTGATGTATTC

A\_14\_P137994 AAAAAAGGATTTTGTTTAAAATACTTTAAAAATGTTATTTCTGCATCCCTGGCTGTGAT

A\_14\_P136582 CTGCATAAGATACCAGTTATGCTGGCTTCCACTTTCACAGTATTCTCAAATAGTATCTCT

CUST\_3041\_PI426210822

ACATACCTATCTATTTACTTATTGACTCTGAAATAACAGAGGTAGATCCTTCCAGGTTTA

CUST\_4733\_PI426210822 CCCATGGGCTTTGGAGTCCCATGGGGCTCTCAAGCCATGATTCTT

A\_16\_P03809793 CTCTCAGGCTCATTGTTATAATCCTCTCAAGGATCAGTCTCATTAGCAGACAGC

A\_18\_P14133801 GTGCATAGTCCCAGGGAAGCCGTCTCATGAGCCCCCTCCTTCTCTT

A\_14\_P109531 CTTTGTGTCCATCCCTTGATCAAAAACCTTTTCATTTTCTACCTGCACTATACCTTATCAAG

CUST\_210\_PI426210822 ACTGAGGACGCCGCCGCTCGGGGCCGCCCTGTGCTCGCCTTCAG

A\_14\_P102903

TTCACTGTTTTTCATGGAGAAAACCTACCAATCAACAGAGAAAAAAAAGGAGACTGAG

A\_14\_P114435 ACTTAACACAATTTCCAACATAATTCAGCAGTGATCTCCTAGTAGCAAGAGAATGATGACT

A\_14\_P108180 TCGAAGGATAGTGCCATTTTTTATCTCATTGCGGTTCTGGAAAAGAAGAAAAAATCTTTG

A\_14\_P123877 ACCTTTCTTTTATGATGGGTTGTAGAGGCATCCATCTCTTCTCCTATATTATCAATT

A\_16\_P00685571

CCTCTTTCAATGTTTAAATGGTTTTGATTCCAAAATGACTTCATTTAAGAGCAAAGAAAGA

A\_14\_P114714 ACCAAGGGAATAAAAACCAATGTTCTTTGAAACAGCAGGTAATTTGGTTTTTCTACAAA

A\_16\_P18196734

GACACCAGAATATTTGCATGATCAACGTTTTTCATAACAAATTACCATTCTGTTCTCCTC

A\_14\_P117046 TTTGCTTTCTTTAGAACTCTATGAACAAGAATGCAACGGAGAGACTGTGGTCTAC

A\_14\_P110815 ACATCAGTCTTACTTAGAATGACATCTCTGAGTCATTTAGGACGTTCACTGTTTTCTGAT

A\_16\_P00685201 TATTGTGCTTCTGTGTTGAAGTCAGGGAATAAGAATTTCTCTGTGCCACAAATAAT

A\_16\_P39773474

ACTGAGGCTCTGAATCTATAAGTCCCTAAAACCTTTTCTTATGAAATTCATGCTTGTGCT

A\_16\_P03810157

CATCTGCCATCTTGAATTATCCATTCCACTTCTGTTTTCCATTAGCATCAATAATCACGA

A\_16\_P03288778

AGGACTTGATCACAAAAGATGGAAATCACGTGTTAATTGTTGAGTAAGCACATTTTGGTT  
CUST\_1365\_PI426210822

TGATATAGGCTGTCCTGCCATCTCAGGTCTAGACAAGCAAATCAAGTTGTATTTTA  
CUST\_606\_PI426210822 GGCAAGCATTGGTCCCTAGTGAGTCCCCTCCCTCTGGAAATGAAG  
A\_16\_P19832903

AGGATGACTCTACTTACATGCCAATAATGAACTTCAGCAGATATACACCATTACATTT  
A\_18\_P14246653

AAAAAAAAAAAAATGTTCAATTAAACCCATAAACATTCTAACCCACTAACTGACATTTTCT  
A\_16\_P19398194

CATTCTTTAAATTCATGCTTGATAAACTGATGCTGGCTATAGTAATCTTCTGTCACCCCC  
A\_16\_P37726834

TGTTTTGCGTCTTCATTCTACAACACCTCAATAAGTAAAATGACAAAAGATTCTCCTTGA  
A\_14\_P200411 CTAAAGTTAAATGAAAACCTTGGTTTCTTTGAAAATCAGGCAATAGAGACAGGCTCCAGAT  
A\_16\_P21499121

CCTGCAAATATCCTAAGACTATGCTCAGAAGATACAATCCCAATGTGTATAATACTGCCA  
CUST\_4060\_PI426210822 CTGATGTGGCACAGGTGGTCAGTGGGGCAGGGAAGACAGAAAGAT  
CUST\_10114\_PI426210822 ACAGAGCCCTCACCTAGTCTTGAAGACCTTTAGGAAAATCAGCTTCAG  
CUST\_5801\_PI426210822 ACCATGGCACTGTAAGAGAAGCACAGCCAGCCCCAGCGTCCTTAC

A\_14\_P138702 AAGGACTAGGTGAAGTTTTAGGCTTGGGTTAAGGGTTGTGTTATATTGTATGCAAATTT  
A\_14\_P103213 ACATGTTGGAAAAATCCTTCTACCAGTTTCAGCATTATAGAGCAATTCCAGGAGTAGTAG  
A\_14\_P122250 TCTTTACCACGAAATCATGGTGCAACTAATGAAATTATATTTGTCCTCACATCTCGTTGT  
A\_14\_P115596 TTTAGATAAGGTTTCATTTTTACTTCTAGGCTCTCCAGGCAGCAAGACAACCTCTTTTAC  
A\_14\_P106392 CTTCAGCGAATCTTATATCCTAAAACCTTAGCAAGCCTGAGGATTTGCAAATGGTTGC  
A\_18\_P22841623

GTGTTTGTATGATATTCTGTGTCAGTTGCACATGGGATGTTTCTACCAGCATCTGAATT  
A\_14\_P115102 TAGGTTGCAGATGCTGCTAAAAACACAGAAGTCTGTGATGAACTAATGAGCAGACATAA  
A\_16\_P15406713

AAGGCAATAGACAGAAGAAAAGTTCACAGAGTAGGTTTCAGAAATAAACATAAATGGGGC  
A\_14\_P127957 GTGGCATTACAATTTACCATTAAAACCATAAAGATCACGGAATTGAAACTGTTGGGCTT  
A\_14\_P136915 CTAATAATGGGTAATCCTACACCATTTTTGCATCAGAATATAAGATGGGGCTGTTTGTCT  
A\_16\_P15652898

ATGAAACATTGAGGCAAAAAAAGTTTTGTAGTCCTTGAGATTCAATATCCGCACATTT  
A\_16\_P20798707

TTCTTCCTATCGACTTCTACCAATTTTGTCAATTCTTTTTGGCTCTTAAAAACAGACTGC  
CUST\_4169\_PI426210822 GAGCTTATCCTCTCCTCTTTGTATCAAGCCAGGGGCCACATGTT  
CUST\_7954\_PI426210822 GGCTGCATCATATGGTCTTTCTCTTCGATTCACATGATGTACCCCAAATG  
CUST\_2778\_PI426210822 GATACCGTTTTAGCTGGAGTGGGCTAGTGGGATATTTCCGATGTT  
A\_14\_P119363 GCCTGAATAGGTCTAAAGAAAAGAGCGGCAGATAGGAACAGGTTAGGAAGTTT

A\_16\_P17617455

AAAAGTATTTTTGTCTGTATTTATGCTCTGTGATCTCATTGTAGGGAATTGCTAAGCCA

A\_14\_P110634 ATGATTCTCCTTAGTATTGTAGTCATTGGTCAGCCTTAAATGTTTCATACTTGTGCAGAGT

A\_16\_P15122320

AGACAGTTCTGACATACTTAAACCTAGACACTTTTAAACTTCCGTTAACCCTGAAGAGT

A\_18\_P11597138

ATGCCTCCTAGTGTATACTGGAGTTACAAAAGAACCCTATTTTCAGAGTTGCAAATAGAC

A\_14\_P200916 CTGATGATTGCTAATTAGCCATAAGTTGGGACTGTGGAATGGTCTTTAATTTTGGAAAGTA

A\_14\_P200886 CCTAATAGGTGAAATCTACACCAATGACACAGTTCCTAAGAACGCCAACAGGAAATATTT

A\_14\_P133410 CAGGCAAACAACATGGGTGTTGGAGTGGTTGGAATTATAGAGTGTAATTTCTTAAG

A\_14\_P122868 CATTGAAACATGAGTATACAGAAGTCTTTGGTAATTCAGGATCACTGATGAGTAAAACA

CUST\_10253\_PI426210822

TGTTCTTGATGAGGTAATCAGGCAGTCTCTATGTTACATGAGTTAAGAGTCCTAGACTTA

A\_16\_P02202972

AAATGCACGACATCAAGTAATTGTTACTCAAACCTGATGCAACTATGACCTGTAATGACGT

A\_16\_P16191880

GCTTTCCCCTCAAAAATCATCACACAAGTAGGAGTAAAATAATGAGTATTTGAATAATGC

A\_14\_P122766 CTCCTTTTTCTTCCCAATGATTGTGTGGTCACCTTGAGATGAAACCAG

A\_16\_P15763483

ATTCCACGTTCTTTATTAGTCATATGCTGCAATCCCTAATCAGATCTCTTTACACAGAG

A\_16\_P37311670

CCCATTCATCCTAGAAAATCAACAACCTTCTAACCAGTATATTTAAATCTCTCAGTTCCCA

CUST\_9156\_PI426210822

GATCAAAGATAAAAATAGAGATAAATTTAGCAAATTTTGGTGGTCTTGTTTTATAATTCAC

A\_14\_P134738 AGTTTTCTTGATTCAGTGCTCTCCATCGACTTGTATACAAATTACAAAGGCATACTGTG

A\_16\_P18539449

GTCACAGAACTTCGCAATAGTCTTAGTCTTAAGTGGTAGTTCCAAATTCCTAGCAGATA

A\_14\_P121698 AGAACACCAGTAGATGTTAACATCAAAAAGTCTGTGAAAAATGACAGTCGTTATACACAG

A\_14\_P200755 TTGAAAAGTATAACGGACAGAATTCTTAGGGAGCGGTAACGTTATACCTATGAAATGTTT

A\_14\_P123776 CAGATAAGTGTTCTTCAGTGTAATGTGACTTCATGCTATATATCTTTTGTAAGACATTC

A\_16\_P16191871

AATTTTTCAGAACAGACCTGAAAAATTGAACCACTTCACTTTATTGCCATTCTTCTGCAG

A\_14\_P132102 TTAGTAAAATGAGTTGTGCAACATCACCGATAAATATCAGTCGAATGATTCTGGGTGTCA

A\_16\_P00685463

CTCACACAGGAAATATCTCTCAAATAACATGGGCAGTGTATATGTTATTTTTCTGGAGGG

A\_16\_P17301621

AAAAGCCACTTTTTCTATTCATATTATTTGCCTTCCCATCTAATGGTTTTCCACATAGCAC

A\_16\_P37489672



ACCCCAATTTTCCAGTTAAAAGCCTCTCATGTGCTAGAATTACCTACATTTAGATTAGCA  
A\_16\_P00685127  
AGGAATGGAAGTTAAACTTTATCCATTTTGAATTTCAACATGTCAAAACATTATCATGGT  
A\_14\_P131679 GAGAAGTTGGTTTTTAAAAGTATGGACTTCTGGATAATTGGCAACAAAGAAGATGACAGG  
A\_14\_P106370  
CTCAAAGTCCAAGAAAAAGAAAATGATCTCTACTACCTCAAAGGAACTAAGAAGGACAC  
A\_14\_P108587 CTCTCATAAGCACAGACATTCAATTAAGCAACAAAGTTTTACGGCTTTCAGTTGGAAG  
A\_14\_P127454 CTTCAAAGGGAAGAGTCCAGATGAAGTCCTGGAGAACATTTATGGACTCAT  
A\_14\_P126504 CAGTAAGGAACTGGATAATCCATAACCAGGAGATTTACTGTTGATAGACGTGTATTTTA  
A\_16\_P30952667 TAGCAAGAAGTCTGCTCTGTATCACCTTTATATAGCAGACATGTCACCCTGCTTCTA  
CUST\_6713\_PI426210822  
TAAAAAAAAGTATTGCCATGGTAAATGCATAATTTAAAAGATTAATAAAAAATAATCCCAT  
A\_14\_P123401 CCTGGGAGGCTTTAAATGATGTAGCCTATAGTTTCTAATGGTAAGGCTAGATTCTAGATT  
A\_16\_P02298191  
AAAAATACTCTCAGGCAAGTGATACATGAAGTCATGAACACTCTAGTATGAATCCGTCAC  
A\_14\_P101109 GGTCATCAGATACTGAAGAAGAAAGCAGAAGCAAGAGAAAAAAGAAACACCGTAGAC  
A\_16\_P38628714  
AGCCTGAGTAGCCTTAAATATAATGTCATATCCTGTAAAACCAATAACTCAAGTTCTGGA  
A\_14\_P123652 CACTAGTTTACTGATGCAAACATTAGGAGAGATCTGAGTTCTATTAGTATGGCAGGCATT  
A\_14\_P138611 CTTGTGGGGGTTAGAGGAAATGTATTTTATTTGTTAAGCAGAAAATCAGGGTATGAGATG  
A\_14\_P118377 CTTACCAAACACTGCATGCCCAATCGCCAAGGTAATTTATTCTTATTACTTGATGTCCTA  
A\_16\_P20899881  
ACCCACCAATACTTTTCATTTACTGCAACATTTTAGGAAGATTATCAATCTGAACTGCCC  
A\_18\_P11914440  
AAACCTTGTCCTTTTCGTGATCATAATCCTATAAACAACAAAAAAAATTAACACCTGGGTCA  
A\_16\_P17537852  
AAATACCAGAGAGAATACACATCAAACACCTAGAGACTATAGATTCTGCAAAGTCATGCC  
CUST\_4037\_PI426210822 TTAAACAGAAACACGCGTAACTTTTCTGCAGATGCACTTCTGTGAATGA  
A\_14\_P106767 TTCTTTATTATTATGAATTCATCCAAGTAATACAAAGATGCCCTTCCCCTGCCATATGGG  
A\_14\_P136998 AACCTCTTGACACAAAACATGACTATCCCTACGATTTATTCTAACTGTCATCCTTAGATC  
A\_14\_P201906  
AGGGACAGAAGGAGAAGAAAAGGATTGAATAAAGAAAATAAATTGGTTCATTGTTTGGGT  
CUST\_8464\_PI426210822  
AGGAAATGATTGACTTCTGAAGACAGAAAATGGAGAAATGCTAGGGAAAACAAGAGA  
A\_16\_P19790022  
GTCTTCAAATACGGGTAAGAGTTAAAGGGTTGAGATAATATAACCGATCAAGGATTGTGC  
A\_14\_P126597 CCTTAACATGTTTTTCAGTTTGATCCTGGGAAGAAAAAATATGCCCTGAATGAAGGATATC  
CUST\_3777\_PI426210822

TTAAGATTCATAAGAAGTTATAACTCATAAGAAGTTTAACTCATAAAAAGTCAAAATAG  
A\_18\_P11427421  
AGCCCAAACCTTACAAATAATACCCAATACGATAAAAGATAAAAACATGTGCCATAAGGAA  
A\_14\_P102564 CATATATATTATTCCTTATAGGAATCGCAGCATCTGACCCCAGGATTCACCTTACAAAGT  
CUST\_3829\_PI426210822  
GAACATTTGCACCTTTCACCATTGCAAACCTTTGACATGTGAGAGTTTCCAGAAATA  
CUST\_6987\_PI426210822  
TTTAAGTAGTGTTAAAACTAGTAAACAATGTAGGGGTTTGGAGAAAAATGCTAATTCCT  
A\_14\_P114690 AGATTTCTGAAGCCTGGACAACCTAACGTCTACTTTTTCCACAACCTTCTCTCT  
A\_14\_P101718 GAGACGGAACATTTGCCTAATTTTGTAAATAAAACACTGTCTTTTCAGGATTGCTTCATGG  
A\_14\_P105156 CTAATTTCTTTTAAAAAGGTGATCTACACAGTAGAAATTAGACAAGTTTGGTAATGAGATC  
A\_14\_P121494 ATCTTACATAAGAAGCATCATTAAACAGAATAGATAGAGGATTATGGGGCTTTAGCCACCC  
A\_16\_P02101684  
AAAAAGCATTCTTTTCAAGATGCCTCTTTCTATACATCGTTTAAAATCCAGCAGAGTGT  
CUST\_3374\_PI426210822 TTCACTGCCTCTTCATAATAGAGTCCTGGGACCTTCTCTGTGTTAAGCATAT  
A\_14\_P105159 GTCCCTACCTGACAGTTACTGTGCTCCTGGATCTTCATCTTTGCTC  
A\_14\_P136627 AATATGTGTTATCACATGTTAAATAGGGCATAATGTTTGAACCTTTTAAAAAACTTTTCC  
A\_16\_P40327887  
CCAACCTATTGAGAATTAGTTCCTGAGTAAATCAAAGAACATTATTTTATCCAGCCCCGGT  
A\_14\_P136823 TCATATCAACATGAGGAACATCAAACCTCTATTTTAAACCCTGTGAAAGAGAAATTTATAAT  
A\_16\_P37315088  
GGCAATCCAGGACTTATTTACCAGGTTACAAAAGTAAGGATTCTATGATCAAAAGCACTT  
A\_14\_P127641 CTCTTAATGCCTTGTTTTTAAATCATCCCTCTAGAATCTCATCTCTATGCTCCCTAGGTA  
A\_14\_P200633 ATCAAGACTCTTGTTGCTCAAATCTGCATTTAGTTATTGGAAATAATCTCAGGCCAAGAT  
A\_14\_P125043 TGAGCCCTATTGTAGCCTCCTTAAATACATGAATTTTGACCTTTGGCCTTCCTTTAATAA  
A\_14\_P116229 GGCAAAAAGCACTAACCTGTATTGTTTTAATCTGCTGAAAACAACCAACTTCTCGAGT  
CUST\_2785\_PI426210822 CCTGCTTATCAACATGTTTCTAATGTACACAACCTCCAGCTCTAGGACAAA  
A\_14\_P123134 CAAATTCGTGGATTTTATTTTTTGCCTCAGCCTCAAAAAGCCTTAGGGCTGATTC  
A\_14\_P106880 CATTACTAACACAATCTTTAATGGGCAGGGATTGTGTTTTTTTTATTTAGTCCCTGCAAGG  
A\_14\_P119685  
ATAGGAAAAAATATAGAAAAGTCAGAAGAGTTCAGATTTCAGACAGAAAGAGACACGTGCC  
A\_16\_P19540246  
AAAGTGAGCAAATCCTACATATTCCCACCTATTAAGGTATGAAACTGAAAGGAGTCACAT  
A\_18\_P14138393 CTCTGAAGGCAATGGAGTTAACAGGAAGATGGACGATGCTGAGAG  
A\_14\_P121334 CTCTGTCAAGTTAGAGAGAGACAATGTGTAGGAAATGTTCTTTTTTAAAAAAAATAACA  
A\_16\_P00890019  
CCTGACACAGTTAATTGAGCAAAATTTTTCACTTTCTCTCGAACTACTTGTATTCCACGT  
CUST\_7130\_PI426210822

CTAGGCATTGCAAAGATAACCACTTACTCTGATTTTCAGAGGTCTAAAGGTGTTAGTTCC  
A\_14\_P126106 TACATTTTCAGTTTCTTCATCGGTTGGATTGGATGCTTACAGGGTTTTTCTTGTAACATTT  
A\_14\_P111503 AAAAAGGGAGAGATAGTGTGTGTATGGGTCTAAAGATAAAACAATTTTGAGGTCCCTCTT  
A\_18\_P22841371  
GATTCTTCCCCCTTGACTACTTTCTATTTATTTTAGGATGCATTTTTTTGGCAACCTTTCC  
CUST\_8567\_PI426210822 ATGAGGTGCTGTAGTGAAGAGGGCAGAGTCCCCAGATACTTGTTT  
A\_18\_P22843398 CATGATGTTTCAGGGCTGGAAGAGGTCTGAGAATCCCATTGATCTCTTAG  
A\_14\_P136115 ATTTTACTTTTGTCTCACATTTTCAGAAGGGTTTTACTCCCCTGCATGTAGCAGC  
A\_14\_P108517 AGTTCCATATTGACTTTGTGTAAATTTCACTCTAATGAACACAAGGTCTTTGGCTCATT  
A\_14\_P200534 AAACCAGAACAGGTTTCTAGAACTGGTGGGAGAGAACAGGAGATGTTG  
A\_16\_P18405395  
ATCAGAAAAGAAGAGTTCATTCAATCTAAGGCGTTGTTCAAAAAATATTTTCAGGGCTCC  
A\_14\_P125620 GTTTTAATGATGACAAAAATTTGCATCTTGTTTACTCAGCACTTTACATACTGGGCCTC  
A\_14\_P132257 GCGTTCCTACCCATCAGCATTACTTTTTTTTCATGAGGTCAGACAAGATTGTCAGATATAT  
A\_16\_P35552051  
AGACAACATCTACTCCAGTGAATGATCTTCAAACCTAACTACCTGATGTAGTCACTTGTG  
A\_14\_P112608 GCGTCTCTGAAAATTTTAATTTGTTCTGACAACGAACTAACACAGCATAAGGACTTAAG  
A\_14\_P121716 GGGGCTGAAATGGCTTCTTCTTTTTGCATTTTATGGTTTTACAATTGTAGCAGTAAAACA  
A\_14\_P105361 AAAAAAGCACAAGGGGATATATGCATGCCTTATTTTTACCAATGAGGAAGATGGTAATCT  
A\_16\_P15680092  
AAAAATACCTAGGGTTTAATCAGTATCCACTTATTCTGACTTTTTCTCCACTCACTCACGC  
A\_14\_P105209 GGCAGTATGGTAGGAAATATGGGTTGGAAGTTCTGTATCTATTTTAGAATCTTGCTTTTT  
A\_14\_P200859 GTAAGTGCGCCTCTCTCCAATAAAGTGATAGAGATCACTTTCTTATAGAAGAAAACTGG  
A\_16\_P00201823  
CAACAATGGCTTTTTGAAGATAGGCAATGAAATTAACAACGGTAACATTGAACTTCAGCAC  
A\_14\_P135576 CTCCAAATATAGAAGAGGGGGGAAAATATGATGAGCCTCTCTGACATTTGTCTTTAAAAT  
CUST\_3721\_PI426210822 TCGATAAGACCTGTTTCAAGATATGGCAAGCCCTAGTTCTGATCTCTGG  
A\_16\_P20785996  
ACCCATGACTTTTTCTACTGACAACAAAAATCCAGATTAATCACCACCTTACTTCATTAGC  
A\_16\_P17469311  
TGACAGTCCAAACATTTTAAACACCGTCTTAAACTTAGCATCACCTTCTTTTATGTGTCTC  
A\_14\_P137861 CTTCCAGCAAAGGAATCTGAATTCTGGAGTGTTTATTTCTGTTTTCTTTTTTGCTTTTCC  
A\_16\_P18376817  
AGAATTTGCCCTGAAGAAAATACAAGACACAGTTGCATTTCAAATCTTATCTGTCCCTT  
A\_18\_P22839039  
TGATCTGATTTATGAAACCAATGGTCTTTTTTCATCCTGACTTGAGATGCTGAGTTTTCTT  
A\_14\_P112347 CCCTGTGCCAGCATTTTACAGATTTAGTGTCTGAACTTCTAGATCTTATCCACTGAATAC  
A\_14\_P126935 GTTGACTTTTGGTTTGGAGAGATATGTTTCTGTGCTGTTTAAATGCTAGAAAGGAATTAAC

A\_14\_P102690 CTGCTCCATCTCATTGCAAGATTTTTGTTACAGTAAAGTTGGACTGAGTTTTCTAAAGAC  
A\_14\_P108407 TTATGTTGCCATTCAAATGAATTGCGTAGTCCTTACTACAGAATATAAGCCCAGTCAAT  
A\_14\_P129702 GAGAGAGAGACTTAGCAGTATTACCTAGCAGTTTCTTTCCATTCATATTCTTCTCCATCT  
A\_14\_P132758 CTCAAGTGTTGTGTTGTTATGCTGATGGAAGATACCTTGTTTCAGATTTCAATGAGAATG  
CUST\_3942\_PI426210822  
TTAAAGTTGGATAGGAAGAAAAAATCCACACCAGGAGAAGATTGGTTGTAAAAGTTTAT  
A\_14\_P132525 AATCCTTTGCCGATCTATCTTTATTACTTTGTAGGTCCAATAAAACTCGCCTTCTAAAGG  
A\_16\_P16318853  
AAAAAACACTAAAGGCATTCTTAGACCATTGGGAAGCATGAATTTATGCTTGGCACACAA  
A\_16\_P18695158  
ACTGCTCTGTCATTAACCATCTGAAGATCTATCAAAAAATTCCTCAAACATCAAGAACCA  
A\_16\_P20980807  
ATGTTCAATGGCTTAGGTAATGTCTTATACTGCATATCCTACATGCTAATCACTGTGACT  
A\_14\_P102429  
ACCGAAAACAAATGGAAGAAATGCAAAAGGCTTTCAATAAAACAATCGTGAAACTTCAGA  
A\_14\_P109843 GAGTTATTTTTCCTCATCGTTCCCTTTCTTTGGTGTCCAGGCTGCTATT  
A\_16\_P01891855  
AAATCCTCACCAATAAATCCTATTATACAAGGCAAAACCTGTATATTATCCCTATCCCCT  
A\_14\_P116445 AACCTAAAATAACTCGTCCTCCATAAATGTGAAAATAATAGAGGGATTAAAAGCAGTCC  
A\_14\_P127291 GTATGGTCTATGAAAGTTGGCTATTATTAACCATGCCTAGGGAATTCAGACTTCATATGG  
A\_14\_P128032 CAGGATCATTGTGGCTTGGACTTCCTGATTGTCCAGAATCTGTAAAGAAATC  
A\_16\_P15114647  
GTCCCTATCTTCTGGAAAAATTTGCAGGTATCCATAAAAACTCCAAGTATTTGACACTA  
A\_14\_P120240 CTAAACGAGAACTTAGGACAAGTCAACATAATAATACTTTGGTCTGAAGTGACCAAAGAC  
A\_14\_P111312 CTAGAAGCAAAATATCCCAAAATATTTTCATAGCAAGTTAGGATCATGGGAGGGAAAGGAA  
A\_18\_P22745477  
TTAAATCTTTCAGTCACAGACTAAATAAAACAGTCACCTACAAGTTCTACAAGTTCAGCC  
A\_16\_P35981870  
AACGAACAACAAAGAATGTTTAAACACCATACATATGCCTTTCTAAAGTCAGACAGTGA  
A\_14\_P138781 TAATTCTCCCCTAGAGATCACTCACCATGAGGTTTAGTGTCTAGAAACCAG  
A\_14\_P120006 ACAATTCCCCGTGAGTGCGTAATTTTATGATTCAGAGGATACTGCTTCCAAATAACG  
A\_16\_P41818075  
CATTTAACTACCAGAAAGGACTCTTTACAAACTGGATCAAAATGAAAACCTACCCTCCCTA  
A\_14\_P133598 CAGGAGGAATTTTGTGTCAGAGAATAAAAGGAGGTTGTCCATAATTGACTTTAAGCAGC  
CUST\_8450\_PI426210822 AGCTTCCTGAAACACGTGAAGGAAAATGATCAGAAAAAGAAGGAAGCTGG  
CUST\_1411\_PI426210822  
GACTGCTTTAAAGATGAAAGAGTCCCACACAATTCCTATTCATGTCAGAAATTTATGAG  
CUST\_4690\_PI426210822 GGTCTAATGGTGGAGGTGAAGAGAAGAGGGCAGGCTGCAGAAAAG

A\_16\_P39937758

AAATTGTGACCTCCAAGAGATGAAATAAATGGCTCTTTTCATGAAAAAGAATTTGGGGAA

A\_14\_P118107 TATCACAGATTATTAGAATTTTGTGTCAGTGATCCAATGTCAGTTGAACTAAACTTGGGGGG

A\_14\_P202508 ACATGGAATGGTTAACAGTTGTTAAAATATCAGTTTCACCAAATTTGGGAAAATATCCAGT

A\_14\_P131079 AAATAGCCTTAAAGGGCTGATCCTCACCTGAACATGTTTTCTTGTCTCATTAAAG

CUST\_8828\_PI426210822

GAATTACTTATCAGAAACGAAAGCTTCTTAGAGCAAATTTAAACTCTACAAACTTTGGTC

A\_14\_P128321 TTTCGTTTCATACTGTAAACATCAAGGTTTTTCTCTTACAAGAGGGTAGATTACACCGTC

A\_16\_P16715252

ACTTCAATCACCAATACTAACATCCACTTTATCAGAACACTACCATAATGTTGTCTAGCC

A\_14\_P110182 AGATCAAGTGGCCAGAAAGAAAGTAAGAAAATAAAAATTATTTTGTCTCTTGCAACTGGG

A\_16\_P03738926

AAATTTGGGTTGAGGGTAAATTATAGTGCACATCAGGATGATAACAAGAAATAGGATCCC

A\_14\_P111685 AACACGGCAAAAACGAGTTAACTGCCCTGCTCAGTAATAATAGTATTGTATGAGTTTCA

A\_14\_P126273 CACAGCCACCTTTGACTACAGACTATTTTTTATCCAAGATGTATTTCCATGTAGCAAAGT

A\_14\_P121473 GGAGTAATTTGACCGACAATGTCATGATCACAGTAGATATTATTCCTTCAGGTTGGAATT

A\_14\_P112991 GGAATTCCACATTTTAAATGACACAGCAAGATTTCTAGGATCCTATTTTGTCTCTCTC

CUST\_7413\_PI426210822 AGTCCACAGGTCAGGGGCAACGGGCCCTGCAGACTTCTCAGCATC

CUST\_9379\_PI426210822 CTTCTGCTCCACAATCAACCTGTACCCTGGCTTGAGGTTCTGGC

A\_16\_P36231066 AAAAATCAGAGGGATCTGGAAACCTGAGGGCTATAGGCTGCGTCC

A\_14\_P110326 AATTTTTTGTCTTTTCTGTCTATTTATAGTCTATTGCGTCTGCAGACATGGATTTCAAC

A\_14\_P111715 GTTACAGATCACAATGGCTGTAAGAGGCAAAGGGCATGAGTGTCTGT

A\_14\_P112787 TTTTTTCACAAACATCATTTTCATTGGGTAGACCATGGATGTGAACTCTGGAACTTTTTG

A\_18\_P13856766

AAAACCTGACAATTAATGGAGGAAAAAATAAAACAACATTTGCATTAATATTACCA

A\_14\_P121915 TAGAAGCAAAATCAAAATCTCCCACTCTTTGGTGTATTCAATTAATGTTACTATCCAGCCC

CUST\_6613\_PI426210822 CACATGTTATTCTTGTTGATGTGCCAGACATGCAGGAGAGTGAGGTC

A\_14\_P201270 ATTCAATCCCTCTGATTTAAACCTCTCTTCTACTGGGTCTCGCTAGTACTAATT

A\_16\_P20270933

GGATTTTCAGAATTGCATTTACCTGTCACATAACCCATTAAGATCTCTCCGTTAAGTTCAA

A\_16\_P18179266

ACATATTTCTTGGCTACCTGATCAAATTCTACAATGGTCCTAATCTGTCTTATCAGCAGC

A\_14\_P130281 CTGTTTTATAAGCCAGGAATTGTCTTGCTTCTGGCATTGGCAAAGTATTTGAAAATGAAT

CUST\_5478\_PI426210822 AAGTGGGGAGAAGAGGTTGGCCTGGGGACACAGTAAAGCATGGTA

A\_14\_P130917 CCATATTATTATTTCAATTACCATCTGAATTAAGTTTGTAGCAGCGATCAGCCCACGTA

A\_14\_P133555 GTCTTTATAATTCCAGACTGTCTGATATTTGTATCTAAAGAGGGAGACCTCATCACTTG

A\_16\_P36599493

CCCTCAACCTTACATTTCTTCAAGCAATCCATTGTTGACTTTAAATCCATTA AAAACCA

A\_14\_P102256 AGCAAATTTGGGGGTGGTAATATTTTCTCCATTTTCAAGAAATATCTTCAGCATATGTCC  
A\_16\_P30952328

AGAGTGCTGATAAATATCTTTGATCATTGATTCATCCTAACTAGATTTTTTTTTTTTTTCA

A\_14\_P103283 CTACACAGGGATTTGACCAGAAGCCATATTACAAAAATAGCCTAAAAATACCTCTATTC  
A\_16\_P00692385

TGCAAATATCTGAATTCCATACCACTAAGGTCTCACTTTTTAGCCATTGTGTTGGATACT

A\_14\_P138893 GACTGACATAACTCTGTTAATTGTGAGGAATTTAGGTCTAGTCATCAGCAAACCTTGT  
A\_14\_P133971 TCACTTTTGAAAGATTGCCAATACATACCATGTCTGCTTTTAATGAAGGACCACTCTTAG  
A\_14\_P136590 GAGGTATTTGGAAATGAAAAGGCACTGATTTTTATACTGTAAAACCAGAAACAAGAAGTT  
A\_14\_P117772 CTGCAGTATCCAGGAAGGTCTTTATGTAGGAGGAAAACTGCTCTTTGAATAATATGTAG  
A\_14\_P106144 CCACATAAAAATTTTCATCTGAAAGTGACTTCTGGAATCATTAAGCCTCTTCCCATTCT  
A\_14\_P116586

CTGTCTCACAGACACTAAAGATAAAACAGAAAACAAGCAGATGAGTGACAATGACAAAACA

A\_16\_P03142070

CCCCCAGAAAAACAAAGAATTTTCAGAGTCAATAGCACGTTATGTTTTGACTACATCACAA

A\_16\_P18269070

AATCAGACATCCAAATTTTCAAGAACCACACTACATTTCAAGCCTTCTGTCCATATTTCA

A\_16\_P20976463

TTTGTGTGTCCCAAAAACAATGAATAATAAGCCAGTGCAGTCTTTTACATGCCATTAAGA

A\_14\_P118651 CAGTTGCCACGTTACTGCCTTTTTTAAAAATATATTTGACAGAAACCAGGTGCCTTCAG  
A\_18\_P11167500

GCTCAAGCCAGTATTTAACTCAATTCAATACACATGTTTTTATATCTGCTTTGTGCCAGC

A\_16\_P18873974

TGTGTAAGTTCGACGTCCAGAGTATTTGAAAAAGCATTGACTCAACTCATGTTTTCTTT

A\_14\_P114649 CTGCAATTGGTGGCCGATTATTATTGTGAATATTCTTATGAAACCAACAGTAACTAGGT  
A\_14\_P121737 CCTTGAATTGTCTAACCATGGACATAAACAGTTGTCTCCCTTCTACTGTGTAGAATACTT  
A\_14\_P134106 CCATTCAGTTAACCAACAGAGAAAAGTGAAGACTGATTAGTTGAAGTCTCACAGAGTAT  
A\_14\_P103995 AAATACCACCCTCCGCCAGAAAAGTGCAGAATAAAAATTTTCCACTAGCAAAAAGAAG  
A\_14\_P108293 AAAAAAAAAAGGCCACTGAAATGTATAAAATGGTCTGAACATGATGGTGGTATCAAAGTCG  
CUST\_2984\_PI426210822 AGTTGCAAGAGATCAGTACTTCCGGATCAGTACTTCTGCAGTGAGATGA  
A\_14\_P123646 TTTAGGCAAAAACAAACGTTGGCATATCCTTTCTTAGATATACTGAAAAGTCTTGGGGTCT  
A\_16\_P18105009

ATTTTTCTACAGCGACTTCCAGTTTATCCTAAGCCTCTTTATGAGTTGACCATAACAGAT

A\_16\_P38976991

CCACAAAAGAGATATAGGCAATTGATCCATCATCTTACTAGTCAGCCAATTAGACGACTT

A\_14\_P111619 ACCTGATAAAATGAGACTTTTGGCAATCAACTGTAATGTTCTAAAGGATCCACCAAAAAC  
CUST\_8288\_PI426210822

ATGACAAAACAGAAAATGTATACTTTTATAATCCAGTTTTTAAAAAGTCAAAGCTATGAT

CUST\_8520\_PI426210822 CATTGTGTGATGGTGACAGTAATTTCTGGCATTGCTGCCCTCTGG  
A\_16\_P18993775  
CCTAACTAACAAAAAGCAAAAACGACTGAACTAAGAGAACAATTTTCCATCACGTTGAGG  
A\_18\_P16727456 GCCTCCAGTCATATTAATTCTACCTCCTTAATAGTTCTCATCATTATCCCTTTTCTCCAC  
A\_16\_P38507738  
AGCAAACAAGTCAAACCTTAAACTCAGAGCCTAGTATAAATCAATTAGATCCAGTCTCCTT  
A\_14\_P135926 GATATTGTTGGTTCTGCAAACTAAAACCTTTTTCCCTGGACAAGCAAACACCAC  
A\_14\_P103129 TTTGTTCCCTCAAAGGTTCTTCAGAAGACCTGAAATTCTGCGTGCTCTATCTA  
A\_16\_P00176893  
GTAGGTGAAGAAATGGGAAATAAATGTCACCTAGATATCTATCTTGAACCCTGACTTTCC  
A\_14\_P132346 TTATTATCCAATGCTGCTTTATTATTTGGCTATTGGGGGCTTCAGCCATTTTCCTTA  
A\_14\_P131659 AAAGCCAATTTGAATAAACAACCTTCCCTCTCAAATGGGCAAGAGTAACTCTTCAG  
A\_14\_P111008 GTGAAGTTGTTTTAAATTACCCTTTAGAAACAGGAGATAAAGTGAGGGAGTAGAAAGGCA  
A\_14\_P112839 ACTTAGTTGAAGACGTTCTAAGTCACTTCGTAGTTTCTCAGTCTCAGAGTTGTATATTCC  
A\_14\_P100207 TTTTGTCTGTTTGTGTTCTCAAGACAAAATGTCTTTACCGAACATTTGCTTTGGAACC  
A\_14\_P136584 GCACCTACCTTCTTCCGTTAGTGCATCAGTAAATGTGTTATTTTGTCAATTTTCCAAAGA  
CUST\_8545\_PI426210822 TCTTTACTGATCATCGAGCCAAGGAAAAGCCACTGGAAGGGACTT  
A\_16\_P16191948  
TATCATAGAAAAATCTTCAAGTAAGTTGTGTTGTTTCTTCCACAGGACAGTTCGTCTGTC  
A\_16\_P01482961  
AAAAATGGATAAATTGGCTACGTAGAGTTATGTCAGGCTTACTAGCACAAAGATCCATGAG  
A\_14\_P106752 CTTTGCTGCCCTGCATTCCACATCCAGACGCAGTGAAGTATTTAAATACTTGTTTA  
A\_16\_P15024708  
AACACCTAACTCATACCTCTTATTTGAAATTAACCTGCAAATCTTCTTCTCACCAGGAG  
A\_14\_P121275 TAAACCTTATCTTCTGCCTTCCCATCTTCCCTTTTTCCAGAAATAGTGTTTTAAGGAACT  
A\_16\_P17136719  
AAGCACCTTTATAGACACGCTAACTTATATACCTGACCTTGGAGTAATTCCTATTGGAGA  
A\_14\_P111740 CAGCATCAACCCCTTTAATAATGATCCTTTTCTCATACTTTTCCCTTAAATCGTTGCAGA  
A\_16\_P32060000  
CCTTGCTTGTGTTTTTTTACTCTCATAATTTCCATAGACTATTTGCAAAAAGCAGACTTGCC  
A\_14\_P136364 ATTTGAAGTTTTCTTGCATAACTGACTGGGTTGTCAGGGAGACTCACATACAAATGAAAT  
A\_14\_P106213 GTTCAAATTATATTGTTAATTCCAGTTTCCCTTTTTCTCATATTTACCCCGAAGAGGTGT  
A\_14\_P118461 CTTCTTTTCCATGAGTGGAATAGCCAGATTCATTTACTTTTACTTTTGGCCTATTCAGAT  
CUST\_9015\_PI426210822  
CACATGATCTAAATCATACTTCTCACACATTCTCCTACTTCAAAGCTTTCCCTGGTT  
A\_14\_P113279  
CAGAAGGAAGAAATTTTCAGTGACACTTAGAACAGAGAATTCTCAAAAAGTGAGATTTTCAGC  
A\_14\_P134496 TTTGGTTTTTTTTTCTCTTCTAGGCTTTGAATTGTATTCCATGGTGCCATCTATTTGTCTC

A\_14\_P123004 CTGGTTCTCTATAACAAAAACAATGGACAGTGGAAAGAACTAAGAGGAATATTGGCTTC

A\_14\_P107284 ATTAGGGAAGTCAGAGAGATACCTGTGACCAAAATTTTGACCTTTTCTAGTTAATTTGGT

CUST\_2935\_PI426210822 TGAAACGAAAACCAGGAAGGGGCGCTCTCTGAGTGATTGCATTTT

A\_16\_P37894295

AGCCCCATCATGTGATACTTACTCTATGCAGATTTCTTAAAGTCATGCTGAAAACTTGT

A\_14\_P137988 GTGCTTGACCAAGGATGGGCCATAAAACAATGAGTAAACAGTAAAGTGTGGATC

A\_14\_P105780 AAAAAATTTCTGCTTGCCACCTCCCACTTCACACTTTTACTAAATAATCAAGTATTTA

A\_16\_P16191077

TTCCAAGATCACCCCTTAAATAGTTTATGGCACTTAAAAAATGAGACAATACACCAGACA

A\_14\_P131706 AATGAGACTGAAATGGCTTACACATAGGCTGACGACCTATAATAACATAAGAAAGTGATG

A\_14\_P101741 AAGCCAAGTCTGCCAAGTAACTTTATTCGTGTCTTCTCAAACATTTTACAGATCAAATAAT

A\_14\_P136174 ATAAACTACTGGCTAAAAGTCAACACCAAAACACCTCTAAAACCTTAGGAGGTTTAAAGG

A\_14\_P123833 CTGATAGAATTCTTTTCTGCATCGAAGTAGCACTATTCCAGTATAGGCATTGAGATATCG

A\_18\_P22841740

CAAAACACTTTATTTCTCAAATAAATGATGGAGTAGGTTCCAGCGTTGTTTCTTCCTTGC

A\_14\_P135649 TCCGCTAACTTTTTTAAAAATTCTGTTTCCTATGCTCCCTTCAGAAGTCAGTTATCAGAG

CUST\_5655\_PI426210822 AGGTCACATCCCTGCATAACCTCCTCCCGCTGAGGAGCTCCCTTC

A\_16\_P36230433

TGCATACGTGGGTGTATTTTTTAAAAATTGTGACACATCATCAAGATGGATATACTTGCCC

A\_14\_P102613 AGATCTGAATACTTCAGATTAAAGAGTAAATAACTGGAGGTGAGGTTGAGAATGGGAAGA

A\_18\_P22840148 GAGTCTGCCTCCACTGGGCAGTGCTGGCCTGGAGGAAACTTCCAT

A\_14\_P109937 GTCCTCCTTCTTCCCTCGTTATTGATCTATAGACATTAGGAAGGGAGTGAGA

A\_14\_P112946 ATAAACTCTAAGGCCAGATTGAATGAGCATCCAAAAGACGTATCTGGAGGGAG

A\_14\_P110478 TTCCTCTTCTCATTTAGATCATCTGCCCCACACTCATGGTAGAGTGGAT

CUST\_9559\_PI426210822

TAAACACTAATTTTTTATAACTGTAAAGATGATTATTCCATACTTAAAACCAATTCAA

A\_14\_P110062 TAAATAAATTTTTTTTCCACCAAACACAACAGTATTGTTTTGGTAGAAACCATGTCAC

A\_14\_P200235 CAGGAGATAAAAATGTCTGTAACGATCTCTGCTGCCATGAAGAGTGCAAAAACAATC

CUST\_3878\_PI426210822 CATCTGAGGAGCTGTCATCCTTTATTCATCCTGCCCTTCTGCTTG

CUST\_962\_PI426210822 TACATGAATCCTTCTTTGACACTTTGATCTCTGACCTCCCAGAATGCTT

CUST\_263\_PI426210822 GTTGGTGCCCTCCTTGGCCACATCCTCTGGACCAGAGGGTATAAA

A\_18\_P13086403

ACAGTCTACCTGGGAGTATTCTAATTTATTTCTGAAAGATGGAAAAATGAGCAGAATCCC

CUST\_7326\_PI426210822 CAGATGTGGGACACTCCTCACGGACAAGTTCAGTGTTGTATTTACTTTTC

A\_16\_P15628390

CTTTACACCACACAACAACACTTTCCAATCTTTTTAAGTCTATCATGGTTTGCCTCCAA

A\_16\_P35744410

AATCATGTTTCGTATGCCTTAAAGATTACACCTAGCATCATTTAGTAAGCCAAGTCATCTTT



CUST\_60\_PI426210822 GTCATGGGTGCTTGGGTTGTGACTCACCTCTCCAGCCCTTCACAG

A\_16\_P18292168

TCCCTGTGCTATTGACAAAATTCTCTAAAAACCTTTTGAATAAATGTGACAAAGACTACC

A\_16\_P15325198

TCAGCGGAATAGAGTTATGAGGTCTCAATGACAAATAATCTTGAAGGTATATTGGGCATT

A\_14\_P111935 TTCCAACAGAACATAACCAGATATACAAAGAGATAACGTGGATGATCCCAAGAAATTATA

CUST\_1649\_PI426210822 CTTGGCCCTGTTTTATGTAGTATGGGCTGAAGGGAGAGGGGTGTG

A\_14\_P200131 CTACTIONCCTTTTGTGTTTTGTTAGAAATCTTTGTCTCCTTAAAACATCTGAGAGTGGATT

A\_14\_P105662 TTATTAAGCCTTTATACCGTTCTTCAAATTTATCACC AATTCCTGCAGATCTAGGCGCC

A\_14\_P136044 AAAACTTTCAGACATAAAGGTCTATTTGACTCTATGTTAAGTGGCCCCAGATTGCAAATT

A\_16\_P41638130

TCAGCATAACAGCAAATTTGACAACAATCAAAAACCTCATCCTTTCTGAATATGTCCCTGA

A\_16\_P17219472

TTGGCCCTTCATCAATTAGATCTTCTTCAGAAAACCTATTGTTCATATACTCCTCAGACCAT

CUST\_3422\_PI426210822 GAATGAAGACGGATGAGCCGTGTGGACACAGCCACACTATGTTTT

A\_16\_P00685283

CTGCCCCTATATAAGGAATATGTTATTACAGTCCGAGACTAAAAGATGCTTTTGTCTTCT

A\_14\_P123830 GTCTATTTTAAGTTGCACCTTCCAGAACTTATTTTTGTCTCTGAAAGAAAGAGGCAGAG

A\_14\_P201853 CGGGAAGTTTTCAAGGACTTAAAAATAAATGCGCAGGCTTAAAGTTGCGAAACTCA

A\_14\_P137977 GAATGTGGCTCTTTAACAAGCCATCGCTTTATGAAGCAAGGTTAACAATTTCACTTGATT

CUST\_2973\_PI426210822

AATCAAGGAAAAGTACTAATTAGGCAGTTCTAGAGATGAAATGCTTCCAGAATGATTGCA

A\_14\_P117345 AAGAAAATGCATAAAAATGCTGACATGGTTATCTTCACTACCCACAAAAAGCACCTA

A\_14\_P119787 GATGGATTCCTTAGGGGGTTATATGCTTGGGAGGCTGATACAATTTCTAGAAATT

A\_14\_P131869 CTATTTTTTTTTTCTGGTGGGTGGGGGTTAATATCAACAATAAGAGTAAGACCAGAGAT

A\_14\_P104658 CAAGACTGTGAGTTCAACTTGCACTGCACAATTAATGTTGTGTTTGATTGTCAGTAGTA

A\_14\_P201093 CTGTTAGAGGAGATAAATCATCATTGTAAGGCCAATTAGTAGACGGGGCAATAACTCATA

A\_14\_P104549 CAGAATTATTTTCATATGAAAACATATGTGGGAACAATGTCTAGGTAAGTGCTCAGGGCT

CUST\_9573\_PI426210822 AAGTAAAACCTTAAATGAGGGATTGAGGACATTTCCCAAGGGGTGCTGAC

A\_14\_P108793 CTTCGTTTTCTATTACCGAAAATAGATCACACTTAGAACCTCAAACCCCTAGACCAC

A\_14\_P120073 GATTGCTTGGGGTTCTAGAGAGGTCAGAGTTATACAATAGATGATAAGCCATGCT

CUST\_5300\_PI426210822 CTTTTGGGGGTGTTGGCCTGTTTCTAATTGCTGCACCCTCCTCTG

A\_14\_P125698 TAATCATATGTGGAAGAACAAGCCTGGGATTCAAAGGTCACAAAGAAAATATCACTTGAA

A\_16\_P40206630

AACTTACACTGTGACCTTACAAAACACTCTTATTCAAAAACCTCCAAAAGTCTTGAATT

A\_14\_P128153 TGGGGTTTCAGATCTTTGTGACGAAATAGAATACTGTTTCATATTTGAATCAGAGGGCTT

A\_14\_P108516 CAGCACAGTCTCATCTGATTCTCAAAGCCACTCTGTGGAGTAAACTGAG

A\_14\_P105627 AGTGTCTTTTTAAAGGAAACACTTCAAGTTGAAGAAGATGATCGACCTGAGTTACCATG

CUST\_8284\_PI426210822

ACTTCTAGTCATCTTGGCAGTCTGATAAATTTAAGTTTTTTAAGTGAATTTGTCATAGAG

A\_14\_P202144 AAGATGAGGAATATATGTTTCACCTTTGAAGTCTCAACACCCTGAACAATACAACATGTT

A\_14\_P110103 TGGTGTGGGAGGATATAATGACTAAGAGTTGAAGAAAACTTTTGAAGAGTTCCTAAGTG

A\_14\_P114589 ATTCTCTAATGCTGATGTTTTAGTCATTCTCATGAGATGGGGAAGATACACCCTATTTCA

A\_14\_P105345 CTGATGAGACCTCTATTAATACACGAAGTTTCTCAAAGTTTGTAGGAATGAGTGCAGATG

A\_14\_P128822 ATTTTGTAGGAAAATTTGAATGACTTATCTTCTGATGCACCAGGAGTGCCAAGGATTGA

CUST\_4874\_PI426210822

CACATGAGCTAAACATTTAGGAAAACCTTACAGAAGCAAATCTTTAACGGAAGGGTTTC

A\_14\_P122149 TTAAGCCAGCAATATTTGGAGGATCCGACAATGAACCTGAAAGAGAAAACACGTATATAA

A\_18\_P14137507 CACCTGGCTCTGCCTCTCAGGGGTGTCCTGTCTCCTCTGCACAGC

A\_14\_P132133 CACATCTCAATCAGGATGCTTCTCTCCATTGGTAGCACTTTAGAGTCCATGAAAT

CUST\_5021\_PI426210822

CATCTTTGGTTGTAGTTTTATAAAGAATGCTGGTTCATGGACTCCAGACACTTCACT

A\_14\_P128726 ACTCCTGAATGCTTTTTTTTTTTTTTTTCAAGAAAGAAGTGGCTGTGGACTCAACTAGATT

A\_16\_P16191297

ACAGCAAAGTTTCTTCTTTATCTGGAAAATAACATGCTAAATCTCCGGGTCATCTTGAG

A\_14\_P114028 GTGGCTGAAGGAAATTAGAAATTAAGTTGAAAGGCAGAAAAGAGAGGGCAGAAAATTT

CUST\_5667\_PI426210822

AGTGACATATCTATACCACGGTATGTTTGTAGTACTACTTTTCAAAGACAAGATGGAG

A\_14\_P137139 CTTAGTTTTGTGGGTTATTCATTTAGCCTTTCCTTGAACACCCAGATAGCATATGGTTTA

A\_16\_P17230620

AAAAACATCTATAGTGATTTGTTGATTGTTTACAGCCCTTTAAATTTTGAACACCCCCC

A\_14\_P126116 TACTAGATTACCTTTAGGACTCCATGGAGCATCATCTGAATTCTTCTTTTTCTTGGGTC

A\_16\_P00388789

AAAAATCACTGCCTAAGGAAACAAATTCTGAAGAGATTTGACTCTGCAAAGCATAGACAC

A\_14\_P110980 CTGAATTACTACAGGAGATATCAGAGATCGAAAAAAGGTATGACATTTGCAGCAAGGTTT

A\_14\_P117499 ACAAATATGACTTTACGTCCAGTCGGCATAACAGTGGTGCAGTAAGTGGG

A\_14\_P132210 AATCCAATGTTGAATATCACAGTTCTTCTTTAATGGAAGCAGAAGATTCAGAGTCTTGT

A\_16\_P58424471 ACTTTTTATTAACGTGTTTAAACCCTCACAGCAACCCAGTGAGGTATGTGCAGTTAC

CUST\_7921\_PI426210822 CAAGATCTGAAAAGGCAGGATTAGGGTGTGGGCTTAGGAGAAAGG

A\_16\_P18949351

AAGGCTTGAGCAAATTTAATCCAACCTTCTGCATAATATTTGATTAATCTCAGACTCGGG

A\_14\_P105886 TCACTTACAATACTATTGGGGAAGATACCGATGTCTTCTTTTCTTATATGACATGAGGG

A\_18\_P17037952 AGTTAAACAATGTAACATTGACCCACCTTTCTCAGAGTAGCAGACCAGTCTC

A\_14\_P134108 GGGAAAACCTTCTTTTCTAAGTTGAGTTATTCATCAAAGCAATCAGCCATTATCTCCTCAG

A\_16\_P01779981

AACACAGCCAACCTTTTAAATTTTCTTATGTAAACTACCCATTGTCCAAAAGATCAGTAA

A\_14\_P136822 AAATATTAATGATTTAGCAGTCTCCACGTGTGTTAATGTTTCAAACGTGTATCATAATG  
CUST\_7102\_PI426210822 CTATGAGAGCTTTGCCTTTGACTGGGGCTGGGAAGGTGGAAATAG  
CUST\_8117\_PI426210822

CAGTATTGCAATTGTGAAAGGTTTCATTTGTTAGAATAACATGTCCACACAGCAGCAGT  
A\_14\_P100058 ACAAACATTATTATACCCCGTGCAAATGAATTGAGGCATCAAAGTTTGCTTTATTGA  
A\_14\_P139165 ACAGATGACAACCTATTAATGCTGTGAGAATGTTTCTAGATCAGTGCATGGATGGCT  
CUST\_4549\_PI426210822 CTTTGACAAAGGATGGGATGTTTTTCTAGGTTATGAGGGCCTGGACATTT  
A\_16\_P02835317

TACCCCTGTAATCATATAGTCCAAACTTTTTCTATCCTCCTTACAACCTTTTTACCCCAT  
A\_16\_P01426183

GTGCCTATTACCTAAACCTATTCCAATGTCTTAACTATGAAGAACTCGGTATGTGGTGA  
CUST\_8431\_PI426210822

CAAGCAGCATGTCATTCCTTCTCTCCTACTTATCCTTTTTAAACATTTAGTTTTAAA  
A\_14\_P131772 AGACCTTGAGGCCTTCAGTGGTCTCATCAGCCCTATTTTTAAATAATTTGTTTTCTTTTT  
A\_16\_P15606097

ACTCTGTTAGGAATTCAGTAGATGTCTAAGAGCACAAAGCATTTTTATTCCCTGAAACCCCT  
CUST\_1314\_PI426210822

TTTTTTTTTTTACTAGAGCTGTGTCTGCCCAAATGCATTGTTTCCTGTATTGTACAATTA  
A\_18\_P17363787

GAGTCATCAATTCTTATAGATTTTACTTCCCTCAACAACCTCATATCTATCACCAGTGCTCA  
A\_14\_P138024 CACGGAGGATATCTCTGGGATCTTTTTCCCTAATACACAGTTATAGTTATATCCATATTG  
A\_16\_P16191951

AAAGAGATTACATCCAAATTGCCAAGACCTAGTAACTGCTCTTTAACTATTTACCACCCC  
CUST\_5925\_PI426210822 CATCTGGAACCTTGGGGAAGCTACTGTCCATAGATCTGAAATGTCAGAGA  
A\_18\_P16668991

TGACCATCACAGAAAAATGGAATTGGAGTCACTCAATCAGATTAAAATTAGACTAGCAC  
A\_14\_P118533 TGATATTCCAGACTGGATTTTTTGGGAGATGAACTAGATTTCTATGTTAGGATCCCTTTC  
A\_14\_P121939 CAACCAAAGTAACACAACACTTTTAAGGGAAGTAAAAATAGAGGGTAAACCTGAGGC  
CUST\_4667\_PI426210822 CAGGTCTAGCTCCTGAGAGCTAGCCTGACTTTCTTCCAGAGTCTT  
CUST\_4886\_PI426210822

CTTTAAGACCCTAAAGGGAGAGTTATTAATAGTTTCAGAAAGTTGAGGGAAATCATGCAG  
A\_14\_P111739 CAAGAAAAGGGGTTTTTATATGTTGATGGCCAATGCACAGGTAAGTATTTACTGGATAAA  
A\_14\_P107030 ACTTGTTGACAGTTACAATTCTTCCACAATGCCCTGCTAGAGCGATATATTATGTTTTTG  
CUST\_785\_PI426210822 TTCTATTTCTGTTTTGCAGTGGGAGAGAGGATACGGTTTATAATTCCGCACTG  
A\_16\_P02732362

AGTTGGAATACAGACAAGATGATAGGAATTGAAGCAACTAGACAACAGAAAAATGGAAGG  
CUST\_7962\_PI426210822 CCTAGACAACACAGAAGAAGATGTGGTCTGTCACCTATAGTCTGTCAATC  
A\_14\_P107245 CATCTGAGATTAGAAGCACTCTGATCTTTGTGACTAAAACCTACTCACTGCATTCACATA

A\_14\_P134599 GAATAGTCTTCAGGAGCAACTATCCCTGAATATTAAGATCAGCAGAGGGAAAAATATAGG  
A\_16\_P16937272  
AAAGATAGAGTCCCATGTGCTAAATCACTAGAGTCAAACCAAGAAGTCCTATAAAGTCC  
A\_18\_P15197382  
CACCCAGCAAATACCAAATAACCTGAACTTTGAGATTAAACCTCTTCTATGGAACACTAT  
A\_14\_P119235 TGATTGCACTGGATGATCCATGTCTGATTTGAGAAATTACTCAGCAATCTGATATTTTGC  
A\_14\_P119699 ATTTTTCATCTTCTACGATCAGCACTTTTACCACCATCAGGTTGATGGAATTCTTGATG  
CUST\_8880\_PI426210822 GCCTCCCATGAAGTCCTTGAAACTTGAGACTTAATGAAGGACACTGAG  
A\_16\_P16191459  
AAAATGGAGATGGGGTATAAACATCTGAATTCACTGTAAACACTCCATGAACTGTTGAT  
A\_14\_P115789 CTGTTCCATGTTCAATCGTGCTGTTAGTTGGTATTTTTCTTCCATCTTTCTTGAGCAG  
A\_14\_P122873 CTACAAAGTGAGATACAGATAAGTCACTCTTGGAAGAAGGCTTGAAACTGGTATGATAT  
A\_14\_P129080 CGGCGACTTTCTATTAAGTTAACACACTGTGGCCACCTTTAATGAAAATCAAATGTTTTT  
CUST\_9584\_PI426210822  
AGCATTAAACATTTGGTAATTAACATAATTTAATATGCCAAAAATGAGAAAATAGTCAGG  
A\_14\_P114723 GGCTTTTCTATCAAGCAGTTGGACCTTTTTTCTCCCTCCAAGTTATATTACATTTATCAC  
A\_16\_P02938148  
AAGGATGAGTGAACGTGAGAATTCAGTGCAAGAAAGAAGTGTTTATCTCCTGACGTTTG  
A\_14\_P118450 TTAAAATATAGCATCTGTTATTCACCAAATCATGCATGTTATGGGGAAGAAGTCTGCC  
A\_16\_P19847489  
ACTTCACCTCTCCATTAATAATCACCAATTCATCTTGATCATTCCATTGCATAGTTCAAA  
A\_16\_P01501363  
CCCATTATTTTCTCAAGAATTATAACCAGCCTGCTTCTAAGTATCCATCACCTCATTCTTG  
A\_14\_P119592 AAACGCTGAAAGAAATGTCTGCAAACAGAATGTCTCAAAAATAGGTAGGAGATACGATTC  
A\_16\_P02057082  
AACACAAAACGTCTTTTCATGGTTATTCAGAACTTGATCTTACTAACAGTTCCAACGAGTG  
A\_14\_P113891 ACTTTCTTAGTGGCCAAAGAGCAGTTGTTGACATTGATGTCTAATTATTGAACACGACC  
A\_14\_P137510 TTCAGGACAATTTAGGAAATACTGGGAAAAAAACCAACAGTAAGTATTGGGACGATAACG  
A\_18\_P27173174  
AACCTGAGTCCAAAATGAGTTTCTTAACCAAATCCACAAGTCAGAAGTAAAGGAAAGTT  
CUST\_8579\_PI426210822 GGATTTGGGTGGCTTGGTGCAAGTGAAATTCAGTCCTATTAGGAGAAA  
A\_14\_P200006 CAATCTCAGGGCCAGATAACATCACAGATACTTTAAACCTGCAATTAATTTCTGGTTGTT  
CUST\_9467\_PI426210822 CTCAATAAACTTCAGTCCTGTCCGTTTTTGGTGAGCAAGAGATGAGAACATC  
A\_14\_P137445 TCTCAGTCTTCTCAGGCTTTTACTTTAATGCTAGGATAGTCTAAATCTTCAAGGTGGCTA  
A\_14\_P103781 TTTTTCTTGTCCTTTAAGGCCTTTCCAACCTACTTGCAAAAAAACTTTGTGTTTCACAA  
A\_16\_P00685359 GAAAAGTCGAAGCAAAGGGGTACAGAGAAAGATTTCTCTGATGACTGTGTAG  
A\_14\_P118051 TTTCTCCGTAGCCCTGCCAAAATGAGGTTTTATGATTTTAATCGCATCATAGGTAACATA  
CUST\_7761\_PI426210822

TCTTGATCTTTTTTATTAAATCTTTGTCTTCTGAAGCATCTTAAAGTAGTATCCAGGAG  
A\_14\_P132620 CCTAAGGAAATTGAGACGTCAGATGGACATCATTGTGTCTGAAGTAAGAATCTTTAGTTA  
A\_14\_P202263 CTTTGAGACTTCCTCATAAGGTTTTCTGGGCATGTTATTCATAATTCCTCTGCCTAATT  
A\_14\_P119917 TTGAGATACAGAGTGAAAATGGGGAGAAGTGTAAATCAAGACATGTTTGAGAATGAATCAC  
A\_14\_P138151 GAATAAGAACTAGTGTCTACCGCAAGAAATAGTGACTATCTGCAATGGTTTTGTGAGATG  
A\_14\_P104628 AGCCATTAATTTGATTAAACAAATTTTTGGCCCTAAAATTCAAATTTCCAAAGGACCTGC  
A\_14\_P106350 CTGTAAATGGTTTTCACTCTTCACTTACTGATTCAAAGGTGTGATGTTAGTTTTACCCTG  
A\_14\_P122494 TTTATGGCATACTAGCCAGACATAATTGCCCAGGATTGCCACCGATGATAATTAGTT  
A\_14\_P136024 AAAAGTCTACCGCCTTCTGATATATTGCTTCAATTTTGTGATCAATTAATTCAGAATT  
CUST\_3362\_PI426210822

AGATATTCATTATAAGCATGATTCCCTTCAAAGTAATCACCTTCTAGTCATTCCCTGTTTT  
CUST\_8937\_PI426210822 TTTAACTTCTTGCTCCACCTGCTCTATCCCCAGCTCTGCAGGTTT  
A\_16\_P15206940

CCTCCTACCTGCCTTATAATTTTATGTATGACCAGAATTTAAACTTTCCCTAAGACAGCA  
A\_14\_P109710 AGGCTTCAAGGGGTGATATTTTAAATCAAGGTTTTAAATACAAAAGGTGTCTTGTGTTGC  
A\_16\_P16957415 ATGTTTATGCTTGGTCTATCCTCCATACCTACGATATCCTTATACACCCCTAATCTTGAT  
CUST\_6880\_PI426210822

AGGTGATAAAACAGATCCACTTGCTAATCTGGATAGAGCAGGAAGGACTTAAACAT  
A\_14\_P101492 CTGAGCAAACCAACGTATACATAATATATGCTTCTGTTCTTAACTAAAAGCAGGCCTCCA  
A\_16\_P01410304

CGTCACCATAAACCGTTTTAAAGCATCCAGTAATTTACTAATAATGCGTTTTCTGATGAGG  
A\_14\_P138644 GAGCCAGAATTTTTGGTTTTCCATTAAACTCTCATATTCCTTAGCCCTGAAGAGAAAAAAA  
A\_14\_P116573 TCATAAACTTTAACCCTCTCGTTTTATCCATTCAAGATCATCAAATTCACATACACC  
A\_14\_P108130 CTGAAAATAAGAAAAATGAAAAGATCTCTTTTAGCAGGTTGGTGTTTTTGCCTTGGTGT  
A\_14\_P201492 GTGAGATGGAGAGAATTTGACATGTCTTGGTTTTGAAAATAAGTCAAAGAAGTCTAATAT  
A\_14\_P113080 GATCAGTAATGCTAAAATCCAAAAGTAGGATTCTGTCTTTGAGGCAGACCACATAATCAG  
A\_14\_P138923 CAAAACCTGGTCTTTTTCTGTATCTATTTTTCTCCTATCCTGGATCTTGTATTACTCAGG  
CUST\_4833\_PI426210822 GTGGTTCTCCCGTCAGGTTATAATAGGGAAGGGATGTGTGATCTTTC  
A\_14\_P113005 CTTCTGTTATCAGGCCAACTATAGGTGCAATCACACATTTCTAATATAAATTTCCAT  
A\_14\_P122584 TCTCTATCTTTTTTTTTAAAGTTAGTCACAACCTACAGTGTGAAAACATGGTCTGGCCAT  
A\_14\_P115727 GTTCGGGCATGGAGATCTAAAGTGGATTGTTACGAGAACAATTTTTTTTTTGTAAACGAAA  
A\_14\_P139754 GTAATATGCCTTCAGTGACACTATCTTCTGTTAAGCAGTCAAATAAGAAGGAGATGGAAC  
A\_16\_P00698907

GTGTCAGACTCTTTAGGTATGTTGAAGCAGAAAACAATTCCTAGATCAAGTCACTCAAC  
A\_18\_P16117951

CATCTTCCCATCCATTACTACTTTGTCATTGTTCTTATGTCTCATAGTTGAACTCCTGAG  
A\_14\_P106175 GATAAACTTTTTCTCTTTGTCCTTATCCTTTTTCTTGCTTGCTTTAGGATCAGTGCTAGC  
CUST\_2808\_PI426210822 ATTAACCCCAAGACAAGATAGAACCAGTGTGATTGGAATTCAGAGCACGT

A\_14\_P201745 CTCATCAGAGAGCAATTTCTTTTGACACCCAACACAACGGGTAAAATGTTTAATTTGAAA  
A\_14\_P128502 ACTGATCACCAAGTAGCCACAAAATATAATAAACCCCTCAGCACTTGCTCAGTAGTTTTGT  
A\_14\_P200964 CTGACTAAATTACACAAAATAGACCATAATAGGATAGCGCTGTGAATACATCCTTCCCCGA  
A\_14\_P121075 CTTGTTTGTGCTGCTAGAAATTTGTCACATGCATCTACTTTACGGATGTATAGTTTC  
A\_14\_P126192 CTAAATGGATTTAAAAGTTCTTTGGGCCTTTAAGGGGTTTAAAGGAAGAGAGTTTTTTCC  
A\_16\_P16991562  
AAAAGTCACAGAAAAATCCAACCTTCAATTGTCTTCACACAAAGGAATGACTCTAATTGC  
A\_16\_P16191638  
TTTACTTTTCATTTTTACCCAAATTTATTTCCCCTGGACGTCTACTTCACAAGCAGTAACA  
A\_16\_P01831436  
GTCAGTGTGAAGAGAACATTTGTTGACAAGATGAGGATACATATTCTGATGAGAGCAAAC  
CUST\_6495\_PI426210822 ACTTCATGGTTTATTTCTGGGTAATTCATTTACCAGCATGCATTCAGGAGGT  
A\_14\_P123176 TTCAAAGCCAACTTCACATATGTTTTGAGGCTTGCAAAATACAGAATGAATACCTAGGAG  
A\_14\_P110609 ACAATTCTCCTTAACAAGGAGCAGTTAGTGTCTCAAACATTTGGGTGTAAAGAAAATTGT  
A\_16\_P00684979 ATTGCACTCAGCAGATGTGGCCACCTTCCAGTATCACTGACTCAG  
A\_14\_P100351 ACCAATAAACACAGATCTTAATCAGCAGGAGGCAATTTTCTAGTATAACAGGATTCGTCA  
A\_14\_P104198 CACTCAGCGATGCTTAAAGATGCTTGTGAACATTGCTAACTATTGCGATATAAACGTA  
A\_16\_P20314896  
AAACATTTCTGGGTTTAAAGCAGTTCTTTTCACTTTACTCTTCTAATGGCCAAAATCAGGT  
A\_14\_P125004 TTACTACTCTCTATAGCATGATGGCTCAACTCTTCACTTTTATCTGTTTGAAGTCTGCA  
A\_18\_P15327820  
AAAATCCCCTCATCCTCTTTCAAGTTTGCTACTTTCCAATATCATGTGCATTAACCAAG  
CUST\_2330\_PI426210822 CTGGTCTTTCTCCAGTGGGTCAGAGACAGAAGGGGACACACATT  
A\_14\_P112226 TCCCTAAGTGACCTGATTTAAAAAGAAGGCATGTTTATTTCCACTTAGTTCTCTAAGTGG  
A\_14\_P100323 ATTGTGGAACTTTTCTTTGTTCACTGTGTCAATTTGTCTTCTATTTACAGATGGAATCAC  
A\_16\_P16997472  
ACTAACACAACCTTTATAGTTTCATCCATACATGCCATGTCTTTAATTGCACCCCAGTAAT  
A\_14\_P110269 GTAATCCATGCTTTCAATTTGTGTAAGGCTTTGGGATCTTTGGATATATTTGGTAATGAGG  
CUST\_6445\_PI426210822 ATGTCTCCTTGTGACAGTTACGCAAGAAGGAAAGTGAACAGAATGTGGAT  
A\_16\_P58424130 AAAACCTCTAACAATGACATCCATTGCCCTCCACATCCTCTGCCA  
A\_14\_P118066 CTGATTTTTCTTCTTCCATTATCCTGAATCTTTGCTTATTTAGGATGAGTGCCTTTACCC  
A\_16\_P16791270  
AGGAACATAGAGTATGCTTGGGATATACAGACTTACACATATGAACAGAAAACAGATGGG  
A\_18\_P14686228  
CCTCATGTCTCCATTGAAACATACCCTAAAAATTTACTCACAAACCTGTCATTTCACTT  
CUST\_9221\_PI426210822  
TTTTATTCTTCTAAATCTGGTTTTAATCAATTTGACTTACAAAGGCACAGACTGTGGTC  
CUST\_5235\_PI426210822

TTGTTTACTTTTTAATTTATAGGATTGTAAATGAAACTATACTTGGCCTCAGTTTATTCT  
CUST\_3415\_P1426210822 CTCGCCAGACCTCCCCACCTCCCGGACATACAGACTCCAGATGTG  
A\_14\_P125846 GCTTTTTACTCTGTTTTCTTGCTAGTAGTAAATCACTCCTCTCCATGCTCTGTCAAGAC  
A\_14\_P202229 ATTCTATATGGTTAATAAGGCTACTCTACCCACAGAAAGGTTACTGCGAGAAAAGTTACC  
A\_14\_P137177 CCAGGCATGTGGATTAAAAATCCACAAGGGATTTTTTTGAAGCACTATTCAACTTCATTAA  
A\_18\_P22841922 ACATAATTGCTTCTGATGCCAGCCAGTCTGCAACTGCCAGTGATTG  
A\_14\_P136909 ATGGCTTGCTTCAATCTTTTGATATCTTAGAGTAATTGCTTCCAATTTTTGGGCATCGC  
A\_16\_P16464648

AGACTGGAATTGCTTCACATTTAAGTGCCTAGTACTATTTTCTCTTTTAGACAGTGT  
A\_18\_P15331595

TGAACACATGCTTATCTCTTACAAGAATTAGGTTTTTCCATTAACTACCCCTTTCACAGT  
A\_14\_P113075 GAATCTCAGAATTGGCGCTATGCTACTGGTGGATGGGAGACTGTATTTAG  
A\_14\_P138905 GCAGATGAGAAGAGTAATGCCAATTTTATGAATTGTTTCCAAGTTTGGGCATTTGTTTGT  
A\_14\_P115457 ACTAATAACCCCTGGATGGTCAATCTGATAATAGGATCAGATTTACGTCTACCCTAATTC  
CUST\_225\_P1426210822 CTACGCAGTTCTGGAGCATTTCCACGACAACACGCGCTGGTGAGT  
A\_14\_P125429 AGTTTTTCCACATTACCTTGGAGTCTGCCACTTTATCCAGACCTAACTCTTGAAT  
A\_14\_P101902 CTTTTTCTTTTCTTTTTCAACCTCCAGGTGAATTCCTGATGCGGAGATGAG  
CUST\_1032\_P1426210822 GTCCATCTTCTCGCCAGTATGCGGAGCTCTCATGCACCCCAAGA  
CUST\_1690\_P1426210822 AGAGACTTGACCTGCACAGCATCTGTTATCCCATGAGCCTTCAT  
A\_14\_P101274 CTTGTTTGGATACATCTTTCATGAGGACTCTGCCACATCCATACTTTGTCTTG  
A\_14\_P105673 TGAATGTGTGAGCACAATAGGGCCCATTCGCTTGAAGGTATTTTACTCAAACTT  
A\_14\_P133652 AGTTTCCTTCTCTTTATTCTTAGGAATTCATCTCGGTTTATAAACAGGCACAACATGCC  
A\_16\_P30952515 GATTAAATTGAGACAAATGTTTGCTTCTCAGAATGGCAGTGACCATGGGTGCTT  
A\_16\_P21569285

CCTTAGTTTTACTCTCAACTGCTTGACATACAATTAAGTCTTGACATACCATTAAGTGC  
A\_14\_P107228 CCTAATTAATAATCTCCTACCTGAGTCAATTTACTGAAGTTTCTCGCTAACTGAAGGAA  
A\_14\_P122806 TACCTTATTGCGAAGATAACCAAAGTCCAGTGAAAAGGATGTAGCACTGTCACG  
A\_14\_P201259 TTCTTCATCATGTTAGCACTGTCCAAAGTATTTGGCTCCTATGCCAAAGACATTAGATTA  
A\_14\_P120915 AACACAGCCTAGATTCCTTTTTTTTTCTTTTTTAATGAAGCCACAGCATTCTGCTTCTGT  
A\_14\_P124282 TCTTTTTCAATCATCGAGGACAATTCTCTCGCTTATAACTCTGCCTGGAGTTGTC  
CUST\_7099\_P1426210822 CTCACTCTGGGTTTTTCTCTCTGGAATTAATTTGTCCCAAGTGAAGT  
A\_14\_P118818 ACTCTCTTTAATGGGAAGGGGATCGTCATTTCTTACAGCAATAGGTAAAAACATAAATAC  
CUST\_285\_P1426210822 ATCTCCCTCTCTCACTTACTCCAGTTGCTGGGTATAAGACCGAGT  
A\_14\_P128229 TGTGAAAATAGAAATGAAAGCACCGTTCTGGAAATAATAACCCAGTTAATGTCTGGCTAG  
A\_14\_P104274 GTCCTTAGCCTCTGCCGGGAACAGAGTGTTTCATATGCTGTTAGAATTTTTTATTGTAA  
A\_14\_P118465 ACAGAAAATTTTGATGAATCAAACCTGTGCCCAACGTTAGTTTGCACATACTTTGTGICTA  
A\_16\_P02142511

ACTGACACAACCTCACTTTCTATGGACACTATTCTCTTAATTACCAATCATGTATGAGCA

A\_16\_P03606956

AACAACCTCATTCTTACTGCTTTTAGATTGTCTTGAATGCATATTTGGAGTCTAAAGCCGG

A\_14\_P118497 AAAGCATCACTACAAGATGAATGGATGACTCCGATACATATGAACTTCAGTTGACAAAAC

A\_16\_P02936646

GAACCTTATCCCTTAAGCATCTATATCCCAGTCATACTTATGCATGGAAAGGCTAAGTAA

CUST\_326\_PI426210822

CTTAATTTTTTCTTAGATTGTGTTCTCCCCTTGATTTCTGTTCTCATGCTGTTGTTTTCA

A\_18\_P10896589

ATGCCCATCCTTTTAGAATATCGGATATATGACTCAGTTGACCTGCTTAATAACCAAACA

A\_14\_P112923 TGGCAATTGGCAGGCATCTAATATTTGAATAAAAATTGAAAAACCTTCACAAGAAGGGTCA

A\_16\_P18034150

TGGAAGTCCTTAAAGCATCTAATACAAGTTAATGAACTCTGCAACCATTTATACTAGCCC

CUST\_8125\_PI426210822

GACCATATTATCTTCTAAGCACACACCAGAATATTTTCAGATGCTCATTCTTTTCAGGCA

A\_16\_P41871116

AAACCTTTATGTGCATCAACAACTATCAACCACTTTGTTTATCTCATTGAAAGGATGGT

A\_18\_P14131636 AGCACTCACCTTTAGAGCCTGTTTCCTCACCTGTCACTGGGGGT

A\_14\_P117802 TTCGTGGATTCTGAAAACATCAAGAAGAAAGAATGCGTGTATTTTGTGGAAAGTTC

CUST\_7345\_PI426210822 AGGCCTACTCTGTGGGCTGTCCTTTTTCTAGGGCCTTGATTAAT

A\_14\_P137653 ATTATTACCAGCGCTGAGAAACCAATACTTTCTTTTTCCATCTCGCTTGTGTAATTTCTT

A\_14\_P130524 TTTCTGAAAATTCCTTTGGTTATATATTTCTCATATTCCTCCACTCCTCATTCTGTCTCC

CUST\_3801\_PI426210822 GAAATGCGTAGGGTTGGTCAGTGATTTTGCTATGCGCCAAAGCAG

A\_18\_P16251338

ACGCATTTTAAGATAAACTCTAACCAATACCACTACTTGAAGATAATAATAATTGGCCCT

A\_14\_P202132 CTTCCCATCTTTTCGATACGTGAATATCCAGAAATTTTCATCTCAAGCCTTGAAATCATA

A\_14\_P113691 CCCACATTAGGAATTGATTTAAGCCTGAGAGTTTGAGGGCTTTAATCCTTTAAACTTGG

CUST\_2301\_PI426210822 GCACCCAAGGAGGATGACTTCGCAGGGGCGGTCTATATCTATCAT

A\_14\_P134156 CTA CTACTGAGAACATAAAAATCTTGGCGAGTCATTAACTTATGAAAATCACCGCTCTTGGAT

A\_14\_P108365 CTAGAAAAAAGTTTACGTAAATTTCTACCTCTGATAAACCTAATGACTTACTATTTTGTG

A\_14\_P102160 CTGATGACAGTTATTCATATTCATATTCACTGCAGCAGAAGGGATTCTTTCTGGATGGAA

CUST\_5768\_PI426210822 ATGAAGGGCAGTTTTGGATTCTGGGAAAACAGCCCATTGAAACAGAAT

A\_14\_P137403 TAGTTCTCTTGTCTCAGAGAACAGCAGGTTGATAGTAGATTATGTCTCTAGGTAGAGAC

A\_18\_P12879225

AGATGCATCATGGCTTTAACTCTCTAGAAAATGGCTACAAACCCTAACTAGGTGAAAAAG

A\_16\_P18419782

ACCCA ACTATGCACAAAAAATCTTAACTCTTTATTCACATATAAATCGAATGCTCTCCCA

A\_14\_P138087 GAACATGTCTCTTCCATTGACACACACAAAAAACTTTACTCACAAAAGAAGCAGAAT

A\_14\_P129554 ACCATTGCTTTTATAGACATCCAAGGTTGAATTATAACTGCCTAAGAACAACCTCTTCTC



A\_16\_P15841947

AAAAAGGTGAGGAATGATATCATAGTCTGAATTTGTCCAAGTTTTCTTCTAGCACACAC

A\_14\_P111336 CTGGGATAGTTGATGATTAGAAACAATTGCACAAATGTCTCATTCTGACTTCGGACATTA

A\_14\_P200802 CTAACAGAAAGGCACATATGGAGGCATGTCTTTTCATACAATATTCAGTTAAGCCAACAT

A\_18\_P17040875

TGTAAACCTCCAATTACTGTCAAGATATCTTTTTAAGGCAAACCTTCTCCAATCTCCTCAC

A\_14\_P115975 GGCCTATAATTTCTGTAACACACTAACAAAAGCATGAAAAATAGGAACCAACCAATGC

CUST\_135\_PI426210822 CACTCTAGAAAAAAGAGCACAGGAAAAAGTATGGCTCAATACAGGGTCCAGA

A\_18\_P11191015

AGGAAGCCCTCTGAAATAATACAAATACATCATCACTCCAGATAGATTTTAAACATCCCA

A\_14\_P130831 TTGGAGACTGATTCTTATTTTTAGGTATGTTGAGTCTGCAATTCTAGAGGCAATCACCAA

A\_14\_P119825 AAGTAAATCTCCTGCCCTTTTCAAAGAAAGCCCGTTAGATATACTGAAATACATACTGA

A\_14\_P117554 CTGCAAATTCATAAATTTCTTCCATTTCTGCTTCATTCACGTTTTCTTGATCTTCTTCGT

A\_14\_P101555 CTCACCATCTCTTAAAAGTTTTATGGAGAAACATCAACTGTCTGGATTCAAGTTCCTTTTT

A\_16\_P21296091

GACCACAATGCAGAAAATACATAGGGGATCCACATAATTCAGGATAAGTGCTACAAAAA

A\_14\_P123693 CTTGGTATCACTAGGAGGCCAGATGACGGAAGGTAATGAACTAAACATAGTTACTTAT

A\_14\_P136942 CTTGAAATTTTCCCACTTGTTAGATCATCTCATTCTCAGGATAGGAACTGGAAAGGAATG

A\_14\_P114370 ACTTTCTGGTTTAGATTATGACTTGATTGCCACATTTGTTACCACCAAATCTTTAGGGAA

A\_16\_P41102903

ATCCCTGATAATCGTTTAACTTCTTAGATCGACCTGCAAGATTTTCTTACTGTGGAACCTT

A\_14\_P114251 GATAGAGTTCTAGGCCTGTTAGGAGATACACAGACACTTTTCGGAACAAACTATAATCTT

A\_14\_P125231 CTCATTCAAATGCCTTTTAAAGCATTTGATACCTTCAAAGAAAAAATTCTGAAACCTGG

CUST\_80\_PI426210822

TGGCATTATGTTGTACAGCTGTATTCTAACACTGATGGTTGTTGCTTAAAGCCGT

A\_14\_P100974 GCAAAAAGTTCCAAATTTGAAATTCTTAGACCTCAACAAAAACCCCATTCACAAAATCCA

A\_16\_P21558109

AAGTCCAATGTAAGAACCAATAAAGCAGAGCCAAGACAATTATCTCCTGACCAATTTGTA

A\_18\_P24091661

TCACCCATTTCTACCTAAAGATGCAGTTTAGCGATAATTTACATTACAAACGGTTTTCC

A\_14\_P132605

TTTTTCAAAGAAAAAGGACAACCAAAAAAATTAGGGAAAGAGAATCCCTCTGTCCCATTC

A\_14\_P200773 CTGATACCTTCGGTTATTGCTGTAGTTTTTCATCTTACTTCTCAGTGTCTGTTTTATTGCA

A\_14\_P121066 ATCTTGATTAATTATTACGCTGTAGAAATAGATCTGAAAGCATAGGGACCAAGGTTGGTT

A\_14\_P108828 AGATAATGTTACCTTCGTCTTGACATTTCTTCTTTTCAGGTGTATAAAACCTCTGAAGGG

A\_16\_P01292634

AAAAATGGTCTCATAGATAAAGCCACTTTATATTAAGCCCTAAATATCCATGAACCTCAA

A\_14\_P103983 CTGAAATAGGTGCTTAAGCCACTCATATATAACAGTAGATTCCACAGAATCTACCCACAT

A\_14\_P131261 AAGATTTTTGTTTTTAATATCCTGGTTAAGTTCTCCTCCCTACATGTATTTAAATTTGTT  
A\_14\_P114528 GGGCTTTGAATATTAGGCTGGGAGGTCTATAGATAACTCGATATTAATGAGTCATCAA  
A\_16\_P17031267

AGTAAGTCATGTGGTTTAAGAAGTATGCCTTCCTATCTACTGTCCACTAAATCTGAGAGT  
A\_14\_P122291 TCACCCAAGAGATTGTTGTTTGCCATACTTTGTCTGAAAAATTCCTTTGTGTTTCTATTG  
A\_14\_P138877 TTTTCTCTGCCTTCGGAGGGAAATTGTAAATCCTGTGTTTCATTACTTGAATGTAGTTA  
A\_14\_P134541 ACTTTCTTTTTAATCTACTCTGTTGCATGGATATAGTGAGGGGACAGTTGACCCTTTATG  
A\_18\_P16291168

AAATACTTGCTGCTTCATTACTCACTTAGGTGATAGAACCTCTGGATCTGAATACTGTG  
CUST\_2519\_Pi426210822 GGGATCCATGCTTCCAGTGGTTCAGCTACTTTTCTGTAAATGTGAG  
A\_14\_P102424 ATCAGCCCATATCATTTTTCAAAGATTATTCCACCAACATTTACCTTGAACCCTGACATT  
A\_14\_P100891 CCTCTGAGAGTTTCAGCGATTTCCCCACAGAATTTACGGCAATATTAGAGAAAATAATAT  
A\_16\_P01875891

AGTCTTACCCTCTGAATATTAGTTAACTTCAAAGTCTGCAACATAAATGCTCAGTCAGCC  
A\_16\_P02392977

TGAGAGTTGTAAATTTGGGTTAAAATAGGGACACATAGTAGACAAAAGCAATGGGATGTAGT  
A\_14\_P136477 TATACTTACAGGGTGTATGGCTGGAGAAAAACACAAAATGAGGTCTCGTCTAAGTTTC  
A\_14\_P106751 GGGAGTTCAGGATGAGTTGCTATTATTTTCAAAGTGATGACATTTCCACTTGAATCATG  
A\_14\_P108429 ACTAGAGCAGTGTCTGAGAATAGAAGAATTTAAGAAAGTGAGATTAAGTCAAGTGGTTGG  
CUST\_6628\_Pi426210822 GTCGCATCACACAATAATCATCAGTCTCTCATGCATCTTCATCCTTGTCATCTT  
A\_14\_P122037 CTAATTAATGCTTGCCACTGGCTTATTTTGGAACTTCATGGACTGTGTGAAAGCC  
A\_14\_P114102 CATTTGCTGTGTATGTGCAGAAGTATTATAGAAAAATTATGCAGGAGATGGCTAGGATTA  
A\_16\_P16418493

AAAGAACAATGAATCATACTGCTTTTTCTCCTCACTACAATCCAAATAGGCCATGTTTCAG  
A\_14\_P124990 ATCTGCATACCTGTAAATTTGATATGTCCTATTTTCATCAAGCAAAATGCTGTAAATCAA  
A\_16\_P16706006

AAAAATACACAAAGTCTTCCCTTATTCCTCATAACTCCCTATGTTTGTCTTCCTTGC  
A\_14\_P100487 GGGGATATTATTAGCGTGGGACAGAGATTGGTATGCTTGTTTACTTATTTGGTCATATTT  
A\_16\_P40243707

AATCCCTGATACTGCCTATATACACAAAGCAATTTTTTACAAGACAGTTAATCACCCTT  
A\_16\_P36477108

CTCATCTCAGTCGCTATGTTTTACTTATGGTCAGATGTCTTTTTCTTAACTAGGGACATT  
A\_14\_P137810 TGGTGAAATGTTTTTTGTTGTTTTTTATGTTATCCTCCTCCTGTTTTTCAAAGGGATCC  
A\_16\_P03771353

TAACTATGGCTACATCTGCAAATTTACCCTTTCAATGGAATCTTGAATCAGTTCATCCC  
A\_14\_P101135 TCTGCATTTATCATAGCACCTGCCTGACACATAGTTTGAAATTCATGAAGAGTATGAAT  
A\_14\_P122677 CTGCTTGGGATGTCCAAACTAAAGAGCAATTGAGATATGTATGTGAGTTAACTCAACTTT  
A\_14\_P202192 TGGAGAAATGGTCAAAACAACCGTGGCTCCATATATACTTCTTTCTCAATTTTGAATCT

A\_14\_P124447 GGGAGGGATACTCAGGAAATGTATTGGTTTTCTTAAACCTGTCTTGTGATCCTAAAC  
A\_16\_P17049595

AGCCAGCATAATAAATTTCCCAAATCTTACTCCAATCAGAATTACCCATTGCCTAAATG

A\_14\_P131025 AGATTTATAGGAAATGCACAGATACGGCATGGTTATTCCTGTTCTTTCTCTTTTGGACTG  
A\_16\_P20332084

TCAACATCTCTCTAACAATAAGGTTATGTTCGGTTTAGAATTTTCAATTGCTTACCCCGTC

A\_16\_P17282881

AAATTGATCATTCCAGTGTGGTATAGACAGATTTTCAAGCAATGATCATTGACAACAAGCAC

A\_14\_P117727 TTTCTTTTTTAGTCCCGGACGATCCCCAGTATCCTTTGACAGTGAAATAATAATGATGAA

A\_14\_P102344 TGACCATCTTCTTCTGTGAACTGCTAAATGCAAATAATAATGAAGCCATATGGAGTGAA

A\_14\_P113247 AACAGCCAATGAGATTTTTTACAAATAAAAATAGGTCTGACCAAATGTTTCTAATATATT

A\_14\_P131647 GTTCCTTGTCTTAGCAAATCCTACTCCATTGCCTAACAAATTTCTTTCTGTTCCTATC

A\_14\_P131577

GAACCTTTCCAAGGGATCTGTGACAAGAATGGTTAAATACTGAAGTGTGAAAGAAAGAAA

A\_14\_P108568 TTCTAAATCATGCATATTCCTGTGTTCCAGGATTTCTCTCTGATCAAACGGACAGTT

A\_14\_P102143 CTTTCAAACCGCAATTTCTGAGAACAGAATAATCGGAGCCATGGCCATATTTTTTCAA

A\_14\_P105618 GATGAGAGGACAGGGGTGATGAATAAATGCAGTGTGAATCTATAATTAACAAAAACCCCAT

A\_14\_P132311 CTAAATCCACATGCTGAGTATGTATTCTCTCTGGCTGCTTCTTTGTTTATCTTATGTCC

A\_14\_P133651 AGACTTCAGGTAGTTATTTTCGCATGTCCTTTTTGTCCGTCTGAAAGAAAGGGAAT

A\_14\_P105570 TGATTTAAGACCCTCAGCAATTAATGAGTTCATAACACCAGGTTTCATAGCGATAGGC

A\_14\_P130016 TAACTTCAAATAGTTACCTTGATAAAAATCTCCTGAACCTTTTGTTCCTTTACCCAGA

A\_16\_P30952380

GATAAATGAAGATAAATGCATGAAGTAGAATAATTTTCAAGTCTGGTTAGCAATCATCACA

A\_16\_P00685084 TTTGTGTTTTTCCTTAGTTGACCTTGCTGGTCTCTTGGTTTTGTTCTTCCATGTTT

A\_16\_P16306808

ACATCCCTGATAACAGTATTCTAATGCAATCACATTCTGTTTTCTGTTCAACTTCTTCGA

A\_16\_P19638230

AAAAACCTTATAACCCCAATATATTCCTGGACACACATAAAAACCTGTTTGCTTTCACA

A\_16\_P20210331

CTAAGTCTCCATCTTAGTTGCAACAGTATGAAGTCATCCCAGATCAAATTCACCTACAT

A\_16\_P01220379

CAGATAACACTTTTGGAAATCACACATATGGAGCAAACCAACAATTATCTTTTCATCACC

A\_16\_P00685060

GACAAGCAAAAATCAAGTTGTATTTTTAAGTTTTTTAGATACGAGTATGGTAGAATAACCC

CUST\_5807\_PI426210822

TAAGGATTTAGTGAGAAGCTGGAGAAAATTTTTCAAAGACAACCTGTATTCTCCAGGGAA

A\_14\_P110236 CTTGGTTTTTGGATTGTTTTTTTCTAACTCTGAACTGGACAAAGATGGAAGTTTTTAATG

CUST\_7965\_PI426210822

TGCTCACAGTTTTCTGAAGAGAACTCTCAAATTCTCAAACATAAATACCTGTATCCCA  
A\_14\_P135836 CTGTGATCCTAAAAAGTCATCAAATCCATTTGGATAAACGGTCAAAGCAAAAAAGAGGT  
CUST\_6530\_PI426210822 TAAGAGAAAGAAGGAAGGAGTGAAGGATGGACGGATGGACAGACTT  
CUST\_7138\_PI426210822  
CTTTCATTAGCAAAGTTATGTGTTAACAGGTATTAAGTATACCGTTATCATTTCCTT  
A\_16\_P02989210  
GAACATCTCCTCTCCATCACGACTACTGTCTTTTTACCAGCATTTCCTATCCTAAAAT  
A\_16\_P15685585  
AATGCAAGTCATACCCTAGGAGAATAAAAGATTACTGAGTCATTGTCCATGCAAAGTTGA  
A\_16\_P02678550  
ATCAGTCTATTGCCAGAAACCTAATATGGTGAGTCATCAGTTTGAATCCTGAGGTTTATG  
A\_14\_P200577 GGAAAGGCCTACACATCGAGACTCATCCATGATTGATATGAATTTAAAAATTACAAGCAA  
A\_14\_P109027 CTAATAAATAGGGATTGAAATTCTCACCTGCTCACCTCTCTGCAGACATTGAT  
A\_14\_P104957 TCTCCTGTCTTGTGATTCACAATATCAATTTCCGCCAGACTGTAAAATGAAAAAATTCAGT  
CUST\_9302\_PI426210822 GTTTCTCTGGTTTGTCTCTGGAGGGAAACTGGTTTGGGGCAAGTTG  
A\_14\_P105048 AGCCAAAGAGAGAGCCCTGGTAGGTCGTTATTTTCAACAACCTTAAATTATCAAAAAACA  
A\_14\_P126062 TGTTTCCACACAAGAGGAAAAACCTGTAACATTTTAGACCTCAAAGTCTATATACCACAA  
A\_14\_P122799 CTTTTATACTTTCTCTCTGGGTTTCAAGATTGGATGTGGTTGCCATATATCTGAATTCTCTT  
CUST\_7423\_PI426210822 GTGGCTTTGGACAGCTTGAGAATCTACAACCTGTAGGTGACAGAGCA  
A\_14\_P111614 ACCATATTTTCATGTAAGTTATCCTCATACCATGGCATAGATTTTAGCAAATTCGTGGCC  
A\_16\_P02720928  
CGCAATGTAATGCCATGTAATTATCTCTTTTCCTTTTCGTATGTGTTATTTTCGCCTTGGAA  
A\_14\_P139104 CTAATGAAGTGAATGAATGAATATCATAAACTAAATGGCTGGAAGGAGAGATGGTTCGCA  
A\_14\_P123294 GAATAATCTCTTTCTCAGTGTGATTACAAATTAATATTTGGAGGAGGGGGAAGAGGAAGA  
A\_14\_P120700 AGAAGTGGAAATAGTTGCTCTTATGGGTAATGGCATATATGGGACCATTTGTCTATTTTTG  
A\_16\_P16191514 GTTGCACTGCGTTGTATCTCTTGTCTGTTTCCCCTGAGACTCATTATTC  
A\_14\_P111849 TGAAGACTCTTTCTCCTCCTAATCCTTAAATAGTTTTAAACCTCATAACCTACCCTAGC  
A\_14\_P136126 GAGTAGAAACATGTTCCCCCCTTTTTTTTACATCTCTCCACAGCACTAAATATTATTA  
A\_14\_P133957 CTATTGACTATAAACAGGGGCGTTTGCCAGTTTTCCAGAATAGTAGGAATGCTTTTTTTTA  
A\_14\_P135220 AGAGTTCCAGTTGTTATATTTCCCTTTTCTTTGGGGAAATGGAAATACAGGAAATCTAGA  
A\_14\_P139743 ACTTGCACTCAAATAGGTTACTATGTGGACTCTGACGACAAAATCTTTCACGTAAAATT  
A\_16\_P00601337  
ACCCTGTATTAACCACATTCATATGAGTTTTGTATTTACTCCAATAAACAGTAGTGCCA  
A\_14\_P111225 CCTAATAAGCACCTAAGAATTCATTGAGTGAAAAGTTAAGGTTAGCAATCAACCTTGGCA  
A\_14\_P133691 CTAATAAAAAAGGTAAGATAGTAACCTATCTTACCTGGCCCTAAAACTGGCATCCTCGA  
A\_14\_P132352 TGTTTTATGTTGTGAATCAAAGTAGAAAGGAGGTTTGGAGAGCCAATGCTACCCATAATTC  
A\_14\_P105077 GTAAAAGAGTTGGTTATATTTTACCTTTGGATGCTAGGTTACCCATGAATGCAAAAAGG  
A\_14\_P139125 CAAAGTCTGTAATTTTTTTTTCAGTAAAGATTGATGGACTTTTCATTACGGCCTGGTCTAGTG

CUST\_7163\_PI426210822 GTATCGGCTTTCTAGCCAGTTGCAGTGTACAATATTAGTTTTGGCTTTGGGAA  
A\_14\_P200539 CAATCAGATCCTGAGGAAAGTTGACCGCGATAGAGTCCCTTCGTCG  
A\_14\_P138944 TAACTGTAAAGATTAATGCTTTGAGCACTGGAAGTCTCTCTAAATACCCAATTTGCAA  
CUST\_6997\_PI426210822 CTTCAGGGGTGACAGACAGTGGACCAAGGCCATGCCTGCATATTC  
A\_14\_P109291 TTCCATTTGAGGGAGAAGTCTATATATAAACTTGCAACCACATTGGTTTGCTTG  
CUST\_5915\_PI426210822 TGCCTGGACTTATTCTCTGGGCAGGGAAGAAATAACCTGGAACTA  
A\_18\_P26794093 CTCCGAAATTTCTTATAATCCACCATCATAAGAGTGGGCATTGTATGGAACTGAGG  
A\_14\_P121382 TGACATAGAATTTTCATTGTGCAACTTTCTAGCCAGTGTACTCCTCTGGAATATTAGGA  
A\_14\_P134677 TTTGAGAAAAGTCTCGACAGAGAATAGGGGAGAGTTTTAAGAAAGAAATGCTGTTTGTTT  
A\_14\_P110320  
GGAAACTGTTGACTTCAAAGATAAATTGGAAGAAACGAAAGGTCAGATCAACAACCTCAAT  
A\_14\_P137449 TTCCAATTCATCAGATTATAAGTCCCTCACTCATAGCACTGACTGCTCATAATTGGCTAC  
A\_14\_P112643  
ATTCAGGTGTTGAGAACTAAAGGGTAGAAAAGAAGAGAATAGAAAAACAAAAGATGGGG  
A\_16\_P02684099  
AAGAATGTCGTGGAAGGATAAAATCTTGTTAATTCGTGATGTCACAATTC AAGTGTGCTT  
A\_14\_P107310 TGGAAGGTGGTGATTCTTTTATTTTACCCTCAAAAAACCAACTAAGGGATGTCTTTTAAA  
A\_14\_P131145 AAAACAGTGGTTGAGTTGTATTTTCTGTCCAGTATTCATGAGAGGTGCTTTTCACTTTAT  
A\_14\_P136426 ATTGACATTCCTAATTTTGTCTGTAAGTCCCTTGGTATATATGCCTTTATTTGAAGCAAAC  
A\_16\_P19187696  
AAATGGAATGACACTACAAATCAATGCATCAACGTCTACTTAAATGAGAATGTCCTTGGG  
A\_14\_P101258 TAAAGATGGGTCTTTGGAGATGTTTCTTCCTGATTGTGACATGGTCATCCATTTAAAG  
A\_14\_P200989 AAAGTTTTATCTCTGCTCCAATTAAGAAAAAGAGCCTGATGCTAGTCCTCCATTAGATG  
A\_14\_P137371 GAGTTTAAATAATCATAACTCAACTCCCTAAAACCTGAAGATTCTGTGTAAGGTTGGGCCA  
A\_14\_P123441 AAGTCAGTCATTAATGATGTGGCCAGTTATTTGCAAGTGGTAAGAGCCTATTTACCATAA  
CUST\_3143\_PI426210822 ATCTTCTCTCGGGCCTCTTCTTGCTAGGTCTGTTACAAAACCTT  
A\_14\_P122978 TTTGTTTTGTTTTATGTATCAGGAGCCAACTTTCATCTTGACCACAAAGATCTCAGAGT  
A\_14\_P131343 ACATGACACAGTAGATTGCAACTGATAGTTGGTAAAGTTTTTCTCCCTCACAGAAAAAAT  
A\_18\_P10615408  
ACGAAAAACATTATGCTCCACACAAAGTTTTTAACCCCTGGTTTTTATTGTCACTTAGCA  
A\_16\_P00685455 CTAAAGTATAGGTCACATCTCACTGTCCCAATCAGGGACAAAAGAGCATGG  
A\_14\_P107394 TGTGTCTTGTAAGGCCATAGTTTGTCTCTCTGATGCAAAGTAAATATAATGCATGTTGG  
CUST\_7038\_PI426210822 CCTTTGAATAGAGAGCTCTGTTCTGTTTGCAGTGAAGTCCCCTCAAAA  
A\_14\_P103011 CTCCCTATAACAACATGGAACAGAAAGACTTGTATTTAGTCGGACCCATGTCTACTTTG  
A\_14\_P112136 CATATTTCTTTTAAATCAAATTCAGTATGCTTTGGACATCCATCCCACCTGTCTGCTAGA  
CUST\_6679\_PI426210822  
AATGATCATATCCTTAGCTCTATAACTTTTCAGAGGGTGTGAAGTCACATTTTTGACCAC  
A\_18\_P18074774

AAAAAAATTCAGGTTAACGCATCATTTCAGTATAGCATATAAGCCTTTAGGATGCAAGATG  
A\_14\_P112271 GTCAGTTTGCTCCCAGGAAAGCCTTTTTGTGGAAAACAGGTAAAATAAAATTTACTTTTC  
CUST\_7857\_PI426210822 CTATGTAAACACCTATGTCTCTGCTGGGAGGTCCCCACCTCTTCT  
CUST\_7514\_PI426210822 AGATGATAAGTGTCTTTCCTTGAACCAGTTCTTCTTCTCCTCCTAGGCTG  
A\_14\_P124966 TACAGTTTAAATTACTTGGTAATAAAACAGACGTGGAAACTGGTGAAAGTATAATGATGC  
A\_18\_P18607449

TCAGATTTTGCAGGACAAGTTCTAGGTATCTACATTCTTTTCTTTCAAAAAAATTTTACA  
A\_18\_P22839609

TTTATAATTACTCTGATACCAGATGGCTTTGCGGCCTTCAGTATCAAATGCATTGTGATT  
A\_14\_P122828 ACATCCAGAACTCTGTCATAAATACTAAGGTAGTTCTGGCTCTAGGAATTTTTGGTTTG  
A\_14\_P201104 TGAAAAGTTCTAAAACGACCCCTCAAAAATGCCACCACAATTATTTTTATATGGCTAGT  
A\_14\_P120423 ATACAAAAGAAATATAAAGCACCTGACTTTTGCTTCAGTTTGAGAGACTACATGGAGGTG  
A\_16\_P00925417

GGCACTTCTTAGATCACTAACATAGCATACTACTAATCCTTAAATTCCTGTTTCACACCA  
A\_16\_P02953582

CTTTCATCTCAACTGCCTTTTAATAGACTAACCCATTTCTCTTTACTTTTGGCTCCACAT  
A\_16\_P20865633

ACTACTCACCTTACTGCTCAAATTCTATCTAGTTTCCATGTTCCAAAACACAAAGGAAAT  
CUST\_9936\_PI426210822 AGTGGAATCTTGGCTCCCCTTGAGGCCATTCACAACCTGAGGATTT  
CUST\_1514\_PI426210822

TAGGGACTGTTTTCTTGTGTCAATTCTTACTTACTGTAAAGTTTGGCCCTTCGTATCAGT  
A\_14\_P201358 TACCTTATTGAGGCGTTTTATTTACATTCGTAATGTTTCTTTTCTTGTTCGCAAGAGT  
A\_18\_P13374499

ACCTTTGATTTATACGTTAATTTTCAGGGAGAAAACCTTGCTATCCAATACACTCACGTGG  
A\_16\_P17427325

ATTGTCCTTGAACCACAACATAAAAATACAACGATGCTCAGAAAAACATATCAGGCCTTT  
CUST\_184\_PI426210822

CAAAGAAAACCTTGTGTTTTGTGTTCTACAACGAGAATTGATCATTTTTCACTCTCACA  
CUST\_6194\_PI426210822 CATGACTCTGGGATGCCCTCAATTGTCTTACAAAGTAACTCAGGC  
A\_14\_P128798 AAAAAGGAGACCAGAACAACCTTAAACAACGTGTCTCCTGGATTTTACTTTGAAGCCTATT  
A\_14\_P107609 CTTGATTCTAGGATTACTTCCCTTCAATGTCTATTTAGAAAAAAGTCCCCCTTCTCCAG  
A\_14\_P138873 GTTAAAAATTTCAAAGTGAGTGACACAACCTTGTTTGGGGCTTTGTTTTTGTCCCAAATTT  
A\_14\_P119180

AAGGACACCAAGAAATCAACAAGAAAATTTGAGTGTATCTGACAGAAGAAATTTGGCTTT  
A\_14\_P128344 CTGAAGTAAACACTTTGGGAGACCGTTGCAACATAAAGCGGCCTCT  
A\_16\_P18463730

AACACAACCTTGGTTAAGTTACCTCTTGAACTTCTGAACAAAGACATTTGGCAAATTCAC  
A\_14\_P137795 AAGGGGGCACAAATCACATCTGATTATAAAAGGACTTCATGAAAAAATAAACTTATGGGC

A\_14\_P114705 ACCTCAACTGTATAAAAAATCCTCTCTCTATTCTATCCACCCTGTAACGAAAAGAAATCC  
A\_14\_P136619 CTCATACTAACTCCATCCCTTTTCCTTTCTGAATGCAGACTCATAGTTGTGAGTAATATG  
A\_14\_P112935 CTTTCAGAATTATCTTCTTGCTAATTTTGAGGTTGACTGGTAGAAACAACAGAAACGCTG  
A\_14\_P115355 TCTTTTCGCTTATCATTTCAGATAAGACCAGAAATTCCCATTCCCTGAAGAGTTAGATGAC  
A\_14\_P110055 GTTACAAAAGGAAAAAATACAATGCAGTATAAAAAGATTGACAGCGTCATCAAGTTTATT  
A\_14\_P109084 CTTGCCCTTTGTTTGGCTAACTCACACTCCAAACAAATGTTTCTTATTCCATAATTTGAA  
A\_14\_P126244 ACAAGATATTAACAAAAGAAAGAACCAACACCCAAGGTATTGTGCTATCAGTAGGGTTT  
A\_14\_P132643 TATGGCCAAAAGCACTTTAATGCTGCTGACATTGTTGTTTTTATGTTTCATTTGCTGGAG  
A\_14\_P112414 CATCAATAGGTCTGAGAAAGGTGATAGACTCTGCTTTTCCAATGAGCAAAAAGATGTAAG  
A\_16\_P00778545  
CCAAATTAGAGCAAGTTCATGATTCATCCAGGACAGTATTCAGACTCTAAAAGCGTTAAC  
CUST\_6839\_PI426210822 TAGATAATGAGGAGAATAATGCCCTCCAAAACAATGGCAGGGGGCTA  
A\_14\_P105681  
AAAAACAAAAACAGAAAACACGAATGCCTTTTCTATCGATTCAAGGTCTCAAGATGGAA  
A\_14\_P121124 TTTGAGCGAATATATGAGCCTCTGGATGTCAAAGTAAAAAGATTCATGTAGTGGACAGT  
A\_14\_P121508 GTTCTCTTACTGTGACAACTGCTGTTGAGGTTTAATTATTGCTACGACTTCATAGCATC  
A\_16\_P15472947  
AGCATAACCACTACCTTTAATGTAAACAAGGATTGACAGAATAGTTAACCAAAGGCTCCT  
A\_14\_P115077 CACTAATCTCTGTTCTAGTTCAATCATATCAGTTACCTCCACTTTCTGAATGTAAGCCTG  
A\_14\_P121113 TGGTAAATATCCCAACATCTTGCTCTTCTTTGAACAACCTTGATCAGTGTGACCTTAAATT  
CUST\_7376\_PI426210822 GGACTGATGCTGTCTCCAGATGCAGACTGGGGCCATGGATTGAGC  
A\_14\_P130074 AATCCTTTGCTGCCTTTGGAAGTTTTCTTGAACAGCAGTTGACCAACAGGTAAATATATT  
A\_16\_P03417008  
AAATCTGGACCTCATCGTATCATTGACAAATATCTATTGGGGCTCAATATTTTCAGGACA  
A\_14\_P127424 ACTTAGCAAAATGGTTTCAGTCCAACAGGGTAATGGGTGTTAATAGTTACTTAATACTCC  
A\_16\_P02882536  
AAGTCCCTCTCATCAAATACTGAATCTGAACAAGTCTTACAGAAAATAGGTTAGAAGCCA  
A\_16\_P41226222  
ATCTGCATTAGAAATTGACTGGATGACCTGTGTGTTCTTTGCAATTTTTCCCTGTATAAA  
A\_14\_P106577 GCATAATCTCTCTCTTCTACTAGGGAGCAAGGAAAACCTTCTTAGGAGTCTGATAAATACC  
A\_14\_P103350 GTAAGTGCTCAAATAGGTTAAGGGAAAAAGGAATTTAATTAGAAGACATATTCTGATATA  
A\_14\_P102807 TTTCCAACCACAATACTTATTACCTGAACCAACCCTAAGACAAGAACAGATCTGAGATA  
CUST\_1760\_PI426210822 AAAGGGGAAATGGGAGTGATTCCACCAGATTCACAAATTATTGCTTCATT  
A\_14\_P137687 TTCCTTTTATTTGTGTAGTCTTTTGGGGAAACTGAAGTCAAATTGACCTTCTATCTGAGT  
A\_14\_P135414 AGGCAAAATTTATACATCTGGAGGTTTCAGAAGTAGGTAAGGACTTCTTAAGTATTTTGGT  
A\_18\_P12440683  
CCATGATGTATAAAACACTGTTGGCCAAAATGCACATTTGGTAATGTAAAAATGAATGG  
A\_14\_P100086 ACTTCTGGAAGCCTCTCTACATGCCCTGACTCATTTCATCTAAGTATCTC

A\_18\_P17379639

AAAAAGATTTACACATAGGTCTAGCCTTTCTCAGTCTGGTATGTATTCTTGAGAAAGCA

A\_18\_P13503158

TCATGCACTTACCTATAGGAAAACCAGAGAAAAATACATTGAAACATTGAGAACATCCCC

A\_14\_P138897 CTGCTGGTCTTCAGGATGACAGAATTCTACAATATCTTTCCCTAAGAGTTCTTAGAATAC

A\_14\_P110637 GATACCTCTAAACTGAGTAGCCTTTGCTTCTACAACCATAATTTCTCCTAAAATTTCAAG

A\_14\_P133423 TTAGAAAAAAAAGGAGCAGAAAATAATATGCCACGATAATCGATACTTCAGCGTTGTGG

A\_14\_P114971 ACAGATATGTTGATAAAAATGGACAACGTCCATAGAATCTGATACTTCGAGACATTAG

A\_14\_P105271 ACCATTTCCCATTCAGCATCTAGGAGTAATTAAGCCATTTCTTATTTACTTGTGT

A\_16\_P02599803

CAGAAAACGATTTCTCTTGACATCTATCAGCAAATACACTGAAGAAAGCAGACTTTGTT

A\_16\_P01345753

AAAATAGAAGACAGTTTTGTAAACCTGATGGAACAAAACCTAAAATGCTTCATGCATCCC

A\_14\_P121059 CACCAGAAAAGTCAGAGTTGGTTTTTTGTCTTTTTTTCCCCCCAGAAAATTAATA

A\_14\_P128861 TTGAACTGGGGAGAACATTGGGAAGCAAACCCTCATAACACAATAATTAGTTCTTTAAAA

A\_14\_P139573 AGTTTATCTTTGTGTTAGACTCACTCCTTTTGTATTTGAGCCCTTTTCCTTCTGTTTTG

A\_14\_P135462 TTGTATACTGATGGCTCCAGGACACAACAGGATATTGAAGGTCCCTG

A\_14\_P121384 ACTTCTCCTGTTATGTTTTAGGACTATGATGATGGATATGGCACTGCTTATGATGAACAG

CUST\_486\_PI426210822 AAATCTACAGTCTTTGAAACCACGGGCTCACTTGGTCCACCAATG

A\_16\_P15372876

CCCCAACCTTTAATAATTCCTACTTGCAAGATTTGACTATAACAATCGCACTGCTAAAAAG

A\_14\_P117960 GACAAAGATTAATTAGATGCAAAAAGTTAAAAGAGAGAAACAGATGAATCCTCGGCATGGC

A\_14\_P136014 AGACTTAGTCAATTTTTTCTTCAATTTGACATGACTGCTAAAGACTTTTGGCATGTTCC

CUST\_1631\_PI426210822 CAGTACACAGAGGAAAATATATGGCTTCTCCCAGGCCACCTACAT

CUST\_8230\_PI426210822 TCAAGTCCACGGTCATTCAGTGCCGCTGGCATTGTTGGAAAGCAG

CUST\_6813\_PI426210822 GAGAGGGTCAACCGGAATGTAGTGTCCATGGAATTTTTAGAACTCATGAT

A\_16\_P18884086

TACTCCCTTTTAATTCCTAAATCCAGAAGTAAGATCAGAACACATGAGAGATACTGCTG

A\_16\_P00685277

TGTAAATAACAGTTTTTTGTTTAATAATGGCATTTTGTATTACCAAGACCTTGCTTCACA

A\_14\_P109314 ACTGAAGATATATAACTCTGAGCCAGTTAGAATCCCTTAGACTTATGTGATCCTTCCAAG

CUST\_1633\_PI426210822 CCACCTACATACCCCGGTTCTCTAGGTGTTCTGCTAATAAATGCAT

A\_14\_P126295 TCCTGAGAAAGTTAAGAATCATAGATACTGGTTGACGCTAATATCCTTGACCTTTTCCTT

CUST\_8205\_PI426210822 TCTCATATTTGCATGTGTAGCCAGCCAGGAGCCAAGGGCTGTGCC

A\_16\_P17051311

ACCTATTGTGAACTCTTCAAAGGTAGAGCATTGCATTATTTATTGTACACTTCCTCAGT

A\_14\_P138694 AAAATGAACCGTTATGATAAGAAGATTGATAGTCTAATGAATGCGGTTGGTTGTCTGAAG

A\_14\_P110210 TTTGTCTTTTCATACCTTTGTCTCCTAATTGTGCTACAATTGGAAGACCTTCTTTCTTT



CUST\_1346\_PI426210822 GTCAGGCAAAGCCTGCTTTTCCCCTGCTTCTTTGAGGTGGATAAA  
A\_16\_P30952490 AAGATGGAAGAGAACAGTTTAAAGTTTGGAAATGCCTGCTGATGCCAAATACCACTT  
A\_14\_P139749 GGATTTTCAGTGCTACATCTAAAAAGAGAAGCCCTGTTGCCGATTTAATAATTTACAGTCT  
CUST\_8813\_PI426210822 TTGCTAGTGACTTCTCCTCCCCTCTGGCTGTGGAAAGCTACTCAT  
A\_14\_P133958 ACAATCATTCAATCAACATTTATTAGCCAATCAACTCAAGTCTACTGATCCAGCACTTTT  
A\_16\_P17483151  
AAAGTTCATAGTCTCTTGTCTTTTCACTTACACAACTAACAGTGTTTATACCCAAACCT  
A\_16\_P16773751  
AAAACCACAAATGGAACCTTTAAATATTCACTCACTCTAGCAATCAATGTTCCAACCTCA  
A\_14\_P131415 TTTTCCAGCAAACCCTGAAGATGCTTAACATGGTCAAGACAATTTAACCTACAAAAAC  
A\_14\_P127168 ACCTGCTTAGAACATGGGGTTTTGACTTTAAACTCATTACATGAGTATTCATTATCTCT  
A\_14\_P106316 CTGTGTTTGAAGATTCCTGGAGATAAGAAAACATTTTCAGAGAAAGAGTGAGTAATCTGG  
A\_18\_P26111260  
GGTTCCTTACATACAGAAACCTTTTACCCTTGACAGAATTAACGAACTGAGAGACACATT  
A\_14\_P132338 TTTCTCCTTTTCTAACATTTCTTTCCCATATACTTGAAAATTGCTTCCATAGACACAA  
A\_16\_P17925103  
ACTCCTTCACTCTTTCTTAGATCCTATCCAGACAATAGTAATCATGAAGAACGATCATGT  
A\_14\_P127782 AAATTAAGTTGGGTAGAGATTAGTTTGCCTGTTTTTCTCCTTGCCTTTTCACAGTTGTAA  
A\_14\_P107291 CATTGAACGTGTCTTTAAGGGGAAATACAAAGAGTTGAACAAAGAACTTCACGCTG  
A\_14\_P115856 TTTCAAACATTAACCTTGACTCCTACTAACTATCCTTTACTGTGGCCCATGTAAAACCACA  
A\_14\_P112578 GCAATAGTTTCACTCAATGACTGTGAATAGCACAGTCATTATTTAGTGTCTCGTGCTTA  
A\_14\_P117716 TGTCAGATGAGGCAGAGTGATGCATGTGTAGTGAAACAAACTGCCATCAT  
CUST\_3121\_PI426210822  
TATTGTTTATTAGCCACTGGATTTCTGACTGATAGTTTGAAAAGTCTGCAGATTAGAGAT  
A\_16\_P01105427  
GTGCTTGCTTATACATGTTTACAAAAGTGTATCTAACCCCTGCTTTTTTAGTGTGATTGAGG  
A\_14\_P122195 AACACTGCTGTATTAGAAAAAGTCTCTTTTCTGGTCTTTCTGGTTTTGTTTATGAATTTCC  
A\_14\_P130600 GAATGGATGAGATTATTTTCATCCAAAGTCTGAAAATGAAGGGGTCTTCTACTCAGATATT  
A\_14\_P102116 AGACTCAGTTTLAGGCAGATTTGATTAATGGTAATTTTCAGAAAGAGAGTGAGGTCTTCTG  
CUST\_6160\_PI426210822 GCATCAAGGATGAATGGACATGTGGGTGTCTTCCGTGGGAGTTAC  
A\_16\_P02241326  
ACCAAAGTGAATTAATCCAAAATAAGCACAAACTTTTATGTGGTCTATAGATCTTTGCCT  
A\_14\_P129258 CTCACTCCCCCATATATTCCCCCTTACATGTTTTCTTATAAGACATACAGTTTAATCA  
A\_14\_P119734 GACTTCTCCCTGTTTGTATGTATCTTCACATGGCCATCTTTTTTTTTTAACTAGGAGATGA  
A\_16\_P16191691 GTAAAGCACCAGGTCAACTTTCAAGGCTTTCAGTGGCTAATTTTTTTATGACAGAAGG  
CUST\_4237\_PI426210822 ACTATTACAGGTGGGGCCAGGACCCCACTTCCACAAAATTCAATT  
A\_16\_P30952279 GAACATCTACTATGAAGCCGACCACATCTACCCCATGGCTTCTG  
A\_16\_P16994169

TGTTATTACCAACGATCTCTCTTTTCTTAATAGACCAAACATAAACTCAGGCTTCC  
A\_16\_P37384491  
ACGTGTGCCTAGTTTTTATGTCTACTCCTACTAATACTATGCAAACTGAACTAGTTCCTT  
A\_14\_P100252 GAGCAACTCTCTTGTTCCTGAAAGTTACAAAAGAAAACCTTTGTTCCAAGTAGAAAATCT  
A\_16\_P03062758  
CTAACCCCGTGTAATAATCTCTGTATTAATCCTTCCTCGAATTAACCTGTTTCCTGCTGG  
A\_14\_P126520 ACCAAGCACCCAACAAGAATCAGTATCCGGTTTTAGTTGGAAATTAATATGAAAGAGAAA  
A\_16\_P37269155  
TACACCTACACCCTTATGACTTATTTCTCTAGACAAATACCATGACCTGTTTCAAAAAGA  
A\_14\_P103430 AAAAGGTGCCAAACAACCAGAAGACTTAGTTACACACAGAGTGATTTGGATTTTTATGAA  
A\_14\_P116315 TTCTTTTGAGAGCAGATTCTCTGTCATAAATCTTTGTATCTGGTATGTTGTAGAAGCCCA  
A\_16\_P18288150  
AACTTCGGAGACAAACACTAGTAGACATTTAATTCAAAAACAGGATCAGATCATGAAACGG  
A\_14\_P133123 CTACGGACCATAGTTAAAACTGTTATAAACAGCATGGGCGGGAAAGACCTTTTGTA  
A\_14\_P121670 ATACATCTTCAAGAAGCCCACTTTCTGTGATGTCTGCAACCACATGATAGTG  
CUST\_10359\_PI426210822 ATGACTTGGGAATTGCAAGCTGATGATACCATGGTACCACAACCTG  
A\_14\_P112338 CTTAAAACATCTTAAAATACACTGATGGGAAACATGCTCTTTCTTCTGCCTCTGTATTTT  
A\_16\_P16191704  
CTGAGACAAAGAGAATATGTCTGTATACAATAAGAAAAAGAGAAAAGGTTTCGCTGGGC  
A\_14\_P123140 GAGCAAAATATATTTTCACTGGCTTGTAGCATCAGAGAACCCTGCAGTATTTTCAAGACAGATA  
A\_14\_P138297 TGGCTACTGCATCTTATGATACTCGAGTATATATCTGGGATCCACATAATGGAGACATTC  
A\_16\_P16191194 CTTATGTTGCGTCTGAGGTTTTTCAAGGCTCTTCAGGAAGTCAGATCTAAA  
A\_14\_P115033 GATTACAAAATCTAATAAAGCCGAAGTGTGAATTAACCTTAACCGCAAGAGGAGTCACCT  
CUST\_3378\_PI426210822  
CCTGATACACAGATGTTTGATTATCAGAGTCTTTTTTCTTTCTTTGTTTCCTGTGGCTTTT  
A\_14\_P128626 ACCTAAATTAACCTCTTCTTAAATAAGTGTAAGGAAAGAAGACTCGGACCTGAATACGCA  
CUST\_468\_PI426210822 GGCCTGCAGTGTGGCTGGGATCATCTTTGCTCATACCTCTGTAA  
CUST\_2703\_PI426210822 GTTTTATAGGGTGTCCATTGGCATCTGCACAATCACACTGGCCAG  
A\_16\_P30952591 ACATGGAATCATGGAATTTTCACTTCTGCCAGTCCCTCTCAAGGC  
A\_14\_P120613 CACATTTGCACAAAGGACCATCACCTGTCCTTCTGGAATCTCTAAAGTTT  
A\_14\_P109026 CTTGGCGTGAGAAGAGACATTGAGGTCTTCTCTGTAAAATTTACTTAGATACTTGTGAAT  
CUST\_2098\_PI426210822  
TTAAAAGTTGTACCTTTTTTCTGTCACTTCAGCTCATGCCTTCCTAACCAATCTTTCA  
A\_16\_P17840268  
TTTCCTTGAAGCAACTGATTAACCTTACTTTTCTTTTCTTATAACTCTGAATTCAGCCC  
A\_14\_P139100 TAATTGATAACAGTGAGGAGAACAGATTTGGGAAAAGAAAATGAACTCAGTTGTGGATGT  
A\_14\_P136097 TTTTTGTTTCTTATCTTAGCCTAAAGCATAGTCTTTACCTCCACCACTAGTTCTGCCTTT  
CUST\_5613\_PI426210822 ATCTGGACTGGAGATTCAGTCATGCAGTCTGAAGCCACTTGTTC

A\_16\_P00511991

AAAAGACTGAATAGAGTGAGATCACTGACAGAAACATTTTTGCCTAGAACTCCAACCTC

A\_16\_P19756272

TTACTGTGGCATTAGCACAAATCAGTATCTTGATGACCTACTCCAGTTCTCTACTTTCTAG

A\_16\_P15563564

GGTTTGGGATAACTGATAGGAACTTTTAACTGTAAGCAAGACAACATATCATCTTACTCC

A\_14\_P112057 GTTAATGCAATGCATCATACTGGTTTATTTCTGAGTGGTTGTTATTTTGTCTGAAAT

CUST\_6796\_Pi426210822 CAAACAGGATGCAACAGCTTGCCACAGAGTGATAGAGGAGGCCAT

A\_14\_P124717 AAAAGTTGACAGGAAATTCGGAATGGATTTGAATGGTTTTCTTGGCATATGAATCAT

A\_16\_P35336138

TTCCCTTCTTACCTTTACTTTGCCTTAACACTAGACAGTTTCTCTATGTAGAATGCTAGG

A\_16\_P16641832

AACATAACTCAACACTTTACAAATCACAAAGCACTTTTCATATTATGTCACCCCTCACC

A\_14\_P135246 TCCTGGAGTGTATGAAAAATCAGGAACTCAGGGCAAGCAACTATTTAAATATCCTTAAAC

A\_14\_P135342 CTCTTTGGTCTTCTTAAGATGGCTACACCTCAATTTAAGATGGGGTATTCTTTCACTAGT

A\_14\_P104079 TGAAGTTGAGATAATAATATCCCAGTTATGCAGAACTTTGAGTCCTAGTTTGGGTTTCAGT

A\_14\_P130587 AGAGGACACGTAATAAAGATTCAGTTTTTCAGTAATTTTCAATCTTCAAGACTAACAGCCT

A\_16\_P00694002

ACATGGGACTTTCAAATCTATACATGCACACCATCATCTAAAAACCACTCATAGGTCTTA

A\_16\_P16067411

AAACCACACATCTAAACACTAGAAGTTCATTACAGTGAATACCAAACCAATCACAACTGG

A\_14\_P128795 CTAGGAATAACTGGTGAGTAGTTTCTTGACCTTTTTTCCAGACCTTTTTTGGTGAATTAT

A\_16\_P17475144

CTCCCCACAAGATGTTTATTGAGTGAAAATGCCTCTAAGATTTTATTCCATTACTGTCA

A\_14\_P125833 ACGCAGACATTTTATTAAGCAGGTTAGAAAACTGTGCTGCTCTGCTACACTTTTAGAAA

A\_14\_P111671 TGGAGGAGAGAGTAGAAGATAATGACCATGCTAAGATACCTTTTCTCTCATATGTTGAGA

A\_14\_P110908 GGAATAGGTTGGTCTATTTTTCTCCACTGAGGACACATTGAAGCGGAAAAC

A\_14\_P137572 TGAAATAAAATACGGTGACTCAGTATGCTATATACAACATGTAGACACAGGCCTATGGCT

A\_14\_P110367 CAAAAGGGCTTCTTCCAGTGGCTCAGCATCCAAATCCGATAAAGATTTAGAAA

A\_16\_P32455963

AAAGGATCTAGCACCATTTATGATTTTAAATTCCTTGGACTTACTATTTCTGTTTCGCC

A\_14\_P117263 TAAATATTACTGTTTATTACCAGGCATACCCCAGTAAAATAAAGAGGCAACCAGGCGATA

A\_14\_P104247 TTCAAACAGAAAACGATTTTTTTAAGTGCCATTCAATGTCAAAAAATGCTTAGTTAAAAT

A\_14\_P102321 CTTTGGTTATATCACTGATCTTCAATATTTCCCACTATGTGGAAAAGCAACGACAAGGTA

A\_14\_P115998 CTGCATGTTTTATCTTTTTGTAAACAGTGTA AAAATGAAGTCTTCTGTGTCTCTCTCTG

A\_16\_P38284526

CCCAAAATGAGATTATGTTCCACACCATAACTTTAGAGTTGATGGCCTACTTCATAAAT

A\_14\_P124847 ATTTGCATTTATTGAGGTCAAATAAAATGCTGGAAATTGGTGCCTGGTGACACTGTC

A\_14\_P119793 CATCAGTCTCACAAGTCTTAGGTTTTCTTGTCTTTCTCTTACTACTTCCTGGTAGATACA  
A\_14\_P101457 CTCTTTAGTATCTACATGAAAATGGGATTGTCCATCGTGATCTCAAACCAGAGAATCTTC  
A\_14\_P100402 CTGTATAAGTTTTCCATTCTCTTCCTGATTGACTTTCCTTACTAAATCCTGGGCAG  
A\_14\_P111298 TGAGATCATCCCAGTTAATTAAGGAGAAGAAGACATGACTCTTAATCTCCATCTGTTGAT  
A\_18\_P14136784

CCTTCAAACCTCCTGCCCTTTAATATTTATTGAAACCTTGGTGGAAATGAATTCTGTTTT

A\_14\_P102046 AGAACAAGACATTCAACCTACTTTAATGGTAACTTTCCTGATACCATGACAAGGTGAGT  
A\_14\_P101551 TTCAAATCATTCTCCTCTGCACTCACTTTCTATAATGGTAGAGAAATGCATATCCTGGAGT  
A\_14\_P117243 CTGTGAGGACTTTACTGATGACTGTCAAAACACAAATGACTTAAAGGACATCATAGTTGT  
A\_14\_P202464 CCCTGCCTACAGGATTAATTGCTACATAGTCTGAACAAGCAACTTTCTAATAATCAGAC  
CUST\_9493\_PI426210822 CTAGACTGTGGGATCCAGGAAAATGTTGCTTAACATCTCGTTGTTGGATTC  
A\_16\_P20419315

TCAATGAATCCTTTGCTATTGCACAATTAGCCCTCTTTTTTACTTTCTATCAACTGCTCC

A\_16\_P15572397

ATTATGAGCATCCCATTTATGTTTGTATCATAGGGTCCATGATAAGATACAGCAGGAAACC

A\_16\_P19282237

AGCCATATCCAAATTGTGTCTTTTGGTTGCATTGTAAGGAAAAAAGTTGATTCACATGG

A\_16\_P18165255

GACATTTCCAGCACATAGGATACAGTAGTTAACTAGCATTTCATTAACGTCACCAGGTAT

A\_14\_P132260 TAATAACCTGTCTAAACATCAAGGTAAACCTTCTTGCTAACACAGCAGTATTGCTTGGT  
A\_16\_P03708258

TCTAGTTAACCCCATCTATAACCAAGGTTCTTCTATCCTTTATTCAAAGGCTTCTGTTCA

A\_14\_P115005 ACAGGGCTGGGAGAAGAAATAGACTTGCACCTTATGTCATGTAAATAATTGATTTTCTAG  
A\_16\_P02009058

GCCACACACTTAATGATCTCTAGTCCTAACATGAAAATTCAGCAAAGTTAAGCAGTTC

A\_16\_P35589538

ACACTAGTTTGCCACATTATTAATACTATAGAATGACCTGACATTTTGACATTTATCCCCCA

A\_16\_P17711854

CTTTGCTTGTCTCACATATCATAGTCTCATTGTCATTCCAATGCTTTTTTAACTCTGACCA

CUST\_5772\_PI426210822

TCAGGTCATGGTATTTATATGAATACAAAAAAATTTAAATACTGTGCTAGGTGCTGGG

A\_14\_P120866 TGTTTTGACGGACTGTCATTCTATCTGAGCAGAATTTCCATATAAGTATCCATTTTCATGC  
CUST\_9676\_PI426210822

CAAAAAATGCCACTTACCATTCCTTTGGTGTACTGCTTCTAGAGGCAAAGTTTAC

A\_14\_P128972 ACTCTCCATGCTAAGGAGTCATTTCTTAACCCTGCAGAATAATATCCAAAATATTTTAC  
A\_14\_P105866 TGAATAAATTTTCTCGTTCTCTTTATAGAAATGGACCAATTTTGACAAGATATAGTGCTG  
A\_16\_P19900424

AAAGTTGGAATTCTACTATGCCTTTTTTCTCCCTAACTTGTCAACTAAGAGGAACATTGTC

A\_16\_P16191765

AACAAAGAGAAAGGGAGGAAGGATCATCCTAGAAAGTGGATACCAGTTCTTTAAGAAG

A\_16\_P00007064

ATTGGACTCCTACTAAGCATTATAATTTCTTACCACAGTTACTTTCTAGCCAGCATGGG

A\_14\_P120194 TGTTTTAAAGAAAGCATCACGAGGTTTCATCTGATCTTTTTGCTTACTGCTCTGTCAAAC

CUST\_3517\_P1426210822 TTTCTAACTGCCTCTGCATTTGGAAGGGGTCAAGACTCGTTTCATAGT

A\_14\_P111602

GAACAAATAAATGAATACCCAGAAACAAGGAAATTGAAGACATAAGAGGAAAAGCCCTCT

A\_16\_P36230896 CCCTAGACAACACAGAAGAAGATGTGGTCTGTACCTATAGTCCTGTCATT

A\_18\_P22839043

TTTGCATGCAAACCTGTTCTATTTCTGTTTTGCAGTGGGAGAGAGGATAACGGTTTATAATT

A\_14\_P108481 CTGAAGAGCAGCACTTAATTTAAATGCAGCAAAACTAGTTAAAACGAGAGAATACTGTTA

A\_14\_P102088 TATTAAGAAGGTGGGGTCAGAACAGTTAATTTGTTTGGGCTGAGAACCCTTTAAGATTACT

A\_14\_P133789 TATTGTTGGTAGCATAGTTTCTTAGTCATTTTACCAGTTGGCACACTTACGTGTCAGTAG

CUST\_2209\_P1426210822 GTACACCATTAACCCCTCCCTCTGTTGGTTAGTATTTTCTCAGGAAATTC

A\_14\_P128557 CTAATCTCTGCATTGCAAGGGAATTTTGA AACCTTACCCTATTCAAGTTACTGGTAGAA

A\_14\_P111290 AGGTTTTTGAATGCCATTGAAACTGCTTTGGCCTTTGGTGATGTCATCTTAATTGAAAAT

A\_16\_P00685169 CTCGTATGCAAACACTGTCAGGCCTTTGAATGCCTGTGATTGGTGTTTTTATAC

A\_14\_P122508 TTCAGAGTAAAACCTCAAAGGATTCAGTTTGAGCCTAGAATGATGGTTAGACTTGTAGTCA

A\_14\_P109234 GAGGGAGCCTAGGCGCATCTTTTTAAGCAATGAAATTACCTAGCCCCATAT

CUST\_5834\_P1426210822

AAGTCATTTCTACTTGGTTTTTGA AACCTGCATTGTCATCTAGTATTCCAAGGCTTTAGTC

A\_18\_P22841055

ACTTACCAAATAGAAGAGGGAGAAATGAAAAGGAAATATGATCAATGATTTCTGTTCTT

A\_14\_P201038 ACATTTTTCCCCCTAAAGGCATAGACAACAAAAGAAATTTTATTGAGAGGAAAACACAA

A\_16\_P30952668 CTGCTCTGTATCACCTTTATATAGCAGACATGTCACCCTGCTTCTACACAGATGAT

A\_14\_P115600 GTTGGAGGAAAGGCAACTTTAAGAATGCCTGAAAGCGTTATTTTTTGGTTACATTTCAA

A\_14\_P110097 TTTTAAAGATAGTGTTTTTAGAAAGAGCATCTCAACAGGAAAAACTGGCCAAAGAATGGT

A\_14\_P123619 TGCCAATGGGCAGGAATGTAAAGAGAGAAAGTAGAGAGAATATTTTCAACAGTAGTTGAT

A\_14\_P114999 TTGACCACAACGGTGAATGTGTAGTTATAAACAAAGGTCAATTTTCCAATGGAAAAGAAC

A\_16\_P00638898

TGCCTTTCATCATCAACTTCAATGAACTAAGTCTGCAATCAATAACTACGACACTTATCA

A\_14\_P105280 AATGTGTAGAATCAAGGATAATTAAGGCTTCAGCACATGTTTGTTCACAACAGTGTCTG

CUST\_6401\_P1426210822 GAAATCTCGGAGCTTTCATTGCATGAAAACCGACTCCATTTTAGTACCTCG

A\_14\_P113541 ACTACTCAAAAATTTACCAGACCTTACAACCTGTGATAAACTTGAATGTGTATGATGAAT

A\_14\_P102720

CTTTTGACAAAACAGACAAAGCAAGAATGAGAAAAGGAAAATAATTGTTTATGGCGCCAC

CUST\_7268\_P1426210822 CTGGCTGGGAGGAAAGAGATTTTTCTCTCCAGCAAAGTAGTAAACAG

A\_14\_P113729 TGGAAACTGATTTTGATCTGAAAATCCTACCAAGATAATCCCTATGCAAACACTAGTTCCTC  
A\_14\_P124479 AGTCTAGGAGCACATACCTTTTCATTATTTCCATTTTATAGGTGGAAACAAGAAGACTTGC  
A\_14\_P123350 ACATTTAACATCCATTCCATGGGCATCAAAAATTACAATTATGATGCAACCACTGTGATC  
A\_14\_P125079 CTTAGAACAACACTGACTTTAGAAAGTAATCTCAAAAGAAACCATCTGGGCCAATGGTATTC  
CUST\_1766\_PI426210822 CTCCACAAACACAAGGTAGAGAGGAAAACCAAGGAGGGAACCTGAATTA  
A\_14\_P116829 AATGTTGCTCTTAACCTGGAGAACCATGATTCTTTGGAAAAAATTTCCATGGTTAAGTGTA  
A\_14\_P126922 CTTTTTACCTTCTCTCTACGCTAGGAGGATACTTGGTGACCTCATTCTTGTTG  
A\_16\_P15430229  
AAAAGCACAAATGCATATGATGAGGTCTTCCTAGCAATTCCTTGATGTTCTTTTGGAAAT  
A\_14\_P132977 GTCGTGGAAATTAAGTTTATGAATCTCCTTGATCTCTGAATTATCCAAACAGCACCATC  
A\_16\_P16191185  
AACATTGATGAAGATGCCAAGTTAAATAGTCCTTTGGAATGAAACAAATAGTTCCCCTGG  
A\_14\_P122242 GAAAATTCATGCTTTCCACCCACCGCTGTGATTGGTTTAAACAAAGGCTTAG  
A\_16\_P18932068  
ACCTATTGGTTATTTCTTACTCTAACAGGCACTTACGATACTATTTAGGCCACCTGCTAA  
A\_14\_P131164 CAGTTAATGACAGAGATGGCGGTTCTGATCACAAATTAGATAGTTATCCTCTTGAGTAGA  
A\_14\_P118531 AAAGACAAACAGTTTGGACTCACCTCAATGCACATCTGATCCCAGGAG  
A\_14\_P108171 TTTACAGATTTTTTAAAAGCATTGGTGCTGATGAGACCGTCCAAGGACAAGGAAG  
CUST\_6794\_PI426210822 TAAGCTTCAAGCCAGGTGCATGAGGGCTCCAGCTGACTTTTTGGG  
CUST\_4531\_PI426210822 ATTTAGAATGGAGTCAGGAGGAAGATTTCTCTGGGGGGTTGGATTC  
A\_14\_P108369 GTTTTTCAGATACCTACCTCAGTAGACCCTGTGAATGCAATCTTGTCTATGCCAAT  
CUST\_4149\_PI426210822 CCTATTCTTGTAAGGTTTAGCCATGTATAGTCATGTGCCAGTCACCTAGG  
A\_16\_P16191578  
GAATATGAATTTTCATAGGCGAAATTAATCTGTCTGGTTCGAGTCTAGACTGTTTCGTTGG  
A\_14\_P114929 CTGGCCTGTAGACTTATCATTATTTATTTATATTGTTTTTTCTCAGCGGCGGGATTTTTTCAG  
A\_14\_P133753 AATTCTTTTTGAGGATCCTGAGAACAGATAGCAGATATAATGGCATCTGTTTTTCAGGCTA  
A\_16\_P03490319  
ATCACAATTCATTTGTTTTAAAGCCCTCATTCTTCATAAACCATACTAGAGTTTAGGCCCC  
A\_16\_P01163677  
TGCCGGTAGTGTTTTATGTTCCAATGAGCAATAAAAAGTAAAAGAAGTAGAGTAAGTGTC  
A\_14\_P100435 CTCATGAAAATGGTCAGAGAAACCTTTATCTGTATCAAAGAATGGTCCTGCACCAGTAA  
A\_16\_P18131799  
GTCCATTAATCACATGCAAAGTTTGTTCATTTTCGTAATTAATAATGCCTGGTCCAGTTT  
A\_14\_P111625 CTCCAGCCCAGCCTTTTGAAAATACACTTAATGATGGTTTTGACTTTTTTTCTAAAAGCA  
CUST\_8619\_PI426210822 CTGTGGACCTAGTGTCTGTCCATCAGGAAGCCAGGTTGTAATGAT  
A\_18\_P11170332  
AAAAACAGCATCAACTCCACTTAGTTGGATTTCACTTCAAAGTTTAAAGAGTATGTCCTGG  
CUST\_2655\_PI426210822 GTGCAAGCACACATAGATATATATTGCCCATCGTTCCTAACCCCTCCTAAGG

A\_16\_P00323274

CTTTGCTCAACATGTTTTACAGAATGAAGACTTAGAAGACTTTATATGTGCAGCCATGGA

A\_14\_P111135 AGGGATACCTCTTTGTTTCTTTTCACCCCGAAATACAACAGCCCATAACAG

A\_14\_P119525 GCAAATAGGTTACTGCAAATATATTTACTCACCTATCTGGCTATGGATGGTAGTTGCTCT

A\_14\_P134574 AAAATGACTTATCCTTTTAAGGGATAATGTCTTACAATAATCAGAGGCCACACACCTTC

A\_16\_P02007438

CTACCATTACCCATAAAGTTCACCTTTTAGATTCACTTCTATAAAAACCCAACACAGGTG

A\_18\_P15054500

AAGTAGAGAATGTCAATGGAAGATCAAGAGTTACCTCAAAAAGAAAGTGAAACGGGAAAA

A\_14\_P138719 GTTCCATTTTTCACTGTAAGTTCTTGAAGAACATTAAAGCATTTCACACATAATCCCT

A\_16\_P03250279

CTTCTACATTCTTTGTGTTTCAGAACAATCCAATTCATTCCAAACCTATTTCGATGCACAC

CUST\_5315\_PI426210822

TATTTCTTAATTATTTGTCACTTATTTCCATTATCCTTGTGTGTGAAACATTTTTCCCC

A\_14\_P139410 AACCAGAGTCAACTCTAGGATACCACCGCATAAAATGTTCAATTTGCTTTTAATGTGAAAT

A\_14\_P139056 TATGTAAGGTTCAAGACACAGGAAAGAGGAAGGGAGAAAATAAGGCCTAATCTAGTCAT

A\_14\_P116467 ACTTTTTCTATGGCTATTGTGTCAGGTCAGTGTGGATAAAGGCAAAGACAGATATTTATT

A\_14\_P126099 TGTCCAATTCAGATTTTCAAGAACCATATGCTGTGGTTGTTCTTCTAGAAAAGGATTTA

A\_14\_P110417 AGGCCTTGAAGAAACAAAATATTTACAAAGAATTGTCCCTAAAATTGGTAACCACAGG

A\_14\_P131006 TTCAGTTGAACAAGAAAACAGTGATAATTAATGCCAACTTGCAGAAGTAACCAGTGAAC

A\_14\_P105782 TAGAAAGCCAGAAGATAAACCCAATAAACTCAAGTCTCTATTGATTTTTCTCCTCTTC

A\_18\_P16263091

ACAAGCAGCATTACTCATGTTAAGATACAAGATATCACGGTTTATATTACCTAGGTAGCA

A\_16\_P15686134

AAAATGACTGTCAACTTGTAACCTTACTGTTTACACCACAATGTGCAATAAAGATGGCAG

A\_18\_P22843206

AACTATCCTGTAGAGGAGAGACATTGAAAATGACATATACAGACACAGAAAAGGTTGC

CUST\_5794\_PI426210822 ATTTTCTGGTACAGATTTGGGTGGGAGAAATGAGCTACCCTTCCC

A\_14\_P110778 AGAATAATAAATATATTGCTTGTAACCTCCTGCTTGTGTGAATCCCTCAGAATCCCTTCC

A\_14\_P200010 CACATCCAGAAAAATTAGATTGAGAGTATTAATCAGGGAAGTTTGAACACAGATGAGGT

A\_14\_P102743 TGTCTACTTCCCTAACAATATTTCCCTTACTTTAAAAAACGTAAACTGACAGATGGCCAT

CUST\_4954\_PI426210822 GTTTCTTGACACATCTTGGCTTGTGTGAGGGGCCATAACAATAGCAG

A\_14\_P135630 GTCTTGAATATAACACACCTTGTTTCACCTTGTTCCCTCCCTCGATGTGATAATTACATT

A\_16\_P16133698

TTTCCCAAAGGACACAAATATGCCGAAACAAAAAACTCTTATTGATGGATACCTTTTGG

A\_14\_P100647 CCCTATGACAACAAGGTCCTGAGATTCTACGAGATTAAGACTACTATGTTTATTAGTGGT

A\_14\_P121373 GTCATGTAGCATTTACCACAGTTGATACACATTTCTTCATCAATCATAGCCACAACCTTGC

A\_14\_P201154 ACCAATCAGTCAATAACTGCCCAAACCAGAGACCTTACAGGAACAGAAGAATAT

A\_16\_P37168256

ATTCTTAAGAAATGGTAGCGTCTTAATGTCAGTGAACGTAGATTGTTGTCAACCTCATGC

CUST\_8998\_PI426210822

TAAAATGAACCTAGGTCCCTTTTAACCCAAGCCAATTCAACAAACATAGCTTTTAGATCA

A\_18\_P22839597 GTGTTGATTTTCAGCCTTTAAGGGGGGTCGTGGTGGTCTAGGAGAC

A\_14\_P104213 AGATCTGCTAGACCAGGTGGATATCTATCAAGTTCTCTTTCTTTCTGCAGAGTTAAC

A\_14\_P132119 AGTCAGGTAAGACTGGAAGATTATTTTATGCAACAGAAAATAAGCACTGTAGACTCTGGT

A\_16\_P16937040

GCCCAAATCAAACCTAATAAACTGTGATCAAATCTAATCAACTCTAAATACCTTGCCTTG

A\_16\_P03799907

ATGTGAGGCACAACCATAAGTCATTTAAAACAGGACTATGAATAGCCAGGCAAATTCATA

A\_14\_P113364 GGAACATTGATTCATAGGGAATAAAAAGTATGGGTGAAGGTAAAAAATTAATTTGGGACC

A\_16\_P02766512

CTCTCCCATACCTTACTACCAAATTTGTCATACGTTCAAATGTCTATTAGCAAGCAGACA

A\_16\_P18049769

AAACTTCTGGGAAAGTCTACTTCAAATTGACAGAGATAATTTAAGGTTTGCCATGCTCTG

A\_14\_P200007 CTTTTGATTCACGTGGGAGACTAAAGATGAGAATAAACCATTTATTCTTTGATTCAGGG

CUST\_4852\_PI426210822 AGATGCTGGTTCTGTTGTAAGACATCATCAAGGTTCTCCAACCC

A\_16\_P16267730

AATCTTAATTCAGGTGAACTCAATCAGTCAAAAGACGAAGAACACAAAATCTGTCCTCA

A\_14\_P102980 ATGCACATCCAGGGGTATACTTACACTATATGTGCAAGGTCAAGTGGTTTCTCT

A\_14\_P138933 CAAGATCATCTTTTTCCACAGTAAACAAAGGGCTCTTTCCTTCTGTTACATTTTTAGTT

A\_16\_P17342989

CCACTAAACCCTAGAACTCTGGATCATATTAAGTAAGAATGTAACTCAATACAAGCCTG

CUST\_1434\_PI426210822 TTAGAACTGAATTACTCTGTATATTTCCCCAGGGCCCTTTTTCCCCTTG

A\_14\_P131960 TTCAAATATTGAGATGTTTTCTCTGTATTGGCCCAATCATTGGAATGTTTTGTGCATA

A\_16\_P00090185

CATTGCCAGCATTGTATAATCTCTTGCATATCTGCTCATGAGTATTTCCCAAATACAACC

A\_14\_P105470 TACCAGTGGTCTTTTTCAAATGTAAATCTGATCCACCTCCACTTAAAAATTCATCATTGCT

CUST\_7069\_PI426210822

TAATGTAAGTCTACTTTGTAAGTATTTGTTCTGAGATTATTTGTTCTGAAGGAGGCCCAA

A\_16\_P02351256

AAGGAATAAGCAAAGAACGAAAATCTTCAGTGACATAACCCATTCCAAAGAGAAAGAAGA

A\_16\_P18594683

AAAACTGTTGGCATTAGGATGAACTATAACATTCCAGAAAAGTGATTCTCAACTCTCTCC

CUST\_9231\_PI426210822

TCCTTTTTTTTATCTTTGGTTACATTTCTCTAAGCTCCTTATTTTCAGCCCTGGCACA

A\_14\_P123102 GGAAGACTAAGATAATCTATACCTCTACTACTCTACCCTTAGTCACCCCAATAATCATG



A\_16\_P16292721

AAAGACAAGAACGTGTATTCAGAAGGCATTACGGATCTATAAGAAGTGAAACTCAATGCA

A\_14\_P106508 GAGGAAGAACAGTCAATCTTTTTATCGTGGATATCAGAAAAATTAGTGTGTGGCTCAGAA

A\_14\_P114084 AACATCAAGTAATTCGATTTGTCTAGATGACTGAACAGAGAGAATTCCTTAGCCACTCCTT

A\_14\_P132230 ACACTGTTAATTTTCACATGAATCTGTGTTTGAGATAGGTGGGATGTATGCAGTAACATC

A\_14\_P122870 GGACTGTAAATGCCTCCCTAGTAATACAGAAATATCCATTGGAAATAAAAAATAGCACCAG

A\_14\_P120472 ACATCAAAATGTCAATACCATGGGTGACTTTTTCTTCTGTTTCCTAATTTGGGATTCTTT

A\_14\_P118806 TGAAAATATATCTGAATGCCTCAGATGTGACAGAATTGGACTGGAAATCCATTTAAGCAC

A\_14\_P124388 TTAAGTGTCTTTCAAGGTCTGACTCTCAGGATCTAAAAAAGGAAAAGAGCACATAAGTC

A\_14\_P100670 CTTTCATAACATATGCAATAGCACAATTTCCAACAGGGGACTGATGCAGCCTAAATTTTA

A\_16\_P17833653

ATTCTGAAGCCAAAAATCAGTTTCCAACCTAAAAGTCTAAAATACCTTTCCTTACCAGGT

A\_16\_P36230234 GATTCCCACCAGATTCACAAATTATTGCTTCATTGTTGGAAAGAGGAGTTAGTTGG

A\_16\_P01193991

CTCCCTCTCCTTTCATACTATTTTGTATTACTTCCCAGATAAAAACTCTTCCTTACCCAC

A\_16\_P18123894

TTCACAGTGTGAGTTATGATAGACGCAATCTAAGAGTGAATTATAAAAAGTGATAGGGCCG

A\_16\_P36230910

TCACATAAAACATGACTGTGATCTAATAGAAGCCTATGCAAAGCATAGATAGGGTAGACT

A\_16\_P15719908

CTGAACTTACACTAACCTGCTTTATCCATACTTCTTCCTCATCTACCCAAATGTAAAACC

A\_16\_P18865126

AAAAATGGGAAAATGCTACATTACAGCATCCTAGAATCAGTCTTAAGGTCAGTTTGTGTG

A\_16\_P00543254

AATCACAAACAGTTTAATTTTCAGCCTAAATCAGAAAACCAACTCTCAATTAACAGCCTGCA

A\_16\_P41714657

TCAGCCAACTACTAAAGGAGACAAATCATAACAAACTTTTTCTAACCTTGACATTGCTGA

A\_14\_P133504 GTCATGGTGACTCGGGACTTTTTTAAAATTGCCTCCTGGTTGATCCTG

CUST\_5607\_PI426210822 AAAAGGAGAATTGGCCAGAGCCTTAAAGGTGGAGTAGGATTTGGG

A\_14\_P108419 GACAAAAGGCTTTCTTATTCTGGAATCCCACTGAACCTCACCTAGACAAT

CUST\_9275\_PI426210822

TTGAATTGTTGACATCTGATTTTGGGTAAAAAAAAGGAAAAAGGAAAGCATTGGAATTGG

A\_14\_P105114 GAAAGGGTTCTTTTTTACCAGTAGTTTGTCTTATTAATGAGTCCCTGAAAACCTGTCT

A\_14\_P123638 ACACCTGGGAAGATAATAATTGCCTTTCAGTATGACTACTAGACAATAGCAAAGAAGGTC

A\_18\_P25341996

AAGTTACACAGGTCAAGTTGGTTTGTATGGAAGGTTCTAGAACTACGAGTTCCAATA

A\_14\_P201211 CGTGAAGACAAGAAGTATAGGGTGCATAAGTAACTTCTGTGTGTAGGCAGATTATTCCT

A\_14\_P131129 TTTTCTGGCGTTTATGTAATGCTTCTCAACTCAAGGGGCTCCTTTATTACTTTTGAATGT

A\_14\_P111894 ATCTCAGTCGTATTTTGAGGAAAAAGATGCAAAATCACATTTTGGTATTGTCACCTCTGA  
A\_14\_P105432 ACAAGAGCAATGAGGGTAGGGAACCTATACCCAAGTTTCATTACAAATTATTTACATAT  
A\_14\_P109807 GAATGCTAATTGGAATGTCTAGAAAATCAGCCTCTGTTACCATGGATATCTATGGGATTG  
CUST\_9234\_PI426210822 TTTATCATTTCTTTCTCATTCTTTTCTCCTGTTGGAGAAGGGTGACTGTTTGC  
A\_14\_P127927 TCCTTTTTAGGAAATGACCACAAGTGAACATATCCAAGATGAACCAGGTAACGTATTATCA  
A\_14\_P125232 TCAGAATTAATCTCAACTGGCAAATGTTGCATGATATGATTTGCTTTCTTCGGTGGG  
A\_16\_P03033078

TCATGAGCCCTAAATTTTATAATTTCCATGAATCAGCCATCCTTTTTACATCCTTGCAT

A\_14\_P138394 TTCACATAGGTTGAGTGCTCATTGTGGATACCCTTTCTGGGTATGCATAAAATATAAACT  
A\_16\_P00026136

GCTTAAATGTTAGTGGTATTTAGGTGTCAGAACTATGAGTAACTGTTCCCTACCATTCCC

A\_14\_P117024 ATGACAGATAAACAGAGTCTAATTTCCACCCCAAATTTTGCTGAGGTTTTCTTAATGTTG  
A\_14\_P118313 GTGACAGTTCCACTGCACACAGAAATAGCAATGGAATCATCAACCATATACTTGTAG  
A\_14\_P124021 TATATAGTTTAGAGTAGTGATGGATTTGGGTGTGCCCAAGGAAAAGAAAATTGCCTACAA  
A\_14\_P115508 TTTTTTAAACCCCTTTTATTTAAAGGTCCATGCAGAATCATTACAGCAGGTGGTTCAATC  
A\_14\_P114009 TTCACTCAGACACTGGGATCTTCCTGTTCAATTCACAAAACAAGTGTGATTACTGTT  
CUST\_686\_PI426210822 CAGGGTTTGAATCAGCTATTGTTGTTAGAACCATTGAGTACCTTGGGCTTG  
A\_16\_P41087420

GGTTTACTCACAAGTCTTAAGTGACGACATATTTCCATCACTGATTCATACAGTGTCTGT

A\_14\_P124701 AAATTGATTTTATGCTTGAGAATCTTCCTGAATGGGTTACTGCTAAACCAGTTAAGAAGA  
A\_14\_P102774 CTTTGTGAATTCTGGTGGAAGGAATTTGCAAGAAACAGAGTTGCAAAAGAAACCATTATA  
A\_16\_P18981304

ATTCCCAAATAGTCCAAATTTATCAAGTTGAAATCCCATGAAAAGGTAGTCTTCCCATCT

A\_18\_P25293549

GTTTCAGAAAACCAAATTCCTTGAATGACTACAGGATTGCATTAACATGTTACCTACCC

CUST\_8714\_PI426210822

AAGCCATAGAGTAGAATAAATATTAAGAATAAAGTAGGGGATTTCGAACTTGGATTTTC

CUST\_8468\_PI426210822 GAGACAGAAGAGGGGTACAGTTGTGCAAGTGATGAGCTGCAGATT  
CUST\_4489\_PI426210822 AAAGTTCAGATGTCCCCCTTTCCCACTCTGTGGGTGGGCCCTAGT  
A\_14\_P132992 CCTGATAATAGAAACCAGAATGAACCGATGTAGTATTTAGCACATAGAAATGTCTCCCAC  
A\_16\_P18793704

TTCAAGCCGTTATATTTTAAACAGCATTTCATAGTTGCAGTAACCAATCCTGTGTCTTGAGT

A\_14\_P131737 TGTGCAGTAGACACCACAGTGCTCTGGTTATAAATTGTATTTGTAAGAATAACATCGGAC  
CUST\_7803\_PI426210822

AGGACTGTTTTCTCTTCCCTTAGTATGGATTTAAACAAGAATCATAAACACGTGAGCTTTC

A\_14\_P130005 AAAGTGGAGCAGAAAGTGAATTTGACCCAGAAATAGAAATGGAAGCAGAGAGAGT  
CUST\_721\_PI426210822 CATTTGAGTTACAGCAGACAAGGGCCAGCCAAACTGCTCTTGTGT  
A\_14\_P138793 GTCAGCAAAAGCCCCAAATATGATTAGGAATATGTTTGCTACAGCAAAAAGTTAATGTCC

A\_14\_P113793 ATCAGTAACTCTGTCACTATATAGTGGGGTTATCAGGTAGAATTGCTTAAAAGACTGGTC  
A\_16\_P32386788

AAAATAGCCTCTTTTCTCATAGTGCAGTTGTAGTTTAGAAACAAAACCTTGGTCCTCTCTC

A\_14\_P108029 CCTCGGAGGATGTATACAATTATGTCTTCTGAGGAAGCAGCAAATGGAAAGAAATC

A\_14\_P121797 TCTCTGCCTTTCTGTAAAGTCCCTAGTAAATGACACTGTATATACATGAGAGTGAGACTT

A\_14\_P130060 AGAGAAGATGGTATTTTCAGTTCTGCCTACTTCTAGAACAGGGCAAATTCAGAGAAGAATT

A\_14\_P201812 TTTTCTTTGCAAATAACACAGCGATTCCCAGCCTACAAAGGTGAAAGGAGC

A\_14\_P106734 AGTCGCAACTCTAATCTCACTAACTTTATCTGTGTTCCCTCAAATGCCTTAGACTATTTGC

A\_16\_P00548914

AAAAGCCAATCTTGCATACATAAACCAAACCAAGATAAGTGTTGATAACATGTTGATGAA

A\_14\_P125496 CTTCAAGTGAAGATGTGTTCCAGTCTGTAAAGTCTTTATTGCAGAGTCAGAAGGAACTATG

A\_16\_P00814453

ACCGTTTCTAACTGAGCATATAACATAAAGAATCTCCATACTTTTTTGACGTAGGACTC

A\_14\_P114061 CTCAATCACAGGCACGCTGAAGACCTCATCGTAACACCATTTGCT

A\_16\_P40301063

CCAAACTGACCATTTAGTATACTGTGCTACCCCTACATACTACCAGGTTTTCAATATGAA

A\_14\_P130465 ATTTGACCTTTCAGCATTACAGTTCATGAAAGGTATGGCACTGTGGTATCATATGTTCTA

A\_14\_P117293 AAAATATCACCAAAGAAAGGCTTTAAACTGAATTTTCTTGGTGAGATCAGTCAAATGCAG

A\_16\_P17042494

CTCACTGTCTATCTGATTGCTGCTAAAATCTTCTTCTGAGATGTAACCTAGAAAACGTGT

A\_14\_P126098 ATTCTACTGAAAAAGAGCCTGGAGCAGCAATTTCCGAATCACCTACTCTTTGTAAG

A\_14\_P138872 CTGCATCTCTGTGGTTTTTTTTATAGGTGGATCTTTAACTCAAGACTAGCATGAAGAGTTG

A\_16\_P18526283

AATGAGCCCCATGTTAATTCATGTTCAACTACAGAAAACAACAAGTGAAACTTTGTTTGC

A\_18\_P22841228 TTTTCAACGTGTATCCTGAGTCATATTTGGGAAGCACTGGGCTCTGCTTAT

A\_14\_P118990 CTACAAGGCAGTCACACATAATTGAGTGACATGGATAATGATTACCATATTTAGAGGGTG

A\_14\_P128667 CTCACCTTGCTATAGGTGCATGGCATTTTACTCACCCATTTGCTTACCAAAAAACC

A\_14\_P127746 ATCATAAAGGAGCAAAGTGTTTAAAGCAAGAAAAAGGAAAACAGCCTCCTTGTCTTAAA

A\_16\_P58424529 GCATTTCTGGGGCCACCTCTCGAATAAACTACTTACACTCAAATCTTTG

A\_16\_P01892306

AAATGTGAAGACCATCTGTAAGTGTGATTTTTACCAGGATCAGACTCTAATTTGCAATGG

A\_14\_P104320 TGAAGAGAAAGAAACATACTATTGACATGCCAACATAAATCGAAAACCATTTCCCATCT

A\_14\_P201676 TCTCTTCATTCTGGAAAAAGAAGGTTATGTGAAGATACTTACCCCTGAAGGAGAAATTTT

A\_16\_P18211913

AAAACCTGACTCATGAGTGTCTGATCAAAGGTGACTTAAAACCTCATATAAACAGTGTGG

A\_14\_P122521 CAGTCACTAAGGCATGAAACTGACAGATTTTACTCTGAACGTCCTTTTCCTTCTG

A\_14\_P201045 GATGGAGAAAGGCAGATAGATATAGGGGAGTGTTTTCTTCAATTACAGTCTGATTTTG

A\_16\_P19984439

AAACTCAATTTACCTTACAAGGCTTATTTCTGTTTGGCATCCTAATGAATTCTCTGCTCC  
A\_14\_P134842 AGTGATGGATGGTCCATTAGAAAAAGATTAACAGGTGTGCTGAATGGAGGAACAT  
A\_14\_P122894 AATGGGAGGGTTTAGAATTAAGCAGCAAAAATAAGCAGATTCCCTAAAATAAACCTGCAG  
A\_14\_P105371 AGATGGTGCTCAAAAAGATCAGTCTATTCTTTCAACATGCCTGTAAATGTATTTCTAGG  
A\_16\_P30952501 CTAGTGTGGCCAGCGTTCATTCATTCTCCTCTCTCTGCACAGTG  
A\_14\_P122822 GAAAACCCAGCGTTAGTAGAAAAGTTTCTTTTCTTTGAATGACAGAACTACAGCATAATG  
A\_16\_P01456870  
CAGTGATCTTTCTAGAACAGAAAAGAGCAGTTCTCTTGATAATTGGCGAGTAGTCCAAAC  
A\_14\_P120189 ATTTACTCTTCTTTCATCCCGAAACCCCGTTGACTTCTACAGTTCTAGAATTGTTTATTT  
A\_14\_P118622 GGTCTGTTTCTATGTCCAAAACATTTATTTTCAGGAAATATTTGTGCCTGCACAACAGG  
A\_14\_P118271 ACAGGATTCATCTTCACTATCGGAGAAGGATGCTCCATGGACACAAGT  
A\_14\_P128839 TTTTCAGGCTATTTTCCAAAAAAGAACCTGGACTGGGTAATAATGAAATCACCCTTA  
A\_14\_P126532 ACCATTGTAAAGTCATGTGTTATATCATGTCCCGATATTTCACTTGAAAAATATGATGAC  
A\_14\_P128146 TTCGTGTCATTTTCACAAACAACCTTTTGAGGAAAAAAAGTCTTAAGGACAAACACATGC  
A\_16\_P20913860  
CTCATGCCTTTACCACAAATATCCTTGAACCTGACTGAACATATATTACTGAATACTGTGA  
A\_16\_P16160076  
TGAAATACTATGTCCAAAAATGTCCCTGTAACCTATGATACCAACTCAAATTCCTCACACA  
A\_14\_P115551 CCTGCCTATGTCAGTAAATGAAAGAATATTGGGTCAAACCATATGAAAAGCAAATCAGAC  
A\_14\_P114884 GAAATTCAGCAAGTTGATCTGCAGAAGGTTGATCCATAGGCTGGTCTGTAA  
A\_14\_P201428 CAGTTTAGAATGGTTTGGGGTAGCATCAAGTCATCAAATAATTCACATTTGTTGTCCATT  
A\_14\_P135724 ATAAGGAATCCTATCAAAAATGGGTGCCATTTAGCAATCAAGAAATTGGCAATTGCTGTTA  
CUST\_2900\_PI426210822 GTCAGAAGTGGTATCTTCTGTGGTATTTATCTGCTGCTGTCTTCAGCTACATGA  
A\_14\_P106901 TATATTATGACATCTGCAAAACTCATTGCTCCTGTAATTGAAACATCTTTTGCTGCAGGT  
A\_16\_P19239039  
ATCTGAAACTTTAGAATTCACCTGGAGAACTGTCATGTTTAGAATTCAGGGCATTTTGCA  
A\_14\_P137364 TCTTCTCCCTGCAGAAATATTGGCTTTTTGTCTAGCAGCACTCATTATGCTCATTTAAAA  
A\_14\_P106119 CTACCGCATCAGCCTAAAGAAGTTCTGCAAGAAGGACTATGGTAGGTG  
A\_14\_P133441 ACCAACTAGAAGTGGGTCATAGATAGATTACCAGGGATGCAGTGGTGTITAG  
A\_14\_P103188 CTA CTGCA TTTTATTGCCTAGGGTTTAGAGTTGTCACTTTGAAACCAAGATATCACTTGT  
CUST\_9081\_PI426210822 GAAATGACATTTGTTGGTCAATTGGCCGGGGATGCTTGGGTTGTCTG  
A\_14\_P201508 CAAACTCTTCTTGGGTGATCTGTTTTAAATAGGAGTAAACATACTTCTCCGACTTCTCA  
CUST\_9278\_PI426210822  
TTTTGAAACTTTTCCAGCAAGTGCCATTGGTAATTTTGCTGGTAGATAATGCCAG  
CUST\_3001\_PI426210822  
TGATCAGTAGAAAGTAAATTGGCTAGAGTTCAGTTGTAGATCTCTGCACTTGTITGGA  
A\_14\_P100249 GCCCACAATGCCAATCTTCTTTAGGTTTGTATCGTGAAGGATACTTTCTTTA  
A\_14\_P134125 AGTCTTTTTTCGTTTTAAGATGTGAGAAGAGATGGGATTCCTCAATCAAGGCCACAAG

A\_14\_P200863 ATTCTAAGTGTGTGGGAAAGGGAGTTTAATTGACTCTTATCTTCCATATTTTTTTTCCC  
A\_18\_P22841393 AGTGGAACATTTTCATTGCTGTCTGGCTAGCCAACCTCCGATAAAATAAGGACTTTTAA  
A\_16\_P19995490  
AAACCCAGATGTCAATTAAGATGCCAGAAGAAATATCTGCAGGGATCAACATTTTACA  
A\_16\_P01056612  
AAATCTAGATTGAGAAAGTCCATTAGCAGTTATTGCAGATACAGTTACCTTCTCCTCACC  
A\_14\_P105286 CAGACTCAGAAGAATACTATTCAATACCTTATTTCTGCAGGGCACTAAACATTAGCAGGA  
CUST\_4657\_PI426210822 CTTGTGTGTTTGTCTCCCTCTGTGCCTAGGCCCGAGAGGCCATTA  
A\_14\_P134140 AATTCCTTGATATTGAGAGTCACTCTCAGTTATGACTTTTGCAAATAATAAGGCGCTTC  
A\_16\_P36230384 GGAAGGTTGGGATGCATAGAAGTGTGTGGGAAACTACCTTCATCAT  
A\_14\_P110218 GCTTCTAACGCTCTGGCTTTGTGGCTTCAGACTGGTCATTATATTTCTCTCTTTTTT  
A\_16\_P36230138 GTAGGTGCTTTGAGGGAGATAGAAAGAAAAGTCTTTGCATTGAGACTCCTGAGAT  
CUST\_7116\_PI426210822 CTATTGGCATGGTGGTCTGAAACTCTTGAGACACCAAAGAAATTGGTAG  
A\_16\_P15166957  
AACAGTATACCTTTATTAGCCACACTAGAATTCCTAAAGAGTTAACGTCCAATTCCCTCC  
A\_16\_P19424870  
ACAACAAGTTTCTCACTCTCTTTCAGGAATCTCAGATACCACTAAAAATGCTGTCTTTTG  
CUST\_9239\_PI426210822  
TCTGTCTGGCTGAAAATTTTGCCTATAGATGAAACATCATCAAGGTATGTATACGCAT  
CUST\_7473\_PI426210822  
CCTGCAGCTCATCCTTTTTTTCAAAGAAATTAATTTTCAAAAAATGACTCTATTGAGATT  
A\_14\_P134447 TTGTAGAAGATGTTTCGCTTTACACTCCAAACTACACACATCTTCATCTGTCTTATCACA  
A\_16\_P03317530  
ATTTTTCTATTCCATCTGGATAAACAATCTCAGAAGTGCATTGAATTGGTTGTGACACCA  
A\_16\_P16427636  
AAACAGGTCAAATTTTCAGTATGTTGTCCATCAAAAATGTCATGCAAGTTCACATTTGAGG  
A\_16\_P19958245  
GTCTACCTAGAAGGCTATGAATGATAAGAACTCAACCTAATTACTTCGCTTTGCCAACT  
A\_14\_P135991 ATGGGTATGAATATCTCTATATATTGCCAAGCAGCAATTAAGAAGTCCAACCAAGGAAA  
A\_14\_P104970 AAGATTGTCAATCTGCTCTTTGGTTAAACCACGTATTTCGATCATCATCACTTTTCATT  
A\_14\_P134809 CAAAACCCGTATTTCTAAAGTTATGGATCTTCTGTTCCCAAAAATGAATGGCTTGATTTA  
A\_14\_P100311 TGAATGGTGTGTTGTGTAGCAACACATTGTGTGCTATGTTTATTAATAATGCAGCGACAAC  
A\_14\_P201919 TTCATGGGTTATAATAAGAGAAACACAGATGAGATGTAGATGGTAAGGAGTCTTACTGTT  
A\_14\_P119114 TAACTATTAACCATCCCTGGGACCACAGGTTGGGATATAAGACCTCTTATTATATACTGA  
A\_14\_P201275 GCTGTGACCTTCTGAATATAATAACTTAGTGTCTGAGAATTGAAAGGCCTCTTGATTTT  
A\_14\_P108992 AACTAAAGGGAAAGCATTGATGTTTTAACAGGCCTAACTAGTTAAAAGGATTTGTGGAT  
A\_16\_P19042973  
AATACATCCATATTCGAAATCATTCCGTGAATTACAGAACAATAAGTGACTGTCCTCCC

CUST\_194\_PI426210822 TTTACTGAGCACTGCTCCTACAGCTTATCTCACAACCTGGGTGAAGG  
CUST\_8441\_PI426210822 GGAATGGGTACTGTTCAAAAAGGAAGGCCCCGCAAGTATTACCAT  
A\_14\_P130417 AAATTACAAGGAGATATGCACTTGCCCTTTGGTAATCCTGCTCCTTCTGAATCT  
A\_14\_P129938 AAATATAGTTCTGCACCAAATGCAGTTGCCTTCACAAGAAGATTCAATCATGTGAGTTTA  
A\_14\_P135621 TCTACTTAGTTAGGAGAAGGGAAAAACCTGCCACCTATTAAGGTTAGTCTTGACTTGAAA  
A\_14\_P105700 ATTTGAGTTAATTAGCATTGCAGAACATGAAGTAATTGCTGTTGTTCCCTCAAAATTGGGG  
A\_16\_P02232775  
ATAAAGGAGTAGAGTCTATTGCACCTAAGCCTTACTACTAGCCTAAGCCTTCATACTAGA  
A\_14\_P100832 CTGGCTTCTTCAAGTTGCTTTGTCTGAGGTCTTTGCCCTTTAAAGTTACA  
A\_16\_P35681799  
AAACTGCACAGTGCTACAATATAGACCATTTCCCAAAAAAACTACCATTTGTTTGAAGAA  
A\_14\_P116944 AGAAATACTGATCCTGACTGAATGAATAGTTCCTACAAGTGATTGATCTTTGACACAAG  
A\_14\_P202346 TAGGAATTTATAAAATCCCAGAGTAGATCATATGACTATTGGCTGGGATTATCTCCTGAA  
A\_16\_P00060286  
ACCTATGCTAAAAGAGATTTATTACTCCACAAACTCTTTTTATCCCACTCCTTCTCAGA  
A\_16\_P18171178  
AATCAACAGGCAGTTTTTTATTCTTATCTTCAGCAATGTCAGTTTTCAAGATGATCTCAGGC  
A\_14\_P106971 AGGTCAGAGAAAGGAGATTACTAATGAGACTAGTTGCGTCTCACTCTTCTAGCAC  
A\_14\_P103873 ACCAGATAAATAAAAGGTAGTTATTTCCCTAGGGTGACTCAGCAAGATATTTCTCGAGGAT  
A\_14\_P105574 AATTACAAAATCCTGAACTGAAGGATTGTAGCCATGGTTCCTGTGAGTTTTAAAGGTAAA  
A\_18\_P17189316  
GAGTGCAGTAATTATGATCTGAATTTTTCCATGCTTTTCGACCTTTAGAGAATCTATCGCC  
CUST\_9948\_PI426210822  
TTCCTCTAAGGAATGTGAGGAAGATTTCTGACCAGAAAACCTTGAGTAACTGAGATG  
A\_16\_P01481078  
AAACTATCCTCTAGAAAGTGTGGAAGTTTACATCAACTCTGCTGTATATCACAGTTTGGC  
A\_14\_P134055 CTTATAATGTTGACTTTATTTACCGTGGAATTTTGTGCTCAAAGGTAAGAAACCATCT  
A\_14\_P103971 AGCAAATGAACGATATAAACAAAACCTCAGGAAATTTTGGGTGAATTACGGAGAGGCACT  
A\_14\_P108593 CTATTCCAGAAATTCCAAGATCTTACACATTACGCAGAAAAGGCGCTTATCAACATTCTT  
A\_14\_P126878 CTTTGTGGATTAGAGCCTGACAGTTACAACAGACTTTGGAGTTTAAACTTTGTATCACAA  
A\_16\_P17440596  
AAAAATCCTAATGCAGGCTAATAATTTCCCTCAACCTATCAGTCATACATCTGAGTCCACA  
A\_14\_P124210 CGACCATGAAACTTCCAACAAAACCTGGAAAGGCCAACATGTCAAAAAGTTACTC  
A\_14\_P201658 GTGCATAGCCATGTCACAGGAAGTTTGGAAAATAAAAAGAAAATTAATACCATCCCTAATC  
A\_18\_P11374451  
AGGTCTATTCACAAATATCTTGATTTCTTGGAGCACTGAATCTATCTACAAAACCCACG  
A\_14\_P122124 CTGAGGAGAGTAATACTCACGCAGAGACAATTTCCCTCACCCTCACAACTT  
A\_16\_P16107357

ATCACCAGCAGATTGTAATTTTGAGCCTAGATCATCAATGTCTAAATTCTTGCTCCTCTT  
A\_14\_P119932 GGGATCAGTTTCATTCTACATCTTCCTGTGTCATTTGAATCATTTACAAGGAGAGTGTAT  
A\_14\_P109169 CTAGGCTACGAGTGCAGATATAATTTACATGAGTAAAGTATCCACAGGGTATAACAGGTG  
A\_14\_P123414 AAGTCACACCAAGGTCACAGAAATGGCTACTGATTAAATTGTTTCCATCATCAAAGATAT  
A\_14\_P103505 CTTGAATTATGTTAAAATTCATGTGGCCGCTCATCCACCAGAATTAGTTTCAAGTTATGT  
A\_14\_P103442 AAACATCACATTCAAAGGTTGCATTGAGATGATGTATGAGGTTTGCTTCGAAATAATGGA  
A\_14\_P105206 CTTTTTTATTTTTGTAGACACCAACACCCATGTATTCTACATTACATACACATTGGGGGC  
A\_14\_P127810 TGATGAAGAGAGTTACATTGTATTCACCTATAGGCCTTGTGGGTAAGTAGAACTAGGTAG  
CUST\_7396\_PI426210822 CAGGTGGCTGAGATTCCCTCCAATCTTTTTATTTCTGGTTGGGAAAC  
A\_14\_P121228 TCGTGTTCAGGGAACCTTTTGTTAATACAACACAGTTGGTCACACAAAATACAAATGCTT  
A\_14\_P105495 ACAAAAAAATCAAAGAGGCATTTGAAGTCTTTGACCATGAGTCGAATAATACAGTGGATG  
A\_16\_P18360039

CCCGTTTCTTAAGACTCTACACATTGATTCTTACACTTCAACATTTCCCACT  
CUST\_2573\_PI426210822

GTAGCCTAACTCTTAAGCCTAACTCTTAAGCTATTTGCTTTTGGCCAAGAACCCTC  
A\_18\_P22841565 CTTGGCATATCACTGGGGAAGGATTTCTGAGCGGCCACTACAAAG  
A\_14\_P132986 TCTTTTCATTGAACTTCAAGATTAGGAGGGGAAAGAGACAGACAAAGGAGACTGATAA  
A\_16\_P20102252

AGGTATGGGGGAAAATGTAAGTATCCGTTTAAGCACATGAGTTCATGAATTTTTGCATAG  
A\_14\_P126734 AAGCAAACATATTCCATGCCTTCCCAACAATCATATCAAGTGGTTTTACTAAGAACTGG  
A\_14\_P136857 TTATTTCCCTTCATCCTCTGGATGAATGTTAGATCTCTATATCTTCAATGTCCCTTAACT  
A\_18\_P22841080 CTGTCCTTTTTTCTAGGGCCTTGATTAAATTTGCTTCTCTGAACACTGTGAGGTATCT  
A\_14\_P119215 AAGAGCAGTGAAAAAATAATCTTCAGACCAAATTTGGCTCAGAAATGTATTGCACTAACC  
A\_16\_P19490387

GCAGTTCCTATCAAGACAAATCTACAATGGAAAAGTAAATTTTACAAGTGGAAAGACA  
A\_16\_P37015064

AAGATTCCACTTCAATGAATACTAGACTATACCTGTCAGAGATTCCAATAAAAACCTCAT  
A\_14\_P105207 TCACAGAGAAAATCTCTGTGAGAGATTTTCAGTCTTCTCCTGGAGATGTTTGTGAATAG  
A\_16\_P20799789

AAATTTCCCAAATCTCTACATTGCATTCACCTTGTCAGTTTTGTCTATCACGGAGTTAAAA  
A\_14\_P135335 TTGAGCAGAGAATGAGAGATAAGGCAACAAGGAAAAGTACTTTGAAAATCTTTTATCATC  
A\_14\_P100283 ATATAAATACCACAGACTTTTGAAGATACCACAGAAAGCCATATCCTAGGAGTAAGGGC  
A\_14\_P135040 CTAAGATATGGAGCATCTCTAAGAACAATACTGACTTTTGCAGAGTTGGATTGGACAAG  
A\_14\_P106730 CTCCCCAAATGCTGGCTAGTATTATTGTGTGCCTAGAAGTGTCTAAATTACCTATGTAT  
A\_18\_P15531852

GCAGAGGAAATAAAAAGTTGAAGTGAATCCATGACTATTTTTGTGCATCATTAAGGCC  
A\_18\_P22842833 ACATATCTGGAGAGGCCAGGGGACCTGTGATACCTGAATTTCTACATT  
A\_14\_P201781 AACAAATACACAGGATTTGGTCATTTTCTGCCATGAATCTAGGGCACGTGG

A\_14\_P110163 CCTTAGAATAAAACTACCTTTGACTCATAGACTCATTTCATCCAATAGGAATAGAGTGCCC  
A\_14\_P119457 TTAAGTTATAAATGGTAGATTATGAAATGGCTTCGTTTTACTTGGTGGAGGAGGGACACA  
A\_14\_P108432 CACTTTAGCATAACTAAAGTGACAGTAACATCAGTGTCTATGAGGAAAGAACAAGGAAG  
A\_16\_P02475426  
AAATTGGGAGTAATAAGGTTGAAAATACCAAATCGTGAGTTTAAATCCAACCGATGGCTA  
CUST\_3760\_PI426210822 TGGTCAGGCAAATAATTGATCACTCTGTGTTCTCAAGACAAGCAATGGGTAA  
A\_14\_P135820 CTCTAGGAAAACTACAATATGAACAAAGGCCAACAGCAAGAATATTACCAGATGTCTCC  
A\_16\_P17776220  
AAATTAAGGGAAACAAAATTTTTAGGGGGCAACAAGATAAGATGTGCGAAATTCTGGTTCT  
A\_14\_P114634 CTAAATCTTACCAGCATAGATTTGTAAAAAATTCTGTCAGCATGGCCCTGTGACTTTTTTC  
A\_14\_P107571 GTCAGGGATATTTATAACAAACCCCTTTCAAGCAAGTGATGCTGAAGGGATAAC  
A\_14\_P137154 GAAGAGAGAAGTACCTTTCTAACAAAGTTCAGAGACCTAAATTACTGAACCTTTTCCCTA  
A\_16\_P35355644  
AGAAACCATTATTCCACATGCCTTGAATATCCTAGAAACAAGAAATTTCCATCAGACACT  
A\_16\_P17146741  
AGTGGTCACTGAAGATTGCTACTCTACTGGTGTTTTAGACTAAACTTACTCTGTCTCTAA  
A\_14\_P110896 GTTTCCTTGACTTCCACTTAATGTTTCTTTTCATGGGCTTTCCTCTTAAAAAGTAGTGCAG  
A\_16\_P16026886  
AAACAATCTCTCATCTCAAGAAAATAGTTTGCTTTAAACCCATCAAGATCATTAGCCCAT  
A\_14\_P139599 AATTTCCAAGTATTCTTAATAGGAGATAACCACAGCAGCAGATGATTTAACTGCTCTTC  
A\_14\_P114253 ATGTTTTGGCTTTTTTTCCCACTTCTACCATGTTCAAGGTTTACTTTTTTAAATTGAGGGG  
A\_14\_P126406 ACTCACCAATCCTCTAATACACAGTGTATTGCTTTTCCTAGATACTCACATTGCTTTCTG  
A\_14\_P128004 TTATATCCCAATTAGACAGAAGGATCTTCAAGGATCAGAATTCTACTTCAGATGTCCTT  
A\_18\_P23444933  
CATGGAATTTAGGTGGGAAATCAACTCATAATTACCAGAGGATAACTTCTTGGCTCAGT  
A\_18\_P13470333  
AAACATATCTGAAGATAAGTTCCTAGCCATTGAAGTTTCAAGGTTTCATAGAATCCCTGTG  
A\_14\_P111228 CTGGTTTCTGGAGGTGTTTTGCGAGACAACTTGAATTTTGAGAAACAAAAAGTAATGAC  
A\_16\_P00685190  
AAAGGGAAGGCATTTTAGGTTTGGGACATATTACAATATTGCCTTTTAGCGTAGAAAAGC  
A\_14\_P110745 CTAGGTGATGCATGTCTGTAATAACATATGTCAAGACACTAACATGGGAGAGAACATTTG  
A\_16\_P00685153  
AAGTTAGAGCAAGAGTGATTCAGAGCATGAGACAAGTGGTAGAGCAAACCTCTGATTT  
A\_16\_P02240028  
CTACAGACATCCAAATCTCTACCTGTAAGAATATGTCTCACTCTAGATTCCCTTCATTTCG  
A\_14\_P101125 TATGAGGGAAGTTGAAGAAATCAAAGTTGATCTAAGACAAATGGCATTTTGGCTTTTTTCC  
A\_16\_P02950958  
GGCTAATGCCTCTTGCTTATTAAACCTAGACTTATTAAACCTATTTGCGTATTGACTGGG



A\_16\_P18909754

ACAAGTATTTTTTATTCCAGTGTTCATTTGTCTCCTGTTTATCAGATCCTGGCTCCAA

A\_18\_P22840294 GGCAGGGATCGGATAGGTGGTAGAAGGATTAGAAGTGGATTCTACTCTA

A\_14\_P107816 CTTGGTGGCTTCTGAGTTCGAATATACAGCACATCCACTATTAATAATGAGCAATTGTGTG

A\_16\_P18091592

GACAAAGGCTACATCATCTTATCTAAGACAGGAACACTAACTACCTTTATACATGCAACA

A\_14\_P125316 CAGGACTTCAGAAGATGTTCTATTTGAAAATTGAGCGCTGTGTTCTTTTTTCGTTTGAAAA

A\_18\_P22841551 CTCAGGCCTGTCACTTGGCCTCTCAGTGGGAGTCGATGCTGTGAT

A\_14\_P124073 CTAAATATGGCCTGTTATTTTTGACATGTGCATATTTTATATGCAGGGCTTGTGTGGTCT

A\_14\_P131109 AGAGTTATGGTGCCGAATTGTCTTTGGTGCTTTTCACTTGTGTTTTAAATAAGGATTTT

A\_14\_P139789 GACCACATGACTGCTAGAAGAAGATGGGCAATAAGAAGAAAGTGTATCTACTTCACATAA

A\_14\_P101642 CAATCCTCAGTTAAATCTGGAAGGGGTGAGTGAATATAAGATAGAAGAGATTACGAGAAG

A\_14\_P200772 AGAAAGAGTTGTCCTGATGTTTTTCTGTGTTACTTATATTAGAGTCAGAGATCTTGGTAT

A\_14\_P139893 CATGCTAAGTGTATGGAATATGATCTTTCTGTCTCCTCTGTCATCTAACCTCATCAG

A\_14\_P103770 TTGACACTGTTGAAATCATAGCAGGTGTTAAGTTTTTTAAACCAGACAATGCATTTCTGA

A\_14\_P108421 AAATCCTGCAGCATAAATCCGTGCTGTAAAGGGAGGATTCCGTTACATAT

A\_14\_P102576 TACTTCTAATTAGTAATGAAAGTCCACAATACCCTGAGATAGCCTTAAAAGAAGCGTCGG

A\_16\_P01613889

CCCTATAGTCACAATCCAAGCCTTATTTCTACTATTACCATAAACTAATGTGGCCAGA

A\_14\_P131440 CTATGAATAGAAACAGTATGCATCTGAATTAGTCACCAGCCACAAGGAACTTGATGTTT

A\_18\_P22839589 GACAGGGTGTTTTAAAAGTGGGAGGGCCGTGTGGAGAGAGAATTT

A\_14\_P128317 AGAATTTACTGACTGGTTGGTTGGTTAGTGATGCTGAACTTTTAAAAATACTTGACAGT

CUST\_3546\_PI426210822 TGTTTTTGGACACAGCTATGTCAGAAATCTATTTCCCCTTCTCAGAGACCA

A\_14\_P131207 CACTTTAGGAACATCTCCTTTAAAGGGTATCAGATTCAAACCAGGAAATAATGCTCATT

CUST\_267\_PI426210822 CTTGATAGGAGAGAGAGTTAGGCTGCGGGAAGTTCCCCCGTTCAA

A\_16\_P21433108

ACACTCAATTTAACAAGCACACTTCCAATGATACATTTTACGATTATCCCCTTTTGAA

A\_16\_P01402878

TTGACATGCATATTTGAACACTGGAGACAAAATTTCTGTATCGTTCTTGGTCAGCAAAAT

A\_14\_P137818 ATGCTCCAGAGAATGGGAAGTAACTTTTGAATTCTCTTAGATGAGGAATGGCTTTTAAT

A\_14\_P126416 TAGAGGCTGACATTCTCTGTAACTCTGAAAAGCCTTTCTGTGGACTATTTACACTAATT

A\_16\_P17191330

TGTTTTTCTCTGCAATCAATCCACTAAACCAATGAAACTCTGTAACAAAATTAGCCTCA

CUST\_1240\_PI426210822

GCACAATTTGGTTGGTAAGTGTTCCTTCCCTCTTTTTGTAGATGACCTAAAACCTT

A\_14\_P131300 AGAATTGGATAGCAGAGTAATGTTTGACCTCTGGAAACAGTAAGTCAAAATGAAATTGCA

A\_16\_P39704126

ACCCTTGCACCGAGTATTTACTTTTTAGTCACACTTTGCTATAAACTTTATGACTTGTGCA

A\_14\_P102828 CCTTTAAGAAGAAATGCAACAATTGCTCTCACTTTCAATACTATTTTATTGCAACTGGAT  
A\_18\_P20789855

ATCTCCTTTTCTTGCAAATATTTTCACAGGACTTAGGTAGCAATAGACCATTACGATGCT

A\_14\_P120034 CTGCTGGACCCACATGTCAATTTTGTCTTTAAGTGTGGGCTTCAGAC

CUST\_9916\_PI426210822 TTCAGGTGCCAGTGAAAAATCCATCAGTTTGCAACCAGAAAATCGTTCA

A\_14\_P129335 ATGAAGTGAAATTAGCAAGCCTGCCTTATTAACAAATGTGTGTAGGGAACATCATTGTTT

CUST\_4272\_PI426210822 TCAGTAGAGTAAGTAGTGACTGCCTAGGTGGCAGGATTTTGGATGGTA

A\_14\_P134474 TTTAAGGAGGACAAAATTTGCAAACCTGCTCTATTCTCTGTGACAGAACTCAGAGATTAG

A\_16\_P00063718

ATTACCTCCCCTACTATTTTTGTATACAGGTTTCTTTGCTCAATGATCCAAAAATGTGCCTT

A\_18\_P14135226 GATGGCAGAGAAGCCCAGGCAGAGTGCAGGGGCAGTGATGTCATT

A\_14\_P139408 TATACCTTGAATTTTCTCTGGCCATAAGAAAATACAACTCCACTTTGCCATACTCTGG

A\_14\_P200658 TATGGCAGAAAAGAAAAGAGTTTACTGTTCCAAATTTTATTGATGTGTTACTTGGGAAAT

A\_18\_P14574817

ACAGTTTTATCTTCCAACATAAGAAAACCTAGAATGAATGACTCAAAGGTTGTAGAGGGT

A\_18\_P22841894 CTTACGGATGCCTCCCTCCCTTCATGACTCACTGTGATCTACAAC

A\_14\_P101429 TAGTCAAAACCACACAGTCATGAATACATAAACACCACTTTCGGAGCCATCTAATAAAGA

A\_16\_P18458116

GAATGCAATCAGTCCATCTAAGAGTTTAGCAATTTTCCCTAACACATACTTCTCTCCAC

CUST\_3261\_PI426210822

ACGGTATTATTGTTAAAAACAAAACAAAACAATCTACACTAGACGAGGGAATATGCACAT

A\_16\_P20886664

TACAGTCTTCTAGTGCTTTGAAATCAACAATGTCTACCCAATTAACCTCAATGCTTGTCC

A\_14\_P116724 TAGAAAAAAAAGGACTAGAAGGCAGTGTATTCTGGAATTTTCCCTAATGTGATGGAGGCTA

CUST\_5927\_PI426210822 GAAATGTCAGAGAGGTTGAGACAGATTGAGGGGAAGACTAACAAGCC

A\_14\_P111019 GTGATTGGATTAGATGATTTACTCTTACCCTATTTGCTTTCCAGTAGACAGGATGTATCC

A\_18\_P23417744

AGAGTTTTACTTCTTTTTGCACACAAGTTGTACAGTTAGGTGTAATGTGATTCTACGTCT

A\_14\_P102326 AACAAAACCCTAGCAGCCTGAAGAACTCTAAGCCAGGTTTAATTGGTTTCTTTTTTC

CUST\_4508\_PI426210822 GAACTTCCATGCCACCCCTCCTGCCCTGGGCTCCAGGGCTCTC

A\_14\_P110426 AAATTAGGAATTTGGGGAATTTTTTTAAGAGCAACCTCTGATTTTTCCATTGATTTGGCC

CUST\_2730\_PI426210822 TTAGGTGAATGCTGCCTGAGCAGATGTCTGCAGTGGGAGCAGAAT

CUST\_7335\_PI426210822 CTCTGAGCCTCCCCAGATGTGGGACACTCCTCAAGGGTTTCCAG

A\_16\_P30952454 TAAACTGCTGCTCTCCAGGTATGTCGGTGTTTCTTCAGAGCATTGTT

A\_14\_P117162

AATACATTCCAAATCAAGGAAAAAAGGGGAAAGAAGACTTTAAAAACCAGTCATTCCGA

A\_14\_P139330 CCCACACCTTTTGTTCCAAATGTAATTATGACAACTACAACAAAAGCAGTAAAAAGCAAG

A\_14\_P122442 AGATTTTTTAAAATGACGGACCTTAAAGCAAATATATGACACGCAGGGGGATTTCAAATC

A\_14\_P135010 AATAAAGTAGATTCAATTCCTACCTGCTTGGTTGGTGGTCACAGTGACAGAAACT  
A\_14\_P117736 TCTGATTTACTGAAATGGTATCTGCTCCACTTTCAGATCCTGATTCCAGATCCTATTTAAA  
A\_14\_P101960 TAAACTATAGGACAAATTGCTTCAGAAATTCAGACTTGTGCATCCCCTTTGAATAGGTGG  
A\_14\_P136371 CTGCTGGGGGTTTAGAAGGATATCTTAAGAATCTAGAAAATTTGCAAATCCATTTAAATC  
A\_14\_P116639 CCTTGACTTGATCACATTTATTCAATATGGTTGGAAATTAGCAAGAATCAGAAGAAGCAC  
A\_14\_P103597 TATTACTTAGCAGAAAAATCATGGGCCTGCCTGAGTTGTTCGTTTACTGAAAAATTTTAAA  
A\_14\_P115591 TACCTGTTTTTAATTATCCAGTGCTTGTTCCTTCTGGATTCCATATCCCCTG  
A\_14\_P101564 TATTCATTGCAGTTCTCAGTAATAATCCACTTACTATCCAGTCCGTTTCATGCAGAGTT  
A\_16\_P00859011

CCAGCCAGATGATGAAATTACTTGACCAAAACTGAGATTTATTCCTGAAGCAGATTCTTT  
CUST\_415\_PI426210822 ATATTTAGGGCTGGGGGTTCAACAATGAAAACCTTTTTGCTCACAATCTGACAG  
A\_14\_P131801 AAATGAAGTTTGAGGTGAGAAGCATTACCATTGGTGCCCATCGTGTTAC  
A\_14\_P202319 CTTGATGAAGTAAAGGTGAGTGTAGCCTTCATGCTCTTACAGACACTTGATAATGTTAAC  
CUST\_9377\_PI426210822 TGAATGCACTAGTTCTCTGCTATCTGTTTCCACGACAGAAGCCAGG  
A\_16\_P01621453

TAGCATTGATGGAGGTATAAACACTGTTCCCTTTAAAAAGACTAACAGCATAGAAGACCC  
A\_16\_P21574904

AAGAACCACCATTCTTATGCAATCTGTTTAACTGAGGTTTTCTGTATAATGCCACTTC  
A\_18\_P14135556 CAGAACATCACTCCTCAACCCAAGTCTGGCTCTTCTCCTCTTTCT  
A\_14\_P110261 CTCTCATGTTCTCCATGATAAAGGAATCATCTATAGGTGAGTTTTGGTTGCTGC  
A\_16\_P01829914

AACCCCATCTTTGAATATCACTTGTAGACATAGTCACCTAAAGAAGCAACTAAACGTTGA  
A\_14\_P125604 TTTCCAGAATCCACATTCATCTCAATGGAAGGATCCTGCCTTAAGTCAACTTATTTGTT  
A\_14\_P120973 TATTTACCTTCAAAGTATATACTCCATTCTACCTGGAACCTTATAGAAGATGCCCTCTT  
A\_14\_P134118 TCATTGACAGAAGAGAAAACCATGAAGTCATTCAGCAAAGTAAGTGGGAAACGTCTATT  
A\_16\_P03235960

TGCCTAAAAGATTCATCTTCATAAAAGTTTCCAACATCCTTTACCTAACCTCCATCTAGG  
A\_14\_P136484 TTTCAAATGTAACCTTTTGGATGTGTGGATGATTCAGTGTGACATCTGAAATGATGGTGA  
A\_14\_P138170 GATTTTTATCTGATAGGCTGGTTTCATCTCTACTGGTCCTCGACTTCAAATTTTTCAATG  
A\_14\_P139189 ACAGTAATCCAGTAGGCTAATTTTCTGATCTTAATATTTCCACCCATATGGAGGGTGTC  
A\_14\_P130610 CTTGCTTGAGTTGACATTTGTGCATAGGGTCACTGACTAAAATTTGTTTCTACTCAAATTC  
A\_16\_P19762738

ACTCTTGGCACAATAGTCTAACATTTCCCAATTTCTTATATCTCTGCCCTTTCATTTTC  
A\_14\_P106518 CAATCAGTAGATCACAAAGAATTTGACTGAGAACCTTCAGATTAAGCCACGTTAATAAAT  
A\_16\_P19157688

GGCAACCTCATCTTCTAAATGTAATTTACACATGTTACTAAATCACTTTGCTTCAGCCT  
A\_16\_P03639537

CACTTAAAATAGTTCCCTCTGTATGAAGTTAACTACCAGAATCAGGCATATTGTGATCCC

A\_14\_P123629 TTCTTATGTGAATAAACTATTATATGAATGAGTGCCAAGCAAACCTGAGGCTCAGACACAC  
CUST\_8978\_PI426210822

CAACCAGCTGGTATCATTCTCAGTTATTGTATGACTACTATCTTTATTTCAAACCCTGA

A\_16\_P00685621

GTAATCAGGCAGTCTCTATGTTACATGAGTTAAGAGTCCTAGACTTACTTAGCAAGTCCT

A\_16\_P18097938

AACTAAGTATGATGGATACTTGGATGCAATGGATCATAAGTTCTGAGTTTACAGATGCGC

A\_14\_P110963 ACAGGAATGGGCACATCACTCACAACTTTGAAAAGTTAAAAATACTCTCCTCAAGTAAA

A\_14\_P121832 AAACAGGTAAGCAGATTCTTACCACAGAAATGGAATTAGAAAGCAGTGTTCCATCCT

A\_14\_P128159 GGCATTTTATCCCCTCAATGATGAGGCAAGATAATGTATGTATAACTTTGGTGCTTTCAA

A\_16\_P01843009

AAAAAGGCAAACCATTAAAGGCATTAAAATTTCAACAAGAACGTTATCTCCACAGTCAGC

A\_16\_P02955432

ATGTAGGCACAAATTCATATTCTAAAGACATGTCTCAACTGATTTGGATGCATTTGGTC

A\_14\_P113511 AGAGTTGCATGTATATAAGTAATTGCTCATATCATCCTGGGAATTCCTGCATGGGTTAAT

A\_14\_P127443 GAAAAAACTCATTACAACCCAGTCTCATCAAATTAACCTGTTTTACATTTCCATGTCC

A\_16\_P16824825

GCAGCATCTCATGTATCAAATTGATCATCGAATCAGAACTTAATCCTTAACCTTCAGTCC

A\_16\_P15821267

CCTGATACTATGGTATTTCTCTGCAGGGTAAACCTTGATTAGTGGCATATTCCTAATTGT

A\_18\_P14299318

GTATCTCTGAAATATTTTAGCCAGTTGTCTTGAATACCACTAATTCCACCAATGAAGGCC

A\_14\_P125268 CCTGCTGTGTCAGGGGGACTAAATAAATGACTTTGTCTTATTTAGTGATAAATCCTGAAA

A\_16\_P02278442

AAAAGTCTGTAAACAGAAGTTATCGATAACAGTTTTGCGTTCTCATACACTCTGTGTCAA

A\_16\_P01983303

GCTGCTTAGGTTATTGATAGTTTATGTCCAAATGCACTCTAATTGAGGAATCTCTGATG

A\_14\_P118757 ACTACTTAGTGGTTAATAATTAATTAGCAAGCGTGACTAATTAATGGCTTCCCCTCCCAC

A\_16\_P19227761

AGGGCTGTCATACTAGTTTTGAAAATGTATAGTGCCTGAGATCAAAAAGATGTCCTTGA

A\_16\_P41747805

ATACTTTTCCACATTGAGATTCATCTTACACTTTCTTGACCACTCATTGCTTGTCTGCTGC

A\_14\_P110879 CTGCTCTGTGGCCACTAAAAGAAATAAGTTGTAGTGGGTATAGACCAGTAATGTTTATTG

A\_16\_P01755696

TCATTTCAAGGAAAGACTACATAGATGCATTACAGAAACGAGTTAAATTCACAACACGT

A\_14\_P112953 ACTGACACTTCAGACATTGCTGAGTATAGAATCAGAATGCTGAGTATAGAAAATAATTTA

CUST\_5306\_PI426210822 CAGACTTCTTAATTAATAAGGTTCCGGCAGCCATTGCCAGGAAGCAG

A\_14\_P123740 CTTGGAAGTTTACAGAGAAAAATAAAATCAAAATCAAATTTTCAAATAACCACTGACTC

A\_14\_P107511 TCTTGAAACATTTTGAAGGGTAGGAGTCTCTGTGGACACAGATAATGGTTTACAGTATAT  
A\_18\_P14133389

AAATTTAGGAAGGCCTAATGATGACACACAATGCTCTTTCGCACTCATGATACATAACTT

A\_16\_P15987529

TATCAGAGCATGCATCATAACAGAAACAGAGAACATTCCATGTCATTATACAGGTGTAAGG

A\_16\_P20489046

GGGTTTAACTTCAGGAAAATAGCACAATTCACATAGAGTAGATAGATTTCAAGGGAAGGG

A\_14\_P121562 GCATCAAGTTCCTCTCCTCTAGTTTTGTCTACCTAAAGTCAACTTTTAATGTTATGGTGT  
CUST\_6029\_PI426210822

CATAATGCAATTGACTATACTATATAAACAGCAAGGTAGCCCTGTCTCTTATCCTGATGC

A\_18\_P22841252

TTCCCCTGGACGTCTACTTCACAAGCAGTAACATAAGCAAGTATGTATCATTAAAGATTT

CUST\_127\_PI426210822 TGTCTAAACCTCCATTTAGGGTCCCTACGGTACACTCACACAG

A\_14\_P202536 TTTTTGTTTTACGTATGCACCAATTTGCTGCTGTTAGGACATCGTTTATCAGAATAAAAAGC

A\_14\_P113778 GGACTAATAGGATGGGATAACAAGAAAACTTAAGATTTTTTATGGACAGTTCTGGCAGG

A\_14\_P110848 AAAATATGCTCAGGAAAGAAAACATATGGGGTTTTAACTTTCACACCCAGTAAGTCTTCA

A\_16\_P18155017

CAGTCATTCCAGAGATTACTCCTCATAACATGAAAATCCTCCAGATTCTACTTTCTGATA

A\_16\_P00008785

CCGACAGATGACAGTCATAGAATGAAACTCCCAATGAATAGAAAACCCCTAACATTTATT

A\_14\_P112764 AATACTTACTTTAATGGGACAGTCAAAAGTCTCGTGAAATCTTCTCCAGAATACAGTCC

CUST\_1726\_PI426210822 CATGTTCTAGAACGTCCCTGAGAGGGTCTTGAGTGTGGTCTGGAG

A\_16\_P03644192

TACAAATCCATCCAATCAACACATACTCATCTAGTAAACACCTTTAGATAGAGCCTGTGC

A\_16\_P16471902

CTCTGAGTTTCTTTAGTCACCAACCTTCTATTGTGAGTAAAAATGAGTGTAGCCAGAATG

A\_14\_P114400 CTCTTTTTTTGTGCTTGCCCTTTGAAGAATCCCTGTAACCATTCATCCAG

A\_14\_P113446 AGAGGCATCACAATTACAGATTACAGACATTTGCAAGTAAATAATATGCAGGGTTAGAGC

A\_14\_P102475 AAAACCAGTGTTTTTCTATCCATCCTTTGAAATGCCTCTTCTGTAATTTCTGTTCTCATG

A\_14\_P128459

TAAACACAATCTCTGGAATAAATGAGACATGAAAAGTGAAGGTGACAGACTAGCAAATGC

A\_18\_P22842494

TTTCTGGTTGCTTTTTGGATACATGGTTATATGAGAAAATTGTGTATGTCTGTTACGAGGG

A\_14\_P133094 GATGATAATGACAGCCAGAAGGAAGAGGAGATCCGCAAATACAGCATCATCTATG

A\_14\_P132176 CTATTTATTGATCACAGAATATTTCCAACCTTTCTGTGCTGTAGGCTCCTAGTGGTAT

CUST\_4521\_PI426210822 TTTAGACCTTGCTGAAGTAGGGAGGTTATGTAACCTGGGATGGAACAAAT

A\_14\_P128323 CTGCCATTTTTTCTTACTCCATCATCTGAATGCTCAGGATAGATGAGGACTTAAACAAAA

CUST\_3548\_PI426210822

CTCAGAGACCAGGAAGCTCTTGAGGTACAAGCTCTTATTAAGCAGAAAATTTTAAAGTG  
A\_16\_P18139472  
ACCCAATGAGCACATAAAATTAATTTGCAATCCCTATTTAGTGTACACCTGTTCGTTATTC  
A\_14\_P108389 ACCCATTGTAAAGGAAGTAAACACATACATAAAGGCTGCTTCAAAGATGATTTCGGAAAA  
A\_14\_P122033 AAGTAGAAGCAAACCTGTAGTTTGATGCTAGAACACTATTCTTTGAGAGGGTATGTGTGAT  
CUST\_7618\_PI426210822 TGTAAGATTAGTCCTAAGCAGGGTTGATTCACCCGACTACAGAGGG  
A\_14\_P129580 AAGAAATATTTTCAGTATACCTGTATGCTGCCGAACCTAACATTCTCATAATGGAAATGCG  
CUST\_2474\_PI426210822 TGTTTGGTCAGTCCATATCGGGAGGCATTGATATGGATGGAAATGG  
A\_14\_P114160 TCTGTGTGTTATGTTTGACACGAGACATATGAGGTGTCATGACTAACTAAGGATACATTC  
A\_14\_P105672 GTGTATATTGTTACGAGAATTCAAGTTTTTCTTCTTTTTTATTACACGGGGCCCATGAC  
A\_14\_P133817 AAGAACTCATGGGTTCTAAGGGAGTAAGTGAGAATAAGAAATCATCATAGACTTCAGGAA  
A\_18\_P17177212 TCCCCGCTAATATTAGTTTAAATGTTGTGGCCATTATATCTCTACTATCTTGGGCGATAT  
A\_18\_P11529012  
AACCCACTCCATATCTTTTACCCTCAAATATCGTTTAAAATCCCATGTTTCTTATGCTCA  
A\_14\_P134745 ATACAAGGGCCTGAATTCCTCTTTGGAAAAGATGTATTCGGCTGAAAGTTC  
CUST\_9694\_PI426210822 GTGCCACTCACACGTAAGGAATGCTTATCCTGGAGGGGCTGGGAGT  
A\_16\_P18156135  
TTTTATCCCATGATCTCTGACATCTAGCCACATTACATAATTATAACGACATCCCCCTAC  
A\_16\_P21645301  
CCTTTATACATGTCCCTACCTGATTTTTACTGTCCTTCATGATCCTGTTCTTGAAAACCT  
A\_16\_P03082671  
TCCATTTTCTCAATTTTCGTCTAACTAAATCTAACTACGTCTAACTACCTCTGCTAACCA  
A\_14\_P133693 CCACACCTTGAAAATCAGCAACTGTAAGTATGGCACAATCAAACATTTCTTCATCTGT  
A\_18\_P22839779  
GGGATGCATTTTGCCTAAAGAAGATAATTTTCAACTCTTACTCAGAGTTGGAGCCATTTA  
A\_16\_P03768876  
GAAAAATATAACAATGTGTATAAAGGTGCAGTATGAGTCACTTCACGGAATGTCTAGGCC  
A\_16\_P03506943  
CGACCATGATCCTCTTTGTAGCACTCTCTTCAACATTAGTTATTCTCATATTA AAAACGGG  
A\_14\_P122759 AATTGACTTGCAGATGTTCTATTGCTAATTCTCTTAAACAGTTGTATTTGAGAGTGGTGGG  
A\_14\_P117142 CTATTTAGAAATAAATAAGCAAGCAACAAAAGCCTAACAACCACAAAACGGCCAACCTTT  
A\_14\_P135720 GACCGATATAGCCTACACAACACAGTTTTGTGACTCCTTAATTTTCCACCTCCATATTTT  
A\_16\_P36342436  
CATCATTTGCTATGCCATAAACACAAAAAGGAAACCTTCTTAGGAAATCCACATCGAATT  
A\_14\_P129891 CTTTTTAAAGTTGTATATCTCCAGATAGATGGCTTGGGTGAGTTGAACACTGCCG  
A\_14\_P133903 CTGTTATTTTTCTCTATCCCTCTGCTGAACTACAGTGCAGTTTCTGTATGCATAATGTGA  
CUST\_2123\_PI426210822 ATGGGCTCTTACTTCGGCTCCTCCTTGTGCGCAGTTGACCTGAAT  
A\_14\_P111281 CATCGTATTGATAATCTGTTCTTGCTTTTGTGAGTTGTGGCAGTGAGTTTCTGATTTCTCTC

A\_14\_P118321 AAAAATATGGGCCACACATGATATAGGGTCTGTGGCAAATAATGCTATAGGATAATGACT  
A\_16\_P21522159

AGTCAGTTAAATGAAGCACTTGAGCAAGATAAAGAATGATTTCCCCTTAGTAGTGACCTT  
CUST\_4173\_PI426210822 AGCCCTTGCCTCCCATATCCCTCACCATGGATATGCAGTTATAAATG  
A\_14\_P133929 CTAGAAAGAATAAGCATCAAATGCCTACCTTGAAATTGAGTAAATTTAATGGTCCCCAT  
A\_14\_P104787 GATTCTTGGGGCTATATTTGCCTCTCAAGACAACTCCAATTATTCAAGGAAGACTTTC  
A\_14\_P130482 CCATTTTGTAGGTCTATGGTAAGGATCACCTGGTTTAAATTATTAGGACACACCTACTATC  
A\_14\_P114883 CCCTGCCCTTCATACTTACCTTGGTGGAGTGAAGGTAATAAGTCTTATTTTTACCAATT  
A\_14\_P201734 AACTCCTACAGTTAAACATTTACCATAATTGGTTGATGTTTAAAGGCCCAATCTAGGT  
A\_14\_P200484 ACTTATCAATGGGCCTATATATAGCAGACATATGTGGGACAGCACAAACATAGAGACAC  
A\_14\_P135727

AATAAAAAGAGAAAGGAAAAATGAAAATGCATCTCAGACCAGAATACCATAACAAAACCTT  
A\_16\_P15845294

ACTCAAAACTGGTGGTATTCTTCATACTCATCTGACCTTTATCTTCAATCACTACTCGAG  
CUST\_8019\_PI426210822 TCCTTCTTGTCTCTTCCC GCCCTGTCTCCATGCCTGCCCCCCAC  
A\_18\_P13378613

AAATATGGTGACAATTGAAGTGCAAAGATCTGTTAGAAATTTTATGGAGGAATTGGTGGG  
A\_16\_P58424595

AAAGCAAAGACTGCCTGTTTTATTTCATCAATGAATTTCCACAATGTCTAGCACATAGGAG  
A\_14\_P124888 CTTAGTGTAAGTCCAGGATTTTAAAACGGATGTGGAGTAGAAGAGACATGAGATGCTATA  
A\_16\_P01158898

ATTTCTAGAGACTCTTACGGAATTGTCAAGATGTAGACAACCTTTATGTCCAATCTGCTCC  
A\_14\_P131231 TTAGAGAAATCATTCTCTTTCAGGCAAATGCCATACTTTCAGATTTCCCTACTCCTTTCTG  
A\_14\_P118956 CAGGCAGCCCATTGAGTAACTTCTTTGACGTAATTAACAACCTTTTTTTCAGACGAGA  
A\_18\_P22841722 GTTGTGAGCATTGGTGTGGTTCTGGGGCACAAACATGCTCTCAG

CUST\_10310\_PI426210822 TGATAGTGCCATGGTAGGGAAATGTGACTTCTCTGGAATTACAACCTGAGTG  
A\_14\_P114638 CAACCGTATGCAGATCAGTTTGAAAATGATGAAAAATTTTTATCCCTGTCTTCTCCTCT

CUST\_10223\_PI426210822 TCACATGAGCGGGTGTGTATGTCTGAAGGAGGCCTACTTAACTT  
A\_14\_P130589 ACCCAACACCACATCAGGACATGTAATTCTTATTTATTTTTACCCTCAACAAGGAAG  
A\_16\_P03136433

AGGAAATCTAGATTGGGAGATTTGGAAGATTTGGAAGTTATTAGAAGCATGTTGAGAAGG  
A\_14\_P107566 GTTCATAAACCTGGGGACTAATAGATGAAAAGTCAAAAAGTTTCTTTCTTGAGGAAGT  
A\_16\_P41433928

AAAGCCACGTAAAAGCAAATCAGCAGTTTATTATTTCTGAGGATACTGTGGATTTCAG  
A\_16\_P17538573

AAAACACATAGACAGCATTTTTTCAGAACCACAGTGTTAATCTCAAGGGCAAACATTCTTA  
A\_14\_P102415 CTCCTACTGGCTCTTTCAATTTAAAATACTTACTGCTGGAGGAGTAGAGATAGAGAATTG  
A\_14\_P107321 CTCTTTGCTCCATTTCTCTAGTGAAAAGAACTGCCTTTATTCTTTTTAATCTCCACTTGC

CUST\_3118\_PI426210822 AAGACCTGGCAGTGCCTGATGCTGCAGGAATGGCCAGACACTGAC  
A\_16\_P19427904

GTGCAAAAGGAAGATCTTGAAAAAGTCAGATGTCTGTCAATCTATGGAAGAAGCCTTATT  
A\_14\_P105037 TTTAAGGTAAGGAATGAGGTGGCCATTTGTAGAAATTGCCAGGAGAGTATCTTTTATAT  
A\_14\_P125402 TGTTCTGATGATAAAAGGTATCCTGTGAAAATAAATGTGAGAAATATTCTGCTGGGCAGG  
CUST\_8437\_PI426210822

GTTCTCTAGGCTTTTTAGAAAACATGGAGTTGTTTTTTTGGCCACGTGTATGCAAA  
A\_14\_P123518 AAGAAAGTAACGAAATCTACATACGTAATCAAGATTGACTGGTTTTACGATCTGTAAAA  
A\_14\_P115700 TAATAACACTCTCATTCTCCAGGAAATCGTGAAAAACCCAGAATTCATTCTTGAG  
A\_16\_P02174695

TGTCATTTAACATGCTCTGATTTTCATAACACCAATCATGAGAACCTAGCAAGTCTTTGTT  
A\_14\_P124798 TTTGAAAGCATTTTGTGCTTTCTTATTTTGTCACTAATCCAGGGATGCATTGTAACGGAA  
A\_14\_P104579 TAAATGGGTGTGGCGCTAAGTATACTTGTTTACCTTATCTTTCTGTGGAAAAGTTTTGA  
A\_16\_P21385106

ATAGACAAGCCAATATATTTCCAATTCAGTATCCCTTTTGTAAATGAAATCTCCCACGC  
A\_16\_P17693617

AAACCTTAACTGACAGTCTACATATCCATTGTTTCATTCAACAAAATTGAACACCCAGGA  
A\_14\_P131938 ACAGCCTGTAAGATTCCATCTTTCTCAAATTACTCTGATGAACGTCTGATAAACTTGAG  
A\_14\_P123370 ACAAACAGACCAAAAATTGCAGGTTTTCTAAAAATCAGTGACAAACACCCGTATGTTATCA  
A\_14\_P106846 ATCAACCAGTGTTGAACAGCCTAGTTTGTAGATGTCCACATTTCTATCCATGTTTATGTA  
CUST\_4565\_PI426210822 TATCAGTGGTAGGAGATGGAGAGGAGGGGGTGTACTTGGGAAACG  
A\_16\_P19529634

TAATTCCTTTTTATTGCACTGTCTTTGTTATCTGCATTGGTAAATAGAAGTCTCGTCCT  
A\_14\_P111934 GACAAGGAAGCACTACTTCTTCAAGCAAAAATATTGCCTATAATTGTTGTTGGGACCAG  
CUST\_956\_PI426210822

CCCTAGGAATTTTTTAAAATGTAGTGGTCAGATTGACATGTGTGTATATATAATGATAA  
A\_14\_P107924 CTCATGAAGTATTTAAACTCTTCATGAGTTAGGGAGTTCTCACTCAAAGGTGTCCTACTA  
A\_14\_P114155 TTTTTAAAGTAGAATTTGAGGTGCGGGAATGATTTAAATACTGACACCTTCAGGTCCGTT  
A\_14\_P122580 ACCTACACTCTCAGAATAGCACTAAAACACTCATATTTACTGACAGAAGCCGAGAGTAAT  
A\_14\_P126571 TTTAATTAGTTCACCCCTTGTGCATCTTGGCTTCAAGGATTCAATTAACACAAAACCTTG  
A\_16\_P00178612

AGTAGGTGGCCCTATTAAAATATGTATAGCCTGTGCTAAAGTTAATTCTAGGGGTGAGAA  
A\_16\_P15504298

CTTGAGACAGACAAAAGTTTAGCATTTTTCTATCATGGTCCTAACAGTATCTCCTATGCC  
A\_14\_P117004 CTTTAGAAAAATTTTCGTGAAACCTCATACTAGTAGTTGTGCTTGCAGTATCCATTGGT  
A\_14\_P127314 TGAGCACTAATGCATCAAAGCAAGATTTATTTGAGGTGTAGGCAACCTTCACTAACTAT  
CUST\_1077\_PI426210822 CCTGGGCATCGAGGACAGTCACTAATAGTGATTGAGTCAGTCACTATTTAG  
CUST\_6404\_PI426210822 TTGTCCAGAGTTCTCACACATGACAGTGAGCTCCAACCTACAACCTATTC



A\_14\_P123451 TACCATGGAATAAGATAAAGCCCTTAATGACACAGGCTTCTAATCTATTCGGTGACATAG  
A\_14\_P126437 CTTTGTCAATTTTGTGAGAACATCTGAGTATTGACCACTGTTTGATCTGATACATCCAAC  
A\_14\_P110454 GGATGTATTACAGAGACATAAACATATAAATGAGTAAGACCCGAGACCAGAATGAGGGTA  
A\_14\_P127103 AATAAAACCATCCTCTGGATTAATAGTGAAAAATCTGTCTGAGGTCAGTGTGACGATCG  
A\_16\_P16946471  
ATCTCTCCTTAGACTGAACTTACAGGACATTTTGTGTTGAACTTTATGACAGCACAGTTC  
A\_14\_P105828 AGACCTACAGATACACAGGTTTAGGCTAACTAGTCAGAAGTCTATTA AAAACCTTAGGCA  
A\_16\_P02039655  
AGCAGTTTTGAAATTGAGCATTCTAACCTTTCTGAAGACTCCATTGATTTGACCTCAGT  
A\_14\_P116773 TTGAAGTATTCTTATTACCAGGCGTTATGCCAAGTATTTAAGGAAACACTTGATCCAG  
A\_18\_P14465133  
ACCTCCTCTTTGACTAAACCAAGATTTTTTCATTGTGAAGGTTTGACTCATGATAACCTAG  
A\_18\_P15060159  
TGGAACAAAAAATGTCCTTGAGATAAAACCCTTCACTCCAGTATTATCAAACGAATCTGT  
A\_14\_P136758 ACTATGTAGGCGGTGGTGTTTAATAGATTCTGTTTATCAATAAGTGGATGAAGTGGAGAT  
A\_14\_P120595 TGGTCCTCAGAATCCAGATTTCTTTTTGTCTTTTTCTTCTTCCACATGTTCT  
A\_14\_P105408 GACAGAATAGAAGATGTGTGGTTCTTACCTCTGACCTGCTATTCTGATTAAGTTTCTTCT  
A\_16\_P15538508  
AAATCAATCTCCATGTGCTATCAAATAGACTGAATTCCAAGAAGAGTATCATCTCCCCA  
A\_14\_P125218 GAAATACTCAGAGAACAAATTGGCCTCGGTTGAAATCCTCATCTCTTGTATAGTGACA  
A\_14\_P104300 TCATACATACCTACGTTGAGTTCCTGAATCTCGGCTTGATAGATGTTTCAATTGAACTTG  
CUST\_774\_PI426210822 AATTATTTTTGTAACATCTGGAGGGGAGCTTACTGCCATTTCCCCCG  
A\_16\_P18877445  
TCATTTCTTCTAGATCTCATTCTTGCATGAAAATCTCCTTTAATACTGGACCAGCAGAGA  
A\_14\_P135396 TTGCACTAAGAAAAGAGGCATGTTTTCTTTTAGCCACTAACTACGAGGTGGCATATATT  
CUST\_2567\_PI426210822 GAGTTTCTAGCTGTGGCCTTGAATGGCTTGCAGGTATGAGATGATAACA  
CUST\_7267\_PI426210822 GACCTGGCATGTGAAGCTGGCTGGGAGGAAAGAGATTTTTCTCTC  
A\_14\_P137873 TCAATTTTTAGGAGTATGTGCAAACTATCACCTTCAGACTCTAAAATATGGGGCTTTGG  
CUST\_6423\_PI426210822  
CAGGGGACTTTGGAATAACTCTCAGATATGGCAGTAGACTTAACTGTAAAAGCTC  
CUST\_3945\_PI426210822  
TTTACATTTATGTGAAGTTTATTTTTGGTTCTGATATTCTTCATAGGGTAGATATTTCTT  
A\_14\_P122895 ATTATTCAGAAGCATAAGAAGATTGCTGTTTTTCATGTTTTCCATTTCTCCCTCCAGTGG  
A\_14\_P132325 GAAGCCTCTAACTTCATTTTCTTGCTCTTGCTCCAGATCCTAATGCTTCTGACTT  
A\_14\_P134734 CTGCTAAACGTTAGCATCTACAAAATGAATTTGCATAGGGATAGAAGAGCAGTTACATGG  
A\_14\_P100318 GAACGAACTCAACCCGAAAGTAAATAGGTAAATGCCGGTAGTAATTGGCAGTTATAAAA  
CUST\_4419\_PI426210822  
CGACAATGTTGAATCAATTGTTATCAGATGGGAAGATTTCTGAATGCTGAATAGTTTGTA

CUST\_6815\_PI426210822

GAATTTTTAGAACTCATGATGTTTTGAAAACCTATTTGCTGGCTGGAATATTTGTA CTTC A

CUST\_5231\_PI426210822

TGGTTGAAGTTCTGTCTTAGAAGACTGTTGTAGTCAGCTGTGCTTGT CATAAAAGT

A\_14\_P119570 ACTGGAATTGTTTGTGAAAAGTAGTTCTGGGTCAAATTCAGTTTGAAGTGATAGCCAC

A\_16\_P18548522

AAAAAAGTATGTCTAATTTGTTTGCCACTATTCAACTAGGGTCTTGCAAATAGCACTAGG

A\_14\_P103459 CGTTTGTAACAGATCTCACTTTGTGTCAATTTTTTTTGCACAGTATGAAACCTAATGATGC

A\_16\_P20856199

TGAACAGTCTTCTCTAGATCTAACCATTCCCATTATCTACAATCCTAAGTAAAAGACGGC

A\_14\_P101026 GAAATGGGGTCACGTTTCATGTAAGTCAGTTAAAAATAAACCCCAATCTCTCCAG

A\_14\_P120019 GCGATAATTTCCCCACCATATGCAATTTTTTCATTTGTCTTATTCATATGTCTTTTCCCCT

A\_16\_P01165311

GCGCAGTTTACAATTAGACAATTTATAGGGGTTATTGGTCTCTAAAGGAACACAGTGAAG

A\_14\_P123046 TAAGAAATGCTGAAGAAATAAAGGTCATCGATGAACTGTCATTTCAAAGGTCAGGCTTTC

A\_14\_P124914 CTATAGCAGCAGTAGCCTTGCTCTCCTTCATGAAATATGAAAGCCTGTTTTTACTTAGAA

A\_14\_P132635 GATAAAAATTGGCCAGTGACTTCCTCTTTAAAGTTACCTTTGACCCTTCAGACC

A\_14\_P115298 CTTCTTCATAAACTGTTCTTGCTTGATTTTTAGCATCTCCTTCTGTTGAAGACAGAGACA

A\_14\_P118708 TTCTTACACCAGGTGGCTGTTAGATTATGCATAGTAATGTAAGTAACTAGCAAAAATGAGCACG

A\_14\_P108204 AGAAGTTTTATTTCCAAACCCCAGGAAGGCATTACAAATAAGAGATAGAAACCCAAATTA

CUST\_7356\_PI426210822 AGTCCTTGGTCTGAGTGCTCTGTGGCCATCTTCCACTTAAAGCT

A\_14\_P113384 ACGCACATGTGTGTGTATGCATACTTGTCTCTAAACATATGGGATTATACTCTGCTGCT

A\_18\_P14137224

ATTTCTCAGGAAATGATTGACTTCTGAAGACAGAAAATGGAGAAATGCTAGGGAAAACAA

A\_14\_P122292 AAATTTTTTGTTTTTTACCTGTTTGAGCAAACACACAGCAAACCTGAACTGATCAGTCCAAT

A\_14\_P128733 GTCCTGGTGTGTTTGGGAATGGGACAGACAATTTTTGTTTTTACAATGGTATT

A\_14\_P132939 GGACTTAAAAGTTTAAAAAATAAATGTGTAAAGTTGTAAGGCTCCACCTCGATGCTGG

CUST\_7027\_PI426210822 CAACATGCATGAGCCACTTAGAAGGGCTTAGGGTGGTGAGGGTAC

A\_14\_P118351 GTTTCTCACTAACTACAGAATAAGGTGAAAATATCTTGGCCTGGTAGAAAAGGATTTCT

A\_14\_P136539 CTTTGCTCTCTGTATATACTTGTCTGGGCTATCACTTCTATACCCTGGCTTT

A\_16\_P19485040

AAAAAACCAAAATGCATGTTACCTTTTCTTGACCCTTAGTAACTCCTTGTGACATACTCA

A\_16\_P39787199

ACCACAAAAATGCCATATTCAACACTTTTTCTATTACAGTATAAAACACCAATTTGACCT

A\_14\_P102165 ACCATTAAATCTCATCAAGTTGAGCAGGTCAATGTTGTTCTTTTCATCAACTCAGTCAAA

A\_14\_P111700 TGAGGAAGAAGCGATATTATTCTCCAAGAGTCGACAGATATCTATGACACACCCATT

A\_16\_P16280967

AAATCACTCAGTCGGAATTTTAAATTGGGTCAACACCTATAAAACTGATCACAACCAAGA

A\_14\_P123630 GGAATTAGAGAGTCCAGTGTTCACAAAATTTGATTCAACTCTTGTTCTGTTCATTATGGAG  
A\_14\_P202311 AGATCTCCAAGAGAACTGAGTATCCTTTCCCAATTGCCATTATATTTCTTTCAGGTAATG  
A\_14\_P102607 CATATTGCCAGAGCAGAACTTGTTTCTGTAACAATTTATAGGAAAACATCATGAATCCC  
A\_16\_P02504007

GCCATTCTATGACCATTTTTCTATGCTTCCATTTTTTACACTTATACACAGACACTCATCA

A\_14\_P124655 CTAGGAAGGTCGTAAAATCGGATATTAATAATGTTATTATATTTTTTCCATTTGTTAAT  
A\_14\_P128918 TCTATATTTTCTCCAAGTCTTACATAGTTTCTCCCAAATGCCTTTCAGGTTACAAGTGGAA  
A\_14\_P110827 AGTAGGTATTTTCTATGCAGGTGACCACTACCTCATTTTTTAAAATCTCTGACCCAGTAA  
CUST\_3968\_PI426210822 TAGCCCCACAGTTGATTTCTTATTGAGCCTTTGGAAAGTTCCTTGCC  
A\_14\_P139315 ATAGGTTTTGCTGTTCTGTGTTGAGATAGCCCCACTTGAAGAACTGCATTCA  
A\_14\_P119797

AAACGGCGAGAAATGAATTTTTAAAAGTTTGTGATGGGAATTGAAACAGAAAGTGGTAACT

A\_14\_P200716 AATAGGGTCAACGACCCACTTATTTTTATAAGAGATATTAAGCCCGGACTGAAAACTTA  
A\_16\_P03101047

TAAAACCATGTCATTTCTCATCCTACTAAAACCAGTCTACCAAAAAATGCCACCATGAA

A\_16\_P37584436

AGTGAAGATGGTTGAATTGAGGTTACAATGTTAGATAGTTGCTCCTCTCATGTTTCAAAT

A\_18\_P22840121 GGATAGGAGGAGAGAGCCTTGCTTCTCAAGGGCAATCTCTTCTACT  
A\_16\_P30952441 AGGAGAGGGAAGTCCCGCTCTGACACCAGTTCTCCGCTGGAAAA  
A\_14\_P139806 AATTGTGGCAATTCTAGTGTATCGAGGTGGTTTTCTGAAGCAGTAATCAGTGCATTATTA  
A\_14\_P130955 AAGCCCCACATATTTTTATAAGTCCAAAGTTGTTTTCTTGCCAAATGGAATGATGATAT  
CUST\_110\_PI426210822

GTGTAAGGTGCTGATTCAACCAAATAGTGGATAGTATAGGCTGGATTGTGCATTG

A\_16\_P15045119

AAATCAACTAGTCAATTGAACAATCAATCATGAAAGAGGGTTTTAATGTTTCGAAGAGGC

A\_16\_P15943889

AAAGCATGTTAAATGAGAGACCTACTAAAGCAAGACAGTCAAACATAAAAACCAACTGCT

A\_14\_P126840 AGGAAGCCTCTTAAGAGTTAGCCACTCACCTAAACCCTTAAACATTTTCAAGAAAAAATG  
A\_14\_P135338 TCCCATTTGTTTTCTTCTTTTCAGGAAATCACACTGCTGTTTTTCAGGTGTTATGTTTTATTG  
A\_14\_P102365 ATTTTTTTAAAGACTCTGCCAAAGCCGTCAAAGGACACTGGTGTGATATAACATTATCTT  
A\_18\_P22843020 CTCACTGCTTCAGGCTTTAGGAAGAAACCCTCTTTTTCTTGGTGTGATTT  
A\_14\_P131725 CTCTGTCATTTTCTTGTGCTTCATCTTTTTCTCTGTGCCATTTAACTACTTTTTCTTT  
CUST\_9172\_PI426210822

CCTCAATTTAAACATCAGAAAGAGTGCTGTTCTTAAGGAAATCATCAAGAAAGACTAAGC

A\_14\_P104588 CTTTTTTGTAACCAGATGTGGTGTGTCTCAATGATGTTTCCTGCTACTTTTCCCTT  
A\_14\_P102221 ATTTGCAGCAGTTACTGAATGGCGTCTTAGGTGTTCTGTTTTGGTTTAAAGTTTATTTCT  
A\_14\_P132593 CTTTTGTGTCTAACAGCAAAAACAAAATCCATCTTTGTTTCTTCTTCTCCATCATAT  
A\_14\_P101440 ATCTCTGTTTTTTTCAAAGATTTGTCCCATCAGATGAAAAGAAGAAACAAGGTTGTCAACG

A\_14\_P117401 GATGCATGTGTCATAATTTAGCATACCTTGGGTGGAGGATTAGGCTATCAAAAATTCAAA

A\_18\_P17040090 CAGTGCCCCACTGACTTCTGAGGTCCACCCATCTGATGGTTTCAT

A\_16\_P03647922

CCTCCTATGGAATGTAAAGTGCAATCATTCTTCAGATATAAGACTTTCCCAACAATGT

A\_14\_P135880 TTTTTCCTGTCAGGTTAACTTATTTGTAGGTTCTGCATTATTAGAACTTTCTAGATATAC

A\_14\_P125230 GGAATAACAGGTGTTATGTCATTTCTCCCAACAAATCCAATAAATCATTGGCCTAAACA

A\_14\_P125738 AATCACTATTTTCATTCATGTTTTCCACTTTGCTTACAACCTGGTCAAATTGCACTTGA

A\_16\_P15587246

AATCAGGTATGTTGACAGTTACTCATCAGAAATAGCCACACTTCTTTATTCTTTCCCACT

A\_14\_P120952 TCTACTTCAAAATTTTTTACACGTTTTGCAGAGGTGCAATCAAATGGAATTAAGTCTCTCG

A\_16\_P02508728

CTCCAATACCACACATCAATAATCACAACCTCTACAACCTCATAGCAGTGTTTTCAAAATGT

A\_16\_P21346665

ACCTCCCTCATTAACACAGTTCCTTGTAATACTGTCCCCATTACGAATAAATTAGGTAT

A\_14\_P126824 TCCTTGGATTACAGGAGATGAGAGTATTGTAGGCCTTATGAAGGACATTGTAGGTAA

A\_16\_P30952329 GCTGATAAATATCTTTGATCATTGATTTTCATCCTAACTAGATTTTTTTTTTTTCATTCCA

CUST\_10155\_PI426210822 ACTCAGTGAAGGAGAGACCATATCCTCCCTCACTGCTGTCAAC

A\_18\_P15548796

CTTACACTCAGCATATCACCATGGACTTTTTCTATCCTTCAATTCAAATCTCATGACAGG

A\_16\_P02735838

ACCTTCTAAGTATCTGACACCTCTCTTTTACTTAATATGCTTTTCAGTTGACCAACATCCA

A\_16\_P35610156

CATGGATATTGTGCTTCCATGTTTCATATCCATGTATTTCATCCTACTACAGACTATCCCAA

CUST\_1746\_PI426210822

AAAAAAAAGTTCTTGGTGTGAGGAATTTCTCCTTTGTTGTGACTGTGGTTCTCA

A\_14\_P123201 CTGATGTCGTTAGCATAGCATCTTACCAGATTCACATTCCAATTTAGTTTCGATTTAAGTC

A\_18\_P25008127

ACAATCTGACCCATTCTCCTTAACTCCTATAATCACTTGATATCTTTGAAACATGTCCAG

A\_16\_P30952239 AAATACAGCCCTTCAGTGAAGTCTCCTGGGGCTGTGTTTAAGTGC

A\_14\_P202444 AAGCCAGAAATAAATTGTGTAAGTAGGAAATGGGGCACACAGATTATTTGGGCATGT

A\_14\_P116407 AAGTATGTGTTCCAAACTTTCCACGGTTCCAAACTGAGCGCTTCCATTAAG

A\_14\_P127657 ATATTTTTGTAAATTTCCACAGTCACCTTCAATGCTATACCATGTGCTGTGACCTACCT

A\_16\_P00497600

AATCCCATCCTCCCTAAATTTATGTAGAACCCTACCACCTATTAACTTAAATAACTGCCA

A\_16\_P03800439

TGAAGAAGCATACCATCAAAGAATACTGCTTGCTAAGAACTTTCAGAAAAATTAAGGGA

A\_14\_P139251 CAATTAATTCCTGAATGACATTTCTACACTATGTTGACCTCAAATGCTTTACGACATCC

A\_16\_P18430412

AACCAAAATCTCAACATCAGTAAGCATCTCATTGTTACAGTATATACGAGACTCATGGCC  
CUST\_10428\_PI426210822

GTACTTTGGAACCTTGCTGTTTAAAAAGACAGATGAAATAAGTTGAAGAAACCTCATGTAA  
CUST\_5725\_PI426210822 GTGTGCACTTATACCTGGAGCCTTATTTAGGGGATGTTCTTGCAGATAGATG  
A\_14\_P125958 TTTCCTTCTGTTCCAAGTAACTCTTGAAATCCCGTCTTCCCTAAAAGTCTTTTTGAATTA  
A\_18\_P21509659

ACCTGTAGAGCAAGTAAAGTAAGCAATGACTACCTATACGTAATACTATCCCTAAACAAA  
A\_14\_P113908 CCATATCAGATAATTTAGATCTAAGAGACGACTCTCGCCTGAGAAGCCTTGATATAAGGT  
A\_14\_P105333 CTATTCTGGGCATTTTACTGACTTATGTTTTACTTTTCAGTTCAGTTCCTTCCAATGACCTG  
A\_16\_P00685528

TGGATTTTTGAAAGAACTCTAGTGTTAGTCCAGAAGAGATATAAAAATAAATATCATACCA  
A\_14\_P110670 AGATGGTTAATGGAGTATTGATGATCCACAATGTGAATCAATCAGATGCTGGAATGTATC  
A\_16\_P02936880

AAAAGTAGACACATTGCTAAGAAATACACCAGGCATTTCTATGTTCTTATTTCCACAGAT  
A\_16\_P39857072

ACAGCAACCCTTCAAATATAACATCTCAAAAACGCAATTTTCTTACAATATGTCCTCAGT  
A\_14\_P135870 AGGAGACTCTGAGTGACTGGGAGTCTCAGTTCACCTTGTAAGCATTTTTTAAAATTGTG  
A\_14\_P131074 ACTCCTTGCTGATGCTGTGTTATGTGTCATCTAACAGAAATGACTCCTTTGAAATAAGTA  
A\_14\_P135945 TCTGTAAATGGAAACCTAATAGTATCTGTAGCGAGAAGTATGGCCACCTTTATGTGAGA  
CUST\_855\_PI426210822 GAAAATATTTCTCTCTGCAAGGAAGGATAACCTCTCTGTGGCTGAGG  
A\_16\_P16115181

AACCCTCTACTGAACACTTCTTGATTTAAAAATCACACTTGCTTCTGATACATGTTCTCC  
A\_16\_P00685232

AATGCCTTGAGCCTCAGTTAATTGTTTGAGTTTTCTTGAGTATAAAAGGAATCCTGGCT  
A\_14\_P137382 TCTACTGAGTTCATTTCTAAAGAGATGCACCAACCAATGAGGTAGAATTCCATTCAATTCA  
A\_16\_P18432137

AAAAATCTCCATGCTGATGAACCTTAAAGATGCATGTTTTACATCCTTTCCCTGAAAAGCA  
A\_14\_P138645 CAGAACAATCTCAAAGTATCATGCTGAGTTTTGTTTTGGAAGAGAGCAGTAAGAATGG  
A\_14\_P134360 GGCACAGAATATTCTGTAGTTAATAGATGGTTTTCTAAGAGGAGAAGGGAGATTTTCTGCA  
A\_14\_P137164 ACAAAGGCATGTTTCGTGTTGATTGTTCCCATGTAAGATATTTTTAAAGCCACTGCTTAT  
A\_18\_P14135904

GCACAATTCTAAATTATGAATTACTAATTATTAATTTTCTGGTTTAAACCTCACATCCTGT  
CUST\_8841\_PI426210822

CACTTAAAAGAAGGGAGATGGCTGATTGAATTCTGGAACAAAAGTTACATTCCTAGG  
A\_16\_P20034093

ATTACCTTTTTGATTAGATAACTGCCCGTTAAATATAGCATACTGACAAAAATGAAGACT  
A\_14\_P118979 GAGAATCTAAGAAAGGATAGCCACATAAGAGAAAGCCATTTCACTCAAGAGTTTTTCCAA  
A\_14\_P139317 CAACAAGTCCAAGTAATCGAGATGTTACAAAAGTCAACCCTTGATATTAATCGCTCTCT

A\_14\_P123588 TTTTTTCCACACAATGGTTTTTTTTTGGAAAATGTCCTTAAAAGAGGTCTGTATGGTCTCA  
A\_14\_P133968 CTCTTTAAATTAACCTTCAGGAGGATTGTAACAATGTGCTCTCCACCCAGTATTTTACCA  
A\_16\_P03418959 CCAACCCAGATCTATCCATTATGCTGCTACCTAAATCCTTTGTATTGCTGGTCTAC  
A\_18\_P10077302  
ACCCATGACTATACTTTTCTTTCCAAACATCTTCAAATCCATTATCTTACCTGAGTCTCA  
CUST\_2841\_PI426210822  
CTTATCGCTGTTGTGAAAGTGAAGGTAAATTGGCATAGCTGAAGCAGAGAAGAA  
A\_18\_P16724933  
TCAGCCACATTAAAAAAATCTCTCACCAAGTATTAACACGTCTTTCATCAGTTTATTCCT  
A\_16\_P00808557  
ACCTTTTCACACTGTTAAACTGCACATATGCTATGATGCATTATTACACCAGTGATTCCA  
A\_16\_P17161709  
ATGTCTTCGATGATTCTGAAGTTCTTTAGTTTACAGCCTCTTATTTCCAATGACACA  
CUST\_4462\_PI426210822 GACACAGGCAGCCTGGGGGTGCTTGCTTCATTTCTGAAAAAGCAG  
CUST\_2369\_PI426210822 CCACAGTATAACTCTTGTGGTTAGCGTGGAGCGTCTTTAGTGGGAA  
A\_16\_P00130430  
CTCGACTACGCGTATTCTTAAGCAATAACAACGTAATCCGTATTATCCACCCAAGAATAC  
A\_14\_P102066 CTTCATCCTAAGGACAGACTGAAGAGCAGAAATATAGACTGTCGACGTTAGACAATGAAA  
CUST\_261\_PI426210822 GAGTGGTACAGAGCTTGTGCCCAACCCAGCAGAGAAGCACTAAG  
A\_14\_P103402 AGATGTCAGAGGAGAAGAGTAGCAGATGAGAACCATAAACAATGATTTGAAAATTTTGGC  
CUST\_9238\_PI426210822  
TAGTGATTTTATAGTTACGACTCTGTCTGGCTGAAAATTTTGCCGTATAGATGAAACATC  
A\_14\_P113533 AAGGACCTCTGATCTCTTAAGATTTTTTCAGAAATTGTCTATTCTAGACTGCTCCCTCTTC  
A\_14\_P100253 ACCTCTGATTTGAGTTACATTGAAGTAGGTGCAGGAAAACCTGCTACATAATCTCTTATT  
A\_14\_P104357 GCTTTTTCTCCATTCTTTGATTATCGCTGGTAGTCAGTGATGATCATCTCTATGAGTCTA  
A\_14\_P130102 ACCCCTGGAGAATAAACAATGAAGATTAAATGACTCAGTATTTGTAATATTGCCAGAAGG  
A\_18\_P16774111  
AAAAAATTCTCTCAAGGCTTATCAGGAAACCACATTAAGCAGAACAAGTCATGTATCTTT  
A\_14\_P104328 ATGATGTGCAATAGTGCAATTTTCCTTTGCTAGTCCAGCAATGCAAGTAAGTCTTAATAG  
A\_14\_P104103 TTGAAATTAGTCATTAGGAATGAATTTCCCTTTTCCTCTGCTCCTCAGTATTCAGTTCTTA  
A\_14\_P138961 AAGGATTTTTATTTGCATGATTATAGTTAAGCAAATTTTCATTTACATTTTTGTAATGCT  
A\_14\_P138555 CCCCAGATTTTAGGTTTTACTCTGAGTTTTCTTTCTCCGGTTTTATCTTCTATTGTCTCT  
A\_16\_P18175391  
GAAGCATATAACCACTTCCAAATATGACACTGAGCATTAAATTTTTAGACTTCCCCCAGG  
A\_16\_P02092341  
AAGAATGGTCACATGGTATAAATCAGACAGAAACAAAACAAATCAAAGTCTCTGAGTGGG  
A\_16\_P58424266 GAGACTGACCTTGGTCTCACAAACTCATTGCCCTTGCAAAGAAATAAC  
A\_16\_P19260113

ACAGGTAAATTGATGTCCCTTCCTATCATCCAATATCACCTACGACAATTAAAAGCATCT  
A\_16\_P19505498  
CTCTGACTTCTTCATACTCTCTTTTGACGTATTTTCTCCCTTACTCCACAATTTTACCAG  
CUST\_6892\_PI426210822 CTTCACTGCCGCTTTCATTACAGCGCAGGGACTGATTTTCATTGTG  
CUST\_7809\_PI426210822 GTTCTGAGTGGAGCACCACCAGCATCCACACAAGGAGTGGTACTG  
CUST\_10054\_PI426210822 AGCTCTAGTCAAATGTCTACTCCCATCAACTGTGGAAGGGAGGAAG  
A\_14\_P120770 ATTTTTCTCCATTGGCTCTTCTTTAATTTCTTCCCTCTGACAACCTTGTTACTAACAGAGT  
A\_14\_P104655 GGCATGCTAAATGATAACCGAAAGAGACTTCTTTTGAATCTTCATTTGGATCAATCATT  
A\_16\_P19324551  
AAATCTGACCTCCCTAGAGAGATAAACCTAGAGAAAAGATGTATAAGGCAATGTGAGAAC  
A\_16\_P21455963  
ACCATCATTTATACAACCACTTCTTACCCATAAATCCATGACCACACTTTTGATGAATCT  
A\_14\_P131564 GCTTCTTATCTGTCCCTGTGACTAGGAATAATTTTTCATTCCCTCCTACTATACAACCTGC  
A\_14\_P105102 GAAGTTACATTATGCATCTTATGAACCGACTATAAGGGTGTTACATGAGAAACACCACAC  
A\_16\_P17182669  
AAAGATCCTTTTTTGACTTCTTACCTATGCTTCAAACAAGTTTTTTGTCTGCCTATCCG  
A\_16\_P19362734  
AAAAGACAGAAACAGTGTCATATTCCTCTTTGTTTATCCAGGATATGAATCAATACGGGC  
CUST\_4182\_PI426210822  
ATTCTAGGCATGAAAATTAGCAGTATGGTACATATGAAGTACATACCAAGTACTACCTGA  
A\_14\_P106753 TACATCATCAACTTCAAGCCGATTTACAGATATCATCTCAGGAAAGACTACTCAACACC  
A\_16\_P03600388 CTCTCAGAGTGTTTGTGAGTACTAAATGAATGAGGAAGTGAGCAGATGAAGG  
A\_14\_P121987 TCCAAACCTCCAGTGGTGGTTTGAAAATTATATTTTACAATTAAGGTGGCTGCATTTTCT  
A\_14\_P104276 AACAAGCCCTTTCCTGTCATGTCTGTGGCAAAGTTTCCCCTTC  
A\_16\_P16157171 ACCTGTTTCATCACTTCATAGTCATCCTTTTCTTTATATAATCTACTCTGCTCATCTGAAT  
A\_18\_P13641642  
AGTGACTTTTACCGAAAAACCCTATGTAATAGCAATTCACCTTTATTTCTGATCCTTGTC  
A\_14\_P139889 GTTCCAGTTATGTGAGATGTTCTGAATCTTTTTCATTTTGATCCTCTGATCCAGCATCTT  
A\_14\_P128550 TGGGAAGTGAACATAAGATAAGGCTCATAGAGGAAGTGAACCTTAAGGACAACCTATCTA  
A\_16\_P36230165 CTCAGACTTAGAACCTTCAAATGCCTGGGCATCGAGGACAGTCACTAATA  
A\_14\_P128695 CACTGACTATGGAAGACTTTGAAACCAGATAGGGCGGAAAGAACTATTTCAAATAATC  
CUST\_3496\_PI426210822 ATGCTGATTAAAACCTGAGTTGCAAGTGTACCATGGAACATAATCTCTCCCTC  
A\_14\_P127163 GCCTAAGAACTTGAGATTTTGAAATCCAGCATCTTAAAGTCTCTGATTTGAAAGGTGGT  
A\_14\_P133669 ATGACAAGAAAGAAAATTTTTTTTTAGGTCAGAAAGGATTCTGCAGGTCAGAATGGTTCA  
CUST\_1756\_PI426210822 TATTTAAAACCTGAACGACGAAGTGATCATGAACAGGCGGTACACCTACCTG  
A\_14\_P105650 AAACATTGGGGACCATAAGATTATATATAGACTTTTTCTTTCTCAACCAACAGGATGGA  
A\_14\_P129382 AATATATAATCCTGAAGTGTGGGGTATTTCTGTGCTAAAGATAATCCTCAACCAACAGGA  
A\_14\_P111105 TAAAACCTACTGAACAATATGCATGAGAAAACCAGGGATTCAAGTGACATAGAAACAGCAG

CUST\_7145\_PI426210822

GTACCATTACACATTTTCGTCCTGCTGACAGTCATTAGCTAGTGGATAGATCCA

A\_18\_P17043796

TTCAACTTGCAACTTAAACACAACCTTTGCCTTCTCCCTGAGTCTTTTAATTCAAACATTC

A\_14\_P113914 CGAACAATCACTGCTGACACTTTCCGCAAACCTTTCCGAGTCTACTC

CUST\_4371\_PI426210822 CTCTGACTAACTGATCTCTGGAGAGGAACACAGATGTTCCCTCCTAAAAA

A\_18\_P24983760

AAAACATGCTGAGAAAGTAACTGATACTCACTGGACAAGTTAATGACACTGAACAGAAGA

A\_14\_P119943 CTATTTATTGCCTTATCTACTTTAGCACCCAACATCTAGTAGGTGCTTGATGCCCATATG

A\_14\_P138675 ATGACATCTATTTCTCTCAAACTTCTTCACATTTTGGCCCTAACAAATTTACCCCATC

A\_16\_P15841686

CACTCCTGCTTAACCAAAAAATCAAGTCTGTCAATTTAAAATGTCCAAGAAGTCTTCACTG

CUST\_8578\_PI426210822 CTTTCATTCTGGGGATTGGGGTGGCTTGGTGCAAGTGAAATTCAG

A\_16\_P02552154

ATCAAAATCTTCTGGATGCTACATTAACCCTTAGAACCTAAGTATACACTTGAGCCTGC

A\_16\_P19608552

AATGGGCTGCTTATAACAAGTTGGTTAAACTAAAAAATGTGGGGATATTGTAGACCTTGT

A\_16\_P20311087

TCTGATAGAACAGTTTACGTCATAAACACAACACTACTTCTTATGTAAGTCCACTACCTGA

A\_18\_P14137635 ACAGAAAAAAGGAAACAGGTCCTGTGGACCTAGTGTCTGTCCATCAG

A\_16\_P17632683

CCTCTATATCCATGTGTTATCTTATCCTAACCCAATGATTTAATTACAACCCACGTGTGG

A\_14\_P127418 ACATGAAGTGGTTTGCCATCATTGAAAAAACTTGTAACCCTTACAGATTAATGCAAGAG

A\_14\_P127768 CTTAAACAGTGGGTTTTTCAATGTCTCTCTTTAGGATTTTTGCTGGGTAAAAGCCTGTTT

A\_16\_P18854868

ACCCCCGAACACTACATTATAATGTGCACATTATGTACATTTAATGTTCAACATACCCTCA

A\_14\_P121810 ATTTTTAAAATCTGGTTTCATCTCCACGTGCATTTTCCCATCGTTCTTACAGATTTAGGA

A\_14\_P100565 TGATTGGTTTATCCTCCCCACAAATAGAAAAATGACTTGAAAATGCATTATGACCATGCA

A\_14\_P138988 TTTTTTTTTGATCAAACTTTTGGCCAGGTTTTTGGGTTGCTACGTTTGGTTATAATGCA

A\_14\_P129959 CTTTCATCAAAGTCTCAAAAGTCCACAAAAGGCTAGGAGTCACTACCATGATCTTTATTT

A\_16\_P17911250

AAAACATGAACAGGAGTATGCTTAGAAGATCTGCAATTAAGTTTCTGGCCTTGAAACAAA

A\_16\_P19793145

AAAGACAGGAACTGTAATTGTGGGTCATAAATCTCTGTCAATCAAAAAAGATTGTCCAA

A\_14\_P128207 CTTTTTTTGTGTGTGACCCAGAAGTTGCTAAAATTTGGAAATCATTTACCCATAGAAGCA

CUST\_2981\_PI426210822 CTTGTCTCAGCTCAGTTTCTGTGAACTGTGGGTTGTTTCTCTC

A\_14\_P109942 ACTAAAAGATGGAACAAAACAACTCCTTCAGAATCCTCCAAACTTTTTGGCCATTTTTTC

A\_14\_P131629 TTGCATTGTCAAATCTTGATTAAGTCTGTGAGTGTCTTTGGACTTTAATTTGTCCAGGAT



A\_14\_P102056 CCTGAAATAGATGCTAGGTAAAGATTGGTCAAATGAAGAATGGATTCTAGTTCCAACGT  
A\_16\_P36490774

TCTCATACCCCAATATATCAACTTGTATGTCCTATATTCTCCATATAAAGAACACAGCCT

A\_14\_P134578 CATCATTTGTGTTCTGTGACATTTGACCATTGACTAAAGCATTCTGACTCATATCGTTC  
A\_16\_P17761856

AATATCCCAATGTAGTCATTTCGTATGGAAAAGAAATCTGTAATTACCCAGGATAGACGT

A\_14\_P128269 TGACGCAGACATGTCTGAAGATGCCTTCCTCAGGACATCCTTACT

A\_14\_P107775 GAGTTGCTGGATTATATAACCCACAGTTCCTCCTTTAAAAATTCTGTTTGTCTTACAC

A\_14\_P111351 TAGGAACCTCATTGGTTTTTCATAGGCAATATACATTGTGTGCCACTATAATCCAAATCCA

A\_14\_P127902 ACATTGCAGATTTTTCAAGATGACTCTAAAGATGTTGGCGTTTTGAAACATTCTGTCAGA

A\_16\_P18210232

GAGGCTTTAAACCAGATCTGCTTTTCTACTTGCAAGTGAATGTTCTCAAGGTAAATTTCA

A\_18\_P22839037

TATTTTTGCTGTATGTATGCTTGAATGTGTTTTTACCCAGGCTTGGTAAACTATGGCC

CUST\_8490\_PI426210822 CAGCATCTCTTCCCTAATCGACTCTCATCTGGTGGTGCAGAGAT

A\_18\_P13434828

AAAGCAATTCCTGAAAAGTGTACCTAGACCGTTAATATAGTATGCCCTGTAGAGTCAAG

A\_14\_P109051 CATCTTTGTGTATTACTTCGGTGATCAAAGTTTATTATTCATCCACCAGCACTTGAAGGA

A\_14\_P133338 CTGAGATGTCTGTCTAATATAAATAGAACCAGGAGACCCATAGAGATTGCTTGGAAATTTG

A\_14\_P108748 CAAGCACTTTGAAAAAAGGAGTTGAAGCATTGCTGCTTAGATATTCTTCACAGTAAGCA

CUST\_8533\_PI426210822 AAACCACACAGGCTTCTGGCTACCTCTTAAATATTATTAACCATGCTGACC

A\_16\_P16191700 CTGAGAGAGGTAGTTTGTGAGTGTGTATCCCTGAGATACGTAGCAGAAGT

A\_14\_P104181 ATCATAGTTTGCTGCTTCTCTTTGCTATCCATAAACATTTCTCGTTCAAATAGGTCTTC

A\_16\_P58424479 ATGCAGTTGTCTGAAGGCTCCACTGGAGGATCTGCTTCCCTTGTG

A\_14\_P112700 TGAAAGCAAGGTATTTAATCCACATTTTATAGTGCAGAGCCAATAAGATCCCTTGAGGAA

A\_16\_P16191218

AAAAACATATAAAGTAAGCATAGATGCTAGTGTGTCCCATGGTGAAGTTGTGAACTCTGG

A\_18\_P22840491 AGGTATTTTTTCTTTTTTCTTTAAGCCTATCCAATCTTTTTTTTTCTCCCTCTCCTT

A\_18\_P11716805

CCCTACCAGCATATCTAATTAACCTTCTTCTCATCTTTGTCCATAAACCTTATTCTCCAC

CUST\_6864\_PI426210822 AGGGTATTGTGGGAGGGGTGATGATGTTTGAAGGGAAGCTCATTT

A\_16\_P20189853

CTCCTTCCCATGCTAAATCACTTGATTTCAAACCTTGCATACACTTAGTCCTAGAATCAGA

A\_18\_P22842070 TACTTGTTACTGATGCAAAGCCCCAGATTCTAAGAGGCAGGTGTGT

A\_18\_P14138849 ATCACCCAGCACCGGGTAGGATTCTGACAGGACCCAGTGGCTAGT

A\_14\_P131186 TTGGAAGCAACAAAACCTGCCAAAGCAGTTTACCCAAAGCCACCATC

A\_14\_P201051 CTAGTGGTCTTGCATGATTGCATGAGATGTTAATCACAAATTAACCTTGTCTGAGTCC

A\_14\_P135264 CTGCCTTCTTATAATGGTTGGACTTCTACTAGGTGGGATTATTTTTGGTGTGATGAGAA

A\_16\_P02930845

AAAAAGTCACTTTAAGTGGAGACAGAAATTGCAATTCTGATCAGATGTGTAGACTGCTCT

A\_16\_P00379114

AAAATTCACATCAGGTATCAAATGATGGTAATGTGAGCCTTTTACAAATGCTTGTGGAT

A\_14\_P136827 CTAAACTACTTCTCAGTCTCTGTGATGTTTGTTCCTTTACTTTCTTCCACTTGGAATGA

A\_14\_P100885 CCAAGTAGATTTTCATAGAAAACGCTGTAGCCAGGTTATCAAGTCCTTACAACAAAGTAAA

A\_18\_P17559917

ACAACCTCCTTTTTCAAAAACTTTACCTAAAGCCCTATAACCTTAAGCAACTGAAAGCA

A\_14\_P108115 TGGTCTATAATTGTGTAGTTTTCTCTCAATTCTCAAGATTTTGAGGTGCCAGAACTGTC

A\_16\_P58424280 ATCTGAACTCTTAGGCAGGTCCCTGAACTGCTCAGCCCTCAGTTT

A\_16\_P01487901

CAACCAGCCTCCTAAATATTTTCTACCTCCAATAATACTGTTACTTCTCCACTCTAAGA

A\_14\_P135383 TGGTTATAACAGAGAAAGTAGAATCAACAAAGATGTGGGGAGTAAGGAAGTATGCTGATT

A\_16\_P02502857

AGAACACGAAACTTTTTACACCTGCTACTATACATACAGATTTGTTTCATAGTCCTTAGGG

A\_16\_P00685154 AATGTCTGCATATCTTGGGCTGAGTTTGTTAGCAGGACGGCTGCATTT

A\_14\_P107822 TTGCGCATTAAATCCACCGCTGCTCTGGTTTCTGTAAACATTGACCTG

A\_18\_P13289594

TTTTTTTCCCAGTATCAGTTATGACAAACCGATTTAAAATCATTATTTGCCTACCCCTCC

CUST\_5692\_PI426210822 GATTTTCAGATTGCACACTTGGAGTCAGGGCAGCAGTTTGGCTCAG

A\_14\_P116925 TGTGGCAGATGACTACATCAGTCATGACTGATAAAACATAACTTCTATCCTTGTAAGTGC

A\_16\_P18546859

ACATCAACCCACATTAAAGAATTTTAAGAGCACCTTTGTTAGTCTATACCACCTACCTGT

CUST\_7483\_PI426210822

AGCCTGTCTCCCTATATTGTTCTTAAAATAACAAAAGGGACACATAACTTCATCATTAA

A\_16\_P00908168

TGACGTGAATTTTATACGTTTGTAGAACTCTGATGTAAGTCTTCTACCTCTGAAGCGC

A\_16\_P18037928

AAAAAAAACACGCTGTAATTACTTTCAATTTCCCTCATAAATGTTTTTCCACTAGCAGAGA

A\_16\_P16707223

AAAAGTTCATCAGAATCCAATGAAACAAGGAACTCAAATGAAATTGAAGCATGCTTCTGG

A\_14\_P128290 GAATCAGAACACGCTACTTATGACCGATCTCGTCTCATTAAATGACTTTGTTATCAAAGAT

A\_14\_P139175 ATCTTCTTTAGGATCTGTGCGAAATCGAAGAGTTAAGGCATCAGATTTTTTCTTCAGGAGG

A\_14\_P116411 TTTTTCCCCTCACTGAGAAAAGTAATTTTCAACTTTCACAAAACCTCCATGCTGACATTAC

A\_16\_P00195924

AACTTGACCTTTTCTATTTCCACTCTTTATCCCTTTTAATCTGCCTCATCAAGACTCAA

A\_14\_P106873 TTCCCTGGACTCTTGCTCTTGGAATAGATTAGATTTAGAATCTGAAAATAGCAATGCCAA

CUST\_7412\_PI426210822 GTGAGGAGTCCACAGGTCAGGGGCAACGGGCCCTGCAGACTTCTC

A\_14\_P104175 GTTAGAAAAGCGAAGTGCTGTAAAAACCCGGGCCTTCACGAAAAGC  
CUST\_9741\_PI426210822 CATTACCAGTAACAGGAATTAGAAAGCCCAGCTCATTCCTCTGCAAACCTCT  
A\_14\_P112141 GGTCATGCTTGAGATGATGCATCACTTAGAATTGGATGAACATAATTAACAAGCAGGA  
A\_16\_P00443133 AACTCAATCCCACATCAAGTCTAGATTCTGTTCTGCAAATCTACTGCTGTGACTG  
A\_16\_P17394396  
AAGCCCTTCAACTTATACTGGTGTCTAGTTTTATCTCCCTCTACCTATTGTTCTTGTFTT  
CUST\_2759\_PI426210822  
TAACTATTAATTTACTAGGCAATATGCCCTTCTAAAACCAGAAAAAATGCTCACAGAA  
A\_16\_P21372139  
GGAATGTTCAACTTGTTACCTCTTACATACCTCCTTAAGTGTATATATCGTCACCACCT  
A\_14\_P132874 GGAGCAGAAAATACATACTACTGCCAAAAGACCAATAGTATTGTCTACCAGAGTAATG  
A\_14\_P121873 CTGCAAAGAATGAAGTGAGACAAACAGTTGTAAAGATGAGTTCCACCTACTTATAACCAG  
CUST\_7235\_PI426210822  
TATTTATTTGAAGACGTTTATGAAACACCTCCCTTGTFTTTTATTATGTTTGTGTTCTTCT  
A\_14\_P112965 TAGGACAGTAAATTTGGGAACATGCTCATGAAGTGTCCAGCACATGAGATCATTATTA  
A\_16\_P15653805  
AAAAAATCCCACCTAATCCTTAGCAGTAGCATTCCTGAACTCCATAAATGTGGGATATA  
A\_14\_P117298 CCATTACAGAGACATATGACAATGTTTCAGCAGGTCATCTTTAATGCAGAGGAGGAG  
A\_16\_P19056823  
ATAGACCGGATTGATAAGCAAAATTTATGCATGCTGCTATTTTGAATCACTTGCGAGTTG  
CUST\_1968\_PI426210822 AATCTCCACCTCCAGAGAGAGCAGATCTTTCTGAGTACAGGTAGCAATAA  
CUST\_5084\_PI426210822  
TTACCAAAATAGAAGAGGGAGAAATGAAAAGGAAATATGATCAATGATTTCTGTTCTTTT  
A\_16\_P18199550  
TCTTCAACACCATTTTTCCTAATTAGCATTATCAGCATCCAGTTCTAGAAAGTCCTAGCA  
A\_16\_P00637361  
AACAACTTTGAAGTTGGTTTTGACACTTTACACGTAAAGAAATAGATTCCTGAAGCAGG  
CUST\_2796\_PI426210822 GCTTGTAGCATCAGCCAGATGTCAGGGGACTTATAACATTTACTATGGAATTG  
CUST\_3296\_PI426210822 CTATCCTATTTTTCTCCAAAGGCAACCACAGTTCCATTTTCTTAACGTGTCTTT  
A\_14\_P132451 TCTTTTTTTCCAAACATAATTCCTTGGAGTTTCTTACATGTCCCAGTAATAAACTGGGAG  
A\_16\_P19876369  
ATGTCCCAGAGCCTATTTTAAAGTCAAACCTCCCCAAATTTACAAAATTTTGCTGCTATGT  
A\_14\_P123478 GCCCTGATGCCAAAATATGTCCATTCTAGTCAAGCAGTGGTGGTTGAA  
A\_16\_P15523883  
AAACATAGGTTACTGTTGAACTGTTCCCTGAATACTGTCAAACCTTTCATTTAGCACACTT  
A\_18\_P21809891  
ATGGTCATCTTAAGTAGAGACTTATGAGTGCGTATCATTGTATCACC AATCTGAGACTCA  
A\_14\_P101738 CAGAGGAAGAGAGAATAGCCTCCACACTTGTTCCAAAGACAAATTAATAAATAACACCAT

A\_14\_P107316 CTAGCATTCTCAAGCACCAAAGACAGAACTATATCCAGCCTCCTTGATATGTCTAATA  
A\_18\_P21946920

AAGCCTAAGGACTCTGTAAAGCCTTTTAAAGTTCCTCTAACATACAGTTTTCAAGGTCTAG  
CUST\_5272\_P1426210822 CTCTCCCTAGCTTTTAAAGATCACATAACCTGCAAAGTGCCCTGAGATCT  
A\_16\_P18298680

AGCAGTAAGCCTTGTTTTTCTGAAATCACCATTAATTACCTCTTTACCATTTACGCATG  
A\_16\_P17009985

AGTCAGACACAATTTGCTCTAACTTGCATTTTATCTGGATACGATAATGTCAGGCAATGT  
A\_14\_P102629 TTGCAGTAACTACTGGCTCAGTCGGGAAGGCAGCAATCTACATATATTTATTGATTTCTA  
A\_14\_P111238

AAAACAAACAGATAATTTGACAAACAGACTGCAAACAAGCATGAAAAGGGAATAGAGCAG  
CUST\_7435\_P1426210822 CAGTGTGAGAGGCATCCTTCCCAAAGCAGACAAAGAGAAAACACAT  
A\_14\_P116913 ATTCTCTCTTTTTCTGAACAATCAGGGATGTTCTACCATTTACCTTGAAGTTGCCTTATG  
A\_16\_P02691485

AAACCCAATGTATCGTTTCTCTTCTCAAAAAGCAACCTAGACAATGAACACTAATGTATGG  
A\_14\_P136945 CTTATTGAAGATTCCTGGTATTTAACTGAAGAGTCCAAAACATATGTGGTGGGAATGATG  
A\_14\_P202453 TGGGAAGGTAATCATTGTGGATGCTGAAAATGTTTTGGTTGCTGACAAAAGATTAATTAG  
A\_16\_P00818644

CCACAATAACCACATATCCCAGTTTTTGTCTTTGTCTATGTTTACACACACTTTTTGGG  
A\_16\_P19362972

ACCTGCAGAGTAAACAATCTCAGAAGTATCGACTAGGACGTAAATAGCAGTTCCTTATAT  
A\_16\_P18182866

ATATGCTTTGCACATTAGGATTTTTTCAGATCTTCCCTATTCTTGGTTTACCCAAAGCAA  
CUST\_4085\_P1426210822

ATTAAGTTCTTTCTGGTGGCTTCTTTAATTTTGAATAACCAGCCTTCCTTCAACC  
A\_16\_P21564557

CCCCATTCCTCTTGATAGATCTTGCCTATTTATCCATTTCTCACATACAATAGAACAGTG  
A\_16\_P36230816

GTTTTGGGGACAGTAAATAAAAATTGATGGCCATTTTTTGTGCATGCATCTTCTGAATTGGTA  
A\_14\_P137789 GTGGGTAACCATTTGCCAATAACCTTCTTTTTTAAAGTGTGCATATACATCTGAGAATACATGA  
A\_14\_P103375 AGAGTGCTAGTTTGCATTCAACACTCATTTCAGATAGCCCTTCTTCTCCATCTC  
CUST\_879\_P1426210822

AATAATACAGGGACTGAGGGTCAATGTAAAACAATTAGAAACCAAATTAGTTGCCATCT  
A\_14\_P128870 CATATTTCTCTTTTTTTTTTCTCAGCCTGTAGGTTTTGTCAGTTTTGACAGTCGCTCAGAA  
A\_14\_P134300 CCATGCCTTATCCTTCTGTGTGTCCTTCAAATAGCCAGATTGTGTTTAAATGCATTATTA  
A\_14\_P109463 GGTTTGTCTTTTAAATTAATTTAACAAGTGCTGCAGTTTGCCTCCCATTTCCATCTAT  
A\_14\_P109597 TTAACCTTGTTCATTTCCAGAATATTGCCCATGTTTGTAAAGAACTTCAGACACACCACA  
A\_16\_P37247739

ACTCTGCCTTTATTCTTTAGTGCAGTATGAAGCAATAACCTAGTATTACCATCACTGCCT  
A\_16\_P20975515  
AAAGAAACCATTCTGATTGGTCATTCATTTGAAAACCCTAGGTCTAAATAAGATGAGCCT  
CUST\_1947\_PI426210822  
ATCCTAACTAGATTTTTTTTTTTTCATTCCATAGGTTTATATTTTCAGAGCTGACCGAAG  
A\_14\_P122049 ATGATGAAAACGAATCCTTATTCAGAACCTAGCAATACTACTAGAACCACCTCTCCTACA  
A\_16\_P16552625  
GCTGGGTGAATACTCTCTTGAATCATTGACAAGGACTATTGAGAGCCAACCTTTTTAAATT  
A\_14\_P122184 ACAATTGAGAATGTATTTTATGATCTTATAGTTCTGAAAAGAGGGGGGCACAGGAGTAAGG  
A\_14\_P102953 ACAAGTTGTAGGTCTTCAGATGCAAGAGAAGTTCATTTCTTAGGGGGAAAAATAGAAGAG  
A\_14\_P108621 CTTTGAAGAGGAATCAGGACAGCCCTTCTCTTGATACTCACCATC  
CUST\_10326\_PI426210822 TTAATTATCCAGAAAATCTGGCCAAGCACCTTTTCTTGACAGAGGGGAG  
A\_16\_P36230261 ATTTCAACCCTTCTGCTCCGTTCTCCTTTGAGAATGGGTAATCAGAG  
A\_14\_P107509 CGTTACAGTGCAGAAATGTTAGTTCATGTTAAACTTTTCTCCTCACATATGATGTGACT  
A\_14\_P137355 ACTTTACATAGGACGCAGCAATATAGTATCTTCATAGTTTTTTCATGACTTTATTACGGC  
A\_14\_P108141 CATTGAGGTTGACAAATGATTTAATGAAAACAGAGTCAGGATTTGAGGGATTATCTTCCT  
CUST\_3935\_PI426210822  
AGGACTCCATATTATATTCTTATCCTGTTGAAAATTTGACCTTTTAAAGATTTATTTATA  
A\_14\_P202545 CTCATAGAACAAAATTGCAAAACAATTTTCAGGAACCTCACAAATTCCTAAAAATCTACTT  
A\_14\_P201363 ACTATGTGGTATATGCAAGGTTTTATTTCTCCTAAAAGCAGTAATATCCTCCTAGACTCCC  
A\_14\_P133285 CGATGGCAGTTCTTTGACTTCTAAATGTTTTTACCTGTCTTACGTGAAACATCCTCTTAT  
CUST\_354\_PI426210822 TACAGGTGAAAAGATGTGTTGTCTCTAGGGAAAGGGAGGGAGAAGAAT  
CUST\_9416\_PI426210822 CCAGTCCCTCTCAAGGCCAGCCATTATCATAGAAAAATCTTCAAGTAAG  
CUST\_5154\_PI426210822  
GTTTAAAGATATGCTTTTTGGTTGACAGTAGTAAAACAAGCCAAAAGAAGTTGACCATTTAT  
A\_14\_P139497 TATTATTCAACTTTTTAAAGCAGTATGCTCTGGAAAGTGCTGTATTTTGAATGGCAGGCC  
A\_14\_P120986 AATCGCTATAAAGCAACGTGTTGATGATGCACTCACTTCAAAACTTCCAATGTTTTACTT  
CUST\_5544\_PI426210822  
CATTAACTTGATTATATAAAGGTAAAAGTAGAATAAGATAAGTTTTTCTTAATATCTTAA  
A\_14\_P104003 CTGTTATCTCTCCAGTCTTGTCTTATTGATGTAAACCGAGAAGCCATTATTTTGGGAAGC  
A\_14\_P119674 GTTCAAATCCAGAGCCCTCCTTTTTCTTTGCTCCACTTTAGAGAAATCGT  
A\_14\_P135521 ACTCAGTTGCTTCACTGGGTTTAAAGGCATGCTTTGTGTATTTAGTTTGCAAAAATAAAAC  
A\_14\_P114994 AGGTGTTGGTGTACAGAGGAAGAGATCATTTTTCTGTGCATCATAACCTCAAATT  
A\_16\_P19624622  
ACTAAACCCACATGTGTATTACCTTTCCCATAGACATATTTTACACTTTGGACACCTAA  
A\_16\_P21048114  
AAAATCTCCTTCTCATCCCTAAATGAACCATAGCAAATGAACAAGATCTCATCATCATCC  
A\_16\_P02515678

ATGTAAGTGCAATACATTGAGTGAAATTCTCTGGATGAGTTTGTGATCCTAACCCCTAACAA  
A\_14\_P113799 ATATAAGACTCCCAAGTATTACTGTCATAGAAGGAAGGGATTTTCCCTTTTACAAATGAC  
A\_16\_P20423482  
GAACTCAGTCTACGTTGTTTTTCCCTATTGTCTCGTAAAGTCATTGGTATTCACATAGGC  
A\_18\_P16971431  
AAAATGGCTTTGCATGTGATTAAAGCAGTTCTCTAGCATTGTTAAGTGACTGACTTGTTTC  
A\_14\_P114736 CATCTTAGGAAGACTTAGAACCCCTCTTTTTATTTGTGCACTTGCTTGAAGCATGTAACAA  
A\_14\_P124109 ACCTTGAGTTAAGTATACAGTGAGTTATAAATAGGATAGTAGGGCCAGGAATCTGATGCT  
A\_14\_P130960 AACCTCATAAGAAGAGAGTTTTATTCAACATTATGGCATGGCCAGTGTAATTGTTCCAAC  
A\_16\_P39048906  
TTAGGGTGATTGCGAAAGTTATACCTCCTAGGTTGAGTTTAAAATGCTAGTCTCTTACTG  
CUST\_1831\_Pi426210822 AGCATGCTTGAGAAACATTTTCCCTCTGATGGATGTTTTTTTTTCCCTTCCCTT  
A\_16\_P19038585  
AGTAAAAACAGTCTATGACTCTTGAGGTATGTTAGA ACTCATCCCAAAATTCAACAGTGG  
A\_16\_P15398380  
TACCATAGGTGAAGACCCTATCTACTAACACATTGTGTCTTTCATCCCTATATAATGCCT  
A\_14\_P111628 CCTTCCCTTGACAGTATATATGGTCATGTGCACAACGACATGAATTAAGTGACTAAAT  
A\_14\_P121689 CTGGAAATACAAGAATCATAAGGCAGACGCAGCAGACTTTTAAAAATCGCCATTATTTTG  
A\_16\_P17574129  
AAATCCTTCTATTTGACTTCCAGACTGCTCTATCTAAAGAACTGACGTGATCAACTTTGT  
CUST\_4013\_Pi426210822 AAAAATAGGGCTACCTGCAAATGCTTTGAGCACTGTGGAAACCAGC  
A\_16\_P21211442  
AATGCTGATTTTTGGTGCTAAACACATCACATACAGATTCACAGTTTGGAATGTAGCAAG  
A\_14\_P135211 CCTGGCTAATTCCCCTTCCATTCCCAACTCTCTCTCTCTTTTTTAAAGAAAA  
CUST\_701\_Pi426210822 TTTTCCCTTCCCTCGGACGTGATGAATTCTCACTCTTGTGAATTTTTTTGT  
A\_14\_P202517 TATAGAAACCAAGATCAAACCAAGTCACCCTATTTTCTAACACAATTCAGGAAAATCG  
A\_14\_P112152 CTTCTAATTTGGTGTGTAGTGGCCAAGATGTATAAAATGAACCCCAAATTCAGGCTAAA  
A\_14\_P139711 ATCGACATTGTTGAGCACGTAGTTTCGTCAATTATTCTTGTGACTCTGTATTCAAGGTTA  
CUST\_9641\_Pi426210822 GGCCTGCAGAAAGAAAAGGAATTTATCTCTGAGAAGGCCTTCAGAAAGAAAA  
A\_16\_P37433113  
AAATGAATGAGACATTTTCGGAACCAATCATAACATAAAAAAAGCATCCTTTTTTCCAGGC  
A\_14\_P101011 ATTCTGATGATCTCCTTACCCTTACTGTGGATAAAATTGAACAGAAATTTCTCCACTA  
A\_14\_P115478 AAGTAAACTAGTTACCTGGGTAAAAGCGCTAACGACCCAAAGGCTCTTCTAAG  
A\_14\_P131950 CTGGGTCCAAAACCTTTGGTTCGAATTTTAGAACACTTTGAGAATAAAAGAATAATGGACCA  
A\_14\_P100598 AAAGCAGTAACTACTATGCAGAAATGAAGTTCTATGTGAGTGGGAGTGAATGTGGGTAAA  
A\_14\_P137798 TTTGAAAATGGCACAGATCTTTTTCATTGCTATTCAGGCTGTTGATAAGGTCGATCTGAAA  
A\_16\_P41573528  
GTCTAGTAACACAGAACCCTTACCATAAACTCTGTTTGCCTTCTTTAGTTTTTCAACCCAA

A\_14\_P135508 C TACTTTATTGAAAAAGAGATTGGTATTAGATGGGAAGGGGGAGAAACATAACATGGAGA  
A\_16\_P02885804  
GAAAAGCACCACATCAGATAGAAAGCACTAAATTTATCATAGTCAAGTAAAACTCGGTTCG  
A\_14\_P124851 ACCTTCACTTAATAAATGATTCATGGTCTTAGGTTATCATGTGGTTCTGCTCTCTAGTGT  
A\_14\_P128615 CTGCAATCGACATGCAGATGCATCCAGGTCATTGATTCACTGTTCTTC  
A\_14\_P125650 ACTTATTTTATGTTTACCATTACGTTTTCCGGGCATAGTATGAGAACAACCACAAAACCTC  
A\_18\_P22841570 TATAGCCCAGACAGTGGTCTGCTGAGGGCTCTCCGGCCTCAAGGC  
A\_14\_P130203 TAATAGTAAAGTGGCTCTATATTTTCTCTACGCCATCACTGGGTCTCTTCTTATTCTTC  
A\_16\_P18648988  
AAAATGACAAGTGATCATTCTCAACATACAAGAAAGTCTATCTCAGTGTATCCATGGGC  
A\_16\_P16607012  
AAAACCATATTCTCTCATATGGCCTATTTGCTACTCAGTGACACATTGTTTCAAGATGCT  
A\_14\_P128135 ACAAGTTGGTTGATTTTCTGCTTTTACAATTAAGTGTGGTTGGCATAAATCCTAATGGCT  
A\_16\_P35017844  
AGGCAAAAACCTTTCATTCCAAACATAAAGCAAATACCCAGTTAAAACCTTCTTTCCATCA  
A\_14\_P130347 ACTGCATTGCAGGCTGTATGATAAAACACACATAATTTAAAGAGAGAAGGCTCTTGATTC  
A\_14\_P125665 TGTAAGCATGAGACCCCTCTGAATAATACACAAATGATGAAATGTGATGCTCTTAGCAAT  
A\_16\_P37733292  
ACCCAACCTTTTAAGATAGTTCTCACTTGCAAATAGTTCCAATTAGATTCAATCCCTGCTT  
A\_14\_P110576 ACACTTGGCATGCTTTAACAATTTCAATGGAAACGTATAAGGAAATTGGGATCAAAACCT  
CUST\_8695\_PI426210822 AGGAATGAATTGTTTTCCCAAGGATGACCTGGAGGAGCTTCTTAAG  
A\_14\_P120111 AAACATGTTTCAGAAGTCAAGTAACTGGAAAAATAAACCTCCTTGGCCTGATAGAAATGAT  
CUST\_1271\_PI426210822  
CTGTCTCTATACTTCAAACGTGTTTCCATGTATTACGTGGAATTATAGACTACCTAAAC  
A\_18\_P26792317 GGACATAATTCTCAACCAAATTGCCTCTGTCTCTCCTTCTCACTCTCTCT  
A\_16\_P01858901  
AAAAAATCTTTGAAGCCTTCATAAATCAGCCCTTTGATTTAAATCTCCATCTCACTCCG  
A\_16\_P21505793  
AACTCAAAGTTTAAGTGCAGTGACATTTCAAAGTCTTTTTCTGGATTAGGTGACATCAGC  
A\_18\_P12895657  
AGTCTTCATAACTCCTTAAGTCTCCAAATCTCTTCCAAGTATACTGCCAATCCTTCAGT  
A\_16\_P18485704  
TCAGTTCTTAATCATCCACCAATTAGAAAGGTTACCCAATAATAGAATCCTTGGCATTGC  
A\_14\_P201112 AGGAAATTGAAAAATATGTGTATGTTACAACCATGAAAGTGAACGAGATGGATGGTCTGA  
CUST\_7805\_PI426210822 CATAAACACGTGAGCTTTCTCCTCATCCTCCTTTTTGTTGCCTCTCC  
A\_14\_P126621 CCAAAAATATCTCTGAATAGGAACAGTGAAAAGAGTTCAAGCCCTTTCACACAAAAATTCT  
A\_14\_P101865 GACTTCGGGCTTGATTTTCGCTTCGGAGATTTGCTAGACTTTCTTAGAGAAG  
A\_14\_P123952 ATTTATTTAGTGATCAGTGTGGTCATTTGCTTTGTTCTAAAAACTGGGACTGCAGAGAAT

CUST\_7310\_PI426210822 GTAACCTTTCAGAGGTGCTCTGAGTCCTGAACATCGGAGATAGATTCTTTATC  
A\_14\_P135407 GCTGGCTAGTTTCACCCAAAATAAAAAGCGGTAATAATAGTAACATCCTAATTGATGTGCG  
A\_16\_P02180308 TCCTTACACTGGATGAAGTAGACAGATGAACTAGACTCAATTGCTGAGGAGC  
A\_16\_P15049579

AAGCAACCTAAGGAAATGAGATGGTTTGTAGATTTCTTTAGAGGAAGTCATGTCATGCTG  
A\_14\_P109290 TTGAGAACCCACCACTCACTGTTATATTTAGTTGTATTGTCTCTGGACAAAATGATGGTA  
A\_14\_P108927 TATATGTGGGTGTGGGATAATGGAAAAATATACTAGATTTTTTTCAAGGGCAGAAGCAGG  
A\_16\_P00784860

TCACAAATAGCCACATGAAACCATATGAAGATTTTCCAATCCATTTCTTGTTATTGCGCA  
A\_14\_P128599 TTCTTTTTGTGCATATTTCTGAACATGCATTCTTCTACCTTCTGCTGTGTTGTTGTGTTT  
A\_14\_P127220 AACACTGCATTAGAAGTTCAAGCCTGCCATTTGTCTCCAATGCAATCATAAATAGATACG  
A\_14\_P101654 ATGTAAGAAGAAATGCTTATTTCTGGGTGTTGTTGCCAAAATTGGGTGTAATCTCTTTTTT  
A\_14\_P118310 ATTGCAGATTTATCAACGGCTTTTATCTTGAAAATAGTGCCACGCAGTCTACAAATTCTG  
A\_14\_P132539 CTGTAACAATGATGTTTTTCTCCAATTTTCCATTCTCATGGATTCGCCATTTTTTGATCA  
CUST\_5550\_PI426210822 ACTCAGTATGGCGAGGTATGTGGCAGGGGGTTATTATTTTTCTAACCATG  
A\_14\_P116073 CTTAACTCTTACCTTTGGATCTCTCAGAGGAACTCAGAGTATCTTCAGACTCAGAACT  
A\_14\_P125687

AAGGCAAAGTGGAAGTTACAAGTCATGGAGAAGGTCATTCTAGCAAAGAAAACCTTTTTAA  
A\_14\_P137637 ATGTGGACACTGTTTTTGAAGTCGAAGATGAGAATATGGTTTTGGCATCTTATAACAAG  
A\_14\_P115359 ACAGTGGACTAAATAAACGGACACATGTCACTGTATATCAGTCCTTACTTCTTCTCAAT  
A\_14\_P137326 GGTCCCCTTCAAGTGTGTTTCTCCAAGTAGTCATAAATGTAGCAAGTATAAATCAGAAT  
A\_16\_P21498274

ATTTTGTGCCTATACATACTCCAATCAGAGGAATAGAGTTCTGACGATACACCTTGAGG  
A\_14\_P123342 ACTGCAGATGAAGAATGTGAAGTCTGTTTGAAGGTATGAGAAAGAAGAAAATGGATTTTC  
A\_14\_P135352 TGAAAGAGGGTAATGAATGAAAGAGGGTATTTTAAGAAGGGTTTTCCGAATAAGTTTCAGT  
A\_14\_P111472 TTCCAGCAAAGTAGGCTAATCATATCAGTTTGTAGATGGCAATTAAGACATCTATAGTGGC  
A\_14\_P100537 TGTGAACCTGAACATGAGATGAAAAATGAGGAGGCTGTTTGTAAAGAATCCTGAAAATAT  
A\_16\_P19036789

AATACTTGGAACCATTTTTTAACCCATCCTCAACTATCAAATTGTCTGCCTGCATTTTG  
A\_14\_P138529 AACTGAAAAAGGGTGCTAGTCTCATTTCTGTTTATCTTCTTTTTCTTAGAATCTTGGTGT  
A\_14\_P132095 GAGTGGATTGATGGATGACAGGTAAATAATCAAAGACAGAATCCCCTATAACCAATTTCT  
CUST\_9495\_PI426210822 TTGTTGGATTCCAAGTCATCTGTACTCCCCAAAATACCACTTCCATTAATTACT  
A\_14\_P116770 ATAGAATGTTGGCTCAATTAAGAAACATCAGGGAGATAAATTCAACCCAGTGGTAAGTAA  
A\_14\_P133473 CACATTTAAGAGTTATGTTTCAGCCTTGTGATTTGTCTTATATTCTGACTCATCCCTCAA  
A\_14\_P132600 TCTGATCAGGATTGGTTTGGGGTTGCTTATTTAAGGTATATTGAGTATTCAAGCATGA  
A\_14\_P108923 GATCCTTATTATCAAACAAAATGAAAAGAAAGTTTGTGTTGCCCTCGTGACCTATTCCA  
A\_14\_P108262 CTATAAGATTACACTGGGACTTAGATCAAATAGCCTAGACATTTAAAGGTGCAAACAGCC  
A\_14\_P128650 AGCGGTGCTTTAATGAATGGGGAAGGCTAATACTGAGTTATAGAAGATCTGAACAATATT



A\_14\_P114118 AGATACAACCTTTAAGAGAAATTAATTAATTTTTCCCACTCTCCCTTGTGTGTCTCAGT  
A\_16\_P03541365

TGGGATACAATGCTTTAACCTGATTCAATTACCCTTTTACCTTTGTTGTCATCAAGAACA

A\_16\_P18536918

AAAAGATTTTGTGCAGCAGAAATACCTTGTTC AACCATTTATGTCCCCCTATGTCATTTA

A\_14\_P101698

AATCAACTCCAACCTGGAAGCAGAGAAAAAGCAGTAAAACCAAATGTCCTTAGAAATTCCT

A\_14\_P112590 AAGCACTTCATATAGGTAGCAAAAAGGCAACTACGTCATAATCCTAAGGTCCTTTTCATAA

CUST\_1017\_PI426210822 AAGTGGAACGGGCTGGGCAGGGTAGAGTGTGTGCCTCTGAGTAAG

A\_16\_P20775386

AAACTGCCTGTTTCTTTGATCAGATTTTAATGCTGACTGCTCTATCAATGTCGAACATGT

A\_14\_P114175 TTTTATTCTCTCAICTTTGCATTGAAGATTTTGGTGCCTCTGGTTTTGCTACGACAAAT

A\_14\_P108532 AGCATCATTGTATATCTCTTCTGGCATTATCTCTTGTAGTTTTAGAGTCGCTGATCCTG

A\_14\_P117371 AAAACTCCTCCTTACCTTTCCAGGACAATTATCACCTCCTGAGGAGAAAAG

CUST\_3307\_PI426210822

TGGTCTTCTATATGTCAGTTCCAGACTAACCTGATCTGATGCTTGTAGACTAGTTATCTT

A\_14\_P101557 CACATGGGTGCTTTAATCTCTAAGTCATGGATGAAGAACCAGCAAAAATTATTAACAATCC

A\_14\_P100971 AACCTGGAGCAGTGATGACTGTGCTTTGGAAGAATACAATTTTTTTAACTTTTATTTGCG

A\_14\_P134591 AAATGGTTCTTGAATAAAGACAGTGCTGATTTTGGAGCAAAAACCTCAATTTTCGCTTTGT

A\_14\_P133037 TCTCTTTTTGCTTTTTCTTTTCATATCAGTCACTATGAACAAGACCGTAGTGCACTTAA

A\_14\_P133813 TATTGTATTGTGCTGGTTCTGTCTGCTTTGTGAGGCAGTCTTGTTCTTAGTATAGATG

A\_16\_P20124173

TATGAACCATCAACTACCACATTCTTCTCCATTTGATAAACACTTGAGTCCTTTTGTTCG

A\_16\_P17571518

AACTGGCTCATTGTTACAAATCACTTCCTACTGTGGATTTGAAGTCTTCTTATTTTCTGC

A\_16\_P01583620

CCATGGACTCATTCAAATTCATAGCAGAGATTCCTTATTCCATCTACCTCATTACCATC

A\_16\_P15622599

GCAGACTTTCACTTAATTAAACTACCGTGATTGCTTTATTCATATATTTTGCTTGCCCCC

A\_14\_P125946 ACCACATCCTAACTCTATTAAAACCAGAATGTAGAGACTTTGATTAAAGGGTAGACTG

A\_14\_P118626 TTTACCTTTGATGTTTCAAAGCAGTGTCACATACATGAAGAAGTTCAGCAAGAATTAGC

CUST\_5176\_PI426210822

TTCTCACCTCTTTAGGAATTTTAAGCCCACAAATTAAGTATGGAATTTATTACATGGTAT

A\_16\_P18879369

GAAACACGACAGTAAAACATCTACGTTTAGACTACAAATTGTTATTTTCCAGTCCCA

A\_14\_P134006 GTAAGCCCTTTTGAAAATCTCAAGTGTCATTTAAGCACTTTTCTTTGGCATATTTCCACT

A\_14\_P126363

CTCAGAAAGAAAATATAAGACAAAAGTTTGTAGCAGATCTACGGAAAGAGTTTGTCTGGAA

A\_14\_P126650 GTTTGATCTTGCCCTAACAGACCTGGGTCTATGTCAGAATCATTGGATCAG  
A\_18\_P14133043 ATGCTTTCAGAAGAAGGCGTCAGACCTCCTTGTATGGGAACATCATC  
A\_14\_P121896 ACCTTTGCTCTTAAATGGAGTAGTCAGATCATTTTGTTCAGTCAAGTAGTCAAAAAGAAAGC  
A\_14\_P200437 GGTTTTGCTACCATATGATGCCTAACAGAGTAGGTTCACTAAATGATTGAAAAATGGGTG  
A\_16\_P36230178 AGTTGTCTTTTTATTGTGACCGAAAAACCTGATGAGTGTGGAATAGTTTGGGAGC  
A\_14\_P103256 CCAAGGCGTGGGGAAATACCTCATGAATTCATGAATACACTAAATTAACCTGTCAACTG  
A\_14\_P106165 CTGTTCTTATATATTGTTTCATTTTTAAACTAAAGATGCATTTAAGAAGCAATACAAGT  
A\_18\_P13122018  
AAACCTGCAAGGTAAAATCGTCTGAAGGTTATCAAGATTGATACTGCAGGCTTTGTTTT  
A\_14\_P137476 CACAGATGTAAATTGCACTGTCATTTGAAGTCACTCTGTTTACAGTGAGGGAAACT  
A\_18\_P17134079  
AAAACCTGGCTATGACTCACCTACTTACCTAAGAGTTGAATAGATTTGCGTAAGGACCATA  
A\_14\_P109575 ATCATTATTTACTGAAAGATTAATCTTGCTGTGAAGGAAACGATCAGGTTATGGGAGC  
A\_14\_P124564 CTCTGGAAATTGATGAAAAAGTTCGATCTGCATGATCAAATTTGCCTCCTTGCAAATTTA  
A\_14\_P133278 GTTCTGCTTTTTGTGTATATTTGCAGGGAAAGATGTTAACACTTCCTAACAAAGTCTTTGTG  
CUST\_9281\_PI426210822  
TTTGCTATTATGAGTTTATCACAGGTGGTTCATTA AAAAACCCACCTCAACCAGTGCA  
A\_16\_P19949821  
AAAAACAGCCCTTATTA ACTCTTCCCTTCCACTGATTCTACTGTAAACTCATAAAAAGCCTT  
CUST\_7182\_PI426210822 CAAAAGTGGAAGACTGGTAGATAGTCTGTCAGCTCTGTGGGGTG  
A\_18\_P22840319 GCTGTGCTCAGCCCTCCGGGTGGTGAAGGTCTGAGGTCACACTG  
A\_14\_P105042 ATTTGAAACCGCAACCCAGGGAATGAAATTAACCACCCGACATAACAGA  
A\_16\_P03774196  
TACATTACCAACAAAAGCATGTTCTCTAGCCTTAACAATCTAATTACCATGGCACTTCCA  
A\_14\_P200333 CCAAGAGAACTTGAGAAAGTTGCTTTCTCAAGCCTGTTTCACCTCTATTGCT  
A\_14\_P104333 GAAGGATATTGAGAGAGTTGAGGAATAGGAAAGATAACCTTTCCTGAGTGATGTGAAAAA  
A\_14\_P108018 TCAGGCATTTTGAATTAATACGCTCCAATAAGGCAAAGGGCACATTTATAGATTATTCC  
CUST\_1226\_PI426210822  
GCCTGTTCAAGATTAAACTCTGAGAAAGAAATGCAAGAGGTAATTATGATGCCATGGT  
A\_16\_P17422034  
AACGCTCTAGTCTACAGTTGTCTACAAATTTTCCTCACAAATATTCCAATTGCC  
A\_14\_P135832 AGCACTTTCCCTCCTCCTTTTGTGAAAAATTTCAACTCTTTAGAACTTCTCCGTT  
A\_16\_P19036350  
AAAAAGTTACCCTAAAAGTGCTCAGA AACTCATTATCAAGTTCCAAGAGATGCAAAAACA  
A\_16\_P03414672  
AATTAGGTGAGTTTGCTTGA ACTTATACGTTGAATTAGGTGTTGAATTAACACATAGGGGG  
CUST\_3003\_PI426210822 ACTTGTGTTGACCTGCTATCCATGCATTCAAAAAATGGGAGGTTTTGGT  
A\_14\_P104316 GGATCTGGGTTTTAAATGCTGCATCTTCAGAAAGGAAAGAATATTCTGAACTTCTAAGTTG

A\_14\_P100439 ACTTCAGTCTTCAAGGTTATAGAAAATCAGGTCTGTTCCAACAAATAGTGTCATTTTTGG  
A\_14\_P139768 AAAGTGAATAAAGTTCCAAGAAGCAGAAAACGGACACTTTTGTATCATGCAGCATGACT  
A\_14\_P200641 ACTAGGAACAGTGTATTGCATAAAATAACATTTTAAAAATAGTGTGGGCACTACCTTTCT  
A\_14\_P112518 ACTGTGGCTATTCTTCAACAGTGTTCCTTAGAAGAATGGCTTCTTACACCACAATATACAT  
A\_14\_P123940 GTCTAAATTGGCTATTCTCCTAACAAGAAATCTTTAGGAAAGTCCTCCCTAAAACCAGAA  
A\_14\_P104058 AGTTGGTAGTGTAAAGGAAGTAGAACTCATACCTACTTTGGAATGGCTATCAGAAAGAAG  
A\_16\_P16366058  
ATTTCTTTCTTCTCCTTGAATATCCCTAAGCATTCCATTTTACCATCTATCACCAAACCC  
CUST\_7759\_PI426210822  
AGGATCATTTTAACAATGGTCACTTTTTTCTAAGGGCTTCTCTTGATCTTTTTTATTAA  
A\_14\_P133592 TCTTAAAGATGCATACTGGAATGATAAGTTTGAAGATGTAACATCAACAATTCTTTTCA  
CUST\_5522\_PI426210822 GCCTTCTCTAAAGTGTTAAATAAACTGTTTAAAGATAGTGTGGGCGGCTCGTT  
A\_16\_P20865243  
AGCCATCAAGTATGATTGGAGCCATTTTAATGAGTTGCCTAGTATCCTACAATGGTAAAA  
A\_14\_P127775 CAGAGTTACATTCTGTTCCAAGCCCCAGCATTCACTTTAAACATTAATAAGAGATATGGT  
A\_14\_P128216 AGTTATTACTAAGCAGTTTATCCAATTGCATCAGCATTGATTGACCTGCTGCTTATTCAG  
A\_14\_P108409 CTCTAGCCTCAAAAAGCAGGGAGATTTTGCAGTGAGAGGTTCCATC  
A\_16\_P20596392  
GTATCTCTATTTGCCTAACATTCTGCTAAATACACAACCTATTGCTGTCACTTCTGAACA  
A\_18\_P10278479  
GGATCGCTTTCTTTATATATCACCTAAAGACCAAGACATTTCTCTCTAAAAGCCTTCCAG  
A\_16\_P18763664  
TGGATTCTTTGGGGTTAGAACATTCCTTTTATGCAATACATAAATGTCTAGTATGCACCA  
A\_14\_P134820 CCAATTTGAGTAATCGGAGTTTTTTTTAAACACCACACTGAACGCAAGGTCATAATTCAA  
A\_14\_P104812 ATGTCCAAGAAACCCAGAGACTTCAGAGTAACATGAGAAAAAGACAATTAAGAATTCTCT  
A\_16\_P16674324  
AAAGGTAAAGTTGTTCTTTGTAAACACTGGATTTTAATGCATCACTATAAAAGCGGACGT  
A\_14\_P112612 ATGGGGAATTCACAAATTAACCCTCATGCATTACACATTATGAATGGAAAAGACATCAG  
A\_18\_P13583240  
AAAACCACAGCATATTTTAGCATCTGTCATTACTCTCCTGAGTTCTTTCTATCACACCAA  
A\_14\_P201874 CTGTAGTCTATTATATGACTACCACCATCATTGCTGTGGTGATTGGCATAATCATTGTCA  
A\_14\_P131602 TTGAAAGGGCTAATCATGATTTTTTTGGAATCAGTAGAGAGCATTGAATTTGTCAACTCCT  
A\_16\_P16473361  
ACACACCATATTTCCAGCCATACATGAATATAATTCTAACTCCTTGGTGACTAATAGGT  
A\_16\_P40940855  
AAGAACATGGTAATGAGTAATTTTTCTACACATGCAAGTTAACCTACTTTCCCAAGCACC  
A\_14\_P105444 TAATAGGCCCTGTCTCCTACTTCATACATTAATTCCTTAAACAACATCCATAGGAAGAGAC  
A\_16\_P15962422

AATCCCATGATATTTGTTTAGATCCACCTATCCTACATATGCAAGTAGACATAACGAGGG  
A\_14\_P127797 TCACACCAGAAAAACCTGATCATATATATGCTCGTTTTCTGAATAAAATTCTTCTGGGGG  
A\_14\_P112447 CAACATCCAGCATCCCACACTCAAAACTGCTAAATGTAGCAACCATTTAATTAGCAAATA  
A\_14\_P201909 TGCAGTTAGGAGTTTGTAACTGCCTTTTGGAAAGTCAGTGTAAGAATAAGTAGTGTGAT  
A\_14\_P101428 ATCTTGTCTATGAATTTGACAAGTTTTGGTTTGAAGAAGAACCAGAAAGCATTATGTATT  
A\_14\_P122297 GCATGGGAAATCGACCGTTTTTCATTTCTATATCCTTCTACTATAGTGATTGCAATCCTTT  
A\_14\_P123297 ATTGATCGAGGCTTCTTTTTCCCTTCTATGATGACTTCTGGAGACTTTCCAG  
A\_18\_P14879561  
AGTGCCCTAAATACCAATATTGCAAAAACATCCATTTATCATTTTTTCACGTCTATGCCTT  
A\_14\_P116952 CCACTCCATAACAGTGTCTTAACCCATAGTTCTTTAGGCTCTACTAACTTTTTCCTTTT  
A\_14\_P125155 GACTCTTAAGTTTTCAACACTTACCCATTTTCATCATGTCTGAAGTTTTCTGGCTTTCAA  
A\_18\_P22841641  
TCTGTCTGGCTGAAAATTTTGCCTATAGATGAAACATCATCAAGGTATGTATACGCATT  
A\_14\_P102360 ACTTCTGGACACTGAACAAAGGAAATTTTAGCCAGCGAGTATGAATTGTATTTGCTTTT  
A\_16\_P01183532  
CATCCTGTTCTCTAAGAAAACCTGGTAAAATCTTCCTCTTCACTGTTATCTCTGTATTGC  
A\_16\_P15821850  
GAAGATCCACTTCACCAATTCTTTAATGCGTGATCTCTGACTTAATGGCAAAGAAAAGTA  
A\_16\_P15150800  
AAAAAAGTAATCAAGCCAATCAGACAAAATATGTTTTCTCCATACAAACCATGAAACACCA  
A\_14\_P116820 ATCAGAGGATCTCACATTTAGCAAGCGTGGTTTCATCAAACCTTTTGTACAGTTAGTATG  
A\_18\_P14131315  
TGCCAGTTTGTGAGAGTAATGTTATTTCTTGTGTGTGAAGTGAATGCCCTTCTGTATATT  
A\_14\_P128311 GAAATAAGAAATCATTGGGGTAATTGCCTCTGGAAGAACTCACTAAGAGAACAAAGTCAG  
A\_14\_P100082 CTACCTCTTGTGCTAGTAACAAAATGAAGAACTGTAGGTTCCCAGTGAAGAAACA  
A\_14\_P136848 GTATGGTGAGAAAACATGAAGATCTCCCTGATGTGTTTTTAAGATACTGGGTTTCAGTTA  
A\_14\_P116704 TTACAAGCCATTCAGTAAATACATACTTAGACAATATCACAGGATCTTCCAAGGAAGTC  
A\_14\_P139850 CCATTGAAACTAATATTTTCTATTTTCAAGAAAAAAGCAGCAAGCCTCGGCAGCAGTCAA  
CUST\_7863\_PI426210822 ATACGACAACCTCAGCTACCCAGTGCATGCTCAGGGCGCGTTCTGAAT  
A\_18\_P22605647  
TGTTGCTATTGTTATCTCTGTAAAGGCTATCCTCTCCTTTGCTTTATACTTTTACTCAGAA  
A\_14\_P121005 CTACCGAGATTGTGTGATGATTTAAAAAACAATCTGCTCAAGTATCCTGAATTCTGTGG  
A\_16\_P03463884  
CTTTTTCAGACTCCAGTAAGCATCACTGAGAACACTTAATTAATATACTGAGGCCTCTCA  
A\_14\_P104592 TAGAGCACGTTTGACCTCAGCATAAGGCATATAGGCGACTGATTTTCTATGAAA  
A\_14\_P103291 AAATGAACACTAGACAGACGTTCAAATTTGATCTGATTACAGAAAAGCCACTGAAGGTTT  
CUST\_6345\_PI426210822  
TGTTGCTAGGGAAACCACTATTTTGGCTCAGATCATCTTAGTAAATGCTTTTTTCTCTC

A\_14\_P133308 CTATTAAACATAAGTATGGCTCCATTTTTTTAGTATTACCAGAAGCCCTCCCAATACGGC  
CUST\_2885\_PI426210822 CTTCCATCCAAGCTCAGCAGAGGGTGCTGGCCAACCTCTGTCACTCT  
A\_14\_P131409 TTCAGTCACAGCCTTCAAGCCAACATGTTTCCTTTCTATCTGAAAAACATAAAGCATAAA  
A\_14\_P131558 AGATTTGTGATAACGTGACCATGTATTGGATCAATCCCACTCTAATATCAGGTATGACAT  
A\_14\_P102573 GGAAGCCATATGTTAAGTTTTCTTTTAACCAGTATGCATACATCACCATACACCATCTT  
CUST\_8405\_PI426210822

ATCCAGTATAAAGACATTTGTTAAAAATAAAGATGGTAATACAAGCTCTCCTGTCCCTCCT

A\_14\_P122749 CTTTATTAATCCCTTACACGAGCAAATGCGATCTCTGACCTACTAGACTTGTTCCTAC  
A\_14\_P113194 AAAGACAGGACCACCGAAGACTCAGAACCTATAAAATTTAGTCACCTATCAGATAAAGA  
A\_14\_P108749 TCTTGTCTTATGTTTCATTTAGCCATAGACTTGACTGGAGTTTAGAGGGAATTGATTGTT  
A\_14\_P138236 ACTGCCTGTTACCACGGCTTCTTAACAAAGATGTTAAATCATTAGGAGTCATATTCATG  
A\_14\_P108938 CGTTTGGACTTATCCAAGAGATCTATACACATATTGCCATCATCAATCAAAGAGTTGACT  
A\_14\_P100466 TTTCCCTAAATCTGCTGGTTTCTGATTGACCATTTTTACTTTTTCACTCTAAATCGGG  
CUST\_1506\_PI426210822 ATCATTGGCGGCTGTGCAGATACATGAAGCGTGTGAGCATCCCCT  
A\_14\_P110091 GTTGTGTCTGTAATCGCCCTACTATTCAGTGGCGAGAAATAAAGTTTGCTTAGAAAAGAA  
CUST\_9891\_PI426210822 AAAGACCTGTGGTTGGCCAGCCTGTCTGGAGCCAAAGGAGAGAAT  
A\_18\_P22842306 CACCAAAGATGCAAGCCTGGTATCTCAACCAGAGAGGCATCTTTCAA  
A\_18\_P22840687

TCAGACTTTCTCAGTTACACAATAGCCATTGTCTATGGAATTCTCCCTGATGGAAATTAT

A\_14\_P115287 TGTTTCTGTTTTCTCAGACAAATAAGAAGACCGGAAAACCAATGATAAATCTTTATAC  
CUST\_5122\_PI426210822 TTTATTGCTTTAGATGTCATCTCAGAAGGATAAGGAGCAGTGGGGACAGG  
A\_14\_P115870 TGTAACAAATAGCCCTCTTATGAGTCTCATTTATGCCCTTTTCTTTTTTCAGATCTAAGCC  
A\_14\_P104705 CAGATACATAGGTAGGTTGACCCTATTGTTGTCTGTGACATTATCTTCTTGATGTCTTTG  
CUST\_3954\_PI426210822

CTCCAGGTAAAGTAGAGAGTAAAATCCTATTGCTTTCTGACCTTTGGGTTAGGATC

A\_14\_P137327 GGAACAGCATTTGATCTGTGCAAATAAACATCAGAAGGTTATATTTCCAGACAGTTCTG  
CUST\_2702\_PI426210822 CTTCTGTCCATCTGTGAGGCTTTGGACACTCGTGGTTTTTCAGTCT  
A\_14\_P139517 AAGGTTTGAATGTTTCAAGATCAAGAAGCTCAGTAAACTACCATCTGCTTTTTACCTTAGT  
A\_18\_P16486606

TCCGGTAACATATATTTAACATATTGGGGCATATTGTGATATTTTCCTCGGAAGTCTGCT

A\_16\_P16085870

ATTACCAGTTTTAAGCCAAGTAAGCAAACCTCAAAGAGATCTTCTGTCAGTGTGATTCTTG

A\_14\_P133451 CAAACATATTGAATGCAAAACATATATAGAGCAAAGGGATCACACATTTAAGGATCCACG  
A\_16\_P15951967

AACATGATTACACATCTTGCTTTTTCTTCCACTTTAGCCAAATGTCTTAGAGACTGTTC

A\_14\_P110191 TACCTTCTAAACCTGCTTCAATCAGCCCAAACCTGTTCCAATAATTTAACAAAAAGCACAA  
A\_14\_P133128 CTATTATTATACACCACATTGCAGCAATTATGTTGTTCACTGGGTGTTACTCTGTATGCC  
A\_18\_P22840850 AAAGCATTTCTCTTGTCTCCACAGTGAGGACATCAGGAAGTGAGC

A\_14\_P121157 AAAAATCTAAAAGAATACTCAACCAAATACTATTGGTGGGACTGGGTAGTGGGACCTATA  
A\_14\_P117492 TCTTACGACTTCGAGAGAACCAACTATCTGAATCTGTCTCCCAGAATAAAATACTACTTC  
A\_14\_P129904 CCAACTCTATGGGCCTGTTTTTGCAGAAAACAAACATCATCCGTGACTATC  
A\_16\_P16831904  
AAATCGGTTATTAATTGCAAATGGGAAAATTAAGAGAGCATAAGTGATCCACTCAGTGGC  
A\_16\_P03713986  
AGTAATCTCAATCTATACTGCTATACTTGTTCCTCAATCAACCTATTTCATCTGTCCA  
A\_14\_P137771 AACCTTATTTCTTTGTTTGAAGTATATTCAAAGAATTGATTGCCTCCTTGACCATGGCAT  
A\_14\_P123411 CATCATCTAATAATTTTATGCAAAGATGACCTTTCTCCCCTTCTGCACATGCTTTATCAGT  
A\_14\_P130611 CTGAAGAATGTGATACAATTACTTTGAACTGCCACGAAATTCAGATATGAAAAATCAGG  
CUST\_6918\_PI426210822 CTGTGTTTGTATTTCTCACCTGGATTACCTGTGGCCCTTGCATC  
A\_14\_P132099 CCAACCAATAATAGCAAACCATCCAGCAATAGGAAAAGAGAAGTTTTTGCCTAGTGATA  
A\_16\_P01826484  
ATTGTGCTACAACCTTGCTAAATAGGTCTGCTTCTAGGAATAATATAGCCTCCTCAATCCT  
A\_14\_P122750 GGTTTTAGACACAGTGGTATCTGAGGTTATTATTCTTAACTGCTAGGTCCTTGTATGTTG  
A\_14\_P123455 ACATAGAGGCTTCAGTTTGCCACCTCAGAACCTTAGTTAAGAGACTAGAACTACATTATA  
A\_18\_P14133957 ACATGTATATCTTCTTCAGTTGGTCCCTAGTGAGTCTACCCAAAGTGAATTGCACT  
A\_14\_P123851 CAAAGTGAGAGTAAGCAAGGAAAATCAAAGGACCTTATTTGAGTAATACCCTTCTGAAAA  
A\_14\_P117204  
CAATGAGTGACAATGATGGAATGTGAAAAAAGAGAAATCAAGAAACAGTGACACACACA  
A\_14\_P107323 TATTTAAGACTTTGGTGTCTGGAACATCAGTCTTCATAAACCATGACCTCCTAGATTGAA  
A\_14\_P137038 CTCAAGACCAATTATTTTGTATTGTTAAATAATGGGCAGTTTCAACCCAGACAGGTGT  
A\_16\_P16246440  
GCCATGTTTAATTACCTTTACAGGCATTAACAACAGTTTACTAGAAATCGATGGAGGAGC  
A\_14\_P122490 TGAATCTGCCTATAATTAATTATAAATAGGTGACAGTGGGCCTCTAACCTAGGATCTCGA  
A\_16\_P16906075  
GCCTCACTACACGATATCATTTCATGAAGAAGGGAAATATTATGTTAACTGCCTCTGACAT  
A\_14\_P121437 GGCACAGTCTGTCCATGAATAAAACCATATTTTAAAGGCACCAGGACACTTATTATGTAAA  
A\_14\_P132538 TTTATATTTCTAACCTGTCTCTTGTGTTAGTTTCTTCTAACCCAGGTGGGTTCTAAGT  
A\_16\_P18540897  
CCAGTATAGTGAGTGTAGATGTCGGTTATTCTGTAGTCAATCTAAAATGTCCAGTATGC  
A\_14\_P104416 CAATACTCACTGGATTTTGTGGACTTGAGAGCAGAAGTCAAATATATCCATAGCACATTC  
A\_14\_P201665 CTCTCTGAAGTCTCATATTCCTCCTGTCCATTTTCTTTTACTTCTTCCACT  
CUST\_7533\_PI426210822 ACTGACTCAAAGACAGAGAGGACCATAATACCAGGGTTCCTCAGTC  
A\_16\_P19820704  
ATAATTACGATTTTAAAGTCTGTGGTTCCTCTAAGATTCTCTATGATGACCGAAAGCCTGG  
A\_18\_P16521547  
GCCAGAGCAACGTTATATATTTACTGATAGGACCTCATAAAGTTTTCCACAGCATAAGCA

CUST\_6871\_PI426210822 AGGCTTTCAGTGGCTAATTTTTTATGACAGAAGGCATCGAGGGCTTGT  
A\_14\_P130791 ACATAAAAAGACATCTTTTGGCGTCTGTTTTAACAATTTGAACAAAACCTCGAAAGCCAT  
CUST\_5167\_PI426210822

GTTATTTTTAAGAATAAATTTTTAAAAGGACAAAGTAAAACCTCCAAGTTGAACTTAATGGC  
A\_16\_P16236131

CATCTTAAGAGGTTGTTGCACAGATTAAGCGTAATGTAAAATGACTGGAACACTGTTAGG  
A\_14\_P103126 ATTTGATGTGGACTATGATTTTTGAAGAGACTGTCCAATGAAAACCATGGAATTGCACA  
A\_14\_P129468 CTAGGTCTTTATTCAGTTCTTCAATTTGAATCTCCAATCTGTTTTATGTAGGGTTAGGT  
CUST\_6326\_PI426210822

GCCCCCTAAAGTATTCTTTGTCTTTAATCCAGTTGTTACAGTGAGTGAACCTGAT  
A\_14\_P131017 CTGAAAGTTCTACTCTTTCTAGTGGAATATCAATAGGTGAGAAATACTTCTCTGAGAGGG  
A\_14\_P129420 AAAAGCAAATATGCTGTGACCCTGCTATGTAGAACAGTCAAAAAATTCTGGGTATTATCT  
A\_16\_P02258428

ACACATCCTAACCTTACAGTCTTTAATGTCCTTATTTCTACAGATCCTAATCTTACAGCCC  
A\_16\_P02684266

AGGAAACACTCATTCTGCTCATTTTAACTTTATTGTCTCATTCTGATTCTAATCCCCAAA  
A\_16\_P30952443 TGACACCAGTTCTCCGCTGGAAAAAGGGACAAAAGATTGCCAAA  
A\_16\_P21422220

ATCAATCTGCCTGTCAGTAATCTCTCTTATCTGAACTCGGAATCTATAATCTGCAACA  
A\_16\_P01805630

AAAAGAGATTTCAACTTAGGAATTGTCTGTGGTCATTTTCTACCGTGAAGACTTTTGCAG  
A\_14\_P110433 CAGGCTCTCCTTCTTCTCAGACAAGATGTCTTATCAGAAAAAGCAGCC  
A\_14\_P113858 GGTC AAGCAGGAAAAGGACGGCTTCTTCTTATGATATTTGTAAAATCTACGTTGTTTA  
A\_16\_P18892106

AGACGTTTGCTTTTCATGACAACCTGCAGAAAATGAAGTAAAATCTAAATCCCAGACCTTT  
A\_14\_P104295 ATTTTGGATTACATTCAGCCCTCTACACAAGATAGAGAACATTCTGGTATGAATGTGAAC  
A\_14\_P137626 GAATGACCCGAGACTGGTTGTTTTTTCTAAATATAGGCAGAGAGGGTTCTTTTTATGATA  
A\_14\_P127172 CTATCATCAACAGTTGTTTTAACATGCTGATTTCTCCAACACTGTTTAAAATTGAGAACA  
A\_14\_P104137

CTGTAAAAAACAACCAATTACAGGCTTAAGGAGCACATAAACCACACCTGAGAAAGA  
A\_14\_P109881 TTTCATGAACCTTGTAAGGCTAGTGTTGAGTGGCTTACAAATGTCATATAATGGACTGTA  
A\_14\_P108441 GTTGGTAACTACACGTCTAGGTCCTCACTATATTGCCTTGCACTGTGAGATG  
CUST\_10118\_PI426210822 AGCCCCTGGCCCCACCTACGCATGCACTGTGGTGCTACTGTTTAC  
A\_14\_P102574 CCATAGATTCAAAGCAGTCATTCAAGTAAATTAGGTGTTGCCTATAGGAACCCATTTC  
A\_16\_P15527643

CCCAGCCTACTTATCTTTATCTCCCCAAATCATATATCGAAAACCCAGTTTATTTCTAT  
A\_18\_P22842310

AAGACAACATAATTTCTTTGGGATTACAAAATAATATGTATGTATTGACCTAACATAACAT

A\_14\_P124398 TGTGAAGAGGAAGCAGGTTGTGCTTACCTTAAACATTCTCTGTTCCCG

A\_16\_P36052369

TTCCCTTACCCTCTCATACTCTAATAGCACTATGGTCTAAAGATCGGAATACAAACAAAC

CUST\_9146\_PI426210822

CAACTACACACATTTCGGATTCTCAAACGCCCAATAAACATAAATATTTTCCATCCACAAT

A\_14\_P115662

ACAGAATTGCTACAGAAAACGGGCAGAAATATAAAAAGCACAATTCAAGAACAAAAACACG

A\_14\_P200574 GCAAGCGGGTAGTTATTGATTGGCAAGGATGTTTGGAAATGGCTTTTCTTCTAAAA

A\_14\_P110271 CTGAGTAAGCCATAATCCCTACATCGGACACAAGTAAGCAGGTGAAG

A\_16\_P37677342

AAACCATTTCAAAATGTGTTCCCTACTTACCCACACCTACTTTTTGATCTTTGGTCCAAAAA

A\_16\_P58424630 AGGAAAACTGTTGGAGAGCAGGGAAGGAAGCCAATAAAAGATTTGTCATCAA

A\_14\_P131299 AACTGTAAATTGTAATGTCTGTGGAAACACATCACTATGGTTTACAAATCCATTCACCCA

A\_14\_P103810 CTTCTTATTGCTCAATTTCTGTTTCCTCAATGGCTGTAATCCTCTCCTATAATGCTT

A\_18\_P11675915

AGTCCCCCAAGTAGTATAAAATACTTTTGATAGAGCATGACTTTTTTACCTACGCTTGACC

A\_14\_P138606 CACGGGACGTTTCAATAATGAAAGCGCTAGGTGCTAGTGTCTCAAAAATCAG

A\_16\_P18513932

CCCATCTGCCTTACAATCTCAAGATTTGCTTTAATTCAGAAGGAAAGTTTTATCCTATGC

A\_14\_P124160 TTGGGGAAAAAATGGGGGAAGAAGTTTCTTTGCATCCAAAAAAGTAAATGTGATATGGA

A\_14\_P202491 TTTATTATACAGTGAGAACAGAGATATGTTTTTCTTTTCTCCTCTGCTTTGAACTGGCCC

A\_18\_P17924028

AAATGGTGAACATTTTCAGAAATCGATTTCATGTCTACTACTCTTCAAGAAATCCTGCCAC

A\_14\_P106855 TTATCGTGATTATTGCCACTGTCAGGATGAATGATTATGACTGGGCCAGGTT

CUST\_5255\_PI426210822

GCAGAGAAATAGTAAGAAAGGATGGAGGATGGAGGGGATAAAAAGATCACATGT

A\_14\_P115125 ACAGGAAAGGGAATTTGATTAATATACAGTCTAAAATTACCTAAGGCTCCCACGAATCAG

A\_14\_P114879 TCCCAGACATACAGTGAACAATAAGACATATAATAACTCTGGTCAAAACATGTGCCAACT

A\_14\_P125719 CTGTTTCCAGTTTGTAAATATGAAGTCACCACTGTCACACCTAAGAACACTTTTGTTAAAGA

A\_14\_P130019 GGATTCCAAAAGTTGTGTAAAGAAAAACATAAAATGAGGCATTGTTGGGGAATGGAAATT

A\_14\_P103827 GGATCTGCCTCACGTTATATAATTAAGATGTTGAAAATGTCCGCATAAACCAACTCACAT

A\_14\_P125211 TGGAGATTTTTAACCCTACTTTTGAATAAATATTAGGAGACTATGCACTGTGCTTCCCA

CUST\_2589\_PI426210822 TGAACCCTCTCCAAGTATTTCTAGCTGTATGAGTCAGAGGAGGCAGAATTA

A\_14\_P111024 AGTTAAAGGCAGGACCTCTGAGTGCATTGATAAGATAGGGGTAGGGATTAC

A\_18\_P12064293

CCTGTTGATCCTGGTAATTGTCATCAAGTCTAATCAATCACAAAAATGCATCACAGACTA

A\_14\_P111984 GGGGCAACTATATCTTTGTTTTAGAGCCTCTTTGATGATGAAATTAAGGACAAAAGA

CUST\_6888\_PI426210822 GGGAAACCAAGCATTGAGCAACAGAATGGTTCTTAGGCAGAAGTGA



A\_14\_P122164 ATTCATTTTTATCACTTGCTATTTTCATGCATACGTGATACAGGAGGTAGTAAGTGCCCAT  
CUST\_2439\_PI426210822 CAGGGCATCTTCTTCAGCTGAGTGCTTTTGGATTTCCTACAGTTTAAGAAGTGT  
CUST\_8116\_PI426210822

AGAGAGGGCAGGGAACCAGTATTGCAATTGTGAAAGGTTTCATTTGTTAGAATAA  
CUST\_4927\_PI426210822

GTCTATTTTTTCATCATAGTATGGGTTATTTAGAATTCATATGTTATGAGGAAATACACTG  
A\_14\_P104467 CTAATTTGTCTTGTCTTTCTTTCCATATCCCAGTATAATCTCTGTTAATCAACAGGAC  
A\_14\_P118937 CTGCAAGTGTTTTAATAGCCCATTATCAAAAATTATCCCTTGGCTATAAAATCCCCAGAC  
A\_18\_P22841572

TCCCCGATAATCAGGCTTAAAGGGGATGGTAACTGGAGAATTTTGATATCTCAATATAAT  
A\_14\_P126533 AACTTCTAGATCTCATGATAATTAGCCAATAGCCACGTGCTTCAGGGGAAAATAACAAT  
A\_14\_P111679 CTAGTTACTCATCAGGGAATTTTGGGCTGAATGTTTCAGATGTAACTGGAATTAATGC  
A\_14\_P116200

TTGCCAGTTAAAGGAAAATTGTTGGTCAAAGAAGTAAAAGAAGGAAGAGCAGTGAATACT  
A\_14\_P114451 ATTGGATTGCAGCATTAAAGACTGTGCAGAACAGGGAGCACTTTGAGGTTAA  
A\_14\_P129174 TAGTTGCAAAGTAACAAAATGATAAGAATCCTCTTTGCCTCCAACGCTTATCAAGTTTCT  
A\_14\_P117708 TTTCCAAATAAATTATCTATAGACCAGGAGTTTTGGACACTGTCCTGTGCTACTCTCTAG  
A\_14\_P100932 TCTTATTCTCAGATTTTCTCTCCGTCCTAAGAGTATCTGCCAGAGGCC  
A\_14\_P118852 TCTAAACCTCTATACTTAGAACCAGAGCAGAGAGCCAACCTTTTCAAGTATGTGGTTTATC  
A\_14\_P127212 AATGGAACCAAGTCTATTAGGATCCAATTTGTCCATTAGAATTTACCCAAGTTCTTGCAA  
CUST\_6143\_PI426210822 TGAGCTTACGGCTGGCATGCCAGCAGTTTCCTAAAATGTAATATCATCACTATT  
A\_14\_P129598 GGGATGAACAATGAAACATTTTCTGTTCCCAATTCCAAGAGTAATTGGTTATCCATTCA  
A\_14\_P125775 TTTCTTAATCACAATTTTGAAGTGGGCTATTGAGTCGAAATGGAAGAAATGCTGAAGGA  
A\_14\_P125990 CTTCTTCTAAATAGTTTTTAGATTCTCAATGACCCAAAGAGAATGATCACCACCTTGAG  
A\_18\_P13376809

TTTGTTC AAGAACCCTTCAATATTGTTAACGACGTAACCTAGATTAGACCAATGCCAATC  
A\_16\_P16324484

GGACTACCGATCACTTCTTAAATAACCAGCATAACATACAGTGAACCATTCTAAACACCTT  
A\_16\_P20593725

ATATAAAGGCTTATGTGTCCTTTAATTTCCATGTTCTACCTACATAATCCCTCAGCAGGC  
A\_14\_P109279 AAAATGAGAAGAACTGAGTGCTGCCATTAAGAAAAAGCATCCCAGATGATTAATTATGT  
CUST\_6785\_PI426210822 TCCCCACCTCATTCTGTTTTGTTTTTAGCCATTCTGGATTTCTGCA  
A\_14\_P136938 ACAACAGGGTTTAGGTTAATTCTAGTGAACCTTGCATGGTTTTAAATCTCTTTTACAGTTC  
CUST\_1791\_PI426210822

GCTATAATTCTGGATTGAAAGCGAAGCTAAATTTAGGAAGGCCTAATGATGACACACAAT  
A\_16\_P30952521 GTGGGGATGACAGATTTTCATGCTTTCCTCTTTCAGAATCATGTCTCCAA  
A\_14\_P136568 CGCCTGAGTCTTGGAACAAAATGTTGAAGTTGGAGTCTTTGATAAAATCTTGAACCTG  
A\_16\_P21162718

ACACTTCCTTCACATGCATTTACGAGTTTTCTGAACATATAATCCTGTTGAGATCCATGT

A\_16\_P15260920

TGAGTCTTCTTCAAATCCTACATTACCTTAAAACATCTATGCAATACCACTCATGTTTGC

A\_14\_P115928 GAACATCCTGATCTTCATAAGAACTCAATCCTAAACAGATAAACAGATTCCAGAAGCACT

A\_14\_P110371 TACTCACAGTTGTTTACATGGACACAAAACCTGCCTGATTCCATTAGAATCCATGAAAA

A\_14\_P139094 TGTATCAACCAAAAAAATACCTGTCAATTTGCCCTTTAAAATCCACACCCATTGTATGAG

A\_14\_P132105 CAGGGAAAAAATTAACATTACTGTAATACCTGACAAAATGTTGTGAGCCACTTTTTTAC

A\_18\_P16877404

CATGCACATACAGGATCCATATGACAAACAACACACGAAAATAGAAGTCACACCTTTTTTA

A\_14\_P116691 CATAAAGCATGATTCATGAATTCTGTGTATAAAAACGAATGAAGAGAATGGGAATGGGAGG

A\_14\_P116063 TCACTTCATTCATAAACTTTGGAAGCAGCAGTTGATTCTTCATATCAGCACTCTTTTTCTT

A\_14\_P134387 CAAATCCATCTTAATGGGTCAATTAGAGGTGCCTGGAAACTGTAATTATGGTATAGCATT

A\_14\_P102863 CACTGAAATGTTCCAAGAACCTGGGTCTATTTGAGGATATCAGAGTTTATTTAGGAATGA

A\_14\_P117062 CTGTAGACTGACATTAAGCAGGAATTTAAAAGTCTGAAGCAAGTTTATCCAGTAGATGG

A\_14\_P125142 AAAATACTTACTTCGTGCTCATGTTTCGATTCTCATACTGGGATTTGCATTTACTTCAAGT

A\_16\_P19642291

AACACAACCAATGCATAGTGTATGATGTGACTCACCAGATTTTAATGCTATCAACCTACA

A\_14\_P134754 CAGTCCAGCCTTCTCTTTCCATTATAGTTGAAGTTTCACAGAAAAGATCAGGAA

A\_14\_P117297 TTTCTCTCGAGTCATAAACATCTTTAACTGTCTAATAAGCATAGTTCCATGACTGTCCG

A\_14\_P107808 AGTTTAAATTAGCACTCTTCCCCTCTCCCATTAGTGACTAAACCATATCTCTTAACTCTT

A\_14\_P123726 CTATTTCTGTTGAAATATGGACCTCAGTAAGGCTGCCATTACTGCTTTCTTAACTGTATC

A\_16\_P18401867

GAATCAATCAAAGGTGTTGCTTACTAACTCATGAGTTTCTGGTGAAATTACCTAGCAGG

A\_16\_P02471790

CCAGGGAATACTAATGCTATTATGCGGGTATATAGCACTTACATAACGTTGGTCCTTTTTT

A\_14\_P201401 TCTCTAATGTGAATGTGGAAAGCCTCGTTGTTTATAGAACACATTTAAACTTACCATGGG

A\_14\_P121722 ATTTCTTATTGAGTAACTGCCAAACTGAAACAGTGAACGAAATGTCCATCTTTCATGTGA

CUST\_5365\_PI426210822 GTTCATAGGACCAATCTGGGTGAATGCTGCTACAGTTTGTGGATGG

CUST\_8898\_PI426210822

CTATTCATCTATTTATTACCCAAATCAACAGACCATTCTGCTTCCAAAATATTTTATTAT

CUST\_5606\_PI426210822 TGAGGAGAAGATGTTCTATGGAGAAAAGGAGAATTGGCCAGAGCCTTAAA

A\_14\_P111328 CTCCAAATATACTTACAAAACCACTTCATGCAACATAAGAATGTTTGGGTGCGGATTCAG

A\_16\_P15166732

TGTTGGTTTAGTCATCTCATAGTTTACACAAAGCATCCACATACTACAGTATTCAGTCCG

A\_14\_P139190 TTGACAATGAGGTTCTTCCAGGATTATCTTCGAAGCCCTGATGATCTGCTAAATAAATAA

A\_14\_P133025 TTTTACAGAGTTTACTGTTAGACCTTATGATAGCCAAGATAACGAGTGATGAGCCACTC

A\_14\_P127874 ACTGTTAATCATTGTAAGGTTTTTCAGGAAATTTGTTTAAACTCTGAAGTCACTGGGC

A\_14\_P200524 GTCATCAGGTCAAAGTTGTGCTGGCATAAGAGTTGTCATCAGGGGTTAAG

A\_18\_P14137642 CTTTCTCTGATCCCTGAATTGGTTACTGAGGCCACAGAAAGAGGAAA  
A\_14\_P130405 AAATTAAGAGATTTCTTAGGAGTTTCAAACAAAAATTCCAGGTCTACAGAGCCCCAATTC  
A\_14\_P201550 GAAATGTTTCAGATTTCTAAAGAAGATTTTGTGCAGTTTACAAAGGCGGCCAAACAGAGT  
A\_14\_P122324 CCTGTAAATTGAAATGCAGATGGAAAGAGAACATGTATTCCAGCACTATGAAAGTCAAAC  
A\_14\_P116146 CTACGTGTGACTACATTTGGAGATAAGTAGCCTTTTTTCAGACCTTCTTGATTTCAAACA  
CUST\_1250\_PI426210822 TAGTGTGTGTTTGCATTTCCCTAGGACAGTGATCATTTCAGGGAAGGAAATA  
A\_14\_P119026 GTTGCTTTTATTTTTTTTTTCCAATTGCGCATAAGGAAAGAACTCGTTCAGCGGTTTTAC  
A\_14\_P121181 ACTTTAATACAAAAGTGTTGGCATTTTTATGCATGTTCCCTTCAGTCTTTGCTCATGTGT  
A\_16\_P01472349  
AGAGCCCTGTAATTGAGATTTGACCATTTACAACCTCTGAGAAGTAGATACCATATCATG  
CUST\_3412\_PI426210822 GCTCAAGGAGCAACAGGCCTTGAATCACTCTTTGAGTAGTAGCT  
A\_16\_P58424351  
TTACTCAACTGGATTATCATTTCATCTAAGAGCATCTGAAAGACAGTCTCACACAAGCAA  
A\_16\_P16192039 AAGATGCAGAGAGGAATGTCTGACCTCATAAACAGAGCCCACCAATGTTA  
CUST\_8974\_PI426210822  
TGGTTTGCATTTTTCTAGATGGATAATATGAAGCTATCTTATTTATCTTTCTAGAAGTAG  
A\_14\_P126448 GTCTATTTTGTATTTCCCTTGAAGTTGCGTGTTTAGTTCTTTGTGACTAGTTCTTTCACTA  
A\_14\_P108449 CTGAAGACAGTTCAATAGCCACAATGTGCAAAATAGCACAATTACATTTACCTGTCAACA  
A\_16\_P17123141  
GCAACTATAACACTTCTGCTACAATTCTATTTGACAGTCCAAAATTTCAAACCTCCTCTGC  
A\_16\_P01872077  
AAAATCACATCTCCTTAAATCTGTCCATTTTGAACAGTGAAATAGAAATGCCAAGTGGCT  
A\_14\_P120644 CTTTCTGGAACCAAAAAAATCCACTTCTGTTTATCCCCATTTTTCTACTACAAACCTCAT  
A\_16\_P20582916  
ACTGACTCTTAGGTTTCATTTCTTACAGAAGCAACTTAACATTTTCATCTACCTTCCTGTA  
A\_14\_P125090 CTATAAAAGGGGATGAAAGAATGCCCTATTAAGTAGGCATTTTGCCTTCCAATAAATGC  
A\_14\_P111447 ATGCTTATTCATTTTCAAGTTGTCTGTTCAACTGCAAGGTTTTTTAATTCTGCCAAAT  
A\_14\_P138550 CTGCACTTCCTGATTTAACTAAAGTGATTCAATTGAAGATGGACTTCACTGCAGTAAGTA  
A\_16\_P02279773  
GAAGCCACAATTAATCTTGAGTAGCACATTAACCTTGTTTCATATCAAAGTAACCCTGCAG  
A\_14\_P200392 TGTTGGCTTTAGGCTTTAAAACCTTCGTCAATTCGTGAGATTAATCTGAACAAACTGAGTC  
A\_14\_P116161 CTAAGTGCAGGCTTGTTGATGAGGATTTGAAATGTGTTTCTAGGAAGGAAGGAG  
A\_16\_P00347316  
AGAGGGCATTAATCAAGACATAGGCATCCATTTATAATCTCTTTGCACTGTTGCTAACT  
A\_16\_P03190282  
TGGACTAATATCCTCGACACAATTTAAATCCCATCTCTTCAAGACTATTCAATGAGAGCA  
A\_14\_P138479 GTATTGTTCTCTTGCGGGAGGTTATGAATTTGTCTTACTGCATCTTGCAAATTTAAGTTG  
A\_18\_P15154029

CAAGAGCAAAATTTATGAACACAAGAAATTAATTATTCTTTTCGTATAATATTGTTGGCA  
A\_14\_P121025 CCTTTTTTTTTTTTCCCTAAAGCCAGAAAGTGAGCAAGGTCGTAGAACTTCCCTAG  
A\_14\_P109174 GAGCAATAAAGAAACGAGAGTCAGGAAATGCTGTGGGAAGTCTGGATTTATGAG  
CUST\_9295\_PI426210822

TCATTCTGTGGTTATTTTTAAATAGGCACAGAGGTAACACACTGACCTGAGAGG  
A\_16\_P01729591 GACGCTAGCACTATTCAGGATGATCATTTTTACTTAACTCCCCTATTTCCATTGCAGTG  
A\_14\_P132606 TTGAACCTCTAGGATGTGAAGGATTTATTTTACTTACTATGTGGCTTGCTGAAGCAATGT  
A\_18\_P12773926

ACCAACACTGCTCTTTTTTCATATTCTGTGATTTGTCTTCTGGTAAAACACCTGTATCAG  
CUST\_5961\_PI426210822 AGGTATGTCGGTGTTCCTTCAGAGCATTGTTCTCAGGCTCCTTT  
A\_14\_P118486 ACATAAAGTTTCCGGAAATCTTAGATTTGGCTCCTTTTTGACCCCTTAAATGTAAGGTAA  
A\_14\_P101059 CTCCGTAAGTGTTGAAGGCTGCTCCCAATTTTTTCATTCTAAGAAAAATTCTTAGAATTC  
CUST\_6712\_PI426210822

TTTACAATAGTAAGCAAATGTAAAAAAAAGTATTGCCATGGTAAATGCATAATTTAAAAG  
A\_14\_P127270 ACTGTGGAGGGTATTTTCAGGACCATCTTACAAATTATTGTGAAGTGTGGAAACAAAG  
CUST\_8322\_PI426210822 CCTCTGTGTGGTGGAGGCCTCAGCCAATGTCCCAGCCCAGATGAC  
A\_16\_P21406259

TTAGTCCCTCATATTTACATTAAGCACCAAAAATACCCTAGTTTCTTGTGATCCATGC  
CUST\_6087\_PI426210822 GTGATTGTGTCACCCAGAGTGGCCAGAGATCAAGCCATAGGAAAT  
A\_16\_P19607063

AAAACACTAGGCAATCCCTTAGTCTTTGTCAGTATATTAGATCCTCAATTACCCACAACA  
A\_14\_P139970 CTAAGTTGAATGTCAGTTTCATACATGACTTCACATTGCAGATACCTAAGCCACTCTAGA  
A\_16\_P18293762

AATACAGACTCCTCAATAAAATCTCCAACCTTTTTCTTTTTACCATAAGAACACACTGGAA  
A\_14\_P201210 TTCTATCCTGCTTCTCACACCCATCAAATCTTTATTTAGTCTCTCCTGTTTTACTCATGT  
A\_14\_P201412 AATACCTCTCATACTGCCTTGCTTTAAAATGAACTTGAATAAAAATTTCAAATGCCCGGT  
A\_14\_P106233 GCATCTTATTTTGCAAACCTCATGTGCGTGAGGATTTTACTGGATTTGACTAATCCAGTAA  
A\_14\_P136987 AATCAGTCAAATAGGACACATACTACCACTTCATTCTTAAAGTTGAGCAAGAATCATCC  
A\_16\_P21491965

GCCCGTGAACTATATTGTATATAGCCAGAATACTTAGCACTAAGATTAGGGTCATTAGGC  
CUST\_8129\_PI426210822 CCCACACACAGCGCTTGACTCCCTGCTATGACGGAAAGATCCTTA  
A\_14\_P127661 GCCTTTTCCACCTGTGCTCTTGGTATATGGGGAAGATACTAAAACCAAAAACA  
A\_14\_P111713 CTCTTCTCTATACTATCTTTAACTCCACTTCTCGACTCGTCTACTCTACTTCTCAT  
A\_14\_P128880 ATTCTCCATCCTCCTATCTTTCTTCTCATTGGAGTCTCCCTGTAATTTATTTATTTATTA  
A\_18\_P22841106 AGAGTGTGCAGTCTGTTGAGGCAGTGTGTAATGTGATAAGGGGCTT  
CUST\_2414\_PI426210822 GTCAGGGGGCATCTCTCGTGCCTCCATCTGTAGATCCTGTGAAAA  
A\_16\_P00046414

TTCCCCAATTATAAGACAAATGTTTGTGATCCTCTTAAAGGTTTATCACATAGCAGTGC

CUST\_8104\_PI426210822 TTGATGAATTTGATAAGGGGCGGCAGATGCCATTCAAACCTGAAAATT  
CUST\_5197\_PI426210822 CAATTGAGGTTCTCCAGAGAATTAACAAAATGTCCATGCACTCTTTCGTTGTT  
A\_18\_P10845512  
AGCCCATTCTTTTGAATAACAAGTAATTCCTCATATCAGAATCCAGATAGTAGCAGCA  
A\_14\_P133803 CCTTCCTGCATCACACCTTGGTTTTGTTTTATTTTGCTTCTTGGTCAAGAA  
A\_14\_P202235  
ATCAAAGATTTCTTTGAAGTTGCAAAGATCAAGATGACTGGCACAATAAGAAAGCAAG  
A\_14\_P126889 TGTATTGTCTAAGGAACACCTACAAAATGAAGTCAAATGAAGGACTCAGATCTCAGACAA  
A\_14\_P112240 CTTCCAATTTTCTGATTCACTTTTCTCACAACACCTTCTACATCCACAATGCTCTCTTTG  
A\_14\_P133293 CTGCTCCTTATTCAATTCTGTTGGTATTGTCTTCAGGTCTTTGTAAAAATGCAGTGACTTA  
A\_14\_P126160 TAGTGGGAGGTCAGGGAATAATCATGGGATCTTAGTAGAAACCTAACATTTTTTTGTGTAA  
A\_18\_P22841199 ATTCTAATATTTGGAGTGGGACAAGGCCCTCCTCCCTTTCTTATGATTAGTT  
A\_14\_P125515 AGTTGAACTCTTATTTTTTCAGACCCTAGTGCTTACATTTTGGAAGTGTCTACTGCTTTGG  
A\_14\_P106352 GACCTTGCTTTTTTTTTTAATTTCTAGGCAATCAGGGTCCTTTCTGGTTGGTGCTAA  
CUST\_86\_PI426210822  
CACCCAATAATAACAGTTTAACTTTTGGCTTATGAAATACTTCAGTGGGAAAAGTATTTGC  
A\_14\_P137316 TCTTTCATTCACCTTAGGTATTGAAGAAGCACCTGGTATCCACATACTACCATACTAGAAC  
A\_18\_P15959636 ACACACACTTAGGCATGGCAGAAAATAGAACCCAGTTGGGAAAATCTAAACATC  
A\_14\_P200069 CCCTGCTTTGGACAATATTGTCCAACAACCTGTCTTCCAACCTCCAGGATTAATATATAC  
A\_16\_P02936342  
ATGGCTTTTGCATTTCTATCTTTCCATCTGAGACTTACAACCTCAAACCTCCATTTTCCAT  
A\_16\_P02598746  
AAGAGGAGAAGTGTAAAGTCCAATCTAAGGAAGATATCCTAGATATGCGAAGATTGAAGGC  
A\_14\_P128332 ACCCTGGGAGGTGAGGGAAAATAGCAAATGTTAATCATATTAATCATCTTTAGGCACTG  
A\_14\_P105155 AATACTTAAGCGGAATTGGTGAAAACCTTTAATTTACAGAAAGTGTACAAAACCCACTTC  
A\_14\_P129610 GCTTCCAAGATGGTGTGGACTATTTTTTAAACCATTTGACTTCAGGACACTTTGC  
A\_14\_P103413 ACCTTTGAGAGCAATGTGAACGGCAGTTATTTTTTATTAAGGAACACAAAGCAAACATTA  
CUST\_6391\_PI426210822  
TAAATCCCTAAATATTTGCCACAATCTCTAGAATCTTCTAAATCAGGAAATTTTAATGAT  
A\_14\_P127945 CCCCAAAGTCACAAAACATGGCTCTATAATATTACGGTAGCATTGGGGATTATAAAGAAT  
CUST\_4644\_PI426210822 ATTAGAGGTGGCACTGGGAATGCTGGTAACAGTGGAGTTTGACTC  
A\_14\_P117155 ACACAAATAAAACCACCCACTAGTGTATGAATGATGCATGTTTTTATGATCTTAATTAC  
A\_14\_P100174 AGTGGTTACTTATGAACAATACGTTTGTAAAAGACCTATGAAAAACACGTGAAATTTGGA  
A\_16\_P58424070  
CAAAATGATGAACATGTTCTAAGTGTGAGATAGAGGCATGTGAACACTCTTTGGCAG  
A\_14\_P130733 TTTACCTGGGAATATCTTCTTCAATTGTTGCACATCCATAAAGAAACACAATCACTCCAA  
A\_16\_P30952321 TGACCGCTGGCCACTTCTCTCACCCGTCCACCATTGATGTGGTAG  
A\_14\_P131042 TTTGGGAAAACGTGACAAATAAGAAACATTTGATAAAAAAGACTCTGTTGTCACCACACC

A\_14\_P125361 CTAGTATGAGACCTGGCCCGCAAATCTATCCTTTTCCTTTTTCTCCATAAAAATAAGTAAT  
CUST\_3976\_PI426210822 GCTGTGCTCAGCCCTTCCGGGTGGTGAAGGTCTGAGGTCACACTG  
A\_14\_P201811 CAAGCCTCAGACACAATCAGATTCATTA AAAACCACAAGTGCATAATCAAATTAAGAGGC  
A\_14\_P113484 TTGTTATGCATAGCATAGCAATATGAAAGTCAAAAACAACCTAGAAGATCCTGGGTCCATT  
A\_14\_P132492 TCTAATCCCAACCTTTTTCCAAATCTTTTCTATTTTTACACAGGCTTTCAGAAATGCTGA  
A\_14\_P117909 GTCTCCAAGGAGATAAAGGGGATTTTTATTTAAAGAATTTGTGAAAGTTGGTTCGATTTCAA  
A\_14\_P200899 TTTTCTACTAAAATGCCTACTCTTCTGTGTGATGTTCTTTTTCTGTTTTTACCTTGTCCA  
A\_14\_P137026 TCCTAAAACACACTTGGAAATACCATTTGTATGGACCAACTTCAAATCCATGTTCAAGA  
A\_14\_P127905 CTGACATTTGTGGGGACAACAGGAATAGGCTTTTTATTTATTGGTAAATGAGTAAAGCATC  
CUST\_3390\_PI426210822 GTGCACATTTGGGATTCTGTTCCGACCCCTCTGCACTCTGAAG  
A\_16\_P21628209  
ATGCCATGGTATATTGTTATAAGTCACAAAGCAATATGGAAGGTTTCCCAGTATGTCTCA  
CUST\_5137\_PI426210822 CCTGGGAAGGTCAGGATTCTTCTGTAAAAGCAGAGAACACTGCATG  
A\_18\_P14457402  
TTCTCATTTACCTACATGCAACGTTAAATAACTCACTCCTACTCAATTA AAAAGCCCCAAG  
A\_16\_P17567951  
AAGTCTAGGATAATCACCACATCATAATCCATTCAGTCTTTTCCTTATGCCAACTGCTTA  
A\_16\_P18132497  
AGATGACAATAAGTTCGTAAGTTTATACTGTCAAACCTGTTTTTACCCTAACACCCCATC  
A\_18\_P22842460  
GGTGTTTTTGAGAGGCTCTGAGAATTCAGAGAAAAAGAACAAAGCAATAAAAAAGGATGA  
A\_16\_P36922243  
CTCTTCACTCTCACTACTCAATGAACAGACAAATAAGTGCACCTTACTCACTATGTTCTCC  
CUST\_8040\_PI426210822 CAGAAGATGGAAGAGAACAGTTTAAGTTTGGAAATGCCTGCTGATGCCAAATAC  
CUST\_6671\_PI426210822 CAAGTGGACAAAAGTCGACTCTGCTCTACCCAGTGTGCTCTAACT  
A\_16\_P58424502 AGATGGACTCTCATGAAGGGGATTTATTGGGGCAAGAGGAGCGAA  
A\_14\_P114765 AGAAAAGCCTTGTTTATTTTGGAGAAGGAATTGTTTTGTTATTTTAAGCCTTAGGGCCTT  
A\_16\_P01567374  
CCTTGGGCTAGAAACATATTCAGTGAGTAATACATGAATCAACAAGATGATAGGTGTGTC  
A\_16\_P17193155  
AATCACAGAATGTCAAAAAGATTAGCCTAGACAGACAAAAAATCTTTAAAGAGCCTTGGGG  
A\_14\_P201212 CATTTCTCCGATTTTCACTACTATAAGGTGAGTATTTTGGCTCCCTATAGGATACAATG  
A\_14\_P117332 AATGCGGTATTTCTTACAAAATAAACACTCTCATCAAGTTGATTTAGCAGTGCTGAGAG  
A\_14\_P109633 AAGGGAGAAATGTATATCATTTTTCAGGACAAGTTCTTCCCCTTTAATTCCTTACAGTCAT  
A\_14\_P102699 TCACATTTTCATTTTCTCTCTTTGAAAAGTTGAATTGCAAGAGGAAAGGTAAGGTTCTGC  
A\_14\_P122995 ACCATAAGTGTTTACAACAAAGGAGTCTGATAGTGAGGATGAGCCAGTTAGATGATTTAT  
A\_14\_P200060 TTTTTTCCATAGGAAAGCACAAAGGAGAAGACAGAAATATCAAGAGTCTCAAGAACCTTTG  
A\_18\_P15841429

ACCAGCAATATGGAATACACCTCCAATCTTCAATACATCTCTAATCTATGTCTGCAACAA  
A\_16\_P03660657

CCTGTTTCTGATCTGCTATCTGCTAAAACCTAAATGGAAACTAGATAACCATGGAGTTCA  
CUST\_7930\_PI426210822 GTTTTGTCCTCTTACCTGTCTTCCCAGGGAACCCATGAAAAAGTG  
A\_18\_P22840317 CACACATGCCTCTATAGTGTGTCTAGACTGGGGTGGTGTAGT  
A\_14\_P130269 CTGTCTTTTCCCTATTTCCCTTTGTGTTGAATTGTCTGTGATTTTCAAGACCCAATTTAGA  
A\_14\_P100336

AGAATTGGTTAGGGAGGCAAAAGAAATATTTTGTGAGTAAACAAAAGATGAAGAGAACCC  
A\_16\_P20207862

AAGGCTAGCCACCTCATTAAATAATAAAATGAAGAACTAGTTATAAAACCGGTGTTCCA  
A\_14\_P104903 TCTCATTTGGGAAGTCATTTGGCGTATAAAAAGTGCAAACACCTTTTATTTCCAAATCTG  
A\_16\_P16871075

TCCATCAACCACTTCTACTAGTATTGCTCAGTAATTCAATTGTTCAAAATCCCATGCTTG  
A\_14\_P104762 TTACTAAATATACCTTCAGTTCCATCTTCAGCATTTTCTTGCAGGTCAGAGAAGATTGTA  
A\_14\_P133452 CTACAGAAATAGGTAGAAGCCCATCTAAATATCAGGTAAGTATCAGGGGGGTTATGGAAA  
A\_16\_P40362597

TCTTCCAATTTCCCTTCAATGTGTTACGATGTATCAAGTAACTCGTTCATTTAGTCAAGC  
A\_14\_P131553 TAATCTCTCCCTTTTATGTCTTTATAGGACTCATGGTTTTTCCAAAACCCAGTGACCG  
A\_16\_P21592660

ATTTTGACCTATGTTCAAAAGATGAAATCTGGGCAAAAGAGAAATTATCCATGGAGTGT  
A\_14\_P117793 CTTTTTGCAGTGGGTTCTAGGTGAGAAAATTGGCTCGGATCTGGATG  
A\_14\_P114761 TTTACCAGTGTTAAACAGGGGAGTTTCTAATCAAAGGCTTTTAGGAATCAATTTTGACCA  
A\_14\_P104858 CAGTCTTTGAGGTAGCCAATTTTTTTTTTAATCCTACTTTTCGAGGTGTGTTTGGAGTTG  
A\_14\_P118113 GGTGGACAGCGTCAATGTCTAACAGGTGTTTGTTCATATGGGTCTAAAACCTA  
A\_14\_P104833 CTACGAGACTGCTCGGAAGGAAAGAGAGGAATAACCAACTTAACCCTG  
A\_14\_P105188 AGAGATCCCATTTCTTCATCTTTTCTTTGGGTCTCTTCCAGTAGATCTGTAATAAGAAAAG  
A\_16\_P36328276

TCCACATGTTTCATCTTCTACTTGTTTTTTCTCTATCCACACTCTTAATGTCAAAAGCAAC  
CUST\_310\_PI426210822 ATTTGGCCAGTGTGGGAAAAGACAGTCTGGCCTTCAGCTTGGTAC  
A\_16\_P35485535

CAGAAGTCTAACCCCTAAAGAAAATCGTATCACCTTCTGTAAGAAAATCTGTAAGATTGCCA  
A\_14\_P129244 ATGGTCATTGTTTATTTTCTTCTCCCTTAACATGATGAGAACGGAGAGATTAGTTG  
A\_14\_P105090 CTGGTAGACAAAGCAAATAGTAGGTGCTTGGCAACCATATAGGAACTTGACATCAATG  
A\_14\_P123242 CTAGTGATTTCCATAGAAGGATTAATTTCTAAGCACCAGGCAAATGCTCTTCATTGTGTA  
CUST\_5523\_PI426210822

TAAATAAACTGTTTAAAGATAGTGTGGGCGGCCTCGTTCTCAGAGAAAAGAAAGC  
A\_16\_P21149287

TGATTCTTTCAGATGTTTTCAACAACCTTTTACAGCAACTATCTTTACACCTGCCTTCC

A\_14\_P102386 CTACGATGATATGACCCCTTGTCATCGGTTTGAATCCCCTAAAATTACAAAGAGATATCAT  
A\_14\_P138443 CTTGTGAAAATGCCATTGTGTGCTGGAAACCTGGCAAGATGGAAGATGATATA  
A\_14\_P139030 AGTAAGCAGAATTTTTAGTTTTTCTGAAGGTAGGGCTTTTGGCCAGATATGCAGCAATAA  
A\_16\_P15243388  
AAACCCAAGAACCTATCTAAAATCCGAATGCTCAATCTGTTTCTCATGAAGTAAACTAGG  
CUST\_9340\_P1426210822 CAGGCCTCCCGAAGGATGTGGAGCAGCGCCAGCCTTGTGGTTTGC  
CUST\_1718\_P1426210822 CCCCTGATCTAAATGCTGAAGACAGCTGTGCCTCTTATGTTCTTGAGT  
A\_16\_P41530974  
GCCATCAGCACTTTTTATTAGACCCGAATTCATGAATTTTAACCAAATAAACACAGGCA  
A\_16\_P37071069  
AACTCCCAAAAATCATCCACTCTAAAAAAAATTCCTGCACTCATATTTGGTGTGTATGTCA  
A\_14\_P119599 GTTGACCATTGTCTCTTTTTTAGGGTCTTTAAAAGTGTTATTCTTTGTCGCCCTTT  
A\_16\_P17760226  
ACCTCACTGAGTCCTATTATGTCCACTTATGTTTATGCTTAAGAAGTTCACCTCCTCATG  
A\_14\_P107463 ATACTTTCTTGCTACCACCTTTGCAGGCAAAGAGCAGATCTTGCTGCA  
A\_16\_P17328710  
CCAGAGTTTCTAACAAACCCGTAGATCAGTTTTCTCTTCCATAGTTACTAGTTACACAGA  
A\_16\_P17109875  
TTCCAGTATGACCTGCTTTTTTCATCATGAATATTGCCTATGACATCTTCAGGAAATCAAC  
A\_18\_P14473461  
AAAGGAAAGAACAGTATGAGCAGAGTCATCACAAAACCTAAGGAAAATACGGGATTTAAC  
A\_16\_P19528418  
AAATGGAAACAGAGGTAATAATCAGGAAGCCATTGATATGTGAACATTCCCTTGCATACAA  
A\_16\_P19910481  
CAGAGACTCTCATGTTGACTATTCGCAATCCTATTCTAGACAAAATTCCTGTGGTAGTAA  
A\_18\_P14136186  
AATGTTCAAAATAGTTAAGAACCTGCACAGCATGAGCACACCTACCTTTAAGAACAGTTG  
A\_14\_P125690 ACATTCGCAGCACATCATAGAGATAGTCCTTCTCTGCATCATTTTCAATCAGAAAATCC  
CUST\_8415\_P1426210822  
TTTCAGCTATGGTCAGATAATTCCTTCCTTTTCTATGTCTTCAGGTTGTTTGGTGAATATT  
A\_14\_P125411 AAAGAGGTATGGGGTAGGGCAAGGGTATTTAGGTTAAGGAGATTTAAAGGACAT  
CUST\_6157\_P1426210822 CTCATCCTTGCCCTCCTCAGAACAAGTGTGTTGCCGTTTCTCTGAT  
A\_14\_P108188 ATCTTTTGTAGTGGTAGGAGGGTGCTCCTTTAATCAGCCAACTCTTTGTTTCAAAT  
A\_18\_P14137158  
TAACATTGATGAAGATGCCAAGTTAAATAGTCCTTTGGAATGAAACAAATAGTTCCCCTG  
A\_14\_P125269  
GTGTCTAAAAGAAGACGTTTCAGCGACAACAAGAAAGAGAAAAGGAACTTCAACATAGATA  
A\_14\_P136134 GTGACTTCTTGTTAAAAAATCTGCCACATTCATGCATAAATAGACTCCTGTGTGTGTTA



A\_14\_P200624 GATTTTGGAGAGTCCAAAGTCAGAGACCATGATCTTCGAGTCCCTCAAAG  
CUST\_7020\_PI426210822 ATCTCTGCTTTCAGGGAGCTCTCAGAGTCTCAGGAACAGATGTACAT  
A\_16\_P15127242  
AAATGCTGTCTTGGAGTATATACAATGCTGTAAAACTCAAAGGTATGAGTGTCTGAGG  
A\_16\_P00149958  
AATCCGCAAGGTTAGATCGTAGAATAAGTCTGTAATTCACCAACCTTTAGATTGCAAGAT  
CUST\_6944\_PI426210822  
TTTCCTTCTTGTCTGAAGGATATATTACAAGCATATTGACAAAAGTCTTTGAACTCTTG  
A\_14\_P121789 CTTTATAGAGTTAACAAAACAGAGTCAGAGACCACTGTCTTAACAGTGGAAGATGCAAAT  
A\_16\_P03646373  
AAAATTACTGAGTCAGTCAAACATGTGTCACAATCACCAATTTTGCAAATTATCCACCC  
A\_18\_P19482269  
TATGTTTCTTGAACCCATAATTGGAACTCACACCCTAATTTAGACACCTACCTACTGAA  
A\_16\_P00685623  
GTGCATTATGTTTTAAGAAATGGTCTTCAGACTCTAAAAAAGGAAGACATACATCAGTG  
A\_14\_P118190 TGGGATCTTTATTCCTTTCTCATCCCATGACTTGAAAATGGTAAGCATTTTTACAAGGAA  
A\_16\_P58424073 ATTTAGCAGGGCTGAGTGGGACCTGAGGATTTGCATTTTCTGACAAG  
A\_16\_P20161534  
AACAGCAAACCCAAAGTTACCATCTAGAAACATTGTAGAGAAATTTTTGAGTAAGGAGA  
CUST\_1910\_PI426210822 AAGTCTTAAGATGACCCCTCCGCAAACCCCTCTCACTGGCTATCT  
CUST\_8024\_PI426210822 ATGTTCACTGTAGATGATGGTCCATTGTAATGGACCAATGTCCGTTGCTTT  
A\_14\_P124566 CTCCTTGAAGGAGAATTTGCGGGAAATGATTGAAGAGTCTGCAAATAAATTTGGGTAAA  
A\_14\_P129103 CCAAAGAGAACTCGACAACCCCTGGCAATCATACTACAGATGATTCTCTTATAAAAAGAAT  
A\_14\_P131283 GTGCATACTTGATGCAGTATGTAGTATGTAACTCTGTGATCTTCACAATTATCCCACAA  
A\_16\_P02996562  
ATTCACGCTGATTTATTCTATCTCCAGAATACAGGAAATTGAAAATGAATGATGTGGGGC  
A\_14\_P200864 CCCCTTCTTATTCCTTTGAAGCCATTGCTGTGAATTACGTGAGGGAAAGATA  
A\_14\_P135133 TTTCAGTTTTGTCTCTAATGGGCTTTTCATTAATTTTCTCATGTCTCATTTCTGTGCCTCA  
A\_16\_P17830461  
AGAAAGCAAACATCTTTTCGTCTGACTCACTTTACATCCAGAGACCTTGAATCAATGTT  
A\_16\_P17721155  
AGCAAGAGATTCCCTTAATATCACATTACTCACCTGGATGTAATTTCCCACTCAGATTTT  
A\_14\_P101096 TCCAGAATAAAAATCTCATCTTGGGAAATCTCCATCACAAAGTGCAAATGTTCTTAAAGA  
A\_14\_P108214 ATAACCAAACACTCTTCCTTTTCACTTTTCTCCTTTACAACATCCGCCACAG  
A\_16\_P01573448  
AAATGGTCAAGCGATATTTCTCAGGTGTTATTCTATTTCATCTTACTTGTTGGTTTGGG  
A\_16\_P21607169  
TCTCCATGACATGATTGCATCCAATATTTATATGAAGACAGTATACAGGCAATATGGGGC

A\_14\_P111699 GGAAATCTGCAATTGCACTATTTTTAGGCAGAACAGAGGAGTTTCTGTTTATTTTTGGTT  
A\_14\_P136564 TTCTAAAGAACTGAGTGATACAATGACTAAAACCGAGAGGCACCATCTTTTCTCCAATAT  
CUST\_6822\_PI426210822

TATGTCAGGGGGTGATAACTCTTCCTTTTAAGCCAAAATTATCAGTCATTGTCTTAATG  
A\_14\_P110231 AAAGGAAAAGTTATCCTGGGGATTTAGACCTTCTGTAGATTAAGATGCTCAGATATGCAA  
A\_14\_P108253 GAGAAAAAGTTTTGTTTGTCCCTTCAAGGGCATAAAGAAGAAATAAGAAATCCTCTTCCCT  
A\_16\_P15934332

AAAGGCCGTATGTGTATTACTGTTGTAATCAGACTTTTTCTCTGGACACTGACTATCTAG  
CUST\_972\_PI426210822 CATGATAAACATCCGCCTCTTTTCACAGCCCCTCCAACCTCAGAAAT  
A\_14\_P112786 GGTTAGGATTTCTTGCTAGGTAGTCTGAAGTGCATATGATTAAGAAATGGTAACATTGGA  
A\_14\_P119239 GGATGAAGTCAAAGAAGTGGCTGAATTCCACTTTTTGATTTTCTATTTTCCAICTCTTT  
A\_14\_P139828 TGAAATAAAAAATCCTTGCACAGAAATACCATTGGTCTCTTTCCTTTCAGTTTGCTCAAC  
A\_14\_P113273 TTTATTCTTCATACAGGAGTCACCTCACGCTTCATTTCCAGTCTTCTAAGTTTGAAATA  
A\_16\_P00685525

CAGATACATAAAATGCCATTGTAATACCGTATAACAAATGCAATAATGGAGGCATGCCCA  
CUST\_3841\_PI426210822 GATCTAAATCAGGGCTCAGATGAGGCTGTTTGTATTGCACGGTAGGAAT  
A\_14\_P201739 AATACACGTCCTTCCATATGCAATGGAAATTTCTGGAAGAGTATGGAAACAATAGTGATG  
A\_14\_P131273 CTTTCATTCACTCTGGAGTCTACTAATTTACCTGAATGGTGTGTTGCATTCTGTGAAATGC  
A\_14\_P117583

CTTCACTGTATGAAGATAGAATAATAACAAGAGAGAAGGACATGAGGAGAGTGAGAGATG  
A\_16\_P55119454

AAAGTTGAAGGGATGAACAAATTAGAAGTGAAAGACAGTGAGCGGTTGTTCATATCAAAA  
A\_14\_P127214 AAAAGAGCCTTTGCTGTTAGGCTGATTTTGTCTGCTGACAGAAAAACAGCAGT  
A\_14\_P120284 TCTCAATAAACTGGCAGAACTCACAACCTTGGGAAAGGCATATTTGCAACAATTAACAAA  
A\_16\_P15823706

ACCTGAATCTCTCTATTCCATTGTTACCTACATGCTAAATTTACCAACACAGAATGTC  
A\_14\_P200247 TTCATTGCTATCGAATGAGTGAACAAGGTAAAAAGTATGAAACCACTTTTGAGAAGTCTGTC  
A\_16\_P41585213

CATGTTTGGTGCTTTCTAATGATTAATCCCAGCAACATAAGTTAAATTTGGCCCAGTAAGT  
A\_18\_P15461113

GTCTAAGGTCTCCAAAGTCTAAGTTCAGAACACTCTTAACAGCACTCTACAGCATTTTAT  
CUST\_3187\_PI426210822 TACTGCAAGTGGAGCTTTCTCAGTGGAGCTGGCTCTCGGCTTTAT  
A\_18\_P18913335

GACCCCAGGATATTAATAAAAAATACGGTCTCTCATTAAAACAGTTCAATCTACAGACAGGA  
CUST\_3751\_PI426210822 TTTGAACAAAATGGGCCTGATCTTGGGCTTCTGAAGTCTGTATAGTGTA  
A\_14\_P118914 TGATCTGGTTGGACCCTACCATTGAAATATGATTTTGTGCTTCTTTAACATGTCTCATAG  
A\_14\_P128141 TGGCCTCAGAGTAGAAAGAGTTTGTATACAAAGGTTTCTGGTTTTAGTTTCATTTTCAGGTA  
A\_14\_P101522 TGTTTCCACTTGACACAGTGAAGGAAAAATATATATATAAATCCGCACTGAGGGAGATGT

A\_14\_P139179 TACCCTGCAAAATGAATCTTCAAACAGATGGTATGCATGGAAACGAATCTGATACAATAC  
A\_14\_P118489 TCTTGTCTTTAAGATTGTTGCTTCTTTCCTACAAAATAGAAGTGGGGAAAAGGCCAAACA  
A\_14\_P112943 ACCTGAAGGAGAGCAGGCCTAACCCCAACAATATTTTTAAAACTCTCTCTATATATGTA  
A\_14\_P138717 GGAAGGTGTATTTAAGAATAATGATAAGTTGCATAACCCACTTCCCTGGCTTCTTAATG  
A\_14\_P125614 TGATCCCTTGCCATTTGTAAATGAGAGAGCAGTTTTTTTATGTGTATGAAGTAACTGAGCA  
CUST\_865\_PI426210822  
TGGTGCCATGGATAGTCCTGTCTAATTAATTGCATGCAGGACTATTTTTTTAATGTTTTA  
A\_18\_P11234847  
AAGGGCCACTAATAACTTCAAAAACAATTCACTGATCTCTTAAAGAATCTGTTCTCAGGC  
A\_14\_P128691 CTCTTACAATTCAACAAATCTGGAGTTTTAGATAAGTAAATTCAGAGACAAGAGGGGGCA  
A\_14\_P117437 CTCATCAGTTAGGAGTTTTGATTTGAGAGTCACTCGGGAAGTTGGTGTG  
A\_16\_P16191362  
AAGTTATGAGAACCTATTGATGAGAGGCATGCAGAAATAAAAAGCCCAAATTCAGTGATC  
A\_14\_P113716 AGGTAGAATAAAGCATCATTATTTTTTAGTCAACTGCTTTGTCATGTGCTTGGTAGGCAC  
A\_14\_P201081 AAGCCATTATAACCATGGATATGGTGAACCTCTTGGACGGAAAACATCATTTGATGATTA  
A\_16\_P21333631  
TGACAGACCCTATGAACTATGTCTCATAACATCTGAATCCTATTGCTACAGATTTCTTGT  
A\_14\_P122777 ACCCGAGAAGAACAGGAACTACGTATATGTAGTAAACCCACTCATTGTCAAAAATTCTTA  
A\_16\_P16191316  
ATATATTTAAAAACATATACATCCAACATCACTGAAGGTATGTATTTTTAACTCCTCCTT  
A\_14\_P103586 AAGTTAAGATTTAGGGTAGAAGAAGGGAAGATAAAACCAAATTCATGAAGTCAAAAT  
A\_14\_P120893 TTTGGGTTGGATGCTAATAATACTCACCTCTATTACTGTGCTTAAAAGTCATGCTAATGG  
A\_18\_P17148166  
AAGAGGAAGCAGGTAAACTATAAGTGAACCAGAACTCATAAATATCCCTGGGTGTTTCATT  
A\_14\_P103878 GGCAGGACTTTCTGTGCCACAGTAAATTAATCTTCCTTCTGTTTTGTATTATGATGAACG  
A\_14\_P101793 TAAGTCCGAAAAGTAGGCCATAGTAGTTCTACTTTTTACATGCTGGGATCTGTGATATTG  
A\_14\_P111410 TATCTCCTGTAACATAACTGTCTTTTTAAGGAGTGAATGAGTGGATTTTTTGTGATGGACCA  
CUST\_7151\_PI426210822 CATGTTACATATAGAACAAGGCCCTGGGAAAGGAAATGGTCTGTTGAAAGTC  
CUST\_3442\_PI426210822 TTAGATGACCCCTTGTAAGAAAGGAAGCCTGGCCCTGAAGCCT  
CUST\_178\_PI426210822 CCAAATCCTACGTTTTTCTTACCACATCATGGTGCCACAGGTTAAGGAATAC  
CUST\_7772\_PI426210822  
TGCATTGTATTGTAGTCAGATAATCAGATGTCTGCACTAGCAGTCAGGGACATTAGATA  
A\_14\_P123199 AGCAAATGCAAACATTTTATATGAATCTACTAGCATGGAAATTCATCCATGCTTACCGTC  
A\_14\_P200939 CATTAAAATCAAATTTAGCCTCTTGCATCATTGTGCCCTGGTTGTTGGAACAAAAG  
A\_14\_P120836 CTTTACGGGTGTAATAATGTAACAAAACAGCACCTGCAATAAATAAGATTTTCAAAAATC  
A\_16\_P15766700  
AAAAGAGAGTTTGAATTGAGAGAAAACAGGTCTGATTAGTAATTGATACAAACCCTGCC  
A\_16\_P19343208

TGACAACACTCTCTCTAATTTAGTCTCCAAATAGTCTTTGCATACACATTATATCAGGGG  
A\_14\_P116468 GACAACGAGCAAGGAAAGCCAGTTTCTAGAACATGCCAATAACGTGACTTT  
A\_14\_P201309 TCCACAGAAATGCAGTGATAGTTTTCCTTGCCAGTATTTGTGTAAAACATTTTCCAAACAA  
A\_16\_P17514073

TCTTAAGAGAACAGTCAACATTTCCCTCTTACATCATGACAACCTCATACAAACAGAGCCT  
A\_16\_P16191134 CTCTCTGGCTTCCAAAGTGAGGGGCCCTCCTGAGTCAGGAGCAAG  
A\_14\_P101849 GTGATGTCAAAATGCCTACTACTCTCTAGAGAATTGGTCATACTAACATGTGAATGACA  
A\_14\_P130084 TTCCCTTATCCTCAAATAATAATTCTGGGCAATTCAGTCGCATGATGAAGCATGTATAT  
A\_14\_P111127 TACACTTTGTGGTTGAATAGTGTATCAGATTTGAACAGTGGCTAGTTTCTACACGACTAG  
A\_14\_P112458 TGAGTTGAGCATGTTCCCTTAGAATGCCAGAAATTTAACTAGCAAACACACCTGAATTTT  
A\_14\_P109417 AGCCTGTTGTCCTATTTCCCCTGATATCATGTATCAATTGGTGAAAACAAATTCTGTGT  
A\_14\_P135701 ATAAAAGTGCATTGGCTACCTCTATTTTTCCCAAGCAAATACCTCATGTTTTTCTTTC  
A\_14\_P131540 CTGTATTTTTACGTTTTAATAAATCCCCGTATTTTTGTAAAGGCTGGGTAACCTGACTC  
CUST\_4835\_PI426210822

GATCTTTCCCTGAGAACTGAGGCATGCTATTAAGCTTTAAATGGAGCATCTCTAAGTTTC  
A\_18\_P17038569

CCTAGAAAAACAAAATTCATACGTTGAGGAATCACCTAAACATCTCCTGATCTTCACACT  
A\_14\_P121904 CTTGCAGCAATGCATCTTTTCTTATTATTCATGGGTATTACAGTTGGAGAGTCATTTCTT  
A\_14\_P109120 TTAAATTTGAAGTGAGTCGTCATAAAGTGGATAGTGCTTTACCTTGGTGCAAATCCTCTA  
A\_18\_P15053919

AAAACATTTACCTATACCTGGTTCTGTTAATACCTTGCCACTACCATATTATGGATGCA  
A\_14\_P130996 CATGACCCTGATCCAACGTAAAATTAAGTTTCTCAGTTTCTTCAGATTTCTCCATGTTTT  
A\_14\_P107697 TTTAATACTAGGGCTTAAGATGGCACTTCAAGGTTAGTAGAAGGTCATTTCCCATCAAAA  
A\_16\_P03224753

CAACTGAGAATACTGATAGATACCCACATCTTATTGATCTCCAAGGCATTTTAACTCCTA  
A\_14\_P133627 TCCTTATATTACTTTGTCACAATTTCTAGACCTCCATCCTAACTTTTCGTTGTCTGGAGAT  
A\_14\_P126723 CTAGAATAAACTTACCTTGTGCAATTGTAAATGGCTCTCTCTGTAAGGAAGAGACTTGCA  
A\_14\_P121865 CTTTGACTATTAAAGTTTTTGTGATCTAATGATACAGTTTTGATTCATATAGTAATTTGTG  
CUST\_2768\_PI426210822 TAAGTCACCTTCTCTCTTGCCCTGCAGAGCAAGGCCTGTCAATTA  
CUST\_5978\_PI426210822 GATAGTCTCCTTATTGTTTCAGGGTTTTCTCCCGCACTGCATGAATC  
A\_14\_P201127 ACTTTCTTTGGCTTCCCGTTCACTATCCGAATTTCAAGGCTCAAGGT  
A\_18\_P12971137

AAACCAAGGAACACTTGAATTTCTCAGGTTTTGGACATTCAGAGAGATGAATTGTGAG  
A\_16\_P18210156

TGGGCAAGACTTAAGACAATTATGATTGGTTACTAAGTGTTCACTTAACTTCCAAACTGG  
A\_14\_P120467 CTGGAGGATTTGTAGCCAAACTGTAAGATGTAAATAACAGACCCTGACATGTAGG  
A\_16\_P16290457

CCAGTTTTTCCGTAAGTATATAGCCTTAAGTAGCCAATTAACCTGAAATCACCACTACTGG

A\_14\_P134477 TTTGTTCTCCTAAGGTTTTAGTGAGTCGTAAGAGGGAGACTTTGATTCCACTTCTTAG

A\_16\_P20752379

TTTTTGGTTCCAGTAAACATTGTATCTCCACAAACCATTTTAAAGTAAAACCCATGAAGCC

A\_16\_P36230991

GAAATTAGCCATGTTTCATATTAAGGAGCAATCTAAGATCATTATTGCTGTTTCTCTGGCC

A\_14\_P131144 CTCATTAACCTTCACAGATCCAGGTATGTTGAGCATATAGCCCTTGCATAATAATCAC

A\_16\_P00807007

ACTTCAGGCCATTTTTGCATCAAAAGTCTTTGCCCTAATGCTTTTTCTCTAACATCAAAT

A\_14\_P121238 CTTTTGCACAGAAAGGATTGGTTCCAGTTACTTGCATTTTCAAGAAACATCAATTTAGGA

A\_16\_P00818204

GTCTCCTAACCTCCTTTTTAGCATCTCTGTCTATCAACCTTAAAATTTACACACACAGTG

A\_18\_P22840837

TATTATAGTTGAAGGCTTGGCGATAGTATTTGCCCTTCTCTGAACTTTCTGGATATCAA

A\_14\_P115817 CACTTGATCACAGGCAGATCTTGATTTGTAATAGTCCCAAATATCATTGCAGAAAAACA

A\_14\_P110892 AGACACCATCTCCTTGGCTGAGTCAAGATGAGTGAGTTGATTTGACACTTATT

A\_16\_P03000613

AAAAAGAATGTTTCCAAGAGTCAATCCTAATATTCACAATATGGCATTCTTCCATTCA

A\_18\_P11157935

CCACCCCTTTCCAAATATTCACCTCTAATAGTCATTTTTATTATCCAATCTGACAGCACA

A\_16\_P01311005

ATCTGGCCATTTTTAAACAAGATTCTCTACCATTATGCTAAAATGCTCCAAACAACCTT

A\_16\_P00977815

GGCCATTTAACAGGTAAACACAATCTACCAGTCAATCCTGAAAATTTAAATGCCACTTT

A\_14\_P132379 CTTTATTAATAATGTTTTTCAGCACTATAATTTTGTGTGAATTGTTATACTTAGACAAAGG

CUST\_5649\_PI426210822 CTAAGGGTTCTGGCAGGCTCTCAGATGAACCTCTCTGGATCTTTA

A\_14\_P114669 CTTATGACTGTGCTCCGTAAACGAAGTTCTGCTGCTCGAAAGAAAAGTCTGAAAAT

CUST\_9090\_PI426210822 CTTCCAGCCCAAGAGACTGTGCAGAATAGGCCTCTTCTCAGTCAG

A\_14\_P123642 GTGTGCTTCATGTTTTCTGTCTTTTTTTAAACTGATGGCTGTGGTTTTTTGAAGAGAATG

A\_14\_P113285 GCTTTAGAGGAAGGAAACATGCTTGGAATAAAATTTAAGGGAAGAAGTATTCTCCTGAAG

CUST\_7309\_PI426210822 ACATGACAGTTATCCTGGCTTCACAGTAACCTTTCAGAGGTGCTCTG

A\_16\_P00476825

GGAATCCACCTTAAAAATTAGATCTCTTTTCTCTCAAATTTCTCAAACACCAAGCATCAG

A\_16\_P20767197

AGGTTGTTTGGTAACATTGCTCTATGATAATGTCATCCTAGGAGACTTAGCATTGTAAGG

CUST\_8099\_PI426210822

TAGAAAATCTGAACTATATCCTGATGGCACTGAGGAGCCACTGAAAGTTTTTGAAGG

A\_16\_P19198381

AACTCCAGTGAAATAAAAAGTCTGAAACATCTACAATGCATGGTTGACATATCTCAGAG

A\_14\_P112337 AGGATTAAGTAATGATGAGTCTTCCCTTTCAACTGTTGTTAAATCTGAGACATCCTGACT  
A\_14\_P134932 CATATGTGATGGCCTAAATACCAGGGCACGGACAATAGTCTGCTGT  
A\_14\_P111158 GACTCTATAAAAAAGACAGTCCCTGTTTCTTCCCTTCTTATTTGTAAGACATCGTCATCT  
A\_14\_P132902 CCACGATGCTGGATACACTGCTGTAGACATAAAAAAAAATCTTTATGTTTGGACAATGTG  
A\_14\_P118764 TATGATGAGGAAGATGCTGCTTTCTGCCTAGAGATGCTGCTAAGGATTGTGTT  
CUST\_351\_P1426210822

TACTTAATTCAATATTTTGCAGTCTAAGATATTTGCTTCATGCTAATTAACCTACCTGTTT

A\_14\_P120191 CTTTCATGGAGAAAAATTCTCATGTCTCAGCAGTTACTCAAACCTCAATGTGCAGTTATTC  
A\_14\_P110794 GTTTACTGTATAAACACAGTGAAGTAAATATCTCTGAAAAGAACAGATCACCTGTTCTC  
A\_16\_P20864856

AAAAATTCAGGATCATTTCCTCCAACTCAATGTTACTTCAACATCACTTGAACCTATGGC

A\_14\_P135050 CGAAGTAGTCCCTCCAGTTTTCTAAGCAAGTAAATTTTGGAGGTAGAAAGAAAATGTTCTC  
CUST\_9801\_P1426210822

GAAGATTTATCATTACCTTAAAGAGTGAGAAGGACCTAGAACTGGGACTCTGAAGTATAC

A\_14\_P135581

TAAATTAACAAAAAGAGGAAAAATGAGAAAAGGTTAGCATGGGTTTGGAGCACTGAAGC

CUST\_4618\_P1426210822 CTCTTCCTTTCCTTCTGGTAAAGCATAAGGAGAGGACTCAACAGTAAGGA

CUST\_4595\_P1426210822 AAGGGCTCGAAACTGGCATGACTCAGGAGTCTGACCAGGGGCAAG

A\_14\_P127533 AGCACCTGGAGTCTGCAAAGTGTTAATCCAGGCCTAAAGACAAGTA

A\_14\_P122391 CGCTTGGCTAAATCTTCTTATAGAAGGCCTCAAAAACATCCTTGCCTATGTA AAAAGAA

A\_14\_P137560 GTTCATTTTTAGAGTAAATTTTAATTATCTGGGCATCTCTGCCACCTTCAACCTCTTCAG

A\_14\_P127980 GAGCCTGGCTTAGGAAAAATGAATGGACAAGTTCACCTTCAAGGACTGAAGATT

A\_14\_P132473 CTACTAACTTTATTTCTTACATTTGGCCAAACTGGCTTCTATTTGCCACTCTTGTTAA

A\_18\_P14134797 GTATTCAACTTCTTGGCTTCGTAGCCATTTGACTTTTTCTTTTCTTTAGGGCTCTTCT

A\_14\_P137260 CCATTAGATTGAAGGTTCTTGAAGACGGGCAGTTTCTCTTTTGTCTGAGC

A\_16\_P19138717

CACAGCCTAACCATGATATAACTTACCTTAGTCTCAAAATCTCTACAAAACATCCCTTGG

A\_16\_P40545533

CACTCAGAGATCAATTTTCACTTAAAGAGCATTTAGCCATGATTCCAGGAATAGAAA

A\_14\_P136430 ATCATGAGAAGGCCAGGAATTAGAGAGTTTTGCCAGTAATTATTTTTTACAGCAATGAT

CUST\_4437\_P1426210822 TAAATCTCAGTGATGGCTGGAGCCCTGGGGGTCTTAGTTTCCTA

CUST\_5040\_P1426210822 TTAAGACCTAGTGTTATCTGTCTCAGGGAGGTGGGGGACTAGGTG

A\_14\_P126757 CTTACTTGAGTGGAATGTGTAGTGAAAAGAGAAAATGTATTATTGCTGAAGACAATGGCT

A\_16\_P15613231

ATATATTTCTCTGGGTGCAATGGATATGGAAGAACACACGTTTAACTAAGGGTTTTACCA

A\_16\_P18925417

GAGTTATCCAGAGATCTCTTCTATCCAATGGCCTATTAATTTTACACCAAAGTCCCTTTC

A\_16\_P19486896

AAAAAAAGTTTCTGCACATACGAAATCATCTTCACATTTTATTTCCCTACCTTCACAGCA  
A\_14\_P127171  
AGGAAAAAGAAAAGCAAACAAATAAAACACCTTTAAGAGGCTTGAAAGAGAAGGTTCTG  
A\_14\_P115882 GAGTCCTAAGGCGACAGAACATGGGTCAACACCTTGATGTAAAACCTTGTT  
A\_18\_P12913246  
TGTCAGTCCTCCTATCAATATGACTAGGCTCTTTTATGTAAGAACACATTCTACCCTTTT  
A\_18\_P16373176  
TCTTTGCCTTTCCTTACGTCTTTAACTCTTCACACTTTTAAAAAAGTTATTGCCTTCCAA  
A\_14\_P134194 GCTTGTATTCCCATCTACTCTGGTCTATTACAATTTGAACTCCTCACTGCTATTG  
A\_14\_P105509 GACCAGTGCAGTTTCACACCATTTTTCCTCTCCATTACTGAAAATAATTGAAGGTTAAAT  
A\_16\_P00264485  
CTTTGTCTGCCAGAAAGAATAATCACAACCTGAAACAAATGTGTAACGATACCTGGATAGA  
A\_18\_P25781334  
AAAAGATAACGAGGAAGAATTACATAATTACAGTTCTCCTAGATCTCAGGCACTTCAGGG  
A\_14\_P106022 AAAAATCTTTTCCTTGTGCTCAAATGCCTATTTAGTTCCATTTGGGCCATTTTCTTTGAA  
A\_14\_P133757 CTTTATCTCTGCCCACTTGTTTCCACAGGGACTTTAAAAGTAAGAATGTATTGCTGAAGA  
A\_16\_P15228258  
AAAAAAAGCCAATTCAATAGGGTAACTGTTATAAGGTAAATAGGCCTCACATCCATTGCC  
A\_14\_P119221 TGA CTGCTGTGGCTCGCCCTTGTC AATACAG AATTAACAATAACAATGTTATTAATGTCT  
A\_16\_P15529243  
AAATAGATTCTTCAAGAGGCTACTTAAAAGCACATCCTAGAGACTATCTGAAACAAGGC  
A\_14\_P120248 ACCTATGAAATTTGCAGAGAAAGTGCCTCATTCTTAAAAAACCACATCCATTCTCAAGAG  
A\_14\_P101653 TTCCTTTTCAAATCATATATTTATTATCATCAACTTCATCTTCCCTGCAAGAGTTTGTTT  
A\_14\_P131329 CAGGCCACCACAACACACAGTAGATAAAACACAGTGGTTACAAACGTCTTTTAAATTTAT  
A\_14\_P126730 GATCAAAGGTATCTAGTGTGCCATTCTACTTAATCACTCGTCTCCTCCTTAACAAATTAC  
CUST\_8469\_PI426210822 CAGTTGTGCAAGTGATGAGCTGCAGATTGCCTGGAAACCAAATCA  
A\_14\_P105892 TTTCAGGCAAAATTCCTACTAGTGAGTTTGCCTTATAGGAAATCAATAAGTTCCTTCCTAC  
A\_16\_P00685230  
ATGTCAATGTTGGGATCTTCATTTTGTATGAGAGATTTTCAGTTACAACAGTGTGAGGTG  
A\_18\_P14131884 GCTTTGATCTGGATATTTCTATTGAGAGAATACACTGAGGCCCAAGTGTGATTTTCATT  
CUST\_1527\_PI426210822 CTTCCAAAGTGAGGGCCCCTCCTGAGTCAGGAGCAAGACTGCCTA  
A\_14\_P135292 AAAACCCATCTGACAATGGCTTTGACAGTGATAGCAGGATTGGTAGTGATTTTCAT  
A\_16\_P16041599  
CCTAGGACTTGTTAAAACCTATGCACTACAGATATATTACTTCTTAGATGACACAATTGCA  
A\_16\_P16403839  
ATAATGTGATTGGATTACAGGTTAGGGAAAGAATGGTTGAATTTCAAGAACTTCTCGGATT  
CUST\_10072\_PI426210822 CAGAAAATGTTGGTGCAGCATTTATGTGAGAGTGTGCAGTCTGTTGAGG  
A\_14\_P117150 TTCCCTTATTAGTCTAATGTTTTGCTGGTCTTCAAGGACTTGAGTAGGGAAGAAAAAAT

A\_14\_P103612 ACCTACCTGCATAAGATCTTGAAGGCTGTCAACAAAAGAAATCTCTGCTTCTATCATATA  
A\_14\_P126898 AGGCTCTATTCAAGACAGCAAATCAAATGCCTGTTGCTAAGAGAATCTGAGAATATTTGT  
A\_14\_P200887 TTCCCCATTGATATAACCATCTGTTGTCATGGGAAAGATTGTCTGATATTTGGGTTAAAT  
A\_14\_P120255 CGAGAAGACACTACAGCCTCAAGGAGGTGTGCTTCTAGTGTTTAATTGGATAC  
A\_14\_P121713 CAGAAAATGTAAGTTAGTGTTCAAAAAATGTGCTCATCAGGACATTGGTGGAGAACATT  
CUST\_9308\_PI426210822 CCTGACTTAGAGCACCCTGGCCATCCTCTGATTCCATAAGGGAG  
CUST\_7517\_PI426210822 CAGGAACTGTGTTACAAAGGCATATGGCCCAACAAAGGACACTGA  
A\_18\_P22840137  
GGCTGGGCCTGCTTTGTTTAGGCTATCTTTAGGTATTTTTTTCTTTTTTTCTTTAAGCCT  
A\_16\_P15188779  
ATTACATTGCCCTTCTATCATTATGCTAATTCCTCCACAAGAAATGAGAAAATAAGGCC  
A\_16\_P01133223  
ACTGCTGCTTGCAAATTATTACATGTGAAATTATGAACTCTAACTTAAGCGTTCCTTGGA  
A\_14\_P128929 CTCTGAGTCTCTACAACCTGTATTCCCGTGTGAAAGTTATGATCGATGAACTACTTACTCA  
A\_14\_P108211 CTCTTCAAATTCCTACTACTACCAGAAATAAATACAAAGTGAGTCCCATGTCAAGGG  
A\_18\_P11859059  
AAACAAAACATGAATTTGCATTCCCATTTAATCCAACCTGTCAATCCTCTAAATGACCCA  
CUST\_9650\_PI426210822 AGCCAGAACTCCCCCAAGGCAAATCAAGACTTTATGGAATCAGC  
A\_14\_P118296 GGGGATTTAGTAAATGCTTATCAAATGGGGGTGCTTATTGAATTTGAGATTTCTGTTTGT  
CUST\_464\_PI426210822 TTGCTATTTGGGGAACCTGAGGCTTACAGAGTTACACGCCTTGTTCAA  
A\_16\_P20353479  
AACTTCTACCTTGGATCATCTTAAAACAGGCAGTGTAAATTTAAAAACAATGACCCCGA  
A\_16\_P30952282 CTTCTGCTACATCATCCCTCCAACCTCCAGGCCAAAGGCAGGAC  
A\_14\_P115112 GTAAAATCATTAAGATTTTTTTTAAAAAGAGGTCTCAGTGCCTGGACGGAGTTAGGGTTC  
A\_14\_P102833 CTCTGGAACCAGGCTCTATTTTGAAAATTGTGGAAAATCAAAGTTTCTCTGTAATGATGT  
A\_18\_P11701718  
AGTGTGGATGATTAATACGTTTTTGTGCAAAAGAGAGTTCTAAAGCCAAACAGATTTGGAA  
A\_14\_P108852 ATTCTCTTGTTTTTTAATAGAATTTTGTGACTTTGGGGAGTGCTTAGCAGATGCTCATGT  
A\_16\_P03037000  
GTAGCCAACTAAAAACATCTTTATCCCTCTTACCTTCTTTTTATACACACAGAAGCATGC  
A\_14\_P131877 GACCTTTACTTGGGATTAAGAGGAAGTAAATGGGACTGTAAATTGAAGAATGGAGAAAA  
CUST\_8056\_PI426210822 TAGTGCTGCTTGCATAGCCGCCACTGCAGATTGAACTGAGAGGAA  
A\_14\_P139582 AGCCATTTCTCCGAGATTTAAAACCTTGATATTGCCTCTCTATGAAGGAAAAATATAACA  
A\_16\_P15863752  
AAAGCAAATATGATTACACTCTTTGTCTCTTAATAGCCTATTCTGACTCTCAAATGCC  
A\_14\_P105161 CATTCTACAAATGATAGCATCCAATAATGTCCCAATACTTTCTTCTTGTGAAGAGAGTTT  
A\_16\_P16191390  
CTTGTCCCCTCCATCATGATTTAGTATATCATCCTTCCCAAGAGAAGTTTTGAGAACTT



A\_14\_P107935 CTGCCCCTTGATGCTCAACTAAGCATCTGTTCCCTAGAAATACATGTGTC  
A\_14\_P128204 TGACAGAGCAGCAAGATACTATTACTGGCACCTGAGAAAACAAGTTCTTCATTCTCA  
A\_14\_P107065 ACTTCAAGCACTATGCTGGCCTTCAGTAATGTCAGTATTAAATGTGCTATTACATCCTAT  
A\_14\_P121775 TATCTCTTCTCAAAACCCAATCTGGCTTAAGTCTGTTAAAAAAAAAAAAAAAAAGTCTGGCA  
A\_14\_P200505 GCTGCCTATAAAAAACAAATAGGATCCTTAGGGTTTAATTGGAGGACTTATAATTGCACCT  
A\_14\_P113992 GCGAGGTGGTCTTCAATGTTAATTAATAATGGCCTACTTATCTGTGCACTCTGACAA  
A\_14\_P106490 ATCACAAAGTAATGAGACTCAGATCACACCCTTCCTATGCTGGGATTTAATAGAGTATTT  
A\_16\_P19470036  
AAGAAGTGTTCTTACTTGACCATATCAGAGACCTAGTTTTGAATAAGGAGACTCTCTCAG  
A\_16\_P19910602  
AAAACCCTGCATGATAAAACCATAGAAAAATTCACAAATAAACACTTGCAAATCCAGTTT  
A\_16\_P58424142 AAAGGGCATGAGGGAACCCTCTGGGGTTATGGTTCTGTGGTTATA  
CUST\_3901\_PI426210822  
CCCAACAATTAGATAGGAAATGAACTGAATGGGAGTTCACATTTTATCTTCAGGAAAATG  
A\_14\_P126163 AGTGCTTTTTTTCCTTCCCTTTAGATGATTTTAAACCAGCATCTATAGACACTTCCTGT  
CUST\_7563\_PI426210822 GAAGAGATTAGTAAGCTGCTGCCCCCTGAGACAGGGCTCCATGAG  
A\_16\_P17489238  
AAAAATGGGAAAAGGAAGAATAATCCAATTGGCTTAGGACAGAAATACATCTCACGTGA  
A\_16\_P35629001  
TCCTCCAGATTTTTCTTTTAAAGGCCTTTTCTAAGTTATACTGCATATCAAACCTCCCTGT  
A\_14\_P110902 AGTGCAGGTAAGAAGTGTGTATTACCTGAATTTCTTCTTTCATTAAGTATGAGAGGCC  
CUST\_7555\_PI426210822 TTTTGTGCTGGTCTAGGTAAGAGGAGATTGGAGCTGACCTGTTGAA  
A\_16\_P19860171  
ACCCATGACAGTCTCAATAGATCATTCTATACAGGACGACAATATGGAAAACCTAAGAGAC  
A\_14\_P118320 ACTTCATCCCTGCAAGACGAATGAATTCATGACTCCTGTATTAAGAATTCTCAGAAAAT  
A\_14\_P130318 TTAAATCTTTTCAAACAAGGCTTAGATAAGTTTCCAGGAGAAGTAACCCTGCTCTGTG  
A\_14\_P113465 GCAGGTGTTTTCAAATGATTGCAAGGCTTAACATTCTGGTGCATACAAGATACTTTTTTT  
A\_14\_P200987 ATCATAGAATTCATCATGTAAATCTCTAGCAGATGATGCCATTGGAAAACAGAACTGCC  
A\_16\_P21506960  
TACTATAGCACACAGCATACTCATACTAAGGTTAAGATCCAAGAACAATCCCTTGTCTGT  
A\_14\_P127311 AGTTAAACTTTCTTGCCTCTCTGCACTCTGCAAAGGTAAATGTGTTCTAAGTTTACATG  
A\_16\_P21041528  
AAGTTACGATCAAACCTTTCACTCTTAACTGGTTGAATCAATGCACACATCTAGGCTTTA  
A\_18\_P14987503  
ACACGCCAAATCTTAAAGTTGTCTTATAGTTACGCTGAATCTTTCATATCTGCCAGATGG  
CUST\_6253\_PI426210822 TTGTAGAAAACCTCTAGATTTTATGAGCTTGTTTCCCTGACTGCATTCCAGAGC  
A\_18\_P13864281  
AAACCATAATTTCCCTTATCCTTGTATTTGCTGTTTGAATAATCGTATCCTCAACGCTC

CUST\_38\_PI426210822 AGAAGGGGTCCCAAACGTGTTTAGTGTTTACCCTTCCCTAAAGAC  
A\_14\_P127080 GTTTTAAGTAAATGATGGATGTCGTTATGGCCGAAGCCATTTGCTAATTGGCTCTATATT  
A\_14\_P126104 ATGAATGAGAATGGAAATGTTTTTCATCCCCAGCCACAGTTTTCAATATTTCACTTGTTT  
CUST\_9594\_PI426210822  
AATTGGTATTCTTGCGCTATTTTCTCAGCAGTCCATGTTTCTGGATAAAGTTTATGATTG  
A\_16\_P19572728  
AAAAGCCAAGGATACTGATTCTGTTTGATCCCAGTATTATCCTCTTACATAAGGCTCTAG  
A\_14\_P127174 TTTTGGTGGCAAAGAGACTAGATGAAGTTCCTTGCAAATAATTAGATTTCTTTCCCTGTT  
A\_14\_P122182 CTAGCAGATTGCCCTGACATCTTGTTTCATTTAGATAAAATGTGATGGGAAACTTCTC  
A\_18\_P16334578  
ACCCCATGCGTAGTTAATAATCCCATTTAGAAAAAAGCCACTTTGACATTGAATTGCT  
A\_14\_P121232 ACTTCAGTCGTTTGAATTGATAATCTCTCAATTTTTCTCTAGACGTCCTAAAGTGGGAAA  
CUST\_1570\_PI426210822 TGCCTGAGAAAAGAACCCATTGGGAGATATAAACTGCCAAGTCTGCT  
A\_14\_P117718 AGGCATCTCTTGTGCAGATTTACTTATTCCTAAAGTGATTTGGAAAATAGCCATGTGTG  
A\_14\_P202286 ACACATTGGCAATAAACACCCTGGTAAGAAAATAAGCAGTTAGTGTTATGTGCACAATAG  
CUST\_8982\_PI426210822 ATTGTAGTATGTGTTTCAGCCGCCTGTGCCGGAATAGGGGCTTACT  
A\_14\_P135422 ACAAAGCCTTGCTGTGATTCGTTGAAACTTCCTATAGAAAACCCACCAATTTCTTC  
A\_16\_P02635242  
GTGCAGTAGGTTAAACATATCTTATAGATCATGGTCAAAATTGCAATCTTATAGTGGGCC  
A\_14\_P125726 AGCCCAATTTTAGGAGCATTGCATTTGACTTGTAATTCATTTCTAAACTTTTGAAGAGCC  
A\_14\_P135472 ACATAACCTTTATTGCACACGGCGCTGGGTCTTTTTTTCATAGAAAAGGTATTAACACAT  
A\_14\_P107783 ATAATTCATCTGGTGCCTTCTCTCCAATATTGTTCCATACCACAATCACTTTGTGCAG  
CUST\_3201\_PI426210822 TAACACCTGTTTTCCAGGCTAACTGTCTTGTACCAGACTTTGTTCCATTCA  
A\_18\_P22790290  
ATCTCAGATGTTAGGATCAGGTAAGAAGAAAGATTGAACTATGTCATGACCCAGTAAGTG  
A\_14\_P112511 ATTAATCACTGTCTGCTCCCTTCATTTGCGTAAGAAATGTGATTCCTCCAATAAAACTG  
A\_18\_P14230861  
ATAAGAATACAGAGTTTTTACATAGGCAAGAATGTCTCTGGATTCTGATGGAATAGGCC  
CUST\_5911\_PI426210822 TTTTCATAGGCGAAATTAATCTGTCTGGTTCGAGTCTAGACTGTTTCGTTGG  
A\_16\_P16191281  
ATTTTATTTACAGGGAGGAGCATATCCATTTCTTTCTTTTAAAGTTGGCCTCTGA  
A\_16\_P00685507  
CTGTATCAATTAATTTACTTGTCTCATCAAAGGCACAGCAAGAATATAACCCAGAACCAAGC  
A\_14\_P110885 GGACGCAATAATTTTTTTTGCCTTATTTTTGTAAAACCTTACCGCACTTAAGGAAACGG  
CUST\_8216\_PI426210822 TTATGTGCATATATTCTCATCCGCCCTAGTCCCTCAGAATGCTGTAT  
CUST\_1954\_PI426210822 GATGTGATCATGTGGGAGTCAGTACTTTTTAGAAAATTGGTTTGAAGGCCCTAC  
CUST\_1982\_PI426210822  
AATCCTCTCTCTGCTTTCTGAAAGTTTCCATTATACTGCCCTGTTGTCTAAAATTAAGC

A\_16\_P21560890

GCCAACTGATAACTGTAAAACCTATCTGCCACACATATTTTTCACTCAATAGTCTGTGCG

A\_14\_P105179 TTATCAAAAACGACTTTTCCTAGTTCACCAACTAATGAGTGAGTGCTAATGAGGGATTA

A\_14\_P115284 GTTCTTTTTCTGCTTTTTCTGAACAGAACCTTTCTATCTTTCTCATAAACTGGTGGATT

A\_14\_P200165 CTGGTTTTGGTGATTTTTGTCTGATTGCAATGTCTGGACGTGGTAAGCAAG

A\_16\_P15556223

AGCAGCCATTACAAGCATATTCTGAATCTGACATCTAAGCAACATTTTGACATCTACGAC

A\_16\_P00361567

CCAGGGCCATATTGAACTTAGTGCATCCTGTAGTATTTTAAGAGGAGATAACAAACAAAC

A\_16\_P19146296

AAAAAAAAAACCCACTCATGTAAGTTCAGGTATCTTGAAACTTTGACACTGGAACAAACTC

CUST\_5364\_PI426210822 GAACTGAGGTTTCATAGGACCAATCTGGGTGAATGCTGCTACAGTTTG

A\_14\_P129051 CTGAGCATTATGAAGAAATTGAAGACTATGATTACAACAACCCTAACGACACCTCCAAC

A\_16\_P58424268 ATTTTTGTTCAACTGGAGCCTTGGCTTCCTCGTCTAGAAATTGGAGATAAAATGGTAT

A\_16\_P16578240

TGAACCTCTGAGTTCTAATTGGTCATCTCACATGATAATGTTTTGTGCCCCGATAATAAT

A\_14\_P100380 CTTACATCTTTTTTGAAATTATCATTTTAGGGCTTGTATCCAGAGTCACATGGCATCATT

A\_16\_P15245256

ACAAGTTACCAGAAAAGTAAGGCCAATGACATAGAGTTCTTAAGAAGTATGAAAAGCCC

A\_16\_P00242363

CCCACCTTTACAAAGAAATCATAAGGGCAGATTATGTTTCTCACATTAAACACAACACAG

A\_18\_P14474258

CCAACAGGTATCTAGGTAATGTAATCTAATCAGGCAACTAAGATATAACCCTCCAGCAAGT

A\_14\_P138278 TGTTGTTGTGAGATTAAACTGGCCATATGAGCATTAAAACCATCTGCTTCTGAAATAGCA

A\_14\_P130309 ACCATGTTGTTGGGGAGAATTCTGAGATATTTGATGGCATTATAGAGAATATTTGCTGTG

CUST\_2384\_PI426210822 GGAAGGAATCAGAAACAACTCTGGGCAATGGAATCACTTTGCTTTGG

A\_14\_P126506 AATAACTTAGATAGGTATAACGCTTTGCCCATGGTTAGGATGGGATTTGGATTCAAGAAA

A\_16\_P02728242

CAACCATGACTGATACATGCTATTCTGATCTGTTTGATATTTGAGCATTGCACATATGC

A\_14\_P104083 CTTATCATTTCTAGGAGAAACATTGAAATACAGAAACCCTTGAGGCTGAAGTCTTTTCAGA

A\_14\_P120993 GTTATTTGACACCAAATATAAAAATATCTACCCAGATCACATCCATGACTCTTATCATCC

A\_16\_P01800912

ACATGACACATGTTACATGAAACATTTCAAACCTCTCTTTATCTGCTTAAGGCCTATTCT

A\_14\_P112154 ATAGTCCATATAGAATACTGTGTCTTGGCTTCTTTCTAAGAAGTAGACACAGGCTTGAGA

A\_14\_P124544 CTTGAGATTTGAGTTGGTCACTATGATTACTAAAGCAAATTGGCAGGAATTGAGCATAGT

A\_16\_P03807244

AGGTCCTTATCTGCCACTAAGTCTTTACTGTTTTTCAGATAATATGCATAGCAGGTGTTTTG

A\_14\_P132458 GACAATCAAACAGTCTACAAAATGTCCCAAATATGATTTGATCATGGAAGGTCAGTGAT

A\_16\_P41104740

GAGACAAACTGACACCGATACTGATTTATTCTCCTTTTCAAGCCTTTTTAAAAGATCGCT

A\_14\_P125260 AGTGAAAAACTTTATCTTCAGCCTATTAGTTCACCTGCCTGACAGTTAACTCATCAACC

A\_14\_P101697 CTCAGATTTACACTTTTCTGCACGCTGTGTTTTGTCTGTCATAATCAAATTGATCATCC

A\_14\_P137063 CTGTCATCAAATGGAACAGATTTATTAGGATGCTCACAAGAATGGAGAACACATGAACT

A\_14\_P131835 TTACCCAAGGGCTTCCACAACCTTGTAACACTGTATAGTTGCCAGATTTACAT

A\_16\_P02165252

AAAAATGAGAGTCAAACCTTGGGAAGTCTAAACAAATCCATCTGGAATGTAAAGCAAGAGG

CUST\_1607\_P1426210822 TCAGCTGTTTGTGGCTGAGCAGGAAATGTGGTTGAAGGGTCCAGG

A\_16\_P40253448

AAAAACCACTTCCCTAAAATAATCCTTGAGGAAACATATTTGTCAGAAATGTTCCACATCA

CUST\_7120\_P1426210822 GTCAGCTGGAATCCTGCGACATGTTCTAGTTTCCTAGTGTGCAGA

A\_14\_P110100 CAAACCTTGTGGCTTTTGATGTTTGCTTACTCTTTGCTTAATTTAGCCTGGTTTTCTAGT

A\_16\_P16901794

AACCCTTGATACGCTAGTATTTTCAGCCTCTACTCTTTCAAATACCTGTGTCTGTTAAGA

A\_14\_P139393 TCATAGGTAGGAATGTCTAGAGTCTTTTGTGTTTTAAATGTGAGGTGCTGATCTGAAGTT

A\_14\_P126877 CAACATTTGCACTCTTGAATCTGGGAAACAACCTCAGTGGAAATTTATATACAGTGCATA

A\_14\_P132617 AGGCTAAGTGGACCAAAAAATTTAACCTGGCAGAAGCAATGTAAAGACATTTATTGTGAC

A\_14\_P133358 TTTTCTTAAAGGCTCAAGATTATTATATTCCTCCAATTCCTGATCCTGGCAAGATTTTT

A\_14\_P104408 TTGCATTTTAGGACCTCTAGCCTGCTTTCTTGTCTTATACTTCTTGAAACTAATGTTCT

A\_16\_P03663488

CCAGTGACCATATCCATCCTTCCAATACATTAATGAATCAAGATCTTGACAATTCAT

CUST\_10435\_P1426210822

CGATCAAGTGTGGAGTCACATGCTAATGTGTGCTAAAGAACTGTAAGTGTTTTTTCATAT

A\_14\_P128227 TGGGTTAATTAATCTTTTTAATGACCCTGATTGGAAAAACATCCCTTAAGTCTTGGATG

A\_14\_P127417 ATAACAAGTTATTGTGCTGTAAGAATTCACATACAGCCGGGTAAGTCCAGAGACAAA

A\_14\_P108583 CCAGCCAAATTCCTTTAAAATAAAAACTGTGAGCACGGCTATGTGAAGTTTCCTC

A\_16\_P17805262

AACTGATTCATTTCCCTCTCATAAAAATAGAAAGACCAGTGAATAATGACCACACCAAGG

A\_14\_P110740 GCACACACATAATTTAACCAAGAGTCCCACATTGGGAAATCTAGCCTAAGAAATAAAAATG

CUST\_1905\_P1426210822

CTATGCTAATGATAGCAGCTTTCTTTTCTCCCTAATTGCAGAAAACATGATCCAGTTTTA

A\_14\_P128720 CTCCAGTGAAGAATACTCAACAATGACTCAAAACATTCCTAATCCAGAATATGAAAAAC

A\_14\_P105350 GTCTAACCAAAGTAATCTTTATGTCTAATTTTATTAGGTTGGGAAAGGAAGGACCATCCG

CUST\_42\_P1426210822 GAAGACAGGGAAGAAGCTAGAAGTGCCTTCCATTTCTGCAAAATTT

A\_14\_P104076

GGGTTTTATTCAAATTTGGAGAAAACCTATGGAATGGTGAAAAGTAACAAGCCAAAGACTCA

A\_14\_P130500 GAGGTGAAGAAGATGATTAATAAAGTTTTTACCTTAAAGAAGGGGGTGCTGTTCCAAG

A\_14\_P102150 AGGTAGATGCTAATGGGGATTTGTAGAATTGGTGGCTTAGTAAAAATGCTTCTGAATATA  
A\_14\_P136457 TTAAACAAAGATTCACATACCTGTAAGAAATGGCAACAATTCCTTCGGGTCTTTCTA  
A\_16\_P02238557

AAAGAACAGAGACTAAGGTATTTTGGGAAAAGAAGGACTTAATGAAAGGCCACTGATCA  
A\_14\_P102300 CTAGTCTTCGGATTGAAATGAATTACCAATAAAGGGTTGGGAAATGGATCAAGGAGAG  
A\_14\_P112576 CTGATGGAAGACAAGATGTGGAGTGAATGTGAAGGCAAGATACAAAAATAAGAATTTTTT  
A\_16\_P17749700

ATTACACTGGCTATATTACATTGTCTACCCAAGTTTGTATGGTTCATACCCCCATAAACC  
A\_14\_P103739 AATTGGTTCGAACTCTATGATCCCTTTTGGCTCTCGTAATTAATGATGCTTTATAAGCAC  
A\_14\_P102936 CAAATCCCAAGAATCTTAAACCCCATACCTAAACAGCCTATAATCTTCCTTTTCTAACC  
A\_14\_P101254 ATGGCTCCAGTGATTAATAGATGGGTTTTTAGTAATTGACAAATTCATGAGGGAAAGCAT  
A\_14\_P110175 TTGAAGTCCAGAGACGATCAAATATAGATATCCTCATGAACACTCATAATCTTGCTGTG  
A\_16\_P01857191

TTCTTGCCATTTTACAGACCATATTTCCAACACTTCTAGAAATGTTTTGTTCCCTTCAGCC  
CUST\_9867\_PI426210822 TTTTAAAGGGCAGGAACCCAAAGACATGAGTCTGTCTGCCTTTAAAGATG  
CUST\_3570\_PI426210822 TATTCACATGCATCCAGGAGATTTGTGTGAAGAGGGTGACAGAGA  
A\_14\_P120144 CTTTCAGTTTTCTACATTAGTTTTGGAGTGATATGAAAGAATGATCTGTTTCACCTGCGCA  
A\_14\_P113010 TTTGTTTTTTCAGGAGAAAGACCATTTATCTGCGAATTATGTGGAAATTCTTACACAGATA  
A\_14\_P135498 ACTGGATTTTAAAGACAGGAGGAAAAACCTTTTTTTCTGTGATGTCCTAAGTAAAGAGACA  
A\_14\_P108959 GGACTCGTCTTTGAAGGAAAAAAAATAGCGAGTAAGAAATCCAGCACCATTCTTCAC  
A\_14\_P106189 ACCTGTCTGAGTAGTGTATGTTATAAACGTATTTGCAAGTATTTTTCCCTGTTTTCCCTC  
A\_14\_P135374 CTCTTTCCCTCGCACAGGAGAATATGAGGCTACAGGAATTGACAGATCTTCTT  
A\_14\_P107402 ATTATCTGAAAGCACTGCAAGAGCCTACATTAATCAGAGAGAGACAGATTGAATCACATT  
A\_14\_P135874 CTGGAAGGACTTTTTGTCTTCTTAAATATTGAAGCATTCACTGTAAACTTCCATTTCCCAG  
A\_14\_P125877 TTAATGGAATGTAATTTTACAATGGTGGGTTTCGGAAGTTTTCTTTTTCTCTCTTTCTCT  
A\_14\_P105654 CTGAATTCTCTTTTCCCTCTCCCTCTAGAATCCACAGTATGAATTTAAGGAGGCTG  
CUST\_10272\_PI426210822 CCTTAGTGTGAGTCCCTGAGTACCCAGCTGTGTGGCCACAGTCTA  
A\_16\_P19603970

TGTTGACAAGTAAAAATACCTCAAATCCTACATGAAACTTCCCCTGTTTACTCACATACA  
A\_14\_P119951 GCTGCTATAGCCTTCCCTTGATAAGATTTTAGAGGTAAGTTTCTTAGATACTGCAGTTGAC  
A\_14\_P122444 AGTATCAGCCTGTAATACGAAGCCTTTTCTGTTTCTTCATTAGCGATCAGAGCAC  
A\_18\_P15634209

ATGGACAATAAAATTAGCCAATTTGGAACCTTGATCAAGATACCTCAACTCCCATAACATCC  
A\_14\_P136308 CTGGGTTGGATGTAGGACTTGAAGTAACGTTATTCGGAACATTTCTGTAAAGACAAATTA  
A\_14\_P133382 TATTGTTTTCTATATTCAAAACTTTAATTTGGACTTCGTTTCCCTTTGGGGAAGACTGGAA  
A\_14\_P134285 AGGGGGACTAATATTAATCAATTTCTAAAGGAAAATGTTGGTGAGAAGACACTGGAGAAC  
A\_14\_P134825 TGAGAGTTTGTCCATAACCAGTATATTTCTCTGGTTACACAATCAAGTTCTTCAAGCCAC  
A\_14\_P135308

AAGAAGATAGAGGTAAGAAGGGAATATAAAGTGTAAGTAACTGAAACCAAGTAGACGGAGAGTG  
A\_16\_P21054031  
AAATGCTGGAGAAACCTAAAAACACAAAGACAATGCTATTATGTTACCATCCTAGCCTGT  
CUST\_7506\_PI426210822  
TAGTAGACTTTTTAGTTAGTTGAAAGGTAAAACAATGGTAATAACAATGAGCTGTAAAAT  
A\_16\_P00685209 TTAGTGGTCAGGCAAATAATTGATCACTCTGTGTTCTCAAGACAAGCAATGGGTAAG  
CUST\_3369\_PI426210822  
CAAGATTTCTCTGCAATCCTCTCTAGTAGATAATAGTGTGTTTGGGGAAAAGTGAGG  
A\_14\_P110376 ACTCTTGCTGCTAGGAATCCACTATAGGTATCCATCAAATCCCCATTACAAAAATAAC  
A\_16\_P15104944  
CCATAAAGGTAAAACATCGCTATTTTGTTCCTTCTACAGTCCATTTTTTGATGCAAAGC  
A\_16\_P20320469  
AAAAATCCAAATGAGTTAGGAGAGACTGTGACTTCTAAAGCAAACCTTTTTGCAATGCT  
A\_16\_P17586193  
AACCACCTCCTCAGTATTCACATATTCAGCATGTCTCTAGTTTTGGCTTCCATACAAATT  
A\_14\_P201970 AATACCCAGATGTCTGATTACAGACTTTTCCTTTTGTCTTTCTCTTTGTCAGTGATTCT  
CUST\_1200\_PI426210822 CTTCTCAGGTGCTTCTGTTTCTGGTTGGATGGGAAAAGCTACCA  
A\_14\_P201476 CGTGTAATTGCTGGAGATAGTCATAGAGCCTTATAATACCCAGAAAGTTTGGAAACCTAT  
A\_18\_P17038306 ATCTTTGTAGACCCAGTGACCCCTGTTTCTGTGATAACACCTGCC  
CUST\_9071\_PI426210822 TCCTTTCTTGTTTGGGTGCCTGGTGAAGTCCTTTTGTTCAAATTCTAAT  
A\_18\_P22841945 TTTATCTTTAGTCTTTAGTTTTTATATTTTATCTTTAGCCATTATCTTTAGTTGAAGTCA  
A\_14\_P125952 TTTCTTAGAAAAATTCCAACAGTATTTTTGGTTGGTCAGCCAGTTAGTTGGTCAGTTAGT  
A\_18\_P16331674  
CCAGAAGATTTCTATTCACACTTTTCTAAAAAAGCAAGATACAATACAGTAACACTTCC  
A\_14\_P201094 TCTAGAACAAAACACTACATTAACATTATCGACCTGGTTCTTCCCCATTCCAAACTAAGACT  
A\_14\_P109550 GATACAAATGTGTATACTGAGAAACACTCAGACAGTCTGTTTAAACGGACAGAAGTCCTA  
A\_14\_P112662 TTGTATTACTGAACTCATGGTCTTATGGAACACACCATATAGGTTATATAGCCCAATCCC  
A\_14\_P124807 AACTGAAGGTATGGCTGAACAAAATAGGCTTATTGTCACACTACAGTGGCATAAACACCT  
A\_16\_P02877744  
AACCTTGCCCATAGAGTAATTTAACCTGTTTTCTACTACTTCTCCTAAGATTTGAGCACT  
A\_14\_P102539 AAATTTCTTGCCACTCACTGAATCATGCCATTCAATTGTTTATGAAGATCTGTAGAGATGA  
A\_18\_P22839984 ATCTGGTGCGCTTGCTGACTTTTCATTATTGCCTGGAATAGGCAATGATTCTAC  
A\_14\_P113775 GTGCTTACAGTGCAAATGAACTTGCAAATTGATGTGTTTCTCCATGAAACGTTTAAAGATT  
A\_16\_P18379862  
AACTTGGCTCTAGTGAATAATGTGACTGTTTTTGTATCAACATTCTTTCCAACCATCTGC  
A\_14\_P125908 GCAACCCAGTAGAAAAAACCACCTTTATGTTTCCATTTCTCAGGTTGTTTTTATTGAGTCA  
A\_14\_P106056 AATTTCAATTTGTTTATATTTACCTCTGGGCTCAATAAGGGCATCTGTGCAGAAATTTGG  
CUST\_8543\_PI426210822 AAGGTACCCCAAACCAGGGATACCCCTTTTCTCTTTACTGATC

A\_14\_P201724 GTTCTGTTGATTGCTTCAGGGGATCAGTGAAAATTAGGGAATTTTGTGTGTTGCTATATA  
A\_14\_P200945 TACTATTTTATACGTGATTTGAGTTCCTTTAAATGCTCAGGGGTCACCACCACAGTC  
CUST\_6182\_PI426210822 GGGCATTGGCTTTACAGCAAACCTATGAACCATGTATAGGGCTCC  
A\_14\_P127519 CTAACCTTCATATTATGACAACGTGGACTTGGTGGTTTCTGCCTACTGCTTAAAATACT  
A\_16\_P01445619  
ACACCTCCCAATTATGATCAAAGTATTAATCTACTGAAAACGTTTAAATGAGGTCCGGGA  
A\_14\_P103826 ACTCCCAGAAGCAGATTTATGGCTTCAGAGATCATATAGCATTTAAAAAATGCTCTGAA  
A\_14\_P134459 CTGTATTATGATGACAAATTATACATCTATTTGGCAATGCTTTGCCCCCATGGCAATTC  
A\_14\_P106133 GATCTGGAAGGAAAGAGAAAAAAGAAGGGCTCTTAGATTAGATGTGCCATGAAGAGT  
CUST\_2684\_PI426210822 GCCTCTGAAAGATTTCTGGGCTTTTCTTCATCCAAAAACAATACTTGGAGTTGA  
A\_16\_P19689763  
CGTCAGGCTAATTCGGATATAAATCTGTATGAACATGTGATCTTAAATCTCTATGGCTCC  
A\_16\_P36239486  
AAGAGGTTAACAGAAGTCCTTTATATCTGCATAACACATCATACTTCCAAGGAACTTCCA  
A\_14\_P135571 CTATTGTTTGGAGGTCTGCAGATGAAGTGAAAGCAAGAAGATAACCACAAGTTATCACAAA  
A\_14\_P131578 TGCAAGAAAAAATGTGATACTGAATTTCCACATATGTTTTTCAGAGAACCAGCCAACTAT  
A\_16\_P01399815  
ATCTTGGCTAACAACTACTAAGACCCAAGGCTATATTCTGTAGGGGATACTGGATACT  
A\_14\_P125165 CTGACTCAGATTCGCTTATTCTCATTTTTACCAATCACAGATCATGTGCACTTTTAGAA  
CUST\_2705\_PI426210822 GGCCAGGGGTAAGAGATCCACTTTCCGATTTATTTCTAGTATCCTATAAGGATG  
A\_14\_P100950 TTAGCGGTTTCAAATGTCATTCAGATGAGATGACAATGAATCATAGAAGGAAGACAGAGA  
A\_14\_P104413 GAGGTTTGAATTTAGTTTCTTTCTGCATATTGGATAATGAGCAGAGGTCATATTTGACC  
A\_16\_P30952630 TATCAAGCCCAGGTGCCAGCCTGAGGCAGCCACTTCGGCCAGGTC  
A\_14\_P107443 CTTGTTGTTGTTCCACACCATCTCCTTCTGTTTCATGATCTTCTTTCGTGTCAT  
A\_14\_P138656  
ACAGATTTCTCTTCATTCTGAAAGTTCATCAAAGAAAGCACCAAGAAGCAAAAAACAAA  
A\_16\_P21561142  
TGACTGCCAGTTTACTCATTAAACATCAAAAAGTTGCTACCACAGATATTAGCCTATTGCAT  
A\_14\_P103294 ACGAAGACAGAGTTATTAACCATTCAAATCTCTGTGGTCAGTGGCATCCATTTGAT  
A\_16\_P00250456  
GTCCTGACGATGAAAAAGATATGAGGAGATAATGATGCAATCATAACACGTCTGATGGAG  
A\_14\_P200163 CTGTTGTTTATACACAGATTTTAAAGTTTACTCCTACTGCTGACCCAAGTGAAATTCCTTC  
CUST\_5873\_PI426210822 CCTGGAGCTTTGGTTTTGATGAACAGTGTGCTGGTATTGGCTCTAAG  
A\_14\_P125845 GCAAAGTAGATGTGTGGTCTCTTGAATAACATGTATTGAACTAGGTAAGCATTGTTCTT  
A\_14\_P123239 GATGTCTGCCATTTTGAACACTACAAGATCCACGGACATTTTAAACTGACTAGTTTTGCATA  
A\_18\_P22841891 CTGGGGAAGAAGAAAATCTAGGAAGAAAAGGCCACACAAGGAAGAAGT  
A\_16\_P01892058  
CTGAGTCTTCAGACAGTTTTACCATCTTCCCTATTTTAAACCCAATTTAAACATCCACAG

A\_14\_P113471 CCAGAAGACCGGTTATTGTTATGATGGATGAGAAAATACAGTGTTTTATCAGCACATTTG  
A\_18\_P13703429

ACTTGTCCATCTAGTAGAGCAAAATTCAACAACCTGAAAGTTTTCAAAAGATCAAATCTCC

A\_16\_P19876917

TTAATTCTCCCTTATCCTACCAATTTGACCATCCCTTAGTTACCAGAACCTTTCATCTTT

A\_14\_P105683 AGCAAATAATTTAAAAGAATAAACATTGTGAACATCAATTCCCATCACAGCAAGCCCTGG  
CUST\_1874\_PI426210822 GATGGATCAGGAACCCACATTTTTAAGAAGCTCCATAGGTTGTCTGATGG

A\_16\_P18445808

ACTGTTTGCTGACATATGTGACATGGAAAATAATGAATCCGCTAGAAGAATCAAGTTTGA

CUST\_8020\_PI426210822 TGCCCCCACCCACAGTAAGCTGACCAGTCCCACAGCAACAGAA

A\_16\_P37903544

GCATCTCAATGTATTGTCAGTCTTTCTGTCACATAGACACTCAAAAAGTTATATTCTCTGC

A\_14\_P124339 TTCCATGAGGCAGTCTATTTTATCATTAACCTTTTTCTCTGCCAAGAAGATCACATCTGG

A\_16\_P58424278 TAAACCGAATTATATCCTGAAAGGCCATCACAGTGGGAGTTAGGGCTTAAAAAT

CUST\_5027\_PI426210822

TGAATCATTTTAGATGAGTTTGTCTCAGTACAAATCGTGCTGTGTTTAAAGTTCTTGGA

A\_14\_P125416 AGTCAGAGCCACATGATTCCCATCACTCAGACATTCTGAACCCCTATT

CUST\_6829\_PI426210822

GTGAAGCAGTAAATATAGGTCAGTTCAATAAATGTCTGTGTTGGCTTTTTGTGACTCCTG

A\_14\_P129885 CTGGGTATTTAAACAACAACAAAAGGAGTTACTGTAAATTTACAAATCCAGCAGCAGGC

A\_14\_P121053 AGAGTTTCTATTCATCATTTTAAACCGCATTTTCATCGATCTTGAGACACGGCTTTTTGATAT

A\_14\_P121524 TAAAGAAAAGTGTCAAAGACTCTCAGAGTGTCTGAGGCTTGAATTCTAATCTACTTTCT

CUST\_2630\_PI426210822 CATCTTCTGAGCCAGGCCCAAGATAGGAATAAGGTCAGAGCAAG

A\_14\_P114882 TCCCACAATGGTATCAGAGGAGGTTCTTGTAACCTAATTCAGATACAGAACTGTGATT

A\_16\_P18817072

AAAGAAGTGTCCATGTTAAGAATCCATTTGTTCCCTAAGATCATCTCTCAAGAAGGCTAGA

A\_14\_P117367

TGAAGTTACTTTTTGAAGCAAAACGTGGATGTGCAAGCAGAGGTAAGTAACTTGAAAAAT

A\_14\_P137215 TGCAATACATAGGTCATCTTCACATCAAATGCTGCAGTCTTTGTCTATTTACCGTTTTGA

A\_16\_P00685240

TGATTTCACTCATGAAATTATTGTCATGGAGTTAGAGCCTAGATAAAAAGTGTTTGGCA

CUST\_4740\_PI426210822

ACCTCTGTAATGGTATAATATGAACTCAGGAGTTGAGATTCGTAAAGCAGTAAGGAATGC

A\_14\_P104447 ATATTTTAGGAAAAAATGGTAATCCAGTGGCAGAGAATTTCCGAATGGAAGAAGTCTATT

A\_16\_P01081600

CCAGAGACTCACAATACTATAGGATGAACTTAAGCAATGATTACAAGCATGAACTCACC

A\_16\_P15731053

AAAAATAGAATGTCAGGATCTCCATCTTCAACCAACTTCCAAATCGATCATGGAAAATGT



A\_18\_P26827501

ACCATTTATGAACTGTCTTATGTTAAGCACAAATTCCCTAGAAGATTGCATTCATCCTCA

A\_14\_P101407 AAAATGAATGCATCTGAAATGCATCCTATGTAAATGATTCAACCACATCTTGCCAGAGTT

A\_16\_P15996925

AAAAGGAAGGAAAAGATGATACCAACTAGACTTGCTTTAAATCCATGTAGGCTTCAACTG

CUST\_7379\_PI426210822

GAGGAGGGTCTCAAATTA AAAAAGACAAGAAACAAACAATCTCCCCAAATAAGCAGAA

A\_16\_P19916578

AAACCAATTTGGAAAATGGATAAGGATTACAGTGACATATGATTTCCCGAGTAAGGTTT

A\_16\_P00685057

AGAGCATGACATAATGCATAGTAAGTTGCATGTCTATATATACATTATTATGTGCCTGTA

A\_14\_P122323 ATAACTGAATGATTAGGGCAGGAGAAGGAATAATTACCAAATCCTTAATTTCTAGGCTGG

A\_14\_P114807 CATACTATGTGGATGTGACAGTGGCGTTTGTAAATGAGAGCACTTTCTTTTTTTTCTATTT

A\_18\_P15970673

AGCCAACTAATCTCACATCCCCAAACACAAAAGTGTTTTAAGAAAGAAGAAATTCTTTCC

A\_16\_P21373659

AAACATCTATGGTCCACATTTTCTGTTGAAGTCATAAACTACTAATTTGAACCCCACTGC

A\_16\_P30952301 AATTTCTCCTTTGTTGTGACTGTGGTTCTCATTGCATTCCCCTCCTC

A\_14\_P121880 ACCCTAATAAAGGCAAGCCCATCTCATCTTCCTGAGAAAGCATGAGATCATATCTA

A\_16\_P41885477

TCCTATGGAAAAGGAAACAAAATAAAAAAAAAAACTCCCTTTTGTGCAGACAGTTTCTTCT

A\_16\_P20863990

ACCTAACTCCAAACATAGACACTTCTCTACATCATCACCTATCTTTACTTCCTTTGCTTC

A\_16\_P36712025

ACCACACTCTAAGGCAAATTGATTCACAACAGTGTCTGTATGTTTATAGCACAAGAATGT

CUST\_7776\_PI426210822 CGTTCCAGTCAGCTAAGAGTCTCATAACCATCAGCCTTGATAAATGCTAATG

A\_16\_P37854599

ATGCGATTGTTACTACTCTTACTTTACACTTTCCATTGTAGACATTTTCATCAGACAAGT

A\_14\_P122020 TCCCAGAACTTCCTCAATTCTTTGTGACAAAATAAAATATTTTCAGCAGGCATTCATGCA

CUST\_9300\_PI426210822 CACACACCTGAAGAGAGCTGTGCATAGTTCTGGTTTCTCTGGTTTG

A\_14\_P103409

AGTGGTTGGTAATATGAAGCCTCCAAAGCCAACAAAAATTA AAAAAGAAAGGTAAAACGAG

A\_16\_P21255647

CCCAAACCCCAAATAAAAAACTCTAAGGCCATACAAATTCATTCCCTAACCCCTATAAGTA

A\_14\_P107072 CTCTAAAGCACAAAGACCTGGATGTGTGACACACAGTTTTGGAAAAAGGTCT

A\_16\_P19794939

ACAGCAAACATACCTACTAATGTGGTGTCTAATTTCTACTTTGTTCTATATCCCCACAG

A\_18\_P17361955

ACGGGATAGAAGTTAAGTTCCAACCTGTTTCTCTCATCTTATGATATGATATTTTAAGTCT  
A\_14\_P137901 TCGGTGCCACTATTCTTTTTATCAAGACCTGAAATTATTCTATAATTTCCCTTCCAGCACC  
CUST\_27\_P1426210822 GATGACTGCACCCAGGCTGGCTGTCTCAGCTCCTGGACTCAGAAT  
A\_16\_P01164731  
GGAAGGTTTGAATGACACTAECTTACATTCAGCAAAAATGCTTTAACTCAACATCAATCT  
A\_14\_P105686 CACTTTGCCTGACTTCTAGAGTAGGACTTCTGGTTTTAAAATCTTGGAAATCCACTG  
A\_16\_P15860049  
ACCTCAAGCAATAGAGAACCTAGGTTGTAECTATAGAAGTAATCAATAGGGGGAAAAAGT  
A\_14\_P103070 CACCTAGTTAATTCCTCACATTCAGTTCTAGTTATGTGCACAAGCAGTGATAATCTCAG  
A\_16\_P41836732  
AAGCACGATACTAAAAAGAACCTATGTTGAATCACAACCTCATAAAAAACCATCAGACCAA  
A\_14\_P103753 TGATCCAGGTTCTCCAGAAATGAGATATACAGATTACTTTGTGATTGTTAGTGGAACCTT  
A\_14\_P137618 ACCTAATTTGAACCTCATTGTAAGAAAATGTGATTGCATCTGCAAAGGAGAGTTTCAG  
A\_14\_P138138 ATATTTGATCGAAAGATCAACTTTGATGCGCTTTTAAAATTTTCTCATATGTAAGTGTTT  
A\_14\_P120383 TCAGCAAATCCTATTAATACTTTGTGTTTCCAAGCAAATAAGTGTGGCTTCTTTCTTTC  
A\_18\_P12515330  
GGCATTCAATAAATATGCAAAGTTTCCCTAATCTATTACTTTGGTTCCCAAATACTTACTG  
CUST\_9009\_P1426210822 ACACTTTGGTGACCCTCCCTATCCTTGGAACCCCAGCCAGCTGAT  
A\_14\_P129795 AATCTGATCAGCAAACCAATCTTCCCTGGATCACCCATAAAGGCACTAAC  
A\_18\_P14135073  
ATTCTTAGAATCCCAAGTTCGCTAACACTCAGGGATGCATTTTGCCTAAAGAAGATAATT  
CUST\_6748\_P1426210822 GTATTATGGCCAGCAACTGGGTTTCTCAGGGGCAGGCCAGTG  
A\_18\_P14133666 CTGGATTTTTGAGGTCTGGTGGATTCTGAGACTTTCCTTCTCAC  
A\_14\_P104814 GTCTATGCCTCTGGCACAGTTATATATTCAATGCATTTTTGAGGGATGAATGTAAGTAGC  
A\_14\_P125474 GTAGAAGTCCTGTGGAGTCACTGACTGACTTTTTTGGTTTGAAAACCTCAGTCATAATCT  
A\_16\_P36230864  
TTCTCAAAATGTAAAATCTTCCCTTGACTCACTAAGCAACCTTCTGATTGCAACTGCTTT  
A\_16\_P01062492  
ATTCATTCTCAAATGAATTTAGAACATGAAGCATGTTCCGTAAGTGAGAAAAGGAGGAA  
A\_16\_P21226160  
GAAAAAAGATACCACTAGACTCAAATAATTCACATTTCACTCATCCACTGTCAAACCTCA  
A\_14\_P122620 CTATCATTTTCATGTCCCTTTGAAGGAGAAAGCCTCAGAATTATTTACATATAGCCTCT  
A\_14\_P129411 CCCAAATATCAAATAACTGAAAGAGTTTTTCTTTTCGACCATCTGAGTCAAGATGTGGTTT  
A\_14\_P137213 TGGATTGTGTTTCAGGGCCATGATAAAGGCAATGTATGATCCTTCAAGTATACTATGATT  
A\_14\_P104737 TCCAAGTTCTGTTGCAAGTTTTCTCTTGCTGTCTTGCTCCTTGATTTTTCTAAAATACT  
A\_18\_P22841388 ATCTGGACTGGAGATTCAGTCATGCAGTCTGAAGCCACTTGTTTAC  
A\_16\_P17598232  
AGAACTGGAGATAGCACAAAATAAAGGGGACTTCAATAATGTAGAACAAGTAAGTGCGT

A\_14\_P131244 GTTTTCTTGAAAACAGAACATCTGAGTCAACAGGTTTTTCAGATTGGAAATTCTGAGTGTT  
A\_16\_P21203810  
GCAACATTGGTATACGAATATTGACATCCACTA ACTTACCAAGAGA ACTTGAACCTCTAC  
A\_14\_P128899 CAAGCGTGACAACAATTTTTATAGTGTAGAGATTGGAGATTCTACATTACAGTCCTGAA  
A\_18\_P22841767  
TGGTGAGAAAGAAAAGCACACATATGTTACGCTTTTTTTTTTCAGCATTTCACAATATTCA  
A\_16\_P01907956  
CCCAGA ACTCTAATAAAAATTAGCCTAAGTAGAAATCGAGTCATTTATTCTGACCCCTGC  
A\_18\_P19444245  
ACTGACATGTGTGACTTTGAGTTTAAACAATTGCTAAACTGTGATCAAAAATTATGGGAGGC  
A\_16\_P19618566  
ATGCATTTATGGATATCTCAGCATCTCGTAACTACTGTCAAATGTGTTTTAGAGACCTGC  
A\_16\_P16947867  
ACCCCTGAAAGACTTATTACAAATCACAGAAAGCCAAAATCATTGTATTCTTGCCTGAAT  
A\_16\_P30952653 CTCATGTAATGAATCCACCAGGCTGGCAGTGGTGCATATAAACTGTGG  
A\_18\_P13357613  
AAACCTTGAACAATCTAGTGAATGAACGAATGTGTCTTCAGAGTTATGACATAACCAGCA  
A\_14\_P116879 CCGTTTTTACAATGATTTTTTTTAAAAAAAACACCAAGGTGCATTCTGGACCAGATTCTA  
A\_14\_P108501 GAAAAGATGGGCACTGGAGAGGTAAAAATTCTATTTAGTGATCACTCACACTTGAACAAT  
CUST\_2432\_P1426210822  
TGACAAAGGCTGTTTGTACAATAAATATTGTTGAATCAGTGCTGCCTGTGTGGATATG  
A\_14\_P120731 GCATTCCTCCAGAAA ACTGATGTGGATTTTTTAAAGTGTGCATCTTAGATTTTATTAATGC  
A\_14\_P101549 ACTAATTCTACTA ACTAAGAGGCAAGACAGGCATTTCAAATACAAA ACTATGACCAGCCT  
A\_14\_P102273 ATGTCGTCTAAGATTTAACTTACCTGCCTCAGTCTCTATGTTTAAATTAGTTGTTACAAA  
A\_14\_P117746 TAAAAAGAACAAGTGCCTTAGTTTGTCTGACATCCAATAAATGCTCTAATATCGGGATT  
A\_14\_P200507 TCAAGGCATGGATGCTACTTTCAGGTCAGTTTTCTGAATACCTAAAAGTCCTTTGATTTA  
A\_16\_P58424128 CTAACCATTGAGGCCGAATTTAAAGATTGTTCTCTCACCTCACTCTCCTACTTCTAA  
A\_16\_P20352864  
AACTTTCTGGTCTTTCTAAGTTTAGCAATTACCTTGTTCATCTAATATGAGCGCAGGA  
CUST\_7934\_P1426210822 GCATCTCGTCCCACTGGTGCCTACCGTCTGAGCACTGCTCTGAAG  
A\_14\_P124156 CGGGGAAAAATGCCAGTATTAATACGAGCCAGACAAAGATTA ACTTCTCAGGATTAGAA  
A\_14\_P134660 CTTTGGTCTTTTTTGTAACTCCCAGTTGGCTGCTAAATCCAGACTTATGGTTTATTTCTC  
A\_16\_P00300828  
TCCAGGGGCTTAGTATAAACTATAAAATTTTCACCACATATTACGAAAAGAACTTGCTGCT  
A\_14\_P110887 GGAGATAATTCTCTCATTTCTGATAAGCAAATAAGCAAAGCCTTCCTCAGGCATATTCT  
CUST\_2647\_P1426210822 TTGATAAAGTCCCAGGATTCAGCTGAGCAGCAGTGAAGGCCTGGA  
A\_18\_P14135552 AGAGGACAGCCATGGCTGTAAGGAGGAGGCCAGAGGTCTCCAGCA  
A\_16\_P19747130

ACCCATGTCAATTGCAATTCCATTTATCTCTGAAGCCATATGTATGAAGAGCACATACTT  
A\_18\_P25260998  
AAAAAAAAATCCATAGCCAGATTTTGTGCTTTAATGTGGACCTAGGTCAATAGTACTGC  
A\_16\_P37447078  
CAGTGTGCTTACCTATCTTATAATTTCAAATTCTACCTCTACGAATCATTACCTCAGCC  
CUST\_4259\_PI426210822 AAAATAGCAGTTGAAGTGCAGCTGTGTTTAGCTTGTGTCAGAGAACCTGTTGAG  
A\_16\_P01173894  
AAGGGTGTGAATGTAAGTTGTGCAAAAATTTGGACACAATAGACATGATGAAGTGAGAAT  
A\_14\_P113344 GCTTGGATTTTTTAAAAAAGTGTTCAGTCTTCCCAGTCTGGATATTTTAAAGCAGAAG  
A\_14\_P136933 TGA CTGGCATCTATTTGTATAAATCCAAATGGTTTACTCTGAAGACCTCTCTGTTTTTC  
A\_14\_P119584 CGTGGAGTCTGTGTTTGGAAAGCAAATAACAAAGTCGCTGCAACTCTAC  
A\_14\_P119479 GAATAGTTTGGAGTCTTACCAATTTGTAGGGGCTGTTCTTATGTTATACACCTGAAACTT  
A\_14\_P119755 AAATCATGGCAATTAGTGTAACGGAAATGTTTACAGCAATCTCTGATGGCAGTTCTACTA  
A\_16\_P15517416  
AACGATAGGGGAAAAGATAAGACACTAACAAGTCTTCAGTTTACCAATGATGAAATCAGG  
A\_14\_P114886 AGAGGTAGAATTGTGTTTTTCCATACTCTTTAGTTCTTGATGAACCCCATATGGTTCTG  
A\_14\_P137715 GTTTTGGGCTTTTCTATTTATGAAGTTCTTAGTTGTCTGTTGTGCACACTGACTTTTTT  
A\_14\_P139834 TACATTAAGCACCGGTCAAACCAGATAGTTATTTTCATATAAAGGTGTGCTTTCAACCC  
CUST\_6349\_PI426210822 GTACCTATGAGGGAGGTGGAGGTATTTCTGGCTTCTATAAGTGAGTTTTT  
CUST\_338\_PI426210822  
TTTAGAAAAATACATTAATTTATTCAGACACTGGAGGCTTGGGAGTAGTTTTGCAAAGGG  
A\_14\_P106348 TCAAAATCATGGTCATATGGGGGAGAAGTAAATATTCCTATTTTATGGTTATCCCACTCC  
A\_16\_P18217712  
AAAGACACAATGTTGACCCAAATTAACCCTTTTCTGAATTTAACACTGAGGAACACTTC  
A\_16\_P36626646  
TTATTTCTCTATCTTTTCATTCTCAACTTCACTGAAGAGAAAAATACCAGCAATCAGGCC  
A\_14\_P107606 TGGCAAAGTTTCCGAGAACAATAAAACCATTATTAGAATTGAAAAAAAAAATGTATAGAA  
CUST\_7407\_PI426210822  
CTCACCACAGCACCATTCTTAAGTTTTCTAGCCTCATTATTTTAGAAGGGGAACT  
CUST\_1856\_PI426210822 TGTCCAACCTCAAATCCCAAACCCTTCCCAAGTTTGGCTTTGATTTAATG  
A\_18\_P14132631 TGGTGTGTTGGGTTTGTAGGCAGGATGGCCATGTATGCACAAAGAA  
A\_14\_P123334 TTCTCTTACTAGTCAAAAGAGAAGATGTGTGAGAATACAGAACCAGTGGAACCTTCTTCT  
A\_14\_P121973 TGCAAAATGAAAAGAATTGTGCTGAGTGTTCAGGAATACTTTGATATTTTGGCTGATTG  
A\_16\_P58424514  
AGGTGATGTAATTTGCAGATGTGGCAGAAATTGAAAAGATGGTATGTGAGTGAAACTTAG  
A\_14\_P100248 TTTAGACAAATATCTATCTGTATTTCTTTGCCATCTAGATTGGAGCCATGGCTTTGGA  
A\_14\_P133172 CTTGGCATTCTACCAAATATACAGATAGAAGAAGCACAATTGCTACATCAGTTTCAGGA  
A\_14\_P124215 ACATAGACGTTACACTCCTGAAAATAAGTTGGCAAGTTATCCTGTAGCAAATGTTCTGAA

A\_18\_P22842476 ATGAATTTGATAAGGGGCGGCAGATGCCCATTCAAACCTGAAAATTCTCATT  
A\_16\_P03462711  
CATCCATCCAAACCTTCTAGATATTCTTACCCACCTAAATTCAACACCAATTTGGATTC  
A\_14\_P115345 GTCTCCTCCTTCAATATGTGGGGACTGCAGTGTATTGGAGAATCTG  
A\_14\_P138167 CTA CTGAAACTCCTCCACCTGCTTCTAAAATGCCCAGAAGACA ACTG  
A\_14\_P117472 CGGGGTTAGGAAATGAAAAACAGGGTCTTGTCCAAGATCATTATTGTTATTATTATT  
A\_14\_P109287 ACATAGTTCCAGACACGATCTTCTCACCAGATTTATCAAATCCCACACTTATACTACTC  
A\_14\_P133607 ACTTATACTAATGTTTACAAGAATGCAATATACTGTGATGCCTTCCACTCAAGCCTCCT  
A\_14\_P139439 TTTTCATACCCCTTGATGTCATTTATATGCTCTCCCTTGAAGTCAGTAAGGAGAAAGAG  
A\_14\_P130479 CGTCCCACAATTTAACAATTGCACCTGATTTACATATCCATTAATCAACAAAGGAGATG  
A\_14\_P136052 AGATAACTAATTGGTCATAAGAATCAAAAGACCCAGAAGGGAAAATAGAGAGTCTGGTCT  
A\_16\_P18397523  
CAGCCCCTAAAATTAGTTACCTTGAATTCACACTTACGTATCTTTTACCTTAACTCCCAA  
A\_18\_P15712741  
ACACTGACCACATACCTACTCATTCACTTATACTTTCAAGCACAGAATTTCAGGAAGAAA  
A\_16\_P17110942  
ACCGAGATAACATTTCTGAAAATATAGTATAGCCCTCATAGTCTTATCCAAGTGC ACTGT  
A\_14\_P139342 TTGTTTTTATTA AAAAAAAGATTTTCGGCCTTTTGTGCGTCCACCTCGTCACTGTAATTTA  
A\_16\_P17799068  
AAAATCCTGTCCATAAGTGTATGAAATATTTGGCATTCAAGTTACCCTAGGAGAAGAAGA  
A\_16\_P01171307  
AACCAATTTCTGAACCACCATTTAATGAACGTTAGACAAAAAGGGTTACAATAGAGAGCA  
A\_14\_P106652 ATCAGGAAGAAAATGATGTTGTATAATCTATGACTTTGAGGACAGCCTGTAAGACAGGAA  
A\_14\_P131179 AAACATATGGGACAGTGCTTTGGGATTATGTTGACCCTACTTTTGGTCTAAATATTGAAT  
A\_14\_P124297 GCATCTTGAGGTTTGCTTTGTTGACTCCGTAATTCTAGACCTAAAAAAGAAACAAGAAAA  
A\_14\_P106509 ACTCACATAGTCCACAGGCTTTTTCTTTCTTTCTTTAACTTTAGGAAGCGAACTTTTGCT  
A\_14\_P132689 TGTTTTCAAAGATCAAGTAAATCCTTCATTCCAGTGTGATACAGAACAACCTGTTTCAGTT  
A\_14\_P100587 TGGACTCTGGCTAGAAAAATATGGTCTATACATGGGCCAAGGTAGACTGTGATTA  
A\_14\_P139819 CTCATTCTCCAATTCCTGAACTTATCTTCTCTCTCCCATACAATCCCTATTTTTTTTTT  
A\_16\_P18533376  
ACAACCAAGTATCCCATCAAGTATCAACCAAGTCCTAGTATATGTTCTGTTTATTCCCAA  
CUST\_1450\_PI426210822 ATGATTTCCAACATCCAGTCACTTTTCTGGGTATTTTTAGTCACTCACTTTGCA  
CUST\_7403\_PI426210822 TCTGCAGCCTGTGCAGTGTCAAGGGGACAGTGGCTGCATGATGAT  
A\_14\_P104406 AGATATA CAGTCACTCAAGGCGATAAGATATGCAATTTTATTCAAGGGAATTCTGCCTCT  
A\_14\_P126632 TGCCTTACCTCTTCTAAATAGACTGATGATGAGTATATTCCTCTCATTA AACTCCAACGG  
A\_14\_P101532  
AAAGGGAGTGTTCATGGA ACTAAAGGAAGAAATAGA ACTAGGAACTAGAACCATAGAGA  
A\_16\_P16756831

GGTTCAACAGATACTACCAATTCAGGTTTCACTAACAATCACAAAAACATTTACACAGG  
A\_16\_P38283517  
ATTCTTATGCTATGTTTGTCTAGTCAGCATTATCCTGAGTAAATTTACACAGCCTGGC  
A\_14\_P134527 ACTGCTTGAAGGTGACATTTGTCATCAAACCTCAGAGAAATCGCTTCATACTATCAATACA  
A\_14\_P129041 GATGTTATACTTTCTGTGGTTGGAGAAGTAAATACCATGGAGAGAGGAAGAGTATTAGG  
A\_14\_P111648 ATGGAAAACATCCACGTTTTCTTTTCATTTTCTTGCCGCTTTCTAACAGTATCACTCATA  
A\_16\_P16895388  
AAACCGCATATTAAATCTTCACATTCTAACAAAGCCAACTGAATTTATATTGCAAGCACA  
CUST\_1404\_PI426210822 GCTGTCACCACCTCGGAAACCCGAGGTCCTGCTCCCAACATAGAC  
A\_14\_P105387 CCAAGGAGACGCTGACACTTGTGTTTGAATATGTGGTAAGTAAAATAAGACTTTTAAATT  
A\_14\_P103623 ATGAAATGTTTTAGCATATTATTGATGCATTTTCTGTTGGAAAGTTTACTGGGAGACTG  
A\_14\_P125323 CCTTAGAAATCTTCAAACCTTAGCCTCTCAGAAAATATAACCAATCCAGGGCTATGAACTT  
A\_14\_P139197 TAAAAAACACTCAAGACACAGACCCAAGCCGGGTTTTATTGAAATGCCAG  
A\_18\_P22842675 TTTCAGTCTGTAAGGCTTTTCTCACTGATTCTACAACCGTGGGGGC  
A\_14\_P132569 TGAGCAATTTAAAAAGTTCTTCAAAGTATCTCTCTCTCTCAGCATTCTCTGAACCC  
A\_14\_P130582 ACTTCTTCTGTTTTACTTTAGAAAAAGGAACAAGTTTTTCCATTATGTTGTAAAGTCTAT  
A\_14\_P200676 GAGTTAACTAAGCCAAATGTGTATTACAGTAACATTTTCCCTAATCCTGGAGCAATGGAAT  
A\_14\_P138119 TGCTTGATGTAAAGTCCAGGAAAGCCATTCTATATAAAACCACTGGGATTAGTCAAAAG  
CUST\_7073\_PI426210822  
AGTTTTTGATCAATTGGGTTGCTGAGATTACAACCTTCTTTTTTCATTA ACTATTAGTACT  
A\_14\_P134857 GATGCTTGGTTCAATTTCTTGCCCAATTTTAGCCTCAAACCTGGTCAGAC  
A\_14\_P138643 TGTTTAGTGAGCCCTTATTACATGCACAATGTATTAGACGATCCCGTGAATAAACAAAGT  
CUST\_9929\_PI426210822 GAGTCTGGTGATTGCAGGTCCCCCTGGGGTCCCCACTCATAGATG  
A\_16\_P01220348  
AAAAAATAGAAGCACCAGTTTAACTTAGGGGAGAATCAACCATCATTATGGTTGCTTGA  
A\_14\_P128735 GTTGTTTTCTTAAAAACAAGTTAAACCTGACGATTTCTGCAGGCTGTGTAAGCATGTT  
A\_14\_P111857 CTCCAAAGATAAGGTAGAGGTGGAACCTAATGTGATTGCAGTTATATTGAAGAGTTAGGTG  
A\_14\_P129785 AAAAGAAGTCTATCCTTCTCTGGAATACTCCTTGATAATGACTGTGATTCCACTTAGCAA  
A\_14\_P135368 AATTTGTCTAATGCTCAATTTGTTTCAGATGACGATACTATCCACCACAGGGTAAAAAACT  
A\_14\_P129706 CTTAAGAAAGGACACAAAGCCTGAGAAAGTTGTATTATGCCATTTATAAATGTCCGGTGA  
A\_16\_P02331079  
AAAGGGCACATATTATACCTTTTCATGTTTCATTTGTTTCATTTGGTATTCCTGAGGATAGGC  
CUST\_2477\_PI426210822  
TATCCTGGTAAGCTGTTTTTCTTTAAAGGCACATGAGATAAATGAAGATAAATGCATGAA  
A\_18\_P17273297  
AAGTTTACAGACAAGGCATGAATGAGATTGACCTTTTTTGACAGAAGTGAGTAATTGTGAG  
CUST\_9367\_PI426210822 CTTTGGCAGAGATGAGCAAAGGGTACCCTTGGAAGTGTCTGT  
A\_16\_P58424507

CATTGACCCTAACAGTGACCCTTTTCACCTTAGTCAGTTCAGTCATCTATAACAAATTAC  
A\_14\_P124308 TTTACTTTTTCACAAAAATTATTTACACAGCAGAGGAACCTGCTCCAAAATGAAGGAAGCA  
A\_16\_P02532875  
GTTTTACTTCTCCAGACTATCATTACCTGTTATCCGGTCTATCCTAACACATGTGTAACA  
A\_16\_P17617733  
AATCATTGTGAATGTCTAAAGGCTATCAACCTTTTCCTAACCTTGAAACTTCTTCCTTT  
A\_16\_P00581832  
CCCCTTCCATTCTGAATAAAAAACAAAACATCACTATTCTGTCCTGATTTTTAAGCACCA  
A\_14\_P109781 CTCTGCCTGGAATTTCCACCATCTATGTCATTTTGGACAGATAACAAATATTAAGCAGAA  
CUST\_3221\_PI426210822 CCCAGCTCTTGTCATGACCTGCCCTTTCTCCTGGAACCTGCT  
A\_16\_P16637263  
AACAGAGTAAGCATTGACCTTTAGATTTTCCTTTCAACTGAAATGTTTCAAAACCAAGCA  
A\_14\_P126283 AGTTTTAAATAAATAAATAATCCCCCAAAGATACCAGACGATCCATTGGAGACCTTGA  
A\_16\_P16191484 AAGTGAATGCCCAAATGAGTGGCACCAACACTGATTATTACTGGGTGAC  
A\_14\_P101990 CTCCAGGAGCCAGTAATTTAGGCAACATGATAAATGATGAAGTTGTTTGATACTTACG  
A\_16\_P03474027  
CTTGTTATTGTAAGTGCCTTCAATACTTTGCATTTTGGGATAATAAAAAAGGCTCCCTCC  
A\_14\_P136444 CTCTGTTTCTGAAAGTGTTAATAGCATACATTTGGTTCTTGACCCTTTCTGTTACTGCAA  
CUST\_8510\_PI426210822 GTGCCTGCAGTCCATGTTGAGAGGATTGTGAAAGCATTGCTCTCTATA  
A\_16\_P15322855  
AAAAATATGTGGCCAGTAAATAACTCTGTGTGTCATGAAATTGGGTCTGAGATTTTGCTT  
A\_16\_P41695853  
ATATTCAGACTAAATGCCAAACATCCTTTTCTATGTTTCCCAGATTTGGAACCTACCTCAG  
A\_14\_P111871 CTATTCTAGAACAGGAAGGCACATTTACCGCTATGATATTAATGAAGTCATTCTCCCC  
CUST\_893\_PI426210822 TTGTTTCAGGTGCATTTTGGAGAACTTGAGAAGTGCCTGGGGGTGTA  
A\_14\_P200673 CAATCATTCACTGGTATGCGAAACACAGTGGTAGGCATTTAGTTGAGAATTAACAAAAG  
CUST\_7973\_PI426210822  
CATGGAACATTGTAGTATGTGCCATCATTATAAGGAGATACAAACATAGGTA AAAAGATG  
A\_14\_P120941 ACGTATTTCCATTATCACATTTGGTCTGCAATTTGATTAAACTGCTTCCAAGTGACAACA  
A\_16\_P18103647  
AATCTCACCTTCAATCTACAAACATGTCCTCTAAACATACAACCATGTTTCCTTGTAAGC  
A\_16\_P03662877  
TCCCTCCAATATGATTAGTTAACCTTCATCCCATATGCAGTTAAATCACCTTCAAAAAGA  
A\_16\_P19245437  
TGAAGCCACGTTATCTTATACCAGAAATCCCATATCAACCTCTAAACTCATTTTTTTGTG  
CUST\_3004\_PI426210822  
CTGCTATCCATGCATTCAAAAAAATGGGAGGTTTTGGTCAAGTAATGTACAACATGC  
A\_18\_P22840470 ATCTCTATGGCAGGTGCGAATGTAGGAGGGTTGGCAGGGACTGAT

A\_14\_P121136 GCTCTATTACAAAATCAAAGGGGAGAAAATGAAGAATAGACTGCTTCCTTGGTTATTGTG  
A\_18\_P14589316  
AATTCTGACTTTGAGTTCTCATTCTACTGCAAGAAGCAAAAATTTTCGCTTAAACCTTCCT  
A\_14\_P132023 CTTAGTCCATTCTCCTAAGTAAAGCCTGAAGGAAAACCTTAAACACCTAATTCTTTGTGG  
CUST\_631\_PI426210822 AGCTTGACCACACACAGGGAGCTCAGGAAGCAGCTTTGTTGGAAA  
A\_18\_P11196441  
AAAAAACCTGCAGGCTGTAAATAGTGTGTTCAAAATTCAACCTTCAAAAAAGGAGCAGAG  
A\_14\_P112763 GCCTTGGGAAAATTATACTGCCTTACTAGGAAGTAATTACTTTGGCATTTCCTTCATGGA  
A\_18\_P14130265 AAACGTTGTTTGAAGCACAGATATGACAAGGTGAAGCAAGTCATTACCACAGTG  
CUST\_4979\_PI426210822 AAAGATAACAGATGAATGTCTCATGGCCAGTAGCTTGGTTTTTTTTGCATGGTGT  
A\_16\_P38605828  
GAGACTCTTGAACCTTGTCATCTCATAATCTCACAATTCGAAGTCTATTGATCTTGATGCC  
A\_16\_P01131211  
ATGGCCCATATCATTACACATCCAACCTTGAAATGTAGTTCCTAGTCCTGAAAAAAG  
A\_14\_P132463 GCAATCTAACAGAATGGCAACATTTTACATAGCATTCTAAACGGTCCAATGAAGCAAAAC  
A\_18\_P14134212 CACAGGTAGAATGTTGAATGCACTAGTTCTCTGCTATCTGTTCCACGACAGAAG  
A\_14\_P139631 ATTTACTTGTATCATTAGAGAGGGAACATCAAATGCTGGGACATCATTACTAACCAATA  
A\_14\_P120134 ATGATTTCCCTTATTTATAGTGGGAAAGTAAAACCTGCCTGCGCAATGAGCCTTTGGTTTT  
CUST\_9942\_PI426210822 ATAGGATGGTGAGAACCTAACTCCAAAACAGAAGTCTGGGGAGCA  
A\_18\_P16621387  
CGGCTTTGAAAATACCTATGCAACAAGTATTAGATGTGGATGTTGATTGATGTGTTCTTG  
A\_16\_P18271480 ATTTGTGCCTATATTGCCTTCTACATGCTTCTATCAGAAATCTTTATTCCCCAGTCTTT  
A\_14\_P135018 ATTTGCATCAATATATCTCTCGCATCAAGTGGAGTCAATGAACTGCAAAGAAATACAAA  
A\_16\_P00886995  
TGTTTAACTTACACCATGTTGGATATGAATTCCTCACTAAAATAACGGTCACCCATTT  
A\_14\_P100627 ATATCTTCTCATCCCCACTCCACTATCATAAAATGGGTTTATATTCTTCCATCCTTCTTG  
A\_14\_P138571 TCAAAACAATTTAAGTTGCAAGGCCAACTTCTCAGTTATTGGTGTCACTTTGAATGTGA  
A\_18\_P12143830  
ATGTTAAATTTAGGCTGACATTGAGACACATTTTCCCGTTGTCTTTTTTCATATGCTTGCA  
A\_14\_P115437 ACAGCATCTGTTGGAAAAATGGCTGCATGGACATTTCTTATTTTATGCCCACTTATAAAT  
A\_14\_P123007 AATTCTTTAGAATTTATCAAAACAGTATGTTGAGAGTCTCTTTAATTTTTAGAGTAAATA  
A\_14\_P104201 CTAAACTTTTTCTTTTTCTTGCAGATGCATATGAAACAGCCAAGATGCTGTGTGAACAG  
A\_16\_P17254626  
TCTATTCCACAGTTCACTCTAAATACTATTCCCTGGATTTTGCTATCATCTAGAAGTCC  
CUST\_7482\_PI426210822  
AAGATAATCTTGAAGGCAAAGCCTGTCTCCCTATATTGTTCTTAAAAATACAAAAGGGA  
A\_14\_P134368 CAAAATAAAAGCAAGTCTCATTACTTTTCAAGGGGAGTGTAGAAGCGATTAGTCTCTGAT  
A\_14\_P134863 AAGCAAGACTCCTTCTAAGAGCAAAAATGTGAACTTCTTTAACTATCCAAATCCCCAACA



A\_14\_P139475 AAATTCATTGCCAGTTTAGAGTCTTCCTTGTTCAAGCCTATTTCTTTCAATGATTCCATC  
A\_14\_P200174 CTGGTTGTGGTGTTTTCCAGCGAGGGAAGAAAAGAGTAATTTTTTCAAAGCATTATAGA  
A\_14\_P115830 TTATCTCCAATCACTAGATTACAGAAGTAAAGACTAAGAAGTGGAGACCCCTG  
CUST\_10045\_PI426210822 ATCATTCTCTCCACCCGAGACCAGCTTTCTCTATGTTTCCCTA  
CUST\_5091\_PI426210822  
ATCCAAATATTACGAGTGCAGATGCTGAAAGGAACAAAAGGAAATCTCACTCAGTC  
A\_14\_P102519 AACTGAGAAAAAGACAAATGAAATTAATAAATTTTAAACAACCTGGTTTATTTTGAA  
A\_14\_P123550 TTTCAGATTCATTGTGATTGGATTTTGGGTTGGTCTTGCAGTCTTCGTGATTTTTA  
A\_14\_P121294 TTTTCCTTTGCAGTCTCGAAGATATGACTCCAGGACCACTATATTTTCTCCAGAAG  
A\_14\_P124921 CTAAAAGAAAGCAGAAAATATACTGAGACTCATCAAAGACCATACGTATGTCCGCACTC  
A\_14\_P119025 ATATTCTTATCCAGGTCAACATACATAGGAAATGACTGACAAGATCTGGTAAGTTTGC  
A\_14\_P100130 CCCATAGTTCATCATTAAATGTGGATGTCAAATTTCTGAACATGCTGTGAGGAAATTGT  
A\_14\_P127026 ACTCCAGATCTTGCCAGTGTTTAGTTTTACCCATGAACTTTGTGTATGGTTGATGATAT  
CUST\_7162\_PI426210822 AATGCTCTACCTGCTTTCTGTATCGGCTTTCTAGCCAGTTGCAGTGTA  
A\_16\_P00685391  
TCACATTTTCATTTCAATTTCTAAAAATAACTTTGGAAGCAGAGATGTGCTGTTTTAGTCA  
A\_14\_P107962 GACATTTCTGAGGAGTGACAGGAATATTGTCACCTTTGCTGTGTGAGTTACTGA  
A\_14\_P121669 GCCCAACTTCCTTCTTACTACAGTCATATTAACAGATCACATCAATGACAAATGTCACT  
A\_18\_P16691447  
AAAAAACCAATGCATCAAGTCATACACAATTCCACAATGTGTTTTCAAGTTATGGCTTGC  
A\_16\_P02048033  
AAGGTGAGTCACTAAAACCTCAGAATCCTTTCTTTAGAAATTTCTAGCAACCCACAGTATCT  
A\_14\_P128816 GTCCCTTCTGCCAGTAATCCTTGATAGTAATTTCTTAGACCTATATTGGTCATAATCACT  
A\_14\_P113123 TTTCATTCAAGCAGTTCAGACTCACGATTTTAACTAGAGTAATCTGGGGTTTGTGCTT  
A\_14\_P136715 CTGGGGAGTAGAAGCAATAATGTATTTCTAATTTGTGGGTCCACTTCGGCTAT  
A\_14\_P123321 ATCAAAACGGTAAAACATCCAGAATTTCTCAGTCTCTGCGTTTGGTAGTTTCTCCT  
A\_14\_P110597 GACTCTCAGGCATGGTCTCACTCACTTTCTCTACTTGATGTCTCACT  
A\_14\_P133543 CTTGAATGTGATTTTAAATTTGGTTCGTTCTTGATTTTATCCTTGGAGGAACCTTCCTTGTG  
A\_16\_P17197826  
CACCCCTCTCAGAATTACTCATTGAATTACATATCTCAACATCTATTTTGACCACTCCTG  
A\_16\_P15013792  
AGCGATGATTAACACTTCTGAAATCTGGAATTACTGACTTTGACCTTTTCTTTATCGGC  
A\_16\_P00405428  
TAGTCCAGAAGTAAAGCGATATGATGTGGTTCTTTGATAAAAACCCCTTTTTTACACCAG  
A\_16\_P00368152  
AGCCCCTTCTAAAGTAACTAATCAGCATCTAACACATCTAAAGCCAACCTTTCAGTCATTT  
CUST\_7243\_PI426210822 GTTCAGAATGTCATTCCTCAGCCCCAGGGGACATAAGTACAAAG  
A\_14\_P133719 ACAATAGAATGTGACTAACTTAAAATTGTGGCTGTCAGACTAGACAGAAAATGGGCTTCT

A\_18\_P13384499

AACGGCCTTTTATCTTCTATCCTACTCACTTCACATCCTATGCTCTATAGAACTGGTTAT

A\_14\_P103893 AGATTATGGGATGTTTCGAGACAATAACACTGTGTATTATTGTTTATCTCCTGGTAACGCT

A\_14\_P128226 AACCTCAGAAACATCAGAAATTACCGACATCATTGGGGAAAGCCTTAGAAAAATCTATAA

A\_14\_P200532 CTCTTAAAGGCAGATCTTCACGGGGCTATTATTTTCAGGTAATTTACCTAAGAGCGTGTA

A\_14\_P102685

TGTAAGCAGAAGCCAAGAATGTCATTAGAAAAGTAAAACCTTAAACAAGAGGGACTGAATCC

A\_16\_P18003274

AGGCCAAAAAAAAGTTAATCTCTCCAGCAATTCTATACCCATAAATATCCCATACAGAAA

A\_14\_P106832 GAAAGGTAAGAAACAAAATCGGAATTAGAAAATGACTGTTGCCCTCTCTTTTCATTCTT

A\_14\_P101662 GACTTGGTAATCCACAGGCTCTGCATATCCCTCTTTAAACAGCATGAATACCAA

A\_14\_P133440 CGATCAGAATGCCAAATGTGTTTGCATGCTGGGTAAGAAGGCTTCTCATTTTAAATATA

A\_16\_P18089474

GCACTCCACTTGTGAGAATAACCAGTTAAATTTCTCAAGTCATAACTACCATTTATCCTC

A\_14\_P106671 GTTCTGAGTTAAGATTAAACAGTGTAAACTAGTTTAGTTTTGGTGGGGTTTTTTTCTCC

CUST\_4993\_PI426210822 TAATTTGGGGGTAACCTCCGTCTTCACCATTAATGGCCATTCTTCAAAGC

A\_14\_P112551 CTTGAGATGAGATCCAGTGCTGGCTTCCTCATCTTCTTGTCTAATGTAAAATTAGTTTT

A\_14\_P137211 AGAATGCTTTCCTAAAAAAATGTCCACTCTTACAATGCTGTCTGGGCTATTATTACACAG

A\_14\_P134142 GATATTGATGAGTCTCATCCAGAAATGGGTTAGGCATTTCAAGGAAATATCTACCATTCT

A\_14\_P132120 TGATTATGTGAATGATTTTACATGGCACATAAGGGAGAGAAAGACAAGATCAATGTCCAG

A\_16\_P15544604

AAATGTTGTTATCCCTATGTTAACCCTTCCAAAGAAACCTTTATTGTGATGACTCTGGC

A\_14\_P109418 TTAAGTAACTTGTCTTTCAGGCTGTTTGTGTTACCATAATGGTGGTTTGCATTTATTT

A\_18\_P22840342 ATGTCTTTTGGGGTATGCTGGCTGCTCACGTGGCTTTGTAGACATTA

A\_16\_P02391032

AAAAACCCAGTGTAATTACTTCCCATTATTGAACATGATGTCAATACTCTTCAGTGGCTC

A\_16\_P02311567

GCCTCCCATAAAATCAATTACATCTATTCTTTGCTTTAAATATCGATTTTCATCGTCCA

CUST\_1343\_PI426210822 AGTGACTTCTAAGTCCCCTTGTTC AACCTATCTTTTGGGTCTCAGATT

A\_14\_P131933 AAAGAGAAGGGTCATCCAGAAAGAGGCATCTCCAGAAACAGGAAAT

A\_16\_P16215274

TATCTAGTGCCTTTCCAATTCCATAATCAACTACCTTTTTTATTACTGATTAGGCAGCCCA

CUST\_9632\_PI426210822 GAATCAAAGTGCTGGTTGCGAGGTGCCAATTACATGTTGAATTTTCATCTTCAA

A\_14\_P101965 CAGGGATATACACAGTCCTATCCAGTGTTTCAATCAAATCATTCTAATGTGTCAATCCAT

A\_14\_P134520 TATTGCAACCCTAAAATTTTATAATCAACTAAACTTTCCGCAAAGCAAGGGAGTGCCT

A\_14\_P110428 CTCTCTCACTTACCAATAGGAATATTGGGGGTAACCTTTTTTTTTTCCAGAGTTGTTGTTAG

A\_16\_P16878076

GACTCATTCTGCTTTATGCTCCATCTTACTTTTCAGGACACTCTATTCTACAACACTCTT

A\_14\_P114850 ACCCAGGGCTGACATCCTAATAAAAATAACTGTTGGATTAGAACTCCATAAATGAGTGG  
A\_16\_P18397997

AAAAACATTTTCCTTATTGTAAAACCTGCCTTCCATAAGAAAAACCTATGCTTGGAAACCCAG

A\_14\_P130022 CTGCAAACAAATATTTGAAAATTGCAGTTTGGATTGCGTTTTCCCCACATATTGGTAAAT

A\_14\_P114203 CTACTACACCACTTCTGACGCTGTCATTTCCACTGAGACCGTCTTCATT

CUST\_4873\_PI426210822

GTTTCCTTGTGAGATCAGACACATGAGCTAAACATTTAGGAAAACCTTACAGAAGCAA

A\_14\_P110739 TTTGGAAACATATCCTTCCTGTTTGTATGTTCAAAGGTCCTTTTCTGAAGTTATGATGGTA

A\_14\_P120603 AAATTTTTGTTTTGGCGCCACATTCTGAATCTTTTTGTATTTGTCACTATGCTGTCAA

A\_16\_P21639639

TTAAACATGTTTCCCGCTATGAGTTCTCAGAAATTTAAGAAATACACAAAGGAACCAGGT

A\_16\_P18446952

AGAGCCTTTTATGTTGACCAAAGTTTTAGAAATCCTATCTGTCCTTGAGATCTATGCAA

A\_16\_P40937468

AAATGATAGATTCATTTCTTTGTAAACCTGAAATTCCACCATAAAGGAAACCTAAACGGCT

CUST\_1592\_PI426210822 CCTGCTGAAATCCAGGCTTTGGGATTTAGAACCTGAGGGAAACAT

A\_14\_P131908 TATATGTGATATTTTAACAGAGACGTGATTGGCAGCAGATGGCTGATTAAGGAGGAACTA

A\_14\_P104027 CTCTGGAGATGCCACATGGAAAGAAACATTCTGGTTGGCAAGTATCTTCT

A\_14\_P101815 ATCAGTGTATCTTACTTCTTGAGTTCTAACTGAATGTCTGAGAACCTGTGTTCCACTAG

A\_14\_P104362 CGACATGTTTCTCCAGTGACACCTCCCAGAGAAGTTGTAAGTATAAAATGAAAAATTATT

A\_14\_P132847 TTTACCACATCATTTTCAACAACAAGGCACATTTTCTAGCATTAACACACACAGAAGGAT

A\_18\_P22840877 GTCTTTTCTGCTGTGTTCAATCTCCAGTAAAATATGTCAGCACCTTAACCACTGTC

A\_14\_P132125 TCAAGTCAAACATGATTCTCTGCATTGCAATTTGTTTTACTTTCGTTGCTTCTAGCCATT

A\_14\_P114806 AAGTCAAAGTCAATTTCAATTGCCAGTTTATTTTGGCAGTGTGTAAGATACCTATGAGTAG

A\_16\_P00685589 ATTAAGATGAATGACCTCATTGTGTGAGGTGTGCTCGAATCTGCTGAATTCCT

A\_14\_P103313 TTTAACAGTGGTGGTCTCTGCGTCAGAGTCAAAGATATGATTTTATTCATTTTGTCTCTG

A\_14\_P125422 ATGCATAAGCAAGAGTGCATCTTCAGATTCCAAAGCCACATACAGCATAAACTGGTAT

A\_16\_P15683473

AAGGAAAGGCAAATTAGACACTGTATCTCTACTCAAATTCACTTAGAATACCCGACATCC

A\_14\_P129740 CTAGAATGCTTGCTGGATTGAAAGGGAGTGCCTATCTATATTTAGCAAGAGACTATTA

CUST\_9396\_PI426210822

CTTCATTTAAGAGCAAAGAAAGAGTTAAAAGCAACTCATATGAAGGGTTTGGAGGGTTGTG

A\_14\_P135357 CTTATTAATATTTTAATCTGCATCCTGTGACCCATGAAAATCTCTAACCCGTGCTTTCCA

A\_16\_P18486587

AAGTCATCAAAGTCATCATCAAAAACATGCTAAAAGTCACTACTCAAAGATTGCTCCCTC

CUST\_9506\_PI426210822

AATGAAGTTCTACAATCTGTTGTTCTCAATTTTCTGGCAGGAAAAAAAAAATCTTTTCT

A\_16\_P01412483

ACACATCACTTTTCATCACTACGTAAATCAAAGCCATCATTTCATGTTACATTGCTAAGGCT  
A\_14\_P130301 TACGGATGTTGCAGATGTTTTACTTCAAGCAGGGGCTGATTTAGTAAGATATTTTTAATT  
A\_16\_P15969210

GACAATCGTCCAAATTAGTCTTAAACTCTTTCCACCTATCTAACTTGCAAGGATTCCATT  
A\_16\_P01388843

AAAATCGAACATGAGGATTAACCCCTCTCTTACTACATAAGAATTTTTACACGCTCACA  
A\_14\_P133244

AAGGGGCTTTTCCATAAGAACCAAAGAGCAAAAAGAAAGAGCATCTAGGTAAAATTCAAT  
A\_14\_P124193 AATGTGCTCTCATTGTCCGCAGGGAGGTTATTTTGCATATTCTTGTTTCTTATATAACAA  
CUST\_9715\_PI426210822 AGAAGGTTGCCAGTCCATCAAAGGCTTTCCTAGATGCTAGTTATACC  
A\_14\_P126497 AAGAGGGTTGCAGGAATTTTTTTTTTTTAAACAACAAATCAATGGTATGTGTCCCAATCTC  
CUST\_1366\_PI426210822

CATCTCAGGTCTAGACAAGCAAAATCAAGTTGTATTTTTAAGTTTTTTAGATACGAGTAT  
A\_18\_P22839417 GTTGGAGCCTTCATGTCCGACAGCGTGGTTCTTCTCAGGTGAGAG  
A\_16\_P35549209

ACTAAGCCATTCATACCACAATCATTGGGATAAATACATGACATCCAGGAGAATGAAATG  
A\_14\_P109985 ATAGACAGTGCCACTAAAATATCGATTAAACTGCTGATTCTAGAGTGAGCAATAGGGAGA  
A\_14\_P118751 ACAACAGGGTAACTTCTTGACATACTGAACATGAGCCTATTCATGTTAAATATGCTTGGA  
CUST\_919\_PI426210822 CTGCTGCTCAGACTTTGGAGGACAACCTCAAAATGTTCAAGTCTAATGTGCG  
A\_14\_P134656 ACAGTCCTAACATACCTTTGAAGAGGCACAGTTTCTTCTCTGCTTTGATCATG  
A\_14\_P122635

GAGGATAGGAACTTCAGGAGGAAAATAAAGAGAGAGCAGAAGAAGTAAGATTATTTGGT  
A\_16\_P19221069

CACATGGATTGCTAAAAAGAAAATATGGTCCTAGATCTCTTCATCAAGACAGCAAACTGA  
A\_14\_P117908 TTTTTCAATCAAGGGAAGTGGCATGTATGGTTAATATAAAAGTGTAAGTTCGGACTGACTTG  
CUST\_9825\_PI426210822 AATGGACAAGGATGGAAGGGCATTTCAGGAGGCAAGAGCAGCCTG  
A\_14\_P116505 CATAAACTAATGGAATTGAAAGCCACTATTTGGAAGCAGAGTTTACAGACCACTTACCAA  
CUST\_1788\_PI426210822

CTGTCTTTGCTTGTGTAGATGACAATTACAAGACTCTTTTCTTTAATTTATGCCCTAAAT  
A\_14\_P130637 CAGAACTTACCACATAAAATGAGTTACCCTGGGGCTTAAACTTAAACCATATAAACCTGT  
A\_14\_P136559 CACTATATCCTCATTCTGTGTTTCTGTGTACACATTCTCTGGCTCATTTATTTACTTAA  
CUST\_6133\_PI426210822 GAGAGGAGGTAGATGGGCAAAAATCCACCAGCAAAGATAGCTGC  
A\_14\_P132839

CATGGAACGCTGAAGTCTCTGAAAGTGAAGTTGTAAAAAGAAAAGGAATGAAATAACCGA  
A\_16\_P41137901

TACCATTTGTATGCCGTTTGTATGTTTTGTAAAGCCAAAAAATGTTGTTGAGGTGCTG  
CUST\_5369\_PI426210822 AGATGCTTGGACTGGATGGATACCTAAGTACCCCAAACTGGCAG  
A\_14\_P134292 CATGCAGATCCAGAGTTTCTGCAACCTGCAGTGGTTCAAGAGTAAGAAT

A\_14\_P107173 GTCTGGGAATCCCAGAGAAATTAGTCCTGAATTGAGTAAGTTTGAAGTCAAAAATAGACT  
CUST\_9966\_PI426210822

AACTGCAACTTCCTGACACCAAAGTCCATACTTCTCTAGAATTACAAATTCAGATGTAG

A\_14\_P124971 AGAATGAGTCATTTCCAGTTATCACCATGATTACCTTTTAATTTATCTTTAATGTTTTCT  
CUST\_5917\_PI426210822

AAATAACCTGGAACCTACATTTTGGGGAAAAAACTCACGAACATGAGCAGTGAC

A\_16\_P21431115

AAAAAGAAAGTGAGCATCTCCTAGAATATTACAGTGGAAGTATCCAACATTGAAGGCAGA

A\_14\_P123266 AAAAAGTGTTCCTATTGTTGGAAAAAATTAAAGGAGAAAAGACCTCAGGTTAACCGCTTT

A\_14\_P131223 CATATGTCTCAGGGCACAGCAAATCAGAAGGTCTATACTGACCCTGAAGAAAA

A\_18\_P16274532

CTGCAAGTAATATGAAAACCAATCCCTAAAGTATGCTAAATAATATAACCCATGCCTGCCA

A\_14\_P137827 CTCTTTGTGAAGTCTATAGGTCATGACAGGTTTCAGAAAGATTCCTGAAATGAATGAAAAT

A\_14\_P124720 CTGGGATAAGAAAGAATAGCAGCCCTATAAGTAAAGCAACAGTTGAATCTGTAGCAAAAC

A\_16\_P01455604

CTTTCCAGTAGAGCATTACAGATCAGTTAACAGTCTTCAAAGTGGGTTACATCAATGA

A\_14\_P105617 CTATGAAAATAATACCAATCTCTTAAATTCATAAAACAAAATTAATACCATTAGGTA

A\_16\_P03601932

TGCTAGTGTATCAACATTTGGAAAATGCAGAAAATTAGAGAAAGGAAAGTAGGGACTCC

A\_14\_P131372 GGAAACACAATAAAGGTGGCATAACGAAGGAAAGGCTGGTAGCAGAGTTTTT

A\_14\_P132030 CCTTTTGTGAATCAACCATTCCTGACTTGTAAGTGAACATCGTTCTGCTTTTTTAAAAAT

A\_18\_P12877138

ACACTTTTCATACGCTTATTCAAAGTATGGCTATTTTTGTCCACTATTCCCATGTTCTT

A\_14\_P109135 CTATACCTTTTTTTGAATCATTTCATCTCTTACTAATTTAGCAGGGTTGACAGCAATCT

A\_14\_P104874 GGTATGAGTTAATGAAATATTGATGCAGAAATTTCAATGAAGCAGGCCTGGAACACACTA

CUST\_7207\_PI426210822

AACCTGTAATTGCTTTCTGACATTTGAGCAAAAGCATCAGTAGCTCTTCTCATGAC

A\_14\_P136260 AGAACTTGATATACAGAGATGTAACCTGAGAACTTCTTAATAGGACGACCAGGAAACA

A\_14\_P123448 CTTAGTTTTTCGCGAGATAACGGTTCGAAAACGCGCTCTTGTCGATTTT

CUST\_6177\_PI426210822

ACACCCAACATTCTCCAGTACTATGATAACTATTCTCTATTGCATTCGTCTGGACC

A\_14\_P114953 CTCCTTGCATATCAGTTGTTGCACTTCCACGTAAGTCACTACGTATTAAGAGCCATA

A\_16\_P33138531

ACTGGCATTCCTCTCTTTAAAATTTCTACCGAACTTAATGGAATGGAAAAAGCAAACCTCA

CUST\_4311\_PI426210822

TGTGCTCATGCTTTCCCTTGAATCTAGATAACCTGTAACCTTCTGTTACAGAATGAGAT

A\_14\_P113773 TTTGAAGGGGATCTTGTCTCTTGAAGGCTTATGTTACTAAGTCTAAAATCCTGTTTCCA

A\_14\_P137914 GTTGTATCTCCTTCATGCAGTTTTTTTTTAATGGAAAGTAAAGAACTGGTGTGTTGGAGT

A\_16\_P17131976

GGTGGTGGCTTTTTAAATACAGACAAACACATGATTATGGTATCTCCTGAAACTGACATT

A\_14\_P125823 CAACTTAAATGTCGCATTAGGTATCCAAAGAGCACAGGTTATAATTCATGTTTTACATG

CUST\_1474\_PI426210822 TTTCTCGCACACGAGGGGAGGAAGTCTGCTGGGGCACTGGGCAGC

CUST\_4701\_PI426210822 CCTGGGGGAGGGGATGGTGCCAGGGAGCTCTAATTGTATTTTGCT

A\_18\_P22839782 GTTAATGGGCATATTGCTGGCTCAGTTGATACCTCATGATGGCATGAGGTTTAAAT

A\_14\_P138956 GTCTCTCCTTTTGTCTTTCTCCATCTTCTCTCTTACCTCTCAAAAATTATCAATAA

A\_14\_P107230 TAGAGACTTTTGATGATTAGTGTGCTAAATGAGGCAAGAGTTCTAATTCAGTGCTACCAG

A\_16\_P01155836

TGTGATCTTCTACTCCCAATTTTTTAAGAGTTGCATCTCTATTGAGAACACCTATTCCGT

A\_18\_P22841895 TCTAATGTCTGTGAGGGTGGAAACACCTAACCTAGAATTTCCCTGTGGAT

A\_16\_P16302497

AAAAACA AAAATCTGTGATCATCAGTAGCATACTGCAGCATTAAAAAGGACAGATCCCTG

A\_16\_P00416472

ATGTTACA ACTCTGATTTACTTCCATTACCTCCATGAAACTTTTAGCAACACCTTGATGC

A\_14\_P115909

ACTTATTA AAAATTCCAAAACAAAACATGAAAGAGAAAAAAAAGAGGACTGAGGACCGGC

CUST\_9538\_PI426210822 AAGCACACTGATAACCCCAATATACCCACAATTCACACTTTTTTCCTTCTCTGA

A\_14\_P112571 TACAACATAATTTCTATAACCTGAGGGGACTCGCACATCATTACCTGATTGCTTGCT

A\_14\_P117241 GCTGCAGAGCCTGGTCATTTTAGTCCTCTGTCCACTTGTGAATCTG

A\_14\_P125757 ACTCCAGACTGATTA AAAATAAAGAGCATTATATTGAGTGCCTCTCTTGAGCAGGCATT

A\_14\_P121404 GCCAGGCTGTGAAAGCATTGTGAAGATTTGGACAGTTTTTAAAGTAGGTTTTTACTT

CUST\_2843\_PI426210822

TGAAGCAGAGAAGAAGAAACCAAGATGCAAGTTAGAGCAAGAGTGATTGAGAG

CUST\_2846\_PI426210822 TAGAGCAA ACTCTGATTTGAAGGTTTCATGAGCTGAGCGCAGAGGAG

A\_14\_P126130 GTCATTCTAAGAAAGTGATGTCTGCTTTTGTGTTAGCACAGATCGAACAATGGAAAATCA

A\_14\_P111239 AGAAAGTTGTTATTCAAAGGCTCTGAAGTTTTCTCTTGAGAGTCCTGGGTTTTATTAA

A\_14\_P127820 TTCTACTAACTATTATTCATGCTTTTCACCTGCTAATTTTACAATTCCAGCAATCCAGA

A\_14\_P126460 CTGCTTACAATCCAGAGGGA ACTTGTTACCATCCATTACCACCC

A\_14\_P132558 CTAGAAATCCGTCAAGAAAGGAATTA CTCAATTTGTTTCTGTTTGTTCACAACATATGA

A\_16\_P02722916

ATTTGAGTCCTTCTATTAAAAGAATTTTCTAAACCATATTCATATGCCACCACCAT

CUST\_976\_PI426210822

GAAGCCAAGGGCTTTGCTAAGTCCAAA ACTTAGCAAAAACAAAACATAACTGATTT

CUST\_7074\_PI426210822

GCTGAGATTACA ACTTTCTTTTTTCATTA ACTATTAGTACTTAAAATATTGACATGCTAAG

A\_16\_P00828290

GATAGCCCCAACTCATAAAGATATGCCAAGATATGCCTAATGAGAAGACTATGTAATGCA

A\_14\_P117179 TGTCCCTACTTGGTCTCTAGTTGGAGAAATGATAGAAAAATGCAAAACAACCTTATAGGGA  
A\_14\_P102080 TAACCATCACAGGAGACATGTATGTATGTGTGTGGAACCTCTGACGTGTATTTTAACTTT  
A\_18\_P12832262  
ACAAGGTATGCCACTTTAAACAATGGATCTTGTATCTGGAACCTGAAGTAAGTAAACAGAC  
A\_14\_P127351 AAATTCTGTATACTTTTCATTGCTTCCACAATTTTCTCTCCTCCCATTATAGGCTAAGAG  
A\_14\_P127276 TTTAAGGAAAGATCGGTGAGACTATTAGCCTGCATCTTTCAAGAAAGACTGCTTAGATTT  
A\_14\_P136213 CAGCATTTATGGACACATGTCTGTCAAATTCCATCCCAAAGACTTTAAATTCAGTAGTGT  
A\_14\_P113149 AACTACAGGAACATCTTCGTTTCATCTCTGTCTCCCACTTGTGAGATGTT  
CUST\_5376\_PI426210822 CTTCTTTGAACACAGTGCTACTCTGCTCCAAACGCCCCCAAACCTT  
A\_14\_P109034 TTGCCAGTTTTTTGGATATAATCATCTCAGTTCTAAAAAGTGTCTATGGCATGTCTTGC  
A\_16\_P02028444 GTAAATCTGGTTTTACGGTCTTAAACCCCTTACTGAGACTACCTCTTTCGCAACTTTT  
A\_14\_P114830 CTCAAATCACACAGCACCTTGTTAGTAGAATCTTTTTTATTTCAGAAAAAAAAAACCCCAA  
A\_14\_P134943 AAGCAAATGGGCTTTGAATAATTGCCAATAAGAAAAGGGCTTGCTATATTCCAGAAATTG  
A\_14\_P118980 AGCAATGAGAAATCTAGGTTGGACAGATCATTTCACCTCGAGAGCCAATAATATGAAATA  
CUST\_9491\_PI426210822 AAAATCACTGGGCATATTGCCTTCCATTATAGGACTAGACTGTGGGATCC  
A\_14\_P111611 AGGGAAGATGGAAAAGAGGCAGGATTATAGGCTGAAGGGCTTTCATTTTAGAAAATAA  
A\_14\_P101072 AGAATTGAATGAGAACTGAAGCAAGCCACAGTCATAATTCAAGGGAAATGTATAAACCT  
A\_14\_P113628 GATGAGGTAGCACATTAATTGCTTCTGGAAATGTGATGCTTTTAATGTAGTGGTTTTCGA  
CUST\_952\_PI426210822 GTTCTTCCCTCACAGCCGAACTCATTTGGAGAGATTGATGGAGTT  
A\_14\_P139042 TCTCTATGTGTTCCAATTCATTCTTCCAACCTGTTTCATATGGCCCATGTATGTAGAAATG  
A\_16\_P16191786  
TGTGCTTTTCATCACTGTGTTTTTAAAAATGTAACTGATGATTTCCCTGATCCTGAGAGT  
CUST\_3491\_PI426210822 AAGGCACTAGTCACACAGATCAAGCCACACAGCCAAATGGAAATACAAAT  
A\_18\_P15338150  
AAATGGTTCCAAGGGCATAGTAGTATGTGATAAACTTATTGATCACCAGATGTCACTCTT  
CUST\_7056\_PI426210822 GACACTCACTGACCACCTAGAAACCAGAGACCCAGAAACCCAAAG  
CUST\_7683\_PI426210822 CTCTGCTCAGGGATCAACAGGAGTGCTTGCTTATGTGGCTTCATT  
A\_14\_P200172 TTGCATCCTTTTATTTTCTCTTGACTGGATTTCTTGAATCTCCTCTCTCTTTTTCTTAG  
A\_14\_P110832 CTTGTAAAGGGCAGAGTTGCAAGTTATACATAACAACCATACATAACAAATGCAGGATG  
A\_14\_P134464 GTAGAGTTCAGGATGGGTGACATTCAGGTCCTATTGTTTTTGGAGTCAAGGTTT  
A\_16\_P19533020  
TGGTTGTGGTGAATAAAGTAGATGTATCAACAAAAGCACACTATATAAAGGACTGGGCT  
A\_14\_P120577 TGCAAGGTCTAACATGTAATGCTGGTTTAGAGATCCTGGTTTAGAGACAATTCTAGTATG  
A\_14\_P120203  
CATTACAAAAAACAACAAAGAAGACAAGGCCACAGGAATCAATTCACATTCATCAGG  
A\_14\_P201260 AGTGTATTATAGAGGCTAAGAATGATAACTCTATGAAGGTTTATTATGAGATTCCCATAT  
CUST\_5648\_PI426210822 AGGCCCGTGGGTGGGCTCCCGGTGGGACGCAATGGCACCATCTT  
A\_16\_P16458703

ACCCTCTACAGGTGCTATATGACATAGACATACACTTACTGTTTTGATCAATACTGGGTA  
A\_14\_P111771 AATGTCCATAGTATTTGCTCCTTCACTTACCACGAAACAGTCTCTAGGTAGTTGTTCTT  
A\_14\_P132289 AATGATGCTCACCGATACTGATATGTCTCATTCTTCTCTTAACACTGGAGTCAAACAA  
A\_18\_P14806828  
AAATGACATTGTTTCCAATCAGATGAGTAACACTGCAAAATAACATTGTCCATATGGGC  
A\_16\_P18616308 ACATTAGTCCTGGAGTTAGGAAGACCTCAAGGGAAAGCAAGAAGTC  
A\_14\_P111322 ATTTTGCTTAGGTCAAGGCTACTTTTTAAAAAGGGAGTGACTTTCATGAAGTCAGTTTGA  
A\_14\_P133711 CTAAGTCTTTCGCATAGTCTTCTTCAATCTTTATCCTGCAAAGAGAGAAAACCCAACACA  
A\_16\_P58424215 GGACCTTGTTCAATGCAGATCCTGATACAGCAGATCTGAGGTGAATTTCTA  
CUST\_2242\_PI426210822 AGCACGCTGCTCTGTTTCAGAGGGGCAGCCTGCTCGCTGACTGTC  
A\_14\_P130327 TTTTCATAATGGGAAATTCTCTTGTGTTTTTTGTGGTGTGTCACTAACTAACCAGATCCAC  
A\_14\_P135432 ACCATTTTGCTTTTCTGGCTTCTTGCATTTGCATGGCTTTTCTGCTATTAATACATAGT  
A\_16\_P16677154  
TGGTAAAAAAAAAACCCACTACGTATGACTCTAACCTGATACTTGCTCTCTAATGGCTC  
A\_14\_P137247 CTCAGCCCTGGATTTATATGTCTCTTTGCTATGCCATCATAGCAGTATAAATGGTTAGTG  
A\_16\_P18217803  
AAAACCTATGGTCTGAGGTCTAATTTTATCCATGACAACATGACACTTCAGGACACTAACT  
A\_14\_P106974 AAGTATTATGTAATAACAGAAAGTTGTTTTTTTTCTTTTTCCCCACATCACTGCCCCACTT  
A\_14\_P108730 TGTCTAAAAGCACATTTTTTCTTGGCTTCTGAAATCTAGAAGCATCCTATAGCCTTTGTCT  
A\_14\_P128555 ATACTTGAACAATGTAAATCTGCGATGGATTACCTTCTTAGTTCTGCTCTTGTGATGAGA  
A\_14\_P201001 ACATATAGCATATGAGTAACACAAATTCCTACTTTGGGAGTTAAAGCATAGGAAGTTGCCA  
A\_14\_P120635 AAATATGTAAGGCATGTTTTTTTTAGGGTGATGGTTTTCTGATCCAGGCTTTCTGTTAGAA  
A\_14\_P137829 ACAAATCTTTCTTCTATCCCCCAAAAACTAGGGGAAATATTTTAAATTGTGAGTGTG  
A\_14\_P127628 CTGTATTTGAACTAGAAATAAAACAGTCCTCATCACCTAAGCAATAGTTGTTCACTGGGT  
A\_14\_P201414 CTAATGAAGATGTAAAGGAGTGGCTACTCTATGGCTACTACCTATCTATGCATAAAACCC  
A\_14\_P117926 TATATTTTCATTACCTGTGAAACTAGTCAATCTTTCCCGTTTATAGGATGGTTCTTCCAG  
A\_14\_P202563 GTCATTAGTTCTAGCCATAATTCTCTCAGTGTGTAGTGTGGTGATTTGACAACAAAAAG  
A\_14\_P101223 AACATCAGGAGAAGGAACTATGAGTTTCATGTAAGTTTCCTTTTTGGCTTGATTTACCAA  
A\_14\_P118974 ACATAGAGACAGTAGGAACGCAGCAAAACAGGACCTACAAGGAAACAACCTC  
A\_14\_P115326 TCGACCTAGTGGTTTTCTACTCTCACCGACTTATTCTGATTTTCAGAAATAAAATGAAATGT  
A\_16\_P01671421  
AAGTCAGTAAGCATCCAGTCATCAAGTAGAAAATAGGTCACTTTTTCATGGTAAGCATTCA  
A\_14\_P113852 CTGGGTCAATTACCCTTATCTATCATGTTTCCATGTAACTTCAATGGGTTATTTGAATCA  
A\_14\_P111904 ATGTAATACAGTCGGACTTTGCTTGCATGTTTTCGACTCTGGGAAGGAAAAG  
A\_14\_P106858 CTTTGTGGTTCAGTGAGATGAGAAATCAGTCTCCCTCATTAAGATTTAATTCAGAAATTC  
A\_16\_P16601986  
AAAACCCTGCCAGTAATTAATGCATCTCACAAATAAAGTGTACGAATAAACTTAGCA  
A\_14\_P110324 GCTAATGGTGGAAACAACTGATGTTACAACATCTCCTATGATGTATTTCCACAAGTATT



A\_14\_P101301 CTCTACTTGGTGAAAAAGTAGGTGGCTCTGAAAAGAACCTTTTTGGTTTGGAC

A\_16\_P36668815

AAATACCAGGATATCAAACCAAGTAGCAATTACCAAAAACATTTTTCTGATACCTCCCCA

A\_18\_P22606618

TTTATTCTGGATTGTGTATTTTCCTGTAGGATCATAAAGACTTTCCTTACCCTGATTCCC

A\_14\_P137655 CAACATTAATCCTTCAGACACCCCAATATCCTGCGCCTGTATAACTATTTCCATGAT

A\_16\_P20589443

ACTTTGTTGCATAACTCCCAACATTATTAGTAAATGCTCATGGTTAAATTGCCCTGTCTC

A\_14\_P104941 ATGTTCTGCTCCCTCAAAGCATCTATATGACTCCGGAGTTTTCCATGAACAT

A\_14\_P103463 GGAAATAATCCAGGGGAAGGCAGCAATACAGGCATTATTAACATGTGAGTTATTTACAAA

A\_14\_P117325 ACCTAAATACTGAAGGCATTTTTATGCAGATTGACTGAAACCTGAATCAAATTGGAAGGA

A\_14\_P139160 GAAAGAAGGTAGACAATTTAGCAATAAGCCAATGCAGATTTGTCCAGAACATGAATGAAG

A\_16\_P00007114

CACCCCCATTCTAAATCTTGAATCTTAAAAAGAAAAAGCCTCTGATTAATCCTTTCCCA

A\_14\_P112806 TGGCGAGTATCAATGAAAACCCAGGGAAAATAATTTCAATCTGTTGTCTTTCCCTCAA

A\_16\_P00233016

ATTAACCCATGAGATGTGCATAGAAGGTGTCTTCCATTTTATAAACTGACAGGTGACATT

CUST\_10129\_PI426210822 ATGCTTGGCGGCAGCAGGCCCTGGCTCTGACACAAAATCCACAAT

CUST\_8583\_PI426210822 CTGGTGGCATTCCCTCCCCACCCCACTCTCAGCCACCACCATTC

A\_16\_P00713190

TGGCGTATAAACCTGATTAGAACCATAACATCATAACCCATTTTAAGTTGTATCTGCACAC

CUST\_963\_PI426210822

TTGACACTTTGATCTCTGACCTCCAGAATGCTTTTAGTTTAGTATGAAATGCAATATTT

A\_16\_P21244968

TGAACACAGTATACATCACGCTAATCCATTACTATCAATCATAGGTTTCAAGGTAGGCAA

A\_14\_P133524 ATGAAATCTCAACTTACCTCTACAATAAACGCTTTCCTCTCAGATTCACCTTTCTATTTGT

A\_16\_P17192352

AAAAATCTGAGATGTAGAATCGATATGATCTAGTGGCTAACAGGTCCTCTTAATTGCTGG

A\_18\_P22842461

ACAATAGTAAGCAAATGTAAAAAAAAGTATTGCCATGGTAAATGCATAATTTAAAAGATT

A\_14\_P200583 GTTTGGATCTTTGCTGAGCAGTCCCATCGGATTTTTCTTTATTAATAGGATTGTGTTTT

A\_14\_P200473 AAAACAAGGAAAAGGGTGAGGAAATTCTGAAATGATAAACCTCCATGAGTTTCACTAT

A\_18\_P14169858

GGATCCAGTTTCTTGAACGATTTATTACAGGCAACAACTAAATGTTTTTTTTCACAGTCT

A\_16\_P19419715

GGAATTGGAATGAGACAACCTGCTAGTGATAAACTCATGCTATCCTCAGAATCACTTTTTTT

A\_14\_P129275 CAGACTACTGTGCTTAAAAACATGGGATCCTTCAGGCCCATGATCAAGTT

A\_14\_P104892 GCCAGGAAAGAAGAAGCTTTCTGCATTTGACAGATAAAGATGGTGAACAACCTCAAAT

A\_14\_P127285 ACAGAGGAGATCTTAGAATTTTGAGGAAAATCTGGGACTTGAGACCTGGATTCTAA

A\_16\_P00940363

CTCCTTTAACCTCCTTTACATGACAAAATTTCCACTTACAAGTTAATCAAAACCCTGACC

A\_14\_P202556 ACCTGACCCCAATACCTTATCTATATTGAGATTGTTTCATTAGATCCAAAACATCTTGTGC

A\_16\_P39528417

CACACAACCTCAATCTTAACTCAATGTCAGTCACATTCTACAACTTGACACAATTCTCT

A\_16\_P18834566

AGGGTCAAGTTATCTTCCATCTAGTCAAACAGCATTGTGTTTTTACATCAAGAATGTTGG

A\_18\_P22841636

TTTACTTCAAGTTGTGACCTTCCAGATCCGAACCTTAGAGTTTCTGTATGTGATTTCAA

CUST\_6687\_PI426210822 AAACCTTGACAAAGCATCAGGCTCTTCGGGACGTGGTGAGTGTTAG

A\_14\_P202026 TTAAATTACATACCTGCCTTCATTTAGGGTTTGAGATAAATGTCCGGTAGCAATCTGCA

A\_14\_P137562 CAAGGACATATCTTGTATTTCAACATCAGGCGAGAACCACTGTCTCTGATCAAC

A\_16\_P19282615

TTTAACCCAAAAAATTGCTTCAGGAAAATACATCTGTCAGAATATGTCTCTTGCTCGCC

A\_14\_P127076 TCAAGATGGTTCATATTGGGAAGGAGACAGTATTTTAAGCCATTTTCCTGTTTCAAGAAT

A\_18\_P13105171

GCTCAGTGGTATGATATGATAAGTTGTGCAGAGAATTGACTTTTTGATTAATTCAGCCACA

A\_14\_P138233 GTTGCTGAACAAAAGTATCAGTCTACCTTGTGGTAAGTTTCCTTATCATAGGAGAGGAG

A\_16\_P17840605

ACTCTCAATCTTTTTGTACCCGAAGTAATTAGATTACATTACCAAATAGTTGCCCAAAGA

A\_14\_P137941 GAAAAATCTCTAACCTTAGTGAGATGAATTTTGTAAGTTCAGTGAATTCCTTCCATGCA

A\_14\_P102637 CTGTTTCTATGACACCTTTAGCACATTTCTCCTTTCTATTAAGTCTCTTCCTTCCTTCTG

A\_14\_P138640 AAATAGTGGTGGTTCATCTACATCCCCAACAAATGATCTTCAGCATAGTAGCATCTTTAAA

CUST\_193\_PI426210822 TATTGTTATGAACAACAACAGCCGGCGTTTACTGAGCACTGCTCCTAC

A\_14\_P123222 ACTTTGGGGACAGTTACTGTAAATTCATACATGTTTTGACACATCCTTCTGTTTTGCTT

A\_18\_P15082822

CCCTTACCTCAAAAATCTATCCATATCAAATCAAGAAAAATATCCATTGAACGTCTCTCA

CUST\_4131\_PI426210822 TTAGGGAGTTCCCTTCCTTTTACCCATCTTTTTCTCCCATGGCTT

A\_14\_P132723 CACATGGCCTGTATTCCCTTGTGCTAAAATTAATTTGTAAGATTGTCCACATTTTTCTT

A\_16\_P03719723

ACTTGGCTAAGGAGTAAAGTTTGAAAGAATCATGTCTCAGGAATTTTAAAGCACTCACTG

A\_16\_P39073069

TATTGCCATCACAACTATCTTTACATGTTCCATTCTAATCAGGTTTCCAATGCAACTG

A\_14\_P106096 TTTACAATTTCAATTTACAGCAAGCCCTTCTTGGTAGTTTCTTTGTGTGATTGATGCTGAA

A\_14\_P118073 GTGTGTGTGTGCTAATAATCCACACGCACTGCAGTAGAATATGGATCAGCAAAAAA

A\_18\_P15535921

AAAAAGATGCCATTGGTTAGAAATTCTCTCAATTTTCTGCTACCAATCTATGAACCTGCC

A\_16\_P21200626

AGTTCTCAGCCCAAGTTAAATGACTATCCTATTGGTTCTCTTACAGATTATCCATTCTGG

A\_14\_P136648 GTAATGCTAAGACCAGTGATGATGGCTCTAGCCCTGATGAGAAATATCCTGATC

A\_16\_P15842535

CTCTTGATTCCCTATGAAGTCATTCTCCCTTATTGACCAACATCATAACCTTACCACATC

A\_14\_P102951 CTAAGCCTGATCTCCTGTAAAAACATCATTTCCCTGATGGACGTATCCTTCCAAATATTT

A\_14\_P139372 GGATAACATTTATTTTGAATACAGCCATGCTTTCAGGCAGTTACAGAGTTTTATGCAA

A\_18\_P10923027

AGCAAGGAAAGATCTGATAATGTGGCAATAACAATACTACTACATTTTACAGTCAGTGGCA

A\_14\_P110849 ACCCTCAGTCATTGTTTTCCGATTATTTTAGCAACAAATGAACAGATAAGTGACTTTCCA

A\_14\_P110447 AGTCTGTTCCCAGTATTCTAGAGGAGTATTTGCCATTTTGGACTCTATGATAAGAGGT

A\_18\_P22842448

CAAGATAGCAGAACTTGTCATTTCTAGTTTTTCCACAGGACCATAAAGCAAATTTGGTGC

A\_18\_P22839776 ATGTTTCTAAAGCCAATGGGGTGGAGGAAAGCGAGGGCATCCTTG

A\_14\_P122042 AGACACTAGACATTTCTACCAATCGTTTGCTAACTTTACCCGAGAGGCTTCACAT

A\_16\_P19505641

TGAAAGCATTCTCAACATACCAAACACTACAAACATATCAGCCATAAATTTCTGCAATCTCA

A\_16\_P01808431

CTTTCCCTTTGTAAGTTTTCTCTTTCCACAGAAAAACCTAATTTCTTAACCTCTACCGTG

CUST\_1566\_P1426210822 CAGGGAGCTGTGGGGTAGAGGAAGGAGGGTTTGAGCCAGGCTTCT

A\_14\_P134346 ACATTTTATAGTATCAGCATGGTCTGGATTTTGAGTCACCTTGTCTTATACTCTGAGGTT

A\_14\_P108270 ACATATTCCTAATGTTCACTTTCACGGCTGTGTTACACATTTTGGAAGAGAAGTTATGAG

A\_18\_P15354957

CACCTGATCACTTGCTACTAGAAAATACTCCAGACAAAATATCCTTATCAGTTGCCTAGA

A\_18\_P14131934 AAGATTTAGCAAAGGGAGCCAAGAAGGCAGCACTAGAGCATTTGTGGATAAT

A\_14\_P200039 GCTCCAACCTATCCCTCTGAGAGTAATGCTTACCTTAGTTATGTCTTTGCTATTTTCAA

CUST\_683\_P1426210822 AGGATTTGGGAAAAACCTTTCATCTGACCAGCTGATCAGAAGTTTTGAACTG

A\_16\_P19790207

AAAGTTTCAAATGTAAAGAACTACGAAAGTCTCTTCCTTATCCTACTCCAGACTCCAACCT

A\_14\_P133472 TTTTAAAATTGTTGCTATTTGCTGTAGTTCCCCTGTTATTCCTAAACTCTCAGGAAGCAC

A\_14\_P126180 GTTAAACCAAACCCAGGAGAAAACCTTTCGTTGACAGAAGGGCATT

CUST\_5520\_P1426210822 AGGCATGCAGAATAGCAAGCAGCCAGGCATCGCCTTCTCTAAAGT

A\_14\_P132033 AGGGCCTACTTTAATAGTTAATGGAGTAGATGCTAGCGTTTCGATGAACATTAGGAATTTT

A\_14\_P111617 GATGACATTAAGTTTTATAGTCCCTACCATGCTAACTCTAGGCCCAAATTTGTTGACTTT

A\_16\_P19917455

TGCATTCACCAAATAATTCCTTCATAATATAGCATTCCAATTGCCCATATCAGTTGTCC

A\_16\_P36248829

AGTCCAGTTTGTGTCAGTTATCAAAGTGAGTGCTTTAAACTCTATGTAACTTAGTGCCCC

A\_16\_P40649515

CTTCCTTCCAAATTACATCAGTTTCAAGAATATTCTCCGATCACTATCCCTGTTTTGTCT

A\_18\_P22843222

ATTCACCTACCTAATAAATAGGCATGAAAGTATATTTGCCACTACACAGGTGGAAGTCAC

A\_14\_P115836

AAAAATAGGACTGAAATCAGGAAAATAAAGAGAGCAGATCCCCAACAACTTCGACAAGAA

A\_18\_P14134273 GAAGATCATCACCAGGATTTGAGGGAATGCTGTGGTGCATACTTTGTGTT

A\_14\_P134044 CTTCTGGCTCCAGAACAGATCCCCTGGATCAGAAAGAAAGAAAAACA

A\_14\_P102540 ACAATACTTTTCCTTTTACAAAGGGCTTTGGTAATCCTCACCTCATATGGACTTAAAGTT

A\_14\_P106898 AGATCTTTGGCTTACCCTTACCAATGGTGTCTGCATCTCACTCATATGT

A\_14\_P138637 TATAATGAACTACACTTCTCATTAGGTCTTCACAGGGATCTTCACAGCAGAAATGTTTC

A\_16\_P00924534

GCACCTCTTTTAACTAACCCGTCAAACCTAATAATTGGCCAACTATGACAATTACATCA

A\_14\_P202531 CTTGTCTTCTCAAATAGTGATCGGCATATAATTACAATATAAGTTGTATGTGAAGTGGTC

CUST\_795\_PI426210822 CCCACCCGTGGTTGGGTGAATACTTAGCCATCTGCCTCCTATTTT

A\_14\_P100948 GAGAATTTACAGGGTGCAGTATACAGAAACAGAGCCGTATCATAATTACCGAGTAAGTATG

A\_18\_P23776966

GGATTTTCAGATGCCCTAAACATAGTCCAAACCTCATTATCAGTGCTTTTATAGATGAGG

A\_14\_P139568 GTAATTACAAAGGATTCTTATCTTGTCTTTGGATGTTTCTCAGGGACTGGTTTTGGAAA

A\_14\_P129517 TACCTCTTCTTCTTCGAGTAGAATGAGCCGAACCACAACAATGTGAATTGCATT

A\_16\_P00685413 TATGTTCTAGTCCGGATCTGCATTTCTGGTAGAACTAGTCTGTCTGCAGC

A\_14\_P131662 TATAAAAGCAACTTCTTACCTGTCTGTCCATATGCAAAAATACACGCATTATACCCCTGA

A\_16\_P19757734

TCTACTGCTTTCAGTTATATACCCAATGTGTCCGATAATGTTTCTACCTCAGATTATGCC

A\_14\_P138813 CTCTGTTTTCTTCTTTCCAAAACCTGTGCACCCCTGGATGAAAGTAAGTTATGTG

A\_16\_P30952548 ATAAGAGGCTCCAGCATCATGATTCATTCTTGAGAATGACTCCTCTGACAGG

CUST\_10106\_PI426210822 TTGCATAAACGTGAATCGTGACATGGTACTGAAAGCTGAGCAGAGCAG

A\_18\_P22839803

TTTGTTTAACTGGTGTCCCATGCAGTCTATTTAATTTACAGACTCTTATTTACCCCAGTC

CUST\_6118\_PI426210822 GATGAGAGCTCCATCCATGAAAACCAGTCTTCCAGAGGAGGATCC

A\_14\_P135305 AACCTCCAAAATTAATAAAGGGTAAGGCCAATGCATAGCGTAACCTATATGTTTGCTAA

A\_14\_P119364 ACCAGAAAATGCTAGTTACCGATTTGGAATACGCTTTAGACAAGAAAGTAGAACAGGATC

A\_14\_P117951 GAATTTTTTTTAAAAAAGAAACCATTTGGTTTTCTGTGTGGATATGAGACAAAGTAGTAT

A\_14\_P139533 TATAGCACTTCAATGAATCACAGACATCATCAAAGAACTCTAGCCTGTAGAATGGATCTG

A\_16\_P18445140

AACTCCTGCCAGAAAAAGTAATGAAACCTGATATCCACCAGAATACAAGAGAGAGTTTAA

A\_14\_P115911 TTGCCTACGTAACAGAATCACTTCCGCATTTGAAATGAGTATTAAGTCCACATAATTGAA

A\_14\_P200194 AATTTAACTCATAACAGGAATATGGGAATAGGTGGGATGAAGGTAGTCTATCTTTGACAA

A\_14\_P122367 CTCAATGACTTAGGATGGGCATGTGCTTGTAATGTAATGAGAAGAACCCTAATTTATTGT  
A\_16\_P16191794

AGATCCAACCAGAATTTTGAATTTTATTGACTGAGTAAGGTGGAAGAGAGACCAGAA

A\_14\_P115921 TCCTCTTTATTTGACTTGACAAAATTTGTCTGAGATGAATGAGAAGAGGGTGAGAGTTT  
CUST\_595\_PI426210822 ATTACTGGTGGTGAAAGCATCCTGGCTGTCCCTGAATTACTGTGA

A\_14\_P202471 AACTGGTGCATTATTTTGGCAATTCTCTTGAAAGAGTTCGTTTTTAACCTTCTGCTCAG  
A\_16\_P19327473

AAAGACAGTAGTTTTTAACCAATTCACCAATAAGAACCTCCTTATCATTCCCTCTTCCAG

CUST\_1930\_PI426210822

TCCAATCCATAACCACCAACTAATTTTAAAAACAGGAATAAAGGAAATATTTCAAGAAACA

A\_14\_P137244 GGTAACAGCACTACTCTTATTTAACTCTTGGTGCAATTCCTCATTCTTTCCACTTC  
A\_16\_P00685473

GTTTAAACAAACACATGTCAGAACTAGAAAGTTGGAAGTGAGACTTCAAACCTTACCTAGC

A\_18\_P14136772 AAAATGTGAGCAGAAGTATGGAGAACAGGACTCCCATGAAGATCTGCAG

A\_14\_P131166 GAGTGGGTTCTCCAGTGCTTACATATTGTTTTCTCTTTCATTAGTCTGAGAGTCAG  
A\_16\_P16628494

AAGGACAAAATGACAATTCTATCATGAAGTTTGCTCTCAATAGGTTTGTAGTCTGGAAGG

A\_14\_P112799 CTGCTACATTCATCTTTTACAATAACTGTTTCCATTAGCAGGAAAAACAGTGTTCAACGC

A\_14\_P110604 CGCAAACCTCATATCTTGCTTGAAACTTGTCGATGAACTCCTTTAGTATGACAAGAACAAA

A\_14\_P113922 ATTTGGTTTTTGAATGATATTGAACTTGGAGATAAGTGAGAATACATGACCCCCACAC  
A\_16\_P00685587

GTATGATCATCATCATTATTATTTTTAGGCAACAGAACCCATTTCTAAATTGAAATATGC

CUST\_6979\_PI426210822

GACTGAGACAAAGAGAATATGTCTGTATACAATAAGAAAAAGAGAAAAGGTTTCGCTGG

A\_14\_P115735 AGAAAAAATGTGTCTGTCTCATCCACAATATGTGATTGTTGAGTCCCTGAGCCT

CUST\_4660\_PI426210822 ATTTGTGTGTCTCAGCATGGCAGGAAGGTCAAACCGCTGCTTCCT

A\_14\_P136386 AAAAGGGCCATTAACGATATTGCAAGGAAAGGCCTGGCCTCACTTAAC

A\_16\_P15883553

TTTTACCCTATGTTAATGCCTAATTTAAGTCGGATCCTCCTAATATACTCACATACGCC

A\_16\_P21582579

GGACAGCAAAGATTCAAAAAACAATTACATTGCAGCAAACCTATTTTACTAGGCTTCTCC

CUST\_9727\_PI426210822 CTGTGCTCAGTGTGCGTGTCCATGTCCCATTAAGATGAATGACCT

A\_16\_P16024979

CATCAAATACCTCATTTCACCAAAGTCAACATGTTTCTCATCTCATTACATTTCCCCAG

A\_16\_P01856516

TGATCTGTATGCTATCAAACCCTCTACACCATCATTAAAAGAACCCAGGAAAAAAAAT

A\_16\_P21209773

AGCAGGATAATGTTTAGGTGATGTTTCAAGATGATGATCTTCTAATGATCAGAAGTAGGCC

A\_14\_P134370 TTCTGCTTTGCTATTATCCAGAAGGTGTGTAGACATTAGAGGTATCTGCATAATATGGCT  
A\_14\_P201985 CTGCTCAAACCTCCAGTATTGCATTTGAGTTCCAGATGTAGAGAAAAGTAAGAAGTAAGAG  
A\_16\_P15374716  
AAAATATGACTTAAGTGTCCATGGTAAGTAGAAAGAGGCTCAATATGTCCATTCACTGGC  
A\_14\_P123017 CTTCACTGCAGATATCTGGAGAATTCCTGCAAAACTGATTACTTCTTTTTGGATTGCTA  
A\_14\_P116281 CTTTTAGGTGATAAAAATGATTTTCATCTTGGATCTCTACCATGACTTGGTCTCCATTCTGA  
A\_14\_P128171 CTTGCAITGCATTTATTTTCAGATACTGGAATTCCAGATATTGAAATAGAAAACAATGGGA  
A\_14\_P116992 GCTGGAAAATATAATTTCTGCCAAGAACGACACAGATATTGTGAATGATCTATCACTCTG  
A\_16\_P37072639  
AAAAGAATTTGCTCTTTAACAGTTCCTAGCATCTTTCCAACACATTTCCCATTACGTGTT  
A\_14\_P137609 GACTGATTTCCCTTCTTTACTCTCTCTTTGGGCTGTTTCCATTTCCTTTGCATTGATT  
A\_14\_P134572 TTCAGGTGAGTTTTTTACTACAGGCTGCTGAACTATACTGCAGATAAGTAGGCTTATGAA  
A\_14\_P200683 TTACAATCCAAGGCTCAAACATTTGGAATAAAGCCTCCATGTAAACGATTTCAATGCTTT  
A\_18\_P22840518  
TGAGATTTGAACTGGAAGAAATGCTGTTCTTTTCAGTTAACAGTTGTGTTTTTTCCAAGAA  
A\_16\_P18010898  
AAAAGTCAGGTAAGTAGAGTTTGACCCTTTGATTCAAGAACCTAGCCTTTTTTTATGACAA  
CUST\_220\_P1426210822 GCGCTGGTGGTCGCGGGGATCCCCGCGGGCGCCTACAACCTCGAC  
A\_14\_P127469 AAACAGACATAATAGCCTAGATGAACTCCCAAGAGATCTATTAAATCTTGTGGGCTGAAT  
CUST\_171\_P1426210822  
TAATACATGTTTAGCGTTTTATGGTTAGGAAATGCTGTCCTGAGAAGCTCATCAATAGGT  
A\_14\_P107411  
CTGTTGCACAAAAGGGGAACTTGGTGTAGGAAAAATAACTAGAAATGATAACTACGAG  
A\_16\_P17211111ACCTTTTTCCCTCTCAAAAATACTGATTCCATTAACTAACACTAAGATCCACTGGTTCA  
A\_14\_P133591 AAGACAGCACAAAGTTTTGGCAGTAAGGGATAAGGAGAAAAGAAATCCCAAATAG  
A\_18\_P10390241  
CTCCAGATGAAACGAAAGATCTTACAGACTAGTGTTAATACCCCATACTCTTCATGATGA  
A\_16\_P18204787  
AAAGAACGGCTTTTTGCAATGTAGAATTACGGCTCAATGTTACCATGAATTAAGTGAGAG  
A\_14\_P104727 TTTGGCAATGTCACCTTCCACTGAGGTTAAGTTTTTTGTTTGTAGTTAAGATAAGAAACAGGT  
A\_14\_P100096 CTCTACTGTTTCTCATTCAAAGGCTGATGTAACCAAGATTTTTATCACGACTTAGGTCAT  
A\_14\_P105749 GGTTGTGATTACAGTCATTCTTGTCTTTGGGTAGTGAACATTAAGTCAAGTTGAAACATT  
A\_14\_P116106 ATCTCCATATCCCAAAAGAAAGCAAATATGTGAACTGTTGCTAAGAAAAGGAGCAAACAT  
A\_14\_P116806 GCAATTCCTAATATTATTCTGCGCAGCAGAAGGGGTAAGTGGTAACATCTCACTAATCAA  
A\_14\_P101941 CTGGTTTTTTGGACAGTCCCTTTGCAAAGTGATTCCTTATCTACAGGTAATTGTTTTTAA  
A\_14\_P127644 AAATATCCTGTGCTACTGTGAGATCACATCAAACTATGTGTCCTGATTTTTGACTCAGA  
A\_16\_P21483941  
ACACAACACTAAGTTAAAAATTTCTATACGCCCTAGGTTTAAATATGAAAGTCTACAGCCC

A\_14\_P114228 TCCTGTTTTCTATTTCAGAATGACATTTTTGTTTCAGAAAACACAGATGACCTACTACTTCGC  
A\_14\_P101197 AACCATTTCTGCTGTGAAAATCCCAGTAAAGACCTAAAAAATAGAGATCAGCACTACTTC  
A\_14\_P112161 TTTTTTCCCGTGTCTTCAAACAGGAGAGTGATGGTTGTATGTTAGCAGATTTTTTCTAT  
A\_16\_P15744496  
TCTCCTTACAGTAGAACTCCTTGTATAAACTCCTTCAGTAAGGCTTCACTAAACAAAA  
A\_14\_P131900 GGGAAAACAGATACTTACTGAAAGTTATGATTTGGGCTGTGCGTTGGACCTAAAA  
A\_14\_P106935 TTAAAAGCAAGTAAATCTGTGTGCCTCTCTGAAGAATAGAGGCATTCTCCCTTATAACC  
A\_14\_P113441 TGCTCAAGGGCACGTTTCAACCCATAATATAAATGGCAGTCAGTGTGATAATACATT  
A\_16\_P01211838  
AAAAGTTGGCTGATACTTAACTCATTCTGTTAGACACTTCTCTTTGGAATAGACTGGAGC  
CUST\_3347\_PI426210822  
TTTAAATATGTAAGTATGGTCACAGCATTGACACTTCAGTGGTTATCGTAAGCTTATTTG  
A\_14\_P104982 AACACATTCGCAAAAGAGTGAGGACTGGAATATCTTTGATGTAACAAGCCAATGCTAT  
A\_14\_P118612 GAATTTGCATGAGCCCAAGTTGTTTTTCAGAAAAGGGTGTGACTCTGAAAATGAAC  
A\_16\_P19687608  
ACCTTTCTGTTCTGCTTTAAATTAATCAAAGCCAGTCCGATATTAATACTGTAGGGGGAA  
A\_18\_P22841253 AAATATTCATGGAAACCTTGGACACTGTCTGATGTCAGGACTACTTATGAATGC  
A\_14\_P115712 AAAGTGGGAAGTGTAGTTTTGCTTCAGACTGGTTTAATGATAATTGTGAATGGATTTTGA  
A\_14\_P108618 ACTGACTTTTTAGAAAGGATTTCCATTTGTTGAATCTCCGTTAAAATAAAGTCTGGATCC  
A\_14\_P122258 GTTTGGAGTGTTTTTCCAGAATATTTAGAAAGAACAGCCTGTAAGAGCCAAGATTTAGAC  
A\_14\_P138035 CTCTATTCTAGACTAATGAATCAACAGCCAGGCATTCTTTTTTTTTGGTAGATGAGTGT  
A\_14\_P130680 GATTTGGACACAAACGCATGGTTCACCTTCCTGTGGAAAAATCCG  
A\_14\_P104728 ACTAGCCAATTTACACAGCACTGTTACATAGATTTGATTACCACAAAAATGTGATTCCC  
A\_14\_P113152 TCTCAGGCCATGGACATTTTATAATTTTTTGAGGTTTGGGGCTCCTAGAATCTC  
A\_16\_P36230378  
AGGCCAATAACGGTATTATTGTTAAAAACAAAACAAAACAATCTACACTAGACGAGGGAA  
A\_16\_P16382267  
CAAAAACCATCCCTAAACTATTTTTTCCCAAAGAAAAACCTTTAATGGCCATAACAGTGC  
A\_16\_P18063253  
AGAGTCCTCAGAGTTTCAATTAGCAAGACTATTTAACTGCAACTGAAAACACTCAGAA  
CUST\_8231\_PI426210822 CACGGTCATTAGTGCCGCTGGCATTGTTGGAAAGCAGGACCCTG  
A\_16\_P00527064  
CTCGATACTACCACAAGTCTCAAGAGTATATCACCTTGAATCTTTACTGCATTTGAGTGG  
A\_14\_P130509 TAAATGCATTCCTTTTGCAACTTGCATCCTTCTCATTACCAGAAAATCATGTATCAGTT  
A\_14\_P124761  
GACAAGAACTCCTAATTGGGTTTTGAAAAAGTCTAAAGAAGTAAGTAACTGACCACTG  
A\_14\_P122629 GTGAGTAAGCAGAGAGGAAGTCAATTAAGCATATTTTCGATGCCAGCATTTAATGTGTC  
A\_14\_P137871 AAAACATTAATCCATTCAAATGGCATGAAATGGTCCCTTGCTTTCTGATGGAAAAAGAA

A\_16\_P18233041

CCATCCTTCTGTAGTTACCTAAATCTCACAATTCCTAAGTATAACCCATCCATCTTCACT

A\_14\_P202432 GCTGCATTTCTCCTTATTTTCAGAATCTGAAGACCACATGATTTGTTTTCCCGTAAAACCTT

A\_18\_P12308351

TGTGTTACTTATAATAGACACTTCCCAAAACTAAGAGTATGAATTGATTACCACCTCACT

A\_16\_P17503364

TTAAAATCACTCTCTCCCACGAAATTGTATTTAAAATGTTTCAGTAGGAAAAGGGTTTGCC

CUST\_6615\_P1426210822 CTTACACGGATGGGTAATGAGGATTCCACCCCCCAGAAATTAGTA

CUST\_2353\_P1426210822 AGATTAATAAACTTCGGTGATTTCAGCCACAAGGCAGGAGGAAGAGA

A\_14\_P129270 TTTTTCCCTTTGACTTTAGTTATTTCAAAAACCTTCGATACTGCTCCTATGCTCCCAT

A\_14\_P124775 TTCAAGTAAACATAAACACCACCAATACTTAGAAAAGGCTTGTAACGAGTGATCCGAAAG

CUST\_2120\_P1426210822 CATCCTTGTGTGAGAGCAGACACTGAATGCTTTGTTGCAACTCAACTTG

A\_14\_P125943 CTAGTATTCTTTTCAGAGGAAAATTCTGGTATGTTAGGGAAAATCAGATGCTTCAGTGC

A\_14\_P122760 GTGTCTCTCATGGAGGCGTCTCTAACCAGGGTAGGAAAACAATAGTTCTAA

A\_18\_P11339161

GACTCTCCACCCTATTCTTATCATTACATTCCACTTTCTTCATTTAACTGCCTACTTGAC

A\_14\_P118322 GGTTTACCATTTCAGCATAGGCTTTATCCGTAAGAGGGCAACACATTATTTGTTGAATTTA

A\_16\_P37948583

GCATCCAGATCAAACCTATTTCAACTCATTATACCATAATTTCCCTAACTATCTCAACCCA

A\_16\_P21483824

AAAAAAAACCTTTTTCTGATTTTCGTATGGTTCAACTTGATACAATCCTTACTTGGCAGCC

A\_14\_P130434 CCAGCAAAGCAGGTCTTATTTAGTTGTAAGTGGAAAGGAATACTCTTCTCTGCAGAA

A\_14\_P201649 CTAAGCAAGTTTCAGGTTGAAAATATCTTCTTTTCAGAGCAGTTGTTACTGAAAGAAAA

A\_14\_P119222 AATATTTTTGTTTTGCTTCAGGACAACGGGAAAACCAAACGATTATGTTTTGTTTGCAGA

A\_14\_P101997 CTCCACTTCTAATGCTAGAGAATGATAACTAAGACTTCTGTGCATTTGAAGGTTGTTGGA

A\_18\_P22842103 TACTATACACCAGGGACTTTTTGCATCTCGTCCGCATCCCCTCTT

CUST\_3914\_P1426210822

ATCACCTCTCACTCTCATTTTTCTAATAAGCCTGAAAAGCATGATGGAGTCATAAATCATG

A\_18\_P14133912 AGTTCCACTGCCTCTGTTATCACTACTCTCTGTTGACCCCATCTC

A\_16\_P30952635 GGCCAGCACCCTTCCTTTAAAGATGAACTCTGAACTTTGGAGAGTG

A\_14\_P115843 TCTCAACAATCCAAAGCAGTAAAACCTATTACTTCTGTTTGTGAGTGTGGAAACCGAATTT

CUST\_736\_P1426210822 AAGGAGACACTCCAGTGAGGGGTGGGTCTCCCTGGCTCTTTGTAC

A\_14\_P118788 CTCATTTATGTCCAGGAAATGTGTTTCGTGAGTCAGGCCCTATAAGCATAATTTCAATTT

A\_18\_P17289811

CCTCTACGTGTGTTTCATAGAAATATTTTTATGTCTGAGAATAACTTCAGAGGTTGAGAGC

CUST\_6403\_P1426210822 GTTGCACTTTAGGCTTTCCCTGTCCAGAGTTCTCACACATGACAGTG

A\_14\_P100067 ACTTATGTTGAAGCAGGAACTCTCAGTATACTTCACCTAGTATAGAAATGGTCCAGATA

A\_14\_P108357 GGAATACTTTTCAGTAAAATTCTTCTAGAGGATTAGTTTCACAGGTCTGTGAGAAAACCACT



A\_18\_P14139288 ACAGCACTGGTGGCTGTAAGCCACTCTGATGTTTCCTTTATCCTCAA  
A\_14\_P117368 AAAACTATTTGGGCAGCAAACCTCTTACTACTTTTAAAATGGTATGGCATCACCTAGAAAT  
A\_16\_P03259037  
AAAACCATGTTGGATGTAGGTAAGGATATAACATGACGTGCTAAATGAACAAGGTGCTTA  
A\_14\_P134525 CTTTGATCTCTAGGTTCTAGACTGACCTGTTTATGGCATAGATATGGCTTATAGGCATTT  
A\_14\_P110150 TATTTTGCAGAGCATCCCCAAAGACAGATTGAAGAAATGCAGAGACAGGTAA  
A\_14\_P134076 CTTTGTAACATAATATTTATAAAAATCAAAGCGGGAAAGCCTTGTTTCCTTGCTAGAAATG  
A\_14\_P132326 TCAGAATTACTTGATCAGAAGGACAAAACCTGGGACATCTGATAAGAAGTAACCAGAACAT  
CUST\_3479\_PI426210822 GCTCCAGCCATTGTAIGTGTTTTTCATGCAGGAAGAAGTGGGACAT  
A\_16\_P39243515  
GTTACATAAAAACAGTTCACAGTCATAAAAACGGTTCAGATAAACGTATGCACTCCAAGAA  
A\_14\_P123661 ATGTAAACCTCAAACCTATACTGAACCTGGACTTTTAATTTTGTTCCTCCAGAGTGC AAAACA  
CUST\_10285\_PI426210822 TTAGGAACAGGACTGGAGACCCTGCAGTGTTAGAGTGGGGCATAG  
A\_14\_P103811 CTTGAACTCAAACATGTTCTCTGCACGAAAGTCTTGCGGATCTTCTG  
A\_14\_P108834 CTTTACCACACGTAAAATGGTTACAACATAAAAACCACGCAGCACGTTAGTGGG  
A\_16\_P30952432 AGGATTAGTAGTTAATGCACGTATTTGTTTATTGTTTCAGCGGAGGGTGCAGGAC  
A\_14\_P201790 CTGCTGCTGCAGTTTTTTGTTTCACATATCCTCAGAGAGATTCAAAAAATTTCCAACCTTCT  
A\_16\_P21050682  
TTGAAGGCACAATTCTATTCCAGATTATAGACAAAATCAAATCTTACAGACCTCACCTGG  
A\_14\_P129531 CTCATCGAATAACTATGATGCAAGGTCATAGACAGTAGATGTCCTAGGAATGGCC  
CUST\_6496\_PI426210822 TAATTCATTTACCAGCATGCATTCAGGAGGTGCCTGACAGTCCTCA  
A\_14\_P122554 ACTTATCACAAGGAGACTTATTTTGAGACTATGTTCTAACTTCACAGCCCACATCTTGAA  
A\_14\_P133647 AAAAAAAAAAAAACTGTAAAAACCCTCTTATGGAGGACAGATTGCTAATCAGATCTGCAGG  
A\_14\_P202308 AATCAAAAACGGGAATCTCATTAGACTTTAATTTTTTTGAGATTATCGGCGGCACAATC  
A\_14\_P120007 AAACTCTATTTGCCAAAGGAACTTGCCTTATCACCTTCTTGCTTGCAGGTAAGT  
A\_16\_P21209576  
ACCTCAGTGAAATATCCTTGATTTTATCCGAGTATACAGGAATTTTCAAATGCAGAGGG  
A\_16\_P20761061  
AACTGAAATGTCTTAAGGGTCCAGAACATATTGAAAATGGGTGAATCAACTAACAGTAGG  
A\_16\_P01786132  
AATCTGCAACTCAGAACATATTTTGAACCTGGTTTCAGATTTATATTGGTTAGCCCCCTG  
A\_14\_P116262 ACACTATTTTCAGGCTTGGCATATTATCTGATACAATGAAAATGTCAATAAACATTATTGA  
A\_14\_P129130 ACAATCTAAAACTTCAGTATCACCTATCAGTTATTAAGGCACACTACAAAGCCTGAGT  
A\_14\_P101964 TATGGAATTCAGTTGGGATTGAATATTCTGTGTGAATTGTGAACCTGTATGCAGTAATCC  
A\_14\_P108223 CTCTCCACACATATACTTTATTTCCACAGTCCCATTTTCCCATGCTGAACCTG  
A\_14\_P115393 CATTATAACCACCTAGTATATTTACTGAAGGTGATACCTGAAATTCAAGTGATCCTCTGG  
A\_14\_P135865 GACAATGCAAAAATGTAACCTTGTGTGGCTTTCCATTGCTTTTCTTAGGATCAAAAATACGT  
A\_14\_P202195 ACAATGTAGACATCACTAAAGTCTAGATTTAAAAGTCCAGTGAAAATGGCACACAGTTGG

A\_16\_P21659318

CCCTTGTCATTGAGTATAAATGCATTAGAAAGGTGGAGAATTGCTAGAAATCAGAAGGAAA

A\_14\_P112336 CCCTTCAGCCCAGCAAGGTTTAATCAAAATGCAATGCTTTGCAAGTCTTTA

A\_14\_P132181 GGAGGGGGGATTGTTTTCAAATCTAAAAAGGAAGATTTGGGTTATTTGTTTTTACAGTT

A\_16\_P18288634

GATTGGACTTTCTTATCCAGTTCAGAGCACTAGATAAAGAAGCCTTTATCCAAAGGACTT

A\_14\_P122798 GGCTTGTTCTGTTTTGTTTTTGTGGGAGGAAAGAACATGCTTATGATGTTAATCATTG

A\_14\_P104894 CAGTAAATAGTCTCAAACAGTGATTTGTCTCTACCATTGAACTTTTAATGGCACCAGAA

A\_14\_P117775 TGCTGCAAATGATTAAGAATCTTCACAACCTATGTTTTCTTTCAATATACTCATGATTCT

A\_16\_P33435330

CAACAAAGCCATCCTAAGAAAAATAAAACATCCACAGCATTACATTACATAAAGAGGTCG

A\_16\_P39660032

AGCCTAACAACCTTTAATGATCCTCTATTGTCACTGAATTAATACTAACCCTTAGCCTGT

A\_14\_P126855 CTAATTAATGAAAGAATAATATTGGTGAAAGGGTCCCAGACTGAAGAAACAGCAATGAGG

A\_14\_P132749 CTAAGATTTGCTTTACATTGTGGCAAATATTTACATTTTAGAAAACAACTTTGTATTTA

A\_14\_P126803 CGGTAGACCCTGAAGGCATTATTCCTTTCTTTATGCTTTTATCCTTGACTTCTTCAATA

A\_16\_P17316203

AGTCCAGAAATGTCTTGCTTTAAGAATACCCAGCATAAGAAAATCAGATCCTACCAACTT

A\_14\_P116249 TGTCTTTCTCTTTTATAAAATGCCTGCTGATGTCTATGAGTTGGTTCCTCTGTTTAGTT

A\_14\_P121654 AATGACATGCCTATAGTTACATACACTTGCAAGCAGGACTATAACCTGAATTCCTAGAAG

CUST\_4643\_PI426210822 CCTTTATTTTAGTAATTAGAGGTGGCACTGGGAATGCTGGTAACAGTGGAGTTT

A\_14\_P117131 TATAGTGATTCATTTAGGTCATTGTTTCAGAAGGAACAAGGGTGTTTGCTGAGTTTTT

CUST\_6220\_PI426210822 ACACCCGGGAAGGCTGAGTCTACCTCACAGGTGTGCCTGATAAAA

A\_16\_P19841485

AAAAATCTCAGAGAGTGAATGCATATTCAGCCTTAGATTCTAAGTGACACATCCACACTA

A\_18\_P14917607

AAAACATCCACAAAATAGTGCATACATTTCTGATGTACAGAAATATGAGATAGGCGTGA

A\_14\_P105416 CCTTTTATTTCTGGGCATATCGTGTTTCGATAAAACCCTTTGCTTGTAACACTGCTG

A\_16\_P16751190

AAGGGAATATAGAGCCATCAGATGATAATAACAAGGCAAAAGTTAGTATGAGACTGGGC

A\_16\_P00468295

GAGGTTCACTACTCTCTCTTCTGTTCTTCTGTGTGTGTCTGAAATTGTCCATTTAAA

A\_14\_P137022 TTCATTTTAGACAAGCATTTCGTGGTGGCTCTGTATGACTACACCGCTATGAATGAT

A\_14\_P118405 CTTTTAAAAATATACTCCCTACAGGAATTCTGATAGTTGCCCTTCTCCAATTCATCCA

A\_14\_P115369 ATCTTCATCGTCGTAATGTCCTCTGGTCTTGATCATCATTCACCTACACATCTC

A\_14\_P136399 GCTCTCTTTCACATTTTCTCTGGCTTCACGTTTCATCCTTAAAGAAAAAGATTCAAATAT

A\_16\_P17878746

CTCTTCTGAACACATGCTAACAACTCTCTTTGACTCTATTTTCCCGAACTCTGTTAATC

A\_14\_P109846 AATCCAATTTTGCAAAGGCTTTGTGTTTATAAAAAATCTTAAGATGGAAACCTTGCTTTGA  
CUST\_7844\_PI426210822 CTGCCTCTGATGTCCACAGGCCAATTAGCCAGGATTTAGGGTAGT

A\_16\_P16322132

GTTTTTCAGTCATGCAAAAAAATCAGGAAACATTCAATGTAAGTGTATACGCAAGGGTCC

A\_14\_P117302 CATATCCGCAGTTTCATGAAGTGTATTTTCCTGGTGGGTGTAAATACGTAACCTGTTTC

A\_14\_P139589 CATTACTTTTAAGAATATAAGTCTCCATGAGTTGGTTCTAATTATCACAGCCTGCACTGG  
CUST\_1984\_PI426210822

CTGTTGTCTAAAATTAAGCCAATTAGAGAGTCCTGCTATTAATAAGCAACAGTTTTTCATG

A\_16\_P36230957 CACTTTGGCCTTATGGGACTTTGAATGGAGCAGGGCTTTCATTCTG

A\_16\_P03031877

CATTTTCATTGACAAATCTGAAACACAGATCAAATTGGCCTTATTCCAAGACTAAACAGCC

A\_14\_P128894 CTTCTGCCATTCTCTAAATCAAATATGTAAGCAAAACTCACTATTCACAAAGTGTGGGA

A\_14\_P131123 CTGAATGTGACAGTAATGATACTTATATCAGGTCAAGGATGCCTAAGGACCATAGTTACT

A\_16\_P58424279 GGCACAGACTTGGGAGCCCCATGGCCAGGATTTGAATCTGAACTC

A\_18\_P14264151

AAGGCACTAAAACCTCCAAAACAGACTTTTCCTTCATGAAACATTTAATGTAATCCCTCAA

A\_14\_P113376 TGAATTATGAAAACCTTCTCCCCAAAATCTTTATACCATGCATTCTTCTACCTCCATGCC

A\_16\_P00592470

AAAAATGTGACTATGTGAAACAGAAGGATGAGAACTCAGAAGTCATAGCACTTTTTCTCTG

A\_14\_P100990 TAATCTAACAAGAGAGGGTATTGTAGTGCAAAGTATAGTGTCCCGGTTTGGATTTTATT

A\_16\_P40473789

TGGTGTATACATAAGAAGGGCTGAATAAACATATAGGTTGAATGGCATAGAACAGACACT

A\_14\_P118799 CTAGGGAATGCTGCCGAATTTGCATATTTTACCAATTATTGTTGGCTTGGATGTTATGTA

A\_14\_P124665 AGCATTGAGAGAGGCTAATTCTTACTGGGAGATTGGGAAAATATTTGAAGAATGGATGTA

A\_14\_P111726 AATCCTTAAAAGTTTATCAGAAGGCCAACTTTCGGACAAACCTGCTTTGACTTACCAATA

CUST\_3348\_PI426210822

CACAGCATTGACACTTCAGTGGTTATCGTAAGCTTATTTGTACAGTATGTGAGATGCA

A\_18\_P20230161

TGTGAACATATATACAAGAATGTTAATTACAGACTAAAACATAGCAGACTTGCCACCATG

A\_14\_P100411 CAGCCCACCAAAAACGTCAATTTAGAATGAGACATGTGTTGAAAATGGGACG

CUST\_7968\_PI426210822

CTTCATTTTTAAGAAGAGTAAAGAAATTAAGTCACTTTGGTATTGGTATGGAGACAGATT

CUST\_841\_PI426210822 GAAGCAGCTGGATGCTGTGCGCCAGCATGGTGGGGGCCCTCCCTCCT

A\_14\_P133300 ACTATATACATCAAACCGTAATTACTTACCTACAGAAGATGTGCTCACATCCTCCTAAAC

A\_14\_P103403 ACTCCTTATGCTAGCAGATTCAAAGATATGCCTAACTTTATTGCCCTTGAGAAGTCATCA

A\_14\_P136769 ATGAATGTGTGACTGACCGAATGTTATTTTTACTATAGAAAGGGCCCTTTAGAAAACCAC

A\_16\_P16406189

GTAGCACCATTTTTAAAGTCCTCTTCTTAATGAGTGTCTCTAGCCAGTAAATTTACACC

A\_14\_P136176 GTCCGTTTTACACGGATTTTGGAAAATCGAAATTCTAGGAAACACAGGACACCAATTA  
CUST\_5573\_P1426210822 ATCAAATCATGATGACCTTTTAGAGTTGGGGTCTGCCCCACTGAT  
A\_14\_P101590 TCTAAAGTTTTATTATGTAACCTGTCAGATTTTCAGGACGAGTGAAGGAGGAAAATGGCAG  
A\_14\_P115933 GAGCACACCAACACAGACTCACACCTTTCCCTAATACTTTATTGGTTACCTCTA  
A\_14\_P100299 ACTAGACTTGCTCTTCTACCTTCTGTGTAAAGTCATCATTTCACGAATGCTAAGCATGT  
A\_14\_P118422 CTGAGAACCTTTTCTCATTAAATTTCTTTCCCTCATCTGTTATTCCATTGGCATCTTCATC  
A\_14\_P131916 CTACAGAGGTAAGGAGTTTCTATGAGTTCATTGTGAAAGCATAAATATTCACAGGGTAGG  
CUST\_7314\_P1426210822 CTTCTGAAGAGGGAATGAGGGGCAAGGCTCTGGCCTCGCAGCCA  
A\_14\_P138523 CTTCTTCTACCCAGAAAGGTTGTTCTTAACCAACATGCAAGTTCTTTCTT  
A\_16\_P18534051  
TCACATGACCCATTCTTAATAATTCAGCCTAACCATCTGTTTGTTCATTCCATTAAAGA  
A\_14\_P201702 ACATTCTAACATTCCACTAGGTGGGACTAAGAAATTACTATGAACATTCTACCCAATCA  
A\_14\_P138693  
GAGCAATTATACCGAGGAAGAGCAAAACAAACAAAAAAGAATCATGGAACCATGTTTTGT  
CUST\_2529\_P1426210822  
CAACACCCAAGTGGAGAAATTTTAGGAACACTATAATTCATGGATTTGCCATTTGTTTTT  
A\_16\_P18927806  
TGCAACTTAAGAAACCATTTTTGTTACAGTATAACCAAGCCAAAGTATTAATCTCAGGACA  
A\_16\_P02969864  
ATTCAGAACCCACTAGCAAGAAAAGACATCACCTAACCAGCATTTATTACCTAATAACGT  
A\_14\_P107312 GTGAGGAACATTGAACGATTCACTGCTTTGAAATCTTTACTATATCTCCCATGATGTAT  
A\_16\_P00685200  
ATGCAGTTCCTGAATCAACTAATAAGTAAAGTATACCTTTTATCACCTGAGGTTCTGGT  
A\_14\_P103996 CTTGCTTTCGTCTTAAATTGTGACCTTTTTAACTGAGTAATGCAGAACAGACATCTAGGT  
A\_16\_P19648258  
AAAACCTAACTGTTCTTAGGTAGTGATCACATTGCTTTCAGATTAGCATCTTCAGTCAGG  
A\_14\_P106629 GGAGGCACAGATTCCCCTTTCCAATTAGTTTTTAAGTCAAATCAATCAAATTTCAAAGAG  
A\_16\_P20673416  
AAATAGTAACTTGACCAGAATATGCAGGCTAATATCCATTACCCTCAAAAATCCAGAGT  
A\_14\_P123835 AGAAATTGAAACACTAAGTCAGAGTCCTGCTCAATGCCTCTCGGTTATCATTAAATATCAA  
A\_14\_P131551 TCTCGTTGACCCAAAGGATATCGACCTCAGCCCTATACATATTGGGTTT  
A\_16\_P19916128  
AAGAGAAGACCTCTCATTAGCACAAAAATGAAACCTATCCTCATATTTCACTCCTACCTT  
A\_14\_P120895 GCATGCTTCTGATTCACTAAAATGGTTAACAGGATAAAAAAGGAATGTTCCAAGTAAGTT  
A\_16\_P20886808  
AGCCCTCTAATAATCCTCTCACCTTTGTATAACTCACTTTTCTTAAAATTCACCACCTCA  
A\_14\_P129945 GAGGTGAGTGAAGTCTGTGATGGTGTCTTACATAGTTGTGACTAAAAATCAAAGAAAAAGA  
A\_14\_P102210 CCAAGACTATCTACACAAGTATGTAACATCTGGGCATTGTCTCAGAGAATGTATGATCAA

A\_14\_P200569 GTTTTCTATCATTAACTCCGTTGTTGTGGTCTTCTTCCTGTCAGGTGAGAGATCT  
A\_14\_P130402 TCTTCCATCTGCAATAATATTAGTTAGTTTGTAAAGTGTCTCACCAGTGGTTTACGCCA  
A\_18\_P22840896 GTGGCGGAACAGGAGCAGCAGGTCTCTGGCCAGAGTATGTGTCAG  
A\_16\_P16191124 CTTATCTGTTAGTTTTCTTTCCACCTGGAGAGATCTTCCCCCTTTCCTTC  
A\_14\_P109741 GAATATTCTTCCTCTAGTGGTTAGTGGTCTTGCATATGTCATTTGATGCTGGTATTCCTA  
A\_16\_P19943641  
AAAGACTGATCTTCATTGTGACTCTTATACGGCATTGTATGTTGAAATGTAGCCTCAAA  
A\_16\_P18696387  
GGCTAACTAGGTGCAAAAAATGAAGTTAGATAGACCATACCTACAGTAAATTCCAGATCA  
A\_14\_P129936 CTTTTCTAATAGTGGTCCAATCTCTAGCCCTTGTTTTATTGAGAGACAATGGCTTGCAATA  
A\_16\_P00685126  
GTTTTTTGTTTTTAAAAACATATAAAGTAAGCATAGATGCTAGTGTGTCCCATGGTGAA  
A\_16\_P00000987  
CCACTCCAAAAACAACACTTAGTGGCACATAAGAATATTTTCTTGCTTAACCGTCACTTA  
A\_14\_P102912 CTTCTCTGCTCCTTTTGTCTTTTCCTTCCCTTTTTTAAAAAAGAGGGGGGAAAT  
A\_16\_P19884938  
AGATCAATTCAACAACTACACATTTACACTTGCTTTGAGATAAATTGACCTTCACCGA  
CUST\_7628\_PI426210822 CATAATTGCTTCTGATGCCAGCCAGTCTGCAACTGCCAGTGATTG  
A\_14\_P138078 GGTGTGATAGTGCTTAGATACCTTAAGGTATTTGGGAAATTTTAGAACCATGTTTCAGCAT  
A\_14\_P136060 AAATCCAAGGTAAAAACACGGCATGGGTATTAGTTTGAATAGGGAAAATGAGAACTCTC  
A\_16\_P03810575 GTCTCTTACCTGTCTGAGACTACCTACTTAATACTTACTCCTTGAACAGTGACACTT  
A\_16\_P16191549 CTCTGAGGAAGCAGGTGCTCTGCTGCCTTTCCACATCCTTTCCTC  
A\_16\_P00685271  
TTGCATGTTTCTCATAAACTGATTGTGCATTCTAATTATTTAGTTTGGAAAATGTAGTCT  
A\_16\_P18390193  
TGTGTATTTCAATCACCAAGTAGAGTCAAAACGTGTTTCAAGAGATCACTAAAATGCCTG  
CUST\_2990\_PI426210822 ATTCACCTGGGAAGGAGGCTGGTCAGGGGACCCCGAGGAGAGTCT  
A\_14\_P133984 AGACATATGGAAAAAGGCTGGAGTGATTAACATGTCCTCAATGTTCTGTATGTCCTATAA  
A\_14\_P201119 CAAAATGCACAGGCTCGAGATTTTGGAGTCAATACATGTTTAAATTGGCATATCATGCTA  
A\_14\_P117572 TTTATTTGAACAGTTTGCTCCTGCTAAGATCATCTGTCACTACTGAAAATTATGCCTCTC  
A\_14\_P102194 ATTCGTAAATCATAACAGAGTGTTTTTCTGTGTTGTTGCCAAAGACATCAGAAGTTGAA  
A\_14\_P135317 CTGCACCTTTTAAATGTTCACTATCAGATGTGTCGTCGCCATTGTTGTGATATTTACAAA  
A\_14\_P120640 GTTTGTTCCAAATCATTTTTCAATGCTGTGATTTCCCTTCTCTTTGCTTTAAACACTCAG  
A\_14\_P131325 TAGAGTAACAGATGAAGTTGCCACATATAGAGATTGGATATCAAAGCAGTGGGGCTT  
A\_16\_P16669962  
CTCTTGAACATTGATTTTTCTTTTATTCCCCTTACTCCTAGAACATTTTCATTCCCACCTC  
A\_14\_P139461 CATTATATCATTTTATTTTTTCTCAACCCAATTGCCAGGGTCTCTGAGAATCACAAGT  
A\_16\_P15434946

CCGTGAAGATCCTACATCAACCAGTAAACAAAAATGTATTAATCACATGCTACTTTCTGG  
A\_14\_P128208 GTATGTTGTCCTATCTTTATGTTCTTTCTGTTTTTAAGGGATTCTGAAGCAAAGTCAC  
A\_14\_P100408 TGTATAGGGATTAAGACAATTACCTGTAGTGATGTAATAGATGCACTATGGCCCTGAAGA  
CUST\_3915\_PI426210822

TCTAATAAGCCTGAAAAGCATGATGGAGTCATAAATCATGTCTGTAAAATGAAGATGTGT  
A\_14\_P103796 ACCTGACTAGGCTAAAGGAGAGATACGCCAGGACTAAGAGAGACATCTT  
A\_14\_P101970 AAGTGTCCTATTAGGGTTTTTTTTTAATTGCAAAGCCAAATAAGGCTGTCAATTGCATCA  
A\_14\_P134493 ACTGCTGTTATTGCTAAAAGAAAGAAGTAACTCAGAGGAACTATGGTGTGTTGAACTGAC  
A\_14\_P131966 GAAAATGATATTTTCTGCCAGGTTTTCTATGAATTAGCATTAAATTATCCATAGTCACCT  
CUST\_6072\_PI426210822 GGTGGGGAAGGGAGAGGAGAACATTGAGATGGTATAGGTCATTTTAC  
A\_14\_P122561 ATACTGAAGTTTCGTCTTTCTTCTGGTATCCCATGGCAACTCTTTCATCTGTATAACAAT  
A\_16\_P16191728

ACCACTGGAGCCTAGTAAAATCCATGCTACTGTTCTGCAATTGTTCTTTTTATTCTTTCT  
A\_14\_P121709 GTCATTTAGCATCCTAAGTATGTAAACATGTCTCTCTTCACGATTCACAAAGTGGCTTTG  
A\_14\_P108355 AGAGGCTATGAAGTTTCAGAACAAGGTGGTATTTTCTGCTCTTGCTTTAATTCCTTTAT  
A\_16\_P18404066

AAATGGTCTTTTTGACTCTTGACACTGGTAATTGATCACCTGCTAGAATGAATCATGAAG  
A\_14\_P130702 CCTAAAAACAAGTATTTGCTGTAAATTTTACCATTTCAGGGTAAGCACTTCTTTGCCAT  
CUST\_7059\_PI426210822 CTGGGGAATGCACAGGAAAAGAGCTCTGCCTCCCGGAAGGTTCCA  
A\_14\_P128785 CGTCATTTTTGAGGAAGTAGACAAACCTAAATATGTGTCTGAACTCCAAGGAATATGAAC  
CUST\_10315\_PI426210822

AGAATCCTATTTCCCTGTTACATCCTTCCACAGTTTCATGATTACATTCTCCTTCATG  
CUST\_9665\_PI426210822 TACTTTCTGGAGTTGCTGAGAAGGTTTCAGTGATACCAGCATGAAGCTC  
A\_14\_P109130 ATATGAGTGAACCTATTAATGATCAACTAGTCAAGGGGTCACCATTAAGGAGCCCTAAA  
A\_14\_P200228

ATTTTCAACAGGGCAGAAGAAGAAAGCAAGAAAGAAAAAGACAATTTCTCTAACCACACA  
A\_14\_P107131 CACGGTTTATTCTAGAAGCCTATAGAAGAGCCACATTGAGTATTTCCAAAATCACAAAAT  
A\_14\_P131427 GCAGTTCTTCTCATCTCCAGGAGAAGGCAGGAGAAAAAGACTCAAGAAT  
A\_14\_P101507 TCAGGTTTTTAGGAACCATTTTTGCAATTGGAGATGTTTGTGAGGAAAAAATCTCTGTT  
A\_14\_P124063 CTACCTAAGCCAATAAGAAGAGTGATTGATAGTGACTGTGACCACATACAGCACTGTAT  
A\_18\_P27285590 CACTGCAGCCAAGTCCCCATGTAGCACCACAGCCCCTATTCCAAG  
A\_16\_P58424541

TTCATATCAAAAACCAATGGGATTTAGACAAAACCAACACAGAGGAAAATGCCACTACTTA  
A\_16\_P18306494

TCTATAAAATCTTCGTGGATTCTAACTTTGGTAACCAACTTAGCAAAAACCTATTGTGGCC  
A\_16\_P18367273

AATGTGAATCCCCTGTCAATAAATAAGATGGAAGATACAAAATACAGAAAGCATGCCAGG  
A\_16\_P15153711

AATAGTGGAAATGTCCTTGACATAATGACTGTGGAGAATCAGTAGAGAGATGTAAACCCAG  
A\_14\_P126771 TTTTATTTTCTGCTGGTGGCAGGAACATCCCTACATATTAGACAATAACTTTAACTCTGGG  
A\_14\_P119301 ACAATAACGAATCCATAAATAACCCTGTTGATGCAATTAGTGCATCACAAGAAAATGGCT  
CUST\_1750\_P1426210822 CTCACTTCCTTCTCTGCTTACCGTTGGATTTCTTTTTGGTAGGAGCTG  
A\_14\_P202279 CTACACTAGAATTAACCTCAGACCTGTTAGCAATGAGACTATCATGTTCTTCCATTCTCCT  
A\_14\_P116807 TTGGGGCTGATCTTCGGAGTCGCTACGTGTTCTCTATACAAATAAAATAATCTGTAAAG  
CUST\_3744\_P1426210822 CTACAGCCACAACCATCCCTACCTGGAGAAAGGGGCTAAAAGAAG  
A\_14\_P102602 AACCTTGAGACTTTTCTTAGTCTTTGAGTTCTGTCTTTCACTGTGTTATGTCTAGCAAAG  
A\_14\_P122992 TTTCCGGATTAGCATCGTGTGTCTTCTTTATCGAAAGAAAATGCAGACACGATAATTAA  
A\_16\_P01908081

GCATGAACACATACAGAAAGGATATCTTGAATTCAACGTTTTTTTTAATCCTGACTCACCC  
A\_18\_P14135751 CATCCTATGCCATCAGCAGTGGGTGGTGAAGTAGTTCTTTCTCTTCAC  
CUST\_3153\_P1426210822 TTAAGTGGGAAGGATCAGGGTTGCGCAAGGGGTTGGTCTGCTACTTT  
A\_14\_P103284 CTGGAAGTTCTATGAGAAAGCGTGCTAAGTTGATATCAACTGTTTCCAAGAAAGATTTC  
A\_16\_P18213978

AAACATTATCCAGTCAATTGTGATTAGTTAGGCTACAGGATTATCATGTGTGTCCCAAGA  
A\_18\_P10432299

AGCATACCTCCTAATAAATGAACAGCGTTTTTCATATTCTCAATCAATCTCTAGTGGCCAA  
A\_14\_P130686 TACCTGTTTGCAAGACCACTGTTCTCTTTCATCCAGAGAAATAATCCTGAAGTTATAGA  
A\_16\_P00685604

TCTTTGGGATTACAAAATAATATGTATGTATTGACCTAACATAACATATCAATTACCAA  
A\_14\_P115493 AATTGATTAGCATCATTGAAACCCCGCTTGGCAATAACTCTTCAAATCCCTAAAACATA  
CUST\_891\_P1426210822

GGCAAGTATTTACTTTTTAAATTAATAAATGGGAAGGATATGTGTTGTTTCAGGTGCATTTTG  
A\_14\_P118032 ATGTGATTTGATATGTTTTCAATTCTGAACCCCTTGCATAAGTTCAGGCGAATTAGAGAAT  
A\_14\_P112727 CTTTGGGATAAGAGTTTTCAATTTTCATACCAATGAATTAATGTTTAGATCCCTTCCCCATC  
A\_14\_P139481 CCTTGACAAGTGAAGAAACAGGAAGAGATGATGAGAAAGTTACCTGTGCATGAATTTG  
A\_14\_P105605 CATGTCTACTGCATCATCCTTACAAACCAACAGATTCTAGTGTCTCCTATCACTAAGAAA  
A\_14\_P112462

CAATGGTGTGAGTCTGACTTTGGAAAGAAAAAGGGACTAAAGAGAAATGTAACAAACTTA  
A\_14\_P123053 AACTTTTTGTGACTTTGTGGGATTATTGGAGTTGACCTTAGTCTATTACTATAACCACCGT  
A\_14\_P121581 CTACTCCTGCCAATTCAGATTGAAGTTCTCCAAGTCTTTGCAGATCCCTATAGTAAATAA  
A\_14\_P202156 CCTTACTGAAATAATGACGTTTTTCAGTTGCTTAGTTTTTGTGAACTCTTGGGAATTCT  
A\_14\_P136183 ACATATTTTCTTCTGTTGTAGGACAGTTCGTGTTTGGTTAAAGAGAGACAGTGGACAGTA  
A\_14\_P112045 CACTGTTATCAGGTTTAGAATATTGGATAGAGTCTTCAGGAATCCTTTATGGGCTGTAAG  
CUST\_9748\_P1426210822

GTGCCAGTCTTGCCAAATGTACAGTTTTATTTCTGTTTCAATTTATGTCGTCTCCATAAGT  
A\_14\_P106126 CAATCAAGCAGAAATGGCATTCCAGATTTGGACTTGTTCATATGAGACACACAAATAAGTA

A\_16\_P17912492

AAGCCTGAAATTATTTTGCCTGAACTACAAATGAGATGTGTTACTTTTACTGCGGAC

A\_14\_P118555 AGATTTATCAGTCAATGTAAAATGGTTAAACAATTGCACGTGCTCTTCTTTTGTGAGTTC

A\_14\_P135622 GTGTTGGGAGGAAAAATGTCCTTCTTCAATTTCCGTAAGATCTTCAAGTTGGG

A\_14\_P131431 ATACAAATAACCACTCTACTATGCTTACAGGTGCCTTTCATGCATGTCATCGTTGAAGAA

A\_14\_P124680 TCATATTTTTTGCCTCACAGTCTTCCTGTAAGGACTTAAAAAGACTTTTCTCCGGAACAC

A\_14\_P129254 CTCATTGTTTACTTACATGAGGCTGAACATCCAACAAACAACTTTGTTTTAGCAAGGA

A\_14\_P105930 GGGTTATTTATTTTGGCTGCTAAGAGGATGTTTTATGCTTTTATGGTAGATGAGATGGCA

A\_16\_P20107820

AAAAAATGTCTGTTAACACCTAGTGTCTTCTCCTGGATAATGAGGACCAAAGAATAACC

A\_14\_P132345 GCCTTCCTGCTCTGTGGGATGTATATGACTTTTGAAATCCCAAAATTATTGATTTTTTCAT

A\_16\_P19159338

CCCTTTGATTTGCCACTTTTACTAGACTTACACAACATAACACAAATATCAAAGCCTCA

A\_14\_P100941 TGAAGCCAGCAAGACTTATACATTGGAATTTTAAATGTATGGGATTGTAAGGAGGGTAGA

A\_14\_P121013 CTGAACCCTTTTCATCTGAAAAATTTTGTATGCACTGTCTGTCTTATACAAATACTGGCC

A\_18\_P15508690

TGGATGCAAAAACCTTATATGAAAATTTCCCTTCGCTAAGAGATAGTATCATCCTTAAGA

A\_14\_P130325 GGAGGTCATCCACTGTCTACTTTGTGTAATATCTAGGATTCTCAACATTTTTCCAACATT

A\_18\_P22841711 CTTGATCTGGCTATAATTTTGCCTGTGGAATCGCTGCTGTGGTGTTTGT

A\_16\_P15433198

AAAACCTACTTTAAAATAGTCTTTGGCCATGTATTCCTTATAATTGGACTCTGCCAAGA

A\_14\_P138421

GAAAAACAGTGGAAAAAGCCTAAGATGGTAAACTAGAAGGAGAATTTGGTTAGGGATTTT

A\_14\_P125440 TATTTGTTCTATAAAAATGCAACCACTTGGCAGAATGTAGTAGGTCAGTAATGGAGTGTT

A\_14\_P113319 ATCCTATTAAGTAGCCTAGATGATGCTGAGATAATAATGAATCATTGATGATGTCGGCGG

A\_14\_P120718 GTGGATTGCTCCAAATATTGAAGTTACAGGGAAATTATCTGAGTGAGGTAATTGCTTTGA

A\_16\_P36610291

AAAAAAAAAATACTAATCATTGATTTTGCAGGACTCAGATATCATAGTAAAAAATCAGA

CUST\_2158\_PI426210822

CCGCCTACCTTTTCTCTAACATGAGAAAACGCTTATGGAGATAATCAGTGGAAAAAT

A\_14\_P100373 TAAAAACTTTTATCTGTGAATTTTCTATTTCTTCCCTCCCACTGGGTTTTTCATCTCTAGCC

A\_14\_P119664 AGGAAAAATACTTTCACAGACCTTTACTCAAAGTGAACCTGCTCCAGTTGAAAAATAAAG

A\_14\_P112261 GATGAATACATACCCTGCTCTGATTGGTAACTTTTACCATTAAACCTGCAAATTTAAAGG

A\_14\_P109709 CAAAGCATGACTTTTTAATAACATGAGAAGACCTTGTTTAAAGGTCACATGGCCTTGTTAG

A\_14\_P110049 CTTTAATAAAAAAGACTAAAGGTTCTTTTAAAGATATCAGTGTCCAGCCTTGGCCAAGACC

A\_16\_P03147514

CCTTCACAAAATACCATTCCATACGTATATTTGCTACATATAGGAACTACAAGAAAGGGA

A\_18\_P25384941



AAAAAACAGACTGGCTTTTTCAAATCTATATCACCTGAGAAAGATGTATGTGTCCACCTG  
A\_16\_P18536631

AAGGCAGATCATGTTTAATGTCCCTCTAAAACCTTCTGTATGGTCATGGATTAGAATGTGA  
CUST\_3885\_PI426210822 AATTCTGGGCTAGTGGGGATCATGGGGATTTTGTAATTATTTTGGTAGCC  
A\_14\_P131657 CATGATCATCCTTTTACTTCTACCCCCACCTCCCTTTTAAAACAAAGAGGTT  
CUST\_7685\_PI426210822

TTCATTCCAGTGGGAGGTTTCATATTTTCTTAGTTATGTATCATGTAGTCTTCCTTGATTC  
A\_14\_P121899 CTTCAAAGTAAATATTATCATTATGACCCTTTGTGCTCTTCACAGCCATGACTGCTACTG  
A\_16\_P17197574

AAACAGCCCATCTAACAACCTATCAGTCCATCTTTAAGAAGTGGAAAAAACTGTTTAGCAG  
A\_16\_P21040707

AAACTAGTAGACCAAATCTCAGCCTTTAATAGTCATCCTGATGAGTTAACCAACCTTCG  
A\_14\_P100556 TACACTTTTAGGCAAAAATAGCATAAAAACATGGAGATACAAGCCAAGTGTGCTCATGTGT  
A\_14\_P115203 AAAATGGCAGTTTTGTCTAAGGAAGAATGTTGAGGGACATGTTTATTACATTTGGTAGCA  
A\_14\_P126053 AGGGTTTTGGGTTTCAGAGGTTTTTGACGACTGTAATTATTTGTTTTCTTAACTGAATG  
A\_16\_P18303874

ACCCATAAATAGTGCAGATTCGATTTCTCTGAAAAATATCAACTCTTCCAAGACAAGACT  
A\_14\_P102714 AGAAAAGGAAAAGAGGCACAGAGATTTTTATTTTTTACAAACAGTGTAAGGGGATTATTT  
A\_14\_P102749 GAACACACAAGTTCTTTCAACAGTCAAAGTTCTAGGAGTCTTTAGGAGATTGCAAGAGT  
A\_14\_P138533 CTGAGTCATGTGTTCCAGTGGCTTGGGTTACAGTGCATATACACAATA  
A\_14\_P109097 CATACTCTGAAATCGATCAATTTTACCTTGAGGACATCTCCTTCGGAGAGTTTGAAT  
A\_14\_P113202 CTGGAATGCACTCAATTTACATTTACCAGAATTTTCATGAGAGAACCTGAGATTATCAG  
A\_14\_P202216 CTCGGGAGATGCTGGTTTTTCATTTACAACCTTCTGTTAATCAAACCTAGAGCAG  
A\_14\_P102514 TGACATCAGCATCAGAACTTAATGAATTTTCTAAACTCAGTTGTAGGTGAAGGGGATTCT  
CUST\_4773\_PI426210822 ATCTCCCCACTGGAGCTCCATGGGCAGAAAGCACTCTTTCTCTTC  
A\_16\_P18503828

ACGTTAGTGCTAATAACCCAAAACCTTATCATCACTATCATAAGAGTAACAGTAATCGTT  
A\_14\_P136162 CATTTTACCCTCATCATGCACCACTTTAGCCAAATTCTGTCTCCTGCATACAC  
A\_16\_P35747774

AGAGTTTTTTTCAGCATGAATTATAAACAGGGTCCAAGATAGTAAGAACAGAGCACTCCT  
CUST\_4465\_PI426210822 CCTTTCATGAGCCTTGACTCTACTGGGCTCTCCCTGCTCCCCATG  
A\_14\_P104563 ACTTCATTCAATCCTTTATCATTATGACCATTTAAGGTGAGGACTACCCTAAGGATTAG  
A\_14\_P117726 CATTTGAATGTCATCAATTGCACACAAGATGTTTGTATCCTGTAAATAAAGATGCCCCAC  
A\_16\_P19637303

AAAATGAACGCAAGAATTAGTTGATACTCCTCTGTGTCTTTAACTGAGTAGCCTCTGTTC  
A\_14\_P112034 TTCATCTACTCCCTGTCCATATAGACCTAGTGAAATGGAAGATGTCACATACAGTGAAG  
A\_16\_P58424335

TAATCATCAAAAAGAAACATAAACGGACGTGGGTAATAATGAGTAATAATGGTTGCCCTG

CUST\_2823\_PI426210822

TGTCTCATTGGCAATTTCTCTTGATCTTCAGGTATATTGAATAAGCTCAACTATTAACA

CUST\_7974\_PI426210822

GCCATCATTATAAGGAGATACAAACATAGGTA AAAAGATGTGGTGATTGGAGGCAAAACT

A\_14\_P116295 CTGAGACGATGTTTTGGGAAAAAAAAAATTGGAAAAAAAAATGTTACCCCAACACGATGG

A\_18\_P10606340

ACTCAACATTCCCAATATTTGAAACATTTCAAACGGATATCTTAACTGGTCAAGACAA

A\_14\_P104822 ATGAGAACCAAGTAATTAACATCATTACTAGCCTAGATCCTAATTGAGGACATGAGATT

A\_18\_P14136601 CTTAATCACAGAGCCTTGTTTGAATCACTTGACTTTGAAATCCCAGGAATGACTTTG

A\_16\_P00685054

GTTGATCCATTTAAAAATTCAAGAACAAGCCTCATAAATTTTTATTAATAAAGACCTCT

A\_14\_P111475 GAACTATTATTGTTTTCATTTTACTTATTACGTAGATGCAAGTAAGAATTATGGCAAAAA

A\_14\_P108098 TTATCAGGAGAACATTTAAATGACGATAAAATGGGTTGTTTCGGTTTACTCTTTTGC GTGT

CUST\_9265\_PI426210822

TAATTCCATTGGAAATTTTTCTGACTTTTCTTCTCAGGACTGTGAAAAACCAGGAATTTTC

A\_14\_P118792 TGTGTGGTGACCATGGTAGTGTTAGATTGTTTAGTTAGTGCTGTAAGTATTACTAAGGGA

A\_14\_P117000 ACACTTTTTTGTCTTCTGTTTTTTTTCTTCCCTAGAATTGCAGTCTGAATTTCCCTAGATC

A\_14\_P132654 GCTGACTGCAAATGAGGAACTGAAAATAATCATTTGTTTCGTGTTTTTCATTTTTCAACTGG

A\_18\_P13860917

TGACCGTAACTACTATTCAAGAAGAAAAAAAAAACTACTCATTAGAACTTAAAAACATAAA

CUST\_3298\_PI426210822

CATTTTCTTAACGTGTCTTTCAAAGCTTGTCATAAATATAGAAATCTGTGTGTGTACC

A\_14\_P139456 GAGGAAATGGCTTTTGTTTATTTGACATCTGCAGAAAAAGCAGTTCCCAGGC

A\_14\_P129621

ACATGTGCTTATAAGAGAACACACAAAGAGACAATGCAACACAAGGAGATAAAGAGATCA

A\_14\_P129794 CTTTCTTGGTCCTAATTTATTTGTCAGTACTAGCCACAGTCTACACTCTACAAAAATACCCTC

A\_16\_P41085968

CTTTCAAATCACCTGATACAATTTGCCTCTACTCTCAATGATGAATTCTGTTTTGCCCTA

CUST\_5948\_PI426210822 AACCACAGTTGACTTAGGCTTCCTTGGAGCTTGAAGAACCCTT

CUST\_7646\_PI426210822 GCTGGAGTCACTGTGTGCTCCAGTTCCTTAAGGATACTTTTAGTTTATCTGATC

A\_18\_P16848731

TTACAGATTTAACATCCTACTTCACTAGATGCTCATAGCCTTGATCCATTACAGTAGCCA

A\_18\_P14874515

AAAAAACACCCTACCAAATTTTAAACACCAATAGAACAGATCCTATATAACCCTTGCA

CUST\_5208\_PI426210822 CCCGACACACACAGACTTTTCAATGCAAAAATCAAACCATTCCCAAATATC

A\_14\_P124710 CTCCAGTGTATTTTGGAGTTTTGATTGATACTTCATGCCTCAAATGGGGATTTAAAAGAT

CUST\_2650\_PI426210822 GTTAAAGTAGGGCTTGGCTCAGCCTGGCCTAACTGATGTTAGATT

A\_14\_P107071 TATAACCGCCAGCGGAAGATCAAGAAATACAGACTACAACAGGCCCAAAAA

A\_14\_P103853 ACATCATCCGAGTCTTTTACTCGCTTAATCTGCTCCCTAAAAACGGGAATATATTATCAG  
A\_14\_P136027 TTATGTGATGGACTGAAGTGCTCCCTTTAAAAAATGTTTTAAAGTAATCTGGGGCAGAT  
A\_16\_P00685418

TTAATAGTAGCCTCAAGTAAAATTCAACCCTTAGATGTTTATAGTCATCTTGGCCTGGCC  
A\_14\_P133307 TTCTGGGGAAGAATTTCTGGTTCCTACAGTATCCACTCCATCCTCAAG  
A\_14\_P133759 GTTTCTGCTTGCATCCCCTAATGTCTAGCAAATAGGTTTTTCATGTATCTACCTAAGTT  
A\_14\_P102288 CTTATCTGTTTTCTTACCTCTGGATTTCCGCTTGTTAAACACAGACTGCCAGAC  
A\_14\_P116621 ACAGATTTAAAGGATCTGATGGAAGCACGTCATCTGATACTACCTCAAATAGTTTTGTTC  
CUST\_1826\_PI426210822

CTGATATCCTTGTGAACATGACTTTTTGTGAGATGAGAGCCATTCAGCATGAGA  
A\_14\_P105976 CCAGAAACAACCTTCCTTATTCTCCTGGTTTACCCTTTTGTTATTCTTGTGTTGGATA  
A\_14\_P109012 AATAATCACTCATGTTAAAGTCACTGGGCCTGGGTAGTATATTAACCTTTTCTTTGCATG  
A\_16\_P30952598 AAAAATCTTCAAGTAAGTTGTGTTGTTTCTTCCACAGGACAGTTCGTCTGTCATCC  
CUST\_4369\_PI426210822 CTTTCTCTGACAGACGGCTCTAGGCAGGGGAAGCTCTGACTAAC  
CUST\_4517\_PI426210822

TATTGTTTATGTAAGGACCATTTGCCTAATGTCCCTGGAATTTATTTGCTGGAGCA  
CUST\_2523\_PI426210822

TCACAATGGATCTGAATTTCTGATCTTGTGTTTTTCATAAGGGAAATTGACAAATTCATC  
A\_14\_P139885 GAACACAGATCGGCAAAGAAAAAATCCAAGATGACAGATGAGGAGATCTTAGAGA  
A\_14\_P129584 TGGACAATTTATAAGAACTATGGGAGCAATATGAAGGTGCTTGAGAAAAGAGATGATGTT  
A\_18\_P22840140 CACATTTGGGATTCTGTTCGCCAGCCCCTCTGCACTCTGAAGATG  
A\_16\_P01615906

GAGGAAGTTATGTTATCTTGATCTGATGGATACTCAACGTGAACATTATTTCAACGTGCC  
A\_18\_P14134621

TCAATCTAGACCTTGCCCTTTTCTGATCACTGTTCTTGACACTGGATCTAAATTAAGAAA  
CUST\_4402\_PI426210822 TGCCTTGGGTTGAAGCTGATTTTTTCAGCATCCCTGGTTTAGCATATG  
A\_14\_P127445 GACATCACAATCACCTGCATAAGAGAACGAAGAGGAGGACCAGAAACAAATAGT  
A\_18\_P22840677 GTAATTTATAAGACTGAGCCCTGGCCTTATGGTGTCCTTCAAAGAATGGCATTAGT  
A\_18\_P16501633

ACCTTGCAAAGTAACTATCTGAGTATATCTGAAATTTGCCATCATTATCAACTGCCCAA  
A\_18\_P14679376

TCTCTCACACACAATCAGATTGAAACTATAGAGCATCATTTTCAAATCAAACCTCCACCAG  
CUST\_370\_PI426210822 ATATCACACTGAGCACAGAGCCCCAGACCCAGCTTCTCTCAGAGTA  
A\_16\_P36231138

TAGACACTTGTCTTACCATATGTGAAAAGTTGTAAGACCAAATGTAACATCAAAGGGCAG  
CUST\_10035\_PI426210822 CTTAATCAGGGTGGGGAAGGCAAGATGCGAATTAGTTTGGCAAGA  
A\_14\_P107528 CAGAGACAGAAATATTTTGGCACTGTTGATTACTATACTTTAAAGTTCTATATTATGAAA  
A\_14\_P134232 CTTCTCAGGGATACACACCGTTTTAAAGGAATTGCTCATTTGCTAGTTGTATGTTTTGATAT

CUST\_7055\_PI426210822 TGACAAGAGATGTGAGAATTCCGTTGACACTCACTGACCACCTAGAAA  
A\_14\_P119652 TTCTTACTTTGAAAACCTGAATTTTCAGGGAAAATCTGCCAGTCATTTCAAGTTCAAG  
A\_14\_P130916 TGCAACAAATTTAGAGACTCAAATGGCAGGTCTCTTCTCATTCTAATCTATTTTCAATGT  
A\_14\_P138727 CTTACTTCTTAAGCAGGCTTTGAAAAATGTTTCATTCTGTCTATTTGTCAATGGTGCCAGGAT  
A\_14\_P110812 TAGTTATTTTCAGTGCAGAATCGATTACGTGTAAGCCTCTACCTCCTGCACTTA  
CUST\_10031\_PI426210822 GACCAGTTGGACTTGAGAGGTCAGGGAGAAAAAAGAATAGCTGTCTC  
A\_14\_P116790 GTTAATATAGGTGGGCACACTAATATAAGGAGAACTAATTTTATGGGTAGGGGAGAGTGT  
A\_14\_P104844 TTTCAGTAATCATTCAACCAACGCTTCCATGTCTCTACTCTGTGCGTAACAAAGGC  
A\_14\_P139914 TAACCTTCTGTTCCGGTGATGAAATTATCACTAATGGTTTTTCATTCCTGTGAAAGTGATGA  
A\_16\_P18508257

TCTTGGTTCCTTCCAGAAATTATAATTCCTTCAGCAATAAAAATCAACCTGTGAGCATTCA

CUST\_7289\_PI426210822 TCCTTGATGGGAACATCATCACCTTCACGCTTTGTCTTTAATTTGAGAAGCTT  
A\_16\_P02445254

TCAGATTGCCAAGGTATCACTAGAATTCTTCTCCTTAACCATTTTCTTAACCATTACTCA

A\_16\_P18549409

CAGTTCCTGCTAGTTATAGGATAACTCAACTACTTAGCATTTGATACAAGCCTTTGACA

A\_14\_P135408 ACAGATAGAACACTGTTTACATCAGGGTATAGCACAGCACAATATACTGCCTTTACTACT  
A\_14\_P118192 CAACCTGATAATAGTATTTATTCCCAACAGTGCAAAGAAAAAGAAGATGGCTGACAAAAT  
A\_14\_P136632 CTGACAATTACCAGTGGCACACTGCACTACAATTTTCAAGTTTAGTAAGTGCAAATTAGT  
CUST\_5525\_PI426210822

CAGAGAAAAGAAAGCCTTACTTCTGGCATTGGAAGTCACCAACGTAAGAGCTA

A\_18\_P24515496

AAAAAGTCACTGGAAATGAGAGCATTAACTAGGATACAAAGTATTGGATGGGTCCAATTC

CUST\_9217\_PI426210822 AAGTCTTGGTAAGGATTTGTTTAGTGGTTGGGGTAACACGGGTGG  
CUST\_2896\_PI426210822 CTGAGTTTGTAGCAGGACGGCTGCATTTGGGCAGAGCAATACAC  
A\_14\_P138044 CTACGAATTGCTTCTTCTCACAGAACTGTGACATTTATCCAGGTAAGGAATAACACATG  
A\_14\_P114000 GCATATTTTCTGATGTTGAATAAAGTCTGAGTATTAATAAAGTTTTTGTCTCTTAAATA  
A\_14\_P114426 TTTCAGCAGCATAAAGAAAAACATCTCATTCCTTTTATAGAAATGCAATCCCCTGAGGTT  
A\_14\_P116034 TTGTATTGCCAGAGGTGTGGCTTTTGGCATTAACTTTTATTTAATTTGGATGGCTACTTT  
A\_16\_P02606498

GCCTCCGTCTATAGACAATGATCTCTTAAATGACCATTGGACTATAAGAATGCATCTCTT

A\_14\_P124491

AGAAAACAGAACAGGTGAAGGGACTAAAAACAAGTCAGGCAGTCATTTGGTAAATATTAT

A\_14\_P101664 TGCCTTTTCTTTCACGTGTAAGGTCATATATGTTCTTTGGAGCCAATTTGAAAGAGAAT  
A\_14\_P119861 CTGAGGACTTAAAGTATTCCTCAACTCAAATGATTGCTGCTGGTATTCTGTAAAAAAT  
CUST\_5047\_PI426210822 TCAACATCCCCAAAATGTGTGACTCGCCCAAATTAAGTGGTGTGCATAC  
A\_14\_P107975 AAGGCATAAGAAGTCTTTTTGGCTTAATGGGGAAATGAAATGTTCTCTCATGCAATAAC  
A\_14\_P115533 CAATTTTATTTGCAGAGAACTCATGTTCTGGTTTTTGATTTGAGGTTTTGGTTTTGGGTAT

A\_14\_P131063 ACTACTTACAGTTAATAGTGGCTTTCATATGTTATTTACTGCTATTAATAGGCTGTCAA

CUST\_4532\_PI426210822 GAAGATTTCTCTGGGGGGTTGGATTCATAGATCTGCTTTGGGGCT

A\_14\_P107747 ACATGGTCATGAATACACAGAGAAGTTTTTCATAACACCACCTTTTTTCATCATGATCCATCT

A\_14\_P138894 TGATTAGTAGGGGGCTCTTGAGCAGTTCAAATCAATTTATTCATTCACATCATTGGTTAG

A\_16\_P16240764

AAAAATGGAATGTTTGTGTTGAAGGTGTAAATAAAAGCCCATGATCTTAAGTGTCACTGCCT

A\_14\_P104236 AACCAATTCCTGACTACTCTATATGCTGCATAGAACCTGGAGAGGATTTTTCAAAGTAAA

A\_14\_P127856 ACACGAATGTCTTGTCTGTTGACGAAAGGAAATCCAGTATAGGAAATAACAAAGTTAGCA

CUST\_3356\_PI426210822

TGCCCTTTTAACTGTTATTCTTTGAAGTCACACATGATAATGTGTTCTGTTTTATTGG

A\_14\_P200306 CTGGGGGCAACAGGAGAATATATCAAGAGGTGAGAAGTGAGGATCAAG

CUST\_5505\_PI426210822

GGAGGACAACACTGTGAAAGAAAGGGCATCAGCTAATAATAAGAGTCCAGTAAT

A\_14\_P129817 TTTCTTTGACTAACTCCTACTTACCCTTTAAAACCTTCAACTCAGGTTTCACTTTCCCAT

A\_16\_P39364378

CGCTTCAAAGAATCTTTCATCAAGCACCTTACTCTTAAACACTTTCCATAATACCAGA

A\_16\_P19598990

AAACCCAATAACTTTTCATTCTGCCTAACAAAAATAGACCTCCTTTAAAAAGTGGTTGC

A\_14\_P136251 ACTTGTGCTTCAGAATAAGTTGTTTCACAGACAAGGTTGCATATGTTAGGTGACAATATC

A\_14\_P116828 TACCATGAATTAACCATCAGTTTCTGTGGATTTGTCAAAGCATCCTCACTCATAAAGA

CUST\_5598\_PI426210822

ATAAAGCTGGAAGCAATTCAATTGTGTGTCTACTTTATGTAAGACCTCGATGAAAAATA

CUST\_7395\_PI426210822 GAGGATGACCTCCAGGTGGCTGAGATTCCTCCAATCTTTTTAT

A\_16\_P03450213

TCATGCTCCTCAACCTAAATTCATAAATACAGCATTCCCACTAAATATAGCATTGCTCA

A\_18\_P13789303

GACTTCAGGGTAGTAAGACAGTGAGTTGTAGACTGAAGACTAATGCATCTAGGTTCAATTT

A\_14\_P119184 ATAGTCTTATAATTAGCAAATCTTAATAAGCAACAGCACTGCTTCTCTCAGCATGCACAT

A\_14\_P111880 TTGGAAAACAGAAATTACAGCACTGGACATTTCAAAGGTATTGAATGCAGGGATTGAAAG

A\_18\_P22842483

TAATTTTCTTTCCATCCTAGGGTGTCTCTTTGCTCTCTCCATATTCTCCAAATAAAAA

A\_18\_P17391833

TGGGATAGCAGACTTTGTCTAATCATCTATCTCAGAGTTTAGGATACCACACTCGTTTAA

CUST\_6068\_PI426210822 CATCTTGAAGCCAGTGGGAGTACAGCCAAGTTGTAGTGTAAGTGCTTTTAA

A\_18\_P11869943

GGGTAGAAAACGATCAAATGATCATGAGCAAGATAGTGACATAATTCTTGAGGAAAGCAC

A\_16\_P16233158

TTTCCCCATTCTAAATTCACAAACATAAGAACGCAATCTAAACTAGTCATCGAGTTGGTG

CUST\_2822\_P1426210822

TATGTTTCATCCTTCTTGGCTGTCTCATTGGCAATTTCTCTTGATCTTCAGGTATATTG

A\_16\_P16191397 GTGATTGGTGAGGACTGTTTGACAGTGTAGCCCAGGACTGTGCAT

CUST\_4944\_P1426210822 GTCATTAGAAGGCTGTCCACAGAGGGGATCAGCCCCCTCAATGA

A\_14\_P137019 AAAATAACCTTTTCAATAGCCAGTTGCTTGTTCGAAGGACTCTTCTTCGATGGACTAT

A\_16\_P19008438

AGTCCCTGATGATTTCACTGTATTGTAGCATAACTCTGGTATTCATAATGTCAATTCTGA

A\_14\_P200735 CACATAACTTGATTCAATTACCATTTAGTCATTTCTCCAAAGGATAAAGGCCCTTACCGC

A\_16\_P18396113

TGCCAAACACTGAAATTTATCTTATGTCCAAACTACTCGAAATGAAATACAACGGTGCAG

A\_14\_P131321 GGAGAGTTGAGTTGGACTTGAAATAGAGCACTGTTGGATTTGAAGAATAATGTTACGTTAT

A\_14\_P108711 GAAAATGGAGTTATCCAGAATCAGCGTTGCTCTCTACGTGGTCATAACATGTGTATTATA

A\_14\_P139977 AAGGAGGGTTTAGAAAAAGAGAAGCCACTATAAATAGTCACCTGTCCAGTCTATGCTATT

A\_14\_P120185 CTGTGGTTTCCCTTGGATCTAAGAATGGGACAAAATACCTATTCATTTTTATATGCACTG

A\_14\_P202502 GGAACATAGGAACACAAGAATAGATAGGAAAATACCAGTCATGCCTTAGCATCACAAATG

CUST\_2550\_P1426210822 ATTGTATAGCCCAGACAGTGGTCGTCTGAGGGCTCTCCGGCCTCAA

A\_16\_P02754738

TTCACCATAAGTCCAAATCAAACGTAGAACATGACAAATAGAATTAGTTCCTCTCTTCCC

A\_14\_P129818 CTTCGGCCGTCTTCAAATATTGTTTAAATTGCAACTCCGGAGGAAAAGTATTTTTTGTA

A\_16\_P17614982

AGAAAAAGCATTCTACACATGTCAATCCATGTTGAACTCTTAGAGCACAAAAACAACCT

A\_16\_P16855081

ATTCAAAGACTCCAGTAAACCTTATCACCAAAAAGAAAGATACTACTAAACCCAGGCTG

A\_16\_P21360315

AAATAAAGATGGCTTCTTGATGTTAATATGCCCTGCAGATATCTTACAAAGCCCCAGTA

A\_18\_P14138717

CTAGTTCAATGATAAAATTTTTGTCTGGGCTACATGGAATCATGGAATTTTCAGTTCTGCC

A\_14\_P127035 ATACCATTTTGTATCTTTAAGACTCTCACTGTGTGAACATCATGTGCATCAATTATGCCT

A\_14\_P127221 GAAACAGGCAGTTAATATCTGTCTCAACATCTACATTCAGGAATTGCAGATATTTTGCT

A\_14\_P127903 TAAGCAAAGGCCATCTTTTTATCTAGGAATTGTCAAAGAGAAGATTCCAAATTGGAAGGA

CUST\_5774\_P1426210822 AACTGTGCTAGGTGCTGGGGTTATAAACATGAATTACATGATTAGGGCCT

A\_14\_P120453 ACTCACAATTCTTCTTTCAAGTTCAAGGCATCTTCTACTTTATCATGTGACAGCATAAA

A\_14\_P128672 GAACAATGCCACGAATTAGACATGGCTACTCTAAAAATTCTCTGTGGAAACAATATTTGG

A\_16\_P17216796

ATGCAGGGAATAATAGTCAAGGCCACTTAATAGACACAATACATGGGGATCTTATTATGC

A\_14\_P102169 AGTGGAAAAATACTCACCTATTTATCTGACCAATTTCTACTTCGGTGAAATCATTGGAGT

A\_16\_P02426392

GGACTATTGGCAAGGTTTTTATAATCTGCACTAAGAAAGAGTTTCATCTACCAGATCAGC

A\_14\_P121844 ATCTTTCTCCCTATGAATTTTAAGGATAACCATGGAATAGCCCTGATGGCATATATTTCC

A\_16\_P01649618

CCATTATCCTGTCTCAATAAAGAATTGGAAGTGTCTGGTATCCTGTTGGAGATTTTACA

CUST\_1479\_PI426210822 ACTTTCCTTCCTCACCCAGTCTGGATGGCATCCCTGGGCCAGC

A\_14\_P124797 CTCGAATGTTCACTGCTGCTATTACCAGGCAAAATTTGGAAATACAGTGTGCTTAAATT

CUST\_5007\_PI426210822

GTCACATTTACCTTGGTTAGGGAAGATAGTGACTTATAAAAACCTCAAACATTTATGTTT

A\_14\_P117525 GTAGGACTCATCCGTGAAGATAGGTTTGTATGAATTTCTACAAAGTATTAGAGAACATTCA

A\_14\_P123144 AAGGGTTTTAAAGAGGAAGAGTGATCCTGAGACTTGGCAGAGTTTTCTGAAAAG

CUST\_7188\_PI426210822 TTTACACTCTGGTTCCAATCCTTCCCCCTGCACACATGAGTCAG

CUST\_8079\_PI426210822

CGCTTCTTTTTACTGGTCCACAAGACTTGGTTATTTTCTATTGACACTATTTTCAAGATC

A\_14\_P114892 CTTTTTGTATATAACCTGCAGTTTACGAGGGGAAGCAGTGATGCGTATCTATACAAATTT

A\_16\_P17592216

AATACATGACACATTACTAATCTGAATTTACCACCTCTCATACTTTTTCTCTCCCCAGGA

A\_14\_P104305 TTGAGGAAAGGTTGATGAAAGGGGAAAATTTGGGACTTTGTGTAGGTATCAATTATGTTA

A\_14\_P117780 GGAGGAACAAATCCAAAAAGAATAACAGCAGTAGCAGGTAATTTGGTAAATACTTCTTTC

A\_16\_P03039825

ACTCAGAACACTACTACTCATAACAGACAATGTTCTTAAGTCTAAATTATCCCCTCTGGT

A\_16\_P18140657

CTAATAGTCCCCAAAGAAGAAAGTAGTTGCCCTTTTATTTGACACAAGACATAAACCACA

A\_14\_P118352 AGCATGACCTTAGATGACTAGTCTAATTGGTTTCAGCATCTTCCCTTTGTAAATGTGATGAT

CUST\_8109\_PI426210822 ATCAATGTGCTCTCTTGGTCTTCCACACCTGAGGCAGCCTGTAT

CUST\_4061\_PI426210822 CAGGGAAGACAGAAAGATGAGGGCCACATCCACAGAAGTCATTTT

A\_14\_P126515 CTGAAGGCTAAAGTAAACCTTGCTCGTATCAAAAAGTAAAGATTGTGCAGACCTGTTGTA

CUST\_1768\_PI426210822

CCAAGGAGGGAAGTGAATTAATAACTGTATGCTTTAATTAATAAAGCTGACAGTTGAACCTC

A\_14\_P202246 CACGGACACTTAAAGTCAATCTGCGAAATAATTCTTTTATTACACACTCAGTAAGTTGGA

A\_14\_P128211 TCATTAATAAATAGGTTTTCTTCATTAAACACAGAACATATAACAGATTGAAACACTCCC

A\_14\_P131648 GAGTGAACCAAAATTCCTCCTAAGTCACATAGTAAAGTTGGAAAACAGACCCATG

A\_14\_P120169 GAATGACTTTAGAAGATGGTTTTAAATTTTCGCTTGGCACTTTGCCACCTAGTC

CUST\_2809\_PI426210822 ATAGAACCAGTGTTGATTGGAATTCAGAGCACGTGATCACCTGAAGGAAAT

A\_18\_P16324992

AAATGACATTCAGGACCAAAAAATAAGAGGCATGAAACTACTTTCATTGCTACTGTCAGC

A\_14\_P116667 TTTGCTAGGTAGAAAATATGATAAAAATGGAAACCTGGATCCTTGGTGGTCTACTGAATC

A\_16\_P01648559

TAAGAATCCTTTCTGGGTTTTAATGTTTTCGCGTTATTCTAACAAAGCCGAATGTGTATCG

A\_14\_P120198 AGGTCAGTAAACCATTTGAGTTAGCATGTGGTAGCCTTAAACTTAAAGGTTAGTAGAGT

A\_14\_P136082 CATGACATGGCACATAGAGAAAATATTTTTTTCTAGCACACAAGAGCAACCTGAAAGGCT  
A\_14\_P100909 CAGTTCATTTTTGCTTTAGACGATTCTTAATTAACACCTAACGTGCCATGACACCAA  
A\_14\_P138513 ACCTATTTACATGGGCGTTTTGTATACAACCTATTTTGATCTACACTTGATGTCTGAGCA  
A\_16\_P18211513  
AAAGTTCTGATGCCCTCATTCTGATAATACTCATCAACCGTAGAAACCATTTTGACATTC  
A\_16\_P20858958  
TGGTTAAAGTCATTACATGCTACTTATGCAAGAAGGTGAATGTAAACTGAGAACTGGTCA  
A\_14\_P120844 ACCATTTTTTTCCTTTTTATTACTGCCACTAAGGACAACCTCATCTTCTCAAGTTTGAGA  
A\_16\_P21083865  
AAATGAATCAGATGTTTGACACAGTAGAATTA AAACTCCTAACTTGACTGATATCCGCC  
A\_16\_P00485950  
ACCCAATTTGTGTTAAAACCTTATGACCCTATCTCCTATACTTTGTCTTATCTTGTGCCT  
A\_14\_P139965 TATTTAGGAACGGTTATGAAACAAACATATCACCCACAATATCTGCACTGACTATGGCAT  
A\_14\_P132132 GATGATCTGAGATAAGATTCTTACTACATCTTAAATTCCATGACTCTGCCAGTGAGTGGA  
A\_14\_P132526 AGGTGCTTGTAATGGTGGTGTTTACCATGATTACTGTTCTTACTATCAGTAACACTTGT  
A\_14\_P109123 CTTTCTCCCTTTTTCATGCTGACACAACCATGCTTTATCTTGCTTCTTTTTGTAAAAACA  
A\_16\_P19850449  
AAATAACAGTCTCCCTGTAGACTAAAGCACTATCAAACCTCAAATGAGGTAGGGTATCAC  
A\_14\_P109009 CCCAGTCTTCACTTAATGACTGGAATTTGTTCTTGAAAACCTGCTGCTAAATGAAAATCT  
A\_14\_P121768 TATTTGCGTGGGTCACTCTGATTATAGGACTTCACTGTTTCTTGAACCTAAAAGTGCAAG  
A\_14\_P104125  
TTCAACTACAGAAAGAACTTAAGACGCTATTGAGAAACCATTCCAAAACACACAACCTGCA  
A\_14\_P100758 TGATCACCTACGTGAGTTTATGAAATACAGGAGGGATTTTATCAAAGAGAAAAGTGATG  
CUST\_4310\_PI426210822  
TGGACTTGATTCTATCAGTTGTGCTCATGCTTTCCCTTGAATCTAGATAACCTGTA  
A\_14\_P103900 TATTTAATGACATAACTGGCTTGATTTGGGAACCATTTTACCATGTGTTAGCCTCAGTTG  
A\_14\_P134905 ACAGTCTTGATTTCCAAGACATCTTACATGACTTACAAGCAATAAAGACAAGAGCAAAGA  
A\_14\_P119252 TCTGAAGATGATATCTGTGGCCATGAGACCAATTTGGTTCATATATAAACCACAAAAAG  
CUST\_3742\_PI426210822 GAAGAGCTTTGGAGCCACAGCAGA ACTCCAGCCAGGCTCATCC  
A\_14\_P100830 ACAGTGACCCTAAATCTTTGGAAACATCTGCTTTTGTCAAGTCCTACAAGAACCTT  
A\_14\_P124999 GGATTGAATAAAAATAAGTCAGAAAACAGGCTATGTTAGCAAATGCACAGTCAAAGGGGTA  
A\_14\_P125811 CAAGGACACAGAGGACAATAATGATTTTAGTTGTATTGTCACGATAGGATTGAAGGTGAT  
A\_14\_P125250 CTCTAAGCACTTTCCAAACAGTTCTCAGTGAAATGCTGAACTACTTGGAAAAACACACTA  
A\_14\_P120735 CTTTGATGTGGGAAGAATATTGAATATTGTTTACTGAGATGGAGATGGGTGGAGGTAATT  
A\_14\_P134084 CTCAGACACTTACCAACTCCTATAACTTTTTCAATCTTAATGCAGGATGCGTCAATTTCT  
CUST\_8971\_PI426210822  
TGATTTAACATGAGATATAATTTGAAGGGCTCTTTAAGGCTGCTAAGCAACCATGAATCA  
CUST\_3699\_PI426210822 AGATGTTGGGTTGGTCCTGGATGCTGCCCTGTAACCTCCATCACAC



A\_14\_P119853 TTCGCCCTTTCAAGAATATCTTCTTCAACTGATCCCTTTGTAAGTACGACGATAAATATTC  
A\_14\_P122188 TAACACTGTTTCTGCAAAAGGTTACTCACATGAATATAATGTTTCTTGGGCTAATTAATC  
A\_14\_P106943 CCAAGGTTACAGAAATTGAAAGTCTCTCATATTCTCACTTCCCAGAGACAATTAAGTTTG  
A\_14\_P116653 TTTAAGGAATAAGAGCATACTAAAATGCACAGATCTTGTGTTTGGACGAACATATGCC  
CUST\_7736\_PI426210822 ATGAGAGAAGGTCTTTGCCAAGACAAGCATCTCTTGTGCCAGGCA  
A\_16\_P18427080

AAACCCATTTCCATAGCATGAAATTCCCAAGATTCATACAGGTCATTTTGAGTGTATTGA  
CUST\_797\_PI426210822 ATCTGCCTCCTATTTTCTTATCGTAGGTTGTGACAGAATGCCTTTTTCTCTTGC  
A\_14\_P105311 CAGAGAATTGACAATTGATTCCATAATGAACAAAGTGAGAGACATTAATAAATAAGTTTAA  
A\_14\_P129677 CAGAGTAATCTTTTGAACCTAGTCTCTTACTCTTCTCTGCTTAAAAATCCACCTCTGTTC  
A\_16\_P00161202

CCGGAATAGTGATTACCATTACCCTCATCAATAGGCTTTATTAAACACCCAATTGTATCA  
A\_14\_P126859 ACAGTGAAGTCTCCCAACTTCTTTTTTTGTTTTCAAGTGAGTCCCAACTACTTGATTAA  
A\_16\_P16191097 TTAGAAAAATGGGGGACTAAATTGAAAGTTTCTGTAGTTCTTGGCCCTGTAAGAGGA  
A\_14\_P115351 CTCAAAAGCCTTATTGAACTCTTTCCACACATTTTGATTCCCTAAAGATAGAGAAGAGA  
A\_14\_P102809 CAAATCGGTCAGATGCATTCACAATAATAATCCCAAGAAGATTGTAAGAAACTGCAT  
A\_16\_P20857881

AAAAAATAGCATGCTCATGAATTCCAACTCTATGGGTTTATTTCTTCAAGGCTCTTCCA  
A\_14\_P140000 AATACAAAATGCATCAGAAATGAGATAATGCGGAGTAACTTGAATGATCAGACTGGTC  
A\_14\_P109584 ATACCCTTTCTTTTCCACTTTGAGATAGCCTACCAAATGGACAATTCAGTAAAGAACAAT  
A\_14\_P127709 CATAAATATTGTTTTTATAAACATGAACAAAACCCTTCACCTTCAGTAGCACAGGCCTC  
A\_18\_P14580935

TACCGTAATCTACTGGCTTTTAAAAATATACCATCCACTGAACAAAACCTCTTGAGCACCT  
A\_16\_P21434599

AAAGAATGGGACTACATACATCATTGAAGGATACATAGGGATAGATTGGAAATCATGGGT  
A\_16\_P00685324

TGGTCTCTAGTTCTAGAATTATTCTGCTTTCTAAGGTCAAATCTTACTGGACTGATAAAC  
A\_14\_P121277 GTGAGGCTTTTAAAGTAGGAAAGTGGGATTATGTCAAGATTTAGGAAAATTTTTCTGGCA  
CUST\_4271\_PI426210822 AAGGAGAGTTTGTTTTTCTCAGTAGAGTAAGTAGTGACTGCCTAGGTGGCA  
A\_14\_P135019 CCTACAGATGAACTATTAAAAGACCTGCAACATTGAAAAAACTCATTTTTTCCACCAAAA  
A\_14\_P139732 CTCTAATCAATCCTTTTAGAAAAAGCCCCAGCCTTCTAATTTCTAAGTAATGTCCATCA  
A\_14\_P118482 GGTGTCAGATGTTTTACCTCTGGGTAGAATATTCTTTCTCTGATTTTCTTTTCTTATC  
A\_14\_P105384 TAATCTCAAATATTATTCTTTTCCAGACTGTGACAAAGACATGCTGATCAACATTCTGA  
CUST\_9679\_PI426210822

TTTTACTGTCATGAAATAGACTGTGACTTGTTATTTATCATTATGTGACCAATTATAGT  
A\_16\_P02299409

ATACCCCAATTGAGTCTATCAGGATTAATGTCACGCTAATGAACACAAGAAGGATTAAGC  
A\_14\_P133242 TTAATTCTGTCTTTCTGGTGCTTTTAGTCCTGATTCTTGGAATAATCCAGTGATGATGAC

A\_14\_P121464 TCTTCAGTTGTCTGCATGTGATATTGTCATCACTCAAGTTGCACAAAATTATCAGAATCC

A\_16\_P18745720

CTGACATACCTCACTTCATCGAAATTCACCTTTACCCATTAAAATGAAGGTCAATTTGCCT

A\_16\_P17360454

AGGACAAGATTACAGTGTATGCTCTCTTATTCACTCAAGACAAACCTCATTTAGTTGCAG

A\_18\_P22840673

GAAAGGGTGACTGAACTATCCCAAAAATACAATGGACTTAATGATGGTTAAATGGAACCTG

A\_14\_P127208

AAGTAATTTCTGTTTTTGTGAGGAAGAGAAAGGAATGAAACGGGAGAAAAAGGCTATTA

A\_14\_P101044 ATCTTTTATTGCCTCCAGTTCCCTTCATAAGAGTTTACTAGAGAGGAAAGCAAAAAGTCTC

A\_14\_P201427 TGGATGTCCTTCTTTGTGTTTATTAATGCAGATAACAAGAGTAATCCACAGACTTAAAAC

A\_14\_P111083 CTCCACTTGAGAAATACTGCATATACCTCCTAACTCATTAGAGGCATCCAAATATCTTG

CUST\_7560\_PI426210822 TTCTTTAAGAAGAGTCTGAGATGTACCCAGGAGTAGCAAAGTGGATGTG

CUST\_8679\_PI426210822

AATTTTCTAAGGAGATATATCAATGTCTTTGCCATAGGGTACCATTAGGACATTGACTTC

A\_16\_P20771277

AAACGCATACTTTGGGACATACTAGTCTAACACAGTTTTAACACACAGTGTAGTTGTCTC

A\_14\_P201699 ACTTGATTTCATTTTCATTTTCCAGTCTACTTTGGGGTTCTCGCAGTGGATAATTTAGC

A\_14\_P116649 AGATTGATAGAAATAACAAGCGGAAAAAGCCACAGCCTCATTATAACCTTTAAGAGTGAC

A\_16\_P02420742

TGGTTATGCTTGATATAGTTCATACTGACCTTTTAACTGTCTCATTTTTGTGTCTCATGGT

CUST\_7510\_PI426210822 AATGCTTCTCTGGTAAAGGGAGGCCAGTTTCAGCCCCTGGTGCAA

A\_18\_P11054847

AACCCGAATAATACTCCAGTTTATGAAATCCCTTCCTAATATATCAAAGGCTCTTCACCT

A\_14\_P125709 GCACCTGGAGACTAAGACTATGCTGCCATAATCCTCTTCTGACTTTT

A\_14\_P138089 AGAAAATGGTTACATTTCTTAATACTTACTTTGGTGACTCTGGGGTCAGAGGAAGAGATA

CUST\_792\_PI426210822

ACTTTAGGACCTCTCCCCAAGCCACACAGAAAAGTATAATAATATGATTTTCAAAG

CUST\_7906\_PI426210822 TCTGAGAAGCCCTGTGGTTTTGTGAAGAGCCTCTTGGCTTTTCTTTT

A\_14\_P128416 GCTTAAGATATCACGTTTTACCTTTCTATAGATGCCAAAAATGGTTCCAACGGACACAAG

CUST\_1761\_PI426210822

CACCAGATTCACAAATTATTGCTTCATTGTTGGAAAGAGGAGTTAGTTGGCTTTGA

A\_18\_P11644138

CCACTGTGGCTATGTTAATACCATTTTCTTGCTTTACAAGTGAAGACTGTTACATGGAAG

A\_16\_P01522950

AAAGGGGATAATCCAATCAATCATATCTAGCAACTGAATCCTAAAATGTCATCAATGGGC

A\_14\_P122615 GCTCAGGACAATCGTTGCCTTGGCTAGATTGTTACCTAGGAGACAAC

A\_14\_P104764 CTTACATATTTTCCATTGCTCTCTTAGCAATATGCTCCCTTCCCTTTTCTGCCTTTTCTT

A\_14\_P123010 C TACTCTTAGGCCAGATAGCCTGAGCAGACAGACATGATGTGAGTTGTC  
A\_14\_P122688 G GCTATCAAATACTTACACTTGAAAAGGATCAGGTATGTTTCGATTATCTTCTGGTATGTC  
A\_14\_P125898 A AAATACTCACGGTCTTTCTGGTGGCCCTCTTCATCTAGATAAATGTTAGTCTTCATGTT  
A\_16\_P17843371  
ACTTTGTATCATGCTAGGGTCATGAGAATCAAGTCATAAAAAACAGGCAACAACAGAG  
A\_14\_P116081 C TTGAAGAACCATCAGAAGATCTCTTTCCGTTTCATGTTTGATGTATTTTCTTGTTCATGG  
A\_14\_P102876 G ACAGCCATTTCTATTCTGATGAGACAGATTTTCATAGATATCTAAAGTGATTGGTGCTC  
A\_16\_P20353628  
AGGGATCTGAAAATGATTATGGGCTGAGGTATATGAAAAATAGCAGGGTTAGAACAATA  
A\_14\_P133715 C TTTTGATGCAACATAATCTCCTTTGCAGGTCACCTAACCCATTTGTGGCTT  
A\_14\_P132979 A AACTTTGACCCGAAAATCCTGAATGTGAAGGTAAAAGGGGAGATTTTCAC  
A\_16\_P19748040  
AGAAATTGGAACCAATAAAAAAGGTAATCAGTTGGGGATAGATCATTATAAAGCCTCCA  
A\_16\_P20190791  
ACTTCCAATCAGAACAAGTTACTTCTAGAATCCAATGTATTTATCAAACCCATGCTCA  
A\_14\_P116826 A GGCAGGCATGTAGATGTAAGTGTGGTTATAAATTTTCATGTTGTCCACAAATGTCTTTC  
A\_16\_P16905757  
CACTCCAAACTATTTACAAACACATCTACTCCTATGAAAACCTCATTAAACCTCAAGGCA  
A\_16\_P39989500  
ACAAAAATCTACTAACCCCTTCTAGGCATGTTATAGCAAATACCCTTTTTTCTACCCATCTT  
A\_14\_P133054 T TTTTAAAAGTTCATGAAACTATTCACCCCTCCTCAACCTGTAATACACATCAACTTTGCA  
A\_14\_P131378  
GAGATGGAATTGAAGTTTGAAGGTTAGGGAGGAAAGAGAGAGAAATGTTAGGGTTAAATA  
A\_14\_P128810 A GAAGTGATACTATGCAAACCTGGATACCATGTATCAAGCACAAAAATCCTATGGCATT  
A\_14\_P103851 A CTTAGCACCAGGATTACAAAGACGAAGAAGGAAACAAAAGTATACCACAATATGACCAT  
CUST\_167\_P1426210822  
GTCAAGTCTCTGTAAAACAGCTTATTCTGGCAACTAGGAAATTGAGCTCACTCTTG  
A\_14\_P108215 A TTTGGAATTTCAATTCCTCCGGCTCTCTGGCTTTGTTTACAAAGTCAGAG  
A\_14\_P110216 A ATATTTAAAATTGGGTTTCTCAAGTGTTTAAAACCACCTTCCACTGGGCAAGATTTTGA  
A\_14\_P139015 G CACATGCACAGTCATCCTTGTGTATTTTGTATATGCACTTTCTTGCACATTTTACTTG  
A\_14\_P116056 C TTGAAAAAATAAATGAAAATAAAATAACTGGGTAGGTGCAGGCACTTGCTATCTTGGGG  
A\_16\_P16066593  
GATGCTAAAAATGGATGTCTCAGGTTGAAATTTAAATTCTGATAGGCTCACCTAAGTTGC  
CUST\_6292\_P1426210822  
AGAAAAAAAAGAAATACAAATGTTAAAACCTTTTTTTTTTTTTTCTGGTGCTAAAGAACAA  
A\_14\_P126119 A TGGAACCTGGGAGAAGAATTTTATCTTGATCAGAATAAAAAGGAAAGCAGACAGATTGCA  
A\_14\_P110649 G AACCTTAACAATAGTAATGGATGAGGAAGGCAAACCTCTGTTGTCTTCACAAACCAG  
CUST\_9979\_P1426210822

TTGTTTATTTAATCCACATCGCCAGATAGATTCTTAATTCTCCTTTTTCTCCAACCTCCAA  
A\_14\_P132428 AAGATAATGAGAAGGAACAGATAACCCAGCACATTGCAGGTAAGGTAGAGAACACT  
CUST\_3085\_PI426210822 GCCCATGTGAAGGTCAGTCCTCTCCTCCTTTTTATCCTCAAACCTT  
A\_14\_P119198 TATCACATATTTTCAGATATCTGTCTTTGCTTAAGGAAATGGAAGAATGCAACCAGTGG  
CUST\_7922\_PI426210822 CAGGATTAGGGTGTGGGCTTAGGAGAAAGGGGCCAAGAAGATGAC  
A\_18\_P14134342

TGACCTTAAAATCCCACAGTTCAAAAGACTATAAAAGTTAAATAAGTGAACATAACTGCA  
A\_16\_P20081774

AAGATAGATTGCTTTGTTATGACCTTACATGCAGATTGATTTACATCTACCTACCCCTCC  
A\_16\_P15620846

AACAGTTGTATTCTAGATCAAACACAAAGTTTCTTCCTTAGATTTACTGCCAGCATTCCC  
CUST\_7926\_PI426210822 GCCATGGCCCAGCCCACCTCACCAGGACTGCCCTAGGGTTTGAAC  
A\_16\_P01836792

AAAAATCTATAAGAAACCGGTGATCTACTGAGAAGCAAACCTTAAATGCAGAACGACTTGG  
A\_14\_P103776 GTGGGTCTATGTAAATGCATCTGTCTCATGTGTTGATGTAACCGATTCATCTCT  
A\_16\_P36230704 GGTAGAACCTCATGTTTTATTTATCTGCTCTTAGATCTCCTGTCCGGGCAG  
A\_14\_P106329 CTGGAGAATAATAGATGTGCAAAAATAGGCAGTGGAATAATTCTCAGATGATGTGTTCC  
A\_14\_P131695 TTGACAGTGTTTACTCACCAGTTGCAAAAATGAGGCAATTCTGTAGAGAAGACTCTC  
A\_16\_P01176120

AAAAAAAATAACTGTTCCCTCACTGTAAATCATGTTGCATTATTTCCCTAGTAACACAGCA  
CUST\_6098\_PI426210822

CAGGAACAGGGATGAAACTTGTTTAAAAGTTTCTATTAAGCAGGACTGAAAATTCCATTT  
A\_16\_P58424589 ACCTCCTTTCTTACTGAAAGCGTGGATCTAACCTGGGGAAACCATTT  
A\_16\_P21159652

ACAAAGCCCTCATCAATTTCAATTTTTATTAGTGGTATGTAGTTGTAGCATCCTCCTCAT  
A\_14\_P110603 CAATATATGTTTCAGGTATTTCAATTAGGATCCTCCCATCAAGCAGGGAACCTAGATGTTTG  
A\_18\_P22841039

AAGAACTCTGAGAAAGAGGAGAAAGAAAAACAGCAAAAGTTTCTTCTTTATCTGGAAAAT  
A\_16\_P19614698

CCCCGTTTTTTCGTCATTACCATGATTTGGATCAGCATTAAAGATAACATCTGACTTACT  
A\_16\_P03777434

AAAGAAAGGGGATAAGTCACAGATGCCAAATTCTTAGTCCCAAATCACAATTTAGCATGT  
A\_14\_P101157 CAAAACACCTAAACTACCCTAGACATAGGGATTTAAAATATGGCTGGGGCAGCAATT  
A\_14\_P200373 GCTTCCCAAAAATACCACCCTATACTCTCCTGGAAATCTACATTGAGACATTGAT  
A\_14\_P139354 ATAACAGTTGAACCTGGAATAGCAGGCATTTAGTCACAACGTAGACATTTCAAAGAG  
CUST\_5367\_PI426210822 CCATTTGCTTGTTTCAGGTAGCTTTGAGCCCAAACATTGGTCAGCA  
A\_18\_P14038373

TGAGACTCTCCATTTTATCTCCCTTTCTAAAAACATATCAAGCATCCAAGTAAGAGCAA

A\_16\_P17363790

ACCTGAATTTGCCATCTATTTAATTAGAGTAAGAGACTGTTGCTAAGATACCTGCTTGCC

A\_14\_P129522 GACATTTACGGTAGTGGGGGAAGGCATATATCTACGTTAAAAGGCAGGACATTTTTTAAA

A\_14\_P133089 ACTGTGTAAATAAAACCTGCAGAAAAGTTCATTTAATGGGATATAACTGTAATGCCACCA

A\_14\_P100819 CTGTATTTTACTGGGTCTCACCGTCTTCTCCTCATTATCTACATAACAATGACCTAC

A\_18\_P10003754

ATTTTATGCAACGACACATAAATTTGACCCTTCCCTATTACTATTTCTCCCCAAAATTG

A\_14\_P139702 AGGATTTTTAAAAATGTAACCGTATCATTACCACTTCTGTTTTTCCCCTGTGGTCTTAAAA

A\_16\_P19550262

AAAAAGAAACAGCACAGTATTAATTTACCCTAGAATCCTCTCTTTCCACTCAGAACTACC

CUST\_9920\_PI426210822 ACAGTCTGGATACTTCTCTGTAGTTCTCTCCAAATGTCAAGCCCAGG

A\_16\_P15498767

ATCATCACTGTATCTCCTTCTTTCACTTTGAGTTCCTATCTTTTCAGATAACGTGCTAGC

A\_14\_P110441 CAGATTCAGAATCTAAATGCTTTCCCTCCTCACTTAAGTTCTGTGCTTCAAGTATGTT

A\_14\_P200944 TAATTATTGGATTATTAGCATGCTTTGCTGTTGAGGTGCATTGCCTAGGTTTGTTTTCTG

A\_14\_P120728 TCTTTTTGTTTTTCCAGGAAAATTCCCAGATGTTTCAAGGTAGACCTTGCAAGAATATGT

A\_14\_P109565 CAAATATGAGACCGGGTTTTTACATTAACTCAGGCTATGAACACAGGATCTATCTTAGAG

CUST\_8186\_PI426210822 GCTGAAGTCTAGCAACTCCTCCTGGCTGCAATACCCTAACTTCATT

A\_16\_P00685007

ATCTGTCTTGTGAAGTTCTGTTCTGCCTGCTTTCTGGAAAAGTTATTGAATTGCAATA

CUST\_5842\_PI426210822 CTCCCCAGTGCCTGACTCAGGTCTCTTGATTCCATGGTGTATTGT

A\_14\_P131094 CTGTTATAAATCAACTGCTAAACATGTGGCTCAGATGGAAAAGCCTTAACATTTTGGAGA

A\_16\_P20284024

CCCAAAATCCCTCTGCTTTAAAGTCAACTTTTCTAAATTGCATAGCCTTTTACTAACCA

A\_16\_P02731280

AAAAAGGAAGAACATTCTGTTGAACTATAACCACCTTAAATCCATAATTTCCCTCCGCCTG

A\_16\_P02176410

GTTTGTTCCTACCACTCTAATCAGTTGCTGAAATGCTAAACAGTGTGTAGTTGGAATAG

A\_16\_P02759691

CCCTACTTACCATTGGGTTCAATTGATGTAGACTGTTAGAGCAAGTATACTCAATCAACT

A\_14\_P124368 GAAGATAAAAAAAGAGGCACGCCATTTCCAGCCCGAAATATCTATGAAATACTAAAGTCA

A\_14\_P200747 CTTATCCTTAATTCATTTCCCCTCCATCTAAAGTAGGGTTCAATTTGGGCTACTATAGACC

A\_16\_P00684984

CTATTTCTAACTTTGATTAGTGACTTTGGCTTTACGGAGGTAGCATCTTCTACATCCACT

A\_14\_P200085 GCACAGTTGCGAAGGATTGTGTGATAATACTCATTTTACAAATGTGACAGATGACACC

A\_16\_P37458123

TCTTCTGATCAGATAGACCATGAACCTTGCTATGAGAACAAAATACACATTCATTCCTGT

CUST\_7334\_PI426210822 AACTCATGTGAGCCCTGTGGAGCAGGCTCTGAGCCTCCCCAGAT

A\_14\_P126529 CTGCCTTAATCTTTGCCTTGTAGATTAAACTATTTTAAAGTGGATTCATCATCAGAGGTT  
A\_14\_P129081 TAGGCCATCCTAGTTGCATTTTCCTCCTTTAATAACAAATGAGTCCTGTATCTGAAGAAC  
A\_16\_P16574446

AATCTTGAAGATGTTTATCCTGAAAATTCCAGGTCTAATTTATGTCCTCCTCCAAACAGC

A\_14\_P135552 TTCTCCAAGAAGTTAGTTGGTTAAAGCCAAGTTGTATGGGTCTAGTTTAAAAGTCCACTA

A\_14\_P200124 ATATGAGTCCCTTTTCACGATGCGATGTCATGTCTTTTAAATAAGCCATACTTTATGTTC

A\_14\_P120802 TCACACCATGCATTTGCTCTGCATAGAAATCTGCAGATTACCTAATCTTAAACTGTTCT

A\_14\_P118970 ACCTGGATTCTTGATACCTATGCTTTGAATAACACACATCAGGATTTTGCTTAGCAAACA

CUST\_6750\_PI426210822 CTGCCGGGCAAGGAACCAGCAAAGCCTCACTACAGAGTGACAATT

A\_14\_P131064 TGTATGTAGTCTGGAATCCCGAGGTGTGAATAGCAATATCTTATTACACAAACCAGAGTA

A\_16\_P02558749

ACAATCAGTATTGTCTAGGCAAGATTAATCAGTGACATTCAACCGTATAACAATCCTGCA

A\_14\_P118869 CTCATTTTTGGGTGCATTTTTTTTTCCATATGGCCAAAGACCAGTTTTATTCTCTAGTCA

A\_14\_P125633 GCCCTTGGAATCTTCATAGAACTCTCTAACATCTGGTGAATCCAACACAATCTTAAAA

A\_16\_P18086155

AAACATATAGTCAACCAAACAACAGAACTAGGTAATGTGTAAAAAGTGTCCCTCCTCACTG

A\_14\_P105586 CTGACTTTTGTCTTCTATAGTCTTTGGGCTGAGGTTAAGAAGGAGGTAATATCAGAGTT

A\_14\_P113462 CTTGTCCAAGCCCTTAATCACCTAAGTGATTTTTTTGTGTGTGAAAATGCTGTTTTTTTG

CUST\_7311\_PI426210822

CTCTGAGTCCTGAACATCGGAGATAGATTCTTTATCTGGGGAGTGACTACATAAT

A\_14\_P113327 CACGTGGGATGAATGGAAACATAGTGATTGGCCTTTTTGGAGTTTTCTTCT

A\_18\_P14135353 CTTTTATTGGAAGATTCCCAACAAGAATTTGGATGGAAAACCTGATCCCTAGC

A\_18\_P11812988

AAATTTTTGACTACCTGTAGACTACAACCACATTCCTTAGTATGGTATTCCATGACCTGG

CUST\_8890\_PI426210822 CAACCCAGTGAATAGGTGTGCTGCTTTAGCCTTTAAGGGAAGATGG

A\_14\_P111260 CTCATATAACAATATACAGGACAACCTACCGGGTAGCATAAACAACCAACAACGGACTA

A\_16\_P16883617

AAGATGATCCCTCTATAAGATGATCCACTCTTTTTCCAAATCACTCATGATCACTCTTG

A\_16\_P20370846

TGTCATATGCAATTCAGAGAGACTATTCCAGAAAACACTATCAACTCAACAGAAGCAACT

A\_14\_P201455 AAAAAAGACGAAAGAAGAAGAAGAGCAAAGGGCCTTCTGCAGGTAAAGAGAGTTTTAT

A\_14\_P135213 TCTTCTCTCGACCAATAAACGACTCTGATGGTGATTTTTGCTACATTTTGGAAAACAATA

A\_14\_P201230 CAAAAATGTCATTTTCCATTTACTTGCAAAAATGATTCTGCCAGCCCAGC

A\_14\_P136343 CTTCCCTCATTACTCTAAATGTAAATCTTGTGTCTTGCCCTTTGAAAAATTTTGCTCCT

A\_14\_P136451 ACCTATTACCCTATGGGTAAGAAATAAATGGAAATATGACATCGGATGTTTCAGCAACTG

A\_16\_P16804599

AAAAACTAATCTCTAAGAGACTGATGCTTCTGAGATGCAATCACTTTTTCTGCTTTTGCC

A\_14\_P127153 TTTGAGCACTCCAAGTATTTTTATGTTTCATAGGGGAATGGCCGCTGTTTTATTGG

A\_14\_P125777 GAGCCATGCGGTTAATTCCTGACTTAGTTTATTTTTGCAAAACGTCGATCTCCTC  
A\_14\_P106953 CTACCAGTAAGAACTGAAAGAAATGGAATCTGGTATGCAGTAATTTTATATTTTGTGTG  
A\_14\_P106658 TGTCATGGAAACAAAATGGAAATAAATGGTGTTTTTTTTCCAGATTTGTGCTCATTGCAG  
CUST\_2142\_PI426210822 GTGGGCTGGAGCAGAGCTCCCAGTGCAGAGCTGGGCAAGTGGGTT  
A\_18\_P22839611 CTTGGGTTTCTGGTTTGGAGAACAGGGTGGATGGTGCCTCTGAAG  
A\_14\_P125973 TCCCAACATTCAATTCCAGTTACCAATGTAATATGTCTCACCTGTGAAAATGTAAGACTC  
A\_14\_P126031 CTCCTAAATTCAGAACCCTCTACTCTCTATTCTTATGAATCATCAACGGTTAGCACTA  
A\_16\_P02708226  
ACATACCGTCTAGTTCATCTAAAAGTTTCCCTTAACAACCTCAATCCCCTTTATTCTTGTG  
A\_16\_P39430582  
TACGGGTGTTTTATGTCATTACTACCTACACTGCTAGCAATATCACCTTTTTCACTCATG  
A\_14\_P115008 AAAGTTAATGGGGTACTCTTCTTTTCAGACTGGAAAAAGTCTATAATCTTGTAAGGAA  
A\_16\_P01783193  
ACCTGTATTTTATTAACCCTGATCCATTATGCTTACAACCCTTTACATAGAACCCTCAGT  
A\_14\_P100619 AATAGCAGAATACTTAATTGTCTCAAGGAACAAAATCAGGAGTAGGATGACTTGTGCTGA  
A\_14\_P119072 ATTTCTAATATTTTGTCTTCTGGTCCCTGTCCAGACTATGGCTCCTCAAAATATGTAGAA  
CUST\_2787\_PI426210822 CCAGCTCTAGGACAAATAATGTTGGACCCCAAGCATTCTTTTTGCAAATATGAG  
A\_14\_P108914 TATCAATAAAGTAAGATCTTACCTAGACCATGTCTGTGTGTTGACATTGGTGGTAAGACA  
A\_14\_P138014 TTTAACACAAGTAGATGATGCTTTCTTGACTGGGAATGTAACATTTTAAAATATTAGGAA  
A\_14\_P112239 CCTTATTATAAATCACAATGAAATCCACAAACCAACCCCAACTCTCTAGCAAAAACAAG  
CUST\_9186\_PI426210822 TAAGGAGTTTTACAGCACCGTGGGGGCTTTCTAGAATGGTTGAAAAC  
A\_16\_P38247758  
ATTTTCTGTAAACACAAGGTTTCTTTAAAGTCAAGTATGCAGCCCTAAATCTTATCGACC  
A\_16\_P18259657  
ACCTGGGCATTATAGTTATTCTCCAATCACTACATTTGTTTCTAACACACTGTTGTTCTT  
A\_14\_P136725 TAAAAGTAATCCCAACATGGGAACTTACGCTTTATGATCGATGCACTCCACAACCTTTT  
A\_14\_P117786 AAAAAGAATTAAGAGGACTTATACAGCCTTTTGAAAAGTGTGGCAATGGGATACTTTGTCT  
A\_16\_P00685082  
ATTGCACAGATGGAGATAAAAAGATCAGAGGGAGTTCCGAAGACCAGAATTAGTTTAG  
A\_14\_P120493 GTTACTTAATTATATTCCTAATCCTGGATGAAGTTGCTGGATTCTGCAGCACAAGTCTTC  
A\_14\_P105689 GTTGTATGTGAATTCCATCTCAATTGAATATTTATAAGGCTCTCACTGGGAGTGAGTCAG  
A\_16\_P20396875  
GCCTTACACATTTGCATCACATTTGCATGGTATTTTAATTGGGAGGAAAGTCATACATTC  
A\_14\_P108936 CAAGCATTCACTCTCTCCTTGCCCTTGTCTTACTTGTGTTCAAAGAAAAACAAC  
CUST\_5496\_PI426210822  
GAACCTTTACTGACATTTTATAGATTTAAGCAGCCCAATCAAAGCCAGAGATGGAG  
A\_14\_P201325 AAGTGGCACTTCTAATTTTCATATGAGTAACATAAGAAAGGAAGCAGAAAGATCCAGGCA  
A\_16\_P02450112

TTTTCTCCACTTTTACCAAGTTTCTCCACATTAATATCTACACCTCAATTTCTACCTGCC  
A\_14\_P131522 CCTTTGAATGAAGTGTGCTTTTAATAATGGTTTGCACCTAAAATGCTATTTGCCTTCCCT  
A\_14\_P139712 TTACAAATACCGTGTTTTATAAATTGATGCCAGTGTCTTGACCTGTCTTGTGAACAACT  
A\_16\_P00685569  
TTGGTAAAAGATTATTTGTGCTTAAAATTATTTCTTGCTTAAAGTGAGTTAACTGGAGT  
A\_14\_P129541 CCCACTCCCCAAAAAGTTTGAAAAAATATTGTCTCCTCCTCCTTTATAAAACCCTA  
A\_16\_P16191576 CAAAGTTGGACTGTCTTGCCGTGTGAGACAGGAAAGGCATGTGTGAT  
A\_14\_P201603 TCATTATTGGGCCTATTGTTATAATGTCAGTGTGACATTTGGAAATACAGGAGATAGGT  
A\_16\_P03437887  
TCTCTTACTTTCCCATATTTTGACCTAAACAGACTTATACGAATATAAACACATAGCCCC  
A\_14\_P139805 CTAATCATATCTCCAAGAGAAGAAAAAGATTTCAAAGGCTCAGAATAAAGCCTGTCTGCA  
A\_14\_P101244 CTAAAAGTAAATGAAGTGAAATCTCCAGAATATTGCGTGGTCATAAAACATCCCAGAAG  
A\_16\_P16690243  
AATTTTGTCTAATCTGACTTTACAACATGGCATTGGTATAAGACAAGCCCATCTTGGC  
A\_14\_P136180 CAAGTGACACAGGAGGGAGAAAAGATCTCACATACAGTGTAACTGTAAAGAAATGTG  
A\_14\_P139647 TGGCCAACCTCCTTGTTAATTTGTTGGAGCCCTATCTATTTTATTGTCTGTTTTCAAAGT  
A\_14\_P134301 CAAATACAGTCAGCCAGTAAACTCTTCCCTGCATTATGCTAACAGCATAAACATGCAGG  
A\_14\_P105800 CGAAGTGTTATTTCAACTAGCAATCCATGTAAAAATCACTGTTTTTAGATGCCTGCTTCC  
A\_16\_P16035393  
AAAATCAAACCAGTAACCCAAATATTTTCTTCATCCATATCAAATGAAACAAGGCCAG  
CUST\_403\_PI426210822 CAGTGAGGAATAGGAGGCAATTCCAAGCCAAGGAGAACATATCCTTG  
A\_14\_P124489 AATACATGTGGTCAAATTCATCACAGGCATTAATAGAAGACCAAATTTACATGGGGCAA  
CUST\_9463\_PI426210822 GTGGAGACACCACATGTCAAATGTCAGAATGGGGTTCAAACCAAAG  
A\_14\_P104843 CGAGTGATGGTCCAATTTCTCTTAATAGTCACTGGAGATAAAGGAAGATCAAAGCAAAT  
A\_18\_P16265997  
TCTCCTTCTATATGTTCTGTTTTTTCAGGTAATTCAATAAAGCAATCATGTTAATGTCATC  
CUST\_8224\_PI426210822 TTAGCTCCACAGGCAGTGTGCTGGCTTTGCTTGTCTGTTAACTCC  
A\_14\_P105073 TTCTGCTACAGAAATAAACGTATCCCACAGTGTCTTGCGATTTCTTTATGAATTTGAG  
A\_14\_P103622 ACACGTGTTTTGATGTCTATCGCTGTGGCTTCAACCCAAAGAACAAAATCAAG  
A\_14\_P137684 TTAGTATGATCACTTCAAGTCTTATGCTCTCCAATGACAGGATACACAGCATCTTAGAGA  
A\_14\_P201511 CAATAACTCATAGAGAAGGAACAGTAAACCTTATTAGCAGAACATGCTTACTGTAGCCCT  
A\_14\_P124575 ACCCTTATCTCCCTTCTATTTTTTTGGTAAATTCACACATTTTCTGTGCCTATGCAAAT  
A\_14\_P128301 TCCTAATATAAATCACTGCCAGTATCACATGACATCAGTATGTGATTTCTGGGTATGTGG  
A\_14\_P131832 CAGTTCCCTAAACAACATCAACAGTCTCCTAAGCAGCAGTTATATCAAGTGCAACAG  
CUST\_9875\_PI426210822 ATTTGCCTCATCCCCTGGCACACGCACACTCTCCTACCCCAGC  
A\_14\_P102726 ATTGTCTTAAAGAGACAAGAGAGGAGAAATCTAGCAGTGTAGTTTGCAATATTATAGCGC  
A\_14\_P133885 ATTTCCGGAGGAAATGGAGAAGTCAGGTGTAATATAGAAACAGACATTCCATTCAAGATTT  
A\_14\_P115402 CTTTGGCAATAAAAAGGAAAAGAACAGAGGCCTTAGAACAAGGTAAGATTCCCCTTTTA



CUST\_8640\_PI426210822 CTGCTGCAATGAGCAGTAGCTACTGACCTCCCTAGCTTACTTTTTTCC

A\_14\_P123969

AAGGAAAAATCTAAAAAGGAAGAATGAGGTCTTGAAGAGTAATAGGAGTTAACCGGGTAG

A\_16\_P03305536

TCCCAGTCATAAGTGCTTATCAGTTTTTTTTGCCAATAAGTTTCTTTCGAATTATGTGGAGC

A\_14\_P107128 TATTCCTCTATTGCAGACCTTCAATCATACTACAACCCAAGTAGGCAATTCAACCTTTAT

A\_16\_P00161672

AAGACTAAAACACAAGCCAGTAAAAAAAACAAGTAACCCTTGCTGTGTAGACTATTCTTT

A\_16\_P20768425

ACTTTACACACTGTTATTTCGTATGAGATTACCTTGAGAACATCATATTTGGCTTCCCTGC

A\_18\_P22842465 GAAACCAAGCATTGAGCAACAGAATGGTTCTTAGGCAGAAGTGAGCCT

A\_14\_P103105 CTCTGGAGTTTTTCAGTTCATTGTTTTAACCAAGTGCTTGGCATATATACAGTAGGTGAAT

A\_14\_P112945 GAGATTTTTCTATTTTAGTTTTTTCCTCAGGGCTTAAAGGAGGGGATCGCTCCTTTA

A\_14\_P109664 AGTTCAGGGGTGAGGCTTAAGATCTTAATAAATAATACCTTACTGCTTAATCTGTGGCTT

A\_18\_P10331263

AAAAAGGCAGTTTAGTCTAACAAGGGAAGTCAGTTTTCAATCACTTGGGAGTTACCAAT

A\_14\_P126591 CATAAGTCTTGCTGACCACCGTTTTGGACACCTCTTTCTTTTTGATGTGAGAAA

A\_14\_P117984 AAGCAACGTTTTGCTCAGGTTTTGACATTTGAACTATGCAACTTCCCATTATTTTCTATG

A\_14\_P106975 AGGTCAAACACCTTTCTGCAAAGTATCTAGCATACTAAAGGGGAAGTAATTTTACATGTC

CUST\_10149\_PI426210822

TTTAAGAAATACCTTCAGCTTATATAAGCCAGCCTGGTTTCTGTGGAAAGAATGAAGATG

A\_16\_P02486028

AGGAACTTCACGTAAACAATATTTTCTTGATTCTCCCACATTAAGTTCAGAGATCATGC

A\_14\_P123219 CATGATGCCAATTCAAGTGTGTCAAAGTTCTCACAATTTAAATATGAATGTTACCCACT

A\_14\_P128050 TACTGAAGCAGTCTCAAAGTAGTTTGTCTTAATCCTTTCAAACCCCTAAGAATCTAACACA

A\_16\_P00441240

ATATAGCCAATGCCTGTAGAAAATCCTTTCTGAGTCAAATCTCACCATCCTGATACGTT

CUST\_8580\_PI426210822

AAGTGAAATTCAGTCCTATTAGGAGAAACCAGCACTCATTCTCTGACTGCACT

A\_18\_P17300063

AACGTCATTCTCTTTACCATCAGTCTAATGATTCTCTAGTATCACTAAACTAACGGTGG

A\_14\_P110214 TCCTTATCTACCTCTGTGGTATTGGCCCTAGAAGGTAGTGTTTTTCTCCTATAATTTATG

A\_14\_P115980 TACTGTGTCATCAAATGTGCGGTTAAGATTCTCTGGGATATTGATACTGTTTGTGTTTTT

A\_14\_P134887 GATTATGGCCTATTATATATCGTTCCTGAAAACACTTTCGTAAAACTCAACAACCACAC

A\_14\_P116013 AAAGATAAAGCCTTGGACTTGAGGCCCTCACTAACACCATAACCAACATCTT

A\_14\_P125821 GCTGCAGAGAGGCTGTGCTCCTATAATATATACTTCTGACATCTGAACAGGGTTAT

A\_14\_P124639 CGTTGTAATTTAGATCTGCATTTCTTTCTTTCTTTGCTACCAATTTAGCAACCTTCTG

A\_14\_P107403 GTTCCTGCTGAGGCCAGAAATAGCATAGTGACAAGTGCCTTGTAACAC

A\_14\_P125292 ACAGGGTAGATAATAAAGTTTTATTTTCCCTGGTGCTAGGAACTGGAAAAATAGTCTGAG  
A\_14\_P104169 GTTTTCAACAAGACGATTGCCTAAACATCCATCATGTTAATAATCCTCAGATTAATGGCC  
A\_14\_P129550 CTAGAACTGTGAGGAATGTTCCAGAAAAACAAAGGTGGTGTGTCAGTGTAGTCATTGATAT  
A\_14\_P137289 GACAGATGTCTCCACACTCCTCGTTGTCATCTTTGTTCAACACGATGTAATTATC  
A\_14\_P202040 TCCAACCTCAAAGATTTGACAAAAAATGAATGAACAGTCGTATGTGTCTGTGGTTTGAATG  
A\_14\_P131665 ATGCCGAGAATGATGATTTTCTTTCTGCAGATGAACTATTAGAAAGGGTCTTAGATTG  
CUST\_2325\_PI426210822 GTTCAATCTTGCTGATGGTGTCAAGCCCAGCCCATGGGAAAAAAG  
A\_16\_P16565355  
CTATCCACCCATTCAAAGATCTTTTGTGTCTGTCCTTGAGAATATAAACGCCTGTAAAG  
CUST\_3386\_PI426210822  
GACTGGATTTATTGGATAGTGTAATTGTTTCCATTTAAAACAATGGAAAAGATTTTCATTT  
A\_14\_P116447 CTCTCCAATCTTGAATGGATGTTGGCTTCGATAATGTCATCCTGAAGTTTCTTTGT  
A\_16\_P20397682  
AAAACCCTTTAAAATCAACACTGTTATCAAGCATCTCTAATATCCCTGGGAAGAATTTCT  
A\_14\_P115607 CTTAGATCCTTTTCTACCCACTTTCCTATGGAGGATTCCAAGTCACCACTTC  
A\_14\_P129995 AAAGTCTCTTGAGAGTTTACTCTGTATTTTAGATTTTCTGGCTCTTCATGAGTCCTAGGT  
A\_14\_P120918 CCTCGAGTTTCTGATCACAAAAAGATCACGGTAGGTGATGTCAACTTAATGT  
A\_14\_P100503 TAAAGATTTTTTTCAGCACTGCAACCACTTCTTCTGGAAGCAACTTCATCCAC  
A\_16\_P01625254  
CAATACCTGTCCAATTCTTTATACACGTTACCTTCAGTAGGAACTTAACGGTATACAGTG  
A\_14\_P110765 GTGGGAAGAAATCTTCTTGATGGCATATTTGCTTCCTATATTTCTTCTGGAATCATGT  
A\_14\_P200043 GTATGTGTTCCGGAAAGGTGTGCACACTCAGCAACTCATCATCTCTC  
A\_14\_P112901 GGGCATGAGAGTATGAGTGGAACCCAATATACTTCTCCTTACATCCTAGAAAGTTATATC  
A\_16\_P37548477  
AAGCCATTGCTATGTCTCAAACATAAAAGGGACTCTATTTAGTGACATTACACTTGCCTA  
CUST\_7051\_PI426210822 GGTGCCTCCTTGCCCGGGCATCTTCATTATAAAAGCTTAGTCTTTC  
A\_18\_P11183159  
GAACTGGGTTCAACATACAAATAATTGAGAGTCATTGCTATCAATCATTAGGAAGGGAGT  
CUST\_7152\_PI426210822 GAAAGGAAATGGTCTGTTGAAAGTCACAAGGCCAAATGGCATAACCAG  
A\_14\_P137065 CCACTTTCCACAAACTATAAACAGCAACATGAACACAGAGAATCACAAATAAGAGGGTC  
A\_14\_P134901 ATTCCTGCCTCAAACACTTCAAATACTTCCCATTTGAATATACATGCTAGAGATGTTT  
A\_14\_P116623 CTCTTTCTATTGTGTTTATACAGTTTTGTTTGTATACTCTTTGCACCTTAAACCCCA  
A\_14\_P202011 GCAAAGATATTAACCCTTTTCAGCAGAGGCATTGAAAGCATTAAATCTAGTGTGCCATTT  
A\_18\_P14134369 ATTGCAGAGGGTCTTGGCACCTCTTTTGCACCAGGATGGGTCTTA  
A\_14\_P134250 CTGTGACTGTGGTTGTATCTACAAACAAAACACTGTGAAAAAAGGTGACATATCCTGTAA  
A\_14\_P131344 GATTGGGAGATTGATTTTACTTCTCGGATTTCTCTACTTTTTTCGTGTGCTCCCTG  
A\_14\_P126205 TATCTTGGCTAAGATATAAGTTGCATCCTAAACTCCAACCAGTGGAATTAGGGAAGAAT  
A\_14\_P139414 TTGTCGTTTCTAGAATGATTTCTTTGTGCAGAAGTTCAACCACCATTTTCACATGGC

A\_14\_P102337 CTAAGAGATTGCCCTCATTATGCTCTGAAAGCCAGTTTTGTTTTGTTAGAAAATAATGCC  
A\_14\_P105869 ACCTGTCATTTAGGCTACTAAATCCTTTAACTGCTTTGACCAAAAACAGAACAAGTTGAT  
A\_14\_P202108 ACAAGGTTGACTTTGAAAGTGTGTCATTTAGTTGGTTCATTTTTCAAGTGCCTATGAGAA  
A\_16\_P36230471

AAGAATTCTTGCTATTTAATCTCAAGCCCAAACATGGTTTTTTAGTGAGGAACTGATACTT

A\_14\_P129006 AAATCATCCAGTATACTACCAGTCTTTGTATTCCACCCTTTGGGACATTACTGCTATAAG  
A\_14\_P136722 ACAAAAAATGATCGAATATCATGCTGTTTTTCTTTTTCGAACTAGGAAAAGCAAACAGTA  
A\_14\_P117685 CACAAGGATTGAAAGATGAGGTTCTCTACAAGTGAGAAAAGTGCAGGTAAACTATTTTAT  
A\_16\_P00374032

AGGACATGGGATAGACAAAAGTTGACTTACACCAAAAAATACTAATATTGTGGATGTGTGG

A\_14\_P110221 TTATTTTTATCTACATGAAACTCATTGATCTCCTTCCAATTTGGTGTAGCCTCTTCATT  
A\_18\_P11339071

TGAATATGTCAACCACTTTCATTTTCATCATTGACAACAAAATTATAACTGTAAAGCACAT

A\_14\_P125337 CTAAAGGAGCCATGCCAGAATACTCTCCACCACTTAATACTTTTTATTGCTTTTGACAA  
A\_14\_P139607 AGTCACAATGAGGTTATTCTGAGTAGTGCTCTCACTAGCATAAGGTGAGAGTTAATGTAA  
A\_14\_P118083 CTTCTCGACACTTTGCTAAACCTCAGGATAAAGCATATTCATCTGCACATATTTAACTCC  
CUST\_2473\_PI426210822 CAGAAGATAAATCCAGTGCTCCGGATGTTTGGTTCAGTCCATATCGG  
A\_14\_P127140

GAATGGGGGAGGAGGAGAAGACACAAGAAACACATTACTTGCAAAAATAAAATACTAAGTA

A\_14\_P135703 CTGTCTTTTCATATCCCTAACACTGAAGTATTAGGCATTTTTGCATTTTCATGGGTTAGGA  
A\_14\_P124858 TAGAAAGCATTTGTGCTGGGTATGTGACCTACTTCATTCAATCTAGATACTGAAGATGAG  
A\_14\_P119858 CTTCAGCAGGAGTAGAAAATTGGTATGCTTAGAAGCAGATTCTAAAAGCAGTTTCTCTTCA  
A\_14\_P114540 ATCCCTTGCACATGTGTGTATGTATTGTTTGTGTAACATAGATGATGTGGAAAGATCTC  
A\_14\_P131722 CTGTA AATTCTGGATTGATCAGCAGAGACAAAAGTAAGAATGCATTTCTCACAGTGTCA  
A\_14\_P126931 GTA ACTATGAAATGTCTAGGTTAGCAGCAATTATGGATGCCAGAGACTGGGC  
A\_16\_P18810976

ACGTTTCATTTTTGCACATCTGAAATTCTCATAAATTCCAATAGAGCAACATGTCATCCCA

A\_14\_P133565 TATTTATCTTACTGTGGCTGCCTTCTTTTTAGGTCTCAAATCCTTCTGAATATGAACCA  
CUST\_1945\_PI426210822

CCCAGGAGAGTGCTGATAAATATCTTTGATCATTGATTTTCATCCTAACTAGATTTTTTTTT

A\_16\_P03247860

AATGTAACATGAACATCTACTCTGTCTTACTGATCCTTGAACATCTAGCCAAATCTGCAA

A\_18\_P14564096

ACACTCCCCTAAATAGTCTAAAGAACAGAAGTGTCTACTTGCTGATAAAAACAAACAGGTT

A\_14\_P106227 AACCCCTGATGATCTGATCATCTCAAATCTCACCTCCAAATTTGGCAGC  
A\_14\_P139060 ATTTACCAGCCCAATTAAGGCTCTGAGTAACCAAAAATACCGTGAAATGTATGAAGAATT  
A\_14\_P113196 ATTTTAGTGAGGCCACAGTTTTTTTTAAATGGTTGAAATGAATAGTGTCTTCTGCCTTAGCCA  
A\_16\_P16031751

AGCATAAGATTGTCACCTCTGAAGTTAAAATGCATGGTCCAGGTATATGAAGGAAAGATT  
A\_14\_P106703 CTTCAATTTGCTTCAAAAATAAAGGAATCTTCTCCATCACCATCACTAATTGAGGATCTGT  
A\_16\_P35360815

AAATGGAGTTCTCTAGGTCTTGACATAAATAAAAAGGGTTGATTCACACTGAACTTCTCC  
CUST\_6672\_PI426210822 CTGCTCTACCCAGTGTGCTCTAACTGCTGATAGCTGTTTCAGCTG  
A\_16\_P03632745

CTGAGATGCAGCCCTTAGTATTACTATTGTTACAGGAACGAATTCTGTAAGAAACAACCC  
A\_16\_P39337081

ACATACCCGAGAACATTGATAATAATCAATTTCCAAACATCACTATACTCGTCTATGCCA  
A\_14\_P121159 TAAAACCTACCCAATGTTGCACAAATACATCCATCTCTGTAAGGTGAGGTGTCAAAATAGA  
A\_16\_P17128215

AAAAAAGGAAGGACATTAATGCTACTGTTATGCCACTTTAAGAGAATTATTCCAGTCCGC  
A\_14\_P123932 AGTATTACCTGGAGCACAATGCACGTGGGTTGGTAGAAGTCCACTA  
A\_14\_P128815 AGAAAACACAGGACTGAATTCATTTAAGACAGGGAATACTTTATTCAAACCCATCACAG  
A\_16\_P21084638

ACCATGAAACACTTACCTATCCATACATGGCATAGTCTTCGAATTCTCATTTGTTTCTGA  
A\_16\_P02982590

ACAAGTGATCATTTTAACTTGCTTAAGGAATGAAGGTCTGATCAGTGAAAATCTAGGTGG  
A\_14\_P135083 ATTTGAATTGAGATTTCAAGAGGGATCAGATTTTCAAACCAGGAATAAGGTAGGTCAAGT  
A\_14\_P138638 ATTGAATTATGCCCCAGGACAATGGGAGTGGAATTACTTGTTTTTTAAATCATAAATCCA  
A\_14\_P107257 GCTGCTGCTGAGTCAGACAAGGACTCTGGCTTTTTCAGGTTAAAAATATCTT  
A\_14\_P125201 GCATTCGTAACTTTGTTACCTACCCACTTCATTTAACAAGCATCTAACGAATTACTTG  
A\_18\_P14136476 AGGGGTGTCTTTGGTCACCCACACCCACATTTGGCTGGACTGTGA  
CUST\_584\_PI426210822

GCATTTGTGTCTGCTCTTGGCCTTGCAGATAAAAATACCATAATCTACTCTTGCAAA  
A\_16\_P18982509

AAACGCACCATTATATCTTCTGTTGCTCCATTTTAGTGTAGAGATCTAAGTTATGGCTG  
CUST\_8419\_PI426210822

TTGGCAACCCACTCATCTGCTCTATCAGTTTTTATCTATTTATTCTTTGAAGTGGAACC  
A\_14\_P110851 CCTTTGGAACAAGGAATTAGGCAAGAACATATTGTAGGTATGATTGTGTGAAGTTTCATG  
A\_14\_P130850 TATGCTGATGCAAAAATAAAGTCATTGTTGGAACCTCCAAAAGCAGCAATATCAACAGGAG  
A\_16\_P38444381

AATGAATTGACCATCCTTATTTCTTCAGTGTCCACTATAATAACCATCTCTTGGCAAACC  
A\_14\_P103303 TAGGTTCTAGAATGTTAGCCATGCATTGATTACCAAAGGATATTTGGGCTACATTTGGAA  
A\_14\_P119729 GTGAAGACTATGAGACACTGCGTCAGATAGATGTGCACATTTTCAATGCAGGTAAG  
A\_18\_P12967894

AGTCAAAAACATGGCTAAAAATGGATCTCATTAGCAAGTTCTCTTCTGAACAGAACCAAA  
A\_16\_P16527280

AAATATTTAGTATTTGGAAAGTTAGCATAGTTCAATTGGAAAAAGCATGTGGTAAGGGG  
A\_14\_P127606 ACAGCACTCCATTTACACAGAGTAACCCCACTCTTGATTAATCTGTTCTAAAGTGC  
A\_14\_P110523 GAGTGGTGCATACAATAATTCCAAGAGTTTGAAGGATTTACATTGAATGTATACCTCGA  
A\_14\_P112968 AACCTTTACTTTTTGGTTCTGTTTGAGCAACTTACTCTGTGCTATTTTTGAAAGTGTTTTC  
CUST\_4163\_PI426210822 CTTGACTCCTCTCCTAATGGTCACATGGTGCCACCACTCTTTCAA  
A\_14\_P110477 ACGAATGCTTGCCATCACGTAATACATTATTTTCAAAGACTGTTTTAGCCACTTGTAGTC  
A\_14\_P137224 AAAATGTGCTTGAGGTGCCACTGGAGAATAACAATCATAGCCAGGATGTGAA  
A\_14\_P123576 AACCCCTCAAAACAGAACAACAATGCTTACGCGAAATAACACAAGCCTTAACTATTATACT  
A\_18\_P14136521 GCATTTGGAGACCAAGTAGACATGCCCAGGAGCAGCCAAGTCTG  
CUST\_8569\_PI426210822 ATACTTGTTCAGAGGCCACAGCTGGCACACCCCTCTGCCTTAAA  
A\_14\_P102724 TTTGCTTTGCTATGATTCTGAGACTTGCACCTAAGTGAGATTTCTTTTCCAGTGTTTTTT  
A\_16\_P16499791  
GCAGTTTCTCACACGAATTTACATGAGCAAGACTTACTTCGATATAGATATAGTGCCTGC  
A\_14\_P122403 TTCTTCTTCTACGCTACAAGGTCTTTTTACATGTAAAAATGTTAGACCCTTGGAAAGGTA  
CUST\_9285\_PI426210822  
ATACAAATTCCTATGATTTATTTTAAAGGTGAGAGCTGCTGAGAGGCCACTTCCAAC  
A\_14\_P120717 CTTGGACTACTATTGTCTGCAAGTCTCTCAGAAACCTCTTTTTGTTCTGAATCACATAAT  
A\_16\_P19432355  
AAAAAATCCCTCTTCGTTTGGTGTTAAGTTTCCACCTATCAAAATGCGTCTTTCTAGAT  
CUST\_2375\_PI426210822  
GAGAAGTGGTTTTGGGCTCTTAAGGAAAAAAAAAAGAAAGAAGCAACTATGACTGTACG  
A\_18\_P11870717  
AAATGCAGGTGTATGAAGAATGGACTTAACCATTGTCACAGTGTCTAGTAACTACCGATT  
A\_16\_P38658185  
ACCAAAATACCCTTTGAATCGAGTATTCCTTCTAACTTAGTAACATAACCAAAAGCCGTC  
A\_14\_P121770 ACCGACCTTCGTTCTTTCTTAGGTGAGACAAATTTTCTTTAAAGTTAAAATTTAACTACT  
CUST\_1000\_PI426210822 GTCAGGGAGAACCAGGCCCAAGAGCCCCCTCACTCACTCGGTGA  
A\_14\_P119454 AGTATTTTTGTGAACGTTGTAAGAAGAAGTGTGATGCACGGAAGGTAAATGCCATGTAG  
A\_14\_P127818 GAAGCAAAATTGGGATACAAACAGCAATAACCCAGAAAGAAGACCAGGATCTGT  
A\_16\_P16162753  
ACTAATCCATTTTCTAAAACCATCATCACCTAGTATCTCTATCTTTGCTTTTCGTCTGA  
A\_16\_P17926545  
AAACCCTCATCAACCTACATTCAATATCCTAATGTAGAAATCCCTTAGTGATGGCTTACA  
A\_16\_P21033900  
AGGAGGATACATGTGTATGCATATAGAATGACCTTTTACGCAGATTCAGATTTTTGTCCA  
A\_14\_P101868 CCATGTGACTGGTATAAGGAACCTAACCAATTTATTTACGTGGCTTTCTGAAAAGTTTGC  
A\_14\_P117585 GCACTCGATAAACAGTTTACATCTTCTGAAGTAAGCCAGAAGATTGTATGGCTCACTTAA  
A\_14\_P108110 GCTTGGCTCCTCTCTGGAGGTAAAATTTATAGTCATTCTAACTGCACTTTGGAAA

A\_16\_P01239878

TTAAAAAGAGTAAGCAACTGAATTGTA AAAAGGTCCTAGCAATGATAGATTCCACAACCCG

A\_14\_P122564 AGTTGTATTGTTTGTGGTTTGGCTGTAACACATGTATACAAAGTTCTGTGGCA

CUST\_4235\_PI426210822 CTGAGCAGCATTCTCAAAGCTGGGTGCTGTAGTGGCATGACTATT

A\_16\_P17460390

AACATCAATTTGTGTGAAATGGCAAAGAACATCTAATATATAGGGTCAGCCAATGAACA

A\_14\_P126692 AGTAGGACATATCAGTAAGAAACAACTGGAAAACCTTCTACAATCATCAGTGCTATGAC

A\_16\_P36732942

GGACAACAACTGGTATTCACTCTCCAATTTCAACAAGATCCTATGAATACTGCAAGAT

A\_18\_P22839610 TTTCATGAGCCTTGACTCTACTGGGCTCTCCCTGCTCCCATGGA

A\_14\_P105636 TAAGAAGCCTGCACAAAGAGAAAAATCCGTATATCCAGTTATATCTACACGGTCCAACT

CUST\_7800\_PI426210822 GAATGAAGTGCTCCCCTAATGGGGGAAGCCTTGCAACCTTTATAAA

A\_16\_P00622975

TAGAGGCCATTACATACCTTTTGTGGATTAGA ACTGTAATTGACTTAGTGTTAAGGCA

A\_14\_P115376 GTGCTTCAACTTTGTGTATTGGCACAAGATAACTATAAACAATACCAAAGAAAACGGTCC

CUST\_7193\_PI426210822 ATCTTCTCCCTCTGGAATTCTCCCTTTCCGTCTCAGTTGGACTAT

A\_14\_P117280 GCTGAAAATAATCACCGAATCTCAAAACGCTTCTTCACTTCGAAGAATTTAGACTAGGAA

A\_14\_P130893 CTCCTTTAAGATGGAAAGATGAACTGTTAAGTCGAACCATATGATTTCCAAGAATCAGC

A\_14\_P122729 AGAAACACTGGAATGAAATGATTACAGATTTCAATTGCTAATGTGGGCGAGTGGAGTAATG

A\_14\_P202343 AAATACAATGAGGCTAAAAACATATTCACACATAGGAACAAGGTTATCCCAGCCAATTGT

A\_14\_P100429 AAATCAGGCGTTACCACTGGGATGAAA ACTGGGGAGGCAAGAAAAT

CUST\_656\_PI426210822 CTTTGAGTTTGTGGCATCTTAACTGGGGATGGGATAGGAGGAGAG

CUST\_9436\_PI426210822 GTGAATGTTTCTGCTATGATTGTCCAAAGGGAAAATGGTCTGGAAGTACA

A\_14\_P132118 AAAAATTACTTACCAATTATTGCCAAATTATGCTCTGAGCCACAAGAGACCTGTAAAAAA

A\_14\_P138001 AACTTTGAGTTATAATCAGGAAATCAAGATTCTGCCTGGGTTATGACCCTGAATTCTCTG

A\_14\_P130526 TCCAGAATATAGAGGTTGATGGACTATCTTATAAACTGGAAGGCCTGAAAAAATTCACCG

A\_16\_P34289615

AAACCAGAAATACTGTGTA ACTGTGATCTATGTGGTATACTCTGAGAGAATTCTGTGTCC

CUST\_3761\_PI426210822 GATCACTCTGTGTTCTCAAGACAAGCAATGGGTAAGAAGACAAGGCC

A\_14\_P128358 GAACTTGCAAGGAAAGCAAGGCCTAATAATCATTTATTTTTCATAGAAGATGAGCACAAC

CUST\_3907\_PI426210822

AGTTTCCTACCTACTCAAGGTTATGTTTTGTAGATGCTAACAGTGTACATTCTAGAGAAA

A\_14\_P106871 TTTGCTGAGTGCCTTTTGTGTGTTTCTTTTTGGTTTTATTGTTGCAGTAAAGGTTTTTGT

A\_16\_P18190680

AGAAGGTCACACTAACTGATAAATGCCCTCAAATAATCAATTCTTGCTTTACTGCATCCT

A\_18\_P11428652

AATTCCAGATTGTCTAAATTGTGTTTCGTAAACTGCATCTATTGGGTTTCTGATTGCTGAG

CUST\_4639\_PI426210822 CCTGTTCTCCCTATCCAGAGCATA CAATTCAGAAAATGCCGGAACAG

A\_14\_P105488 TGAGATACTGGAGACTCATGGGACCATGAACTTTCTAGGTATGGTTCAGTTC  
A\_16\_P17164758  
AAACAATCTCTGTCCCTTGCTTATTGTTCTTACCTGCGTAACTATTGTTTCCTTTGATCC  
A\_16\_P19332004  
AAAAAACCCAAATGTATATCTTCATAAAATCAGAACCATGTAATCACCAATCATTCTCTGA  
A\_16\_P15525630  
AACATTTAGGCCATAGTAATCATCCTGCTGATATTGCAAGTTTGTTGCTAGAATGAGGTT  
A\_18\_P13956959  
AAAATCTCATACCCTACTTGACTGACTTCCTAACAAATTCCCACAACCTTTCTGGTATTTT  
A\_16\_P16507250  
AGCCCTGATAACTAAATCTAATCCCCACATAGGATCTATTATGACCTAGACCTACTTTT  
A\_16\_P20522827  
GCAAACCCAGAACTCATTATTTTCCTCTAAAAACACATTTTCACTTGGTCTTCATTGGT  
A\_14\_P128924 TAATAACGTTATCATTGATTCTTTATCATTTCCTAGATTCTGTGTCCGTGCCTTGTTTGA  
A\_14\_P103157 CAAGACAGAAAATGAGTTCTTAAAGTAAGCATAAGTTATCAAAACACCCAGTTGGACCTC  
A\_14\_P122674 TGCCCTTCTATTACCCAGGATATATGGCATCAATGCTCAAAATACTTTAACCCCTCATAAT  
A\_14\_P115499 ATCTCAGATTATTTGAGAAGGAAATGCACATTTATTCTGCCGCTTAACTGGTTTAGAGTC  
A\_18\_P12789651  
CCCATAACTTAGTCTTTTACAGTGTTAATGGAGTTTGATACAATAGAGCAGATGGACGG  
CUST\_3992\_P1426210822 GTGAGGAAGTTTATACGACCACAGATGCTTCTCACCCCAAGGTAC  
CUST\_9906\_P1426210822 CCTTACATGCAGAGCACTCCCGTGTTCTTTGTTTCAAAGCTGAAACAAA  
A\_14\_P126565 TCGCTGCTAACATGTAGAGGGAAAATAGATAAAGGCACCTTTATTGCTTTTTGAAACTTGG  
A\_14\_P131474 CTCCTGCAGGCCTCTTTTTTCACTTATTATACTATGAGGATGAAAGCACATTCTGGTATA  
A\_14\_P119155 AAATGGGACCAGGTCTTCACATCTACAGAGCATAAAACAGTATAAATATAACAAGCCTTT  
A\_14\_P110193 GAATACTGGAATTCTCCATGAGCCAGCCAGGGATGCTGCAAATTATTAAGAATTAACATT  
A\_16\_P00685247  
GTTCTAATTGATACCAGAAGCAAAGACGTAGAAACCGTCATGTTATAAACATGAAAGCCC  
A\_14\_P128990 TGACATCCGAGGAGATATTGGAGATCTTTGGTGGGACTGTGAAAACAAAAG  
CUST\_2063\_P1426210822 GTGTGCAGTTCAGATGTTAATACAGACACACATCTCCACATTTCCAGGCT  
A\_16\_P18068756  
AGCAGCAAAAACCTTAAATGTGATCCTCTCAGAACTTATCTACTTCAAAGGGTAGCCTAG  
CUST\_1261\_P1426210822  
ATAAATAGAGCAAATTAAGAGAAGAGGATGCAGTTGTACATTATGGCCAGTTAAACAGA  
A\_14\_P131230 CTTGTTCACTGCAGATTAAACCTTGTCATAGTAAATCTCGGGGAAGTATTATTTGCAAGT  
CUST\_2675\_P1426210822 GCTGGCACATTTGTAGGCAGGACTGTGAGACACAGTCTCCCCTGC  
CUST\_3940\_P1426210822 GGGAAAAGTTCATCCCAGTCAATGTCCTGTCTTGCTTATGTTTAAAGTTGGATAG  
A\_14\_P124150 ACTTGGGCTTGAAAGCATACTTCCCATCTATTACTTCAATTTTGGGATTGTTGACTAAAG  
A\_16\_P35130142

AATCAAGTATCCATTGGAGCAGACACTTTATTATCCAGGCCATAAACCTGATTTACACTT  
A\_16\_P01583052  
AACGCACTATGCTATTCAGTTCTACTCATGAATTCCAGTCAGATCTTGATTTCTTGTTCA  
A\_14\_P123979 TACATTTATATATTCACTGTTGCCTTATAAACTGTTAGGGTAGGTCTGTCTACCCCTAGC  
A\_14\_P111591  
GCTGAACTCTTCCGAAAGCAAGAAGAATTCAAACAAGAAAACTTCTAAAAGATTCTGGA  
A\_14\_P116666 AACTGAAAATAATTTATTTTCACTTCCTGTCTTTAAAAGAATGCTCATCCGACCTGC  
A\_14\_P135326 TGTTACTTACTAATAGTTCATCCATACTGGTCTGGCATTTTTCCAAGTTGATCCGTTTAA  
A\_16\_P16823602  
GATGCACTCATGACTATAGGCACTATACTGTTTCATTGTAAGTCACAGTTTTGCAGAAA  
A\_16\_P20757808  
AAACCCATAACGTATGCTCTTTCAACTTAAAGCATCAATGGATTCAACAAAACCGTTGTA  
A\_14\_P119422 CTGTTCTTACCCTTTTGACAGAGATCTCCATTTCCGGTGATAGGTGTTGG  
A\_14\_P102975 CCCTCAGCCTTCACCAAACTTTACTAAAGATGACTGACTCTAGCATTACAGTTTATAAG  
A\_16\_P00596253  
TTTCCTCTATTTCTAAAGACTTCGCCATTAATGTTCTGAATATAAATCTGCACCCCTG  
A\_18\_P15028019  
AACTTTAGGTCCAATACAAAATGTCATCCAATCCTAGATTGAGAATCCATCACCAATGC  
A\_14\_P126467 CTAGGAAGTAAGTGAGAAGCATGCGATGACACAGAGATGAGTAGTAGTCAGATTAATAC  
A\_14\_P130185 GAGAAATGCATGTAATTATGTATCTCCTTTTTAGAAATGAGAATTGGGGGCATGTTCCAAG  
A\_16\_P30952535 CTACAACACTGGCCCAAGCACCCCTTCCAGGGTCATCTGTCAGCAT  
A\_16\_P00685152  
ACATTTTTAAAGAATGAAGATTAATTTTTGATACACATAAGAATGAGAACTATTCTAGAAC  
CUST\_1516\_PI426210822 GAAGTGTGCTTTCTGCATACTAGCCCCAGGGTCCTTCAAATGAAAC  
CUST\_3987\_PI426210822 TTGAGTCAAGGGTAATAGGGTGGGAGCAGCTATACACAGTTGCATTTCT  
A\_14\_P131081 TACTTGGCTGATCGTGCTACCTAGCAACTATATTGCTTTCTTTAAACACTTTATCATCCC  
A\_14\_P101675 ACTTGATATACACAAATATTCAGGGGCGTTATTACCTATTTAAGGTGAATTCAGGCAG  
A\_14\_P135841 AAAGCATTATACAGTCATAGGAGAAAGATATGGGACATTTCTATAATCTATATTCTAATT  
A\_18\_P15591964  
AATATTCGGTTGAAAAGTTAAGATAGCATCTCAGTGACAACATTCTGAGTAACTCTGCCA  
A\_14\_P128606 ACAGTCACACGGAAGAAAAATTCCTGTTTCATCCAGCAGAAGCACTTAG  
A\_14\_P119673 CCTGGCTGATCATTTTCAAAGTTTATGGACTCTTCAGATTTTACTGTGCACCTTGTA  
A\_16\_P02702084  
AGAGAGTTTCTTTTACTACAGACCAGATGCATTGAAGATCTCACATTTCTATCCAATGCT  
A\_14\_P133615 CTCCCTCCAGGAAATTCATTTTAAAACCTGCTATCAAATATACTAGACCAACTCATCTCT  
A\_14\_P115886 GAAGTTCTCTAATTCATCTGTGTCTTGCTCCATTCCTTCTCACTCACTGTCC  
A\_14\_P113496 ACTGAAGAATTACCAAAGTCCATGAAAAAGGATGACAGTCCTTGCTCATTAGATAAACTT  
A\_14\_P127400 CCATCTCTGCAGTTGGATCAGTCTGGAAAAGCACATCTGCAGGATAATG



A\_14\_P135516 TTTGAGGAAAGCCTGGCTTTTTTCTCCTCTAATTTTCATTGCAAGTATTCATTTTCCCTA  
A\_14\_P119199 TTTATGTGCCCAAATTGGCTATTTTGAGGTCAGGGGAAACTAAATAAATCCAATATGTGA  
CUST\_4427\_PI426210822 CAGAATTGGAGCTGGAACAGCCCTCATTTGTTGTCTTCTCCTT  
A\_14\_P131855 CTAAATTCATAATCGAAGCGATTTTAGAGTAGTTAACTTGAGATTTACAGCCAGTAAA  
A\_14\_P128580 GCGAACACCATCTAGATAAACCCCTATGATGTGCTCTGTAATGAAATTATTGCTGAGAGG  
A\_14\_P122825 AGATAGTTGTTTTTTAGGAGAAGTAATTGGAAAATTCGGAGGACTTTCTGGAAAGGAATG  
A\_14\_P118722 CACTTAGCCATCTCTCCATAAATCTGTGTATTTAGCCATGTAGTTTCTTCTTAGTGC  
A\_16\_P35185604  
CCCCACTTAGATACTGATTAGCAAATAGACACAAACATTTCTCTAAATACTTCAGTGCC  
A\_16\_P19924708  
TTCCAACCTCTTAATGAAACCCATCCTCTTTTGACAATCTCTCTCATAGACTCAAGATTT  
CUST\_7465\_PI426210822  
AACAACTTCTGCAGGCTCAAAGCATGGGAAGTAATCAGTAAATGGCCAATTTAT  
A\_16\_P20909534  
GGCAGAATTGAAGAAGTATGACATTCTCTGATCACTTAATCCATGCTCAATTTGACTAGC  
A\_14\_P109998 CAGCAAATTCATCTCTAAATCAAACCATTGCACACCCGTAGAAATAGATCTCCTTTTACA  
A\_14\_P119956 ATCACTTTCATACTTGGAAATATTAGGCAAACCTTTAATGAGAAACAAGGTGGCTCCTTGT  
A\_18\_P22841557 GTCTGTGGAAGGTCTCCAGCAATGTCAGCCTCACATGTGATTAATTTGAG  
A\_14\_P103541 CATCAAGTCTCCAAGGTATCCATGTGTGCCACATTGTAAAGTATTTACTGAGC  
CUST\_3231\_PI426210822 GGGATGCCACTGTCATCTTCTGACTTCTTGGAGCTTGTTCATG  
CUST\_5341\_PI426210822  
CTGAATGATTGAATCTATTCCCAGCCGAATGTTTTCTGAAACACCAGTAAAAATCATC  
A\_16\_P02223248  
AAAAGCCATTGCGTGTATGAATTCATGCTGATTTTATGTGACAGCCTTTTTCCATTTAGA  
A\_14\_P109125 TGTGTTTCATTTTTTTAATAGAAAATGCATCCGATGCAGATTTATGGCTCCTGAACAGTTG  
A\_16\_P16191351 CTTTATGCTTCTTGTGGGTCCATTACTTTCCCTTGCCTGTTTTTTTAGGGAC  
A\_14\_P117430 TTTTCTAAAACACTCTAGGATCTTGTGACCCATAGTTCACGAGGGTATTCCAATATTCAA  
A\_14\_P125310 GGGACATACAGTCAAAAATATCATTATTAGCCAGGTAAGTGTGGAGTGACAATTTCTTTTT  
A\_16\_P17477841  
AAAAGCCACTTAAAGACAACACTACTAAGCAACATTTTGTTAGACTGGTTCTATTTCTGGGG  
A\_16\_P02792057  
TGCCCAGTCTAACAAAAAATCTTCAGTATCCCAGTAAAAGCCTCATTAAGAATAAAAACCA  
A\_14\_P200871 GGTGGTGGTAAACACAGAGGAAAGGGATTTTTATATCACCATATAATCACATTTTTGGTT  
A\_14\_P122880  
CAATAACTTGAAGGAGTAGAACAGACTAAAAAAGAAGAAAGGTCTTATTACGGTTGGTT  
A\_14\_P133976 TCTCAACAGCAGACATTTAATAATCAATAACATTACATAAACCAATTTTTATAGAAGTCA  
A\_14\_P109303 CTATACCATGTGTATGAACATCCTTTAAACTGATATGGTCTGCACAGTGTATGAATCCC  
CUST\_8869\_PI426210822 AAACACATGGTTCTCATTTAACCTGCCAAGGACTAATTGTGTATGCTTCGGAA

A\_16\_P21245530

AAATCTCACCTCATATATCTTTTCTTAGGCTCATCCCTCAAATATTCAGGTTATTTCCCC

A\_14\_P118006 CCTTACCCTATTTGAGAATATAAATGACAACATAAAAAATGAAGGGCTCGCATCATCCAG

A\_16\_P40989344

TTCAGTTTGCTCCTACTTTAAAACCACAAATCTTGCTGAACATATGCACCATTTTTTCCC

A\_14\_P101208 TGTGAATATTGCAGTCATTTGTATCATTTTAGTATTGGAGGCCAAGCAGAAGGAATCAGA

A\_14\_P125592 ACAAACCTCCATATGCACAAACACATTCATTGACTTCACAATACACATCTGCACATGTGT

A\_16\_P21429986

CAGTGTGGTAGTCTGACATCATATAGACCTGGTAATTGTCCATAACTGAGCATCAATTTA

A\_14\_P108399 ACCAAACCCACACCTTAACCCTTACCCTTTTGAGTAAAAGGTAATTTACTATTCTTTTG

CUST\_1797\_PI426210822 TCACTGGGAACCTTCTTGTTAAATGGGGTTAGGGAGTCGTTGACTTG

A\_14\_P128127 ACCCATGTAAAAACAACCAGCCTATCATTTTTAGGTGAAAACACACTTGACTCCATGAT

A\_14\_P134325 CTAAGTCTGCCTCATTTTGCATTTAGAAGCCACAAGAAAACTTTTCGAAAACTTTTGT

A\_16\_P02261048

AGTTTGAGCCACACTACTTATAGATCACTGCTTAACCTATGTTGTCTGTCCTTAGTTCTT

A\_14\_P137820 AAGTCTTTGGCCTCATTGTTAGTCCAGTTTCCTTTTACCATAAATACAATCTTCTTAAAG

A\_14\_P121189 GACCGTAGAGATTATGTCACTGTTTTGCATCCTTGTTACATAACTCAGTTCCTGGTAGAT

A\_16\_P00685108 AATAATCTTGGTGTCCCCTATTCTGCAGAACCATGAAAGGGACGTGAC

A\_14\_P123142 TAATTGAAATAACTTGCTTCTGTGTTTCAGGTGTCTGGAGTAGATTTGCAGAATGCCTC

A\_14\_P108614 ATTAGTGGAGTAATGACCAGCAAAGAAATTATATTGGGACTTTGCTTGTATCACTAGGT

A\_16\_P18105596

AAAAAAAATGGGTTCCAACACTAAGATGATCTCACATGACAAGTTTGAAAGTAACCAA

A\_16\_P00685238 CCGGTTCTATTTCTTGCTTTGAAGAGATTGTGTTCCAATTATCTGCCCTGTTTAGAT

A\_18\_P11395800

GAAAACACCACCAGATTGAAAATCTTCCTATATAGACCCTTGATATATCAGCCACTCCAC

A\_14\_P132026 CAGCAAATAATTCATTCTTTTTTAGGCCTTGGTATTTGCTGTCTTCTGCACCCAGAATTC

A\_14\_P106151 CTACAGTCTAGAATGATTTTCATGGGTTTCTTCTGGCTCTTAAGACCTTATACTTAATGGT

A\_16\_P35675511

ACTCCTTCATGTTATTCATATCTCATGCTTACATCAAATGCAATTACTACTGCTTTTCA

A\_16\_P37775209

TGCCTAACAGACCTTTTTGATCCATCACATTTAGTCCATCAATCATATCAACTCAAAGA

A\_14\_P102816 TCTTTGTTTTTAATTGGACTTTAAAGAACACATTTCTCATGCTTGTCTTGGAAGCCTTCC

A\_14\_P139561 CTGAGTCTAGACTAAGCAAAGAGTCCTTTATTTAGCAGACGTTTGATTGTTGTAGTGT

A\_14\_P121776 CCAAAACATTGTTGCCAATGTGTAGAAAGGAAGAAGCAAACTGATTATAAGAGCCAAAT

A\_14\_P117600 TGAGGCTGATTGGTCAATCTGATCCTGTGTGTTAGTGCTACATTATACTTCCATTAATAA

A\_16\_P16031128

ACTTAGCACCTAGAGACAATCAATCAACCTGAACATTTTGAATGGCACTATCTGTTTTTC

A\_16\_P03772413

AACCATGCTGAATTTAGGGATTATGTGAATGTTGTTAAATGAAAACCTTGCAAAACCTGGG  
A\_14\_P119633 GAAGATTCATTCCATTCTGGATGTGAATGCAGGTAACACCTAGAAAAGATAAGAAGTCACA  
A\_16\_P19603868  
ATCTGGCAAATGGAGTAACTAATGCATCACCAAGAAGTTAAGATAAGGGTAAGGCATA  
CUST\_4887\_PI426210822  
AGTTATTAATAGTTTCAGAAAGTTGAGGGAAATCATGCAGAGGTTCTCAGATGTTTCAGAG  
A\_14\_P201247 CGAAGAGGATTTGGAGGCGCCGCAAGTCAATATTTGATCACAAAGTTAATATTATCTCAA  
A\_14\_P120502 ACTTTTATATTTCTGTTCAACCTGTTGGTTTCTACAATGATTTTAAACATTGGAAAGCCA  
CUST\_6386\_PI426210822  
GAATTGAACCTTTTTGGGTACAATATCTTTTTTAGTATTTCTTGGTGATTTTTTTTTTT  
A\_16\_P03288507  
CCTCCCTTTGGAAACATAAATTTATGGCAGCACTTCTAATCTTATTTTCTCTCAACTTGC  
A\_14\_P114613  
ATGAACGATGAAAAAGCGAAAAACAAGAGTCTTGTCAAGATTTGGTGCAAAACTTTTACC  
CUST\_9174\_PI426210822 CATCAAGAAAGACTAAGCACCATTGTTTTGTTTCTGATGTTGCTGTCACCTCAGC  
CUST\_7647\_PI426210822 CTCCAGTTCCTTAAGGATACTTTTAGTTTATCTGATCTGTGCTCCACACCTCTC  
CUST\_6946\_PI426210822  
GTCTTTGAACTCTTGAGGTGTTTGTATGATATTCTGTGTCAGTTGCACATGGGAT  
A\_18\_P17038917 CTTGCCAACCATTTCCTGACTCCTTCCTGTCCTATTTCTACCGAATCATT  
A\_14\_P202426 AGGAAAGCATACTCACCTTGTAATAAATAATCCTAAGTGAAGCACAGATTTGTCAGACT  
A\_14\_P127667 TAGAATAATGGGGGAGAAATCTCTGCCTAAAAAATTAAGTAAGAAGCAAGTGCTCCTG  
A\_16\_P36142270  
TCCCACCATCAAAAATTAAGTTACCATCTCAGCGTATTTATTTCCCATCTCTTTTCTTCA  
CUST\_3613\_PI426210822  
CTTGCTGTCCATTTCTAAGGATGAGTAAAGAGTTAACGTATTGAACTTGAAAGGAGAGAT  
A\_16\_P15618872  
AAATCCACTTACAAGCAATAGTTCTGTCTTTCCAATGTTACATTCCAAGCATTCAACAAC  
A\_16\_P38058647  
ATTGAAATGTTCGATTGTTCCACTAGTAGAAAATTGCCGTAACAAAACCTTTTGGTCCCTTA  
A\_16\_P17869630  
AGTCTCAAACCAAAGTAAACTGACTATCCTATTCCCATAGATTTTTAGCAAGACAAGGGT  
A\_14\_P115139 AATATACTTCTCCCCATCTTGTGCTCCTAAATTTGGGATAAGCATAGAATCCTTTTAAG  
A\_18\_P10527395  
GTCATCAGGTCCTTAGTCATAGGAAATGCATCTTCTTCATCTACGATCTCATCCTTTATT  
A\_14\_P202482 TACATGTGAGTGGGGATTGGTAGATAAATAGATAGAAATTGCTTTCCAGAGGAGAACAT  
A\_14\_P131481 TCCCCACCCAACATGAAAAGTAATTGCTTAAATAAATAATATATGTTCTGCCCAGG  
A\_14\_P139999 CGTGCTATTTTCAAGGATGATCTTGAAGACCTTATAGTTAATTGGGATGAGAGCAAAAGCAT  
A\_16\_P17846978

AAACTCAGATGAACTATCTCAAGTATGTCCACACTACAAAGTTACAGAAAATGGCGTTGT  
A\_14\_P129421 AATGTTATACTTACTGATAAACTTGTTTTGCATAGTCTCCAACAGGGCTTGGTGAGCATC  
CUST\_3846\_PI426210822 CTCCAATTGCTTAAGACACTGAGGCCCATCAGGCCAGAAACATATG  
A\_14\_P111081 ACGAACAAAAACCACTGCATCACCCTTACATTTATAAGACACTGTGCCTATAAGAACAA  
A\_14\_P200114 CTTGTGTCTGATTGAAGGATGAAACATCAAACATGCAAAAAGGACCATCTTTCAGAG  
A\_16\_P16125671  
AAGATAATTCATCAGTTTGACTTCAGATCCCAAGATCTTAATCAGCAAACCTCTTCCTGG  
A\_14\_P129508 CTTACATATCTCAGCCTTCTGCCTCTCATTCTCATCTTTAGCACTCAGTTTCTAAAATC  
A\_16\_P02462237  
ATTTAAGTCACCAACTGTTTTATACATCCACGCCCTAAATTCTTCAGTTTTAGGCAAAG  
A\_14\_P126980 TTTTAAAGACTCCTTTTCAGTAACAATTCGAGGAGGAAGAATCTACAGCCAATTCCAAG  
A\_14\_P118883 ATAAATATTTTTAAAGTTGTAATACAAGAAACAGATTGTCCGGGGGCCAAAAGGATGACC  
A\_16\_P16191905  
ACTGGTAAAATGGCAAACCTGGTAGAGGCATCTATGCTTCTGCCTGTAAAAATATACTAA  
A\_14\_P139870 ACTTTGGACCAAAATCTTGAGATTCTGTAACCTACTAGAGACTGTGAAGGATAATGTTGG  
A\_16\_P20516541  
AATGTGGTTCAAGGATCAGGAAATGTCTTAAATTGTAAGGGACAAAGAAGTTTACAAGCC  
A\_14\_P128013 AGTTGGTCATAGAAGCGAGTAGACTCCTCTTGACTCATCTGCAAAAAGAAGATATAATCAG  
A\_14\_P130980 TTAGTCTTTTTGGTTGTA AAAAGCCTTCCCTACTCTAAGATTAAACATGATTTCCCATGTT  
A\_14\_P122115 CTGTCCAGAGAAAATCTTTCCCCTGTAATCCCAGTGACCTTCCATTATACATATGT  
A\_18\_P14807358  
AAATTTATATCCTTTTTCTAGCACTGAGTTTTGAACTAGCCAGTCTTCTATACCTCAGCGC  
A\_16\_P21042724  
TTCACATCCTAATACTAGAACTCTTACCTTTTTCTCATGAACCATCCTTTACTGTGATGCA  
A\_14\_P109907 AGTAGAAATACCTCCTCTTTAAGCCCATATGGGGATAATTTACTTCAAGAAGTCATCTCT  
A\_16\_P15827631  
AGTAGATGTTGAGGGCAAAATGAAGTAAAATTTAGGCATGCAAAAACCTCATTGTTTCCCA  
A\_18\_P10754219  
TGTCATACATGCACTCTATTCCTGATACTACATCAATGACAGTAATCAGCCTGTAAGTCT  
A\_14\_P130805  
GTAGAAAAACAGAATTGTAACGGGAAAAAATTCAGATCAAAGGAAGTCATAATCCCAGGA  
A\_18\_P11925050  
ACTCACTGATCCTAGTCATTCTATGCTCTTCACTTCAATAGATATGAAAACCCAGGAGAT  
A\_14\_P120476 AGAATCTTATTGGGCAACATTAGTATAAATTCAACACATCTGCCAGAGACTTAATGTGG  
A\_14\_P110563  
AGAGTGGACTAGAAAGAAACAGTAAAATAAGAGGCTATACAGAAATTGTGTGGTCAACCA  
A\_14\_P137669 ATCCTTGAATTGCAGAGAGAATAGAGACCTATTTACAGTCAATAAAAAGGGGGAAAAAA  
A\_18\_P15671275

GCCCTGTCATATAAGAACCAACTTCTATCAACACTTTTATAAACAACCGAACCAAGAGAT  
A\_14\_P109922 CTTGTGTGAAGAAAGACTAATGTGAGGTTTCTGAGATAAATGGTGTCCTTTTAAGACAAC  
A\_14\_P114675 TTACCTGATCTCTTTAATGCTTTCCAATTTGCACATGATTTCTTGCTCATCTGCCATACT  
A\_14\_P116576 ACAAACCTGAAAAGTTGAGAAGTAAAGTCACATGCTCTGTCTTTCTCAGAGTTCATGAATT  
CUST\_3784\_PI426210822 CTTCAGCAGAGCTTGGCTACAGAGGAGAAAGATCTAAACTGGACCAATTT  
A\_14\_P107398 AGTAAGGGACTTGTGCATGTATTCTATTCTGGTGAGATTCACCTAAGTAGCACTAGAACTCA  
A\_14\_P119201 GGACTCTGGCCTATTGAACATTTACACAGTTAATCTCCCTATCTTCTGTTAATAGTTCA  
A\_14\_P110264 GGCAGTGTGTGTGATTTGTGATGAACCTAACTCCTCATGCCAGTTCTC  
A\_14\_P120181 ACGTGTGCATCAAGTCCTGTAAGCACAAGAAGTGAGAAGAGAACTGTGAGC  
CUST\_7722\_PI426210822 GTGAGACTTCAAACCTCTACCTAGCATTGAGCATAAGCAGGTCAGTACC  
CUST\_9509\_PI426210822 GGTTTGCCTTTTTAGAACAAACACGATCTTCCCTGCGTGATTCTTCTGAAT  
A\_16\_P19905619

AAGTTAGTGAGGTTGTGTTTCTGCTACTAAACTGTCCAACAAATTCCAGAGATTAAGTT  
A\_14\_P125579 TTTCCATCAGGTTTCTTTATAATAAAGCCACTTTGAATTCTGTTTCTAGTGCCAGGAA  
A\_18\_P25548571

TTTATTTCTGGCAGATAGATGCCTAAAGAGCAATCAATTGCTGTATCAAATGGTGCACAT  
A\_14\_P103565 TACTACTTGAATCTGCCATGAGGTTGGAGAACAACCTTACATTACTTGGTAGGTGAATTA  
CUST\_2622\_PI426210822 CATCTATGTGAACCCTGATGCCCTAACCTGTGCCTACACCCAAG  
CUST\_5899\_PI426210822 CATCCTTACACCCACTTCCTCCTGTTTTCTTCTTAGTTAAGATGGCAAAGAAAAG  
CUST\_580\_PI426210822 CATCAAGGCCCTGTCCAAGGTATCAGGTTTCTAAGGAAAAAGGAGAA  
A\_14\_P202217 ACTCCTAAGAGTTTCAGAGTTTCTTTGTCTCACATTCTAATTTGAGTTAGCCATTTTTGG  
A\_14\_P128110 TATTTCAAGTTCCACTCTGACAACCAAGGAGGCTAAAATTAGTTCTGGAGAAGGAAAA  
CUST\_1820\_PI426210822 CTCTCAGAAAGCAGGAGACGTTGAGGCTAAGCCTAGGCAATCTTT  
A\_14\_P130080 CTAGGAAGGACATTAGATTCCGAATGAGGGAATGATATGCAAGAAACAAGATAGTGATTT  
A\_14\_P102196 ACACCAGCAAACCTAAGAGAGTTCATTTGTCCTTGGTGAGATGAACAATATAGAGTTTTAC  
A\_18\_P16228195

GATACGATCCCCATCAGATAAAAGTTATGGTGAATGTGTTCTAGTAAGAGATGCTTCTCA  
A\_14\_P127072 CATTACTAAAAACATCAATGGGCCTGTGAAATAAGAAGTGTGAACTCTCAATTGATGAGG  
A\_18\_P16723363

ATCCAGGAAGTCTATATCCTTACAACACCTAGAAGTTTGTCTTAACTCGATTGACTGAAG  
A\_14\_P133953 ACATGATCATCCTTGGTTTGGTCTTCATCTTCCAATTTGTAATCTCTTGCTCATGTCT  
A\_14\_P100594 ATGGTAATTTAAATAGTTCAGAAAAGGGAGGAGGAGTTGATAAGTCTTTTTGTCCCATCT  
CUST\_6092\_PI426210822

AGAGCATGAATTCTGGCAGGCCTGTGATCTCTTAAAACAATCAACTCTTCAATTAG  
A\_14\_P106455

TCTGTGAAAACAAGAATGGAAACCCTCACAGAGAAAACCTAAGAATAAGCAAGTCTTCTT  
A\_14\_P129846 GTTTTTCTTCTTATTCCTAATTGGAATTGTTCCCAAGGTTGCTATGTGGAAGTGTAT  
A\_18\_P10828817

ACATGAGAACAATAGCACTCACAATCAATCAATGCCAATATTGAGTCATGGACACCTATA  
A\_14\_P105351 CTATGTCTCAGGACCAGAGTTGAAGAAAAATATGGGGCAAACAGGAAGTGT  
CUST\_4228\_PI426210822 CAAAAGCATCAGGACCCCTGATATCCACCTTGTTAACACCGTAGATG  
A\_16\_P17782262

GGAAGCAGCATTTTAGACTGGACTTATTAACGTTAAGATGACCATATGCCAGAACTTGT  
A\_14\_P111075 ACTCTTTGCAAGAAAAACCCAAACAATCAAAAACCTCCGCAATATTTAACAATCTGTGCAT  
A\_14\_P122213 GCACGGCATTCTGCCAAGTATCGAAGAGCCTACAGCAGAAGAAGTAAT  
A\_16\_P02810586

AACTTTCATCCTTGAAGTCTAGTGGTATTGCAACGGATTTGAGAAATTTTTGAATAGGGC  
A\_18\_P15018776

AGCCACATTTCTTTTTCTCACTAACCTATACTGTTTCTTAAGGAAGTCCACACTAATCGA  
A\_14\_P139973 AGGAGACTTAGGAACCTACCAGTTGGCCATGATGTCCTTTCTTCTTTTTCTTTTTTTTAA  
A\_14\_P118880 ACTTTTTGTTTTCTTAACTTCCAGTACAGCATCTTCTCAATCAGGATCCTACACCTT  
A\_16\_P16191271

GCAATGTGTATCTGTAGCCATGACTTTGCTTAAGCGAACTTGGAAATTCACTTCATTTAA  
A\_14\_P127529 CTTTTCTCAAATGGTTCTTTTATACTGTGGATGATACAGGACTCTGTTACCTAAGATGTG  
A\_18\_P12627671

AAGAATGGCTGGTAATTTAATGTGGTTGGTAAGTATGGAAAAAAGGACTAGAACGTCG  
A\_14\_P122953 CTTACACCTGTCTCTTTTTTCAATTTTTAAATCCACCACCATTATATAGGCCACAAAATC  
CUST\_4632\_PI426210822 AAGAAAATCTAGGAAGAAAAGGCCACACAAGGAAGAAGTGCAGATGGC  
A\_16\_P02356663

GTTTGTTAAAAGTGATGGGTTAGTGGTAACTGAGCAAATGATTTGCACTGAATAGGCA  
A\_16\_P16700937

AAGACCAACTCAAATCTTCGTCATTCGAGAAATCTTTTTTAAGCACACTAGCACATGTTT  
A\_16\_P19569201

TGCTTGCAACTTTAGACACTGACTCTAGTTCTTACACCATTACCCTTCTACTACTAACTA  
CUST\_9840\_PI426210822 TGAGTTTGAGAGTTGTGATGTGAGAGAACAGGCTCTGCCAAAGCAT  
A\_14\_P107576 TGGGTTTGCAACTACAGTTGTCCAAATTGTCAGAAAACCTATGGACTGAATAGAAAACAAA  
A\_14\_P133536 TCAAGAAGGACTTACTCAACATTTCTTCCATTTACTCTCTCATACTTCTCAATTTATTT  
A\_14\_P117023 GCATTATGCAGTAACCATTGTCATCGTTGGAATGAATTATGCTTTCATTACCTGGTAAGT  
A\_14\_P134427 ATAAGTGCTTTGTAACCTCCTTGGATGAAAACCAAATGAATGCTGAAAGTAGTGTGGTATG  
A\_14\_P127394 AGAGACTTACAGAGAAATAAGATCCAACCACTTCATTTTCTGAAAGTTCCTAGAAACAA  
A\_14\_P112143 GACTTGGAGAAATGGGCAGAATTGATGTCAACTCTAATAAGACAACAAATTGGAACATTT  
A\_14\_P127722 CATTTCTGTCTGGACTCAGCATCACCAAGGGTTACATGATAGTCTTGAAG  
A\_18\_P22841766 CCAAGCCAAATTTCTGAAGCAGCGCAGTTGTTTGTGTCTGAACTCAG  
A\_14\_P100903 ACATAAATACCTACAAGATAGAAAAGTGTAATGCCGCGAGAGATGTGCAGAAAAAGCATT  
A\_16\_P19443228

AACTCCCCAAATTTGGTTAATTTATGTCTCCTCAACTGAATAAGAGTGGACTTTTTCTT

A\_14\_P116746 CAGTAAAAAACATTCCATTTGCAAGTTCCATCTCTTTTTTCTCTCCATTCAATACCCAG  
CUST\_9574\_PI426210822 TTCAGGACATTTCCCAAGGGGTCATCTGACCAATTTAAGAGTTGGTATG  
A\_14\_P101344 TCCATGGAACCTTATTGAGTATTTACACAAGAGATTGACACATGAAACGATCAGCAAATAGG  
A\_16\_P35364260  
AGAACTCTGACTGTTGAGAGTATCCTCAGAATCCATTTTCATCCTTTATACACACACATTT  
A\_14\_P124248 GAGAAGTCTGTTCCCTTATCACGTGTGTAAGGGGAAAAAGGTAAGAAAATGTTTTTATTTTC  
A\_16\_P58424467 ATTAAGATCTTGACACTTCTGGCCTGTTGTTTGCAGGGGCAGAGC  
A\_18\_P16463108  
ACACCAGAAGGTAATCCATTACATCTCAGTAACTGTAGATCCATACACCCAGATAATTTG  
A\_16\_P39210633  
CGATGCATTTTTTCATTCAATCAACCGAATCAATTAATTGCCTTACTCACATAGGAACAAC  
A\_18\_P14621949  
TTCAGAGAGTTTCACCATTACTAGCATTACAGGATTACAGACATTGTGCGAATAAAACTGCA  
A\_14\_P127091 AGACTTCTTTGGTTCACAGAATACTCAGGATGATCTTAGGTATAAGGTCATTGTCCTTTTT  
A\_16\_P16988102 CAGTATGCACTTATTTTCGGTTTCGTAATTCTGCACTATTTTTGACGGTTGACTCATCTC  
A\_14\_P112863 AGGCCCAATTTCAATTCTCATTTTTCTTTTAAAGTCACAGGAATTTTTTATCCTTGGGGAA  
CUST\_6383\_PI426210822 TAAACCACAGGGGATTACCTATGTTTATCTGGGGCAAGTTGCAGGATAA  
A\_14\_P127369 ATGTGAAGGGAGGTATTAACATGGTGCCAAAAAATAGCCCTAGAAATCCATATTCATTTA  
A\_14\_P200694 TGCTTCTATATGGCAAAATTAATGTGTTTCATCTTCTGGCACCATTTCTAGAGGGCTAA  
A\_14\_P131226 GATCCATTTTCCCAATGCCTCGTGTAATCTATGCTATGGCGGAGGATG  
A\_14\_P119061 TTTCTTTTACTAGACCTTTTCACAGTGGATTACAGGCATAAGTGCAGGGTTTTAAACTTTTT  
CUST\_3558\_PI426210822 TCCTTGGTGACTTCTGTTTTGCAGATGGGGAAATTTGTTGATTGTAGTGAG  
A\_14\_P108724 AGCAGCATAAATGGAAGCAGAATTTGAATCATAATTGAAAAAGGCGTTCAGTGAAGTGAA  
A\_18\_P26793618 TAAATAGGATCCACATCTTCATCTTTCTCTCAGGACCCCAAAGACACCTC  
CUST\_5852\_PI426210822 CACTGTTGTCGCTCTCATTTGCCAATGTTAAATAGTGATGCACAGTGCCTAA  
A\_14\_P103259 CTAAAGGAAATCGTTGGGAGAGCCAATTACATTTCAAGAGAGACTAATTCCTGTAAAGA  
A\_16\_P01095018  
AAAAGTGAATAATGCTACCTTCCTGAAAATTCCTAATTGCCTGAAACAGACATCTTCAT  
A\_18\_P11892104  
TCCTCAAACCTTTCTGCTTTTACTTTTTTCATACAACCCTCAATATTCACACTATATGTCCT  
A\_14\_P119859 ACAATACAAAACGTATGGTCACACATTCACAGTAACTGAATTCAGATGTAGCAAATGCTG  
A\_14\_P126033 CTCCCATTACTIONACACATGAGGGGTGCATAGGTTTTGCAAATCAAACACACATAGAAAAC  
A\_14\_P109414 ATGTCTGTCAATAGCAATCAGATAACAACCTTTGACCTAAATATTTACCCAACAGCCTCA  
A\_14\_P133836 CTCTCCTACTAATACTGCCATTCTGGAATAAGTGGGCAGAATAGAACTTCATAAACAT  
A\_14\_P113215 TATAAATGGCCATTTGTTACTATCCAGGTCTGATGAAAAGTCAACATTAATTTACCTGAG  
A\_14\_P134544 CCCAAATTACTIONACCTTAGGAACAAGGTCTTGAAAATGCTCCAGTATCACTGAGAATGAT  
A\_14\_P106995 GGAGAATGCTCTTATCTTGCCTATCTGATTAATAATTCATTCATGACATGAGCAATCCAGT  
CUST\_3472\_PI426210822

GAATAAAACATAATATCTTTGGTCTTCACAGAGGTATCAGACAGGAATTCCACTCAGCTT  
A\_14\_P137397 ACCACAACAAAGTCTGAACATTTGAACAAAATACTCTCCATTATTTCTTCACGTTTTCGGC  
A\_16\_P18075318 ATGCTCTCATTATCTTGACACATCCCATATTTAATCTCCATTTTTCCATGCTTTCTCCTC  
A\_14\_P116676 GCATTTGCCCATGCTGAATATTATTTGCCACTTCCTTGTTTCATTTCTATTATTAGGAGGA  
A\_14\_P116051 ACTAGTGAGAAATACGTTCCAAGTTGCTTTCAAATTAAGTCATAAATAGGCCTGTCTTCC  
CUST\_4921\_P1426210822 AGTCAGTGGTGCTCGCTAGTCCGGCAGATTGCTGTATTCTTGCAC  
A\_18\_P17070665  
AACACAACATAACAAGGAAATAGCCCTTTAATTCATCACTAACATGGTTACCTATCTGCA  
CUST\_704\_P1426210822  
TGTAATAAATAATTACAAGTGGCAATTAGTCACTGTGCTGATGTAAATTTGGAGTTGGTGG  
A\_14\_P132152 CTTTATGTATCCTGCTCTTTAAGATGACAGAACCATGGGAAAAATGCCAGTGTTACTTAT  
A\_14\_P102423 AAAGATGATGTGCTGGAGGATATTTGGATGGAAGACAAAAAGCCTTTATTAATGGATTCA  
CUST\_9284\_P1426210822  
TCGGTGGCTCTTGAAGAATCATACAAATTTCCATGATTTATTTAAGGTGAGAGCTGCT  
CUST\_5289\_P1426210822  
AGTTTGTAGCGTTATTTTTTTAAGCAGTAAAATTTCAAGCGACTATGGTCTGTGCCAGAG  
A\_16\_P20907737  
AAAAAAGTTTTGACACTGTGATAGAAGCCACTCATCAGAACTGTATCACAAATGCTCC  
A\_16\_P18074804  
ACTGTCCAATTTACATGTTGTATATGCCTTTGAAACTGGAATACTCACATTGAACTTGGC  
A\_14\_P125669 GCAAGATCACAGTAGCAGTTACACGAACACATACACTTTTTTTTTTCAAATGAGCACATG  
A\_14\_P119481 TTTTTGTTAAAGAAATCCTTTCTTTCCCATAGGTCATGAACAGCCCATTAATTTGGCT  
A\_16\_P19373370  
CCTCCAATTATGAAAAATGAAGGTGCCATCAAGATTAAGTAGTTAGGCCACATAGAGAAC  
A\_14\_P135276 GTTTCTTGGGTTTCTTGAAGCCAGTATTTCCCATAGTATCTTACGTCCAGC  
A\_14\_P138380 ACCCTCTATACACTGTGATTCAGGATATAGTAGTGCCCAAAGCATGAGAACATTATCATA  
A\_18\_P22842445  
CTTGAATGGCTGCATTTAGAAACAGCCCTTACTTCAAGCCCCTATTTCTTAATTATTTGT  
A\_16\_P01690346  
AAAAATTTCTCAACAAGAAATGCCTTTAGATAGTGCTTTATGTGAAAAAGTCCACTGAG  
A\_14\_P139258 CATTTCTAGACTTCTCTGTGGAACAGCCACCATTGGTCTTATTAAGAGAGTCT  
A\_16\_P37820864  
AGCATTTATACTTAGGGACTTGAGTTGAAATTGGGACAAGAGGAAAAAAAAATTCATCGGT  
A\_14\_P131896 CTTATCCGGCAGCGTAATTGGCCATATGCACCTTATCAAAAATCATTAGGCACTTT  
A\_14\_P106390 CCATGTCCCTAATTCATTTCTTACCAGGCTAACTCTCAAATTAACAGAAACCTCTCTA  
A\_16\_P17387069  
ACCACATCACACCTATTATTCCTGCTTCATTTATCTCAGTTTCAAGTTTCTCATTCCATG  
A\_14\_P104114 TTTAGGCCTACTGTGCTCTGGCTGCAAATCACACCTTATTATCAGTAATACTAAAAACTG



CUST\_6533\_PI426210822

TATTATCCTAGTCATCATTGTTAAATATAGTTGTGGTTGGTAGATACAATACCGATAATA  
A\_18\_P22841715 CAGTATCCCCAAGGAGCACAAATATTGGATTCCAAGGTTGGGTTTGAAG  
A\_16\_P38392565

ACCGTTTTTAAGTAAGTGAATTTAAACTGATAACTCCATGTCAATCACATACACTGCCTT  
A\_16\_P15893569

ACACACTTGTAGCAGATCTAATATACTTTCACCACCCTTTAACTTCAACTGATGTGAAAT  
CUST\_15\_PI426210822 AATGTCATGTGCACTCTATCTACCCCACTGGCATCCCAGGCAGTG  
A\_16\_P16668992

AAAACATGTCCCAACTAAATTCCTGATGTTATGAAAGATTAAAGGCTCATCTGTCC  
A\_18\_P16362244

AAAATGAGACATGTCTTTCCAGAAAACTTAGGCATAACTACTGTTCCACAGGTTTTACC  
A\_14\_P135903 CTGCCAGCATAACCTTGGACTAAGATCAGACTTTTATACTCTATTCAATTCATTGCTACT  
CUST\_7049\_PI426210822

TCTTAAGAATATCACTCTCTTGACAATCACAGTTGGGAAATGTGTAATCTCAGGGTG  
A\_14\_P113622 GAAGATGAAGAGACTTCCAACCTCTCTATGATGAATGATTATTATGCAGCATCTCCAAG  
A\_16\_P17177081

CCTGACTCAGTGAATTAACCTTTAATTACAGCCGTTAAAATTGAAATGAGCCTCTTGCT  
A\_14\_P103670 CTCCTTTGCTACATTATCCTGTTTCATCACTCCTATCTATCCTTTTGCTGCTATCATTTC  
A\_16\_P00501883 ATCGTAGTCGTATTTTCTCTTATTTTACTGTCAATCCCCTATCATGTAACCTTTGGCCAT  
A\_18\_P22841564 CTAACCTTGCACCATTCATAGGCACCCCTTCTTTCTGCCACTC  
A\_14\_P136396 ATGGAGGCAAATAAAATTGTGATAGATGGAAAAAGGCCATTTCTGTCTGTCATAAATTTG  
A\_16\_P19097127

AAAATTCATGGAAATTTCTGGAAAGGATTAAGGACCTGTATGAACATGATGGGCAATG  
CUST\_4904\_PI426210822 GACTCCTGCAATGTTGGGAAAACGACTCAGCTGCCCTATATAAG  
A\_14\_P137589 CTAAGTGGAGTCATTTATTTCAATGATCTAGTGCTTTTCCACTCAGCGCCTTCATCAT  
A\_14\_P111683 CAAATGAAAACATTTTGTGTGTGTGGCCAAAATATTGGAACCAGTATGAGATGCCAAATA  
A\_14\_P126334 TTCCTAATTCCTTACTTCTACAAGTAAATATGTTTCGTGACTGGTTAGGCCTGAGACTCTA  
A\_14\_P104258 AGTGTCTGTCTACAGAAAGTCCAATTAAGTGAGCGATTAATGTTGAAGATTTGAGAAACAC  
A\_14\_P137075 CTAAAATAAATAAGAGAGGAACCAGTGTTGTATAACGACCTGTTGGTGACACATCAGGTA  
CUST\_9110\_PI426210822 AACCTTTCAGAAAAACGTTGCTTTCCCGATTGAAGTGATTCCCATGTAA  
A\_14\_P107237 ATGTCGTAAGTCACTGACCCTAACTGCAGACCATGAAGTAAATTATGTAACCTAGGTTTTTT  
A\_16\_P58424362

TCATGAGGCCTAGTTCCAGAGCAAATATATTCTCACTTTTGCTACATTCTGTTGATCAAA  
A\_16\_P01400770

TCCCTTGCAGATAATTATACAACTTCTATCCTCTGGTTCAAGTGAAAAGCAAATCCTTTG  
A\_14\_P136049 GCAGATGATGATGCCAATTCCTACGAGAATGTGCTCATTTGCAAGCAGAAAAC  
A\_14\_P118299 TTCTCACCATGCTCAATATAACCAAAATTAACCTCCCAACTCTTTAAGCCTTCTTTTTTA

CUST\_10238\_PI426210822

TTAGCCATTATCTTTAGTTGAAGTCATTATCTTTACTTAAGGGGATGACAAAAACCTTGC

CUST\_9707\_PI426210822

ATCATTATTATTTTTAGGCAACAGAACCCATTCTAAATTGAAATATGCTTCAGTTGACT

A\_14\_P115636 TCATTTTATCTACATTATTTGTCCCCTACTCTTCCCAATGATGTGATTACACTATGACCC

A\_14\_P117677 TTGTCTTCCAAAGGTTGTTTTCTTACCCCTCTGTTGCTTAAACAATCATCTTCTGTGTTAT

A\_14\_P128369 TTTATGTTTCATGTTTCAGGTTAATAGAATTTTAAAGGTTGCCAAACCCAACCTTTGTGGTT

A\_14\_P130575 ATCAGACATAGGTAGTGTCATTGCAGTGGAATCCACGTTTCAGAGTTCTACTGTTAT

A\_16\_P16540829

ATTTAAGGTCAGATTTTTCTCGTCAATAATGCCAGTCATAAAAAAGTCAGCGTAGATGGG

A\_16\_P20184422

AAAGCCATGGAACTACATATATGGAAGTACGTATGTCAACTCCCATTGACTTCCATAAAT

A\_16\_P20469729

AATCTTGAAACTGCTTAAAGGATAAGCCCTATAATGTGATCCCAGATATGACTAAGTGGC

A\_14\_P117217 CTATTTAGAGGTGGGTATGAGCCACTTGTTTGAATTTGAATCAGCCATTTTTATTAAGCC

A\_14\_P108249 ACAAATTTCCATTTGTAATGATTAGTGATGTGGCATTGAATTTAGGGGCCTTAGGAAAG

A\_14\_P127269 CCAATTCTATATTCATGGCACCTTTCTCTACTAGCACATTGGGTATCATTGACTTAGAGA

A\_14\_P118518 ATGACCACGGCTTTTATTGTTCGTCAAAAGTTTGTCCATGTTTCATCAAATCTACTACT

A\_14\_P120241 CTCGAACATCTACAGAGAAGTTGTGAATTTAGCAGTAACTGATAAATGATGAGACCCATG

A\_14\_P107988 TGATGCATTTTTAAAATCTTCTAGAATTTGTAGCATTTGAAGTCATGGGTGGGCTTGCAT

A\_16\_P02608660

AAAATAATGTCATGTGTGTGAATTGACTATGGTGCTTTACTAAACTCTTGACTTTGGGGC

A\_14\_P136851 CGCACGGGTAAATGTTTAAAATCTTTTCCCTGATTAATTTTGCCAGTTAAGAAAAAGAGG

A\_16\_P20256210

AACAGGATTGGGGATACATAATGAGGATTAGACTTTGGAATTCAGAAACAGAATTACCAG

A\_14\_P110482 CTTGTGGCCTCTATCTGCTACCATCTGTGTTTTATCTGAGTAAAGTTACCTTACTTCTG

A\_14\_P129831 AATTTTAAATAAACTGCAGTGATTTATCCTTAAATTTCTTACTCTCTATAGGTAACAGG

A\_14\_P105374 CTTAGCCCTCTGCAGATAAGATTAGAATTCTGCTAGTGGAATTCAGAATTCTAAGCATGC

A\_14\_P117504 CAGTTTTCACTATTTAGGAGCACTTAAACCACCAAAGATTAGCCACAGTGGCAAATAAT

CUST\_5592\_PI426210822

AAAATTTAAGGAAAGCAAAGACCTGCATCTGTCTCATCAGAAAGGGAGGCATA

A\_16\_P01836677

CAACTCAAGTCACAGAATTTGGTGATCATGATTTGTCTTAAACTGACTCCCACCTTCTAAG

CUST\_453\_PI426210822

TGATAACTTCTATTGTGATTTGTTTCAGGGAAAATGTTGTTTTTACATTTGTTAAAAGCAG

A\_14\_P138824 CCGACGCGCCAATCAGTGTCCCGTTACCTAAAGTCAAAATTTAAAAACAAA

CUST\_8797\_PI426210822

TCTCTCCATATTCTCCAAATAAAAATTCAAAACTGAGCAGCAAATCCTGTGCCTCT

A\_16\_P00683167

ATGCCAATTC CCCCATATTGAATTGCATGCTACCATTCAA ACTAGAGCCACTGAAAATTA A

A\_16\_P16455384

AACAGATGCC CAGTTTCTTAATGGTAAGTGAAATGAACATGAGTTGATTCTTACTTTGGC

A\_14\_P134647 AACTTAATTTCTCTGAGGCTCACTTCTATTCTGTCCAGCAAGACAGGCAAAGAAATATTA

CUST\_400\_PI426210822 GAAATGGAAGATGTGCTGGGCTTTTTGCTTTGTAAAGTTGTCAGAGTGTGT

A\_16\_P18478959

GAAGCATAGACATAATGAATCTCTCCCGATGTATCTATAAACCCCTTGCATAACTCCCTTT

A\_14\_P108827 AACCTAACAAAGAGCCAGTGATTCCACCAACAGGACTCCTGTCTAG

A\_14\_P200321 CAGATTGAATTTGACTTTATTCCCTCTAGAAAATAGAGACATCTTTGCCGAAGCCCTAAA

A\_14\_P123183 AGTTTTAAACATAATTCCCTTGTGTCCCAAGAAAACCAGATAGGAAAATAAACCCCTACT

A\_14\_P126108 CTATAGAAGAACCTATGTCAAAGATCTTCAACTCAAGAAGGAACAGTGAGGATTAGTTCC

A\_18\_P13354612

ATGTCTTGCTTTCAAATCAGCACTTTCAAAAATCTGTCCATCGTTAGTGTTTGACCACAT

A\_14\_P120126 TTCATTAATAATCTGAACCCAGTCTGAGAGCGAATGTAGGCTTTCAACCTGAAATAAA

A\_14\_P127157 ATACATAACAAAGAACCGTAGGTCATAAGAGAAAAAGCAATTATGCTGACCTGTGGGAAT

A\_16\_P00615665

CTGTTTGATTCAACCATTTTCATATGAAGATGATAAGGAGCCATCAGAATATACGTCCTG

A\_14\_P122436 ATGGTGGAAAACAAGGTAGAAATTGATAAAACAAGGTCTTAAGTATGTTACAGACCTAGC

A\_14\_P138353 AATATCCAACCATGTGGATCGAAGCATCTTGATATTTTATGGATTCTTCCATTTCTGCTT

A\_16\_P01623502

ACGGTTTGATCTTTCTGAGTTAACTAAAAATCCCTGAATGTGTTGAATAGTGCTTATGGC

A\_16\_P58424489

TACTGGATTGAGGATGAGAAGCATCAATCTGTTTCATCCTAGCAAAAATGTTTAGCAAAAATG

A\_14\_P101508 AACCCACCCCTTTACATTTTGTGCAGTGATTATTTTTTAAAGTCTTCTTTTCATGTAAGTA

A\_14\_P132242 GGAAAACATACTATTCAATTATTCATTCTAAGCCCTCAGAATGGA ACTCAATTGCCTTGC

A\_14\_P137641 TCACAGCAAAAAGTATTGCATGCAATGCTTAATGATTTAATAGGGGATACTCACATGCCAA

A\_14\_P123716 CTGGAAACGGGAGGAATCACTCATAATCCTACTCTGACATTTGAAAATAATTCCTTCTAA

A\_14\_P136971 CAAATCCTCATTTTCCACCCCAAATGTCCGTTTTCAATTGATATCTCTTTGTTC

A\_18\_P12797826

GGAAGAGATTGGTAGAAAAGAGAAAAACCTTTTTTTTTATTTCTGTGTGCCTTCCACTAGT

A\_14\_P101339 TACCAGCAATGAGTGGATTTTATCAGTGTTGTCTCTACAAACAGCACCAAATTATAA

A\_14\_P113740 CATCACCTAATGTCTATTTCTGTAGTAGGTTGTAGTTCTTGTCAAAGTCCTACTGACAA

A\_16\_P15525430

ACGAAAATTCAGCATAATTTCAATGGCAAAGGTATCTCTATGTAGCAACGGTAAGGAGA

A\_14\_P127283 AAAAAGACAGATGCTCATGACTGACGGTGCCATAAGACACACACTTGGATAG

A\_16\_P02963988

TTTCAGCACACACTTGATATCATTCTCACACAGTATAGTAAATTTTCTGACATCACGGT

A\_14\_P131713 CATGAATGAATTCCTGAGGTGAGATCTGTCGGCTTCTCTTAAGACTTCCCTATAAAAT  
A\_14\_P104723 TGGCCAATAACATTTTTTATGTTTAAGTTCTTTGCTGTCCTGGGTGAAACAGAAAGAAAG  
CUST\_6588\_PI426210822 GATTGGCAGAAGTTTAGATGTCCCTGGCCTGATCCCTTACCCTTT  
A\_14\_P105208 TTAATTTGCAGACCATGAAGATTATGACCCACAAACTGTGAGGCTGGGAAGTA  
CUST\_2192\_PI426210822  
GTTCTCTCCTCTTCCCCACTACACTGAAAGAAAGAAATTAATGCATATTTGTGTTTTG  
A\_14\_P104560 TTTTCTAGAATATTCAGAAAGTAAAAGAAGATGACACAACCCCAACCATTTCTGCCAA  
A\_16\_P21654109  
GGGCTACACCTCAAAAATTGATTAATCACTGAGAAAGTTGGGTAAAGGTATAATGTCACA  
A\_16\_P16191946 CATTTTCTGGTTATCTGGATCAGTGTCTTTGAATCTGAGCCACAGGAAG  
A\_16\_P16847052  
AATTCCACCATTGTGACTCTTTAAAAATCTGATCCATGCTAACCTTAATAATCCAGGAGC  
A\_14\_P106647 GCATTGCTTAAGAAAACCTCCCCTAAACAATTACATAAAACTAGAATCGGTCACTACCCTC  
A\_14\_P102517 CTAGACTGAATTGTAGTCTTCTAGAAATTGTCCAGGTGATTTCTGATTTAAGGGGAAA  
A\_14\_P101171 CTGTATTACACTTGCACAAACCAGTTTTTCTTTTCTGGATTGAAGACCCACATTTTATGT  
A\_14\_P138316 ACATGACAGATATAAAAAACAGTGTGGAACAAAATAATTTAAATTATGGTTACAATCTAC  
CUST\_6067\_PI426210822 AACACTTATGAGTCTGGACTTCATCTTGAAGCCAGTGGGAGTACAGC  
CUST\_501\_PI426210822 TTTTCTGGAGATGTTTGATCACTGAGTGAACAGGGACCCAATGATTCTG  
A\_14\_P132121 ACATTCCTTTACATTGTTGGAGAAATGAAGCCAAAGTTATTCAGATGGTTTTCCAGG  
A\_14\_P132223 CTGACAAGGCATCCTACTAAACCATGTTTGCTTCTTTTTTTTTTATTGGCCAAATTTTCTAGA  
A\_14\_P132175 TGAAGCGATATAAACTTTGGCAGTGTATTGAGCAGACCTTTTACACACTTAGAGTATGC  
A\_16\_P00194794  
AAAAATCATCTTGGATAGCCTAAGCCTTTATGCATTCTCACTGCTTAAATGGAGAACTCTG  
A\_16\_P17124643  
GAGAATGAACCTAATCAACTGATCCAATTGACATTGAATGTAATTTTACTGACAAGGCT  
A\_16\_P01216299  
AAAAAATAGAAACGTTTACCAGGAAAAGTATATGCTAGATGGATAAGGGGAAACAAGAGA  
A\_14\_P124349 ACTGATATCAAGTGGTCCTTCCATACTTTGATCCGGTTGGAAAATCCAATGATACT  
A\_16\_P16985217  
AAAGGTGCCATTTGTAGAATTTCCAGGAATAAGAAAACTAAAATGCAGGCCTTGTAATG  
A\_14\_P101517 CCAAGATGTTGAGGCATCAACAATAAGCATATTTTCAATAAAAATCTCAGAGGGAGCATTC  
A\_18\_P22843031  
TCTGGAATGAAAATATCAGATGATCATAATATAAGAGTTAGAAGTCAAGAGAGATGGAAA  
A\_18\_P11657476  
CAGATGGAAAATCTCATGAACGAAATGCTAAAGGCTCAGAATTCAATGATTCTCTCTCAG  
A\_14\_P135195 AGTGAAATGTATACCTTCTCTTTAAGTTTACATGCCTTCTCTCATTGGTTCTGTAGGAGA  
A\_16\_P17347679  
AAAAAAAATCTTGAGAAACACTGTTCTGATTCAAGGTGGAATTAGACCAACAAAACACGC

A\_14\_P107541 GAGTTAGACTTTAGGAGTCAGTCAGAAACATTCAGTGAATGGGGGACATTATACTATCTT  
A\_16\_P03600374

CGTAGTTTCAGGAACAACCTTCTAGTCTAAGCAAACCATTAGCGAGTCAAACACTTACAC

A\_14\_P104376 CTTACTCAGGTGTCTGTTGCAGATCGTTCTCCTGATATTGACAATTATTCTGAGGAAG

CUST\_4225\_PI426210822 CAGCTTCCAGAATCAAGTTGGTCAGTTTTGAGCAAGATCTGGAAAGCAA  
CUST\_1776\_PI426210822

CTTTGGATGGAGTCCTTGCTTTCTGATCACAAAACCTGGTAGCAAATAGAAAGATAAGA

A\_16\_P00196863

AACTGCCTCTACTAGTCCTTAATCTCCCACTACTCTATGTTTTTCCTGCATATACCTAAA

A\_16\_P19854236

AAGCAGACTCAGTGATTATTGTATGCAACATCTTCTAGATCTTTTCCAGTCTATGACACG

A\_14\_P101670 AACTGGAATAATAGATCTGACCAAAGTTTCTGTTTTGCTTTGGAGTTCTGTTGCCTATGT

A\_16\_P01911075

ACCTGGAATGGTTATTTCTTACTGAGCATTGACAAATCTGGAATCCTAAAGGAAAATGTT

A\_16\_P37070517

ACATTCCTCATGTCTCCTTCATTATGGTTCTACGAATTTCAACAACCTTGGTATGTAGACT

A\_14\_P128049 ACATGAGGGTCTTACAATTTAGATGTGGGAATTCTCACTCAAATCTATCATTATAGGGC

CUST\_8341\_PI426210822 CTGGCCGGACCCTGTGTGGATGAAGTGAAGGAGATGGGCCCAACT

A\_14\_P134847 AAGAACAACCTTTTAATAAACTTTTTTTTTGAGAATGGTTACAAAGCCTTTTGGGGGCAGTAA

A\_14\_P138396 ACAATCAAATGAAGAAACAGTATTGATAGACTTGGGCAGTTTCACATTTGAAGAACCG

A\_14\_P138008 ACACTTAAATATAATGAAGTCAATAGATACCGTAAGGATCTAAATCCAGGGACCGCATCT

A\_16\_P16537388

AAAATGCATACAAGGAACTGACATCATTTAGAATCATGAAAGCGTAGAATGACTGAGGTG

A\_16\_P39575930

ACAGGACAAATGACATCTATCATTTTTGACCATCAAATCAAGAATGTGACTTAGATGCTGG

A\_16\_P19591158

AAGGGACCAGTTATTAAGAGGTAAAAAACATCCTTTAGTAAGCCACAGAGAAAATGACTG

A\_14\_P100066 CGTAGCATCTGGATCAGTTGGAGCGTATGACTTTATTGATCCAGGACATGTATT

A\_14\_P127795 TTTATCAATAGACTGAGGAGGTGAGGTATGTTAAAGCACTTAATAGAAAAGGGCTTCGCA

CUST\_476\_PI426210822 TTTCTGATGTCAGAGAAGTCACAGGTGATGGATTTTCAGAAGAAAGGAGCT

A\_16\_P21090847

CATTTTATGTGACCCTGTAGGATTTTCATCAGAAAGCGTTAAATATTAGGCTGCCTTTTCA

CUST\_6371\_PI426210822 GTATCCAGATAGATGCTAGTGGAAGTCTGGGACAAGCTGTATAAGGGTATCAA

A\_14\_P125960 GTAGAATATTGCAGAAATCCAGAAAAATAGCCAGGGGGATTTTGTGTTGTTTTTCTTA

A\_14\_P134552 ATTATTCAGCAAATCATGCAGGCTTTTTCTTTGACGGTAAAATAAGCAGAGGCAATATT

CUST\_4782\_PI426210822 CTGCTCCATCCTCTTCTTTTAACTGCAATTACTGGGTGAAAAGAGTAGGATA

A\_14\_P129893 TTTTTCTTTTTCTTGCCATAAACATCTATCTCACAGGCTGAAAACACTGAGAAAACCTGG

A\_14\_P107862 GCTTTATTTTTAGTGATGCAGAAGTTTGAGAAGGTTCCAGAATCAAAGGTGATCTTCGAC

A\_14\_P111538 ATTGGCATTGGCGAAGTCTTCAAATTGGATGAGGCAATTTATTCCAAACCTGT  
CUST\_3783\_PI426210822 TGCTGCAGTCTTCAGCAGAGCTTGGCTACAGAGGAGAAAGATCTA  
A\_16\_P17383540

AACGTGTAAAGTTCCTACTCATATATTCTCGAGCCCATTTAACATCATTATAGTTTACCA  
A\_16\_P15345634

AATCTTAAAACCTCAGTCTTAGTATTCAACCCTTGACTTTACATACTGCTTCCCAAACCT  
A\_14\_P139254 AAACCTGTGTCTAGCAATTATTATTATTGATGCTACAAAAGACAGGCAGAGCCTCTTCT  
A\_14\_P100297 TATTCCACCAATGAAACTGGCAAGTTATAAGTGAACAGAGGCTTCACTCATAACTAAGTT  
A\_16\_P30952544 CATTCAAATTTTGTATTCCACCCTACCCTGACATCCACCTTGAGGGTTT  
A\_18\_P10924087

CAAGATCTGAGCAAACCTTTAGTATCCTCTACAGACCCTATCATTGGATTTTTTTGCTAAG  
CUST\_2291\_PI426210822

TACGAGCATAAGGTAGAAACTTTTTTGGAACTAAATTCTTCTCAGTCAGCTTCTATAGTT  
A\_14\_P129875 CTGTCATTTAAAAAGAGGAAATGTCGAACATGGTGATAGTTCTGCTTACGAAAACGTGAA  
A\_16\_P18545699

ACTCAGGAAGCCATTTAATATAGACACACTATTTGACC AAAAAGAACCTCTACCAATGCT  
A\_14\_P104297 GTGATTTTACCTTTTTAGGTCAGAACTGGATGATATGCCAGAAAATTGCATCTGTGATGT  
A\_16\_P18401918

CCAAATTAATGACAAAGGACTAGACAAGAATGACTGTTGATGATCACCTATGCTGAGATC  
A\_14\_P200587 TTAAGGCTGAGTCCCTGTTGAAAAGAGCCATATCTAAGAATGAGATATACATACATGGCT  
A\_18\_P13415265

AAAAGTCTAGCATCCTACCAAGGTATATGTAATTGGCCAAAAGGCTATAAGAGTATCCTG  
A\_16\_P16103405

AAATCTTTGTTTAAAGGCCCTAAATATCATACTCTGGGATTCGATGAACAAGAGTTTGGG  
A\_14\_P132685 GTTAAGATTCTGGCCACAATCTATGTCAGTGGAACAGAAACCAAAAAAACTAACAAACAT  
A\_14\_P101051 TGAAGA ACTTTGAACTTAGCCATTTCTAACTTATCTGTTCCAGGAGCACATAAACAGACT  
A\_14\_P134940 AGTCCACCTATAAAAGTCTCATGTGTAGAAAGGTTTTCTTTATTATAAGCATCACATTTT  
A\_16\_P16191733

ATAAAAATGGGGGACTAAATAGGGACCAATAAGTGAGTCCATGCTTTGGAAATGATGA  
A\_16\_P00982859

AATCAGCCGTAATGAAAATCAATCACTAGAGCATAAACAATACTTACAACAGGACACGGT  
A\_16\_P17837904

AATTGTGATTTTGCTGTAGGCTTACATGTCTCATTATTTGCTTGATCCTCAGTTGTAACA  
A\_14\_P120929 AGCACATCTCTGTCCATTTTGGAAAAAAGAGGATCCCCTCAAGAGCAAATAG  
CUST\_5305\_PI426210822

GACATGTAATAAGAAGCTGCTTTTTCAGACTTCTTAATTAATAAGGTTCCGGCAGCCAT  
CUST\_8357\_PI426210822 AGTATTCTCCAGCAACAGACTGCGAAACCATGATACATAACACATGTCC  
A\_16\_P18198705

AAATCCCTTATATGGTGATCACAGTGTTAGTAACGAACTTCTGGGTAACAAAGTTGACAT  
A\_14\_P127307 TTTGCTAAGAGAAGAAAGGCAATCATCACTTACATGCAAAATGAAGAGATGAGCAACTTC  
A\_14\_P201382 AATCTTAAACAGCATTTTTAACAGTGCAATTGGCCTCTTTAAGAAGTCACAAAATGTTTT  
A\_16\_P16611174  
AGGCAGATGGATAAAATGTTTCTAAGAAAAGTAATCGCAATGTTTTACCACTTCAATCGT  
A\_14\_P127595 GGGTATACAGAAGGAAGGCATTTGAGCCATTTTGGGGTGTATAGATGTAGTAAGA  
A\_16\_P01720981  
AGCAGAGATAGATTTTCATAGATACTTAAAAGACACAAAAAAGATAAGAAGCAGAGAAAGA  
A\_14\_P124327 ATATTATTTATATGGACTGTAACAATAAGGTCAAAGGGACAAATGCTTCCTAAGTGCAGG  
A\_16\_P19077022  
AATGCTTCTAACCATAACTCCAATTCTTGAGAATGACTTTTTAGCAAAGTGAAACCCACA  
A\_14\_P122118 AAGAAAATGACCTCACAGCCACAGTTTATTAAAAACGAAACGAAAACCTTTTTGGCAACAT  
A\_14\_P114526 TTGCTGTTGTCCCCTTTATCCTAGGAACCCCTCACCCAGAATGAAATGATATTTA  
A\_16\_P18199976  
ATCAGCGCTGTATTTTTGTATCACCTTGCACTTAACTTTATTATGTCGCAATGCCAGATT  
A\_16\_P00003400  
CTTTGAACTGAGCAAATCCCCTTAATAGAAATGATTTTCACTCAGAAAGCAAGGTAGGAA  
A\_14\_P101527 GTTTTCAAGTGTGAAATATGTCCAGGATTCACCCTCCTTCTAATACTAATTATTTCCCACA  
CUST\_2009\_PI426210822 AAAATGACTGTGAGCCATTCTGCAAAAGGGTTTTCCAAGCACCCCTTAAA  
A\_14\_P121782 CCTTGGAAGTCTATGCTCCTTGAGAGACTTTGAGGAGAAAAAATAGAAGTCTATATAC  
CUST\_258\_PI426210822 GGGGTGGGCCTAAGAAGGGGGCAGCTCTCCCCCATTAAGCACCAT  
CUST\_3768\_PI426210822  
TGGTAATGGAATTGGTTGTATATTTTAGTATGATAGTTCTTATAGATGATAAAGACCTCA  
A\_14\_P139310 CATCTTTTATTCTAGGAGGTGAGAACTCCGTGGTATCTGTCTACATTTTTGTAGAAGAAG  
A\_14\_P107823 CTTGAAGACCCAAAACCACAATGATCAAGAATTTCTGACGGTTTTATTCAATTTCTCATC  
CUST\_3130\_PI426210822 CAGATGCTTCTCAGTGGGGCTGGGCTGTGTCTTCTGCCAGGACTC  
A\_14\_P107319 TGAAATCCCATGTGGATTATAACACATTGACATAGACTAACAAGCAGAATAACATCCCCA  
A\_16\_P15881585  
ACAGATCCATTTAACTCAGAGTTCATATACAGCCTTACATAACATGTCTCACATTCCAGG  
A\_16\_P19099019  
AATGAACTCACCCTAGAACTATTCCAGAATTAAGCCTCTTAAAATACGGTCAGATGCA  
A\_14\_P130440 CTAATGTCTTAAATCTATCAAACACAGTCCAGGAAATCTAGGTATACAACTGGCGATTTTC  
A\_14\_P111575 CTGCCCAAGAATAGAATCTTTATCTTCTTCTTCTTCTTCTGATCTTCATCTACCAATTTCCG  
A\_14\_P107652 CTCAGGCCAGGCTTCTTTAAGTTCTAGAAGGAAACCAACTGGTTTTTTGATTTTCA  
A\_16\_P01715998  
AAAGTCGTTGTGCTAAGACATAGTTTATGCGAAGTTGAGAATATTGGCAAAGTGAAAGGA  
A\_14\_P102561 CTCTCCCCTAATGATCTGAAGATTCTAGAAAAATGAAAAGCGTCTCTACCAAACAATTA  
A\_14\_P202157 ACTACTGACTTGATGACTATCTGAAAACTTTTTCTTACCTGTCTAAGCAGTAGTCATGG

CUST\_454\_P1426210822

TGTTTCAGGGAAAATGTTGTTTTTACATTTGTTAAAAGCAGCCATGGTGTCTCTGAAATT

A\_14\_P117676 AATTCTCAGGAATATAGGGCCCACCAAGTTATACCTTGTTATTTATTTTTGTCAGTACTGAGC

A\_16\_P00903421

AACTTGTGATCTAGCAGTTTCTTGATAATCCCCAAAAGGCTTTAATTACTCCATTTCCCT

A\_14\_P133152 CTAGAATAGCAAAAATAAAACTAAATAATCAACAAGGAGTAGTCCCCACTACCCACAGGC

A\_14\_P127151 ACTTGTTTTAAGTGGTCCCCAAGGTCAAACCAGTTAGCAATTTTCATAGTTAGGAAATTA

A\_14\_P200368 CTCCATCAATAGTCTACCCTCCCTCTTGCAATTTATTTGTCATGTTTTCCAAATA

CUST\_2712\_P1426210822 AAGTCCCGCAGTTCCTACTGCCTCTGTTATCACTACTCTCTGTTGA

A\_16\_P16926389

AAGTTTGTTCATGCAGTAAGGTGTAATGTCTATTTCCAGTTTTATGATACAGGCTCAGT

CUST\_9052\_P1426210822 GCTCTCTTCTCAGTATCACACCTATGGAATCAGCCCTGATTCACACTT

CUST\_6436\_P1426210822 TCCCTAGTGAGTCTACCCAAAGTGAATTGCACTGGGGAAATTCAGAAATA

A\_14\_P102278 AATTCTTGATATGCAGTAAAGTTTCACAATGGGAAACCTTGTTAGATTTACAGTGGAGGT

A\_14\_P103386 TGTTTTATTTCCACCCATATATAGGGACCCCAAATTACCACACAGTCCAGTCATT

A\_16\_P21086454

GAGAGAATGACAAACATATGGATAGTTACAACACATGAAGGATCAAATATCATCCCCCTCC

A\_16\_P58424219 CTCTGCATGGCCAGCCTGGTGACGTGAAGCACATTTCTTATGTCA

A\_14\_P122261 CTCATGGGTCAATGTATGTTAAGATGAACACATGTGTAAATGGGAGTGTCTTTGTGTGT

A\_14\_P109045 GAGAAATACAAAATCACTAATCAGATTTGTAAAAAATCAAAAAGACTGCTAAGATCCAGT

CUST\_2740\_P1426210822 GTTGATTTCTTCTGCCCTGAAGCACTTTGCTATTACCAGCTGGGAC

A\_16\_P16368533

CTAACACAATCGACCTCCTATTTCATATTCTTAACTCCTTTTTTTTTTGCATGAACCACTCA

A\_14\_P135881 CCTTACCTGGTTCTTGAAAGTGTCTTTCATTTGACAGAGTTCTGGACAAGATGAGTAT

A\_18\_P22839964 GGAAGGAAACTCTGACAGCCAGACTTCTCAGTCGGAAAGTGTCTTT

A\_14\_P119783 CATTTTGTGTGTTTGAAAACCTAAATAGGGATCAAGAACCAAACCTGGTTGCTAGGTTCAT

A\_14\_P123993 CTCCTTTTCCCTGGGAAGTAGTAATTAAGGCATATCTTCTCAAAAATGTTCCCTTTATGCA

A\_14\_P137087 CACTGAGGACTTACAAAGTGTCCAAGATATTTTTAGGAACTCTTTCAGATTTCCCTGTA

A\_14\_P129953 TCCTTTCTAGCCTTGCAAAATACCCTACTAAATAAATCATTTTAGACATGGAGTGCAGGT

A\_14\_P129459 ATGCCAAATGCTTCTTAAAATCACGGGGTTTTTATATTCATGTGGATAATGGAGAGAGAT

CUST\_4702\_P1426210822 CAGGGAGCTCTAATTGTATTTTGTGCTGGCACTGGGGAGCCATGGAA

A\_14\_P131173 GGCTTGAGTCTTCCAAGCAATCAAATCTGTAAAGCAGATGGTTACTAGTAAGTCTAGTTA

A\_16\_P16191432

TCCCTCTATGGACTGAGACATCTCCCTTTACACCAGTTTTTTACTTAAACATGCTTATTA

CUST\_929\_P1426210822

TCTGTCCATTTTTTTTTTTTCAAAGCCACAGGGTACATTTTTGCAATTTACTTCTGTTGCT

A\_16\_P30952277 GTGCTCATCGCTGGAAGAACATCTACTATGAAGCCGACCACATCCTA

A\_14\_P135600 CTCTGGGTGGTCTACTATAAACTTCCCTTACAGAGGTTATGCTTAAATGTTCTTCTTCTTC



A\_14\_P138030 CTAAGGAAGTAAAGGAAGATCCTTACTCCTCTCAAATCTATCTGTCTTTAACTCCTCAGA  
A\_14\_P133678 ACTTATGCCAAGTATTGATGAATAATTCATAAAATAAGCATCTTTGTGAATTTTAGTGAA  
A\_18\_P24862355  
AGCCAATACTGTTTGGAGAATAGAGGAATAAATAAAGACAGAGAGTTCTAAGTGATGGGG  
A\_14\_P130225 GAAATATTGAAAATAACTTTAGGATGTTGCTAGTCTCAGGAACCCAGTTTGAGCACCATT  
A\_16\_P01767315  
AAAAATGAGCACTGTAAAAATAAACCGCGCAAGAAGAAATATATGAATACGAGGGCATGG  
A\_14\_P128362 TGGGGTTTTGTTATGTGAAAATATCCTGGAAATAAATACATGTTTCTGCACTTAGAGCCA  
A\_14\_P127984 AGCCGATAGATTATTGTATTCTGAATTGCGTTAAATTCCGTCACTCAATTTCCCTTCTAC  
A\_14\_P122542 TTGTGAGTTTAGAAGTTTTAAACCGAAGGGCAAAATGCTTTCACCAGAAAACATAAGAGA  
A\_16\_P41503230  
CAACCTTGGTTATGAAGTTTTCTAAGCAATAGCAGATCAGAAATAGTCAAAGAGAGCAGG  
A\_14\_P201870 TGAAGGCTTAAACCTTAAACACAATTTTACCTCAATTGCATTTCTTTACGTTTCTGCATT  
A\_16\_P16191539  
AAATGTGGTAGGATTTTGAGTAAGTAGAAGAGTATAAAGAAGAATGTTGATCCTAGAAAT  
A\_14\_P111310 GGATGCTAAGGTATAGCCAAGGAATAAATAGGCTGGTAGAACTTTAACAATGAGTGATG  
CUST\_1052\_P1426210822 ACCACCAGCTGAACATTTCCCCAGCTTTCCACATGCTCATGATAG  
A\_16\_P15528986  
AAAGCATGGTTTGCTTTTTATAACTTTTTGTGACCCAAAATAACCAGACTGTTGTTTTCCC  
A\_14\_P132001 CCAGTAACTCAATTCCTTCTCTATTTCTCAAGGCTTCTATCCCTTGTAGATACTACTTTC  
A\_14\_P121649 TTAGTTTTCATATTCTCCAAGACACTTGTGGCTTGACCACTTCAAAGCCTCATATTATG  
A\_14\_P106145 TCCTTTCTACTCAAATGGAATGAATACCATCAGTGAAGAAGATTTTGCTCATATTCTTT  
A\_16\_P15563346  
AAATAAGCACCTCTATTTGAACAACCTCCTGCTCTAATAACTACCTCTATTAGGCACACGA  
A\_14\_P109677 CGCATCCTACAAAGTATATTTCTTCGAATATGGGTGATTTCTGCATTCTACAGACAGAA  
A\_16\_P15652598  
AGCACCAACAACAAATTATGGGACAAAAGTTATTTGCAAACATACATATCTAGGCTTGCC  
A\_14\_P128107 CTTTTTCATTAATACCCTTTTAAAATTTGCTCTCTTCTGCTGAGGAGATAAGGGAGGAGA  
CUST\_181\_P1426210822  
ATGCTATAATTTTAAACCGATATCAATTTTGGGTTTGGTTTCCAAAGTTGGAAATCAGT  
CUST\_5395\_P1426210822 TTTGCTCTCCTCCCTTCCCTTTCCCATCGTGACTGTCAATCGACTG  
A\_14\_P116565 TACATTCCAATAGATTCTGAAAGGTCTGAATCTCAGAATTAAGTCTGGAGAGACAGTCG  
A\_14\_P125480 AGGTCTTTAGAATCAATGTTGAATTATCAGCCCAAATGAATCCTGTGCCTTTTAAACAAGA  
A\_16\_P17028465  
AAAAATAATCCCATGTAATCCCTAAGTCTCATTTAGCCAGTCATTTCAACTTTTACCAC  
A\_14\_P113098 ACAAGCCCTGGAGTTGAATTTAGATTAGCAACTATTATCTTACATGTAGTTGGTGATCA  
A\_16\_P19409233  
GGAAATATGCTAGATTGCAGGGTGTATCTAAGGAAATAAAAGCATTAGGTGGGTGAAAAA

A\_14\_P120900 CCTAGTGATTAGTAGAGTGCATTTTCTACCAGAAGGCCAAAAATGGAAAATGAAAGAACAC

A\_18\_P14135897 GAATGGGGACAGCCAATGCTTCTCTGGTAAAGGGAGGCCAGTTTC

A\_16\_P58424108 CTCCTGCAGTCTCCACCAAGCAGCCAAATGGTCTTTCCAAACTGT

CUST\_1812\_P1426210822

CACATGGTGAGGAAGAATTGATCATGATATGATGTCATCGCGAAACTCAAACAACCTTA

A\_14\_P106739 TAGGGTTACACCAGGACATTAGCATTACTAATAAGGTAGTGCTTGTGGAGTTTAACTCAA

A\_16\_P02557115

CAGATTACCTCATATCCCATTACCAAAAATCAAATTTTAAACATCTCTATCACACCCAGTC

A\_14\_P104945 AACTTCTGTTTTTTTTCTGACGTGAATTTGGCTAATTCCTCAGTGTGTTACAGGATTCTAT

CUST\_2157\_P1426210822 AATGAAAACATTCTGGTGCCGCCTACCTTTTTCTCTAACATGAGAAAACGCTTAT

A\_14\_P128356 ACATAGGACAATGGAATTTATAAACATGTCCTCTAAATGGTTCGAGTCATCTACCAATG

A\_14\_P132337 CTGCATCTGAATGAAGCATTGCTTGAAATAGTCATGGAAGAGGTAAAATCTGAATAGTGT

A\_14\_P127560 TTTCACATTTGGTTTTCTTTGTCTTTCTTGGTGATCTTACGTGACTAGCCCTGAATATTTT

A\_14\_P109804 AGGTCACATAAAAGCAGTCTCAACAATAATGTGACCACATGTGCAATCAACATTTACAAA

A\_14\_P201560 TCCATCCAAGTATTTAAAAAGTGTTTATATATCTGTAACAGCATATTAGCAAATTGAATC

A\_14\_P106622 AGAGTTCATCTTTGGAGTAAAACATACCTCCTCATGTTTGGATTTCTTTGAGACGTAATC

CUST\_5929\_P1426210822 CATGGACCGTAGAAGAAAGCCCTAACCCCTCTCCAAATGCTGCTG

A\_16\_P19055826

AATGGTAGTATATCTCAAAGGTTAAAGGTAACGATAGAGCCACAAGATTTGATCAGAGCC

A\_14\_P106061 TGAATGCACAGAAGAATTAAGGCACAAATGAAGTAGATTGCTGAAAAGCAGATTTTCTCT

CUST\_8057\_P1426210822 CACTGCAGATTGAACTGAGAGGAAGTGGGCATCAGCCACTCAGAG

A\_16\_P00685079

CTATCCTTTGTTAAGGCTCTTCCCCAAATTAACCATAACACGTATTGTTTAAGGCATTGC

CUST\_1825\_P1426210822 CTCTTTCTGCCCTGATATCCTTGTGAACATGACTTTTTGTGAGATGAGAG

A\_14\_P136480 ACTTTAATATAAAGAGGGCCACAAGGAAGCAAGGAAAATTCAACTGTTTTCTCAGAGTTGA

A\_14\_P105630 TACTTCTTTCACATTTAGGGCAAGAAAACCAACTGGTGGCATTGATTCCATATAGTGAT

A\_16\_P00514992

AACTCAAGCAGTGTGAGATTTTCATGTAGTTTCAGATAGCCTTTACCCATCTAAATCCTTG

A\_14\_P114535 AAATAACTCTATTCTTTGTTATCAGGTGAGTCATAAAGAAGATATCCCAAGGATTCCC

A\_14\_P118698 CTACCATGCATCCAAGAAGGCCAACCTGTCTAATAGAGATAGATCTGGATTTTTAATTAG

CUST\_5715\_P1426210822

TCATGGTTTCCTCAAACCTTTCAAGCTTATTGAGTTTTCTTCTGTATTATCCTGTCCTAT

A\_14\_P100731 AGATCTGCCTTTTACAGGACGCTAACAAGTGCTGGTAAAGACCTACAAGATAATTTTCT

A\_16\_P00684999

CTCGAAGAAATTATTCTTTGTTACTTAAATCAATATTTTGCAGTCTAAGATATTTGCTTC

A\_14\_P108906 TGTTCCCTTCATACCTTTCTCAGGAATGTCAAAGTCCCAAGAGGATG

A\_16\_P02784481

AGGTCTAAATCACAAAGCACACTTACATTCCAAAACAAGATTTTATTCTAGAAATGGCA

A\_16\_P19985683

AAAAAAGTCTTGAAGCCAAGAGATTGCATTCAGTTAGAATTGCTTGAAACACATGACAGC

A\_16\_P00664251

ACTCATCGAAAACCTGTTTCAACAATGTAGGAGAGATAATTCACCAGAACAAAATAATGGGAG

A\_14\_P117673 AACTTTACTCTTCTGTAGAATAATGCCATTCCTGAGGTTTTACCTTTTCATCAGCCTAA

A\_16\_P16843382

AAATTAGAGTATCCTGATTTAGATCACAATCCAAAGTCTCCTAGCATTACTCCCTCACC

A\_14\_P123933

CATGTGAAACATTTTTTCAAAAACAAAATAACAAAACCTTAGCGAAGAGGGAAGAGATGGTGG

CUST\_209\_PI426210822 CGCTCGCGCAGACTTCTCGGGCGGACTGAGGACGCCGCCGCTCGG

CUST\_4683\_PI426210822 CTTCAGTGTGCCTGAAAAAAGTCAACCTGGAATACCCACCAAGCTAA

A\_16\_P39681384

AATGGGATTCTCTAACTTTTCTAACCTACCCATTCTACTAAATTACTCCACTCAATGCCA

CUST\_4805\_PI426210822 TTCAGCTGCAAAGAACACAGAGGTCAGGAGGAATAAAGCTAATGAGAGAG

A\_14\_P104900 TTCATTCCCGAAAATTTGCTGTGAATTCAACTGATCTTCAAGTGAATGTGTTTATTAACC

A\_14\_P116227 CACAAAAGCAAAGGATGGGAAAAAGTATGCAACACTCAGTTTATTTAATACTTACAAGGG

A\_16\_P30952488 GTCATAAACTGCAGAAGATGGAAGAGAACAGTTTAAGTTTGAATGCCTGCTGATG

A\_14\_P102961 ACATTCAAGGTCCGTTAGCATGGATCAGACAGGATCGTAGCATGATGAG

A\_14\_P124460 AAATATAGAGGAAAATATTCACCTCCTTATCTGCCATTATTATTCTGACTCCATCCAAGA

A\_14\_P139308 CTATTTTCAGAATTGAAACTATAAGACCGCCATTTGACACTGAAACTTGCGTGAATCCTA

A\_16\_P03470249

AACTACTTCATTGGATTGTAAGACTTGTTCTGATTTTGGTAAAGTTAAACTCTGCAGGGC

A\_16\_P36201133

AAAATATTCAACACCTATTGTATACTCGTCATTGCACTGTTATAGAAGCAGATGAACCAA

A\_16\_P03371632

AGGAATGAGAAAAATGACATCCAGAATAACTCCATCATGAGAAAGTATCGCTTAGAGGAT

A\_14\_P126579 TATTCCTTTTTTGTTCCTGGTGACAAAACATGAAATAACTAGGCAGGAGTTGTTTCTCAA

A\_14\_P132183 GAACACTGAGTGCGTATGTGAGGATGTCAAGATATCATTATTTGTCAGACATGACTATGA

A\_14\_P128953 TCAAATAAATAAGTTTGTGAAAGGTTTCCATCCTCTACTGTGGTCCAGAAATCAATGTGT

A\_14\_P106178 TTTTGGCTGATGGCTTATAAATCTTTGAAGGAAAGGAATGTTCTCTCAAGTATACACAGC

A\_16\_P17418394

GTTTCTCTGCTCTCTCTTTTAGGTAAAACCTCCAAGTAACACCAACTGAAACTTACCTTTT

A\_18\_P14135200 ATGGAAAGAGGCTGCCCATGTTGAACAAAGGGCCAGTAACATTTCT

A\_14\_P131004 CTGCACATAAAGAAAAATATAAATGCATACTTCCCCTTGTGACAAGTGGGGATGAGGTA

A\_16\_P20137635

GGTGCACAATTCATTAGAGGCAAAAAGAGTAAGATTTGTTCCATTGAAGTATGGCAAATG

A\_14\_P117275 CTTACCTGATTCAGTAGTGATGGGTAAAGAAAAAATGTGTCTGAATAGAGTGGCTTTGT

A\_16\_P00685557

TGGAGAAATGAAGAAATAATCAACTATCTGTGTATAATGTTTAACTTAATCATGTGGTTG  
A\_16\_P15862024  
ACTAATTTGGTTCCCTCTTTGAATCTTGTAGTCTACCACCCATAGATAAAGGAGAAGTGT  
A\_14\_P106214 CTATTTCCCTTCATAGGATAGGGCATCTTACACCTCGGAATTACCGTCT  
A\_16\_P19898354  
ATTTCTGTCAATATCCCCTTTAAAATCACCACCTCTATTA AACCCCTCAGAATGCTTGC  
A\_14\_P113666 CTAACAAA ACTAGATCTGTTGTTTACATTTCTTCCCTCTTGAGGCTTGCATTTTTCACAGG  
A\_14\_P134297 AAGAGGTTATCTCCATATAACAAAGAGTTATATGCAGATTTTTTTCCCTCTCCCCACTCT  
A\_14\_P116433 GGTCCACATCCAACCTTTTGACATTATCTCAGATTTTGTCTTCAGTGAAGGTAAGT  
A\_14\_P138470 GGATTAACCTTGCTTCCAGCCAAAGTTCATTA AAAAAATCTTTATTTAGTATATTCTGTCT  
A\_14\_P109521 AGTTTTGCTTACCTAATTCTGCTTCTGAAATAAGCAACATCAAACAGCCAGGTGTCAG  
A\_14\_P106700 CTTAGAATTTCCAAATACTTCACAACTATTGGTGCTACAGAGAACATGGCATTGGAAAC  
A\_14\_P115435 TCTTTACAAGGTTGGCATCTCAA AATACCATTATAAGACCTAGTTTTGGACTGAGAGCAA  
A\_16\_P02091219  
AAAATTAATCAAACCACTTGAATTCGTTCTTGACATGAATAGTATTGCCAAGCCCTC  
A\_14\_P134095 CTGGCCAATCAGATTGTTTTGTCAATAATTTGAAATTTGAACTGGAGAGATCCAGAACCT  
A\_14\_P122877 ACTTGAAGCAGAGGCTATTT CAGAAAGAAAGGATAATAAAGACGTTTATTTGCATTTGTC  
CUST\_2915\_PI426210822 CTGCTCTCTTGCTGGCTTTTCTAGATGAGCTCCGGGCCCTTGTG  
A\_16\_P16993815  
AACATACACGTCCATCATAGATTTATGGTCTCCTAATTTCAATCTCGAAAGTAATCAGCA  
A\_14\_P133114 TCATAGCACTCTTCGTCCACTACATCAACATCTACAAGACAGTGTGGTGGTAT  
CUST\_665\_PI426210822 CAGGAGAGTTGGGGCGATGTTTGAAGTGGCTAGGATGTCTTTTTAT  
A\_14\_P105080 CCATAAATGCATTAAGTGGCTCTGTGACTTCAGACTCTTCTTCAGTTTTACGGTATATAA  
A\_14\_P201748 ATGGTATAAGTGTATAGAATCCTGTGTGGGAAAAACATCACTACA ACTTGCACACCTTAA  
A\_14\_P102020 TTATGTTTTGTTTTCTTAAAGTTACAGTCCCTGTTTCAGGCATGATCACTATCCCAGCAG  
A\_16\_P18243167  
AGTCCCATTATTTATGCAGTCAATGGTATCTTATTCTATTGCTTAGCCTCACTAACATGA  
A\_16\_P21384069  
ACCTTCCTTCAAATCACAAGACTAATTTCTCCAGTTTACTTTCTTTCTTCACTATAGCCC  
A\_14\_P113086  
ACAGGAAGTTAGGTTAGGCACTTAACAGTTATAAATAGCATCAAGAAAGACAAAACAGGG  
A\_16\_P16335570  
ATGCCTAACAAAGTATGCCTAACGAATAGAGATATGGACTCAAACTTACCTGACTCTTTC  
A\_14\_P202454 TGGAGGAAAGAGCCATAACTTGTTTTCTGTTGCATGTAGTCAATTTCTACACTTTTAAACAG  
A\_16\_P19306775  
AAACTGCTTCCTTTATTCATAAGAGATTCCACCTATTTCAAGTGTGTTTATCATCCAGCC  
A\_14\_P110734 CTTTACTTACAGGTTTTCGGAACGTCAGGTAACGTAATCCAGAGAGGAAACACTAT  
CUST\_7324\_PI426210822 CTGTACAGTTGGGGCCTGAGGAAGTTAGGTCAGTTCTGAGGCTCC

A\_18\_P22841272 CAGCAGTTGACAGTGACACTGATTTTTAAAGCCTGCACATTTACATCAGAAAAGTC  
A\_14\_P131452 GGGTAATAATTACCTCTTATTTCTCAAGTTTCACTGGACAAGTGAACAATTAATGGTGC  
A\_14\_P102421 ATCTTAAATAAAAATGGAAAAAGGCAATATGGTTCCATCTCACCTGCTTTGGTAGAAGAG  
A\_14\_P111697 GATTTAAACACTTACGTATAGCAATCACAGCGAAGGTCACCAGCAATTGCTTCCAAAT  
A\_14\_P117907 CTTCCGACTGATAAACTTTGGGCTGGTCCATATATTGTTTTGTTTCTGTTTGAAAGATTT  
A\_14\_P126399 AATTCATTGTCTACTGAAATTCCGACGTCTTGACAGTTCAACATGTTCCAGGACAT  
A\_14\_P102072 AAATGGATACAGACATAATCCTAAGTGCACAAGAACTTGCATGCATGTGTATGCACACA  
A\_14\_P132703 ACACTGCTAGATTTTTAGCCTCAAAGTTTAGAGAACTCTTTTCATCAGAGTTGACTCTTC  
A\_16\_P15535093  
TTGCCTTTCTCCTTTAATACGTCTCTTTTGAAACTGATCATATACTGCAGCACATTTTCG  
A\_18\_P10379634  
AGGGAATATTAATGGGCAGTAACTACATCTCATTCTCAGGCTTTTCAGAAGAAGATTCA  
A\_14\_P112004 ACAACTGGCTGATACTAAGCACGAATAGATATTGATGTTATGGAGTGCTGTAATCCAAAG  
A\_14\_P202046 AACATTTTTATATAATTGACAGTTCACTTCTGGCCTTCAGTGTATGTTTGCCTGTCCATT  
A\_14\_P111893 TCCAGTGAATAGACAGAAAAAAGAGATGTGTTTGTGGTTGGCTTTTTACTCTTAGCAC  
A\_16\_P20304150  
ATTTTATGGCACCCCAATAATTAAGTGGTCTAGAGAATGGATAAACATTAGCCCAATG  
A\_16\_P00298079  
AAAAAATTGACTATTGAATGGTATGAAGTGTATTGCCTTTATCCGTCATAACCTGTGGGG  
A\_14\_P133461 CTAGGTTGAGAATCTCTGGCCTATGTTATCACTATCATCCTTTCCATGGTTAAAATACTG  
A\_14\_P119456  
GAAAAAAGAGACTCACCTTAATGAAGTTACAGATGGACAAGCCTGTCCATACAA  
A\_16\_P58424614 AGTTTGGTATGTAGAGGTTATGCAAGGAAAATGTTTAGCACTGCGCTTAGCACACA  
A\_16\_P21683379  
ATGCATCCCAATATGCATATTGCAATATGCACAGGAAAAGTGTGTTTTTTTTTTTTCTTT  
A\_14\_P108337 TACTATAGTTTACTCTCTGACATCGTAGACTGCTTATGCACTAATCCTTCCCTGGATACCG  
A\_14\_P114549 AAGAAATTTGTTAGTATATAAAATGAATCCGAAAAGGGTTCGCTAGTAGTTCCTTGCAGC  
A\_16\_P20786268  
AAAAAGAACCATGAAACAGTTTAAGCAACGAATTGTAGGAACATTGTCTAGCCATCACAA  
A\_14\_P120663 GCCTTCAGAGTAGCCACAATGTGCTTGCATCTTAATGGTATTTTTAAATAAAGTTGTGTCT  
A\_14\_P137458 AAATATTCAGACAATAGCCAAGCAATCACATCACGATGCACAATTACCTAGAATTGCAAT  
A\_14\_P119723  
AAAAACTCAACTAGAAATTAATGGAAGGAACAATTTGATTTCAGCAAAAAACTGCAGCAGC  
CUST\_1075\_PI426210822 CACTTGGAAGGAAAATGTATCCTCTCAGACTTAGAACCTTCAAATGCCTGG  
A\_14\_P114063 GAATACAAAGAATACAAAACGCTGTATGAAAGAATAGACCTTTCTCTTCAATACTTAT  
A\_18\_P14135727 GAGAGATCTTCCCCCTTCTTCCACACAGCAATAGTGTAACCGAAT  
A\_14\_P106866 TTCACCATAGAAACCAAGCAAATATTTGCAGACATTCCTTCAACCTTCACAGATAAGTAG  
CUST\_5568\_PI426210822 GGTCATGTTGCCAGATAACATTAGGGTTCCACTACTTTAAATGCCTTGATCTCTT

A\_14\_P108493 TGACTTTACCTTCAAGGATGACATGATCTGCCTTTGAAAACATATAGGCAAGAACAACCTA  
A\_14\_P100813 TTCTGCAAAGATAAATAATATCCCTGCATTATCAAATAAAGTAGCAGACCTCTCAATTC  
A\_14\_P113698 CAGGTTTCGCTCGAACTCCTGTTTCTCTCTCTGGAAGTCCTGAATA  
A\_14\_P120122 GAGGACTTTTTCTTAAAGAGGAAACTTTTAAAGAATGATCTGAAAGGCAATGGTGGAAAGA  
A\_16\_P17014431

ACTGGAACCTATTTCCCATGTAAATCAACCAGATTTGGAAGCAACATTTAGAGCAAAGAAA  
A\_14\_P135389 AGGTATTTGGGTCAACAAAACAAATACTTATGAGACCCAAATAGGAGACACTCTGAAACT  
CUST\_231\_PI426210822 CTAAGGTCGGGGTTCGGCGCCTGGAGGCGGGGCGGGGGCGTCCGGGT  
A\_14\_P125193 GACATGATGCTGTGTGAATATCAAAGAAGTGGGGATTTCAAAAAGGTAAAAAATGAGGC  
A\_14\_P131110 CCTGGCAAGAATGTGTTTAAACTTGGTTTTTAAAAAACTGCTGACTGTTTTCTCTTGAGA  
A\_14\_P127395 TAGCAGACTTAACATTGGATTAAACACACTACTGCAAGTTTCAACAAATGTTTCATGGCAT  
A\_14\_P201012 ATTAAGTTTTGCTGTGCTAAATCTTCAGGAAAACGTTTTCCCTTTAGTTGCACCAAAAACCT  
A\_14\_P126325 ACAACTGAAGATAACAAGAGATTTAAGTTTTAAGGGCATTTAATCAGGAGGAAAGGTTTG  
A\_14\_P115953 CACACCATCAAAAACAAATCTTCCACGATAATCACTGCATGACTGAAAATTTTAGTCCAT  
A\_14\_P108347 TGAAACTGTCATCCCTCCGTCTTCTAAGGATGATACCTTAAATTTTGTTTTTCTTCATGT  
A\_16\_P17672337

AAAAGTCATTCAATTATACCCAGATTAGAGAATAAGCCCTCAATGTAAACCTGTCAAACA  
A\_16\_P00158637

TATTTCTTGGTCTTATTTCACTTTTCCACATTCACCATTACTGAACTGGAACACAGCAAC  
A\_16\_P39063565

GCACTATCACTTCTTTATACATTTTTTGCTACCCATCAGATACTTCATTCAAAAACCTCGCA  
CUST\_1818\_PI426210822 ATTTATGCTGGCCAGAGGAGAGCTTTCAGCCTGCTAGCAAGGCTC  
A\_16\_P38548240

ACATCAGTAAATCTTGTCTTATCCTAAGTATGGGCATAGATGATTCAACCTCTGGATGC  
CUST\_4362\_PI426210822 AACCGTCATGTTATAAACATGAAAAGCCCCAAGCAAACAGCCTTTAGCC  
A\_14\_P137405 TTCAGGAGTCTGCTCGTTAGAAATTTTAATTCCTGAGAATACTTCCTTCAGTTGGTTCAA  
A\_14\_P201216 AGTAATGTGATTTCTAATTAGGACATCCCTTCTTTCAGATGCCAGTTTGCAGGTTACTT  
A\_14\_P121262 TCATTGCTAATGGATTGATTATTGTGGATTGTGATCCAATTCTCCACAAACCTGATCTTT  
A\_14\_P107947 GTGTCATCTTTTTTCTTTTGGTTTAGATAACCTCAAATCTCAGACTTTGGCTTGGCAA  
A\_14\_P105880

GAAATCACAGAACTATAACCAGAAAATAGGATACAAAACCAACAGTGAGGAGATTGAGAA  
A\_14\_P119390 AACCAGCCTGACTTAAACAGTATCTTAAGGTAGATGGTGATTAGCACATGTAGTATGCT  
A\_16\_P16868970

TTACATACTCTTCTAGACTCATGACAAATCTTCCCTCAAATCACAATACTCTTGGACCC  
A\_14\_P112882 AAAGATGGTAGTTTCTTGCACCACCTTCTTAAAAGCAGGAAAAATATGACCTGCTTTTAA  
A\_16\_P18817883

CCCCTTTCCATTATAACAATGAAACATCCCTCTTAATCTCTTAATTGCTGCAACAACCTGT  
A\_18\_P22839587 CCAACCTCCAGGCCAAAGGCAGGACGCTGATCCCTTGCTATGAAG

A\_14\_P123229 AGAGGGGCAAGAAGATTTTCAGAAAGAGAAACGCAATGGAAACTGGGAAA  
A\_14\_P131554 GAAGTTTGTTCCTTCTGACTGTATGTCTGCATTTCTGCAAGTCAGAATTTGTTCTATTC  
A\_14\_P126128 TGAAAGGTAAACAAAGGCTATGAACTTGGTGTAACCTTAAACGTTTCAGATGTCGGAGTT  
A\_16\_P18805052  
AAACTTTCCATCCAGAAAACAAAGTTATTGACTCCTTTGTTAGATTCTCAAGGTGCATCA  
A\_14\_P107749 AGATGACCTCTGAGCAGATGGTTTCTGATGGTGGTTTTTTTTCTGATTAATTGAATTACA  
CUST\_2067\_PI426210822  
CCCCAAAGCATGTCATTGCCATATTGAAGTTTTATTGAATTAACGGAGTATGTGAAGC  
A\_14\_P112587 ATGTTGTTCTTTCGAAGTTCTTTTAAAAGTGCAAATTGTCTGTGATCACTTTTGGGCAAA  
CUST\_8618\_PI426210822 CAGAAAAAAAAGGAAACAGGTCCTGTGGACCTAGTGTCTGTCCATCA  
CUST\_1335\_PI426210822  
CAGGGCTTAATAAAACCAGCAGCTAAACCAAGGAAAATACTCCCATTTTTAGAAATGG  
A\_14\_P202021 CATCTTTCATCACTGAGGAAAATTCGGTGAAAGTAGAAACATTTCCCTTTTGGTTATG  
A\_14\_P112544 GGATCTTAACCAAAAATGATTCAATACTGTTATCACTAAAACAGCACCAAGACCTGAAGC  
A\_14\_P137132 AAAAATTCACCTACCATTTTCAGTGGTGTGCCTTCATATTCAAACCATATCTCACTAATGT  
A\_14\_P137041 ACCTGCTTTTTTAAAAGGCCAGAACAATTGTCTGAAAATTAGTAACAATGCTGCATCTAGAT  
A\_14\_P139368 GAACGAGAGCAAAGCATGATGGGTGAAGAGAACCGAGCAAAGATCAAATAAA  
A\_14\_P108052 TGAACAATCTTGGTAACTTTTTTTGACTGAGGCCACATCAGATTCAAATGCAAAGCATA  
A\_18\_P22841017 CCTTTTTGCCAGAAGGAGTCCTAGGAAGCCGATGTAAGTCCAAGATT  
A\_16\_P16191585  
CTTCTGTTTCTCTTTGCCAACCTTTTATTTTAGACTTCATTTAGGATGAAGGTGCTGG  
A\_14\_P100157 GAAAGCAGAAGTAACTCCGAAAACAACCCTCATTTCTGGCTTTGTTTTTCAACATATTAT  
A\_14\_P113791 CAGCCTTATCTCCTAATCCATTGTTAAATCACCTGCCCAATTCAGTAAATGAATTGTG  
A\_14\_P106838 TCACAAATGGTTCTCATTGACATGAGTGTAGACCTTTCTACTCAGGTGAAATTTGGTATT  
A\_14\_P137526 ACACACCATCCTTATTCTTGAGGCAGGCTTGAGTAATATAATCCAAATGTTTCTGAATTT  
CUST\_3266\_PI426210822 TTCTATGTTCTGAAGGATTTTTTCAAGGAACTTTGAAACCTAAGTGGCTGCAG  
A\_14\_P129693 CCTGACAGATAAAAGAGAAATCAGTGGCTTTTTTTTTTCCATTATTTCTGGCCAATCATCA  
A\_16\_P15755696  
GTTCAATATCATGACACCAATGCTTTTACTAATACTTCACACCCTTTTCTATACTCATCC  
A\_14\_P202419 GATGATCTTCACAGTCAGAGAATCTATCACTTGTTCATCAAACACATGGTCCACAAA  
A\_14\_P103680 GGAGGGGATGATGATAATATTATCTGGATACAGTATTTACCTTTGGGGTGGGATCTAAAT  
A\_14\_P129156 AAGCATGTAGTGAGATGTTACCTTCGACTTTTCAGATAACCCAGGTAAACATTTATAGGA  
A\_14\_P106786 CGGCTGGAGAAAAATATAAGTCAGGGGTAGTTTTTAAAATTGTAATATGTCCTTCCTACCT  
A\_14\_P123728 AGGCAGATGAAGGCTGTAAAAAACCTTTAGAAAGATTGCTGAACATCTGGCAAGAA  
A\_16\_P19181909  
AGCAAACATCTATCTTTGAAAATGAGCAGACGTTTCTTAAACAATGATAGTGTCCAAGTT  
A\_14\_P117045 CAATCTACAGTATCATTTGCTTGGCTTACAAGTAGTGTGAAGGATGACCTCGTAGCAT  
CUST\_6028\_PI426210822 GACCCAGTCCCCCATATGTATCAGCTACCAATTGCCACAAAAAA

A\_18\_P19235831

AGGTCCTTTACATTCCAGACTGTATACACTTGTTCCTCTTTAATTCACAATCAGCCTCAAA

A\_14\_P102879 ATCTACCAGGAGCAAATAAACTAGACTCACACAACTAAAAATAGCCCATGTTTTTCAGC

A\_14\_P115669 TGGTAACACTGTTTATCTCATCCCTAATTATGGAAGCAAAGGGTGAAAATATAAAGGTCC

A\_14\_P127602 ATCTGTGCAGTCTGGCTATTTTTTAGCACTATCAGGATGAATCACGCTGGG

A\_14\_P121027 ATTAATGGGAAGAGTATCTTCTATACCTTTTTTACATGCCCTCAGACATTCTTGTGGGA

CUST\_4578\_PI426210822 AGAAACAGTAGTGAATGAACTTGAGTCCCTTCTGCCAACCCCTTG

A\_16\_P01174177

AGGCAAACCCATATTTAATATCCTGGTGACTATCTTTAGTGCAGTCTAGTCTATAAGCCA

A\_14\_P105032 TTCTTTCTTTGTAGTGGTTTGTGTCTTCTGATTATGTGGAGATTCACACTACGAAAATGG

CUST\_7026\_PI426210822 CCTGTTTGTAGCCATGGCTGCCAACATGCATGAGCCACTTAGAAG

A\_14\_P125123 CTACTTTAAGCATGAAAGAATAAGGTCAGACTGGGGGTATCAGAGGCGCT

CUST\_10330\_PI426210822 CGTCAGAACATGGCATTCTGATGAATGTGGTCTTATGCTGGGAAGAA

A\_14\_P110058 ACAGAATATTGTGTGTCATGTGGCTGCCATTTCTCTTGTTTTTTAAAAAGCAGGTAATC

A\_14\_P120197 CTTCATTATAGGCCTCTGATACAATTATAATAACGGTTCCTGAACCTTTTAGAGTGCAA

A\_14\_P128914 GGCTTTACATTGATCTTTTTTAGATGTGGGGTTAACAGTAAGATTCTTTATGGGAAGAG

CUST\_3334\_PI426210822 TTGTGCATAGCTGGAGAACAACCTGGGGATGAATCAAGAAGGGAAAG

A\_18\_P14112203

AAGAGCCACAACCTCAAATACTACAAGAATTGAGAAGAACTTATCAACCTTGTGTTCAAGG

A\_16\_P41024886

ACACTGAAGGAAAATAAGCCATAATTCTATGTCACTATGAGCCCATAATTTTTGCCAGAA

A\_16\_P30952378

TCTTTAAAGGCACATGAGATAAATGAAGATAAATGCATGAAGTAGAATAATTTTCAGTCT

CUST\_8660\_PI426210822 GGGAGCTTTATCTCAGACTGCAAGCTTCACTTGATGGAGTTAAAAACCTGTAT

A\_16\_P17934194

AGTGTATATTCCATTTTCTACTTCCAACCTACCAATTCACTTTATTCACTACAGGCTCCCA

CUST\_8304\_PI426210822 CTTTGTATATGGCGAGTCCGTGGACGCAGCCAACCTTCATTCAGCT

A\_14\_P117901 GATTTCTTACGGAAATTGAAGGATGCTTATGGAAAATCCTTGTCTGAACTGACATTTGAT

A\_14\_P118964 TGCTCATATTGGTGGGGTTAATATTGTGCTGCTTGAAGGGATTACACCAAATATACAGTA

A\_16\_P02993541

AGTGTGACTGCAGATTAATCTACTCCATCAACTTTACATATTCATCCACACACAAAACA

CUST\_586\_PI426210822 GCCTTCAGTAAAAGTCTGTGGTCCTGGTTGGTGATGAGATTCTTTT

A\_14\_P101909 TTTCATTTACAGCATAGACTTTCTCTGAGTTCAGTTCACCTGCCGCTTAAACT

A\_14\_P128751 GGGAAGAATGAAAGAAATTATAATTAAGTGAAGAAATTTGTCCGCTGAGAAGTCTCCC

CUST\_3339\_PI426210822 TGTTTGGCCATTGATTTATTTCTTGGGTGCAATGAAGGGCTCTTAATCTTCTG

A\_16\_P18103585

AAAAGAATACTTGGGTACATTTTTGAAGCATTAGCAGTGAAAATCCATAACTGAACTACA

A\_14\_P200764 TGGAGAAGAGTTTCAGAAGAACTTGCAGTAGATACACCATTTTTGTTTGCTTGATTCTT



A\_14\_P127843 CCTCATGGGGGTAATAGGATAATGGGGGACTTAAGACACGTAGAGATAAATTATTATACA  
CUST\_10034\_PI426210822 TTAAGATAAGTTCAGACAAAGGATGGGTGCCCTTAATCAGGGTGGG  
A\_14\_P125192 CTGTTGAAGCGACTTGCTGTTAGGAGTTTGAGTAATCCTACCAAAAAAAGATAGCAGTT  
A\_14\_P123801 CTTTGAAGTTTAAATCCAATGGAGAAGACTCAAGAAACAGTCCAAAGAATTCTTCTAGAA  
A\_16\_P19996208  
CGTGAACCTTTTATAACTAGAGCAGAAAGATTTTTAGCCTCTTTAAAGGAAATCCTGGCA  
A\_18\_P22839395 AAAAGGGGACTCTGAGACCAGCCACTAAGAATCATGCTGTTTCAG  
A\_14\_P139274 GAGATATAAATGGAGGATTCTCCCTTCTCATTAGATTCCACCAATTCATTTCCATTGTGA  
CUST\_49\_PI426210822  
ACTCATTTTTTGGTGAATGTTCCATTGCATCTGAATGATATTGAAGTGAACCTTCTCTTAC  
A\_16\_P18090886  
AAATTCACCTTGTTTCCATCATTGAATCACCAATTCATGTTGTATCCCTAGAAAATGCC  
CUST\_587\_PI426210822 GTAAAAGTCTGTGGTCCTGGTTGGTGATGAGATTCTTTGAGGGA  
A\_18\_P22840879  
CTTCAGTTTTTCAGAGACAGGAGACTCCCATAGATTTTTAGCAGGAAAAGGTAGATTCTT  
A\_14\_P129921 GAGGAGATAGGAAGCAAGCAAGTAACGGAACCTATGCTCCTAATTTTTATAAAAATAAGCGG  
A\_16\_P41162739  
TTCCTAAAATAAATCAACATTTGCATGTTAGTTTACATTAATGACACATATTTGCCCA  
A\_14\_P139164 CCTCTGACATTCCTTTTATTAACCTCACCTCTCAGTTGAAAGATTTCTTCTTTGAAAGGTC  
A\_16\_P18925133  
GATCTTTAAACCTTTCTTAGTATTGCCAGTGTCTGTTTTATTCTGCATTAACTCCCACA  
A\_14\_P106420 AAGGTTTTCCAACATTGCGTATTTGTCCCTCCTTGCCAAAAAAGAGGGTAGAA  
A\_14\_P109599 AAATAGATATTGGTGATAAAGAAATGATAGAGGACAGAGTCCAATGCACAAATGTTTGGG  
A\_14\_P106467 AGAAACAAATCTGTTGGAAGACTTGGTTACTGAATATTGGAAGAAGGGGAATTCAGG  
A\_14\_P114277 CTTCGTTATCAGCCAGTCCTAATAAGAAAATGCGCACTTTGTCAATCTTCACTGGAA  
A\_14\_P120609 GTGCAAATACAAAGTGAAGAGTTATTTGTGGCTTGAGATAAGTTGGAATTTGCTCCTTTG  
A\_14\_P101753 CATTTGGCCACCCAAATATTAATGAGATTCAGTTACTCCCTCAACTTGCTCACC  
CUST\_5106\_PI426210822  
AGTAAAGAGATGTGAGATGTAAACACTGAAAGGAAGTAAGGGTAGAGCAAAAAAAAAGTA  
A\_14\_P108275 TTTTAATTCAATCCAGATTGTGTATTGAGTCCTCTTACCATTTGGGCATGAAAAGGAGAT  
A\_14\_P112911 AAAAATCCTCAGCAGTTACAGAATAAAGTCCACACGTTTTAACATTGCTTCCATAATCCT  
A\_14\_P202085 AGGTTCATTTTTCCCTTCTTGGTGTGGTTTTTCTGCAAACAGATGAAATTAATTTGTGA  
A\_14\_P135668 TGAAGGGCTAAATGGAGAGTCATTGTTTCTCTATTGAAAACATAAGGAGTCTGTTGATTA  
A\_14\_P101401 ACTTTATGTCATTGAATTAACCTGAAGGCTTTTTAAATGCTGCTTGTTCATGGAGGTTTGG  
A\_16\_P17494949  
CCCTAAGCCATGTATGATCATAACATTTTAAAGAAATAGAAGCCAGGTATTAGAAGGTTCC  
A\_16\_P01103217  
AACATTCGTGCGTATTTCTTCTCAATTTTACCTGCTCATGTATTGAATATCTCACTGACA

A\_14\_P103539 CAGGGTGGATTTTCTAACACAGACAATATGGCTTAAACTAATACGCTATAGATCTCTGCT  
A\_16\_P41594067

ATCCTTTGTTGCTGGTAAATACCCTTGATCAAGCCAATTATTACACTTGCTACCTCTTAA

CUST\_328\_PI426210822 TCATGCTGTTGTTTTCAAGTATTTTCCCTCCCCATCCTTTTTTCTCTTTCCCTTT  
A\_16\_P15017255

CCTTCACTTCTGACGAGTTTACAAGATACAAGTTAATTTTTGGACAGATTATCCTGCCAA

A\_16\_P40019960

TGCAGGAACATACTACATAGTCACAATTCCATTCATCTAACTACAAAGTGAAACCACA

A\_14\_P127194 CTGGAATGGGAGTGATTGAAGTGTTTTTGTGCATGCAGTAGATTAATGTGACATAAAAATG  
CUST\_3140\_PI426210822 CGTATGCAAACACTGTGAGGCCTTTGAATGCCTGTGATTGGTGTTTTTATAC

A\_14\_P120263 TTAAGACCAGATACATGCTACCTAAGGCCATGAACTTGACAATATCTGCTCCAGA  
CUST\_10232\_PI426210822

GAAGAGTTACAGATTTAGACCATGTATCTCTTAAAGCAAAGGAACTACAGGTGCTCCT

A\_14\_P117186 ATTATTTCTTCAAAAGCCCATCTCTAATTGTCTCCTTAGGGAGTTTTTGAGTTCACATTG

A\_14\_P135873 ATAACCAAGCAGCATTAAATGCAAAGTCACATCAGCATTGTGCTGTTCAACATCAA

A\_14\_P102885 CAACTTTCTCTATTTTGGCACAGAAGCATAAGGCCTCCAGATTCCCTTGATGAC

A\_16\_P02907777

AGCAAAATGCTCCACTCATAAATTGTATCACAGTCAGTCTTAAATATCATTCCGATGCCT

A\_14\_P123173 AGTGCCCTTGGATTCGTTTGCTTTCCCTTTGTTTATCTCCAAGTGCAGT

A\_16\_P19047934

ACACTACGACATAAGGAATTCATGTTTCGCTAAGGGAAAAAACTAGAAGTTATAGCAGTGG

A\_16\_P41084892

ATCGCATGCTTATGTAGGGATTAGAAAAACCTTCTACTTGATTAACCTGACAGAATCAT

A\_16\_P01384095

AGCACACATGATATAATTTCTTGAATCAATACGCCATTCCTCAAAATATGTTCCGAAAGT

A\_14\_P133876 TACTCAGTCCTATTATACACATCTTCCGGTCATGATGCCTGCAAATTTTGAAGAAAAAAA

A\_14\_P111870 CTGCTTGTGCCATATCTGAGTGAGAAGATCTGTTAATTA AAAAGGCAGAGCAAGGTT

A\_16\_P30952537 CAAGCACCTTCCAGGGTCATCTGTCAGCATCTCTTTCCCTAATC

CUST\_1117\_PI426210822 ATGCATAGGACCAGTACTTTGGTTTTCCAGAAAGATGACATGTTGTGACA

A\_14\_P111659 CCTCATGTGACTTTGATCATCATTTGAACTTGATTTTCATCTGGATAAATATGTGAGGAGG

A\_14\_P101591 CTCCTATCCCTCCTCTTTAGAGAAGCCAATCACAAATGACCTTTCTGCTTG

A\_14\_P115352 ACTCTCACAGATGTAATACGTTGAAGTGATCATAAAGTGAATGGTAACATGCTTCAGCAA

A\_14\_P124621 TGCACAGTTTGATGTTTTACCATGTGCCTCTATTACTTAAATGCATACATTTAAAA

A\_14\_P126609 CTTTTAGAACCTCGATCCATGGCAGAGCCAGGTAAAGATGATTTCAACTTTAATTTATTA

A\_14\_P122519 AGCCCCAGGAGAACCATTACACCATTATTCATTTTCAGTAAAAAGTCTAATAGAACAGTG

A\_14\_P201166 ATGTGTGTTGTCTTTTAGCCTTTAATAATTGCAGAAACTATGAGTGAGATGTTGGGATCA

A\_16\_P16357849

AAACTCTGGAGTAATTTCTCAAAACCAAATCTCTTCTCAAAAACAGACTAGCAACTCAG

A\_14\_P103247 GAGATGCTTCCCTACCCTGCAGAAGGAGATGAACTTCTATGATACCAATTGTTT  
CUST\_8253\_PI426210822

ATGAGGTACTGATGGAATATATTTGCAAATTAGCATATTTTTGCCTCTGTTACAGCTCT

A\_14\_P102495 AAAAGCGGTAAGAATTACTCATCAGCAAGTGGTAGGAAAGCAATCTGATTAACAAATGC

A\_18\_P17041616 CCACCCTTCCCTCTTTTTTTCCCCCCAGTTTGAGTTCTAACGATAAATAAAC

A\_16\_P15724517

AAAATATCATCTGCCCTAGTATGTTAATGTTAAATCCTGCTTAAGTGTCTTTTTGCCTA

A\_16\_P16699429

TCCAGTTACCCAGAACTAATTGCCTTGTCTTAGATATGAACACTGTTGCAAACCTTATGT

A\_14\_P103621 ACACTCCATCTCTGAAGAAACAACCCATCGTTCTTTTTTTCTCTTTTTTAAAAAGTCCT

CUST\_6463\_PI426210822

CAAACTATTTACTTTTCATTTTTACCCAAATTTATTTCCCCTGGACGTCTACTTCACAAG

A\_14\_P100382

CTAAGGCACAAAAAATTTGGTAATTCTGGGGAGTCCAGGGTCATAAAAAACAAAAAATCTA

A\_14\_P122325 ATACAACACCTGGTCCAAGGAATGTTCCACCTCTAACTAAAAAAAAGAAATAGCAAGAGT

A\_14\_P126947 TTATTCGCTTTCATGGAGTGGCTATCCTTTCTCCACTGGTAACTTGCTTTGTTTTTA

A\_14\_P122181 CTTTATTGAAACCTCATGTGACTAGTCACATGACTACATAAAAGAGAGTGTAGGTGGGTA

CUST\_9440\_PI426210822 TGTGGAGCCAGGACTATTTATATCTTTCTTAGACCTTTCCTAAGACAGACCACA

A\_14\_P135754 TGTTTTACAAAGGAATTCAGGTCACATTTGCTTAGTTTTAGAAATGCTCTATAGGCCCTG

A\_14\_P118647 CTGTCTCTATTTGCAGGTGATAAAAGAAGCCATGGTTGAAAGCATTGAATATAGAAGACA

A\_14\_P137523 CTTTCATCGTTAAAAAGATAAAGTGATGCAACAACAACGCAAGCATAGATTGAGAGTTTCC

A\_16\_P01672481

AAAAAATGCAACTCTTTATTGACTGATTCTTTACTGCAACACAATGATAAATAACAAGGA

A\_14\_P125312 AAAAAGCAATTTTCGCAAAGGCATAAACTATACAGGAAAGGACCAACATGACAACCTGATAT

A\_16\_P16068867

CGCATCTGACTGAGAAAAATTTAACGGCAATATTCAAATGAAATAGAACTCCAACCAGTG

A\_14\_P122128 CTTTGCCTGTTCTAGGGCATCACCCCTTCAAACATGATGTATTCTTTTAGAAAAAG

A\_16\_P00685502 TTTTCTTCCGCCCATGCAGGGTGAACCTTGGGAACCAACTGTGAAT

CUST\_2444\_PI426210822 TGTCTGTGAAGCTCCAGAATCTATAGATCATCTGGTTGGCTGGATGG

A\_16\_P15715340

TCACAAATCAAACATGGTGCTTATAAATTCACCTTTTTTCACATTAGCGTTCTATCCTCACC

A\_14\_P108794 GTGGAAAGTTAAAGGCTCTCGGAGGTGAAAAGGTTGTCAAGTGTAAGATG

A\_14\_P134644 TATACATCACTAAAATCCAGACTAGTGTAGACATATGCCCTAAGGTGTAGACAGGATGCA

A\_14\_P113500 CTAAGTGGTTTCATGGCACCTATTGACCATACTACAATGAATGATGATGCCAGGT

CUST\_4970\_PI426210822 GTAGGATGGGTGTTAATTGGGAATGGCATGTAATTCTCTTCTGGAATCCAG

A\_18\_P14133551

AAAAGATCAGAAGGCGAACTATAGAACAATTTCTTCTTTTTCTCTAAGGAATGTGAG

A\_16\_P21351485

ATTTTATTGAGCAAACCAATTAGAACAAGTCAGACCCTTTTATGAAGACACAGCACTGAG  
A\_14\_P127790 GGCCTTAGCCTCATTCTGAGAGAACACTTATTCACCTTAAGAGAATATAGATATTTTGCC  
A\_14\_P133951 AATAAAATTAATACTCCTTGCTTCTATCTTGCTCCATCTATGCCTGGGATCTTGTCATCA  
CUST\_8584\_PI426210822 CCACTCTCAGCCACCACCATTCCCCAACCTCCAAAGGCTACTGAA  
A\_16\_P18923781

GCCCAACTGCAATAATAATAATAACTGTGCATGGCTTGTATTAGAATCCTAAGTTCACCC  
A\_14\_P114847 CCAAAGAAAGATTATTCACCTTCTCTTAGCATAGCATCTATTAGTGGAGAGTAGGTGACGT  
A\_14\_P136150 CTGTCCTCTCTCCACATAAAATTGTGCTCATCTAATAATGCCTTCTTGAAAACAACCAAT  
A\_14\_P132252 AATGAACAAAATTCTTCCCATGCAAGGCATAACTGAAATCCATTTTTCTGAAGAAGCATT  
A\_16\_P58424173 CTACAGAGTGCCAGACACCCTGCTTATCTGGGGCACGGAGCAGT  
A\_18\_P12315719

AGAGGAACTGTGGCTTTATATAAAGGACAACCTCTCATTAATGAATAGACAGAAGGTGTGC  
A\_14\_P137173 AGAAATCAAATTTTAAATAACATCCTACCAGGCATACAGGCGAGAGAGGAAGATACAAGA  
A\_14\_P125334 AATCCAGTGACAGGCATGAAGAGAAAGCCATAATAATACTGATAACAATGTGCCAGTTAA  
A\_14\_P120402 TGTCTCAAGATTCATCTGATCAACCTTGATCAATAACCATCTTGATCACTGATAGATGA  
A\_14\_P125560 ACAAGAACATCCCAGTAGTGTGGACAACATCATTCTTTTCCAAAGTTGATAAACTATTG  
A\_16\_P41786518

ACCAAAAACCTATATTCATCATACCCTTTCACTACACATGATACAGTCTGACTAGACAGA  
A\_14\_P134507 CGCCAGCAAATTTTAAACCCTGAAATTAAGTACTGATACCAACCAATCCCTTTATGGACATATA  
A\_14\_P138588 GACTGCGTTATGGTAAGGATTTTACTGTGGTAATCTTCTTGAATCATAACTGCATCAAA  
CUST\_914\_PI426210822 CATCCTGAGCTTCTGTGTGCAGACGACATTTTAAAGAAATGAGCGG  
A\_14\_P108636 CCATAACCTTCATATCAAAGATTATTGCTCTGATATACACAAGGTCTTTGGGGTATTGGC  
CUST\_9042\_PI426210822 GTGGGAGGAAACCTGTGTCCTCTCTCTTGCTCTGAGTCAACAGAC  
A\_16\_P20391551

GACCTCTGACATCCCTTTAATCAGATAACCAACACTTGAATCTCTCCAGTGACTTATAG  
A\_14\_P139982 TCTGGATTTTTGCTTCCCTGCATTTAATGTCAAGAGCAACATTTTCTACTTTTACTCTT  
A\_14\_P133376 TCATTTTTCATACTTCTGGCTTTGAATTAAGAACTTAGGACTTTCTGTGAACTGGTATGT  
A\_14\_P121260 GATGCTTCCCCTTTAATCTCTACATCATCACTATGAAAAGCAAAAGAGCAAGTATCGTTT  
A\_14\_P125523 TTTCTTCCCTGAAACTGATTCCTCTCTTTTATTTTCATGAATCTGGTTCTCTTCTGATTCT  
A\_14\_P127528 TCTTTTCTTCAAATGTGAACTCTTCCAGAAAACAGGATCTTTTAAAGGTAACAATCCTTTT  
A\_14\_P123336 TGCAGAATACAGTGTCCATAAGATCACCTCTACCTTTCATCAAGGTAAAGCCTTCTA  
A\_14\_P138927 GAAATAAGATCCAGAGTTGTTGAGCGAGCCACATGAGACCTCATAACTAATAACTAATGT  
CUST\_1995\_PI426210822 GAGGCCATGTGCCTCCTCAATTCTGTTCTGCGGAGTTAGAAGT  
CUST\_7730\_PI426210822

AGAGGCTCACTAATTTCAATTTCGATTCTTCCAACCACTGCACGTTACAAACAG  
A\_14\_P115608 GGGTCAAAATGTATCTATGTTTTGTTCCATAAGAACAATCACTGCAGATCACCTATTC  
A\_14\_P116924 CTTACCTAATACAGACTGATGCCTTGAAACAGGGTTACCCATCAGACTATTC  
A\_16\_P38581098

AACAAAAATGGGTGAAACAGTGAATAAGTCAGAATAGCAAGCCTTTCTTTTCCATACAGA  
A\_14\_P132044 ATCATCCAAGTGTCCAATGTCTTTGGAGAAACGATTTAAAATTCTTCCTGCAAGAACAG  
CUST\_449\_PI426210822 TGAGTGTGAGAGTGTGAAGGGCCGGGCCCCAGCCAGCTCTGATTC  
A\_14\_P101312 AATTGAAAGTCTGCTTACCTGAGGTTTAATTTTCGATCTTCTTCGCTGCCAGC  
CUST\_6162\_PI426210822 GTGTCTCCGTGGGAGTTACCTGGCGGAGGGTGGGATTTAGGCC  
A\_18\_P22843042

CTCTTAAGCAAAGGAACACTACAGGTGCTCCTTGACTTATCATATTTTAAGTCAGAAATGCA  
CUST\_7827\_PI426210822

TGAGTAAGGTGGAAGAGAGACCAGAAATAGTTAAATAAATGCTGATATAAATGTTACGTT  
A\_14\_P100626 CCTACTTTCTCAATTGGTGTCTTCTTACTTTGCTCATTTCCTTGTTTAGATCTTGAACCT  
A\_14\_P103014 CAGTAGTCTGAGGATCTCACTTTCAGATTTTCGTGTTTTGATGTCGGATTCAATTC  
A\_16\_P17916600

ATCCAGGCACAAGAATATATCCCTCAAACCTAAATTATTCCTCAAGTTTCATACCAAAG  
A\_16\_P38975664

AGGATGGGAAATAATGCTAATTGTGCAATCAATACTTAATCTTGAAAACACTGAGGAACT  
A\_14\_P131489 TAGCATCATAATTCATCATAATTTGTAGGCTCGCAAACATTTTCTTGAATCCACTGGAC  
A\_14\_P137330 AGAACAACTGAACTTTAAAATACATACGAAATCCTGTTGACGATGGCATCTTCATCTTCT  
CUST\_5389\_PI426210822 GAATGTGGGACCACCTACCAGCTTTACTCCTGCGTCTAACTCTAA  
A\_16\_P30952578

GAAATTTTCTGACTTTTCTTCTCAGGACTGTGAAAAACCAGGAATTTCTTGCTAACAG  
A\_16\_P18645421

AAAATTGGAACAGAATTCTGAGACAGTCATTAGTGAAAAAGAATCTATGTGACAGCCCAG  
A\_14\_P125081 ACAACAGAGGTCAGTGTCTGTTTCAGGTAACTATAATTTCTCTGTAAACAGTGGAATA  
A\_14\_P116842 GCATGGATGGAGAATCAGCAAGAGAAATGCTGTATTAGGACTAATAATCCATCTACGCT  
A\_18\_P15099897

AAGTCAATGTTTCATGGCAGAACTTATGGTTATCCCAATAACAAAAAGATTGCTTGAGAA  
A\_16\_P35255698

GGGAGACATTGAAATTTATACTACCGTAGCATGATAACACAACATGAAAAACAGTCACCA  
A\_14\_P114127 GAAAAGAATATTTGCAGGAAGTATGAAGTGTTTTAAACACATTAGCGTGGGTAGCAGGAAA  
CUST\_2648\_PI426210822 AGCAGCAGTGAAGGCCTGGAGGCATCAGCTGGCTATGTTAAGTAG  
A\_18\_P22841718

GTTTTGTGGTTTAAACTAGACCTACTATGGCTTTTAAAGGCCACCATTATTTCTCAATGT  
A\_14\_P112291 CAATAAGAATCTACTATATACCTGGCTTTGGGGACACTTGGGATACAAAAATGATTTGGT  
A\_14\_P139555 CTTAATTTGACTGTCCTCGCAGAGAATGTGAACATGTGTGTGTGTTGTGTTAATCTT  
A\_14\_P126704 ACATTTCTTTCTTCATGACTTTTTTAAAAATGACTTATGAAGCCCTTCTACTCTGGCTT  
A\_14\_P128848 TATGTTATGGAAGATCAGAGACAATAGAAATCCAGGGACCAGTTACAAGAGTTTGTCAAA  
A\_14\_P111022 CTGGAGGACGAACTTTCTAAACTATTTTGAATACAAAAGAAGGAGTCAAAGGAACATT  
A\_16\_P02701034

ATCACTGAACGCTAAATCTGTATCTCCAGACCATATCTGAATTCTGTGCATAGTCTATGA  
A\_16\_P19609312  
AAGATCACAATGTGTATTACTCAGATAGAAGTCCAGGTAAAACTTATCAGTCTGTGGGG  
CUST\_2813\_PI426210822  
AGGTGCTTCATTTTTATTTAAAAGGCTGATTTAATAATAGAAAGAAAACTCCAGGCAAA  
A\_16\_P21314251  
ACAGTGACCCAGTAACTTAGGTGTAAGTCTCCTCATGATGAATCATTTTAAGAACTTGTT  
A\_14\_P119189 AAAATCTCTAACTTCCAAGGTCCCACCAACAGTTCAGAAACCTACCACAGTAAAT  
A\_16\_P19906070  
TACGTTTGAAAATTCAAGATCTAGACCCCTTCTTTGATATTAATGGAACCCAGTATGTGC  
A\_14\_P128291 CTGGCAAAGTTGAGAAGTTTGGAGACTAACCGTGACAAAATTTAAACATCAGGTATGTG  
A\_14\_P127915 ATAGGTAAGGATTGTATACTTCCATCACTTAGCAATTAAGAAGAAGTGCTTCTTGTGCA  
A\_16\_P20939272  
GATCAAATTCCTCATAATGGCACCTCTGAGTTTTTGTTTTAATTGGATGGCATCAAAAA  
A\_18\_P11818228  
GGTATGCATCAATTACTCAGGTTCTGTGACATAAGCAGTTTATCCAAATCCTAGACTTCT  
A\_14\_P130760 AGAATGATTCACTGGGTAAGACTAAAGGACTTGTATTACTCTCCAATTCAGTTTCAC  
CUST\_5914\_PI426210822 CACACTGACACTCTGAGGTGCTGCCTGGACTTATTCTCTGGGCAG  
A\_14\_P126097 CTTGTAAACTCGCCACTATCCTTTATGTTTTGTGCATGAGGAAAGGAACAAATTTGATTC  
A\_16\_P01102371  
GTCTGGTGAAC TTGTATCTGTAACCTTACCCTGATGATTTTAAAAAACACCCCATTAGCAA  
A\_16\_P02166642  
AATCTACAGCATGCTTTAAAGAAGGATTTCCATAAGCATCCTAGCATATTCTCACGACAG  
A\_14\_P120571 GAAATAAACACACACAGAACTCCTTTGTGAAAAATACATTTTAAAGAAAAAAATCAAT  
A\_16\_P03434208  
ACAAACTTACAGTCAAACAAACACACTTACTCCTTAAACCTAAGTTATATCTTTAGACTA  
A\_14\_P120569 ATCATAATCTTGCTTACTGGGAACCAGAACTGAACAGCAAGGCAATAAGAAAGGTAATTA  
A\_14\_P100256 TTACAGGTTCTAAGGCTGTGACCCCTTACCCTTTTCTGGATCCTG  
A\_14\_P114752 GCAGAGATGAAGGGAAGGACGAACTGAGTAGGTTGCTGAAAAACGTTTAATTC  
A\_18\_P12419855  
GACAACTTCAACTTTAGAGTGCATGATTATCTCAGAATAAAAAAAATAACCACCCCTCC  
A\_16\_P00037055  
GTTGCTTCCAATGGAAATAAACATCTCATATTAGGAGGGAATCTAGTCTAAGTTGCATGG  
A\_18\_P22839604 CTTCTTCCCGTGTGATGATGGCTAAGTGCGCAGAACATGTGAAATTTAAGTAGATTT  
A\_14\_P108366 TTAAAGATCAGCACTGGATATCCGCCACCTTTTGTCTTTGTATAAAGAGATATTGGTTGAA  
A\_14\_P106579 GGCAGTTAAACAGAATCCTATGCATGCTGTAGTCCATGAGTTGAAATAAACACTTGAC  
A\_14\_P120138 AGGGTTCTCATTTTGTAGTTTCTTCCCTCTTTGTGACTATTCTTAGCCTTATAGATTT  
A\_16\_P02720857

AAAGTGCAGACAAAAGTAGGATATGGTTCTTCTTTTCTTCGAAGGTAAGTGTGATTCTC  
A\_16\_P02040593  
AAATCGTGTTAATTTGGCAAAGACAATTGAAACCTAGAATATCATCCGTGGATGGAAAGT  
A\_14\_P119854 TCCACTTCTACTTGGATCTCTCTGCCAACTAAATGATCCTGATAAATGCATAAAAAAGGA  
A\_14\_P139373 ATCATCAAGCAGAACATTGAATTAAGTCTCATTATTCTAGGGCAAACCTCAAAAGGGTTT  
A\_14\_P100379 TTTTAAATGTATTCTCCAGAACAACCACTAAATCCGTGGTCCAACTATACCTAAAGTCC  
A\_14\_P119974 GGGATGTAGTTCTGATCATTTTCTCCTTGATAATGTAGTTCTGGTCATTTTTCTTGGAT  
A\_16\_P03098868  
CCAAATGTCCTACTCTTGACAACTAATCCTGACGCTTATACTGTTTATCATCCGATGTC  
A\_14\_P121101 ATCACTCTAAGACAACTCAGACCATCTCTTTTCGGTCTGAAAAATAATCCGTTTAAAT  
A\_14\_P135973 CTCAATCAAGTATAAAAAGTAAAGATTCTTGAGCCTTCTTGGACCTTCTCCCTGGTTTC  
A\_14\_P110116 CAGCAAGATTGTATAATCCCTGCATCCTCTTCAGTTACGTCCTTGATAATTAACGAGTA  
A\_14\_P103890 TCCATCTCCCGAAGAAAGCAGAGAAGGAAACATGATGGTATTGCATC  
CUST\_4038\_PI426210822  
CGTAACTTTCCTGCAGATGCACTTCCTGTGAATGAAGAGTCTTGATATATATTTTTCTTT  
A\_14\_P106617 CATTCTTAATTAATAATTCATCTCCATGCCTGCCAGTTGGTAAATGAGTATCCTTGACTTG  
A\_14\_P116309 TATCTTGCACTTTTGCCATTAATGTGTAGATGGAGAGGCATGCATAGTTTTTTTTTATTGT  
A\_16\_P36626284  
AGTTAAGCAACAATTTTCTGCTCTTGATCTCAGTTATTTCCCCTGAATTCCTCAAAAACA  
A\_14\_P103524 TAATGTTCTTCTCTGACTCTTTAAAAATGTCCCTTCCCTCCTCCCAAGTTTTATACTAGA  
CUST\_1092\_PI426210822 AAAAAGGATTCATGAGAAACACTATATGGACACTGGGACCTTCTGGGTA  
A\_14\_P128175 TCCCTTGCCAGGCTACCCAAATGTTGGGCTATTCCATAAATATGATTTTCTTGTTATATA  
A\_14\_P118098 ACATTCTGTAATGTGATTTTTTCCCCTCAGTATTGTCCAGACTCTGTGATAAAAAACA  
A\_14\_P112201 CCACTGCTGGAAATCTCTTCATTGTGGCCTTATCAGATGTTTGAATTCAGATCTTTTTT  
A\_16\_P16575024  
TGAATCAATGCCACTCATGTTCACTATATTTCCCTCCAAATTGGTTTGTGTTTGCATGGTAG  
A\_14\_P121889 CAAGAGGAAGATAAACACAAAATTCAGGAAAGCAATATTTTAGTCTCCAGGCTGATTCTC  
A\_16\_P16118679  
ATGTCCAGAATCCACAATAAATCTCTGCTGAACTTTTTCAATCCACGATAAACCTTTTGA  
CUST\_5262\_PI426210822  
TCTGCTTTATTTACAAATTTAAAGTGGGGCCAACCCTTCTGTTTTCTTTAATTTACC  
A\_14\_P107282 GGATGATCCTTTTTAGCCAAAAACAAGTTTTTATCTTTAGGCTTATGGGGCATCATTCAT  
A\_14\_P139381 TTCTTGTTCTTCTCTGGTAACAACAATCTTATGGCTCAGGTCCTTTAAGTCACAAATAC  
A\_18\_P11965037  
AGTTGCTCCTATGTTTGCCTAGAAAGTATCCTTGAGAAATATAAGAAAAAACCACCACT  
A\_14\_P100855 AGAAAAAAGTGAAGATGTCTTTAAGAAAGGAGACCTCTATTTCAACAGTGGAGATCTCT  
A\_14\_P111333 GATTACCTGAATTCAGTAATCTACACCAATCAACCTACAGCCAGTATCACCAGC  
A\_14\_P111515 CCTCCATGAAATGCCATATTTTGTGAAGAAAGTGCATGCAGGAATATTCAGGAGTC

A\_18\_P14137402

ATGTTTTGTCTCATATGGGGGCTATTCACCTCATTATTACCCAAATCAACAGACCATTCT

A\_16\_P18057959

ACCATACCTTACCCAATTAGTTTTTAACGCTTTAAGTAGCCTTACTCCTCTTCAATGGTT

A\_14\_P104317 CTGAAGGCCTTGGACAATATTGTCACCTCAATTCAACGCCTATGAAGATTCCTG

CUST\_3441\_PI426210822 ATGTATGCTTAAGTCTGTTTTAGATGACCCCTTGTAAGAAAGGAAGCCTGGC

A\_14\_P108714 ATGTCAGACAGTGTTTTTATTGCTATTTCTATATGTGTTTCATCCTGAAGACTGTGTTGG

A\_16\_P00685068

TTTTTAGGGACTGTTTTCTTGTGTCATTCTTACTTACTGTAAAGTTTGCCCTTCGTATCAG

A\_14\_P126756 GTTAGGATCTATATAAAATTAATTCAAACCCCATTCCTCAACGGTGGGATGATGAATGTC

A\_14\_P117658 TTCCCGGTTTCAGCCTATTATTGCTGCATATTCTTGAAAACAAAATTGTTGATGATTCAGA

A\_14\_P100863 ATGGCAGGCGACATTTGAAGATCCACAAGTTAATTGGTTTAAAACTGATAAATCCATACA

A\_18\_P16651867

TGTTTAGGTAGATGGGAATAGAAAAGTGTTCATATGGTTTAAACATCAGAAAAAGGGCAGA

CUST\_4191\_PI426210822

TGTGGAAGATGGGAGATGTCTGAGAAAACCTTGTGTCAGTACTTCATGTTTGTA AAA

A\_14\_P129116 TTGAGTCGTAGAAAGAAGTAAAATTCCGTTGTCTTTTATCTGTCAGACTTTCGTCTCTTG

A\_14\_P113630 AAAACACATTAATCTTTCTACACATCACAAAATTCTCTGAAAGGTCTCCAGTGTGACCA

A\_16\_P01828625

CCTTGGTCCATACATTTAATTCAGTGCATATAAATTTCTGATGAAAAGATGGCCTTCAT

A\_14\_P110467 ATATTGGCCTGCTAGAAATTTGGTCATCTGTTTGACTTTTTCTTTTATAGATGCGGGATT

CUST\_1695\_PI426210822

AATTTTGTGATTTTAACTGTTTGCATAGAAATTTTTTCTGAAATACTTTGCACATTAC

A\_18\_P16690831

TGACGACTATAGAGAACTTACATTAATGCCTAGAATGATACATAGCATGCAACTGGTAG

A\_14\_P200337 TAATGTTCCATGAGTGGATTGCAGATTACAGTTGATTACAGTTGAACAATGCCTGAATAA

A\_18\_P22839036

CTTAGATTGTGTTCTCCCTTGATTTCTGTTCTCATGCTGTTGTTTTCAAGTATTTTCT

A\_14\_P127189 AGTAGTTTTGCTTCCTAATGAGTGCATCAGTGATTTTTCTCCTTAGGTTTCTGTGTTTT

A\_14\_P104697 GTTCTTGCTTCTGTATATTTGCTTAGTGTCTGAATCCCCTGTCAGGTTTTATTATTCT

A\_14\_P130139 GCAATAAGGTCCCAAATAAAGATTTTGTTCACATAATTTATGCTATGCTTTATTATCT

A\_14\_P124008 TAGGAACAGCAAGAAGGTATTAATATTAACAACTTTGCACCTTTTACCTTTAACATCTA

A\_16\_P21403088

AAATAAAGTCCTCGTTATGAATCTGCAGCAAAACCTTTCTTTTCAAATTCTGCTCTGTGCG

A\_14\_P101958 AGAAGCAGAAAAAGTTGATCAGAGCCTTCCAGAGTGTGGTATGCTTTTCACT

CUST\_47\_PI426210822

CTCTATGGCAGACAACCTTCTGATACATTCAATTCCAGGTACTCATTTTTTTGGTGAATGT

A\_16\_P15767048



AAAGTAGATTCTGTTCCCTATCATGTTTTTCAGAGGCTTTAGTATAAAAGGATGCACCCAGT  
A\_18\_P11380985  
AAAAATGCACCTGCTTAAAGTATTCCGTGAATAAACCTGAACTATTGAAAAAGCGTGCTCT  
A\_18\_P24972124  
AACTAGATCCCACCTTATAAATTTTATGTGCACATGTTTAACCATTCATCAGACACAGAAC  
A\_14\_P104899 ATACATAGAATAGTGTGGAGTTTTCTTTAGGGCATCTGGAAAAGTTAGGACCTGTGTTA  
A\_14\_P131338 CTTCTTTTGGATAGATTATAGAGAAAAGGCGTCGGGATCGGATAAATAACAGTTTATCTG  
A\_16\_P17487799  
ATCATAGTGTCAATTAGAAGCAATGTCATATCATTGTGGAACAACCTATCCTTTTCCTCAAGG  
A\_14\_P115686 ATCAAAATTTATTCCATCAAGCAGCCATCCCTCCATATAAATCATATCACTCCCTGTTTT  
A\_14\_P122239 CTGAATTTGTGATCAGTCTTGCTGAGAAAAATACCACCTTTGATACTTTTAAGGCTTCTC  
A\_14\_P101194 ACCATCCTGGCCTATTTGAGACAATTTTAAAAATAAGTGGCCACTTTCAGTTACTGTAAT  
CUST\_4785\_PI426210822  
TAGTAAAATGCAAATGCTAGTTTAGTAAATGGCATAAAGACATTGAAGTGTCCCTGGACA  
A\_16\_P17804294  
AAAACCTACCAACTGTTTCAACTTTGTTTATCGAGAATTAGCATGCACCAAGGACTTAAA  
A\_16\_P01356781  
CCACCAGCCATGAATAATAGAAAGATAGGTTTAATGTGTTATAAATTCCTCTTGTCCTCCCA  
A\_14\_P123299 GATAACATGCATATGGATGCAGGTGCTCAGATACCTGACACCTTAGGATTCAG  
A\_16\_P18125073  
AAGCCCAAGAATGATCATTACCGACTCTATTAGAATTCTCACTGAAAAATTTGAGGCTG  
A\_18\_P12684694  
AAGAAAGCATATGTCAGAGGTCTGTAAAAAAGTTCTACGAATCATATTCTCCCCATACA  
A\_16\_P15774815  
AATGATGCAAATATCCTCCAAGACATAATCCCTGCATATAGGATCTTTTATGGACTCGAC  
A\_16\_P21442446  
AAACTTCGTTCTTAGCAGAATGCAATGATCATTCTAGGAAAAAGAGTGAGTGTATTGGG  
A\_16\_P02998046  
AAACTTCACTCAAGAAATACCTGATTTTGTCCATCAAATGCATCATTATCAAGGCTCT  
A\_18\_P22839801 GTTATCTGTCTCAGGGAGGTGGGGGACTAGGTGGACTGATGGACC  
A\_14\_P118706 GGTGACAATGATTAACACTTTCTAGAATCTGCTGTATAACAATGACTGCAAAGATACAAGG  
A\_14\_P132987 ACATATTCCACCATTTTTGCAAGGCTCAACTTCGCATTCAATTTATGTCTAAGAAAAACAG  
A\_14\_P128023 CTGCACAAAAAATGATTGCAATGCTATGACAAATCAAAGACGCTTTTGCCAGAATTA  
A\_14\_P200462 CTCATAACTGTCCAGCATTGTGTCTCTGTAGCAATCCTTTTGAGAGCCTTCTAAA  
A\_14\_P100668 ACAGAAGGAATCTTGAAAGCCAGACTCTCCTGGGTTTTAGTTTCCTTAAAAATATATTGT  
A\_14\_P101936 ACCTCTCTCCAATACACTGGGTAGTTTGCTCTTGCTTCAAATAAATTTAAATTGCTT  
A\_14\_P124776 ACTTTAAAGAAATACTTTTGAGTCGGTGGACTGAACATGACTGATGTATATAGGTTTGTA  
A\_18\_P22842639 TTGTTGGGATGAGGAGCATCCAATGGGCTAGAGCAGGTGGTTTAG

A\_14\_P104377 CAAAACCTCACACTGGCCCGTTTTAGGAAATAAGCATGAAAATAATGTATTTTCCTTTCA  
CUST\_5256\_PI426210822

GATGGAGGATGGAGGGGATAAAAAGATCACATGTTTGGTGAATCCTCTTTTAAAA

CUST\_2924\_PI426210822 GTATTATTCATCACTTCATTCTTGGCCTGGGAACAGCCTGTGGCC

A\_14\_P115052 GGAATGACTCCCGATTGCTGTCTTTTACTTTTTACTTACCTTTAATCAGTTTATTCTGGG

A\_14\_P137341 GCAATGAGGAATGTTTCTGGTCTGAAAAGAATAAAGTGGGTTTGAAAGCGGATTC

A\_14\_P129028 ACCAAGACTCATCATATCATTATCATCACATCATACTTCTTAGCCACACTTTCAAACACCTG

A\_16\_P36244421

TGGTTCAACTGATGCTTAATTAACCCATCAAATTTACATAGACACTCTCTAACAGTCCT

A\_14\_P112539 CTGTTTGAGAAAAAGCAGAACAAAGACATGAAGGGGCATAACATTTGGCTATAGATTAGAA

A\_14\_P139384 AAATCACTTAATAACCTAATTTCTCCTGATTTGGAAGAATGTCACACTCCACATAAGCCT

A\_14\_P106840 ATATGGTAGCCATGCTGCAACCTCTAACATTACTAAACACTCTTCTGAAGTCCGT

A\_14\_P114608 AGTGAACATTATTACAACACTTCCGATTACCATCCAAAAGTTTTGCGATTTTTGAATGT

A\_14\_P126943 AAAATAATTTGTTTCTCTAATGGGGGAAGGAAGTGGAGTTTACCTTTCACTTATCTCA

A\_14\_P200310 GCTTAAGATCAGAAAATTTTCTTCTGCTCATTACCCAAGCCAGAGTTCTTGC

A\_14\_P138720 GATCTCGCCAAAAGGACATCTTTGGAGCCAGGTATGTTGGCTTTGTTTTTATTT

CUST\_2928\_PI426210822 AAGGGGACCCTGCCCTCACCCGTGGACGGTGCTTGTACCTACTC

A\_14\_P128062 GGAATTGCGTTTACACTTACAGAATTCTGCCCAATGAAGATGATAAATTCAGTTCAGG

A\_16\_P02755699

ACAGGAAGTGCTTAAACAAATATGCTACAAGTAGTTGGAATAAAAAGAAAACCCCTCTTGC

A\_14\_P201741 ACTTTTGACTAAATGTTGGGAGTGGTTCGTATTAACCTTCTTGCCCAAAGAAGTAAGCATAT

A\_14\_P201007

GCCAAAATAAATGAAGCAAAAGACTTGCTAGAAACAACCACCAAACATTGATGCTTAAGG

A\_14\_P130151 CTATATTGCTGGTAGCCTGTCAACAATGTTCCGTGTTGAATATGCATCTAAAGTTGATGA

CUST\_9951\_PI426210822 CCAGAGTAGCTTCATCATAACTTCTCCCAACCTCATGGTGGTTCAATTTG

A\_14\_P121812 AATGTTATTCCAGGAGACGTTTCATAAGCACACATTCACCATGTGAACTTTTGTCTAATT

A\_16\_P02726900

AAAACCTTAACCATAGAGTCTGAGATCCATGACCATGAGTGAAAAACAGTGACATTTTCAC

A\_14\_P111890 GCAACTGATAGAAATCTCTCTATTTGGAGAGTTGAGCCATTCTTGTGCCACCTAT

A\_18\_P12744550

TCAAATTATAAATAGCGTCTCCTCTTCTAAATCTAGAAACCGTTTGTTTAATGTCCCTCC

A\_14\_P129122 ACTCCTCAGTTACCTTTAATGGGATTTGTGGCCAGAGTCCAAGAAAATAGTAAGTTTATG

A\_18\_P13216376

TTATCCAGACACATTGAACAGATATTCAGTAAATGTCCTTAAAAAATCTACCTCACCCC

A\_16\_P20762179

AAATGTTGCTGAGGTGTAATATATAAAGTAGTCCCCCTAATTAGAGATACCCCCATTGTG

A\_16\_P21386182

GCCAAACGACCCATCTATTTCTGTTTTCTCCCTTAATTTACAATATCACTGATTACACCT

CUST\_1620\_PI426210822

ATTTTAGCCTGACATTGAGGATTAGAGAGAATTCCTGGGAGGTTTATTTATTTTTGTAG

A\_14\_P113047 GCTAGAATCTCAGTCTTTCCAGAATCTCAGAATCTTCTAGTTCAATTGCCATTCAAACCTT

A\_14\_P107972 TTTACCTTAATGCACTGGGTTTCTGGGACTTCTGTAGAATTTTATAAGCCCCTGAAA

A\_14\_P103319 TTACTTTGTGGAACAGTTGGCTCACAAATTCATCAGGTGAGAAACACTATGCATTTTGT

CUST\_4588\_PI426210822 GAAGGCAGCAGATTGGTGTCTGGCCATCCACTTCAGGTGAGAA

A\_16\_P36230557 ATCTCAGCATTTACCGCTGTCTCGGTATGAGATTATGGTGATGTTGAAT

A\_16\_P01390951

AATATCCGATAICTGATTCTTGCTGATGTCTCTGAAAACGTAAACGGTAAAGTCTGAGAA

A\_14\_P138103 AAAGTTCACACCAAGAGACTGAACGATTTCTAAACTTTATGGAAAAAGCCAATGACAATC

A\_14\_P139679 TAGTAACAGTTATCATACTGAGATATAGTTTCTGTGCTTGTAATAAATTCTTGAAGTG

A\_18\_P22840295 ACAACTATGAGGGATTTCCAGGAAGGCACTGTCCCTCCCTTCAGC

A\_14\_P114935 GAGGGTCATGGTATTTTTACTGTATTTCTACTCATTTTGCTTGTGGGATTCTAACCTTG

A\_16\_P15365051

AAAAAGTTCTCCAGGATAGAAAGTATTCAAGCAGACAGTATTCAAGTATTGGCAGCAACT

A\_14\_P121604 ACTTCAGAAATGCCTAGTTTTCTGTTATGAAATATTTCAAAGGCCAGACAAAAAATCGCC

A\_16\_P17259501

GCAGTTAGCAATTGTTTGTATACTAGTGATCCAACATCTGTTAACAATGAGGTTCTGGC

A\_14\_P113548 TACCTTAGGTATGACACCTAAGAGGGTCAAGTCTTTCTGTTTAAGGCAAAATTATCTCCT

A\_14\_P139203 GTTCCACCCCTTGAAATCATAAAACATCAGTGTCTGGAAATTGTTGTCATTGTGAGAT

A\_14\_P131117 CTTACCTGCTGACGTCTATATAATTCAGCCCAGCCAATATGCATTTATATCTCTCTGTAG

A\_14\_P108183 TTATGTTTATTCATCCGATGTTTGTCTTTTCCTTCTGGGATGCCTTCGATCATGTCAATT

A\_14\_P135788 ACACCTACATCCCCTGTGCCTGCATTATTGAAATTACTACTCACTTTAATTTTTTTCC

A\_18\_P22840172 GTGGGTTGGTAGGTGGGGGAAAGGGGCTTCCTTGGGGATTTGATC

CUST\_6677\_PI426210822 TAGCCTCCTGTATCTTGCTTTGCTCCCCCTTACCATGCTTTTCTTTTTA

A\_18\_P15872232

CCACTCTAACTGCTACATTGAACGAACATAACTCATTAGGACGCAACTATTCAAAAAAAC

CUST\_4166\_PI426210822

TATATTCTGCCAAATATTCTGTTTATAATATCTAACCTCCTATCAGATCCTAGGCCATT

A\_14\_P201796 TAGGATAAGTATTGGGGTGTGAAGTTTTATTTATAGATTTAATGCAACAGGGGCCCATGT

A\_14\_P202505 AAACCTCTCTGATCAAATTCTGATCAGTCATCATCCTTCAAGGCCTTGGATTTTAGTATT

A\_14\_P100907 TCTATTTCTGACTTCCAACCTCCCTGCTTATTTAATAACCTATAACCTTTATTTCCACAT

A\_14\_P200132 CCTCAAGTTCAGGAACAAGAGTTCGGTAACTTCTCCTATAGATTAATTCAACCATGTTTT

A\_14\_P133914 AAGATGTTAAAACTGCTCAAGTTGAACTTTTCAGCCAAATGACTGACATTGTCCATATGA

A\_14\_P130555 TTCAATCTGTTTCTCTTGTGTAATACTGGGGTATATGTGAGTCCCTGTAACCTGTC

A\_14\_P107129 CTTGCTTAACTTTTCTTTAACTATGAAATTAATAAACATAATTAAGGTCCTTAAAGGA

A\_14\_P138453 AGAAGAGGTATATAAAATACCTCTGTCCATTCATCCTGGTCTTGCAGATGGTTAATTGAA

A\_14\_P135030 ACTATCTCTTGGACTTCTGGCTAATGGTAATCATCATGCCACTTCTACATTAAGTTGAT

A\_16\_P01748223

CCTGGACCATATACTCTACAGAATCAGACATTTGATCACATTCTCGGAATTTTTTCAACA

A\_18\_P18296894

AATGCCTACTTAAATTTGTCTAACCCCAATTATATAACTACCAAAAAACTCAGATCTTCGC

CUST\_5500\_P1426210822 ACTTCTGGTTCCAGATGGCCAACCAAGCACAAATGTTGATGTCTG

A\_14\_P120839 ACGTGAAGCCTTGACTTCAGGTTAAGTAATAAAAAATTTATTGAGAATTCCTGGGTTGGTG

A\_16\_P19861458

ATGTTCCCCAGTATATGAAGGCATTACTCTGTATTCCCTAAAATCTAAACTTCTGCATCT

A\_14\_P109815 CATCCTGATACTAGGTGAATTATCAGCATTCTGTTTAAAATGTAGCCCCAGAACTCAT

CUST\_3623\_P1426210822

GTTAATCTTTGTTTAAATAACAAAGAGCTGCCAGATGGTAATTTTGGAGGCTCAGATACA

A\_14\_P125616 TAAACAACCTCTAAAAATAGCCTCTGAACTTTACACCCTGCTCAATAAAAATGAAGCGCACA

CUST\_186\_P1426210822 ATCCTATAGGCAGGAGTAGGTGGTGGGGGGCAACGGGAAGTTTTTC

A\_14\_P108427 TTATATGAGGCTGCCATACATACAAATGGACATATGGAGAAAATGGCCTATTTTCTCCAT

A\_14\_P116147 TTGGTAATGAACCACACAAATGCACGTTCTCTCTTTCAAAGCATTCTCCCTC

A\_14\_P102283 GATTATAAAGTCCCCTTTCCAGTGGACTCCTGAAGACAATGATGTTTTAACTTTCAAATG

A\_16\_P18514036

CCAAGAATCCAAGAATTTCAAAGTAAAGAGTATCTGACAAAAAAAATGCCTTAGTGCTGC

A\_16\_P03800097

CAACTCTAGGGCAGAAGATAATTTTTGTTGTGTAGTTAGGGACTTATTGCAGAGAATCAG

A\_18\_P16098428

GGCCAAATTTCTGAACTTAAACCAAAGTGAAGTTACGATGTAAAATACCAAAGCCAGATG

A\_16\_P58424145 CAGTCTCCACCACTCCCTATTGTTATGTAGACAAGGAAGACAAGTGTCACT

A\_14\_P102397 GGGAACGTTTTCTGTGAAACTGAGAATTAGCACTTTTTGGTTAAAAGAATCTTCCTTCTC

A\_16\_P16191126 ATCTCTGTCCCTTCTGGAGTAAATGAAATAATTGTCAGTACTAGCCTCCCACTTAATGACT

A\_14\_P116126 AATATTTTTCCAAGGTTTATTTTAGGATCCCATGATCTAGTGCTGACTAGAGGAGTTGGA

A\_14\_P122079 TTTGGGATCATAGTCAAACCTGCGCTCTCATGAACATCTAAAAGAAGGTAAAAGGAACT

A\_14\_P101652 CTTTATCTGAAATTATTCAACCACATCCAACCTAGAGTTGACTCATAATGGAGTTCTGCC

A\_16\_P58424405 CATCCAGTCCATGAGAAAAATCTGTTGGCATGACCTTTGAAATGTGTCCAGAATAT

CUST\_9272\_P1426210822 TGAAAAAGGTAAGCCCTAATGAACCGCACTTGTGGATGCATTTAGAAGCAT

CUST\_9259\_P1426210822 AGAAAGAACGATTGCATCTTCTTGTGGATTTCTCTGCCTGGAATTGC

A\_16\_P17150120

TCGACTGCTATTTCTCAATCCTAAAAATCTCTCTACACATGTCATTCCTTATTTCCTTGCA

A\_14\_P124058 ATTCCATTCCCACCCTCTGTGATATAACATATTTATGGTATCTGATCTTGGTTTTGTGATC

A\_14\_P127305 TATCTCTAGAAGCCTCTAGAAGACATAAGTGGATGTCTCATCAGACATATAACATCTGATG

A\_16\_P15047635

AAAAAATGGAGTGTATAGCATAAAAGGACCTTTGTTGAGATTCTTAACTCCCAAGACCAG

A\_18\_P22839936 GTTAGTGACGATGTCCTTTGTGATATCTGCCAGCCTTTGCTGGAGTC

A\_18\_P14138229

AACTTAGCATGAGGTGAACAAACCACACAGGCTTCTGGCTACCCTCTTAAATATTATTAA

A\_14\_P127340 CTGTGTATTTGCTTACGTTCTGCCTATAAATCAATTCACCTCTTCTTAGGCTTGCCCTAAA

A\_14\_P135642 TTGTTATAACTTTTATCCTGCATCACCTTTGGGAGTTGCAAGTTATAATCGTAGAGTCCCT

A\_14\_P115781 CACAGATGAATGGAGTAATTAATACAATATCCCCCAATGTTTCATGGGATTTTAAAGAGGC

A\_14\_P121065 ACTGATTATCAAGAAAAGTGATGACATTGGTTCCTTCAAAGTTTTAGCATCTCTGAGT

A\_14\_P122488 CTTTTTCTACCTACTTTTTGTGTGAGAAAAATTAGCGTGTGTTGGAGGGTATTTCTGCTTA

A\_14\_P115946 AAATGATGAAGGAGTCTGGGAAATAAATGATAGAAGATAAAAATACAGCCGTGAACATGGT

A\_14\_P135781 ACATCTTCATTTAAAAATTACTATACCTGCAAATAAAGTGCTGCCCCAGGCTTTGATAAC

A\_16\_P17737641

AGGTTCCAATCCTGTTATACCTGAAACCAGAGAAAATATGCTGACTGTCATATATCACAG

A\_14\_P125989 AAAAGTGGGGTGGGAATCCTCTTTTTGGTTTATAATGTGATGCTTTTGTTTTTCATTGTTT

A\_18\_P22843575 CCTACCACCTCCTACCAGTAAATGTTCTTCCCTGAGAATTGCCTATTTATCTGAAAATT

A\_14\_P125876 CTTTAAACAGGAAAATAAACGTCATAAAGCAAGTGACCAAAAATAGCACATTTTGTGCCTT

A\_18\_P24996351

ACCCGCTACAACCTTATTTCTCTTAGATAGATTCCCTACTAATTCCCCTTTTGCACATTTT

A\_14\_P137867 CTAAACTTTGTTGTCTTCGAATAAATTCAGGTTCAAAGCCCCCTACATGCTAACCTTAAG

A\_14\_P109265 CAGTCTTCGGCCATGTGGTCTTCATAACCATTAGACATTTGTATTTTTCAAAAATCTGCC

A\_14\_P100772 TAAAGTATAAGAGAAACAAATCTTGTTATGGTTTTGTCTTCTATCTCGGCCACGTGT

A\_14\_P118023 ACGAATGTGCATCTTCAGTCCATCATTTTTACTGAATCCTTTTTTACAGTAAGGACATTG

A\_16\_P30952405 ATCTTCCCTCCGGGCTCCATCAACATCACAGCGCCTCAGTGTCAC

A\_14\_P133823 AAGCAGGTTTCTCCCTTCTAATGTAACCTCTTTAACTATGCAAATTCCTCCATATTACGT

A\_18\_P11863912

AAAAGGCTTTAAGTCTATACACAGATGCTGTCCAATATACCGTATGTCTTTCTAGGTTT

CUST\_8729\_PI426210822

GAGTAAAATAATGAGTATTTGAATAATGCAACTAGAGTTGCGATCATTTATATAGAGACC

A\_14\_P122203 GACATGGCTCATTGTAGCACAATCCTATTACTCTTCTCTAACATTTTTGAGGAAGTTTT

A\_18\_P12560184

AAATTTTCATTTCCAGTAGATTACACCAGTAGTTCAAGGACTTTTGAAGATCAGACACTG

A\_14\_P127813 CAGTGGACTTTCACTTAGATGGGTTAGACTGCAGATTATAGTTGCCAGTATAATGGTAAC

A\_14\_P139143 CAGTTGGAGAGATAATAACTGACATGGCAAAAAGGAATGGAAAGTAGGATTACCCAT

A\_16\_P00685321

AATATGCAAGGAATCTGCAATCCCAAGTCTGTTTCAAATCTTTTTCTTGAAACCCAAGATC

A\_18\_P22843232 ATGTCTAGGATGATTTGTTTGCCTCACACTCTCCTTTTACAGAGACCCG

CUST\_5270\_PI426210822 AAGAGGGACTTTTCTATAACAGCCTCTAGGATCATGCTACCCCTTC

A\_16\_P00685586

GTGACTTGTTATTTATCATTTTATGTGACCAATTATAGTTACAATCATGTTCCATGTGACA

A\_16\_P35666443

AGGCTAATCAATATTTTTTCATATATCCTGTAAAATCACCACATAATCCACCAATGACACT  
A\_14\_P138625 ACATGAGAAGATGTAGGAACCAGATGAGAAGTATCTTCCATTGTAATTACAAAGAAGTGG  
A\_14\_P122626 CTGTTGGTGGTTGCATGTTTATGAGGTTGATTGGATAGAGTTAGTGTGCGACTTTATTAAT  
A\_16\_P16546489  
AAAAAACACTCCCTTAGAACTAACCTAGAACTCCTTTCATCGTATATGATCCAGAA  
A\_14\_P138853 ATCTTGTCTCTGAGTTACAAATACTGTATCAACTTGGAGACTAGATTGCTCCATTGTGT  
A\_16\_P30952558  
AACTCCCTGCATCATCCCTCAAGAACAAGAAAATATCTTCCACACAATATTTGCTTTTTT  
A\_16\_P00685395 AAGAACATCTCCCTAAACATCTCTATCTCCAACCTCGGAGATGATGCCTATGAT  
A\_14\_P108228 TATAATGCTTGTGAAGAACTATTGTAGAGTCAGACACACCTGGATTACAATCTTCACTG  
A\_16\_P20955095  
GCAGCACTAGACAATGTAATTTCTTCAACTGTCTTCTTCAAATTCATTATCCTTCAGCA  
A\_14\_P119354 ATGACATTATTAGGAGCCACCAAAGTCACTTAGTATGGTAAAGTATGTAACCTTGGATGT  
A\_16\_P00689236  
AAAGGGTATATCGAAGACTGTCTAGGCTTATTCCGATAAAAACAAAATTTGGCACATCTGT  
A\_14\_P103137 CTAAACTTATGAGGAATAGAAATTGGGGTTTTAAGTGGAGGAGGAAATAAGAAGCACCTG  
A\_16\_P03052804  
AAAAAATGTTTCAGTGATATGTGGAACCAAACTAATGCAGCAACCTTTCTTACAATGCCT  
A\_14\_P106458 GCTTATTCAGTTCCTATTAGTCCCTATATAGAGGGACTGCTTATTCAGTCCCTATACAGA  
A\_16\_P02797234  
AGCAGAATTTCTATCGCTCAAGTTTTCTTTTCTAGTCGATTTCTCATGATTCAGAACT  
A\_14\_P131827 TACCATGTAATTAAGTGGGAATCAGTCTAGGTTTCCAGGGGAACCTTATTTTACAGTTAA  
A\_14\_P117260 CTCTGATCCACATCAAATAAGAGGCAGATAAATCTTCCATTCTGAAGGGAGCACTATTT  
A\_16\_P18543259  
AGGTCCAGTTATGCTATATTTTCACGGTTTGAAGTTTTCAATACTCCCCAACATACAACA  
A\_16\_P19937619  
AAGTTCCTCATTACCTTAAAACCTTGAGCCTAAATATCTCTCCCTAGTTTTAATGGCGTA  
A\_14\_P124953 CTGTATTTTCAAGACGTTACCTTCTACAAAACACTGCTTTTGGAAAGTATTTATGGCAAACC  
A\_14\_P118331 GCAATCACGGAAGTATGGATTCAAATTTGCTTTCTGTTCCATAGAAAGGAATTAGGAGTT  
A\_16\_P20389385  
AGCAAAAGCAAAGTATCCAACAACTCAAATGGTAACTCAATCCTGAAATGCTGTAACCT  
A\_14\_P120137 CTGTGGGACTCCCTATCTATAAACTGGCAAGAATTAGATTCAGATAAATCATGATGTCTG  
A\_18\_P10984425  
AAAAAGTTCTCTATAAGCCTGATGCTCACATTCAAATTACCAAGTCAGATGTCTCTACAA  
A\_18\_P14135175  
GCAGAGCCATGGAGTAAAAAAAACACCCAAGATAGCAGAACTTGTCATTTCTAGTTTTTC  
A\_14\_P106556 AATACCTTACAGATTCCTTAAAGTGCTTCCAAGACTCTCTTTTTAACTACACTTCTCTC  
CUST\_8740\_PI426210822

AGGATTCTGAGAGAAAGTTGTTAGATTCAGACCAAAAAGTATGAAATCTTACTAECTTAT  
A\_14\_P201471 GAGTATCTTTCCATGTTTAAGTCTCCTTCTGGCTGCTTCTCTGAATTCTCATTACG  
A\_16\_P36230180

GAGCCCTTGGCAAGTTATAATTTCTCAAATACTGTTGAAGATCATATTGGCACAATTTGG  
A\_16\_P15549187

GTCCCAAAGCATAGTTGATCTCTTCTCACCTAATCTATTATTAACAGCACCTAAGTTCT  
A\_14\_P119303 TTTTGTCTTCTTGCCACACACAAGTAGACACCCTGTCTTTTTCTGTTACTGATCCAATAA  
A\_14\_P125382 GCTGTGACTTTTTGGTTTAAGTGGAAAGGTTGAGGAGGAAAATGAAAATAATTCTTTTTGTTA  
A\_14\_P120161 AGCACATATCATTTTTATAGAAATGATAATGCTATTAACGATCCCTCCCCAAAACATAACC  
A\_18\_P15963743

AAGTATGGGATATACTGTTAAGCCTGGCTACATTAGAAGACATTTTTGTGCATTCAGACAC  
A\_14\_P101651 ACTTAAATGCATGATATCTGGGGCTATGCTGACTCTAAAACAGATCTCTTCAAAGATGAT  
A\_16\_P00685270

GCAGACATCTGGAAAGAATTTGTCAAGAATTATAATAAAGAATACCACGGAATGAAAGCA  
A\_14\_P104585

CTTTTGGAGACTGTTCGTGTAAGAGAACAAGCAATTACAAAAAATCTAAGCAGGAACTG  
A\_14\_P124997 CTTAGAGTCTGGGGCTTCATAAATTATTCAGATTGTTAAAATCTCTCTCTGTGACCTCAT  
A\_14\_P126430 TTTATTTTTTGTTCAGTGGTCTGATACTAAATCCACCTCCACAAGTGAGGATACGTAA  
A\_16\_P16325474

AAAGTCTTGGCTAACTAAACTAAGTCTGCATAGCAAGTATAGTTGTAGAAAGGTTGAGT  
A\_16\_P19693793

AAAGCAAGTTAAATTCCTCTCCTGGAAGAAATAATAGCAGTATTCCTATGGCAACTCCT  
A\_14\_P109501 CTAGGACATTGATCACTGCATCCAAAGGTCCAAAGTTTTATTGTTTTGAATACATTCTCC  
A\_14\_P112575 GTCTTCCCAAACCTCTTCTTACTCTGGTGAACCTGTTTTCTGCAATCAG  
CUST\_8143\_PI426210822 ACGTCTTTATCTCAACTCTTCAACTTAGCTCATTCTGGAGCAGTCACACGAT  
CUST\_9860\_PI426210822 GAAGAGAAAGTTGGTTGCCTACGGTTGCACCAGGACCAGATTAAA  
A\_18\_P14134619

TAGACTTTCTGAAAATCAGTCTCAAGAAACAAAACCCAGAGTCAAGTAAAAGGATGCTTT  
A\_16\_P18393370

ACTCCCTTACCTTTCTCAAAAATTTTGTACTTTTTCCCTAAGATACTGCACAACCTGGAA  
A\_16\_P15823968

ATTCACATAGAGATACCTGGTTCATTCATACTGAGAGTTGAGATGAAATCTGTCAGATGC  
A\_16\_P15688574

GGCACCATTCAAAAATTCATTAGCCATGTCTCTTAGATCCTAGAGTGTGCATAACATTAGC  
A\_14\_P102516 CTATCATCTGCCAACAAAAAGGGTGATTGGGAACTAATTCATGAAACACATTTTATGCTT  
A\_14\_P111572 CAGCATAACAGGGCTCTGCAAATATTCATCTACTGTCTTTGCTCAAGCCCTT  
A\_14\_P109233 CTTTTTTTTGGTTGCTTTTTCTAATAAAGATGGAACAGTTGTCTTTGCCTCTTTGCTCACCT  
CUST\_8388\_PI426210822

GGAATACGGAGAAAATGTTTCTATATTTCCCTTATTCCAGTAATATTGTTTCCTGAAGGAGA  
A\_14\_P107436 AAGTATAAAAATACTATTTACAAAGGGAAGGAGGTATCTGTTGCTTAACCGTAGACACCC  
A\_16\_P15010309

ACAGGTTACTGGAAAAACAAGCAAAATCCTTCTCTCACTCTCTATTAGACCTAAGATACA  
A\_14\_P200749 AAGAAACCCAAAAAACCCTAAAGTATAACATGAGGTATCTCCTTGAAGTTCACAT  
CUST\_5014\_PI426210822

TATTTACAGGAACATAAAAATTCAGCTATTTCTACTAACAGAAAGTGAGTTTATGGGATACC  
A\_16\_P58424569

TCTACAATTTGCCTAATTTAGTTGAAATGCAGAACTTCTTGAATCCATGTTGGTGCTGAA  
A\_14\_P127089 ACCCTCATGTTTATAATATAGGGGGCAAAGCAAAATCCATTGACAAGCATTTCCTTTAAA  
A\_14\_P111842 GGAAGAGTTATATCAACTCACCTGCAGTGTTTTATTTTGCATACATGTGCATGCAGAGAT  
A\_14\_P116674 GCATCCTTTGGCGAAATGGCAGTCCTCTGGTCTATTCTATAAAAATACAAAGAAAAATTAT  
A\_16\_P19544919

ACCTGTTACCAAACCATTTGAAGTTCTTTGTTCTCATAACTGTCAATATTTGAAGGCTCC  
A\_14\_P139123 CTCAGATCTCTCCACATTCAAAGAGATCTTTTTCAAGTGACTCGACTTCAAGCATAG  
A\_16\_P03700202

GGAAACAGATACTAGAGTTCAAAGTCAAGTAGGAAAGAGATAGTAGAATTTGCCTGTGCT  
A\_16\_P17756282

TGCCCAAAGTGTCATCATATGCTCTTTTCATATAATGTCTTTCTGATAAGTCCACTTCCTT  
A\_14\_P108067 AGGAAACAAAGAATGCACACTTTAATCTACTTTAAGGGAGTCACACTCATTGACATCTT  
A\_16\_P16271146

AAAGAACCCACTTATCTAACGTTGAGAAGATATCTACAAATAAGGGCAAACAAGATTGTT  
A\_14\_P133516 TTGAGTCATTTTGGGATATATGCATGGGTGATGTGCTTCTCTGTCTTTATTACCTACTTT  
A\_14\_P104769 ACAGGAAACTAGGGAATCAAATTCCTCAGAGATAAGAAGTTGTTCTTCCAAGTTTCCTT  
CUST\_4278\_PI426210822

TATCTGGTCTTAGTGGGTTCTGTACAATCCCATTAAGTTGAAGGAATAAACCTGTAGTT  
A\_14\_P201645 CCTTTGCCTTTTCTAAACCATCAAGTCCTAACAAATCAATGTAAAACCACATTTGAAAG  
CUST\_2764\_PI426210822 TAAATGCTGGGTTGAAGGCCTAGGATTTATCCTGTTGGTCTAGTTCTTGTTT  
A\_16\_P41576865

TCCTCGGTAGTAGCAAAATTCAAAAATTCATGTAGACCAAAAAAATTATGCCATTCCT  
CUST\_7692\_PI426210822 TGAGCAAGTGGCAGGAGACAAGGTATAGTGTGAATCTAGTACATGGAAGA  
A\_14\_P110487 CTGTTCTTGACTGTTGTGTGATGTTGCTACATTCCCTTTTGTGTTTTATTCACTAACTT  
A\_14\_P122602 CAAAGGCTGAGGAATTAAGGGTCGATTTTTATAATATTGAAACAAACCTGGTTCTGTTTC  
CUST\_3684\_PI426210822 TGGGTAGACTAATACCTGTCAGATCATATAACCCGACAGTCAGCTGGAAA  
A\_18\_P12267662

AGGATGTGAAGAATATGCTCAATCCCTATATGTAAAAGCAAAGGTGTATTTACAGTCTGGA  
A\_14\_P139012

CCTTTGCTTTTCACATTTAATCCAAGGAAAAAGAAAGAAAACCAATCAGTGAGAAAACCTCA



A\_14\_P100013 GCTCTGACTTTTCTACTTCAGCCCTGGTAACTCCATCTCAATATAGTAATTGTCCTC  
CUST\_8069\_PI426210822 CAGCTTCTCCCCTCAGTAGCATGTGCCCGCCCCTCTCCAGGATAG  
A\_14\_P116232 GATATGATCTTCCAAACGTCCTGGTCAGACATGGCTCCTAGAATAGCAAACATTAC  
A\_14\_P135997 TCAGAACCAAAATTAAGGCATGTAGTCTGAAAAATGCAAGTATACTTTCCAGAACAAACC  
A\_14\_P106788 ATGATGACAATCATTAACTACTACTAAAAAGAAGCAAGTCACCTGTAGCAACACAATC  
CUST\_6288\_PI426210822  
CTTTAAGAAAGTTTTCTGTGATAATGAGATTTGAACTGGAAGAAATGCTGTTCTTTTCAGT  
A\_14\_P117577 CTAATTATAAAGGATTCCATAGAAAATGTCAGCAGATATTGGCAAGTGACTTTTGAAGTC  
A\_16\_P30952568 GTAACACGGGTGGTCTCACTCGGAAGACACCAGTTTTCTATTTGATAT  
CUST\_5626\_PI426210822  
TAGTTGGTCTCAGCTGCTGAAACAGAGGGTATGGAATAATGAAACAATCATG  
A\_14\_P109423 TTTTGTAGCATGTTTGACTTTCCAAAACGTTTCCAGCATCTTTCAGATTTCCCCAA  
A\_14\_P113172 TAATCTAGGTCCCATTGTGCTTTGAGGGAGGACTTTAAGAATGACTGAGAATAATTTAAA  
A\_14\_P130391 AGTTTGCAAAGCACTCTCATTCAACAGTCATATGGCAAATATAAGTTGAGGCTCTA  
A\_18\_P14137440 TTGAAAATCAGGGCAGCAAGGCCATATGGAGCAGGTGAATATCTG  
CUST\_10258\_PI426210822 TGATCCAGAGCTGCATGTTCAACTCCATCAAGCCTTGCCTACTTT  
A\_16\_P31306814 GCTGCCATTCTGATTATCATCCACTCTCCTTTTATGATCTTCTTTATCCTAATGCCCTAAT  
A\_14\_P200051 CAAACCCACTAATGTGCTCAATGCATCCATCCCCAAAACATCTACAGAACTT  
A\_14\_P129561 AAGTAGTTTCTCACTTTTTGAAACAATAACTCTGCACCAAATATTGCATCGCATGCTGCT  
A\_14\_P116699 GTGAATGATAGAGACATTGTTCTGCTGTATAACCTGTTTTGGTATCTTCATAGTGCATCC  
A\_16\_P16993607  
AAATGTTTTCTCCTCCTAGTCATCTAGATGCACACATAAAAAACAATACTTCTTTCCAC  
CUST\_5326\_PI426210822  
GGATTTAAATGCAAAACCTTAAGATAGTCAGCCTTAGGGAAACACTGAAGAATTTATTTT  
A\_14\_P103315 GTAGGCATTTGATTTTGCAACCCATGCTCTGATGATACTAGTCACATATTGTCTCATTTT  
CUST\_4319\_PI426210822 CATGGAATGTCAGCTTGGGAATCCCTCCCTCTTTCCCCATAACTT  
A\_14\_P117555 GCCCTAGATTTACCTCACTCTTTTAAAGAACTCTATGGAGTTGTAGTCACTAGAAAATGCA  
CUST\_5882\_PI426210822 CTAGGTGAACCAGCTGGAGGAATCTGGGGATCCACTTGTGGGGAG  
A\_16\_P20078471  
GATAAGATCAAGTGCTAATCACCTCAACTCAATTATGAATCTTACTGCATCAAGTCTGGG  
CUST\_9214\_PI426210822  
CTCAAGAACAAGAAAATATCTTCCACACAATATTTGCTTTTTTTCACAAAGTCTGGAAGAA  
A\_14\_P123196  
AGAAAATGTTATCAGAACAAAATGGAACAGGATTACTGGAAGAGCAACGTGTTTAGGAA  
A\_14\_P119132 ACCCATGAACTCCAGTTTGCGAATTATAGAGACAATCTATTTTGTACTTGCCTTGT  
A\_14\_P105973 CCCAACAAATGATCTATTCCAGATTCAAGGAATGCAGGGCCCTATATATTTCTAGTAATT  
A\_14\_P127989 GGTTTTCGAACACTACATCTTTTTTATGTTCTTCCCTTGTTCAAAGCACTTATTGGCTGT  
A\_14\_P111843 TCACTCTTTTCCCAATCATGGGAAATATCCAGCCAATTCTGGTTTTAAAGATTTCATATCA

A\_16\_P19356433

TCTGCATCCCTAATTTGTAATTTGTGTCTTCAATCCAGCAGCAAATGGTATTTTGAATGA

A\_16\_P18423441

ACCCACAATTCTCATTATTTCTCTGATTCATGGTTAATCTTTGTTATAGCCTTCCAGT

A\_14\_P109747 CAAAACCTTTCTGGCACCTTATGCTCCCATTTTTTTTACATGGAGGCATAAACAATCTTAT

A\_14\_P131393 ATAAATCTGAAAGATGCACTGAGGGAAAAATAACAGTTCCTGGTGACTGATTCAATATGG

A\_14\_P109894 GCAAAAATCTGTGAAGCAGCATTCCGGTTTTGGTAACATTGTTGGAECTATGACAGAA

A\_14\_P106986 GAAACAAGTTTATGCAATCGATCAAATATTTTCATCCCTGAGGTTAACAATTACCATCAA

CUST\_2017\_P1426210822

TGCAGAAGATAACAAATGGGTGAATGTATCTAGCATGGAAACAATCTCCCTCTTC

A\_14\_P107326 GGAATGATCAATAGAGATCCACTTATCAAATGAGACTATATCCACTTGCACTGCCACTG

A\_14\_P133095 CCTATGAAAGGGTTAGTAGTTTACCGCTTGAAGTCACTGAATCACAGGTTATTGTTTTTC

CUST\_2013\_P1426210822

TGCTACTTGTGATTTACAAAAGAGAGTTTCAAAGAGCAAGTAGGGTATGAGTGGAATTA

A\_16\_P36230678

TTAGATAACAAACCTGTGGTTCAGTTATATGGGATTTATCCAGACCTTTGGATGTTCACT

A\_14\_P129054 CAAATGAGACAGAGCGCTTTCTGGATCTCTTGGTTTTCTGAAAGCATATATGACAG

A\_14\_P138362 CCTTACCTTTGTATTTATGGTTACAGGATGACACTTCTGTGGTGTGTAGTGAGTCTCTA

A\_16\_P02361680

AGATACTCAATTAATGGACTTTTAGTGCTACAGACAATCCTAATGGCTTTGCAACTTCCA

A\_14\_P133793 AGATATCACAAAGGAGTTGGTAATAAGATTTAATTTCCAGTAGCCTGCATGAATTGTTCC

A\_14\_P110503 CTACCATTCTAAAAGCCATTTATACATGATTCCTTCGATATACCAGAACCGCTTACTGT

A\_14\_P137179 GTTAAGAAATGACTCATTTCTCATTCTTCCATTCATATTTCTGTCATTTTGGCCCCAA

A\_16\_P30046570

TTTGCAAACCTTGAGACTAAAGACTAAACTACCATTCAATTAATCCCTCACTTCCTCAAC

A\_16\_P40927351

GCCTATCTTGACTAACAATGAACCTTGGATTTGAAACATATCATCAGAAACCTCAGAAGA

A\_16\_P16190311

ACTGAATCTGAACCGACATGAAATATTGTTTCCATCAACATTTACATACCACGTCTGAAG

A\_14\_P132157 ACAGAAGAGTGCTTTTCTCTAACACATCACCACCTTTAAATGAAGAAATTTTGTTCAG

A\_16\_P19975262

AAAATCTGACAAAGGAACTACAATGGTTGGAATCATATGTGAAAAATGCTGTAGCAGTGG

A\_14\_P109564 CTATTTCTATGAGAAAAGAGGCGTCTGTATATTTTGGGAATCTTTTCCGTTTCAAGCATT

A\_18\_P14170710

GGGCTAGAGTCAGTGTAATTAGTTGCTTATAACTACCCAAAGATACATCACTGGTAAGTG

A\_14\_P107983 ATCCCTGGAGAGTATTGAGTGGAAAGAGGCAGTATCTCCCTTATTTTCTAAATGTAT

A\_14\_P124118 CTGAGTCTCAGATGTGACTTATAGGGTATTTCTTATGGCAAGACGGTTAAAACAAACTTC

A\_16\_P18909886

AGTGTCTCTGTAACACTGAGTCTATTGTCCATGTAACATTCAGTCTACTGAACTGCTTTA  
A\_16\_P15314783  
AAAAAACCTGACTAAGAAGACATCAAGCACAACTTTACCTAATTCTAGACACCGCTCTA  
A\_14\_P105348 GTGAACTGCCCCAGATCTAACTGAAAACACTTGCCCTTCTCAAG  
A\_14\_P133964 CATATATAAGGATCATGACATCTGGACACCTCAAAATTTACCGTGCATAAGACTTGAGTG  
CUST\_2093\_PI426210822 GTAAAAGAAAAGGCTTGTTTCATGTCCATCAACCCAGGGGCCTTTTATTAGA  
A\_14\_P106381 TAGTGATGTAGATATTGTCATAATGGTCCCAGTTCAGGTAACAATACCGGTAAAATAGGG  
A\_14\_P115697 TGCAACAATTCTCCCAATTTGGTTTGAAAAGAGACAACAGTTGACTTTTGTTCAAAAGTC  
A\_14\_P122747 CTTACTATTCCCTGATCAAATCAAGAAGCCCCCTTAATTAATGCTACAATCTCCCCT  
CUST\_1006\_PI426210822 GATAAAGTCACCAGGCCTGCCCCAGGGGGTGGGTTTTGATGGCCT  
A\_16\_P03494119  
AATAAGTTTTGAGCATAATCTAGCCCGTAGTTGATATCAAGCAGAAGATGTGATCTGTGG  
A\_14\_P108853 CTACACAGACAGGGAAAGGGACAAGAATGCATAATTTCTGGAAAATTTTTGTCCCTTAA  
CUST\_6181\_PI426210822  
ATAACAATATATTATTGCACACATGCAGAAGGGCATTGGCTTTACAGCAAACCTATGAA  
A\_16\_P16191203 CTTTGATGCTCCATCATGCTCTACCATGTTGATGGGGAAATGAGTGAG  
A\_16\_P36735867  
TGCAAATCTAAAGCGTTCTTAAAAATGAAAGATCGATAACAGTTTAATCCTCCACAAGGC  
A\_14\_P126537 AGTTCAGTATTGGATTAATAATCTTTTAAGGATGGCTAATTCTATTCAGCAGGAATCTAAC  
A\_16\_P17396847  
AGTCATTGCTACATGGTTAGAACATCACTACTTGCTTTTTTTGGTTTAGAATACTGCTCT  
A\_16\_P20134784  
AAGCAATCTCAAAAAGATGTTAGGGTCCAGTAGAAAACCTAGTCTTCAAGTATTAGCAGG  
CUST\_9193\_PI426210822  
CATTTTCCTCATTTCAGACAAGAATTGCTTGTAAGGATGTTCTTAAGTGTGCTTTCAAAAC  
A\_18\_P14023255  
AAACCTTGCAAAAATGGATCGATAGAGACTGCTTATTGAAAGAACCTTGAACAAGCACAT  
A\_18\_P22841611  
TAAAGGCTGATGTTGGCGGCATTATTCTTAGGAGACATAGAAATGTTGTGGTTTTGAG  
A\_14\_P108913 AGAGGGAGAAAACACATGAGAGAGGATCTGCTTCATATAGAAGAAGGTAATGTAAGAATT  
A\_14\_P114125 GAGGTGTCACTGCAGATGGAAGGATTCCTTCTTGAGGAAGTCTACTACT  
A\_14\_P109391 ACATTCATAGGCTATCTGTGTTCTAGAGGAAACCATGAACTGGCTGATAAAAGAGGAT  
CUST\_4199\_PI426210822 GAAGGAAACTCTGACAGCCAGACTTCTCAGTCGGAAAGTGTCTTTG  
A\_14\_P201787 AACCTCAGCACTACAATAGTTGCTAGTATTGCAGAAAGTGTACATCTAATCCTCAAGTC  
A\_18\_P19476092  
TAAGGCACTCAACAATCAGACTATTCCCCTTAAGTCATTGAAACACACATTTCTTAAGTG  
A\_14\_P139289 TGGCTACTGGGACGCATTTTTGCTCTTCTTTTAGGCAATTTATACGTATTTATTCTTGCA  
A\_16\_P17827582

ATGGCACATGTCGTTTTAACCTTATTTAAATGTCATCAACCTCCCAAGTAAAGTTTTGCA  
A\_14\_P125583 ACTGCCAAAATAATCTAAATTATTGATTAAGAAGCCGATTTTGTCAAAGGGCCTGAGGA  
A\_14\_P136991 ACACCAATAAATTAAGTCCTACCAACCCACAAGAAAATTGGTCAGTCTTTTTTTTTCCAT  
A\_14\_P109416 AGTGAGAATAAAATAATTAGAACCTTACCACATCCATACTGGCTTTTTCAAATCTCTCCT  
A\_14\_P117365 CCATGGTATACAATGGTATGAATATGGAGGCCATTTCATGTTTTACTGAATTTTATGGAGA  
A\_14\_P108269 TGATAAAGGTCAGAATGGATAACATTGTGAACTGAGAAAGTGTATTTCAACTTAGAGTTC  
CUST\_2263\_PI426210822 ATGTACCTAATGCCTAGGTCTGTTTGGACAGCAGTGTTCCTCACAG  
CUST\_5747\_PI426210822 GGCCTCACCAAGCAGTCAGCCCTGCTCAGTTATCACAGGGGTTGA  
A\_16\_P01780782  
CGACCACACCTCAAATATAGTAAGGCATCACATAATATTACAGCACTTCGTCTATCTGTG  
A\_14\_P124405 GGGTTTCTAATGAAGTTGTGAACTAATTTCCCTAGCACTTGACAATTTGGATACTCAAG  
A\_16\_P00685227 TTGATGATAAAATGGTGTCCGTTGGTGAGCATCTTGGTGGTGAGGAAGTTTATA  
A\_14\_P113597 ACACTTTGTGAACTGATAGGTCCAGAACAGACTTAGACACATTCCAGAATATGAACTTTA  
CUST\_2676\_PI426210822 AGGACTGTGAGACACAGTCTCCCCTGCCCCAGGAGTGTGGCTGG  
A\_16\_P17086467  
ACTTCTCGTTTACACTGCATCTTATATCATCCTGTTTTTCAGAAAATTTCAACCCTTTCCA  
A\_16\_P16999725  
AAAAGAACTCACTTATTTCCCTTGACACCAACATACACTATGACTTCCAAATTATGCCACC  
A\_14\_P118659 TTTTAGCCACACCATATCCTGGTGGATTTAAATGTTTCACCTGTGAAAAGGCAG  
A\_14\_P129987 ATGATACAGACAGCATGTATGGTGAATGTCCGACCTACATCATTACTATCTTATGG  
A\_16\_P58424400 CCCTCCTTCAACTCCAGACTCATGCATCCACCTGCCTCAAAATCT  
A\_14\_P114491 GACTGGTCATGTAGTCTGTATTTTAAAGTCATAATATCCATCCCAATTGGGATCTCCAAAT  
CUST\_9550\_PI426210822  
CCCTTCCAATGATCCTGTCCTCTGCTTCTACTTGATATTTTTTCTCTCTTTCAACTA  
A\_14\_P121227 CTGCCCAGAAATCTTGATAAATGTATGTTGACATCCTAGAAAAGAGTGGCCATTCAATTA  
A\_14\_P107763 TTAAGAGTCTTCATACATACTTAATTCAGTAACAGTCTGAGAAACGCAAGCCAGCAG  
A\_14\_P139380 GAGTCTAAAAAGATCTACTTTTCGAAGCCCAAGGGAGTGTTAACTATCCGCAG  
CUST\_933\_PI426210822 ACACACCATTCTTAGCAGCCAGGCCAGTTGTGGCCGTGCACTGT  
A\_14\_P113089 TGGGTTCTTTATTAAGCAATGAATTCTGGATGTCCTGGCTTAACTAGATTAAGAGGGAA  
A\_14\_P123520 AACTTTGACCAGGAGCCTATACTGGACTCTTTCAACTTCTCTCAAGAATACCTTTTC  
A\_14\_P113814 TAAAGATAGACTTCCAGTAGGTCCAGGTAAAGAACACAAAGATGGCATGGTAGAGTATG  
A\_14\_P139124 TCCTTCTTAGTCATTCATTAATAATCTCCAGACTTAGATATTCAAGCAATCCCTTCACCCA  
A\_18\_P16128121  
AGGGTTGTTACAGAATTATGTCAAGTGAAAAAATGTATAATAAAATCGGCTAATTTCTT  
A\_14\_P124641 TAGTGAAGTTGTCAGTCAAGTTTGTGAATGACTTAAATTATAGATCCAGCCTGAGTTCT  
A\_14\_P139597 CCATAAAATCATTTGATGAACTCTGACAATCCTGTGGATATGACACTATGCTATGGGAAT  
A\_14\_P139556 AAATTATATTCGGCTTCAATTATGTTAATTGATCTACATTCGCTAGTGCAGCACCTGGCA  
A\_16\_P18579842

ATTCAATAGTGCTGTAGACAAAAAGTTTTCCACATTGATCCTATTTGTTACCCATCTCC  
A\_14\_P126860 TTAATGCCAGTTCTTTTTTAGGTATCATCTTTATCAGAAAGTGAGGAGTCCCAGGACTC  
A\_16\_P19591862

ATTATCTCTCCACCTTTATATGTAACCCCTTTTAGATGTCTGTAAAGAAAGTGATCCCACCC  
A\_18\_P22839413

TTCCAATCAACAAATATTTATTTATTGAACACTTACTACATGCTGACTACTTCCTACTCA  
A\_14\_P133956 TGTGATATATGGTTGTTGCTATAAACCGTTGGTTCCAGTGGCTTTTACTCATGATATCTT  
A\_14\_P128952 TCACTTACAAGGAAGGGTTCATTATGCGTCTTCCTCCTGAGCAGGTTAAAT  
A\_16\_P30952425 GTCACTATGTGGCCCATGTGAAGGTCAGTCCTCTCCTCTTTTAT  
A\_14\_P124678 AAAAAATGTGCCCGTCCCTTAATCTTTTCTGTCTTTCTTAATCTAATCCAGTAATATGCAT  
A\_16\_P03663880

AAAAAAGATGAGAATATGACAAAGGAGCAACCTTTAAAATGCTGGTATTGGGAAAGAGT  
A\_16\_P15607083

AAAATCCACATTTAGGAACCATAACACTGTAATAGTGCTTAAACCTTCATGATGAAGCCC  
A\_14\_P114006 CTGACAGGATGGAACCTTTAAGTAAGAGAATCACCTTAAGAATCACCCCTAGTGATTC  
A\_14\_P136549 GTATTAGTGTGTTGACTATTATCTTGCCTCTGACCCTGGAAAGAAGACTGATTGTATTACC  
A\_14\_P130787 CTTAGAAAAGCATCACACAAAATGCAGTATCAGGTCCTCTATTGAAAGATGACCATCACAT  
CUST\_637\_PI426210822 CATGAACCGATGCACCCACACTGCTTATTAAGAGAGGCAAACCTC  
A\_14\_P100521 CATTTTTTATATCATTCTACCAGAAGATGGATTTTCAGGAGGTAGAAGTGAGACTGACCTA  
A\_16\_P16968977

AAACACTGTGCAATTTACAATAAGATCTCCATGGACACAATTACTTTAGTTTTCCGCAGG  
A\_18\_P22839942 AGCCCTGGTGCAAGATTCTGCAGGGAACAAACAAGTTCCTTTTGT  
A\_14\_P138116 AACCAGATAGAATATCATGCCCCAGAACATCATTACCTTGGTAGAACATTACCACTTTA  
CUST\_5825\_PI426210822 TTTGTCTGATTGAAGCAGCCAAGCTTGTGTTTGCCAGAGGACTTAG  
A\_14\_P128440 TTCAGTTACCATAAAAACATTGGGGGAAAAATGGTTTTGAAATGCCTCATTTTTTCAAAGG  
A\_14\_P106585 TGTCTTCCTCCTGATAAATAAGACAACACTGGTATCAAGAGGCTATAACACTTTTTCTTT  
A\_14\_P136323 GCAAAATTGAATTTAGAAACCATAGTAAGTTGGGAAGTTATCCACAATGGGGATTACTGG  
A\_14\_P102239 CCAACCCCTATCAAATATCCCTGCTCTGTGTCCATAATGTGAGCAGTATTTATATTTTTT  
A\_14\_P103220 AGTTACCTGCAGAAAATTTGCCCTCTGCTCCACAAATCACAATGGCTTTTTATTGTA  
A\_16\_P00029046

AAATCTTGCTGTTGTCTTGTAATTTTCAACTTTTGACCCTTTAAAACCTGAGAAGGTGTGG  
A\_14\_P201118 AAATGGACCTTTCTGAAGAGAGGGAAAAGAACAAAATTATGATTAGTGGAAGTTCTGTC  
A\_16\_P17457639

AAAAAGATGAATCAACCCCTTATCCGTTTATCATTCAACATTCATTGACTTCCCACC  
A\_14\_P120063

CTTGCAAAAACGAGCATTAATGTCAGCAAAAGAATGGAGACCTGAAAGAAATTGATGAAA  
A\_18\_P11413315

AAAAGATGCAGATAAGGTGATTAAGTCAACCAGTGGTGTATATTGTTCCAAGTGTGTCA

A\_14\_P117605 TTACTTCTTACCTGAGACATAGGCATACAAATCCAATTAAGCATGCAAGTTCCTTCAAGT  
CUST\_5812\_PI426210822 AAATCGAGTCCATGAGGCTGAGGAGGCCACTGGATGTCCAGTCTT  
A\_14\_P122088 TTTCTTACCTGTGGGCTATTTTGTTCATGAATTGATGTTTATTAACGTGGCCCAATAT  
A\_14\_P132186 CTCTTGAAAGAATGACAGGAGCACTATATACAATAAACAAAAAGATTTGTATTAGAACA  
CUST\_5938\_PI426210822 CCAGTCTTGGTTAGAGAAAAGGCACTGTGTCCCTGTAACTGCTG  
CUST\_5593\_PI426210822 GACCTGCATCTGTCTCATCAGAAAGGGAGGCATATTTGATAGCAGGA  
A\_14\_P100724 CTAAAAAGGACAACCTGATTTGAACTCGTTGAGGTTGAGAACCAGAGGAGAGAAAA  
A\_16\_P58424299

TCCAAACTTAATGATGTAAAACAACAGCAATTTTATCATGCTCACAGACATTGTGGGCAA

A\_18\_P13181970

AGTTTCCCAGTCATTGTATTTTCAAACCTTCTCTTCACTCTACATTTTAGCCACATTGA

A\_14\_P118339 CAAGAGGTGGCTTTTTCTTCCCTTCGTTTTTAAAATTGTAGGTTGCTATCACTGGATTTA  
A\_18\_P22840725 GGAGAAGTCTTGCTGGGATCCTCTCTGGTTTTAAGGCATTTTTTTTCTCACT  
A\_14\_P139242 GTAATATGCGATTTCAAGCATTGTCTGAATTCTCCACTTCACTATGGAATCTACATTGCA  
CUST\_2135\_PI426210822

TTACCCAGAGGAGATGAAAATATGTGATATCTGTCTTGAATAAGCTCAATGGCCCATTA

A\_14\_P121069 TTTTAACTCTCAAGAATTGATATCTTACCATTCTTTCTTTTGTGTTGTGCCAACACCAA  
CUST\_3652\_PI426210822 CTCTTCTGCTTACAGCTGTTGTGCTGGTGGGTCTCCTCCTATTCT  
A\_14\_P139961 ACTCTATGTCATTGTATAACAGACCATGGTTTAAATCTGATTTTCTTTTATCCTCCACTGC  
A\_14\_P117847 TAGATACTGTCTACTCTGGTCACATGCCAATCAGGCTTTAAGTAAAGATATGAGTGACTG  
A\_14\_P115384 GAGGCATTTACAAACAACAACAACAATAAGTTGTTATTTTTCCATCTGGGTAGAAGTC  
A\_16\_P30952404 GTGGATGTCTCCATCTTCTCCCGGGCTCCATCAACATCACAGCG  
A\_18\_P22842671 CTTTCTAGAATGGTTGAAAACCTCTGGCAGCAGATCATCCATCAGGCTT  
A\_14\_P138491 AAACAACATGTAAAGTATTCTTACCTTCTCATTCTCCTTTTTTCTTAGGCAGCCTGCTGTA  
A\_16\_P16124310

TGATATTTACAAGGCTCTGCTTTAGATCATCATAAATGTCAGATAACATACAGTGCCCCG

A\_16\_P16518036

TGCCTAGTATCATTGAATTTCTTTAGCACATCCATAGACATACAACAGAACAGATAGGA

A\_14\_P109861 AAGAAAACATGGAGAACATTTTATAAATACTTTCCCATCAAGACACGGCATTCTGTGACA  
CUST\_5006\_PI426210822

ATATGCTTTTTAAAGACTGTGGTCACATTTACCTTGGTTAGGGAAGATAGTGACTTATAAA

CUST\_546\_PI426210822 CTGCCTGTTTCTTCTCTGTGCTCTTGGAAAGCCAAGGAGCAGATG  
A\_14\_P124360 CTGGCTCACATATTATGTTTCTAAATTTATCAGTTCCCGCCAATGAGACAAATACATCT  
A\_14\_P125913 TCTGGAGTTAATTTACTATTGGAAGTGAAAGTAACATATTGCTAATTAGTCCCCAGTGTC  
A\_14\_P104456 TTATAGGCATTCTTGGAAAGTGCTTTGTTTTGAATATTTATGACCTTAGAAAACAGTCAGT  
A\_14\_P125498 CCCAGCATATGGAAGTATTACATAACTCAACAATGCTTTATAAAGGGAAGTTTCTTGGCT  
A\_16\_P01188592

ATACAAAGCGTGGGTAATAAAAATAGTTCTGTTGGTTTTTCATTTTCGAGTCTGGTTTTACG

A\_16\_P36648219

ACTTTCCTCATCTGCTCATTTCCTTAATAATCCCACTGAATCCATAGACAATGATTGGC

A\_16\_P18723930

TCAAGGATAGTAGGAAAGACACAGCATCCAAGTGTAAATGAAATCACATTTATCAGACTGT

A\_14\_P134632 GCCCTTAACCTTATCAGGATGGTGGACTACAAAATACAATCCTGTTTATAATCTGAAGAT

CUST\_8508\_PI426210822 CATGCGTCTGAATGCATTTTGCTGAGTGCATTTTGCACAGGGAAAGT

A\_14\_P125534 CCTGGGATTCCTACCCATGGATTTATTTTGTTCCTTTAATTTTCATGTTTCACAGC

CUST\_8266\_PI426210822 AACCTCTGATCTCTCCAGGAACCTAAAACAGCTCTTGCCATTTGGTAAT

A\_16\_P21365108

GCTCTGATCAAATAGCAGTTTTTTACACAGAGAGTTAAACGAGAATATAACAACCATGTGC

A\_14\_P111201 TAAGTTGATCAGGGAGATAGGATCAGAAATAAATACGTAAGGCTGGATTTTGAAAAGAGA

CUST\_4638\_PI426210822 GACTCTGAGTTGAGAAACCTGTTCTCCCTATCCAGAGCATACAATTCAGAAAA

A\_14\_P118954 GTCTCCTGACGCTTTTAGGATCTGGTGGTTTTAAGGGGTTTTGAGAAC

A\_18\_P26791116 CTACTCACTTCCTCCTCAAACTTTCTCCAGGAGAGAAATGATGTCTCCC

CUST\_7260\_PI426210822 CCTAGGTTAATCCCATTTCCTGACTCTTCAGCACTCACTGTGCTAGTATC

A\_18\_P10011223

GGGGAACCAGAAAATATGGCTTTTATTTTCAAACTGGAATCAATTATAATTGGGGGGTT

A\_16\_P58424075

ATGTCAGTCATTTTCAATTATTCGTGATTGCAAACAGCAGCAGGGGTAAACAACCTTTAA

A\_14\_P131262 AATCATTGCATATTTTATTTTGTTCAGTTTGGGTTACAGTGACTTGTGGTCTCACGTGA

A\_16\_P18665862

AAACATGGGCATAAAAATGAACTCTAGCAGGAAATCAACCTATCTCCATAGAACCTAAGT

A\_16\_P00685410 ATTCTGTTTTGTTTTTAGCCCATTTCTGGATTTCTGCACTCATGCATGCCTCATG

A\_16\_P16191804 TTTGAACCCAAAGCATTAGTTAGGAATGAAGAGTGGTTTTGTCTCTTACCTGTCTT

A\_16\_P01767123

TTTTGGATCGCAGCATATACCTTGTCTAGAATTGTATAAAAACCTACAGGAAAAGGCTGA

A\_14\_P138858 TTTTTGACACTGCCTAGTTTTTCGCTTCAGCAAAGTTGGAATCAAAAAGTAAGCACAC

A\_14\_P127654 GAATCTTGTGATTTCAAAGCCTTGTCACATGTTTCAGAATTTGTCACCTTCTGGTGTAAAA

A\_14\_P201165 CTAAAACAAGGTAGCCTAAAAGTATTATACCATAACAACCTTCTCAGGCAACATTTTCATG

A\_14\_P109798 CTCAGAGAGGTTAATTAAGTCACCTATTTTAACTTAGGACATTTAAGATGGAGAGGATCT

A\_14\_P120132 GAATGGAATATGGTGAGGATGTGGTATTTCAGTCGTGATTTAGAATTCTACCTCTAGTTCC

A\_14\_P202473 CTCATAACAAATAGCAAAGAAATTTAGGAAAGGAATCATAATTCCTAAAACCTCACC GCC

A\_16\_P30952369 TAAAGCAGTCACAGTTCTTATTTGTGACTGTGGTCTTTTCTGTGACTCCATTTT

A\_18\_P22843213 ATGTCACCCCATGTAGGAAGACAGATGAGGAGCCAGGGCAGAGAC

A\_16\_P00394881

ATTGCCGGGGCTATATAATAGAGATAATGACCACAACTCAAGATAAATTTCTTATGCGCC

A\_14\_P132349 ACATCCAAGATCAGTGGTGTACCATCATTAGAATAAAAAATAAGTCTGTCTGGACATAA

A\_18\_P10009438

CCAGCCATGGTCATTTAGAAATAAGTAGGTGTCCACTATATGAAATCGAAATAGGGATCA  
A\_14\_P118075 ACCAGAAGAAAGTATAATTAATAAAAAAAGTTAAAGCACTGGCCTCCAGACTATACTCCCAC  
A\_16\_P15023836  
TAGTGTCAAGTTTGGAAAATACCAAAAACATACAAGCATACTCGTCTATCATCTTACCGC  
A\_14\_P122725 TTTCTCATAGCAGGGCACACAGAAATTCTGATTGTCTTTGGGGATGAAACTC  
CUST\_6703\_PI426210822 TTCTGGGGAATGTGAGCGAGGTGCTAGCCACATCTGCTATAGTAA  
A\_14\_P117594 ACAGGATTTCAAATACTGTATATAGAAACCAGACAGTAAATGTATTATGGTCCTTTTAC  
A\_16\_P01847015  
CCCATTACTCTCACTAAGCAAGATTATTCACACTGATACATATCTTATCATTGCAGGCCA  
CUST\_2961\_PI426210822 GCAGCTGATCGGCTGCTTCCCAGACATGTCCTCTGCTTCCCTTTC  
CUST\_1983\_PI426210822  
AAAGTTTCCATTATACTGCCCTGTTGTCTAAAATTAAGCCAATTAGAGAGTCCTGCTATT  
A\_14\_P100228 AGGCAAAGAAGTTGAAGGTTAAATCCCTGCCTAAGAGATACTCTTTTTCTTTTACACATT  
A\_16\_P15626415  
ACATGGCTTGATTTAACTGTATCTGTCACTACACATCTACGTATACTGTCTATCCTGACA  
A\_16\_P36007283  
TCAGTGTGATTTTTACTCGATAGTAAACCACCCAAAAAATTCATAGCAAACCTTCTGACCC  
A\_14\_P116064 TCTTTCTACAGGTTGATATGTCAGATCTCTCTCCAGAAGAGCAATGGAGGTAAGT  
CUST\_8519\_PI426210822 GGTGGAGGTTTCAGAAAACATTGTGTGATGGTGACAGTAAATTTCTGGCATT  
A\_14\_P104988 GTGAAACCCTAACATCATCTACTACTACTGCCAATCAGTTAAGGAGTTACCATGTTTTTA  
A\_14\_P134655 CTGGGGCCATGACATGAGGAATATATGTGCTGGAAATACAAAGGCTGATAGTT  
A\_14\_P107842 AAATCATCCGCTTCACTCTGGGTCAGAAAAAGATCTCTAGGTTAGACTTTCTCTG  
A\_14\_P110763 ACTCCAATGGAAGAATAAGCAAATGGGAGGATTATTCAGAAATTATTGGAAGTGTTACCT  
A\_14\_P114397 CGGATGATAGGGCAGATTTGTGAAGTCGCAAAAACCAAGAAATTTGAAGAGGTA  
A\_16\_P02118201  
CAACATGACCAGTTTTGTAAATCAACTATCTCTAACTATCTCTATATAGCACCTGACGGG  
A\_14\_P123367 TTAAGGTGAGGATATTTGCTTTTGTCACTCTTTTCTAGTGATGTTTTGGGGTTTTGACATT  
A\_14\_P102925 GAAGAACCTAACATACACTCTACTATTTTGTAGGCAACAGTGAGGAAATTATGACTCAGAC  
CUST\_9944\_PI426210822 AACTGCCAGAAGGGGGCGATTTCCCATTTGCTTAAAAAAGATCAGAA  
A\_14\_P130366 AAAACCTCCACATTAGCACCTTCTGCTCCTTTTCTTTTATTAATAAATAGATCAAGAA  
CUST\_3692\_PI426210822 CCAGTTATGGAATGTCTAATTCTTTCTCATTTTCTCCTGTCACTACCATGCTGCA  
A\_14\_P138783 TATCGTTTTGGAGTTACTGGCCCATGCAAGGATCCTGGGTCTTAACATA  
A\_14\_P136831 GAACAACATTGTTGCGTGGCTAAATGAAGGCCATAGAAAATTTATCATCACATTACACAG  
A\_14\_P124015 ATTATGAACAAATAGCACTTAGGTTACCTGAAAGAGTTACTACAACCCCAAAGAGTTGTG  
A\_14\_P114926 AGATTTGTGTTTCGGCAGAACATTGAGCAATCTGACCAGGTCTACTTTCGAATTTTAA  
A\_16\_P16504386  
GCACCTTACTAAAGTCTCATTTCCTATTTCCCATGAAACTAACATACTTAATGGACAAGCC  
A\_16\_P15729621



ATGTGAAACAATGGTAATCTCTACTACTCTAGTTCTAGTCCGATAATCTAGCCCAG  
A\_14\_P137199 CTTAGGTTTATATATTTTCGCCATCAAATCGAAGAGAGAGCAAGAGGACATGCCTAAAGTA  
A\_16\_P00685399  
GGTAACTGAAAAGATGTAATTGGCAACTGGCTCATTACATTACACAGATTTCTCTCACTC  
A\_14\_P112626 ACTCAAGCAAACACCGTCAACCTCAAATTAGTTTAAACAAAGTCTGCTTTTTAACACAAAG  
A\_16\_P41000533  
TCCCCAAACAATATACTCCATGCAGAATTTTAACTCTTAGTCATCATAAAAAACACTGGA  
A\_18\_P22841905  
ACCTCTTACTCAGGTCATGGTATTTATATGAATACAAAAAAAATTTAAATACTGTGC  
CUST\_8685\_P1426210822 TAGTAAACTGTAAAATCTTCCCTCCCCATGCTTGTACAGTAGACAGGCCTA  
A\_14\_P134018 TTCCAACAAAGAAATTCCAATAACTAAGTGATGCAGATCAAACTGACTCGATCTAATG  
CUST\_2562\_P1426210822 CATTACCATTCATGGGCTCTTTCCTCTGTCCTGTTCCCTTGTAGG  
A\_16\_P15274282 ACATCCCATCCTATAAAGTATCATCCCATCACTCCTATATTTTCAGTTTTTTCATCCCCTT  
A\_16\_P03636386  
ACTAACTGCAGTGAGTTTTTAAAGCAGGTTGTATAAGAAGTTTAAAGTGATGCCTCATCGA  
CUST\_9236\_P1426210822  
ATTGTTGAAAGCCCTTAGACTTGTAGATGTAGTGATACCTAGTGATTTTATAGTTACGA  
A\_14\_P108968 AGACATTACCTCAGAGGAAGTGTGGTTTCTATTTAAGAACATAGCAATGTTAAAGTGCC  
A\_14\_P118824 CTCGTGAAAAAAGGAGGGAGCCATTGTAATATCACACAGAGAAATGATTTATTTACTTG  
CUST\_7580\_P1426210822 ATAACATGGGCAGTGTATATGTTATTTTTCTGGAGGGCAGAGGGCATCATG  
A\_14\_P101680 GATCCAGAAGCAACTTTGATTCCACTCTAATAAGCCCAAACCTCTGTCTTTTTCTCAAT  
A\_14\_P132365 CAGATTATGTGTATTGTTCTTTGCCAACTCTGCATATGCAATTTGTTATTCAGCCAAAG  
A\_14\_P123829 AAGTTGGAATGAGATTTTATGGGGCTCAAAGTCAATTGAATGAATGAATGAATTTTGTCC  
A\_14\_P137931 TAAATCCTTCTTTGGCTGCCTGTGTGACCAGAAGGCTTATTTGCAAGTTTC  
A\_14\_P107142 AAGGGGTGGGAGCATTCGTTTGTGTTGTGGTAGGTTAAATACGTGTTAATTTTTGTTC  
A\_14\_P131479 AGAAATAGATAAATTAACAGTCCACTCTACCAACTGAAAGACTGCTGGGCAGAAAAATA  
A\_14\_P201269 CCTTTTTATTTTCAGGAATTACAACATATCGTTGGATCACAGCACATCAGAGCAGAGAAAG  
CUST\_8012\_P1426210822 CCATCCCTGATTTTGGCTTCTCACCCAATTCTTTTGCCTGTCATC  
CUST\_541\_P1426210822  
GACTCAACACTGAAATGAATGAGATATTCTAACATAGACACACTCTTCATTATGTGTG  
A\_16\_P18730981  
AAATCAAAGATGGTTCTGTAGTTTCTGTCTGAGTCATTAACAGACTGAGAGCATAAGAGG  
A\_14\_P115767 CTTCCAACAAGAGTTTAAATACATTCTTTATTTCCATTTTTACAGGCCAGGTATAGAGGTG  
CUST\_3953\_P1426210822  
CTTTAAATAATGGTTGGAGAAGCTCCAGGTTAAGTAGAGAGTAAAATCCTATTGCTTTCT  
CUST\_2049\_P1426210822  
CCCTGTCATCATCGTTCTGCTTTTTGAAATAGGCCATGACCTTTCTTTATACAACTTATT  
CUST\_8460\_P1426210822 TTTCATGTTTCAGCTTTTTTCTCTCCCTCCTTGCTCTTACTGGTCTCT

A\_14\_P124927 CTTTCCTTCTTATCTGCATTGTATCCACTTCTCCCTATCCTGAGTCTGGCTT

A\_16\_P00710368

AAAAGTTGACTTTGATGATCTCTTGAACCTTTATCCCATAAACTAGACACCCACCATTGC

CUST\_8963\_PI426210822 CATCCACCCTTTGTAGGTTATCCTGAGTCTGCATTATTACAGGGTCTTGAAT

A\_18\_P22839765

GCCTCATAAATTTTTATTAATAAAGACCTCTACATTTACATAGGATTTTATGGTTTCCA

A\_14\_P125552 AATGCCTGGAAGGATTTTTTTAATCTTCCTTTTAGATTTCAATCCAGTCCTAGCACTTG

A\_16\_P17491678

AACCTACCATGCCAAAATATTTTATCCTATCCAGTTCTCTGTATTTCTTCACTCATCTCA

A\_14\_P139482 TGCTATCCCATCAGGTAAGTCAATTCCTTTAAAAACAACATTTGATCCTTCTGATTGTCG

A\_14\_P119023 CAGCGACTAGTAAGCCTATGTCATTTTCATCCACCACATTACTTAGGTAAGTAAATAAAAAG

A\_14\_P118342 GCAGAAAAGGAAGGGAAAAGCAAAAGGAGGTAAAGAATAGACAGCAGATGAG

A\_14\_P104496 CAGAATTCCTTGTCTCGAATTATATGTGACAATACCGGTATCACCACGGTTTCAAG

A\_14\_P121971

AGAAAAAGAACAACACCTTTTCTGAAAAAAGAAAGCAGAGAGAAATGCAGCATTGCTG

A\_14\_P123166 TTCCACTTGCTTTGTGAGAACATATATATGGAAGAGTAAACTGCCGTTCTCTTTATTCT

CUST\_930\_PI426210822 GAGCTTCTTAGGGGAGTCTCATGGCATCTCAGCCTCTCTGTGATC

A\_14\_P123990 TTGAGTATTCTCAAGAGAAGAGATAGGGTTCTATGTAATATCATTATTTGAAGTTCTACT

A\_14\_P139940 CTGATTGCAGGCTACATTGACATCATCCTGAAAAAGGTATTTTGTATTGATGCAAATTGG

CUST\_2535\_PI426210822 TTGGACTCAGATACTTGGTTCTGTGAAGTAGTAGTGGGAACCCCA

A\_16\_P19838742

GTCCTCTCCATATTACAACGATTTTACTCATCCATTTTCAGTAAATACCACATACAAGCA

A\_14\_P119043 CTTGATTGCTGGATTTGTAAAGGAATGTCAATGAATGTGAATACACATGCTCTCTAGAGT

A\_14\_P107645 GCGGCTGAATCTAAGAATACGCGGTCTCCTGAGAACTTCAAAAAACAAAAACAAAA

A\_14\_P138818 TAGTTGAGTCCCATCTGTCTAAAAATGAGCCATTATACTCACATTATACTCTCATGGGTG

A\_14\_P202344 ATGATGGAAATTGCTAGTAAGAAGATCACAGAGTTGATAAGTTGTCACAGTTGTGACACA

A\_16\_P19875960

TTATAACCACCATTCACATTCAGAACAGATCATAATTCTTCATACATTTCTGTCCAAC

A\_14\_P200543 ATCCCTTAACTGAACTTTGAATAAAACCAGGTAACAACATGCTTAAAGGCCTAAAACATCA

A\_16\_P00708449

CTGCCACCTCTGATATTTTTTGCTATGACAAAAACTGTTTATATACTCTTCCCACTGCAG

A\_14\_P128984 CTCAATGTCTGTGCTGGAATATAGATTCTGGGGTAAGTCATAAAACATGCTTGAATCATT

A\_16\_P21437526

TGAGTTACGCCATTTTATCATCTCTCTCAATTGAATGTATATAACTATTCCACCATGTTCA

A\_16\_P16256953

ACAGCAGGTATGGATTCCTTTATTACAATAAGCACAAATACTCAAATCTTAGGGCCAGTT

A\_14\_P123571 TTGGTAGGTCCTATCTTATGCTATCCTTGGTCTCTCATGCTATTAGAAATCCACATTTT

A\_14\_P100216 GTATCCCTATCTGATAGATCTTTGAAAACAAAGGTGCCATGATGGGCTGTTCTAAC

A\_14\_P131675 CAAATTCCATTTGAGATTGTGCATGTATCTCTTACGTGTATGATACTTCAGTTAAGCCC  
A\_14\_P202118 ATGCTTAACTCAACAAGGTCTAAACCACAATCTTCTTGTAATACTATTAGAGAGTTTGC  
A\_16\_P16835897

ACTGTTCCACATAAATAAATGTTCCCGTTACATTA ACTTATTCCATCAAGTAACCAACAC  
A\_14\_P138820 ACGGAGAATGTCAAATAATTCAGGATTCAGACAAGGTAACACATACCCTACATGTTGAA  
CUST\_9733\_PI426210822 GTAGACAGCTGACCCTCTGTCTTAGGAGTGACCCCTGGCTCTAAT  
A\_14\_P123167 TGTTTTCTTTTTGCAGTAGGGCCTTTACTGTTAGGTGTGATTTTATCTGGAATGTATGAG  
A\_14\_P113246 CTGGCATTGGAAGTAAGAAATGTTACCACAGATGAATAAACTTCCCAATCCTAAAACCTT  
A\_14\_P200768 TGA CTTAAATTCTAAAATCCCAGTGAGGGTGCATTCAACGAACTGTCCTTGTAAGAA  
A\_14\_P109717 AGGAAGAACAAAGAGGGGTGAAGGTTCTCTCTCTTAATTTGTGTTTTCTTCAAGTTAAG  
A\_16\_P19797298

TTCACTGAGCAAAGTATCCTGTATCCTCCAGAATACTTACAGTCATAACTCTACTGACA  
A\_14\_P103272 CTCCTTTGACTTTTCAAAGTAAGACCTGGATAGGTGAGGGGATTAGAGTTTAATCTG  
CUST\_8857\_PI426210822 CATTAACTTTGTTGCCAGCATGTAGGCTAGTTGAATGCCGATGCGTA  
A\_14\_P111308 TACATGAAAATGTGAAGATACTTGATTGAGGATTCTGACAAGATAATGGGCAAGGAGGTA  
A\_18\_P13106193

CTCAGCCCCTTTGATTAAATGTAATGCCTCCAGTAAATGATGATAGTGCCTTTGAATTTG  
A\_16\_P18934143

AACCAGGATGTTGACATTTTACAGACCAGAAAATCTGATTCCATATACTTCCCCAAATT  
A\_18\_P22841561 ATTGACCTGAACATTCTACTGGGTGGCTGGTGGGGAGGTGATGAG  
A\_14\_P105527 TTTGCAGGTGTCTTCATAAATGGTTCAGATTCTGTTTGGTTTGGATAATTGTGTATGCAT  
CUST\_7711\_PI426210822

ATTGGGGAATTTGGGATGAAGTGCTTCCAAAATTTATTTGAATTCTAAATTA ACTAAGTG  
CUST\_4136\_PI426210822 AAGAGAGACCATTCTCCCATTTGGCCCTGGACCACCACTCTGATTT  
A\_16\_P36231031

AAACTTTTCCAGCAAGTGCCATTGGTAATTTTGCTGGTAGATAATGCCAGGGTAAAATA  
A\_14\_P119338 GCAATGCCGGAAGAAGTAGATTCTGCTTTCAAATGGTTTTAATTTATCTCAACAAAGGT  
A\_14\_P103720 CAAAAAAGAAACCAGTTCTTCCCCCAAAGTATTCAATGCTTAGAATACTAAAAGGTTTTTC  
CUST\_7529\_PI426210822 GTTGGAGCCAGCCATGGTCTGCAGAGTTCATTTCTCTGAGTCCCT  
A\_14\_P138761 CTTTTTTTTTTTTCTCAATAAAGCATTAAAAGAGAGTCTGCTCCCTGCAGGGAATTATGGT  
CUST\_7798\_PI426210822 ATCTGAAACCAGGAGAACAAGTGGGTA CTGGTGTTCCTTGAATG  
CUST\_1458\_PI426210822 GTTAGTTTTCTTTCCACCTGGAGAGATCTTCCCCCTTTCCTTCCA  
A\_14\_P110277 CTATTTCTTGAATGTTTATTATGTGGATTATATGCTGGCTGGCACAGTGCAAGACCAATT  
A\_14\_P109105 TTAAATATCATACTTACTAAAAAAACTAACCCGCAAATTAGAAGGGCTAAGGAAAAAT  
A\_14\_P123549 AGTATGGAGTCAAGTAGTGAATTAGGAATGAGCAGGGGATAGTTGATAGTGTA ACTTCTA  
CUST\_9334\_PI426210822 TGCAGAGAAAAGCTTAGAACAAAAGTTGACCTGGAAGCCAGATGGG  
A\_14\_P119128 ATCGCTTCCATTAGTTT TAGGACAGAGAGATTTTGCTTTTTTACAGAGTAAATCAGTGCTCA  
CUST\_6472\_PI426210822

TTTGGTGT TTTTATTATTGTCAAATTACTTGCAATAATGTATCTTAAGTTGGTCACTCAAG  
A\_16\_P15349551  
AAGGACCTTCTAACCTTGACAAACGTATCCTTAATCTTTCTGTGATGTCTTTAAAATCCC  
A\_14\_P117255 TTTATGTTATGTCTTTGTGTTTCATGGTATCTCATCCCCAACTGCTAAAAGAAAGCAGAG  
A\_14\_P201981 CTACCTGAGCATCATT CAGGGAGA ACTA ACTTCTTTATGACATCATCTTTTCAATTCAGT  
A\_14\_P135598 TTAGCAAGTCCATGATCCAAA ACTCCGTAACACTTCTCCTGTAACAGGTAAATATTCATT  
A\_14\_P122354 TCACCAGTTATGATTTTTAATTCATAAGTTGCCTGAGGATGGTTGAAGTGGCTTACTAG  
A\_14\_P137016 CTGGAACCAAGATCTAGATAGTCCGTAGATAGCACTTAGGACAAGAATGTGCATTGAT  
A\_16\_P00685043 TACCAAGCATTATGAAGTCTCAGGGACCGAAATTCACCAAGCCTCAG  
CUST\_10005\_P1426210822 AGACCAGGGCTTGCCGTA ACTAACGGGTGGCAGGAAAGCTTTGAG  
A\_14\_P136035 TTTTTGTTTTTTGGTTTTTTTTTAATGACAATGAAGTGACACTTTGACATTTCCCTACCTTT  
A\_14\_P106117 CAGTATGAGTCCATTCAGTTCATGCCGTGACAATTTTCTTGGA ACTCCTTTTTATTGTTA  
A\_16\_P18153284  
ACATTTCAATGTGCCATATTTGCTTACTTCAGATAAAAACCCTTGCATACTCTTTATTGCC  
A\_14\_P100794 TTTAAAATGATTATGGTGTATGGAGACTGACTCTGATTCACAGGGGCAGGG  
A\_14\_P130228 TTACCACTAAGGCTAGAGAAGCCAGACTTTAATGCCTATGATCAATAGGATTTTCCTAAC  
A\_14\_P130994 CTTGCAAATGATTGCACTGTTTCGCTGACCACACTTTTGAAATCATCTTTACTTTGCA  
A\_14\_P116068 AAAGCCTGAGAGAGAGATCGGGGGAGAACAAGATAGTGGGGAAATATATATTGATTAA  
A\_14\_P128390 CAGGGCATCCAAAAGATGGGGAAAAAATACATCTGGTTTTGGAAAATTAGAAAAAATGAAT  
A\_14\_P139500 GCATTTTTAGTAGCAAAAATGTTGGAGTCCTTGGTAATTATTTGGGGAAATAATTGGGTGT  
A\_14\_P134546 ACCAGATGTCAAAAACAATGGTCTGAACTTTGCCATTAATATCTGAAAAGGCCTAAAAGAA  
A\_18\_P19472397  
ACCATATATTTCCATTA CTCTCAGAACTTCAAAAACCACATTTACAGCAACAGATCTCATTGA  
A\_16\_P02072835  
ATTCAGTTTATGGACTACTTATCCTGTCAACACTCTAATGTCAAAA ACTTGGACCTAACCA  
A\_14\_P109915 TAAGCAAACACAAAAAGCAAAA ACTACTGGTCTTCAATCATTGTCTGATTTGACCTGCT  
A\_16\_P01843657  
TTTAGCCAAGAAAGAATTTGAATCATTCCAGTTAAACCCATTATGGTCCATCTACTTGCA  
A\_14\_P122908 TGCTGTTGTCCATAACAGAAAACAATTATGTAAACAGGCAAATCTCCA ACTATGGGAAAA  
A\_14\_P107473 GTTGGGCTCGGTGAATCAGTCCGTGATACTGAAACAAACAAAGAATATCAAA  
A\_16\_P03074180  
TAGAGTTAGTGTGGCCTTAGAAAAGTTTGGAAATCTCATCAGAAAATACCTCGTTTTTGTC  
A\_16\_P37790614  
GACCCAAAGTTAGGATTAACCAGAACATTTTCTACAACATTAAGCCATAATTTCTCTGTG  
A\_16\_P19439360  
AAAAGTCTTTCAAACGATGAAGTCCATGTTTAGCAATAGTAAATTGGAACGAGGCTGAGA  
CUST\_10349\_P1426210822 GTGGCTGTGATGCTTCCCTGGATGTTTGGCTCACAGTGAAGAAGC  
A\_16\_P00685548

CTGCAAATTATTTCTTTAATTTTGAGCGACGTTAATCCACATGATCTAAATCATAACATTC  
CUST\_3909\_PI426210822  
GTACATTCTAGAGAAAATCAGCTGGAGGGAGGAAAATGGCACAGTTCTAAAATTCT  
A\_16\_P17250600  
AATTTTTGTGCCTGTTTCTTATAACCATCAATGATGCTAATTAAGGACCACTGACACTGG  
A\_16\_P58424305  
ACAACATAATATAGTGTGTAATATCTCAGATTTCTATCGACGGTAGAGTCACAGGTCTT  
A\_16\_P00685572 AAGTAAGTTGTGTTGTTTCTTCCACAGGACAGTTCGTCTGTCATCCAGTTCAT  
A\_14\_P113635 AGGAGGATGGGGTAGGGATATAAAACGGAAGTAAAGGTCAGAAAACATATATAT  
A\_14\_P135599 ACAAGTGGTGTAATTCTGATTCATGACGATATGTTGTTGCTAATGTAACAGAAAGGTAA  
A\_14\_P201281 ATGCTGAGTTATGAGCATAAAAGGGTGGGTATTTGTGGTTATCTACTTATTGCATTTGAT  
A\_14\_P103717 CTTCTCCAAATCCTGACAAACACGCTCGTAATGAAAATTAACCTTAAAGGTGAATTTGCTT  
A\_14\_P105983  
TTAAAGCAGACTATAAAAACTACAGGGCAGATGAATCAGTTGCAGCAGAAACGGTAAAAA  
CUST\_1752\_PI426210822 GATGGGTGCTCCAGGGTCATTTTATTGGGCTGGAACCATCAAAGT  
A\_16\_P41864830  
CTCATTTACATAGCATTCCTATGTTTTTGGAGAAGTTAACTCTGCTGTATCAACTGGACA  
A\_14\_P114054 CTGTTACTGCAGTAACAGAAAACGTGATCAGATTGGCTTTGATTGACAACACAGCAT  
CUST\_6017\_PI426210822  
GGTATTAAGTTAGCAAAGTCCTAATGCTTTTGTACCCATTAGTGGATGATCAAATCCAT  
CUST\_8482\_PI426210822  
AGATCCGAACCTTAGAGTTTCTGTATGTGATTTCAAAGAATCTTAGAATATATATTGCAT  
A\_14\_P108302 ATGGCCATGTGAAGTCAACTATGTGTATGCATGTTAATACCCTTTGGGGTATAAAAGTAT  
CUST\_441\_PI426210822 AAATTTCTCTGAAGATCTGGAGAAGCTGGCAAGGGTGCTGTTTTCTG  
A\_16\_P02120013  
ATTTTACCCTCTTATGCTAAGATCACATTTTCAACATGCTAGCAAGTTACATGACCAGGT  
A\_14\_P135046 ATCTGATAGTCTTGTATATGTCTGATTTTCATACCCAGAGGCTCAGAACAACCTGAAA  
CUST\_6015\_PI426210822 ACTTCATGTGGTGGGAAAATGTTCACTTGCTCCAAGGTCAGGTATTAAGTTA  
A\_16\_P38212003  
AGAGTTATCTTGTGAGTGTCAAGAATTCCATGATAGCGACTTGAAAATCCCTATTCTGTG  
CUST\_3253\_PI426210822 AGTTCTGAGTCTGATGCAGGGATGGCAGAGAAGCCAGGCAGAGT  
A\_14\_P129629 CAGTCTGATAGATTAGTAACCACTAATCCATTTTCCCAGACAAGAAATGCTGAAACAGAA  
A\_14\_P103073 TGTTTCCATAGGGGTTCCCTAAACAAATCTTTGGCAAAGGTTAAGATAACTTAT  
A\_14\_P129444 CAGCATAAAAATGGCCACAGACACATTGGTCTGTGGGATCTTGAAGTG  
A\_16\_P19794517  
AAGAGATTAGAGGGCAACTTACTTATGAAGAGCATTTTCTGAGACAAAAATGAAGGTTGC  
A\_14\_P134349 ATAACATTTCTTTGAGTCCCTATCAAGTGCAGTGTCCAAAGAAATGTAGATCTTTTCTGCC  
A\_14\_P135437 CTGTTGCATTAGCAGCCATAGACCAAGTGACAACATCGTTGTTTTTAATAAAAACGGATTA

A\_16\_P30952513 GAGTGCCCTCCAGTGGAACACTGTGCTTCTCATATTTGCATGTGTAG  
A\_14\_P129698 ACTCTATTCGCAGCAAAGTCCCCAAATAAACTAATTACATCACACTGTAGAATCATTGG  
A\_14\_P116242 CCTTCGTCTCTGATGGTGACATCCAAACAATAAATATGCAATAAATAGCGCTCCTG  
A\_14\_P107943 CTTCTCAACTGTAAACCAGTGGTAACCAGATCCTAAGTAATAGTTGGTAATTCTCAACT  
CUST\_5509\_PI426210822 GTGTTAGTGGGTGAACTTGAACGTGACATGGAAGAGCTGGCTTCC  
A\_14\_P113752 GAGTTCATTTAATTCACCCAGTGCTTGGATCTTGACTCTGCAGTAAAGTGTATATATGG  
A\_18\_P16923363  
CAGAGTAGTGTGTGCAATTAGTGAAATGCTTTTATAGGGTAAAATACAAGGAACCAGGTC  
CUST\_7629\_PI426210822 GCAACTGCCAGTGATTGGCACAGGGTTATTTTCATGTGCACTTCAA  
A\_16\_P15426586  
ACCATTATTTCTCCTTCATACAAGTTCTGGGTCTATTTAAACAAAGGTCACTCAAGAGG  
A\_14\_P106463 CATGTGATTCTCCTGTTTTTGGCTGGATGTCTGTATCTACATAATAAACAGGCACACTTCT  
A\_14\_P136129 ATCAAGCATTAACATTCTGTTCTCAAAGGTGTTGATATTCTGAGAATAGAAGGGAGAGAG  
A\_16\_P36997974  
ATTTCTTTTTGCACCGTTATAACCAGTGATTTTCTCGAATCCAAAATCTGTAACGTTCTT  
A\_14\_P113806 CTGCTCCTCCTATTAACCATTTTTGGTCCATGGTCAATGAGAATACGAGGA  
A\_16\_P00685164 CAAGGAGAGTCATTAGAAAGGCAGAGGACATCATGCTTCTCTCGATTCTTT  
A\_14\_P120939 GGTTTAGGATATTTCCCTTCTCTACCAATATCTCTCTTGGTATTTCTTCTTGAT  
A\_14\_P111544 GGCAAACACTTTGGGACATGCTGTTTTAAAAGCGGAGTTTAAAGAAGTAAGTTGTCTG  
A\_14\_P131897 CTGAACCATCACAGATGCTGAAACATGCAGTTGTAACCTTGATTAACATCAAGATGATG  
A\_14\_P134882  
TTTGAGAAAAATAGTTTTAGAAAGAGGAAAGAGATGGAGAGATGGGTAAAAAATTGAGGGT  
A\_16\_P41874918  
CCTGTTTGCATGCTAACTCTCATCTGAACATCTCAAGTGCATTGTCAACTTTCATTTTAA  
A\_16\_P00756292  
TCCCCTAACTCTTCATCAGTTCAATTTCTACTCAATCGTAATAACACATTTATACACGA  
A\_16\_P16743257  
AGCCATAGGTTTCATGATTCAATACTTCTCTCACATTGTTCTGCTAATTAGTCATCGATGG  
A\_14\_P137621 ATTTTCCAGAAAAGTTATTACAGTCTTTTCAAACTGCCTAGGACAGATGCCAAGACAAA  
CUST\_8981\_PI426210822 GTCCTAAAATTAATGTCACCACAGCCATTGTAGTATGTGTTTCAGCCGCT  
A\_14\_P132156 AGCAACACTACCGATGGCTGTTGATCTAAGTTTTTTCATTTCTGGTTTATTTTGTGTATG  
A\_14\_P115637 TCACTATGATACATGGTTGTAGATATTCATTTACAGAGTGCCCCTTGATTTTGCCCAT  
A\_16\_P02285346  
AGCACAACCATGAAATAAGAAGCCATCCAATATGTTTTATCTACAAACCAATCTTCCAGT  
A\_16\_P35954814  
AGCAGTGACTAAAATAATCCAATCTTGGTTAACCTAGAAATTGGCAATACTTTCCTTGCT  
A\_14\_P134175 TGAGCAAATATCCTGATGGAGTCTTACAATTGCACATAGTGAGATACTTCAATAAGTGAC  
CUST\_8647\_PI426210822

CACTTGCTCCTTAGAGATTTCTTTTTGAAGTGAAGATAGATCATCTTCTCAATTTTTTCAG  
A\_14\_P130429 AAAATTCAGACTGTCCACATTCCACCGTATCTTTTGGTTTCTGGAAAAAACTTTAAGGTGA  
A\_14\_P115152 GAATTACTTCGGCAGTATCAAGATTTTGGGGGATTTTATGACAGAAACAAACTGTTTTGG  
CUST\_4495\_PI426210822 CTTCTGTGAGTCAGAGCCTCCAGCCGATATGCCTACTGTCCCA  
A\_16\_P00685350  
CTAATTGCCTTTGCCTTTTCTGTTAATACTGACAATTCAATACAGTCCCATTGCTCAG  
A\_16\_P00685286  
AGAACAGCAAGTCCTCAGTGAGAGTATTTGTCACTTCCTACTCTTGGTGTTTAATATCAT  
A\_14\_P116069 TTTTTTTAAACTGAGGATTGTCATTAAACACAGTTGTTTTCTACCTGCCTGCTTGGTCT  
A\_16\_P33913878  
AAAATCCCATACTTCTTTGGTAACTCAAACAATTCCAGATTTATGTGCAACTCACCTGC  
A\_14\_P121786 CAATACGGTTACTCCAGATGCTGTATTCAAACACTGTATGGGTCCGTTGAAAAAATAGATAT  
A\_18\_P14134912 CTTTGGTGTCTGGAGCCATGGTGGCTGGTTGTCCTTCCCCTTAG  
A\_16\_P01894311  
CCAGACTTAACTCACATTATCTCAATAAACCTTCTTGTTTTAATTCCCTGTCAGACTGA  
A\_14\_P201436 ATAGTGGAATCAGTCATTAGCCCCTGATTAGAGACAGAATCTCTCATCTACTCAACTTTT  
A\_16\_P37276821  
GACAAGAATCAATTAGCAAAAAACTATATACTGATCAACTGACTTAACTAGCCAAAC  
A\_16\_P16191116 CTTTGTGTTTGTGCAGGAAAAGTTCTTCTGGGAACACAGGAGACTG  
A\_16\_P15134155  
ATTTTTTTAAACCAACGATGAAATCATTCTTAAACCTTCTCGAAAAGTTCTTGCTTCC  
A\_16\_P00951238  
CTGGGTCTAAACAAATGCTTCGGATACACAACTTTTTACTTAACTTCACTGCATGAGT  
A\_14\_P126228 CTTCAATCACACCAGAAAAATCACTTTGGTCAACAAGAATGCTCAGATAATTCTCAAAC  
A\_16\_P16682190  
AACCACACCAATTACCATGATCACATCTAATAGTCTAAGAGTCTAATATGGAACAAAAGA  
A\_14\_P110024 ACTAGAATTCTTTTCATTCCCAGGCGATGCATTGCTATTTCTTTTCTCAAGATTTTCACA  
A\_16\_P35913415  
GCTTGATCGTTTTCACTATTCCCCTAACTGATTATTGCCATCAGACACTTCTAGTAGATT  
A\_14\_P107449 GATGAGTAGCAAGTTCGACTATCTCAGGAGGGTTCCTTCAATCTGAGTCTAAATAGAT  
A\_16\_P20349834  
CTCAATGATGCAATGTAAACTGATGACTTAAGCATTCATACTCATAACCATGTGTCCAGA  
A\_14\_P127648 TGTTGAAGCCCACAAGAAGTGA AAAACAAAATACCTTTATTTAGTTAACTGAATTTGC  
A\_14\_P136988 TTGGGACATGTAGACATAAGTTACCATCTTTCCCTAAAAACAAAAAATAAGCCCTGTCT  
A\_14\_P133118 ATTTTGTTCATCAATCTTGCAGTCAGACATGCTCAATCAAATTGTATTTAACCCATTGCC  
A\_16\_P38679846  
AAGCACACACTTTCCTAACTAGATATTTTTGTTCTTCTAGATATAGTTTCTGATTCAGCA  
A\_16\_P19994182

AAAGCCAAATTCAAATGCCTAAACCCAATCTCTTTATCTTTCTTGCTATCCTGTAACCA  
A\_14\_P111263 ACTCAGGAGGAAATATTGTCAGAGTTTCTGCTTTGTAAGACAATTGGAATAAGGTCTAAG  
A\_18\_P22841089 CATTGTTGTGTTTAGGTGAGTGAGTGGCCTCCAGCATCTAGAAGTCGATATTT  
A\_16\_P17305549  
AGATATTCACCTTCTCAACTACCAATTTCAAACAACATTCTCTGTATCCTCTCTTATCCCA  
A\_14\_P114936 CTATTATAATCCAAATAGGGGTTAGAGCCAAGAAAAATACACCAACTAATGGAGAAATGT  
A\_16\_P15388823  
AAGCCTTTCTACTACACAGTTAGACCAACTTATCAATTACAGAAGTTTCATCTAGGCAGA  
A\_14\_P123180 ATGATGAAGATGAAGTTGGTGACACAGAAGAGTTCTGTATAGTTTTGTTGAGGTTTTCT  
A\_16\_P15898604  
CACTACACCACAACAATTAAGATCTGCATTTATTCCTGGTCATAAGTAAACTCTTGAGGC  
A\_14\_P132676 CTTTCATGTTCCATGGTAAATGTCTGTAGAAAACCATCTCTGTAGTAGTAGCAACTATGC  
CUST\_5780\_PI426210822 CACCATAGGGGCAGAGACCTTCTGCTAAGTCATACCGCATATCAAGAAATATAT  
CUST\_3813\_PI426210822 ATCTCAGCTGGGTGGGACCCTTTGGGACAGGAGTAGGGGAATAAT  
A\_14\_P116158 CTAATCAGACTGCCAGTGAACCTGTTGCTGCACAAAGAAAAATTGTATTTTTTTTCAGAT  
A\_16\_P21510099  
GAGAGTTTGTTCCTCCAATCTTCAATAATTTACCCTCTATTTAGTTTACCAAAGCCTG  
A\_18\_P22841047 ATCTTTGTTCAATTGATTCAGATTCAGCCCTTGCCCTCCCATATCCCTCAC  
A\_14\_P128028 TTAAACCATCTCTCTCAGATTTACCAGGATGCAAGTCATTTTCATCAGTGGG  
CUST\_8560\_PI426210822 CTGTGATCAAAGGCTGTGGGCATCTTCATCGTATGGAAAAGTAAATTCCTG  
A\_16\_P40893071  
ACAGAAACTAGTGTAACCTCTGCCTAATTAATGGCTCCTATCTAATCCTTCCTAGTCAGT  
A\_16\_P16834969  
AAACCGTTCATGCAATTACATTCTTAAACAATCCCATACTGATTCAAACCTATTGCCTTCA  
A\_16\_P36230232 ATTTTATTGGGCTGGAACCATCAAAGTGCTGAACCTTACGGACAACACCTATTTA  
A\_18\_P24319289  
AAAAAAGCCTAGTCTTTGAGTTCAAACACTGTCTCTTTAATGGTTCCCTTCATTAGTGACG  
A\_16\_P41883894  
GCCTATTTAATCTTCTGTAACTGTGTTTCTATAAGACTCAATCTATCCAGGTGCAAAAAGT  
CUST\_2868\_PI426210822  
CTCAATATAATAAGGCAATGCAGAAAATTATTCATCCCCAGCATGTTTCTGTCACTTTCT  
A\_14\_P123036 AGCATGTTAGCACAGAATAGCCACTTTTCAGTTAAATGCCAGATTATAATTTGGCATCT  
A\_16\_P20185837  
CTTCCTAGGTGTCTAGAAAGTGACACAGTCAGATACATTTATAAAGATGGAGGTCCATAA  
A\_14\_P117125 ATCAGACTGATCCAACCATGCAGTTTCTTCAAGGTCCTCACTTCTGTTTTCT  
A\_14\_P124855 ACAATTATTTTTTAAAAGTAAACGTGTGGAGAAAGAATCCGGGCTTCTTGGTTTTATTTCC  
A\_16\_P19430060  
TTCCCATTTGATGTTTATACAGTCTGAAAATCTTGCAAGTCTAAAAAAAACCTCCGGAAC



A\_14\_P120766 GAGAGTCTTTACCTGGGACCCTGAAATGTTCTACCTGAGTAGTCATGTTTATC  
A\_16\_P16899606  
AGGAGTCATGATCATTGCTAAAAGAAAAGGTCTTCCAAGTATTACGCTATGTTGCCATA  
A\_16\_P19963753  
AGCCCAACTATATTCCTTCTCAACAGAATACTTTTCCAATACCTCAAAGAAATGCAATG  
A\_14\_P132474  
TCAGCAAAGAGGAGATCAAAGAGAAAAGTTCATAAATACAACCTTAGCAGTACAGACAAGT  
A\_14\_P113386 ACATCCAAAAGCCTGGATAAGGAAAAGTCTTGGATTTATCCTCTCTCTCACTTAAGACATT  
A\_16\_P20255388  
CAATTCCTGTTTTTGCATGTAAACAACCTAGAATCCACACTAACTTTCTTACCATTGCC  
A\_14\_P111586 GGAAGATTGTTGAGTTATGAAACCCAAAGTAAAAAGGGGAAATAAATTAGTCTCCCTCAT  
A\_14\_P132019 TTAATTGCTGTTGGTGGAAAGAGCAGCATGATCATATGTTTCAGTTTCAAACAGAAGCTTT  
A\_18\_P22841105 TACTTACCTTTCAGGGAGTGATGAGTAGGGGGCGAGAGGGGAAAAT  
A\_14\_P115313 CAGTTTTCTCAACACCTGTTGCACATCAAATGATGAAGAGATTGTTACAATTTCCAAAAC  
A\_14\_P125399 GCATTAATGACTGCCATGCAGAAATAATATCTCGGAGATCCTTGCTCAGATTTCTTTAT  
CUST\_9591\_PI426210822  
AAGATTTTGACTTCAAAAAGTAACAAAATATTTAAGAAGGGAATTCACATCTTTCTGTTCT  
A\_14\_P102827 AGTAATGGGACCTGGGTAAATTAATTTTGTATGTTGTGTTGCCTTTTTTCTGCCTTTTT  
A\_14\_P136687 ATGCAGAGATGTCAGCCCAGGAGAGACTCTATTACTATTCCATTACTATCACTATTCATT  
A\_14\_P137859 AGTAGGGTAGGCTTTTAGTAATGTTTGTGATGTTATTTCCATAGCCCAGACCCTATAT  
A\_14\_P112427 AGGCTTCCAACCTGGGCCATCTTAGTGTCTTTTTCTTGCTTTTTACTTCTACTATTATAGA  
A\_16\_P18921219  
AAAAATCAAATGCTAGGAGCCAATTTTCATAATGGTCCATCAAGTATCCATCTGGCATTAC  
A\_14\_P133235 ACAAAGCCCTCATTATTCATTTTTTCTAGAACTCTAAGGGGCTCAGGATCAAATC  
A\_14\_P115143 CTAGAGGGAATGAGTCTTTCGTCATCCTAACAGGATTAGAAGGAAATACGTTATATCACT  
CUST\_5751\_PI426210822  
GGAGTAAAAAAAACACCCAAGATAGCAGAACTTGTCAATTTCTAGTTTTTCCACAGGAC  
A\_14\_P105647 GATTGACGTATATGTTTCTGCATTATTTTACAACAAGTTTGTGTATCAGAGCGGGAGTG  
CUST\_3091\_PI426210822  
CTCTTCCAAAATTTTATTTTACAGGGAGGAGCATATCCATTTCTTCTTTTTCTTTTAAAGT  
A\_14\_P135761 CTGTTTTTATCTTTCCATAGGTATGAATCCTAGGACCCAGAATAAGGATTCTCTAGAGGA  
A\_14\_P117643 CAGATGTTTACATGGGGAAATGGTCTCTGGATTTGGACCCATCTATAATTACAAA  
CUST\_10343\_PI426210822 CTCTTGACAGTTCTCGTCTTTGGCTTGGCCAATAAACCCCTTTA  
A\_14\_P107801 ACTTAAGAGAAGTGGTCCTATCTGCTGAAAATGATGAATTCTATGCTAATGTAGGTGGTT  
A\_14\_P102457 TTTCTATGAAGGGGCATATTTTAAAGCAAGGATTTGAAGCCTCTGTGCTATTGATTTAACC  
A\_16\_P15833481  
TCACAAGATCAGAAAATAGACCTAGACCTACATTCTACATTCCTTATAAGTCTCCCCTTC  
CUST\_7918\_PI426210822 GCTTCAGGCTTTAGGAAGAAACCTCTCTTTTTCTTGGTGTGATTTTCTTAGAG

A\_14\_P116480 GATTTATTTGTTTCGTGGAATGAAATTTAATAACTGGTGGGAGACGAGGCGTGAACAATAA  
CUST\_1495\_PI426210822 CGAGGGAGCAGATTCTGGTCCTCACACCAGAGGAGGCTATTTCTA

A\_16\_P20514975

GGCGATCTTTCTTCCTTTATACATGTGTAACCTCTTAATGATGACCAGAACAATACTAGC  
CUST\_10023\_PI426210822 TTGTAAAGTTTGTGTCAGGGCAGTCACTGACCTGCAGCAAGACCGTC

A\_14\_P114360 CTAGAAGTCAAATAAGACAATTGTCAAAGTGAATAATTTTCCAGACCCTTCCA

A\_14\_P119024 ACCCGAAAATCTTCATAACTTCTTTTAACAATCCAACCTTTTCCCTATTGGTAGAAAAAA

A\_16\_P00957329

CAGGATACTTTATTTAACCCCTTGATGAGTGTATTCTTGCAAATTCAGGTCAAGATGCC  
CUST\_8996\_PI426210822

TAACACAGAAACGTGAGTTAACAGGAAACACATGTTATTCTAAAATGAACCTAGGTCCC  
A\_14\_P134244 ATGTTTCCAGGTTTAAAGTTCATGAACATATAAAACAGAAATTGGGTCTGCCACCTTG

A\_16\_P15523496

TGCTTTGCTGTCTGCTAAATTCTTTTAACTGTCCCTTTTTTTCCATTAAGTCCTCAAAT  
A\_14\_P122110 AAATCTAACAGAACTGTTCTTAATTTGAGGAGGAGGATGGTAACCTTTACTAGGTTGATC

A\_14\_P129730 CTCCAAATCTGTGCAGTCAGGGGATGAATCAGTTAGTAAAGATCTATTTTTAGTTTCCA

CUST\_4737\_PI426210822 AGTTTGGAAAATGTAGTCTCTGTAGGTTTACCCTTCCCTGAGGCAGTAG

A\_14\_P132701 TTTGAACACAGGTGGATGTGAAGGATTTTCATTTAAAACCAAGTGGTTTTGACTTTTTTC

A\_14\_P132130 ACAAATGTAACAGTAATGATAAATCTCTTTTCCAAGGGAAAGAGAAACGCTGCAGAATG

A\_14\_P114121 TCCAGCCAGTGCTACTAAATCATCACTTTTTTAATACAAAATTCAGCCCCAACTGCTTT

A\_14\_P131524 TGTGGGACATTCAGAATGGCGAGGAAGTTTACACCTTAAGAGTATGTCAATAATGTTAAT

A\_16\_P15171653

AGTCAGAGTCTCTCATTAGTTGGTTGAACATAGTCCCATTAACACTTTTTAAAAGTCTCCT  
A\_14\_P120350 ACAGACACTATCTAAACCATTGGAGTTCCATATGAATTCTATGACAGGAACTTAGGTGC

A\_14\_P126675 TGGAGGAAAAAGAAAACCGTCTGCCTGCTGCATTTACAAAAAGGAAAACAGAA

A\_14\_P121911 ACACAGTATGAACTGCTATATTACCAGTCTCTTTTTCTGGTTTTAATAGAGTGGGACCAA

A\_14\_P107395 TTTAACAATGAAGAAAAGGCTTCCCCAAGCCTACGTAGATTGGATTCTCTAATACATAGT

A\_16\_P41475992

ATAAGGATGTCTGGTCATTTTAAAACCTTGTGGGAGTAAAACATTGGTAGGCTGTTTCA  
CUST\_2249\_PI426210822 TAGACACGCAGGGCTGAGCTTCCAGCCCCTGGAGTTTTGCCTCT

A\_14\_P103210 TTCATTATTGTTCAATTTACTTACATGAAATCTCCGATCCACCTCATAGTTGACCTGCTT

A\_16\_P30952398 GATGGAGCCATTCACCATTATGGGCTCTTTCCTCTGTCCTGTTC

A\_16\_P18155655

CTTCTTTAGACTTACCCTAGAACTTCCAATTTATCCCCAATATCTTTTAACTACTGCA  
A\_18\_P11794167

AAATGACAAAGGTTTCTTCAAGTCATACCTAGAACCACTTCATTTTTTCTTCCCACATA

A\_14\_P138543 CTAATCATCCCTATGGTATCATATCATGAATGGACTTTACTAGTGGGGCAATGACTTTC

A\_16\_P02039772

AATCTGGGGATAACACGATTACACTATTTTCACTACTTTTAGGCATGTCTCAAAACAACC  
A\_14\_P125599 AAAGTTTTGATAATTAATGTAATGAACCTTGTCTACAAAGCGAAGCATGCCTGCTGGTG  
A\_14\_P128505 CTTATAGATGATGGATCTGGGGAAAAAATCCCCTACAAAATCCCATTTAACCTTCTCATT  
A\_14\_P112325 GGAACATTTTCATGTCTTAGTGCTTTTGTAAATGTGGGAATTTGGCAGTTTGAAAATGTA  
A\_14\_P128829 TCTTTCAGATTCTATCCTAGTCTTACTGGTTAAAACCTTTGTCTCCTCACTCTCAATCAT  
A\_14\_P130111 ATTTGCCTGTGTTTTGAGAGTGAAATGATTGAGAAACAAGGACTCAAGTGGTCTC  
A\_18\_P21696353  
ATATGCTGCCCTTAAACAGTTTACTACCATAGCAACTACACTTGTCAAAAGATCAGTTCC  
A\_16\_P16106225  
AACTAATGTCATGCACTTTACAACATCATTACCCTTTATTGAGTATCACCTTGTGTTCCC  
A\_14\_P117520 CTGTCTTTTGAAGAAGTTCTTAAATACGTTGTTAAATGGTATTAGTTGACCAGGGCAGTG  
A\_14\_P107168 CTACCTGTCCACATAGAAGGGGAAACAAAACCTTGGTCAAAGTCTGTAGAACTTC  
CUST\_8447\_PI426210822  
TAAGGGCAAGATTCTTGCCAAGAAAATTAATGTACGTATTGAGCACATTAAGCACTCTAA  
A\_18\_P10752362  
AGTCAGCATTCTTAGAAGACTACAGTCTACATATACTAGCCATTACTACCTTTCCAACA  
A\_14\_P120064 CGATGGATGTATGGAGTTAACCTTGTCTTTTTGGCTTAATATTTGGTCTAGTCATAATC  
A\_16\_P19769863  
AAAAAAGGTGACCAAAATGAACAACATCTTTCTTGCCTCAACTAAAATTGCCAGTTCTT  
A\_18\_P15155631  
CTCGACTCTGACTATTTAGACACTTAAAGTGCCTTAAAGCAGACTTTGTGGATGAAATCA  
A\_14\_P105779 GAATGTGGCATCAAACCTTACTTTTCCAAAGAAGCCTTTGAAGAACTTCTTTCTCTG  
A\_16\_P35727966  
ATGGAAGACCTGACCTCATATTCAAAAACACTCAAGGTATATTCACATTTTCATCTTGTCC  
CUST\_1111\_PI426210822 CCTCCTTTTTCTAAGGAAGAAAAGGAAAAGCCTCTGGAACAACCG  
A\_16\_P16345522  
ACCACCTGATCTGAACATTCATCTAAATAACTGTTACCTAATCGAAAAGTTCACCAACTC  
A\_16\_P15019143  
AAGAGTATGGACCAAGACTTTCCTAACTCGGAGACTGTCTATATCAAAAAGGTATCCTTA  
A\_16\_P36793054  
AACAGTCTACATTTATTGTCTCCATTTCTAACTTTCCTTTTGTTCGTTATCTCATGGCAA  
CUST\_3509\_PI426210822  
CAGTGGGAAAGGGGAAGGCATTTTAGGTTTGGGACATATTACAATATTGCCTTTTAG  
CUST\_2629\_PI426210822 ATCTGGTACATGGGCTGGGGGCGAGGGGCCCTCATCTTCTGAGCC  
CUST\_9886\_PI426210822 GCTTCAGCGATCAGTGAGGCTTCTTGACAGAGGATTGAACTAGGTTTA  
A\_14\_P132453 TTGCTGGTCAGATGAACATCGAATATATGAATAACACAGACATGTTCTACACCTTGACTG  
A\_14\_P200151 TCTGTAAAGGTGCTGGATGTTAACGATAACTTCCCGAACTAAGTATTTTCATCACTTAC  
A\_16\_P19842463

AAAAAACCTTTGCTGAGTCTTATTTGTCCTCAAGACATATAAAGATCTTTGTGGACCGTG  
A\_14\_P131104 GATAATCAAATTAACCTTTTAGCAAAAAGCCGAATGCTGGGGAACTTCCTGTGAATTTAT  
A\_18\_P22842072

TCATGGCCTCTTTTCTTCTCATTTTGGGAAGGGGAATATTTTGTAGACTCTTTAATGAGAGA  
CUST\_3792\_P1426210822

TGGCCTTTATGTGTAAAGGAGATATTGATAAACCTTGGTATGAAAGACTGTAGGTCTCTG  
CUST\_5903\_P1426210822 GAAATTTGGCTCTCTCCTTGACCCAGTAGTGTCCAAAAGAACA  
A\_16\_P01489681

CTACTTTGGGAGAGTGGGACATACAATATCAAGATATCGAGGAGATGTTTAAATTTGCTG  
A\_14\_P111841 TTGCTTAGTCTGTATGAACTTCCTTATGGTTTAGGACATGCAGCCATTTACTTGCTATAC  
A\_14\_P113824 ATCTACTTTATGATTTTGGAAACGTATCATTAGGCTGCAAAAAGAGGTTATTCTTGGGCATC  
A\_14\_P107273 CACAGTGGCACTCATTAGAATCAAGTGTAGATCAGAACGTTTCTGTAAAATTTCCCTCAA  
CUST\_1099\_P1426210822 ATAGAGTGAGCCTTCCTTTGGTTTTTCTTTCTCCTCTGTATCAGCATTGATCAG  
A\_14\_P127895 TAATGCTTCCTTCCTCTCCAAGAACAATAGTTTAGAACGGGCTGTGGACT  
A\_14\_P109954 CAATTTGAAGAGAAAGGCAAAGTACTGTCTGTAGTAATTGGGGACAATGTGATCATC  
CUST\_4922\_P1426210822 TCCGGCAGATTGCTGTATTCTTGCACCCTGTACCACAACATTGTTA  
A\_16\_P16191436

ATAAGGAGAGGACTCAACAGTAAGGACTAATATTTGACAGTGAGGAGCAGATAGAGTTTT  
A\_18\_P15530110

CAAGAAAGCATCATATGATCTTTGTCATCAATACCACTGTTCACTGTATAACCGATTCCA  
CUST\_8529\_P1426210822 CAGAAGAAAGCCGCCAGTGTCCGCACCTATGATGTACTATGGTT  
A\_16\_P01063200

AGGCATAAGAACACTCTGTAGTAAATCAGTCAACACCAGAATATTCCAAAAGCATTTCCTT  
CUST\_9523\_P1426210822

AGAAATCAAGCAATTTTCTGTGATCTTTTTTAATAGGAGTTTTTAAAATGCATTTTATAT  
A\_16\_P21424213

CTCTATGCGATTTTCATCTTCCTCAGACTACCTTAGATATGTTAGCAGGTCAATTGGAGA  
A\_14\_P100968 TTAAGAGTTCAGACATACAAGTTGGAGACCTCATCATAGTGGAAAAGGTTGATGATTTTT  
A\_14\_P116647 TATGTTTTGGAAAGGTCTAACCAGATTTCTCTTTTCTTATCACAGGAAAAGGAGACAATT  
A\_14\_P121960 CTTTTATTACTGCCTGAAACCTCTTCCTTTTTGTCTCCCTCACAAGTAAGATGAGC  
A\_14\_P123313 ATTCTTCTCTGAGAAATCCAAGTTTATTATAGATGATCACACAGACTACCAAACACCCC  
CUST\_2328\_P1426210822 GCAGAAGCATTGTCAGGATATTTGTGGATGTCTGCCTGTGGAGTG  
A\_16\_P20945944

CCGTTATGGCTGGTTAACTTGACAGAAGAACACATTATACTTCATTTTTTGTCTGTTGTCT  
A\_18\_P14135292

GAACACTAATATGCCTGACTCCATAGAGCAGTGTATTTGGTTTTCTTAAGCAGGAAGAAG  
A\_14\_P133661 GTCTTGCAACTGTATATAGTATCTTTGACACCCTGTTTGTAAAGGTGAGGGTGGATATTA  
A\_14\_P134818 AACAGAAGGCTTGAGTGGATGTTTCCAACCTTAACATTCTATGATTACAAAATGGAATCA

A\_14\_P128195 GGGAGGGAGAAATAAGAGACCCAGATAGGCTTGGTTTCTTGCTTTATTAGGTTTATTATA  
CUST\_9898\_PI426210822 GCAATAGATGCTTTGAATTCTGCAAAACCAAACCTCCCCTGTGACCAGT  
CUST\_8451\_PI426210822 GAAGCCAAACAGAAAGATACCTGGGTCCAACCTGAAGCACCAGCCT  
A\_14\_P201677 TTGTTGTTTGTGTTTGAATATCATTCCCTTAGGCTATGTTGAGAGTAGAGTGGCTTCCCATT  
CUST\_4568\_PI426210822 GTGGATTGAGAATATGTAGGGGGACGAAGCCAGGAGTCCAAGGAC  
A\_14\_P106711 TCTTCCAAGGAAAATGTAAATAGTGAAACAAAAATCACATGATTGACTGAGGGTCTGAA  
A\_14\_P113378 GTGATGAATGTTATTTTTATTACATGCTTTTTATCTTCATCTTCCAGTGTGAGGGGTTTC  
A\_14\_P201469 CTGTTTCTAGACTTCTGGACTTTATCAGTTTGGACAACAGAGTGAGATGAAACTGTCA  
A\_16\_P16364872  
TCATTTAGAAAGGAAATGTCTGATGATCAAAAAGGGGAGTTCAAGAGTTATAGACAGTGC  
A\_14\_P103168 GAAAACAGCAAATACTAATTGCATGGATTGTTCTCTGGAATATGTCAATCCAGCAACATC  
A\_14\_P116187 TTTAAGCAAAAAGAAGTCAGCAAAAATCCCCTGTGATCCCACAATAACATTCTTAGATGT  
A\_18\_P22840471  
GCTCATTGCCTTCAATTAGAAAATGTAAATTTTCTAATTAATTTTCAAGCAACATAATAG  
A\_16\_P30952366 GCACCCAAGGAGGATGACTTCGCAGGGGCGGTCTATATCTATCAT  
A\_16\_P01353053  
GACGTGTAAGGAAATCAAAACCACTCATGATTATCCAACCTCTCATAAATAACACTGGTAA  
A\_14\_P135528 GTGCTGGTGAAGATGAGCAGACATCAGAAGTATTTCTAATACTAAGTTCAACCTCCATAA  
A\_14\_P121281 GAAACCAGAAAGTCCTTTGCTGTTTCTTATTATCCTCGAAAATCATTGCATTTTGTGAA  
A\_14\_P104470 TGCTTTTTGCCCCACTGTCTTATTCGATATTTATCATTCCCTTACATTTCTTTGTCCTTT  
CUST\_2711\_PI426210822 TTTGTCCTGTGGCCAGATTTGCTCTGGAAGTCCCGCAGTTCCACT  
A\_18\_P15081434  
ACACCCTTTAGCATCTCCATTTCGTAAATCTCTCCGTCTATCTTTTTCTAAATTGTATGCAG  
A\_14\_P119174 TGTGTCCCTTCCTCTGTTCCCTACTAGTTGTTGAAGACATCAACAAACGG  
A\_14\_P105935 ACTATTGCTTTCAAAATAATGAAAGACCTTTAATACTCGCTCCATTGCACCAGGAGAACG  
A\_14\_P122844 TCAAGTTCAAATTATGCTACTGGGGCAACCAATAATTTGGGTCTAAAATAGACATCTAAA  
A\_16\_P20069680  
TTGCCCAATTTACATATTTGATCTCAATTTGCTCCAGTCTATATCCCAACATCTAGGTA  
A\_18\_P15891789  
TTCTTCCACACTAACATTGCATTAACCTTTAGCCATTTGAACTGATAAAAGCCATCACCC  
A\_14\_P120667 CTCATTTGCTAGAGGGAAATGAGTAAACCAATTCACCTTGACAAATTACAAAGACCTATGG  
A\_16\_P17767599  
GACTGTTCTGAACTTTATCTGATCATGGAATTCCTTAAATGCATAACATCTACCAACACC  
A\_16\_P58424566  
ACTCTTCATTCTTATGTTTACACAATAATTTTATCCAAGTGTGCATCTTCTGAGATTGA  
CUST\_10097\_PI426210822 CTTCACTGAGGGCCTTTGAAGACAGCGGTTGGCGGGGACAGTGTT  
A\_18\_P15482929  
CTTTTCTCGAGCACAATCAAATTTTCATTTTCCCAATCTCTTATAATGACTCATGACCGG

A\_16\_P38262609

CCAACCTCCGTGAAAAATTTCCATTACATCAGATACTTCTAGGATTGTATATTCCCTTGGACUST\_2664\_PI426210822 TAACCTAACAAATGGCACCAGTGGCACCAGGGGTGAAGGCTCTTTAT

A\_14\_P200856 TATTCAAGTGGGTTTGATTTTCAAAAATGCATCATTACATCTTGTGATAGGAAACAATTTA

A\_14\_P139896 CTACACGTGGACTAAATAAATAACAACATCTTTATTTGGCATTGGATATCCTGACATTTGT

CUST\_447\_PI426210822 CAAGAAGACAGTCTTGTCTCAACCAGTCATTAACGGCCCTGAGTG

A\_16\_P00747121

GTCTTACTTCTAAACGTAACATCTGAAATCTAATCACCTTTGATAATCCATCATCACCCA

A\_14\_P106076 AGCAGAGACTTGTTCAACTCATTAAAGGGGATGTTTGTGTTGATTTTCATTTGGCTAAAAA

CUST\_4696\_PI426210822 CATCTCATTCCCCTATACCATCCTGAGAGGGTAAATAATTCTGCCTATGACG

A\_14\_P129784 GGGTCTTCAAATACCTGATTATTCCGATTTTCAAGTCTTGGAGAAAACTGGAAATTGT

A\_16\_P18932119

AAGTTGATTCTCCAGTCATACCTCAAATCAGTTTCATCTTTAGCACATTTCTACCCATC

A\_16\_P15402919

TGTCATCTGGTTCAGTAGTTTCGTTTCAAGCAATAAAAAATAACTCTCCTATGCAGACAA

A\_14\_P117177 GAAGAATTTGATCTGTTATAAAATTGTGTTGTAAGAGTTCCCCCTCACAACTCTTGTTCCA

A\_14\_P113572 CTTGACAAGCAAACAGAATTAATTGTCATGTGATTTGCTCACCAATTCTGACATTGCTTT

A\_14\_P100307 ACCCAAGTGTTCAAATAATGGAAAGAATTGAAATGTGGGTATGTTAAGAAAGAAAGCACT

A\_14\_P133993

ACACAGGAAAAAAAAAAAAAAAAAGAGGCAGAACTATCTATTCTTTGCACAAAGTTTCCACTGC

A\_16\_P19436077

CTTAAATCGAAATCCACTCACATTTGTAGCCATTTACAGTCTCTTTGCATATTGGTGAG

A\_14\_P124071 ACCTCCACCAGAAGAAAGAGACATACCAAACAGTTTACACACAAATTTATTTGGGAGA

A\_14\_P100839 TCCTCTTGCAAAATTAATAAAAGATGTTATTAAGAATATAGTCCGAGTCACCGGATTTGG

A\_16\_P19936031

AAAAAATGGTGGTCAAATGACAATGATTATGCCTTTACCTTTACGTTGCTGGAGTAAGA

A\_16\_P01793926

AAAAAGCAACCTCCTTTGATAAATATCCAGTGGCTTAGATACCTACCACAACTAGAAAGT

CUST\_6020\_PI426210822

CTCTATTGAATTGTGCTTTTCTTATATTAAGATGTAAAATTCAAGGCTCAGTATAGCACC

A\_16\_P21456925

AAATGATTATTTCTAAGACAAACTATGGGACCTACACAGATATTCAGGGAATGCAGTTGG

A\_16\_P30952261 CCGACAGCCCAAGGCTGATGGCCGTGTGTTGGTAAGTCCCTCCTG

A\_14\_P138486 GGAGAGATGGCCCAACCTAATATGGACTACTTCTAACTGAGAAATTAAGTATATTGGTGA

CUST\_5875\_PI426210822 GTATTGGCTCTAAGCTGGGGCATCCACCATTTGGCTCCCCATTTG

A\_16\_P20260894

CTCTTACGAGTAAAAGTTAGTTTCAGCATCTTCACTAAACAAGTTTCAATTCACTGGGAA

CUST\_4743\_PI426210822 TATACTGGAAATTTGGGAAAGGGAAATGGACTATGTGGGAAAGCGGG

A\_14\_P125680 GTGTCGTATCTTCTATTGCAGTTATGTAAAATGAGGTAAGTGCACAAACATCTATCTACCCC  
CUST\_9645\_PI426210822 TCATCTGTCTTCGTGCAGCCATAAAAAGTTATCAGGTGAGGCTGAGG  
A\_14\_P109397 CTAAAGACATGTGGGAAAGCCTGACCCTGGATTCAGGTCAAATCTC  
CUST\_2801\_PI426210822 TTTCTAAAAGAGGGGTGCTGCTTTGGCAGCTCAGAATTGAAAAGAGG  
A\_14\_P135219 ACTTTTTCTCTGTTACAAGTTTTCTGAGGAGAATGCATCTTCACCATTACCCAAG  
A\_14\_P126431 TTGACTCTTCTAGGACGCGCTCCAGGAGATATAATCAGAAGGGCATGTTT  
A\_14\_P130438 CTTTATATTTTTCTCTAATTTTTAATGCTGGCTAGATTTGGGCAGAGGAGGTGACAAAAG  
A\_14\_P124367 CTACCAAAAAGTCTGCTTAGGTGCAGGTGTTCAAAAATGTATCTTCTGACTCAATTAAGC  
A\_14\_P128992 TATTGGGTATTTTTGTAAATTAATATTTCTTTGGGGATGATGCTGCGAGCAGCATAGTGA  
A\_16\_P16190991 CCTCTGAAGCAACATGGAAAATGAGTGAAGTCTAGGTTAGGAGCATCTGTTCTA  
A\_16\_P01584335  
CAAGTGCTTGTCAATTATGTCTCTACTGGAATCTCTAACTACTTTTTCTGTCCTGGTAAGA  
A\_14\_P130416 CGCCATTCAAATTCTTCACCAGTGCTCTTTATGGGCAGTAAACTTGGTTTTTATTTTAAT  
A\_16\_P01769977  
CTCTCCATATTACACCTGATCTGTATCACATGTAGTCTCAATTTCTGAATTCCACTCCAT  
A\_14\_P102091 GGGGAAAATGCCCTAGACTGAAAACCTCTCTGCAGTATAAAAACCTTTTGTAAGTAAATA  
A\_16\_P16844765  
ACGGAAGGCTAATATTAGAAAACCATTTATCTCCAGATCATTCTCATTCTACTCTCTTCT  
A\_14\_P135364 CTTTGTTCATTTTATACTTCTCTGTTGGATCAAACCCTCTCAGTATGGCAAAGTAA  
A\_14\_P115104 GTCTTTTTTTCCTTCAGTGGTCCACTGTAGGTGTGCCAAGTGTCTGTTAT  
A\_14\_P116348 TTGAGTTCCACTAGCATTATGACTTTAGACCCATAGAAAAAAAATAGCCCCAGCACTA  
A\_16\_P00205494  
AAAAAAAAGCATGTTGTTCTAACCTTTTCAAACCTCCAAAGTCAGCAAATGAGAGCCA  
A\_18\_P15905467  
AAAAAATCCCGAGAATCCTCAATATCCTGAAACAGACTAAACAGAGACCCTGAAATCA  
A\_16\_P00685430  
GAAACTTCCCAAATTACTGATCTGACCAATTAGATATGTTTTAATTTTTTTATGACCGGA  
A\_16\_P00685611  
TTTTCCCTAAAAGTCACTATTACAAACAAAATTCGCCTAACTAGAAGTTTTGTTCTATT  
A\_14\_P202400 GAGTTTGACTTATCGATTCTGATAGGAAGGCATAACAGCACTAGATAATGACAGAAGGAA  
A\_14\_P118123 AATCACACTTTCCTGTGCCTAAATAACATCTTAGGCAAGTTGGTTAACTTCTTAGTCATC  
A\_14\_P104183 ACTTGATTTTTTTACAGAAGGTCAGTCGTGCTAATTCTTTCTCTTAGAATGGGAAAT  
A\_16\_P18095024  
AACCACATTCTACACCTACTCTCTTAAAGTTACTCACTTTCAATTGCATAAGCAATACA  
CUST\_2945\_PI426210822 GACAGCTGGCTCCCTCCTGGCCCAGGCCCGTGCAGGGGGGCTCCT  
A\_14\_P124173 ACTTTAGTTACCTTTGCTAATTTCCACCTTGAATCACATGCAGTTATTTCAACCCC  
CUST\_8089\_PI426210822 GAAGCAACATGGGCACGGCAGTGAGGCTGTCCATGGGGCAAGAAG  
A\_14\_P100490 CAGTTCTTGCACCATATAGATCAAGAACCTTCTCATTGGAATCAAATATCATCTGGCAA

A\_14\_P109499 CCAATGCTGCACAGAATGTTGCATATACAAATACAGTCACACATACGTAGACATACTTGT  
CUST\_6370\_PI426210822

TGTATTTGAATGCAGACAAGTATCCAGATAGATGCTAGTGGAAAGTCTGGGACAA

A\_16\_P00639091

CCTGGGATATCTGATTTTTGCATAGTGCTAAGAGTTTCATTTTCATACACTTGACAGAGC

A\_18\_P15677271

CAGTAACTGTCCATCATATAGATCATCTTGCTTATAATCATAAAGCCATTGGATCCGTC

CUST\_5827\_PI426210822 ACTTAGGAGGATGTGGATAAAATCAGGCTGAGGCCTTTTTTTAAAGGCC

CUST\_2455\_PI426210822

TACACCTGTGTAAAAACAAACAGAACCTGCATTAGGAATGGAAGTTAACTTTATCCATT

CUST\_9261\_PI426210822 TGGAATTGCCTTAGTCACCAAGTTCATGGAGCCCACTACTCTGTAAA

CUST\_1490\_PI426210822 CTGTCTGGGCATTTCTGTTCTCTTGTGGGTGTTCAATTCCTTGCTTAT

A\_16\_P30952300 GAGGAATTTCTCCTTTGTTGTGACTGTGGTTCTCATTGCATTCCCTC

CUST\_2472\_PI426210822 TATTATCTGTTTCAGAACTGTCTGGGCAGAAGATAAATCCAGTGCTCCGG

A\_14\_P108628 CTTTCCAAAACGGAATTATTTTGAGCACATTTTTATATGCCCTACATGATTCCAACAGT

A\_14\_P117487 GTTTAATTCCTTACCAGTTGGCAGGGGAAAGTTACTGATTCTATAACTTGACATAACCTT

A\_14\_P106158 TAAAAAGAATAACCCTTAAAAAACTCATCAGTTTCTGAAATAGTGGCTGCCACACACT

A\_14\_P109574 ACTTGAACTGAGTTACTGTGAAGAAAGCATGTCATCCTTGACAATGGATTAATGAAAGT

A\_14\_P121676 CTATTATCAGCAAGTTGACAGATGCTAGTTGGTATAACCGTGGGTAAGTAATTAAGTAATT

A\_16\_P00685622 CATTGATCTCTTAGGCAGAGACGAAGACACTATGGCTCGAAGCCAGAAAATAA

A\_18\_P13776686

CTGAAACGGTATGTTGCTAATACAGACTAGGAGACAATCTACACTGAACTTACCCAATG

A\_14\_P123107 GGCTAGAGAAGTTCCCATTGCTCTCAAGTTTCTAGGATGGGTTTCTATTTTGGATTTTTTTT

A\_14\_P126288 CTCTAACTGTTTGCACACTTAAAACATCATATTATTGCACAAGAAGCCAGTGAAGGCAT

A\_18\_P14136290

ATCAGAAACCTGGAAAATGTTGTCAGAACATTAGCCGTGTAATTTTTTTCCCTTCATTG

A\_14\_P101529 AGAAAATCACCTATAATTCAATACCAAAAAGAACCCCAAAAATGTATGCTGTGCCTACA

A\_16\_P21567352

ATTTCCATGTGTGTCAGTAATTAGCCAATAACTTTGATCCTATGAATCAACAGCCAGAGA

A\_14\_P125601 GCTAGAGGAGACACATTAGATCCTTTTTGTGCTGAATGAACTTGTTGGTGTTTATAAGAA

A\_14\_P111711 ATTTATCTTCCAGATAAGGGCCTTAAATGCCCTGATAGATAGAAGAGATTAGAGGCTTTT

A\_16\_P00482216

ATGTGCACCTACTCCTTATGTCAATCAAATAGAACACACCTTCATACGTAAAGTCAGTAT

A\_14\_P112498 CTCTGATAATGTCGTGACCATGAAAATCACTATTACCATGGATAAGATTCACAAAGCCAT

A\_16\_P19695044

TTGGTTTCCATAATACTTTGCCATTTCTCACATACAAGACTCCCATTTAATGCATACGTG

A\_14\_P106138 TTCATGTTGCCAAAATCTCCTCTTCAAGGCTACAGTAGATGGCTTGCT

A\_16\_P18041494



GCAACTTTCATGAACTGAGAACCATTTTAAATTAAGACATGTCATCATCCAAGAGTTGGC  
A\_14\_P105397 CCGGGGTCTTGTGTTTCCATTTTTATCACCTTGTAACCTACAATATTCCAAAGATCA  
A\_16\_P16744023  
AGAGCATAAGCACAGAAAAATTATTGAACCCAAAGTTGTAACATGATGTAACCAAGGACC  
CUST\_8995\_PI426210822  
GAGAACATAAAGTCAATGAATAACACAGAAACGTGAGTTAACAGGAAACACATGTTATTC  
A\_16\_P18127714  
AAGCACCAGCATAAGGAAGTATAGACTCCACATAATTCACCATCACAGTTTAATGTCTT  
A\_14\_P103849 AAGCATATCCTTTTAGTAAGAGAGTGGAATGCTAAACAGTTCTTATCCAGCATTGTTGGAC  
A\_14\_P120947 CCTAAAATATTGCTGTTGTAATAATGCCTTCAGAAATAAGTCTAGACTGGACTCTTGAGG  
A\_18\_P13409285  
GCAAATGTCCTTTATACATCCATATAGTTACTGTTTCATCAGACTCAATCATTCTCTCC  
A\_14\_P115094 CTTTTTACATCAAGTCAAGAGGAAGTTACTCTTGCTGTTACTCCACTGAATTTTTGCCTC  
A\_18\_P22842301 TTTATCCTCAACCCAGATGGCTGCTGCTTGCACTTCAGTTATTTGCACTTAAT  
A\_16\_P00685615  
ACTTTGAAATATGAAATGCTTTTAAAGGAAGAAAAGTCCAAATGAGTCCCCTCTCCTTTC  
A\_16\_P30952455 GTATGTCGGTGTTCCTTCAGAGCATTGTTCTCAGGCTCCTTTTTCTTGA  
CUST\_6485\_PI426210822 AATGTAATCCTGTTTTTCTGCCATCAATAGGCAGAGCATTTTACAAGCAA  
CUST\_570\_PI426210822 ATGGACTCCACCAATTTCACTCTGACTTAGCGTTATGTGGTGTGGATT  
A\_14\_P102962 GACCATGTATAGTTAGAGATGACCTCCTGAAAGGATCTGAAAAAAATATTCTGACCAT  
A\_14\_P110222 ACAGTCCTCCTTTTTAGCCTCTGATGAAGAATCCTATTTTAAGAAATTGATCAAGAAA  
A\_16\_P15666234  
CCTGCTTCAAGAAGTGTAATAATTCGCTGGTAATATAGGAATCTCATAACAGAGTGCTTACA  
A\_18\_P10638362  
AAGGTTTTCAAAAAGATGAGTTTGGAGCAAAGTATGGAGAAAATATGTGTATGGTGCCTG  
A\_14\_P139504 ACTGCAAATCAATAAACAGTAAACTCAGAATAAATGCCCTCTTGAACCTCAACTGACCT  
A\_18\_P22841771  
AGAAATGTTACAATGAAACCAGGAAATCAGTGGCAGAATTAATAATGTTATAGTCAGGA  
A\_14\_P111287 CTGTTGAATAATTACCTTGATGTTGTAATAATGCCATACACTAGTGTGTCCTCGGGTTA  
A\_16\_P03550745  
AGCCTACAAATTAGCAGAATTTCACTATGAAGCAGTCATCTATTAAGCGTATTCTGAAAA  
A\_14\_P120997 CTTTAGTTTCTGTTAGGACTTAGAAAATAGGACAAATTCTCTTCCATGGGCTGTTTGAGA  
A\_14\_P116802 AATGGGAGAAAGGAGGAGTTTTTCGGTGATCTCGTGTATGTCCCTTATAGAA  
A\_14\_P117853 CTCATCCATTTCTTCATCTCCTCACATTTTCTATAGCATTCTCCAAGTCTAAGTCTAAGC  
A\_14\_P104425 GAAAGGGTTTCTCCAAAAGGATCTTGCATGCTGTTTCAGCATTGATCATTGATAT  
A\_14\_P123771 CTAATTTCCCTGACAACAGCATTATCTTACCCAGTATGCGAAGAGTATACTTTTTGTTC  
CUST\_902\_PI426210822 GCGTGAAATGTCTCAGTGACCAAAGGCATTATGTGGACCATGGAC  
CUST\_4418\_PI426210822

TTTATGCCATGGTATTTTGACGACAATGTTGAATCAATTGTTATCAGATGGGAAGATTTC  
A\_14\_P110617 ATGCCATCTATGGATTTTTTAAAAATGAGTGACACCCTAGCAGTTTACATCTTTGAAGAGA  
A\_14\_P133248 TAAACTTCAATCCGGCCATTTCTACACTAATGTCCACCAGATCAATAGGAGTGTA AAAAG  
A\_14\_P107161 TAGTGGAAGATAACTAAAAATCAGGCAGTCTTGGGTTTTGAAACCAGATCTAACTCTCA  
A\_16\_P19852317  
AAAAATCTCTGTAGAGGAAAAGTTAGTGCAATGAAGTAGCAGATTTGAATGCCAAACACG  
A\_16\_P16535471  
CCTCTGCTGTAAACCTACTATCTTTTCACACTAAGATGTAGATATTCTCGCCTTGCTCTA  
A\_14\_P107630 TATCTCCCATCTCTCAACGCCATGATGTAATAAGAAGTTACTGAACAGTATTAAAGCCAG  
A\_18\_P18978334  
AAAATTTGGAAGCCATTACAATAGGTATCAGGACTCAGGTAATTAATAGGGTAGGTGCA  
A\_14\_P105764 TGGGGATTGAAAACCTCTTAGTGAAAGAATTTAATACAGAAGGGACAGATGAATGACTT  
CUST\_6424\_PI426210822 TAACTCTCAGATATGGCAGTAGACTTAACTGTAAAAGCTCCCAGCCCACA  
A\_14\_P100662 TCATTGTATGAGTGCTTCAGTTTTTCAATTCTAATGGCATGTGGGCAAGAATATCGGATC  
A\_16\_P58424620 ATTCTTCCGTCCCACATGACATTGAGTGAGGTCACCTTAGTGGCATTTC  
CUST\_273\_PI426210822 CAGGGAGGTCGAGGTCACTGATGCTGGTGCTCTCAGCATGTAGTT  
A\_16\_P21653590  
GAGAAGACACAAGATTAAAATGCAGAAACATTCATTCCTCATTGACTTACTTTTTCTTGCT  
A\_16\_P00685319 GCTGGAAAAAGGGACAAAAGATTGCCCAAAGAATCAGGTCAGAACCCTAAA  
A\_16\_P00299866  
ACTACCTCATTATTGCTCTTACATCTGCACTTGATTACTATGGATTTACACGTACACCC  
A\_14\_P106289 CTCATTAATCATTATGTTTTTAATTTTGTGTCTTGACACACCCACGGGCTACATTGTCAG  
CUST\_8126\_PI426210822  
CACACCAGAATATTTTCAGATGCTCATTCTTTTCAGGCATTGGTGAAGATATGGTCT  
A\_16\_P00685237 AAAGTGTCTTTGGTGAGCCTTACTATGTGACTGGCTGATTCATTTGTCC  
A\_14\_P122399 CTAAGACCAAACGCAGAATTAGCACAGTTCAGTAACTCACTAAAGGAGAATGTTGC  
CUST\_3765\_PI426210822 GACTGGGTTGGGAGTGACGTTGGGAACTGTTTCGCCAGAAATACT  
A\_16\_P01722650  
TCTGACTGTAAATCAGCCAGTGATCCATAAACTAAATAATCTTTCCACTCTTTAAGTCA  
CUST\_3782\_PI426210822 GATAAGTGCTGGGGCTCCTATGGTGGGTGTGCTGCAGTCTTCAGC  
A\_18\_P16356101  
CATCACACAAATCACAGAACGACTTTGCTATTGCTTTTTACCAAATGTGTTGCTAAATGG  
A\_18\_P22840720 AAAGAGATGTGGTCATCGAAACACTGAATGCAAAGGGTTAGCAGAGTGAG  
A\_18\_P16940005  
ACTTCTATTTCCCAATAAGCCATGAATTTTGTCTCACTTTCTCCATATGTTCTGTTTCCC  
A\_16\_P02407296  
TGCTCTACAAAGTTTCTTCCCTATGAACACTCATTATATCAATGGTCTTGAGAATCTCCTC  
A\_14\_P135315 CTGAATGATAGCACCCTTTAAATCATATAGTGATGACTGCTGCTGATGATGCACATTTTC

A\_14\_P110673 AAAGTTGCTCTTGCTTTATACTTTCAGGGTGAACCTGGTCTCAGAGGTGAAATT  
A\_16\_P16276923  
CCTCACCCCAAAAAATTACACATTTTAATTGCAAAATCGTGTCTTAGTTCACCATGACAA  
A\_14\_P100254 CAGGCACTTCAGTCAAATAACAAGCCCATGTTCAAATATAAAATGCTAAAAGTGAGAAAG  
A\_16\_P38745132  
ATCCTTACTTTACACCCAGAATACTCCCTTACACTTTCAATTAATACCTGGTGAACAGT  
A\_14\_P125735 CTATTTTTACACATACATGCAACCCAGTTATGATTCAGAGGCAAACAAGATTGAATGACT  
A\_14\_P117835 CAAACCTACAACCTCTACAGGGTAAGAGAACAAATATTTACCTTCTTAGCATCTGCAGAAG  
A\_14\_P128649 TCCACCCTTGAAAATCCCTTTGAAGAATATTTTATTTCTGCAAATGCATCTCCATTCTTA  
A\_18\_P14134017  
AGTCGAATCTCCCATTTAGTCAGACACATTTTTCTAGTTTTTCTAGTTTTTCTACCCTTCA  
A\_16\_P18905984  
TGACCGAATTGTTCAAATATCATGGAGATGAATGCCTTACTCAAAGATAGCAGACTGTAT  
CUST\_6282\_PI426210822 ATACAAAATGTCCTTACTGGTGGGGAAGTGAAGACAGGTACAGTCCTTAC  
A\_18\_P17040966 AAACTCTAGGCTGATCCTCTGAACTTCTCCATCTCAAACCTGAGCC  
A\_14\_P202489 GCGAGGTTCCACTTCACATTATCTTCTGGTTCTGCATATGAATATTTAAAACTTCTCTGT  
CUST\_6145\_PI426210822  
AATGTAATATCATCACTATTATTGTTATTATATGAGGGAAGGTGAATAGGAACTCATCAG  
A\_14\_P132100 TTGTATTACTCCTTGTTTTCCACATGAAAAGAAAGATGATTGGTAGTTGATTGGTGGAGT  
A\_16\_P17673863  
ATAGTCAGTCATCATTCTCCATAAAATCACAAATCTGGTCTCATGAAAATTCCTTGCTCC  
A\_18\_P22841907  
CTCTTGGGACATCATTTTAGCAGGGGAGACTACCATTGAACATGTAATGATAAAATTGAT  
A\_16\_P02113823  
AAATTGCATAGACGTTCCACAAAAAGGATAATACAAGAGGAATTATTTGATGGGAAAGGT  
CUST\_3800\_PI426210822 CAGCTCCCCTGAAATGCGTAGGGTTGGTCAGTGATTTTGCTATGC  
A\_14\_P200111 GACGAAAACAGCACAGCAAATCCTGTTACCAGATTTGTCGCAAAAAGAATAGAGAATC  
A\_16\_P30952274 TTTCTGCTCTCAACTGCTCTCTATCCCTTTAGGCCTGTGCTCAT  
CUST\_3723\_PI426210822 CTGGGGTCTCACCATTTATAGACTTCCATTAGTCTGTTGTGACTTAATTGT  
A\_14\_P115970 CTAGGTAGATAGAGACATAGATATAGATACAGACCCAAAAATGGCAATTGGGTGTGTAGG  
A\_14\_P121288 TTTCTCGAGGTAAGAGATTACAGCCATCCAATGGTTTTAGGCTTGCATATCAGTTTTAT  
A\_14\_P113340 AGATTTAAACATCTCTCCTCAAAGCATGAACTGGTCTCTGACTCAAATAACTGAGGTTA  
A\_14\_P109496 GATGCTCTCTGGGGCTCAGGCCAATTTGCATACATTTTAATCTATAAAAAATTAAGTGCT  
A\_16\_P18211850  
ATTTGGCAGTTGAGATATAAATTTGGCACTATGTGGTAACCATTCACTAGGTTTATGTCCT  
A\_16\_P15160760  
GACCTAATGCACTGAAATCAAATTTGACTATTTCCAGTATAGACTACTCCTCCTCACAGA  
A\_14\_P128322 CTGCCAGGAGACTGTAAATAGATAACCAAATGAATTAACAGTTGTAGGTGGGATTTGAAA

A\_16\_P00685030 CAAGTCTGGCTCTTCTCCTCTTTCTCCAGGGAAGAATCGGGGCAC  
A\_14\_P136232 AAAGTGAATAAGAATCTGGCAGGATCACAATAATTGAATAACAGAAGTATCAGGAGACCC  
A\_18\_P14134570 GATGTGAGAGTGAGGTCATGGGTGCTTGGGTTGTGACTCACCTCT  
A\_14\_P104259 ATAAATGAGCCAACTTTCTCATGAATGATCAAAGAGTAGCCAAATTCCCAATACCATCAA  
A\_16\_P19122468  
ACTTTTCTATTCCACAGCATTAAAGATTTCCCAAATACACCTTAGGACTCTTAACAGGG  
A\_16\_P19171972  
AAAATATTGCTCAACGCTTGAAAATAGTCCTAGGCTTTTAAAGACCCATGATTGTGCTTC  
A\_14\_P124980 ACTGAACAAACAAAACAGGACGTAGAAAAATCGGGTTTTATGGATATTTAATGTCTGGAA  
A\_14\_P110250 TCTTTATTGAAAATATTCTAATCAGCCAAAACCTTAAAGACTTGTGTATAAACATTTGTGT  
A\_14\_P122398 CTGGTTATGGGAAGGGAGAAATAAAATCATCAAACCCAAAAGGAGTGTGTTGTTTTAAT  
A\_14\_P127061 GGTCTCTATCACCATAACAACAATTCCAAACATCCCAAAAATCAGAGCATAGTCACT  
CUST\_8134\_PI426210822 CTTTCTTCCATCACCACCCTTTGAAGGTCTCTTTGCCTACTTGTAGATTTAG  
A\_14\_P200786 TGTGTTAAGCCATGAGTCTTATAACACAGCATTAGTGTCTAAGGAGATATGTGTTGTGGG  
A\_16\_P16191364 GTATTGAGTGGGAAGTGATTCAAGAGGCCAGACATTCTGTCTGGACATTA  
A\_14\_P116263 AGGAAGACTTGGAAATTCTTTGTCAAGGTTGTGTTATCAGCCACAAAAAATAAATCTTT  
A\_14\_P106618 CATCATCTTTCTCACTGACCGTCTGTTTGATACTGACAAGGAGAACACTG  
A\_14\_P107627 TGTTATCACTGGGCTCCTTGCCTGAAAGATTATAAATACTTCGTTAAAATACATACATCC  
A\_16\_P35677911  
AAGACTCTTCTCAGTAAGAACATTTACGTTAAATTACGACTCAAGTAGATCTTCACTCA  
A\_14\_P125701 GCAGTATGGACCACAAGAAAACGTTACATGTTTGTAGATTCTGATTCAACTTATTGCTC  
A\_14\_P102039 ACTGGGAATAAATTAATAAGAAGATTAAGGTCTGCTGCTTGCCATTCCATAGACACAATC  
A\_16\_P02225023  
AGAGAGCCAGTTCCATTAATCTGAGTCAGTAGAAGTTGAAAATCCTTTATACCACTCTTT  
A\_16\_P18142639  
CAGCAATTCTCAGTAAAATACCCCATCTTATCTTCTGTTCCCTATTCTAATCATCTCCCC  
A\_14\_P116383 GGTAAGTATCTCTCATCCAGCAGGAAAGAGTATAACATTGCATGCGTGTATAAAAGC  
A\_14\_P137296 AGTTGAATGAAAACCCTCTCTAATCTAGAGACATTTCTGAGGAGGTAACTATAATCAGCC  
A\_14\_P128559 ATTCATTTTCATCAGTTGTAATGATGCAGAATTCTAGGACACCATTGTGGTATATCTGCC  
A\_14\_P125320 CACATTTCTCTCAAAGAGTCCACCGCAAAGCAGACTGGCATGAAATATAGGTAT  
CUST\_7252\_PI426210822  
TGCTACTGTTCTGCAATTGTTCTTTTATTCTTTCTCTCTACTAATGTTTTACCTATGGA  
A\_18\_P12771619  
AAAATGACATTAGCCTGCTTAATGAGGACAATGATCAAAAAATCACAGGTGAGGTGTTA  
A\_14\_P129178 ATCAGATCAGAGTTTGTAAATTGCTGCTTTCAAGAAATCTTTACATCCACCTGTTTTCC  
A\_14\_P121721 AGAAGTGTCAAGCCTTGGGATACAATCTCCGAGACTCCTGCTTTACATTAG  
A\_16\_P00908095  
AAGTTAATTGGCATATGGAATGTTTTAATCTCCTCTGAAATGTGTAGCGTAGGCTTTTTCC

CUST\_10295\_PI426210822 GAGCACATGAAAGCCACATGTAAGAGTGAGTTCAGGTGCTCTAAATCCTTT  
A\_16\_P21048710

GCCTTTATCCAGGTATCTCAAATATCTCCCAACCCTGATTAAAGTTACATATCTCAGAGA

A\_16\_P02835011

CACTGTTCTTTGTTCTGAGAAAACCTCTCTATCAAATCCATATCCAAGTGCTACTCTTGTC

A\_14\_P127906 GAAACTGAAATGGGAGGTAGGACTCTTGTAACAGCCACGTTTATCTTAGTTAGTATAC

A\_16\_P01652009

CTTCCTCTGCTCATATATGTGGCCTGAGATCTTATTAAATGCCTACAGTTCAAAACTCTT

A\_14\_P125034 CTAATATAGAGGAAGGTGTGTCATTTTGAGATTCCCTCTAGAGAACTTAGGAGCCTG

A\_18\_P22839977

CAGTGCCTGACTCAGGTCTCTTGATTCCATGGTGTATTGTTTTTTTACCTATTAAACAAT

A\_14\_P103665 AGAGGTAGACAATTTGGACGATTTTTTAGCCCTAAAAGTGGACTAATTAATACTTCGTC

A\_14\_P129135 ATGTGACCTTGAGCAACACCATATACCCAAAAGCACTTGATAATGTAACCTTCCATTTAT

A\_14\_P117097 GCATATAAGACAAGGAGGAAATTGGTTGACTGAAATGTAGAAACATTTTGCCGTATTGAG

CUST\_2069\_PI426210822

TTAACGGAGTATGTGAAGCATTTGTATTTCAAAACTGAGATAGGAAACTTCACATATAGA

A\_14\_P110198 TATTTTCTCTTCTGTTGGGATAATAGACCTTGCATCCTGGAAAGAAGTAACAATACTGCT

CUST\_152\_PI426210822

AAAGTAACTGTGGAGAGCAATTTTGCACAGCTTATAGAAAACGCCAATGCTAGG

A\_14\_P128414 TCCCTGGTTACTAAAAAACTAGAAGAGTCTGCTCATGTGCACAAATATGGCTTAGATATC

A\_14\_P111865 AAACCTATCCCATATGTTTGAATCCCAGATCCAATTCTGAAAGGCACAAAAGGGAATTT

A\_16\_P21485358

ATAAGGGCTTTATTTGTGTCATAAAAAAAAGGATGGACTTAAACCACAGAGGATTGGA

A\_16\_P00685170 ATTCAACTCTGCTGATCTTCCTCTACCCAACAAGTGGCATTCTTCACTCAA

A\_18\_P16581092

GTGTTCTCTTGACAGCATTAAATAACCTAGACCAATCCATAGTTCAGATCGTAAGGGTAAT

CUST\_8085\_PI426210822 AGGGTAGACTTCATTCCCATTGCACAAAATCCAGAAGGGCTTCAG

CUST\_96\_PI426210822

CCGTAAAGAGGTGCATTTAGCTGTGTCAATCATTTAGACAACGATTATCTGGTATGTG

CUST\_791\_PI426210822 AAAGATCTAACAGGTTTCACTTTAGGACCTCTCCCCAAGCCCAC

A\_18\_P10646610

AAGAAAAGAGCGCTACATTATTCTTGGATGCAGACATTATTCATAACGTTAGTATTCCGG

CUST\_2944\_PI426210822 CAGAGCTAGAGTTGATGAGAGACAGCTGGCTCCCTCTGGCCAG

A\_14\_P116020 TGCCAGGGAATATCATTACAAAGATGTAAGAGTAACAGACTTAGAAGTTCAGAGAGTGAC

CUST\_7123\_PI426210822

AATGCTGGGTTGTAGAACATCTGTGATTTTCATGGGATAAAAGCCCTTATTTTTGTTTTG

A\_14\_P130354 TCTCTGTAGACAATTTGAATACGGAAATTTAGGGCTAATCATAAACATTACCCATGGGCA

A\_14\_P130730 TTTGGGTTGAGTTTAAACAATTTCCATGGTAGAGAGTCTCTTCTGCTATATGCTGTTTACT

A\_14\_P137060 GAAACCAAACATGCTTTTTGTTTTACAGGAAACTTCGGCTGTTCTCAGGAAATTCTAAG

A\_14\_P125339 GTCTGGAAATTCCAGGGCCTGACTCTTGATCTTACTGTGTAACACATGAT

A\_14\_P129211 TATAGGCAAACATGCATGTGTTGGAGGCTGAGTAGTAATGTTTCATTTTGCTGTTGAC

CUST\_226\_P1426210822 GTCTCTTCCACGCCGCGTCCCAGGGGGCGATTAAATGTCTCC

A\_14\_P100798 ATGAAATAACATCCTTTGAATGAGTTTGCTCTGAGCCTGTGACTCCTTCTGCTAG

A\_14\_P121335 TGGATCAATGTCTAGTAAACTACTGGTAGCAGCGGAGCATAAATGTGTTCTTCTTGATAT

A\_16\_P41574111

AATCAGAATGTAGGTTCCCTCATAATAAAAACAGGCTTAACCAATCTTCTTGCTCTGTGACT

A\_14\_P132387 TCAAATTTAAATGATACCTTTTCGGACAGCACGAACGGAAGATGATAATTTCTCATGCTT

A\_14\_P133666 GTAATAAAATATGCCAGAGAGATATCTGTAGATAGAGTGAGTCTTCCAACCTTTGGAGG

CUST\_6710\_P1426210822

CAAATAAGCATAGAATGAAGCAAAAACAATTTTTATAAATATTTACAATAGTAAGCAAATG

A\_14\_P110777 ACAGTATATATAAAAAAATCCCAAAACCGTAGATTGGAATAATCTGCCCCATCAGACCTC

A\_14\_P121907 AAGTCTATTACAGGAGCAAATACCTGAGAAGCGATACCTACAACACCAATATTGAGGC

A\_14\_P131332 TGGAGATCTAGATGTCTTATTCCTGACAGATGAATACGACACAGTTCTGGCTTATGAAAA

CUST\_3233\_P1426210822 GAGCTTGTTCCATGCTGCCTGACTCCTGCTTTGGGGATACTTGTC

A\_16\_P21202195

CCATTGAGAAAACCACATTGCTTAATTCTAGTGAGACTGAAACTTTGTAGAAAGGGTGTA

A\_14\_P129221 ACAGTCTGTTTGACCTGCGTTTTCTCCTTTAATAACATATGTTATCGTATCATTAGGGA

A\_14\_P121790 ACTAAAGAAAATGAAGTCCTAGTAACCACTGTTTATGGGGGTTGGCCTGTAGAA

A\_14\_P131973 CAGGCCTCTTTGTTTCTTCTTTTCTTTAAATTGCCTGCACTTGAGTAGCCTTTATCAC

A\_14\_P139208 GATTTTACTAAGGGCAGAGTTCACCTCTTGCATTGTATAGCATCTTCTCCAGGTT

A\_16\_P01871134

CCACTTCGAAAATGTTTACTTTGCTTAAAATGTCATGGCTAAAGAACTACTCGTCTGCA

A\_14\_P125956 TTAAATTTGAACTGCTGTAAATTATGTCTGGAGCCACTCAGTGATGGCAGAAATGACTA

A\_14\_P201942 TCTTGATAGATTTCCACAGGAAAAGATGAATCATAAAACAGTATTGAAGTCCACTAGGAG

A\_16\_P21161147

AAACTTGTTGTAACCTGAAGTAGTATCTAAGAACTGGGAAGTAATCTTACAGGCGTGTGC

A\_14\_P112360 TCATGGTAACTGGCTCCTCTTTGGATTTATTATTGTAGATGACTACAGCAACTGCATTGT

A\_14\_P137116 ACTGGAACCAGAGAGACAGCCAAGAAATAGATAGAAGAATATTGGAAGTTGGCATATAAT

A\_16\_P30952387 CTTACAGCAAGTTTCTGAACGCTGTAAACTTCTCATTTTCAGATGTCACTGTTGGAG

A\_14\_P110290 AACTAATGCGCTCGTCACTCAAGCCAAAGGAACCTACAAACAAAGTGGTTTA

CUST\_4102\_P1426210822

CATGCTGTCATCTTTATGTTGTATTGGAAAAATCTGGGATTTCTTTTTCCCTTGGTCAT

A\_18\_P16485023

ACTAAACAGAACTTCCATTCAAGGCTTTATAACATCTGACTCTATATTTCCCCCTCCAAT

A\_16\_P01813537

ATGTCCTACCTGCTTTTAAATTGTTCCCAAATGACTTGATGTAATTCCAAAATTTAGCCCT

A\_16\_P30952236 CTGCAGGGTCCCTTGTGGGCGCACCAAAGGCAGATTCCAAATACAG  
A\_16\_P03136323  
TAATCAGGACTGAACACAGAAGACTCAGTATGGGAGAAATACACGAAATATTTGTTCTCA  
A\_14\_P131089 CTGTCTCTCCAGATCTTCCTCCGTGTCAATGATGTTTATATCTTCTTCATCTTGATGC  
A\_14\_P116179 CAATCATGGCCTAGTCTCACCTGGAATTTCCATTTTGCATCAGTAGAATATTTATTACACA  
A\_16\_P16030946  
ATTTTATCCCATGATTCCTTATTTAAGCAGGCCCTACAAAGTATAGTATCTGAACGCC  
CUST\_5362\_PI426210822  
CCATGCAGTCTATTTAATTTTCAGACTCTTATTTACCCAGTCTTAGGGAACTGAG  
A\_14\_P201171 GGGTGATCCCGAAATTTTTCTGATTGCTCACAGGTAATAAAAATCATTGGTCAGTTTAA  
A\_16\_P16214752  
GTTCTTTTCTATAGGCCTCAAAAATATTCAGTGCTCTGATTTTTTCCCTTGGCTCTGATC  
A\_14\_P202442 TTTTACTTCTGCACCAAGTTAAAAACAAAGATTCTATTGACTCCTCTGCTGCTTACATG  
A\_14\_P133768 TTCTTTCCCTCTTCAGTGACGTTTCTGCAAATTCTATAGTTTTCTTGTCACCTGGTTAT  
A\_14\_P121105 ACAATAGAACCTGATTTTCTGTCATTGGAATAAGTGGATAATAGGTTCCATACTGTGGGT  
A\_16\_P18105535  
ACACACACGCATTTATTCTGTCAACAATTTACATCCTATACTATCTACCTGTTTGTCTCT  
A\_14\_P133237 TGCATACAGGAGCCTTTAAATGGAAATACTGAATTTTATTGGAGACACTGAGAAACCTTT  
A\_14\_P137970 ACAGTTAATTGAATTGGGGTGTAGTTAGAAGGCTTTGGTTTAGAATATTAGATGATCCGC  
A\_18\_P13523190  
AAGAACCAAAGTTAGTCATTTTAGGCACAATAAGGTCAAAATCCATTTCAACTTCCAAGC  
A\_18\_P13497263  
AATATCCAGATCAATCTGCCTTACATAACCCAATCTGCTTAGTGGTTATTCTTGATCTCC  
A\_14\_P106878 TTGCATTTCTTTTTTTTTTTTTCTAGCCAAACATCATGTCAATGGCAACAGAACAGTCGA  
CUST\_708\_PI426210822 CTGGGGTTTTTGAGTGGAAAGAGGTATTTTATGCTCCCCAGGTCTT  
A\_18\_P22842666  
TGGGTTTATTTTCATCTTAGTTGTTTCTACTCTTTCTACTCTTATAGTTTTGGGGGTGTC  
A\_14\_P130812 TTAAAATATTGGATCAGGTTATTTATCTGGAAACCCTGAAGTTTGGCTGTTTAAAGGGCT  
A\_14\_P123815 GATTTCTTAAATTCATCTGATCAAACTTGACCTCAGAGGAACTGTTAAACAGAATGCCA  
A\_14\_P101574 CTTGTCATCTTTGATACAAAACAGAAATCTTTGCAAATACCAATTGCATTCTGTAGCCC  
A\_14\_P113012 AGCAATGTCTTTTAAATGTCCTGTTGGGAAAGACACAAAATTTACCTCAAAGTAGAATTCC  
A\_14\_P130537 CCTGCTTTTCTCTATCATCTCCTTCCTTCTATCTTTTATCCAGTGAAAATGAAAACATC  
A\_14\_P107960 TATAAAAGCAAAGAACATCTAAACATCACAAAACCGACAAGTTCACAAAATCCCGATCTC  
CUST\_3188\_PI426210822 TTTCTCAGTGGAGCTGGCTCTCGGCTTTATGGACAAATCAAAGAAGAT  
A\_14\_P128160 CGTTGGACATAGAAGCACCAATGAATATCACAAACCAGAAAGATCTAACACATTTTTAAC  
A\_14\_P110984 GAGA ACTCCATCACGGTCAACATCAAATACCTTGAAGCAAATAATGAAAAGAACTCTT  
A\_14\_P118719 ACCATTCAATTTAAACCTGGAATATTAATGATAAGTTTGCCAGCACCTGTATGTTCTCG  
A\_14\_P125949 AAAATTAGCCACTTTTAAAGATGACATTTCCAGCAGGTGAGACACACAACCATAAAAGCA

A\_14\_P102882 CAATTCTGGGCTTCAAGGAAAAAGTATACTTCAAGACATTTCTCCATTTTTACTTGTGT

A\_14\_P137046 CCTTTCCCATGGCGTAGATCACTCTGCATTGTAAGAACAGATTTATGCATGTAATATGT

A\_14\_P136143 CTTGGAATAAGACTTAGGAGAAAATGGTGCTTCACTAACCCGCTCCG

A\_18\_P22839396 CCTGCAGTGTGGCTGGGGATCATCTTTGCTCATACTCTGTAATC

CUST\_9215\_PI426210822

TTCCACACAATATTTGCTTTTTTCACAAAGTCTGGAAGAAAAGTCTTGGTAAGGATTTGT

A\_16\_P16191210

ACATGCTGACTACTTCCTACTCATATGTATTTGTATTTTAATTTAAGAGGCAGCAGGTA

A\_14\_P130815 TGAAAATCTTGTCTGTGAAGATGAAGTTGAAAATGTCTCAGGAACCTACTGCAAATCCAT

A\_14\_P128006 TCAAAACTCCTCCCTCTCGATACACACATAAAAACACACATACTTACAACCTAACAACCT

A\_18\_P12599630

TCATGCTTTCCCATTTGAGATATCAGGAGATTTTCCTTTTACTTTGTTTACACTAGGAACA

CUST\_5574\_PI426210822 TAGAGTTGGGGTCTGCCCCACTGATGGCCTAATTAAGTGGAAT

A\_16\_P16089410

AGATAATGGGTATCGGTTTCTTAGAAAAGACAGAGTGACATAAACTAGGACATAGAGGGT

A\_18\_P22839763

TTATCACTTACGAAAACAATGCGTTTGAGGGAGGCAAACCAAGATGTTAAAACTGATTA

A\_18\_P13268119

GTTCTTTAAACCAGAAATCTATGGACTTGCTTTCACATTATAACAGTATTTCCCCAGG

A\_16\_P00685420

GGGGGGAATTTAGAAAACATGTGTTAAACCTCTAGATTTCTTTTTTCTAACTAACTGCA

A\_14\_P113214 TCACCCAACTTTATGTCCTTAGAAAAGACCAATCTCCTCAGTAAATTCCTTTATCACTGA

A\_16\_P03741464

ATCCCTTTGGTTTAAAGTCTGCCTGTAAGCATTAAACAGATACATTCCTAAAGACAGTA

A\_18\_P17236266

AAAGGTCTAAAGAGTGGAACCTATGAATTTAATTCTGCCGTAAACTGACCATTGAACTGAC

A\_16\_P39688968

TATCTTGGCTGAATATCACTATCCTCTTGAGAAGGTGAATAGTTGAAATAGCATGGTCTG

A\_14\_P131132 CCTCAACACGTCTGACTTCTCTGACTGGTCTAGTTTTAATGGTAAGTGGTG

A\_14\_P117564 CTTGTGTGTTTCTTTTGACAGGCATTACGAGATTGGACGACCAAATATTTCTGAACAG

CUST\_3449\_PI426210822

GGGAATATTTTTAGACTCTTTAATGAGAGAGTCATTTTCTCAGTAAATATTTGATTGGCC

A\_14\_P135953 CAGCACCCATAAATATTGTTAGTCTTATGGAAAAGGAAAAAGAACTTGC GTTATCTGACT

A\_14\_P104152 ATTACGTTTTTCTATTTCTTCATGCTCTTCTTGAGTCTTTTCCTACAAGAGAGGTTTATG

A\_14\_P112711 ATGTAATTACTGCTACCCTGCCAACTCCCTAACCCTTACACTTTAAATTTGCTAA

A\_14\_P111292 GTATCTTCATTTACGCCATCTGAGAAGATAAGCAGTTGTTTCAGCAAATTTCTTAGCCCTA

A\_14\_P120480 GCTACTTTGATCCAATTTGGGAGGCAATGAAAATGTTGCATAGTTGAACAATGGAATAT

A\_14\_P101530 CGGTATGGATTAAACAGATTTAGGAAGAAAATCTACAGGACTTGTGTTGTTGAAGTCTGG



A\_14\_P107080 TGATAATAGTTGTAATCTTCTTCTGGATGACAGACTCATCACAATGAGAATGGCACAAGT

A\_14\_P106281 TACACTTAAATTTGGTGCAAATTTAATTTTATTAAACCTTACAATGAATGTTGTGGCATA

A\_16\_P17832313

GTGACTGCAGAAAAGCATGATTATATAGAAATTACTCATAATTTATCGCATATATACGCA

A\_14\_P107689 AGTGGAATGCTCTGTTGTTAAAAAGGAAGAACTGTCTTTCTGAACTGACATCACGA

A\_16\_P39614210 TCCCATGACATATCTTATATCCATTCACTGTAATACTCCCACAATATTATCACAGCCA

A\_14\_P109528 ACTTTGTTCTAACCTCTTGAACCTCTATTACTGCCTCACCATTTCTCAAATGAACTAGCAC

A\_16\_P19344411

TGCTACAGGTTTAAGAACTTCTATCGATGTTACTTCTGTCTACATCATACTAGTGCGA

A\_14\_P126179 GTCATTGATGGCTTTTTTGTGAAGCGCACAGCAGACATTAAGGAGTCAG

A\_14\_P116298 GAGGGACTCAGATTAGTCTGAAAAATATTGGACATGCCTATGAAATAACCCAACACTATT

A\_14\_P107216 GACCAACATCTGAATTGTTAAAGCCTTGGATTACATTTGAGTATATGACAGTGCTCATCT

A\_14\_P107431 TTAAGCAATCAGAAATTGCTACTCACCAGCAAGGGTATAATCCATATCAAAAACCAAAAACA

A\_14\_P132633 CATTGTTTTCATGTCTTAAAAATTGCCACCTGCACTTTGTTTCTGCACTATTATGTAGTGC

A\_14\_P112216 GACAAGTCTCGTTTACCACATAAAGTTTTTATTGAACTCAAACCTCAGGGGCTCCAAAG

A\_14\_P134601 TGGCAATATCCTTGTTTAGAAAACAAGGCTATCCAAACACTATAATTACAACGTGCACC

CUST\_3921\_P1426210822 GCTGGTTTTTCACTTGGGGTTCTCATTTCAGATTCGTGATTCTGTTTACTGA

A\_16\_P16191934

GAGCCCACTACTCTGTAAATTGTTGTGGATTTGTCTTTGTTCTTAATTCCATTGGAAATT

A\_14\_P125883 CAGACGGCATGAAGATGGAGAATTCTGGTAAGATTAGTGGAGGCTTCAG

A\_14\_P106029 TTCTTTTCTTGCTCACTCTTTTTCTTTGTGCCTGTTGCAATGCTTAAATGTGAATAAGCC

A\_14\_P132448 GCTAACCAATTCTGAGGGCTGTGAGGGGTAGGTGTTAACACAAATTACAAAATAAATAAG

A\_14\_P114544 AAATTGTCGGGAATGCCATTTCTTCAGATATGCAAGTTAATATCCAAGGGAAAATACCTT

A\_14\_P104452 GTCAATCTGCTTTTCGCCATCTGGTCACTATGGGTATAGGAAAGAAATTCAGTTTTCT

A\_14\_P134560 ATCCATATCTTCAGATCTGTTCTCTCTGTTTTCTACAACAACCTTTTCTATTCCCACCAAC

A\_18\_P10798686

ACACCACAAGATAACATGTAACCTAACACAGAATACCAGATAAATGCTTTGCTGACAGA

A\_16\_P00685243

TTTCCTTGCTTCTCTACTTTTTCTCACTTATTTTGTGAGCATTATTGTAAGCAGCCTT

A\_14\_P106817 GATGACTGATTTAATGCACATTGATGGATGTTTTCAATACAATTTTTGTTCTCACAAAGT

A\_18\_P11178128

ACAACAGGAAAACCTGGAAAAGAATGTCACAAATATATAACATGTTATTTGCCTAATGCTT

A\_14\_P113580 ACACTTTTCGCAGTTTGACCAACAATATTGATTTTTGTCTGTGCTGCTATTTGATGCTTT

A\_14\_P112260 AAAATGAAAGTGCATCGATTTAAGCAGACAACAGGGTCTGGTTCTAGTCAAGAACTT

A\_16\_P17664422

AGGGCCATCAAATCAGTATATTTTCACTTGACACACAATTTTGAGATAATGAACCGAACT

A\_14\_P114503 AAAACTGCCATATCTTATCTTATAGACTTGAACAATTGTGTAAAGCCAGGAGGAGAGAA

A\_14\_P130642 TCACAATCACGTAAACATTTTGGTTTATTTCTTTCTGATCTTTTTTCTTAGGCATGGGGC

A\_14\_P131963 GATAGTGACCTTCTGTTTATCATGTGAAGAGAGAAGCAGAGAAAAGTCTCTACATGA  
A\_14\_P136882 CTCTTATTATAAAGACCAGCCCCTTAAGGAAGAGAAAATTGCATTCTACTCACTACAGTC  
A\_14\_P133361 AACCATGGCACTATGAAGGACAGTAAGAGACTACACAGTTAAACTGGTTACTCTAAAAAT  
A\_14\_P121296 TATATATATTTTTTCTTTCTTTTTTCAGCACTCTGTTTTCTACAGTGGACACTGATGA  
A\_14\_P101270 ACATAGTAACAGAACCAAAAACACAAATTTGCATCATAAATTTTATCCCGATGCGGGACA  
A\_14\_P125311 CTTTTGTTGTTATGTGTCAAAGACACTTAGATTGGTCCAGAGAAAAAAGGAACAAAGCAT  
A\_14\_P121033 CTGACAGCATCTTTATTTATTGTGCATGGATTTCATGTTAACCTCATCATCCTTTTGCTG  
A\_14\_P103803 ATGAGAAAAGTCCAGAAAGAAGTGTCTGACAGGCTAAGAACAGAAAATTGCTTCAA  
A\_16\_P20115595  
AAACCTTTGTGCCCATATTAACGATCTGTAAGTGAATCACCAAATAACCTTTCACTGTC  
A\_14\_P128862 TTTTCTGGGAGGCCCTTCATTGCATTTGTTAGAAAATTTGGGAGAAGGAATTTCTTATAG  
A\_18\_P14136407  
AAAAACAGGAAAACGCTTTTCTGACATACACCCCAAGTTTCTTCAGACCAAAAAGAA  
A\_18\_P14134802 ATCCACCTTGAGGGTTTGGAAAATTCAACTCATTCTACCCTTTGGAGACATATC  
A\_16\_P00389114  
AAGGTCAATAGTTCCTTATTGCCAAGTCTGAATATTTGTCTGCCTTTATCTTACCCAAGT  
A\_16\_P16093608  
ACCGTCAGTGTTCCTTAAACTCCATGTTTTTCTTCATGCTTATTTCCAGTATCAA  
A\_16\_P18490107  
TCCCAGTGGTAAAGAAGTATAAGCATTCAATTTCCCCTATAATTCCTCAGAAGACATAAC  
A\_14\_P101729 GCAGGGATGTTGTATTGTTTTCCAGGCAAAGTAAAAGTCAATGTTACAATCCGATAAA  
A\_16\_P18073636  
CTTCAATCTCCACCAAATAGGTCTATAATGAGAACAGCAATTTTCAGAAGTGAAGGGACT  
A\_14\_P115776 TCATGGAAGAATATCATACTTGGCAAAACTTTGGAAACTCTCACAGGTATGAACAAAAGT  
CUST\_6205\_PI426210822 GGCTCCAAGTGTAGGGACCGCCACCCAAGGACGTTTTTCTCTGTT  
A\_14\_P124090 ATGAGTCATAAGGTGATGATAACTTTTCAGACCTAGATGGTTTTCGTTAATCTCAGTGCAGA  
A\_14\_P132137 TTCAGACCAGTGGATTTAAACCAATATCATCTACCCCTTTAATTGCATAGTCATTCATGG  
A\_16\_P36167641  
GCCACTTATAACACAGATTAACCTTCACAGCACATAAAAAGAATACTGGAGAACCCTTACA  
A\_14\_P105002  
TTGAACACAGAAGTTAAAAGTATATAGAGAACAAGACAAGTCAGGACAGATCTGCAAGCG  
A\_14\_P131292 TAAAACACATTTGTCCCTCATTAGTGTCTGTGCATCTATTCCTTGCAAAGGTTGGTAGATTG  
A\_18\_P22842112  
AGGAGAAAAGTAAGATAATCTTGGAAGGCAAAGCCTGTCTCCCTATATTGTTCTTAAAAA  
A\_16\_P17742563  
ATGGCTCTATAGTGCTTACACCGAATATATCTGACTTTTAAACGTTCTATCAATTCAGCCT  
A\_14\_P125270 CACTTAGAAGATGTTGTTAAAACATGTGAAAGATAGGTATGGAAAAAGCATAACACCCCC  
A\_14\_P115609 ATAATTTAAACAAAGGAATTCTGTGTTTAAAAGATCTTTGCCTCCCAACAGGGTGCAT

A\_14\_P123066 AGCCCAGGCAATTTGGTCAAAAAGTAAGAGTTCTATGATATCAAGTTTGAGATTTGGATG  
 A\_14\_P130983 AATTGTCAGGCCATCTCTGAGAAGTAGGTTACTTCTTGATATAACATGATAGGAACCATT  
 A\_14\_P123734  
 TTAAGGAATATAGTAAAAGAAAAAGACTTGAAACTGCAGCACAGCGAGGAAAGTCACATC  
 A\_14\_P137735 AACTGATACAATAGGCAAAACCAATCACTCAAATTTGGCTATTAAACACAGAAGAGAAAA  
 A\_14\_P131809 GATCGACTGTGGGTTTAGTTTTAGTTGTCTGAAAATCACTTCCACCACTGATTATTCTAA  
 A\_14\_P120335 CCTTTGCAGTCACCCCTTTACCCTTAAAGTAAATGGATTTAGCCATACTGCTTG  
 A\_14\_P127973 CAACAACACAGACAAGACCCTGTTTACAACTTTTCTTTCTTTTTTTTTAATTTTAGACC  
 A\_14\_P119527 TGTCCATGGAGTGTTTTTAAGGCTATTTACAAGTCTCCACATAGAGTGGAAGATAGTAG  
 A\_14\_P124253 CAGTGGAGAGAGGAAATAGCACTGTTACTGTTAAAGAGATTTGTCTTCATTCAAAGACT  
 A\_14\_P132341 CCCCATTGTTGACTTTCTCTACTGCTGCTCCTTTGTTGCCTAACAATATAGAAAATAAAA  
 A\_16\_P16284506  
 AAAATGGAGCCGACTTTTTAAAACAATCTTTGAAAGGCATAACTGATTTTTGGGTGCAACA  
 A\_16\_P16891969  
 AACCAACAAATGTTTCACTACACTCAGAAAACACAGAGTCTTTATTCCAAGAGGAACTTT  
 A\_14\_P126054 CTTTCATACGAGAGTCAACAACAGCCTACACGGAACAATAAGGAAACAGAC  
 A\_14\_P125864 AAAGCACTTTTATTCTTAGTGCACCTATTCCTTCCAGCATATAATGGGCCTCAAGTATAT  
 A\_14\_P139293 TGGGTTTAATGCATCCTGCAAACATTTTTTTTTCTGAATTCCTCTCATTCAAAAAGT  
 A\_14\_P106339 AAACAAGTTATTGATAAAGGCCAGACAATTCCAGAGGACATCTTAGGGAAAATAGCAGTT  
 A\_16\_P16191213  
 TTGACAAAGAGAAGTGGTTTTGGGCTCTTAAGGAAAAAAAAAAGAAAGAAGCAACTATGAC  
 A\_16\_P20195934  
 ATTTACCTTTTCGACTTAGAACAAGTAGAAAACAAGTTTCCAATCATGGTCATCTCCTGC  
 A\_14\_P134141 TTGTTTAAGACAGGTATGATTAAGTGCATCTTAGAGAAGTCTGCTGTCTGGACTGA  
 A\_16\_P03072721 TAATTCTACTGGGGTAAGGTTCTATTGGGGTAATGAGAAGGTTCTGTTGGGATAAC  
 A\_14\_P202381 TTCCTATTTAGAATCCATTCAGACTTCAAATACAACACTCACTCTCCAAGTGTGCTTTGTC  
 A\_14\_P111951 ACTGGCTCAAAGAAGTGGCCACACTTTTTTATAATCATGGTTTTCTGGTTAGATTAT  
 A\_14\_P121598 GAGATATCTGGCCATATAACCTTGCTGTAGTTTGTGGTGGTCTATCTTGATAACCTTTTC  
 A\_14\_P114726 GGAATGGATGAGAATATTTGTTTTGGGTGATCAGAAGTGGACTCCTATTGTGGATTAG  
 A\_14\_P137006 ACCCTCCTTATACTAGTGCCAGGTGTTAAAAAGATAAAAACATTCAACTCTGTAATTCACC  
 CUST\_3477\_PI426210822  
 GATAATTTCTCTCTTCTAGAGGAAGAGAAGTTGCTGATGTTGGTTCAGTGACTC  
 A\_14\_P130677 TGGGCAGGGAAGAAATAACCTGGGGTTTTGTTAATTTCCCTGTTCTTAAAAACATAT  
 A\_14\_P136580 TAATGTTTTATATCCCTAGAAACATCATAAGTTGGGCTAATGAGAAGTTGTCAGACACAC  
 CUST\_5690\_PI426210822 CAGACAGGCTCCTGAGACCGTGCAAAGTGGGGGATTTAGATTGC  
 CUST\_3950\_PI426210822  
 CCCACCAAATAAACCTCTTTTTATTTTTGAATCAGCTTCATATCTTCAGAACGTCCAA  
 A\_16\_P20135192

AAAACCAAGTCCATTATGCAGACTTTCTTGTCAGTTAAATTTGTTGCAGGCACAATTTTG  
A\_16\_P02028174  
AAAAAGTGGGAAGTAGACCAAATAGAGGAACCCTTCAAATAAGGACTCAAAAAGTGGTAT  
CUST\_6154\_PI426210822  
GGTATATTCTTGAAAGAAAGGCAAATGCTCAACCAAATGGAACCTTTTTGAATAAGAGTT  
CUST\_6131\_PI426210822 TAGAGACCTTGGGTAAAAAGTCTTCCTCTCTTTGAAAGCCCCAATCC  
A\_14\_P128007 CGTGCCATTTTAAACCACAAGAGCAAGGTAAGAAAAACTGGAGCCCAATATTCAAT  
A\_16\_P03718835  
AATACTGCTTTTTTCTCACCTATAATCTCTGATGGCTGAAATCTTGAAACATCCTGTGC  
A\_16\_P16474361  
CTGTTTCTCCCAATTACCAATGGATGAAGTTAGTGGATACTTGCATAGTCTTGTCTCATT  
A\_14\_P110964 ACTAATGTATAACCGTGCTTGAAACAGGTATTTGAACATCCAGAATCATGCAGTATATCG  
A\_14\_P137665 GATTGAAGTTTCTCTGGAGTTAAGACTAAAAGGGTGAGTTCTCATTTTTACATGTGATG  
A\_18\_P15463280  
GATAACGTGTTAATTCTCATGGTCAAAGATTCTCCTTAGTAACAACCTCAAGACAGGTGTC  
CUST\_9773\_PI426210822  
CAGCTGTTACAGTAGGCATATTTGCATTGATCAGAACATAAAAGTTTCCAGAAACACAGA  
A\_18\_P12695732  
ACAAGTAGGTTTTATCAGTTCTATTTTCGTAGCAATCATGTGATTCCTGTAACCTGTTCTT  
A\_16\_P02738739  
TCCAGACAGTCTTTTTTTTTTATTAAAAAGAAACCACAGGCTCAACTTAACATGCATCCAA  
A\_16\_P03594623  
TGGATCACTGAAATCCATATGGAACCTAAGAAGTTATCTTTATCCACAACCTCAAAAAGTCC  
A\_14\_P136334 CACAACCTCCTACATAGAGGAAATAAGAGGAACAAACCCCTTTTGGACAGAATCTATTA  
A\_14\_P139677 CTGATACTCGTCTATTAATCTGCTAGGAACTGGAACCTGCAAATAAAGAAGCAACATTT  
A\_14\_P114441 ATTATTGTCAGTCTCTCTGCTTCTTTGCTGAAGATTCTTTCTATTTGAGGATAACGTGCA  
CUST\_10303\_PI426210822  
TTTAAATCTAGAGCCCTATCAGCTGTCTGTCTGATTCATTAAGTCAGCAAAAAAATATT  
A\_14\_P127639 TTCTACTATTATACCTACTGCCTTTGTAAAAGCAGTGCTTTCCTTAGAAGAGCCTCTCT  
A\_14\_P121451 ATTAGTAATACAGATTATTCGTCCCTCTATTTCCAACACGTTCTGCATTCTCCATGAGTAG  
A\_16\_P21293885  
GAACACATCAAGATCCTAGTGAAATAAAAAAGTCCTTATATTCCATGGTGCCCCATACTC  
CUST\_9449\_PI426210822 GTGTGGCAAACCACGAGGCTGAGAGTGGAGGTGTGGGAGAGGCTG  
A\_16\_P38088391  
ATCCCTACAGACTCGATAACAGACTTTTTCTATTCTTATTCCATGTATAACATTGCTCTGGC  
CUST\_1635\_PI426210822  
TGCTAATAAATGCATCTTGGGAAAAAGCTGCATTGCTTATTGATGGGATTCCACAAAT  
A\_14\_P123521 TTTTCTTTCTCACTGCTTCCCTGCAGATATTCTCTAAGCCGCTTTCATCATGG

A\_14\_P134291 CGCCATAAACAGTTTATGATGAACTGCCACGCTCTTAATTAACAATAAATCCAGCACAA  
A\_16\_P41649804

AGAGTTTTGCTTTTTTTGCAACTGTATGGAGTCACTGATTTGCAAATGAATACAGCCAT

A\_16\_P19139255

TCACCAGTGTTTTCAACGTATGATTCTTATCTAGACGACTCATTCAACCTATTTCCCTCAT

A\_14\_P123026 GAATCTTACTACGAGAACTGTCAACACATGAAGCAGCAGATTCTAGAATTTTAACCATCC

A\_16\_P03715724

ACCCACCCTCTATCTTTAATATTGTAATCATTCTAATACAATAAATGGAAGCCTAACCCC

A\_14\_P118566 GACTGAGAAATTATGTTAGTATCAGGTTATGAGGTTAGAAGAGGTAAGTAGGCAACTGGT

A\_16\_P03343590

CCATCACACACTGAACTTGATACTAACTTGCTTCCAATACTGCTAGATTTACCAGAATCT

CUST\_7206\_PI426210822 CAGGATCCCAGAACAGTTCAACCTGTAATTGCTTTCTGACATTTGAGCAAAA

A\_14\_P128688 CTTTCATCTCCTGCTGTGTTCTACTTTTTAAATTTCTCTAGCCAGAATGAATGATATTTCC

A\_14\_P106193 AAAGGAAAAACAGAACCACAAACAACATTGCTCTCTGGTTAACATGTATTCTAAAGTAGG

A\_14\_P108798 AGAGGAGTAAGTTCTTAAGGTAAACTTTGATATATTATTTGGTTTCTGGGACATTAAGA

A\_18\_P10656261

ACAGATGTGCAGAAAAAGACTCATGACAAGACTATGCTTCTTAATGGGATGTTTCAATG

A\_16\_P00685013

GCATTTGTGTCTGCTCTTGGCCTTGCAGATAAAATACCATAATCTACTCTTGCAAATCAG

CUST\_10171\_PI426210822

CTTCTGACCTAAGGCAGAAACTTAGAAAACAAATCTGTGAAATGGCTCAGAGAAT

A\_14\_P114268 TCATTCCTGGATCCTCAGGATTTTATTTTAAAGAAAAGAAAACCATAGGTTTCCCTGTTCC

CUST\_4283\_PI426210822 GACCCTCTTTGTCCCATTCTAGTCAGGAATTATGTCTTCTACTGTTCCACA

A\_14\_P135294 AGATTTCTAAAGTGTGAATTCTGAGCAATTTTCTTGCATCCTCTCAAGTATTCTGGAAT

CUST\_6224\_PI426210822 TTCCAAACATAGCCATCCATTGGAGTTTTATGTGGAAGCATCTTTCCAG

A\_14\_P118151 TTGTAACAAATGCCAATATTTATGTTACGTTGATATTAGAGCATAAATGTTACAATACCA

A\_16\_P21564616

AAAAAGACAGATGAGCATTGGACTTAACATCACTGATCTTTCTACTAGATCTACCCTGTC

A\_14\_P114568 GCCTGTGTTTCTCAAGGAGGAATTTATGGTATTTACTAGCACAAAGCAATCACTTAAAA

A\_14\_P120998 TTGAAAATAGTTGTAATTTTCTGCTGGGTACATTTTACCCTCATGAATACTTGTTTA

A\_16\_P00526136

TCCCCTGACCCTATTAACTAAAGACTTGACTAAAATTTTGATAATAGACACCATGCAGT

A\_18\_P22842083 TTTTAAAAAGGAAATCAGTTTGGTGGCAAATCTCCCCTTCCCTGTCCATAATTCAGA

A\_18\_P22842128

TTACCCTTTGATAAAAAGGGAATAAAGCAATATATGCAGGAAATGCAGAGACAACCC

A\_14\_P104589 TGCTGAGATAATCTTCAGACTTCATTATAAAATTTGTCCATTCCTGACAAATGTCCCTCCA

A\_14\_P125446 CCTTTTCTGATTCAGGAACTTCGAGCCACGTTAGATGAATATACTACTCGTGTG

A\_16\_P21422483

TGAACTGTGATGTGTGATATACTTGTGAACATGCTAAGGAATATTAAGCCATGCCCTAA  
A\_14\_P138168 CTATCTCTGCAGTGAAATAAAGCAAAGCAATCAAGCCAAGAAAGTGTCCACAATAGAATCT  
A\_16\_P19900662  
AAAAATGTTAGGCTACAACCTGAGTATTCCTTCCATGAGAGGCATAAAGACACTAGTAGG  
A\_14\_P132581 AGAATAAAGCATAAGGGAGAAGAAACATGGTCAGTATGGTTGACCATGATAGTCTACTAG  
A\_16\_P17301436  
AATTCCACAATTCCTGATTTTTCTCAATCTTCCCAAATCACAATTCATGTGCCATATGTC  
A\_14\_P132763 AACCAACGAACGAATGAATACAAACACATCCTAAAACCTTGGGGACAAGACAGTTGATA  
A\_14\_P104065 CCACTAATAAACTTACCTTCTCTTGGATTTCTTGCCTGAAAATAGAAAATAGAGAAAAG  
A\_14\_P111716 TGGCAAACAGAGAAGAAGAAAGTTAACTACATACAGGTCTAATGATGCTAGCCATACTGA  
A\_14\_P130828 TCGAAGAAGAAAGTCTCATCCTAATTTTCTGGACCACATAAATGCTGAAAAAATGGTTCT  
A\_14\_P103241 CTGGTTATTCAGTAGGCTCTCCTTAATTCTACAAAGAATGGGTTTTACTGGGAGTTAAT  
CUST\_6200\_PI426210822 TTAAATAACCATTGCAGCTTGGGGAACCTGGCCTGTCTTTAGGTG  
A\_14\_P103514  
AAGAAATCTTACAATTTTAAACTGCTCAGGTGTCTGGGAAGTAAAGAAAAGAAGGAAGGA  
A\_14\_P115798 GGGATCATCACAGTTTCTTATGAGGAATGTAGTGAAATTATGGATTTTCTTCTTGGGCA  
A\_16\_P00631339  
CCATTTGCAACAACCAAAATTCAGTAAAACCTCAATGTTTCTGGTCCTTAAGAGTCCTAA  
A\_14\_P135416 TCATTCTCTCTGCTAACCTTCCACCTTATGCACACACTTTCCTATATTTTAAGATAAGT  
A\_16\_P15449324  
AAAATTTAATCTAGTCAAACATGCTAATACTCACCTACCAGAATCAACAAGGATCTCCC  
A\_14\_P135249 ATTGAGATGGTTTCCAAGGCATCTTCGAAAACGTCCTGGGGGAAATAAAAAATA  
A\_14\_P106771 CAGTTTCCAGGAACGTTGCTAATTTAGAGGAATATGTGTATGTGTGAGTTGCTTAAACTT  
A\_14\_P122360 GAAAGGGAGAAGTTAATGGGAAAGAGGTTATCAACTTATTACTGGGATGGTTACTAGAAT  
A\_14\_P118205 ACCTCTTTCCTTTTCTTATTGAATTCCTTAGAACTTAGTTAACCTCCCTGCCTTTTCTTA  
CUST\_6360\_PI426210822  
AAGCACAATTCAACTACATGGCATAGTAACTCACTCCAGAGGAAGTTAAAACATGTAT  
A\_14\_P201602 GTTGAGATACAATATTCTCCCTCCACAAATATGAAGACCTTTAGTCTTAGTGTGGAAT  
A\_16\_P19895690  
TCAGTTGTCCTCTATGAGATTCTTTGTTACCTCCAATACACTTTACAAAATTTTGGCTG  
A\_14\_P123889 CTTGCCCATCCAGAGGATTTTGAACGTAACCTGCTCTAGACGCAACTTTTC  
A\_14\_P136718 GATCCAGATTTGAAGGCACTTTTAAGTGTAATTTGTTTTTCTTCTGTAAAGACCCACACA  
CUST\_9635\_PI426210822 TACTTACCTTTCAGGGAGTGATGAGTAGGGGGCGAGAGGGGAAAAT  
A\_14\_P134724 CCTTAGTGTATTCACTTGACAAAGGAGGGAGATTGCATCTAGAGAAACAAGAACAACAT  
CUST\_1584\_PI426210822 GAAAGTGTTCCAGGAGGGAAGTGTCATTATGTTTGCCGCAGCAG  
A\_14\_P128165 TTAATTCTAAAGTTTCATTAGGTTGATGTCAGCATGAAGTTGGGCAGGACCATATGTATT  
CUST\_3618\_PI426210822  
ATTTAATAAGGGATTGCTTTTCTGGATAATCTCGCTCCTTGGGTATAAATCTAATGTGAAA

CUST\_3971\_PI426210822 CGTCAGAGTGGGGAATATTGACTGTGCAAACCACTTAAGGTCACAG

A\_16\_P36293909

ACCCCAAATCTAGTCCCTTGGCAAGTATATAAAATTTGAAACCTTAATCCAAATTGCAT

A\_14\_P115919 CAGAGTTATTTTACTTCCCTAGCAAACAGGAAGATTGTTGTAAGCACTCCAAACAAACTGA

A\_16\_P20530319

CTTTGCTAACCAAACCCTAAATAATTGTCTGGATGTTTCCTTTTATTGTCACCTCTGAAAC

A\_14\_P124106 TGGTGAAATCTGTTTTATTTCAGGTTAAGAGAGAAGAGAGTCAGCAACAGCAAGTTTTAC

A\_14\_P101761 CTAAGAAATATAAGAAAGAAGATTACACCAGAGAACACAGTGGGGACATCATCAATTCA

A\_14\_P123168 ATCCAAAAGATGAAGCAGTCCTGTTGGTTTTTTGCTAATAAGATTTATGCAGCAGGTATT

A\_18\_P13003566

TTCTTTTTCTTGGTAGCATTCTTAAACAGCCTTGAAATTTTATTGGAAATTACCAAGCCA

A\_16\_P02253973

AGCCTCACGATCTCATAGTCTGCTTAAAACCATTTTCAGATTTTTTCCCAACATTA AAAACA

A\_18\_P16103475

GATCTCGCATTATATTGTTCCCTACTATCTCTACCTTCGTCAAAAAGATCATAAAAACACCT

A\_16\_P17756080

TTCAAACAGCCATTAGGACTTACAAAACCACTACACTTAATTACTTTCCCCCAATCTAAG

A\_14\_P110075 AAGTATATCAGAAGCCATTAGTGCAGATTTAACACTGGCTATATGACATAAGGAAGGAGG

A\_14\_P136948 CTTGAAGTTTCTGAGATGTAGCATCATTTCTCTTCCTTCCCTACACTCATTCTGTGAG

A\_14\_P133464

TACATGTGCACTTAGCAAATGAAAAAACTCAATGGGAAAGACAGTAGTTAAGAACCTGG

A\_14\_P113678 GTCTATGCCTGTAGTCTAGCCCACTGGGTTGTATAAAATAGAGGATTGATTTATTTTCT

A\_16\_P01721777

TACACTGTAAGCAGATGAGTTTTAAAGTGTCTTCTGAAAGTAGGTTTTGAGAGTGTGGTT

A\_14\_P133513 GCCTCTGTAATCTCTCATAATGTTGTTCTCTCTGATTCCAGATCCTCAGC

A\_14\_P113166 ACATCTCAACAGTTGACTCCATATAGTCAAGTCCATATTTGTTTGAGATCTGGCAACTAT

CUST\_8250\_PI426210822 TCCAAGCATTCTGCTCCTGAGCTTTTGGCATTTTTGGTCATGTTTTTTAAA

A\_14\_P126639 CTTCAAAGGGCTTGTAATGCCTGAAGACCATAATAGCACTGACTTATGATAATCTAGTTC

A\_16\_P18453971

TGCCAAGTTAGAGAAAAATCGTATCTACTTAAAGCCTTCGATAGTATTCTCATTTCCATC

A\_16\_P15111104AACTCCCAAAAATGAATTATACTCTGCCTTAAACATCCAAAAATCTCTCAAGTCTCTCTG

A\_16\_P03800744

ACCTGGAAAAAAATTGGCAAAAACATCCTATCAACAAAAATTTCTGCATTACATGAGGT

A\_14\_P103823

AAGGACTGTA AAAAGAAATAGTGAAGCAGTAAGAAACAGAATAATTGAAGGGCCATAATGG

A\_14\_P137278 ACCTGGAAAACAATGCCAGACTCAATTTAGTGAGGTAAGGATTTTAGATTTTAGCACTC

A\_14\_P114374 TAAGGTAATCTTTCTCAAGTGTAATTCGGGAAAACAATGACACTGATTTGGTGAGAAAT

A\_14\_P115742 CTGCAGAGGATGTCTAGTTTCAGATAAGGAATGATACATTGTGGGAACTGGACA

A\_14\_P121936 CTTCATGAAAAGCGGACATGAGGGAAACCTCTAATTCTCTAGAAGACATCATATTTCAA  
CUST\_8551\_PI426210822 CTATCGTTCTGGCTGAGTGGACCCTCAGATACCCAAGTGGTGTGA

A\_14\_P137383 TCCTAAAACTTGCCAACTGGATCTTTGTTTAGCAAACCTCACTGGAAATGAACACTTAAT  
A\_18\_P16901803

ACTTGGCATTTCTAACTCCTTGATGAATATTTCTACTCAGATTTCCAGCCATTAACACCT

A\_14\_P135358 CCTGATGTTTTATAAGCCTGTTTACTGACAACATAAGAAAATCTGACCCGCACAAAGAGA

A\_14\_P129909 GTGTTGGATGAAATTTAGGTGTTTATATTGTTAGGTGCTTTCTTTCCATCTGCCCATAG

A\_14\_P109579 GTAAGGGGCAAAAGCAGCAACGGAATACGACAACGGAATAAGCATGAATAC

CUST\_5187\_PI426210822 ATCAGCCTGAGGAACTCCCAGGGTCACCCCTCTACAAGGATTCTT

A\_16\_P18441306

AGATGTCTGTATACAACCTGCTTATGATAAACAGATGTGGGATTTATGGAATTTGGGGACA

A\_14\_P104927 TATTA AAAACGAACGTAGTGTCCAGATAGACTGACGATAAATTCACGAGCATTGGCTGT

A\_16\_P19601317

ATCTCTTGCCCTGTATCAATTTTCACATCATTACTCTTCAGAATTCAACGAAAAGGTCTC

A\_14\_P128702 AACATCAATAAAAATGATTACCACTCTCTTTGACACCATGAGAATAGAAGAACTGAATCGC

A\_16\_P30576913

AAGAAAGCATATGTCCCAAAGTGTGCATGAATATCAGAACATAATTTTCGATCTGTCTCCC

CUST\_4781\_PI426210822 GAATGAGAGGCTACATAGCCTGCTCCATCCTCTTCTTTAACCTGCAA

A\_16\_P21506871

TACCAAGTAACTCATGCAATTTATTCAGTCCCATTTCTACCTTAAAAAAGAGCCCTAGCA

A\_14\_P111743 ACTTGAAAACTAATTGAATCTAGGTCTCTGTATTGTTCCCTGTTTCTACCCTGACTGTTT

A\_14\_P122484 GGAGGCCGAAAGATGTTACCTTCAACATCATATGTA AAAAATGTGGGTGGAATATAAAA

A\_14\_P117012 ACCTTCTTGATATCGAGAGCCTGCAAAAACCTCAACACTGGCTAATTATTTACTGGTAT

A\_14\_P135038 CTCCAAAATGACGTCGATTCTGCATAGCACACAAGGACCTAAAATCTAAGTTTTTGT

A\_16\_P18064952

CCAGTAGCAGTAGCACTATAATTGTCCAAAAACGTAACCTTACAAGGCTTAAGGT

CUST\_521\_PI426210822 ACAAATTTCCCTCCATCTTAGCTGATCTGTTGGTGTGTTAAGGCCACCT

A\_14\_P135351 TCTCATTTTATTCCTTGTGATTTCTGTAACTTGAAAGATTTGGGATTTTTTCCCACC

A\_14\_P126896 CTTTTCTTATCAGTGTGCTCCTGAGAAATTGCAGAGAAGTCAAACCTTTATACATCATCT

CUST\_1894\_PI426210822 GAGGAGGGATCAAGCAGGTGACCTTCGATCACCTCAAGAAAGAGG

CUST\_8632\_PI426210822

CTGTCAGTTTGAAATTAATCACTCTTCTTGGGTACATCGTGTGTGTGCTGTAGAC

A\_14\_P132983 CTTCAAAGTGTAATCCTCCTTAACGACAGGTTTCATGATGATGAGGCCATTATTTTTGATA

A\_14\_P115071 CTTTTTCAAACCTTCCACCTCCTACTTATCTCCCTTTATTGTGGTCAATAAATGTCCTT

A\_18\_P22839397 TTTGTTGATGGCAGCCTGTTGGTGGGGACACTCAGGCCCTTTTAT

A\_18\_P22843212 TAATGCTACCACTTTCCCTCCACATACAGATGCTGGGACCTGAAG

A\_14\_P139074 CGATCAAGATATTGGGACCGTTTCGCATGCACTTGTTCTTGTAGATAATTCTCAGA

A\_16\_P00930527



TCTCCTTTCACACTCTGTTTATAACACATCTATTCACCAATATAATTGTCTACGCCCAA  
A\_14\_P135686 AGCATAATAAACTCACCTTCATTGGGAGATGTTTTCAATTTGGTGCAAATCCATAGAC  
A\_16\_P20093303

AACTACATCTGAACATCGTAAGATTCAATGCCTTTTTAACCTTGCACATTGGAGAAAGAG  
CUST\_6166\_PI426210822 AAAGACATCGAAGGGTGACATGCCCTTCCAGAGAGCCCAGCTTCT  
A\_14\_P124217 CAGTTGGCAATTAAGTGCTCTAGAACAACAATTACTAACGAAGAGGTGGACCAGAT  
A\_16\_P21210226

ATAGGCGTCAACAATCATGAAATTGAATTCTGCCGGTTACTATGACTTTATTCTGTCTCT  
A\_14\_P135232 TCAAATAAAAGGTGACAGTGTTATGATTCATTATGACTAGCACAGTTCTACATGAAGGG  
A\_14\_P123761 CTCACCTTTAAGGGTGAAGTTAGGTAAGCAATTAGCAGAGGCGTTATCTATGTGATTA  
A\_14\_P109378 TGTGTATGCAGGTCTGTATGCATTTGAGCCATGTGTTAGGCCTTATATTGAGTATAAAGA  
CUST\_8964\_PI426210822

GTTATCCTGAGTCTGCATTATTACAGGGTCTTGAAATGAATGGTGATACGTGAAAGTATT  
CUST\_3354\_PI426210822

TTCATTTACACTGGGTTTCATCTATTAATATATACTGTTGATGCCCTTTAACACTGGTAT  
A\_18\_P22842294 CTTCTGGGTCTCAGCCTTGATTAGCAGTAGAAATGTTGATCCCTTGCAG  
CUST\_2321\_PI426210822 AGTTAGGACTCTGCGCTTGCGCCCTATACTTGGGAACATGGAAGT  
A\_14\_P111950 GTCTTTTTTTTCTTATCAACTTTAAAAATGCAAAAAATGTGCCTCAAGCCTGCCTCACAG  
A\_14\_P106009 AAGTATCCACAAAGACCCCTGTCTATAAACTGACAACTCTTATGCCTATTTTTCTTACA  
A\_16\_P18093969

TTACACTTCCCTATTTTACATGGACTACACCTTAGTGACACTTGCTTACATGCATATCTC  
A\_14\_P127828 AAATGGGTGTTATTACTATTTTATCTCGGTTTAAAGTGTTTTACAGTGGGAGAGGTTGGAG  
CUST\_4672\_PI426210822 AGAATGTCCTGCTCCCCGGAGGAGGACATATGAGTGCATCTCAG  
A\_14\_P130675 ATTCTTTCAGTGGTTATAAAAAGATCTGGCAGATATGGCAAGGTAAGCAGTTTACAAGTG  
A\_14\_P104587 TTTTAACTGGAAAACCACAAGGACCTTAGTGTATTCACTTAGCAGAAGCAACCCAA  
A\_14\_P130248 ATAAATAAGATTCTGGTTTGCTTTTCCTTTTCGTCTCGTAAAGGAGAGAGAAGTGCAGAG  
A\_18\_P10989521

CAAGGCTGGAATTGTTAGACATTGCTAAACTCTATATGTTAATGCATTACAAACACCCCGC  
A\_16\_P37541828

GCATGCTAGGCTTACTTAAGAAAAAACTCATATCTTCATGCTTTCATCATTGTCTCTGC  
A\_18\_P16265663

CCGCTATACTCTCTTTAAATATAAAAACAACTGACACCTTTATTCAAATCATCCCCTGAC  
CUST\_4640\_PI426210822

AGAGCATAACAATTCAGAAAATGCCGGAACAGCATAAACTGCAAAAACAAATCCA  
CUST\_4572\_PI426210822 CTCTGAAGGCAATGGAGTTAACAGGAAGATGGACGATGCTGAGAG  
A\_14\_P137466 CTTTAAATTCTGGAGTCTGAAATATCCCATAATACCCTGTTTTTATCTCCCATATCGGCT  
CUST\_3607\_PI426210822 TTATTTTAAAGCAGGGAGCTTATGGCATTCAACTGTACCCTGGGAATA  
A\_14\_P135892 GTCTACAGCAGTATGTTTTATTTGGTTCTCATGGAGGTATCCACTGTTTTTCTTTCAAC

CUST\_5971\_PI426210822

AGATTGTTTAGGTTTTTTTTGTGTGTTGATTGCAATTCCACATATCTCACAATGTAGCTTG

A\_14\_P136510 AGGGTAGACAGTGTGGATCAAGGTGTAAATTCCTAAAACATTTACGTTGTTTAATCCAT

A\_14\_P102227 TTGCTTCTTTAGTGTTTTAAACAGATGGGCAACTCTAAAATAAAGGTCCATATGAAGCCAG

CUST\_2277\_PI426210822

AAGGGAAAAAAGTTAGGAAGATCTAGGTTTTGTTCTAGGAGTTGCCAGTTTGTGA

A\_14\_P104607 ACAATGAACTAAATTTGCTTTGTGGAAGACAGAGAGTGAGCATCCCAAATTAGTTTATGT

A\_16\_P00685166

CAGTTAAGGCATTTTAAAACCTGGTTGGACTAGATTCTTCCCCCTTGACTACTTTCTATTT

A\_18\_P11244975

TGACAATATAACATTCAGCATCTCTTCACATCAATAAATAGTCATCCACAGCATTGTTTT

A\_16\_P18684822

AAGGTGAGCATTAGATTTTGGACAAAATTGAGTAGTCTGTAGAAACCACGTGTAAAAAGC

A\_14\_P131258 ACCATCACAGACATTTGGTTTTTAATGCTGTGAAGCAGTGGAGTGAAATTCTATCTATAG

A\_14\_P129013 CTATAATTGGCTACAGGGAGATGAGAAGTGTAATGGTTTTAAGGAAGACACAGGCA

A\_14\_P118789 TAAAGAGTCATCGAAGTCTCTCCCATGGGGTGTCTGATAACCTGTTTTAAAA

A\_18\_P17948470

ACACCTCTGATGACATCTCTGATAGCAAATAGATACTATTACAAGACTCTATCCACCCAA

A\_18\_P22841247

AACGTCCAGGAACAGGGATGAACTTGTTTTAAAAGTTTCTATTAAGCAGGACTGAAAATT

A\_14\_P125518 TTCTTGGTAAAATAACTGTAACATAAAAGATGCAAATATTTAGAAGTAAATACACATTG

A\_14\_P100961 ACTTAACGTCTCTGTTGCTACATTGGGGAAAAGTTTCCAAGTCTCTACCGAAAAA

CUST\_5022\_PI426210822 ATGCTGGTTCATGGACTCCAGACACTTCACTGAAACTGTGTGAATCAT

CUST\_4761\_PI426210822 GTTTTTCCATTCTTCCAAGCAGGCCCGGAGAAGGAATGGGCTCCA

A\_16\_P19967221

CCTCAGTCTTGATTTTTGGACTTCCAAATCTAGAGCATCATAATGTTTGACACGAAATCA

A\_14\_P128842 AATACATGCTTCAGAGAATGCAAAATAGAATATGCATTCATGCACTCTTCCCTCAAAGAG

A\_14\_P122664 CACGAATCTTTTCTTTACAGATGATTAGGTTTTTGGCAGACAGGTTCAAATATACGGAGA

A\_14\_P134023 ACTTTATTCCTTATTTTGTATAACTTCGTTTAGGCCAGAGAATGCCAATGACTAACTGC

A\_14\_P137908 TCTAATTCAAAGAAGCCCAATCATAGACCTTATTTTCTTCTGATAGCCCCATATCACCA

A\_16\_P16613444

AAAAAAAATCCCTTTCAGATTCTTAAAACACTTGGACTGATTTGCTGAGAAAAAGCCAGC

A\_14\_P116416 ACTTAGCCTTCTGTTATTCTTATTCTTTAAGCAGTGTGGCTTCCATTGACCATATGAA

A\_14\_P109048 GATAGATCATAACGGTCAGGTTAGCCATTTTTTCTCTATCTTTGTGCAAACTCTCTTT

A\_14\_P116978 TTTAATCATTACACATCTCACCCGTAATTGATTTGATGGTTTCACTTGATACGGTTTGCC

A\_18\_P17044310 ATCACCGTTTTCCCTCTAAAATCTAAAATCTGCTTATTCCACAGCCCCTCAGTA

A\_14\_P137797 GGTCACACTGAACATCTGTTCAAGGTGTGCCAGGTAAGACATAATAGGTATAGTATAT

CUST\_1868\_PI426210822 GGATCTAGGGCTGCCTGAATTCCTTTGGGAAACATGACCTCTGAG

CUST\_8699\_PI426210822 CTCCCTAATCACCAGAGGCAGGCTCAGTCAATAGGACAGACAGAT

A\_18\_P12475990

ATGTGCTCCACTAGAGAAAATAGTCTACTCGTTAAAACATCAATACCTGAAGTTCCAAGC

A\_14\_P106345 TATTTCTGGGTGATGGGAAAATGAAAAAACAATGTAAAGTCTGAATTACTGCGAGACGA

A\_14\_P108972 GCTAGCCAGGTTGCGAAGAAGCTCTGTTTATTGATGACACCTGCAAATCAAAC

A\_14\_P138885 AGTTATTAAGTAGAATTTAGTTCCCTAAGTTTGGTGCAGGAGACAGAATTGCTACCAGTGT

A\_14\_P123493 CATTCTGGATGATACTTTGTAACTTTTAAAACAATACTCTGGAGGTCTTCAGGTCTCT

A\_14\_P100339 AATACATGCATATTTATTTGTTGCTGTATTTATGTATTCTTGATAAACTGGCCCCGGCGG

A\_14\_P200279 CTTTTTCTAAAGGCTCCTGTGAACACTGCAGAACTAACAGATCTCTTAATTCAACAGAAC

A\_14\_P110318 CTGGTCCATAGACTACATTAGTGTGTTTGTATGTCAAATCAGGTGATTGTTTTTTTTCAGT

A\_16\_P18389630

AGAACTTCTGAAAAACCTCATGGAACCTTCTAGAATCCTTAGCCTTACATTCAATCCCTC

A\_14\_P113569 ACAAGAAATCTCTCAACAAACAAGTGTAGTGCCAGAATCTGATTCAAATAGTCAGGTTGA

A\_16\_P17240220

GCCTAATCCACTAAGAGTAATTGTGCATGTATGATACCTGGATCAAATAATTTGGCACTC

A\_14\_P124988 ATTCATATGCCAGACATTTTAATTGTGTCTGAGACAGTTCAGGATACTAGAAGGAACATG

A\_14\_P130311 AGTCGTCTTTTACTTTAAAATGTTATTGTAGGACTGACTCATCCATTCTTATCATGCCC

CUST\_6654\_PI426210822 CTATGGTTTTACATCTGGCCCCCTTCTTGGAGATGATACAGTTGCTGTCT

A\_16\_P36702504

TATTACTTGTGTTTAAAGAAGCCTCTAAATTGATTGATGGTCATTTTCGTAGTCTTGCCCC

A\_14\_P131314 ATTTACATGCAAGGATTTATTTTATTTGGGACAGACTAAATTGCCTGAAGATAATGCCAT

A\_14\_P135592 CTGCCTGTTTGAATGACTGTTCTTTTTCTCATTTTTAATTCTTGGACTCATGTCCTCATT

A\_14\_P136903 CTTTGACAAAACCATTATCCAACAAGTTACATGTGATGCAGAAAAATTAGCAAATGCATT

A\_16\_P21088238

CCAAAAATCATTGACTATGAACAGTGCAAAGATAGTAAACTAAAGATTCTGCCTTGTGGG

A\_14\_P202052 CGGGAGAATAATCCTCTTGTATCATTTGTGCACTTAAATGCCACTCGGAAAAATCAAAA

A\_14\_P122201 CTAGATGCTGTTGTTTTCTCCTTTTAAAGGAGAAAATGTGGCAATTAGCACATTCTGCTTA

A\_16\_P15127518

ACACTACGGAGAATTACCCACAAATAGGAAAAGGAGTTGAATATTGAGCAGAAGAAAAAC

A\_18\_P12501088

CCAAAAATTTAATAAGCACATTTTCTCCTTAAAGGATTAATAAATTATGAACGTGACACCC

A\_14\_P132283 GACCTTTTGAAGACTGAGTGGCAATTAACATTGTAATTGAGATAAACTCTAGTCACACCT

A\_18\_P14996930

CCTGCTCAATTGATACTAAGGTCTGAATTTATCCACTGTATTCTCAAGAACCTCGAAGAA

A\_14\_P101089 TACTAGGAATTTATCAGGATAAAAGGCTAGATACAGAAGGAATATGGACTGTGGAGGTCA

A\_14\_P118713 AGAAAGAGATTGAAAAAATGAGAGGTTTAGCCATTCTCTGGGATAAACCTTGTAGATGT

A\_14\_P102608 GTTATAGAGAATTAACCTCTCAGCACCATTCATAATGCTTTCCGAACTAGGAGCATGA

A\_16\_P39998501

TCTTAAAGCCTCAAAAACAAATTCTCATTGAAGTCATAGCATACATTCTCTTTACCGT  
CUST\_1732\_PI426210822 GCGGTATTGCTTACTGCTTTTCATGAGTGGTGTTCGCCAGAATCTG  
A\_14\_P130491 TTTGACCATCTGAATACCAAATTCCTGTCACTTCTAGGATGTCACCTAAGATGAGAC  
A\_16\_P02377939

GACTCTCAAACAAAAGAAAACCCATCTTTCTTCTACTGAAATCCAGTTTTTGAGGTT  
A\_14\_P104073 ATGTGTCTTGGGGTATGTTGCTGTCTTTGATGTCAATAGAGTGTCACTTTCTAGTG  
A\_14\_P118644 CACAAAATAACTCCTTTCTCTCCCTCACTCACACAGTAGAGTTCAATTGATTAAACTTA  
A\_16\_P03027028

GAGTTTTCCCTGAGTTAGAATTCAACACCTAATCAAAGACATTCTGGTCAGAACTAAAGA  
A\_14\_P131127 TGCACCCACAGAACTCTTGTGAAAGGAGACTTTAAGGATATAAATTATCTTCTGGATCAA  
A\_16\_P17868226

GCCCTAACTAAGTCAACCATACTTTCATCAACAGCCTATGATCTGTAACTTCTTTACCT  
A\_18\_P10232645

CTGATCCATTCAACTTGACCCAATTCTCTATGCATATGATATGACATTCTCCACTTTCA  
A\_14\_P112350 CTATTCAGAGGAGTGTGTCATTAATAATGGAAAAGTCAATAATGTGAAGGCAAGTTTAGGG  
CUST\_2946\_PI426210822 GTGCAGGGGGGCTCCTCGGGAAGCAGCCGGGGGCAGGGCAGGGAG  
A\_16\_P20178418

AGCACTGAAGATAATGATGGATCATTTCATTAATAAAATCTAATGTCTCAGACAGACGGA  
A\_14\_P139797 ACTGATTAGATTTTTCAAGCATCACATCCCCAGACAGTTCTTTGAAGGGAAATTTCTAT  
CUST\_4598\_PI426210822 AGAAAGGGAGAGCCAGCTGAGGGTGACACCTTGGGCTGCAGCCAC  
A\_16\_P00735583

TGTTCTAATGACTTCAAGAAGACAGTTTTTTTCGTAGCAGATGTTGAGTAAAATGGATCCG  
A\_16\_P01842727

AAAATTC AAGCAATTTCTTTCTTAGAAAAGACCCTACGTGAACATTCTAGACTCCTGAG  
A\_14\_P101922 TAGAAATCAAAGGCCTTTTTTTCCCCCTCTCACTATAATACTGACATTTGGAAAGAAAA  
A\_14\_P138823 ACATATTCCAGGGTTTAGCCACACAGAAATTACAGCAATTTACTCTGGACTTATTAAGC  
CUST\_9459\_PI426210822

AGTCAGTGTGCTGTGACACATTTACAAAAGTGATAAGTTTATAATGATTTTGTGCTTAG  
A\_16\_P15884682

ATGAGATACACATGTTTCAGTCATAGCCTGAGTATGGTAGATGTAGTCTAGGAGA ACTTG  
A\_16\_P20390061

GTGGAAGGTGAGTAGGTTTAAACAAGTAACATTTGATCCAGGCATTTTTACAGTAACAGTT  
A\_14\_P107196 TTATAGGGTTTTGGGCTGCTGAGAATAATTGATGCTGATTAAGGTGCAAATCATGACTAA  
A\_14\_P110460 CAAGGCACAATAGTTGCCGTATACTAAAACAGACCAAATGCAGCATTTACAAGGTGAA  
A\_16\_P01489066

GTAACGTTTGCTACTCTGATCATTGTAACACAGTGTAACCTTCATGTAGGTCTACCACTAC  
A\_14\_P103925 TAGTGAATCACTTTTTAGATTATTAAGGAACACAATCACTAATTGCGCTGGAGGAGATGT  
A\_16\_P17017526

AGATAGAGGATCATACTTGCTCACTGGAAAGATAATTGCTACAGCAGACTAAGTCAGTAG

A\_16\_P38193439

ATCTTTGTGTGAATCATCTAAGCAAACCTCTATGTCTCCTAACATCTACTTAAGTTCGGCC

A\_14\_P119886 ACTACTAGAACAAACTCTCCTAACTGCTTATGTCAATGTTTCAAGAGGACTTTTTGAGCA

A\_14\_P200907 ATTCATCTGATACCAAGTTATCAGATGTCAAGAAGAAACTCCAAGAAAAGTTAGGGGTTT

A\_14\_P120684 AAAATTTTAACTGAAATAGAAATACCCAATTCTGCCCCACCATCAATATCTCGTCAGGAA

A\_14\_P127289

ATGGCAGAAGATGTTAAAAGAGAAGAGAGGATAGAAGAACAACAGCATAGAAACAGAGAA

A\_16\_P17041618

AAACATAGCACTTATAACCAGTTACCCTCTGAAAAAATTCTGATCTTCCACACTTGTTTCG

A\_14\_P116858 CCCCAAAGCATCTTTTCAGTCTACTAGATGAGTGGTTTTAGATTTTAGTTTTTCATCAACC

A\_14\_P117111 TCGATACCCAATGCCTGCTAAAGTAATTTTCTGGCACTTGGGACATCTGTAAATTTAATA

A\_14\_P100242 AAGCATTATGGAGGATATAAGGAGTCCTAAGACAACCTATGCCCTAGGTAAATTTAAAAC

A\_14\_P113693 ATTGATGCAATTTGCAAATAGTAAAAAGTCTCAATGTGAATCCCATCACCTGGATATGG

A\_16\_P01882313

ACTCAAACCTGAAATTCTCATTCTCATCTTTGAATCTACCCCAACATATTACCCTATTGG

A\_18\_P16690136

CTAAGTTTTCTACCCTTGGACTATGTTTTGTGCTGAATCTAAAATGACAGGGAACTCACT

A\_14\_P112772 AATGTTTCCAAAATTTGGTCAAAATTATGGCAAGAGAAGAAAATGAGTCCAAATGGGAG

CUST\_1476\_PI426210822 GATGGCACCAGAGCCTGGATTTTTGAGGTCTGGTGGATTCCTGAG

A\_14\_P120331 CTCCTTCAATCCTGTCCAGGATTATAATGTATGAAGTAGACCTAACTAGACCTCATAT

A\_16\_P16950234

AAAGGAAGGATACAGGTATGAACTTACTCCCAATTAACCAAAGCAACAATAGAATTCCAC

A\_18\_P22841786 CTCTTCTTACCTTCCCTTAGAGCCCTAACATAGGATGGTGAGAACCTAAC

A\_16\_P18603472

AAAACAAGACTACTTCACGGATTTATCTCTACCTTCAAATAGCCCTAAGTTGCTCAGAAA

A\_14\_P103235 GATTTTCATTTTAAAGTTGTCTGTTTCCTGATGATGACTAAGGAGTCCCCTTAATCTCATCA

A\_14\_P136760 CTAGAGATGTGGCTTGTGAAATGGGCATGAAACAAAAATGATAGTTCTCTTGTCTGATTA

A\_14\_P201955 ACAATTGCTTTTTAAAAATTGGGTAAACAGGCACAGAAGTTTACAGACAGTTTTGGATC

A\_14\_P134350 AAACAGTATTTTTACTTTGTTTTCTTAGGTTTGATTTGATCTTCTCTTGCTGGACCCTC

CUST\_7084\_PI426210822 GTCTTTTGGGGTATGCTGGCTGCTCACGTGGCTTTGTAGACATTA

A\_14\_P108417 GTTGGCAACATTTTTGAGAGACTCAAATGTCCTTTGAAACTGAAATTGAAAACAAAAGTA

A\_14\_P131557 ATTATTTACACCTCTGATAAATAGACTAATACTGACCCAGGTGCCTCTCTGTCTAGGAAA

A\_14\_P113928 TATCATCGAAATCAAACCTTACAAAGGAAGACACTGGATCTGAGTTAATTGCTGAGAAGA

A\_14\_P121270 ATAATACTACAGTCGGGTTCCCTTTCTACATATACTTCAATTAACAAATCTCCAGCC

A\_16\_P18069258

AAAACCATCAACCTCATTTTCAGTAGATGTCTTATCTCACATAAAGTATGCTGCTAGACAT

CUST\_9098\_PI426210822 ACAGTAAGAGGAAAGGAAGCTTTCCCTCCACCTCTACTCCTCTGT

A\_16\_P15450788

CTCCCTCAAATCACTTACACTGTTTTTGTATATGCTAAGAATCACATTGAACTCCTTACA

A\_14\_P129312 TAACTTACCTATGAAATCCACCTCTTCACAAGAAACGGACTAGTCAATAACATTGTCTGT

A\_14\_P109669 TTGAGCCTCCATGTCACAACAAACAGGAGAGAATTTGAAACCTGTAACAGTAAACATT

A\_14\_P109013 AACACCATTATCAAGGTATGTCAAGCACTCAGCAATAGAGGTCTGGAAGAAAGTC

CUST\_10269\_PI426210822

ATTGAATTTTCAAAAAATTTCTCAAAAATCTTTGAGAAAAATTGAGATGGGACAAAGACT

A\_14\_P116277 TAAAAAACCAACTCTATAAAATGGAATGGAAGTGAAGTGCCTGACTGACAGCATGTTG

A\_18\_P14524752

ACCTGCACATTCAATAAATTGTCCCATTTGTTTCTACTGTCCATAACTTTGTTCCATTGTT

CUST\_10368\_PI426210822

GATGACTATGTGAGAAAACTAGACACTTGTCTTACCATATGTGAAAAGTTGTAAGACCA

A\_16\_P58424611 CTTTTATTACTATTGCAGATTGCCCTGTAGAAAGGTCATACCAATTCACCCTCCCA

A\_14\_P132315 TTGTGTCTTAAGTTTCTCAATCTCTTGGTTAAGGTCTTTGACTTTGTTGTCTTCTGATT

A\_14\_P104530 TCTCCTTTCCACTTATGTTCTTGGGAAGCACATAATAAATCACTTCTAGGCATACAGATT

A\_14\_P104860 GGATCTATGTGACAGTAAGTCAGATAAGTAGATCATGTTACCCAAGAAGACCGTAATGAT

A\_18\_P22840883 CTAAAAGTTGTCAACAGGCTCTTCTCTCCAAATTCCTGAAATGAGCAAAGC

A\_14\_P136068 ACTTCAACACTTACTGATGTCTTACCTCTGTAAGTGCATGCAATTGTCCTTGATGAAC

A\_16\_P02027627

AAAAAAAAGCCTTTAACTTGCATTGTTGAGATTGGAGAAATGAGGTTCCATCCAGGAAAA

A\_14\_P138305 GTGCGAGGCAAACATAAAAAAAAAAAGTCCATGTTTCATCTCTAAATGACATCATTGTTCC

A\_16\_P40070324

AGAAAACCTTCGCAGTCAGTATCCAGATTTTCTAAATCAACCACTTCAACAAATTCTCTGC

A\_14\_P119988 TTGGGATTCACCTTTCTATTAATAAAGTGTCTTTCATGGGTTAGAAAATAGAACTGTAGCGGG

A\_18\_P22840718 CCGTGATCTTGCCCCACAGACCTTTCTCAGGTGGCGGTGGTGTATG

A\_16\_P21287052

TTCTCTCTCCAAAACGCTTTTAAATTCAACTCTCTGTTTACTTTCCATTCTCATGTCTT

A\_14\_P128482 AGGTCACTAGATCACTTCTGTTTGGAGGAATCTGGAATTAAGGGTTCATTCTACTATTAGT

A\_14\_P109784

CACAAAACCTGAGTAAGAAAAATGATTGAAAAAAGAACCCTTCATAAGGCTGAAATCCC

A\_14\_P134720 TGTGTCAATTTCCCAATAGTTAATATGATCCTCTGTTGAAGCAAGAAGACAAACTGTATG

A\_14\_P113074 GAGTTCTACAGTGGCAAGTTACATCGAGCATGCTTCATGAACAATTCAGGTAG

A\_14\_P200253 ACAATTTCCACTTATTTCCGTTACTTGTCTTCTGATCTTTAAGCCTTGTGCGCTGTTTTAT

A\_14\_P103116 AAAACCACAGCCAGTAAGAAAACCTCTGCATATATGCTGAAGGAAAATGTATATAAGGCA

A\_14\_P102647 AGCACATCCATGTGATGGACCACGGTCACATTAATAAAAATTCAAATCACAGAAAACCTA

A\_16\_P01977949

ACTCAACTAGTTATCTCCACTTTGAAATACACTATTACAACCATTAACCTATGAGCCTCT

A\_14\_P129897 CTTCAAGTTACAGTTAAACCAAGATCTCAGCATCTTGCATCAAGATGATGGTTCATCTAAG

A\_18\_P26903911

AAAAACACTGCAACATCAGACTACAGTTTTGTGGGAATTATCACTTAAGGCTAAAAGCAG  
CUST\_6667\_PI426210822 CTACCCATAATCATCCCGAGTGTACCACCTCTCAGAGGAAGTGAA  
A\_16\_P00874206

GAACTGATTGACAATTTCCACTCCTTTAAAACGTAATGGCCAATGATCAAAGATTTCTGA  
A\_14\_P121168 GTCCACTCCTAGAGGGCCTCAAAGTCAAATCCCCAAGTTATCACATAG  
A\_18\_P22842279 AGGCCCCAGACTGGCACTTTGAATGCAAATTCTTCTGTGACAAAT  
CUST\_2027\_PI426210822

GTAATTAACAATCTGTAATTGTGCCCTCTCTCCTTGAAAACCTCTTGGTTTG  
A\_14\_P131369 TGATCCATGGTGTGATATATTGAAATGGGATTCATGGACTATGTCAGGCTTTAGAAAGTC  
CUST\_5152\_PI426210822

AACCTATGAAGACTGAAACAACATAATGTTTCTGCAGTTTTGAAGCATTTCAAAAACCAG  
A\_14\_P111504 CTTAACACTAAAGACAGAGTGTGAAGAACCAAATAACGTTGCAGGTATATCCACAAACT  
A\_14\_P103334 TGTGACTGTGACTGTAATCATTGCTGAACAACATCTCTTTGAATCAAAGGTTGATTTTCC  
A\_18\_P14136736 GTTGCCCTGAGAAAGAACCATTGGGAGATATAAACTGCCAAGTCTGCTTT  
A\_14\_P101791 AGACGTTTTGAACACAGATCACTTTATTGGCATGGCTTTGTTTTAAGAAAAGGAAAAGTG  
A\_18\_P20221954

GTCTCATTCTTTGACTATATTTTTGTTGGCATTTTAACAATTCCTTTGAAAGTGTTTGCA  
A\_16\_P00685374 ATTCATAATTTCAATATATTCATTGCTTGTGACTATTTATGGCCGTATTTGGTTCCTGA  
A\_14\_P126790 GGTGATTAAAAATGCGAGAATAAAAAGTGCAGTTTTGATTTTCTTCCCGTAAGAATCCG  
A\_14\_P127057 TGGTTTTTCATTACAGCCTGTTGACTCCAATTCAGAGGTTTCAGGTAAATATTAAGGCTTAT  
A\_14\_P123444 AAGTGGGTGAGATTATCATAGTAAGCAGAAAAAATAGACTGTTTTCCAGAGGAGTCTGA  
A\_14\_P127587 CTCCTCTTTCTCTGATAGTGTGATCAAATTCCTGGAAAAGGGCAAATCACATCAGATAA  
A\_14\_P115280 GATCATGATGTTTCAAAGGAAGAACCAGTCACCTTTCACTTCTTGGCCAAATTTTA  
CUST\_834\_PI426210822 GCAAAGTGTTTTTGTCCCCTCTCTAAGGAGCCCACTTTTGTGTTAAACT  
A\_14\_P123910 TTATGTCAAGAAGGTTAGGTGCCCAAGTTTCCCGACAACAAATATTCTCAATAATCTATC  
A\_16\_P17720400

ACCTACAAATTGTCATTTTTGTTACTAGTTTGATCAGTCATTAAGTTCACAAGCAGCAT  
A\_16\_P18152248

CCCCAACAGATTCACTAACAAAATGGACACATTAACCTTTACTATGTTACAGTTACGGA  
A\_14\_P133425 ATGCTTAGAGACACTGCAAAGCAGTGTTAGAATCAGAATTGGTTTTTAGGATGCAGAGTA  
A\_14\_P116326 CTATTTCTGGCTGAATAGCACAGAAAAGTATTTAACCTACCTGTAGAGATCCTCGTCAT  
A\_14\_P112609 CCTGCATCCTACACCTCTGCTTAAAATGTTTTAGATATACTCCAGCAGAGAAGATT  
CUST\_7468\_PI426210822

CTCCCTCACAGCCAAGCCAACCTCCTAACATAATTGGAAGTTTAATATATTCCAACA  
A\_14\_P200919 GTCTACAATTACCCATAACCAAAACTCCAGACAATATCAATATGATGCGGGATAAGGAAT  
A\_14\_P119662 TCGTTAAATTCTGGGTTGAGAGTCTTCTTCTTACACACGTCCTTATGCTTGGATTT  
A\_14\_P129181 TGAGCATGCACTTTTTGTGAGTCATGCTTTAATGTTCTACCCTGGATTTTTATGGATAATC

A\_16\_P17483061

AAATCAAGTGGTCAAGATCCTTATCCTTAAAGAATCCCAACTTTTAAACTGTTGAAGAGC

A\_14\_P131587 GAGAGTTATGGAGAGAGAATAATGTCGAGTTTATTCCCTTAAATCATCGAGGCCATCA

CUST\_8434\_PI426210822 GTAATTCGCCAAAATGTCGAACACAAAGGGAAAGAGGAAAGGCACC

A\_14\_P126841 ATCTCACTCATATGCTAACAGGTAAGTATGAAAGGAAAGAAAATAATGCCTTCTTGGGA

A\_14\_P104938 CTTGACATATGTCTTTTCTTCTCTAGGAAAATATAGTGTATACCAAAGGGCCAAGC

CUST\_2515\_PI426210822 AATAGAAAGAAGTCAGTGTGAAAGCTTTGTCCCAAGAAAGACCCTTGTGG

A\_14\_P134455 TTTGCAAATGCTACATGAATGTTTAAACAGTAGGTGTTTTCCATCCAGTTAGAGCATTG

A\_14\_P102000

GGAAGAAGAGAAAAATAGAAAGTGTCTCCTGAAGAAATTCAGAGAAAAAGACAAGAAGC

A\_14\_P120040 CCAACTGATTTGTGAGATAAGGTCTCCATGCATCTGGATCTTCCATAGAAGTGA

A\_14\_P121717 AGTGATGACCATAGTTAAGTTACTTTTCATAAGATGCTAGGAAGTTAGCATTTTGGGGGA

A\_16\_P19806223

GCAGACCTATAACTTTTGCTTTAAACTAAGAGACTAGGTGAGTATATGATTAGACGGGC

A\_14\_P201804 AAACCTTTATTTAAATAAATAGGCCTTTTTAGTTTTGTTTTGATCTTCCTGAAATCAAAT

A\_18\_P22840290 CCTGATGATTCCTCTATATATACCACAAGCACAAAGGACAGCCCTCTGAAGA

A\_14\_P123136 ATTTTACCCAGAAAAGGCAATGTGTAACATAAAAAGCCTCCATTTCTGACATATGAAGA

A\_14\_P124450 CTTGAGATCTGCCTTCATTTACATACCTTATATCCCCTAGGCTTCCTTTTAAACTCTAC

A\_14\_P201934 ACAACTATAATGGTTTGTGCGATTCCTCTCAAATATTCTTGCAAGGTCTCAAAAATGGG

A\_14\_P132545 TAGTGTGTGAACAGCATTGCATTTTGTTCATGGGTTTGTTCATAACTAGAATATGCTC

A\_14\_P121743 TCCCTATTCTGTTGTAGCAAAGTTACTTCTCTAGATATTTTTCTCTTAATGGGTAAAGA

A\_14\_P109509 TTTCAAATGCACACCAAATCTTAACATGGAATTGTAAGCCACAAAACAGAAGTGACAA

A\_18\_P22840361 ATTATTGGGGGACCTAAGATCCACATTTTCTATTATTGGCCCTGTTGATGCTACAA

A\_14\_P110661 CAGATGAACTTATCTCCAAATGAATAGTGGAAGTCAATGAGAAAATAAGGCTCAGTGTCT

A\_16\_P00280054

ATGCGATTTCCCTGGATATAGCCCATTTAATTCTGATTACAACTAGCCATTCCCTTATGCA

A\_14\_P103641 AGACAATCCACTCCTTGTAGTATTTCAATGACAAGCCTCAGATTTGTCAATTAATTCCTG

CUST\_6232\_PI426210822 AGCCATGTGTGGTTTCCTTGCTAAGATTTTTGCAGTTTATTCTGTGTGGCT

A\_14\_P102985 CAACTTTACAAGGGAGAAAAAGCATCCAATTCCTGCAATTGATTTTTTTTCTACTCAA

A\_14\_P128005 TTTTCTCTACAGTAACTGTGGTCGCTGATCAATGACACCTTCCTGGTAACATTTTCATAT

A\_16\_P58424105

CACACATGCAGAAAAAGGTATAAATCATCAATGTATACCTCAATAAATTTTCATTAGGTG

CUST\_5383\_PI426210822 CTGTCTCCCCAGGGACTCGGCTGTTTGAGCCACTTTCCTTTGACA

CUST\_9820\_PI426210822

TCATAATATCAAAAAACACCTGTTTACTTTAAAGGGTTCCTACTGTATTGCTGCAAAGC

A\_14\_P107242 CACTTTTACAACAGGTGAAACGAATACCATTGAGTTTGCAGGCAAATCTGTAACATATGTA

A\_16\_P58424522 AGTTTTTCAGAAGGGCTCACCAAATGATTCTAATGAGCAGCCAAGGCTAAGAA

A\_14\_P124105 TGTTCATCTTTCTCCAGAGAAATCGTTCATTTTGTGTAGGTTTGCTTTTATTCATGTA



A\_14\_P129925 TTAATTTAAACAGGTCTTTGCAAAAACAGAAGCACAGAAGGGAGCCTATATAGAACTAAC

A\_14\_P108513 GTCCACTCTACGTTGGTGCATATGCAATCAGCAGAAGAATCAATTTTATGATGAAGTTTA

A\_16\_P01017105

ACCAGGATTAACCTTGTAACCTTGAACCTAATTATTCACATTCCATGACTCCTATAACCA

A\_16\_P16250744

AGCACTCTAAATATTAATCCTAGTCAAGTAACCCAGTAAGAACCTTTGTCACTCAGTTCC

CUST\_4331\_PI426210822

CCATATTACATTCCAAGAAGGGAACATGAAGAATGTTTGTGGCTAAAGAAGTCTCAAC

A\_14\_P106198 CTAACAGAACCACATTCTTTTACCAGCAGGGAGAAATTACATGGTCCATGAATGTTATAA

CUST\_8638\_PI426210822 TCTAACTACATGTCATGGACATTGTCAGCAAACCACCTTGGCCT

A\_14\_P128108 CTTTGGCTGAACTGAGGTTGTCCAAAACCTTACAGGTGAATAAAGAGTAGAAACCTTATAA

A\_14\_P103627 TCTTCTCCTGAGGAAAGTGTGAGGTGCTCCCTAACCTATGACTTC

A\_16\_P00443055

AAAATACACGTATCACTGTCAGAAATTAGATAAGCCTTCATATGCAATGCTGTCACCTCC

A\_14\_P100977 TGCTGCTCTGAAAAATATTCGATCAAAACGAAGTTTACAAGCAGCAGTTATTCCAAGATT

A\_16\_P16191309

TTAAATTTATTGAGATCTTATTTTTTACCCTCATTCCGTGCACATTTGGGATTCTGTTCG

A\_14\_P125851 TTTTTTTTTTAAATCATAGGTCGTATTTGTTCTGACTGGAGATTGTGATGACAGGACCCA

A\_14\_P135008 ATGTTTGTACCTTAGGCAGAAGAAAACTGCAGGTGAAAATTTCCAGTGTGCGTAA

A\_14\_P105830 GCTCTTGTTCCCTGCTCTATATGCTCTCATTGTAGCATGTCACCTTCATAAGTGATTTAA

A\_16\_P16857320

AAGTTTGCTGTTCCCTGGATAAAACATCTGCACATGAAACCTTAACTCTGATCTCAAGAAG

A\_14\_P129304 TATTGGTCTGAATCTCTAAACAAAGTTTTTGTAGATAACTTTGACCGTGACCCATCTCTC

A\_14\_P130073 CTAGATCCTCCTCCCTTAAATAAGCCAGTGTTTTTAAGACAGAATACTACTTGCATAGTG

A\_16\_P15524863

CGCCGTATATGTAGTCAGTGTCTTTACTCATGATATCTTAAGAACGGAGAAAAAATGCCA

A\_14\_P103323 TACAAGGATAAAGAATCTGAGGTCTGAAAGCCAAAGACCTAAGAGGAATCGAA

A\_14\_P109739 ACCTCAAACATGACTATTTGCTGTGGATTCTGAATTTGCTTTGTTTCCTTTGTATTTTGC

A\_14\_P107445 CTGATTTAAACAGCATAGGAACCCCACTGCATATCTAATGAATTTAAACCTTGAGTTCA

A\_14\_P126318 CTTTTCTAAAACCTACACCAAGAAGGATCTCTCATAACCCACAAACTCCGTTGTATACTCC

A\_16\_P15339563

AAAATATTGGTTTGATAAGCAAAGAAAATCCTCCTTTGAGACAACATAGATGGTCCCTCC

A\_14\_P119018 CTGTGACAAGGGGGCACTGAATGCATAAATTATATTGCTGTAGTTATTTTCAACATAACA

A\_18\_P14133535 CATATGCATCCTGGTGGATACCAAGTGCCTGGCAGAAGTCATAGG

A\_16\_P02992490

AAAACCTGCTAACCAATTTTAAACCACCTGATATGGATGAGTTTACAAAAAGGAAATTGCA

A\_16\_P17976786

AATGCTGACAATAAGACCCATATCTGTTTTTGGTGACATGTTTAATCCTTCCAACCTACTC

A\_14\_P109774 CACAGATAAAATGATAAAGCGCAATAACCTCATACTCCACCATGGCTTTCTTCATACTTT  
A\_14\_P125781 AAGATAGCACACTAATTTCCCTGGGGAAGAGGGTTTTATATAAATCATTTTCTTGTTTA  
A\_14\_P110373 AGGACAGAATGTCTGCTTGTCCGAATATCTTTTGCTTAAAGTATATGTTGGAGATCTCA  
A\_14\_P135072 ATGAAACTTTCATTCTGTCCTAGCCTCACCCTAAGTAGTGGTGTCATTTTATACATCAT  
A\_14\_P136188 ATGTGATTCATTATCAAATGTGACTCTTTTGAAAAGTTTACTCTGCTCTGGGTTGAGTTC  
A\_14\_P133399 TCAACCCTCACTCCTTTCACCTATTCTTTTATGGAACAAGTAGTCTTATCTTCTGAATTT  
A\_14\_P112832 ACTCTGAAATGAGACCCTCCAATTCTTACCTCAAGCATTCTAAATTCTAAAGATAGAAC  
A\_14\_P119081 CTAATTAAGTGCTCTGAAAAAGACACCGTTTCTTGAAACAAGATGGTTGTATTCTCTCAC  
A\_16\_P15506837

ATAAGTGGTAGAAACAACCTATGAAAATCTTGAGGACGAATACATCATTCTGGATCTGGT

A\_14\_P121804 CAGGGTTTTCTCCTGCATCTTTCCTTTTTCTTTGTAAATGTGGAACAATGCATAAAGAC  
CUST\_8717\_PI426210822

TGAGAATGTATTGCAGAAGAACAAGCCAGTTAACTTATTCCTTTTTTTAAATAGC

CUST\_3938\_PI426210822

TTAGCTCAGGCCTTAAAAGTTCCATGTACTATCTAAAAAGGGAAAAGTTCATCCCAG

A\_14\_P125961 CTATTTTCATTCTCAACTCTTTGATCCAAGCGTTGTGTAGTTAAGATGTGCCATTTCTGC  
A\_14\_P129129 GTTTTAGATAGAACCATTCCCCTGATAAGCATGTTGACCTCCTGATCAATAAGTATG  
A\_14\_P107087 ATCAAACAGTGTTTTTAGTTTGGAACTTTAGGCTGTATTTCTGTAAACCCAAAGACATC  
A\_14\_P119681 TTGATTAAGCATCCAATACCATGGGGCCACATCTAACAAAGAAAAATATCCAGTGGTA  
A\_14\_P111502 TCAAGTAAAATGTATGGTCCATGAATAGAACTATGTTTTATCCTGTGGTTTCAGACCCC  
CUST\_7196\_PI426210822 TTTTTGATTCTGCTTCTTCCCAAAGTGCTTTTTTCAGTCCATTGTTTTCTGA  
A\_16\_P03750363

TCCTTAAGGACTCAAGATCATTAATCCTCATTCATCCCCTAATTACCTTTTTCTACTCCT

CUST\_2704\_PI426210822 CACAATCACACTGGCCAGGGGTAAGAGATCCACTTTCGATTTATT  
A\_16\_P16407479

AATCCACTGAAAAATCCAATACAATCCTCATTTCTCCTAACAAACATAGCAATTTCCAGCA

A\_14\_P105958 GACAGGATTTATCTTCTACTTCTTCTTTTAGAAGCAGATCAAGAACTGGCGATTGAA  
A\_16\_P16410032

ATTGCACATTATGTTGTCCTTCTGTTTTTCTGTTCTACGATGCTTCAATTTGATTGCCAA

A\_14\_P109819 ACGTCGGCAATGTAACATGATGTTCTGTAAAATAACATGACAAAATAGGATTAATTGTG  
A\_14\_P137456 ATGGAATACATACTAAACATATGACAGGGTGAAATGTTGGGAACACGATGGTAAAAACAT  
CUST\_2383\_PI426210822 GTGAACTAGAGGAAGGAATCAGAAACAACCTCTGGGCAATGGAATCACTTT

A\_14\_P115069 AGAAACACCTGCTTCTTGAGGGAAAACGGGGTAAGGAATCCTTCTT

A\_18\_P14136210 CATTGATGTCATTAAAAGCCGGAGCCTTCCCTAATGCCTGACTTCACTT

A\_16\_P00685040 CTCTTCATCAGCACAGCAGTGACATCTGGATGTGCAGAGACATGC

A\_14\_P132046 CTTGGTTATTTACCATTTGGAGAGATGCTCATAACAGCATTTACATCTTTCATCCTTCCAA  
CUST\_3732\_PI426210822

TGATCCTTTCTCTTCCCTTGTCAATTAATTTACTAATCTATGACCAGAGGAAGCA

CUST\_5189\_PI426210822 GATTCTTGACACTTGCACCTTCTACCCACTCTGGGTCAGAAGCTATTCTT  
A\_14\_P125530 CACTATTTCCCAAGAAATATCCAGTTTCTGCTTATGTCATTCCCTCTTGTTTAACTACT  
CUST\_9178\_PI426210822 AAAATCAAATCACTCACCAAGAGCTCGGCAAGCATGCAGGTCCCC  
A\_14\_P130710 CTGGTGCTTCCACATGACTCTGAAATATGAAATGCAGGTTAGTAATGATGAAATTGACAA  
A\_16\_P02995643  
TCCTGTTCCCTCTTTTATTTTTCTTAAAATTCACGAATATTTATAAGGCACCAGCAGTG  
A\_14\_P111275 AGTCCTTGTGTCTATATTGAGGGGAGAACTAGATAGGTTAAGGAATGGATGATAACTTT  
A\_16\_P40143769  
TGAAACAGAAGTCTATCAAGAACATAGCCTATCTACAAGAAGAATGAAAGCATCACAGTG  
A\_16\_P00798733  
ACCTACTAAATATGTCTTCAAATTTCCACTCCTTCTGAAATATTTTACCTGACCCTGT  
A\_14\_P129861 ATGCAGGCTGTGATGCATGTAAGTGGCAAAAGCATCTTTGAATAGAAAAATACACTGC  
A\_14\_P120680 AGAGGAAAGAGCAGTGAAAAATTTACAGTTGCAGTTTGGAGAGCAAATAAATCATCTTGT  
A\_18\_P11853354  
GTGCACTGCTTTTACTATTCTGTTGCAGATTTCTATGTGATCGATACCAGTATTTCTCCA  
A\_16\_P01756608 TTGCCATCTCTTTTATTCCTACCTTAAATACTCCTCCTTCTTTTTATCCAATTGCACTC  
A\_14\_P118398 CTAGAGTTCAATCACAAAAGTATTCTGCAAATGAAAGTTCAACGTGGACCAAACTAGAG  
A\_16\_P15533888  
ACACTCAGGAGTTAAAAGACTATGTTGGAGAGAGTTAGTTATTCAAATGAGCCCAAGTAA  
A\_16\_P20045014  
ATAATCCAACACTAACAGAAACGATCTCTTAATTCCTGAATTTAATGCTCCCAATGCAC  
CUST\_8147\_PI426210822 CTGAGCCGGCCAAACAAACGGCAGGGCAAGACCTGGCAGGATGCT  
A\_14\_P121946 TCAGAAATGCTACACACAGAATCCACTTTCTTAAAATAGCCTTCATTGACCATCTAGAAA  
A\_14\_P127162 TTTTACAACTTTTCCCCCTTTCTCTTTTAATGCATTAGCCAGAAAAATGATAAGGGGTC  
A\_16\_P30952523 TTTCTCTTTTTCAGAAATCATGTCTCCAACCTCCTTTGTATATGGCGAGTCC  
A\_14\_P122572 ATGGGCGGTTGGCTGATCTCATTATTCAGGAGAACCTTTTTATATAGAAAATCTTACTCA  
A\_14\_P126963 CTAAATGTTCACTTGATTCCCAGGATTTCCATATGTAATAATCAGAACTTGACTGTTCTCT  
CUST\_755\_PI426210822 AGGAAAGCTGTCCAGGGTCATCCTAACCTCTGCTAAACACCTTTT  
A\_18\_P14136932 GAACTTCTCCTTGGAGACAGCAGGAACTGTGTTACAAAGGCATATGGC  
A\_14\_P123507 CTTTTTAATTTCTCTTTTTCCACTTGTAGGACTGGCTTTAATTTTGGGATAATCACACC  
A\_14\_P202501 GCTTGATGACCTTTGACAACCTTTGAAGGTTTTATTACCTAGTCCCTGTATAGAGATAAG  
CUST\_10350\_PI426210822 CTGGATGTTTGGCTCACAGTGAAGAAGCATGAGGACAAATACACAGAC  
A\_16\_P03651740  
AACTTACCAGTTGAACCTGTATGAACTTGTAAGCAACACATAAACAACAGTCCAGTC  
A\_14\_P200847 GGGAAACTCTCCATTTATTTAGTGATCGAAACACGATAGCATGGTAGTAAATTAGGCATT  
A\_14\_P107615 CTCATCAAATAGGTAGAACTTTATTTTCTAAATCCCTCCCTGGACCTCTTTCAGAAG  
A\_16\_P16394265 ATTTTTCGGCCATAGTTTCATTTCCATAAATCACTTCATTCTTATCCTAATCCTTCCCCA  
A\_16\_P17661293

ATTTAAAGAACTGGACTTGAACCTAAGGACTTCTACCATCATGTTTTATTTCTGTTGCCCC  
A\_14\_P117904 AGTAGGTCAAGAACTCAGAGAAATAGATTACATAAAAGGTTACTAGCCAAGCCATTAGGC  
CUST\_4229\_PI426210822 CTGATATCCACCTTGTTAACACCGTAGATGACTTCGGTGCCCTCC  
A\_14\_P135872 CTTCATATGATCAGTTGTTAAAGCAAGTTGAGGCACTGAAGATGGAGAACTCAAATCTTC  
CUST\_2678\_PI426210822 CTGGCCCGCTCTGCCCTCAGGAAGTTTGCTTCCCTCAGATTAGCT  
A\_14\_P132602 AAAGTACTCCTTCACAGAAGAGTAGACACTTCTTGCTTCGTAGTAAAGTTCTTTCTGAT  
A\_16\_P17834036

AAAGTATGCTGGGTTTCAGATTTTCTTACAGAACTAAAACCTCCTAAATACTGTTGACGAC  
A\_14\_P124741 CATTGAATTAATGGAAGAATTATTGCTTCTGAAATCCACTCCAGTCCTATTGAGGAGAAC  
A\_14\_P135445 TTAATTAATTACATAGTGGCTGGAGTCCCTATCATCCACCTTCCTTTTCTTGATGTCATT  
CUST\_266\_PI426210822 CAGCCACACAGTGGTCACTTCTTGATAGGAGAGAGAGTTAGGCTG  
A\_14\_P130766 TCTTTTTTCTGTTTTGGCAGAGTTTGTTTTTCTCCTGTCTGAACAATGGTGTCT  
A\_14\_P200189 GTTGAAGCACATAATGAGGTGATTAGATCTCCTCATTCTTGGAAGATATGAGGATAGA  
A\_14\_P133851 CTCAGGTGTCTGGAATGCACAATGCCAGCAAAGCATTTTTATTTCAAGGTAAAG  
A\_14\_P134111 ACAGTGTGAAGATTCTCTTAGGGAAAATAGAGAAGGCAGCACTAATTAACAACGCAATTA  
A\_14\_P134096 ACCAAATATACTACTAAACACCCACCCAAACAATCAAAATATCAAGACCAGAAAGTGGAT  
A\_14\_P137904 ATCATACTCTCCATTTTTAGTTTCTGTTGGATTTTCATCAAGTCAATGGGCTGAGAAAC  
CUST\_8731\_PI426210822

TGTCTCTTCAGTTTAGTTGTGTTGGAGGCCTTAACAATAAAAAGAAATGATAGCCTTTAT  
A\_14\_P109519 CTCCATCCTGTAGGTTAGAGAACTCATCAGAAGAAAGTTTCAATCACTTCACTGTTATT  
A\_14\_P108800 CTAAATGTCTAATTTTCTCAATGTTTCTCACTTTCTCTTAGGCTGGACAACTGCATGCA  
A\_16\_P01336816

CTGCCCAAACCTTAATTTATCCCCCTCAGTTACAAATATCTAGAGTCATCAACCAAATGT  
A\_16\_P35362518

AATCTTTTACATGTTTCCAAACCCAACATTGTCTACTCTGTATCCTGTATAGTTTGTGCC  
A\_16\_P16507403

CTCAACTTTGCCAATGATTTTTGCTATCCTTTTCGACTGACAAAATGCAATTTTCACTGA  
A\_16\_P39496581

TCCATCTATAGCCTTTAACTTTCCACCTATAGTCTATACTCTCAGGCAGACAAAATCTT  
A\_16\_P35183063

CTGTATCACATGGATGCTTCTATTTACAGGGTAATTGAGCAAAAATGGTGGTAAACTACG  
A\_14\_P138489 CTAGTCATCTGAAATGCTGATCCACGGCAATTATCACCATCAGATTCTATGCATCC  
CUST\_6165\_PI426210822 GTAAGGGACAGTCACACTCTGGGAAAGACATCGAAGGGTGACATG  
A\_16\_P02101462

ATGAACCTCAAAAAAGTAGCAAAGGAAATTTGACAAGAAGTATCAACTAACACTCTGCCG  
A\_14\_P113648 CTAACAGGGTTGTAATATACTGTTGTCATTGAAAGAAAGGAGTGTCTCGATACTGTGATG  
A\_14\_P121926 AACTTTTTCTCTCCAGCATTCCACTGAAGATCTCCCCTAAAATTAACCATGCAAAAAC  
A\_14\_P107116 ATGGGATAAAATCAGCCATAATGATCACTGAACAACATAAAAAAACCTGATGTTGACTC

A\_16\_P15963229

ACACTTGGTGGTATGTTATTTCTAGCCTCATTTAAGAAGAAAGACCTATGCAATTCAGCA

A\_16\_P20032190

TATCCACTTTTCTCTAACCAAGCACATTTAAGTTCTATCAGCAATACAAACTCAAAGGGG

A\_14\_P114280 CTCTCTATGCTTTCTCCTTCCCAATCCTCTTATTACCACCACTTTTCAAAGAAAACTT

A\_16\_P01681278

CCACCTCAAATCTTGTTCCTTATAGTATATGCTTCTTCACCTAAACTCAGAATTGGCACG

A\_14\_P115898 ATCCCTCTTTTACCCATTGAAATAATTTTGATTATGCTATGGTGGATGTAACACCTTCT

A\_14\_P137906 CTTCAATCCCGGGGATTTTACTGTTTCAGTTTCTAAAAATGGCAGAAGTTCAATTCCTAA

A\_16\_P00577635

ATGTTTGGATATCTACAGCCTCCTTTTAAATCCTTCAGTATTAACCACTACCCTCTAGAC

A\_14\_P104605 TGTCAAAATCTCAGGGAAAAGAATCACTCAAAAACCTAGAGTCATCACTGATTTCTTCTT

A\_16\_P18117215

TGCACCATACCTCATGATCTACAACATCTATTCACCCTGTTCTTTTTGTTACCAAATTC

A\_14\_P137197 ATCTTGAAAGTTTTGCCTTTTATTCTCAGTTCTCTTTTGCTGGCTTCTTATCAGGAAACA

A\_18\_P15003175

AATGTCTCCTCCTATAATAGTCCCTACTGTTTATGACACAACCTGAGAACACTGTAATGCC

A\_14\_P139820 CTTTGCTGTATTCTATCAAATGCACTTACATTTTGCATGGGCTGATGGAATCAATTCATC

A\_14\_P121468 TGATAAATGTTTGATAGAAGTGGGCATCAGACTGGAATGCTTTTTTCTCAAGAGAGTAG

A\_16\_P30952408 ATGGCAAACACGTTCCAGGAGAGATTGGTAATGAGCCACCAAGTC

A\_14\_P101616 TTCAGATTACTCTGATAAATGGACAAGTGGTCAGAAACAAAATTAACCTACACATGGGCAC

A\_16\_P18157399

AAATAACTCATTCCTGGAGGTATACCTCATATAAGTCCCTTTATGTCATCAGCAACCC

CUST\_9143\_PI426210822 ACAGGGAATTTGGAGACCTACAGGCTTTGGAGTGAAAAAGTGATGGATATTA

A\_14\_P200588 CTCTGGGGAAACTATTACACATGAAACAGAGAATTCTGTGAATTGAAATCCTTTTTTCTT

A\_14\_P104443 GGTTCTGAGAACTGCTTCAATGTGGTATCTTTGTATGGCAATGTATATAGATTTTTTTA

A\_14\_P139290 TGGGTTTTGCCCTTCTTATCCAGTTGAGATATGTTAATACAGAAGGTATGTTTCTGTTTC

A\_14\_P110120 CCCAGGGACGAGTTTACTTAGTTTTAATATGGCTGTATCTTCAGAAATCTTCTTCTCT

A\_16\_P21451772

TTTGATATGTCTCCATATAGCCAAAACCAGAGTTATCATTCAGTTTAGTCAGCATAGCCT

A\_14\_P119449 AATGTGGTGTATGGCCGTTTGTGTATATCGATGTGCATAGTTTATATTGCAAAGCAGA

CUST\_8993\_PI426210822

GTGTAATATGATATGGAAAAGTGGCCCAGGGATGTAACCTGAGAACATAAAGTCAATGAA

A\_16\_P18426217

CCCTCCAATGATGAAACTTAATCTTACCAAGCATATAACCCATTAATCCTCACTTGATCTT

A\_18\_P22841758 GAGAAGATCTGGGGAGGACCCATATAACCAGAACTCGGGAGCCAG

A\_14\_P132798 AATTCAGAGTTTCTGAAAACACAGGCTTTTCTCTTGGAAAACATGATCTGTAAGATGTTG

A\_16\_P17885176

GGCCCAAAGTTTATTAACCTACAATATTTTCCTTCACAGCAGTATTTCCATGAACAGTTG  
A\_14\_P113983 TAGGATTTTTACTGGGTCTACCAGACTGGATGGAAATGCAATAGGTATGTATTTGACTTA  
A\_14\_P100285 AGAGATGAATAAAATCTGATGGAAGAGGGTTGAAGAAAGTGAAGTAAATTTTATGGGGGAA  
A\_14\_P123054 AGAACCTTGAAGAACATTTTTTCCTTTTCAGGAAAACGGAGGTTACAGAGAAAAGTATATG  
A\_16\_P15456360  
TGAACCCTTTTACTGAATCACAGAAGTATGCACGTATAAGGCTGAAAAAACAAGACC  
A\_14\_P127278 AATTATCCTTCAACTTCAGGACATTTTCAGTAATGGCTATCATCATCCTAGGTGGTATAC  
A\_16\_P01750462  
AAAAAAATTCTAACAGTCTTAGCCATAATTGATTACTATTGTCCATTTCATAAGCATTCCA  
A\_14\_P121947 GTTTGTGTTTGTAAACATTTATAACACATCTGGATGATGTTAGACGCTTCTTATTGGGCTT  
A\_14\_P137491 CGTATTTATAATGTGTTTACTCTAGATGCTGTGAGAAAACCATGGAAGTGATGAGAAAC  
A\_14\_P201070 AAAGGGCGAGGAGATTAAGGGACTCAAAGAATTTAAACTCAAGTTTGGATAGTGCTTTAT  
A\_14\_P132104 CTAAAATTTTCATGGTGGAACTCTTTTGCACCTCTTTGATCAAACCTCCTTTGTTTCTTCC  
CUST\_4646\_P1426210822 CCTTGACCTCACTTGGCTTTTCTCCATGTTCCAACAACCTTGTTAAGT  
A\_18\_P14135804  
TGTTTAGGTTGAGACATTTTGATCCTTTTTGCGGTTGTGCTATTTGATGCAGGATTTATT  
A\_14\_P133389 CTAATGCTATTGAAGAACCCTCACAACTATTTCAGTGATAAGATGGAGTGCTAATTGAC  
A\_14\_P138735 CATGTTTTCCATTTCTTTGGATACAACTTGGGAAATTTGCGTTCCTTGGGAAGAAAAA  
A\_16\_P30952620  
CTGATCACTAGCCTGTCATCCTTGGTCTTTGTATCTTCCATATTTGGAAGAAAAAAATCT  
A\_14\_P201898 TATCCACTGGTGGCTTTGTATCGGTTTCCAAAGCAATACTTATCTGTATCTCAGACTT  
A\_16\_P15573650  
AAAAAGAGCCTCATAGGATAAGTCAAATAACAGCACTTTTTTTAGTCAGTCCAATCCCAAG  
CUST\_5616\_P1426210822 TGAGGAGTTGGATGTGATTCTACGGTGGACAGACCATGGCATATTTT  
A\_16\_P20078819  
AGCACAGATACAGGAGATTATGAATGGGTCATTAGTTACTATGTTCTTTTTGCTGTCACG  
A\_18\_P17039158 ATAAATAGTTCCTTCTCCCATACGTAGCCATTCTCTTGACTTTCCTTTTCT  
A\_14\_P134150 TTAAATACATCCAGAACAAGAAAGGGCAGAATTGACCCTGTAAAACTAAATGAGTGGT  
A\_16\_P19717342  
ATCTACTGCCTCAATTCATAAGAAGAATTGTGTAACACTTCGTAGTTACTCCTAGGTCTG  
A\_14\_P132390 ATTTGAGATTTATGACCAATTGTTAGTTTCAAGTTAGAACCATTCCCAACCATGGTTAC  
A\_18\_P10823623  
GATTTCTTGCCATAATACTTCTCATCTTCAGTAACTTCAAATATCACCCACACACTACACA  
A\_14\_P137662 TGTGGAAGTCAACACACAAAAAGTTATGTTTACTCACTCTTTCAGGGGGATTAGTTTTAT  
A\_14\_P108168 GTCAAGAGTTTCTTTTGCCCTTTAATTTAAAGGAACCAACTTCTTGTGAAATGGCACTAAA  
A\_16\_P18956515  
CCATGGGGTGTTAGAATAGAATTAGTATTGCGATTCTGAACAATAACGATTGACTTACC  
A\_18\_P11463036

AAAATGGAAGTAGGATTATTCTGAGCCTCTATCTTGATCTGAATGCATGAAGACGATGAC  
A\_14\_P109624 CTCTTTTAAAATGTGATTATTTATATTTATGTTGAAAGCGGACTTTAAAAAAAATAATGT  
A\_14\_P115476 TCCCTCCTTTTCTTTAATCAGAATAACTGAGTTGTTTTCAAGATGCATTAGGGAAAGTGT  
A\_14\_P130147 ACAAACATGTGCTAAAAAGTTAACATACACAGTTGTAAGAGATCAACGTCGGGATGACT  
CUST\_6433\_PI426210822 CATGCCCTATAGACAGAGGCTCATGAACTTGTGCTTGCTGACATGTATATCT  
A\_14\_P123904 GATGCCAATTTTCTGGGCATGACACTGTTGTTTCAGATACTTCAAGATAGCACTGAT  
A\_14\_P112944 CTTAACCTATTTTCTGTTTTGTGCTAGGAAACCGTATCATCATGGGTAAAAACCATGT  
A\_14\_P139532 ATCCTTTTTGTTCTTCCCAACTCTTCAAGCCAGGTGGACAGAGAGT  
A\_14\_P136125 AAATGGACACGTAATAAATAGCCACAACCTCACATTTTCGAGAACACTTTGAAGAAAAACA  
CUST\_7228\_PI426210822

ATAAAAAATGTACTTCAGTAATTTGCAAATATTTACTTAAGGATTTAGTAATTTAGTAAT  
A\_16\_P01672707

TGCACTGTAAGATGTGAAGTCATGGTTATTTTTGAATCTGAGTTTTCTTGCTAATGCCAG  
A\_16\_P35697802

CCCTGATTCATATATGGTATAGCCTATACGATGGTCACTTAATTATCACTCAGCCCTTTC  
A\_14\_P116637 AAAATTCTGTGGGCTAGTCTTACAGACATAGTCTTTAAATGTAACCTTGCTTCCAAGGAGA  
A\_16\_P00319130

AACCCTTATGTCTTCACTCTTCCAAAATCACAATCAGTAACATGATTCACTTCAACTTCA  
A\_14\_P110273 TCACCTTCTAAATACCAGTCAGGAGATTTTTGTCGTGTTTTGGGTCATAAACACAATCT  
A\_14\_P137592 GTCCTGTTGCTGGTTAACATTCACCTCCTCTTTTTGAGGAGTATTTTTCCATTATGTATT  
A\_16\_P17637153

ACTGACTTTACACCTGCTAATCTAACACAATTCATTAAGTGTGTTTCCAGACTATGTGGA  
CUST\_3555\_PI426210822 CATTTTGTGAGAAAATGGTGGCCTCCTATATTTCTTCCCTGACAGGTTACTG  
CUST\_9303\_PI426210822 GAAACTGGTTTTGGGGCAAGTTGGACTCACACTGCAGTGCTTTCTT  
A\_14\_P135210 AAAACAAAATGAAAGTCACTTTAGCCCTGAGTTGTTATTGTCATCCATTGTAAAAGTGGC  
A\_16\_P21136292

AAAAATCAGTCCTGACAATACCAAAACTTTGCCAATTTCTACTTCTGAAATATCTCCTGGC  
A\_16\_P58424251

GAAATAGAGTAGAAATAGATCAGCCTCTAGTGAGAGGAACCTTAGAGTCAATGACAAAGG  
CUST\_8199\_PI426210822 CTCGTGCTGATGGTGCCACTGATGCACGAGGTGGACACGTCCATC  
A\_16\_P01164223

AAATTTCAATAACGGAGAAACAGTCCTATTTGTCGATTCTCAACTGCCTTTATCTCCAGA  
A\_14\_P132923 GTCTAATGAGATTTTCTCTGGCTGAATAAGTCCAAAATCTATTATGTGGGGGGAAATATG  
A\_16\_P00685027

TGTTATAATCATGACTGCAAGCATTTCTTTCTCCAAAGTCTTTTTGCATAAAGATTTTCT  
A\_18\_P14131094

TATTCCTGGACTTTAACTTTGCAACTGTAGAGGAGGATGTATAATCATGACACTTGTCTT  
A\_14\_P131823 ACAAACCTCACTGAGCACAAAATTATAGCGTTCGTTCCCTTCAGTTTATGTTGCTTAGAAAT

A\_16\_P20446234

AGACAAACTCCTGAAGTTGTTTACATCAGTGCTAGGAAATGCCAAGTGAAAAAGTTTATC

A\_16\_P15427938

AAAAATCTCCTTTGGGACATTAGATATGCCTTGAATTCACCACTACAAGTTCTACCATC

A\_14\_P113011 TTATTTTTGAGTGCTTCTCTACCTCCTTGAATGCTCTTGCTTTCTGGAAAAATCTCTTT

A\_14\_P108099 GAGGTCAGATCCAATGTTGGAATTTACAACCTAACCGGTTATATGAATGATCTTGAGTAAC

A\_16\_P15654327

AACTTCCTCCTAGTAATATCAGTCTGTTTCTCATTGACCAATCTGTTTCAAAAAGCCAC

A\_16\_P19822623

ACCCAAGATGATACTACAGATATCCAGATATAGTTACTAATAGAAAGGACACTTTGCC

A\_16\_P19488075

CTAATGCTCCCTAAATCACTACCAGGAAAAGACTACATTAACCTACCCCTGAAAATAGAT

A\_18\_P22840711

ATTTCTAGTCAGGAATTATGTCTTCTACTGTTCCACAACCCACAAAAGAAGATGTCTGTT

CUST\_9814\_P1426210822

GGCTTCTTGGGAAAGCAGATATTGGAGCAGAGTCTCTCCTTTAAAAAATAAAAATGG

A\_16\_P19317079

CCTCCATTCTCAAAAAGTTCCTGACATTGAACTATCAATGCTACATTAATGACTATGCTCC

A\_16\_P58424079 TGTGAGAGAATTGTTGGGGGCGGGTATTGCCTGTGAAAGACAAAT

A\_14\_P130230 TTAAGCAGAATAAACAGACCTTTGCTGATCTCCACATTAGGAAGGTTGAAGATTTCAAG

A\_14\_P121236 CATTTCTTCAAAGAGATGCTCTTTTCCCTTGTGTTGTGATATAAAAACCAAACATAACT

A\_14\_P102966 AAACCTCCGATTAGACAACCTATGGTTTTACACACTTGACTTTATAAATGCTCTCTTTGG

CUST\_344\_P1426210822

ATACTCGTCAAAATGAGTGAGGAAGGTAATATAGACATGAAAGGGAAAAGCAGTATAG

A\_14\_P136142 GAGTTATAATGGTCAAACCTTTTCCATTATTGCCTTTGTGACTGGGTTATATGGTGCATA

A\_18\_P22842488

AATGATTTTGTGCTTAGAAACTGTTGTTAATTTACTCTCTGACAACAGTGGAGACACCAC

A\_16\_P03038638

TTTATCATTACCAGTTCAAGATCCAGTTCATCAACCAAAGTGGAGACACCAATACAAACAA

A\_14\_P113599 CTACCACATTCTCCCAAAGCATAAAGAATCATGAAAAACAGAAATTCTTTCTTGCCTTC

A\_14\_P118063 GAATGGCAATTCCAAATCCTTGTCTTCACTTATGTAAACTCACGTTTTCTGATGATGTTT

A\_18\_P16215082

CCCCATATCTTTACAATAAAAACCTTTTCTCATGCAGTCATTGTATATCTAGTAGGCACC

CUST\_6669\_P1426210822 TGAACAGGCTTCCCTGCAGACAACAAGGGGGAACAAGTGGACAAA

A\_16\_P00685432

TTTTCTCTCTGGAATTAATTTGTCCCAAGTGAACCTCAAATAAAAAGGAAGAGCACCTAT

A\_18\_P13043355

TTATTATCATTTTTCAAAAATGTCGTGGCCCTTTACCAATTCCGGTTCAATATGACTTTC



A\_18\_P22841778 AGTTGAAGAGGACACAGCCCACAGGGTGGAGGTTTCAGAAAACATT  
A\_14\_P102806 GAGTTCATTTTTTACAAAGTGCATATCCAGCAAGTGCCCCAGAAAGCAGTG  
A\_16\_P01607971  
AAAAAACGGAAAGTAATTAGCGTAAGAGTAATGACCATAAGTAATTAGCATAAGTAGACA  
A\_14\_P128772 TATATACTATTTTTATGGTCTGTCTGACTCAGAATCCTATGTGGTGTGTTTGGTTGGTAGG  
CUST\_7960\_PI426210822  
AAATAATTTTTTTTCTGAGACATTCTGTGCCTCTTTGAGTCCCCTAGACAACACAGAA  
A\_14\_P105065 AGTCTTGAATAACTTCTAGTGATGTTCCAAGTGATTTGCTCTTTTCAGAGAATTAGATGGG  
A\_14\_P107913 TGAAGAAAGAAAATGAAGAGTGAAGGGTAACCCCAACTGAAGCAGTATTCTGATTAT  
A\_14\_P114147 CTTTTTGATGCCTAATATTCTACTGCTTCCCACTGGTTAAAATACAAATTGTCTCCTGCA  
A\_14\_P109474 AAATTTACCACCGATGATTCCATTTGTGTGCTGGGAATAAGCAAAAGAAACGTTATTTTT  
A\_16\_P01273837  
CATCTCTCCACATTAGTCAATAAGATGACCTTGTCTTATAAAAATGCCTGTCTAGTGTCA  
A\_18\_P15969808  
AAAGGGGCCAATTTAAATCATTTTCATTTCCATATGCAGCCATAACCATGTAAAAACTTCC  
A\_14\_P134278 GGTTTTACATTCACTCCGTCTTAGTCTTCCCCAAAACCCTGTGAGTT  
A\_14\_P123739 CCAGTTTTCTAGACAAAGAAATACTTTTGAAAATTCCAGAAAGTATCACTCCTGGA  
A\_14\_P123014 GCATGTTTAATTATCCTCACTGGGAGAGTTGAAA  
ACTACTTGACAGGTTCCATAATCAAT  
A\_14\_P124126 ATCTTGACCTTCAGAAAAGATTAAGAGTGTCAGGTTTGTGTCTTCAAACCCTAACTCT  
A\_14\_P110016 TCCTTTAAAGCATGAGTAAACATCGAGAACATTTCTCCTTCTAACTCACTTCTGCTTCAA  
A\_14\_P201100 CCCAAATGTTAAGTCTTTCACGTTTCCCCTATTTAAGAAGCATAGATACTTTCAGTTTGT  
A\_16\_P00566891  
TCCCCCTGTAATTATGAAATCAATTTCTCCCTATAGCAGTTATATTGGCATTTCAAAGCA  
CUST\_1306\_PI426210822  
ATAGCTTAGTCATCAGTTATTTTCATAAAATGTTCTCGCTTCCCTCTTTAACCTAGCTGTT  
A\_16\_P35649948  
ATAGGAGATTTAAGCAGACTTGACATCTTCTTATGCCTTAAATTCAGATCCTTGCTTCCA  
A\_16\_P17472973  
AATACTGATGTTTTTCCCACAAATGTAACAAGGCAGAATGTAAA  
ACTCCTTGGAAGTGAA  
A\_14\_P113744 TTATTAAGTGCTCTGATAAAACACTGTAAAGTGAAGCACAATTTGCATGCCCTCTCATCA  
A\_18\_P14135952 GTTCCAGCCTGCTCTCCTTCCCTGTCCATAGTCCCTCCCTGCCCC  
A\_14\_P123725 GAAAATGGCATAGGATTCATACGTTGAATTCAGTTGAACCACAAGAAGAAATGTCTAGGT  
A\_14\_P105355  
AACAAGAATTTCCATGCTTCAAAGTAACAGCAAAAATAAACAGGAGAATAAAGCACGTGT  
A\_14\_P118904 AACTACCTGTTTTTCTATATCCCTGTCTTTTATATGTGAGGAGGCACACAGATTGATCAA  
A\_14\_P139231 ATAAGAACCATTCAATGATTGAGAGAGACATCTGTGAATTCTTACAGAGAGTGCATCATG  
A\_14\_P116628 CAGAACATACTTAAGAGGTTTAACTTCAGTAAACTCAGCCTAAGTTAGCCCAAATTAGGG  
A\_14\_P106288 TTGATCTAAAATGGCTGGGTTTTTATCTGAATAACTCACTGATGCCATCCCAGAAAGT

A\_14\_P200308 TAACTGAGAAAAAACTGTGATGAGGGATCCTTTGCGAGAAATCCGTTGCTAAATGTA

A\_16\_P01466368

GCGGGCTTATAAAATTAGGTGACGTAAAAAATTCAGGACACAAAATAGCATTGTGTCAG

A\_16\_P18105799

CAGTTCAACCTACCTCTAAGAAATGTTTCAGTGGATAAACTCAGATCTCCAAATTACACTG

A\_14\_P109685 TAGATCTTCAGTTTGGTGACGCAAACTCCTCTCACTGAGGAAAGAACAATATTAAGAA

A\_18\_P14139221 CTAACCTTCCTCTCTGTCTTTCTCACAGACTGTTTTTGAAAGGAATTGCC

A\_16\_P20398646

AAATCCATTACGTGAAGGCATTAGAAGTGTGAGTGTGAAAAACAATTTAGAATAGAGGCTCC

A\_16\_P00461896

AAAACCTCAATCCAACAAAACCTCCATTTTTTCAGTAAAGCCTATCATCAGTTAATGTCCCTGA

A\_14\_P138384 CATGCCAAGGAATAGATTCTGCTCTCATGGGTATTTTATTAACATATCTGGCATTTCCTT

A\_16\_P02435352

ACACAGATTGTATGGTTATTGGAATCCATTTGTCTTGAAAGTTCATTGCACAGTAAGCAC

A\_14\_P124693 CAAACTGGGGACCAAAATAACATGTGAGAAGTAGACTATCATAACTTGACAAGTGTGAA

A\_14\_P108001 CTCAACCTATGTCTCTTTCTTCAGATCTCTCAACTTAATTCCTCCTAAGTAAGCCACTTA

A\_16\_P00685113 CACTTTGGAGAGAGCATTGCCAGCCTGGACGATCTGGACAATGAT

A\_14\_P117290 TGTTTTTTCTTTTTACATAATTAATTGGGACCCTACCATATGGGAACCTTCTGGAGTTTC

A\_16\_P39526950

ATTCTGTA AAAAGCATCAAGACGTAAATATTCCCGATACAGAAAATCTTGAGAGGACCTC

CUST\_5492\_PI426210822 GTGAACCTATCTCTCATTCCCTGCAAGTCTGTCAGTGGCACAGATGT

CUST\_7442\_PI426210822

ATCCTTAATGTTTGGCGGGTGGATTTCTTTGTTTAAAAAATCCTGGTTTGCTTGA

A\_14\_P129191 TAGGACGTGATTATAGGACACGCATATATGTTTGGTTTTAGTGGACTCTTAAAAATTGTT

A\_14\_P103758

GAGGCTAATTTGACTAAAATGGACCTGGAGAGTCAAATAGAAAGTCTGAAAGAAGAACTT

A\_16\_P16191481

AAATCGTGCTGTGTTTAAAGTTCTTGGAGACACTTCTCTCTTCCAATAAAAGGCTTTTAC

A\_14\_P114631 ACTAATAGTAAGAGTGTAACAAACGAAGCACATTCATTAATTCCTCCACACACGTGTCTT

A\_14\_P201037 ATTTCTAAGTGAATCAAACCATAGACACAATCCCTTTAAAGGTTGTTTTCTCCATCATG

A\_14\_P112835 GAACCTGTATTGGTGCTACAAATAAATTTGGAGCAGAAGAGAAAAGCCTTATTGGACTTT

A\_14\_P123248

AGTAAGAACTAATTTGAGCAGAACACAGTAAGAAAGTAGTAGAGCCAGAAAATACCAGTCA

A\_16\_P02558234

ATCTCTTAAAGGGGCAAGAAATCTTTACTGTGTCAAATAAATAACAAGCCAAAGTGTCTCC

A\_16\_P00685562

TGTATACGCATTTTGGAACTATCATATAAAAAAGAAAACCTTTTGTAACCTTAAATTTGGG

A\_14\_P108143 CTGAATATTAACCTCATCCCCCTTTTGGATATTGAGTGGATAAATGGCAATTAATCAGCC

A\_14\_P125963 CTGAGCACATATGGCTATCATGATGTCAGATGTCAGTTAAGAGTTATGTTCCCTGTAAACC

A\_16\_P18118539

ATCTGTAGTCTAGACTCCTCTCACATTCAACTATCTGCTAAAGATCTAAAGATCTCCACG

A\_18\_P22841038 GGGCCTCTTCTTGCTAGGTCTGTTACAAAACCTTTCTTTAGGTTTCTT

A\_14\_P128232 TTCAGTCAAGATGTAAGTAGTAGCAAGGGGAACATGGTGCATTCAGGTCATTTT

CUST\_3490\_PI426210822 CAGTACAGCATGGAGCCTCCCAAGGCACTAGTCACACAGATCAAG

A\_16\_P01161122

ACTACAAGTAGAAGCCCATTGAATATCAACAGGAAAAGTAGTTGCAGTCATAATCCCTTT

A\_16\_P31885920

GAAAAGGACACTTACTTAACTAGGACCAATATTTGACTTCCAAACACCTTTACTCACTCA

A\_16\_P30952436 GACGTCATCAGCCCGATCGTGTGTTGAAGCAGCCTACAGCCTCAGT

A\_14\_P113877 TCCAGACTTCTAAGACCTGACCAAAAATAAACTTTCTACAGAATTTTGCGTTGCAAACCTT

A\_18\_P14135332 GACGGCTGCCTCTAAACCCACTTCTTGTGGGATGGTGGAAAGACC

A\_16\_P02380923

ACATAGGAGGTGCTAAATAATTAGTCTGAAGAGCCTAAGAGTATCCTGTTTTTCAGTAGAT

CUST\_12\_PI426210822 CTGTCCTTTCCACCTTGCCTTTGCAGTCAGAACCTCCACCCAAGG

CUST\_1176\_PI426210822 CTGTTGAGACTATGGAAGAGAGGGATGGTGGAAATTCGAGACTGG

A\_16\_P35660671

ACTGAAATTCCTTGCACTCCATTTTTAACCCTCCAATTCCTATTAAATACACCTACAAA

A\_18\_P14138133

GAAGACAGTTTTTCAGTTAGAAAGGGAGAAGACATCTAGAGTTAAAGTTACGATCTTTTTCC

A\_14\_P200875 GATGTTACATTTCTGGTAGAAGGAAGACCATTTTATGCTCACAAAGTGCTGTTATTTACA

A\_14\_P201541 ACATATGAGTCAAACTTATGGTTATTTTTTCATGTAGACTGACATAATAGGGCTGAGTTT

A\_14\_P115574 CTGGAGGTAGCAAAGTTTTGAACTTGAATCAGGGATTGCTAAGAAAACCTTACAACCTAATG

CUST\_10406\_PI426210822

CTGTCATCCTTGGTCTTTGTATCTTCCATATTTGGAAGAAAAAATCTTCTCCAGATTTT

CUST\_1096\_PI426210822 CACAGAAGAGCCAGCAAGATCTCTGCAGGAGGCACAAACCCTCTC

A\_14\_P122452 ATCTTCATCTACGATGCTGTGGGCAAAATGCTGAACTTGACCCATACCTATC

A\_14\_P125475 AGCAAGAAACACTCACAAACAACCTCTGCAAATACAATGGGACATAGACAAATACATTTT

A\_16\_P00572783

ACCCTAAATGCTACTGAGATACACAATTTGACTCCTTCTCATATTATCATGCTTCGACAC

A\_14\_P109811 ACAATGTGGAAGCCTGGTTATTTAGGAAATATTTTCGTTTCCTAAAGTGCATCTTTTGAAG

A\_18\_P11252000

ATCAGCCAACAAATTCCTTTTTCAAACCATCTCCAATATCCTCCATTGCTGTTATTTAGA

A\_16\_P00196223

AAAAGGAGATGAAATCCAAATGAATCCATTTGCTACATGTTAAGTATGATGGACGAGAGC

A\_14\_P137943 CTTGAACCATGATCAGCAATAAGAAGACATTTACGTTATAACCAGTGCAGACCAAGGTAT

A\_14\_P135016 ACAAGTTGGGAAAATTCCTCTAAAACCCACTGGATAGAACTTCCAATGGTAAAGTTC

CUST\_7872\_PI426210822 GGTGTGAACATAAGAGCAGGCAGGGTGTGTGTAGAAATAGTAGCATATACGT  
A\_14\_P200727 CCTTTGTGTATAACTCAGGGGCTTCAACTGACATAATATAAACTATGGCCCTTATAGTCA  
A\_14\_P132382 CTGGTTTCCAGAACAGTTTTTTGTTTTAACTAAAAGCCACATTCAACTTCCTGTCATCAA  
A\_16\_P03223807

CATGTTATGGCCATTTTTATGACAGCGATGTCACATATCATCCTTCACCTAATTCCTTTT  
A\_16\_P35122793

AATTTACATCTCATAAGAATCTCTGAGTCCCAATTTCAAATTTCCAGGAAAGGATGCTGA  
CUST\_8620\_PI426210822 AGTGTCTGTCCATCAGGAAGCCAGGTTGTAATGATCATGAAAATAATAGAGGG  
A\_14\_P121480 AATAAACCTATTCTTCCTCATTGTCTTTGTCATTATTGTTTGACCAGGTAACAATACTG  
A\_14\_P107997 AGAGTGATTCTCTGGAAAATAAATTCCTTCAACCTGAAAGTAAGCCCATTGAGAATTTA  
CUST\_6721\_PI426210822 GTCCTGAGCCTGGTCCTGCCTGCCTTTCTCCCCAGACCCCT  
A\_14\_P107076 GGTAATCTGTAGTCAGAGGGGGCTTGGAAAGTAATCAGAAGAATATTTGACCAA  
A\_14\_P101219 AGAGTTTCCAAGAAGCAAGTAGGTGGTTTTTCAGTTTTTTCTCTAATTCCCAGTGTATATT  
A\_16\_P02944183

GGCAATCATTGTGGACAATGTAAATCATGCATAGACAACCTGAAAAAACCCCTGAATACTC  
A\_14\_P120790 ATAAATCAGATCTTTCAGAGTTTTTCCAGCATTACCAGATTGCACTCAGAGAGTGGTTC  
A\_14\_P107978 CTTTCTAAAGGCCTGCTTTAACCCGTGCCCTCTCTGTATGAAACCCTT  
A\_14\_P201905 ATACTTGACAAACCACGGCCACTGCTATTCAGACTTGGGACTTAGAAATCTATTCTTTA  
A\_16\_P02162002

GCAGAGTGACGTAATAGGTATGGAAGTGTTTTTAACGGGACAAAAACGTAAAACCAG  
CUST\_9102\_PI426210822 CTCCCTCCACCTTGATGACCCTTGGTAGGTAAGTTCCTGAGT  
A\_16\_P19745256

CCGTTACCCAGATCATTCTTTTCTCAAATAACAGCCCTTGATGAATCACTCTCATAATTT  
A\_18\_P17403390

GAGAAAAACATACATCTCATAGATACAAATAAACTACAAGAATAGAAAACAATCAATGT  
A\_14\_P110115 GTCCTTAAATTTTAAAAATTAGGACTGCACTACAAAGCACATCTAGTTTCCCTTACGGA  
CUST\_6249\_PI426210822 GAGACCTGGGTTTAAACATGACCTGCCATAAATCAGTTTGCTGCAA  
A\_18\_P16514273

CACAACCTTCTACAAGTTTTTGGAAAACATCTGTTATGATGACTTTCATACACCTTCACC  
A\_14\_P201927 AGTAACTTCGTCAATCTGAAGAATATAACCTACTTGGTAATCATGGAATAGGGGTTTGA  
A\_16\_P01939860

AATTCCCTCTTATACTGATTTTTCTCTGTCACTTGAATTCATATCGGCAAGATTCCC  
A\_16\_P16191917 GGTCTGAATCAGACTTATGTAGCACCAGGCAACCTTCAATCTCCTTTTGAAAG  
CUST\_9457\_PI426210822 GTCTGCTTCCCTTCTGTGGAATTTACCCTCTCTTAGAACAGTCAGTGT  
A\_16\_P15344697

ACAATTCATGCTGGATATCTGGATACAATCCTAGAACTCTATCTCCATCAATTCCAAGAG  
A\_16\_P15628801

ATCCCCCAACTGTTTTATCAGAGCCGAAGTTACCAAATTACGTTGTTGTTTTAAATTTG

A\_14\_P108416 TCTTCTATTTGGTTAGTGCCACCATACCATCCAGACACTGTTTAGTAATCTTTTGAAACT  
A\_14\_P124859

GGAGTATGTTGCAAAAATAAGAAGCTCAGAGAAACGAGTGAGTTTGGAAAAAAGACTTACAG

A\_14\_P136724 TGAATAACAGACATCCTAAGAGGGGATATTTCCACCTCTATAATGAAGAAAAGCAGGAG  
CUST\_4317\_PI426210822 ATCACTAAATGGTCACTTCTCTCTAGCCTGAAGAGCCCATGGAATGTC

A\_14\_P133676 TTAAAGGGGGCATGTGTCTGTATGTATGTATACTTTACACAGTAACAGAATATCTCTTA  
CUST\_5916\_PI426210822 TTCTCTGGGCAGGGAAGAAATAACCTGGAACTACATTTTGGGGAAAAAA

A\_14\_P126090 TTTCCCAAAGCCCATTTCTGTAACCTAATTAACATTTGTTAGATATGAGTGGAGGGGCAAA

A\_14\_P103544 ACTAACTTAATATGTTGCTTTTTTCATAGAGTGAACATCCAATACCCTTCCCTGTGACAGAGA

A\_14\_P114815 AAGATTGAATAACCTATAGTATTTGGTGAACCTTCTGGCTGACCTAAAACATCTCAAGTGG

A\_14\_P127833 CTATTTATGCGTTTAAAGAATACCATGTAGTAGACGCGGGAACACATCATCCAACCC

A\_14\_P124597 CATAATCTTCATCTTCTTCATACATCATTTGTGACACTACTCTGTGGACATCTGTTTCTT

A\_14\_P129139 GGCTATAGAAAACAGGTAAGATGAAATACAAAGATAGACTCCTGGATGACTAAGGCTCAAA

A\_14\_P121485 ATGCTTTTTCTTCCAGTCACTACACATAAATGACTTCTACTTTTCCACTTCCCTAGTCAGA

A\_14\_P134743 ACACAAAAACATTCAGCACCCCTTCCAGATCGTTTAAACAATAATTGTTACATTGTTCTTG

A\_14\_P133741 GACATCAATAGATTGGATTAACATATCTCTGTGCTCTGTGCCCTGAGTTTATTCCTATCA

A\_14\_P127646 CTTTTGAGGCTGTATTTAACCAAAAATTTGTTTGGAGACTTGAGTCATCAACCCTTATCT

A\_14\_P118675 CTAAATCATCACCCGCGGTGATGGCACTCCAGTCTTAATCTCATAACTATAAATAGATAA

A\_14\_P202083 CATCCTCTGTGGAATCTGACTATAACCAGATAGAAGAGACACTGGGTTTTAAATTCATG

A\_14\_P111886 CTAATGAAAGGAAATACCCTAGGTCAGAAAAGAGAGAAACTGACTGCTTTTTTCAAATAT

A\_14\_P119003 CCCAGTTATCTCAGTCTGGAAAATTTCAAAGATCGTAGAACAGATGATCTCAGTTAAA

A\_14\_P112147 TTCAATCTTCTGCTCTTGCATTATTGAATACTTTGAATATCCCCAGGCCTACTCTTTC

A\_16\_P16191400

TGTCATGGAGTTAGAGCCTAGATAAAAGTGTTTGGCAAGTCTCTAAAGCATATTTCAAGA

A\_14\_P137165 AAGGAAATGGGTAATAGTGCCACACTTGTCACTAAGTTCACAATAATAAGAACAGCACAG

A\_18\_P22841733 CAGTGATGGTCCCTGGCTTTGACTTGTTCTTTTGGAGAGGTTTCTCATC

CUST\_2100\_PI426210822 TTCCTAACCAATCTTTCACCTGTGCATAGGACCAGGAGAGAATAACCTATTTT

A\_14\_P123795 CTAAAGGATGAGGCACCTGTGGCTATTCCATAAATACTGATGTGAAGATGATTAAGTAA

A\_14\_P132618 TTCACCTGTTATGTGTGCTCTTACAGGCATCTTATTATAGAAAACCTTTATCCCTCTGGAA

A\_14\_P126412 CTACCATGGAACAGATTTTTTTTTTCCCACTAACTGCAATGCTATGTTGGTAGTTTGT

A\_14\_P121547 CACCTTAGGGTTTTCAAAGCCTCAAACGAAAATATGTGTGAATGCTATTTATTAGAAGCC

A\_14\_P132188 TCATTTTCCCTAGTCTGGATCATGCCTTTCACATACATTTCTTATTATCCGCTACAAAG

A\_16\_P15988074

AACTTCACTCTCAACAGTTACTTTTTACCTAATCCCCACAAACATTTTCATGAAGAACTT

A\_14\_P200367 ACCTCGTGATTTCTTGATACCAATCTTTGTGTGGTTTCTGTATCTGTAATACAATTTTG

A\_14\_P102233 GTCCCTTCTCTCTCCGCTTCTCTCATGTAACAAAAGTAATTAATAAATTCCTCCTCA

A\_16\_P36230386

ACACTGGGTTTCATCTATTAATATATACTGTTGATGCCCTTTTAACTGGTATTCTTTGA

A\_14\_P125708 ACAGAGCCTAGCAGAAGAATTAAGAGTGCCTCAATTGAAGTAAAATTATTTGCCACTTC  
A\_14\_P109768 CTGCAATGTGATAGAAGAATGCAGAATCCAGTTAGGAGAGAAACCATATAGATGTTGTGA  
A\_18\_P14135961 CCAAGAAGATGACAGGGTTGCCTTTTCATCCAAACCTTAGGAGGT  
A\_14\_P120443 TTATTTGTAACAGTTGCACCCCAGACAAAATTTTAACATAAATTTGAATCCCTGTGCCTG  
A\_14\_P132767 CTCATGTGAATGTATACTTTGCAGTAGAATGGGATATGACCAATGCAAATAACTTAATCA  
A\_18\_P17376523  
AGTTACTTGGCTCAGGTTCTTGTGAAAAATCTCATTTGTAGGCTACACTTATGCAGAATT  
A\_14\_P135812 TTAATTTTCCAATACTGCTAATCAGGGTTCAATCCCCAAAAGCAAGTAAAAGTAACTGAGATGT  
A\_18\_P14137627 GTTCCTTCTAACAAGGATTAGAAACCCCTCTCATGTAGGAAGAGGTGGATTTG  
A\_14\_P107119 TATAGAACAAAATTTTTTTGCTGCTTACCACAACATACTGAAATAAGAAAAAGGGGGGAA  
CUST\_4440\_PI426210822 CTCTTGCCTTTCTGAGCATCATCCTCGTGGCATTCTGGAGCATGA  
A\_14\_P103393 AAGCAGAATAACCTAAAAGCCATGAAAAAGTGCTGGTATTTTTTCAGGATCTCTTCAAGAC  
A\_16\_P16809533  
ACGTTTGGATCTAGTCTATATTGTCTTTCCTTAGTCATGACATACATCAGTCAAGATCGC  
A\_16\_P17441836  
AAACTTTCAAATCAAACCTTAGGTTTGTATCAGCAAAACATCTCCCTATAGGCTAATTGCA  
CUST\_3402\_PI426210822 CTTGATCATGTGAGACCTAAGGGCTGGTCCTGCCCTTTTCTTATC  
A\_16\_P16191532 CTGGCCTTACTCTGAGGTGTGGAGAAGGCTAGAGAAGAGTAGAAGATAAG  
A\_18\_P19486022  
ACACAGATCAACCATGACACTGACTTACATGTAGAGTGAAATGATAAGGGAATCTTTCAA  
A\_14\_P106718 ACAACTTAAAAAGCATTATCAAACCCCTTCAAAAACAACTAAACAATGGCTGGTTGGAT  
A\_16\_P41753112  
AAAATTGGGCAATTTCCCTTAAATATTCCCAAGTCCCTCATTAATGGTGTCTTTTTAGC  
A\_14\_P121119 ACACACACACAAGCAAATAATAATTACTAAGTCTTCCCTTGCTAGACAATTACATCCC  
CUST\_2617\_PI426210822 TGATTAGGCCAAGAACGTCTTTGAGCCATTTTCTGGTCTCCCAAG  
A\_16\_P37078267  
ACTTTTGCCTTTTCCCTAAAACATATTTATGAGCCCAAAGAGTAAAAACCTATAACCCTACAT  
A\_14\_P132579 GATCAAAAAGCAAGCAGAAATGAATCCACATTCTAGTCCTTTATGCAGTATACAAGGAGA  
A\_14\_P118358 CAGCCAATACCTGGTCCATAGTTCTTTCACATTGTGAGTATATGAATACGGGGAAAT  
A\_16\_P02707520  
GATGGAATCCTGAATATTGATGGGTGATGTTATAGTCCTCTACACAAAAGTCAAGATGATG  
A\_18\_P23603006  
AAACAGATACTCACACTACAGATAACACAGCCAATAAAGTAAGTCAAATCCGTTTACCCA  
A\_14\_P114198 CACTAGTAATATGAAGATAATAGAACCCTTTGCTGTCTGTCAAGTTCTTTGAGAGGCTTG  
A\_14\_P117296 ACACAGCCAACATAATATCAAAATATATTTTATTCTGGACCTTTTCAGATCTGATTCAA  
A\_14\_P134064 GGAGGATAAGGATACAGCCTCAGTCAAGTCTCATGATCTAGATATAAGAACAAGGAAAAG  
A\_16\_P16191824  
ATTATCTTCTAAGCACACACCAGAATATTTTCAGATGCTCATTTCTTTTCAGGCATTGGTG

A\_16\_P02271036

AAAATAAGATTGTGCAGAAGTGTAGAATATAACCACATGCCAATCCTTAGGAAACAGTGG

A\_16\_P02288122

TCATGACCAAAGGAGAGTTAGAAGGTAGGAAATAAAGGCATAAACAATTCACCAACTATG

A\_16\_P20803516

AAAACATGACTGCATTACACATCAAAAATCAACCTAATCCTTCATTTCTGACCTATGGA  
CUST\_3154\_PI426210822 GATTCAACTCTGCTGATCTTCTCTACCCAACAAGTGGCATTCTTCAC

A\_14\_P107432 ATGTGAGAACTTCAGATTGAGACCCTCTTTGCAAAAAGGGGAGGCAAA

A\_14\_P110590 ACAAAAAGAGTTGTCCACCAAGGAAAAGTTCTTGCTTTCCAAATATGAAGATTTTCTTCT

A\_16\_P21128211

GTGACCTAATCCATGTCTCTGATGATAACTAGCACCCATAGTAAAATGAATGCAAACCTGA

A\_16\_P30952415 GTCCTTTCTGACATTTTGGACCTCTCATTATTGGCAGGCCTGAATTATGTTCTGAT

CUST\_6110\_PI426210822

TTTTAAGGGAGATGGAAAGACACAGCAGGATATCTGTAAAGCCAGAATCATCTG  
CUST\_9648\_PI426210822 TCTCTGATCCCTGAATTGGTTACTGAGGCCACAGAAGAGGAAAG

A\_14\_P202395 CTGATGATTACAGATCCCTGAATCTACTTTTTTCAGAGCAGTTCACTATCCGTTTTTTTTCT

A\_18\_P25351430

AAAGCCCAAATTTTACATGCATTTTGCCTCAAATTTCTAAAGCAGGGAGATTCTGAAAAG

A\_14\_P105985 AGAGTTCATCTCAAAGCCTGGCAAGTGAGTATCTTATATTTTAAATTATCTAAAAATCAT

A\_16\_P16771507

CCTAACTTAACTAAAGGTGCTCTAAATACACAGAAATCATCATTTTGCCAAGTCAACTG

A\_14\_P125584 ACTAGGGTTCTGGCATTGTAATATTCTAGAATTCCAAGATGCCACTTCTAACAACACTAA

A\_14\_P107595 AACTGTAGGGGTAGAAGTTAAGTGGTCAATCATCATTAAGGGAACTAGATTTGTTTGCTA

CUST\_7424\_PI426210822

CAGCTTGAGAATCTACAACCTGTAGGTGACAGAGCAAAGAAAACCTTTGAAAAGTTTCT

A\_18\_P22843396 AGACGCAGAATGATCAGCCACCTCTGATTCTGGTCCCACATATC

A\_14\_P103546 TCAAGCCACCCTATTCCCTCACTTTTCAATCACTTTACCTATGACTAATAGAAAGTTCAA

A\_16\_P20750252

CCATGGTTTTGTTTTAAAGGTTATCATTGCAATGGAAATCCAAAACGTAAGAACTGTCGT

CUST\_3292\_PI426210822

ATTTGTTTTATTTTTGAATCAGTAGTGTGTATAGTTAAAATTTTTAAATGGTTATAAAAAG

A\_16\_P16415779

AAAATTCAAGCATGCTTCCCTAAAGTATTTGCCAAAAGACATGAACACTTTGAGCATCT

CUST\_7126\_PI426210822

TTTTATTTTAAAGTCAAAGCAATTTCTACCAGTAAGAGACTGAATGAATAACAGGAAGCC

CUST\_4088\_PI426210822

TTACATGCATTAGAACTTCTGAACTGTTTTTGTCTGTTTTTAAATTAGGTTGTGGTACA

A\_16\_P20628051

ATGGATAGTAATGTGTAGCAATGACATCATGACCTATGGATTTAGAGTCCCTTGTGACAT  
A\_14\_P109607 ATATCTGGGCCCTTCAACTTTAATCTCACATTTATGTTCAATACCAAATTGACCTCCAA  
A\_14\_P133672 GTTTGGCAAAGATGATCTTGAGACAGATCTGCAGAATTAGATTCATTTTATGCCTTCTCA  
A\_14\_P119516 AAAATCTTGCAGGTAGAATTAGACTGCTTTTGGTGAACAGTTAAGTTCCTTTTCTACTCT  
A\_14\_P121696 GGGATAAATTCAATTTGGCATAACACAAGTGTGTTTTCTTGGTGGTGGTTTTGTTACTTA  
A\_18\_P16383343

AAACTCAATCTCAGCCTAGTTAGTGCAGAATATCTCACAAAGGGTAAAAGATCAGGAAAA  
A\_14\_P121816 CCGAGAGTCATTTCTACTTGCAAAAGGATTCGTAACAAAGCGAGTATAATTTTCTTGTCA  
A\_14\_P109809 TTAAGTTGATCATTTAGTGCCTTCCATGAACTGGCCTTTACAGAGGTCCTCAAT  
A\_14\_P139508 ATTTGGCAGATTAAACTTGAATAGTGATTCCTATCTGGATCCCCATTCTTATGTTTCCAA  
A\_14\_P109095 CTTGAAAGCATCCGTCTCACTCATTTCTCAGGTATTACATTTTCTCAATGACC  
CUST\_6819\_P1426210822 CCATCATGTACAGTCCCACCTTGTATATGATGGGTACTACCATGGTAGTCC  
A\_14\_P138563

AGATCAGAGGACAAGAGTCAACAAAGAAAAAGAGGAAAATTGTTTCATGGTAAGAATCTTG  
CUST\_936\_P1426210822 ATGACAAAGGCTTTGGCCATCTCTATGGCAGGTGCGAATGTAGGA  
A\_14\_P104650 GCGCCACACATCCATGTCTGTTTGGTTGAATATAATTTCTCCCTTAAAAGCATATAAGAA  
A\_14\_P108440 CACCTAAGATTCTACCTTACCTTTGTCATAGTTGTGTCATCTTTCTTGGGAGTAAAGTTT  
CUST\_4957\_P1426210822 CCTTAGGAACATGAGTGTTTTTTGGAAAGGCCTTTGATGAGTGGCAGT  
A\_16\_P21435887

CCCTTCTCTCACAAACCATTTCTCAGTATCTAGACAATAAGCCACAACCTTAGATTTCAAG  
A\_16\_P00685381 ATCCTGTAGCAGGAATGATCAGTGCTGGCTGCATCCCTTTTATATTTATGTGCTAT  
A\_14\_P112594 CTCCAAAGAATTAATAGGCAACAGTGGGAGAAAAAAAAGGCATAATGGCAAATCCTTC  
A\_14\_P117799 TTGAAGTATTTAGTATATGTGGTTTTTGTGTTTTTAACTAGCAGCAACACTGGTGG  
A\_16\_P02686617

AAATGAGAGACATCAATAGTTTATTTAGGTCTGGATGATCCCTAATATAGTCTCCACCC  
CUST\_7904\_P1426210822 AAACATACTGTTTCCGCTTGGCAGTCTTGATTTGCTTTTCAGTGACTIONCTGA  
A\_14\_P119444 ACCTTTGTCTTTATATCCACATACTGACAAACCCAGAATTACCAGATGATTATGAGACC  
A\_14\_P127341 GTGAGATCACTGGCTTTGGAAAAGAGAATTCTAGTAAGTGACAATTGCGACTGACTTA  
A\_14\_P110009 TTGTTGATTCGGTCTCTAAGATCCTGGGCCTATTTGTTACTCATAATTGTCTAGATCTTG  
A\_14\_P137651 CATCATAAGGAACAAAGACGTAGGTTCCATCAGTCATTTTCAGATCATGAGCACATTC  
A\_14\_P135964 ACGTCTGTGTAATTGATGGAAATAGCATGCACCACTTGCAAAATGGAAAAATCATTACTC  
A\_16\_P17247327

AGGTAAGCAAGACTCACAAATACTGGACCTTTTCATCATTCTCTTTACTATACTCCAATC  
A\_18\_P22841790 ACACACCCTTCACACTGCCTCAATTAGAACCATGTGCCAATGACATTC  
A\_14\_P139724 CTCTATAATCATGTAGTGCCCTCTGTGTTTGTCTTTCTAATTACCCTGTATTTCTGCTACT  
A\_16\_P35252560

TGCCCTTTACTAACTTACAGTATCATAGTCTTTTTTCAAAAACCTTAACTCCCCTCTAACCA  
A\_16\_P16568150



GCCATTTAATCCGTCACATTCATCTCATAATAGAAACACGTTTCATATTCCAGTGGTCAAT  
A\_16\_P00727471  
AATAAACTTCAAGTCCTTCTCTGTTCAAATTGTGATCCTCCAGAAATTTAAGTGCCAA  
CUST\_5644\_PI426210822 AGGTCTGACCTGGGCTCTGAGGAAGCAGGTGCTCTGCTGCCTTTC  
CUST\_7109\_PI426210822 CTTGGGCTGTCTGCACACACTGTCTCCAACCTCCACCACCACCATC  
A\_18\_P22842636 GATTTTTGCAGTTTATTCTGTGTGGCTGTGTGTGTTGGTCCCTTGCCAATAAT  
CUST\_3799\_PI426210822 CTATCTGAAGATCACACAACCTGTGAGAGCCCAGCTCCCCTGAAAT  
A\_16\_P58424583 GTTAGCAGTGAAGAGAACCATGGTAGACCTAGGCAGGGTCCATGC  
A\_16\_P00722081  
CCTTCTGATTAAATGCTGCTGTCTTGACTTTATCATTAGACCTAAACAAGTTGAGCATA  
A\_14\_P120548 CCACCATATGTTTATCAAACTCAGTCAAGTGCCTTTTGTAGTGTGAAGAACTCAAAGTA  
A\_14\_P129162 CTCTTATCCCTTTGGCCTTTACCTTTCAAACTGAAATGTTGCAAATTGATTTTGAGATG  
A\_14\_P123331 CGGTCACTGTTTCATTTTTCTCCATTCATTTACCAGCAATATTTTTCCAACTGTGATTCA  
A\_14\_P131442 CAGGGCTCCAGAGTAACTTAAAAGGCTTCAGATTCTGATTCAAATTTGTCACATATTCA  
A\_16\_P00685059 GCAAAGCCTGCTTTTCCCCTGCTTCTTTGAGGTGGATAAATGTTTTGTTC  
CUST\_9895\_PI426210822 TTTTGTCTTTTGCAGTGAGGAGCTTAAATGGGACAGTGGTGTATTGGG  
A\_16\_P17990888  
ACTACTCACAACCTTACAACCTTGTTACTTGCCCTCTAGTTAAATTCTGCTATCCCTTTACCC  
A\_14\_P103595 GGATTCAGAAAACCTGAATGCATGGAATTTGTTTTGCTTTATCACAATGTGAAAGTGTTC  
A\_14\_P119781 AATTTAGTGGCATTTC AACACTGGACTTAAAATGTTCCCTGACCTGACCAAAGTTTATT  
A\_14\_P116681 CTGAGACCTAGGAAAGACAACCCATTTTTTTTACATTCATTTATCCCCACTATTAGTAGA  
A\_14\_P132765 CATTTAGCATCTGCTATAGACTGTGGATGACATTAGGCATTTTCAAATATCATCACCATC  
A\_18\_P22840486  
AGAGTTAATTATTGCCTGTGGTGGTTGTGGCTAACTGGATAAAGATACATGATTTCAAAC  
A\_14\_P117796 ATTTTTCAATTGGCTTAGGGCAGATTTTCATGCAAAAGTTCTCATATGAGTTAGAGGAGAA  
A\_14\_P131727 GCCCATATCCAGTCAGGAGACAATATCCAAACCAACCCCTTACT  
A\_18\_P18666673  
TTCTAACTTTCTTTTTCTCAGACCAACCTTAAAATTGACGAATATTCCACCAGTTCACCT  
A\_16\_P16191944  
CCTGATACATAAAACCCCAACTTTATAAACTGTTAAATTGGTAAAAGATTATTTGTTC  
A\_18\_P22841244 TTTTGACATGCCAAGACTTGCCCCAGTAAGGGCTGGGTGGGGCTTT  
CUST\_3469\_PI426210822 GCTTTGAGTACCATGGTGTCTGCAGGGAGTCCCAGTCTTACTG  
CUST\_2137\_PI426210822  
AAGCTCAATGGCCATTAATGGAAAGTTATATACAATGTTACAACCTGCAGACACCC  
CUST\_2557\_PI426210822 GATGTCACTGTTGGAGCCTTCATGTCCGACAGCGTGGTTCTTCTC  
A\_14\_P101847 CTGAGA ACTGGATGTCTCACAGTCCAGATCTCACATTCTCTGAGAAGCA  
A\_18\_P14138409  
CTTGGCTGCCCTATACTATTATCCTAGTCATCATTGTTAAATATAGTTGTGGTTGGTAGA

A\_14\_P103728 GAAAGTATTTGTGGTAATAACCCCTACCGGGAGTTTCACTGAAGGTAAGAATGAGTT  
A\_16\_P58424584

ATCATGTAAGCAGTTTATTTAGGGAGATGCTCCTAATGAGACCCAGAAATAAATGGGACA

A\_14\_P137782 AACTATTGATTACACACACAGATGTGAAACACTGTGAATATATTCAGTGCATTCTTCCT

A\_14\_P138076 CTCCATTTTTGGATGGTTAGAGAAGCCAAGCAGAATAAAACCATGTAAAGAACTATAATT

A\_14\_P136955 AAGAATAAGCCCTAACTCCAGAATCTTTTCTTTTCCAGAAATAAATACCTTGCTTTCCA

A\_14\_P108721 CCAAAGTGGGAAACAGATGCTAATAGTTCAAAAAGTGCTCAGTAGATACTCAAAAATGCTT

A\_14\_P101102 CCTGTGCAGTGATTCTAAATCACCTCTTATTTATGTGTATGGATGCAGGTGTCAATATTT

A\_14\_P127534 AGTTGAGATTCTATGTTTTGGTCTTCAGGTTGCTTATCAAGTGTCCCACAAATGAAAAA

CUST\_1184\_PI426210822 ACTTCTGCCCTTTAGCCTCAGGCCTGTCACCTTGGCCTCTCAGTG

A\_14\_P116116 AAAGTGACCCTTCTACTGCAGCAGGAAGACTGTTTTTATAATTGAAAGATAGTTTGCCTT

A\_18\_P11900496

ACCTGTAATGTCCTTTTTCCAAGAATAATCAAAACATTACTTATCAGACACAACACCAGA

A\_16\_P15920292

ATCAAGGGCCTGAATCAATAAAACAGAACCATTTCAGTATTATCACTGCTACAACCTCACAT

A\_14\_P102562 CTCCCTATAGTGAAAGATCCGTAACCTTAGGAATAAATGATAAATCCTGTGACTATTAGG

A\_14\_P136193 TTCTTTTACCTAAGCAGAAATTGTTCCAACCTGCTGGTGTCTGCAAGATGGAG

A\_14\_P127598 ATAACACTTATCTTCTGTAGTTCCATGTATCATGGATGCTTAGGCTCTCTTGGGCTATT

A\_14\_P118333 ATAACTAATTTCTGAATATCTTCTTGTAGGGCATGCCAGAACAGTGGGCTCGATTACTA

A\_14\_P122549 AAAAGAAGGCAAAGCATATTGAGAAAGGCCAAATTCACATTTCTACAGCATAATCTATG

CUST\_9686\_PI426210822 GTTGTTGAAGGGTCATCACCGCCCCATCCTATGCCATCAGCAGT

A\_14\_P129108 TAATTTCTAGGTATCTGGTGACCCATCTCATGGGGGCAGATCTGAACAA

A\_18\_P20345151

AACCGACCACAAAATGTATCTAAAATACTTTTACTATGCTGGATCCCTCTAATGTTGCT

A\_18\_P13484330

AGGCCACCTTAAATCATGATCTATACGAATAACCAATTTTGATGAACGAAATGTCCAAG

A\_14\_P121327 TAATAAATATCTGGCCTTGTCTATCTCCTTCTGTGCCCATCACAGAGCAAAGCAAATA

A\_16\_P17012042

AAGTCACAGTCTATGTAACACGTTCTTGTTTCATTAAGCCATGTTTAGTAGTATTTGCCCA

A\_14\_P123338 GTTCTTATTTGTGGCTTAATCGTGGCCATTTTTATGGCTATGTTGGAGTTTTTATGGACT

CUST\_10003\_PI426210822 CACAGACTGGGAGGGAGAGGGCAGTCACGGCCGCCAGGGACACAC

A\_14\_P125764 CAGACTTGATAATTAATTGGAAAATGATACTGGAAGTTATGGGGATTAGGTGCAGAGTTT

A\_14\_P103713 CACTAATTGAGGAGAGAAAGGCACTTGTATTCTGTATTACAGTAAGTATTCAGTTGAGGA

A\_14\_P133108 CTGTGATGTTTTGGGGATTCCACTCTCCAGTGTAATGATTATTGACAACAGGTAATATAT

A\_16\_P01914353

AGAGAAGAGTAGAACAAAGCAAGAATAACTGGAATCAGGAATCATTTAACGAGGAAGAGA

A\_14\_P138919 AGTCACTAAAGCCTGAGCGAATGCCTGAACAAGTGAATAATTATGCTTTTTATTACTCCTAT

CUST\_3643\_PI426210822 TCATCTCTCAGCCCTGTTATTATTCTCAGGGATTTGGAGGGTGCA

A\_14\_P116517 AAGGCTGTCAATAAAACAATAGGTTAGGGATCTCTTCTGGGGAAAGGAAAAGATGTAAA  
A\_14\_P127457 CAAAGGATTATGATGTTTCATCTATGTCCCAAATAAACAGTCAATTTGGAGCCAGTGTAC  
A\_14\_P100686 GGATCAAAGACAAATTGCTACATATATATTATCAAATAGTATTGATGATCGGTAAGTTA  
A\_14\_P200221 CGGGAATTCTGACTTTTGTGTGATGCCAATGCTGTGTGATTAAGGGGAAAAAAA  
A\_16\_P18653577  
ATGTCCTGAATCCAACATTACGCTGGTAAAGAAGAGAGTATAGGAAATAGTATCACAACC  
A\_14\_P118174 CCAGAAATCTTCTGACCTAAACTCTCTGGCTTTTGGTTTAAACACAGTAAAATAATTGCTG  
A\_14\_P130720 AATTTTCATTTAAACTACTGACCTCCACTATTAACAAATTGATGACGCCAACAGAGATAG  
A\_14\_P137656 CTAGGACTTCGCTAACAGATTTCTCCCAAACCTTAATTCTTTGGAATAGCCC  
A\_14\_P139259 ATGAGGACGTGATGATGTGCATCATAGCAATGCCTGCCAGTGATATAG  
A\_16\_P03610481  
TGACAGTAGTGGTTAATATTGAGTAAGTGCAACACATGTAAACAATGGCAATGAGTCAGG  
A\_14\_P202149 TCAACCCCTCTTCTTTATCATAGGTATTGCGAGTTAGATGTTCTGATAGGAGACTTCTTC  
A\_16\_P03618427  
CTACTTCTTAAGAATCGATCCTTTCATCTATCCTCAGACAATGATAAGGTAAGAGCCCTT  
A\_16\_P00685412  
ACAGGATTAGAAGTATCTCTAACCTGAGCACCTCACTTTCTAGACTCCTAGAAGTTGT  
A\_14\_P132097 CTAACTCACTCCTTCTAGTTAGATCTGGCCATTTTCATCATTGTAATAGGGATTGTAGACA  
CUST\_5012\_PI426210822  
AAAGGTAAAGATCAAAGAGATCATAAACACACATGAATACTATTTTCAGGAACATAAAATT  
A\_14\_P124385  
AAAATGACTCAAGATGGCGAACAAGATACAGTAAAATAGAAAACAACACATACAAATGAG  
A\_14\_P117641 CTGCTGATGTATTAGCAGGTTTTTCGTGTTGACAGTGTGCATCTACTTCTATTGTTTAAATCG  
A\_14\_P112934 AGGTGAACTTGCTGTCCAAATTTTTGCTGATTGCAAAATCTTGCTATGAGCAGAGA  
A\_14\_P134334 TTTGGCACAAAAGGAAGGACAATGGTGTGAATACTTTTAGAGAGAGTGAAAGCATTATT  
A\_16\_P00076652  
ACACAGCATGTATTTTCACTCCATTAACACTACTATACAATCTGTAATTGCTAACCCCA  
A\_14\_P118711 CAGATGTTGCTTTCTATATTTTTCTTTGTTCTGTTTGAAGTGGGCTAAGTAAGCACAGT  
A\_16\_P16043672  
AACATTGTCCCATTGCAGAATAATACACAACTACTTGAAAATAGCCTTGGAGTTTCTTT  
A\_16\_P02101604  
AAAATCATCAAGAGTATGTCTATCATCATGCTTCAACTTGTAAGCCTTTCACCCAAGG  
A\_14\_P104992 CATTTCCATGAAGATAAGGGGATTAGGAAAGAAGGTTCTACTAGTTGGCATAGCAAAC  
A\_14\_P107524 ACATCTTGTGAGCACATTGGTGTAATTATAATGTCAATACTTAAGTAGCACAGATCTCAG  
A\_14\_P130660 AGTATCTTGGTGATGTCTGTGGGCATTTTCTTTGACTTTATATGGAATAAAAGGCAAAC  
A\_14\_P116303 GCATTTTTCTCCTCTTCATAATCTGAGCATTATTTAAACAATTCATGGCCCAATACAGCC  
A\_16\_P17217514  
TTTTTCCACTCAAATTATTTCACTCAGACTTATCCAACCTTATCACGACTATCTTCCCTGG

A\_14\_P126940 ACTAAAGAGAAAACCTATGCAGACCTTTGTAGTCGGTCACATCTGCTTTCTATACTACTA  
A\_14\_P136835 CAAAACAGACTTTTCGCCTTCCATCTTAGCCTTCTTCCAAGAAAGTATAAATCATAGTCAA  
A\_14\_P137724 GGAATTAACGCAAACCACTTACAGACTACAGTTAATGTGCGCTGACACTTCTG  
A\_16\_P21570337  
AGGAACAAACTGTAGATCTTAGTATATTCACCAAGGTATTAGCATCCTGTGTGGTCTTTC  
A\_18\_P14136651 ATTCATCCTTCTCCACACCGCGGGCAGTCTTCAAATTCTGGTTAG  
A\_14\_P110769  
CTCCAGGAAGAAAATAATTCCCAGGAACACAGAAAATAAGATAAAAGACACATACACAG  
A\_14\_P132799 ATATTCATTATCTTCTTCTTCTCCCCAGATGATCTTTCAGGAGGAAAACCCAGG  
A\_16\_P02393543  
AATAAGGGGTCCAAGAAGCTTTTAAATGATGGTAGCCTTTAATCTGCAGATGTATACTGGT  
A\_14\_P109546 ACTTGTTTTTTTAAAGCCTACACGATTTTGAATATTTATTACCTGTTCTTCAACAGTCCA  
A\_14\_P109527 AACATAGTATGGGCTCCTAACGTGATTAGAATATTCATCTGTATTTCTCAACAGGTCTT  
A\_16\_P58424319 CTGTGGCCCAGCACATTGCCTGGCATAAAGTAAGCACCCAATAAAT  
A\_14\_P115325 GAAGATTAAGTGGGTAGGTAGATTATGTCCTAGGCATGCAGATAAATTTCAAATCACACC  
A\_18\_P16337655  
ATGTTCTGTGGATATTGTTGCTCTAACTTTGCTTACCTACTCGTAATTTTCAGGCACCAA  
A\_14\_P105145 AAAATGTAGTCAAAAAGATCCAAAAGAAAAGATGGTCTCAGCAACTCTTGTCTCAACATTG  
A\_14\_P110850 GTCCATGAGAAAATAGATGTCAAATTTACTTCAGTGCTTACCTCTAGAGAGGTATGGAG  
A\_14\_P137639 GGAATGTGCACTTAGTAAATAAGTGTGGAAGTCTTAATGCATCGTCTTAGAGACATTGAG  
CUST\_1976\_PI426210822 CCAAACACAGGTTGCCTGATTCCTCTTAGAACCTTGAAGCAGAAATAGC  
A\_16\_P17422249  
AAAAAAAACCTTCTGGAAGCTTTCAACCTGAAGCACTAAAATTATTTGGGAACCAATACC  
A\_14\_P109707 ATCAGGGGTCTGACTTCTGCTGCATAATTTTCATCTGCACAAATGAAATACAAAGT  
A\_14\_P130672 CAAAATCTCATTCTCACCTTCACTCCAGGGATCTCTTACCCTCAAAGC  
A\_16\_P03520187 TTGCCATAATTAATGCCTCGATGACATTTTTTTTTCTTAACTGCTATCATATGTCTCC  
A\_18\_P14378600  
CCTCTCACTCTTCTTTTTAACGTGAAACACAATACTCTGGTTTTTTGTATCTGTCCATAACA  
A\_14\_P107295 TACAGTGTAGAGGAAGAATAGGACGTTCTGCTACTGTTTTCAATTAACACTCAGTTTGAC  
A\_14\_P126934 TTAATAGAGGACTTACTATAGAAGACAAAGCAGTGGAGCAACTGGCAGAAGGATT  
A\_16\_P02923398  
CCCCTAGATGGCCTAGTTAAAAACCTACAGAAAAGATCTACAATATGGTCCAAAGTTTAC  
A\_14\_P133498 AAATAAAATTCTCTATTGTAAATAAAATTTTTCTTTGGATCTTGGCAATAAGTGTGCCT  
A\_14\_P111374 GTAACATAAAGAAGAAAGTGGTTAGTTCCTATGAGGCAATGTCTTACCGCCTGATTTGT  
A\_14\_P107893 TTCTTACCTTCTTCTTTGAGGTTAGATTTTCTGTATCCCTCAGAGGCTTCAAA  
A\_14\_P111530 AGCAGACTTGAAACATACCTCATTTTTTACAATGTCATTGTGTTCTGGGTTGTTGTTGTTT  
A\_14\_P116726 CTATTGTTAGTGACCTACCTTGAAGCTTTTCTCAATATTGGCCAGAAGTCCAGTT  
A\_14\_P110962 CCAGTTCCTCTCTGCTGTATTAATATTTCAAATAAATAAACTCCCCATTGCATCTGGGA

A\_16\_P41750467

AACTCAGACACAAATCTTTTCTGTCACTTGAATTCCATTTTCACATTGACTTTCAGGATC

A\_14\_P111437 GTTGGATTCTAAAGAGGTAGGAAAGTTGGAAGAAGATGGCCAGATGTTTAATTGACAAAT

A\_14\_P118359 CATATAGAAAAGATTCTGTTCTTGTTCCTTTTTGCTTCAAGCCAGAATTCAAAGGGAA

A\_14\_P105863 CATTCCCTGGGATAAGCAACTCTAATTAGAGGCAGGAAATGTTTATTTGAGTTTTATTGG

A\_16\_P16191493

TGGATGATATATTTTTAACTGCTGAGACCAGAGAGTTCACATAACCTATGAAGACTGAAA

A\_16\_P02467500

AATAAGTGTTCAGATGAAAAACCTCGGGGAGCATTCTACTTAAAGTCTCTCATTTCCT

A\_14\_P115248 TATGGGCGGGTGCCAAATACTGCTGTGAATCTATTTGTATAGTATCCATGAATGAATTA

A\_16\_P15705042

AACAGTTCAACTACCCTGATAAACTATTTTGTCTTTCTATTGCCTCTATGAACCTGATTA

A\_14\_P201333 ATGCTAAGAAGTAGACTATTAGATTAGCATGTAGGAGAATCCTGACTGAGATTGTGGCAA

A\_16\_P17817120

TCAAGTTACCATTTCTGAAGTAATACTGCACACTTTTTAATTCGCTGGTTTGATAAGGC

CUST\_1145\_PI426210822

CAACAACCCTCACAAAGCAAGAAAGGGTGACTGAACTATCCCAAAAATACAAT

A\_14\_P120652 CTGGACCTAGACTGAGTTTCAGTTCTTATGGGGATATAGGTCATTTTCTTCTCAGAATTA

CUST\_8459\_PI426210822 TCTGTTTCTCCTCGAGTTTCATGTTTCAGTTTTTCTCTCCCTCC

CUST\_2283\_PI426210822

GGATTTATTATCAAATAATAATAAGGAATGGTCCTTTATCCAGGACCTCAGACTTTTCTCA

CUST\_2048\_PI426210822 GTCTCCAAGTAGATTTACCCTGTCAATCATCGTTCTGCTTTTGAAATAGGCCAT

A\_16\_P02638667

CTCCAAGGATACAATAAAATCTCAGAAGTTCCAAGAACTAAGAACTACTGCAAAAGGGA

A\_14\_P124457 TTATCCTGCCTCACTCATAAAGCATCTCCCTTTACTTTAATAAGCACATGGATTTCTCTT

A\_14\_P136789 GTTCTCTGCCAACACTTCTCTGTCCAAGAATTTTATCTGATTTTTAAAACCGTTTCATAA

CUST\_5468\_PI426210822 ATTGATACTTGGAACAGGCCCTGGGGGAGTGAGGGAGGACACGTG

A\_14\_P125689 TTCCATTCACCAGGTCATACAGCAGATGGAACAAAAAAATTACAACAAGGAATTCCTC

A\_16\_P58424433 TATGAGCCAAACAAAACATGTCCAGTGACCACCTCCAGCCTGCAG

A\_16\_P20010793

AATGGTAACTGATTAGCATCATCAGCCAAATGATTCCAATACTATCTAATCCAGCAGGTC

A\_14\_P122237 ACTATGCACATTGACTAAAAGAAAGCATAACCTTTCTCTCTCTCCTTCGGTGATATCATAT

A\_14\_P131275 CACCTCCACCATAACAATTTCTAGAAACATGTTACCACATGTAAACAAAATGCAATTTT

A\_14\_P138891 GCACTGGTCAGCATGCTCAAGAGTGCTAATTTAGGTGAGAAGCCCTTTATT

A\_14\_P200403 GAAGCACTGCTTGGCCATAATTACTCAAAATTATATACACACTTTTTTAAAAGCC

A\_14\_P127430 TTAGAATTCATTTTATTTGCATCTCTTTGAGTGTATTTGCCGTCTTTAGGGCTTCAGCAG

A\_14\_P136538 CTCTTCTGAATTTTCGAGCAGGTTAAATCTCTAATGTATTGGCTAGATCCAAATCTTCGA

A\_18\_P14133838 GAGGGAGCAGATTCTGGTCCTCACACCAGAGGAGGCTATTTCTAC

A\_18\_P15230776

AATAACTGTCATCCCTAACCTTTACATTTAGCATCTTTCAGCCTATTCACTACTTCCCTC

A\_18\_P22841204

ACTCTATTATCAGGGAATGACTGGCTTTTATTCTAGTGTGTGTTTGCATTTCCCTAGGAC

A\_14\_P114214 TGTTGTCAACCTTGGCATCTAAAGCACTGCTGGGTAAAGATATTAAATAACAGTTTTTGC

CUST\_6084\_PI426210822 CCTCTGAATACCCACCAGACTGAGGAGCCTTTGTCTTAAGACAGA

A\_14\_P106875 CTTTTTCCTTAGGTTAAATTTTCTTCATGGGGTATTGCTGGGCAAATAATCATTTCAGG

CUST\_848\_PI426210822 TGACTCATCTGTAAATCAAAGGGTAGCCCAAGGTCCTGATTGAGAACA

CUST\_2652\_PI426210822 TAGATTTTGAGTTACTTTAGGTTTTGGGTGGGACTAGAAAAGCAGGGAGG

A\_14\_P113664 GGATCAAAAAATCCCTTTTGCAGAATATGAAATTCTGTGTAAACATCAGTGTGGGTTT

CUST\_1463\_PI426210822 GTTTCTTTTTGGATGGTAGGAGGCATCCAAAGCCTCTTTTAGGGAAGAT

A\_14\_P116581 AACAAAGGTAGTATTTATGGAGGTCTCTCCATGTAATCTTTTCATTGCTATCTGAAGGG

CUST\_8013\_PI426210822 GCTTCTCACCCAATTCTTTTGCCTGTCATCTCACTGTGCTCTTTAATGTTTTTA

A\_14\_P129249 CTTTTTCTTGTGCAATGGCTGATATGCTACATTTTTTACAAGAGGCATAAAGTCATGCA

A\_16\_P17134422

TACTGGTAAATGTTTAAACCCATCCAAGTAGTGATCATTTCAACTTTAGCAGGTATTTCCC

A\_14\_P105139 GGTA AAAAGTCACAATGCATATGAAAATACTGATCAGGCTCAAGGTAAAACTGTTGAGG

A\_14\_P131589 GAGGTGAGAATGTGAGAACTTGAATTAGAGAGTAGACTGTTCAAAATATGGAAAGACTT

CUST\_2240\_PI426210822 GTGAGTGAGTGCTCCTGGTGCACGGAGCCCCTCCAGGTGCAGCAC

CUST\_8272\_PI426210822 CTTAGTCTCAAAAATCTGCCATTGTTGTGTTTAGGTGAGTGAGTGGCCTC

A\_14\_P111578 TCATGTCACAGTAGAACTGAAAATATTC CCCATCAGTATTAGACCTGAAAGGAAACAAGA

A\_14\_P202023 CTCTGTTGTAACAATATTCTGAATAGGTGCAGGGTAACCAGGATGGTGCTAATTTTTAAT

A\_14\_P136179 CGTTTTTGGCAACAAATCTCAAAAACCTACAAAATTGACTCAAAGCAAGCATCTTTACT

A\_14\_P133961 CTTGCCTTTCAGCAAACATCAAATACTCAGCCCATTCCTATATTGTATGAACATCAACTG

CUST\_9982\_PI426210822 ACAGCCTCTGGTTTGTGGGTGGAGAACAAGCCTGCTCAGTGTTT

A\_16\_P33010332

AAAATGCAAAGAGGGAAAAATTATTTACCCACTAAGTTATACAGCCAGTCTTGTATGGC

A\_14\_P106609 TCTTGAGTCCTTCTTAAACCAGTGCCTTCTTGATGAATGGAACTCTTTGAATTTAATCT

A\_14\_P103266 ACATTAAGTATCACCTTTTTGCAGGCTTACCAGCACGACTGAAGATCTAGAATTTAAAA

A\_14\_P200244 CATAGACGACCCAGAAAACACACCAAAAACTTATGAAACACCTCGATGGACAAA

A\_14\_P136273 CGGACACACTAAGTAACCTACTCTGGTTTCAGTAGGGAAAAAATTATCAACTGAAATGAA

A\_14\_P116479 TCGCTGAATATTTGTAATCCTCAAAGTCTCATTGAAGACACTTGAGTCTTGGAACTGTGTC

A\_14\_P107332 TGCATGCTGGTTATTATTACCATCACCCTCTCAAGATCTTCTTTCTTAGAGTAAATGCC

A\_14\_P114670 ACCTAAGAATTGCCAAGGTATACCTGTCTGGGGAAATAACCATGAAATTCTATACCATAA

A\_18\_P22841257 ATTATATCTACCTTTACCACAGAAAGGGTGGTCCCTTTCTTTTCAGGAGTGGTT

A\_14\_P129594 CTGCTTTATTTAACACCTGCCTTTCTGATACCAACCAAAGCAATCTTTTTTCATTCTCAT

A\_16\_P17543476

CAAAGTCTTGCATTTTTTTTGCTTCTTCTTACTATTGCTATACTATCTGAAGCCGACAG

A\_14\_P137033 ATATTTGATTTAATGCCCTCAGCACAGACCAGAAAAGTATAGGGCTATTGCAAAACA  
A\_14\_P133087 CTGTAAGTGGTATGTAAAGAGAATGTTAGCATTATTTAACTTCGAGTTGCACCGCTGCT  
A\_16\_P58424327

GATAAGCAAGAACCCAGAAAAGTTTACCTCCCTAGTAACTCTTCCAAGGAAATTATCTTGT  
A\_14\_P104740 CATAGTCATGACTCAAATATACCCTGAAGCCTGTCTCAAACAATACTCAAACAATGTCTC  
A\_16\_P15722338

AAAAAAAAAAAAAGGCTTCTAAGTAAGCCCTAGGTTACATCACATAAGGTGCCAAATGTTGA  
CUST\_9371\_P1426210822 TTTAACCAAAGGTGGCATTAAAGTGTAAGCTCCTTGCAATGACAGGCAAG  
A\_14\_P127770 ATCTGAGAGGCACCGCAATTGTTTTCAAAGTGGTCTTGTGAATACTTCTAATTATATG  
A\_14\_P201613 CCTCTGGGTAGTTGTATACTTGGTCAGAAAAGTTCGCCCTAAAAGAAGGAAATAAAA  
A\_14\_P125853 TAAAGTCCTTTATTTGTCTCTGAAGGAGTTCAAGAATTCCCAGAAGAGGCAGCAT  
A\_16\_P38054709

AGTGCATATCATCCATTATACAAAAAGCCAGTAATAGCCCAATTTTTATTTCTGTCCA  
A\_14\_P125333 AACCGTATATCAGAAACCTCTGGAATTATTAACATTTTGATGCGCCAATCCCTGTTAAC  
A\_14\_P113687 GTCTGATATGGACTAATTCTTAGATATGCAAGCATTGGACTTTGTTAAGCCTCAGAAGAG  
A\_16\_P03597402

CATAAGCATCACTTACAATCAGAAAAGATCCCTGATGAAAGTGCATGAAGGAACACAAAG  
A\_14\_P136015 GTGATTATAATTGTGATGAGAATTGTGAAAGGGGGCGCATGTTAAGATCAATCTAGCATA  
CUST\_8164\_P1426210822 ATGTGAGAGCTATTTAAGTGCTGTTGCCATTCAGCACTTGCTGGTTGAG  
A\_14\_P130378 AAACATGTTGGCCAGTTGCGGCAAGTCTCATTGTTGGGATGCATTTTA  
CUST\_707\_P1426210822 TCTGCTGTGTGGCCCTGGGGTTTTTGAGTGGAAGAGGTATTTTTAT  
A\_14\_P129600 CTGGGATGAGTGTAGAGGTAAGAGGACTTTAACTCTATCTGTGCTATTTGAATTATAACC  
A\_16\_P02279019

AAAATTCATTTGAACCACCAATCTGATCTTATCCCCTGTTTTATATACCTGGGCCTTAC  
A\_14\_P109920 CACATCTGTAAGTTGAGCAGATTTGCAGATTAAGCAGACCTCTTCCTTCTTTTTAAATGA  
A\_14\_P130849 CTCCGTGTCTGTTTCTATATCTTCAACTGCCAAATAGAAAATGTTTTCTCCTCCTGAAA  
A\_16\_P21670984

CCATGATAGACTTAAACACTGGCTATATGAAACTTGCACCATTATAAAGGCTCTCCTGAT  
A\_14\_P107406 CCAGTGTTTTAAAAGTGCACCAAAGAATTTGTGAGAGAGATTAAGCATTATCATTGG  
CUST\_3070\_P1426210822 TGTGTGCTGCTTTCTGAGCAAGTCTCTGCTTGGGGCTGCAGTCTC  
CUST\_9163\_P1426210822 CATTATAGACAGGGCAATTTAACAGATGCCTGTGGTTAGCCATGGGATTGTAA  
A\_14\_P121102 CCAGAAACTCTCCCTGTGTGCCAAGGGTTAAATATTTATTAGGTTTGTTTTAAATCAGGAA  
A\_16\_P15786681

CACATGCAGAGACAATTGAGCCTTTAGTCGCAACTCATGCTCTAGTTATAATGTGTTTTT  
A\_14\_P112621 TTCTAATCACAATTATATTTAGAATTTGAGAAAACCCCCCTGTGTGTCTAATGGCTGCCAG  
CUST\_5642\_P1426210822 GCTTCCTGGTGTGTTGTGAGGAGAGGATGAGGCCGTCATGGGAGCAG  
A\_14\_P118962 CAAGGTTTGGTAAATGATTGTCCATTTGAAACATAATTCCTGCTTTCTGGTAGAAGTCAG  
A\_16\_P16804232

AAATGTAACTTGATCATCAATGAGCCCTTATAATGTTGTTATCTGCCACTTCAGTTGCC  
A\_14\_P133006 ACTGGAGGTAATAATCTACAATTTTTTTAAAAGGAGTTTGGAGCAGGTCAATGCTAAGCAA  
A\_14\_P124081 GTTGTAATAATGACCAAATAATAAGCATCACTAAGAAGAGAGAACCAACATGAACATGGG  
CUST\_7003\_PI426210822 GTTTCTGCAGTAGCCCAAGTTTGCAGGCCCTTGATAGGGCTGGAG  
A\_18\_P14522386  
CCTTTCAGATTTTTAAGATGCTAGGCTTTTATACCTTCCAAACAACACTTTTTGTCCACCAG  
A\_14\_P132266 GATGCAGATAAAAAGGTCACACTCAGACGTTAAACAAATTATATGGAAGTTCAGTGGCAAA  
A\_14\_P104487 GATCATATTGCCCATCCAAGAGGAACTAAGAAAGTATATTTTCAGGAAAGTGACATGGA  
A\_16\_P40186140  
TCAACTGGCCACAACAATTATCACTAACAATCCTAATCAAATGCTCATCATTTTTCTGGA  
A\_14\_P132335 CTCGGTTTAGTGGAGTGACGAGGACTACATAACTGATAGTCATTCATTAAGCATTT  
A\_14\_P126350 CTGAGTGGGAGCATAGATTATTTTCATTTGTTAAATGAGAAAGTTGAGAAGTCTATGTTT  
A\_16\_P21625250  
GAAAAGCCATTGTAACACATCCTTATGCTAACAGTCAAAAACCTCTCTGTCACTAATTGTC  
A\_14\_P125901  
AAATTAATAAGTAAACTGAGAAACTAGTGCAACAGAAGGCTGTCTTGACTGTGTTTTGT  
A\_14\_P127890 GGATCTTGTCTTCGTAATACACTTGTCAACCTACAATGACAAAAGCATGCAATGATAT  
CUST\_6622\_PI426210822 CTCAAAATTTGTAGCCCTGGGTGGGAGCATCTGTTCTCACATCGC  
A\_14\_P128969 CAGCGTCTTTACTGCCGTTTAAATAAAGAATCATACTGAAAGTGGCTTGCTGG  
A\_16\_P15605340  
TCCTTACATGTTAAATCTTCCAAGTATACCACATGTTTCAGATGCTCACTGTGATTAGA  
CUST\_658\_PI426210822 AGCCTTGCTTCTCAAGGGCAATCTCTTCTACTGGCTCCAAATGAA  
A\_16\_P17551027  
ACCAGTCTCTCCTTGATAACTACTAAGACTCGCAGTTTCTTAATCTACCATCTGTCTTA  
A\_16\_P18867409  
TTGAAAGCATCTATCAAGTCCTACTATTGAAATGAGCAGAATTTTATTACTCCCCGTC  
CUST\_1208\_PI426210822  
TTGTCTGATGTGAGAACATCATTACCTACCATATGTTCTTTGGTTTTATCAGAATGTGTG  
A\_14\_P121566 GCAAACATACACAGGGTGATTTGAATTGAAAAGTTGGCTACTAAAATCACAGATTGCTAC  
CUST\_1301\_PI426210822 GTAGGGAGTTGGCAAAATGGGTTGCTAAGTTCTAGGTAAAGGGAACG  
A\_16\_P17452620  
CCTTGCTCTGAAAGTTTAATAACCGGTATTTCTAAGTTGATAACCTCTACCAAACCTGCTG  
A\_14\_P105242  
TCACTGATGAACCTCAAATAAATTTGAAGAGAAGTCAAGAAAATGAATGGGTCAAGAGTG  
A\_14\_P115718 ATTGGGCAATAGAAATTTATGTTAATGTCTGTGGGATAACAAAAAGCAACATGTCCCTG  
A\_14\_P128509 AGCAGACAAGGTCGTGGAGAGGTTGGTAAATCCTTTAACATCTGCAAAAAGAAT  
CUST\_710\_PI426210822 TTAGAACCTGACCTGTGGAAAGGCTGAGGATGTTTCAGCAGTTTAGA  
A\_14\_P127826 CTGAGTGTTTTTTCCCCTAATATTTTCTTGTGCAATTCAGACTTAAGCATCGAGTTTTT



A\_14\_P202318 CATTCCCCCTTCTGAATTTTAAATAAAGAGTTAGGCAACCTCAGAGTTGGGAGT

A\_16\_P02834640

TTCAGTATCATCCCTATGACCTGCTAAACTCTTAAAGTAGAACAATTTTGTCTTGTGCCA

A\_14\_P100345 CAGTTTTAGAGTCCACTTTGGGGCAAATAATATCCAATTTGTCTCCTATCTGTGGGTA

A\_14\_P139085 ATTAAAAAGGACCCAGTTTTAACTCCTACCTAGTGAAAAAGGCATAAACCAAGTTAAA

A\_18\_P13870916

ACGTGATTTTCAGTTGGTTTTTCATATTCTTATGCAACTCACCTCTCTATATATGGCTTCCA

A\_14\_P107231 TATGCCCTCCTATGGTTATCTGTATATCATCAGCATCCAAAATACTCCATAATCCCCATA

A\_14\_P106083 AATTCCACATCAAATATTTAGAGTGCTTGATTTCCCTGTCTCTTCTTCCCATTTTCATTG

A\_18\_P13950250

AGCCACAATCTTTCATAGTATAACCACAGTCACTAATCTACACTGAATTATAATTACTGT

A\_14\_P120586 CATCTGTCTTGAAATCTGGGATGATGCCCAATTGCTTCTACATAAACCTTTATACTAG

A\_16\_P00614641

TGAGAATGCATGCTGAATAGAAATTTAACTGGCCATTTTCTACATAAACCACTCCAGAAG

A\_14\_P107212 TTTGAAGGTTACAGGCCTGGAAGATTTTGGTTGTCAGACATTAAGATTTGTTTTTCAGAAA

A\_18\_P14133117 GGGCCAAGGGTGACAAGGTTGCCAGGGAGCCTGGGATCGGAGTTC

A\_14\_P123972 GCCATGCAACAAAGGATTGGCGAGATAGTGGCTGAAATGGATGTT

A\_14\_P129710 CTAAATGTTCTTCCATTAGCATTGCAGATCACTAACATCGCTGGGAACATTATGGTAAAT

A\_14\_P118705 CTGAAAAGCCAAATCAAGGCCTCCTCTTATTCTGAAGAGTATATCCATACTTTCTGAAAT

A\_14\_P139346 CTGGAGGTTCTCAATGAAGAAAGAACATCAACTTTAGGGATGAATTAACAGTCACTTAAC

CUST\_2691\_PI426210822 CTGTTTTTCCAACCTTCCACTGAGGTCCTGTGTCTGGGCTGCCCA

A\_14\_P108915 AATTTACCCTTCTGTGAAATAACCTTTCGAAATTTGTTGCCCCATTTTACTTATCTTGC

A\_16\_P17904583

AAGGTGGCTGTGATGTATTAGTATAGGTTCTCAATTTCTGTCCTAGGTAAGATGAAAAGC

A\_16\_P00685338

AGTAAAAAAAACACCCAAGATAGCAGAACTTGTCATTTCTAGTTTTTCCACAGGACCATA

A\_14\_P118303 AGAGACATCTCCCAACTCAAAACAGCAAAGAAGTTCTGGTGCTTTAAGTGTT

A\_18\_P14135451 CTTGAATGCCCTCTGGTGGCGAGAAAGAACGATTGCATCTTCTTG

CUST\_4021\_PI426210822

GAGTCAAGTAAAAGGATGCTTTTGGAACTGATGATTCTCAGAAGAAGCCATGAAG

A\_14\_P129776 GCAAGAAAGAGATTACTCTGTCCCTTTCTCAGGCCTAAAGGGAAGAG

A\_16\_P00685380

GAAATATACACCCTCAGATTCAACAAGGGTGGTATCTTGTGTGTTTTCTTTAAGTTATA

A\_18\_P11401633

TCCTGCCTACATAGAAATTATAGATACGAGGAGAGAAAGATAAATACGGGGACACAGTAA

A\_16\_P15719508

ACAGGGCCCTTCTATTAATGCTCCATAATAATTATCTCTGCTATGTGTCTGAGAAGTGAT

A\_16\_P00635235

AACTGAACGGTATAAACATTTATCCATCTCCTCTCTAAAATTC CCTCAGTATCATTCCCT  
A\_14\_P110128 ACATGGAAAACGCATTCTAATGAAATCCTTTCCATTGCTCTTTTTTCTTAGTTCTTCAAT  
A\_16\_P17174242  
TTTGATTGCTGCTTATAGTGGTTGCCAAGTAGCCAAACATTA AATTC AATATTTGGCCAA  
CUST\_4028\_PI426210822 CTCCAGAGACACAGGGGTAAACAGGTCAGCGTCCTTGTCCCTCAAG  
A\_14\_P109582 CTGTGTGTTAGGGAAGTGGTTCAGCCCCTGAGAAATAAAAAGGTA AATATATATTTGAGA  
A\_14\_P124829 AAGAAAAGTCAGACTGTTCTAGCCTGTTACCCTAATGTAATTTTTCTGGCCTATTATCCA  
A\_16\_P20792056  
AAGAGGAAGAATAGCCATGAGTATGTTAGGTCAATCACTCTATTA AAGGGACATTACTGC  
A\_18\_P22842451 AGGTCCCAAACCTGAATGTGCAGATTTCCCCACTGAAGAGGATAAA  
CUST\_4092\_PI426210822 CATTTCCACATCTACTGTGAACTCTGTGACTTCTTCCCGTGTGATGATG  
A\_14\_P123501 GGATTCATAATACCAGTGAGAGAATAAACAATGTGGGAAACCTACTGAATTATCACAGGT  
A\_16\_P18059688  
AGTGTCTCTTCTTTCCCTCTTGTA ACTTATCCACCTAATATTAATTGGCCAAAGTGCATA  
A\_16\_P58424508 AGTTCCTGGCGAGAGTTCTCTCCTGGTTCATAAACAGAACCTTCTCTAT  
A\_14\_P139738 CTTTTAAGAGACCAAACAGATTCTCATTGTCTACCTAAACGCAGTGATATTGGCAACAA  
A\_14\_P114213 ACCTTCCTTTATGGGGAATTTAGTTACTGTATATGTGGGTTGAGTGCAGAAAATAGAATC  
A\_16\_P58424066 TATTACTTGGCTCATGGGTCCCTTCTTTTATCTCCAAAGCCAACAATGTGG  
A\_18\_P12782281  
ACCACTGATTGTCAAAACTAGTCCAAAATAAAACCATT CATCCATACTTACTTCTGCCAC  
CUST\_2008\_PI426210822 CAAAACCCCAAAGCAACAGCACTGGAAAATGACTGTGAGCCATT  
A\_14\_P134926 AACAACTGACTTGAATTCTTGCTTATTGTTTTCTTGCAATCAAACATATGGCATCATGA  
A\_14\_P102226 ATCTGTCTGAACTGGGTGTTGGAAGAACTAAACTCTATGTCATATGAATATTTGGACTGA  
A\_16\_P02633923  
ATGTCCCTAATTTGCTATATCTACTCCCTATCACACATTCAAATAATCTGTTAGCCCTCC  
CUST\_10046\_PI426210822 GCAGACCAGCTTTCTCTATGTTTCCCTACACATCGTAGGGAGATAGTTG  
A\_16\_P00685145  
ACTTATTTAACAAGGGTGTGGTGCACATTTATTATGGGAACGAGAGGATGAATTCACCG  
A\_18\_P22841285 ATAAAAAGTTATCAGGTGAGGCTGAGGGGTGAAGGCGCTTTCTCTGAT  
A\_16\_P01756720  
CAGTAGCGTGTTTAAGTCACATAAGAACCTCTTATAGAGCCTACTCCAGTATCATCACAG  
A\_14\_P135504 CTGCCCTTTGAGATGCTTATTTATTCCTAAGAATAACTGACATTTTCCCTCAATCTTTCC  
A\_14\_P131054 AGAATGATATTCCTCACGGCACTGCCTCTGTTCTGGATTATGATTT CAGGTAAC  
A\_14\_P110522 ACATATAAGATATCTATCAGCATATGTTTGCAGGAAGCAATGGCTGACGTAAAATACAGC  
CUST\_74\_PI426210822  
CTCACTGTTACTCATCACCCCTAAACTGCCTCCAACAAATATCATCATTTTAATATTTTAT  
CUST\_9314\_PI426210822  
ATATGTACCTGTCCTGTTTGTATTCTTCAAAAATGGTGTGCAGACAGTTTTATTGCC

A\_14\_P119701 AGTAGACCCGAAAACATTCCACCCAAGTGAGTTCTCACATGTTTCTTGTC

A\_18\_P14247393

AAATCAAATCATAGACAGGGCTGACTTATTTTGAGAAGAAACGTCATAAATGCAAGGAGG

A\_14\_P202146 GAATGGGGCTGCAGCATTTGAAAAGCAGAACAATGATAACTTCCTTAAAGCATCATT

CUST\_4273\_PI426210822 CTGCCTAGGTGGCAGGATTTTGGATGGTAGTGGTGTACTTATTGAT

CUST\_1686\_PI426210822 TTTCTGAAATATATGTGGGTGACCAAGGGACGGGGTGCAGGGGAATT

A\_16\_P58424605 ACTGATACATGTTTAAACAATCAGTTCTCTGGCAGGAGGGTAGGGGTG

A\_18\_P26374281 GTTCTCGCTACTTCTGACAGTTTTCCGGGATAGAGCGAATCCTCTC

A\_14\_P112221 TACAAAGGATCGGATACCAGGTGCATGAACTCCTATGAGTGAAGCAATAAATATGAATTT

A\_14\_P126843 GAGTCAAAATGACCCTTACTGGTAAATGCTAATTAATAGTGGAAAACAGGCTAAAAGCAC

A\_14\_P122207 CTGACTGTTCAACTGATCCTTATTTTGTCTGGGATATTCTTCACCGATTACTTCTTTTACT

A\_16\_P37254560

TGCCAGGATGTTTTAAGTCACCTCATTGCATAACATTATAAACTATGTTGCCAAACTTGA

A\_14\_P134790 CTCAGAAAAGAAGTAAAATCAAATGTGCCTGATGCCACTGATGAGAAACAATTTTTTTTGG

A\_14\_P129928 ATCATCAAATCCCCATTCAGCACTCCATTTTCAAACTGAGAATCCCAAATCAGAT

A\_14\_P131459 ACTCAGTGTTCCACTGCAAAGTGAAACCAAATGATTTATTTGTGCTAAATGAATGGAAAT

A\_14\_P116897 CTAAGAAAGGAAAACATACCTTGGTAATAAACTCCATTGAGATGGCCAGCGTGAC

A\_14\_P124552 ACGGACTCACATCCTTTGTGCTAATGACACTTACATATTTCTTGCCATAACTTTTCTCTT

CUST\_3403\_PI426210822 ACCTAAGGGCTGGTCTGCCCTTTTCTTATCCATTGCTTTAATCAGAAATA

A\_14\_P137415 CTTTTCTTGCTCAGGTGAGAAATAAAATGTGATCCTAAAATCCCTTTGGTATCTACAGGA

CUST\_3591\_PI426210822

CACCCCTTGCTTCTCTATTTTCAATTCACTTCTGTTTCTACACACATCAGTGATGTA

A\_14\_P126413 GCAATGCCAGGTTTCAAGTAAAACCTTTCCAAGAATTTACAGTGTATACAGAAAAGCACCT

A\_14\_P133742 CACAGATTTCTTTAAGGGAAAAACAGTATTTAATCACTGGCTGCCAGGAATGTGTTATAG

A\_14\_P104210 AACGCCAAACAATCAGTTTATGATGGGAGGCCGGTATTATAACAGGTAAATCATAATTTT

A\_14\_P119615 CATAAAGAGTAGCATCTTAACTCTAATTATTGGCCACATCTTTGAAGAATTCCTGTGCA

A\_14\_P201595 CTGCCTCCATGCCTATTGATAATATAGTATTTGGAAGTTAGAAGTCAACAAAAGGCACTT

A\_16\_P20977471

AACAAACAGCCCTCATTTACCAAAGAAACATGTGTAGAAAAAAAATAAGGACAGTTGCC

A\_14\_P115588 CAACAAGTAAACTTGACTTTCCTTCTGATAACGGATCTGGATGTTGTAACCTTTATCTTT

A\_14\_P112488 ACAACAAAAAAGATACTACCTTGAAGTGTAGAAATGGTTTCTCAGAGGTTCTCAAAATC

A\_14\_P111384 AGTCTACCAAACGGAATTTTTCTGTGTGAATTTTAAAAGATAACCGAGTGCCCAATATTT

A\_14\_P106011 GGGACATGGAACCTAGAGCCGAACTCAAGTTTCTGAAAAGAGAAAAAGAACA

A\_16\_P00516239

CTAATCAATGGACTTCATTTGTAAGCATCCTAATCCTGATTACCCACAATTGGAATGGAC

A\_16\_P35783521

CCATCAATTCCTAAGAAAACCTATCACCAAACCTTGTGATTTGGAATAATGAAGTCTCCC

A\_16\_P15482228

AAAAAAACTTCCTTGATCATCTAGGCTACATTTTCCTCTCATCATAATGCCCCCAATTT  
A\_18\_P14135495 CATGTCCTTAGCGCAGCCCTGGGGGTTATCAGGGTGGCTCAGATG  
A\_14\_P202154 CTTGAACCTTCCAACATACAAATCCATCGGAAACTGTGTGAGAAAATTTCCACTTAAGTA  
A\_14\_P122071 CAAGACATCATTACATTTTATGGAGGTTCTGTTTGTCTTCTGCACCTTGGTCTAATCCTA  
A\_14\_P133422 CTAGTGCTACGCGAGTGGTTGGACAGATATTCAACACTTCCAGAAATGCTT  
A\_16\_P01721668  
GCAGGAATATCACAAAGTAGAGAAGCAACGGTTTTTTGAAGTTCTAAACATGTAACATTCCA  
A\_14\_P120051 ATCTTGGAGATGAAAGTGTGACGCCGAGATAAAAAATGACCTTTTTAGCAAAAAGCACAGT  
A\_18\_P14696802  
ACAGGGGGAGATATAAGATAAAAACATAGAAGAGCAACTGGAATAAGAGAATGTTGGGAA  
A\_14\_P127185 AACAAACATTTAAGTATCATTTACGGCAGCCCTATAAGAAGGCTAGCCATAATTCCTAT  
A\_14\_P110615 TGCCTCATAAGTCTTGTGACATTAGTGAATAGTTGTATGTGCACAGCAGAAGGATAAG  
A\_14\_P107518 TGATCCAGGTGTTTCTTGTATGAGAACAAGACATTTTACATTCTTCCATTGTAGGTT  
A\_14\_P130795 GCACGTTTTTCTTTGTCTTTTTCTGTTTGTGAGCAATCATCCTTTCATGTAACAGTCAG  
A\_14\_P102665 ATTACTGACAGTGCATCTCTGACATTTCTAAAATGAAGACACCTTCCTTTTCTACAACT  
A\_16\_P15152789  
AATTCCTTTTTGAACCTTCTACAGTAACATGCTCTTCAGTCATTTATAGGGTTACGTGCT  
A\_16\_P00818908  
TCCCTGAAGAATTCTTTAACTAGGCTATCCTTACATTACTTCAAACCTAGACTACCTCAA  
A\_16\_P19017170  
AAATTGTTACTAGCATTGACAGGTTTAAATACCGTAGACTTAAGGTGACTGGCTTACATGC  
A\_14\_P114843 GCATATTTGCACATGTTAAGTTCTTTTCTTTCTCTGCCACCTGTATTTTCATGTGTTGATC  
A\_14\_P123024 AACTACGACTTGAAACATACTCAGGTTCACTGAGAATTAATACTCGTCAACCTTATGT  
A\_16\_P02677248  
TTCCTGCATATCACAGTATTCAGTTTTAGCCATTCATTGAAATATCACAGTTTCCAGTGG  
A\_16\_P02178514  
ATGCCAAAATTTTGAAGATACACAATTTGTTGATGGGTATAAGCAATTGGGATTTTCAGG  
A\_14\_P100902 TCTGTCTAGTATTAGGAACCTCTCTTCAAGTGGTCTTTTGTCTCTCTGTTCTTCTTC  
A\_18\_P14136088 CATTGCACAAAATCCAGAAGGGCTTCAGTGGGGAGGTAGCATTTAAA  
CUST\_4576\_PI426210822 GTGGGTGCTGTAAGAATGTTTTGTGAATGCAGGAATGAGGAGAAACAGTAG  
CUST\_854\_PI426210822 AGAGTTTGTCTCTGTGAAAATATTTCTCTCTGCAAGGAAGGATAACCTCTC  
A\_16\_P00532995  
TCTTGCTCAGTGTAAATAACCATCGGATCATATTGTTAAAATATCAAGGCTGTGTATCCCT  
A\_14\_P107165  
AAGAAGCATGAGTGCATAATAAAGTAACAGTAGAAATGCTCAGGATAAAAACAGCAACCCA  
A\_14\_P103913 AAGCCTTTTGTGGAGATCTGCATGAAACAACATAACAAATACGAAGCCAAGAAGTATGC  
A\_14\_P201143 AACCATAGGAAGCAATGTTGAAGAAATAGTTGTGAAGAACTCATTTTCTTATGTGGGA  
A\_14\_P104734 CTCACGATACATTTATGAAGCAATATCCTAAAGTATTCTGCACCAAAAACCCAGACTTC

A\_14\_P100412 TTACCTTGTTCTTTGATCTGACGAATTTGCTTCACAGTTTCTTTTAAGATTGCACATTTG  
CUST\_3948\_PI426210822

TTAAGACTGTTAATAGTGTATTTCCTTTTTATTTGCCACTCCCCACCAAATAAACCCCTC

A\_16\_P02860475

CTACCTGTCATCACCTCTATACAGATAAGCCCTAAGTCTATACATTTCTGTTGATCTCCT

CUST\_5833\_PI426210822

CTGTACTTTGTACCAAGGAGAAGTCATTTCTACTTGGTTTTTGAAACTGCATTGTTCATCT

A\_16\_P18085852

TGACTCCCTTATCAATACCTGTCTTTCTAATCTTACTTCTTTCTACCTCGACTCTAAGCA

A\_14\_P100404 TAAAATTTTAAGAAGTTTAAAGTCCCTAGGTGGGCTTTAAGCCTAGCAGTGGCGATAATT

CUST\_2327\_PI426210822 AAGTCATGCTCTCAGCAGAAGCATTGTCAGGATATTTGTGGATGTCTGC

CUST\_6793\_PI426210822 CAGACCTGGACATGAAAGGATAAGCTTCAAGCCAGGTGCATGAGG

A\_14\_P126584 TTAAGAAAATTTAAGCATGTAGTAAAAATCCAGTCTGAACAAACATGGGAAAAGTCAGCC

A\_18\_P13714499

GCCCATAATGGCTAGAAATAGAGAAGAAATGACCAACACTTCATAAACATATCTCTCTCC

A\_14\_P114144 CTCTCTTGACAGCCAAATTTCAATTCTGTTTCACAGTTTTCCAAGAGAAAAGCAACAG

CUST\_2185\_PI426210822 CTGTGTGTCTAAATCAGAAGGTGGACTCTTGAAGCACAAGAACTCCC

A\_18\_P22840710

CTAAATGTATATGGTATTTCTTGTTTTCTGCTCTTACTCTTCCTACCTCCAACCCCATTC

A\_16\_P16003753

GGCTAGACTTCCTTTTCAAGATTATGCGGATCCTAGAGATACATAGTTCAAGACACAAAT

A\_14\_P135214 CTTTTATAACTGTTTGGATCGGTTGCACATCTCTGAATCTGAAACCTAGAAGCAAAATCA

A\_14\_P118294 GACAGGTGGTAAACGATTCTTCACTCCAAGTAGAAAGGAAAAAATGACAACATACTATGA

A\_16\_P18517014

AGCACTCAGGGTTATACAATTTCCCTTACATCTCCCTTATTAACACCCATCTTCACAAC

A\_14\_P110564 TAAAAGTCACACATACTCATTACCAAAAACACCTCCTATGAGACACTGAAAGAAGTCATT

CUST\_8901\_PI426210822

CTGTGGAAGGAAAACATTTTTGGTATGCATGTCAAGTGCTCAGATAACATATTTATGTAT

A\_16\_P02915333

AAACATTCTAGGTATCATTTGAAAGACTCAAAAATAGGAACACAAATAGGTCTCAGTCCA

A\_16\_P18379194

ATTAGAAGGTGCAAATTCATCTATAGCCACTGCCTAGTTAAAATTCATCTATAACCAGTGCC

CUST\_1086\_PI426210822

GCTGGACTATTTATTTCTTAATTTCCCTCCTACTTTATTTGGACAGAAGTCTCACTGG

A\_14\_P118112 CTTTTTAAACAGAACCAACTTCGATTATCTTCAAGAGGTGCCTATCTTAACACTGGATGT

A\_14\_P119127 CTGGATCTGGCTTTGGTTTTAATATCAATGAATTTCTCCTTGGAAAGTAATCTTGGTCAC

A\_14\_P113035 CTAGTTTGGGCCGATGTATTTTTAAAGCAGAGTGGACAGCAGAGAGTCAATTT

A\_14\_P112493 TCTCAATAAATCTCTAAAGCGTCTAACATATGAAGAGAAGATGGCTCGCAGATTGCTAG

A\_14\_P110298 TATACTCAAAGCATTAAAAATGAACGGCTTCCCAGTGTCTCAAGGCACATATTAACGA  
A\_14\_P202183 AAGATTGAAATGATAAACGGTCCCCGAAAACATACAGGAATCCTTGAGTAACTGATAAT  
A\_16\_P20482071  
AGGCACTATTGTGATTACAGAAAACGCCATTTTATGCAATACCTTTGAGAATTCACGTTG  
A\_14\_P201456 CTTAGGAGTTGGGTATTGACCTGTGCTCTTTGAGGCGGTTTTTAACCTT  
CUST\_8346\_PI426210822 AACTCTTCTCTGCCTCTTGCCTCTTCCCCATGGAGAGATGGTTT  
A\_14\_P128375 TACTTGCTGAACAAGATGTAGGTGAAAGAACCAAGGGAAAAACAAATCAGTTTTATTCCA  
A\_14\_P112996 ACAATTTATTGAGAAAGTAAGTCTGAGTCACAGCCAGTGGAGGGAGATGATGAAATTATT  
A\_14\_P111897 CTGCTTGTACACCCAGTTAGGCTTATCCTCAATAATACTTTCAAAAAATAAAAGGCAC  
A\_14\_P109036 CCTCAGCCACCTCCATAGAAATAATATTATGAGTGGACGTTTGTATGGTTAAAGTTGTT  
A\_14\_P116811 TAGAGGTTTGGGAGGGATTTGCTTTTGTTTAATGGAGTGGTGTTTAGAATAAATAACCAT  
A\_18\_P16369168  
ATAACCAATAGCATGTCAGATTCTTAACTCCCACCTTTCTGTAACCTCACAAAACCAGACTT  
A\_14\_P135752 AATGGAGCACATGATTTAATTTGCCATTGAGTCTCCATGACAAGAGATGAAATCTTTAGT  
A\_16\_P00055490  
CGTAAGGTATATCTGAAGGCACTTAGTGTAGAACATTGCTTAAAGGTTTGTTCCTACC  
A\_14\_P120768 CTACAAGCACTTCTTCATACCTGTTAAGTATTCAAGTTCTTGAGATAGTCTCTCATTGGT  
A\_14\_P129560 AAACACCCACCTTTGTAATTGGATTTTCAACGTCACAACATGATAGACATCTTGTAGCAT  
A\_16\_P18182156  
AAAAGTAGGACAATTGAATTCCAAGCAAACTGTGAAAAGATGAAAGGAGAAGTTTCGATG  
A\_14\_P127441 CAAAATCCAAAACCTACCCTGTTGGGGAGAGGTCTTTGATATATCCTTTTATCCTTTTT  
A\_14\_P112956 CTTAACTATCATTTTGGTCTTACTGTGATCAATGTGGTCAATCTTGTGACATCACTGTTG  
CUST\_7770\_PI426210822  
TCTTTTAGAGCAAGATTTCTGCTTCACTCTGTATTTGATTTGCATTGTATTGTAGTCAGA  
CUST\_2197\_PI426210822  
CTGTTTTCAAGGTGTAAATTGTGTTTATAGTGAAAAAGAAGACTTGGTCATGATAAAAAGC  
A\_14\_P131469 AGAAAATGAATGAATAAAAAGCGATTTTGAATTGCTTACCTGCTGGCTGTTCTCACAGAA  
A\_14\_P129161 GATGGGTTTTTATGATTTTGAAGGAGACCGAAGGAACTGAATGAACAAATATTTCTCC  
A\_16\_P16624394  
AACCCCAAACCTTTATCTCTTCATTAACGATGGCAAATATTTTCTGGCTTTACCTTTCTT  
A\_14\_P121374 CTCTAGGAATCAGAAGGTTCTTTCTCCAGCCTAACCCCAAGTTTATCCTG  
A\_18\_P22511035  
CCAATTTCTCTGCTCATAATGTCTTCATTCCAAAATTAAGTTGATACTTCCCAATTCCC  
A\_16\_P01044168 CACCATCTCAAATAATCATCATACTTCAATATTCCATTTCTATTGCTTTTACCCCTTCA  
A\_14\_P105590 TTTCCGTA AAAAGACAAGTGGCATTTCATGAATGCTAAAGTTTGGAGGAGAAAAACAGTG  
A\_14\_P102228 ACAGATCCTAGGACTTTCTAGTCAGGTAGAACCATATTCCTTCTAAAGAACTCTAGCAAC  
A\_14\_P200340 AGTCTTCCTAGTGGAAAAATGTGACCCAAAACTCTTTTTCTTTTATCAAAAACCTTTCTG  
A\_14\_P106223 CTTAACAGTTTGAAGCATGATATTTGTTTTTGTGCAGAAAGCACTGATTTTGTAGAAAGT

CUST\_2430\_PI426210822 ACACGAATGTTGATGCGCAGCTTCAGTGTGACAAAGGCTGTTTGTGA

A\_14\_P132726

TGAAAAGAGAAACCACAGAGATAGGAAGCCAGAAGAGGTTTAAAATTCTTTTAAAATACT

A\_14\_P134642 GGTGAAGATGAGGTAGCAGCAAGCACATATTGTTTGTGTTGAGAAATATGTCAGAAAATGA

A\_14\_P116124 TTTTATCTGAGTCCACATGCAACCATTAAAATTAAGTTCGTTATTTGGCTGGTTTCTCCT

A\_14\_P138130 ACCTGATATGTAAACAGACAAATAGTTCACACAAAAAAGAAATGGAAATGGCCCTGAATT

A\_14\_P108106 TACAACGTGTTTTACTTACACAACAGAACACTTTTGCTGCCATATCTGGTCAAACCTGGC

A\_14\_P103012 GCTTTCCAATTTCCAACACTGTCCCCAAGATTACAAAAGGCAAAGGAATTCTTC

A\_14\_P124810 GTGTCTACGAACAATTATTGAAGGCACAAGAAGGTCAGATTTCAAATACTGGACAGAAC

A\_16\_P18047782

AAACCATAATTGTGTTCACTTAGAAACATCTCCCATTTCCATACTGATGTCCTTTCCTGGTG

A\_14\_P102327 TGAACCTCCTGACCTTTTCGACACTTACCTAGTAAAGTATTCTTAGGCATCATCATAACTT

A\_16\_P20968827

TTCCATGTAACGTATCTTAATCTACATTCCCAAAGTAATTGTGTCTCAGGTAACCTTTGC

CUST\_4759\_PI426210822 CCTCTTCCCTAGCCCCACACATACTCTTTGTTTTTCCATTCTTCCA

CUST\_343\_PI426210822

GTGACTTAAAAGGATCACAAATACTCGTCAAAATGAGTGAGGAAGGTAATAATATAGACAT

A\_14\_P113651 TTAAGAATTCAGCAAGCCTTTTTTGTAAGGCTTTTTTATGGGTCAAGAGGTGTGATAGT

A\_14\_P112502 GACAGAAAGTGTTAATTCCCGTAAAACAGTTCCCTAAGGTAAGACAGTGAGGTCTA

A\_16\_P17475543

AGACTCTCCATTGATAAGCATACTCACTGAAAGAAATCAATTCTCCTTTGTCATTTTG

CUST\_7609\_PI426210822 TTACTTCTTAGGCTTCAGAAGGGATGGCTTGCTAGTCTTTGTACTTTGGG

A\_14\_P125750 GTAAAGGCCTGGCAGGAACCTTTTTGTGATTGAGTCTGATTTAGTCTGTGATTTACT

A\_14\_P121725 CTCGGTGCTGGAATTTGATATTCATTGATCCGGGTTTTATCCCTCTTCTTTTTTCTT

A\_14\_P132965 CAAGTTCTCAAACATTTCTCTGCCTTATGGACCCAAACATCCAGTTTCTCCTTTAT

CUST\_3824\_PI426210822

GACTCACTTGAGAGTATTTCAATTATTCATCTAATAAAGGAGTATGTGAGATTCCCAGAGG

A\_16\_P02402050

AACAGTGACACGTGTTTAAAATAATTAGATAAACACTAACAGGTTTATTGTCCCTCAGGC

A\_16\_P36230059

CAAGACTTTTTTGAGGCTTCTGAAAAGCCAATGTTGTTTTACCCCAACATTTAATCA

A\_14\_P116321 GTGGTAAACACATTACCCACAGTAAAGGCTTTTATTTTTGTTGACCTGCAGTGTGAG

CUST\_5385\_PI426210822 CTTTCTTTGACACGTCTCAGACTTGCCCTGCTCCACTTGGAAGT

A\_16\_P17981623

GGGAAGGAGTCGAAAAACTATTGCTCACTTATCTCTCATGCATTCTTTCTAAAAGAACTG

A\_18\_P11988130

AGAGCCCTAGAGATAACAAAATCTAGTTTTGATGCAGTCAATAATCTCGATCATCAGGTTC

A\_14\_P116937 TTCCTTTCCAGTCAACCCAGTAAGATAAATGCTATTTCCAGGGGATATGGTATCTACAAA

A\_14\_P120323 ATACTTCTTTTCTTCGTCTTCCTTTTTTCCATCAGAACCTTGAAACTTTTCAATTTCTGG

A\_14\_P119210 AGTAGACTATGAAGACCATGGTATTCTTTCTTAGAAGCAGGAGTAGATCTTTCAAGACTC

A\_14\_P103946 CTATAGATGCTCACTGGCAACTGTGTCCTTTCTTTGTTTCCTAGAAATCATTATCACTGTA

CUST\_8547\_PI426210822 GCTCACACTTACAAATAGCTGGCTTGCATGGAAGGCATTAGAAGTGGT

A\_16\_P30952426 CCATGTGAAGGTCAGTCTCTCCTCCTTTTTATCCTCAAACCTTTGATCTCT

A\_16\_P21243324

AAGACAAATCCACAACCTCACTACAGTATGGTCTGAATGTGACTTGATCCAATGATCTAAT

A\_14\_P202341 AAATCTGGATCTCTTTTATAAGAAAATGCAATGAAAACACCAGAATGATAGAGTAAGAAA

A\_14\_P101854 TTTTCTCATGGCATGATAGTTCCCATAAAGTTTAAACTTAACCATGCCTATTTAGAGGGCA

A\_14\_P112311 TATTAGGTGACTTCTTAGTAGATATAGATTGAGGAAGGAGAAAACCAAGGTTGCTCTTGC

A\_14\_P124011 GTGAATAAATATCATCTTGAAATAGTTAGAAAAAGCAGCAAGCACTGCTCTGTGGGCTTT

A\_14\_P102617 ACTACAATGACCAGCATTGGTGAACCTATACTCACTCCAAGTCTTTGCTTTATAATTGTGA

A\_14\_P130612 TGTTGCTGCACCCCTATCCCAGTTATAAGACAGTCAAATGACTATTTCCCTAAATATTGT

A\_14\_P106665 TAAGATCCAACACCGCACAAATCAAGGGCTTAAAGGCACACATCTAAAACTTCAT

A\_16\_P02847096

CTGCATCTACCCATTAAGTTTATACTCCTGTGTTCTCATATTAACGTCTGTGTTTGCGAA

A\_14\_P200804 AGAAACCTTACCCTAAGACAATGAGTTCACCATATTTTACTGGTGCTTTAGATGGATGAT

A\_18\_P10977279

CCAAGCATGCCAAGAACTACCAAATAAGTAAAAAAAAAAAAAAAAAGTGGAATAAATAGCGA

A\_14\_P125842 CTTTTTAAAAAATCAACTGTAAGAAAGGAGAGTAAGGCCATCCTGTTTGGGATCCTAAA

CUST\_8026\_PI426210822

AATGTCCGTTGCTTTTCAGGAAACATTCAGTAGAATTCAGTGTGCAAATATTAGACCATT

A\_14\_P116234 CGCAAAGGAGAATGGAAGCAAACCTTTATTCCTCTTGGCTGGAGAAGAGAA

A\_16\_P37102673

ACTTTAGAGTCCGTAATCCTGTTTATGTCTCAAACCTGCTTATCAACTGTAACCCAGTTA

A\_14\_P113115 ATTTTGGGAATCTTTTCCGTTTCAAGCATTAAAGAACACTTTTAATAAACTTTTTTTTGGAG

A\_16\_P31947691

GGGCTTTTTTTCTTGGCAAATACTAAAAATCTCGTCAATGTAATTTCTGTGGTTTCTATT

A\_16\_P01463829

AAACTCTAGCAGATAGGACACTTGTTCTATGATACTCAGGCTTGATCAATTTCAATGCTG

A\_16\_P18865853

AAAAAAGTGCAACTTTAGAGATTTGTGAAAACATTCCTGTTAAAAGCCACTTGAGCAA

A\_14\_P103917 CTCAATAGAAGGAGCATTCAATGTTAGTGATTGAAAAATGGTAGATGAAACTTGGACAGG

A\_14\_P127848 AAAAGTAGCCAGTGTTAACATGTAACGTGTCTAGGTAAGGGGAATATAGAAGTTCATTGT

A\_14\_P114784 CTGCTAGAAAGTTCCTGCAAAATTTGATTTCCAAATTTCTGTGAAACAAATTTATCCCAG

CUST\_3447\_PI426210822

AGTATTAATATCATGGCCTCTTTTCTTCTCATTTTGGAAAGGGGAATATTTTACTCTT

CUST\_8014\_PI426210822



TCTTTTGCCTGTCATCTCACTGTGCTCTTTAATGTTTTTAATTTAATTCAGATCTCCTCC  
A\_14\_P200086 CTCCTCTCACTGTAAGGAAGTTTGGGATATGTAGTCTATCTGGGCACATTTCTATCT  
A\_14\_P127676 CATTAAATTTGATTACACAAATCTGCATAAAATGACACTCTAGTCCGGTTGGAGATAACAG  
A\_14\_P103296 TCTCACGGATGAAGTTCCTTTATAACATGTTTCATATGGCTGAATTAATCTTTGGCTCCACAA  
A\_14\_P126547 GGAGATTTCAAATATAAGATGTCCAGGTAAGAAACCTCAGAAGAGTTCCTTTATGAAAC  
A\_14\_P110961 ATAGGGCGTTTTTGTATGGTATCTTTAAATTTTGGACATAGAGAACCATCTTGGATAACCT  
A\_16\_P1971999  
ACATATGCCTAAGAAATGAAGCATTACCAGCATAAGATGATCTGTTTCTCTATACACGGG  
A\_14\_P105285 GGAAGAAGGTGGAATTTATAGTCTGAAAAAGGGGATTTGGAGTAATCTTCAGATTTGGT  
A\_16\_P18147004  
ATGCCCAAGTATTTAAGAATTGCAAAAGATCAAGAGTCAACAAATCCAGCCAAAGACAAT  
A\_16\_P15398168  
AAGATAAACGTCATTCCTAATCCTGTTACATCCTTCCTATTGCACAGATTAAAGGCTTGT  
CUST\_6838\_PI426210822  
ATGTGATGCACGTAATACATAATAGCGAAGTTTAGATAATGAGGAGAATAATGCCCTCCA  
A\_16\_P02611877  
GGCACTGGTTTTTATAGTTGATTCTCAATTTTTCACGTATACTTTCATTATTCCAGCCCC  
A\_16\_P21178101  
CTGTGGCTCATTTTTAATTGCTCAGCAGTGAAAATTATAGAGGAGAATAGAATGTCTGCC  
A\_18\_P14137390  
ACCTTTCCTTTCACCTTTTATAGTCTGCCTAAGTGTAAGATTTAAGCACAGCATTCTTTTC  
A\_14\_P108764 CACGGTCTTCTCAGGTTTCATCTGTGGAACCATTCGACAACCAAATGTTAT  
A\_14\_P117440 TGAAGTAAATCATCTTTTATTTTCATCTTACATTTGGTTATCATGAGACATGCAAACCTCC  
A\_14\_P113781 GGATTTGTGAAATACTGTTCTAAAATATTGACAGACCACTGACACAAAGGAAGCAGAGAA  
A\_18\_P22842456  
TCACTCAAGAAAACCTTGGTTAAATTCATGGGCCTAGAAGATCAACATCAAATCTTTGTCT  
A\_14\_P116490 TTTGGTTTTGCATCCTTAGACACGAGACAGCCCTGGATACCACTTATAATTTTTTATGTA  
A\_14\_P121544 TAAAGTAGGACTGTGTTTATTGAACAGGTCAATAATGTATGGCTGTGTAACGCTGATGAA  
A\_16\_P36231034 GAAACTGGTTTGGGGCAAGTTGGACTCACACTGCAGTGCTTTCTT  
A\_16\_P15258313  
TAACCTGTATTATACCCATGAAAACCAGAAATGCCATTATCAGAAAGAGTCGTGTCAGAT  
A\_14\_P138510 TCTTATTCTTTCCATTTCCATATATGTTTGGCAGGATCACCAATACTAGTGATGGTAGT  
A\_16\_P19069840  
AAAAGTCATGACTCACTCCAGAAAATACCATCAGTTAACAAACGGAAAAAAGGAAAAAAGG  
A\_14\_P109480 TAAAGGGATAACTGTGATTTAAAATTTTCTGATTTAATCTTCCTTAGGAGAAGACACCTG  
A\_14\_P130626 GTGTTTCTGGGAACAAGGAAAATTTCTCAAAAAAGAATATTTACACATCCCTTCTTTTG  
A\_14\_P114821 CCATTTTCTTTCCATTTAAATACCTACCTTGGAAATGATAACGGCATCTTGGTAATCTTC  
A\_16\_P40451597

CCTGTCACAATACCAAATGCTTGACTAAAATATCACCTGAAATACCTGACTAAAATGCCA  
A\_16\_P16479907  
TAATCCCCATTCTATAAGTTTCAGTTATCAACAAACTCCTTCATAAAGAATCCCTTCCTGG  
A\_14\_P114311 TACACCTTTCAGTGTAATCTAATGTAAAATGGTTTGCCTTTGTCATAGGCTCACCTACAT  
A\_18\_P11477079  
AAAGTTTAAGACCCAATTGCTTTTGAAGGAGATTCATCTAGAAAAACCAGGGATTCAAAC  
A\_16\_P15861392  
AAATCAAATGTGTTCCATAGCAATTAACCCCATATTTCCCTAAACTTATCGTGACACCA  
A\_16\_P00692330  
AACCACCAGTCAACAAAAATTTGGAAAGTAACAAAACATGAAGTGTTGTTTCCTAGAAGG  
A\_14\_P120990 TGGTTTCATTGTGCCTATTTTTTTTACAGAATCCTTTCAGAAGAACGTGGGATACAAATGA  
A\_14\_P116238 AAAAACTAGAATCTTGCAGGCTAACCTTGCACATATGTATGTAAGACAGTCAGAATTCCA  
A\_14\_P116455 CACCTTTCCTGCACATAAGTTATGGTTTTCCATCTTATCTGTCTTCTGATTTTTTATATCC  
A\_14\_P200509 TATCACTGTCAGCACAGACTATGTCCAAGTTGATAACTGTAGGTCCTTTTGGTG  
A\_14\_P106303 CACTTTGTGCTTCACACATATATCAGTTTCTTTGTTAAGCATACCTCTGTGAACCAGCA  
A\_16\_P16676759  
AGCACCAAGAGATCTGCATAAAACCCTTATCTTTCACTATCAATAGCATCTAAAGAGAGG  
A\_14\_P122829 CTCTATAAATGTAGGCTGGGCTTTGATTCATTTTTTAAGGCCATAGGTCATGACAAAGAA  
A\_14\_P123430  
CATTTGCCAAAAAAAAGTGAGTAAGTGAGAAATAGAAGTTGAAGTCGAAGTCTTGATGTT  
CUST\_3943\_PI426210822  
AAAAATCCACACCAGGAGAAGATTGGTTGTAAGTTTATTTTACATTTATGTGAAGTTT  
A\_16\_P00436500  
GTAGCGAACAATCTTTTTCCCTATTCTCTATCTTCGTTTCACATATATGCCACAGAGGAGT  
A\_16\_P03029514  
AACTGGACCCTTCATATCTACCAGAGCATAAAGTGAAATTATGACTTATTAATAGCGTCA  
A\_18\_P22841651  
ATTATTGACACATTACAACATCAGCAGCCAAAGGTATGTGCTAGAGAATCCTATTTCCCT  
A\_14\_P118912 TCAAATTTGACTTTTGAAGCTGTATCTCTGGGTAGAACTTGGCTGTCCTTAAGCATAG  
A\_18\_P22841587  
TTTGCTCTTTACAGCCTCTTAGAAACTTGAGTTCTATCTGGATTTCATCCTGTCAATTTGAT  
A\_14\_P108285 CACAAAAGAATGGAACATAGGCCCTTTACAGCAAATAAACTCTAGAATCCTAGTTTTGG  
A\_18\_P22843204 CTGCATGATGATGTGCCTAGCAGGGTGTCCCCATCAGGACAGTC  
A\_14\_P109698 ATTCTAAGAATAGAAGCGCATAATTAATATTTTATGGCCTTGGCTCATGGAAACAACCCC  
A\_14\_P112339 CTCTAGTCTGTCCACATACTTCAGATGGAAGGACAGTCTCATTACTTTAATAGTTCAA  
A\_14\_P115540 GCCCTTGGAATTGAAAGTGAGGATGACTTGTATAAACTGGTGAACCTTCTTCCTTAAATA  
A\_16\_P16191421 ACCTCTGTCAATTTAGGGAGACTGAGCATGGCTGGTAAATCTCAGTGAT  
A\_14\_P121164 TAAAACAGTAACACAGAGTGATAGATACATCCAAATAGCACTGATGGCTTTTATTGCAGAT

A\_14\_P115055 TTTACAGATTTCCAGAATCTCTACTGGATTCTTTGCTTTTCCTTTCTCACAAGGAACTT  
A\_14\_P104898 CTATCAAATATAAATGGTTTCTAAATTCATTTTTCTGGGAGTAAGTATTACCACTTTCT  
CUST\_9241\_PI426210822  
ATCAAGGTATGTATACGCATTTTGGAACCTATCATATAAAAAAGAAAACCTTTTGTAACCT  
CUST\_1654\_PI426210822  
TTGGTTTTAAAGGTTTTTGAAGACAGGAATTACTTTATCTTACCCTGTTTATAATGTTTG  
A\_14\_P112204 CTGATGGCCTGAGAACATAAGAATTCTGTTTCTTATTCATGCAGCCACAGACTAATG  
CUST\_6369\_PI426210822  
TGCTGTTTGGATTTTTTTCAAGTGTATTTGAATGCAGACAAGTATCCAGATAGATGCTAG  
A\_16\_P40957696  
ACCTCACAATAGCAGGTAAAGGAACATCTTCAGTTGTTTATGATGTCTAATGAAAGGAGA  
A\_16\_P19319706  
AATTTCTGATTGTCTACTCAAAACCTGTTGTCTTTTGTCTATGCCTAAGCAACTCCTACT  
A\_14\_P105046 ATGGCAAATTTAAAATGGTGGACAAACATCCAGATAACAAATGAAAATGTCCTCCCTTTA  
A\_14\_P135173 ATCACTGGAGGAAACATTTAAGAAACCATTTTCCAAGGAAAGTATACACATGTGGAAAAT  
A\_18\_P14132987  
CGAGAGGTTTTTTTTAGCACTCCTAAGAAAAAATTAACACACATGGGAATTCCACAATGC  
A\_18\_P22841238  
TGTAGATTAGAGTTGTAGACTGAACCACAGAGAAGGGTTTGGGATTTGAGATATCCAT  
CUST\_1078\_PI426210822  
CAGTCACTAATAGTGATTGAGTCAGTCACTATTTAGCCCAGTCGAATCTGAGCTTTAA  
A\_14\_P100555 TTCTTCCGTTTTAAGACTGTCCTCTTACATGAACTCAAGAACCTGAAAAACAAAAAAGAA  
A\_14\_P135293 AAATAAAATGCAGTTTTAGTTCTCCCCTTCTCTCTCAATTAACAGTATAGCATGGCCATC  
A\_14\_P114470 AGGAGGATTCGATGGCAATTTTTTGTGGAACAGAATTGGAGCAGGTAAAAGATAATTTTC  
A\_14\_P105954 CACTTGGATACCTGTAAAACAGATCTTTTTTCAGATCTTCCATGTATCTCCTGCAAATGT  
A\_14\_P135365 ATATTACCCTAAATCAGAACTCCTTTTTCTGGGTTGGAATCAGTCCTCTATCTTTACTTC  
A\_14\_P138013 ACCTGATCTACACAAATGTATCTCTTCCCTTCTGCAGAGAGAAATATCAGTCTTTAACTG  
A\_16\_P00125269  
ATCTTTTCCTTGACATCAACTCTTATTTTTCCGAACACTGAAAATCTAAAGCCCCAAAT  
A\_16\_P21479925  
AAACAAATAACATGAATCAAAAAGACATTAGCACTCTTGATCTGATGGTAGGCATCCCAG  
A\_14\_P130425 ATATAAAGTCACTTACAATCATCAAGGGATAGTCTTCAAGTGTGAGGTATTCATAGGGAC  
A\_16\_P01209833  
CAAGTGGCATTAAACCCTGTAAGCCTAATGTTTTATCCATAGGACAACCTCAACTCCTAG  
A\_14\_P120353 ACTCCTGGGTCTGTGCTCTTTATACCTCCTTTAAACGTAGCATCTCATTATTGTTTTTA  
CUST\_1262\_PI426210822 GAAGAGGATGCAGTTGTACATTATGGCCAGTTAAACAGAGAGGGATTCTGA  
A\_14\_P125926 GAGATAAAGCACTGAAGATTTAAATTGTCAATGGCCAGTCTCTTTAGGCAATTCTGAAGA  
CUST\_5908\_PI426210822 TGGCTGGGACACTTTTTTCTTTTGGAAATGTGGCAGGGGAATATGA

A\_14\_P117118 GTTAGTTTTTTTTCTCCTTGTAATCTCCCAAATAAAACGGTTTGCTTTCCCCAAGTTAG  
A\_16\_P18802922

TCCCCCATGATTTACGATATGTCACTTTCAAATAGTAACTGAATAACACAGAGTCTACA

A\_14\_P114449 TCCATCTTAAAAAATTATTGTGGTTAGCCGACTGGTAAGAAGGTTCTTTCCCTGGTTCT

A\_14\_P117225 AATGGGTGCTTTAAGGTCAGTAGTTATCTTTTCATCCATTCTTGTCTAGTAGATGTTCA

A\_14\_P120761 AAAAATTGCTGTGACATTTCAATGCATGAGGATCACTAAAAGAACATCCTAGTGTTTATT

A\_14\_P138450 TATTTACCAAAGTCCTCACCTTTCCCATCTCTCAGTCTTGCCTTACTTATTATTCAACA

A\_16\_P19525428

AAAGACCAACTGTGAAGGATTTATAAAGTGGTAGCATGGCATAGTTCAAGAACTCAGTTT

A\_14\_P201099 TACTAGATTGATTTTGATTCTAATAGTGATGATAATTAATCTGATGATATTCTGATGGCA

A\_14\_P118117 CACTCCTGGGTCTCAAACAATCCATGGATCTCCAGGCTACATTTAATTACC

A\_14\_P200730 ATGGCAGCCCGGCCATAACTAAATTGATATAACTAAATTGATACCTTTTTTTAGGCATCAT

CUST\_5844\_PI426210822

TTGATTCCATGGTGTATTGTTTTTTTACCTATTAACAATTGCATTCCTAGCCTATGGAA

A\_14\_P102959

CTGTCAAAAAGCAAGGGACTACTTGACCAGAGTAAAAGAAAACCTACCAACTAAAAATTT

A\_14\_P135803 TTAAATCTTTCTTTTCTAACCACAGGAACATTTAAACTTACAATAGAATTCCTGAAGAA

A\_14\_P112969 TATTCAGACTGCATATCATCTTGGTGCATTCAACTGAATCAGAATCAGGTTAGACAATGT

A\_14\_P132006 CGCTCTGGGACTTTGGAAATGTAGAATAGGAAAGCAAGAAGAGCAATCATATACATCA

A\_14\_P131460 TGTAATTATCTTTAGAAAAATGGGAAGTAGCAAGAGCCTGAGAGAATGAATCATGCGTCT

A\_14\_P100073 GCCAAAATAAGGCCCTAATAAAAGGGGTTCAAATCATTATTTTAGCAATGCTTCTCCTTT

A\_14\_P103437 TGTGGCTACAGAAAAACAGTTAACACCTTCTGTAAGATGCTTTATTTTCATTGACCAACAA

A\_14\_P127917 CTCAAATGTAAGACTTAAACTAATAAAGAGGTTCCGGGATTAGTTCATCAACCCAGAGC

A\_14\_P138224 GATAAACAGATGCCAGAAGTAAGTATGCTGCCTCTGTTGTGATTTATCCTTTTCAGAAAT

A\_14\_P111975 GTGTAGGAGCCTAATCATTGAACCATGTGTTACTCACATTCCATGTCACAGAAC

A\_16\_P20456748

AGCCCTAACTTGGATTTTGATTTTGACTCTATACAACTGGTTTTCTGGAATTTGTAGGAG

CUST\_3152\_PI426210822 CTGTTTCTATGGTGGCCCTGAGGGTACTGGGAAGGATCAGGGTT

A\_14\_P121496 CTTTGTACCATGTATCCAGGCCAATAGAAGAGTATTTCAAGTCCAATTTTATGGTGTGA

A\_14\_P126131 GGGTGATTTTTATTACATGTCACTATAAGTGTATTTAACCTCCCTCGCTCACAATTTCCCT

A\_14\_P134107 CTCTCAATGACTCTGGCTCTGAGTCACCTAATGATACCGATACCTACTGCT

A\_14\_P110017 TCACTGTTGATTTTCCACCTTCAAATTCAGAATTTCTTCCCCCATCTTTTAGGTAATTCTA

A\_18\_P21971098

AAAAAGCAGGATAGTCCCAAACATGGAGTTACGTAAAGGATTACAACTTAAATGGATCG

A\_14\_P135765 TACCATTTAATTTCTACAGCAGCATCGATTTGGCCATTTACTCTGAAAATTTCTTCTTCAG

A\_14\_P114888 CTCCACAAACAAAAGCATATACCTGCACATACCAAACACACGAATATTCGTTTGAACATA

A\_16\_P16771589

AAAGACATTGAATACGACTTCTCTGTTGCTACTCTATGCCTTATAATACTCACTGCCAGA

A\_14\_P138900 TTTTCCCAATTTAGACCTTCAAAAAACGCATGCTTTTTGAAATCCTCTATTCCATTCTGC  
A\_14\_P104234 TTCATGAAGATTTCCTAACATTGGTAATGTGATGAATAAATTTGAGATCCTTGGGGTTGTA  
A\_18\_P13047416

GAACTCTGATTACTGAATCCCTCATCTTTATAGTGCAAATCATCTCGTTTTTCCAACCTGG

A\_14\_P131024 CAGGAGTCAGTTGTTTCTTTCCAATTATAGCATTGTATTTGCCCTTGTTTGGTTTTTCAA  
A\_14\_P122581 CTACAACCCAGAGTTTTAAAGACTTGGAAGGAAAGCACAATCAGAGAAGAAAA  
A\_14\_P107387 GGATGTCACGTGTATATCATAACCTCAGTAGCAAATGCTGCAATCCACCAATATTA  
A\_18\_P14137620

TTCTTGCTATTATGAAATTTGATGCAGGATTTGTTCATTGCTTTGCACTAGTCTCACTCG

A\_14\_P134866 CCTTTCAAGTAGTCTTTCCACATGATACTGGAGAGAGGAAGGACTTTATGTAAGTTAAT  
A\_14\_P122722 AAAAGGACTATGACTGAAGATGGTGGTAGTAGGAATCTTACTCTCAAGATGTTTTAGCAG  
A\_18\_P13049745

AAGTTCTCACCAAGTGAATATCTTCATGCTAAAGACAGTTTCATTTGTGATTAGGGACAG

A\_14\_P113405 TGGAAAGACTTTCTCATTACACATGGAGAAATTCTGTGATAATGATGCCTTTTGCATTA  
A\_14\_P131399 CAGTGCCAACAGGGAATGGTTAATAATAAAGTTAAGTTGGTAGGATTTATTGCACGAACA  
A\_16\_P02103341

ATTTGATCACCTACCTCATTTTTATGTCAAAGAATTCAGTAACCCCTCTAATCTACACTGC

CUST\_8498\_P1426210822 GGAAAATTCAACTCATTCTACCCTTTGGAGACATATCTGGAGAGGCCAG  
A\_14\_P134049 CCTTGAGTCTTTTTTAATCAGTTCCCTTTGTCTTTTAAAGTTATAACCAACTGATACTAT  
CUST\_8115\_P1426210822 GCTAATCATAACAGTCAGAGAGGGCAGGGAACCAGTATTGCAATTGTGA  
A\_18\_P22840169

TCTTGGTGATTTTTTTTTTTTACAACAAAAAATAGAGCAATACCTTTCTTGGTTAGTAAAA

A\_14\_P139084 GTAAAAATAGGAAGTCGTTTTTTTTCTGAGGCTAGACGAGACACTGATGTTTCTTCCTTG  
A\_16\_P02024250

AATCTCAAATAATCCTGACAAGATGTCTTATACATGCGATTAATGCTGAAGCAGTCCTTT

A\_18\_P16366399 TATTTTTCTATTGCCATTTGTTATTGCCCTAAGTCGTCATCATTTTTCTCAAGCCCAT  
A\_14\_P123618 ATTAATAATTTTGTTATTTGTAGTTCCGACTTCTCCACCAAGGATGTGACTGTTGTGA  
A\_14\_P137043 TGTTAAGATGCATGTAGTCTTGTGCAGACTAACAAATTGATGACAATGATGATTCCATGT  
A\_14\_P129837 ATTTAGGTTTGGATTTAGACAGTTGAGATTTTAGAGGGTTACACTCTGCTTTCCAGTTTG  
CUST\_467\_P1426210822 ATCACTGTGTTGGGAGGGTGTGAGATGTGCTCCTTGGCCTGCAGT  
A\_14\_P102383 CTCTTGATCACTTTCTCAAAGATGTTACTTTTCGGGGTGTGGTTCTTTCAAACAA  
A\_16\_P21478667

AATCCATTAAGGCCCAATAAAGTTTGTCTCTAAGCGCTGTGTTAGATCTATATGACTAC

A\_16\_P39877855

ACCATGTCGGCATAATTTCAAAGAATCACTGTTTCATAACCCAAAACAAAGACTGTATGT

CUST\_1560\_P1426210822 GAGGCCGTGATGTGGTAGGAGGCCGTGAAGCAACAGGACAGTGTA  
A\_14\_P105165 ATGAAATAAACTAAATAGAAAAACCTTAGTCCTTCATCTTCTAAGATCCAGGTAAGTTC  
CUST\_2788\_P1426210822 CCAAGCATTCTTTTTGCAAATATGAGGGCTAGACTGAAGCCTCATTGGAC

A\_16\_P19838936

AAAAACAGGATGTAAAATTGTGCAAAAGGGTAAAGATTCTTGATTATCAGTCACTGGGGA

A\_14\_P118783 TTAAATGCTATCCCGACTTTATACACGTAATGATCTAATCCATTTTGGGCCATCTTTCCT

A\_14\_P131583 ACCGAGATTCTGAGAATGTTTTATACTGATAGACTCACACCCAAATATTGCTAGATTTGCA

A\_14\_P136423 TTGAGAATCAAAATGAGATGTTACAGGGATAAGGAAAGAAGCCTAGAGTTGGTG

A\_14\_P100754 AAAAACATTTCTTTCACAGATTAACAGAGGTGGTGCCGTTTCATGGCAGTCTG

A\_14\_P135667 ATGTCATTACGTGAGGCACATAATGTCATTTGCACATGTAAATGGTGAACGGGAA

A\_14\_P128020 CTTGTTTAGGTCATTCTCAGATTGTTTGATAGTGTTCATCTGGAACATAGAGTGGGA

A\_14\_P111449 CTGTGTTGGCTGCAATAAAGGTCATTACCTCTCTAGCCAAGAGATTGTTTATGAG

A\_14\_P103299 TTTATAGCCTTAACATTTCTTGCCTAAGAATCTGAAGGCCAGGAAAAGGTAATAGCATCT

A\_14\_P115410 GTCTCTGGGAAGAAAAGAGAAAAGAATAATGATAACATCTCATAACGACACAGCCCGTT

A\_14\_P134840

AAACAGAAAATCAAAAAGTTTCAACAATTTGCAAAGCAGCACAGAATTGACACCCTAAAGA

A\_14\_P100867 CTCAGGCCAAATGATTTTACACATAACTGTTCTGAGGCCAATAAAAGGTTATAATGGAC

A\_14\_P136541 GGCCCATCAATGCCATACTTTGCACTGATAGAACATTTAATGTCAGATAAAATTTTTCTGC

A\_14\_P112287 GCTTGTGGAAAGTTCTAGGCATTAGTCACTGGCTTTCAAATGGACTTCTCTC

A\_14\_P123826 TAGATTTTCTGTATTTCAAGAAGAATCATACTCAAACACAAGTGGGGTGACAGAACA

CUST\_969\_PI426210822 CCAGACATTAAGTACAGCAAAGCCTTCCTATAAGTGTGAGTGTGAGCTG

A\_14\_P103808 ACAAATTATTTTCAGTGCAGCAATCCAATGGAATGCAATTTAAATGACACGTGACATTGAC

A\_18\_P12028947

AATTCTTGGAGCAGGAAAAATAGATGTTACCCTTTACTACAGGAGGAATTTGTCCACTTC

A\_16\_P16191854

TGAAAGACCTCTGGACTGTTTAAAAAAAAAAAAAGAAAAAAGAAAAATCCTTAACCCATTGA

A\_16\_P03473856

GGGGCTATAAACTAAAATGCAGAAATACAGAGGAAGACATATTTTCAGTGGTTACATAGCA

A\_14\_P126367 TGTATATAGTCAGGAATATGGAACAAATGGGCTCAGACTTTTTCACATAAAGAAATGCCCA

A\_14\_P123216 ACCCAGTAATACGCTTCTTTTATTTTTTGTGCCTTTATCTTAAAAATATATTTAAACAAA

A\_14\_P200625 TACCTGGGAATACCTTTTATTTTTTTTTTACCTTGGGGTGATGGTTCCAAACCATAAATG

CUST\_8206\_PI426210822 AAGGGCTGTGCCACCTCCACTTCCTCCCAGCCTTGAAAAGCAGGAT

A\_16\_P36179789

TTCTCCAGTGATTGCAAATCAACTAAAGAAATAGACATCCTACACAACCTTTCTTTACCC

A\_18\_P22841196 AGGAAACACCCAGAAATGGTGGTGGGAGCCCTGCCTTCTCATAAC

A\_14\_P114693 CTAGGATTCATGTAACACGATCTATTCAATGTTAAACCAAAGGAAGAAAAGGCATGCAAC

A\_14\_P114047 GGGTTGTCAGAATGAAACCCAGTCATTCATGAAACATTGCTCTAGAAAGAAATAAAATGT

A\_14\_P109180 ACAGTGATCGCAGGTGTAATGATTTCATCCTCCATGTCTTCATCATCCTCATTT

A\_18\_P11658567 ACACACATGTAATTCCTTAATGAGTCATAGTCTACAAAACCTGAGTGGCCTTCTGTG

A\_14\_P135557 GGAAAACCTGCAGTGGGTAAGAAAAGTCAGTCAGTATGGTATTTGTCAATTGCTATTATTGT

A\_18\_P17090465

AAGATACTCCTTGAATTCAATTTTGTGGCTTAGATATACCCCTTGAAGTAAAATGGCAGCC  
A\_14\_P120868 CTCTAAAGTGAAAAACATGTGCTTAAATACCTTGTGGTAAATCAACCCCTTCTCCTCAGGT  
A\_14\_P115252 AAATATGACCTGTCCCTAGTAACAAAACCTCGCAAAAATTGTCAACCACAGTGGAAGC  
A\_14\_P101524 TGTTGTGGAGAAACAACCTCTTTATTCTCTCCCTGGTTCTGAAATTAGTGATAGCAAGTTA  
A\_14\_P132323 TGAAATGTCCACTTTTACACCTTGAATCATTTCACAAATATGAGTGATGTGAACACC  
A\_14\_P200928 CTTGGTGAAATTCCTAAATATTAACAAGAAATTGCATGCGTGTGTTTTGTTTTTTTTAAGGA  
A\_14\_P120672 AGAACTGGTTCAGCGGAGAATAACATATCTTCAGGTAAGAAGGTTGGGTTAAGAATAAAT  
A\_14\_P202401 CTTACCTTTTGCCTTTCTGTTGATGTTACATCTCTTCTTCCCTATGTTCTTAGGTCTATGA  
A\_16\_P19624936  
TGGAGTGATGCATGATTTCTGTGACTAGATTAGAAAGCCTTCTCTCATAATCAGTAAACT  
CUST\_3823\_PI426210822  
CCCCTGGTCTCATCTATCAGACTCACTTGAGAGTATTTTCATTATTCATCTAATAAAGGA  
A\_16\_P16467312  
AAAAAATCACCTAGATGTGTTTTGTATGACACCTTGGTCTCTTAAAGCAGACTCTGGTTG  
A\_16\_P15667316  
TGTGTAGTTTGGTCTTGCTAAAACCTCTAACACTTCTGGATTACTGCTACTGGTTATTCTG  
A\_14\_P122934 ATGACTCATCCTAACTAAATCACCAGAGACGGGTTTATAAAGCAGATGCCATTTTATTCA  
CUST\_1215\_PI426210822  
ACTATTAACCAAGCTATGATATTTTAGGACTCCGAAATGTTAAGTCAATGCATGTGATAA  
A\_14\_P128404 CTTCTAGAAGCACTTTTGAGTATAAGAGCACTGTTTTGTATATTCGGGGCAGCAAAAATC  
A\_14\_P108528 ATGAAAGCCACTTCCTTAAACAACCAGGAAACACTAAATTTTCAGAGTTATGTTTTCCATTC  
A\_14\_P135325 CCATGAAAGCATTGCTTCTATTTACTTGCACATAATATTATGGTAATGATAGGAAAAAAA  
A\_14\_P107593 GCTTTTGCCTTGATTTCCAAATTAACCGCACGTGACGCTTTTCTGTGTA  
A\_16\_P31939460  
AGCAATCTTTTTCCCGTTTGCTTTTGAATAAAGTCTAAACCATCGCAATTGTTTTCA  
A\_14\_P126404 ACAAGGGAAGTCTGCACAGAATCAAATGATACGTAAAAAGAATGAAGGGAGTCAGAT  
A\_16\_P21363354  
ATGGCTTCCATTATGCTTAATTAACAGTTGGCTTGAATATGACTATCAACCCTGTATGCA  
A\_14\_P133021 TTATACAGTATGGGCTTACTCTTGCATGTCCAATACAGCATTTCCCTGGAACCTT  
A\_16\_P18266383  
CTCCAAAAACCTGCATGAAGACATTTGATAGTTAGCCAAAATTCAAGAGACTCCTAATCT  
A\_14\_P115809 CAGGAAAAAAGTAGGTAAGTCATATATGCATACCTAAGACCAAGACTCATTACAGGGCATA  
A\_18\_P11380291  
AGAATTGAAAATGAAGCAATTCCTGGCTAAAATATTCCTTAACATGAAGATCGCTGAGGC  
CUST\_4745\_PI426210822 TATGTGGGAAAGCGGGACTCTTATCCTTGCAGAAGTCACTATGAAATGAG  
A\_14\_P134184 GAGAAAATTTAATCCACTCCTTGGAAATCCTGCTGAGAATCCCACATAAGATCAGTC  
CUST\_6804\_PI426210822 AGAGCCTCGCTGAGGTTCTTATACAAGATCTAGTAGCATAACCTCACAGT  
A\_16\_P17046724

ACACAGATTTTGTGATACGCCACTATGTAAAGCAATATTCTGATTAACGACCTTTCA  
A\_18\_P14135138  
TTTCTAAGGTCAAATCTTACTGGACTGATAAACTTACCCATACTTGGGTTACGGAAGTTA  
A\_16\_P03598436  
CTTAAGCATCAGTAGAGTTCTTTATTCCAGTTTCACCTTATTTCACTAAATTCTTTTGCA  
A\_14\_P126296 GAAAAAATATCACACAAGACTGTGTTTACCAGTTCTTTTCAATTTCAAGGAGACTCTTTGC  
A\_18\_P16137254  
AACAAATTGTCCGCTCAATTACCAGATAATTGTCGTATGGACTCTTAACAATCGGAGATT  
A\_16\_P00365100  
CCAGGACCTCATATAATTATCTCTAATCCTTCTTTCATGTGTTTCTCGTGT  
A\_14\_P122861 ATGCATCAATCTCAAATAATTCTACAAGTAAAAGGAAATCTGAGTCTGCCACTTGCAACT  
A\_14\_P101321 TAAAGGCAAATACTCTCGACGTATCTGTTCTACATGATATAGTCTGAGCAATGCAACTGT  
A\_14\_P119518 ACATTGAGTTCCCAAAGATGATCCTCAGCACAGAAGTATGTTAATGGAATGCCTTAAATT  
A\_14\_P137925 TTCAATTTGACAATCACTCATTAAATATATGCTATGAGCAAGGACCAAAGCCAGGTGAGA  
A\_16\_P20732306  
AAAATTCAGGGTAACAAGAGTTTAGTGACTACCAACAAACAATTTTTGCAGATTCCCAAC  
CUST\_2007\_PI426210822  
CTTGTGTTATTTTAACATTTCCAAAACCCCAAAGCAACAGCACTGGAAAATGACTG  
A\_16\_P16556686  
AAAACGTGTAATGGCTAATCTTGCTTTGTAGGCACTACATAAACGTCACTACTCAAAG  
A\_14\_P133033 CTTCACCAAACAATAATGGCTATTCTACATTCAAAAATCAGGAAATTTAAATTTATT  
A\_16\_P38517817  
AAGACATGTAAGGTGGGTTAGACATTGGTCATGAATTCCTTTATCCCTTTTAAATGGAAT  
A\_16\_P19284934  
AACTGTAAAGGTTCTGTCTATCCTGTAACCTTACTGTGTTGATGCTCTAAGAGAATCTTCA  
A\_14\_P134508 GTTTTTTTTTTTTTAATTTACAGGCCACAGAAACTATTCAGAATGGGTGTAGCAAGAGG  
CUST\_2143\_PI426210822 CAGTGCAGAGCTGGGCAAGTGGGTTGGGGTGTGAGGTGGCATCAC  
CUST\_2159\_PI426210822  
TGAGAAAACGCTTATGGAGATAATCAGTGGAATAATGGGATGAAAACGTCATGTACAA  
A\_14\_P202403 ATAATGGTAAAAAAGATAAGAAAAAGGAGGCTGTCTGCTTTCATCACTGCACTGGTC  
A\_16\_P18852682  
TTAGGAGCACTTATTTCAAGAGAGTCAGCATAGTTTCATTTCCCTCAGGTTAAAAATTCCC  
A\_16\_P41140309  
AAACTCTTAGCCTGCAGAATTTAAGACAATGGCAGTTTTTATCGTGATTTGCCTTTGAAC  
CUST\_5357\_PI426210822 CTACCACCGCTTACTTGGAGGCAGTGGCAGTAAAAACGGAAACAA  
A\_14\_P120373 GAGCAGCATAGGAAGGAGTAGATGACAAAGGAATAGGCTTCCTTTCTAAATCCATAATTA  
A\_14\_P200754 GGAAGTGTCTTGATTTAAAGGAAGACATGGAGGACTGCTGTATGCTACCGTATT  
A\_14\_P119730 TGCTTATAGTAGTTCTTTGCTTCTTCCTTCTGACCTAATTCATCTGTATTCAGACCTTTG



A\_14\_P118399 AACGATTTTACAAGAAAGGGAATTTCGAAGCAAACAAACTTCAAGGGATGCAGCAA  
A\_14\_P136870 TATTCACATCATTTACCATTGTGCCTTGTCTAAATATGAATTGAGGTCCAGAGAAGATG  
A\_18\_P14093611

AAAACAGCCTTTACGATTGTTTTATGCCATTCATGAATAGTTTCGCATCCTTTAAAAGGG  
CUST\_1012\_PI426210822

GATGTTAAAACTGATTATTTTCAAAGCAATATTTTAAGAAAATGCATTCACTGGCTGG  
A\_16\_P20389054

TCTATGAGAACACAAACTACACCGAAATTGACATCTGATAGGGTCCTGTTGTCTATGTAG  
A\_14\_P109974 TCTTCACCAACTCCAGATTATGCCATAAACCAGTAGAGAGCCAACGTTCTTTAATTTTT  
CUST\_8961\_PI426210822

ATTGCAATTGAAAAATTAGAGTAAATGAACAGAGCCTGTGAGCATCCACCCTTTGT  
A\_14\_P111489 CTGGTCTGCTGGAAAGCCATGGGATCCAAAAAGTAGGTTTTGATATTTTTTTCCATA  
A\_14\_P114561 CTGGTTTGTATTTCATCTGCATCTTGTCTATGGCTTGCTTAAGGATGCCAATTCCT  
A\_16\_P00464436

AAAGAGGAATTACCAAGAACAATAATTCACACTGTTACTATATCAAATACTGCCAGCCCC  
A\_16\_P30952498

TTACTGCTCAGAGGTAAGGGGGGGGTTTAAACACTTTTTTTCAAAGATGAGAGATTTAT  
CUST\_3033\_PI426210822

AGGGACAGAGATTCCTGTTCTCTCACTTTAAAATAACATATTTCTTGAATCCCCAAA  
A\_16\_P20768250

GGCAAAAGTCCATAGTTAGATAAACTGTCAGCAGATACATTTATTAAGGTGGCATGTGTC  
A\_14\_P106864 TTGGATTCATTAGCAACAAGGCATGATCCAGTGTTTGTGGAATCAAATGATTTAAAGACA  
A\_14\_P108520 AGATATCCTCACTTTCTCTTTGCTTAAATTGTTTTTACTGACCAGTTTTGAGAAATCCC  
A\_14\_P106334 AGTTCAGTTACTGCTTGCTTATTTCCAGGTTCCAGAAGTAAAACAGTTTTCAAATCTAAA  
A\_14\_P124281 CTCACCAACTTGCCTTGAGGCAGAAAAAAAAGAGTGCAATTTATCATTTTTGCTGAAATA  
A\_16\_P00685555 CTTGGGGTTGACACTGAGGCTTAGGCTGTTTCTCACTCGCTTGCC  
A\_14\_P103835 ATTGTAAATAACATTTTCAGGTGACCAAACCTTAAGGATGCAGAAATGAAATCCAAGGTTGG  
A\_18\_P12697368

AGAAATACAGCCTCTATATACCTCTTACACCCACTAGATAGAATAATCAGGATCTCTTT  
A\_14\_P104009 CTAATCTGATCATTACCCCAGCCTCCATCAGTTGTTTATTAAGGATGAAAACCTGAGTTTT  
CUST\_1925\_PI426210822 CACAAAAGCACTCACACTAAGATGGCAGTTCCTTATCTCATGGGAAGGTTAT  
A\_14\_P101879 AAGAAAAGACTTGCTGTAAACAACACCATCTATCATCCTACAACATCCTTGACAAAACCT  
A\_14\_P110573 ACTACCTGTTTCACATTTTGACTTGTGAATTGAGTATCCTAACGCTTTTTTGTGTTGACTCT  
A\_14\_P124323 AATGGTCTTTGCAGACCTATTTTAAGACTGTTATCCTTGGACTGCAGAGAATAATCATC  
A\_16\_P00349431

CTCTATGAAGTTGACTAAGGCAATCGAAGTTTTAATGACCACGTTTTTCTGTCAAACCTA  
A\_14\_P118786 ATAATCATAATAATCAATAATAACAGCAAGAACCATCCTAAATGGCGCGGAGGTGGCTAG  
A\_16\_P17466662

ACTTGAAACATTAGTTCTGATTTTTCCGGTATACATCATCTACTTAGCCCTACATGTCCA  
A\_14\_P136967 GATTTCCAGTTTAAAAACAATGCACTGACCACATAATTCCTTTTTTATTTTACACAGTT  
A\_16\_P58424363 CAATTCCTGAGATTCAGTGGTTGAGGGCTACTCTGGGTTAGGTGG  
CUST\_2172\_PI426210822 AAGGAAGCAGTGAAAGGAGAGCCAGGGATTGTTAGAGCCTTATGTT  
A\_14\_P120488 CAGAAGAAAAGTGGGGAATAGAGGTGGCAGATGGCCAATTATAATACCAAATTTACATAA  
A\_14\_P133534 CCCAGAAAAATAGGACCAAGAGAAGAAGACGTTGTTCTTCCACGCATTCTT  
A\_14\_P110997 CTCTCCTCTAGAGTGGAAAAGACAAGGATGCCGTGGATAAATTGCTCAAG  
A\_14\_P101280 AACTCACCTCTTATTTTTCTTGTAATTCTCCAGTTGCTGGGACTGCATATGTTTGCATC  
A\_16\_P15352768  
ACAACCTCTCGACTAACTGATTCATGATTACCTTCTCATCCTTATCAAGAGAAAATCCCT  
A\_14\_P105302 GTTTATTGAAGATGACCTTAGAAGAGAGACGCAAAGAATACCTAAGAGACTATATTCCCC  
A\_18\_P13456628  
GCGAATGTTCTGAAAACCTAGCAAACATCATTCCCTAAATATAGTAAATCTGAACCCCAA  
A\_14\_P102979 CAAGCAGAGAATTCGTGTGATAAAAAGCAGTTTAGGAATGCATCTATTTCAAGGTCTGTTT  
CUST\_8355\_PI426210822 ATTTGTGGGCTCTGACAAACAATGGTCTTCCCTCTCCCCAGAGTAT  
A\_14\_P116209 TGGTTTTAAAACTCTCAATGAAGATTA AAAAGTTCACTGTCAGAGGTTTCAGCAGTCCTT  
A\_14\_P110384 ATAAGATTGAATCTTTGCTCTGTAGCAATTATCAGACTAGACTCTAGTTAGAGGGGACAC  
A\_16\_P15831916  
AAAAAAGTCCATTCTGATACCTCATTGAAAACCTGTCATTTTGTAACAGGTGAACATGGAA  
A\_16\_P03682192  
GGCCAGTTAATCTCTTTATCTGTTGCATCTTTCCCTAGATTCCATTGTGTCTTTTCGAAAAT  
CUST\_2492\_PI426210822 ATGGAGAAAGATTTGGAGTTAAAAGAAAACCAAGTCCCTTTCGCGTGTGGAC  
A\_14\_P105482 CTCTATTGCAGCACATCAATTCAATCCAGTGTTTAGATATGCCATTTTTCTGTCACACAA  
CUST\_8268\_PI426210822  
ATTTGGTAATGCTGGGAACTCACTACCTTACTAAAATAATGCACTAAACATTGAAAATGG  
A\_14\_P107828 ATTTGCTTTTTTCTGTTTAGGACATCCAGGCAGAAATTGATGCCCACAATGACATATTTA  
A\_14\_P125916 CAGTTATTATCAAAGTTTTGTTGGTAAAAGATGCTAGCCTTGTGACTGTTAGATTTGGGG  
A\_16\_P18035958  
AAAGGGCTAATGCTCACTAGTATCATTACTCTTCAAAAATCAATTGCCTAGGTCAATCCT  
A\_18\_P22843200 GTTCAGGCACAGGCAGGCTGACTCCAGTGTGCTCTAATGCATCTT  
A\_14\_P129200 GCTTTTTGTCCTCATTATTCATCCCTGGAGTGTTCAGAACTTTCTCTAGAAATATTGTA  
A\_18\_P22839038 GAACAACACATATATGAGGCCTGAGTTCCAAGGGGATCCAAAAGCATCTT  
A\_14\_P119169 AGAAGCATTTACCATTTTGTATGCCTTCAATGCCACATCAACTGACATAACATTTCTACAT  
CUST\_6171\_PI426210822  
TAAAGACTCTCAGTTGATGAATTTATTCTGAAATTTCCAACAGGAGTATCATATCACCTTT  
A\_14\_P134151 ACAGAGTTAGGTAGTTTTCTGTGAAGAGTTTGCAGGCTAATATCACTGTTTTTTGACAATG  
A\_18\_P22840467 GAGGGCATTTGTGTCTGCTCTTGGCCTTGCAGATAAAAATACCATAATCTACTCTT  
A\_14\_P109380 AATAAATATTATTTTCATAAGCATTTTATGGGTATGGCCAGGTAGTGGTGGGAAGAGATGG

A\_14\_P201636 CAACGCTGCAGATATTGTTTTTTTTTTTCATTTCTTTAATTTTCAGAGGGCGAAGACGAAG  
A\_14\_P130941 CTGAAGTTCTGTCTGTTACGGAAGTGGTTGAAAAACAATTTTCGAGATCCAGAAGT  
A\_14\_P136726 GCCATCCTCAAGAGGCACCAGCACTTTATCTGTTGAGCCTTTATGTG  
A\_14\_P100969 ATGAAATATACCAGTGACAACCTTAGGAAGAAGATACATACTTCCATTCAACTCCCCATGA  
A\_14\_P106553 CAGCAGGGATGAATGCAAAAAGAATTCTTCGAAAATTGGGTATGACGTTCAATGTTTGT  
A\_16\_P15792584  
AAAAACAATGACCTTGACATGACTAGACACAATCATTCTTAACATGATCAATATCTCAA  
A\_14\_P202215 TGTGTTGAAAAACAGTAAAAGGAATGTTAAGCAGCAAATAGTCCAATTTAGGAGTCCCTG  
A\_18\_P10185446  
AAAAATTTCTGGTCCACTGATATCCTATTCAATGTTTTCCAGTGATGCTATACTTTACTCCA  
A\_14\_P109453 CCCTATTCTAGAACATGAACTATTGCTGTGATACTTGCCAATTTTTTTCTGTTGATTCT  
A\_16\_P18789758  
AAGGCCATTTTCTAATGATCACCTTTTTACAAGCCTCAACTGCATTTCTTTCTTTACTTT  
A\_14\_P108476 CCTATTTTATTATACTCAAGTAACGCCCCAGAAATTCAGAGAATCTCACACAAAGAG  
A\_14\_P128989 ATGCCACAGCACATAAAGATTACAGTGACAAGAAAAACATTGTTTGAGGATTCCTTTCAA  
A\_14\_P114866 ACATATCAAGTGGTTCTGGTAAGAATGATGGTTTTATTCTTGAAGGTCAAAGTGGATTCT  
A\_14\_P100164 ACTTCTGTCTTTGCTGGAAAGTGTATTTGTGCATAAATAAAGTCTGTGTATTTGTTTCAG  
A\_14\_P134057 TCTGAGAAACATCTCTCTCTCTGAATTAACCTTGCACAGTGGCTAACAGTGTTTTGT  
A\_16\_P17517929  
CCTTTAACTCTCCCCATACTTAGTCAATGATCCAAGAAATTTCTTCTGAGAACATAACTC  
A\_14\_P120358 TGGGGGATAATTCAGAGGTTTAGAAGATTCATGTCACTAAAATGTCCGTTAGGGTAATA  
A\_14\_P105843 GAAAGGAGAGAAATAGGGCTTCAAATAAGTAAACTCCTTTGTGATGTGAGTGGTATTGAA  
A\_14\_P117765 ACTGAAGTGGTATGATACCAAGTATCAGAATCAGCACCCATGTATATTTCTTTTCTGTCT  
A\_16\_P16143547  
ACTTTTGTAGTTCATCCCTTAAGTTATACCCCATCTCTCACTAAATACCAACAATTCCT  
A\_16\_P20091080  
AATGCCTATGCCATAGTTTACAGAGTTAGCCCATTTTAATGTTTGCAGTGCCAATAGTTT  
A\_18\_P16592923  
TTCACAGGAATCTATCTCACCTAGCAAATAACTCAGGACAAATGTTTAAGAGGCCTTCT  
A\_14\_P114579 CTAATATCTTCAAGGTTATTATCCAGTTCAGGCAGATGCTGCTATTAATGAAAGCCAGAG  
A\_14\_P121261 TTTCTATTTACAGGGAAGACCCGAATTTTCTGAAGTTGTCATGAAGTTAGAAGAGTGTCT  
CUST\_1029\_PI426210822 ACCCTAGTGCTGAGAGGCTCCTCTGGAGAGCTGGCCAATGCATCT  
A\_14\_P138541 ACGTCAATGATGAGAATTCAGGAGTGATTTCTAATCCAAAACCAATGGCAATCAGATTTA  
A\_18\_P22842101 CCCTATAGACAGAGGCTCATGAACTTGTGCTTGTGACATGTATATCTTCTTCAGTT  
CUST\_6886\_PI426210822 CCATACAGAACTGCATCTGGGCAGGAGAACAAGCAAATTGTGTTACAG  
A\_14\_P200896 TAAATTTCTATCTTTTCATGTGACTGCAGTAGTGATCTGAGTTAAACCTAGATCATTGA  
A\_14\_P100589 CTTCTCACACACAAGGTAGTTTTCATACCGTTCTCATAACCTAAATTTGTCATCGCATAAAC  
A\_16\_P58424609

GCCACATTAATATCCCTGGAGCCAAATATTTGCACAAATCTTTCATTATGTCGTTAGGT  
A\_14\_P101985 TTCTGTGCTCTTGAACCTCAAATCTTGCCTTGAACCATGTCATTTCTATATGACC  
A\_16\_P16094105

TTGTTTTTCCAACCTATGGCAATTTCTCAATCCACTACATACCATCCCTCTCAATAAAACA  
A\_14\_P120517 AGTGTATTCCAGGTTAAGTTGGGGAATCAGAATGTGGAAACTAAACAACCTTCTTAGTG  
A\_14\_P126672 ATACGCACCTTGTAATCTTTATCTTCTACATTGAGGGTGGACACATCGACAAAGCATAT  
CUST\_7488\_PI426210822 TCTAATTGCGTATTGATCACCGAGGTTCTTGGCATCGGGCTTTTCT  
A\_14\_P135648 TAGGTCTAGAGAAACCGTGAACACTGTACATTCCAGGGACAAATCTCAAAAATAA  
A\_14\_P116221 AACTCTCTCAAAAAGAATTATCCTTTAACATCTAACTTCCCAACCTGTTACATCCTCAAT  
A\_16\_P58424146 TTAATCCTCGCAGCAGCCATGTAAGATGGGTCTGTTTATTATCCACCATTATTATTC  
A\_16\_P16645082

AAAAAAACCTGCTTTCATAAGGTTGACTGACTATGGAATCCAAATGCAGATAACTGAGTG  
A\_14\_P132907 ATGTTCTTATTGGAGTGGAGAAAGACAGCACTCTTGTTACTCTTAAATTTCTTCCTTACG  
A\_14\_P115445 CTTCTATCTTAATCAGACTCCATGGCTTATTTATCTGCTTCACATCTTCCCAAATTTCT  
A\_14\_P131180 AAGTAAATGCATTTCTTTCCCTTCTAACCTGAGGTTGTAGTCAGAGGCAG  
A\_16\_P15956018

AACTTGGAATCTGCAGTTTAAACAAAAGATAGGCTTTGCTTTTACATCTAGCACTCCACTA  
A\_14\_P111342 CGATGAGCACGTGTGAATAAAGATCAGAAAGACCCAAAATAATTGTAAATCTTTGGTGG  
A\_14\_P131280 TTTTTTCTTTTGGAAATGTGGCAGGGGAATATGAATTTTCATAGGCGAAATTACTCTGTC  
A\_14\_P133003

ACCAACAAAGAAAAAAAAGGGATGATGAAGAAAAACAGGGAACTTTGACCTAATTTAACC  
CUST\_649\_PI426210822 GCTTGCTCAGGTGGGGATTACATATGTGAGTAGCTGGCACCAGAG  
A\_16\_P37584069

TTTATCTTCACTTGAGCCTAGTTAAGTAGACTACTCTCTTATATAACCGCAGAGCAAAGCC  
A\_14\_P134288 ACCATGGCTGCCTTTGCTCTGAAAGTTACTAACTAGGGAAAGTGTATATATATTTACAT  
A\_16\_P15715795

GCCTCAAATCTATGTGCATTCTCAGTATAAGCATCTAACCTCTCATAACATGGTCAAAGA  
A\_16\_P00769764

AAACTTTCCTCATAACATACCAAGAGATACCATTTCTTGATAGCCAATAGTAACCAACTT  
A\_14\_P123037 CTGCTCTTTGCCCTGCTTAATCTCCAGAAGTGCTTCTGAGAAAAAGA  
CUST\_8330\_PI426210822 GGGAACAGCCTTTCGGAAGGGCAGTTTTATAAGAACAGAGGAGTG  
A\_14\_P122092 CTGAAATGACTGAGAACTTTCCTTTCCTCCTTAGAGTTACAATTTTACTTCTGCTATTCC  
A\_14\_P120035 ATTTTTACCTTGACTGGAGCATTGTGAGCCAAAAGTAAATGGGCACATTCT  
CUST\_4304\_PI426210822

GAGAGTTATATAATCACTGAGAATAGGCTTCCACATCAGGACAGGTTTCATGTCTTA  
A\_14\_P102911 GATTAAAGATTTCCATATTTGTTCTTCAGGGAATGTTTGTGAGTCTCTTTCCCATCCATC  
CUST\_4410\_PI426210822 AAACATGCATTCTCCAGAACTGAGTATGCAACTGTTTGTCTTTCGACCTTACA  
A\_18\_P20183055

AAAGCCTGTTGATGCTTAAATTGTAAGTATGATGTTTGCCTAAAAGTGAGGACAGTTCAGT  
A\_16\_P19702651

AGTGATAAAAAGTGAAGTGCAGTAGAGTAACTAAGAACAAGTCCATTAGAGACAGACAGT  
CUST\_7641\_PI426210822 AAATTCCCAAGTGCATGGGTAATCACCTCTGGTTCCCTCGGAGT  
A\_16\_P00853010

CCAGTTAAGAACAGAAACATTTCCCTAAGAATTACCTAAGAATTTCCACCACTTCTTTTGC  
CUST\_9298\_PI426210822 GGGATGTTTTTCCATTTTCAATCTGTAGCCGTTACAGCCCTCACACA  
CUST\_3766\_PI426210822 CTGTTTCGCCAGAAATACTGGGGACCTTGAGTGGTAATGGAATT  
A\_14\_P113878 GAATGTTGATTATTTAGGGCAGGAACCAAGTCTTACATCTCTTAGTATCTACCACTGAC  
CUST\_4197\_PI426210822 GCGGGGCTTTCCCTTTTGCTCTGGAAGGGAAGGAACTCTGACAG  
CUST\_7421\_PI426210822 GTTAATGTTGAGGCAGCCACCCAGGTTAAGGGTCTCATTCTGAG  
A\_14\_P102313 ATCTGAGGACACTGAGGCAGCATGTGAATTATTGGCAAATATATAACATATTTTGTCT  
A\_14\_P120568 ATGAACCCCTTATTCATGCAACTACTTATATTCTTTGATGGATAATGCTGACTCAAGTC  
CUST\_1837\_PI426210822 GTCCACCATTGATGTGGTAGGAGGTGCCCCACAGGACAAAGGCAT  
CUST\_6952\_PI426210822 AGAATGTGAATGTACGGCTACAGTCCGTCACCATCCAGCTTGCCA  
A\_14\_P200376 ATTATTTGACCAAATTGATTGTTTTGTATTGTTAGCACCACCAATCTTCAGAACAGGCAC  
A\_14\_P118854 TTTTTGTCTCTGGGTTGTAATTAATAATCTTCAAACAAAATGTTTACGAAAATGCCAA  
A\_16\_P17567366

CTGTCCAGTAACGTAAAATGAACAGACTGCTAAACTCTCATTGTTTTCCATATCCTCTC  
A\_14\_P119976 TACTTCCAAAATACTATTCCCACTGGTATTTGTGCCAAAACCTAGGAAGACAAAAGAAT  
A\_14\_P110270 GTGATGACAAAGTCCCATTTTTCTTTCAGAATGCCTTACTTAATGGGACTTTCTCTCA  
A\_16\_P21645231

AATCTTACTGTTACCCTTCAGTTATTCCAGTTTTTCCAGTTATGCAACTAAAGCCTGCTA  
A\_14\_P119645 AGATAATAGCAATGGGACTAAATTTCTTTTAATACCTGCATCTGTAAGTCTCTCACCAA  
A\_16\_P00492803

GATAGGAAGTCAAATCTCAAATGTCTACTGCATCAATCATCTCTACTGACATCAGAGCA  
A\_16\_P16401393

AGTAGCAGAACGTTAAGTTTTCTTTGCCAAAACAGAATCTAAATTGTGCTGAATCAGAGC  
A\_16\_P58424220 TAGTAAGGGATTAATGGGTAGTAGTGAATAGCATGGATGTGCCGGACAAAGGT  
A\_14\_P120368 CTGTTTTTTTTCTTCCCGTTTTTGTCTCTTCACTAAGACAATATGAATGATGATTCAAG  
A\_14\_P200453 TTTATGGTAGTTTAATCCAGTTAAGACCACATCCAGTTAGTTTCCATTTTCTCCTCTACT  
CUST\_2890\_PI426210822 TCTTTGTGCTGGCAGCTGCAGAGGAACCATGTGGATGATGACTTT  
A\_18\_P12103562

AAAGGATACTACAGTTCCCATCCTCTAAAGATGACAACTTTTTCTTCCAAAGCACATT  
A\_14\_P133400 AAAAAAAAAAAGTATGGTAATTTTTTAAAAGGGTTGAAGAACAATATAACCCATTTACAT  
CUST\_8522\_PI426210822 CTGGGTCATGTGGACTGAAAACCAGACGCATGTGAATGTTGAATGT  
A\_14\_P131845 TCTTCCACTTGATACCAAATACTAGAGTGCCTTTAAGACTAATCTCTGGTATTTG  
A\_16\_P19448916

AATTTTTGAGAGTCCTTGAAATTAACAGATGGATCTATGGTCAAAAAAATTGCCAACCA  
A\_16\_P18547896

AACTTTTCCCTAACTTACTGGAAATCACAAGAGTCACAATAAGTCACAATGAAGCAACAG  
A\_14\_P136759 TCATAAGACCTTTTCAAACCTTATTGAGTCAATAGTTCTAGAGAAAGAGAACACCCATGA  
A\_14\_P120098 AGTGGGAACACCCATGTAAAAGCCAAATCTTTGTTTTGTTCTTAAAAGCAATTCCATAAT  
A\_14\_P138200 TGTTTCTGGACAACCTTCCCCTTCTGCTTTAAAGGTTGTTCGATTATTTTGAAGC  
A\_14\_P134879 AAACAGGCTTGAACCACAAGGATACTTGGTTTTTGCTCCCAAAATTCCTG  
A\_14\_P136218 GACCAGGAGACTCATGATTATTTTATTCCTCCTCATTTTTCAITGTTCTTCAAACACCAAG  
A\_16\_P01234511

GGTAGCACATCTGAAGGAATTAAGACTCAGAATAACCCTAAAGTTAGTGAAGACTGCT  
A\_14\_P106795 CAACCCAAGTCCCCTTTATAAGTGGGGAAACAGACCTAGAAGACG  
A\_14\_P128890 TGACGTCTCAAGTCGGCTTTGATGATCTTGACATGAATTTTTGATTTCTAAGAAATGCTT  
A\_16\_P18155733

AAAATCAGCATTCAAGTGAGATAGGTCTACAAACATAAACTGCTTCTCAGTATCCTACAGG  
A\_14\_P110752 TGATGGACAACCTCTTGACAGGGGACATATTACATTTAACAATTTAAGAATAGGGAGGA  
CUST\_9947\_PI426210822

TATAGAACAATTCTTCTTTTCTTCTAAGGAATGTGAGGAAGATTTCTGACCAGAAA  
CUST\_6523\_PI426210822

GATTTTATGATACATTGTTGAGAGTATCTGTGATTTTTTTGGAAGCTGAATCCTTACTGA  
A\_16\_P03483188

ACAAAGATTAAACTCTCTACAGAATCCTCTCAGTGTATTCAATATGAGCCCCTTACTTC  
CUST\_2542\_PI426210822

AATAAACATTACCAGTTAAACCAGGGTCTTGGTTTATAGCTTACCAAGTATTTCCATGAA  
A\_14\_P120824 ATCCACAAGGCCTATTCATAATGATGAATTCATCTCTTAAAATCTTCCATCCCATAGTGC  
A\_14\_P110249 TGGACTTTAAAGATATTGCACAACAAAAGGAGCAGGTTACAGTGGATGTTTTACAAAAA  
A\_14\_P137288 TTCCAAGCCAGGATTTTATGTCTTTAATCTTTTCCAGAAGAAAAGAGTTCTCATTACGT  
A\_14\_P109032 GCAGAATGCCAATCTTTGCATCTAGTTGAGCCTCCTAATCGTATGGATAGGAAG  
A\_14\_P113647 CATGGCTACCTATTATCTGGACAGATAAGTCTGCGTAATTCAGGAATTCAGTGTTAAGAA  
A\_14\_P136894 TAATTCAGTAAACAGGACAAGCAGGGAAACTAAACTTTAGGTCTAAGTTTCTTGGATTGC  
CUST\_3661\_PI426210822

TGAATTATCCGTATTCTTTGGTTTTATACTTTTATTCCTCTTTAGTTGACCTTTTAGATA  
A\_16\_P03651800

AGTAAACCAGATGCTAATCCTTTGTGTTGATTGACTTTGGATTTAAAACCTTTGAGCACA  
A\_16\_P18091707

GCAGTGATCACCTGATGATACTAATTCCATCTAGACTTCTTTGTATTCTGAGACTGAACA  
A\_14\_P104080 TGAGTTATCTCTGGGAAAATAGAGGAAATGGATAGTATGTTTTCTCTGGGGATAAGACCT  
A\_16\_P15559148

TACTCCTCTACGCATGAATTACTAAGCCTATTTTTTCTCGATACCTTCTTTACCTTGAC

CUST\_6099\_PI426210822

GTTTAAAAGTTTCTATTAAGCAGGACTGAAAATTCCATTTGTAAAAGGATGCAACTATGT

A\_14\_P139017 AATAAGCCCTCATCTGGTCTTTTCAACTTTCTCTTGGAGAAAATTCTTGATAATTTCCAC

A\_14\_P122740 CAGGATTGGTAAATGTGATAATTTCTACCATCCCAAAGTTTACTCTCTGTTGCAGAAAAG

A\_14\_P107322 TTCTCAACTCATTCCATTTAAATCACACTACTTTTACATCAGTATTTCTGTCCCCTGACC

A\_14\_P101632 CTAAGGGGTGTCTTGTCTAAGTCTTTTATCCGAACTTTAATCACCTGAAGGATTTGTA

CUST\_9426\_PI426210822 AGGGCAAGGGAAGCTGGGTGACTTGGAGACCTGGAGCTGGAATTT

A\_16\_P16701175

ATATCCTAGGTTCCACACTATTCCTTACTCATCTCTTTGGTTATATTGTCACTTGCTGGA

A\_14\_P131317 CTGGATAAATAGCCCTTTTGCTTTCTTTGATAACACGGGACTTTTCTCTACTTGTAGAT

A\_14\_P135310 AGAAAGACAATGCCTTTACCTACCTTAAAAAGTCTTAAAATGTTAGCAACCATGATGGAC

CUST\_2987\_PI426210822 TGGTAAGATAGTCCAGTCTCGCTGTTCTCTCCATTGTCTCCCTTC

CUST\_7063\_PI426210822

TACAGCAGAACTTCCCAAATTACTGATCTGACCAATTAGATATGTTTAAATTTTTTAT

A\_18\_P14133703 ATATTCTGAGATGGTAGAGAACCCTTTCATTCCCTCCAGCCTGTCTCTTTCATC

A\_14\_P119779 CCTCCTGAAGTAAATCAAATGAAAAAACTGCCTGGGTTTAACCAACATCTAACATACAT

A\_14\_P105536 CTGTTGTTTCAGGCTGTAATCCTTGAGGTAATATTGGAGCACCTAAAAATAAAGTTGTAGC

A\_14\_P126222 GTCATAGAAGATTAGAGGCTTTATTTTTTCTCAGGCAGTTGAGTTTATTTTCAGGTTAGC

A\_14\_P127028 AAGTAGCATTTTATAGATTTTGCAGATGATAGTGGGGAAAAGAGTTGTTCCCTCCTTTT

A\_16\_P00685331 ATTACATGAGGGAAATGTGAGAAGCCCGGAAATGATGAGGCAGCAC

A\_16\_P21476013

AACTTAAACGGATAGGAAATATCTTGAATGCTTCTAAGTGGATTAGAGTCTTTCCTGCCA

CUST\_6811\_PI426210822 TGAGAGTTTGGGGCTTCAAGTGTCCGAGTGTCTGGGGAAGGAGAG

A\_16\_P01889123

CTGGAGCAGTTGTATGTGTAGAAAGTGAAATCAGAGGAGATGTAACCTATCGGTAAGAAAT

A\_14\_P100493 AAAACCCAGAAGCAATTCTCAAGACGTTTCAGATTGACCCTCAAATGGAGAA

CUST\_146\_PI426210822 GCAGGAGGGAGCAGAGCAGTATAACCATCACTTCTTTTGCATTGTTACA

A\_14\_P109155 ATGGAGAACTCGGCACATAATTGGCCATGGTGAATAGTTTTCTTTTTTTTTTTTTCCATC

A\_14\_P103444 ATAGCACAAGACATCTCATAAATAAAAGCCATTTAGAACATTATCCACAGGAAACGGCTG

A\_14\_P129185 CAAAGAACAAGATAGCCCTTTCCTTAAAGTATAGCAAACTCAGGAGTTGGCTCAAATTA

A\_14\_P130776 CTGTAGAATCTCTCTCATCATGTGTCTTTTCAGGACTGGCATATGTTTTTTGTATGCT

A\_16\_P20792154

AAGACCTATGCTATGTCAGTAGAGACCTAACTGTAATTCCTGGATATTCCATGATGTTC

A\_14\_P108046

TATACAACAAGCAAAAAGTGATTTTAGAAATAACAGAACGCGGGAGAAAATTCACACACGG

A\_14\_P113350 TTAAACTTGAAGCAACCCTTAATGTGCATGATGGTTGTGTAAGTAATAGTTAATTCTCA

A\_14\_P129766 TTAAGTCTGTAGAGGTGTTAGCATAAACATGTGCATGCCACATAATTTGCCACATGAT

CUST\_3778\_PI426210822

ACATTCTTTTAAAAGAGTGCTCAACTCAAGATTAGGAATCTATTTTTCAACTACCATTAG  
CUST\_6481\_PI426210822 CCCCTTCCATGTTATTTCTGCCACCTTCATCCTCTGATCATGT  
A\_14\_P130199 ATTTAAAAGACTTCTTGAGAATCATAAACTTCTGCAGAGCCACTGGAAAAGCCAATTAT  
A\_14\_P200613 GAAATCTCTGCATTGCACCACCAGAGGGGCATAAATTTGAAAGTTCTAACCT  
A\_16\_P16046297

AAAAAACCTGACAAATGATTAGGAGTTAAACACATTTTCTACCAAACAACGTTCTCGC  
A\_14\_P202031 CTTGTGCATAAACTCTGACTCAGAATAAATCAGGTTATTTTACAATCCCAGTGGCTTCTT  
CUST\_262\_PI426210822 AGCAGAGAAGCACTAAGGGGGGGTTGGTGCCTCCTTGGCCACAT  
A\_18\_P24409523

TTCCCTTAAGACACCAATTATCCACGTTATTTCTACCTTTAAGAAATCACCTTTGAACCA  
A\_14\_P132394 CACTACTAGTGAAGAGGCATTTCTTTATCTGTAGGGACACATTGCATTTTGGTTACATTT  
A\_14\_P200958 CACTTATGTCTGAATCTTCATCTACTCCTTCAATAACCGATTTCTTCCCTTTACAACAGG  
CUST\_7384\_PI426210822 TACTTTCAGCACTCCCTCGTGAGATCATGGAACAGGGCAGGAAAT  
A\_18\_P22841275

CATTCTTCAGAAGGATCTCCCAAAGAATGCCATTGAAAACCTCCTCATTACCTTCAAAT  
A\_16\_P38119572

GTGCCTACCATTCTCAAATGAACCAAATCCCTTCATTTTCTTTTCTACTGAACCTCTAAA  
A\_14\_P126402 CTGAAAGTGCTCAAGCCCAGAAAACAATAGTTACTTCTGTGAGATGAATGGAAACTATG  
A\_14\_P110751 ACTTTCCAAAATAAAAGTCTGGCAGGTAGAAATGAGGTTTTCTTGCTGTAAGTAACCTAA  
A\_14\_P130631 TACAACCTTACTGACGCTGCAGTAAGTTAGAAACTCAACATCTGTAGTCTAAACCGTTAA  
A\_16\_P00221914

AAATTCATGATCCCAATTTTGTTCACAACATTCAAAGCATTGTAAGGAACCAGTTGAACA  
A\_16\_P17582499

AAACCGAACTGTTACTACACAGAGACGTAACCATATTACAAACTGTGGTTCTTTTAGGAA  
CUST\_1180\_PI426210822 GACGGCTGCCTCTAAACCCACTTCTTGTGGGATGGTGGAAAGACC  
A\_14\_P115572 TATGTCATTACAGAAGAGACATCCTCTTTGACTACGAGCAGTATGAATATCATGGGACAT  
A\_14\_P127403 CTTTTAGCCTCTTTCTTTCTCGGGATTCAGATGTCACCTTAAAGAACAAGGAAG  
CUST\_6922\_PI426210822 CTTCTGCGGCAGTCGGCAGTGAGGAAGTGGTGGAGAAACGCAGA  
A\_16\_P19961765

AACTCATTTCATTTGGTTTTCTAACCTCTGTTAATCCAGCACAATTTCTATCTACCCC  
CUST\_10157\_PI426210822 CTGTCAACCAAGGACCCTCTCTCTCCCATTTGACCCTTTTGCAA  
A\_18\_P22841391 TAGTGTATGTTTTAACAAGTAACATTTCTGTGGCAGGAGAGGGCTGAAGGAGAG  
A\_14\_P136950 CAAGTATAGCCAGAAAGGGTCTCACTGGGTTTTCCAAGGCTTTAGCA  
A\_14\_P131798 ACATCTGGTAGAGGTAAGCCAAAAATTAAGTGAGATTCAAGCATTGACACTGACTAAAGA  
A\_14\_P130023 CTTACTTTGTATGGCTTCAGGTCTAAAAGTTAATATTTTGCTTGTCCATGGAAACAGGC  
A\_16\_P17254384

TTTTACATGACTCCCAAACATAAATCTCCTAATCATTTCACTCTTCTACCAGCCTTTTCAG  
A\_14\_P100527 ACTTAAAATGAATGCTACCTGGAATTAATGACTACATATGGCACATCTACATCTTACTT



A\_14\_P103651

TGGATATTTTGTCTATTCTGAGGGAAGAGACTGCAAAGAAAAAGAAGCAACAACAACCTTCA  
CUST\_8515\_PI426210822 CTTGAAAATCAGGGCAGCAAGGCCCATATGGAGCAGGTGAATATC  
CUST\_4315\_PI426210822 GGCTCCTTGTTTTTCTCTCCTCTGGCCTCTACATCACTAAATG

A\_16\_P16067178

ATGATTCTCTCATTCTGCTACTGCTAAGATATGGCTGAAAAATTCCATTGTGTTCCCTGAT  
A\_14\_P112974 TTATTGGATACTCTAATTGCAGTGGCATAATTCATTTTTTTTTTTGAGATGGGACTCCCT  
CUST\_3552\_PI426210822 GTCTGCTTTCTTGGGGCAAACAGAATACGAGAAGCCAGCTTAGAAATTG  
A\_14\_P138340 AAGGAAGCCTCGGATCATAATTGAGGTGAAAATGTGTTAATAGAGATCAAAAACAGGATG  
A\_14\_P137486 ATCCACATGGCAGACTTGATTCTCTCTTCTATCAATAAACTAAATTCCTCCAGACT  
A\_14\_P139512 TTCTTTGCGTTTGGAAATTCTAATACCCAAAGTGATGTTGTTTTAAGGGTTTGGCATAAG  
A\_16\_P16172989

CCTCGAGTATTAAAAAACAGACTACCCTCCTATTTTACTGTTCTAATGTTTCACTGTGCA  
A\_14\_P200138 ACTACGAGAATGTTTGTATTACCCACATTTGAAATGATTGCTATGATTTTTATGAAGAT  
A\_16\_P01483908

AAGCCTCAACAGTTACATAGAAGAAACCATGTTTATACTCATGTTGCTTTAACAATGCCA  
A\_14\_P135764 TGGCTTTACCTTAACATACTCATTCCTGTCAAATTTTTAACACTTATCCTAAGGCACT  
A\_16\_P41696167

AGTGAGTTAACACATCTCAACTACTGAAGCAATCCATTTGATTCATGTGCATACTGCTTA  
A\_16\_P17508724

CTGACAACCTCCTTCTAAATTACCATCTTGGATAGTTCTCTTAAACAACCTTTTAGGCCAC  
A\_18\_P21300081

GATCAGCCAAAGCACTTTAATTCTTACCTAACACTCAAGTTATCTTCCAACATTCCACTT  
A\_14\_P137578 CTATGAAAATCCCAGACTTCATGCAAGATATGTATGAGTTGTTTTTGTGATGTCTACCCCT  
A\_14\_P104872

CATTTGAGAACTTGCAAACAGAAAAAATAGTTGGGAAGAAAGAGAAGTCTGGCATTTC  
A\_16\_P20840873

AAAAAATCTCTCATCTTGCCATGATAAAAATTGGTTCAGATTTAAAACACCCCCATCTGG  
A\_14\_P118890 AATATCTCAGAATCTCTCCATCTTTCAGAATATGAAAGTGCTGGCTTAACCACATCTTCA  
A\_14\_P137537 CTGGCAAGTGTAATCTTCATGCATTACCAAATCAGTATTGTTGACTTGAGATTTTCCCTA  
A\_14\_P118932 CTCTTCATGAGGTTGAATTTTCATGCCAGTTTGTATTTTTATAAGTATCTAGACCAAACCT  
A\_14\_P138056 TCTCCTAATTTTTCTTAAACTAAAAGGAAACCAGGTAACATTAGTGTGGCAGAGAGTTC  
A\_14\_P115966

AGATAAAAGAGACATATCTTAAAGTCCAGAGAAGAACAGGAAACCCAGCAGTCTCTTTAA  
A\_16\_P19915593

TCCATTGCTAGATTAACCATTATGACCCATCAATCAGTATGCTTATGTCCTCTGTTTGA  
A\_14\_P132826 TTTTAAATTTTTTTTTTCTCCTGGACCCTCTTATGGGTTAAGACTGATTCCTTTCATTGGCT  
A\_14\_P109771 AGGTTTTGCAGGATGATTTCTGAATAAGGACATCATCTTCATTATCTAGAATCTGGTCAG

A\_14\_P120958 TAGGCTATTAATAAAGCCCTTAGAGTGTGTCATAAAGTTAGGTTCTATGCATGCAGAATGGA  
A\_14\_P114893 TGGCCACAATGATGAACACTCTCATTGGATCTAAAACATTGTCAAGATTCTCTTAATTCT  
A\_14\_P113654 ATTTTTCATCTTTCCTTTACAATGTTTTGACACTGGCGATGCAAGTGCTGTATCCAATTA  
A\_14\_P130125 CTTACCTTCAATAAAGTATCTACATGCGGTGAAGCATTGTTGACTCTAATGTGTGAATCC  
A\_18\_P10091310

CTTTCTGTTTGATTTCGGAAAATCTTCTTGATGACATCAGAATCCAACGATCAGAGGAA  
A\_14\_P139871 TAAGTGTGGTAGTAACGACACTCACAGGTATTTCTATGTCTGCTATTTGCACGAATGG  
CUST\_4882\_P1426210822 GTCGAACAGGAACCCAAAGGATGTAGTTTTTTGGCAGATGTCCTTTGTA  
A\_16\_P19971038

CCCAATTTACTCATTCAACTACCTATTGTTCTTTTCGCTTTCTATTAATAAATGCTGTGGCC  
A\_14\_P117196 TGCTGTGTTTTCAGTTGGGTGAGTGAATAATGAACAATGTTGTTAATAACAAGGACTGTT  
A\_18\_P15543418

AAAATTGATAGGTAAGACCCAACCTGTTCTTTTATGTCCGTGTTTCTAATAATGCTCAGGC  
A\_16\_P01867244

CCAATTACCATCCAGTCTTATTCAAGTAACAATGATGACTTCCCATACTACGAAATCACC  
A\_14\_P119916 CGGAGTTAAAGTCAAAGCAGGAGAGTAATTATGAATAGCGCAGCGGGATT  
A\_14\_P121694 CTACAAACAAGAAATGGGAAAACCTCGAAACAGATTTTTGTGAGTCAAATTCGACCCTTG  
CUST\_10196\_P1426210822 GAGGAAGAGGCTGCTGCTGCAGGGTGGATACCCAGAACTCAGTC  
A\_16\_P20042526

TTGAATTTAAAGGAACTCTAATTGCACATCTCTCATCTTTGACTCTCCTACATTGACTGC  
A\_14\_P110051 CTTCTCTTACTAGTGAGTTTGGGGTTTTTTTCCCTCAAATTTTCTTGGATGTCTTTTTT  
CUST\_772\_P1426210822

TTCTGTTGACTGCTTTCCGGAAACAATGCATAAAACTGTAGGTCAGAATTATTTTTGTAA  
A\_16\_P00018710

CTCGGCTTTGATTTGCATAAGGAGTTTTTTTCTGATAGAGTTATCAGTTCATAGCATCTC  
A\_16\_P17058347

CTCTGCTTTGAATGGATATCTCTGCTTTGACATTAATAGGACAATTCATAAATGCCACGC  
A\_14\_P127476 ATGTAAATGTAATCACCACATTAGACTTCCCTTCTCTCTGAAATCTTGGACTTTCAAAC  
A\_16\_P00426075

AAAATTTTCAATAAGGCATAAGAACACAGGTTTCCAGTTAACCTCAGTTACCCAGAAAA  
A\_14\_P127360 ACATTTTGAACAAGAAGTTTTTCTAGTCTTCGTCATCTAAAGCAATCTACCTAGTGTCT  
A\_14\_P103290

GAACGGAGAGTAAAAGATCAGCGCACTTGTTTAAAAAAAAAAAAAGTCGTGAAAAGGACAA  
A\_14\_P136940 TTTTTTTTTTCCCAAGGAGACAGTTTTTAGGGCAGACTTTGAGTATTTTTTCTCTTGT  
A\_14\_P124697 ACGAAGAACTTACTTTATTAATTTTTCAGTGCTGGTAATGTTTCCGCATCTGTTTTTGCCA  
A\_14\_P104102 ACAGAAATGCATGTAACAACAGTTGCTGTTTGCTACACTCACAAGATTGTGTTTTGAAAA  
A\_16\_P30952429

TAAACTGTGAAATGCTCTACGACTGTCAGCCAGGATTAGTAGTTAATGCACGTATTTGTT

A\_16\_P03100699

ATTTTCAGGAAACTGTTGAGTCAGTAGGTAGAATATTGAATGTTAAGTTTGTCCAGAGGC

A\_14\_P201760 CTCAACTTTACTGCCATCTTTTTGATAAGGAGGAACCAATACAATCTTAAAGGAGAAGCTG

A\_14\_P107784 AAAAAGTCCATTGCTCACAAACATGACAACTCCTAATAAACTCTTCAGAATAATGCAGAAT

A\_16\_P18301819

TGTCTCCACCTAATCTGCTAATTTTCACCTACATACAGTTACTCATTAAAGATCCTTCAGG

A\_16\_P18230847

AAAAATCGCCACATTTTCATGAAATCCTCACTTTTAACAGGTCTAGCAAAAAGTTGAAGTC

A\_16\_P03115289

CCAAGCCTATCCTTTGTTATTCTACTTCCCTTTGTTATTCCACAAAACAAAAATCACCATC

CUST\_9985\_PI426210822 TTCCTTCTGCCTTTATATGGGCTCTTAAAATGAGAGGAGCTGTGTCCTTTATG

A\_16\_P18960875

GTCAATCTCCTAATATCCTCAAACATCTCAGAAAAGAACATTCGGAAAAACACAAACTGG

A\_14\_P100485 CCTAAAGCAGCCTGAACACCTGGATTCCGACTATTTTTTGTGTCTGTAAATATTTTTAG

A\_16\_P03453335

TGAAATACAAAAATGACATCACGGCTGCTACGTTGGATTATTGAAAGCAAAAAGTTCCTAA

CUST\_8310\_PI426210822 CGTGGGGGCTAACGGAAGGGCACATGGGATGTCTCTCCTACAGAG

A\_16\_P19385274

TTCCCAAATAAGGAAATTACTCGCTGATTATAAATTCTGCCATCACATAGGAATCAAGG

A\_14\_P113795 CAGAAGAAGCACACCTGAAACATGAATTTGATGCAGACTTACAGGTAAGTATTATAGTT

A\_16\_P39064559

AACTTCATAAAGACAAGCATATCCGTTTCAGAACTTATCAAAAAGTGATATCGTTAGCCACA

A\_14\_P111527 TAGCCACTGTGGAAGAGAGGAAGAAAATAGTTGCATCGTCACATGGTAAAAAACAAAA

A\_14\_P139613 ACAAAAAAGCAGAAATAACTTGTTCAAATTGGGTAGATGATGATGACGTGCAAAGTCTG

A\_14\_P130651

CAGCAATAAGAAAAACAAAAACCACCGTGAAAGTAAAGTGCTTGTCATTGCTTCAAAGA

A\_16\_P40889804

ACTTTAGCACCCAATAATTCAACTCACTTGCATGACTCTAATTCCCATGTTTTTCTTAG

A\_16\_P36230153 TTTTGAGAGTCATTCTGAGTGTGTCCTCTTTTGCCATTGGGCAGAGAG

A\_18\_P19342545

AAAAAATACAAAACCTACACCATAATATCAGTTCATCTAATCAGCACTCATACTGGGTA

A\_14\_P117500 CATTGACATTATTCGACACAAAGATTCAATGGATGAACTCTTCAGTCACCGTAGTGAAAT

A\_16\_P15044194

ATTTTCATAAGCCTGTTATAGTCCATGTATTCAAAGTCGATGAGCAATGCAATCTCA

A\_14\_P125040 GCCTTGAACCTCTGTAGTATAGACGGCAAATTGTTCCCTCAATTGCTTCGATAG

A\_14\_P139898 ATTGAAGGAATGAGTGATGGAGACGACCTAAGTGATCATCAATAAGATGATTGGATAAAG

A\_16\_P02267207

TTCAGATAAGTGTAACCAATCTAAATGTATTGCATTATATACAAAACCACACTACACCAGA

A\_14\_P202187 AAGGATCTAATGAATGCTTGATGTCCTCAAATGTGCTATGATTTACCATCTGTCAAGATG  
A\_14\_P119208 TGATTACATTATTGGAGTCACAGCCACTTCTCTTTGAATTTAATCGTGACATCTCCATTC  
A\_14\_P135965 TTCTGATAGGTTTTTCGTGTTCTTGTGTGTTCTAGTAAGGTATAATCAGGTGATGTAGCAG  
CUST\_3936\_PI426210822

TATCCTGTTGAAAATTTGACCTTTTAAAGATTTATTTATATTTAGCTCAGGCCTTAAAAG

A\_14\_P121230 AAACCTTCGGAAGGTAAATTCATAGAATGCATGTTTCAGGATGCTTTCCATTTTTATACCA  
A\_16\_P40333223

TCACCTCTCAGAACATTAATTCATTAATTTGCCCTAACATTAATTGATTGCTGGTGA

A\_14\_P107166

CACCAGGAGGAATGACTAGGAAAAATAATAAGAAAACACTTTGTGGAAAGAAATGTGCTC

A\_16\_P03034349

AAAGAGACTGCAGGTTACATACACTTATACCCAGTGCTAAAATATTTTTCTTCCCCTCA

A\_16\_P18414720

ATGAACCCTATGAATATTCTCTCCATCAAAATCTTTCAGGCTGACTAGATACAAGGAGCA

A\_14\_P116641 AAATTATTTCTAAAGTTACCATGGATGCCATTGAGTCATGGCTTAAAAATGTCTCCTGGT

A\_14\_P126526 AACAACTGTTTTCGTTTATTTTTACTTTTTTTTACACATAATGGTATCTCTTATTAAT

CUST\_7132\_PI426210822 AAGGTGTTAGTTCCCCTCTTAGAAGTACCAAACCTTACAAATGGGAAAGTGA

A\_14\_P124521 TTTCTTTTTAGGATTGACTGAGATAATATTACATCCCGTCTCTATTTGATATGTCCCCC

CUST\_2262\_PI426210822 CTTGGGAGGCATGGAGGCATATGTACCTAATGCCTAGGTCTGTTT

A\_14\_P135088 CTCCTTTAATCTTTTTAAAGGATCAGTGCTGCCCTAAGTGAATAAACTCAATTGTCCATC

A\_14\_P138669 CTAAAAAACATGATGATGCTGGAGGTGAAGGCGCTTGATTTTTAAACCTGAAAAATGAAA

A\_14\_P126885 ACTTACTCCAATACCTAGTAAGGAGTAGAGTTGGAAGATTGGAGAATTATACATCACTGG

A\_14\_P109019 TCTAAGGTGGGAATCAATTAATTGGAGAACAGAGAATAGTGAATAGTTGTGCACTGATCT

CUST\_9393\_PI426210822 TCCCCATCTCTCCATCAGGCATCCTCTTTCAATGTTTAATGGTTTTGATTC

A\_14\_P120662 ACCAAAGGGAAAAGGAGGGAGAATATCACTATTTATCCAGGTTCTACTAATGTTCTAGAA

A\_14\_P109629 AACACCAAATCCTGTGTTATCACAAGTGAATTGTATAATTTGGGTTTCTCTTCACCTTC

CUST\_4662\_PI426210822

CAAATGTCCCCTTCTGCTGTGATACCTGCCATAAAGAAACATGTTACTATTAAGTATA

A\_14\_P134536 CTAACATTCAGCATTAGTTGTCATGGTGACCATAAATCACCTAAATCCAAAAATACCCAC

A\_16\_P00629303

ACATTCGAACTTCTGAGAAATGAATCCTAAAGTTGAAGATTGTTTTGAGACCGAGAACTT

A\_14\_P110333 TGTAGGAATGTTTAATCCTATGAGGGCTCAGTATGTGCTTATTTTTCTGCTTTTTCTC

A\_14\_P131610 TTTGCCAAGAGTTCCTCAATTAACAGGAAGTATTTTTACAAGAAACATGGCTTTGTTTGG

A\_14\_P201300 AGCCTTCTTTTTAGATTATCAAAAACCACAAAGGGTATTCTGAACTTTCTCCACGTATT

A\_16\_P02167025

AGACCCCGATATGGTAAAGTCAGTGATATAATGAGGATCGATCATACTTAGCGTTTAAGA

A\_14\_P105853 CTATTTGTGAACTCGCTTTGATTTTTCTTTACTATCTCGAATGGTCGCCACTGTAGAGA

A\_18\_P12539454

AACAAACCCTAACTGGCTATAAAAATGATCGTCTCTTGTATTTCCATTATGCTCTGCTCA  
CUST\_6202\_PI426210822

TCTTTAGGTGGAAACAAGTTTTGGAAATTCCTCCTATTGCAGAAAGCATTGATTTGC  
A\_16\_P17372546

AAGCCCTCCGGATATAGTTAATGATTTTTAAAAGGCTTCTTTACTTGCAAACACCACAAA  
CUST\_9482\_PI426210822

GTGAAAAAGAAAAGTGGTTCCTGCTCATTGTCATAGTTCTGGTTTAAAAGTTTTATAGA  
A\_18\_P17193412

AAACACTTTACATCGATTAATTATCTGCTGTTCCCTCATTATGCATCTACCCCAATCAAGG  
A\_14\_P200741 ACAAGAAGGATTTACAGATGTCATACATCCCATCTGTGTACAGGTGGAGTTTT  
A\_14\_P200430 ACTACCTCCACCCCTATTCTGTCTGAATAAGACTTTTATAACCCAGACTCCTGATT  
A\_14\_P134434 TATGCCCACTGAGTTTCCTAAAAGTCCATAAACCTAGTCATCTTGATTCTTCTGTTTTA  
A\_14\_P107153 TGGCATGTGATTCTTTTTCTAAACTCTTGAATACTAAATTTAGGTGTATTATTGCCTTT  
CUST\_9877\_PI426210822 CGGGAATGGAGGCAATGAAGTAGAGGTGGTCTCATTCTTTTCCCTT  
A\_14\_P126002 AGGGGGATCACTCTAGGAGCAATTTCTGTAGACACACTACTATAAAGATGTTACAGAATA  
A\_14\_P135665 TAATTACTGCTTAAATTTCCCTCCCACTTAGAGGTCCATGCAATACTCGAAGTCTTTTAT  
A\_14\_P123255 AAATAACCCAGGAGAAATTGTCACTATGTCCCCTTTTTGTTTGTTCGGCTGTTATTTT  
A\_14\_P136363 ACAAACACTGGCAATGCTCATTCTTCTCTCAACATTTCTTCAATTTTGATGCTTGGAA  
A\_14\_P101962 TTCTACATTGTGGGTTTAAATATTATCAATGCAGATACCTTTTGTGGGATTCCAGCCAATC  
A\_16\_P15060691 AAGCCAGCAGTTCAATTTTATTGCGTGCTGTCTATAGTAAATGGAGCCCCAAAAT  
A\_16\_P16191342

GTTTCAGTGGTTGTTTTTCATTCTTTCCCTGTTAGCCAGTTTCCCTCAAATTTGGTCAGTATAAT  
A\_14\_P133927 TTTAATACTTAATAACTAGGGCACTGCCTTAACTGTTTTTCTCCCCTGCAATTTCAACTG  
A\_18\_P15331182

ACTGCCTATATGCCTTCTTTCTTAAGCAAACCTTCTCTGAACATACATTCAATCTTTGGCA  
A\_14\_P133862 TTTCTTCTATTCTAGCATATCATTATGGTCCAATCCTGCATTACAGTTGGTTGAATGCA  
A\_18\_P11160897

ATTCATGCATCACCTATACTCCACAGTCTTGAATCTTATGCATTGGCCTTATAAACCTAG  
A\_14\_P129747 CTCAACAAGTGAAGGTTAAGTTAGTTCAGAAGCACTAAAAATTGAGAACCAGGTATTGTG  
A\_16\_P16411848

AAACTGCAATGATACACAAATGTAGATCAGCAAGCATACTTAGAGGATGGTTTAGTCACC  
A\_18\_P22839758 GGACATTTGAAGGGCCTCTTCTCACACCAAGGCTGTCTAGCATTA  
A\_16\_P01671475

AATGCAAGAGATCAGCCTTATATTTTGTCTCGTTTACCCTCATTGAAAGTTTCCCTCTA  
A\_14\_P126669 TTGTGATCATATTTCTAGGCTTCTCCAGTGACAGTGATCTGGTATCTTACTGTTGATG  
A\_14\_P105398 TCTTCAGCAACACACTTAACTTCCAAAAGGACAAGTGTTTTTCCAAACAATTTGAATGTT  
A\_14\_P108529 ACTTCTGCTCCATAGACATCAGTATTCTGCCATCATTTTTGATGACTACCTCAGAACATA  
A\_14\_P200765 GTAGTCCCAAACCAGCAAAGAAGTGGTTAAATGTGCCAGCAGGTAACATT

CUST\_7265\_PI426210822 AATTCTTCTTTCCCTGATACAGTGCCCACCATAAAATCCCCAGTCATG  
A\_14\_P131022 TCTGGATACTTTATCCCTGAACTAGTATATTCAATAAGGTCCCTTTTACTACCTGGCAGA  
A\_14\_P115468 CTTGTAACTTTTACCACATGAAAGAGTGGTTGATTTCAGAGAGAGTGTAGATAGAGTTT  
A\_14\_P115105 GCATCCCTCCATATAACACTAAGTATACAGTAGGAAAACTTGTCTTCTAGGAGTCACAT  
A\_14\_P121989 ATTCTGTCCCTCTTGCTTTTAATAGGACATAACGACTATATGTGTCCAGCCACCAAC  
A\_14\_P100428 GATGATGACAGAGGAGTCATTTAGTTGTTGCTGGAAGAGAAAAGGGTGGTTTAATC  
A\_14\_P125933 CATCTGTGCACTGAGTGCTTGTCTCTCGGTAAGTATTCACCCAAATAAGTTTTTT  
A\_14\_P129186 ATTTCTGTCCAGGTCTCGCCATCTGTCATTTTCTGGTTCATAAATGACAAG  
A\_14\_P102036 AAATCAATTTTAAAACTCAACTCTCCTCTTTTGGAGGTTTTCTAGGGGCTGAGAGG  
A\_14\_P124900 CTTCTACTCTTTCAGAATTTGAGATGAATTGCTGAAGGACTTCTCTACTGAATTCCTC  
A\_18\_P22841577 GACACTTGCCACAGAGGACATTGTGATTAGCAAAGGAAGGCACAAAAATTCTAAT  
A\_16\_P15671733

AGGGAAATACTGTTTCATATTTCTGCTCCAAAAAATTCACCATTCATTTTACTAACCCCA  
A\_14\_P110276 GATACACCTAAACCGTATCATTGCTACATGAGAATACAGAAGAGCCCCATTTTTAAAAT  
A\_16\_P58424077 GTGAGTGGTTTCCAGTTTGTCTATTTGGGGAAGTGGGCTTACAGAGTTAC  
A\_14\_P136522 GAAAAGCATGAAGAGGAAAATGGAGAGAGATATGGAAAAATCAGAGGTCCTACTCAAG  
A\_14\_P107521 GCCTGAATGTCAAGCCTCTACTGCTCTAACTAAATGTATACACAGTTAACTTAATGCCT  
A\_18\_P17054687

AACAAATGAATCTCTGACAAATAACACTATTCCAGGTAGCAGTCTTTAAATATGCCCTCC  
A\_14\_P202109 ACAAAAAAAACCACATTTTTAAGTTCAGAAAAAAATCATTGCAATTTGTTGTAAACAGC  
CUST\_5744\_PI426210822 ATGTGTCCATAAAAGGCCACCTAGTCCCAGGCAGATCCAGGAAG  
A\_14\_P117635 AAAACACATTAATTATGATCCCTCTGACCAACACATTTTTATACTGGTGGAAAAGCACCA  
A\_16\_P16293187

AAATGACCAAAGTGGCACTTCAAACCATCTGTAATTTTTAATCATTGTAACCACTGGGA  
CUST\_4936\_PI426210822 CTCACAGACTCCCCTAACGTCCATGAAGATCATCACCAGGATTTG  
A\_16\_P38197840

ACCAGATGATCACAAGAAAAGTCAATTACATAAGTGAGATCCTATGTTCCAGGACAATGT  
A\_16\_P15612769

AATCTGAATCACTGGCCTTAATCACTTAACTATTGAGAACTTATGTGGACTAAGTGACCC  
A\_14\_P104203 TGGGTTTATTCAAATATTCAAGAATCCCTGTCAGGTTTGGTCAATAGCATTTTTGCAAAG  
CUST\_6649\_PI426210822 AAGCAGCCGTAAATGCCACAGAGTGCCAGAGAAGTGTCTGTATT  
A\_14\_P112031 GATAAATTTAAATGTTTATAGCATACCTCCTCTGTTTCCATTTTCTTCATCCTACAAATG  
A\_14\_P110759 TACATAACTCTGAAGTGCTTGAATAATAGAAAGGCACTGAAAAATGGGCACTGGTATGT  
CUST\_4528\_PI426210822 CCAGAGTTGGGGAGCTGGGGAGCTGGAGTGATAGAGAAGGAGTTG  
A\_18\_P19432408

AAGATGCTTCATTAATACTATATAGCCAGTCCATCTTTGTCTAAAAAATCCCTTCCA  
A\_16\_P16191958

AAAAAAAATCTTTTCTGAGTAGGAAGGTTTGCCTTTTTAGAACAAACACGATCTTCCCTG

A\_14\_P105974 CTGCCATTTAGATTACATTTGGCTTTGAGGGTTGAATGGTGTGTTTGCAAAGC  
A\_14\_P201020 CTTGTTTTTTCTTTTAAGTGGGTGCCACATGCCATTATTCCTTATTTTGGGATATCTTT  
A\_16\_P16561653  
TCATCACAGAGGCGTATTAGAAATCTTTTGACTCATTGAAACCAAGTTCATTCTATGTGG  
A\_16\_P02035799  
TGGCTTTGAAAACCTAGAAAAATACTCCTATTAGACTGGCTATAAGAATGCTGAGAGTGGA  
CUST\_4368\_PI426210822 GTGTTTCTAGAAAGCTCTGCAAAGGACTTTCTCTGACAGACGGCTCTA  
A\_18\_P11838322  
AACCTCTGTGTCAGTCTTTTAGCATTCAATTAGTTCCATTTGCAGTAGATGTAACCCAGAA  
A\_18\_P26750760  
AACTTTTTTTAACCCTTAGACTTTATCCTTGCACCGAGTATATAAACCCCTTAGCCAAAC  
A\_14\_P127138 CTGAACAGAGCCACTCAAGGGGCTGGATACTATATAGAGATTATTGTAAGCCATTTTA  
A\_14\_P110401 CCTTCTTTATTTCTTGGGATGATTTTTGGGACCTCATTGCAATCTTATAATTAGTGGGT  
A\_14\_P112083 GTTTCTTCTCATTGGGTCTCTTCTATATCCTGTCGTCTCAGACAAGCCTGAA  
A\_14\_P105454 ATGAGGTAATTTTAGAACAAAGGGCTTCATATCAACCACAAAGTGATCAAATTCTGCATC  
A\_14\_P100655 TATTGCCCCCGGCAATAAATTGTTTCTATATGCCAGAGCCATGCAAAGTTCTT  
A\_14\_P134798 GAGAAGATCCCAGGTATTTCCATGTTTGATTCTTTTGAATGGTTGGAATTCGCAG  
A\_14\_P108500 ACCAGGTCAAAGATTTTTGTATTCTTGTGAATTTTTTTTTTTGTCCCTATTGCCAGGGA  
A\_14\_P100906 GGTCATCAATTCAAACAGAGTTGGACATAACAGGAAGAGACAGTGTAAGATACCAATAAT  
CUST\_3663\_PI426210822 TAGTTGACCTTTTAGATACTTTTCTAACCATGCCCCCTCCCCGCT  
A\_14\_P108140 TAGGAACAGGAAGAAAAGATTTAACTCTTGAAACACCCAACCTCAGTCTTTGATTTACTGT  
A\_14\_P134975 TCTTTAGTCCATTTCTTTTGTCTTAGAAGCCACACATACATATGAACACGCTCTGTTTTG  
A\_14\_P105120 TTTTATTCTCCCAGTCATATTCCAAAATGACCCAGGATCTGAAAAAATTCAAACTGAGTG  
A\_18\_P22841265 ATGACTCCTCGGATTTTTTTCTGCCTCTCTTCCTCATTCTGTCCACATTC  
A\_16\_P02383618  
CCTCAGTGAAAAAATTACCTTAGTGGCAGTCCTATCTTTGTTCAACCATATAATAGGCAC  
A\_18\_P22841908 AGTCTAGACTGTTGTTGGCCAGCACGTTTGCTGGCGCCACACT  
A\_14\_P112771 TCTTCTTGGGCTTAAGTTCTGGACTTTATTAACCTGGCATCCAACATCACCAAACAT  
A\_14\_P120859 TCTGGCTTTATGTTTCTCTCTTTGATGTTTGTGCTTTCTCATTGCAATCTCGTTAATT  
CUST\_702\_PI426210822  
CGTGATGAATTCTCACTCTTGTGAATTTTTTTGTGATTTTTGTAAAATAAATTACAAGTG  
A\_14\_P108734 TTTTGATCTACCTTTGTGTTCTTTTTCTTAACATCCATGATGGATTTCCAAGGAACAGGA  
A\_14\_P107099 TTAGCAATATGACATTCTTGGTGACAGTGGAATCTTTGTCTCTTACCAGTGTTAACATAA  
A\_18\_P17360727  
CAGTGGCACTATTCAATTAACCATTTTTGCCTCCTTACTTTTCTTCTACTCCAATGT  
A\_14\_P124064 CAATGTTCTTTCTACTTCAATTCATCGTTCTGATCAATGTCAAAGGTAAGGTTGCTACTT  
A\_16\_P19239751  
CCCTTTTCTATCCAAATGAAAACAGATTCCAGATTCCGAAACTTTTATAATAGGGGACTG

A\_16\_P16185689

CCCATTGCTTCTGAACTCTAAATGATCCTGAGATGTATCCATAATTCTGATCAATGAAGC

A\_14\_P101387 CCTAATTTCTACCTTGTTTCAGAAGGCACTTAAGATGGCAATATTCCTTTAATTCATCC

A\_14\_P107848 GAGGAGGAAGAAGAATTAGGCATAACACGAGTTCTCTAAATGTCATTTAGGGGAGTTAA

A\_14\_P119843 CTGGAGAGATTCTCAGACCCCTCCCCTCTAATAGGCAGAGAGGAAATTAAT

A\_14\_P130757 CCAACATTAAGGAAGAATCCAATTGCTGCATGTATTCTGATAAGCGCAACAACTCATT

A\_14\_P135938 GTGGAAGAAAAATTACCCCTCAGTGATTTAGGAACATAACTCCACATATCCTTGACTAGC

CUST\_2042\_PI426210822 TAGCCATTGACTTTTTCTTTTCTTTAGGGCTCTTCTGGCCCTAACCTTTG

A\_16\_P03774988

GGGTTCATTTTCACTATCTCCATACAAACCAGAAACCAAATTCATTTTTGCTGATAGAG

A\_14\_P103683 TTATTGGGCCAAAGATATCGTCTTCTGGTAACAGAACATGACCTTCTGG

A\_14\_P102379 CTGCAATTAATAAAGTCAGGACAAACTCTTCAGTCAGTTTAGGACCCAGGTTACAAATAT

A\_16\_P35843651

GCAAAAGATCCTTTTTTACAAGCATATACTAATGGTTCATCTTCAAAGAGTTCCTGAGC

A\_14\_P101405 ATGTTTGAATGTTAACTCTTTCACATAACCAGTCTCTTTTTTTTTCCCCTGAGTAAATGC

A\_14\_P112642 CTATTTTCTCAAATCAGTTACTTCCCTTCAAATCATCATCTCTTCCCTCTGCCAGTAACT

A\_14\_P134925 AAGGACAGCACAACGAGGATGATCATTGTCAACATTTCTATAGCACTTTTCTGTTTATACA

A\_14\_P108039 CGGAAAATTCCCATTGATGAGATTCCTAATTCCTGAAACAAGAGAGTGAATGAACAAG

CUST\_6449\_PI426210822 CTTTCCAGAAGGAGCTTGGGCCCTGTAATTCAGAGATATTCAGATTAAC

A\_14\_P202045 TGAGTCTCCTCAGAGTCATATGAGACTGAACTGCTTATAACATTTCCGTGACCTAATAA

A\_14\_P123907 GGGGACAAGTCCCAAATTGTTTACATTCATTGATATCTGTAGGCAAAATAAAACCAAATA

A\_16\_P21391413

AAAAACCTACAAGTCTAAACGATGCCAAAAATTCATCAAACGTCTCCACAAGATTAGCAT

A\_14\_P135960 TATAAAGATGGAAAATTTAGTATTATTTTCATGTCCTGTGGGAAAAACAAAAATGTAGAA

A\_18\_P14136449 ATTAGAAGTGGTTTCTGAAGACCTGGACAACCTGCCTGGCTATCGT

A\_16\_P35900561

AGACTTGCATCCTGTTTTTAAATCATTCTTTTTAAAACCTCTAGATTTAACTGACCTCCGCA

A\_14\_P136949 CTCAGACCATCTCATCAAGATAATCTTATAAACCTTCAATCAACGGTTGGCTTAAAGTCT

A\_16\_P15773312

ACAGGACTAAAAGAACAACACTTCTTCCAACTTTCATACAAACTGATGGCAATAACCAA

CUST\_3128\_PI426210822 ATGGCCAGAGCCCATGAGTCCATGCCCTCAGATGCTTCTCAGT

A\_14\_P113467 CTTCTTTTTCTTTTTTTAAAGTAGAATCTTTGTGGCTTCACTTGTCCCCTTTTGCAGGTA

A\_16\_P00894847

GCCTATCTAACTTTGTCACTAATTTGCCCTTTAAGTCTAATATTATCTGATGCTCCAACC

CUST\_1821\_PI426210822 TGAGGCTAAGCCTAGGCAATCTTTTCTTTGTTTCTAGGTTCTTTTTGCAT

A\_14\_P201458 TAAGGCATGAGAAACAAGTATACTGCTAACAGCAGTTACTTTCTGTTACCTACTGCTTGT

CUST\_4340\_PI426210822 GGGGCCCCCCCAATTTTAATTTACTGAATGAGTTTAAAGAACCATGGTG

A\_18\_P15668573



TTTCCCACATTTAGTCCTTCATAACTCTTCCTAACCTCATGTTTTTTTTTCCTCAACAAAC  
A\_14\_P105505 CTGATTCCTGATTGCTGAAAAGTGAAAGTTTTATTGCTGCAAGTGCTAAATGACTTAGC  
A\_14\_P107725 TTAGACTTGAAATTCAGTTTTTCCTGAAACTGATCAGAAGTTAGTGACACCTTGATTGGA  
A\_14\_P125649 CTATAGAGTGAGGGGTTGTTAACAAAGAATATATATTGGTCATTCTTACAACACTACTATTT  
A\_18\_P26796436 GTGTCTCATTCTACCCTATAGAAGCAAACCTACCACACCCTTCACTGAG  
CUST\_5425\_PI426210822  
TACTTGTGACTACTGTGGGACTTAAACACTTTCAGACAATTCTCAGGCTGTTAGA  
A\_14\_P101151 TTACTTGAATTCATTAATCTTGTAGATGATCCTCTCTCCAAAGAATGTGTGTGTTGAGCC  
A\_14\_P127801 TGGTTTATTAAGAAGGGTCTGACTAGAAAAGAAGGCTGAAAGTAGTCATGTGTAAATTGT  
A\_16\_P20006647  
GCACCCAGCAGATTTATAAATCATCTCATACTTTGACAATTACTCAAGCAACTCTCACA  
A\_16\_P36230950 GATGTTTCATGTCCAGGAAATGGTGGTGAGTTCTCCATTTGTTTTCACTATTGCTTT  
A\_16\_P15015761  
TGAGTTATGAGGTAGCCAATTATAAGTCACAAAATGATTCTATCAGCCTCTTCCCTTTGT  
A\_14\_P120624 CTAGGTTTTCTCCAGAGGTTAAAATTGTTTCACAAATCTACAGGGAGAAAACCAACCAAA  
A\_16\_P02059499  
ACCCATACACAAAAACTGATGTCTTAAGCATGGTAGAGAACTAGAATGTAAGGTTAGCG  
A\_16\_P18863997  
AAAAGAAGTATCTTTTCACCAAACAATCCTAACCTCTTCCAAAATGGTATGCCTCAGTAG  
CUST\_1319\_PI426210822  
TTTCAGAGCTAAGCTAAGGAACTACAGAAAAATAATTGTAAAATTGATGTGTTAAAAAGC  
A\_16\_P01578232  
GTCCTCATTACCATTAATTAGTCTATTTTGAACCTCGCTACATTTGTCTTTAGTCCCACC  
A\_14\_P112989 CAATCCCGGAAATTTGAAATCTTTTCGGATTTTATTAGACCCTGTGATACCAATCAGAAA  
A\_14\_P123818 CTGGCCCATGCTGTCTCTTAGAACTCTGCATTTGGTAATTATATAAAATGACACAATGTT  
A\_16\_P18196387  
AAACCTGTCAGACTTCATCTTTGGAAAGAATAGAACATGCAAGACCTTAATCCTTGTGAT  
CUST\_260\_PI426210822 CCCATTAAGCACCATAAGCCGAGTGGTACAGAGCTTGTGCCCAAC  
A\_14\_P128324 ACAGGAAGGAATCATACTCACAAAGAAAGTCTTCACTCTGCTGAAGGCATCT  
A\_14\_P120420 AATGAGAGAATAGAACCCTCCTTGTGTGAAATCTACAGGTGAATGTAATTCACGAAAATC  
A\_14\_P134613 CTTTCATTTGGTTATTCAACAGACACTTGCTGGGCTTTGCCCTCAGTCATA  
A\_14\_P114844 TATGTATTTTTGAGATCTGCCATCACTACTTCTGAATTGTTTCAGAATAGCCGGCTTCATT  
A\_16\_P18697959  
AAAGGTAGAGTATGCTTGCATTTCAACTAAAGTTTAGAGTGTTTTAGGAAATTAGAGGCT  
A\_16\_P15817242  
AATGCTGTAACCTCTCTAGGATATTAACCGCGATTTTCTTATTATCTCTGCAAAACACCCC  
A\_16\_P02354966  
AATCAATTAGCATCGTGTTTACATAAATTGGGCTCTTGTAAGTAAAGTCAGCACAAAGTCA

A\_18\_P22839983

TTATATTAGTGTAGGCCTCAGGGCATTTCATTGCTGTCTATTTTTTCGTTACAGTATGGATG

CUST\_7485\_PI426210822

CACATAACTTCATCATTTAATTATATTAGGAGGTCCGTCATTTCAGTGCTCTTGTA AAACT

A\_14\_P109689 GTTACCTTGTAGGACTACAGAGAGATGTTTGCTTTCTAGCATGTATACAAGTTCTGCTGA

A\_14\_P139185 AATTCTGATTACTTACAGAAGAAGGACTGATACAAAGAAAGTGCATGAGGCAATGTCAGT

A\_14\_P110418 TAATTTGCTGTTCCCTGAAGTTTTCCCTAATTAATTCAGTTAAGAGAACAATTGCCTGCAA

CUST\_4378\_PI426210822 AGCCATGCCTAGAAAATTTATAATTACTCTGATACCAGATGGCTTTGCGGCCT

A\_14\_P117382 GTAGTTGATGTGGAAGTTGAAATCATGGCTGTAGCGGTTAAAGGTGATGACTTTG

A\_18\_P17232054

GTTTACCCAATGTCACTTAATGCAGGTAATACTTCCAGATAGAAGCAAATCATTGTCCAG

A\_16\_P36956217

AAGAACACCATCCGCTATTA AAAAGTATTCACATTTTCACATTGTTCTTATTGCTTTGGCAA

A\_14\_P125205 ATAATTCAAAAATAAACCCATCAAAACATTTGTTCTTACTTTTAACCCCGTTGTCCCCAA

A\_18\_P22841202 GGGCTGTGGGTTGAGGACGGCTCTGCTGCACTTCTGCCCTTTAG

A\_16\_P16784441

AAACTGATGAAAAGCCACTTTGATTCCGTATTACATCTGCTGAGTAACAATTTGTGTAC

A\_18\_P17765743

TCAATAGA ACTGCTCTAATAAACTCCCAAAAATGACTGATAGATTTGTTTAGGCCGACC

A\_14\_P125362 GAAAATATTCTTCTGCAGCCCAATGCTCAGAATTAGTCAAACATAATAGTAACGCGGTTT

A\_14\_P121419 CTGCAGAGGGTCAAGGCTTCTGCTTAGTTTTTCTAGTTAGTGTGTTGAGTTGAAG

A\_14\_P115260 GTATTGCCGTGATAAATAGAAGAACGATAAATGCACAGACCAAGTTTGACTTGAACACTT

A\_14\_P105959 TATAGGTCACTTGGTCACTCCACTGCAACATTTCTTCTGAAGAATCTTTATGATAG

CUST\_7451\_PI426210822 AGGAGACAGAAAGAAGGTGGGTGACTTTGGCACCGTCTAAAGTAT

A\_14\_P117448 ATTGTTCAA AATTGCTGTGGAGTTTACCTCAGTTTCCTTTTCAGTCTGTGGTG

CUST\_2698\_PI426210822 GCTAGGCTTTTCTTCTGTACCATGACCAGGCGCGTCAGGGACCAG

A\_14\_P116109 AGGCCTTTAGTATGAATTGATTATTTGCCACTAGGGATAACTCTTTTCTAAAGCAGAGG

A\_14\_P139996 GTTACACA ACTGATGATTTACGATTTATCTGGCAGTCAGGAGATCCTGTGCAATTAGAAA

A\_16\_P02448583

ATTCCTATGAATCACAATCATTTCTACATGTTCTGTCACAATTTAGAGTGTTCCAGCACC

A\_16\_P18997896

AATCCCATAGACTGATCATATCTAGATCCAGAGTTGCCTATAGTTGGTCCCTCAAACAG

A\_14\_P138071 CCCC AAGGTAGTCCTTCTCGGAGTATACATTAGACACTAAATAAATGTTTGATGAAGATG

A\_16\_P02136339

GTCTGTCAGTAGAACAATGTATAGGGTCTTTTCGTTTCAATAGGTTTGCTGTTGTTAAAGC

A\_18\_P11034827

ACCATGCACACAGAATATTATTTTCATCGTTCACTACATTTAGCCAAAACAATGTTTCGTCA

A\_16\_P35023056

AGTTGGCTAATTTACAGTAATCAATTCCTTACGGGATCCTCTTATAATAGCCACTCAAGG  
CUST\_9106\_PI426210822 ATAGGATTAGCTGGTCTGAATCAGACTTATGTAGCACCAGGCAACCTTCA  
A\_14\_P110361 CTTCTGGCAGTTTTTCGATTTAAAGTGTTAATACTTGCATATGCTGTGTGCAGACTGC  
A\_16\_P17765279

CTTTATAATGGCTTCATATCGGTTACTCAGTTCTAAACTTTGTCAGATAAAGGCATTGGGG  
A\_14\_P119293 TTCATTTTAAAGCCAAGTCCATCAAGTTGAACACCTTATCAAGAAGGAAAGGAGTTTTTG  
A\_16\_P17992000

ACCTTTAAACCATACTGATGATACACAGATAGTTTCCAAGTTCTGCATTTTTAACTGCCT  
A\_16\_P00685163

ACTGATTATAGAGCACGACTCAACTTTGTTGAGATGAGTTAAAATTATCAGACGAGATGG  
A\_16\_P41665482

ACCCATCATCTGTAATTCCACAACCTCCAAAATAATCATTGTTAGCAGATCACCAAATTGG  
CUST\_1091\_PI426210822

GGTTTCAAATTTTGTGGACACTAAAAAGGATTCATGAGAAACACTATATGGACACTGGG  
A\_14\_P111010 AAGAAATGCTATCTGTTTGGGCGTGTATATCTTTTGCAGGACACTGTGTAATAATTATCAC  
A\_14\_P106870 TCATTTATTCATTTTTAAAGCCCTGTCTATTCTGCCCTCTGATACACCATCCAACACATA  
A\_14\_P138884 TGCCTAAACCTAATTGTTTCCCACCAGTCCAATTTTATTTAGATTTTATGTGCTCACATA  
A\_14\_P139992 GATAAGCAACCTTGTTTTCCCTATCTTTATTTCTTAGGATGAATTCCAAGGCTTCTGATA  
A\_16\_P19880119

ATTCACCCTTAAACTCTATCTCGATTTTCACCTACTTTCCATGTAGCGAAAGAAGATCTT  
A\_14\_P106761 AGAGAATAAAGATATCTATTGACCTTCAAGAATGCTTGCCGCTTGTCTGATCAAACCTTA  
A\_16\_P21214537

AAAAAACCAGTAAACCTCAATGATTCCTTTGTGTGTTTTCTTGTATCTGGTCCAATCAAA  
A\_14\_P129110 GTGGCCTATATTGTCTTTTTCTCTTTTACCTGTTAATCATGTTCTCTTTTTGCAGCAAGCAA  
A\_16\_P19177355

GGTGTTAATGTATCATAGCAGAGGTTTATTCCTAACACATTCAACTACCATCAGAATCCC  
A\_14\_P131263 CTGGTTGCCAATTCAGCAATCCCACTTTCTAAGGTGTGTCTACT  
A\_14\_P116441 TTGAAAGATAGGTAGTGTGGCACATGTGGCAAGTAAGTCAAAGTTAACATTCACTATCT  
A\_18\_P22840337 AGTAGAAATTGAGGCTATGGCACCTGGGATGTCTCCTTGTGACAGTTA  
A\_18\_P17288686

CCCATAAATTTTCAGGCCTAGTAATTCTCAATGTCCATGTATAGTCCACTCATGTGACTTA  
A\_14\_P119909 TGTTATTTGGCTAATTTTTCTTTGTTCTCCATTCTTCTCAAATTGAGCCCAAACCTTAGGC  
CUST\_8766\_PI426210822 GACTTAGCTATGCTTAGAGGATAATTGCAACAAGAAGTCTCCCCTGCAGC  
A\_14\_P119985 CTTAATTCAAAGAAGGAAGGGAAAACCCAGGGACACAGTTCCAGGAA  
A\_16\_P37921082

AGTTTGACTGTAGTTGTCAAAAAGCACCAAGAACAGTAAGTTCACTCATAGTAACACTCA  
A\_14\_P131011 GAAAAACCCCACTGTAATATAACTGACTGATGAAAACACATAAATTAGAAGAGGGGAAT  
A\_14\_P129854 GGATGAATTCTGGAGTTGATACACAAGGAGGAACAAACACTTCCACTATAAAAAAAGTT

A\_14\_P132194 CCGGACATAGAGTTTTTCAGCAACAATAAGTTAAAACATGAAGGGAAAATAAAACCACCTT  
A\_14\_P101435 GTATAATAATTATTATCCTTCTCTACCTGGAGAGTTCCAATTTGTCTTTTAAGAAGAAAT  
A\_14\_P120864 TCTTACCCTTTTTTTTGCACCTGATGTGTATAGACTTATCGTAGAACACACATGTAGCATT  
A\_14\_P139082 AGGATTA AAAACTGCCTATGTTTGGTGTATAATCTGGCTGTTGAGTAAAATTGGCTGTTT  
A\_14\_P202476 CTACAGTTTGCTAACTTTTGCTCTTCTACTAAAGCACAGTTGAGTTGTTCAATCTTGTT  
A\_18\_P22840175 CTGTTTTCCGTATGTTCTAGTCCGGATCTGCATTTCTGGTAGAACTAGTCTGTC  
A\_14\_P113155 ATTCTCCTTTATTCCATAAACACCTAGTTACAAGTTGCACAAATCAAAAAATAAAGGCAG  
A\_14\_P110585 GATGAGAGTAGCACACACGCCAAAGATACATCAAGCAAGTGCTTTTTTAATCAATACATC  
A\_16\_P16019840  
ATCTCCTTAGAATACAACGCTTCCTTTTACTTCATCACTGCTGTCTTAAACCAACATGTT  
A\_14\_P116893 TGCTATGAAGACAGACAAACAATGTAACATTCCCAGAGGAATTGAATAAATTCTAGTTAA  
A\_14\_P111381 CTGACCTTTAAAATATTTTCGGCCATCAAATGATTCTCTTTTCCTTGAAGATATATTTGCCT  
A\_14\_P112289 TTCTTTCTTCTTACAATGGTAGGTTTTAAAAAAGCAACTATTGAAAAGAACAGGAGCC  
A\_14\_P136073 AACTAGGAGTCTACCGTTCATTCTTTATCAAAGAAAAGTATCTACTTCTTTCTAGAAT  
A\_16\_P16307079  
CCCAACAGTTTTGTCAAGTAAATTCTATTAACCCAACATGTAGTTCTTTAAAGCACAGGA  
A\_16\_P30952246 AAGTTCCTTATTTCCCTCATAGGGCTGTGGACCACCCTTTGAAAGCAG  
A\_14\_P100220 CTCAGTAGCGTTTTAGTCGTTTTATGTTTCTTTGCAACGGCCTCAGAAGTTTG  
A\_18\_P16651955  
TCGACACATTATCAATCTCCAATTACTCTTACGTAGTCCAGAAAAAATCTTCCAGTGCA  
CUST\_9616\_PI426210822 ATGCCCTCAGGTTTACGCCACTTGTGGGAACACTGGCACAGGAAG  
CUST\_874\_PI426210822 CACTTCTCTTTCTTCCCCTGTATGGGCTCTGCCTCCTTCGTGAAG  
CUST\_10217\_PI426210822 GCATCCAGCTTAGCCCATCATTAATCATTTCAGCACCTTCAGG  
A\_14\_P136572 TTTTAGAGCGAAGACGGGCTTTCTTTCAAAGCATAAAGAGATGAAAATCTATCAGCAATT  
A\_14\_P104627 GCGTAAATCTATGACTAAATGCCCATCTGACATTCAGGAACTACTGTTGTAAGATAGCA  
CUST\_850\_PI426210822 AGAACAAAAAGGAGGTGGTGGCCCCGTGGCAGCATAACACAAGAT  
CUST\_10265\_PI426210822  
ACCTCATAATCTTTTAAAATATTATTA AATTCTGTTTTATTTGTTTCTTTCAAAAATTA  
A\_18\_P14588026  
AACTTTCCAAAGACTATGAAAACCTCCAATTCTGTATCGTGTCTCTTCATCCTTAGAGTT  
A\_16\_P01119449  
AAAACCTTCTTGACAAACAACTTTTCTCTTAAGACACCAAATCTTCTCCTTACTGCTTGG  
CUST\_3539\_PI426210822 CCCCTTATAGGAGGGTGGTGTGGGCTATAATTTCTTCTGCATTCTCT  
A\_14\_P121876 CTAAACCTCTTTGCACTTCAGTTTGGTTCCATTCCATTCATGCCACTCCTTAT  
A\_14\_P126858  
ACACTGGAGTGTGTAACAATACTGAAAGAAGAGTTGACTAAATAAACTTCAGGAAGAGCA  
A\_14\_P137895 AAATCTCCTGATCATTTTTTAGGACTGTGAGGACGTGGGAAGTTGAAAATCCAAAG  
A\_16\_P18945790

AAGAATTCCCCATCCTAATGGTATTTTTCACTTGCATAATTCCCTTAGTTAACAGAGTCC

A\_16\_P03806607

CTACAGCACTTCTCATGGAAAGTTCTGATGGAAAAGAAAACTCAACATATGGTTATGCT

A\_14\_P132441 CCATTTACCTATTGCCTCTGAAAGTTAAAGGGCAGGAACAAGGTGGAG

A\_14\_P104122 CTATTTACAGGTGAAACGAATTTCTGAAGATCCTCCTTGCAAATGCCCAAACAAGTT

A\_18\_P22842105 CACAAAGGACTTTGGCTCTTCTTGCCTTTGTCAAACAGCCATGAATTTGTTTG

A\_16\_P02669721

ACTCTCAGCATTGATCTTTTCATGAACAAGACAGGAGTTATATCAGATAGACACAGATGG

CUST\_5278\_PI426210822

TTCAGATGGAGCATATGTTAAGTTCCCTATAAAACCTCAGCTGCTGCAAATTCTG

A\_14\_P129998 AATAGGGCAAACATAGAAAAAGACTCTAAGAAAATTTTCAGGATAAGTTTAGGAGGGGGTT

A\_14\_P133280 AGAATTGTCAGTCTTTTTAATTTTGGCCCTCAAAAATGTCATGTTTTTCATTTGGTCACCCA

A\_14\_P138622 TCTCTCTGTGATAAGTCTGTCCAGGACTTTCATCCTCTAAAGAAAGAAGAAAAATGAAAG

A\_14\_P132577 ACATTTAGCCGGGCTTAATAAACATTGAGGAGTGAGAACATAAGAGTGTTACTAGAGATT

A\_16\_P19917592

ACTCCTTTAGATAATGCTCAATCTTCTGAGATAATTGCATAATGTTTCTTCCACCCCTCT

A\_14\_P118579 TTAAGCAGGCAAGAAATCCTACTAATCCAGTTTTGTTTGAAAGTTGTTTGTCCGTATGAT

A\_14\_P200438 GACATGCTTGGGAAGATGAAACAGGGTTTTGGAGAGTAATGGCTTCAGTTT

CUST\_5085\_PI426210822

GAAATGAAAAGGAAATATGATCAATGATTTCTGTTCTTTTTACTTCCTACTTGCAAAGAC

A\_16\_P02707570

GCCTTATTCATCAACTTATCTCCAGAATTTAATCCAGATCCACATTATACATAGTCAGCA

A\_16\_P18177401

ACTTGGGAAGTAAGACAAATAACCTGTTGTGCATACTTAGTATCAGAACATTTGCCTCAA

A\_14\_P129675 TAATCAGTCGGGGATCAATTTTTACATGATACAACATTGTAGTTGAAGATTGTCCTTC

A\_14\_P120112 CCTAATTGTAGTGGTTTTTTGTTTTAAACCTAAGAGAGCATAATTGCTCCCTAGGGTTC

A\_14\_P135283 GTTAAATGGAATGTTTTCTGCTCTACTCTAATTCATATTGGGAGCCATGTAGAACACT

A\_14\_P127515 GGGCCTTGGGAAGAGTATGAATGGATTCCCTGTTACTTAGAATATTCAAAATTATATTAT

A\_14\_P138851 GACATCACACTGTCCCCTCTGAAACAATCATCTAATATTTGACTGTGAAAGTATCATCTT

A\_14\_P113177 AGTAGCCTCTTAAAAAATCACTATCTTGGAAATAAAAAATAAACACCAAAGAGTTACTGT

A\_16\_P17106112

AAAACAGTTGCCTTAGAATAGAACTTGTGTTCTAGACTTTTGACCATAGCCAGTTTTGAC

A\_18\_P22842272

CAAACTTGATGAAACAGGAAATCACTGTTGGCTTAAAATTGCAGAGGTCATCAGTAGAG

A\_14\_P127120 TATTTGCTGTGAAGATTAACCACAAACACGATCAGGTCAATTCGGGGC

A\_14\_P110663 ATGGGTGACCAACTTGAAATTCTAAGAACAAAAGATCCCTACTTTCTTTTCATTAAGGA

CUST\_10312\_PI426210822 TGAGTGACCTGGGATTATTGACACATTACAACATCAGCAGCCAAAGGT

A\_16\_P16366313

AATTTGCCCATTTCTCTAAAAATCCTTGAATCTTCACTTCTGATTACACACTAGCCATC  
A\_16\_P18118752  
AAAAATGTCTCAGCCAATCTAAAAATTGTTCTCAAGCAGACATCTGATTAGAAGGCTTTTG  
A\_14\_P135771 CAGATAACAGAAGTTTGGCAGATATAAACACTATCCCTAAGGAACATATTCATCTGGAGG  
A\_14\_P107074 ATATTTAAGGCTGATAAGTTTCATCTAATTTAGAGGTCTGGCGAGCAAAGGAAAAGACC  
A\_14\_P136462 TTTGAGTCCCATAGGAATTTGAATGCCAAAGTAGAATTTCCCTTGGTAACTTTAAACCTCT  
A\_14\_P118401 GGTGCATTCTGCCTTTTCTCAACAGCAGCACAAACTTGAGTAATTTAAAGATTTCATATTC  
A\_14\_P127799 GCTTGTGAGATTTCGACGACTATAGTGTTTCAGAGAGCAGCAATCTGTAGACAAAGAATT  
A\_16\_P02511424  
TACCAGGATTCTTCATCTTTACATTTGCATTAGCCCTAGAAAATAAGTAGCGCCCTAAAA  
A\_16\_P15563849  
AAAAATCCAAAGAACCCATATTCAAGAGAGTAGAAAGAAATACCATGAAACCACTGTGGA  
A\_14\_P115872 TAAGGTTGAGGTTTGTGACTTTGCTACCAAGTCCTGAGAAAAGTGGACTTAAATTTATAC  
A\_14\_P115439 TGGCCTGGTGGGAAGGAGTTTTATTAAAGATTATCACTTGATTTTTATTTTTGGGTGAG  
A\_18\_P15103776  
AAAAGCAGGGTAGGAATATGAACTCATTTCAGCAAGAGTTTGACATCTATTCCATTCTAGA  
A\_14\_P136517 GGACACAGTCTTTGCAGAGCGAGTGCTTTAATATTTTCGATAAATATAAAGATTTCTTTAT  
A\_14\_P201982 GAGAGAACAGGTTGATGACAGGTTTTGTTCTGGACAATAGGAAAGAAGTGAATATTATCT  
CUST\_626\_PI426210822 GTCCTTCTCTGTCACCCGCTCTCCAGAGAATTTACCTGCAGATTA  
A\_14\_P201722 CAAAAATTTTACATGTAGTTTTGAAACCTCAATTCAAATAGCCGTGTGTTCTGTGGCTCT  
CUST\_9458\_PI426210822  
AATTTACCCTCTCTTAGAACAGTCAGTGTGCTGTGACACATTTACAAAAGTGATAAGTT  
CUST\_4693\_PI426210822 TACGAGGTAGAACTCCACAGTTTCCCTCATCTCTATTGTACATAGTAATCAGGG  
A\_14\_P113299 CGTTGATTGATATTGCAGGGGTTTAATTATTTTACCACGACTGTTCCCTAAATTGAGGAAA  
A\_14\_P124627 CAGGCATCTCTACATTAGTTTCAAACCAAATGGTGTTAAAAGTCACATGCTTACACTACT  
A\_16\_P00190462  
ACCTCTCCAATCATACTAATGCCCAAAAAAACTATTTTCATACCAGCAAAAATTTGTCCTGA  
A\_18\_P12880012 CCACTGAGACCTGCTTATTATGTTAGTCATTTACCCCATAGTGTGAATATCAGTCCTCT  
A\_14\_P120657 CTAATTTTCTCATCTGTTCTTGGCAACATTTTAGCAAATCCACTTCCTGAAATGAAAAAT  
A\_18\_P14132356 ATTTTTCTGTGTCCTGCAGACTCAGGGTCTGAGGTTGAAGAACACATC  
A\_14\_P129287 CTGTTTCTCCCCCACCTTTTGTATTTACTTTGAGACTAAAGACTGAAGAATAATCTAA  
A\_18\_P14775918  
AAAGAGATTGAAAAATGCTTCCTGTAGTTGATGATTTTCGATTCTGTATACCTGCTTTGGC  
CUST\_7340\_PI426210822 CTCCTGAAACCCTCTGGTGAGCATCCCCACCCACCTTTGGTGTC  
A\_16\_P17994732  
AAGCACTTTCACACATTATCTTGATCTACTCAAAAATCTTGACCTTAAATTAGTGGCT  
CUST\_238\_PI426210822 TCTCTGAATCGAAAAGTAACTTGGCTCCTCTGCCTCCGGGCGGCC  
A\_14\_P109744 TTATAAATTGTAACATCCAAAAGCCAAACTTCCAGTATTTCAGCAAAGACAGGGACCTCTA

A\_14\_P131122 TTTTTTTTTTTTTTTATCCATTTCGCAGACCCCTTTGCTGATGCAACTAAGGGTGAC  
A\_14\_P108689 TACCCATTCACTCAAAACTCTTCACAAAATGCAAAAATTTTGCCTTACAGACTTTTGA  
A\_14\_P104112 CTCCAAGTCTCAGCATATTTTAAATGTTTGCCACATGCCAGACATTAATATTTTAACGG  
A\_14\_P133360 ACAGTGGATTTAATCCTGGACTTTTTCCTTTGGATACCAGAATTTATATATAGCCCTGAC  
A\_14\_P125102 GACACAGTAACTATCCTAACTAGAAAGTTCATGACTACTTCAGAGGAAACAGATGCTCAT  
A\_14\_P126065 CTTTTTGCCTCCTATTTCTTACCAACTAAACAGGATGGTAACTAAAGAGGTTCAAACTG  
A\_14\_P115381 AAAACTTCTCTCAGTTCAGAAGTGTGAACCTTGATGTTATCCAAGTGTGTTCAAAATGTGA  
A\_14\_P116786 CTGAGCAGAAATACACAAAACCCACAAAAGCCATGAAAAGACCAGCACACTA  
A\_16\_P18303035  
TTTGCACAAAATATCATGCATGTCTCTCATAGCATATGTAACCATTAGCACTCTGTAGCA  
A\_14\_P103726 TCTACCCACAGTTAGCCTCCAATAACAAAAGGTTTGATATTGGATTTTCTTTGTCAACTT  
A\_18\_P22841937 GTTCTTGACTCCATGACTGTTGGCCAGTGACCTAAGTTCAGTCTCATTTT  
A\_16\_P00014844  
AAAACCTTAACTCTCCAATGGGAATTCATGTTACTATTCTCAGTTCTTCCACAACAAG  
A\_14\_P139812 TGCTGACATTTTACCTTAACAAACAACAGGAAGAAGGAGGATTCTTTTAAACTCTTCA  
A\_16\_P03447173  
CCATGAGTAACATTCATTTTCATCTACCACAAACAGATATACAACCTCATCTGAGCCTTGG  
A\_14\_P125610 GGCCCTCAAATTCTGCTACATTTTCTAGTTCACAATTATATATCTGAAAACCACCAACAG  
A\_14\_P112452 TTTGCTTACTGCACAAAGTAGTGACACATTGCCTAGTGAAAAATAAAGTCACATGCATCA  
A\_16\_P00483340  
TGTCACAGTATTGGTCAGAGATTTACATATTTACAGTTTTATAAGCATTGCCAGCATGC  
A\_14\_P111470 ACACTTCACTACAGGTTGTGCTGATGTCACCTGTAAGTGTAATGAACATTTTCTATAGTT  
A\_16\_P18065666  
ATTTCCAAATCATGTCCACTCTTCTCAAATACTCAACCCCTTCATTATGGATGTTTGTCT  
A\_14\_P127023 AGACTTTCTAGTCAATTCACCCAAATTCACACAGGAATTGGTTTATAAATTGGTTCCAAC  
A\_14\_P126721 TTTATGAATAGTCTAAGTATTCTCTCACGGATCCATCCATTCAATTCCTTTGCAACC  
A\_14\_P122958 GACAACTAAATGGCATAATTAAGTTTGGAACTGCCTATGATATAGCCTGTTGGCTCTG  
CUST\_4859\_P1426210822 AGGAGTGGGGAGAACTGACAGTGAAGTGTAGACATGAGGCTTAG  
A\_14\_P200584 CTCTCGTTTCTGACCTATGTGGATGGCTGGGTTGTAGAAATCTCTGATGATTATATTG  
CUST\_2867\_P1426210822  
TAACTGGAGAATTTTGATATCTCAATATAATAAGGCAATGCAGAAAATTATTCATCCCA  
A\_14\_P131576 TTATTCTCGGTGAAATGAATGTTTTTTCGGTCATGTGTCATGCTCAGTTTTTACAAGC  
CUST\_4821\_P1426210822  
TTGTAAATAACAGTTTTTTGTTTAATAATGGCATTTTGTATTACCAAGACCTTGCTTCAC  
CUST\_2865\_P1426210822 TGTTTCCCGATAATCAGGCTTAAAGGGGATGGTAACTGGAGAATTTTGATAT  
CUST\_6108\_P1426210822 TGCTGTCTGGCTAGCCAACTCCGATAAAAATAAGGACTTTTAAGGGAGATG  
A\_14\_P128528 CTCCTGGTCTTGCAAATCATCCTATAACAAGTGTACCTATAGTGTTCATGGTAAAATAC  
A\_16\_P02742385

GGCTTACCGATACTGTTGTTGTTATAAGTTGAACAAATGATTGCCTTAAATGCTGTATCT  
A\_16\_P01858391  
AAAAACGAAACTATGTTGGAAGAGGATTCAAATCACATGAAGCATTATGAAGTGGCAGT  
A\_14\_P136011 ACCAGCATCCCTATTTCTTCAAGGTTTGTCTCTTTCTTTTACGCTTTGTATTTCTACAAT  
A\_16\_P58424494 GTTCTTCTGCCAGGGACACTCTTCACTCTCCCTTCATGTGCTTAG  
A\_16\_P17754787  
AAATTGCTTGCTTTGTGAATTCCTTCACTCACTGTAGAGTATATCTGAACAGCCGTATTT  
A\_16\_P17307069  
AAGAAGTCATTTTGAAGACTCCATAAAGAAGCCTACATTGAAATTTTCATGTTCTCTGCTG  
A\_18\_P15667295  
AAGATCTCCTTATAAAGAAAAGGTTTCAGAAATATTGCTGTTTACTTTTTGATATGTGGA  
A\_14\_P105288 TCTCTGTGTTTCATCTCATTCCCTCCATAATACTATAGAGTTTGTGCTATTACAACATTAAT  
A\_14\_P129482 AAAAATAATAGCAACAAATGTGGCTCAAAATTCTCAGGGCTGAACAACCTAAGACTGCAAC  
A\_14\_P126728 TGCCAAATTCATTGAACCAAATCTTCTAGTTTCCAAGCAATTCTATAGACACCTTGGAAT  
A\_16\_P17656789  
CAGAACCTAGTCATCTATTGCTTGCTATTCTTTTGACATCCCTCAGTAAATAAGTGCAGA  
A\_14\_P124579 GAAGGAGAACTCACTTTACAGAAGGTTAAATGATCCTCATCGTCCTCATGCTAC  
A\_16\_P00685450 CAGGAAATCTGAACCTGCTGCCAAAGAAAACCTCGCTTTGCCTTTTGTAAAAAG  
A\_16\_P16711940  
GATTCCCTAGACTAAATCCATTGTTTATGATTCCTCCTGTAATATTAACCTAGCCTTCCC  
A\_14\_P115241 CAAAGACAAAAATAAGGGCAATCTCTGGTTGGTCCACAGATAGTCTGAAGTTTTTTATT  
A\_14\_P119237 GGGGTAGTTATTCCTCCTGAGGATCTTACATGGAATCCTTTTTTTTTTTTCAAACCTGTAT  
CUST\_6947\_PI426210822  
GTTTGTATGATATTCTGTGTCAGTTGCACATGGGATGTTTCTACCAGCATCTGAAT  
A\_16\_P21368528  
ACCAATAATTTTTCTCAACAATCCCAGTAATCAGACAAATGCCAGTAATTGGATTTACC  
A\_16\_P01231350  
AAAATTTAATTGACTGTCTTTGGCTTGTAATGCTCTGAAGTGAAACAGGTGAAACTGGG  
A\_14\_P135550 CTGTCTTGTTCAGAATTAACCTGGTATCCAAAATTTCCCTAGGCTATTCTTACTTAAGA  
CUST\_1170\_PI426210822  
AAGCATATATACTAATATGCCATGTACAACATACTGTATTCTGAGCAAGTGTTTGTTA  
A\_14\_P113458 GGATTTAAACCCAGAGTAAATGATCATGGCTGACACTTGCAAATGAGTTAAAATATCTGG  
A\_14\_P134797 CGCAGATGGTTCTTGGTCCTTGAGGCTGCTTATATAAACATTACAGGCTG  
A\_14\_P200605 AGGTGAATTTGTGAGACTACGTTGATAACCTTCTTGAATTTTGCATGTTTTTCTGGCAA  
A\_14\_P134327 CTGAATATTCTCTGTGAGAACAGAATCTTCTTGAAGCATTGGGAGTAGATTTATTTTGC  
A\_14\_P117335 AGTCTGAAGTAAAGATCTACCCTTGACAGGTATGTACATTGTGATACCTCTTAATAAGC  
CUST\_360\_PI426210822 CATGTTGAGGGACCTGCGGGTGTACATCTCAAAGCATGTGAATGT  
CUST\_8682\_PI426210822



AATATGGCATGAATACCAACATCTGTTAGAATATTCCAAGTTGGTGCCAGGACTCATATT  
A\_14\_P138140 ATAGCAGAATGTTTGCCTGTATTTCAATATGCAACACAAGACTGTGCCTGAATTAGAAC  
CUST\_10440\_PI426210822

AAAACCTGATCCCTAGCAAGAAGTCTGCTCTGTATCACCTTTATATAGCAGACATG  
A\_14\_P104507 TGATGCATTAAAATAAAAAAAGAATAAAAGTAGTCCTACCCAGAGATGAGAGGCAGCCC  
A\_16\_P17302397

AAATGCATCACACAATGACCTATGACAGATGATTTTCCTAATTTTTCTCCCAGTAGACTC  
A\_14\_P103400 ACACATCCAGAAAGAAACAACACCAGACCATGATGCATTATTTTTGTGCATTAAATACTC  
CUST\_7330\_PI426210822 AGCTTAGAATGTGCCAGGGAGGGGAGGAACATACCTCCTATGCGG  
A\_16\_P02668376

ATTCAGGACTTCACAATCACAGTTGAAACATATCTTATTTTTGAAAGATTACCCCAGTGGC  
CUST\_1456\_PI426210822 GTGAGCTGAGGGGGTGGAGGAGAAAAGCTTATCTGTIAGTTTTCTTTC  
CUST\_4409\_PI426210822 GCCATAGACCCCGAAACATGCATTCTCCAGAACTGAGTATGCAAC  
A\_14\_P105160 GCCTCATTACCAGATAAATCATCTAAATAAATAGATGCTATACAGTCTCTTACCAATGT  
A\_14\_P135370 ACAGTTTGCAAATTAATAACCTTAAATAACCAAATGCCTTTGGATTTTCAGCAGCCA  
A\_14\_P131709 AAGGCAGGATTCTGAAGACCACTCCAGCGATATGTTCAACTATGAAGGTAAAA  
A\_14\_P139792 ACTCATGATTGGCTTTAATATTTCTTTACACTATACATACTGAAAATGTTTACATTTACT  
A\_14\_P137905 ATGTTATGTGAGATCAGAGGTTTCAGTCCTAAAATTCTAAAAACCTGGATTCTCCTGTTT  
A\_14\_P114787 CTCAAAACTCATGGGATGTGATTCTTTTCGACCAATTTAGTGCAGAAAGAAGAAATTCAT  
CUST\_9057\_PI426210822 CTAGAGTGAACAGGGGATTCTTTATCCTCTCACAGGCCTGGCACC  
CUST\_6607\_PI426210822

GAGATCAGGGTCTTAATTTATTGGAGGCCGTTCAAGAATTTGCAGCTCTTAAGTTAATT  
A\_18\_P14130809

CATGCAAGCCTTATGTATCAGAACAATGTATGGACTGAGATGCTTTAGAACATGTGCTAG  
A\_16\_P15251888

ACTCTGTGCACTCCTAATAGGTCTGAGTTTTACCTGTAATCATATAGCATGTGTTCTCTT  
A\_14\_P129950 ATTGACAAAGTAGAGGCTGGAGTGTAGGTCTTCACTGAAAACCTGCAAGAAGAC  
A\_14\_P119131 ATGGTGAGAAGGGATGTTGAGACCAGGAAGTGTAATAATTTAAATGAAGTTTATGCTTGA  
A\_14\_P131507 CTGTGATGATTTATGCCAATGTGAAACAGGGATTTTATCCCATTTAATGCCACTGTC  
A\_18\_P15488505

ACATAGAATCAAGAGTTGCTACCTATACCTCTTCAATAACAATCGCCCTAAAACCTGAACC  
A\_14\_P119989 ATGGATTCATTAGCCAAGGCTGTTCCAGAGCCCTTGAAGAAGTATACTAAATGTAGA  
A\_16\_P01882475

AAATTCAGCAAAGTTTAAATCCTAGAGGATCATGGACAATATCTTTGTAGACCAACTGGC  
A\_16\_P01935459

CTTAAGTGTTTCGCATATCTCATGATAAACAGGACAAGATACATAGTTGCCTTGAGCATCT  
A\_14\_P138752 CCGAACTTCTCCTGACATCTCTTCACATGCAAATATACACTTTGGATCCTTCTTCTTAA  
A\_16\_P36133478

AAAACACACAGGCAATAGACGTATGACCCATAACCATTTACGTTCTTAAAAATGCAAAC  
A\_18\_P14137782 CACACCTGTGTGTATTCAAAGCACCATGTCATGTTCTGTAGGGAGATAGG  
CUST\_666\_P1426210822

GGCGATGTTTGAAGTGGCTAGGATGTCTTTTTATAACTTAGCAGATGGCATCTTTT  
A\_16\_P00925753

GCTACTGTCTACAAAGACCTGAAAATCCTTACTCACACCTCTTTATTCTTCAACACATTG  
A\_14\_P128589 GATGTCCCAAGCATCATTTTATCCCTTAAAACTACAGATAGTTTAGGTTTCTGCCTGAA  
A\_18\_P14135934

TTGAAAATACAGCATATCCTGATACATAAAACCCCAACTTTATAAACTGTAAATTGGT  
A\_16\_P18923351

GGCTGAACAGATTTCAAGATGAAATGCCTAGTATCTATTTACACTTAGACCAGGGTAAGT  
CUST\_2719\_P1426210822 CAGATTTTCCTTAAACGCTTCTTCCATTGGAGTTGGTGTGGGTCATCAT  
A\_18\_P22839584 ATGTAAATTTGGAGTTGGTGGGAATTTTTGGACTCTGCTGTGTGGCC  
A\_18\_P15725064

AAGGGAGAAACCAATAATCACAACATGTTATACGGCTCATTCCACAGTATAATTGGAGAG  
A\_16\_P20251807

ACAACCTGAAATTGTTAACCTTAACTCCACGATTGTATCTAATCAGAGCGGAGAGAACATT  
A\_14\_P138618 CTCAGGGAGAATAACAAATTGGCTTGTCTAAAAACCTTACACCTCAGGTAAGGATAC  
A\_14\_P132245 CTGTGATACTAGCGAATGCATAGAATGGCCTCTTCCCTGAAGGCTTCTG  
A\_14\_P133488 GGATTATCAAACAGGAGAAGGAACATGAGACAATGCAAAACTCATTTTGCATTTCTTTGA  
A\_14\_P101030 CTGTCAATTAGGATCGATTGTTTTTATGGCACAAATAAGTAGGGTCAAACTAACCATCC  
A\_14\_P119940 ACTTGGGTTTTTTATTTATAGATATATCAAGATGCTTATAGGGCGGAGTGGCAGGTATAT  
A\_14\_P127886 CTACCAGAGGCAGAACATCGGTCTTTTCGTATTTAGTAAAAGAAGTCAATATTTGCAAAA  
A\_18\_P14395909

ATGACAACCTCTAAAGTGTATGCCATCTCTCATCAGTATCTCTCATCCAGTTAATAGGAGA  
A\_16\_P15653195

AACTAACAGGGATCTTCTTGATCTAATTCCATCTCAGATCTTAATGTTGTCTACCTGCTG  
A\_14\_P102286 CCCATTTTCATGAACTGTTTCTTAGAGATCAGGAGAAATAAAAAGAGGGGAGAAGGACTTC  
A\_18\_P22840165 TTGGCTGGGACACTTTTTTTCTTTTGGAAATGTGGCAGGGGAATATGAATTTTCATA  
A\_16\_P19856429

CTCCCAACTTTTTAAATCCCCTCCTTAAAAATATAATGGGCATAGAATGATCCAGAAAGG  
CUST\_6984\_P1426210822

ATCTTTCTCTGTACTTTATGACACTCTTTCAATTATTGTTTTATATTACACCAGTAATT  
A\_14\_P201877 ACAGAAAGGAAATGGCAATCTTATGTGTGCTGAACAAAGTTTTCAACAATTCCTAGTTGT  
A\_16\_P18392194

AGTGACAGGAATAAGTTCATATATCCGAAGCAAGAGATATCACATGACATGCTCGATAGA  
A\_16\_P01206658

AAGATTCCAATGACAGAAGTCAGTTTCTCAATCCTACCCTATGTAAGACAAGGCTATTAG

A\_14\_P113262 AAATACATGTAAAGCGTGGGAGATTTTCATTTTAAAGATGCAGTAGAAAGCAGCAACTGAC  
A\_14\_P139853 TATTTTCCTAAGTAGACTGAACTGACTTTAGAACCCAGTGGTCACATGACTGCTTTACTTG  
A\_14\_P116254 ATTATTTTTCTGCAAACCTCATCCTTCTGTAGGTTTGGTTTCTAACCTTCTGCATTCTAT  
CUST\_8753\_PI426210822 TATGTCTTTTCTGAGAATTCTCTCCCCCTTGATTTCAGCCCTGTTTGATTTT  
CUST\_938\_PI426210822 GGGACTGATGTGCCTTTGTGGCCGAAGCACCCGAAAGTGCCATT  
A\_14\_P124903 ACAATAACACCAAAGGTAAGAATGGTTTTCTTTTTCAGTTTCTTACTTCTGTCTCAATG  
CUST\_7011\_PI426210822 TCAGTGACTCAGCCACACTTCTCTTTTTTCACTCACTCTTCTTTCTGGT  
A\_16\_P00907514  
AAAAAAAAGAGCCACTGATATATGTTACGAGAAGTGTATCTTACTGAGACAGGACA  
A\_14\_P106615 GAACCTTGATGACAGATTGTCTGGTTATAAAGCATTTTTTACGTAAAATCATCATGGTGC  
CUST\_4766\_PI426210822 CAGGGGTTTCAGCATTGAGATATGACTGTCACCTCCATCTCAAG  
A\_14\_P132670 GTGAATTATGACTTTCTTTTCTTTCCCAACCTACAAAATAGTGGAAGGCATATTTTGG  
A\_14\_P135192 AATACATCTTTTGAGATTGGGGTAGATAAATTGTCTAATCTCTCTGGAGAGAAATGCTCT  
A\_14\_P132191 CCAGAAAATAAATGACTGAAATATCACGAGTGAGGTAAGTGCTGATCTAGGAGAAATAGG  
A\_14\_P118680 CTGAAGGGAAGAAAGCATTTTTCAGACTTTGATTATTAGTGCTACTTGGTTTCTCACTACT  
A\_14\_P125658 GTCATGAAAACATCCTGGGATTTATAGCAGCAGACAATAAAGGTCTGTAACATTTGCTTT  
A\_16\_P41871631  
ATGATGCAGTAAAGATGTTTTTCTTACTGACAACCTCCTCATCTAGTCATTGTGAAACCACT  
A\_16\_P18017948  
TAAAAATGAGATATTGAATCTACCAGCATGATCTCTAATTTTGGCCTGATGGTGGAAAGG  
A\_16\_P00547964  
TCCCCATTCCTAAGGTTAAATTCAATCAATGCTGCGATATGTTAAAAAGAAATTGGCACA  
A\_14\_P108311 ACTTTTAGTGTTTACCAAAGAAGATAACCAATGTAATGGATTCTGCAGGGCATGTGAAAA  
A\_14\_P122446 CACAGTCTGATTTCTTCTGGCTAAGAAAAGCCGTTCCAAAAACAGAGTGAGTATT  
A\_16\_P02251402  
ACACAAGTAGTTTAAGCATCTGCATATCATTCCCAAATTCCTTTAACTTCCTATAACCTT  
A\_14\_P119172 GAACTATGGCTCTTCTTCCCTTAGGAAGAGTCTCTGACAAGTAGGACTTTGTTTTCTT  
A\_14\_P108434 GAAACAGATAACCTAACACAGCCCGTGCAACGTATTTTATACAATGCTCTGAAAATCATA  
A\_16\_P19848700  
AAAGGCCTTCTAATTTTTTCTTTCAGAGACAGAAATCCTTTAAGACCATTGTATCCTTAGGC  
CUST\_7582\_PI426210822 CATCATGAGGAAGGTGGTCTTCGTGGGGTGAATATCATGTTTCCT  
A\_14\_P110207 TGCTGGACAACACCATGGAAATATTTGACATTGAGGTAAGAAGCATGATTTTTGGAG  
A\_16\_P16945005  
ACACCCTACACATTACAATTTTTTCTCCCTCATTTATAACCATCCACTTTTGATTCCACA  
CUST\_7900\_PI426210822 TGCCTTGAAATGTTAGTCTGAGCTGAGATGTGAGTCTGGAAATTGGA  
A\_14\_P134364 CTGGAGAGAATGTTACTAACAGAACTGAAAATCTGAGGAATTTGAGGAAATGTGTTCTTC  
CUST\_10041\_PI426210822 CTCACTCCCTGTGCCCCCACCAGCAGAAGGAAGGTCAACAGAA  
A\_14\_P202056 CATTTAGCAATGCCATTTCCCAAGTGAAATAAAGGACAGTCACACTGATCTACATCACTTT

CUST\_5420\_PI426210822 CAAAAGAATCAGGTCAGAACCTTAAAGCTCATACTCAGCACCCAAGGTG

A\_18\_P22840730 TTTAAAAACCAGACTTGTGGAGTAATGTGTGGGAGACCCCTTCAGG

A\_16\_P18283709

ATGGTTTGATGCTCAATTCTAATGCCAGATTGTTTTGAGAAGAAATGTTTCATGTGCTCT

A\_16\_P00685090 GTCCACCATTGATGTGGTAGGAGGTGCCCCACAGGACAAAGGCAT

A\_14\_P200690 CCTTTTCTTTTAATTGAAAAACAGATGCATCATTTGAACCTTCTGTAGCATTGGCAAG

A\_14\_P202010 AGTGCTTTTTCCAGTTGTATTACTTTACTGAGACCAGAGTAACCATCTAAATCCACTTCA

A\_18\_P21523026

AAAAATGCATTTTTGTTACTTGCCCAACTTCTACTGAATTAAGTTGTGACTAGTGTGGTT

A\_18\_P11100097

CATGCACGAAAATATTTTTATTCTGCAGAACTATCAGATATGATCAACGATACTGTGGTC

A\_14\_P129341 CGTTAAGTCCTTGTAAGTGACTATTCCAATGTTCAATCTTTGTTTTTGGGAAGAATGCTTG

CUST\_7467\_PI426210822 AAATGGCCAATTTATCTCTCCCTCACAGCCAAGCCAACCTCCTAACATAA

A\_14\_P113804 ACAAACAAAAAAGATACAGTTTTCTCTGAAGCCAAATAGAGGAAATGTTTGCATTCCCT

CUST\_9822\_PI426210822

GCATCTTCTGATTTTTTAACTTAGCATAATAAACATCATTTTTCCCACATTATTACTATGT

A\_14\_P123614 CTTATGCAAATCAAAGATGTTGTGATAATTGATAATTGAGTCTGGGCTAAATTCCCCCTG

A\_14\_P137302 AGGTTTTCAATAGATGAAAGGCATCTCTTGTGGGAAAACATTCCTCAAAGAATGTCTATT

A\_14\_P125712 AAACAAACTATTAATATGCCTTGTTTACAGGGGAGCCACATTGATGTTTCGTAACAAAAA

A\_16\_P41611390

CAGCCCATCTCTTTCTTTTTACATCACCTGAATCTTAATCCAGTTGAACACCTATTCTA

A\_18\_P14394141

AAAAGCAACACTATAAGCATTTCAGGTAGTCCTTATGCAGTATCCCAAACAGTAATACCAG

A\_16\_P16118011

TCACCCAGATTACATCTATTTCCACAGTGTTATTCAAGACCCAGTAAAATACCTGTCTTT

A\_14\_P107591 GCCTTCATCAGTGTTTGGGATGTAAAGAACCCTGTCTATTTAAAAGAGATACTGCATTTT

A\_14\_P138787 TGCTTGTCTATGTCTCTTTTGAACAGGTATTTTGATGTTGGACTGCATAATTTCTTAATC

A\_14\_P114706 GTTTGTATCCTGTTTTATGAAGAAAGCAGAAATAATTACTGAAAGTGCCAGACACTAAGG

A\_14\_P118943 CCCACATCATGTTTTAAATTACTCAGCCACTAAAAATGAATGTGCATGGCGTCATTAACA

A\_14\_P104092 GAAAACCTCAGGACCTGCACATAAGTGGATGACCGGAAACAACAATAAACATTGT

A\_14\_P118289 TCCATCCAAGATGACATAGAATGCAGTTGTCCATGTTTCATGTAATTCATCTAAAAATATC

A\_16\_P18100460

CTCCACACATACTATCCTTACTCCACTTTGTTCACTACTTATCTTTTTGACCCATTTGAAA

A\_16\_P16720695

TAGAGTGCACAAGAGAATTACTGGTCTAATACCTGATGATTTCTGAAACAAAGAATGT

A\_16\_P19193104

ACTGAGACATATGTGATCTCCTCATGATTAGGGTTCAAATAATACTAGTATGCTCCTGCA

A\_14\_P120912 AGTGTGCTACAGACAGTGATAATTTGAGTGTGTAAGAATTACATTTGGACCACAGTGATT

A\_14\_P102641 CTAGATTAAACAAACACACAGCCTTTCTGTAGAACACACTCACTTTCTGTAAGTCTATGC

A\_16\_P16190992

GGAAAATGAGTGAACCTCTAGGTTAGGAGCATCTGTTCTAGATTCCATTCATTCTAGATGT

A\_16\_P58424572

ATGTTGATTGAGATCATTTTCAGGCTAGTGTGTTTTCCCAAATGTTGTCGTTCAAATAAA

A\_14\_P137793 AACATGGGAGAGGGGCATATAGGATAAAGATGAGCAAATTCTACCCATAAAAATGTTCTAGT

A\_14\_P126861 TTTCTTCCCTTTTCTACAGCAATCGTTCCAATCTTTATAGCACTTAAGCAACATAATG

A\_14\_P128851 CTACCTTCTACTGGTAGCACCATGCCAGAAAATAGGACACTTTTTTAATTGTTGAAATCA

A\_14\_P101098 ATTCTGATTAGTAAGAGTCATCCTGATGGAGTCAGAAGAATGAGAGTTGAGTTTTTCAGAA

A\_14\_P130239 GTAGAACAAACGTTGAAAAATTGTTTTGCCAGGAAAGAGTTCAAGTTCAGTTAAGGATTT

A\_14\_P111698 CTTTAAATTAATAAAAAAGGCAAAATCCAATTGCTTCTCATTTTCTTGATCCAACCTGGCAG

A\_18\_P12804037 CCACCTCTAACACACTTTTTTCTATACCCCTCCTATTACCAGATCTTATATCACCTCCTAT

A\_14\_P115027 AAATATGCACAAAAATTCATAAAAAGCCTTTTTCCAGGTTCCAAGGTTTTTGTAGAAAGCC

A\_14\_P123919 CTTGAAAGATACACGTATATGTAGATGGATAGTGAGTTCCATCAGGATGCTCAGCGTT

A\_14\_P102168 ACTTCAAGATAGTCCAAGATTTTGCCAAATGTTGCCTTCATTTTTCAAATTCAACTGGTT

A\_16\_P17329252

GGATCATCTTATGTAACAGACTTTGTTTTCAACATTCAACCTCTAGATGGCAGTTTTGTGT

A\_14\_P112155 CTCCTCATTTGAATGAGAATATAAATCTTCTCCCCTGGCTCTCATGTACATCTTTAAAA

A\_14\_P101378 CAAATGCTTTCACCTTCACTGTCAATTGTTGTCATTGTCATTATTGTTGCTATGCTGCATA

A\_14\_P122723 CTGTCTTAAATCTTTTGAGTGTTTACTGGGCCTGAATTCAAATATTGGAATAAGAGACCT

A\_14\_P122932 TCCAGAGTCATAAAGGGGTTATTGGAACATGTTGTAAATGCAGAAGGTAAATATATCA

A\_16\_P58424209

GGAAGATCTGGAGTTTGTTTTTAGACACACTGGTAGATGTTTAAAGTGTGTATGCGTATGT

A\_14\_P114174 CTCTCAAAGTATGTGGAAGAACTACCCTCTCTATTAACCCTTTGTAAAACCATGATGA

CUST\_5687\_PI426210822 AGAAGGAATGGAAGGCTAAGAGGGTGGGAGAGTAGAAGAGGAGAG

A\_14\_P200366 TTTTTTTTAACTAGAAATCAAGACTGTGGAATCTATAACTGACATCAGGGCAGATATAG

A\_14\_P106799 GTTTTTTCTTTCTCCTAAGACAACCTGCCAGAACTTCCATCTAAAAACCTGTTTTTCAACA

A\_14\_P132922 CTCTGAAGTATACTACACCAATTCTTCTCAAAGAGATCACATTCATCCAAGTAAGACGT

A\_16\_P15837728

AAAGAAAATCCCCAAAGATTCCAACATGTTCAATTTAAAAACATCAATGCAGAGGTAGGTC

A\_14\_P139701 ATCAGTGTCTCCTAGTCTATACAAAGTGAATATAATCCGCTCTCACACTCACAAAGTTGCT

A\_14\_P107612 GCCTGTAACACCATACATTATCAGAAGGAAGATGGTCTTTTTCAGTGGGTCTAGAAATAA

A\_16\_P16402629

CGCCTCTTTTCAAAAATACCTGTCTCCTTATAAACCTGTTTTTCATCTTTTTCCAGTAA

CUST\_2165\_PI426210822

TTTAGTTTTATCTTTATCCAAATAGTGAGAATATAATTTTCATATTTAAAAAATCGAAGT

CUST\_10321\_PI426210822 TGACATTTCAAGCAGTAGCTTCTTAGATTTCCATTCAGTCTTGGTCCGTTTTTCT

A\_14\_P130435 TCATGTTACTATGTAGGTAACGAGCAAAACCAAATCCGCTATTTCAAAAACAGAAAGT

A\_14\_P108712 TGTTCCCTGGTGCCCTTTAACCTGATTAAAATGAACAGTTATTCTAAGGTAGATATTCCC

A\_16\_P16248705

AAAAACTACAATACATGAGGTTTGTAGAGAAATCGAATTGCTAATATTGCTGCCATGGT

A\_16\_P15586237

AACAAAGTCTTTTAACAACCTTGACCCTCTAACATCTGATTGGTAAAACTGCTTAGTGCC

A\_14\_P125357 ATTTCTTTTCAGAGCCAGTTTTTAGTCTTTTTGCCTTCACCAACAAAATTACTTCTGTGCA

A\_14\_P118133 TTTCTGCAAAGAAGATTTTAAAGATATTCCATTTCCAAGGGAGGCTGCTTGAAGAAATCC

CUST\_5695\_PI426210822 GTTAGAGGAAAAGGCTCCTGCCCTCCAATGTTGTTTGACCCAGAT

A\_18\_P16781155

AAATTCAGTCAGAAATTCATCAACACTGGTCATTTCAACTAATCATTAGGCTCAGAGTGC

A\_14\_P136098

AAGGAGAGACTTTAGGGCACTGTGCCAGAAAGAGTTATTCTAAAAGGAAATTAAGTTC

A\_14\_P132207 CTGGGGAAGCACACATTTGGATTCTTTGCATTTTACAATGAGCATTTTTTTGCTGTAA

A\_16\_P17995968

ACTGTTTGCATCTCTAGTCAATAGCAAAATTTACTCCATAGCCTTTTTTTGTTTACTACTCC

A\_18\_P17168891

AGTCACAAGACTCAAGTAGAAGAGATTATGCAGTCAACATAGATATGTGAACAAAGGGAA

A\_18\_P10590747

AAGAGCCAGCAAATTTATAGTTCACCTCTACCTACTTTGTTCATATTTTACCTGTTCCAGG

A\_14\_P121306 TTAATTTCTTTTCGGTCAATCTATGCAGAGTATGACTTTTTTACGGGGAGGATGTAGTAT

CUST\_5579\_PI426210822 CTGATTAATCTGAGGCTTTTTGCTATGAGTTAGGAATGTGCAGGACAGGCA

A\_14\_P132688 GGCCTTTCTAAGCAATTGCATCACTCCTCTATATCACATGATTTGAGTTATAACACAGTC

A\_14\_P137635 CTGTGGGGGGCTTTAATATTCTGGACATTTATTCACTGATGTTAGAATCATCACACATAT

A\_14\_P201283 GCAGTTTGAAAAGGGAGGAGAGTAATTTAGAGGGAAAATGACGTTGGTTATTTTTTTTC

A\_14\_P132197 CTTATGGTTATTCTCTAAGCAGTCATTGATTAGAATGGGAAGGAACTAAGTAAAGGGGT

A\_16\_P00722514

AAATGGAAAGATGAAATCGAAAACAATCTGGATTTCCCTTAAACATATTCTGGATCCCAC

A\_14\_P121022 ATACACATAATTCAGGAAGATTGTGCTAAAATACATTTAACCAATAGGAGTATGCCGTCA

A\_14\_P124509 ACAAGATTGGCTGACACTAGAAAGTAGAATTCTGTGGCTTTTGTCTTGTGCATATTAAG

A\_16\_P02738795 ATCACTTTCTGTGTCAGAACTTTGAAAAGCAAAGACAGGACATCGACTTCCTTC

A\_16\_P41381783

TGCTGCAATTTTTTCTGATAAACCTCGAAACATGTAAATATCAAACCCTCTTCCTTCAGT

A\_16\_P16191056 CTTAATATGCCTGGGAAAGATCTAACAGGTTTCACTTTAGGACCTCTCCCC

A\_14\_P133772 AGGCTTTAAGAAAAAGAGACCAGTCTGCTACTTCTGAAGACTACCAAATTAGTCAAATCA

A\_14\_P201611 GCATTTATCTTGTGATTTCTTACAAAAGAAAAGGACGATGTCAGTCAAGCAGCACTTT

A\_16\_P35687829

TCCACCTCTAGAGTTTACAAATGTTATCCAAATCCCACTCATTTTTTTATGCTTGTGTCTT

A\_16\_P00638752

TGCAAGGCTTATTATAAATTCCATCTTCAACATTATGACTTCCCAATTCACCTTCTGCTCC  
A\_16\_P17508436  
CAGTTGTGCTTTTTTCTACAAATCAGGAACATACAGACCTATTTTTGGGTGTTGCATCCTA  
A\_14\_P133781 ACATTGTCAGAATTTTTTCCTCCTCGCTGTTCAATTTTGTAGTTTTTACTCTCAAAAAAT  
CUST\_1224\_PI426210822 GTGTGGAATAGTTTGGGAGCAGCATGGCAAATTAACAAAGCCTGTTCAA  
A\_14\_P110631 TCTGTCCTGGTCAATATGGACATGTCTTTACATTCAATGGAAGTTGTAAATCGGTAAGTT  
A\_14\_P135452 CTAAAGCCAGAAGATCCACTTTGTATATATTTTCAGAGGCACCATTTACACGGTAATACTG  
CUST\_5141\_PI426210822 CTTCTATGGGCTCACACGGGAAACAGATGCTTTTCTATAACTCT  
A\_14\_P101681 ATGAAATCTTTGCTTATGATAGGAGTTTGGGGATTAAGCCTTTTCTTGCACAGATTTGAA  
A\_14\_P109797 CATTACTTAGGTTTCTTTGAACAGTTTGACCAACACTTCAACACTGATGAAGAGTATGTA  
A\_18\_P22840870  
ACAAATGTCCCCTTCCCTGCTGTGATACCTGCCATAAAGAAACATGTTACTATTAAGTAT  
A\_16\_P00057167  
ACTACTAGAGGAAACGTTACTTTTGCATGAATACATAATAGGTCCACAACATATGAACTG  
CUST\_9263\_PI426210822  
CCCCTACTCTGTAAATGTTGTGGATTTGTCTTTGTTCTTAATTCATTGGAAATTTTT  
A\_16\_P21047975  
AAAAACTGGCTTGCAGTAAATGACATTATTTTTCCCATACTGTTAAGGTGATGCTCACTG  
CUST\_1144\_PI426210822 AGTAAAAGCCAGTCAACAACCCTCACAAAGCAAGAAAGGGTGACTG  
A\_16\_P21203699  
TCCTTCAGGGCTTAGTAATTTGAAAGAAGATAAATGCATTTAGTAGTAGTGAAGGGGCTT  
A\_14\_P115290 ACTGGTTTAGTAAAAGCAGTAAATAGGAGTCTCCATGCAAGAGAAATTGGAGTTTCCTAA  
A\_14\_P125642 TAAAGAGGGGGGCTAGTAAAAATGCATTTTTTATAGAGATGTTGGGAAAGGCTTGCTT  
A\_18\_P13113245  
TGTCAACTAAGGTATAATTAGACAAAAGTTTTCAAAGGCGTAATTTTCTAGCAAGGTGCAC  
A\_14\_P128758 ACCTTTCAAATTCAGAGCCCTGGATTTCAAAGGCCTTTTTTAAATTTCATTTTTTTTTCC  
A\_16\_P01156871  
GGCATTTTTCTTCAAGGATCCAATAAGATATCCCCCTAAACTATACATCATAGAGCCTTT  
A\_14\_P120285 CTAAAGTATCTTTGATCCACTTTGGTGACATCAAACCAACTTAAACTCTAAGGGAATTC  
A\_14\_P112479 TGGCTGCAGTGGTAGTAGAAATGGTTTTTCAGAACTACATGCTATTTGGACATACTATT  
A\_18\_P10355967  
ACCCACCCAAATTATACTACATTTTCTCTTTATGACTCTCTATGAAAATTCCTCGCT  
A\_14\_P128391 AATACCCCATGCTGATTTGGTAAAGATGCTCACTGAGCAAGGCAAAAAAGTC  
A\_16\_P00685342  
GGAGAAAATATTTTTCAAAGACAACCTGTATTCTCCAGGGAAACCTGAGATGAAGACCAA  
A\_16\_P21425710  
CAAGCACACTTGATGTTCTTCTTACTCAGCAAATTTACAACGATTTTAATTTCAAAGCCCG  
A\_14\_P107486 TACTTAACAAAGACATGACCATGACCATTCATACAACAATACAGTAACCAGAGTTTCCCA

A\_16\_P00795988

AAGAGAACAGACAATGGACATTTTACTGTGATCTGCCTACTACTAGAGTCAAATGACATG  
CUST\_8306\_PI426210822 TTCATTCAGCTGGATGACCTGGAGTGTCACTTTCAGCCCATCAATAT  
A\_14\_P108629 CATTTCTCAGAATTTTGGGGGAGTTTTTGGATAACTTTTTGTGAATCTTGAATCCAAAGC  
A\_14\_P102750 CCAACACTGAAACTCTTTTCAGACAAGTTGAGGCTGGTTTCCTGAACATAAC  
CUST\_3753\_PI426210822 TATGCTTCTTGTGGGTCCATTACTTTCCTTGCCTGTTTTTTTTAGGGAC  
A\_14\_P126765 CAGCAATGTCCCAAAGAAGACCATAAAATTCTGTGGTGGTTAAAATCTGTTGTTTAAACA  
A\_14\_P105827

AGTCAAAGAGGCTTTAAATTTGAACTTTCAAAAAACAGAAGAGACTAAGAGGCTCAGGA  
A\_14\_P119556 TTAAAAATTTCTGGAGTGTGGGCGATCCTCAGAGGCTGTTAATTGATATAAAGAAGCTTCA  
A\_14\_P129853 GGGGAGGAAGGAAGGCTATTTATAAATGTCTACAGGATTCTGCATCAATTAGAAAAGATT  
A\_14\_P127670 ATTAAGGGGTATATTTTTAGGACCTTCTGTGGGTGGCAAAACATAAAAAACAATACAGAGT  
A\_14\_P116406 ATAATTACATATTTTTGCATTTGGGCAGTAGCATGGGCCATTCCAGTAAGTATGCCTTTC  
CUST\_6121\_PI426210822

AGAGCTATTTAGAGTTTGAACAAATTGTTCTCCTTCTCAAAAGTGGCAGAATGGTTAGA  
A\_14\_P123892 CACATAATTCCTTTTTTATTTTACACAGTTATACAAATATTCTAAATACACATTTTGTGT  
CUST\_8727\_PI426210822

AAATTTATTGCTTTCCTCAAAAATCATCACACAAGTAGGAGTAAAATAATGAGTATTT  
A\_16\_P03069475

GCAGTAATGGCTTCTTATCATTGTTAACCTGGATTAATCATCAACCCTTACTGATTCTC  
A\_14\_P128403

GAAAAAGTGTAACCTGGATCCTTGGGGAAAGTTGTTGTGATCTAATGAAGAAAAACACAA  
CUST\_2696\_PI426210822 CTGACGAGGTGGCCCTGGGGATGATGGGGCGGGCTAGGCTTTTTTC  
A\_14\_P114700 TCCTCATGTCTCACTTTGAATTTTGGTCAGTTATTAGGACTTCTAAAGAACCATGAGAAG  
CUST\_9069\_PI426210822 TAGAATACAGCCTTGTCACTGTGTCCTGCATCCTCCTTTCCTTGTTT  
A\_14\_P105162 ACTAGTATACCTACACAGGCACACATTAGAAATGTCTGCGAGCAATTCCTTGATAAATAC  
A\_14\_P126346

CTTCCTGAAAAATAAGTTACAAAAAGAGACACAACACCATATGAGGAGAAAACCAAGGT  
A\_16\_P18267343

AATTCCGTTTGCAATTCAGTATCCATTACACCTGGTCAATCAAGTTTCTTATTAATCCCA  
A\_14\_P132715 TCCAACATTTTGTGAAAAACTTCAAACATACAGCAATGTTGAAAAATGCTCTGTGAGGCAA  
A\_16\_P36230725

ACTTGCAATAATGTATCTTAAAGTTGGTCACTCAAGAAAACTTGGTTAAATTCATGGGCCT  
A\_14\_P114957 AATTATGTAAGGTAATACATGTTTGAATTTGGTAAATTGTGAGGGTCATTAATTTCTGAAA  
A\_16\_P17276721

ACATCTGCTTCTGAAGTTACTAATACTCATACTGTCCAATGAATTCCAATACTCACCAA  
A\_14\_P113893 CTCTTCTTTTGCAGGTGTTTTTGGATGAGACAATGATAGGGATTCTGAATGAGAATAATA  
A\_14\_P103454 AAGATCATGGTCCAATAGAGCATCCTTTAATCTCTGAGAGGATTTTTTAGTGTCTTCTGAT



A\_14\_P105000 TGGGGTATTCTATTTGTCATCTATTGAAGTTCATTTCACTTGGCTAATCTGGTTGTTCTG  
A\_16\_P02051477

AGATCATCCCAGGAATCATTTTACACTTGACAATAACTCTTTGATATCCACAGAATTGGC

A\_14\_P108902 AAAGGTTAAGCGTTCGAAAAGGTCAAGTGCTACCGTGGAGAGATCATCT  
A\_16\_P21432271

CTCCCGCTATTGATAAAATGCAAATCGTTCATAGGTAACCACATGATAACAGGAACTTTT

A\_14\_P200330 TGTTGTTGTTGTTGTTAATTAGTGGAATAAGTTACAAGTATCACAGTATCTAACAATAGG

A\_14\_P121897 TTCCTTCTCATTTAGGAATGAAAATTCCAGAACCCTTTTCCACTACCTGGTAAGCAACT

A\_14\_P105659 CTAATCAATTCCTTCCTGCTTGTCTTTTATGGCCACCTGGGAGAGAA

A\_14\_P100821 AAGAGTAACAGTGCATACACACACGGAAGTGTAACCTACCTGTCTATTTCTTTTCATTCATT

A\_14\_P113604 GGAAATGAGAACATTTTCAGCAAGATTTCAAGCAAGCAAGAGATGATGGGTTCATTGTT

A\_14\_P115295 GAAGAAACATTTGGTTAAGATTTGATAAGGCTTAGAATGGAAGAAAATGCCAGCGTCATT

A\_14\_P200951 GCATCAGGTTTAATTTTCTAAAAGGCAGAAAACCTTGAAGTTGCCCTCTTTTCAAAGTA

A\_14\_P118822 AAAAATAAAGAAATTTATGATTCGAATTGGAGTCTTCAGCGGCTTGTATCTTGTGCCAT

A\_14\_P122365 CTTTTAGTCAATTAAGGCAGGAATTTTCTTTTTGCTACATAAACCAATTGTGATGGC

CUST\_6694\_PI426210822 GAAAAGGAAGGGAAAAGAAACAGAACTACCCTTCCAGGACTCCAG

CUST\_10410\_PI426210822 GTTCTCTTCTTCATTCTATCAAGCCCAGGTGCCAGCCTGAGGCAG

A\_14\_P105713 AGTCTATATTCAGTGTGCCTTTTCTGAATCCCATTGTAGCCTGTCAACTAAATTTGAGT

A\_16\_P58424600

AATTAGATGCTCAGCCTAAAGGAAAGTCATGGATACTGTAAACCGAGAAGTGACATGAT

A\_16\_P00685034

TGGGAGGCAAGTATTTACTTTTTAAATTTAAAATGGGAAGGATATGTGTTGTTTCAGGTGCA

A\_14\_P139472 AGACACAGAGAAAACCAAGCAATGTTTGAATGTATTTCTGAAAACACCCAGAGTTTTAT

CUST\_7304\_PI426210822 ATAAATAGAGAACAATAAAAGATAACGTCGGAGGATGAACCCACGAGCGTGG

CUST\_2959\_PI426210822 GACAGCCTGATCCACCCACCTTCCCAGGGCCCTGACCGCGGAGCC

A\_16\_P16080279

ACTGCCCTTCTTGAAAGTATATGTAATAATTTAAAATTTATAGATCATATTCAGGCTACA

CUST\_9335\_PI426210822 CAAAGTTGACCTGGAAGCCAGATGGGGCCCCAGCTGCTCCCAGAG

A\_14\_P134528 TAGTTCAATAGGCAACCTGACATTACCTTTTCTTGGAACTTGATGAACAACTCAGAACT

A\_14\_P103911 GGAGATCCAAGATCATCTTGGTTTAAAGTGAAATATTCTAACAGTTACATAGTATTCTAC

A\_16\_P00902388

CGTGGTATGATAAGGGGATTTTTTAAACAAAGAACTAGAATGCTTACTAGCCCATGAGT

A\_16\_P17992226

GGATGACTCACACTCTTATAGAACAAATCTTTGCAAACATATTGTCACTGATGAGTGCC

A\_16\_P03756616

GCGATTCTTCTCCACTTTTATTGCCTATTGAGTTTATTGTTTCATGGGAAGTTATGTGCTT

A\_14\_P131402 TCACAGAAAAACATTGGGTTTCTCTCTGGGTTTGGACATGAAATGTAAGAAAAGATTTTT

A\_16\_P03189661

AAGTCTCTTAAATGCTGGAAAATGTCTTCATGAGCATATTCAGTGATTTGGCACTTACTC  
CUST\_8609\_PI426210822 CAAACTCCCAGCCTTGGCTCGTGATCTTCTTTCCTTGTAAGCTAATG  
A\_14\_P119540 GGGTTTGTATGCCTCGAAGCCAATAGCCAATATGCCCAAGTCTATGAG  
A\_14\_P108975 CTCTGAAATCTCTTCCACTCCCTAGTTCCTTCATATTTCCAGAGTCCCAC  
A\_14\_P113526 TCCCTTTGGTTTTTTCAGGTTCTTTATAGAGTTGGAAGCAAGACATCAGAATAATATCTTC  
CUST\_2816\_PI426210822

CAAAAACACTAACAGGGACCTGAACCTACTGACGTTCTTAGATATTTTTAATGTCATGAG  
A\_14\_P120199 ATTGTATTTGCCACAGCAATTGCAGGAGAGTAGAATGAGATCATCAGCAACAGATATAAT  
A\_16\_P03650559

AATCCTATCAGAATTTCAAACCTACCCTAAATGTTTCTCTTTAATGTAGCCATTCACCC  
A\_16\_P18593822

AAACAAAAACACTGTCATCCTTTTTTCTTGATGTATCTGCAATAGCCACTTTGAACTCCT  
A\_14\_P100882 CTTAGAGGCTGAATTGCCACATGCTACTGAATTAATTAAGACACTGACTTCAGTCTAAGA  
CUST\_3779\_PI426210822

CAACTCAAGATTAGGAATCTATTTTTCAACTACCATTAGCCCCACTTTGGCAAGG  
A\_16\_P03133400

ATGGGCTTACCTGAATTAAACTCAAAGAAATCAAGCAATCTTCTTTTTTGTGATGTCC  
A\_14\_P121596 CTTTATTAATTTGTTTACCTTCTAAAAAAAACGATTACAAAAAGAATACTTCATTTAA  
A\_14\_P109548 GTCTTGCATCCATTTCAATCCCTTTAATCTGTCAATTTACTCTGGTTTATAGTGAGTCCA  
A\_16\_P17153804

GGCCATTTTTTGTTCATATAATTACAAGTCCACAGATAACCAAAGAAACCAAATCTCCCC  
A\_14\_P102412 TCATGTCTCAATAAACGTGTTTTTGCCTGATAAAGAGAAGTGTGCACATATTGATTCTGC  
A\_16\_P18923042

ACCTTCTAGTCCAATAGACACTTTACTGATATGACCCAGTTATAAAACAGTTGCACTGAC  
A\_14\_P120563 CACAATGAAAGAATATTGAAGTAAAGTTCGGGATTGAGGATGAGTTTTGGTTTAAGACGT  
CUST\_1221\_PI426210822

AACTTAGCAGGAGTGAGACTGCAAACAAGTTGTCTTTTTTATTGTGACCGAAAAAC  
A\_14\_P119442

GAAACCAGAGGAAGAGAACGATTTAAGGAGCGAATACTACTGGTAAACTAATGGAAGAAA  
A\_14\_P117966 CATATTATCAAAAACCGAATGCAACCTGAAGAAGACACTCACAAAATCTCTCTTCTCTC  
A\_16\_P30023357

AAAATCACCTTTTTGGAAAACATCAAACCTTCTCCATCGTTAGAAACTGCAGAATGGTTTT  
A\_14\_P116771 TGCATTTGAATTTATCTGATAAGGACAGATTCAGAGGCATAGGAAGCACATTCCTAAAGAT  
A\_14\_P125006 AAAAGTATACAGTATTTATTTTCTTCTTTCAGGTTGATTATGTGACCGCTCTGGCAAAAAG  
A\_14\_P108994 TTTCTTGAATAGGATTTTTATCTCCACATTTTCTGAATGGTTTCCATTGCTTCTCCTTG  
A\_14\_P111344 ATACCCATGGTTTTCTTCATAATACTGTAGAATACACCACCCTGCTGAAACATGTGAG  
A\_14\_P104439 TAACCTCTCAGTTTATGTAAAGAAGCCTGTATTTCAAATGTGTTGCTCTAATTTGTTTAT  
A\_14\_P111760 TACATTGGGAAGACTAGGGATAACCATGGCCTTTGAAATTGTTTATTTGGTAAATTCAGA

A\_14\_P116402 TATCTTCTTACCTGAAACTCTCTGAGCAAATCTGATTGCTTCTTCAACCGGGT  
A\_16\_P17606589  
AAATGTGAAAAAGCAACAAAAGTGAACCTTCTGATTACCCAATATTCTAGGTGCTCCTTCA  
A\_14\_P117634 TGATTTGAGTAAAGAATCATGAAGAGCAGAAGTAGTTATCAGGCTAGAAAAGTTAGGCTGG  
A\_14\_P110054 ACTCACTTTTGAAGGCACTTTCGGTTAGAAAAGCATTCTCACATGCTTATCTCATCG  
A\_14\_P133050 CTTCCCCAGAGGAAGAAGAAGAAAGTGAAGATGAGTCTGAGATTTTGGGAAGA  
A\_14\_P106560 TTTGACTAGAATAAAGAAAAATCTCCACTGTTAGGTAGAGAAGGCAGTCTTTTGTGTTGG  
A\_16\_P03747451  
AGCGCTTGGAAATTAGTTATGAAAGTTCACACATTCTAAGACCTAGGGAAGATTGTAACA  
CUST\_3254\_PI426210822 AGAGAAGCCCAGGCAGAGTGCAGGGGCAGTGATGTCATTCCCTAC  
A\_18\_P14135371 TAGTTATCTCTTGGGAGAGCCTGAGTCTCATCTCATATGGGCCATTTCG  
A\_14\_P112272 CCTCCTTCTTTAGAATCCAGCAACTATCACAAGAATACTCCTTAGCCACTTCAATTG  
A\_14\_P105171 ATCTCTCTGACAGAGAGTTTGTGTTCAAAGAACCTCAGCAGGTAAATTCATGGTTTT  
A\_16\_P58424596  
AATTTGGAAATCAGGCAAAAAGATGATTACATATCCTTTCAGTGTCACTACTGGAGCATCC  
A\_14\_P128803 AATGTCAGAGCAACAAATGGACCTGAAGGATTTAATGCCACAAAGAGGAAATAC  
A\_14\_P106689 TATGGGACACAGGACAAGTAAATTCCCAGAAAAGAAAGTCTAGTGTTACAAAACAACCA  
A\_16\_P03105737  
AATGTGAACCTAGGTGATGTTCAATAAATGTTTACTGGTAAAGGATTAGGGGACCAAGTT  
CUST\_6691\_PI426210822 TAGCTGCTGTGGAGGCAGGGCCAGCCAGAAACGCAGATGGGCAAG  
CUST\_4992\_PI426210822  
CAATTCAAATTGAATAGGAACCATTTTTAATTTGGGGGTAACCTCCGTCTTACCATTAAT  
A\_14\_P202350 GGATATTTTGCTTTTTATGCTTTTTCAGAAAAGAGGCTTGGCAGCATGATATTAGCATTTAGA  
A\_14\_P109096 CAAAAGTTCTTAAATACCATCCCACTGAATCTGAACTTGATCATTCCAGATTTTGTGAGG  
A\_14\_P127375 TCGTCTAAACAAACATTTTCATTTTCAGAAAATCTGCATCAATCTACACGGACCATACACAG  
A\_14\_P132108  
AAAGTGAAACAACATCAGAGGAACAAATTCAGAAGAAAAGTCAATTTGAATCCCCTCAAA  
A\_14\_P134385 GAACTACATACTCCGTTTTCTCTATTTTCAGATGAATTTCTGAAATAAACCGAGCCTCAA  
A\_14\_P136236 ATTGGGCCAGCACTCAATCTCTGATTCTCTGTGTGAAATTACACCATTAAAATTTCTTTAT  
A\_18\_P16984226  
ATGGCTTTCTCTTATCACTACAGTCAAAAATCATTCTCTCTTCTACAACCTCCACATCAA  
A\_14\_P131080 CTTCCAAAATTTCTATGAAAACATGTCTCTGGATTTACAATGCAAGTTGCATTTGCTCT  
A\_14\_P138712 TCCAGTTTTCAAACATTAAGTTAAGGTTGCAGAATGGTAGCATGTGAGCCACTTCTAA  
A\_16\_P36092885  
GAGCCAGATAACTGTATTCTCAATGAGCATCAAAAACTAATTGAATGCAAGACCAATCG  
A\_16\_P16192043  
GTCCATGCATTTTGA AAAATGTCTCCACAGGATGTTTTTCTTGCCAGTGTTTTCTCTAAT  
A\_14\_P134192 TTATAAACAAAACCTGAAGAGAAGAAGAAATATCTGCAGATGTGTCCCTGTATCACCTGCT

A\_14\_P112243 CTTCTAACACCTGCACATAAAATTTACTACACCTGCATATACTGCCTCCTGTGACTTTTA  
CUST\_711\_PI426210822 AAAGGCTGAGGATGTTTCAGCAGTTTAGACAGGGCAAACCTGCTAATTCTT  
A\_16\_P41756466

ATCAGAAGAGACACCATATGGAATTCCTCAACAAGATCATTTTATTGACATGGAACATGT

A\_14\_P201969 AAAACTTCTGAATAAAACACAAACCAAGTTTGTACTGTATGAGGTATTGAGGGTGACCA  
A\_18\_P16116569 CTTAGAGTAGTGGAGATGTGCTCATTCCACTTGCGTATTCTTCATTTGGAGG  
A\_14\_P133130 AATTAATCCCCAGGTGAATTGTTTCTGGCCACTTCAAAAAATTGTTTTTATGTTGGAAAG  
A\_16\_P38441356

TATACCCCCCAATCCTTCATATACCTTTTAACCATGTGATATTCTCCAAGTCTCAGAAAT

A\_18\_P22840167 AGGTTTTATGTGGAAGCATCTTTCCAGCAGGCACAATGACATGGCTATTTTC  
A\_14\_P104915 GTTTACGGTATCTTACTTATATTGCCAACAATAAGATCAGAAATGTTGCCCAAGGGCAA  
A\_14\_P134239 TTGTTTCATTCTAGCAACACGCTAGAAGGGTTTATGAAATTCTTCGACTACTGGTAACTG  
A\_14\_P125802 GTTAACTCAATAGGCTTGCCTTGAGACCTAAACTGTGAGGAACTTTGCGAC  
CUST\_4405\_PI426210822

TATGTATCTGGGAAAGTAGCATATCTATTTTCTCATTTTGCATTACAATAGCATCTAGTA

A\_18\_P15975000

ATGTGTCTGCTAACCTAAATCCATTCAAGTAAAAGAGAAGTCAAGTTCAGTTCAAGACAGA

A\_14\_P120032 TTTCACCTTCATCAATAAGAGCCAAAATTCCAAGGATCTTCACATGAATAACTTCTCCAC  
A\_14\_P106582 ATATGGACTTCTGACTTCAACCTGAGAAAACCTCAGGTTGCATATTTTACTGCTATCTACT  
CUST\_9100\_PI426210822 GTTGTCATGGCTGTCACATTGGTACCTGTTCAACACACTTAGAGGAC  
A\_14\_P107670 AATGCCATGAAACTCATATGAAGGCTCAGAGATCTGGGTTACATGCAATAATAATGATGA  
A\_14\_P109544 TGTTTTTAGTAGTCTGGGGGAAATTAGATTGTATTTTCCATTTGAGCAGGATAGAGGATG  
A\_14\_P133795 ACCAACTCCTTCTGTGTGAACATTCATGAGACATACCAACTCTTTTTTCATTTTTTTTAG  
A\_14\_P106643 TCTACTTTCTATTTGCCCATCTTCCTAATTAGAGGGAAAAAATCTACACTCACTTCTCT  
A\_14\_P124146 ACTAGAGAAGTCCCCTGAAAACCTTCTGTCACTTTTCGCTTTCTGTCTATATATCTTCTT  
A\_14\_P126266 CATGTCTGTCTTTCAGCCACCCTACATCATGTAGCAGTTCTTCTGAGATCAT  
A\_16\_P39174731

TTCTCAACCTATCTAATACAGAGTCTAATACAACCTGTCCTCTATACAAAACCAGTCAAT

A\_14\_P134476 CTGGTATTAATTGGCCAAGCCAGTAACCTTTATGAAACAGGATAGTAATTTCCACACATA  
A\_14\_P100659 TTAATGTTTTTGGATTCCTTTCAGCAATTTTACCCGAAACAAACTGACGAGTTTGTCTAGG  
A\_16\_P16120045

TTCAACTATCGACATCATTCATGCAGATGCTTATGACTTATGCTATGGTTAGGTTACACC

A\_14\_P126929 CTGGATTCAGGATTTTATGCCTAGAATCTGATTCGTAGGTTTCTTAAAGTTAAGGTGTT  
A\_14\_P110979 TGTGCAGAATGTTTCAGACAAAGATGTTTTAGATATGTTAAGATGAGGCAACTAGGCATGT  
A\_14\_P102393 GAAATTACTCCTTGGAAAGAAACCTCACCTGTGGACCTTTCTCCAGATGAAATTT  
A\_14\_P202126 CTTCTGGACTTCGTGCCTTACTGAGTCTCTAAGACTTTTTCTAATAACAAGCCAG  
A\_14\_P112553 GTTTGAAGACAAAGAATCTATATCTTCATGCTGAGTTATAAAGGCGGCCCTTTCAAAGAA  
A\_14\_P136601 CTTCTGCTTGGAGAAGATAAGGAGTCATGTCTTAAGGCCCTCCTC

A\_14\_P102049 CCACAAAATTATCCACTGTTTTTGGAACAGTCTTTCCGAAGAGACCAAAGATCA  
A\_14\_P136606 GGTGCCTGATGAAATACATGTTGACTTATTTCCCTACTACAGTATCTCTCTTGTTCACAG  
A\_14\_P134500 CTTACATATTCATAAGGCACCCGCTAAGTTCATGATGGTAAGTGAATCTTTCCAATTT  
A\_14\_P118431 GCTTAGATCAAAAATCATTATTGCCACATGGACCAGCCTTGGAAAGTGAACAAG  
A\_14\_P117850 CCCAAAGCATATTGTCAAATAAATGGAAAAATTGGTATTGGGGGTTTTATCTTGGCTTA  
CUST\_5123\_PI426210822  
TTTTGATGAAAGTATTGGAATTTTTGATGACCTTTTTTATTACAGTTTGGGAGCAACTAC  
A\_18\_P16808287 TCATACATATATATGTTTTACTTTTTTAAAGTCTTGGTTACTCATCTCTTGGTTATGCCT  
A\_16\_P01578341  
ACAGTAACTTCACACTACAAGTGATTATACTCCAGTGAAAGAAAGTCTAAAGGCCTCTTC  
A\_16\_P39618325  
GGTCATGTGTCAATATAGAAAGAAGACCCATGTTTAGCAAGTTTGGACTTCATGTTTTTG  
A\_14\_P135834 CTAGTGCCAGGTGCTAATAAAGTTGTTGTTTCAAATGCGGCCAGGAACAT  
A\_14\_P139729 TTGTTTTCATATTCCTTGGCTGGTAACTATTTTTATTTCTTTGACTCTAACATAATGAA  
A\_14\_P132269 CAGACCTATGCCACAGACTTAAAACTGACCAAGGTTTACTCAGTAATAAGGAAGTCTAT  
A\_14\_P136653 CCCTCTCTCCTCTCGAATTAATTTACCACATTCTAAATCCGTAGATAAAGTAGTTCCAGA  
A\_14\_P115814 CTGCCCCCTTATTATCCAACCTACATATCTAGATTTCACTTGATGTAAAGGCTAACCTTA  
A\_16\_P03689916  
TCAAAGGCTCATAGAATTCTCTGTTATCAATAATCCTCTCAAATGTGACTTCAGCAAATA  
A\_16\_P02057272  
GCCAACTTTTAGTCATCCATTAGCATCATTATCCTGTCTTTAAAGTATTACCATTCTGC  
A\_14\_P120130 CTTTAGATCATTATGGGCAATGATGAGAACTGCTACACACCTTACGATAAACTTGGTTT  
A\_14\_P109851 ATACTGACCTTTTTAAGTCATAGACCAAAGTCTGCTGTAGAACAAATATGGGAGGACAAA  
A\_14\_P138175 GTTAGAACAGCAAAAGCCTATCCCTAGAGAGAGAAATCTCCTTACTTGTTAGTAGAACTT  
A\_14\_P138542 ACTTAATAACTAGGGTTTCATAGAGTGCTGTGTGGGTGAAAGAAGAAACATGAAACTAGA  
A\_16\_P02858728  
ACACTTGAAACTTTTCTTACAACCTGTCACTGGTATTAACCTTCTAACCCATTAAACTCGC  
A\_16\_P18173957  
ATTTTTCAATCAAAACCATTAAGCCTTAGAATTGCAGAGAGTAATAAAGTCCCCTCGAGG  
A\_16\_P21419509  
AAATTCATCACACCATACTCTTTGATATTTTTTCAGAACTATCCACATCTTGGTATCCCC  
A\_14\_P107892 TGGCCATGTGAATGGAGTTCCCTGATTACATGAGTCAAATATGTCTTATTGTAGCATATT  
A\_14\_P118997 GGCAGTGGCTCTTGGTTTTGTGTCTGTAAATTTTTATTGTGATGATTCATATAAGATGGC  
A\_16\_P02832154  
AGTAATCAGTTCCTGAGAATCCAAGATCAAACTACTAGAAGAGATCCAACCAAACCTTCT  
A\_18\_P19827305  
AAACATGCTTACAACCACAACCTTCATTCACATCCATTTAAAGTAACTTCTCTGCTGACTG  
A\_14\_P111406 CACATGGTTGATTTCTCAGAAGAAGGGGGAGTATAGTCGAATGGATTATTTTTCTCAA

A\_14\_P119103 CCCTCTAGAAGTATTTGGCATTATCTTGACTTTTTTTTTTAATCCTTTGGTTTCCTGGGA  
A\_16\_P58424462 CCCACTCCCCATTTCTTCTGTCTGTGCTTAAATGTCACCTGATTAGAAATAT  
A\_14\_P125271 AAACCTCACCAAAGATTCCAAATTTTTGCATTTAAATACAGCACACCAAACACCTCTCTT  
CUST\_8807\_P1426210822 ACCCAACTTTCCAGGCCATTTTCTCCAATAGCCCCTCATCCCTGA  
A\_14\_P132737 ATACTTTGCAGTGTTTAGGGGGAAGAAAGTCTCATTATAAAATGTTCTCTAGGATCACA  
A\_14\_P134167 AATGGGAAAATTCCTAATGATATAGGGCGTTCTTTTCTATTTGAAGAGGGGAGAAAAAAT  
A\_14\_P112691 GAAGAAGAGCAACCACAGTCACTGAACCATGGAGTTTAGCATTGGATCTT  
A\_16\_P30952514 AGTGGAACACTGTGCTTCTCATATTTGCATGTGTAGCCAGCCAGGA  
A\_14\_P121020 GGTTTTCTTTTAGTGGAACAAATGGTTGATGGATCCAGATCCTTAGAAAAGGAGAG  
A\_14\_P135014 CAATTATGGGTAGTTTTTTCTCAAATATTTTATCTGGATCAGACAGAGCAAGACCCAGG  
A\_14\_P125993 TCATGTGCTGGTCATTTTATCTGTCTTCTCTAGGTTCCCTTTGTTGCTAGAGATGCTATTT  
CUST\_1339\_P1426210822 TTAAAGCATGTAATGCAGGCCAAGTAATTCAAACCCACCCATGGCAG  
A\_14\_P130209 TGAATTCAGGCTCCATCCTATTTTTCTATAAATCCTTCACTCAAGCAGTGTCAATGATTC  
A\_14\_P113499 CTCTTAGAGATGGTGAAAACACAAAAAAACCATGGCTTTCATATGGACAGATAAAAATG  
A\_16\_P17050571  
AAATGCAATTTTTCTTGTGGTAATTGTAGACACATCCACTACTTTGACACTTGTAGAGGC  
A\_14\_P133636 GTTCATAAATTCCTTTATGCCAAACCACTCGTTCGTGCTTGGATACCTTATACTTTATCT  
A\_14\_P137442 ACCAATTGTGCATAACTAAATGCTGATCACATAATACAGTGTCTTGTAGCCAAGCAACA  
A\_14\_P115573 AAGCAAGCAGGAATCAAATAGATTTTCAGGCACATTAACCAGAATATCCAAGCATCTT  
A\_14\_P123872 CATGGCTTGGGAAAAGTTCTGGAAATTCAGAAGAACAGATGTGATAATAATGACACTACT  
A\_16\_P17469719  
ATCTGCTCCGTCCTAAATTAATGTCTCCTCAATGACTCGAATGTTTCAGGTAGAAATA  
A\_16\_P16233900  
ATCATCCTTTAAGTCCTGTGATAATTTAGCCATCTCTCAAAAAGTATTTTACCCTCTGCT  
A\_16\_P02980899  
AAGTCAGTAAAGATCACCTTGTAATACTTGATCTCACAGTTAACGTAGACATGGTCAGTG  
CUST\_244\_P1426210822 GTTTTGGGGAACCCCTGAGGAAGGAGTATAGCCTCTCCAGCGCCG  
A\_16\_P38678332  
TCTGACATACACGTCTCATAGTTCTGAATCTGATATACTCTAACCAGACCTAACCTTCAA  
A\_14\_P129085 ATTCACAGTAACCAGAAACAAAAACGGAAATAAATTAAGTGATGTGGGGTAGGGGAG  
A\_16\_P17354988  
AATGAAAACAATCAAACACCTACTACTTTTCAGGAGAACACAAAATGATCAATTTGGGGC  
A\_16\_P17799363  
AAATCATACTCGATCAGGTAAATTCCTTTATGACTCACTGTGTAGATTAGAAGAGGCAG  
A\_14\_P103457 GAAAGCCAAGATCGGTTTGAATCATCTGCAACTTTATTCCAGAGCAGAAATAAGTCATTT  
A\_16\_P16025683  
AAAACCCAAATAATCTGATTTGAACCTTGCCATAAATCTTCTCTACCATTTGTTTTCTG  
A\_14\_P117259 ATAAGAAAATAGTGTCTGCGGTGACAGCACAGTAGTTATTATTGTCGTTATCATGATCG

A\_14\_P111824 CTACATTGTCTGCTCATACTCCCTTCCAGATAGTGCCATTTTAAAAATCCCATTTA  
A\_14\_P127298 CAAAGATTGGAAGAAGAAGAAAAGAAGACGCTGGATAAGTTTGCAGAGGCTGAG  
CUST\_3082\_PI426210822 AGAGACCATGGGTCAGGTCACAGAGAAGCTGCAGCTGACTTACAT  
A\_18\_P26794544 CTTATCACCTATCCATATTCATCTATCATCTGTTCATGTATTCTTTCTACTTATCTTGCC  
A\_16\_P19807746  
CTGGCTCCGTTAACTACTTTTATGTTCCATCCTTGAAATTCATTTAATGTCAGCATCTGTT  
CUST\_5087\_PI426210822  
TACTTCCTACTTGCAAAGACTCTGGAAATGTAATGATGGTTCAGAGTGTTCTGCTATAAA  
A\_14\_P109879 GGATGTTTAGTTTAAACACCTACCGCCTTTGAGTGTTAAATCCATTAAGATGATTCTCTCT  
A\_14\_P138037 CCCATGTTTTCCGTTATCTATGTTCTGTTCATAGATGGAATGTGCTTGTTTTATCCATACT  
A\_14\_P129518 CAAAACCTTTTTCTCTTCATAATAAATGTTTGCTAAGCCGTGGATTCCCTGAGGAGGAAAT  
A\_16\_P18534810  
GTGCATATGACAAATCATCCAGTTCTTTATTCCTCTACCTAATGTAACCTCAAACGTCC  
A\_14\_P109929 TCTAAGTGATGAAGAAAACCTTGAAAACCTGTTTGGGAAATGCAACAATCCAAATGGCCAT  
A\_14\_P126047 CTTTTGTGGCTCTTTGTTTCAACCTGTTACGATGCTTTCTATTTCGGAATAAACCTTTT  
A\_14\_P127878 GATCACAAGAAGAAAAAATTTGGTTATAAACGAGAACGTGTGCCATTTGTTTTGACACAG  
CUST\_2014\_PI426210822  
AGAGAGTTTCAAAGAGCAAGTAGGGTATGAGTGGAATTAAGGCTAACATTTTAGATCTTC  
CUST\_3180\_PI426210822 TGTGGGAACACAGCTATGGAAGCTGAGGCAGGAAGCAAGGATGAG  
A\_14\_P130061 CTGCTTAGGTTTATGAAAGGTCACCTGGATATTTTCAGTTGCATCATCCCTGTATTTAAA  
CUST\_6130\_PI426210822 CAGAGGTACTAAGGCTAGAGACCTTGGGTAAAAAGTCTTCCTCTCTTTGAAA  
A\_16\_P19509180  
AAAAACACCATAAGAAGTGCTTAGGGCTGTATTGAAACTAATTCAACCTCTCTCTATGGT  
A\_14\_P124618  
TTGGACAGTTGTCTGAAAAAGAAATACAGAAAAAATAGAAGAAGAGCGAGCAAGAAGGA  
A\_16\_P36230626  
TGATGAGTCAAGAGATTGCAAAACTTGATGAAACAGGAAATCACTGTTGGCTTAAAATTG  
A\_14\_P110227 AAAGGGTATTTAAAAGGCATACTTTAGTAAAGTGTGTGGCCTCTGTAATAAGCCATTTTCG  
A\_14\_P124033 CTGCTTATTAGCAAAGATGAGCACTGGCACACAACCTAGTTTTTTCTTCTCCAGTA  
CUST\_883\_PI426210822 GTGGCTGAAGGAAACACCAGGAAACATTTCTGTAAAATGTTCTTGGAAATG  
A\_14\_P108820 ATATATGCAGTGTTTTCATGTAGGAATCTGGAGCCAAATCACAAGTTCTTAGAACCACTA  
A\_14\_P127271 AGACAAATTAAGCACTGTCTGGAACACAATTGAAGAATTAGAATGGATTACTCACAAGC  
A\_16\_P58424277 CTTAAACACTCCAGCCTAGAAATGACCCACATCCCTTCTACCGACTTTC  
A\_14\_P122296 CTATGCTTACAATTTGGGTCATGCCTCACACTTTTCTCCTAAAGCCCACAC  
A\_14\_P122440 ATCCCAGCACTTGGGTGTAAATATAGAGATGGTCTCTATAGTTAGAGACAATATGGTTTC  
CUST\_9781\_PI426210822 AATTCTACAGAAGCAGGCAGGGTGCCAGTGTCTGGACCTGTCTCAA  
A\_14\_P107926 GCTGGTAATAAGAAGTTTGGCTTTTCTTAACTCACAAATTCAGACTGTTGTTCCAAAAT  
CUST\_7210\_PI426210822

ATCAGTTTACTAGGATTTTTCCATAGGCTCAAAGAAAAGACAGTCTATGTTCTAAGTACA  
A\_14\_P135784 GGCTGGCATCAGTTTTACTGGGCTTGTATTCCAAATCGTTCTATACTTTTTATTTGAGTTT  
A\_18\_P22839607 ATGACACCCACAAGATGTTGGCTGGCTGGCTGGATTTCATGACTAT  
A\_14\_P202039 TTGGGTGTTTTTAAACATGGTTACCTGATAAAAAAGCAGTCTGTAAGAAAACTGGTCTT  
A\_14\_P118811 GAGATCGACACATCCTTTTTCCAGAACATGGATGGCAAGGAACTGTGTAATAAT  
A\_16\_P00685056  
TCACAGAAAAAAAAGTCATATTTTTTTTCAATGGCATAATTTTATGAATTTTTGGGACAC  
A\_14\_P125067 CTTGAGAAGCAGTGGTAGATAAGTCTTCATTGATAAACCCATACTTTGAGCAAATGTG  
A\_18\_P13254873  
CCATCACCACATTTATCACATTAACATGGCAATGATAGACTTATTCAGGTTCTCTACAGC  
A\_14\_P118627 TTAATCTTACATGGAAATTATCATTCCCTAGGCCTGGTATCCAGGTATGCAAAAAA  
A\_14\_P202250 GGATTTGTAAGGGAAATCCTACTTTGGAATCTCTGATCAAAGGGTAACTACTCTTTG  
A\_14\_P106966 CTTACCTACAACCTTATCTGTCTCTGGCAGAACTACTTCTGACTTTCCATTTAGAAAGCAA  
A\_18\_P17332833  
TCTTAAGCAACCCATAACAAAAATTCAGTTATTTTTCTTTCACTGCATCATTAAACCCTTCA  
CUST\_362\_P1426210822 ATGTGCTCTGTTGGTGGAAGTAGCACTTCTCTAATCCATAACTGAGCAT  
A\_16\_P01969178  
AACTTCATCCTCCAAACCTAAATCTCAAATCCCTAAATTTTAAACGTCTTAGATCCCCTT  
A\_14\_P123701 TGAACCTCTAACACATTGTCTCAACATAGATCTTTCCAAATCTTTCTTTACAACCTGCTGC  
A\_14\_P132126 AAGTGAAATAGAAGCAGAGGTCAACAATAATCAACATTAATTCACCAAGTGGTCAACAT  
A\_18\_P17186064  
ACATCTTGGTTATCATTTCATATCACCTATCACAAACTGTTATTGCATTGAAAACCTCCAA  
A\_16\_P01697718  
CTGTGTCTCACCATTCTTTTTACACACATACATAAAACCCTTAAATCTGTCAGTTGCCAT  
A\_18\_P15784724  
AAAGCACTGGATTATTTCTCTCTAATTTACCTATTGGCTTTTTAACCAAGTTCACCCTT  
CUST\_6730\_P1426210822 GATTATTCATTTGTGCAAAGTTACAGAGACTCAAGGCCAGGCCTCC  
CUST\_8967\_P1426210822  
TGTCTAGGATTCATTAATATTATATTTTTAGTCTTTGGTCAATATGAAGAAATACTC  
A\_18\_P22839769  
TGCCAGACTTTTACATTTAATATGTAAGTGTGTTTGGTTGAGACATTTTGATCCTT  
A\_16\_P16190997  
TTCAACCATTATCCAAACTCTGTTGTAGAATTAAGTGGAAAGAAGAGAACACAGGCA  
A\_18\_P20293436  
AAAAAAAACCTTTCAAATCACTCAACTTTTCAACTATTTGGCTTCTTTTATCCACAGT  
CUST\_5217\_P1426210822  
CTGAGCACTGATGCTTGCCAAAGGGTTATACATTTCACTAATGATGATATCCATTAC  
CUST\_2667\_P1426210822 AAGGCACCTTGAGCAACATGTCAAAGGGCATCCCAACTGGTTGTA



A\_14\_P104766 ACATTGATTGATAGACACAGTCGTC AATGGGCAGTGGCATTGTTTGTCTATCTTATTAATA  
A\_14\_P111434 AAAAGGGCGCTAAGCATT TTTTGATTCAACATCTTTTTTTTTTGACACAAGTCCGAAAAAAG  
A\_16\_P41788357  
CCTTTTGCCTTATGCTCATATCCA AACTACATCTTTCAGTTCTTCTGTTTTCAACACTTCT  
A\_14\_P112624 TACTGTAACTAGGGCAATGTAAATCAAACCTTCAACATATCTGTGTCCCATAGTTTCTCT  
A\_14\_P135215 TATTATCTAATTATCAAAGTGAGAGCAATTTGGAAATTTCTGCCTGGGGTTAGGAGTTGG  
A\_14\_P106204 AGAAAATCTTGGTTAATTTGGGGTAGGACTTCTTCATGAACTCACATTTTGCATAACAGA  
A\_14\_P138940 GGCATGAGAAATGATTTATTACAAGTTCTAACTCTTGAATATCTCTACAGGAGGGAGATGG  
A\_14\_P127019 GTGTTCTAATGTGGTTTAGTTGTTCTCCGTTGAGGATAGAATGGAATTTCTCCTTAATCA  
A\_14\_P109472 CTGATGCTTGATCTTGCACAATTTTATGTCTAGTATGTATGCTTGAGTGAATGTGCGAG  
A\_14\_P139664 GGATTGTCAAAAACAGTCCCTCAAGTTGAGTCTCGAACTTTGAAACAGACAA  
CUST\_4831\_PI426210822  
ATGTATTTAGCCACTCAAGTATCTTTAAGGTCTAGGCCTTATCGAATGGGGTTTA  
A\_18\_P14245141  
AAATAGGGCATTACATTGAAGAGAGTCGTTAAATACTGGTTCAGCATCATTAGGTTGCT  
A\_14\_P106782  
CTAATCTTGCTGGTGAAACAGAAGTTACTAGAAAGAAAGGAAGAAAAAACTTGATTTGGT  
A\_14\_P106825 CATCATTCTCCTTCAGTGTGGTATTCGTCTGGAAGAAACAAAAAGGACTCTC  
A\_16\_P15001886  
CTAAACCGAGTGTGTTATCTCTGGGTAGTTTGGAGTTCTTGT TTTCTCAATTAACCATG  
A\_14\_P100970 CTCTTTCTGCCCTAACTGAGAAAAAGATTTTCAGACTTTCAATGCCAAATCTGCATGATA  
A\_14\_P129419  
TGATAACAAGCAAAAATATGAACTCTACAATGTTAGAGGGAGCAAACGCAATGAAGAGCA  
A\_16\_P02423383  
GCACATACCATTTTGTCTAACTTTTCATGATTCTCTTTTACCAATCCAAATTGACCTGT  
A\_16\_P15504485  
ACCTTCATATGATCTTCTTCCACCTATAACTCTTCTAATTAATGATGCTTTCTCCCA  
A\_14\_P138775 TCTAGATTGAACATAGATTTTCTGCCAACAAATCCTCTCTGCTGTTACATTATCCTTTG  
CUST\_815\_PI426210822 TTCTCTCTTTCTCCAGGGAAGAATCGGGGCACGTCCTGCGGAAA  
A\_16\_P19103141  
ACATCTGCATGTGAATTGGAAAACTCTCAAATTTTACCCACAAAACCATTA TAGCAGT  
CUST\_7947\_PI426210822 CTTCACCAGCCACTGATTCCGCCGCTCCCTGAGGTGAGGAGTC  
A\_16\_P19405388  
AAAAAGATGAAAATACACATGTAACCTAACCCTAACTTCCATCTTCAAGGACTTTACCC  
A\_16\_P01826313  
AAGTGATTCAGTCATTAGTGTAGCAACTTTAGATCTTCAAGTGCATTAGATTTACCAACA  
CUST\_6301\_PI426210822 TTCTTATATGCCCTCAGAAACACCATGCTCACCTTTCTCCTGCTGT  
A\_14\_P107672 GGTAAGATAGACCTTCTCTTTTTGACAGTATTATGTCTTTGAGATTCATTGACTCCT

A\_16\_P15853115

AAAACCATATTCTTCCAAATCACAAACCATACATCCTTAACTAGAGATGGAACACAACGG

A\_16\_P17207674

ATCAACTGACAGTTAATCAGCAACAGTAAAGAATGATATGTGCCACAGAAAAACTAAGT

A\_14\_P111377 TGTGAGATGAGTAGTTGGTTGTCTCATTGACAGCCATGTCATTCTTGACACATTT

A\_14\_P108742 TCGGAAAAAGACTTCTTCCCTCGGTTTTCTGCTCTGCACACGTTGAAATTTT

A\_14\_P120552 AACATTTAACAGCAAAACGGTTCACAAGACTCTTTAATCGGAAGTTCTTTTGCTTTCTGC

A\_14\_P131220 TCCTAGGGTCAGGTTATTGCTGAGTTGCTGTTAGCATTAATAATTATATAATGGCCTTCC

A\_14\_P120694 TCTTTCTGAGCATAGCATACTGGTGACCAAATTGCGTTGCAAATGAATATCATTATGAA

A\_14\_P106135 CTTGAACAGAAAATTTGCAAATTTGCAGTCAGTTTTATTGGTGGGAAAACCTGTGCTTTTT

A\_14\_P126863 TAATAATGTGGACCTCAAAAAATATACACCAATTTGGCACCAGCAGTGTATCCAAGTG

A\_14\_P107940 TTATCTTCTAAGTCTCCTAAGTCTTGGACTTTTCAAGGCCAAAGATTTAAAGGCCAAGTG

A\_18\_P14548166

CCACCAATTCATTTCACTTAAGATTTTGCCTATACTCAGATCATCAATAACATCCCAGA

A\_14\_P112534 TGCACACAAGTTTGTAAACTGAGATCTACAATGCAAGACGTTGACAAAATTATTACCGTG

CUST\_7811\_PI426210822 AAGGAGTGGTACTGCTTGCCAAAGCCCATGCTCTGATACACCTCT

A\_16\_P16889336

AATTGTATGACAAGTGTTCAAAGCATGTAGCATTACCCTAGTCCTCTTTATTGGTTTTG

A\_14\_P137615 AGAGGAGCCAACCCAGCATGTGCTTACCACACTGTAAAGAATGACTTATTTATATAATA

A\_14\_P110614 TTTTCTCTTTCTGCAACAGGGTTACATGATGGAAAATCGAATCTCAGGCTTAAAGTGT

A\_14\_P118086 TTTTGGTTGTCTTAATACTCATTATTTGTCTTCTCGTGGCTTTGGACAGATTTCTTTCA

A\_14\_P102229

CTCAGTGAATTTTAATATCAAGCAAGCAAAAAACAATGAGAAAAAAACCCACTGCCAAGT

CUST\_7226\_PI426210822

AAATTTTTTAAAAATTTCTTAAGAGTTTAGTGCAATTCACATAAAAAATGTACTTCAGTA

A\_14\_P137181 TGTCATATTAAGACGCTTTTTTTGATTTCTCTCTCCAAGCCATCACCACACTATTTGTATT

A\_18\_P12045853

AAAGCCAAAAGATTTTGACCTGGTTCCTGATTTATCATGAGTATGCTTTTAACTGATCT

CUST\_6516\_PI426210822

TTCTAAATGCTAAGGAAATAAACACAATTTTATTTATAATCTTATAGCCAAGTATGTTTC

A\_14\_P111797 AGGAGCAAACCTTAAGAGTAGTTTATTTATATACCCTGGGGACAGAAAGTCAGGTTGAAAC

A\_16\_P01445702

AATGTGTGTTTCATGAGAGTTCTTAATGGCAACAAGAGGTAGCATGATATCCATGAGAAAT

A\_16\_P37754196

CCATCTGAATCTAATCTGAAGAATCTGGCACTAAAACAAATCAACAGTTCCTTACCTCTT

A\_14\_P103174 ACTAGATGTGGGTCAGCACACTTCAAATTTCTGAAGGCTTACTAGAAATTTTCAAAGTTT

A\_18\_P16310423

AGGGCTCTTTTTTCATCTTTATAACCTTCAGAATACCAAGCAACATGTCTTACACAGTGT

CUST\_6356\_PI426210822

TGATCTCTCTCTGGAGTTAATAACCATATGGATCTGTTTTGCCTGATTAGAAGGGATT

A\_14\_P125899 CGTCTGCTTTGGTGGCATTATCTGCATTCTGTATATTAGTATCTGAGGAAAAAAGAAG

A\_14\_P106363 TTGACTTCTTGTAGAGATGCATCCTCATTGTAAAAAGTAGTCTGAACACCAAGTATCCTT

CUST\_2673\_PI426210822 CTTGGGTGCTCCTTTGCTTTTATCTCAGAGGCTGGCACATTTGTAG

A\_14\_P104516 CACATGTATCTTTTATGTTTCGTAGCAACTACTCTAAAATCTTATGATTCAAACACCCCAG

A\_14\_P104631 CTTAGAGATGTTGCAATGTCTCTTCAAGTTAGGAGTGAAATTATTATCCATTTTGCCCCA

A\_14\_P130308 ACTGACTGGCTTCTCTGTTGCTTCTAACTATAGACTCTCATTCACTTTTATCACAG

A\_14\_P125795 CACTTTTAATTGGACTGTTGCTTGTACCCTCATTATTCTTAGGAAAAAGCATCTGCAGA

A\_14\_P117790 ACTGTCTGCCAAATATGACAGGGAAGACATATAGGAAGGACCATCTGAAATATAAAAAAG

A\_16\_P00685097

ACATTCATGGGATTCATACTCGCTTTAGGAGACATTCTGTAGCAAGATGAGTTATATGGG

A\_14\_P137267 CAAAACCCTCATCAAGACAATTGTCACCAGGATCAATGACATTTACACACAG

A\_16\_P02333492

GCCAACAAAATAGCCATAGAACTCAAGTTGAGTGACATTGTAACCATTCTACATATGACC

A\_14\_P124883 AAATAAAGTAAATAGTCATTCCACGGCTGTGGAGAGAATTGGATTTGATGAATGTCAAGT

A\_14\_P117378 AGTTTTTAAATCAAGATTTCCAAAAGCCAGTTCGAAAATAGCCGATTTCTTTCTGGATT

A\_16\_P32382524

AAAAAAAAGATCTGGCAAATACATACACCCATTCCATTTCACTCCAAAAAGTTAA

A\_14\_P118376 ACAATTAATAATTTGTCCACCTGCTTTCCTCTACATGTGTGGATGATTTTGTGTTTCAG

CUST\_265\_PI426210822 AGGGTATAAACAGCCACACAGTGGTCACTTCTTGATAGGAGAGAGATTA

A\_14\_P122148 ATTAGACCAGTCAGGTTTTTTGAAGACATATAGGTAACCTCCACAGAAAACACAAACATGT

A\_14\_P119448 CATCCTTCCCGCTGATCTAACAAGAATCTACAGAACTCGGTCAATAATTTATTAGTAAA

A\_14\_P131246 ATCCACCTCAGTTATGTTGGTGTCCAACCTTCTCTGTCTGATTATCTACTACATCCAAA

A\_14\_P117749 AGGTCATTTTTAGACCAAAAACACAGAAGAGTCATCTCACTCAGGATTCGAGTTAAAGTC

A\_16\_P17904268

AACATAAGCAGATTGCATTAAGGATGGAAATACATGGGAATACAAGGGGATAAACTTCC

A\_14\_P137697 AAACACATTGTTACACGGATATAAGGTAACAGTTTTTTTTTAATTCCCATCTTTGATGCAG

A\_14\_P136766 CCTGGAGTAGCCATTTATCCCATCTGAATAAAGATGGGACAGAATTAGAATTACTTGATT

A\_16\_P00911913

AATTGCCTTAGAAGTGTTAGAGCATGATAGTCAGACAGTAGCAATTTTAATGGGGTTTCA

A\_14\_P111604 TTATCAGAAAATATTACTTACAGGGTTGCTTCTCAACTGCATTAATTATCTTTTCCAGTT

A\_14\_P127344 ATGGACTAAAAAGCGTATCTCTTCAAACACTGCTAAGGAGAACTAAAGGACAGACTATAG

A\_14\_P121115 CTCTTCTATGAACCTAACTGATATCATGAATAAGGTCTGGAACAAGATTCAGAAGAGAGGC

A\_14\_P116966 CTTGGACAAGCCACTTCTCAAATAAAGTCACTAGCAGATGCGATAATGAATGAATACTA

CUST\_4428\_PI426210822 ACAGCCCTCATTTGTTGTCTTCTCTCCTTGGGAAATCTTCTGCTAT

A\_14\_P109470 CTCCACTATGTTAGAACCATCTTTGGCACTTGTTCACAGAATAATGCCCCATAC

A\_16\_P17026924

CTCTCCTTCCTAATCACTGACAACATGACTATACTCTAAAACCTCCCCTAATACCCATTTA  
A\_14\_P118411 TGGAGTATCTCCATTATGAGGGCCCAAAGAAATTTTTTCTCAGATCTCAATTTTCAGAAA  
A\_14\_P109617 CTCTGGGCAGTTAGAGAGAAGGTGAAAAGAAAATAAGATTTGCAGTTCGGACTATACTG  
A\_16\_P00722074  
AAGAAATACCTGAGTTTTTGGAAACCAATTCTACTGCACATTACCCTTAACCCTATATGCT  
A\_14\_P112211 AACAAAAAATTACTAGGTTTGGAGTTTTAAGGTTTCATCTGAATGAGGGAGGAGTTTCCAT  
A\_18\_P22842674 ACTTAGAGCACCCTGGCCATCCTCTGATTCCATAAGGGAGGCTG  
A\_14\_P113892 CAGTTTTGATAATAGGCTGAAGACTGCCTTCAATCACTTTAATTTTTGGTTCCACAACCT  
CUST\_5143\_PI426210822 ATGCTTTCCTATAACTCTGAGCACTGAAGCAGCTTGTCTGCCTTG  
A\_14\_P113251 ATGGAGCAGACAAGTAATCAGAACCTGAGTAATATTTGCATATTGAGGTCTTCAAACTC  
CUST\_3190\_PI426210822  
ATCAAAGAAGATAAATAAAAGCATTCTGGCTTATCACACACCATATGGCTAGCAGACAGT  
A\_14\_P137541 CCTCCGGAAAAGACCAAAGACAAAGGGAAGAAAGGCAAGAAAGACAAA  
CUST\_5734\_PI426210822 CAGCCCCTTTATTTGAACTTCCTAGCTGTTTTCTGCCTCTTCTGACTAATTAACA  
A\_14\_P133811 TAACTCCCCATTATTCAGGCATTGTAAATTATGTATCTTTGATGGCATGTCTTTGAAGG  
A\_14\_P114316 AGTGACTTGATGGAAAGGTAAAGAAGATACTAAAGGAATGTAGAGATGGGATAAATTCCC  
A\_16\_P15147705  
AAACCAAGGCTTATGATAAAGGATCATTCCACATCCAAATATACCTCTCCTGTATTAGCA  
A\_16\_P01178729  
AAAATGCCAAGTAGGGTAAGTTTAGCAGCATTCAATCCTCTAACAAAAGATCAGCAAATG  
A\_14\_P128149 AGTCTTTTTGCTTTTTTTCCTCCTCTGAAGTATCCATGTCTCTTTCTCTTTCCAATCATT  
A\_16\_P18439026  
CCCCCTCAGAATGTAAAGATTACTGGAAAATATTAGACTCCCTTCTAATCAAACATGAGG  
CUST\_753\_PI426210822 GCTTTCAGGGCAGAGGGAAGGGAGCCTGGGTCAGCTTTCTACATC  
A\_14\_P115337 ACACAGACTTTTTAAATTGCAACTGTAAATATGAAATGGTCATCACATCTGACCTTGGTC  
A\_16\_P01802510  
TCCTTTCTCTCAGTCGAAATCACTCACTTCAAAAACCTTGGACTAACATCAAGATTTTAGC  
A\_14\_P118363 AGGGAGCCACCCTTTTGACAGACGTTGCAACGTAATAATAATGACAGAATTATAAATAAG  
A\_16\_P16116852  
GCTCCAGATTTACAGACTTCCTAAGAAATGTCATCCTACTCTTTCCTTATACGCTTTCAA  
A\_14\_P108868 CTTTTGACAGACTAAGTAGATAAGCCGTCATTCAGGTAAAAAGAGTGCTCAATACTTCAG  
A\_14\_P107357 GTTTGTGGATAATGAAATACATACGGATGAATCCAAGCAAAGAGGTGTTAGACAAAGTG  
A\_14\_P100936 AATATGTTACTTGTTACCTGTGTGAGTGAAGTTTTTGGTTCATAACCTATCACTGTAGG  
CUST\_14\_PI426210822 GAGGATGCCCAATGTCATGTGCACTCTATCTACCCCACTGGCAT  
CUST\_8847\_PI426210822 CACTCAACACACACCCTCTGGAAGGTGGGGGTAAGCTTCAGTCCC  
A\_14\_P200769 AAATTCCTTCATGGCAGAGAGACGAGATAAATATAGCCATGACACATTGTGCCTATGTT  
A\_18\_P22841614  
GGAAAAAATAGTTTTTAAAAAGTAACAGATGGATAAACAACTAAGAGAAAGAAGGAAGGA

A\_14\_P101287 CTTCTGCTGCAATCTGTTCTTCTGTTTTCGCCTGTCAGAGAGAGAGAAGAATAAA  
CUST\_9409\_PI426210822 CACCATCCACCATGATCTGCAAAGAATCCTTAAGAGAGACCCTAGTCT  
A\_14\_P133952 CAAAAGACTATGTTTGGAACACGATGTGGAGAAAGCCAGAACTTATTCAAACACTTCAG  
A\_14\_P130264 CCTTCATAGGTAATCTCTATACTAGACAAGTTCAGATAGAAGGTGAAACCCCTGGCTCT  
A\_16\_P16191013

CCCATAACTGAGCATTCTCTCAATTATTTGTAGACCAAAATTGTCACTAATCGGAGGA  
A\_14\_P125278 CTTTTTGGATTCCAGACATCTTGACCACTACACAGTATAACAATCTGTCACCTAAGTCTTA  
A\_14\_P127199 ACATCACTTCCATCTCCTTTAGGATATATGCTACATTTAGGCTTTATCTTTTGCCCCAGA  
A\_14\_P116970 ATTTTGTTTTTTTCAAAGACAAAACCAAAAGGTGCATCTTAATTAGGGAACAGGTGCAG  
A\_14\_P202210 GTAAGGATCTGAAATTCTTCATTTTTCTCTCAGTTTAGTCTGTGGCAACTGTCATGTCT  
A\_14\_P101379

CAAGAGGCAATACAAGAAATTATGGAATGAGCAAATAAGAAAAAGTGGGAAATCTCTGGG  
CUST\_9892\_PI426210822 CTGTCTGGAGCCAAAGGAGAGAATGACTGCCAGAGCTGTGATTT  
CUST\_4603\_PI426210822 CCAAGGGTGACAAGGTTGCCAGGGAGCCTGGGATCGGAGTTCCAG  
A\_18\_P22840667 CATCAAGGCCCTGTCCAAGGTATCAGGTTTCTAAGGAAAAAGGAGAAG  
CUST\_5664\_PI426210822 TTCTGTAATCCCTCTGGGAATCCCCACGGGCAAGAGAGCATGAT  
A\_14\_P122375 CTGCAAGCAAACATGGTCATTCTCAAGAAATGCCTTATTTAGAGAGCATTGCATAACATT  
A\_16\_P16779539

ACCTACCAAGTTCTTTGCATTGTTTCATTTTAAAACATCCTCTTAGCCTCTTAGTCATGC  
CUST\_7441\_PI426210822

ACATAAGTCTGCTAAGCCATCCTTAATGTTTGGCGGGTGGATTTCTTTGTTTAAA  
A\_14\_P201474 GTGACTTTATTTATGGAGTTTCAGTGTTTCAAGTATTACCTGGAGCAAATCCATCTTTCC  
A\_14\_P114657 GAAACGATAGTGTTCACAAAGTGTAGACTGCAGAAGTTTTGAGAGGTATCAAACCTTAT  
A\_16\_P00706818

AAGGAAATATTAAGCCCCTATTGTGTTGATTTAAACGGATTTTATCCATCACAGTGCACC  
A\_14\_P102119 CTGAAAACAATCAGCATGTGATCTCTTAATAACAGTCACTTCTAAGGATGAATTTGGCCA  
A\_16\_P02517678

TGATGTGGATATAAGATGACGGTATAAACACTCTCTCTTTCATGTACAGTACATACAC  
CUST\_1839\_PI426210822 GACAAAGGCATCGGCAAGGTGAGGAGAAACATCTGTGGAATAGCT  
A\_14\_P120691

AAAGAAAAAAGAGCAGAAGTCTTACGTTACAGAAATAAACACGATTTTACTGGTTTCG  
A\_16\_P01012648

AAAGTGTACCCAAACTTTACTTATATTTCTAGCAAGAATAAGTTCCACTCTTTCCCTG  
A\_18\_P16456492

TCCAATGTAAAATAGAACAATTATCTTTGCCTTACTTATTCTAAACTAACATGCCGAGCC  
A\_14\_P126689 CTAGTAGTAGGTGCTCGAGTATTGCCTTATTAATACTGGGGCCTTAGGGAC  
CUST\_4984\_PI426210822 GCCATCTGTCACAGTAATGAGTTGTGCAAAGCCCAATGAACCTTGTAG  
A\_16\_P15155612

ATCCAAGTCTGCTATGATTACTGAAAAGATGACAAAGATCTAGTTTTGCAATCCACTGGT  
A\_14\_P135483 GAAGAAATCGTCACATTGTAGTCAATAAAGCCGAACCTGCTAACTCCACTGAAGTGTTAG  
A\_18\_P15500791

AACCTCAACTACAAGTCTTAGTATTGTGTTTTGTGTTTAATACCCTACTTCTAAGGATGGA  
A\_14\_P128497 ACATGGTTCTTCTCATTAGACCCAGAATAAAATTAATAATGTCAGTGACTCTGGCAGAC  
A\_14\_P136366 ACCAATGAATTTAATCCCTTTTGTGGAAACTGCAATGGGTTTGCTCAATTTAAGGTAAG  
A\_14\_P124593 ACGTTTTTTAATGTGTTCTGAATTCCATTTACCCACGTCCCTATCCTCAAATTATACTGT  
A\_14\_P101520 CACTTCTGGTCTTTTTCTTTCTTCATCAAGTCCCGTGCCTTGTATTTAATTTCAATAAT  
A\_16\_P01085278

TCCAACCTGCTGTTTAAAATGCTTGTAATGTGACTTTCTACTACTATCCTAACTTTTGCC  
CUST\_6569\_PI426210822 GATGTCATGGATGTTCAATTCATTCAAGTGTTCACTGAACACCTGCTAGGAG  
CUST\_1719\_PI426210822 TGTTTTTAAACAGTGATACCGTCTATTGCTGCCTTGTGGTCCCCTCTT  
A\_16\_P03029717

AACCTAGTGTCCACAGAAATCAATGCAATGTCCTAAAAGTCTGAATATATGATCCACTCA  
A\_16\_P21561091

AATTTCAAGACAATGCGACCTAGTAAAAGAATGACTCTCTGTTCAAAAATGCTTGACTTCTG  
CUST\_7227\_PI426210822

AAGAGTTTAGTGCAATTCACATAAAAAATGTACTTCAGTAATTTGCAAATATTTACTTAA  
A\_14\_P202260 ATGGCTTTCTGAAATCTGTTTGTAATTTTCAGCCTTGTGCCATATCAGACATAAAAAACC  
A\_14\_P112491 AACAGAACTTACCAACTGTAAGAGTGGATACTCTAGCAGACAATACCAGCAATTACATT  
A\_14\_P134636 TCTGATTTTAAAATAATTTTCTTTGTTGTAGGATGAGCAATCTTAGGTTTTGGCTCAG  
A\_16\_P03460197

AATATACCTCCATATCCTCTAGTAGTGACACTTGAGTTGCATAGTTACCACATAAGCGTC  
CUST\_1537\_PI426210822 CATTCCGCACCCTCAGTGATTCTTACCTCGCTGGAGAATCATTTTTTA  
A\_14\_P129737 ACCTAATCAGAATTGATGTGACTGAAGTGCAAATCTTCATAATAATCATGCATTTGCTGG  
A\_14\_P112690 CTATTTAAATGGCGGCAGGTATCTGTAATGACAGGATAAAGAAAAAATATGGGCTTTGGA  
A\_14\_P106062 CCATCCCTCACAGCAGTGCTTCTCTAGTCCAGTTTGAAGCATCTTTC  
CUST\_5069\_PI426210822 GACGGGGAGGGATGAGAGGTCCAAGGCAAGATGGATAAGTAGGAA  
A\_14\_P110641 CCTTCAAGTCTTTTCAAGTTATGAGATTCCATGGGTCACATGCATAATATGAGATAGGAATT  
A\_14\_P117784 AGACGTTTGGCAATTCATGGAGACTTTAAAAAAAATGTAATTGAGATGCAATTCACATT  
A\_14\_P105842 CTTGCATCTTGTTAAAACCCTATCTCTCCAGTTTCGTCATTGCTCACACTTTCA  
A\_14\_P102121 CTCTAACCTAAATCTTTCTTTGTTGATAACTCTTTCTTGGAACAAGGCTAAACCTCTTG  
A\_14\_P123568 CCCCTTCTGACTTTIACCATTTATCCCATCATTTGTTATGTGTTTGACTCAGTCTGTTC  
A\_14\_P126912 ATTGAAGGAAAGAAAGGGGTGAAAGTGGAAAACAGACCTTTCCTCTCAAAAC  
A\_18\_P22840142

TGATCCTTTCTCTTCCCTCCCTTGTCATTAAATTATTAATAATCTATGACCAGAGGAAGCA  
A\_14\_P136745 TAAAATGATCTGTTTCTGTGAGGAGACTTTCCATGGTGAGATTGCTAGTGTCTCAG  
A\_14\_P104555 AAAAAAATACATATCCCCGTTAGGGTTTTCTTACTCTCTCCTTTGTTGATTCTCACAGAT

A\_14\_P131151 CTTCCACAGATGAAGGAAATTACCTGCAAATTCCTTTGATTAATTACAGCAGGTGTTTTTC  
A\_14\_P137163 ACTAATTTTGAGGATTTCTCAACGTCAGGCTGACATCACATTAGTCTTCAGAATAATGCA  
A\_14\_P116816 ACAAAGAGAAGAGTAAATTCACCTCGGAATCAAGATTGTCCCTAACACCAAAGAAAATACT  
A\_16\_P00452776  
TCTCAATGCTCTCAAATTACTAGTATTTCCACGATTTCTGAAATTTTCAGTCTTTCACCC  
A\_16\_P20160065  
ATGATAAACGCGTCCATTTTTAGAAAAGAAGGCTCTTTAATGAGGCATTATTTCCAGATGC  
A\_14\_P106510 CTCTGTCTGCAATATCCTTCCAATACACATGTAAAATATATGTAAACAGTGCCTAGCCCA  
A\_14\_P101413 ATAGGATGCATACTTTTCCCACTCACTGCGTCTCTTTTTCTTTTTGCAGCCTTT  
A\_14\_P139816 TAGTCAAGAAATCTTCCACTGGTTTTCTTGGTTAATGGAGGTGAATCTGAAATAAGTAGG  
A\_16\_P19993108  
TGGGCTTCTACACTTATTGCTATCCAATATTTAAATCACTGTGCTTCAAAGACAATTTCCG  
CUST\_6323\_PI426210822 TCTTAGGACATTGGACCTCCGAGCAGCCTGCAGATCTTGGGAATT  
A\_14\_P103980 GGGAACAAGTCAACTTTTTGAGGTCCCCAGTTAGGACTACAATACTTAATCATTTATTGA  
A\_16\_P30952483 TTCATGAGGTCAAAGTCAAAGGTAAGGGACACAGACGGGACCCTT  
A\_18\_P22705818  
ATAACTTTCCGAATGGGTTTTAGAAAATAACACGAGAATGTCTTAAGGAACAGAGGAACC  
A\_14\_P106814 GAATGACTTCTCCACATCAAAATGTATCCATTCCAAAGAAATCTGGAAAGAATGTTTTG  
CUST\_1169\_PI426210822 GAAACTCAGTAATGCAAGTTCTCTGTTCCACGTTAGGGGTCACATTATGGTTA  
A\_14\_P137148 ATAAAATTTATTTTATGGCTTAGGATCTATGACCCCTGCCTTGAGAGGGAGAATGGG  
A\_14\_P133230 AACTTGCTATGTTTGGGTTAGGATCCTAAAGGGCTATAACTTAGAAGTAAAGGCAAATCA  
CUST\_6254\_PI426210822 TTTTATGAGCTTGTTTCCCTGACTGCATTCCAGAGCCACGTGTGA  
CUST\_10179\_PI426210822 ATGTGCTTGACACACACCCCTTCACACTGCCTCAATTAGAACCAT  
A\_14\_P117145 CTCTGCCAATTTTGGTGTGTTTACCTTCATAATTTAAATGTGAGGTTTLAGAACAGAGACC  
CUST\_5494\_PI426210822 CAGTGGCACAGATGTGGACTTTCTTTAGTGAAAAGCATCTTGGAACCTTTAC  
A\_14\_P118587 TCTCATGGTTCAAACAGAGAGTGTAACCATAACATAGGAACTCTGTGAGTATTCAAGT  
A\_16\_P41398473  
ATCTCAGCAACTATTGTTTTACAGCCTATTTACCAATTGCTCTTCCTAATGATTCCAGCA  
A\_14\_P107611 AATAAATGCTCAGCCTCCATGAGTCCAGTGCTGGAATGGCATCACATATAAG  
A\_14\_P131880 TGACCCTCACTTCCCCATCTACTTAAAGCCTTCTATGATTCTTGTCACCTTTAAAAACATA  
A\_14\_P103750 GTGGCTTAGAATATATTCTATTATAAGAACCTTCATTCTCTGTGACCACCTTGGGTAGCA  
A\_14\_P107078 GGAAGAAGGCCTTAAATTTACAGAAAGTTTCCAGGAGAGGTAGGACCCTTTAAAAA  
A\_16\_P16178563  
ACTGTTCTCTCTCAAGGTCTTAAAAAGCACCTCTGGTTTACAAAATAACATGGAATTAGG  
CUST\_5894\_PI426210822 AAAGTTGGACTGTCTTGCCTGTGAGACAGGAAAGGCATGTGTGAT  
A\_16\_P19785040  
TACTACCTTGATCCTTCGTTTTAAAGTTCTGACGTGAAAATCGAAATTAGATTCCACTC  
A\_14\_P100637 CTAAATAAATATAACCCTGTGCCTAAAACCTTAAACGTCGGGGAAAAGACATAAACCTTTC

A\_14\_P138375 ATCTGTATTTTTAACACGTCACACATCATAACCTAAGGTGACCAGCCTTAGGTGCTTAA  
A\_14\_P101341 ATTACTTGGTTATGTTCCCTGAACTATAAGAGTTAGAAGAAGGAACTCCCTACTTGGACAT  
CUST\_2438\_PI426210822 TAGAGGGGAGGGCAGGGCATCTTCTTCAGCTGAGTGCTTTTGATT  
A\_14\_P104331 GGTGAAAGAGTTGTCAACAGACTGAGGGCAATCTTTAAATGATGGGGAAAATATTTAAATT  
A\_14\_P135826 ACCTGTTTTAAAGTCGTGTTTACCCTCTTAAAGAAAACACTTCTAAATTGCTCTCTCCTTT  
CUST\_5301\_PI426210822 GTTTCTAATTGCTGCACCCTCTCTGCCTCCACCCATGCCTCAGT  
A\_14\_P121453 CTCCTACACAAGAGAGCCAAAGCAATGTCAAGTTTGTCCAGGATACATCC  
A\_14\_P135811 AGTGCCTTGAGAGTCGGTCCCACAGAAAATACTTATGTAAATGAAACAAGAAGGAT  
CUST\_7829\_PI426210822  
GCTGATATAAATGTTACGTTCTAGCATTTGGGAATTAACAAAAATAAGGTAGCTGAGCAG  
A\_16\_P00403530  
AACCATGTTCTAGGAAGATTATTGACCATCTTACACCATTCTACCCTATATCCCTGCAAT  
A\_16\_P20217347  
TCACTTCCATCACTATCAAAAATATGCTTCCATTGTTTCTTCACTTGTCAACTTTCAGCA  
A\_14\_P125283 ATGACATTAGTAAGAGAAATACTCACTCGTATGCTGGTATTAGCACATTAGACTCCCCAA  
CUST\_7591\_PI426210822 AGCCCCTTCAAACATTTGACTCCCGCATAACCTTTTCATCCAAACA  
CUST\_5974\_PI426210822 TAGTGTATGTTTTAACAAGTAACATTTCTGTGGCAGGAGAGGGCTGAAGGAG  
A\_18\_P22841192 GCATTAGATGCCATGTGCCCAAGAATGAGAGAGGATGAACTGACTTTATG  
A\_16\_P20302264  
AAGTCCCAATCTACATCATCTTGCCATTGATGCTAGTGTAACTTAACTGCCTGTTTGATA  
A\_16\_P37373022  
GCCATCTGTCTAACAACACTAAACGTTAAACTCAATCTATCATTTAGTTGTCCTCTGTCCA  
A\_14\_P104445 GAAAAAAAATTCTGGCAAAGTTTGGATCTTACAATGCACATTCTATTTACCCCCAAAAT  
A\_16\_P17144206  
ATTACTTCTAATGTCTCTACCTTTTTGTTGCATACCTACATCCAGATTGCTAGTTCCCATG  
A\_14\_P138835 TCTAGGCTGTTGTCCCTTTAAAACCTTGAATCCAAGGGGGTAATGATTTATCAAACCTTGTA  
CUST\_1123\_PI426210822 GAGTTCAATGTCCATGTGTACGCAGGTCCACGAGGTCATAATTCT  
A\_14\_P116224 CCCAGTGGGAGTGCTGAAATAACTTAAACATTTTACATGGCATTTACAAATGCGATATTT  
A\_14\_P127191 TCCTCTCCATCCCCTGTAACCACCTTATTAGTTTTCTTAATGTATCCACATTTATTTA  
A\_16\_P00685544  
TGATCATCAGACTGTTTCTGTTTTTTGGATTTTTGTCTTAAATAAACACCTTGGAACCA  
CUST\_6964\_PI426210822  
CCAGTGAGTCTACTCCCTTCAGTATTTGTGTCAGATCCTGCTCAATTATAAGATGATCTT  
A\_16\_P17292338  
TGCTGTCCCTGATTTTCATACTGCAACATAACCATTTACTGTCACATCATTGAAAGCAAATC  
A\_14\_P109443 CCACAATCAAGAGTAAGGAAATTCTCTAACATATCCCCAAGAAACATTTAAATATTTCC  
A\_14\_P130935 CTTTTTTTTGTGTATGCTACTGACATGTGTGATTGTGTCAGATCAATTTCTCCTTTTGCCAG  
A\_14\_P138801 ACCAAGAAATGAATCAGCAGGTTATTCAGTGGGCTTTCTGTATTTAAAGGTATTCTTTTC



A\_14\_P123406 CAACATAAGCGGAGGCATTTTCCTTTTCTTCGTGGCCAATGCCATAATC  
A\_14\_P109452 TATATGATCCATCAATTTCTCACCTTGTGTTTTCTTTGTGTCTTCACTTTCCATGCTTGT  
A\_16\_P16825731  
AAAGCACAATAGGATATCTACACCATTACTTAGTTTCTGGATATCACCCATAGCATTGCA  
A\_14\_P115910 ACATTCAATTTTCCTGGATAAAATGCAACATGAACTTGTTCCTTTACTTTGCCTTGGATT  
A\_16\_P03544239  
AAATGCACAATGTTAACAAGGTATACAGGAGACTTTTTCGCTTATCCTTATCCACTTAACC  
A\_14\_P106358 TAGAGTGGTGAGGCTAAACGGCAATATAAAGGAACCTTAGACTGCTTTGTGAAGATATAC  
A\_14\_P106402 ACCCTAGGAAAGATCTCCTTTTACCTCAACATGAAAACAATTTTTTCCCAAGTTTTCAAA  
A\_16\_P00685329 AGTCTGAAGCCACTTGTTCACTGGCTGAGGAGTTGGATGTGATTCTA  
A\_16\_P30952263 AAGGCTGATGGCCGTGTGTTGGTAAGTCCCTCCTGGGGGTGCTGT  
A\_16\_P01894969  
TAACTTCACTGACATCTCTATCAAGCCTATTTAGTTTCTCCTCTTATGTCTCTGTAGCA  
CUST\_7781\_P1426210822 AATCAGAGCACAGAAGAAGCCTGGTCCCTGGAATCTCTCCCATAT  
A\_14\_P130197 CTCTGCAGAAGAATGCAATTTGAAGCCTGAAGGATAGGAAAGTGACAACCAATATATAAT  
A\_14\_P129905 ATCAGAGAGATTTTAGATTAGTTCCCTGGTAGATGAAGTCTAACTCAGCATTAAAGGTT  
CUST\_4002\_P1426210822 ATTTAACAGCATATTCCATCAGGCCTCACCTACTAGTGTTTTGTGAGGCTG  
A\_18\_P22839592 ATTCCCAGGGCGCGGTTGTGTATGGGCTTCAGCAAGTTTCTGAAC  
CUST\_2986\_P1426210822 TTCTCTGAGCTCAGCTAGTTCATCTCTGGTAAGATAGTCCAGTCTCGC  
A\_14\_P111722 ATTTTGCCCATATGACTTCAGAAAAAATTGAAAGAGGGACAAAATTCACATGAATGGGA  
A\_14\_P112788 TAGGCATAAAAAATGGAACCTGGCAATTATCAACACTGTATGAATGGAGGATTAGGGATA  
CUST\_4599\_P1426210822 CTGAGGGTGACACCTTGGGCTGCAGCCACAGGCCACTTTGCCACT  
CUST\_6978\_P1426210822 GAGGCTGCCATGGCCTAAGACTGAGACAAAGAGAATATGTCTGTATACAACCTA  
CUST\_5992\_P1426210822  
ATTTTTCAAAAATGCATAGTGTATCCCTTACTTAAACTATGAGAGTTAAGTTTGGATGAA  
A\_14\_P133567 CTTACAAAGAACTTGCACACACATCTCATGCATAACTCACAAAACCTCTTAATTCTTTCC  
A\_14\_P105138 TATTAGGAAAAGAATAAATGAGCATCATGAAGTTCCTTGCCAGTCACTTTTTCCAGAAA  
A\_14\_P129700 AGCACAAATCTTACCTGAGTTACCATTTTTCTTTTTCTCCATAAACCACGGATAGATGA  
A\_14\_P121858 ACTATATCCCTAATGGGTGAGAATCTACATCAAACAACTATAATGACCCTGGGAATTGA  
A\_14\_P131796 CACAAACTGAGAAACATCAACAGCACCAAAAAAAGGTAAAAGGGCCAGTTTGAAAAA  
A\_18\_P14131916  
AAACTTCAGATTAAGGTAGTCCTTGAAGTGGAGGCTATTAAGACCTAGTGTTATCTGTCT  
A\_14\_P136281 CTAGGTGCTTTGTAGTTATTTGAATAATTTTCATTTCCCGGCTTACTTGTTCCTTTAGCCA  
A\_14\_P130977 CAATGTTTCCTAAGGTTCTGCATTTCTAACTGACCTCTGTCCTAATTATCTTAATATTA  
A\_16\_P01858482  
ATCCTGGACACATATACAAAAGACACAGACGATATCTTTTATTATTCTCCACGTTGCTGC  
A\_14\_P104677 AATTAACCTCCACAGTTTTTCACAAAGGTCTCTTGATATCAAACCTTCTTTCCCTTGCATGCT  
A\_14\_P132805 CTCCATGACTGTTCCCTGACATACTGCAGTGTGGCTGTATTTTAGAAAATAAATACTTAGA

A\_14\_P100368 CTAAATATATTAACGGCACATTGCTGTGTATTTGGCTCAAATGAGGCTTACAGGAAATGT  
A\_14\_P133219 CTTATTTTTTCATATTCTTCACAGGGTGAAAAAGGCAGTGAGGGGGGAACCAG  
A\_14\_P101768 TACTGAGCAGAAGCACTATAGAACTACTAGTTCTGGAAGGAGAACACCTACATTTAAGA  
A\_16\_P39251670  
ACTCTACCTAAACCCATCAATATAACCTCACTGCCAATATTATGCTAAGATTTGCCTGA  
A\_16\_P15356000  
CACAAACAACCTAGAAAGTTACCTGTCCTGTTGATTCTATTTCAAAATCTGGCTCACATG  
A\_14\_P105011 AGACATGAAAATAAACAACGAGAACCTCCTATTCCAAGTGGAACATTTCTCTTCTTACT  
A\_14\_P135284 AGTTTATTTAACGTGGGAATGCTTACAATAAATAAAGCAGAGGGGTAAAGAGAAACAGAA  
A\_14\_P116429 GAGATGGATTTTGATAAAAGAGGTTAAATAACAGGTTTTTCCATTTACCTTATACGAAT  
A\_14\_P106578 AAATCTTGAAAATAGATTTTTTTGTGTATGTGAGAGGATGTTGAAACTGCTTTCTCCCTT  
A\_16\_P17389016  
TTCCAGCACCATATCACATTAATTGTTTTATCCCTAAACTATCAGAGAAAGCAGCATCGT  
A\_14\_P101917 CTGAGAAATGTATGATGGCTGTGTGCTGAATTCCTCTAGGGGTGTATTTGTTTAAATATT  
A\_14\_P120382 TTTCACGTAAGACTTTTTGGTTTGATCATCTTTGTTGAGGTAGGACTATCAGTTCCCT  
A\_14\_P120107 CACTTACTTATAATAAACATTGATTTGGTCGTTTCAGGTTCCCTTTGGTCCTCCTATTGAGA  
A\_14\_P129457 GCTTATTAATTTCTCTCTGCCTTTTTAAGTCCAGCAGGTGAGGTAAATCAGTTTCTTTCAA  
CUST\_2716\_P1426210822 CCTCACCTATCTGTGCCTCGTGTCTCTTCACTTCCTTTGTTTAC  
A\_14\_P113915 ATGTGGGGATGATTCACAACATAAAGATACACAGTATTGTCTACATGGAAAAAAGGGATA  
A\_14\_P108602 CTCACCCACTTTGGAGATAGTTTGCTTTAAGGAATTAATTTTTCTTCATCTTGAGCCTAG  
A\_14\_P122679 GCTTCAAAGGCTAGTAAAGGGATTTCAATTTCTTTAGTCATATGGTTAAACACAGGAACC  
A\_16\_P02814835  
CACATTCCATTATAAGAGACCTGGTGTCATAAAACAGTAACTAAATTACGTCAATAGGCC  
A\_14\_P127593 CTGATCAACTGGAGGGTAACAGGTATGAGACTGGACAACCTCTCTAACAG  
A\_14\_P139634 ATGAAAGGTTAACAGTTCTCTTATTTTTCCCTGTGTGCTATTTGATGATTTCCCTGTGAA  
A\_14\_P103094 GTATGTATTTTATGACTGGTTCAAGAAAATATCTATTCTCTCTTCCCCACTGGAGGAAA  
A\_16\_P16772064  
CCCCCAAATAAGAAAGTAAATAGAACATAACTGCTACCTACATCTTAACATGGCTCTG  
CUST\_482\_P1426210822  
CAAAGCAGAATAAAATGTTTTATCCCAACCTTCCTTTTTGCCAGAAGGAGTCCTA  
CUST\_6562\_P1426210822  
GCACAAAACTCTATGCTTGATCGTTTTACTATTTTCAGCAGGACTGTCAGAGAGG  
A\_14\_P133871 ACGTTTCTACACGGCAGATGCTTTCAACGTAGACAATGATCACTTTCTTTATTCTTAGTA  
A\_14\_P112486 GAAGGTGACATAACTTTACCTTTCTCCTTCCAGTCAAGTAAGAATATCTGTCTGATCCTA  
A\_14\_P136809 ACATGTTTTTCATTGGTGTAGATTACCACAAATGCAAGGCAACATGTGTAGATCTCTTGTC  
CUST\_4828\_P1426210822 AGTCACTAAGCACGCTACACCCTAGCCTTTCAATTCCTTTATTACTTCATGGA  
A\_14\_P119910 GGTTAGTAATCATTCTGGATCCCTTTTTTCACTGACATCTCCTACAAGGAAAAAATACAA  
CUST\_9153\_P1426210822

GATATAAACCTTCACCTTATTTATTTTCAGACATATATAGTAAATCCTGGAATGTATTCA  
A\_14\_P118241 AATGAGAGGTCTGTTGGGAATAAAGGTTTTCTTAGATTCTGAGTCTGGCTGCTTT  
A\_18\_P14133360  
AGTGAAATAGTGCAAATCAGCATCCTTTTTCTTCATTGCTTACCCCATTCATGCTTGAAAT  
A\_14\_P107365 TTATGTTACATGGGGCATTCTTTTTTAATATTAAGAACATTCTTCATTCAAGTTTTGAG  
A\_16\_P15540781  
CGGATTCTAGGAAAGTTATCAGTCATCAAAAAAGAGCCTTAATCAGATCGAAGAGACAAC  
A\_16\_P02401154  
AAAAGTTATTAGGTTTTCCAAATCACTGATATGAGCCAAAATCCTTACTGAGACTAGGGG  
A\_14\_P125397 TAACTGCAACTCAAGAGAATTAGGGCACAGTCAACCATGTCACTGATAAAAACATAAGAA  
A\_14\_P201821 GTCTAAAGGCTAGAATAGTAACCTAAATGCATGTAGTAGTGATATGGTGACTGTAAGCCC  
CUST\_9990\_P1426210822 GTGCCCCACTTCCCCTTATAGTCTGCATGCCCTCCTTCTGGCCGC  
A\_14\_P101995 CTAGGATAAAAATTGGGTAAAGGACATTTGCTTACCTGCAAATGAATCACTGTGGAAATG  
A\_14\_P200629 AAAATTGAGGGAGATGAGAGTATCCAGGGCAAAGAAAGGAGAGAAAAGCAAATG  
A\_14\_P104208 TTGTATGTGTATCAAAAGCAGTTGGAAAAACTGGCTCTATTTTTCTGCACCAACATCAT  
A\_14\_P102904 ACATCTTCACAAATTTAGGCTAACAAAGCACTTAGAAGAGGAAATGCTCTCAATTTTCGAG  
A\_16\_P03768491  
AAAATCAACCGCAACTTGAGATTTTACTCTTTATCGGCATAAAAACAAGTCATCTGCCTC  
A\_16\_P16916861  
AAGCCTGTCTCCAAAGATAATTAAGTATTCCTTAATTTAATGACACGTCTGTGACTCA  
A\_18\_P16216347  
AAAATTTGATTGCAATAGGGAACTTCATAGATTGTCCTTCAATAAGCATAGCCATGGGC  
A\_14\_P130912 AAGTTGAGAGCGATGTGAATCGGCGAGAGTTTGTCTCGAAATTCTGACT  
CUST\_1252\_P1426210822  
ATTTCCAGGGAAGGAAATAGATTACCCATTCAAAGGTGAAGATTTTTTTCCCTTTAA  
A\_14\_P138819 CAGTCTCCTTTTCTTAAACTGCTATGAAGATGAAACAAGTGCTTTGCAAACAGCAGAG  
A\_14\_P100442 TTGTGCTATTGATGCTATTAATTCCATTTTAGGTTTCTTCATATGGTGGTTACCTCACTT  
A\_14\_P130552 TCTAAAGCCATAACCAGAGTTTTCTAGAGGACTTCATAGGTGTCATTTCCACATGTAAAAT  
A\_16\_P00571441  
TCACAGATCCTGACTTAACTGACATTCTCAATCTCCTCTTTAAATATCAACTGCTACCT  
A\_16\_P21561275  
AAAAAAGTAGTGAAACAGCAAAGTTAAACCTAGACTCACCTTACTTTCTTACCTATTGCT  
A\_16\_P19264745  
AGATACTTGCAGAAACCAATATCCAACAAAAACCATATCCAGAAAATATATCTACGTCT  
A\_16\_P20867367  
TTCTCAAGCATGTTTACCTCAGATTCCATAAATACATCTCATCCCTTCAACAACAAATGATC  
A\_14\_P113132 TGCAAAAACACATTTACATTTGTTGCTATCCCATAGCATGTCAATAGGACAGAGTTTCTTG  
A\_14\_P129991 TCTTTTACGGACATTACACCATTGATGGGGTGAAATTCAGAACTTCACCTATGATCT

A\_14\_P128841 CTATATGTATATAAAACAGACTTCAGTGTTACTAGCCAACCCACTTGTGAAGTGGAAGGA  
A\_14\_P111647 AATTCAATTGGGCTGCTATCACCACATTCATATGGTAATAGATAGAGGATGTGTTTACCT  
A\_16\_P17432071

ATTTCTTGGTTACAGTGATATTCTCAAAAAGAGGGCATAACCTATCTACTCCATATCTGGC

A\_14\_P118200 CTCCCATGAGTCAGTAATATGGTGCTTTTAAAAACTGAGCATTTCCTCAAGGATATGTTA  
A\_14\_P202237 GCCTTACTTACTCTTTACAAAGTCTGATGAAATGAAGGAACTCTTTTCAAAGTTCAGTGG  
A\_14\_P127142 CTTACCTAAAATGAGATGAAGTTTGGTTTCTGTCTGGAAAGCATAATGTAATGTTACCAA  
A\_14\_P127348 CTGTGTAACCCTGTCATTCATTTTGGCATAATTTTGTGAATTCCAACGCACCTG  
A\_14\_P100031 CTGTGCATAGTGAGTGATAGGATCCCAGCAATTTTCCAAGTGGAAAATCAATTATTCTA  
A\_14\_P200787 TTTCAAGAATTGTCTTTTCTCCCATTTACATCACTGTATCTTCTCCAATTTTCTCGCA  
A\_14\_P202466 CTAAATGCATACGTTTTCTCTGATGGAAGATACCTTTATAGAGAAAATCCACCTCAGT  
CUST\_9047\_P1426210822 CCGTTTATCTGACCACCTCAGCCTGGAAAGTAACAGCTCTTGACT  
A\_14\_P108202 TTAGAGGGACCTTCAGAAAAGAAACAGCACAGGAAAAGAGATAGGGCTTAAAGAT  
A\_14\_P138334 CTAAAATTGAGGCAGGTAGGAAAATATTATTGGGGGCATAAGCCTATTAGTGTGTAACG  
A\_14\_P116529 CCAGGGTTACAGCAAGAAGAATTAGAGGGTCCATGTTACTAAAATCACTTGAAGTTAATA  
CUST\_2206\_P1426210822 CAGTGATTTGGGGTGAGAGTAGGTATGACTTTTTTCCCCAAGTTAGATG  
A\_14\_P114481 CTTCAAATCTAGAAACCACACCCAACCATGAAAAACACATGTTAAAGCAACTCTAAG  
A\_16\_P20243460

AAGTTGCACTTCAATAACCATGATACCGAATGATGTCCAAAGATTTAAGTTTCTACAGCC

A\_14\_P117930 CATAAAGTATGTGAACACATGTCTAAATTTAAAAGGAATTACTCCACCGAAATGACCTCTG  
A\_14\_P106197 ACGGATAACACTTACTTATAACACTTCCCCTCAATTGGAAACTGTTTGCAGTTATTACAG  
A\_14\_P200666 ACTTTCCTTAAGGGCTTGGAATAAAAACAGTGCATTTATTAATTCCTTAGGGACCATGA  
A\_14\_P108713 ACCTATTTCCCCTAAAAAAGCAATTTGAAAACAATCCTGAGAAATTACCCTTAGGACACA  
A\_18\_P22842847

TGTGACATCTCGAGACAGAGACATGCTATGTAAATAGTCAAGTAACTGAAGAGAACTAT

A\_16\_P30952541 CTAATCGACTCTCATCTGGTGGTGCAGAGATGTTTCATGTCCAGGAAATG  
A\_14\_P136026 ATTCATCTATTTTGTGGTCTGCATCATTGGGTTGTGTGGCAACACACTTGTCAATTTAT  
A\_14\_P113917 ACTCTTGTTTTTCTAGTGTCTATCAAATAGTTGTTGAGGAAGAACGTCCTCGAAGAACTA  
CUST\_6508\_P1426210822 AAGAAGGTTGCCCATGAGAGTGGCTAAAGACATCTAGAGTCATCTCAAATG  
A\_16\_P17081608

GGATTCATATGACTACTTATCAGCCAATTCCTTTTATAATTATAGACTCAGACCAGACGC

A\_14\_P127873 CGTTTTAATTTTGGCAAGAACTCAGATGCAAAGACGTCCATTAATCCTCATGGAAATGGT  
CUST\_9223\_P1426210822 AGGCACAGACTGTGGTCAACTCCTAATTTTTCAGTCTGAGGTTTCAATCA  
A\_18\_P17192842

ACCACCTATGAGATCATGTTTCTGTATATAGAGTGTTACATTTAGTTTTGATGGGCTGCA

A\_14\_P102803 CAGGTGGCAGCATCTTTCTATGTTCTGAATGAAATTTTAGAGAGTTCTATGTCATGCATT  
CUST\_8943\_P1426210822 TCCAAGCCAGAGCCCCTCATATTAGCCTAGCTTATGTTGTTGTGATC  
A\_14\_P105367 AAGAAGTGTGTGGTCCATCCTATGAGTGACCCTAATGTCATGACCATTTATAATAAAGA

A\_14\_P123358 GGAACCTTCTTGGGAGGTAATTATAAACTCTTCCTGTAAGTAAAATGCAACAAGACTCCA  
A\_14\_P105796 CTGTCACCTGTGGCAATGAAGACCATTTCCACCGTCTCATAGCGATT  
A\_14\_P130523 ATACAGCAAAATTAATAATAGCACAGGAAATTAATTCTCTCCTAGCCCTACCTCACAGGTG  
CUST\_2109\_PI426210822  
GCTTGCATTTTTAAAAACAGCACCTCATTCTGTGGGCATCAATCTATTTATCTTCCC  
A\_14\_P107937  
ATAATAGCAGCATAATGAGATAAACACCACAGGAGAAGTGCAAAGTGGCAAGAAAACATA  
A\_18\_P17291863  
CAGACCTCATAATTCATCCTAGACATCTTGTTAACTTTCCATCAAAACAGCAGATTCCAA  
A\_16\_P16805095  
ATGTGTGAAACAGATATAGTGTCCCATCTAAAACCTTTTCAACATTGAACCTCACC  
A\_14\_P120119 CTTTGCAGAGTAAAACAAATCACTTCCACTTTGTGCGTGTCAACTTAAAATGTCAGATTT  
CUST\_3993\_PI426210822 ACCACAGATGCTTCTCACCCCAAGGTACCCGTGCCCTGTGCTGCT  
A\_14\_P117166 AGGTGTATGGAGATATCGAGTATTGCAGCATTATTAAGAATAAAGTGACTGGAGAAAGTA  
A\_14\_P101556 TCCAGTATGGAGAAAGTAGCAAACACTGATTTTATAGGATGTTAGCACTTTACCACTCTG  
A\_14\_P128727 CTTGCTGTTTAAAAGTCTTGCTGATATCCATTAGTTTCAATTTTCTTACCTTAGTGGGGCAA  
CUST\_7080\_PI426210822 GTTCAGGCACAGGCAGGCTGACTCCAGTGTGCTCTAATGCATCTT  
CUST\_8539\_PI426210822  
CATCTACAGTGTTCAGGAGCCTTTTTTTTTCTATGGGCAAAAATCATCTATTGAC  
A\_14\_P124811 ATGCCATTTGTCAGAGTAAGTTATTTTCTCTGATCTTCACACACAGTGAATGGAAAAACA  
A\_18\_P16134355  
GCCAATTCATGAATGATGTAGTAACCTGACAAGCAAATATCAACAAGACTGAGAAAACCTG  
A\_16\_P19928121  
AAACGAGTGAAAAATTCTAAGTTCGTGAGGTATGGTTATTACCCTTTGACAAACAGGAAA  
A\_18\_P22841619 TTTCTTTCAGGAGTGGTCTCTCTTTCACCTTCAAGGCAAACCGCTCAA  
A\_14\_P200461 CACAGTGCTTATCACACTGAATTACAGATTTGTATCTACCTCCTCCTCATTGTAAAAAGA  
CUST\_3297\_PI426210822  
CCAAAGGCAACCACAGTTCCATTTTCTTAACGTGTCTTTCAAAGCTTGTCAATAAATA  
A\_14\_P130062 CTTCGAGCCACATTAATTTTAAATAAATTCATTTTTGAAGATTTCCCTGCCATGGCAAGGA  
CUST\_2028\_PI426210822 TAATTGTGCCCTCTCTCCTCCTTGAAAACCTCTTGGTTTGGATGAG  
CUST\_3617\_PI426210822  
CCATAACCATTTTGAGGTCATTTAATAAGGGATTGCTTTTCTGGATAATCTCGCTCCT  
A\_14\_P118903 ACATATGATTCCTGATTCCATTCTCCAACCACTTAATCCATCTTTAATACATTAGACGGC  
A\_14\_P138277 AAACCGAGCGATTTTTAAATTAATTTTCTGTGGCTACTTCCAACTTAAGGTTTCTGGAAA  
A\_14\_P201002 AACTTTCCACTGGCCTTTCTATCTACTAAGTAAAACCAGCAAAAACACTCATGATTTTT  
CUST\_3382\_PI426210822  
AAGTAAATTTGTGGGGTTCAGTTAAACCACCAGACGACAGCTTTTATGTTTGTACATT  
CUST\_8612\_PI426210822 CCTCTGCTGTGCTTGTATTTACCTTAAAAACAGAGCCACGGTGGTG

A\_14\_P111921 CTATTAGAATATGACGGTCTGTCTGCAAATGGAATATTTGAGGAGAATGAGACATGTGAT  
A\_16\_P03798067

AGTGTTACACGCTCATTATAAAAACTCAACAAGACCAGAAATATCGTATGAGTCCTCAAGA

A\_14\_P114604 CTCTTCAAACATCTTCCCTACTATTTTATTCTGAACCTTTGTAAACACACAGCCAAGTTG

A\_14\_P102214 GTGTCGTTTTGAATAGAAACAGTGCCTGATATTTGTAAATACCCGGTTTATCCTGAAGAA

A\_14\_P116688 CCTTTCTGAAAACCTTAAAGAGTGATGACGTGGTCAGATCTCCTTTTTAAATAGACAACAC

A\_14\_P118975 CTGACCAATGATTAATAAACATTATAGATCCGGAACGAAGTAGAGAAGGCATGCAAATTCA

A\_14\_P130924 GAGAAAATAAAAAGGAAAGAGTCCAGTTGGGGCGCTAGTATAGCACATGCAG

A\_16\_P39702284

AAATGCTTGCTTGAATGATTGAATGACTTCAACAAGGTTAAGTCCAAAATCCAACCTTGAC

A\_14\_P126580 CTCAACCAATTCTAGCAACTAGCAGACACCAAATAAGCAGATTTCAAACCTTATGACTGT

A\_18\_P22841373

GAGAGTCATTTTCTCAGTAAATATTTGATTGGCCTGAAGTTAAGTGGGTAGGCGTAAAAA

A\_16\_P02273502

TCCTCAGTCAAGTCTAAATTCTTCAAGTTAGCATTCAAAGTCGTCTAAAATCAGTTCCTG

A\_16\_P16906598

AAAAAACACGGAGCATCTTAAGAAGAATCTCCTATCTGAATCTAAGACAAGAAAATGGCA

A\_14\_P133204 TTGCTGTTAAGTTTTTTCTCCCAAAGCAAAGTCTATTCTTCTTTTTGGATTGTGAG

A\_16\_P15850577

ACACTTATACTCTTGAAGGTAACAGAATCAACCCAATGTCATTAAATCTATTGACCCCTT

A\_16\_P15948552

GCCTTACCAGACAGTTAAGACGCATTAATCCACTAGACAATTGATACAATCATACCCTA

CUST\_7095\_PI426210822 CCTCCCCTGGAATGAGCTTTCTGAGGTGCCCGCGTGTCTCCACT

A\_18\_P22840729 ATATAACCTCAGGTGAACAAGAAGGCTGCCCTGTGGCTCTTCACG

A\_14\_P103087 TGTCAAATTACCAAGTAGAACAACCAGTTACTAATTATTTGGGGAGGTTATTTTCACAG

A\_14\_P125293 CGTTTCTTGGAATTCTCCTTCTGCTGCCTAACCATATTCTATTTCTTTATTTATGGGTT

A\_14\_P139329 ACAGAATGTGCACTGATTAGAGATGTGTGGTGATTTAACAAACATTTAAACTGCCTGTT

A\_18\_P22842458

ATTTGATTAACACTTGTGCTAGCCTTTACTCAGGCTAGATTTATGATGGCAGCAAAGAA

A\_14\_P113840 AAACCTGGCTCAATGGGTATTTGTTGAATAAATAAAAAGGACGATCGCATATGTGAGAGAC

A\_16\_P00177935

CAAGGACTGTTCTCTTAAACCAACCTTTGTTACCATCTTGTGTAATTTAAGTATGGAACC

A\_14\_P137032 TTCTTAGGCATTCGTCATAGCAAGGAAAGTGGTAAGTCAGACATTTTGTTTTCCCTT

A\_18\_P22841240 AGGAGCCTGAGAGAAGTTCTGGGAGAGCAGTTCTTTCTTATTGTCCTTTT

A\_14\_P108562 CTGGTCCAGATTTGCACTTTTAAAGATCATCTGGTGATCTTTAAGCACTCTTATCTCTAGT

CUST\_4325\_PI426210822 TTACTTTTCTTCTTTGGGATTTCTTAGCATGCCCGTTGGGACAATTAGGG

A\_14\_P102257 TGAAACTCATTTTTACCAGGCAGATCACATGACTCTAATATTACGTGAAATCACTTTGG

CUST\_7859\_PI426210822 TTCTGAACTCTGAGCTCTACGAGGACAGCGATTAACATCTCTCAGATATGTTC

A\_14\_P115965 TTTTAGGATATATTTAAATTTGCAAGAACTTCTCCTGTCCCAAGACAAAAGAGGTCCATT  
A\_16\_P19523785

AAAAAATTCACATCAGCAACAATCCTACCATTCTAATTTGCTGTTTTATGCCTCCTAGG

A\_14\_P101991 CAGTGAAAAGTCTCCCTTTCCAGATATTCAAGTCACCTCCTTAAAGGTAGTCAAGATT  
CUST\_2661\_PI426210822 TGAGGCTTTCAACTATATGACCTCAAATTAGCTCCCTGGAGATAGGTGG  
CUST\_10236\_PI426210822

TTAGTGTTTATCTTTAGTCTTTAGTTTTTATATTTTATCTTTAGCCATTATCTTTAGTTG

A\_18\_P17349688

ACTTGTTCAATAAAAAAAAAATCAACACACACAAAACATTACCTCCATAAATAAACATTTTC

A\_14\_P106276 CTTTAGACATAGAGAGGATAAACAGACATTTGCTCTGCAAAGAAGAGGGAAAAACGTATT  
A\_14\_P100753 CTATTATCTGTGGGTTTTCCACCTCTGCACTTGATATATTTTCAGAGGAGAGTATTTATG  
A\_14\_P200980 CTTAAGTCACCAGTCCTGCATTTGGGTGCAGAGATTCCGTTTTAAAAATTCGAA  
A\_18\_P14136121

AATTTACAAAGTGAGATTTAGATTAGTGTGTAAGAATTTCACTGCAGAGGCCACTTCTGG

A\_14\_P124501 ACTCAGTTCCTACTTCTTTGGATTTGTTTCCAGAAAAGGAAGCATAATCAGAAACAGAG  
CUST\_7276\_PI426210822

ATCAGTTTTTCTTTCAAACCTTCTGCAAGGGCATAAAAATGGGGGACTAAATAGGG

CUST\_9248\_PI426210822

GGAAGTCACATAATGTAGGAAACGTGTCTGTGTTCAAAACTCATAAGAATGCTTTCAGAA

A\_14\_P116923 GAAAGACCCAATGTGGTTTAGAACAATTATGGAGACTTTAGAGTGATCCTGATTTTAAGG  
A\_14\_P107353 CCTGAAGGCATTTTTTCAGGAGTTAAATTAGAATTGAGGAATATATGGTCAGTCCGAATTC  
A\_14\_P109277 GTCCACATCTTTAATGATAAGATTGTCAAGGACAATTAGGGAAATGATTACAAGTGTCC  
A\_14\_P135428 ATTTCTAGGCAAACTTGTTGAACTAGATGTGAGACAGGAAAATGTTTGCTGCTTTGTAT  
A\_14\_P127474 CACCTATGCAAACAGCAATTTTCATGCAGTTAAACCAATATGTGGAAGGGCTTTATAAATC  
A\_14\_P136554 TAGATCTTTGGGAATGTCCTTGGCAGATTCTGCTTTGGAGAAATTAACAAACTAAATCAA  
CUST\_4412\_PI426210822 TTTGCTTTTCGACCTTACAGCACAGGCTTTGGGAGAAAACAGTTAAGTTC  
A\_18\_P22840332 CAGGCTGCCCTGATCCAAGTGAGCAGATAGTCTCCTTATTGTTTCAG  
A\_14\_P201514 TTTTCAAATTCACAGGTTGCATATGGCCAAGTCCTTGGAGTTATAGGATATTCATTACT  
CUST\_6740\_PI426210822 GGAAGGCTGCTTATAAAAACATGGGGTACACATGGATGACCATCTGC  
A\_14\_P131598 CTGATCATCTTAGCAATAAGTTGAAGGCATTATTCTTTCAAACAAGGGTAACCAGAGG  
A\_14\_P130221 TTTGGCTTAGCAGAACTTCTTTTCATTCTTCCAAAGCATCGATGGTCTTTCGC  
A\_16\_P03575484

AATACTTTCCACAAATGAATCCTTTGGGCATATCTTTCTCCTTCAAACCTAGAGAAGCC

A\_16\_P20977700

CTTTTCAATGGCTTGGCTAAACTAAACACCTTGAATATTGTCATCTTTTCAATGGCTTGG

A\_14\_P112128 AAAAGAGAGATCGATTACATACAAGTGCAGTATTCCTAATGTGTCCTTTGGATGTTGGTA  
A\_14\_P100524 TTTAGTGGGATTTACTTTGGCCCAACATTTTGATGAAATCAATATCTCAGAAACTGCACA  
A\_16\_P00685471 GTAATTCATATGCTGTTCAAATGACAGGCCTTTTCCCCACACCTGTGTGTATTC

A\_14\_P200668 GAGGGCTATCAGGCCAAAATTCATTATTGTATTTCCAATACAGTTTGTCTTGAATGTCTG  
A\_16\_P00685431

GACTCCAGTGTGCTCTAATGCATCTTCTTTGCATAAAGAGGCTTATTTACATGTCTTTTG

A\_16\_P19856890

AGGCTAGACAACAACCAATCTTCATTCTAATTACTGCCACATTATGTAAAACAATAA

A\_14\_P117728 CCTCTACCAAGAAAACCTTGTTCAAGTTGCTCAAAGTATAGCAGAATTCTAAATTATCTT

A\_14\_P105705 CAAACATGTTTTGTTTTTAGGCTTTTTTAATCCAAGGTCATCCTGATGCCTCATTATGGA

A\_14\_P121639 GAGAGGTCTATGAGGGTATTGAGATTTATTTCCCAAATTTTCCACATTTTTTTTTCCAT

A\_14\_P127484 TTTCAGTTTTCAAGTATTGGTATTCATTTTCTCTCAACCAAGTCTCAATGGTTCA

A\_14\_P110931 ACAGAATGAAGCAAAGCACATGGAATAAAGGTTTTGTCTCTTCATTAATACCTTCTGCAT

A\_14\_P114920 TAGACTTTTTTCCAAAGCAGCATCACTGTTTCTTGGCGTGTGAAGATAACCC

CUST\_2919\_PI426210822 CACTCCGACTGTGGGCTCCTCCAGGAGCAGGTTTACAACGTATTT

A\_14\_P106566 GTCTCGGATTTGACGAACATCTACCGAAGAGAGAAAGGGGAAAAAG

A\_14\_P115864

ACACAGATCACAGGACAAGAGAACTAGTCTAACAATTCATAAAGAAATCAGGACAACCTG

A\_14\_P112815 ACAATGATGTCACCTACAGATACTAGAAATTCACATCACATTTCAACTTCTTGGCATGTG

A\_14\_P136266 TGGCAGTCAACTCCTGGACAATAAGAGAGTTTCAGTATGTTTAACTACTTGATTTAGGTG

A\_16\_P03320914

AAAACACTGCCCGATCATAAAAATTCACATTTGAGTCAAAAAGAATTAAATTTGCCCCCTAC

A\_14\_P137551 AACTTACCTTTATCTTCATTGAGAGCATGTAGAATCTCACTCTAACCCTGTCTTCTGA

A\_14\_P116233 CTCATTTCCATTCTACAGAACGTGGACGCGTCAGAGAAGAGAAACAGC

A\_14\_P116050 CTCCTAGACACAAAGAGCCTGACTGATGGTCTGAGAAAAGGGAAATA

A\_14\_P133843 GAAACAGTATTGCTTTTCTGGTTTCTGTTGTATGAAATGTAAAAAAGGGATGGCTTCCA

A\_14\_P130634 CCTAATCTTCTGAATTATCTTCTGCTGTTAAAAGTCAATTGCATAGAATCTGAGGGGAT

A\_16\_P01345022

ATACATTCCACTTGAGAACCTAAAGAGCCTAATGGTAAGAACATCTAATCCTCATCTCAC

A\_16\_P40162983

AAGGCTACTCAGAATATTCTTCTTAAAACATACACTGATTCATCATTAGCATGACCCAAA

A\_14\_P124255 AAATTCGTAGGACATTTTCTGGAAAGTATCAAGCGTTTCATTTCAGTGCTACTTTGTTTCAT

A\_14\_P114206 AATCTGTGTGAGTCTGTTTTTCAAATGAAATAAAACACACTATTCTCTGGCCTTTGGCT

A\_16\_P36875358

ACACCAATTCTCAAAGTAACATGATGCTCTTCTTTACTTTTCTTAAAGCATGTTTCCC

A\_18\_P17197299

TCCAATCATAACATCTCAAAAATTCTGATCACCAACTATATACTACATGACACTAAAGGGC

A\_14\_P107793 CTCAGAGCAGATTCAATGAGTCCTTTGATACTCAGTTTACCCATGTTTAAACAAGTTTGCT

CUST\_975\_PI426210822 AATAAAACATGGTCAACCCTTGAAGCCAAGGGCTTTGCTAAGTCCAAAAA

A\_18\_P14135377 AAAGGAAATGGTCTGTTGAAAGTCACAAGGCCAAATGGCATAACCAGGTTTT

A\_14\_P134768 TATCTGGAGACGGCTTTTACTTTTTTCTCCTTTAAGGAAGGAGGATTAGTCAACTTCAA



A\_14\_P113828 ACTCAAAATTAATAACCAAACTTACCCATCCACAAGTCCTTGCTGAATAATCAATCGC  
CUST\_7439\_PI426210822

CCATGTTTAAGGGGCACTTAAGTGGATTAATCAATATGTAGTCACATAAGTCTGCTAA

A\_14\_P113728 ACTCTGAACACTATCCAAGCAAAACGTCATATGCTTTGAAGATGCACTAGTATTTCAACA  
A\_16\_P00077691

TGCTCTTCCATCTTTACAAAAGTTTTCTAGATTCCCTAAACAATCATACCACTTCCCATGA

A\_14\_P127939 GTATATCTGAAGCAGAAATTTGCTTTTTCTTGTTTGCCTGGGAGATTCTTACAGAATGAG  
A\_14\_P122597 AGTATTAGATGGCACTGATTAATAATGACTCATTCTGCAAGGAACCTAAGCCAAATCAATCG  
CUST\_3557\_PI426210822 TTAAGTGGGCACTTCTGTTTGCAGAT

A\_14\_P135979 CTTCCATTAATGAATCCAACCTAGAGATGTTGGGATGTTGAATTGCTCTCTATTTGTGTG

A\_14\_P130731 GTGCCTTTTTGAAATGTCCTAAAGATGGGCTTTGTTTTATCTTCTAAGAATGTTTCTGGT  
A\_16\_P00559043

CTTCTGTCTCCTTCTATTATCCTAAGCCCAACTAGTATACTATGTAAACAGGGCACTTTCA

A\_14\_P136525 ATGCAGATGTCCTGATCATACTGTAAACCTAATCTTTGCGACCAACAACGTATTTAGG  
A\_16\_P19830470

ACAACATCTCCTTAACATTGTGATATTCTCTAAGGTTAATGGGTCTGAATTCACATTCC

CUST\_3288\_PI426210822 CTAAGAAAAAACAGTTGCAGGGTTTGGCAAAAGGGGACGCCAAC

A\_18\_P22840698 TAATCAGAAGCTAGCAGCCTCCCAGGGACAGACAGGGGCTGGCCAG

A\_14\_P118020 CTTTTGTATATGAATCTTAAATGTTTATTAAAAATAAAAAATGAACTGATCTTGTGGAC  
A\_16\_P18158291

CTTCCTCAATTCATCTTACCACAGAATCAAATATTCCCAAGTATCAAGTATCCTTCTCA

A\_16\_P18106281

ATTTCTGTAGTCAAATGTGTTTCTCACGTCTAGACGAATTTAAAGTTAGTCATTGCAGGG

A\_16\_P16459088

ACCCAAGAATGTTAAGCAAAATCAAGAATGTCACCATAATGAAAAAATTACAAAGGCCCA

A\_14\_P106604 AGCCTCAAAATCTTCTATGAACGAGGAGAATGTGTTTCAGTGGGTAGTTTTATTAACATT

A\_14\_P136268 ATCATATGACCATCTCTCAGGCAATTCAGGCTTGGTCTGGATCATGTT

A\_16\_P00309602

AATGTGGGAACCAGTTTAAAGTCAGGGATAGAATTTAGTATTAGAAACATGTGTAACCCA

A\_14\_P105547 CTTTTCTTTTCTCCACGCTACGCTTATATACCTGGCACCTGAGCACTAC

A\_14\_P115391 CACCTATTGCATCAATCCAGTGTGTAATGAAGTTGGGCTAGTTGAAGATCATAGTAAAAT

A\_16\_P35490246

ACACTTTACTAGCAGAACTTATAGGGAATCAATCGCACAATATACAAATCACATCAAGA

A\_16\_P17524879

ACTACAAGTAAAGCAAATGTCAGTAGTTTTTGGTAAGGTATCTCGTATTGGCTCTTGGTG

A\_14\_P120870 TCCTGAATGCATTTCAAGGAATGGTTATTGTGTTTATGAAGAACTGGAGAATTTGTGAG

A\_14\_P130615 GCTCTTTTTTCTTCAATTTCTTCAGGGGCTTTTGTCCATAAACTAGAAGCATCTATAGGA

A\_16\_P02999393

GCCACATTTTACACACTTTTCTATATAGACAACCTCTCAATTAATTCCTAAGCCAAACCC  
CUST\_5120\_PI426210822  
ATTCTGGGGGTTGGGGATAAATATGTTAGCCAGTAAATGCCATTTATTGCTTTAGATG  
A\_14\_P134209 GGCCAAAGCCTATGGAATTGTTTTAATCATCAAATTTAACCATTTTCATAACTGGTTCC  
A\_14\_P115014 CGAATGGATTTTCAGTACTCTGATCTCCTAAAGTTGAATCAACTGTATAACTGCTGTATG  
A\_14\_P113235 TTAAGACAATGTCTTTAACATTCAATGGTTAGGGCAATTCCCAATTCAGTCTGTGATTCT  
A\_14\_P134950 TCTTTTTCTTTACCTTCTAACACTTAAAATCAGGATAAAATCCTACAACCTGATGTCAGTTG  
A\_14\_P105459 TCTAATTAACAGTATTGCTTTTGCTGCTTATCCTGGGTGCTGTACATACATATTTTTCCCT  
A\_16\_P19878986  
ACAGGTGTGCCATTAATAATTTGTTAGATGAGTATCCAGATCCAGAATTATTCAGGAACAC  
A\_18\_P23949279  
TACACCTACATCATCTTTTCATTTCCAGATACTCCTGAAAAACAAGTTATGACGCCTACTT  
A\_16\_P01377311  
CAAGGCATGGACAATAATCTACCCATCTGACATTTCTCTACTGTAGTTGAAGTTTCCTAT  
A\_16\_P02207364  
GGCTCTGCACTCTATATAATAACTTATCTTGATTTTCATCTAACATACACGTCAGCATCAC  
A\_16\_P20310458  
ATCAGACCAACTCCAACATTGTATGAAAAGAGATAACTGGACGTAAAAAGTTACTCAACC  
A\_14\_P108148 GGGTGAAATTGTATGAAATCTGGGAGAAATATGTAACAGATTGACAAAATGTGGGTGGT  
CUST\_1137\_PI426210822 GTACTCCTCAGCACGTTACCTGGGCGAGTGGGTGCAGTCTCTGGG  
A\_16\_P19242515  
AAAAACTTGACATTGGGAGCAACAAAGAGAAATTCGTTTAGCATTTTGTTAAGAAGGGTC  
A\_14\_P127065 GTTTATCGTTTTTATTTTTGACAAAGGCCATACTCTCATTGTCCACTAAAGATAAGGGCCA  
A\_14\_P106335 ACTATAGGTCCAGATTCTGGAAAGTGGTGATTTCAGGGCTTTCAGGACT  
A\_14\_P102303 CAATCACAATAAACCTTCCAGTTTTGTGCAGATAATCCCTGGCTCTTTCTAATTAAGAGA  
A\_14\_P115428 CTTCAAGCAAAAGGAAAAAATGTGCACCCCATATTTATACTTTTTCCAGAACATTAAGGT  
A\_14\_P122630 CAGATTTTCGATGGGGTCTCTATCATATTTCAAATCCTAATGGAGACAAAACAAAAGTGA  
A\_14\_P100208 TGTGTTCTGTTATCTCTTGATGAGATCATTGCACCATGTCAGACTTTTTGTATATGCCTTG  
A\_16\_P17524460  
TATGTGAACCATCTCTGTTAACATTCACCTGAAACTAAAAATGCTAGTAAGTGCCTTGGT  
A\_16\_P36231125 GTGTGTATGTCTGAAGGAGGCCTACTTAACCTTGGGATGTGCTAATTTCC  
A\_16\_P01644227  
TATGATTTCCCGAGGCAATTTTACTTACATTTACACTGCTCTATGACAAATTCCACTTC  
A\_16\_P16677088  
ATCATGCTGACCTAATTACAAATGAGTGCATCTTGAAAAACATTCTTGAATGACTGTCAG  
A\_14\_P135695 AGTCTCTCACTGCCCCAACATCGACTATTTGTCATTATTTATCGATTAACGGTCATTAA  
A\_14\_P106768 GTAAAAATACTATTTAATGAAAAACTCACCATATCTGTATCTGAGACAGGGCCAAAACCTG  
A\_16\_P36874016

ACTTGGTTGGTTCATACTCTCAGTGGTTTTTTTCGTTCTTAACAAAGCACTGTAATTTCTT  
A\_16\_P21541883  
AAATCATTCTGAACCATTTTCCCAAATTCACAATGCAAAAGTGATTGAATTTTCCACC  
A\_16\_P40955108  
GAAAACCTGACAAAGGATACATGGTTGATAAAAAGCAAAATATAAACAACAGCAATTGTCA  
A\_14\_P113762 AAATTGAGTTTTTTCCCTTTTTCCCTCCTCAAGGCAGTTGCATTAAATTTAAATTGAG  
A\_14\_P110835 GGTGTTTGGGAAAAGATTTCGATTTTCAGAGAACCCTTATCTCCAAAATGGGTCTAATCTAC  
A\_14\_P133935 GCAGCAAATGACAATTGCTTGATTGGTTGATGGAGAGATATTAATAAAGTGTCTTTCCAG  
A\_14\_P123361 AAATCATTGCATAGTTGAACATAGATGCCGATGATTGTGGAACAATAGAGAACATAAGCC  
CUST\_10384\_PI426210822 GTTTATCAAAAGCCAAATAAGCTTGGGGAATGTCAGGTCCCTGGTTTTTTTC  
A\_14\_P103485 CTGATACTACCTGCAAGCATTGAATTCAGGGAAAGTTGTGAGTAATTCAGATTTTCATTG  
A\_14\_P200824 CACCTTCCTTCTCAAACCACCGTTCCTTTACAATGCATCTTCAACTTAGGTTATATAAA  
A\_16\_P17993421  
ACCACCTGTGCATACATTTGTCTCTTATGATACATAAAATATAGAACCCGTGCCTGACA  
A\_14\_P106562 AAATCATCATCCAGGGCAGCATATTCTTCTATAGATAAACCTTCAGGAAATTCTACTCCT  
A\_14\_P202380 ACCAGCAGGTGTATTTAAGAGGATAACCATTAAGAAAAACCTGTTGCAGCAATAGTTAAG  
A\_14\_P134401 CTGTAGACAACATTTTAAGGCACCTTGATAAAGAAGTAGGAAGGTGTATGATGCTGACTA  
A\_14\_P126227 AATACTTATAGACGGTCATGGCCCCAAAGTTCTATGTCATGGAGATTAGATGTAATGATT  
A\_18\_P14137033  
TGCAGAGGATTTTGTATTTTTTATATTTAAAAACCAGACTTGTGGAGTAATGTGTGGGAG  
A\_14\_P125660 ACCTCTGCTTTGTTTTTATTTTTTGGAGAAAGGGTTGACCTAATACAAGCACTGTTTAAG  
A\_16\_P16069912  
CCACCCTAGAATGACATGATTTTCACAGAAACGTTTAATAATCTCTTCAATTCCTTCCC  
A\_14\_P119410 AAATTCCAAAGCCAAATCTTGAGTTTCCAAGTGATTTACAAACAAGCGCATATACTTCTC  
A\_16\_P16830052  
AAAAATCACAGAAAATGCTTGGTTCTCATACCAATCTGTTCTCATACCCTACTACCTTGT  
A\_14\_P101062 ACCCAGGGAAATGTTGGGAAGATTTCTTTAGATCAGATTGATTTGGTAAGTAGAACATTC  
A\_16\_P03495693  
ATTTTCCAAACCACTGCTTATACAATTTGCACAAGGTTTTAAAGTTACCTCTCACTTGCA  
A\_14\_P125959  
AAATGAAAGAGAAAAAGAACTCCAGAGTTGATGTCAGAGTTTCATATGCCAGTGAAACAA  
A\_14\_P202407 GTGTAAATATTTTCTGCAGGTCATAAGAACACCATTTTAGGGCACTGTATTCCAAGAACA  
A\_18\_P14134083 CAAAGGATGTAGTTTTTGGCAGATGTCCTTTGTAGGGTTCAGTATTTCTCACTCAC  
A\_14\_P109606 AAGGCAATAAAATTATCCCTCCAAAATTTGATTGCTAGTATCAATGGGGATGTGTGAGAA  
A\_18\_P22840308 CTCTGACAGCCCTTTTATTTATCTTACTGTGTTGATTTACGCCTTTAAAGGGGGG  
A\_14\_P126674 TTTACAGTGGATTAACTTCATTGACTTGATGGTGCGACAAGGGAATATTGACAACC  
A\_14\_P139356 TAACTCCGATGGAATCATCACAATTTGTGGATCCAAGATGTATCAGTGTGATTGG  
A\_18\_P11669220

TCACCAGAGGACCTATTTACATTTTAGCACTTACTCTCCTAAAGTCCAGTTTATCTAATT  
A\_18\_P22841575  
CTTGTGTTGGGCATAAACCATGTGCTTTATAGAAGTCAGTATTACACAAAGCCTTGATAA  
A\_14\_P114389 GGAGGCTTTGTTGCTGATGAATCTTGTGTGTAATAATGATGAGGTGTGCTCTG  
A\_14\_P106800 CTATAAACTTAACCTAACTCATTACTGACCATATTTACATAAACCAATTTTGCTGATGGG  
A\_18\_P14931213  
AATGACACCCATTAGAACAATAGTTTAGAGCAATAAGAGATTGATCATCCCAACTACCCA  
A\_14\_P137294 GTTAACAGAAGCCAGATCAAAGATGGCTGACTAAGGCAAGTGGAACTTAAATTTTACTTG  
A\_14\_P123547 TTTGCTTTTAGGTATTTATACACGGACATGCTTACAAGTTGTAACTATACAGAGCGATTT  
A\_14\_P129375 GGAAAGCAAGACTTAGGGGCTTGAAATTTTCTGAGTTTCTAAAAATGTTGTCAACTATTT  
CUST\_8401\_PI426210822  
ATCAAAATTTAAAGCATTTCCCCACCTGAAAAACAATGGCCAAAAATAATGCAGATATTA  
A\_14\_P115512 CGTATGACTGGGGCACTAAATGGTGAATTCTGTTTGATTTGTTTCAGCGTAAATGTATAC  
A\_14\_P115488 CATCCTATTATATATCCCATCACACTTGCTAGAGGATGGGTCCCAATTTTGGTTTAAAA  
A\_14\_P105741 ATGAATATTTAGCACAAATATTTAGCAGAACTAAGTTTCCACCACCATGGAGAATGGGGAT  
A\_14\_P115329 AAATGCAAATATAGACAGAGACTGCATAGGACAACCTCAATAAGATGTATCTTTCCCAACC  
CUST\_10278\_PI426210822 GAATCCCATTTGATCTCTTAGGCAGAGACGAAGACACTATGGCTCGAA  
A\_18\_P22840130 TATGGCTGTTGTTCTCCAACAGGCCTGTCTAGTATTGTATGACTTGAGTCAATA  
A\_14\_P125815 CTACACAATAATTTGTTTATCACTCCGCTTACTTCCATGTTTAAATCCAGAGAAGCCA  
A\_14\_P131371 CTCGTTGGTAAGGGCTGTTGGTAGATTGATGAAAGAGTTCTAAGGAAAACAATAAAGTAG  
A\_18\_P22839933 ATTTGGTTGCCATTTCCGTTGGGAAATTGGACAAGAGGTTTCAGTTTTTCAAAA  
A\_14\_P120229 CAAGTATAGTTTACAAACCACCGGAGATAATAATGTGTGATGCCTACGTTACTGATTTTC  
A\_14\_P111205 ATTAAGATTTGTGTTTTAAAGGACTCACCTTACCAGCAAGCCAATACGACTCTT  
A\_14\_P108227 GAAGATGAAGAATCAACTGTTGCCTATGGATGGATTATTCACGTAGGGAATTTAGAACT  
A\_16\_P19848199  
ATCACAACCTCACAGTAAAGTGTTCCGGTTAGTCATTCTTAACTCCCAGGAGATATTTTCATA  
A\_14\_P122138 GCACTGATAGACTGCACCTTGATCTTTCTTGAACATTTGAAAAATAATGGTATCGCCATC  
A\_16\_P19802589  
ACTGAGATGGAACCTTACAATATGAGAGACATTAAGATTGAACTCTTTCTAGTTGGGGAA  
A\_14\_P100370 AACGCGATTATGTTGCAAACGATCTTTGTCTTTATGTGCCAACGAAAGGCAATTAGATAA  
A\_14\_P137182 CAATCAATATTAGTGTCTTCTTTTCTTACTCTTCTTTATTGGACACCTCCACCCCTAC  
CUST\_4763\_PI426210822 CTCCACGATGCAGGGCCCGCGGTAGAGAACAGCCAGGCAGAGCAG  
A\_18\_P11339359  
TCCTCACTATCTGAACCTAAATATAGCCAGTGTGATTTTAAATGTTGCCCTTTCTAAAGCA  
A\_18\_P13308422  
CTTGAACCTTTCACCCTCAGTTTAAAGAGAAACCAAGGACTTAAAAAATAGAGAATCCTG  
A\_16\_P15137539  
AGGTTAGAAAAAACTGAAATACCGTAGATGTTTCAGAAGTATGAAACCATCCCATTTCTCG

CUST\_4408\_PI426210822 GAGATTAGGCTATGGTGGGCATTTGAGACCTTAGGGCCATAGACC

A\_14\_P116817 CTGTTTCTGGCCTTAAATTAGAGGAAATGCATCCCACGTTTACTGTTGATTATGATGTTT

A\_14\_P137001 ATGCAAGGATATTAGTCATCTTTGACTGCAGAATCTAGTGAGTCCCAGAGTTCC

CUST\_1429\_PI426210822 CAAGATTCTGCAGGGAACAAACAAGTTCCTTTTGTCACTGGACTGCT

CUST\_9021\_PI426210822 AAGATTTATAATCTCATTAGGAGCTGTGCTCTGAGGGGCTGCGAATGGATA

A\_14\_P120140 CTAAGATTGGGAGGACTCTGTAAGTACTAGGAAGACCTCGACTCGACCTAC

A\_14\_P121633 AGAATGTGCCATAATAACATAAATTGTGCAGTATTGGTGGAAAGGATGGGTAAGTTGAGC

A\_18\_P12329317

ATTCTACTTGCATATCCCAGTTATTTGGTAGCAATTCTTAAAGTGTGTCTAGAGCCAA

CUST\_1227\_PI426210822

CTGAGAAAGAAATGCAAGAGGTAATTATGATGCCATGGTATGTTAGACCTAAATTGTGGA

A\_16\_P03538530

GGCTAGTATTCTGCATTCTTGACAGTCTGATAGATGGAAAAATATCCCTATGGCAATGAA

A\_14\_P126869 CCGATCACCAAGTCAATGGTGGCCTGGGTAGAAAATAATTCGTTGCAAATA

A\_18\_P22841791 GCCCTCAAATGGTGAAGCAAGCACTGGAAGGTTCCAGAAAAAAT

A\_14\_P110800 TTTGTTCCATGTTTAAATCATTCACTTTGATTTGAGTGGGAAAAGCCTGAAGCCTTTATC

A\_14\_P133579 ACAGGATTCAACTTTGGAAACCTCCATATACAGATGAAAATAAAAAAGTTGGTTTGGCAT

A\_14\_P120602 AGAATTAAGGATAGTGATGGTGGAAATGATCAAAAAATGTGCTGGGTAAATGTTTCATCTCT

A\_14\_P123846 CTGTAGGAATAATATTAAGCCTGGGACAGTATAGGAAAATAAAGCCAAGAGGCCCTTG

A\_14\_P111644 CATGGGAATTTCCAGGGTGTGTTTAAATGCAGATTTCCAGACAATC

A\_16\_P21654952

AAACTCTAAGTGGATGAGGAATATAGAAGTCACACAAAAAAGAGGAAAATATGGAGGCC

CUST\_1634\_PI426210822

GTTCTCTAGGTGTTCTGCTAATAAATGCATCTTGGGAAAAAGCTGCATTGCTTAT

A\_14\_P106805 AAGTCACTAAATGATTTCTTCTAAGTTGTTGCCATTTGCTTGGATGAGATCTTGAAGGTT

A\_16\_P03543027

AAACATGTCGATTTTTAGACCGTCTTGAATGATTTACACACCTTTTCTACAAGCAGACC

A\_14\_P125655 CTATTA AAAACTAGGCTCTTTTACAGACACTGCTACTTCTTGCCCCCTTTGAATAAATTA

A\_14\_P137069 CTTTTCAAACAGGACTCTTTTCATGATGCAATTGTTTTTCCCTTACTAACCAACCTTAC

A\_16\_P00612038

GAATTTTGTGCTAAGTGACCTAGACTCTCAAAAAACTACAAAGTAGCCTTATCACCCATC

A\_14\_P138279 CAAATAGAAGGAACAAATGAAAGCCCAGTAGATTACCAGTGTTTTGAGCCTTAATTTAGG

A\_16\_P03549724

TTAGCACCTATCAGTTTAAAAACAAGATGCGATTTTCTCTGAATAGGAAACATGTCGGC

A\_14\_P119611 TTCTTTTGTGTTTGGTCCATCATTATGCTAAATAAACGGAAGCCTTTTCCCTCTTCACAC

A\_14\_P114763 TTCTCGTTCAGTATGTGCTCGACCTGCTTCATCTTCACCACCTTCT

A\_16\_P39091670

TAGATTCCTTTTGAAGTGACTTAAAGATGCTCACAGATACTCTAGTTCTAGCCCTTTCTG

CUST\_7432\_PI426210822 ATCTGTAAAGAGGAGAGTGGCTTCAACCTGCTGTTCAGGGCCTCT

A\_14\_P125036 ATGTGTCTCAATGTCACCATCATCCACTCCCTATTACTTCTGTAATTAAGACAAGTTTTTC

A\_16\_P30952449 TTAAACACTTTTCAGACAATTCTCAGGCTGTTAGAAGTTACAATCCCCCTCGAGTTC

CUST\_6603\_PI426210822

CAAACAGAAGAACAGAAATAACCTATCCACTGTTTAAGATTAATAATGGCCAACAATAATA

A\_14\_P138237 GACAAAGGAAACCTTAAGTTGTATTGTCTACTTTCTTCTCCATCCTGCTTTAAACACTC

A\_14\_P101196 AACTCAGATCGGCTTCCTTGACATCCAACCCACTTTATGTGATTAGTAAGGAATATTC

A\_14\_P107857 CATTTCTGATTGCTCTTGTGTTTTGTTTTTATTCACTGGCTCTTCTTACTCAGACCACTTC

CUST\_1919\_PI426210822 ATGGGGAAACTGGTCATAGTGACAAAGTTGCTGACAATTCCACATTCC

A\_14\_P119841 TCTCATTTTTATTCAAGAGGAAGAATACAAGCGATTGAGTGAAGCACTAGCAGAGGATG

A\_16\_P15242180

AAACAGTCTGTCTATAGAAAAAGCCTGGTTTCTTATCACATATCCTCCTTACAGAGATGC

A\_16\_P01786913

TCGAACACTGTATGCTCTTTATACCTTGGTAACTTCAAATGATACATCCCTTCATCTTGC

A\_18\_P14625419

AAAAGTTTTACCTGTTTCTAGTTCACATTCTTCCCCTTTAATCTCATCTGTGCATGCTT

CUST\_7257\_PI426210822 GAATTGTCTGTGGCTTCTTAGAAAGTGGTGTGTGGACAGGCAAGG

A\_18\_P13654222

AAAACACTACTAACCATGAATTTAAGACTCACTTTTGGCTTATTGCACTCAATGAAGGAAA

A\_14\_P120894 ACATTTTCCACATGAACCAAAATCATTGCCGCCATGGTGAATCAAAAAAGTAATAACAAA

CUST\_4180\_PI426210822

GATAAAGAATCTAATAGTTATCAATAATGTTGGAAAAGTAATTCTAGGCATGAAAATTAG

A\_14\_P120942 GACATGGACTGAAATAACAGAACTGAAGAAATGTATTCTGCAAGGAAACATTTAGGCTGA

CUST\_9487\_PI426210822

GTAAACCACAGTGTTAATAAGTGGAAAGCTAATGGAAATAGCTAACAGGTTTTCTACACGT

A\_14\_P201284 GTCTTTCATAATGATGAATCAGCATCTGCAGCAACACCCACTAATGAGAGCAAGAATT

A\_16\_P02292858

GGTCAACCCTTAAACCTTTCCATACAGATAGGACTAGAATAAAAAACAACTTCTGCCTT

A\_16\_P03578642

CCTCATTGCTCTACATCAGTGAAGAAATGTGAACACCAAGGTTTAGACTGAGAAGTAG

A\_14\_P201450 ACGTGTGTGGACACATCATTTCTAAAAACAAGTCAACACAAAAATACAATGTGCCAATAA

A\_14\_P113864 GAATGTATTTATCTATCAAATTACTGAAGATCTCATCATGCATGTGTCAGCCACAGCGAA

CUST\_4127\_PI426210822 AAGGCCAGTCAGCTTTTGGATGAATTTTCAAGGAAGACAGCAGCTG

A\_14\_P112732 GCACTGAAGTATTATAACAGGGATTATCAGGATTTATGGGCTCCCTTATACTTTTATGCT

A\_16\_P17283706

GGGTTCTGTTATCTCTATCAAGGAATATGAACACACTAAAATGATGTCTATTGAGCAGGG

A\_14\_P120555 AGGACAATGTGAAGGTTCTTTCTCACCTCTCAATAAAGAAGTTATACATAGAAAGAGGA

A\_16\_P15667496

ACAGGGTCAGTTCTAATCACTAATGTTCTTTCTGTCATTCAACATATCAGACCAGTTCAT  
A\_14\_P101490 AGCGAGAGCGAGAGAATAAATATATAAATAAATACGAGAACGAAATCCACTCCGCAGTCT  
A\_14\_P127916 GATTACATTTATAATACCCGATTAAACCGAGGAGAATATGTAGATGTTCCCTTCCCCAAC  
A\_16\_P18058193  
AAATAATCTTACGTCCTTTATGTCCTACTTCCATTTCTCTCAGAGACACATTCTGTAGCC  
CUST\_6830\_PI426210822  
CAGTTCAATAAATGTCTGTGTTGGCTTTTGTGACTCCTGATTTTTTTAAAATAATGCTTG  
A\_16\_P15437997  
ACTCTAATGCTCTCAATCATTGCAATAATTGAAACTTCCAGAATATTACCATAATGCTGC  
A\_16\_P03502402  
ACTATTTTTCAAAGATGGAAAAGTAATTAACACTAACCATCAAACAGCAGTTCTCA  
A\_18\_P14297202  
AATTCCCACAGCATGATAATGAGCCTATACTGCCAAGTGAATGCAATTTGATTGAATGTC  
CUST\_3048\_PI426210822  
GTGGTCATAGTTTTGTTGAAAGGATAGGCACTACAAAATGTTTGATCACCACACTC  
A\_14\_P131853 AACAGGCACATGAGTGGTTAGACATTCTCTAGATGTAATGAAGGAAATACATGGTGCT  
CUST\_6621\_PI426210822 CTTCAGATGATCCCTGGTGTCTCTGTGCAACCCTCAAATTTGTAGC  
A\_14\_P119821 GCTCTCCCATGGACTATGGTTTTACAGAGTTTATTTAAGTAGTGTATCTACCATAGTCT  
A\_16\_P00049297  
TGTAATGCCATCTTAATGCCATCATGCTTTTCTAATGACATCCTAGGTGACATAGAGAAA  
A\_14\_P118062 TTTCTTCACAGGTAAAGTCAGTGATAAATCTTTTGTGTTGCTGCATATACTGGAGATGTGT  
A\_14\_P116096 CTAGATCACTTATCCCAGCCTGACATTATGTGTTTCCTTCTCTGAATTGCTATTGGTATAA  
A\_16\_P00914927  
GGTCAACAGGATTGAAAGTAAATAGCACTTTAACCTGAAGAATACATATGGGCCACTAAG  
A\_14\_P109958 GAAAGGAGAGAAGGTTTTTTTTTTTTTTTAAACATTCTGAAGATGGTGCTGTGTCAAGAAGG  
A\_14\_P129036 CCTTTATTGCACTCGGAGCCAGTTGATTTACTGATGCTTAAACTTAGTAATCAGTAGAGA  
A\_18\_P17388182  
TCCCAATAGAGGAAATACTACATTGCATCCATAAGGACTAACATTATATTGCATCCAGGA  
CUST\_3096\_PI426210822 TTCAGCCTTTAAGGGGGTTCGTGGTGGTCTAGGAGACCAGTGATG  
A\_16\_P03298599  
TAGCCCTTGTCATTAATGTTAGACGTCATCTTCCTGAAAATATCCATTTAGCCAGGTTTA  
A\_16\_P21365337  
AAAAATGAAGGTCCTTTGCTTTTATAGAGACACCATTCCAATATCCTTCATCTAGATTCGAG  
A\_18\_P14151175  
AGCCAACATAACTCTTGAACCAGTTTTTATAGTGAGGAGACCAAATAACCTTTTGACAAA  
A\_16\_P00685437  
TTTTTTGAGAAGCATATAGAAAGTCACCTAGAAATGCTTACCTATAGGACAGGAGACTGG  
A\_14\_P107851 CTCCATTTTTTATGGCTAAGATATTAAGTGACCACTCTGTGGTGGTATAAAAATGGCACT

A\_14\_P123211 TTTGTTTTATTTAGAACTTTGTGTGTTCTTAAAGTGTGCTTCCAACAGGAAGGTCAGTGA  
A\_18\_P22842824 CTGTTTGTAGCCATGGCTGCCAACATGCATGAGCCACTTAGAAGG  
A\_14\_P125373 GATCCTGAATCCTAAAACCATGGATTTTTGAGATGTTTCATCCCAGGGCCTTAATT  
A\_14\_P121301 ACATAGAGTTGCAAAATATCCCTGAAAACAAACATGGAATTGGTCTACTACTCATTGCTT  
A\_14\_P138252 GTGTCCCTCCTTTGGAAATAAATTTTTGCCTGTATATAGTCAGACCCATTCTAGCAATGA  
A\_14\_P110251 ACATGGCTGTGTGCTTAGTGTAACCTCAGTATCTTTCAAATCTTCTCCCAAACCTCTATAT  
CUST\_9879\_PI426210822 TTTCTTATCACCAGGGAAGAGCCAGTAAGTAATTCATTTCAGTTGACAGGTAG  
A\_14\_P135933 ACATTTTAGCATACTTCAGTGCTAATATGCTCAGACACTGACTCAGCGACTATTCACTAT  
A\_16\_P00685339 CTTACCATAGGGGCAGAGACCTTCTGCTAAGTCATACCGCATATCAAGAAATATAT  
A\_16\_P02211658  
GCACGTGTAATTGCATCTAAAAAAAATCCCGCTAGATCTCTCATTATAACCCTGACTTTG  
A\_16\_P19841974  
CAAGAAATTCCTTCACTTAATACTCCAAACTCATAACAGCATCTGACCTAATTCTGAGTC  
A\_14\_P200106 AATGATGAGAACACTTAAGTCATCTCTACTTAGCAAGGAATATAAGCAGCCTGCTATACT  
A\_14\_P103113 TGCTAGTGGCTCTGTAACCTAACAGATGACAATTAGGCTTTTTGTTCATTGTTGCCATCATA  
A\_14\_P119429 TGACTTGCTTTGAGCGTATCTGGTTTCTAAGATTTTGAGTCTTAGTTCCTCGTTTTTTAC  
A\_16\_P01136190  
GGGGAGCCTAATACTGAAACTCACCTATACGTTTCTTTGCATTACTGTTCTAACATTCTA  
A\_16\_P18099342  
AAACCTTGAAATGTGATAGAAATTTTGCTGCCAGTATACACAGTTCTTGGGATTTAACCA  
A\_14\_P112135 ACAGTTATGACTGCAGATTTCCCTGCCACTAATTCTGTTTTCAGAATGTTGTTCAAAACTA  
A\_14\_P124434 TCAAGACAAGTATTTTATGGCCTCAATTCAGGCGTAGATTACCCCTATTTTTCTCACTTG  
CUST\_4727\_PI426210822  
AAGAATTATAATAAAGAATACCACGGAATGAAAGCAAATGTGGTGAGAAGCAGAGTTGCC  
A\_14\_P119224 ACTTTGAAGCGCAAATGCCTGTTTTCTTCACAAAATCCATCAAGTTACTGAGTGAG  
CUST\_9232\_PI426210822  
TTACATTTCTCTAAGCTCCTTATTTTCAGCCCTGGCACATCTCACCTTTATCATTTT  
A\_14\_P139453 GAAAGCATACCCACCTTACACTGGAAAGCACTTTATAGTTTGCAAGAAATCCTTTTTAATG  
A\_14\_P119381 GTGAGTCTGACTGTTCTTGAGAACTCTGCAACCTTTTAAGTGAAAAAAAAGGTGATTG  
A\_14\_P117473 GGAGTTACACTTTTTTTTTTTTTTCCGTCCCTGCCCTTTTCACACGAAGAAG  
A\_14\_P128406 AGACTTTCATCATGGTTGATGGAAATGACATCCTGAACTTTAGAAATAAAGTTTTACAT  
CUST\_4548\_PI426210822 CTTGTCTGGGTCTGCATGGAATTACTTTGACAAAGGATGGGATGT  
A\_14\_P103128 AGAAAAAAGCCACATATAGTCATTAGTATGCCCAAGACTTTAGACCTGTGTCTTCTATT  
A\_16\_P19750803  
AAAACCTCAAAATGGATTTGCAACTGAATTAAGGTTTTCTGAGTAGAGATAAGGCTGAGG  
A\_14\_P133833 GAAAGCATGTCTGCTGGGTGTGACCATGTTTCCTCTCAATAAAGTTCC  
A\_14\_P103671 CTTAATGTATCAACACACTTGGTTTAAAGTAATTTTTCACTTGGCTTCCTTTTTTTATGACT  
A\_14\_P130492 ACCCACTAGGCAATACAGTATTGTAAAAAGTAAGGCATTGATCACATATCATGCAGTCAT



A\_16\_P00685291

GTTCTACCCTTTAATAGGGAAGGGTTTCTTCTTCTATGAATTTTTACCTCACTTTGTGT

A\_16\_P16665332

TTTCAATTGGCTGACTCTTTAGTGATTACTACTCCATGTATACGACCTCATCCAATATCC

A\_14\_P110177 AATGCAGTTTGTGCAACTGGGAAGTAATTCTGAACTTGATATGAGAAAAAATTGTCCCT

A\_14\_P103141 TAGCGAGTGTCTACTCCGCATCCGTAATGGAAGGAAATGGTATTGTTGTTTATAT

A\_14\_P111767 AATTATGCGGGGAGAGAAGTATAGAAGCCTTTTTTCTAATGGTTCATTTCTTTCTCTTT

A\_14\_P106162 AAATATTTCTAAACTTGAAACTGCTTTGGAGAAATACCACGACGGTATTGAAAAGGCAG

A\_14\_P129386 GTCAGTAATACGGTTTCCCCTGGGGTTGACCAGATGTTCCAAAATATCT

A\_14\_P103773 ACTTTCGAATAGAAAAGAAAATTGGTCGCGGACAATTTAGTGAAGTTTATAGAGCAGCCT

CUST\_9012\_PI426210822

GCTAAAAATATCACATACCAAAGCTGCAAATTATTTCTTTAATTTTGAGCGACGTTAATC

A\_14\_P129333 AGAATACTTTAGGGTTTTTCAGAGTCCTTTTCCATAAAAGGAATATAATTGAAACACATC

CUST\_7185\_PI426210822 GAAATGAAACCAGAGGAAGTTTGGCTTTGCAGAGTGAGGACCCAG

A\_14\_P137369 TCAATATGCATGAATTTTTGAACACTGCTGTTTAGGAAGGTGCTGGACTACTCATTCTA

CUST\_6537\_PI426210822

ATTTTTTTAATGCAAATATAGTTGGATGCATTTGATTAACACTTGTGCTAGCCTTTACTC

CUST\_6380\_PI426210822 ATGTTGAGCTTGTGGGATGAGGAGCATCCAATGGGCTAGAGCAG

A\_14\_P109568 CTGCTTTCATTCTAAGGAAAAGGAACTGAACTACCCTTAAAGTGAAACGTAGATTCTGA

A\_14\_P117717 TAAGGCCCTATCTACTGACACCCTATCTACTGAATTTGATCAACACATTTGATCAAGTAG

A\_14\_P119869 TTTGAGGCTCCTTCTCATGTATCTCCTGAATACATCTCCACCCTTATCTGTTTATTTCT

A\_14\_P105226 CTTTCTTCTATCTAATCTTTTGAGTTGCCAAGTGCCATGGCATTATCGTTACAGGTTAT

A\_16\_P17954872

ACTACCCTCTCCTAGAAATCTTATTGGATAGACAAATACGCCCAATGTTTTAAAGTCAA

A\_14\_P134890 AACAAATTTTATGGAGTAAATCCAAATCAGAACTACTAGGAAGATAGGGATTTCCAGTGGC

A\_16\_P16709534

AGGCGCTGATTATAAAGAGATGAACATTTCTTTAATGATTCTGTCAGTTACTTAGCCCA

A\_14\_P201264 TTTAATCTGCTCTTCGAGTCTCTGCAGGTTATGAAATGGGACGAATAAAAGTAAACAGTC

A\_14\_P122397 GCTAAATTTTCTCCTGAATCCAGACTTTCATGAAGCAGTAATGCCAGAAGTTTAGAAAC

A\_14\_P114247 ACTTGAAAGACAAGTAGTAGACAGACTGCCCTAATATCTGCTTCTTTTAGCAACAACTT

A\_16\_P16113853

GGCCTAAAGAACTTCTCTATCTGTGAGTAAAGCATCTGATACAAAACGATACAACAGCAT

CUST\_9003\_PI426210822 CGTGGCTCATGGGGAACACTACTGTCATTCAGTTTGTTCCTCTGC

A\_16\_P17865825

TCAATACTCTGAATCACGTATGCTTTCTGTATAACCTGAGTCTTTAAAATAGCCCAGACC

A\_14\_P101150 ACCTCATCAACTTTGGTCTTAGATTTAACTCTGAACATTTCACTTGTCACTCCTCTTT

A\_14\_P104038 CTCAGGAAAGAGTTAACCCAGCAGTCTAATTCTGTTTAGTCTTTCTTGGTTAGAAATGCTC

A\_14\_P115212 TTTTATCAGTTTAAAGGGTGATTTCTGAGTCCCTGACAACTAGCGAATTGAGCAATCTTA

A\_18\_P22841591

CATTTTTCTGAGAATTCCAGAAAGAATATTGATAATTTTCAGACACCATGGCTTCCACGC

A\_16\_P21469550

AGTATGTCAAGTCCCATCATATGCTTATTATCTCACAAACTGAAAGTGGTCATTTCTGCA

CUST\_9160\_PI426210822

TTGTTCCCTACCATGAATAAAAAGTTGAAACATTCTTGAACAACCTATATTTTACTCAAGG

A\_14\_P104482 ATAACCGATAATAAGTATTCAGTAGTTGATAAGCAATAGAAAACATTTTCTAAAATTCTG

A\_14\_P118364 CAACTCAAACGTTTTACAGTAAAACCATTTTGCAAATTACCCTAAAGTTGCTGAACTCGT

A\_16\_P19668855

AAAATAGTCAACTAGGTAATCAGAGTTAGCCTTCATTTCTATCTTACTGAGTCACTGGG

A\_14\_P113169 ACGTTCAATAAATGTCGGCTATTAACTGTTGGTGAGAAAGTCTATTTCTGGAAACCTTT

A\_14\_P114345 TGCATGCTAATTACTAAGGGTGATTACTCAGTTACCCTAACTAAGTGGGTTCACTAAAAG

A\_16\_P01847192

ACAGAGGTCCAAATATCAAATATAGGCAAAAAGTAGACTCTCTATTCTTTCTAACGCGGA

CUST\_8474\_PI426210822

CATGTA AAAAGAAAAGTTTTAGCAGGAAGAAGACAAAATGCTGAAAGAGAATATGGTAGT

A\_16\_P41535142

CACTGCTGTTACCTTATCATGCTTTCACTGCTTATAGACCAGAAGTAATTAACAAACACC

A\_14\_P121455 GCATCCAGAGTTTAGGAAGTGCTTTTATTGCAGACTGCACCTTGGCTAATACTAT

A\_16\_P15337584

ATGACAGAATAGCAGGTATTGAAATAAGAAGTGGATCTACCAATTTGAACTCTCCAAAG

A\_14\_P130052 CAAATGGAATAGTCATGGCATAACGCTGTCAATTCTGTAAAATAAAATGCTTTTAGATATT

A\_14\_P117341 AATATGTTTAAATTCACGTATTGCTGCATTTGCCAGCAAGGACCTAGACTCATTATTGTC

A\_14\_P138169 GTTGAGAAACAGAAGGTTTTACTGTTAATGGGGAAAATAAGGGAAAAGAGGAGGAG

CUST\_8151\_PI426210822 GAGTCGCCTTTGGCCTGCCACAGCAGTGATCCCAAGGCTTTTGT

A\_16\_P15699707

GGTCTCACATAAACTGTTGAAAACCTTTAAGCCATTTCTACCATATAGCCACATAATC

A\_14\_P100103 GTCGTGTGGATGAAGGGATTCAGTTGAGGCTCTGGTTATTTTTGTAC

A\_14\_P113774 CACAGGAACATCACATGGGATTCATGTCACAAATCAAATTCATCCATGTTTATTAAGAT

CUST\_7286\_PI426210822 AGCAGACGCCTGCCCTCACACACAACCCCATGCTTTCAGAAGAAG

A\_16\_P31231253

AACATCAGCAAACCAGACAAAATACTACGTCTCTTATCGTCGAAATGAATTTGTCTGAT

A\_16\_P55110736

CAGAGGAAAATGCCACTACTTACATGTGGAAAATAGGGAAGACTGAAAATAAGTGAACCTA

A\_14\_P114493

AATGACAAAACCTGGAAAGGAATACACAAAATAAAAAGAGCACAGTGGCAATTTTGTAGG

A\_14\_P108999 CTTTTGGGTGATGGGATACATATTACTCTTCCACCTCTCTTGATTTGACTCTAAATAACT

A\_14\_P139843 CTCCACTGAGTATAGTTGGAAAACCACAGGTCTGTAGGATAAACACTGAATTTCTAATTT

CUST\_4958\_PI426210822 AAGGCCTTTGATGAGTGGCAGTTGGGTGGATGGATGAGCTAATAC  
A\_14\_P131943 TACCTGCCCTCATACATAAATCACTTGCAGGGCTTGTAAACCTTATTTATGTGTAGTTT  
A\_14\_P122956 GCTGGCTCGATACTGTGACTCCTTGTGAAGAAAAGGTATTAATGACCCTATGTTTT  
A\_14\_P117267 AAGAAGATAGCCATACCTCTTGCACAGGAATCTCTGGTCATAGAAAATAGAAGGCAAAA  
CUST\_3423\_PI426210822 GTGTGGACACAGCCACACTATGTTTTCTGTGAAGGCATAAGACCATG  
A\_14\_P106891 CTAGTGGAGATATTACCTTACATCTGGATACAAGTCTACCTAACAGCACCATAATGATC  
CUST\_1741\_PI426210822  
CTTGCTCAGTCTCTTCACATCTTTAGTCCTGATAATCCCGTCTGTATAATAGATTCCAT  
A\_16\_P00685089  
CATGGTGAGGAAGAATTGATCATGATATGATGTCATCGCGAAACTCAAACAACCTTACAAT  
A\_16\_P00685512 GGATGACAAATAATGACAGGGTGAGGGTCTAGAGAATGTGGCAGTAAAACATTT  
A\_14\_P106837 TATTGGAAGGGGTGGGGAGATATATAAATAAATCATGAAATCAATACATATGCCTGGCTC  
A\_14\_P131400 TCACCTAACCTTTCCTAGGCTGTTTATGATGCTTGCCATTTTAAATGAGCAGTGATAAA  
A\_16\_P00476970  
GACCAGGTAATGTTCTAATCCATGACCTTATACTTTGTCCTTACTATACTTGCTGAGCA  
A\_16\_P17898688  
GCAAAGACTCATTAATCCAATTCAAATTGCCAACATCAGTAAATCCTCTACCTCAGCAT  
A\_14\_P138758 CTTCTGAAAATGCATTTATGGTTGACTGCTTGCATGAATTAATAGCATCAGACCCCTA  
CUST\_3109\_PI426210822  
CTTGACTACTTTCTATTTATTTTAGGATGCATTTTTTGGCAACCTTTCCCCTCGCAC  
A\_16\_P15237536  
ACACTTCCACAAATCATTGATAATCCATTTTCCAACCTTCTTCAAATTCCAGACCATCAAC  
A\_16\_P20240824  
AGTGCCTTCTTTGACGCAAAATCCATATCTGGTGAAAGAAACAATTCTCAAGAAACATTA  
CUST\_4256\_PI426210822  
TTTGGCAAGTCTCTAAAGCATATTTCAAGAGAAAAAGGAGGCCAGAATTTATAGAATCTA  
A\_14\_P132671 GTGTGATTTCTCCAATATTTAATGAGACTGGACTCACTGCACTCATAAGCCCTTTCTTTT  
A\_16\_P00828958  
AAAAAAGTGTCGATGTATCACTTTGCTCACACTAAATGCATTCAAGTTGGTGAATAGAGG  
CUST\_4807\_PI426210822 TAAAGCTAATGAGAGAGCAGAGAGTCCTTTGTCTCCCCAGGTGTTATTC  
A\_14\_P126736 ATGCATAGCGAAGGGCACAACAATCTTAAGACCTTTTCTGAAAATAATCAGAAACATCTT  
A\_14\_P113028 AACCTCAAGTGGATATTTCTTCATTTAAAAAAAATGCTGGGTTTCCTTCCCTTTTTCTGA  
A\_14\_P128340 CCACTAAACCAGAGAATTCTCTGGAGTTTAAAATACCGGGACAAATTCTATTTCTGTCT  
A\_14\_P123034 GGATCTGAATGAAGATCTAGCCAAGATCCTAGGTATGAGTTTGAAGAAATAATGGCT  
A\_16\_P15347174  
AAATAGAAGAATACGGACTGGTTTAAACAATTCATCAAACACACTATCTCAGGTTCCAGG  
CUST\_8984\_PI426210822  
GCTTACTGTCTTTTGATGCCTTGGTTCTCAGAGTAGGCAATGGGTAATTGAATTA

A\_14\_P110403 CTTGGTATTCAGTTAAGTATTGTATTTAGTTCAGTGAACCGCCCGTTAGTTTTGTCAAAC  
A\_14\_P122675 GTCCCATGGTTTATAGGCCAAAAGAGATGTAAATAAAAAGTGACAGGCTGATTAATGGTTG  
A\_14\_P119684 TTATAATTTGTGATCTATGCCTTTCAAGCCTTTTGTCTGCCTAAAATGTTCTATCCCTTGC  
A\_14\_P137554 ACTTATATCCATGTTGGGAGTAGATGGGTATATAACAGTTTGGAAATACTATCTTTGGAG  
A\_14\_P105914 AGAAAAGTGCTTTTCCTTGTCTTTAGTTGGCTTTGTTGTCTGGTATTTACCTGTGAATAT  
A\_14\_P128819 GATATCACAAAGAGGATGCAGAATGACATCAGAGCAATCTAAAAAAGGAAGAAATCCATT  
A\_18\_P14866479  
ACCTGTAGAAAAGTTGGGTAGTTTATATATTGCATCTGGAAGCATTTTTAAACACAGTGTGC  
A\_14\_P115832 AGACCAGTCACACGAATGGAGACTCGTCTTTATTGCCTTTTTTCTGGG  
A\_14\_P118836 CTTGATTCAAAAAGCCTTTATCAAAAAGGTGGTAATTTGCTTTCAATGCTGTCTCATTCA  
A\_14\_P123062 TTATCAGTTTCCATAAGCAAGTATTTATCATCCTATCCACTTTTCTGGGCAACCTGTCAA  
A\_18\_P14136202  
GGTTTTATCTCCCAGATGTGATTTATGCCATATTACATTCCAAGAAGGGAACATGAAGAA  
CUST\_1987\_P1426210822 TATCAGTCATGCACTTCTTGTGTGGCTTAGATCAGCAGGACTGTTTGG  
A\_14\_P135653 ACAGAATATGTATCTATTACTTTGAGGTCTTTTGGAGGGAATGAAGATAAGGTATT  
A\_14\_P105826 CTGCACACTCAGTTTCTCTCGTTTTTCTTAGTTATCAGTCCTGTCTCTGTC  
A\_16\_P00685296  
AAAAAAGTAAAGCATCAGGTAAATATTTAATAAAAATGTTTATACATGTATATTGACTGT  
A\_14\_P126685 AATCCCATTTGTCAAGTGCTACAAAAGGCTAAACTCTGTGCCATTTTGCATATAATTGAT  
A\_14\_P128932 ATATGCTGAGACTTTCCACTTTGTCTCAAGTATCTGAACTTGGTCCTTGACTTATAATCC  
CUST\_1421\_P1426210822  
ACTTTTCACATTTAATATGTAAGTGTGTTTGTGTTAGGTTGAGACATTTTGATCCTTTTTTGCC  
A\_16\_P18362638  
AAAAAAGGTTTCTTTTTCTCAAAGTGAAGTCAAAGAAATTGTATTACAGGAAAGCCCGC  
A\_14\_P115936 CAAAAGTAAATTTGGTGTCTGCTCTTTTAAAGCCATGAGAGGAACACCATTGTTAGAATCT  
A\_14\_P139193 CTATATCCCACAATACTGTGCATTCGTAAACGTTAATGCTGCAATAAATACGGCACTTCA  
A\_16\_P16874270  
AAAGTTCCAAAATCTACAGTGTAATAAAGGACCTGATCTGGTATAAGTGACTCCGAAGT  
A\_16\_P00695370  
TTTCCACGTAAATTTTACATCACATCCAATAGTGCTTTAATTAGAGAGATGCCATGTCT  
CUST\_2274\_P1426210822 ATTTTCTCCCCTTGGCCTCACTTCTGCAGACACATGACTTTTGTTA  
A\_18\_P13242725  
AAAAATCCCAATTACCTTGAGATCTTTATCCAGCAATCAAAAATAGGACTCACTAACCCAG  
A\_18\_P14134946  
GGCACAGTAAATTCATTAGAGCGAATTCAAATAAATAAGGTTTTACTTTTTCTTTTGGG  
A\_14\_P100579 GTTAAGAAATGAAGGCAGACTTACTTTGTTGCTACTCATTTCTCTCCGGCGTCT  
A\_14\_P123305 GCGATAAAAAAACCTGGTAAAGTTCTTCAAACCTTTATTGCTCCAGTAGGCTTAAAAAC  
A\_18\_P15961740

TGTCCTCTTCTCAATAGGTTACTTGTATAACGAACCGCTGTATAAACAGAGACTACAAGA  
A\_14\_P123612 TTTTATCTTTTTAGGATGCAATTCCGGTTCAGATAGCCCATATTCAAAAATACCCATCT  
A\_18\_P11734158

GCCAACTAAATTCTAGGATCCTTAATGAAAAAATGTGACCACCTTTATCACTTTCCAGG  
CUST\_6572\_PI426210822 CTGACAGTCCTGCTGAAAGATGAAAACAATCAGGCACGGGGTTTTTAT  
A\_16\_P20450065

AGGAATAAGAAAAGATTTAGGGATTATTCAAGACGATTGAAGTGCTGAGTGAATGGTTGC  
CUST\_782\_PI426210822 TTTCAGTTCAAGATGGAGGATACAGAGGTTTCATTCTTGCTCCTGTTTGCAT  
A\_14\_P110712 AATTCTCAATAACTATATCATTAATACCTTATGTATACATAGGAGTTTATATAATGCATT  
A\_14\_P110178 TACTATCTTGGAAGACTGGGAGGGCTAAGAATTGTGATTATAGAGAAGATGGTTAATGAG  
A\_14\_P101364 AAAAGCAAATAAATGCAGACAAACAAACCAAGACCAAAGGCTCTTTTTAGAGCCACC  
A\_16\_P18082044

AAAACCTCTGCAACTATGACTGATAGTAACACAGTATACCCTTTTTCATTCAAGGCAATTGGC  
A\_14\_P120087 TTGAGGAAACAGACCTACTGCTGCCAACTTTTAATTTTTGTCAAGCAAGTGCATTAAAAA  
CUST\_2682\_PI426210822 ATTGAAGGTCACAGGAAGCGATCAGAGAGGCCTCTGAAAGATTCT  
A\_16\_P15658964

AACCTTATAGGTCACATAATTCCTCATTATCTAGTCAACCTTACACTAGGAGACATCCC  
A\_14\_P122622 GGTAAGCAAGTTTCTACAACATGAAAGCAAGTTGGGAAAAAGAAATCTTCAACCTAT  
A\_18\_P13091037

AAGCCACATATTCCTCCTATCAAAAACCTCCAGTCTTACCATTCAAAGAAAACCTTGA  
A\_16\_P00348282

AACATTAGCATCCTGTCATTTGGTAAAAGTGTCAGCATTCAAGTTTTAATGAGAGTGTCTG  
A\_14\_P106201 GGCAAAGATCAATCAGAAGGACCAACCTGCACTCTCCATGTAGC  
A\_14\_P107250 GCTAATTTATGGGATGAGGAATGTTAAGGCCAATCAAGTGATCTAATTGTTTCAACAGTG  
A\_16\_P00762550

ATGCTTTTGATCATTGGTCTATGCTCTTCTCATAACAAAGCAGAACAGATTTAAGGACT  
A\_14\_P125749 CTTCGTGGAACACTTTTCCCTGTTTGGAAAGAAAAGGAGTGAAGAAAGAGAG  
A\_14\_P130471 TTTGTCCCTCTAAGGAGTGAAAGCAATGGCCATTTTTGTATTTCAATTACAGAAACTAT  
A\_14\_P202323 CTACAGAATCTGATCATGTTGATAAATCCCCTTTCTTGTGAGAAGACACATGCTGAGTTT  
CUST\_7178\_PI426210822 CCAGGCCCATGTGGTATCTTCCTTTTCTGAAGTCATCCATTCAT  
A\_14\_P115889 CTTGGCAAAGCATTAAAGACAATTTCTTTTTGGTCGCATCTTAAAATTCCAAAACGATATGA  
A\_16\_P15522708

CACCTCATTGTTAATTCAGCCTTTGAATGAGTCTACCTTTGAAAATGTAGAAACGTAGGA  
A\_14\_P134221 CTCAAAGGAATGTTGATCTTTCTGAACCAAAAACAACCTGCACTGGACCAG  
A\_16\_P01556303

CCAGTGCTATACTACGTAAGAACCATATTCAGAATGCATTTTCAACATTGTGTTTCATGCC  
CUST\_7851\_PI426210822  
GAATCATTAATGCCATGCAGTTCTTGAGACAGCATTTGAGAAATTATTCTCTGGTTTTCC

A\_16\_P58424212

GTAGTAGTCTGAGTAAGAAGTATCAATTTGGGAGTCGCCAGCAGACAGATGGTATTTAAT

A\_14\_P132486 TGGCAGCAGTGATCACGGTGCTGAAATGCATTTTCATATTTTGTATCAAAGAGTTATCA

A\_16\_P16440193

AAAAGATGAGTTCCAAAACCTGTGTTAACAAAAGAGACCTTAGGAAATTATGCTCACCAGG

A\_16\_P35210134

AACATTAACGTGCTTTTTTAAACAGTCAAGTTCCTGGTATAAATGTGCATCCCTTCTTACG

A\_14\_P107392 GTATACTTTATTTAATCTGCTATGGGGGATGTGGAAGGCAGAAATTTATAGGCACCTAAG

A\_18\_P13413387

AAGAAACAACCTATAGACAGGGACTAACTTAAATGCTGACTTTCATAGTTCATACCCCACA

A\_14\_P201417 TCCTGTTTGCCAAAGATATACGCAGCACTTGATTAAAATGATATCAAATACAGTTGGCCC

A\_14\_P106498 ATTGCCTTTTTATAAAACACTGGCACAAAACCTGGCAGAGACTTTTTTTTTTCAGGATCTTT

CUST\_8809\_PI426210822 CTGACCTTGCTTCCAGCCTCCCTGGACCATGAATGCTGCTGAAG

A\_14\_P104600 TGAGGCATTTGTAGAGGCCTAATATGAAGGAATATAGTGGGACATAGAGTATAGTGGATT

A\_14\_P118501 ATAAGGCATTGGGACTCTATCAGGTATCCTGAGGAGAGACTCCAC

A\_16\_P01560442

TATAGACTTGAGTTAGATCATACTCTTCCACTAATCCAATTAATTACCCAACCTCACCCC

A\_14\_P121198 GGCAACCTAATGAGGCCTCTCTTGAATTATGGTATTGCTTGGTGAGCATATATATATTTT

A\_14\_P106736 TGTCTGGGTTAACTTTGTAGGCTTTAGAAACAGTAATGTGAAGTCTTGTAAAGCCTCC

A\_14\_P108765 CTGCACCTGTAAACACATATCTGTTTCTTCCCCTGAGAAATGTCCTTAGTGTATTTGT

A\_16\_P15217217

AAATGCAATTAGAACAGCCTTCAACATTAGAAGAAAGCCATAAGAATCTGACTTACACCC

CUST\_10026\_PI426210822 ACTGCTAACCAGGACAAAGGGGAGCATGGGAGGTCTGTGAGCAG

A\_14\_P125685 AGATGACCTCCTTTCCAAGATTAGTGAACCTTTAAAGACTGTGTAGAGAACTTAGGTTTTTC

A\_14\_P114176 ACGAATTTGAGCCCTTCTTTATGGATTTAAACATCAAATACTAGTTGACTTGCCTTTGCT

CUST\_4943\_PI426210822 GAGATTATGGTGATGTTGAATGGGGGTCATTAGAAGGCTGTCCACAG

A\_16\_P19782760

TGTAGAGAACCTTACACTGACCTAGAAAGATACAAGATTGCCAGTCAAATATAGTGCTA

A\_16\_P35079728

CTTTAAAGGCATCAAATTTCTACACCCTTGAAAATTAGGTTGATTTCCACACCATTCTT

A\_14\_P108844 AATTGCTAGTAATAACAAATTGGTGTCACCTCCAGAAGAAATTGGACACCTTAGACATTT

A\_16\_P16241359

AAAAAAGGTCCCTAATTTATGTCACAAATCTCACTGAATCAGCACTGTTCTCTTCAAACA

A\_14\_P116548 GAATGTCTGAAAACCTTGACAAGTCCAATGTAAATGAAGCAGGAAAATCAAATCCAATG

A\_14\_P128396 CTTTTCTACTTGATTGTTATCTGACAGCCGTATTGCTACTTTTATGGAGAAAGTCTGCCTA

A\_14\_P201334 TTGTTTTTCTTGCAAGACTATTGACTGCCACCATTTCATTCTGCTAAATAAGTTGAGTAG

A\_14\_P110784 TTTGGCTCAATATAATTTTGGCTCAAGATCCAAAGGATCTTTGGATTAAGGCCATTTACT

A\_16\_P01359248

CCAAAGTTAGAGCGTAAATATCTCCCACTAACTTGATGATTAAGATAAGGTCCAGGAACT  
A\_16\_P03068633  
TGATCTAACCTATTCCAAGAGTAAGGAGACAAACATCTAGTGAACCTAAGAAAGAGCAGAG  
A\_16\_P16723465  
TATATGGGCAGGAAAACCTTTTTAGTTTAGATTCAACCAGTAGTAGTAGGAGCATCAGTGC  
A\_16\_P19367276  
GCCCATCTGTTAGCCTATTTCACTATCTTTGCATTTTATAACAACAATTTCTACCAGCCA  
A\_14\_P115923 GGTTCACATGGAAATTATATTGGTTCAGTGTGAGATCACTTGATAATCATCCTGATCCA  
A\_14\_P134328 TTTGTTTGGCTTTCAAATGCCTGAGCAAGTAAAAAGCATTATCCTCACAATGAGCAATAT  
A\_14\_P109419 GACCTCGGGCCTATGTTGTTTTGATAGACTTTATTTTTTAGGCATGTTGTTTGTACT  
A\_16\_P17306779  
AATCTTCAGGCCATGAAAACTTTAGTGTTTGAATCACAGAATCATTAGAAGAGGACGG  
A\_14\_P117053 CTTTGAGAAAGGCTAGCAAAGAGCAAGGAAAGAGAGAAAACAACAAAGTGGC  
A\_16\_P01628113  
ATGTAACATAAGACCTGGTAGATATCTCCTATGATTTACCCATCATGCAAAAAGGACTGAG  
A\_14\_P112560 AGACGTTGGTAGTAATTGGGCTTTTTGATAGCACATGTGTAGGTGTAATGGACATTGTAA  
A\_14\_P111754 CAAAAGAGCCTCCTTATCTATCGATAAAGACAGACAGATGCTTACCTGTAAGGCAAGTT  
A\_14\_P136100 CACAACCTTACGCTGCTTTCTTTCTATCTTTGCTGCTTTCTTAGTTACAGAATCATCAC  
A\_14\_P105714 GTGAGTGCCTCTTATTCTCTGTGCTGATTGATAATGATGATGAAGGCAATTTGTATCTAT  
CUST\_10085\_PI426210822  
TCCCATGTCTACAACCTAAGAATGATACATTATGTTTAGTGAATAGTGATTTCGGTATCAC  
A\_14\_P107873 CATCAAGAGTATAACATTCCTCTTTAGTTTGCTTTTAGTTCTCATTGTGAGATCACAAGT  
CUST\_2976\_PI426210822  
CTTGGTGAATTGGATAATGCGGTATGTCTGTGATTGTATGTTTAAACATTTTAGAGAAAT  
A\_16\_P02615868  
AAAGAAAGGGAAACTAGAAACCTTCAAATTCTTAACAGCAACTTCTTTCATACTTCCCCT  
A\_14\_P101131 CTTGCATAGAGATAAACTTACCTTTCAAAGCGCTCTGTTTCTAGTTGTCTTTTGGTAATG  
A\_14\_P131360 CTGCTGCTCCAAGACAAGGAAATATGTATACTTTGTCAAAGACAGTTTATCCAATGGAG  
A\_16\_P03749170  
ACAGTGAGATAGTCCTCAAGCAAATATCCCTGGTATGGAATTTGGTTTTAAAATCAACG  
A\_14\_P111159 ATTGCTTGCTTCAATGACTGCATACAGAAGTGGCCTAAGAGTTAAAATTACCAAGTATCA  
A\_16\_P21248893  
CCACCTTTGATTCAGATTTACATATTGCTGTCTCTTGTCAATGATCACATGTGATGGAA  
CUST\_1408\_PI426210822 GAGGCACTGAAGTTCTCAAATCTCCATTTTTTGGAGACCTTGTACATAAAGA  
A\_14\_P133870 ACTTAGGGAAAAGGATTATTAAGCAGGATGATTGGGATGACATCATGTGAAATTTAGGAA  
A\_14\_P132089 ACTCATCCGATAAATTCAAAGTAATTTTAGAACATTTTGACCAAACAAGTGTGATTTTT  
A\_14\_P201105 TTTCTTTATTTTTATACACAGGCAAGGGCACTATTACAACTGCATCATCATTAGCACCC  
A\_14\_P105365 TATTTTTTAGTGATTTCGCCTTTGCCAGTCTCATCTCGTGTCTGCTTTGTAAAGTTC

CUST\_915\_PI426210822 CAGACGACATTTTAAGAAATGAGCGGGGAGGGGAATCACTTCTTGAAATAA  
A\_16\_P03718936

CAGTATGTGACCTTTTAACCCATAGTGACTCTCTAACACATTAGTAAACATGGCTCAA  
A\_16\_P19915714

AACTGATGCATCTCCTTTAAACTCCTCTAGAGATTTCAACTCTTCTATACTCCTCTCAA  
A\_16\_P02776734

AACTCTTGAAGCAAACATGCTCTTTTTATCCCCAATGTAGTTTTTGACACAATGAGCAT  
A\_14\_P108984 ACAAAGGCGCTTACAGTCAAACAAGTTCAGGTTTTCTATAAAGTCAAATGTTTTCTTTC  
A\_18\_P13124838

ACCATCCATAATCCTAAAACCTTGCTAATTCAAATGGCTTTAGACTCTCCTCTAACCTAA  
CUST\_1178\_PI426210822 AAATTCGAGACTGGTCATGGTGGTGGGAACAGGGCAAGGGAGGAG  
A\_14\_P109868 TGGACCCTGTGCTAGGATTTAAGACGGCAGGTTTTTAAAGAAGTTTTTAAATGATACAT  
A\_14\_P125213 GACATCCACATAAATGAATTTGAAGTTTCCCACTTTATTGTTCAACATTCCTGTCCACAT  
A\_14\_P136388 CTATTGGAAATGTAATTCTATAAGACTTCACAGGTGGTTTGGAAAGCCTCTCTAAATGGAT  
CUST\_5988\_PI426210822 TGTTTTAGCCTTGGGGCCAGAAACCCCTCTATTAGTTTTATTACCATTTCTGA  
A\_16\_P19427171

AACTACCACTTACTCTGATAACCTGAGACACTCTAAGTATGATTTTGCCTGCAGAATACT  
A\_14\_P104490 CTACTTTAATTTTAAGTTAACCCCTGGTATGTGGGAAAATTTGTCTTCTGTGCTGTCTTGC  
A\_14\_P103280 GTTTTATTTTTTTCTACAAGAAACGTGCTGAGAAGAGGACTGCAATGACTGCTTTCAAAA  
A\_14\_P112697 CAGAGACTGAATTATTTCTTTTTAGAAAGTTGGTTTGTAAAGGATCACTCAGGGAACC  
A\_14\_P115174 ACCTCCCCCAAATTGTTGCCTAATTTAATGTTCCCTGTTGAATACTAAGAATGAAATGAG  
A\_16\_P16583931

CCATAATGCTTTTCGAAAAGGTCTACTTCAGATATGCTTCATTTTCAGCAAGAATTCTGA  
A\_14\_P119828 TTCCAATACAAGGAAAATAAAAGAAGATACCAGCGAAAAGAACCGCTTACACCTTTCC  
A\_16\_P00685456

TTTTCAAAGGGAGAAAAAGAATGAGCAAACTATCCTGTAGAGGAGAGAGACATTGAAAA  
CUST\_246\_PI426210822 GTGGGGCTCCCAGGGGCAGGGTGTCTGGGATCCACTGGGGCGCA  
A\_14\_P129387 ACTTATCTGACCCTCCCTGTTTCATAGATCTACATCATTTTTCTTTGGGGATAAAGTTTTT  
A\_14\_P126635 ACATGAATTC AAGAAGGACCACCCTTTTTGTCTGTTGCACACAGTTTATTTAACAATATG  
A\_14\_P131987 TCCCTGCTAATGTTTACCACTTCACATTTACTTTGGTATTTAAATGGGGGATGATAATGT  
A\_14\_P131364 TGTAATCATTTGCTGATCAAAGAACGTGTAATAATGTTACCACCTCTGATTCTCACAGAG  
A\_16\_P00904033

AATCACCTGATCCAAATTTTTCAAACGTAGAACCCAATTATAGATGTCATTTCTCTGGGC  
A\_16\_P18736133

AGCAGTCTCAACTTCTACGTTGCTTGTGAATATTGTTTTCAATTCGAATGGCTATAACTCA  
A\_14\_P103466 TGTGCACTTTATGAAGTTCACATTAGAGGAGAATAAAGTAGGAAAAGGGGAATGACCTAA  
A\_16\_P19050504

ATGTAGCCTCTTAGAAAACCTGGTAATATCAGAAGATCCTGGAAGTAAATGAACCAGTG



A\_18\_P22841294 AGAACATGGCATTCTGATGAATGTGGTCTTATGCTGGGAAGAAACCTCC  
CUST\_9608\_PI426210822 CTGGATAGAGACTAATCTGCTCTCACAGGAGGCTGTTGGTAGAGG  
A\_18\_P11862591

CACCAGGAAATTAAGTCAAGCAAACCTATAAACAGTTCTAATATATTTGTGCACACGC  
A\_14\_P133526 TGTCAATTTTCAAACGAATAACCATCTAATTTGCGTCAGTGCTGATTATGTTTGTCCCT  
A\_14\_P111327 CTCCCATTTAAGAGATAGAGACATGCTGTTGCCATTTTTCTTAGATGATTCAAGACTGA  
A\_16\_P02319438

GGATTCACGTCTTCGAAAAGTTTTATTTGCACGAAGGTCATAATTTTCAGTTGCATTATGC  
CUST\_8661\_PI426210822 AAGCTTCACTTGATGGAGTTAAAAACCTGTATCTGTGAGCAGCTTTCTCACAC  
A\_14\_P122172 TAGATTAAGTGCATTCCACGGTGCCTCTTTTGGATCTATTTACTGTTGATTTGCTGTA  
A\_16\_P16191313

CATGTCTCAGACTGTCACACTTATTCCTCTGTCATGTATGCTTAAGTCTGTTTTAGATGA  
A\_14\_P135029 GATAAATCTGCATAACTTGGGGAAGTAGAAAATGGCAACTCAGGAGAATTAACAGTTGTT  
CUST\_2646\_PI426210822 GCAGCCGTTGATAAAGTCCCAGGATTCAGCTGAGCAGCAGTGAAG  
A\_14\_P128877 TTGTAAGTGAAGTTCAGGATAATAAAGTGTTCCTCCAGTCACGTCCTTCCT  
A\_14\_P110262 TAAAACTAGGTTCTTTATACAGATAAAGTTCAGTAGAGTTCCAGAATAAAAGATATGACTT  
A\_14\_P115018 GATGAAGTATTCTAGGCTATAATGGGAATTAATGCTGTGCCATTGTCTCAAGTTCTAGCA  
A\_14\_P114767 TAAACACAAACAAGTGCCAAAATGAAGACCATCAATGATCCAAATCCTTGCAAGGTATAA  
A\_14\_P135262 AGGGAAACGATATTCATACAAATTACCTCAAGAATACAACATAGAGACTGTAGTGGTTGC  
A\_14\_P112087 CTTTGAAGAGACATGGACCACATGATTAGCCTGATTTTTAAAAAGCAACAAGAATGGTGA  
A\_18\_P13399081

GGTTAACTGGGGTAACTACAGTGATATTATGGTGTGGATATAGATCAAGTTTCAAAG  
A\_18\_P22840149 CTGGTTATAGATTCTTAAGTGGGATGTCAAGCCCCTCCCTAATGATCTCAGTTTAA  
CUST\_6920\_PI426210822 TTGCATCAGGGAGAGCCCAGCCTTGAGTGAAACTGCCTGGGAGAC  
A\_14\_P201340 TATTCTGTTGGCAGAAATATCAGACCAGTGAATGGAGTAACCAATCTTAGTGGATTTAGA  
A\_16\_P00213634

CCCAACTAGCCATTCAGTATATCCTTTGATTTTCATTCCTTAATCTGTAGTGTGTCAGTGA  
CUST\_7607\_PI426210822

CAGAAGGAAAACTTCCTGAGTGAGCATCAAATACTTTAATTACTTCTTAGGCTTCAGAA  
A\_16\_P15557303

AAATACCCGTATTAGCAGATCTACCTCCATGAAATAGACAATTCTTGACAAACTAGTCCC  
A\_16\_P00685039 GTGACGTGGGGCATTCCATTCGACCCCAGAGTGGTTATTTACAT  
CUST\_9503\_PI426210822 TTCTCCCTCCTTTCCATGACTTTGCCTTTTTCAGTCCATGAGCTAC  
A\_16\_P15769351

TGAGAGTTACCCTCAAAGATATTTGCAACAATCCTCTCTTAATGGCATAACGAAGAAACTA  
A\_14\_P105811

CGGCAAGTTATGAGGAAAAAGATCAGGTTGCTTGATCCAGAAAAAATTAATAAAACAA  
A\_14\_P125721 CTGTGCCAACTTTTCTGTTACTAGTTCCTCCATTAAGTAATGCTCTGTCCTTTAAATC

CUST\_5603\_PI426210822

ATAATTTACAAAGTGAGATTTAGATTAGTGTGTAAGAATTTCACTGCAGAGGCCACTTCT

A\_14\_P132340 CTGAGTATAATGAAGAATCTATAGCAAATTACCACAGACCAAGGTGTGATGATAGGTGGA

A\_14\_P107388 AAACCTACCGTTTTCTATGAGAAGAGAGCAGTAATGCAATCTGCCTCCCTTTTTGTTTT

CUST\_3894\_PI426210822

CACACACCAAGTGTGTTAGAGACAACAGAAAACCTTGTTTTTTTCCTGTGTCT

A\_14\_P134212 GATATTTAGGTAGAACTAGTTCTTTCCACTTTGATTAGCCGAAGGGGGTTAAGG

CUST\_4388\_PI426210822 GTTATTGCCTGTGAGGCTCACTGAGGAAATGTCTTGCTGGCAAAG

A\_14\_P109486 TAAGAAAGCCACATGTAGCCATCACAAGTTTTTCACAGTTTTTTTTTTTCACTGATGCAG

A\_14\_P125717 GAACAGGAAGAGAAGAAGGGGCTACGAATTATAGAAGAGGCTGAGAATGATCT

A\_16\_P18107782

AAAACCTGGACTTTTTTTCTACAGACTTGGTGTTCAGATAATGATTTAAGACCACCTCACC

A\_14\_P136227 AACATCTTCCAGATATTCAATGTTCGGCAGTGCAATATCCATCTTTCATTCTCTTTTTAA

A\_16\_P20253396

AAGCCTCCTCTATATTCAATCATGCCTTAATTGAGTCTATCCTTTGCCTAAATTTGAGA

A\_14\_P124893 CAGAAGGCTCTTGTTTTCTTGGTTAATAAGATAGCCAATCGTTTTGAAAACATTTCCACC

A\_14\_P136081 CTTGTCCTCCCTCCATATTTAATTTATTCAGCCACTTTTATTAACCTCTGTTGTCTCCA

CUST\_232\_PI426210822 CTGGAGGCGGGCGGGGGCGTCCGGGTGCCTCCCTGGGGTCCCAGC

A\_14\_P113800 TCAGTGAAGCATATCCAATCAACATGCATAATGATCTGGAAGTCTGACACAATACTC

CUST\_3825\_PI426210822

ATTATTCATCTAATAAAGGAGTATGTGAGATTCCCAGAGGAGGAGGATCTACTTCTGTAC

A\_14\_P124439

GAAAAACAAGGCATGAATGCAAAAGGAAATGGAACCTAAGAGTATAGTTATGGAAGGAGAC

A\_16\_P58424067 GCTTCATGCAAGAGGGGCAAGGGCACAGGACAAAAGCCATAAGTC

CUST\_1543\_PI426210822

TATCAGTCTTTTTTTTTTTTTCCCTCTAGATTCTAACTTATCTCTTAAGAAGGTTATTC

A\_14\_P120439 AAGGTCATTTGGCCTAGTTCCTTGTGTTGCTAAAATCACTGTGCTGCATATTGTTTTAAAA

A\_16\_P01286658

CCTCTCCTGGTATAATCTCCTTATGTGTAACCTATCAGTGCTACTATATCTGATGCTCAA

A\_18\_P15677807

GCCCTGATTAGATCAATTTTGGACAATGACAATCGTAATTAATTACTCTTAGCCTTCAGG

CUST\_423\_PI426210822 AGAAGAGAACTCCTGTGAAGGGAAAACATTTAGAAGGGGAGCCC

A\_16\_P03739138

GCCCAACAATACTTCAATTACTCCATACATATGCAATATGAAATGCCATCATTGATAGGC

CUST\_5633\_PI426210822 AATGGTGTGATGACAGAGGCCCTGTCTTCAATCCCTGTACACAGAAT

A\_14\_P115395 CTCTCCACCTCCAGTAACAATGATGACAAAATTAATGGAAAACCTGTTGATGTGAAAAAT

A\_16\_P17990412

TGTAGCCGAGTGTCTAAAAATCTTGTCTTCTGTTTCATGTTAATTCAGATTGTCCATCCATG

A\_14\_P112930 CTCAGCATATTTTACGATAGAGAAGATCTTGTTCCAATGGAAGAAAGTGAGGACTCACAG  
A\_14\_P117340 TCTTCACAGATTCAAGTCATCAAAATTGAGACTGAGGACAACAGAGAGACACG  
A\_14\_P107686 CATTTTCTCCTTCCTCTTATCCCTTTTCAATTTCTGAAATTCTGAAAATAATTTACATTC  
A\_14\_P116365 CAACAGCAGATAGATTCTTTATGTTCAAGACAGCAAATTCAGATACAAAAACCCACCGC  
A\_14\_P107262 CGAGTTGTTAATTTCTGTGGCTACTTTTAAGAGGACTACAAAAAGATACCTCATGAGCCA  
A\_14\_P105394 GATATAAGCATGACTGCAAATTGCACAGATGCAGAAAAAGACACTTCTGACAAGTTAGTT  
CUST\_3925\_PI426210822 CCACCTGTGAAGATCCTGAGTAGAGGCTTAGGTCCTGTGGACAC  
CUST\_2953\_PI426210822 AAAACCTAAAGATGTGAAATGTGCTGTTGGAGCAGGCCCTAATCAGAACT  
A\_16\_P17170534  
AAGGTCTAAAATACTTCAGATAAGCCACACATTAGATACCCAGACACTATACAATGCTCA  
A\_18\_P14134390 CTTGTTGTGTCTGGAAGAAGGAAAGGGTCTTAGAGGAACACAAATTGCC  
A\_14\_P136021 AACATAAACAAATTGAACATAAATGGATTGATTAGTCTACAACATGGCTCCCTCCCCTAT  
A\_14\_P137763 TAGAGAAAATACTCAGAGACATAGAAAATGCCTGTTTCATGGGAAATGCCTAAAGAAAACC  
A\_16\_P00499695  
AAATGCTCACACATTTTGAAGTATTCCATGAACAACCTGAATAATGTGACCTTCTGACTCC  
A\_18\_P10649640  
ATCAGCATACGGTATTTTCCACACAGTTTAAGTTTCTAGAATGGTTCTTAGTTCGTGTCA  
A\_18\_P14133564  
AGCATTTAGGAAATAATGAGAGGCAGATAAAAATCTACAAATGTATAAGCAAAAAGAAAA  
CUST\_9760\_PI426210822  
AGATGTTATTCTCTTTCCACTTCTTATTTTATATAAATTCCTTCCTTCTATTGAGACAAG  
A\_16\_P19860748  
AAACAATCCCATTAAGAGATCACCAATATCCTTTCCCTTATGTCTTTTTAACTCCAGGC  
CUST\_2689\_PI426210822 ATGTACCTGTGAAGGTCCCTGTGGTCCATTTCAAAGGATACTGTTTTTC  
A\_14\_P114556 TGAGCCTGGGAAATGAGTTGATACGGATAAGGAAGGAAATATTTTATGAACTGATTGACA  
A\_14\_P100901 CTTTTATAAGGATGCAAAAACAGAGGGCAAGGCATGCATTAATGTGATAATAGCACAC  
A\_14\_P135629 TGTATATTTTGATACAGTTCTTTGTAATAAAATTGACCATTGTAGGTAATCAGGAGGAGA  
A\_16\_P58424290  
TAAGGCAGTAACTGTTTTATGAATAGGAGATATAAACTGGGTGAAACAGTGAGGTTCTCT  
A\_14\_P134666 ACTCCCGTATCATTTTGGCTCTTTCCAAATTACAAGTTGACTATACATTTGCAGAGTTTC  
A\_16\_P16365666  
AACCACCCAAGTTTACATTA AAACTTCTAGCAAAATATCCACTGAATTAAGCACTGTGGG  
A\_16\_P18031768  
AAAAATGACCTAAAGGAATCCCGAAGAGTTCTACAGTTCATTA CTGATGGCAAGTAAAC  
A\_16\_P02117350  
ACAAGCAATGGACAAGTAAGAAATATAGTGTGATATCAGTAAACTTGA ACTACCTTGGCT  
CUST\_7431\_PI426210822 CAGTTCCATCCCTAGGAATCTGTAAAGAGGAGAGTGGCTTCAAC  
A\_14\_P129870 GTGCATCAAAGCCAGTGAAGAAAGGAGCAAATAGAATTGGTAAAAGTTCATAATACAGCA

A\_16\_P40936496

GGGACTCATTGCATTATTTTACCCATCACAATACTTACCCACAATTTTAATCCACCTCAT

A\_14\_P104595 ACACCTAAAAATGGTCAAGAAGGTAATGGACCTTCTTGGAACCTAACCTAAAAACCTAAAAA

A\_14\_P114855 ACCTGTCTCAGAAATAACAACATATTTTAATCAGAGATTTGTAAGTATCCTTTTCTTCTT

A\_14\_P105833 ACATAATGATTACCTGATAAGTGCATTGAGTGGAATTTTCTTCCATGGGATACCTTGTTT

A\_14\_P117804 AACTGCTGAATAGACTATGTTGGGAAGAACATCTGTAACCATAAAAACCTCAGACTCTTGAA

A\_16\_P58424296 CAGTGGGGGTTTCATTTGACGAGCCATGGGAAGGCTTCCAGCAAT

A\_14\_P134309 CTTCTGTTTACCACTGTCACGGGTCTTCTGTATCATTGGATTGTGGGT

A\_16\_P00685468 CAACTATGTCACCTCATTGGAAATTAACATGTCTGCCCTCTGACTTCAGTATTTCTCC

A\_14\_P122109 CAACAGGCAATAGGCACATTTCCAGAGTTTCTAATTGAGAGATTGTATATCGGTTGGAAAA

CUST\_9464\_PI426210822 ATGTCAAAATGTCAGAATGGGGTTCAAACCAAAGACTACTCTTACAAGACCCT

CUST\_9897\_PI426210822 ATTGGGGAGAGTTATTTGGTAGCAGAAGACGCAATAGATGCTTTGAATTCTGC

A\_14\_P105076 TTTCCATTCACTATCACATTGAGGAGTTGGAACCTCCTTTATTCAATAACGACAGATGCT

A\_14\_P129450 CACATGCATAAATATCTCAGGTGAAATTAACATCGGGAAGAGTCCACCAGAAATGAAA

A\_16\_P19055652

AGAAGTATTGACAGATCCATAGACTTACTAGTGCTTACTATTACTTACCTGGACTCCTGG

A\_16\_P16113486

AAAGTGCTAAAAATAACCAAATGCTCAGAAACCATTTGTGATGCAAAAATGACTGTAGGG

A\_16\_P18526110

ATTGCCTCCTATGAATAACTCCTCCTTTCTTATGGTCCTCAAGAACAAAAATAGTCATTC

A\_14\_P104667 ACTTACATATTTTATGGTGGAGCAAAAAGTCAAAGGATAAATGCTGAGTCAAGGAACAGA

A\_18\_P22842680 GGAAGAAACCTCCAGGGCTGAAATCACCAGGAACTCAATATCTGTTTACAAAA

A\_16\_P37916997

AGCAGTTTGGTATCCTAACTTGTAACCTCGCAAATAATCATCAAATCATCTACCAACCCAT

A\_16\_P00685564

ACATGTGAAGATAAAACTAAATATGCATGTTAGCCTCAGAGATTCCAATTATTTTCTTT

A\_14\_P130218 TTAATCACAGTTGCTTAGAAATTGGGTTGTTTCTTCTTCTTTTCTGAAATACTTTGT

A\_18\_P10647586

AAAACCCAATGAACCTGAAAAACAATCTTAGATCTGTGTTTTAAATGAGTCTCCACCTTC

CUST\_9006\_PI426210822 TTTAATCTTCCATTTTCTTTGATTGGTGATGCACGCATTCAAGGGGCA

CUST\_1952\_PI426210822

AAGGTGAGGTTCTTGGTATAAGTACTATTTTTTATTTGAGAGATGTGATCATGTGGGAG

A\_14\_P123540 GTGGGGACCGGTATGCCAACTGGAATGATTCTAGAACC AAAATAAAGTT

A\_16\_P15114886

ACACCATAATTAACCAACAGAGTGCTAAAATTGCTAAAATCACCTACCCAATATTCTTTT

CUST\_272\_PI426210822 TATTACCAGCCTGAGCGTCCTTAGGGGTGGCAGGCAGGGAGGTC

A\_14\_P100355 CGAGAAGAGGGCATTATTTATTGGCATTTTAAAGTAAAGCCAACCTGGAGACCTAGGTTT

A\_14\_P103780 TGCAGCCCTAATTTTTGTGCTGACCATAGGAGTCATTATCTGTGTATTTATAATTTTCTT

CUST\_9213\_PI426210822

AACTCCCTGCATCATCCCTCAAGAACAAGAAAATATCTTCCACACAATATTTGCTTT

A\_16\_P58424546 CTAGATCAAGATGTTTACATACAGCCTCTGACCAGTCACTGGCTGATCACTAA

A\_14\_P134411 GGCCTTTTTCAAGTGCTTTGGCTGTGACTTTTCACTACTCTGCTCTTAGTCTAAAAAAAAT

A\_14\_P122876 ATTGAGTTGTATGGACATGTAATTAACATAGTCATGGCAAAGTTCTCTGACCTCAAGTG

A\_14\_P116769 CTGTCTGCATCTTCCAAGCACTTTACAGATACCTTGGAATGTATATTTTTGTCTTCTTAC

A\_14\_P129241 CTGAAGTTTTATATTTCTTTACGAATTCCATTTAAAAAAGAGAAATCTCTAAAATCATCA

A\_16\_P39846521

ACCAGCACACTACTAAAACAGTCTCCTTATTAATTTCTTTGCAAATAATCTCATTTTTGAA

A\_14\_P137093 AGTAAACCCCATTCAGTTGCAGACAACAATTACTGCAGATGGGATATAATAAGTAGATGT

A\_14\_P106239 TGGGCCTGGTGTCTATATTTCTTCTCTCAAAGAAACACCTCAACTGGATAATTATGACTA

A\_16\_P16017443

TCAGTAGATTCTCTGTATATCATAACAATGTCTTGGCCTACTTAAATTATCACCCCCCTTCC

CUST\_7936\_PI426210822 ACTCGATTGCCCGTGGAGCCTGCTCCACACACCTGCCTTTTTGT

A\_18\_P27214678 CCTTCTCCCTGTTACTGCCCTTCTTCTTTTATTCTCTCTCTCTCTTTC

A\_16\_P17651250

AAATCAGATGGAACCTCCTACTAAGTGTGAAAAAGTTACTGTTTTCAAGATCCAAAGAGG

A\_14\_P105603 CTATACAGATTGAGGGGACTGCAGGAAGTGAAATAGATGCATTTCTTTTTTCTTTCTTTC

A\_18\_P14132766 TTGGGAGGGAGAGAATCCACCTGGCCCAATGTGGGTTCATATGTCT

A\_14\_P115692 GGATTTTTTCAATTTTATAGAACATCAAAAGGAGCAGTTGCGTTGTTTACAAGCGCTCAG

A\_14\_P200035 ATGGATACTTTTCCACTTCTCTCATTCCATTCATTGGTTGGCAGAGAC

A\_16\_P40343865

CCATTCAACCTGTGATATGTGACCTATGAATTCATTTCTACCTTCATGCTTCCAAAATT

A\_16\_P20906839

AATCTCAAAGGTAATGTCACTAACGATTCCTCAGATCTCTTGATCACTTTCCCTGTTATG

CUST\_6910\_PI426210822 CAAGCTCTTTATCTTGCTTTGTTGGTCTTCCCATCCGCTTATCAGATG

A\_16\_P16397052

TGCCCTTGTTAACTGGTAAGAACACAGCATAAGATTTTCATCGGTAGTGATATGTTTTTTC

A\_16\_P15532565

AAGACAAAGTCATCTCATTTTTTAATCTCAGTAATTCAGTGAGTCCTATAATGGACCCTCC

A\_14\_P130735 GAGGGGATTTTTATGGTGAATCTTTTGTGAAGTGACTTCAGCCAAGTAATTGTGCAAAT

A\_14\_P128441 GAATATGACCAGGAAGAAGAAAGGAAGAGGAAAAAACAGGTGCCTACAGAACATA

CUST\_2541\_PI426210822

CTAAATTAAGTTATTTAGGAATAAACATTACCAGTTAAACCAGGGTCTTGGTTTATAGC

A\_16\_P16306478

TTGTTCCCTAAGTCAATACTCTATTCCTTAACTAGCCATTAACACATCTTGCTATGGTGG

A\_14\_P138124

AGAGAAAGTGTGAGAAACAGAATTGAGACAAATGTTAACAATATCAGTCTAAGCCAGTGA

CUST\_6134\_PI426210822 AAAAAATCCACCAGCAAAGATAGCTGCCATCCCTCCCCTCCATTC

A\_18\_P14136287

GGACTGGTCATTTTGATACTGAATGGGATTATTCTGGAGATTAAAGCAATGGAAAGACTT

A\_18\_P14133735 AACTGGTTGTATTATTTACCTTGAAGTGAAGTGACAGGATTTGAACTGTCAGCCCT

A\_14\_P106150 TCCTTCCACAATGATGACCTATATGTGCAATGGGAGAATCCACAGAATTTTATTAGCAG

A\_16\_P03068920

AATCACTGATGGGTTTAAATCCAGAAAATTAAGTGAATACTAAATGCCAGAGGTCAGC

A\_14\_P118823 ACTAGGACAGTCAGTAATTAATGCATCATTGAGGATTATGGCTGTTTCTTAAGAAGTG

A\_16\_P17419045

AAAGATTGAAATGCCATCTAAGTCCAGTTAGATTCACACTGAACAAACAATACTTCTGGC

A\_14\_P108190 ACTAACAGTATTACATGGCCAAGAAAAATATCACGTAAAATTAGTGTGTTCCCTGCAGC

A\_14\_P118665 GTTCTCAAGCGGAATTCGTGTTTCATTTTGTGTAGCACCCGTCAGAAAGA

A\_14\_P116982 TCTCTCATCTTCGATCTCACTCGGTCCCGAACTGCAAAGTAAAAAGATAA

A\_14\_P118016 CTTATGAAAAGAGTTGAAAGGAAAAGACTAGCACCTGACTGTGAATCTGAATGTAGAGTT

A\_18\_P22842308

GGAAGATTTATCATTACCTTAAAGAGTGAGAAGGACCTAGAACTGGGACTCTGAAGTATA

A\_16\_P00684990

GGTTTATTAGTTATTGGTATCCTTGTTTTATTGATTTACTAAAATTACACAGTTGTTCCGG

A\_16\_P16582789

AAAATTAGGAGATTTTCACTGAGTCACTATCATCTTTCCTACAAACCAGCATGCTTCTTA

A\_14\_P121421 CCGTTGGCATAAAGCAGGTAAAAAATGTTTGTAGGGTGAAAAAATCATCAAGATCTTGA

A\_18\_P14140723 GCTATTTCCCTTGTGACTGGACGCAAGGAAAGGATCTATGAAGAGAATGTA

CUST\_5414\_PI426210822 CGATCGTGTGTTGAAGCAGCCTACAGCCTCAGTGAGCATGTGACTG

A\_14\_P112409 AGAAAGAAGATATGAGACATTGTGGGTGCAATTAGGAAAATCTGAACGTGGACTCAAT

A\_14\_P109497 TTTGTGGGAAATTAAGAGAAATAATTATCAGACATATCATCACCTCCAGTGGAAGTACAG

A\_16\_P16196996

AGGCCTTACAACAGATAATCCCCATTGTAATCATTTTTTCATCTGTCCATAGCACTTTACT

A\_14\_P134495 CTCATATATGTCTCTAATTTGCCTAATGTTACATCAGGAAACTGAGTAGAAATGAGGGGG

A\_14\_P101260 ATATAGTTGGCATTAAATAATCTGAGGAAGGATCATCTCTACGGGTTGCAAAATCACT

A\_14\_P134183 CCTCTCATGACCTATGAGTTACATGGAGATTTTCATTGTTCCAGCCAGTAAGTATTATGTA

A\_16\_P00913745 TCCAAGACCTCCATAGCATCATCAAATCAGTGCTCTATCCAAGTTCACACAAAAAT

A\_14\_P119678 TCATACTCATTTTTTCTTAAATGGGTAAGAGTTAGCAAGTTGATTGGAGGTAGTGAGGGA

A\_16\_P15010701

AGTGAAAAGTCCCTGCATTAGATTAAACATATCAATCCTGTGTGTTACCTTCTCTTGTCT

CUST\_4214\_PI426210822 GTGATTGGTGAGGACTGTTTGACAGTGTAGCCCAGGACTGTGCAT

A\_18\_P15516806

AAAAAACACAAGGCTGATAGGTAAGAAAAAGACCTTAATGAGGGATCCTTAGAGATGTTT

A\_14\_P103360 TGTTCTGTTATTAGTCTGAGACAGCCATTTTTTTGTTTTAAGGAAAAATATCAGTCAGTG

A\_14\_P130697 CTATAGCAATAGGCTGACCTCCATTTTCAGCATGGCTTAAATGAGTCATTTTGTATATTGC  
A\_14\_P133076 CCTTTGATTCTGCTTGTGATTGAACCTGGTTAAATGTGGGAGAAATGTTTCTAGAAAAAT  
CUST\_1745\_PI426210822

AATCTGTTTTTGTGCTTAGCTGGGGAAAAAAAAAGTTCTTGGTGTGAGGAATTTCT

A\_18\_P11720918

AACATGGAACCTCAGTATAATCTGGCATAACAAAAAGTAGTTTCTGAAATGTGGCAAATC

A\_16\_P02578363

ACCCACCTATCCTTCTTTTTACACAATCTTTGCTTAACTTTTGATGATACAGGATTGACC

A\_16\_P16191085 CTTTCTGGTCCCTCTGCTCCTCTTCTCCCACAGAAAGAAACAT

A\_14\_P137174 TGAATAAAGGACATTTTAAAAATGGAATTTTCATGGTGGCCGACGAATTATGCTGAAATTG

A\_14\_P135345 ATCTTTTATGAAATAGAACTAAGAATTTTGCCAAACAGAGAAAGTTGCCCAAGGTCTCC

CUST\_4767\_PI426210822 TTCAGCATTGAGATATGACACTGTCACCTCCATCTCAAGAAGCCCTTAC

A\_16\_P18541261

AAAACCATATTACATTTTCAGGGCCAATGATCTAATTTTGCTTTTCCTCTGACTGTTACCA

A\_14\_P131760 CTTTCCTCATGTAGCAAATGCTATTCCTTGCTATTTTGAAAAGGGGAAGGGTATTGTGAGT

A\_16\_P30952310 AACAGGTAAGAAAGGGGAAATGGGAGTGATTCCCACCAGATTCACAAATTATT

A\_14\_P116622 TTGTCCATGCCTTGTAATGTGTAACCTCTGAGTCATGGAAGCAAAGAGAACTAATCTCTAA

A\_14\_P134254

CTAAGAGATACAAATCAGGGGTTATCAATGAAAGGCACAAAAGCAAGACACAATTACAAC

CUST\_3100\_PI426210822 TCTATGAGGCTTGGTAGCCTTTTCAGAGGAGAGCCTTGGAAGCAT

A\_16\_P58424496

ACATGTTATGACTTCATTTTACTGGTAAGGAACTGGAGGCTTAGAGAAAGGATGGTTAAT

A\_16\_P02390109

AGTTTGACTAACATCACAAGTCTGTGTTGTGAACTAAAGTGTAGACCAAGTATCCCTAAG

CUST\_8690\_PI426210822

CTTCAATTAATTTATAGTGGGACTGCTCACATCCCTATGAAGAAAATATGCACCTGATAC

A\_14\_P111733 CTACTIONCTTTCTGCCATTCACAAAGAAAACCAATTTGTCTGCTGTCATTGTCACA

A\_14\_P105691 ACTTTGAAGCAATTATCATCACCAGGTTGATTATACCATAGAAGAGTGAAAAGTGGAAATT

A\_16\_P03424088

GGGAAACAAACTGCACTGTAAATTTCAATAAATAACTGTAGGCATATTTTCAGAGAGGT

A\_14\_P123753 TGCCACAAAAAGTTGATCCTCCTGTTAATCAAAACCACACAACGTTTTAAACTTCAAATT

A\_14\_P130037 TTTCTCTTTTCTTCCCACAGAAAACAAAAGAGACGTCAATAATTTTGACCAAGACTTTA

A\_14\_P200398 GTCTTCACGCAACACGGGCATAAGCAGCAATTATCGCACGAAGTTT

A\_14\_P121645 CTCTGAAGCCAACCTTCTGTATACCTTCACCCATTTTCATGAAAATAAAATCAAAAAGGGAAA

A\_14\_P117928 CCGTTCAATTTTAGGAGACCTTTTCTGAAGATTGGTAAAATACATATACCTAGAGGGAAA

CUST\_7096\_PI426210822 GAATGAGCTTTTCTGAGGTGCCCGCGTGTCTCCACTCCAGGTCT

A\_14\_P104026 CTTCTGCATAAACGGAGAGGGCCGGGATATTTATAGTTGGAGTTGAACATAATACTAAATG

A\_14\_P115585 CTGTTAGAAGTTTGAAGATGACAATTAATTGCAAGCCTCTTCCTTTTCAGTGTGGAAAAT

A\_14\_P135604 ACAATGGAATGGTCATAGATGGGAAGATCAACTAGAGAGAAGAGTGGTTTTTCAGAAAATG  
A\_16\_P20707227

CACCCAAGCAAGGAAATTTATTGAGGCCAGTAACATTTTAAATGCTTTTTGGAGTTGTTT

A\_14\_P115306 ATTTTAAACGTTTGTGGCATGAAGAAGTTCTGGGTTGAATGACAGTCCATAATTTTTTGT

A\_14\_P119588 CTTTACCATCTGGGATATTGATGTGGCAAGAGAACCTGGAAATAAAGTAAAAGCCAG  
CUST\_4279\_PI426210822

TGTACAATCCCATTAAGTTGAAGGAATAAACCTGTAGTTGGAGAAATAACAGTGTGACTT

A\_16\_P17793409

ATCTCTACATTCCTCTTTTTAGGTAICTCCAAAAACACCAACAGTTTTTAAAGCCACAGAC

A\_18\_P22841423

GGCCACTTCCAACAAGTTGCTGTAAAAATAATTACATGTGAAGATAAACTAAATATGCA

A\_14\_P137716 CTGCTTGATTTTTTGGGGCAATGGAAACATATAATTACAATCATGCTGAACTGCATTTGT

A\_14\_P100102 TATAGGTCAAGTTGACTTTAAATATGCGACAAATATTTCTTTTCTCCTTCTCCCCCTTC  
A\_16\_P02077445

GACTTGCTAGATGGCTATTTACCAGGAACAAGAATTTATGAGAATTTGGATTCCCTGTAT

A\_16\_P19236271

CTGACATGGTAGAACTCTCCTTAGTATCTCACCAAATAGCAGTCAAACCTTCTAAGATGT

CUST\_9513\_PI426210822 CTGAAGGGGAATTTCCATAGAGCCTCGCCACCAAATTTAAATTAGGCAA

CUST\_1845\_PI426210822 ATTCTACTGGGTGGCTGGTGGGGAGGTGATGAGGAACCCCTGAC

A\_18\_P22842295

GGGGGTGTCTTGCAATTAAGATGTAGTTCAGAAAATTTTAGAAGGGTTCAAGTAACA

A\_16\_P19226689

AATGCTCATTGTTTCCCAAGAATCCTGATCAAACCGTAAAGCAGTATTAACCTTATTCCAG

A\_16\_P03433094

AAACAAAAAACTGAAAAAAATTAGCATATGCATCAGTAACCCTTCTAGTAAAATAAAGA

A\_14\_P110682 GTTATGTAGACCAGATAATTGCTAGGATAGTACTACAGAGGGCAATATCTCAGTCTCTT

A\_18\_P22840547

TACGATCTTTTCCTTTCTGTGCTTAAGTGATACTAGGTCAATCTTTAACTTCTTGCTCCA

CUST\_2521\_PI426210822 TCTGTAAATGTGAGGTGAGCAAGGTGTTACAGTTCACAATGGATCTGA

A\_16\_P16229376

ATGAACCTTATGCTGAATTATCAGAGACCTTATGTATTGATAGAGAGAGCCTAGACAGGG

A\_14\_P111969 CCTCAAACCATTTTTGTATTCTGTATTACTTTCAGAAAGTGTGGAAGCAAAGGTCATCTA

A\_14\_P131463 AGGTTTACATTTTTAGAATATCCCTTGGAAAGTGGTTGGAGAGTAGCAAAAGTGTGTTGT

A\_16\_P18266291

AATTGCCCAACTAAGACATATAACTTCCTGTTATCCTTTCACTACCTTTGATAACACACT

A\_14\_P122645 TCAACTTTTCACCTCCAATTTTCTTCTCAGTCTGTTTCAGATAAATCTGTTTCTTCTCTT

A\_14\_P128035 CAGAAAACACCTGCACTAAACATAACAACAGGTTAACATTCTGATTGTCGGGAGAAATAA

A\_18\_P15536085



ACTGGTAGGAGCAATATTCAGAAATAAACTGAAGACCTAAAAATCACATGCCATGCTTA  
A\_14\_P123695 CTGCCACACCATTTTAACTTCTTTGATAAATGTCTATCCTTGTGATTTAGACCTTTCCTC  
A\_14\_P120740 CTATGTGACCACCTTTGTTATTTTTTCCAAACAGAGAAGAAATCTATACGCACAGACACA  
A\_18\_P26391921  
AATGTCCTTTTGTGAGTGTAAGCCACATCCAAATAATTAGTCTTCAGTTCAGATCCTGTTA  
A\_16\_P02295877  
AACAAATTTGTTGGAGAAGAAGCCATTAACCTGAGATACCACCTCTTCCTTAGTATCCAAG  
CUST\_669\_PI426210822 TTGTTCTGAACTCTGGGCCATGGTAATCTCTGTATCCCTTGGGAT  
A\_14\_P117915 TGCAGTATTATATTTGGCTAGACCAAAATGTTTCCCTATCAGTTTGTGAGCAACTTGAG  
A\_14\_P120288  
ATAGAAATGAGAAAAAGTGCTATAGGTAATACAGTGATGGCAGTGTGAAGGGACAAACAA  
A\_14\_P130304 GTATTCCTTTGCAATCAGGAGGGCTGATGTTCTTTTGAAGAAGAGTTCAGAAAAA  
A\_14\_P117049 CTTACTGTTCTGAGTATTAGGGAGATCTTAATAAAAGCCATACATTCCTGATCCTTCTG  
A\_16\_P18102046  
GTCTTGCACAAAATTTCTTAACCACACATCAACATCCTTTTACATAAAACCAGGTATCCC  
A\_16\_P38877582  
TGTCTCTAATCATTAGAAATTTATCATCTCCCACTTTACCTTTATAAACTGAGCCCCA  
A\_14\_P134457 CTTTAAGGTCATTCAGATGCTAATTTAGACTGCCCTTGTGTCAGAATACTAAGGTGGG  
A\_18\_P22839405 TTCAGTTCACAGGCTTTTGGCCTCCTTAAACAGGAGGTCTTTGAA  
A\_14\_P136512 CTCTCATTATGTTTCCAGTAGAAAATGAAAGTTTTTATGGAGCAGTCATGGGAGACATTG  
A\_18\_P13160132  
GTAAAGTTTCGGTCAACTGTTTTTCAGTTGTTGTAACATGACAGAACATGCTAGCCATCTT  
A\_16\_P15537177  
AAAAGCACAATAGGAGAAAACACTACTGGAAGACAAAGAGGATAAATTGCAACTCTGATC  
A\_14\_P106254 ACCTTTTGGCCTTTTCTGTGTTTCGTGTGATGAGATCATTATCCATATAAAATAAGCCAA  
CUST\_9469\_PI426210822 AGAGATGAGAACATCAGGGAGTCTGGGATGAAAATGAATTCCTGAATGAGT  
A\_14\_P111385 CCAACAGAGAAGATGAACATGGACTTAATCCATTTCTTACACCTAGTTTACTTTCAAAGC  
A\_16\_P38146303  
AAACATTAATGACCACAGAATCTTCATATACATGATACCGTAACAACCTTCTAGTCAGATT  
CUST\_3224\_PI426210822 CTTACACTTCTTTGCCTTGGTTCTTATGCTCACAGAAGTCAGAGGC  
A\_14\_P120103 ACCACAGTCAGAAAATAATTCTGTTTCTCTGATTCTGCTCATTACTCAGATTCCAAAC  
A\_14\_P111306 CTGCTGTCAATCCAAACCATTGGCATCATCGTTTCTTTTGAATTAACCAACATATCAG  
A\_18\_P15740797  
TCAAAACCATACGCAGAATCCATTAATAAAGACAATACCTCAAGAATCCTAGAATGATCAG  
A\_14\_P201156 TGGGTAATAGTAAAGAAGTGTGCTTTATGTGGCTTTTCGTCAATTTTTTAAGCCAAGTTGG  
CUST\_4809\_PI426210822 CAGAGGGCAACTAGGGAAAATGGAGATGGGGTATAAACATCTGAATTCAC  
CUST\_4147\_PI426210822  
GAGGGAAGAAAGAAGGTAAGTCCTAAGATGTTTGTCTTCTTATTCCTTGTAAGGTT

A\_18\_P16335507

GTCTGTATGACCTTCTCAGAATAACACTGTTGGCTAATATCTTTCTATTGTATGCCAG

A\_16\_P01840716

AAAAGAGAATGGCAAAAATGTCCAATCTACACCTACCAATGGTGAGTTCTTTAGAAAGTCT

A\_16\_P01339690

GCTTTCTCAGGATTACATTAATATTACAGACCCAAAAGAAAAGTAATACCATCTCACACA

A\_16\_P15870759

AAGTGGAACCTTCTGAATTTTAGCAAATCCAGCAAATCATTACAAAAGGCATTTCAGTAGT

A\_14\_P127719 TCTACTCTACCCCTTAGAAAAGCAAATGGTATTCCTTCAATTCTTGAAAGTTTTTCCTT

A\_16\_P16191087 GACGCTGATCCCTTGCTATGAAGGTGAGCATGGATTGATTTTTCTCAT

A\_14\_P121315 AACCTTAAGATGTTGCATTCTAACTGACAATAAAGACCTTTCCCAAATATGCTGGTGTT

A\_14\_P110575 TATTTACATTTTGGTCTGAAGCCCTAGGATAGTTATTGTGCAGGAGTGCAAAATGCTATT

A\_14\_P139044 CTCCAAGGAGAAGTGATATTTTCAGCAGAAGATGAAGTAATTCCTATTCAAAGCATCTGTT

A\_16\_P36156710

TTTCCCAAGACTAATTCCTTCAACTTGTGCATATGCTGTGGATCACCTAATAGAATCTCTT

A\_14\_P125932 CCGTGAAATTCATTTACCTGGGAATTTGGATCTTTGCTTCTCTGTGCTGATAAGAA

A\_14\_P103109 CAATCTAAGTTTTACAGGTGAGTAAATTCCTTGTGAGGGAGGAATTCAACATACTCTCT

A\_14\_P101124 TTCAACTGTCTGTAATTTTTCTCGGCTGTTATCCACAATTCAATTATGGTTATTTCCCT

A\_14\_P127792 AAAAAAGTGATACTCATTTCAAACACCCAGGATGCCCAAACACTTGATTTTAAACCT

A\_14\_P201908 GCCACAGATAGTTGCTGGACACACATGACTTTCCTACACTGTTTAGTTTTTGAAA

A\_16\_P15499357

GCACGCATACATTTTAATGGTAAAAGGACGTAGTGAATTCTGAAAATGACTGTTTGGCA

A\_14\_P102592 CTGGGGTTATTAATAATCTTCAAGATATATTTTTAAAGGCACAAGAAGAGCCTGAAGCAGT

A\_14\_P134116 AACTGAAAATGAACAAACATACCTTGATTTGTGCAAAGGGTCTTTCATAACCTCCAAC

A\_14\_P107890 GCACATATTGTCCATAAGCATGGAGACATTATTTTGGTCGTGGATAACACTTTTATGTCA

A\_14\_P107734 ATATGCTTTGGCTGATGGTATGATCCTCTGGGTCAAGAAATTACTGAAATTTTCATT

A\_14\_P135290 ATGGAAAATAATCTAACTCGAAGGCGCCTGAAAAGATCAAATTCATATCCCAGATACCT

A\_14\_P119346 TCTAGTCATAGAAAGGGTTACACCAAGTTGCTGCAATTGTGTTTTTATATTGGCTTGTTT

A\_14\_P128958 AATATTATTGGCAATGAATCATATGCTCAGCCACATATGGCTTGCTGTTTGTCTTTGTA

A\_14\_P132912 CTGGCTCTTGGTTCAATGTTTAATTCATATGAACCCCTTACGACCATGATGTATATTGA

A\_14\_P101994 AAGATCAGAAATGAGGGGTTAGGAGATGGGGGACATCTATTTTCATGTTTATAATACTCT

CUST\_2099\_PI426210822 TGTCACCTCAGCTCATGCCTTCCCTAACCAATCTTTCACCTGTGCATA

A\_16\_P15802704

TAGACTACACATCTATGCTCCTCTGTATCTAATCGTGACTCTCTACTCCTAGTTTTCTCA

CUST\_4840\_PI426210822 CTCTTGCTTCACCAAACACGTAGTGATGGACCCCCCTATACCCAG

A\_16\_P39782989

ATCAGCAACCTTTGAATTGAATTAACAACACGAACTAATTAATCCTGGTATACCCAGC

A\_14\_P135889 AACTATCTGATAGTGTCTAAAATTTGGTTACTTGGGTTTGGATACCCCTTAGTGGGATGA

A\_14\_P109905 AAGTATATAATAAAGAAACTCATGACTTATTGGCCAAGTGAGCAGTGGAGACTTTCTTGA  
A\_16\_P03340069  
ACCACCATCAAACCTAGTTTTTCAAACCTTAACTCATCCAAATACCACTAAAATGACATAT  
A\_14\_P112383 GAAATTTTCTGTGCACAATTTCTCCTCCTTTTGGTTCTGTCCTGGGGATT  
A\_14\_P119736  
CTGAAAAAGAAAATGAAAAGGGAGAACTCATGGCTTGGTCATATTAAGAGTGCTGAAT  
A\_18\_P15868294  
GGGGTGAATTTTACACAAGAGATTGCATAACTCATGATTGATATCCTTTCTGCTAAGACA  
A\_14\_P119312 TGTTTGCAGCAGTATCAATTTCCCTCAAGATTAAGTTGTTTACACAAAAATATTTTGGGG  
A\_14\_P112459 CTGAAGTTCAGTAGCACACTGCATAATTTTTTGCATTAGCATGCTGTTGTTTCTACCTAA  
A\_14\_P112565 ACTTCTTTTCCAGATGTTGTGACACCATTATCCACTCTTCTTCCACCAATATCCAATT  
CUST\_1729\_P1426210822 GTGCACAGTTTCTCTCGCTACGCATCAGGTCGGGGGAGTTGAAT  
A\_14\_P102549 AAACCTACCCCATTTAGGTATTTCGAGAATGTTCTTCTCTTCTCAATGGAGAATTATT  
A\_14\_P114289 TAATTGTCAGTAATACTCCATGCTTTCAGAAGCAAATGCAAGATCAGTCACAACTACCT  
A\_16\_P01109484  
AAACCAGTTAAACTTTCGGATAACAGAACAAAGTTCCACAGAAATCAAGATGCCTTAGAA  
A\_16\_P18329472  
AAGTGATCTGCTTCATTCTATGTCATAGGCCCATTTATTCAATCCTTAGCAAGGTATTCTC  
A\_14\_P136968 CAATGCCTTCTAGAGTTCTACATGGAATGTGATTATAACTACCAAATGGCCTCTACCTTA  
A\_16\_P16130522  
AAGTCACACACCATTAAACATTTTTCAACATTCCTATCCTAAATATGCCTTCATTTTTGCA  
A\_14\_P123609 TTAAACTATCCACTCTCAAATCTCAAAAAGTCCAGCAAGTGTCATCAATTCTCACATT  
A\_14\_P139598 GCATATTCAACTTCTAGAGAATAGGACCAAATTGAACAACAATTTGGCACCAGTGTAAG  
A\_14\_P136385 TAGAAATGAATTTACTCACTGTGTTAAAATTTGGAAAGAGCCCAACAGCAGAACTACTGT  
A\_16\_P36297695  
ACAGAAAGTCGTTACTAGTCTGTAAGAACTAGAGTCAGATCCTAATTATCACCATTGTGC  
A\_14\_P126477 TCCAGAAACCTAGGGTGAGAATACCTGTGTTAACTGTTTTTAAAAATTTCCATGACATGT  
A\_16\_P00183575  
AACAGGCCTCAGAATAGAGATTTGCTACAACCTACTCACAATGCTTAAAGAAATCTTTC  
A\_18\_P22839985  
ATTAATAAAAATAATCCATAATCTCAGTTATAACCAATAACAATTTGAGAAGAAAGTTGA  
CUST\_4636\_P1426210822 AGTCCGAAAGCTACACAGAGCAAACAACCAAAATGAAAGCAAACAGACTCT  
A\_14\_P114668 ACCTCCATGCTACATCTTCCAATTCTCCAAAATGTCATTTGTGAAAGAAAATATCAGACA  
A\_14\_P110893 ATTCCTACTTACCCATTTCTGGCTTGGCCATTTACACTTTAGTCTCTAATTCCTAGATC  
A\_14\_P202051 CCTACTATCCACATTTTCGTCAGGATAATTATAATCTCTTCAATCTCTGCTTCTTTGT  
A\_16\_P18076567  
AAAAAGCCCATCCCTTACATATTCCTAACCATATTGCATATTCATAAGAGCAGAGTTGT  
A\_14\_P110787 CTTCCAAGAAGGTTTTGGATACTAGAAGTATTAATCTATGGCTTTTCTCCAGTAAAACC

A\_14\_P137492 TCAGATAGATTCTGTTGCTGTAAACATTTCAAACCTTGGTGCTTGAGAATCAGCCAC  
A\_14\_P135337 CTCAGTTAAAATTCACAAATCTCACCGATATTAAGTTCCCACAATTAATGCAGCAGGTTTC  
A\_14\_P114928 GACCTCCTGAAAGTGAAGAAATTCTCAGAGGACTTTGGGCAAGAGAGTTA  
A\_14\_P123935 TTGAAAATGCCACTATACTTTCCCTCTCAAGTGAACATATTCAAAGGCTCAGGAATAATC  
A\_14\_P110137 AAACGAAAACACTACTTGCCACTTACTGAAGATTTGTATTTTAGGGTGGATTGCTACTACAG  
CUST\_4289\_PI426210822 ACAACATTGGAATGTCACCATCTTAAAACCTTGTCACCAGTAGGCCTTCAAAC  
A\_14\_P126332  
TCATAAAACCCAAGCAGAAGGGTGAAAAGTAAAAGCAACACAATTTCAAAGAGAGAGTG  
A\_14\_P138365 CTTTCAATCCAGGAATGATTTTTTCAGACTCATTGTCTATCATTGCAGATGGTGAATATG  
A\_14\_P135400 CTCATTGTCAATCCTGACCTGGGTCTTATAAGCATCTTCTGAAAAACACAAGACAA  
A\_14\_P200541 CTCTTAATACAAAACCTGAGTGTGTGTCTGCCCTCCTGCACTCATGTGTGTA  
A\_14\_P106496 CCTGCTATTTTTTATAAATTGCCTTCTAACTAGTGCAAGACACGTCTACATTTGGGAAGC  
A\_18\_P15967801  
ATCCCTAATGAGAGGAAACAACATTACAAGACTTACATGAAAAGACATTATCTGAGGCCT  
A\_14\_P101503 GAAAGTGAAGTGCGAACCAATCGCAATCCACATTCTTTCTACGCCTC  
A\_16\_P58424608 TCATCCAGTCCCCTGATACTGGAATTTAGGTTGCTTCTGTTTCACACTTCTTTTAA  
A\_14\_P110111 TTTAGTGGATGCTGAAGGCCTTCAGGAAATATGCTACTGGTTGCCACT  
A\_14\_P116336 ATCTCTACTGTAATTCTTGAGGTGAGATACAAAGTAGTTCCCATGTGACCTTAGTAAGAG  
A\_14\_P200620 TCTTTATAAAAGGGAGGCACGGACTAGTTTCCAGGTTTCATTACATAAACATTGCAATA  
A\_14\_P114501 TTTGTATGCACACATTTCTTGCTCTTGTCTGCTCATTACTCTAATTGCTGTTGGACTTG  
A\_14\_P116689 TCAAAAAGAAAAAACCCAGAATGCTGTTCTGATGGCCAGACTTTTCATGTGTTATAATG  
A\_16\_P40438135  
TTGTGGCTTATTACAATTGTGAAAACACTTATTACCCCTTGTGTCATTACTGATACCCG  
A\_16\_P30952288 CTATGAAGGTGAGCATGGATTGATTTTTCTCATCCCCCTACCCAC  
A\_16\_P01577880  
ATCACCCCTACTTTTGAAGAGTCACATAGAAGAGTTAAGATATGGCTACTTTCCAACCTGG  
CUST\_8208\_PI426210822 TTGAAAAGCAGGATGAAGCTTTAGCTGCAGTAACTCATACTCCTCCC  
A\_16\_P40055844  
ACGTGTAGACTTCACATCTATTGGATCATGCCTGAAATAATTATCACACTGGATTTTGG  
CUST\_1847\_PI426210822 CCCACTCCATTGGAAAGTTTCCCTTGAAAGCTCAATTAGAGTGTGAGTAT  
A\_14\_P104327  
AAAACAGGCTTTGTTAGACGTAAAAGAACACCCAGAGGAGATAAAAACCTTTGAATGTCAT  
A\_16\_P16682325  
AAATGCTTTTTGCTAAATGCTACCCACTGTGAAATTTTCAACCAGACCAATTCTTCATTG  
A\_16\_P15513739  
TGAGATCACTTGCTCATTAATTTTCATCATTGTGTTAAGGAAGAAGAGACTTAGGATTCTT  
A\_14\_P108849 TTTTGAATTTCTCCATCCACACTGCATTAGAGGGTAAAACCTCGACTCCGAAAAC  
A\_14\_P130886 TGTTCACTTTTCTCTCATTTTGCCTTCGTGACGTTTAGAAATTGAAGAGCACTACAAATT

A\_14\_P134889 CCTCAAGAAGTAAGAGTATGATGGGAAAGATACTAGTTTATTCCTCAGTCTGGGATAACA  
A\_14\_P113537 CTGAAAGTCTTGCTGTCTTTGCTCAGGTTTGGAGTTGTTACTGGATGAAATTTATGAC  
A\_16\_P00424919

AATACGGGCTTTTCATTTTTAAACTCAGGACTTCATCATTCTAAATTCCATCATGCAGCA  
CUST\_1836\_PI426210822 CTGGCCACTTCTCTCACCCGTCACCATTGATGTGGTAGGAGGTG  
A\_14\_P131175 CTATACCATTTCCCTTGATAACTTTGGTCTCCCTCTTACCGTCTTGTGCCATAC  
CUST\_7440\_PI426210822

AGTGGATTAAAATCAATATGTAGTCACATAAGTCTGCTAAGCCATCCTTAATGTTTGGCG  
A\_14\_P101081 CTAAGTGTAATAATATTAACAAGTCCTCTCCATGAGGAACCTTTCATGAGGGTCTTGTT  
A\_14\_P128446 TTTTTCCTTACAGGTGTATGTTAGATTGACAATCCTTGTCTTCTGATTCCCTTATGGA  
A\_14\_P138164 ACAGGAGAGAATACAAAGGTAGCCTTTAGAAACGTGGTCTTGTTTATGTATAAAAAAGGT  
CUST\_8347\_PI426210822 TCCTTCCCATGGAGAGATGGTTTCCCACTCTGGCATTCACTGCT  
A\_16\_P02332967

AACCCATTCCCAGAATCATTCTTGACTGGATTACAAAGTCCTTGAAAGCAAATATTTGAT  
A\_16\_P20093777

AAAACTTTTGTGAACTGACATGAAGAGATGGCAATTATAACGAGGGAGAAATTCACATGA  
A\_14\_P112335 GCAAAGAAAACAATTTCTAAAATTGTCATGATCAGCATTGGGGTGGGGCTCGTTTT  
A\_14\_P118676 CTGCTGGATAGAGGGAGGAGGAAAGGAATATTTAAAAGACATGTTTAAGAAATTTAGCCA  
A\_14\_P101735 ACATAGATGTATCTAAGGAATTTTTCTGTTGTGCTATAATACATACTGTTTCAAATATGT  
CUST\_8664\_PI426210822 AAGGCTTTGGGATTTGGCTCTTGTTAATATGCAAGAAGGGGAAAAGTCAG  
A\_18\_P12413258

AACCTAATTCTCCAGTCTTCTTCGTAAAAAACCAGTTTGTTTTAGTTTCAGGGATTCCTTT  
A\_14\_P102183 TCCTTTGTCACTCTCCTTTCTTCTCGACCTTTACCAACTTTGTAATTTATAATCACAGTA  
CUST\_5973\_PI426210822

ATATCTCACAAATGTAGCTTGTATTTCTAATTTCTATGAGTATTTGAGGGGTGGCTATTTTT  
A\_14\_P137909 TTCAAAGTCCACTTCTAACTTGAGCAATTTCTGTCTGTCTTCTTTGGATTTGGAAGTAAT  
A\_14\_P115738 CTCAAAAAGTTTGAAAAAATGAAGTTTTTAACAGGAAGTCAGTAAATGCTCATAGACCCCC  
A\_14\_P134139 GAATGAATGAATGGCTTGATGGGAAAATGACAGTTACTATGTCACCAATCATCAACACTA  
A\_18\_P14131308

TCTCATAAACTGATTGTGCATTCTAATTATTTAGTTTGGAAAATGTAGTCTCTGTAGGTT  
CUST\_4337\_PI426210822

TGAACACTAATATGCCTGACTCCATAGAGCAGTGTATTTGGTTTTCTTAAGCAGGAA  
A\_14\_P115627 GCAAAGCCACTCAGAAATATTTTGCAGTGAAGTGAATAATAGCAGCAATGTGAGTTC  
A\_14\_P201391 CAGTCTTTGATTTAACCGTTTATTTTCTTCTTTCAATTGCAATGCTGTCAGGTGGAA  
A\_16\_P02338131

CACCCATGTCTAACAATACTTATTCATCCAGCATTACAATTTTTAAAAGGGCTCTCAGA  
A\_14\_P127117 TTACTIONTATTTAATCAATGCCAGGACATAATGTGTAAATGGACAACCTCTGTTGT  
A\_14\_P129873 CCTTCTTTGGAGCCACTACGGTCAGCATTAGGTCCTGTATTAGGAGTATATTTTGTAT

A\_14\_P130908 CTCTTCACTCTCCTGTTCACTTTTCCTTCAGGCTTTTAGTTCCTTTATTTCCCTC  
A\_14\_P128296 AGTCTCAATCTTCTTCTACATCCTTACACCTCTATAAATTCCACCTTCTTTAACAAACC  
CUST\_7368\_PI426210822

CCTTTTCCTTTCACCTTTTAGTGCTGCCTAAGTGTAAGATTTAAGCACAGCATTCTTT

A\_14\_P119332 ATTCATTGCAAATGTTGTCATCTGAGGAACACAAGTTCCAAATTGGAATGAAGTATCATC  
A\_14\_P137015 CTAAAGGAAATAGGATTTTCTTTGCTTGTGAGACAGCAAAACCTCATTTTTTAACCCC  
A\_14\_P109493 TCTGAGAGGGCACATTGGTGACTTTATTTGTTGACAGACTGATCACTCACAT  
A\_14\_P114498 AGTGCCTTACACTAGAAATCACATTAATCCGCATAACTCTTTTAATAAATAAAGCATAT  
A\_16\_P02851266

AACTCTTGGACAAGTTTCATTTGAACCTAGCAATCTCATCTGGATAGAAACCTCTGATAA

A\_14\_P119139 ACTACTCTGCCATAAGATGCTAATGTGCTTGAGTAATATCTCTGGAAATAGGTTTACAAG  
A\_14\_P107766 TATCACATGTCTTTGGTTGTAAACTGCTGTGATAGTTACCCTAAGTAATGGGACAGGA  
A\_14\_P111223 GGCAAATGACATTGTTCTTTTTTCAGATGTAGAAATCCCTGAAAATCCTGAGGCATATCTT  
CUST\_9913\_PI426210822 GGTTGTTGTCATTACAACCCTTTCAAGACCTAGGGCTTGGATTTCAGT  
A\_14\_P139031 ATTTTGAAATATGATTAAACTCCTGATGCTGCAGCAGAGGCTAAGAATATTAATGGCCAG  
A\_14\_P101628 GAGGATGATGTCTAAGTTATACTTACCTTTACTAACTCTGTGTAGCCCGTTTCTTTTGGG  
A\_18\_P22842090 GGCTGATCTGAGCCTTAAGACTTATTTGTGGAGACCTTGTGCTGTTCTTT  
A\_14\_P135032 TTTGCTATTATCCCAAGTAGACAGACAACTTCAGTAGTAGCCATCTCCCTACATTTTTAG  
A\_14\_P109362 TATGGTTTCAGAAAATCCACATATGATATAATCAGTTCAGGTAAGAGGGAATGTGTACCT  
A\_14\_P134805 AAAACTCCTAGCCTACACATTTCTGTGAGTGAAAATTTAAGCATCACAGGGTTTTAACAA  
A\_16\_P01778838

AAATATGCAAAGAGACCAATAATGACACCTCACATAAGAAATACCTATGTGTGCCACTGT

A\_14\_P115296 ATTCTCGGTCTCAACTTCTTGTCTTCTGCCACATCTTGCATCATATAAGTCTCATCAT  
A\_14\_P126810 ACTTCCAATACCATTAGTTATCCTGGTAATAAGAGTCTCACTCAAAAGTAGCAACCTTAC  
A\_18\_P22841593 TCATTAGAAGGCTGTCCACAGAGGGGATCAGCCCCCTCAATGAC  
CUST\_4001\_PI426210822 CTTCAGCGGGCATTAAACAGCATATTCCATCAGGCCTCACCTACTA  
A\_14\_P108556 CTTGCAAAAGAAATTTACCTGTTTTGATTTCCCTTTTCTGCACATTTTGCTTTTTTGTG  
A\_14\_P126263 ACTCCACCAAATACTCTTTTATTGACACCAGTTTAATTTCTTATGTTTCTTCTGTGCGG  
A\_14\_P201852 CACACCATGAGATTCTTAACTGCATGTAAAACCTTGATCTTTCTGAGTGCTCAGAGAAAG  
A\_14\_P128642 ATGATCACTTTAAACAATTCCGTTTACTGGCAGGAATTTGAAGATACCTGTGTCTATGAG  
A\_16\_P39655939

TGGCTTTATCTCTTACAATTCCATTCACACTAAACTTGCTATTATAACAACCTACTCT

CUST\_5058\_PI426210822 CTGCCCTTCTATAGAATGTTCTACCCTTTAATAGGGAAGGGTTTCTTCTCCTA  
A\_16\_P20633218

AATTTGAAGACTTTTAATCTTGTCCCTAATCCCAAAGATACAATAAAACCTTCTGCCAC

A\_14\_P116823 AAGCCCCAAGAGAACTAAGATAAAAGGAGTCAAAAAATATTCACCAGATAACTTCCTGG  
A\_16\_P16113964

GCACCCTTAACTTGGAAATCTATATCCTGCTGTTTAAACTTCAAGATGATTCCTATCTGG

A\_14\_P102822 AGATCCAACCCAGATACCAGTGTATAGTAGGGAGAGAATCACCAAATCTGCTTAAA  
CUST\_9257\_PI426210822 CTGGGTGGGAAATCCCTTGAATGCCCTCTGGTGGCGAGAAAGAAC  
A\_14\_P117233 TTTAAGGAAGAGAAAAAAGGATGGATTGGATCAGGAAGTCAGTTATTGTTTTCTGGGTTA  
A\_16\_P36074796  
TCATGTCCCATTAATTCATTCAAGAGTCCTAATGCTAATTCTATCAAAAAACCCAGCACA  
A\_16\_P41161744  
TTTACAACAATTCTCATGACTCCTCATCTAAACAGGATAAAACCATCACTGATGACCAAC  
A\_14\_P120852 TAAATGACTGTTCTTCCATCTGATTATTTTTCTTCCATACACACCTGTCCACCAACTTTT  
A\_16\_P39375423  
ATTTACTGACATGAGACAACACTGTTCCAAAAATATTGGTGGAGTGAATAAATCGGGTTC  
A\_16\_P00254468  
TGCACCTCAATCCATTTAATTCCTTAATCAAAATGATCTACCACTATTAAACACCACACA  
A\_14\_P120375 TTTCAAAGTCATGCGCTTCCTCTCAGTGCTGTTGATGGCGAATTGTATCAT  
A\_16\_P16191199  
CTCTGTTGGTTAGTATTTTTCTCAGGAAATTCATACCTGAGCCATGCATGAATAATAGGCA  
A\_16\_P02296358  
AAAAGATTTAGACCCTCTATCTCTCAAAGTTGCAAGTTACTAATGCTGCTCACCCATTTT  
A\_14\_P116996 AGGATGAAGTAGAATGGGCCTTTCCATTCGCTTTCCTTTTCTTAAAAAAGAGAGAG  
A\_16\_P19554695  
AAAAACAGAATCTGCTGATTCTGAATTCTATATCCACCATATCCACAGTCAAAGTTTGCC  
A\_14\_P107048 ATTCAAAGCAGTCTCCTTTATAAAACCCAAATGGCATGAATTCACAATATGAGATTGT  
CUST\_7327\_PI426210822  
CTCCTCACGGACAAGTTCAGTGTTGTATTTACTTTTTCTGGATTTATTTTTACAAATATTC  
A\_14\_P102621 GTTCAGTGGAAGTTTTGATAAGAGCCTTGAACAGCAATACACACTTTACCCATTTATTTT  
A\_14\_P133012 TTTTCTCCATTTTCATGGTGTGCGTTTTATAATAAGAAATAAACCCCTGAAATCCAGTTC  
CUST\_3569\_PI426210822 CAATGGTGGATGAATAGTTTATTACATGCATCCCAGGAGATTTGTGTGAAGAG  
A\_16\_P17225774  
AAAAAAGAGAGTTGTCAGTGAATAGTCATAATCTCAAGGATTCCTATATTGTCAACAA  
CUST\_7097\_PI426210822 TGTCTCCACTCCAGGTCCTGGAAAGCTGGCAGCAGCCTCACTCTT  
A\_14\_P120461 GCTGCCTAGAGGCTGGTATAAAAAAATGCTGATGTCCACATAACTTGTAECTTTAAGTA  
A\_14\_P127413 TTATTGTCTTTGCAGGATGAATTGGATCTCACTGACAAAAACCGAGAGGCTATGTTT  
A\_16\_P18131616  
ACAAATACGCAATCTATTATTTTTATCACCTTCATGTCCGATTTACAGCATCAAAGGGGG  
A\_14\_P135369 AAGGTTCTTTGTGGATCTCATTGTTGCAGATAAATTGTAGAATAGGTTTGCCAGGTAACA  
A\_14\_P114466 TTGGTTTCAGGTTATTGCACAGCGATTAATGCAATCAAAGCAAACCATACCTCATTATTA  
A\_14\_P123921 TTTTTTTAAAAATACAACCTTCCATTAACTTTGGACCTGATGCCATTCTAACTGTCACC  
CUST\_9423\_PI426210822 GTGGAAATAGCTCATGGGAACCCAGAAGAGGTGACGGTGAGTCAG  
A\_14\_P132070 ACATTTTACCCTTGTA AAAAATGTACAGAAATTA AAAATCTCAACTTGGATCCTCAATGATT

A\_16\_P15019930

AGGGTTGAGTCATTGAATCACCATGAAATCTACAACAGAAAACCTGTCATATTCATTGCAA

A\_14\_P103530 CTAGAAATAACACGAGTTTACTTGAAATGTGTCTTCCAGAGGCAGAGCATGATTAATTGT

A\_14\_P122890 TTAAATTCTTCCCATGGCAAGAGTTTGCCATTCTGGTCTCGATTAATAATCCAAAGAATTA

A\_14\_P109345 CCTTACAAGCCATACAGACGTAAACAAAACTTTATTTCTTTTTGGACCTCAATAACCTG

A\_14\_P107841 CTATAAATCCACACTTCCAGCGTCAAGAGGCTAAGACATCTGCATATGAATATGATTCAT

A\_16\_P21665277

CAACACAAGAGATGTTATACCCCTAGTCAGAATTATCCTTCAAATCCATGTATACCCTG

A\_14\_P127478 TTTTTGGCCTGTTTGTTTATTTAGAACTAATCTGGATTCACTCCCTCTGGTTGATACC

A\_16\_P36231082

GAATGATTAATTCTGCTGAAAACAGGAGTAAGGCAGGCTTCTTGGGAAAGCAGATATT

CUST\_5750\_PI426210822

AACTGCAGAGCCATGGAGTAAAAAAAACACCCAAGATAGCAGAACTTGTTCATT

A\_14\_P103863 ACACAATGGCAGACTTCCATTATTTATGCCACAGAGAAAGGCTATGATTAACTAAACAAC

A\_14\_P112429 ATGTATGTGATCACATTTACGGGTTGATGGGAAGACAGTGACACCCAC

A\_16\_P18138027

AAGGTAAGATGAAGACCCCTTCTATCCTTGGCTAGCACATTGATGATTCTTGTATGTAAC

A\_14\_P129524 GACTTTTTCCCAAGAATCACATTGTTGGAGGATGATTGTTTTGTTTTGCTCTAAATTGA

A\_14\_P124421 AAAGGACACGTTATATGAAGGAATAGATGGAAAGTGATGTATAACCACAGTGCCTAAAAT

A\_16\_P00685519 ATCTCTTTCCCTAATCGACTCTCATCTGGTGGTGCAGAGATGTTTCATGT

A\_14\_P135901 TTGAATCTTCTAGGAATCTTTGGGTGGTTTTTTCTCATAAGAATCACATGAAGGGCAT

A\_16\_P20672668

CAGTGTAAGGTTACAATTCCAAATATGCATTAACTGAACCCATCAATGATATCTAGCGGG

CUST\_8192\_PI426210822 ATCTGCCCTTGGAGAATGTAGAGATTCAACTCTAAAGTGGAACAGAGAAAGC

A\_14\_P101942 CCAATTAAGAGTGAATTAATTTGCTGTGATCAGCCTTAATTAGGACTCTTACCCTTCG

CUST\_779\_PI426210822 GTCTTGCCCCTTCTGTAGCCGGGGGATGCTCCTGCTGGGGATG

A\_14\_P127095 CATTGAGGACCCAAAAAATGATTCCTCTGAGTGCATTTATGCTTGTGTGTTTTCTAAAAA

A\_14\_P134872 CTTCTCAAAGTGCTGCATTTTTTGCTTTTCCATTTATATCAGATCTGTTAACTCTGAG

A\_14\_P132011 TTAAATTTGATGACTTGCAGTTTTTTGAAAACCTGCGGTGGAGGAAGTTTTGGGAGT

A\_16\_P16099422

ATTTCCAAGGGTATTTGACTTCTAGATTTCTTGACTCTTCGAATTTGAAGTTTCTCGGTT

A\_16\_P21277800

AAGCAATTGGCACTTTTAGTCCAAAGATTACTGCTTCTGAGTTGATCCAAATACAATCTC

A\_16\_P18926065

CCAAGGGATCCAATTTTCAAAAAAGCATAGTCAGATTTACCACCAACTCTACAATTTCTTG

A\_14\_P103676 GCTTCTTAGTGTCTTTTGAATTTGCAGACATGAAATGTTTGCACCTTTGAAATGTTGACA

A\_14\_P105656 TCAGCCAACCCGCAGAGTGAAAAAGACGCTGTATTTGATTTACAATGAACAAGATTTA

A\_14\_P132226 GCCATTTGTGTTAGCCATAAAAACATTCTGCCAAGATACTTGTGAGTATTTAGCCATTT



A\_14\_P120639 CTTGGCCTCAGATGTCAATACCTGTGCAGAATGTGCAATAAAATAATGAACTCCAG

A\_16\_P16766732

AAGTTGTTACCAACAAGAAAAATAACCACTGACATGAAACATAATTTCTATCGTGCCT

A\_14\_P124189 CATTTGAGGTTTCGTGATTTACCATTTAGACTTTTAATCAGATGCAGTGATGGGTAGTCA

A\_14\_P123914 CTCTGCCCGAATTACTTGATTAAAACGCATATCAACTATTATGTGATTTCGTTTCTCTGCC

A\_14\_P100474 CAACAAAGTGCTATGCAAATGTTCTTGATATTCTTAGCCATCTAACATCTATGCACGCTC

A\_14\_P129941 ATTTAAAACGTATAAAAGAATGTGGCCCTAAGTGTGTCACCTTACGATTGGTATACAGG

A\_18\_P11101723

CAGAGAGGATACACTTTGAAGTCGGCCTCTTTCAATCATTGTCTTTTTCTTACATAAATA

A\_18\_P22841602 AAGAAATAACCTGGAACCTACATTTTGGGGAAAAAACTCACGAACATGAGCAGTGAC

A\_14\_P106457 CTTCTAGGTTGTTAATTTCTGAATTGCACAAGGCACACGAATAATTGAACTTCACATCTC

A\_18\_P22840503 GTAGGGTTCAGTATTTCTCACTCACCCCTTTAAGACCCTAAAGGGAGAGTTAT

A\_14\_P132866 CAGGTTTTTTTTATTGCTTCTTTATTAGTTTGAACAGACCGTGGCATTGAAATGCATGCT

A\_14\_P119269 TCAAGGACAAAAGGACAGTATTCTCCTTTATGGAGAAGTAGTAAGTTTCTTGGCTAGATT

A\_16\_P36230595

AATGCTAACTGCTTATTTGCTGACCTTCTGCTTTATTTACAAATTTAAAGTGGGGCCAAC

CUST\_7291\_PI426210822

TAATTTGAGAAGCTTATGTGGAAGGAAACAGCACATTCTTGTGAGAAGATAGGTTTTGG

A\_16\_P18931399

GCTTTTTACCCCTTTTGTTAGTTCTGATCATCCTTAACCTACACACCAAATATGCTACAA

A\_14\_P137230 GTTTAAAGGCTGCTTCTCTAAATCATTGCTTTGTTTTCTTTGATGCCCTTTGTCATTT

A\_14\_P200763 AACCTTTTTTTGTAATCAAAAAGTGAATAAAAACGATCTTTTTGTCTTACAGAATTCACTA

A\_16\_P37848355

CCTAATCCCTCTAATAAGTTCAGGACATTCTAGAGAGTATTTTTTAAGCCTCACACATCC

A\_14\_P139907 CTGTATTCATAGTGACTGCTTTTGGTTTTAACCAGTTTATGATCGTTACTGTGTGGATCG

CUST\_9468\_PI426210822 TTTTTGGTGAGCAAGAGATGAGAACATCAGGGAGTCTGGGATGAAAATG

CUST\_3166\_PI426210822 CATTTTCTCATGCAAGGAGGTGGGAGCGGAGAAATACACCAGATAG

A\_14\_P111442 ACTGTAATATGTCTCCTCAGGTTGCTTCTTTCATGAAACACTGCGTAATAATTATTGCA

A\_18\_P20185507

ATTCAACCACTCAAATCAAGTCATTGTTAGAACTCATAGACCCAAGTCCAAATTTTCCTA

A\_16\_P55127254

AAGAATAATATAGTCTGGGTAAAACAGGATGTAATCCAGGAATGCTAAGTTGGTTCTCCA

A\_14\_P119092 CCACCATGTTCTCCACTGAAAAATCCTCTTTCTTTGGGGTTTTTCTTTCTTTCT

A\_14\_P108327 ATCATCCAAAACATTGTGGCTACATGTAGATCATGTGCACGTGTTTACGAAACCATT

A\_14\_P117604 ATCTTCTACTGGTTAAATCCATATACAGTTGAGCAATTCCAAGAGCATCCCTTTTACAGA

CUST\_1394\_PI426210822 TGGGTTTCAGAAACATGAAAGTCAGTGATGGTACCGACTTCCATGTG

A\_16\_P37370061

GGCTAAGTTGTTATGACACCTCATTAATCTAGTTCCCTCAATAATTGTCCCTCTTTGAAG

A\_18\_P13180232

CTCATTTAGTATCGAAAACCTTGCCAAAAATGTAACCTCCACAAATCGTAGTCATAGTGCA

A\_14\_P121805 CTTCTGTATCTACTTGGGGCTCAAACCTCACAATTTCTTTTTTCCTATCAGTTTTGCCTA

A\_14\_P110154 TTAAACCTAAAACCTTAACAAAAGTCATAAAAGTGGCTGACTGTATCTGGAAGTGACACGG

A\_16\_P21490542

TGGACTCATCTCCCACTATATAACCCCTGAATAAGAGATAATCCCCAACTAACAATGTT

CUST\_9017\_PI426210822 TCAAAGCTTTCCCTGGTTCCTATTACCTTCTGGGTAACCTACCTCCA

A\_18\_P11557686

AGGAGTTGAAATAGACCTGTCTAGCCAGTTATTTCTCTAAGGCACTTCAAAGAAACATTT

A\_14\_P134654 ATAGTTCTTTCACCATTCTGGTATTCATGTTACAGAGAATTGTGTTGCAGAGAAGAACTC

A\_16\_P00261383

AAACACCCAAATTTTTCTCTATTTCTTAAGTAACATCCAACATAACAAGTCTACTGAGGT

A\_14\_P129097 CTTACAGTGAAAGATCTTCAGAACACCAATTCAGTTGCCTTCAGGGTTAAACCATAATAT

CUST\_881\_PI426210822 TTGCCATCTTTCTTGGTGGCTGATTCTAAGTGGCTGAAGGAAACAC

A\_14\_P116378 CTCACCCTTTTTCATCATTCTGAGATTTCGAGTTTCTTGCAAATGCCTCGTC

A\_16\_P16432723

TTCATAGCAAACCTTAGACTGTCCATGTAATTTTCTCCATATTGTTTTTCCGATGCAAGCC

A\_14\_P110201 GGTGATTTGTTTTTCTTTAAGATGCTTCACTGTCTGGTTCGAGAGATCAGTATCAGAA

A\_14\_P129255 CTTAAGAGTGAGCCTAAGTTATAACCAGAATTTCAATGCAGGTCTGGCTGACAATCTTATA

A\_14\_P123533 GAAGTTTTGTTTGGCAATTGTAAGAGAACTACCAGGAAGTGCTTTTAGAGAAAATAGACC

A\_16\_P40396532

GCAACTCAAACTCAAAAGAAATGCCTAGATTCATGCTTATCACATCCTCTTCATAGACA

A\_14\_P112088 GAGTTTAAGGATGACATCTACATGCCGTATGCTCAGTGGCTAGCAGAGAAC

A\_18\_P22841923 GAGTCACTGTGTGCTCCAGTTCCTTAAGGATACTTTTAGTTTATCTGATCTGTGCTC

A\_14\_P127673 ATTTTGCTGTATGCCAAGTAAACAGGGCTGATCACCATACACAAATATGTATGCAACTTA

A\_14\_P109023 AGTGATCACAAATATCACAGGTTTTTATCCCATGTA AAAACCAAGGAATGTAACCTTTCC

CUST\_6209\_PI426210822 GCCCACCATACATGAGCAACAGATAGCTCTCCCTACAGATACCAT

A\_16\_P20192212

ACTTTTTTAACACATTCTAGATTAGCAAGACAAGGTATGGTTTTCCAAGGAATCTCTCTCC

A\_16\_P17437295

ACATGTGAGTTCACTAATTTCCCTCAGATATAAACACCAGCATGAGTTACTTGATTGGT

A\_14\_P115304 GTAATTAATTCCTCCATGTATGTAAATGTTCTTGTGATGCAGAAAACCAAGTCCACAG

A\_14\_P103004 TGCCAGAAGGATTTCTATTATTAACAAGATAATTGCCCTCAGTTTCAGACATTCTCTCA

A\_16\_P02445972

TTTATGCTCTATTGCTTCACTAAGACAATGCTTCACTAAGACAATGGTTCACTAACCACC

A\_16\_P02198506

ATCTAGGATCAACTTCATCGTGTTAGTTATGGTGTGTTTTGTTAAAGTGTCCACAGAAACCA

A\_14\_P100350 TTGCCTGAGATAAAAACCTTTTCTACTTCTTTATGAAATTCACCTGGGGATAAATGGATTCC

A\_14\_P120619 GAGAAATGTGTCATGAAAAGAAATGAGACTTATTTTGGCTGTGAAATGCATCTTAAGGTG  
CUST\_1487\_PI426210822 GAAGAAGTACGGAGAGGAACACGGCTCCTGCCAGGCTGGGATAGC  
A\_16\_P17856470

AAAACGTAGGTGATTAGAAAACAGCAATCTGTCAAAACTTCAATCCTTTGCTTTTCCCTA  
A\_14\_P126656 GATTAATTTAAATTTGCCTTCTTTGGCAAGCCCTTAAACCAATGGCTAAAGCAGTTAGTT  
CUST\_6648\_PI426210822 GAAAACATGTTGGTATAGCCAAAGAAGCAGCCGTAATGCCACAGAG  
A\_14\_P120633 CAAATACTCCTTTTGGTTTATCTTACCACCTTGCTTCTGTGTTTCCTTGGGAATG  
CUST\_8397\_PI426210822

GTCTTGGGCCTGCTTTTTACATTTTCATCATAGTTTTTAAACAGACACATTAATTTCTCGA  
CUST\_8649\_PI426210822

TCATCTTCTCAATTTTTCAGAACAGACCTGAAAAATTGAACCACTTCACTTTATTGCCAT  
A\_16\_P00204197

TGATTCTTAACAAAGTGGAAGTCTACTAGACACATTACTCAGAGACTCGTATTTTCCCAG  
A\_14\_P117898 CTGAATCACTTAAGTCAGAAGTGATGGAGAAGGATTATCACTACACACAGTAACTATGCT  
CUST\_8842\_PI426210822

GCTGATTGAATTCTGGAACAAAAGTTACATTCCTAGGCTCTTGGTTAATTTGAGCTTG  
CUST\_6173\_PI426210822 GTATCATATCACCTTTTGACATGGAGGCTTCTTCCCATTAGCTTCCCTAGGAATAC  
A\_16\_P35519177

CCTTCATAAACCTGTCTAACTGTTACGTCTCATGAGTCCTTAACCCAATTTGTTATCATA  
A\_18\_P14134960 ACAACTGTAACACCCTGTGATATAAATAAATGCTGCCTGGCTGGCGTG  
CUST\_2659\_PI426210822 ATGGGCTGCAGCTAAGAGAAAACCTGGCTGAGGCTTTCAACTATATG  
CUST\_9394\_PI426210822

CATCCTCTTTCAATGTTTAATGGTTTTGATTCCAAAATGACTTCATTTAAGAGCAAAGAA  
CUST\_5502\_PI426210822

CAAATGTTGATGTCTGTGCCTTCTGGTACCCCAATTGCAATGATTATAAATGAGTAGAT  
A\_14\_P125794 TAAAACAGACCTTCCAGATCCCCTAGTTGTTCTTTCCTAACTCTTAAGGTTAATTTGTG  
A\_14\_P124259 AGCACCGACACTGATGCAACAAATATTCTCTACTAATGATGCAGAAATAGAACATCTCTT  
A\_14\_P112625 TAAAACCAAGTTTTAGCAAATATTCCTTGCAGTGTCTTCCCTTTCCTTATTAGCCTTT  
A\_14\_P114224 TGTGTTCTATTAATCGTGTCTTCAATTTAAAAGACCACAGACTTCTGGAAACTCTTTGCTG  
A\_14\_P131913 ACATTTCTGCAATTGAGAAACAGGCACACAAGTGTGAGGAGTTGCTAAATGCT  
A\_14\_P133688 ACCACACATGGTTATAACAAGATGGTAGTGTGAGTAAGGTGTTTCAAACATGAGATGATA  
CUST\_2565\_PI426210822

AGTAAGTGGAATGCTACCTTATTTTCTCATTCTAATTATTCTCTATCCCAGAGTTTCTA  
A\_16\_P18200202

AAAATCCCTTATGAACGAAGATTTGACAGCATCATTATTCAGAACAAATCGAAGCCAAGA  
A\_14\_P105295 TAAGATGTGATAAGTCAGGGATTAAATAAACAATGAAGGGGTCAACAGGGAGCACAA  
A\_16\_P17031469

TTCTGCCATCTAAACAATTATCAACACCTAAAAACAGAATCATACTGCATACCCATTTCT

A\_16\_P00685609 GAAGCCCCTTCTCTCTACTTGGCTACACATCCGCATCATTCTCTTC  
A\_16\_P19519087  
AAAACAAACTGTGCAAATTCTGGACTACAACACTAGAATAATGGTATCTCCCCACTATCAGC  
A\_16\_P01431195  
AACTTTTGAGAGCAGAATCTAAATCGAACATGGCAGTAATAATTTAGCCAAAGTGAAGGG  
CUST\_7112\_P1426210822 GCCCAATATCACTGGGAAAAACCCAGATCCCCTACAGAAATACAACA  
A\_14\_P132022 ACGGAATGGACTTTCTAAAAATTTCTGCAGGATTTCAATTGTCTGCTAAGAATATGTGCT  
A\_16\_P36230697 CATGACTCTGGGATGCCCTCAATTGTCTTACAAAGTAACTCAGGCATT  
A\_14\_P108487 CTCTGATGCAGTGACCTTGATATTAATAATCAACACTCGGGAACTAGAGTTACTACCTAA  
A\_16\_P16715205  
AAAGTTTTGGAGTCAATATCTGTAGCCTTTTGATACTGAAAATTCTGCATAGTGGATGGG  
A\_14\_P107405 GTTTTATATGCAAGAGGTGAGCGTTAATTCTGTATCATAAGGTTGTCCCCTTTCATCATA  
A\_14\_P126167 CTGATGTCAATGCAACAAGAATTAGGCATAAAAAGGAGATTACCGTGCATTGTTGAAGAAG  
A\_14\_P200091 CCAATTTATTTTGGCCGTGGGTTTTTGTCTTTTTTCCAGTTGATGACTTTGTGAACATT  
A\_16\_P20079307  
AAAAATTTGGTGGACCAGTATTGACAACCTGTAATCAAACCTTTCCAAAACGGACAAAAGAG  
A\_14\_P103554 GGAAGAAGTACTAGTTTTAGGCAATTTCTAATCTTGCCAAGGTTTTGAGTTTAAGTGGATAGG  
A\_16\_P21474131  
CTCACTATTCCTTCTCCTAAGTATACTAATGAGACAGATGGATTCAGATATCCCTTGC  
A\_14\_P103508 ACAGAGTTGTTATTTCTGTAAATTAGAGTTTCTTGGCAATTTTTGCTTCCCTTCCATCC  
CUST\_6579\_P1426210822  
GACTTTTTTAGCTTTGGAGAAAGAATGAAACCCCAGCTTTGAGACTCCTCTAAAAAAA  
A\_16\_P39920466  
ACAGATGCCATGAATACATGAGTATACATAGTCATTCTCTTAAACTCATTACGATCACCC  
A\_14\_P137791 GAGTTTTTTTTGCCGCTGATTGTGATTCTTCTTTGTCTGTTTTGACTTTTCTGTTTACT  
A\_16\_P30952563 ACAAAGTCTGGAAGAAAAGTCTTGTAAGGATTTGTTTAGTGGTTGGGGTAACAC  
A\_14\_P102130 TGGCAAAAAGTTAAATATCATCTCAACACAACAATTTGGTCAGTAGGCCTTGAGGTAAC  
A\_14\_P110391 AAAATGTTATTAACCTTAAGTTGGGGGGACACTTGTCTGAGATTGGATGGCTGGTAA  
A\_16\_P03526039  
ATAACATGGCAGCAATACGTTAGAATGTCAGTAGATATCACTGAGTTTCGTTCCCTTTGTC  
A\_14\_P101561 CTGGTGCAGTCACGTTATACAAGAACAGGTATTCTTTTTAAGAAGTAAAGGAAACTAAA  
A\_14\_P117112 TACCACTGATATTATACAGTTATTTTGTTCATGCCTAATTGAACAGCCATCTTCCCCAA  
A\_16\_P16111335  
ATGCATCTTAAATTCGAAAGCATCTTGTCTACTTTTTCTTAGTCCCCACTACAAAACCTCC  
CUST\_112\_P1426210822  
GATTGTGCATTGTTAAGAACCAAGTGGCTAAGTTCTTTAGGGCTAACTCCAAAG  
CUST\_8214\_P1426210822  
AGTTTAAGCCCCATAATTTCTTTGAACATTCCATATACCTTTATGTGCATATATTCTCAT

A\_14\_P100507 ACTGCTGATTTGGAGAGTAGTTTTTACTTCTAGACATAGTCGATGCCTAGAACTTGTA  
A\_16\_P20795467

GGGTAGAAGTCCTAATCTCCTAAAAACAGTCAGTTCTAAATCTATGCATGTGCTCATGAT

A\_16\_P19213367

AAGTCACCAATCAGATCTCAAAAATTGGCTAATTCAGTAAATAACAGCAGAAGGGAGTC

A\_16\_P16905846

ACCAATGACAAGGATTCAAAATCATTATCGCTCATTATAACCTCTGCACAAAATGGA

A\_14\_P135807 CTGCAGTTTTTCGTAGTGTCCATGGAAGTGAAAGAGCAACTCCAAAACTCTAC

A\_14\_P134048 TTCACTGAGAAGATAATTGTAACCTAATCCTGCAGCGAAACATCCATTTTTCTTGTCT

A\_16\_P16654866

AAAAAACTAAATTACTTCGAATGTTATTCAGTGCTGTCATTGTATTCAATCAAAATCCCCCT

A\_14\_P110571 TAAAATCTTTGGCACTGGAGCGAATTTTATGATCCATCTTCCTGAAGGAAACCAATAAAA

A\_18\_P13353994

ATTACAAGGTAGCAACATATCAAGATAGCCTGGACTAGTTTTAGTTACACCAAGTCTTCC

CUST\_9027\_PI426210822 AAGATGGAGTGGGACAGAGCATCCTGGTGGGGATTTTCGAGATGT

A\_16\_P21475842

AACTATGTGCTCTTGAATAGGCTACAACCTATTTACACTATCTCATTGAACTCTCCTGG

A\_16\_P03519975

AGAATGCATACTCACAATTGATGCCACTAATAGCAATGCTTACAGATATTTAGAAGCCCC

A\_14\_P104407 ACTTGGTTGTTTAGTTGAGGCACTTTATAATTTTTCTCTTGTCTTGTGTTCTTTCTGCT

CUST\_1116\_PI426210822

CAGTGATTGTTGAACCATACTAGTTATGCATAGGACCAGTACTTTGGTTTTCCCA

A\_16\_P35059872

AGTCTCAGCAGTCATATATTCTCATGATTTAGCAGTTAAACAAAATGTCCACAATCCACA

A\_16\_P18524407

TGAAGTCTAACAACATTTTGGTCCAGATTCAAGTTTCTATCAAATGCACTACACTCTTGG

A\_14\_P101176 AAGAAGGACATTTTCCTTCTTAGTCAATTAGAAGACAAGTGTGTTTTGGTCAACCAGT

A\_14\_P100128 CTTTTAGGGTGTACTATCGTTAAACCAATAGTTTACGGTAATGTTGCTCGGTATTTTGG

A\_14\_P100761 TATGAATTTACCTGGAGTTCTTAGACCTTGTGAAACCAGAGGTATGTTCTTTCCTTT

A\_14\_P128437 TTCTTCTTTCTGTTTTCTTTCCCTTGTTTTTGCACAAAGCCATTATGCAGGGAATATTTT

A\_14\_P108361 CCAGTTCCTCCATTATATTAATGGTATCTGGCTTTTCAAGACAGAATTCACCTAAGGATGT

A\_14\_P131072 ACTGTTCTTGCTGAGATTGCCTGAGTTATATTTGGAGCAAAGTTCACCAGTAAATATGTT

A\_14\_P125228 GACTTTGCAGTCACCTGGACAAATTTGTAAGAGACTATTTAAAGTGGAGAAAACAGGATA

A\_14\_P137761 CATATATTGAGTTCCCAGAAAGTATCAGAACAAACACCAGTTGCAAAATTACAAGGCTTC

A\_16\_P03099826

ACTTCTCCTTGATTTTCAAATATAATATGCTGTCTATAAAATACTGTCTACTAAAACCTCC

A\_14\_P112506 ATTCCAAATGGATAGACATTTTTCTTACCTGGAAGTGTGTAATTTGGTCTAACCGTTTG

A\_14\_P120413 ACTCTTTGTATGTGTAATATGCCTCTCCCTTACCTCCAACCTGAGAATTGGTAGATAAA

A\_14\_P200657 TAAAAAGTTAATTCTGCTCATCATGAGTTTGAAACTGACCTGCAACTCCTACTTGATGTG  
A\_14\_P112761 AGAAACAACATAATTCAATATGTGAATTTGTTTGGATCAGATTCAGGCAAGCCAACCATT  
A\_16\_P19077863

CCTCCACTTTGTCCTTAACTGAAATACTTAACTGTCAAATTAATTCTGAACTTCCCCAT  
A\_14\_P100173 TTTCTCTATTCCCATCACAGGTTCACTCCAACCTTCTAAACCTGTTCCAG  
A\_14\_P123705 CTAATCCTCCTGACTTCTGATTGTCCCACTTTATTATTCTCTATGATTGAGCAGGTCAA  
A\_16\_P18090439

ATGGTCAATGCTATGGAAATCATTATTCACAATCTTCACTGATAAGCAACATGGAGATCC  
A\_14\_P136837 AATTAACATTGAGAAAGCAAAGAGAAATAATAATGAAACCCGTCTGGCTATACTAACACC  
CUST\_9846\_PI426210822

CATTCTTGTTGGAACCTTGACAGACTAAACTGTAGCTGCTACTTTAACCTCTGTGTC  
A\_16\_P17462398

TGGCAAAATCTCTGAGTATCTTCTTCGTTTTAAAGCAACACTTTATAATCCACTCACACG  
A\_18\_P21886229

AAGTGCAATTCTCAAACACTAGTTTGAGTGGCCTAATAACTAGAGCGTAGTATCTGATACCT  
A\_14\_P108934 AGAACTTCCTTAACAACAAATTGAAGACAATCACTGCATATTTGGTGACCTAATTCGAA  
A\_14\_P137840 TGTTTTCTAGACAGTTCAACACAATTTCCCGCTCTCCACACATACTGTGTTCTTT  
A\_16\_P17582713

AACCAAATACTCTGACTCATAACAGGTTCTGGAAAAGACTCAAAAATGGTTCACTATTGAC  
A\_14\_P110217 CTTTGAAACACATCTTCAGGAACACTTTGGGAACACTATATTAAGATTTTGTTAGTGCAG  
CUST\_9346\_PI426210822

ACTGTTTTGACCTTAAACAAGTTTTTCATTTGAAATGTAGGATCTGATTTTTAAAATCACTG  
A\_14\_P113186 TTCCCTCTGCCTCTCAACAGCACTGCATTTGTTATTATCCATCATATTTTCAATTA  
A\_14\_P115480 ACAGAGATTAATACTATTTTCTCTGCATTTTGACCTTGTGGGTAATACTTCTGTAATGTCC  
A\_16\_P20000318

CCTCTTTGAATTCTATGCTCCCTAACAATCCACATCTCTAACAAAACCTGTCATAGTTCT  
A\_14\_P117130 TACTCATGTTTCCTCATCCATGGAGGCAGATTTTCTACATCACACCAATATATACTC  
CUST\_3240\_PI426210822 CTGACTGCTGGGAAGTGATGGCTTGAGATGATGGAGAAGAGAATTTG  
CUST\_6614\_PI426210822 AGACATGCAGGAGAGTGAGGTCCTCTCTTACGGATGGGTAATGA

A\_14\_P132537 AAACGCTTTCCTTTTTGTTTTTCATGTTTTGATCTTATGAGCCTTGACTAGGCTCAGTTA  
A\_14\_P127857 ATGCACTGTTCAATTTTTGTCTTTTTCCCTGTTTCATTTTGTGCAGTTGTTCACTGATCTT  
A\_16\_P17055174

TGCTGTGAGTATAACTGAAACCACTAAATCCATGAAATCCGTAGACTTCTAGAATCTTGG  
A\_14\_P105499 CTTGATAAAGGTGCTTTTCCCACTTTCACCAGTTCCTATAAGACAAAACAAGTGGAAAA  
A\_14\_P113705 ACCTACAAGCAATAGGATTGTTTTCGATAATCTTCATCATCCTTGCCTTTGTGATGAATT  
A\_14\_P107178 CACAAGGTGGCAAGGGCTATTTATCGTTTTCTAATTTTATACTGTTTTACCTGGCTTCAA  
A\_14\_P124337 ATGCAATCATTAATACTTTTCCAGAAATGTCCCACTCATTGTGGACTACTTTTTCTACAAT  
A\_14\_P135156 GAAATGCTTTGTAAACAGCAGGACTGTCATCAACACTAGAACTCTGTATTAATACTACCCTA

CUST\_3\_PI426210822

CCATTCTTAACATACTTATGTAGTCACTTTTCTGTCTTGAGGCACACAAAAAACAAGG

A\_16\_P40147692

CACTCAAGCCATTTTCTTCTAAACCTCTCTAAGTAACCCAGGAAAAAATAAAAAATTAGCA

A\_16\_P02356310

TCCTTCTAGGATTCTTTTACGGAACCAAAGATAATAGTCCCCTTTGATACCACATACAAG

A\_16\_P36230278 CTGACTGGGGATGGTGCCTACAATGCGCACTTTGGAGAGAGCATT

A\_14\_P135362 GCAGGGCTTTCTGTGCTATGAATATTTATTTTTAGTTAAAGTGGATTCAAATTTCCAGAG

A\_14\_P101832 GAATAAACATAATAAACAAACAAAGCCTCTGTGAGGACTTTGTCCAAAAAGTCCTTCACAC

A\_16\_P19854039

AGTTTTGGTGAAGAGAAGACATACTGCAATCCAAACATATTCCACCCTATACATAATGGT

CUST\_7899\_PI426210822 ATGTTTTTCATCCACCTGTCTAGATGCCTTGAAATGTTAGTCTGAGCTGAGATG

A\_14\_P135515 ACCTTCTTTTAACTTCACAGCATCATTTTCAATACCTGAGCATCGGAGAATTAATGCT

CUST\_9560\_PI426210822

ACTGTAAAGATGATTATCCATACTTAAACCAATTCAAAATAAAAATAAATCCTCAATAC

A\_14\_P139684 GTTTGATTTGTGCGAGCAAAGTTCATTTTCTGGCTCTAGGTAAGCATTCCAAATAGTGAAA

A\_18\_P10093824

AAATGCCCTCTTAGATTCATCTTATTTACCACCAACCATCTTTATTTTACTCACGTTC

A\_14\_P111524 GTGGAAGAGAATTGGGTTTTCAAGCCTCATTTGTAACAGACTCGGGCTTTTAATTTTT

A\_16\_P19344783

AAAGTTCATCCAACACTTTCCATACTTTCAAGAACTACATTTGGAGGCCTTTTTATCCT

A\_14\_P123847 GTGTTTGACCTAAAAATCCAAGGGGATTAAGGATGAACTAGAACCAGCACTG

A\_14\_P109923 CATTCTCCACGGAGACTTCTCCAATTCTGCATCGGAATTGTCTG

CUST\_1993\_PI426210822 CTTAGTGGGATCTGGGAAGAAGCATAGGATGTCTGGGACATGGGA

CUST\_8282\_PI426210822

AAAATGCTATCAATGAACGGATTCAGCTTTCAAATGCCTAACTTCTAGTCATCTTGGC

A\_14\_P111479 TGTCCAGGAATCACTAAAAGCAGTAGAACTTGAGCAGACTTATTATTTACTCCTGTAATA

A\_14\_P123816 CTTTTAACCTTAAACTGCAAATATTGAATATTGCTTTAAAAATATGAAGCAGGAAGCCCA

CUST\_10289\_PI426210822 GTGATTTTCAGGCCTAATGCTGACACCACTCCACTGAGAGAAAGAAG

A\_14\_P122889 TGCTAGATGATACTGACAAATTATACTTTTGTGTGGCTTTCTGTCTTCTCCAGGATCAA

A\_16\_P17854912

TCACCATACTGAACACAAACAATTGAGAACGTAAGGATCACATAATTTTGTCTTTTCTGT

A\_14\_P100151 CTATACATCTCAGATGTTCCATGACGGCCCTAATTTGAAATCATTTGTCTTTTTTATCC

A\_16\_P16215304

AGGCTGTTTCGTCGAAGGTTTTCTATTGTTTTTCATTAGCAAAATGACAATCAGTGCAACTTT

CUST\_5920\_PI426210822

AAGTTTAATAATGAGTAAATTACAACATAAAAGTTGTCAACAGGCTCTTCTCTCCAAATTC

A\_16\_P01719644

ACAGGGCAGAAAAATGAGTAAGTCACAGTTTCATCTTTATTTAGCAGGTCATTGTTTCTG  
CUST\_8538\_PI426210822 TGAGTTGTTACAGTGAACATCTACAGTGTTCAGGAGCCTTTTTTTTTTCC  
A\_14\_P136259 ACTTACTTTGCAAACGATATATCTAGGTTTCTACTTTGTTGCTTTCATTCTGCCAGTCA  
A\_14\_P114846 GTCTTCTATTAGAATTGACAAATGCAATAAGAAGCATCTCTCCTCCTAGAGATCCAACCTG  
CUST\_229\_PI426210822 GGACGGCGGGAGAAGGGAGGACGCCGTCCGGGGCCCGCTAAGGTC  
A\_14\_P108105 AAATAAGACTTCAGTCATATTTACACCAGAGATCCATTTATTACAGTCCTGCAACCCCGA  
A\_14\_P121800 GAGCCATCCATAATGCAGTCTTTTAGATTTTCTGCTGGTCCCATAAATATTGCAATACAT  
A\_14\_P102369 CTATTTTTTAAGTTTCTTTTCTGACCTATACCAGTTGGTTTACAACCAAGCACTTTTCG  
CUST\_3399\_PI426210822

CTCCTGCAACTGAATTTAGTCTTAATTAGTACAGAGTGAAGTACTAGCTGTGAACAATCTGGT  
A\_14\_P135555

GGAAATTACAAAAGCCCTGGCGTAAAATTTCAAAAAATGTGAACCTCAAAAGAAAAAAGG  
A\_16\_P15847435

GTAATGACTCTGCTTTATTTCTGTTCCCTTCAATATCCAAATATCCTCTGATCACACTGG  
A\_14\_P134270 TCAGATTTACAGACAGAAAAATGCCTGATATGCTTAAGAATAGATTCCAGGGCAAGTATCT  
CUST\_6625\_PI426210822

CGTCTTCCATTAAGTGGTTATCCGATTAAACTGGCCACTCACATGGATTTATTTTG  
A\_14\_P125024 TTCTAAATTTTTCGTAGGTGCTGAAAGAGTCTGTAAGATCTACAAAACAAAAGTTAGGTG  
A\_14\_P128679 TTATCACAGGACATAACTATGCTGCCTTCGTGCTTTTTTTTTTTTAGGAGCCCACTACTTA  
CUST\_5320\_PI426210822

ATGATGTCAGAACCTGATGTAGTTGGGGTGGTTTTAAAATAGTATTTTATGGACAGCAAG  
A\_16\_P37001586

TCTAACAAATCACCTATATAGTCATCTTTCCTATTTAAACCAATTTATACTCACACTCCCC  
A\_14\_P118541 GACGAGAACGTTGAGATTTTCGAACTTTCAGAACTTCTTTTTTTTGATGTTTTTTCCCAT  
A\_14\_P121932 CATTATGGCACAGATCCTTGCCTGCAACCTTTCAGATTCCCTCT  
A\_14\_P106000 GGTATATTCAACACACAAAACCTTTTTGTGAGAGAGGGAGTAAATATTTATGGCAACCTG  
A\_14\_P117294 GGGAAATCAAAGCAATTTCCATGAAGACAGTCAAAGTTTCTGTCAATTGGGATGTAATAA  
A\_16\_P20921527

ATTTAAAAGGAATTGCACTCTGATACATAGGTAGTTAGCAACTTAATTCTGAGCCCGAGG  
A\_16\_P15992361

AAATCAAGACAATTGCGTTCAACTAACTGACTCAACACCCATTTATCATTGACCTTATGC  
A\_14\_P136499 ACTGTGGAAAATTACAGATTTTCGACATCCATTATCGCTTTCATGAATGAAGCCTTAAAGT  
A\_14\_P100235 ATATTTGCCACATGAAGATAGAAAGTGTGATGTCAAAGATAAAGGGAGAACAGCATTTT  
A\_14\_P133182 TAGGGTTGTTCCACATAATTCAATATCATTTCAGCCACTTTTAGAGTTGTTGTGGGATTT  
A\_14\_P106340 AATCTTTTGATTCCAAGTTTTATGTTGCACACAATCAATTTCTATGAGCAGGTAAGAGGCA  
A\_14\_P129963 ACACAGTTGGTGATTCTATAGCCGAAGAGCACTCTTCAAACAATTAATGATTCTACCTAA  
A\_14\_P121589 ACACATTCATAAATCTGGGGTTTTAAATACCTTCTCCTATAATTGTACAGGGGACAG  
A\_14\_P138888 TCTCCCTCCCTTTTTATGATTAATGACAGAGCAAGTCTGAACTGTATTTGTATGATGGA



CUST\_3578\_PI426210822 GATTGGTGCTAGGTTTCTCCTGGTCTTGGACGAGGTTGCACTTTT

A\_14\_P116849 CTAGCCTAGGTTTCAGTCAGCAAGACCTATCAGATTTTTCTTTTATATTGCCTTTGTCTT

A\_14\_P106907 TATGAAGGAAAATCTTAGGGCTTTTTTTCTCTGTCCACAGCACCTACATACTACTTGTGTT

A\_14\_P104997 ATAACAGACAAAATATACAAACTGTTTATTCGTTATTGCTTCTCCTTAAAGTTCCTTTGGA

A\_14\_P127381

GAAACCAGAAAACACAAAATAAGGCTGTAGAAAAGAGAACAGATGCTGATTATCACTGTG

A\_14\_P120788 CAACCAGGCCTGAGACTGATCAAACAATAAACACGTTTCCCCTCTGA

A\_16\_P16221613

TAGTTAATTTTCTGTCTTCCATTACTGTTCTCAAATCCATTATACACTCTGGCCTTTCCC

A\_14\_P124082 AAGGTCCCATCCAACATCAAAGCAAACACTAAAACCTTACCTGCATCCTTCATTGAATA

A\_14\_P133806 GGATTTAGAAGCACAGAGTAGACTTCAAATCAGTTGTCCCTGATCTTCTTGAAAGAATTA

CUST\_6125\_PI426210822 GGTCAGAAGTGAAGTTTGTCCCTGTTTTATGAAGGGAAAGACACCCTTGTTA

A\_14\_P128852 TGTGTATCCCTTGTGTCCACTAACACTATGCCTTGTGCCTAGAATGCTGATAA

A\_16\_P18066865

ATTCTGCTCCTATCTAACCTTCAGTAGTCTCATTTCATTAATTACGTGGTCAGACATC

A\_14\_P119340 AAAACTAGACGGCATCATATTCTTAGGCCACTCAAATTCTGTTGTATGAATTCGTATGCC

A\_14\_P114856 TTATAGGCTTTTAGATCATAACAAGTATTTTTTTCTTTTGTCCCTCCAGCCAACATCC

A\_14\_P132516 GAAAATTGAAACTGGAGATGTGTTCCAGACCCCTCAATTCGTGTTTCATTTCAATTTATA

A\_14\_P121016 AATCGTTGTTCAACAGTCTGTTCCACAAACAACAGTAATTGAATTCACAGACTTTATCC

A\_18\_P22843027 GGAGCCAAGGGCTGTGCCACCTCCACTTCTCCCAGCCTTGAAAA

A\_16\_P37643957

ACGTGAAAAAATCGATCCATCAAAGAACTTATCATTCATGTAATCATTGCTCACCTGCA

A\_14\_P114080 GTGTGTGATGCTTAGGATCATGAGTGGAAAAGACCTACTTAATAATACAAAGAAGTAGGA

A\_16\_P15012136

GTGTCTCAACATCTATTAGGCAGAGTTAAATGTGGATCTGAGTTATGGTTCCAGATATGT

A\_14\_P138144 ACTTTTGTCTGTTCTTGAAGGATATTGCTTTGATTTTAGAATATCCGGGTTATGGGAAT

A\_16\_P03620743

ATCTCTGAAATCGCATTAATGACCCTAAAGCAAAGTTCAGTTTCTACTTTCAAATGACCC

A\_14\_P128297 AAAAATAGCAGTCTTCATACTGCAGGGAGCCATGAAAAGGATATGAGAAATTCTATTAC

A\_14\_P111444 TCCCATGCCTATGAGCGATTCAAGAGTTCACCCATGTATGGACATTGTAT

A\_14\_P113331 AGCACCTCCACAACCTTTGATAGCCTTTTTTGTCCCAATTCCTTCAAGGATAAATATTTAA

A\_14\_P100169 CTGATGGTTCTTAGGGTCTTGCAGACTTTCTGCTGATCTTCTCTGAGAG

A\_14\_P121263 AAAATGCCATTTGTCAATGAAGCAAGTGGAAATGGCATGTAATAAACCTGAATTGTTCTAC

A\_14\_P110742 TCTTTGGAGAGATTTTTTTTTTGCCTCCTACTTCTGTCTTGAAGCCAGACAATCG

CUST\_2190\_PI426210822

CAGTGTCTTCTGATGTTGTATGGTTATTCTAAGTACCAGAGTATTCTCATTCTGTTGAA

A\_14\_P107690 ATGGCCTGTATCCACTTCTCCAGTATAGTCAGTTTATGTTTCATATGTTCTGAAAACCTGTTT

A\_14\_P133401 ACAGAATTTGTAGATGTAAATGAGTAAAACCTCCCAACTATGTGCGAAAAGGAAATGTTT

A\_14\_P124642 TGATTTTGTCTCTTTTCCTGATTCAACCAAAAAGGACATTTAATTCTTGTCCAAAACAGC  
A\_14\_P119895 ACCAGATACACTTCTGAGAAAATCATTAAAGAGAATTTCTTATCCACCAACTTCCAAGGT  
A\_14\_P115340 ACAATTGAAACAGTCTTTCCATTTGATGTTGCGGTTAAATTTGTTTCTACCAAGGTATGT  
A\_14\_P120411 CATCAATGTTGGAGAAATTATCCGGTAGTAAATCTTCTGTGAGCGAAGAAAATTCACTT  
CUST\_8215\_PI426210822 TTTGAACATTCCATATACCTTTATGTGCATATATTCTCATCCGCCCTAGTCCCT  
A\_16\_P15483430

CCTGAAAAATGTATGGGAGAAGATGAAATGATCACTGAAGTCACATATTCCTCACTGTTA

A\_18\_P19104171 CTAGTGTGTTTATCTGGAGGAAGGAAATGAACTCTTTTCATCTCCTCGAACCG

A\_14\_P122731 ACTCTGGAATCTGAGGAGTTCTGCTACTCCATCCATCAAGCAGGTAAAC

A\_16\_P00665217

CCTCACCTTGCCTTAATCTAGGACATAAAGCATGCAGAACTCGTAATTTAATTATCACCT

A\_16\_P21203266

CTGTAACTTTAAGGTGCAGATGGTGAATAGACTCTAACAGTGCTTTATTGCTCACACT

A\_14\_P103926 GTTTATGGCAATACTGTGTGATGGGTGCCTTGATCACCACAAAAGGATGAT

A\_18\_P22841707 CTTCTGCCACCTCCGCAACTGCTGGCACAGACCTTTTCATAGTTG

CUST\_1558\_PI426210822 CAGAACTTTGGGAGTGGAAGGGCCTGAAGGGAGGCCTGGTAGGAG

A\_14\_P132533 CAAAGGATAGGGAGGGATATTGCTCTTGGCATTGATGGGAAGCATCT

A\_14\_P202418 GATTTACTTTTCTGTCTTACTTGGTAGGTCAAACCTGTGCTGAAAATATCCGCAAACACAT

A\_14\_P112190 CTGCCTAGAGATCAAAGAATCTTTCTAGCAGTTTTATTGGAAATTCAGAGGCCCTTAA

CUST\_2131\_PI426210822 GATGGGTGTGGGGGAGGGACATTTGTCCAGCCAGCAGTGGCCGAG

A\_14\_P131499 AAATTCTGAATTGAGCCTCTCGTAAGTCTCATAAGTCATCTCTATCCCTGCAAATTCATT

A\_16\_P15767487

ACCAATATTATGAACAGATTCAGAGTAGAACAGAATGGACACAAAGTATCTTCCAGGGAT

A\_16\_P58424112 CTTTCTCACGATGTATCCTTTACATTCTGCTATCCTTTGAATCCTCCCAGAACC

A\_14\_P109231 TTCCAGTTTTAAATATGATCTCTGCTGACTGGTAAATACCAGAAGAAGGCTTTTTTTGAGG

A\_18\_P15382423

AAAAGCCATGACTACGTTACAGTTTATATCCCTATGTTTCTGAACTTAATATGACCTACA

A\_14\_P122596 ACTTTTGAGGATAATGTTTACCTTTTCTTACACTCTCGATTTCTCTGTGCTGGGATAATG

A\_14\_P113971 CCATTCATGACTCTGGGAATTAGCATTCTTTACCGGTTTCATATGGTAAGAGACTTAT

CUST\_7602\_PI426210822

GTTTGTGACTAAGAATTTGCAGCCTCCGAGGAAATTTTTTTTAATTGAAGAAAACTAA

CUST\_1581\_PI426210822 GCTAGATTGATGGGAGACATCAGAACTCAACGGAGATGTTGACAGAGA

A\_16\_P03212730

AATTCAAGTGTGCAAAGGATTCTTTCCCTTAAGATCTATATGTAAAACAACCGACTGGC

A\_16\_P37074032

CCACATTAAGCCATGTTTAAGATGATATCTACCATAACTTAATGCAATCATTTCCCTTCGC

A\_16\_P18192983

AAATCGGCGATTTTCAGCATATTCTCTTTAGTAATCTCAGTGGGTTTGTAGTTACTCTGAC

A\_14\_P202370 AGAATATAGATCTAGGATAAAACAGGGCAACAAGCCAATAAAAGCAAGTAGATGGTCCAA  
A\_16\_P18088793

AAAAAAAGGAATGATAACACATACTACTTGTCTTTTGTCTTTTGTCTTACTTGCCAACAAGA

A\_14\_P138454 AGACCTGACTCAATATTCTTCTACCCCTTTCTTAGAATAAGAGTCAGTCTTCGAATGTGT

A\_14\_P109865 CAGAGAAAGAAATCTGTCAGGATTTAACTTTCCTTAGACATAAGAGGAGTTAGAGGAGA

A\_14\_P112497 ACTTTAATAGGCACTAGCAAGAGGTGGAGGTCACCTTAGATGGTGTTCATATGAAT

A\_16\_P00289240

GGCACATTTAACATCATTTTTGTTGCCACATTTAAAATGGGAGGATGCTAATTAACAAATA

A\_18\_P11007916

CAATTCTTACTCACCCCTACACATTATCACTGAAACTTTCTATCCATCTCACTCAAACAGG

A\_14\_P117875 CTACATTCTATTCCAGAGGAGTTTGATTGCTCACACAGATAAGTAAAATGCAATGGCTTT

A\_16\_P40323699

TGAGGTCAAGAGACAAGTCTTTCAAAGCATAACATAACAACATTTACATGCACATAAACA

A\_14\_P106082 CAGGCACTGACTTCTGAAATTTCTTTCAGCCACCAGGAATATGCAGTCTTTATTAATTA

CUST\_7472\_P1426210822

CTTAAGGCAATCTCATGGCCCTGCAGCTCATCCTTTTTTTCAAAGAAATTAATTTTCA

A\_14\_P124946 GGGAAAAAAAAAAAAAAAAAGAGTTAAGAGAACTGGGATCGAGACCAAATCCCATTAGCC

A\_14\_P133227 AATGACATTTCATAAAGATAAATCCAGAGATTAGTGCTGAAGACTACACCCCTGTGTAGT

A\_14\_P106209 CTCTTACCATCGTTTTGTTCTCCACGAAGTTCTCAAATTCATTCCTTTGTTCTCT

A\_14\_P118038 AGGAATCTAATATCACTGTGATCCTATATTTATGAGTCTTCTTCCAGTCTGGATCACAGC

A\_14\_P103233 AAACAGTCTGTGAAAGTTTTCCATAGTTTAAATGTTGTATCTTCTTTTACCTGTGATTA

A\_14\_P134189 TCCTACCCCAACTGTTATTTACTCACCTATATGCCTGCCCTAGACTTTTATATGCA

A\_14\_P115165 TTCTAAGAAGTTGGAAACATTTACCTTTTCACTTTGATCCTGACATACTTAAGGGG

A\_16\_P36295704

AAATCACACCACAATTATCACAATTTTACAACATGGCATAGTCAGGTTTCATTTACCCTTT

A\_14\_P101881 GAGCACATCCAGCAAATCTCTTCAAAGAAGTATTCATGGAAACTACAGACAAGACTTAAT

CUST\_8073\_P1426210822 AGTTACAAGATGCCTTCTCCAGGGCAGATCCAGCATGCCTTGAAG

A\_14\_P118987 ATCTGGGGCTGGATTGAGACAAAGTTTTCACTTTGTCTTGACAAAAATGAGAAAATATT

A\_14\_P108274 CCATCAAAGACATGAAGACACTTCTGCAGCAGGGAAATCTTAATACTTATAGATGTTTCA

A\_14\_P114973 CTTTTATCTGATGCTGCTCGTATAGTCTGTCTTATGCGAATGGAATAGACATTA

A\_14\_P121586 ACACCTCATTCTTCCCACCTAAATAGGTATTCTGTTGCGAGAGCAAGAAGTTAG

A\_14\_P116012 CTTATTCTCTTTTGCCTTTGCCATCATTATAACCTAGACTTTTGTCTCTTCATATCTGGT

A\_16\_P00077226

AAAAGCCTCTCAGTAATTTTTCAAATCTTCCCCTTTTCATAGATGTCAATGCCCAAC

A\_16\_P36864546

AGATAAGACACTTCAAAGAAAGCACTTCAGGTAAGACATTGCATTTTCTTCAAATCCACC

A\_14\_P135212 GGTGAAAGGATTTACAAATACCTTTTCGATCACATTAGTATACATGCTTACTTCTGCTGCC

A\_14\_P107895 GACTGAGTTCATGAGAAGGCAATTGGTAATAGTCACTCTATCTTTTATGAGACAGGATGA

A\_18\_P22842827 CCCAGATGTGGGACACTCCTCAAGGGTTTCCAGGTGACCACAGAG  
A\_18\_P14137987 TTCAGGTGACCAGAAGTGTGGCTGGTTCTGGGGAATGTGAGCGAG  
A\_14\_P111272 AGGTGAAGGTCATTTCAATTTAAAATAGCAAGGTCCTGAATCACGTCCATCAATTTTCATA  
CUST\_6314\_PI426210822 GTCAAGGGACTATGATGGCCCTGCTAACCTGGGCTTTCTTGAGCT  
A\_14\_P126644 TTCTAAATTTTTTATGCACTAGAATCTTGTGATATCCCAGTATTTATGAATGCCAGAAGT  
CUST\_3032\_PI426210822  
TTGCCTTGTCATTCCAGGGACAGAGATTCTGTCTCTCACTTTAAAAATAACAT  
A\_14\_P116066 GCTTGCCCAACAAGTGCATTTGGCCATTAGGAAATGCAAAAACAATAATAATATAGCAATA  
A\_16\_P17717624  
CTGACCACAAATAGTTTCTCTAGAGGTAATAATTATGGCAGACTTTTCATTTCTTTGTGCA  
A\_14\_P131087 CTTCAGAATTGAAACAATCAAAACATGTCACCTTTCAAAGTAACAATTAATGCCCTGC  
A\_16\_P20030096  
AAGGCTCTGAAATTGCTCATTTTTTACTGAATATCTGCTTTCTTGCCAATTAACATAGGGG  
A\_16\_P02302740  
CTCCAACCTTTCACATGAAAACCTCGTATTTTGGCCTTGAATCCAATTTAGCAAAGTCTTTT  
A\_14\_P139029 CATGTGTTTTGGCTGTTTTATTACTTTTTAGCATCAGTGCTAGAGATTGAACGAGAGGAT  
A\_14\_P139966 TTCAAACATTGCTCATTGCTCAGGATGAAGACACTAAGAAAGAAAAGTTGATACAGACCA  
CUST\_7603\_PI426210822  
CAGCCTCCGAGGAAATTTTTTTAATTGAAGAAAACTAATTTTTTAAAAATCTGAAAATA  
A\_16\_P15753792  
AGTGCTTTAAGTTCCCTGTATAAAAAGAACAATAATAGTGATTCAGCCTTATAACCCCCC  
A\_16\_P01695627  
AGTTAGTTCCCATATTCTTAATTCAGGCTTTTCAAATACATCCCCTTTGAAATTTGCT  
A\_14\_P118817 TTGCTGCAGGCTGGGCCTTAAGTATCCACTTGTAACAAGTAAGAATTTATTGGAATTT  
A\_16\_P18981586  
ACTGAAAGGCCAAATTATCTTCAACTACATTAGTCTGACAACCTATAATGCTCTGCAGAG  
A\_16\_P36491466  
ATACTGTCAATTTGTAACCTCCATCCACAGAATACTGTCAATGATACAGGCTAGTGAAAAGG  
A\_14\_P138408 CTGTGAAAAGACCCATGTTTACTATGGAACCTGCAAAATTAATCTTCTCATAACAGCAGAA  
A\_14\_P125242 TCTGTGAACCATCGTGCATATTTTTCTTTTCACTCTGTCTTTGGAAATCCTCATTCTAT  
A\_16\_P19596445  
TGTCACCTCAAACAAAAATTTCCCTAACTCAACTTTAACTATTTCTTTTTAGCCCCA  
A\_14\_P135120 GAAAGCAGAAATAAGGCTCAGAATTGAGCAAAGACACATTTTTTAAATGGGTGACAGATTT  
A\_18\_P13384130  
AAGCCCTAACTATGTGCTTTTTAACATTCACGTGAAAGATAAATATCATCACAGGTGCAA  
A\_16\_P19240435  
ACTGCTATGCTAGTTTGATAAGGCAGAATAAAAAGAAGTGGTGTTATTGTGATTGTGTATT  
A\_16\_P02227387

TAGACTGCTGTAATCAGATTGATTTCTTGTGCATAAAACCACAACAAATACCTAACCTGG  
A\_16\_P16222364  
ACTGCTGTTGTTTTACATAACCTTCTCTAATTGTTCCACACATAGAGTAAGATGTTGCCA  
A\_18\_P13360369 CTTACACACACAAAACCTCTGAGGTAAGAAAGGATTGTCTCAACTCCTTGGTGTC  
A\_14\_P129944 CTGTCTGTGTCCTCTGTTTAAATTCCTCCACTAGATTTGGAGATTTGATATGATAAATGT  
A\_14\_P122227 TTTAAGGATTATGTTAATCAGGTATGCTTCCCTTCCCCTCAGTGGAGTATGTGAAACTTA  
A\_16\_P18248909  
ATATGTCCCTAGCACCAACATATCTTTTTTTCCAGACCTTACATCCATATGTGTCCATAA  
A\_14\_P131471 AGGCTATTTAGTCAGTTACTCATTAGTGAAAACCACACTGTCCAGTATCATCACTTTTCT  
A\_16\_P03596829  
ATTCCATGAAATCTCCACTTTCCTTCTACTGTAAACATGTATACTGCTCAGGGTTAGAGC  
A\_14\_P109456 TAAAGCAGTGCTACCAAGCCATTGTTTCAGGCTAAATGTTCTTCCTAAGTATGCTTTTATT  
A\_16\_P21204653  
AGTTTGCTTCTATTTATGTCTCATTACACCAAATTAGCATTGTGTATACCAGTCTCCCA  
A\_14\_P201490 CTAACTATTTACAAAATTTTTTTTCCCAATTGCACTTAGGAGGCTAGCCTCAGCCTTACA  
A\_14\_P120951 GATGTTTTCCAAGAAGACTAGAAAAAAGAGGAGTGGTTGTAAGTATGTCTTGCTTTGCTACC  
A\_14\_P100443 GAGGCCCTATCTATCAATTTACTTCCCAACCCGTTTGGTAACGTCATGTC  
A\_14\_P101539 CTAGAGGGACTAGGAGATAATGTGTATGTAGGTTTATGTGATGGGATATCACCCCTGAA  
A\_16\_P41202074  
TATAGCCAAGGAAGAAAAGATTGATACCCATGAAAATTTGAAAAGAGTCTTCACGTCAA  
A\_14\_P124387 GAAAGAAGACAAATTTAATCCTGATCCTTAATGGTTAGAAAGAGGCCGAGATGATTAACC  
A\_14\_P119610 TGGTCTTTCAGGACATCACTAGACTTCTTAGACACTCTATTCTTTCCACATTTAAATGT  
A\_14\_P113950 GCGGATATGCTTGTTCCGATATTCAGGGATCTCAACAAAAAGCATGTTCTATAAGGAA  
A\_14\_P124233 ACCATGATTACAGCGTTTGGAGATTCTGACAATTTGAAATTCTCACATTCTAGACTTCTA  
A\_14\_P135817 ACCCTCTCTGTTTTGGTATTTTATAGACAAGTAGGGGTGTTATTGGTAATCAATCTACAT  
A\_14\_P108754 CTGCTCTTTTCCAGTTTTGGCAGTGAAGGTGTCATTTTGTTTTCTGCTTTATAAAAGTAT  
A\_14\_P104243 GACCACTGGTGGGCATTCCATATATATAATTGTAACAATCTAGGCAAGTATGTTTCAGCG  
A\_14\_P100344 TTCATTTAATATGCACTACATGCACATGATGCAGGTAGGGAAGAAGTTTATGAATCCATG  
A\_14\_P200697 TTCTCATGACTCCTCATCTAAACAGGATAAAACCATCACTGATGACCAACAAAAATGTAA  
CUST\_1109\_PI426210822 CTGGGTTTCCACTGCCCCAGTTTACTCCTCCTTTTTTCCCTAAGGAA  
A\_18\_P22842079 TCACTGTGGACACAGTGGCAGCAGTGGACAAGGACAAGGGATGCC  
A\_14\_P132138 CAATGGGAGAAAATTGCTTTAAGTGTTACACCTTAGCCAACAGAGCCCAAACCT  
CUST\_5782\_PI426210822  
AAAAATAGCCTTCTTGTTTGCTCTTCTTGGTGTGGGATTATTCAGTCCAATTCTTCTA  
A\_14\_P111649 TATCTTCAGAGGATTCTGGAAGGGTGGTAAATTTTCCAGTAGAACTGCAAGTG  
CUST\_5081\_PI426210822  
GTTTCATGTTAAATTTGTTCAAAGTTTCCATCTAATGGTGAGGTGGTAAAGGAAATAAAAC  
A\_16\_P41862419

TGCTGGTATCTTATATCACAGGTATCTTATATCACTACAAGTAAAATCCGCTTTGAATCC  
A\_14\_P137335 GAAAGTGCTTCTGAATTAGCGACAGGAACACGCCTCTGAAAGTGAGAC  
A\_14\_P200149 TTTGGTGGATGTAGCACAATTTCCACACTGTGAAGGCAGTATTAGAAGACTTAATTGTAA  
A\_14\_P104109 CTTGGCAAGTTATCTTCTCCTTCCGTGAAACAGAGCACTTTAAAGTGCTTACTTTCTTTA  
A\_14\_P124834 GGAATGGTCAGGTAGGCAGAGATGGCTATTTCTGCTATCTAATCGTATTTCTCAAAGT  
CUST\_760\_P1426210822  
GATGATCTATTTTCATGATACAGAAGAAACCCTTGTGAGGTGAATTCCTCTCTTTTCTA  
A\_14\_P128366 GATTTTCAGTGGAAGTTAACATCTTCTGAAGAACCCTTGTGGACTGGCAGAGTT  
A\_14\_P128327 ACCTCATTTCTCTGATAGCCCAGAATTGATTTCTGTAAATATAAATAATTCAGAGTC  
A\_16\_P31611160 AAAAGAGGGGAACGTGTAAGTATGGTTATCCACAGCAATTACCATCTACCCTTCCTAT  
CUST\_1672\_P1426210822  
TTTGTAAAGGCTCTTCCCCAAATTAACCATAACACGTATTGTTTAAAGGCATTGCC  
A\_16\_P15612190  
GGTAGCCTAATAAGAGTCAAAGTAACCATATGAAGAACAAAGTTTCACTAGGATTGAGCA  
A\_16\_P15582204  
CTCAACAAAAATACGAGTCTTAAAGTATACGCCTATGTCATCCAGATTTAGTCCCACACT  
A\_14\_P107489 TGGGAGAATTTCCCTTCCCTCCACAGTATAATCTCTGAAATATGTAATGGATTAATGTCA  
A\_14\_P201233 CAACAAGTATGAAATTCCAAAGTGGTTTGCCATCCAAAAATGCAAGTTTTTCATGAGTTTC  
A\_14\_P109293 ACATGGTAAAAGAATTATCTGACATTATCCATGAGCAGGCAAGTATTAGGGTGACTAAAA  
A\_16\_P17371363  
AAAGATGGCTTAATCGACATTCAAAAATTCTAAAGTGGAGAGATGAATTTCTGACTAGGGC  
A\_14\_P200602 AAATTAATAACGAGTCTTCGCTCCAGGGGACAAAAATGATAGGGCAGAGAAT  
A\_16\_P16284299  
AAGCAACCATTTTCAGAGAAACATGCTAATTAACAACAGATCAAACACTTAACGAAGGGAA  
CUST\_1342\_P1426210822 CCAGCTCCTCTAAGTGACTTCTAAGTCCCCTTGTTCAACCCTATCT  
CUST\_6593\_P1426210822 AATGAGGAGGCAGCCCCCTCCATGGTCCTGGGCTCATCTATAC  
A\_16\_P17568911  
AGGCCACATATAAGAATGTCTTTGCAAATAAAATCTACCGACATATATTTCTGACTGGA  
A\_14\_P121580 ACTGTCAACTGGGTTCAATTTAGGACTTTCAATTTCTAAAAGTCTTTTCTTGTATGACTCT  
A\_14\_P121390 CTGTGAGGAAAAGGAAAAGGATCTTACAGATTACAGAAAATAGATACCAAACCTTTAGG  
A\_16\_P18101142  
GCAGGCAAGGCAATTTATATACAGATGAAGTTGTTGAGAATTCTAGACTCTGAAAATCCC  
A\_14\_P104023 CTCCTGAGTAGTGATTTTGGTGACAAGTTTTTCTCTTTGAAATCAAACCTTGTAACCTCAT  
A\_14\_P201092 AGAAGCATCTGCTTACCTTTTTTTGTGGTGAATATTCATCTACAGTGCTGAAAGGAAAAA  
A\_14\_P133839 CCAACTCATTGGGAGACTATTTCCAAGAGACTGAAATCTGGTTATTTCTTTAAACAAAGT  
A\_14\_P110640 ACTTTAATTTTCAAGGGAAGACTTGGAAGGACCAAACCCCTAAAAATGATTTAAAAGTCT  
CUST\_10010\_P1426210822 AGAGCAGTATCTCATTTCCGGCTCACATTTCTCGAACGCTTACTTTGCC  
A\_14\_P103755 AACTAGTTCACATCCAAGCATTTGGGTAACAATGGTGAGTTAAGAGGGTTCACATTT

A\_14\_P127738 CTGACCCCTGATGCATACATTGAGAAACATGATTACACACACAACCTGTTGATAGTATTAC  
CUST\_6487\_PI426210822 AGCAAGTGAGTTTTAGGATCATTCTTTTCAGATGTGGCTCAATTGCTACCTGTC  
A\_14\_P134470 GAGTCATGGAGGTTGTGTAAGTGTCTTTCCAAAAGATTGTGATAATTCTTACTGTCAAAC  
A\_14\_P136114 CCACCTTATTTTTATTAGATTCTCTTTCCAGTCCTCGAAAGAACCCTCTTGAGAGAA  
A\_14\_P109422 TGTGACATCAACAAGAAGCAGCAGACAAAACAAAATATTTTCACAAACATTCAGAAATCC  
A\_14\_P121555 CTAGAGGACTGTGTCCACCATGCATTCCCATGCACATACATGTATACACATGTAAATATG  
A\_14\_P101918 GTGCTCAATGTGTCCCTTATTGCTAAATGGGAGATAGAGGCTCAGGGTAAG  
A\_14\_P131717 GAATTAATAAATACTTACACTATTGGTTTTTCCAGGCGACTTCCCTGTGAACCAACGATC  
A\_14\_P130878 CAGAGAGCAGCAATCTGTAGACAAAGAATTAAGCATCATTTATTAAGAGTCACTTTCAGT  
A\_14\_P202102 AAGAGTCATCACTTAAGCCAGTAGTGTATCATTTCCAAAATGTCAGAGGATACAGAATCT  
A\_14\_P131147 TTTATCTTGGTCTCTTTATGAACAAGGGTCGTTTGTAGCCTCTATCTAAAGCGACAAAA  
A\_14\_P118547 AAAATTATTTACCTCTTTATGAGACCCATGTTTACCTCCATTTTGGGCAAGTGATTTAC  
A\_14\_P111520 ACTTTTATGTTAATGCTCTGGACTTGCCCTCCAGAGACTGCTCCAGAGTT  
A\_14\_P112516 ATCTTGACCTAGCACATAGTAGACACTCAACATGAGCAGTGATCATCATTGCTATCATT  
A\_14\_P110830 AAGATGACTTACCGGCCAAAAGAATTACTGTCAAAACTGTGTCCATGATGATC  
A\_16\_P36230313  
CCTTGTAGGCTGGAGGTGCTTAGTAAGTGGAATGCTACCTTATTTTCTCATTCTAATTA  
A\_14\_P120601 CCCAGTCCAATTTATCATTCTTCAGAACCCTAGACACACTAGATCCTGAGACATT  
A\_14\_P108134 TATGCTTCATCTCATTAAAGGGCTCACAATACTCTTCTGGAACAAGTAGAAAATGAAGCAT  
A\_14\_P100746 CCTGGTGGGGCTTCTTCTGTAACATGACTTGCGAATATTTATATAAAAACGAGTGTTACA  
CUST\_5540\_PI426210822  
AATTAGCACTATTTATTGGTTTTCAATATTTATAATTAAGCCAAAATCAGAGCTATGGTG  
A\_14\_P132781 CACAAAACACACTCAGACACATCTCTAAAGGAGTCAAACAACCTTCACAGTATGATACATT  
A\_16\_P01991247  
AAACAGGGTAGATTATTTTGAACCAAGATATAGGCAGACTCACAAATTACATGAAGCGGT  
A\_14\_P139141 CTGATTCAAACTTGTGAACTTCTTGGACAAGGATATAGATTCCATTAACAAGAGACAGGA  
A\_14\_P109460 TCCCCAGTCTACTAGAGTATTGAGGAGCAGTAGGAAATAAGTAAGGACAATCAAATACA  
A\_14\_P135542 ACATTGAAACTGGGAAACCCCCATAACTCTCAATATTCAGCCTCATTAATACAAATATT  
A\_14\_P134196 TGTCTTCTGTTGAATTGGTAAAATCTCAAAACCAAGCAGCCAGGAATTTTTTTTTTGAGAA  
A\_16\_P19055951  
AAGCCACCATTTTTAGAATAGATTTCTTACCCGATATCCTATTTATCCCCTGTGAATTGG  
CUST\_6317\_PI426210822 TGATGAAATGCACATACACTGCTTGCATTTTCTGTGCAATGGCCAAGTGTA  
A\_16\_P20459596  
TGGCTAATATTGCAATATGGACTCTAAAAATGCATTACAAATAACTTACTCTGGACCCAG  
CUST\_7492\_PI426210822 CCTGTGTGCTCCTTCCCTGTCCTCGTGGGCATTTCTTAAAGCTTCA  
A\_14\_P106868 AATGAAAAGGTAGAAATTAATTGATTCCAGATCACACTGAAGAGACCCCTCATTTATGA  
A\_14\_P201078 GTTTGCCTGAAACTGAAAGATGCTGAGTTACTAACAAGACTTGAACCTAAGTCCAG  
A\_18\_P22841642

ATTGTAAC TTTTGTG TTTTCTTGAGGAAGTGT CACATGACTTCTTAGCCCTCTTATTCAC

A\_16\_P15241444

TTGTCAGTTTCTAAATGTTCCCTCAAATAAAAAGGGCTCCTAACAAATCTACAGCGTCTAC

A\_14\_P102835 TCATTTCTTACTTCGATGATATCCTTCTTGTTC AACTTCTATATTTCCCTCTAATCTGC

A\_14\_P200058 TTCCTGAGAATTGCGTAAAAAGTGTCCCATCTTAAAAACAAGTGTGGATACCACACTTT

A\_14\_P138658 ACTTTCCAAATAAAGGTCATGGGAGCACAAATTTATCTCTGCGTGTGCGAG

A\_14\_P113097 TACTTTGCAGTGTGGTGATATAACGAAATAACATGTGTGCCACTGTTCTGTAAAGTGTA

A\_14\_P120131 TCTTGTCTCCTCTGATGTGACCTTCGTAGTTTATTTAGTTCTCTCTATGGAGTCATTATG

A\_14\_P132896 CTGCCTGGATGAAAATTCTTTTTGAAAAGTGCCTGAAAATCATCTATATGCCTGATGATT

A\_14\_P124295 ACAAGTTAATGTAGATGATGCATCTGAAAATAGCCGAACAAAATGCAGTGCTCAGAAATG

A\_18\_P14137802

CACTTATTCCTCTGTCATGTATGCTTAAGTCTGTTTTAGATGACCCCTTGTAAGAAAGG

A\_14\_P108955 GTTTTGGAAAGAAGTTAATTGGTGAATAGGGGCAGGATGAGTATCTTTATCTCTTCCTTA

CUST\_2991\_P1426210822 AAGGAGGCTGGTCAGGGGACCCCGAGGAGAGTCTGCTCAGCAGCT

A\_14\_P102546 TGTTAATGCTTTTTAAGTGCCAGACACTGCTTTAGATCATTTTTTTTTCTCCTTGGGAGAT

A\_18\_P22840668 AACATCTCTGAATGGAAAACACATGAGAGGCTGCCTGACAGGATGG

A\_14\_P116135 CTGGCAATAAAAGAACCTCATAGGCACTGTATTCAAATTATGCTGTAGTAATAGGCCAAG

A\_14\_P112264 GAAGAGAAATTCCAGTTTCCTTACACAAAGACAGGCTTCCTTTATCATCTCCAGAG

CUST\_7668\_P1426210822

GTGTCTGACATCTTGTAGGTGTTTGTAGATGATTGGTGAGTGAATTAATGAATGTACAG

A\_14\_P130606 CTCCTAAAAAGTTAAAAATTACCAGTGAGGGCCTTCCCTAAAAATAAGACCACTTACTTC

A\_14\_P200414 ACAGTTCAATTCTCATTTGTCACACACTTTGGCTATTAGAGATCAACCCCTTCG

CUST\_4864\_P1426210822

ACACATTTTTCTAGTTTTTCTAGTTTTCTACCCTTCAAATACTTTGTGTTAAACTCAAT

A\_14\_P120217 CTTAGGAAATGCATACACAGCACTAGGAAATCATGATCAAGCAATGCATTTTGCTGAAAA

A\_16\_P15276578

AATAGGTAGA ACTGAGCATGATCTTGGAGAAAATCTGCATACATTACTGATCTCTGAACC

A\_16\_P18424842

AAAAGTGAACACTCTCCTCATAAGAGATGACAATTTCACTATGCTACACAGACACATTGA

A\_14\_P138057 CAAAGAACTGTTTACCTCTCCTTTATGTGATGTCTCCAAGAAGAGTCCATTTAGGAAAT

A\_16\_P02694240

AAAGGACCAGGCTTTTAAAAAAGGAATCATTCATAAGTCAAACAGTATGTTTCAGCACCA

A\_14\_P119595 AAGCCATTTGACCGTGGAGAAGTAGAATCAATGGAAGATGATACTAATGGAAATCTAATG

A\_18\_P23426389

TACGAAGGCAATCATAAAACACTCCTGAAGACACAAAAAAAACCCGAAATAGAACAGTTA

A\_14\_P109563 CTTGTGTTAGTCTAACACAGTGGGAATGCTAGGAGTAAAACCAAGTTTTCCATTTATTCA

A\_16\_P00791244

AGGGAGATTACTAGCACATATCTAGGATAAGACCACATTATTCCAAATGATGCAAAGGTT



A\_14\_P200935 CTTTTCAAATGTATAATGTCAAGGACAAACACCAGGACGTTCTATTTCTCTGTTTCTCTG

A\_16\_P21251266

CCACAGGTTCAAACCTCTATCGTAGTTTCAGATTAGTAGTCCATGTTTTTCTTATGACTCC

A\_14\_P108661 ACCAAGCAATGAAGAACAAATTAATAAATCTGCTACAATTGGAGGCTCAAGAACATCTCCA

CUST\_1913\_PI426210822

AGGTATAAAGTTAAAAAGTTGAGAATGGTACTTATAATTGATAGAGCCAGACAGCGGGAC

CUST\_10332\_PI426210822 GGAAGAAACCTCCAGGGCTGAAATCACCAGGAACTCAATATCTGTTT

A\_16\_P00637661

CCAAGAACTCAAGAATTACTCAATGGTCAAAACTTTGTAACTACTCAACGGTCAATGAG

A\_18\_P10715505

TCCAGCAAGGAATCACTCTAAGAACTAATTTTTTCTGAATCTTTAGCATAATGTCCACA

A\_16\_P17576304

AAAGAGCAATAGAAGTTTTCTCCGTATGTGCTTTAACAACCATGAATTGGATTTACCACC

A\_16\_P19694090

AAAAAACGTAAACTGTATTATCACTCCATTAATCTCAGGCAAATCTATATGCTCCAGTGA

A\_14\_P106564 ATCCAAACTGAAATGATGCAGTGGAAAAAGGTATACTAAACAGATCTGCCTATCCTAGAA

A\_16\_P03389736

AGCCCCTTTAAGCATATATGATCTATTACAGGAGGTCTACCAATGTATGTTCCCTTGTCT

CUST\_8670\_PI426210822

TGAAAGAACTCTAGTGTTAGTCCAGAAGAGATATAAAATAAATATCATAACCATTCAITCC

A\_14\_P200790 CATTTTCTTCTCTCCTGTCTGGCAATTAACACTCTAATTGTCTGGTAGAATTGCATCA

CUST\_5797\_PI426210822 CTCTGAAGTCACCCTCAGCCAGGAGCGGACACTGAGCTGCTATTT

CUST\_2936\_PI426210822 TCTGAGTGATTGCATTTTGCCTCTGACCCAGTGCTCCTGTGTTT

A\_16\_P38501035

ACTCCCAGATAATATAGAAACCTTGCTTATCCCCTTATGAATATTTTACCAGTATTGCT

A\_14\_P102994 ATCCATTCCTTATCTCGTTCTAATTTCTTCCTATGATGAACAACACGTTGAGGCTTTTG

CUST\_3592\_PI426210822 TTCTGAATACCATGACTTGGCAAGTGAAGCATTCCTATGCCTTCC

A\_16\_P00685444 CTTTCATTCTGACAGTAGGAAGAGGAAAAGACTCTGGCTGACTCCTTGTGATA

A\_14\_P114412 TAAATTGGATTTGAAGAAGTCTCCTGGTTCAGTCTTTTGTCTTTTGGTGAAACATTC

A\_14\_P134222 CAGATACCATGTATAAATCCAAATGATGGCAATGAATGGCACATATGCTTACCAAATGCT

CUST\_6263\_PI426210822

TATCCTGAGATGCGGTAGAACCTCATGTTTTATTTATCTGCTCTTAGATCTCCTGTC

A\_14\_P118001 GTGAACTCAGAAATGATTTATGAGAATATCCTCCATGGAAAGCACAAAGGTGAACAATAC

CUST\_6808\_PI426210822 TCTGCAGCCTTACTGTGTTTCATGTTCTCCCCTTGGCAACAGATAAATTA

A\_14\_P135478 CCTGCTTTAGAAATACCAGATCCTATTATATAATGGAGATGTAGACATGGCCTGCAATTT

A\_14\_P118973 ACTGCAGAAGGTGAGGAAAATATCAAGGAAACCACATTTTATCTCCTAAAATAGTAGTAT

CUST\_9539\_PI426210822

ATATACCCACAATTCACACTTTTTTCTTCTCTGAGGTATGCTGTTTTTTGTCAAAACAG

A\_14\_P101728 AAGGGGAGAAGTTTTAGTGCCTCTGAAAATACACTTTGCCTTTATGCTTTATTTCCCTAAG  
A\_14\_P133402 GGTAAGACAGACTCACCTTAATCTTCTCATACTTAAGAACAGATGGATGATTCTCCAGA  
A\_14\_P139941 CTACTIONCAGGGTCCTATGGATATTTTCAGAGAAGTTATTTTGTTCACACTTGTGACCAGA  
A\_14\_P202015 ACAGTTTTAACATGATAGGATTCGGGTTTTAATTTCTCCTCCTAACCTTCTTCATGGAGC  
CUST\_5685\_PI426210822

GCTCTAAGGTTTTATTTTCATTATTATATTTAAACGTCTCTGCAGAAGGAATGGAAGGCTA  
A\_14\_P115959 ATTCAAAGTGATGTTTATTGAGCACTTCACTTTGGAAAAGCAAAAATCAAAGGCTGTCT  
CUST\_7669\_PI426210822

GTTTGTAGATGATTGGTGAGTGAATTAATGAATGTACAGATGGATGATGTATAAGTCCT  
A\_14\_P122618 CAGCCTATTTCCCTTCTTTTCATAAATGTATTGTTCAICATGCTATTAGGCAGCCAATTCT  
A\_16\_P15418631

AGTTAATGCTAACTCCTCAAATATCAAGGCAATCCCTAATAGATTACAGTCACTCTTGGG  
A\_14\_P133919 CTTAATTTTTCTTTTTCTCTCTGAAGATTTCCATGGAGAATGATTATCTGGGACCTCGA  
A\_14\_P126213 TGGACTACTTATGCTTTGACTCCTACCCAGCAGGAAAAAATGTTTAAAGACTCATGATC  
A\_14\_P112954 AAACCTTGGAAAAAGAGACCCTAAATTGACTGAGAGTAAGTTTCTATTACCTAGCAGAC  
A\_14\_P126844 AAATGGGGTGTAACAGAACATTAATTAATGGCTGAATACTAAATTGGGAGGTGTTGCA  
A\_14\_P133018 GGATGTGGCTACTTTGTTTTGGGTTATCTGCAACGAGAACACGTGTAAGATTTCT  
A\_16\_P58424457

AAGTCACCATCGTCTTTTGCCTCATTATTGATTGGCAATAGCCTTCTTCATAATTGGTTT  
A\_16\_P35545003

TCCTTCTAGCAAAATATCACCTTCAACCTTCTAAAAAGTCTTAGTCTTCATCGCTTGT  
A\_16\_P40357212

AACACACTCAGAAATCACACTTTTTAAAACCTATTATTACTTAAACATGTTCTGCTTCTGCTT  
A\_16\_P18505235

AAAAGTTAAATCAGTCTCGATTCCAGAATTCAAACACGTTACTACAGTCACAAAACCACG  
A\_16\_P01428886

ACAAAAGCATAACGAATTTTTCACTCCCCTACTAAGAACATATTTTCCAACACGAATCCTG  
A\_16\_P39908006

GAACCTCCAGAGAACATTCAAACATGATGAAGTTTAAACACATATCAAAGTTTTCCCA  
A\_14\_P109758 ATGTTCTTACCAGTTCTTTTTTTGAGTGAATCTAAGGCATGCTCAATGTCTGAACTTGAT  
A\_14\_P123011 CTGAAAAAATGGGCCAAGATAAAAGGTTTAAATCTTCAAACCTTTCAGTGTTAATCAAGCCC  
A\_16\_P00032116

ACGAAGTTGCCTATAATCTCACCAAACCTATAACATTTTGGACAGATATTCTACCAGTGTTCT  
A\_14\_P130953

GAGTAAAAACAGAGAGGCAAGACAAGATAGAAGGTCTTTATTCAATAGCAGATGAGAGAC  
A\_14\_P110342 AATTCTCTGCATTAGACTGTAACTTCTCAACATACCTGGTTCCTATGCGTTTTGTGCT  
A\_14\_P105392 AGAGATGCCAGCCTTTCTCCTATAACATGATTGCCTTTTATTTATTATGCAGGTTGTTGA  
A\_14\_P139002 CCTAAAGGCCTGGGAGATTTTAAACTCTTCTAAGGTGTATTTGAATCAGATCTTCAAAGA

CUST\_954\_PI426210822

TTGGAGAGATTGATGGAGTTACTAATGCTTTGGAGACAGTCCCTAGGAATTTTTTTTAAAA

A\_14\_P128757 CTATTTTACCCATCTCAGAACGTCCTGTGTCTCCATGTAGGAGAGTGG

A\_14\_P201598 GAAAGAGTGAGAAGGGTAGGTGTAAGGGTTCCCTAATTCGTCGAAAGAATTCTAT

CUST\_4190\_PI426210822

TTTTCAAGTTTGAAGTACTGACTGTGGAAAGATGGGAGATGTCTGAGAAAAGTTGTG

A\_16\_P00290081

GTCAAAACAGCATTCTTTGATGAACTATTCTACCCCTCATCTTGTTATATTTGAAGGGCA

A\_16\_P17131803

GACATCATGCACTTTATACACAGGATTTGTTCTTAAGAAGGTAGTATAGTGACAGGAGGA

A\_14\_P135844 GACTTTGGATACAATGTGCCATAAGAAAAAATAACACCAAATTTGGCTACAGCATCTGT

A\_18\_P22841081 GATTCCCAGGACCTGGAAGACCACTTGCTCAGAGTCTGAAATGTTTA

A\_14\_P133644 CTATATCAAATAGACACTCAAAGTTTCCAGTAACAGTGGGGTGGTTAAAATTGGTGGTA

A\_16\_P18266545

CAAAGCCACTCCAAGAATCATACCATCGTTTGCCATTTTATATTTCTCTCCAAGATTTTC

A\_14\_P116160 TCTGAATTTCTCATTTTAAACATGAATCCAAATCTTTTGCCAACACTGTCTCCTTCAGCAG

A\_14\_P118935 CAGTTGGAAAAAAGTGAACAAAAAAGTTCGAAACCATGCAGTGGACTTTCTATATTAT

A\_14\_P119947 ACCGAATTTTACATAAAGAGAACCGCTATGCATGCTGGATCCTCAACTAATTTCTGTAT

CUST\_1277\_PI426210822

TGGTTTTCTTGGTGATTACTGAGTGCTGTGGCCTATCACAGAAAAAAAAGTCATA

A\_18\_P22842312

GCAGACCTGCAGACGCTTTAAACAGCCTCTCACGTGAGAGCAGTATTTATTAATTAT

A\_14\_P102988 GCATGTAAAAAAGGGGGTAGTCTGTGAGTTTATGAAATTTTGTGTAGAAAAAAGGAA

A\_18\_P14134792 TCGGAAAGTGTCTTTGGTGAGCCTTACTATGTGACTGGCTGATTCACTTT

A\_16\_P40881587

CTACCCTACAGTTTTCAAACAAAATCCATTTACATTCACTCATTTAATTATCCCCCTGGT

A\_14\_P123033 CAGACGAGTAAGAGTGGCTAATTAGAAAATTGACATCTTTATACCTAGATCTCAAGGCTT

A\_14\_P115720 CTGCAAAAACCAGGACATCTTTATACATTCCGCTGAAATAGGGACATTTGGATTTAGATC

A\_14\_P122736 GAGCATGTAAAAGCGGAAAGTTAGTGCTTGTCTAAGATTACCTTCTTGTGATAAACCA

A\_14\_P116273 CGTTCCTCAAGGATAAAGTAGAAGTTGTTTCATTTTAGGGTGTCTTTGCATCACTCTT

CUST\_8511\_PI426210822 ATGTTGAGAGGATTGTGAAAGCATTGCTCTCTATAGGGGCACGTGAAG

A\_14\_P136897 AGAAAATGGAAGTTCTTGTTTTCTCTTATCCTTTACCTACCTCAGTATGGTTTCTGCTT

A\_14\_P101350 GTCTTACCTTTGCTGATTTTTCATGGTCCGGGGTTTATTAAGCCATCGTAGT

A\_14\_P138860 CCAGTAAGGTAAGTAACCGATGTGGGGTAAAATGTCTGTAAAGTGAACAGGCT

A\_14\_P118135 ATTTCAAGTATGATCACTTACTTGCATATGTCATCTTCTGGGTCTTCAAGCCCAAATCTT

A\_14\_P116488 GCATCTACACCTAGAAATCAGGAAATAATCATGGGTCTCCTTGAATATGGAACGAAATAG

A\_14\_P132343 AGTCCTCCCTCTTCTTCTGGCTCTGCTATCTGGGACATTCTGATTTATAG

A\_14\_P202013 AGGAACAATGTCCTTTATTTCTACTTCTCTATAATCTCTTGCAAGGAGGCTTACACCTAA

A\_14\_P133808 CTGTTGCTCCATTGGGAGAAATGTGAATATTTTTGACAGCACTAGGAACTAAAACAGAAA  
A\_14\_P108942 TTGGTTCTTTCATGATATCATAACATTAATCATTAAAAATATAAGGCAATTTAATGTAA  
CUST\_5373\_PI426210822 AGCAAATTCCTCCCCGTGTGCCTCCTGGGGCCTTTAGAACCTCTA  
CUST\_6303\_PI426210822 CTGTCCTAGGCTGAGCCTGCCATCCCTCCTTCCCTCTGTCCATCA  
A\_14\_P126297 CCAACTTATGGATCTACCAGATTTTCAGTTGCTTTTCTAACTTGTTTTCTACTGCCTTTG  
A\_14\_P108146 AGCATACCCTTTCTTCCCTTGAGTTTTCTTCACCTAGTGTCAATTTCTTTGTGAATCTTAT  
CUST\_4128\_PI426210822 TTTTGGATGAATTTTCAAGGAAGACAGCAGCTGTCCATCTTCAGTCTTGAC  
A\_14\_P137077 ACACTTGAAAGTGAGAAGACTAAATCTAGACACAATTAGAGTTCAACCAAGCCTGCTTAA  
A\_16\_P38286507

GTTTGGTTCTCCAATAACAACCTCTATCTCACAAATCATGTCAATACCCCTAATGAA  
CUST\_5264\_PI426210822 AGACAAGCAGCAATTAGGTAGGCTTCTAGGTCAGGTGGCCAGTTA  
A\_14\_P111549 CTAACCTGATTGCAAATGTTGATGTCAACTCCATTTTTATGTAGTCGAGGGCCTTTTC  
A\_14\_P106253 GAAAACCTTTTTTTTTTCCAGAGAGATTGGAACAATTATCAGGTCATTAGGATGCTGTCCCT  
CUST\_6264\_PI426210822 GTTTTATTTATCTGCTCTTAGATCTCCTGTCCGGGCAGGCTGATTGCTTTTTA  
CUST\_8528\_PI426210822 GTCTTTGGGCTCTGCTGACCCAGCAGAAGAAAGCCGCCAGTGTC  
A\_14\_P111846 TACAAAGATGTGTCTTCTTGTCTCAGATGCATGCAACTGGCATGGAATTTAAAACATT  
A\_14\_P101497 TTTTCTAGGGCTGACATCATCTGCTATGAAATAGACCATAATTGCCTAATTGTAGCG  
A\_14\_P109342 GAGGGTGTCAATCATCTCGGAAGCCTTAGTAACATAGATAGGAATAACTCAAGTTTA  
A\_14\_P138213 TGTTGTATGTTTACCATCCCTGCTGAACAAATCAGTATCTTAATTATGGTAGGATGCCTC  
CUST\_1533\_PI426210822

TCTGATCCAGAAAGCAAGAAAGAAAAGGCAGAAAGTCTGAAGTTTTATTTTCACTCTCA  
A\_14\_P110369 ACTTTTTGAAAAGGGATAAGATACTCAGTTTTTCATCTTGTTGCTTTATTCAGTTTGCTCC  
A\_14\_P100963 GTTTTGAATATCAGAACTCTTGTTAAGGTGAAAACCTCTGGAACCTTTACCCCATAGTAGT  
CUST\_10388\_PI426210822

CAAACAGCTTACGTAATATCACCCGCAGGAAGTCCATGATTTTTGAAAAATGTC  
A\_14\_P128017 CTCACATACTATGAAGTTATGTTATCTTGCAATTCGTTCTGTTTCAGCATGTGAGGCACTAA  
CUST\_2261\_PI426210822 GTGAGGAGAGAATTAGAAACCCAGACATCTTCTGCCTGATTATAGCAGCAG  
A\_14\_P122964 AATGTCCTGTTGACCTATCCACTGCCACATGTGAAAACTAAATTTGCAAAGTAAGTTTA  
A\_14\_P121313 TGGACACTTAAATATCTTCTCCCTTATATGGATTCCCTTCATGACGACTCCGATGAGAATT  
A\_14\_P112504 ATTTACACCACATGCCATTGGTATTAATCATGGGCTTGTTGATTTTTAAATCATCTGCC  
A\_16\_P39263831

AATGTTCCCACTTAACTCTCATTTGCCAAGAAGAAAATTTTACATGGTGCAGACTAAAGG  
A\_14\_P139196

AAAAGGCAAAAAGAGAAACATTTGGTATAGTCTGGTATAATAGAACCCCAAGGAAGGAA  
A\_14\_P105730 AGAAGACAGGAGAAGTTAAGGTAAGACACTCAGGAAAGAGTCAAGCCACTTTATTTATAT  
A\_14\_P131478 ACAATAAAAATGGCTCAGATGCCACTTCAAAGAACCAGTGAACCTTTTTCAGTCTGT  
A\_14\_P126133 AGAGCACAGTTTACTTTCTTCAACAAAACCTGGACTTTTCCAGGTAAGCACATTCATTA  
A\_14\_P121423 ATAACCTTCTGTCATAGGAATTAATCAAATGCTCGCAGAAACACCACCAGTTTGGAAAG

A\_14\_P102007 CCTTGACTTTTCTTTCTTCTGGATAAATGTCCAGAGAAACAAATGTCCTCTCCTGATT  
A\_14\_P122223 CTTCATAAAAAAATGGGTAAACATGGTGTGTCAGGGAACCTAATGATTAGATATGGCCAAGA  
A\_14\_P101476 ATTCTTCCCCAAATCACATTAACGATCCTTTTGCACCTAAGTGATTTCGTCAGTTTTG  
A\_14\_P109273 CTGGGGAAAAAAAATAGTTTGGTCTAAAACCTATAGAAATCTCCAAAGTCACGCCTGAAT  
A\_14\_P107599 CCTAATATGAAAAACAGCAATGTTGTGAAAATGCTACAGGTAACCTAACATCATCCAACA  
A\_18\_P11920122  
ACCCCTCGACATTAGTTGTATCCTTAAGTTGTATTAAGACAAATTCATAGGCCTGTTTAC  
A\_18\_P22841732 AACCATGTGGATGATGACTTTGTCCATGGAATGCCTGGTGAATGAGT  
CUST\_6936\_PI426210822  
TGTGTAAACCTCTAGATTTCTTTTTTCTAACTAACTGCAAAAACAGCAATTTAATAATT  
A\_14\_P123615 AAAGACGGATTAAGAAAGTATTCATCACTACTTAATGCTTTGTGTCACCTCCATGTCCTG  
A\_16\_P20444586  
TAAGAGGACTAACTATGCAGGATCCACCTAATAGATTGTTATGCAACCTATAATGGCTGT  
A\_14\_P126317 AAAGTTACCTTTCTCTTTCTGCAGTATATCATTCTTGTCATAGTGAGGAGAAGTGTCCTC  
A\_14\_P114605 CTGTTTCTTCCGGGATATAAGAGGAAGCAAAGAAGGTGGGATGAAATACATCAG  
CUST\_10092\_PI426210822  
GTCTTAATGTTTCCGGCTTATTGCCATATTCATATGTAATTTCCCTCCATTCTTTCAAG  
A\_14\_P109699 TTCCCTTCTCTGAATCCTGATACCACCTAGCATCTGAATAATTCACAACCTATGTAGGTTT  
A\_14\_P107003 TTCATCGCTTCTATCTAGTGACAGGATGATTACTTTGCTTAACATCTCAGGAAGAAAGTG  
A\_14\_P106917 TTGACCAGCACTGGGAGAACTTAACTGATTTTTTACATTACAACCCCAATTTGTAAACA  
CUST\_723\_PI426210822 GGGAGGCAATGTGATCTGTTTGGGAAAGTGCTTGCTTTGATTTC  
CUST\_2207\_PI426210822 GTATGACTTTTTCCCCCAAGTTAGATGACTTTTCTGCCTTTGTACACCATTA  
A\_18\_P14134472  
AGTTGGTCATATCACTCAAGTCATGCCTGATACACAGATGTTTGATTATCAGAGTCTTTT  
CUST\_9164\_PI426210822  
TAACAGATGCCTGTGGTTAGCCATGGGATTGTAAGCACAAATTCTAAATTATGAATTACTA  
A\_14\_P107542 CATGCAGGAAAAACAGTGATTTTGAATATTTGCCACAAATGGAAAATGACAGGAGTAGA  
A\_14\_P118710 ACTTAGGCAACCATGGTTGGCTATCATGGCTTAAGTAGTAAATATTTTTATCGGTTTGC  
A\_16\_P21079760  
TGATTTGTTCACTGATACCTACAAAGAAAAAGACTGTTGCTCATTTTGTTCATGTGTGA  
A\_14\_P119327 AGAGAGAGGAGTTTATCTGAGAATTCTCCGGTCTTTTTTTTAAACCACTCGAGCAA  
A\_16\_P18514360  
AAAACGCCTTCTTAATCTTTCCATTTTACCAACTTAACTCCCTTTCATATTCAACTCTGT  
CUST\_8379\_PI426210822  
GTTGCACAGAATATACCAAATGTTCTTATCACCTCTGGGGAACAAAAGAAAGAAAT  
A\_16\_P03707010  
GTCAATGAACAAATGAAACAATCTAGGCGTGTAATAATCAAATAGTTTCCTCACACTTCCC  
A\_16\_P16648592

AAATGCTTAATGTGATGGACTTTAACCTTATGGGACTTAACACAATTATGGGACTGTTCC  
CUST\_1155\_PI426210822 AGTATTGGGGTGTAAAGAGCAGCCCTTAGAAAAATGGGGACTAA  
CUST\_7036\_PI426210822 AGGGTTAAAGAAGGACCTTGCAAAGCCCATGGCCTTTGAATAGAG  
A\_14\_P123662 GTAGAGTAAACTTGTCTATGAGCAATCACCAAAAATGAGACATTTGTGCCTTACACATC  
A\_14\_P139322 TCAGACAGCAGGTGCTGAATCACAACCTGTCAATGCCTCAAACCTTGGTATTA  
A\_16\_P36372194

TAAAATTGTCAAATTAGGTCCCTCGGTCTAAAATTCATCAAGCCTTTACCTAGAAGCAAG  
A\_14\_P111795 AATGCAAATGTCTTTCATGTGTTTCATACCATCAGGAATGATTTTCAGGACACAAATGCTA  
A\_14\_P135683 CCCTAGCACTTTTATCAGAAATGAGGCTCTCTTTATCTCTATCTCCTTTACTTCTGTTTG  
A\_14\_P136954 TTACCATTCTGTATACCCAAATATTGGCCATGCTTTTTGTATATTAGTCAAGATGGCA  
A\_16\_P00350620

AATCATCTTCATCTTAAAGAATCTCCCTAGTCCTTTCTAACCTGACTTGAATTCCTGTG  
CUST\_8398\_PI426210822

ATTCATCATAGTTTTTAAACAGACACATTAATTTCTCGACAATAAGAGGCTTTTTTGGC  
A\_14\_P112800 GTGTCTAACATTTTGAAGAACAAGATAAGTCACAGCCATATTTTGTGAAGGGTTAGTA  
A\_14\_P134880 CTGCTTCAACAATAATCAAGTGTATAGACTTTATGTTCTCTCTTAGCAATGACAG  
A\_14\_P115046 AAGATTCTGTTTTTCAAATCACTTTTTGCCGTGGTAAAAAAAAGTCTCACTTTGGCTC  
A\_18\_P22842273 ATCCTGTTCTCCGTTCTCACCTCTTTCACCTCCATCTCCACCTC  
A\_14\_P113534 GAATAATGTTTCATGAGCCCAAAGACAAGACAACCTTTGGAATAATGTCCATGAGC  
A\_16\_P30952663 ATTGGAAGATTCCAACAAGAATTTGGATGGAAAACCTGATCCCTAGCAAGAA  
CUST\_4292\_PI426210822

CCTTTAATATTTATTGAAACCTTGGTGGAAATGAATTCTGTTTTTGGTGGAGTGCGTGA  
A\_16\_P00685568

GGATTCGGATTTTTTTGGAAGTATTCTTCTTTCAGTCTGTAAGGCTTTTTCTCACTGATTC  
A\_16\_P01607707

AAATATCCTTCTTCTGATTAACGTAAACCTGCTTAGTCTAGAGTTTCATGGCAATGGGT  
A\_14\_P138562 CCTCATGCAGGATAAGCCAATTTTAACTTTCTACAATGGGTGCCTCAATAGTTTCATAAT  
A\_14\_P116824 TAAGATTTTTGCTTAGCAAATGGTCCATGGGTTGAAAAGGTAGAGAAAATGTGGCTTAA  
A\_14\_P112734 TTTATTATGAACTCAATGGCTCAGACAAGACAGAGTAGTAATTCCTCCCATTTTATCCCT  
A\_14\_P129543 CTACATATTTTTTTCCACCAAGGATTTTGTGTTGAGGCTTTGACTAATGCAAGTCTTAC  
A\_16\_P16191907 CTATTACCTTCTGGGTAACTACCTCCACCCACGCCATGTGTAAGACTT  
A\_16\_P00088381

AATTCATACTCCATCAAGCCATTCTACAACACTTCATTTTCAGAGTTTCCAACCTACAGAG  
A\_14\_P111610 CTCTAAGGAGTCCAAAGGATAAAGCCTGGTTATAAAAGGCCACAGCCAAC  
A\_16\_P00161441

TGACAAGGCCTAGATATATTTTTATCTCCCGAATATCGGTAATGCATACCTATTTTTGGGG  
A\_14\_P100264 ATTATATCCTAGACCTTTGTTCCAAAGAGTTTCATCTAGTAGTGATGACAGCACCCCTATC  
CUST\_9317\_PI426210822 ATACTTGCCACTGTCCATAGAGCCCTGGTGACAGCACTGGTGGCT

CUST\_8530\_PI426210822 GTGTTCCGCACCTATGATGTACTATGGTTGGAAGCTTAGCATGAGGTGAA  
CUST\_8700\_PI426210822 GCTCAGTCAATAGGACAGACAGATGAGGAGTAGACCCCAAGAAT  
A\_14\_P136351 TGGTGATACCGATGACTAATAGTGGTATTTCAACTTCTGTGTCTTCTGATTAAGGGAATT  
A\_14\_P130966 CTTCAACTTCAAAAGTATAATTAGCGTGGGCTAGCAGGTCATGACAGTGACATAGTTAT  
A\_14\_P139370 TATAAAATACAAGAATAAATACCTTGGATTAACAACCAGGGCTGGGGTTTGTGATAAGG  
A\_18\_P22841052  
TGACTCAACCAAGTAAGATTTACAAAACAAACAAACAAAACACTGTTTTTCATCATCTTTGGT  
A\_16\_P16904885  
AAAAGGCAATATGATCAGATGGAAGCCCTAAAAGATCAATTACACTCAAACATGAGAAGC  
A\_14\_P132974 CTGTCTGTATCCAAGTCGTTACATCTAGTTCAGAAAGATCAAGTTCAGGAAGATCTG  
CUST\_5410\_PI426210822  
TGGAGGATGAGTAAAGTAATGTCTTCCATATGCTCAAGAGAAGATGATTTAGCACCAT  
A\_14\_P102559 GCAAACCTTAGTTGCCTCTTATCAATGTGTAGAATTGAAACAAGAAAGTAGCAATTGGGC  
A\_16\_P01572478  
CACCAGATTACTCACTACCCTTCTATTCTCAAATGACTATAGCATTCCAAAACACATGG  
A\_14\_P104921 AGGGGTCTTCTTCTAAAGTTTCCCTCCGACTACCTATTCAAACCAC  
A\_14\_P135411 CCTTACAGAGTCAAAGAGATTTTGGAACTCTGGTGATACTGTTGTTTATTACACTAGCCT  
A\_14\_P133487 ACTATAGACATTTACATGCTGCTGAACACAGAAATACTGAAAAAGGTAAGCCCTAATGAA  
A\_14\_P127211 CTAAAGTCAGTCTACTATCATTTTTGGTCTATCTGGTTTGACTTCCTTAGGTTGGCAATT  
A\_16\_P16944627  
AACTCTGCCAACTTAAATACTTAGGTCAACTCCAAATAGAAGAAAAACACAAACAAGGGT  
A\_14\_P104395 CTGGCTCCAGTGATAAGCAGTTGAATTGCTTCCAGTTGCCACTATTTTCAGATAA  
A\_16\_P20765503  
ATGCAGAACTGCTTTATCCAAGAATGCTGAAAAATACTGTTCTATCCAGGTTTCCTAAAC  
CUST\_414\_PI426210822 CAGGGCCTGATCTATATTTAGGGCTGGGGGTTCAACAATGAAAACCTTTTT  
A\_14\_P115422 TCTGGCAGAAAGCCACAAATAAAATACAGGCCTCACTTAAGTATCTCAAATTTTACAGG  
A\_16\_P30952556 TTTCCAGAAAAACCCAACTCCCTGCATCATCCCTCAAGAACAAGAAAATATCTT  
A\_16\_P15794840  
GCATCTTTTCGACTCTATAAGTAGTCCATATCACACCTTCTATAGATGGGAAAACACAGT  
CUST\_7753\_PI426210822  
GAAACAAAAGAAGGAATTGAGTGCTGGATAGGCAGCTTTTGAATGTGAATTTTCCT  
A\_16\_P00496018  
TCCACCATAAATCCTCTTTAATGATTCTACCCACAACAATTGATTTCTCCTTCCAAATA  
CUST\_7344\_PI426210822 AGAACTACAGCTCAGAGGCCTACTCTGTGGGCTGTCCTTTTTTCT  
A\_16\_P03583254  
GGCAAATCCAAACAGTCTACATTAATTTCCGTCTTTATTTTCGTTAAGGTTTCACATGGAC  
A\_14\_P105511 CTGGTGTGTAAGTATCACACTGAGCCATTAGCCAATATCCCATTAACCTTTTTAAGTAGG  
A\_14\_P107448 CTTTCAAAGTCATTTTGCAGAGAAAAAAGATACTGAGCAATCTGAAAGCAGGACTGTAG

A\_14\_P107182 CCAGCATGAGCATGCTTATATTGTTTCAGGATCGAGGAATATTGATCTCTAGATGTCTTTT

A\_14\_P126433 AGATGCTAATGTGCTGAATCAACAGTCATTGCAGATCACGAAGTGTCCATCATAACT

A\_16\_P00873278

ATGACTTCAATGTAAACGGGACTTTCCATAGTTAATTGAGACACTAAGTTATCCCCCTAA

CUST\_8154\_PI426210822 GAAAGGAAGGACAAGGAAGTCAGGCTGTGTGGGCACCTGATCCTG

A\_16\_P03250832

AAAAAATGGTGTTAACTAACTCAGTCTCAAATCCTGAATAGGACTCAAGTCAAGCAAAA

A\_14\_P112132 CTGTCAICTTTAAAGTAACTGCTCTTCTCTGTTTACTTCTCTTGAGAGAGGATAAAGAGA

A\_14\_P109854 TAAATGTGATTTTATTGTCCTGTGACTATTAAGTGGGTAGCACATTTGGTCCTAGCACTT

A\_18\_P14741364

TGGGATTCAAACACAATTTTTAAATAATAGATGATAAAAAACAAAGCAGATTTTCAGATTGG

A\_14\_P104302 TAGTAGGCACCAATTTGTTTACTCATTATTGTCAATTCCTCAACCAAATGTAGTCCACA

A\_14\_P138845 TTTGGCGTCTTACTTACTGATGGGTAGAGGTAACCTTCTCCATTTCATGGCTATAT

A\_14\_P114011 CTTTTACCATTTAGAAATGCAGAGGTATCCATGACAACATTATGAGGCAGAGTTAGAAT

A\_14\_P137275 TAAGAAGGCAAACCTTACTTGAAAGACAGGAAATTGACTTTGAGTCTCAGGCCTTTCTT

A\_16\_P03808663

GAAAAGAGGAAGGGTTAAGACTGAAATCATTCTACAGAGACCACGTTAATGGGTTTAAAT

A\_16\_P17423087

ACAACCCCATCCTTTAAATAATATGGTCTCTCCTTTTATGAGCAAATTGCAAACCTGTTT

CUST\_3310\_PI426210822 CTTCTCCAGAAGAGGCTCCTCTTCTCTCCCCTAGATCCATAGTATC

A\_14\_P137285 CTTTTACCAAAAAGGCTGCATCCTACTAATATACAGTAGGAACTTTTACCAGGGT

A\_14\_P116310 ACCATATTCTCATTTCATGACATTTCAACCACAGGCAGAAAAGACTGTTTACTCCTTG

CUST\_6665\_PI426210822

AATGAAGTGAAGTTTATATAGCATGACTCAAAGGTACAGTGCTGGTATTCTCCCCTAC

A\_16\_P15838440

AGCATACCAAACCTCATTAGCAGAAGTCAAATATGTCTCTCCCTATTGCTACACAACCTTTT

A\_14\_P102947 AACACATCTTATGTCCCATCAGATGGAGATAAGGATTCCAGATGGCACTT

A\_14\_P122228 GCACCTTTTATCGTTTGATAAAGATTAAGGACATGTTCTTTGGTCAACAGCCAGAACTT

A\_14\_P200789 TCTGATCTTAAGGAGAAGGCTCCACTACACATATATTGTTTGATAGAAATTCAGGCCATG

A\_16\_P19314674

GCAGACCAACTATCATTCTCACAACCAACTTTCTAAAGACTTTTGACAATCTGGATATCA

A\_16\_P21605554

AGAAACCATTCTCTTTGTTTCATGCACATTCTGTTTTAGTCACCTTCATGGTCAGTATCAG

A\_14\_P101850 AAGTCAAGAGTAAAACCTGAGACTCTGCCTCAGAACTGTCAGGTAATTCTACTGTCTAAC

A\_14\_P123206 CTTGGTTTGGTCTTGAAAAGATTCATAATCACTCCAAATGAAATGCTCCTCCCTTG

A\_14\_P126177 GGAGAAGTTTGTGTTTGTCTTTGGTGTGTTATTTTCATGAATAGATTGTGTGCCATTTTCTCT

A\_16\_P16191572

AAAGTTAGGACAAGGAAAATGAGTCTTTACAAAGCAACCAATTCCTCGTGAGAAGTCTTT



A\_14\_P114190 ACAACTTATGATGGCATCGATGCCCTTCCAATTCCTTCTTCTATGAAATTATATCTGAAG  
A\_14\_P108169 TGATACTGAGTCTATCATATTTTCAGGCAGAGAAAACAAAGAATTTTGTGTCAGCCGAAGCC  
A\_16\_P19367483  
CCAAAAACCCCATTAGCAATCTTATTTAAATAGACTGAGCCATTCCTATAACCACTGCA  
A\_14\_P107259 GATTTCCAGTGGCGTTCATGATGCATGAAGATTCACATTCCAATTCCTTATTCTCTTCTA  
A\_16\_P35010609  
ACTGTGACCACAGAAAATGATGTCTCTAACCTTACTTTGCAGAATAGAAAAGAAACGCAC  
A\_14\_P100738 CTGTAGTTTTTGCTGAGATACGTTGCCAAAGTTGGCTTCACCTTTTTACTACTTGC  
A\_14\_P135921 CCCGTCATTTTCAAACATTTAGATCCCTGATCCTTAAATACTACCTTTCTTGCTGTAT  
A\_14\_P132476 CAGATGCTTGGTTTTTCAGGCATAAATTTGGTTTAGTAGAAGATGGCATTCTGGATTAGA  
A\_14\_P200443 TCTGTTTGATGTTTATTGGTGGTGTCTGATGAGCGTTTCTCTTGTCAGACT  
CUST\_1009\_PI426210822 ACGCTAAATGTTATCACTTACGAAAACAATGCGTTTGAGGGGAGGCAAACCA  
A\_14\_P123741 GGTAAGTCAGCAGGTTTCGTAAATCCATAGCAATTGTCATTAATAAATGAATAAGGTGTCCA  
A\_16\_P19511379  
TCAAATTAGAGGGGTTTGTCTTATTTTAAACAGGAAGTGTTAGAAAGTTCTAAAGAGGA  
A\_14\_P105249 AAGGTTTTGCTGTGATAAAAATGGTAGTAATCTTCCAGGTTTCCAATCTGCAAGACAAGA  
A\_16\_P03053868  
TTCCAGATCAAGAGGAATAACCAATTGCTACCTAGAGTTATCTTCGTTGACATTTACAGT  
CUST\_4129\_PI426210822 AAGACAGCAGCTGTCCATCTTCAGTCTTGACTTGCCATTCCTTA  
A\_14\_P104511 GTATAGAAGGAGCCTAGGATTTAGAAAAAGATCGATCTGATGACAACCATTGAGTTG  
CUST\_8185\_PI426210822 GAGACATAGCTGCTGAAGTCTAGCAACTCCTTCTGGCTGCAATAC  
CUST\_6450\_PI426210822 GGAGCTTGGGCCCTGTAATTCAGAGATATTCAGATTAAGTCTGGT  
A\_16\_P03617534  
AAAAGCATGAAAAGGAGGTTAGAAAACAAGGTAAGAAAAAATGCTAGGGCTTCATTTCC  
A\_14\_P137400 TAAAGTTGCCTCTGTTTTCCATTATGGACATCACTGAAAGGTTTCATTTAGACTTCTAAC  
A\_16\_P21367662  
AAGATTGTCCAATATGAGAAGTGCTCTTACCAAGAGAAAATAATGAACTGAGAGTCAGCC  
A\_14\_P107901 TTCTGAGAACGCAGATAAGTTACTATCAATAAATAAATCGATGCAAATTCCACCCCAACC  
A\_18\_P13004354  
TGACAGTGTTTAACTCTGTGCAATTTAAGACAGTCTAGCAAAATCAATATAAATCAGCCA  
A\_14\_P135438 TCCTTTAAAAGACCCAGTAGAATATTTAGGTGCCTATGAGGAAATTCAGTCTTGCAAAAAG  
A\_16\_P01709388  
TTGTAGAAAACCAGTTGCACATTGATGTAGACAACTTACTGAAAACTCCAGACATACG  
A\_16\_P37610600  
CCTCAAAGAAGATAAAGGTCCTCTATAAATACAAACAAGACTCTAAGACTCAGTCAAGGA  
A\_16\_P02284006  
GACAGGTCCACACTTAATACAAGCCATCTGATCTAGAATAGGAAATCCAAGACTTTAGAG  
A\_14\_P100012 CTACATGAGAAGCAAATGCTGCCATTAAGTCTCAGAGTCAAATTGCAAAAACATAACTTCTT

A\_14\_P132265 CTAAACTTTAAAGAAGACCTAGGGGAAAACCTGGCTTTAAAGGAAACCATTCAGTCAG  
A\_14\_P133273 TACAAAAGGAAAGAAAGTAGTTTTCCAAGGTTATGGAATAATTCAGGGAAGACTTTTTCTA  
A\_14\_P102715 ATGCATATAACTACCTCTCAATGGTCACCTGCTGGCCTATAACAGAAAATTCTTCTTAGA  
A\_16\_P58424179 ATAATTGTGACCTCTCCCTGTCTCAGTCTCTGCATCTCTAAAATGGACACAGTA  
A\_14\_P126306 AGTGGATATCTTTTCTCAGCCCTAGGATCACTACTTTTCATTTTAAGGCTTCATTTTGCTC  
A\_14\_P103723 GGGAAATGGGAATTGGGGTAGGTGCGTTCATTTGAAGAATTTTATTCTATACTTTTTAT  
CUST\_10027\_P1426210822 AGGTCTGTGAGCAGAGCGGTGGCATGACCAGATCTGTGTCGAGAG  
A\_16\_P19193060  
AGTATCAGCAAGGAACTACTACCATTTTAGACAAAAGACGGATAAAAGGAAGTGTTGTGTT  
A\_16\_P20334590  
ACACACATGTCAAATATCATTCTCCCTACAACCTATTTCACTCTTTTCTCCACAATCTAGA  
A\_16\_P19871395  
AAACATTTCCCTCACTATACACTTTACCATTGAGTGAAACCTCACATTTATGCTGTTTCAG  
CUST\_4119\_P1426210822  
GCTAAATTTTAGTTTCGTTGCTGGGAAGTTTTGGATGAGCTCATTTTCATAAGGATTTATGT  
A\_14\_P139326 TACTCACCTCATACTCACTATTGACCATTGTGATGAACCTTAACTTATAAGAAGCACCAG  
A\_16\_P21377842  
AACTTCTAATACTCCAACCTACCTTTATGTGGTTTTCCCTTACTACAAAAGCACCAATGGGT  
CUST\_7585\_P1426210822 GCTTCAAGTTGCAAACCAGTTTTGAATGAGCAGAGTAGAAGGGGGTT  
A\_16\_P30952290 ATTGATTTTTCTCATCCCCCTACCCACCTCATGCCCTAAGCCCG  
A\_14\_P103080 ACAAACAAGAAAAAAGACTAATGGCCACTAGTAGGTTTGAAAAGTCCTCTTACTATCCA  
A\_18\_P14132672 ATCAGTGACACCCCTAGAGGCATTTAGGGAACTTTTTTTGAACAGAACCATG  
A\_14\_P201828 CTTCAATTCTTTTCTGCGATGTGCGGGAAGACTCTAGTTCATCAGATAAGTTTGTATATA  
A\_14\_P134375 TGTGCCTGATCAAATGGGAGACAGAGATTACTAAGAAATTTGCTAGGTTTTAGAATAGGT  
A\_14\_P103382 ATTTTCTGTGACTTCTGCCTGTAATTTTTCTGGGAGTTTCATTATCTACAAAACACAAAA  
A\_16\_P00340533  
CAGTCTAAACCCTGCGTATAATCAGTGTGAAATCCTGGTTAAGTTGTTTATTTTCTGTGC  
A\_14\_P132273 TTACCTGTCCACAAACAGCATAAATATGATCCATAAGTTTCTCCATATTGGTCCAGAATG  
A\_14\_P201069 ATACCACGTGCAACAACTTATTTAGACAGTATCAACTCTAGCCCTTAATAGGTTCAAGG  
A\_18\_P11372668  
TCCCTGTAAATTCACATGTTATGCTATCTCCAAGTAGACTCAATCTGAATAATCCAGACC  
A\_16\_P17011055  
AAACAAACCTGGACCTAACTAGAATCTGAGAACTCTATCACTTATATGTCTTTCTGAGT  
A\_14\_P126933 CTGTAATAGGACTGCCCATCCACTGAGACATAGTAAAGTATCATTAAATTAATCTTTTCAT  
CUST\_4991\_P1426210822  
GACCGAAGGTTCTTCTTTAACAATTCAAATTTGAATAGGAACCATTTTTAATTTGGGGGTA  
A\_14\_P139576 TTTATACCTTGGTGAAGAATTATCTTGAATAAAAGTCATTCCTGCATCCAATCACAGCAG  
A\_14\_P119472 TGATTTTTTTCTTTTAGTTAGCATCAAGTGTTTCATTCTGGTCCCCAAAGTTCAGCAAATG

A\_14\_P123190 CAATATGGCAAAGACTCTTAACTAATTCTACTCAATCAACCAGATGGATAAACCAATGC

A\_16\_P41646566

GATGAAGTAAAAGGCTAACACTTCTTTACATCTTGAAAGAAGGACTAAAGGCCACATTGA

A\_16\_P19403255

TCTCCATTGTCCTTATTTCCCTTCTGTAGTAAGACAAAAACATCCTAATAGTGTGCTGA

A\_14\_P110199 CTCTCAGGGCTAAGGTCCTCTGTGCTTTTTGGTTCCACCTTAGAA

A\_18\_P13892317

ACACGATCTTGCATATTCATATCCCTTTCAAATGTTTACTGACTTAATCACACCATTAGT

A\_14\_P201556 GCTTCTCTCTTCAGATATTTATTGTCTGAGTCTTTGTTTCAGTCCTTGCTTTCCAA

A\_14\_P118227 AAATGAAAACAGGCAAGTAAAGTATTTCTTCGGAAAACATTTTATCAAACCAAATGTAA

A\_14\_P107035 CAGATAAGATGAAAGAAAACAATCATGAACCAAAAACTCACCAAACGGCAAGCAGAAGT

A\_14\_P111903 CGAACGGTTCAGCACATATTTATTATGACTCAGTTTCCCTCATCTACACAGTGCACG

A\_16\_P15626079

AAAAGTTAAACAACATGTTTCCCTAATTCCTTTAACAGTCATTTTCTCAGAGGCAAAGG

A\_16\_P55126412 AGTTGTCTGAAGGCTCCACTGGAGGATCTGCTTCCCTTGTGGCCC

A\_14\_P111095 TACAATCATCCAGATCTAGAAGTGAAACATCTTTGGTAAGAGGAGTTCTATCTTGCTTTG

A\_14\_P129539 CAGCAATAGAACTTTTTGACAAAATCAAATAGGTGTGGTTTGAGGAGGCGATGTGA

A\_16\_P39431094

AGATTGCCTGGTAAGTTAAAATGATAGATGGTCCTTAAGAAAAGTCTGAGTCAGCAAGTT

A\_14\_P127936 ACTATAGCAAAGAGAAGAAGTAAAATGTTTTCTTTTCCCTCAAACCTCTCTCACCCAAA

CUST\_8395\_PI426210822 CTGCCATTGTACACAGGAGAAAGGCAGAAATACTAGTCTTGGGCCT

A\_16\_P38598426

ACCATACCTCTTCTAAAAGCATTTTTCTAAGTTACCTCATTTTTCTTGTAACCCCTCAGA

CUST\_6281\_PI426210822 TCCCTTGAGAGAAATGGCTTTCATACAAAATGTCCTTACTGGTGGGG

A\_14\_P110122 TTTGCAAAAGTTATGTGTGTGCATTTTTAACTAGATGCTGGATCTCGAAGGTCTCACATA

A\_14\_P117593 GCTGAGAGACTTGCTTCTAGAGAAAAACCTGTCCTTCCCTAGGTAAGTATTATTCACATCT

A\_18\_P13307415

CCATCTTGGTCTGAGGAAAAATGCAGGAATCAGAGTCAAAAATATATCAAGGGATTACTT

A\_14\_P114517 CCTAAATTTATATTTTACCATCGTGGTCTAGCCACTTTTCTGTAGATCAGTCCCACTTG

A\_16\_P18806586

TCCAGGTTATTCACTCAGGAAGCAAAAAACAACAGGACCAAGGATTAGAAATTAACCTGT

A\_14\_P137640 ACTGACAGACCAACATGAGTGTTTTCACTTATGAGCAGTTTTATTTCTCAGTGTAAGACA

A\_14\_P100147 TTAAGACAAAACTTACCCCTTGGCTTCCCTTGAAATCGGATAGATGGCCTC

A\_14\_P111676 CCATTAGTAATACAGACTCATGAAAAGTTATGCTGCAAAAAATGCTGAACCTCCTCTGAT

A\_14\_P202225 TACAGCATCTTTGATAAACTTCTCAGTGAAAATGTTGGCTAGGCAAGTTCAGTTAAAATA

A\_14\_P138357 AAATCTTCCCTCCTCTTCTGCCCCTGAATGTTTTCCCAAACATGAAGGTAAG

A\_18\_P14796866

GCAGCATACTAAATATTTCTGTTATCTAAAATCTACTGCCTATCACTATTCTACAGAC

A\_16\_P36380398

TGTTTCATTAAGCCCTAGAAAGCAGTATCTTAGTTCACTTTTTCCCAGATCTTTAGCAGAAA

A\_14\_P138674 GATGTGCCCTGTGACCGTAAACCATCTTATATTTACTATGACAGGACAGTATTTGAGTTA

A\_18\_P22842298 CCTCCTCATCATGAATCATTATCACTCAGGAAGTAAGGACCTGGTTTACTATCTGA

A\_16\_P38313941

CCCCAAATCATATCAAAATTGCTTCTACTGCTGTAACAACACTAGTCTGTCACTACGTTTTTC

A\_16\_P00722951

AATTCACCAAGCAAGAGAAAAAAGTATGACTTCTACTCTTCTCTAGATCAGCCTGAGT

A\_16\_P18370259

AAGTCTGGCATCATCATATGTAATTCACTTCTTTACCTGAGGTTAAACAGTGTTCAIGCA

A\_14\_P135626 TCTGTGTTGTGGATTTGGCTTGCCAAAATTTTATTTTAGCATCCTTCCTTACATATCTAC

A\_14\_P136592 TTTTGTGATCTGGGGACTCTAGGAATCTGATTGCAATATTAAGTTACTTGACAGTCAAAGT

A\_14\_P110118 GTAAAGACAGCGGTATTAATAGAGGAGTCTCTCATTCTCCACCTCCCAG

A\_14\_P138751 GTTATGGTGACAACAGAAAAAAGTCTATATTGGGACCTTCTGTCTGCATTAGTTCCATAT

A\_18\_P15974653

TTCTTGACAGCAAAGACAAAACCTTCTTATTACATTACAGTAGTCAATTTACCTCCC

A\_14\_P126845 ATGTCAAGCCTAATCAGATACATATTAATCATATGCTTAATAGTTTGGGGGCCCTTGCAT

A\_14\_P117795 TATTCTTTCACAGGAATTGAAACCTGACATAGTAACTAAATCTGCTCTTGGTGATGATAT

A\_16\_P03310207

GCACAACCTCATTTTCGTTTTCCATATGCACAATATTCAACAGAACCTTTTTTCCCTTAGTG

A\_14\_P139194 CTGAACCACCTGTAAACCCTCTGATTTTCAAAGACTTATTGCATTCCTAGTATATGCCA

CUST\_5954\_PI426210822 TTGCAAGAAAGGAATTGGCCACTGTGTACTCGTTTGCCACTCAATC

A\_14\_P200046 ACAGACAAATACTTAGACAGTATGCATACTGGTGTTAACAGTCACAATTTCTGGGTGATG

A\_16\_P03445724

AAACATGTTATCTGGAAATGTAACAGACACATCCCATCATATAAAACCATTGTTCCCTGG

A\_14\_P134161 ACATTAGCCAAGAACTGGAACAAATCTCTCAAAAAACCAGGTAGGTGATGTTATAGAAT

A\_14\_P127524 AAGAGGTTTGGATATGGACCTTCTTCAATTCCTGGCCTTCTCTTTGT

CUST\_985\_PI426210822

ATAGTTCTCTGCCTCATATCATTTTCAGTCTATTTAGAAACCTGCTATTTTAGCACAAAAC

A\_16\_P16829150

AAAACAAGGTCTGACTTAGATTACGAATACTCCACAAAAGAATACCATTTTCTCTACC

A\_16\_P02668155

AAAACCCTGACGAAAAATTTATGCCTCGAGTTTTAATATCATCGATGGTCTGGTAATCAG

A\_14\_P125550 ACCATCACCACCTTCAAAGTTGGAGAACTAAAAACAAACAACAATTACAAATTGGGTAT

A\_14\_P130728 AAGTAATAGATTTGCCCTTAATCCAGACAGTATGAGATACAATTTCTGGGACTTTGTCTT

CUST\_8837\_PI426210822 GAATGCAAGCTGAATAGTCAAGTTCCTGAAATGGGTCAGGATTAGGTTTGC

A\_16\_P19832738

TGATGGTTACAGCAGATAGATCAGTAACAGACACTAACTAAAGATAGATAACTCCGGGTT

A\_14\_P118887 CATCCTAAGGCTTCTCATCTCAATTTTTCTGTTACCACTATTTGGTGCATAGGATCCATT

A\_16\_P19342197

CAGCCTCAAGTTCAGAATAGCATCAATTAACATGGCCAAATTACTTATAGGAAGAGGAAG

A\_14\_P129806 ACCGTAGACAAAGCCCAGACAACACAAACCACTGTTAAATATACATGTAGATGTTCTTAA

A\_14\_P135324

GAGAGGAAGAAGTCATTTTATTGTGCTGAAAAACAGTGGAAGTAAAGTTACCAACGAGTA

A\_14\_P124616 TCCCAGGTTTCTGATGAGCAGAAAAAAAATCTTTGTTTCTATAGTGCTATCCTCTTTTA

A\_14\_P134093 AGATCATGCAGAACTTTGAATGCCAGACTAGGCTTTGGACTTTCTCTAGG

CUST\_907\_PI426210822 GTTGACCTTGGCTTAGTGCCTGCCATCTCAGCTCCATGGACACT

CUST\_5360\_PI426210822

ACAAAACAGAATAAAATCCTCTTTAACTTTGTTTAACTTGGTGTCCCATGCAGTCTATTT

A\_16\_P19529393

AATCACTTTTCCCTGGAAACTTGTTTATCATACTGTCAAAGATCATTTGTATGCGTCTC

A\_18\_P15975746

CACAGTTAATGCTCGTATACAATGAAGTTGTGACCATGTTAAGGAAATGAATCCAAGTGA

A\_14\_P123019 CCAGCATATTGCCAATTATATCTCTGGGATCCAGACTATCGGACATAGGGTAATTG

A\_14\_P133184 AAGAAATACACCACAATATGTATGGTGATGCCCAAAGTTAATGCAATTTTTCTCTGCAGT

CUST\_9790\_PI426210822 ACTCAGAGACTCCACTTCAAATCCCACATCTCTTTTGTGCAAAGTGAAGT

A\_14\_P107175 GAGGACCTCCGCTGCAAATACATCTCCCTCATCTACACCAACTATG

A\_14\_P111261 GAAAAATGAAGATGATGTAGACACTGGACTATTAGGTATGGACTTAATTGCCGCTTGCTT

A\_14\_P112341 AAGCCACAAAGAAGCACATATTGGTGACCATCATTAATGAAATCCTGAAGTTTATTCTGT

A\_14\_P131382 CTCATCCTGTGTTCTCAGACAGATTTTCAGTCATTAGATGATGTTTTTAAGTCTGAGTG

A\_16\_P02200834

TGCCGTGTAATTCTAATTTTCATACAGATATCAGTGTTGATAAACTAAGTTGAGCCCATGG

A\_14\_P123123 AAGCAAATGTTTCATTGGAATTCAGACTGCAAGTATTTTCATTTGCAACTTTTTCTCCCT

CUST\_7466\_PI426210822 CAAAGCATGGGAAGTAATCAGTAAATGGCCAATTTATCTCTCCCTCACAGC

A\_16\_P00277225

ATAAGCATTGGACTACTTCCTAGAAATGTCTCACTCATGTAGATTTTGTCCCAAAGCAC

A\_16\_P16191174 CCTCAGGATTGAAGGACCCTTTTTTTTTGCAGGGCTGGTAAAATGACA

CUST\_2833\_PI426210822 TTCTGTCCAGTGCCAGCTCATCACGTAGTTGGACTCTGTAAAAAACA

A\_14\_P103024 AAGAGACAATGAGATAATGCCAACTTATACCTGGTCCAGATTCTTGCCATAACTG

A\_14\_P132485 TGAGTCCAATCTGATAGAAATATAACAGGATAAAAAGTCACAACGGCAGGTTTCGTTTCAG

A\_14\_P121122 GTGTGGAGAGTTTTTTTGTATCCTGAAATCAAGGAAATATTTTACTTTTCCCTCTGAGGT

A\_14\_P128889 ATTTCCAAAGATTTAACTTTGTCACTCTCAGTTTAAAACCTTTTGATGGCTGCCACG

A\_14\_P121308 CCAAGATTGTGGTTGCCTAAATTCCTAAGTCATTTTTGACTCATCAAGTGAGGTTATTGA

CUST\_3949\_PI426210822

TTTCCTTTTTATTTGCCACTCCCCACAAAATAAACCTCTTTTTATTTTTGAATCAGCTT

A\_18\_P14135021 CGTGCTGATGGTGCCACTGATGCACGAGGTGGACACGTCCATCAC

CUST\_672\_PI426210822 CAGCCAGCTGAATTAACCTTCAGAAAAGACTCACTCATGGGCTGGC  
CUST\_3059\_PI426210822 GCTTCTGGTAATGTTCTGTAGGTTTGTTCATGATGTTTTGCTTGTGACGACACTA  
A\_16\_P18105078  
AACAAATTTGGCAATAAGTCATTCAAGGTATGACATAGAATCTCCTCATTAACTGCCCTG  
CUST\_9122\_PI426210822 CTTGGGGTTGACACTGAGGCTTAGGCTGTTTCTCACTCGCTTGCC  
A\_16\_P00562028  
ATTAATACCAAAGCAGATCCAATTAAGTGCTCTCCATTTTAATTTCTCAACCCAACCTGG  
A\_14\_P202275 AGACAAGTATTAAAGAATAAAAATCTGTCTCAGGCTGGTAGTTAGCAGTTGTGACCAAGAT  
A\_14\_P139355 CACCTTTTGAGTTTTATTCTAGACTTAATAGTTTCTCTCCTCTCAGTGCGAACGATAGC  
A\_14\_P201764 CTGCTCATTCTCCTCCCAGTAATTACCTTCTCAGTTTAGACTTAATGCAAGTGAAATTTT  
A\_14\_P106555 CATCAATAATCTTCCACTCGGCCCTAAAATTCTATGATTGGTGACATTAAGAACAACAG  
A\_14\_P110867 TGTTTGTTTTTGAGATGGAGTTAAATTTACCTGCCTTACCAGTTACATTTGTGCCATTTT  
A\_14\_P103588 ATGTTTCAGAATCCTTGTCTTTAACCTGCGTCCACATGTAGTCGCCT  
A\_14\_P123415 AGAAGCATAAAGTATAACACCTTGAGTCCATGATATATTTTGGGGAAGAAACCTCTTGCA  
A\_16\_P58424601 ATGCCACAGCCTGGAGCAATTTCCCAAACATAACAGTGAGAGAAAGAAAC  
CUST\_1936\_PI426210822 TTATTGTGTGGCTTTTATAAGTATTGTGGTTCAGGAGCAGTGGAGGTGATG  
A\_18\_P14132835  
ACTCAATTACAGAGATAGATCCTTCCATTCATCAAGTGAATTTTAGAAGCCACACCTTTG  
A\_14\_P139446 AACAAAGGCCATTTTCTCAAACGAGAGTCAGCCTTTAACGGTAAGTAAAATCAGAATTTAT  
A\_16\_P03575857  
CCACTCTAACAGTTATCATGAAATTGCATCCATGATCTTTGAGTCTTATCAGTCCATACC  
A\_16\_P20929290  
AGAGGCTTTTACATGATACCTTTAATCAATGGGGCTTGAATTCTTATCAGTGCATTTTGC  
A\_14\_P113650 TAAGAATGTAACAAACAAACTCACCAATCCTTCCTTTTTTGTGAATATGGCCAGGCATG  
A\_14\_P100244 ATTAGTGATGGGAAATGGTATGTCTGATGAGCATAAGAGAAATTTGAGCAATTATCCTCC  
A\_14\_P121056 CTGGCTTCATTGGTATATGATCTGGGATAATGGGAAGCACTGATTTAGGAATTATCAAAT  
CUST\_1547\_PI426210822 CAGGAGAGTGCCCGGGATCTACAACACATGTCTGGGCTGAACAAA  
CUST\_7072\_PI426210822  
TCCAGTTCAGTTAAATCTGAAGTTTTTGATCAATTGGGTTGCTGAGATTACAACCTTTCTT  
CUST\_4005\_PI426210822  
GTAACCTTTGACTTTCTCTGCTGTCTCCTATTTAAGAGTAAATAAAGGTAGTGACAGTCAC  
A\_16\_P00369826  
ACCCAGAATCATTTAAAACATGATCACAGGCTCAAATTTTTTACCATAGTTCCGTATCTGG  
A\_16\_P15030317  
ACTGTTAGTGTGCTATCAGAACAACCTTCTATCTGTTTGTAAACATCATACTTGGAACGCTT  
A\_18\_P10645820  
AAAAAAAAAAGCAGTGACTCTTATTTCTATACTTCATCTCAATCAAAGCATGACTTTCT  
A\_16\_P16704468

GGAGTCTTTACTGAGTAGTCTAGTTCTGGAACATAACTATGAGTTAGAATGATCCCATGC  
A\_18\_P14134582  
TGCTTAGATAACCTATGAATCTGTGTCTGTGAATTTGGAGCCATGGCATTATCTGAAATT  
A\_14\_P201018 TGAGATCTGGTTCCATCCAGTAAGACATTTTAATAGAGAAGATCAAAATGTTACCTGGCA  
CUST\_4109\_PI426210822  
AACTGATACTTAATAAAGTTTGATATTTTTAGTTCTAGAAAGAATTGTTTTGGGGGGTGG  
A\_14\_P103049  
CGCAACAAACAAACAAAAACAAGGCACAGAATTTTCTGCAATCTACTGAAACTAAATCC  
A\_14\_P104249 CTTAACCCATTGAGTTTAGGATAAATGGTAGGGAGAAGATTGGAGGTTTTGGAAATAC  
A\_16\_P17224094  
AAAAATCTACTCCTCGGTTTTTCATCTTAATTTCTTTGTGGAATCTAAGCACCCCTTGATGC  
A\_16\_P19514863  
CCCTGCAATCTAAATTTCCAGACTCAAACCTCAACTACTCATCTACATGTAGCCATCTTA  
CUST\_1575\_PI426210822 CTGCCTGGGGCAGAACTTAGATTTGGCCCTTGCTCATGACTCTC  
A\_14\_P133388 ACTAACTGTATCAAATGGAAAGACAATGTGTTTTCCAACATGGGAGTATGTTTCTAAGT  
A\_18\_P11396975  
ACCAATCGATACAAGTAAAAAAAAAATGTCTGATCCTGCTTGAAGTAAATTATCAAAGCCA  
A\_16\_P18813710  
AAAGACCCACATACATTTCGAAAGGAAGATACTGCAGAAGAACTCATTACAGTCTTGAT  
A\_16\_P58424440 TCTTCATAGGGGTTTTTCATCTCCATACTCCAAGGCTGGGCTTTCC  
A\_14\_P103051 GCTACCTTTTCAAAAATGGAGTTAATGTTTGGGATATCTGGTTTCTGTATGTCGGGATT  
A\_16\_P18021820  
GAACCAAGCACTGACTAGTAATATCCAAACTCTTTTCTATTGCCATCAAAATGGAACTA  
A\_14\_P117647 TTTTAAGTAACAAGCACAATCTGTGTCAAATGCACTTGTGAAAGTCTTAGTATGTGCCG  
A\_18\_P12971318  
CTGCTGCTCATGTAAGAAATTCATTTTGATCGTAAGCCTTGCTATCAGTAACTGTGACTG  
A\_18\_P15962090  
TGTTCCAGGTTCCATGTTATTTACATGTCATGTTTCTGCTTTTCAAAAACCTACCGTGAAT  
A\_16\_P02667195  
CTCTTCCACATGTTATCCATTGGATCAAAGATGAAATCCATGACAACCAAGTTTAAGATGC  
A\_14\_P131521 ACTAAAGTCATAAGTGTATATACTATATGCATGTAAATAATCAGACACACACTACACTAA  
A\_16\_P21625821  
CCTTGCACAAGTAACATAACTCTCAGATAGCAAATGATGATAGAAAGCACTCTCAAAGG  
A\_14\_P202529 GACTATGTGAACAAATTACCTATTCAAAAAGTTGAGAAGAAGAAAAGGTTGTAGGGTCTGG  
A\_14\_P136972 GAGTTAATTTGCTTGCTGTTAGAGATGTAGCACTTTATCCTTCCCTATCAGTAACTGCTCC  
A\_16\_P35667398  
TCTGTGATCTGTCTATACCGAGTAATACCAAGAACTGTTGAAAAAATAAGGCATTGCT  
CUST\_506\_PI426210822 AAGTGTCCCAGGAAAGATGGAGTACTCTGCAATATTCCATGTATCCCTC

A\_14\_P110732 CAATAAATGAAACATCATGCAGGTAGCCAATGAATGTTGTTTCATCATTTCCTTAGAGCATG  
A\_14\_P202569 CATGACAGACAGATTATTTTATATGGGGGTATCAAAACATCTGGAAGGAAACAAAAGAAA  
A\_16\_P17431962  
GAGATACGCACAGTTTTTATGAAGTTGCATTAGCCAATAATAACCCCCATTAGCAAACAA  
A\_14\_P138784 CTGGGAGGGCTCAGTAAGTTGATTGTTCAATATGATTCTTTGTATTTTTGAGTCTGAATG  
A\_14\_P109639 TTGTCTAATGGTAAAGTGCCATGTTTTGATTCTCATGAGATCATCAAAGGTGAACCTCAA  
A\_14\_P138855 GAATGTTATATGGAAAAGTATCCGTAAATGACATTAGGATTGATTCCGATTTGGTGCCTG  
A\_14\_P105127 GAAGGTTTGTGAGGGTGAATTTCTCAAAGTCACTTCAGGTCCCTACTGTAGC  
A\_14\_P100624 TCTCAAGTCAGTATTTTTAGCCCTTGCTAAATCTTGGCGATATTTACCCCAGTTTATACT  
A\_14\_P110167 GATGAACAGGAAGATGGCCACCATGTCACACTTGTTCAGTTGTC  
CUST\_3352\_PI426210822  
AAAATTTTTATTTTAAGAGGTGACTTTCTATTTACAGTTATTCATTTACACTGGGTTCAT  
A\_14\_P134267 TTGACCTCTAACCTTTAACCTCTACGCTTTATCAATTCTGACCTACCTTTTCTGTCTC  
A\_16\_P20188073  
TCAAGACATAGAGCAGCAATAAATAGGACTCAGTTTAAAGCCTATCTCTAGCCTTAAGGAA  
CUST\_10226\_PI426210822 TAATTTCCAAGTGTAGGGGGACTTTGGGTCCTGGCAGTAATGGAATA  
A\_16\_P03430020  
AGGAAGTAAGAGCCCTTGTAACCTTTTAACAAAGTGAAATCTTGTAACAGCCTTGCTTTG  
A\_16\_P00354105  
GGCATAGAAAAAGAAGAGTTGAAGATACAAACATTGGTTGATAATATCCAGCACTGTCCA  
A\_14\_P120479 AAAGGCAGTGAAGCATAACTAATAAACATCATAATACTTAACGTTGCCAGTTGGTTGTT  
A\_16\_P58424253 GCTTTGTGCCCTTGGGAGGCTGACCTTCCCCTCTGCCTTTTAGTT  
A\_14\_P115023 ACTCGGATAGTCTCAACATGGGAAGAAAACATCACTTTGTGAGTGAAGTCTGATAA  
A\_14\_P118085 TAAGGAAAGGATTCTAAGTAAATGGCTCCCTGGTAGTCATGTATGTTCAACATAAAGTGT  
A\_16\_P03077635  
TTCATTCTCTGATAGAATCTGGGTAAATACAAGTCTCCTTATGCAGAATAAACAGTCCC  
CUST\_8301\_PI426210822 GACTGTGGGTGGGGATGACAGATTTTCATGCTTTTCTCTTTCAGAAT  
A\_14\_P134891 CTCTCTAAAGTGTTAAAGCAAATTTGTTTTACCTGCAATCTTATTTCTGTGACCTAGG  
A\_14\_P132780  
GAGAACTCAAAAAGACAAAAGTGTGGTAATTTGGGAAAAGAACAAAAGAGTTTCCCTGTA  
CUST\_6095\_PI426210822 TTTAATGGGCTTGAGTCCAGTTCCAAAACAGGCCATTGTCAAAACGT  
A\_14\_P132833 TCCCTTTTCTCAAGGAAGTGAAGTGCCTTCACTTAAATTTCTTTACATTTCAAGTGCTT  
A\_14\_P129133 GGGAAAAGCCAATTAATGCAAGGATGGTGCATAACTGCAAATAAGCGCAATACAATATTA  
A\_14\_P129448 CAATATGGCCTCCATAAGAAGTAAGGACCAAAGCAACATTAGGATTTTGCTTAGCAGTTT  
A\_16\_P16504307  
TCAGCGAATATTAGTCTGAATCTCTCCAAATCTTGTTTTCTTACTACAGACCACCATCAA  
A\_14\_P112632 TCATTAATCATGCCTTACTCCACAGGAACTACCCTTAGTTTATTACTCAAAGGTGTTTCT  
A\_14\_P138204 TTGGGAAGTGGTGATGGAGCACGCTTTTTTATCAATAATAGGACATCTAGAAAAACAAC



A\_14\_P130077 AAAAAGGTGTGCTTTGCATGCCAAATTGGAGATTGAAGCAGAAGCGTAGAG  
A\_14\_P116915 CACTACAACGAACAATAAGGGCAATGAGAGAATCTGTCCTTGTCATAATCACATTGTTAT  
A\_14\_P123823 GTTCACTTTTTGCTGAATTACAGAAACAAATTCAAGGAGCAGCAGCCAAATACCTATGTT  
CUST\_10418\_PI426210822  
TCAACCCTCAGGGGAAAACCTGTTACCTAAAGTATTTTTATAAATATAAGCCTTTTATACT  
A\_14\_P136144 CTCTTCGTAACAACATCACTCTGATCTTATCTCTCAAAATCTGATCTGTCAAATTAACCC  
A\_16\_P16191776  
CCAAATGAGGCAAATTCTTATCCTTTCAAGACCTACCCTAGAGTCACCTTTTTTGATATA  
CUST\_1637\_PI426210822 ATTCCACAAATGTGATTTAGGTAGTGGTGGCCTTTGCTTAGAGAAGCTTTCA  
A\_16\_P01729172  
GCCTTCACTTTTCAGGACTATATACTATGTTGCTACTTCCCTTATCTCTCTTTGCAAATGA  
A\_14\_P202124 TAACACTATCACACCACTGGTTGGGTGAATAGCAAACATATCTGTTTCGATCTTTAAAACCT  
A\_16\_P02370994  
AAATCTGTTTCAGCCATGTAGAGAATTATCCCATGTAATAGACTTTATCTCCATACTGCAA  
A\_14\_P104086 CCATAAATGAGAGCAGGCATTTATTTCAAAATCCTAGGCATTCCCTTGAGGAATTAATAAT  
A\_14\_P116143 TGAAATCTTTTAACTTTTCATTATGAAGATTCTCATAAGAAAATGTGGTGGGGGTGGTG  
CUST\_1904\_PI426210822 TGATGCGGGTGCCTCTATGCTAATGATAGCAGCTTTCTTTTCTCCC  
A\_14\_P106168 CTGAAAACCTCAAAACATCTGGAACCTACCCTTCTCCAATTACGTTCCCTCTTG  
A\_14\_P114205 CACAAGCAAAAAAAAAAAAAAAAAAGCATCTATCTCATCTATCTCAATCCTAATTTCTCCTCCC  
A\_14\_P113848 GAACCTTATCTCAGAAGATTCTTTTCTTTATGGAGGATAAACAGCAGTGTTTCAGCATCA  
A\_14\_P100463 TCTAAATTCCCCTCTTTCAATTGTGGAGTGAAAGTCTTTTTTCTTGATCATGGGATTTTA  
A\_16\_P01363212  
AGAACATTCTAAATTCTGCTCCCATCTTGTCTTTACATCTCAGGTCACTTTTAGCAAAGA  
A\_18\_P14134013 CAATGACCACTACTCCGAGCATGGGCTTTCTTCTGTTTGATCTCGTT  
A\_14\_P201520 CCTGTATGCAAATTCAGCCTATTCATGGCTTGTAACAAATTTACTAAGTTGCAACCAACA  
A\_16\_P02206404  
GGGTTCCTAACAGATCACTCTAAAGAATTTGGTAATTCATCTATCCAACCTTCACTCTGCA  
A\_14\_P126862 CAGTGTCCACCTATTGAAATATTTTTTCAGAAGTGATACGTGAAATTGAGATGAGTGTGGA  
A\_16\_P00685614 GGTGCTACTGTTTACCTAAATCAGAAAGCCCTTATCGTGTGTCAGCAAGTGTCTTTT  
CUST\_6795\_PI426210822 GACTTTTGGGTGCAAACAGGATGCAACAGCTTGCCACAGAGTGAT  
CUST\_2963\_PI426210822 CTTCCCTTTCCACCAGACCCTTTACCAGTGGGTGCTGGTAAAACCT  
A\_14\_P128600 GGCAACAAAACCTCAGAATAACCTGAAAAATAACGATATTCACAGACGGTAGATTAATGA  
A\_16\_P16939266  
CTTACCCAAAATATAAGCGAACTTGAATCATTTCTCTGAAAAATCCTCAACTAGCCCAT  
A\_14\_P100750 AGGCGTTTGAGAATATTGAGGATGAGATCAAACCTCATTGGCTACTTCAAGAGCAAA  
A\_14\_P200816 CACATGGGCGTTTCAGGCCTTCAATTACTAGGGAACAAAAGGGAAGATAT  
A\_14\_P132728 GAGTGAAGAGGTTTATTTCAGGGATAGGCTACTATGTGATTCATATGATGCAATATCT  
A\_14\_P112938 GGTCATGTAAGGAAATCATTCTAAATGTGTAGTTCAGAGTAAAAGTGCTCTTGTGCGAT

CUST\_9725\_PI426210822 AGAGAACCGAGTCTTGGCCACAGATGGAAATGTTCTGCACTCAGA

A\_14\_P109042

CGACAACAAAAAGGCAAAAACAAAAAGAATTAACACCACTCCTGAAACCCTTTCAAAAAGA

A\_14\_P117833 TGATGCCTTCCAGCAGCCAATGCTCTAACAGGTCATTTTAATTAAGAATATGCACATTTA

A\_14\_P133217 CTATGTTTGAGAGCAACTACTTAAAAGTGCTCCAGTAGCCAAGTGAAGAAACGTTAATAC

A\_16\_P19606017

AGTGATAGGCAAATTGATCCACTTTATAGGTTAGGTCATATGAGCATGATGGCAATAGG

A\_14\_P108645 CGCATTCTCATTCTCTTGCTGTATCTCATAAGAAAACAGTCAGCCTGTTTCTACATTTT

A\_16\_P16823308

AGGGAAAAAGCACAAAATTTACTCACATTCTCTACATCCTTATGCTAACTCTGATCCTGA

A\_14\_P112313 AGGAATGAGAGCCACAAGTAGAAAATACAGCCATTGTTTTAGAAAGCAACATTACATAGG

A\_16\_P35874480

CTGAAAATTGCTCTGTCCATGATCTTTCCATCAACTTAATTTTTTTCATGCAGCCAACA

CUST\_8233\_PI426210822 AGTCTGTGGAGACCTGAAACAACCTGTGTGTCAGTTTTCAACCAAAGC

A\_14\_P120164 ACACTGTCATGTCCATACACTCTTCTGCACAACAAGTCTATATTGTGTTTCCTATTTCAA

A\_14\_P104126 TGTGCAACTTATACATTATGTATTACATGGAAGCCAAGCATGCAGTTTCTTTTCATGACCT

CUST\_7111\_PI426210822 ATCCAACCTCAGGCCCAATATCACTGGGAAAAACCCAGATCCCCTA

A\_14\_P117408 AGGTGTAACCTGAGAGCCGGCAGATAATGGAACCTCAATTCCAATATTATATACTCTCTCTA

A\_16\_P41579293

AGAATTGTGGAGCAGAAATACCAACTGAATTCCTGAATAACCCCTTTGTTGTAATTGTTT

A\_14\_P111267 AATTTTAAGATCTTCATAGCACTCAACTTCCCATACCCAGAAACAACCTCTGTAAACATT

A\_16\_P00142842

AAAATCATGAAGCATCTGTAAACGTTTTCAAACCATCTAACAGAAAGTTATGACTGCCTACC

A\_14\_P122156 ATTATACCCTATCAAATAAACAAACCTACCATAAAGGGCCTTTGCACTTGTTTTTGAACC

A\_14\_P103124 GTTGTGCCTTAAAGACAAGACAGCATTGTGTGTTACAATGTAACCTTTGGTTAAATCTC

A\_14\_P201250 TGGAAAACCTCTGATGGAATGATACTTACTTTACTATTTGGGAAAATTCTCGTCATCAATGT

CUST\_1680\_PI426210822 TGTCCCTCAGAAATTCTAAATCTCTGCGGCAGGATCTAGCCTCCAG

A\_16\_P20508963

GCCTACCTTCATATTAACGTTAGCCAAAGTGTAATAAAATCAGTGTTTCTCTCCTTGT

A\_14\_P117573 CTATCTTCAAAGAAAATTGTAAAGGACCTGTGGGGGAACCTAAAATTTGGGACTTTGAAT

A\_14\_P104108 TTGCCACAGCATACTTTCCGATTTTATAGCAGCATCCACATTAACATGGAAAATGTAAAG

A\_18\_P22839972 CCAGGAGTCAGAATTTTCATCCTTGCCTCCGCTGATGTCTAATTCTG

CUST\_7009\_PI426210822 GACCACCTCACAGACAAGGTGACTTCTGGCTTCTCAGTGACTCAG

A\_14\_P114758 CTATATTATATGGTTGATAGGTGGTTGATGCCAGTTGACATTCACATTCTTAGCACGTA

CUST\_3847\_PI426210822 ATCAGGCCAGAAACATATGACCCACTTTTTCTGAGAAGGAACTTTCCC

CUST\_5696\_PI426210822 CCTCCAATGTTGTTTGACCCAGATCAACCCTACTCTTATGGGTATCAG

A\_14\_P111720 TTTACAGGGAAATGATCTTCATTGGTTAGCATGTGCCTTATATGTGGCTTGCAGAAAATC

CUST\_5721\_PI426210822

GTCTGGCTGGGGAGGAAACGTTAGCCTCTCTTTTCTTATCTTATGAGATAATTTAG

A\_16\_P18025024

AAATCTCCAATGCATTATTATCTAGACTCATCTCAAAGGCTCACTTTTCATTTGCATGGG

CUST\_10353\_PI426210822 AACAAAAACATTTGATGTGCCCATGACAGCTGGGTTTGCTTCACGATTT

A\_14\_P112193 ACATGGTATTTGGTATCCTTCTTGCACTGTGAATGGTTCATTTTCATGGATGTAAAAATG

A\_14\_P115349 GAAGGAGAATAAATTCTAAAAAAGGGATGCTGAGATAATCAGTATGGATGCTCTGCCAT

CUST\_1220\_PI426210822 AAGAAGCCGGAAGCTTAGCAGGAGTGAGACTGCAAACAAGTTGTCTTTTAA

A\_14\_P123381 TAAAAAATATAACCCATACCCTTAAAAATCCGTCCAAGTCCCTCGGAAATCCATCTGGT

A\_14\_P120854 TTGACAGTCTTATAACCAAAGTGGGCCTTTTATTTTAAAAACGCTACTCCATCCC

A\_16\_P36432358

CCTGCCTTAAATTGTCACATATTCGCTTAAAGTCAATAAAAAACAATATATTCACCTCC

A\_16\_P01971194

CACAAAGACCCTCTATTCCAAGCATAAATCTCGAAGCATATCCAGGATTTTATTACCATC

A\_18\_P16675391

CATGAATCTGTACAGTATTCTCTTGTGCTTTTCAAAAATATGATTTTCGCCTGCAATGT

A\_14\_P127223 TTTTCTAAAAGAACAACAAAAAATTTATTTAAATGTGAGAATTATGGGAAACCTAAGCCAT

A\_16\_P16367834

ACAGTTACCTTTTCTAATCAGAGCATTCAATTTCTCCTCATTATGATCTCACAAGCACAT

CUST\_6653\_PI426210822 AATCCTCTCCCTATGGTTTTACATCTGGCCCCTTCTTGGAGATGATA

A\_14\_P100661

AGAGAAGAAGTCCTGAGAGTGTTAAAGAGCAAGTAATCCAAAAAGAAATGACATGGATTT

A\_14\_P125868 TTTTGCTACATAATCAAATGGTGAAAATATGGCAAAGTGTGCAAAACAAAGCCCTTGGC

A\_14\_P104665

TATGAAAAAAATTTTGTCACTGACCAAACCTCATAACCTGAAAAGAACCAAGAAAAGAA

A\_14\_P127501 CTGGACAAGGCCCTTAGAGGACTTGAAATATACTTCTCATGCTGTAGTTTATTTAGGCT

A\_16\_P15531264

CTGTAGTTTGCATTAAACCGTATAACCAAATGTTTTGTCTCTAAGTATCTGTCACCTGC

A\_14\_P136833

CAGAGTCAGACCTACTGAAAAACAACCTTTCAAATGAGAGACATACAGTTAAAAACCTCG

A\_14\_P114191 TCTAAGAACTTCTTTATGGCCACAATCTTCCAGTATCTTTATTCCTACACTTCATCACC

A\_14\_P105343 CTAAATGGGAGAAGAGGAATGTTCCCTGACAATTTTCGTTAAGGTAAGTATTTTCAGTTAA

A\_16\_P17840707

AACACAGTTAAGTCATGTTACAAGCAGTCAGGTTAAGTGTGAGAATAATGGTGTCAACAT

A\_14\_P138499 TACATGTTACTCAGACCAAATGGCTCTCATAACAATCTCAGTATATGTGGGTTGCTAAG

A\_14\_P201691 CTGCTGACTGTTTCATTCCTGCTGCACTTTGCTCAAAAATTTTAAAAATACCAATCACAAG

A\_14\_P123737 AGACACCAAAGACAGAAAATAAAGCGACTTAAAGCAACAACCTGGTGCATAGGTTCAAT

A\_14\_P100444 CTTTGTGATACGTAAGTGGTGGTCTTCCTTAAAGGGCTTCAAATTAGTGGATATG

A\_14\_P116032 GTTTGGCAAAAATTAAGTTGAACATGAAAGCGACACTTTTGGGTGTGGTATACTGTTAT

A\_16\_P19759446

GCTGTTGTAATGATGATGGAAAGACTCAGTGTGAAATCGAATATCTGATCCTTGTTTACA

A\_18\_P13722448

TACAGTTCTGAGTAAAGACCCCATTAATATGAAGATTCTAGGGCTAGTGGATCTCTAAC

A\_16\_P15967583

AGTCCTATTCCTTTTAAAGTGCAGTCTCATACAATTAAGAGTCTTCTACTACGCAAAGA

A\_18\_P18507827

AAACTTCAGTCTATAGCAGTTGGTTAACCCCTTAAGTTTCTCATAGTCTAACCTGATCCC

A\_14\_P125166 GTCATACATTATTAAGTTTCCTTTACCATATGTTTTCCAGCCTCTTTTGTCAAGGCAGCA

CUST\_4188\_PI426210822

TTGGGGAGAAATCTTTATGAAAAATGCCACTTTTCACTCTTTTTTTTCAAGTTTGAAGTGA

A\_14\_P135378 GTATACAGTAAGACATGGTCAATGCCAATCCACCATCTCAGTAACAGTGACAGC

CUST\_3616\_PI426210822

TTTTTCCCTCTTGTAATAAATCAAACCTTTTCTGAATCTGGAAAAGTGATGGATGAAACT

A\_14\_P137891 AATGAGTTTTAACTATTGATACCAATATTTGCCCAGTGCTTTTAACTTGCCACAGGCATT

A\_14\_P103859 CTGCTGGAAGACCCATTTATCTCATGCTTCTTGTTTTCTTTGGGGACC

CUST\_4620\_PI426210822

ACTCAACAGTAAGGACTAATATTTGACAGTGAGGAGCAGATAGAGTTTTTTAGGCAGG

A\_14\_P133024 TTTTTCAGGGCAAGTCACCAAATCAACATCAATTACTTTGTCTTTTAGCAGTTTAAAGGG

A\_14\_P104919 CTGAGAACACTGATCTGGCTTGAGTAGATTCTGTTTCCTTGAAATCTTAAAATGACTTTGA

A\_14\_P201239 GAGATTAATATCCTCCTCTTTTCCACAGTTCAAATAAGAACATTCTTTCTCCCCACAC

A\_14\_P133259 AATTGAGGATGCTTTTTAATTGTCTTTTCTGGCAAATATCACTCCTCACTTGCTCTCAA

A\_14\_P116846 TTTTCATGGGAAAACTTTTCATAGAATCCAACAAATGGTAAGTAGATGAGACCACTGAGT

A\_14\_P130745 AACAGCCAAAAGAAAGGCCAGCACCTGAAGAATTGATGGTAAGTGAATGTTTTTAGTTA

A\_14\_P118584 AAGACAGGTTCTGTGTGCTTTTTATTTTGATTTTTTTTTCCCAAGAAATGTGCAGTCTGTA

A\_16\_P02570314

AAAAAGAACAAGAATGTAGACTTGGAATTTGAGAACAGATAAAGCAGTCCTCACTTGTGC

A\_14\_P134917 AAAAGCCTTAGATTTTCAGTAAATGCCAGGCGGGCTAGACAATTTGAGTAGCA

A\_14\_P101053 GTGGCACAAAATATCCATATTGCTCAGATTCATTTTAGCAGCAAACCTTCTCTTTTCTCT

A\_14\_P102932 TGTGGTTTTTTTACATTTACCACATAACTAAAATGACAGGGAAAATCCCAAGTTAACAT

A\_14\_P113278 GACTCTTGTTGCATAGTCTTTTTGCTACTATTAAGCCAGAAAACAGAGATAATGTGCCAG

A\_14\_P118906 CACAACCTTCTGGCTGTTTTAATTTCTAAGACTTTGCTGGATTTTGCCAAGATCGAACTC

A\_14\_P101360 TCCCTTGCTTGCTTATTTTTTACATTACATGAATAGCCCTGCTAGGCATTTAGATTCA

A\_14\_P139531

ACACAGGAGTTGGTGACTGCATTTCAGAAGCATAAAAAGAAAATAGTAAAAGACGTGAATT

A\_14\_P122370 CTGAAATACCTGTTCTGAAATGGCTTCTATGTTTATCTCTCCAGAGAGGAATTTTAAAAG

A\_14\_P137969 TCCCTTTTGGAAATAAACATATGCCCTATCATGATGGTTCAACTGAAATGTCAATTTTGG

A\_14\_P123332 ACCCTTTCCTCCTTTTCTGGTGGATTGTTATTGTTTGATAAAAATTATGTCACAGATAGGAT

A\_16\_P20269427

AATGTGCAGAAGTAGCCATTTATTTACACACCCTTTCCATTTAGAAAAGATGTGTTTCCGG

A\_14\_P137890 TGGGTTGGCAGAGCAAGGATAATTTCTAATTCAGTTATTTATTTGGAGTGCCTTGGAA

A\_14\_P139770 ACTAGTAGTGTATCTAAGTTAAATGAAGGTGATGAGTGGGTTAATGTATCCTGAGATTCT

A\_14\_P111926 AGATCAGTTAATGAATAAAAAGTAATGAAGGCTGGAATAATGGCAGTGGTGGAAAGGAAAT

A\_14\_P100393 CTAAAAATCAAGTTGCTACTAGGCTAGATGCCCTCGGAAATGGTCAAGTCAACTATAATA

A\_14\_P106229 AAAAGATACAATCTAAGTTTGGGAATTTAGACCCTAAGGAATGGTTTCTCCCTTTTGGTA

A\_14\_P136701 TGAGTTGTTCTGCAGAGCAGTTTTGTGTGTATGCATTTCAAAAATCGAGGTATTCTTATTC

CUST\_5254\_PI426210822 TAGGTGAAAGTAGGGTTGGATGCAGAGAAATAGTAAGAAAGGATGGAGGATG

A\_14\_P109918 CTCTTTAAAATCCTTGTCTTATGTCTGACTTGTTTGAATGGATGAACCACTTATTCTGTG

A\_14\_P133081 GGATAAATACCATGGAGAAGATAACTTACATTGGGTCTCCAGATCTTATATGTTTGCAGG

A\_14\_P133511 CATGATCATTACAAACGCCTGCCACAGCATATGGGTGCATAGTCAGCATATACTAATCAT

A\_16\_P03642953

ACCTGGTCAAATGATAAAAAGTTGCAGGAACCAACATATGACTTTAAAAGCAGAGAATCA

CUST\_2641\_PI426210822 AAGGCTTCAAAGACAGGCTGGAGCCCCTAAGAGAGGAAGCAAGGT

CUST\_6038\_PI426210822

CATCAGAGAAATGTTTCATTGATACTTAGATAACAAACCTGTGGTTCAGTTATATGGGATT

A\_14\_P136061 ATTATGATTCTAAACACCTTCTGGCAGAACTCAAACCTTTTTCTAAGTGATCGCCTCTTAG

A\_14\_P129667 AGCCTTACTGTAGGTCATCCAGGTGGTAGAATTATTCTGGTTTATACAGATGCTGAATTA

A\_14\_P126123 ACTAGACCGTATACATAGTCTTCAAATTAATAGCAGTTTGAGCACCTACTCTCTCGTAGA

A\_16\_P39946062

ACTTGCCTATCTTATCAATCCCAAATAAAACATTCTCTGCAATCATAACAATTTTTACCT

A\_14\_P123681 ATTAGCATATGTATAAAACATGACAAAAGCCCAGTTTCCTTAAGTAATGTGATTACAAAT

A\_16\_P16557524

ACAGGAGGAATTTTCAAGACATTTTGGCAACTAGATATACTGGCTTACAATGAGGAGAAT

A\_14\_P119171 CTTCTTTTGTCTTCTACGATCTATGAAAGATAAAATGTGGTGTGAGGACACGGCC

A\_14\_P123280 GCTGGTCTTCTTCTTGGCTATTTCTTCTTCTTCTTAGATGGGGACAACGC

A\_14\_P103591 CTAATTATAAAGACGTTCTCATTCTGTCATCTTATTCATTCTTACCACAGTGCTCAGA

A\_14\_P125284 CAGAAAATCATGCTGCTTTCTGGTGGAGTATGGTAAGAATAATCAACACGGAGAGT

A\_16\_P36006556

AAATTACACAAGGACCCAACGTATTCAACTGTGACAGTCAAATCAGTCATCTTTACTCTT

A\_18\_P22839800

TGATAGATGTGGTCTGCAAAAGGACCGAAGGTTCTTCTTTAACAATTCAAATTGAATAG

A\_14\_P105222 CTATAAAGGATCCATGCCAATGTTTCAGATATATTTATTGTGCCTGGAAGTGGATGTTCTT

A\_14\_P104682 ATAACCATTTTCTATCCTTTGCTTTAGGTTTCGACTCATTGGTTCCCATCTACTACTTG

A\_16\_P37853844

GGATTTAACTGGACACTTATCTTAGACATAGATGCCGTAAAATTTCAAGACTGCTTCACC

A\_16\_P58424165 AGTGGGTGGGTGAGAGAAGAAACAAGAAGGACAGTGAAGTCTTGAC

A\_16\_P16108265

AAAAATCTTCAACTGTGTGAATCTTACATTTGGTTACTTACTGGCTAATCAGGATTGGGC

A\_16\_P19915353

ACAGCCTAGAATTAAGTAACTTTGCTGCTAAGTCATACAATATCTTAGCCTGTCTGTGGA

A\_14\_P119911

ACAGAAAATTGGACTACAGTGCTAAGATGCTGTAAGAAGAGGTTAACTAAAGGACAGGAA

A\_14\_P136825 TTCCAAAGGACTCTCTCCGACATCGCTTTCAAATTCAATAGAGATGACTTTAAGATGAAG

A\_14\_P123841 TGATCTTTTCTGTAGGTATTCCATCTCCAGATTGTCATATCTTTCCCGATTACTGGATTT

CUST\_8418\_PI426210822

GTTCTTTTTTGAATCAGGAGTTGGCAACCCACTCATCTGCTCTATCAGTTTTTATCTATT

A\_14\_P118092 CACCTCTTAAGGAGAGGAGAGTTCAGAGAATTCAGGAGTCAACATGCTTT

A\_16\_P21422750

ACCATTTCCCAAACCTTCATAATTGCCCATGTCATTAATTTTTCTTTTTACTGTTGCAGA

A\_18\_P22841063 CATTGAAACAGAATTGGGAGGGAGAAACCTCTTACACTCAGGTCATGGTATT

A\_16\_P03550922

TTAAACACACAAATAAAGAAAAGGAAACAACCTGATCAAAAGAGCAACAATCTGGCCCAAC

A\_14\_P118053 CTTGGCTTCTTAGGACAGTGTTCTTTCTCCAAGTCATATTCTCCCCCTTT

A\_14\_P123113 AGAATGCATGTTATTTATTCCATACTGGGGAAGTGCCACTATAACATTGTTTTAAAAAAT

A\_16\_P40074672

GCACGTGCATTTTACCTTAATTTCCCCTGCTAGTAAAAGTGTTAAAACATCCTTCTTTCT

A\_16\_P03412806 GGGTCAGACTTCCTCCAAATGAAGTTCTGCTGCTTTAACAGGGAGATTT

A\_14\_P134190 ATCTGTTTAGGTTACCACACACCGAGTTCTTCTATGTTGCCAAAGTATTCCTCAATATTA

CUST\_6003\_PI426210822

TTAAAACTCATGGCATGGATATTAGAATTGTTTCACATTAGTACGAAGGACCTCCTGG

A\_16\_P20978904

CCAGATTCCAAACCTCATTTTTAGTGTGCCATATGTGACTTTTTCTCCATAGTCTCTGAATTA

CUST\_8329\_PI426210822 CAGCTCATCCAGGAGCCCACTCCTCCTGCAGGGGAACAGCCTTTC

A\_16\_P16086398

AATACGAATTTTCATAACGAGAACACAAATTGAGAGGTGAACATTTGAGAATTTCCATGGC

A\_16\_P17542510

CAGACCCATAAGGAATAATGACCCATTGAATCTCTCTTACTATACTCATAAAGAGCACT

A\_14\_P113834 GGAACATCAGATATGGCTTTTGCTAACTATCTATATACTCCCCAGATTCTGATAAGGAA

A\_14\_P112811 GTCTTTTGTGGTTTTCTCAGCAAGTATGGAAGAGTGACCTGAGAGAAG

CUST\_6520\_PI426210822

GGAAGCATTGTTTGTGATTTACATTTGCAGGGGCTATTTACATGTATGATTTGCATC

A\_14\_P130468

GGAAATAGTCTGAGAAAAAGGGACTTTTTAGTTACACATTAACCTTAAAAAGGGGAAGCAA

A\_14\_P118050 CTCTGCTTGACATCTCTGCTGTAGTGGACAAAGATTTCTTGATAAGTAAGTATTAACCT

A\_14\_P121952 CTCTATTATTTCAAAGATGAAGATGAAACCAAGCCCTTGGTGAGTAGGAGAAAATGTAAA  
A\_16\_P15240010  
CAGCACAAGTAAGTAGTCATGTTTACACACTCTATAAAATAACATCGTATTTCCCTTGCC  
A\_14\_P130741 TGTTACTACTGGTTTTTAGGCAAAACGGTGCATTTATCTAGCAAAGCAAGACATTTTTCTT  
A\_14\_P122646 AGTTACAAAGGTTTCAAACAACAGATCATTCTTTAGGCTAAGGAAACACCATACAAGCAC  
A\_16\_P20062270  
ACAGTGATTAGGACACAATTAGTAGGAAGCACAAATGTTGAAAGTCTCTAAAATCAGCCT  
A\_16\_P18029141  
AAAATCCCACCAGAAACATAATGTCATGTTCCCAAATTCATCTCATTTCCTTTCTTGGA  
A\_14\_P117390 TAGTCTTTTCCCCTTTAATTTGAGTTCTATGTTTTGTATTGGGCTGATACTTTTAGTCCT  
A\_14\_P134369 CTATATTACAAATTTTGCCTTTTTACCACCTGAAAACATAAAAGGAATTACGGCAAGGAGT  
A\_14\_P122232 TAATCATGGCCAAACCTTATGAATTTAACTGGCAGAAGGAAGTTCCTCCTTTTTG  
A\_16\_P17853697  
CTAAGGAAAAATGAACTATGTCTCTCTATCTCTCAACCAAAAACATCAGAAAGTGCTCC  
A\_18\_P16601597  
TTTCATCTCACATAATCACAGTCTCTTTTACTCCAGGTTTGTAAGTATATAGGGCAGTGG  
A\_16\_P21584609  
AAGCAATCCTAATCAACCCAATAGTTGTCTTTATTTTGGTTGTCCTATTTCTATCACGCC  
A\_16\_P02277319  
AGATTCACTAGACCTGTCTAATTGCTTTGGAATCCCTAATTATAGGCACTTACTGACTTC  
A\_14\_P100649 CAGGTGGGGTTTCATTTTCAGGAAAACATAATTCAACACCTTTTTGAAGAACAATTAGTG  
A\_16\_P16186029  
AAAATGCTTCTAAAGGGCTTAATTGAGAATGCTTGTCATGGAAAAGTCACAGGATGAAAAG  
A\_18\_P14136549  
GCAGCAGAAAAATAACAATAGATTGTTTTCTGTAGTTTAAATGTCATACGACAAGAGGCA  
A\_14\_P132906 GCTTCATCCTTTTCTAAGTTTCTTTTCAGGGAAGCCCAAAGAAAGAAATTCTAACAGATTC  
A\_14\_P108017 GGAACCCTGCAACAATTAACCTGAGGTGGTATGATATATGTAAAGTGAGGCATGATAATAC  
A\_14\_P136905 GTGACCATGAATAAAGTTATCATTCTCTTTCTCTTTACCTGTGACTTAAAGATGGAAGT  
A\_14\_P138322 CACATGTTTTTGTGCAAGGTATATGTTCCAGGTATCAATTACGTCAACATTTTTCTGTCC  
A\_16\_P41786906  
CTTCAACTTGGTGTCATTAAAGAAGCATTTTTTAAAGCCCGAGATATATGTTCCATTGCAGT  
A\_16\_P18045590  
ACATATCACAAAATGCTCTCATAAGAATTATTGCATACCATCTTCATGAAAAACACCTGT  
A\_14\_P110662 AAACAGAGACTACGATGACATTGATGATGATGACCCCTTTAACCCCAAG  
A\_14\_P115752 TGATTAGTAACGATCAGAGTGATTGGTGCTACGAAGAGTTAAGTTCAGGATACTTTGAGA  
A\_16\_P00685038 GCAGTATGGAGTGATTATTTACTTAGTGATATATTTTTTATAGTTCTCTGCCTCATATCA  
A\_16\_P00158181  
ATGATCTAAAGGCTGTTGAAGTATGAGTGTTCCCTAAGGAAGACAAAGTTGGACTCTATT

A\_14\_P108731 CTGTTGTGCTTCATAGATTCCATCTGTTCTTTAAAATGCTTCAGATCCTGCGCTAAAC  
A\_14\_P132445 CTTAAAACGAGACTTTACTTTGGGCACATCTAGATAAACTCAATTTACGAATTTGCCACA  
CUST\_1711\_P1426210822 TTCCATTATCGTATCACCCAGGGGAAAACCCAGCAGATATCTGT  
A\_14\_P116933 CTACCTATAGTTATTTATGCAGTAAATTCTGTTTAACTCACTTGAGTGGGCCCTGCTA  
A\_16\_P01705278

GAGCACACTAGTTCTTCACTTAACAACCAGAGTTATTTACAGAATCTCCTTCCTACACAT

A\_14\_P115722 TCAGGGAACAGTTGTTCTGAAGTAAAACAATCCAGACCATTACCACATTGATAATTTCT  
A\_14\_P116844 CTGTTTCTCCTTTTTGTGACGCTGGGAATCTGAACAACCTGAGGAAATAGG  
A\_18\_P22842660 AAATGCCTAGGACTTTCCAAGTGGTTCTCGGTGCCAGCAGCCTCATAA  
A\_14\_P100576 AAGTATAAAAATTGCCAGCATCCTGTTCTACCAGGACAAAGTCATCATGGAAATGATAAT  
A\_14\_P106942 CATACTGTGCTGTGTCCTCAATGTTAATTCCAGTATTTCTATGCTAGAGAGACTTAGCA  
A\_14\_P130583 GCACCCTTGTTGACGTTATTGTTGTAGCCGCGACCATATTGTTTGTTC  
A\_14\_P129374 TGGAGTTAGAGATTTTACATTCTCAAACAATTGCTCAAGGTTGATTAGTTTGATCCTT  
CUST\_10254\_P1426210822

GGCAGTCTCTATGTTACATGAGTTAAGAGTCCTAGACTTACTTAGCAAGTCCTCAATTC

A\_16\_P30952594 CCAGTCCCTCTCAAGGCCAGCCATTATCATAGAAAAATCTTCAAGTAAGTT  
A\_14\_P102890 TCTTCCAGTGGGTAAGAAATAGAGAAAGCAACTCACTCTGAACAGTTATCAAGAGAGT  
A\_14\_P103300 TCTCCTGCATGAGTTCTCTCATTTTGTAGTATGGTATAACTTCTTCAAGGCTTTCTCATT  
A\_16\_P02134975 AGTGGAAAGGATACATGAATACTGGAAGTTAGTATTCTGGAAGTGCCTCACAGACTT  
A\_14\_P102338 TATAAGGTCTTGTCCAAGTTGAAGTCCAGATGCCTAAAGAACCCACAAGG  
CUST\_4395\_P1426210822 CCATCCCAAATCCACACCCTTTCTTCTGTCTTTTGCAAATCTATGACACT  
A\_14\_P137402 CTCTTGACCAAATCCCTTTTTTTGCGATTTACCCGTTCAAGCAAAAACAACGTTTT  
A\_14\_P130350 GCATCTGAGTGATAGTAATGTACACAGAGAGACTGTCTTCTTTAAACATAAGCCCTGAA  
A\_16\_P17578608

CTGTTCACAAATCAGGACTACTAGGATTAGACCATCCCTATCATAGGCTGAACTAAAATC

A\_16\_P31235956

ATACCCACAATTCCATTCTTAAAATCAAGCACAAAATCTGACAATGAAACATATCCAGGG

CUST\_3826\_P1426210822 TGTGAGATTCCAGAGGAGGAGGATCTACTTCTGTACTTGACCTG  
A\_14\_P137008 CTGACCTAATTCATTCTCTAGTTCAATGTCAGGTGTATCAATTAATGCTCATCTTTGTG  
A\_14\_P117396 AAGTCCTTACCCCTTCATAAAGGCACCTGAAGAATTTAATCTCATCTGTCAAGGAGT  
A\_14\_P113507 GCATAATTTGTTTGCAATGTCCTTTTTGGTGACCGTATCTTCTATTCAACATGGAAAAT  
A\_14\_P123282 TCCTCCAAGAAGTCTTCTCAGATTATACTCATGCCATGTAGGAATCATGAATTCAATTTA  
A\_14\_P121044 ATCGACAATGTTTTCAAACAATAATGATGAGGACAGGACTCATCAAGCATAACCGAGTATA  
A\_18\_P23898069

AAAAGTCACTAACCTGAAGTTTATCCTGTAAAGCAAAAAGTTATCAGACTGGAAATACGGA

A\_14\_P137638 CTATCAGCATAAACTTATAAACACAAACACAGGCAATACACAGACACCAGGTAAAACAGG  
A\_14\_P125140 GGAGAAATGTGTTCAACATATTGGGGTTCATAGTTTGGTCTAAGTGGTTTGGATAAATC  
A\_14\_P100049 ACTACATCATGGGATGAACATTGTAAAGTGTACAGTATCCTTTGGGTAGATTCTGAGAA



A\_14\_P102272 CTTTCACAATTGCAGCAGATGAAGATCCATTGGTAAATTGATCAGGATTTTTGGCCTAC

A\_16\_P16512476

GCCCATCATAAGATGAGAATGTAGACCAGGATTACAGACAAAAACCCAGTTTAAAACTAA

A\_14\_P126223 ACAAAGTAAGAGTTTTTAAAACCTTTTCAGCATTATTCGTTCCCATTCCCCACTCCAAG

A\_14\_P126488 CTGATACTTTGGCATTATGAAACTACACTTTTTCTTCCCATGCTTCCATATCCAAA

A\_16\_P00685593

CAGAAATGATGTTGAATGTATTAATTTGTATATTCATGAATCATATAATGAATCAGTGCC

A\_18\_P15498864

GCCTTCATTGTATTTGGCAGAACTCTGTAAGCATTAGAAATCTTGGCAGGTTTCATTTTT

A\_14\_P129256 AAGTAACATTTCTGTAGACATCTCAAGTCAAATAATGACTTGCTTTGTGTATGCGTGTG

A\_14\_P123553 GTAATTCATCTATTTTTGTAAGACCAACAATAGGTGCCAACCAACCTCATCTGTCTGATT

A\_16\_P16182153

CCACTTACGCTTTTGATCACACTACTTACTCTATTTCAATACTCTACAGCAATCTTATCC

A\_14\_P128256 CTACCTATAATTCTCATTACTTAGGGCAGTTTTTTTTTTTCACCTCTGCAGAGAGGCTG

A\_14\_P131408 CATCATCTTTGGAGGCTACTGAGAACAATGATTCCTTCAATTGCAAAGTTTGCTATAGA

CUST\_10047\_PI426210822 TATGTTTCCCTACACATCGTAGGGAGATAGTTGCCTCCAGCCCCT

A\_16\_P16753254

ACACTCAGTAATTCTTTACCTCTAAAAGATAACATCACACCAGATCAAGTAACTTCCCA

A\_14\_P121663 GAAAATTTAGGACCCACAGAATTAAGCCCTCTTTCAAAGCAGGTTATCTGCTATCCT

A\_14\_P137971 GATATTTTCTGCTGGTCCAATGCCACTTCAAGCCTGTTCACTCTTATCTTCTC

A\_16\_P00305703

AACACGATTATTCGGCTCTTAGACGTTATAAATGAGTGTGAAAAGGCTTTGATTTCTGCT

A\_16\_P16191280 CTTTCTGACATTTTGACCTCTCATTTATTGGCAGGCCTGAATTATGTTCTGATGGC

A\_14\_P136108 ATGTTCTGCTCCACTGTGTACACTCGGCTAGGAATGCCTAGAAAATAC

A\_14\_P114313 CTTACAAACTGTGGTCATGTTAAGATACAGAACATCAGCCAAGAACCAGAACCAACT

A\_14\_P102829 AAGTGTGTGTAATAATTACATCCCAAGGTGCCTGCTGTATTTCTTATCCTAAAGCAAAC

A\_14\_P138548 ACCAGTCCTCTAATTGTCTCTGGTAGAAAATGACCTTGTCAGTAACATAATGTTATTTCC

A\_14\_P137667 CTTTGTGATAGGATAGAAGTTTTGGGGTTTTCTCTCATTCCCTTGTGTGTAATCATATA

A\_14\_P116850 CTATTTTTGGAGTAAATTTGACACTATAGGGTGTCTTCCCTCTTTGTCTCTCAACATA

CUST\_1630\_PI426210822 CCAGCTGCTCATGCCAACTTGCAGTACACAGAGGAAATATATGGCTT

A\_14\_P113144 TTGGAATTCTTGTTTTCCAGAATCTTCTGTGACAGTGAAAATAGAGAACAAGGAATCTCG

A\_14\_P113944 AGATCCTCACAACCTATTTCATTTTCCAACTCCATATGCTTCTTTCTACAATCCTTCTT

A\_14\_P133990 ACATGACAAATGGTAGAGTCTATCGTAACTGATTTCTGGGGCAAACACAGTAAAATATTG

A\_14\_P109567 CTTTAACTTGAAGTTTCACAAAGTTATCCTCTGTAACAGGAAGATCTTCTTAGAACCAAA

A\_14\_P131384 CACTCCATGCTTGTCTACTTTGTTTTCTGATTTTACCCCTTTTCTAACCTTTACATTTTT

CUST\_2722\_PI426210822 GCTCTCTTTGAGGGATCATTGTACACAGGGGCATCATTGTTCTCAAG

A\_14\_P109413 TCATTTTCAACCGTTTATAATCTTCTTCTGTGTCTGCATATTTTCTCTGTGCACATTATT

A\_14\_P138077 TAGAAATGTTTTTTAACAAGTTAAGGATCTTTAATCCTCTAGAAGACTGGAGAGCCCCTTG

A\_14\_P112133 TCACACTAGTGTATTTCCAGAGGTGACAGTTTTTAATAGTCATATTGGAGACGCTTAGTGA  
A\_14\_P111511 AAATCACCAATCCAATAAGGTTACTTACGTATTGAAATACTCTGCAAAGATCAAGTTGGT  
A\_14\_P130727 TCTGAAGGCAGATTGACTAAGCCTTTGGCCCACTTTTGTCCACATGTATAATATTTATGAA  
A\_14\_P113867 CCTCTACCCAAATTACTTTGCTTTATGGCCAGAACAGCAAATAACTAAAATCTCTGAACA  
A\_14\_P138512 TATCTATGGACTGTGAGTAGAACCCAATTTACAAAGCACTTGCACATTGTTTATCTGGAT  
A\_14\_P200833 CAAACCAGTATTTGCTGGCCCTACCTAGTGCTTTCATCAAATTGATCTACATGTT  
CUST\_1727\_PI426210822 GAGTGTGGTCTGGAGGGGATTCCCTGGAGTACTAGTGCACAGTTT  
A\_14\_P122176 AAAGCCGTGATCATTAGCATAAGCAGATACTCTGTTTTGCTTTAATTGTATCACCTCTGT  
A\_14\_P131527 TGAATTCCTTTTTGTGTCAGTGATAAAGTCTACACCAGGATATCAGCCTGTTTAAATGCTTG  
A\_14\_P120056 CTTGATACATCACAGACTCATACAAATGTGAGGCGCTGAGACCATCTGTTATTACTG  
A\_14\_P113802 CTATTGTAAGGTTGAGTTTCTTACTTAAGGCTTTCATTTGAAGGCATTTCTGTCAACCC  
A\_16\_P02089638  
ACTTCTATAGCCTGAGTAAACCTAGTCATTCTTTTTTCATGTCTACACTTGATTGTCCAGC  
A\_14\_P134929 GAGTGACCAAGCAAAAATTACAAGCATTTCGCTAAAATGAGATAGTTTGTATTAGGAGTTTA  
A\_14\_P131620 CACAGAACTTGCTGATATATAACAAGTTTCCTTCCCTTAGAGTGAATAACAGTTTCTAGT  
A\_14\_P131953 ACAACTTGCATCTCTGCTGGACATACTAGATATTGAAATCTTTGTTCACTCTCTGGTTC  
A\_16\_P02222933  
ACGTGAGAAAAGTATGCTACAGGAGTAAGATTCATATTCTAGGAAATATGGCAATCCACC  
A\_16\_P16677456  
AAAAGGCCATGCTACTCTTACATACCAATCTGTCATAAAAGGCTAACCTCATTGTCAATT  
A\_14\_P116113 CACTTCTCCAGCAAATTAGATTTGTCTCTGGGAATGTGTTTGTAACATACCAACCTACT  
A\_16\_P00306341  
TAATCTCACTGTAACAGAATGTTGTCATGTCTTGTGACTAATTAAGCATCCTCGTTCCA  
A\_16\_P01381724  
ATATCCCTATGTCACCCATAAGAGAACAATACCATTTCCCTTTGACCTGTAGTTTTAGAGC  
A\_16\_P19836803  
AAAAAAAACACAATTACTGCCACTTTGTATTTCAATACTTCTCCAAAAAATCCAAATCT  
A\_18\_P14134637 GCAGGAAAAGGAAGGGAAAAGAAACAGAACTACCCTTCCAGGACTC  
A\_14\_P133550 CTAGGAAGTTTTGCATTAGTCTCTGTAATTAACGGGCCAAAATCTTTTTACACTAACC  
A\_16\_P36962179  
GGTCTTCCCTTTGCAAATTTTAAAACTCAAATGATGCCAAAGTAAACTATTCCCTAGGCT  
A\_14\_P122369 AAGAGCATCCCATTAATGGATTCTTTAAAATACTGGAAGCATGATTCCAGGCAATAACAT  
A\_18\_P21289869  
TCAATCTGTTACTACCCTCTACTGAATACTGCTTGTATAAATACACAAGTGCTTGGCTCT  
A\_14\_P131861 AGAATAATCCACAAGGAATAACAGAAGTATAACTACAAGTGCATGGTAACAGGGACTCT  
A\_14\_P117659 ACTGAACAGGGAGGTTGAAACGTTTTGTATTATGTGAGTTTAGAATTACATGTGGTCTTT  
A\_14\_P131609 GTTTTGGAGGAGGGTCAGAGTATGCTAGGATTTGTCTAAATCATTTATAGCCTTTTTGAAT  
A\_16\_P16542891

TCCATCTCCAATTCTCATGATTCTGCAATAACTCTACTTCCTGAATGTAAAAATAGGCTG  
A\_14\_P114046 TGACAAAAGAAGAAACCTGAATTCACGGTTGGAATTGAGGATGGAATGATTAATAAGTGA  
A\_14\_P113724 CTGGAATTGAATTATGCAAATATATGAAATCCACAATACTTATTGCGCCACCTCTGGCAA  
A\_14\_P126181 CCAAAACACATTCAGGCAGTTTTGCAGTCTTTCATGGAGTAAATTCCCATAA  
A\_14\_P103195 GATGTTTGTCTCTGACTACCTCTCCATTACTTCTTTCTACTTTTTTCATACCTT  
A\_16\_P16259263  
ACACTGATGCAGACAATAACCAATCATTTGAGTCTTTTGAGATCTAATACAGAGCATCCAA  
A\_14\_P103432 TTGATGATATCTTTCAATTTGTTAGCCAACTTCAGATCAATGTCTGGAATGAGGTAGATG  
A\_18\_P14134295 GATGCCCTGAGGGACTGATGTCACCCCATGTAGGAAGACAGATG  
A\_14\_P138847 CTTTTTAAAAATCTCATTCCACTTTCTGCAGAAAACTAGATTGACATCCTAGAGGGCTG  
A\_14\_P131396 CATAACATCTGTGTCTATAAACATACACACGTCGGGGTGTGGGATGTATGAAAAATAT  
A\_14\_P118228 TGTTAGACTTCCTCTACGGTTAGGATTATTTTTATAGGTGTTTGAACAGGAAAGGACATA  
A\_14\_P123840 CTGTCCAGGAGACAACATATAGAATGGTTCATTACACTAAAATGCATAGAAAATTGGCCT  
CUST\_3419\_PI426210822 TATCCTCCAACACAGAGCTTTGGTGTCCGAGACACATCCAAGTGA  
A\_16\_P01575674  
AACATCCAGGAAATCCATTATGTGTAATGACTCATGCTTTATTAATGCTTCCCACATGC  
A\_16\_P00685105  
ATTTTTAAAAACAGCACCTCATTCTGTGGGCATCAATCTATTTATCTTCCCCTTGATAGG  
A\_14\_P138115 CTTGCACCTAAAGTTGAGAGGCTATATGTGTCCGTTCTCATAAAGCAAGTAAGATTACAA  
A\_14\_P112823 GCCGTTTCTGTTTTAATGCTGATCTCTTCTCATAAAAATGCAGAAGAACATCTAGAAT  
A\_14\_P104534 TATTTTGATTTATTTAGGAAGGCGACATGCCAATTCATGAACCTTCTCAGCCTTTATGGTT  
A\_18\_P26374964 CTCATACCTCAATGCTAGTATGAATCATCCCCGCTAGATAGACACGAAACGACTAG  
CUST\_3185\_PI426210822 GTGTTGGTCAGGGGTCAAGAGCAGGATGCAGTCTCTACTGCAAGT  
A\_14\_P123928 CTCCCTGGTATAGCACATAAGGCGCTTTACAGGGGAATTCCTACC  
A\_16\_P39227110  
AAGCATATCTTCCTTTTCTTACACTCTTTTTGACACAACTTTTGAATATGGACTCACA  
A\_18\_P22841092 TAAATATTATTAACCATGCTGACCATGCCACATTTCCCAGCATCTAGGAGTGTTT  
A\_18\_P17160837  
TACCAGAGACACACATTTGAGTTGTCATCCATATAAATGTGCTCAAGCAATTCTATCTGT  
A\_14\_P130158 GTTGCATGTTCTCCTTTTGGATGATGTAATACTGTGGTTTATGTGGTTGAAATGTTGTTT  
A\_14\_P108087 CTCTATTTATTGCTTTTACTATTACCCATCTGCCTCAGTCTGGGCCAAATCTATTGC  
CUST\_7984\_PI426210822 AAGTGGCCCATGACTCCTCGGATTTTTTTCTGCCTCTCTTCTCA  
A\_16\_P58424378  
TGAGTATCTGCTGTCTTTGAAAACATGTGTATGTTAACTTAATTCAGACCAGCCACA  
A\_14\_P101880 ATTATGGTGTATTCTTTCTTCTGTAGTTATCACACCCTGGCATATGTGCACACC  
A\_14\_P119383 ACTCCAGGACCAGACGCCTCCTTAACAAACATATAAATAATATTACATAAAATGTGGCCA  
A\_14\_P131550 AGTTAATTATCCCTGCATCTTGCTTCATGATATTATTGGGTGACATAGTTACTTCAGGCT  
A\_14\_P103515 CTAAGTAAATAGGCCAAAATCCTCTTCTTTAAAGTCTTGCTCTTCTAGGATTTGCTGG

A\_18\_P22841214 AGGTCTCCTGAGAGATCACACCCTGGGATCTGCCAGGTGTTTTG

A\_18\_P16863576

CAGCAAATGTCAGGTCCAATTATACAACCTTCTCTCAATAAATCTTGAAGGGCTTCTTTT

A\_14\_P100270 AATGAAGCGGGGACTCACTGGTTCAAGGTAAACATTACATGGTTAAAGTTAGGTTAA

A\_14\_P113844 GGGGTATTTGCCAAAATTTAATGGAGTTTTTAAAAGTTTGCTTAGGATCCAGAAAGTGTGA

A\_14\_P137005 GTAGATAAAATAGCAAGATCAACTGATGGGAGAAAATAATGAACAAGGGCCATTCTACT

A\_14\_P106261 CCAACCTCAATTACTGTTCATGATTCAGAGAGTGATGATGAAGAAGATAGTCTAGAACTC

A\_14\_P112062 CTAGAAAAGAGGAGCCTCATAAACTGGTGTATTTAGACATTTAAAAGTGATCCAGGCATT

A\_14\_P118655 ATTAGTGTTTTTTTATGGCAGAGAACATAGGCGTCCCTTCATTACAAATAAGACCCAAT

A\_14\_P108728 TTGTTTTCTCAGGATTTTTTAAAAGTCGAGATCGTGCCTATGCAAATCTATACCCTT

A\_14\_P129470 CAACTTCCCAAACAGTCCAGTCTCGTTTAGTTAGTTGTAATAATTTAGGAAAATTGACC

A\_14\_P131387 CTATATATGGCATTAAACCACCTGCCTGGATACTTCACCCAGTGAGGAGA

A\_14\_P139493 GATATTGCATTCTCAAGAAGGTCTTTGATAGCCAAATTTCTAGCACCTTTAGTAGATGCC

A\_14\_P117792 ATATATGCTAACAAAATAAACTCACCTGATTTGACTGTCCAGTAAGGTAGGGCTCAAAGT

A\_16\_P15324152

ATATTCCTGATTTTATACTGTGGTGATTCCCTATAGATGACAACCTGCTCAAACCTCTAGCC

A\_14\_P103615 TTATCTGCCCTGCATTGAAAATTTATCAAGGAATTACATGGGTTTTGTGTTTGATCTGGA

A\_14\_P107016 ACATGATGCAGATTTTGGTGAACAGAAGGATATTTTCAGAAATCAATTTAGGTGAGTTCAA

CUST\_5426\_PI426210822

CTTAAACACTTTCAGACAATTCTCAGGCTGTTAGAAGTTACAATCCCCTCGAGTT

A\_16\_P18657716

AGCCATCCTTAGCAATCATGTCAATTAAGCAACAGTAAAAGAGATGTCTATCCTACACAG

A\_16\_P32450697

CAGACCTGGTAAATTCAAATGTCCACTACTTCTGTATTCTAGTCATTGCAACTCACCTC

A\_18\_P16374983

AGGGTGAAGTAATGTGGAATCTGAGACGTAGGACTACTTCATTTAAAATGTCGTGTAAA

A\_14\_P101785 AAAATGTGATCACTTACATCGCGTTTTAACTTTCCAGGCTGCATTTATTTACACAGTTGC

A\_16\_P02100540

CTAGGCCATAATCCATTCATCCAATCTAATAATTTTGCCATCCATAAAACCTTCAGGTGT

A\_16\_P01373918

AAGACAATTCTGATTCCAAATACACTGTTCCATCATCTATATAAACAGACTCAGGCGTGT

A\_14\_P113070 TTAGGTATACAAGAGAATTTTTATTTTGGCATTTTAGTCTGTGAGATTTGTAGTTTAACT

A\_14\_P106300 AGTGACTGGAACAGACCAGTGCCTTATTAAGACAGTATTACTCTTCCATTATTCTCATT

A\_14\_P101674 CTTCTTATCTTCAACACAGTAATGCAACAATAACACATGTATTCCAAAAGGGTTTCTT

A\_14\_P118252 TTGTGAAATAGGAATATAAAATCCCTACTTTGTATTTGGACTTTCATGGCCTCCTACCAA

A\_14\_P105815 GCACATTGCACATCACAGGTAATCCAAATTACTTGTGTAATGTAGGAACAAATACAACAG

A\_14\_P131285 AGTTAGGAACAACTTACATTCAGTTTTTCTGAGAACTCATTTTATAGTAGTGCCCTT

A\_14\_P103724 TGCATTTGTAAATATGGTATAGAGTTTATTAATACTATTGTTTGCAGATAAAGGCCTT

A\_14\_P120643 TCTTGAGGTAGTGAAAAGAGAATACTGAAGAATAGGATCTCAAGATGAGTAAAAAGCCCC

A\_14\_P130503 ACTATTGTGCAGCACATAGCATAAACTTCCTGAACTACATTATTGCCAATTTGTAGGCAT

A\_16\_P01376395

AAGGAACCAATACAATGGAACCATCTATAGTCAGAGCCTAATAACACTGCAAGTTTCGAA

A\_16\_P18084446

AACATTTTTCTCCTCCTAATTCAGTCTTACATGAAACCTTAAAGTAGATGTAGGCCTGCT

A\_14\_P124926 AATGATGAACACATTTTTTTTTGTGGACATGCCATCCATTTCTGTCAGGATCTGGTT

A\_18\_P22841916

CCCCCTTTTTTAATCAGTAACTTTGGTTTATTACAGCAGAAACTTCCCAAATTACTGAT

A\_14\_P104190 CACTAGGAAAAGCCACATTTTAAAATATGTCAAATTAGTGAGAAAAAATCCCACTGG

CUST\_5898\_PI426210822 GACGTTTCATGCCATCCTTACACCCACTTCCTCTGTTTTCTTCTT

A\_14\_P122887 TTTATTCTCTCAATTCACCTTGTTGGCTTATTTCACTGTTCTTCTGGGATGAGTGCTATTTT

A\_14\_P108185 AATGCACTTTGTTGCCCTAATAGTGAGTTGAAACACACAATTAATTAAGTTAAACC

A\_14\_P104479 ACATATTTCAACCCACGCTTGTAAGACATAAGAGTTTATAAAGGACCAAATTCAGTTC

A\_16\_P01252741

TTACCTCTAGATCTCAAGCATCACAACATCAGTGTTCCTAAACCATTTGTTTTCTCGCTA

A\_16\_P18429908

AGCAGACATTACAGTAATCCAGAACTAAACAATGGTTGATACTGCATTCCAAGTATA

CUST\_1119\_PI426210822 ATGACATGTTGTGACAGGGACACATGATGGTCCCTGATGATTCCTCTATATATA

A\_16\_P01454959

AACATGACATAGACACTTCGTGGATGAACTTGGTATCAGTTTCCTGTCGTATTTTTTTCAG

A\_14\_P102176 ACAGAGGAGTTTCAACAAAGAAGCCAAATGTGAAGGTAATGAAAAGTTTATTGTTACCTT

A\_14\_P136086 AGAATACTGGGTTCTTAGTTGACAACCTAGAATGTCAGATTTCTGGTTGATTTGTAACAC

A\_14\_P114465 TCCAAGTCTAGCAAAAATTTGAAACGAAGAAAGAGATAGTTATCTCTGAACCTGCATTGC

CUST\_1312\_PI426210822

TTATTCTCTTTCATTTTTCTGTATAATTGCCCTTTTTTTTTTTTTTTTTTTTACTAGAGCT

CUST\_5042\_PI426210822 GACCCAGAACTCCAGATTCCTTGCACTGGAAGCTGGTGTTTTTGT

A\_14\_P110972 AGCCACATATGCAACATAGTCAGTTGTGTCTCTGTTAAAGAAAAAGAGATGTCTATGTCA

A\_14\_P111791 ATGACTAATAGTCAAACAAAATGTGAAAAACAAAACCTCTCCACTCAAACCATCTCCCCTA

A\_16\_P00685072 CACTCTCTTCTCCATCTCAGCAAACATTTAGATTGTGTGACAACCTATGGCTGTTGTT

A\_16\_P19984621

AGGCATTACAAGGGTTCATTTTACTCCCAATTAATTTACGTTTCAGTCCAAAATACTGTGT

A\_14\_P137129 TATCATTATAAACATACATACCATTTGGGAGCAGGTTTATTAACCTTGAGAGCCAAAGGT

CUST\_8105\_PI426210822 TGCCCATTCAAACCTGAAAATTCTCATTCTCTTGCCATTTCTTGGATCCA

A\_14\_P128872 AATTTCTCAGAAAACTGTGCTGTAATCTGTCTCTTCTGCTTATCAATGCTTTGTTTACT

A\_14\_P101746 AGCAAAAACAGTTCATAACAACAATAAAAAGCCGATAAATCACATTTTACCTCCCCTCAC

A\_16\_P02112978

AAGGAAACGTAAAAATGGACTAGACCCAGAATTTTAGTAAATATCTTGCCATGATCACGG

A\_14\_P107158 GTGACTACCGCTCTTGACCCTAGTTTGGGCCAATCTGTTTCTCTTT  
A\_14\_P117447 TTTGTTTTACTTCAAAGTTAAATACAATTCTGTGGGTGACCTGTCCATGTCCACAGTTTCT  
A\_14\_P201483 CTCTAGAGTTCTACTGTTCTGTCAGATAAATGGCTATTCTACTCTTCTTATCCGCTTC  
A\_18\_P14593689  
AGGCTCACAATTTACCATGAACCAGAACTTACCTCCATCCTGAAGATCTTTTGAATATAT  
A\_14\_P113767 GTTTGTTCACAGAGCATATATCATTACAGACTATATGGGCATCCGAAATGAAAGTTTC  
A\_14\_P111478 AAGGGTGCTGAAATCACCTAATATTTCCCTCTAATACATTGACACCCAAGATATACTGA  
A\_16\_P18845594  
AGAAAACAGTTACCTACCACAAAAGTATGTTTGCCTTTAGAGACACTACCTTGGGAATAT  
A\_14\_P106491 ACCCTTCTGAATTTGTTACTCATAGTGACAAATCTGTTTAGGTTTGGCCATACAATCTT  
A\_16\_P36041706  
CCTTTCTGTATCTGCTGCACATACTTTTGTTCACGAATCACTGATTTTTCCAGTAGTA  
A\_14\_P122163 TGTGTGCGAAGTAAACTACCTCAAGGTATGAAGTTACCTCAGCAATTATTTCCTTTTTG  
A\_14\_P200178 AAAAACAAATTTCTTTAAACCATTGTGGGATCCAGAGCAGAATAGTTGAAAGAAAAAAT  
A\_16\_P35991964  
ACTGTTCTAGTTTTTCCGATAATGCTCTACAATCACTATCTGTATTTTACTCAAGCACTC  
A\_16\_P16815844  
AAAGTCTCAGCAATTTAGAAAATCATGATCAGTAGAGCAAGTCACATAGATCCTCAACCT  
A\_14\_P132376 TTTAGTGTGATGCTATTGGCCTACATCCCATATGTTATTGTGCGGTTACAAAAATAACA  
A\_16\_P17152121  
AAGTCCAGTGACCTTAATTACTCTAATGCCGTTCTAATCTTATCTGACCTGTGTAAATG  
A\_16\_P39245723  
CTTTGATCCAATGTGAGATCCAACATGTTCCATAATTTGCATCAAACATCCTCATAACAGC  
A\_14\_P104942 GGATTCAGATGCAAGGACTTTGGAAGATAGTTTTGAATTCAGCAAAACTTGTTTTTTCAG  
A\_14\_P120458 ACTGAGATTTTGAATAAAACATTTGTTTTACACCAAAACTACAGAGAAAACGCATGGCAG  
CUST\_2707\_PI426210822  
TAGTATCCTATAAGGATGAACCCAGAAGAAAATGGAAAGACTAAGGTGTTGGCC  
A\_14\_P131962 CAATTAAGTCTTACCATCATGGTTTTTGAATTCCTCCTAAGGAATCCTGAAGAAGACGA  
CUST\_2602\_PI426210822  
CCATCATATAGACTCTGCTTTCTCATCATTCTTGATTTTTTAATCTTCCTGCTGTGAGC  
A\_14\_P111069 GCTTTCTAGATGGGTCACTTGATAAAAACATGACTCGGAAAAACAATATGAAGATGGTA  
CUST\_2347\_PI426210822  
AACGCTCGGAAACTCAGTAGGAAAACCTTACGAATATGGAAACTATTTTGCCATGAG  
A\_14\_P110019 GGCAGTAGAAAGGTGATCAATCTTCATCAGGCTACATTTCCAATCACCTAAACA  
A\_16\_P03109090  
AACTTGAAACAGAAGTTGTGTAACATTGGATCGATCACAAAATGTTTGGGTAACAATGCT  
CUST\_5075\_PI426210822  
GGCTTGTGTGCTCCTAAATTAGATTTTACATTTTTGAGGGCAGAGCTACTTAATATTG

CUST\_2010\_PI426210822

TGAGCCATTCTGCAAAAAGGGTTTTCCAAGCACCCCTTAAAGTTAGAAAAGAAATAAC

A\_14\_P117157 GATTCTTCTTTTCAATGGAAACAATGATAAATATCTTGCCTACTCCCCAAGTCTGTTGAA

CUST\_6975\_PI426210822 AAAATCTCAAAATGGTCAGGGAGGTCCCTTCTTAGAGATGAGAAAAGTCACT

A\_14\_P110880 GTTTCCATATCAGTTGTCTGCATTTTTAAAAATGCCTGAATAATATTGTGTAGTGTGGCT

A\_14\_P130454 GCCTTATAATAAACCCACAGGCCCTTCCTTAGCCGTTGCAAAAACCTG

CUST\_10121\_PI426210822 AAATCAGAAAAGCCCTTATCGTGTGCAAGTGTCTTTTCCAGAGCTGA

A\_14\_P109506 CTGAAGACTCCTGTGACTTGTGTTGATGTCTATGAGATGCTTACTAGGCCTG

A\_14\_P105094 CTTGATTTTGCTCACTACACCATATTTTCCTTGGAGGCTTCTGAACTAATTTTTGTTTGAT

A\_16\_P03073763

AATTCAAACAGAATCCTTAACATGCCACAGATTATTTCAAGGATCCTTCAGTTCATTTT

A\_14\_P123514 GTTCTCTAGAAACACGCTTGTGCTTTTAATCTGCCTTTTAAAAGGGACACAGAACAAAAA

A\_14\_P127467 TTCTGGTGATGATAGTGATATCTAACTACCTCAGGTTACCTAACCTGAATAAGGCCTATT

A\_14\_P126813 TCTATCATAACAAAGGTGTCAGTTATAAAGGGGAACATCTGTTTTGCTAGACCCTAAACT

A\_14\_P114505 AATGACTTTGTTGGTGATGAGGTTTTCTGGGCGATCTGACCTGGAAAAAT

A\_16\_P18506119

AAAATCGTTGAAGGAGATTATCAGACTGGACAAGATAAAACAACCTTGGAGTGAAGATAGG

A\_16\_P02863977

AAAGACTTCCATTTCAATTCACACCTCCAGAAAAGTTAGAATCCCAGCAGATGTAAGTAG

A\_16\_P39998981

AGATGACTGATCTGATTTTTTTGTTTCATGTTTCAGTGTTACACTTACAATGCCTGAATCCA

A\_14\_P106441 GCAGAGGGCACAGGTATCTGCTTCTACAAGAACATTTTCAGATTTTCTCTAACATCTTATA

A\_14\_P110461 GAGAGGCGGTGGGATTAAGAAAAAAATTTCTTCTCTCCCTGTCACCTCAAAAAG

A\_14\_P101726 AAAGCAAAAAGAATGGAGCCAATTGCTATTATTATTACAGACACTGAAATCAGTGAATTTG

A\_14\_P104138 ACCAATCTCATTGAAATCTAGAGCCGTTAACTGTTATCCTAACTCTGGTCTTATCATCAC

A\_14\_P137030 AAAAATGAAGAAATACTACATCTGAACTTAAAATTGGACATGCAGAACAGCCAGACTGCT

A\_16\_P16191938 AAATGACGGTTTGTGTTTGGTCCAACCTTTTGAACCTCAGGTCACCTTGGCTATTATGAG

CUST\_4053\_PI426210822 GTGAAACAGAAATGGTAGAATCAAGTCACCTTGCTCATTACAGTCATGTGTG

A\_16\_P01180479

GCAGTTTTTCTTATCGGGATCTATATTTGGCGTCTGTAACATTATATACGGTGTCTGCAA

A\_16\_P35889969

ACAATCCACACATTAATGAGATTTCTAATGCAATGATTCCTAATTCTATGCTCACAGGA

A\_16\_P01401819

ATGAGATAAACAACACTCACATCAGCACTTTTCTCTTTTGTGCTCCTGTTTTAATAACACGTTG

A\_14\_P115931 AAAATTTTCATCAAGGAATCAAACCCAAGGAAGGACCTTAGAATCTAGCAAAGAGCC

A\_18\_P22840300 ATTTGATCACTCTGGTCTTCATGTGTGTCAGTGATTTGGGGTGAGAGTAGGTATG

A\_14\_P138710 CTTTAAATTTTCAACCCATGTTTTGTCAGTGGGCTTTGTGTTTACAGTTGGATATCTGTTAG

A\_18\_P10892437

TCTCCCTCAATACATACTCAGGTAACTTAAACATGTTCTACTTTTTTAATCACGGAGCA  
A\_14\_P117680 TGTAGGCTTTTTTTTTTTTTCTTGTAGTTAGGGTCAGGGAGATTGGGGCTATTAGAATTTT  
CUST\_5095\_PI426210822 CAAAGAGGAGCTCAGTGTCTGTCTCTGTTATTGCATCAGGATCTCACATTA  
A\_14\_P129551 ACACAGTGAACACTGCTTCTCGAATGGAGTCTAATGGTCAAGGTAAGACATTAG  
A\_14\_P136010 CTGTGGAATTACACATCCATTTGATTTTTAAATGGTATCTGTGGGGTGGGAACACT  
A\_16\_P16215727

AAGTTATTGGTTATCATAAATTCCTCAGGTCTAAGTCCTAAATGAATGGCCTTAACTGGG  
CUST\_8940\_PI426210822

ATGTGATTTTGTTTACCCGTTTCGGTTCAAAGACAGAACTCTTTATTTGAACACTGAAG  
A\_18\_P22839959 CTACCTGGAGAAAGGGGCTAAAAGAAGCCCATGGGATTAACAGACATT  
A\_16\_P00549438

ATCCTAATACAGTGCATTTCTATTCAAATCCTCCTTAAAGCATATTCATGGTTTCCCCC  
A\_18\_P14137239 CTGATGGATGCTAAAGGTCTCTCACGTGGCTGAATATCTAGTGAGGGAAA  
CUST\_7986\_PI426210822 TTTTCTGCCTCTCTTCTCATTCTGTCCACATTCACCCCAGGAGG  
A\_14\_P138652 CTCACATAATATCATCTGTCTCTATTCTTTCAGGACTCAATTAGAAAGGCACTG  
CUST\_7991\_PI426210822 AAGTCCCATTAGACTCCAGGTAGGGTGAGGGTGGAGATAAAGGAG  
CUST\_10367\_PI426210822

CTTCACTGTTTGGTGGTGATGACTATGTGAGAAAACTAGACACTTGTCTTACCATA  
CUST\_7174\_PI426210822 CAAACCCTCATTCACTGCTCAGTCCTCCCATTTGTTCATCTGGAA  
CUST\_8970\_PI426210822

AATAGTAAATCATAGCAACATGATTTAAACATGAGATATAATTTGAAGGGCTCTTTAAGGC  
CUST\_2511\_PI426210822

GTATGAGGACACCACATTGTGTATTTTTGTACAGATAGGAGTTTTGGAAATTCCTCAAGA  
A\_14\_P118577 CCTGGCACAGAAAAACATGCAAGGACAGTGATAAAGAGTAATAGACTTAAAGGTTATTGT  
A\_14\_P104047 AATGGGAGGTAGGAATGAAATCAATGAAATCACTAAACGGGTTTCGATGGGAATAAAC  
A\_16\_P39239653

CCACAAAAGTGGGTTTTCTTTAAGTTTTTGACTAGTCCGCAATTCACAGAATTGACATTT  
A\_16\_P16028412

AAAATGCTAACTCAAGAGGCAATATGCTGACTAGGAGTAAAATGTTCTCACCTTCTATGC  
CUST\_9941\_PI426210822 CCTTAGAGCCCTAACATAGGATGGTGAGAACCTAACTCCAAAACAGAAGT  
CUST\_3756\_PI426210822 CTTCTGATTAAGCTAGGTTGGCAGATGCAAGCACACATGCCTCCTAT  
A\_18\_P10024696

CCTCTCCAAATGTTTAAACAAGCCAATAATCAAATCAACAATGCTTTAAACAAAGACCCC  
A\_14\_P100687 CACCAATAATCTCACCATCACTGCTTCGGATAGGCATGCACAATAATGATTTTGTCT  
A\_14\_P127553 ATACAAACAAGAAACAAACTGCTTGGCTTTGACAGTTTTCTCACAGACACATACAAAA  
A\_14\_P112250 CTGGTAGAATTAGCAACAATTTGTGCTCTTTGTAATGACTCTGCTTTGGATTACAATGAG  
A\_16\_P15660269

GGCTCATGATATGTTCCAAGATTACCAATGTTTTTCATCACCAAAGAACCTATTCCATAGT



A\_14\_P111167 GGAAGGCTCTAATTCAAGAGAAACAGGCTATTGTAGGCAATAAATAGTTCTGACCAAATT  
A\_16\_P19112999

ACATTCATAGAGGTGCAACTAATTGCTACATGGTTTGACATCATTACAGAAAAATGCTGG

A\_14\_P102451 TTCTGATCATCTGACTCAAAGTAATACATATTAAAGGTTTCCTTACAGGTCCCCAGTCCT

A\_14\_P101977 CTGAAAGTTTTCAAATGATTTGTCAGAATTATACAGAAATTCCTGGGCAGTTTTTGGTG

A\_14\_P113293 CATTTTTTTTTGACAGTGTGAGATGTGAGAACCAGAGAAGTTGGAATCCAAGAAATTCA

A\_14\_P139300 TAGACTTCTCACAATCCCCAATGCCTTATTATACAATGTTAACCCAGATATGATGAGGTT

A\_14\_P117377 TCACGTATTGATGCAAATGAATACTCAGAGTCTACTAAAGTTGGTGTGGTATGTGGATAC

CUST\_8691\_PI426210822

CTCACATCCCTATGAAGAAAATATGCACCTGATACATCACTGACCATAACAGGAG

A\_18\_P10684050

ACAAGTATTTTTGCTGACTGTCAAGACTTTAACCTTACAAGAACTTACTCTTTTGCCAGG

CUST\_8471\_PI426210822

GACTAGATTATGATGTCTGAGTTCTCACCAAGTGTAATAGTCTATGAGTAAATTCCTATG

A\_14\_P107032 AACTTTCTCCCTGCAACATGCTAAAAGGGGGTGTTTTAAAATTACATGTTCAATTCATT

A\_14\_P100620 CTTAAATCTCAAAGTCTCATTCTGAGATCTTGGATCCAATTCTCCCTCTTTCACCTTC

A\_14\_P101063 GGTAACTATTAATATTAGTTTCTCGTCCTTGAACGTCTCTCCTACTTCATCTGTTTCTCT

A\_14\_P115210 CTGCTGAGAGGAAAAGGATTATTATTAAGATGGAGCCAGAAGATATTCCTACAGATGAAC

CUST\_4265\_PI426210822

AACATTTCCAAATAGGGATTGACTTTTAAGGGGAGGAAGATGGCTAAATGTATATGGTAT

A\_14\_P127353 ATCTTGTTTAGGATGGGAAGAGGCTAAAATTGTGATGCCAGGTCTCTTC

A\_16\_P16325762

AAAAATCTTGCTTCAAGAATCCTTTTGATCCAACCTGATAAAGAATAAGACAAGCCTCCA

A\_16\_P15916752

AATTCATAGGGAACAAACTAGAGATTGTAGAAACAGCATTGTTAGAATCAGAGACCAGGA

A\_16\_P00685349

GCAGTGACAAGGAAGAAGTTTAATAATGAGTAAATTACAACATAAAAGTTGTCAACAGGCT

A\_14\_P115803 GACAAAATTCAAACCATCTCCTGCTTTGTATATCCACTTCTTTATCTCAGATGTGGCTTT

A\_14\_P128077 GCTGCATATTGGATTACAGAAAAGAATTATTTGATTGTTTTGTAGTGTCCTAGCAGCAGG

A\_14\_P134367 CTAGTTTTGCTGCCTTTTGAAACTAGTGGAAGAATCATTTTTATTCTGGGGATAATTTGG

CUST\_2863\_PI426210822

GTTTCATAGATAAAGTCAAACATCCCTTTACTCTAAGGGTGTGTTTCCCCGATA

A\_16\_P17080777

CTTGTGACACTAACCCAAAATCGAAGAATTTAACATGCTGAAATTTAAAATATCCCTGCCC

A\_14\_P117384 TTTCTCAACTTATTACACTAGTGTGCCAGCACATGAGACACTAGAAATTTAGTGCAGAAG

A\_14\_P128959 TTTCTGGAATCTACTTCCCTTTCACACCTTATTGTAGGAACTATAATCTGTGCCCTTTTTT

CUST\_3267\_PI426210822 GGAACCTTTGAAACCTAAGTGGCTGCAGCTCCTTCCCTTGCTTTTTGT

A\_16\_P30952248 ACCCTTTGAAAGCAGCCAGCAGAACATCACTCCTCAACCCAAGTC

A\_14\_P136634 TATTTATTGCTTACCTCTTTAGGGTCTGTCTTTTCTACTGCCCCATCCAAATGAC  
A\_14\_P119808 TTTCCCAAATAAATTGTGTCTGGATTCACATAATCTCATAGTTCTCTGAAAGGCCAAATGGT  
A\_18\_P11925737  
ACACTAACTGGGAAAAATGAATGAAGCATCTCAACATGGATTACTAAATCTTGCCAACAG  
CUST\_5763\_PI426210822 AACAGTGTATGCCTTGATTTTAAGAGGCAATGAGCCTTTTCCTTCCTTCGTTTA  
A\_14\_P102136 AGTAAGTCAAAAAGGCACAAACTCTTTTACCTGTCCAACCTGAATGTGCGAGG  
A\_14\_P131847 CTACCGTAAGCAAAGGCTGTTTTTTACTGAGAGAATTTCTAAAGTAGGCTCATCACTTTT  
A\_16\_P36230849  
ACATAGTATGACTATGGTAGTCCAGTATTGGATTCCATAATTTAAATAACTAGTAGACTT  
CUST\_5716\_PI426210822  
TCAAGCTTATTGAGTTTTTCTTCTGTATTATCCTGTCCTATTGAAAACCTTGTGCAAAAAGT  
A\_16\_P16670325  
AAACTTCTCTGATCTCAATCTCAAGAAAACCTTATGTTTGTGATTGCCTTTATGTCCTGC  
A\_14\_P132842 CACAAAGTATCTCGTGACTGGGAAGAAAACCTTGCAGAGAGAGTAAGAAATTGCTG  
A\_14\_P138378 AAAAGGCCAGTATTTCTTTAAGCATAAGACCATATGGAAAAAGGCCTAAGACAAAATCTG  
A\_16\_P15613963  
TTTCTGATGCAATAAATGACACACCTAAAACAATAACTGAATCTAAAACACTACCACCCT  
A\_14\_P115906 GCTCAACGTTGACTGAATGCCTTTAATTCTATTTAAATATTCACACGTTTGGACAACCTGC  
A\_14\_P102522 GGTAAGCACTCACTTCACTTAAGAATCACATTTTATGACCCATAAGGATGTTTAGGTCT  
A\_14\_P110042 ACATCAGACCACCCATGTGAATTTAAGCAGGACTATTTTAAGTGGGGAAACAATACTAG  
A\_14\_P118605 ATAGTTATCCACAGGACAACCTGAATTCATCCAAATCACATGTGCCATAAATTGATTCAT  
A\_16\_P19848500  
AAAGTTCAATCATTATCTCATTGTCTCCCTGAATCATTACCTTTGTGTGAAATGCTGC  
A\_16\_P15716515  
AAAGGCCTATTCTTTTTATGGTCAATGCATCAACATAATCTCCAGATTTAAAGAGTGCTT  
A\_16\_P18532584  
AAAAACTCACTATTTCACTATTAAGAAAGTTCCAAAAATGCATCTTCTCATCCTACATCA  
A\_14\_P102456 GACATTATTGAGTGGCTTTAAAGCAGGTTATAGGTGGCGATTTGAATACATTGACCATTT  
A\_14\_P129701 ACACTTCTTGTAGCCATTGGGCTAGTAAATGGGAACCTAAGATTATAAATGCAAAGAATG  
A\_14\_P115715 GTAAACTCTTTGTAATCCATGATGGAAGAATGGAGTGTTCTATAGCAATTGGGTGTTTTG  
CUST\_9946\_PI426210822  
AAAAAGATCAGAAGGCGAACTATAGAACAATTTCTTCCTTCTTTTCTCTAAGGAATGTGA  
A\_16\_P18604688  
ACTTCGCCTTCTGCTTTTATTCTTTGATTTCTGCCTAAACCCATTTTCATAATCTTTCCAC  
CUST\_1276\_PI426210822 TTCTGTTGGGATCCTGGTTTTCTTGGTGATTACTGAGTGCTGTGG  
A\_14\_P108240 ACACCTTATCGTTTCTCATTACCTGATACTGTCCATTTTCCAAATCAACTGAAATAGTCA  
A\_14\_P119668 TGTTTATGCATTTCTTCTACCTGACATCTCCCTCTTCATCCTTCAAAGAGAAATTCATCA  
A\_14\_P110659 TAAGGTCCTCCAAACCTTTTCTATCCAAGGAAAATTTTCAATGGATAAGCCTCG

A\_14\_P137779 TTTCAAATGGGAAGAAAATGAACCTACTCAGAATCAATTCGGTGAAGGTTCACTTTTTTT  
A\_14\_P116218 CAACATGTTTTTCCCTTCCAGGATTCAGAACTGGAGTTTCTGAAAGACTATGAC  
A\_16\_P15208022  
GTGGCATTATCTCTATTTTACAGCAAAAGCAAATAAAATAGTAAAAAGCCTGAGTGAACA  
A\_14\_P131580 GTTGAATAGTTGTTTTCCCTGCCATGGTATCCATTATTCATCCTAAATACCTCTCAGTAT  
A\_18\_P26795967 ATCCTAGACCTGGCCATCTGTCATTCCATTACCTTCCACCCCCAC  
A\_16\_P00003554  
GATTGAACCTCATGGTAGACAAGGTTTTCTTTTGTAGCAAAAAATAAACTACGCAGAGCACA  
CUST\_594\_PI426210822 CCAGATCCCGTCAGAAGTGGCATGCCTTAGCTTGATGACGTATCT  
A\_14\_P119805 GCATTTGCTTATATAATGCACTTCTCACAGAGTAATCCAAAACCCTGAAAATGAAATTGGC  
A\_16\_P38010306  
ACCCAGAAAAAATTAACAGATACATAACTTATACTCTAAAATCCCCTAATGACCACATGT  
A\_14\_P201010 GGGGGCACAATGTTTGTCTAGTCTTCCATTTAGATCAGGGTAAGATAAGAAAATGATAA  
A\_16\_P03378832  
CAACTTCCTCATTTTACTCACTTCACAGATTCAGACAAAGATCCAGACATACTCAAAGAA  
A\_16\_P00653804  
GTGAAGCCTGAAAACCTTGTAGAACTTTCTAAAACCTGTAAAGTCTAACACTCCCAAGTGA  
A\_14\_P132587 CTAACCTATGTGGACTCTTGAGTCTCTGAAACTGCTTAATTCACGGAGCATGTTAG  
A\_14\_P126051 AGTTTTATATTTAGTTTGCTTTGGGTGAAAACAAGAAAGAAGAGCCCACTACCTCTGAA  
CUST\_5181\_PI426210822 CCGTGATCTTGCCCCACAGACCTTCTCAGGTGGCGGTGGTGATG  
A\_14\_P106766 ATTAGAAAATGTTAACCTTCTGGGATATGAGCCAATGTGTCTACTTTCAAATCCACCAT  
A\_14\_P119855 AAACCAGTCAAAGTGTAACCTGTCTGTAAATAAACAAGAGCACCATCACCATGAATAACT  
A\_18\_P13082539  
ACATTTAAGGGTCAGAGTCACCTATTACTGAACATGCCATTATTCCTGTAATCTGCATAC  
A\_14\_P112205 ATTAACAGCGACCGTGATGAATTGGAGAGAAACTGCTGCTTGCTAATTAAGGTG  
A\_18\_P22839410 ATATTCTAGTGTCAGGGCACAAAAGCACTCACACTAAGATGGCAGTTCCTTATCT  
A\_14\_P104525 GATGCTTTTTGTGCACTGTAGATTTCCATGTAGGTATAAGAGATTGCTGTACATTTGTT  
A\_16\_P15491890  
ATGTTTCAGAGAATCTTGTATTATTCAGGACGATCATCCATTATCGTGAGACTGATGGCAT  
A\_14\_P122497 AAGACTTTCTTCATCTTGTCTGTTCTCCATTTTTTATCAGGCCCTACAACTAACATGA  
A\_14\_P105744 TGAGAGGAGTCTCCTGTTGTATTTCTTTTTTCGAAGATATTAAGATTGTCTTCACCCAACT  
A\_14\_P128846 TTCCTGTGAAGATTCTATCACTCTATTCACTTCCACCATCATTACCAGAAAAATGTGTTT  
A\_14\_P110958 CCTCCTTGGAAGGAGACCCAATCTGCAACAGGTTACAGAAAATCTGATTAA  
A\_16\_P16504743  
AGGGAGGTAGCATAAATATGTAACATGTGAGAGTAGAAAACAATGGAGAATAATGGAGCA  
CUST\_1723\_PI426210822 TCTCTTGGTTTTGTTCTTCCATGTTTGCAGTGGACTGTAATGATCGGAAAAC  
A\_18\_P22840909  
AAAAGTTGTAACACCAGGAGTTCACATCCCAGAAATAACCATGATGAGCATAGTATTG

A\_16\_P15065617

TGACCCAAAACCTTCTTCTACACAGTTAAACAAAATTTCTCAAGACCTGATTTAAGAGCA

A\_14\_P123357 ACAGTTTACACTTTGAACACGGACTATGATATAGTGCTTGAAGACATAGAAAACCTCTTC

A\_16\_P20376000

TCACCTGTTCGGAATACATCATGTCATTTACGCTCACCTTACTTCTTTGTCTATATTAAGG

A\_14\_P107280

AAACTGAAACAAAAAAGGATTCTGAAGAAATGTTGAAAGCAAAGAAGAGAGTTTTTCCAT

A\_14\_P128078 AAGCATAGAGAGAAGGCAAATGCATAAGGCAGGAGTCTATGTTTGTAAAACACACATAAA

A\_14\_P138149 GTAAATCATCTTGTGTCTTTTTTCTCAACACTATTTTGGAGATCCATCTCTGATCCTGTG

A\_14\_P102813 AATTGTATCTTTAAGGCAATTAGAAGATTTATTGAATATTGGTTAAAAGTAGATTGACAA

A\_14\_P133994 CAGGCTGTAGTGGAGTCTGATTTGGCTGAACTTTTTAAATGGTTCATTTTCATTTTGAAAA

A\_14\_P111536 AGTGAAACTGGAACCTTTTCCTAATAGGAGTCCTAGCCTCTAATCCATAAAGCCTTTA

A\_14\_P100149 CAAGTCTTATGATAATGCATCATGCTGATTTCCCTGACTTTCTTTGTCCATCCCTTGATAA

A\_14\_P139379 AACCCGTGTTTATTGTGGGATATCAATATTTTTAAAGTGCCAACACAGTCATGATAGGACA

A\_16\_P17666884

TACTGACAGTCTTATGCATCTTTTGGTTAACTTAGCATCACCTCATATTCTTTCAGCAGC

A\_18\_P15526638

AACACTAGCAATAGGACTTGTTCGGTATCATTTCTACATGGCTTAACTTTTTTTTCACTGC

A\_14\_P121999 ACAAATGTCACAATGCTTTTTAAAGAATGGATCTATACTGGCTTTGGCCAAAGGAAAGTTA

A\_16\_P16326975

ACTCAACATAGCAAGCAAGTTTCTCTGAAATTTTGCCTTTCTATCTCTGTAGACAAATCC

A\_14\_P129993 TGTGGTAAAGATAGAAGACATAGAGACTTTTAAAGGTGATGTCAGTGTTACCAGTGTA

A\_14\_P139188 CTCTGCCTTCAATATTTAGAGATTGTATTTCCACCAGAGCCTCTGAGATGTAAGTAAATG

A\_14\_P109817 CAATGTTTCAGTTTCCCAAGTTCAACCACAGATTTCCCTCGTCATCCTATTATTC

A\_14\_P102225 ACATCAGACTGGCTCTATGTTTTAAAACCTTACTTAGCATACCCTTACCTCTGTAGAGTC

CUST\_6698\_PI426210822 TAAATGGCATCACCCAGCACCGGGTAGGATTCTGACAGGACCCAG

A\_14\_P125127 ACATGTCTGTATGACAGATGAATAGTGATCTGGTATAGAGACAGACAGATGATGAGAGAT

A\_14\_P134316 CACGGTGCTTTCAAGAGAATGGATTGTCTAATTTTTAGGAGCCAACAAATGCTCATTAAT

A\_14\_P116440 AAGCAGGCGTTTTAAAATACCCTGAAAATCATTGTGTTTACTCCTGAAAACCTCAGAAGA

CUST\_378\_PI426210822

TGTATCAGCTAGGATACAAACATGCAAGGGACTCAATTTTCTTTTTTTCTAATAACACCC

A\_14\_P123226 AGTATCATTGGAAGAGACTGACAATCTATCATCAGGTAAGGATGGTGTATATGCAACAGA

A\_16\_P15519243

GTGAAGACATCTTATCCTGAATGCTGCTACTTTAAGGTAAAAATAGACTCATTCTTCCCC

A\_16\_P18931248

AAAACAAGACCCATCACTGAAATATGCCAGTTTGAGGATAAAAAGACCATTGAAAAAGACT

A\_14\_P118925 CTGCTGACAAGAAGAGAAAAAGGAGGTTGATATTTAAGGAAAATTGCCTATGGCTTTATG

A\_14\_P114962 TTTGAAAAGCAGGATCTTGTTCGTAAAGGCCGTAGAAGCCACACTCAG

A\_16\_P17637809

AAAAGACCTCTGTAAATTTTCAGTAGTGTGTGTCTTGTCATATAAGTTCAGGTTTCCCTCA

A\_16\_P16191580 CCCAGTCTTGGTTAGAGAAAAGGCACTGTGTCCCTGTAACTGCT

A\_14\_P110228 CTAAAGAAAAATTCTGGAAGGCTTTTAACCCCTTCTGAACTAAGTTCCTTTCTAAACGA

A\_14\_P128435 GCTTTGGGTGGCATGGCTTTTCTCCTATTTTTCAATCTCTTATAATAACCATTTTCATT

A\_14\_P121098 CTTATCTACAATTTTGCTGTAAACAATCCTGCATCATGGCTTGGTCTTCATTTAATCCACT

CUST\_3044\_PI426210822 TTCTGCCATCTGGCATAACACATTCAGGTATGGGGGTGAGTTATTCTTT

A\_14\_P109379 ACGATGTAGTTAACATTTGGATAAGGATGAGTTCATTTATTATGGGTAACAAGACATGGTA

A\_14\_P128101 GTATACTGCTACTAACCTGTTTTCCATAGTCCATAGGCCCTTAAATAAGTCAGACTTCCCTT

CUST\_6336\_PI426210822 GGAGGGGCCCACTGACTGGCTTATTTGCCTTGTTAGAAAGAGGAT

A\_14\_P130877 TTTAAGGTATTCGATAACTTATGGGACGTCTCAATTTGTGCTTTAAGGGCGCACG

A\_14\_P114940 TTCTTATACTTTTCAGTATACTCCATAGACCAAAGAGCAAATCTATCTGAACCTGGACGC

A\_18\_P19183010

AATACTGGTTCCTTTACCTAACTCTCAGACTTTCACCATCTCTTCTATTTATCAACAGCG

A\_14\_P133418 TACTCAAGAACCTGATACGGTGAATAAAAAACCAAGAATCAACCCTGAAGTTCTGATCA

A\_18\_P10653944

AAAATCTGGGATGGCTCATTATTTACAAGATCAATTTCAAAGTATTAGCCTGGCGTTCC

A\_14\_P127412 TTGCCTTTTAGTCTTTTCGTGTATAAAATTGTAGATGCTCGAGGGTATTATCTCCCTACAG

A\_14\_P107092 CTTTTCTTCTTTTTCTTCATAGCAAAGCCTGATTTCCATAAAGAACTTCATCAGCCATT

A\_16\_P19369580

AGCACACTTCTATGTAATTGGCCTACTTTGTGATATCTTTTCCATTTTCCTGAACTTTT

A\_14\_P121533 TAAATAAATAAGCAAAAGAATTCAGATCTCAAGCACCCAAGTTTCTGCCATCGAAACAA

A\_14\_P107020 TGCGGCAGAGATTTCCATCGGATTGTTCTTTCTTCATAAAAGAGGAATCATTTATAGGT

A\_14\_P129656 TCTGCTTGTTTTCTGATTTTTATCTCTTATGAGATGCTTAAGGGGCTACTTGGTTTTCTGA

A\_18\_P14137166 CACATTTCCCTATCAGACCGCCATTTACAGAGGAAGAGAAAGTTGGTT

A\_14\_P123970 AGAGGCATTATGTGCAGAAGCCACTGTTAAGGTCAATATCTCAGGACCG

A\_16\_P15005538

CTCTCAAAGACAGAATTCTGCTTAAATGCCAGAAAAGAGATTTAGGAGATCAGAATCTT

A\_14\_P108769 TATCACTTTCCAGTCAGACACAGATGCACAACAGGTAAGAAGAAAACATTTTCTGATACA

A\_14\_P118335 AATGCCCGTAATTCTCTAAACTTACTCAAGGACCAGAAGTTTCTATTTTCAGAAGAACTC

A\_14\_P106408 AAATCCCATTTTATACATAAATGTTTTCCAAGTGGATGGTCACTGGAAGTGTAGAAGGAA

A\_16\_P01937600

GGAGTCCCCTAAGAAAATATAAATCCTCAGTTCTCAATCAACACCTCTCAATTAACACTT

A\_14\_P112670 CAGTTGGAAAGAAAAAACTAGGTAGTCACTTGCAAATAAATTTCCCAGGTATCTTTTT

CUST\_10186\_PI426210822

GAGACATGCTATGTAAATAGTCAAGTAACTGAAGAGAACTATAAACATGAAGTCTTGAGT

A\_14\_P104986 GTAGGGTATTCAGAAGTCTCCCATTTCAAAGACACTGTGCACTATTGTAGAGAAAAAAA

A\_16\_P15843078

ATGGGAAAGACTTCTTAGGTATAAGATATCACCCCCTTATTCTAATGTAGGAACTGCTTC  
A\_14\_P101968 GCCTATTGACTTTTCATTGCATTCTACATTTGGACAGGTTTTATATTGAGTTTCACGGAG  
A\_16\_P40832469 TAGGAATGTGCTGTCTCATGATGGAACATAACAAGGATACACCTGCTGTCC  
CUST\_3969\_PI426210822 CTTATTGAGCCTTTGGAAAAGTTCCTTGCCGTTTCACAGCCATTTCC  
A\_14\_P122826 ATTATTCAAGAGTCATGTAGAAAAATGAGGTCCAAAACAACTTTATTTACATAGAGATA  
A\_14\_P125398 GCAAGAACTAACTGTAAGTTAATTGGAGATTCCAACCTAAGCCTGGGAATATAGTCCTAC  
A\_18\_P16721921  
AAGACATTCAGGTGAATATCTGTGATGTAGGCCTTATATGCAGAATTTAGAGAGGACATC  
A\_14\_P122944 CTATGAAATTGTTTCAGTAATGTAGCCTTATAAGTAAGCAATTAAGCAGGCCTGGAGTCC  
A\_16\_P17359351  
GGAGACAATGACCAGATCTATAATTGCAAGTTTAAGTAATAAGGTATAAAAAGCAAGCCCC  
A\_16\_P17451954  
TGCCACTTAACATCTCACTTTGTTTGATCTTTCCCATCTATATAATCAGCAGCACAAATGT  
A\_16\_P16191635 CTGGGATGTCTCCTTGTGACAGTTACGCAAGAAGGAAAGTGAACAGAAT  
CUST\_1528\_PI426210822 CTGAGTCAGGAGCAAGACTGCCTACCTTCCTTTTCAGAAACTGCTG  
A\_14\_P114648 AAGAACTTTTAAATTCATGAAGACTTACCTGAAGATCAGATTCAATCAGAAAAATGCCC  
A\_14\_P123243 ATAATGTCCTTTTGTATTGCAGATCCTTGTGCATACAACTGACTTGTGTGGGTGAG  
A\_14\_P102849 GAGAAAAACCAGAATAAATCTACCAAAGAGTTTGGCCTTGAATACAAACTTCTGCAAAGT  
A\_16\_P15768090  
AGTGGTGCTTTAATTGTCGTTTCATGCATGTTCTACAGATCATTACTGAATGTTTACAGGT  
A\_14\_P128925 CCTAAAAGATCACACAAAAGTTGGGAAGAGAAGGATGTCAATTAGACTACATCAAAATCT  
A\_14\_P137568 ACTCTTTAAAACTGAGTAGGTGTCTGAATGAGGAAATGCTGTGTAGGGTCATACTTTTA  
A\_14\_P118425 AGCCATCTGTGATTTTGACCAACTTCCCATTTTATGATCCTAATCAAAGTTCCACTGAT  
CUST\_9022\_PI426210822 CTCATTAGGAGCTGTGCTCTGAGGGGCTGCGAATGGATAAACAGT  
A\_14\_P133482 ATACAATTGTAGTCAGTGAGTCTGTAGTGAGGATTTCAACTCTCATTTCCATTTTGACTC  
A\_18\_P10790903  
CCTCCATGTCGTGATAACCCTAAGACTTCAGTTCTCTATAAAAATCCCCACAAAATATTGC  
A\_14\_P129843 GGCTAGGACTCATGAGATTATAGTTCAGAGTTTCTACTGTAATTCCTTTCAGCAAAGTGA  
A\_16\_P20302809  
AGGTTCCTTGATACCTTCTCATAAAACACTTTAAACCCTTTCTCCTAAAGCATCTGTGTT  
A\_18\_P15049092  
ATATCTAAGTCTAGGAAATTGCAACATTGAGACTCGTTTTCCCATTTGAAACACTTGGAC  
A\_14\_P118432 CTTTACATCAGAAAACACTACAGGGCATCAACTAGTAAATGCATGCTATTGATAGCCATGTG  
A\_14\_P109085 TTAATAGGAGAGACAGTCACATGAGCAAGGCATTACAGTAAAGCCTAGAAAAGGCTT  
A\_14\_P131778 ACTACTAGACCTCTGTGTCAGTAGCATTGCTGTAATTGTAGAGACTGCTGTAATTTGAGATT  
A\_14\_P103016 GTATGTCAAATTC AAGCAGTTGTGAAAATTAATAGCCTTCTACTGGACAAGGTCACGA  
A\_18\_P14511853  
TCCAGAAGTAAAGAAATAGCCTTTTACCTTATTCAGCACATATTATTTCCCAAGTCACCT

A\_16\_P19116139

AAAACAGTGTGTTTCAGATATGTAATTTTCAGTTTCCATTGTGATCCAGATAGACTCCAGC

A\_16\_P15017571

TTCCTATGATGAACACTAAATGCCTTTTGGTCAATAAGCAATAAAACAGCCCAGTAGAAG

A\_14\_P202316 ATTAAACCCTGCAGAGTAAGAGCCATTTTTCATATCCTCATACCCCTATTTTTGGTTTCA

CUST\_2476\_PI426210822

GATATGGATGGAAATGGCTATCCTGGTAAGCTGTTTTTCTTTAAAGGCACATGAGAT

CUST\_6387\_PI426210822

CAATATTCTTTTTTAGTATTTCTTGGTGATTTTTTTTTTTTACAACAAAAAATAGAGCAAT

A\_14\_P130740 AATCCAGCCATTACTAAACATGCTATCTGGGGATAAGAAACACACACACCTTTCTG

A\_18\_P22841062 AAAACCTTGTGCAAAAGTATGTGTGGGGTGAGAGGTGTTTAAACACACC

A\_18\_P15080658

CTTGCCATCCTTTAAATGACCATGCTGATTCAATAGTAATTAATTCCTCAACAGGCTGA

A\_14\_P125806 GCTCAAATGTAACGTCTGTCTAGTATGAGGATTTATTTCTTGTCTGACTTCTGAGTTG

A\_16\_P18037422

ATGCTTACAACCTGATAGAAACCAAATGCCTCATTGTTAATTGTCCTGATATTGCACTG

A\_18\_P14137673 GACTCACAAATGGGCATGCTGCCTGCCAGCAAGGGTCTCCTGGCC

A\_14\_P116737 GGTTTTACTTAACTGTTTCAAAGCCAAGACCTCACACACACAAAAAATGCACAAACAAT

A\_14\_P130506 ACATCTAGCAATTTCTGAATCTATCTTTAACCATCCCTGCTTGTCTGCCTCATAAAATTC

CUST\_5066\_PI426210822 GAGGCACATGGAGAAAATGTCATGAGGGAGGAAATGCTGGGATTT

CUST\_9014\_PI426210822

AATTTTGAGCGACGTTAATCCACATGATCTAAATCATACTTCTCACACATTCTCCTACT

CUST\_6351\_PI426210822

TTCCTATAAGTGAGTTTTTCAAACCAGAAATTCAGTCCCAGGAATGATTTCCCTG

A\_14\_P118992 ACAGATATTTAATTCCTTGGGAGGAAGTTTTCACCTCATCTTTTTTCCCAGTAAAGTAA

A\_16\_P16075914

AAGAGGACTGTGCTTAAGATGAAAAAATATGAAAACAAGAATATATCCACCTGCTGCTT

A\_18\_P14839294

CACGCCAATATGGATCTTCACTAACTTTATTTCTGGTATGCATTTTCTTACCTTATCGCC

A\_14\_P132370 GGTTTCATGGTGTTTAATCTATTTTAGAACTGGATGGCTTCTACAGGGAGCCAG

A\_14\_P128764 CTTCTGTCTTCCACATCTGAAATAATTTTAGACTCTTCTGTGTTCTCATTGGGCTTAA

A\_14\_P200982 AATAATGAAGCAAAAAGAAATCCAGAGAGATGGGAGATGTTGAGAGCAATGTCACATTTT

A\_14\_P115279 TAGCGAAGCAATAAAAAAATATTTAACAACCTCATAGGCTTGTGGCAATGAGCCAATGGT

A\_18\_P14136021

GCAGTCTGATAAATTTAAGTTTTTTAAGTGAATTTGTCATAGAGTGGGGTTTAGGATGCC

A\_16\_P00685478

TGCAGTCAGGACTGTTTTCTTCTTCTTAGTATGGATTTAAACAAGAATCATAAACACGTG

A\_14\_P111542 CTGGCCAACACTTTGGAAACAATTTTTTTCTAAAACGACCTTGATTTTTAGTCCAGTTG

A\_16\_P00576994

ACTCACTAACACCAATTTTCGTTACCATCTACTAGTTCCTTAAGTCAATAACCCTAACTTC

A\_14\_P101610 AGATACTGTTGGACCCAGAAGAGAAGGGCACTGAGAAAAAGCAAAGGTATA

CUST\_173\_PI426210822

TGAGAAGCTCATCAATAGGTTTATTAGTTATTGGTATCCTTGTGTTTTATTGATTTACTAAA

CUST\_822\_PI426210822 CAAAGCACCTATGCTGTATTTTGATCCGTAGGTGCTTTGAGGGAGATAGAAA

A\_16\_P20203475

ACCAGACCAACAATATAGAGTTCCTGTGATCACTTATGATTTGAAACATAAACTCAGGCT

A\_14\_P112694 AAATGTCAGTTCATGATTCAGCAATCACTATTTTATATTCATATGGCAGGTTTCCTGA

A\_14\_P116815 CTTTTGTCTCTGCCTACAAAATTCCTATGAAGGAAAAGGAATTACTCTTTTGCAGTCTG

A\_14\_P201890 ATATGGCGGTTCCACTGTAACATGATTCCTTCTTTGATTCTATGGAAAGACTGGTTATAAG

A\_16\_P01832211

CAGTTCACCTCTAATATAAAAAGCATTTTCTTGACCAACTATTACCATCTTCCCTCTCTGA

A\_14\_P111089 ACTGGAAAGATGAAACCAGAACTCTTGAATTCAGAAGGTAAAATTTAACAACACTTTATT

CUST\_4676\_PI426210822 TACCTTAGGTGACCCTAGGGAGAGGTGATGGGACCATACCCAAAA

A\_16\_P20757886

AAACAGTGAAGTCTCTGTAATTATGAAACTACTTGTGTGACATGACACTACTTGTGTCAGCA

CUST\_7616\_PI426210822

ATTTAGGGGAGTGTTTTGTCTTTATTCACCTTTGGAAAAATGTAAAGATTAGTCCTAAGC

A\_14\_P131277 TTACTAGCGCCACATGGATGGTGATAATTATGTATATGAACTAGTTTTGAACTGGACAG

A\_16\_P00041993

GTGGCCGAAATATTTAATTAGGGGACACTTTAAAAGGTATCTGAGGTCTTATGTTATGC

A\_14\_P136928 CTGTTGTTGGAAAGTCCTCTTATCATTCCCTAGTTTTGTGGTTTACTGTTGCTAAATTCTG

A\_14\_P133014 GAAAAAATATGAAGACTTCTGAGATGCATACCATGTCTGGAGCACAGGTATGCAG

A\_14\_P133323 CTGTGAACGTGACCAGACCTATTAATTACTTAACTGAGGTGCTGAACTTTGAAAATGAAA

A\_14\_P118440 GATAATCCACCGTTGGCCGTAAACTTAACGACACTCTTCCCTTCTTTC

A\_16\_P15956524

AACCTAGTCAGTTTTGCAATTTGTAGCAACAACCTATTTGAAGGTTTAGTGGGAATGAGAT

A\_14\_P132613 GTAGTGGCCACCTCTTTTCTTTTTTTCATGAAAATCTCTTTCCTTTGCACCATGTTATAT

A\_14\_P133239 ATTAATGGTAATAATACTAATACTTGTCAAGCGCTTCTCTGCCGTGCACAGGTAATGTG

CUST\_5279\_PI426210822 AGTTCCTATAAAAACCTCAGCTGCTGCAAATTCTGCCACCAGCCT

A\_18\_P11671577

GCAGATTTTATAAGACTAGAGAAGAGAAAAAATATATATATATAGTTCGGCTTCAAAGAC

CUST\_8034\_PI426210822 CTGGCCAGAGTATGTGTCAGGCTTGGTTTTACTGTTAAAGCTGTGACT

A\_14\_P106905 AGATTTTTAAGTTAAAGGGAGCAAATATATTCGCAACCCTCTCTAAATTAGTCCTGAGGC

A\_14\_P136547

AAGGACTGAAGAAAAATTCAAGTTTGAAAATCCTGAAGTAAGGAACCCATAAGCAGGAAA

CUST\_7985\_PI426210822 TCCTCGGATTTTTTCTGCCTCTCTTCTCATTCTGTCCACATTCAC



A\_14\_P133262 CTAATCATGCAATGATGATTTCTTTCCCTCTGGTCAAAGGAGAAATAGATTGTCTCCTTA  
A\_16\_P19420377

AAAAACATGGTATTACCATCACTTTGAACTTCAGTTGTAAATCACAGACCCCTAGTTGAG  
CUST\_9176\_PI426210822 TCAGCACCGTTGCCATTGCTGTCAGAAGCAAATCAAATCACTCAC  
A\_16\_P36343394

TGCATCTTTTATAACCGTCTACCTCACCTAATACAATGTTTTGTTCGCATCATACTTTCTCA  
A\_14\_P104604 CAATGTCACCTTCTCTTTATTTCACCTCAGATAAGTTTCTCCTTTTCTTTCTGTCTCT  
CUST\_5314\_PI426210822

CAGCCCTTACTTCAAGCCCTATTTCTTAATTATTTGTCACTTATTCCCATTTCATCCT  
A\_14\_P139183 CCTTTATTTTTAATCAGTCATTTGCAGTCCACAAGTTAACTGACGTGGCTTTGAATTT  
A\_14\_P133576 ATCAATTATTCCCATCATTCAACAGATGAACGGGTAAGACAAGAGGCTTTTGCATTAATG  
A\_14\_P138790 AAGTCTGCTAAATTCCTGTTGCCACCAAATATTGTTTCTTTGGGGAAATATATTCTGATT  
A\_18\_P11922927

AAAAAAAGGAGATCTTCATGTGTGAACCATATACTCCCTAACATCTGTTTTTGGCTGTTT  
A\_14\_P120352 TAATGACTGGAGGAATGAAAGGTCTTATTGGGATACTCTGGCATTCTTAGATACTCATT  
CUST\_2334\_PI426210822

TATTTATTTATTGAACACTTACTACATGCTGACTACTTCCTACTCATATGTATTTGTATT  
A\_14\_P121664 ACAACTACTGTTTCACCAAAACACATTTAAATACACTAAAATAAAGCCTCGTCCTTCAC  
A\_14\_P108740 CCATCTTTCCAGATACAGCATAAATCCTGACCTCTGTCTTTTATCAGACATCCGAA  
A\_14\_P131353 CTAGACAGGATAAAACAACCTCATGGAGAAAATCAACACTTATTACAATCAAAGGGGAATCC  
A\_14\_P200342 GATTTGTATTTTAAAACATAAGAACGTCATTTTGGGACCTATATCTCAGTGGCACAGGTT  
A\_14\_P118614 TACATTAAGACTCCAGATGGAACCATTTCTTTGACTGATGGATGGACTCATGTATGCTA  
A\_14\_P104580 AAGAAAGAGGTAAGGGTAAATAGGCAGTAAATCAGACCTCATATAGATTATGATCTGGCT  
A\_16\_P35369060

AAGACCAGGTCAGTATTCTAAACCAGACCAATAGATGAAGATGATAAACCAGACTGATAG  
A\_14\_P105388 CTGCGGGGATTCTGCTGACCATCTTTTAGAAAATTATTTTCATAATTTATTCTGGCTTTGC  
A\_14\_P135395 TTGCACCCTTACAAAATCTTTCCAAAGGTCACTCTTATGAATGGATGTTGGTTATACTTT  
A\_14\_P124994 GTGATATCAGAAGGATTCTAACTCTTCCAAAGAAAAATGGAACAACCTGCAGACAATTTCT  
CUST\_4253\_PI426210822

ATAGTGGTGATTTTCATACTCATGAAATTATTGTCATGGAGTTAGAGCCTAGATAAAAAGTG  
A\_14\_P119251 ATCCTAAGGAAGCCAACCTAACTAATTATACTCCCTCTCCACGTTCTGAAAAAATGATA  
A\_14\_P118456 CACACCTATTTATTTGCCACTAACATGAGATTAGACAGTAAGCGGATGACTCATTCTTTG  
A\_14\_P116047 ATATTTATCCTGCTTTTCCAGTGACTTCCAACATAAAACACTTTTTTGATATTCATGGAGCC  
A\_16\_P16191627

TTTTTTTTCAAGTGTATTTGAATGCAGACAAGTATCCAGATAGATGCTAGTGGAAGTCTGG  
A\_14\_P122427 GCATCACAAAACAGTTTACCATTGAGTCTGGGTTTCAAGATGAAAAAGGTCTGA  
A\_14\_P124620 TGAATACAAGAGCAGTTACCTTACACCTGATCAGTTTCTTGTTTTCGTGATACTTATTCT  
A\_14\_P115927 CCATAAAATGCTTCTCTTCCACTGTTCTTTGAACAAACATTAATTCATTTTCCCTGACA

A\_14\_P132094 GAATCATTCTTGTGTTCTCTTCCTCGTTCTGAATAAAAAAGGTAATGAAGAAAAAGCCT  
CUST\_2345\_PI426210822 AGACAGGGCTTTGGGAGGCGCTGCGAAGAGGAGGGACTGTTTTTTT  
A\_14\_P126902 GATTTTGTCTAGTGAAGTAAGCAACGTATTAATAAGGTAAGGAGCATTATTTCCAGAAAT  
A\_14\_P127366 ACAACTCCAGATCAGAACTTCAGAGGATATTTGTGATACTGTAAAATAGGGGACCTTAAA  
A\_14\_P112306 GTTCTTTGCATTCTTAAACTGTCATTAGATAAACAGGTCACTACAAATTATGGCAGGGGA  
CUST\_3759\_PI426210822 TGTTGTCCTAGACTGGGGTGGTGTAGTGGTCAGGCAAATAATTGAT  
A\_16\_P18369771  
TGCAGACAAACATCAAATGATGCTTAGCCTATTCCTCCTAATTTGTAGTTGCCTAAGAAT  
A\_16\_P39950423  
GCCCCAAAGATTACAGAACAGGAGTGTGGTTTTCTCAGATTCATTTGTGATAACTTAGT  
A\_14\_P123126 ATGCTGTGTAAAATTAGGTGAGGACTGAACAGTTACCTTTAGGAAATTGAAAAATACACA  
A\_14\_P201915 CTACAGATAAAAAATCCACATATGGCAAGTTGTATTCAAGGTAATCAATGGGCAGAACTCT  
A\_18\_P14135589 GAAGGCTCTCTTGGGTTCTTTGCCAAAGTTCAGATGTCCCCCTTT  
CUST\_1863\_PI426210822 GTTCCCAAGACTGGTTCAGCCCAAAGGCTGGACTGGAAATATGTG  
A\_14\_P122976 CTATGTGTTTTTCTTTTGCATTATAAAAATAAACTGCTCTGGCTCTACCCCTGAGACAT  
A\_16\_P20244301  
ATTCAGAAGAACTAGAACAGAAACAGCCTCATTTTAAACATCCATTACACAGTTCAAGCC  
A\_14\_P119790 ATGAAGATGGGAAAGAATGTTAGAAGAATAAGCATTGTTTTGAACAAGCATAACAGGCGAT  
A\_14\_P129888 GACATAACCGAATTGAATTTAAATACCTGACTTTGGTGTATGAGAATCATAAACTTGCTT  
A\_14\_P117422 AAGAAAGGAAAGCAGGTAAACAGAACAGATAAACTAAAAGGAAAAAGCCCCTCTCAGA  
A\_14\_P116380 GAGGCTTGACTTTAGTGTGGCCTAGAGGTTTCACTTTAACCTGTTTTGAT  
A\_16\_P36230462 GTAGAAGGGAGACAGTGACCCACGTGAAAAAGGATGGCTACAGAT  
A\_14\_P120416 CTATGAAAAACAACCCACTCCTTGCCTTATTCCAGAATAACTGAGAAGGAATCTAATACA  
A\_14\_P128566 AGCAAAAGTGAAATACAGATGGACCGCAAGTATCACATGTGACAGGCTTATTAGAATTGA  
CUST\_6843\_PI426210822 TGGCCCAAAGGGCTGGAGGAGTGCGGTATGGGATTCAGACTTTTTT  
A\_16\_P16191683 GGCTCACCAGCCTCTGCCAGAGAGGCCACAGGATTAGAAGTATC  
A\_14\_P130854 TTGACAAATGCAGTGCGAATTGGGTTCTTTTAAATCAAATGTTTGGCAGGTGTATGAATTA  
A\_14\_P131424 TGTGCATACGAGAATGCATAATAGGCAAATGTGAATTCAATAACTGTGGGAAAAGCATTC  
A\_14\_P110627 GTTGGGGGAGAAGGGGAAAAAAACTAAATTTAAAAGGAAGCCCAAGTTGTC  
CUST\_6188\_PI426210822 CAGAGAGGATAAGATCCCTGAGCCCTGCATCATCCTGGGAGTGAC  
CUST\_1340\_PI426210822 CAAGTAATTCAAACCCACCCATGGCAGGAAGAGTTCCACAACCTG  
A\_14\_P121169 GGTTTTTCAGGTAGACGACTTTGCTTTCAATTCAGCAAATATTTATTTCTGGTCATCTT  
A\_14\_P115562 GAATGAATACAAATGAGAATCATGTCTGCTTTGCAAGAGGAAAGTTTATTAGGCGATTTG  
A\_16\_P19997306  
TAAAGGCTTCCATTTGTTTCTGAATACCCGTATGCATACAAAAGTCAAACATCAAATCCA  
A\_14\_P137251 CTCTGTTTAAATGATGTGGACCACCCTCTAGAAAAGAAAATCTTTATCCTATCTTGAGCAT  
A\_18\_P13614516  
CAGTCAGTAACAGAGACATTAGACCATGAAACATACAAAAGTAAACACTAACAACCTCCCTC

A\_16\_P20855477

AACTGGGAATCTGAGAATAAGATCATGCTTCAAATTTACGATACTGCTTTGAGACAATGG

A\_14\_P131658 ACCATCTCTGTATAATGATGTTATGCACGGTTAGAAGAGAGATCACAAACTGCCAATTAA

A\_18\_P15285832

AGTTGTAAGTCTGCTATAATGATCTGACAAAAGACCTATTCCTCCAACATTACCAGT

A\_14\_P117937 CTTGCTTTGTATACCTGAGCATAAGGACACTCTTACTGTAAAGAAAACCCATTCCAGTATA

A\_14\_P110856 CTAAACACTTTAAGATTCAATATTACTTTTTTTCTCTCCTCTGAAATGTGTCCGGTGAAG

A\_16\_P36422461

AAAAGTTTCGAAGGTTTCAGAGTATGCTGAGGAAAATAAAGAGAAAAGAGAGAAGTGCAATC

A\_14\_P127603 GGCTTCAAATTGGCATGGATTTTTTTCTTCCAGAGAAAATATCTTCAACTCTCAAAGTAGA

A\_14\_P112222 GGCACAGGAATTCGGCAGAGTTCAAGTGGGGAATTCATTTGTAAAGAGTTAAATA

A\_14\_P129923 TAGGATGAGAGAAAAGATTTGACATCTACTTTCATACTTCTCAAATCTACACTATTCCTC

CUST\_10222\_PI426210822 CCAAGGCACCCATGCGTGCTCACATGAGCGGGTGTGTATGTCTGA

A\_14\_P110353 TAATTGCATGGAGACCATCTCCATTAGGATAGAAAAGTAAGAAAACAAGGCAACGTCTAA

CUST\_5485\_PI426210822 CTTACCCATACTTGGGTTACGGAAGTTACCCAGACTCGGGGTCCT

A\_14\_P136898 CTTTTTCCAATTTTAAACCTGTCTTACGGCAAGAAACATCTAATACGTTCTTGCAATCTC

A\_14\_P136917 ACTTCTGGCAATAACGATTCAAGATCTCTTTGCAGTAACTCTAGAAATCTTAGGTTGCAA

A\_16\_P19966733

AAAAACCACAGAGGCTATAATTGGGTCTGTCTTAGTAAGTTCTAAAGTGTGAGTAGAGAC

A\_14\_P117513 TTCCAAGAACAAATATCAAATCCTGTTAGTAAGATGGCATGATCATGTCTCTTGCCATTC

A\_14\_P201714 GTAGTTACTCTATAATATGCCACTTGACACATTGTGTTGGTAGCATACTGCAGTGATTT

A\_14\_P134324 TTATTCATTAGTAAAGGGATGAGCATCTAGGAACCCCTAAAGTTTGTGGTCTTCTTA

A\_14\_P131860 TCAAAATCAAAAGCAGGTGGAACAGGATATTAAGTTGCTATATTTACTGATGGTAGA

A\_16\_P38613855

ACATCACTGCATTTTTCTCTATCACACCATCTCTTCTTATAATTAGGATCTTGGCAACCA

A\_18\_P16505721

GGCAGTAGATAAATCTCTTTTTCTTACACTAGCCTATTGATCCTTCTCTTATCCAAGTGG

A\_14\_P133882 AATCAAGAGACTATAGTTCAATTCCTTATATTAATCTTAGGACTGCCAACTGGGTGGCT

A\_14\_P115442 ACCCACAGGCTAAACTGAACCTAGAATGAAATATAAGTGGAGAGAGTATCATTGAGGATA

A\_16\_P19521153 CTCCTTTTGCTCTACCAATTATCCTTTCTCCTTGCTTTATTTCCAAATTCTCTAATGGCT

A\_14\_P132885 ACAGATGTATTTGGCTGCCCAATCACTAGCCAAGTCATAGTTATCAAGAATTACAAGC

A\_14\_P111304 AAATATGCAGGAACAAGGAAGGCGCTAAGCAAATTCTCACCCCTTAGTTTTTTGTTTTTT

A\_18\_P13617495

AAATCCACAGAGTAAGCATAAATACAGCCAAAATGACATTTTTTACCAGATAGATCCTT

A\_14\_P124328 CTGTAGACATAATATCTCACAAAAGGTAACATCCCTATATAGTCTCCCCAAATCACGCAA

A\_16\_P30952399 CCATTCACCATTCATGGGCTCTTCTCTGTCTGTTCCCTTGTAG

A\_14\_P110183 AGTAGAAATAGATACCTGTCCATATGACACTTATGGGTCTTTCAGAAGAGGAAGTTCTTT

A\_14\_P137489 TAAGGAAATGCAAAGAGATGGGAATGTTGGCTGAATGTATGTATACAGGTATTCACTTCA

A\_14\_P138874 AATGTTTCATATTTATTTTCTGACACCAACATTA AAAACAAGAGAATGCTCATTCCACAAT  
CUST\_3087\_PI426210822 TTATCCTCAAACCTTTGATCTCTGCAGATGTTCACTTGGAGCTGGTGGGA  
A\_16\_P41313609

ATGGACCCAAGTTATGTTTATTCAAGTTGCCTGTAGAACTTAGTGCTCTATAACCACAA  
A\_14\_P113822 GTCAACAACCTGGAATTCAATTGGCTCTTGCCTTATGTAAGTGAGTAGGAGTTC  
A\_14\_P103974

CCACCTGAGACCTGAACAGATAAAAAGTGAAACATCACAGAGATAAAAATAAAAACAGATCC  
A\_14\_P129406 CTA CTACTATGTTCTTGGCTTCGATAAAACTGCTCAGCCTACACAAAATAATTCTCTCCACTA  
A\_14\_P117846 TAAATAGTAAGAGGAGGCATTTAGAGTGAAAAAGTGGAAGTCTTCCCTTCACTCTCATCTT  
A\_14\_P127689 ATATTTTTAGGTATATGAGGCTAATAACCTCCATCTCACAGAGTGCATGACTAACCACAG  
A\_16\_P17977950

AAAACCCAATTTCACTCAATGATCTGAACCTAACCAGTAATCCAGATAAAGGGAAGTGAT  
A\_14\_P129593 ACACCATCGTTGATATTATATGAAGAAATGTTGTTACCACAAAATGAAAGGCTCATTCT  
A\_18\_P22841046 CAGGGGCCACATGTTGGAGTTATAGCCCATCTTTGTTCAATTGATT  
A\_14\_P108364 ACTGGATATTTAAGTGTGAGTAATGTCTTCATTAGAAAATAGCAGAACCGCTCTTGTCTT  
A\_16\_P37620534

AGGCCAGTTCCTATATTCTGTATTCTTTTTACCTAAGGCACTTAACACTGAAATTACA  
A\_16\_P36008634

AAAAATGAACTGTCTGGTCACTATCATTCTGATCCTTGAAAAGGAGATTTAATCTGGTGC  
A\_14\_P114117 CTATAGGCAAAGAGCACAATTTCCAAACAACAAGCCATCAAGGAACGATGAAATATATCT  
A\_16\_P35521023

ACAGTTACCAAGACCAAAAAGACCTTATAAGTCAATTTTCATGCTGAGTTGTTTAAAACCA  
A\_14\_P123901 GTGACCTACAAAGTGACCTAAAATCCTGTCAGTTCCTATCTTTGAATACTGGAGTTTC  
A\_14\_P104905 ATTTTACTTCTGTTTGTCTCTCCTTCTCCACATAAAAAGGAAAGAATAATGCTTGCTCACT  
A\_16\_P02098806

TAATAACCAAATCAAATCAAATCTTCAGGAGAACATTCACGCTCAACCTCATCATATGCC  
A\_14\_P117110 CTCATGCTAGTTTTCTGGTTAATTTTTCAAGAATATGGGTTGTTAGGGATCAGAACACTG  
CUST\_7959\_PI426210822

CCATTTAGTTGACCTTCCTAAAATAATTTTTTTTTCTGAGACATTCTGTGCCTCTTTGAGT  
A\_14\_P107260 GTGTGAACCCCAAGGCTGAAGATTATGAAGAAAACCTTGGTAATTTTAATGTATTTGTCCT  
A\_14\_P110243 GAAGACTTGTAATCCAAACACATATTTGCTTCCCCAAAAGTTTTTTGTAACAAGATTCCC  
A\_14\_P102648 TAACGATATGCGTTGTTTTTTACTTACTTTATAAACCGTTCCAAAAGCACCTGAGCCAAG  
A\_16\_P58424398

TGAGTCCTCATTCTATCTATACTCATTTCCCTAGTGATCGTTTCTAGTCTGTCCCAAATG  
A\_16\_P01636978

GAGTGCTCAAGAGATGCTTTAGATGTTTACAAAACAGCCCAAATATCCTTCTAGAAACTG  
A\_14\_P133844 TCAAAAAGGTATTGCTTGAATTCTAGTCTCCTTAGTTCATGCATTACCAACTGCACTGA  
A\_14\_P112877 CTCTATCCCTGCATACTACCCAAATATCAGTCCCAGTAGAATTAATGCCTACCTTATTAG

A\_16\_P15948071

AAACCTTCATCCAGATGTAGTGAGTATATGTATAATGGTAGTAAGTTTGTATGGACAGCCC

A\_14\_P124344 CTGAGATGAACACAAACCATCTTTTATCTTAATCCTTCTCTACAGAGTATCAGCCTCCTA

A\_18\_P10016579

CAAGAGCGGTTATTCCATGTTAAAAAGTATCAGAACGATCCATGCTACATTCAACTTCAT

A\_16\_P20107984

ATACTACCTGATCTACCTGTTCAATATGATGCCATTGCTTCTTTTCATTACAAACCTACC

A\_14\_P117945 GATTGACAACCCAGAAATAAAAAGTGCTCAGGAATAAAACTGAGTGTCAACAGATTTCCTT

A\_14\_P112688 TTAAATGTTAGTCATTCTGATGAGTAAAAAGTTCAGAATGGTTGTTGGGTAGGGAGAGAG

A\_14\_P110687 CTCCTGTAACCAGATCATTCTGTGTCTGTTTATCTTTCTGTTGTTTCCTTTCTCTTCTG

A\_14\_P129965 ATGTGATCTTGCCATTTGTTGCATCCTTGTCTGATTTCCATAACAATTACCATATTCA

A\_14\_P117277 TATTATCCCCTTCATACCTTCATTTGGATTCTATACTACCATTAACCACCTTTTCAGGCT

A\_18\_P13902885

CGATCACTAACAGAATTACTAAACTACCCTAGCAAAGTTAAACAAAGTTCCATAATCCCC

A\_14\_P104315 TTGTTTAAACCTTACAAAAATTTAGACTAGTAACTTATTTCCACTGAAAAGTGAGTTCCA

A\_16\_P00564628

ACCTCCGATTTTCATTGAAGAGTAGCAGCAGTAAATAAGTTTTATCAAATTCAAAGGCC

A\_14\_P110023 GAACAATAGTAAAAAATAGTCATGAAGCCTGTCATACCTGTTCCCTTTCTTGTTCCCTCAT

A\_16\_P17726486

ACAGGCATATTTTCAGCAGATCATTAGACTACACATTGGTTATGAATGAGTTTTCCAAACC

A\_14\_P129197 CTAGTGGTTTTCCCAAGTCACCTCCTGGGTAAAGACAAGATGTCACAAAT

CUST\_5524\_PI426210822 GCCTCGTTCTCAGAGAAAAGAAAGCCTTACTTCTGGCATTGGAAGTCAC

A\_14\_P123067 CTAGCATTCCACACAAAAAAGTTATGCTGAAATAAACAGTGGTAGGAAACCAATGGTTT

A\_16\_P37895930

ACAAAAGTGGCTACAACCTAAAATGGACCTAACATAACTCAAAAATTTCTACTTCTGGCCA

A\_16\_P17047389

AATTGAAACAACCTAGACTTAGTGACTACCATTTTCAGTTAGATCCCCTAATCTCCAAGTGT

A\_14\_P102926 CTCTTTACTAAGTTATCATAATTTCCAGTGTGCAGTGACAAACCCATTGATGGATGATT

A\_16\_P00685376

TTGGCTCAGATCATCTTAGTAAATGCTTTTTTCTCTCACTTTTTGAGCATAAAACTGGCC

A\_14\_P102339 GTGGGAATCACTGAACATGTAGAAGACAAGGAACATATTGTAACTCCTGATTCTTAACT

A\_16\_P02097469

AAATAAGAACCCAAGTATGTATTCAACACTTGCTGTGTATAAGACCAAGTGGTTAGCACC

A\_14\_P138612 TTACAAAACTTCTAGTGTGCATAGAATTTGAATTGTCTCAACTGTTGGGTATGGGATGCG

A\_14\_P128339 CTTTGTGTCAGGATTAAGCCAAGGACACATGGGCACACTAAAATTAATACATTACACAA

A\_16\_P37671651

CCTGTTAGTCTCATCCTCTACATTACCAATGACTTAAAAAATACTATTACCCACAACA

A\_16\_P40020105

ACCCACAATATTAAGTAACTTTCTCATATTTCCCATAAATTTAAAGCATATTGCCCCC  
A\_14\_P100554 TAGAAATAACAAACATGCCCAACGCTTTTATACAGTTGCTAGAACGTTTTTCATTTCCAAC  
A\_14\_P113588 TTATTTTAAACAACATAAATTTGGGGAGTCTGTGGGTCAGAGAAAGTATAGAGAACTGGAGA  
A\_16\_P20830969  
ACCTCAATAACTGCAGACATATACAGAACAACTTTAAGCCTATTCTCACTTAAACACCA  
A\_14\_P138246 CTTCCCTAAATTGCTGTCTCCTTATACCCTCCAGAGTCCAAGACTCAC  
A\_14\_P125789 CTGACTCAGTCTTTTTAATAATTCGTCATTAACATGTTCAACTTTCCACTCCAGGTGATG  
A\_16\_P18738609  
AAAGGGATCAAATCATTTAGACTGCCATGGAGAAATAAAGGAAGGATTAGAAGACTAACC  
CUST\_1069\_P1426210822 TCAGCATTTCATGACATTTGAGGTCTGACTTTCCCTCCCATGTGGTC  
A\_18\_P26794931  
AAAAAAAAAACTAGACAACCTTCACACTACACCCTTCTGTTTCTAAAAGTCTTCCTCTGAA  
A\_18\_P14136822  
CACCTCAGTTGATTGGGGAATTTGGGATGAAGTGCTTCCAAAATTTATTTGAATTCTAAA  
CUST\_5781\_P1426210822  
GCATTGATCAAATCAGCTTAAAAATAGCCTTCTTGTGTTGCTCTTCTTGGTGTGGG  
A\_16\_P16194835  
ATCATTGCAACTATAGACGAATTCTTAGGACAGGAAGTTGAATCAAGACTCATTTTGGTG  
A\_14\_P131503 TTTATATTAATAACTACTATTTGGCTACACACTGTAGTTTCAGAGCAGATGCCCTGCAGGTG  
A\_14\_P110506 ACATAACTTTGGAACTTACTGGTGCCAAGCATGTAAATGAGGTATTGAGTAGAAAGATG  
A\_14\_P108116 AACCCAAAGGAGCAGGAGATTTTCGGTAGCGTTTTAACTTTATCTCAGAATCTGAAA  
A\_16\_P16191736 GACCTGATCCCCGACATCGAGAACTGACGGTGTGTCAAGAAATAAATAT  
A\_14\_P111642 CTCTTCTTGGCTTTCAGTATACTGGTCATTAGCATCAAGTGAGTAAGGACTTTGATAAAG  
A\_14\_P124631 TAATTCTCTCATAGCCAGAGGTATCTGTCTCCACTGACTTGGTCACCATAACATATATCA  
A\_14\_P125696 CCGACAATACATTTTCTTGGGAACTCACGAGAAAAGAGAACAAAAAATGAAATGATTCAC  
A\_16\_P20238771  
AACATACACCCGATGACAAATTTTCAACATAATGCCAGAATGTTTTCTTTGAGTTTCGAGT  
A\_14\_P127416  
GAGGAATCCAACTTGAAAAAAAAAAGTGGACATACAGAGAAAGGTAGAGCCAAAAGAA  
A\_14\_P100259 TTCTGTGTCAGTGGTGAAATGTTTTACTGTAAACATCATTGCCTCCTTAGAATAACTGGA  
CUST\_6437\_P1426210822 CAAAGTGAATTGCACTGGGGAAATTCAGAAATATACACCCCTCAGATTCAACA  
A\_14\_P106405 CATTCTCTCTGTAGCAGGACAGAACTGTCTAAAGACAAGACCCCTTTG  
A\_14\_P127953 TGGTTTTGTGAAGCCTGTAATCTTTTAAAAGGGCTGTCACTTGCTATATTTTTACCAAAG  
A\_14\_P130833 AATGTGGGTGGAAGATACCTAGATAAGTTTCAGAGTCAGTGCAGAGATGGTAATTTTTAA  
A\_14\_P118368 CTCTTTCAAATATAGTCAATGCTGGGAAATGTGATTGCAGTGATCTCTATCTCTCCACT  
A\_14\_P111916 TCTCATTTCCCTATGTTCACTTAGGAATAGATTTTCAAGCCTGAATCCCTACTCTTAACT  
A\_14\_P103934 CTCCAAGATGCTGCTTGTGCTTTAATCATAAAAAGTTTAAAGTGAGTGTAGCACCTTTT  
CUST\_5440\_P1426210822 CACACTCATCAGATTCTGGGATGTGCGGCTGTGTAGAGAAGCTTTA

CUST\_2391\_PI426210822 ATTTTAAGATCCTTGTGTGCCTTTCCCAATGTGAGAGCCCTCTGG  
A\_14\_P107980 ACCTATAATGGTGATGAGTATGGTTAGAAAAGTAAGAGGTAAACACAATAAATAAGACGGC  
A\_16\_P34408881  
AAAACCCCGTTAATATTTTTACCTTCACACTTCTCAGAGGAATCATGAAAGTATGTCCTG  
A\_16\_P30952299 GTGTTTCATTTCTTGCTTATATGATTTTGGCAACCCTTAGAGGTGGGACTTCT  
A\_14\_P107966 TCTAGTCTCATTGTGGAGGTAATGAATCTACTTGTCTAGGGGCAGACTCAGAAT  
A\_14\_P128747 CTTCTGCATCCAAAACCTGATAATCACAAGAAAGATCTACTGAATCTTGAGCCATCTTGG  
A\_16\_P21119276  
TCGCTGTATATAACATTTTGTGATAGGTAGTTGAAAATACGGATATTCCTTAGCCCTGC  
A\_16\_P17842341  
ACTGCCTTTAATTCCCATTAACACTTTCTTCAGAATAAAGTCACTTCCTCTCATCAATCG  
A\_14\_P112949  
AAGGGCTATGTCTTCAAATGGAGAAACAGGACACACACCAAATGTATAAAACAGAAAAT  
A\_16\_P18559516  
AACATTCATCACTGAGTCCTAAAAAACTTCCCATTTCAAATTTCAATTTGTGTCAGTGCT  
A\_14\_P138259 ACCCATAAAAATTGGTGGTCTCTAGCCCTTTTTCTCCACAACCAATATAAACTAAAATGA  
A\_14\_P120002 TTTAGAAAAAGGTTACATAGAAGAGAAGGAACTCGATGCTTTCTTTCTCCACATGTTGAT  
A\_14\_P119205 GCATGGGTGCAACATCCCAGAGGAAAGACCTTTTTTGCAATCATCAA  
A\_14\_P106559 CAGACAGTAAGCATAAAGGCTAACGAACTGGGTTAGCCTTTATCTTAAGCAACCTAGA  
CUST\_4940\_PI426210822 TTGGACAGTTATGGGGGATTGCTTTTGCCATCTCAGCATTTCACC  
A\_14\_P118346 TGTCCACCTAACCAAATGCCTTCAGTTTTTGAATGTATTTAATGTAAAACTCAAGCCA  
CUST\_6991\_PI426210822 GAATCAGAAATGGAGAAATGCTTCCCCCACCTGGTGATTGCATCT  
A\_16\_P36424634  
ATGTCCTCTTGAAATTTTTTCCAAAGACTCTATAGCACACATTCATTGTAAATCCCCCAA  
CUST\_6222\_PI426210822 GTGTGCCTGATAAAATTTTTTGGGCAGTGTTCCTTGGCTTCCAAACATAG  
A\_18\_P14134959  
CATTACACACCAAGTGTGTTAGAGACAACAGAAAACCTTGTTTTTTTTCTGTGTTCT  
A\_16\_P19907509  
AAAAAAGTTCCGAATATGTATTTCCACATGAAAACCTGATCTGGTTAGAGCAAAGGACTGA  
A\_16\_P00685353 CAGATAGTCTCCTTATTGTTTCAGGGTTTCCTCCCGCACTGCATGAATC  
CUST\_10425\_PI426210822  
GCCTAAAATCTTGGAAGTACATGTCCATGAATACAAATTTTAAAGGATGAAAATCTTACC  
CUST\_3175\_PI426210822 AGGACTGGGCAAATGGCAGAGTGCACCCGTAGGATGAGTGCTAAT  
A\_16\_P21458263  
AAGCACAACCTGGACATATTCTTGAGTGAATGTAATGGCTTTTTCTTTGTGACTTTACAGTG  
A\_16\_P03241397  
TCCGAACAATTCCAAATCTACGTTTATTTATCAGCCTCATTATTTTTATCCTCCACCA  
A\_14\_P136327 GGGTGTTTTTTTTTTCCCTAATCTTTCTACTTAAACCTAAGTTCTAAGTTCCCTGAGGAC

A\_16\_P00685162

ACACTGAAGTCATATTTCTATAATGAAATACATACCTATCTATTTACTTATTGACTCTGA

A\_16\_P15440294

TTGGAGAAAAACCTCAAAACTGAATTCACCTCAAAACCTAAGAATTATTATGGCTTTCCC

A\_14\_P128621 AAACAATTCATTGACCATGTCATCTACATTGATGTCAGAACCCAAGATGTAGAGAGACAC

A\_16\_P17480331

AAAGTATCTCAGAGTTCAGAATCATTTAAAAGCCACGTATTTGAAATTCCTGCTTGGAGG

CUST\_2275\_PI426210822 CCTCACTTCTGCAGACACATGACTTTGTTAGAAGCAAGGGAAAAAAGTTAGG

A\_16\_P38095317

GAACAAAATTCACCTTGGTAAAGCACCTTACAACCTTATCGTTCATTGTTCAAAATTGTCCC

A\_14\_P109718 GTTTATGAACATTCCTGTAAAAGGAAGTGCACAGGTGGTTCTGTTAGTTCCATT

A\_14\_P109400 CACTAAAGATGCTTTGGAAATATTCCGCTTCTAAATTGCAAATAGTTCTGCAAGCAATG

A\_18\_P22841910 ATACTTTTCTTGTGTCTGCACACACCCTCTCATCAGCACCCCT

CUST\_4870\_PI426210822

CTTAAAAGCAGTTCATGGGAATCTATAGGCTATTGTGTATAACTGGAGGGTAGCAGAAA

A\_14\_P123426 TCTCCAAGATTACCATCTTCTACTGAGAAAGGGGCATACTTCCATCCAAAAGTAATTG

A\_16\_P20134557

TTCAAGACAGCAAATTC AATTC AATTC AACA AAAACATGCCATAGAATTCTATCCCTCCAC

A\_14\_P113939

CAAGTTC TTGCAAACAAAACACTGTTAGGGGAAGGGGAATCAAAGAGAAAATTTACAAA

A\_14\_P126422 TTTCTTTACAGTCTTTTGTGTCTGTCAATTTCTCTTTCAA AAAAGGCGGTGTTTTTTGTTGT

A\_14\_P119643 GTATAAGAATTTTTGAAATGTTTTACAGGTGATGATGAACAGTCTACACAGATGGCTGCA

A\_16\_P19654403

AAAAGGGAATGCTTCTTACTTGACCAAAAATTGAAAGCACCATGGGATAAAAATTTCTGAG

A\_16\_P16085560

GGTGACAGTCCGATATGTGTA AATCGTAATAGCCCTTCATCGTAGATACCAGTTTAAAAT

CUST\_2693\_PI426210822 GTCTGTTTCCTGCCTGCCGCACTGTCTTCTGCAGAGCTCTTTTGT

A\_14\_P121945 AACGGAGAATATTGCAAAAAGGAAGAAGAAAACCTTCTTCTTATAGTGTGTATGAAGCG

A\_14\_P113208 GTTCTATTCATCTTCACTCTGGGTCTTGTCTTTCTCCCATGTTATAAACTGTGTAGAA

A\_14\_P105702 GAACAAATGAAGGGAGTTTTACTTCAACCAATTTGTGACTTCTGGCCAAGAGGAATAAATT

A\_14\_P112395 CCTTCTTTCTTTTTAGGGAGAAGACATTTTTTTGGACATGTTTGAAGATGAGTATAGGA

A\_14\_P119871 GAATCCTATATTTGAAATGTATTTTGTGTTCTTTTTCCCCCTAGCGTTCATTGTAGA

CUST\_114\_PI426210822 TAACTCAAAGAAAACCCGACAGTTGGCATTAGATGCCATGTGCC

A\_16\_P20011213

AAAAC TGCAAACTATTACTCTCAATGGCATAATGTCTGGGTATTCAA AATGTTGGGTCTC

A\_14\_P115028 TCTTGCATTGTGATAACATTTCAAGTGTAGGAAAAATCTTCCATAGGAAGAAAACCCACAT

A\_16\_P18151254

TTCCTCACCTACTGATTTTCATACTGTTTCATTA ACTCTCACTATCCACATTTTTTTGGC



A\_14\_P108336 TTTTCCTGCAGATGACATAGACACTAGGTTTTTACAGCAATTCTCTGATGACCTTGATAT  
A\_14\_P110174 CTCTTTTTCTTTCTTCAGGAGTCACATGCCATAGGAAAAAGCCTGAAAATTCAGCA  
A\_14\_P136393 CTTTCAACCAGGACCATCCAAATTCAACTAATTACTGCACTTTCTAATTTAAATACTGCC  
CUST\_5889\_PI426210822 ACCAGATGGATTTAGGTACATCCTGTTCTTCCGTTCTCACCTCT  
A\_14\_P124661 ATACACCTTGTATCCTATCAGTCTCCTTATATTACTTTGAGGATTTTCTTTTTTATTTTT  
A\_14\_P113606 TTGTTTGTTTAGTGGAACACTCAAATCAAAAACAGGCTCACGGTCTGAATAGTCTTCT  
A\_18\_P14134999  
GGGTAGATATTTCTTTTAAGACTGTAAATAGTGATTTTCCTTTTTATTTGCCACTCCCCA  
A\_18\_P14138128  
TTCTCCTTTGCTTTTCGTAATTGGGTAGGAAATAGATAAAGACCTGATGGGTTTATTTCA  
CUST\_1482\_PI426210822 TGGCTGGCTCTGCTGGCTCCACGCACAGCTGGCATACTGACAT  
A\_14\_P115195 GAGGGCGTGTAATTCATTCCTGTGGATGGTTCTGAATCTTCATATGTAATCTTTTATCT  
A\_14\_P115527 CTTCTAAAAAGGCTTGGGCTTCAAATGTCATCTGCTTCATGTAATCTAAAGAAAAGAAGA  
A\_14\_P111098 TTCTCATGTTTGGATGCTAAGCCATAATGAGATTGTGTTCTTATGATGCTCATCCAGAAA  
A\_14\_P124650 TAGGCAATTTACATTTATAGACCAGGTCAAGCAAATTGGACAGTTTAAAGTGAGCACTGAA  
A\_14\_P123333 AATTACATATTGACCCAAATGATTACATTTCAAAGGTGCCTAAAAAACTTCACAAAACA  
A\_14\_P104851 CTCTCAATTGCTGCATAGAAGTTAAACAGAGAAAAAGAAGGTAAGGAATTGGTGTCATG  
A\_14\_P132748 ACAAATTGCAGATCCCACATACCTTTAGTTACAAAATTCCACATATCCTATTGCTCAGAG  
A\_14\_P102254 TACATGTGCTTCTTAGATCCATGGAGAAGGATACAGACTCTACTAGTTCAGAGACC  
A\_14\_P116671 AACATGATAGGATTTTAATGCATTTATGGCAGGACTGTGATCCAATCTGAGTAGTTCCTG  
A\_14\_P139756 TTCCATGGGAAACTCAATGGGATACTGATTGAAAGAAATTCTGATACATTTGTTGATTG  
A\_18\_P14134005 TACTTAAATGCCAGTGGGCTCGGGGCTACTTGTTACTGATGCAAAG  
A\_18\_P14135860  
CATTGCAATGATTATAAATGAGTAGATCGGAACAGGGAGGACAACACTGTGAAAGAAAG  
CUST\_2055\_PI426210822 AGGACATGACCCAGGCTTTCAAAGGATGCCTTTAGATTTATCCCTAT  
CUST\_4647\_PI426210822 GCTTTTCTCCATGTTCCAACAACCTTGTTAAGTCTGCTTCTCCATTCCATT  
A\_16\_P01639682  
TATAGAAGGCTCAAGTGATAGTATCTAGTTCTCCCTTCAATCAAAAAAATACTGCCACAGG  
CUST\_6097\_PI426210822  
GGCCATTGTCAAACGTCCAGGAACAGGGATGAAACTTGTTTAAAAGTTTCTATTAA  
CUST\_2860\_PI426210822 CATTACAGCACCAGTGTACCCTCCCATTAATTTCTTCCCTATCCTC  
A\_14\_P110927 TATGAAGAAAAGTGTGAAAATTCTTCTTTTTCAGAAGGGGGAATACCGATCTTGTAGAGTT  
A\_14\_P115432 TATTGTCTGTGGGTTTATTCCTCAGAAGAATAAAGTGTCTGGTTATGAAGTTAACAGGA  
A\_16\_P00723869  
ATCACCTTATCCATTGCTTTGAAACATTATCCATTGCTTTGTAACACCACAATACTCAGG  
A\_18\_P26891043  
CCAGGAAAGATCGTTTTGATTATGATACAATCAGGACTCCTTATCTAGACCCATACTTGAT  
A\_14\_P122536 ACCTGACATGATCAAATAACTAAAATGAAGGAGCAAGGGCTTTACATAGACTACACACA

CUST\_1363\_PI426210822 TCTCTGCGCCTACCTCACTTCCCATAGCTTTGTGATATAGGCTGT  
A\_16\_P00643035  
AGATCATAATGACAATCAAATAGGGCCTAATACGTAGTAAACCTCCCAAATTAGTGTGC  
A\_14\_P119046 TTAGGAAGTGTTGCTGATATTGTGGTTTTGCTTTGTAACCTGATTTCTACCAAAGGATT  
A\_16\_P30952666 AAAACCTGATCCCTAGCAAGAAGTCTGCTCTGTATCACCTTTATATAGCAGACATGTC  
A\_16\_P17378120  
AAAACCTCATGCTGTTGTAATAGAATTCAGATCTCATTTC AATTTGATGACTCACCTGTGA  
A\_14\_P108350 GTATGTCATCCATCAGACACTAGTATGTGTTCTTCCCTTCAAGTGCTTGGTGTATATTAA  
CUST\_2732\_PI426210822 GCAGTGGGAGCAGAATGGTGTGATTTACTCTTTGTTTTGTGGGATGT  
CUST\_1716\_PI426210822 GATGGTTCTGGGGCACAAACATGCTCTCAGCCCTGTTGACCAATTT  
A\_16\_P00084056  
CAGGTTACTGAGGCCTTAATAGTTAGACGGAGAACTGAATTTAGTGGAGTAAGCAATAG  
A\_14\_P116318 CAGGAAAGTCCAGGAGCCTTGTCTACTAGGTAAGGAACTGTTTCTTTAAGAT  
A\_14\_P137699 ACTACTTTGCCATTCTCAATAAGAGGCGTGCACCATCTACTACAAATTTTAAATTTCCC  
A\_14\_P100300 TGTTTTAGACCTAGACATGAGATATCTTCTACTTACCTGAACTTGAACAAAGTAGCAGC  
A\_14\_P116085 CTTTAAACACCTCACCTGCAACCTTGTCTTTCTTTCAAATGTTTATTGAACCCACTATTAC  
A\_14\_P124407 ATGTTACATCAGATTATCACATGACTTGGTGAAAGATTGATCAGTGTTTAGTGGCATCTG  
A\_14\_P135958 TAACAGATGCTGACAGGTCAATACTATCTCCAGGTGGAAGGTAAAACCTAATTTTATTAC  
A\_14\_P114031 TCCATTTCTTTTCCCAATGAGGTATAAATGCATTTTGTCTTCCATCTTATAAAAGAGGGG  
CUST\_276\_PI426210822 ATGCAGGAGAGTCACTGCTCTGTATTGGACAGAGGCTGATGGAAA  
A\_14\_P202007 AAGAATGCCAAGCAAAGCAATTGCCAAGATAAATCACTTTTATCTCTATAGGAAAGGGAG  
A\_14\_P121799 AACCATCTAAGAAGTGTGCACGTGTGAGTTACTAAATCTACCAATGCAAATAAACTGACA  
A\_14\_P129503 TCCTCCCTAGGTCAAACCATGAAAGATGTAAAGTTGCTTTTCAGATGTCTCTCATATTTA  
A\_18\_P22841590 CTTAGGCCCAAGTGTGTCAAGCCCCCTCTGCTTACAAACTTTA  
A\_14\_P122097 ATAATATATTGCTGTTATGTGTTTTAGGCCATGACCACAATGTTTCTTCAGTAGCCATCA  
A\_16\_P16680031  
ACCTTGACCACTACAGAGTTTTTCAAGTTTATTAACACTACAGGCATATCCAGATGTGTTTT  
A\_14\_P106812 TAGAAAGAGGATGTGCTAGCAATTCCTTATAACCCATGATAACTTAGCAGCATGTAAAGA  
A\_16\_P17574013  
AAAAGGCACAATTAACACTGACATGTCTTCTAGCATCTTTCTGACAGGTAATCTCACTGAT  
A\_14\_P108123 AAACCTGTGAAATTTGTCATAAGGGTGTGAGGATTTTCTTACTGGCTTCCAAAGAAACA  
CUST\_4444\_PI426210822 TAGTTACGTACACAGGCTCTGCTGCAGGGACAGGATTACAGAAGAT  
A\_14\_P124236 AGCCCCGATATTTATAAGGGGTATAACCAGATATATGTCAGATAAAGAGAACCTCAGTAA  
A\_14\_P122583 TTTTTACGAGATTTAAATATTTTATTCCAACCTGTGTAATAGGGGTCTCCTCCTCCTTGA  
A\_18\_P21751987  
AAGAAAACCACTACTGTAAGACTTCTAAAAATCTCAACGTTTGAACACATTCCTCTTTT  
A\_14\_P201524 TTTGTGACTACTGTAACACTTTAACACAACCTTTATTTGGTGGCAAGCACCCATATTGATT  
A\_14\_P112647 TCAACAACACATTAGACTAGCCACAGTTCCTAAATCAGTATTTGTCAATTTCTCTCTCTT

A\_14\_P100470 CTTGCTAAATATACTAATATAGGGCAAAGTATGTTTAGTCCAGCAAGTATCGGGTCAGCCA

A\_14\_P114727 TCTGCTAATGCCAACAGTTATTTTTCCAGTCCAACACAAAGATCAGATGATATTCATCTG

CUST\_9667\_PI426210822 ATGAAGCTCCTAGAAGAAGGGCTGGTGCATAGCTGCTGCTCAGGG

A\_18\_P13981703

GCTCATGTGGCAATATCATTTTTAAACTCACCCAATAACTCTTGAATCCCTACACTGTAA

A\_14\_P137392 TAAGGTTTCCCTTGATCAGAACTGTGGACATATAATCCATGTTGGGTAAACATTCATATG

A\_14\_P126127 TGGGAGAGCCTGTTCGAATCAAATGTGCACTCTTTTATGGTTATATCAGAACAAATTACT

CUST\_4404\_PI426210822

TGGTTTAGCATATGTTGCATTATGTATCTGGGAAAGTAGCATATCTATTTTCTCATTTTTG

A\_16\_P15580710

CACTCAGCAATCTTAGATGAAAACCCATCCATTTAATTATAACTCCATGATGTTAAGCCC

A\_16\_P00648938

CTTGAGAAGCCTACAGAGAAAAATGCTTACCTCTGATATCACAGTCTGACATAGAGTCTA

A\_14\_P125597 AAGCCGCATGCTAAGGGTAAGGTCTATGTCCAGAGTCAAGGTAAGATTTTTAAAATATTT

A\_14\_P100193 GATTGGCTGTCATTGCATCGGACCTACCATAAAAACCAAAAAATAATTGAGTGCCTT

A\_14\_P113223 CCTTTGCTCTAAACGTTTCGAGTTTCAAATTCCTCTTACGACCAGACTTATCTCGAAA

A\_18\_P14134771 GCATGAGTATGATATAGTGTGCATGTGTGACATGCTGCGAGTGTGAGGAATG

A\_14\_P134914 CCATTGATTGAGTAATGTGTCACTACAGGCCAATTCTAAGAGCGGCTTGACAT

CUST\_9421\_PI426210822 CAAGGTGAAGGTGGATCCTGCCCTAAGGGTGGTGGAAATAGCTCA

A\_14\_P138190 AAATAACCTAATAAATTCTGCGGATGGGATGTAACTTCTCAACACAGTGAACATTTTCAG

CUST\_8237\_PI426210822

CCATTTCTTTCCAGCTTCAGAAAACAGAGTGCATACCTCTTTGATAGTGGAAAAAAG

A\_14\_P101424 CTTGTTATTATCAAAAACCTACCACCTACTTTAAACCTGGATTGTTTCGGAACCAGAATTTG

CUST\_4044\_PI426210822 TTATGAGAGATTTTCAGTTACAACAGTGTGAGGTGGGTGGTCAGGAAACATT

A\_14\_P101882 GAGTATATTAATAATTGAAGGACATTTACTTGCTGCTTCTAAGTGGTGTGAACCCACTGTT

A\_18\_P14138823 CTTGCTTCTCCTCCAAAGAAAAAATGAACAGACACATGCCCATGTGCTTG

A\_14\_P134792 GCTACATTAACATGAGGCAAGAAAAGGAAATGAGAATCAGGTGAGTAATGTTTTTCATG

A\_14\_P127806 TATTGACTCCCAATATCATGACAGCATCTCTGTTTGCAATGGCTGAAGTCTATCTATCTA

A\_16\_P17351106

ATACTACAAGCATCTGAAAATTCTCATAGAAGCAAAGTCTCTATGTCTTTTTCTAGCCCC

A\_14\_P123459 CAAAACCTGAGTCATTCGGACCATAATCTATCTCCAGTGACTCCAAAGAACTACAAATTTT

A\_16\_P21400908

AAAGTCCCACTGAAAAATGTGACACTAATGATCCCTGGAATTCATCACTGTTTTTTTT

A\_14\_P116349 GAGTGAGTTGCATCAAACCTTTCTAAATTTCTCATTCTAGAAGTTGCTGAGTTGTTCTGC

CUST\_8153\_PI426210822 CAAGGCTTTTGTACCCCTTGGGAAAGGAAGGACAAGGAAGTCAG

A\_14\_P104025 CTGTTTCTTATTCTCAGAACTGTTGGGAAGGAACTAAGGAATGTTTCCTATCAGTTTGTA

A\_14\_P125890 CTGCAATGTGATACCCATGATAAAAACAAACCAAGAGGAAAATGTGAAAATGAATTTGCG

A\_14\_P200300 CTCTGTATTTCTGGAACAATGAGTATATCCTAAGCCTCATTGAGGACAACCTGCCAC

CUST\_2031\_PI426210822 GGGGGTAGATCTGAGAGTGGGTGGTGCAAGGAGGATGAGATTAAC  
A\_16\_P55125479 AAGGACTGGAGTGGTGGAACCCCTCGTCCTTCATTAACACAAGCAG  
A\_18\_P22840126 GGCCCAGTTGTGGCCGTGCACTGTGGACCTGGATGCATGACAAAAG  
A\_14\_P112043 GGTCTGCTCAATAAGACCGTCCAGTTCATGCAGCATACTTTCTAACGTGTATT  
A\_14\_P101961 GTAAGTACTGCTACTTGCATTGAAACTGTAAATCAGGGAAAGTTTCTCTTTTGTTCCTTTGCA  
A\_14\_P125476  
AGAGAAAGAGGTAGAAAAGACAAACAGACCACAAAAGACAAGAACCCAGACATATAGAC  
A\_14\_P139316 ATTTAAGAATAACCTTGAGTCAGATATTCCTTTACTTCCAAGTGGTCTTATCTCCATCCC  
A\_14\_P118602 ATCATGGAAAAAGTCAGACTCTTTCTAGGATTTGAATCGGGAGTCTGAAGAGGA  
A\_14\_P104855 CTACTACTTCGAATGCACTGACACTTTTCAGGTGCATATCCAAGGATTCTTCTGT  
CUST\_1851\_PI426210822  
CACACTCTCATCTGAGGTTTTTCACAGCTGACCATGTGTGTGTGTGTAATTTATAA  
CUST\_4978\_PI426210822 TTCTACATGGCAAAAAGACCCCTTGAAAGATAACAGATGAATGTCTCATGGCCA  
CUST\_4717\_PI426210822 AGAAGTCTCTGAGGGTCCCTCCCACCAGGAATCTCCCCACTTGAA  
A\_14\_P124324 CATTTGCTCTTGTTCCAAATTCTCACAGTGCTTTATCTATGTTTCTTTTATGGGGCTTAC  
A\_16\_P15902795  
CTGCCACTCTCAAGTAATACTGCCATCATTCAAACACTTTTTGCTCTTCTTTTGGACTT  
A\_18\_P13878092  
TCGCCTAAGTATACAGAAATCATCATCCCCATCCATAAAGTTAGAAGCATAGTATTTCAA  
A\_16\_P00454920  
AAGTCTCACTTATAACTCAGTATAAAATCACCAGAGCGTTTTTATAGAGTTCAGGCTTGAGG  
CUST\_7121\_PI426210822 ACATGTTCTAGTTTCCTAGTGTGCAGAGTACAATGTGGGCAATGCTGG  
A\_14\_P115398 AAAACTAAGCAGAATAGAAATGTTTGTGTTTATTCCTAGTGTCCCTCTGGTCTTTCAGTT  
A\_14\_P111209 TGACTGGCTATTTTTCTTGGTTTTATTTATGAAATCTGAGTGGTGATCCCATTTGGATAC  
A\_18\_P14135474 GAAGAAATGGTTACTCAGTGATAAAGCCTTGAGCCGCAAAGTGGAATTGGATTT  
A\_14\_P112961 CTTTGAAAACCTCCATTTTTGGCAACACTATTTGCATATCAGTGATTACTGTCCTAAGGAC  
A\_14\_P118242 ATTTGGGGAGAGGTAGGATTTATAATCAGATGTAGATACTACTTAAGGAAAAACTGGGCT  
CUST\_2824\_PI426210822  
TTGATCTTCAGGTATATTGAATAAGCTCAACTATTAACATATTTATTTTATCATTTTTT  
A\_14\_P125663 TCCCAGACCTCAAACATATTAAGATGGATTTTATCAATTGTCCCATCAACATTTGCTTCT  
A\_14\_P120171 CTCTCTTGGATTTACGAACTCACATTTATTCACAGACAGACAAAGGGACAAG  
A\_14\_P201654 AAGTTGAAGGTAAACATAGAATATTTTATAACAGGCACTCACACCTGCCATTTGCGAAAAG  
A\_14\_P120804 ACTGTAATTGTTTCCATTTCTCCAATTTTCACTTTAATATATGTGAATTTTACATGCTT  
A\_14\_P100389 AGTCCTCACGATCATCTTACTTATCAAGTTCTCCTATAAAGAAGTGGTTCTCTTGCTCA  
A\_18\_P14137854 GGGTGAGTGACCACATCATCATGGCTACCCCTTCCCGAGTGCTTC  
A\_14\_P131846 CGTTTACTGACATGAAGATAATATGCCACTTAATCATGTTATTGACTTCACTTAAGTGG  
CUST\_764\_PI426210822 GTTCTCACTAAGAAGTGGCTTGGCATTTTCTACTCTTTGAACATCAGTGTGGAT  
A\_14\_P200389 CTCTCTAAGGTGATTGTTGTTTAGGCTTAGCGTCTCTAGTTTTTTTTCAGATTGCATATCTC

A\_14\_P103977 GGGCTGTTCAATTCTCCCACTTTTACTGTTCACCATATGTGTGTTTTTTCATTA AAAACA  
A\_16\_P01406487  
TATAAGATTGAGTGACATGTCTCTATTGTGCTCCAAATTCTTCAGTTCAACAGCGTATGC  
A\_14\_P109910 TTGGGTCACTATGATTAGTTGCTATGGAAATTACCTCCTATGGAAATGATTCCAATGTCA  
CUST\_1230\_PI426210822  
GCTCATTGCCTTCAATTAGAAAATGTAAATTTTCTAATTAATTTTCAAGCAACATAATAG  
A\_18\_P22840898 TAAAGAGAATCTGACGGCATCTGGAAATTCTTTTGTGTCACTGCCTCTCTCA  
A\_14\_P131826 AGCAGTAGTGTTCTGAGAACTGTTGTCAAATTTCTTCTCCTGTTAGAGAAATGAGACC  
A\_14\_P125567 TGTTATTGTGTTCCCAAATCTGGATGTTTTTCTCTGTCCCTTGGCTGTAAAAGATAGAAAT  
A\_14\_P132406 CCTTGAAGTTCCTTAATTGCATTTTACTGAAGCCTCTTTGCATGTGTCTAGCAAAAAGATA  
CUST\_4561\_PI426210822  
ATGGACTGAGACATCTCCCTTTACACCAGTTTTTTACTTAAACATGCTTATTAGCCTC  
A\_14\_P139473 CTCCAAGTGAGACCAAATGAGAAGGAGAGGTTTAAAGATTTCCACATAAAAATTCAAATGTT  
A\_18\_P14133384  
AACAAATGCACATTTTTATCTATGCTGCTCTTCCCATCATGAACACATGCTTCTTTTTTTT  
A\_14\_P119134 TCACTGTTATCTCTAGCGGAGGAATTAGAGTAGAAGACAGTAATTTTTTCCGACCAGAG  
A\_14\_P115894 TTAACCATATTTGATCCAAAGAGTGTAGCAACTTTCAACCCAGTGCTGAAAAATTTCAA  
A\_14\_P102184 CTCATGCATTCATATGCAGTCATTTGCATATAATTTTAGGGAGACTCATAGACCTCAGAC  
A\_14\_P117637 TTACTACAACCAGCATTCTGATCAATGCCCTGTAATAATCTAGGTAACCTACTACCCTCT  
CUST\_7393\_PI426210822 CTAAAGGCCCGGGCTGCTCTGCTTACAGCCACACGGCTGTTTCTG  
CUST\_4665\_PI426210822 CAGATACTCACATGTGACATTCTTGTGGTTTTCCCTGAGTGCAAAAAGAG  
A\_16\_P02731746  
AGAGGACACACAATGGGTAGTAGACTCTATTA AAAAAAGAGCGTATTTTGATACATGACT  
A\_14\_P102392 CCCCCAGTATTCGTAAAATCGCTGCCCTTAACATTCATTTCAATAGGACTAATTATCT  
A\_16\_P19936000  
AATGAGGCTAGTTGGCTCTTTTTCTTAATGTCAGTAACTAATGATTGTGTTCTGAAGGCA  
A\_14\_P138361 TTGGGTTTCATCATGGCCACAGAGACAGAATATCAACCC TAAATACCTTTTTTTCTTTATTT  
CUST\_10405\_PI426210822 CCTGATCACTAGCCTGTATCCTTGGTCTTTGTATCTTCCATATTTGGAAGA  
CUST\_8353\_PI426210822 CAAATAATGACAGGGTGAGGGTCTAGAGAATGTGGCAGTAAAACATTTGTGG  
A\_14\_P139059 GAGCATAATGGCAATGAAGAGGTTGTTAGGAGACAAGTTAAATATGGCCTGCAAAGT  
A\_14\_P130769 TTCAACTCAGAGCACATTAGGGATGAAGTGTGATTTAAAATCAGGAAATAAGCCCATTTT  
A\_14\_P139455 TAGATATTA AACTCCATTAGTAGGCTCCACAAGTTGTGGACAAACATTTTTTTCTCCTCC  
A\_14\_P138205 CTGATTTATAATCTCATTATACACCTTTCCACTTGGGGAAAAGAGTTGTTTATTTAGTTA  
A\_14\_P129810 GAATCCAGCCCGATTGTAATTTAACTTGTTTCGAGGGATCTAAATATTTAATCTGCCTTCA  
A\_14\_P136244 AGTGGAGGACAAGCACCTAATTAACAGGCATTTATTGGACTCAGAGAAAAAGGAAAT  
A\_14\_P117689 ACTCAACACATGTGACAAACAGACTCTTTTTTCTTTAAGCCTGACATCTGTAACATTTCT  
A\_14\_P104451 TACTTGACAGGGGACCTGACTTACTACAAAAGGTTTTGTTTTCTTGCCTTCTATTCTTT  
A\_14\_P134294 CACTGAAGGAAAAATGCTTCAATTAAGGCAGACAAACTCTTCCATATAAGAACACAGAC

A\_16\_P17904936

ATACCTGTCCAAAGAAATGAACTCTCCCACTAACTTCTCATTTCAGAAACAAACA

A\_14\_P109346 GACAGCAGTATTAAGCAACTCAACGCTGAAGACATGGATGAAATTGAAAAGATTGACTAT

CUST\_5957\_PI426210822 TGTCTTTCTCACAGACTGTTTTTGAAAGGAATTGCCGTTTCAGAGGACTG

A\_14\_P113517 TGTCTGTAAATCAACTTTCTAGACCTGGCTGTAATACCTTCCTATATGAATACTCAGCCA

CUST\_692\_PI426210822 AGTCTTGGCTCTAGGCTGGAGGAAGCAGTGCCTGGGAATAAGCTC

A\_14\_P130033 CTTACCTTCTACATCCTCTGAGGCCAAGATGTCATATTTGCTGGACCC

A\_14\_P115681 ATGTTATGTTCCAGCATTTCCTGTTTCATCTGGCTTTTGCATTTCTGTGTGTTCTTC

A\_14\_P127449 GGGATGAGGATGATGTTGCTTTTTCCTGGAAAAACAATCTCTCAACCTTACAGAA

A\_14\_P117764 AATTTTACTTACTACCCCTTGCCTATAAAAGCAAATACTCCAGTGGTTACTTCAGCAG

A\_14\_P136763 CTTTCTGTTACTTTTGTCCACTTGAACACTTCATATACCATGGGAGTTAATTCTGCTTGA

A\_14\_P105024 AAAGAAAAGCAATGTTTTATAGGATGCATTTACGTAAATCTCCCCAAAGGGCTTTGATTC

A\_16\_P03469856

CTCCATTAACCCCTTTATGACTAGTGTACCTGATATGACTATTTCAACACACATAGGAT

A\_14\_P132048 TTAATAGGTAGAGGAACTATACTCTAGGTAAGTGGGAAGAAGGATCACCAAACATTGAAG

A\_16\_P02283705

GATGCTCAACTAGAAAAAAGTGGCTATTGAACTTACTGAGACATAGTATATTGATCCCCA

A\_18\_P17037765

CCTCTCTGTTCAACCATTTTCCTACCCTTGATTTACCATCAACTGCCTTTTTTTTTTTTTT

A\_18\_P22839422

AGTGTGTTTGGGGAAAAGTGAGGTATAATAATACAGGAATTAGTATTAAGAATGTAGTA

A\_14\_P126530 CACAGAGATAACAGGTTTACAATTCAAATTCCTATGTCCTGAAAAGTGGCCTCTTAAATA

A\_16\_P30009023

TGCTTCCCTAATGAGAAATAAAGTGTGCATGCAAAGAAACCTCACTTCAAAAATTTACGGA

A\_18\_P12007948

AAAGCACAAAATACTTTTCTGACGTTTCCATATTTAGCACAAACACCACATAAAAATTGCT

A\_14\_P130298 AAAAAGCAGACCCAGAGAACATACCCGTTTCCTCAGATTGCAAGTAAGAGT

A\_14\_P134951 AGTATCTAGACTCAGAAGCAAGATACTTCTAACCCTCCACGAATGAAGCAAACACAC

A\_14\_P123732 TATCCTCTCATTTGTCCTCATAGCAAACAATTACTCTTTTAGAACCCATTCCATTGCTTC

A\_16\_P03577333

GCAGGTGAAATTCAACATTAATTTAAAAAAGAAATGCATGCCTAAGTAATACCTTGGACC

A\_14\_P109384 AGCCGAGTTTTGGGGGAAAGAGAAACATATAATACCAACATTTAAAACATAATAAGACT

A\_14\_P115790 CAGAAAATCCAACCCCCAGACTGAAAAGAGAGAAGTATTTGAAAAGAAACATTAGAGCAG

A\_14\_P136826 TTTCTCTTACCATGCCTACTGAACTGAACTTTGCTTAATACTGTGTTATAGCCATTAC

A\_16\_P18529409

TCTACATCTCCAAAATAATTTGTTTACGTGCCTTACTTTTCAAATACCTGACCCTTCAGC

A\_14\_P135405 ACCATCATGCTAAGATGCAACAAACTAAAGGAATATTTGTAGCAGATATAACTAAGTTTG

A\_14\_P108947 TGTCAACAGGGAGAATCTTATGGGTTACATAAAAGTGAATTGGAAAGTTTTCAAAGGTGA

A\_14\_P135266 ACTGCTACCAATATCAGGGAAAATGCATTTTTTTTTTTTGCCATGACTGAATTATTTCAA  
CUST\_9674\_PI426210822 CAGAGAGGCATCTTTCAACATGGCAAGCAAGATTACTCCAAAAAATGCCA  
A\_14\_P130009 GCCGAAAGGCTCCCATTGGAATATTGATATTTGCCTAAAAGAGAAAACAGGGTAG  
A\_18\_P12295025

TCCTCTATGTAGCCCAGTAAATCCTAATCTAAATCTCCAATACCTCTCTTGAAACTTGAC

A\_16\_P41790854

ATGGTAGTAGACGATGCAAGAACATTCTTACTTCCATATCTTACTTGAAGTTGCTGTG

A\_14\_P128950 GAACTGTGCTTAATTTTACATTTCCCTTCTCAAAGGCAATTGTGGAACAAAGACCTTTTA

A\_14\_P126018 CTTCCGGAAAACCTCCTTTGTTGTGTATTTCATGATCTAACATCCTCCATAAAAAGT

A\_16\_P00878247

CAGGAACCTCAAAGAATTAAGGTATTACTACAGATGATCTCTCTATTAACCTCCAACCT

A\_14\_P126459 CTGACAATTATACGAAGCAGAAAAGCCAGATCCACTGGAAAACACAACACACATC

CUST\_8318\_PI426210822 CCTCTGCTTTTTCAGGATTTGGAAGGACAGGTCCACGTCATGAAT

CUST\_8925\_PI426210822 TGGTCTGGAGGCTTTGCCCTTTATTTTCAGTTTCAGATTTGATCTCAG

A\_14\_P132460 TTTTTTCTCCCTCAAGTTTTTCACACACACTAATAACCTTGTTCCAGACAAGGATACAA

CUST\_6690\_PI426210822 TATCTTGTAGCTGCTGTGGAGGCAGGGCCAGCCAGAAACGCAGAT

A\_14\_P131537 CTATACAAACAATGTTGAGATGGATAGAGAAATGTGAAGCCTGTGGTAATGATAGCACAG

A\_14\_P116405 ATCACAGTGGAGGATGCCAGAAAGTAGTTACAAAGAGACATATTTTATTTGGCTCTAGAT

CUST\_5415\_PI426210822 GTGTTTGAAGCAGCCTACAGCCTCAGTGAGCATGTGACTGGAGAG

CUST\_9949\_PI426210822 GAAGATTTCTGACCAGAAAACCTTGAGTAACTGAGATGGGCTACAGTCCAGA

A\_18\_P14134367 CTGTCTCTTATCCTGATGCCTTGTGTTATCAGGGCTATTTTCAGTCTTTATTGCAATGC

A\_14\_P117459 GGTAAGTGGGACTTTTCTGTTTACATAGGATTATAATATCCTCACTGGCCACAATCTGTA

A\_14\_P119992 GAGCCTATTGCCCTGGCTTTAGTTCTTTCTTTATAATAAGGTGCAATAATGACTATGGAG

A\_14\_P128486 CTTTAGGAACCTAAGGTAGCAAGAATGTTCCACCTATTTCTTATGGGCCCAGTAG

A\_14\_P120753 CAGAACTATCACTCCAAGAGTGATGTTTCTCTCCAGTAAGTTGGATATAAATGTCAAGCA

A\_14\_P113091 CTCAATAAAGACTGTTTATGACTGCACAATACGTTGTAATGCCAAAAGGCAAATCTCACA

A\_14\_P107945 TAAGCAGCATCCTGCCTTAGAGATGGGTTTTACTTAGAATTACAGAACATTTTTCTCTG

CUST\_8194\_PI426210822 ACTGCTGGACAGCTAGTGTGGCCAGCGTTCATTCATTCTCCTCT

A\_14\_P128407 ATCCTTGATCTGCAAAACATAACAAAATCTTATGGTTCATACAGCAATGTTATCTGATGA

A\_16\_P19946255

AAATATAATACCACTCTCAGACAGTATCAAACGATAATGAAGTAAGAACTGATCCCCGGGG

A\_16\_P35643778

AAAAAAAAGAAAATTGAGACTCATCAACCTAGAAATGTTACAGTCGAGAAAAGAAACCT

A\_14\_P125513 TGTTTCATGTTATATGACCACATGTCTCTAATTTGGTTATAAGACAAGAGGATGCCACAT

A\_14\_P118907 GTTACCATTTTACTCCTTTTACGCCTGGTAGCAATAGCAGGCAATGGCTTCAT

A\_16\_P16777431

GTCTTTCTAACCCCTTATACTTTTAACTTTTCCATCATTAGACTTCCAAACAGCAAGA

A\_14\_P135054 GTCCACATACCTTATCAGTGTCTATTCCAGACATAAACTCCTGTTCCACGGTTAATTTAT

CUST\_9995\_PI426210822 CCACCACCTGCTTTGCCTTGCTTTTGCTGTGTTTGTTTAAAAAAGCAT  
A\_18\_P12365528

AAAAAAAAGACACCTAATTGTAATCAAATTGTATGGAGCATTAGAAACTGGAGAGAGTT  
A\_16\_P58424207 TAACATTGTGAGAAGTGGTCAAATTCTGCGTGCATTTTGAAGGGGGATC  
A\_14\_P128974

ACAAAAGATCCCTTAAGAACAAAGGTGGCAAATTGTTGTGACACATTGAAATAAGGAAGA  
A\_14\_P128383 CAGTAGAAACTTCCTTCGACATTGTAACACACAGCGTTAAATCCACAATATACACTATAG  
A\_14\_P127981 AGACTTTATATGCTGCCTACCAAAGTCACTCCCAAATATTTGCATTACAATGAGATGC  
A\_16\_P02366592

ATTCTTCATCTGCTGCTACATTGATTATTTTAGTCCTCAATAGAGAAGTCCAACAGAGCC  
A\_14\_P127473 TCTGTTAGAGACCTCAGAGGATCTATCTTCTCTCTGGTAAAGTCCTTTAGAAATCTGC  
CUST\_10175\_PI426210822 GTTATCACCTTCCCTTCAAAGTGGGCTGGGAGGGGCATCCTTGCTT  
A\_14\_P127883

CTAGAAAATGTAAAGAAGCAACAATGCTACTTGACTGCAGAAGGCAGTAACATAACAGAC  
A\_14\_P115356 CTGTGAATGGCATATGGTAATTTTTGGATCACTTCTGGGAGGGCTCTTTAATAAAAGTAT  
A\_14\_P126140 GCTTTCCCTTTATTTTATCCTTTTACAGTTCCTGTCTCCTCTCTTTGGTAAATATGTCT  
A\_14\_P117805 ACGAAATTAATAATTACCTCTTCTGCTGCGAAAATTTTATTGCTGCAACTCATGCATGCA  
A\_18\_P17365273 CTCCTCCACTGCTCAGTATTGACAGTCCCCTTCTCCTCTGTTC  
A\_14\_P134379 GAAACAATTGGATGGGAAGTTCATCACCCCGATGCAGCCATTAGAATATTACTG  
A\_18\_P13461039

AGAGCCTTTACATATTCAGTAATTTAGCAGTCCAATTATGTCCTTCTGTCTCTAAGTCA  
A\_16\_P17363649

AATTCCTCATGTCAAGTAATCATGTCAATATTGACTGGCCTTTATGAAGAAGTCCTTTTGC  
A\_18\_P22840690 CAAATTGCCTGGGTGGTGGAGTAGTGGTTCTTCAGGTGTTTCAAG  
A\_14\_P137271 TGCATTTTATATTGCTACTTCCTGACATAATCTGGAATGAATGTGTCTAAGCAACCCACT  
CUST\_6402\_PI426210822 CCGACTCCATTTTAGTACCTCGTTGCACTTTAGGCTTTCCTTGTC  
A\_14\_P139073 ACAGTGTTTCAGCCACTGGAAAAATCTGCCAGAAATATTTCTGTACTCAATAATGATA  
A\_14\_P114223 TCTGTTGTGAAGTTTGCTAGTTTATTGCTGTTGTGGGCTACTTGTAAGTGAATCTGAAAA  
A\_14\_P123787 CAGGGAATACATAGGCATCCTCCAGTTTGGTGATATCAAACAGACAAATGCAG  
A\_14\_P124201 GGAAAGTGATTATATTCATCTTATCCCTCTCCTTTTGTGGCATTTAATGATGTTGCCTC  
A\_14\_P107786 AATGACACTTTTTAAAAAAGCAAATACATCTCTAGCCTTCACACCAACCAAGAGACAGAA  
CUST\_6968\_PI426210822

TTCACTGACGTGATTTCTTATTTTACAAAAATGAAGCCATTTCAACGATGTTGTCAATG  
A\_14\_P105013 TTTCTAAGTTATAGCACCTAGTTCAGAGACCTATGCACAGTAGACTCTTGGAGAATGAAT  
A\_16\_P03809928

AGGAAAACTTTCTTTCAAAAAAAAAAAGTTGTAAATTAATAACCCTTCCCATTCGGCT  
CUST\_7869\_PI426210822 AGGGCTAAGGAAAGGTGCTCCTTGACAGTGAGGACAACCTTAAACA  
A\_14\_P105715 CCCAGGATCAAACCTCATATAAGTTTCTCCAAGACATAACAGTTCTTGTCTCAAGTAAGAC



A\_14\_P123994 TGAAAGGATATTTCTGAATACAGGATTCTGGCCTTAAAATACACTGTAAGTGTCCCTAAGT  
A\_14\_P113241 TGCTGTCTATAATGGATTTCGAAATGAAAGGATTGATAATGATTCCACCAAAGAGACTAGG  
A\_14\_P115115 CAAGGATGTTTGTTAATCACTGTAATAGCAAAAATGGAGGAAAGAAAACCTTTGGAAGGA  
CUST\_7626\_PI426210822 ACTCTTTGGGAGGAGACCTCGCCGTCTCCATTTGATCACATAATT  
A\_14\_P114970 GTTTTTCCTTTCAGAGATCTGAAACCTGAAAACATCCTGTTAGATGATTATGGTAAGTCT  
A\_16\_P19560053  
ATGAGACATTGCTAATCCCTTGACTATGACTTTGAATGTCTAACACTTCACTGATACTCA  
CUST\_6725\_PI426210822 TGAATCAGTCGCCACTTAATACCAAAGCTGCCTTTACCCAGGAATCA  
A\_14\_P136261 AGAGAATAGGTAAATTTTCTCTACTTAACATTTTACCCGGTTCCCGAAAAGTGATGAATC  
A\_16\_P17963050  
GACGTAATAGACATATGACTTACACATGTGACACGTGAAAAATTAACACGACTGACACGT  
A\_14\_P118829 TGATGAAGGATGCTGCACAGAGAAGTTAGAATTCCTTTTCTTACCAAATCTACTCCTAAA  
A\_18\_P22841917 TAGATGAACTTGAGCACATGATCTCACCCTTGGAGCCTAGTAAAATCCATGCTA  
A\_16\_P02210107  
TGAATGTTTCGTAAATGTTGCTATCCATGAAGTCTTATCCACTGCTTTATAAAGTCCGAGG  
A\_14\_P130755 TCTCTCTGTCTCTGTTTTTTTATTTTCCAGAAAATCAGTTCGAGGAAAGGGAAAGGG  
A\_18\_P11042963  
AGCACATCCAATTCAGAATCACCATTTTACTTGCCATAGATATAGAATTTCTCGTCTCCT  
A\_18\_P14136483 CAGGATTCTTCTGTA AAAAGCAGAGAACACTGCATGGAGCCCAGAGAG  
A\_14\_P111440 GGATGCCACTGATAAGTTCTGAACTACAAAAGTGCCTAATCTAACAGGTAAAACATTGAC  
A\_14\_P132297 TGTTGCTGGGTAGGCTGAAAGACAATAACTGATTATTCAGAAAGGAAAGATATTACTCCT  
A\_16\_P41142715  
ACACAAAAGCAAAGACAAATCTTTACTAACAAGGAACTCAAAGATCTTCTGAAATCCTC  
A\_14\_P138698 CAATATGAGTGGAAAAAACAAGGGTGTATTCTAAAAGGGAATAATTCCTTCTAGGCACT  
A\_16\_P19653526  
AAAAGTGCCTGTGTA AAAATTCATTTTCGAATTCCTGCAATCTTAGAAATCCTCACTTGAA  
A\_14\_P121039 CTAGAACAAAACCTACCATTTCTGATTGTCATCAATTGCTTTCATCTGGACTTTAAGT  
A\_14\_P136803  
TAAAACATCAGGAGAAAGAAGAATTGACAAATGCAAACCTGGCTGAAAAGTAGAGGCTATG  
A\_16\_P41767358  
AATTACCCCTCACCTTTGCTATTTTATGTAGACAAATCAGCCCTCTATAGTGTTCATCA  
CUST\_217\_PI426210822 CTGGGGATGGGCGGCCCGGCTGCGCCGAGGGGCGCCGGGAGGCTC  
CUST\_3520\_PI426210822  
TGGGGGATTA AAAAATGATTAGAAGCAGATGGTGAGAAGAAAATAGAAAGTATGGAGCAA  
A\_16\_P19903258  
AAACCTTGCTTCAATTTCTTACTTTTTTCATAAACCTACAATGCCTACCTAAAGGATGGC  
A\_16\_P30952504 CTGCACAGTGGCAACACGGAGCGCTCTGAATCCCTGCATGACAAC  
A\_14\_P122528 TATTCAGATTTTACCCAGTGATGAAAAAGATCAATTTTCTTGTGGAAATTCAGTGGCTGA

CUST\_1279\_PI426210822

CACAGAAAAAAAAAGTCATATTTTTTTTCAATGGCATAATTTTATGAATTTTTGGGACACT

A\_16\_P30952654 AGTGGTGCATATAAACTGTGGGTGTGGCAAGACCCCGAAGACATT

CUST\_927\_PI426210822 TAATTATCAGGGCTGTCCATTATCTGTTCAGTGCTTCCCATCTGTCCATTTTTTTTTT

A\_14\_P137686 AGATACCTCAGAAAATGATAGAAAGACCGAACCTGAGATTTGAGAAGCAGTTCTAAAATC

A\_16\_P00060419

TGGTCTCCAACAATATTATGATTCTCCAGTTCTACTACTCATGATATATTTTGCCAGCCG

A\_14\_P131865 CTACTIONCAACAACCTACCACAAAAGTCTTAAACTAATGGCCATTCCAGAATAAAAACCG

A\_14\_P127376 ATGGGGTATCACGGTGATGGTCCCATTAAACTTCCACTCTGCAA

A\_16\_P15790389

AATAGAGAGGTTTGATAACACATAATGAACACCGTAAGACACTATTCAACTGCTGGAGAG

CUST\_4100\_PI426210822 TGGTCTTCTTCCTGGAGGGCTTCAGTATTATCTCATGCTGTCATCTTTATG

A\_14\_P129622 ATTAGACAAACCTCAGTCAGTTCTCTAAATACTGGAGAATAAATTTGGCACTTACCCAAC

A\_14\_P117688 TTCCACCCAGCAAAGTGAGCCAAAAATTTGAAAAGCAACTTTTATTGAAGAATTTGGAG

A\_14\_P124700 CTTAATCCACCTTCGTTCTGTGCTTTACCGTTTCTCTCTAAACTTGAAAGTAAAATG

A\_14\_P118700 GGTAGTGTGAAAGAAATCCTTTGCCAAGTTTTTATATAAATGTAGGCAATGACCTCATGG

A\_16\_P00685234

GCTTTTTAAAAATAATGTAGTTTTAAAGAATTCTTGCTATTTAATCTCAAGCCCAAACA

A\_16\_P30952664 CAACAAGAATTTGGATGGAAAACCTGATCCCTAGCAAGAAGTCTGCTCTGTAT

A\_14\_P132592 CTATCTTTTTGTTCCTTCTAGGGGCAATTGGATTGGAGAAGCACCATATAAAGT

CUST\_1960\_PI426210822

TGTAATCTGTACATTCATGGGATTCATACTCGCTTTAGGAGACATTCTGTAGCAAGATG

A\_14\_P202364 AATGTTCTACCCTTTTTATAGATTTGCATCTTCCTGTACAGGGATGTGGGGAAATAC

CUST\_5352\_PI426210822 TTTCCAGTCTGCCCTCCAGTGTCTCTGCATGCATTCTACTCACCT

CUST\_5668\_PI426210822

GTATGTTTGTAGTGACTACTTTTCAAAGACAAGATGGAGGATATACAGCTGGTGAAAGA

A\_16\_P16191450 GTATTAGCCCTGAGATACACTGCTGCTCTATGGGATTTTGCCCTCATT

A\_14\_P114530 TTTTAAACCAACACACCACATTAATTTGGCTCTTTTTACAGAATTCAGATTTTCCTT

CUST\_5361\_PI426210822

CTTTAACTTTGTTTAACTTGGTGTCCCATGCAGTCTATTTAATTTTCAACTCTTATTTAC

A\_16\_P36614063

GCCATATTCATCACCAATCACATTATGCATGTAATTTGCTTCCTCTAAAAACATAACCCC

A\_14\_P128465 GGATCACGTAAGAGTTTAGGAATCTTGTGACTCCTAGTCACACTTTCTAAACAGACATTT

A\_14\_P123768 CCCATTGTATAACCAGTTTGCAGAGTAGTAATTAGGGGCAAAAAGAAAATGAAATTTGCC

A\_14\_P109479 GGTATTGCTCCCTGCATTTATCTTGTCTTCAAAGCCTGGATTTTAACTTGGAGTT

A\_14\_P136123 ACAGATTTTCATGCTTTTCTTTTTCAGAAATCATGTCTCCAACCTCCTTTGTATATGG

A\_14\_P120938 GATTTGTTTCGACTATCAGGGTATAAAGAGTGAAGGTCAGACTTTGAATCTCTCGTTT

CUST\_3588\_PI426210822 GTTATTTTCATGCCTGCATTCGGGGCACTGTCTTACTTGGCCTAGT

A\_14\_P102265 CCAAAGTATAAAACATGGCCCACTTTATATGCAAGAACTTTGTAATATTTGGGAAGACAC

A\_18\_P14136962 CATTGCCGAGAAACACATGGTTCTCATTAACTGCCAAGGACTAATTGTGTATG

A\_16\_P00685236

TGTTTTTAATGATAAAGAATCTAATAGTTATCAATAATGTTGGAAAAGTAATTCTAGGCA

A\_14\_P114664 CCACATGGGATTTACTACAAAAGCAATTTTCAGAAACATCCAAAAAGATATCCATGTGCAT

A\_14\_P105902 TTCCAATTCTCAAATCAAATAGGGGATAGTATGTTTTCTAAAAGGGAATCAATTTTGGAC

A\_14\_P116125 AGGTTTAAGTTTATCTATTCATGGGGCTGAAAAGCGTTTGCAAATCCATCAACGG

A\_16\_P16735838

AATGATCAAGGTGGCATAAAATCAGATGGCTAATGACTCTATTCTGGGCTTGAATCTTAT

A\_16\_P01789136

TACTGTCCATGATACCACTCAGTGATATAAGTCTCTAAACAGCAAACCTCTTCCATGAATG

A\_14\_P130270

AAATGAATAAAGTAAAAGGCTATGGAACACATAGACCTCAGAGGGAATTGTCAAAGGAAG

CUST\_6741\_PI426210822

GGTACACATGGATGACCATCTGCTGGCTTTTTTCTCTCCTAAATAAAGCTAACTT

A\_14\_P125026 TGAATGTTCTGTTCTCTGACATTCTTTTTTCCACTTTCTTCTTCATCCATAAAGACT

A\_14\_P101975 ATCAAGGGCTAGGAGCAGTGAGTGACTTTTTTTAAAATGGACACATCCAACATT

A\_14\_P120003 AAAATGTTACCCTTTTTGAAATACAGGTAGGTATTTGAGTTATCATCAGCCCCAAAAGA

CUST\_10322\_PI426210822 TCTTAGATTTCCATTCAGTCTTGGTCCGTTTTTCTGGCCTTCTGTGG

A\_16\_P00685136

GTTTGTGTCAGGATTCTTCTCAAATAAAACACACTCCTCAACTTTTACAGTTGAAAACAGGC

CUST\_2746\_PI426210822 ATGGGGCTACAACATTGCAGTTCATGCTCATAATGGCAGCAAATGCTT

A\_14\_P122123 CATGATGGTGAAATTCACCAATGACTATCTGGAATTTTTAATATAAGTCACTGAGTG

A\_14\_P112595 AAAACATTGATTATGGCAACGTTTCATGCTTTCTGCATCCCATTTTTAGAAAGAAAGAGGTA

A\_14\_P105357 ATCTGAAGGATGCATACAAGAAGAATCTGCGTTCCTACTCTCTAATGAATGTTTCCACT

A\_14\_P123563 CTCCAACCCCTTACATCCAGAACTACTTTTACAGGATACATTTTAAAGATATCTACTT

A\_14\_P127210 AATCTTCTGTAAATTGGCATGGTTCTATATAACGAGTCAATTTGTTGGCGGACACTAAAA

A\_16\_P35958754

CCAAAACCAACTTGCTAAATGACTAGATTCAAAGTCCTAGAGTATCAAGAAATCACCCA

A\_16\_P17230788

AATCTCTATGCTCTTTAGCAAGTCTCTTCCAATTTCAAGAAAATATGGTGCTCATGCTCA

A\_14\_P135055 CCTTTATACATGGCTGCCCAAGAGAATCACATTGATGTTGTAATAATTTGCTGGAAAAT

A\_18\_P17414462 TGGTGGTGAATTTAGATTATTAGCAGTTCTATTGATCTATTAGATATAGCACTTCTATTG

A\_18\_P22841348

CCATTTTGTGTCCTGGTAATTAATGGTAATTTCTGTTAGTTTGTTTTTTGGGTTTCTAA

A\_14\_P104411 GGAAGTCTCAGTAATCGCTTTGAAATATTTTGGTTACAATTACGTGGTTCCTGAGAGTAT

A\_14\_P110736 GGAATTCCTGCTTGGACCAGACATCAGGAATTTTTTTTTCTTTCCTAACATCCAAA

A\_14\_P114238 TTCACAATTTGGACATTTTACTTACTGCTCTCCAGAAAGACACAGAGGGAGAATTAGTTA

CUST\_6526\_PI426210822

CATGCTGCCCCCTAGTTATGATATTGCTCCTAGGAAGAATAAAAATCTGCTTCACAATG

CUST\_8191\_PI426210822 GCAATGAGGTGCCATCTGCCCTTGGAGAATGTAGAGATTCAACTC

CUST\_3379\_PI426210822

TTATCAGAGTCTTTTTTCTTTCTTGTTCCTGTGGCTTTTTAAGTTGATGAATAATAGGA

A\_16\_P16284625

AAATTACACAGTTGAAGTGCATAAATCACATCTGAAATCCCTATTTTATGATACCTGGTC

A\_14\_P125691 ATATGGGTCCAAGAAATGGTCTTACGACTGCTTTGCTGTAATAATTTCCAACACCAA

A\_16\_P21459964

AAAAAATCAGACCCTAATCCATAGCCCCTTGACAATCATCTTTGTCCTTCAAGTTTAGT

A\_14\_P117426 TATTTAAATGGTTGGAATATGTGGCTCCTTTTCCATCACTACATCTTTTCTTCCGGATCT

A\_14\_P118861 CAAGTGATTGTCCCCCTTTTTTTTTTTAACATCTTGGAGGTGAAATGAACTGGTATTATG

CUST\_7128\_PI426210822 AATGAATAACAGGAAGCCCCTTGTTCATGGTTCAGAACTAGGCATTG

A\_18\_P16711344

AGATTCCGTAACACTTGATACGTTGTAAGGTTTCTGTTTTTCATTCATTATACACCTTCCC

A\_14\_P113078 CTTTGAGGACAGTTTTGCATTTTTAACTATCACATTGCTTTGGATTGGTGTGGCTTAT

A\_14\_P101279 TACATTGCTTAAATCTGAGAGCATCACTAGGACAAGCCACTCATATTATAATGGGCTACT

A\_16\_P37619873

ACCAACAAACTACTCATTTACTCCCCTAATGACTTCTACTCATAATTGTATTTCTTACA

A\_16\_P00685523 GCTTGGTGCAAGTGAAATTCAGTCTTATTAGGAGAAACCAGCACTCATTCT

A\_14\_P132773 ACCTGTGGCATTGCATACCTGTAGAATATGATAGTCAATTTTGCACAGATCTAAATGACT

A\_16\_P39739083

ACTGTGATGCCACTAATAATCCATTTTCTATGTTCCCAAATATCTAATGACCCTCCTTT

A\_14\_P102341 TTCTTGAATTTATATGGTGCTTTAACACATTTCAAAGTATATCCACCCACCCCTCCATTT

A\_16\_P03697272

ATAATGCCCAAGATGCTTTATGAAATCTGGAATCCCTTACAAGAAAAACCATAACCAAGA

A\_16\_P37934367

AGGATCCACGCTGTATTTATAGAGGTCATTCAATAACCAATTCCTAACTACAGAGTCAAC

CUST\_10397\_PI426210822 ATTCTTCAGCACTTCTAACTCAGCTTCTCTTTCTTTCTGCCTTTCAGATGGG

A\_16\_P17962005

TGCCATTGCTTACTGATACAGAAAAACAGTATTCTGGCCATATGTAGGTATTAGTCTCT

A\_14\_P118464 AATACAGAGTATCTGGTCACGACTGCAAGAAACTGGGCTGCTAAATAAATGTGAG

CUST\_9456\_PI426210822 AATGATGCTACCTGTCTGCTTCCCTTCTGTGGAATTTACCCTCTCTTAG

CUST\_4047\_PI426210822 TTTTGCTTAGAAAAGTCCTGATGGAAAGGTTGAGGTGGGAAGAGAGTG

A\_14\_P113670 CCACCTGTGAGTTGTTCTAGGCTTAAAATTTAAAATTCATGTGTTTACTTAAGACTTTTA

CUST\_9655\_PI426210822

TGTGTGAGAAGCGTGCATGAATTCTTGCTATTTTCTTGATATTTTCAAATAGCAGAATAC

A\_14\_P122680 GTGCCGTTTTGTTGTTATTCACATTTTATTGTAACCTTAGGAGGTGAACGACCTAAGATTA

A\_14\_P119246 ACATATAAATGCTCTAGAGGATTTCTGAAGAAACGTGTTATAAGTGCTTACCGGGAATGT  
A\_14\_P124103 AATGCCTAAAAAATTGCTGCAGGGTATAACAAGGAGAGCATCTGTAGTTTGGTGATATAA  
A\_14\_P106247 CTAGGCTGGGCCTTGTAAGAAGAACAACACTGTTTATAACTATTGAAAGTCAATATTTACTA  
A\_14\_P114809 ACAAATATATTTTGATAGGAGAGGTGAATAAACAAAAGATTGAGAGTGGAGGCTACCCCTG  
A\_14\_P118941 GGTAAAACACTACATCACTATTTGCAATCGGGTCTAAAAATAAACTGCATTTGGAATGGGT  
A\_14\_P105788 ATCAAATAAATCAATGGTTACCTTGTAATCTGACCCTGGACATGAGAAAGTGTCTGTTC  
A\_18\_P10598967

GAGTCACTAAAAACAATTGCAAAAAGATGTCTACATTCTGCTTTAACCGGAAATCAGTGG

A\_14\_P124875 TCCCCTCCCATCTATAGACATGCATATCAATGGGACATATTTGTATACACTTGCTTAAAA  
A\_14\_P132891 TCTGGCACCTGATGATTTCTTTCTTTCTTTTGGGGGCTTAACTGTGTTTTACATTTTTAT  
A\_14\_P106612 CAGCCACAAAGAGAAATACTGAGAGATGACATTACAGAATGACCTTTAGAAAAATACGGT  
A\_14\_P127193 AGTTTAAATGCCTTGAGTATTTCTTCATGGGGATCTCTTTCCAATATCCAGTCTGTCC  
A\_14\_P110498 CATGTTAGACGTATATTACAGTCCATTTTCAGTCACTTGCACTTACAGAACACAGGCATA  
A\_14\_P102349 ATTTTATTAGTCGGTGTGTTTCAGTATCACGCTCAAGACAAGGGCCAACCTATTACT  
CUST\_8373\_PI426210822

ATAGTTTTGGGGGTGCTTGCAATTAAGATGTAGTTCAGAAAATTATTTAGAAGGGTTC

CUST\_6742\_PI426210822

CCATCTGCTGGCTTTTTTCTCTCCTAAATAAAGCTAACTTGAAAACACATTATAAAAAGAG

A\_16\_P03556520

ACTCAATTCAACATGCAGTTAACTCATAACAGAGAACTCCTAGATGTTGTGTATTGTTCT

A\_16\_P16903891

AAACAAGGGGAAAAATTTCAAATGGTTCTACTTCCATTTTCATGTTGACATTCTCTAACCC

A\_14\_P129617 ACATCTCATTCTGTAAACAGTGTTTGGGAAACATCTTCATCTGAAAATTATGGCAAAGTC  
CUST\_9621\_PI426210822

ATTTTTATGCCATGGTACAAGTTGTGCTTTACAGAGCATTGGGGTGAATAACTAGAAATA

CUST\_8124\_PI426210822

TAAATCACAAATGTTAAGATGACCATATTATCTTCTAAGCACACACCAGAATATTTTCAGA

A\_18\_P13339677

ATTTTGAGTATTATCTCACACGTAGCATTAAATTTGTTCGTGGATTGATACCTTGGACCC

A\_14\_P127114 CTACCATTGGGTGTGATGTGACAGAAGGAAGAAAAATGTCTCACCAGAGAT

A\_14\_P113266 GTTTCCAAAGTCAGTTCCTTTATTTAAATCATTTTCACAGACCAGAAATACAAAATGAAA  
CUST\_2060\_PI426210822

CCTGGTTCTGTCTTTATTGGTTGACTTTCTCCAATAGTACACTTAAGAAATCACCAAC

A\_14\_P115957 CATATACCCCTACATGTATCTGTGCTAGGCATACATCCCTGTAACCTCATGGCATT

A\_14\_P118458 CTGCCTTTTCAAACATTTTGATGAAAAAAAATTTCCCAAAGAGATTTTACTCTTCTTC

A\_18\_P14117570

ACCAACCTCAACCACTATAACTTCATCAGTAGCCAAAAAACTTAATCTATTTACCTCCT

A\_14\_P127004 ATTTATCCAGACCCACCAGGGACCTGTGCATAACTATAAGGAAAAGAATGTATTTCTC

CUST\_4080\_PI426210822 ATCCAAATGGGTTTTCCAGCCATCTTCTGGTGCATTTCTAACATACC  
A\_14\_P119233 CTAGCACTTTCCCTCTTTTATTTCCAGAGTGAACACGTGATCAGAAAAATAATCACCAATG  
A\_14\_P132841 ATTAAATGTCCAATCATTATCTTGTAGTGCTCCCATAATAAAAATCACCACCACCATTTA  
CUST\_5661\_PI426210822

GGGCATCATATCAGAGCTTCTTCACTAGCAGATTCAGCAGAGCTATAAAATTTAAAAGAAA  
A\_16\_P19565414

ACCTCCTACATTTACCTCATACTGAAAACCTGATACTTCAAATGATGACCCTAAGTCCATT  
A\_14\_P101433 GTCAGCCTGGCTTTTAGAAAGAGAATTTTATTTGGAATGAAAATATAGAGCCCACCCCTC  
A\_18\_P22839401 ACATTGCCTTTGGGCCTCCCTGGGTTTTCTAGGTTTCAAATTTT  
A\_14\_P121117 TTTACAATCATGTGGACACAAGCATAAGTAAAGAAAATTTGTCAACCAGGCAAAATGTGG  
A\_16\_P18760273

CCAGGACTGTTTTACCTCTCCTTTTCATTATCTCCATGGAATGTTGAAGTCACAAATATA  
A\_14\_P116946 TGAAAGGAATCTTCATGAAGATTTTGTATTTCATGAAAACGATACAGAGATGCAACACAGG  
A\_14\_P139592 TAACATCAAAAATGAAGTGCTCCCATGAGAATATTGTGCAAATAACTGCTGAGGTTATC  
A\_14\_P102643 ACAGTTCTATCCTACAATCTTCCTGAACTCTTCTTGATTATTTTTGTGTGTTTGTGGGT  
A\_14\_P118551 CTGAAGTGAGTAGTGAATATAGTATGGACAAGGCAATGGTTGAATTTGCTACATTGGATC  
A\_14\_P102355 CATCATTCCTTTACAGTTCCAAAATCTTCCTAAGGAATAAAACCTGCCAGGTA AAACTTT  
A\_14\_P130154 CTGTCTTCCTAAGGGCTCCTGGTGGATATTTGCTATGGAAAAAGGAAAATACAATATTTA  
A\_14\_P104685 CTAAGTTTTGTAAACCTTCAGCGTCTCCTAAGCACTGCTAACTTTTAATGTTAAACCT  
CUST\_9138\_PI426210822 GTAATCTCAGCAGAGGAATGTGCATGCCACAGGGCTGCAGAAAAC  
A\_14\_P201145 GTTTTAGGATATTAGAAATGGCTACTCCCCAGTCAATTTTCATCTTTGCAATCTGCATTT  
A\_14\_P120784

AAAGGCATTCCAGAAAAAGGAAACTGTAAACAGCACACGAAAAAGCATAGTGAATGAATA  
A\_16\_P02599000

CCCTACATCCAATCAAATCATCATAGCAAGGTTTTTCATCATTTTTTATGGAATGTCAGCC  
A\_14\_P116250 TATTTTGGAAAGAAAGGGCTCTGGCAAATGAATGTCGTGTTTTCTTTGTTACCACAC  
A\_14\_P139445 GGGAGTTGTAAAGTGTAATCTCCTACAGGATTATTTTTAGGGTAGTGGGCAAATA  
A\_14\_P114553 CAATTTTACTCACCTCCCCTTATCACTTGCTTATCAAATGCATGCATCTGCTCTTAACT  
A\_18\_P14059250

CTGTCCAGATTGCCAATCTTTTTATTGCAAATTA AACTTCCAATACTCCAAGTGCTCAG  
A\_14\_P106355 GTGCTAGATCTGAAGAGGGAAGACTATATTATGATGGTGAATGGTATATACGTGGACAAA  
CUST\_4196\_PI426210822 ACAAGAAAAATCAGTGGATGGCTGGAAGGCGGGGCTTTCCCTTTT  
CUST\_2498\_PI426210822

TAACTGGATAAAGATACATGATTTCAAACCCAACCCCAAGTGATATCTGGCCTAG  
A\_16\_P36231024

TGAAACATCATCAAGGTATGTATACGCATTTTGGAACCTATCATATAAAAAAGAAAACCTT  
A\_16\_P16756569

AGCCTTCAGAACTTACTAAGTGGAATCATAAGGAACTATTTAATGGCCTCATCCAATTGT

A\_14\_P115615 ATGAAGGGAAATATGAGTATCCGAACTGCAGAAACATAATCTGTTGTCCTTTTGTGAAAT  
A\_14\_P126472 ATTATATACTTACCAGTCTTTCCACTGCTGTGACATTTACAGTCTATATCATTTTGGAC  
A\_18\_P11914852  
ACACTTGTGAAGCATTTTTCAATTTTCCTGCACAGTTACATTATCTCAGAACGGTTCATT  
A\_14\_P124920 ACACACTGAATCATTCTGTTAACATCCCATTCACTTGAGGTTTATTTAGGCATTTTGTG  
A\_14\_P127998 TTTTAAAAAGCAGCCCTAAACTCAGTTCACAGACAGATTTTCTTGATACCATGCTACAG  
A\_14\_P106305 ATCTTCAGGCCTTCATCGACAGTTTCATACATCCTATATCTCATCAAAAAATGTTCCATCA  
A\_14\_P122998 AGGGATGCTTAGAAAGTTGATTCTGACATCACATACCAATACACAAAAACAAAACCCAAA  
A\_14\_P102189 CTGTTGTTAGAGACACTGTATTTTCATGGCCTAAAATGCTTCAAACGTTTGAGATGAGAA  
A\_14\_P118319 TTTCCCTGAAGATTTCCAGTGTATTCCACAGTGTTTAAAAAATAGTTTCCCCAAAATA  
A\_14\_P114079 CTAAGTGTAAAATACTTTGAAAAGGGATATTGGAGATCTTGGTTCCCCCAGAGAGATA  
A\_16\_P20373036  
AAGGCAAATAACTGACTTTTCACTTTTACCTGGTAGTAGAAATGTATCATGGGTATCCACA  
A\_14\_P122288 ATACATCCTCTCTCGCACTGGTGGAAAGCAAATTGACTTTTTGTTTGTGTATAAAAAAC  
CUST\_9521\_PI426210822  
ACATAACGTGTGCACGGTGGTAAATTTAACTGATGGAGAAATCAAGCAATTTTCCT  
A\_16\_P21495769  
TTTGACAATTAGTTAGGTGAGAAGCATTTTTGTAGCGATCCAAATTAAGTCAGGTGACTC  
A\_16\_P16053513  
TGCCATTCTCCAACATATTTACTATCAAAAAAGAGCCCAAAGTTAAGAATTATGCAGGA  
A\_16\_P03056462  
GCTGACATAATATACCAATAAATGATCTTAACTGCATCATCAAAAAAGTCATCAGTGCC  
A\_16\_P18181901  
ATGTCTATTGGCTTTTAAAGAAATTTTCCAAAACCAAAAAAGGTGAGTTAAAGGCAGGAG  
A\_16\_P01075001  
AAAACCCTATTCTTACATTGCTAACTCTCTCTACTACTATCTTGGGTCCAAAATCAGG  
CUST\_9962\_PI426210822 GCTTTAGCTGATGAAGGTCTGTCTTCTTCTTGTTCCTACTGTGTC  
A\_16\_P30952249 CCTTTGAAAGCAGCCAGCAGAACATCACTCCTCAACCCAAGTCTG  
A\_14\_P124624 ACAAACCTGGAACCAAAACCCACTAACTTAATCTCTCATGAAGATTTAAATGTTTCATGGTTG  
A\_16\_P58424189 GAAGGGACTTGCTCACACCTTACAGTTGACAAGTAGCAGAGGTAGGATTTAAA  
A\_14\_P125622 AGTTTTTACTTGGCTCACAGTCTGTCTAGGAACATAAATTCTCCTTGTGTCTAATTGAGA  
A\_16\_P15998784  
AAACACTTAGGTATCCATTCCCATCAATGAAGTTAAAAGCAGTAGCACATTCACATGTTG  
CUST\_2893\_PI426210822 AATGAGTGCCAGCCCTGGGCAGGCCTTCCAGGCACCTCTCAATGT  
A\_14\_P115881 CAATAGAAATTGTCAGTTCCAAAGGCTCAGGAACAAAGGATTTTATGCTTTTTTTTTCTC  
A\_14\_P115275 TCAACTGATCCCTAGGTATAACAATAAGACATACAGAGTGGATGATATTGACTGGGACC  
A\_14\_P136869 TAGTTCACAACCTCATAGCAAAAAAGATGCCATGAACACTATGTTCCATTTACGACATTC  
A\_14\_P118255 AAATAATGCAAGTCAGGGTTATGAAATAGTGTGATGCCATCTCAAACAGAACCTCTTACA

A\_14\_P103547 GTCTACCCATTCTTATTTCTGCAGCATATATAGCAGTGACGAGGATGATGAGGACTTT

CUST\_5964\_PI426210822 TCCCAAACCTGAATGTGCAGATTTCCCACTGAAGAGGATAAACAG

A\_14\_P105768 TTAGGAACAATCTCAAGATATAAGTGGCTTCTATCCAATATCTTGGAAATCAGGGCATGT

A\_14\_P139157 TGCAACTTACAAAGGAAAACCTCTTTATTTCAAGTTTCCGAAGCTGACCTAGCCAG

CUST\_8017\_PI426210822 CTGACTCTACACCAGTCAAGACCCTGCCTCTCTCTTCTTCTTGT

A\_14\_P133103 TCGATCTCTTTTAATTTTTAGGCCAATTTTTGAGTAGTCAAAGTCAGAGCAGTCAATCTGT

A\_14\_P136438 CTAAAATTAGCAACCAGATGGCACCCAGAATAGCAATCCATCCTGAAAATAAGTAAATAG

A\_14\_P100217 AAATAGTGTGAATAGTCTTGATTTGTGGGAACAACCTACAAGGGAACTTAAGCATTCCAT

A\_14\_P139383 ACAGAAAGTGACAGGAGTAATCACCATTGTGATGATCCCATAGAAATCAACTTTACTAAC

A\_18\_P26794317 CCCCAAAATCCCTATTGGTGCAATAAATCCTCTCTCCTCCTCTGATTAG

A\_14\_P131565 CTTAATTAACAGAAATAAATGCACACCCATTAGAGTTCTTGTGTTTCTGCAGTGCTGTGG

A\_16\_P17438709

ACAGAATTGCCAATACTAGCGTATCACCAGGAATACTTACGAACCATACTAACTCACATG

A\_14\_P126380 GTCACTATTGATAAGTATTTTTGCATCCTCTTCTTTCAAAGCAGTGTCTTTGTTGCTG

CUST\_6013\_PI426210822

GACTGGAAATGCTGGAAATTTATTTTTGGATCGTAGAAAACTTCATGTGGTGGGA

A\_14\_P107526 ACCTCTCTACTTTCACTTCCCTGACAAAAATTGTCATTGTGAAGTAAAAAGTGAATCATG

A\_14\_P124540 ATTTTCACAGTTGTGACAAATAATAATGCTCAGGTTGGCTGTATGAGGAATTATCTAGGG

A\_14\_P130979 TGGCCATGGAAAAAGGAAATAACTCAGTTTGTGTTGAAGTATTTGTGGAATGCACTTTAAG

A\_14\_P133005 CTTTTTCCCCTGTGAAATGAAGGAATAGAATGATATAAAGCATGACTACTCCCCTCTAT

A\_16\_P36230759

ACACTTAGCAGAAAACAAAGAAACCAGTTTCTACAGACTTTTCTGTAACATTAATGTCCA

CUST\_13\_PI426210822 AGTCAGAACCTCCACCCAAGGCCAGAGGATGCCCAATGTCATGT

CUST\_7215\_PI426210822

TCAATCTAGACCTTGCCCTTTTCTGATCACTGTTCTTGACACTGGATCTAAATTAAGA

A\_14\_P113323 TCACAGACAGAATTGTAGTGTTATAGAAGACTGGCCTTGAGGAATCTAGATTTAATCTGC

CUST\_4221\_PI426210822 AATGCAGTGGGACAGACCCGGTTCTATTTCTTGCTTTGAAGAGATTG

CUST\_1524\_PI426210822 ACTCCAGGAGAGCAGAGAGCTGGGGAAGGGCATGGGACATGGGGG

A\_16\_P18116566

AAAGTGAAAACCCATCCTTCATTTTTACCTTCTCCCAGTAAAATACATTTTTTTCTCA

A\_14\_P130403 GTCTACAGAAGAACATGACTCTATAGACACAAGAGCCTGGAAAACAATCCTAGTAAATCA

A\_14\_P128181 TTTAATGCAGTTCCTAACCAGGAATCTGTTAAAACCTCAATTTCTGCTCTTAATCTCTGC

A\_16\_P21262674

AAAACCCCAAACAATAATTCTGTGTCAGATGACTGTATTAGAATGTGCTTACATGACAC

A\_16\_P21388702

GCACACTAGATCAAGCCAAGATGACTAGAGTATCATTCATGTCAATACAGGATTAAGAA

A\_18\_P10769047

GTTTTGCACATGTTTTCAAGATCAAATACCAACCATCATATAGTCCCCGAAATGAGATG



A\_14\_P110724 AGATGTCTTTTTAAGAACAGGCACTTAAAAAGAAGTGTGTATCGATGCATCCACCTATCT  
A\_14\_P104758 CTCCAGGTTCCATAAATGATAGTGTAGGTATCATTCTCTCAAGAGCAGATACTAAATCT  
A\_16\_P58424333

TCCTGTCTATCATGGAAGGAATTTAGTAAAATAATGTCTAGATCTGATAAATCAACGAGT  
A\_18\_P22839428

TGGAGTCATAAATCATGTCTGTAAAATGAAGATGTGTAGGCTTTGGTAAGATCTCACATG  
A\_14\_P120221 ATGCAAAGATTTAACGAGATGCTATTTTAGGTTCTAGCACCTACACACAATGGAACCTCAA  
CUST\_5307\_PI426210822 AGCCATTGCCAGGAAGCAGCATTTCGCACCCCTACATGTCCAAATG  
A\_14\_P129633 AAATTTTATTCATTTAACATTTTCATCGTGCTCTCACTCAGTAATGGTGCTGGGGAAACA  
A\_16\_P58424420

AGGTTATTCCCAGTTTCTATATTAAGTAAAATTGTGAGAAATGTCTTTTATGGAGATTAG  
A\_14\_P132683 CATTCTCACCCCTAATATTAAGGTGCTGTCCCTTATCTTCTCTATGATCCAGTCATATTGGA  
A\_14\_P113287 GAAGCAGCGGCCAGTAGGAGAGAGTTGGAGCCTATTAATAAATAACACATATATTCATAAA  
A\_14\_P138565 TATGATTACGTGTGACTTGCCATTTATTTGGCCTAAAATGATCCTTTTTCAAGTTTGTC  
A\_14\_P108004 ACAAGGATGCTGATTTGGGACAGTGTCACTATTTTCCAAAATGCCATAGCAAAG  
A\_14\_P138374 GATTATTGAAGAGTAGGAGTAAACTCTTGCTTTCTGTTACCTAGGGCAAAGCATATCTTG  
A\_14\_P122235

CTTTAGAGCAGGTCACAAAAATGACAGAGAAGGACTTGAGAATCAGAACTTTGAAGATCA  
A\_14\_P109572 TGAAGACCAGCATGAGAGGTCCATAGAGTTCACCTGCAATTTTCTGTCAATA  
A\_14\_P128191 CTTTCAGTGAAAGAGATCACCCAACATCAATAACTTGTGATAATATTCTCTCCCTCCCTA  
CUST\_1112\_PI426210822 GAAAAAGGAAAAGCCTCTGGAACAACCGGTGGGGCAGCTCTTCAG  
A\_16\_P58424216

ACATGAAGTCCTTATAAAGAATACAATTACATATGTTAATATGTGATTATATACAGAAAA  
A\_14\_P103477 AGAAGTTCATTCTACTGGAGGGATATGAGAAGTCCATAACCCAAAAAATATTTCAACTT  
A\_16\_P17527094

TTCCAACCTTTGTCTCCGTAGTAAATGTCCACGTATTCATTTTACCCTTCAGAACAAAAAT  
A\_14\_P200589 TACAACTAATACCACACAGAGTTTCTGGATTTCAATTCCTCAAATCTCTCTGCCC  
A\_14\_P115193 TGACTTCTGAACTGTGCTTTCTGGAATACTGGTTTCATAAGATGTTAGCAGTTATTTTG  
A\_16\_P20138493

GAGCCATAATATCCCGGATCATCAAATGTTCAATAACATTGCAAGTCACATCTAACCTT  
A\_16\_P36647817

TCAAACATGGTCTCTTAACACATAGATTCATGAACTAAATCAAAGATTCCCACACACTC  
A\_14\_P132316 CTGGTGGTAGATTGGTTAGAGAGTATTGCCAAAGATGAAATTGGAGAATTTTCTGATAAT  
A\_14\_P100394 TAGGTCTCCAGCAGTTCTTTTTTTTTTAAAGCATTTTCCTCATTAGCCTTGGGCACTTA  
A\_16\_P16981501

GGTAGTCTTAATTCACACACCAAGATAGAAGTTGCTTTATTCTCATTGATGTCTCCATCC  
A\_14\_P112237 ATTCTGAATGTATAGAAATCTTACGTTTAAAGTGAGTTCTCCAGGATGTTCAAATGGTGCC  
A\_14\_P130584 AATGTAATTGGAGTAAGTGACAAAATAAGAACTACCCTGGGAAACCCTGCATTCAATGT

A\_14\_P107377 GGGTCCATGGTGGACATTTTACACTGGATTAATTCATGTCTATTTTGGACTCAATTCAAT  
CUST\_5290\_PI426210822 TTAAGCAGTAAAATTCAGCGACTATGGTCTGTGCCAGAGCCCTAAGC  
A\_14\_P134160 CATGAGATATTCTCAAAGTTAGAAGGAGTCTGTAACATTTTGGCTTACAGGCAGAGGTTTG  
A\_14\_P137455 GAATGTTTTTGGCTTCTCTAAAGTTTGAGGAAGTGTTCGAGAGTGCCTCTCTCTAAC  
A\_14\_P112613 TAAAATTGTTTCATCACCAATGCTCTTTGGGATTGTATCACCCAGAAAAAGCAATGCTTAA  
A\_16\_P02309532

GCATGAAAGACCATGATATGTTTGGGAGAAATAGGAAGTAGTATGAACAATAAGGCAAGA  
A\_14\_P111868 ATAGGGCGTCTCTCACTGAAACAAGACAGTTATATCTGGCACGTATTAGTTAAGATGAA  
A\_14\_P200329 CTCCGATTTTATTCGCATCCTTGTGATCTTCTCTGGAATGTTCTTGTTCAC  
A\_14\_P115256 CCTAGTATGAGTTAAGGTCCCCATTAGGTAGTTCGTGAATAGGAACATATGCATAAACA  
CUST\_7358\_PI426210822 TTAAAGCTCTAGGACAGACCAGCAGCTCTGGAAGTGACTGGATTAANAAC  
A\_16\_P36895232

AAAATCCTCAGACTATCTTTCCAATGCCTGAATAAAGTTTAAACTCACCAAAAACCTTTCA  
A\_14\_P115779 GAGTGAGTGCCATAGAAAATGGTGATTTTATTTTTGTTTATCTGTGTGTAGGCCAGACT  
A\_14\_P128771 ATATACTTGCCTGGTGGGTATGATTTCCAGGAACATATACAGACTTAAACTGTTTCAGGA  
A\_14\_P118273 CTTGTGTAAGAACCTGAGTTCCTTGTAATTAATATCAACTGAATTACATGAGACTGTGG  
A\_16\_P20954370

AAGCAGACAACAGAATATAAACAATGAGTTCAAAAAAGTGGGAGAAGTATTGTGAAGGA  
A\_14\_P124755 TGGTTCTTGTTATGTTCTAGGAAGGGAATTTAGTTTAGACCAGTATTTCTCAACTGTTTC  
CUST\_5308\_PI426210822 AAGCAGCATTCGCACCCCTACATGTCCAAATGCATTACTCATCCAAAATAA  
A\_14\_P114235 CTGCAGCACCTTGATGTAAAGACCATTAAAAAAAAAACAGAGGAAGGTATTTCTAATTCC  
A\_14\_P113506 AGAAATAACCACATGAAAGAATAAATGATTGAATGAATGTGCCTTTCTAAGGGAGTGGCT  
A\_14\_P115855 GGCAAAGCCTACTCTGTTGTTGCCCAAGTCGTAGACGGAATAGTAG  
CUST\_5456\_PI426210822 GTAAGTGTAGGGGAAAACACTAGCAGATTGTGACCCATGCCTTGTAGATTAGAG  
CUST\_1377\_PI426210822 CAAAGGAGTGAAAACAATGGAAAGCATGCTTGTGGCCTAGGCTGT  
A\_14\_P100728 TCCAAATAGGATATAAAGGTCAATAGAAACAGATGACCCCTGAAACTGACACATAACAAG  
CUST\_3184\_PI426210822 GAGCAGGAACTGGGGCCTGGGGGGTGTGGTTCAGGGGTCAAGAGC  
CUST\_4559\_PI426210822 TTTCATTCTCCAGCCTGTCTCTTTTCATCCCTCTATGGACTGAGA  
A\_14\_P136702 CTGACACGTTGATCCTGCTATGGATTACTGGTTTTACCTTTAAAAGCAAAGGAAAAAAA  
CUST\_3007\_PI426210822 AGGTGCCAGTGTCTTCTGTGTGGGAGCACTTTCTGTATGCATTATT  
A\_14\_P126703 ACTCATGTATGGTAGGCATTTGAGTTTTTACTGGAGTGAACAACCAATCAAAGTCTAGTT  
A\_14\_P201479 CTTTAAGAACTCAAAGCATGCTTACGTTTTGCATTCAGATGGTTAATGAATCCAGTGTTT  
A\_14\_P135547 GCAAGAACCCTGTGCTTATTTATTTGTCTTCACTTCTGCTATAACATTTAAAGGTGCAA  
A\_14\_P137864 CTCTGAAAATCTCTTGAAGATCAGATGTATTTATCTTCAGACATGTTTCGGATTTTGCCC  
A\_14\_P139155 CTTCTACTTACTCCATTTTGTCTTCGAAAGGGTTGTTGGCATCACTTATCTTTGTTCTTA  
A\_14\_P127900

ATACAGAGATAGGGACATAAAGGAAACAAGAGGGCAAAAAAAGACTAGTTCATGGAAACT  
A\_14\_P103535 TGATGTTATGACAATGAGGTATAAAGTCCAGTAAAGAGAAAAAAGGATGATGACCATCCC

CUST\_7070\_PI426210822

ATTTGTTCTGAGATTATTTGTTCTGAAGGAGGCCCAATCCAGTTCAGTTAAATCTGA

A\_14\_P101237 CTATGGAAGCAAGAAGGAAGCATGGATTCTAAAACTGACAACAAACCACTTACCC

A\_16\_P18590867

CTGTTGCTGAGGAAAATAAAATTTTCATCACATCTGGTTCTAAACTGCAATACGAGTGGAT

CUST\_880\_PI426210822

TCAATGTTAAAACAATTAGAAACCAAATTAGTTGCCATCTTTTCTTGGTGGCTGATTCTA

A\_16\_P19162444

AAGAGAGCAGAGGAATAAAGTGACTAACAGATCTCCAAAAACAACCTAACTACTGCATTT

A\_18\_P14133460 GAAACATGCATTCTCCAGAAGTGAAGTATGCAACTGTTTGCTTTTCGACCTTACAG

A\_18\_P13564338 TTTTCCAAACTTTGGTCGAATTTCACTATTCTAGCGCCTATCATAATACTCCCAACTG

A\_14\_P115721 ACTTTGTTCAAGAAGATGTATGCTTGAAGTCTCAGGTAGAAAAGAACTTTTTCTTCCACT

A\_14\_P138206 ATCTGTATATGGTAAACAGGGGTTTAAACCACATGTGGTTAACATGGATTAATGTGGGAAC

A\_14\_P116657 ACTTGATTTTCAGAAGACCCTTAAATCAAAGTCCACATTTATAAGGCCAAATACGCCAGAT

A\_14\_P134353 TCAAAGGAAAACAGACAGTGTGAAATCAGCATTAAGATTCAGATGACAAAGATCCTG

CUST\_2043\_PI426210822 TTCTTTAGGGCTCTTCTGGCCCTAACCTTTGCACCATTCCATAGG

CUST\_8171\_PI426210822 GATGAGCTGAGCCAGCCTCAGCAGGTCTAGGGGACTCTTTTCTTC

A\_14\_P112741 AGCATCTTTGCTGCACATTGCATGAAACTTTTCAGTTATTTTCATATAACTTCCAGGTGTT

A\_14\_P202478 GTCTGAGGGCATCAGGCATAGAATACATTAACAAATTATTAATGGATGCCAAAGAACCA

A\_14\_P138198 TTGTGTTTACATTTTCCAGCAAACAGAAGACCATAAAAAGAATTGCGATGTTTCATAGG

CUST\_3295\_PI426210822 AGAAAGGATGTCTTTCAGCTATCCTATTTTTCTCCAAAGGCAACCACAGT

A\_16\_P00930965

ATAGCCTCATAGACATAGTGGTAATTCTGAAGTGGAGTAATAAAAATGCGATGGTTGGAG

A\_14\_P120573 GTCTTATCTTTGCATTCTTTAAAGTCCCCAGTAGTATGCCTGCATTGCAATTGATAATGT

A\_18\_P11943703 TCACTCTCTCCATATACGCATATGTTTTCTCCCAAAGTTTCTCATTACCCATCCTTTATA

A\_18\_P16361329

AGATGGAAATCCATTTCCAAATGACCTCATTACACTGCTATGGTCTGTAACAATTTTCGAG

A\_14\_P129713 AGATGTGTACAGTAAGGTGACAGATCCAATGTTTACTCTGAAATTTACTACACATCCACAG

A\_16\_P19610922

ACAGCAAAACCTGATTTAGTGTCTTTGTTACAAAGTGGAAATTTAGAAAAAGGCAGGAGA

A\_14\_P124876 CATTAGAGCCTGGAGTGATGAGAAATGTCTAAATGTAGGTAAATAGACAAAGACTTCCAG

A\_18\_P17262226

AACCACCTCATTTGTTTCATTTTCGTAAATAATCTCCTGCCTTTTTTAATCACAAAGTCCCTA

A\_14\_P136163 TTTTCTACGTTGGCTGTTACCATCCAGATAGATGCTCGGCTCAGC

CUST\_5671\_PI426210822

AAAGGTGTCGGCTTTGTTGAGAAGTCTTACTTTGTTGTCTTTCAAGTGAAAAGTG

A\_14\_P102785 CTCATCCTTCCATAATGTTCCAAATAAACCTTTAAACCTGTGTGGGAATGAGAGTTCATG

A\_18\_P14133344 GAAGACAGAAAGATGAGGGCCACATCCACAGAAGTCATTTCTTCTCT

A\_14\_P134315 CGTTAACATCACAAGTAGGTCAGAAAAAATCAGAATTCGGTTCCAAATCCAAAGTTAGT  
A\_14\_P113603 TCTTCAGAAAACCTTCTAAAAAGAGGCTGCATCTGCTTTAGTTGCTTAGAGGAATGCATAT  
A\_14\_P114947 TAAGGATCTGTATTACTGCACAGAAAACCTTACAGCCAGTGTGAGAATTCATTGTCTGATG  
A\_14\_P138546 GAAAAAACTTTAAACTCTAGACTAAAACCTGGGAAATAAGTGGATAGGCTCTCAGGATGTT  
A\_16\_P03039908  
CCGAATTTCTGCTCTTTTGTCTAAAATGTCAGTCTAAATCCTTACTTGTAATTGTGCCCT  
CUST\_6114\_P1426210822 ATGGTTGTAACCTTGATAGTGTGTTACCATGGGGGTTGGGTGGT  
A\_14\_P113669 CTAAAAACGACAACGCAATTCAACCCACCACAAAATGCTTGTTTTTCTTATCCTCTCT  
A\_14\_P133745 GTTCACGGCTGTCATATCTGTGGCTAGAGAAAGTTTTATTGGCTTTAGTTAGTGTTTTCA  
A\_14\_P100559 TAAACAGGTAAAAATCCCGTAATTTATCACTACTTGGTGTCCATTCTCCCAAACACTTT  
A\_18\_P11655651  
AAAGCAATTGTCCTTTTATTTGTGCAAAGATCCAATTTGTTCTGTCATTAGATTTCCGCC  
A\_14\_P110676 TTTTCATACAGGTTATTTTTACGATCTGTTTCCAAATCCCTTTCATGCTTTCCACTTCT  
A\_16\_P16781780  
CTCAGCAGCAGAAATCTTATATACTCATTCTTCACATAAACCATACCACATTCTAACATT  
A\_14\_P101184 ACTTCTTATAGAGTATTATTTTCAACTATGTTGTCACCTGCAAGAAGTAGTTGAAAAGCA  
A\_14\_P138621 CTGTTATTTTAAAATGTGTATTATTGCATTCATGCACTGGGCTTATGAACAGAAGG  
A\_14\_P105550 CTTTGGATTCAGAGAAAATGACATAAAGAAACCTCAATGCCACATTTCTGAATTCTGAA  
A\_18\_P14135314 TGGTGAGTGTGTTAGAAACTGAATTACTCTGTATATTTCCCCAGGGCCCTTTTT  
A\_16\_P30952464 ATCTCCCTAAACATCTCTATCTCCAACCTCGGAGATGATGCCTATGATGC  
A\_14\_P116335 GCCAGTTTAAAACCTGCCTGATGGTTTTTTTTTCCACCTTACTATAAAAAGACACCTTGAA  
A\_16\_P58424453 CATTTGTAGGAAACAGTAACTCCATCCTTCTTGGCTCTCCCTTTTCTCTCATA  
A\_16\_P17854111  
ATACATATGTCTCGGATATCCCCATTTAACCTCCTATTCAATTTAGATGCAATGCCCTTT  
A\_16\_P37819466  
AAGTTCGATCTCATCGTAACAAAGTTCTTCTAAATTACCTCGTATTTTGATAACATGCCA  
A\_16\_P16743541  
AAACCCTGTCACTCACTATTGTAGGTCTTACTCAAGAATAACTGAATTGTGTCATTACA  
A\_14\_P104805 ACTCAAAACAAAACAATCTCTTCCACCAAATTTCTATCAGGGATTTGAGAGTATTTTCAGG  
A\_18\_P16460279  
ACTTTAATCCATGCCATCTTTTCATGAAATCCCACATGTAATTAGTTCCACAGATAATGGG  
A\_18\_P22843389 GAGAGGGGAAAATGCAGAAAGTGTGTTTGGAGGCCACAGAACTATAAAG  
A\_14\_P125704 TTTTCTGCTTTTGCAAGGGCTTGTCTGTAGTAAGATACTTTTCTCCACTATGGATTC  
A\_14\_P118743 TTACTTTCTTAGTTTAGGAACGAAAACACGAACTCTGTGGAACCTGGCTTGTCTTATGT  
A\_14\_P201141 CTATCTTATTCTAGATGGTTCCAAGTCTACTCTTCCTTTGGTCTTCTTCTGTCTGTCAA  
A\_14\_P128185 CAACACACCATCTTTATCATCAGAAAATCGAACATTTGTCCTGGTGTCTCTTGCTTATA  
A\_14\_P120357  
TAGGCATATACAGTGAAGACACCAACAAAACAAAACCTACAGCAAAGAGAAAACCTTGAAT

A\_14\_P101971 GAAAAAGCATAGATTTTTATTAATAGGAATCCCCTAGACTGCAAACCTTACAGAGAAGAC  
A\_16\_P30007526

TCCGTTCTGAAAACACTACAAATCACTCACTATAACAAAATAAGATCCAGAACTTTCCATT

A\_18\_P14136776 TGGACTGGAAATATGTGGGTCTGGCTTTCCCTAAACTATAGTATCTGCCAAAAAA

A\_14\_P119405 CTCTACAAATTCGAACCTCAAACACAAAACCAGTATTTCTCCGTAGGGAACCTTAATG

A\_14\_P110323 CAAAAAACTCACAGACCTCAAGATCTCCATCTGCATATGCTAAGGAACTCCAAAC

A\_14\_P110040 ACCTAGACCCCAAGGATACAGTTACTTTTTCTGCACTCTATAGATTTTTTCTCTTCTAT

A\_18\_P26794363 CTCCGGACACCATCTCTGGACACCCTCCTCTTTTCTAACTCAAAC

A\_14\_P135268 CTTCTCAGTTTCCCTCCATGTGCGAAAAAATGAGGATTCGTATCATAGACTG

A\_14\_P111100 TCTGTGTTTGTGCATTTTTAAATTGCAAAAAGTATTGACTGCTTTTCGGTGACGATTTCAA

A\_14\_P117962 AAGATGAAGTAAGGCAAATTGCTTTCTTATTATGTTTATGCTCTCACCCATATACCCCG

CUST\_402\_PI426210822 AAAGTTGTCAGAGTGTTGTTTCAGTGAGGAATAGGAGGCAATTCCAAGC

A\_16\_P17328093

AAAAAGACTGTAGAGAACTTTTAACCTGGAGTAGGAGAAAATCAAACATGCAAATTCCT

A\_14\_P137332 ATAGTAGGTTTTCAATAAAGATGCCTGTTTGAAAGATTGTTTCTATTTGCCTTCCAGAC

A\_14\_P104955 AAGGATGTTTTGTGGAAACGGTATTTCCCAAACATTCTTAAAAATCAAGTTTTAGTGAGT

A\_14\_P106371 GGTGACATTCTTACTCCTCAAACCTCAAACAACCCTTCTCTAAATTTTGTCTTTAATG

A\_16\_P18330844

AAAAGCAAGATCACTCATTTGTCTTTACTCAGGTGACTCCTCTTATTCAGGAAACAGAAA

A\_18\_P22840845

GTTAATTCCTATTGCCTTCGAGTAATTAACAATCTGTAATTGTGCCCTCTCTCCTCCTTG

A\_14\_P105385 GTATTACCCTGATTTGGTAGGTAAAGTATTATCCTGATTTATGTGACAGAGTGAAAGGCA

CUST\_10020\_PI426210822 CCATGAGTCCCCCTCCCTTGCCCCAAGGAGGAGGGAGGATTA

A\_18\_P13306007

AAATGGGCTGTAGCCATTTAAATTCCTTGTTCAGTGCAGAACTAAGAGACTTCAGTTTC

A\_14\_P133898 TACAATTAAGTCTTACCATTATTCTCATGCAAAATGATGGGAGATGCAGTCTTGTGCATC

A\_14\_P113435 GGTTGGTGTGTTCAACCCATAGACCACACTGCTTCTTATACTTGAAATATTTCATAA

CUST\_10283\_PI426210822 TAGCTCTGATCTCCCATCCAAGAGATTACGCATAGGCTGTGTTAGGAA

A\_16\_P58424560 ATTCATCCAGTGCTTGACCTGTGTTGAACTCCTTGGCTCTCTAGACT

CUST\_2419\_PI426210822

AGAGAAGGATAAGGAAAGAAAGTCAAAGTGAGCCCCTAGATAGCTGTAAACCT

A\_14\_P136776 AAATCTGGGTTTCCCAAGAGGAGTTTTGTTTTTCATTCCTTATGGGGCATCTTTAT

A\_14\_P120136 CATGGAGAAGGGCAGGCATATGGAGTATGAATGCCCTACTTGGTATAT

A\_14\_P124240 ATCAGCCTGGCTTGTGGGAAACTGTCACGTATCAAAAACAACCTTTGCTTTTATAC

A\_14\_P100645 GTAGGTCTTCAACAACAATATTACCTTCACTAACCACAGACAATACCATAGAATGAGGTA

CUST\_9187\_PI426210822 TCTAGAATGGTTGAAAACCTCTGGCAGCAGATCATCCATCAGGCTT

A\_14\_P126145 CTTGAAAGGATGTTTGAACAAGAAGATCTTTATGCCATTAGTATCTAGCAAGAGACAAAC

CUST\_9356\_PI426210822

ACTTTATAAACTGTAAATTGGTAAAAGATTATTTGTTGCTTAAAATTATTTCTTGCTT  
A\_14\_P116760 GGCTTTTCCTAGCAAAGCAATTATTTTTTAGGTAGAAATTATCCCTCCAGCCTATTGTGAA  
A\_14\_P104355 CCACCCTAGCATTTTATAGCCAATTATGTGTCTCTTTCATTTGTCACACCAGATTAGATT  
A\_16\_P19949934  
AACTGCACTAGAAGAAAACGTTACAATAGCCGAAGAAACCTCTAAGAATTCTTATGCCAA  
A\_14\_P108847 GTGCACAGTAGTCTAAGATTATTACCTTCATTAATACCAACAGGCTGCAAAGCAAGAGTA  
A\_16\_P16516844  
AAACTTTCTCCAAAACCAAGTCAAAAGAAATGTTAGTCTACCTAGCCATTACATCCTGTCT  
A\_14\_P101105 CCAAATTACCTTTCTCCAGTTTTAGGTAAACCTTATCCTCTTTATCTAGGTAGAGCAGGA  
A\_16\_P01711821  
GTGCAGAGTATTACAAAGATCATGTTTAGTTTCTAGCAGTATATAAGTAGCATCCATCCT  
CUST\_2341\_PI426210822 GAGGGTTGGTTGGTTGTCATTCGTGCCTCAGATCCCCCTCTCTACT  
A\_14\_P132488 AACACAGGTTGCTAGTCATGAAACACATTCTGTTACCACCTAATTAATTTGGGTAGTATC  
CUST\_2518\_PI426210822 CAGAGCCTGCAGTGCACGGGGATCCATGCTTCCCAGTGGTTCAGC  
CUST\_3336\_PI426210822 AAGAAGGGAAAGGGTGTGGTGAATGTTTCAGCATGGGAGCTGATAT  
CUST\_8975\_PI426210822  
GGATAATATGAAGCTATCTTATTTATCTTTCTAGAACTAGACACCTTAGGGTCAGGCTAAT  
A\_14\_P110941  
GTGGCAGAAGCATAGAAATAAAAGATGAACTAAAGAAAAAGAAGAATCTCAACCGATCTG  
A\_14\_P131212 ACAGCCTCAGGAATACTTATAGGCAAATTAAGTGCTACTTTTCTATCTGCCTCTCTGA  
CUST\_10115\_PI426210822 TAGTCTTGAAGACCTTTAGGAAAATCAGCTTCAGCAAAGCCCTGAAGGT  
A\_14\_P201944 ATTGAAGTTTTGGACAGTCCAGCAAGTAAAAAAAAGAATAGTCAAATAAATTATCTGAA  
A\_16\_P18594578  
AAAAACTTTCAACATCCACTCTAGAGTTCTATGTGTAGATCTTCCACTATCACCAGTAGG  
A\_14\_P117837 GCCAGAGAAATGCTCCTGAAAATATCAGAAATTAATGCTCAGGAAAGATATTTCCCTTG  
A\_14\_P115807 CTCAGTAGTTTTTACTTTGTTTGTACTCTGAGATACTCAAGGGATAAGATACTCT  
A\_14\_P121190 ACGTGTGATCATATAGATCTGGAAACCAAACCCTCCAGGGGACTAAAG  
A\_16\_P36479434  
AGTGGAACATGAAATCCTCAGTGTAATTCACCAATACCCAAAAAGAGTCCTTTAAATCT  
A\_14\_P112162  
AACTCCTCTAACAAGAAGTCAGTTACAGTTGTGAGAAACATGCAAAACGAAAGAAATGTT  
A\_16\_P16024592  
AATGGATAGAAGAGACAATTTACAGTGGATGTCAGCATATAGAATCTGTTCCCCATTTCT  
A\_14\_P137706 AACCATTTTTCTTTCTTTTCAGACCAATGATGCCTTAGGAGCCACCTGGAATT  
CUST\_9516\_PI426210822  
AAAGATTTTAGATTAGGCACCAAATGTTATGGCCTTGGAAGGAACAGGAAATGTA  
A\_14\_P107105 CTTGACAATATCCTCCTCTGCTGTGAATGACTTGGCCATTTTTCTTAAAGACATCAG  
A\_14\_P200799 GCCTTATATTTCTCAAAGGTCCTTGCTAAAATACGAGCACATAACTGAGGAGATTCTCAT

A\_14\_P117413 ATGATTACAAAATGTTCCCCCTAAAAAAACTTTCATTTATTGACATTTGTGCCCCAGAC  
CUST\_9582\_PI426210822

AACAAAATATATTCCATGGCAATCTTGAAAAGTCAGGGAGCTCAATATATATTAAGAGTA

A\_18\_P22841365 ATTTACTCTTTGTTTTTGTGGGATGTCCTTGGGGAGCCCACAGGT

A\_14\_P119075 ACAGTCGTTTTTCTGAACTCTTACATTTTTGTGACATTCCTTAAGCAAGTTAATCAAGAC

A\_14\_P123418 ACTAGACCTGTTCTTCAGGAATCTCTGCCTTGGATAATAAAGTCCCTTCTTTTAAAATAC

A\_16\_P15993481

AAACACAGGTTGAACAACTTACAGAACCATACTTTTTCATATGATACTTGCCTTGTGGC

A\_14\_P200375 AATTGCTCGAGTTTGCATTTTGATCCTTAATGCATGGATTCAACCTTTACTACTGCCTTA

A\_16\_P36231002 ATTTGAAACAAAGGGTCTGCTCTCTTTCTCAGTATCACACCTATGGAATCAGC

A\_16\_P16881883

AAAAGTAAACTTAGTGGAGACAGATCTTTCTAGTGTCTGTATGTAGGATCCTGAAGG

A\_14\_P102530 ACTCAATACCTCATCTGGCATGCATCTCCTAACAAATATGTATTCCAATTTCTCCTCTAT

A\_14\_P202360 TCTTTCCTTGGTGATTATCTTTTTTTTTGCCCTAAAAGTTTGGACATTCCTTCAGTAACAG

CUST\_993\_PI426210822 GTTTTGAGAGTCATTCTGAGTGTCTCTTTTGGCCATTGGGCAGA

A\_14\_P200492 TAAATTTCAAACATTAACAGTTGGGTGATCACGTTGAGAGAGACTTAGATGGGCATTG

A\_16\_P58424454 AGTAACTCCATCCTTCTTGGCTCTCCCTTTTCTCTCATAACCCACATCTATTTT

A\_16\_P02687131

AGTCTCTGTTACCCAAAATTCACTCTAATACCATATTACTCTCTTTTGTGACTTTGTCCAA

A\_14\_P105279 CGGGAAGAGAATCCTAGCAGAAAGTGAAGTGTACATTAACAAATTCAAAACATGTAAGG

A\_14\_P201182 AAATATTACGAACAAGTAATTGTGAACCTGTAGCCAAGGAACCTTTGGGAATTTAATG

A\_14\_P136486 ACACAGTTCAAAGGAAATTGAGGTTAAGAGAGATTGAAGTATATAGTTTGGCCGACTGTA

A\_14\_P113894 GATCAGAGGACTCCTTCAGACAAAAAATAAGGTATTTTGGGTTGAGGCTCATTAATTAAT

A\_14\_P123536 ACCATTTACCATCTGAATTATACCTCTTGGAAAGTATTGATCTACATGCCTCATTCTTGG

A\_16\_P03009456

AAACTAGAACCCAATTTAAACTTGAATTTTTCTGGCTTTTATTAGACCATGGGCATGTC

A\_16\_P20282818

AAAATTTGTAATGATTGAATGTTGCTTCTACAAGAGAACCTGCTTCTTATAACTGGGCC

A\_16\_P18071554

CCGGAGGGGTAAAATATATGCTATAAAGAAGAAAGGCTTGATTTGTATACACCGTTGCTT

A\_14\_P124221 GAGGCAGGATAGGGATTCTTTGGAATCACAAGTCAAGAAAAAGACTCATTCTATC

A\_14\_P128830 CTAGATCTCTACTTTAGTTAGAAGATGCCCAATCTTGTCCATCTAGACTTAAGGTAT

A\_16\_P03098273

GGACGAAGGGATTTTTTTACTCCTATGACTGTTTGTAAAGCAGATATCCCATTACATGACT

A\_14\_P100562 CATACTTCTCCTCAAAAATATTAGCAATGATTCCAAGTCTGCTTGAAGTTCA

A\_14\_P124584 CTTATTCTTTTTTTTCTCCATTGTGACCCTTTACTGTGTGGCAAAACATTTTAATTTG

A\_14\_P107018 AGTAATCCGGGTTTCTTTTTCCCATATTTAGAACAAAATGTATTTATGCAGAGTGTGTCC

A\_14\_P127241 ACTGGTTGATTCATCTTCATTATATCCGGAAAGATTATGAAGCCTGCAAGGTAAGAGATT

A\_18\_P22841235 CTGTTGTAAGACATCATCAAGGTTCCCTCCAACCCCTGCTCCTCAT  
A\_14\_P116398 AAATAACAGTCTTGTTCCTGTCTTAACAATTCTGTTAGACTAATGATCTCCAGTGATTGG  
A\_14\_P105558 ATGTAGTGTGATGCTGAGCAAACCTTTTGGTCTTGACTCTTGAAATAATTAAGAGAGCAG  
A\_14\_P113655 GAGTCAAGGACTCTGTCTTAAACTCCATACAGTATCTACAGCAAAGAAGTAACAATGAC  
A\_16\_P38137383  
GGCAAGTCTAGGAATACTAACTCATGAACAGTATCTAAAATATGACTCCCAGTCTTAGGC  
A\_14\_P139839 CCAAGCAAAGTCCTGGAACAATAAGGCATAATAGGAGCCTATTTATAGGTAAAAGGCTT  
A\_14\_P113239 GAATGTGGCTTTGGTTGGATTTCACTGTAATTTTGGTTGAGAGAAAGCCCAG  
CUST\_9365\_PI426210822 CTGTGTGCCCCAGGAAGTCTTTGTGGTTTCTTTGGCAGAGATGA  
A\_14\_P136755 GCAGATGTAATATCGAGTATTCATCAACTGGTCTCAATTTCTGAAACACATTCAGTAT  
A\_16\_P21086342  
AAAAAAAAATCACAATGGCCTAGAATTCTAAGTGCTCTCAAATGGCATAATCAGGAGCA  
CUST\_4394\_PI426210822 CTCCTTTTCTCCTTTCCATCCCAAATCCACACCCTTTCTTCTGTCT  
A\_16\_P17752541  
TGATTTGATCTACCTCACCGTAAAATTCTAATCCAGAGCACGTTCTTAAACACTATCCAT  
A\_14\_P118463 ACATAAATCATAATTGACTTTGCTTTTCAGAGTCAACCAGTGATTGATTCCAACCAACTCT  
A\_14\_P137388 CTCATTTCTGCTCATTCTACTAATCTCCTGTCTTTACTCCATTTATTTGCCACTTTTGCT  
A\_14\_P105735 ATTCCCCTACTTTCTTCTACCCACTAAGGCAACAACACTAGATTAATCACCACATATTAA  
A\_16\_P35402474  
ACTAATCTCCTTAATAACATGAAACGTCTTCCTTATTTGAACAACCTCATTATGCTTCCA  
A\_14\_P120953 CTAGGAGTTGAATGAGGAGTGCAGGGAAGAAAATGTAGAGTTGATAATATGGAAAACATT  
CUST\_1423\_PI426210822  
ACATTTTGATCCTTTTTGCGGTTGTGCTATTTGATGCAGGATTTATTATTAATTTGTATT  
CUST\_674\_PI426210822 CTGCGGTAGTCTTGCTGGATGGTGGCCTAGGTACAGAGCAGTGCT  
A\_14\_P118591 CACGTGAAATCATAGCATTCTTAGGGGCTGAAGTCAATAATTACAAAGCATTTCAGATGT  
CUST\_10124\_PI426210822 CTGCTGATGTGCTCAGCCAGACCAGCCCCTCATCTGCCTCTGACC  
A\_16\_P40317236  
ACACTTTGAGTATGTGAACAAATGTAACCTTCAGTTTGGCTTTTTATTGTAACCCCTTGCA  
A\_16\_P02377661  
AGTTTAAAATCTGAGTGCTTCATTATACACATTTCTGTTTTATAACCTCCACTTCCCCC  
A\_14\_P201497 AGATAGTATTTGGATGGTTCTTCTTTGATTTTCAAGATTCTTCTTTGATGCTTCCCAG  
A\_14\_P105759 CTTTTCTGCATTTCCACAGGTTTCTCCTTCTGTATCCAGGCCAATTTTACTCA  
CUST\_8951\_PI426210822 TAATGAACACGGGGTCTCTTTTTCACAAAGCAAAGACCATCATTCTTCAGAAG  
A\_16\_P15793046  
AATGTTTGTGATGACTGAGTTCGTTGTAACATAAAATTGCCTGTAACAATGAGCAGAG  
A\_14\_P130220 CTCCAACACAAGCCAGTAATTTTATAGATTATCCTGGATTACTTAGGCTCACAATTAGC  
CUST\_6745\_PI426210822 TTAATTTGTTGGTGGCTACTCTGCTGGCTGGCGTGTGCTGTCCAG  
A\_14\_P134674 TAAAAGAAAGTATTTTATGGCATTCCTCTATGTTTCACTGTTCAATCTGTGGCCAGACTG



A\_14\_P126405 CTCACACAGGAAACAAGTGATATGACCCTAGAACTCAAGAATCAGCAAGAAGATATTAAT  
CUST\_5343\_PI426210822 AACACCAGTAAAAATCATCTGCCAGTCACTCGGGCTCCCACCCCG  
A\_14\_P137784 TCACAGCCTCTTAAAGACTAAAACCTTCTCTGTAAAGACACTGGTTTCACATAAAGGATAA  
A\_14\_P139714 ATGGAATCGATGTGCTTCTTCAGCAGTTATCCGTGAGTAATTCTTATGCTTCCTGT  
CUST\_10301\_PI426210822 TGAAAAGTCCAGTTCAGCAAGGCACACTAACTGATGCTGTTTAAATCTAGAGC  
A\_14\_P118645 CAATGATAGTGAGGTCCATTGCCGTCTATTAATGGAGATGATTCCATCTTGTCTACAG  
A\_16\_P37517991  
CCCTTTCTTCACCAAAAATTACTCTGACTCTAACATACCACTGTAATTTACAGCCTCATC  
A\_14\_P123121 TTTCTCCCTCCTTGCATAATCTTTCCTATTCTAAGCCTCTAGTTTTTCTTGATCTGCTG  
A\_14\_P106888 GAAATTGTAAGTGGACTTTTGGCAGCAGTATCTTCAAGTAAAGCGTCTAATTCTAAGCAA  
A\_16\_P00685417  
GGATAGAGCAGGAAGGACTTAAACATTTATGTGTTTGTATAACCTTTATTTGAGGGAGTGC  
A\_14\_P118306 CTGTCATTCGCAGATGTTCTAAAGTATTTATACCTTATTTTGAAAACCTTCCCTTCGTCC  
A\_18\_P12246208  
ATGATCTTACGCTACACTAGAACTACTCAGTCAGCATCTTTAATTATCATTTCACCAG  
CUST\_7707\_PI426210822  
AGTGTTTGTGAGAAATGTTTTCTGTAACTCATTGAGCCAGGTTATTAAGAACCTGTG  
A\_16\_P17568820  
TCATACACCTTGCCATATACAGATCTTAGGAGTTTACATCTTATCTTCTCAATGCGACTG  
A\_14\_P202043 CTCACTTCTACATGTCATCTACTCCTACATTCTCCTATCACATTGTAGATGTGAGGAATT  
A\_14\_P124098 ACCTAAAAGTTCTGTCTTAAACATGCAGGGTTACTTTCTTATATACGGAGGTTCAACTGA  
A\_16\_P39081417  
AACCTTATAAATTCCCCTGAACGAGATAAACTAGACTGAAATTGAATACAGTAAATGT  
A\_14\_P108639 ACAAATTTTATTTAACAAAAAGGTAACATGATTCTTCCAAAATAAAAATCACTACCACCT  
CUST\_6018\_PI426210822  
CTAATGCTTTTGTACCCATTAGTGGATGATCAAATCCATCTCTATTGAATTGTGCTTTT  
CUST\_4083\_PI426210822  
GGCATAAAAAAGTGGCATAGATGATGGCTGGAAAGATTAAGTTCTTTCTGGTGG  
CUST\_670\_PI426210822 TCTGTATCCCTTGGGATCAGCCTGGTAAACAGCCAGCTGAATTAA  
A\_14\_P103428 ACTTACCCAATGGCTACTAAATCTTCATGATGAGGTGAACAAGTAAGACAGAAAATTGTC  
A\_14\_P108899 ATAGGATCAAACAGTGTCTACTTAGATTCAACGTCTATTACCACTTCCAAAAATATAGC  
A\_14\_P139505 ACTTAACCAATTTTATTGTTTTTGTAAATAAAGGCCATTACCCAATACAGGAACAGGGCTG  
A\_14\_P139502 AAGACCTAAGAATCTGTGGACTTAAAGACACTGATTTGTGGCATAATTCGAGGTAGTTTA  
CUST\_7518\_PI426210822 GTTACAAAGGCATATGGCCCAACAAAGGACACTGAGGCTACTCAGTAAT  
A\_16\_P16191050 ATCTTCTCATGGAATCAGATACAGACCCTCCAAGACTGACCTGG  
A\_14\_P200277 GTGTATTTACCTCAGCATATATTGTGTTCTGCCACAAGCATGTCCACAAAAATTTGTGTA  
A\_14\_P106957 CTGCATTTTCAGCCAGGGTCTCTATTGTCTTGTGGTAAGAACTTTTTTTAAAAAATTTT  
A\_14\_P103698 CATTATAGGTTTGTGACAAATGATTGTGGAGGAACTATTGGAATGAATTACCCTATGGACA

A\_14\_P122842 GTGTATTCTGTTTCCTTAAGTTCATTTTTGGTGTCTCCACAGATTATGCCTTTCTAAATTA  
A\_14\_P201025 GACTGTTTTCTCTCAATCCTTTGCTGTTGCTACATACCTTCATTTTATGCTGGAGAAGCTT  
A\_14\_P110819 CAATAAAAAGTCCTTTGATTACACAATGGCTTGATATTGGCTTTTCCACTTCCCAAATGA  
A\_14\_P126962 TCTCAATACTATAGGAATTATTTACTTACGCTCCACAAAGGAAGTAAAGAGCATTTCGAAA  
A\_18\_P22841291 GTCATAGATAAAATCACAGTTGAACTCCTTTGGGGAAGAGGAGGCAAACAGAAAAT  
CUST\_2224\_PI426210822 GGAAAGGTGGGTAGGGAGGTTTGCTTGTGTGTAGTGTATTAGGAC  
A\_14\_P131451 ACAGACTGATCCAAAAATCCAATTGGCTTGCTAGTAATTTTTTCTGTGAATTGCTAAGA  
A\_16\_P30952393 CGTGGTCTTCTCAGGTGAGAGGCCCTCTTGCTCCTTGAATT  
A\_18\_P15415828  
AAACAGAACCCTATTGTTCACTAAGTTTTATCACCACGATTACAGGACAGAGAGATCTA  
A\_14\_P118749 ATACATGAAGAAGAGCCAAAAGTAAAGTAGGATAATCCATCTCTGGAAACTGTTTGAAAG  
A\_14\_P139814 CCCGCCATCCCTTTTTTTTTTCTTTTCAGTAACTTGCCCAAGTTCACATCTTTTATT  
A\_18\_P22841926 AGATAATCAGATGTCTGCACTAGCAGTCAGGGACATTAGATAGACAGTTTGCTCAC  
A\_18\_P22843573  
ATTCCATTGGAAATTTTTCTGACTTTTTCTTCTCAGGACTGTGAAAAACCAGGAATTTCTT  
A\_16\_P02980445  
AAAGTTCGTGAATACAAAAATGGGGTCATAGTTCATCAACATCCAAATCGTGATATCTGC  
A\_18\_P22839235 CTCTGCCTTCCCGAGAACTCTGCTGGCTTGTGTTATTTAACATTTCCAAAA  
A\_16\_P15155906  
ACACCGCTGATACTATAATCCACTAAATGATTCATTGCTTGACTTGTTTTTCAAGGTGTG  
A\_16\_P40352146  
GAATAATGTCCATGAGTCAAAACTAAGTTAGTGCTTTCCAAATGTGTCTTGTAGTGGCA  
A\_16\_P19576844  
TAGCCTGTAAATTTTATCACTGAAACTTAGATTTCCCTCCATATAATATCCCCACAGCCA  
CUST\_5497\_PI426210822  
TTTAGATTTAAGCAGCCCAATCAAAGCCAGAGATGGAGGGACAGATTAGTATTG  
A\_16\_P00631945  
GAACCTATGAAACCCATCATTAGGCAAATACGAAGTAAGTCCTTGGTTTACTCTTTAAA  
A\_14\_P120405 TTTTTAGATCTCCAGTTAACTTTAGGCCCCTTACATAATGTTCAATTAGTCTGGGATA  
A\_14\_P139099 GGCCATTGTGAGAAATGCTCAGTCACACTATGTCCTAGTAATCTATTATGCAGTATTCAT  
A\_16\_P18800725  
AATGTGTGCACTTAGTTTAAAAGTTTCCCAAGACATAGAGAAAATAGCAACTCCAATC  
A\_14\_P112604 CTTTTTCCACATTGGACTTCACTGCAAGATCCCCTTTGAAGAATTAATAATTGCTCT  
A\_14\_P137071 GACCAAAACCCAAGAGAAAACACAATCCTAAAATTAATTTGACCTGGACACACTAATTC  
A\_14\_P202477 GTCTTTCTGCATTATCAGTCATGTGTGATGTGTAATAGGGAAGTGTTTTTTCAAAGGCTAA  
A\_16\_P02850760  
ACTAGATCCCCATATTTATAAACTGCCCTCTTATATCTACTGATCAGTTACATCACAAA  
A\_14\_P105635 CTGTGAGGTTTTCACAAACATGAAATGTCAATGCAAACACAGATATATCCAAAATAGCAGC

A\_14\_P101805 TAGTAAAAATAAAGTAACTTACCATCCGTTTTTCATTTAAATCAATGTGACAACAGCCTT  
A\_16\_P20780382

AAAAGTAGGTTGAATGCATTGGAAATACTCAAGGATAAGTCATTTGATAAATTGCCCTCG

A\_14\_P127978 TCATATGGCTGATGTGTTATGGGCAGTATGGATGTCTTCATTTGTTGCTTCTGTTTTT

A\_14\_P113615 ACAGGCCACGATATTATCTTTACAAGCATGCCTACTTTTATCCTCATTTAAAACGATTTT

A\_14\_P123906 GATAGCATACCTTGTCTGGAAACTATAATGTTGACTGACGGGAAGAGAGGTATGAAATAA

CUST\_6908\_PI426210822 AAGCCCACTCGAGGCTCTAACACAACAGCAAGCTCTTTATCTTGC

A\_16\_P17745958

AAGAAACGCAAAACGAAATAAAACAGACCACTTTTTTCTCATGTCTACAGACCACTTCAT

A\_14\_P131559 TTCTTTCATCTTTAGGTTGAATAAAGAAACAGAAAAATAGAACATACTGAAAAATAATCT

A\_14\_P116792 CTCTGGGTGCTCCTTAAATCTTGAAATAAATTAGGCAGAATCAAAATCAGACTCTCTTCA

CUST\_2724\_PI426210822 CATCATTGTTCTCAAGCTACTAATGCCCTTAATCTTGTTATGTCACCCCAGT

A\_14\_P101396 TCACTCACTTTCTGAGAGTCTTGTGACCATTCTACTCTCAATGGTCATCATTTTTAGAA

A\_14\_P126171 CTCTAAGGTGGAACCTTCGGTAACCAAGCATTTGTTGCTTTTTCTCCATACTCTATTAA

A\_14\_P109533 TTTGTTCTATTTTCCCTTTCATTTCTAGAAAAGCATCTTCTGGAAAGTTCTAGCCCTTT

A\_14\_P121284 AGGAAAAATATTCTGTCACTCATAATCCAGGTCAATTGCCCTTCTTCTCAAAGTAACTTT

A\_14\_P103496 TGCTGCAGGAATATTTTTGTAATCTGGGCACTGAGTATGATAATTAAGAATGAGAAACC

CUST\_9286\_PI426210822 ATTTAAGGTGAGAGCTGCTGAGAGGCCACTTCCAACAAGTTGCT

A\_14\_P134204 GGTCATTAATCCATCATTATAAACTGCAAGCCTCCATTCTCTAGATGAAACCCTCAT

A\_14\_P101934 AGAGGTATGATTTCTAGTCAGAACCTTCTGCAAAGTTTTCTGAGTATAACAATATGGCAT

A\_14\_P100582 TCCTTCATCCATTCATTCATGACTCATGAAACAATAAAGACGTCTTTGTGCAACAAAAA

A\_14\_P104744 TCCATTAAGTTGTGAGGACTGCTGAAAACAAGTTAAGTAACCGTTTCTTCCCTTATGA

A\_14\_P111065 AAGATAGGTGTGCCTGATCTATTTGCTATATGCATTATTTAGAATAGGCTACAGACCCCA

A\_14\_P118801 GTGCACAGCATAGATCAAAGACACCGTGCAGTCATCACGATTAGATTCTATGTAGTTT

A\_14\_P135202 AGAGTCTATCGTTACTGTTTCAGGAAGCAGTTTTTTCATTTTGGAAAAGGCAGTAATAACA

A\_14\_P129145 ACTGAAAACCTGAAGATGAATTTTCTCATGGAGTTCTTCTTCTAGAAAACCTCCTAGACTCAG

CUST\_387\_PI426210822 TTTAGACATGGACCGGTTACTCAGCTGCAGGGCTGACAACCTGTAA

A\_16\_P21419343

TCCTGCCAGTTCAAGTTTATACCCCTCCAATAACCTCATATTAAGATACAATATAGTGAC

A\_14\_P105755 GAAGGATCTGGAAGAGGTATTTTCTAAGTCGCTTACTCTCTAGTCCATGACAATAATGTT

A\_14\_P112577 CTGAGGAGTGATATCATGACCAAAAAAGGAACATGTTTCCATTTTCATCTTTGTCCCTT

A\_16\_P00904949

ACCCATATGCTAGAAATTGATTTCAACTCCTTTACCAATAAGCAAAAATATCGGCATCGA

CUST\_1848\_PI426210822

AAGTTTCCCTTGAAGCTCAATTAGAGTGTGAGTATACTCACACTCTCGATTTTCT

A\_16\_P02752834

TGGTTCAAATTA AAAAGTCCAAGCATCACAAATACTCTCAACTCCTTAATGGTCCAAACT

A\_16\_P15643638

ACCTCATTGCCTCTACTTTTTGCTCATAACAGATTCAAGACTTCAAATGCTTACAAAAGTC  
A\_14\_P108403 CTCTCCTATGCATGTGTGTTTATGGGAGGTGGGGTAATTATATTCACAAAATCTATGTTTT  
CUST\_1969\_PI426210822 AGAGAGAGCAGATCTTTCTGAGTACAGGTAGCAATAAATGCTTCTCACTGAGC  
A\_16\_P01507081

GTATTTCAAACCTTGATTGCCATTAACCTCCCTCTTTCAATCACCTACTGTCTAGATTTCA  
A\_16\_P01771821

ATGCCTTCATTTTTGTTCTCCATTAGTTCACCTTTTCCTACCTAACCTATAGATGACACT  
A\_14\_P135003 TGGAATTGCACATTTTTGCTCTCTTCACTTTGTTTCCTTACTTACATCCACATGTAGTATG  
CUST\_4308\_PI426210822 CCTTCTGGACACTACTGACCTCTCATTGTCATGTTGGACTTGATTCTATCA  
A\_14\_P103888 CTTCTCTACTTTTAAAGGATGATCTTGCAGGCAGAAGCAATGACTGAAGTGAAATCTC  
A\_14\_P122616 TGCATCATGTCAAGAAAATAATGTAAATACCTGATTTTCGAATTGCAGGTCATTTTCATTC  
CUST\_6959\_PI426210822 TTGTTGTAACCTCAGGCACCTGAGCATAACTAGTGAGCCTGTCTCTG  
A\_16\_P02300638

TGGTCTGTGCAACTATTTTTTCTCTTTTGGACTCCATATAGCAAATAATTCTGCCTCTC  
CUST\_2677\_PI426210822 AGTGTGGCTGGCCCGCTCTGCCCTCAGGAAGTTTGCTTCCCTCAG  
A\_16\_P03125646

AGCAACAGTTTATAGGGACTCAAGTTTTCTTTTCACGAATTCGAAAGAACTATAACGGAC  
A\_16\_P58424591 AGCATATCATGAACATCTTCCCGCTGCTTCTTGTTTCATCCTGTTGGCT  
A\_14\_P128690 GTTTGTTCAGAGTGGAATTCACAATGCCAGTAAGGAAATTTGGTTATGCACTGTATCATA  
A\_14\_P128475 CAAAACACTTCCATCATCATCATTTTCATACCTTTAAAAAAGGTATCAAACCCCATCTTC  
A\_14\_P202290 TGTGAACGACAACCTGATAGGTCAAATCACTAGGGAGCGGCTAAAGAGTTATTAATG  
A\_14\_P139803 ACATTGGACAAGAAGGGTAAAGTTGTCTAAGTGAACCTGGCTTATATACATCGCTGATTA  
A\_18\_P13653392

ATCCTAGTCAATAGCATTCTATTATGTTTACCCCTTTAAACACAAATTGAACACCTCCC  
A\_16\_P20112486

AACAAGTCAAGAATGAACCTTGCTCAACTTTTTTCATGAACTCTGATTACTGAATAACCCCA  
A\_14\_P133520 CTGAAGACGGCCAAGATCTTTCTCTTGCGTTCTACCATGGAATTTAGTTTTTTAAT  
CUST\_5979\_PI426210822 GGTTTCTCCCGCACTGCATGAATCCCCCAAGGCTAAAGGTGAAC  
A\_14\_P134652 TTTGCAGATTTACGGAAAACTTTGAACAAGACCCACAAGGAAGGGAAGTTC  
A\_14\_P106780 CACTGTCATTACAGGAAGTTTATTACCCACCTCTCCCTGTATATGATAGGCATACTTTAT  
A\_16\_P02821140

CCTAGCATCACACCAAATTTACTTTTCATAGTCACAAGTCCCTTACAATAGTAAAGACACA  
A\_14\_P118863 TTCAGAAAATCAGAGTCTACTTACTATTTGTATGTCTCAGAACGGATATACTCAAAAACA  
A\_14\_P132550 TTCTCTTAAAGGGAATACAGTGAGTAACCTGATCATGATTATACTCCAATGTTCCGGTG  
A\_14\_P119639 GAGATGTGTGTTTTAATCAACTATTTTTCTGGCATGTGCCACATAAGACATGCTCCAATA  
A\_14\_P126299 GTCATTTTGCTTGTCTGTTTCATTCTTGCATTACATTCAGGTCCGGGTTTCTG  
A\_16\_P16774024

GAGTTGCTCTATAAATGTGACACTTGATCTGAAATACCAAATGGCAGACTTTTACACAG

A\_14\_P107619 CTTGCCTGTTCTTCTGTAATTTGAGTATCAACCTTCTACAGTTCTAATATGCTGCACATG

A\_16\_P16945954

TCCCTTCTCAAGACAATACTACCAAACAGGCATATTTTCATAATCATCATTTCAGTCCTTG

A\_14\_P121809 AAATTTACCAGTTCCTGTGACACAAACTGTTTCAACCTTTCAAGATACTGTCCATAAAGT

A\_16\_P16191553

AGCATGATGTGTGATTTGCAGTGACATATCTATACCACGGTATGTTTGTAGTGACTACTT

A\_14\_P102596 AGAGAACATAGGAAACTACCAAATGTTTGTCTGGTGATTATTGACATGGTAGATTACAGG

A\_14\_P132117 GGCTAAGGTTGTATTCTTAACAGGGTTCAGAACATCTGAAACATCAAATATCAAGGTAGTT

CUST\_4974\_PI426210822 TAAGGCACCAGCATTTCAGCATAAGAGGGTCTGCCTCTCAGATTA

A\_16\_P00298299

ACAGTGTCTTGCATGAATTCTATCAACTACTAATTCTCACTGCTACTAATTCTCACTGCA

A\_16\_P20798500

AAGGTAGTAAGTGTGTGGACTTTACTAGATCTTGTGAGTAGATCTTATCTAAACGTGCCG

A\_14\_P101745 CTGAAAATTGACTGAGATCTCTTGGAACTATAACAACCTTTTTTGTGGTGCTCTTTTCCT

A\_14\_P105477 AATGAGATACTAAGTCTAATAAGCAAGATGCCTTTCAAACAGGGACTATAACCATCCT

A\_16\_P20841976

AATCTCCAATATAATTGTTGGCTTACTTACTGGTCACTCTTAAGCAAAGACTCCCATCAA

A\_18\_P22842068

AGAATGAGAACTATTCTAGAACTCTCAAAAAGGGCAAACGAGTAATAGTTTCTGTGTATG

A\_16\_P19627062

AGGCTTCAAGTTTTGTATCTTGGACTCCTTTATAGTAGCATCTTAGTCTACATCCTCACAC

A\_14\_P130594 CTGCAACTATTTTTCTCCCAGTTTAGTTTTTACTTGTCTTATAGTGGCTTTGCCATGCA

A\_18\_P11505119

AAAACAGATTGATTTTTTGTATGACCAGAACTGAACTGAATTTGAACAAGTCCCATTGGG

A\_14\_P109720 CTATTTTTCCATTTGTGTATTTTTCAACTCCCCAAAAGGTGTTTAAAGATTCCAAAGGTCA

A\_14\_P133703 GTTTTACCAGAAGTGGCACTGTTGACCACACACCTTTGAGAATTGGTTATATACAAATTA

CUST\_7452\_PI426210822 GTGACTTTGGCACCGTCTAAAGTATAGGTCACATCTCACTGTCCCAAT

A\_14\_P135585 ACATTTTTAAATAGCAAGTCAGACATAAAAATAAATTTATGCACAGCAAATAAGATGCA

A\_16\_P36230372 GGTGTTGGTCAGGGGTCAAGAGCAGGATGCAGTCTCTACTGCAAG

A\_14\_P131771 AAGTTACAGTCATAGAAGACATTTGTATTTTCAGCCACTTCAAATAATCACTTCCTGCGTC

A\_16\_P17000977

CCTGAGTGATGGATAAAATTAACATTAAGGCACCTAGATGAGATGAAACACATGAAGGA

CUST\_3596\_PI426210822 ATTTCCAGAGCCAGCTGCCGAGCTTTTTCCCCTGGGCTGACTTTC

A\_16\_P19889006

AAAAAGTGAACCCAATCTTTTTAGAGTAGCATAGGAATCAAATCACACTGATCTCCAGAG

A\_18\_P22832735

TGCTTAACTTCCTCGACCATATGTATACTCAAACTATTTGTTTCTAGGTATGATCAGCG

A\_14\_P125577 TTAATATGTTGAATAAAAAGGTATTTTTGAGGGGGTTGATTTCCAGCCATCTCACAGGAAA

A\_14\_P101369 AAATCATTGTCTTGTCCCCTGAATAACACCATCCAATTTTCTGATAAGCCATGCG  
CUST\_4239\_PI426210822 AATTGGATACATCTGGTAGGAGGTGTTACCTGGAAATCTGGGTCTTAA  
CUST\_8236\_PI426210822 GCTTGGAAAAATGAGAACTCCATTTCTTTCCAGCTTCAGAAAACAGAGTGCAT  
A\_14\_P139856 ACATTTTCTTAICTGCCTGTCCCTTCTTCCGTTCCCTGTTTGCCATGAT  
A\_16\_P03807842  
TTTTACAATGTTTCCAGGAAAATACTCTCGTTGGCTGTAATAACAACCTTTGACCCTAAG  
A\_14\_P102263 GTGTAGGTAATTCCTTTCTAGCAGAGAAAAATGTGGTCACTTATAGGTAATACCTTGTC  
CUST\_5400\_PI426210822 GAATTCATCCTTGCCCTCCGCTGATGCTAATTCTGGGATAACGCTG  
A\_14\_P139553 TGAAGTGAAAGATCCTAATATGAAAGGTGCAATGCTTACCAACACTGGAAAATATGCAA  
A\_14\_P129922 AGCACCTAGTTTATTTTTTATATTGTGTTTCTGCCATACGTTCTCGTTCATACAGCCGA  
A\_14\_P108887 ACATGCCCATGGGAGAATGTGTTATCATAATAATTTTTAGTATGCAGCCTCTTGACTTGA  
A\_14\_P137712 GTATCTCAGGGAAATTC AATTCCTTAAGATTCGGAAAGATTCCAAAGATGTTTCAGTGAT  
A\_14\_P110173 GTTAGGGTCCAAAGATAATGCTTTCTCTATATTGCTACTGCCTCTCCTTAGAACATTACT  
A\_14\_P110169 CTCAGAGTTTCCAGAGGAACCTCAATTGTGATGAAGTCACAATGATTACCCTAGAGTAATG  
CUST\_63\_PI426210822 TTTGAGGGCTTGAACACTTAGACAAAGGAAGGCTCTAAAATGGCCC  
CUST\_6453\_PI426210822 TTCTTTATCCCTAGATCTGTGTGGCTTGCTACTTTTTTCTCCCACCACAT  
A\_14\_P102128 GATGTGTATGGACCTTCAGTTCCAAAGATGATGAATCTGAAAGGAAATCCGGAATTATC  
A\_16\_P17084234  
AAGTGCCTTTCTTAAAGAGACTCCTTTCAACATTTGAATGTCAGAATCATCACCCCTAAAA  
CUST\_6835\_PI426210822  
TTGGAGTTTTTGGTTTAGGGATATTGACTTTTTTAAACCAAGATATATAATTGTTCAAAT  
A\_14\_P102340 GAGTAGTCCTGTGACTAGTGCTTATGTAACAGATCCATAAACGCATCTATAAATAACAAC  
A\_14\_P102634 TTTCTCTATCATCTAGCATATTCCTCTGCAGACACTATTGAAGTTCATGGTGGATATTG  
CUST\_7631\_PI426210822 TGGGAGAGGAATTTTGCATTAGCAGTTACATGGTTCATCTGCCTCAAACAT  
A\_14\_P111021 GAAGTCCTAAGGAGAGAAATAAAAATACTTTTAGGGCTTCTCCACCCTCATAAGGTTTAT  
CUST\_9510\_PI426210822 TTAGAACAACACGATCTTCCCTGCGTGATTCTTCTGAATGCCTGG  
A\_14\_P200955 AACCTTGTTTTGTCTTCTGTTTGCAAATGGATGAATTTTATCACTCCATCAAGGGGATTA  
CUST\_5845\_PI426210822  
TTTTTTACCTATTAAACAATTGCATTCCTAGCCTATGGAAGGTCTTACCTAAGCCAAGAC  
A\_14\_P130362 ACACAATTATTCAAACCCAATATGACAAAATGTTTTGGCTGTAECTATCTAAGCCTTAA  
A\_14\_P120055 GACCATTATACTGACTGTCACAGTATACCTTCTGGATCTTCAGGTTTTCGAACTTTCTC  
A\_16\_P00685156 CTGTGTTTCCATGGTTAGCCTGAAACTCGGGAAGGAGAATTTGTTAGAATTC  
A\_14\_P113346 CTGGATAACTGGCTTTTAGAATGATAATCAGTGAAATATTGCAAGATCACGGAATCTCCT  
A\_18\_P22841027 CAGGCCACCTACATACCCCGTTCTCTAGGTGTTCTGCTAATA  
A\_14\_P116629 CCCCTATTCCATCTATTTCTATAGCCTGTTCTTGTCTGCACCAGTATTTATCACATTGTA  
A\_14\_P111113 ACATTTTATAGTCGCTGTAAGTTGATTCCATTTTTCTTGAAATTGAATTCTCATCTGACC  
CUST\_4454\_PI426210822 CATGTTGCACACCCCTCTCTACCTGCAGCCGCCATCCCCTAACAG  
A\_14\_P128253 ATAAATCACTGTTGACCTGTTTCATGTTCTGGAGATATCCTACTTGAGAAGGAATATTG

A\_16\_P01097802

GGGAAAATGATGATTGGCTCCAAATGATTAGAGAGTGTGATGATAGTATGATTTACGACC  
CUST\_7923\_PI426210822 CTTAGGAGAAAGGGGCCAAGAAGATGACAGGGTTGCCTTTTCATC  
A\_14\_P134441 TTCCACATGGAACATAGAATTCAGGTTTAATAACCGTCTTAGAGACAAAGTCATTCAGGC  
A\_14\_P105732 GACAGTGTCTTAGTAACCCTGGGAGAATATGTTTTGCTTCAGTATAAGAGGAATCTAGA  
A\_14\_P101535 CCCGAACATAACAGTGTTTTTCTGAAATTTTCGACCTGCTCCGTTTGAGA  
A\_14\_P122193 GAGAATGGTAGTCTTTTGGTTCCCAGGTTTATTGACAATTACTCATCTATTTTTGACTCC  
CUST\_9524\_PI426210822

GTGATCTTTTTTAATAGGAGTTTTAAATGCATTTTATATTGAGTAGTTATTTCAITGTTT  
A\_14\_P136983 GGGAACACACATGGTTTGAAGGGCTGAAAAGCCTTAAATCATTTGTGTAAGGTTTAAAT  
A\_14\_P124821 TTTCACCTCGACTACACATAAATGTGTGAATTTTTATCGCCACTAACCTGCTAAAGTTCA  
A\_14\_P121728 TAAATGGGTCATCAAATGGGCTTTAAACCCACATGATGTCCATAGGCATTAAG  
CUST\_2050\_PI426210822

TTTTGAAATAGGCCATGACCTTTCTTTATACAACTTATTCTACTTCTTGCCAGAAGAAAT  
CUST\_5784\_PI426210822

GTCCAATTCTTCTACTTTTTTTAGGCCTCAGCATGGGATTTGGTTGTCATATCAAC  
A\_14\_P101134 TATCTTCACAATAGCATTCTTCCCTCCCTCAGTTGAAGAGTAGCCTCTGATATTAGTAAA  
A\_14\_P112822 GAGTGGAATTCCAAAGATGGCATATAAAAATACAAAAGATTTTGCCTCCTTCAGTGCTCG  
A\_14\_P138552 CAAAGTCATCTGGAGATTCTCTACCACTTTCATTTTCTGTTCTAGATCCTGTTTAAAT  
A\_14\_P111766 GGACTTTGGATCTTGTTTTAAAAAATGGGCATATAGATTCAGCCAATGCTTTCTCTCTTT  
CUST\_2537\_PI426210822 GATTTATATGGCCGGGTTGGGGTGGTAGGGAGAAAGGCATAGAAC  
CUST\_9325\_PI426210822 CAGTGGTGACCCTTTGCCAAGGAACATGTCCCAGTGACTACTGTC  
CUST\_3984\_PI426210822 CTTTCAAGGGTCTTTTTTCATCTGTGTACAGAGTATATTTCCCTGGAGGCAGCT  
A\_14\_P110160 CACAAATTGTTGGTTCCTAGCACAAATTAGATGGTTTGGAGCACAAATGGTGAAG  
A\_14\_P104442 GACTTGGATTTTGTAAATATCAAATCTCTTCAGGCAAGGCACATCTGTATGGCACATAC  
A\_14\_P132975 CAGAGGAACTGCTGATTGACCATCAGGTGTGTTATGAATTACTTGAGGACTTT  
A\_14\_P129381 CTTTCTTAGGCTCCTCACGGGGATTATGGGCTCTTTAAACTCCATGAG  
A\_16\_P01721916

CAGTTACCAGGATGAACATTCAGAGGTCTGATTGAAATTATATGGATGAAATCACTAAGG  
CUST\_7762\_PI426210822

ATCTTTGTCTTCTGAAGCATCTTAAAGTAGTATCCAGGAGAATTTTGACTCCTTCAACAG  
A\_14\_P103814 TTGCTAAGCCAATCAGTGTATTTTCATCCCTGAGATTTTAGTGATTGGTCAAAGTATCTGA  
A\_14\_P201876

CACAAATATGAGCCAAGAAAGAGGAAAGTTGATTTGAAGTGAGGATTAGAAGTGAATGAC  
A\_14\_P134969 CCTCTCTTTGAACGAGCAAACGCATATAATTAATAACTTCATTTTGTGTTGCTCATT  
A\_14\_P202335 CACTACAGTATACTGTGTTACTTTCTTCAAAAAGGAAAGAGACATTTACATCGCTGGAGT  
CUST\_7270\_PI426210822 AGTAGTAAACAGGCTCTCTCAAGCATTCATCCATCTGGGGAGCTTG  
CUST\_185\_PI426210822 TGAAGTTATGCTAAGGAGATCGGGCTCCATCCTATAGGCAGGAGTA

A\_14\_P202259 CTCATTTGCAACAAGTCCTTTGACTTTTGGAGCCACAGATAAAAAGTCGGTG  
CUST\_1431\_PI426210822 CTTTTGTCAGTGGACTGCTTTCTGGCAGGTCTAGCAGTTGTCCTTATAAT  
CUST\_10276\_PI426210822 GAAAACAGAAAAAGCTGTGATGATGTTTCAGGGCTGGAAGAGGTCTGA  
A\_16\_P17828276

AAAATAGGCAATGTATTAGTGTGATTTAAAGATTCCCTCCCAAATTTTCACTTCCACGG  
A\_16\_P16965349

CGGGATCACTCTATCAAAATCTGCTGCTAATATGACTGGAGATTTAAACACCTTCATCTT  
A\_14\_P101207 TCTGTGTGAAGTCTTTAAACAACGGTGTTCAGGGCTCCTCAACAGCAATAAGAT  
A\_16\_P15032643

TGAGATAAAGTCCCTGATGGTTAAGTTCTCTGAATAAATATTATGAACAGAGCCCCATCA  
A\_14\_P112998

TTCTTCAAAAAAGGATAAACAGTTGTGGCACCAGAAGTGAATAGATAAGAGACAGGTGAA  
A\_16\_P58424597

GGTCCCAAATTCTGTAAAGTTACCTATTAACCTTACGGAAGGCTGATAAGTTATAAATGAC  
A\_18\_P15072017

ATGCCTAACTGCAAATTTACAGGAGTAATTTACCTAACGTTGATAAAATCTCTTCTGCC  
CUST\_10162\_PI426210822 ATGTCTTCCCAGGAGGCCAGGACCTACTTGCTCAAGTGGCAAAG  
A\_14\_P104200 AGGAAGACCTGAGACAAGATTAGGGCTGGGGATCTAAAAATATAGTAAAGAAAATCAATC  
A\_16\_P19183486

TTAAGTCTGCCTGTAAAATACTTTTCATCTCCCTGACTTAAATCTTTTTCTCCCAAAC  
CUST\_1010\_PI426210822

CACTTACGAAAACAATGCGTTTTGAGGGAGGCAAACCAAGATGTTAAAAACTGATT  
A\_14\_P107234 CGAAACTCACTAATAGTCCCATCTGTCTCGCCTTCAACTGAAGACTTTCC  
A\_16\_P36230976

ACAAGAACAATTAATCTAATCTTCATAATAATTTCTTAAGGAAATTGAGGCAAGGAAGA  
A\_14\_P128824

ATAAATACAGAAAAGAAAGTGAAGAGTATAAAGTGGCAGGATGGTGCCTACACTTAGAAG  
A\_14\_P111891 ACAAGATCCTTCCCAATTTGATGTTCTTGTATGCCAAATTTGTATGGAGACATCCTTAG  
A\_16\_P15105137

AAAAAAAATATATCAACCACCAACAAATGTTGTATATTAATGTTGACACTCCAGAGATG  
A\_14\_P131483 TAGATGAATAGGTGTTATACCAGTTCTCTTCAAACCTGCTCCCTAAAGATGCATTCGGAA  
A\_14\_P132215 GGAGGGAAGGAAGAGGTGAGATTCTAAACACATTAATCTTGACTATGTTTCATAACTCT  
A\_14\_P123918 CATGTGCAGAACAAATGGTAAATGAGTAGAAATGATCATTTTAAGTTATATCACTGGCTCA  
A\_16\_P39454949

TCCTGGCCTTATACCACTAACTCAAATGTTTTAGTTAAAAAGACTCGAGAAAGAGACTCA  
A\_16\_P21062977

AGTGTCTTCAATTAGAGCATGCTGTCAGAATAAGTAGTCCTCTTCAAATACATGGTTGAG  
A\_14\_P135340 TTAAAGAGTTCACAGAGAGCAACAGCATCTTTAATCTGTGCAAACAATGGAGACATTTTTT



A\_14\_P102443 GAAGACCCTGACTGCCTTCTCATTCTTGTGTGTGTCTTGCAGTATTATTATATGATAGTC  
A\_16\_P03136396 CTTTCGGGAGAGAATGATGAGTCTCTTACCGACTCTCTCTTGAGAGAGT  
CUST\_10395\_PI426210822 AGACTGCCTTGGGGTCACAATGGCTGATTCTTCAGCACTTCTAAC  
A\_14\_P115548 GAGCCGTTTTTCTCCAATCAATACTTTTTTGCCTACAAGAATCACAATAAAGGACTG  
A\_14\_P136916 TGGTGAAACTAGGAATTTCCAATTCTTTCAAACCACAGTGTCTAATGCCACTGAAATA  
A\_14\_P119968 CTGAAATGCAAATAAGAAAGAGTTAAGTCCCCATCTCATGGCCCATCAATAGGC  
A\_14\_P108368 CATCTTAAATTGCATCAACAAATTCTGGACGTTCCAAGAAGTGGCTGGACATG  
A\_14\_P126272 AAGATGCCATTGAAGATGAGGAAGAAGAATGTCCATCAGAGGAAACAGACATCAT  
A\_14\_P132320 TCCGGTTGCCTGACAAAGAATTGATACAATTCAAATGGAGATGTCTTATCTCTGTTTAGC  
A\_16\_P37488462  
CGTCACCAAATTCTACCATATTTTTTTCATGTGTCTTAAGATTCACTACTTCTTGTTC  
A\_14\_P136734 ACAGGTTTACCACCTCAAAAAGAAGGAAATAAACTCCAAATAATCCTCACTTTCCTTAACA  
A\_14\_P128451 CTTCCATGAAAAAAGAAGTCCAGGCTGGAATATTAGTGTTCCTCATGAATAATACATGAC  
CUST\_6985\_PI426210822  
AGCACTCTTCAATTATTGTTTTATATTACACCAGTAATTTTTAAGTAGTGTAAAAACT  
A\_14\_P202280 CTATTTGCAGTATCTCTTTGTCTTAATCCGGAATCCAAAAACTGGAGGTTTGTATTCTG  
A\_16\_P30952406 CATCAACATCACAGCGCTCAGTGTACGACGGACAGCAGCCTGT  
A\_14\_P114399 CTAACTTCTTAAATGTGGGTAGAGAAGAAGTGACATTAACAAGAACTTACTCCACCCCA  
A\_14\_P115346 CACTTTCTAGGAGAGCACCCTTTTCTCCAATTCCATAAAATCTTCAACAGTGATGAAA  
A\_14\_P133907 GCCTGAGCACTTCTATTGTGCAATGAAAAGGCTTTTACGTTGAGAAAAATGAATC  
A\_14\_P116316 ACCATCTCAAGAACCAAAGTTATTCCAAGGGGTGAAAATATAATGTTGTCCTTATGAGAT  
A\_14\_P109353 TCTTCAAACCTCTCCCAGTTTACCAAGCAGAATAATAACGAGAAGTAAATGGAAATTAGGG  
A\_16\_P01994984  
AGTGTGACCTTTGCTAGATTTTGTCACTGTTACTTTCATTCACACCTATTTACCCTATCA  
A\_14\_P104182 CCCTGACCTTCTACTTGGAAAAAACAAAATGAATATGGACCACCAGGTAGAAATTTTG  
A\_14\_P100175 TCTCCCAATACGCTTCCATTCTAACTGTTGACCTTTTTATTTTTCATTCTAGTAAACTGT  
A\_16\_P00409984  
TCCTCTTAAATATGTTCCATTCCCTAAGAGTTCCCTAAATCTCTAGCATACCACAATTGC  
CUST\_1391\_PI426210822 GTTTGATTCCTTGCCCTAGAGCATCCTGAGAAGGCAGCTTAGACT  
A\_14\_P132818 TTTTTATGGCTGTCCTGATCTAGTAATTTGGCATAACTCTCCCATGGGACATATGTTTAA  
A\_16\_P16360976  
AAAGTCCTTTCTGTGAATCAACCACTCTATAACTGCAATCACAACCTAACTACAATCAGT  
CUST\_5183\_PI426210822 CTTTGCCTGGTCTGTCACCTCTCTTCCTCAGATGTCTAGTGTTTATTA  
CUST\_8794\_PI426210822  
TTCTCTTCAAAAAAGATTACAATTCCTTTAATTTTCTTTCCCATCCTAGGGTGTCTC  
CUST\_5880\_PI426210822 GTCTGGATTTGCTTGTGGAAGGGTGAGAGGACATGTACTAGGTGAAC  
A\_14\_P119977 ACTACATGGCTCACTTACATCAGACATCATATTTGTATACCCTGAGAAATCTGACACTGA  
A\_14\_P108309 AGAAGCAAATGTGTAAATTTAACGTAAGCCTCTAGAAGTGTGATCGTAATCACCTGCA

CUST\_9991\_PI426210822 TATAGTCTGCATGCCCTCCTTCTGGCCGCCCCACCTGGCTCTGCC  
A\_14\_P132263 TCCTTATCAGTTCAGATATTGCATTCTCTGAAGGTTTTTTTTTCCCCCATATTTTGTGG  
A\_18\_P15151033  
AAAAGAGGGGGCTGTAAAAAATCAGGGGAGTTACAAAGTTTAAACTCAGCAGAAGAATA  
A\_14\_P120560 ACTGTTCACTTAGAAAATAAACATGTGGGTAAGCATTGGTCCATACGTATAAGCGATCAA  
CUST\_4710\_PI426210822 CTATGGGATTTTGCCCTCATTCAACAAGCAGAGGGCCTACCCTTA  
A\_14\_P133301 ACGATCTCATGCCAATATTTATGCGCTATGACACAATTCTGAAGGAACTTACGGTGAAT  
A\_16\_P15176826  
AGAGCCCTACAAATTTAAATAGCCTACACAGAATACAACCTGAAAAATGGCCTCTACTGTT  
A\_14\_P111276 TGAGAGAGAACAGAGAGATTTAGATAAGAGAATGAAATTCAGCCTTGACTTTCTTCTGT  
A\_14\_P123015 GGAGGTTGAATCATCATCAAAAGCATTGAAGACTGTATACAATTTGTTATCTGAGGCTAG  
A\_18\_P10310794  
AGACGTCTTGGGCATTAGATTGAAGCATCTCAAAACACCTTTTTATCCCCTTCTATATAG  
A\_14\_P110992 ACTCATTGATAGGTTGAGTGAGTCATTTTGATTGGAAAGAGAAGCTGGAAAAATCTTCACA  
A\_14\_P117107 TGAGAGAGGTAGGATTTGGACCCAAGTCTATCAAATTACTACACTACCCTCTATGTAATA  
A\_14\_P114023 CTAAAGTCAAAGGATAAAGATTAAGTGATTGACTTTGATATTGAAATGGTTTAAATTCTA  
A\_14\_P109086 CTAAAGAATAACCTGCCTTGTAGTCTCTGATGTTTCAAAGAATCTGCCCAAACATATGA  
A\_14\_P130050 AAAACCAAATGTAAACCAAATATTACCTTCTTCAACACCATCATCTGTTTCTTCTGACT  
A\_14\_P135152 CAGAGTTGCCACAGTAATTAGAGATAAAAATAGCCGGAGACCTATCTGGTCAGTTTTATT  
A\_14\_P104720 CTTAGTAAGACAAAGACACAATATTTTGGAAAAAACAAAAGTTTACAAAACCCCGCTGGT  
A\_16\_P15273362  
AACCACAAAACCTTACAGATCTGCAGAACTTTAGTCTATATCCTCATCACCTTCCTATAGA  
A\_14\_P120091 TCCAGCATGCCTAACTTGCTAACGGGAAGAAATTTCTCATTTTTTCAGAATCTATTTAGTC  
CUST\_7982\_PI426210822  
GTGAGAATATTCTGGTGAGGGAGAAGACTTGGTCATTTCTTAGCAAATCACTTGA  
A\_16\_P19911497  
GCCCAAACCTGTTGATTTTTTTCAGACTACTCCAAATTCAAACCTGTGTCAATTCTGACTAG  
A\_14\_P108549 AGAGTGGTTTTTCTCCTGTCTCATGAGGTGCTCAACCCTATGTATTGTTTATTT  
A\_16\_P02321765  
GGACACTACCCCTTTTTTACTGCACAAAACCTCACTTGTATCCATCTAGACTTATATCTTC  
A\_14\_P126870 GAGGGTCAGCAATTTTACAAACCTAAGCACTAAAGCACACCAAATTCAGAATAAAGTTT  
CUST\_5935\_PI426210822 AATATTTGGGTTTTGACATGCCAAGACTTGGCCCCAGTAAGGGCT  
A\_16\_P21570748  
TCTACAGGAAGAAATTGGATGATATTAGGCCCTAAATATGGAAAATTTTCGCACTCTTGG  
A\_14\_P131851  
TAGGAGTTTGAAACATTCCACAAAAAATATGAGTGCCAGGAAAAAAGAGAAGAAGAGCA  
A\_14\_P102792 CTGGGAGAGGAATGGTTTTCACTCTATGAAGTTGTGTCTCTGGTTTACATTAATAAATATT  
CUST\_2146\_PI426210822 ATAATCTTGGTGTCCCTATTCTGCAGAACCATGAAAGGGACGTGA

A\_14\_P106484 AAATCCAACCTTGTCTTCAACATGGATGTTAGTGATGTCACTCAGCATCCATATTATAAGG  
CUST\_5349\_PI426210822 TCTTGCCCTTGCCACTCCACTTCATCATGGCCGCTCCTCTCTGG

A\_14\_P132760 AAACGTATGTCTCAGAATACCCAACATTTTAATACCCTGTGGTAAGGATTATCTCAACC

A\_14\_P115903 TTCATTATCATTTGTAGAAGCCAGGCATGTGTCCCTTAATAGTAAACGTTCCCTAACATGT

A\_14\_P105577 TGGTTCGTCTTCTTGCTTTTGTAAAGTAGATCACTGTGCATAGCATTCAAAACATTCATC

A\_16\_P00685211

AGTTTAAGATTATAAGAAGTTATAACTCATAAGAAGTTTTAACTCATAAAAAGTCAAAA

CUST\_9283\_PI426210822 CCTCAACCAGTGCATCGGTGGCTCTTGAAGAATCATACAAATTTCCCTATG

A\_14\_P118909 AACTTCTGTAGATCTAATTTCTGAACACTCACTGCTTCATTTCTATTCTCCTGTTGCA

A\_14\_P103662 CAGTAGATCATGATGGAGACGAAAAACGTGAACTTGAAGCCGATGATGAACAG

A\_16\_P00685377 ACATGTATACATACATATAGAATGTTCTGTTTAATATTATTGGTTTATGCAGTATTTGAA

A\_16\_P20925064

AACAAGTGTTTTTGATAAAATCTATCCTCGTAGCCCAATAGAACAAAGGTGAGCGTTTTG

A\_14\_P129071 TCCTGAAATAATTAAGTAGATTCCTTGTGGCATTTCACCTCCTTTACAAATGGTATCTCC

A\_16\_P18545842

AAAGTCTTGAAATAGTGCCATTCAACTCATAATCATGTTGGTTTTTCCTTCATACCTCCT

A\_14\_P119557 CCCTCTGGATAAGTCATCCTTATAGTAGTTTTATTTCCAACATGTTCTGAATATCCCTCA

A\_14\_P119136 GACAATTCTAGCAGTCCTCATCTTTTGGATCAATTAAGCGCAGAATCAAGGTAACATT

A\_14\_P201123 CAAAAGAAGTTATGTCCAGGTGAACACAGGTGGCGAAGTTCTAAGAAAGAGC

A\_14\_P105956 GGCCAGTGATAGTTTCACTTGTATTTCTAGTAGAACTATGCCATTTAAAAGTGCACATA

CUST\_2756\_PI426210822

TTTATGGCTTCAACCAGATGCGTTTTATTAACAACAACTTGCTTTTTATTATTGGGACGC

A\_14\_P113579 GTTTTGACATTCCTACCTACATGGCCTCAGTCACGATTACATTTTTTTCTCTAGTTTAA

A\_16\_P02663848

CAAGCATTACCCTTTATCTGACTTACCTTTTTCTCATAGCCTTTTTATTGTCCCAGAGA

CUST\_5088\_PI426210822

TCTGGAAATGTAATGATGGTTCAGAGTGTTCTGCTATAAATCCTAACAGCTTAAACAATC

A\_14\_P139454 CTTTAAGCATCAGAGTCAAGGTTTCTAATATTGCAAAGACTAAATAATTCCAAGGGGGGT

A\_18\_P15783015

CAGAAATGTCCAAACTCTTTACTGTGCATGTAACAATCTGCTTAAATCCTATGAACCTGA

A\_14\_P200023 GTAACCTTTTCACTGTGGAGATAGTCCCTGTCTTTCCACAAGATGCTCAC

A\_14\_P137467

GCAGCAGAACTGCAGAGAATGAAAAATAAGTCCATAGGAGAATGTTGCAAATAGAATCA

A\_14\_P201678 CTCCTTTTAAAACCAACATAAATGAGTAACAGAAGAAAAGGATTTTGGGTCCAGGAAGTA

A\_14\_P127009 CTTTCCTGTTTGTATCTTTGGGTTCACATAAAGTATAGACCTACTTTAGAACTCAAATTG

A\_14\_P131336 CAGGCTTACCTCCAAATACTTAATTACAGATGGATTGTAGTCTATGGTTTTTCGGTTCAC

CUST\_4448\_PI426210822 ATTGCAAAGTACGGAGGGGACAAATGACATGACCTTCTGCATCTC

A\_14\_P108779 TGAGCGCCCTTTTAGTTTCCTCAATTAACCTTCTCAGTAACTGTTGTTACTTTATTTTGCT

A\_14\_P120117 AATCCACAAAATAGTCTGGGAACAAAATGGAAGTTAATTCTGGTTCATTGTGAAACACAC  
CUST\_2200\_PI426210822 CAGACACTCGTGGGATGGCCTGTAGGATATAGTGGGCCAGACTG  
A\_14\_P134812 CCCTTTTCTCTATTTACCTCTAATTTTTTTTTTGCATTTTCTTCTGTAGTGGCCTCAG  
A\_16\_P16191324 TCACACTGACCGTGAGAGCGAGTGCTCCTCATCAACAACGTGGGG  
A\_16\_P17964284  
CAGGTTACAGTAAAAGTATTCAAATCAGATAAAAGGCGATCTTGATTTTCAGCAGCCAGTC  
A\_14\_P119770 TAGTATGTATGCGACACAGAAAAGTAACTGCTCTCTATGTCTTAGATTTGTAAAGTGGGG  
A\_14\_P130219 CTAATATTTTTACAAAAGTTGTGCCAGACATTACAGAGTGAAAACGTCTCTCAAGGTGGA  
A\_16\_P18973702  
AAAGTCCAGAGTTTTCACTGATACACAAAACATGTTATTGATTAGTGCCATCCCATAGGTG  
A\_18\_P13141471  
TGTCTTCCATCACAATCATATGCCTTACAGTTTTGATACAATACTCAGTCCAGTTCATTG  
A\_14\_P123812 AGGAAGAAAATCAGTTAATATGGCTCTACCCTCTTCTTCATCCTGTATGTTGACTCTTT  
A\_16\_P35653840  
CCTGGAAATGATCTTCTCATTGTAGATGCAACCAAATAGCATTGACTCCCACTTAATA  
A\_18\_P10034828  
TGAGCACGCATATTTTACAAAACACAAAACCTACAGTTTCCATGAAGATCCACAAAGAA  
A\_16\_P02476224  
GTCTTGATCATGTTTGGTAGCAATTGTTTGTATAGAGTCCAATATCCCTCATCAGATTGG  
A\_14\_P134563 CTTCTGCTTTTGGTTTTAGAGTCTAACGTGAAGACATTTTGTCTCCAAGAATATCCTAGC  
A\_14\_P123330 AAAGGACCTCATTCCAAAGAATAATGCTGACACAAAAAATCATGCAGAGATAGAAATGGA  
A\_14\_P113071 GAACCCTCTGGAATCAATAAAGGCTTCCCTTAACCAGCCTCTGTCTT  
A\_16\_P16086540  
ACGCTCTGACACATAGTTAAGTTGTGCTGTAGTTAAGAGAATAGTAAACAGGTGAGCATT  
A\_14\_P202440 ACAGGGGGAAAAGAAAAGTGGTATCATTAGGGAAAAATTATTACCACTTCTAAGTGAATG  
CUST\_9288\_PI426210822  
TTGCTGTAAAATAATTACATGTGAAGATAAACTAAATATGCATGTTAGCCTCAGAGAT  
A\_14\_P112080 TGCGTTTCCAGCGTCTCCTTGGTATAATTATAGTGTTCCTGGACCTTGT  
A\_14\_P117691 GTCTGTATTAAAGGTCAATTGATTTGTGCCTTTGCCAAATGAGTTTGGAAAAGAAGTTTC  
CUST\_4799\_PI426210822 TATTTCTCCCTCCGTGACATCTTTGCTGAACAGAACAGCTCTTAAACCA  
A\_16\_P58424586 TTTACCCTCTAAAAGTGAGGCAGGCCTCTAGAAGTGAAGGCATGACAAA  
A\_14\_P106811 CTTTTTAAATAATTCATCTTGATCACTTTGGGGTCCAGGATGATTTTCAGAACTGTCTTCA  
CUST\_3725\_PI426210822  
CTGTTGTGACTTAAATTGTTTTGTTATATTTTTGGTGGCCTCCTACACTATGGAAGACTTT  
A\_14\_P201195 CCAGTATTAGGAGACTCTGGGTGAACATACATTTTGTTCCTAAGAGAAAATGAAACAAA  
A\_14\_P133275 CTTGCAGGAGAAAATTTTTTTGGTGCTATAGGCTGCTGTCAACCTATGTTACTAAGACAC  
A\_14\_P112235 GAAGTTGTGTGAAATTTCTGAATCAGAACTGAGACAAGGAGATCTTCTCATCTGTTTTT  
A\_14\_P111017 TGTAATAATAATTCAGGCAAAGCAGAAGTCAAACAAAATGGGACAGTATTCATCCGTTCC

A\_16\_P16771803

CCATGTTTGTCTCCATCATTGAAAGTCTTCCTCAATCTACTCTAATTTATGTTCCAGATT

A\_14\_P130064

ACAAAATCTAAGCAAAATCTTACGGAAAAGCCTAAGAGAAAAGAAAAGCAAAACTTTGCCT

CUST\_5\_PI426210822

GCACACAAAAAAAACAAGGTCATATCTTTTAATGTCTCAGTAAACAGCTTGAGCCCTC

A\_16\_P02138467

CACGAGCATTTTTTTGGCAGGAGTCTCTTTTGAGTAGTGTTTTTTTTTTTGACATTTTTGG

A\_14\_P106639 CCTGATGTTAAGATTTTTGTATATGACCACACAGTCAGTGAGCCATCTATGTCCTATATTC

A\_14\_P127656 GACTTGGCGACTTGGCTAACCAAGGAGACATTTGTTATTTTCATTTCCCTCATCCATTATT

A\_14\_P112436

GGATCTTAAAACTTCAAGGGGTCTATTTGAAGAAATGAAGAAAACAGCAAACAACAATGC

A\_14\_P137118 GCAAATTTGATTCTGGGATAATTTTAAGTGTGTTTATTATCAGCAGTAACTTGGGCCTGC

A\_14\_P201322 ATAATTTGGAATGACATGATGACGGCAGAAAATAAAAAGTGGTTTTGGAAGGGGAATAAAT

A\_14\_P109801 TCTGAAGAGAGGAGTATAATGGGAAGAAAGATCGGTGCCAATGTTTAAGTAACTTGTAT

A\_16\_P00271329

TGTCAGAAATATTTCAATGCACAGTTTCTGTTTGTCTCTACCGATTCTGAAGTTAACGAG

A\_14\_P134795 CAATAGCCTGAGAAAAATATTTTAATGAGGACTGTGTGTGTTTTGCCACCACTTCATTTT

A\_16\_P01363530

ACCTTCGTGATCCTTAAATTTGTATGTGTGGAAATCTTTGTTTCAGGTAATTGCCTTACTC

A\_14\_P112182 CCTTGGTCATTACAAAGAAGCACGTTCAAAGGAAAAAAAAGACAATTGCACAAGGAG

A\_14\_P101086 CTTCTGAGACAACCTCAACTTTCTGAAGAAATGATGGAAGCATTCTATAAAGAAAAAAA

CUST\_4376\_PI426210822 ATGCCATTTGGCATTTCAGTTTCTGCAGCAGTTCTGCAGAAAGCC

A\_16\_P03593553

AGGAAGGTGTTTGTGTTTTATCAGCATCTGTAATTGATCAGACCATATAGTTAAACCCCT

A\_16\_P03550639

TGCTTAGGTAAATTTTTTTTTTAAAAAGCAAGTTTTATAACATCTGCGTGAATTGTTTCCT

A\_14\_P125388 AATTCCTGAAGCAGTTAAACACCTGGCCTATGAGCAGTTCAACTTCACCAT

A\_14\_P111395 ACACCCATTTTTGCTCTATGGGAAAAAACGATTTACCAATTAATATTACTCAGCACAGA

A\_14\_P125542 TGACGATGTATGATGAATTCATGCTACAGGAGAATCTATGTCTTTGTGATTGGGTTGTA

A\_14\_P111269 TTACACCTTAGGCTCACATCTAATCCAGCATCCAAATTTTACTATATGTTTCACTGTTCC

A\_14\_P104618 TGAAAGACAATGATTGGTTAATCGGTAATAATTAAGTAGGAGGAGAGCACTCTATCTTCC

A\_14\_P121366 ATCTTCAATTAGCCATAAATGGGCATCTCACATCTTACTACAGTTTCTTCATCCTGAGAA

A\_14\_P132595 TTAAATGTTGCATTTTCACTTACAGGCGTCGATTAGCAAGGTAAGTAACAGAACCATG

A\_14\_P120500 ACTTCCTTGTGAAACCTCCTAGTAGAAAAAGTTCTTGGGACAACTTCATTTGGTAAAGT

A\_14\_P112094 ATTGAAGACTCCTACCTGAAACATACGGAGATTGACAATCAATGGGCCATCTT

CUST\_6634\_PI426210822 CTTTGGGGGCTGTGAAGAACATCTCCCTAAACATCTCTATCTCCAAC

A\_14\_P109775 TTTTTGCTAATATTGGCTGGTGCACATTTATCTCTCGGATCTTCGAGAATGATCTTGAAA

A\_18\_P14135988 CTAGGAATCTGTAAAGAGGAGAGTGGCTTCAACCTGCTGTTTCAGGG  
CUST\_2078\_PI426210822 CTGTGCTTACTGATTTCTTTTACCAAAGCTCAGATGGGGAGATTGGCAAG  
A\_14\_P104402 CCATCCCAGTGTAGTTCCCAAACATTTTCAAGTCACATTTCTAAATCTTTAATCTTCCAT  
A\_14\_P116374 GGTAATGCTGTGTAGCATCTGCATCTTCTTCAGATATTTTTCTCTGCTCTTTCATGTTTT  
A\_14\_P129722 TTGGGCTGCAATGACTTTTAATTAATCCTACTTTTTATGGCATGAACTACATATGGCCC  
A\_16\_P41597026  
ATAACTTCAGAACACCATAGTGAATACCTTGGAAAGCATCATCTTCATCTTCTGAGACTT  
A\_16\_P03409905  
ACATGTGCCATATGGTCTAAACTATGTCTGCTCGATAAAAAAACTGTTGCTGATTTGAGG  
A\_14\_P113574 TAGATGCTACAACCCCACTTTTAGGAAAAATATGAAGATAAGGGTTGAACTCAAATCAG  
A\_14\_P134610 GGAACAAATCTAAACAACGGGAAGTCATACATAAATCCTCTCCATTCTTCACAAATACTG  
A\_14\_P126750 GAAAGGAAGACAAATGTCCTTGGCTCCAAGGATATTATAAATATGGAGACAAGGCATTTA  
A\_14\_P127787 CCAGTTTTATGGGCATGAGTTTGATTTTAAATTAAGGATTCCTGTTCTACCCAGTTCTT  
A\_14\_P111937 CTAAGAACAGGAGAAATGACTGATGACACCTTCTTTTAACTGAAACCACTTAATTGCTC  
A\_18\_P12942759  
AGCAAATTTACATCCTTCTTATCTCCCAACATTATAACCATTTTCAAAAAATCCACCCTT  
CUST\_5331\_PI426210822 AGTCTTCAAATTCTGGTTAGCAGAGTCAGCGGGCAGGGAGGATCT  
A\_14\_P122418 ATTCTAAATCTTATCAAAAGGAAAAAGCAAAGAAGGGAACTTAAACCGTCTTACCAAGGC  
A\_14\_P138624 CCTCACAGTGGTGTTCAAACATCACTAGAGATGTTTTATTCAATAGATTTGTCTCCTGTA  
A\_18\_P16145884  
CCCCTGCATTA AAAATTCCACCATCATTATTCTGTAAGAGAGCATTGACATTATAAGCCA  
A\_16\_P17894270  
CTTCACATTACATTGGTCTCTAATTTTCACTTGCTTCCAAACTTACTACACCCTTGACAT  
A\_14\_P130101 TTCTGCAATTCTGCAGTTTTCAAGATGTGAACCATGGTTTTCTTTAGACGATTATCAAGTT  
A\_16\_P17749023  
ACGTTAAGAAAACCTCAAGTTTTGTCCAATCACCAAATCAAGCCAAAGTCCATTAATCCTT  
A\_14\_P122837 GCTAGATGACCTTATTTGAACAGTGC GTTTTTTAACTTCATAGACGTGTCTCCATAGCATA  
A\_14\_P201160 TAATCCAGTAGACAATGAGAAACGCTGATTTGGGTCTATGGCATAATAGGAAGTAGTATG  
A\_16\_P36618189  
TGGTCCTATGTAGAAAAGTTTAATTTTTCAGAATGATATCCCTAAGATAACCAGACCCCTAA  
A\_16\_P00173344  
ACTGTATGTGTAGAACAAAGTAAGGCCTAGCAAACATAATAATTTTCAGGAGCACCCCTAAAG  
A\_14\_P137047 ACACAAAATGGACGCCATAAATTCTGAAATAAAAAGTGTATGATGTGTTCTGAGTCACTGT  
A\_16\_P19288466  
AACTTCATTCACCATGGAACCTTTACGAGATAACAACATTTCAAACAGAACACAGTTTGA  
A\_16\_P19327781  
AAAACCTTGTGTCATTCAGTTTTAGTGTGGGCTTTCTAAATACCTCATTCTGCTCATCAG  
A\_18\_P10165025

CCCAGAGCAAAATTATCCATCTGATGGTCCATTATCCAAATCTATAATGAATTACAGACC  
A\_14\_P137745 CTGTAGGTTTGCAGAAATGTGTGAAACCAAAATGATCACTGCCTACTTGTGATTCAAATC  
A\_18\_P10006204

CATAACGATTATTGAATTTGAAAAGCCAGGAGTCAATGCATTTCTGCACGATTTTGTGTCAG  
A\_16\_P17434992

AATAAAACCCTAACCTCCTTTTCTATGCTTAATTCCATTCTAGTGACCTTCTTTGATGG  
CUST\_3962\_PI426210822

GGATTGTTACATTAAGATCCAATCTGAAATTAAACTTATGGTTTTAACCAATAAGCTAT  
A\_14\_P110258 CTTGAACACAAAACATTATTTGAAAGAGAATGAATGATGGCTTTGGTTGCCTTTGGTTAC

A\_14\_P117528 TATTCATCTGGCTGCTCAGTTCGGACATACCTCAATTGTTGCTTATCTCATAGCAAA  
A\_16\_P58424340 CTCTTCATTTTTTAGGTCTCAGCCTAAATGTTGCCTCCTCAAAGAACCATTCTC

CUST\_8308\_PI426210822 ATCAATATCACCTTCAGGTACCCACTCCTGGAGACCTCCTCTGT

A\_14\_P120023 GGTC AAGTCTTGATCGACATGTTCAAACACTAAAGTTAGTTTGGTTTCTCTGTCTGTTC  
A\_16\_P38741071

CCTTTATTGCGCAATTGCTGTATTGAACCCATTGTCTAAAACTAAACTTTCTCCTCGTAA  
A\_18\_P14229849

ACTGCATTCTCACTGGTTTAAGTCCATGAATAATGCCAGATAATCTAGCATGACTTAAA  
A\_14\_P107777 AGTTATTAAGGACATAATTGATGTGCTTGTTTCGTCTGTGTGAGGCTGACATCTCTTAAAA

CUST\_870\_PI426210822 CATTTTGCACATGGGCAGTCTTGCTAGGAAAGGCTTGTCTTAAGTC

A\_14\_P111997 ATTGATGGCTTTCTTATTTACAGGCTGCTTTTACTAAAGCAGTTTCTGACTTAGTGTTT  
A\_16\_P37592767

AATCCACTGCTCTTGTCATTTAAGGCATCTGATTTTTTCTTTTACTTCTAGGACTTCCTC  
A\_14\_P126038 CCTAGAAAGAAAACCCAAGCATTCTTAACCTTTAAAAAGATCTTAGCCTGTGGACAGATA

CUST\_8730\_PI426210822 GTCCCTGCTAGTGTCTCTTCAGTTTAGTTGTGTTGGAGGCCTTAACAATAA

A\_14\_P130331 ACCTTAATTCAAAATACTAACGGAGTTTCCCGAGGGAAATATTCTCCTTACAAAATTGA  
A\_16\_P21443476

AATTTACCCCTCCTAATCTGACTAGTGTTTACTAGCCCCATTAACTAAAAGAATGAGGA  
A\_14\_P106414 GGAAAGTCTTTCTCAATCGTTTCTGACACAATGTCATAAATTTTCTCTTGCTCACTGTGA

A\_16\_P17017828

AAAGCCCCATCTTAGAAAACAAAATCAGTGATCATTTAAAAGGTAGAGTCAGAGTTTGCA  
A\_14\_P138687 TCAACTATAATTAGGAAAGACATTTTTTCTCTCTCAAACGCCATCACAATTGAATGCCAAG

A\_14\_P124910 TGGATACATAAATGAGTTAGATATAGTGCTTAGGGGAGATTAGGTCAGTTAGGAAGGT

A\_14\_P114141 CTTTATCCAGGCATCTGATGTTATAGATACTGAATCTGTCTTGCCTTTGACAACACTAAC

A\_14\_P103557 GGTCTCAGTGGAACCTAAGTGAAAGAAAATTAAGACAGGCATAGAATTAGGCCTTT  
A\_16\_P00685327

AATTCATCAGAACTCTCTAGGTCATGTTGCCAGATAACATTAGGGTTCCACTACTTTAAA

A\_14\_P124430 CTTTAAATTTTGAATGGAGTTTTTCTGCTCAGCAAAAATAGGGCATGAATCTGGCTTCA

A\_14\_P111122 CTAGGAATCGTACATAAAATCATGACATCAAGGATTCACAGTCATAAGCCCTACAGG

A\_16\_P19075481

TTGGATCTGGATTACACAATATTTCTCTTCTCTGAATAACGTATACTAAGAGCACTGAGC

A\_16\_P17806768

AGAAATGAGAAATGAAACACGTAACATTCAGTCATACCCTTAATACCTTTGTTCTCAGG

A\_16\_P03201183

TCGTTTCAGCATCAAATCATCTTTTCAAAGTAAACTGCATTTCTAACCGCTTCTTCTTGA

A\_14\_P121365 GAAAAGGGTTAATGGAACCAGCACATAACATTCTTATCATGTGGCTATGAAGGTTCTAAA

A\_14\_P124003 CATTAAATGAACCTGGCTTCTCTCAGATCTGTGAGGTTCAAGTCAGTGGTTTC

A\_18\_P14134227 CACTTGAACCTAAGGCTGGGACACTTTGGCATGTGTGTTTTAAAGGATC

A\_14\_P128474 TATGCATTATGTATGTAGCAAGAGTTACATGGGCAAACCTACTGCTACTTCAGCAGTTCAT

A\_18\_P13007055

AATAGTCCTTATCCACAAATAGAAGAAAACAGACCCTTAAGTGTCTACCACAATGCAAGA

A\_14\_P103570 TTAAATAAGAGGAACCTCATTTCAGGTATTCCCTGCCTTGTTTTTATTGTGGGAGTGT

A\_14\_P131183 CTTCTCTTTCTTTAATTGGATCAATCGACTCTTTGGGCTGTGATAAAAAAAGAATGGGAA

A\_16\_P19519906

CAGGTCCAGATGAATGGTTAATGTCTTACACCTAAGAAAAAATGAAGCCCTTCTTACAT

A\_18\_P14136566

ACTCTCAGTTGATGAATTTATTCTGAAATTCCAACAGGAGTATCATATCACCTTTTGACA

A\_16\_P19600635

AGTAGAAAAGCAAGGAATACCAGATACTGCAACTACAACAGTTTAGGTCCTCTTATCTCT

A\_14\_P136459 CTGGATCCAAATGCTACAGCAATTACCTCAAGCATCGCATAGTTTAAAAAATCTGTTAGA

A\_16\_P21630903

ACTGATATGCAACAAGTAAACCTAAGTCTCCAAGTAAACCTAAGTTTCCTAAATAACCTG

A\_14\_P101291 ATATATTTGCTTGAATTTACAGCCTCGGGATAAAGGATCTAATACCTTCCAGTGTAGAA

A\_18\_P13840049

AACATGAGAACTTTCCTAATAGACTGACTGCTGGTAAATTTAGACCCCATTC AATTCTC

A\_14\_P202037 TTGTTTTTGA AACCATAACCCCATCTCCCTTGAGTGTGGTAATTATTAGATGTCAAATA

A\_16\_P19771324

GCAAAGCAAAGATTTTTGAGATACCAGATACGTGATTTGACAGGACTTATTTAGCAACCA

A\_18\_P22841741 GAGCATGGAAGGGAGGAGTCCTTGTCATCGTGTCTCACCATCTG

A\_14\_P112909 CGCCATCTTGCCTGCATGACATCACCACTATTTACTGACCTTTGACTTC

A\_14\_P100234 CTTTATTTCTAACGACCAGAGTAAAATACTCCTTTTAAAGTAAGGCTCCTAAACCCCTGAA

A\_14\_P127726 GCTCATTCAATTTATGCAGTCATTTTACTGACAATCACTGACTACACTGTGTATCACTGTG

CUST\_1491\_PI426210822 TTCTGTTCTCTTGTGGGTGTTCAATTCCTTGCTTATATGATTTTGGCAACCC

A\_14\_P102177 GAGGCTCTTGTTAAATCCACTAATTTACTAACTCACTGCCCTTGGGATTTTAATTGAAAC

A\_16\_P01860041

TTTAGCATCATGAACGTTATAAAAACGACAGTGGCAAATCATTACAACCTGCTTTTCGGTG

A\_14\_P124615 GAGGGAGCAGCCAATATTAGACTAACTCCCTCATCAAAAACAACCTACCAAAAATTATCAAA



A\_14\_P111923 TTCTAAGTAAATGTATAGGACAGAGAATCCACCAAATATACAGCCTGTATGGTCCTCAA  
CUST\_2371\_P1426210822 GTCTTTAGTGGGAAGCAGGGATAGCATCTGGACCAGCCTGCCTTT

A\_18\_P22840700 ATAGTATCCTGGCTGAGGACCCCTGAGAGGGCAGCATGGAGGGGC

A\_16\_P02923885

AAAAAACCTTTTCATTCACGTTCCAATTCTGCAAAGACTGAATTCTAACTGATTAGAGGG

A\_14\_P123687 TAGTCAATCACTTGTTTTGGAAACCTTCCATGGATATTTGCTACTTCAGTATAAAACCCTG

A\_16\_P03366613

AATTGTGCCCATTAATTAGAATGATTAGATGACTGCTTCAAATAGAGAGACTCCTGGCT

A\_14\_P111136 AGAAAACCTTGGGGAGGAGAAAATAAAATATTAGGTTGGGTAGTAGCATTGATTTCTCCTT

A\_14\_P120869 ACAGCAAGATTTCAAGCAGTTTCCAGAAAAACAACAACGACATTTTCTTTCTTATC

A\_14\_P134680 GCACTGTGTGTCTGAAAAAAGAAAAAACCTCGTAGAAAACCATTTCTTAATGTTTGTGC

A\_16\_P19630577

AGCCCGCATGTATGTAACCTTACTTCCCCAAATTGTTACTTAGACCAATAGTGTTCAAAT

A\_14\_P104878 AGGTGATTGATCCTCTAGTAGGGTTGCTGGTTTTAAATGAGGTTGAGAAAACATATATGT

A\_14\_P134870

GTAAACAAAGATGAGTAAAAAGAGGAAACACACCCGGCTTAACAAAATCTGGTTAGAGTA

A\_14\_P111899 CCATCTTCCCTCCTGTCACTATCAGCAAGTCACAATCAGGTAATGTTTAGTAGTT

A\_18\_P11367447

CTATAGAGAACAAGATCTTTCAAAGCCATATCATCCATCTCTCAATAACTATTTCCGGG

A\_14\_P107773 TCCAAAATCTTATGACCACATCAGAAGATGGGAAAATGAATGTAAATTGTAACCTCAGTTC

A\_14\_P103846 TAAAAAAAAGAATGAGGCTGAAAGGGCCTTTAGGCTAGGCTAAGAGGTATGAC

A\_16\_P00924208

AACCTCTGTTTTGAAATTTTACCTGCTACAACCTTGATTTTTATTGCCTCAATTGCTTTGCA

A\_14\_P201184 CTAAGATCCTGCCAAGATCATAGATCTTTCTGAATAGTTTTACTGAGGGTATTGTAGGA

A\_16\_P19916229

AATTCAGAGATAGCCCCTCTAACTGATTAACCTTTCTTTACTGAATATGCTAGGAAACCC

A\_14\_P107275 TGAAGTTAAAAGTAATGCGGTCTTCAACTTCTTGTCCTCTGTGTAAATCTCCAGAGATTA

A\_14\_P102027 AAAAAAATCGCTTAATATTGCCTGTCTTAATGTGCGCTGAGGGAATATTAAGATCAGTG

A\_16\_P18450174

GATCATTAGTTTTTACCATGCCTAATCAAAGAGCACTTCACTTATGTTTTCCGTAATGGCC

A\_16\_P35611092

TCTGAGAGAAAACACAAAACATTGCCCTATAAACAAACATTTGCAATAGAATTCCTCCAA

A\_14\_P134213 ATCACATACTTACCTGGGGACAATGAAATAGGTCTTTGCTATTCCCTAGAAGTCAC

A\_16\_P18467897

TCTCTGAATGCATGTCTTAGTAGTTCAAGTCTGTAAATCCAGGTTACTCTGTATTCCAAC

A\_14\_P102919 CTTTTACAGTTAATGATGACCTGTTCACTTGAATGGCTTCTAGTTTCACCTTCAATTCAG

A\_16\_P18022114

CCCAATGAAGCATCAATCTACTTCTAAAAGATCCTTTCAACATCTTAACACCTCAACAGT

A\_14\_P139950 ATGAAAGTGTGGGAGGAGGAAATTTGGATAGCGTTGATAACGCTGACATATAGTTC  
A\_14\_P102131 TTGAGTTTGGCTAGTCAAACCTCACATGATGACAATAGGTCCTCATTTAGTGCCATTTAACA  
A\_14\_P102934 CTATTACAACTGTGCCTCTAGGGAGTTACTCAGCCTAATTGAGCCCTATTATTTTAACTT  
A\_14\_P126182 GATGGGGTGTATGTTATCCTTTAGGTATCTGGCATGTGACATCATGTAATTTGTTTGGTA  
A\_14\_P122672 GAAGCCTCAAATAAAACATTTTTTCTCCTCTGTATTTCTTTTCGGCAGCATCAATTGAA  
CUST\_4719\_PI426210822 CACTTGAACCTAAGGCTGGGACACTTTGGCATGTGTGTTTTAAAGGAT  
A\_14\_P103828 CTTTTGCAGAACATTTAGACATTTCCACAAGTCTCAAGTTACATCATTATGTCAGAGCAC  
A\_18\_P18638703  
AGTCTTTGTGGTTAATGTTGATAGTTTGTAGGCACAATCACTATTCTATGCATAGGGACA  
CUST\_1728\_PI426210822 ATTCCCTGGAGTACTAGTGCACAGTTTCTCTCGCTACGCATCAG  
A\_16\_P02395604  
AAAATCCTCATTAGAGTGTGACAAAATGCTACTTGTCTGAATGGTTTATGCTGACAATGG  
A\_14\_P106610 AATTTTACTTCTTCTTAAGGGTCCTCATATTTTGTGCTTGCAAATGGACATATCCTGCC  
A\_16\_P19352438  
GCACGAGATGCCTTAGTAATACTACAGTTCCAAGAACTTTTCCAACCTGTTTTTCTTAA  
A\_14\_P133216 CGGATGATAGACATTTGCACATTTGTAGTCATGATGTGATGCAGGTTACTGGGAT  
A\_16\_P03002914  
AATCTCCAAACACCATGATACAGCATTTTTACTTATTCTACTTCCATCTACCTCTACCAA  
CUST\_8712\_PI426210822  
TAAATTCAAGATATTGATCATTCAAATGAACTTCAATATAAGCCATAGAGTAGAATAAA  
A\_14\_P135199 CTGACGCTTTTCTAAACCATTTCTAGATCTCTGGCCATTGCCCTTTAC  
A\_16\_P35857809  
TGACTACAAATAGATATTTCCATTGGAACAGATATACATCTATAAGTATACAGACATGCA  
A\_14\_P201341 GAAGACAGGCTTCATATCACAAAATTTTAAATAAAGGCTATTGACCATAAGCCAAGGTGG  
CUST\_1473\_PI426210822 CTGTGGCTATTGCTCCTCTTTCTCGCACACGAGGGGAGGAAGTCT  
A\_14\_P128859 AAAGTAGTGAAAAGGTCTCAGACATCAATATTTCAAAGCACATACTGTCAGACGAAGTG  
A\_14\_P132348 CCTGTCACCTGTGTGAAGCCTGCTTCTTCTTTATTTTCGCTTAGCAAGTGA  
A\_14\_P106033 CAGGTAAAAACCCCAAAGGCTTAAGATTTTATCATTATCGTTTCAGAATGTGCACAGAT  
A\_16\_P18522752 TTCCTCAGTTTCCATGGGGTTTTTCATGCAAATTTAAATTTGGGATTGAGACGATGAA  
A\_14\_P118953 TTAAAAAAGACTTAAGGGGAAGCCATAAAGTGGGAGTTTAAATTTTGTTTTTAAGTCTAA  
A\_16\_P21120541  
GAAATGTAAAGAAAGATCAAAGGATTAAGACTCTTGATGCAGACTCAGACATGATTCCCA  
A\_14\_P114702  
CTATGGACTAACAGTAAGGGGAAAAGAAGATGGTAAATTTGCAGAGAAGATCAAGTTTGA  
CUST\_8509\_PI426210822 ATTTTGCACAGGGAAAGTGCCTGCAGTCCATGTTGAGAGGATTGT  
A\_14\_P134869 ATTAATTTACCTCTTTAGGCATGCGTCAACACTTAAAATGAAAAGTTCTTTAGTAAAGT  
CUST\_7223\_PI426210822  
AATAAGGAACTGATTTACTTTAATCACAAGTTCTTCTGCTTACAAAATGATTCATACTG

A\_14\_P105915 TTCAAACATCTAACACAGAAGGAAGGTCAGTATCTAGGACCCCTCACTACTCT  
CUST\_9400\_PI426210822 TAAAATGTAGATCAGATGCCTTCTGTGGAATGCCAGGCCTAGATTTGCTC  
A\_14\_P112353 TGTAGAATTGCCACCATGTTTGTTCCTGAATTGGATGTATAGAGTGATTTGGGGATAA  
A\_14\_P129431 ATTAAGGCTACATGAAGCATGCATGTATTTCTTCTGTTAAATTCTGAAGGGCTTACTTG  
A\_16\_P16191838 CAAGACACTGGATTAAATTGAGACAAATGTTTGTCTCAGAATGGCAGTGACCATG  
A\_16\_P21399661  
AACTAGCACTGCATTGATGATTTTCTCAGTAACATCTCTACATTGATCTACTTTGTGGCC  
A\_14\_P127290 CCTTACACCGTAGTGTTTTAATTTTGCCCATTTTAAACCGCTCTCTTCGTAGACTGTA  
A\_14\_P100267 TATGTAAATATGAATGGACTACTTCCCTATGTCACCAGAACCAAATAAGCACTATGCTCC  
CUST\_6070\_PI426210822 CAAAAAATAATAATAATAATGCAGCTGGGCACACTCCAGGAGCCAGGGTG  
A\_16\_P02706852  
GGTTTAAACAAAAGAGAACACGAACACTCAAAGAAGATGGAATAAATGACGGGTTTATCTG  
A\_14\_P106014 TTTCCCAATGAAGTTTGTGACCTAATGTAGTTGATTAAAGAGAGACCACACTCTTTTACA  
A\_14\_P130551 ACTGTGGTTTGTGTCCACTATTTTAGCAACAAACCAAGTGTCATTTTTATTCCGTATTTG  
A\_14\_P201562 CCAAACAGCCACAACAATAGATTCTGAAGAGAGGAAAAGTTATCTGAATTGACCTAACTAT  
A\_14\_P130991 GAATCCGTTTTTAAAAAAGACTCGGGATTGGATTTTAAAGAGGGCGGAAAAAACCAAA  
A\_14\_P201219 TGAGAACAAACATTCCAGTGCCACTTACAACAATTGGAACACAACAGTGATTATAAAAA  
A\_14\_P125178 TACCTTGAATGTTTATAAAGTTTACGAGGTCTACTATGCAATTTCCGATCCCAATTCTCT  
A\_14\_P135248 TTTAAAGACTTTGTTTGAACCCAGAACTTGTGATGCATCAATCAAACTTTGCAGTTAG  
A\_14\_P137681 ACTTTTGATGATGGCTAGCCATTTAGAATTTAAGCCATGGAGGATTTTGTCTTTCTCAA  
A\_14\_P128304 CTGCATTTTCTCTGCCTTCTATGAAACATATCTTCCCTTTCTACTAGACTCTTTTTTGGT  
A\_16\_P40440650  
AGAAACCCCACTTAGAATATACATAAACAACATTGTTATCCTAAAATCGCATGAACAGT  
CUST\_5572\_PI426210822 GACTATACAGAAGGGTGGATCAAATCATGATGACCTTTTAGAGTTGGGGTCT  
A\_16\_P02264240  
AGAATCTTAGTCCACATATATCTGCTCTCACAAGTTCAATAGAAGCCTTTCTTAAACTCA  
A\_16\_P18300395  
TGAGCACTCATTCTCTAAAATCTCTAACAGAACATAACCCATTTCAATCTTAGGTCTGA  
A\_14\_P201918 TCCATTTTTTTTTCAAACAAGTATGAATCTAGTTGGTTGATGCCTTTTTTTTTCATGACATA  
A\_14\_P115880 AGTTTTGCTGGCAAGTGGAAATGTCCATTCTACATTAGAATAGCATAGGAGGATTTTTTT  
A\_16\_P30952478 CTTTTGTGCAGCCGGCCCATCTGTTGGTGCTTTTTTCTTTCAGGAG  
A\_16\_P40203601  
TGCTATTCAAAACAGAACTTCCACTAATATCAATAACCTAATGTTTCATTCTCCATTCCA  
A\_14\_P103790 GCAGCAGTTCTTTTGAATTGGAGGTGAATGGTGATTGTCTAAATGTGTCTTCTGAAA  
A\_14\_P117108 CTTTCTAGACAGGAATCAAAACGACGAAATTAACAACAGAAACCTGGACATCCTATAAGA  
A\_18\_P22841630 AACAAAACAGTTCACCCTCTGCATCTCTGCTCAGGGATCAACAGG  
A\_16\_P02230849  
CCCAAGGATAATTTCTTCACTTCTACTCTAGTTGTGCAAATGTTTCATTGTTTGGTAGCA

A\_16\_P18251219

AGCAATTTGTTCCCCAAATATACTGCTATCTTTAGTTCGATTAACCTGAAACCTACTGCAA

A\_16\_P00922037

AAAAGGATAAATGCTCTATGCAGGAAACATCTGAAATACTTGTGTTATGAATGGGCTTCC

A\_16\_P16191505 CAGTTCAAGCATTGTCTCTTCTTTCTGGTTGAAGTTCTGTCTTAGAAGACTGTTGTA

A\_14\_P124286

TCCGTGTTGTGAAGTAAAAAATCCTGAAGGGTAAAGTAAAAACAAAAAGCAAGTCTGACA

A\_14\_P133199 AAAACCCCTTCTTACACTTGTCTCTTGAAGTTCTCTGCCTTACAAAAGAATCTCTTAAAT

A\_14\_P135523 AAATTTGGTTCACAAAACCTGCCCTAACAGGTTATTTTTACCTTACCACAGAGAAATAGA

A\_14\_P117482 AATGACTCTTCCAGAAACCTTAGAGCAGATGCAGAAAGTGAATGGTAAGTAGGAC

A\_18\_P17422728

AGAAGAAGCAGCACCTGCAACTCTTCTGCAGAAATTATTTTCAGAATGAAAAGAAAGAACT

A\_14\_P131761 AGGCACCCAGGGAAATAGTCCAGAGGTCTGAATTGCAAACAAAATAATTTTAACTAATAT

A\_14\_P202420 CTGAGAGAGAATTAGAGCCTATAGCACCTAGGAGGTGTTTAAATTATATTGCACGCAATT

A\_14\_P114507 TAAAACTCTACTGGATGTGACTCTGGGCTGAATGTTAATAAAGAAAGAGGACACAAAGA

A\_14\_P105553 CTCTCTGAAATACCTATTCAGTGTGTTTAACTGATGAACTAAGAACGGTGAAGTCAGAAG

A\_16\_P15608845

AGGGAAAAAAAAAAGTTACCACTATAGGTGTATGACAGACATTTAGACTACAAGGAAGCCT

A\_14\_P107235

AGAACAGGAATAATGGTTAAGGCAGACAGCAGAAAAAAGACAAAAGTTTATCCAAGAATG

A\_16\_P00376120

CAACTTCTGTAACAGACGTCTAGACAATTTGACTTTGAAATACATACCCTAAGCCTGAAC

A\_14\_P101012 ATTCAAATGCAAAGATGCTGCAAGGTAATGTTTAAACAAACCACACTGGTCAATTTTT

A\_14\_P120076 TTTTTATGTCACCAAATTCAGCCATTCCTCTTCTGAATCAAGATGTCTTAAGTGCTC

CUST\_7262\_PI426210822 TAGTATCCCTCTCAGGCGTATGAATACGTCAAGCCACTTCAGCATGAT

CUST\_6821\_PI426210822

AGAATATAAAACATAGAATGTATGTCAGGGGGTGATAACTCTTCCTTTTAAAGCCAAAAAT

A\_16\_P00579328

GCCTAGTGTGATTTGACATTGTGTAAACTCCTTGAGATTTGGTTATGACTTCCATTTACC

A\_14\_P133747 AGTTTACATTTTTTCATCACATATGCAGAGAAAATCAGGTGTGTCTGCGGAACATCTACAA

A\_18\_P10781779

GCACAAGAACATTCCTATTTTCATCCCTCAATTACCAAATATCTGCAATTCCTAGTTTTGC

A\_14\_P136382 GAGGTGTAGTGGGGAAAAGAAGAGATTTTATTCTAAGCAGGAGATTTTATTCTAAGCCTT

A\_16\_P16191483

AACACTTATATGCACATTCCTTGTGACAGGCACAGTGAAAGATTTATCAAGGAATGACATG

A\_14\_P135116 ATTCACATCCAGATGAGAGAGAATAAACCTTCCCATGAAATGTGAGCATTTTTAAAGAAT

A\_14\_P114777 CTTTATTAAGGCTTCTTACCTGTCAGGAATACCTAGCCTCTTGACACTTCTATAAACAGA

A\_16\_P19950947

ACTATCCATAATTCACCCCATGACAGTTTAGTAGACTTATATACATGTTACCTGACCCGT  
A\_18\_P22841612 GAGCAGAGGCTGAGGAGTAAACACCATACCAACATTCTGGGACAAAATAG  
A\_14\_P202498 ACTTCTCATTAATTCTGCAAAGATAAAGACCAGTTCATGGTCTGCTAACAGAGGTCTTAA  
A\_16\_P03380225

ATGATATCCTACGTTCTGCCTAAAATTGTCTGAAACTCTATTCATGACTTGCCAACTACG  
CUST\_4976\_P1426210822 AAGGCACCAGCATTTCAGCATAAGAGGGAGTAATTGACATTCTACATGGC  
A\_14\_P125366 GTGTCACATAATAACGTCCTTGGAAAATTGAAGGCATTTCATATCTCTGCTTCAGTG  
A\_18\_P14136506 CTAATGATCTCAGTTTAAACCTGCTGTCCATTCCTCTGTGGCCTATTCCTGT  
A\_16\_P18339246

CAATCTTTGCACCACTTACTTAATTTGCCTCATCATATCACTTGACATTTGAACTACTGG  
CUST\_5622\_P1426210822 TTGCAGGGGCCTTTGCAGGTGAGTCCCTGGGGAGTCTGTGTGATA  
A\_16\_P18344568

AGCGAGTTATCCCCTAATCTTAAGTAATAAAAAGCAGAATCCAAAAGATGTGACCAGTGAT  
A\_16\_P16117888

AAGAGTTATGAGATACCTGTCATGCAAAATTAGGACCAATTTAGGATCAACTAGGACCAA  
A\_14\_P107559 CTATATGGTAAATCATTAGTTGCAGTTCCCAGAACTCTGCTTCCTCTTTCTATCTTCTTC  
CUST\_2583\_P1426210822 CACGTCATTCCCTGTTGGCTGCAGAGGTGAGGGACATGAGCTGAG  
A\_14\_P109790 TTTCTAGATTTTCGGCTTAAACATCTAATAATAACATTTAAAAAGTGCTTTTGTAACTATT  
CUST\_2871\_P1426210822

CTGGCATTTCATATCTCAATCTTTGCAGTAGAAAGAGAAATGTAGAAATCTGCCAGAAAAT  
A\_16\_P36554095

AAACATCTAGAGAAATCCTTACATTCCTTCTCAACCAAAAATGCTTTTCCCCATTTC  
A\_16\_P03497149

CTACCTATGTAACAATTGGGAATCTGGAAAATTATCACTTACATAACCACATGCTGCTCC  
A\_16\_P02969505

TCTCTTGCAAGTCTGACCTCTGATTTACTGTTTCATGAATACTAAAGTCACTCTTGCTTT  
A\_14\_P115130 TTGCTCCATTTTGAAAATTCTAAGTGTGCACAAAAATAGAAGAACACAGCGTGTGTCAT  
CUST\_788\_P1426210822 TATTTTTTTTTCTATTTGCCCTAAATGTCCATGCTGTGTGTGTGGTGGG  
A\_14\_P125807 ACTTCTTAAAAGGACCACAGAAGACAAAGGCGATCTATATTGTCTTCTCTTAGAGTGAAA  
A\_16\_P16191353

AGTTCTTATAGATGATAAAGACCTCAGAAAAATCTCACTATGTCCATGCCCAAGAGTTCC  
A\_16\_P00036945

TCCCTGTTTTACCCATCATAACACATTTCCATTTCAATTGAGTTGCTTTTCAAGAATCAC  
A\_18\_P10096569

GCACAGATTATCTACTCAGCAAAAAGATAGCGAAATGACTGGGTGGTTCAAGATAATTCAT  
A\_14\_P201388 GCAAAGCCACGATTTAAAGGTTCTTTTTTATTTGAAATCTCATCCAGAAACACTGGTTAT  
A\_16\_P20910605

ACCCAGAATCTCAGATATTTGTAAAAGAGGTATATCCTATAGAACCATAGAAACATGCCC

A\_14\_P119298 CTACAAAGCATGGGGGTAGTTTATATTTCTGTTATCCTGATGAGAAATCTGATGTGGTAG  
A\_16\_P15217532

AAAAACTGGTAGGAAAGGTTATGTAAAGGTTTTGTTCTATAGAATGTGAAAGCCGTTCCA

A\_14\_P112706 TTCTCCTCCTCCTTCTCAAATTTAAAAGACTAATGTTAAAACCTCTCGAGCAGTTCTTAGG  
A\_18\_P16097541

AAGTGGCAAACCACTATCTATTTCTTGCATGTCTGTTCTAGAGTATTAATCGTGCTGTTG

A\_16\_P02353934

TCAGGTCACCATTTTAAGGAATTCTATTTATCCCAATATAAAAACCACTAGGCAACCTTGT

A\_18\_P11103642

CTGAAGTGCTCAGTAATCAAAAAAAAAAAAAACCCTCAAGTTTTGTATGTCTTTCTCCAGA

A\_16\_P16280235

GTGGACACTAGAAAATTCTCCTACAACCATTTACTCCAAAAACACAAGCAATGTCTTAGA

A\_14\_P126275 GCTTGTCTTTTTAAGAACCAAATATCCTACTAGACTGCAATCGAGTTAACTACAGTCTA  
A\_18\_P10009073

AAAAAAAAAGCAAGGTAGATTCCACCTCAATGACTGTTTACTGGTAGCAATTCAGTTCAA

A\_14\_P132211 CATGAGCGTTTCTGAGTCTCTTCAAGACGAATCTAGTTTTACCTTCACAGGATAT  
A\_18\_P16501287

AAGCCAGGATTCCTGATTATAATTCAGCCTGACTAAGAATCATCTACAGCGATATATCCT

A\_16\_P19806018

TGCTCATTAACATCCAGTGAAATGATATTGTCTGCTTATGTTTCAGTAGTTGTGGTTACCT

A\_14\_P131514 AGTAGAACTTCAGGATTGGTTAGTTATTGAAGGTCAGAGGGAGTAGTGAAGAATAATTCT  
A\_14\_P117636 CTGTATTATCTCTTCTCTCCCACTCTGTTCTAACAGCCATATTCTTAAAAGACTGAAACC

A\_16\_P01095752

AGCCTCCACTTATAATTTCTGGAAATCAGTTCTACTTTCTAATTCAAGTTCTCTGGGTGA

A\_16\_P17109593

AAAACTTTGAACAAGGACAAGTCAGTATTAGGTGAGCCATACACATGAAGTAAAAGTGTC

A\_16\_P01414776

ATCCGCTATATTATGACAAGGACATATGATGTTTAGAGAACTGTGGATAATCTGAGGTGG

A\_16\_P00993916

AGGTGACCATTATAGTGATAGAAAACCAGTTTATGACATCTAAAATGAAGTTCCACAGGT

A\_14\_P133370 AGAGTGAATTTCTTGGTTTTCACTGGCTTAATAATGGGTTCTAGAAGAAAAAAAAAAGGT  
A\_18\_P22841361 ATACCTTAGAAATGTAGATCCAGGGGCAGGCTGCTGCTAGAGTTCTTG

A\_16\_P02779176

GCCAATGACCAGACTTCAAGAATCTTCCTTAATTTACAAAAAAAAATTTAAAACCAATGGC

A\_16\_P18741163

TCCTCATTACCCTCCAAAATACCAAATATTTCCATTCATCACTTATTACAAATGCCCTGC

A\_14\_P128633 CACCAGGCAAATAGAGAACGGATTTCAATCTTAGCAACATGTCATAAATCATCTGTGTAT

A\_14\_P127649 CGATCGCTTGCATCATTTTTAGACCCATAAAATTCTCGGTGAAAGTAAATCTTACTAC

CUST\_6071\_PI426210822 TAATAATGCAGCTGGGCACACTCCAGGAGCCAGGGTGGGGAAGGG

A\_16\_P16102875

CCTGGCCTATCATTACAGTTAAGACCTATCCTCCATATACAGATTTTTATATCGTTCATCG

A\_14\_P138582 TCTTAAAGTTTTTTCATTTCTGCCCTCAAATTTGGATTTAGGCTGACTGTGCTTACTTCTT

A\_14\_P116750 ATTTAAGTATGAGTCTTTAACAGAAATTTGCGCCAGACCATCATCTGCTACTTTTAACCC

A\_18\_P17058044

GCTATGTAAGACTGATTGCCCATATAATTTGACCTTAACTCTAAAAGTGGATGTTGGGG

A\_18\_P14136659 ACTGGGAGCCATAATTTAACTTTATGTGCGAGGATTACAGTAGCCAGCCAAAC

CUST\_5193\_PI426210822 GCACCTTCTCTGCACCACAGTTTTTTGCTCACACTCCTCTATTTTT

A\_16\_P16978071

AATGCTTACAAAGACGATACATTTTTGAGAACTCTGATTTCTCTTTACATGGTCCAGTCC

A\_16\_P36713697

AAAGCCCACGCTTTTATAAGATTCCTATTTCCCAATCATATGAAATCAACAGAACAGCAA

A\_18\_P15980674

AATGTTCCCCTTCCTATCAAATCTTCTCTAGTGTATGCTATGGCCAATCACTTTACTATC

A\_16\_P16191687

AGGCAAGAATATAAAACATAGAATGTATGTCAGGGGGTGATAACTCTTCCTTTTAAGCCA

A\_16\_P58424576 GCTGGAAATGTCTACATCCTAATCAGGGTGGTAGTCTCCAGGTATAAA

A\_14\_P121178 ATCAGAAGATAACGAAACGTCCACTTCCTGAAGGGTGGGAAAAAAGAAAAAGAAA

A\_14\_P103522 ACAGGTGACAAACACAGGCTTTGGAATGTAAATTGTCAAATTGACTCATAATTTCTACC

A\_14\_P104750 CTTTGTCTTCTTTAGTTGTGTCTACTTATGGGCCAAAAGAGCATTCTACCTCTGTAATT

CUST\_3312\_PI426210822 ATCCATAGTATCCTGGCTGAGGACCCCTGAGAGGGCAGCATGGAG

A\_14\_P108298 TGAAAGAGAAAAGGAATTAGCAGAAGACATTATGTCAGGTAGGAAACCCATTATCTGGG

A\_16\_P02844914

CTGGTTCGGAGTGATATTGATTGGCATAATAACCACTACTCATCAGTAAACCTGTGTAA

A\_14\_P125424 CCCTTTTTCTTTTCTGTTTCTAGACTCAAGTATTTTTCAGAAGTCTTTACCTAGGGTCTT

A\_14\_P100371 AGAACTAAGGTCATCTTTTATAGGGTTCGTCTAAGGACAGTTGCCTTAATGTGAAGACT

A\_18\_P11605467

AAACCACGTATGCCAAATTATGCCATGTCATACCTATCTTCTGTGATGTCACAAGACAT

A\_16\_P01017497

TTGCTTCACCCTCTTTATTGTAATACTTATACTCCAAGAATGTTCAACTTGCAACCAAGG

A\_16\_P16326677

AGCCAATCCGGAGTAGAATGAGTTTLAGGGATAACAAAAACCTTGGTAAACTATAGGTTA

A\_16\_P38506540

ATCATGAATGATCTGATGTAGAAAGATGAAAGGATGACTGATTTCAACTTGGTATTGGGC

A\_16\_P18962053

AAGCGTTCCTAAAACAATGATTAACAAAAACCAATTGGTGTTACTCTCCAAATCATGCAA

A\_16\_P55110658

TGCAAATTGATTCCTATTAGAAGAATAATATAGTCTGGGTAAAACAGGATGTAATCCAGG  
A\_14\_P127618 CTCAAGTGAGGTGTTCTATGTCAGAGAAAACAAGTCCCTATAAAGGTTTACTTGATGATT  
A\_14\_P106719 CTTACCACTGCCCTTTGTTTGGCTAGCAGACATCTATTCATCTTTCAACTTAAATAATGT  
A\_18\_P22839580

TACCAGATTATAGTAGGCATGTCCTTAAGGAACTTGAGTTATTACCCTTGTTATGCTGCA  
A\_14\_P120222 AGATTTTAAGTTGTCTACTGAGCAGATTTCTGCATTGGTTTTCCAGTCCTGTAAAAGTT  
A\_16\_P17149875

AACTCTCATGCTAAAGTCAGTAGATAAAGCGAATGTGAAATTAGGATTATCTGTGCTGCC  
A\_16\_P39702870

TCACAAGCACTTTAGTATTCAGACACTTTAGACAGTTTGTATTCTGGTAAAGAGGTAGC  
A\_14\_P109552 ACAGTTTGGCAGTATCTATTCCAGTTGGAGTCATTGTGGTTTCTAAGATTTTCTTATAGG  
A\_14\_P125857 ACAAAGAATAAATAAACACCACCCATAAGGCCTCCATCCTAAAACAAGTATTTCCCT  
A\_16\_P17834151

GGAAACAGGTGATATGCTTAGAGGAAAAACAAAAGTGTAACACAGAGATGCATGATCTT  
A\_16\_P21461725

AAAAAATCACAAGCCTTCAGTTATCTTGATGCCCAATGTAGTGTAACCTTTTCTTTCTCA  
A\_16\_P03140774

GTCCCACTTCGACTTTATTAGATTAAGCAAATTAACCTTGACTATTCACACGTATGT  
A\_16\_P19916045

CCTGGGATAATAATTGGGATGATTTCTACAGTGATAGAGCGGATAACAGGGATAGAATAA  
A\_14\_P134726 TTACCCACCACTGATATGTATGATAATGGCTCCCTCAACTCCTTGTTTGAGAG  
A\_14\_P114943 CAAGACCCGCATCTCTAATTTTTTTAAAAAGACTATTTCCCGGAATACCTGCTAGATA  
CUST\_9647\_PI426210822 CGTTTTCTCTGATCCCTGAATTGGTTACTGAGGCCACAGAAGAG  
A\_16\_P16191890 ATTTTCTCCAATAGCCCCCTCATCCCTGACCTTGTCTTCCAGCCTC  
A\_16\_P15207028

GAAAATCTTGTCCTCAATGCTTTTCCATCTTGTTTAATGTAATCACCTTAGTGTCAACCC  
A\_14\_P117103 ACCACCAATTGGTTTATAACATTGACTATTGTTTACTGTCTTTCTTAGTCCTAGTATTT  
A\_14\_P132112 GCAGCAGAAAGATTGAAGTCATTCATAAGAAAACTTCTGCCATGGAATTAGATGAATG  
CUST\_3456\_PI426210822 TATGCGTGTGTGCATGCATGTACTCCAGCTCTCTGTGTATGTTACACA  
A\_14\_P134946 AGTGACCATTGTATAGTGAGTTTATTTGTGCTCTAAAATAGTATCAACGTGCATCTTTCC  
A\_16\_P21071553

AAAGTGCACTCTTTTACATCGTAGGAAACCATCTTTCAACATGCTTCACAGTTTATTACC  
A\_14\_P104973 ATGTGGAAAATTCCTATTCATCATGAAAGGATGCTCTCCCTTTTCTAGGCTATAAAATAG  
CUST\_3302\_PI426210822

GTTTCGTGGAGATTGTTCCATATTGGTGCATATAGAGCTTTCCTGTTCTTTTTTCAGTA  
A\_14\_P115984 GTGAATCAAAGAACTAGAGACTGAGTCACTCTTTGTATGAATCCTCACCTACAGTTACAG  
A\_16\_P19097588

AAATCATAAGACTACCTTGCAGATAACTAAACCATCCTTAGAATACACTCCCTTTGAGGC



CUST\_7804\_PI426210822

AGTATGGATTAAACAAGAATCATAAACACGTGAGCTTCTCCTCATCCTCCTTTTGTG

A\_14\_P126549 AATATAACTTATCATCACTTTGCTTCTTTACTGAATCTTCTACACTCTTGCCTGATACCT

A\_16\_P15781861

CCTGAGATCTAGGAACACTAATATTTGCCTAATCTCCATATCTTAGAGACCCAAGAAGAC

A\_14\_P202172 TATATAATCATAACATTACCTTTTTCAATATGCATCCTTTTTGACTCATGTCCCATGTCAT

A\_18\_P14390160

AGCCTGTCCTTCTTTTTAGTTCCTCATATGTGCTATCTCCATCATGATATTTTCAGTTCA

A\_14\_P132838 CAAGCCTTTTTGCTTCTAIGCGCTCAAATCTCTGCTGTGCTCAATGACAG

CUST\_6971\_PI426210822 TGTTTGGATTCTGTCTTCAACAGAGGTGCCACAGCTCCATACTA

A\_14\_P109136 CTTCAAAAAGTAAAAGGAATATTGACAGCGACCAATCCTTTTGTGTTTGGTTCACTGAAGA

A\_14\_P102426 CTTTACCATGAGAAAGAGCCAAACAATGACTGTCTCCAATAGAAACATCAACTATTCTTG

A\_14\_P201320 ACAATTACATCTGCTATATTTTGGTTTGTTCCAAAGAGTTACGGTTCCTCATTACTGGA

A\_18\_P14136767 GTGATCTTATCATAGAATGATGTCAGGGAGAACCAGGCCCAAGAGC

A\_14\_P135089 AAGCCAGCAGGGGAATTGACAAAAACGAAGATATATTTTATGTGCAGTTTAGAGTTTTCT

A\_14\_P201303 CTGTGGCTTTAAACTTCATCCTTACCCAAGGTCAAATATCCTCAAATTGGATAACAG

A\_16\_P02031639

AAAAATGCAAATCAAATGTGTCTGCTTCAAATTAAGTCCATTTTCTGGTCTAGTAGGGGT

A\_14\_P112048 CATGTGATTTCCCAAAGGAGCCAGTCTTAGTCCGTAACCCCTTAC

A\_14\_P121577 CTGACCCAATCAGAGACATGAACCCATCAGAAAAATGTAAAAGTTTTTCATCTTTCTAGTT

A\_14\_P103708 GAAAGACAAGTGTTCGCTCTCCATACACATCTTCATCTTTAGAAGAAAAAATTCCTAGG

A\_14\_P104176 CTGTCTTAAACAATCTATAGCAACCTAAAATCTCACGAACACATGTGAATGACTGAAGCA

A\_14\_P122831 TTTGCCTCTTCTGAGGTGAATTTAAAACAGTAGGGGAAAAAACCCTTTTATCATAATC

A\_14\_P119083 CAAATGAAAGTAAAAGGCTCTAATACAACCTATAAGGACTGCAAAGTATGGCCAGGG

CUST\_3867\_PI426210822 TATTGAGTGGGAAGTGATTCAAGAGGCCAGACATTCTGTCTGGACATT

A\_14\_P130398 ATGTGGCCACTGCTTCATTCTCTGGGCAAAATAATATTAATGGATTAAAGAATCTAAAA

A\_14\_P102609 AATTCATCAACAGCAAAAAGAAAGTAGAAAAATTCGTAAGACCTCAGGGCTGTGGAAAG

A\_14\_P106404 GATCCTGGGGATATCCAGTAATGTAACAAATTACTGGGAGTTACTTTTCATCTTTTTCCA

CUST\_3404\_PI426210822

CTGCCCTTTTCTTATCCATTGCTTTAATCAGAAATAACATATCAAGGTGGCCCAA

A\_14\_P129340 TCAGATTCATCTCTTTTGAGAATGGTTAAATAAGTGCAATTGCTTGTATCTATGTGCCCA

CUST\_5528\_PI426210822

TCAGTATATAGTGCAGATTGAATATGTTTCTTTTATGGGTAAGAAAAAATAAAAGCATT

A\_14\_P201506 TATGGAGACTAGACATAGGTGTGACAGGATCCATTATAAATCCATCACACAGGAGTAG

A\_14\_P104153 GAAGTGGATTTCAAATCATAGAATGAATCCAACCAGATGGAAAAACAATCAGGTCTTG

A\_14\_P117975 CATGAATTGCTACAACCCAGTAAAGCAGAATTTTGAAGTTTGTIATTCCCAGTGAAACAT

A\_14\_P107247 ACGAAATGAGTTTAATTTATTGTGACTGCTCCAAAAGAAAAGTGCAGTTTCTAATTTT

A\_14\_P107959 GTCTCCTTGCAAAGAAAAGACATCTTCACAACTCCACACTCTAGCACCTAATATTTGAA

A\_14\_P125018 GTGTCACCTAGCCTCTCTCAATAATGCAAGTAACTTTCTGTATGTTGGTGGCACAAA  
A\_14\_P133069 TACCAGAGATTTAAACATTTCTCCCTAAATGGAGTTTGTGGAAAGATGTGAAAATTGGCAT  
A\_14\_P116111 AGACCTGCAGATCTTCAACCCAGAAGAGATCATTAAAATCAAGAGAAGTAAACGAGATTA  
A\_14\_P124561 TACAACCTCAATATGCTCCCTCCAAATGGATTTGATGCATCTTGGGTTTTAAAAACATTCA  
A\_16\_P37838223  
GCGATGCTATACTACAATGAAAAATGTCCTCCTGATTCTAATTTTCTATTCTGGTTTC  
A\_14\_P138192 GTATAAAAGTATACTACCTGACAAGACCACTTCAATAAGATCGCCTTCTGGATATCACT  
CUST\_6755\_PI426210822 GGGGGGTGCTGCATGGTTAAAAAGGAGCATAAGGAAGAATAGATAACC  
A\_14\_P128779 AAACCTCACTTTCAAATCTTTTCTCCTTTTTGTAAACTGTCGTCTCCAACCTCATAGTC  
CUST\_682\_PI426210822 ATTTTCCATTGCACAGGATTTGGGAAAAACCTTTCATCTGACCAGCTGAT  
A\_14\_P109197 CTTTCCCATAAAATTGTAATCTACTCCATTTTCAGGTTTCTTTGCCTAAGAAAAATCCC  
A\_16\_P00810551  
AAGATGCCTACAACACTGATATTTTGAAACATCAGCATTTAATGCCATTTGCTTCTTGAG  
A\_16\_P19064905  
AGCATGTTGAGACCATGATCTTCTCATAATTTGGTTCACTTTGATTAAGCAGCATCATG  
A\_14\_P124897 CCAGAAACAGACAGTCTGCCTTCAATGTGCTAAGCATTCTAATGCCGTC  
CUST\_7568\_PI426210822 GCCCATCCCTTCATCTTCAGCCAAAGGAAGTTCAGCAGTAGCTG  
A\_14\_P118613 CTATTCTGCGACATTCCCTTCTGTCAAATCTATCTGGAGATGCAGTGGTAG  
A\_14\_P130951 TTTTGATTTGGGATCAGGTTTTGCCTGTCAAATAGGAAAATATTTTAATGACAGTCACCC  
A\_14\_P113646 ATTGGTTTGGATTTCTGTAGATGGAAGTAAAACATACTGAGTTTACAAGCCTATGCGATG  
A\_16\_P21390145  
AAAACCTCCCTCAACAGATAAGATTCCTATACTCTCTGGAATAGGTCAGCAAACACAAGA  
A\_14\_P106720 CTTGTTCTTTCTGTAAAAAACTCACGCCTAATCTGCTTCACTGTTTAGTGGCTGAAATTA  
A\_14\_P110493 CTGTAATGTTTCATGGTGATAATGTGTTTCATGTCTCCCATATGCAAAGAAAGAGAAAGTCA  
A\_18\_P12813773  
GACCCAAACATTTTTATTGCCATTATCTGCTAGAAAGTTAGACATAGGCTGGAAAACACA  
A\_14\_P112280 TAGATCGCTGAGAGACTACGAGGGTCCGGTTCAGTTTTAATTCTGTCTCTAAT  
A\_14\_P136498 CCTTTAACATTCATCGGTGTTGATATGAATTAATAAAAAAATGTTCTAGGTCTGTTTGGCT  
A\_14\_P111728 ACTTCTGGATCAAAATGGATCTGTGTCTTTTTTACATCTCTTAAATCACTTTCTTTGTGC  
A\_16\_P16791588  
ATGTGGCTCTATTGATAGGTTCAATGTTGAAAACACAGATGTCTATAGCGTAATGGTAGG  
CUST\_2551\_PI426210822 GCTCTCCGGCCTCAAGGCTGGGTCTCCATCCTTGTGAGCGCATTC  
A\_16\_P00428382  
ATCCTTGTCATCTGGATCTGAGATACAACTTTAATGATTTACATATGTCATCTTGCCAC  
A\_14\_P113129 ACAAAAATGGGGATCAGGATCTCAGTCTGTAGAAATCTGTTTTATTCTTACCAACATCCA  
A\_14\_P137766 TTGCATGACTACTGCAAAAGGATTACTTTACAGATACCAGTTCCTTTGTCAAGAGCATAAC  
CUST\_1657\_PI426210822 TTATGCAGGACAGATGAGTGTAATAAAGAATGAGTGGATGGATGCTCTGCTG  
A\_14\_P201356 CTGAATGTGATGACTGGGAGACTAAGATTAACCATCAGACTCGAAATTGGGAAAAAC

A\_16\_P21269778

ATCATTTTCTCCTTCATTAATCACAGACACTTGGGTTTATTGTTGTCGACTTTCTCTGAC

A\_18\_P22841012

ACTCTAGAAAAAAGAGCACAGGAAAAAGTATGGCTCAATACAGGGTCCAGAAATACTC

A\_16\_P17839919

AAAACCTTACAGTCAAAGAGTTTCAGACATCCAACCTTAGCACAGGTCTTTTCATTG

A\_14\_P122560 AAAATGATTTTTTCTAAACAAAACCTCTAAATCAAAGTGGGATGGGTCTCCAGTTGA

A\_14\_P106302 ACTAGTGAATAAGCATTGTGTGCCACAAGTTTTATGCAGAGAAGATGGAAGGAAGTTTC

A\_14\_P135731 AGGTTGTAGGTAGTATGGAATCTAATGAACTGGATCAGGGAAAAAAAAATCTGAAGGAAT

A\_14\_P102003 CAGTCTGTTTTACAGTAAGATGTCGCCAAATCCAGAAGACCTAAAAGTAAAATATGTGA

A\_14\_P127453 TCTTCTTGGAATTTTTATTTATTTCCAATTTTTGAAACCTTCCAGGGCATGCGTGTTCATT

A\_16\_P01109799

ACAGCAAGTAGAACAAATGGAATTAATGATGACAGTTCGATATATTGTGCCCATCACAGT

A\_14\_P138661 GTAAATATTCTGTGGAGAAAAGAGGACTTCAGGGAGTAAAAAGCCACTGATGTCTGT

A\_16\_P19806656

ACTTGTTCCTAGTGATGATGTTTACCAAGTTCCTCAAATATGTGCTTGTGAGAATAG

A\_14\_P201039 TTGGCTATATACAACTCTGCATGTAATCAAACCTCTAGAACATCAAATGCAACTCCACTGC

A\_14\_P125251 TGGACTAATGCGATATCATAGATATGGTGTGTCTTCAGTTACAAGATGCTCTGTTTGAAT

A\_18\_P22842638 CTAAGCCAAGAAGGAAAAAATTCTCATCTAAACCGCCAGGCTTAAAGGTGG

A\_16\_P17996716

AAATGAGCACACATTCAACTTATCAAACCTGAGCAGTCCTAGATATAAGGAGACCTTCAA

CUST\_3047\_P1426210822 AGGCCCTACCGTGGTCATAGTTTTGTTGAAAGGATAGGCACTACAAAA

CUST\_169\_P1426210822

GAAATTGAGCTCACTCTTGAGCTCAGATTATACGAATAACTAATACATGTTTAGCGTTTT

CUST\_3988\_P1426210822

AATAGGGTGGGAGCAGCTATACACAGTTGCATTTTCAGTGTGGATGATAAAATGG

A\_16\_P36159938

CCAGAGACCTTCAGAAAAAGAAATTCGAAGTAGAAATCTCAAATAAGTCATGTTCCAACC

A\_16\_P00515446

AACAGATTACTGCATGGTATTAGATTTGTCTGGTAGACTACTATACTCACCACCTCTACC

A\_16\_P16243170

ACCTCACAGTTACATGGATTTGAATATACTTAACTGACAAAGACTAACTCAAAGTGGCT

A\_16\_P17564876

AGTTCTGATTGACCTAGTCTCTAATCCAGCAACTGATTTCTCTATTGACATCAAACCAT

A\_14\_P101007 GCTTATGGTAGATGACACTGATGCATTTTGAGCAGGACTATATCAGGTAAAAGGTAATCA

A\_14\_P107600 CAATTACAGCGGGCTCTTTATTCATTATTCCTTGTCCCTTTCTTGATTCTGCCTAAAATG

A\_14\_P133136 TTCTTGGGGAGAAAGATCTTCAGGTGGTGGCTGTTTTCTAAAGGGAATTAG

A\_16\_P16944148

AACTGTGCAAAAGAATAAGAGTCTTTCTCTCACGTAGTTTAGGTTAAGTAGCAACCCAGTC  
A\_16\_P00572956  
AAGGAGTAAAGCCAATTGAATAGTAAGCCATGTTTTCTTTTATCTTGAACCTTGAACCCA  
A\_18\_P16382517  
AATTGTAACTCTCCTTGCTTTCTATCTTGTTCTGAAGAAACTCTTGGGCATTACATCC  
A\_16\_P39432547  
CCCTTTGCCATATTAACATAGCACAGATTAAAACTGATATATTCATACAGACAGACCCC  
A\_14\_P125576 GAAAAAGGGCAATTACAAGTCAGTTCATCCTTTGGGAATATGTAATGCACAAAGATTTCT  
A\_18\_P19852797  
AAACTCCTTCGAGTAATCAAATACGCTCAATGTCTGCTATCTTAGAAATAAGTGTATCCA  
A\_14\_P117858 TAAAATCTAACAGGTAATCAATGTGTTTGGCTACCTATAGGAGCATCCACCAACTGATAT  
CUST\_2847\_PI426210822 CTGATTTGAAGGTTTCATGAGCTGAGCGCAGAGGAGATGTGGGTGC  
A\_18\_P22841605 ATGGTGTGTGGCTGGAGGCCTCTGAATACCCACCAGACTGAGGA  
A\_14\_P139606 GTGTTTCGCCTTGCTGAAGCATAACGGGCAAGATCTTGGAGTTAGAGTAT  
A\_14\_P134341 CAGTATTATCATTGTGTCAGGTTGCTTTCTGAACACCAAATCAAAACACATCTTAAGTAAGT  
CUST\_4617\_PI426210822 TCAGCAAGCTCCTCTGCCTCTTCCTTTCTCTGGTAAAGCATAA  
A\_18\_P22841284 ATAGATTCTTGAGGCTTTGCCTGGTTCACTAATGACAGGCTCCAGG  
A\_14\_P114271 TGAAAACATTTAAGTGAAGTGATCCTTTTTATTTTTCTCAAGGTGTCTGTGGAGCAGTCAT  
A\_14\_P131391 CTTTCATAAAGGCAAATCAAGATAGAACCATCTTCCTTCTCTAGATTGGGGATCAATTCA  
A\_14\_P200984 GATACTTTATTATTTGGGTTACCTTTGCTCAGTAGTGAATTATAAGCACTCTACTAGGT  
A\_14\_P112437 CTTCCAATGTTACAGTGAACATCGGAATCATCTAAGTTCTTAACCCACACCAGTGTA  
A\_16\_P00685344 AAATAGGATTACACTTTGAATTTCTTATTTCTTAACTAGTATTTTATCTTTCCATGATT  
A\_18\_P22840901 AAAGAGTGC GGTTAAAACCAAGTTGTGGGAGGATGGATAGTCAGTAATTGTTTATCT  
A\_14\_P131815 ACCTGAATTACTGATATACAAATGACAACACATGAATGAAAAGAGCAGTGAGATTCTGGG  
A\_14\_P125465 GGCTCAGGAAATTTAGAAAACAATTTACAATAAGCACATCTGTGTTCAATGCCTAGCAGA  
A\_14\_P121144 CTACAAGCAATGGGTTATTAATCATCAGAATTGAGATAAAGGGGCTGGCAGGTAAATAT  
A\_14\_P120359 GAACGAGGTAGTGGCCATCTCATACTACTCTGAAATGCAAACTTCTATTCTGTTG  
A\_14\_P127361 TCTCTTCTACACTCAGTTAAACATCCATAGCAGTGGATTTCAAGGTAACATAAAAGGTTGT  
A\_14\_P102667 ATTCTCAGTCACCCAGTTTTATATTTCAAGAATAAATTTTGACTTCCTTCTCCTTTTTCT  
CUST\_9968\_PI426210822  
ATTACAAATTTTCAGATGTAGGTGAAAACAGCCTCTTAGAGTATTATAGATGGATATTTTA  
A\_14\_P105447 CATATAAGAACCCATTAACAGATCATTGGAACCAATTCTGTGTTGTGATATGGATAGCCT  
A\_14\_P115628 ACCCAAACTCCACTGAAAATAACATATCTTCAGTTCAAGTTATACCCTTCTAGATGGAG  
A\_14\_P111254 AATGAATGATTGGATAAAAAAAAAATATCCACTTGAGCCGGATATTTCTCTCTTCTCCCC  
A\_18\_P14546029  
TTGTCCTGCAACAATATTATGTTTAGTTCTACTGCAGAATGATAACTGGATCTTACCCCC  
A\_14\_P118575 TCAGTGAGAGCGTTTTGCTTTTCCAATGGGGTCTATATAAACAGTTTTCTTTTCATTGTGA  
CUST\_10400\_PI426210822

GAAGGTACAAAGAAATTATCGAAGCTGAGAAGAACCGGAAAGAGAATGAAGACAGT  
A\_14\_P139563 CTAAACTTAATTTTGTATCCTCAGAAGAAATACTTGTGTTTCTGGGAGAGGATTGGGAC  
A\_16\_P18161804

AGAAGTGGTAACTGCTATCATGTTAGAAGCTGGCCCATCATTTTAAGGTAGTGAAACATCA  
CUST\_2449\_PI426210822 CTGTCTGTCTAGGGAAAGACTCTGTAATGTGTGCCTCTTAGGAGCAG  
A\_16\_P19174736

AGACCCCAAGAATAATCACTTCATTAAGACACAGAAAAGAATATCAAAGCCAGTTGCTC  
A\_16\_P30952305 CAGGGTCATTTTATTGGGCTGGAACCATCAAAGTGCTGAACCTTACG  
A\_14\_P127446 TCAAGTGAAACCGTTTCTGTATTTATGGTGTTCCTCCCCTGTCTACAGTTTATTTATG  
A\_14\_P109099 CCTAATGCCTAGAGAACAATTTTAAAGTGCTTAACAAGGTAAACTGCACATCAGAACGAT  
A\_14\_P109723 TGCTAGGAGAAGACTCAGATGAAGAAGAGGAAATGGATACCTCTGAAAGGAAGATAAAT  
A\_16\_P36653153

GGTCATCCAATCTACAGAAGCCTACTTGCTATCACATCAGTCTATATTTTTTCCTTGATCA  
CUST\_9294\_PI426210822

GAATGAATAACCTTAGAAAAGTCATTCTGTGGTTATTTTTAAATAGGCACAGAGGTAACA  
A\_16\_P02111963

TGATTCTCCTCAAATTCCATTCATCTGACAAAATTGCCATTTTCATTCCATTTTCATTCCA  
A\_14\_P110206 GATTGGCCGTAACCTTTTAGAAAAAATCTTGTGATGATAATGTGATTTTGGGGAGGTCA  
A\_14\_P136265 CATCAAGTGCAATCTGTAAAATTGTGAAGTTCATCATTTCCATTCAAGTCATCCATTCT  
A\_14\_P122849 TTTGAATTATTTTTTCTCTTTGGAAAAGGCATGTATTCACCAAAGGAGTCCATGCTATCC  
A\_16\_P03022356

AAACTTAGATCTGACTCTAATTCACAGAGACAGCCTAGTAAATTAACCCTCAGGAACAG  
CUST\_10132\_PI426210822 CCAGACCGCTCTTCAAATTCTGAAATGGATCCTAATCAGCTTTCCCAA  
A\_14\_P201653 ACTTTACTGCCTTTGTTAGGAGATGAAGTAGTTAATCTGGGATAATTGTTCTCTCTCTCC  
A\_14\_P128393 GTGCATAGAATAGGTTACACCAAATCTATAATCTTTTTGTCTTTTGCCTCTCAGCATT  
A\_16\_P17756894

ACCATTAGCCTTAATCCACCATTAAGTTGCTCTTCAATAATTTGAATCCTCAGAAGATGC  
A\_14\_P116686 ATAGGAAACTGCTGGTGATGAAAATAAAGGGGTCTTAAAGATTATTCTCAGCCAGAAAAA  
A\_14\_P125659 ACCTTACCTCTTGGTCTGAAGTATTCTTCCTTAATAACTCAAACAGCAATTAATGTCCAG  
A\_14\_P109324

TAAAGAGAAATGCTAGAGTCCAGGCCAATGGAAAACAAGTTAAAGACAGAAGGTTTAGTA  
A\_16\_P02482532

CATCACCACCCTTTGTTATTAAGGACCTACACTTACATATATTCATTTACGTAGCCACA  
A\_14\_P124433 CTTTCATGAGTATTTGGGCTACAACCTTAAACAACCTTGAACATTACGAGTTTGCTTTA  
A\_16\_P21135857

ACTTAGGGAATACTGCCAAAAGTGCATATTTTCATTGTTTCATTACATATAGGAAGGGTGA  
A\_14\_P106921 TTTAATTTTCGTAGATTGGCATCAAGATCCTCAAGACACTGAAGCAAAAATCTAGAGAGA  
A\_18\_P12201372

ATCTATACCAGCCTGTGTTAAGAGTAAAATATGGAAGAGAACAACATAATCCCCTCCAAT  
A\_16\_P19862304  
AGCCTATTCAACCTTTCCCTTCAATTTCTAGCACTTCCAAACTACTTTTTCTTGACGTT  
A\_16\_P19776477  
GCATCAGACTGTTCTTGAAATCCTTACTTCTACATCAAACCTTCATTATGTAACCTGGTCC  
A\_14\_P124120 CTTTTTTTTTTTTTAAAGGGTCTCCAAATCTACTCCCTTAACTCCTAGGTGCATCACT  
CUST\_5284\_PI426210822  
GATTTTTAGCAGGAAAAGGTAGATTCTTGCCTTTTAGTCTGTCAGAATGACACTTTATTA  
A\_16\_P02767588  
AAAACACAAAGGATAATGTATTCCCCGAAACAGTGTTATTTAACAGTCCATCAGATAGGG  
A\_18\_P22841542 ACATCAAGACGGCTGTGCTTAGGCACAGAGCGAGTGCTCGGAAAT  
A\_14\_P138978 TGGATGTTGAAACTTTGTCCTTTTCTGTTCTAAAGTGCCTCTCAAACAATTTTGTTC  
CUST\_5055\_PI426210822 AACACTCACACAGTCATTCTCCTCACATACCCCACTCTCATCTGC  
A\_14\_P100504 AAGAAATCTTTTATTTACCCTTGAAGATGGTCTTTGATGCTTATGGTTATGGAAATGGC  
A\_16\_P19736089  
TTTTTAGATGTGAATTGAGCCAAATAGCAGTGGATTAAGGAGTAAATGAGCCAGAAGAGA  
A\_14\_P109060 CATTTTGTCTGTGCAGATAGAGAACGTCACTTTTACCATGAAGGGTCTTCTG  
A\_14\_P137622 TGAAATGGAACAGAGATAATCTTAACCTTGGAAATTGTTTTCCCAAATATTGCAGGTGTG  
A\_14\_P122733 CTCTGTCTTTATGCATTGTCTCAACACTTTCCCTTTTTTCCCAAATGAGTAGAGAATT  
A\_14\_P100029 CCTTCCTTTTTCTGAGCAAATCTTTACTGTTTTCTAAATTTTCTTTGGTGCTCTTTGC  
A\_14\_P135825 CCAAGTCCATTGGATTAACAAGTATATCAGTTATTTCTAAACGAACTTGAGTCTGGGTCT  
A\_14\_P103288 ATAAAGGAACTGACTAACACAAGTATCCCGTCTATATCTGAATGCTGTCTCTAGGTGTAA  
A\_14\_P128527 CCATTTGAATCTTTGGAGCAATCTTATTTTCTGTGCTGTGAAAATTGTTATATTGCCAT  
A\_14\_P200869 ACTCAGAAAGTAAAGTAACTGGAAATATTCTGGATGAAAACACGCAGAACTACATGTC  
CUST\_4482\_PI426210822 CACACCAGCCCTTGTCTGCTTATAACTGTGGTGTAGACCTCAGT  
A\_14\_P118976 TACTTTTGTATGAGTTCCTTTCTTTGGTAAATTTGGTCTGTAGGTAGTGTCTGGGTATCT  
A\_16\_P03408745  
CCAAACCCTTTGAACTCATTAGAAACAGATCTACCACTAGTAAGCAACTGATTATCAGAC  
A\_14\_P130797 GTTTTATGGTGACCTTGAGGTGCAATTTATTACAGGTGAGTTGATCTTTGGCCTTAG  
A\_14\_P113231 ACTTGCTTTTAGAGCCAGAGGGAATTTATTTAAGCCTTATGAGACAGCAGTTCCCAAT  
A\_14\_P127248 CTGCAAATACAAATTGCATATTCCTAGACCTTTGAAAGATAACAAAGACTTCTGCCCTCA  
A\_14\_P124467 CTAAATGTGTCATTTCTGATTCATCGAAGGAGTAAGTTTLAGAGAAACCTCATGGCTAAT  
A\_14\_P128676 TTTAAAAATGAATCGGTGTTTTGTGACTCAAAGTGACGGGAAGACTTGTTAGTATCCAC  
A\_14\_P138228 TAATATTGACAGGGTATATTTATTGTCCTTTAATTGTCACCTCCTCCGTGATGTCCTCTT  
A\_14\_P132063 CTTCTCCCAACTGATTTGAAATGTCAATTTGTATCATACTGCAATTCATAGGTGTTCC  
A\_14\_P109294 CTTTTTATTCTATCTACGGCTTATTAATAATTCAGTGGGAATGATGGCAGGGATCTCTGG  
A\_16\_P03264517  
AAAACCCTATTCTCATCTTTCTCCACTAGCAATTAACCTAAGGTGATAACCTACTCTGTGC

A\_14\_P119274 AGAGATTCTACCATTTGGAACCTAAAGCAGGCCTTAGTTAAATTGAGGTTTATTCAGACC  
A\_18\_P18734360

AAATGCACCTTACTTTGTTCATAGACCACAGATCAAACATGAGACTTATGGCTTATTTGCA

A\_14\_P107434 CTAAGTATGTTTTCCTTGTCCAGAGGTGGGGTGTGCTCCACATTTAAAGAAAAATT

A\_14\_P135129 ATCTTAACATCTAACTACTTAGGACACCCACCCTGTTTACAGGCAGAAATAAAGGATTTT

A\_14\_P101425 CAAATTTTGGGAATTTGTGGATACCCGACCTAGAAAGGATAAGGCGTGTATGATG

A\_14\_P127410 ACTTCTCGAAATCTAATTGGGGGCGCTGACATCATTGTGATCAAATACAACGTTAAT

A\_14\_P113452 ATGATTTTATCAATACACAAAGCCATCTCTATGGGTATTATGTCAGGGACAATTCTGTGG

A\_14\_P107554 AAAGCCCTTCCGTGCTCACAAAGTTGATGATTGTGAAGAAGAAAATGTAGGTTAGA

A\_14\_P134772 ATTGGGTTTGAATCAGAAAAAGTATGCAAATGAATGGTTGAATGAATGGTGGGATAGATG

A\_14\_P102571 ACAGTTCATGTAATCTACTTGGCTTAATTGATTTTCCACTTCTCTCTTCTTCTAAGA

A\_14\_P108633 ACCTTCTCATATATTCATGCATCTCTGGGAAACTTTGTCTCACATAATCTTCAGCACTG

A\_16\_P37938425

CCTGCTTTTAAACAAATCAGATACCTACCATTAAAAGTAGTCTACAGAACATACATTTCGGA

A\_14\_P107949 TTTTCTCTTGTATAATTGTGCTCAACAACCTGCATTGGTTTTTGCCTCAGTTACATCAT

A\_14\_P114122 CAGGATTCCAATGAGGACTGAAACAGAAATGCATGTCAAAGACTATTTAGTATTTTGCTG

A\_14\_P129659 CCTATTTGTAATTTATTCATTTGCATACCTGAGATATTGGTGGTGACATTGATGGCTGTG

A\_16\_P21213297

ATCAACACAATCCAGACTAAAGCCTGAAAAACATTTACTGTCAATGTCCATTAGCCTAG

A\_14\_P133832 CACTCTTCTCGTAAAAGTGTTGCATCAGGAACCTTTTAAAGAAGTGCTTAAATTCAGATTC

A\_14\_P102892 CAAATGTTTACCTTCTTTGATCTAGAATCCCATTTTCGGGAAAACAGAAATAACCCAAAGA

A\_16\_P17177118

CAAGATCCTCAAATCTGAATCTATTATCTGTTGCCAAATCACTATTCCACTTGTTCACG

A\_14\_P123339 TCCAATTTTTTGTGTTGTTTTTTTCAGAACCCATCTCGGCTTTTGCAGGTGAGAAATTTTAA

A\_14\_P108152 ACAGGCTTTGATTCTGATAACTCTTCTGGGGAATTTTTCAGAGGCAAATCAGAAAAG

A\_14\_P134984 ACTACCGTAAGGATGGTCAGTATGACCCCATATATGATTTTTTAAAGGAATGGTTTAGAAA

CUST\_9408\_PI426210822 TGATTACTGGCAAATCCATCATTTCCACCATCCACCATGATCTG

A\_14\_P100455 CTGGACATGCAATATTTACATATCAAATCCATGTGTGGTCATCATCTTGAAAGCAAGTG

A\_16\_P15629024

AAAAGTCAAAGGGGTAAGAGTATTCTTCATACACAGTCTAACATCTCTTTCTTCCACTCA

A\_14\_P110693 GCTATTCTGTAGTGGTATTTAGGAGATGTGGCATTCTTTAGTTACCAAGAGGTATTTTG

A\_14\_P113466 AATATGTCTAAGATTGGTTACTTCTATACCGATTGTCTTGTGCCAATGGTTGGAAACAAT

CUST\_9938\_PI426210822 GATTTGGACCACTTCAGAGTGAAGGCAAAGTCTCAGTTCTCTTCTC

A\_14\_P124041 ATGAGGAGAAGAGCAATAAGGGAATGTTCTGGTATTCTCAAAGGAAAACATTTCCAAGAT

A\_16\_P34921944 CACCGGGCTATTTATTGTTAATTTATTTGTTGAGGTTATTTCTCTGAGCAGTCTGC

A\_14\_P122008

TAATGGATGAAGTAGAGAAAGCACGGGCAAAGAAAAGAGAAGCAGAGGTAAATTCTTAAT

A\_16\_P16587359

AACACCCTCTATATTAGCCCTAAGAAATTCTCAACTAAGTCATGTGACAAGATTCCTCTA  
A\_14\_P106836 TGACAGTGTTCGTGTCTAACAACAGGTGATCTAAATGGTCCGGGC  
A\_14\_P111088 TCAGGCTAAGAGAGGCTCAGGAAGTCATTTCAGATTCTTTCATAATATGAATTAGTACTC  
A\_16\_P15549868  
AGTGATAAACAACCTTTAGTATCCATACCAATCCATTACAATTTCTGTCCACT  
A\_14\_P104250 AGTCAGACTCAGTGAATGGAATGATAAAATCCAGTTTTAGCATTGTTGGCAAGAGATTCTG  
CUST\_1730\_PI426210822 CTACGCATCAGGTCGGGGGAGTTGAATGGTGAGCCTGGAGTCCAG  
A\_14\_P200979 GAAGACAGTATTCACCTATGTATTTTGCATAACGATTATATCAAGTCTAGGGGCTTCATG  
A\_14\_P107222 AAACATGAATATGTATTTTCTTAAAAATAAAGACTGAGTCTGCTGGCACAGGCATGGGC  
A\_14\_P131420 GGCTAGATAATCCAGGGGGAAGTAATACTATATGGAAACGTGTTAGAAAACCTCATAAGAATG  
CUST\_3104\_PI426210822 ATCACACTGCACCTGATGCCTTTCTCAGTGGTCTACTACAAATTAGCTCAT  
A\_18\_P10072427  
CTTCCAGCCAATCTCTATTTCTAACTGCCATATGTCTTCTCAACTCAAACCTCAACATGT  
A\_16\_P18736664  
AAACCACTTAAAGCATGTGTATTCTACTTTGTGAAATGTGTGATTCTGCCAATGTTAGGC  
A\_18\_P16132058  
AATTTCAAATGTTTGCTGAACTGAATTTTTGAATGCTGTGTTGACCAAACCTACTAGCAGG  
A\_14\_P100553 GTTTTATGGGACCTCAAATCAAAGAAAGCCGACTACAGATACACATATGATGAGGTAATA  
A\_14\_P106385 GGACATGTATACACATGTGCTAGAACTTCCTACTTATCTCCTTCAGGTAACCTCTACCAG  
CUST\_8517\_PI426210822 AGGTGAATATCTGAGCCGAGAGTTGAAGAGGACACAGCCACAGG  
A\_14\_P139762 CTGTGTGTTAAGGAGGCATTTCTTTCCCATCAGTAAACACATTTTCGCCTCTT  
A\_16\_P16191303  
AGCATGATCCCTTCAAAGTAATCACCTTCTAGTCATTCCTGTTTTGAAATTTCTTCCAT  
A\_14\_P128546 ACTTTTCAGCATAGTTGCGGTTATTAATATAGGCCTTTGGTTCTAAACTGCTTGACTAGT  
A\_14\_P130250 ATACGTTCTTGTTTCATGATGAATTAGCAGAAATTTGGTTTGGGGAATAGGGAAGTAGT  
A\_18\_P13231150  
AGGTCAGACAGGTAACAAAATGAACAGGATTCTAAGAACAACCTTCTCACTCACTTTAAGTG  
A\_14\_P121867 CTCACCTTGGTGTGAGAAAACCTCAGGGAAGGTTAATCTCAGTTAATGAACACATATTTAC  
A\_14\_P200566 GATTCTTCATTTCCATTTCTGCGTATTTTCAGCCAGAGTGTAATATTTCCGGTAGTCTACAT  
A\_14\_P108392 CTTCTCTGATCTGTGTGTTTCTCACTTCTCAATAAAAAATGTCTTTTGGCTTTTGTGTT  
A\_16\_P03001327  
ACAGGTGTCATCATGAAAGTGTCTCTAAGATATTAATGTGTTATAGCGTGATTAACAAT  
A\_16\_P16054774  
AAAACCATTGAACAACCTGCATACAGTAATTCACCTGCAAATATGTTGATACAGGTTCTGC  
CUST\_4164\_PI426210822  
TGGTCTAGAATATATGAAGAACCTCATGTGTGAACCTTAATATATTCTGCCAAATATTCT  
A\_14\_P117486 ATTCAAGATAGTCCCTGCAGAATGTGGAGGACAATCTAGGGGCAAAGTT  
A\_16\_P41573639



CATAAAAGCAAGTGAAGGATAGACTACCACCTAATTTTCAGAACAATATAGTATGGCTGA  
CUST\_3603\_PI426210822 CATCTGAGCTGTCTTAGCACCTTCTTTCCACCTGTATTTGTGTTACTTGGGA  
A\_14\_P116465 ACCCTTTTTTGTGACTTTTCAAAACAGTGAATTACTGTCACCTTGATGGACAAGTTTCAA  
A\_14\_P107329 ATTTGCGCCTCTTGGGACATCGTGCATCTCAAGAATTAATCAGACATCGAA  
A\_14\_P115471 GAACCAGTTTGTATCACATTCATGGTTTATTCACTGTTACTTTGCTCAGAGGCAAATAA  
A\_14\_P132684 CTTTTCTTCTCTATGCGAGGATTTGGACTGGCAGTGAGAATAAGAGACAACGATT  
A\_16\_P58424506 TTGAAATGCAAAGACAGTATCTTAGCCAAGATCACAGTCAGTTTGTGGTGGAAC  
CUST\_5526\_PI426210822

ATGAAGCTAAGCAATAGAATGATGAGCAAGTGGCAAATATTCAGTATATAAGTGCAGATTG  
A\_14\_P122562 TAAATAACTATTCAGGAAACAAAAGCCACCTTGTGGAAACATAAAAAGTGCCCATTGACA  
A\_14\_P133092 AGTCGCCAAGTTGTATTTGTAGAATGAAAAGTTCTGTCTGGAATGTCAAAACCTTGTATCT  
A\_14\_P128472 CTGTTAGGCCGGAATTAAGTGGCTTTTTGAGGTTTGGTTTTTCACAATCATTGT  
A\_14\_P121498 AATTCTTCTCCTAGCATCACCTCTGGAAAGTGTCTGCTCTGTTCCAAAAAAAAAAAAAAAAAG  
A\_14\_P113326 ACATAATGCAGAAGTGAAAATTATACAGTAGTCACCGATAGGAAGGAATTGTATACTCTA  
A\_14\_P110438 CAAGAAGTTCCTCAATGTCTTCGTCAACAGCACATCTCGGTCTCTC  
A\_16\_P16754593

AAAGGCAGTCTATCATTCTTTCTGGCAATTTACATACGAAAAATACTTTACAAACATGGG  
A\_14\_P107736 CTGGCTGATATCACATTCACAAATTTGCTAAAGGAACCTGAAGGAAAAGCAGC  
A\_14\_P126913 AACCTGAAGATAACTGATAGAATCCAATAGTGCAGAGATGAGCAATTGAAATCTAGAGAG  
A\_14\_P108943 CTAGTTTAACCAGATTGCATAGACGATGATCAAAGTTAGAAACCAATTGGTTGGCATAGT  
A\_14\_P131228 ACCTTATTTGGTAGTAATTTATCTTTGGATGTGAGTCCAAGTCTGCAGAGTAGTGAATT  
A\_18\_P22842835 GGTGATACGTGAAAGTATTTGTCTAGGATTCATTAATATTATTATATTTTAGTCTTTGG  
A\_14\_P125882 GCAAACCTTGCCATTCTCTGTAATCTAATAAAATGGGAGGAAAACCTTTTCTCAATTAGGA  
A\_14\_P124456 GGACTTAGAATTCTGTGATTTTCCAGAAACTGTGTTACTTCCCCATGTTTGTGACTTT  
A\_14\_P136310 TCTCCAACATAAAATGAAAACCTCTTGA AAAACAAAACACTTCTTAACAAACTACCCGCAC  
A\_14\_P136893 CTAACCATCTTGACAAATCCTCTGTCCCCTAAAGATCTAATAGAGATGCCCTTATTATAC  
CUST\_2524\_PI426210822

TGATCTTGTGTTTTTCATAAGGGAAATGACAAATTCATCAGGTTCTTTTATTTTTAAAC  
A\_16\_P39363892  
CTTTCTCACGTTAAGTGTTACTCATTTCAGTTCCTATCAAGAGTATCAATGGCCTTCAC  
A\_14\_P133394 TCAGCAGGCTGATTCAGTTCAGATATACCAGCATAACTAGGTGGAAACTACAAATAGAAA  
A\_16\_P39212454

TCCAACATTTTCAAACCCTCTACTTTGGATCAATTAGGCTGAATGTGAACCTAAAATAA  
A\_16\_P18392433

AAGAAAAGGCACTAAGGTTTTTAAAGCATCAGAGGATGGTAAACACAGGATATGTCCAG  
A\_18\_P10682064

AAAGTTTTTCGAAGGGCTAAATATAAAGTTTTGCACAAAGTGATACAGTAGATGTGGCAGG  
A\_14\_P134490 AGAATATCTAATTTGCTAGTTCCCTCTAAGTCTGAGGATCTAATTAGGGCCATACTTGTG

A\_14\_P126631 CTTTAAAGGGTTCTGTATGATCTAATTCTGAAAGAGTTTAATAATTCCCACGTGGGGTTC  
A\_14\_P134522 TGGAAATAAGGACCTGAACTAAAGTTGATGTAGTGGGGATGGAGTGGAAAAATATTCA  
A\_14\_P117203 TTACAGGCTGCCCTGATGATCTCACTCATTGGAAAGTATTATTCTGTCCCT  
A\_16\_P30952234 CTTATCGTAGGTTGTGACAGAATGCCTTTTTCTCTTGCTGCAGGGTC  
A\_16\_P40223344  
ACCACTCACTTCAACTTTAGCAGTTCATCAATTCCTAACATTTTATTTCTCCCTTAAAA  
A\_14\_P105844 ACACCCCTCTAACCAGTGCTTACAGGTTAATGCATGTTAATGAATATTTTGCAGTTGTA  
A\_18\_P22841714 ATAGAGACCAAATCTACCCACTTTCATTCTCAGCATCTGGAGGACATCTCTCTAA  
A\_16\_P18903206  
GCAGAATAAACTACATACCTGATCTTGTTTTCCATAGCCTACATGTATGCTTTCTCTGGA  
A\_14\_P112127 GAGTGGATAATCTCAGAAGAAAGGAAGAATGAGCAGAGTCATAACTTCTCAGGTG  
A\_16\_P01680566  
GACAGATACAATAACTACTCATGAACAGAAAAAGAAGGTTCTCTCATTAGACAACACGC  
A\_16\_P18356041  
AAAAAAAAAAAAACAAAACCTTGTAGTGCCTTTTTAGTTGAAGCAAATTTGTGATGAAAGCCA  
A\_18\_P15504396  
TCTGCATTCATGTTATTGACAAAATCAATAGACAAAAGTTGGTGTGCTCTCATGTTTTGT  
A\_14\_P103768 AAGGATGGATGAGTCAGACACGATTGAGAAGTACAAAAGGAGCCTTGATAATAC  
A\_14\_P111723  
AGAGAGACAAAAGGAAACAGGGAGAGAATACAGGTTTCTGAATACAAACTTGTGTATTTT  
A\_14\_P117330 TCATCAACAAACACCTGAGACTGCAAACATGAGGGCTTATTTGACTAGACAGTTAAAATA  
A\_16\_P15658603  
AATGAAGTCTTGATAAACATCCTTGTGCCTAATTGTTACCTTTACTGCAGAAATCCCAG  
A\_14\_P107665 AGGACTAACTAAAATTTTAGAAAAGTGGTAGTGCAGTCCAGATGATAAATGGGGCTGATAA  
A\_16\_P15142419  
ACGTTCTAAAAACAATCCTAGGTTCTCTACATCAGAAACGATTCTGCTTGAATCCACTTA  
A\_14\_P106744 TCATGTCCCTTCATAGCCTGATTTAAAATACTCCAAATCTTTCTTAAACATGTCAGCAC  
A\_14\_P102404 ATAGGTCACAACTATTCTTACCAGGTAACCAAAGTCCCAAATCAAACCCTGACT  
A\_16\_P41079548  
GCCATATGTCCTCAATTTACAATAGGCAGAGATCATTGCATTAGATCATTCCACAAACAG  
A\_14\_P100361 ACGAGATACTATGAGAGAATATAATCAGGCAAAGGCTTTGGAAAAGAAGACCTAACAGAT  
CUST\_3939\_PI426210822  
CCATGTAATCTATAAAAAGGGAAAAGTTTCATCCCAGTCAATGTCCTGTCTTGCTTAT  
A\_16\_P21663085  
AGAGTGAAAGGATTGGCTTAGAGTCATTACTGTATGGGATTAATACTTGC GTTCAACAA  
A\_14\_P110349 TTATACTTGGAAATGCCAGGGAGCATTTATATTCTGCTTACTTTGACCCTAGTGCAAAAA  
A\_16\_P36231100  
ACACCAAAGTCCATACTTCTCTAGAATTACAAATTTTCAGATGTAGGTGAAAACAGCCTCT

A\_14\_P106125 CCACTAAAACCTGACAGTCTTATGGGTTATTGTTATCTGGTAAATATAACCAGAGAAGCAC  
CUST\_689\_PI426210822

AAATAATAATTCAGCAGGTTCCCTTTCCACTTTAGATTTTGGTGTAACTTTGTCCCTGTC

A\_16\_P18507538

ATCCACAGGAATCTTTGACTTGGTAGTCTTTGCAATAAGCATATTCATATAGCCTAACCC

A\_14\_P126007 GAAAGTTGGGTGAACTTCTTGTAGACTACGCAGGCTTTCAGAAGTGCATTC

CUST\_3687\_PI426210822 ACATGAGATTGCCTATCTACATTTTAAATTTGGCTTCAGAGGGAGCAGCCAG

CUST\_4824\_PI426210822 TAGAATTTCCCTGTGGATCACTCACCCCAATGATGGCATGTCTT

A\_14\_P131702 ACCTAGGACCATCTAGTTAGTTCCACAAAGACAGATGTTTTGTGCCAAGTAAGTATCAT

CUST\_9073\_PI426210822 TGTTCAAATTCTAATAGCCATGGACCTCTGCCAGCTCCCAGAGGC

A\_16\_P36231033

TTTGAACCTCAGGTCACCTTTGCTATTATGAGTTTATCACAGGTGGTTCATTAATAAAAACCA

A\_14\_P100777 CTTTTGCTTAAGGCTTCCAAGGCAACATTCACTTGTGTTACAAATTCAGGAATTACTGTT

CUST\_2133\_PI426210822 CTCTGGGCCCGCACTGGGGGCAATGTTACCCAGAGGAGATGAAAA

A\_14\_P105615 CTACATTTAATGCTGGCATCCCACATTTTGCCCAAAGCACTTCTGTTTTTTTTAATTTGA

A\_18\_P13210842

AAAAAATCTCAGAGGCTAATCACAACCTAGGATTAATTGGAAGACATGAATAAGCACCCC

CUST\_2528\_PI426210822

ATTGAAGAACAAAATTGATACAACACCCAAGTGGAGAAATTTTAGGAACACTATAATTCA

A\_16\_P18371031

AGCCATTAGCAGAAAATCTAGTAACTCTATTCCCAGACATAACAAGATTAGACTCAGGCT

A\_14\_P101306 CTGCTTAGTTTCTGCTCTTCCTGTTTGAAATTGGAGAATCTAGTAAATAAGTGACACCAT

A\_14\_P201348 CTAATCACCAGAGATAAACTGCTCACGAAAGCACCATATGTAAACCTTCCTAAACAATG

A\_16\_P18464201

CCACTAAAGTTTCCTTAAAACAGAGATTCTACTTAGCCTTTTTCTTCCACATCTACAGGTC

CUST\_7684\_PI426210822

AGTGCTTGCTTATGTGGCTTCATTCCAGTGGGAGGTTTCATATTTTCTTAGTTATGTAT

A\_14\_P118441 AACTTGGCATGCGATTTTGTATAGTGTGGCTTTGTCCAAATAAAAAGTGGTGGATATAATT

A\_14\_P112755 TTCATCTTGTGGCAAATCAGATATTTTCTCCATAAGCATATTGTGGCAGTTGAGTTAGGA

A\_16\_P19735291

ATTCAAATGGAGTGTACTTTCTTACATTCGCGTAGAGTTTCTAAATTTTCAGCCCATCAC

A\_14\_P129902 CTTATCAGTCTGTAGGAGAATGATCTTGAAATGTTAACCTGACTAAAATTTGGGAGCAT

A\_14\_P131260 CTTAAGAAGGTGTCAGATCTTTAACTACCAAATACTGGTGGATGGATACAATCCCC

A\_14\_P102604 CAAAAGGAAAGCAACTAAGACACTGGACTATCCTTTAAAGGTAGCAGGTGTAATGATG

A\_16\_P17536263

AAGCATTTTTAAAGGAAGAAATTTGTGGTTGTCATGGCTAAAGATATAACCCTGTGGACAA

A\_14\_P116268 GAATTTCTCCTGCCCTTATATGTGCCCTAGGAAACACTGAGTTTGTATTGACTTTTTAATA

A\_18\_P11642208

AGAGTCATCAATAATGTCAATAGTCGTCAATAGCCATCAATAACAATACAGCCAAATGCA

A\_16\_P16616280

CGATGAAATTAACAGCAGAACAGCAATTTTTAGCACTTGAAAAGTCTCAATGACACCTCT

A\_14\_P201959 TCTCTAAGGAGTCAGTTTTTATTTTTTAAGAGGAGACCTGTTACACCCAAGCATGGATTC

CUST\_1187\_PI426210822 AGTCGATGCTGTGATGCCTCCACTGCATTTACCGCTTTGGGTAT

A\_14\_P200133 AGTCGAGTCACATCATTGACACACCAAACCACTGGAAAACCTAACACAGACAAT

A\_14\_P138126 AGTTAAAAAGGGGAGACGGTAACGTGTTTGGTAGAGGTTACATATCTTGCTATAGTTGTT

A\_14\_P125263 TATGACTTCTGCAAGGTATTGACTCTTAATCCATCATGACTTGATATTGGCTGCCAAAA

A\_16\_P00685003 CTCATTTGAATTTTTCTAGGGAAATGGCATTTCAGACATTGTTCTGGTCCTCACT

A\_18\_P16494604

ATTGCACTATCCAATTTTTGTGAATGATTTGTCGACTCTACCATAGAATCTTTAGGCC

A\_14\_P139282 TTCTTGGTCTTGGCAGAACTGACTTTTTAGCCTTGCTTCTGGTAGATTTAGGAAT

A\_14\_P128607 TGCTGTTTCTTACTGACAATAAAAAATGTTCTTGGTTTCGAATAAGCCTTGTTGCCTGA

A\_14\_P106129 TGGAAGTAACCTACTCGCTGAAAAAGAATACAGAATGTGCTGAAGTTTGATTAAGAAGGA

A\_14\_P116435 TGGGCTCTTGTGACTATAAATATACTGTCTATTTCTAATGCAATCCGTCTTTCCTGAAAG

A\_14\_P117865 TTCAACAGATTATCAAGAATGATCTGTGGGTAAACCCTTACGCTACTACCTGAGA

A\_18\_P16591431

ACCAGATACTTATTGCTTATGCCCACTAAATATATGTCCACAGCCCTTAAATAACTACCT

A\_14\_P121653 GATGTCCATGAAGTCAGGTGATGGTGATAAGGTCAAGGCCTGTTTCATT

A\_14\_P121009 TACGTCTCTACATAAACCTATGCCAACAAAATATCGACAATCAAGAGACCGCTAGGTAG

A\_16\_P19503720

CCTGAGTTACTAGGTAACCACACTGTTTTCAAGAAGAAGCAACTACTTAGTTCAAAGTGA

A\_14\_P128704 CTGACTGACCTATTTAAACAAAAGCATTTCCTTTTGAGAGGCCCAAATGACTAAATTAGG

CUST\_10416\_PI426210822 CAATATTTATGGATGCAACACGCATGGTCAACCCTCAGGGGAAAACCT

A\_14\_P202289 AATAATGTAAGTGCCCTGTCACTCCATCTATCCATTTTTGTTCTTTTAAGCCTATTTT

A\_14\_P104709 ACTGATTGAGAGTAACGATATTGAGATTAGACTGCTGGAGAAATAATGTTCAACAGTCCG

A\_16\_P21378478

AAACTCGGGAAAGTTATTTTTGTTTTGCAAACCTTAAACCATGACCTTGCTTTACTTCCATG

A\_14\_P139772 CTCTCCTAGGGCAGCAAATACAATGTGCATCTGAAAGTTTACATGTAAGTCACTTATGTG

A\_16\_P58424081 CTGTCTGGTAAGCACCTGTTTCTTGGTTCATAGATAGTGGTGTCTCACTCTAA

CUST\_823\_PI426210822

ATTTTGATCCGTAGGTGCTTTGAGGGAGATAGAAAGAAAAGTCTTTGCATTTGAGA

A\_14\_P120067 CTCTGATTTAAACTATTAGGAGGGCTGAGGATTAATATTTGTCCAGGTCACTGTAAACC

A\_14\_P106435 CCATTCCACTCAAGAATGACACAGCCATCTGTTTAACTGTATTTTCTGGGTTTATTCC

A\_14\_P138125 CATTCTACTTGTCTGCGAGGGATTTTTGTTTGATAAAGGTTTGAACGTTTATGTGCAAA

A\_14\_P133897 CTACAAACCAGAACAAATGTGACTAGATAGATAGGATGATCTAGATTTGAGATCTGGGCAG

A\_14\_P134083 ACTTTAACTGTAAGTGATTTCTTCTTAAGATTGATAGGCGAGGGTTTCACATCAGGAAGT

A\_14\_P128158 ATTCAAACCTTAGCCTACTAAAGGACTATAGCCTGCCCTGGGTCTTCTAATTCATATATA

A\_16\_P17889609

AATTGCTTTCTACTTTTTGTATTTTGCCTGAATCCATCTAGATATTGTGAGAAGACCCACC

A\_16\_P03697227

ACTCCCTTCCAGATTCATTTTTTACTATTCTCTAACCCCTTCTCATTCACTACTACCTCA

A\_14\_P133040 TTTGGTATGTTAAGAAGTTTGGTCGTTATCTGGAGCACCTGGAGGTCAAATTCAT

CUST\_5179\_PI426210822 CTGGTCCAGCCTGCTCTCCTTCCCTGTCCATAGTCCCTCCCTGC

A\_16\_P00685464

GAGTGATAGAAAATAAAAATAACTTGATTCATTAGATGGAATTCAACTTGAATTCTTAGT

A\_16\_P39290846

GGCCCTACTCATGATCTTAGTTCTTGAATTTGGAGTCTACCTAGATAGAGTCTCATAAAC

A\_18\_P15270891

AAAAAAAAAAAAATCACCGTTATCTGGAAGATACATTCACAGGCAGTTAACAAATATTGCA

A\_14\_P123590 TGGAECTATGAAAGGTAACATGAAGTTATAATACAGCACCATCTTAGGCAAATGCAAGGT

A\_14\_P135161 CATAGTCTGTCCAGTAAAGATTACGACCTACCCAATCTATTGCAATAGTTTCAGTCAAGA

A\_14\_P135082 AAGACCCAGATGACGACCTGGATATTTGACTGGCCAGATTTGATTAGATTGTAATT

A\_14\_P125080 ACTTGTTATTATTTAAGGACACAAAAATATAGAAGGTGGCATTTTTCGCTTTCCCTTCG

A\_14\_P200370 AAACAGTCTCTATGTTCCCTTATCTTAGAACAAAGAAACAAAGGAAGAAAAGTTCTCTATG

A\_14\_P111215 TTTTCAGTCCAGAGGTTTCTCCAGTTTGTCTTTGTTGTCAACTGTTAGGAAAAAT

CUST\_6990\_PI426210822 CTCCCGGAAAAGGGAAACCATCAGGAATCAGAAATGGAGAAATGC

A\_16\_P02762669

ACATGTTTCTGTAATATGGATGGCAGGGTATAATATTAATAATCATAACATGAAGGGAAT

A\_14\_P105799 TATTGCTACAGTGATGCTACATGGAAAACAATGAATGGCTTATAACAACAGATGCTTGGT

CUST\_3736\_PI426210822

ATTTTTAAAAATTGTGACACATCATCAAGATGGATATACTTGCCCTTTAATTCAACAGG

A\_16\_P03438259

CTGAACTACTCTAAGTGAAGCCAATCAGGATTACTTTTCATTTTCATCACTTCAAGGACTTC

A\_14\_P125835 CTTCTCATTATTTCTTGTCATACAATTTGGATAACCTTTTTAGTGGCCTCCCTACTTTC

A\_14\_P100091 CTCTGCTACCATAAAAGGATGATGACTGTAAAGGTAAGCCCTATAAAACAAATGAACA

A\_16\_P16382318

ATTAGTAAACCACATACCATCACTTCCCTGAATGTCTCTTGATTCAITTAGACCGGATTTTC

A\_14\_P134010 ACATTTCCATCAGCATAATCCTTTAATAAGTGACTATATTAGCATTCGGTTCAAATGCTG

A\_16\_P02452510

CGCAGACTCTTTTATCACAGGTGCTACTGATTTATCCCATGTATTTTACTCATTAGTGCA

A\_16\_P21108197

TCCATCACCAAATGTTCAAAGGATACCCAAACATTTAAAGACTTACAACATGCTCTTAGC

A\_14\_P132508 TCTGTGGGCCTTATTTTCAGTGTTTACCCAGTAGAATTAGTATCAAACCTGTATTACCCA

A\_18\_P15752567

TAGGGAGAAAGCATACTCTATAGCACAAAGTGAAGATACAAATATCGATCTGCCTTACCT

A\_14\_P133046 TTCTTTTTAGGCAATTGAAGATGAAGGTGGTAATCCTGACGAAATTGAAATTACCTCCG  
A\_18\_P22842673 CTGAGAGGATGCAGGCATCAGGGGATGTTTTTCCATTTTCAATCTGTA  
A\_14\_P115175 AAATATCCTGTATGCAAATCAAGTGGGTTTTGCAGGAGATGTGATTGTTGCATTA AAC  
A\_14\_P129119 ATTTCTCTTGGTTCAGATGTATCTGGGAATAGTGCTGAGACAGGACTGAAAGAGTAA  
A\_16\_P21211702  
AAAGTATGGCAAACAATTTTGTAAATTTCCACCCTGATCTAGAATTCCATACCTCCCAC  
A\_16\_P03060835  
ACTTGGGGAAGTATAGAGTTTTTGACACCATTAAACCTAGAGATTGAGAAACCTACCTTA  
A\_16\_P15166158  
GCAAAAGATCACTCATAGACCCTTAACACTAAATCCTCTTAACAAAGATAAGTGCATGGG  
A\_14\_P132020 AGCCCTATCCTGTGGTGCACAGGACAAATAAAAAACAAATAATTTCTAGGAGTTAAATCTT  
CUST\_3338\_P1426210822 GCTGATATCTCCGATGAGCACTGTTTGGCCATTGATTTATTTCTTGGGGTG  
A\_14\_P102552 TTGTGCCTTTAATTGCTGGTTTAGGTTATTTCTGTTATGCCACAACCTAAAGTTATTCA  
CUST\_507\_P1426210822 AAGATGGAGTACTCTGCAATATCCATGTATCCCTCTAACCTCCTGGG  
CUST\_9717\_P1426210822  
AGTTATACCCCCAGTAACTATGAACAAGATGAAATTTTTACCCTCAAGACTTCCACAG  
A\_16\_P02169928  
AAAAACAAAATGAAGAGTGAACAGAGTTAAATGATTCCTCTAGGGTGACTAACAAACGGA  
A\_16\_P20925609  
GCCATGAAATGTTAAAACCTCTTTTACTTTACCCTTCATTCTCTCAACATAAAAAGCCAG  
A\_14\_P113110 CTCTACTCCCTGCAGGGCTCTGAGATACTTTTGGAGAAACACAAATTCTGTA  
A\_14\_P123119 CTCAGAATCTCTTTTTCTTGCAAATTCTGGTTTCATCGGTTGGGGAGATTCTG  
A\_14\_P128948 CTTTAATCCTGTTACCTTACAGTATAGAGTGTGTATGGGTGGAATCCAGTGC  
A\_14\_P109766 CTCGCCATTCACCCCTAAGCCTAAGTTCTAAAGTTAAACTCTAATTGGTAGAAGGAAAAG  
A\_14\_P115012 AGTATGGATAAATCAAGGCCAATGTCTAGAAGGTCTTGGGCAAAGTTGAAATTCA  
A\_14\_P129851 CGCAAGTTAAAAAAAAAAAAAGAATTTAATGATCAGAATGATAGTGAGGGCCCCTTTGTGCA  
A\_16\_P00048884  
AAAACATCATTCTGATGTAGGACATGGTCTAAATCCTCTTTGAATATCCAGCCACTAGAA  
A\_14\_P123660 CTACCTCCTTGCTTTTTCTGTGAATCACTTCTTTTTGAAGGTTTTTTGCAGCAATTTCTA  
A\_16\_P58424580 AATTCTATTTCCAGTTGAGGTTAGTCCCCAGGGAGTAGCCTGCTTTAGATT  
CUST\_6191\_P1426210822 CCTAGCCATGCAGCAGA ACTCTGTGTTTCTTAGGAGCCCTGGCTC  
CUST\_3101\_P1426210822 CTTGGTAGCCTTTTCAGAGGAGAGCCTTGGAAGCATGTGCCTCTG  
CUST\_1132\_P1426210822  
TGGGTCTGATTACAGGTATTTTATTTTGGAAATTGTTCTAGAAGACACCAGTGAGGC  
A\_14\_P100748 CCCCAGAACTATCACTCAGTGAGGTAGAAATTTTTTAAAAATCACGGAAACAAATCTGT  
A\_14\_P139422 CTTTCCATTCTTTATTTTCATCAGGTTCAAATCAATTTCCAAACAGTCTCCTACATTTT  
CUST\_7381\_P1426210822 AAATAAGCAGAAAGTCTGAGCGTGGA ACTGAGCTGGTTGGAGCTG  
A\_16\_P16181715

ATGAATTACAGAACTGTTTCATTAACCAATTACTGCACTGTGTTTAAAATGTGCTGGGACC

A\_18\_P26715683

AAAAATCCCAATGAACTAAACTTACTGCTTTAGATCTTGAAGGATAGTTTTCCCTACCCTC

A\_14\_P134893 CTCCAAATTATAGTCACATATGGAAGAAAGGTTTTAATTCAATATTTTATTATAGTCCAC

A\_14\_P111054 TTTCAGTAACTGTATGGAATACTATTGCATGGATTTTACTTAACTCGCTCCTAGAGGGTG

A\_16\_P16191525

GTAAAGTAATGTCTTCCATATGCTCAAGAGAAGATGATTTAGCACCATGCAAGGTAGAGA

A\_14\_P135679 TGAAAGTGTTGGTTGGCGACTTGCAAATCAACAAAGTTTAAAAAATCGAATTGAATCTGT

A\_16\_P20926863

TCCTTCAAATTTCTGAGATTAATTTGACTTGCCAGTCTTTATATCCAGTGCTGCTGAAAAG

A\_14\_P117947 CAAATCATGGATGTGGTTGTCAAACCTTTTTGTTTAAACCTCTGAGTAATTTCAAAGGC

CUST\_9839\_PI426210822 CTCAGCTCATCACTCACAGATGAGTTTGAGAGTTGTGATGTGAGAGAACA

A\_16\_P02198718

AGCCCCCGTTAAATATGATTTGCATGCAACATAACATTATACAATTTTTGACACTCTGCA

A\_14\_P122582 ACAGAACTATTCAGATTAATGGAATAGAGCGGAACGTTTCAGAAACAGTCCCATTATATGT

A\_14\_P138253 GGCTGTGGGTAACTAATGCTTACCCTTCCTGTTTTAATCATTCTACTTCTTTTTCTAA

A\_14\_P101707 TCTTTTAAAGACTATACACAAAGACATCATAACTACTTTTCTCTCCAGGTGTCCAAATGG

A\_14\_P123974 GTGGGAGTTTTGGGTTTCTCAATGGTCTGATTTGGATTTAAATATTGTAATTTAAAAAC

A\_16\_P21360229

ATGACATTGACTGAAAAATACCATGCACACTAAGACATTTCAAGTTATGATGGAGGAAGG

A\_18\_P22842443 TTAATGGCAAGGAAGTGTCAAATGAGACTCTGCATGTAACCTCCCATGC

A\_14\_P127608 GACATACTTCCAGGTTTTTAAGTAGGCAAAGTTCAGAGGAAATTTTAGGATCATCTTCTC

A\_16\_P35109744

TGCCATGCTCTTGTATTAAATGCTATTGCCCGTAATTTACTCAAATTTTCCAAATTCATG

A\_14\_P124770 TGATGTAGTAATTTTGTATGATTCTGATTGGAATCCCAAGTAGATCTTCAGGCTATGGT

A\_14\_P118362 TTCTTGTGGTTTGCCAGGTTGCAGATGAATACATGTTTTCCCTAGAAGAGAATAA

A\_14\_P128708 CAAACAGCAAATATCCCGTGAAGTAAAGACCTTTAATCCAATGTAGGATACCAAACTT

A\_14\_P112871 GTAAAACTAAGATGTCAGACTCGAAGTGTGGGGTATGACTTTATCTTTCCCTGGAT

A\_16\_P15760787

ATATGGTGTAGTTAGGAGATCCATGTTTTATCCCCTTAGTTAATGTGTGATTGTGCTAGC

A\_16\_P38115841

CAAGACCCATGGCTATTAATCATCTTTTTAGCAACTATCCAGCAAAAGTGTAGCATCTTG

A\_14\_P111806 AGAAAAGAAGCAAGTATATCTTTTACTCCCCTACTTCCTTCTATATCCATCTTGACGTT

A\_14\_P201801 CGTTGCTCATTAAGCACTTTTACGGACAGGAATACAGTAAGTTTCAATCAAAGTGAAAT

A\_14\_P133551 ACTGATTTTGGTGGAAAACATTAGTTCATGTCTGAATCTTTTAAAGGTGGATGCACAAAAT

A\_14\_P105043 CTTCAAATCATTCAAACACAAATGCCATTTTATCTTGCCGCATTATTCTGTTTTCAAAGGC

A\_14\_P129866

ATCCTGTTTTCCAAGACATGGGAAACCAACTTGAACAACATAAAAGAAAAAAGAGAAAGT

A\_14\_P132367 CTTACACCTCGAGACTTCAACTCAATTTGCTTCTTACTAGAGAGGAGGTAA  
CUST\_8180\_PI426210822 ATAGCCAGGGTCTATAGCGAGAGCTTCCATGATGTTTATAGTGGTAGGTTTG  
A\_14\_P129057 TTTTTTAACCATATGCTACTCTGGGATGGGAACTGAGAATCTGGATACTATGTTTCATCT  
A\_14\_P133657 ATATTTGAGAATCCTCACATTAATTATACAGAGCATTCCACCTGGGTGATGTCATTTGC  
A\_18\_P14136576  
GGGCTTGTAAGTTTGTTTTTCTTATCAAGTGATTCTTCAGATTATATCTACCTTTACCAC  
A\_14\_P200141 CTTACCAAGACAGTTAAAAAGTTGAGAATTAATACTTTGGATCACAAATTGCTCTTCT  
A\_18\_P14766139  
TGCCTATAAATTAGACCCAAAACCTCATGAATGTTTATGCTTATGCTGATCCTTTGTGACA  
A\_16\_P00685117  
CTGAGGGATCTTGTCCCAAATTAATGCTTGAACAATCAACAACCAATAATTTCTGGTAT  
A\_16\_P19410894  
AGGGAAATGAGAGACATAAAACATAGACAACAACACTCTCCATATTTTGAACCTTGCAAG  
A\_16\_P58424445  
TCTGGTTTTATCTTTTGTGAATAAGGATACTAAGAACATTTTTATACCAGTTTTTCGTGTG  
CUST\_2379\_PI426210822  
TATGATAAGGGCAGAGATTTAAAAGAAAAAAATTTCTTTAATGGCAGATTCTTGCAGGCC  
A\_14\_P114212 CAATTCCTTTATCCCCATTTTTAAAATATCCTGGGATTATGATGGGGACTGCACTAAATT  
A\_16\_P18530842  
TGAGCCACAGAGAAATAAGATTTCCAAATGACTTTTTGCTTATGACCTGATTTACATCTC  
A\_14\_P127464 TCTTTCATGTAGGTTTTTTAGATGTGAAGGACAATGACATCACAGAACTCTGTTTGT  
CUST\_4659\_PI426210822 ATTAGAAGCCCCATTTGTGTGTCTCAGCATGGCAGGAAGGTCAAA  
A\_16\_P39117488  
AGAAGCAGCCAACTATATATAAACCAATCTGTTACATGGAAAACATTACACAACCTGCT  
A\_14\_P101696 TACCTTCTTCTCAGTGAAATCTTGTGCTTTGGAAATCACCCATCATCAACCCTAAT  
A\_14\_P122330 CTTCTCCTAAGGATTTTTGTAACTGGTTTTCAGGATAAAGAAAATTGAAGTCCTGACT  
A\_14\_P103005 AAGAAGAAATCGTGCATATGGGCAATGCAATTATGTCATTTTATTTCGGCCCTTATAGATC  
A\_14\_P110194 CAACTCTTAGAGACTCATTGTTCTTAGGTTTGTAGAGTTGAGATTTTTTTTTCTCCCTG  
A\_16\_P35415663  
TCCCTACACATAAGCAATATTCTCATTAGCAACTCAAATTTATTTTCATGGCCTCACAGA  
A\_14\_P139686 ACGAAAAATGGTGTGCCAATTATGTATGTTTTGTTATGGCTTTGTTTACCAGATTTCGAGA  
A\_14\_P138917 CTAAATGTAATATTGCTCCTTCCGTAAAGGACTACAGCCAGGAGACTGACATAGTTTTTA  
A\_14\_P106221 GTTGACAACCTGATCTACCTGAATGGTCAGAGGTAAAACCTGTTACCCTAAGGATAAA  
A\_14\_P120606 TACTCATGTTTGCATTTTTTCAGCCTGGACTTCAATATACGGTTTCTGAGTAAATGCTTTT  
CUST\_2222\_PI426210822 TAAAACAACATTGGGGAAAAAGTGCTATGCCTTAAGGACGTGGAGAGC  
A\_16\_P01321008  
GCACCTTAGTAATCTGACACATGATATTCTCCATGCCATAATAAACTTTGATTCACCACC  
A\_16\_P00654842



TTTCCTTCAGCCTCTATAAGTCTCTTCATGTGATGTATCTCACTTACCCTACATCTATGT  
A\_18\_P14212652  
TGGTAAGAAGATAGCCTTGTGTAGACTATACTACTCATGCATGTCAAGTTACTAAGTCCT  
A\_14\_P202284 CATACTCAATCATGAGTTCGTCCTTCAGATCAGGCTTTTAATTTCTAAAGAGACTGCTTT  
A\_14\_P121326 GCAGTGACATGAATCCACTTACTAGGTTACTAGGAGAGATCAGAATTAAGGAATATGGAA  
A\_14\_P114803 GGAATATTTACACAAATCATAAAAAATCTGGGGTGAAGACAATCTGTGGACCTTGAGTAAG  
A\_18\_P15117935  
ATCTCTAATCCACATCCCTCTCAAAAATGAACATTGACATTTTATGGCTTCCTTGTCTGT  
A\_16\_P15995906  
ATGCAAACAAATCCTATCATTTCCTTGGACATATCCTGAGTAGAATACAAACCCTTATGG  
A\_14\_P108953 CTGAACATCCTTGACTTTCTCAAAACCCTTTGAACATCTGACAGGCAATTACAAAAAAG  
A\_14\_P100135 GAACCCCGAAACGCATGTTTAAACCCCAAATACATCCATAGCATGTATTAGTTTACAATG  
A\_16\_P37553030  
AACCCCTCACTTATTTGGAAAATTCAGTTTTGTAGCATGCTTTATTCCATAACTGTGCCTT  
A\_18\_P14622085  
TTCCCACCATAGTTAAGTGTGAAGATAGTCCTCATCCATATTTAGAAGAAGCCTCAAAAA  
A\_14\_P103250 GATACCATCTCATTTTTGTCTTTTTTTGACTCTACAAGTTAACTCCACCTGTTTATC  
A\_18\_P22840164 ATAAAGCCACCTTTCATCTTGCCTGAGACGTTTCATGCCATCCTTAC  
A\_14\_P127265 CTGTAAATGCTCATTACATAAAACATCCTTTCTTCTGATTCAAAGTTTTAGCAGCAG  
A\_14\_P116536 GAACTGTTTCAGTATCTTTGCTGGTCTCTTTTTTCCAATAGGAATCTGAACTGTCATCC  
A\_14\_P131218 TAAATTCACAACGAAGAGATGTTAGAACAGGAGACTCAGTTTTGCTTAGAACACAAGTCA  
A\_14\_P118162 TGAGGACGATCTCCTTTGTGGCAATCTGCTTATGACGTCAGTAAAAATCTAATATATAGC  
A\_14\_P127914 CACGAACAATTCACCAAATACCTCAACTTCTCAGAGTCTGAGGAGAAGGAAAG  
A\_16\_P40727565  
GCAGAAATATAAAAGGAAAAGACAATCACCCATATTCCTCCTGTAACATCTCGTTTTGCT  
A\_14\_P102669 AAGAACTTATAGCCTGTATATTTGCCATCTAATTAGTGTCTTGGGTCTAAGTGCTTTGT  
CUST\_4355\_PI426210822  
AGGTTTTACATATATCTTTCTGAGCTTGTTTTGTCTAATATTGCCTGTGCCAACAGTAT  
CUST\_9034\_PI426210822  
ATTGTATTATTTCCATTGATATCTGAACTCAGTATAGAGATGGGACCATAAGCGATTTCC  
A\_14\_P202314 CTCTCCTAATTTTGCCTTTATAGATCTCCATCCTTTGTCCAGAGCAGAACAGGAT  
A\_14\_P107917 CCTTGGGAAGTGCATTTCTGCATTCGAAGAAGAATCTGAGAGAAACCTGTA  
A\_14\_P101546  
AAACAAAACAAAAAACACAACAAAAGTGCTCTAGTTCTCTCTAGAAAATTTGGTCCCCC  
A\_18\_P22841399 TGCTTGTTGATTTTTTTTTTCCATTTACTTACCATTTGCTTAAGTATTGGAGTTTTTGGT  
CUST\_9553\_PI426210822  
CTATTTCCATGTTAAATCCAGAGAAATGTTACTTTTTGGAAAGTTTCTACTGCTGCCTG  
A\_16\_P02411542

ATTGGACGAATGATGAAACTTTGGAAAGCAATTGATACTTCGCACAAAATTTTATGACCG  
CUST\_9911\_PI426210822

TCTAAGTTTTTCAGTACACTTTTGTTCACCTCATGATATTTAAATCAGGGTTGTTGTCAT  
A\_14\_P108622 CTAAGCAAGAACTAATGGCTAAATTATCAACTTGGAAAACCTGGAAAATCTGGATGGCAGA  
A\_14\_P200898 CCAAATGAACCTTATTATGCACTCAGGTCTCTGCATGAAATAAGACAAAGATCCATTA  
A\_14\_P108706 AAAAAAACGAATTCTGACCTTCGTTGTGCTACATTTTGTGGGAAACCATTGGC  
A\_14\_P102587 GTTTCTCCTGGCATTAAACAACAATAATTCTTCCTTAGGGTGAAAAATGTAGGCAAAACCT  
A\_16\_P41875793

AAACTGTTTACAACAAAATCCTCTAGAGTTACAAGATAGTAATGAATGAACTGCACCTCT  
A\_14\_P202283 CTGAAATCTGACATCTATTTAGACTTGATGGAAGGAAGACCTCAGAGACCAACAAATCTT  
A\_16\_P36230149

CTCTAGGAGGGATGTGTTGTTTCCATACAACAAAAAGGCCTTTGAAATAAAGTGTTTAT  
A\_16\_P21504991

AGGAAACTTTGTTCTGTCCCTAGATATAACCATCCAAGTCTGCAAATGTATTTTCACATT  
CUST\_2482\_PI426210822

TTTAGGATTAGGACAATTCACACAATAGAATAGGGTGTTTTGCCTGGTGTTCAATTTTAA  
A\_16\_P03271378

TTTTCTCCTTCTACAGCATCTACAAAAGTTCTCTCAGTGTCTTCTCTTAATGACCTCAT  
A\_14\_P128167 CAAAAGAAGTTCTAAGTTTATTGCAAGAAAAAACCTGCCTTCAAGCCGGTTCTTG  
A\_14\_P107317 ATGGAATCTGGAGCACATAAAACAGATTCAAATGCCAAAAACTCTTGATAGGAGATCAAC  
A\_16\_P20866140

ATCTTGGAAAGCGTGTATAAACACATTAATAATTGGGCCAGATAGACTTCAATAAATGCC  
A\_14\_P137227 ATTAAGGAAATGCTCACACTATGAATGTTCTGTTCCTGACAGAGAATGTCCATAAGATTC  
A\_16\_P17248087

TACTACTCCTTTGAAAAGTGAATTTCTTCCAAAAGATAAGGTTGCAATATCCCTACC  
A\_14\_P133107 TTAATGAAATGTGCTAACCTGCTATCTTAGGATGTTACACTTCTCTCTCAGTGTAACCTT  
A\_14\_P135638 GATCAGCCCAGCAGATTGAAATCAGCACCAGAAGAAGTAGACTCTTCATCTTTA  
A\_16\_P16666504

ACCTCTCTTAATAACTTGGTATGTCGTTTTTTCACACTACCATAGGACATTTTCTGCTCAA  
A\_16\_P37313312

AAGGAGTTGTGATTCTGTTAAGAACCCAGTAATGTTTCATATCTTTAACTTCTTTCTGGG  
A\_14\_P118409 ACCTGCAAACCTACAAATACAAACAAATTCATTTTCGAGAGTTGATCAGTTGGGCTAACAA  
A\_16\_P02745681

CAACCATGTTAGACCTATTTACAGTTACTCAAAGGAAGACTAGACACTCTGTTAGCCTTT  
A\_14\_P108319 CAACAAGTGGACTGAACTATACTTAGAAGCAAATGAGTTATGTCTATGGATTCGACACAC  
A\_18\_P22840473

CCCATGTTACAGGGTCACTTTTTTTTTTCTGAGAGTAGAGCATGACATAATGCATAGTAAG  
A\_14\_P135798 TAGAATGTGATGACTTCCCTACTTTTCGATTTTAAAGATGCTTCAAGGGAAATCTGTCTC

A\_14\_P126714 CTGATTATTAATAAAGTCTTTTCTTTTACCTGCCAATGCTTAGTTTCTTTGCCCAAAGGG

A\_16\_P20406699

ACCGTCATCTCATACATCAAATAATACCCCTCATCTCATATGTCATTTAAAGAAGTCTCCTCC

CUST\_7212\_PI426210822

TCTATGTTCTAAGTACAGATGAAGAAGTAAAAGTTTGTGTTCTGGAGGGGTGGG

A\_16\_P15505882

GGAAGGTAGCACTTACAGATGGATCATCAAAGATTTACAGATTCTAGAAGTAGGTCAT

CUST\_2000\_PI426210822

AAGTAGACCTTTTTGCAATTTTAACTATCCGAATAGGTACTACTTAGTGTATAATTGTCAT

A\_14\_P108196 AACTGCCTCTTTCTTCAATTTCCCAAATAGTTTGAGAAAAATGTCCTGGACTGCTG

A\_14\_P139765 TTAAGTTTGTCCAGGATTATGTGAGAGAGTCCTTCATTTCAATTTCTTTAGTTACCAGGAG

A\_16\_P00278370

AATCAGAAGATAGCACATGAATTGCTAAAAGTTGGGAGATACTACTCTTAGGGATGAAGC

A\_14\_P130071 GTGTGAGTGTGTTTAAAGGAACCACAAAGCAAAGATAAGGTTTCTCTTTTTTTCAGAGTT

A\_14\_P120386 GACAATGTCAAACACTACTGATAACCAGTGTGCCAAGATATTTGGAAAAGGTATTGCTCTTT

A\_14\_P132931 CTAAAACCTTTTCTCTTGATAACCATGACTGAAGATTAATGCTTTAGGGATAGGCAGGGAT

A\_16\_P17215848

TCGAGTCACTGCCTATATGTTTCATATTCATAAAGATCCCAAAGTTCATTCCTTTTCATTCT

A\_14\_P138162 CTATCTAATTTCTTCTCGTCATGGAGAAAGGATGACAAGAAAGATAGTTACCACTAAGCC

A\_14\_P105776 AGCACAGTATGTTTCCCATGTGTCTTGTATCATCTATTAATCTATATGAAGAGGAGGTTCTC

A\_14\_P105512 TTCCTTTGATCTCTCTTCTGAATTGCAGAAATCAGATAAAAACACTTGGTGAATGACT

A\_14\_P134452 AAATTCACACTGTCTCCCGTTTTGACAGTATTTCTGAATCATAGCCTATACGGAAGAATA

A\_14\_P111961 AACATTATGCACTCTGTTGATACAAACATTTTACTGAACTTTCAGAGGCAAATTTGGGG

CUST\_5860\_PI426210822 GATATTTGTGTACATGTGCATGTGTGCATATACACACACGCACTGTGTGTGTG

A\_14\_P110774 ATACATGTAAATAATTGTTAGACTCACTGCAGCAAAGCCTTGATTTCTTGGACTGTTTCAG

A\_14\_P102952 ACAGCAAAGAGAAGACATCGGTTTCAGTTAGGTAAAAGACCTTATAAGTTGTTGTGACTTA

A\_16\_P02475900

GATTTTGCTCTCCTTCAAAGAAAAAGAAAATGCCAAATTAGAGCCTAAATTCCTCAGTCG

A\_14\_P110852 AACAACTCACCATACAAACTTGCATCAGTTTTTGTGGAGTCAGAGGTTCAAG

A\_18\_P16632700

GGAACATTTCTCTATGATGGGCAGAGTAACTATGATTTAAAGTCTCCAAACCAGTTTTCA

CUST\_495\_PI426210822 TTCTGCCTGCTTTCTGAAAAGTTATTGAATTGCAATAGCAGTAGCTTCTCTG

A\_14\_P119585 TTCAGTTACCTCTCACCTTATAAGTCTTCTGATTTTTCCAATTTGGCAAATGTGCAT

A\_14\_P103944 ATTAGAGGTGTCTTTGCAATCTCAGGGATTTTCAGAGAGAGAGAGGCATAAATACAG

A\_16\_P18187185

AAAAGAAGCAATACCTGAGGCTTATAGTCAACAGTTACCCAATATGGACTCAGAAATC

CUST\_10264\_PI426210822

TGTGTTTTGTGAATTCAAAGACCTCATAATCTTTTAAAATATTATTAATTTCTGTTTTAT

CUST\_4470\_PI426210822 GCTGAGCAGTGGGACAGAGGACAGGAAGATGAGAGGAAGATATTC

A\_14\_P138791 AGTTCATGATGTGCTCACGAAATATTGTTTGAATTAAGTGGAAATGCGTTGTGTTTTTTGTC

A\_16\_P20919241

AAAACAGGGAAATTGAAACCATCATCTCTTAACTGCCTTTACTTGCAGAAGAATAAACCA

A\_14\_P100846

TGTGGCTGAAAAAGCAAAACAAAGCCATTGTGTAAAGTAAAGAGCACACAAAAAAGGATA

A\_14\_P117306 CCAACAAAGTCTAAAGCAGAGATGAAGACAGTAAAAACTGGGATGTATGCATAATTGGAA

A\_14\_P113634 ATGTCTCTAGTTTCTGGACTCTATTATTTGTCCTCCAATCACCTCCCCAAATTAATTTTT

A\_14\_P137420 TTTACATTA AAAATTTCACTCTTCCTCCCTTCACTGAGACTTAGCCAATCAGACTAGAT

A\_14\_P117038 AGAAAGTCAGCAGATGAGAGACACAAAGAGAAGTGGTAATAGGAAACGGAAGAG

A\_16\_P16025533

CACATCAGCCCTTTTTATACGTAGCATGTTTCTAGTCAAACATTTTTGTTCTTGCCATT

A\_16\_P15166472

ACCACAATAACCATGATTCTACCTGCTAATCATTCTTTCACTAAATCTTCTCTCTCTCT

A\_14\_P120940 CATTGTTTACATCTTTGTGATTATAGTCAGCATTCCAGCCAATATTGGATCTCTGTGTGT

A\_14\_P122644 CATCAAGGTAGTCATCAAAGTCAAGACAAATCAGAACTCTGTTGGCTTCTTTTTCACTT

A\_14\_P118825 CAGCACTTATAAGTTCACAGTGAGAGTGCAAAGGATACTTTGCAAAGTTCTTTCAAGAAA

A\_14\_P111525 GAGCAGAACTGAGTTCTTCATCCTTCTTTTTCAAAGTTCTATGTTTTTATCAACCTCGG

A\_16\_P00921201

AAAAAACGTGTAGAAATAGAGAATCCCGGGATTTCTATTTTAGCCACAGTTGAATCAGTC

A\_14\_P126562 ACACCGGTAGTGCTCTTTTGTCTTGCTTCGTTTTTTAAACTTGAACTTTACTTCGTTA

A\_16\_P41780334

AACCCAATGGTAGTTCCTTCTTGATAATAAAATTCCTCCAACCTTACATTATGATACCC

A\_14\_P106003 GTCATCAGGTTGAAGAAGTTGTAGTTGCCGGTGATGATAATCAGGACCTG

CUST\_9899\_PI426210822 TTGAATTCTGCAAACCAAACCTCCCTGTGACCAGTGGGGATAAA

A\_16\_P18337125

AACACCGGTAAATCTTTTTCTCAACTAAAAATTTGGACATTTTAGTGCCATCAACCA

A\_14\_P127201 CTACAATTCGAGACAGAGCATCTTTAATATGGTTCTCCTCTTCCAAAATGTTCAATGTTT

A\_14\_P129955 TTGACAGAGGAAGAAAAACAGCAGATCCTTCATTCAGAGGAATTTCTCATCTTTTTTGAC

A\_14\_P106936 CAGACATCTGCTTAGCGCGTTTTCCAATGGATTTCCCTTTTAATTAACCCACATTAATTA

A\_14\_P104964 TGGGTTTGTCTTTGTTTTGTTTATGGTTAGACTTACAGACTTGGAAAATGCAAACCTCTG

A\_14\_P136762 TAGATTTGAAACCACATATGCAAAGATAACTGCACTCCATGCTAATCCCACTTGAAAATC

A\_14\_P136978 CTAATGTGAAGGATGCAAATATTTCTATATTCCTACTATCTGCTTGGGGTCTTCAAGAG

A\_14\_P122587 AACCCAGACTAGACAAGAGCCATTTCAAGAGTAAACCTTTATGTGAAATTTCTGTAAATGTG

A\_14\_P135624 TCTGGTGTCAAGTTTACTTGTACTTGGTAGAAGGGATCCTTTTATGAACTCAAGTAAA

CUST\_3067\_PI426210822 GTCATTAGAAAGGCAGAGGACATCATGCTTCTCTCTCGATTCTTTGAGCA

A\_16\_P19526011

AAAAGACCTTCATACTAAGATAGCCACCAGAGTAAAAAAGTTTCATGTGATTTGCTGTCA

A\_14\_P113128 CTAAGAAAGAAGTATTTAAGCCACGAACTGAGACCACGATGCCACATGCTGAT  
CUST\_1916\_PI426210822

TCCTGGACCCAGTTTATAAAGTACATAAAAATGCTTCTTTCAATTAGACCACCTGAGAG

A\_14\_P104930 TATCTTACGAAAAAATGGTAGCATTTTAAACAAAATAGAAAAGTTGCAAGGCAAATGTTTA

A\_14\_P103638 TATATCAGTATATGCAAACCTAGCAACCATCTGAATATCCCTGCTTTTTGGATAGCCTTC

A\_18\_P17035431 GTTGATACCACCACTTCCAGGTTCCACATTCCAAGTCCCCTCAG

A\_14\_P105756 GCACATGTTCTAATACCTACACTTGTCTGTGGTAAGTTTGTATATACACTGGAGT

A\_14\_P130940 TATCCATATTGTCATGGCTAAGTTAACTATCATGGTAACCAACAGCAGAAGGACAAAGAA  
CUST\_7238\_PI426210822

TATATTTCTTTTTATTTGCAGTACCCTCAAGTACTTTGAAGGTTTGGGGACAGTAAATAA

A\_16\_P01809742

CTCGTCCATGAACCCCATATATGTGCGTATTCTTCTAATTTTATGAATTCCTATGTGCA

A\_16\_P39513384

TCAGTTCTGACCTTAGTCTCTAGTCACTTTTTCCATAAAGTTTGAAGTTCAATAGCAA

A\_14\_P136303 TTTATTCCTCAACTGTTGAAGACAAGTCTCTCATTTTTAGGGTAAGACTCATAGGTTTG

A\_14\_P115238 GCGAGTGATCTTTTTCTCTCTCAGATTCAGGTTGGCATTATTACTGTTATACTATAACCCA

A\_14\_P139341 CTGTTCTAAGACTTGGGGTTATGCCTTTAAATCATTTTCAAGCATTGGCCAAATAATAAT

A\_14\_P109354 CATTAAACAAGGAATTACACTGTCATGCCAGACTAGTGTA AAAAGAACTTTAATGGGGC

A\_16\_P01345807

CCGGTATTCATTATTCACTCATGAGTCATAAGTAGAACCTCTGTAAAATAACTGCACGCA

A\_18\_P11881012

AAATCACCAGACAATATTCTCTATCTTGTCTCAGTCTCAATTCACATGCTTCTCAGTCA

A\_14\_P200707 AATTTATGTCATACACAATGATGACATCAGATCTTACTGTGTAAGGATGCATGCTGGGTT

A\_16\_P20388582

ATCTGTTTTGACTCCACACTTATTACTGATGGGAATTTTCACTGGATACTTGTGGAAGAT

A\_14\_P113357 ACTCAGAATCCAACAGAACCTTTCTGTAGAATCCAAATTGATTTTCTGAAGTCAGGTGA

A\_14\_P200949 TTAAGTGCTATGACTTCAGAGGACAAAGAGATCATTCTAGCATGGAATTATCCAAAGGA

CUST\_455\_PI426210822 TTACATTTGTAAAAGCAGCCATGGTGTCTCTGAAATTCCTTGCTTTCAAGGG

A\_14\_P136885 AGAGCAATTGCCTCTGGTGGAAATTAATTACTCTTTTATTAGCACAAAATAACAGCAACCT

A\_16\_P19463100

AAAACAGCCTATATCAGAAGTTGTTTTCTAGTGCCAGTAAACAGAAATTAGTCCAGTGGT

A\_14\_P202480 CAAATGAATCCCTTCACCCAGAGCAAAGAAGAATTTCTTCACCACATTTAAGTTTTTAAG

A\_16\_P15469225

ACTGCAATAGACATCCACTATGAACACCACTTAATTCATATTCACAGTGAACCTTGATGTA

A\_14\_P139577 CACCATGAGAGAATGTTTTGTGACATATTGGGAATTCAGTTGAAAGGTATTATTAGGGAG

A\_14\_P128276 ATGAGGCTAGAAGGTATTTATCAGTGCATTGAGTCTGATACTAAATGGTTCACTACTG

A\_14\_P120249 CTAATCCAATTGGTTATTTTCTAGAAGAGGAAAGTCAGATCTAAGGCAAAAAGGAAGGAG

CUST\_5299\_PI426210822 GAAGAAGGGGCTGTCCTTTTGGGGGTGTTGGCCTGTTTCTAATTG

A\_18\_P15975479

TCTTGGCAGTTTTAGTGAATCAAAAACATAGCCTACGAATCCATTATGTGACTACTACCT  
CUST\_9866\_PI426210822 AGTGATTTGATCCACAGCTTTTTAAGGGCAGGAACCCAAAGACATGAG

A\_14\_P117455 AGAAGAACGTATTTGAAGAAGAATAAGGAACTCTATTAAGTGTATATCTCCTATATATTG

A\_16\_P15632770

ACTCTCTCCATCAGTCTGTAAGAATGTAAACTACCCAGAGTTTATTTAAACCTAGCACC  
A\_14\_P133205 AGGTGCTAATCTGTGGAAATTTAAGGGAATGAAAATTAAACCTGGCTCAATGGGAAAAC  
CUST\_6707\_PI426210822

TTATTTACTGATAAACTACTCAAGAATACAAAAGTAGTTGAATAAAAAGTGTGCCACAGC  
A\_16\_P19029071

TAACTCATCCTTGAATTTTCATGACCAATCACTACCTTTTTCCCTAAGCAATTCAACCTGA  
A\_14\_P124969 AAGGAGTAAAATGCTTTCTTTACCAGTGCATATGCAAAGCACTGTAAACTGTGCTTTTTT

A\_16\_P16499283

GCTCCATTTATCCCCCATATCAACAAACTTTTTCTTCATGTCTATTGCAAACAGAATACA  
A\_14\_P125094 GTCTTTTTGATGTTGTAGTGAACAGCAGAGAATTTCAAAGGACCTTGCTAATATCTGTAA

A\_14\_P120594 CTGTGGGATAAGTTTTGGAATTTATTTCTTCTTTGGAATTTATCTTACAGATGGGCCTGC

A\_14\_P109383 CATACTACATATCTTGTTTTGCTTTGTGGAATGAACATCATTACCTATATGGGATCCT

A\_16\_P20844407

TGTGAGTTGAACTGAATTGAAACTGCTCCATGTTTATCAAAGATCAGGCAAAGATATGAG  
A\_14\_P102295 TGAATAGCACATTGTAGCACAGATGTTTGAGGGATGTGTAATTTGAAACTCTTATCCCAA

A\_16\_P37479274

AGCAGTTTTTCAATGTGTATTAAGAACCCTCAAAGAGAACAAAAACACCTAAACAGCCT  
CUST\_1779\_PI426210822

CTAGAAATTATCATGACAGATGGCAACCTAATGCTGAAGGTTAATTAAGGCTCAGAAAA  
A\_16\_P15674562

AATTGAGCCTTAATACCTTAACAAGCAATATCTGATGTCCTCTGATTAACAGTGTTGGC

A\_16\_P30952296 GTGTCTGCTGTCTGGGCATTTCTGTTCTCTTGTGGGTGTTCAATTC

A\_14\_P134395 GGAGAACTTGAACATATCCTTTAAGTCCCATAAGAGAAGAATGGAGTGAAAGACAGTATT

A\_16\_P00940091

GAAGCCTAAGGTCTCAGATTTCAATACCCTGAGAATGCAATTGTGGTCATGTCAATATT  
A\_16\_P16070668

AGGCTGAAATCACCAATTAGTAGGAACAATGTAGTGCTTTGAAGTTGAAAAATGCTTTGC  
CUST\_3583\_PI426210822 CAGGGCAGGCAGGAGTCCTGGGGACTGGAGGTTCTCTGCACTTCT

A\_18\_P25906598

GCAGTTTGGAAACAATATGGAAAGTAACTTATGATCGCATGATTTTGAATCAGTGGCAGTT  
A\_14\_P102342 ATCATGTTTGCTTCGATAAGTCAAAGACATAGGCTTGGCTTCCTGAAAATATCACTAATC

A\_16\_P21660706

TGCCAAAACCTTAAGTTTTATCAATCCCTGAACCCAATTTTAGTCTTAAACAGCCTTCTA

A\_14\_P200822 GCATTGATCCGAAATGCTGAAGAATTTGGCTTCGAAATCTGTCTCTTAAATTCTGAAAC  
A\_14\_P106563 AGGCTGGACTCACACAATCATGCAGAACATCATGAAGATGTTCCACAG  
A\_14\_P116690 AACTAAATGGCAAGTAACATGGGTGTGAGATCCCTGTTGCATGCTTTCATTAATACTAAA  
A\_16\_P39137721  
CTTCCATGAAACTTTGGTCCATATACACAATAGGTGCTTGTCAAATACTTCTGGA  
A\_14\_P116872 ACAGAATATGGGCCAACTGATCGCTTTAGGAAAGGATATGGTGGTGAGTTTT  
A\_14\_P131743 GTTTCCTGGTTTTGTGAGACATGTCCTTGGTCTATGCCAATATAAAAAGCCATCTC  
CUST\_10328\_PI426210822 GAGGGGAGAAGGTGAAGAGGTTTCAGGAGAGAAAAGTATATGTGTGG  
A\_14\_P111241 ATGGTCATTAGAGCAAAATTGTGCAGTGAAGCCAATGCTACAAACTAACAAAAGATCAAT  
A\_14\_P100560 CAATAAGAACCGAGACGAACTGAATGGCTTTTTTAACAAACTCATTAGGAATGTGATTGC  
A\_14\_P200466 ATAGTTCCATCTATAAAATGGGAATGGAGGGAAATAGGGGAACTGGGATAGAGAA  
A\_16\_P00823570  
CCCCTAGTTATCTCCTATACCAGTTAATCTGACCTCTCAATCAGTTTCTTTCTACAGTAG  
A\_16\_P16045685  
AAGAACTTAGGCTCAAAATTAGGCAACTTCCCTAAAATCTAAAACCCAGGTATGTGAATG  
A\_14\_P101559 CTCTGCTATCAATGATTTATGTTCAATCAATCCGTAGAACTGGACTTATCCTGCTAGAAC  
A\_16\_P38632228  
ATTCTGTCTTTTTTGTCTGACCAACAATAATGAATAACCCACAAACGCTAATGAATAACT  
A\_14\_P103099 CTAGAAGTCCAGAGTTTGCATGCTGATGTGCTGATTATTGTCTCTTGTA AAAAGAAACAT  
CUST\_477\_PI426210822 GTGATGGATTTGAGAAGAAAGGAGCTCTGCTTTACGCTGAGCCAC  
A\_16\_P16348230  
CAGAGAGAACCAACATAATTATCTGAACTTAAATGTCCCTTGAAACTATGTCTGTCTCCA  
A\_14\_P110548 CTTATGTTCAACAGACATTCAGCCTTTTACTTCCACTGTTGGGATTTTTTCATTCAAACCTC  
A\_14\_P114959 CTGTCAAACATTATGGCACATTTTTCTGTTTCTGCCTCATTAGAAAGAATCACTAGGAGA  
A\_14\_P109000 CTGGCTGGGCTTATATGTATGTATGGTGGAAACCACTGTGTTATGTGCTATCTTAGTA  
CUST\_984\_PI426210822  
TACTTAGTGATATATTTTTTATAGTTCTCTGCCTCATATCATTTTCAGTCTATTTAGAAAC  
A\_14\_P113872 CCAGTGATGAAATACAGATTTTTGAAGTCTGAAATTGTAGCATGTCACTGCTCTGTTTCAT  
A\_16\_P16191444 CTTAGGTGACCCTAGGGAGAGGTGATGGGACCATACCCAAAACAC  
A\_18\_P16682657  
ACCCCTGCCTTACATTTCTAAAATGGCTCACAAATCCATTAGTTTTTTGTCTGTTTATCA  
A\_14\_P113043 CTCCTATCTGAACCAATTCTGCTTTAGTCTAATCAGGGAATATGAAGTTAAATCTAGGGC  
A\_14\_P133019  
AAGGAAAATTTGAAAAATACAGAAAGGAAAAAACACAAAAGCGTGGGGAGGCTATTTCT  
A\_16\_P01223388  
AAAGGAAGAAAATGCTAAGCAGACTATGTAAGTTCCAGATTCCATTTCAAACCATGTGA  
A\_14\_P138042 TACACCTGCAAGGTCTCTGGAGGAATTC AATGATGTGTGAGTAAATTTTTTGCATTTG  
A\_14\_P106391 ACTGAAGATGGATGGGGATCATTAGGTTTTCTCTTATTATATTGTCCACAAATATCTTAA

A\_14\_P108656 TGGCTTATAAAAATTACATGAAATGTGCCCTAAAGCACTTTTCCAGGTTTCATCTTCTGTAG

A\_18\_P14129199 CTATGATCCTTCTCTTGCTGGAGGGGACACTGCATAGAAACCTGG

A\_16\_P17919281

TCTCTTTTTTATCCCCAGTTCTCCAATATAGCAAATGAAACTCCTTATAAAAACAAACCCC

A\_14\_P138390 AACAAAAGTCCTATGACAATGAACCTGATTTTTAAGAGAGTAAATTGAACTTTGAGGTTT

A\_14\_P129906 CTGCCCCGTAGATTTTCAGCAATATCCCCACATACCTTCTCAAGGTAAAAATATATGATTTT

A\_14\_P115464 TTAAAACGTTACCCCCACAAAAGGGGAGTGGACAGATTTATTGAAATCAAACCT

A\_16\_P19923830

CTTCATCTTCTTTTTTCACCTTCAACATCTTTACTCCACTATACTCTCTTCCATGCTAACCC

A\_14\_P104171 AAGTTACTTGCCACGTTGAACTTCATATTCCTTCTGTATCAAAGTGGGTTTCAACAATTT

A\_14\_P105822 TTGGTCCTCCTCATTCCCTAAAACCTTGTTTTATGTAACACTTTAAATCTTCTGCCTCATT

A\_14\_P129101 CTGTTGCAAGTGCCAACAGATCTGTCAATGCGTTTTTCATGACCATGGATAATTTTATATA

CUST\_5472\_PI426210822 TGGCCTTACTCTGAGGTGTGGAGAAGGCTAGAGAAGAGTAGAAGAT

A\_14\_P130540 AAGGATTAATAATCCCTTTTTATCTTCTTTTCATTTTAGTAAGGTCAGTTCCACCTGGCAT

A\_16\_P15868417

AGTGCATTGAATAGTTACTCTTCCCATACAAGTTAAGATCAGTAAAGACTAAACTCCCCC

A\_14\_P113289 AATCTTCTTTTTCTTAGTCATCAGAGGAGCCATTAGAGAGTCTTCACCAAGACTGAAAATA

A\_14\_P117803 TGCTCAGTCAGTGTTTACTGAGTGAAAGTCTGGCATATCTTATCTCCATAGCAAATACTA

A\_14\_P100480 ACATTCTTGAGCAGGCAATGACTTCACAAAAGGATTTCTCAAAGGTTAGTCCTG

A\_16\_P19730169

GGGTATTGTAAACACGCAACATTCAGAAAACGGAGAAAATGGTTATTGTCATGTGTCATT

A\_14\_P136033 ACATTCAGAATCTTTTTCTTTTGCAGCCATTTTCGTAGAGTGACGTTTTCTGTTGTGAGT

A\_14\_P104004 ACTGTCCTTTAAATGCTACATCTATTAATCTAGATGAGGTCAGGTGCTACGAATTCCAAG

CUST\_7456\_PI426210822 ATACTCTGCTGTGAGAGAGATGGTATGCAGCCAGTCCAGCCATCT

A\_16\_P38188020

TCCAACCTTAGTCAAGTCTTTCAAATACCATAACTATGCTCAGATCTTTCTCTTGTCAC

A\_14\_P102780 GTGCTAATGCTCATCTTACTGAGCATAATAACCTGGAGCATGACCTATATTGAATTCACT

A\_14\_P201180 CTTTCTGTTTGAATCTGCCATTTCCCTCAGAAAAATTAAGAGGGCAATGTCAATCAATTCA

A\_16\_P00685482

AACTTAAACAGAGGTGTGAACATAAGAGCAGGCAGGGTGTGTGTAGAATAGTAGCATATA

A\_18\_P14135187

TAATAATTATTTTTCTTTCTTGTGGCCTCTCCTAGGTGGACTTAGGGGATGACAAATAAT

A\_14\_P139862

CACATAGTTTAAACACCTGAAGGGGAATCTAAAGAAGAGGGTGAAAGACTGTTGAGAATAA

CUST\_479\_PI426210822 GAGTTCTCTGAACTGCAAATCCTTTTAGCCAAGTGGATTTGGCGATCAA

A\_18\_P11408593

ACTGACTCCATCCATACATACCTTGATCAACACATATTACAGATCTTTGTATTGCCAGTG

A\_14\_P138419 AAGTCTGATGGCTTTTACAATAAAAAGATATTAAGAATTGTTATCCTTAACTTACGGGCTT



A\_14\_P131516 AGTAAAGTCTGCCATGAATATTTATTGGGCAGTGGAAGAATAAATGACAGGTGCAGG  
A\_14\_P124488 ATGCCTTTATAGAAAAGTAGAAACCAGTAATATTCTCTTCTCCAGCATCACTAACACCAA  
A\_14\_P113150 CACGACTTATACACAGGAAACCATCTTGTGATTATGTAAGGCAGTAATGCACATTTGAAA  
A\_14\_P121490 GTTAATCTACGGTCAACTATGCCACCTGAGAAGTGTTATCTTCCCAAAAAACAAATTCAT  
A\_14\_P127419 AACGATGAGTATCGGATGGCAATAAGGTAACATTATAAAATTGCCAAGGAAGAACACCTA  
A\_16\_P17488921  
AAAAACGGGGAAATTAAGTCTTGGAGAACTCATGTCTTATCTGCAACTCTACTCAATTC  
A\_14\_P100473 TCTGATGGTTCTTGTGCTTCTTTGTTACCTTCTAGAAGTAAGTGTGGCATCTATTTATT  
A\_14\_P113819 TTATTATTGGCCTTGAGTCATCATGTAGTGTCTGACATAGGTTACGTGTCCAGAG  
A\_14\_P105766 CCCCCTCATTAAATGTGCAAAATGAAGATTCTGACAATAAAAAACAAATTGTTTAGGTGG  
A\_14\_P122797 CCCCAAACCATAAAACCTTATACAAGTTGTTCTAGTAACAATACATGAGAAAGATGTCTA  
A\_14\_P108759  
GTAAAAAGAGTGGTAAAGAAAGAAAACAACACTTGCGTTTGTAACTCCAGGAAATACAGG  
A\_16\_P02971069  
CCACATTTTGTTCCTAACTTACGAAAGAGTAAAGGATCTGTTTTCAATCACAGTCACTG  
A\_18\_P15960409  
AAGATACACAACACCTAGTATGATGCCTTCAAACCTTAAAGAAAGTGTGTATCTGTGGGT  
A\_14\_P136980 CATTTATGCTACTGTGTGTAATAAAATGCCCATTTTACCCTCCTTCAGCCATTCTGGATT  
A\_14\_P120712 GTTTTATTTTCAATTCCTACTAATAGAGATAAGGGAAAAGAAGGCTCTGTTCTCCAACCTC  
A\_16\_P39245349  
CAGTGGCCACATAATTGTTGTGATACTATTTGTTATATTATTCTAAGAGTGCTGCATGGG  
A\_14\_P130215 GATGAGAAATTAATAGTATGAGTCTTTATTGCCATCCCTAACCTTAGGGCTTTTGACTT  
A\_14\_P115262 CTTTCCAGATTTTCTTCTGGCACTTCGTCCATATGATTTAAATATTGCTTGTCAATTTGTA  
A\_16\_P02595071  
CCTGAACAAAATCAATCCTCTTGACATAAATCAGAAGCATTCTCAGTCTTTCATTTCCCT  
A\_18\_P22840517 GTTTTTAAAGAGGACTTTCCAGACCCAAGGGAATGGAAGGGGGCT  
A\_18\_P16166562  
AAAATCAAGGAAAAACGTATTCAGATCTGTCATGACTCTATGCCAAAAACTCACATTGGA  
A\_18\_P11382787  
CCTTGTCTCTAAATGATGGATTCTGTCAATCTCTACAGCCTTATAACAAACAACCTTGACC  
A\_14\_P111574 TAATAATAGCACTTCCCTTCACTGCATTTTGTGAGTGTCTGATTAGGCAATAAATTCTGTG  
A\_16\_P30952252 CTCAACCCAAGTCTGGCTCTTCTCCTCTTTCTCCAGGGAAGAATC  
A\_14\_P138281 AAAGCGATTCACTGTATAAACTTTTTTTTTATGAAAAAATGGCATCAACCACCATGGATT  
A\_14\_P127912 GGATAACAAGAAAGGGCTCTGTTAGAGTCTACAGAAAATTCTCTCTTAATAAGAGGACCT  
A\_14\_P114861 AGATTGTATTTTGTTTTTCTGCCTTAGAGTGAACCTGAATGTTTCCAGTCCCATGTATAACC  
A\_14\_P114630 ACCAGAAATAGTGTTTTTGAGTGATTTGCAATGTAATGCAAAACTCAATGGAATGAGGAG  
A\_14\_P114074 ACCTACTCTCAATGAGCATTCTACCTCTGTGGAACCTGAAATAAAAAACAAGTCTTCCAT  
CUST\_2948\_PI426210822 TGGCTGAAAGTATTACTCGGGGCTGATCAGCTTTTCCATCACCAT

A\_14\_P113114 TCCTAATGTTATAACAAGCACTCTCTGACCATCTACTTCAGCAGAATCTGAAAATGAAGG

A\_16\_P15638807

CAGAGACCTGTCTATTAAGGACCAAATCCAGAATATCTGAGAACAAAATTGAGGGAGTAG

A\_16\_P00685527

AGAGATTTCTTTTTGAAGTGAAGATAGATCATCTTCTCAATTTTTTCAGAACAGACCTGAA

CUST\_6789\_PI426210822 GAGAAAACTCAAGGGGCTGGGGTTATGTGTACATCTTCATGGTATTGAC

A\_14\_P119451 TTAGACGTGTTGCTTTTTTAGGGAACTTGCCTTTGAAGAATTCATCATCAGGTAGTAAA

A\_16\_P20654647

AAGGCACACAAGTTTAATTATGACCTAAACGAATTTCCATCTGATACTTTCCATCTAGGA

CUST\_7999\_PI426210822 GAAGCAAGACTGACTAAACCTGGGGATTGGGGGGCATGGGAGCAG

A\_18\_P14132325 ACGTGGGCCAAGCCTAGCCATGCAGCAGAACTCTGTGTTTCTTAG

A\_14\_P131417 CCCTCTTCTTATTCATGCTTTCTCCTTTTTCTACCTTTTTTCTCTCCTAAGACACCT

A\_14\_P126576

AAGACGAAACAAGTCTGAAAGTTTTAAAACCTTGAAAGGCAACCCAATTGGACTTAACAT

A\_14\_P130159 TTGGTTGACTATGTTGAAAGTAGTTGCTTGGGTCGGTTTTCTCTTGTAAGTGTTTATTT

A\_14\_P137059 CTTTTGCGGTCAGACTTTGTGTTACATAAATTAACACTGTTCTCAGGTAATGAGAGATCC

A\_14\_P200656 TGCTTCTTCTGTTCCCTCATTACGCTTAGTTATCTTTCACATTATTCTTGTTTTTTTCAG

A\_16\_P58424094

CTATTGTATCTGGCATCTTTTTGTTTCAGTATTGTATTTGTGCAGTTCATCTCTGTGGTTGC

A\_14\_P135141 CCATGTGACATTCGTCTACCTCACAGTGACTGCAGTTTAGATAATGCTTAATATTCACTT

A\_14\_P135540 AAAATGTTAAAAAGAACAGATACAAGGACATACTGCCATGTAAGTTGGAAATGCCCTTGA

A\_14\_P113037 TTCAATACCTGATGAGAAGGATCCTTAGTGTTCCATATACAAAGTTCAGTTCATCCAAA

A\_18\_P22841753

GCCCTGAACCTGTCATAAAATGTAATGGATGATATATTTTTAACTGCTGAGACCAGAGAG

CUST\_223\_PI426210822 CACTTCCAGGGCCCCGCTGACTCGTTCTTCGGCTACGCAGTTCTG

CUST\_9770\_PI426210822 TGAGATGTAAGTCCATTGTGATCATATTCTCAGGCCTTGTGGAGACATG

A\_16\_P17585895

AAAATTCATATTCGGACAGAAGTGAACCTACAATTAGAGGCATACACATGAATGGAGTCA

A\_14\_P103657 TAATAGTGAGTTCAAGAAAATGCTTGGTTTTATGTCACGAGGCCTAGAAATCTGTCTGAA

A\_14\_P125758 CTAATTGAGACCTATTTCTCCAAAACTACCAAGACTATGAGTATCTCATCAATGTGTAA

A\_14\_P136622 TAGTTTTTCAAACCTGTTCAATTCACAGAGAAATGTGAAACCCAAATGACCAGTCTTCATC

A\_14\_P125545 TTTCATGCAATGTAAACCTGTGTAACCTTATGTATACTGAGTCCCATATGGTCCCATCTTT

A\_16\_P36230703 AGAGCCACGTGTGAGACTTGGGTTTAAACGTGACCTGTCCGTAAAT

A\_14\_P105606 ATGTGAGCAATGTAAACAAACAGATTTGACTGGCATTGTTTAAACCACCAGTTAGTCAC

CUST\_4096\_PI426210822

TAAGTAGATTTGTGGAAACAGAAACACATTTTTATTTAGTCATGAGCGTCACTTGGAGTA

A\_14\_P129826 TTTTATTTGGCTTTTATTCTATTACTCATGCAGTGCAACATGTCTGTGCAACCACACATC

CUST\_483\_PI426210822 CTTTTTGCCAGAAGGAGTCCTAGGAAGCCGATGTAAGTCCAAGATTG

A\_14\_P114514 ACTTCTCTTTGGGGAGAAATAGTGTTATTGCATAGAACCAAGGGTATGTTAACCCTAATA

CUST\_600\_PI426210822 CCAGGTAGAACTACTGGCTTAAAACCCCTAGAAAGCAGTCAGTATCCACTG

A\_14\_P131315 TAATGGATTGGGGTCCATAGATGACATCGAAACAGGTAATGTCCCCGATA

A\_16\_P01075175

CCTAGAATTGTCCTGTTATACCTATTAGCACCCACATAACTATATGTGTTGACCACTTCGG

A\_16\_P30952470 CTGTAAAAAGAGCAGTTGTTCCATCTGGTGCGCTTGCTGACTTTTCATTATTGC

A\_18\_P22605317

AAGGTATTTGTTACAAAACCCAACCCTGTTTGCTTGAATATGAACTGTCCTAATTTCTAC

A\_14\_P137010 CTTCAAACAGCCGCAAAACTCAATAAACATGTCAAGATGCTCCACATAAGATCCAAAAC

A\_14\_P127363 GTAAGTAAAAGGAGAACCACATGATCACTGAATCCCATGTCTTAGATGGTTCTGG

A\_16\_P16903599

AAGTGTATACTGTGATTTAGTTGTGCTCTCCCATTAAGTCTAAATGTGTCTTCCAACCA

A\_14\_P201029 AAAGTCCTGTGTATCTGGCAGCAATAAAAACCCAGTAATATGGTTGTAGAGTTCAACATG

CUST\_7652\_PI426210822 GGTGCTACCCTATACTAGCCTTGTCTGAAACATCTACCCCATTCATTT

A\_16\_P20433527

AAAAAACATTGCCTCAGAAACATTGATCTGCTATTGTTTTCTAGGATGAAGGGAAATGAG

A\_14\_P110509 ACAGTTGCTGCTGCTATTTTCAATGAAAGAATCCTTAGCACTGGTTCAATTTTGTCTTT

CUST\_654\_PI426210822 TAGAATAGGGCACGGGTGATGTATTTGACTACTGGGGTGCCTGCTA

A\_18\_P15369258

CCCCTACTACCTACGTATCATATTCTTACAATCTTATGGCATCATTCCTCTTGAATAGGC

A\_14\_P114480 ATCTCAAGAATAATGCTGAAATTAGAGAACTCCAAGACATGAAGTCATCAGCACACTTC

A\_16\_P36331761

TTACGTTACTCACACATTCATAACAGAATCTCGAAACTTTTATTCTGTATCCCATTC

A\_18\_P19498307

AACATCCTAGAATAACAAAGCACCTTTACAATTGTCCTTGATTTATTGCATCTCTGAGGCT

A\_16\_P41692690

AGGTCCATTTATCCATTTTACCTGTCAAACACTTTACCTATATTTTAATGACCACGTCA

A\_16\_P00450790 CCCCTATCTCTTTTATTTCATTCCTAGCCATTGTATACATATTCTCTACCGACATTTGCA

CUST\_9572\_PI426210822

AACTAAACACCTAACTTGGAAAGTAAAACCTTAAATGAGGGATTCAGGACATTTCCCAAG

A\_16\_P19402677

ACATGAATGGGTAATCTCAGAACTGCTACAAGTCAACTTAGAGAAATGCTGTGGAATAAG

A\_16\_P20543719

TTCATCATGGCTTTTAATGTCTACGTAGCATTCCATTATCACTTTTGATCAACAGTTCCC

A\_16\_P37196383

ACTCCAGTAAAGTCTAAAACAAAGCCTATCATCAAGAAAAACATCCTCTATCAACACTGA

A\_16\_P17953479

TTGTCCTCAAGTGATCAAATTCTAGAAGATACAACACTCATGAATACCCTCTCAAATTGG

CUST\_5216\_PI426210822 TTTTTTGACCCTCCTGAGCACTGATGCTTGCCAAAGGGTTATACATTTCC  
CUST\_4186\_PI426210822 CAGAAGGGTTTCACCACTAGTCAGTATCAGTAGATTGTTGGGGAGAAATCTT  
A\_14\_P108460 TTCTTGATTTTCAGTGGCAGGCCATGAAAAGCCACTAGAAAAAAGAACAAAAATATCCAC  
A\_14\_P119984 CTCATAAACAAAGGCCAAAAGGCCAAATGATAGGGGCTGACTTAATTTCTGGTGATTTCGATG  
A\_14\_P118116 CTCAGGAGAATCTTTTCACTGTTGGTTTGTGCAATCCAGCCATGATATTTTTCATTACA  
A\_14\_P137877 CTCTAGTCAGGGCAAATCATAAGATAGATAAAGTATCCTATAGGGGCCACATCCCATTT  
A\_14\_P135684 TTATTGTTTTCTTTTTTTAATGAAACTAGATCACTGCTTACAAAACCCTGCACAAGCCCT  
A\_14\_P104706 TACAAGCCTAAATTAACCTCGCAAATTAGGGAGTTTCTCGCCTACTGGAAATATAAACAGG  
A\_14\_P107381 ATCAGAGTCCTCTATATAGCACCTTTTCCCAACAGTCCACAAACTGTCAATC  
A\_16\_P40866523  
TTCCCTTAACTATTACACATGCATAACACTAACTTATATTATTATGTCCCAGGACTGA  
A\_14\_P111309 TCTATATAAAGCAAACCTGGCCATTCCAAAGCAGAAACACTTACAGACCTGTATAATTGGT  
A\_14\_P122945 AGTTCAATAAGGAACAAGGTAGAACTTTAAGTCATGTTATTTAGGGTAGTGCATCCTGGA  
A\_16\_P16191469  
CCTTTAAGACCCTAAAGGGAGAGTTATTAATAGTTTCAGAAAGTTGAGGGAAATCATGCA  
CUST\_7436\_PI426210822  
CATCCTTCCCAAAGCAGACAAAGAGAAAAACACATGGGAATGGTAATTAATGAGT  
A\_16\_P19204080  
AACTGCAAAAAGTTGATAACCAATGTTTCGATAATCAAGGGTTAGTTTGATTTACCAGGCA  
A\_16\_P58424527 CGACAGCACGACCCTCCTGTATGGCATGCCTTTATTGTCTCCTTT  
CUST\_4377\_PI426210822  
AGTTTCTGCAGCAGTTCTGCAGAAAGCCATGCCTAGAAAATTTATAATTACTCTGATACC  
A\_14\_P131754 GATTGTTTAAACTGACAATGACTCAATGCTGATACTGGGCATGCTTCATTGTTTTGTTTT  
A\_16\_P36230550  
GAGAGATGCTAACTAAGTAGTCATGAGTCGAATCTCCCATTTAGTCAGACACATTTTTCT  
A\_16\_P18168664 ATCACTCATTGGAAATGGCAAGGGTCAGTCACATCAGGGGTTAACTAAG  
A\_14\_P100898 GACAATATCTTTTTTCATAGGTAATTTCTCACTATCAGTGTAAGAGCAGCGTGATGCC  
A\_14\_P127783 CTTGTTGTAAAACCAGGTTCCAAGACACTGCCAGGTAAAAACAAAAGAGATTTTTCTATT  
A\_14\_P116054 GTAAAATAGAAAGCCCTTTAGGATGATTACCTAGAGGTGAAATACAAACGACTGTTTCCT  
A\_16\_P16108359  
CCCAGTATCTAAAATCAATACCTGTAGTTTCACATCCCTATAGCATTTTCCACCTCAAATG  
A\_16\_P17285401  
AACTTAGGCAAAAAGAAGAACACTTAACAGAACTGGGATTAGAAGAAGCAACATGTTTCATC  
A\_14\_P132844 TGAACGTAGCGTATTCTACCATTTCAATCCTCATTGCTTACAAATACAATGAGGGACAAA  
A\_14\_P100202 TCAAGATATATTTGATATCAGGGCTGTAGTTTGTGACCTCTGGGTAAAGGTAAAATTGGT  
CUST\_805\_PI426210822 GAGATGCACCGAACTGGACATGGCTCGAGGTGGGTGACCATTACT  
CUST\_5632\_PI426210822 CTTTATCCCTCCTCCTCAGCTGAGCATACCAATGGTGATGACAGA  
A\_16\_P17375262

AGTCCCAACTTGAATTTTATCCAACATAATCCACCTTCCCAAAAAACATGAATGAGAAAA  
CUST\_2322\_PI426210822 TATACTTGGGAACATGGAAGTGGTGTGAGTTCTGTTTTTTGCCGTATCAGCTT  
A\_18\_P22605461

CAATAAATTGAAGTTTCTTAATCTGCAGAACTGAGGACCAATCGCTTTAAAATGTGTGCC  
CUST\_9973\_PI426210822

GTATGTATTGACCTAACATAACATATCAATTACCAAAAAAAGTTGTAAAACACCAGGAGT  
A\_16\_P15609299

GATATCATGTTACCATTTTTGTTTCTAGGCAAGCATAATAGATACCCATTCCACCAAAGG  
CUST\_5989\_PI426210822

AGAAACCCCTCTATTAGTTTTATTACCATTTCTGAAAAACAGTCACTAGTTTTGGTAGTT  
A\_16\_P17992675

TCTGAACTTTCCATCATTCATCTTGCTATTCCCTTCTTATATACTAACCTCGAATCCAA  
A\_14\_P122662 AAGATACAGACTTACATTATTTGTCTCCAATGGTTGACTTGCCAGCATCTAAAAGTAAC  
A\_16\_P16191974

GGCTTTCCTAGATGCTAGTTATACCCCCAGTAACTATGAACAAGATGAAATTTTTACCC  
CUST\_1808\_PI426210822

TTATCAAGGATCCGTTTCAGGCTTTGATCTCACTCAGAATACTCTTAGGTACTATCAG  
A\_14\_P112985 TTACACCATGGCCTCATCTATCAAGAAGAGGAAGAAAAGGCTCTGCCTTATAC  
A\_16\_P20348659

AAAACAAATGGTGTATTGACTACATAGACAGAGATCCCTGAATAGTTTTCTGAACTCTCC  
A\_14\_P116461 TCAGTTCAAGGCTCTGTCTAATGAAGTTTATGCCCTGGAAAAATGTTTTAAAAGCAAGAT  
A\_14\_P117957 TGGGATGCTTCTCCATGATTTTTTGAATCTAGACTGGGCTGTTCTCTGTGTAA  
A\_14\_P113095 CTGGAAGAGAAAAGACAACAAGTTTATAAGTTAGACCTTGAAGGACAGCGACTACAAG  
A\_14\_P106176

CTCTTGCAAAAGGGCTAAGGAGGAAATGAAAAAACAAAAGAGAATGGATTGAAAGTCTAA  
A\_14\_P112549 TATTTCTCTGCGAGCATCACTAAATTCTGCTGTCATCAAGAGCAGATATATAGTAGTTGA  
A\_16\_P18684258

ATGTTCCCTTAGAGTAGGTATAAGAGGTAAGTCATGACAATATGATTACGTTGCTCCCTGA  
A\_16\_P17823844

TCTCGATATTGCAGTTTCAATTGGATTATATCCTAACGTGCTTTATAAAGTGTCAGGCCG  
A\_16\_P18650299

ACTCTACCACTAATGATGATAATCCATGAACACCTTCCAATCTGTTAGACACTCATGAAA  
A\_16\_P36116525

GCCATTTTCATGGACCTCTCAGCAATTTTTTATTTGTAGGTCATATCCAGTTGCACTTAAA  
A\_14\_P135916 ACATACCACATAAAGTATGACGGCATTTTCATCTACACTTAAAGTGACATAGCATACTGTGG  
A\_14\_P200311 CAATCTCCACAGGAACCTCTTCTTCATGCATTTGAAAGATGACATGAAGGAAATCT  
A\_14\_P109524 ATCATACTAGACTACATGTTATCACCCAAAATATGCTGGGTGCATTTGAGCCTTGATTAT  
A\_14\_P135955 GTTTTTTAAAATTATGATGGTTGACTCTTACCTGATGGACAAAGTAGGGAGTTGAATGTTG

A\_14\_P114266 AAGATGATATAATGCATTATAGCAAAATAGATACCACTGGTATAACCACAATGAAACACT  
A\_14\_P121235 CTATCTGGGTGGTGTCTTCTCCCCATAAAAGAATCCAAGCATCTTCATATTTTCATATATA  
CUST\_7639\_PI426210822 CTTTGTAGTGCTTTCTTTGTCCTGCTTCTCCAAATTCCCCAAGTGCAT  
A\_14\_P115593 CTCCAATTTTGACCTGTAGGAACTACCATGTGTTTTATTATTGTTACTTGGGGTCA  
A\_14\_P104615 GTTTTCTGTAACATTCTTTACGACATGAGAGGGGTGAAGTATCCCATTCCAATACTTTAA  
A\_14\_P127078 TAGATTTATCTGTAGACTCTCTAATAAGGAGTTTTATGGCCGTATGTTTCGTGTTTCCCC  
A\_14\_P134779 ACAAATGTGTGAAACGGGCAAATAAATCTCTACCCTAATTATCCTCTCATCATGCTATG  
A\_14\_P106217 ATTACAAACCGACATTGGATTTTCAGTTCATGCTCCTTGGAAATTTATTTTCTGAGACATCA  
A\_14\_P109343 TTCCCATGAGTTTCATCTCAGGAAATCCACCACAGGTGATTTCAAATACCTTATTTTAA  
CUST\_8383\_PI426210822 TTGGTATAATGGTTGTTATTGTGGTTGTCCTGCAGGAAGGTCACCTAACCA  
A\_16\_P16565674  
AAAGCACAGTATAATTAACCCCTTTATTTTGGGATGAGAAAATATGCTCAACAATGCCA  
A\_14\_P121440 CTTTTGTTGACTTCAATGAAGGGGAAATCAAGTTCATCCCCACTTATAAGTATGACTCTA  
CUST\_9530\_PI426210822  
TCTACATTCAAAGACATGCAAACAAATTTTCCACTTAGTCCATTTTTCTGTTCTCAGCAT  
A\_14\_P112159 AAATGAAGTCACTTTTCAAAGATAAGGCTCCAGGGCCCTGCAATTAACCTTCATATTTAA  
A\_14\_P127511  
TTCTAAGAAGGAGAGGACATAAAATAGGAAGAATGAGTCAGGAAAAGCAGTCAAACCTACT  
CUST\_1209\_PI426210822  
ATTACCTACCATATGTTCTTTGGTTTTATCAGAATGTGTGAGAAAACGAGAGCTTTGGTG  
A\_14\_P123044 AAACCCTGTGGCTGCATACCTAAACCCTGCTTGCCAACCAATTTTAA  
CUST\_4215\_PI426210822 GAGGACTGTTTGACAGTGTAGCCCAGGACTGTGCATGGGGATGAC  
A\_16\_P00590895  
AAAAACAAGCAAATTGGATCAATCACATTTCAAACCTTCATGCTCAGAAAGTGTCTTCAGG  
A\_14\_P121352 AACCTACTGCTGGTGATGAGTATACTTCCCATCAATTCCTTTTTCAAATTCCTTTTTTCA  
A\_14\_P127317 CTGACTAGTGGAGTTGCCATGGCACAAGTTCTTCATCAAATGTGAGTAGTG  
A\_14\_P130458 TAATAAGGAGATTTAAGATAAGACCCAATAAATGAATGTATTCTGTAATGCTTTTTAGGAT  
A\_14\_P200341 CTATGGAGTATGGGCACTGCTGGTATTTCTAAATCCTAAAAACAAGAGAAAAATAATAC  
A\_18\_P11835335  
AGTGTCGTAATTAGAGAGTGTATGAATGGCTCATAACTTCACTTCTAGTAAAGAAACCGT  
A\_14\_P201892 CATTGTAAATTTTCTGCCAAAAACAAGTAATCTGGGGTAAGCAAGTTCCTTTCTTATGT  
A\_14\_P105685 TCCTTAGCCCCATTTAAGTAACAAATGCTATTTCCATTTTAGTGCTAGCAGTGAAATGGA  
A\_14\_P139096 CAGATGAAGATGGAAAACCTGTTTGTAACCTGGCAGCAGCGTTCTAC  
A\_18\_P14801324  
ACTTGAGGCTTATAAACCAAGTAAACAATTTCTGAGGGTGTGATAATAACTGAAGGGCTA  
CUST\_715\_PI426210822 TTATGAAGCGCAATATGTGACTTACCCAGTGGCTCTAAAGCTCAGC  
A\_14\_P109715 GATGAACCAGTCTTTTTTGGCTCACTTTGCCCTGGATAAAATGACAAAATATAGTTTCTT  
A\_14\_P134458 TTTTGTAAATGTATGCAGGAGATTTTGTATACATGCATTTTGCCCTGGAACCTCTTGTTTT

A\_18\_P10082774

AGTCAAGGTTGTTTCTACAATAAGATTAATTCCAGTCGCTTAAATTCACATTGCCTTCCT

A\_16\_P00907049

ATAATTAGGTCTAGTGGCAACAGAAAAATGCAGACAGATCAATATGGATGGTTCATGCTCA

A\_14\_P201567 GTCATAGTAGGCAATTCATTTTCTGCATTTGTATTTGAGGTTGAAGTAATGGTGATGCC

CUST\_4202\_PI426210822 CTGATTCACCTTTGTCCGCTAAGTCTTGGGAGAGGTGATGTAACCAG

A\_16\_P16376780

AGGAACCGTATAACCAAATAATCACCATTCTACATCAGACCCCTTATAAAATCTACCATGA

A\_14\_P102102 GAAGCAATCCTATTACACCTATGCAGATGAATGAAATCACCAACTTTAGGCAACATGAAA

CUST\_5515\_PI426210822 CAAGTGGTGGTGGTATTGAGGGAGGTGAGTCAAATGTGAAGGTTG

A\_14\_P131305 TGGAGTTCATCTTTTATCCCTAAGTAATTGCTGACTTCTGCTCTGGGATTATAAACAGG

A\_18\_P22841780

ACCAACATCTGTTAGAATATTCCAAGTTGGTGCCAGGACTCATATTTTAGTAAACTGTAA

A\_14\_P135546 TGATATGTGGGCATTTGAGGTGAATTAAATTTTTACTTGAATTATTTTATGTTTTTCATAC

A\_16\_P16428833

CGTTATTACAAGGAAATCATTACTAACCTACAAAACCCCTTAACACTCAGTATATCCCACG

A\_18\_P13855326

ACAATGCTGTTTCAGAAATAGTGTGTTTTATTATTAATAACATATGCAATAAAAAATTCTAA

A\_14\_P113333 AAAAACATTTTTTTTAAATGTTGGTAACTTTTGCTTCTCTACCTGAACAAAGAGATGAAT

A\_16\_P17256413

AAGTTTGTGTAGCATATTTGTCTTGTTTAGGGGATCATTTAATTTCAAAGCACCTTGCTT

A\_14\_P123664 TAAATGGACTGCAGAATCGAGAGAGATCTGCTATTTCTTTGTGGAGACATCAATGTATTT

A\_16\_P18941577

ACCACTAATATTGCTATTTCCAGTATGAAAGTCCACAAGAGTTCTAAAAACCTGTCCACT

A\_16\_P01226192

AAATCCTTAGACACAAATTCACCCTTCTTAAAGAAACATTTTTTTTCAGTTGAATCAGCCT

A\_14\_P113881 CTCATTTACAAAAGTAAAGATCTCACAGCCCACATACTTTATCCATTCCTTTAATGGGCA

CUST\_4063\_PI426210822 ATCCACAGAAGTCATTTCTTCTTGTGGTACAGACATGACACCAC

A\_14\_P109936 GCATTCTGCTCAGCAGTCTTGTAATAGTCTATATGAAAGAGCCATGCTACTGTTG

CUST\_4566\_PI426210822 CTTGGGAAACGGCGAGGTCAAGTCAGCAGGGTGGATTGAGAATAT

A\_18\_P22841043 AGAGTGCCGCAAGGAGGAGGAGTCCCAGATCACTGGTTGACCTTC

A\_16\_P18653069

TTCCATCACTTGCTATCCTTTTATAATTCGAACTTACTGCCTAATCACAACCTCAAGATCT

CUST\_10017\_PI426210822 AATAGACCTGCAGGCATAATGGAGGGTGGTGAGTGCTGCGCAGTAA

CUST\_306\_PI426210822 GACGAGAGCAGATCTGACAGAGAAAAGGTGTTTCAGCCTACTTGGAT

CUST\_6601\_PI426210822

TAACTCAAGCCTGAGGTTTATTCTTTTAAATCTTCCAAAAGCAAACAGAAGAACAGAAATA

A\_14\_P135565 GAGTCACAGAAATCACCCCCAGAAATTTGCAGAACTCAACACCAGG

A\_14\_P130751 AGAAAAAATGTAGTGTAATTTACTTTCTTCTCTCTTGGCAAAGAAGCCATTCTAACTG  
A\_14\_P202445 CTCACTGCTTTGAACACCTAACGCACCTTCTTGGAAAGTGGGTCAGT  
A\_14\_P102765 ATTTGGGCCTCGAATTTATACAAGGTCTTTTCTCCAAATAGTATAAAAAAGTGGCAGCCA  
A\_14\_P124334 TTTACAATACCTTGGGAGGTCTAGTGCTAAGTGCCCTTATAAGAGGAACAC  
A\_14\_P108033 CATCTGATTGAAGAGCATGACAGAAACAAAATGTATTCACCAAGCATTTTAGGATTTGAC  
A\_14\_P201005 ATAAAAATGATATCGCTTTTTTAAAAAAGCAACTGCTAGGGAGAGAAGGAATTTGTCCCA  
A\_14\_P105664 GTAGGGATATAATATGTAAGGTTCTAAATTATAAATAGCACTGACCAGACTGCACCATT  
A\_16\_P20363669  
AAGGTTTTGCGTGTTAATGTTTTACCTATGGGTTTTTGTCTATACGTTCAATCTGGTTT  
A\_14\_P108736 ATGCCAGTTCACAGCAGTGGGGAGCCTTTTTTATTCATCTCTGTGAGTATAAAA  
A\_14\_P102521 ATTCAAGAATGTAACCTATTCATTTCCAGACTTTATGGCCACCCACATTTAGAAAGTGAT  
A\_14\_P127549 TTTTTTCTGGTTTGCTTTATTCAAGGACTAATGTTCCGACGTTTTTACAGTCAAATCTAG  
CUST\_1409\_PI426210822  
CTCCCATTTTTTGGAGACCTTGTCCATAAAGAGACCTTGAGACTGCTTTAAAAGATG  
A\_14\_P201685 ACCAAATTACCGAGTCAGTTC AAGGACAACACCTTTATTTTATTATATAAAAATCTATTAC  
A\_14\_P129935 GTGCTAATAACTCTCTTCTCCCTTGTGCTCAAAGTCTCCTTCTATGTATTTATTCTAGT  
A\_14\_P126634 CTGTTTCATCTTTGGCTTTGAGCCTCAGGATTCTATAGAATCAGAGGAGCG  
A\_16\_P41235076  
GCATTTTCCCACCTAGAATCGTTTTATTGTAAGCACCCATCTTTGAATTACGAGTGATAA  
A\_14\_P105680 CACTACAAGCAACATAACAAACATCATATTCTGAGGAAAGGTAATTTTCATCCATCAACCC  
A\_16\_P58424387 GTCCTGGGCCCCCATTTCCCTCCATCTCCTCACCTCTCAAACGTT  
A\_14\_P108527 GATTGGAACAATCTAAACAAGCACAGTCTGGGCAGCCATGATAATGTTAGAAATTTATCA  
A\_16\_P36541896  
CCAAGTGGCCATTTCTTAATACGTAACCATGAGATACTTGTTTAGCCTCTTAAATCACAG  
A\_18\_P16338127  
ATCTGCTCAAGATACCCAATAAAGTGTATTTGTTTCTCATTCTTCGGAAAAGTCTCCAC  
A\_18\_P16735481  
AACTCAGTGTACATAACCTCATTTTTTGTCTATGCTAAGATTTGTTTATACAGGAAGGGTGG  
CUST\_4374\_PI426210822 CTGGCCTTGCTTTCTTACAGGTCACGAAGTCTCTTTTAGGAATGCC  
A\_16\_P40017176  
AAGAGTATAGTGTCCAAATACCTTGTTTTTGAATTGGATCCATCAGCATTGAACTGTCTG  
A\_16\_P58424184  
ACCAGATGAAATACAACCTCAGCAATAACAATATTATGTTATTATGATACACACAATAACA  
A\_14\_P130579 CTTTTTCTTGTCTTTTTTCCAAGGCCACTATCCTTTTTGGTTTCAGGGCAAACCT  
A\_14\_P109333 CATTTTCCAAATCTTAGTTGCTATTATTACACTTGTCTGTTTGTGAGGCACACAGTGG  
A\_14\_P134570 ACTTAGTCCTTGATAATATCTGAGAATGTCGATTGTAATAGATTAGAGTCTCAAGGGCC  
CUST\_8818\_PI426210822 ACTCTGTTAGTGGCATCCTCAGACACACAGTCACCCCTTGTATCT  
A\_14\_P136640 CCAACTGCTCTTCTGAATATTCCAGGATCTTTGGTATAATCAATATCTACAAGGAAATGG



A\_16\_P58424415 AAGATTCATGTGAGCCTCTAAACAGTCTAGTGAGTTAGGCAAGGTAGAACCCT  
A\_14\_P139159 GATTCCATCATGCAAAGATTTGTGGTCTTGTGTTTGTATCTGTGACACTGTATAATTTCC  
A\_14\_P137629 TTAATCCCTCCAGGAAAGAAAGGAGAGGCTATCCAAATTTGAATCTATTTCGTCATTCAAT  
CUST\_4367\_PI426210822 GCCTGGATCATGAAAGAGGTGTTTCTAGAAAAGCTCTGCAAAGGACTTTC  
A\_14\_P134143 AATTCTTTATAGAGGCTTCCATTGGGCATAATATTTTCGGAAATGTTTTTCTATCCGGGAA  
A\_14\_P100827 TCTTGGAAAGTGCACACCTTTAATTCATTTTTTGATCTCCCAAAAATTGTTACAGTAGG  
A\_14\_P122665 CTCACTAGATGGCACTTAGGATATTTTTCAACCATCTTCTGACCAAAAATTGTATGTGTT  
A\_14\_P123445 AGAACTGTTGTAGTGGCTGGTGACAGAAACCTGACTTAATCAGGTTTTATTTTTGTGT  
A\_14\_P115670 CTGGCAGACAAGAAGGATAAATACTCTCATTATGATTTTAGCATGCCCACTTAGATCTA  
A\_14\_P101029 AATTCTGTTTTTTTATCTCACCTCTGTAGATGTTTTTATACAGTGTCCCGGAAAGAGGCA  
A\_14\_P131390 TATCTATCTTGATTTTGCTCTCAAAGCACCCACAAAGATTGATAATCAGCAACTGAAACC  
A\_14\_P103067 GCCATCTATGGCATTATAATTTCTTTATGGCCCTTTACAGAATATACTGGCATCTCTGG  
A\_18\_P15908479  
ACAGCCGATCCAAGTTTATTTAACCACCTAAAATTCAAATAGAAAAGCAAATGTTGACCAA  
A\_16\_P37060173  
GCAAACCTGCACTCTTAGTATACTCCTGTAAGATTATAACCAGAATTCATAAGTTCTCTGA  
A\_14\_P130206 ACTAAGAGACCAACTTACATTAATAAGTTCAACCTCCCAGATTTTTTTTCAACAGGTCCAT  
A\_14\_P106428 TCAAACAGAGTTTGTGACTGAAAAATGGATTTTTGTGCTTAATCAGACTGGATGTCAAC  
A\_14\_P121978 AGACTTAAAATCACTGTTCCACCTACTCAGAGTCACTTATCTTAAACAAGTCCAAAAGAAC  
A\_14\_P118520 ACCTAACAAATCACACCTGGTCATCCTAAATTCTGTTTGAATGCTACATGTTCCATTTTT  
A\_16\_P58424481 ACCAAGGACTGGAGTGGTGGAAACCCTCGTCCTTCATTAACACAAG  
A\_14\_P119161  
GAGAAACAAAACAGAACTTTAAAGCCCCTGAACTAGATAGTGAATGAGAGACAAGTTTG  
A\_18\_P15528703  
CAGTTCACAGTTCTTGATACTTCCTTTAACCTCAAAAAGCATATGAACATTGACTTTGGC  
CUST\_9526\_PI426210822  
TGAGTAGTTATTTTCATGTTTTCTTAAAACAATTATTGTATTGAACTAAAATAAACTAGG  
A\_14\_P133997 CTGCTGAGAACTCAACATTTCTAAGATGCTGAGATTATGTATCCTATCACTTCCAGAAAC  
A\_14\_P138502 ACAATGATCTTATCACGAAAGACGAAGAATTCTATACACAGAATGGCGTTCTGTATATGT  
A\_14\_P103874 TCTGTTTTCCCAACAAGGTTTCTCTACATATCATACTTGAAGGATACTGAAGTTGCTAT  
A\_14\_P200950 AACTGAAGGCACAGTATTATTAGAAAAGTGTAACATTTTTCATTTTCTTTTTACTCTACAT  
A\_16\_P01650997  
CTCCCTTCTGTATACACTTTCAATCCTAGATATGCTTTTTTAGATGGCTTACCAGTTGGAT  
A\_14\_P122983 GATGGTAGCCAGAGGTGGATTACTTGACAGTTCTATAGAAGGTTAAGACACAAATGTTA  
A\_14\_P135497 GAGTGCCTAAACTTGTCCATTTCCACCAAGAAAAAAGTTTCATAGCAACCTTCCTT  
A\_18\_P16611845  
ACACATCACTACCATTTCATATTCATCATTACCTAGACCTGAGTAAAATAACTGCATCT  
A\_14\_P114516 ACATTTCCAAATGAACTTGCACCTGTTATATTATAATTGGAAGTGCAGTCAGCAGATGCT

A\_18\_P10309986

ACCTTAGTCATTCCAGTGTTTAACTTCTGACTCAAGAATTTTAAAATTGCTAACGTAA

A\_18\_P22840519

GCAGAACTTAATTAATGTTGCTGTTTGGATTTTTTTCAAGTGTATTTGAATGCAGACAAG

CUST\_7846\_PI426210822 GATTTAGGGTAGTGTCTACTTGGGACAGTTGTGGGTGTTGCTTCTG

CUST\_5681\_PI426210822 ACTGTTTGCACAGCCTGGACATTAGGTAATAGTTTCCCGGCTGAG

A\_16\_P16191055

ATACGGTTTATAATCCGCACTGCTGCTATTTTTTTTCTATTTGCCCTAAATGTCCAT

A\_16\_P01522740

GGGTGGGCTATTAATAACGGTTTTATAGCATCAATTTGCAAAAATATAAGAGGTGGC

A\_14\_P118494

AGGCAACAAAGAGAGCAAAGAGAAAGATAAAGATGGAGTCCTCAAAGAATAAACATGATT

A\_16\_P16191419

CCTGAGGCATCCTTGCAACATTAGAACCAGAACAACATTTTCATTATTTTATGTAAACGG

A\_16\_P36230969

GGGATTCGAAACTTGGATTTTCTGAGAATGTATTGCAGAAGAACAATAAGCCAGTAAA

A\_14\_P106654 GCCTGTGTCAACTGAATATTTTTATGTGGTTTTGTATTTGTGTTTCCTTTTGGTTCTTCC

A\_14\_P109613 ACATATAACCATTGTTGGTATGAAACATGCCATTTGTTGGTATGAAACATTCCATCATT

CUST\_5429\_PI426210822 CACTTGGTCCCTGAACTTGCTCTGTTCTAGACTGTTTTAGAG

A\_14\_P101335

ATATTTGTTTCCATGGCAGATCAGTGGCTTGTTACTAGAAGGATGTAGTTTTGATGGAAA

A\_16\_P19170535

AAGTCCCAGGTTTCATTAGTTTCTGATTACTTAAGGCTAACCAGACAAATACTTTTTTCC

A\_14\_P129474 CATGGAGTTTGAGTTGAACTGACTTCACCTGTTTTTGTGAATTTAGAGATGACTTATTG

A\_14\_P113504 CATCTATTTTGGCCTTGTGGCACTGATTAGCCTTTCTTCCATGGTCAACTTCTATA

CUST\_7501\_PI426210822

GTGTGCAAATGATGAGCTAATTTTCCACTAAAGTAAGCACTGGTATGGTACATAGTATG

A\_14\_P112537 TATGAGAACACATAGACTCTGAAGCATAACCAACAAGGTCTGTCTTTTCATTCTCCATTTT

CUST\_9896\_PI426210822 GGACAGTGGTGTATTGGGGAGAGTTATTTGGTAGCAGAAGACGCAATA

A\_16\_P16461082

AAAATTCCTCTGAATTTACTTACTCCTCTACTTACTCCTAGCATCTACCCATTTGTCTG

A\_14\_P108290 CTCTCCAGGTGTTTCTCCAGAAATATATGTTTCATGAAATTCTGAACCATCATCAAAA

A\_14\_P126217 TTAATCTACCTCCTGGGTATTTACATCGCCACATGTTCAAAGAAATCATCAACTAATA

A\_14\_P135361 ATTTTTTGGGCCATTTACATTTAGGAAAAATAATCATTTTACAGGTGGAGTGACAGAGA

A\_16\_P39851705

ATCTCCCTATGCCATGAAATAAATGCCAAAATGAAAACATCCTACAGATAAACATATGCT

A\_14\_P200290 GAGAGTATGTGGCTGAAATCTTGCCCAAGTATGTCCAACAAGTTCAGGTAATAC

A\_14\_P133775 GAATAACTCAACAACTCCTCTAACAATAGCCTGGCTCTTACAAGTCCTTATAAGACATT

A\_14\_P129606 GCCTCTTTATTTACATCCTTTAAGTAATATCCCTTGAAAACATTCCAATTAGACCGCAT

A\_16\_P16606264

TGGTCTATGCACTTCGTAAACAAATCCATCAGCATCATATTTAGAATAGTGTCTGACA  
CUST\_2199\_PI426210822 GGTCATGATAAAAGCCAGACACTCGTGGGATGGCCTGTAGGATATA  
A\_14\_P119319 TTATAAAATGCACTTCCTGACAACAGTGCAACAAAGGCTTACTGTGTTTGTCTTCT  
A\_14\_P108671 GTGTGTTTATTTTTCTATTTTTCCCATGTCCAAACCCACATATGTGAATCTTTGCTG  
A\_14\_P108268 CTGGGTATTCTCAAATATCAACAGTAATATGTTCCCTTTGCTGAGAAAGATCGTTTTTGGG  
CUST\_8270\_PI426210822

GCACTAAACATTGAAAATGGATGAGTTGTTGTCTATTCCGACTTAGTCTCAAAAATCTGC  
CUST\_5222\_PI426210822

AAAACTCTAATCTGATTGAGAAATTTTCAGAAACAAGGTACACTGATTTTCTTACCACT  
A\_18\_P14135290

GTGGTCTTCTATATGTCAGTTCAGACTAACCTGATCTGATGCTTGTAGACTAGTTATCT  
A\_14\_P107330 CTGCAGAATCTTCTTACAGAGAAGTTGTTTTGAATGCTACCTACATATCACTGCAGGTAA  
A\_14\_P128722 CGTGTCTTTCCACATTAAGTAGCAGGAGATTCCCTGAGTAAAAGGCATTTTCTTAAGTA  
A\_14\_P105061 CTTTAATAACATCAGCCTTAGATACAAAGGGAATCACTTATTCTGGCAATGGAAAGCAA  
A\_16\_P20240368

ACCCAAATAATCCATCTTAAATACATCACCCCGCTTTAATAACTTCTTCTTTCCAGATA  
A\_16\_P19341770

AAAACCTGCTTCAGATACATTTGCTATTTGCTACCTAGAATCATGTCCTCTCAATCCTACC  
CUST\_861\_PI426210822 CAGTGAACAGCAATGAGGACCACAGGGAAGATTTAGCAAAGGGAG  
A\_16\_P15505177

GCTCTAACCATCAAATGAAATATTTACCCTTTTGAACTTTCCTATTCCCATCCATTTCCC  
A\_14\_P101974 TTCCAAGGAATGTGTTTCTAATTTGGTTTCAAAGCACACTGGTTCCCACTTTTA  
A\_14\_P130718 ACATTGGGCTAGATCTTGATAAGTGGACATTAAGGATTCATTCAACAACACTACAAATGAG  
CUST\_3474\_PI426210822 ACAGGAATTCCACTCAGCTTGCAGGAATTGAGACCCCAGGACAGG  
A\_14\_P104204 GATATGTAATGGCATCGAGTTCAGTCCTTAACTGATGCAAACATAGTCTCTTAATCTGG  
A\_14\_P112558 CTATAGACTTCAAGTTTCAAACAGGCATCATTTCTTCTTTGGAAGATGTCTGTGCCTTA  
CUST\_8552\_PI426210822 CTCAGATACCCAAGTGGTGTGAGCTGGCTGCACTCTGTTCTTTGG  
A\_14\_P131245 AGTAAGTGAGAATGGCAAATAGACGCAAATGGCAAAGGAGAAGTAAATAGGTGACTG  
A\_18\_P15814546

GCAGACAGGATTGTATTACTTAAACTCAGTATGGAAAGGTATCTGAAAATAATGGCAGCC  
A\_14\_P117548 ACTAAGCACTTTAGTTACAATACATTATTCAACCTCATGCCATTCCTGGGCAGTAAATGA  
A\_14\_P131741 ATGTCGAGATCTGGGGTGGATATAAGAGAAAAGGAGATGAAGCAGCCAT  
A\_16\_P01371685

CCCTACCATGCCTCATAAAATAGAATAAACATGCTTCACATTCATTACATTTCTTGCAGC  
A\_16\_P00309767

AAATATCACCCATTCCGAAGTTCAATGTAAGAACAACCTTTCTAAGAGACGCTCAGATTTCG  
A\_14\_P120529 GTCATCTTGAAATTTCTGGTTAAATCCTACAGGGGAGATTTGAAATGGAATACTTTGATT  
CUST\_8542\_PI426210822 AACAAAGACATTTAAGTCACTCAGATTCTGAAGGTACCCCAAACCAGGGATA

A\_14\_P123228

ACAAAATCCTGGTGAAGAATCATATCAAAGATGAGAAGCAGGGAGTTCAAAGGTAAACAA

A\_14\_P108966 ACATATCCTTTTTTGGTAACTGTTCCAGGAACAGAATTTGTATGTGATGAAGTCCAAAGA

A\_14\_P114458 CAAAGATTTAGGCTTACTTTTTGCTGCTGTCTTCTTCACTGTCAATTCTTTTTAGGAAC

A\_16\_P19783580

ATGTTTCTGGACAGTCCTTATTTCAATTCCTCTTTGCTTATAAACTGCTGATTCTTCCAA

A\_16\_P03003065

AAAAACCAGCCTAGTTTTCAATTCACAAAGGTAAATCACAAAAGACGTAAGGACTCAGT

A\_14\_P110136 TAAAGATGTCCCCATTACCAGGGAGTAATCAAAGATAGAAGCATTCTTTAACCTAACAA

A\_14\_P109878 CTTGAGAAGCCTGAAGTCTGGTCAGTAGATCAGTGGTTAGAAAATAATATAGTGTGTGTTG

A\_14\_P200957 GTGTTCAACAACCTTCATCCAGCCCTTATACAAAGACCTTTCGGGTAAGTTGATTAA

A\_14\_P138034 CTCCGCATTGGTAATTAACGATTGCAAACCCATTTATGCAACACTTCTCTTCTAAAAAT

A\_14\_P135239 CCTCTGATTGTTACCATTTTAAAATAGAGAAAGTCCATAGTGATGCCTTTCCTTTCAGTG

A\_16\_P02808659

CAGAGGCCACATACTATAGTCATTTCTTCGGTAAAAGTCTAATTGACGTCAATGACTTTG

A\_14\_P122693 TAGTTAAGAGAACACAGATTCTTTTCTCAATATTGCAGAGACAGAGGGATGCTCAAACT

A\_14\_P123471 CTACCTGGTGCTCCCTGAAAATGACTACTCCTTCAATTATGCATTCTTAAAATAGAAGTG

A\_16\_P41877375

AAAAATACCTTCACCCTGACATTTATCATTCTAAGGTTCTACAATTCACTCTTTAGAACA

A\_14\_P110037 AGTGGCATTGTATTCCAACCTAACTGTCCTGAGAAGATACAGTATGAACTAAAAGTCCAA

A\_14\_P118867 CTGTGTGACTACCTTCCAAAGACCAACATCTATCATGGTCAGATTATTAACATGTGATTT

A\_14\_P106919 TTAAATATGCTTACCCAAGGCAGACTTAGATAACTGTGAAGGGGGAAAGACTAAAATGG

CUST\_8805\_PI426210822 AAGGAAATCTTAATGGCCAAAGCCATAGGTCCAAAACCCGGCGTT

A\_18\_P22840163 CTCTACCCCTTCACCTCTCCATGCCTCACAAAGTTGGACTGTCTT

A\_16\_P19654666

AAAAATGTAGCCAGTATGCATATCTGACAAAACTCGACAAGTAGGAATGAAAGCAGTGT

A\_14\_P115209 ATTGAAGCCTTCGGCTCCAAATTCATTCTTGACCTCATACTGAACAAGTGAGT

A\_14\_P121091 TTTATAATACTGTGGTCCAGATCGCCTGTTTTATTATGAGTTGTGACAATCCAATGTGGA

A\_16\_P16179214

AAACCTTAAGGTCCTCTACATTCTAAAACCTCGTTCAATGAATGCATTCTCCATAACCAAAG

A\_14\_P108591 CTGTCTTGATGCTTCTCCATCTCAAGCAGGTTTCATTAAATCCTGAAATGTTACTGATG

A\_14\_P100988 CTGGAAACTGGTTCTATCAACGTTGTAGTGTCCAAATAGTGTATTTTGTAGAATTCCAGT

A\_14\_P119683 ATAGATGCCCTTTAAATATCAAAGGGAACAGTTACGGAATACTTAACAGGTTTCAGGTGT

A\_16\_P00685476

CTTGATCTTTTTTATTTAAATCTTTGTCTTCTGAAGCATCTTAAAGTAGTATCCAGGAGA

A\_16\_P17801419

GCAGTATCACATCTAGTAATAGTCCAACATCTACTTTACCTTGTCATTGTTACTCTCCCG

A\_16\_P03367608

ACAGGGGATGCTAATTAAGTGATGATATAGTGGCAGTTATAGAAAACACTCTCTAGACCA  
A\_18\_P13118757  
AAACAAGTTGTCTGGACATTGTTGATCCTCATTAAATGCTGGTTTCAATTCCCATAAATG  
A\_18\_P22841546 GTATTTTATCCCAGGGAAACAGGTTTTCCCTTAAGGCACTAGGCAAAGTGTTTTTGT  
A\_14\_P127149 CTTATCATTTGGCACCTTTAGTTCACCAAAGGTATCATATTCTATCCGGAAGGAATTTTG  
A\_14\_P136697 ACGTGGTATCCTTTATCTGGCTTCCTTCTTTGCGTATTAGTTTGTAAAGGACTCTATAT  
A\_14\_P100310 AAGTTCGTTAAGTACTGATGGGAATGAAAAGGCCATCAGAAGTATCCTTATTCAGATAGAAA  
A\_14\_P139642 GGCACAGATGGTCACCTTTTTATTAGGATATTGGCAGCATGAGGGTCTAAG  
CUST\_2188\_PI426210822 ATGCACCCACACCCTCCCCTGCCAACCAGTGTTTTCTTGATGTTGTA  
A\_14\_P113469 CCTTGAATGCCATGCCAAGGAGTTAAATCTTCACTTATAAACAGTAAGAACTGCTTAAC  
A\_14\_P108580 CTCTTACACAAGGAGATCCATTCTGAGGAAACATTGATATCCATATGGTTTTTGTTCATCA  
A\_18\_P22839588 GAGTATTGGGGTGTAAGAGCAGCCCCCTTAGAAAAATGGGGGACTAAATT  
A\_14\_P113815 TCTGAGCATAAATTTTCATGAGAATTATGGAGACACTGTTCTCAGCAGAATCAGAGGAG  
A\_14\_P112619 AGTTAGACTCTTACCATAACAGTTCACACCAACATCTTCTCCATGATAACAGTTATGGCT  
A\_14\_P123506 ACCTTTAAGTTATAATGCATCAAATGCTGTTCCCTCCATTGGAAAACAGCCATTTTCATGAA  
A\_16\_P15842761  
ACAGATACTTCAGGCTACAGTGATAGTTCCTCAATTTCTACGGTTATTTTCTCCTTATGA  
A\_16\_P17050329  
GTTTCAGGTGAATCATCAGATTCCAAATTCAAGAGGGTTAGAACATATGTCAGGAAAGATC  
A\_16\_P40050778  
TGTATTCTACCTCCTTAATATTGAGATCAACCGTCACTTATTAATAGCAGCGAGTTTGGG  
CUST\_4571\_PI426210822 TTTGGAGAACAGGGTGGATGGTGCCTCTGAAGGCAATGGAGTTAA  
A\_18\_P15807999  
TTCCTACCTAAGTAGTTACAGTAAAAGAAGGTTGTTCTCATAATCACCACGAATGATGCC  
A\_16\_P15568512  
AAAAGTCAAGGTTGTAACCTAGCAAATACCTACTTAATCGATGTGTAGAAACCAGAGTGC  
A\_16\_P16009218  
AAGGACCAGATAATGTGAGAATGTCAAAATGCTATTGAAACTCCTCAAATGTAAGAAGCC  
A\_14\_P108848 TCCAGAGTCTTCTATTATAGGCATACAGCCTTAAAATTAGTTCACACAGAGCAGTGATT  
A\_18\_P22841221 CACCACTCTGATTTGGATTTAGATGGGCTCAGGAATTTTGTGGGAATCCTTTT  
A\_14\_P118476 TGTATCTGTAGCCTTTGGAGCACCTATAGGTGGAGTATTATTCAGCCTTGAAGAG  
CUST\_7752\_PI426210822 CAGTGCCCTAACTTCTGAAACAAAAGAAGGAATTGAGTGCTGGATAGGC  
A\_14\_P136220 AAATATATTGACCTGCTCTTACTGGAACCTACTTAGAAAACCAAGGAGATTTGTTCCCTTG  
A\_16\_P30952511 GTTGCCACAACACAGGAGTGCCCTCCAGTGGAACACTGTGCTTCT  
A\_16\_P19789955  
TTTAGTTTGTATCAACCTAGGAAAGTTTCTCCAACATATCTTATAGGACATCGCTGACCC  
A\_14\_P106863 CTTCTCCAAAATTAATTAAGCAAACTTACCCATATCCTCTGCCTTCTAAAATGACAGG  
A\_14\_P133035 CTCATTCGGGACCATCCTTTTCTTCTTTCAGCATGTGTTTATTGACTATAAACTAAAGTG

A\_14\_P104691 TCGGACTTACCAAACAATCCCAAATGTCATTGGCAACAATAACCAAACTAATAGAGAAT  
A\_14\_P116119 ACTGTCTTTGGCAATGTTTTCTGACTTGTTCCTAACTTAATTAGAATTGGAAAACAGCC  
A\_14\_P131121 TCCACTGTTACCGCGGTGACTAGTGGAACAGTAGGTATGATTTAGTCAG  
A\_14\_P110753 CATATCATATTAACCTTACCACGTTGCAGAGTGTAAGTTCCAAGAACATGCATTTGGT  
A\_14\_P134154 GTAAATCCCTTGGAAATCCGCCAAAATAAGTCTGCCTGGGTTTCAGAATTTATGAT  
A\_16\_P37853530  
TCCACTGCTACAAATTACCTAAGATCATTCTGAACACATAAATTGATTCCACGCTTTTGA  
A\_14\_P112192 ATTCTTTTAATAAGCCTTCTACGAATTTACAGTTGGTCTGTGCAATAACTGCAGGAGAGA  
A\_14\_P106697 AGTATCACTATGGTGTAAGTACTCAAACTTCATAGAAGGCAGGTAATTTATTCCTGGTT  
A\_14\_P124557 CTGGTCCAGAGATATCTAGTAACTTCCCCAAGTTATAACAGAGTTGGTAGTGAAGAGTT  
A\_14\_P108571 GTGTGTGTTTTTTCCCCAGATCAATGAAAACACAGTTTTATGAAGGTATTTTTATTCC  
A\_14\_P101634 CACAATATCCTAACACCAGAAAACACAAAAGACACCTAAATCTAGCAAATTTGCCATGG  
CUST\_802\_PI426210822 CTTCAAGTGAAGTCTCCTGGGGCTGTGTTTAAGTGCCGTGTTTACA  
A\_14\_P120258 TGCAGTTAAGTCATCCGTGTATATCAATCTAAAATAAAGGTTTGAGCCTTTGACCATGC  
A\_14\_P137493 AATCTGAATGTTTTAAGGTATAGTTTTTCAACTACTAACAGATATGGAGGAGGGGGTG  
A\_14\_P133544 AGAGGTTAAGCAAACCATCCCAAATTTATAGATAATGAGCACTAGACGCATCTGAAAAG  
A\_16\_P21609062  
AATGACACCATTCTAAACAACCTTTATAACACGTTTTACCTTATACTTCCCTCAGCATTGT  
A\_16\_P15580346  
ACACTTTTCAAGAATGTATAGCATAGACCCATCTAATTGTTTCCTTTTCTTTCCATGCACC  
A\_14\_P138598 CTTAGATAATCCTCTGAATTAAGGCATTCTTACTACTTCTGAACACAGAAAACGCCTGG  
CUST\_6149\_PI426210822 CATTAGCCGTGTAATTTTTTTCCCTTCATTGTCTGCACCAGCTCTGAA  
CUST\_4435\_PI426210822 CACCTCTGTCAATTTAGGGGAGACTGAGCATGGCTGGTAAATCTCAGT  
A\_14\_P117761 GTCACTATCATCATTCTTCAGGCATGTTTTGAAAGTTTTGTTTTGTTTTGGCTCAGTTTG  
A\_18\_P22840706  
TCTCCTGAGGTTTLAGGAAATGGTGCTATGATATAGATTAGTTTTCTATGAATAACTTGGC  
A\_14\_P119423 CCATTAATAATTGCTTCTAAGTGATAGTGCATACTTGGCAGGGAATGGGAGCATTATAG  
A\_14\_P105154 CTAATCTCTTCTAAGGCTTGTCTTTCCATTCCACATTTCTAATTTGTTCTTGTGTTGCTG  
A\_18\_P13716842  
AAATCCTAATGGAACTCACCTATGTAATGGGCTTGAATTTGACTACACAACTCAGATG  
A\_18\_P18164260  
TTAAGAATGTCTTACCAGTTATGTTGCCAAAAGTTCCTTTTAAGTTAGCGTCTTCACAG  
A\_16\_P00526915  
CACTACCTTATTACCAATCGTATCTGTAGGATTTGCTTAGACTATCTGGTGGTTCTTAGG  
A\_16\_P16191325 TATAATTTCTTCTGCATTCTCTGCCTATTGCTTGAAGGACAGTGTGTCAGCAGTC  
A\_14\_P109555 CAACTGCTCTTCACAAAGTCATCTAGGAGCAGAGAAAATTGCAGACCAGATC  
A\_14\_P118513 AACCATTTGACAGAACAATGTCTATCTCGTCATCTTTTATCCTCGTTACTGCTATTTGCA  
A\_14\_P132416 ACTTGTTTCATCCACTCCATCATCCAGAAAGATGTCTCTCACATCATTAATGACATCTTC

A\_14\_P112056 CTTCCGAGTCTTTCTGTTAATACTTGTATCCCACATTCTGGTAAGCGTTTGGTGAATAAA  
A\_14\_P201832 CTGCTGTAAGTAAAGATGATTCCATTATTTCAAGTCTTGATGTCACTGATATTGCACCAA  
A\_14\_P118685 ATAAAGACAAATACGTGGAGATGGGATTAGTGTGTGAATAGTCAAGAGTATTCATGCACT  
A\_14\_P117192

TACACAGACTCCATCAAGACAGAAAAAACCCTGAAAATTAATCTGAGACGACCTACC

A\_14\_P107861 CTAAACATGACTGCTGGAACAAAAATAACCTGGCAATTAATGTTCCCTGAGTTATTAGGCA  
CUST\_2290\_PI426210822

GATGGGTCAGTGGTTTTTCTTACGAGCATAAGGTAGAAACTTTTTTGGAACTAAATTCTT

A\_14\_P137803 GTCCATAATTCCAATTGTCTCCATAATTTCCCTTCTTTGGAAAAGTGTCTTCTCCATAT  
A\_14\_P116045 TATTCACTTCTCCCATTTAGATTCTCAACACTACTATACCCCTAACCCAGAGTAAGTCACA  
A\_14\_P108642 CTGTAACCTCTAAATTTCAATGGATTCTTGGTCTTTGCTCTTCACTTGCCCTCTCATTACA  
A\_14\_P202324 GCAGACCATACTTAAATTTCCACATCTCCATGATTGAAGGGAATATAAAGATGAAACTGA  
CUST\_8913\_PI426210822 GTTTTACAGGGCAGCCTGGTGGTGGTGGCCTGCACTCTTGACTTT

A\_14\_P107204 GAAAATTCTAAGAATTTGCATCAAAGGATATCCAAGGCACAAATCTATGTGAGTTTTTTTG

A\_14\_P105366 GCCTTTAGTTCTCGCCTTTACCTTGAAACAATGGTCATTCCTTCATTCATATGAATAACT

A\_14\_P112837 GTGATCAAGCAGAGATCCAAATGTCTCATTCTCCAGATAATATAGGCATTGCACTC

CUST\_2902\_PI426210822 CTTACAGCTACATGACCTGCTCTCTGAGGATGGTTTTGAGAGCCATAA

A\_14\_P124696 ACTTTGAACACTCTATTTATTGAATTGTGACCCACATGGAATAACTCCATGAAGACAAGT

A\_14\_P127542 CAAGTCTTCCAATGATATGCTATTTTCTTGTCATTGCCTTATGACTTCCAGCAGTAAGTT

CUST\_8428\_PI426210822 TTCTGACCTCAACTTCAGAGTTGCAGATTCCCTGGATTCTCTCTCTAG

A\_14\_P128506 CGCAATGAGCAATTTGCCCTGTGAAAATGTTTGGCTCTATATTTAAGAAGATAACTGTTG

A\_18\_P14137370 GTAGAAATGCTGCATTGAGCCACAGCCCTCCCTCTGCAGCCTGTG

A\_14\_P133065 GATTATCAGCCTAGTCATGTAAAGTCTAGAAGTTCCCTTTATTTGCTCATCACCTTTCCCTT

A\_14\_P120318 TTACCACTACTGTCATGTTGTGGTAAGAAAAATCCAGCACCTGAAGATGTGACAAA

A\_14\_P130137 CTTTTACAGCTCCCCTTTTACACACTTACTGATAAAGGGACGAGGAGAAATAGT

CUST\_4760\_PI426210822 TAGCCCCACACATACTCTTTGTTTTTCCATTCTTCCAAGCAGGCC

A\_14\_P105501 CTTACAAATAAAGCCATAGAGGTGGTAGTGAACAGAATTTTGGGAACAGTATACCTAGAG

A\_16\_P17960804

GTTATCAGACTTCAAATAACACAACAGAAATAATAATGAGACCAAAGACAAGATTCCCTG

A\_14\_P125435 CAGTGTGTTGGCAGCGGACTCATAAATGTTGCTCATCTTCTTCATTCTGTTTTIA

A\_14\_P120487 CAAACTAGGGGTTTCTCATCCTAAACTATTTATGGATGAAATGGTGACAAATGTGCATCA

A\_16\_P18269388

AAATATCTGGTCTGTTCCAATTCTTTTTCACTGGACTGACACTACAACCTCACCATTCTT

A\_16\_P17205845

CCCTGAATCCTAATATCCCCTAACTTCATTCCCTGATACCTACATGTAAACTATCCTCAT

A\_14\_P120596 AGAAAAGAATAAGTCTTACCAATGGCTTCCAACATTTTTTTCAAAGTTCAGTGTCTTCT

A\_14\_P200782 GTCAACTCTTCTACTTCTGCGAAACAGGAGAAATTGTATTTAACCATGTAAACCCAT

A\_14\_P134109 CTAAATATAATCTGAGATCACCCACCATAATATGGAAGTGAGGTAGGTGAGATTGGATG

A\_16\_P37541022

ACCCCACTAGCAAATTTAATAATCTTTGAACAAACATTCTCACTTTCAACAAACAGAACC

A\_16\_P58424202 GATTTGCCTTTACTCAGAGGGGGATGGGAGTGTGTGAGGGATCTG

A\_14\_P106318 CTGGATTTCGAAAACAAAACAGAATACATTCCAGTGTAATTTAGACTGTAGTCTCCTCCAT

A\_16\_P17085847

AAGCGCTATTGTCAATTATAAAAAGGCTCTCTCTTTTTCTTAATAAGTCCTCCATACCACT

A\_14\_P117115 GTAAGTTCAGATGTCTAACATCATGCTGCTTGTGAACTGTTTAAACAAAAGGAATTATCA

A\_14\_P108387 GTCGGCGGGTGTCTTTCTCTTTTTACTGTATTTAACTACATTAATCGTGCTCAGTATTTTCG

A\_14\_P127367 TCTAAATCTGGGGGCACCTCTTTATTCTCTGTGTCTTTATCTCTAGCAATATCTCTG

CUST\_7840\_PI426210822 GAATTCCCAGTGAGGTATTGGGCATTACAAGAGAACTGGAAACAGAGTTAG

A\_14\_P115470 AAGGTCTTCTTGTGTCCTGATGAAAAATATGTGCTTGAAATGAGAACTTTGATCTCTGC

CUST\_5168\_PI426210822

TTAAAAGGACAAAGTAAAACCTCCAAGTTGAACTTAATGGCAAGGAAGTGTCAAATGAGA

A\_16\_P16400029

AATCCAAGGAAAAACAAGTGTGTGATCACTTGAAAGATGACCCTGTATTTCTAACTGGAT

A\_14\_P119862 CAGTCTATAGACCCTCTTAGACTATAGTTGACTTAGTGGAGTGTGGAGTAGGTTATTTGA

CUST\_7103\_PI426210822 ACTGGGGCTGGGAAGGTGGAAATAGCATGGTCTATCCTGTTTTCT

A\_14\_P125626 CTTTAGTTGTAATTGGTTGAGGGTTGGGCAATTCGAAGTTATGATAGGCTGCTAAAAGT

A\_14\_P116265 TGAGACTTTCTCCTTTAAAAAAAAGAAAGAAAATACCTGCAAGTTCTCCAAGGGATGTC

CUST\_4552\_PI426210822

TGGGGTTTTTAAAAGAAGGCAAATATATAGAGTGGGTTTTGGAGCCCTGAACTTA

A\_14\_P116911 CTTGGGAAATTTTGCTTATATGTAAATTGTTTTGCAGGTCTATTTGACTGGGACTTGACC

A\_14\_P124826 CCACTCATTGTGACACCCGATGGTGAAATGCTGCATTATTATTTATGGTGTGTAATAATC

A\_16\_P19325379

AACCAAACCAGATGTAACCTCAAACACCAACTACTTAATCATAAATTCCAGTGTAGTCCC

A\_16\_P20541709

AAATGAAACTACCAATCTCCATTGATACCTACGTTGATAGTATTCAAGCCCCAAACAAAC

A\_14\_P114558 TTATTGTCTCTAATGCAGCCATTTCTCTTATAGTGCAGGCTACTTAATTCTATTCCCCC

CUST\_1322\_PI426210822

TTTGAAAGACAGAACTTTCTCAAATGGGTAATATGAAGGGAGATTATTAGGAAGAATATA

CUST\_7871\_PI426210822 CAACTTAAACAGAGGTGTGAACATAAGAGCAGGCAGGGTGTGTGTAGAAT

A\_14\_P139153 ACTTAAAGTCAGATAACTTCTGGATGCAACTCACTGAAGTAAGAATAGGTGGATATTTCT

A\_14\_P109931 AGGACAAAGTTAGTTGATTTTTCTACCCAGAATCCATTCTCCTTTTTTTGTTCAAGTATC

A\_14\_P112413 TGATTTTCGTCTCTAGAGGCAATGGGCTTAATTGCTAGAGGCTGTTTTGTATACGTAAA

A\_16\_P15665043

AAAGGCTCTAACACATCAAGGTCAAAGTGAATTAACTGTTTCATGTCCCAAAACATGTT

A\_16\_P03809813 CTAATACTGCCCTATCCTTCTCTGCAGAGAGGACACACCTTCATTTCTATG

A\_14\_P130207 GACTTCGAACTGGAATATTTTCTGAGGAATCACTGGTCTCTATTTTTCTTCTACTTGAA



A\_16\_P58424411 CTTTGCTAGTCCCCACATACCGTGTTCCTTGCTCCCCTTCTTTCTT  
A\_18\_P15975168  
AGAATACACCACCCTACCTATCAATATTCTGGCCTAGAAAAAACTGAACCTGGATGTAAA  
A\_16\_P16191665  
ATATTCTAAAAATTACCGCTGGATTAAGCCCAGTCAAGAGAGAACCAAGTATCTGTATGG  
A\_16\_P20361768  
AAACTTCCCCTAAATTCTCAGTCTCCAAAATATTTAATAGCCTTCCATGAAAACCTTTCA  
A\_16\_P19413128  
AAAGGAGATAAAAAGTCCCATCTGTATACTGCTAGCAGAAAAAAATTGCCATGAACTTTCC  
A\_16\_P40106410  
ACCGAATTTCTCTTGCTGCAAATGACTTTGAACTATTTTTTTTTAAACCCACTTTTGAAGA  
A\_14\_P201688 CTCTGCACAGTTCAGGCATCAATTTTGATGATGTATCTGCCTGTAAAAGATTGTCATTAT  
A\_14\_P102223 CTTGTGCACTCTTAGAGTCAGCATCATGGGAAAGAGTAACAGCAATTGAAAAAAG  
A\_14\_P125988 GTCCAACATAGGATCCTCCAAGGTCCACATATTTAACCTTTTGGTTCTGTTTTT  
A\_14\_P106715 CCCCAAAATATTAATTTTCAGTAACAAAATTGCATTTCAATTTAGCACCAACTTCCTAACA  
A\_16\_P19829344  
GCCACCTCTTCTTAAATATAGAAAAAGTCCCTATTTCCTTCTTATTACCTAGCCCTATCA  
A\_16\_P20847544  
AACAGAAAAAAGCAGTCTTCTGCAATCTCTAGATCCTTCATGCTCATGAAACTCTTTGTC  
A\_14\_P202174 TTTTTGATCCTGATTCCAGTTTGCCTCTCTCTTTTTTTTCCCCCAAATTATTCTTCG  
A\_14\_P106248 CATTATGCTTTCTTTCATGTGCTTTTCCCCAAAACCTTTTCTTTTCTGACTTTTGAATT  
CUST\_3564\_PI426210822 CTTCGAAGCAGCCATCCATAGGTAGCCTGGGGGTCTTTTCAACAAG  
A\_14\_P138269 CACAAACACATATACTAATTAATAATCCAGCAGCGGCATAACACACAGGGAGTTTTATC  
A\_14\_P119123 AGGATTCACTACAACATTTTCTATTGCCTATATCTTCAGGAGAATTCCTGCACTCAGG  
A\_14\_P111426 GGGCATTGGTATGTCTTTCTCTTGGGGTGATTTCTGATGTTTTTACTCTATATAGTGA  
CUST\_7534\_PI426210822 ATAATACCAGGGTTCCTCAGTCCTCACCAGCATAAGAATCCCAGAG  
A\_14\_P101178 CTTGATGTGTGGAATGGGAATATTCTTGTCTAACAAACATAATGTTTTCTGGCTGGACAAC  
A\_16\_P21108406  
AATTTTCTACCTCAGTCATTTATCAGCCTAGCCTGATTATTAGCCAAGAATGCTGTCAAC  
A\_14\_P113348 TGACAAAGCAACATGTAATCAAGTCACACATGGGAAAGGAAGTTGCAGATATTTTTTCAA  
A\_14\_P120062 GTGGGGTCTAATGTTTTTGACTTTTACTATTTCTTTGAATAGGATGCAATGCAGTATGCT  
A\_14\_P124122 AAATAAACCAAGAGCCAGCGCTGTATTAACCTCTAGTATAAAGAAAACGGGTAAGCATTCT  
A\_14\_P108690 CTGACTGATCACACCGCAGACATTTAGATTTTTTATAACCAAGGCACCTTAAAAAAATGTT  
A\_14\_P118483 CTTTTTTTATAGTTGGCAAAAACACTTAACTAACACAAAAATGGGTGTTACGGAAACC  
CUST\_4839\_PI426210822 AAGAGCTCTTGCTTCCCAAACACGTAGTGATGGACCCCCCTATA  
A\_14\_P119306 ATTTATTTTATAATAGCAACGTCTCCCAATAACTCATGAGTGAGTTGGGCATGTGTTGTG  
A\_16\_P03800545  
AACAGTAGTGAAGACTTGTGTGCTATAAATCCTTTTGTGATTCCTTATGGATCTCGTTCA

A\_16\_P00293779

CAGCATATGACTTGAGATAGAAGGATAAAGAAACCAGAATGATTCTCTCTTTCTACCC

A\_14\_P113318 GAAGTCCTCAGTGGTGAAAAGGTTTAGGAACATAGATGTATGAGAGTCTTGTATAACATC

CUST\_8757\_PI426210822 TGGGGTCCGACTGGACATCCAGAAGTCTCCGTGTGTGTTCTCAT

A\_14\_P121534 CTTTAGAGGTGCAAGGAGTGAGGATGTGATTTTAGCAACAAGTCAGCCATC

CUST\_4986\_PI426210822 ATGAACCTTGTAAGAAACAACATCGTGCCAGAAATAGCCTAGACCTCAG

A\_14\_P116354 ATAGTAGTCAGAAAACCTTTGAACAACCTTGCCCATGTGTGAGCAGTCGGATTTTAAATAC

A\_14\_P139235 CAATAAATTTTCTGGTTTGTCAATGTTTCATCTTCGACTCTTTCTGGGGGCGTTATAAAG

A\_14\_P107314 AAATCTAAGTAGTCTTTGATTTTCTTACCTCTGATCTCAAGATTGCATGAATGGCTTCA

A\_18\_P14135171 AGAGACTGGTCAGTTATTTTTTTGGTAGCAAACTCTGGCTTAGAGTTGGACCAT

A\_14\_P103111 AACGCCAAGCAGAGTCATGTTCTCAGCATCTATGTTTAAACAATCTATACTTCAAATGCA

A\_16\_P36060749

ATTCAACATGCAATTGGTATCACAGAAACAAAGTCTTCTTTCAAGTTTCCATTTTGGTGC

A\_16\_P58424386 CCCAAAACACGAGGATGTCAGGATGCTGAGTGGCCAAAATAACAA

A\_14\_P125014 TCACTGTGATTCCCTACTCTGGTGAAGTAGTATTTCTCCTCCAGTTTAAATAATGAG

A\_16\_P01845564

TTTCCAACCACACCTTCTAATTAATTTAGTCCCAATTAGTCTTTATTCGGCGAATTGTT

CUST\_1432\_PI426210822 GTCTAGCAGTTGTCCTTATAATAACCGGACAAGGCGGGAGAAGTATTTA

A\_14\_P132231 AGCCACATCTCTATGTCTATGACCTCTACATTTATTTTGTCTTGGTAATGAAATTTCC

CUST\_1352\_PI426210822 GCATTTGGAGACCAAGTAGACATGCCAGGAGCAGCCAACTGCTG

A\_14\_P116351 CTACTTTGGGTTGTGCAAGGTAAGGTCCATGGCGATAAGATTCACGTT

A\_14\_P133022 TAGACTCCCTTTCCGTTAAGGCAAGACCTACTTAAATAAATGGGGGTAATTTTATTCTTG

A\_14\_P100633 AAGGAGATGGTCTGAGGGTCTGTGCTCAAATGTTTCTATTATTCTGTTCAAGGTAAT

A\_16\_P00420408

AGCAAACATGACAGGATATGACAGGCTTTGACACTTTAACATTTCTACACTATCTTGCAG

A\_14\_P132101 GAATTGTCTGTTTCATAGCATTCCACATTATTTCACTCCAGCCTTCTAAAATCCCTTCAAAC

A\_14\_P108757 TCATCTTCCATATAACCAACTAAGCATGTTTAACTACGAACGTCCAAAACACTTCATCCAG

A\_14\_P112398 GGAGGAATACCAGGTTATTCATGGAATAAAGTCTTTCCATCTTTAAACTGTGATCTTCTT

A\_14\_P101122 ACACATACATCTGAAGGGGCCATTTTCAGTTTTAGGGAGTTACTTTGTTTTTGATAGAAA

CUST\_300\_PI426210822 CTGGCTCAACTGCCTTGGAGCTCTTTGACAGCTAGAGGGAGAGAG

A\_16\_P18864143

AACAACCTACCCAACCTGAACAGATCACTTTTCTCCTATTTTCAACGAACATTTCAAGCAT

CUST\_1526\_PI426210822 GATGAAGGGTGCTCTCTGGCTTCCAAAGTGAGGGCCCCCTCCTGAG

A\_14\_P122381 ATTGAGATGACCAGTTATAAATCATCCAATATGAGGCCTTGAAAGAAGATGTGAGGTTAC

CUST\_8243\_PI426210822 CTGGAGGTTACAGTTTCTAATTTTTTCGGTTTTCAAGTGCTTCTGGGTCT

A\_14\_P103316 ACCAAAATGAATAGAGCATCTTGCAATTTGCTAAAGAGAAATGGAATTACAGTAGCCTCAG

A\_14\_P101650 CTTTTCAGTATAGCCTACTTTAAGGGTTTTGATAGCCACAGGTAATTTCTTTTTCTGG

A\_14\_P128967 AGAGGTATAATGTTTGTTCGTTTGTGGAATGTTGACTGCTTGCTGCAAAAATTTACAACA

CUST\_2933\_PI426210822 ATCAAGCTGGCAGTTCTGGGCTTTCACCAGAGTGTGAAACGAAAA  
A\_14\_P112435 CCCGACCAAGGATGACAGTAAGGACTCAGATTTCTGGAAGATGCTT  
A\_14\_P107882 TCCTTATCTACTTTTTCTTGTCTATGAAGGAGGGCAGGTTAATGTCAATGACCTAACA  
A\_16\_P01823322

AGGCAAATTTGTATTCTAATAAACCTAACTCACACCTATTATGTGTCTCTGACCAACTA  
A\_14\_P136367 CTCCACATTGTCTATCAATAAAAGCAAACAACCTTACTTCAGGCTTAAAACATTGCTTTT  
A\_16\_P16191534

AGTGAAAAGCATCTTGGAACCTTTACTGACATTTTTAGATTTAAGCAGCCCAATCAAAGC  
CUST\_2364\_PI426210822 GAAGCTAATCACACAGTGAGGCAACCTGTGAGAGACCCAGCTTC  
A\_14\_P112684 GTATGTCATAGAACCAAAGTCTGTGCAGTTCCTGATACAGCATGGCTTCAACT  
A\_16\_P16658116

ACAATCACACACCTCATCTATAAATCAGCATATGTCTGTAACATCTTCCAAAACCTCAGGA  
A\_14\_P139515 AAGTCTGACCAATAAGAAAGTCAACAGAATTACTGGTAAGAAAGCAATTTTCGTTGGTCTT  
A\_14\_P133671 CCTGTTACCACTAGCCTCTCCCTGGAAGAAGAGTTCAGAAAAAAGAAGAAAATA  
CUST\_5194\_PI426210822 CTGCACCACAGTTTTTTGCTCACACTCCTCTATTTTTCTCTTCTCAGC  
A\_18\_P14135113 GTCTGTATTGCCTGTGATCATCCATAGAGCATAATGAGGATGGGCTTACTC  
A\_14\_P128935 TTATAGTATAAGGATGCATTTATGAAAGCAAATCCTGGCTACAAATGGTGTCTACCACA  
CUST\_4277\_PI426210822 GGGGTAGACTAACTATCTGGTCTTAGTGGGTTCTGTACAATCCCATTAAGTTG  
CUST\_4062\_PI426210822 GCCACATCCACAGAAGTCATTTCTTCTGTGGTACAGACATGAC  
A\_14\_P130706 TGGGCCACTTTCAGTCTTCAAAGAGAAAGATAAGAAATTCTGGATTTTCAAATCCTTTT  
A\_14\_P106120 CATCATCACCAAGAAGACTGTAGCATGGGTGACTTCGAAAACCTGTGGCT  
A\_16\_P16191972

CTGACCATCAAGAATTGAGAAAACCTCTCGGTATAGTTTTCCAAACACACGAGTCATATTT  
A\_16\_P18212093

AAAGTTCAGGATGAAAGGCTAGAAAACCCATTCAAAGTTAGGAAAGAACACAGATCTTTG  
A\_14\_P135869 TTAAAGTTAAAACCTGGCACTTAGATCTGATATCTAGTTTACCTTCACGGGCATTCCATGT  
A\_16\_P16191187

ATAGGACCAGGAGAGAATAACCTATTTCCCATGTAACATTTATTTTCATGCCTTTCTTG  
A\_14\_P133474 GAACCGTGTGAACCACTTCTTACCTGTAATTCTGACTCAGCATTGATATTTGAAAATTCT  
A\_14\_P104666 CTCATTAAAGGTGGCTATGGTTTTGTTAGACAAAATATCTGGCTTCTGCCAAAAGACTTA  
A\_18\_P26797159

TCATCTTACTATCACCTAAGAAAATTTAATAATATCCTAATATCCACATCATGCAAAT  
A\_14\_P135024

TAACAACAAAGAAAGCACATTTCTTTCCAACCTCCACTAAGAAACAAAGTCAAACAAGTC  
CUST\_2168\_PI426210822 GTACTGTAAAGCAGTGGCTGAGATGCTAGGTATCCCAGTTGGGAG  
CUST\_2349\_PI426210822 TATTTTGCCATGAGGCATACATAGTCTGAGGGGCATTTATCTATCCAGACCAT  
CUST\_5427\_PI426210822 ATTCTCAGGCTGTTAGAAGTTACAATCCCCTCGAGTTCGTGAACTGG  
CUST\_9251\_PI426210822

TGCAAAATTTAAGTTTGTGGGTTTAAAAAAAAAAAAACAATTATTTCTCTTTGTGAATTCAT  
A\_14\_P102734 AGCGGGCGCCAAATAAATATGAATAAATAAAAATGAAAGTGGGCGAGAAAGGAAAGAG  
A\_14\_P108807 ATAAACGTTTTAGAGCAAACCTTGAAAGGCATCTACAAAGAGAATTAGGGATAGGAACCAG  
A\_14\_P114620 GAAGAATTTTTAGGTCTTCTCAGTTGTTTCAGTTGGGGATATGTCATCAGTGAAATTTCT  
A\_14\_P124570 TTGTTGTATTTTTAGGTGGAAACGTAGGTAAAAAGTGAGAGGTTTTTGTGGCTTTG  
A\_14\_P127063 CCAAAGGAACCGGTAGGCCTCTACAATTGTTTTAAAATTTCTATTGGAACCTATTACTCT  
A\_14\_P104987 CCTGTAGACATTTCGTAGAAGTTCTAAGGCATAGGACTTCCTGATTTGACTTAATGTGTAT  
A\_14\_P133208 TTCCTTAGTGTCAATAATGCCAGGATCATTCTTACAGAAATGGGTAGGATGAGTAGAAT  
A\_14\_P109643 ACATTTTGTCTCTGCATAGCCGTGGCATAACAAAATTATTGACTTCCTTGTATACATG  
A\_16\_P21072614  
AAAATGCAAATTTTGATTCATGGGACAAGTAGAATCCTTCAGATCTTGTAGTTGGCTTGA  
A\_16\_P36579282  
AGTTTGTCCCTTATGATAAAACCGTTCTTACTTCACACTCATATTACAAATTTTCGCACT  
A\_16\_P02153154  
TACCTCAGTATTTCTCTGAAACACGTAATCCTTCATCATTCTGCTCTGAATTGTTCTCAT  
A\_14\_P121847 ACATATAATACTCGCTGGTTCTGCAAACCTGTATTGTAATAAATAAATACTGGGGAAC  
A\_16\_P01020706  
AAAACCTACCATTCTGTTCCACTTTCATAAAGTTACTCTTATCCTTTGCATGTGGTCACC  
A\_14\_P112569 GGTCACATTTCCCTTCTAACAACCCCAAATTTCTATATCTCTTTAAACCTGATCTTATG  
A\_14\_P127042 ACATATGGGACATAGGGACTTTAGAGGGAAAATTTTATATAGGAGCAAGGAGTAAATGAC  
A\_14\_P109298 CCACTGATGCTGAAAGAAGACTTTAATGTGCACAAAGAAACCTCACATTAGTGACAG  
A\_16\_P01931671  
GCCTCCTTGTCTACTATTAATTCCTTATCCTTCACAAATATTAATCAAAGATACTCCCGC  
A\_18\_P10932330  
AAAAAGACTATGCTAGAAGGTCAGACTATCCTATCTAGGCTACAAGATCTCCACTTCG  
A\_14\_P112017 CATATATTGCCATCTACAGTTATCACTCTGCTGCGTTCTGTCAGTCTTTTGCTTGCTTTA  
A\_14\_P200993 GGCATTTTGAATAAAGTGTCCATGAGTGAATTAGACTTCACAACATTTTCTTGAAACA  
A\_14\_P110720 ATCAGTCGCCATTTAGCATTGTTAAGATCTGTGAACGCGTGTGTCTCAAA  
A\_16\_P02118771  
CTCTTGACGTTGAAGAAGAAAATTCCTACTGAATGCAAAATAAACAATTTGGCTGCTTTGT  
A\_16\_P16780449  
ATGGCCAGAATTCTAATATGTGGTTTCCATTAGATATGCATTCAGAATTCCTCTTGTGCT  
A\_16\_P19629962  
AATGAAAAAGACTCATAACCTTACAAGTAAGAACTAAGAGGTCCCATATGCTAGACTGG  
A\_14\_P131411 ACCACCAGTAAAATGGGTGTAACATTAGCCAAATGTAACATTCATAAAGCACTTTTGAA  
A\_14\_P132945 CTGTTCAATCTCCCTTCCCTCTTTTATGGATTACACTTCTTTATTTTCCCACATCCAGAT  
A\_16\_P16432341  
AGCCTCTCCAAGTTTAAAATACCTCAAAGCGTTTAATTCTTCTTTTATGTTTCCCTGTGAG

A\_14\_P200901 ATATTTCCCAAAACCCCTTCAACCCACTGGAAAGATAAAAATATCTTCTTCAGAGTTTCATTC  
A\_14\_P135221 CAGATGACCATATGTCATCACAGGAGTTGCTACTACACTAAAACATAAAAAGATGCAGGA  
A\_16\_P18154227  
ACATGCCAATTTCTCTTAATGTATTTTCATAGGTAAGCAAATAATGTAAGTGTGCGCCCC  
CUST\_9505\_PI426210822  
CTTTTCAGTCCATGAGCTACAATGAAGTTCTACAATCTGTTGTTCTCAATTTTCCTGG  
A\_14\_P107564 CATGTCACAATCAGTTGCTCTGTGTTCTCCTAATACTTTGCAGCACTTCTTTTATAACAT  
A\_16\_P19249235  
CACTGACTTTTGGCTTATATTCTAAAGGTGAGATAATGACAGAAGTTTGAGATACCCACC  
A\_14\_P127187 CTCCACATCCCTGTAAAATTTTTGGGAATAGATTCTCCAAGTTTGCTTACTGGTATAAAG  
A\_18\_P16040761  
AAGCCAGCATCCTATTTATCTCACAAGTTTCAGGAAATTATACTGCTTCTAGGTCAGGTT  
CUST\_3076\_PI426210822 CGGTCCTTTCTGACATTTTGACCTCTCATTATTGGCAGGCCTGAATT  
CUST\_7220\_PI426210822  
ACCTATACTATAACAAGAAGTTATCAGCTAAGCAAATAAAATCCAGACTTTGAAAAAGGTA  
A\_16\_P03603024  
CACTCTTTGGTATTCTAGGCAAACATCTTCCTTAAAGTTCTAGACATCTCATACAATGGC  
A\_14\_P120061 GAAATCATTGTCAAACCTTATGGTCAAGGATGGTGGTTAACTTTTTTCCCGTTTATGTAGT  
A\_16\_P00685294  
TCTCTAAATTGTTTAAATTA AAACTCATAGTTCATGTTAAATTTGTTCAAAGTTTCCATCT  
A\_14\_P137685 TCCTTCATATTTAAACTCTCTACAGAACTGCTGTTGTCTGGGAGATTTACCAACAAAAA  
A\_14\_P103902 CTTTCAGATAGATGACACTATCAACTCATGCTTTTCTATTATAGTGCCAATGAGCATCCCA  
A\_14\_P112327 TGTCTCCATATTGTATATTCATTTGATGTCTCCCATTA AACCTTAAGTTCTCTGAGGTCC  
A\_16\_P38635619  
AGGCTTTTCTGTGGATAACATTACTCCTAATTGGTATCAATTCCTGAGTCCTAGATACAC  
A\_14\_P131893 CTGTCAAACCTTGCAATAACATAAAAGTCTAGGCAAGGAATACTGCTTGTGTTTGAAGAAC  
A\_14\_P104700 CTGTCTCTGGCCATATTAGTATTTTCAGAAGTTCTCTGAAATCTAGCGACTGAGATAAT  
A\_14\_P132389 ACTTCTGCAGGAGATTCTTCAGCATACTTATCCAAAAATTACTCACTGTCCTAATGTAT  
A\_16\_P15153538  
AAAAAGTGCAGTGTGGTTTCTAAGACTTGAGTTAGACTTACACCATCACACTTACTAGCA  
CUST\_996\_PI426210822 CTTGGTGGCAGTGGCTTGAAGGATGAAGAGCAGAGAGCTTAGAAG  
A\_14\_P104290 TCAGTGATTACAATTTTCAGGTGTTCAAACTCAAGAAGGGTCATCATTATACTCTGAAGC  
A\_16\_P16191057  
AATACTTAGCCATCTGCCTCCTATTTTCTTATCGTAGGTTGTGACAGAATGCCTTTTTTCT  
A\_14\_P123055 GGTGTTTGTAAAGAAAATGCTAGAAGAAAACAACTGTCACAAGTTGTTATGTCCAAAAC  
A\_14\_P103366 TGGGTGGGTCCATGTGAGTTCTAAATAAAAGAACTTGGTTTTTTTTTCTTTGTAAACAT  
CUST\_3624\_PI426210822 AGAGCTGCCAGATGGTAATTTTGGAGGCTCAGATACACTCTGTTGC  
A\_16\_P16602909

ATGCTACTCATGAACCTTTTAATAACCTAACTGCAGAAACAAGATCACTGGAATACCTGA  
A\_14\_P132410 TAGCCTATTCTCTCAGCAAAAAGCAAATAGCAAGTTACCTGTTTTTTGATGAGAGCCTAAT  
A\_16\_P01683748

AAATGATCAAAACTTGGATCATGACAGTAACCTGAGTAACTCTTTCCATTCGCTTGTGT  
A\_16\_P20191046

GGCTACATCATGATCACTAACACATTACTGAAGGTTTACTGGTCTACTCAAAGGTAATCA  
A\_14\_P125055 GGACCTTGGTCAGAGATCTACATCTTAGTATCACGGTAATGTTTATTTCTTCCAAAACCT  
A\_14\_P110145 CTTTAATTAGCATCATGTTGCTTCTTTCAGTTTGGATTGTCATAAGTTAAAGCAGCCAGG  
A\_14\_P127690 ACAAAAAATTCTGTTGGTATAAACCAATGAAATCCAAATGAAATCCCAAGCGAACAGCC  
A\_16\_P40406237

TACTTAATGTCACATCCCTCTAATGTCAAGACCTATTCACCTGAACCTCAACTTTTCATT  
CUST\_3747\_PI426210822

ATTAACAGACATTCTGAAACACCAACCCCTTAGGAAAGGAGTAGAAATGGGAGTT  
A\_16\_P16493899

AAAAGCAACAGTATGTCAAGATCTCAATATTGAACCCAGAACTAATTTATGGCAAGCCT  
CUST\_2077\_PI426210822 CTCTTTGGGTCTTTGCCTGTGTCTTACTGATTTCTTTTACCAAAGCTCAGATG  
A\_14\_P119056 ACTTTTAGAGAGGAGTGACTTTGTTCAGGGAACAGAGATACATTCCAAATTAATAAAACACT  
A\_14\_P103912 TTTCGTCGTCATCTTTTTTGTCTGGTTTGGGATTCTTTGCCTTTTCTTCTGCAAT  
A\_14\_P112294 ACTGTATTGATGACCTCAGTAATGGCATGATTATATTTTTCTGAGGCTGATTTGAACTCC  
A\_14\_P111531 TTGATATCTTTACCACCTGTCAAAACACTCTTTTTTTCCCTGCAATTTTCACCTTTTCAC  
A\_14\_P110762

GAGGAGGAATTGAAGATTTTTCTAATGAAAAGAAAAAGGGTCACATGAACAGATGTTGCA  
A\_14\_P201538 AACTGGCTTAACTCTTGTGGAAGAGCATCTTTCAAAAAAGAATCACAGGCCATTTATTAA  
A\_16\_P19732761

CCTGTCACATTTCTAATGCTGATTGCTATTTCTTTTTGTCAATTCAACGCTTGTCTACCTT  
CUST\_9651\_PI426210822 CCAAGGCAAATCAAGACTTTATGGAATCAGCTCTGTTACTGCAAGACATC  
A\_14\_P138027

ACATGCAGTATGCAGTGAATTATTCTCAAGCAAAAAAAGGCAAAGACAAAGAAACAACAC  
A\_16\_P21440807

CGTTTTTGTGTTTTCCCAATCTTGATCTTGTATTTGGACCAGTAATACCCATATCTCCTC  
A\_14\_P200485 TATGCAAACAGAGTAAAAAATTAATGTAGATGTAAGGCCCTACCATCGTGGCCACTAT  
A\_14\_P132775 CTTCTTTTTTTTTTTTTTCCCCCTTCTGCAATAAGTCTGTGATCAGCCACG  
A\_16\_P03023472

AGGCCCTAGATTATTGAACAAACCTTTTAGGATCGTGACATGTTTAGAGAAATGCTTG  
A\_16\_P16402971

AAAAGGGCTAATGTAACCAAATAATCCCCTATCAGTGTGTATCAACTCATCTCTTCTTG  
A\_14\_P128684 TTA CTCTTGTGATCCTAGTTCTACTCTTTGATCACAGTCTGTGTTTTTGGATCTCATGAT  
A\_14\_P201807 AACTCTTCCCATACCCCTTCCACAATTATATATACTCCCTACAATAACCACATGAAAACA

A\_14\_P116883 CTGTAGGAACATCCAGAAGATTCTGGAAGCAAGCACACATTTTCCATTACACAT  
A\_14\_P114788 CTGGCTGACAGTCTCTTCATCAACATATCCAAAGACAGTATTCAAATTCCTGATGT  
A\_14\_P118589 AGTGACCACTTTCTAAAAAAGACGACTGCAATATTAATAAGGAACCCCTAACTTACCTG  
CUST\_7048\_PI426210822 GAGGAGCTGCTAACCTCATCTTAAGAATATCACTCTCTTGACAATCACAGTTG  
A\_14\_P118841 CTCTGGGAAAAGGCCAAAAAATAATCATTAAATCAAAAATTTGGGGTGAGGTGGGG  
A\_16\_P15852898  
TGAATATCCCCATTTATTACCTTTCTGCATTACCAATTCACCTCTTTACAATGACCTGG  
A\_14\_P124452 GATGGGGGATAGTCAAAAGAGTTTCCCTTTTTTAGGATAGGAGAAATCCAAAGAGTTT  
A\_14\_P124155 CTTGTGCAGGTGAGAATAAATGGCCATATTGCATTTCAATTTAAGGACTCCCTTAAAATG  
A\_14\_P130263 TATTATATGCTGGGAACTGAGAATACAAAAGATAATACTACGGTCTGCCTCCAAGATGCT  
A\_14\_P117191 ACTGAATGACGTTTAATGAACAAATGAGGAATTGGTTATTTATACTCTGTGGACGTTTTAT  
A\_14\_P101357 CCACCATTTTTCTGGGTGATGCAGCAAGAGTTAAATTGTTTACATTCTAGAATGTGTA  
A\_16\_P38240918  
GTGCACAAAATCAAAAACCTATCTCTTCATCATCACATTCAAAAACCTTTGTAATTCGGCC  
A\_14\_P130962  
CACAATCTGGAAAATTACAAAAAATGAAAAACAAAGGGAAACCATCTCCAAACACTGTCT  
A\_14\_P105452 TTCCACCTACTGAAATCTGAAAAGCAAAATTGGTAAGAATGACGTTTGAAAGATCATTGG  
A\_14\_P134983 TCCTGATAGACTTCCCTGATCTAGATATCCTTCGTCATGACACTTCTCAATAAAACGTAT  
A\_14\_P127011 GGATGGTCTGAGAATATGTGCATGCCTTTACATTTTAAATGAAAGATATGGCTGATTGGA  
A\_14\_P131611 TAAATATACTTATTCACATCTGCAGATACAAAGCACAACTTCTCAAATGCAAACACAGAC  
A\_14\_P105175 TTTTTTCTCTGGTGTGTTCTTTGTCAGAGAGTGAATCTGTCCTTCGATTTTCCATTTTA  
A\_14\_P138831 ACCTCTTAGAGAATACCTTTTTGATTCTTACTACTTATTCTCCTCTCACCAAGTGATACTT  
A\_14\_P125986 TACCTTGTTTTGGATCCTCATTCCACTCTACAACCTTCTTTGTCATTAGTGACATCA  
A\_14\_P113337 ACAGGTTCTGAACAGTATCCCTATTCAAAGGGAATACGTAGTATTCCTTTTCAATTATCT  
CUST\_7181\_PI426210822 ACTTAAGGTTGGAGGCAGCAAAAAGTGGAAAGACTGGTAGATAGTCTGTC  
CUST\_8198\_PI426210822 GAATCCCTGCATGACAACACCCTCGTGCTGATGGTGCCACTGATG  
A\_14\_P124506 ATATTGAAGATTAAAGAAAATGGGTAAAAAGTCCAGTGTCTCCTCAATCTGTGTGAAGGT  
A\_14\_P132712 TCAGTAAAGGAGGGAAAAGTGAGAGCCCCTAGTCAACTAACGCATCAT  
A\_16\_P16191778 AAAATCCCTTCTTACCTGTCAATTTGTATTCTCCCCATTCTGTGTCTGACATCTTGTA  
A\_16\_P01537386  
AAAAAATGGTTTGTCAAATGTCTTATAAATGTTGGTGTCTCAAATCTGAATGCAGCCAGG  
A\_14\_P202287 TGTAGATGTGTAAATTGACTTGAGCAGAAAAGAAGCCAATGAATTCCAATTAGCCACCTTA  
CUST\_8548\_PI426210822 CTTGCATGGAAGGCATTAGAAGTGGTTTCCTGAAGACCTGGACAA  
A\_16\_P19324338  
TTCTGTTCCCTCTCTAATATTGACATGAAATACCTACACAGTATGAATAGCCTTCCAAA  
A\_18\_P14610231  
GTGCAAACCTCAAAGAATAGAATTTCCGAGCCTTTATATTCTAGACGATAAATACGATCCC  
CUST\_6362\_PI426210822

GAGGAAGTTAAAACATGTATACATACATATAGAATGTTCTGTTTAATATTATTGGTTTAT  
A\_14\_P119466 GCTCTCAAAAAGATTGTATTTTTTACATCCGGGTGCTAATTTTTTCAGTTTGTCTACAACA  
A\_16\_P16948447  
ACAAATCAGACAAGCATAACCAGATTATTGGATGTCAGTTCTAAGTAATATAGGGGGTGA  
A\_14\_P117575 CTCATCATCACTGATATACTCACTATCGCTACTATCTGACTTCTCAGAATCCTCCGAATC  
A\_16\_P00736723  
CCCTAACTGCAACATCAAAAACAATGAATTAATTGCTATTCCCTATAACCTAACGCTACC  
A\_14\_P128817 GATGGGTACCCTAACATCATCTCTTCCATATCCAGATTGGACCATAATTCAGTT  
CUST\_8862\_PI426210822 TGAGGAGTTTGCTTACGTTTCATTCCCTAAAAGCAACATGACACAGAGCCTT  
A\_14\_P123309  
AAAAATCACCTCTGAAAACACAACCTTCTTTACAAAAAAGTCACGAATGACACGAACCTCTCA  
A\_14\_P101300 ACTTACGCCAAACCACAGTCTGGATAGTAACAGGAAGTTTGCATTTTGTCTATCTCTG  
A\_14\_P101478 TTACGTATAGATTAGCCGATGAATTACATATGCCATCTCTCCCTGAAATGATGTTTGGAG  
CUST\_9661\_PI426210822 ATGGTGTCTGGACACTGGACACAGCTATCCCTGGCTTCTCTCTA  
A\_16\_P21620912  
ATGGCTAAACATCTTTCACACAATAAAGTCCCTAAAGAATCTATGCTTGCGATGACTACA  
A\_14\_P138879 AGAAAAGGTTCAACTATGAAAACCTTAGGCAAGAAAATAACTTGTAAGCCATCAGCCTCAT  
A\_16\_P20176850  
TACTGAAGAGTTGTGCTATTCTCTTGAAGAACCCTTACAGTCACAAGAATCTATCCTTCC  
A\_14\_P113624 CATTGTGATTTAACTTTGGATGTGAATTTAGTCACCCTTAGCCCTTCAGATAAGCCTAG  
A\_14\_P116040 ATTCAAATGTCCCACAGTTTGAAAGTCATTAAGACAGAAATTTATGGGACAGGCAGATA  
A\_14\_P103997 AAACACTGGAAGGATCTGAACACAGAGAACTTGAAGATTTCTTCACAGTTTATTTGAGA  
A\_18\_P22840516 GATCTATGAAGAGAATGTAGCCCCGAATCCCTCCCTTCTCTCAACTTG  
CUST\_8541\_PI426210822  
CAAAATCATCTATTGACCAAAAACAAGACATTTAAGTCACTCAGATTCTGAAGGTACCCC  
CUST\_4656\_PI426210822 CAATCCAGCCCTCAGCCTGGACCGCCGACCTTGTGTGTTTGTCTC  
A\_14\_P116927 GACAAAATTTCTGCCTCTGTGGAAATAATTTATCAACCAACATGCTCTCTAACAAATGGC  
A\_18\_P14136775  
AAAAACCAGGAATTTCTTGCCTAACAGCACACTGTAACCTTTAGTGCTCTTGCTAAAGAAG  
A\_16\_P01545764  
ACTCCATCCATGTTCTAACACTTTTTGTAAATTACAAACTATAAATCCTCCAGTCATGCCT  
A\_14\_P127677 CACAACCTCCACTTAAAAATTTTAAAAGCAATAACACTTTGGCAATGAAGACCAGGCTAT  
A\_14\_P104782 TTTATAACTTATGGAAAGTATGGTTATGGGGGCTTCTTGTGAAGATGGTGATTGAATCTG  
A\_16\_P18150505  
ACCTTGCTAATTTTCATATTACCAAATCACTCTGATTCTTCAGTGTCTATCTTGGCTCA  
A\_16\_P18313059  
GGCTGTTCTAGATAAAATTTAACCTTCATACCAAAAATGTCACCTCTGCATTATTTACCCCA  
A\_16\_P58424354 CTGGGCTCAGAAGTGGTGCACCTTTTCCCTCCAGCCTTATTCTATTG



A\_14\_P118686 TTCATTTTCAGCGTGACCAAATGTTACTTGAAGATGTATTACCTGTTCAAGAGGATGATTC  
A\_14\_P112994 CCCTGGCTTAGTTCTTTAGTTATTTTCCTGGAATGTGGCTGAGAGTGAATGGTAAATA  
A\_14\_P112096 GGATAGAGTAATTAAGTTGAGCCCATGCAATGGACCTTTATTATTATCTTCTAGAGCCC  
A\_14\_P100709 GCCTGCAAGTGTGGATTTGGTTCTCCCATACATTTTAATATGTATTATATTTAAATCAAA  
A\_14\_P114484 ACAAACACTTCAGCAATTTCTTCTCAATTATTTTCAGATTCCATAAAGGAGAAGGGTGTG  
A\_14\_P107671 CTCTCAAAGCAGCATGCACAATGCCTTGCACATCTATATGAATGGAACAATGTC  
A\_16\_P17360974  
GCCATGTTGCCTTAATCAAAATTCATCTTTCTCCTATAATCTTGGTGTGCCTCATAGAAT  
A\_14\_P114983 ACTATTTCTCAACCTACCATATTTTGAGAGGACTTAGTTTCTTTAACAGACTGTGACCCA  
A\_16\_P16823766  
AGAACAGCCCATATGTTAAAGTCAACATCACTATTTCTCTGAAATAAATCTCCCACCCTA  
CUST\_6287\_PI426210822  
CCAGGAGCACTGGACTCTCCTTTAAGAAAGTTTTCTGTGATAATGAGATTTGAACT  
A\_16\_P18575072  
GGACACACGCATTAATAATCTCACCTACAATTCAAAAACCTCACAATCCCATCTTAGACAAT  
A\_14\_P134630 CTACCGTGAATGACTCTGCAAGCCTTGCTGGTCCAAGTGCAATATGTAATTA  
A\_18\_P21328997 TCTTAAGTCCACAATTCCTACTGAAGAAAAGATATTCTCTCAAAGCAATTGGGTCAGC  
CUST\_1488\_PI426210822 GCTGGGATAGCGGGCTTCTTCACCGAGGTGGGTGTCTGCTGTCTG  
A\_14\_P121015 AAAGGCGCGAGTTGTGAAGTTTCTAGAGCGCATTTTTCCCGTTT  
A\_16\_P16728827  
ACTGAAATTGCTTGTCTCCTACAAACTACCAAACACCTTTAATTATTTGGCTTTTCCTGG  
CUST\_2818\_PI426210822 CACTCATGCAGAAATATTTACGTGAGCTAGTTCATTCCTCAGCCACACCT  
A\_14\_P129144 AACATACATCAAAACGGAATCCATTGGGAGTTTCACCTGATAAAAGTCTCATAATTTCA  
A\_14\_P104994 ACTAATCTCCTGGAATACAGAATGTGGTTCAATTTGAGTGGGTAATATTAACAAATTA  
A\_14\_P133430 CTTGGAGGATGGACATTTCTGGATACACATACATAACAAACAGAAAACATTTTTTAA  
A\_16\_P00685129  
CTGGCCACATCTAAAATGGTTGAATAGTGAAACCTCATGTTTTCTTTGTATTTAACCAC  
A\_14\_P121772 CTGCTTAACATTTGAAAAAGCAACTTTTAGTTCCAGTCCTCTTGCCTTTGAAAGATTCAA  
A\_18\_P12770043  
GGCAAACAACACTGAATAAGCCTAAGAAAATATTCATCCTTACTTGACTTCTGACTCTGG  
A\_16\_P41273590  
TCCTTTGCATCCAGATGAAGTCTTATCAAAAAGAATTTCCCTCAAACCTTGCCATATCAT  
A\_14\_P101581 TACTAACTGGTGTTTTTACCGTATCCTTCAGTGTAACCTTGAAGTTTATAAGCAGAGCC  
A\_18\_P11416150  
CACAACTGATTCCTTAATACACAGAGTATCTTCACATTCCTCAAATTTTCCTCACCTACA  
A\_14\_P135130 TATTTTACTACTGCAAGATGCCAGAATATCATCACTCACTCTAATATTGGCTCCTTGCTC  
A\_14\_P115624 TAGTCTCAGGAATCAGTTTAAGATGTGTAACCTTAAGACTGTCCAATCAGTGATGCTT  
CUST\_7825\_PI426210822

TCACCAAGATCCAACCAGAATTTTGAAATTTTATTTGACTGAGTAAGGTGGAAGAGAGA  
A\_14\_P117362 AAGTCTCTCATCTAGATAGCACCCAGACCTTCATTCCTTAAAAAATCTCCTACAATACT  
A\_14\_P117273 ACTTAATAAATGTCTAACAAATTCTAGGCAGAGGAAACAGTGTGAGGAAATCCAGAGAGA  
A\_16\_P01363237  
ACCTTGGCTATAGTGATAGAGAATTGAGAACAACAAACGCATGGACTTGACTTTTAGAAT  
A\_16\_P00709628  
GAGACAAGAGAATTCTCAAAAAGTGTAGCCATTCTTTCAATCGAACAATCCATTACCAG  
A\_18\_P22841574 CATTCTTCTTGCCTCCTCAGGCAGGGTCTCTCGTTGTGACTCTT  
CUST\_857\_PI426210822 TTGTTTCCAGAGGGGCAAGACAGAATTCTGTGTTACCACAGATCAGTAT  
CUST\_5788\_PI426210822  
CATGTCAATAATTGTATTTTTTAAAAGCAAATATCACCAAGTCCAAGAACTGATCCTCC  
A\_14\_P129691 AATTCAAACATGTTAAAAAGATCTTTGGAATTCTCAGGAATGCATCCTGTGGTCTAGAAG  
A\_14\_P109407 CTTTTTCATCAAAAACCGCTAAGATTCACACTGAGCAACAGCCCTGAATAAAGAAAAAAA  
A\_16\_P19964062  
AAAAGTATGTTTCATGCCTCCTCAATACATCTTCTATGAGAACTGCATACAGACATTCACC  
A\_14\_P106996 TCCTTTCTTCTTTTCTCCACTTAAAAAATGAGGTGTGTTATTCTGCGGTAGAAACTTGG  
A\_14\_P105142 GTAATTATAAAAGTAAGTAACTTCATTTATGAAAAAAGAGTTCATTGTGGCTCCTAGAA  
A\_16\_P37982821  
ATCAACACCCAGTCACTTAAGTAAATATCCGCTTTGCTAAATTACTTTCTCTGTGAGTGT  
A\_14\_P109603 TATCTGTGGACTTCTTTGGAACAGGAGGAGTTACAGTTTTTAATTCCTTTGTCTTACTTG  
A\_16\_P17266612  
TTACTCACAGTGTTTTGTGTTATAAAGTCATACTCCAGGGTATCTTTTAGAGCAACAGCC  
A\_16\_P18946179  
CAAGTGCATAGATGCTAAATGTCGATTAAGAAGAATGTAAGAGGAGTAAAATGTGAGGGA  
A\_14\_P125728 CTGGACTTTTGGGTCAAAAAGGTAAAATCTCCTCTCTTATGAGAGATCCTCTTGC  
A\_16\_P16191855  
GACAGAAAATGGAGAAATGCTAGGGAAAACAAGAGAGGCAAAGTTTTATAGAACCAAATG  
CUST\_3625\_PI426210822 GCTCAGATACACTCTGTTGCACGTGCCTGTCCAGCTTACTTAAAATATGTC  
CUST\_9869\_PI426210822  
TCTGTCTGCCTTTAAAGATGAGAGCTGCTCATTTGAACTAGATAGAAAATAGTGGATTTA  
A\_14\_P139619 GCAAAAATATGCTGAGGCAAAGGATGTCTTCCCTGGGCATGTAAGTAGATAAGAAATTAT  
A\_14\_P118929 TTTGTGTTTTAACCTGTCTCCTAATGTTTAAAGTGACACAGTGACAGTGAACCTTCTCATC  
A\_16\_P00365013  
AATCCACTGTTATCTCCCATGATCTGTGATCATTAGAAATGGACCTAGATTTCCAGAGT  
A\_14\_P126984 GTTGTATATCTGAAATCACTAGACTCTCCACACAAAAGAATGGGCAATAAATCAAACC  
A\_14\_P118840 CTGCAATTACCGCTCTTATTCATCTCTGATTTGTTTGCTTTTAAAGCCGACTAAAGA  
CUST\_651\_PI426210822 ACTGGGTACCTGTTGGTTCCCTTTTCCCTCCTTTTACAGGCTGATGTG  
A\_14\_P128658 GAATCAATTCGTTACCAATTGTCTTCAAATATGCAGGGTGATCTAAGTAAATGCCGAAAG

A\_14\_P139127 GAACTTCAAGAAGAGGTCATGTAGGGAAAGGACACAATGGGGTAAGAGTATATAACAG  
A\_16\_P15924680

AAAATGCAAGTCATATTTACTGCCCTTTAGTCCTATAGTTGTCTAGTTGGAAAAACACAT

A\_14\_P138033 GATGTGCCCTAGATCAACAGATCAACAATACCTTTTTTTTCAGTGTTAAGGTAATGGTTG

A\_14\_P130450 TGTTTTTAAGGAGATTGAGAAGAACTTGAAGAGGTAAGATTTATGTAAAATATTGCCAG

A\_18\_P22839585 TTTGCTGGAGTCCCCTTTGAGGGCCTCAGACTTCTGTTGTATGAT

A\_14\_P138036 TGACATGTCTAACTTATTTTAAAGGTATTGCTATTAAGGAGTCAGCAAAAAGTGGGTGATC

A\_14\_P133514 GCATGGTATTCTGCTGCTGAAAAATACTTTCCTGGTGTTACCAGTTTATCAGTCATATTT

A\_16\_P17588786

AAATAAGCCTCCATAAGACAGAATTCCTAAGAGGAAGATGATTACTGGTTGTTTCCATT

CUST\_10427\_PI426210822

TAAAGGATGAAAATCTTACCGTACTTTGGAACCTTGCTGTTTAAAAAGACAGATGAAATAA

CUST\_7300\_PI426210822 ATTAAATGGAGTAGGACCTGATCCCCGACATCGAGAAACTGACGG

A\_14\_P135716 AGCAACTTGATTGTCTGAAAGAGCCAATGCATCTCAAAAAAAGATATTTCCAGGAAGTAA

A\_14\_P117468 GATGTTAGTCAGCAATTTCAAGGTTCTGTTTACCTGAAGTTGGAGAAACATAGATTGTTT

A\_14\_P113544 GCTAATCCTAGAATACATACCGCTTTAATTATTCCAGGAAGTTTCACAGAAAAGCCAGTT

A\_16\_P18196141

TGGAAATGCATGTAATCTATTTACTCTTAACTCAAGTCAACACCTAATATAGCCCCCAA

A\_14\_P111587 CATGAAGGAGTTGCTTGTTTCTCTGGTTTTTGGATGTTTTTGAAGTTTTTGGATGATTAGT

A\_14\_P104159 CCAAACTCGCCTTTATTTTCTTAGTGTTAGATCCTTATCAATTTGCATATCTAACAACCT

A\_14\_P127616 CCATGAAAAATACACTTCTATGATGTGCAGAAAACCACATCAGTTTCACCAAAAAACA

A\_14\_P111853 CAAAAACCCATATGTTTAGCATAACGCTAAAAACCAACTGAACCTTCTGGAGAAAAGTG

A\_14\_P200008 AGAAGAACTGGAGTCAGCCCTTAAAAGATGAGTATGATTTAGATAAGGGGAGAAGAATC

A\_14\_P106748 AAAGCCCCAAGACTTAAGGAGATAGAGCGCCACTTCATGACTTATTTTAAATAAATAAGC

CUST\_675\_PI426210822 CTAGGTACAGAGCAGTGCTGGGCTGCGGAGGAAGCCACGATGTTT

A\_16\_P01645557

ACGATACCTGAATCCCTTTAAAAATAGGCCATTTCTTCTTAGAAGATTTCCACGAATCAC

A\_14\_P200233 CTTCTCTTCTTCTGGAATTTTCAGGAACTACTGACTATATGGTGAATGAACGTGAGTA

CUST\_2632\_PI426210822 AATAAGGTCAGAGCAAGGTTTCAGTTCCGGTACATGGGCTGGGGGC

A\_16\_P01169397

AGCCATCATATAGAAACCCATGGAAAAATTCATTTACGTTTCACATTTAATGTCTCCCAT

A\_16\_P16024335

AAGCAAAGTGTCTTCAAATACCCTTCTTTCTCAGTATCACTAATTTCAAAGAACAGAGGC

A\_14\_P111989 ACATGAGTAATTACACAGACACACATTATTCTGTCCAGTCACAATGGCATTTTTCCATTT

A\_14\_P111202 AAGTGATCAGAGTTGAAGCAAAGCATGAAACAGCCTCTGGATCACCAAC

A\_18\_P16970024

AAAAAAGAATGTCTAGAAATGTGATCTCTACTCCTGTTTGTAAAGAGTTACCCCCATCC

A\_16\_P38629769

AGTCCGTAGATTACAAAACCTCCTATGTCATGAAATTTACTGCCACCAATAGTTACAATCA  
A\_14\_P107687 GAAATGGAAGCGTGTCTTGATTTTCACTAATGAAGAGTTGGAGAGGTCTGAAGTTC  
CUST\_4203\_PI426210822 GCTAAGTCTTGGGAGAGGTGATGTAACCAGGGACTGCAACTTCTA  
A\_16\_P03526444

AATGCATACAGCATATTAACCTGAAAAAAATTCTAGGAAATAGAAAAACATGCATGTAGT  
A\_18\_P11255101

AAAAAAGAACGTCTTCAGGAATTAGGTGTCCATTTGTCCATTAAGGCTACATTTTT  
A\_14\_P137351

AAAACTCGAGAGGAAGTAAAAGTATTTTCATACACTCAAAAAAAGAAAGTGTCCACGTG  
A\_14\_P112866 CTTTTGCGTTGACCTTTTCCTTTTATCTATCCAGGCTGTCACCTCCTG  
A\_16\_P15914605

TTTCCCTACTTGTCCATTATTCCACTTCTAACCTACATTTTAATACTCCCAACACTCT  
A\_14\_P103636 AAAATTCCCACCTCCCAAGCAAATCCGAGATGCATTTAGATTCATTTTTTTTCTTTTTTG  
A\_14\_P123876 ATAAGTTTGCCTTTAATCTATTCATGTCATATCTAACTTTGATCAAGCCCATGGACACA  
A\_14\_P104763 CCCATCTAGGCCAAATGCATTGGTATGATTTGGTTTGACCTTGCTGTTTATTG  
A\_16\_P15184537

AAAAGCAAGGTTTTAGCAACATCATAATCATCTAGGAAGCATCGGAACTTAGAATCGTCT  
CUST\_3859\_PI426210822 CTAGTTGTCCAAGAGATGGAGAGAGAGTGCAAAATCTGAGCTGTGCTTATG  
A\_14\_P201727 ACCAACAATACTTCCAGAAAAAACCTTAGGTTCCAAGGAGAAGCAGGCTTAATATTTAA  
A\_14\_P131009 AGTGACAGCCTCTCCGTCTCTTCTTAAATACCCATGTTGAAAACAGGTTCT  
A\_14\_P130172 CTGAGATTCCTACAAAAGCCATTTAACTATCTCTCCACTTCTGAGGTATCTTCTTTTCAT  
A\_14\_P128152 CTGAGCACTCCTGTGAGGGCTATTCATATCCATTAATTGTTACAATACAAGATACATTGG  
A\_16\_P18685139

AAAACTACTGCATGACTATACAGCATTTGAAACTCACTGTCTGATTGGAATTTGGGAAAC  
A\_14\_P120092 CTGTGATTGATTTAAACAGAAATCTCCATTCTTATTATTCTTGGGCCTCTCTCATCA  
A\_16\_P17863974 TCCATCCTATCCATTCATCATTAGTTCATCTACCTTATTCATCTCCCTACTTGTTTCACA  
A\_14\_P123953 AGCAGAATAGTTCAAGGCCATTTTTGTTTCATGTCATTTGGGCAACAAAATTAECTCTAC  
CUST\_10325\_PI426210822

GGATGATGCTATGACTTTTTCTTAATTATCCAGAAAATTCTGGCCAAGCACCTTTTTCTT  
A\_14\_P104556 CTCTTCTCATTTTCACCAGAAAAGTCGGGGCTACTTTAAAGTTTTGGGGAATC  
A\_14\_P201065 GTCACCAGATACCTCATCTTCTTCAAGTGCAAAGACAAAGTGAATTCTACAGAAAAC  
CUST\_6906\_PI426210822 ACTTTACCTTGAACTTCCTGTATAACGCCAGGTAGAAAAGCCTCACCTG  
A\_16\_P02268223

ACATGTTCTGGCATTCAATACTCTCAAATAAGGAACTCAAATTAECTGTCCATCTCAC  
A\_16\_P15813941

GTGTGACCTGTTCAATGAAGTCAAACAATGATAAAATCCATGTCTACCCTATTGATCCAT  
A\_16\_P00685583

GTGCTTTACAGAGCATTTGGGTGAATAACTAGAAATATGCCATAGATTCTTGAGGCTTTG

A\_14\_P106212 T TACTCAAGGTTTTCTTTCTGTGACCTTATCACTTTATTGTATTTAAGCCTCTGGTTGGG  
CUST\_3746\_PI426210822 GCTAAAAGAAGCCCATGGGATTAACAGACATTCTGAAACACCAACCCCTT  
A\_16\_P20823001

GACATTTGCGATCAAGAACAACCTTTGAATTACCTCTTTATTTGTCCACCCATGTTTTAA  
A\_16\_P20876493

ATTACCCTGGAAGACCTATAAGATTCACTCATACTTGATTAATTTGAGACACTGATCCCC  
A\_14\_P112307 ATTAGTATGCTAAGGGATTGTTACATTTGCCTCACATTCAGTTGAACTGAGACATTTAG  
A\_14\_P130752 ATGTAAAGACTTTTCGCTAATATTGCACCTCCATAAATTCCTTCTCTCTATTCAAGGCGA  
A\_14\_P131139 CTGAGAGAGAAATTGTGTTGAAAGTCAAGTCACTGATATCTAACATCAGAGAACTAGAGG  
CUST\_7576\_PI426210822 CAAAGTCTGCTCAGATAAGGGCCGTGTGAATAGACAGGTCTTCAGT  
A\_14\_P135289 CTTATCTGGAAACAAACCTGTTTGCAAAATATTTTAAATCAGAGAAGGACTTCCGGCTTC  
CUST\_7459\_PI426210822

GGTATGGAAAGCAAGGCACCTGAAAAAATTTTCAAAGGGAGAAAAAGAATGAGC  
A\_14\_P127053 CTTTCTGAGATGGCAGATCCGTGTGAGTAGAGTGTGGAAAAATCTCTGGATATT  
A\_16\_P18274343

AGGCTGAAATACCAGAATTCCTATGAACCATTTCTCTCACATTTTTTTTCATTGCAAGTT  
A\_14\_P128696 TTTTATTATCATGTCCCTCACAGAGAATCTTTATAGGCAGGGCCAAGATGTTACTCAA  
CUST\_6858\_PI426210822 TTCGTACCTGGCATCGGTTGGCCATAAGTCACTGAATTTGGCTAATAA  
A\_16\_P20173836

CCAGGATCTTCCAACATGAGAAAGCAATAACCTTTAATATTCACGTGCTCATTCAACTT  
A\_18\_P16909656

AAAAGTCATTATAGCAAAAAATAAGTCATCATCCATAAAGCAGTCTTACGTTCTGAGTCA  
A\_14\_P106025 ATAAATTAATAAAGCCAAGTCTTACCTCTGGAGTTCCAGATAAAAATGCAGGTTCAAG  
A\_16\_P30952346 CTTGTGCGCAGTTGACCTGAATGGGGACGGCCTCTCTGACCTGCT  
A\_16\_P00685287

GTTTAGAAATTGGGTAACCTCAGTTGTTTCATGGAGGAAAAAGTTGAACATTACTCAAGTGC  
A\_14\_P127144 TGCTATTGTCTTGAGATAAAATCCAAAGATAACCTTTGCAAGTGAGTAGGCATTGAAGCA  
A\_16\_P01284553

TGGGAACAGTCAAAACATAGGTAATAATGATGCTTATCTAGTCATCCCTTTACTGTTGCA  
CUST\_6340\_PI426210822 ATTCTACCACTACATGGCTGGGGCCAAAGTCAGCTGGGCAGGGAC  
A\_14\_P136325 ATTTTCCTTTTGCTATGGCTGTTAGAAAACCTGGAAGAAATGAGTAAAGCAAAGTATGCT  
A\_18\_P22842452

TCTGAAAAACAGTCACTAGTTTTGGTAGTTATTTTTCAAATGCATAGTGTATCCCTTAC  
A\_14\_P105523 CTCAGTCCACACATCTAAAACAACAACAATACTGATATAAGACGTATCTGCCTGACACC  
A\_16\_P16285869

AGAAATCTTAACATTGCATACCTACTGTCGGTTAAGTCATCACCTAGAAGTTTTGGACA  
A\_16\_P19561480

ACCTTCATGTTCTACCTAGATTCTTATCAAATTACCACCACTGTTCCAAATATTCAATGA

A\_14\_P132863 TAATCGCTGGTATTTTTCAAACCTCCCATAACAATACTCTGTTTTTCGGGTTTCCACCT

A\_14\_P120964 CACCTGAAACGTATTTTGACCTAAAAGAAACATATTTTTGTATCAGTATTGAATTTTGGGA

A\_14\_P122706 GAAATCATTGTAAAATGTAGGCATGTGATATGGTTTATGGTAATGTAACAGCCAGAGGT

A\_14\_P108325 AGGTTTCAGCATTAAACACAATGTTTTGCTCTTTTGCATTTCAGGAAAATATCATATGCC

A\_18\_P22841208 ACTTTCCTGGGTATTTTTAGTCACTCACTTTGCAGAACCTTTGATGGTCTACAGA

A\_14\_P104825 TAAGGGGATTGAAAGCCTTGCTTTTGCAGGACTGGTTTTTCCTTACACAT

A\_14\_P107253 TTGAGAAAATCCATGCACTGGGGCATGATTTATAATGCAGATGCTTCAAATTAAGGTAGTA

A\_14\_P117013 ACTTAGTAGACTAAAGTGGCATTTCAGTGTTCCTGCCCATGAGAAAATACTTTTGATCATT

CUST\_9434\_PI426210822

GTTCTTGTGATAGCATTGTCCTTTAGGATGCCATCATTATGTGAATGTTTCCTGCTAT

A\_16\_P17878471

AAATCAGTTTCTTCAAAGAATTTGTGATCCAGATAAGGGTAAGAACTATTCCTCCAAGCC

A\_14\_P137751 TGCTAAGTGCACCATTCTTTACACTTATTTCTACTGCTAGGAGCAAAAAATCCAAAGGA

A\_14\_P114640 CTTGCAGAATTAGTTTAGTCATCCTTTAGAAGGTTCTTTAGATGTGTCAAACGTGTTTGG

A\_16\_P16517162

GCCTTCACATCTACACAAATATCAGTGCTAAAAACAGTTAATCAAGGGATATGAACCGA

A\_16\_P00309394

AACCAGTGGCAATGTTAGTTAGAATACAAATGGACCTTTTTACCTGAAAACCTCTTTTGT

A\_14\_P116189 TATCAACTCCTGGACAACCCAATGCAGTGGTAGTGTCTCTAAGTGGATTTTTA

A\_16\_P30952508 CACTGATGCACGAGGTGGACACGTCCATCACCGGGTGAGTAGCCT

A\_14\_P118070 CAATGTCTGCGGCTCGCTTCAAATGATGTCCTACAAAACAACAGGTTAATGT

A\_14\_P107346 ACTATATATGGTCCATAGGATTATGTCAGAGACTTTGCACGATACAGTGCATTTCAGGTTA

A\_16\_P17513780

TAAAATACGAGGTTATAGGGCTATCACTGATTGTCATCATATGCCACTCAAACCTTCTTCC

A\_14\_P202234 TTGACTAATCACACATCTCATTGTTTAACTTGACCTGAAAATGCACTGAGGATTTTGA

CUST\_4392\_PI426210822

CATTTTTCTGTTGTCCAACACTTGCTTTGTTTGTGACATTTAGCTCCTTTTCTTCCT

CUST\_8394\_PI426210822

TACATAATTGTTTAAAGGCTCCACTGCCATTGTACACAGGAGAAAGGCAGAAATACTA

A\_16\_P01257810

AGAAACATTGCAAATGAAGATGACCAATTAAGAACTTCACCCTCTTTTAACTCTGGAGCAC

A\_16\_P18931896

AGACACATAGTTAGGCATCTTCACAATTATAAACTGCTGCTTATTCTTATCCATGCTCCT

A\_16\_P01842490

GTGACTCTTTTAGACTGCAGTAACCTAATTCATGATGCTTACTCCCATCTTCAAAAACCTC

A\_14\_P126041 CTAGTTTGCCTTCAGTGTTCATCTGAAACGAGAGGGGTTTACTTGT

A\_14\_P109593 AAGAAATGGTTTTAAATGGAATCTGGAAGACTTAGACAATGCTAAGGAAAAATTTAATGA

CUST\_1973\_PI426210822 TTCCCTAATCCTCAGCCCTCAACTGTCATTGCCAAGGTGACTGTT

A\_14\_P103165 TGGCAGTAAAACTTCGATTCACTGCTCAATATTTGATTCCAAACTCTGCATTTTCTCTTT  
A\_14\_P113430 CTTTGGATCTGATATAATTCAGAACCATTGCTCTAATAGTGAACCATGGGCAGAAAATCA  
CUST\_2932\_PI426210822 AACTTGCTTGTCAATCTCTGGAGGCTGGGAATCAAGCTGGCAGTT  
A\_14\_P136907 CGTTGAAATTGAGGAACATCTCGCAGTTGTCAGGAGTTTCATCTGTGATGTT  
CUST\_7895\_PI426210822  
TATTAGAGTTTAGTTTTATATTTATATATCTCTTATCTTTTTGTTTAAATTGTATTTGGGCT  
A\_14\_P128228 TAGAAAACAAAGTATTGTTCTCAATCACTGAAATGCTTAAATGCTTGATTCTTCAAGGAA  
A\_14\_P129394 CGTGTGGATGAAAAGACAGATAAATGAGTTTTGTCCAGTCAGTGCTTTCATTATGTAAAC  
A\_14\_P105118 GATTGCCAGACATCCTTCAGCGAAGTGCATGTGTGTTTGTAACCAT  
A\_16\_P39988686  
TCTTTGTCTGAAACATACTCCTCTACTTTTCATTGCATAACAAATTTAACCTTCCAGGCAC  
A\_14\_P135150 TCACTGCTTTTTAGAAATGTTCCAGCAACATAAAGACAAGCAGAGTAAATGAAAACACTG  
A\_16\_P15976973  
ATATTTCAACTTTTACCAAACCTCATTCAAAAAGAACCGAGTAAATAATCCTTCCCTGCCGC  
CUST\_3414\_PI426210822 AGTAGCTGGTCCCTCAGTCTACCCCAAAGAGCTGCCTCGCCAGAC  
A\_16\_P00410099  
AGCCTTCAACTGATGTAAGATGTTTCAGATATGATCTATACAGAAATACAGCACTTGCCA  
A\_14\_P201301 GAAAGTGTTAGATTGGCATGTATTCACACATCTCCCTTAAATCGTTTCAAATATATGTGG  
A\_16\_P18860154  
AAAACCTTAGAAAATCCAGAGTCTTTGAGTCCATTTGTGAAGATAGTAGAAGTTTGAGGC  
A\_14\_P120345 AATTGTAAATGGACCAGTTGATTGAATGGTGTCTATTCAGTATGATTTTTCTTCTGGCT  
A\_14\_P132877 TTTCCAATGGAAATGATGCTGTGTATTTGGGGCATAAAAAATGACTATGGTGTAAATGTCT  
A\_16\_P00685280  
ACTGCTCAAGTCTTTCTTAGGTCTTATGATGGAACCTGAAAAGCAGGCTACCTATTTTATC  
A\_18\_P11305457  
AAAAGGTCTAAACCCACTTAGATGAGTTTACCCAATGTAGTAAAATTCCATTATGCGAGC  
A\_14\_P121781 GGTGTGATTGAAGAATTCCAATTCATTCCATGTGTCAAAGATCTTGTTTTAAGATGTTGG  
A\_14\_P111305 AAATTCTGTCTTCTCATCGAGCCTGAAGTTGTCAAAAATGACGTAATCCACCCTTAA  
A\_14\_P111175 GACTTCTCAGTAAATTCACACAATATCATTAAAATATGTCCAGGTAGTCTGCAGTGAGGC  
A\_16\_P00710148  
GCACCATCCTTTGATTTCTCACTAAGTCCCATTTCAAATTAATTTTCAGAAAACAGATGCTG  
A\_14\_P118564 TGGCCACCCTATATATAATTACATAATTGCATCGTAAATGCTGGCCTTCCTTCTGCAAATT  
CUST\_4305\_PI426210822 TTCCACATCAGGACAGTTTTCATGTCTTAGCCTTGGGACTACATGTT  
CUST\_4959\_PI426210822 TTTGATGAGTGGCAGTTGGGTGGATGGATGAGCTAATACATCCATCAT  
A\_14\_P123412 CTGTCTAATCGTGTATGCCCTCCAGGATCCCAATTCTGGGTAACG  
A\_14\_P134711 TGATGAAGAATATGAAGGTCTTCCTCATGTTTCTTCACAATTTCTCTTTGCTCCTGTTTT  
A\_14\_P110338 CTGACTTCTGTTTATATTTGAGGGGAGGAAGTTTGAGTCTCATTTGCTATGTCCAAAAA  
A\_16\_P18810080 ACTCTTCTTTGCTTTAATGTCTACGTATCTAATCCTTCCCTCATATTGCTCTGATTACCC

A\_14\_P127420 CTACCTCATAACTGGATTGTTTCTCACACGTGTTTCCCAAATGACACCAATAATCTG

A\_14\_P105592 CAGATACTGTCAGTCAAAGATAAATACAAGAACACATTCCTCTGCCTGTTACAATTTCCC

A\_14\_P115758 GACTCTGATTTTCGAATTTTAGACTCACTTGTTTACTTCAGGGTAACTGTTGTCACCTGA

A\_14\_P121316 CTGACCACATTACCTGAGTTTGTGTTATGTTTCTTGATAATCCACAGGTTGTTGTAGTC

A\_16\_P02702523

CCCGATCCCTAAATCACTACTGCCTCTCTCAATATCTTTTTTAAATCTTCCCAATAAGAA

A\_14\_P133704 ACAGGTTTGATAGCAGAGTTCCTGAATTCAGCATATCATCAGAATTTCCATTTACCTTTT

A\_14\_P128529

GAAAATAAAGGGAAACAAAGCAGTGGAAAAAGACAAAATGTAGATGACAGCCCAGTAAAA

A\_14\_P103007 CTCTATGACTCCAGGGTGGTTTTATTTATGTATTTATTTTTCATCCTTCCATGAACCCCT

A\_14\_P125995 AAGCAAACAAAAAAGGTGATGTGATATCCAAACTTCCAGTTTCTCAAAGTTGCAAAGA

A\_14\_P104679 TCATCCAAGGTTTTCATCTTCCTGTAGGAGAAGGGAAAAAAAACGGACATTTATTAECTAT

A\_16\_P16285992

AAATGTTGACTAGCAACTTTTCCTAACATGTGAACCTATTTTGAGATTTGGTAGCCTGTG

A\_18\_P22744009

ATACTGGCAGTAGTCTATCTGAGTGCTTTAACGTGTGATAAATAAATACAGCGTCCTTCA

A\_14\_P110416 GGTTTATTGGAAAAATAAACACACAGAGGAATTAAGCCAGGAATTGAGGCTAAGCCTG

A\_16\_P38163268

AACACATTTTGTCTCTTTCCCTAACATACAAATCCAGTTAGACTTCCAATTCATCCTAG

A\_16\_P02367333

AGACCCTCTGAGGATAATTTAGTGATCATATAATGACACACTCTATGTAAAATCCCCCAC

A\_16\_P17975751

ATCTGAGTCGATCTGCAAATATTTTGAAGCAAACACATCTTATTTTCTGTTTCCAGGCTG

CUST\_10422\_P1426210822

TATCGATGTTTTATTATTTCTATTAAATAGTTATATAATCACTCAAGCACTGATATCTG

CUST\_8594\_P1426210822 CTGTATTGCCTGTGATCATCATCCATAGAGCATAATGAGGATGGGCTTACTC

CUST\_8296\_P1426210822 AAAGCACAGACTGGCTATGTAACAGCCCCAGCAGGGAAGCACTGG

A\_18\_P14100613

AAGGCTAAGAGATGGGATTACACATGGTAAACAGGTAGTGGAATACATTTTCAGCATAAAT

A\_14\_P117121 CACTATGGCGCAGAGTCCAATGAAAATTTCCATGGTGATGTAGGTAACATTGG

A\_14\_P139311 TGTAGCAGGCATCTGAAATCTTTTTCTTTTTTTTTTTCATATCCCCTCGTTTGTTCATCAC

A\_18\_P22840353

ACCTTACTAAAATAATGCACTAAACATTGAAAATGGATGAGTTGTTGTCTATTCGGACTT

A\_18\_P15785882

ACTGTTAGCCCAAGTAGATTAAATGGTGACTTCTGCATAATTTGGTAAGAGGCCTATATG

A\_14\_P137849 GTTCTTATTCTAAAGGAGCAGGAGATGAATCCTGCCGATAATGTTTTTATAATGTGGCT

A\_14\_P138091 ATGCTTGCAAATTCCTTGTGCCCTGAAAATTTAAAGACATCCTTCAGAAAAAAAAGTGA

A\_14\_P122605 ACTGACTTTGTGAACACATATTTGCATTGGATTCAGGTAAATTTCTTAATGTCAAACCCG



A\_14\_P133183 AACGGTCTTTGAATCTTTTTTCATTTTAAGAGTTGAAAACCTTCATTGAAGAAATGTGCACG  
A\_14\_P124133 TTGTTTCATTGACACCTCCCTCTTGCCAGATTAAAAAAAATGTATTTTGGGTAGCAAAG  
A\_18\_P17044655 CCTTCTTTGGGAGTCCCCTTCCTTTCTCTTTTCCCTCACTCTCAC  
A\_14\_P106684 TCTGTGATTTTTTTTTTCTTGAGGAAGTTGGAAGCATCATCGGGAAGGTAATTATTGAT  
A\_16\_P37015615  
GCCATTTCAACTTAGCAATATTCCTACTGATTACCTAACATACTTAACTGCCATTCTCTG  
A\_14\_P106489 CCTCGACAATGGTCACTGCTCACTGAAGTCATCATATACAGTATATACAAAATAATGTAT  
A\_14\_P105939 AAAAGAGCCTTTTGGGGTTGGACAGACTTCTTGGGCTGATAGGAATATTTATG  
CUST\_4193\_PI426210822  
TACTTCATGTTTGTAAGGACAGGGAATCCTTCTGAAAATCTAGTTACATAAATTTATG  
A\_14\_P126772 GGGAAAGTTATAGAAATCCTGGAAGAATTAAAAACTGGGCTAAATGCTTGCAGCATTTTT  
A\_14\_P117309 TGCAGAGGCTTAGCACAGATTTCTTCAATTTAACCTTCATTTTTTTTCATTCCTCCATCT  
A\_18\_P14788998  
AAAATAAGAGCCAATATACCTTACTTAGAAAGGGGGTTACATCTTTACTATGGCAAGGGC  
A\_14\_P107343 CTTTAAGCATTACAGCCTTGAGAGGGTATTGATTATGAGTTCTGTTTTGCAGATTGAAA  
A\_14\_P109898 TTTTTTTTTGCTGGTTCTTTTTTCACAATCTAGTCTGTGGCTGGAACACACTATACAT  
CUST\_7571\_PI426210822 CTCTGTTCTCAGTCCACAGCTCCACCAGCCAGTTGCTTGTGCAG  
A\_14\_P111895 TTTTAGTGATGAAGATGCATCAATTGAAACAATGAGCCATTGCAGTGGTTATAGCGATCC  
A\_16\_P19667420  
AAACCAAGCATTGAAATGATGGTCATTTAAGCATTCTTCTCAGAAAACTACCTACCTAGG  
A\_18\_P14671874  
ACTTTTAGCCTTACGTTAACTTGCTTCTTACAACCCTAAACAATGAGTGTCTCATCAGTG  
A\_16\_P17018972  
TGGGTTACAATCTGAAGATTAACACCAGTGCAATATATGATTAGTTTAGAAGCCTCCCTT  
A\_16\_P21399118  
TTACTCCATGTGCCTGTAATAAGAACATGATGATGTGTATAACTGAAGGTAATCTGGCAC  
CUST\_1337\_PI426210822  
TCCCATTTTTAGAAATGGAGGAGCCATACGACTTAATGAATTAAGCATGTAATGCAGG  
A\_18\_P13071134  
TCAAAGTAGTTCAATTTCTAGAGATCTCATGACCAATGAGCAATTATTCAGATTCCCTGT  
A\_14\_P119742 CTGATGTTTTCTGCCCTTGGGTATTTAAACCTGTTTATCATCTGTAAGGCATAAATCAG  
A\_14\_P200181 CTCTTAGATGTCACCTGCAACCATCTAGAAAGTTTGTATCCCCTGTATGGGAG  
A\_14\_P109268 CTCACCTACAGAGAAGCCATTTTTATGTGTCTAGGCCTTTTTTTTTTGTCTGGAGAT  
A\_14\_P200357 CTA CTGCTATTATATATTCTATAACAATCCTGCGCCCTTAACGGCAGGACCCTTTCA  
CUST\_808\_PI426210822 CCTTATACCTTGCTCTTCTTCTTCCCAGGATGGCCTGATCATTAC  
A\_14\_P104426 CTATATTAATCTTTCAATATAGAGATCTGGAGGGCTGGCCTGTGAGAAAGAACAGAAGT  
A\_14\_P200307 CTCGCCCTTACATGACATCATTCTAGATAGGACTCTGGGTAATTGAGTTATTTGTATTGGA  
CUST\_9617\_PI426210822 AACACTGGCACAGGAAGCCTCCAGGGCGTCTGGAGCATGCACACAT

A\_16\_P17119838

AGAGCATCCGGTTTAAATTATTCATGTCGTTATCACTCATATTTTTGCCAAACACTCCAG

A\_14\_P133133 GAAAAGTTTGAACGAAGTGAGAGTGGTGGGAAGATTATGACCCCTGAAAG

A\_14\_P137600 TCTTTATCTCAGGCAAAAACAGCATTGGCATCCTTGTCTTTCATCCATTAACCTTTATATT

CUST\_3478\_PI426210822 TACCCCTAAAATGGCTCTGGGGCTCCAGCCATTGTATGTGTTTTT

A\_14\_P130588 ATCTGGCTTTCTACTTACTCCTGGCATGCTCCCATATTGTCCTTTGAATTTTCAT

A\_14\_P133559 AGAGGGGGTTGGGTTTTCAATGTGAGAACAGCACAATAAACTTGATGTCTAG

A\_14\_P136712 CGGCGAGGAGCCAGTTTGTATTACTTATTTATTCTTTCAGGGCAATGGTGTGTC

CUST\_3131\_PI426210822 GCTGTGTCTTCTGCCAGGACTCCTGCAGGGGCTGCCAGACCAG

A\_14\_P122276 CTGAACTACAGGGAGGCATGTTACATGTTTGAGGTGAGAAAAACGGTAAAAAGATTTATA

A\_16\_P00962333

AAAATCATCATCACATGCTAGATTACATTCTCCTAACTCTGGACATAAAATGGAGAAGCCA

A\_16\_P18884298

ATTGCTCAGTCCTTATGTTGGTGTCTCATTTCACATGATAGAGTTCCAAACCTTTTGTA

A\_14\_P116368 GGGAGGAACTATGAATCTTCCCAAGGCCTTTTGAATTTTCAGCATATTATAATTTCTAGG

A\_14\_P133224 AGTTGTTTCTATGATCTGGGAGAAATGACAGGAGAAACAAGACTGATACTGGCTTAGAT

A\_14\_P116024 TGCCAGAACTGTCACATTTCTAGCATCTTACCACATATATTTTATCTTGTTCCTATT

CUST\_6060\_PI426210822 AGAGGGAAAATGTGAGCAGAAGTATGGAGAACAGGACTCCCATGA

A\_14\_P119786 TTTACAAAATCGAGTTAATCCTTCACTTCTAATCCTCTGTGAGAAAAGTGCCCTACTG

A\_14\_P119813 TAGAATCCGTCAATACCAACTTTTAAAGATCAAGGAGAATTGAGTTACAGAGACACCACA

CUST\_6238\_PI426210822 GCCAAGCCAAATTCTGAAGCAGCGCAGTTGTTTGTGTCTGAACT

A\_18\_P22841205 CTCTCTGGGGCTTTCCAGGTTTCCTTGGAGCCAAGAATTTTAATCTT

A\_14\_P202115 TTTATAAATCCTTTCAGACATCATAAAGAAAAGAACTTCCCCACAGAGTTCATCCCACAT

A\_18\_P25514485

AGCCCTGAGATCTAACATATATGCATCTCACACTTGTATTTCCAAAGAATAAACAGGCTC

A\_14\_P108024 GACATCCACAGGGGAACCATCTGAAATTCAATTAATTAAGTGTGCATATTTTGAACAGTT

A\_14\_P106844 ACTCATCCAAGATGCAAAAGGAATATAGAAATTAACAAACAGCCATGGCTGTTAAGGAACT

A\_14\_P124911 CAGTGCTAGATGAATCTTGTCTGAAAATAGCAAAGATGTTCTGGAGCATCTCATAGATGG

CUST\_6897\_PI426210822

CTCAAGTAAAATTCAACCCTTAGATGTTTATAGTCATCTTGGCCTGGCCATTAAGATGAT

A\_16\_P00685479

AAATCACAGTAGTAGAAGAGAGGGGTATAGAATTAACAAACATTTGGTTCAGGGCAGTTGAC

A\_14\_P132404 CTGGTCTGCCACTCTGTTGTCCAGAGTCAAGTTTAAAGGTATTACATTATAGGACAG

A\_14\_P131068 TTACTGGACATAACATTTTCAGAATAGTTGGTTCATCTAGCAACCGCCTCAAAAATGTGTAA

A\_16\_P35635113

TCCAATCTAACATCTCATCTCTATCCTCTACAGTAACAATATCTAAGTCTGTGTGTTCCA

A\_14\_P103227 TTTAACCAGTCTTTCTAGTTGTCTCTATATGAGCATTGACCTGTTGCAAATCATTGAA

A\_16\_P00696866

AAATGTGGAACCAAAAAATTGAGAGCATTTTGACTCTAGTCTTGTAACATCTCGCTCAAC  
A\_16\_P20057400  
CTTCTCTTTCCTGGTCTATAGTAACTCCAATAAATGAAATTCACAAGTCTATCCAAGGGC  
A\_14\_P110656 CTCCACCTTACCTTGGCAAACCTGGATGTCTCATTTCAAAGAGGTAATATTTTTTGT  
A\_14\_P112384 TGTTTCAAGGATCATTACCTGGCTAATCCACAATATATCAAATGCTGACAGACCTAC  
A\_14\_P109529 ATTTAAAGCATCTACCTCCATTGCGTCAAACATTTGCCAAAGAAATAATCTCCCTATTG  
CUST\_3890\_PI426210822 ATTATCATTACAGCTGCCACCTCCTGGATCCTGCCCTGTAAACATG  
CUST\_1901\_PI426210822 GGGCTACCGGGCATCTCTGTAGAAATGGTAAAAATGCCTACGTCTA  
A\_16\_P18678520  
AGATGTTCAAGTGACTTCAAAAATCAACAAGCAAAAATGAAACTCAGTATTACCACATCCCCG  
A\_14\_P111429 CTCTCCAAAGGACTCCATTTTTTCTACTTCCTTTTTATATGTATCCTACTTATCTATCCT  
A\_14\_P115947 CTAATGCCAAGGTAGGAATAACAAGGGCACCTAGTATGTTTTGCTTTGGGAG  
A\_14\_P139376 ATATTGCATTTTCTAGTTCAAGTTGCTTAAGTTATGTTGCAGATAGCACCGTGCTTGACA  
A\_16\_P02468904  
GCAGTAGCATTACTCAATAAAGGAAACCAACATATTACAGTCATATACTAGACCCACCA  
A\_14\_P139102 CACTTTAGGAAAGAGGCTTAGTCATTTTGCCAGACACATTAATTTAATCCACTGATGTG  
CUST\_5158\_PI426210822 CAATTCAGAGTTGAGGAGCTACTACTAATCTGTGGATAGTCCTAATCCCAGC  
A\_16\_P17797823  
AATACCTCTCCAAACCTTATGAGTCAACATTAACCGAATGGAAGTTAGTATAACCAGGAAA  
A\_14\_P128093 CCAGAGTAATCCAGCAGAAGTGGTTTCAATGTGTGTTTCTCTTATCTGGAGAATGAATAT  
CUST\_8622\_PI426210822  
ATGAAAATAATAGAGGGGAAGAATGACAGACCTTCTAGTCTATCTGAAATAGCAAAATT  
A\_14\_P120078 CTTCCCTGTATTTCTAAGAACTCTCTTTTCCCCTGCTTTCTCTGGATTTTGG  
A\_14\_P108026 TTTTTTTTTTAAACCTCAACTTTATTCATCTTCCATGTGCCTGCTGAGTCTCAGACTCC  
A\_16\_P20110634  
AAAGCAGAGAAGGTAATGAAAGGTGCTCTATACTGTAAATCACTCAATCGATTGTAATCA  
A\_14\_P111023 CTCCACGGTTTTTTCAAAGAAAATTCTCCTAATCCCAGTTAAATATACACAACCGAGTC  
A\_16\_P16782190  
AAAGCCTAGCAAAGGGATAAATTGGAACATCTTATCACCGATGTCTTCACTATGAATCTA  
CUST\_1703\_PI426210822 TCCTAGCTCCAGCACAGCCTCTGCACAATGGGAGCTTCGTCTTAA  
A\_14\_P102929 GTTTTTTTTGAGTGTGAGAAAACCTCAAAGTATGCCTCTTAACCACTATCGTCAGAAGTTTA  
A\_14\_P123559 CCACCTTCTGTCTCTACTCTTCCCAGATACTTGTCTGATTTGCATCTATCTTA  
A\_16\_P00047795  
TGACATCCACTTTGTTTAAATTCTCATCATTGGCATTCCAAGAAAGAAAGTCTCTTCTCA  
A\_16\_P19477135  
ACACTGTCCTATGATTCACATCAGAAACATAAAGAGTTAGTGCTAAGATCATCTGTGTGC  
A\_14\_P125643 TCTACAAACCTAAAATGTATCCATTACAGATTTGACCTTCCCTGTTCCCTTTCTTATTCTG  
A\_14\_P129927 CTCAGTCTCCATTTCTGTAAAGTAAAATTAACAACATATGTGCTCAAAGATGGGAGG

A\_16\_P19154571

ACACAGGAAAAGATAAACACTATAGTTGGCACATTTAAAAGGTATATTGAACTGGGCTCT

CUST\_7149\_PI426210822

GAGGATGGAAGCTCAAGTTGTTAAAGGCCTAAAAGGTTGCATGTTACATATAGAACAA

A\_14\_P134766 ACACAGCATTTTAGTAGAAATACTTTGTGGGAAAGAGTATAATGGGTTTCACAGGTAGCA

A\_14\_P200997 AAAAGACAACCTTCATTTCTTTCTCTGAAACAAGCAGTTTCCGGATTTGATTTTTGCTACA

A\_14\_P116693 TCCTCAATTAGTGCCCAATTCAAATACCAGATACAATGATGTTATTCTGAGTAACACCCA

A\_14\_P112345 TTGGAGATTAAGATGACGTGTGTAACCGCTTAGGTTGCTGTTACTATCTCAAGATCTCT

A\_14\_P136630 CTTACAGGTAGAGGTCAGGAATTACAGAAAAAAACCCCTCACTTATTACTTTGAAGACA

A\_16\_P00502918

AACTCTCAAGGACTCATGTATACCATATGTTCCACTTATTGCTTTGTTAGTCAAAAATGCA

A\_14\_P122371 ACTAATTAAGTAAAGAAAGTGGGAAGGACTAGCAAGTGTAAGTCTCTGCAGTTTTTTT

A\_14\_P114187 GGAAGTTACCTCTTCCATTGTCTCTCAATACAAGATGATTTGACCTCACTTGC

CUST\_2747\_PI426210822 GTCATAATGGCAGCAAATGCTTGAGGGAATCCCTGAGTATGCATCTATTT

A\_14\_P127218 TAATGAACTGAATTCTTCTCTTCAGCCTTATAATGCCTTCCCTCTCTGCAGTAAAATGGAT

A\_16\_P20168125

GGTGCCTTCTCTCAAGAATGTGTTAACAGTGAACAGTTCTGCATTTTTTAATTTGCTACA

A\_14\_P114424 GAGCAAGAAATCAGGCTTGATTAATATTTAGATATGAACCCATCACCCATCTCTTCTCAG

A\_18\_P15392112

AATACGAATGAAGAAGGACAATAAGCCCATCTCATATCACAAATGGTTATACTAACGGGA

A\_16\_P02428253

GGCTGCTTCACTTAGAATTTTGCTAATGTAGTTGTCTGCCTAAAGAGAATATTCATGCCT

A\_14\_P130829 GATCCACATTTTTACTGTAAGCAGAACTTAGGACCCAAGATTATAATGCTGCAGAGGAT

A\_14\_P106860 AGTGGGATTCTACTTTATGTAATGGGGTCGAAATCTTTGAACACATTATTTATAAAAAC

CUST\_7989\_PI426210822 AGTGTCTGCCCTTGAAAATGGATTACATGTGGATGGCAGAGTACA

A\_16\_P18917475

CTGTGCCCTATAGACAATACTCCTGGTTATTGAGCATCCTGAGACATTTATAAAAAGAAGA

A\_16\_P20180771

CCCCAACAGTTATTACATCACTGATGCATCTAAAAGTCACTGGTATTTGAAAGTCAAGA

A\_16\_P16189097

AGGACCATCAAATATTTCTGCTCAATAAAGGTTACAGTGTTTATCCTGGAATCAGATGCT

CUST\_4476\_PI426210822 CTGGGTTCTTGTCTCTGACCAATCCCAGTCATGGCTCTCCCAT

CUST\_2292\_PI426210822

CCTACTTTTTTTTTTTTTTTTTTCCCGCTGAGGGATCTTGTCCCCAAATTAATGCTT

CUST\_9716\_PI426210822

AAAGGCTTTCACTAGATGCTAGTTATACCCCCAGTAACTATGAACAAGATGAAATTTTTTA

A\_18\_P14136977

AATAACCATATGGATCTGTTTTGCCTGATTAGAAGGGATTTCTAAAGCATGATGAGATGG

A\_14\_P121557 TAAATATGTTGGTTATTCTTCCTTGTCTGGGAGGTTGTGCCAAAGTTTACATAGATTAGA  
CUST\_10012\_P1426210822 AACGCTTACTTTGCCCCAGTCCCTTGCTTTGCCTGGACTAGGCACT

A\_14\_P113017 TCTTGGCTTTAAGGCATACACTCCTAGTCTGACTTTTATAAATATGAGGCTTAATCTCCT  
A\_18\_P22841566

GAAAAAAGTTAGGAAGATCTAGGTTTTGTTCTAGGAGTTGCCAGTTTGTGAGAGTAATGT

A\_14\_P139873 AAGCCCATATGGGTGGTAATTTTTTCCTAATGCTCAGGCTATAGTGATATTCAGATGAA  
A\_16\_P20271523

TTGATCTCACTTTTTTACGCAATTATGAGTCATTCCACATGTTAGCATTAGCAACCCAAG

A\_14\_P131967 CTCTGAATACTTGCTGGCTGGAAGGAAATCCAGAAGACTATTTAACATTGATTAGAAAAGT

A\_14\_P103215 ACCTATGGGTATTAACAAAGATCCCCAGTATAGTTAGGTATTCTCCCCAAATAATGACAT

A\_14\_P102419 ATTGAAGAAAATAACTTTCAGGCTTAGGTCTGAGACCTCATGTATTATGACACCAGGTAA

CUST\_7259\_P1426210822 CCCTTGGCTGGCAGCACAGGCTCTGCAAAGGGGGTGGGTGAGTGA

A\_16\_P15364453

ATACCTGTCTCTCTTAATAGTCACTGACCACCTTATGAATTGTATCTCCATATCACAGCA

A\_14\_P135673 AATGAGCAGCAAGGAGATTGTGACCCTCGTGGAAGATTTTCACAGAG

A\_14\_P135107 ACAAATAGGTGACAAAATTATTGACTACAATGAAGAATTCGCCTCTTTTTGTCAACAAG

A\_14\_P130024 TTGTTTTACTTCAAATCTGGGCTTTCCCTTGATGTTAGTTTTGTGGAGCGGATC

A\_14\_P107069 TGGCCCAACAACACTTTTAAGAACTTGAATACTGAAAGACATCTATGAATTTGAAGAGAAA

A\_14\_P105675 CACCAGTCTCTTGCTGCTCTCAGCAAAGTCATCAGAGGAACTACTTTACT

A\_14\_P127891 CTACCAAACACTTGAAGGGTGAGTTGCTATTAAAATACCGTGGTAACAGTATTTTCACAA

A\_14\_P110534 CCCAGACAAATGGAAGTGTATGATGCCCTTCGAAAAATGATCAACTATTGACCATATAG

CUST\_9988\_P1426210822 GTGTGTGGAACCAGACAGGGCACAGAGTGGGGAGTGTTGTGGCCG

A\_14\_P112470 ATTTCTGCATGTAGATAGACCTAACCCAGTGATGAGAAAACAGAGGCTACTAAATAAAC

A\_16\_P03798188

CTCTCACAAAGGATGTGCAAAGACCAGTTTTGTATAACCAATAAGATGTGCGAGTTTGTAAAT

CUST\_1357\_P1426210822 AGGTCACCCCCACCCCTTCCAGGTCCCTCCACCCTGCACTTCT

A\_14\_P125713 CTATCTACAAGTTTTTACATGCAAGGTCAAGTATCTCAATCCAGAGGACTTTTGTTTTC

A\_14\_P117664 CTCCAGAAAGTATTAAGGAATGACTTTAGTGCTCATTTGGATGCAGTAAGTGGTTTTGATC

A\_16\_P17918620

CACCCATTCTTGGCATTAAATTGGCTCTAGTAGTTTATACTACATCTTTGATCATCCC

A\_14\_P105875 CTGAAGTGATTTGAGGATTTATTTTCAGGAGATTATGCAGGATTTCCCTGGTTGTGGTTTA

A\_16\_P21488855

TTAAGAGTTGTAAACCTCTACAAACTACACAGCCAAACTAAAGTCAGTTCAGAAGGATGT

CUST\_9600\_P1426210822

ATCATATCAAAGTGATGACCTTTCAGCAATCTGAATTCCTTTGGCTCTTGATGTGTTT

A\_14\_P116475 ACTTGGTGACATTATGGAGGTTTATGGCATAACAGAGTTAAATCTCCTTCTTTATACCTTG

A\_14\_P106273 CGGAAAGATGAGGTGTGCCTTGGATCTATTTCACTTTAGTATTTACAATGGCTTTGTTTA

A\_16\_P37721204

TCTGCCTTTTACGTTAGATCCTCAATCCAAGTAAACTTTGAAAATACATCAACAACGGTT  
A\_14\_P105850 CTTGTAAACTGGATATATTGCTGCCTACAAAGCAATGGTTTGTCTAACCAACCACAATAAGT  
A\_14\_P123611 TTTTTATTTTTTTGGCATTGACTATGTTGGAAATTGGCTACTCCACCAACATTTCTCCTC  
A\_14\_P118236

ACGAGGAAGATAAAAAGAATAAGATATGAAGAACAACGACCATCTCTCAAGGAAGCAAAGT  
A\_16\_P55109649 GCACCTTGCCTAGGCTTACCTTTCAAAGGGAGGAGTGTCAAATA  
A\_18\_P15972616

TTTTGTCTTTTTAAAGCGTGTGTGTTTTCTCTTATAACGGAAATGCTATGAGAACGTGGA  
A\_14\_P136794 GCACATATTTTTCCCCCAATGCTCAATATAATATGCAAATCAAAGGACCCTCATACTA  
A\_14\_P128325 AAGCACTCCTAGAAGAGCCTATTATATCTATCCAAAATCTGCTGGCTTGGAAATAACTTT  
A\_14\_P114904 ATCTAAACATTTGCAAATTCACAGTCGTATTTCAGTCATCCGGCACATTATGAACCTCCAC  
A\_14\_P128037 GAACAAGCCAAAGGCTAGTTTTTTTTTTTTCAGTTTATTGTATACACACACATTTCACTGGT  
CUST\_2904\_PI426210822 CCATAAGCAGCTGATGTTAGTCTTGTGCCTTTGGTTTCTTCTTCTACCT  
CUST\_2072\_PI426210822

GATTTCTAATTTAACATTGATGAAGATGCCAAGTTAAATAGTCCTTTTGAATGAAACAAA  
A\_16\_P37465821

ACCAAGAGTTCTCAATCTCTCCATCAAAAAAATTCCTAATTCTGCACATGGACTTTCTTA  
A\_14\_P132881 GCATCTAAGAAAAACCCTTCAATGCCTCTATGGTTTGTAAACCAATGTTAAAAGTCCTT  
A\_14\_P135930 TTGAATGCAACTTGGACCAAGAACTCAAACCTTTTTGTATCTCGACACTCTGCAAGATT  
CUST\_8090\_PI426210822 AGTGAGGCTGTCCATGGGGCAAGAAGCCCTGTTACACCTGTGTAG  
A\_14\_P119517 TGGTTACCAGCAAGTCTCAACTCTTGTTTATTTTTAAGCCAATGAGTTTGGAGAGTGTTT  
CUST\_3978\_PI426210822 CAGGTCCATATCGGGATTGGGGCTCCAGCAGGATCAGAATGACTT  
A\_14\_P102465 CTCTCAGAAGTGGAGCACTATTTACCTTTAACATTCTGCCCTTGACATTGGG  
A\_14\_P107088 CACACATACCCTAGAATAAGTAGGTTTTTAATTCCTTCATTAAGCACCACAAGGACTTCT  
A\_16\_P01250464

AACCTTTAATCCAAGTAATGTTTCATCTACGGAGAGTCTTTTTATCAACAAGCCTAGTCCA  
A\_16\_P18805544

AAGTGCCATCGTTTTTCATTCATATAAACACGTCTTGCTAAAATGGATCTTACATTCCACG  
A\_14\_P117633 TCGCTCAGAAAGGATTAATGGAGTCTGATGTTTAATATCCTGGAGAACAATTAATTTGCC  
CUST\_4142\_PI426210822 TCCCATAAGTCATAATCTCAGCAGGCTCCTGTGTCTGAGCTATTTCTGT  
A\_16\_P19951239

AAAAAAAAAGCAACAAAATGGTGTAGACAGGTAAAAACCTTTCACATTCACATCCTAACA  
A\_14\_P200192 TTTTTTCCCTTAAGTCAGAATGTGTAGTTAGTTGTGGAAATAGCCTACCAGTATGTGTC  
A\_18\_P12830647

TCCCAGTTTTCTCTCAAAAAATGGAATAAAAGCCTCCAAATGTAGTTATATCAAAAGTCC  
A\_14\_P125670 CAAATCGCCAAACTAATAATGGTGAACAAACAAGGCAGAATTCTCCGCTCTTTGTATTAA  
A\_14\_P138442 TCCTTTTCAGATCTTACAGGTGAACAAGGTGATGTCCATCTTGTTTTTATGTGATATTTCT  
CUST\_2141\_PI426210822 GAAGGAGTAGGAGTTAGCAGACAGGCAGGGTGGGCTGGAGCAGAG

A\_16\_P18384524

GGTTCTCTCCATAACCTAAAAACAACCTTTATTACAGACGTTAGTCTACTGACATTTGCC

A\_16\_P58424311 CTCAAAGGGAGAAGATTATACAGGGGCATGGGTCACTGGCATCATTTTAG

A\_14\_P201999 ATTGGTGCTGAGAGTTTACAGGAGACACTAGGGTTTGTACAGACAGATTATTTAAAGAA

A\_14\_P103092 ATGGAGATAAGCATGGCATGGTATGAATATGAGGCCAGAGTAACAAATTGATAAAAGACA

A\_18\_P16082600

ACAAGTTCAAACCCAGAGAGAAAGTTAAGCCCATTTTAGTCCTTCCTAGTTTATAAGCAT

A\_16\_P16155714

AAACCAGGTGATAGAGGATATAGGCAATGGTCCTACTTACTAAGAATGTTACATGCACAT

A\_14\_P111793 TCTGGACATTTATGGCTTTGATTCAAGAGAGATCTGTGAGTCTCCTGTCATTTTGT

A\_16\_P39238824

ACCCATTTTACATACATTTCTCTGAAACTAGATTATACAGTTCAAATCCTATTAAGCCAC

A\_14\_P200475 CTTGGGATCACTTAGTTGTGACCGAGTTTTAATGTTTCATCAGAGTATGGCTCTTGT

CUST\_9937\_PI426210822 CTTGAGGCCATTCACAACTGAGGATTTGGACCACTTCAGAGTGAA

CUST\_480\_PI426210822

GCAAATCCTTTTAGCCAAGTGGATTTGGCGATCAACCAAAGCAGAATAAAATGT

CUST\_6872\_PI426210822

AGTGGCTAATTTTTTATGACAGAAGGCATCGAGGGCTTGTAAGTTTGTTTTTCTTATCAA

A\_14\_P116646 TAATTTGGAAAGAGTTTTTCAGGAACCTATGTTTGGTTTAAGGACAGTTGACCTACATTGT

A\_18\_P24040920

AGTGAAACAGAAGTTATAAGGGTTTCTAATCAACACAGTTCATGAATGTCATACTCCCAG

A\_16\_P18197348

AGGATAGCATTTTGATTTTCATTCACAAAGTTGACGGACATATACAAAAACAGCCCTGAA

A\_14\_P114680 AACCATCTGTTGCATAAAAATGAGAATTATACTTTCAACCAAAGGCAACTTGCTGTTGC

CUST\_5563\_PI426210822

GGAAGCAGAGCTGATCTTTAACCTGTGTATATATACACAACAGTTTGACACAGAGCAT

A\_14\_P115646 CTCACGTTGCTTCAGAATGTGAGAATATTTGTCATATGTTCTCCAGAAATGAATCCGTAG

A\_14\_P103915 ACATAGACCTCATAAGCCCTGTTGTCAGCACATATTCCTCATAAATACTCATCTTCCTTT

A\_14\_P113335 TTAAAGCATCATCTTCAATGAGTGTATCAATCCATTGGCAATCAATGGTGGGCTAAAAA

CUST\_6312\_PI426210822

GAGCTAGAAACAGAAAAGTTATGGCCATGACAGAATTACTTGTCAAGGGACTATGATG

A\_14\_P200521 GTTGCTTCATTTCTTTTTCTAGCAGGATGCATGATTGGGCAAGAAGTTGCTTAAA

CUST\_2825\_PI426210822

ATAAGCTCAACTATTAACATATTTATTTTATCATTTTTTAAAAAGAGCTTAGAAATTC

A\_18\_P14134318 CATTCTAAGGTCAATTTGGAGAATTCTCTGTTCCAATAAGTGGGATCCACATG

A\_16\_P18509391

AAAAAAGCAAAGGATATAGTCAAACACCAAACCTATGCGTCATCCAGTTTACAAGAAGGAG

A\_18\_P22842850 ATATAAACTGTGGGTGTGGCAAGACCCCGAAGACATTTACATCTTTATCG

A\_14\_P118119 CAGGGGCTTAATCAGCCTAGTTTCTCACTCTTACTTTTTTTTTCTTGAAAGTTTGGAAACA

A\_14\_P120926 TTAAATAGGAGGCTTCTCTCCTTTACTCTGGTATTATGTTAAAAGCATCTATCTTCCCTC

CUST\_8149\_PI426210822 GCGGGAGTGGGCCAGGATGGTGTAAACCCATCCACAGGGGAGTCG

CUST\_2876\_PI426210822 TTATGGAAATGTGATAGGAAATGAGGTGGAGGTGAAAGGTCAGGTAACCTGT

CUST\_4030\_PI426210822 GCGTCATCCTCCAGGGAGGACATAGCTGGTAATGACAAAATGTGG

A\_18\_P16464285

ATTACAGAGGTAGAGTTAGGCAATAGTAGTAAAATGGACTATAGTTCCCTCACATGCACACA

A\_14\_P117763 TAGTAAATAGTATTATTGGACTTTAAGTGCTCCTTCAGAGTGAGGACAAGGTATCCCTGA

A\_14\_P128714

ACTGGAGGAGAAAACAGAATTCAAAGGAGAAATTATGTTCTACAAGAAAAACGGTGAGTT

A\_16\_P19163166

ACATTTTCCAAACAAAACAATGACTTCTTAAAACCCAATCCAAATCAAACCTGTGTTTCCC

A\_16\_P18126981

GAGCATATCCACCAAATTCTCTAGCACATACCCAATATTTGAATTTTTTCATCACCCTG

A\_14\_P130224 TCTTGTGGAGAATACCAAGAAAATGTGTATTTGCCCATTTGCTAAATATGATATATGCCAT

A\_14\_P129896 TTAAATTAAGCCTTCTAATGTTCCACTGTTTGGAGAACAGAAGATAGCAGGCTGTGTA

A\_18\_P22841363

ATTAGGACAATTCACACAATAGAATAGGGTGTTTTGCCTGGTGTTCATTTTAAGGTGAA

A\_16\_P00132444

ACACACTACAGTGTTTAGATAACCTTCCTTTTCGAATAGAAAAACATTTCCACTTCTCCA

CUST\_9088\_PI426210822 TATCTGTGTGATGAGATAAGGTAGTCCCCTGCTGTAATGAAAATGCACAGACA

A\_16\_P17040865

TCCACGATACATTCAATCTTACTTGCTCATCTTTATTTTCCACCCGTAATAATACTGCCA

A\_14\_P116258 GGTTGCTTAATGTGTTGATCAGTTTACTGGTCATTATTTTCGATGGATCTGACCTTCTAA

A\_16\_P17665223

AAAAGTCTCAAAGTCTATGGTGTTCAAACAGGATTACTTTTGAAAAGGTCATGTGCTTA

CUST\_10199\_PI426210822 CATCTAAGTAAGGCTGTTTGGGGCAATCTGTTGTTTCCCTAGGAGTT

A\_16\_P20998220

TGGTGGTCACCATATATACTTATTTTTCTTCTACTGTAAAGCAGGAATAATTGTAGGGC

A\_14\_P116322 CCACTGTTACGTAACAAGTTTGGATGACTCCTTCCAGAGATAGTTTATGCAACTATAATC

A\_14\_P128421 TTCCCTGAAACCATTCATAAAAACCTCTGATCAAAGTGTCAGTGCTTTGAGGGTG

A\_14\_P101458 AAAATGCATTGTTCCCTTCAGAGACTTGTCTGGGTGTTTTAGTTATGCATAAGTAATTCT

A\_14\_P108801 GTTTCTTGAATGGGAGAACTCCAGAAAAGGAGAATAGTGAATTTAATATCAGAGACAC

CUST\_1347\_PI426210822 TGCTTTTCCCCTGCTTCTTTGAGGTGGATAAATGTTTTGTTTCAGTAGTGG

A\_16\_P17809785

CCACTGTATATGTGCGTATCTACATCATCATCCTTATTTGTCACAGTATTTAGACCCTCA

A\_14\_P138262 GCCTAGTCAGTTTGGTTTTATTTTTCTACAGTTCTAAGTCCCCTATACCCAAATATGGTT

CUST\_371\_PI426210822 CACAGAGCCCCAGACCCAGCTTCTCTCAGAGTACTTGCTTGAGTG



A\_14\_P126376 CAGTGGGCTCACTGTCATATTGATCACAATTTTATTTTCAACCACTGCTTGAAGAAATTT

A\_16\_P16230160

TAGTCACTGTGGAGATATTTGTTGACCAGTAAATACTATCAAGATAACTTGGGCTTGTGG

A\_16\_P37646744

AGTCATGTATACGTTCAAGCAAATATCATCCACAGACAAATATCAATGGGATCCTCTTGA

A\_14\_P119944 ATCAGGACTGCTGCTACGGTTTTGGAATTAATCTCAAACACATAACTTTAATAGAAGGTC

A\_16\_P21475080

AAGACAAATCTAATGATGACAGGCTAAATCACTCTAGTCCTCATCTCTTAACACCAGAAG

A\_18\_P22841094 GGGCTTTCATTCTGGGGATTTGGGTGGCTTGGTGCAAGTGAAAT

A\_16\_P18536317

AAAGAAGGACGACATATCTGAAAATAGATCCCATATTAGGGCTACAGATGAGTTACTTGG

A\_14\_P116852 TTTACTCTTTTTTATTAAAAATGTCACGGGAAGTCCACTTGAACATTTGAAGTCAACGCC

A\_14\_P127215 TTATGATATCTTGTTCAGTTTGAAACCGGAGGCTTCTAACAACCTGTCATTTTATCCAGTC

CUST\_5204\_PI426210822 ATGTTCAAGTATTGTCCAGGAGACCCAGGGAGCTCAAGACAGAGCT

A\_16\_P19848592

AGAATATTAATGTTGCTTGTCTTATAGTTGTCAATCCCCTATAGAGTTCTCTCTCCAGGC

A\_14\_P120957 CTCTTAGGATATAATCCTAGTCTTCCTCAAATTATATCCATGGGGAACTACTGCCCTAT

A\_14\_P106847 GATAATCTTAGCAAGTATTTGTACACCTATCCCAAGTGTCTGATGAAGACAACGTT

CUST\_7420\_PI426210822 TTATCCAGAGCAAAGGAAGGAAAACCTCCTCTGCACAATGCACT

A\_14\_P103989 AAACCACATCCTCCCTAAATAACCGAAAAGGTATGCATCCTATTATGGAATGTTAAATGT

A\_14\_P134749 CATTTCTTTCTTCACAAGTGCCTGTAACATGAAAAGAATGCCACAAAAAGAAGGTTGTTA

A\_14\_P119626 CTGAAATTGCAGAAAAATTTGTTTTCTTCATTGGCAGTAAAAATGGGGTAATGCTTTCTT

A\_14\_P133980 ACCAATGGAGACATTCTTGTGTTATACAACCTTAGTAAACATTATCGACGCTTTTTCCAG

A\_14\_P100859 AATATCTATAGGCTATTGGTTTTTCAGTTCCGCTATTGCTAAGCATTGTTTCCCTGGTAAT

A\_18\_P12013919

GCAAGCCCTATCTTTTATTGATCCAGTTCAACCTATAATTGTCCTAGGACTTAGTGTAGT

A\_16\_P01855208

CCAGCAGTCTAAATAAAACATCTTTCTCTTAAACAACATGAGCAATATTCAAGCATTCCC

CUST\_6488\_PI426210822 CATTCTTTCAGATGTGGCTCAATTGCTACCTGTCTCTGGAAGCTTCATGTA

A\_14\_P110828 ATGTGGCAGAAATCTGTCTTGTGACTTCTGATTGTGTAATACATTTAGAAAGACCTTCTG

A\_16\_P17100327

GGCCCTCCACATTATAACTTTTTTTTTATCCACCTGATTTTAAGATGCTATCAAAACCA

A\_16\_P40955230

CACTCTCAATGCATGTCTTTAGTCTTCTTTGAAAAGTATGCACCACACCATATTTTTCA

A\_16\_P03369051

AAGATATTAAGGTCAATTTTACTTCCACTATCAAGGCTCGATTTACTCATGGTGCAGGA

A\_16\_P15131815

AAACATCATTGCCCAATTTTCGAAATTTCCCCTTGTTATTTTTTTCTCCACATTTTTTCGC

CUST\_1225\_PI426210822

CAGCATGGCAAATTAACAAAGCCTGTTCAAGATTAAACTCTGAGAAAGAAATGCAAGAG

A\_16\_P19935545

CCACTGACCATGGTTATTAGATTTGCATCTTGAGTAACAAAGTTCTGTAAAAATCTCACC

A\_14\_P109049 CTCATTGAGGCTGTCCAGAAAGGAAACAGTAATAGGAAATCATAATCTTGGTTGACATAT

A\_16\_P03220335

ATCATTGGAGCATAGAACTCTGGAAGCATTTAATGATGTAAGATGTGGCGTAGAACAAAC

A\_16\_P40175468

AGTGCCATCACAATATTGGAACATTTACCAACTCTATTAACATAACATATTGGCCAAGTCA

A\_14\_P134568 ACCTTTTTAGAGCAAAGAAGATTTTCTGAATATCTGCATTGAACCTGACACCATCAGCAA

A\_14\_P102831 CCAGTCTTGCAAAACTCCATCCTGACGACCCAGTATCTGTCAAAAAGAAATA

A\_18\_P14134122 AGCAAGGGGGCGATGGCCACAGAGTCCTTAGCCAGCCAAGGAAAT

CUST\_6635\_PI426210822 AAGAACATCTCCCTAAACATCTCTATCTCCAACCTCGGAGATGATGCC

CUST\_4255\_PI426210822

TTAGAGCCTAGATAAAAAGTGTTTGGCAAGTCTCTAAAGCATATTTCAAGAGAAAAAGGAG

A\_16\_P30952524 AGAATCATGTCTCCAACCTCCTTTGTATATGGCGAGTCCGTGGAC

A\_14\_P117985 AACCAAGAAATCTTTATGCTGCATATTACAGAAATAAAAAGATGATTGAGAGAAATGCTTC

CUST\_6429\_PI426210822 ATAGCCTGAATGCTGTTGTACCTTGGAAATGCAATAGCAGCTGCCTTC

A\_18\_P12068352

CTCTTTGTAGCAGGGTAATGATGAAAAAGATTAGGCAAAGTTTAAAGTTGAGACGCAGTT

A\_16\_P18545105

AAAATTGGACCATCCATAATAAATTCAGTTATGCTGATCAATTATGCACCAATTGGCCA

A\_16\_P17216230

AAAGGAGCCATTGTTGTCTATTGTGTCAATATTTTGC GTTCTAAAGATGATCCACAGAAG

A\_14\_P131904 TGCAGTTTCGTAGACCACAAACATTGTATGTGTCTGCAGACTGGATTTCTTTTATGTAAA

A\_16\_P39543315

TTGCCTGTAAGATAAAGTGTGCACTCCCATATCATATAAGGTATTAAC TTTCTGAGCCTC

A\_16\_P35398958

AAACTGCAATGAGGACTAGTTTGTCTCCATACATACCAAGGTGTTCTAAAATAAGATCCTT

A\_16\_P19031202

ACTTCTGCCAAATAAATCTTACACCTAAGCATTCTTCTACAACCTGAACAAAGAACAAAA

A\_14\_P126069 ACATAAATGATTTTAAAAGCCAAAATGCCAAAATTTGGTGACAATTTGGTCGTGAGTTCC

A\_14\_P138015

CCAACTGACTGTCATTGAGAAAGAAAGAAAGTAGTTTGGCATTGCAGTAGAAATAAGTG

A\_14\_P201398 TGCTACATGTTATAAAACACAATTTAACCCAACATTTCAACAGTAGGATGGTCCTTGCTT

A\_14\_P129318 AAATCAGGCTGGGGGCCAGATATCTTGAAATTAAGTTCAAGAATCATATGGGTGT

A\_14\_P100069 ACAGGAAAGAGTTTACTGGGCTATCTCAGCACAGAAATCTGAATACAAAATCTTTACTC

A\_14\_P105008 GCTAATACCTCTACTAACCTCTGATTCATCACCTTCTCTCTATAAGCAGTAGCAATACT

A\_14\_P100629 ACTCACGACCAGAAACCAATGGAAAAATAGGAAAATAAATTACCACCTTACAATTTACCC  
A\_16\_P17299346  
CAGGCCTTGATTACCTATCAGCATTTCCTCTGAATAAAATATTACCCTAGTTCTGGCT  
A\_16\_P00791337  
GCAAGTCCAATCTAAATGACTCCTTCTACTAAATGTCTCCCAACTTAAATATCTCTCC  
A\_14\_P134547 TTTTAAAGACGCTAGAGTGCCAAAGAAGACTTTGAAGTGTGAAAACATTTCTGTAATTG  
A\_16\_P18126409  
ACCGAATTGCAGGTAGATATCACAATCATTGTGACTTTTTTCTCCCAATGACAATCTT  
CUST\_1407\_P1426210822 CAGTTTGGGGAGGAGGCACTGAAGTTCTCAAATCTCCCATTTTTTG  
A\_14\_P113073 CTACAAAAGGTCCCTTGTGACTTCTTCTTTGTTAATGGTTGTGCTACCTCTGTTAGATT  
A\_14\_P138493 GGAAGTGCTTTTACAATAAGTTTACTTCCTTGGGTCATCATGATTCTAAATTCCAGGTAG  
A\_16\_P21494069  
TTCATCATCACCTCCTTACTGATAAATCTTACGTCATCTCTATAGCACTGTTTCTCAACC  
CUST\_174\_P1426210822  
TTATTAGTTATTGGTATCCTTGTTTTATTGATTTACTAAAATTACACAGTTGTTTCGGGCC  
A\_18\_P15001708  
ACCCAAATGAACTTGCATCATAATGTTTTTCTCTGTATTACTGACCATCTTATCCAGAC  
CUST\_6011\_P1426210822  
ACAAGAAACAAAAATATATGGATTTGTTTTGTCTTGAGGCAGACTGGAAATGCTGGAAAT  
A\_18\_P22839047 CTAAAGTTAGCCTGGGTGAGATTACTCTGCCTGGGTCTCCCCAC  
CUST\_5660\_P1426210822  
TAGTTCCTTTGGCAAAAATTGGGCATCATATCAGAGCTTCTTCACTAGCAGATTC  
A\_14\_P103282 TCTTCAATGACTAACATTTTTCTTGGAAGAGTCCACTCCATAACTGCTAATCTCAGTGA  
A\_14\_P117807  
AAGACTGTTTTACACAAGACAAACATCGAAGTGAAAAACAATGTAGAGCAACCAATGTT  
CUST\_7397\_P1426210822 TCCAATCTTTTTATTTCTGGTTGGGAAACCCTACACAGACCAGTGTCTG  
A\_14\_P131883 TTAAAGACCACCTTTCCTTTACTACTCATTTTTTAGGAACTGAAAATTCAGGAGTTCGT  
A\_16\_P18262385  
CTAAGGCTAATCACTACCCTATCTTGATTCATTCATGGTTAAGAACTTCCAAAATCTGCC  
A\_14\_P133988 GAGATAGGAAAGAAACAACCTTTTCTGAGTAGATGTTGTTTTCGAGTCTGTGAGTCAAG  
A\_14\_P102193 ACTTGACTAGGTGTTCTTTAAGGAGACTATGTAAAATCAGTCTGTATCCACAAAGTGCT  
A\_14\_P131433 ACTACTAATAATTACTCTCTCAGACAGTGGCTCTCCCTCATCTCCTATATCCCGT  
A\_14\_P119206 ACATTCACATATACACACATGACCATTATATGCCATACCTCTGCAATTCACATAAACGGT  
A\_14\_P129678 AACACAGTGCACATTCTGACTTAATTCGCGATAACTTTCTGTAAAGTAAGTCATCTTGCA  
A\_18\_P11189121  
AACATAAACTTTCCACTACAATGGCTTAGACCACCATTAGTTCTGCTTTTTTTTTGCCATC  
A\_14\_P109484 TAATCCCCAAAGTCACAGAAATAATACCTAAATATGGCAGTATAAATGGAGCAACAAGGC  
A\_16\_P00228213

GCAGCAGTGTCAATTTTATCCCTAAAATCTCAAAGCATAATAGCAATATAGGAGGATTCC  
A\_14\_P135198 TTTTAGGTATGCAGATGCATTATTTAAGTCATCCGATATCAGATCAGCCAGTTTATAGAGGA  
CUST\_5247\_PI426210822

GAGTCTTCAAGCTGATGAAAATTTTAAAGTAGCTTATAACATTTTAACTGTGATCTTATT  
A\_16\_P01834518

AGTTTTCTGAGGGCAAAAAAAAAAAAAAAAAATGGTTTGAATTCATTCTTCCCCTTCTGT  
A\_14\_P117972 GGAAAACTTAACATTTACCTGAACAAGACTATAAACCAGAAGGGACTGCACTACCATAT  
A\_14\_P115985 TCATAAGCAAGTTATCTGTTGACATAACATGGCTTGATCAGACTACTTGCTCCTAGATGA  
A\_16\_P18982780

ACCCAATCTCCACTTAGACTCATCCAGAATATTTTCTTACACCTCTAGCCGTAAATATTC  
A\_14\_P103302 TCATTAGAACGTTCTGGAAATGTCACTAAAATGTGCCCGAAATAAGTGCATCAAGATAG  
A\_14\_P138202 CTCCTCTTTGCTGGAAAAGGTCAAATTTTACTTTTGAAAAACAACCAAGCAAACATGTA  
A\_14\_P129405 GCTAAAAGAGTAATTTCTCCTGTTTCTTCTTTTCCACAGTAAAGATTATTTCCAGCCTG  
CUST\_7879\_PI426210822 GACAGACATATTTAAGAAGCTTCCTCTGGCAGCCAGCCAAATGGAC  
A\_14\_P127013 GACAAAACAACATAGAGTAAAACCTGAGTATTCCTTCTCTGTTGAATTGGGCTTATTTCC  
A\_16\_P18485909

AAAACAGACTTGAAGTCTCAAATGAACACCTTAAATTCCAAATAACCATTGAGGCATTGG  
A\_14\_P137930 ACTTGGGTGCTCAGCATTTTTGTCAGTTCTTTTGATATAGGAATATCGAAGTTAGATGAC  
A\_16\_P00685364

CTGGAATCTCTGGCTATAGGAATGGATTTCTCAATGGTATATTCTTGAAAGAAAGGCAAA  
A\_14\_P100114 TTGTGCCTTTCAAAGATACAGCCATGCTTTTAACTGCTTGCAACATAAGAAATGACTTTT  
A\_14\_P104755 CTTAAAGCAATCAATTTCTTACCTTTGACTCTTGAACCTTCTTGATTTTTTCTGCTGGA  
A\_14\_P122413 AACTTAGATGGGGTTGCAGTTTGAATTTTCTTTTAAAGATGGGGAAGAAGTGAGTGAAG  
CUST\_6079\_PI426210822 GTCTGTGGGGCAGCTGCCCTTCATCTCAGTGCAGGAGCAGCCTTT  
A\_16\_P00685299

CCAAAAGAAGTTGACCATTTATGTGATGTGCAGTAATAAATTAGCAATTCAGAGTTGAGG  
A\_14\_P122756 TAACTTCCCACCCTCCAGGCTTCTAAAGTGCTAAGCAAAACTACTTAATAAAAATAACCA  
A\_14\_P113947 GATAGAATAATAAAATAAAAATACCCCCACTTATTACCTAAGTTTTCTTTTAGCACAAAT  
A\_14\_P133223 CAGGAATATCTCTGAATGAATGTCCCACGTCTTGAAACTCTAGGCTTCTTC  
A\_14\_P113684 TATTGTGTAATCTATCCCCGAAATTTCTACCCAAATTGCTTCTGTCTGTAAATGGAATTCT  
A\_14\_P117781 ACACAAGTTGCACTGTGGCTTTTATTGTTGGTTTGTTTTTTAGAAAACACTCTTGGGAAT  
CUST\_6939\_PI426210822 TAAGGGGAAAGGGGGGAGTCTTGGAATTTTAAATCTTCCTAAAGCAGC  
A\_14\_P115948 ACAACACAGTTGTCTAAGAAGTTTGTAACTTTGCCAGGCAACAGACAAATGTTGAAA  
A\_16\_P18504123

AAGTCGACCTATCCCACATATCAATGGTTGTTTTCTTAAAGGCGAGTAAATATTCTCACTT  
CUST\_2339\_PI426210822

AATAATTGTCCTTGGCAGATAGAGATAAACTAGTTAAGGGTGGAGGGTTGGTTG  
A\_16\_P15498002

AGACTAGAAATGAACAACACTAGATGACATCATGGTAGAACTTAAGGATTACCTGAGACCC  
A\_16\_P17255005  
ACAGTTCGGTCTTTCTTATCCATGTGTCTGCAACTTATTGAAGCAACACCTCTATATTAA  
A\_14\_P126503 CTTTTCTGTGCTTTTCTCATCAGACTGTGGCTACACAATCTCTCAAGTGAGAT  
A\_16\_P16046952  
GGTGCTGGGCTGTATATTATTAACCTCCATAAACATGTTGAACATTAATTGCAACTGCTG  
A\_14\_P109332 CACCCATTTCAATTTTTAGGAGATTTTATGAAGATGGAGCAATTGTCTTGGGTGAAGAAG  
A\_14\_P113354 ACATTCACCAAATCTTGTCCATTTTTCTCCCTAAGAATGGCTAGCATTGCTC  
A\_14\_P100650 GATACCTGTTTGATAGTGAGCAGTGTAGAACTTAGTCTCAAATACCCTGTAATGAGTCT  
A\_14\_P200959 GAAAGAAAACAAAACCTTTCAACTTTGGTGTCTCTTGGTGTACTGATCGATGCTCTCCT  
A\_18\_P13866349  
GCAGATTTGTCCAGAATTTTGAATCTAGAAAAAAGCAATTTTAATTTTAGCCCGTGTG  
A\_14\_P104269 AAATACTAACTGTAACCTTTTTGGTTTTCTGGTTTTGCTGCTTTTGCATGTAGACTGTTCTT  
A\_14\_P131458 CTCTGATGCCTGTGGATTCTCACTTAATATGTGAATGATTTAGATGACTGAGGAACAACCT  
A\_14\_P201552 GACATTTCTTATTTTTGGGCTTTTGAATGGTTACCGTGGTTTGTCAATGAAAATGGAAAA  
A\_14\_P121285 AACCTGTGCTCCAAAGTTAACAAGTATGTCTCTAAACTCTAGATCTGATTTTTACAGCCA  
A\_14\_P122252 AAGGAAGGAGAGAGGGATGATTTACTTATTCCCAAACCTTTAATCTTATACAGCATCCTTC  
A\_14\_P114611 CTTCGAAGGGGCGCAGGTATTTATGGAAAAACGTGCAGGTCTTATTTATTTAGTATTTAT  
A\_14\_P138802 TGTGTTTTGAGGAGTTTTCTTTTTTTCTTTTTCAATATCACTTTATCCTGCTCACCAGTA  
A\_14\_P109259 TTTTGTAGCCGTCTGTTTTTGCACCCATTTTCGTTTTGTTTCTAGACGGTTT  
A\_14\_P104510 CAGTTCCTTCTACAATAAGTTTCTGAATGGAAGCACTTCCAGAACCTCACCTCCATAT  
A\_18\_P22842289 CTACACCAGTCAAGACCCTGCCTCTCTCTTCCCTTCTGTCCCTCT  
A\_14\_P118293 CTCAATTCCTAGCAACCAGTGCTGGAAATCAGCAGGCTTTGAACTTTAC  
A\_16\_P41676264  
TCCACCACATTCTACAAGTGTTTTTCAAATATTCACATATTAGTCTGTGCTTAAGAACA  
A\_18\_P14137248  
GAGCACTGGACTCTCCTTTAAGAAAGTTTTCTGTGATAATGAGATTTGAACTGGAAGAAA  
A\_14\_P118026 TTACTAGACACACAGGCCACATGTCCTTCAGGAAGTTTTGATCACCC  
CUST\_6190\_PI426210822 ACGTGGGCCAAGCCTAGCCATGCAGCAGAACTCTGTGTTTCTTAG  
A\_14\_P115658  
AGAAGATACCAAATCCTCAGCAAATGACTGTAAGAGAGAGAGAGAGAAATGAATGAGAA  
CUST\_6023\_PI426210822 CTAAAGCTGCCTCCACTGCCCCAGTCTGGCCTTTCAAGTGTGGTC  
A\_14\_P124178 CTTAACCAAGATGCTTTGTGTTGCCATTGGATCCCCACAGTTTCAC  
A\_14\_P138501 CATGTAGGAAGGGTAAATATGTTTCATGAAATGCTTCAGTTTGTATCGTATGTGAACTGG  
A\_14\_P122025 TTTTCATCACAGTTGTGCTGATTTGTGATACTCATCATGTTCTGAAATGAGGAATACA  
A\_14\_P116543 CAACTTTATTGAGAATCTTCTATCTACTGCGCTAGACACTATACCATCTGCCTCAATTTT  
A\_14\_P122939  
AAGAAGAGAGACACTACTAAATGGATTCTATCTCAGGAAAGTTAAGGTTGAAAGCCAGAA

CUST\_8076\_PI426210822 GTAGCACTTGGCTGGCAGCTCCAGTGGAGGGAGGGGCGTTCAGGT

A\_16\_P17761070

AAACCTGTACACTTACTTCAATATAGAAACATAACAGCAACTTTTAATTGGCCACATCT

A\_14\_P120406 TTGGGCCCCAGAATGCATCTTTATTTTGGAAAAGGTGCAGATTCCTAATATTTTCAGATTTCT

CUST\_7541\_PI426210822 TAGTGTAGAACACTTGCCTCAGATGATTCAAGATCCAGGTTTCCTGACTC

A\_16\_P16701488

AAAAAGCAGAGTGGCATTTAGTTAAGGATACTATCAATGATGTTCCCTAACCTCAGTGCAA

A\_14\_P139947 AGATAATAAAATAGAAAGAATGCTTGATCTGATCTGAGAGCAGGAGCAAAGCCTTTCTGA

A\_18\_P10823936

TCTGACATCATCCATCGTTTGACATTTTTATCCAAACACATGTAAGCATTATCATAGGGG

A\_14\_P136612 ACCTTTCCCTAAAATAAAATATTTAAACTTATTAAGTGTGTTATCCATTATGAAGAACAAT

A\_16\_P00932994

AAAAAAATTCCAAAATTCTAATCTACCAGGGAGAGGTTTACAATGTCCATACTCAGACTG

A\_18\_P22839233 GAACTTTCCAGTTGACTAGGCTTGACTAAGGATAATTTCTGTGGATCCTCCTG

A\_14\_P133637 TGGTTATAAAACCCTATGAAAGATACACACTTTCACTTTCCCTAATTATACCTGGGCTCT

A\_14\_P124117 CTGACTACAAGACAAAGAATATGCTGGCCACACCCATCATGAATGGCAAAG

A\_14\_P132678 GTAGTCATGCCAGTTTCTTTCCCATGCCTCTAGATTTTAAAATGCAATATTTGTTGTTG

A\_14\_P118009 CAGGCTTTGGTATTTCTTGCAGTTCTGCATAGAGATAGAGCATCTACTTATGAATTGTTG

A\_14\_P109147 GATGAAACAACTTTAATATAAGCAAGAAAATACATTGCAGCAATAACAGGAGAAAGAGAC

A\_14\_P119638 CTGTTCAAGAAACACTATCCTTACCTTTGCTGTCTGATCCTTTTATGATTTATGGTTTGG

A\_14\_P130321 GACGTAAGGATGACGCAAAAGTTCACAAGATGTTCCCTTGACCATACTGGTAAGTAA

A\_14\_P139703 AGAAAGAATAGGGCTGATAAATAATGAATCAGCATCTTGCTCAATTGGTGGCGTTTAAAT

A\_14\_P128220 CGCAATGAAAGGACCTTTTTCTCTTTTGACAAAACACTGCTTATCACCAAGAAG

A\_14\_P133609 TAAATCAGAATGTTTATGGATACATTCCGACATAGGGGATGAAGCCAAAACCATTGAAAT

A\_16\_P02249004

CAGCAATTCTTCCTTTTTAACACCTTCACATTCTATTGCTTCAATATGCAAACAAGGCTG

A\_14\_P126976 CTGTAAAAGGGCACAAGGTCTGGAAGTAATGCTTTTTAATCTTGTTATTGCTCTCATATGT

A\_14\_P120017 GCCTCACTTGCTATCTTCAAGCCTCCTCTTCTTAATTGCAGACTCCATT

A\_16\_P21498856

GCCCATGTAACTCTTTTCACCCAAGTCTTAATGAATCTTACCTTTCTCTGCATTACAAA

A\_14\_P139721 TCTGGCCTTCCTTACTTAAATGTCTTCTTTTCCCTACTCTAATGCATTTCTAACTCACTTT

CUST\_10102\_PI426210822 GTAGCTCTTGGCATTGCTACCTATGGTCATTTGCTGCTGCCTTGA

A\_16\_P03590164

CTGATTTAAAAAACTGCACATATTCTACATGCTCTTATTTCTTGTATCCAGACTACCCCA

A\_14\_P117247 GCAGGAAACACCTTTTCTTTTGTATTCTCTCTGTTACTTCTTTTAACTAAAGACCTTT

A\_14\_P130716 CTGACTTCTCCAGTTGATGTCTCTACTGGAAAAGTCACAGAAAGGTCTCTAAA

A\_14\_P103645 AAGAACAGATATTTACATGGATCCCTCAATGACTTTCAAAAAACATCTTGCATAAGTGG

A\_14\_P118702 TTCATAGAGCCTCAGCCACATTAGGAAACACTGACCCTTTTAAATTTTAAATCCCTATGT

A\_14\_P128902 GATCACTGTGGTGAGTTCTAGAATACTTGGCTTTCTCTGACTCAAGTAAATGGGTTT

A\_16\_P16849649

ACAGTGTATCTTGTCTCAGGAATTCATTACGTGTTAACAGCAACTCTTTCTGCTTGTTAA

A\_14\_P115631 ACAGATTCATCTCCTGAATATATTGAAACTGGAGTCACTGTATCTCTTATGGGCTTTT

A\_14\_P108032 ACACATAGAGAAAAAACCTAAAAATGTGGAAAAGCACGCCAAAGCCTTATTTAAATAAT

CUST\_1790\_PI426210822

CTTTAATTTATGCCCTAAATGCTATAATTCTGGATTGAAAGCGAAGCTAAATTTAGGAAG

A\_14\_P126636 ACACTCCTCAATAAAAAGTGAACTTTTCTTACCCTAAAGGGTGGCACAATAATATAAC

A\_14\_P110387 TAAAAGCCCATTTGTTTCCTTCTAGATTTATTATGGCTGAACTACTCCAGACAGAGAAGG

A\_14\_P201782 TTAGCAGTAAAAACAGGCAAACAACTTGCTCAATTTGTTTTGAGTGCTAAATCCCTTCA

A\_14\_P127106 GGATTCATACTTGAACATGGAAGCCTCACCTTGAATAACCAGATGCTCGAG

A\_18\_P14641574

ACTACAATATTTTCATAACTATCCCCATTTTTACCTACATCCTGACTACATCCTTTACA

A\_14\_P126046 TTATATATTTGCTTTAGGCAACTGGGGGAAGGAAATACATTTGACATCAGAACTCAAG

A\_14\_P126783 GTCAGAAAGAAGCAGCCGAGTTTAAAGATTAGGTTAATATTTAAATTGTGTTTCCAGAG

A\_14\_P100304 GATGATGGATAATCACAAGGATATGATGAAAGCATGAGAAACAGTTGTGGCCCAAC

A\_14\_P120925 AAGACTGTTCTCCTCCAGTCAATACCCATCAGGAGCAAATGAAACAG

CUST\_9924\_PI426210822 AGCCCCGTGGCTACGTCGTGGGGTGGATCATCGCCATCAGTTTGT

A\_14\_P104011 AAGTTCCACAGGAGTCATAACTACTGAATCACTCTCTGGCTTTCTAGTTAATGTTTTT

CUST\_8754\_PI426210822 AATTCTCTCCCCCTTGATTTTCAGCCCTGTTTGATTTCTGACCTTTGAAAT

A\_14\_P114876 TCTCATATTCTCATCCATCTGTGGCAAACAATCCTTCAGTAAAAACACTGAAACATTT

A\_14\_P136636 CTAAATTTGAAGGAGGTAAAAATTGCATGAATTCCTCTGCTCTCTGGTTTTCTTTTTGAA

A\_14\_P129252 AAATGTATCTTTTTGTTTACAGGGCATGTCTTTAACTTCAGAATGGTTTGCAAAGTATTT

A\_14\_P111618 CAAAGTGCCAGGATTCAGTCCTTTCTGGCTATATAATAGGTAAGTAAATCAATGCAGTG

CUST\_7449\_PI426210822 GACTGGCATCTCTATAACCAGAAAGGAGAAGAGGGGGACTAGATGTTTT

A\_14\_P135500 TACAGTGGACTTATTATGTCTATTTTACATGTTTTTAATCTGATTGTTTGCATGATATTC

A\_14\_P131348 ACATTTAAGTGCTTTTTTAAAGGGCTGGATTAAAAGCACGTAAGGACTTAAAAACAATGC

A\_14\_P131517 ATGAGGAGGAAGGAATGAATATCATTAAGTGGTATTCACCCTTGCAAGATTCTCTATAGT

A\_16\_P01739956

ACACCTCCACATATCAATCATCATTACTGCCTATAAAAACTTTACCTTGTATTAA

A\_14\_P130162 CTAAACACAAAATCCAACTCTCACTTAGCACTTTAAAACCAAACAATTTCCCTCCACA

A\_14\_P103681 TATACTCCCTGCAACGGTAATCAAAAAGTTTTACAAATGTCATAGCATGAAATGTGCACG

A\_14\_P200795 TTTAATCAGGAATGTAATTTTAGATAGAGGCGGTAATGGAGTGGTAGGCCACACATAACA

A\_16\_P19016478

ATTGCAATAGTGTGACACATCTAACTCCATGACTAGTTCTGAAATGCACCACTTTTGAAG

A\_14\_P133654 TCAAATTTAGAAATCTTACTGCTTCTCTCAGGCCTCAGCAATGTTTTTGTCTTCTTGTTT

A\_14\_P122592 AGGGGGATCTGACCTACCTTTTTATAGATAAGGATTTCTTTAATAACAACGATGATGATGGA

A\_16\_P16191413

GGCAGACAAGAGCATGTCACATTTAGAAATACTGTAACCTGGTTGCTGAGGTTTTACATAT  
A\_14\_P134771 CTGTGGAAGAAACATTTAGAATTGTTAAGGACTCTCTCAGTGATGATGTTGTTAAAGCCA  
CUST\_8592\_P1426210822 AAATTGTTTCTCCCTCTCTAACAGTGCCCTTGGTGTCTGTATTGCCT  
CUST\_6854\_P1426210822 ATTGTGAACTCAGCAGGGAGAACCCAGATCCTCTACTCCTGATCAT  
A\_14\_P122994 AGACTGCTACGAAACAGCCTAGCAGCCCTTATGAAGACAAAGATAAAGACAAGAA  
A\_16\_P19139191

GGTATTGCTAGTCATACGCTTTCTAATCTTAGTGAAATTACTCAACGACTTTTGCTCATC  
A\_14\_P100365 GATGCCGAAGGGAATCCATTTGATCATTTTAGTGCTGGAGAATCTGGTAAGAATATGTA  
A\_14\_P137558 TTCTATGGATGCAGAGAATATTTCCATAAACTGTTAATTCAGGGTGATTCTTCTGGAAGG  
A\_14\_P100920 GTAAGCCTATTGCAACTAATACCTTAGCATTCAAATAGCACAAAGGAGGTATTTGTTGCTG  
A\_16\_P30952242 TAAGTGCCGTGTTACACCAACCCTGACCGGAGATGCACCGAACT  
CUST\_8863\_P1426210822 CGTTCATTCCTTAAAAGCAACATGACACAGAGCCTTGCCATGGCA  
A\_14\_P134504 TCTATTTTTTCCACTATCCTGCTATGCTTTGCTTTCCACAAGATACACTTTCATGAAG  
A\_16\_P00685093

ACCTTCGATCACCTCAAGAAAGAGGTGGTTCTTTCTGAGTTGCATGAATTTATCTAAG  
A\_14\_P114142 CACTTGCTATGATTTTCACTCGCTGGAGACCTTGATAATTCAGCATTTTTCTTAATATCT  
A\_14\_P107140 ACTCAGTATGTGGCCTGTTCTGTGTTTTTTTTGTTTTTTCATCAAATGAAAACAAAATGG  
A\_16\_P16172547

ACTCCTTTCATTACTCAACACAAAACCTGTTTGATTTCCAATTCTCTTAAGATCCCTCCTT  
A\_14\_P139360 GGGCCAATGGATCACATGAGTCACTTTTTAAAAATCTTTCTCCTATTTTAGAGGATACAG  
A\_14\_P108232

CTAGAGAAAGTGCAAAGTATGAGAATGTAGCACAAAATTGTTGAGAAAGTGTGAGTGCTT  
A\_14\_P102928 AATAAAGAATTCCAAAACCTGAGATGTTTGCTTTCTCTACCTGTTTCCTGTTTCAGATGCCT  
A\_14\_P116900 GCTTACAGTAATCACTTTCTAAATGGCTTCCATCTTTTGCCATGCAGTAAACATTTTCGTT  
A\_14\_P113577 CTGGAACCTTGTTATCTGGGTAATTAGTTTCAGACCCTGCACTGAGGC  
A\_14\_P133380 GGGGATGAATGTAGTGTCAAAAAGAACAGAGGACTTAAGGTGTAATTTTTTCTTTCCATT  
A\_14\_P200597 ATGGAATAGTCATCATTTTCTTTTATACAGCAGTCTGGTTTCCACATCAGTTCATCTCTT  
A\_14\_P115895 CTGTGTGTGACTATCCTTTTGCTATGGATGTGTTCAAGCAGATCTGATGTCCT  
A\_14\_P105316 TTCTCTGTCTCTTAAAGATAATTTAGGAACAGAAGCCTTGACTTTTGACGGTCAATTTAG  
A\_14\_P101253 TGCTTCTTCCATATGTGTCTAGAGAGTAATTTCTCTCCTTTTGCAATAGTTTCACTGT  
A\_14\_P114701 CTTTGGTTTTTAATGCAGAAAAATATCCTTGTGGATTATGGACTCCGACGAATCACATTC  
A\_18\_P11107491

GCAAGGGAATAAAAATTTAGAAACAGTAGAAGTTACAAAAAACGATGATAGAAATGAGCA  
A\_18\_P15179583

AAAAAAGAGCCTCTTTAGATCACATTTGCTTTGGATTTAGAAGATGAAGTTTCTGTGCCT  
A\_16\_P36193462

AAAATGAGACTGACAGGATTATGATCATAAATTAATCTACTGAGCACACATAACACAT  
A\_16\_P19737209



AAATACTTTCTTCCCAGTTCTAAATTCTCAACGAAAAATTCTCCCTGATATCAGACCAGC  
A\_14\_P105393 GTTTTAAGTGAATATGGAGGATTTTCAAAGAGGTTTGAATAAACTCAGGCGCCGTG  
A\_16\_P19300425

AAAAGGTTTTCTCACAAAGTAAAAGTGCATAAGAATAGGGATACCACTCTGAATTGACGG  
A\_14\_P103624 ATTTTTGTGTCACCTAGTAGCAGGGGATTTTGAATACATGTCATGTGTGTTTATAAAGCC  
CUST\_1714\_PI426210822 AATCATTTCTGGGAAGTCTAGGGTTGTTGTCAGCATTGGTGATGGTTCTG  
A\_16\_P02563327

AAACAGGCATCTTAATCCAAGTCACTCACATGAAAAAAGCCTCAATTTGTTTAAAGGTCCAAC  
A\_14\_P108349 TAATACCTGCAAACCAATGATCACCCGTAACATTTTAAAATCCTAAAAGTAAAGCCATTCC  
A\_16\_P00685462 GATACACTCTGAAGGTGCTAGACTAGGAAGAGGTCCTCTCAGGCC  
CUST\_4198\_PI426210822 CTTTTGCTCTGGAAGGGAAGGAAACTCTGACAGCCAGACTTCTCA  
A\_16\_P20009716

AAATACTTCACAATGTCCAGTCTCAAATTGAGCAACCTTCTTATTCAAGCATGGTAATGG  
A\_16\_P16327680

TGCTGCTCTTTAATGTTCTCATATATGCCTCTTACAAGTAAATTTCAACTGCTAAGCCT  
CUST\_3165\_PI426210822 GAGTCATTTGGATACAGTGGTTGCTTGGCCATTTTCTCATGCAAGGA  
CUST\_3269\_PI426210822 CTTGCTTTTGTGGGCAGATGCTCATCCTGGCCTGGCGAAGGGTGG  
A\_18\_P11989682

AACTTACACATACTGATGCATGATGTAGACATTCAAAACATGTTTCATAAGATTCCCCACA  
A\_16\_P35737961

TTTCCTTCCATGAACATCATACTACGCTTCTAAATTCTAACCTGTATTGAATCTTCCAA  
A\_14\_P139211 GCTGGAAAATGTGTTTCATAAAGGCCCTATGCATTTAGAATTAGTGGCATACTAAAGTT  
A\_14\_P130093 TTATTTTTAGGCATCTCAACTTGAATGTGAGACCGAAGCAGTTGTCATCCTTAGTAAGAA  
A\_16\_P03744684

AAATCCAATTTGCCTTATCTAGGAAACTTTAGCCATCTTATACCTGTTGGTTTGCTTTGG  
A\_14\_P117380 TATAAAGAGCATCTTATGGATGTGTTCAACCTTAATAGTAACCCATGCGCTACATAAAGG  
A\_16\_P16457966

GAAACAATTCCCTCAAATACTTCCATGCATGGTTCATCTATTGTCCCAAATAATTCAGC  
A\_14\_P118712 GGGTTGTTGACTGTGCAGTCCCTCAAGGAATATATGTATCAGTGATTTAATATAGGGAGAA  
A\_14\_P106565 TCTTCTTTGAAAAACAAGGTCTTGTAAGTTGACAGACTTTGGGTTTCAGCAACAAATTC  
A\_14\_P113607 AAAACCTGGTTAGTTTTCTTATTTTTTTGAGGAATCTGAATGGGTTAACGTCTGTAACCTG  
A\_16\_P15862393

CCTCTATTCGATTTGTTCCCGTCTATAACAAGTGAGATCTATGAACTTAAGAGTCCAAC  
A\_14\_P120354 TATTTGTTAGGGAGGATAGAGAAACAGAGCACCCCCTGTGCTTTCTGAAAATA  
A\_14\_P119248

CTTTTAAAGAAAGAGTGTGTAATGCCCTAGAAAGATTTGAAAGAAGAAAGAGAACAGCCAC  
A\_14\_P113457 CTGGTGGGTCTTCAGGTTATAGTAAGTGACAAAGGTCTCCCAACAGAA  
A\_14\_P121006 GAGGATTCATTATGCTAAATTCTGCTTGTTCCTCAAGTTCCTGTTCTATTTGGCCTCTG

CUST\_7848\_PI426210822 GTTGCTTCTGGCAGGAGGAATATGAGGAAGAAGATGGTAGGGAAAG  
A\_14\_P116118 GTTGTCAAAACCTTAATGAGGTTTTGACAAATAATGAGGGTAATGAGAAGTGCATGGAAT  
A\_16\_P01731261 TTGAATTCACCTCCATTCTGTTACTTGAACCACTTACTTTGTAAACTGCTCCATGAA  
A\_14\_P138974 GAAGATGGCATATTCATAAAGACATCTTCTGATGATTGTGAACATCTTTACCTCTGGGTG  
A\_16\_P30952287 CTTGCTATGAAGGTGAGCATGGATTGATTTTTCTCATCCCCCTACC  
A\_14\_P102018 CACGAAAGAATCTATCTTGGCCATGAAACTGTGGCTGTTGACCTTGGAATT  
A\_16\_P17179116  
AAGTCTTCCTAGTGTCAACAAGAATGTAAAAAATCTGCTTCATTTAAACAGTCCAAGCCTG  
A\_14\_P105653 TTGATTATTAGTCAAGAGGACGTGATTGGAGACCAAATTTCTTTTTCTTTGCTCACATGT  
A\_18\_P12065094  
AACTCACTACTGCTAAACTGAAATGCTTGAGGTATTCAAAACTGTTATTTTTCTGCGTCAA  
A\_16\_P18885595  
TGACAGAGAAAATTTTATCCATGATCCTTTTTGTGCACCTTATTGCTATTTCCATCACCA  
A\_18\_P12942826  
ACCTCTCCCAATATACTTTCTATCTTGTGATCCAATGGTGATTCTATGTCTCAAATGTG  
A\_16\_P36896135  
ATTAGGGAAGTTGTTAAAACATCTGCATTCTTAACACATCTCATTCCACATATTCCCCTC  
A\_16\_P39067696  
CCTATCATGCAATGACAAATAACTTCATCATCCACTCCTATAGTTTATTCAACCCCCAAA  
A\_14\_P101075 TTAACCAATCACACAGAATGACAGTGGAAAAACACCCTGACAAGAATTTTATGTCAAAAC  
A\_18\_P13499302  
TTCTTCTTGCTAGCAACATATAAACTAACA ACTAGGTCCATTTCTAAAAGTCAGTCCGCA  
A\_14\_P130813 TTTTCCAATTTTTCTTGTAAATGCAACACTTGGTTTTCATGGGCAAAAATGTTTTCTGAG  
CUST\_2083\_PI426210822 ATTTCAACCCTTTCTGCTCCGTTCTCCTTTGAGAATGGGTAATCAG  
A\_14\_P108016  
CTGATACAGCCTTATCTAAAGAAAGCAAGAACAGCCCCATTACAACAGAAAAACAAAACA  
A\_16\_P36362266  
CGAGAAGTCATATTTTCAGGTTCTAAAAGCAACCCATACTTTTCCCCTCATAAAAAGTGAT  
A\_14\_P120584 AGAATTACAATGCCATTCAGTATTACATAATAGGCCTATTCTGACCTGCCATTTTGTGGA  
A\_14\_P106938 TTTTGGAGGTGCAAATGCCATCATGAAACA ACTGGATATCCTTCCATAAGAAAAACAAC  
A\_14\_P137522 ATGGCAAGAAAAATGACTTGTCTCCATATGTATTTTTTTGTGCCTGTTCTGAAATATGGG  
A\_16\_P16120222  
ATGCCATTTTCTGATTTTCATCCAAGACACACTCTAAATGTATATGACGAAGAAGCAATCC  
A\_18\_P26485289  
TCAGCAAGACTAGAATGAAAGGATACCAAACATTTACTCTTTACTGATGCTTCCACAAC  
A\_14\_P101170 CTGCCCCTCGTATTAACATAATGAACCTGTGTGAGGCAGGTAAGTTCTAATTTTTCTTT  
CUST\_8778\_PI426210822 AAGCCAGCTCTCTGGGTGAGAGGTTTCCTTCTAACAAGGATTAGAAA  
CUST\_4538\_PI426210822 TTAGCCAACAGCCTGAGCCTCACTGCTTGAGCCTTGGCTGGATTA

A\_14\_P119349 CACTTTGTAAGGTTTCATTTCAAACAGTATCTGCTCCATAAACTCTTCACTGATCATCCAA  
CUST\_7867\_PI426210822 AGCTTGCCATCCATGAGTGTTTGGGGACAAGACAGAGGAAGAAAA  
A\_14\_P100774 AAAGAGTGTGTATGAACATACTTTGAATCATGTAAGATTTACATAAGTAGCAGGTAGCC  
A\_14\_P110525 CTGATCCTGTGCACTTTGCTATAACTTTATCAATACACTTCTTGTGAATTGCTGCATTGC  
A\_14\_P107558 TTTGCTGCACTAAAGAGCCCTAGATTTTGGAGTGTTTTCTAGACCTTCTTTGATATTTA  
A\_16\_P19856553  
ACTTTTCCAATAATCACTGCTATCTTACCTTAATCTGAGTTTACTACCTCTTCCATGC  
A\_14\_P200807 TGGGTAIGTTACTCTTTAGTGGAGATGATTCAATAACATTGAGGGATTACAGCAGAAACT  
A\_14\_P120192 GAAAAGACTGGAAGATGCAGACCTTGGTTCCTGTTAGTGGAACACTGTA  
CUST\_7758\_PI426210822  
GTTTTCGGTACAATCACAAAAGGATCATTTTAAACAATGGTCACTTTTTTCTAAGGGCTTC  
A\_14\_P135026 ACTTCTTTTACAGGCAGTATATATTGTGTTAGATAGCAGCAAATGAAGTTTGCCTCCT  
CUST\_7816\_PI426210822 AGTTGACATGGCCAGTATAAACAGCTATGTTGGTGCTGACAGGCAG  
A\_16\_P16695123  
ATGATGCAATTTCTCTTTAGCCTGTAAGTGAATTCATGAGCCTCATTGTTATACTTCCCA  
A\_14\_P200097 ATGTGTTTCAAAGTTCAATTCCTTCCCCATAATACAGAACAACAACAATCAAGAGATA  
A\_14\_P130786 TATCTCAGTTGGTGAAGGTGAATATAGAAAATCGGGATCACAGGAAAATTACCATCAAC  
A\_14\_P138756 ACTTTATAGATTTCCACCTAAACAAGTAACACTAGAACTTGGACCTTCTCCTGTAACCA  
A\_14\_P137280 TTTCAAGAAGACATATGTCCACTGATTGTCCTTCAGGATGTCAAGATAAGGAGTAAATGA  
A\_16\_P02252073  
CCTGCCAAACCTTCATTTTTTTTTCTGCTTAGATGCACAAGAATGTAGGCACTAATTCTT  
CUST\_7\_PI426210822 GTAAAACAGCTTGAGCCCTCCCCTTATCACCTTGAGAAACGCCTC  
A\_16\_P03194999  
AAGGTGCAACAACATAAACTTGTCTGAATGTTAAGGTCTGTTTTTCATTTAACCGATCCTT  
A\_18\_P12060729  
ACAGGTCCTGCTGTAGTATATAATCCTAACACTAGACAAACTGTTCTCTATCACATTCCA  
CUST\_5230\_PI426210822  
TTCAAGCATTGTCTTCTTCTTCTGGTTGAAGTTCTGTCTTAGAAGACTGTTGTAG  
A\_14\_P120430 AGCATCTTATTGAAAATCCTGTAATGGCTGCCTCACTGAATTTTCCATTTCTAATCAACT  
A\_14\_P122950 AATTAAGAAGGTATTTACTTACAAGGAGTTCCTCTGCTGGCTTCTTCCATAGTTACCCT  
A\_14\_P201152 TTTGTTAGTGGTTTTCTTACTCTGCTTTCTTTCTAACTGGTTTTCTAAACTGCTTTAGGG  
A\_14\_P200736 ACATATTGGTGGGAGTCACCCTAGAATCACTAAAACACTGTGTTATTTCTTATGAACACTTC  
A\_14\_P125466 ATTCTGTGGCTACAATGAACAGTGAAGAATTTGTTTTGGTTCCTCAGTATGCAGATGATA  
A\_14\_P113480 GTATGTGTAACACATTCATTGAATTATTACTGTTTTCTTGGGACAACATCAAGCCTA  
A\_14\_P127864 AATTTCTATTTTCAGCATTGCAGGGGGTCAAATACTGTCAGTGATAAAGATGCAACTGAT  
A\_16\_P37915020  
AAAGAAGGATTGGGATTTTCCAGTAGCACAATAGTAATACTCAAACGAGAATCTCATGG  
CUST\_7114\_PI426210822 ATACAACACCGGTGACTTGCTGGATGCTGGTGGCTTTGTGCTATT

A\_18\_P16594436

AAACTCTGTGACCTGTAAGAACATGACACTTCAATCTCAGCAATTACTTTCCTAAAAAG  
CUST\_5382\_P1426210822 CTTCTCATTCTTCCCTGCTGCCACTCTCCTGTCTCCCCAGGGACT

A\_14\_P121771 GACTATTTCCAGGATCAAGGACAAAGGATTCTTATATTTTCATCAACTGCTCAAACATC

A\_14\_P116836 GTGGGAGAGAGTTCAAACCATTTACTAAGCAGATTCTTAGCCTTCCCCTC

CUST\_9813\_P1426210822 CTGAAAACAGGAGTAAGGCAGGCTTCTTGGGAAAGCAGATATTGGAG

A\_14\_P116598 AAATGCCTCAAATAAAAATGGAGGAAAGTTGACCTATGCAGAAGGGTGAAAACAGAAAC  
A\_16\_P00632576

CTGCCTTAAGTGTAGATAGTGTGACCAATAAGAATTTGAACCACAATCAGATCAATCAGG  
CUST\_5297\_P1426210822 GTGCTGCTACTTTTCTTTGACGCTCAGATAAACAGGCCAGTG

A\_14\_P101400 CCAAATGCTAACACTTTTTAAAGAGTTTGTATTGCTTTTTCCCCCATTATGAATGC

CUST\_9035\_P1426210822 TGAACTCAGTATAGAGATGGGACCATAAGCGATTTCCCAGGATGATGTG

A\_16\_P20280628

AACAACAAAGCCTAAGATTTAATTGCTGCTAATCTCACAACATGGATCATAGACACTCAA

A\_14\_P106548 GCTTTGAATGACAGCAAGAACTCTGTCTTTAATGGCTTCATTGGTAGCGTATGATG

A\_16\_P39589820

TTCATCTTGCCTACTTAAAACTTTAATCCCGAATATTACATTAGCCTTACCCAATCTT

A\_14\_P133962 AGTGGTGTAGAATCTTTAGTTGATACTTGTGGTTAAATCAAGAAAGGTCAACATCAGAGC

A\_14\_P139667 GCCATATGTGGATGACACAATAATTGGGTCACTGGTAATTTTTTTGACTTGTGAAATAT

A\_16\_P01425554

GAGGTCCTTAATACTTGTAACCCTGTGATAAATCAATGTTCTACTCTCAAAAATACCCCT  
CUST\_2346\_P1426210822

CACATTGCAAAAAGGAACGCTCGGAAACTCAGTAGGAAAACCTTACGAATATGG

CUST\_1318\_P1426210822

ATTTTTCCCCAGTATTTTATTTTCAGAGCTAAGCTAAGGAACTACAGAAAAATAATTGTA

A\_16\_P20710499

AAAGACTCAAACCTCATTGGCTTCATTAATAAACGTCTTCTAAACTGCACACACCATAGG

A\_14\_P122419 TTGGCCAGAACTATGCATGTCTTTCATCAGTGACAACTGACTCCTAA

A\_14\_P120719 CTAGAAGAAAAGGCTTCTTTGGAGAGTCTGTTGGTTAACATCAAAGAAAAGCATCATTAC

A\_14\_P123475 CTGTAGAAGATTATAGAATTATAGGCTCTTAAGAGTGTGGGTCAAGCAACAAATGGCAC

CUST\_5972\_P1426210822

TGTGTTGATTGCAATTCCACATATCTCACAATGTAGCTTGTATTTCTAATTTCTATGAGT

CUST\_7197\_P1426210822 TTCCCAAAGTGCTCTTTTCAGTCCATTGTTTTTCTGAGATGTAATGACTCAAG

A\_14\_P129705 CCTTTCAACATTAGGATAAAATTGGAAAAATGACACAAAAGGTCAATTCCAGCATAGGG

A\_14\_P128591 TGCTCCAATATAAGTTATTTTCTGTAGTCTTTTTCACAAAGATGTCCTGATTCCTCCA

A\_14\_P120289 ACAAATTCATTCAGTTTTTAACACCCTAATTCACAAAATTCATGCCAATGTATGCGCT

A\_16\_P18292372

TTCTTGTGATACTGTGCTAGGCCTCTATACAAAGACATAAATACTAAATCATTTTCCTCT

A\_16\_P17653365

GAAAGCAGTAAAAAACCTGATCATAGAGTAACCATGTAAGTAAGCAAAATGGGGAGTCA

A\_16\_P18057613

AAAAGAGTTTGGAGCCTTAACTTCTATTGCTAGACCATGCTAATTCTGAGGATTCTACTG

A\_16\_P16612542

AAAATCCTCTCAGTTTACAATTCGTTCTCTTGACTGTTCTACTTCCTTACTCTACCAGTC

A\_14\_P135181 GCCAAAGCAAATGTATTCTACCATAATCCTACTGGTGATGGTAATGGTAAGTGACT

A\_18\_P22841239 GTGTTACGTAAGTGCTGAGATTTTTACCAAGGCATCGCATTATCTCCCAAAG

A\_14\_P103947 TATTTTATTTTGTTCACAAGAAATCACCTTAATATAACATTGCCTTTCCTGTTGTTGCAG

A\_14\_P125226 CCTTAGGAGTGACTCTAAAGATCTTTGTTCCAAATCTAACGCAGTCACTTCAGTTATTTT

A\_14\_P200776 TACCCCTCAATTAGATAAACTCTAAGGTCCCTCTGTGATTTTTTCAATACCTCTCATTCT

A\_14\_P107485 CGAGACAGTGAAGAAAGTGGAATATGATCATGGAAAACCTCAACCTCTATTTAGATTCTGT

A\_16\_P00685285 CATACTTTGTGTTGGACAGTTATGGGGGATTGCTTTTGCCATCTCAGCAATT

A\_14\_P115064 TCTTCAGTGCATATGCTTCTCTTCTGTTTTGGGAATAAAATCTTACTTTATCACTAC

A\_14\_P114413 AGCAATGCTATTAAACTGCTCTTGGAGAAATTCAGGTTTGTCCGGATGATGT

A\_14\_P126780 CCACACCTGAGTGATTACTTGTATTCAATAAGCACCTTGAAAGCAAAATTACAATAGATG

A\_16\_P16191299

ATGTCAGTTCCAGACTAACCTGATCTGATGCTTGTAGACTAGTTATCTTAGTTTGCTTCT

A\_14\_P104056 ACCCATCAATTACTCTTTTAGTGGACATAACAGATACACAATCTGTAGTGTCTCAGTGAC

A\_14\_P102638 AAATTGTGGGCAGGATAGTGTCTGTCATGGTTCAAATCAGACTTGTAATTTTAAAAAAGG

A\_16\_P15310073

ACTTCATCTAAAGTCACAGAAGACTAGACCTGAAACCTAAATCTTTTCACATCACCCCTAA

A\_16\_P17478349

AAGCACAAGAGAACCTTATCATTTAGCCCCATAGTCATTTTATTCCATGCTATCAAACCT

CUST\_3239\_PI426210822 CCTCTGTCTGGACTGACTGCTGGGAAGTGATGGCTTGAGATGATG

A\_16\_P39073975

ACAGCCTAGAAATGCTTCTTAGTAAAACCTACATTTATGTGAATTGTATCCCTGAAAGTGGC

A\_16\_P00594978

CTTAGCACATCCTATGCCAAATGATCAAGGAACATGTATTGATGTGGTTGAATTGCTTTG

A\_18\_P19569279

AACAGGCATTTTTGTTTTCTCACAAGCAATTGGTAAATCTCCATACAGATAATATGCGCC

A\_14\_P115050 TACTTGACATACTTCTGCCCTAGCATATTCCAGAAGTTCTAATTACTGCAATTAAGTGGG

A\_16\_P00449934

TCCAACATCATTTGATCTTCTATTTGTTTCATGCCAAATACACATCTACTTTTACCCTCAG

A\_14\_P130974 AGAAAGTGTTAATACTTACATATGCAATGGAGGAATCGGAGATGGATCGTAATGGTAACG

CUST\_3027\_PI426210822 CTACTTGTACTGATGCAAAGCCCCAGATTCTAAGAGGCAGGTGT

CUST\_6498\_PI426210822

AGTCCTCACTTATTCCCTGTAGCTTAATTAACACCGTCTCTTAATTCTTCATGTTATAAT

CUST\_859\_PI426210822 CAGATCAGTATCACAAAGGAGTCATTTCTGGGGACAGTGAACAGCAATG  
A\_16\_P16940200

CTGTAAGCCTTGATTTTTTTGCTTTTCCTTCACAAAATAAGCAAACATCCCTCAGATAG  
CUST\_3208\_PI426210822 GTCAGCAGAGCTGAGGCAGCTCCAGCCACTTCCTTGGCTTCTCTG  
A\_14\_P104624 TATTGAGGAAAATAAACAAGTCTCGGTCTCTTGTTAAACCAAGAGATGTTCTCTGGTGTT  
A\_16\_P19780049

ACACCCAATTATCCCAGGATAAAGATCAACTACCGAATGACTATTACTTATCTTTAGGA  
A\_16\_P18615868

ACATTCACCAGATCAAAGTAGGAAATGTTACCAAAGTAACATTTGCATCCCATTACTGA  
A\_14\_P135118 AGCAAATGTAAGATCCATATTGGAAAAACACCCTTGAGGTTGTGTTTCTCTAATTGTAGT  
A\_14\_P201629 AAGCCTGTAAATTTAGTAGAACCTCATTTTTCTCTTCTACCCCTGGAAGATTTTTTTCCA  
A\_18\_P22840279 AGACCTTTTCATAGTTGCAGCAGACCCTGGGGCATGTGGAGGGAG  
A\_16\_P18087414

CCCAAATCCTATGGTATCTGGCATTACTATCATTTTTCTGGGTTATGTAACCTCTAGCA  
A\_18\_P22840897 ACTAGAGTCTAACTACATGTCATGGACATTGTCAGCAAACCACCCTTGG  
A\_14\_P121220 TTTTTTTTTTACCTCCTGTCTTGCCCCCTAAAAGAAATAAATAGAGCAAACATCTTGACT  
A\_14\_P129749 ATTCCTCATAATACAGCATGTATGTTACAGAAACCCCATGTATGTGAATGTATGTGCA  
A\_14\_P114622 ATTGTTTTCAATATTTACTGTGACTTTTGTTTTCTGAGTTGATTAGAATGCTGTTTCGAGT  
A\_16\_P17556168

AGATGGTCCCCATTACAATGTTTACAGACCACTCTCTACAATTTCCATGAAATTAGTCAA  
A\_18\_P22839773 TAAACTATAGTATCTGCCAAAAAACCCACCCCTGGATCTAGGGCTG  
CUST\_999\_PI426210822 GTGATCTTATCATAGAATGATGTCAGGGAGAACCAGGCCCAAGAG  
A\_16\_P17016644

GCAGGAGCCCTAAATACATAAACTACTGGTGCAGTTTAATTCTTATTTCTACGGAAAAGG  
CUST\_8092\_PI426210822 GTGGGCACGAGAGTGTACTGGGGATTTCGTGCACCTTCTCAGAAGA  
CUST\_3018\_PI426210822 AGGCCATTAGAAGCATCAAAAATACGCCCTGTGGCAGGTGCAGAA  
A\_14\_P125246 AAGGGAATGCAGGCCTTGCTTTTCTGGTTAAATATTTTTTTCTTCACACTTTTGGACAA  
A\_16\_P15652494

TGTCAACAAGATTAGCATTTCCCAGAATTCTACTAAACCTCAGAAAACATAGCAAACCTCC  
CUST\_564\_PI426210822 GAGCCCCAGGCCAGGGCAGCAGCCTCTGACCTTTCACTCCCTAAC  
A\_14\_P125296 CAAACTCTACTCATCATCCATTCTAAATCTTCACATTTGGAAAAACAGACTCTGCAAGTG  
A\_14\_P124930 CTATCTAGAGATCTCATGTATTTCTCTGGTGCTACTGGAGAAAATGGAATTGAGCAGTC  
A\_16\_P58424628 AGAAAGTAATTGGAAGTGTGCACAGCCCCTTGGGGACTGTGTAAC  
A\_14\_P117816 AAACCTGTTAAAGGAACCTTGGGGGATCTTTCAGAAATATTTAAAAAAAAGATGAGGCTGT  
A\_14\_P101047 TTCCTAACAACTGGGTTGGCAGAAAACCTGTGTTTCATCTTTTTTCAAAAAGAATATTCTGTC  
A\_16\_P40219752

AAGAGAGCACCTACACTATAGGATATTAGAACTACAACCTCCAATTACTCCTTCACTCTCA  
A\_14\_P131930 CTACAAGCAACTAGGTTGCCTTATAATTGTTGGTAAATATGCAACACTTGGGTCATCATC

A\_14\_P100328 TCTTGTCTTCCTTTCCAGAGCATACCTGAAGAGAGATACAAGATGAAGAGCAAG  
A\_14\_P106570 TTCAAACCTCAAAGTAAAGAACTTTAACACATATTCTTAACCTGGCTTCCAGGAGAGCC  
A\_16\_P33641207  
AAGTCCCTACAACGTAATATTTAACGAGTGATGCTTTTCAATATGCCATACAAATCTCAA  
A\_14\_P200405 ACTCTCAGAGTATTCAGAAAGATTTTTCTGGCAAAAAGCAATCCAGGAATTACTTAAGGT  
CUST\_961\_P1426210822  
CAGAGACACTTTGCATTGTTTTCTACATGAATCCTTCCTTTGACACTTTGATCTC  
A\_16\_P00685104  
AAGGCTTGTTTCATGTCCATCAACCCAGGGGCCTTTTATTAGAAAACATTTATTTTAAAAG  
A\_14\_P124463 TAAAACATAATTCTCAAAAATACACATTTTCAGAGACACTATGGTGTGCTATTTTCAAGT  
A\_18\_P14236436  
AACAAAAAATCAAAGGTCTAGCAATCTTCAATTCAGCAGTTCCATATTGACAGAGCACAA  
A\_14\_P122185 ACAACCCATGAGACTAAAACAAACTTTTTCTCTCAGCATTTCTCCCTTTTAAAGTCATA  
A\_14\_P136454 TCCTCCTGATCAAATCCATCTAAGTATGTGATTTGCTGCAGTAGTTCAAAAATACTTTCT  
A\_14\_P106032 TCTTATTTTCCCACTCACATACCTGATTTTCTAGATCCAAAAGAACTCAGGCAGAGAC  
A\_14\_P122383 CTTATCTCCGGCTACTGCCAACAAACAGCCTTTAGTTCTGTAAGACTAGCATTCTAA  
A\_18\_P10522898  
AACTCCTGTGACTTTAGACTACTTATCTAATGCAACCCACTTTCTTAATGCATTCTCCAA  
CUST\_9705\_P1426210822  
TAAATCAAAGTTTCCAGTCGTCATGATGAGTATGATCATCATCATTATTATTTTAGGCA  
A\_18\_P14048331  
AAAATGCCATATCTTTGTGAAGTTAAAAGTCTCTGGATTGTGGTTAAAAGTCTGGTCTGC  
A\_18\_P14136203 CTCTCTCAGACTACTTCCCATCTGTATCGCTTTAACTCCAATAAAAGGCCATC  
A\_16\_P03139649  
AATTGCCAAGTCATCAATTAGTTCACAGACTCAGAATTTGTAGATTCCAAGAAACACACTC  
A\_14\_P102171 TTACGTTTCTCGGGAGATGTTGATTCCTTAGGATCTGTGAAACCAAGAACAGAT  
A\_14\_P134307 CCCCAACTACTTAGAGTATGTGTTAGCAAATAGGCTTCTTTCAATTCCAATAGAAAAAGC  
A\_14\_P131942 GAGGGACAGATACAGTAACTTCAAGTATGTCTGGCTTAGCATATTTTGACGTTTATGTGA  
A\_14\_P134295 TAAGAAATACAGGATGCACATTTGCCAGGCATACCTAGGACAAAATAAAGCCCTAC  
A\_14\_P138931 AAACCCATTTGTGAATGGCTCATAAATCACACCCTTAGAAAACCTCACTCCTCATTATAAT  
A\_14\_P125182 TTGAGTGTAAGAGTCCAGTTATTCCAACATAACATAGTAATGCCATAAAGGCTGCTAG  
A\_14\_P109859 AACTGACTTGAATACCTTCAAAAATATGCCACAAGAAGGTTGTGAAAATAAGATGGGAAAC  
A\_16\_P01414887  
AAACCAACTTTCTTTAAACATGACTCATCTCTTCGATTTTCTTGTATAGGTCTTCCTCCC  
A\_18\_P15818779  
AGTAACCACATTTCTCACTTCAACTGTAATTCCTCCTTACTCTTAGTCACACTAATTCCC  
A\_16\_P15914126  
AAAACCAATGACCCATTATCACGTATTCTCACCATCATTTCCAAAGAACATTTAAACATT

A\_14\_P135728 ATAGTTAATTTTCTTTCCCAATTCAGAATGCCCAAATATTCTCCATCCTTTGAGGAAGTG  
A\_14\_P125367 CACAGCAAAGATAAGATAGAATTGATTAAGGAACCTTTGCACCAATCTCCAGATGAAATGG  
A\_16\_P01665003  
ATGCTTCCATGGAATATCTTACCTTGGTCAAATTAATTGCTTCCCAACTTAATCACTGAG  
A\_14\_P116171 CCATATCAAACCGGTTTTTTCTAATTGCTGATTGCTGCTACAAATGATAGTTACTGAAGC  
A\_16\_P18124527  
AGTGCTACCATATTTTCAGACACTGTTTATAGACACGAGGTGAATTTAAGATACTACTGCA  
CUST\_2555\_P1426210822 TTCAGCAAGTTTCTGAACGCTGTAAACTTCTCATTTTCAGATGTCCTGTTGGA  
A\_18\_P10819307  
AAAAATCATTCAAGATCGTCAGACTTAGCATAATCCACAAACAACCTTGCTAGATGTGAGG  
A\_16\_P36230465 ATGGAAAGGTTGAGGTGGGAAGAGAGTGAGGGGGAAGACTCCATG  
A\_16\_P16586147  
TACTTAGACAGTAGATCCTTGACTCACCTAATGTAAGCACCAAGAAAAGATATAGCGTCC  
A\_14\_P121445 TCTCAAACCAGGAAGTAATTCAGGAATCAAGGAAATTTTCAAGCATCAAAGTAATGG  
A\_16\_P20863022  
ATATGAAGACATGAAGTAATCCTGACTCATGAAGAATGTTCAACTACCCAGTAAGTAGGC  
A\_18\_P14849684  
AATAGCAACTACAATAGGATCAAAGGTTTGGGATAAACATACTTGACTCTTGCTGAGCA  
A\_16\_P16013184  
AAAAATTCAATTTTCCCTTCTCCTTGACAATCTAGACATGAGAATGCAAAGAATTCAGGG  
A\_14\_P108871 AAAATGATTTCAAGGCATGGAAGTTCTCTGTGATACAACAATAGTATTTCTTCAAATGCG  
A\_16\_P01030111  
GCCACAATAAGATGAACACAAGGTCAGTTAGAAACAAGGTTACTATTACTCTGCGAAATG  
A\_16\_P17370613  
AAAAATCTGGATAAGGAGAAGACTGAGGATTTACTTGACTCATTAACTTGATGGCTTTGG  
A\_16\_P01953173  
AAAGTCCCCTAACTATATCCAGTTGAAACAAATCCTTTGTCTACAAACAGACTAGTTGCT  
A\_16\_P00685314  
TCCCCTATCACTCTCTTGAGAAAGTCCTGTGTTTTATTTATGCTGAATGATTGAATCTAT  
A\_14\_P109500 ACTTTCTCCTGCAGATCCACGTTTAAGAGGCTTTTTCTGCATAAAACCAAGGATAAAAAA  
A\_14\_P107592 ACAACTGGGAAATGATGTTCTTCTGACGTATAAATAACCATCAGGTGGCCAATT  
A\_18\_P10746379  
AAAGAAACTGCGGCTGTATATTTACCTCTATTCTGCTACTCACAAATGGTCTGAAAGAGT  
A\_14\_P132062 TTTGGATTTCTTCCTTATGCTAGAACTAAGCAATATTCACCATTTCAITCCTCCTTCTGC  
A\_14\_P119165 TGATGAACTTCTTCATTTTCAAGGGTGCTCCTGCTAAAGAAGAAGATATAGAACTTGATG  
A\_16\_P02887871  
ATGATATGGCCTCTTTGTAACCAATGAGCACTCTCTTTTTTCAAATACAGTATTACAGGGT  
A\_14\_P128595 CTTGTTTTATAAAAAATAAAAAATGGGTAAATCTTGGCGGCTGTTGCCTCTTTCTTTGGG



CUST\_3659\_PI426210822

CCTTTGGGTTACTAGTTCATTTTGGAACTTATTCCACTATTGAATTATCCGTATTCTTTG

A\_16\_P16191257

AAGAATGAGAACTATTCTAGAACTCTCAAAAAGGGCAAACGAGTAATAGTTTCTGTGTAT

CUST\_1830\_PI426210822 GGTAGTTTATGTTCCAAGAGTAGGGAGCATGCTTGAGAAACATTTTCCTCTGAT

A\_16\_P18175174

AAACACCCCCTTTTTCTCTAAGTCTATCCTAATTCCAGGTCTTACTACTTCTTATAGAGG

A\_14\_P118527 GATTGGGCATATATAACTCCTTTTACTGATAATCTCTGCTGAACGCTTTGGGGTAATAGA

A\_14\_P113077 GGTTGTGTTCCAGAAAGTTTAAGGTTTCTAAGAGCAAGAAATGAAAGATGGCATATCTA

A\_14\_P135188 CATTTTTTATAATTTTAGACCAACAAACCTTCAATGTGGAGTCCAAAACAGACTTGGGTG

A\_14\_P111214 ACTTTTCTCAGCAAATCTTGGCCTCTGGAATTCATTTGTCATTTAGCAAGATGACTTAA

A\_16\_P17687156

GTGTTACCCCTACAGAATTCTGATACTACATGGTCATAATCTGATTACAGCACTTACACC

A\_14\_P138910 ACCAATTAAGCCATAACCTGCTTTTCGAGACTTAGCACGATTATAAGTATTTCCCTCATGTT

A\_14\_P102722 AAATTTATAGGCCACTATATGTCACATACACAAGGTCTCAGTTGAATCAAATGTGGTCTT

A\_16\_P16850423

ATGATTCAAACACAAGCATTCTAGTCCTATGGTGTCTTTAATTGGAAATTGTCACAGCAG

A\_14\_P137601 CAGCCCCTTCATTCATATCTTTTAGTAATCCAAAGTATTGTGCAGATCACCATCAGATT

A\_18\_P17059917

AAACACCTTATTGCCTTATCGTAGAATGACTGCATTACTCAGAATTCTTTACCTCTACCG

A\_14\_P101972 CTTTGAGACTGATGAACCAAGTAAATGCTCTATTTAGGGCTAAGTGAGATACAGATTCCT

CUST\_10247\_PI426210822

CCTCTAGGGCATTTAGAAGATAACATGCTTTTTTCTGGTCTTGCAAATTACTTTTCGGT

A\_14\_P101229 CCAGGCATGGTTACTAGACACCCAGAGACTCAAGCAATTTTAGCAAATTCTATTTTTAAA

A\_14\_P105609 GTGAGACCCAACTGTATTCTATCTGAAGCATTAGAAGCCAACTGTAGTAAATGCATCTTA

A\_14\_P122678 ACTTATAATACACCCTGGTGTTTTTGTAGGGAAAAATGAGAAGATGTTGACAGAACTGT

A\_16\_P16191692

GGTGATAAAACAGATCCACTTGCTAATCTGGATAGAGCAGGAAGGACTTAAACATTTATG

A\_14\_P124771 CTTAGTTTAATGCAGATGTCTGGACCTAGTGTGGTTAGCATAAAAATTCAATAGCAGCAG

A\_14\_P118373 CTGGGACACTACCAGTTTGGCCTAAACAGTATCTATTTCAGTGAGCAATCTTAAGTAATTA

A\_14\_P102518 AGAATAAATCCCAAATTGGAAGCAAATAATTCATTGGCAGGATTGTTCCCTTCTGACTATG

CUST\_8688\_PI426210822

ACGATGGGTATCCACAATGAGTCAGTTGATGTGGGAACTTCAATTAATTTATAGTG

A\_14\_P103507 TCAGGAAGATGTTTAGCCAGTGTATAAAATAGAATGTGTGATCACAATTCCTTCTCTCT

A\_16\_P15699412

ATGTCTGTTACAAGTTAGTTGATCATAGCCAGACTCCATTTATTTGACGTCATTTGCCTT

A\_16\_P21035857

ATTGGTGCATTAACCTCCAATCTCCATGTTTATACAGAATGCTCCATTTGTTAAACCTCTC

A\_16\_P39883785

ATCATTCCGATTAAACCTATCAGGGAACTAGAACTTTTGTAAGAACTCACGACCTAT

A\_14\_P130501 CATGTGCTTCTTTTCCAGTGCCATCAAGTGGAAGTTACCAAGGTAAG

A\_16\_P37246213

TCCCTAAAGCAAGTCTAAAAACAACTTCCATAAACCAAGTTATTCATGTCTTTCATCTG

A\_14\_P108176

ACAAAAGAAGTCTGCAACAGAGAAACAAGAAACATGTTACCAAGACAGTTTTAGTTACGT

A\_16\_P17903385

GCAGTTGTAGCACTTATCACATTTTCAGTCCTTAAAAGTCTGTTTTTAATTCACCGTGTCT

A\_16\_P40156331

TTTAAAAAGGCCTTTATCCACAAATCAACACCTTTAGTCTCATCCACACATTGAAATTGG

A\_16\_P58424245 ATAACAACTGCCCCACAACCTCCATGGCACACATCAAGAAGCATTATGTTC

A\_16\_P16508097

CACTCAACAGCCAGGAAATAACTAGGATAAATTTGCAGATCTCATTTTTCTTCCACGATT

A\_14\_P139176 CTCATGACTCTGGATACCTAGCGTCAAATTCTGCTTTGTTGTTGTCTCAGAGA

CUST\_7348\_PI426210822

CTAAAAGTTCTTGCAAAAATGTCATAGAGTCTGATTGGTCCAATTGAGTTAAGCCTGG

A\_16\_P16994571

AAATCTACTGCCCCCTTATTAGTTTTCTCCTTAGTGAAATAGTCTTCCCTACATTGGAAT

A\_14\_P139055 TGCCATTTTAATTGTTTTAGAACAGCATTTTACACCTAATATAGACTCCCAAAGCCAGCC

A\_14\_P120723 CTGTATCTGGATAAACCTAAATTTGGCCTGCAAGTGAATCATACTTCCTTAGTAAACCTC

A\_14\_P201570 ACATCACAAACAGTTATGGCTAAAATATAGTTAGTTCACAAGGAAGCGGCTTTATTTTCA

A\_14\_P126648 AACTAAAACAGTGGTTGAAAAATTCTGTTGTGGATTGAAGATCCTCCAGAAGCATAATTC

A\_14\_P118683 ACAAAGTGTTATTTTTCCACATTTAAAACAAATAATAGCCTTCAGCAGGCAGTGCAGGAA

A\_14\_P202537 GAAATCTCTATCACAGATTTATTGATGAAGAAACGAAGGATACCAAAGGTAAAATGGCAG

A\_14\_P109476 ACTCACTACCTAAATCCATGCTTTTTGATTTTCGTGTTTTAACGAAATCCAATTGACTGG

CUST\_9342\_PI426210822 CCTGGGCCTGCAGTCGTGTTTATTTTCCTTTTGACCTCAAGATCT

A\_14\_P137248 CTGCAAATCAAAATGTCTCCTAACCCCAAACAATCATTGACAGATCATTCTATGCAATT

A\_14\_P102192 AATGGTATTCAGGCTATTCAGGTATCTTGGCTTTCATCTACTAAATACAGACATGGGTGTG

A\_14\_P131816 TCGGAAAGAAGTAGCAGATAATCACCAGACTATATCAACAAAAACACCAATTTGACCATC

A\_16\_P15623350

AAATGATGCCATTCTCATGCTTTAAAATTCACGTCCAACATAGTAGGAAAAGTTGCCTT

CUST\_7935\_PI426210822 ACTGGTGCCTACCGTCTGAGCACTGCTCTGAAGGACTCGATTGCC

A\_16\_P03093054

AGCACATACTATTTGATTCCAAATAAGCACACACTTTCTATGATATCAGACTCCTGCACA

A\_14\_P130003 AACAGTTAGTGAAATTTTCATTAGACGCTGCTGCTGGTATGTTGTATCTCGAGAGTAAAA

A\_14\_P132425 CATAATTCATCAACATTTCTCTCATCCTTAGAAAAAACCATGCAGATAGCATTGGGTGAG

A\_16\_P16310593

AAAAAAAACACCTTGCTAAAACCTCTCTATGCACATTGTTTCAAGGAATGAGAAGTCTTGG  
A\_16\_P18464012  
AGTTGTAATAAGGGACCTTAGCACATTTCAATCTTCATGAAACCACAGAAAACCATAGTC  
A\_14\_P116972 TCACCTTAAAGTTATGATGTCTAACTTGGTAACAAGGTTTGGGTAAGTCAGTTGTGACTA  
A\_14\_P114592 CTTCTCGAAGTGCTAACTCGAAGCGAAGTCTAGGGTCAGAAATTATCTGTAGAAATAAAA  
A\_14\_P106476 GAATAAAGTCCATCCAGTATGCACCATTACCATCTCTTCGCTCTACAATATCTTTTAGG  
CUST\_898\_PI426210822 AGGTGGGCTAGCTCTTTTCAAAGTGGTGTCTGGTGCTGATAGAAAA  
A\_14\_P200201  
AACACATGGACAAAATAGAAGCAGTAATGAAATATAGACATGGGAAGACTAGCAAAGGC  
A\_14\_P131625 ACATGTGGGAGAAAACTTAAAGTGTGATGAGTGTGGTAAGGAATTCAGTCAGG  
CUST\_8938\_PI426210822 CCAGCTCTGCAGGTTTGGAGTGGGCTGTCATGTGATTTTGTTTAC  
CUST\_4583\_PI426210822  
CATAGCACCTGATGAAATTGGACCAATCTGTTTTCAAATACAAAGCTAGTAGTTAGAATA  
A\_14\_P130175 CAGAATGTGTTCTGGAGGTAAAATTAACCTTTTCATCTCTAATAAATACTGAAAGAGTAA  
CUST\_3589\_PI426210822 ACTGTCTTACTTGGCCTAGTCCACACTTGTCCCTCCCACCCCTT  
A\_14\_P130768 AAAGAACCTGTTCATTTTCCTTTTTTGTAAAAGTGTCTAAGAATAAAAGGGCCGTTT  
A\_14\_P120270 CCATTAATATAACCACCTTTGCGTAATCAGTCTGGACAGTTTTGGTTTTGAAACATGTTTC  
A\_14\_P100610 GAATTTTCAATTTATTTGATCCCATGTGTAATGCAAGAATGGAATGACACCTTGGCATGAA  
A\_14\_P136250 TAACTTTTTTGTAAATCTTTAGGTGTTGGATTGAGAGTTGGAGGAGAGACTGGAAGTAAA  
CUST\_2607\_PI426210822 ACATATCAAGAGAAGAGACCTAGGAGAGGAGCCTGGGGAGCCCTG  
A\_14\_P201503 AAGGAGATGTTAGACTATGAATTTTTTTTCATTGTCTTTTAAAGGAGAAAGTCCCGCCAAC  
A\_16\_P17965966  
GGCCAGCATTTTACTAGAGGTCTCTGTATACAGAAAGTCCCAGTTATCCTTATTCTATTT  
A\_16\_P18897844  
ACATTTTCATCCACGTTTAGAATAAACACTTTGACTGGCTATACTTGCATGCAAAAAGG  
A\_16\_P00685536  
AAACAGCCCAGCAAATAACCCAAAACAAAATGAACAATGCACATTTTTATCTATGCTGC  
A\_14\_P122982 ATATGGTAAGTGTATAATGACTAATCAACCTACTTCTGATAATTTTGGTGTAACAAAA  
A\_16\_P18040089  
ACTCTGAAAACCTTGTGATTTTCAAGTGAAGATAGTAAGCAGAGACAAGTAATGAAGGCCTTG  
A\_16\_P19569895  
ATTAACAACAGCATATTGTGTCTAGTTTCCCAACTAGAAGAAATCCCAACACAATTT  
A\_14\_P126640  
GGCAAAAACAAAACAAAACAGATGAGAGACATTACTCCTTGATAGGTGACTAGGAATTT  
A\_14\_P103813 TCTTTTATGGTATGTTTGTGTTCCAGATTCTAACTCATATGTTCTTTGCGATTTCTCGG  
A\_14\_P108021 ACTCATGTTGTTTACAAGTGTCTAAGTTCGTGCTCCATTTTAAAGGAACTAAAATTGGA  
A\_16\_P15029976  
GCAAGTAAAGACGTAAAATCTCCTTTGTTCTTAATGTTATGGTGTAAGAAGCAGTTCAGG

A\_14\_P115062 AATTAGTGAAGCCAAACAGTGTGGGAACAGAAGATGTTCTATTCAATATCGCAAAAATT  
CUST\_1444\_P1426210822 CTGAGGGTGCCAGGAGTGGTCTGTGGAAGGTCTCCAGCAATGTC  
A\_14\_P114305 ACACACTATTGGCAAATAATAGTGTGAGGGTGTATGTGAAGCATCTTTTTTAGACATCCT  
A\_16\_P02276961  
GCACAACACCTGAATAAATGAATGACATCACAGAATCTGTCTTTTTTTGCAAATAGCCAC  
A\_14\_P134554 AAGAAAGTAAAAACGTTTGGGTATATTTTGATCCATGGGTGGCATTTCCAAATGTGCAA  
A\_18\_P16473810  
CTTTCAGCAAACGAAGAAAATCTCCTGTTGTTAAATTACTCATATACGTGCCATGAGAGG  
A\_14\_P102363 AAATACCAAACCTGCTAGCCCTAGTATTATGGAGATGAACATGATGATGTAACCTTGTAATA  
A\_14\_P112023 TCATTATAAATTAACCTGAGAACAACTTTCCAGTCCCATGTTACAAAACACTACATGT  
CUST\_6595\_P1426210822 ATACTGTCTCCCTGCCAAATATCCATGGAAACCTTGGACACTGTCT  
A\_16\_P17889352  
TGAAGTGAAACGTTATCATCTTTGGAACACATTCACCTATTCATCAGTTACTTAGCCTCT  
CUST\_971\_P1426210822 AAGTGTCAGTGTGCAGCTGGCTATCAGACAGCACCATGATAAACATC  
A\_14\_P124742 GTCAAGATTCTGAACTACAAGAATACCCATCTATCTCATGCAGAGAATGGAATGAGCA  
A\_14\_P111987 CACTCTGAGATTCTGTTTTGGGAACCAAGAGACAGAATTACACGACTGCAAC  
A\_18\_P21289499  
AGTGTTTTCATAGATTCTTCCAGGCTTTTCAGTTTAAACGCATGTCTGTGCTTTAATGAAG  
A\_18\_P14962462  
AAAAAATCGTTTACAGTAATTTTTCACAAGAGAATTCCCATAGAGGTAGCAAAAAGTCA  
A\_14\_P134964 GTTTTTCTACCAACTGCAGAGAACTCTTTCCTATCCTTCTTATTACCTGTTCTCAT  
A\_14\_P109328 TTTTTTTTACCCAGGAACTAAAGAGAGTCTAATAAATCCCACTGAACATTCATCAGCA  
A\_16\_P58424223 TTGAGGGAAGGAGAGAACATTCCAGGGATAGGAAATAGCACATGCAAAG  
CUST\_543\_P1426210822  
CACACTTTCATTATGTGTGGCCTCTAACATTTTTGTTATGCTCTACATAAATCTGCATT  
A\_14\_P105331 CTATGACATCTGAGATTGAGGCACATCCCACCAGGAACTGTATTTGTGTTTTAAG  
CUST\_4226\_P1426210822  
TCAAGTTGGTCAGTTTTGAGCAAGATCTGGAAAGCAAGACAATGTCTCAAAAG  
A\_16\_P03807415  
CACACACACCATGAACTCAGTTTGAAGTAAAGTTTACAGTTTTTAAACAGTAAAGCCTTGG  
A\_14\_P115553 AGATTTCAAACCTGCATCTCGGATAGCCATCAGGATCTTTCCCAACAG  
CUST\_6568\_P1426210822 GACTGAGATGGAGTTGATATTAGAGCCATGGCTGGGACAACCTTCAT  
A\_14\_P128129 TCAATCTCCTCCACTCTCTTTATCCTACCAAAGTAGCAAATCTGCTTAATAAGAGTGCTA  
A\_14\_P122919 CTGGGAAAGTGATTTGTGAAATGAAAGTAGAAGAAGAGCATAACCAATGCAATAGGCAC  
A\_18\_P14509407  
ATGTCACCAAAGACTAATCAGAACAAATTGCAAGAGTTTTTCCTAATGTCTCTGCTTCAG  
A\_14\_P109260 GTCCAGAAAACAATATTCAAACCAAATACTAGGCAAACATTAAGTAAGACCTGAGGGTC  
A\_14\_P114647 TTACCTTAGACAGTGTCTCCCATAGCCATCCAGTGATTAATAACTGATTAATAAGGGAG

A\_14\_P114291 TGGGGAACAATACAGAGTAGAATAGCCTGAATAGGTGAAAATATTGTGCAGCATTTCAAA  
A\_14\_P134281 TTACTIONCTCACTGCTTCTTAGAAGGTAGAATTAAGTTTCTGGAATTGCACCTACATGTT  
CUST\_9055\_P1426210822 ACTACTTCATGAAGCAAGGTCTTGCCAGATCCCCTAGAGTGAACAG  
A\_16\_P37525264  
AAACATGCAGTCCCTCATCATATCACCATCAGCCTTGTATTGAAAATTAATGACTATTTCA  
A\_14\_P129416 AATGTAGCCTTTTTGTATCAACTGTCAGTGGCATATTTAGATGTGAGTCACTACAGCAAT  
A\_14\_P130549 ATGGACATATGAATATTCTAACCTGCAAAATGATTCTCCACATTATATCAGCGAAACT  
A\_14\_P126701 CTGGATCACTTCACATCCTTAAGGTTTTATGTCTAGTATTGGAGGACTTAACCAAGAATC  
CUST\_2315\_P1426210822  
CCGTCTATGCTAAGGCAAAGGAATATGTTTTAATATATAATCTAGAAGAAAAATGGTCCA  
CUST\_318\_P1426210822 GCTGAGCTCAAAAGTGCCCTCTTGTCTGATACAAGCTGGCTA  
A\_16\_P36336846  
ACGCATTTTTGTCTACAAGATTAACCAATTGCTCAGAAACTTTCATGTTACTCTGCTTCA  
A\_16\_P03203259  
ACAAACCTGAGTCTTGAGATTTCAAATCCACTGTTCTTTCTGTTACCCCAAGAAATAATT  
A\_14\_P124719 CTGCATCAGAGACTCACATCTTGCCTTTCATCTGTGGAACGTTTTGTCT  
CUST\_966\_P1426210822  
GGATCTTCTAGGAATTTTCCAAGATCACCCCTTAAATAGTTTATGGCACTTAAAAAATGA  
A\_14\_P200317 ACTGTCATCAAGGGGTATGCTCCATGCTTTGAGTCACCAATGAAGC  
A\_14\_P113171 TTTGGAAGTAAAAAGAGACTTTGAATAAAAACTTAACGACTGCTGACCTCCTTGTCTCC  
A\_14\_P133329 CTGAGCCCATCTGAGTCTGCTCTAATCTGTTCTAAACTCTTTTCTTTGATTTATTGCTT  
CUST\_8673\_P1426210822 CCTGCAAAACCAATTGAAAATATTGGCCTCTCTGGCTTGTGTTTTCTTGCTAT  
A\_14\_P201139 GGAGGAGTCACTAATGTTTCAATCTCTATTTCTGTAATCTTGGGCAATAATGCATAGGAG  
A\_14\_P139294 ACAGCCTTTGACAAACTAGAAATATTAGAGTAGGCCAAACACACCTCCAAACTGTAAG  
A\_14\_P139659 AACCCGTTTTCTTTTTCTTGTGATGAAAATCTCTGTATAAAATGTCTGACTCTCAGGAT  
A\_14\_P128192 GGAACACATGAAGATCATCTCGTCTATGGATCATGTTGACAAACTAAGTTTTTTTTTATTT  
A\_16\_P17412114  
ATAAGCAGGCATAGTTACCAATTTCTTACTGATAACCAGATGGCCATTCTTTTTTCATGG  
A\_14\_P126895 CCTTTCTCGGGATCTATCTTTCTGTGTCTTTTCCCTTGCTGATTTTCTGTCT  
A\_14\_P201241 CTTGAACAGGGCTGACAACATTTTTCTTTTCCGTAAGATTATGTTCCATTAATAGATT  
A\_14\_P104520 ATTCTCCTCAGCCTTCAAGTCTTGATGGTTATCTTAAAAATACAGCATGGTAATAAAAAG  
CUST\_2488\_P1426210822 ATTCAAAGGCTTCTTACTCTTGAGAGGGGAAAAGAGCAGCACCCC  
A\_16\_P00911382  
AATCCCTGTTACCTTATTTAATGCTCCAAATTTTCTGAGAGGTCTAATTGAACATTCTT  
A\_14\_P108673 ACAAATTTACTCCAAATAATACTCACATTGCTGGTTTTAACAGGTCATGGAGTCACAAGT  
A\_14\_P126313 CTTCTTGGTAAAGATCTTCGTATTCATCAGACTTGAGTTAACCAGACACATGACTCTTTT  
A\_14\_P126622 AACTGTGATCCAGATCTGTTCTACTGAAGAATTATAAAACAATTCACATTCAGTCTCCC  
A\_14\_P100489 GATTTTATGTAGATTTCCCTATCATTCAAAAGCATCTGGCCCATATTGGAGGAATCAACT

CUST\_9466\_PI426210822

AGTAATAATGCTTAGGACCTCAATAAACTTCAGTCCTGTCCGTTTTTGGTGAGC

CUST\_10329\_PI426210822 GAGAAAAGTATATGTGTGGGGGCGTCAGAACATGGCATTCTGATGAATG

A\_14\_P135562 CCTTTGTTCTTTAGTATGTTTGTCTTTGAGGTGGACTGTTGGGACTCAAGGA

A\_16\_P01859482

CCCTGCTGACTAATAAATCAACAACCTTATGTCACAAAGTCCAATAGTTACAATGACCAGA

A\_14\_P105494 GAAGGGGTAGTTCAAAAAGTAGTTTTTCATGTTAAACAGCCATTTTAAATTGGAGTCACGT

A\_14\_P119159 GACTTGTCACCTTTGATGCTGTGCGAGGATATTGTCTTTCCATTGTGAGTAGAAGAGAAAAA

A\_18\_P22840731

AAAAGAAATACAAATGTTAAAACCTTTTTTTTTTTTTTCTGGTGCTAAAGAACAATTTTAC

CUST\_3168\_PI426210822 ATACACCAGATAGACACATGTCTCTGAGACCTTTATGGTTCAAGAGGCAACAT

A\_14\_P125289 GGTAACCATTCTGAAGGCTCGTTTGGCTTTATAAACAAACAAACATTGTTTTATTAGTCC

CUST\_1238\_PI426210822

CTTGCAAGTTATAATTTCTCAAATACTGTTGAAGATCATATTGGCACAATTTGGTTGGT

A\_14\_P201952 TGTTGTTTGTTTTTAGGGTTTGAATCTTCTCTTGCTCTGTGAATGATACGGGATAAGTTG

A\_14\_P100494 TTTGGATACTTCTGGTTTTTAGCCCCAAACCTTGTATAACCTCAGGGGTG

A\_16\_P02750980

AACGAGAACAACAATCAGAGTAAATACAAATCATCTACCCATTCAAATAATCAGCACCA

A\_16\_P18462065

CATAGGCACCAATTTTATCCTAACCCACATCTCAAAAGTAACTGAAACTTCTGCACTAAG

A\_16\_P19364729

AAGGCAATTGGAATTGAATGTATCCTGCAGACCTTATACTCTACGATTACACATACATGC

A\_14\_P114578 CTGCCGCGACATAGATGCTGAGTCAAAGCAGGTGTGAGACTAAGAA

CUST\_5437\_PI426210822 CTCAACCCAAGAGTCCCTGGAAACCAGAGCACTGGGGCAAGTACA

A\_14\_P127943 CTCTATGGGGTTATCCTCTATTTCCCTGACATTAGCAAGTCTGAAATTGCTTCTAG

A\_16\_P19309812

ACAATCCCATTTTTAGTCTCTTAAACCTTATGACCACTTTCTCTAAGACCGTTTTTGA

A\_14\_P116004 AACAAAAAGGATCTTAGGAATTATGGATTATAGCAGTTAATACCCTGGGGGACACATACA

A\_14\_P107864 CTCTCAAGTATGTTTGTAAAGTTCAGAAAGTTGTTCAATTTGGAGACTGTGGGTGTAATAAA

A\_14\_P121788 AGTTATTTGAGTGGGCATGGTTTCACTGGGATCATTATAAAATATTTGCTTTGGTTGATG

A\_16\_P18202145

ACCAACATGGGTCATATATCACACCAAGTCAGATTAATGGATCAAAGTTCAAGTGAAGTG

A\_14\_P126615 GGCTTCCTAATTGCATGATTCAATCCACAGTATTCATACTTATTTCTCCCTATTTGGTCT

A\_14\_P111243 AAAGTATTTCTGAGATCACCAACACCAATTTCTTCACTGCTCATGTG

CUST\_3918\_PI426210822 GATTTTAACTTCATCTTCTGCTTCAGGGACCACATTGTTCCCAGTGTGTTT

A\_14\_P132890 CTTTGCCTATTTCTCCAGAGTGAAGATGAATTGGCTCCTAAAGTTTATGATAGAATCAAT

A\_14\_P119892 GTATCCAAAAAAGAAAGTATTCATCTTGGAAACCACCTGAAGCAGTGATCTCTTTCTATG

A\_18\_P14197867

GTTTTCTCTTACATGACTCAAAACCAAAAAGGAATGTAATAAATAACGGCTGTGACTCC  
CUST\_8454\_PI426210822 CACACTTTGTGAGAACCAATGGGAAGGAGCCTGAGCTGCTGGAAC  
A\_14\_P118611 AAAAGAATCCCAAGGCTGGTCATGTAACAGTGACTTGTGGTGTGATTATCATCTTCTT  
A\_14\_P115853 AGGAATCCCATTTCATTTGTAAGGGAGAAACAGCCAATAAAAATGTATTCTTGTCTCATCA  
A\_16\_P02020177

CCAAGCAAACCTTACTATCCCTTTCTTATTGTCCTCATCACTTACTCTTGTGGTGCACAAA  
A\_14\_P133034 CAGAGAGGTATCTATCTGTGTTAGAGTGTCTGGTTTGGTGTTCCTCAAAGTATTTTTCT  
CUST\_5791\_PI426210822

TGAACATGATAGCTGGACTAGGCTAAGAATCCTATTTCTGTTAGATCAGAAGTGAAG  
A\_14\_P134088 TTCTTTTTCTTCAAGTAACAAGTTCTCAATCCACACCATTCTGATCACAGATATAACTG  
CUST\_54\_PI426210822 ATGGCCACATCTGGGAAGCCCTGGAGAGATGTGGATTTGACAATT  
A\_14\_P119580 TGAAATCATATTTGGCTTCTACTGATCCTCTCAATCTACTTTCAAAAAGGCCATCAGCA  
A\_18\_P25365859

AAAAGCAGGTTGCTTTACTACATCCTAATCTACATCAGAATTTAGCATCCAGTAACCACC  
A\_14\_P119576 TTCTCTGTTAGGTGGTGGTATTAGGAAAAAAGCCTATTAGGAAAGTTACTCATGGATTT  
A\_14\_P133802 AATAATGTCACTACTATAAAGAAAAATTTAATCTGGATTTATCAAGCCCCCTTGGTCCAG  
A\_14\_P102078 TCTTGGATTCCTTGTCTTCTCTAAGGCATCATCAATGTCTAGAAAAAGGAACACAATT  
A\_14\_P129154 GAAACATCGCCGAGACACGAAATGAACCAAGAACACAACACTGAAATGGTG  
A\_14\_P138592 ACCATATTGCCTTGTATCATATTCTTGAAGGTAGAGACCAAGTAATTCACCTTTGAATC  
A\_18\_P22840344 TTAAGTGGGTTCTCAGAAGTGGTTGCACCTTCAGCAGGCAAGGAAAATATTTAT  
A\_18\_P14133720 CTCTTAGGTTGGGTTATTTCTCAGAGGACCCCTGGCCTCTCAAATA

A\_14\_P130937 CCATGACTGCCCTTTTGTGAACACAATGTGAAAGAAGCCTGCTGTG  
A\_14\_P120215 GTCACCCCTGTCTAATCCCTTATCCCAGGAGTGCTATGTTACTCAG  
CUST\_1582\_PI426210822 ACATCAGAACTCAACGGAGATGTTGACAGAGAGCCGAGGAGAAAAG  
CUST\_254\_PI426210822 CCGGAGACCTTCACCAGAAGCCTTAAGAGAGAGACGTGTTTCTATA  
A\_14\_P136550 AAAAAGCCCTGAGTCATAGTTACAGCCATTTGCCACAGAAATTCTAAATCTCGTAATTTT  
A\_14\_P129166 CTCTTTGCATTTTAAACGCGATGGCATTTCAGACTTAAAGTAAGGAAATTTACATGAAAGGT  
A\_14\_P201732 GAATGCATAAATTCATGTGAAAATATGTCTCAAATAAGAAGACAATCAGAGATATGTAGT  
A\_14\_P114581 TCTCTGCAACAGATTTTAAAATGCACGTTCTTAAAGGTTTCATAGTGAAAGTTCAGGGTAG  
A\_14\_P107856 AACAGACATAAGGCAGAGCCACCTGAGGTTTTTAGAATCTATATCTCACATACTGAACTA  
CUST\_10195\_PI426210822 TGCAGGGGGCTGGGGAGGAAGAGGCTGCTGCTGCAGGGTGGATAC  
A\_14\_P108318 CTGAAAAGGCAGTGAACATCTATTATTTTTCCCATTGATATCTAGGTTTCCTTCCACTA  
A\_18\_P16097805

GCAGTAACACACAATCAATAGGTAGTCACATCTGATTAGCATCTCACATTTAGAGAGTGC  
A\_14\_P119324 TTTCCCCCAAATTACCTTTGAAGTGATGGAAGAAATACACAACATAAAACCCATC  
A\_14\_P124394 AAACGAAAAATATAAATGTATCTGAGGTGGCATGTCTGCCTCTCCAAGAAATAAATTGT  
A\_16\_P15524588

AGGACTTCTTACTACCATTGGCATAAAGGGTCTATAAAAGCATATGCTATCTCAAGTGGT

A\_14\_P110953 ACCTTCATGAATATACATCTGTTGAGCATCTTCAAGATGTAATAACCCCAGTAAAGGTGA

A\_16\_P15473384

ACAAAGGAGATAACAGATAAATTGAACCTTGAGGACTAAATAGAATCTTGCTGCTTTGCC

A\_18\_P22746653

AAAAAGAAATTGGGTGCATTTTCATGATTTCAAACAAAACCTCACTAGCACCATAGCAATGG

A\_14\_P104790 CCTATCTATGCTAATGATGAGCAGGATGGCTACTCCTTCTATCACAAATAACCAGAAAAA

A\_14\_P115336 TTTGGAGACAAACATGTCATCCAGGGTGTAATAGTCTCCATCTGTTTTTCCATA

A\_16\_P18324369

AACTAGAACTTTAAGGAAGATGCAAAAATGAATAGACTGAATCATGGATGTGTAAGGCAGG

A\_14\_P123927 CATTTACCCATTCTCTGCTGCTTAAAAGATTACAAACATCTTGTCCTGACATCATTTGAC

A\_14\_P126329 CTTGTAAGACTTGTAAGTGGCAGATAGTCTCTTTAAAGCATCTCACTTTGTCCTTGTAAG

A\_14\_P127329 CTATGTCTCTAATAACCCTGTCTTTCCCTCCAATAATTCAAATACTGTCTTCCCAACAT

A\_14\_P104119 TCTAAAACACTACGCAAAAGTAAAGGATTCTTATGTTTTTAATATGCGAGGAACCGGAAGGG

A\_14\_P125104 TTGATGAGTCAAGCATCCTCTCATGATGTTATTAATGTCAAAGAAACAATTCCCTGGGTT

A\_18\_P16294623

AAATACAGTTACAACCTAATTCTAGAGGTCCTCAAAGGTAGAATTAATGGTGATGACCCA

A\_14\_P126102 AGAGAATAAAATGGCAAAGAGAGTGGAGATTATTTGCCACACGGGTAAGTAGCAAAG

A\_16\_P36065811

GCACTGCCTATTCAATCCCTATTTTTGTTCTGGAAATTATACCTACATTGAGCCTAGTTC

A\_14\_P121269 AATTTTTTCAGATGATTCTGGAATTTCTGGTCTACGCAATCACATGACTTCTCTCAACTTG

A\_14\_P106661 ACACTGCTCAATGCATCTGTTCTCTTTGCCCTGAAAATATTCTATCAAAAAGATTCTAT

A\_14\_P135162 ACTGTTTCCTCACTGGAATCATTAAGATTCGGATAAACCGAGAAGTAAGTATCTCTCTC

A\_14\_P103161 GATTTGGGAAAGTAAAATCAAGACAAGGTGTTGGTAAGTAGTTAACTCACTCCTTCTTTG

A\_14\_P129219 CTCTGGGCCGAAAATAATTAATAAATCAATACTTCAGATCAAGGAAACCGTGTTTTCTCAT

A\_18\_P13658373

AAAAAGACCTGTGTTACTTCTCAGATTGTTGTTGTCATCCCATCTCTGTTTCAGTTTTCTT

A\_16\_P03130315

AACTGTTTTTCAGACCATCCTTGTTAGATTTGCCAGAGATGCTTATTAAGTTGCAGAATC

A\_14\_P135393 CCCACTCTTTTTAAAATTCAGATGTCTCTTCCTGAAAGATTGCTTTCTTCATGTCATTCC

A\_18\_P13927541

AAACATGTTCAAGAGAGGATTCATAACTAAAACCTGGAGACTCAGGATACTAGATTGTGGC

A\_14\_P103180 CACTTGAAGTATAATGGGTTTCTGTGTAGGAAGGAGCAAAAAGTTGCCTGCAAAA

A\_14\_P122658 TTGTTCTTTCTCCGTGCCTATCCTCTATGGAAAGGTCAACAAATTCATAATGTCTTTTTT

A\_14\_P128313 ACAAAGAAAAAAAAAAAAAAAAAGGTCTGGTCCCCCTGAAACCAAGGCTACATTTTTGTATTTT

A\_18\_P22843203 GAGGAAGTTAGGTGAGTTCTGAGGCTCCCCCAGATGTGGGACT

A\_14\_P131477 GATACCATTACTACAGTAGCACTTGGATCTCTCACATCTATTCCAGAAAATGTGTCTACT

A\_14\_P102520 CATTACCTGGTTATGATAGATATGCACATCAAAGCCTTTACCAGTATCTTCTGTATTCC

A\_14\_P114583 TCCTACAAGACGTTTATGTGGATTACATTCACATGAGGTTGTATAAACCTCTTATTCTT



A\_14\_P124272 CTACCTACCACAAAATAAGCACCATTATGAGAATACATAAGTTCACCTCACCGGATATTCC  
A\_16\_P58424367

CTGTGAACCCGGATAAGGAAATGATTGCATTTTGTTCCTACTAACTTCACACTGAAATTT

A\_14\_P132930 ATCTGCTTATAACTTGGATTGAAAGTCTTCCAAGGAATATGATTTGGCCAATGACATCAT

A\_14\_P112675 ACTCCACTAGACCGTTAGAAATCAAAACAAGACTAGTTAGCAAATACAGAGATCATAGCG

A\_14\_P107512 TTTTGTGATGAGCCGGGACAATGCCCTTTAACATTTGATTTGAAATACTCATCTCC

A\_14\_P119156 CCTTAATCTATCTTATAATTTCCATTTTCATTGTGCTCAGTGCCCATTCACCTTCACTGA

A\_14\_P122374 ACCAGTCCAAAACCTTGAGTGTGTGGAGGTTGATTATTTTGGTTCTATATCAGTGTATTT

A\_18\_P11141374

ACACCTTCACACTCATCATTTACACATCAAACCTTTTCTTAGATTTTCCCTTAATTGTC

A\_14\_P129797 GGCTATATTTTGACCCAAAATTTAGCCCCAACCTGATGTAATAATGCCCCATAATATTA

A\_16\_P19837205

TTGATTATTGCCCTCATAAGATAACGTCCACTAATGCTTCTAAATCTTGGTCAGAGTCCAA

A\_14\_P112041 CTTCTTTGTGTTCTCTCTACTCAGTTTATTCTATTTTCTCTAAGCCCCAAGATCTCAC

A\_14\_P102468 ACAAACCTTCTGAAATCTGCCTAGGGTTTCTTTCTTAGCAGAAACAAAAGATAAAGTCTGT

A\_16\_P20111022

AAAAAAGTCTAAGTGTAGCATTCTTAATTCTAAGCCTTTTTGCAAATTAAGGCCTCTGGC

A\_14\_P124750 CTAACACAAAAAAGTCTGTTTTATGTTGCAATAGTTGAGGCTGACATGAAGAAATGAGGC

A\_16\_P17546478

AAAGGAACAGCGTTATTCATTATTTCTACCATTCCTAATACCTCCTATATGAACCCAGAA

CUST\_2795\_PI426210822 ACTTTGGAGGCTCCTTATTGAGCTTGTAGCATCAGCCAGATGTCAG

A\_16\_P02206729

ACAAATCCTCGTAACAAACATCTTCCATTGATACTTGAAGAACATGCTCACATAGTAGGT

A\_14\_P120889 ACACTTCAAATTGGCATTATGTGTATGTGGCTTTTATGCTACAGGAGATTCACCAATTT

A\_14\_P109994 ACCTTGGATCAATTACATCTGGATAGGCACATACTCTCAGAGTTTTTGAATTTGAACCAA

A\_14\_P136946 AATTGTGACAGTGATAAAGAACATGCAGGGAAGACCTACAAGGCCAACTAATTAATAATAT

A\_14\_P129198 AAAGTATAAAACAGGCAAAAGTGGACCTTTATCCGATCTCCGCTCTTTAGAATAGAGG

A\_14\_P126658 CAATTGGCTATATGCAGTTATATATAAGGGTGTGAGAATGCCACACAGAGATCACTGAA

A\_18\_P14942027

CAGAATGTTGATAGTCCATGTAACCTTTAAAGCCCTACCATGAAAAGATGACTTCCCAAAA

A\_16\_P37147310

GGCTATCTCCAAATTCATATCCGAATGACCTACTTTTTAGTTAGTGTCTTAGTGAGCAAA

A\_14\_P127025 TGAAAAATGAAAAAAGTGTGCTTTACTGAATTTGGATGTAGCACGGAGCAGTTGAGATCAT

CUST\_446\_PI426210822 AGAACCTTCCAGGGCAAGAAGACAGTCTTGTCTCAACCAGTCATTA

A\_14\_P126836 GTAGGAATGGAGAAGAAGAGAGAAATCAGAGGTTTATAAAGGAATACATTGGCATCACTT

A\_14\_P131984 CAACTGGAGTCTAAAGAATTTGCACCCACTGAAGTCAATGACATATGGAAGTAAGTTCT

A\_14\_P130902 CTATCCATGCTGTTACACAAAATTTACACAACAATTTTTGCAGGTCACTCTTTAGTGGAG

CUST\_287\_PI426210822 CCGAGTGTGTCTGTTCTTAACACTTGTCAAATTCCTTTTTAAAGCGGA

A\_16\_P17847593

AAGCATGAATATGCAAACCTATTTGGTCATAGGCCAAAAATCCTAAATCCAAGAACCCCAT

A\_14\_P200942 CTTCTGGGGGTTACTGTGATAAATCATATGAAACAGATCTTGTGATTTTGCATACAAG

A\_14\_P111197 TTGAGTGTATAAATTGGTTCCTGGCTATAAACTCCTTAGAGAGAAAGGATGCCACAATTC

A\_16\_P16246165

AAGACATTAATGAGACATGTGGTTCAAAAAGTCATCCATCAAATCAAATATGGCACCAAGA

A\_14\_P115058 TAACTTATGAAGAAGACACCAGAGACACAAAAATGGTCCAGCAGTTTTGGAAATACTTTT

A\_14\_P133613 CATTTTACCCTGGGTCTAGAATTGGTGGTGATAAGCCGACTTAGATGGAGTATTT

CUST\_2643\_PI426210822 GAAGCAAGGTGGGGCAGGCCAAAGGGGTTGCTGAGCATGTCTGAGG

CUST\_9141\_PI426210822 GTCAGCAGATGTCCACTCCAGAAGACAGACAGGGGAATTTGGAGAC

A\_14\_P101459 TTATGTGAATGTGGCAATAAAGGAGAAGAGATCATTTTTAAAAACCGTGTTGCTCAGACA

A\_14\_P139365 TGTTCTACCTCAACTACACTGTGGTTTGCTAATTAATTCATCCCCACAGAGTCATTTTA

A\_16\_P18752648

CTCATCACTACTGAAGAATCAGAGAAGACAAACTTGATAACCCAACAGAAATCTAAAGCC

A\_16\_P15983794

ACCTAGCAACAAGACATACAATTGAAAATGAAGAAATCCACTATCTCTATCTCAAGGACA

A\_14\_P104334 ACAAGTTTGAGAATCCAGATCTCTTTGCCAAATGGCATTGAATTTTGCTACTCAGATAA

A\_14\_P109515 GAGTTTTGAAATAAAATGGATGATTTGACGTTACTTGATCTTCTGGAGTGCCCTGTGTG

A\_16\_P38998448

AACTTAACACCCTATCAAATCATTACAAAGTGGAGTTTCGAATTGTATGCAACATAAAGGT

A\_14\_P130461 CACATTATCTACTTACTGATACATTCTGGTAAAGGTTTGTCCATTGTCCATTTGGTTGA

A\_14\_P202089 ATTAGGGAAACAGGATTATGGGTGACTTTCCCTCCTAAATTTTCAAATCAGCCTTTAAC

A\_14\_P133167 AGACCAGCAACACCACAATGTTATTATTTCAAAGGCAGAAATTGCCCCATATAAATGTAT

A\_18\_P16182548

TATATCACATTCCTTTTTTCTCTGCACTAATGTTAACCTTCTTAAGATCCTCACCCACT

A\_18\_P22839766 GTTTCCTTGGAGCCAAGAATTTTAATCTTGGGCAAACCTGTCTCCTATACTTCAA

A\_16\_P20860873

AAAAAAGACAGCCTGCTCTAAAATCATCTTGAGGGAAAGAAAAGTTGTCAGGTATATCAG

A\_14\_P106057 CTTAGACAAGTTATGAACACCTGTAAGTCTTTATTGGTGAATTATAGTTATGGCTTAAC

A\_16\_P00685356

CACAGGAACCATCAGAGAAATGTTTCATTGATACTTAGATAACAAACCTGTGGTTCAGTTA

A\_14\_P109431 CCTGTGCATGTGCTATGCCTAGGTGGTGCAAAAATTACTCTATTTAGTATTTTGTGATTT

A\_18\_P13233192

TGCACACCTAAACTCAAATAATAATCGGCTCCTATCAATTTGTATCAGTTTCTACCTTCT

A\_14\_P115421 GAGGAAAAACCAAAGCAAAAACATAAACAGTTCTAGTTTTTCATAATTCAGCCACACCTGT

A\_16\_P17036376

AGGTGAACCAAACCTCATCTACCATAGGCTTTCACAGAACAACATACATTTTATTCAATGG

A\_14\_P130914 TAATCCTATCAAGGAACCATGTTTGTAGAAATCCAGTGCATAGGCATTAAGCGACATTTT

A\_14\_P129604 TAGATGAGATATGAGAAATGTATTGTGACTGTCAGATACATGGAGACTAAGTGACCTCCT

A\_14\_P125501 TAAAAAGTAAAGGATACCTAATTTCCATAACGCACATGCTCCAAGGCAGTCGTC

A\_14\_P133121 CTTTTTCTGGCACAAAGACTGCATTTGTTTTTCATGTGGGTTTCTTATAGACAATACGT

A\_14\_P133148

GAAAGTATGAGCCAGTAAACAGACACAGACCAACAGAATTGTGGGTTTTAAAAACAAAAC

A\_14\_P114684 ACATTCTTGGGATACTGGTTATGCACAGAAATTTGAGAGACTCATTATGTAGATACCCCT

A\_16\_P16379429

AAGACTTCTCCCTCAAATAATTTATACCTTCGAGTAGTTCTAATCCAGATTCCCCTCTC

A\_14\_P202288 ACTGCCTGAGGTTGTTTAGTGAAATTTAGAGGAAAACAGTTATTTTGCAGCATTACATG

A\_14\_P108231 AACTCTCCCATTTAGAGACAAGGGAATAGATGAATTGACTAAAGGAAGTCATAGAACTCA

A\_14\_P124436 CTAGAGAAGGATCATTTCCTGGGGCTTTTGGGTTATGTTCTATTAATAATAAATCATCGT

A\_14\_P107446 AGATGTTCAAATTTGCCTATTAACAAAGACCTCTCCAAGTGGGAATAATCTGAAGAAGT

A\_14\_P112844 TTTATGTGGTGGATTCCATAAATGACTTAAACAAACTAAACCTCTGTCCAGCCGGAT

A\_14\_P121072 CCTCTTAAACCACTTACATTCAAAGGGGAACAGAAATCATTCTAAGCAGGAAAATACTTC

A\_14\_P111421 ATTCTCTATGGTATGTAAATCAACACTTGAATAGCCCAATGGGACTCGCTATTTAAAGGA

A\_18\_P13078227

AGACAGAGAAACTATTCCCTAAGATCCTATGAAGTTCTAAATTTCCCAAAACCTAGAGGA

CUST\_8477\_PI426210822

TTCAAAGTTTGAGATTTTTAGATGCATGTTAGAAGTGTCTATTTTTGTTGAAATTTCCC

A\_14\_P134699 GTCCAGTCTTCTGCCGTGTATACATGCCTGACCACTCTTATGTGAC

A\_14\_P200497 AGGATTTTTTTTCTTTGTTTCCATAGATGCTTTTTCAAATTGCCAGATTGAGATCTTTGT

A\_16\_P21325898

AGAGCCCCAGCAAACCTTAGATTCAAAGTGCCCCCTGAAATATATGTGTATTTGCTTCTAT

A\_14\_P128712 AGTAATAGGAAAATTACTTCTCTTCGCTTAGAAGAAAATCCTCCACCTTGAGCATCTTCT

A\_14\_P135078 TGAAGTCTATAAATGGTCTGGTTGCAGTTCTCTCATGTTCACTGGATGTCATAAAATTG

A\_14\_P132004 TTCCAGACTCCTAACATCATAGGCTTTTAAAACATTGGAGCCAGGAAAAATATTGTTTGT

A\_18\_P15877925

ACTTTCACAATTATAGCGACTCTACTTAATACTTCCTTCAGTCTTGTATGACGTATCCCA

A\_14\_P103582 GTCCAGCATTCTTCAACAATTAGTTTGCCATCTTCAGTCTAAGGAAGAAATGAATAATC

A\_16\_P00824317

AAACCCACCAAGAGATACTACTATAAGTGATACTGAATCCAAAGACATTGACTTTTCTGGT

A\_14\_P109312 GCCTAAGGGGATAAGGAAAAATAATGTGAAAGTTGCAGTCCATTATCAGAAGTAATTGATT

A\_18\_P19673555

TGATAGCGCTAATAATGAATCACTAACAATATGGCACACTTCTTATCATGGATGGTCTAC

A\_14\_P139113 ACTACCAAATCCTCATGCTAAAAATATTTGGGGGAGAGACTACTTGCTTTTTCTGTGTATA

A\_14\_P201675 ATTTATTAAGAAACAAGTAGAAAATAAATCAGTGGTTCGACTTGGGGACCGTAATGGCTTC

A\_14\_P115047

AGTGACTTAAAAAAAACAAGGAGACAGACATTTATGGAAATGGTGTTTACTCAAGGCTGA

A\_14\_P111153 ACCAGTCTGTGTATATAGCAAGGGGAAGTAAATTTATTTAGATGCCCATTTTCGTCTAACT

A\_16\_P58424416 CAAGGACACATGGCTAGTTAATGGGGCTCCTGGAACCTGTAGTTCTG

A\_14\_P103107 TTCAGATTATTTTAGCAACTGGGGGCACACAACACTACTAAAAATCTCAGATCAACTGAATG

CUST\_7256\_PI426210822

CTTTAACTAAAAAGGAAGAATTGTCTGTGGCTTCTTAGAAAAGTGGTGTGTGGACAG

A\_16\_P39615288

ACTCAAGAGGCTACATAACCTAAGAGACTCACATTTATCCAATTTTCATGATCATAAGAGT

A\_14\_P201131 CAACAGCACATCTTTTCTTTGATAGGAGGAAAGCAATTAAGGATTTGGAAATGTGGTTC

A\_14\_P130345 CTCCATGAGCCGTGAATCTGTAACCTTATGCACTTTGTGGCCAATATTTCT

CUST\_1042\_PI426210822 TCTATCCCTTTAGGCCTGTGCTCATCGCTGGAAGAACATCTACTATGA

A\_14\_P106251 GCCATTAGTAAAATTTAAAGTGATTGGGGGCTATGGTTACTGAGAATTCAAGAGGTAGAT

A\_14\_P123143 TAAGTCAGTCATTTTTTTTCAGACTGGAGAAATTGCAGAAGAACTTCATCCGTTAGCAA

A\_14\_P133168 ATAGCATGAAACCAACAAAAGGCAAGTCATATTTACTCCAAATTTTCAGAGTATTTCCAGT

A\_14\_P201446 GCTTTGTGAAAAATGCTATGTCACTATTCAGAATATGCTGGGTAAATTGACTTGCCTAGT

A\_14\_P107523 CTTTAATTACCAGGCAAAAATGCCAGGCATTTGCGATAATAGAGATTGCTTAATGCAAAC

CUST\_9087\_PI426210822

AGGATGGATAGTCAGTAATTGTTTATCTGTGTGATGAGATAAGGTAGTCCCCTGC

A\_14\_P138849 TAAAGGAGAAAGGAGAAAAAATTCTTTTCAATTTATTTTTTCCCAGGCATTTTAAATTTG

CUST\_4762\_PI426210822 GAGAAGGAATGGGCTCCACGATGCAGGGCCCGCGGTAGAGAACAG

A\_16\_P21579594

CTGGCTCTTCTTTTGTA AAAATAACCCTGTAGACTCCATTTAATTGTCACATTGGCCTAA

A\_16\_P41248245

AGGCTCTGCTTAATGAAATGAGGTGAATAATTAGGACAATCTGACAATCTCTCCATAGAA

A\_16\_P40053497

ATGTGCTGGTAAAACTTTATGAACCCTTAATCATTGCAAACATATTGGATCCTCT

A\_14\_P137428 TTGTCTTACAGAAACAAACAGTCGTTGCTGTCAAAAAAGAGGTAATTAGTCTTACACTTC

A\_14\_P114615 GAAAAGCAAATGGTTCTTCATCTTGACTTCACTTCTTCTGAAAACTGGAGCAAAAAAAG

A\_16\_P01492805

AAAAACATGCCCATGAAGTAACTGTAATTAGAAGTGGTCTAATTAGTTCCACCTTGAAGG

A\_14\_P136780 AACTTTAATTACTTTTAACTCCTGCCATCTATCTCATCTGGGGACATCAATCACTGATTC

A\_14\_P100293 CACAGTAGTGGAGTCAGCCCTTTGTGCTCTGAGAAATTGTATAGCCTTCAT

A\_16\_P15979449

ACAGCACCTGAGTATACTATAGTCTTCAGAACCGCTTTATCTGTTCTTATTGTCCT

A\_14\_P121087 CTGCGATCCTGTAAGTTTGTGAAGGACCAGAATAGATGCACACACATAACACATATAATA

A\_14\_P127597 GAATATTTCAAGCACTGGTTTACATCTCTTGTAATGGATCCATCTCTTGTAATGGAAG

A\_14\_P133756 CTGGTTATTAGATCCTTCCCATCACAATGAATACTTTCTGCTTCATTATTACACACCAC

A\_14\_P102755 TGGTCCAATGCCATCCTTTCTGCTAGGAACTGATAAACCCTTTTATTATATGCCAAATA

CUST\_1219\_PI426210822 CTTGAGACCACTGAGGCAAGAAGCCGGAACCTTAGCAGGAGTGAGA

A\_18\_P26792593 CTTTGAGTGCACGGTCCATCAACCAAAGCCCTCTTCCCATCAATA

A\_16\_P00783563

CTTGTTACCTTCTAACAGATTAAACCTAAGATACTCCTACCTAAAATTTCTGACACCA

A\_14\_P118444 CCTTTTTTCTTACAGCCAGTAGAGCATGCCTTTAAAAGATTAAAGTCTTTTCTTTGGTCTC

A\_16\_P16240997

AAAGTTGAAAAAACCCAGAATTACTGCTTAAACAATCCCCTATATTCTCAACTGCCTCC

A\_16\_P17865061

GTCCCAAAGAAAATATCCTTTGTCTAACGCTAATAGAACCATTGCTTCTCAGTAGATTGG

A\_14\_P129723 CTCAAATATGTGTTTCTCTCTTGAGAAATGAAGGAGGCCTAACTCCAAATCAATTCTAA

A\_14\_P106237 GTCTTCTTAAGGTGGTTGAATCACTCTATGCCACACAGAGTCTCCAGAAGA

CUST\_3674\_PI426210822

CTGGCTGGATTCTTCTGCCATTTTGGCAGTTATATATTGGTCTGGATTAAAAGTGAT

A\_14\_P137365 GAAGCATGCATCTGTAAGCAGATTCAGATATAGCATAGATGTGTGGAGGCATCTCAT

A\_14\_P116177 CGATACTTACTTGTGGCTTTGCTACGTTTGAATAATGTAGTTATCATACTGGTCCCATGA

A\_14\_P125878 CACAACAAATTCCTACGAAAGCAAATGTCAGCCTTATTATTCCTCCCTAAGCAATATGTT

A\_16\_P02232831

AAGTATGCTTTTGGTCACTACACCATTTTTTTATACCACCATAGAGTTGACAAACAGC

CUST\_5127\_PI426210822 CAAATCATTCAAGGTAATTGTGCTGGTTCAGTTAGCCCCCAAGCT

A\_14\_P109107 CGACAAGTTGTGCTCTTTCAAAGACCCCTGTTTCTGCCAAAACCATGCTAT

CUST\_8879\_PI426210822 ATGACCTAAAGCATAATTCAGGCCTCCCATGAAGTCCTTGAAACTTGAGA

A\_14\_P134284 TGTTGGCTTTTTCTTTTCATGATGCTTTTGATACATTTGTGTGGATATCTTTCTGCAGTGT

CUST\_8041\_PI426210822 CAGTTTAAGTTTGAATGCCTGCTGATGCCAAATACCACTTCCTTTTTCACTAG

A\_16\_P18286436

AAGTCACATTCACATTAATCTCAAAAAGCCTAATATTCCTGCTCTTTTTTCTTTGATGCA

CUST\_4715\_PI426210822 AAGGTGGTTCATAATGGTGGGCTGAGGAGGAAGCAACTGAAGTAG

A\_14\_P202244 ACGCTCTTAGATTTGTAGAAGAAAGGAAAAATCACCAGTGGAAAGGAGCAATTTTACTT

A\_14\_P130543 ACACTTGGCCAGTTTTCTGCTTTGTGGATAGTTTGAACAACTTCAAAAAATGATAAGA

A\_18\_P19125795

TGAATCCTTGATATACAGCCTTTTCTATACCATCATAACGAACATCTTAAGCCAAATGACT

A\_16\_P17489945

ATGGAAACAGCAGATCTATGAGTCCTGTAAGAGAGACACAATAAGCCCTACCTTAATTTT

CUST\_8896\_PI426210822

AGATACAATTCGAAGGACCATGTTTTGTCTCATATGGGGGCTATTCACCTCATTATTAC

A\_14\_P202458 CTCCTGTCTGTTCTAATTCCTCAAATCAAGTTTTTCCATCTCTGACCATATGCCTAGTTG

A\_16\_P19039558

TGGATTATTGCTCCCTCAAACAATATGAAATGCTTCTACCAAACAATCACTTCAGAGAT

CUST\_5684\_PI426210822

TTAACATGCCATTATTTACAGCTCTAAGGTTTTATTTTCATTATTATTTAAACGTCTCT

A\_16\_P16191551 TTAGTCTGTCGCAGAGGGAGAAGATCTGGGGAGGACCCATATAAC  
A\_16\_P17056017  
AATTCACAGAGCCTCTATCTTTATTGCTAGAACAGGATATCTTATTAGTATTCCAGAGCA  
A\_16\_P19791466  
GGCACACCATAAAAATCTCTTCATTAACACACTGATAGCATCTTTTATTTTCCTTCACTC  
CUST\_9028\_PI426210822  
TGGAATTTAAGGAGAGCAGAAGTTAAAGCTTATCTGTCACATCCCTGATAAATGTCTCT  
A\_14\_P130939 CTTGTGATTTTGGACAGTTGTGTTTCCAAGTTGAGGGCACTTTTTTGATCAACTTC  
CUST\_7743\_PI426210822 CAGACAAGGAAAAGTGGGACTGGGGAAAAGGCCAGTTATGTGAAT  
A\_14\_P103426 TATAATACAGTATTGCAGTTACTTGATTGCATGTCCCTCCTCCCTCAAGACCTTTAATT  
CUST\_9776\_PI426210822 GAATCAAATAGTGTGGTTTAGGTTACCCACTGCCTCAGACTGGAAG  
A\_18\_P10904915  
AGACACAAATAATGTTACCAGTTCAGTTTTACAGAGTCAACTTTTAATGAACCAGGAGG  
A\_14\_P115494 AATTATTGCCACTTTTGGAAAAATTTATTAATCCCATGACAGAGTTACTGGCGCAGGAAT  
A\_16\_P17276227  
AAATTTGCCAGTTCCTAATTCTATTTTGTCCCCTGATAAACAATAGTGTCCCTGTATGAC  
A\_14\_P105616 CTCTAAGGAAATTTCTGGAGGAACAGGAAATAACAGACCTCAAAGTGTGGACAAG  
A\_14\_P103139 ACCTGACACCTTTTGTCTTGTGGAGACCACAGGAAAATTGTATTTAATATCCTGTTA  
A\_14\_P114282 ACACATGTGTA AAAACTCCTGACTAAAGGACACCAGGGTTTAGAGTTCAATATACTGATA  
A\_14\_P103593 CTGCAGATAATTATTCAACCCTCTAGTGTAGGCAGGGACCAGTAGGGAA  
A\_14\_P102333 GGAGGATATGTTCCAGGAGTTTCTTTCAATGTCTCCAAGAAGCCAATTTTCAAAGAT  
CUST\_7750\_PI426210822  
GACCAAAGGCAAAAAGATTATTTGCTTTATTAGAGTCTTTAAAATAACAGTGCCCTAACTT  
A\_14\_P138369 CTGTTGAAACAAACAAAACGCTGCATGAGATGAAGACCAGATTCCTGCTCTTT  
A\_14\_P200072 AAAAATGAAAGAACTGTAATTACCTTTGTGTTAGTAGGTCCTGAGCAGTGATAGTCTCA  
A\_16\_P30952495 ACTTCCTTTTTCACTAGTATGAATTCAGCGTGATCTTTGATACAAGCCACCTGTCTG  
A\_16\_P21209713  
AACAGCAGGGTATCACAATGGTTTTTTTCAAAAATATGTAGCACTATGAACTGAAACATGGC  
CUST\_9362\_PI426210822  
TGTCTTATGGTTGTTTTAAGAAAAGAATGATAATTGGTGCATAACTCCCAAGTCACATAT  
CUST\_1510\_PI426210822 ATTCAGAAGGACAGGACACCTGCATGCTTATGTGCCCGTGTGGTA  
A\_14\_P135927 GAAAGGGAACCAGATTAAATGACAGCCCTAAAATCCTTCATCTTAAAATGCTCAGATTCT  
A\_18\_P14493155  
AAAATCTTGCACTGTTATGACAACCATCTTCACATACTACTGACTTCTGTATTGTGGCTT  
CUST\_3544\_PI426210822  
AGCTTGACTTTTTCAGCAGTTTTTTTTAAACTTCACTGCAGTGTTTTTGGACACAGCTAT  
A\_16\_P17581659  
AAAAATGTTGATAAACTTCTCGTTGTGAGTTCTGAGTTGATAAACCTCCCATCCATACAC

A\_16\_P01129962

GCACATTTTCCAAATACTACATGTTGCTTTTTGTTACTCATCATTATTACCCATACGGCT

A\_14\_P108137 ACATGGGCCTATACTATTTCATGTGCATACATAGGGCTATACATAGGCCTATACTCCTATT

A\_16\_P16775265

AAAAATCAGTCACTACCTAAATTACCCAATATTAAGGAACTGTTTAACTAAGCCATGGCA

A\_14\_P113801 ACTATAACCAGGACAAGAAAAAGAGAAAGGGCAGAGTATTAAATTATTGCTCAATGAAGGC

CUST\_8262\_PI426210822 CATGTAATCAGTCCTTAGAGGACCTTGTTGGGAGGTGTTAACAGCC

CUST\_4881\_PI426210822 AATGTCCCTTCTCTTTTCTTTACTCACTGTGCGAACAGGAACCCAAAGG

A\_14\_P133828 ATGATAAAAATTCTTCTGGCTAAAAGGCTTATGTAAGTGAAGGCATATGAAAGACCGGAAG

A\_14\_P139910 TATCTGCAGATGACGCTCAAACATGTTCTTCGTCTTGACAGACAAAGTTGCAAAAAA

A\_16\_P18834455

ACATGCTTGTCTCACATATTCCTCATCTGTGTTTACCTTTGCCATTTCATTTTCAGTTAC

A\_14\_P202347 TATTTGAAACAAGTCTCATTTTTACACTGAAATGTCACAGTCCTTCAGGCTCTCTGTTTT

A\_14\_P110743 GATGAAAAGGCCCTCTTAGAGATGACTGAAGAAGTAGATTATGATGTGCGATTCATATGCT

CUST\_1920\_PI426210822 TGACAATTCCACATTCACAGGGATTGGGGCTAGTACAGACTTGAT

A\_16\_P21557108

AGGCATAGATCAGAAAAAGCATCACTTACTTTTTCTCCATATTATACAACCCCAACACAT

A\_18\_P14134979 CATGTCTTGCTCTGGACCCATGATATAATGATCTGGATACAGCCAAAGTCACTAAG

CUST\_10110\_PI426210822 AGGTCTGCATGCTTTATGCTTGCAAGATGGCCAGCACCTTCACTA

A\_14\_P137742 AACTCTGCCTTATAGAGACATGAAGATAAAGTGCTTTTCGACTAGTAAAATGCTGTTAGCG

A\_16\_P20042668

GGCTGAAACATTCCAAGAGATCACTCATAATTGATGCCCATCCTTTTTATCATTCTTTA

A\_14\_P131352 CAACAAGGAAGAGGGTAAATGTTCAAGAACTCTTCTCCAAATCCAATTCCACTTG

CUST\_5639\_PI426210822 GGCTTCTTTCCTCCCTGGGCTCTCTGGGGAAGGAGCACAGGCTGT

A\_14\_P117988 TAGAGAAAGGGGTAACAGTGATGGTGATGGAGATTCATTAATAACAGAGGAATTGAACAC

A\_14\_P108786 GGAGGTTGGGTAGAGACCTATATTGCCTGCCTGGGCTTATTCATTAATAAC

A\_16\_P17250417

AAATTTACATGTGAAGGCCTTCTTTTTTAATCCTACCTACCAAAAAGTTATCACCTGCAA

A\_16\_P34485672

AGTAAGAATCAGTTCTTACTCTCTCATTTCACCTTAAATTAATAAATTCACCAACGGC

A\_14\_P124052 CTTGTTTCAGATTTTCTTAATGTATACCTTTACCTCCATGCTGACACATTCATTGTGCAT

CUST\_6869\_PI426210822 CAAGTTGGGGTTTGGAGGCAGTAAAGCACCAGGTCAACTTTCAAG

A\_14\_P136911 ATGTTATTTTATGATGATTTTACTCCTCCTCCTCAAAGTGGGTATGAACAGCAACACTTC

CUST\_699\_PI426210822 GGAGACACAGTGGAGGAAGAACCTGTTGTTTCTTGCAGCCTTTTC

A\_14\_P115769 CTGCACTTCCACCTGCTCTTTAAGGCTTCCTTTTTCTGTTTCACTGA

A\_14\_P114900 ACTCTGGCTCACATGTGGCAATAAATTGTATTTCATGAAATGTTACAAGAAACCAAGTGATT

A\_14\_P127804 CCAGATCCTGCAATTCCAATGAGAGCAGCCAATACAGAAGAAAGCATCTAG

A\_14\_P128864 CTCCTCTCAGGGTTCAATAATTCAATGAACTATAATGGGTTTTTAATCTTATTGCCAG

A\_16\_P17812363

AATGATCCCAGCACATAAATAGCCTTCAGAGTCTGTCAAAAACACATCTTGGTCTTAG

A\_16\_P15008268

ACACATAATAGCCCAACATCAAATATTTGACTTTCCCTACTCTTTCCTGTCAAGATCATG

A\_16\_P18058614

AGCGGTAAAGGCTACTTAATGACTACTTCTACTGTCCACACATATCCTGTGATTGTCATTA

A\_14\_P111498 AAGAAAGGCAAACAAGTGACTTGGCACTTCTGCCTCAGTCAAGGTAAG

A\_16\_P01482091

TGGCAAGAAATATTATAAACAACCAAAATATTATAAACAAGCCAAAGTCACATACCAAG

A\_14\_P118826 TGGTGACTGACAATTCTTTATTACTCAGAAGAGGATCTTCTCTGGTGAAAAATGATTGAG

CUST\_7269\_PI426210822

AAAGAGATTTTTCTCTCCCAGCAAAGTAGTAAACAGGCTCTCTCAAGCATTTCATC

A\_16\_P00348738

TTACTTCTCATCTCAAAATGCTACAGTATCTCTCAGTTCTTCATTACTCAATGTCCCTGC

CUST\_9067\_PI426210822 GACAGATGCCAACAGAAAACCCCTCAGTACCTGCCTTGGTAGAATAC

CUST\_9501\_PI426210822

TTTTAGCACTCCTAAGAAAAAATTAACACACATGGGAATTCCACAATGCCCTTC

CUST\_9919\_PI426210822

ATGTATTTATTTATTAGTAACAACAGTCTGGATACTTCTCTGTAGTTCTCTCCAAATGTC

A\_16\_P15900371

ACCTCGTATCAGGTTCCCTAACTTCTCTTTCATAGAGTATCAGAATGGATTTTTTCACCTAC

CUST\_2594\_PI426210822

CTTTTGTGGCTCCAAATGATTGAGGTTAGATTTGTGAATCTGGTTGCTCTAGTTG

A\_16\_P16554871

CCCCTCAACCCATTTTTTTTTTAGGAATATATGAGAGGAATAAAATTCGCTACTGTCTGCT

A\_16\_P17467903

AAATGTCTTAGGGCTAACTTTTTGCAAAACACAAATTACTGTTACATTCCATACTGCCACC

A\_14\_P101061 TGGGTATTCCAAAGAAGTCCCATTAATTATGACTTCTCAGGGTGCTTTTGTATATAGATC

A\_16\_P18175287

AAGATCCAATACTGACATTTTTTTTCGGAAAGAGTGACTTACATGTGCTACATTTGATGGC

A\_16\_P30952315 ATTTTCCTCTGATGGATGTTTTTTTTTCCCTTCCCTTCTTTTTCAACCGTGTGC

A\_16\_P40075866

TCTTTTCTGCATCACTTCTTTTTCCATTGATGGTAGACAACCTAGATACAGACACATCCTA

A\_14\_P121378 ATGTGACATCATAACGCTTTGGGTGAGAGAAGGGAAGAATCATATCAGTAATAGCATATAG

A\_14\_P127246 GTGGTGTGCTATTTCCAAGGAAGTGCTGCTTTCTTTTTCTTTTTTAAATTTTGTGAATT

A\_14\_P119232 CTGGCAGATCTCTTCCCTATGGGAAATCCTATTACAGACTCTATTACAAAGCAATACTGTT

A\_14\_P102497 TTAAGAGGATTCGGGGAAGGTAAACTTCATGTAATCTTTGGAAAATGGTTTTAACCTG

A\_14\_P130210 CGAATGTTCAAAATACGGAGGGAAAGTTGGTCAGAGGTGTTTATTGCATCATTATTTG



A\_14\_P200686 CCTGGAAGAATCTCCCTAGTTGACCTTACATTCTTGAATATGCTTTTATTGTTTGCTTTC

A\_16\_P00685485

TCTTTTCTTGGTGTGATTTTCTTAGAGTTTGTCTTTCCTGAACCACCAAGATCTGAAAAG

A\_18\_P10460590

CTCAAACCTCGCTATACCTCATTTCCTATTTATGCAACATGGAAAATAATTCTTGCCCCTT

CUST\_6441\_PI426210822 ATTTGGCTGGACTGTGAGGCCTGGGACTTGAACCACATCAGTAGA

CUST\_172\_PI426210822

ATGGTTAGGAAATGCTGTCCTGAGAAGCTCATCAATAGGTTTATTAGTTATTGGTATCCT

A\_16\_P16470732

AACCAATTTAGAAATCTCACTTTCAGAACTACCTCTTCAAAAACAAAATGTGGTTGGCC

A\_14\_P127401 CTGTCTTGTGAAATCTGTGCATCATGCCCATATAAGGCAAACCTTGGATTACTTTTTTA

A\_18\_P22841419

TGGCCTTATATTAAATAGTGTCAATTGCAATTGAAAAATTAGAGTAAATGAACAGAGCCTG

A\_18\_P11197536

TCTGCAATCAGTTCTTTGAAAGAAAAGTCAAAAAGTAGAGAATACAAGAAATTTTTGGGA

A\_14\_P134242 GATATTATCAAAGCCTCCCTTGATAGGTGTTTCATGGACTCAAATATGTGTCTCAAATCT

A\_18\_P14136056

CTTGTGTTATTTTAACATTTCCAAAACCCCAAAGCAACAGCACTGGAAAATGACTGTG

A\_16\_P02025161

ATGCTTACATCATCCAAAATTCATTCTCCCTCAAATATGTATGACTTTCACAAGCCTTGC

A\_16\_P20852737

AAATGCTTAGTGGTTAAAATAGATTCAGTGCATCAGAGAAAAGTAACACAAGTTTGCCCCG

A\_16\_P03543123

AACTTTGCCTTTTGCTAAATTTTGCAACAAGTTTTGAGTAATTCTGCACAAAACAGTGCC

A\_14\_P102319 GAAAGACCTGGAAGTGCTGTTCAATCTAATCCTGTTACTCTGTAGATTAACACTACAGATCA

A\_14\_P127924 CTTACGGGATATGGAGAGAAAATCAATTGTGAGGTATTGATGCTTTAATCTTCTTTTGC

CUST\_1878\_PI426210822 GATCTGGACCTTTAGGGGTAGACCTGTGATAGAGTCTGGTCATATCTC

A\_16\_P16109244

AATGTATCACTTGACCATTTTTCCAAGTTGATGTTTCATCTCCTTACTGATTGCGTCTTTT

A\_14\_P201434 CTTACAGGATACTTACTCGTAGGTAGAACTCTCCATTTTCATTTCCAGATTTAATCCGAAA

A\_16\_P19520126

TGACCACAAAATCTTATTTCTCCAATTTACCTTAAACATCACACAGAATTACAGTGCA

A\_14\_P137186 CTGGAAGATTTAGAAATACTACGCATTTTGTGACGTGTGGAAGTCATTGTCATCGATTAT

CUST\_5041\_PI426210822 GGACTAGGTGGACTGATGGACCCAGAACTCCAGATTCCCTTGCAC

A\_14\_P128755 AGTGCTCGTTTAATAAGTTGGCTTTCTTCGCTCTACAGAGAAAAGACAGATAAATTCACA

A\_14\_P121415 ACTTAATTGACTTATTTGTTTCAGACATAAACTTTGTAAGGCCCTGTGATCTGTGTTTGT

A\_14\_P124040 CAATATCTAATTTTTAAGAAAAGCCCAAAGAAAGCACCCAGACTCAAACCTCCATGATGT

A\_16\_P17858069

AATTGATAGCCTCCAATTCTATACTGAGCCAAAATACTCTATAGAACCACCAAATAGCCC  
A\_14\_P123791 ACATATTCATTGTAACAACAACAATCAGATGAAATGAAATTCCTGTTTCTCCCCTCAG  
A\_16\_P00867117  
GTATTTGATACACTTGATTAGATTCAGCCGACATTATGTCATCACACATGATTGGACCC  
A\_18\_P13078645  
ATTCCGTCTACCAGAGAAATACTACAGCCAGTAATTCAGAAGGTTAATACAGAAAGGAG  
A\_14\_P105068 GATTATAGGAAGATTGTGTAGAATCTTTGGTGTCCAGAGTAAGGGGAAATAACCGT  
A\_14\_P116979 CAGGCTATCCATTCTGAAGATAAGAACAACCTTTTCAGCAGAGTTCAGGTAAAGCAATAA  
A\_16\_P03746582  
TTACTCAACTCTAATGCTACAACCACAATCTATTGTTTCAATCAAAAAGTTCCTGCACC  
A\_14\_P118739 CGGTCAATAAGTAGCATTAAATGACCAAAGGGAAATAACAAAACTCTTCCTTCCCTTT  
A\_16\_P21618199  
AGCCTAATCACATAGCCAAACTCTCTAAAACCTTTTCCTCATCACTTTGTTCTAAATCCA  
CUST\_9264\_PI426210822  
TGTGGATTGTCTTTGTTCTTAATTCCATTGGAAATTTTTCTGACTTTTCTTCTCAGGAC  
A\_14\_P108447 TATTAATAAACAACCAACTTTCTGCCTTAAATATTGTGAGCCAGGGGGCAATTAGCA  
A\_16\_P21652364  
ATGCTTTCACAATAAACCTTTTCAGAAATAGCAATTTGTCTTTATTCCCGGAGTCTCTT  
A\_18\_P12135823  
AATAGTCCTTGGGTATTTACATAACTGACCTCAGAGAATCTCATCTATACTGCCTTTCT  
A\_14\_P113004 CATTTGCTATCAAGATGGGTATGACCTTTTTACCCAAGCCTATTACTGACAATTCAGAAA  
A\_18\_P22840496  
TGTCGTAAGGAGGCCTGAGTGAATTCATAAACATATGCAGTTCCTGAATCAACTAATAA  
A\_14\_P119717 CTTTGGTCAAACCTAAACTGAAAAAAAAATACCGTGGATGACATTTTCAGAGAGTCTGCG  
CUST\_2501\_PI426210822 AATTGCCTGGGTGGTGGAGTAGTGGTTCTTCAGGTGTTTCAAGAT  
A\_14\_P133009 GAAATAACTTTGAAGACATAGCATTGAAAGTGTGATGGGAGTGATAAAAAGCCATGTGAG  
A\_16\_P01801677  
TACCCTATAGAATCTCACGAGTCTTCTTATTTACCCGATCCTGAGTTATACATGCTCTTT  
A\_14\_P136076 TAGTGCATGTTCTATGTGGAGCACAGAAATGTGATGTTAAGTTAAGCCTAAAGTGGAT  
A\_14\_P131714 CCCTTATTGATAACAAGACATAGCGGCCATCATCAGATAACTAAAAAAGAAAAAAAAATA  
A\_14\_P112475 CTAATCACCAGTTGAATTCATCATAGTCATTGTGGACTTCCCACCAGAAGTAAAG  
A\_14\_P105646 TCTCAAATACTCACTTTCTAGGAACAGAATCTTTATTTCTGATTCCGTGAATTCCTACTC  
A\_14\_P103018 TCTTGCTTTCCAGGCAAAAGTAAAACCAACCTTTTCAGTTAACTGTAGTTGAAGAGAAAA  
A\_14\_P135791 AGTGTGTTGAAAGATGTATGGTGATCTTGAAACCTCCAGACACAAGAAAACCTCTAGCAA  
A\_16\_P18096605  
AAAAAAAATCACAACTGGATTTGTAGAGACCTCAGAAGTTTCTCAAAAAAATGCCTGC  
A\_16\_P00685594  
AGTAAAACGTAGAAAAGAGAAATAATATTCATAATATCAAAAAACACCTGTTTACTTTA

A\_14\_P135063 GGAGACAGAAAAGTATCCAACCAGGACAATGTGACCAAATAAGTGAGAAAAATGTAG  
A\_14\_P105190 CTTTATTTCTAGTCAGGCTGCATGTTAATATTAGGACTTTCCATGGGCATTTGAGAGTTT  
CUST\_3521\_PI426210822

GAAGCAGATGGTGAGAAGAAAATAGAAAAGTATGGAGCAAATAAGAAATGTGGGAAGAGA  
A\_16\_P16121948

CATAGTTCCCAATACACTTACCTATTGTTATCCACCAAATTTATCCTTCTTGTGTCCCA  
CUST\_3272\_PI426210822 GAGAGATCACACCCTGGGATCTGCCAGGTGTTTTGGCCTGTTTC

A\_14\_P123804 CAAACTCCTAACCCAGCATGAAAGATAAACTACAACCTCCCGGCAGG

A\_14\_P116848 CTTTTAGATAGTTCCTTCAACTTACAGGAATTCAATTTCTGGCCTGGATATAAATTTGC  
A\_16\_P18001054

CTTGTCATAATCCAAGAGTTTTTAAAACAGCCTGAATGATTAACCTTTCCAAATCACCTGGC  
A\_14\_P118506 ACTTAATACACTTTTACACCAGACTTCTAATGTTAGATGAAGAACACAGTATTTCCAGGG  
A\_14\_P137563 CATCTTGACACCAAAGACTTTTTTTCCCTTTTAGAATAATAACTAAGGGACATTGTCCCA  
A\_18\_P10873529

TGTTTAGCAAAGGATTACATACTGCAGTTAAGAACCGTTTACCTAACTCTCTTTCCTGAA  
CUST\_10291\_PI426210822 GAGAGAAAAGAAGCTTGCTTCCGGGTGCCTGCAAGAGATGACAGTG  
A\_14\_P106575 CAGAAAAAGATTTACAAATATAAGAAAAGTGCTGAGTAACCCAAGCCGCTGGGAAGTTG  
A\_14\_P128548 TTCTAGAAGATAAAGTTGGAAGTTGGATATCTTTGCATGGTGATTTGCGCGTTCAAATTT  
CUST\_8202\_PI426210822 CTGGGTTGCCACAACACAGGAGTGCCCTCCAGTGGAACACTGTGC  
A\_16\_P39267213

TCCCACATTTAATATTCTCATCCCATTTTCTTCTACGAAAAGACTTAATTAGCAACCTCA  
A\_14\_P128492 CTATTTCCCATTTTTAGTTATGAAGCAGGCTTAGGGGTGATGTGTTTGTGTGTATCTATT  
A\_16\_P15215054

TCACATTTCTGAAACTATGGACTGATTGTATCTATTCTCTATTACTCACACCAGAGCAGA  
A\_14\_P106211 TTGAATGAACACTATGCACTGCTGTAACCTGGTAGTGTTTCAGTAAAAGCAAAATGATAGTT  
A\_18\_P14136426

TCGATCAAGTGTGGAGTCACATGCTAATGTGTGCTAAAGAAGTGTAAAGTGTTTTTTCATA  
A\_14\_P115316 GCCTTCATGCTCTGGCTTCTCGATTTCTTGTGTATCCGCAAGCATT  
CUST\_8972\_PI426210822 AAGGGCTCTTTAAGGCTGCTAAGCAACCATGAATCATGGTTTGCATTTTTCTA  
A\_14\_P113257 TGTAGTTGATCATCTCCTAATGTGGCACAGTCATCTGCTCACTACACTAAAAAATTAGTG  
A\_14\_P137130 ATACATTTGCCTCTATACCACATTTCCCAAGCCTTTCTTAAATATTTTTGCAAAGCCCTG  
A\_18\_P12041433

ATATGGAAATTGCTTAACCCAAGAAGCTTTAATTGCTTCACCATAGGTTGAATACTGGTC  
A\_14\_P118548 CTGCATTTACCTTACTATTTGTGGAACACAGAACCTGACTTCTATTTAAGTGTGTTTCA  
A\_14\_P109248 TTACCTCACCTTTTCTAAGGGCTCACATTTCTTAAATAATCAGTGGGATTACATGAAGTG  
CUST\_5104\_PI426210822

AGCTAAGGTTAAAAATGAGGGAAGATCTGAAAAGAAAAACAGTAAAGAGATGTGAGATGT  
A\_14\_P106894 CTTGATAACAATTCAGGCCACAGTGAATTATAACAAGACATATATCTTGGGAAATATAT

A\_14\_P137623 TTTTAAAGGCTACAACCTGAGGTGGAAATTAAGAAGAAAGGCCCTGGATCTCTTTTAGTT  
A\_16\_P36456777

CCTTACTTGCAGACCTTTAAGGATAAGTTGTCTTTCCTATGACACATTTTAAACCTTGC

A\_16\_P18003386

AGCCCACTTGAAATTTACTATACATTCTCTATGCACCTCATGTCATTCCTTTTTCTGAGA

A\_14\_P130186 CCTATGTAGTAACCATCTGAATGGCAATCTATGTAGATTTTTGCAGTGTGTCTGTGTAGT

A\_18\_P14134775 AATCTGGATGTGCCCTACACATATCTACTTGCCTCTCGCTAATCTTTCTGCTAAG

CUST\_356\_PI426210822 AAGAATGTGCTGGAAGTGGTAGGGGGAGAGCACAGACCCCAAAGT

A\_14\_P112992 CATTTTCTCCTGTAATATCAAACTCTTGTTGACTGTGCTTTACATGTTTTGGGTCTGTG

A\_16\_P03674973

TCATCCACCACTACTTAAATAGGCATTTTTTGCCTAGATCTGATAAATTTCCCAATGGC

CUST\_2540\_PI426210822

ACTGGAAGAGTAAGTACTTCCTAAATTAAGTTATTTAGGAATAAACATTACCAGTTAAA

A\_16\_P01819020

GGCAATACACTCTACTACCATGTGAGATGTTAACTCCTAAATCAAATTATCTTCCTCAC

A\_14\_P113637 TTCTCAGAACATGGCATTATATATTATGAGAGTAAACTTCTGACCTGTTGGTCCCAGAA

A\_14\_P201604 ACGATATCTGCAAACAATTCTAAGACAATTCGACCAACTAAAAGAAAAGAAAATCTTGTC

A\_14\_P109849 GAAAAGGAACTTAATTTGATATTAACAACCTGGAGGAACAGGATTTGCACCACGAGATGTC

CUST\_3972\_PI426210822 GAATATTGACTGTGCAAACCACTTAAGGTCACAGGCGCCACAGCT

CUST\_7494\_PI426210822

CATTTCCCTAAAGCTTCAGCCCTAAGCTGGTATATGTTTCTCTGTTACATCAACTGC

A\_14\_P134923 ACTTCTTCTTTCAAGTCCTTCCCTTTCTATACTTTTGCTGAGATCAACCCAATATCATAA

A\_14\_P108854 GCCAGAGAGATTTTTGTGGATGAAGATAAACGGTAATGTGGTTGATTATGTTAATTGGC

CUST\_4201\_PI426210822 CTTTGGTGAGCCTTACTATGTGACTGGCTGATTCATTTGTCCGCTA

A\_14\_P136788 TGCCTATGCAGGTTCTCTTTAGGTTTCATCGAACTTAAATCCTGTTACTTCTGTTTATTCT

A\_14\_P126136 TATCTTTGTTGATTCTCAGATGTCAAATAAAGGAAGATGCCGTGGAGCAATTCATGTTTC

A\_16\_P15812985

ATTCTCCATAACAAGTCTATTCTTGCTTTCTTAAGATGTTGGTTCCTATTGAAACCTCAGG

A\_14\_P112150 TCATTTACTGTTGTTGCAGCCACTTTTCCTCACCTGGAGCAAATAACATAGTCATATA

A\_16\_P35304083

CCAGGCTTGATATCTACAGATATGGGAGTCATTGATACATAGGTTGAAGTAGTTAAAGCA

A\_14\_P139616 TACACATGAATTTGATAGGAGAACTCCATATTGGTAACTCCTTCGGCATGTTATAACCTT

A\_18\_P18479963

GTTTCCTCTTTATGCACATGTTTTTTTCGTATCTCCATAATTTTGCCCATCATTAAGCCA

A\_14\_P116418 ACTTACTCCTCTATTTTCAAGAAATTGAAAAAGATCCCCAAGGATCTGTTACTACTGCATTT

A\_14\_P130297 CTGCAGAGATCACATCACCTGACATGTGATAGATTCTCAAAAAAATGCCTAATGAATAT

A\_16\_P03609846

CATTACGCTAGTTTACGAAGGTAACAATTTCCCAAACGGTTAATATGTGCGAAGAAGACTAT

A\_16\_P15430919

AACAGATTCTGACACAGCATCATTAGTGTATTCTGACCCACATTCAATTTGTCAAAAAA

A\_18\_P14136036 CTCCCAAGTTTGTCTGAGCCACCTGATATAACCTCAGGTGAACAAGAA

A\_14\_P122728 CTGAAGGAAAAATGTTTTCTGGTTAGTTATCCAGGAAGTTGGGCAGAGAAAAACATATTT

A\_14\_P112138 ACTGAAGTTAAACAATTGTTCTGGAAGTACCAGAAATGCTAAGCCAAATGATACCTTGAAA

A\_16\_P17283037

AAAAACATGATCGACTTGCATCATCAAAACATATTTTCCTGTTATTCCGGTTGAGTTGTC

A\_18\_P12541286

GCAGTCCAACAGAAAAAGAGTAAACGAAAAAGTGCCATCTAGACATTGACTAAATATTGG

A\_16\_P16481937

AGAGGCTCAGCAAAGAATATAGTGACAGATCTAATAAAGTAATGTGCCCAATATCTTTCT

CUST\_2037\_P1426210822 TGAATGTCTGCTTGGATGTCCTTATCATACCAAGATACATCAGGTTCCCTG

A\_16\_P19777699

CCAGATAACTTGGAGAGAAACATATTGATGCAGTGTAATAAGTGATATGAGAGAGGCATG

A\_18\_P20322080

AAACTTAACTGGATTGGCCTAACTCATAATGGACATCAGAGAGTTTTTCACAACATACAC

A\_14\_P112970 TTCCATGTGCAATCTTGTAGAGTTCATTCCCTGGTTTTACAGACATATTTATTATGGACC

A\_16\_P16863491

AAATTTGTCACCTCAGCATTATGCCAATTTTGAAACTGATCCTGTTAAGAACAAGTGTGGT

A\_14\_P137847 AGAGCACTAAAATACAAGGAACTTTTATTTTCAATTTTCATCAAGAAATTTGCTGTGGT

A\_14\_P117597 CGCTGTGCCGTCTATATGTGTTGTGGTCTTTAATGTTTAATAATTGGCACTGTCAGAATT

A\_14\_P114710 ATTGAAAAATGAAACAAAGATCATAATTACCATTTTGGCATAATGTGCATTTACTGGGTC

A\_14\_P112051 TCTTTCTCTCGATTTAGCCAAGCAGTCATTCTATCTCAACTCTTTCCATTGGAATCTATT

CUST\_8793\_P1426210822

CTATTACCTTGACTTCCCCCTTCTCTTCCAAAAAAGATTACAATTCCTTTAATTTCTTT

CUST\_1148\_P1426210822

CTTAATGATGGTTAAATGGAAGTGGTGAAGAAATTAGCAAATGATTATGCCCTGCC

A\_16\_P19753061

AAAACAGGATGGAGGAGTATTATTTTTGAAGTATGTAGCATGATTGTATCTTCAGCACAA

A\_14\_P117611 TTGGCAATAATCTTCAAGGTAACGGGCATCTAAAGACTCTCATACTAAGAAAAAACTCCC

A\_14\_P106590 CTGGAAAAGCAATCCTGTTTAGGAGAACAACCTATAGACATATTTTTTGGTTTAGGGCAGA

CUST\_8675\_P1426210822 TCTTGCTATGGGGCAGTGATTCTAAAGAACTGACCTGATTTCAGGA

A\_16\_P16286904

AATGTGCATAAATCCTGGATTATCATGCTTTTTCTCAAGACTCTAGAAGATTCTTTTCCCC

A\_14\_P107104 TTATAAACACTGTTCTCAGAAGAGTCACAGTTTGGGGTGAGATCTGGAAATCAAGAAAT

A\_14\_P134424 ACAACTCTTCAAGGAAAATTCGTATTTGCAGTGGGAAGAATAAGTAACATTGGTATGTAT

A\_14\_P108607 CTACAGGAGAACCCAAATGTAGACTATTTATTTCTGTTATTCTGCCTTGACCACTTCTTT

A\_14\_P118593 CTTCTGCATCTTTTGTGACACTTTTCTCCAAAGAGCCAAGATTGCCAAGTAACT

A\_14\_P135104 ACCAGAATATTAGTATTTGGGGGAATGGTTGAATATGGAAGATACAGCAATGAGTTATAT  
A\_14\_P110533 GTTGCCAACTTAGAGGATTTTATACATTATGAAGTGTCTATTTTCCTTCCAGGGTCTGA  
A\_14\_P101701 TTCCAGGTTATGGGGAGAAGAAATACAGTCAATAAAAGGTTTTTGTATAAACTCTTGGTG  
A\_14\_P135128 AATAATGATTCCAGCCAGAATGTCTTGAGCCTGTTTAATGGATATGTTTACAGTGGCG  
A\_14\_P108627 CGGAAACAGATGTGTGACAATCATTAAATGTGAATCACTGAGTATAGAAATGTGTTGCTTG  
A\_16\_P03776081

ACATGTCCTTCAGCAAACATTCTATCCAGAAAAAAAAGATGTGCAGTCATGTAGATGTC

A\_18\_P22842076 GACAGGAGTAGGGGAATAATGCCGTCGTTAACTGCAAAGAGGAGTTTTG  
A\_14\_P119833 AAGATGTAATGTGAACAGGTGGAAAATTTCAAATGGTAAGAAGTACTGTTTTGGGATAC  
A\_18\_P22840315

ACCTTTTATCACCTGAGGTTCTGGTAAATATTTTGGTATTATAAAGGTTGCTTTTCACT

A\_14\_P137530

AAAGACTGTTGTTTTTTGGCAAGTGTAGAGATTTTAGGACCGTCTGAAAAAGAAAAACA

A\_14\_P134170 CTAAAAACATGTTTCTGCTACCACGTTTTGAGATACATTTCTGTGCAAAATGTCAAACA  
A\_16\_P16903382

TGGCATTAGAACTTTCTAAACTACAGATTCTATCTCATTAAATATTCATGCACGCCAGG

A\_14\_P107163 GCATCTGGTCGAGAGAAGACAAGATTTTCTCTATTTACAGTGAGGCAATAAATATGTTTG

A\_14\_P116162 CTTACCTTGAGAAAACTGTTCCACCATAACTGAAGTCTTCTCTGTCTCATTATCTTGCTT

CUST\_5766\_PI426210822 CTGAATGGAGCTGAAATTCCTGCACTCTTATAACGTGCCACATGAAGG

A\_16\_P16506032

TTGCTAATATCACTGTATTCTGCTCACTGTTCAATAGATCCATGACACAGATTAAGTCC

CUST\_3278\_PI426210822

TAGAGTGTGGATGCTGGTTTTTCAGAGGTGATCAAACTTTTTTTTTTTCTTGTTAAGA

A\_14\_P128059 CTAAAGGCATGCATACCTACAAGTTTTGATGTGAAATACAGCATTTTTGTTGCCAATGTT

A\_14\_P129523 GTTCCGTATCTCCCTGGAGAAGCACCAGCAATTCTCTTTTCTTTTACTGTTATAGAATAG

A\_14\_P127156 ACCAACTAAATCCTAGTATTACCAAATCCAACCTTTCACAAACACTGCTTTGTGAAAGT

A\_14\_P130704 ACACTTCATCTCTTACTTCTTTTCTCATCATCTGATTAAATTCACCCTCATATCTCAC

A\_14\_P132632 ATGACAGTAGGTCCTGTCACAAGAATTAGATTATAGTTTTCTTTCAGCAGAACACAGACAT

A\_14\_P101034 GATGATGTAATAAGAATAAACCACATGCAGAGAATTATAAAACCAACAGAGACCAGGTC

A\_14\_P124647 GACATTCACAACAAAACCAGGCTTACTAAAAATGAACAAGTAAGTTGACTTTGCACATTG

A\_14\_P114932 ACTGGAATAGTGAACCACGGAAGACTCCAGAATATACTTTTAAAGTCAATGAAGATGCTG

A\_14\_P106284 CTTAACTGTGCCGCATTTTCTGACTCACTTAGAACTAAAGAAATGCACTTAATGTGCGAT

A\_16\_P00246247

GCATGTTACACAACCATCTAGACTTTTTCTGAAACACATCAACAACTGTATGCTATTACTA

A\_16\_P00826560

AGTATCTCTTAAATGGCCTCATAATACATACCTTAACTCTCAGAATCATTCCCACAGACT

A\_16\_P21009118

AAATTGGAGATTTGAGAGTCTCAAATACTAATACCCAGATTCTTATGCTACATGCAGGC

A\_14\_P134841

AGCAAAAAACGGAAAACCTATCAACACAAACAGAAGTGAAGCAGAGATAATCCAGATAT

A\_14\_P139433 CTTGGCTTCAATTCCAGTATACAATATGGAGAAGGAAGTGGGCGTTTCAAG

A\_16\_P19433083

AGGCGAAATAGTAACTGACAAGTGTTAAGATTGCTCGTTTACAATTGATGTGTCATTGCT

A\_14\_P103040

GACCCTGAGTAGAAGGAATGCAAAACCTAGAAAAACAAAATTATATGAAGGACATCGAG

A\_14\_P134177

ACAAAAAAAATGTTCTTTGTGAGGAGCAATTTTCAGCAAATCTGACAAACAGCAAGAGT

CUST\_1724\_P1426210822 GTTCTTCCATGTTTGCAGTGGACTGTAATGATCGGAAAACCATGTTCTAGAAC

A\_14\_P130373 GTCTACTACATAAATGACTGCATCTGTGTTTGAATAGTAACATCTCCAGTATGGCCTAGA

A\_16\_P02760150

AAAAAAAAGACCAAATTCCTGACTTGTAAGCAATGAGAAGTGTTACAGAAGCAATGGG

A\_16\_P17934430

AATGATTTGCCAAGTAGACTATTAGACTCATAACATGCTGACATTCATAGAGAGAAGGCG

A\_14\_P138346 ATATTAAATATTACTGGAGCAGCCACTTCACTGTTATCCCCATTGCCATTGTTTATAATA

A\_14\_P122988 CTTACTGTTATTATTATTTTATTCACTGGACCCAGAAAGGAGAAGGGACCCAGAAAGGA

CUST\_8749\_P1426210822 TTTATTGAGAAGTTGCAGGGACCAAAGCTATCTTACGGGAGTTTGCAATGA

A\_14\_P103584 TGTTTGTCTCCTGTTAGGACCCAGATCTTAATATTGGCTAGTGATAAACTTGTAACTGTT

A\_14\_P139558 CTTATACAAAACCCACTTCCAGAAGGGTGCAATAACACATTCACATGAATGTATAAATG

A\_14\_P103298 CAACGAGGACCATTCGAGTCTACTGAACCTTTAAATATCATCTTTTTCAACCTGTAACA

CUST\_2680\_P1426210822 AGGTCCTGTGTCAGGGTGATAGGCACACGGTGCTCTCCCATTGAA

CUST\_9700\_P1426210822 GGCTGTCATTGCATAAAGAGATGGCCAAGGAGATGAACCACATGAAAAA

A\_16\_P02835076

AAAATGTCCAGTCCAACCTAATAATCAAACGTGTGAAATTCTCTTACTCTTCGTTTTTCC

A\_18\_P10352404

AACTAAAGAATCCAAGAAGTTTTACGTATGATGCTGAACTAACTGGATCTGACTTCCTTG

A\_14\_P123470 CAGGAAAATTTTACTAACACAAGACATCTGCATGGCAAATATTCTAACAGATGCCTTGCC

A\_14\_P101221 ATCCAGACAATTCTCGTTACTCCCGTAACATACATTGCTTAATAAGTAAGTATTTGGGA

CUST\_3147\_P1426210822 CTTCTTGCTTTGGCTGAGAAGTTATCCTTTGTTCTTAGTTACCAAGGGTACT

A\_18\_P22841880 AATTATGTTCTGATGGCTGACGTGGCCAAAAGGAGAAGGGCCAG

CUST\_2748\_P1426210822 ATGCTTGAGGGAATCCCTGAGTATGCATCTATTTCTTGAATCATGGCATCTG

A\_14\_P136890 CAATTCTGTTTTCACTGTAGTTTTCCCTGGACTTTATGTATTTATGGGAAGATCGTCCTT

A\_14\_P109488 ATGATGTGATGACACTTCATCTCTATACAATCTCACATCTCACACTCTTTGTTGCAATTG

A\_18\_P22841210

GTTCTCTCCTCTTCCCCACTACACTGAAAGAAAGAAATTAATGCATATTTGTGTTTTGG

CUST\_176\_P1426210822 ATTACACAGTTGTTTCGGGCCTGGGAGTTAAATTCTCTTACCAGATG

A\_16\_P18499895

AGTAACAACAAAGAATGTCAATCCTGTAGCAATATTTTCCTTCACCCATCTAGACATGTCT  
A\_16\_P15938765  
AAAAGCGAGTGGGAATGAATATTATTACAAGTGACAAGATTTTTGAATGCAGAACTGGCA  
A\_16\_P02534560  
TGCCTATTCCGAAATACATGATTAGTTCAGCATTACATATCAAGTATCACACCGAAGTCT  
A\_14\_P104880 GCCAAGTTTACTTTCATGACTCTGAACCGTAACTGCATCATGAACTGGTGAC  
A\_14\_P135959 GTGTAGGTTTTTCTGAAGAGCATTGGGGAGTTTTGTTTTTCTTGGTTACTTTTCCTAT  
A\_14\_P117411 TAGATGAAATTCCTTATTATTACGAAAGTATTAGCCATGCAGGGCATGTTTTCCACAGAA  
A\_14\_P113092 CTGGCTCACCTGTAATAATCCTTGTCTTTAGAGGGTGACTTAGACAAATTTCAAGGA  
A\_18\_P21299208  
AAACTACATTAATTCAGACTCATTAATTCAGAGCCTATAATAGTTCAGACATGGGAGACG  
A\_14\_P125731 TATATAAATCTCATAATCCTTAAGGGAAAAGAGACCAGGGAAGTGTATCTACCACTGGAG  
A\_14\_P126726 TAAACCTATTGAATCCAGATGGAAGTTACATATGTCATCAATCTTCTCGTTTGCATGCCA  
A\_14\_P134662 CTATGCTGCCTACATGGCTTTGGGCTTGATTTTTCTTTTTCTTTAAGACAATGACA  
A\_14\_P132560 ATCCTCCTTTTATTCCAGGTATCATTGGAACATTTCAAGATCATCAAATCAAATCCACA  
A\_16\_P16243997  
AATCAACTGAAGTTCCTCAAACAGAATCCATAAAACAGTCATACTTCCATCCTTAGAG  
A\_14\_P138742 ATTGTTTGTGGCATTCCAGTTAAGAGCACAACATTTTCAAGAAAATTCAAGGTATGGTAG  
CUST\_2194\_PI426210822 ATTTGTGTTTTGGGGTGGAGTTTCATTCATCCAAGAAATCATCTCACCTT  
A\_14\_P103542 CTTTTGCTCTGTTCTTTTTTGTAGCCCAATTTTCTCAAGTGCATTGAATCCATGCTCAG  
A\_16\_P00358461  
AAAGTTTAACCAATTAAGATGCAGTGTAGATTTGAAGTGTGACAAACTATCACCACAGGC  
A\_16\_P16191702  
AGCCACAGCACAATTCTATTTATTCTTGAGGCATTCCCTCTTTTATTTTCTTGGTCTTTT  
CUST\_1383\_PI426210822 AAGTGTGTGTGGCAGGGATCGGATAGGTGGTAGAAGGATTAGAAC  
A\_14\_P111983  
ACAGGGTTGCAAATTGGAGCAAATGCTGACACAGACTTCAGAAACAAAAGAAATTTAAAA  
A\_14\_P110125 ACAGTTTGGAGGTCTTTTTGTGTTGGAAATTTAACCAATACTGAACTGGGGAGATTTTT  
A\_14\_P103504 TTCAAAAAGCAAAGGATGTCTTAGCAGGAAATAAAGTGGTTCATATAGAGATGAATCT  
A\_14\_P129069 TGTCACCTGCTAATTTAGTTTACTCACCAAAGTTAAAATAAGCAATTGAGAGGCCTGTAAA  
A\_14\_P113268 TTTCAGCAGTGATCATTATAACTTCACAAAAAAGATGCTGACGGATTTACTTACAGGGC  
CUST\_7380\_PI426210822 AAAAGACAAGAAACAAACAATCTCCCCAAATAAGCAGAAAGTCTGAGCGTGG  
A\_18\_P15515240  
AGAACAGACCATGAATTATCCTAACATAAGATGTCACAGAACTCATTACACACTTAGCAT  
CUST\_5980\_PI426210822 CAAGGCTAAAGGTGAACCGTACAGCGCCTTCTGTTTTCTCTTTG  
A\_16\_P16700544  
AATCTGTGACAAGTAAAGGAGATAATGTAACTTTTTGGAGGAATGACTATGGTTTGCTGG  
A\_16\_P55127906



AGCCAAACTCACTTTGAAAACAGATACAAAAGTTCTAAATAAATTGCAAATTGAGGGCCG  
CUST\_9446\_PI426210822 CTTTAACTATTTACCACCCCTTCTCCTCCATAAAGTGCAGTTGGCAC  
A\_16\_P00624766

GCCAAGGAAATAGATTCGACTCCAACAAGATAACTCTATTATTCAGAAAACCTTTTCCCCT  
A\_16\_P18499496

CACACTGATAACCCTTACATATGCCAAAAATCTGTTCCCTAAATTGTTGTATGCCAACTGA  
CUST\_3986\_PI426210822 CTTGGAGGCAGCTTTGCTGAAGGCCCTTGAGTCAAGGGTAATAG  
CUST\_8142\_PI426210822

GAATGACGGGAAGCCTTTTGATGTTTGACGTCTTTATCTCAACTCTTCAACTTAG  
A\_14\_P112906 CTCCACAAATGCATGAAGAACCCTGGATATTAACTCATCTCTATCGAGAAAAGACAAAAA  
A\_14\_P128904 TAAGATAGTCCTATGAACATTCAGAATGATGGTGTCCCTGGGGTAAAAAGGGATTATAAA  
A\_16\_P01839692

CACCTACTCAAACCCATACATCTTTCTTAAATTAGCCACAACCTAATTTCTTTTCATGCTGA  
A\_14\_P121024 TTTTCACTTTTCCATCTGGACAAGTATAGGTTGGTCTGTTTCTTCTGTGAACCTGAATT  
A\_16\_P18974997

CCATAGCATTAAAGTAGGCCCAATTTCTTACTCTATCACGTATGGTTGAACTGTTTCTCTA  
A\_14\_P104370 CTCATTGAAATGCCCCGGATGACTTGGCTAGTGCAGAGGAATTGAT  
A\_16\_P17133633

GTGAGAACTAAATGCTCTTAAGTGAGAAAGATGATGGATCAATCTAGACCAAATGACTGG  
A\_14\_P117402 GGGGACATTCAAATGTTTGGAACATTTGAAAATGTTCCAAAAATGTAAGAGAACCTTGGAT  
A\_14\_P121961 CTTCCAATATGGAGTCATAATCTATAAAAAGCATACCCAGGTTAGGAGACACAATCTCTG  
A\_16\_P21671314

ATAAACTCATCCACTACACTTACCATTTGACCGATGAAGAGACTTATACAAGGTAATGG  
A\_16\_P16706739

AAAGGGCAGATAAAGAGTAATGTAGAAAACACCATTTAAAGCAATGTTCTAAAGGCAGGG  
A\_14\_P132397 TATTCAATCCCTAGCCTTTTCATTCCTTTTGAACGTCAGCACAACAGTTACCACATA  
A\_14\_P110106 TGCCTGGCCTGTAGAAGGTCCTCATATAATTATTGAGTTGATGAGTTTAAAGTTGAATCAT  
CUST\_6030\_PI426210822 AAACAGCAAGGTAGCCCTGTCTCTTATCCTGATGCCTTGTGTTATCAG  
A\_14\_P125657 CTCTGCTTTCACAATTAAGTCCTCCTATCATTTTTGTTTTTGTCTTTACCTATGTGCTG  
A\_14\_P104850 TCCTTATTGGCTTTTTGTGTAAGACGGTGACATAACATCAAAACATTCCGTAAGCATT  
A\_14\_P103066 ACACTGGAAATGGGAAATGTCTGACCCGCGAGTTCCATACAATTTTCATT  
A\_18\_P16349726

AAAAAACATGGGTAAAAAGTAAGAAAAGACCAAAAACGTCACTAAACTTCAAAAACCCGG  
A\_14\_P137698 ACAGCATCATTTGTCAACAAAGCAACAATGTAAGCAAATCGTTCAGAACTCATACAGATT  
A\_14\_P201904 GACACTTACCTTACAGCCTCATGGGAGGTTAGAAAAAGTCAAATATCCTTTAAATTCCAA  
A\_14\_P125640 GACATGCTTTGCTTTTGTGTTTACTCAGTTAGTTCTTCTTGAACATTTTTGTGAAAGGGA  
A\_14\_P109498 CCCTTAGATTAAGATATAGCAAGGAATCTCATCACCTTGGAAAGTTTGAGGAAATTCACA  
A\_14\_P129248 CTAAGATTTTCATATCATGCAGGCAATTTTTCTACATGTCAGCATTCTGACAAATGTCTGC

A\_14\_P124793 CTTAGGCATAGTCACAGAAAAATAGAGTTAAGAGGGTAGTTTTTGGTTTTTAAGGACTGG  
A\_18\_P22154311

AAGGACATATCTCTATTTGCACACTGTGGTAAAAATGACTAATAATACTTTGCTGGGCTG

A\_14\_P118097 ACAGCATTCAAATGGTGCCAATACAGGTGTAATATTGATTGACTGCTACAATATGTCACA

A\_14\_P116635 TTTCTTTCTGTCTCTGTGTTTTTCAGTATTACCCAAATCGTCTGTAATGAGTTCTGAT

A\_14\_P110620 CTTTCTTGCCTGTCAACTTCATGCTAACACTCACCTGCCCTGTTCTT

A\_14\_P134559 CAATGATGCCACTATTGCACAAGACTGTGTATAATATACCAACACTTGTCTGCAATT

A\_14\_P121853 GATTGTTTTTCATCGAAATGCTAATGAGGATATTTTTAAATGCCTCCGTTCCATAGCATCG

A\_14\_P134347 CTATCTGTGTTCTCTTTGAACTGATTATTTGATACAGTTTCCTTTATGTTCTTTGCCT

CUST\_7221\_PI426210822

TATCAGCTAAGCAAATAAAATCCAGACTTTGAAAAAGGTAAATAAGGAAGTACTT

A\_14\_P135229 ACATCTTTAATATGTTTTCCCTAAGGGTCTAGGCATTATGATGCCACCTCTTCATTTTG

A\_16\_P58424592 AAAGGGGGTTTGCACATCATGTTCCCTCTCCTTGGAATGATCTTC

A\_16\_P16191881

GCTAGTGTCTCTTCAGTTTAGTTGTGTTGGAGGCCTTAACAATAAAAAGAAATGATAGCC

A\_16\_P38225166

TCCTAAATATGGACCTGTGAATTTAGTAAATTACCCCCATGAATATACTCCTTCAGTGCA

A\_14\_P114595 CTGCCTTCCTAGCATTCTTATGTGTTATAAAGCCCTTTATAAGATCTGATACCCAACTGA

A\_14\_P109323 TTAACACTGGCAGATCTCCAAAATCACTACAAACATGCAACTCAGACTCTATCAAATAA

A\_14\_P120932 CTTTTAAGTAGAAAACACTAACAGTGTAGTGCCCATCATAGCAAATGCTTCAGAAACACC

A\_14\_P108193 AAATTCAGCCCCATAGCCTCATTTCAGGCAACTTTATTCATTGTTATTTTTATTCCAAG

A\_16\_P00377348

AATTTCTACTCTCACTGTGTATACTAGACTCACTTTTTCATCAATAGTAACCACAGAGCC

A\_16\_P03642448

AAATGCAAGAAGGTCTGTTAGATTTCGTGAATCAATGGATGCAAGTAGGTCACCTAATCAAA

CUST\_5532\_PI426210822

TAAGTAGAAGAGTATAAAGAAGAATGTTGATCCTAGAAATATTCTATCTGAAGTAGAAGT

CUST\_4375\_PI426210822 GGTCACGAAGTCTCTTTTAGGAATGCCATTTGGCATTTCAGTTTCTGCA

A\_14\_P117395 TTTCTGTATGCAAGAATTTGGCAGTCATCAAACGTGCAAGGATTTTAAGACTGAAATGAT

A\_16\_P20195714

CCAAACATGAAAGACAGAGACTCAAAAACCTTAGCATTCCCTCATCTACTACACATACTAGA

A\_14\_P121481 ATATCTACGCTCAGTCAATCACAAGAACACACAGACATACACAGTGTATCCATGCTTAAT

A\_14\_P123852 AATCACAGATCCTTTCCAGTTTAAAGCAGCCAATCAGACCTCTTCACATTTCTAAAAAAT

A\_14\_P124599 CTAATGAACCCTTTCTTATTTTACCAGAGTCCTTTGAGGGTATATGTCAATGAGATTGCT

A\_14\_P100842 ATTAAGGAAGGCTACATAGTCAAGAAGAGCCTTCAGAGTTTTTCATTTTAGAATCTCAGTG

A\_14\_P132055 CGGTTAAAGGAGCCTCCTGTGGATATCTGTCTAAGTAAGGTATGGTATTAACAACTTAA

A\_16\_P01648604 ATTGTCCCTCGGAATATTCCTAGATGGCATTATCACTGTGGATAGTTACCACTACTC

A\_14\_P129434 ACAATGAGTTGGATACAGTATCACCTTTGGTTCATCACACACTGAACTTAACTTACTCAT

A\_14\_P121476 GCAAATTCAACTATCATGGTTGATCAATGTTGCTTGATTACAGAGTTAGATCAGCCTCAT  
A\_14\_P100530 TTAACAGGGATGTTTTTGAACATAAATTTTCATGAACGTCAAATTTTCCAGTGGTTATTATG  
A\_14\_P101521 CACTTGTCCCATTTGGTTAACATCTGGGTGGGTCTATTACTTACTGTGATGACT  
CUST\_5150\_PI426210822

GATGATATATTTTTAACTGCTGAGACCAGAGAGTTCACATAACCTATGAAGACTGAAACA  
CUST\_9229\_PI426210822

TGCAGGTATTGAAGATGGAATGACAATGCTTTCCAAAGCCTCCTTTTTTTTATCTTTG  
A\_14\_P202349 CTGATGTTATTGGTTTCTATTTCTACAGACTAACTCCCAAGATAGGCTTCCCCTG  
A\_14\_P127711

AGCCAAAACAAAATGGAGAAGGAATAATAGGATTGAGGCACTAAACTTAAAAGCAAGACA  
A\_14\_P126671 TCCAGCACGTTTTCTACTCTGGTTGTGAAAATATTTTAGCATCATTTAACACACATTGT  
A\_18\_P22839785 AATTGTGTCACTATTCTTTCCCTTTGTCTTCTCCACCCATTCCCACGG

A\_14\_P122633 TATTCTAGCGGCTACCATATCGATGTGTATTCTCTTTTATTGGTTAGGAATACCTGGGG  
CUST\_8411\_PI426210822 TTGAAATGGGATTTCCCAGACATGCCAGGATGTTTCTTTTTAATTCTGTGCA

A\_14\_P135549 AGACAAAGCCCGATACTCACAGTGAACCTTTATTTGGATTTGTCTGTTCCGAC  
A\_14\_P108799 CTACTCAGTCCCATCAAGTAGACAAACAAGGTGTAAACTCACAAAACCCTGTTTTTTTA  
A\_14\_P107587 TTGAAGACAGTATGTCAACTGTGGATGATCTGTGATGTGTATAAAAAAATTCACGCGCT  
A\_14\_P138097

GGAACCAGTTTTTAGAAGATGAACAACAACAATTAGAAAAGAAATTACCTGGTAAGGCAGC  
A\_18\_P13056819

AATCTGCTGCCCTTTTAAAATATTTGTGCTGTCTTCATAAACACATGATTCTCCACAGTG  
A\_14\_P122610 GGAATTGTCATATTCAAAGATTAATAAGAGACAAACATCCTCCCTGAGAACCTCAAAGTC  
A\_14\_P131885 GCATTAAGAATCTTTTAGGATTTTTGGAAGTTGACCAGGGAACCTGGTTAAATCTTGAGA  
A\_14\_P108832 TTACATTTTCTTCCAGCAAAGGTTTCTTATTTAACCCCTGTGGGCTTATCTTGCAG  
A\_14\_P139948 TGTGCTACAGACTGAGCAGCATGTTAAACCTGATAGTTTTTCATTATACCGTTATACCACA  
A\_14\_P128242 ATTTCTATTGAACTCCTGTCAATATGTTTATTTCTCTGTCTACAGCAGATGGGAGTCTT  
A\_16\_P00432097

AAAGGATAATTTACAGCAACTTTACGGCTATTTTCCAAGAGATCACTTACAACCACAGATC  
A\_16\_P39638745

CAAGAGTATCAATGAGATGGAGATTCAGGTTTAATATCTTCCAGAATTCTAACCTCCAGG  
A\_16\_P03195321

AATTTGCATTTCTCCAATTGCATGTATCAATGTCTACACCAGACTATTTCTCTCTCTTCC  
A\_14\_P128467 CATATTAACAAACATCAAGAAGAAGAAAATTCTAAAAATCACCCCGCTCCCCTATCATGC  
A\_14\_P101477 TTAAGTGGGTCTTAGCAACACCTGTATTATATCGACATACACATCTTCATCGTTCCTTA  
CUST\_10138\_PI426210822

GCCAAACCACCATGCAGGAAGAAAACCTTTGAAATATGAAATGCTTTTTAAAGGAAGAAAAG  
A\_14\_P106982 GGAATTAACCTTACTGCTCTCTAGAGTCACAATTAACAGGAGACTCAAATGATGCC  
CUST\_159\_PI426210822 CATTTGGTTGCCATTTCCGTTGGGAAATTGGACAAGAGGTTTCAGTTTT

A\_14\_P100190 ACATATGTATTTGTGACTTTTCTTTGGATTTGTTTTGTGTTTTTGTGACTAGTCCTGGA  
A\_14\_P106670 GTCCACATTGGTCCCAGTTTATGAGGGAGAAGAGATCATAATCTACAAAAATTTGCAAG  
A\_14\_P104115 ATTTGGGTAGACTCTGTGTTCTTGGTTCTAATTAAGTAAACACACCAGCCTTGA  
A\_18\_P26790942 AGCCTCACCAGATTTAATCACAACGTTCAACACAGAGAAACAGGCCAC  
A\_16\_P36230510 GAAGGATCCCTTTCTCCTCATTTTTTCCCACCTCCTTTTCATCATG  
A\_16\_P21202495  
AAAAAGGTTTGCAAATCTCTTAAAAAGGAACTCAGTAGAATTACTTACCCTAGTCCCAGC  
A\_16\_P02572896  
ATCCAGGCCTCCATATAAAATTTCTCCTTGTAACATGACTCGAGTGAATCTTCTATTT  
CUST\_2618\_PI426210822 CATTTTCTGGTCTCCAAGTCCCTTACCCTCTTGGAAAGAGATCAG  
A\_14\_P103446 AGATCACAAACAGAATAACATGCTGAAATAGCGAAAGTCAGGAGAAGTCTTATCACAAG  
A\_14\_P108882 GGTCTCTGACACACATGCCTCATAAATGCAGAGAAAACACAGCACAG  
A\_14\_P123232 CTAACACTACTTTTCATTGTGAAGACATGGAAGTCCTAGAACTCCACTTCACATTCTTAG  
A\_14\_P107221 AAAAGTCCACCAAATTTAATCAGACCTCAACTTTCTGCATCCATTATTAAGCAAAGTTC  
CUST\_5998\_PI426210822  
AATAGTCCTCCAAACCACTTAAATATTAATTAGCATTACTTTTACTTAGGGCAATAGTGG  
A\_14\_P119798 AACTCCTTTTCAGTTTTCCACCACAGATCACCAACAATGGTTCCTAATTTACTTTAAGAAAG  
A\_14\_P108632 CTTTATAACTAAGTAATTTGCCTTTTTTCATTCCATCGCCTGTGTAACGTATCCCTTGACT  
A\_14\_P131276 GGCAGAAGCAGCAGTCGCTATCTAAGGACATAACTTTATTGGAAACAAAGAGTG  
A\_14\_P202554 CAACTGTCTTTACTATTTTGAATTTCTGCGAATGGCATCTGCTTGTCTTTGGTGAAAC  
A\_16\_P16817802  
ATTAAGTGCCTCTCACATGTAAAATCCTAGTTTAAACCAAAGCCTATCCAATTCTGCTTCT  
A\_16\_P36675350  
AGCCCTGTGCATATTTTAAGATTTTCATACATTTAACTTCCCCAAATGTGACTTGATGTGA  
A\_18\_P14558175  
TTTGAACTCTACTCGCTTCATTTTTTCAGTATTTTCATGACTCAGATCAATCCCAACATCC  
A\_16\_P01812915  
CAAGATCTGCCAAATCTGAATCTTAGTTCCATATTCCATCCCTTAACTTAGATTTTACA  
A\_18\_P22839603 CTGTAAACATGCCAGGGTCTCTGAGGATGGATGCGTGTCAATC  
A\_16\_P37172415  
AAGCCCTGTATCTACTGTCTGAAGCAACTATCACTTCTACACATGTTTTAAAAAATCACTT  
A\_14\_P138580 CCATTGATCTCCCCAAAAACTCACATGCTCAGTGTTACAGCCAGTAACTTTTAT  
CUST\_2428\_PI426210822 GATGGGACTTTTTCTGATTCAAGAAGTTCAGTATCTTTGTGAGGAACTGCGC  
A\_16\_P21449537  
TACTAATGTAAGGAGGAAATTAAGCGGTAATTACAGCGTTAAGGATAAATGAAAGGCCCA  
A\_16\_P00734983  
CAACACTAGGCATCTATCAGAAGGAAAATGAGAATACCACCCTAGCAAATTATACCATTG  
A\_14\_P135967 ATCAATGAAAGGTATAGTATCACAACACATTATGCTAAGACCCAGCAACCTCTCATCTAA

A\_14\_P102480 GTAATGGAGGCAAGTGAACCACTACTATCTTCCATAAGTAAGGACTTTCTTATGCATA  
A\_16\_P21188221

GTATTCATGTTCTCTTGCCAACAAAAATAGCACTTAGTAGAACTGACACACTGTCCAC

A\_16\_P19779356

AAATTAGGCTTGTGAATTTTGAACACTCAGTCCAGTAGGTAATATCACCCCAGATGAT

A\_14\_P113900 CAGTAAGGCCTATTTTTTTAAACATTCTCATAGTATTACGGTCACACCTAACGAAATTGG

A\_14\_P125096 AAAAGGAGAAGGGATTATTTTCAAATAAATGTGGCCAGAATACCAACTGACATCTTCAG  
CUST\_2071\_PI426210822

TAGGAACTTCACATATAGAGATTTCTAATTTAACATTGATGAAGATGCCAAGTTAAATA

A\_16\_P03807527

AAAGCCTTTTCTTTACCTCAAACCAAATCACAAAAGCATTATAGATGCACCTAGTCCAA

CUST\_4031\_PI426210822 GACATAGCTGGTAATGACAAAATGTGGGCCAGCGCCTTCTTGACG

A\_14\_P105549 ATCCACTATTTTATGTGTGGACCTAGAAGCGTTATTTCTACCAAAGAACCACCTTAAATC

CUST\_2516\_PI426210822 AGCTTTTGTCCCAAGAAAGACCCTTGTGGGCCTTTTAAAGTTTGAGA

A\_14\_P106147

CTAATAAGAGCAGAGATCTCCTAAAACGCAAGAACTTGTATTGCTGTGGGGAAAAAAAAA

A\_14\_P108451 TTTTGGCCTAGTATTTCCAGCGTAGGCTCCTTTTCTTCTTCTTTTTTTTTAAGGAAA

A\_14\_P117628 TGCAATACATGTAAATTTGCTACCATCACATGTAATCTCACTTCTTCTGACATCAGCCAA

A\_14\_P113013 TAAAGATGCTAATGGACTCTTGTGTGAAATAGTTTAGAATTCACCTAATAAATTTTTAGA

A\_14\_P100162 CTTATTCTCCGGGTTTCTTATACGTTGACACAGATTACCTAGATTCCATATCAGAAGA

A\_16\_P17187502

TAGTAGCAACAATCTCAAATGACTAACAAGTGCAGAATTTATAACCCAGTCTAGGTGTGG

A\_14\_P112423 ACCCCTAAAACCTCACCTTAAAGGTTTGGTTGAATATTTTAGGTGAATATTTTGCTGTA

A\_14\_P126421 GCTATATTCTGAAAGATGGCCTTACAAAATGAAAAGGCACTTCTGTGTGATAAAGTG

CUST\_10408\_PI426210822 CAGATTTTTTCGGAGGCCCCACTGATGCTGTTCTTCTTCTTATTCTATC

CUST\_10066\_PI426210822

TACAAACAAAATTCGCCTAACTAGAAGTTTTGTTCTATTTTAAAGTAGATGAAACCTCA

A\_18\_P17068745

AAAGGGACCTGTAATAAATTAGCAACAATTTCTAATATTATCAACATAAATATGGCCGT

CUST\_7367\_PI426210822 GTCTAGAAGTTCATGTGACCTTTTCTTTTACCTTTTATAGTGCTGCCTAAGTGTA

A\_14\_P138803 GGGGATTAGAGGAAGTTTCTGAAAGTAAGATAATGGGACAGGAAAAGATTTTCTGGTATA

A\_14\_P138428 AAGTCATCAGGAATATTGACCAATCAGAATTCGAAGGATTTTCTTTGTTAACTCTGAAT

A\_14\_P128806 TAAGGACAAAGGAACTCTCCATTTAGAAACACAAAGGCATCAGAGACCAGTTTTAAATAC

A\_16\_P03577150

AACCGTTTTCCCTTGATAAAAGTTTCAATCTTCCCAAGCAGAAATTTTCATGCAACTAATC

A\_14\_P133904 CAGAAAAGACATTAATAATTGGTCTCAATTCAAACCACTGCTCATTAATTCCTCCTTGA

A\_14\_P126556 CTCCTCTGAAAATAAATGAGTGAAAACCTCCATGAGTTATGTATGTGCTTCAGAATGCA

CUST\_9432\_PI426210822 GCCCCCCCTGGAGAACTTCTGTGGTTCGTTCTTGTGATAGCATTG

A\_16\_P38186419

AGCCAGATTATTAGTCCCTAACTTAAAGCCATTCAATTCATGTGCTTGTAATAAAACCCA  
CUST\_4728\_PI426210822 GGAATGAAAGCAAATGTGGTGAGAAGCAGAGTTGCCTTAAGACTGAGAAG  
A\_14\_P202053 ACCTGAAATTTGTCTGTTTTAGGCTTTCTTGGAACCTTCTGTTCTATGCTCATATCAACA  
A\_16\_P00214134

AAGTGGAGGTTTACTAATGGATGGCAAATTGAATGAGGTCTAAGCATATTCTCTTTCCAA  
CUST\_1468\_PI426210822 CATTCCATTCTGGGTCACGTTTTTCAGCTCCTTGCGCCTGCAAGG  
CUST\_10407\_PI426210822 ATCTTCCATATTTGGAAGAAAAAATCTTCTCCAGATTTTTCGGAGGCCCA  
A\_14\_P125045 GTGGGGTGACTIONGGATGTTAACTCAAGTAATGAGATTCAGAGATTAATAAACTGTCTGT  
A\_14\_P107654 GTTTTGACTTTTCCCACCTATAATTTCCCTTGTAAGACAATTAATTCATGCTTGTGGC  
A\_14\_P109725 TTCTAAAAGACAGTTCCATCTACATCTTGTGTTGTTTCTCCTCTACTGCTTGA AAC  
A\_14\_P200270 AAATGTGTCTTCCATCTCTGGAACATTTCTTGAGGACATCGAAATCCAAAGC  
A\_14\_P135097 TCCTCCTTATCAGTTAATATGCATTGAACACTTTTATGTTGCCTTATTGACTCCCTTTGG  
A\_14\_P114368 ATACTTCTTCAGCATCTTTGAATTCATCCCTTGACTTCCATAATGTTTTATGATTGGCT  
A\_14\_P110050 ACAGAAGTGGTCACCAAAATTATGAAATTCTCTAAAACACAGACTGCAAGAATACATCCT  
CUST\_1387\_PI426210822 ATTAATGACAGTCACAGAAGTTTCTGGGAGGCTGGGACATGGCCT  
A\_14\_P102345 AAAATTAGAAGATCAAAATGGAAAATATGCTGCTTTGGTTGATATTTTTACCCCTGGGT  
A\_16\_P17031897

AAACAAGAAAACCAAACTACCTATCAAAAAGCACTGTCTCATTAGTAGTTCCCAATGCAC  
A\_14\_P105411 AGATCCAGAACAGAGCAGAAACGGTGATAATTATCTGTATGAAAAAGTAAGGATACTCTA  
A\_14\_P128363 TGAAAGAAAGGAGGTATAACAATTTATTGGGAAAAATACAGTTCTTTCCAGGCACTGACT  
A\_18\_P22840865 CTATTCCTTGTAAGGTTTAGCCATGTATAGTCATGTGCCAGTCACCTAGGGC  
A\_16\_P16553833

ATTTTACAGGTTCAAGAATTCACCTTCTAGTGATAAGACAGGAACTCCTTTTCAACAACC  
A\_14\_P135578 TTAGCATGAATTCTTAGGTTAACCAATTCCCAGGGTCAAAAGAGTAGAAAACAAGATAGC  
A\_18\_P22606946

ATTTTCGTTGATCATGGAAATGTTGAACAGACGTTGATATAACAATGGTGGTGAATTTTCC  
A\_14\_P110756 CAAGATTGTTGTGGGAACTTAAAGACCATGAAGATTCTTAAACCACAAATCAGATTGAGT  
A\_14\_P114497 TTTTCTATCAATGGACAATGGGATGTTGTTGTGGAGACTGAAGAGAAACAAGAGACTTT  
A\_14\_P125485 CCTGTCGTCATTGGGAGAATAAAAGACAAGTTTTTCATACAGTCATAAAGATGAGTGTG  
A\_14\_P118137 CTTCCAAACAGTTTGCATACAGTGGAGGCTTAGGTTCTAATTCTTTAATAAATCACACCA  
A\_14\_P102711 GATGAAACAAGCACACGATGGCAATGATTAATGAGGCACTATCAATAGGATTTTTGAAT  
A\_18\_P14134211 AAGGGGATGTGAATTCTCAAGCACTTCCATCTCTCCATGTTTCATGCAAAG  
A\_16\_P03670760

ACTCTTTAACCGAATGATAACGCTGTAAGTCCATTATCCCATTACTCTAGCCTGAAAATG  
A\_14\_P201774 CTGAAAGAACTTACTGTTCTACTGAGAACTTCTACATCTGTGAAACAAACATGCTGCTA  
CUST\_8064\_PI426210822 GGCTGAGCCTGTTGGCAGAGGCCCAAGAGATGCTACTCAAGAGA  
A\_16\_P01817935

TACCTATCAAGAGAATGGCAAATACAACGAGTAAAGTAGTTATCCCAGTAGAACAGTGAG  
A\_18\_P12916470

GTCACATAATGTCTACATCTCCTAAACTTCTCCAATAGTTCATCACATCTGCTCTTCAGTT  
A\_18\_P23461077

AAGCACGCTGATTTCTAAAGACATTCAGAATGAAGGTAACAATTGTAGACACCTGCTAAT  
A\_16\_P16714463

AAACTGCATTTACAGACATTAATAGCCACTAAGTGTTACATTATTAGGGTCATGGGGAT  
CUST\_4975\_P1426210822 TGCTCTCAGATTAAGGCACCAGCATTACGCATAAGAGGGAGTAATTG  
A\_14\_P127281 ACTATTTTCATTCAGTGACTTTCTATAGGTATTTGTTCTTGCGAACCTGTGCTCCA  
A\_14\_P133599 AGAAAGTTCTGGGAGTAGAAACTACTCACGTGATCCAGATGCGATGAACTG  
CUST\_2604\_P1426210822

TTAATCTTCTGCTGTGAGCTTAATCCAAAGGGTATTTTCTTTTTCTTCTTCTCAITGGT  
A\_16\_P58424065

CCCAACTGGATCACTGTGAGGTTTACATAAGATAAAGTGATCTATAACATGCTTAGTGCA  
A\_16\_P01648800

AAAGAACTGACTAAGAACAGGTCTGGAATTACCATTCAATCGCTATGAGAGTAGGTGAAT  
A\_16\_P00685063 TGATGCAGGATTTATTATTAATTTGTATTATTTCTTGCTATTATGAAATTTGATGCAGGA  
A\_16\_P02976615

AGCAATGGAAAACCACTGATAGACAGATAGACTCCACTTAGAATATTCACCTTTGCAAACA  
A\_14\_P134756 TTTTTTTTGTATTTTTTTTAAGTTTGGTGTGTTGCTACACCCTGTGTTGTGCCCTGTTC  
A\_14\_P109549 TGTTATGTTAGTGAGTTATGAGAAGGAACATTTGTTTAAAGAAGGCCTGTTTCATTGGA  
A\_14\_P100825 ATTAGTTCTTACCTCACACCCTGCCTTTAAGAAGTCTGCAATCTTTGACATGG  
A\_16\_P20943983

TTCTACTTTAAATCCCAACTTAGCATGGAAAATCATTGCAATTTTCAGAACAAAGGAGGC  
CUST\_1784\_P1426210822

ATAGACACAATTTAATGTAGCTATCAGGCAGAATGACACTGGGACAAGGTCCAT  
CUST\_5390\_P1426210822 GACCACCTACCAGCTTTACTCCTGCGTCTAACTCTAACTTGTGAGATTG  
A\_16\_P16599837

ACTTTTGTGATGAACTCCTGTCTTTACTCTGATGAAATAAACAAGGAAGCCTAGAATGAAGG  
A\_14\_P103100 ACAAATTGAGGAATCTCGAAATATATAAAATGTGCGAAAGTCACGACACTCAGAGTTACC  
A\_14\_P109389 AACCTCCACTACTATAACAAATTTACTCTTTTCAAGTTTTTCACTTTCTCTCCAGGCCTT  
A\_16\_P19971508

AAACAAGTGAGATCCCTAAATGTAAGTTCCCTAAGCCCATTTGTGAATATCCATTTGTTCA  
A\_18\_P22841057 ACTGCAAGTGGTGGTGGTATTGAGGGAGGTCAGTGAAATGTGAAG  
A\_16\_P00898948

TTCCCTTTGCTACTCACTATACTTCTACCTACACAATCAATATCTTCTGGATACACTGT  
A\_14\_P109478 CTTCAAAGAGATCTTCTCCAGGATCCAGAAGACCAAGGCTGACATCAA  
A\_16\_P01720840

GGCATTGCAATTCCTCTAGTATTGTAACAAGCATTACCTTTCTTCTAGCACATACAAAC  
A\_16\_P41670779  
AAATAATGCCAAAAGCCTAAGATATCTACCAACCTGGGATGTATATCCATAAATGGCTGA  
A\_16\_P35350507  
ACCATCAATGCTATCTTTAACACACAAATTTAAGATCATTGTAGTTACAACCAGCAGAGT  
CUST\_4526\_P1426210822 AGTGGACTGAGTGCCCCCTGGCTGTATATTCAAGTCGCCTCTGT  
A\_14\_P138535 AGTCCATATTACAGTGGCTGGGCTGTTTTTTTCAGTAGCCCCTAGCATT  
A\_16\_P58424133 CCTTGCTCAGGACTTTCTGGTGTCTTCTCATCTACTTAGAATGAAATGCAAAT  
A\_14\_P200348 CTTCCCATATTCCCTGCTTACCTTAICTCTAAACACATAGCCAGCAATGGCT  
A\_14\_P133049 CCATGGTCATCGGAGGCTATGCTGATGGAGAGAGGTTTCATATGAATACAAATAA  
A\_18\_P14430069  
AAAGTAAATGTTTATTCCGTCTACTTACAATGCTCAGAACATTTGTCACCTACATGCAGG  
A\_14\_P138273 ACCCATCTGTTCAATGCTACGGAATAAAAACAAGATCATCAGCACATTTCAAATGAAAGC  
A\_16\_P36231144 AGCCTTTTATACTGATTATGTCTTTTATATTTGTATCGATGTTTTATTATTCTATTA  
A\_16\_P37055808  
ACCTTGGAACCTATTTCACTTGCAGTATCCCTAATACAGTTTCAATAAACCATGACCAGT  
CUST\_6875\_P1426210822  
TGATTCTTCAGATTATATCTACCTTTACCACAGAAAGGGTGGTCCCTTTCTTTTCAG  
CUST\_7047\_P1426210822 GTCAGCTGCAGGAGAGGAGCTGCTAACCTCATCTTAAGAATATCAC  
A\_18\_P16046072  
ATTTCAAACAACCCCTATGAATACCCATGTATCATGTAACAGTGTGATTCTGTGCTTTC  
A\_14\_P112390 GTATTTCTGCAGGTATCGTTAGTCTTGGACATTCAATTTTCAGGATGTTCTGTATCACTTT  
A\_14\_P136597 TGTTGACTGTTTAGAAAATAGCAAAAGCAGTTATTCATCCCTAGGCTGGCAGTTTATTCA  
A\_18\_P13634897  
AAACCAATGCTGAACCATATCAATTCCTAGCATACTTAACTCATTTCCTCCATTTGTTGAG  
A\_16\_P00685301 AAGGGCAGTTCTCCTGAGAAAGTTGTGGGCATAAGCAATGCATGTAG  
CUST\_1090\_P1426210822 TCCCTGGGTTTTCTAGGTTTCAAATTTTGTGGACACTAAAAGGATTCATGA  
CUST\_1057\_P1426210822 CAGAGAAGAGGCAGGTACAGAGGGGGCAGCAGTCCCAGGCCTTTC  
A\_16\_P01524363  
TAACCACTGAACAATCACTTTACAGGATTTCTACCTTATTAATAAATCGAGTATGGCCACC  
A\_14\_P121968 TCTTTGGTATCTGTCCAACCTCATGGAGAAGTGTGTGGTCAATATTCAAACAC  
A\_14\_P114482 CAAGATGAGAAGATGAAGTGAATTTATGGATTCTGGTTTTTCTGAATTTTCAAAGCATAA  
A\_16\_P16191771 GGAGGAGACCTCGCCGTCTCCATTTGATCACATAATTGCTTCTGAT  
A\_16\_P00426782  
GCAAAAAAGCCCTTTGGATTTAAATGTTTAAATCTATGTCCTCTCAAATCGGAAATACCA  
A\_14\_P133538 GGAACACCATCTTTTCTTTTAACTTTTTATGGTGCTTCTGTTGGCATAGTTGGGGAAA  
A\_14\_P115011 CTAGGTGGCATGGACAAAATACAATTGAATAAGGATCCAGTATCCTGAGTTATTTTGAA  
A\_14\_P135281 CTGGTCCCTAGTTAAGTGGCATTATGTTAAAAAAAATAGTTCAGAATCTCAGCCTTTT



A\_14\_P105960 AGACTTACTATGCAGTAAACCAAATCTCCCATTCCTGCATAATTCCACTAAAACAGAATG  
A\_14\_P112351 TTTCAACCCATTTTATCTATCAAAGAGCAGTGCCTTATTTGCTCATGTTGTCTGCACATA  
A\_14\_P139081 ACTATAATTCTTGGTCACTGTCCAGCAGAAACATGTTTGATTGCTTTTAGAGTCAGAAGT  
A\_14\_P135274 CTGACATTCAAAAATCTTCAGACAACCTGTAGAAGATCTTAAGAAAGAAAATTCATGTTATT  
A\_14\_P137521 CTGAATATTGGAAAAGAAGCCTCTTAACTGCAAAACCGAATTGAGTCAAATGACATTTCT  
A\_16\_P16191609 TATCACTAACTATAGTCATGATCACGATGGGAATATGAGGGAGTTCCCCGG  
CUST\_2424\_PI426210822 AGGACATCAGGAAGTGAGCCTCCCCTGGGGGACCATGCAGATAAA  
A\_14\_P136876 ATTTCCACAAACCGTAGTGTTTTTCGTTCAGCCTTATTATGGCATTATAGGTTACTAAGGA  
A\_16\_P00232360  
AGTGCTTTCTATGCGTTTTCTTCATTA AAAACATTAGGCTAATACAGGCAGATCATTGGCAA  
A\_14\_P131484 GAATTTGAAAAATATGTGATCACCCACCTGGAAGATGTGTAAGTTCATTTCCAACCTATT  
A\_14\_P104651  
CAGTTAAGTTTAGGAAAAATGAAACAAAGTGGCAAGAAAAATGTTTGCAGATTGCAGACC  
A\_14\_P100591 ACGAGGAAAACCTGAATTCCAGATTTTTAGTGCAAAGTATTTATCATTCTACCAGAAAT  
A\_14\_P111315 CTGTTTTAATTCATAAGTTTTCTTTAATTGTTCCTTTTTCATCTTCAGACTTTGAAACAAA  
A\_14\_P100360 CTCTTCTTTTTTTCTCTCGCCCTCCTCACTTTTTGTCTTGCAACATTGCATATTT  
A\_14\_P112077 GTATTTTGACGGCTTGGTATTAATAATCCAATTA CTCTTTCCTTTTACCCAATCCACA  
A\_14\_P107944 ACAAATATTA AACTGCCCTTTACGATATTGCCTTCTGAAGGAAGTGTTCAAATCTTTGCT  
A\_18\_P16762528  
CTGATGAACAAAAATGGAGA ACTGATCAATCTACTGACATGACTACTTTTTAGAGGCTTCC  
A\_16\_P00867756  
GCTCATTCAAGAATCAGAAGTATCATTTAACAGTCCAGAAAAAAGACATTCAGGTGCCT  
A\_14\_P125145 AAGATTGCCAGTCTTGCTGAGAACTAAGTCCAGATTCTCTACAGTCATTAAAGATTTTG  
A\_14\_P137607 CTCCTTTGAATTTTATTCTAGGATCCATCAGTTACACAAGTGACAAGAAATGTTCCACCA  
A\_18\_P14575936  
CCAAAACAAATTTCAA ACTCAAGATTGCAATACGAATCTCAACAAAAAAGATCATTGCA  
A\_16\_P02756165  
TGCCCCTAGTAAAATGATCATGGCTCTAAA ACTTTAAGGCTTATCACTTTTTCTTTCAAGG  
A\_14\_P131871 AGTAAGTTGATAGCCCGTAGTTGCAGATGCCCTTCAATATCTGATTCAGATTTAGAGTTTT  
A\_14\_P120776 TTTAATTGTGCTTATAGTGCTGTTCAATACCCAAATTGCTGGCAAATAGCATGGCCTTA  
A\_16\_P41263407  
AAAGGTCTTTGCTTGTTGTTATTTCTCACTACTTCTGAAATCCATTACAACCCTTTGGTT  
CUST\_2861\_PI426210822 CCATTAATTTCTCTCCCTATCTCCATCTGCCACATGGGTTTCATAGATAAAGT  
A\_14\_P127324  
CAAACGTGAATGGAACAAAGAGTGAGAATATAAAACATCACTGAAGCAGGCTTAATCTGA  
A\_16\_P02762572  
TGAGTTACTGATCACCTCTTTTCCA ACTCTGAAATATCAATAATATGCAGTGTCATGTGG  
A\_14\_P118323 ACTGGCTTTCAACCTGTAATTAGTTAGCATAACCAACATAAAACTCATTCTGCATACCT

CUST\_9816\_PI426210822

TTAAAAAATAAAAATGGTTTTACTTGCCTTTAAAATGCTCAATTTAAAAAATAGTAAAAC

A\_16\_P36231021

TATTACCTGGAAAAGGGATAAATCTTTGCAACCCACCAAGCACAAAGTAAAATGTTTCTT

CUST\_1696\_PI426210822

AAATTACTGATTTTCATTAGAAAAATAATTCTGATTATTTCTTATTGCAGTGTGCGAAACTT

A\_16\_P16772597

TCTTGGACAGTATACATTCTTTCAGTCGTTTTAAGAAACAACATAGTCACCAATTCAGCAA

A\_18\_P16190441

AACTCTCCCAAATAAATATTTCTGCACCTGATACTAGTCATAGGCATACATACAATCCAA

A\_14\_P102684 ACAATCACACTTTGTTGGTGTGGTTAGGAAAAGAATGTCGTAGACTTAGGAAAACATAAT

A\_14\_P118232 CCAGGGTGAATATACATTTCTCTCTTCTTGCTTCATATTGTTGTTAGTTGGTTTCTTTGG

A\_16\_P41429465

TACACCTCTATCATCTGGATTTTCTTTCTTTGTGATCTTTACAATCCTAGCCAAAATGCC

A\_14\_P104718 ACGTGATACTATACAACAAAGGGTCTTACCAAGATTGGCAAATCCATCCTGAAG

A\_14\_P113838 GTGTTTGAAACTTATCTCATCTGCATGAATTTCCACCTTGAGATTTTCTTGCATTGTGACG

A\_14\_P110989 AGCCAACCAGATCAATGGCTCATTTGCACTCAATTTAATTCATGGAAAGATGAAAACAAA

A\_16\_P39357973

TCCTCAGATCATTCCCTGAACTATCCTAACTCTTCAATATAGCATTTTCAGGATAACCT

A\_16\_P19658035

ATGCATCATTTAAGTGTGTTAGTAATGTCATTTTGGTCCATCGTATCCTTTTTTCTCCCC

A\_14\_P105941 CTAAAGTAAAAAACGTTGATGCTGGTGTGTATCAAGTATGTTTGAGATCAAAGCCATGG

A\_14\_P132918 CTAATCTTTCAAAAAGTATCACTCAACAGCATCACTTCAATTGCAAATCATAGAGGCAGT

A\_16\_P41610856

ACAGCAATCATAAACTGGACTGATCATATATCTGAACAATGCCTAAAATCTCAAGAACCA

A\_14\_P131673 TAAATTGATCCCCTTCTTAAAAGAAAATTTAACACAAATCCAGATTGGAGTCGGCTAGTG

A\_14\_P135962 ACTCACCTGACTCTTGCAAGTATCTATATACCAAGAAGTTGACCTCATCACTGCTTATAC

A\_14\_P111172 AAAAAGCACCTCAGTATTTTTGTATCTATGTAAATATTTTATTCTGCTTCCAGATAGAA

A\_14\_P103558 GAATATGAGGATAAGTGCTTATTGTTCTTTTGGGGTATGCTTGTACACAGCATTATTGT

A\_14\_P122493 ACTGTTCCAAATGAGAATAATGGTTTCCGTGATATGATAAAAGCAATGCTATTGAATATG

A\_14\_P113211 AACTTTATGAAATTCTCCTAAGCCAAATATCGTTTTAAATATTACAAACAGTTTTGGAGAG

A\_16\_P41071793

CCCATGGCTAGAATAGTATTTATAAACCTAAACCTCCTGTTAGATATCATCAGCACCTTC

A\_16\_P00458416

AAATCTTGCAGGAAATTTAAAAGAGACCCAGATAGAGAAATGAGATTTGCTAGACAGGC

A\_14\_P114988 CTTCCCCAAATATAAATGACCATGAAGTCACCATAGAAGCGGATACTTATTTGCCTGT

A\_16\_P17577379

CCTCAGATGAGCCCTAATAATACTAGCACTTATCACATTTACTCCATTAATAATCTCCACC

A\_14\_P111764 GAATCCATCTCCATCCATTACTTTTTGAAATACACACAAACCACATGGGAACAAACAATT

A\_16\_P18916423

ATCAAGTTGTCAGCAATACTCAACATTCCTCAAACATCCATAGAATACATGACCATCT

A\_14\_P137356 CTAGCATTATTACACCAGTTCCTCCATGGAAATGATAAATGTTTACGGCTTTTGCATTTCC

A\_18\_P10670212

AAATGCACAGAAATCCATGTTAAACAACACTAACCACACAAAACTACATTCTCCTTCAAGA

CUST\_5580\_PI426210822 CTTTTTGCTATGAGTTAGGAATGTGCAGGACAGGCAGGAGACCAAG

A\_14\_P127613 AGATAGGTTACCTGCTCAACTTGTATCTTCTTTGAGTCTTGGAAAAAAACCCTTTTTTC

A\_16\_P16766003

TTCCCAATATAACCACATTTTCAGAAGTTAGATCATAGCCAGTTAGATTACACAGAGCGTG

A\_16\_P19588201

AAGACGAGCATCAGCATAATTCTTCAGTCAGGTTTTTCATCTCAAACATATGTTACCATGT

A\_14\_P106638 GGAGACTACAAAGTAAGTATGGCCATTATGTGTTACAGCAATAAAAGACTTCACTGTCAA

A\_14\_P134338 AAATGGAGGTATCAGTGTTTAAATGCAAAGATTCCAGGAAAACAGACAAACAGAGATACT

A\_14\_P201306 TGAATCGCTTAGTAAGAAACCTCACTGTAAGGGCTGCAAAGCAAACAATCTAGATTTAG

A\_16\_P03318529

ATTCTGTAGTTCACTCAGTAAGCATCAATGATCTGATGAGCATGTAGGAAATAGCCTTTG

A\_14\_P109933 TTATTCTTTCTTTTTTCAGGGAAGCAGAAGATTCTCTTTCAATCACAGTTGTTGCTGCTGC

CUST\_1124\_PI426210822 TCCATGTGTACGCAGGTCCACGAGGCTCATAATTCTGCATTACTTTCTATTAA

A\_14\_P103362 TTCCTCCTCATAATTGAAGACTCTATCCATCATACTGACAGCATCGTGAAGAATATTTTC

A\_14\_P101979 CTTCTGTTACATCTCCTTTGTGTGCATCTACGGACTTACCTGCATCTACACG

A\_14\_P120907 GCATTTTTACTGACCAAGTTCTTTCTGTGCTGAAGGGAGAGGAGTAACAGC

A\_14\_P109925 CTTCTGTCAGCGTTTTTGTGAGTCTGTCAATTGATATAATCAATGGAGAGGTAATACCCTAC

A\_14\_P102681 TTATACAGCAGACTTGGAACAGAACATTTGAAGGTGGGGATTCCATCTATAAGG

A\_16\_P37323662

GCCTCTTTGTAACTTAGATTCCAATTATCAAACACACATACATTCCATATTACTTCCCC

A\_18\_P14942834

AAAAAACCAGGAGTGATTGTAGAAGCATTCTCTACTGAACACAAAATATGAGACAATGG

A\_16\_P35822192

ACAGGTGGCAACTGAAATATTCATAATCCAATGTCCCTTTACCTTAATCATGGACTAAAC

A\_16\_P40216030

CCACAACACTACAGGTATGTTTCTTTTCATTCATAAAGGTATGTTTCATTTGTCCATCAGTGC

A\_14\_P123073 TCCCTTTGCAATCATCAATATTTAAATTTGGCCTTCTTTATGCCTCTAAAATCCCTGAGTT

CUST\_7619\_PI426210822 CGCACTACAGAGGGACACGTTAGGAACGAGACAGCTTATTCAAGT

A\_14\_P135513 ATGTATGCAGAGTGTGTTGTGACGATTCCCTAAAATCCTAAATGCTTGATGTTACCTAAAG

A\_14\_P107902

AACATCAAAGGTTCAAAAAACAAGACAAGAAACAACTGTTGTAAAATTTCAACTCCTC

A\_16\_P00685196 CCACCCCTTGCTTCTCTATTTTCAATTCATTTCTGTTTCTACACACATCAGTGATGTA

A\_16\_P02444734

TCAGTGTGTCTATACTTATACTGCTCACTGTCATACACTAGGTCAAAAATTACCCCAATCT

A\_14\_P127898 CTAATCTGCAGGGCTCACTGTGTGAATCGATTTACTATCACATGGATAACATGAGTT

A\_14\_P100048 ATCTCTACCAAATGGAGGTCAACTATATTTTATAGCGAATCTTTGGCTACTTTTTCGGGA

A\_14\_P138518 TCCAGTAGGCATCAAAATCAGATGGTTAGACAACCTGAATTTGTTCTTGCTCCTGTAAATA

CUST\_7832\_PI426210822

CTTTTGAATGATCAAAAGTACTGTTGTCTTAGGTCAAAGCTAATTAAACTGAGGTTTCCT

A\_16\_P00955401

AAATCACCAATGTAGACCAGTCTTTCTACTCAGGATCTAAACCATACCAGAAAATTCCAT

A\_14\_P202038 AAATGAAACACTGAGTGTCTTTTTCAGTCTCTAAAGCAAAGTTACAGAGTTCCTCACTTT

A\_14\_P116981 GTTCCAAAAGGAATGGCTCTTGAAGCATGGTAATAAATGGCTATGAAATTGATGAAGAAG

A\_14\_P121956 TCAATACCACTTAAACATCAGGAAGACTCACTTTCAAATTTACCCCCGTCATTAAGAT

CUST\_2418\_PI426210822 CTCTGCAGGATGACTCGGGAAAGAGAAGGATAAGGAAAGAAAGTCAAAG

CUST\_8593\_PI426210822 TGCCCTTGGTGTCTGTATTGCCTGTGATCATCATCCATAGAGCATAATG

A\_14\_P123939 TCTTCATTCTGATTCCTATGTGAACCTTAATCCGCTGATTATTCTTATTTTCTCACCCCC

A\_14\_P130041 CTGGAATGTCTGCTCTCTATTGGTGCCTTGCATTTCAAAAACACTGCAGATATTTTTTAA

A\_16\_P16191086 CCACAGAAAGAAACATCTGGCACTGACAGGAGTCTGCTTTGTGATCTTTT

A\_16\_P00934796

TGATCTCTGTGGACTTTAATCATCCCAATGAGCATAATAGGACCTATCACAATTTTCATGT

A\_14\_P111465 CTTGCCACTCAAAAGATGTCATTAGAATTACCATTAAATACAGCCTAGAGGTGCTTTGTT

A\_14\_P133744 TTCTGGCACACTGTCTGGAAAAGTATAATGATTTTTCTTTCTTTCAAAGAGTGCAAGA

A\_14\_P112983 AAACCTCAAAGTGAAACGAAGAAAATAAATATCACCAAACCTTTTTCCCAACCCCTCTCAT

A\_16\_P17417616

ATGCCAGTAACTTCAGAGAACTATTACATCTACCATTCCCACTTAAATATCTTTCCCAA

A\_14\_P101829 CTTGAGTTAACCTTTCTGTGCTTAAAGTCAAACCTTTCCTCATTCTGACCTCATTCTTAA

A\_16\_P00360356

AACCACACAGATTACTCAAAAGCATCATCTACTGTCTACAAAACCTCATATTCCCAGTA

A\_14\_P130944 AGGACAACACAGAATCCTGGAGATATTTTGATGAGTAGTGTAAGTCATTTCCACTATCA

A\_14\_P200612 AAACCTTGTCTTCTCTCTGAGATAAGATTCACAAACCTGGAGTTGAGGGAGAAAT

CUST\_6262\_PI426210822 GGAAGGGAGCCTATCCTGAGATGCGGTAGAACCTCATGTTTTATTTATCT

A\_16\_P18814503

CACTACCTGCATGTGTTCTAAAATCTAGTGTCTTTACAATTAAGCCACCTAGAAAACG

A\_14\_P134769 ATTTGCTGTTCTGTAGGCGTGTGTGGATTCTTTCCATCAACTGCTGATTTTCAT

A\_14\_P120991 CTATCTAAAACCTCCTACTCCTTGATCCATTTCCATGAACAAGGAAAAGAAAAGAGTCTG

A\_14\_P135160 AAAAATTCTTCATCTTGCGAATAGGGAGCAGCAAAGCAAATAACCGATGGTTTCTA

A\_16\_P03610283

CCTCGTTGCCTTATTACTATGAATGCTAACATCTCTTTCTAACGCATTAGGCTTCTGTTT

A\_18\_P22840851 AAGTTGTGAACTCTGGTTGGTTGAGGGGGCTGTTTTCTAGAGGGG

A\_14\_P109553 AAAACAGGCTATCAATACAGTCATCATAATAAGGCAATAGGGCTAGGGGGACATTTATTG  
A\_14\_P108998 ACTCACCGCTGCTTGGGATACAGGTTGTCAAATGATTGATGATGTTGTATTAAATAATG  
A\_14\_P109695 AAAAAAACAAGAACAGGTTTCTATAACAACATCTCTTACTATTTTTACTTGAAAAAATG  
A\_18\_P17378185

AGATGTCAATATTAGACAATGGTGAGACTTTCATCCAAAATTAAGACCTGTCTGTGCTGT  
CUST\_5287\_PI426210822

GATGCTTTAGAACTGCAGAAGCTTCAATTTTAGAATTTTCAGTTTGTAGCGTTATTTTTT  
A\_14\_P136689 ACCTCAAATAGAAAGTATGAAGAGCAAGTGAGAAATCTGGTTTCATTGTTACACTAGGCA  
A\_14\_P129721

GAGAAATCAAGAAAAGTGAGAAAAGATACCTGGCATAAAAGGACCTCTTTTGTGGTTAAG  
A\_14\_P125134 CACACAGTGAAGGAAAACACATTCCTCTGGTTTACAGGTAAAGTAGTAAAAGCCAG  
CUST\_4792\_PI426210822 GTCCTTTAAAGACCCACCAGCGACTTTGTGAGATTCTAGACTCCTTTC

A\_14\_P136673 CAGTTGTGGTCCTAATGAATGGAGGGGTGAATGAATGACCTTCCTTTC  
A\_14\_P113111 AAATGTGAATTTCTGGATTTTTTTTTATAGCATGTTTGTGTCATTAGTGAAACTGGAAAA  
A\_14\_P133675 CTAAAATAATTGTGTCTGAAATCCCTAATGTGAAATGGGGAACCTTTTCACTCCGAATCT  
CUST\_5380\_PI426210822 GAGGTTGGCCTCAGCCTGCCCGCCCAGCTTCTCTTCTCATTCTTC  
A\_14\_P119228 ACATAAGCCACATTTTTTTTTCTGAAGAAAAGGACAAGGTGTCTACCAGATTCTATAGT  
CUST\_6073\_PI426210822

AGAGGAGAACATTGAGATGGTATAGGTCATTTTACCCTCTATTCTCTCAGTGAA  
A\_14\_P121282 ATTAAAGAAAACAAACCTTATTAGTGCATAAGGAGCACTGGTTGTATTCTTCACGCTCAG  
CUST\_3550\_PI426210822 GCAGAAAATTTTAAAGTGGTTTTCTCTCTTTTCTTGGGTCTGCTTTCTTGG  
A\_18\_P12873507

TTCATCGTATACTTAGTTTTCCAAGAAAAAATCACCAAGCAAATAACGCTATGGACCTCA  
A\_14\_P107001 TTACACCATCCTATTTATACAGGGCTTAAGGAATCAGATGCTTAATCGAGGCTTGATAAC  
CUST\_9454\_PI426210822 CAGCCGATGCACTTCTTTTGCCAGTGAGCTGTGCAATGATGCTAC  
CUST\_1467\_PI426210822 GATGGCCACATCATTCCATTTCTGGGTCACGTTTTTCACTCCTTG  
A\_14\_P108746 ACTCAGTGTGTCACGAACTTGATAAACTCTGATATTTTAAACCTGACTATGGTGACATT  
A\_14\_P129342 AATGTAACCAAGACTAGAATACCTTTTTAGAACAGGGATTCTCAACTAGGGATATGCTCT  
A\_16\_P38102125

ATGGGAGAGCATATGAAATGGATAAATCATTGGCTGAAGATAGAATTGCATAGGACACT  
A\_14\_P135477 CTCTTTAATTAGCCGGTCTCTCAATAATGTAGCAGCCCCCTCTACAGATTAG  
CUST\_7967\_PI426210822

ACATAAATACCTGTATCCCACTTCATTTTTAAGAAGAGTAAAGAAATTAAGTCACTTTGG  
CUST\_4751\_PI426210822 ATTCAAGGACTTCAGTTTCATTACCTGTCCAGAAAACCTATGAGAACCACCCAT  
A\_16\_P17914888

ATGAAATTAAGACCAAGAAGTCAATCATTAATTCCTTGCATGTAAGTCAACTACCCCTGG  
A\_14\_P123517 TATCCATCGTTAGGTGGCATCACTGTTCTGGAATCTAAGAACATCCTTAGAAAAG  
A\_14\_P122570 TGCACATTACAGCATTTTCTTACATTGTGGTTTCAGTTGTGAAGATGTGCTATCTGTTTC

A\_14\_P201533

AGCATATAAAGAATAGGTCTCTAAAGAATTCCCCCAAGGAAACAGAAAAAAAAAGTTCGGA

A\_14\_P129396 CCCCTTTTCCCATCAATGTTACATTTCTGGCTTATCTAGAATATTATGTCTTTGCATA

A\_18\_P16728204

AAAGTTGAGCAACATGATCATCTGCATGTTTCAAGTGTTCTCAAGAGTTACGGAAAATGT

A\_14\_P104040 TGTTTTAGACATTTAGGACCAAAGTCTACTGTAGAGTGAAAGTTTAGGGAGAAAGGTAT

A\_14\_P129819 GGAGTAATGTGGAATGTGAGGTTACTTGAATAAAACATTACTTGGGTTAGATAAGGTCT

A\_14\_P118714 ATGGTCTTCAGTTAGGAAAGACCTTTAAAATTGACACATTTTTTTTTCTTAGGGGCCTTT

A\_14\_P124604 TTTATCAAGAGTTTATGATCCTGAACTAAGGATCATAACGGAGGAGGATCTGTGTATAACG

A\_16\_P21314140

AAAATCCTATCCTTTGGCAGTAATCTAGAACCAGAATCTCACAGATTCACTAGTAACTGG

CUST\_2509\_PI426210822

ATTTCTTTCCACTAAAATTTAAGAAAACCTAACGCAGTCTTGTATGAGGACACCACATTGT

A\_14\_P113400 ACAAAGGGTAAGAGTAATACAATACCCCTGTATTTCTTTACTTTTCAGGGACTTATGGCA

A\_14\_P200173 TATTAATTCAGTCACCTCTATCCACCCATTCTTCTCCCCACAGGATCGT

CUST\_7983\_PI426210822 AATGGTGTTACCATATACATATCAGGCACGTGTGGGAATGTGGGA

A\_14\_P103787 CACTGATCAGTGACTTTGGAGAGGAGCATGGCTTTTCTCTGTATGAAATCAAG

A\_14\_P107826 ATTATGTATTTCCCATGAGAAAACCTGTGGTAAGGATCTTATTCATTACCAGGCTGTCTTC

A\_18\_P12146453

ACAACCTAAACAATAAAAAAGACACTTTAACTGAAAAAAAAAAGCCAATTTCAAGAAGGA

A\_16\_P17746186

AATCCAAATGTAACATATCTGACTACCAATCCTTGTTTTTCCAGTTATCTTGATCCTCCC

A\_16\_P18529893

ATCTCTGAATTACTAGCCTAATTGCTTTATCCCTATCCTCAATATCTTCAAAGCCTTGCC

A\_16\_P19961473

CTTCTTAATTGCCGTGGAAAATTTAATTGCCTCACTAGCCAAAAATGAACACAATTTGCA

A\_16\_P19637866 TCCATCTCCATATTCCAAATCACCATTATTTTTCTTCTCATAATCAATTTTCCACCCTGC

A\_18\_P26606843

GCTCCTCAGATGATTGTAGACCTTCATACTATAACTTTCTTCAACATGTTGCTGATGCTA

A\_14\_P129708 CTGAGTGGGTGAGTCAGGGTATTTTTCAGAACATTGACTATTTTGTGTGATCATGATG

A\_14\_P107655 TAACTTTTTTTTTTACTCGACATTGAAATGCTTGTCTCTTTACCCCTCAAACACCATGCTG

CUST\_7549\_PI426210822

AAGAATGTTGCTTGTTAACAACCTTTGAAGGCTTTTTAGCAAAAAACAAAGTGTCAATTTG

A\_14\_P201939 CGCATTTGAACCACTTTTACGAAGTAATCAATTTGTGTGTTTCATCAGTTCTCTTTCACA

A\_14\_P137885 GTTAGGACTTAGGGGAAAAAAGATCTTTTAGGAGGTGCAGGGAAAACATTGAGAAT

A\_14\_P124907 GTGTATAATGATCATGGATTAATCTCACATTCTGAGTTCAAAGGGAGCCATTGAGTTTAT

A\_18\_P13003507

AATAGAAATGCCTGTTATACTGGAAGTAACTTGTAACAGAAAGGTTGTTGAAGAGGTGG

A\_14\_P124438 TACTAGTGCTCCTATAACTTTTCGTTTAGAATGGTGTTCCTAGACTTACTTCCTTTGAC  
A\_14\_P108920 CCACACTCACGGTCCAAATAACAAGACAGAAAAAGAGCAATAAAGATCTGTGCAAAAAG  
A\_18\_P14755235  
ACCTCTAACGTGCTTATCTCACTTACTGAAAATTCTCAGCCATTTTAATGTTTCATCCCT  
A\_16\_P18445048  
AGGTTGCAATTGTCTGATTACTTACACCAGAACAACTAAAACCTAACATTGCCATGTTT  
A\_14\_P116644 TCCACAAACAAAGATGGTTTAATAGATTTTCAGCATGTTTCCACTTGACAATGTTATACGA  
A\_16\_P16931879  
TTCCATCGATGTAGTTTTGTCCCTCCATATGTGTAGACCTTTATAATAACAGCCTTTCT  
A\_18\_P22840669 ATCTTTTCAGTGGCTTGTCTGAACTCTGGGCCATGGTAATCTCTGTATC  
A\_14\_P124600 AGAAATGACAGCAACTGTACACCATCCTTACTGGGTTTAGGGATTTCTTC  
A\_18\_P15524846  
ATCCAGCATTTTTATCAAATAATACTCACCAACATCACCTTAACTACCTGAACAGCATCT  
A\_14\_P116138 GCTTTGTTTACAACGAATGTCTTACAAATGCTGACTGAACACTAGCATACTGCATGAA  
A\_16\_P01804794  
GACATGCTTTTTTCGCTAAAACCTGATCTCTCAAAAATACTGTTTCAGAAATGTCTGCCAGA  
A\_14\_P100011 CTATTTAGACCTTAATAAGATCTTGCAGAATGAGTGGTGAGTGCAAAGGCAGAAATCTTG  
A\_14\_P109622 GTGTGCCTTGACACCTTAACAGTGTTCCTACTAACATAGTGCCATTAACATGGAATTT  
A\_16\_P03807337  
AGCAGCCATGTAGTTTCTCTATGGTTTTTTTTTAAATTAATAGTATCAATGGAATTTCTTT  
CUST\_5675\_PI426210822 TTAACTATGTTGAAGCCATACACTTTGGGTCTCCATTGTGCTGGAAATCGT  
A\_14\_P134719 GACTAAGTAGGTTATAAATGGTCCTCAGTCATCATCATCATAAATGATTCAAGGCCTGAA  
A\_14\_P113220 AAATAAGTAAAAAATGTGCAGTTCAATAAAGTCTTGCCTGAAATAGAGGAAAGCACAGGT  
CUST\_10380\_PI426210822  
GACGCTTTAAACAGCCTCTCACGTGAGAGCAGTATTTATTAATTAATCCACAGATGG  
A\_18\_P22839947  
ATTTTTTCTCGGTAGTTTATGTTCCAAGAGTAGGGAGCATGCTTGAGAAACATTTTCCT  
A\_14\_P105218 TCTTCCCTTTCCTTATTATTCTATTTTTTCTCTACCCCTCTCTTAATGACAAGGCCTTA  
A\_14\_P118716 ACAATGATTCTGCAAGTCACCAAGAGGACTACCCATGGCCATCAAG  
A\_14\_P118047 CGTTTTATTTACAGAACTCTGGAATAGATTTTGGAGACGTTTCTTCCAGAATGGCACTC  
A\_14\_P122884 ATTATCCCCTTTGGTAAGTTTTGTTTGGAAAATAATATGCTGTTGCCCAAATGCCTTAA  
A\_14\_P130585 GAGCAACTTACCTGAAATTTTTTCATTTTCATGTTCTCTTGAGAAAGGGCCAAGAGTGTT  
CUST\_7682\_PI426210822 CTCTGCATCTCTGCTCAGGGATCAACAGGAGTGCTTGCTTATGTG  
A\_14\_P128384 CTAGTGTTGGAATTGACTGATTTCTTGCTCTTTCTTTATCTGCCTCTGATAGAGGTTTCA  
CUST\_7830\_PI426210822  
CTAGCATTTGGGAATTAACAAAAATAAGGTAGCTGAGCAGCTTTTGAATGATCAAAAAGTA  
A\_18\_P22841424 ATGTTTTTCCATTTTCAATCTGTAGCCGTTACAGCCCTCACACACCTGAAG  
A\_14\_P137064 GGAACTCTTACTAATGTCTATAAAGCCAGTATGATAGCAATGATGGCAGGTAAGTGTTTT

A\_16\_P02671497

CTAGTCCCACCCCAATATTATTTCCAGTTGAACATTACCAAGAAGAGAATTGAGACATTT

A\_14\_P106644 CTTGCTAAGGTCTTGCTTTACCCCTAAAAACCAAAAATAGTGTGTCACCTTTAGCAGT

A\_14\_P136900 TATTTGGTCCAGTAATGGTCTCCCTAGTATTGTCACATTGACTCTCATTCTTACCCT

CUST\_1194\_PI426210822 GCTCCTTTACAACATTGGAAGGTCGGTTTGGTTGCAGAGACTCTAAATATG

A\_14\_P201140 CCTTTCTTTGACCACTAAAGGTCATGTGGGAAAAACCAACAGAACATTTTGAATATTTT

A\_16\_P17853460

AAGGGAAACGTATAGCAATCTGCAATTATGATCATTGTAGCGTACTGATTAGTGCTTCG

A\_14\_P130095 TGGTGCTGAAAAACATTCACTTTAAAAATTGGCTGTGATTTATCAGCACGTATCAGGAAT

A\_14\_P127259 CTTTTTATTATTATGCAACATTTCTAATAGCCAGACATAGACTAGCCTAAGGAACCCCGC

CUST\_8772\_PI426210822

CCCAAAACAAAAATGAACAATGCACATTTTTATCTATGCTGCTCTTCCCCATCATGAA

A\_14\_P113286 CTGAAAAGATGAAGAAATTTTCGACCCAAAGGGACTGCTCTGTTATAAAATGTTAAACCTT

A\_14\_P116033 AGAATTGGATTTGTTAATTTTAAAGCAATGTGCCTGCCTTGAAGTATAAGGAAAGAAAG

A\_14\_P130261 ACTTAATCTTCGTTACATACTCTACCTACAAAGACATGACCTACAGTAGTTCTTCAAGC

A\_14\_P107939 CCTCAGGAGGGAAATAAAGAGGTTTCTCTCCGTCCTCCACCAATTTATTT

A\_14\_P129890 CATTGAATATTGGTCAAGTATTTCTTTCTAGAAGGTGGAGTGGCAATACCATTTTAGCA

A\_14\_P119093 CAAAATGTCAGAGTCCCAGGACATTAAACTCTGATAGGAGAGGAAAAGTAAGCATC

A\_14\_P111902 CGTTTTTCATTGATACAATTCAGTTGCACAGAGCGCTTCTTAATCTCTCTGCTCAAATAAT

A\_14\_P118588 TGATCATGTTATTTAGACAAAACCTTTCCCTTCTCTTCGTATTAGACGTGATTAAGGCTG

A\_14\_P100041 AAGTTTTGGTTTAAAGTATCTGGAGTGCAACATCTGAACACAGTTTCTAATAGACACACAC

A\_14\_P103880 CTTAATATCTACTTGATAATTAATTTCCGACTCAAACCCACCTTCCCTGCCTTTAGAA

CUST\_33\_PI426210822 CCCTGTCACTGGATTTGATTCGGAGTCATCCCAATCTCACAACATA

A\_14\_P111330 TAATGTAGGGGCTTCAGAAATGTGAATTCCTTCACATAAAAATAAAGAAGAGACGAGGAG

A\_14\_P118263 ACACATTTTGCTGATGTTTGTCTTAGAACATATATGGACTTGCAACAAATTCAGGTGTG

A\_14\_P115992 CTGAATATGTTCTGTTTATTTCTTGAAAGGCATGCAGATGGCATTACAAAACCCGATG

CUST\_8052\_PI426210822 GAGGAGGAAGAAATGGTTACTCAGTGATAAAGCCTTGAGCCGCAAAG

CUST\_2011\_PI426210822

TTTTCCAAGCACCTTAAAGTTAGAAAAGAAATAACTCTGTGCTACTTGTGATTTACAAA

A\_14\_P122035 ATGAACATTTAAGATTATATGGGAGTCCTAACGATCACCCACCATTTCTGAGAAATGGTTG

A\_14\_P137354 GAGGAAGTGAGACAATGGAGCCAATTGAGGCTTCCAATCTAGATAATCAATACAAATATT

CUST\_9878\_PI426210822 AGAGGTGGTCTCATTCTTTCTTATCACCAGGGAAGAGCCAGTAA

A\_14\_P125999 CCTGTCTGGTTATTATCAGTTTTCTCATTGAAAGTTACATATCATTACAGCGGTCATGCTT

A\_18\_P22840904

AGTTCAGTCTCATTCTCCTCATTACAGACAAGAATTGCTTGTAAGGATGTTCTTAAGTGTG

A\_16\_P16427128

ATCACTTTCTGATCTCCAAAACCTAGGTAATAATTCCTCTATTATGGGCTTGTATGACACCT

A\_14\_P116683 ACTCTCAAATGTTTCAGTTCTTTTCTTACCTCACATTCTTAAGTTTTCTGAGAGAAGCAA



A\_14\_P121969 TACATGACTTACCAGCAATGGAAGAATCTCATCTGAGAGTAGTTCTCAACTGTCATCTAT  
A\_14\_P117392 AAAATACATGGGTATGCGCACAAGTCAAATAATGGAATTGAACATACAGGTTTTCTGAA  
A\_18\_P22841540 CTTGGGTTGTGACTCACCTCTCCAGCCCTTCACAGGGCACCTGAA  
A\_14\_P103938 GAGTTGTAAAACATTTATTCTGCTCCTTCTTCATCTGTCACTGATACTAAGGACTCC  
A\_14\_P114193 GGTCCTTTGGAGTTACTGCAGTTACTGTTGGAGATTCCAACCTAATGTCA  
A\_14\_P115969 GTAATATAATCCCTAAAGGGGATTCAATTATTGATGTGGACTGGTTGTTTCCCATTCTGTG  
A\_14\_P133937 CAGCAGAATTCTGAAAATGAGGTCACGCTGGGTAAGAATGCCTTTTTTTTTTTTCATAG  
CUST\_3227\_P1426210822 CTGCTGAAGGCTTGCTGTTGTTCAAGGCTCAGTCCACAGGTTTTG  
A\_14\_P112382 TGACTCCACCCACACAGGTTTCATCAGTTAATTTTAAATAAACCTTAGCATTGGCTATA  
A\_14\_P124099 TTGCAGAGGGATCCCTAATTTGAAGACTTTGACACAGAATAACTTCTTTTACTTAAAT  
A\_14\_P129879 GCTTTGTTGCCAAAAAGGCTGATAATAACCTGTGTTCCATATTCCTGTAAATTAGATGCA  
A\_18\_P12554250  
AAATTCTACCAAATAAAGATCAACTATGATGTAACAACCAAGTAACCCTACAGTGTGAGA  
A\_16\_P17741056  
GACCCATCATATCCTCATAATTTCTCAGACCACTCTTATCTACAGCAATGCATCTTAACA  
A\_18\_P12784625  
TTAACGTTTTTCCAACAAGATTGTCTGTTTATGCATATCCTCTGTATCTGGAATTGTCCC  
A\_14\_P118923 CTACCATGGTTTTTCTACATGTGCCGCTTCTGGATGTGCATTCCTAAACATTT  
A\_16\_P19564897  
CCCCATCATATCCCATAATTCATACTACAATCCTGCAAAAACTATATCTGGCATTGGAAGTC  
A\_14\_P125907 ATTTTTTCTCCTTTGAAGGGCTATTGAGTGGCCAGACTTCCCCAACAAAT  
CUST\_1073\_P1426210822 GGTTTTAAGAGCTCCTCGCCAAGGGGCACTTGGAAGGAAAATGTA  
A\_14\_P100434 GTGCTATGCATGAGTGGTGCCTCAGTCAACTAAAAGAGTTACTTTCGCCAT  
A\_14\_P112532 ATGTGGTTTAAACCTTCATCCATTTGGAAAATTTTGTGGAATCGGTGATTATACACATCT  
A\_18\_P16293304  
TTTCCATAGTCGTTGTAATATACTGCCATAGACACCTTAATTCTTTCCCAATCACTTCCT  
CUST\_5945\_P1426210822  
TGTTAATACTGACAATTCATAACAGTCCCATTGCTCAGGCAGAACCTATTTTCATATATAA  
A\_16\_P18967943  
AGAGTATAATCATGCTTAGGAGATGCTACGTATTCTCTCTCCAGTGATTACAAACCTCAG  
A\_14\_P122078 CTGCCTCAAATTCTGCGTTTTTGGTTTTAATGTTATATCTGATGCTGCTATATCCACTGT  
A\_16\_P21011780  
GAAAAATTGGACATTGGGAATCAAGTATAGCCACCTTAGTTTTTTCAGTGATAATTCCAGC  
A\_16\_P32642677  
AAAGTTTTGCACAATCTCAATGTAAACACTTGTAAGTCCAATGCTTAAATGTTTCCCCC  
A\_16\_P18989848  
AAAAAAGGAAACCAACTGTATTGGATAGTAAACAGCATCATTTTACCAGCAAGAAAGCCA  
A\_14\_P201542 CCACATATATCCACTATAAGAGCATTTTCTGCTCCACTAAACCCTAGACTATTGTGAAA

A\_14\_P200796 GTATAATCAGATCCTCATTCTATTCCAATAAAGTCTTTGAATTAATGTCTATTCCGCT  
A\_14\_P115745 ACTTCTTGTCTTGAACATGCAATATGTCTCTGAATCTGTGAAGAAGGAGATGGAGAATA  
A\_16\_P16244082

AAAAAAAACCCTTCACCTTTATGTGTAATAAAGCACTGCTTAACAATCAAGGTCACCCAT  
A\_16\_P58424186

TTCTAAGATCGTGGTTGTAGCGGTTGTATGGTTGCATTTATTAACCTTAACAGAGTGCA  
A\_16\_P00491836

TTACGGCACATATTAAGATTCTAGAGTCCTTTTTAACCTTAACATCCCTAATTCTCCCA  
A\_14\_P102851 AACTGACAAACATCTCATGTCTTTTAAAGATCGTTCCTGGATGTCTGACTTCAAGAAAGA  
A\_14\_P106053 ATTCGGTGCAAATAGTTAATCTTTTCTCTTTTTTCCATTTGTCTGGTGGAGAAAAAAT  
A\_14\_P125889 AATCAGAAAAAATGGAAAGACAATGTAGCCAGACATAGTCCTACCAGAAGAAGGGA  
A\_18\_P14138614

AGGGTATGAGTGAATTAAGGCTAACATTTTAGATCTTCTGCAGAAGATAACAAATGGGT  
A\_14\_P201185

AGTTTCCAAAATTGAGGTAATAAGAGATCAGATGAATTTGAGACGACCGGCCAAAAA  
A\_18\_P22841037

TTAAAAAATAAAAAGGGTTACGGAGGGGATGACCTCTGGCACAGAAAAGCAGTAAAATA  
A\_14\_P139904 TGCCTATTTGTAACAATGAATTCCTTAATGAAGGAAGGTAGATTCTTGGCTGGAAGATGA  
A\_14\_P101272 AGGAGGAAATAAACAGATCAGAGGTCAAATGTGATTGCCATCCGTCATCACT  
A\_14\_P138911 GAAATGTATTAATTAGTTCCCCAACAAATATTTTCTGAATATCTGTAACCTATGAATTCC  
A\_14\_P109158 TTATTTTTACTGAATGCAGCAGTTGGCTGATGACCATAGGGATGTATCCCCAATT  
A\_14\_P121492 CTGTAGATAATCTTTCTTTCTGTAGACAGGCCGAGAAATGTAACCATATTTATGGGTCAG  
A\_18\_P11077065

AAAACAAGTAAATGTCAAACCAATTAGCATACCACTGAAGGTCTTAATTTGGCTCCACG  
A\_14\_P124314 TCTCCTGGAGTCAGTGAAGATTGTTTGTATCTCAATGTGTTTCATCCCTCAGAAT  
A\_16\_P58424214 CTTGCTCTGATCAACCACATGGTCTCAGGCAAGTTGCTTCACCTTTA  
A\_14\_P133547 GGTTTTTGAGGGGACATTGATATCCAGTTTATTTTATTCATTTGCTTCACTTCCAGCAA  
A\_14\_P101814 AAACCCCAACAATTTCTCTGAAGGAAACAATTGGGAAATATTCTGATGATCATGAAATGC  
A\_16\_P21623676

AACCAAGATTGGCATACCACCAAATTTCTTTTTATTGTTCTTATACGTGCCCATAGTTGT  
A\_14\_P121273 GTCAGAAAATTCTCTTCATATCACAGTGAATTTAGGAAAACAGGTATTCTTCGTCCCTTG  
A\_14\_P138341 CTGCAACCTTAACTGCTACTCTGTGAATCTAACCTCATCAATTCTAGGAACAAAATCTAG  
A\_16\_P58424115 GTTGTCATTCTCCTGTGACAGGAGTAAGTGGAGACTCAGAGTGTATGTGAATT  
A\_14\_P117734 TGTAATGTAATGAAAAATATGTGACCTGGAAATTAATCCATCCAGATGCAGGGGTCTT  
A\_16\_P02294877

ATTTATCCTTGTTATCCTTGCTATCAAAGCCTGTATTGACTACCAAATGTATGAGGCCTG  
A\_16\_P00685292

GTAGAGTTTCTTTTTTAACTTATATGCACATTCTTGTGACAGGCACAGTGAAAGATTT

A\_16\_P37109384

AAAGGCAGATCATTACTATTAGTATCTCCAAATTAGTGACCTATGATACGAAACAGCAGT

A\_14\_P105860 GAAGTGGCAGAAATGTTCTTGTCTGACATTTCAATGAGCAGCCAACCTTTTATAGTAGAA

A\_14\_P112036 ATTTATTTTGCCTTTACTAATATGCCCACTCCTTGGCATTACCTCTTATTTGCTAATGCC

A\_14\_P101855 TAGGCAATAATATGGGGTGGGAGTTTAAAATAATTTTCCCTTCTACCCATTCTGTAGTGT

A\_14\_P116141 GTGCATAACTCGTCAATACTCCTGTGATCGTATAACCATCAGCAAGAAAACAAATTTGAT

A\_14\_P129546 GCCCAAATAGCATGTTTCATCAGTTATCAAATGTCAAAGATCAGAAGCCAAGCCATATAAA

A\_14\_P139126 GATTAGTATCCTTTTCAATTTTATCCTTGCCTTCCCTCTCTCTCTCATGTGAATACTATA

A\_14\_P100749 TTTTCTAGGTGTTTCCCGTTGTATTGGTTGAAATAAGTTTACTAATTGGTAACCTCCA

A\_16\_P37039971

ACCCTTGAAAATCCTGATTCTGTAAGTAAGCATGACATTTATACCCCAAACATTGCTTTT

A\_18\_P19420634

ACTGAATTTTCCACTCAGAAGCAAATCTTCTACAAAATTCCTATTGCTATTGTCTTGCA

A\_14\_P100273 CTATGGGAGAAATAATAAAGGGGCAGTTCAGTGATTTTGAAGAACTGTTATCAACTGTTG

A\_14\_P134861 TTTTGTTTACACAGTGTTATTTTCAATATCAGGGCAAAGTTGTTTTGAGAACTCTGGGG

A\_14\_P118061 TTTTCAACCACCAGAAGTTCAGCGACGTCGGCATTAGAATAGATCTTGTGATT

A\_14\_P125051 ACTATTGCTCATTCATACTTGTTCATCAAAGCCTGGAGTCCTTAAGGACAGAATTTACCT

A\_14\_P109604 CACAGGGTCCCAACCCCTTGTCTTCAAATAAAGTATAATGTAACATAGCAGGAAG

A\_16\_P00438474

AAAAGGAGTTGTAGAAGGTAAACCGGAGAAAAACTCAGATTTTAATCCCTCGGAGTAAT

CUST\_1950\_PI426210822

CAGGCACCTTAATTAAGATCTTTCAAGCATCAGGTAAAAAGGTGAGGTTCTTGGTATA

CUST\_604\_PI426210822 CAAATATAAGAAGAGCTTATGAGGCCTTTCAGGTCCCATGGCTCCATTG

A\_14\_P135519 CTGGAGGAATTCAGCCACATCCACAAACCAAAAACATTAAGAAGAGTATGTAAATAATTC

CUST\_994\_PI426210822 TTCTGAGTGTGTCCTCTTTTGCCATTGGGCAGAGAGTGGCCTTGT

A\_14\_P106513 TTTATCATGTGTCTAGGTAGGGGGAAATAAAAAAAAAACTTTACTCAACAACTGCAGGGT

A\_14\_P125294 GAGACATGAGACAACAGCAAAACACACTCAATTAATAATCTTTCAGGCAATTGCTACC

A\_14\_P109948 AAACACTTAGCGCTATTTACAGCCAGTTGGGCAATGCTTATTTCTATTTGCATGATTATG

A\_16\_P00685538

ACCTGGTTTACTATCTGAGAACTTTAGTCCTAATAATTTCTCTACACCAACTTCTAGTCC

CUST\_5325\_PI426210822

CTGACTTATTTTCATCATTAAGGATTTAAATGCAAAACCTTAAGATAGTCAGCCTTAGGGA

CUST\_2891\_PI426210822 ACCATGTGGATGATGACTTTGTCCATGGAATGCCTGGTGAATGAG

A\_16\_P58424193

AAGTCATTAGGATAGCACAAAGAAATACCGTAAATTTCTTCACCCAGATTCCCTAAATGTC

A\_14\_P108555 TTGCATGTTCTGTGTTCTGTTGTGCAGTATTATTACAGCATAAAGGACATCAGCATTGGT

A\_14\_P122993 CTTTAATTATGTCATTTTGGGGTATGTGCAGAAGAAAATAGAGACTCACCGAATGTGTGA

A\_14\_P113532 TGGACCCCTTGATTTTAACATCAGGTGAAAAAATACAGTATTCTGTTTCAGAACCTTTCA

A\_14\_P115257

GAAAGTAGAAAGGAGAAAGAGGAACAAACGTTTGTGTGTAAAAAGCATATATGTGGTGCT

A\_14\_P116725 CCTCTGCTGAATTTTTAAATGTTCACTCTGGCTTACCTGTAAATGGAAGAATTTGCATAA

A\_14\_P202191 TGTATTTAACCAGATTTTACAATGCCTACCTGGACTTATTTGTCATCTTTGCATCTGTTT

A\_16\_P17651603

AATGGATAAATGTATAACCTCAATGTCTTATCCTCTTCTCTCTATAAAAAGGGCCACTGTT

A\_14\_P137808 CTTTTCTATCAAGCAGTTTCATTTTCATCATAAACCAAAACTTGTCTGGCATAAAAAGGCCT

A\_14\_P200358 CTTATTAATATTAATGTGTTTCGATCCTTGAAATGACATAGATGTGGTGTCTTCTGAAGTCA

A\_18\_P11309160

AACATCCCTTCTCAATCATCAAAACTCAACATGGTTATTAACAAAACGTTTCCTCATTCTG

A\_14\_P138972 ACTCACATAGAAAATAAACAAGAGGGGGCCCATCACATACGCCAAGTTATCAATACTC

A\_14\_P107077 ACATATGGCCACTGGAATGACAGTGCACATTGATATTAATTACAGGGTATGTGACAATAT

A\_14\_P111198 CACACAACCTGCATTCAGATTTCTCTTGCTTTAATACAAAGTTGTATTTCTGCCTTGCTTG

A\_16\_P16846024

GGATTAGTCATAACGGGTTTTTTATCTTCATTTGCTAGAGTCTGGATACATCAACACAGG

CUST\_8369\_PI426210822

CTTTTCGTAATTGGGTAGGAAATAGATAAAGACCTGATGGGTTTATTTTCATCTTAGTTGT

CUST\_10431\_PI426210822 TGAATCCACCAGGCTGGCAGTGGTGCATATAAACTGTGGGTGTGG

A\_18\_P22842297 GCTTGTGTTTTCTTGCTATGGGGCAGTGATTCTAAAGAAGTACCTGATTTTC

CUST\_7621\_PI426210822

GAGACAGCTTATTCAAGTGCTTTTTGAATTTGTATTGGTTTTTTAAAATGTAAGATTATTT

A\_14\_P105229 CTTACTGTGTGAAAATTTATCATTTCTTGAAGACTGTCAGAAAACCTGGTCAAACCTTGTC

CUST\_9994\_PI426210822 CAGCCCCTGCCTCCTCCAGCCCACCACCTGCTTTGCCTTGCTTTT

CUST\_10044\_PI426210822 CTTCTCTCTACTTGGCTACACATCCGCATCATTCTCTTCCCACCG

A\_14\_P113060 ACCTTCCTGAGTAAAAAATTTTATAGGGTCAAACCTAAGGCCTAACTGAAGAATGAAACT

A\_16\_P19837518

GTGTAAGACATTTCGAGTTACAAACATAAAGCACACATTTTCATAACCAATACCTAGGGAGG

A\_14\_P132091 TAATATCAGATGTGTTAGGTGACACCCAAGTCACTATGCTAAGTCTGTGTTTTAGACAAC

A\_18\_P22841074 AAATTCAGTCCCAGGAATGATTTCCCTGACCCACTGTAAATTTTAATTGAGGTG

CUST\_8138\_PI426210822 GTTTCTTGAACCTCTCCTCTCAGCAGCCACCAGCCTGGCTTTTGC

A\_14\_P127591 AAGAAATCCCAGATTTTTTACATCTTTCCGTCATTCCTAGTAGAATTACTGGTCATTCA

A\_14\_P130348 TCTGGTTAATCTGGATAAAAGGGATTTTTGCAACTTCTCTGGGAGTGTGAGTTTTAAAT

CUST\_1371\_PI426210822 CGTACATGAACATTTAGAAGATGGATTAGGGAGAAACCTAAACCTGCCCTCTT

A\_14\_P113020 AAAATATCAATTCCTAGCCAAGATCCTCCAGATTTACATCTATGAGATCTTGTCCCTTCC

A\_14\_P130305 CACCAATGTAGAGGATTCCCACCTTCAGCAGCATACTGAAATCTATAAAGAGAC

A\_14\_P201237 CAATTAACAGTGGTTATGTCTGGAGAATATGTGCGTAAGAAGTGATATGAGCAGGTAGAA

CUST\_7045\_PI426210822 GTATTTGAGAGGGTGGGAGTGGCCCAGGAGACCTCACGGTACAGT

A\_14\_P138815 GCAATATATACCCCCAAACATGCTTCTCTTAAATCAGCATGCGTTTACTGTTAGAATTT

A\_16\_P00904726

ATCCATGGTAAACACATTTGCTTCTAGCATAAACTTCTTTGAAACAGCATCTTAGGTGG

A\_14\_P124791 TAGAAGAATATGAAAGCCAACGTTACTCCATTTTGTCTTCACAGGCAAGACATTAAAAGG

A\_16\_P19364410

AGATTTGGTTGAGAAATAAATGCAGTGTGAAATCAGTTGTCAAGGTTAGCAATACTAGGA

A\_16\_P17766208

CTCATACTGAATCAAAAAGACAAGGTTAATTTGGGACTCCATTACTGATTTGCTTCTGGG

A\_16\_P01718468

TTTACAACCTCGGAATGGAAGTAACTGTAATTTGTTGAACGGTAATGTTGATGACTGTGC

A\_14\_P121765 GACTATCTTCAGATCTTGAGATCCTTCTCAGAGTCTCTCATTACCCTGACAC

A\_16\_P58424587 CTATGATTACCTCCTGTCACTCTGACATCACCCCTGTGAACTAGGCA

CUST\_10220\_PI426210822 CTCAGCTGGCAACAAAAACAGAGATTTGCCAGTGTTTCTCAAAGCT

A\_14\_P102597 CTAAAGAATGGCACATCTACTCCTAAAGGTGTCCCTTCTTTCCCGTC

A\_14\_P120561 TCCATTTTGAAAAATCTCATCTCAATTTTTGATTTGCCAGTTGGATTACGTGCTCATT

A\_14\_P133088 CTCTTTTTATGAGAACAAGGAACTTTTTAATGTTGCTTGTTTCGTTTTTCATCCCGATTCC

A\_16\_P37552248

ACCCAGTAGAAACAATTAGCCGTTGAACTAAGTTGTTTTTTTCTTGCTTTTCAACTT

A\_14\_P116343 TACAGTAGTTATAACTCTCGGAGTCTTTTTCCAGAGGATCTTTACATGGACAGAATTGTC

A\_16\_P30952552 CTCTTTTCATTTGCAGGTGGGCCAAGAGAAGGGAAACTGCTCTTTT

A\_14\_P119873 CACCCTTGTTACAAACATTGTTTTTTTTAAAAAAGACTGTGTTTCTTGGAAGCTAGAGGA

A\_16\_P15126315

AAAAAAAAGGAAAAAGAGCAAATCTGAATGATCTCCATGGAGAAAATAAAACAGCACAGT

A\_16\_P17530102

AACCTGGTCCTTTTTAGTGATTTAACTTTGATCTGGCAAATAATGGCTCTTTCAACAAC

A\_16\_P16503231

CAGCATAACCAAGAATTACCAGGAATTTTCTCAAGAAGCATTATCAGGTCAGTCATCAA

A\_14\_P139693 ATATCATGAACATTACCTGAGTTTTCTTATTTAATGCAGCATAACACTGCTATTCCAT

A\_14\_P139705 GCAATCTCTATTAATCGCTGCTTAACTTTTTCCAGATCTTTTCTTGCTCTGAACTTAA

A\_14\_P101933 GAGGACAGAATGAAAATAGTCTTTGGATGCCAGAGTATCCACTGAACTTGAATC

A\_18\_P15686204

AAAAACTGCTCAAATGAATAGTATGATTAGTAAAGGGTTAACGCATATAGCATGTATGGA

A\_14\_P201405 ACTTGTTTAAAGTTGTGAAAAATCCCTGAAGATAAAACCCTTCTAGTGCTCCTTGATACAT

A\_14\_P106372 CACTAACACTACTAAATGTATTTGATCCCTGTTGCCTTCTACAGAATGCTCATTCTCTA

A\_14\_P137887 ACTGAACTGGGAAGATTCAAGACTGCCACTTCACAGACTTGCTGAAG

A\_14\_P117556 AGATTTTTCAAGAAAAGGTGCTGCTAGACTCAAGCATCAACATGGTTTTGTCAATATCTG

A\_14\_P103117 ATATTCTTGAATGGGAACATCTGAGTGTGATATCCAGGTAAATATGACATTTTAGTGGG

A\_14\_P125135 AATGAGGGCATTFTCCACCTTAAATTAATAAGGAAGACTATGGCATAAGCACAATGTTTT

A\_14\_P110755 TTCCATTCTCTGTGTTCTTCTGACACAATGTAATACTTCCCAGCACCAAACATTATTACA

A\_16\_P16841970

TGTTCTTTTCTCCTTTCTAACAATCCACCATACTTTATATCCTCACATACCTACAAACGA

A\_16\_P58424287 CTTGTTTACATGGTTAGGAGTTCTACAAGTGAGAGTGGAAGTAGGCAAGG

A\_14\_P119960 ACTGGTGTGAACTTTGTGAGATTCCCCAAACCTGCCAGAGAGATAC

CUST\_9341\_PI426210822 CTTGTGGTTTTGCCTGGGCCTGCAGTCGTGTTTTATTTTCCTTTTG

CUST\_6199\_PI426210822 AGCAATTTGACCCATGGGCCCTCACTTTAAATAACCATTGCAGCTTG

A\_14\_P104875 AAATTTCTGGAGCCGATTCTTTGATATGCTTTCAGATGATCAAGGTCACATCATACTTT

A\_14\_P136982 GACCACACACACGCTGGAGTAGGGTTTAAAAAGGGGCTTGTTTAATTAATTAATACAAG

A\_14\_P129171 CGTAGACGCACATTTATTTGAACGACTTACACTTTGACCTGAAACAGTTTTTCCAAATT

A\_14\_P102830 AGACAAAAACCAACAACAACAAGACTTCCCCTTATACTCTTCTCGATGATGGAATTTG

A\_14\_P134420 ACTATTTCCCTCCCTGCTTCTGTTTTCTTTTTATAAATCTAGAAACCTTTCAGGGAGG

A\_18\_P14761122

AAAAGGTCAAGGTTAATAACATGAACACTTGTAGGAGACTTAGAGTTACTGAGATCCCAG

CUST\_3545\_PI426210822

TTTTTTAAACTTCACTGCAGTGTTTTGGACACAGCTATGTCAGAAATCTATTTCCCCTT

A\_14\_P122463 TTCATGATTCAGGACAGAATCAGTTAACACTGGTTGATTTTTGACCAAACCTGTTCTTACT

A\_16\_P15885711

AAAAATCACAATAGTAAACACTATGTAACAGAACAAGGGATTTACCTTGGACTGAGGGC

A\_14\_P107029 TATTTCCCCCGTGTGATAGATGCATGAAGCAAGAAATCATTTACTTTTACCTTATCTCC

A\_14\_P126164 TCCTAGACTGAGGGAAAGGGTCAAGTGAATGTGTTTTGCTTTGTTTTGTTTTAATTTG

A\_16\_P15341521

AATTGCCATATAAGAGATGATCTGCTAAGGTATCTAGAGGACTAACATCTATGCCCTCAC

A\_16\_P58424064

ATATATGGGGTGTGATGCTGTCTTCTTCTAAACTGAAAAAACTTGATTGCAGAAACAC

A\_14\_P102478 AGATATGAAATATCTCCAGATAGAGAGTATGCACTTTTTTCATACAATGTGGAACCCGTG

CUST\_4942\_PI426210822 GTCCTCGGTATGAGATTATGGTGTGTTGAATGGGGGTCATTAGAAGG

A\_16\_P38205181

TCACATCAACTTCATTGTCAAATACTGTTCTTCTGCCTAATATTCCTTCATTTCACTT

CUST\_7608\_PI426210822

TGAGCATCAAATACTTTAATTACTTCTTAGGCTTCAGAAGGGATGGCTTGCTAGTCTTT

A\_14\_P136094 TACTTGTGGTCATTATGCTATGTCAACTGTTTCTAATGCCGCGTATCCTAGTGTTCATA

A\_14\_P130592 CTCAGTGTTAGCCATCAAACCTTTTCCATAGATAAATGGTTGATCATAGGTAAGCACAT

A\_16\_P58424198 AGTGAAGCGGGTTTTGGGAGTGCAGGCATGGGGTTATGGGGGTCAG

A\_16\_P16999289

CACTCTGTATTCACTAATTTAAGACCTGTGAAATGTTTCTGTAGTCTAACCCTGTGCT

A\_16\_P20200575

AGTGTATGCTTTTCTTCAATAGTGTTCCTTCAATAGCATATGTCTTTCCTTACGCAGG

A\_14\_P124310 CTGGCCCTATATACAACATAAAGAAAGGGTCAACTTTGACATGACAATTAATGAGTTCCA

A\_14\_P135484 AAACCATTCAATTTCCATGGGCAAAAACAGATTCTGGTGGTCTCCAGTAAAAATGTATATA  
CUST\_1540\_PI426210822

TTAAGTTTGCCTATGATGTCTTTATCATCCTGGCAATAAACATGCACATTTGGCCAAAT

A\_14\_P200200 AGGCATTGTTAACATTTTCATCAGAAGGCCAGTGCAAGACAATTAATTGTTAATAGCCATT

A\_14\_P113595 TTTCAAGTCAAGATTTTCATCCCATAACATGCATGACTCAATCAGATTTGGAAATGTGGGTA

A\_14\_P112535 GGACAAACAGCATTATTCCTTCTGAAGAACTCTTCTGTTTTAAACAAGTAGAGCATGC

CUST\_6048\_PI426210822 GTTATCATTGAGCTCTCTTGATTCAATCTTGTCTGGGATGGAATGTGCC

A\_14\_P114915 ATTTGCTTTGTCAGAAATTCCTTACTTCTTTTGTCAATTAAGTTGCTAGAGAATAGATTG

A\_14\_P137912 AACTTCCTTTGCACAGCAAAATGGATTTTCATAGGATCAATTAAGAGTATTTGGACCAAAC

A\_14\_P118731 GCATGAAGTGCCTAGTATTTAAACCTTTATGGGGTAATGGCAATGTCCAATATGATCAAT

A\_18\_P22841255

TTCCTTTTAAGCCAAAAATTATCAGTCATTGTCTTAATGAAGGATTGAGAGAGAGAGAGA

A\_16\_P58424177 CATGGACAGAGCCACTAGAGAAAGCCCTCAGGAGAAGAGATGCAG

A\_14\_P139277 CAATACTATTATCCCCCTGCAATTCAGGTGAAGCCACCAGTGAGAAAC

A\_14\_P128531 CTTAGCGACGGTAGTTTTTTGTTTTGGCTATACTAAGACTTGGAATTTATCTCTCCAGT

CUST\_2171\_PI426210822 ATAACTAAGTGGGCAGATGCCAGAAAGGAAGGAAGCAGTGAAAGGA

A\_14\_P124002 TTCTATACCAACATTCACACCCATGTCAGCCTTATGCTTCTGGATCATAATGTCAC

A\_14\_P102290 TTAGGATGAGGCAAAAGCGGCTATTTAATTTTTTAAAAGGTGAGTTGATTTAAACAAGTG

CUST\_8973\_PI426210822

TGCTAAGCAACCATGAATCATGGTTTGCATTTTTCTAGATGGATAATATGAAGCTATCTT

A\_14\_P201453 ATTTTCTCCAGTTGTAACTCCTTTGTAAATGCTTTAAAATACTAAGAGGAAAAACACAG

A\_16\_P16191092

CTCTGGCCCTGTTTATATCTGTATTGTCCCAAACAGAAGAAGAACAACAACTTCATCTTAAA

A\_14\_P103310 TTGGCCTCCTCTGTTGGGTGGAAAAAGACTTTCTTCTCTATTTTCCTAGTTATATATGC

A\_14\_P103858 CTTTTTTGCTAGGGGCTGAATTAGATTTCTTCAGACCTAAGATATCAGCATCCATGC

CUST\_2720\_PI426210822 TCTTCCATTGGAGTTGGTGTGGGTCATCATTCCCATCCGCCCTAT

CUST\_9276\_PI426210822

TTTGGGTAAAAAAAAGGAAAAAGGAAAGCATTGGAATTGGTGTCCCTCATGACAATCTG

A\_14\_P127607 GAACAAATCAATATCATCGTGATTACTATCCTTGTCTAATGCAGCCTACAGAGTGGGTA

CUST\_10049\_PI426210822 CTCCAACTTGCATCTCAAGGACTACTAGCCACAGACGCAGAATGA

A\_14\_P123319 TTCGTGAAGATATTCTTAAAATTAATCTTGGAACTCTGTGCCTATGAGGTTTTCTCTAAA

A\_14\_P110027 TGCTATCTGTCATTTTGCACCTGCAGAAAGCCTGGATAAATGTTTCAGTTTATAAATGGAGA

A\_16\_P16191629

TTCCATGTTTCACTGAAATCTGCAGGAATCGAAAACAATAGGCAGTCACTAACTAAAATG

A\_14\_P124889 AGGCAACTCAATGGACAACCTATTAAGCATGAAATAAATCCCTGTGAAGGAATATGTTGT

A\_18\_P22842129

GGGTTAGAGAAAGCAAGTATTTTATTTAGAAAGACAGTTTTTCAGTTAGAAAGGGAGAAGAC

A\_14\_P122715 AAAAGAAAGCAAACCTTACATACCTTATAGTTTGCTCTCCTGATTCCTGCATCTTGGCTT

A\_16\_P17017624

CCCATGCTATGAAGGATAAGATACAAGACACAACCTTTCATACTCCTTGCATTTGGAGAAT

A\_16\_P01533962 ACCATCATTCTATACCATCCTATTATTGCCTATACCATCCTATCATTGCTATACCATCA

A\_14\_P134251 TGTAATCTTATTTTTACAAGACCAAATGTTTTACAGTCTGGTCCTCTGTTGGCTCTTCTC

CUST\_9636\_PI426210822 GAGAGGGGAAAATGCAGAAAGTGTTGTTGAGGCCACAGAAACTA

CUST\_3974\_PI426210822 CAGCTGTGTTTCTTCTTTGCAGAAAGGGGGTTTCTTTGGGTGGGG

A\_14\_P137201 CTTTGAATTTCTGACATTGGTGTGGGATACAGTCTGTAAATGTTTATTGAGAACATCTT

A\_14\_P100790 TGTCATTGAGATCCTAATAGAAAACCACGAAAAGGTAATATGTAATTGATCACTTGCAGT

A\_16\_P00912156

CTCTCACAGAAACCAAAATCAAATAAACCCAGAATGTATTCACTTGCCTTCTAGACATCT

A\_14\_P138283 ACTCTTCCTTAACTTTTCATTTCTAGTCATCAGTGATTAGTGGAGATGAGTATTTTGGCCA

A\_14\_P200585 TTATTATAGAGATGTGGGTATACAGAGAAAAAAATTGCCTGAAATTCTGAGATGTTAAA

A\_14\_P126745 CTTTCAAAGTAACATTCCTGAATGGAACATTCATCAAAAGCCTGTATAGCAGACAGATCA

A\_16\_P01692757

AAATACTCCGTAAACAGTAGAAAATGTCACTCTGAAGATTTCCAGTGTCTATCTGCCTAAG

A\_14\_P134683 GTCTTCTAAACCAATTCACAGAGCAGACATTTCTGAATCTTAATCTTCTATCAGATT

A\_14\_P103712 AAAGGTAATATAAAAATCCAAGTGGATCTTATCACTATCCCAGAGTCTCAAGATGAAGGG

A\_18\_P16711417

CCGTGGATCAAATAGTTCCTGATGAATTCATTTCTTCTGTTATAATGCCCTGACTTGTA

CUST\_6389\_PI426210822

ACAACAAAAATAGAGCAATACCTTTCTTGGTTAGTAAAATAAATCCCTAAATATTTGCC

A\_16\_P21181152

AAAACAAGAGCAGTATCTATTCAGTTTTGATTTGTGATGCCTTTTGATTATGGCGATCCC

A\_16\_P00685222

GTGTAGGCTTTGGTAAGATCTCACATGTGATGTTAATAACAATACCTTACATATCTGGCC

A\_14\_P200751 GAGCAATATGCTTCCAGAAGAGAAGTCTTGTCTCATGACACAATTATTGAGGAATTTGA

A\_16\_P21619349

AACACTCATTCCTTTCCATAGAAGACAATCTGAAAATCAATCTATAATTGCATGTGGCC

A\_16\_P20529508

AAAGACACAGATGAGGCTATTAGGATTAAGGGAAAATCAAGTAAATCGAGAGGTAAAGCA

CUST\_6091\_PI426210822 TTTTATTTTCTCTCTGGAGAGCATGAATTCTGGCAGGCCTGTGATCT

A\_14\_P103326 ACATTCAAAAGAGGCAGAGAATTTTTGAAGTTGATGTCCAACATTCTAAGATGATGCTGA

A\_14\_P123942 TCTGATCCCAAGAACAGAGACGCTTCTGGACTAAATTCAAGACAACTTTTGCTATTATA

A\_14\_P105810 TTCCCTTCCCAAATCTCTGTGGTCCATAGTAATTCACAAAGCCTTTTTTCTATGTATACA

A\_14\_P111977 TTAATCTCAAACCTCCAGAGTCAAAACATCTATGCAAAAATGCCACTGTCTTGCTCTAAAG

A\_14\_P126393 TAAAAACAATTTTATATGCCTCACTGGTTGTTATTCTTAGGTTATTTCCACACTTGACTT

A\_14\_P106472 CAGATACAAAGCCAGCCTGCGTATTTAACAATGTGGAATATTATGATGGAGACATGTTTC

A\_14\_P136339 TCAACACATTTGTAATTATATATGGATTTGGGCGATCATTGGCTAAAGCATACTCTCTCT



A\_16\_P01818328

ACTCTTACAGAACTTGATATCAACATCCTTTTACTCACCAGTAACCTTACTCTCTCCTTC

A\_16\_P16636309

AAAAAAGGAAATTTGGTGATATAGGCACACTTTCAAATTCTCATTGATAGAGAGGGCC

A\_14\_P108604 CTAATACCTATTCACCAAAGCGAATTCCTACTTTGGTGATTTTTTTGGATCTGCTGTGTA

A\_14\_P117069 AACACAAAAAATTGTCCAGGTTATTGGGCTTGTCACACTGTAAGTTTTTACTTTTTTAC

A\_14\_P121111 TCTTTTCCATTCAGAGTCCTCTGATTGAGATTTAATGTAAACATTTTGGAAAGACAGTAT

A\_16\_P20299153

AAAACAGTAAGAGCAGAACTAAGACTAAATATCCCCCTTATACAGTGTATCTTCTCCTCC

CUST\_688\_PI426210822

TACCTTGGGCTTGGAAAGGAAATAATAATTCAGCAGGTTCCCTTCCACTTTAGATT

A\_14\_P135346 ATGCATTTGTTACACATCCCCAATATCCTGTGATTTGGCTTTATTGAGTCATTAACAGT

A\_14\_P107590 AGCCCTAAATGAGGTAATCTCATCTTCCCATCACCTACTTAAACTATTTAAGCCTTTTCG

A\_18\_P14137246 CTTTTCAGGGTTGGACTTATGAGAGATGTTGTGCTGATTTCCACCATGGT

A\_14\_P134468 CCAGAGAATAACTGGATCTTCAAGGAAGGAAGAGAAATCTTCAGAAGAACATGGATTTTC

A\_14\_P131975 CTCAGAAGGCTTTGGCTAAAGTTGACAAGAGTGGAATGAAAAGTATTGATACCTTTTTTTG

A\_14\_P138999 CTTCAAATCTCATTTTATCTTTTAGGCTGTCCAGAAGGGAAGAAAATGGAGTTTATCACC

A\_14\_P110766 ACTCTTCATGAGGCCTTTCCTGGACATGGAGGATATGAAAAATAGAAATTTAAAGTTTTT

A\_14\_P112545 TCCCCATCAAACATTCTCTCAGAGAAAAACCTGATCACACATTTATACCTAAGTTACAC

CUST\_553\_PI426210822

TTTTTAAAAAGTAAATGTAAATGTATTGCCATATTTCTCTTGAAAAAAAATTATCACAAG

A\_14\_P113237 AAGAAATTTTCTTACCAAATACCCATAAGGTGAATTGAAGTAGCATCTTTAGGGTTCAGT

CUST\_7944\_PI426210822 TTCATGAGGTCAAAGTCAAAGGTAAGGGACACAGACGGGACCCTT

A\_14\_P136738 CCAGGAATGACTCCTTTCTTTCAAATTTGCTGTTCTCAAATGAACATACTTAAGGACTT

A\_16\_P18931571

TGACAAATGACAGCAAAGATCACTATTTTACATTCTCCCTTCTACTCTTCTACTTCTCCA

A\_16\_P21578081

ACTTCTGAAAATCTGCATAACCTAATGTTGTTTTGACTAAAACCTGACCAGTATACCGTC

A\_16\_P01450780

GTCTAGTAATGCTTTCCACAGTTAATGTCCTTCCATTCTGACTAACTCTTAACACCTCTA

A\_16\_P17231846

GAGCATCTTACAACCTACTGTTTACTTCCCCTCATAATGTATCCTTCCCTATCTTACTC

A\_14\_P112533 AATTTTTGTGACTGGCACTTCAAAAATCATTAGAACTTCGTAACAATGGGGATGGAATT

A\_18\_P13607616

AAACAACCTAACACAGAACAAGTAGTAACCCCATCCTAATTGATTGTTGATAGTGTCATG

A\_14\_P108912 AATCCTGACACAGTTACATCAATATACATTTACTGCTCAAAGAGTGCATGCATGATGCA

A\_18\_P22841292

GGATTATTTTAAAGACCTACGTATTTCTAGAACTTCAACTACAGACCTCTTGTTAACTCT

A\_14\_P115850 TCTCGGTTTTGTGGATGAAAAGACTGAAAATGGAAGACTTGCCAAATAAGGAAAATATGT  
A\_14\_P120173 AGTTACCTAACTGCCTAGAAAAGAAGGTGACTCTCAGTTTCCTTCGATAAAAAGAAGAATA  
A\_14\_P100196 ACATGAAAAAAGTCTTTTAAAGAACATTCGTCCCTTCTCTTCTCCAACATGGTGAAAAAT  
CUST\_2076\_PI426210822 AGCAGCTTGGCTCTTTGGGTCTTTGCCTGTGTCTTACTGATTTCT  
A\_14\_P131256 TATCACTCACCTCTTACTCCATCATTCTTCAATAACTCCATCAACACTGAACCTTCTAA  
CUST\_1345\_PI426210822 AAGGGTTAGTTTGTACAGTGCCTGTGAGCTGCTGTGAGGCAAA  
CUST\_1991\_PI426210822 GTTTAGGCTGGGAGCTGTGGGGTAATTTGGAGGTCTTGGTGGAG  
CUST\_5591\_PI426210822 GGCACACATTGCACCTTCAAATTTAAGGAAAGCAAAGACCTGCATCTGT  
A\_16\_P18704690  
TCACGGTTTTTCAGAGAATGTGCTAATTTGGTTATATTAGTTCTATTTCATTGCGGCTTGT  
A\_16\_P02542780  
AGCAAAACTCCTGAAGATCAATTAATCTAACTCATCAAGACGGATCTGATTTGAATTGCG  
A\_14\_P138438 GTTTCTTTCCACACAGATCCTGAAATTCCTGTTTCAGGTCCTCAGGATATT  
A\_14\_P113959 CTCAGATATAGCAATGAGAAATACCAAAAAGTTTAAGGCAGTGGAAGAAAGCCTGCGTAAA  
A\_14\_P106969 GTGGGACATCACAGCCCTAAAAAGCCCTAAAAGACACTGAATTATGAATTTATAGTAACT  
CUST\_5419\_PI426210822 CTGGAAAAAGGGACAAAAGATTGCCCAAAAGAATCAGGTCAGAACCTTAAAG  
A\_14\_P115502 ATGAATATTTGCCAGCATTGACAATTTGCCAAGTGTTTCATGTATGTCCAGGAATTTTCT  
A\_16\_P16725847  
AACAAAGGTAAGCCAATGATTTTGATCTGCTCTTATCTCAAACCTCTTCTAGATTTGTCA  
A\_14\_P200226 AGATGAACAAGGACCCAAATGGGGGAGCATTCTAAATACATTTTCATTTTACAGTATCACT  
A\_14\_P129940 TAGTCTCTGCTGATGCATTTGATGTTTTCTCTATTACCGAGTGAACACCATCC  
A\_14\_P131298 AAAGAAACATTTCTGAAAAATCTGTGACCAAAGAATCCCATCTTTCTCACTGATTGCTGT  
A\_16\_P16191573 GTCTCTCAGAGCAATGTGTGGTCTTTCGGTGTTGATAAAGCAGCAACTACAT  
CUST\_8113\_PI426210822 TTGTCAAATAGAAGACACTTCTGCCTCCACCTAATTCAGGGCTAATCATAAC  
A\_18\_P14131984  
GATTTGTATTATTTCTGCTGGGTAAATTGTGAGATCAGGGCCTACACTTCTTCCACATT  
A\_14\_P201763 GTAGAGGAATGAAGAAATGACACATGCTTAGTTTCTTCTACTTAGGGGTTTTCCAGGT  
A\_16\_P21608044  
AAAGTATTTGTTCTCTAAACCTTGTCCTCAATAACAAAGTCCATTTGCCCAAACCTAGTGA  
A\_14\_P135856 ATTTGCAAGATTACTCACAGGAAATCTATTTATGACAGAAGTCTTTGTTATATCAAAAATA  
A\_14\_P119731 TATAATAGCCCATTCAGCATACTTGAAACTCTGAGACTGACTTTTACAGCCAGAAGCATA  
A\_16\_P16783289  
AAAACCACATATCTCCGGAGAAGTCTTTTAAAATTCAAATGCACCTGTGATTGGTAATGT  
A\_14\_P104444 CAAAGTGAAATGTCTTTGCAAATTATAAATCACCAGGAAATGCAGTCACTTTTGTCTCCT  
A\_16\_P35882626  
CTACAACATCAGTCTTATTTTCATAAAGTTCTCCTCAAAAATCTTTACCATGTCAATCCCA  
A\_14\_P103817 CTGCAATTTTCTGAATCTTTCTTTTCTTTAATTTTCACATTGCTCGTAGTCTCCAGGGT  
A\_14\_P102323 GTTTTCCAAACATACAAATATAAAAACCCTCCTGGGCAGTAAAGAAAGTCAGTCTATTGTC

A\_18\_P12154947

TGACACTCATCCCTCTTAAAATAGACAGTATCTGGCCTATGTATTTTCGATGACCTCTAG

A\_14\_P111218 TTGAAAGACGAACTGTCTGTACATTTTCTCAAAGTTTCTCCTTACTAACTGTGGAAG

CUST\_3534\_P1426210822 ATCAACAACGTGGGGCCAGGCTTGAGTCAGCAGCACTGACTTTAT

A\_14\_P137002 CCTGGAAGGCCTTGGTTTTAGTGATGCATTTGTAGAGGAAGTTCTCACT

A\_16\_P00628590

AAATGACTAATTAAGGCGATACAACATTCCAATCACAACCTTAAAATTCAACGCAGTGCC

A\_16\_P17600258

CTAACATGCATCCATAGACAGTCCCTCCATATAACCAATCTCTATCACTTGTTCACTTGT

A\_14\_P130163 CTATGCAGCCAAGAATCTGATATAAAATTTCTCCCGTTTGCTTATCACACGCAGTATTTCA

A\_14\_P105243 CTGGGAAACTGCAAAACATTAATATGGCTGAGGATAAAGGTAGATATGTGAAACTTTGGA

A\_18\_P16517934

ACTTCCAATCATCCAGAAAGGTCTTCTTAAAACCTCAAATTTCAACCCATCATTCTCTACT

A\_16\_P41036910

ACTCATTTTTTCTTGAACATAGCATAACCTGTCCTAATCTCTCTTTCTCCTAATGCCCAT

A\_14\_P100845 AACTTAATTGCTTCCGAGCCAGACATCGCAAAGGTTATACAAAGTTTATGTTTATCAGGG

A\_14\_P102963 ACCTCAGTGTTAAAATGTAGGAGACCTTCAATAAGTTACAGTTAAAAGATGAGTCACAA

A\_14\_P129961 CTTCTCTAGTCCTTCTTTCATATTTCTCCTTCTCATCTTGAAAACAGGATGTTCCCTCT

A\_14\_P113718 TTCAGCAGTAAAGAGTGCTAAATCTCATCTCATCTTAGGACACCGATTTTATAGAGAAGG

A\_16\_P17483596

AATGAGAACTAGTCGATGAACATGGTCAATCTTGCTTAAAGACTCAAATATGCTGGAGT

A\_14\_P125175 GATTTTCAGATGCTCGTGTTCACAGGAAAAACGTGTCAACATGGTTCATATTGAAT

A\_14\_P135100 TTGTAAACGATGGAGAAAATGTAGATTTGATTGTTGAATATGAAGCATTCCCCAAACCTG

A\_14\_P113783 AAGTCAATAGCAAGAATTTAAAAAATCTCAAGCATCTACAACCTGCTCTTCCCTGCCAC

A\_16\_P00583617

GCAATGTCAACAGTTTTACCCTACATAAGAGATGCATATCACTTATTGGTCAATTAGCC

A\_14\_P201041 ACAATACCAGAACAAGTAAATCTTACTTTAACCCATCCAAAGATTTTCAAAGGCCAGGAA

CUST\_9554\_P1426210822 GAGAAATTGTTACTTTTTGGAAAAGTTTCTACTGCTGCCTGCCTCTGAAGGC

A\_14\_P131937 ACATTTGTGGTGGATATCAACTAGCAGAAAACCAAATCATCACATCTCAAGAAGCAAAA

CUST\_5962\_P1426210822 GTCGGTGTTCCTTCAGAGCATTTGTTCTCAGGCTCCTTTTTCTTGA

A\_16\_P18381982

ATATTTGAATCCTAAAGGCTAACCTCATTTTCTTCCGTCTGTAATGAACTACCCCAAATG

A\_14\_P110292 CTACAAATTTACGTGTTCACTGGTGATTGATCTTTTCATCCAGCACAATGGACAGAAG

A\_14\_P109795 CTGCTATTTGGATATGCTAACTGGGTTTACGTTTAATATGCTAATTGGTTCAGGCAGGTA

A\_14\_P133816 CCAAAGATTGAGCAGTCACAGCATCTTCCAAGCACATAAGGAAAAATATGATAAAATG

A\_14\_P132429 CACCAAGACTAAAGTCGCTCCTTCAAGTCCATTTGAATTGTGACTTTAGTTTCCTTAAA

A\_18\_P11743195

CAGGTTCCCTAAGTTATTTGTAAACAAAGGTTTTTATGCCAGAATTTTCCTCAGTGCCTTG

A\_18\_P22839772 TTTGAGAAGGAACATTGGGTTCCCAAGACTGGTTCAGCCCAAAGG  
A\_16\_P17081328  
ACCATCCCTAGTAGACTTTACCTATTGTTCTAAGATCTGAATAAAGAATCCCCAATGCAA  
CUST\_87\_PI426210822  
CTTTTGGCTTATGAAATACTTCAGTGGGAAAGTATTTGCTCAAATCTCTGCCTGCTA  
A\_14\_P132427 CCATCATGTTTGGTTTCAGGATCAGTGAATGCTTGTGAAAAGACCTCATTATGTTTC  
A\_16\_P03713526  
TCTGCTTAAAATGTGTCACCTGCCTAAGGATAAAAATGCAAAGACTTTTTAGCATACCACC  
A\_14\_P112659 CTTTCATTTTCAGGAGCAATTACAAGACATTGCTATAAAAATGGGGGCAATAGGTCTTAAAG  
A\_16\_P16612455  
ATTTCCAATGAAACCCCTATATGTTTGAACCGTTTCTAAAATTGTCATTAAACACCCAGC  
A\_14\_P111516 TTTGTAATAACTCGAGTCATCTCTCAGGTGTTGAAGGAAAAGTGTGGAAATGGG  
A\_16\_P21525037  
AACTCCTGCAATCTATAACTGACAATAAATACACAATCTAATACCCCAATCCTTGAGGT  
A\_14\_P111189 TAAAATTTGAGAAAGTCGTAGGGAAACAAGATTCATGTTTTATTTCCACAGAGAAACTCA  
A\_14\_P101368 TTCTTGTTGTAGCCGTCATGCATAACTGTGATAAAAAGGACATTACAAAACGATTTACAGG  
A\_16\_P36230092  
AACAATGAAAACCTTTTTGCTCACAATCTGACAGGTGAGAAAATTGTGGGGTTCTAGTTG  
A\_14\_P131197 CTCTGTTTGTTCACATTTTCACTCCTTTTCACTGTAGTAAGTCTACTCAAACCACATG  
A\_16\_P00685308  
GGAGGACGGTTTCAGTAAGTTACTCTATCATTACTGGAAATGCAAAATCCTGTTTTCTTT  
CUST\_8098\_PI426210822 GGACAAAGGTCACCTAGAAAATCTGAACTATATCCTGATGGCACTGAGGA  
A\_14\_P103008 TATAAGACGTCTTTCCGTGTTGAGGCGTCGTGTCCTGCTTTTATTCTTT  
A\_14\_P101717 TGCTTTTATAATGTTTTTGTGTCTTGCAGGGATTTATCAAAGATGTTTCATGAAGACTCCC  
A\_14\_P201371 GAAGCAGTCAGTTTCACTAATATGACAAGAATACTCACTTGCATCAAGCAAAGCAAACAT  
A\_14\_P103183 TCATAACCTAACACCCCTTTTCTTAAGGGAAATGTAAAATCACAGCACAATCCATTCTCT  
A\_14\_P125120 CGAAAAATTTCTGACATCCCGACGCATGTCTACAAGAACAAGGAAAAAATTG  
A\_14\_P117878 CTCATCCATCAACTTTTATCTCAACATTTGCTTCTTCTGGAGGCTTTCCAGTATTTTTTT  
A\_16\_P00045311  
TCTTAGCACCTAAGCAACTTTTATCAACTGTTGTCTTTGACTTTACAAATCTTAGGGGTG  
CUST\_40\_PI426210822 ACATTTGCTTAGAGTTTGGAGTACACTGAGGCTGCCTGAAAGAAGACAG  
A\_14\_P110932 GGTCCGAGGCATTTAGAATTTAAAAACAATACTAAATAGAAAGAGCCTGGCTTGTGA  
A\_16\_P19576994  
AAACCCAGAAATCTCATGAAAACATACGTAGATTCAACTGATATTGAAGACATCACCTT  
A\_18\_P17330509  
GAAGCCATGATCACTTACTTCTTGTGCTAATGATATCACCATTTATCTGAACAGGTGTG  
A\_14\_P118308 ACTTGCACACTTGAATCCTGTTGGCGCTCTCTAGAGAGACAGGAG  
A\_16\_P19492675

CCTGTCACATCACTTTTTTCCCAACACTTTCATTATCCATATTTTGTCTGCTATTCCAA  
A\_14\_P122656 ACATACGATTATTCTCAGAGTGGGGGTAGATTTTAAAGTTCTAAGTTTTTTGGGAACCTT  
A\_14\_P139608 TTTTATAGGCAGATGTCATAGTTGCTGATCTTTACCTGAAATACGGAGATGATCCCTATAC  
A\_16\_P01357601  
AAAACCTTGATTGAGCCTATAGGTTGTTACCCTTTCAACTAATCATGGACCCCAATAGTTG  
A\_16\_P19551582  
ACAATCTTGCCCTCATCTAAAATGTATCCTGAGTATCGAACTAATTTATCACCCTGGAGA  
A\_16\_P18348173  
AGAGCACCATGAAATATACAAACTTTCCTAGAACAAGATCCTGCTATAGCCAATTCTACC  
A\_14\_P100752 GGAAGACACAGACCCTAGCACTTTATCCTTTAATATGGTAGGTGACAAATTTTACACTAA  
A\_14\_P113032 AATTATTTATGTATGGTGCAATGTGTGTATATGGACAAAACAAGAAAGACGCACTTTGGC  
A\_16\_P18399849  
CTTCAACTCTTAAGACTGCCAGAAATTTTAAAGGACAGCACATTCATTCAATAACCTCGT  
A\_14\_P120648 CTGAAATTAGAACCCTTATATGCTTTAAATAACTTTTAAAGAATTTGCTTGACCTGTGGCAA  
A\_14\_P100571 GAAACCACAATCACCCTCAATTTGATTTTCATGTTTATGGGGATACTCTAATTTTTGGAGT  
A\_14\_P125407 ATAGCAATATCCAAACAATATGTCCTTCACTGTCTATTGTTGGAAAACCTCATGCATCCC  
A\_14\_P202212 TTAAGTCTTTAGTTTCGAGGAAGTTCCTTTTTTCTTTTCAAAAATCAGGTTGCTGGAGAT  
A\_16\_P16594569  
GGAAGAAAGCATTTAGAAACCTCAAGAAATCAATACTACTACTGAACAAAAACCTAAGCA  
A\_14\_P100767 AAAGTTTTACAATATGTATGGCTTGACCCCACTCTTGCTTAAGAAATGTAAGTGTGTGAG  
A\_14\_P108040 TACAAATATTCATTTATACAATAAGGAAAAACCTCCTCATCTTTATCTCCTCCTAGGCAC  
A\_16\_P15760152  
GCTCCTTGCAATTTGAATCTCCTGTATCAGTTAGAAGTTAGCATCCTGAACATTCTCATAT  
CUST\_3689\_PI426210822 ATAATCCCACCTCCCCATTCTGGATGTGCCAGCACTTTTCCTACT  
A\_14\_P115663 GAAGTGACATCATCATAGACTGTGCAGACATTAAGGAGCATAGGCATATTAGGAACTAGA  
A\_14\_P108991 AATTCCTAATCCTTGGACATTTTTAGTGAGTTCTACATCAAATGTCTCACTTTCTTACC  
A\_14\_P122855 CTTAACAACCTTAAATCAAGAGTGTTTTTGACACCTGCATACAGACTCCATATCCCTGAAA  
CUST\_2129\_PI426210822 CATCAACAGAGGAAATGTGAGTACAATACTGGGCAATGTGCGGATGG  
A\_14\_P123362 CTTTTCCCAAACAATTTCACTGAGAAAGAGAACAGTCACATTTCTGTGTCAGCCTGTAA  
A\_14\_P122453 TTCACCTGATGGAATGAAAAGGATAAGAATCATGTGAAACCAAACACATAAGAGATGGAT  
CUST\_10437\_PI426210822  
CTGTAAGTGTTTTTTTCATATGTACTTTTCATTGGAAGATTCCCAACAAGAATTTGGATGG  
A\_14\_P122851 CCACGAATCTCTTCAAGGTTAGCACTATGGCCAAAAAAAATGAATCACAGAAAAATGTG  
A\_16\_P17471280  
AAGGCTGATGTCATAACTCATTTTCGAAAGTCCCTTATAATTACCATCTCCACTCATACTC  
A\_18\_P13353347  
CCAATGTGAAGTAACATATTTTCAACTACATTTTTTTTTTCTGAAATCCCTTTATCACCA  
A\_14\_P100725 TTAAACACCTCAAACCCAACAGATTGTCTCTTTGAAACCCTCATCTATAAAAATCTCCAT

A\_16\_P00638333

AAATGGTAATATTTCTACCCCTTTGTCAAAAAGTAACATCATATTCATATCACTGCCCCC

A\_14\_P135800 TGGGGCATTCTGACACGAATTACTAAGATATCACTTATATGCCTGTTTTTAGACTGAGAG

A\_16\_P03133116

ACACTGAGACAATTGCAATTACAAGTCAATTCTCAATTATTCAGGGCTGATTATTCAGGG

A\_18\_P11305055

ATAAGACTTCATTCCCTATAAATCACGCTATTCCATGACTACCTATTCTAACTGCTCCCA

A\_14\_P114490 ATCTTGATGAGAAATATTTTCATCGTCTTCACTGTTACCTCATGTAACAATGGCACCTT

A\_14\_P134296 GTGATAGTGAAGGTGTTTTTACTGCTGCAAACTATGCTCTTTTGTACACAGCAGTG

A\_14\_P112999 CTGCCAACTAAGTCTTTACTTTGATCTAAGAAAAAACACAAAAGGGCCAAAGTCTGAT

A\_14\_P130004 TCACAATTCCTTTTTTTTTTTCTTTCCAGGTTTTCTCAAACAATGATGAAGGCCTTATT

A\_14\_P201084 TGCAAAAACAGATCTATTTAATTTGAGGTTGATGTTCTATCCAATGGCCGAAGATAGCAG

A\_14\_P200862 CTTTGTATTATTGTCAAAGTCTTGCTGCCTTATGAGGTGACACCTTATTATGCTAGATT

A\_16\_P17226633

AAGACTGTCTTAGCACATTCTCATTTTTTGACCTACATTCTGATCACTTGCTTACTTCCT

A\_16\_P17898537

AAATAAGGGTCAAACCTACAAAAGAAGATCTCAGCATGCTCAAAAATTCCATGGTTGCATT

A\_16\_P00823634

GCTTGTGCTAATTTGATTGTTATCTTTGGCCAGTTCACAATAAAACCCAATGGAATTGTT

A\_16\_P15907154

AGGTGCAATCTCTAGCAATCTTTTAACTCAGTGCAAGTTTATTAATGACCTTCAGCAAGT

A\_14\_P128734 ATGAAGGAATTCTCTGTGGAAGAGAGATAATGTTGTCTAGGAATCCTCTGTTTATAGTGT

A\_16\_P15647996

TTTCCTGTTCTTTCAGTGATTGTTTTAAGGCTTCCAAGACACCCTTTTAAATTATCATGG

A\_14\_P118999 GGAATCCTATGGTGAAGTCTGTGCTTGATAAGACAAAACATTCAGTAGAAAGCATGATTA

CUST\_4563\_PI426210822

AAACATGCTTATTAGCCTCCATTAAGAAAAAGGTAACCCTGTGTATACCTGTATTAACAC

A\_14\_P121902 CTGCTACTAAGTCTATATGCCCATTCGTTTCATACCACAAAACAGGCATCTGACTC

A\_14\_P114852 CTATCACTGCATCAGATCTGGTGTGTTTAACTAAACACACCTCTTGAGTTTCTCATAGT

A\_14\_P108423 GAGTCATCAAATCTGTGTCGCGGGTGGCAACAGGATTATCATTATTTCTATAACAAA

A\_14\_P104450 CCCTCCCCTGCTGCTTTTTAAATAAAGCAAAAATTGACTTTCATTAGTCATACTTTCACC

A\_14\_P125181 TGTATTTCCAGTGAACAAGCCAAAGAGTTAAATCTTGCTTCATTTCCCCCTAAGAAATA

A\_18\_P13416205

TGGAGAGCAGAGAACAAAACCTAACTCCTAGAACTAATTTGTATAAGAACCTGAACCT

A\_16\_P18865629

AAAACCAGTATTGCTGACAATCTTCTTGTGAATCTTGTAGTAGACCTTTTTTGAGGCATG

A\_18\_P14134183 GACTTGTCTTTTTGAGAGGTTTCTCATCCTCTCCCCTCTATGAGGCTT

A\_16\_P00516856

TATCTGTGATCTAAGACCATCACTACCATTTTATCCTTTGTGCACTATATATGAGCCCCCT  
A\_14\_P131136 CTCTAACAAGATGAATAATCTGTGTTACTACATCATTCCCATAGGTTATAGTTGTGCATG  
A\_14\_P102125 GGGCTATGTATCTCTTAGTTTGGGGAAAAAAGTTGGTTATACAAATGTGATAGAAAACCC  
A\_14\_P130604 AATGGTGATCTTCTAAATCTGTGTCCACAAATTCCAAAACCCATAACACTCTGTATACTT  
A\_16\_P01642808  
AGGTGACAGAAGACCTAGTAGAACTTAGCCCAAATTTAAATAATGACCCAAAGTCCC  
A\_14\_P138368 CCTAAAGTCCCATTTTATAGATTAAATAATTAATCCTGATGACAGCACCCAAGGCTGGCT  
A\_14\_P121699 ATTCCTTCCTTAGTTTTTTTTTCTCATTGAACTCCGGGAGGTGGAAAAAATTTAGTGCATT  
A\_16\_P35861492  
AAACTGAAAACCTTTTAGTCCATCCTCAACTCATAACAATGATCACCTAACCAAGGTTAG  
A\_16\_P30952336 GATGTTTCTAAAGCCAATGGGGTGGAGGAAAGCGAGGGGCATCCTT  
A\_14\_P127227 CTCACATATGCCTCCAAGAAGTGTGGCCATCAATCAGAGTCTGTGTG  
A\_18\_P15944512  
AAGCCCTACGAAAAACAATCAACACTCCAGAATTAGGTTTCAATGATGTCAGAGGTAA  
A\_14\_P132239 GTTTTGATTTTTCTTCCTGTTCACTGATACCCTTCACATAGATCTCCCCTC  
A\_16\_P21418104  
AAATGCTGCATAAACTCTAAAAACCTCTAACCAACAGTTTGGATACTTCTACAGACCAGT  
CUST\_2593\_PI426210822 CGCTTCCTCTGGATAAAACAGCTTTTGTGGCTCCAAATGATTGAGGTT  
A\_18\_P16680235  
ATTTAACCAAGGCCCTAATTATGTTAAACCTTCAACACTCAAATTCAGGCATAATCCTT  
A\_14\_P112258 CTCTAAGAGTTCAGAGAGGTCTTAAATGATTTGGTCTTTCATTCTCCCAACAGAATCT  
A\_14\_P120575 CTGAGACTGTCTTGAAATAAATATTCTCAGCCTTACTTGCTGTGATAGAGTTGTTGCCTA  
A\_14\_P113921 CTTTAAGACTCCATTTACTTACCAAGAATTGTAGAAATGTTTTCACTGCAGCAGAAGGCA  
A\_14\_P109405 GGAAAATGGCAAAATTATGATTGCCTAATTCCTGAGATCTTAGGGGAACACTTTTTCAAA  
A\_14\_P117843 TTCTGAAACCAGACTCATAACATAAAACTCCATCATCCATCAGCACATACCTAAAAAACG  
A\_18\_P22840176 TCCAAAAACAATGGCAGGGGGCTAGGTCCTGACTCTTTCAGACTG  
A\_18\_P22841893 CTTCCCTGAGGCAGTAGGGGAGATCATCACCTCTGTAATGGTATAATATGAAC  
A\_14\_P104257 AACTTTTTTTTTTCTTTTTGGCTAACCAAGTAGCATTTCCCTTAAAAGCCTGGGTTTTTA  
A\_14\_P134689 TAAAGATGGAAAATTAGCCTCTGTGGCATCTGATTCAATGACAATGGTGAATTTTGCAAA  
A\_14\_P127870 ATTACTGATACTTGTAGATGTAGTCACAGGAATATTCAGGGGTGAAGGTGTTAAAACTC  
A\_14\_P104199 CACGGAATAATGTTGCCATTGGGAGAAAGACTTTTTCTTTTCACTTTTCAAGTTTTCTAC  
A\_14\_P128858 CCGAAACATTCCCTGGCAAACAAAGGAACACTAGGAGAAAAAATGGAAAAAC  
A\_16\_P19759291  
CTGTGTTTGATCGTATTTCTAGAGATAAAGAACCACATGAGTCTAATTCAGAGCATCCGT  
A\_14\_P107073 TCCAGTGATAATAAAAACTCAGGTATGAAATGATTAATCTTGCTGTTTTTAGCAGGCC  
A\_14\_P102692 TCTGTCTTTTTAAACTTGTCTTTCAGATCGGTTATATTTTGCTACTTTAAGGAATAGACCA  
CUST\_9002\_PI426210822 TTTTACCCAAAAACCACACTGGGGATGACTCCAGCCGTGGCTCAT  
A\_14\_P126539 AAATGTCAACAAACAGGCAAACTTTCTTTCAACAGCGCTATTATGACTGGTATGTTTCA

A\_14\_P100247 TCATTCAAATATATTTGTAAATTGGGTTTACAGTATTCCCATCCAAAGTGCCTTCAGGG  
A\_14\_P102087 GCTAGTGCCTTTAGAACATGGTCTTCAAAGAAAGAAGATTTAAGAAAAATATCTTGCCCC  
A\_14\_P118726  
TAATAATCTGAAAAGCGAGGTTTGGACAAAAAAGAGAGACAAAGAGACATCAAGAGAGAT  
A\_14\_P107375 GCATTTCTCTCTCTGGATACATTAACCTTCGCATCAATTGCGACTAGTCAGTATTAAAG  
CUST\_9452\_PI426210822 ATCCTGTATTTGATGCCCACTCAGATCCCAGGGGAGTAGAGGA  
A\_14\_P123736 CATAGCATGGCCCTGGGAAGAGGTATTTTAACTTTAAATTATAAACCTACCAATGAACCA  
CUST\_3973\_PI426210822 ACTTAAGGTCACAGGCGCCACAGCTGTGTTTCTTCTTTGCAGAAG  
A\_16\_P03302011  
CAGATGGACTGAAAAATGAGATAAAAATTCCCCATAGACCAAAAATAGAAGCAGGCAGAG  
A\_16\_P00988813  
ACTATCATTACTACTCCAACACATTTATATCACGCACAAAAAATATCATCCTCATACTTT  
A\_18\_P22840684 CACCCTCCCCTGCCAACCAAGTGTTTCTTGATGTTGTATGGTTATTCTA  
A\_14\_P119695 TTGACTTTGACAGTTCTCGTTTCAGTTGTTCAAAGCACACAAACATAATGACGTTCC  
A\_16\_P20855944  
AAACTGCCAAGTATTGCCATTGTTTTGAAGAAAGCACTTACAGGCTTATACTATCTCTGC  
CUST\_7891\_PI426210822  
TGGCTAAGAGCACAGAGAGATGTTAGAAAATAATCATCATTGAGATCAGTTATATCCGA  
A\_14\_P130946 CAGGAGCCGAATTCAAATCCAATTTAGAAAATCACTTCGGATGTGGTATCCACTAAAC  
A\_14\_P135911 AATCAGAATCTTTGAGATTAATAATGAAACCTGAACCTATTTTGTGGTCTTTGGCTT  
CUST\_6630\_PI426210822 GTGCCTCATGTTATATTAGTGTAGGCCTCAGGGCATTGCTGTCTATTTTC  
CUST\_10123\_PI426210822 AGAGCTGAGCTCCAGGCTCCCTGCTGATGTGCTCAGCCAGACCAG  
A\_16\_P18106742  
CTACCTAACTCAAACACTACAATTCAATCTCTTCCGATTCTTATCCATCTCTCAACCTG  
A\_14\_P118694 AGAACTTCGCTGATTTTACTTTACACATAATTGTAGAAATAAGGTTCTCCGGGTTTCAGAG  
CUST\_3594\_PI426210822 CAGACTCCTGGCTCTGCCTGTGTGAAACGTACTCCATTTCCAGAG  
A\_18\_P22843043 CAGACTGCAGAGAGTCTTAAGGGTTTTCCAGTATGACTTGGGAATTGCAA  
A\_18\_P23419293  
TTTGATGTTGATTGTGGCCTAAATGTTAAGCATATTCTGGATTTTCTACACCGTTCTGAC  
CUST\_3142\_PI426210822 GTGATTTGGTGTTTTTTATACCTGCTGGGGACAGGGCATCTTCTCTC  
A\_16\_P18603224  
AAAAAATTCACAAAGTCCTTCAGAGTGACAAGAGGTAATAATCACTGGTCTGATCATT  
A\_14\_P112352 CAGGTGGAAATAACAACAACCTTTATTTAAACACCCGAGGCAGCCTTTTGCTTC  
A\_14\_P120434 GTGTCTTCGGTGATGCTGACACATATGATAAAATGATCATTATTTTGGATCCTAATGAA  
CUST\_1417\_PI426210822  
TTTTTATGTTTCATTTTTTCAAGAGTTACAATTGGGTGTTTGTAGTCTCTAGAGTCAGTGGG  
A\_14\_P134214 GAAGAGATGACCCTGCACATCTCAATGCAAAATGTCTTTTAAATCCCTTGTTAATATCTC  
A\_16\_P15832871



AAAATCAGAGAAGGAGCCTATACTGATTTATGGGAGCATTGTGTTAACTTCAGGCAATCT  
A\_16\_P18137144  
ATGTAACTCAACAATGCACAATTACTTAAATTCGCTCAGGAGAATTACCTCATTTTGCCC  
A\_14\_P112528 CATTGTGTGATCATGTATAGACCTCAGAACGGAAGATAGGACTGTATATAATTGTAATA  
A\_14\_P123070 GGTAGTTAATGATCTCTAAGATTGGGATGTCTTCTTTCTTTCCCAGTTTGTA AAAACTGGA  
A\_14\_P138601 GTTCTGCTTTTTTCATTGTTCCACTGGACGCTCATCAGAGGGAAGATCTTTT  
A\_14\_P133083 GAAGTTTGAAATGATGTTTCTTGTTATTTGCCGGCTGCATATGTATGTCTCATCTTCTG  
CUST\_8348\_PI426210822 GGAGAGATGGTTTCCCCTCTGGCATTCACTGCTGTGGCTAAATAATAATTATT  
A\_14\_P127977 ACATGCTTATCCAGACAGATTCAGGCTTTTGTCAATTAATATCTCTGGGGTGT TTTTCAT  
A\_14\_P110757 CTGGATCATTGAAGAATCACTTTATATTTTGGTGCTCTGGATAATTGGA ACTTTATTTTT  
A\_16\_P18144968  
ATGCTCAGATTAGGAACCATTATTCAGTGTCTGTTATCAATAAGACCAAGAATAGGGGC  
A\_16\_P16191706  
AAAAC TAGTAAACAATGTAGGGGTTTGGAGAAAATGCTAATTCCTTATCTCCCGGAAAA  
A\_16\_P20237278  
AAAAC TGACAGTAACATCAGATGTGATACCCTATATTCCTGGCCTATTCTTTGAAGTTT  
A\_16\_P15648366  
ACTACCTCCTCTCTAAATCCCTTAAATATCCCTCTACTAACAGTCACTCAAGATCATGAT  
A\_16\_P19588302  
AAAAAATTCTGTGATGTCTGATTCATGGCTTCAAATAGACTTTCCCTTTCCCATTTTGAC  
A\_14\_P131909 AATAAATGCCATGTTTATGTTTTGCAGGCAAATCTCTCCTCACCATCTTCTACAGTATCT  
A\_16\_P00892221  
AACAACAACCCAGAACATATTGTAACATTCTCAGGGAGTTTAGAGACAACATAATGAAGG  
CUST\_6686\_PI426210822 CTAGGTTTCAGTTTCGACAGAACTTGACAAAGCATCAGGCTCTTCGG  
A\_18\_P22843397 C TACTTGCTCAAGTGGCAAAGAGACAGGCTGCAGAATGTGTTTGC  
A\_14\_P119339 TAAAATAGAAAGCAGCAGGACTGACTTGGAATAAAGAATTGCTGAAAATCCCATTTGCTGA  
A\_16\_P19922938  
AAGAAGTCAGCATCGATTTAATGTTCCACATACATGAGGCATACTTCTTAATCTGCGTAG  
A\_16\_P00685341 CTTCCCAAGGCCTTAGCACCTAGATGACATCCTCTCTGAAGTCAC  
A\_14\_P134722 ACCTCCCCAAAGTCTGCATCTTGGCTAAAAAGAGGCATTTTCTATATTGTCCAAATATAT  
A\_16\_P40288179  
CCAGACACAAATAATAGTGACTTTTACCAATGCTTTTTTATGCTTATTAGGGCCTGAAGG  
A\_14\_P106222 TCTCAAATACTTCATGAAAGGCAGTGTATTCTGAAAAAGCCTTCAAATAAAGGTATTGC  
A\_14\_P109308 CTGGCTGTAAAGCATGTGTTTCTTTTATTTTACAGATTGATTTGTTCTGCTTCTTAGGTT  
A\_14\_P116088 GTGTATAAGATATGTGTTTTCATTCAGATCTTGTTTTATTGAGTCTGATGGCAGGAGGAT  
A\_18\_P22665470  
CCAACA ACTGCTCCCATTAATGCTGAAGTATCCATAAAAATGCAAGATGTCAAATCATTT  
A\_14\_P116205 TCCATAAGTGACCTGAGGAAAAAACACTGACAATTCAGAAAAAGTTAATCTTCAGGGATT

A\_16\_P17638070

GCATTGCTTTTATCTTCAACCTTTCCTCCAATATATATCTGAGAACTATACCACCAACA

A\_14\_P114832 AACATCAGCATCTACATGTGCCACAGATGTTTCATTCAACAGATACTTCTTTTTTTT

A\_14\_P131810 TTTATAAACTTTAATAACACCACAGCCATGAGGATGACCAGGAGGATCTTCCCTTT

CUST\_983\_P1426210822

AGCAGTATGGAGTGATTATTTACTTAGTGATATATTTTTTATAGTTCTCTGCCTCATATC

A\_16\_P30952423 AGATGCCAGGGTCTACTTTGTGCTGCTGGGAGAGACCATGGGTC

A\_14\_P101799 TAGGTCATTTCCAAAGTGAAAACCCAAATGCTACCTTGCTTTGGTTTTAAGAAATGTCAG

A\_14\_P133195 GTTTTTGTGCAGACTGCATCATCACAGCCCTTAGAAGTGGGTATGTTGAAAAG

CUST\_10393\_P1426210822 GGTCCCTCAAAGCCTCCCCAGCCCTGTGAGTGCAGGTCACACCTAC

A\_18\_P22841793

GAGAACTGATATTTTTTCTGTTCTTGATGAGGTAATCAGGCAGTCTCTATGTTACATGAG

A\_14\_P109981 GGGCAAATGCTTTTTGCAGTTCTTCTAAATATAATTGTGCTGTCTTGAAGAAGACCTTTA

A\_18\_P19856640

AACTTTCATATTTCTGCAAAAATCGATCAACTACTCCCAAACAATAGAGAATCAACTCCCC

CUST\_7826\_P1426210822

TTTTGAAATTTTTATTTGACTGAGTAAGGTGGAAGAGAGACCAGAAATAGTTAAATAAAT

A\_14\_P124409 GGAGATCTCAAGGTTTTTTCCCACTGATTCTCTAAGTCTTGGCCTTATCTAACACAT

CUST\_1739\_P1426210822 GATAGAATAGGGGCCTGGCCTGTCGTGAATTCTGTACCTTGCTC

A\_16\_P19929823

ATTGCTCATGATGTTACAGTAGATCTACATGTCCCTAACTTGATTACCTATTTTTCCCTCC

A\_16\_P00685217

CACTTTTTCTGAGAAGGAACTTTCCTTTAGGAGTGGTAATTTAGAAGAAAAGAACAAGC

A\_14\_P103035 AACAGCAAGGGTTTTGTGAACAATGGGAAAAGGCTTATGGAATGTTACTCTATTCTTTAAA

A\_14\_P100567 AACAAATCAGATTAGTAGACGACAACGTATTTTCTTACATGCAGCCTGATAAAGGAGGAA

A\_14\_P116133 ACTGAGATGTATTTTCTTTTTTCTCAGTATAACCCTCAGTTCGGTGATGCATTTTGGAAAC

A\_16\_P03476990

AGAGAATAGTGATGATTGTGGACTAGTTTAGAAACTGCCTGATGATATTTCTGACACAG

A\_16\_P37317262

TGGCAAATCAAAATCAGTGTGCAATCTATTAATCAATCAATCACAGCCTATCAGGAATG

A\_14\_P122266 CTCGCCATCCATATTTATTTGAAAAGGTCAAAGGAGCATCTATGAGACAAGGGAG

A\_16\_P01874367

AGTGTGTGCTAAGACTAAAATCCAAGTCCCTCTAAATTCATTATTCTTTTAGCCATGGCCT

A\_16\_P16161581

AAATCCAGACTCAACCAATATAATCAGTATGCTTTTGCTTAGTCATTAAGGTTTTCCAGG

A\_16\_P20041207

GCCCCTTTTACAATATCTTATTCTCCAATCATCTATCCTCTCTTCTCTACTAGACACAA

A\_14\_P119105 CACTTAAAGTGGAAGCAGAACTGAGTAGATATGATGTCATTTGAAAACACAGTGCTTGAT

A\_18\_P22843235 GTTTGTTCAGTTTGCCAAAACATACAGGCCACCACTCAGTGAAGG  
A\_14\_P201034 AATGGATTTTCATTTAGGGCTTTAATGCAAAGGAATACATCAAGTGACCACATTATTGGG  
A\_16\_P03617041  
CTAAAAACCGGTAACCTAGAAATCTATGCTTGAACCTTGCTACTACCCTGCATCTTGTTT  
CUST\_8532\_PI426210822  
TAGCATGAGGTGAACAAACCACACAGGCTTCTGGCTACCCTCTTAAATATTATTA  
A\_16\_P01632325  
GTTTGCACACAGTCTAGAATTGAAATGGAGAATACATCATCAGAATCCTAGGTCAATCCAA  
CUST\_10126\_PI426210822 CAGCTCCTGGCGGCCTTCAAGAAAGCCCATCTGCTGGCATCTCAG  
A\_14\_P125130 AATTTTCCAGTTATGAAAACCATAGCCTGAATCAAGAATCTATGCCCATTTATGGTGACT  
A\_14\_P100770 GTTGTGCAAATGGAGAAAAGGCATCACTTTCCTGTGAGTAGTGTGACTCAG  
A\_14\_P109025 TATTTGCACAGAAATCCAAATCAGTCTCATTCTCAGTGTAGGGATTTTGCTATATTTGGG  
A\_14\_P127928 CAGGAGAACCTGGCAGATCTTTTGAGGTAAGGAGGAGGATCCTATTTTTTT  
A\_16\_P19664473  
AAGAACCAAGTCTGTATGCTCACTGGTAAATATCAAAGATCTTAGATGGTCGGATTCAAA  
A\_16\_P01410230  
CAGAATGCTAAACAAGACTAGAATTTATACCTAGAGCCCTAGATACTGGAAAAGACAGCC  
A\_16\_P18089761  
CCAGACAATGCTTTTTGAATTCTATCTCTGTTCCATCACTATTTGGCTTTTTAGTATTGCCA  
A\_14\_P137226 TTGCCTTCTGTTTTTGTTTTTTTCCCAATATCCATCTGTTTTGTCTAGGAACTCGTTAC  
A\_14\_P137682 CCCATCCCATATTCCTGCATTCATTTCCATTCATTCAAAAACAGCCCTTACT  
CUST\_1774\_PI426210822 AGAAATGAGTGTGATGGAGTCTTGATTTTCCACGGGCGTCCCTTT  
A\_14\_P201403 TTGCTCTGACAAAGAATTTTCATAAATGCAGTTACTATTCTCTAAAATAATAAGAATTTT  
CUST\_10347\_PI426210822 CTCAGCTCCACCTGCCTTCCCTTCTTCAGGGGAGCTTATGACCAT  
A\_14\_P100258 AAACGTGATGTGGGGCTCTACATTATCTTTATCCCGGCCCTTTTAC  
A\_16\_P02734064  
GGAGTTGATGAGAAGTAAGACACGTCAGTTAACAAAGATCACAAAACACAACCATTTGTT  
A\_16\_P18444449  
AAAACCTCAGTGTGATTCAACAATCTCCTCATCATTGTAATACATTATGGCTCCTGTAA  
CUST\_5335\_PI426210822 TATCAAAGGTCTGCCCGATATCTGGAGTTCAAGAGGCGTTTTCT  
A\_14\_P126866 TTTGGGATAACTCAAGAACCCTTTTTTACCTATTTTATTACATGTAGAAGATAGGTCTC  
A\_14\_P105943 TTATCTCATAATGCATAAAAATTGCACTGGAGGCAAAACCAGTCTCCAGTTATGATTGTC  
A\_16\_P20273307  
ACAGTGTCCAAGTTATTCAAGCGATAAGACTAAGTAACAGTAACGGTTCATAAAAAGGA  
A\_16\_P02649681  
TGAAAACCTTTACCAGCATTCTAACCTTGATCAACCACAAAATTTACTCTTGTTTTCCACG  
A\_16\_P18286145  
AAGATTTTCTGAACTCTTAAATGCCTGACATTGACCTTTAGTCTAATGCCTGACATTGAC

A\_14\_P123452 CTGTGGTGCATTTCTAAGTGCAGTGCTAAGACTAAAACTGAATTTCTACATGGATTTCT  
A\_14\_P122331 CTATAATTAATTGCATTTTGTGGGACTTCTGTTCCCTAGGCCAGGGAGTGGGATATA  
A\_14\_P112076 GTAAAAGAGATTCCTACTGGACTAGACATATGGCAGTTACTCCCAAACATTAGTTTTGAT  
A\_14\_P135359 TGCTACCATTTCGTTGTTGACATTCATGAATCACCTTAGTATATGAACTTGGATGTAGGTA  
A\_14\_P114722 GGTTATGAAAAAGTTCCATATGCATATAATTCTGTTGCTATCTCTCTGGGATGTGCTGAC  
A\_14\_P137722 AAACAGTGCCTAAGGTGGTTTCCCCTGACTGTTTAAAAGAATTTACAAAACAAGTTTTGAA  
A\_16\_P01780172  
AAACAGTGCCTAAGGTGGTTTCCCCTGACTGTTTAAAAGAATTTACAAAACAAGTTTTGAA  
A\_14\_P117120 TCATGCTGTGACCAGATTTAGAGACCTGAGACCAGATTTAGAGACCAATAAATATTGCAT  
A\_14\_P202375 AGTGCTTTTACTTTTGTATTTCTTAGGTCTTCTCCATCGTGCAATGAGAATACCAAACCT  
A\_14\_P128038 CAATTCGTGTCTTATTGGTTGCGTTAATTTTATTACTTGCATGGCCATTTGCTGCAATTT  
A\_16\_P17769608 GGCATTTCCCTACCCCCCTTATTTTCCCTAAATATATACGTTATGGTGTCTATTTGTCCCAG  
A\_14\_P130058 GATTAGGAATGTCTGTCAAGCGGAACTTGGAGTGAATATTTTAGGATACAAAATGGAAAC  
A\_16\_P00495112  
ACCATGAACTGCTTTGAAATCATGTATCCTATTTTCATCTGAAATGTGAAGTGAAGTGTGCTG  
CUST\_3508\_P1426210822 GATGGAAGTGGTATTGCTCAGTGGGAAAGGGAAGGCATTTTAGGTTT  
A\_14\_P104673 CATTAACTCAGATGTTCTGTGGTGAGATAATTACAGTTTTTCCAAACAGGTCAAACCT  
CUST\_5338\_P1426210822 TCCAAAGGCTCCCCTATCACTCTCTGGAGAAGTCCTGTGTTTTATTTA  
A\_14\_P126151 AGCAGTATGCAAACCTATTCCTGGGATGAGAAGAAAATAAAACCTCTTACCACTACAAAA  
A\_14\_P130603 TTAAGTGGTTCCATTAATAAATTGGTTAACTTGCTATTTTCTTTGTTGAGCATGTCCCCTCC  
A\_16\_P20062783  
AAAGGAACACTGCAGTCTATCAGTAAGCCAATGACAATAGAGATTAGGCATTTGACTATG  
A\_18\_P22841757 AGAGCCTTAAAGGTGGAGTAGGATTTGGGTCTCAGGGAATGGAG  
A\_16\_P36230922 GATGCACGAGGTGGACACGTCCATCACCAGGTGAGTAGCCTGGTC  
A\_18\_P14134824 GTGCGGTATTGCTTACTGCTTTTCATGAGTGGTGTCCCCAGAATCT  
A\_14\_P202410 CTGGAAGATGGTAAGATGTTAATGATATTTTTGCTTGATAGCATGTTGAGAGTATGGCG  
A\_14\_P109004 ATGAAAACCTTACTTGCCCTAGAAAATTGGGCCATTTTGAAATCCAATTTGGCAAGAATAT  
A\_14\_P108082 ATACATATCTTTTCTGGAGAATATGTGTAACATACGCAGTTACAGAGCATGGACTGGATC  
A\_16\_P15161176  
ATTTTCAGTCAATTCTGTTTCAGCAACTATACCCAAAGTTCTTTTCATCTTCATTCCAGTGT  
A\_14\_P102717 ATCTCTGGAATGTAAAATCCAATATTTACACAAAGGCTTAGCCCAAGGAAGGCATATTTT  
A\_14\_P126512 GTCAATGCTTCCTTCCTCATTGATACTATCTACATGTGGTTTCTGTTCCCTGTAAGAATT  
A\_14\_P100982 ATAGGATCCTTGAACAGTGTCTCAAAGAAACCTACAGAAGCAACTTCCATAAAGTCAAG  
A\_14\_P112100 ACATCTAAAGCCCTGCTGGTTTCATCTTCACTGTATACTTTAATCACCTGTGTAGGTAG  
A\_14\_P127909 ACATCTAAAGGCATGAAGCACTCAATTGGGCAATTAACATTCTGTTAAAAAGGAAGAAG  
A\_14\_P112315 AATGCACCAGGAAATAGTGACAACCTGTATGTTGTGCTATGAGGATGTAAGAGATTTATCT  
A\_14\_P115429 GAAACTATTTTTCTACCCAGATACAATAATCCAGGAAAGAAAGAAATCCCTCCAGGCTG  
A\_16\_P02423126 TTACCCACATCATAGCCTATATCTCCCTAGATCATACTCACGTGTTTTATCTTCTTTGCT

A\_16\_P58424477 TATGAATAATTAGCCCTAGGACAACAGGCAGAAACCGGGACTGCC

A\_16\_P15507623

AAAAAAGCAGAAAAAGATGATCAAACGAAGGATACTGATCCATCAATTACTCCTCAGGAA

A\_14\_P131698 ACATTGATGGGCCTCATAGTAAAGTTATACAAATGGTAACTATGCTTTGTTTTTCATATGG

A\_14\_P111166 AAAACCTGGAGATGGAAGAAGCCCAATTGTGCTTAAGAAGTTGGGGA

A\_18\_P14136551 CCGTGAAGCAACAGGACAGTGTAGAGGGAGGCTTAAGGAATAAAAATGATTG

A\_14\_P120233 CTCAGAATTCTGATAAGTTGTTCTTACCAAGTTAGCAGCACTCACATTTGAAATATCTGA

A\_14\_P123879 TTCACAATGCTTCCTCTGCAGTAAATACTATGTGTTGTATGTAAGCCTACCAACTTCATG

A\_14\_P117067 GCCCATTTCATTGCACTGTGAAAAAACAACAAAGAACCGTTAAAAATCTTGCATCTGTTTG

A\_14\_P101191 TTAAGTGTA AAAAGCAGCATACTTTCAATAAAACCAGTCCAAAGGAAGGAGCCATCATT

A\_14\_P201723 GAAGTTTCTTTGTTTACTGTTTTTACCTGATGCTCTCATAATCTGAATAGTTACTCCACT

A\_14\_P113412 GGTTTTTTGTGAAGAGAGGATGTTCTAGAGGCATGGTTGAAATTGAATTGTAAGTGTTAA

A\_14\_P125015 GCTGGCATTAGATAGGATCTGGCTGCATTAATATTGAACTACTCTGCCTTTTAATGTCT

A\_16\_P00628306

ACCACACTAAACAGTATTCTTTTCTCTACAAACTCAAGGTCATCAACATGAACATAGACC

A\_16\_P02798646

TCCCCGATCTCTTAATTCTCTATATCTTCTGTTCTCAACTTAACTCCACCCATTAAATCA

A\_14\_P104770 TTTTTTTTTTCATTCTAGATGCTGAAGAATACCAGCCTCCTATATGGAAATCATACTGTG

A\_14\_P135031 CCAGGACATCATTCCCTATTTTTCTTCTCTATGACCAAGTGCTCAGTTACCCTTATATTC

A\_14\_P104398 TCATGAAATCACAGTTTAAACATGGCTAGCAGATGAAGGAGTGAAGTCATAAACTTAGGAT

A\_14\_P102610 CATTTCTGATATACTGTCACCACGATTTCTTTTTATGAAAGTATTGAATGCAGGCTCT

A\_14\_P117970 AGAGTGTGGTTCCAATTATTCTCAGGATACATAGAAACCTCTCACAATGCATCTGTAATA

A\_14\_P116491 AATTCAATGTAAGTAAAGACCTACAATGAAAAGCAACCGTCTTGTCTCTGGGGGT

A\_16\_P19107977

AATGCCTCTGACATGTAATCATTTACCATATTCGTCATTTCCACCTTCATTATGCTCTGT

A\_14\_P111134 TTAATCTGGTAAGGATGAGGTTTAAAGGAAACATGCAATAAAATGGTAGAGGAAGCAACAC

A\_14\_P119175 TTAGCCAACCAAACTATTGGTGGTATATTGATGGTATCTATAGATGCACATGTGGATCTG

CUST\_8645\_PI426210822 CAGCTTATGGGAGGCAGGCTGTGTCCACTTGCTCCTTAGAGATTT

A\_14\_P102084 TCTTTTGGAAAATGACAGTTTAAAGCACTTGGTTCCCTCAGTTGGATAACATTAGATCCAAA

CUST\_5691\_PI426210822 CTGAGACCGTGCAAACTGGGGGATTTAGATTGCACACTTGGAGT

A\_14\_P122685 TGGAGCCACTTAAATTACTTACATGATGGTAAAGAATCTTAGATGCTCCCCATCTTTCTT

A\_16\_P17972727

GGCATAAAGTAGATCAAGCCTATGTTCCCTAATGCATACATTTCTATTGACCTCAGAGAGT

A\_14\_P105893 TCTTTGTCAGAACCAGTGTCTTTTCATCCAGAAGTAAGTATCTTTCTTCCCTTTCAAATT

A\_14\_P137980 ATCCATAGATATATCAGTGGAAATGGACATTTTACCACATGCTCATGTTTTACGACAAGG

A\_14\_P105541 ACTGCTGTGAGAGAGACAAGCCCCAAATATTCCCAATTTGTTAGAATAACAAGAGTTT

A\_18\_P22841360 AATGTGAGAGCCCTCTGGGCATATGGCGGCCCTATGATCCTTCT

A\_14\_P118767 CTGGCTGTCTACATTACTTCTTTTCTTGGAAAAGAACTGAACAACCAAACTGAATTTCT

A\_14\_P129714 CAGAACCTGCTACAATCAGCCTGGTATACAGGATGCAGAACACATAGTAGATATTTATAC  
A\_18\_P16043274

CATCTCCCTACACAGTGTATATCAAAATCGTAATCAAGGTAAACCAAGATCATAGCCAGA

A\_14\_P202558 GGGATTTTTTGGAAATGACCTGAGGTATCATCTTTTCAGGAGGTTAGAAAATACAGGATTTT

A\_14\_P200240 TGTATTTTCCATTTCTCATTATTACAGAGATGGGGAGATGCCTTTCCAAATTGCTACTTT

CUST\_7654\_PI426210822 AACATCTACCCATTCATTTCCACCCTCTCTGCTACTATGTCACTGCC

A\_14\_P134319 CTATGTATTAGAATTGAGAGTAGTATGTGTTGACAGGTGTTGGGTTTGTCTGGAGTAAGA

A\_14\_P104202 TCACATGTAGCAAATCAACAGTGGTTATATTTTTCTTCTGATTCTCACTGCAGAACAGGA

CUST\_9319\_PI426210822 GTGGCTGTAAGCCACTCTGATGTTTCCTTTATCCTCAACCCAGATG

A\_14\_P129393

TCTGAAAGGCCAAAAAGATACCCATGCAGAAGGGATGAGATTGAAGGTAAGAATGAAATTA

A\_14\_P101806 AATGCTCACTAGCACCCAGTTTGCATCAAATTGAATACCTGCATTGGACTGAATATTC

A\_14\_P124955 ATAAAGGAAGGTAGCACATTCCTTCTGTTTTATGCATCTTTACCATGGAAACCAAAGAAA

A\_16\_P19663917

AAAAAACAGAGAAGTGTGGGTTTATCAAAGGTAAGCAGGCTAAACAAAGTTGAGACAAAT

A\_16\_P36230761 AAGCCTTTGACCTGGAGGGGCATGGCTTCAGGTGACCAGAACTGT

A\_14\_P126219 GCTTGCAAATTTTCTGCAGCCATAATTCTCAACTCTAAGGGGGAAAGAAAA

CUST\_780\_PI426210822 TCCTGCTGGGGATGGCCACCCTAGGCAGCTTTTCAGTTCAAGAT

A\_14\_P129502 AGTTTTGGAGTTCTTAAGAAGTTCTTTAAGATATTCATCTTACATTGGGAAGGGGCTTGT

A\_16\_P16906345

AACCTCACTATTTCCAATTGACAGCCATATCTTGATTGTAACCCCTTTTAATTCTCTGTC

A\_16\_P18198321

AACCTCTTAACCATTCAAAAACCTTCAACAATCCAATACTCCCTTTCAATTATGTAGA

A\_16\_P38245663

AGCAATGTAAGCCACATTTAGCAATCATAGCAATAGTCTGATATTTTTGAAACCTGTCCT

CUST\_308\_PI426210822 ACTTGGATTTAAAACGGGGATGAAGAAAAGCTGTGTGACATGAGCAGATTTG

A\_14\_P202247 AGCAGGTAATTTCTTGAAATTCAGACTGGCCGATGTCAATTTCAAGTATTTATCTGAAC

CUST\_3439\_PI426210822 CCCGTCATGTCTCAGACTGTCACACTTATTCCTCTGTGATGTATGCTTAAG

A\_14\_P124989 TCACCTTGGTCTCTTTCTTAGGCCAAATAATTCCAATCTATTTAAAGAAGTCCGTTTT

A\_16\_P16008527

AAAAAAGATGCTACTATTTAGACCACTCCAGACAATTTAAGTCTTCCTGAATCCAAGTGT

A\_14\_P115954 GAACATCTTACCTTCTTGGGTCATAAAGTCATCTTCAGCAAAGATGTTAAAGTTGCCAC

A\_14\_P116960 GTCATGTGAAGAGTCTAGGGTTTTGTTTTACATCCTTAACACTTCAGTTTTGAAAATCCC

A\_14\_P130561 CTTCAAGAACGAGTGATTTAAGAACAGCCCTCCCATCTTAGCAATGTCC

A\_14\_P114135 ATTCTGGATTGCCTATATTAACAGATGGAAGGAAAAACTTGGCCTAAAGAAATGGAACA

A\_14\_P139926 GTCATCACCCAGAAACCAAACCTTTGAGAAAAATGGGATTTCTAGAAATTATAGAGATT

A\_14\_P134233 TTCATTTGAAAATGAAGGCTTTATAAACAAGCCAAGAAGTGCAGAGCAACTACTGATCTC

A\_14\_P122057 CTAATTTATAGGTTACCTGCTCACGTGTGAGGCCAATATAGAATTCCATTCAATGATTT

A\_16\_P18729386

AGGATGGCAATCTTACATTGAACCCCTATTATGGATATTCCCAGATGAACTAACTATCT

A\_14\_P131243 CTGAGTTTCTGTTCTCACAAGAAAACCTTAGAGTGGATTTTCACCAGGAAATAACACTCTA

A\_16\_P02604818

AGACATGCAACACGTTTATCTTTCTGTCAGTTATAGGTCCAGAAGTATCTTTTGCTGTTT

CUST\_1692\_PI426210822

ATGAGCCTTCATGACCAGTATCTTTGGAGTTTTGTCTATAGCTGAAAGATTTCTCTA

A\_18\_P15686602

TCACTACCTAATTCTGAGATTACAATGAACAGTGACCACAATAATGGCAAATGGAAAGTC

CUST\_3270\_PI426210822 CGAAGGGTGGGACATCACCTGGCCACCAGGTCTCCTGAGAGATC

CUST\_6540\_PI426210822

AGGCTAGATTTATGATGGCAGCAAAAAGAAAAGGTCATGGTTTTTATGTCTAAGACTTAAG

A\_14\_P202062 CTCTTGTCATTGATGTCTTGCACACCAGTGAAGTAAAAATTGTCCCCTAGAGAC

CUST\_1706\_PI426210822

TGCTTGTAATAATGTCATCTCATTAGCATGTTTTGTGTTTTTATGTGATGACTTCCTTGTT

A\_14\_P119019 TGAAAACCTTTATCAGATCCTCAGAAGTACCTAATTCACAGGTTAATGCATAAACCCAAC

A\_14\_P109651 GAAACATCCAAACAGCAAAAAGGAGGCCAGGATGAAAACGGTCAACT

A\_14\_P138383 CACACATAGAATCAGAATTTATTTTCACTACCATTTTTTCTGGCCAGGCTTTTCCTGTTT

A\_14\_P122251 AACACTTTAATTTCTTTAATCCTGCTAACAGTTAACAACCTCCTACAGGCTGACACCTCA

A\_14\_P109238 ACAGTGGAGACGACTGCAATACATACTTAACAGTTTAAAAATGTATAATTTGGGACAG

CUST\_3930\_PI426210822 ATTCACCCACAAAATATCCATCTATCTCTGAACTAGGCAGAATGAGCAGG

A\_18\_P14135185

TCAGGGGAAAACCTGTTACCTAAAGTATTTTTATAAATATAAGCCTTTTTATACTGATTATG

A\_16\_P01670868

AGGGATAATTGGATTGCACCTTTTACCATATTTTGCCTGATACTTGAAAAGGCATGAAA

A\_16\_P19174917

GTAGAAAGGAAATACCACAATTAACCTTTGGATTTAGGATACATAGACTGATGGTGCTGC

CUST\_8245\_PI426210822 TTCTGGGTCTCAGCCTTGATTAGCAGTAGAAATGTTGATCCCTTGCA

A\_14\_P137552 CATTTTAGCCTAGATCTGTTGATCTTAGTAACAATGAAGCATCCTCTAGCAATGGCTTCT

A\_16\_P00685530 TAATCACCAGAGGCAGGCTCAGTCAATAGGACAGACAGATGAGGAG

A\_16\_P17181631

TCTCAAGACCAGAATAACACAAACAAGAGTGCTAAATAAAATCTACCCAAATCTGTCTCA

CUST\_6230\_PI426210822 CTCCCTTCTCTCAACTTGGAGCAGACAGGGAGCCATGTGTGGTTT

A\_16\_P58424309 GTGACTTGCTTCTTCAAGACTAGCAGAAGACTCTTTTTGCTGCTTCTAGTCTCTTA

A\_16\_P38260129

ACATTTTGGCATGAGTCATACCTTCTTACAATATCCCAAGACATTCTGTATATCCTTAGT

A\_14\_P112473 TGAAAGTCAGCCTTAAAAAGTTTTCTGTGTGTTTGTTTAAACTTTCTGACTAGAAACCCCA

CUST\_3212\_PI426210822 GCTTATCTTCCCTCTTCCCCGAGACCAGCCCAGTTTTGGGGATGG

A\_14\_P201619 CTGTGCTGATAGGAGAGCGCTCAATAGTTCTAATTTCCCTGGCTTTAAAAGATGAAG  
CUST\_1386\_PI426210822 ATTCTACTCTACCTTGAAGGGATTAATGACAGTCACAGAAGTTTCTGGGAGG  
A\_14\_P116387 TTGTTTCAGTTGCCAAATCTCTCATTTCCTACTCTAGTCCATGTATTTCCCTATAGGAAACC  
A\_16\_P58424364 GAAAGTCACCCCTGCCCCTGCCTGGGAGGGTACTTGTTAGCCAAT  
A\_16\_P39142024

TAGTGCTTGTTTTTCATCATTCTAAGGAATCCTCAACCACATAGACAGTTGACTAGAAGA

A\_18\_P24651603

AATCATGCTTTTCTGCCTAAATAAAAAAAGAACTCTCTCCAAAATCCATCCATGTGTGC

A\_14\_P118305 CTAGCCGTGGTGGGTTATTTAATTGCAGTAACGTTGCTGCAGTAAACCC

A\_14\_P131174 TCTGTTCTCAGGGTCACCAGGTCCCTCTGAAATTTGGAATCTAAACAG

A\_14\_P139061 GTAAAACTTTCTTTCTCTTTGCAGGTCAGAAACCAAATTTGACTCCGGTTCAGGTAT

CUST\_335\_PI426210822 TCTGTACCTTAACTTCAACTGTGGGGTTGGTTGATTGACTTGGTAACTGATT

CUST\_9453\_PI426210822 GGAGTAGAGGAGGAGACAGCAGCCGATGCACTTCTTTTGCCAGTG

A\_16\_P03488426

AATTTGGCTGATGATCCATTTCTAGACAAGAAGTTGCTATAGCACCAATTTGCAC

A\_14\_P100204 CTTACCAGAACCATTATCATTAAAAATGAACTTCAGCATTACCCAAGTGCCACCCTATA

A\_16\_P17079783

AATAAAAACCAAACATCCATCTGAGTCTACCAACATGACATGCTAATCTTAGAATGGGAC

A\_16\_P21612085

ATCAGAACCCTTTACTTCAAAACTGTTTCATTACAAAACCATATAACCAATTCAGCAGGCA

A\_16\_P01720112

GCTAGCAAATTGTCAACTCTTCCAACACTATCTTTTTGGTCCACAATTTCCTTTTCAATT

A\_16\_P16191430 ATTTAGAATGGAGTCAGGAGGAAGATTTCTCTGGGGGGTTGGATTCATAGAT

A\_16\_P02254977

AGGGCAAATTCAGAATTTCTTCCTCACTTAAAATGTAGGTCTCATTATAATCCTCCTCC

A\_14\_P115198 CAACAAGGTCTTATAAACCACAGCACTTTGTTCCAAGTTCAGAGTTTTAAATTGAGAGCA

CUST\_6474\_PI426210822

TTAAGTTGGTCACTCAAGAAAACCTTGGTTAAATTCATGGGCCTAGAAGATCAACATCA

A\_14\_P101515 ACTCATAATCACCTCTACATACAGACATGAAATGGAAGATACACTGTGTTTAGGAAACCT

A\_14\_P129867 GCAGAAGGTAAAGTCATAAATCCTATTTGGTCTAGATTTGAAAAGGGGAAAGAGAACAC

A\_14\_P112281 GAACAGAAGAACCAAATGCACTTTTCTTCTGTTTCTTTGAGCAGATATTTCTAACACTGG

A\_16\_P17240929

GTATGATAGCAGTAATTCAACTACAACCTTCTGACAAGTCTTTTAAACGAACAAGCAGGT

A\_14\_P118916 ATGTTTTTAAACAGATAGCAAACCTATCTGTTCCCTTGGCTTTCCCTTTCTGAAATTCACA

A\_16\_P00483740

GCTGAACACACAGATCAAAGAAGATTGTTACAATTTGCATCTGATTCTTACTGTCTAGGC

A\_18\_P10586586

TGAGTGAAATGCAATGCTAACCAACTGAAAACAATCAGAACATAAATTCCTCCAGTAAA



A\_14\_P201304 AATCTGTTTCAAACATCATTTTCAGGAAAAAGAGAATATTTTAGCGTTGAGGATCTTTAA

A\_14\_P120623 AAATGGTGTAATATTGCTTATGGCACAGGCGAATCGTATTCTGCTGCAACTG

A\_14\_P137110

GGAAATAAACCATGAAAATGACCGAAGACGTCACAAGGAAAGCAAATAGGATTTAAAACA

A\_14\_P129213 TTGGCTGCATTGCATGATTTGTTTGCACATATGGCAATCCTGAAATAACTTGAACATAAT

A\_16\_P17463929

AGGAATAGCAAATTTGCCAAAAAATCTTCAAAGGATGATTCTACACTCACATCATACTGT

CUST\_5474\_P1426210822 AGAAGAGTAGAAGATAAGGTGAAGAGGCAGGGCAGGAAGCTGATG

A\_14\_P126695 GAGCAAGACTTACTTTCGATATAGATATAGTGCCTGCTGTTCTCTATCACATGGACGTAAG

A\_14\_P122046 GAAACAATATATTGTCACTGTTACTGATCCTGGCGCATTGCTATTAAGGGGAGTCTATAA

CUST\_4776\_P1426210822 CCATCGGTATGCACCCCTTCTAGGAGCCCCACAGGCAATGACAG

A\_14\_P139178 CCCGGGCATTGCATTATGTAATATCATCCTATATAGTCTGCTATAGTCCAAATAGTCTGC

A\_14\_P120105 CTTCTGGCTGACACAATGCTTATATTTCCAGTCTTGATGAAAGAAGAGCAAATTATTCA

A\_14\_P123041 TGGTGCCAGGCTATTTAAGATGCGTCAAAGAAGATCTGACAAATACACATTTGAAAATTT

A\_16\_P16475235

ACTTCAAGCCACTGTTATTGTCAAGATAAAGTTGTGCATGTAGAGAAGGAAGTCTAACAA

CUST\_7034\_P1426210822 TTAGAGCTGTGATTGAGAGGTCTTCTCCAAGGTATCAGTTTTTCTCTGGG

A\_14\_P119966 ACAATTTCCAGTGTGATGACATTTCAATGGGAAAAAGATTGTGCATTTGCAATAAACACC

A\_18\_P16744998

AAAAGGGTCTTCCAAGTCAACATTTTACGCATTCCAACCTAAGATGTATTTCTCCCTCAA

A\_14\_P135676 CTTATAATGATCCAAGAGGAAGTGGCAAATGAGTGCTTCTTTCAGGTATTTTGTGATT

A\_14\_P115226 ATGCTTCTGTGATTTTCATCCAACCTACTTACCTTGCCCTACGATATCCCCTTTATCT

A\_14\_P116256 CATGTGTGAAAAGACAAGAGAGCATTCCGTGCTATGATTCAGGCCTAATTAAGTGA

A\_14\_P128965 CTTGTTGCTGAAGACTTTGCTGTAGTTGAAAACCTGAATCTCCAGCATCTCATTTT

CUST\_10280\_P1426210822

GAGTGCATTATGTTTTAAGAAATGGTCTTCAGACTCTAAAAAAGGAAGACATACATCAG

A\_14\_P105232 CGGACCTAAACACGGAAGAACGATTACCTGATCTAATATTGTTTTCTTTTTCTTTGAGTC

A\_14\_P135035 GCCATTTTCGGTAAGTGTCTGCCTTGAGAAGATTTTCTGCACAGTGAGT

A\_16\_P38505255

ACTCTTCTCTAATTCCTACTATCTTTGCCTTAATCCACTTTTAAACAATTTCAACAGTCT

A\_14\_P112725 TTTACCATGTCACCCTCAAAGAGTCCAGATTCAACAGGCTGCCAATAAAG

A\_16\_P21425494

AAAGTGACTAACGTATTTTGTTTTCATCCGTGACATGTAAACAATAGAAGGGAATCTCGC

A\_14\_P122477 TAGAATATGCAGGCATGTTTCCCGGACACGTAGTTACAGTGACCATAGTTTGTA

CUST\_7385\_P1426210822 ATCATGGAACAGGGCAGGAAATCTGAACCTGCTGCCAAAGAAAAC

A\_14\_P138136 TTTCTTTGGTAAACTTTACCCTTTGGGAATCTGTCAGAGGTTTTTGTGTTCTTCAATAC

A\_14\_P122984 AAGTTTTATGCGTGAATGTTTTGCTGATGTATAGCAGAAAGTGCATGTTCTGATGACTGT

A\_16\_P15266368

AAGAACACTCATCTCTGAATCCTTTATCTCCATCCTATTATCTCCCATACAATCAGACAG  
A\_16\_P18302698  
AAAAGTATGATTGGACACCCAAAGATTTTCTCGAGATCGACTTAAACTCCAATAAGTCAC  
A\_14\_P103034 TTTACTCCTTCATCCTTTTCCAGAGAAAATGATGTGGCTGGTATTGATGTCAACATG  
A\_14\_P120744 ACTTAATGTAGTTCCACATTTACAGCGATGAACCTCTCTACTATTAAGAGGCAACATT  
A\_14\_P201622 TTAGAGAATGTCAATGTTTTCCAGACATGGTATCAATAATGGTAGTTGTCAGCAGTATC  
A\_14\_P129247 ACTAGAGATAGCCTCTTGTGAAGAACAAGGTTTCTTTTATTAGAAGGTTGCATCAGTGAA  
A\_14\_P128725 ATTTGGCTCATTCTTTCTTGTCCAGCGTTGTTTATTGCAAGGTGGTAATAAACATCCTT  
A\_16\_P02013453  
TTTATAAGTGAATGCATGATATAAGTCCATCGGCCTTTTAATATTCAAACATCTGCCCCC  
A\_14\_P200841 GAGGTATCGGATAAGGAACAGGTTTATGTGGATTATATGTTGAAGGAGGCTAAAACATGG  
A\_18\_P22841264 AGTTTCAGCCCCTGGTGCAACAGCACCCCATGCATTCATCATGT  
A\_14\_P109292 ATAGAGAACATTTTTAGAGAACATTTTTAATCAGTGAATTCAGGTCAGCCTGGATGCTGC  
A\_14\_P106777 TTTTAAAAGTTCAGCAGCACACTGAGCCAAAAGACACATAAGTTTAAACACACTTTGTGT  
CUST\_9381\_PI426210822 TTCTGGCTTCTCCCCAGACCACAGTTTTTCCAGTCCCTGTCTTCTT  
A\_14\_P111411 AAGTAGGATGCTGAGTTATCTACACAGGATGAAGGTAGTAGTCAAATGTGAAAACAGTTT  
A\_16\_P15719808  
AAATAAAAGCAGGTCCTCATTATCATAAAGCCTCATTACTCCAAAACCTCGGTTTCTAC  
A\_16\_P16252870  
ACTGAACTCCACAACAATGAGAAGTCATGACCAGAACATAAGTTCCAGTCTAAAAATTTT  
CUST\_9787\_PI426210822  
CCAGGACTCCCCAAAAGATATAACATTTGCAAATATATTTTTGAAGGAGAGAGAAAATA  
A\_14\_P103825 TAGCATAATAATGGGGTTTTAACTGCTTGTGTCAGTTCCACGAAGAACAAGGAGTTTATCT  
A\_14\_P137966 GATTGAAATAGCCAAAATGCATGTTGATAGATCTCCATTCCAGAATTTTATCTCCTCACC  
A\_16\_P16722798  
AAAAGACTTTGGCAAAAATGTGATTCAGAAATGAGCACTTATGAAGTTCCCAAGGAAT  
A\_16\_P19773526  
CCCCAGTAACATAGACATTAGTATCTGGAAATGACACATTGTAGGAAACAGACCTTAGAT  
A\_18\_P22841744 AAGTTTTGAGAACTTGTCTCTGGTATCCAGGAAATGGCCTCCCC  
CUST\_8495\_PI426210822 TGAGCCAGCCCATTCAAATTTTGTATTCCACCCTACCCTGACATC  
A\_18\_P10369138  
AAAAAATGCACAAGGATCATTACCAGGACAAGAAATAAGTTGGGACTAGAAGACAGATTT  
A\_16\_P15559891  
AAAAAATGCAGAGGAGACTATCTGTTACTCAAAAAGGGATTAATCCAGCATTCACTC  
A\_18\_P22842278  
GGCTACCTCACCTCCCAGGAGAAAAGATTCAAATCTAGGAGATTCATAATTTCAATATA  
CUST\_5131\_PI426210822 ATCTTGTGGGGTCAGTGTTTTGACTCTTTCATTTTGGTCATGGTTCAG  
A\_14\_P117568

GCTTCAGAAGCAAAAGAAAAGACAATAGCCAAAGGGTACTGGAGAAGCATAATAAATAGT  
CUST\_3301\_PI426210822

TCCTTTTATTTTATGCAAATAGTAGTATACTGTGTGCACACTGTAGTAAACTTACTTTTT  
A\_14\_P108287 CTCAAATAATATTAATCCCCATCCCTAGTCCCTTCCCTTTAAGGTAGTATGTCAGATTAG  
A\_14\_P120931 AAATACAAGAGATGTGATATAATCTTTCAAGGTGTCAGGTGTGTCTCCCTGACACAG  
A\_14\_P100087 AAAATTTGAATGGACCCTGTTGTTATAAAAATATACCCAATGGAGTGAGTTCTGGTTTTGC  
A\_14\_P108804 TTCTATTCCCTTCTAAACAAAAAGAATCCTCGAAGACTCTCAAGTGACCATATAGTGTCT  
CUST\_314\_PI426210822 CAGTAATGCTGTGCATATCTTGTGGCCAGTTGAGATGTGGGACTGGTATTT  
A\_16\_P40932782

CCCTCCAACTTCATTCAAGTCTTCTCCTTAAAACCTGTTTCCTAATCTTCATGCTATGAAT  
A\_14\_P201242 CATCCATTAGGATCCTAGCACTTGAGTGTTTTATGTTATTTTTTGACAGATCATGGGCA  
CUST\_4125\_PI426210822 TAGAGGGATATGGAATGACCCACTGCTTTTTGGTGGGAAACGTAAAG  
A\_14\_P125048 CTTAGGTTTAGTTTCCATTGGCACTGGCATTTCCAAAGACATAAACCCAATTTTTTCAA  
A\_14\_P128042 AGAGTGTGTGATATCATGAAGGTCTGTGCCTGATGTATTCACTCAAATATGAATCATGA  
A\_14\_P136222 CATGCAAGAAGTTTCAAGTGTGTGTGCTGATAAAAGGCAAAACAGAACACTTAACTAATA  
A\_14\_P100727 TTCTCTAAATAAGACCATGGCACTTAAGAACATTAACCTTCTCATCTTCTACCTCAG  
A\_14\_P139537 TTGGAAAGGATGATTTGATGATTAGGCAGGTGCGATGAGTCATAGTAGTGTTTTAATTCA  
A\_16\_P00582923

AGGGCAATGGATATCAAAGAGAAAATCGACTACCAAAGATGAAAATATCCTTTAGCACG  
A\_14\_P132514 TCTGTTTTTGTCTTGGTGAGAGAACTTTTTTTGCCTTAAGGATAATGGACAAATTCGA  
A\_18\_P12540731

ACCTGAGATGAGAGGATGATCAATGAAAGTAAACGAAGAGGATCATGGTAAAGATCTCAT  
A\_16\_P02039914

TACTTTATCCGAGGCCTTGTAGATAATTATTTTTTCCCTCTGTAAACCAAGTCCCTGCTTA  
A\_14\_P201207 ACTGAAGACAGTTTTGGCTTTTGAAGGGAGTTCTGTTTATATATACGTCAACATCCAGTT  
CUST\_7877\_PI426210822 ATGGAAGCTGGGATCTTAAGATTTGAGACTTTATTCTGTTTGCAGTGGGGA  
CUST\_3787\_PI426210822

GCTGACATTGATTACACTATGAGTCATGTGACATTCCATGTTGATGTAGTTGCCAAAA  
A\_14\_P132638 TTAAGAACTCAATACTCCTTTTATGTACCCAAGGCAATTCCAATATCCACCTCTTT  
A\_14\_P123526 AATTGAAACCCATAATGAAGAGGATGATTGTTTTTTACCTGTGGATAGAACACAGGGTTA  
A\_16\_P15918118

AAAATTGGAGTTCTACAGACTAAAGTGCAGGTAAATTGGAAAAGTATAAACCCCTTCCCTC  
A\_14\_P125463 AAAGTAAAGAGAAGAGACAAATGGCTTATTTGGTAAACAGGATTA AAAAGAAATTTTTAAT  
A\_16\_P00291610

TTACAGAGTCTAAAACAACCCTACTTTTCAGATAGCCCAACAGTAAAATTATGGACCCCTA  
A\_16\_P03225535

GTGCTAAAATGAATGATAAAGTGTACAGAGAACTGCAATTGTAAATATCGCTTGGGT  
A\_14\_P121402 TGGAAATTTGGAATATTTTTGCCTGTTGCCTAAGGTTTTTATACAGACCACGTTTATGTGAA

A\_18\_P22842635 AACTTTTTGAATAAGAGTTGACAGATTGCTCATCCTTGCCCTCCTCAGAACAAGT  
A\_14\_P200483 CACAGAGAAATACACAAGACATTTTGCCTGAGGATCATTGTTTCCGTATACTCCC  
A\_16\_P01461161

ACACTCTCCAAAAAATCACATTCTACTTCTCACAGAAAGGATACTTCACTTCTCTTGA  
A\_14\_P134337 ACTCACAAATCTGGCAACTGATAACCACATTTTTTCTAGGTTTGCAAATATGATTATGT  
A\_14\_P133788 TTCCTTTAAAGAGAATGCCTATAGAGAGCCTGAGTGCCTGTTACCTATTACAACTCTTA  
A\_14\_P116159

ACAGCAAAACACAAGCAAAAGCAAGCAAGCAAAAGACTTGTATATGTGTAGACTTTTCT  
A\_14\_P130569 AGCAGTCTGGCATAAAAAGCCACACTTTTCACTGACATTACATGAGTATATTGCTTATCT  
A\_14\_P124287 CTTTCTCACCAGCATATTTTGTTCAGAAAAGCAGCAAACTGTGCTGGAATGAAT  
CUST\_9957\_PI426210822 CCCATGCTAGGATGATTTGTTTGCCTCACACTCTCCTTTCAGAGAC  
A\_14\_P126978 CTTCTTAGTAGGTAACATCCTTACAGCGTCGTAGAGGGTCTTAAGAAGTCGAT  
A\_14\_P116410 CGCATGAATACGTGTTGAACTGTGAATGAATCAATGAGTATGGAACTACATTATACGCA  
A\_16\_P03349025

ACAGTATCATTCTCCAAAATGTCAGATATTGCCATAATGTAACCTCCACATGCAATTCT  
A\_16\_P00685064

ATTAATTTGAGTCACTGTGAACATCTCTCCACCTCCTTGACTTTACCCATGAAATGATTT  
A\_14\_P119657 CTCATCTTTTATAGAGAGACATAAAAAGCCAGGAAGCAGGATTTTAAATGAATGGGGTT  
A\_14\_P106981 ATTGCCTGACATAATACAGAAATTTTGTCTGCTTGTCTCAACAAAGCAATGAAAGAGACA  
A\_16\_P02539849

AAAATAACCACACTCCTACATTTAGGACCTTCTGTGATATGACTCCAACCTCCTATTATG  
A\_18\_P22840292

AACTTAGCAGGAGTGAGACTGCAAACAAGTTGTCTTTTTATTGTGACCGAAAAACCT  
A\_14\_P110586 GTTTAAAATGTCCAATATTCAGAAGTTGTCAGGTGTTCTTACCACCTCCCCACT  
A\_14\_P133821 TTTAGCAAAATGATACAAAAGTCTTAAACCAAGTAGAAGATTGGTAGTTACAGTGGAAT  
A\_18\_P15900718

ACTACATGTCCCAAATAATACAATGTTGCCCTGATGATAAAAGTGTATGCTCACCCAATA  
A\_14\_P117983 ATTTTCATGAACCACATTTGACTATCTTCCAATCCAAGAGTAATTTGAGTCAAACTGTCCA  
A\_14\_P107328 AAAAAGATGCTATGGACGTATGGTGAATGGTAAAAAATTGGAGACAGCGGTAAGT  
A\_16\_P16182068

ACTAGTTTTGTCTAGTTTCATATCAAGGCAACAATTTTCAATGTCCAAAAAACTCAGAG  
CUST\_289\_PI426210822 CCTTTTAAAGCGGAGCAGGCTGAACATTTTTCTGTGCTCCTGCAGA  
A\_16\_P15111635

ACACACATTTCCACCTTATCTTGATCCCAATTTACCATATACCCTTATACTCTAACCAT  
A\_14\_P101027 CTGATAAAATGCTCTATGGAATTTAGTATCTTTTTATCTGTCCTTCCCTGGCCTTCAGTT  
CUST\_3701\_PI426210822 TAACTCCATCACACCCATCTGAAGTCCTGCCTGGTAGGCAGCAGA  
A\_14\_P115220 TGGCCAAGATTCTCAGACAAGAATTAAGGCATTCTTTTGGATTCTGTCCTTTAATAACT  
A\_16\_P16191153 TTGAGTCTGTTTTTAAACAGTGATAACCGTCTATTGCTGCCTTGTGGTCCC

A\_14\_P117967 GATTCTACGTGTTGTAACATTAGTTCTCAGACCAAGTTTATCCAAGCCAGTCTTTTCACA  
A\_14\_P112618 CTGCCACTCCAAGAGGAAAATAATTGTTGATTATTGACAGCATGAAAACCTTTTCGGAAGA  
A\_14\_P115899 TGCTGTCTCTGAGTTCTCACAGGAAAACAACCTTTCTCTTTGCTAGGAGTAGTATATAACA  
CUST\_5832\_P1426210822 CATTGGCTTCATGGAGAACCTGTACTTTGTACCAAGGAGAAGTCATTTCTACT  
A\_14\_P135594 AAAAGAGAGAAGAGATCTTCTTACCTGGATCTCTTTCAATTTGGACTGCCAGTCTT  
A\_16\_P38194695  
ACAACCTGCTACTCCTATTAATGTATTGCCACCTTATAAGTAAACTCAACATGAAGAGATC  
A\_14\_P117529 CTTTTTTTTCTCTGTGTGTGAATCTGTAAATATACGGCTTATTATTCTTATTTTCAGAGCC  
A\_14\_P115258 CTGATATTTAAATGTAGACAGGCACCTCTTACGTTTATTTCGCGCCTGATATTCAGCACT  
A\_14\_P130888 CCTGAACTTCCTCACATATGCAGATGAATATGCAATTGGATACTTTAAGAAACAGGTTGG  
A\_16\_P16122249  
AATGACAACCTTTCTGCAGAACTGGAATCACTAATCACACTATTGTTCAAACCTGTCAAAA  
A\_14\_P127240 TCTGCTGGGGTTTTTTTTTAAGTTTTCTTTGATTCTAAAGATGCAGAAGTTTGTGTCCCTA  
A\_14\_P138711 TCCAGGCCTTATTTAATAATAGGCTCAAGCATTGTTAATAAAAACATTTATTTTGCATTT  
A\_14\_P131351 CAATTGAAGTTGGTAAAAGGTGATATTTGTTGCCATCTTGAGAGTAGGTAAAGAAATGG  
A\_14\_P135185 CTGTGAATCATCACAACAATTAAGAATAATTCGTGCTCTTTCTCCTGTCTCATGTCTTTC  
A\_14\_P106306 GGAAGAGTTTATATTTGTGTCCTTTTTCTTTGCCTGATTAGAATTCCAACCTGCCTCTAAG  
CUST\_9520\_P1426210822  
GGAAAACAATCAGATTTTTAACCACATAACGTGTGCACGGTGGTAAATTTAACTGATGG  
A\_18\_P13023498  
AGGTCCTCATTATCCTAGAACAGATAGAATGGCGATAACAAAAAAGGAATTGGAGTGAAT  
A\_14\_P124144 AAATTAGGTGTTTCGATGTTAATGATGTTGAGCCTAAAATCAGACTCTTGGTCAGCAAAAT  
A\_16\_P20250698  
CCTCCTTGAAACCTAAAAACAAACATTTTCCCAGATTAGAATACTGCATCTCTTCTCTGA  
A\_14\_P132634 ATAACCTAACCTTTCATTCCACTTGTGCATCCACTATTAATCCCAAATCACACCTTCTCT  
A\_14\_P131234 CTGCCTGTGCTTAGCAGTGAAAATATTTACTTGGAGATGTTTCAGTTTCACAGAAGC  
A\_14\_P108234 TCTCCTATAAGCAAAACAAAGCATGTCTTTGAGTAACAATGACCTGGAAATACCCAAAAT  
A\_14\_P111756 TTGTGTGTTTGGAGAGGTCTGGATCACGATGTCAGAGGAATTTTTTATCTTGGATTTTC  
A\_14\_P117883 ATCTAAAGACCTTGCTGATGCTTTCAGCCTCTAATTTTATCTAACAAAGTACTTCGTGC  
A\_16\_P17021106 CATTGATCCCATATCTGCTATTCCATATCCCATGTGATAACTTTTCTAAGATTCCGTCTC  
A\_16\_P00685248 CTTTCTTACAGGTCACGAAGTCTCTTTTAGGAATGCCATTTGGCATTTCAGTTTCT  
A\_16\_P41874832  
ATATTGTTCAAATCCTGCACAATATCTGACAATGACTAGACATATGCTCTTCCCTTGGTCC  
A\_14\_P112144 CACTCCTCCTAGGTTTTTCGATTCTTTTTTATTGATGTTGATATTGGAATTGCTGGCTCG  
A\_16\_P17824193  
TTTTTCGTAACAATCTTTCTTTTCCAGTTTGATACTGTAAATCTATCAGAGCAGAGCCGG  
A\_16\_P20299364  
AAAAAAGAACATGCACCATGATTCTGTTATTATTCCTCAAGCCAAAACATTAATGCGGTG

A\_16\_P01118020

TAAAGCCAAGTAATCAAAAACAAAAGTCTAAGTCCCCTATACGATCAGTTTCCTAATGGG

A\_16\_P36230450 GTTTTGTCTCAGGATTCAGCGGAATCCAACCATGTGACATGGACCATTAT

A\_14\_P101336 TCTACATCCTTCCTTCAATTTATCTGGCAGGTTAATCCAGACTGGAATACATTTGCATTT

A\_18\_P14135950 CAAGGTATCAGGTTTCTAAGGAAAAAGGAGAAGGGCCCTGAAAGGAAAAG

A\_14\_P117352

AGAAAAACACTTTTAGCAGAGTAAAGAAAAAAAATGGAGGAGGAACAGAGACTTGCTTC

A\_14\_P123856 CTGTGCATAATCCGCATGGTAGACTATAGTTTAGAGATGTGCTCAAAGACATTATGAAGT

A\_16\_P15897928

TGTTCTAAACTCAGAATTCTACAACCCAATAAATTAATATGCCAAGATTTTGC GGATG

A\_16\_P15425234

GCCTATTGCCTCAGTATATTCTACCTCTCCCATTTTTTTCAATGACTCAACTTTACTCAC

CUST\_6195\_PI426210822 GCCCCTCAATTGTCTTACAAAGTAACTCAGGCATTGATGTGGGGTAG

A\_16\_P20339935

AAAAAGTTGATATTTGCGATATGTAACCAATACCCGCAGTAATTAGGCATGAAGTTTGGC

A\_16\_P20107418

AATAAGAGATGTCAGTTGTGTTCTGAAAACCCTAACCTAGATATACCTTCAGCCAAAAGA

A\_14\_P104373 CTAAATGTAATAACGAACTCCTAGAATTTGGGGAAGGATCAGTGAAAAGTCACTTTCTGA

CUST\_4879\_PI426210822

AATCACGTGCTTAGTCTTGAATTATGATTCACCTTTACTGAATGTCCCTTCTCTTTTCTT

A\_16\_P18948453

AACTGATTTTAGCACATGGAAAAACAATCTGTAAAGCACCGATCTAACTCAGTTTGCATG

CUST\_6271\_PI426210822

GGCTTTTTATTTGCCCTCTTGAATTGCAGAGGATTTTGTATTTTTATATTTAAAAACC

A\_14\_P115625 ACAGTTATGTTTTGCCATTTACAATCAGTTTTCCCATAGGAATGGTCACACAATGAAGTT

A\_14\_P118864 CAAATATGACCAGTTTAAGGATCCTCTAAAAATTCTCCTTGTTCTCAAACCTGCCACTTTG

A\_14\_P129567 AAGGTCAAACCTTACATTGCAAATTTTCTAAATCAGAACTATCCACCAGATCTCATCTG

A\_14\_P135112 CTACTTTGAAGTTCTTTTCACTCTCTGGTAGTTGTTCTTTIACCCAGATTTGTGAAGTCTCA

A\_14\_P124500 CATGGATCCTTGTAATTAGTGCACATTGCTAAGGTTTAATACTCCCTCTCACTACTTACA

A\_14\_P122257 ACTTGCCTGATTGTATAGGGTAGCAGTATGCAAATAAATTTTGGAGTTGTCAGTAATGA

A\_14\_P109779 TCTTGATAGATCGATGCTATAGAAGACAAACAAGGGAAGGTTTTTTTTTCTTTTGCATCA

A\_16\_P21614851

TCAATGAGTTAAGCAAACACTAGCATCATATTCTGTCATATCAAAGTTTAAGTCTGGGCC

CUST\_8337\_PI426210822 ACTTGGTGTAGACTGTGGACCTCATGAAGGACACTGTTTCTTCTCTT

A\_16\_P03729515

TATCCTACCCACATCATTGATTAACAAAACCAAGGACTTATTCATGAACAGAGAGGCATA

A\_14\_P125978 GCAACACATTTTCTTATACCTCTGGTAAGTCATTGCTTCAGTTAATCTATACCCTGATTA

CUST\_2178\_PI426210822 AAGTCAGGGCAGGGTGCAGGGAGAAATGAAGGGGACATTAATAA

CUST\_8648\_PI426210822

CTTTTTGAAGTGAAGATAGATCATCTTCTCAATTTTTTCAGAACAGACCTGAAAAATTGAA

A\_16\_P01728769

TTTCCCAAATTACTAAGATCTATGACATTTCCCTGAACAAAACACTGATCCACCAACAAA

A\_14\_P139072 TTTACTTCTAGAAAATATTGGTGTCTGGGCCTTCGCATTTCCAGTCATGGCATT

A\_16\_P16191849

ATTTATTCTTTGAAGTGAACCAACTATTGCAGAAAACCAAGACACAGTTTTCTAGGGA

A\_14\_P107040 GGGTGGGAATTTCTTCATGTGCAAACAAAAGAATTGGACCAGATCAACGTATTTTACAAT

A\_14\_P124481 ACCCACTTACTTTTATTAAAAGCATATTCAAATCCTTCCAGGGTATCAGGAAAATCAAGA

CUST\_5017\_PI426210822

AATGCAAACAAACATAGATTTAGTGGAAAATGACTCAACCAAGTAAGATTTACAAAACAA

CUST\_10081\_PI426210822

AGGGCAATTGAAATGTAGGATTATTTTAAAGACCTACGTATTTCTAGAACTTCAACTACA

A\_14\_P100003 ACTTTCAACATTTGTTTCCCTCACTGTCCTTTTACCAAAGGTTAAAAATCAAGAAACCAA

A\_16\_P36231018 CACTCCTGCCTCTACAATAAGAGGCTCCAGCATCATGATTCATTCTTGAGAAT

A\_16\_P18446836

ACTACCCTGATCACCAACTAAAACAATTATCCTCACTGTGTATTAGCCTTGAATTGTTAC

A\_14\_P136330 CATTGCAACATGTTCTCATTACTTGACGAGAAAGGAAAACATACTAATGAGAGCAGAAGT

A\_16\_P41914894

ATATGAACCTTATTCCTGCTATATCAGTTGAATCGACACGAAGAATTGACCTTTGGTTCT

A\_18\_P14827452

ACCCTTCTACTTTGTATTCTACCACCTACAAGTTTAACTATCCCAGTGATTTTCATCTTC

A\_14\_P134461 AGATGATCTTTTTTATAGCCATCCTCTTCTCTATTTGCTGACCCTACTTGGGAAC

A\_16\_P17338347

ACCCCACTACAATCTTATTTATCCTATTCACACCTTCAGTAAATATCATACTTCTCGTA

A\_14\_P124291 CCAAAGCAAAAAGGGAAACAGCACACATGATCCTCAGGGTAAAGCAAG

A\_14\_P201425 CTTTATTTTCGGGTGCATAAGTGCTTAATAAATGCTGAGACACTCGTTTGTGTTTGGAAAG

A\_14\_P106336 GGGATTTTGGTGAAGTTGTGGTAGAAAATTGTACACTCTTTGTTGTTTCAGGATG

A\_16\_P36156458

ACCTCATCTCCTAGTAATTCCACTGTAAGCATTCATTTAGTTCCAGTTCTACATCTTGAA

A\_18\_P13081558

AAAAAACAGGTGCGTAAACATGAACATCTAGTGAAAGAATGGATCAAATCCCGGTAGAA

A\_14\_P200737 TTATTAAGGAAATGTAAATAAGAAAAAACAAGTCAAACGGTGTACGGATGTCA

A\_14\_P124167

GATGGTTACCAGAGGGTAAACTGAAAAAATGTGAATAGTGAGAGCATAAAGTAAGACAAG

A\_14\_P116323 GAAGAAAACAAAAGATTACGGGCCCACTTTTGAATTTTCAGTGAATACCTTAATGTTCTG

A\_14\_P133004 TGGTGTCAATCAATCCAATTTATTAAGTCCTCAATGAGGGGGAGGAAGG

CUST\_8280\_PI426210822 CCTCTTATGTAGCCTCCGAAATCCAAGGGAAAATGCTATCAATGAACGG

A\_16\_P18765775

AAATTTCCCTAAAGTATTTTCTCATAGCCAGTCTGATCTTTACTTTCTCAACATGCCAGG

A\_14\_P118183 TTGAAGAATTGGAACAGGAGGAATTAATAAGAAGATGACAAATATCCGCCTTCCAAATG

A\_14\_P139811 CTGACAACACACAGGGTAACATAATCTCATCTCTTGTGACAATCTTACATTTTCTGTGCAT

A\_14\_P120468 TAACATGCTTAACACCATACACGGAAGTATCCTACGATGAATTTTCAATGATTAGGCGTT

A\_14\_P110355 TTCAGACCACAATATTATACCATAAATTCCTACAATTTTCTAGGAGGCCTTGGTG

A\_14\_P119063 TGCTTCTTAGGCCTAAAGGAGAATTGTAAGATGTATCTGTTTGATTCAAGTCCAAATGCA

A\_18\_P22769496

CAACTCGTTCTTAATCTCCATTTTCTCTCCAATAATCAAGTCTTTAATCTTTTGCACTCC

A\_16\_P16615881

TGGTAAACCAGATCGATGCTACATGTTTCAACAAATTATCTACGAAATTGCAATCACCTG

A\_16\_P03597505

GTTGTAAGCCATTCTTAGATTTTCTACAAACCAGACAGAAATTTCTCTAACTCCCAGCAA

CUST\_4443\_P1426210822 GTCTGAGTGGATGACTGTAGTTACGTACACAGGCTCTGCTGCAGG

A\_16\_P16191686

CGGAATGTAGTGTCCATGGAATTTTLAGAACTCATGATGTTTTGAAAATTTGCTGGC

A\_14\_P126719 AAAGAGGTTTCAGATGGCTTTGGCTAATTGAAACAACCTGTTGAAAATTTACTTGGCATT

A\_14\_P131805 TATCACTCAGAGTTTGAGTCGTCCCTGAATTAATCAAGAATTAGAGAACAATTCTGCCA

A\_14\_P200637 GATCAATGGTGTCTTTGTGGACAAAGAAGACATATGCAGGTGAATGAGACATTTG

A\_14\_P136753 TAATCTTATCCCCCAACTTTTGTAGAGAGTGACAACCTCATTAATACCAAGTAAGTTTT

CUST\_990\_P1426210822

AATAACAATAGATTGTTTTCTGTAGTTTAATGTCATACGACAAGAGGCAGAATGTGGGCA

A\_16\_P19432435

TCATATCCAAACCACTATCAAACCTGAGTTCTTCCAAGACTAACATTAGGAACGTTAGAGT

A\_18\_P22840887

GCTGGGTTGTAGAACATCTGTGATTTTCATGGGATAAAAGCCCTTATTTTTGTTTTGTTT

CUST\_685\_P1426210822

AGTTTTGAACTGAAAGGTTGTTATCAGGGTTTGAATCAGCTATTGTTGTTAGAACCATTG

A\_14\_P111235 CTAACATTTTATTAAGAGAATCTGCGCAATTAGATTCTGGTCTCTGGTCCACCTGATAAC

A\_16\_P18808168

AAAAGGAATTGGGTCATAAAATCTTTAAGATATTTGGTCAGACTATAAAAGGGGGTGCCA

A\_18\_P11900211

TGTTTTTACCTACCTGGTAGTAGAACAGACACAATTCAGAAGATGTAATTGAGATTCCT

A\_14\_P113590 GACTGGGATGTAAGCCATAGCAGGACTCCACGAGTTGTCACTATCATTATC

A\_18\_P15986650

ATTTCCATAAACGAATTAACCCAATACCATACCACATTGTAGAGTTTTTCTGAAGGCTT

A\_14\_P121657 TTTACTTTTCTAATTGTGAGAAATAATGAAATCTTCTCTCCCTCCTTCTATCCGTGTCC

A\_14\_P117314 ACTGAAACAAGGCTTGATTTTAAGCCCAAAGATTTGGGGTTTCGTTTTAGAATAATAGAG



A\_16\_P16191452 AACCTCATTCTTATAGGAAGGATTCAGTTCTTTCCCTGAGCAACAGAAGTGCATAG  
A\_14\_P126024 GGAGTGGTTTCAGACATTACATTAACCTGTCCAGATAAACTACTCTCATTCTCCATG  
A\_14\_P135257 CTATGGTGGAATATCATCCTGATAAAGACGAAGACACTTTTGACCGGCTACTTATTTCAA  
A\_14\_P132136 CATCTGATATACATAGGAGAGAACTGATAGAAGAATTCTGATGGCAACTGTATGATAGA  
A\_14\_P124983 CTCGAATCAATTCTGCTTCTCTAAGTTTATCCTCAGAAACCGTTTGTAAGTGGTTTGT  
A\_14\_P116230 TTGGGTATATACTTTTCCTTGTCTCTACAGAGAGAAGATGGGGTAGTGTGATAATTCTA  
A\_14\_P107159 GAGACAGGATAGTGAGAGACACTTATTTGAGGAGCAACGAACTGATTTGATTGTTCTAC  
CUST\_7512\_P1426210822 GTGCAACAGCACCCCCATGCATTCATCATGTGAGATGATAAGTGTC  
CUST\_3574\_P1426210822  
AAGATGATGGCTTTTCTCATTATTATTACCTAGTTAGTCTGAGAAAGAGAAAACCTCCATT  
A\_16\_P03115441  
TCTGTCTCGATTTTCTAGAACAACCTTCCACTTTCACAGAATTGCGGTTATTTTGAGAAAAA  
A\_14\_P104222 AATTTTTTAGTTGGTGGTTTACGCTGATGTCCCGGATTATAGGTTAAATTAGGAGGAAAT  
A\_14\_P108974 TATACCCAATTGGATCTCATCTCCTTGCAACAAAGGTATTCTGCTGCTATATAGACAGTT  
A\_14\_P107227 TAGAGACAACAAAGACATGAGTAAATCTCTTTAGTTTTCTAGTTGGTCCACCGTAAGACA  
A\_14\_P106883 TCACATGTTAGATCAAATTTCTCTAGGCCAGTGACACCATACATTGTTTTTTGTTGTTGT  
A\_16\_P02899477  
CAGGCTTTCCTTAATAGACCATTACTGTAAAATCAACAACCATGTAACTCAACTTCCAT  
A\_14\_P105629 CTGTATGTAAAATAAAACCCAGAATCCTTGTCTGTTATTGCAGGTTTAAAGGAGTTCATG  
A\_14\_P105448 AGGTTACAGTATGTAACCAGAATATGAAACATCACTGGGAGGAAGGGAACTCATTTAATA  
A\_18\_P14135265 CAGTGGGTCAGAGACAGAAGGGGACACACATTGAGAAATTTCCAATC  
A\_14\_P117054 ACCAAAGATTTTAAACAGACTTACCTCAAAAATTTCCAATAATCTTCCAATGTCCCTTTT  
CUST\_4689\_P1426210822 CAGGTAAGAAGTCTGCGGTGGTCTAATGGTGGAGGTGAAGAGAAG  
A\_14\_P123296 GTCTGGTTGGCCCTGAAATCTGTTCTTGATCTTATTAACATAGTTGATGGCATGATTA  
CUST\_7589\_P1426210822  
CATGAGTACATTTCTATGAAGATTTCTGGCCAGGATTTTAGTAAGTACCTGAGCCC  
A\_14\_P128823 CTTACCACTCTGGGCCATTTTAGTCTCTTATTTCTGTGAATACTGGCTTTTTTATAACCAT  
A\_14\_P121051 CTTCTGACCACTCTTTCCTTCTGCTGGTTTTCTTACTTACTGGTGGTTATTC  
A\_16\_P58424136  
AGGAACTTGTTACATATTTTCAACAGTAATCTCTTACCTGATCTATGTGTTGCAAATTTT  
A\_14\_P123762 ACTTTATGAAAGTCTACAACCAGCCTCATCTAAACATTTATTTTGAAGAAAAGGCTTCA  
A\_14\_P200264 TTATGTTATGAAAGAACCAGTGGTTCTTAGGTCCGAATGCATTATCCTCCTTTAAACAGA  
A\_14\_P130361 AAATTGGCAAACCCACCAAGATAACTGCCAAGATATTTCTTGACACATTATTTGACTTC  
CUST\_2269\_P1426210822 AGAGCAACCATGTCACCAGGGCATGTGGTGGTGGAGGTGGGGCAA  
CUST\_9785\_P1426210822 TCATACTCCCCATTTTCGTCTGTTTTGTTAGTCAGCGTCCAGTGTGT  
CUST\_2471\_P1426210822  
CTGTGACTCCATTTCCCTATTATCTGTTTCAGAACTGTCTGGGCAGAAGATAAAT  
A\_14\_P129184 CAGCCTCAAAAACCTTCTATTACCCTATGAACTTTTTCAACTCTGTGTTCTTCTTCAACTC

A\_14\_P116513 CAAAATCCTGGGTGGTAGTAAAAGTATTTAACAACTGCACTGCACAAGTATCCACTATTT  
A\_14\_P116264 GTGCACATACCACACCATTTCTACTCAAATTTGTCCAAATTTCTTTACAAGGAAAGATAGT  
A\_14\_P100294 TTCTTAAACAAATATTAAGCACATGGAAAATTCAGAAATAAAAACACACCACCATATAA  
A\_14\_P111780 TTGCCAAAATGTGATAGGAAACCTACTCATTAAATTGTTAAACTTTTTAATGACTATGTG  
A\_14\_P201008 CTGGACAGATACATTAGTAGATATTTTCATCACCAGAAGAAGGTTGCAATGAATGTGCAGA  
A\_14\_P118654 TACCCAACCCTGCTTACTTATTCAAGAGAAATTGTGTGCATGAGATGTTAAATTAATGGC  
A\_14\_P126740 GTAATCCTCAGATGTTCAAAAAGTAACTGTGTGATGATCTGTTCATGTCTATCTCCCAAT  
A\_16\_P2162092  
CACAGAAGCAAGAACATTACTGTCATCACTAGAGTCAATATATATACGTTCCCTAAACCCA  
A\_14\_P122906 TATTTAAAATTGCCACTTGAAGGTTGAGTCTCCTCCATAATGTATCCATGAAACGTAGTT  
A\_14\_P104623 CAGTCCACATGAACACATAAAAATGGTTAAAATGATTCTGTTTTACTGGGATGGCTTGAAT  
A\_18\_P16744543  
CCTTTCCAATTCTATCTAGCAGACATTGTTCAATTTACACTATAACCATTCTCTCAGTGAC  
A\_14\_P104752 CACATTTCTCACTTACAAATGCTCAGAGTGGGGAATAGACCTGAAAGCCAG  
A\_14\_P136644 GAGATGACTTAGATTGTGTAAAGTGGCAAAGAAAGTTGTGCGTTGATGCTTTGAGAGAAA  
A\_14\_P105921 TATGAGATGAGTGCTTTTCTTAAAGTTCCACCCTATTTCAAACATCATTAGGAGGCTG  
A\_14\_P129292 TTCTCCTGGTGTGTTTTGCACACTTGTGACAATTTACTTGGATTTTATACACATCTTCATGT  
A\_16\_P17056406  
AAGATCTGGGAAGGACATAATTTTAGGCAGAGGTAGGAAATAATAGACATGGTCACTGTT  
A\_14\_P135905 AAGAGACAGAGACTTATGAGCCGTAGAAATAGTGGAAGAAACAGAAAGACAGACCT  
A\_14\_P130882 CTCTGAAGACAAATACATTTTTCTAATCATCTACAAAATTGCCAGCCTCTCTGAAGTGGT  
CUST\_6261\_P1426210822 AAGCTCTGGCTTCCAGGGAAGGGAGCCTATCCTGAGATGCGGTAG  
A\_16\_P17014169  
GCCTGTATGCTAATCTTGACTTAATCCCTATTCATCTTTCCATCATTAAACACGATCCTG  
A\_14\_P138261 AGTCAGTCTCACTACCAAATTTTCTATAGAACTCTGAAATTCGCTGATTTTCTCAAGG  
A\_14\_P132003 TTCTCTACCTTTTACGCTTTCTTTTCCAGGTGGTAACAGAAAACAATCCAGATGG  
A\_16\_P00685343  
ACCAAGGAGAAGTCATTTCTACTTGGTTTTTTGAAACTGCATTGTCATCTAGTATTCCAAG  
CUST\_1755\_P1426210822  
TGAACCTTACGGACAACACCTATTTAAAACCTGAACGACGAAGTGATCATGAACA  
CUST\_484\_P1426210822 GAGTCCTAGGAAGCCGATGTAAGTCCAAGATTGGGAAAAATCTACAGTCT  
A\_16\_P18844468  
AAAGAAGCCACAACAATATCATCACTCTGTTATTATCTAGACTATCAGCATACTAGCGAT  
A\_16\_P18272899  
AATCGATATTTTTGCCATTAGCCCTAATTGTGATCCAAATTAGCCTGTCAGTTCTAAACC  
A\_16\_P20033286  
AAAGGCTTACATATGGTATAAGAATAGCACTTACCTCCAATTTACTTCCCTTTTTCCCT  
A\_14\_P133748 TTTTCTTTAGTCTTGAAAAGCAGTGAAATGCTTATTTGCAATGTGGAACCTTTGGCAGTCA

A\_14\_P126042 AGGTCTGATCTTAGAGTATCTTACTCATGAGGCCTTCTCAAACATCACATCTAAAGAAAC  
A\_14\_P131884 TTTTTCCTCATTAAATGCGACTTTTAACAGGAAATCCTCAGGTTAAACTAAACCATCCTCT  
A\_14\_P126453 GAAACTTTTACATTTGTTTCTCGCTTTCAACCCAGTAAGTAGGAATCAGCCTAACAGATC  
A\_14\_P138090 TGATGCTCTGACTCACTCTCTGATTTTTCATATGTAAGTGGCAGATTAAATGGGTTTGAA  
A\_14\_P122448 TTATTAGAGGTTTAACTCTCTATTTTATGTTTGCCCTTGTCCTTGGCCCTGAATTTG  
A\_16\_P00685184  
CCATTGCTTTAATCAGAAATAACATATCAAGGTGGCCCAAATTGTGTCACTATTCTTTCC  
A\_14\_P135983 TTGCATTTCTCATGGCACTTCCTGCCTCATTAAATTCTACTAATGTTGTTAGATCACCTA  
A\_14\_P123530 CGATAAGGCTATATTATCCGTGAAGAAAATAAAAGAGGGCATCCTTTAAATGTTTCTC  
CUST\_1817\_P1426210822 TATATGGCAGCCTGTACAGGATTTATGCTGGCCAGAGGAGAGCTT  
CUST\_7939\_P1426210822 ATCTGTTGGTGCTTTTTCTTTTCAGGAGGAGATGGGCATCTCCTGT  
A\_16\_P16434298  
AAATTCTCCTGTAACTTTTCCCCTTTTCTGAAAAATTGTATACGGTGAGATCTGAAGGA  
A\_14\_P118802 CTATGCCATGGTAAAGTTGTCTCAAGTATTTCTTCTCCTTTTTTCTCCTTAGTGTTCAA  
A\_16\_P16111090  
AAAACAAACAGATTCTGGTTCTAGGCTAAGGAAATGTTATCACAGTTATAAAGGCATGGG  
A\_14\_P135398 ATTAGTTTGGGGAAATAGTTTCTCCAAAGTCTAGAAAATCTTGAAATAACTCTGCCACCT  
A\_16\_P00685317 CTTTCTTTGACACGTCTCAGACTTGCCCTGCTCCACTTGGAAGT  
A\_14\_P125609 TAATTACCCAAATTCTACCTGTGAATAAAAAACAGCCCGATTTAACAGGCATGCATTT  
A\_14\_P200630 GTTTCTCAACATGAGGATGGGTTGGTTGTTAAATTAACAACCTCCACAGTATCAGAT  
A\_14\_P121427 ATCCCATCAGTGGATTTGTGTGGGATGCTCTCTGGACAAAATCTTTAATACAACATATAA  
CUST\_10290\_P1426210822 AATGCTGACACCACTCCACTGAGAGAAAGAAGCTTGCTTCCGGGT  
A\_16\_P36230455  
CAATCTAATGGCTCTTCTGGATAATCACTTCACATGGGAATCCTAGGACTCCATATTATA  
A\_14\_P124560 AGAACGTGATTTTTGTTATCTCAGCCACTGACTTCATTGATCTCTAATCTTTTTTAATT  
CUST\_4040\_P1426210822  
CTTGATATATATTTTTCTTTAACAAGAGAAAGCCAGGCTTTTGATTAATAATTTATATGT  
A\_16\_P15468443  
CTGAGTTGCATTACTAAAACATAGGGATTGGGCATTATTCTTTAACACCATCGAGATGAC  
CUST\_2324\_P1426210822 TTTTGCCGTATCAGCTTGGTGTTCATCTTGCTGATGGTGTCAAGC  
CUST\_7398\_P1426210822 GAAACCCTACACAGACCAGTGTCTGTCTCACGGTTTTAAAAGGCTG  
A\_14\_P107471 GTTTCATTACACCTCTTTTTTCTCTTAAACTGAGTTTTTACTCATGGAAGCACAGGCC  
A\_16\_P21436986  
AAAAAAAGTTAGAAGTTTGTGAGGTTAGTGTGCATCATTTAGACCACAGAATAGTCCAGC  
A\_14\_P126362 AGGTATGTCAATCAGATGATCATCAATTATGTCAAAGACCTGCTACTAGAGAAGGCAC  
A\_14\_P132351 TTTTTGGGAAATTGGAAGTGCAGATATTGATGTGATCAAGTTTTCTGGTGGAAAGATTCAA  
A\_16\_P16191750 TCAGAAGGGGCTCTCAGAGTCCATGGGCTCAGCAGGCTGATTCTT  
A\_18\_P12038583

TGGATGCTTCTCAAGAAACAACCATATGATGCTATGATAATCGATATCCTTCCAATGACT  
A\_14\_P121613 TTAAACACCCATTGTGAAACAATTAACAACCCCTTTCCCAACAATTCCAGATTTCTATT  
A\_14\_P136621 CTTGATAAGACTGCACTGTAAACATCTTCAGGAAATCCAGTCTTGCATAATGCGAT  
CUST\_6668\_PI426210822 ATAATCATCCCGAGTGTACCACCTCTCAGAGGAAGTGAACAGGCT  
CUST\_3857\_PI426210822 GGAGATCTACTGGAGGCAGCGTATCACACACTAGTTGTCCAAGAG  
A\_14\_P116148 ACAGGAAATTGTGTGTTTATCTTGGCTACCTGTAAAACGAGGACATGATTTGGTAAAGTA  
A\_16\_P01692186

AAGAAAAATAGAAACATTCACCTTCTAAAATACTGCCTCAACATATCTCATTCCAGACCT  
A\_16\_P16120832

ACATGTGGATTAATGAAGACTGAGATAATTGAGTGAAGCCTTATTGTAATGATGGGAGCA  
A\_18\_P26357868

TTCTTAACATTATAAAACATCTTCACCATTCCCTTGTGATAGACCTTCCAAAATTCCCCA  
A\_14\_P133366 TTCGGTAACAGGATATGATGGAAATTGGTTTGTAGGAAGAAAAGGTGTTAATCTCAAATG  
A\_18\_P22841261

TCTCAAATTA AAAAGACAAGAAACAACAATCTCCCAAATAAGCAGAAAGTCTGAGCGT  
A\_14\_P103616 ATTCCTGCTCTGTTGAATGTCCACACTGCATTTTTCTATTGATGATTTCTGTATTAAGGA  
CUST\_8915\_PI426210822 TCTTGACTTTCCAGCATGTTGGCCTGTCACACGCAAAGGAAGAGG  
CUST\_1898\_PI426210822

GAATTTATCTAAGTAGAGAAAGAAGCACTGAGAGCTGTTACATTGATGTTGTCTTCTTG  
A\_14\_P108019 CTGGTAGTCAATAATATCCTGACAAAGTTGTTCACTCTGAAGGTAACCAAACACAACATT  
A\_14\_P125054 GAAGCCCTACACCTTTCCGAGCAAGAATATACACAATCCATGTCGTAATTATCATCTTT  
A\_16\_P16390074

ATTTCTTCTCCAAGAAAACCTCTCAGACTCCCTAATAAAGAAAGTGTGGCAATGTTCTG  
A\_16\_P18315971

AAAAAAAAGTGTGATGGAACCTTGATGTCACAAACAGTGAGATACATTCTTAGGTCACTT  
CUST\_9476\_PI426210822 CATTACTACTTAGGGTCAGTTTTTCTGGCAGGTCAGATATTTGGAGTTGGTGT  
A\_16\_P18357230

AACAATCCCAGGATGGATATAACTCACAAGTAGATATACCAATTTGTTACCCCTTTTCAGAT  
A\_14\_P108053 TTAAAACTCGGAGAAAAAATGGATTGTGGCTTTTTGTTGATGACTGAGGAATTTTG  
A\_14\_P118538 AATTAGGCACTAAATTTTAAGCATAACATGAGCACTCTCCAGGGTGAGAAGCCATC  
A\_14\_P137184 CTTATGGGTTTTTACAATCACTCACACACAGTTCCTACACCATACATTTTTACTACTCT  
A\_14\_P122639 CTAAAAGATTCTTTTTGTTTTAAGTTCCCACTTTGGGAAGCACATAACTACTTCAGTG  
A\_14\_P110709 GCCTCTCTGCTAACTCCCTATTAAGGACCAGGTAAAGCCAATACCCTTTTTTTAAATTA  
A\_16\_P20562151

TCTATTCTAACAATGTGAATTCTGTCTATTGCCAAATGTCTACAAAATGACCCTGAGC  
A\_16\_P00685203

TGGCAAGAAATATACATGAATTCAAAGAGGTTTGGGATAATTTTATTAATGATAAAACCA  
A\_16\_P01530165

AACAGGCTCCTAAAAGTAATAAGTTCTTCACTCATATCAAATGTTACCATCATTGCACCT  
A\_14\_P126711 TTAAATCAGTATCCAATGTTTTATAGGGGCCAAAGGTTAACTTTGCACTATTCCCTGTCA  
A\_14\_P117383 CTAGTTGAAACATATGTCAGAAATTGCTACACAAAACCCTAAGACTTTTTTCCTACCAGTC  
CUST\_6446\_PI426210822 GCAAGAAGGAAAGTGAACAGAATGTGGATCCCAAGGGTTGGGTAG  
A\_14\_P114737 GCTAAGTGGAATGCATGAATTGCATTATGTTCTCTGGTAACACGTAGAGTTCAGACC  
A\_14\_P111873 TGTTGGCTTGTGTGTTTAATTACTGTTTATGCATCAGCAGAATCCAGGCTTTTGTATGTA  
A\_14\_P126647 ATAAAATATCATGATGAAGCGGAAGATCTTTGTCCAATCAGAGGAAAAATTCTGATCCCA  
CUST\_763\_PI426210822 AGATAAGGAACAACGCCTGTTCTCACTAAGAAGTGGCTTGGCATTCTTCTAC  
A\_16\_P18886318

TGCCAAGAAATATCAAATAATGAGACTACTTCACCTCAGATCCTTTAAAGTTCTTGTCA  
A\_16\_P19175168

AAAAACAGCATGCCTACATTATCTAGATACCTGTATGACAGTATGTGATGGACAGTGTCA  
CUST\_5611\_PI426210822 CTAAAGGTCTCTCACGTGGCTGAATATCTAGTGAGGGAAAGGGGA  
A\_14\_P114529 CTGTTACTTTAATCACTCTTGGTTGAAGTTTGTGTCTTTGAGACAATTTCTGCCAATTCC  
A\_14\_P139302 GTTGAGTCCTATTCACAGACAAAAGTCTCCGATGTGTCTAGAAGTGTATATTATCCTGAA  
A\_14\_P200062 CTTTGCCAATCTTCCCCTTGAGATAGTAGCCCTTACCCATGCTGTT  
A\_14\_P107036 ACTGTTGATATAGCAGAAAGGGGAATTATTCCTTTCGAATACATCTCCTGTATTGGTTAG  
A\_14\_P124959 GTTTCTGTGGATCACACGATTTACTCATCTGTCTTTCAATGAGCATGACAGGTG  
CUST\_4901\_PI426210822

ATTCGTAAAGTCCTCTATAAACTTGGGCCATATGCTTATCTGAGCTATAATATGATTCAT  
CUST\_4905\_PI426210822

TGCAATGTTGGGAAAACGACTCAGCTGCCCTATATAAGGAATATGTTATTACAGT  
A\_14\_P126144 CTTGAGAAAAATGTTCTCTAGGAACTGCGTTTATTTACCGTCTATTCTCCTTGTGAGA  
A\_14\_P126327 GTTCTGTAGTTGTAGGCAGTTTTTTTTGGCCTGAATATGTAGTGACCAATAAACCCATCT  
A\_14\_P105465 CCCTGGCTTCTGAGGCAGATAATAAACACATCAATTACTGGTAGATGAAGTAGTTTTTTTT  
A\_16\_P17180641

GCCATTGATCAATCTGGAATCTTACCATTCCCATACACTACATGAGTAAGAACTGAT  
A\_14\_P135610 CCCAGTGTAAGACAGAAGATCCCAATGCCTTTTTGGCCTCTGAAAAAATATCTTTT  
A\_14\_P123464 ATATTTGGATTTTGGACGATACCAAGTAGCACAAGAGTTAGAAATTCACCAATTAAGTGG  
A\_16\_P02541916

GTGAAGTCATCCCAGATTTTCTGAGTTGAAATGAACACTTCCTCAGTATTGTGCTTATAT  
A\_14\_P129020 ACAGATGACGGCTTTGTATATAATTTGGATGCACGTTTCAGATAAGCCAATTTTACACTT  
A\_14\_P106653 CAGTTTTTAAAACACTGGTTCCAGCAATTAGGCATTTTTTTTTCAGTTCCCAAATGACTAGA  
CUST\_1782\_PI426210822

ATTTCTCTTGCTTTCTTAACTCTTTTAATCTTCTGGAAAGAAGATAGACACAATTTAATG  
A\_14\_P129351 AAAAACACTTTTTTTTTTTAAGGCCTTCTAGAAGGGGCAATTGAGCATACTCCACATATGT  
A\_16\_P19589980

AATCATTGTTGCTTATTCATCTGGCTGTAGAAAGAACTTCCAAAATTTTCAGTCTCAGTGG

A\_14\_P122921 ACACTGTCAGACAGAAAGAGGAAGTATCTCCAGGTAATAAATGAGATCTTTGCATTTTTT  
A\_14\_P125477 AAAAAGGGTCCAAACCACCACACAATTAATAATAAGCACACCAATATTATATTGCCCC  
A\_16\_P38369152  
CTTCCACTAACTTCTCCTATAGCCATTACCAATTGTCTTACTCATTTCCTTGTATGGG  
A\_16\_P1962551  
CCTGTTGACAGTTCCAATACTTTCTTACTAGATATTGTGAATACGCCAATACTTTTCCCC  
A\_14\_P135302 AGTTTCAGAATAGAGTTAGTAAGCATCGTGATATAGGAGGAACAGGCAGTAACTAAAACC  
A\_14\_P119880 ACGCACATGGCTTTGTCTGAAGTGGGAAACACCGATATTAACAAATTAATAACAAATCA  
A\_16\_P16319692  
ATTCCCTCCAAACAGCAAATATCTTTACTCGAATGATAGAATACACGGCTTTATTACCCA  
A\_14\_P114059 ACTGTGACTTACTTGAAGTGGCAGTTTCACAAACAAATGTAATAAGATTGTCTTCGATCT  
A\_16\_P17251070  
CGTGACGAATATTGCTATGGTATCATAGAAAAGCCTTCTGAAAAGTAACAATGCTGGAGT  
A\_14\_P139070 CCAGAGAAGTTTTACAGGACCATACAAGTGTCTTCTGAATTATTTATGGCAAATGCATGTT  
A\_14\_P200820 AATTGCAAACCTTTACTTAGGCTACTGGTGTTTTTGGTATTTTGCTGTTGTTTTGACCT  
A\_16\_P00685008  
CCAACAATATGTGAGAGGATGATTTGTATCCTCAAATATTTGAACACTTAATAAAAAGGCA  
A\_14\_P137543 AGTTATCAGTTTACATTGGCTAGATTTAGGTTCAAGTGGCACAAATAGCAGTGGCTTAAA  
A\_18\_P12737083  
TGGTTTTCTGTAATGACATGCCTGTTAGATTTGAACTTGTAGTATGGGCTTTAGTATCCT  
CUST\_3730\_PI426210822  
AACAGCCTTGATTGATTGCTGGTCTTAATGGAAGAAAATGTGATCCTTTCTCTTC  
A\_16\_P16828390  
AAACCAATATCACAAAACTTGCATTAAAACAGAAGAATCTCGACCTATTTCCATCTGAA  
A\_14\_P200977 ATGTCTTTAGGTTTTTTGAGTGTGCTTCTAGCATATTTCTGAACCAGATAAATTTATAAA  
A\_14\_P115597 GCTTTTAGTGGGGAGTCATCTGTCATCTCTCTGTTTCAGTTGAGGTCTCTATAA  
A\_16\_P03663959  
TAGGCCTAAATCTCACTTATGACTTTAGCCAAACTCTATTCATTGTTGAGCACACTTAGG  
A\_14\_P102636 GAAACCAGTAAATTATCAGTTTGTGTAACCTAAGAGTATTCTATATAATATTTTTTTAGA  
A\_14\_P138574 ACATGGGAAAAGGTCATTTCTGTTGGGAATGAAAGGGACAATGATTAATTTAACCTATG  
A\_14\_P114873 ATATCCTGTTTTAAAGATGATCAAACATTTCTCAGAGCCAACCCAGAGATTTCTCTTTCT  
A\_18\_P15571439  
AAGCAAGCATAACTTCTCTTCAAACAGATTGTTTTGGTCAAATTTGGTTGTTGCAGAAAG  
A\_14\_P134002 AACATCTCTACTCAGAGGCCTCATGATACATAGGGAATGTCATCTTATCTATCAATCAGA  
A\_14\_P129435 ATGAGATTTTCCCTTTCTCTCTAGTAATATTCTTTCTGTAAAATGCAGTCCTCTTGGTCC  
A\_14\_P120033 TTAGGATTTCTCTATTAAGTAATTAATCCTAACTATATCCTTGGGCTGATTTGATTTCTG  
A\_14\_P118372 TAAATTTGTTCCCTTCAGAGTTGTGAGGATCTTGTATTATGTAGTTTTTCAGGAGATGAGAAGG  
A\_18\_P22839408 CGGGCGTCCCTTTGGATGGAGTCCTTGCTTTCTGATCACAAAACCT

A\_16\_P15582693

TAACAGCCATTTTCTTCTATCCTCTCCCTAATGAACTTAACAATAGCCTACACCCAAATT

A\_16\_P17291318

AGTGCATCATTTTCATTTACAAGTTATGGCTACCTAGTATAGAATATCCCTCTTGAACCA

A\_16\_P19699791

GTCCTTTAGAAAACAGTCCACCATTCAACTTTTAAAATCTAATCATTGCCTAGGACAGGA

A\_16\_P19426754

CCCATTTTCAAGAAGTCAATGAGCAACTAAATATGCCTTTATCCTGAAATTTGAGCACAC

A\_14\_P126481 GGCTTTGTTATCATATTTTCTTTTAAACAAGACTGTGCCCTCAGGGACATATCATGATTG

A\_14\_P129876 TTCTAGAACATTAACACAACAGAGGTGACATTTTTTATTTTTTTTTCCCCAGATGACCC

A\_14\_P124437 CTAGATGCAGGCTTCTGCTTTAACTATTATATACATTTAGACACATGGCTTCGCAGTAGG

CUST\_9078\_PI426210822 AATAAATGAGGACTGACTGGGCAGAGAAGAGCAAGGGGGCGATGG

CUST\_5329\_PI426210822 TAAACACATAAAGATTGCATTCATTCATCCTTCTCCACACCGGGG

A\_14\_P103236 CTGATATTTATAGGGTGTTTTACTGTGTGCTGAAGACAAAGCAATATAATGTCCCACTCC

A\_14\_P100712 GTCAAAAAAGTAGTGAGTGTATCAGTGCTCCTTAAACAATCCCTAGTCTGTTTTGGAAAT

A\_14\_P134676 TTCTTCAGCATGTCCTGGATTTCTTCTTAATGGTCTTGTGCATGTAGCCATA

A\_18\_P13722361

AGATGCACTGGTCTATATTTTCTTTCTTTGACTTTCCACTTAATCATTAAAGCCATGGC

A\_14\_P134198 GGGCCTATGAATGTGTCTCATCATGTTTTTCTTCAGCATTTACTAAGTCTTCTGAGTTCT

CUST\_2952\_PI426210822 CACAAGCTGCCAGAAGGAAAAACCTAAAGATGTGAAATGTGCTGTTGGA

CUST\_444\_PI426210822 AATGCTGGCTGGGGGCAGAGACAGCTGTCTTGCCCAGTGGAGAAC

A\_14\_P132583 ACGTCTGGATAATGAAAAGGAAGGCTTTCCAATTACAGCAATTCGAGAAATTAATTTCT

A\_18\_P24498194

AGTGTTCATTATTTTTGTTACCTTCACATAACTAGCAATTTAGGATACTTTGCCACCCA

A\_14\_P120846 CTTTTGTTACATAACAATGGCACTAAGTGCTGCTTTGTTTCCTAATTCCAAATAAAACCCT

A\_16\_P15672757

AAACACCCTAAAGCACATTAGTTGGATATAACGCTCATTATTTTACTCCAGGGAAGAGTT

A\_16\_P17642722

CACCATACCCTTTACATTTAAGCCTTCATTTGTAACCTTCCAATAAAGAGACATAGGAA

A\_16\_P00636826

AAACAGGGCATTTCAGTGAATTAGACCGAAACAATAGAAGGATGGATATTAGGAACACTAG

A\_14\_P136211 TGGTATTTTTAACACACAGATGTTGTAACATCTTTCAATTAATGTGTCAGGAGCCCTTTGG

A\_16\_P18066245

AGCATACCACAATTATTCTCCATATATTGCCAACTGAACATCTATTTGCTTCCTAACAAA

CUST\_4720\_PI426210822 CTGGGACACTTTGGCATGTGTGTTTTAAAGGATCCGTGGGTTTTGT

A\_14\_P117888 GTTTAATGTTATGAGGACGTGTCTGTTATTTTCTAATCAAAAAGGTCTCACCACATACCA

A\_14\_P200444 CTAAAGAAACCTTCCTTTTTTCAACGTTTTTTTTTCTTTCAAACCTGTAGGGTCACTTTTG

A\_14\_P114252 ATTCAGACCACAAAGCGGGCTAAGAAACCCCAAGAATTTGGAGAACTATATA

A\_14\_P106923 AAATATCAATAAGGCAAAGAAGTAGGGGGAAAAAACCCCTTGAGAACAACCTTCTGTTTTT

A\_14\_P121233 GGTTATCATAAGGTGTTAAGAGTCCCTTGTTAAAGGGGCAGTGGGAGTTATG

A\_16\_P17051671

AAAAATAATGCATTCCATGTTGACCTAAAAAGAGCACATGTATATTCTTTGGCTTCACGGT

A\_14\_P100693 CTTGAATGTAACCTGGTTCCTAAACATTAAGCACATTCCTCCTCAACAAACAACCATCTG

A\_14\_P124490 TGTTTCGTTGCATGGATTTACACACTATACTTGTGGCATTATTTTGCTAAAATTTGGCTT

A\_14\_P113065 CCTATTACAGATGTTACAACGGATTCTGCTGGATGAATGCTCTCCTTCATTTATTAATC

A\_14\_P201473 TCTTCAATACCAAAAAGTTCCTGGAAGGGTTGCAGAAATGTCAAAGAGATCTAATAGATTT

A\_14\_P121624 CTCAGAATGAGTCTAAATGTTTCAATTGATTCTGAACTGACCATAGAGGAGTTGGTAGTT

A\_14\_P130340 TGCATGTTTCGATTTTTAATTTGTGTGTTTATCAACCAAAAATGGCTTTGTATGCTGGAGA

CUST\_7522\_PI426210822

GTAAGATGTAACAGAAAACATACGTGTCTCACACATGAGAATTATTGTGTAGAAGCTGTT

A\_14\_P100497 TTCTTTTTCCATCACTTTCTGCTGAAACCGAATTTTTGCCACTTGTGCAATCTTCT

A\_14\_P201776 ATCCCTTACCATAAAAAGGTATTTAGGCAAATACTATGCTACATTGCTACATGCTGGAT

CUST\_9039\_PI426210822 TTTTCTGCCTCTTCAGTGTTCAAACCCAGGCACAGGGACTGTGTT

A\_16\_P18090167

ACTGGTAAGTAGACGCATAATTCACATTTCTGGTAACTCAAGTTCTGAAATACCTTAGAGG

A\_18\_P14132429 ATTTAACAGCATATTCCATCAGGCCTCACCTACTAGTGTTTTGTGAGGCTGC

A\_14\_P134056 ATGAATGGCTAACATAAATTTTCAGACAATATGGATTCCTATAGTTCAGTGTGGTGACGG

A\_14\_P200554 GGCTTTTGTATTTTTATTTTTGTTTCATCTGCTGCTGTTTACATTTCTGGGGGGTT

A\_14\_P132090 GTCTTATAAGAAAAATGCATTTGAGCATCTGTGTAACCAATGTTTATCATGCCATGGGTG

A\_14\_P103091 CCCCCTAAAAGGTTATTACCAAATCCAATTTCAATTTACAATATACGCCACATTGCCATTT

A\_16\_P21534137

ATGGACCTAAACTCGTTGTTTTTGGTAGATTTAAGAAGCGTCTGAATATTAGAGGTAGGC

A\_16\_P30952431 CTACGACTGTCAGCCAGGATTAGTAGTTAATGCACGTATTTGTTTATTGTTTCAGCGG

A\_14\_P138381 CTAACAAGTGTGCTTTTTAATTGTGCGTAACTGTTATATTCATACCTTGAAGTAGTCATC

CUST\_8605\_PI426210822 CATTTCTTGAGGTCCAGCTGTCTGTAAGTGGAGAGTGTCTGGCTTATATATG

A\_14\_P139430 CTTTCACAGAGAATGAAAACTTAAAGTTGATATTAGTCTGGATGGGACATAGGTCTGGAT

A\_14\_P108518 ACAAGGCTATGCATTGCTCACCAAAACATTTTTAATCTCAAAGCAACTTTGACGTTCTTA

A\_14\_P100883 ACCAAGATGTCCCAATCAACATGCTCTACTTCAATGACAAGCAGCAGATTAT

A\_14\_P111187 ATTGAGTAGAGGACTGTCTCCTTTTTACTTCATGATGATCCTGAGGTATAATTGAAGACT

A\_16\_P16081856

GCACTTGGTCACTCTTTAAACACCTACACATATGCTATTAATTTTTATCCCCAATATGAG

A\_14\_P102370 TATGTCTTCACCTCAAGACTATGAAGGCTTTGTCACATTTGTTTTTAGCACCAACAATAC

A\_16\_P35932569

AGCCATGTTTTATTGCTATTCAACTTGTCACCTCATCAATTTATATAAACTCACCAGCCTT

A\_14\_P200912 GAATGCCCAATTAGACATTCAAAATAAGGAATACTGCCTTTGAGACTCTGAAGAAAGAG

A\_14\_P100034 ACTTACAAAGCAGTTCTTATCAGGATTTCTTTTCCAATGTTTCTTGTCTAATTTCTTGGC



A\_14\_P135783 CTCTACAAGAGTCAAATTAAGTAAGTAATTCACCTGGGTTGTCTGCCTTTGTAGATCTGAG

A\_14\_P135092 CGGCTACAACAATTCATAGAATTTTCAATGTTTTCTTGAGATGCAAAAGTTCACCTGTTG

CUST\_2237\_PI426210822 CTACAATGCGCACTTTGGAGAGAGCATTGCCAGCCTGGACGATCT

A\_18\_P16725603

AAAATGACCATCAAATGTCATAATCCTCCTACTTGCCAATAGAAAATGCTGCTTTGGAAA

A\_14\_P136030 TTCATGGTAACCTTTGCTGCTACAGAGTTGTAATAATAGAAAATCAACAGAAGGTCCACATG

A\_14\_P136394 CGGATCAAGAAGACACTACAAAAAATTAGCAACAGTCCAGAGAAGCCTAAAGTGATTC

A\_16\_P03495883

ATCTCTGAGGCTCCATCATTAAACATATCCAATTGCAAAAGTTTCCTACTTTCTGGTTCAG

A\_16\_P15662319

AAGCCATCCCATTTCTTATTTTTCACCTGCAATATTAACAAAATTATCTCCTTGCCTTTT

A\_16\_P00205724

CGTTTCCCTTACAATGAACTTTTAGACTCCAGCACATAATCAGAATTAACACAGAGGTCA

A\_16\_P19286019

AGTAGATCATAAGTAACAGCCAAATTGAACCTGTATCTTGAGTTAGAACAAGCAGAGGAA

A\_14\_P104947 CGCCTTATCTATGATTGAGTGTCCGTGTAAATAAATTCCTACTTAGACTTACCCTTTGT

A\_14\_P102906 ATCATTTGTTATTTACTCTACTAACTTTCTAAGTTTCTCTTCCCTCTGACCTCCATCCCA

A\_14\_P126286 CATTACCAACATTTCTCTTGACAGATGACATAGGTAAGGAAAAAATGGATAACTTCTCAA

A\_14\_P106945 CTTGTCAATCAACCTTCCATCTTCCCTCATCATTAGTCACTAACAATCACCATTATCATT

A\_18\_P17180979

AATGTGAATAGCCTAAAAGAGAGGGACATACAGATACTCAAAGATTACTCGTTCCTGGAC

A\_14\_P130067 ATTGTGGACAAGCAGAACAATAAATGATTTATTTTCATTGCTGTCATTCAAGCCAACAC

A\_16\_P19665930

TTTTAAAACCCACTATTTCTTTAGGCAAGAACCAGTAGTAACCGTGTGTTAAACCAACTC

A\_16\_P38203416

TTCCATCTGAAACCATATTGACACTTAAGAACTCACTAAATTAACGTGCATTTCATTCCT

A\_16\_P18122134

AATAGGTCAATTGAGCATTTCAAAATTTCTGACTCCAAAAATCCCTAAGCATTAAATCCAC

A\_16\_P58424487 AGAAAAACAACCGTGGGCTCTCCCCAGACCTATTGAGTCAAACCT

A\_14\_P112785 AACTATATCAAACCTCCATTAAGTTAGAGACCACTTTTTTGGCTCACAATTAGGCCACCCTA

A\_16\_P00368275

AGTCCTATATCTAAACCTTCAAGAAGGTTACATATTACCTAATTCTCCAATCTACCCGGA

A\_14\_P110066 CCCTCAACTACCATTCTCTTTAAACACTCTTCAGAGAAATCTGCATTCTATTTCTCAT

A\_14\_P124070 GAAATGTTGGGTTAAATGACTTCACTAAACAATGTAACCTCAGCGACATTTCCCTTTTCATT

CUST\_3061\_PI426210822 TTGTCAGGACACTAACCTGTGTTGGGTACACCTTGTTAATGGGCATATT

A\_16\_P17546013

AAGTAAATGCGCTTTTCTGTCTCTTATATACATCCAGTTGGCTATTGAAACAACATGGGA

A\_18\_P13800000

CCCAATACACTGTCTATTTATTTTCCAGGCTACAATCTTTATGATGCATATTCCTGAGGC

A\_16\_P17078649

ATTCAAGAAACTTGTGACCATGTCTATAAAAGGGAATCAATAATTTTCGTGGCTCAGTGG

A\_14\_P102652 GACCAGAAGGTTTCATAATTGGTTCTACGACCCTTTTGAGCCTAGAATTATTGTTCTTAT

A\_14\_P123352 GTGGCAACCAAGTTCATGAGACAAATCCATTAGAAATGTTGAGGTAAGGATGTTATATTT

CUST\_7100\_PI426210822

TCTCTGGAATTAATTTGTCCCAAGTGAACCTCAAATAAAAGGAAGAGCACCTATGA

A\_16\_P01429190

AAAGCGGACAAACATTTTTCAATACTCGTGTTATGTGCTTTAAACATTGTCCTGACATCT

A\_14\_P100923 CTATAAACTTGTGGGATTTTCTTGAGCCCTATAGTTCTGTGACTTCATTTGCTATACGC

A\_16\_P01327632

AAACATAAAAGTCATCCCCTAGAAAGAGAGACTAATACCCTAAATCCTACCTTACAGCAG

A\_14\_P107014 TGAGATTCATTTCTTCTAATGAATAAGAAAAGGCAGACACTGCCCAATATCCATCAAGTC

A\_14\_P116561 TTCTCATTTTTCTGGCTTCTGCTTCTGAAAATTATTTAGGAGGAAAAGGGATTCAATGC

A\_14\_P125706 GACTTGCAGTTTTTTGGAAATACGGAGAAAACCACACTCCTAATTTCTAGAAGAACATAAG

A\_14\_P101372 ACTGAGAAACAGTAAATACCTTTCCCTTTCCACTTTTACCCTGTGTTCTTTGAACATCATT

A\_16\_P41732452

AGCCTATTATGCAAGCAGAAGACTCTAATTGATTTGAACAGTCCTTACACTATTCTTCGG

A\_14\_P125092 CCTTTTTCAAGTGGGTATGTGTCTAACATACATGAGAAAGTTCTCTGTATCCAGTTTTCT

A\_16\_P21578897

ATACCTTGTCCCAAATACTCAATAAAAGCAGGATATGAGGAATTAAGCCAATAGTGCTCA

A\_14\_P109956 CTAACATCTTTGACATTACGTCTCTAGAAATATTATTCATCTGTGCCAGAGGAAGGAGGG

A\_14\_P116567 TAAAAGTCACCATCCAAGTTACCGTTTTTCTGAAATACTTTGTCTTTCAACTGAGTGCTT

A\_14\_P120621 ACTGAAGAATGGGAAGGATATATAAGTGAATATTTACCTGATCTTTCAGTGGGGAAAAGC

A\_14\_P115315 ATCAGGTAATGGAATCTTGACTTTTTATTTAATTTGGCAATTCTTCTTCTCTGGACCG

A\_14\_P105469 ACGTCTAGGGATTAAACTCTGAGTAATACCATTTTAGAGTATAATTTTTTCGTTTAAAAA

A\_16\_P19766334

AAGTAACTTTGCATTTTCCCTTCTCAACCTCATTAACCTAAACCTGTTTTCTTTTGAAGGC

A\_16\_P00685510 CTTTTTCAGGATTTGGAAGGACAGGTCCACGTCATGAATGCCAGTTTT

CUST\_6185\_PI426210822 TTTGTTCCCATTCGCTGAGGACAGCAGCAAAGGCAGATAAGGGAT

A\_14\_P106839 ACCTTCAATATAGTATATTTGAGGTAATTGTTCTGCACGTCTGCCAAGAATTTCTACTTG

A\_14\_P133725 CTTTCTTTTCTTTTGAGATTTCTTTTCCCCTAAAGAACTATTTCTGGCTGTTTTGCTGCA

CUST\_4222\_PI426210822 GGACAGACCCGGTTCTATTTCTTGCTTTGAAGAGATTGTGTTCCAATTATCTG

A\_14\_P128428 AATACTTTCTAAGAACTTAGATACTCAGTTTTCTGACCCACAGAAGACATGATCTGGGA

A\_14\_P114508 CTAAAGTATGTTTGGGTTTTCTTTTCATTTGTTCTCAAGTTCAGGAAGCACAGAACAGAT

A\_14\_P113559 ATTCATAGAGAGATCAAGTGATCTCCATCAGCCTTATCAACTGAGATCCATAAGTGATAG

A\_14\_P125766 ACTGCCCAATTCTAGATTAGGTTAGAGGTTAGAATAAATTAATAATGGGGAGTGGTAG

A\_14\_P106750 CTACCTAGACTTTCCAAAGCACAGGTATTCATGCCTTCTCCATCATAGAAAATTTAACT

A\_14\_P118939 CTGAGAAGTCATGAACATATGGGACAGACTCTACTGTAAAATGGGAATCATTGAGTTGTT  
CUST\_8203\_PI426210822 AGTGCCCTCCAGTGGAACTGTGCTTCTCATATTTGCATGTGTAG  
CUST\_4357\_PI426210822 GCCTGTGCCAACAGTATTTTACCAGAATTGAATGAAAAGAAAGGTACCAGCAG  
A\_14\_P113119 TAAATCAATGTAATACAATACGGTCTTCTGTCTGAGGTCCTGCATTCATTCATTCAC  
A\_18\_P25385201  
GTGTCCAATTTACAACCTATTACTTGCCTCCTTATTCTACACAAACAAGATTTTCCTTGCA  
A\_14\_P104299 TTAAACAGACTAAAATGCAGTTACCTGTGGTCATTTTGGAGGAAGTGGAAAGCCTAA  
A\_16\_P18886869  
AAAAAGCAAAACCATCATCTCTTAAGGCCTATCTTAATGCTGGTTTCAAATTTACAGGCC  
CUST\_7094\_PI426210822 CACACAGACCCAGCTCCCCACCAGCCTCCCCTGGAATGAGCTTTC  
A\_14\_P106015 GAGATAATTCCAATATGATCAATTTCTTCTACCATGTCAACTTCTGATCCTTCAGGATCC  
A\_18\_P13727205  
AAAATTCAGCCATAACACCTTATACAGGAGATTATGCTGCATATAAACCTCTTGGAGAG  
A\_14\_P104877 CTTGTATTCTTTTTCTCTCTCTCCCATGATGTTTAGAAACACAACCTATATTGTTTGC  
A\_16\_P17268776  
ATTTTACCACCAGATTTGAGATAAATCCACACTGCTGATATATCTGTTCTGCCTTCATGC  
A\_14\_P133161 AGAGATGCTTTTTAGGACCATTGTTAGAACCAGAAGAGATTTTTTACCAAGTTCACACAG  
A\_18\_P11273166  
AAATTGCAAACACTACTGATTTGTTGTAGACCTATTACCTTGCAAATGAAGTAAACAGGGGC  
A\_14\_P109335 AGATTCCAAAACTCAGATCTCCAGATTTTTTTCTCTCTGTGTGATGATGGTCCTTAA  
A\_16\_P36814985  
AACGTTCTGATCTTACATTGATACTCAATAGTAAGCCAATTTTGTTCCTTCCATAAGCCAA  
A\_16\_P58424158 CACAATAAAGAATACTTCTGTACCCAGAGAGTTTCTTGTGCCTCTG  
CUST\_5103\_PI426210822  
AGCTTAAAGATGCTTAAAATAGCTAAGGTTAAAATGAGGGAAGATCTGAAAAGAAAAAC  
A\_14\_P126252 AAATAAAAGAAAAACCCACTCATCATGGCAAACATTGTCATATTAGTCTTCTGGAGA  
A\_14\_P126387 CTCTCAAATATCACTGTTGTGAATACAGAGAGGGAAAACCAACTGTAACGTGCC  
CUST\_7623\_PI426210822  
TTTAAAATGTAAGATTATTTTTACTTATTTTAAATCTTTCAAAGCACTTTTTTCCTCAGG  
A\_16\_P15714247  
AGAGTAAGTAGCATCAGTTGGATCTAAACATAAGTAACATAACATTCAATGAAGGGCAGA  
CUST\_8235\_PI426210822 TTTTCAACCAAAGCCCCAGCTTGAAAAATGAGAACTCCATTTCTTTCC  
A\_14\_P127642 AAGACGGATGATGATGAAAGAACAATTGATGTGTCATTTGACAAATGGCAAAATTTGTCT  
CUST\_7721\_PI426210822  
ACACATGTCAGAACTAGAAAGTTGGAAGTGAGACTTCAAACCTCTACCTAGCATTGA  
A\_16\_P01708239  
ACCCCTGTTCAAAAATCTTGATAATGGCATTCCATTTAACTCTAATGTCCACATAAACA  
CUST\_3728\_PI426210822

CTGAAAGCCCATATCTCATGCTAAATTTAGCTGGATTTTTAACAGCCTTGATTGATTGCT  
A\_16\_P19318887  
AAAAACCCTGAAATTAATGTCAGTGTTCAATCTGCTGTCAGTATTGGAAGTTGTTCTGA  
A\_14\_P111068 CTAATAAAGGTTAGTGATTCAAGATAATGCTGATTTTACCTGCAAAACTCACTGTGGGCT  
A\_14\_P125101  
ATCTGGTGAAGAAATAAAAGGAAAACAAACAAATGAAAATGGTTGCAAAGCCACAAGATG  
A\_14\_P131432 CTACAAGTGTCCCTTTTAAAAATAGTGTGTGCTAACTAAGGGCTATTCACTGCCATTT  
A\_14\_P100676 GAATTGTTTTCCAGATTTTCTTTTGTCTCTCTTATCCCGTTAATATTCCCGCCCTAAAA  
A\_18\_P15033485  
AAAGACAGCCTGTAATGAGATCTGTAATGAGGAACTAAGGTATAAGTAGCCCTTTGAAAAG  
A\_14\_P118114 CAGATAAAAGAATACCATGTTTGAAGATAACATGCCCATGTAGAGAGCAGAAGTGTTTGT  
A\_16\_P00001153  
TTCGGAAATGTGTTTCAGTTCTCTTGCATTGCATAATTTGTTTCATATTAAGCAGGCTTGA  
A\_14\_P128955 CTACTIONAAGTTTCTCGCTAAAAATGATGAGCATTACTACGTGCAAGGCTCTAACTAGGT  
A\_16\_P01230283  
AAGAGTGAATCAAGCACAAATCATGCCTATTGTTCTATGTAGTAGTTCTCTGTTACCTC  
A\_16\_P16896835  
TTTACCCAATATCATTCCCTCAATAACTGAAACACATATCGTAACATGTTGCATCTACCCG  
A\_14\_P201582 TTTAAGGTGAAAGCATTGACCCAGGGTGTCTTCATCTTCAATTTGGGTTTAATGTTATA  
A\_14\_P127694 ACTTTAAGAACATAGGAGCATTGTCAATTTTCATCAATTATGTCAACCACCACCATGACAT  
A\_16\_P17765570  
AAAATTCTGGTCATATCACATTCAGATCTTGTGGTCAAATGCTTGAAAATGTTACACAGC  
A\_14\_P106122 AATCAAGGTTTGGCTTCAGTTTAAATCACTTGAGGTATGAAGTTTATCCTGTTTTCCAGA  
CUST\_4630\_PI426210822 GGCAACCTGTGGACCAGGCTGGGGAAGAAGAAAATCTAGGAAGAA  
A\_16\_P37740615  
CCCAACCAGTATCAGTTCTAAAATCTCATTGCTACTACCTAAGACAAATTACCTTTTTTCC  
A\_16\_P16191225 AAAGACCCTTGTGGCCTTTTTAAGTTTGAGAAAGCAGTTCTTGTCTGGAAAATTT  
A\_14\_P120295 ACAAACCTATAATCCAGCATCTTTTATTGCATTGGAAAGACTGGCAAAGTCTTTTGGATG  
CUST\_2559\_PI426210822 TTCTCAGGTGAGAGGCCCACTCTTGTCTCCTTGAATTGTGCTGTT  
A\_14\_P129488 TCTTTTTTCTTGTGTAGTCATTACAGTTGTTTGTCTTACTTTCTAGGGTTGATGGGATGG  
A\_14\_P120789 GGAGATAAAACATTTTTCTGTCTTAGAAACACTGTTTTTACACAAATTAGGTCAGGATGG  
A\_14\_P119676 AGAAAAAGTTCTCAGAACTCTACACTTTTATGCACATTGGAGACTAAGACAGCAGGTAA  
A\_16\_P38836439  
GCACGTTACCTTTTTTAAAAGCCTGACATATCTGTATGATATCCCTGCACTAAACATTTGC  
A\_14\_P131312 ATGATTTTACTGATGTCAATTTGATTTCCAAAGGCTGACATAGTTGACACTGCAGAAATTA  
A\_14\_P202241 CTATGACGCGTGGTATTTTTAAATTAAGACCTTTGGTTTTCAACACCTGGAGTGTTCTC  
A\_18\_P15178273  
AAAAAAACCCCAAAAATCTGGTATTTGTAATTGTAGCAACTTTCCAAACCATTACAGGG

A\_16\_P01537486

ACACCTAGGACTGCTAGATTCTACACCTTGTGATTTCTCAAGATTTTTCCAAAAACAGAG

A\_14\_P134480 TAATAACATTCAGCAAGCACATAGTGGAGCAAATGGTGGCTTTCATTGGGTAAGTAATTC

A\_14\_P120525 ACATGCCCTCACTGTGAGCATATATTAGAAGGGACAGATATTAAGCAAATGCCAATTATT

CUST\_8506\_PI426210822 CTCTGGGAACCCCCAGCAGCATCTGCAGTTGCATGCGTCTGAATG

A\_18\_P10542544

AAGGAGAACTCTACTACTCTAGCCAAATCTATGCAAAGTTTTTCAGTAATTGCACACATCC

A\_14\_P129862 TTACCTGAAGGAGTATTTGTTCTCTTTCTTTCTTGCTTGATTCCCCTCCATTCTCAAT

A\_14\_P120805 TAGTAACTTTTATCTTCCTGACTTCCATAGCCAGCATCTTATTTTCTTCTTGGTGTCCCT

A\_14\_P104277 CTCAAATATCAAAGGAAGAATGAGTTCAATTTTCTTGAAGTTTATTGACTGTTACTGGTG

A\_16\_P01637455

CGAGACTTATCCTGTCACCTTTTGTATAGACTCTGTAACCTTTAGAACCATGCCAAGAGATT

CUST\_4373\_PI426210822 TAAAAAAGGACATGCTGGCCTTGCTTTCTTACAGGTCACGAAGTCTCTTTTA

A\_14\_P124820

AGAGCAAATCTCACTCATTACACAAGTCAAGAACAAAGTGAAAATGAATAGAAAGTCTCCT

A\_14\_P107294 CTCTTCTGGTGTCTAGGTCATAATGTTTTCTTCATGCATTTTGTTGATTCATTAGCCAAC

A\_16\_P17547519

AGCCTTGTTATAATGCTAGTAGTCACCTTTTAAAGTCAATCATTATCCATGACATGCAA

CUST\_6120\_PI426210822 GATCCCCAAACCCAGAGAGCTATTTAGAGTTTGAAACAAATTGTTCTCCTTCTC

A\_14\_P102070 CCAAAACTTGCATCACATGCAATATTTCCAAATAATGTGATCCCAAAGCAAGATCTTCT

A\_14\_P123786 TGAACCTACCATCTTCCCTCAAAGTAAAATTATCTGGTAGATTCACAGAGAGAACATTGG

A\_14\_P117539 CTATGGCAACGACCAGACATAATTTGAGGAGATAAAAACAGTTTTACTACCGAGATGAGTT

A\_18\_P14136410 TTTCAGTTCCTTAGGAAACAAATTGGCCATTTGCCCAAAGAGACTAATCCAG

A\_14\_P137435 GAAAAACTACCAGACTGTTTTTTGTCTTCTCACAAAGACAAGAAAAATCAGGGCATTTTG

A\_14\_P121767 ATAATTTTTTAAAATGGAAATACCCAATGCTGCCAAATACTCAATGCTGCGGTGAGATTG

A\_16\_P40254691

AAGAGGCTCTAATACCCTAATCACTTACATACCCTAGTGTAGTCCCTCTATGCTTTTTCAA

A\_14\_P114473 TCCAAGTGTATTTGGCAAATGTGGAATGTTATGAACAGCCAATATGTATACTGCAGTTCA

CUST\_8570\_PI426210822 CACAGCTGGCACACCCTCTGCCTTAAAGCCCTCGGCAAGGGCCTC

CUST\_7847\_PI426210822 AGTTGTGGGTGTTGCTTCTGGCAGGAGGAATATGAGGAAGAAGAT

CUST\_9610\_PI426210822 TGCCTGGGAGCAGGAGAGGGCTTCATCTTGCTGATTTCCATTCT

A\_14\_P114609 TGCCATGGCAGCAGTTCTTTAGAAAAAGGTAATTCTAAGCATCTTGTGTAGTTTTGGATA

A\_14\_P135645 GAACCTTCAAGTGTTTTGTAACTACTGTGTTTATTTTATTTCTCCTTACCATGGCTGTT

CUST\_7928\_PI426210822 GGGTTTGAACCCAAAGCATTAGTTAGGAATGAAGAGTGGTTTTGTCTCTT

A\_14\_P100756 TCTTCTAACCTTTTTCCCCCTTTTGTGATTAACTCTTTTTCCCATGTGGAATTAATATGC

CUST\_9158\_PI426210822

GGTCTTGTTTTTATAATTCATAATTAATAGATTAGCATTGTTAGCTTTAGTTTATTTGTGT

A\_14\_P136993 CTAAAAGTGAGGGGAAAAGAAAATCAAATTGGAGGTGGCAACTCCTGGT

A\_14\_P121021 ACTTGAGACAGCAACAGTGACAATGAAATTGTATCCCTACTTGTTCAGAAAAAATTTGTCT  
A\_16\_P01406520

TCAGTTCACTAATCAATGCTCCTTATGAAACAAGAGTTGCATAACTAGTCTCAGTGTGAG

A\_16\_P21217085

AAAGAGCCTGAAAAGTGTAATCTGCAAATGTTGTGATTGAACAGAGAAAGGTTAGTATGG

A\_16\_P15152385

TTGGCAGCATAATCAACAAGATAGCAAAGAATTTTACTGATGATGAACAAGAGTCCCAAA

A\_14\_P139263 TATAATTACATTTCTCTCTCTTTGGCAGTCACCTGCAGAATCTGTATGCGTGGATACTTA

A\_16\_P01140905

AAGCCCAGTTTACACTATTTCTAAGCCCTTAATGCTTTTATGCACTGTAAAAAACACTGG

A\_16\_P03760876

CCCCCTGAATCCTTTATCTACATCACAAGGCCAAAATAAATCCTTTACTCAAAAGATACGT

A\_16\_P00075962

GAGCGTACTGGAAAATTGGTAAGTTGACACTTTCTCAATAGGGTCATGGATGTTTTTAT

A\_16\_P16192003

GACCAGGCATTCTCATAACATCAACTTATTTTTGAATAGTGTATTAGTTAAATTTTACAG

CUST\_913\_PI426210822 CTTCTCACTCTCTCATCCTGAGCTTCTGTGTGCAGACGACATTTTA

CUST\_8223\_PI426210822 TTTCTGATTAGCTCCACAGGCAGTGCTGGCTTTGCTTGTTTCTGTTA

A\_14\_P139037 TTTATTCCAGAAAGATTTGATCACCAGGAGATTTTTTCGGGACATTACCAAACCACTC

CUST\_3453\_PI426210822

TAAAAAATTATGGAAGTATTGGACTTGAGCAAACCTTTTGACAAATAGCGCTCTCTTTCTC

A\_14\_P124744 TCTTGTATCCTTCTTTAAATCCTTGAGAAAAGTGGTGGTGTGATGTTGATAGTTGTATCC

A\_14\_P102777 AGTAGCATCTGGCTTCTGTAGAGACTGTAAAAATTAAGCAACACAAATCATTGCGAG

A\_14\_P138746 CATGAACTTGGAAATTTGGCTTGGCTTTTGGAAAGTAAATGAAGGCAAGAAAACCTCC

A\_14\_P200490 TTTTCATCTCATCTCCCAACAGAAAGTGACATCAATTACTTGCTAAAAATGGCACTGGAA

A\_14\_P132008 AATACAAAATACATCTTAATGTGTCAAGAAGACCACAGTTAGCACCAGGAAAGGAACTTT

CUST\_5033\_PI426210822

ACATAAATACTGTTTTATATTGTAAGCAGGACCAACTCTTTTATGGTGTGTTTTATACGT

A\_14\_P127249 ACTAGGAAACACTTTCTCCTCATTCAGGACTTAGGTTTCCCAATGTTCACTATATATTTG

CUST\_2265\_PI426210822 CTCTCTCTCTGGCTTGTFTGAGCCTCTTCACCTCGCTGCATACAC

A\_14\_P123703 CCACGATGTAGTCACCTTACTAAGGGATGCGATAAAAAGGAGAGAGGTAACTATTAAG

A\_14\_P119181 ATGTCACAATGCTGGGGATAGTTACATTCATATACATTGTAACAAGGCTGAGTAACTCTT

A\_18\_P13062694

CAACTCAAACACTGAACTCAATGCTGATTTGAATCTAACATCAATTGTGCTTGATGGTTTTGC

CUST\_926\_PI426210822

TTCTCTTTGTCATTTCTTTCTAATTATCAGGGCTGTCCTTATCTGTTTCAGTGCTTC

CUST\_3810\_PI426210822

TTTAGAGTCCTGTGGGTTATTCTGGTTGTGCTATTCTTAAATATTGAGTGTCCAAAAGA

CUST\_2264\_P1426210822 AGTGTTCCTCACAGCCTCTTGGCCTCTCTCTCTGGCTTGTTTGAG  
A\_14\_P136919 CTTAGGGTTGGGGGTCTATATCACTTTCCCGTTGTTTAAAGTAAATGAAAGTAAGAGTATT  
A\_18\_P17414872

AGTGTCTGTGACACAGTTTATTTATGTTCTCACTGTAGCATGTATAGGTAAATTTCCACA  
CUST\_7638\_P1426210822 GACAAAATTTCAAGGAAGCAACTGGCTTTGTAGTGCTTTCTTTGTCCTGCTT  
A\_14\_P115524 GTCTTACATCTCAAGTTTCCTTGTTTGGTCCTTCCTTTCTTTCACTTCTCCTAACA  
A\_16\_P58424084 AATGTAAGTCACAGGTCCAGACTACATCAAGAGGAGGCAGAAACACATTTTCATC  
A\_18\_P14024704

CCCCATCATTCTATAGCCATCGAATGAAGTATTACCTCTTGTAGTTGTGCAAATTCAGT  
A\_16\_P18154343

ACCCCCATTACCTATATGTAAACATCAGAATCAAAAATTGATCCCTTGACTTAACTGAA  
A\_16\_P20878117

AAACTTGAGGAATTATACTGTCCATTGTAAAATTGGAGCCACTCTTGAAAAATTGCTGC  
A\_14\_P118220 AGCAGTCAGAAGCATCCATCAATTTTTTATCGACACCAAATCAAGTTGATACTTCATCTT  
A\_14\_P108027 CTTACATTCCATAATTACCGTTAACGACTGCCATCACGGTTCTTGAAGAGTTATTTTTCA  
A\_14\_P127942 GGTAAGATTATCTCCAGCCAAAATGTCAACCAAGAATTCTACAGATCTAGTTGAATATGT  
CUST\_168\_P1426210822

CAGCTTATTCTGGCAACTAGGAAATTGAGCTCACTCTTGAGCTCAGATTATACGAATAA  
A\_18\_P17378157

ACAAAAGATATGTCAGAATACTTCCTGTGGCTCTGTCATGTAATATTACAGAATTCCACA  
A\_14\_P132889 TTTTCTTACCATGCTTAGGGCAGAAAACATAATCTCTATTTTGCCATGTAAGACTCACCA  
A\_14\_P130011 AGGGGCTGACTGATATGAGATTACTTCTTTTAAAGGGAAATTGTCATTAATGAGTCAAGAA  
A\_16\_P16016192

AGTTCTTGAAAATTGCCTATCAATGAATCTGTCATGACTATATCAGGCTTGTTTGCTTCC  
A\_16\_P37907740

TCCCCTATTCATAAACCATTGTGATCGCAGTCTTCTATAGAAATTACCTATTTTGCCTGA  
A\_14\_P127766 TTCCGAATGAATGGTGATAAATTCCGAAAATTTATAAAGGCACCACCTCGAAACTATTCC  
A\_14\_P111550 CCTCTTCCAGCAACACGTATGATATCCAGAGATCACAAAATAAAATGTGAATGTTTTAC  
A\_14\_P113398 TTCTAGCGGAAGGGACATGGAATCTGCATTTTAAATGCTACAGGTTATTTTTAGGATTAG  
A\_14\_P113941 CCAATGTATCTAAATTCCCAATTACTTACCTCCTCCTCAATTCATTTCTGGTTTTCCAAA  
A\_14\_P104780 ATGGAGAAGGTGGACCTCAATCTGACTTTGAAGATAAATTTGATTTGAAAGATGAAGAGA  
A\_14\_P201157 CAATAATGTGACCTTGAGGGAAACCACATTTTGGAACTTGTATGATTTCCATCTGTTTT  
A\_14\_P133826 GCTTTATTTAGACAAATATCTGAGAACAGAATGGTGCCATCTTGCCTTTTGTCCCAAT  
CUST\_5225\_P1426210822

TATTTCTGCTCTCATGACAGAATTTCTGGAGTTCTTTGAATTCACCTGGTTTTTG  
A\_14\_P123141 AAAAGTTGATGTGCAAAAACCTCATTCATTTACGTCTCATTTGTCAAGAGACATTTTGGT  
A\_18\_P14135987 AAGATTCTGCAGGGAACAAACAAGTTCCTTTTGTCACTGGACTGCTTTCT  
A\_14\_P119118 CTTGGTCAACTAGAGCAATAACGTTTTTCATGCTTCATATGGTTGTTATGCCAGTTTTTA

A\_18\_P22840116 TTATTTAGGAATCTCTGAATTGGGGAAGGTAGCCATGGTGGCCAGTG  
A\_16\_P30134738  
ATCTTCAGGCCATAAGTAAATGTGGACATCAAAGTCTCAATATTTGACCTTAAGCAGCC  
CUST\_5727\_PI426210822 GATAGATGGGGAGAAGTCTTGCTGGGATCCTCTCTGGTTTTAAAGG  
A\_16\_P17060824  
AACCTGTAAGGCAATCATTCTCATTGGACCTTGTGATAAGTAAATCTTCAAATGCCTT  
A\_14\_P132235 GAAATTCTAGGCAACCATCACTTTAATCTCATGTTCCAGTCAATTCAAAGAACTACTCT  
A\_14\_P113735 ATAAGTTGAGGAATACTCAGGTTTGGGATGTCAGGTTTGATTTTCAATCAGATCTTGAAA  
A\_14\_P125927 CCTACATTAACTCAGATCTACTGACATACAGACATCAGGGAAGTAAAGCAACAC  
A\_14\_P100281 ACATTGCTATTTGGACCATGCTCTTATTTCTCCAAATCTTTGTTTCAGTCTACTATGCAG  
CUST\_747\_PI426210822 GTTGATGATGTAGAGGCCTTGTGTTGCTGCCCTTTGCCTAGCT  
A\_14\_P124538 CCTTTTTCCAATTTTGGTTTGGATAAAAAGCAAGAAAATTGGGACAAGAGTTTTAGCAGT  
A\_14\_P124526 AGTCGCTGATCTTACAACACTATTACCACTACATCTTTGTGACTGGGGTGAAGTT  
A\_16\_P17801310  
AATGCTTGACCATATGGTCTGTTAGTCCTTTTGCTAATTACCTACAAATCACTACACAGG  
A\_16\_P01001259  
TTTGAATTTTGGGAGTTGACATCTTACTCTACGCTTAGTCAAATATGCTCTATGCTCAGC  
A\_14\_P201274 GAAAAACAGTTTATAGAGAGCGGTTCAAATGCTCCCAGTTCCCAGAAAGACAATTAC  
A\_14\_P122975 CATGATTTGAGGCTACTGAGGTCATGATGACCATGGAAGACATCATCT  
A\_14\_P109468 AACAAAAGCCACTTTCTGAACCTCGTTCTGTGAAGTTTTAAACAAATTGGGTTTGTTTA  
A\_16\_P03491227  
AAAACAGAAATCATGACAATAGTTCATGTAGAATGGCACGTCATTGTATTTTACTGGGC  
CUST\_918\_PI426210822 GTATAGGCACTGACTGCTGCTCAGACTTTGGAGGACAACCTCAAATGT  
A\_14\_P200440 CTTTATTTCTATCCACAGGCACCTTAAGGATGTGATCCTACTGACAGCCATC  
A\_14\_P119379 GATTTCTTAGTTGAAAAGTGGTGAATACCTCAAGGGATGTAGACAAATACTCAAGGTTA  
A\_14\_P123109 TTCCAGTTTGGAGATTTTCTCTGAGTTTTTTCACATCTTACACAACAGGAATTACATGTGT  
A\_18\_P17390655  
GCCTCTTTCTTTTATTACATTTAATCACAAATTATGGCAGAAAAGTAAACAGCACTCC  
A\_14\_P115848 ACACACTGCATCTCTCATAACAGAAATGTTTTAGATGGCCAGTTCTAAAGAAAACGTTATG  
A\_16\_P19116964  
ACAAAGACTAGCATGTTATGTGGCTTAAGAGTTAGCAGATACTTACTTAGCAGGACAGTT  
A\_16\_P20227693  
CAGGAAACACTACTTTGTAAAGTCATATGCGATGATCAATAGCCATAGAGAACTTCTGAC  
A\_16\_P00685596 ATTCATAGTCAACAATAAGGTTTAGCAGACTTTTCTCACACCCAGGTGCTTTCACAG  
CUST\_7486\_PI426210822 TTATATTAGGAGGTCCGTCATTCAGTGTCTTTGTAAGTGTCTTGCCCTTG  
CUST\_5064\_PI426210822 AAATGAGTGGCACCAACACTGATTATTACTGGGTGACAGAGGCACAT  
CUST\_7979\_PI426210822  
CAGATCATTTAATCTCCAAGGCTCTTTGGTCCCAGTATCTAGTAGCTATTTGTAAACCA



A\_16\_P16879979

TAAGATGAACCAGAACACCATATTCTCTTAGAATCCCAGATAACAGACAAAGTCATCACA

A\_14\_P200004 TTCAGTAAAGTTAATGCCAGTGTTAACTATTAGTAGGACAGCCAATGATCATCTCGGTG

CUST\_5182\_PI426210822 AGACCTTTCTCAGGTGGCGGTGGTGATGGTGTGTAGGGGCAACT

A\_16\_P02995300

AACATTCAAGTGTGTTGATCCAAAAGATGTTTACTAGACGAGTTTCCAAGCATATGAGGTC

CUST\_9623\_PI426210822

GGTGAATAACTAGAAATATGCCATAGATTCTTGAGGCTTTCCTGGTTCCTAATGAC

A\_14\_P128302 CTATGCACCTTTAATTAACCTCTGGCTATTTTCATGATTTCCCTTATTTGGCGGGTTCTA

A\_16\_P20079144

TTCCCTTAACATCAGTCCTTAGAAAAATCTCACCATGTATTCCAGGTCACATTTAAAGAG

A\_14\_P200616 GAAAAATCGAATCCCTATGACAAAAGTAGGTTATAATGTGATCCTACTGTCCCTGATTTGT

CUST\_5890\_PI426210822 ATTTAGGTCACATCCTGTTCTTCCGTTCTCACCTCTTTCACCTCCAT

A\_18\_P10013962

GTAACCAAACCTTTGCACATCTTTTAAACAAAACATCAGCATAAGTATCTGTCAGGTTGCCT

A\_16\_P16191867

AGAGGGGAAGAATGACAGACCTTTCTAGTCTATCTGAAATAGCAAATTAAGTAACAA

CUST\_7462\_PI426210822

ACTATCCTGTAGAGGAGAGACATTGAAAATGACATATACAGACACAGAAAAGGTTGC

A\_16\_P00071825

AGTGACCCCTCAAATATATCATTTGTTTTCTTAATAACCTATTATGCATCTGTCGCTCA

A\_14\_P107359 GACTATGATATGAATGAATGGCAATGAGTGGTCTAATTAGAACCAAAGGACATTTACCCT

A\_14\_P130777 CATGGACAATATTACCAGGCAGAACCAATTCTACGATACCCAAGTCATCAAACAA

A\_14\_P134921 AGTTGACAGGAGAGTCAACCTCCAAGTTAATAAAAGGTTCAAAGCCCTCTAGTT

A\_14\_P106948 TGTAATGTGGTTTTCTACAAAGATGAAACTACTAAAACCTTACAGGTTTTATTTTTTTCTT

A\_14\_P106804 CTAGAATCCGGCTCATCCTGTAAGGAGAGCGTCTTGAGTCTGATCAAA

A\_14\_P120272 GGACAAGAAATGTATGTCTCCTTTTTTGTCTGTGGTTTTATTTCTTCTGTATCTGATAAG

A\_16\_P15268894

ATGGAAAATCACAATAAGCCACTAAATAGTTGTAGTTCTGGTAAAAAGTTCCTGGGTTGC

A\_16\_P00627153

AAAACCACCTTGTGTTGATGGCATTTTACGCTGTAATGATGACATCTTCGTATCTGAGATG

A\_14\_P115098 AACATCCAGAAGAAGGAGATTGTGGTGAAGGGAGACGAAGTGATCTTC

A\_14\_P125000 GTATCTGTCACAATAAATGGCCAGTGCTGCTTCTTGCAATTGGTTTTCTCCAAG

A\_14\_P101708 ACATAATGTTGTTTGGTGTGTCAGATCTCTATGGACAATCCTCTTCTCCTTGTGTAAGTATC

A\_16\_P37944512

CCCATTTTCCATCCCCTAATATCTTTTACTCAGAAAATTTTCTTATAACCCCTACAGGCA

A\_14\_P106185 GTTAGTCTTGTCTCAGAAAGCAGTGATCAAGCCAAACACTGAAAAACAGATCAAGT

A\_14\_P129587 CTGGTCGGGGTTACCCAGTGAAGGCTGCCTATATTTATATAATAAAAATGCTTATTTTT

A\_14\_P115688 CTGCCTTACAAATCTTATAAGAGGGCCTCACAAACAGACATTCATTATTCATTGGAAATG  
A\_14\_P115418 CTCTGAAGATCTGCAACTACATCTTCACTGTCACTTTGTCTTGGAGTCAGTTTTCAA  
A\_16\_P41042815  
CCTTATCCCAAGTTTTTCATTTCTACTTAGAGCATCTTCAACAAAGTATGGCACTTCCAAT  
A\_14\_P123127 ATGGAAAGAACTTGCTTTCTTTGTCTCACATGAGCAACACAAGTCTCTTTAAAGAATGA  
A\_14\_P130046 TCCAATTATGATACTATTCCTTTTTGGACTCTCTGAACAAGAGAAGTGGGCTTCCCTCTTA  
A\_18\_P22841354 CTACGCATCAGGTCGGGGGAGTTGAATGGTGAGCCTGGAGTCCAG  
A\_14\_P102058 GTAATGGGTATTTCCCAAGGAAGATCGGATGACTGAACTGATATCTGAAGAA  
A\_14\_P136101 GAGTAAATAAACTGGCTGGTGAATGAACTGGGGGACTTCTCCCTTTACTTT  
A\_16\_P00685539  
TTAGAGCAAATTTAAACTCTACAACTTTGGTCAGGGATTTGAACACATATTTCCCTCCC  
A\_16\_P02361408  
GGGGAAAATCTGTAATGATACCAGGCAAATATTTACATCTTCTTACAACCGAATGACCAT  
A\_18\_P22842659 ATAGGCAACTCCCAACCAGAGCGCTCTCCACTGACATGTTGCTTA  
CUST\_8162\_PI426210822 GTTTCAGAACAATAGGAGGGAGAAGGAGAGGGGATGTGAGAGCTATTTA  
A\_14\_P129030 TTCAAGTCTATCTAAAAGAAAAATCCAAAAGATTTTTCTCCCACTCACCTGAGAGGAAGT  
A\_14\_P113409 CGGATCTCATGTATCTACGCTGATTATAAATATGTTTCATGACAGGGTGGCATCTGCTT  
CUST\_8643\_PI426210822  
ACAGTCATTCTAAAAACTCACCTGATTTCCAGGAATAAAATGAGTGAGCCAGACA  
A\_14\_P113298 CTCATTCCTGGCTGCAGTTATTACACTCTCTCTATTTTTCTTGCCAATTGCATATAGTTG  
A\_18\_P17204417  
AAACAGCCCATCTCTAAACTATGATGTAGGTAATCCCAATTTCTTTTTGTAGTCTTCCTC  
A\_14\_P119245 GCCATATCCAAGTTTTCTTTAAAGAGATTCAGAAGAAGAAGATAAGTGGAGAAAAACGTGC  
A\_18\_P22842637  
CAGTTGCTCATTGGCTTTTTATTTGCCCTCTTGGAAATTGCAGAGGATTTTGTATTTTTTA  
A\_14\_P116934 TATCACTATTA ACTATTAGTCACTTATTGTCCAAGGTAGAGTGTAGAGTGGGGGACTGTC  
A\_14\_P122063 CTTTTAGAAAATAGGCGAGTAACCAAGTCTGATCCAAACCAACACCTTACGATTATTCAA  
A\_16\_P16552367  
AACAAAATACAAACAGAAAGAGAAGTACATAACCTAAGAGATATAACCCTTTACCTGG  
A\_14\_P120772 CACAGGACATCCTTTGCCATTCAACCTCTGATTTGCACAAGGTGAC  
A\_14\_P136276 GAAACGAGGCAGGAATCTCCATTTTTGTGCTTTTTGAAAATGCAATGAATTCCTATACG  
A\_14\_P137011 CAGTTGCAACTGTCCTGTAACTAAAAAGTTAAAAAGAAAAGTAGTTTCCCTTCCCTTGT  
A\_14\_P136556 TGGCTAATTTAAGTCAAGTTTTCCAGTTTTAGATGCTGTTTTCTCTAACATTTCCCAAA  
A\_14\_P119760 GGAATAGAAAATGCAGAATCCTTCTTTAGTAGCCTATATACAGTTATCTCCTACACTCA  
A\_14\_P126713 AATCCCATCTGGGGAAACGTTACTATCTTCCACAAGCAATTTTTCTAAAAATGCAAATGC  
CUST\_4207\_PI426210822 CATTGGAAGCTTAACAGGGCTTTGGCCACAGCAGATGGAAGTTT  
A\_14\_P110316 TTTTTTTTTTATTTGGAAAAGAAGGGTTCTGTATCCAGAGGGGGTTCCATACC  
A\_14\_P132396 ACAGCAGTTTTCAATCACTAATAAATTTCCCTCACTCTCAAACCACTCAGCCTTTAAA

A\_16\_P40777221

AATTTGGCCCTTTCTTTATTTTCAGTGAAAGACGTATAAAAAATTGCCCCCTTATCAACAC

A\_16\_P58424521 CTTTCAAAAATATCGATGCCTGATCTATCCCCAGAGACCCTGACCCT

A\_16\_P16084839

ATCCTTCTTTATCAATCCCAGACTAATCTTCACAAGGACATAAATAAACGACGGTTTCG

A\_16\_P00702834

AGTCAGGTAAAGTTACAATTTTGCAAGTCCATATTCAGTTAGTCACCAAGTATTAATGCT

A\_14\_P118355 GAAACAGAAGAGACTGTAAGTCATCTCCTACACAAGATCAAATAGTATATTTAATAATTC

A\_14\_P107642 AGACTATAAAGACATGCTGTTTCCTTTATTCATCTACAGTAGTCCGTCCTGTTTTCAAA

CUST\_6758\_PI426210822 CACCATTACACTGGGTTCCATGTAAACGACACCTCCACAGAATATAATG

A\_14\_P135894 AAGAAGCCTGCAAATGAATTCTTAGAATAAGCAGCACTCAATATATCTTCTAGGGGTCCT

A\_16\_P00410034

TTGACCTAGTTCCAACATAAACTCATACTTTTTGCTTCTTTAAGATCGAACATCAGCC

A\_14\_P136521 CTATAACCCAATTCCTCAGAGATAACTGCTGTCAGAATATTATTTTCAGAGTTCTGCTATA

A\_14\_P125547 ACAAAGAAATGGATACTGCCATAAATTGTTAGAAACTTAGAATCGCTTTGATTGAGG

A\_14\_P129310 ATTACTGGTGTTCCTTGGTTAGTTCTGGGTATAAGTTCTGGATCCTCACTCATC

A\_14\_P200617 GATGAAGTGATGCGCTTCTTCTCTGATTGCAAGATCCAAAATGGCACATCAG

A\_14\_P139863 ACCCATATTTACAAAGTGACCCTCTGATTATGTGTCCTAACATTTTATTTTCAGTTCCAT

CUST\_5401\_PI426210822 TGATGTCTAATTCTGGGATAACGCTGGGCCACTCAGTCTTTGGATT

A\_16\_P17169565

AAGTGAGTAATCTGTCCAAAAAAGTAGGGAAGATCATGGATATAGCCCCTAGTAAAAGGT

CUST\_3484\_PI426210822

GCCTCCAGTGACTTCTGCTTATAACGCATTGACCATCCATATTTTAAAAGAGGTT

A\_14\_P128334 CCTTAGGAGTTGGTTACTTTTTTCATTTTACACACATGGACATCCCAGGTCAG

A\_16\_P21612799

ATCAATGTAGGGCTTTTTTGTACCATCTTCAAATGACGTCTACTTACTCTATGCATGCA

A\_14\_P139391 AGACATTACTCATTTTCCAGGGTAGGAAGTCTTATGAATGATTTATATCAGGGAACCTCT

A\_14\_P113813 TGGAACCCTGGCATATATAAATAGGCATATTTGGTAGGCCCAAAGAAAGTGAATTATGAA

A\_16\_P00974822

AAAATGAACTGAGACCAAAGAGAAGTGACCTGTTATTCAAGTCCTTATACTCACAAATGC

A\_14\_P109432 TCCTCTCAATAATTGTCTCTCATTCTCCGAGACCGTAAAAATGACCAGGAA

A\_14\_P105579 ATAAATGGGTTCTGAAAGGACTTCCCAAACAGAAATGTATGTTTGAAACACTGTCATTAC

A\_14\_P104572 TTCCTGTTTGTTCATGCCATGATTAATGGCTGTTTTATTGATATAAATCTTTCATCCCCT

A\_16\_P18650620

AAAACAGACTTTTGTGGCTTATGTTATTGTTGCTCCATTTTAGTTCCCTAAGGTCAAGGAG

CUST\_9798\_PI426210822

AATGCATGCATTCATGTCTTTATTGTATACAAATCACAGTTTACTGGAGTCCGTAGACAG

A\_14\_P101828 CTACAAAGGAAACAAAAGGATTGTTCCAGCGATGAGTATGACTCTATTGAGGAAGACATA

A\_16\_P02574875

TGGAGATTACACTGACATTCAACATTCCTAACCTAAGAACAACAAGACATTATTAAGTGTG

A\_14\_P116358 ATAGTGAATAAAGTATGAGATGTTGCAAATATCACTTCCCCAGAGTTCATGTAACCATCG

CUST\_2718\_PI426210822 TTCACTTCCTTTGTTACCCAGATTTTCTTAACGCTTTCTTCCATTGGA

A\_14\_P121983 GTAAATATGATGTCATTCTTTAGTGCTTCCTTGTTCCTTCTCGGCTATTCTGAGACCTT

A\_14\_P110681 CTGAATCTCAGTTGTATCCATAGTCCTGTTGTTAATGAACTTATGAGAGGAATTCGTCA

A\_16\_P00647360

TCAACCTTTAGAACATTTCTCTTGCAGTAGTTATTTTTGTCAATAGAAAGCAGCAGACC

A\_14\_P125319 CTAACCCAATTTGTAGAGACTTCATTACAAGAGAAACCCTATCAACTGAGATTCTGATGA

A\_16\_P16309604

ACACATGCATCACATTACTGTTCTGTTTCAGATGTAGGTTAAAAAGTCTGTTGTAAGAG

CUST\_7554\_PI426210822 CATCCACCAGGAGGCCGTTTTGTGCTGGTCTAGGTAAGAGGAGAT

A\_14\_P114733 GGTTTTTCCTTATTATTCTTCCAAAATCTGTCATTTAGAACTAGCGTGCCATCTGTGAGA

A\_14\_P130847 AGCACCAAAACACTATGCATTTCCATCTTCACAATGACTTTACCTTCTGAATCATCAAAA

A\_14\_P130721 GGATGATTGTTATTATCAAGGACATATTCTTAATGAAAAGGTTTCTGACGCTAGCATCAG

A\_14\_P103230

ATTCAAATGGGTAGGAGACTGAAGAAAAGGAAAACAAAGTTCTAGGAAGATTTGGTGATA

A\_18\_P22839790 AGAGTCAAGTAAAAGGATGCTTTTGGAACTGATGATTCTCAGAAGAAGCCATGAAG

A\_16\_P19472379

CAATGCCATGATACCATACTTCTGTAGCAACATACTGTATTCATCATTCTGAGTGAGCA

A\_14\_P117193 ACATCGCTGATATCAGTATACTTCCCCTAAGCACTTCAAGCGTATCATTAACTAGAGTT

A\_14\_P109738 ATCCTAGATATACTCAGTTTTTCAGTTTTTAGCCAAAGTCAGAATTTCTTAACTCCCTCC

A\_14\_P126952 AATCTGAATCTAAGTCAGGCTTTGGATCCATTTCCATCTCTTCTTTGCTGTCT

A\_16\_P03501536

AACAATCTGAACCATAGCATCTATATTTCAAAACTGGCAAGAGTATTAACCCTGCACCTT

A\_14\_P202178 ATATTTTCTAATAGATTTTACCAACAGGCAGTTTTTGTTCCTTACTGACAGACCGTA

A\_16\_P02026439

AACCATTCAAGAGTTTTGTGAAACGATCCAAGAGTTAGTGATTTTCAGAAAAGCCTGTAT

CUST\_4684\_PI426210822 ATCTAAGGGTTAAGGGTGTGCAAGAGAGTGCAATCAGTATTGCATTTACGC

A\_14\_P101988 GGGTCTCCTTCTTTGCAAATTGTCAGTCTTTACAATTTGTTACAGGCATGGTAATATACA

A\_14\_P121145 TCTCCTTTCTTGGAGAAAATAGTATCGCGAATATGCACAGAACACGTCCTACTAACATAT

A\_16\_P00393524

AACCATATGCCTTCTTATCTCAGTGAACCTCCCTTAACAAGTAGAGACATTACAGAAAGC

A\_16\_P18536121

GGTGAATGGACTCTTAAAGACCTTGCAAAAATACAACATGTAACCTCGGCTAGTTTTTTTT

A\_14\_P100036 GCCAGAAACATTACCGTCATATTCACCCATTACTAAGGTAAGTCAAGTGCTATGATATA

A\_14\_P118245 AAATATTTGCAGTGATTTTAAAGTGCTTTTCCAGCAATGTTCTTAGGGACTCCTGAGACA

A\_18\_P22840699 AATCACATTACATGCTGTGGGTTTAGAGTGTTGGATGCTGGTTTTTCAGAGGT

A\_14\_P114891 CTTAGTCCTCAGAGTATATTGGCATTTTACATTATTGATCCTCCCCCTCTTTTAAACTT

CUST\_7313\_PI426210822 GTGTCTCCGCAGCTTCCTGAAGAGGGAATGAGGGGCAAGGCTCTG

A\_18\_P22841755

TATGAGTATAGAGATAAAGGAAAAGGCATCCCCTTCTGAAGATTTCTCGTTTCTAGGAG

A\_14\_P122556 TCTGGAATAGAACTCTTCTTTTAGGGAGATGACTATCATCTGAACTGGTCTTGAGTTTG

CUST\_3898\_PI426210822

CCTTTGTTTCTTCGAGGGAGCTTGAGTGGCAGGATTATTATTAAGAGTACTTTTTAAGTT

A\_18\_P16923454

AGGCTTTGAAGAGAATGCATTAAGACTCAGTGTAGTTCTAAACAGTGAAAGGCAAGATA

A\_14\_P139307 AATGGACGTTTGGCATTCTTTAAAGTTCTTACCTGTTCTGAAATTTGTTTCAGGTAGTTA

A\_14\_P112529 CTTATCTTTATCAAGTTCATGTGAGCAAACAATGATACTTGGTATCTCACATCCACCCAT

A\_14\_P118416 AATACCTGTATGAATGAAGACATGTCTCTGTAAGTGATAGTTTCGTTCTAAAGGCAGCATT

A\_14\_P115035 TATTAAGAGTTGTGGCATCTGCTCTAGAAAGATCTGCTAAAGAGAGGATGGAGGTAG

A\_18\_P22841598 CTTGCTGAATTGGCAGTTGAGTTACAGAATGCTCAACCCAAGAGTCC

A\_14\_P126092 CTTTAAAGTTGAGAAGTATAGGCAGTAACTGCGAGCACTAGATGATGGTAACGTTACTTTT

A\_14\_P100218 AAGGTAAAGGACGTTGTGTAGGGAACCTTCATGGTATGCCTGAAACAAAATAAAACACAA

A\_14\_P107094 GTATCACACAATTCCTGGAACATATGTGACAACCATTTATTGTTTCTTTTATGGAATGCTG

CUST\_1653\_PI426210822

TGCGGTAAAAACAAGAGCTGTTGGTTTTAAAGGTTTTTGAAGACAGGAATTACTTTATCT

A\_14\_P120407 AGTTCATTCATGCCAAGTATCTTTCCAGCATGTTTCTCCATTTAGAATATCTAGCATGT

A\_14\_P135033 ACCTTGGATTTTTTCAGTAAGTCTCATAAAGCCCTTGATTTGTTCCACTTATGAGGTAAAA

CUST\_4194\_PI426210822

ACAGGGAATCCTTCTGAAAATCTAGTTACATAAATTTATGTTCCACCACAAGAAAAATCA

A\_16\_P00685028

CTAATTATTTTTTAAATAAAGAGTTATTGTGATTTTTCTTTAGCAGAAAAAGAGGTTTGTG

CUST\_6681\_PI426210822 CACATTTTTGACCACCTACTATACACCAGGGACTTTTTGCATCTCGTCC

A\_14\_P139098 ACATACATACAATGTAGAAAGTGCAATCAACACAGGAGAAGTAAAGAATTCTAACCACCC

A\_18\_P25098425

AAGGAGTTTACCCAGCAATATGTGTAGAACTCCTACTTTTTAGGGTTAAAATATACACAGT

A\_14\_P139949 ACTGCATGGTCCATACTGCATATATTTTATCTGGCAATACTAAATTTCAAGGGCTGAACA

A\_16\_P02862429

CCTATGCCTAATCCAACCTTTGATTGCTTAGAAATCCATCTGTTTTCTCTACTTCAAGTT

A\_14\_P101442 ATATGTGTAAGTGAGGTCCACTGGACTGCCTATAAGGGCCACTTTTTAAGTC

A\_18\_P15524907

AAAGCCGTGTCTTTCTTATCAAGCCTCTTTATTTTTGTTATTATCCCGTCAACATACTCC

A\_16\_P16191178

GATCCTTCCATGTTGTTCTCCCATTCAGTAGACCTTTTTGCAATTTTAACTATCCGAAT

A\_14\_P113913 CTCTCAAAGGGTTTACCAGAGTGAACACAATTTACAGAAATGTCTGAAATACAAGTTAG

CUST\_3244\_PI426210822 GGTGTCCTGTTGTTACTCCATCTGTTTCTGGTTTATGTGTTCTTACCTGG  
A\_14\_P127177 TTGACTGAATAGTTCTAAATGGGAAGAATCAGTGATCAGTGGAGAACACCTAGTGACTA  
CUST\_8045\_PI426210822 CTGGGGAAGAGGAAGTTCTCAGCTTCATTGTTACTGCTCAGAGGTA  
A\_14\_P136077 CTTCCATTTTCTCTCGCCTCTCGTTCCATCTTGAGGTCAGAAAATTAGAAGATTCTTAT  
CUST\_9758\_PI426210822 GAATCGGGTGGAAATGTCATCTCACTGTCACAGATGTTATTCTTTCCAC  
A\_14\_P110991 GTTCCCTATTACATCTAAGTATTTAGAAAAACAATCCACCAAAGCACTGGGGGAATAAAC  
A\_14\_P102405 TAAACTAGATTCTCTCTTCCCTCTTTCCTCAGTGTCTTCTACACCAGTGCTCTTTT  
A\_14\_P114178 GAGTGCTTTTGGATTGAGCATTGCTGGATTTTGGCTTGTGTCTTGTGAGACTTTT  
A\_14\_P139287 CTCATGATAGAAAATCTTCCCAAACCTCCGTGAGGATATTAAGAAAATCTCCATGTCTGAT  
A\_14\_P126567 TACTTCTTCTCCATGATCTTGTGATTCCCATTTACATTTTATCTTGCTCCAGTATTCTGG  
CUST\_576\_PI426210822  
AACCTTTTATGAATACTTTCTATATGCCAGAACCCTGTGTTTCATAGTTCCCTTTATGCA  
A\_14\_P113416 CTTGCACAGTAGAAGAAGGAAGGAACCGTTTAGATCAGTTATAGTTTCATTTTGCCTAGC  
A\_16\_P15966951  
CCATACCTCTTCATCTCGTATTCTTTTTAGTCAGCCGTAGAATTTTAAGTAAGCCAGTCT  
A\_14\_P109722 CTACATTCTACAGAAAACAAGAAAAGCCAAAGTTTGTCTCTGTGTGACTTTCTCTGAAAA  
A\_16\_P15739984  
ACTTTAAAACTTAAGGCCAAATCAAAAATAATACTGGGCTAGATTGTTAGGTCTGTGGGC  
A\_16\_P15188992  
CCCTTTTCAGAGAATGTCTATAATTCCACTCCTTACGATAGTAAATCCAGATGGCAAGAAT  
A\_16\_P40177909  
TCCTGATTTTCCATCATATCTCCAATCTGTTTCATGTGCATAACTCACTATCAGACTTGT  
A\_14\_P105372 AAATACAGATGGCAGTTGAGCACTTCTGTTTTGTGTTGGAAAAAGACCTGAATTTCTAA  
A\_16\_P00339789  
CATCTGTGCCTTGTAGATTTCTAGGACTTTATTTGTCAATCATCATTTCATCAAGTTGCA  
A\_14\_P132267 CCAGGCATCTTTTCTCACTTTTGTATAATTTTACCAAGCCCACAAGAAAAGACTATTTCT  
A\_14\_P130666 TGCTCATTTCTATTCTAACTTTGGAGTTAGGTAAATATTTTCTGGGCTGTGCTTCAAAG  
A\_16\_P18103807  
AGACACATCGTATCTTGCATTTTGTGCTTCATTTACTCACCTTCTGTAGATCTGGAAATT  
A\_14\_P118265 TACTGCAGAAAGGAAGTATTACATAGAAAAGCCCGTAAGTCACTGAAGATGAGACAATGAC  
A\_14\_P132246 CTGGAATTTTGAAGTATATATGATCCCCTTGGCATTGTTGCTGATCTTTGTCTACAATTT  
A\_14\_P101779 GCTTGGGATTACCACTAGTAGCATGGATTTGCTTTAACCGTTAAGAGTAGAATTCTTAAC  
A\_14\_P132568 ACACACAGGGGCAAATAAAAACAACACGGATTTATTAAGTTAAACTGATGTAAGCACTTCA  
A\_14\_P138082 TCAGTGTGAATTTGAGATGCATAGAACTAGTGTCTCTATCCTTGGTAGAGTCTAACC  
A\_14\_P133510 AAAGAAATGAACTGTAAGGTAATATAGATTGAGGGTTGCACAAATGCTATGGTCTCATGG  
A\_14\_P201687 CTTGTTCTGTAAAGCAATTCTCCCTGTCTTTCCAAATTATGAAAACCCAACCTTGAGTATT  
CUST\_6025\_PI426210822 CAAGTGTGGTCAGAGCTAGTTATCCTCTGTGGGCCAGTAATCAAT  
A\_16\_P20955841

TATGACGCATAAACAAAGGAACATTCTCAGTTGAAACATTTCGTTTCGTATAACAAGATGCC  
A\_14\_P202162 TCTGATAACAATTTCTTGGACACATGAAAGCAAGCAATTCCTTATGCTAAAAAGACCTT  
A\_14\_P128281 CTGCTGGATAGTGCATGTGTCTGTAAGTGAAGAAATCCTCCTTGTCTTTGG  
A\_14\_P118858 ATTTTTGCATACCCTTCAATCAAGCAATAAAAAATCTTCCCCTTCGACCCTGTG  
A\_16\_P19026137  
AATATACTTCATTTCCACTCAATGGTCAATCATCCCATTTTAATCCACTATCGCAGAGTG  
A\_16\_P17836616  
GCAGGTAACCTTGATTTATACGTGTAGGAAAAATAAGTCTTTCAAATGTCAGAGTCTGGA  
CUST\_2278\_PI426210822  
AGATCTAGGTTTTGTTCTAGGAGTTGCCAGTTTGTGAGAGTAATGTTATTTCTTGTGTGT  
CUST\_9883\_PI426210822 AGGCATTATAACATCAGTATTGTGCCAGTCACTGCTTGGGCTTGAG  
CUST\_6216\_PI426210822 GACAGTGAAGGCACTGAGGCAGTAACTGTGGCAACCATAGAAGAG  
A\_18\_P22843030  
GCCAGGTTGTAATGATCATGAAAATAATAGAGGGGAAGAATGACAGACCTTTCTAGTCTA  
CUST\_8132\_PI426210822  
AAGCTCCTTATCTTGAAAACACTACAGTTAAAATCTCAATTGTTCTTTCTTCCATCACCAC  
A\_18\_P14136623 CTACATAGCCTGCTCCATCCTCTTCTTTAACCTGCAATTACTGGGTGAAAA  
A\_14\_P114591 GATTTAGAAATGGGACACAGGCTCCATCTTCAAGAAGTTTTCTACAATTGATAAAAAACAC  
A\_14\_P105581 GACACCCAAGTTTTATATCTAATTTAGGCAGCCTAACCTAGTTAACACAGATTGGTGCTA  
A\_16\_P18924887  
AACTGAAAAAAGAATCTCACAAAACACTCACATTGTAACAACCTGAATCGTTATCTGGGCA  
A\_14\_P110259 TTCTTTCCCTAGGAGCACTGAATCAAAAAAATTGGGGAAAGAAATATCCAACATGTAAT  
A\_14\_P121207 ACTTTATTTCAATTTTTTCCATGCCACGAATCCCCTTTCTTATTTACACCAAGAATGACAG  
A\_14\_P105133 AAGTTTCTTCTTGTAACTTTTTCTTTTCATCAGCACATGAGATCTGATCACATTTTGC  
A\_16\_P02270461  
GGTCAGCCAAAACCTTCTATTTAAGTGCATCATGAAACAAAAATTCTGGTTCTAAGTGTCC  
A\_14\_P133528 GGCATGGAATTAGATATGGACTTGCCCTTAACATCTCAATGTTACAAGAATCAATCCTTA  
A\_14\_P118012 CCTTGGCAGTGAGCAAGAACATTAGAGAATAGGAATATACAGATGAAGTGGTGCTAAA  
A\_14\_P130808 TTAAGCAAATCAAATGCCAAAAAGTCTAACGTGCACCAAAAAGTGGTTTATAAAGCAACAC  
A\_14\_P105299 GGACATTGTTTTAGAAAAGCAAATCCACATTAAACACCATGACTGCATTTTGTGTTGTC  
A\_14\_P121941 ACAAGACTATTTCTTTTGGGTCTTCAAGTATGTGCTATTCAAATAGATCCTCAACCAACA  
A\_14\_P118884 CTTACAACATTTTCAATCAAAGTGTGAACTCCCAAAGACTTGGTAAGATCAAAAATCTGAC  
A\_16\_P00079562  
AACCGAAAGCCCCTTTACTTAAAAATATGTAACTTGTCTGTTTGGCACTATATCTCCA  
A\_14\_P132786 CTTTTCAGAACACATGGACTTGGAGGCAGATTTGAAATAAACTTTTAGTAAATGTAAGCC  
CUST\_9455\_PI426210822 CTTCTTTTGGCAGTGAGCTGTGCAATGATGCTACCTGTCTGCTTC  
A\_14\_P129616 TTGCTAGGATACCAGAATTTGAACTGCTTTGGAAAGATATTATCCATAATCCTCAGGCCT  
A\_16\_P35817046

AGTCTTTAAAAGTCTTGATGGCATGAGAATGAAGATGCAAATGCAAAAAGAGGGATTCT  
A\_18\_P15087833

ATTCCATCTTTACCTAGTATTAATACCCCTTCAAAGCACTAAACAGCATGGACTTCAGGT  
A\_14\_P121879 ACTAGGTCAGGTGCTTCTGTGGGATTCTTCCATAATACTCCATACTATATTTCTCATAAC  
A\_14\_P133954 GATGTTTGTATTTGGAATTACAGGTAGGCAGCATCATATACCTTAGTGTTTAGGGCCTC  
A\_14\_P113601

ACTTAAACATTGTTCTGAGAAAGAGGAAAGTAAAGTCAAAGCCAGTGAGTTGAGAAAGAT  
A\_14\_P201713

AAAAGGCTGAAAAGACAGAAATCAAGTAGAAGAAGGGAAAAATTACCTTTTGTGGTGTCC  
A\_14\_P139415 CTATCCAGGCCTCTCATAACCAAGGGGATCCATTAATATTAATAATTTAGATTTTTCCAC  
CUST\_4250\_PI426210822

AACCTCCACGTGTTTTATGAGTATATTCCTAATAATGACAATAGCAGCAAACAAACACC  
A\_16\_P00735374

TGGACAAAGAAAACATGACATAAGCCATGAGTCTTTTAATATTCTATTCTCTTCTGGGC  
A\_16\_P21219751

AAATCAAAGAGAACTGCCAAGTTACAACCTTTACCCTTACCAACACACTAGTGAACAATC  
A\_14\_P113264 AAAAAAAAAAGTTGAGAAACCCTGAACTAGGAACACTTTGGCATGCAGGGGTTTTAT  
A\_14\_P109794 AGTTTAGAATTCACTTAATAAATTTTTAGACTTAAATCTCTATCTGGAAAATCTGAACAT  
A\_14\_P130427 CTGAGCAAGAATAGAGTCATTGTTTTATTATATCCGTTACCAAGGTATTTGGGGCACATT  
A\_16\_P36042714

GCACATAGGGCATAACAATATCCAAGTAAAGTTTCTGAATTATCCTTCTTCAAACATGTC  
A\_14\_P139027 CTTTCTTCTGGCCATTACTACACAATTGTCACATTATCAGTGACTTTTCTGTTTGGCTAC  
A\_18\_P22839234 CTTCTTTCAATTAGACCACCTGAGAGGCATGGGGAAACTGGTCATAGT  
A\_14\_P130292 CTTATGCAGAACACAGTATTTCTGTCAGATAAATGGCATAGAAAGTTGCCAAACATGAG  
CUST\_6438\_PI426210822 GGAAATTCAGAAATATACACCCCTCAGATTCAACAAGGGTGGTATCTTGTGTG  
A\_16\_P36230197

TGTTTAGTCTCTAGAGTCAGTGGGATGGATATGCTTTTTGCCAGACTTTTTCACATTTAAT  
A\_14\_P115703 ACAAATGGTAAATTGGAAAACCTGTATCCAGACATTTCTTCAGCCACTTCATTGGC  
CUST\_2429\_PI426210822 GAAGTTCAGTATCTTTGTGAGGAACTGCGCCACACGAATGTTGATGC  
A\_16\_P00685228

ACTTTGACTTTCTCTGCTGTCTCCTATTTAAGAGTAAATAAAGGTAGTGACAGTCACAAA  
A\_16\_P17270463

CCCAATTAGACTTACTTGCCTAACAAAATCTTAGTGCCATCTTAAAAGAACCATGAAACG  
A\_14\_P100074 CTTCATAATGTTTAAAAAGTTCATCAGCAGATCCAAGAGATTTACATACACTGGGGACATA  
A\_14\_P108791 GTCTAGACTCACCAAATCTACCCATTCCTCATCTGACTGCCCAAAAAAATAAA  
CUST\_1602\_PI426210822 CTGGCTACTTTGGACTTTGGCCTCCGCTTCAGTTCCAGGCTTTT  
A\_16\_P01399381

ATACCACTGCATAGAACCTACAAATGTCCATTGTCACCTTGATTGTAAAAGCGGAAAACCTA



A\_14\_P135887 ATCAATTTTCTTGAAATATCCACACTGTGATGTAATTGTGTTCTGGAATCCAAATGCAGG  
CUST\_4654\_PI426210822 TTTATGAACATTCTCTTTGCCCATGTGTGGCAGCAGAAGGCAATC

A\_14\_P102260 ATGGACACATGATTAGTCAGCCATTAGTGTTTCAAGCACCATGAGAGTGATACTTAATAC  
A\_16\_P01551872

ACTGATGTGATCACTATTTCCACTCTTTTCAGACTTTAGAACATGAGATTGCACAGAACT

A\_16\_P20709761

ACCACTTAGTAGGCACTTTACCAATACATATCATGCTAGAAAACAGATTGCTTTCATGCA

A\_18\_P16318500

AGTTCTAAGGTTATTTTCGTCAGTTCTGTTACCATTACAGCCAAGACATCATAACGACAGA

A\_14\_P137295 GGCTCCTGGAACCAATCCCGTGAAAGAATTATTTTTGTGTTTCTAAAACATATGGTTC

A\_14\_P121582 CTTTATATTCATAACCCAAATTAACATCTCTTGCAGAAGCATTGATCTGCTGAGCCAAT  
CUST\_5037\_PI426210822

GTTTCTTTGAGGTTTTCTCTGAAACTTCAGATTAAGGTAGTCCTTGAAGTGGAGG

A\_14\_P122548 GTTTGTATCTTCTTTTACCCTTCTTTTCTTCTGATTGCTTCTATTATTCTGGGACTACCTC

A\_14\_P107531 CTTCTTCTACGGAGAACATTGTTGTTCTGTCTTTATCTTTGTTAATCATACCCTTTGT

A\_14\_P105977 TCGTCAGTAGTGAAGGAATGAAAAAAAAAGAAGTTGTGTGGTCCATTGTATTATGTGGAAA

A\_14\_P135520 CACTCTGAATGATGTATGAACAGTTGAGCACTCTGTAGAATCCTTCAGGTCG

A\_14\_P127349 ACTGGCAAGTTTAAATTGTTTCTAATACTGGTGGACTCTTCATTTGTAACCTACTGAGCA

A\_16\_P21240263

CAGTCAGTAGGAAATCTTGCATGTCATACAGTTCAAATCATGTGGAGATAATACTTCCC

A\_14\_P139676 CGAAACAGATGTGACTTCAGGCTGACAATGTTTGAGGATCGGAGAAAGAA

A\_14\_P107757 GTGCTGAAAACACCTACAGCAAACCAAATTCATGCTTTTGTGTCTGAATTACGTAATTTT

A\_14\_P125331 GCACTAGGAATGAAAATATAAGTAAGGTAAGGACCCGGTCTCAAAAAATGTATAATGGT

A\_16\_P00482390

AGGAATCTGTCATCTTTGGAAAGTCTGGTATTCATGACGATAAAGAGGTATCTATAACGC

A\_18\_P22841407

GTGAAACTGAAAATTACGAAATTAGGTTTATTTTATCCTGCATTTATTTCAGTGGCACTCA

A\_16\_P15522135

AGTGATTGCTTCCTAAGTTGTATGTAATGAGTTTCTCTAGATATTGCTATGCACCGACT

A\_14\_P113085 GAAGCATGGCTTTGGTGTCATTTAGAAAGTGAACATGTGTCTAAGAATTTTCACACTAGA

A\_14\_P139101 CTATTGCTTTCTTCCCTTTATCACTTCCAAAGCACCTTGACAGAGTTTAAATTACAACAG

A\_14\_P131001 CTTTCAGTAGACCCCATGTTGGGAACACATGAAGCCAATATTTTAAAAGCAAATAATGTT

A\_14\_P112751 AGAGTCAATATTACAATTAACACAGAGAAGTAAAAACCATTGCTCTCAGATTCTGCACAC

A\_16\_P39892563

AAAAAGGTGCCAAAGTCAAATATAGGTAGTTACTGAGAACGTTTTAGTAATCTCACCGGA

A\_18\_P26796994 GAGAATTCATGCCATCAACACTCACATCATCCTTTTTCCAAGTTTCGCAAC

A\_16\_P35562913

ACCTTCCATCTTTGACTACGCTTGACTATATTTTTCTTAAGTCATTCACTCTAAGCCCAA

A\_14\_P123640 CACTGGGCTGAACAAGACATACAAATTGGATTATAAATCCCAAAGCATCAAAGTCAAATT  
A\_18\_P11115843ACTTGATTCAAGGCTCTCATTAAAGACATTTTAGTAGTCCTGACCCTAGTATTTCTGTGG  
A\_16\_P39967930

TCTATGCTAACTTTCCCCTAAATCAATTTTTCTGAATCTCCAATATTACCCTCGATTCC  
CUST\_2038\_PI426210822 GATGTCCTTATCATACCAAGATACATCAGGTTCCCTGAGAAGGGACAGAA  
A\_14\_P137694 CTTGACTTGTTTGGGCAATTAATTAATTGAGGTGTTTCAGTGAAATGGCTATGTTGTTCTT  
A\_14\_P111397 TTAATATTTTTTGTGTTTGCAAGCATATGTAACCCGGTTTATATCATCAGGAAGTCTTAGG  
CUST\_1424\_PI426210822

GTTGTGCTATTTGATGCAGGATTTATTATTAATTTGTATTATTTCTTGCTATTATGAAAT  
A\_14\_P113602 CTTCCCAGGTTGTCTTTGCTATTTGGCCAGCAGCATTCTGTGTAACCT  
A\_18\_P16696200

AAATAGAATACTCCATTCTTTTGAAGAGCAATGATGTCTGTCTTGTGATCACCTCATCCT  
A\_14\_P101226 AGCCGGGAGGTGAGGTATCAGATTATAGATTTGCTTCATTATGGTCAGTCATAAGAA  
A\_16\_P16937358

AAAACCATAAAGCCACCTGTATTGACTATTCATATTCCTAGGACCTAAGAACTTCAAGCA  
A\_14\_P123881 AGGTAAAGTAACTAGAGATGTAGATGTTTTCTCTGAAGAGGATGGAGTCGTTGCTTAATG  
A\_14\_P100745 TATAAAGGTGAAATACTAAAAGATTCCATTTTGGCATTGTTGGGAGCAAAGAAGGCAAGACT  
A\_16\_P17714889

AACAGTAGAAAAGAGCAACATTCTCATTCTCCATACTTTAGCAATTTTCAACCCTAACCC  
CUST\_5841\_PI426210822 GACTAGAACACAGGCACTGAGTTTCAACCTCAGGCTCCCCAGTGC  
A\_14\_P103467 CCACCTCTGGATCTCACACAGACTTCTTGTGCACTTGTCTCTCTATATATACT  
CUST\_10192\_PI426210822 GTAGGATCCCCAAGAGACCAGATGTCATGGTGTGTTGCCAGCTGG  
CUST\_3662\_PI426210822

GTTTTATACCTTTATTCTCTTTAGTTGACCTTTTAGATACTTTTCTAACCATGCCCCCT  
CUST\_3745\_PI426210822 GGAGAAAGGGGCTAAAAGAAGCCCATGGGATTAACAGACATTCTGAA  
A\_16\_P15599018

ATGTTCCAGTTAGAGTCAATCAGCAAACCATGTTTTACCATACACAGGACTGTAATGATC  
CUST\_7925\_PI426210822 CTTTTATCCAAACCTTAGGAGGTCTCCAGCTCAGCCATGGCCCA  
A\_14\_P104621 AAACATGTGTTATCAAGAATGGATCAGACAGCAAAAATCAAATGTTAAGGATGGCTGAGA  
CUST\_9858\_PI426210822 CATTTCCTATCAGACCGCCATTTACAGAGGAAGAGAAAGTTGGTT  
A\_16\_P02528730

GCGTATTGCTCCATTCAAGTAGACCAGGTGAGAGTTGATAATCCTATTTTACATGTAAGA  
A\_14\_P135373 CTTTATTTTACATGAGCCATTCATACATGCTCCATTTAGTTTGGAGAGGGTGAAAAAGAGG  
A\_16\_P36833072

AAAAACAACATATGCAGATTACTTTCTTCCAGTGTATTCAAATAACTAACAATGGCCCT  
A\_14\_P120945 CTTAGAAGTGCTTCCCTGCTCTTTTTCTCCAAAATCTGCTTCTGAGTTGGAATC  
A\_18\_P22841350

ACAATTTGGTTGGTAAGTGTTCCTTCCCTCTTTTTGTAGATGACCTAAAACCTTAACTCA

A\_14\_P115043 TTCAACAGAACCTGTTAGGAATCTTGTGCTGTTCCCTGTATGTGGTTTATCTTTCTTCATA  
A\_16\_P03074434

TGGAAAAATAAGAACAGAACTCAAATGCATCTTTAACCTTACTGCTTAATCCCTAGTCCC  
CUST\_7023\_PI426210822 TCAGGGCCCAGGGTGGGTGGGGAAAAGGTGAGTTATTTAGCATT  
CUST\_1204\_PI426210822

AAAACAGAGGAAATGGGAAATAAAAATGAATTTAGGACATAAACTCATGGAGCATATCCT  
A\_16\_P36230807

TTTTAAGTCAAAAGCAATTTCTACCAGTAAGAGACTGAATGAATAACAGGAAGCCCCTTG  
A\_14\_P120967 ATGCTGCCATTTAATTACTCAGAACTCCAGCATTTTTTGGCTATTTTATTCTAGCCCTT  
A\_14\_P138878 TATAACAGAAGCAITTTATTTTCAGGAGCCCTACATGGAAGGTGTCAATCCATTCATCA  
A\_14\_P114588

GGAGATAACTGAAAAACATCTGACATTCTAGGTAGGGAAAAACAGAAGCAAATGCTTAAAA  
A\_14\_P115709 CTAAGGTAATTTTAAAAGGGAAATTGGCTGCTCTCTGACACTTATCATCAGAGGAAAAAT  
CUST\_7779\_PI426210822 AAGTTAAAGCCAGTGTAGGCAATGATTGGAAGCAATCAGAGCA  
CUST\_9824\_PI426210822 AATAATGAGCTTGTCAAATGGACAAGGATGGAAGGGCATTTCAGGAGG  
A\_16\_P02736350

CATTGCAAGTCCACTCTTTATACTCCCAATTGAGCATCCTACTTTGATGAAACTTGATTT  
A\_16\_P00784055

TCCTCTTTCCCTTCACTATACAGCAAACAATGAAATTGAACATATTTGATCCAGCATAACC  
A\_14\_P100986 AGGCAGATCTTTAAACACTACTCTGCAATAATGCTTTTAATAAGGACAAAGAAAGGCCTC  
A\_16\_P16191410 TAGGTGCTCAATAAGTGCATGGTTGATTAGCAGGCCTCCTTGTTTTTCCT  
A\_14\_P119704

ACTTTTGTGTTGTCAGAAATCCCAGGAAAATCCAGAAATGAAAAAAAAAAAGTGAAGGAT  
CUST\_1028\_PI426210822 ATGGTGTCTTGCGTGGCTTCGACCCTAGTGCTGAGAGGCTCCTCT  
CUST\_10262\_PI426210822

TCAAAGACTATAAAAGTTAAATAAGTGAACATAACTGCATGTGTTTTGTGAATTCAAAG  
A\_14\_P126749 ACCAAAACCACTTTGGATTTCAGCATTGTATAAAAGTAAAGGTCCCTTTACATTTTGACAG  
CUST\_1591\_PI426210822 CCAGAAGAACAGAAGACCTGCTGAAATCCAGGCTTTGGGATTTAGAA  
A\_14\_P110164 AAGGTTTTATTTAAAGAATTACGCAGGTTGACATAGTTTAAACTTTGGATGCCCTCTGA  
A\_14\_P110299 AATGTCCCAATTCATGAATACCACTTAATGTTTATTTGCCACAGTGCATGAATGAGTCAT  
A\_14\_P118985 CTTCAAGGGCTGTCCATAGTTTCTACCTTACACCAAATGTGTTATCTTCACTAAAAACA  
A\_16\_P00685067 ATCTCGAGGCTACCCCTATTTGATGATTTCTGTAGGAGTCTGCTTGACTCT  
A\_14\_P108243 GAGACCTAGAAGCAACTTTTGCGTAGCACTTAGTAAAACTGAGAAAACCTCAGTAGTGT  
A\_16\_P18806496

AAACTAAACCAAACACCTGTAAGAAATGGTCAAGTAAACTGTGATACATCAACCCAAAGA  
A\_14\_P112841 CTAGACGAGTTGTTTGTCAAAATACTTAAAAATGTGCCTTTGATTTCTAGGATCTGCTAG  
A\_14\_P119073 TGTCTAACACTCACAGAATCACATGGTCTTCACCTAAACTCTGTTTCTTCTGCTTTG  
A\_18\_P22842444 TTCTTAATTAATAAGGTTCCGGCAGCCATTGCCAGGAAGCAGCATTTCG

A\_14\_P131983 GGCAGTGACAAAATTAAGACATATGACCAGCATCTGCTGAACCATGGATCTTTTTTATAA

CUST\_4480\_PI426210822 CATTGTTCCCTGTGCATGGTGTAGCCAAGCCCAAATATTTAGCTACGG

A\_16\_P15619043

AACAATTTAGCAGAACAGAATGAGTTAGATTCCCAATTGTGGTAGATCACGTGTAGTAGC

A\_14\_P139244 TGATACAATTGAACTTTATTGAGATTGCACTGGAGTCACTGTAGTAAGGGTATTAGGCTC

A\_14\_P130205 CACAACAAAACCCCAAACCTCATTATACAAAAGCCTCTACAATCAGATGTCTAAGAAAGTC

A\_14\_P202022 TATGGGTAATCCTGTGAAGTGAATAAAGCGTCCAGGACATGCATTTAAATACGCAATTTA

A\_14\_P202493 CACTTTGTTTTTCTGTATCCACACCCATTTTCAGCCATTTCTATTTCAGTGTCAAAAAAGA

A\_16\_P39935842

AATGCATCACCATGCTACTTATCAAACGTTCTGTCTCTCAACATATTGAGAAGTCAATCA

A\_14\_P126178 TCTACAGTGTCTGATAGGGAAAATGGATAACCATTAGCCTAACTTTTTGATGCCAATTTG

A\_14\_P104339 ATTAAGGAAACATACCCAATACCTTACATATGCCATTAATACAGACATTTCTGTCTGTTGC

A\_14\_P116882 TATGAATTTTTATGTTTTAGACCATAGGAGGTTGTCCACACTCTCTAATCCCTTCCATGA

A\_18\_P14136587 AAACCTGTGTGGGGCTATAGAAGGAACACCAGTTCAGAAATGTCACTCC

A\_14\_P137951 CCTTATTTTCTGCACAGAAGTAGAGCACAGTAAATGAGGATAAATGGTCTCTTTAAGCA

A\_18\_P13931436

AAAACCCATACTACTTGAGGAACTGAATTACACACAGTGTTTATTAACACTGAGAGGTCT

A\_14\_P109257 AAAATAAAGACAACAGCCCGACTTCAACTCTATATAATCTTTGGACTCAGGGAGTTGATA

A\_14\_P201827 ATGACCAATTTTGGGAAGCGATTATCCCATTTTCCCAAATCTTCTTGTAACCAAATT

A\_14\_P105885 CCCACTCTGATGCCAATCCTTATTTACTCGAATTAAGAATAAAGTGATGTGATTGTAACG

CUST\_2399\_PI426210822 ATACCTTAGAAATGTAGATCCAGGGGCAGGCTGCTGCTAGAGTTCTT

A\_14\_P134997 TGCATGAAATTGCACCTAGGTGCATTACTTGATATAACTCTCCCCTAAAAGTTGTAAT

A\_14\_P109064 TGTGCCACATCTATTACAACCTGGCCAGTAAGTGCTTCTACTTGTGATGTTTAGCAAAT

A\_14\_P114525 TGTTATCATCATCATGCTGAGAGGTAGAATCTTTAATTTCCCTTTACAAGGGAAAATCCCG

A\_16\_P37991763

ACAGGAAAACACAATGAAAGATCATAACCAACGATTCTGAATTTAAGGCAAACCTTTCTT

A\_14\_P128868 CTGCATACTTATGTTGCCCGGAATACAACGCATCATATAACCCTGCGAATATAAATTTCT

A\_14\_P136922 TGTCCCTGGAGAACCCTGATTAATACACCTATGAATGATAAATTCCTTTAAAACAGTGTC

A\_18\_P14937973

TCCATATTTGAACAATATAGTCTGCCACTCTGAAAATATTTCTTAATGTGCCGAAACCTC

A\_16\_P00685081

TGCTTGTAATAATGTCATCTCATTAGCATGTTTTGTGTTTTTATGTGATGACTTCCTTGTT

A\_16\_P17000378

TCACTATTCTAACAACACAGTCCACAAATAAGAAGTTTCAAAAAGTAAGTTTAAAAGA

A\_14\_P117832 CAGAATAAGTTCCTGGCCAGATATGTATCCCTCCCAAACCAGAATAAGATCTG

A\_18\_P14706976

CCTGTCTGCTCTGTTTGTTAAAAGTTTTGAATATAACTCCTGCTCACAAATCATGAAGGT

CUST\_7998\_PI426210822 ATACAGATGCTGGGACCTGAAGCAAGACTGACTAAACCTGGGGAT

A\_14\_P130613 TTAGATTATTAATGACTTCCAGTTTGCTGAGTGGGAGAATTTCAACACTTCGAGATGAAA  
A\_16\_P20542563  
AAGATCTCCTACATGAATTCCTTCAAACCTTGAGAATTACATTTACTCTCCACACAAAGGG  
A\_14\_P109913 GTAAAAGCCACAGTTCTTATTCTTAATTTGTTTCAATTTGTGGATGGAGGCAAAGAAGTT  
CUST\_2405\_PI426210822 TTTGTTTAGACAGAGCCATGTGGGATGTAGGGCTTTGCCTGTTAGT  
A\_18\_P16934406  
AATGGCGTTTTCTGAAAAAATAGGAAACATTTTACAAGAAAAAATGACACTTGCTT  
A\_16\_P19783436  
AACACCTTTCCTTTTTTACCACACCAAACTTTGAAGATAAGTATATTTAGGCACAGGGA  
A\_16\_P19301134  
GCAGAACCTTTCCTATCATCCGAATTTTACAATTCAGCATTTCAAAGTCTCCTAGTTTTAA  
A\_14\_P135984 ATCAGAAGTGTTAAGACTTACAGGGAATATTCTGGACTTCTTTTCAACTATGCCATATGG  
A\_14\_P129733 TTCCGTTTTCCCCCTAAAGAACATATCATAATCATTGCACAAATAACCATGTTCTTTGGT  
A\_14\_P121704 AGGTAGATTCATGGATACTAGCATAACAATGAATAAGTGGGCCATAGGCCAATAAAACTAG  
A\_18\_P22841738 TGGCCCCTGAAGCCTCATTGCGTGGGATAAGGGGACTAACATATT  
A\_14\_P114341 CATTTGTCTTTATTTCTTTGTGAAGGTGCTTGTGAGTGAGGATTCTGACAGTGATGG  
A\_14\_P101732 TTACTIONTTTTATATCCATCGTAGAAAACATTTTGAAGAACTGGCCAGGGCAAAGA  
A\_14\_P116104 AAATGGTGTGCATCACCGAGATAATATGAAATAACAAACATCCTGTCCAAGTCAACACATT  
A\_14\_P102030 TGCTGCTGTTAATGTATTGCTGACCTCTTTCACAGTTGGCTCTAAAGAATCAAAAGAAAA  
A\_16\_P16998841  
AAAAAACTGTTTCTACGTGCTATGATGACCTTATGTCTTGTATGATTGGATTCTGCAGA  
A\_18\_P22841100 CTGGAATTGCCTTAGTCACCAAGTTCATGGAGCCCACTACTCTGTAAAT  
A\_14\_P111928 CTGTAGGCAATGAATGCCAGATTCAAATAAGAGTAAAGACAAATTACAAACAGTTCGG  
A\_14\_P106312 CTCTGTTCTTCCATGCCTTTATTGGTGACAGCAATGGACAAGAACAATACCAG  
A\_14\_P123096 CCAAGCCTCTTTTAATAAAGTTTCCAGCGTAGATGCCATGTTTTACAAGATTTTCATCTA  
A\_16\_P16308276  
AAGCAACCTACATAACACATTACTCAATTTGTCCAAGCCTTCAAATAAGATGCCTTGTTG  
A\_14\_P136571 TCTTGGGCATTCCTCTTTTGGTGTGATGTTAATTGTTCAAAGTTATTTCTGAGAGAATCT  
A\_18\_P14133341 TTTCTTAGTCTCACAGCCCCGTGCTGCTGTAGAATTGGCAGATGC  
A\_16\_P02196210 CTCTCTCTGTGGCTTATAGTTGATTTAAATACAAAAGGTGGTTCCAAAACGGCCTTG  
A\_14\_P125287 GGGTGGCTCCTTCTCACTGCTGGATCCGGACTTTTTAAATAAAAACAAGTAAAATT  
CUST\_6904\_PI426210822 TTTAATCCAGTGCCCCAAGCCCCCTGGTGACTTTACCTTGAACCTT  
A\_14\_P113163 CTTTTCTCATTGTTACACATCCATCTCTCTAGAGTGTCTTCACATAGATATTCCTGACG  
A\_16\_P16190986  
AGCAGAGCAGTATAACCATCACTTCTTTTTGCATTGTTACAGTAGCAGTAACAATTCAACA  
A\_14\_P122963 AAATGGGGAAGCAAGAAAGTTAGATATAGTTGAGCATTCTAAAGAAAATCTGTGCTCTGC  
A\_14\_P127160 CCCTGCCTCAATGCACGATAATTTTGCCTTTGGAGATGGGACTTT  
A\_16\_P01648811

CACTGACTTTTTCTCAAATCTAGACTCCAAAAATCCCTATCTTGTCTGAAATCCTTTGG  
A\_14\_P200470 GGACTTTTCTTCTTGTGTTTCATTGCAGTTGGGATTAATACTTCAACTACCTGCTGCTA  
A\_14\_P129990 TAAAATAGACACTTCATTCTGGATCATGTGCTCCTGTCCAAAGGAAAAGTTATCTTCATC  
A\_14\_P109566 ACCTTTTGCTCTGTGCTGGACATCTAAATATGCATGTTAACTGTGTTCTTTAACATTTCC  
A\_14\_P201193 TAATCTTATAACAACAGCAAACCCTGATGTGACATTCCATGACGACATACATGCTACTTTT  
CUST\_4442\_PI426210822 ATGAGGACCCAAGGCTGGGTCTGAGTGGATGACTGTAGTTACGTA  
CUST\_4430\_PI426210822 AAATCTCCTGCTATCAGTGAAAAAGGGAGAGGGATCAGCTCTTGTTCCTT  
A\_16\_P35882198  
ATGCAGGTTGCAAAATTATCCTAACACCAAGTCTTACAGTAAATCCTTTTGGTTCTATGG  
A\_14\_P138182 AATGTTTATATGAGAGCCACTTTGGACTTGGTTTGCAGTTTCATTTGAATCTCCTGAGTA  
A\_18\_P10709012  
TCCTCAATATGACCTATTAAGAACAAGCATTCTGAGCATTCTGTAATATTGGTTCCAGG  
A\_14\_P128212 AATGCAGTGGTCTAGAAGGATAAGGGCAAATATCAGTATCTCAGATATTGTCCTATGAGA  
A\_14\_P107066 CAGTCTGACCATTTTGTTC AACCTTTAATTGCCAAAAGATGACATTATTATGGCTTGTGT  
A\_14\_P130713 TCAAGTTAATGTGTAGAAAATGGATTCTCTGTGCCCTTAGAAAATCCTCTCCCCT  
A\_14\_P101138 ATTTTTTCTGAGGTAAGAAAATGATTAGGATGTTTGGGATATCTTCTGGTTATGCCGCT  
A\_16\_P15078767  
TAACACCCCAATACTTAATCAAAAGACAAGACCTTCAATACTGCTGTTTTCTAGAACTC  
A\_16\_P36569715  
AAAACACGACTCTTTTGAATCTACCTAAAGTAGCAAATCAAGCATTACATCATCATGGT  
A\_14\_P123603 CTTTTGTTTGAATATAGGGTAAGTAAAAAGATTAAAAGCCCCACATGACCTTGGAACTT  
A\_14\_P123101 AATAAAGTAGGTGGCAAACGTTCCAGGAATATTCATCCAGAATAAAATGTATACAGCCAG  
A\_18\_P22840522 CTGGTAAGAGAGCCCTGAGGGTGGATGCCGATACTTAGAAAATAATAAGTCTTTT  
A\_14\_P103512 AGAAATACTTACGTGCACAAGATGGATTGATCTTCTCGGTCTGAAACAAAGAAGACATC  
A\_14\_P114087 ACCAGATCTTAAGTCTAGATAGCACAATCTCTAAAGAAAACCCTGGGTTTTCTTTAAAGG  
A\_16\_P15037178  
CTGGCTTAATGAACTTTGCTCTAGAAAATACCCTCTCAATGAAAATGAACTTGCTATGGT  
A\_14\_P100585 TGACAGAAAATGGCTAAACTTGATCCAAGGCTATTACATGCTTTATCAACTGCACAATCT  
A\_18\_P16720254  
AGAAGCCATCCTGTATCATCCTTTCTCCCTAGACTTATATTTCTGGAAAACCTACCACAAT  
A\_14\_P118609 TAGAGGTCTATTCCCTACCCCTAGGAACAAGTGCAGTTTTAGATTATCTGTTTCATCATTGCT  
A\_14\_P139844 TAAAACCAATCCATAAAATTGTATCTAGAAACTCTGTCCCTGGTGCCAATAAGCAGCAAA  
A\_16\_P40111632  
ACACCATGGTATATTCACCCAATGATATATTCAAAACTACCTAAGGTCCCAAAGGATAT  
A\_16\_P19726087  
AAACATTTTCTAGCAAAACTATTCCCTACTCATGGAATTTTCATTCTCCTGTCAGTCTCC  
A\_14\_P135769 GAAGTAATGGTATCCGGCCAATTGAGATTCGGAGTTAAAACAGGTGTTTGTATATCTCT  
CUST\_1699\_PI426210822 TAGAAAATAAAGGTAATCCAAAAGTAGGGATTCCCTGTTGGGGAAAGGAAGG

CUST\_6929\_PI426210822 TGC GTTTGGAAGGAAGGCTATGTTTTGCTTTAGAAATGTCAACAGAGCTGTA  
CUST\_405\_PI426210822

GTTTAGAGCAATGATGTAAGTCTTAAAGGGCTAGACAAGGATCAAAAGGAGAGGTAA

A\_16\_P55124120

TTGTTTCATATCAAAACCAATGGGATTTAGACAAAACCAACACAGAGGAAAATGCCACTAC

A\_16\_P17907943

AGCATTACACCAGACTGAATATTTGCTTAACTGTAGACTCATTTTTAGCATTCCCTCCAT

A\_16\_P38789726

AGAGTCAGAACTTACAGTCAAGCAGTCTTTACAAAACCATCATTAATTCATCTCCCTGT

A\_16\_P17235295

AAAACCTACAAAGATCAGCCTATTAGCACAAAGTTTTTTGAGACTAGTGAATGTGAACACC

A\_14\_P137082 AAGAAAACAGGAACCAAATGGCTTCGATTCATTTCAACAGAAAAATAACGCAGAGGTA

A\_14\_P114434 GTATGGTGTTTCCTCCTTCTGGAAAAGGCCACATCACCTGTATAAAAACAT

A\_14\_P106831 GTTTATTGGGAAGTAAATGAAGTCTCCTCCTTGCATTCCAGAGAATGCCAAAGAAAA

A\_14\_P110664 AATCAGAAAGCCCTTTTCATTGCAGGAGAAGAGGACAAAGATACTCAGAGAGAAA

A\_14\_P114077 CCTGCCTCTCATCATTCTACTTAAGAAATGAAATTAATAAGAAGCCAGTGTGTGGCAA

A\_14\_P202356 AATAAACAAAATGAGAGCCGACATGGAGCCAAATTGCAAGTCAGGTAAAATTTATTTCTG

A\_16\_P40987253

CCCATAATACCACTAATAACAGTTTCTCTTTTTCTTAAGCAATACTTTCTGTCACTACCC

A\_14\_P121736 TCTGGTTTTGTTCACTCTTGAATGTAACCGTGTTTACTTCCACAAAATTTTACGTTGGC

A\_18\_P17041951 CTTTTTCCAAGTTTCGCAACCTCCTTAACAATCCTTCTACCCAATCCGAAAG

A\_14\_P105075 GTAATTTCAATGACTTACAGTCAGAAGTCTTTCAGCAGTTGGTCTTTTTTTTTGGGTTTTT

A\_18\_P10621319

TTGTTTTGGTAATCTAGAAACGAGAGAGAACGCTAATTGCTTCAACATTAAAGAAACCCAC

A\_14\_P128629 TCTATCCCTATAATGCTTGAGGTTTTATTCCATTACTGCCTAAGTGAACAGCCAATCTAG

A\_14\_P113330 CATGTTTCAGCATACTTACAGGATTTTTCTCCTTTATACGTTCAATCAAAGGCG

A\_14\_P114704 ACTCTGCTCACCTTTCCATCCCTTGTAATGTTTTACACGATGTTTTATACAATGTAGGC

A\_16\_P18190850

AAAAAAGAGTCCAATCTGTAAGATCTGAGGACACAGTTAAGTGAATCACACCATTAGTA

A\_16\_P40518637

TTCTCCATTTGTGATGATACTATCCTTTTTCAAATGATGATCCATTCAAAGCCAAACG

CUST\_3455\_PI426210822 CTCTCTTCTCTCTTGGGCGTATGCGTGTGTGCATGCATGTACTC

A\_16\_P19120227

TGACCATTGTGTATTAGCAACCATGACCCTTTAAAACAGATTCTCTTTCAAAAACTGCT

CUST\_8527\_PI426210822 ATGTTCCATTCCAGTTCATGGCATCCCCTTGTCTTTGGGCTCTG

A\_14\_P114838 CTGTGAAACTAGTGAAGATGACGATTTTGCATGGACTAATTTTGAAAATCTTGGGGAAA

A\_14\_P135269 ATCTCTTATATCCGAAAGTTCTACTACTATGATCCTCAGGAAGAGGTATACCTGTCTCTA

A\_14\_P136895 CTTCCAATTTTCAAAGACAAAGAAATACACACTGCTAAAGTTCAGTGGTGCATAATGTC

A\_16\_P19512186

TGTCCAGGATATCAACCACTAAATTGATACATGAACGTGATCAAGTAAGAGCCTGTAAAA

A\_16\_P02190489

ATTTGAGCCAAAACCTAATCTCTTTAATGCAACCCTTTGAAAAAATACCAGGAAAGCAG

A\_14\_P129874 CCAAGACAAAACCTGCCATTTGACCAATCACTGCATTCAAAAAGAGTATTCAAAGAACTA

A\_14\_P128934 TCCGTGTAATTTCTTGAATGATCATTGAGTAACAATAAGTGTAGGTTGAGTTTGTAGAAT

A\_14\_P129892 ACAGCAACGTGAAGGTTAAGGCTAACTTTTCAAACATCAGAATCCTGACAATGGTT

A\_14\_P112615 CTGCTGTTAGATGTCCTCAGAAGTCAGTTGCAAATTTTAGCGTTAAAGTCAGGATTTATT

A\_14\_P134494 TAAGCCATTTGTTGGGAGATATTACAAAATATATAAATAGTGCCAGCCTACGAGCACCAG

A\_16\_P03721798

TCATGGATACAAAAGAATTGTCAGGTCAAAAAGAATTAACACACCTCTAACAAAAGCACT

A\_14\_P133936 CTAACACACCCTCTGGTCACATGAGCATTTCTTTCTTCTCTTTAAAGATTCTGTCTCA

CUST\_4513\_PI426210822 CTTTGTGATCTGGGAAGGATCCCTTTCTCCTCATTTTTTCCCCAC

CUST\_2765\_PI426210822 GGATTTATCCTGTTGGTCTAGTTCTTGTGTTGGTTCTGAGAGCTGCTCCTTA

CUST\_3475\_PI426210822 AATTGAGACCCAGGACAGGGGCTTAAGCACATCAAGATAATTTCTCT

A\_14\_P135980 GGTAATGCCAGGAGTTAGAGAGAAATGAAGATTCAGCCTAATTGGAGAAATAAACCTAT

CUST\_7513\_PI426210822 CCCATGCATTCATCATGTGAGATGATAAGTGTCTTTCCCTTGAACCAGTTCTTC

CUST\_9756\_PI426210822 CTCCCTCCCCACACCTGCACTGGCTATTAGATGGAATCAGAATC

CUST\_5577\_PI426210822

TGTGTGTAACATGGAGATAGTGACCAGTACATGTTAAGTACAGGCTTACTGATTAATCTG

CUST\_6594\_PI426210822 TGGGCTCATCTATACTGTCTCCCTGCCAAATATTCCATGGAAACCTT

A\_14\_P124006 CAAATACAAATGATAGGCTATTACAGACTGCATCCTGTGTTTTGCAAACCTTATGGCAAGT

A\_16\_P17348300

AGATCCAACATGATTATCATAGGTCTGTATTCCCAATAAACTATCTCACTGTCAGGATGT

A\_14\_P102751 GAATCCACCCACACATGTAACACTGTAGTTTCATGCAAGTATGTAAATGCAGAAATTTTG

A\_14\_P139247 AATATTCTAGGAAACTTTCAGCAAGTTAAATCCTATTATAAAATGCCAGAGTCAGTTGT

A\_14\_P138218 GCATGGGTTTTTAATTCAAGTGGAGTTTTTAAACACATGCCATAAATAGTGAGCCAACCT

A\_16\_P17557302

ATTCATCTTGCAATTCACAGCATAGAACTAGCCTACTTACTGATCAAACACAGAGTTAACC

A\_14\_P123110 GTCACTCACCTGTTTCCTCACATACTCTACCAGCAATTCAAGATGTTCGAG

A\_14\_P116785 CTTATTAACAATACATTATTGATGCTCATTAACACTAAAGCCCAGTGTCTCTGTGGTGCC

A\_16\_P40726392

GCCGATGAATCACTCACTATTTTACATTTCTTGAAATTTTAAACATCTATGACTCCTGCA

A\_14\_P110906 ACTGAGGTCTTCAATAAACAGTTCAACTGAACATATGCAGACTGACAACTCAAGACTC

A\_18\_P22841545 GCATGTGGGAGATGATCTATTTTCATGATACAGAAGAAACCCTTGTGAGGTGAATTC

A\_16\_P02529591

ACAGATCCTTCAAAGAAAATGTCTATTGCAAGAGTTTCTCATAACTGGAGCCATGTATG

CUST\_4575\_PI426210822 CCAGCAGGGGTGGGTGCTGTAAGAATGTTTTGTGAATGCAGGAAT



A\_16\_P30952270 AAACATCTGGCACTGACAGGAGTCTGCTTTGTGATCTTTTGGGGC  
A\_14\_P128371 TTTTACCTTCATTGATGTCAAACCTCGTAGTTGTCCCAGCCACTCCTCACATA  
A\_14\_P138019 TAAAGTGAACCTTTTCTCAAAATCTAAATACATACAGAAAAGCGCCTAGACTGCCAGTGT  
A\_16\_P01110282  
AACATCAGGCCAATTACTGAGAAATTTCTATTGACTGAAATCATGTGTGACAGTTTCAG  
A\_14\_P111162 CTAAAATTAATACTTCTGCTTTATTAGATGGCTTCTTTACCTAAAAGACTCTTCTGGC  
A\_14\_P133470 AGTGATTTTCAAATATCTTTCCTAATTGTCTTGTGCATGTTTTTCCACCATGAAACCCACC  
A\_14\_P138448 ACGTTTTCACTCATGAACCAATAAAGCAGATGAAAGTTGGAAGCCACATAATACTTTCTG  
A\_14\_P135657 TTTGCTATTAAGATTTTATCTTTTCTTCACTCTGTTTTGATGGCAGAGGTAAGCAGCAGC  
A\_16\_P15680455  
AAAAGTTGAATGCTGTTACAAAGAAATGGTCAATTCCTAAAAGACTGCATTTGTGTGAGG  
A\_14\_P102661 ATTCAGAGTTGGGAATCAAAAACAGTCAAGTCTGCCCAATGGGCTACAATAC  
A\_14\_P110223 TTGATTGCTCTGGCTCTACTGATACAATCTTAGGCTGCTTAATGGGATCTTAGTTGAATA  
A\_14\_P118010 TAATTAAGACATTTCCCTCCCAAATAATCATAACTAGGTCTCACAGAAATTTCCGACTGG  
A\_14\_P121929 TTCACCTCCTTCAGTGTATAATACGTGCATAATGCTGACTTGATATGTTTTCTGCCATTT  
A\_14\_P107004 ACAGAGTATTCGCTGTATAAACTGATGAGGTTGATTTCCATGTGTTTATAAAAAGGCAGG  
A\_14\_P126729 TAGATACTTTAGGAGGACCTGAAGAACTGAAGAAGAAAATACAACGTATACTGGACCAG  
A\_16\_P16191479  
ATGGCTATATTTCCAGAATATGCTTTTAAAGACTGTGGTCACATTTACCTTGGTTAGGGA  
A\_16\_P00685433  
TGGGATAAAAGCCCTTATTTTTGTTTTGTTTTATTTTAAAGTCAAAAGCAATTTCTACCAG  
A\_16\_P18188633  
AAAAAATGAACCATGAGAGTTCTTGTCTACTAAGAGAAACACACTAGTGCTGTAGGAGA  
A\_18\_P12314296  
ACAAACTCCATCCTGAGAATAGTAACTAAGACATACCCAAATGAATTCTACTCAAGCCAT  
A\_14\_P106088 CAGAGCAGAGAATGCTGCAGGGTTTCTAACAGAAGTTTGACAATTAGTTATTATTCAGGA  
A\_14\_P102322 TAGATCCTGCAGGCTTGAACCTCTTTGCTTCCAATTCATAATTTCTTAGTTCATCAAGAA  
A\_16\_P58424524 CTTACCTGTCAAAGGTGGGTGCTCCATCTCCCTCTGGGGTTGCTC  
A\_14\_P200774 AGAATCACTATGATGGGAGGGCTAAGCAATGGATATGACATGAATATACTTAGGGATATC  
A\_14\_P132637 ATTTGCTAACAATGGGCTCACTGGGTTGTTTTGAAAAGTCACATGAAGTTTATAATTCTG  
A\_18\_P16311616  
CAACAGTAACATCTCTGCTAATATTATGCTACCATGAACTAACATCTTCCCTTTCTTTCCC  
A\_14\_P136379 TTTCTGTCAAGGAGGACTTTTCTCTTTATGAAATGGGCTGTCATTCATAATTTTAAAGCA  
A\_16\_P02182759 CACATTCTCTAAGGAAGAACACAGCAGAACAATAGCATCTGTTTTGTTTCTGCATGG  
A\_14\_P133146 AGCGAGGATGATTCTTATAACTGACATCTCATAATGGAATGGAACTTTACAGGAAACAG  
A\_14\_P109053 TGTCCACATTGAGTCACTAGTCCTGTAAGATATAACCCAGTAAACAACTTAAATGCATCTC  
A\_14\_P110377 CTACATGCATACCTTGGTAATGACAACTTCTTGTGAAATCGCCAGAACCTAATTATTCT  
CUST\_9297\_PI426210822 TGAGAGGATGCAGGCATCAGGGGATGTTTTTCCATTTTCAATCTGTAG

A\_14\_P116594 AAGACTAAGAGATCAACATTTCCAGTCTCTGACTTCAAGGACATTATTACGGATACACAA  
A\_14\_P129339 CACTGAGGCATTATAGGTTTTGGAGTCAACATTATATACCTGAAAGGGGGAATGAG  
A\_16\_P02365670  
ACCCATAACGATTCAACTTTTCCCTTCACTCTATTGATCCAAATTCTTCAGAGTTTATT  
A\_16\_P16418219  
TGGTAACTGCACATATACACAGTGAAATCATTCTTCCATCTAACTCTTCCAACCTAACTCT  
A\_16\_P37407228  
TACTTTGTCCAGTAAATCCCTTGACTTCAAATTCCTCACATCAGCATTTTAATTTCCCT  
A\_18\_P14133293  
TGGTCCATTTTACTCTAGGAGTTAATTCAAATTTGGAAGCAGCAAGATTTCTCTGCAA  
A\_18\_P11194593  
GCAGTAAAACACCCTGATGATAGATAAGAAGTTTTGGCGTATATTCAATAATCCCCCTTC  
A\_16\_P30868734  
AAATAAAGCATTGGAAGCATCACATTTACCTCCTTAACCAGTAAATTTTCTGCCTTGTGC  
A\_14\_P113942 GAAATGTGTTTTGTATTCTTCCAGTTGACTTAACATCCTTTGTGACCCACTTTGAATGG  
A\_18\_P22839770 AAACCAATAAATAGGAGATGCTACCCTCCAACCCCATTCGCGAC  
A\_14\_P202507 ACATTTTAAAATGAACTTACCTTCTTAAAATTTCTGGAACCACGTTCTGACAGATTGCA  
A\_14\_P112582 AGAATGTCATCTTTCAGGGTAACATTTGTTGAGTTACAGAAGTATTGATTGCACT  
A\_16\_P40048209  
ATGTGGACAGAATGCCATTAGTCGTAGATAGCATTGGAGAATAGAATTCGTTGGAGAAAA  
A\_16\_P19973189  
ACTGTCTGACAGGGAAAAAAGAGGAATTAACACAGAAATCTATGAAAATGAGAAAAAGCC  
A\_14\_P126871 GGATGTATTTCAATGTTTTCCATCCTCATTAAGTGTGCATTAAGTTGCTAATGAAGGAG  
A\_14\_P101375 AAATTTAAATTTACATGAGATCTACCATGCTTTTTCTCTACGTGGTCTGGCTTTTTCTGAT  
A\_16\_P02416476  
AGACCAAGTTAACTTGCTAAATCTCTTTTTCTCCTTTGTTCACTATCCTATCCTCTCAGA  
A\_14\_P134145  
AGAGCAGAAACAGTGGTTTTAAAATACTAGCAAATACTGGACTTAAAGTCAGTGACAGG  
CUST\_4358\_PI426210822  
TTTACCAGAATTGAATGAAAAGAAAGGTACCAGCAGATTTTTTTTAGATGTTCTAATTGAT  
A\_18\_P11924571  
ACCGTAATATTAATAAAAAAATGGTTAGTATGAGAGTGGCTCCTTATAAGAAGACCTGCACC  
A\_18\_P22840840 CTGGGAAAGGAATGGGTAGAGACGAGAGCAGATCTGACAGAGAAAAG  
A\_14\_P100682 TTCTTCATTTTTTATAGGGTCTATTGCCGAAAACACAAGAAAAGTGCACATAACTCCGAA  
A\_14\_P116936 TTTAACTGGAGACGAACTTGATAATGACCTTCATACCTCTACAGAGATTTTTTTTTTTTT  
A\_14\_P109089 AGGGGAATAAAGGAGAATTAAGGAGAAAAGAGTTTAAACAATGCATGCCTATCTTAGAGGA  
A\_18\_P15073980  
AGGTTATGGTGATTTTCCAGATCCTATATGCACGAGCATAGAAAAGAGTAGTCTGGTTTT

A\_14\_P121151 GGTGCATTTTTTCAGTTTTCTCTCTTTAAAAAAAATTATGGTTCTCCCATCCCCTTGACA  
CUST\_3977\_PI426210822 GAAGGTCTGAGGTCACTGGGAGAGCAGGTCCATATCGGGATTG  
A\_14\_P117484 ATGGTTTGCTCAGAAGAAAGAGGAATATTTCTGCATTTGTCACAGCATAAGAAATTT  
A\_14\_P138996 ATATCTTCGTCACCAGTTTTCGGACCCGTTTCAGACCATGATATGGTAAGT  
A\_14\_P124531 CCCCACTGCCAGAACCCTGGGTATACTTTTTATTTCTCCTTTATACTTTTTTCACTG  
A\_14\_P116866 CTGCCTAGGAGTATGGAATCTGAGAATATTCTGCTTGTCTACTCTCTAGAATGTTGATT  
A\_14\_P122080 ACAGTGAAGGATGAAAAGAATCAAATGACTCTCCATTACTCAGGGGTATTTAGAAAAGT  
A\_16\_P17421363  
AACCCAGAATTAAGTCACTTTGGCTGTTTTTTTACATGTTGATCTATGGAAGGACTAACC  
A\_14\_P116668 CTGAGATTGTTTCTGCATCTGAATCCAGAAAGGAAGTAGAATTAACATGAAGCAGAAG  
A\_16\_P15962551 TCCATCTCCATTAACCTATTGTAACCACTGATTTCATCCATATCCATTTTTTCTGATT  
A\_14\_P133641 TATTCAGGTATTACTTTGTTTTTCCCGGGATACATCTGTGTTGAGTCACTTTGCATTCAA  
A\_14\_P112288 GGTTTGGTATTTTGTAAACAGAACCAGGAGGACAGATTTTCTGTGCTTGGATTAA  
CUST\_7727\_PI426210822 TAAGGCCAGAGTCTAGACTGACATCAAATGCTTGTATGATTGGGAGGAAG  
A\_14\_P131395 GTCTCATTGTTTCACTGTGTGCAAGTATTTATGTGGGAAGGAATAGTACTACAAAAACA  
A\_14\_P104255 CTCTTTTCTACAAGTTGGAGCCAATTACACCTTCACTCAAATTGCCGC  
CUST\_3274\_PI426210822 TTTTGGCCTGTTTCCATTTTCATATCCAACAAAATGCCTTGGGACCATG  
A\_14\_P129402 CAAAATACTATAAGCAGAGAAGCAAAAAACGAAAAAGCCACTCTATTACTCCCTAACAT  
A\_14\_P113522 CAACAGTGCCATCCATGGAAGAGATTCAGCCTAAAGAGAAAATGTTAAATTTCTCTTTT  
A\_14\_P136171 TTTCATAATTCCTGCCAATCATGTCTGCTAAACTCCTTTTACATCAGCCAAAAAGTTGTT  
A\_16\_P17798690  
AAAAAAGTAAAATTAACCCCCAGAGTATAATTCCCATTCTAATGACCACTGAGCACGTC  
A\_16\_P20517851  
CACACAGTCATGTATCTTTTACTCATCTCATCCAAATAGACTTCTAACTACAGCCCTAAC  
A\_16\_P16191912 TTTCAGTTTGCACAATGTCCTCTTTGGGGTAAAGGGGAGGACAGAT  
CUST\_3923\_PI426210822  
TATATTTTTACATTGAAAGAAGAGAATATGAGCCATGTGTGCCAGGTACGGGGAG  
A\_14\_P113585 TGAACCTGGCCATGACCATCTGGATTCTCAAAGTCATGAACTTCACAATTGTAAGTA  
CUST\_2962\_PI426210822 CAGACATGTCTCTGCTTCCCTTTCCACCAGACCCTTTACCAGTG  
A\_16\_P58424567  
CTTCTGAGATTGATGGGTTTCAATTTCTAAGCCACATTTTTTAGTCAGCAGTTTACCAGAAT  
CUST\_4463\_PI426210822 CTTGCTTCATTTCTGAAAAAGCAGGTTGTGGCCACCCTTTCATGAG  
A\_14\_P118475 GTGTAGTTGGGGCTTAGAAAAGTCATAGTTGTAGCAGTCAGGGAAGCCATA  
CUST\_2552\_PI426210822 GTCTCCATCCTTGTGAGCGCATTTCCAGGGCGCGGTTGTGTATGG  
A\_14\_P135678 AACCCCTCTCTGATCTTTGATATTAAGAAAAAGCATTTCATTGAAAACAGTCTTTGCAGG  
A\_18\_P14134578  
TGTGATGCACGTAATACATAATAGCGAAGTTTATAGATAATGAGGAGAATAATGCCCTCCAA  
CUST\_8716\_PI426210822

GATTCGAAACTTGGATTTTCTGAGAATGTATTGCAGAAGAACAACAAAAAGCCAGTTAAACT  
A\_16\_P02753646  
ATGCCAAGTGTATACACAATAAATGCCACATCGTTTTACATTAATTGTTCCCTGATTGCG  
A\_16\_P01844551  
TTTCAGTTTCATAGTCAGACAATTTAAAATAGCCAGTCAGTAAGAAACAAGTCATCCGCC  
A\_18\_P14132942 ACATACTCTTTGTTTTTCCATTCTTCCAAGCAGGCCCGGAGAAGGAAT  
A\_14\_P107148 CTCCCAGCGGTATCTTACCTTTCCGATAAAAGTGTGTGCGCACTTTC  
A\_14\_P103197 ACTTGAACATAATTAATTGTTTAGGGGCTTCTTTCTTTGTCACTACCAATCCTCCAAC  
A\_16\_P03409218  
AATTCCTGCTCAGGTTTTTAGTGTGATTCAAATCAATTTGGCAAAAATAGTTACTGCATCT  
A\_14\_P104659 CAACAATGGAATATCTGGGAAAACCAAACAGAATAGTTGGGAAAGAGAAAATCTGTGTAAT  
A\_14\_P124408 ACAGCAGCCAAGACTGAATCGAGCCATCTGAAGTTCTTAGTTTATAAAGAATACTTAACA  
A\_14\_P112872 CTCAAGTGATATGTTTAGCCATGAGAATTCAGTCCATTCTAACTCCCACATTTTCCTTTA  
CUST\_9418\_PI426210822  
AGAAAAATCTTCAAGTAAGTTGTGTTGTTTCTTCCACAGGACAGTTCGTCTGTCAT  
A\_14\_P135650 GATTCAGGCAAAGAATGGTTTTTAGAATGATGCCCGATGTAGCAAATAAAATGATCTCAA  
A\_14\_P200269 ACTGCACTAGGTCTAAAAGAAAACAATCAACCAGAACCATTGCATTTATTTTTGTCAAGT  
CUST\_784\_PI426210822 CTGTTTGCATGCAAACCTGTTCTATTTCTGTTTTGCAGTGGGAGAGAGGATAC  
A\_14\_P108870 CTTTTTTCCTTTCCACCTTCTCACATGGAATGAGGGTTTGAGAGAGCAG  
A\_14\_P135450 AAAATAAGGTAATAGGAACCATCTTCTAGGTAACAAGGCAGAGTCAAACCATAAACCATC  
A\_14\_P123885 TGCTTCTTTGTATTACATAAGTAGAAGATATGGGACATAGTGTTTTTCTGCCACTGATCTG  
CUST\_2859\_PI426210822 TTATATCTGACATTAGGTGGGGCCCATTCAGCACCAGTGTACCCCT  
A\_14\_P103785 GTTTTTCTTAGTGCTCTGAACTAGCGAGGTAATGAGTGACCTGGTTTATATTTCTGAGAA  
A\_14\_P104839 ACTTTTTGCTACATGGATTGTAGTTAGTTGGTCTCTCCTAGTTGGAATATAAACTTCCCA  
A\_16\_P00097298  
CCCCTTATAAGATACATGACCCTCAATAATTCAATCTTCTTTACCTAGCCATTATCCATC  
A\_14\_P109011 GTAGATTTCAACGACAAGATTTTGAATGAGCCCCTCAAGCACTCTGACTTCTTC  
A\_18\_P14136915 TTGATCATGTAATCAGTCCTTAGAGGACCTTGTGGGAGGTGTTAACAGC  
A\_16\_P19865280  
TACCAACTTATATATTCACAGAATCCTATCGTCTTAGTCCTAGAAGGAATCTATCCCCC  
A\_14\_P201481 TTTTGTCCACATTAACCTTCTGCTCTCAAATTCTGAAGTATATCAGAATGGGACAGGCAA  
CUST\_7573\_PI426210822 TCCCTGAGATCACTGCCATACAACTAATTGCACCCCAATGCTT  
CUST\_5881\_PI426210822 GAAGGGTGAGAGGACATGTACTAGGTGAACCAGCTGGAGGAATCT  
A\_14\_P107973 AAAAAAGACTATAAAAAACACCATCGGAGAAAGGGTAATGATGAAATTTAACTGCTCCCG  
A\_14\_P109505 CTAAATATAGAAATGAGGACTCACAAATGGGTTGATCACAGAGAACTATCTAGTTTGGGG  
A\_18\_P22841236 ATCAGCCTGAGGAACTCCCAGGGTCACCCCTCTACAAGGATTCTT  
A\_14\_P121038 TTAAAAGTAATTGTTGTGTCTGACTCAAAGATAACAACACACCCTGCTGAAAAGTGACAT  
A\_14\_P126993 TCAGATAAAATGCAGGGAAGTTTCACTGGCCTTGAAGAAAAGCCCTTTAAACATATTTAT

A\_18\_P22841032 ACAATGATGGGTTCCCAGGTGAGTGAGTGCTCCTGGTGCACGGAG

A\_16\_P18508136

AAAAAAAAGAGGCAAATGACTATCTTCATGACGTAAGAGAAGTATATGCCCATTCCTG

A\_14\_P200397 CTCTTTTAGTGGCTAGTATAGTCCTGGGCATATGAATAGTCAAGATATGATGAAAGATGG

CUST\_10420\_PI426210822

AAATATAAGCCTTTTATACTGATTATGTCTTTTATATTTGTATCGATGTTTTATTATTC

CUST\_141\_PI426210822

CAAAAAGAAAAAAAAGATATTAGAGAAAGGAAGGATTA AAAAGACTAATTAATCTTAAG

A\_14\_P137619 ATTGTGTTAACGTGTGGCATTACCAGAGTAACAAACATCTCATTGGGTGACACA

A\_16\_P00685116

CCCTGATGGAAATTATGGCACGTAGTTTATATTTGCATTTCTTTTATTGGATGGGTCAGT

A\_14\_P129273 AATAAAGAGTTACTTGCGTTAACGGTCACGTTATTTTCATTA AAAAGAGAGGAGGAGCAGAA

A\_16\_P01389893

GGGTAATTGTGATAAACAAACACCCTACACATAATAGAGTGGAATTTGACCAACAGAAGA

A\_14\_P106268 TATTAATTCAACAGTGATTGATTGTTAAGCCCCTTTCTATGTGCTGTTAGAGATTGGG

A\_14\_P119995 ATTAGTTCAATGAGTGTTAATGAGAAGTGCTAGTTGCAGGGCACTGTTTTAGGTTCC

A\_14\_P122298 ATCTCTCTGACAAGAGTGCTGAATTAATATATTCGGAGGTGACATCTAGTTCTGGTATC

A\_14\_P103767 TTGATAATACTATAACTCATATTTGCAGGAAGATGGGATTTGGTGAAGTGAGGGGAAGAA

A\_14\_P128919 GGGCCTAGAGTAATGGAAAGGCAATGAAGTGAAAAGACAGTTAAAATGTGTAATTTTCCA

A\_14\_P200451 GGAATCGACTTACCAAAGAGCAACTGAAACAGATTCTACACATGACTATCAGAAG

CUST\_6995\_PI426210822 AGTTAAGTCTGTTGGTGCTGGAACTCATCACTGAGGAACAGCCTATG

CUST\_3605\_PI426210822

TGTGTTACTTGATATTTGTGTTTTATCTTCTGTACCAGAGCATAGGTTATTTTAAAGCA

A\_14\_P106963 CTACATGGAGCAAAAAGTCACAAAGTAGAACTGGGGGCTCGATGGAT

A\_18\_P14135729

GACAATAAGAGGCTTTTTTGGCATCAAAATTTAAAGCATTTCCCCACCTGAAAAACAATG

CUST\_3879\_PI426210822 ATCCTTTATTCATCCTGCCCTTCTGCTTGCCCTCAGTCTCAGAAAT

A\_16\_P35556806

AGAGCCAATCATAGAATTCATCTTTCTTAACATGATGTGTTATAATCCCAACCTAGCCA

A\_14\_P121386 CCCCTCATTTATCACTCTGACCTTCACAGGGACAGATCTGATTTATTTATTTTGGTT

A\_14\_P130567 TCAATGGTGATAGGCTGGTTGAAGTGGAGTGACATTTAGGATACGATATTGTAAGAAAAT

CUST\_6682\_PI426210822 TACTATACACCAGGGACTTTTTGCATCTCGTCCGCATCCCCTCTT

A\_14\_P100615 TAAATGAAATGTCTTAGTGATGCATCAGAATTTGGGAAATAAACTGGCTTTTTTGGGGAA

A\_14\_P123487 CATAGTCTGCTCGGCCCCAGGTAAACATCTTGCCAGTTTCTAAAAACAAATATTA

A\_16\_P16191998 TGTTTTCACTGTTGCGTTGCCTCCTAGGTGGTCTTCGAGGCCCTG

A\_14\_P110012 TCCAAGCCCCTTCCTTTCTAAATTA AAAATGTTTTTCATTTGAAAGTGTATTTGCCAGACA

A\_16\_P16931352

AAAAAAAAGAGTAAACGTATGGACTTTGGAAGATGTGAAACTAAAGCACTGAAAGAGCCA

A\_16\_P16245529

AAATCTACCTGAGTATCACTACCTCTGTCACTGAACTACTGTAACCCAATAACAGGATAA  
CUST\_3161\_PI426210822 CAGCACAGACCTTGACGTGATTATTTTGGTCATTCTAGGGAGAGCAAAAAG  
A\_16\_P18391872

TCTTTCTCAAACCTCATTCCAATTTGCTATTCCATACTTGTCATCTCAATTTTCCCACAGA  
A\_14\_P122277 TAGCACACAGACTGTTAAATGTCTGCCTCACAGATAGGAGGGAAAATATATAGAGGATT  
A\_14\_P122230 GACCTCCAGGATAACTATGGCTTATCTTACAGCAACGTAGTTCATCTAGGATAGAAAATT  
CUST\_4658\_PI426210822 GTGCCTAGGCCCGAGAGGCCATTAGAAGCCCCATTTGTGTGTCTC  
A\_14\_P201865 ACCCATTGATATTTTACCCCTTTCTTAATGATCACCTCCAGTAGAAATAAGCAACACAGA  
A\_14\_P132834

ATGAGCAATTAACACTACACGAAAGAGTGAGAGAACTTTCAGGGGAAAAAATCATTAGG  
A\_14\_P133913 CTCCTAATCACGACCCTGCATTGTGCATTTGATTATAATATTGTCCCAAAGTATAGGTTT  
A\_14\_P105211 CTTTCTTGATATTCAGGGTGAAAGGGCTTCTCCCACTTGCGTAGCAC  
A\_14\_P126949 CCATGCTAGGCATGGTTCTATACACAAAGATCTCAAAAATATCCATCAGAGTTTTCCAAA  
A\_14\_P201167 ATTA AAAACGCCAGCCTTGT TTTTCTTAGTGCTGTTTTTGGTTTTTACCTCGG  
A\_14\_P110238 CTTGTATATTTTTAATATGATGGACACACTGCCGCTGAATTTTCACACTGACAGAGATGT  
A\_16\_P20370262

AACTTCCCTGACATATAAAAACACTGCACAGATCTATTCAACAGTAGACATAACCCAAGTT  
A\_14\_P111097 TCCTACTTGAATGTTTTTAAAGGCTTCCTGAAACAAACCAAAACACAGCACTCTTTTTTT  
CUST\_981\_PI426210822

GCCATAAGAATTGAGTCAGAACTTTAAAAATCAATTATTTAGCAGTATGGAGTGATTATT  
A\_16\_P02392553

CCTAGCATGATATTCAGTTGCCATTTAGAAAACATAGTTCAGTTGTCAAATCCCAACAT  
A\_14\_P133837 GCAAGTTCACATAAAAATAGGATATTCTCCTTACCAAAATGCAGCAAGGCATTTGCTTAC  
A\_16\_P00685142 CAAAGGGCATCCCAACTGGTTGTATTATTTACCTTGAAGTGAAGTGACAGGATTT  
CUST\_1236\_PI426210822

GGGTAGAAAGCTGGATATTCCTAAAATGATTTTAAAGAGCCCTTGGCAAGTTATAATTTCT  
A\_14\_P201844 ATTCATACCATATTCATCACATACTTCTGTAAACCAAGCCCATGCTAAAAATAGGCACA  
A\_14\_P134618 ACACCTTCTGTTAAGAATCATTCTTTAAAGCAATCAATGTATTTCTGGGGCAGAGGTAAT  
A\_14\_P131267 GTGAAGAGTTTGCCAGTGGTAAATTACAACCTCCTCAAGTATATTTGCAGGTAAGAACT  
A\_16\_P18090073

AGACTCTTACAATAAGGTGGTATTTACATGATTCCCATACGAGTGTTTAGAAAGGATGGA  
A\_14\_P118902 TAGGGGGACGGGGCTGACATCTACATTTTTTTAAACTGAATCTTAATCGATGAATGTAAA  
A\_14\_P129475 AAGTGAAATACTTACCAAACATTATTGTCAAGAGGGCAATTGGCATCACAAACAATCCAA  
CUST\_3052\_PI426210822

GGTCCATGTA CTGATTATAGAGCACGACTCAACTTTGTTGAGATGAGTTAAAATTATCAG  
A\_14\_P101327 CTCTGTCTTTCCATGATTTTACTCCCATTA AACCCGGGGTGCATG  
A\_14\_P109189 CTGGAAGTGAAAAAAAATTGATAAGCAGAACCCACTTTTTAATGGCTAGCATCACCCA

CUST\_8011\_PI426210822 AGTTTCTGACATTCTGTTCTTCCAGGCCTCCATCCCTGATTTTGG  
A\_18\_P13177881  
AAAACACACTGAAGACTAGAGATGCATAAAAGTTGTCATGTTAACATTGTCTGTCTCCA  
A\_14\_P103937  
GGTTTTAGAGAAAAAAAACAAAAGGAAGCCTGTGAAATCAGGAGTAAACAGTAATGCCA  
A\_16\_P00910870  
GGCAGAGTGCTATCTAGGATAAAATCCATATTGTTAGGCAGAGAGACTGTAATTAAGGA  
A\_14\_P124504 ACTCACTGTATCTCAAGTGAAAACCTATTAAGCCAGTGGAATGCAATTGTGTTATCTC  
A\_16\_P02932786  
GGCTTTTATAGTGAGGAATCTTTCTATCATGTAATGCAGACCACTTTATTATGGGCTCC  
A\_14\_P137432 ACTACCTCACAAAAAATGATGGAAACATTGTTTTCTTTGTGAGGATTCCTATTTGGATT  
CUST\_2575\_PI426210822  
CTTTTGGCCAAGAACCTTCCATAATGTGCCATAAAAATATTTTATAATTTCTGCGGGTG  
A\_14\_P129555 AGAGCATCCCCAGTCTTGAGGCTCTCACTAGAAAAGTCCACAACCT  
CUST\_2203\_PI426210822  
ATACATCTTCTCATGTCTCAGGACATCAGATTGCATTGTATCACTCTGGTCTTCAT  
A\_14\_P136561 CTCCAGAGTTAGGTAAACGCTGTCTCTCTAAAGTTTGGGAAATAAACCAAGTC  
A\_14\_P122389 TTCACAGTTAGATTGAAACTGGAAAAAGAAAGTATGCTATATAGCAAATGCACACACGTA  
A\_14\_P131242 GGATTAAGCCATCTGGAGGCTACTGAGTGTGTTCAATGACAGTAATTGGGTTATATATA  
CUST\_1415\_PI426210822  
TGCATAATAGTTTCATTCAGCTCATGGGGTCTGAATTTCTTTTTATGTTTCATTTTTTC  
A\_16\_P17570585  
AGGAAGCCATTATCTTTTGTCCATTGAGAAATCTTTCCTAACGACTACTTTACTCAGAGT  
CUST\_3418\_PI426210822 AAAAAGCCCTTGCCATCTCTATCCTCCAACACAGAGCTTTGGTGT  
A\_14\_P112515 TTGCCATTCTCTTTTCAGGCCCTGTTTTTCATAATCATATACAATTTTGCATGGTTGTAAT  
A\_14\_P201047 ACTGTCCCAATTAGGAGCCCTGTATTGTGTTGTATGTGTTTTTCATGGTTTTTTGG  
A\_18\_P15667049  
ACAGGGCTTTTCTGAATAGATCTTTTTCCACATCATGATAATTGACGTGTTTTAGAGCAC  
A\_14\_P101266 ACAAGCCACTGCACTTGGCTTCATTCTAGATTTCTCCTTTTCATCTTCATGATAACAATA  
CUST\_2191\_PI426210822  
TGGTTATTCTAAGTACCAGAGTATTCTCATTTCTGTTGAACATCAGCCATTTGAATAAAG  
A\_14\_P137321 TAGATGTTCCATAGCATTTCCCAATGCTCAATGCCTTTCTTCATAAATGTAGTGTGTTGTC  
A\_14\_P114801 CTTACGTGAAGCCCGGGTAGTGTCTGATGATAATAAAAAGTATTTGCACCTTGAT  
A\_16\_P16467932  
AAAACCTTAGAGGAAGTTACCTAGGATATGGCAAGGAAAATAGTCATCATATCGTGAGTC  
A\_14\_P108897 TTTTAAGGAGGCAGGAAATACTGTAAGATTTGGTGCAACTGTAAACAAAAGTTGAGTAGC  
A\_16\_P19124882  
CTTTCCTCAGCGGATTATAATTGATCAATGGCTCTCATAACCAATTACTTCCGAAAAGCAT

A\_14\_P202273 CTAAGTCTGATTGAAGGATTTTCTCATCTTATCCTCATTCTGCAAACAAAAATAAATGC  
A\_14\_P125021 ATTGACAGACACCAGAAACAAATTTGTGAGTTTAAATGAAATGTGGACCCTAAGCAACC  
A\_14\_P133596 CTATAGGGAGTAAGAAAAAGCATCATGATAACGTCTAGTCAATAACATGGCACTTCAGCA  
CUST\_10351\_PI426210822

GCTCACAGTGAAGAAGCATGAGGACAAATACACAGACAACAAAAACATTTGATGTG

A\_16\_P38690984

AGCCAGTTATAGCCATGTATCACTCCTTAATTTAAAATGATGCCTCACCTAATAATGCAA

A\_14\_P117721 CCACATCTTTTTTGCCTTAAGGGGAGAGGCAGAATTCTAACAATCATAAGACATGATT

A\_14\_P108136 CTATTTCTTATGGAGTTGTTATTTGTAAAACCATGACTGTAAACCCACCTGACTTGGATCA

A\_14\_P135343 GGAGATATTTTTGTTTGTGTCAGAGTCAGAGCACTTTTTCCGATGCTGTTTGGATAAAAAAT

A\_16\_P16931798

AAAAATACACCAAGCCAATTATGTTCACTGGTTACATCTCAAAATCAAATGGGCTTTTTCC

A\_16\_P01222528

AAGAGAGATGTGCACATAAAAACTTATACTACAGAGAGTCAATTATCAACAGAGGGGTGC

CUST\_4010\_PI426210822 TACAGATGCATGGCTGCATGGCTGTGCATCATCCACCCTGGAGTAT

CUST\_10327\_PI426210822 CTTTTCTTGCAGAGGGGAGAAGGTGAAGAGGTTTCAGGAGAGAAA

A\_16\_P21400608

AAGAGACAGATCACAGTGTAACAAGTCCTAAGCAACTGATTTCTCACTTCAGGATCTTAT

A\_16\_P02859497

TTTGCTCTACCAAATTATCCTTTCCATATTGCAGTGAGGTTACTAAAGAAGGTCAGAAGT

A\_18\_P22841369 AATACCATCAGTTCCATCTTCCTGTGTTCCTTTCCACCCAGGTTTTCT

CUST\_3836\_PI426210822

GAGATGAGAAAACATTAGAAAAAATAGTACAGAAGTAGAGCTGGATGAGAATCCAAGTTA

A\_16\_P00327243

GAACATCAACTTTCTAGCCTATCATCCAATTAATGCTTAAAAACATGATATAGACCTTCC

A\_14\_P123692 AGACTCATTCTTGGCATCTGTAAACATACACATCACACATCATTATACAGGCACG

A\_14\_P113188 AAGATTAACAAAAATAAAGCACCAGGGTTCTGAGCAGTTCTAAGGTGAGTATATCAGC

A\_14\_P123275 CCTCCAGAGAATTGTGAAGACTGTCACATTCTAAATGTAAGTTGATTCATATTTTTTCCC

A\_14\_P116099 GTTATAATCTCACTTGTCCAGGCAAAATGAAATAAATGACAATGGCAGTGAAGAAGAGTG

CUST\_1263\_PI426210822 ATTATGGCCAGTTAAACAGAGAGGGATTCTGAGGGGGAGGAAGGG

A\_14\_P108428 CTGGCACTGAGTAGGTATGAAATCATTGTTGAAAGAGTGAGTGAACCAGCAATATAATTT

CUST\_3189\_PI426210822

GCTCTCGGCTTTATGGACAAATCAAAGAAGATAAATAAAAAGCATTCTGGCTTATCACACA

A\_14\_P120511 TAACCAATTGATTCTTCTTGTCTGTATTCTTTCTCCAAATCTCCTTTTTCTCTAGACTCA

A\_14\_P139462 CTTTGGAAACTCAAATGTTTCATACAGACTGCCAACAGATTAATTAGTAGCCTCTTTGGA

CUST\_3492\_PI426210822

ACAGATCAAGCCACACAGCCAAATGGAAATACAAATAATAGATTGAGGTCACATTGAC

A\_14\_P111992 ATGTTTCTTCTTATAGCATTCTGACATCTTCTCCACCCTAAGGAATGCTGGCTTTATTA



A\_14\_P105911 AAAATCCTTTTAAAGCCTTTATGGCCCAAGTCAAATGCCACTTTCATAAAACTCTCTTATC  
A\_16\_P03121533

ACGTCTGTGAACAGTATTTCTTCAACGATATTTCCATTTGACAACCATGAATTAGGACTC

A\_18\_P14981218

AGACATTGCTTTTCCTCAATACATTCTTGATGGTATACTCTGTTTTGGAAAATCTAACTGCA

A\_14\_P125756 GATGACAATAGTAACTCATAGTGCTTTTTCCATAAAAATCAGTGGCTGTTGCCCATACAT  
CUST\_9068\_PI426210822 CCAACAGAAAACCCTCAGTACCTGCCTTGGTAGAATACAGCCTTG

A\_14\_P124947 TGAATGACACACCTGACTGTTACCTCTGTGGGGATATAAGTATATGCATATGGTTTATA  
A\_14\_P201993

CTTCCAATACGTATTTGTAACAGAGAAGAGGAAAGAGATGTTGGAAAGAAAGTTGAGTTG

CUST\_7211\_PI426210822

CCATAGGCTCAAAGAAAAGACAGTCTATGTTCTAAGTACAGATGAAGAAGTAAAAGTTTG

A\_14\_P139872 TTCAACCATTTTTTAAATTGGACTTTCGGAGTTCAGAAACCCACTTAAAAGGGTTTCTTT  
CUST\_7033\_PI426210822 GGCAAGGTGGTTAGAGCTGTGTATTGAGAGGTCTTCTCCAAGGTAT

CUST\_6406\_PI426210822

CAACTACAACCTATTCCAAGCTGAGAGTAATGGACTGAGAATCTGAAAACATGACAC

A\_14\_P201262 ATACAACCGCCATCCCTTAATTTTTCTAATATTTTCGTCTCGCATATCAAACCAAAACCA

A\_14\_P200631 TCCTTTGCAGACATTAATCAATGCGCTTGCAAAGATTATGAAGATTTCTCTTTCTCTTT  
A\_18\_P23851060

AAATGAATGGGTCTTACACTAACAACAGTTAACTAGGTTCAAGTTTTATAACCACCAGGCT

A\_18\_P22842846 AATAGATGCTTTGAATTCTGCAAAACCAAACTCCCCTGTGACCAGTGG

A\_14\_P105257 ATGTGTGATCCTGTGGTTTCTGCAATGTATTGTGAGAAAATATGAGAAGGTCTTTATCAC

CUST\_9386\_PI426210822 ATCTGGATCAGTGTCTTTGAATCTGAGCCACAGGAAGACCTCTG

A\_14\_P120498 TATTTGACCTGAAAACCAAATACGATGAAGAACTACTGCAAAGTAAGTCTCTCTGCTTG  
A\_16\_P20603619

AACATCTTAAGATTGCACAGAACGTTTTAGAGACCATTAAGTTAACTGCCACTACAGGAA

A\_14\_P130187 TATGTGAATATATTGTTCCCTTCTTTAGGGAGGTGGTTGACTCAATGGTTCAGCATTTT

CUST\_8719\_PI426210822

TATTCCTTTTTTTTAAATAGCAATCTGGAATGAAAATATCAGATGATCATAATATAAGAGT

A\_16\_P58424127

TTTTTACTTCTAATTCATCTGCAGTCCTGTTGTTTTAGCCTCCAAAACACATCCCAAATA

CUST\_4234\_PI426210822 ATGGGCTTTGGAAGTGAAGCAGCATTCTCAAAGCTGGGTGCTGTAG

A\_16\_P16558334

AAACGGAAACTTCCTTTAGTTGGAATTAGGTTGAGATTTGTTGATAGGACTCTAAACTCG

A\_16\_P58424504

GGTAATTTGTGATAGAATCCCAAAGTACTAGGGCAAAAAGGTAATAACTTTCTCACTGT

A\_14\_P200740 CTACCTGACTCTTGCTACATTCCCCTAAGTATATCATTTATTCTAGTAAATGATTAA

A\_16\_P20812872

CCAGCATGGTAAAATTTTGAACCTCACAAATTTTCTCAGACCTCTCTACATGATGAGTAG  
A\_14\_P125291 GATTTGGTTCCTTTATAAAATAGGGTTCGTGTTTTGGACACTTCTTTACAATTCACCTTTTCT  
A\_14\_P122009 CAAAACAGCACTGTGTATCATTTAAGGAATACACACATCTACAGCGAAAGCATAAACACA  
A\_16\_P02875236  
AAAGTTCTCCACAAGAGTTAGAACTGAGTAAGTAGGCAACAGATACACACATTATGCAG  
A\_14\_P106344 GAAACTGCTAGCAATTTAATCATTTATAAAAGGAAACAAAGTCACTTTAAATGAAAATGG  
CUST\_10261\_PI426210822  
TGACCTTAAAATCCCACAGTTCAAAAAGACTATAAAAGTTAAATAAGTGAACATAACTGCA  
A\_18\_P15183424  
TGAGGATGAGTTTCATATAACGTGGCTGAATATTCTATACATCAAAGTAGGGCAACATGG  
A\_14\_P123558 ACCCCCAACTCTAGGACTTTTCATCTTAATCTTCTCCTGTGGATATATAAGATCATTAT  
A\_16\_P36794689  
CAAGCCTCAAAATTACCAGTTGGAATGTTGCTATCATAGAGAAGAAGATCTCCATTCAAA  
A\_14\_P121121 GTAAATGACTGTTTGCTCCACTGTTCTGAAAACAAATGAGTGCAGAAACAATCTTCTTTT  
A\_14\_P131645 CCAAATCCTACATACACAGTAGGAAGGTATTTTATAAAATCCTTTATTTTATGAGTGGCA  
A\_14\_P137936 ACGAGGTTTTAAATGGCATCACTGTGAGCATTAGTAAGTATGCTCATGTATGCCTGT  
A\_14\_P103632 ACCTTCTGACTAAGTATTCTTAATAACCTTTTGCTCTGGTTGACCCATTTAATAACCTG  
A\_14\_P200327 AAGTTTATTTTCTCCAAAGTCTGTTGTGCCATCACTTCGAAAGGTCCTCCAG  
CUST\_9848\_PI426210822 GCTACTTTAACCTCTGTGTCCACAAAACCAGACCTCCAACGTGGC  
CUST\_4254\_PI426210822  
ATGAAATTATTGTCATGGAGTTAGAGCCTAGATAAAAAGTGTTTGGCAAGTCTCTAAAGCA  
A\_18\_P16878596  
AAAAAAAAGATGAAATTTCCCAAGTATTCTGTTATCTCACTTCTTTTATCTCTGGCAAC  
A\_16\_P15765730  
AATCTCCCTTTACATTGAACAGATCACTACAACCTCCATTAACCACTACAACCAATTTT  
A\_16\_P37063899  
TTTTCTTCTAGCACAATCTATCCCAGAGTCTTTATCATGTAAACTCAACAATGCGTCT  
A\_16\_P36230951  
TGTGATACCTGAATTTCTACATTGAGACCATTTGGTTAATGCTGTAAGAAGACCTCTTTG  
CUST\_9322\_PI426210822 CACTTCAGTTATTTGCACTTAATCATGCACAGCTCTGCAGCCTGGTTCT  
A\_16\_P41621709  
CAGTGACTIONTGAAGTACTGATTGTCATTACATTACGTTGAACCTTATGCTACTTTCTGCTCA  
CUST\_3389\_PI426210822  
AAATTTATTGAGATCTTATTTTTACCCTCATTCCGTGCACATTTGGGATTCTGTTCG  
A\_18\_P10040140 ACATGTTACTTCCCTATTCCATAAACCTCCACTGTAGGATTAACACCTAAGACAC  
A\_14\_P123106  
ATTCTGAGCAAGATAAGCAACATGACAAATTCAGAAATGCAGGAAAGGAAATTGCAAGTA  
A\_14\_P120661 GATGCCTTAAAATCATAACAGAAAATGATCATGTTCTTCTGTTTTGGAAAAGCCTGGCT

A\_14\_P109284 GAACAATTGTATAAACTGATTTACCATTGCGCTAAGAGTTTCTTCCCAATCAGGCCG

A\_16\_P17468594

CCAGGAACCTTAATATACAACCTGTTACCTTAGATAAAGCATCTTGACTTTCTTAGGCCT

A\_16\_P18032084

GCAGATAAGAGAATCCATACACACTATCCAACCTCAGTTCATCAATTTGATTTCTCACCAC

A\_14\_P105957 AAATTGTGTTTCAGCAGTGCTGTAGTGCTGTTAAGGGTCATTGTAGATTTTTCATGAAAGC

A\_14\_P126409 GCCAAAATGAGGAGTTATTGAAGCAAAATAGTATCTTGATCATTGATACTTTTGTCTTTC

A\_14\_P127564 ATTTTTCAAAAAGGAAGAAAGAAAGAAAGTGGGGGAAACAAATTCTGACCTCTTGGAG

A\_14\_P114548 GACTGGGTCTTCACTTCTTGGGCTAATAAAATTGTTTCTTTGTGGACTAAGGAAG

A\_16\_P19127397

ACTTGAGCATTTTGCAATTTGTGGACTGTGCATTTTTTGAGATTGTTTCATAAAATCCAGG

A\_16\_P02404978

TCCCCCAAGTATGAACATTTATAGCATCTGCTCTGTAAACATGTGAATAAATTAGGACCA

A\_14\_P129478 GTCCTGAAGGATCCAGAAAAGAGATGTGGCTTTTGCTTTTACAAAAGAAAATTTTGCTTA

CUST\_4114\_P1426210822

CACTCTACTGTGGTTCCATTTGCTCTTTGAAAACCTTGTTGTTTCTGTTGGAAAGAA

A\_14\_P135541 CTTACCTGGGGAAAACACATGTTGTCATCTCTTTAAACTCACTTAAGTCCTAAAGAACA

A\_16\_P20829925

ATCTTAGCAGTAAGAGCATCATATTATCTGGATGGACATCTGATTATAGGAGTGGAGGAG

A\_14\_P106395 TCTTTTTACCCTTGTTGTGAAAAATCTGTCTGAAGTTTCTAAATCCCTCTTCCCTACTTA

A\_14\_P126381 GAAGTTTTTCATCTGTGTTCTCCACTAGGTTGGCAAGGTCGTCATTATCTCTAGAAA

A\_16\_P02556055

TCCCATCTCTTACTCTACAACCTACTATGCAAATGACTCATTGTTCTCTACAATGTTAC

A\_14\_P138064 GATAAGTCTGGGACACTGTTTCAGTTCAATAAAGAGGCTTTTTTCTTCCTTAAAAATCTG

A\_14\_P114438 TTTACATGCCTCATGTTGAAATATCGTGTGGCTTATTGTGGACTTAAAGTGTAACATTC

A\_14\_P108000 TCCCTGGTTCTATTTTAGAAACAAAAGGTTGACATACCACAACACCAAGTTTTTAATCAC

A\_16\_P18849842

AAAGGTATCTCATTGTCATGAGTCATAAATGTGTGGGTTGACATAATAGCACTGTTTCCT

A\_16\_P01135424

GTCCCCACTAGACTCAATTATTTACCTCTTTATAGTCATCCTAAGCCTAACACTTGGATT

A\_16\_P17312728

AACAAAGCCTTCAGAGTGACAGATTATACCGAATTTATTGCATAAAAGGGTCAGTAAGCA

A\_14\_P109595 CTTAAGGTATCGATCCAAGTCCATATTCATTGGCACTGGGAAATACATATGATCATCAAA

A\_14\_P108373 CTGAGAAACATGATAAACTCATCTTGTGATCAACCTATTGGCTACCCAATCTTTGTCTCA

A\_14\_P116328 ATTCATCCAGTAGGCACTAAATAAACAATGCAGTAGTGCCAGTTTTTCACTACTCACAGAA

A\_14\_P119402 CTTCTTTGTGTCCATGTCTAGGAGTAACAGTGCAAGCCCTTTCCACAG

A\_14\_P119396 GTTTCTTATCTTTTCCCTTTGTCCTAAGATCAGTATCTCAAGACGGTTTTTCAAATGACTC

A\_14\_P134611 CTAACAAACAGCAGGTTCTAAGGAAATACTGCTTATTGAATCAATCAACCAATGGTCTCA

A\_14\_P121671 GCCACACTTTTCTTGATGCGCTGTCCTTTGATGTTAACAATATATGGCAAGAGAG  
CUST\_10432\_P1426210822 CATATAAACTGTGGGTGTGGCAAGACCCCGAAGACATTTACATCTTTATC  
CUST\_8518\_P1426210822 AGTTGAAGAGGACACAGCCCACAGGGTGGAGGTTTCAGAAAACATT  
A\_14\_P115239 TGAGAGGGAAACTCATCTGTGTAAGAGATAGTTTATATAGGGCTTGACTATTGGTCAGAA  
CUST\_7046\_P1426210822 AGGAGACCTCACGGTACAGTCAGCTGCAGGAGAGGAGCTGCTAAC  
A\_14\_P111828 CAGAAAGTTTACTCAAAATATTTGCTTAGGTTACAGTAGTGGGACTAATAGAGCGCAGGA  
A\_14\_P125759 GCTCATATTATTTTCATCCAACCATGCCTTTCTTTTTTGCCCAATTATAGTTGTTGATCAA  
A\_16\_P16190973 TTAAAATCCCCTGCATTTAAACCATGAGTGGGTGGGACCTTGAGGAAAT  
A\_14\_P129762 AGTATTCAGTGCCTGGGAAGAAGCCAAATATATCCTGATTGCTATTCTGTATCATTCAAT  
CUST\_89\_P1426210822 TCAAATCTCTGCCTGCTATTATAGTTGAAGGCTTGCGATAGTATTTGCCCTT  
A\_16\_P16757445  
AAAAAACCATTGCCACTATTATTCCCATCCTCTAAAATTCTGTTTCTACACCATGTAGCC  
A\_16\_P15516577  
AGCCATCCCTTCTAAGTTGTTAATTACTGTGATCATACTACATTTATCTTTTCGGGCA  
A\_16\_P15796853  
AAAATGCTGTTTCACTCTTCCATAAAATTGATCCTAAATCTACCCTGCTTCTATTCCAC  
A\_16\_P18384356  
AGTAAAAGATCAATGTATGCACTAAATCCACAATCTATGTTTGTCTATAGCACATGCCT  
A\_16\_P03704886  
AACACAAACTTGCTGAACTTATACTTCTATAGAGGGCTATATCTAGGATGCTGCTAATGA  
CUST\_6016\_P1426210822 TTGCTCCAAGGTCAGGTATTAAGTTAGCAAAGTCCTAATGCTTTTGCTACCC  
A\_14\_P133411 CACTGGATTCAAGACAATTTCCAATCTAATGCACAATGGAATAAGTCACTTCTCCCAATA  
A\_16\_P15698189  
GAGATCCATAAAGCACTATTTTTACAACGTGAACTTCTTCAACTAAACCCTCTAGTCCTG  
A\_16\_P03583528  
AAGACTCTTGCTTTTTTAATCATAACGAAGGAACTGCATTATTACGCTCTCATTGTAAGGA  
A\_14\_P100905 AAGTTTTTTTTATCCTTGAAAGGGTTTTCTGAAGTTGGTATTCTATCAGCAAAGGGTCAC  
A\_14\_P114643 ATCATCAATGGCATCATTCATCATCTCCTCCTTCATATCCATGATCTCTGCCTG  
A\_14\_P127776 GATCTTGTACGATTGAGACCAATCCAGTATTTACGCCCTTGTGTTGCTTTGCAATTAC  
CUST\_5052\_P1426210822 ATTGTCCTCTGTCTGCCCTGCCTGTGAGACGGGCCATGCTCTATG  
A\_14\_P100268 CTTGCAAATTGCTTATCTTATACAGCCACTTAACAAATGGAACCTGGATATTACCCTTCT  
A\_16\_P00685467  
TTAAGGATACTTTTAGTTTATCTGATCTGTGCTCCACACCTCTTCAGACTCCATTTCCAT  
A\_16\_P18308867  
GTCAGAGAATAAAAGTGTGTCATGCTAAGTAAGGAAATGTTTCATGAAATAGTGCATCATCC  
CUST\_6586\_P1426210822 CAGGAATGACTTTGCTGTGTGATTAAGTGACAGAGGCCCAAGGTTT  
A\_16\_P16191455 GTTCAGCATTGAGATATGACACTGTACCTCCATCTCAAGAAGCCCTTAC  
A\_14\_P119193 CATAGAGATGTGCATTTACCACATGTGTGTTAAATCTCAGTTTAAAGATGGAAAATACAT

CUST\_1899\_PI426210822 GAAGCACTGAGAGCTGTTACATTGATGTTGTCTTCTTGGGGAGG  
A\_14\_P131438 TCCTGAAGAGTTGCCAAAATGTATACCTTTGTATTTCAAAGTTGCATTGGAAACATCCTA  
A\_14\_P101199 TGTTTTGAAAAATGTTTAGTGTTCAAATAGAAACCATTCGTGTCCCTTCACTCTCTGAAC  
CUST\_4192\_PI426210822

TGAGAAAACCTGTGTTCAGTACTTCATGTTTGTAAGGACAGGGAATCCTTCTGA  
A\_14\_P132165 AAAGCCCAGATGACAATTTCTTATTTGCATTAGCCTATTTCCCTCCTCAGTTGAATTTCAA  
A\_16\_P18511822

AGGAAACAATGGAAAACCTGTAGAAAGACTGAAATCTCCATCACTTATTTTTAGCACGTCA  
CUST\_1659\_PI426210822 CTGTGTTTCCCAGTGGAGCGTCCTGACTGCAGAAAGCTATCTATT  
A\_14\_P106983 ATGAGTTCCTACTGTGTAGGCCTACTTCAGTTTCAAAAACCTTAAACCTAAAAGGAAAATA  
A\_14\_P114082 ACTTCAATGTATCACCTCCATGGGGTAATAACATACTCTTAAACGTGTATAAGGCACTTTA  
A\_16\_P19028086

TCTGCACTACTGTATTTCGAGTTATATTCCAAGATTTGTCTAAAACCTTTCAGGTTCCACGC  
A\_18\_P11617775

ACCCTAACTTCAGAACCAGTGCATTATTCTCCTCTATGATACCTCAAGATTTTTTCAGAAA  
CUST\_7782\_PI426210822 AATCTCTCCCATATGCATCCTGGTGGATACCAAGTGCCTGGCAGA  
CUST\_8760\_PI426210822 TAGCTTTCCTACTCTGGGGGAGTTTTCTGCCACAATGTGAATCACTTATTTTG  
A\_14\_P132083 CTATGGTTCTGATTCTAGAATTCTCAGGTTCTACAGTTTTAGAATTCCATGCTAAGCACG  
A\_14\_P107361 ACGTGATTCAAGGGTATCACAAAAGAAGAGAGTATATTGCTGCTTTTTCTCAGTCACTTTG  
A\_14\_P200655 AACTCTTTCTAGATCTATCTGGAGATTACAATGTCCAGAATCAACCAGGCAGGTAATTA  
A\_14\_P131414 CATCTGTAGACCTTGCCTGGAATTTTTTTCAATAGCAGACTCCAGTTTGGGAAT  
A\_16\_P16995297

AACCCTGGAAGATATAAATGCAATTTTTTTGTAAGGACAATCATACCTCCTCTTCTCAGAC  
A\_14\_P113447 CTCTTAACTCAGAAATCAAGTCATCTGACAGGTGCCGATGAAAATTTTTTCAGAACTTC  
A\_14\_P129230 CTGGTATCTTCTATTTTTCAATCAAGACTCAATATTTGTGTTGCTGCTGATGACGAACTGT  
A\_14\_P114789 GACTATCTTCATCCATAGGTATTCAGTGTACCATAAGCACACTTCTTCACATGTGATGT  
A\_14\_P111532 GACATCCTTCATTTGACATTTAGTAGAATTCCTCTTTGGCCACAAGAATAAGCAGCAAAT  
A\_16\_P16265400

AAAGTTGTCTTTGGCTATAAGCATATATCCTGGCCTATTAATGAGAACTGGGGTTTACTC  
A\_16\_P00600817

AAAGTTGTCTAAAACCAACCTCAGAATATAGCAAGGCACTAAATGTTTCACCAAAGAGAG  
A\_14\_P102166 GGGAGAAGTTGCAGTTTGATTATGGTGTCTATCTTCTGAACAAAAATATAGCACAGGTAA  
A\_14\_P126238 AACACTCCACGTGGGGAATTTTTTCTGGATTGCCTTAATTCTCTCTGTTAGAATC  
A\_14\_P120946 CTATCCCCAATTAGTTTGCTTTTTTCCCATCTTTTATCACTTGAATATGATGTTGGTT  
A\_16\_P36626921

TTTGGTTCCATAAACAGTTAAATTTGGCTACATTAGAGAGATGATAGTTAGAAGTGTGCCT  
A\_16\_P35426203

ACCACAAGAGTTAATATTCATCCCATGTTTAATAGCCTACTATAGTGAATATACTCCA

CUST\_4329\_PI426210822

CTAGCAATTATGGGGGTTTTATCTCCCAGATGTGATTTATGCCATATTACATTCCAAGAA

A\_16\_P02610294

GACCTTTTTGTCCCATCTATACTTAATCTGCAGATTCATTGATGACTCTTCTCTACATCC

A\_14\_P130950 CAGGGCATTACTTCTAATAGCAAAGGAAATTCATATTCATTTGTGGATACTTCTGGGCA

A\_14\_P118724 ACAAGCATTACATAGATCCAGACACTATCTGTGCATGGAAAATAAAGTTCCTGTGATTGA

A\_18\_P22841578 AAATGTTTATATCCACATACAGGCCCCATATACAATGGGGGAAACAGAACAGAAGAA

A\_14\_P123502 CCCTTCAGGTAGTCATAGTTCTCATTAAATGATGGCATCTGAAGAAACAAAGTATTGAGCA

A\_14\_P136446 GACAGTCTCCGGAATATTCTTTGGAGTTGAATTGCTGGTAAGTTTGATAAACCATTTTAG

A\_18\_P26793240 CTCCTCCAGGCTCCATAGACCTCAGCCCCCAAGTTCTGTTTCT

A\_14\_P139785 GCAAATTACATTTTGTTCATGAGAGAGGCAGGAATATTCTCTTTGATTGTTGGTCTGTA

A\_16\_P16191601 TAAAAAGTCTTCTCTCTTTGAAAGCCCCAATCCAGAGAGGAGGTAGATG

A\_16\_P16014825

AATGAATGTAGTAAGAAGACCGGAGTAATAATCATCTACCTGAATTACACTCAGAAGCGG

CUST\_5651\_PI426210822 GTCTGGCCCTCACGTGTCAGGCCCAAAGATGCCTGTTAGTCTGTC

A\_16\_P02993413

AAAAGGTGGCAACTAAAATTCTATCCCATGTATTTGCTCTTCTGGAATACTAATTCCCAC

A\_14\_P101543 AATATTTAATTCTAAAACCACCACAAAATCTGATCTTCTTCAGGATCCAAGGCTGGGTAA

A\_14\_P120554 CAAGGTATATGCTCAAAACTTCTTCAAGATGTGACACCAAATATGGTTTACCTATGTGT

CUST\_8985\_PI426210822

GCCTTGGTTCTCAGAGTAGGCAATGGGTAATTGAATTAGCAAAGTAGACATTCAA

CUST\_7411\_PI426210822 AACATCTGGATGTCGCAGTGACAGCTGGTGGCTGGTGAGGAGTCC

A\_14\_P133077 CTAAAAGCAATGGAAGGGATCGCAAAGAAAATATTGAAGGCTTTGGCTCCGTAAAAAT

CUST\_5200\_PI426210822 ATACCCACAGACCTGCCATCCCTGGCCCTGCCTGGATGCCGGTAC

A\_14\_P129796 CTGAATTCGGTCTTTTGCAGAGGACTGAAGAACTTCTTAAGCAACGTCATGAAAATATTC

A\_14\_P137529 ATATACAATCCAATGAATGAATGAATGGATGTTCTGCCTGAAGTTTCTATTTCTTTCTTG

A\_14\_P125651 TAATGACCACTGAAATATTTTCTCCGAATTCCTGTAAATTTTCATCCTGAGGAAGGAAA

CUST\_8802\_PI426210822

AAGTAAGGACCTGGTTTACTATCTGAGAACTTTAGTCCTAATAATTTCTCTACACCAACT

CUST\_4586\_PI426210822 GGCATAGAGTCTCTTCTGTGTTGGGTATTGTCTCTCTAAGCTGCG

A\_16\_P16453587

TGATATGTAGTGCTCCATTTGTTTCTATGTAGATGTCAATAAGTCCTAAAAACTGCCTGC

A\_14\_P138459 AGACTGTGTTCTGTATAACTGAATTTGCCAGAAATGTGACTTCTTCTGTTATCATGATG

A\_14\_P134758 TCCCTCTACAAAGGCTCATCCTATTATAAGCAATAATAATATTAATGGCAACGGCCACTC

A\_18\_P22840174 GGCCAGTAACATTTCTGGTGGCAGGGAGATGTCAGGACATTTTAGAAAT

A\_16\_P20770170

CCACTTCTTAAAGATAGCCCTAATTTCTTCACTGAACAGTATTTCAATTCTACCCCAATT

A\_16\_P00685565 CTGTTTGTATTCTTCAAAAATGGTGCTGCAGACAGTTTTATTGCCTGTGCCATACTT

CUST\_1988\_PI426210822 GGCTTAGATCAGCAGGACTGTTTGGCTGAGCTTGGCTACTCTAAG  
A\_14\_P114818 CTGGATTTACCTTACGAAAGGTTTTTAACCAAGGACTTGAGGTTTCTCAGGTTTTAAATTT  
A\_18\_P22841730 GTGAATCTGGTTGCTCTAGTTGGTGCTTTCATGATGTCATCTTTGCTCTCTCATTAT  
CUST\_3351\_PI426210822

TTGTAGCAATTGCTATGGGTAAAATTTTTATTTTAAGAGGTGACTTTTCTATTTACAGTTA  
CUST\_4014\_PI426210822 CTTTGAGCACTGTGGAAACCAGCCGTTACAACCTCCAAACGTTTATTTTTCT  
A\_14\_P136677 TCAGTGTTGTAGAGACCATTTGTAATAGTGAGATATCCCCAAACAAAGGATGTAGATCAT  
A\_16\_P19159878

ATTCACAAACATTTGGCTTACTTATTCTGGTCATGTCCATATGTGTAAAAGAGGCAACTG  
A\_16\_P03750687

AAACTACATCTGGTCCTTATAAAATGTGCCTATTGTCTCTATCCTGACTCAGCAGATAGT  
A\_14\_P100211 GGGCTGTATTTATTTGGTGCGGATGTTAATCCTGAAGAATTTGTAAACAGATTTTTTGAC  
A\_14\_P106427 AAAATCAAACAGACTTACCTCTAAACAACGTCAATTGCTCCCTGCCAATTTGACATCTT  
A\_14\_P132209 ATTAAGTTCATTAAGGTGCTGAAAAGTAGATCTCTATCTGAGACACCCTGAGGGCTAA  
A\_16\_P02251955

GATACCTGGCACCAATATTATAGAATGCTCAGATAATAGGTAATATTGAGGACGGTGAGG  
A\_16\_P15617358

AAAACATGGATAAAGGCAGTAAGTGGAGAAAAAAAAAAGAGTTTTAGGCTTGTGTTCCAC  
CUST\_6771\_PI426210822 CTGATTCCTACATTGCAGAGCTAGGGTGGGTGGAATGAGTCAGTTTATT  
A\_14\_P118674 TATCACTCCTTGTCGGTCTGGTTAAACTTATTTATTTTCAGATGATGGTTCTATTCCTGG  
A\_16\_P15404334

ATTGACTGACTTGAACAATCCAATTCGTTTCTCTCCATACCTAATAACTAACTACAGGGA  
A\_14\_P135113 TACAGAATGAAGAATCAGAGCCAGGCACATTATAGAAAAGAATCTGTGACTTCCTAATCT  
A\_16\_P17832137

GCAGAAAGGGTGCTAGATAACTTGAAACAGCAAGCAATGATTAGAGGAAAATTAGCAAAA  
A\_14\_P101986 AAACCTCTGACTCTGTAGTTCGTTTTTCCCTAAAAGGCCCAAATTGCAGA  
A\_16\_P16740162

ACAAGAGCAATGACTAAGTTCGTTACATGTGATCAGAAAGTGAAACACATCTACCATGTT  
A\_14\_P111553 GATAGTCTTTGCAACATGTGATAGTGATAACAGAAACCTAGTCAAACCCAAGTTCTTCTC  
A\_14\_P108358 CACATTCAGATGAAACCATTTAAGAATTTTCATCTGCACTGAGGAACAATTTAGCGTGATA  
A\_16\_P01063056

AAAAACAGTTTGTGTTCTGAGTAATAAAGGAATGTGTCATATAGTCATGCTTCCATGGAA  
A\_16\_P36108961

AACATGGTCCTATATATAACCTCAGAGTTGACTCATTTCTAGATGGTTTGTTTTCACCCA  
A\_14\_P113564 ACTGCCCTATCAGTGAAGTCAAAGATTGAAGAGGAACTCTTTCAAACCTTTCAAGT  
A\_16\_P37021966

ACCCTACTTCTTACTTAGTTTTGTCAAATGACTTATGAAGCACAGTAATAACACCTTTCCA  
CUST\_151\_PI426210822

TTAACAATGTAAGTGTTTAACAAGTAACTGTGGAGAGCAATTTTGCACAGCTTATAGAA  
A\_14\_P134693 CGACACACTACGTTGAGTTTATTAACAAAAGCCAAATTGCACATAAAGGTAAGTGTATTG  
A\_14\_P136688 CACCTTGTGTTTGGAAAAAAAAAAAAATTAACCTCAGTTTCACCCGAGGGAAGTATTCC  
A\_16\_P02044735  
GATTTAAAGGATTCTAGTCAGATACCAGACATCCTCACATAGAGAAAACCTCTGAATGGCT  
A\_14\_P130505 CTGAGTTACAGAGTAATTAATGGGGTGTTCACAGTGAAGTGGATACACCAATTAGAAAT  
A\_16\_P15813175  
AAAGTGATAGTATCGATCAACGTTAACTATCATGCCTTTCACAATTTGCGAACTAACA  
A\_14\_P117466 GTTTTAGCAAGTAATGATGCTGGATCTAGCAAATCATCTTCAGCAATGACCCTGAAAAC  
A\_14\_P132607 TTCTAATTCCAAAGGCACTTTAAGGTTTCAGAGAGCCTTGGATTGTTAATAGAGAAGAC  
A\_14\_P117629 CATTATATGTTTACGGAGAGAACTGTAGGAAAAAGAATGAGATCAAGACCATCTTGAA  
A\_14\_P100271 AACCAGAATGGAGATCCTGGCATTACCTCATATCATTACCTTAGGTATAGAAATGTATT  
A\_14\_P129528 CCTCTTGTAAATTTATCACCTACCTATAAAGAACTTCTGACCGTAGCCAACAACTCCTC  
A\_14\_P134181 TATAAAATGGAGATTCAAGAGCAGCCTAGGACATGTTTGTCTTGGGGATAAAGACTTG  
A\_14\_P119121 CTTTATCAGAGGCAGGCTGTTTTAAGGATTAATGTTCCAGATGGAGATAAATCTTAACT  
A\_16\_P35336730  
ACCTTACAAGCCTTCTATATCCTAATCAATACCTTGAATAATCCTGTAAACCACATACA  
A\_14\_P130121 ACTACTTCACTGTAAGAACGAAAGAATAGTTAGGATACCAATGAGTAAAAGGGTTCCTGT  
A\_14\_P126754 AAAGTCTTCAACCAATCTCGACGTTTCTCTTAGGTAAGTTTATTCTGTGGGGTTT  
CUST\_1212\_PI426210822  
GGACGATGTATAGGGAAAACACTTGTAAATTAAGGGCAAGCACTATAAAACATTAATT  
A\_14\_P123731 TTTACTTCAAAGGCCCTTGCTGTCTTCTGTATATTGAATATGCCATCTGTCTTTGCAAAGA  
A\_14\_P102011 AAATCATTCCTCTTTGTTTTGTTTTGGATTCTTTGATGCCATTCTGTAAATTCAAGGCA  
A\_14\_P118056 ACTCTTTTCTTACAGGTAAAGAAAACGTGCACAGAATCAGATGTTTCACAATCTCAGAAT  
A\_14\_P128618 TTTGGGGAAAGTATCTCATCAGAAATTTTTGCAGATTAATGCCACATTTCTAGCATTGTG  
A\_18\_P10077564  
ATCACTGAGGGCTGATAGTAATGCACATATGTTCAAGTAAGATGACAAATTCACCAAGAG  
A\_16\_P17492431  
ATTTCTGCTACCATAGAGCCATCATAATCCTAGTTCCACATACAGACAAAAGAAGTCTTC  
A\_14\_P103609 AGGTTATACTCAGGTCAAATGAATGGATGTATGTGTATTCCCAAGTCTTTAGAGAAAC  
A\_14\_P106444 ACATTATAAACCTACCTTCAGGAGTTTATACCAACTCAAGCGCGCGTTGTTACTC  
A\_18\_P22839600 CTTTATAATCTGGTCTGAGGCCCTGTAAAGAGCCTCCAGTGACTTC  
A\_18\_P25145545  
ACCTTTGCCATTTCCATTAGAGAAAACCTCACATCATACTCATTGACTTATTATCCCTCAA  
A\_14\_P136054  
TAACAGTTGATCTGAAATAAAAAGGGGAGACCTATTAGAATGAGAGTAGCCAAGGAAAGA  
CUST\_1380\_PI426210822 CTGTCTAATCCAATAACACCCACTAATTTTCTAGACTAGAGTTGCCAGGC  
A\_14\_P200713 CGCATAAAATATAATAAACTAACTGAAATGCAGCCACTTTGAAAATGCAGTGGGGCTTC



CUST\_622\_P1426210822 GTGTTTGTGGGGAGGGAGGGAATCTTTGAGACACTGTCAGTTCTC  
A\_14\_P118529 AGTATTACAGTAAGGATATGAATAGCAACAGCAGGCATTTGTTTGGGGGTAATATCAAGA  
CUST\_2227\_P1426210822 GCAGAGAGTGTAGTCATTGGCTACCATGACATTCTCCTTCCCTCA  
CUST\_678\_P1426210822 GTAAACACATAGATACAAGCACATTCCCGCGTGCCACCTCGTGAG  
A\_14\_P120837 ATGCACAAGTCTTAAGTGATTAATAAACTGTTCTTATGTCAGTTTCTTGATTGGTAA  
A\_14\_P135782 TTGGTGGTTCTCTAATTAGAATCAGTTCTAATATCATATAATGGCCCTGGCCTGAAATGT  
A\_16\_P03226576

GTCCTGATTACTAAAAATCTCAACACATTATAGAAATGTTCTTCTCCTTTTTGAAAACCA  
A\_14\_P131334 AAAAGTATCTATGCATCTGCACCCTCTTAAACCAATGCTACAATTGAATCTTCACTTGAC  
A\_14\_P129773 CCATTTCCCATTTACCTTCTTCCGTAGGTAACATTCTAATATTGCAGTGCATCTCTTACA  
CUST\_9431\_P1426210822 AAGACTATGCCTGCCTTGGCTTCCAGGCCCCCCCTGGAGAACTTC  
A\_14\_P102103 TCCATGAAACAAATCTCCTCTTGCTGATTAGGTAGTTTATTTTGAATTACTGCTGGCAAG  
A\_14\_P112696 AAACACAGGATCAGCATAACCGCCAAAGTGCAATATAAATTTCTGAACTTTACCTAGGC  
A\_14\_P130265 AGTTTAAGAGAAGAAATGGACATGATTGCCTAAATCAGCCAAACACAGGGTATTGTTGTA  
A\_14\_P131281 GCCCACTGGGGTTATGTAACCCATATATTAATAATTGGAAGATCATTCTTTTATTCTTGGC  
A\_14\_P133734 TGTTTCAGGTGAGTAGAAGTATCTGCTACAGTATCAAGCACATTAGGACTCTAAGTAGAC  
A\_14\_P104612 ACGATGGGTCATGTCATTAGAGGAACTGTAGTGATGAAAGTAAAGAGATCTATTCC  
A\_16\_P38164897

ACCAAGGCAACCTTATGTAATAACTTTCCATTCTTTATCCATACAAACTCTTTCAGTGCC  
A\_14\_P122221 AGGAATTAATGTTTCAGGCACCAAGATCATTACACATGTGTCCATTAATAAGCGTAATT  
A\_14\_P102074 GCAAAAATGAAGGATGGGGATTAGGTCTGAAGGTCATAGAATCTATGTTTCTAACCTTAT  
A\_14\_P108646 TAGAACATTGGGTTTCAATTGTGCGAAGTCTGACCAGAAGATGTTCCCTTACTCTAAATACA  
CUST\_6578\_P1426210822

TGTGCTGTTTTAGTCAAAGACTTTTTTTAGCTTTGGAGAAAGAATGAAACCCCAGC  
A\_14\_P133057 TGGGATAAGGTCTAGAACAGAGATTGGCTATCATTGGAGGACAAAATTAATCACATTTT  
A\_14\_P121141 AATTCTCTCAATGGAAGGCAAATTGTATAATGGCAAATCCATAACCCTAACCAATGA  
A\_16\_P16103072

GTCCATAGTTGATGTTTCAGAAAACCTAAAGAATTGGCTTCAATGAACTATTAGTCACCCT  
CUST\_10379\_P1426210822 AGACCTGCAGACGCTTTAAACAGCCTCTCACGTGAGAGCAGTATTTAT  
A\_14\_P120252 ATGTCACATTTATTATTACAGTCTCTACTGAACAGAAGGAAGCACTAGATGCTGAGCAAG  
A\_14\_P116367 AGACGGAGTTTTGTGCATCTTGTTCCTTTGTAAACATTTGATTAGCAAAAATGCATTGAC  
A\_14\_P137162 TTAAATATTAACCTTTTTTCAGGATTGTCAACTTATTTTATTTTATTTTCTTCAAGCAACA  
A\_14\_P104935 AGTCTGCTACACCATTTTTGATTTGGGCTTCCGCTTTGATGTGGCAT  
A\_16\_P36752398

AAGCAACACCCATACCATAAAGTAGAAGTGATTCAATTGGTTAACAGAAAACGTAATGTCC  
CUST\_9823\_P1426210822

GTATGAACATTTTCAGATGAGCAATAATGAGCTTGTCAAATGGACAAGGATGGAAGG  
A\_14\_P135291 CTACCAAAGCAAGAAGATGCTAAAGGACACATGCAAGACCAACTTGTGATTTTTTTTTAAT

A\_16\_P18246137

AATAATCTCCATTATCGTCTCTATTCTCTGCCTACTTAGACCATCTCATTGTTAAGGCC

A\_14\_P115734 TAGTAGTCTTTCAAATAAACTGTCTGCCAACTGTGGGATGTTACATTCATCTCATTG

A\_16\_P16190978

AATGATCCAAACCCTTTTTATTTTTTCTGCCTCTTTTGAAAATACTGTGAGGAGCCATC

A\_16\_P36003017

CCCCATGTGGAGATAAATAACCTATCACCTCTTACATAAATAGATTTCACTTAACCTGGC

A\_16\_P00685631

TCCTTGGTCTTTGTATCTTCCATATTTGGAAGAAAAAATCTTCTCCAGATTTTTTCGGAG

A\_14\_P107855 CTCAGAGAAGAATCTAACCCATGTTTTCTTTTTCCCATTCATTTACTACAGTTACAACG

CUST\_8707\_PI426210822 TAACAAGGCCAACAGAAGGCTTCTGAATAAGCAAGACTGATGTCTTCAGAG

A\_14\_P132288 CTATAAATTCAAACTGTCGGATGTTTATGCATTTTGCAAGTTACACTGATTGAATGCTTA

A\_14\_P107859 AATGTTTGTGAGGGATTTATTAATTTCTTCCCAGATTTTTCTTTTTCTCCCCTGTTGTCT

A\_16\_P18934011

AAACAGTTACCTAGAAATTCAAAGTTGCCAATGGAGAAATATTTGCCTCATACTGGTGAG

A\_14\_P108616 GGGTTTCTCAACTTTATCTGGAAGCAGAGATTCTGATCAGAAAGGCATTGGAA

A\_18\_P14136900

GTATTGCCATGGTAAATGCATAATTTAAAAGATTAATAAAAATAATCCATAATCTCAGT

A\_14\_P201682 ACAAAGCAGAGTTGTATTCTAGAGGCAGATGGTTAAGTGCTTTCAAAAAGACATCAGAAA

A\_14\_P132770 GGAATCACTAATGTAAGATGGAATGTGTAAGAACTGAATAAGCCTCTGCAAATAGTGAA

A\_16\_P19323100

AAGCATTCCTTCCATTTACTGATAAACTTTAAACGGATCTCTTTGTAGGAATTAGGGTC

CUST\_3023\_PI426210822 GCTGATCCCATTGATGTCATTAAGCCGGAGCCTTCCCTAATGC

A\_14\_P123450 CTGGAATACCACACTGACCAAATCTGGATCTTTGGACTAAAGTATTCAAAATAGCATAGC

A\_14\_P117264 TTCCTTGATGTATTCCCAGCATTTCGGAGTAGGTTGATTTGGATTTGAATTTTAAACATG

A\_14\_P106203 ACAGTCTGGTTATTACATTAACCTGTTACCATCTGCTTCACAGGGTAAACAAAAGCACTAA

A\_16\_P01687184

CATCCCTCCTTCATCGATAGAAAATTACTCATTTTGCAATTTGTTTCCTTGAATTCTGCTT

A\_14\_P117526 TCTTTAAGGACTCCTATTTGCAAGATAGAGAGAGCAAACTACTTCACACTCTTTTTCT

A\_14\_P128198 ATGGTAAGAATCACTTACTCTGTTACAGTGGTGCTGCTGAAGGAATTATCCTGAAG

A\_14\_P124867 TATTTAGTTTATTTGTCTCTCACGAAATTTGCCAGTCTACTTGCTGCTGACCCATTACTT

A\_14\_P101903 TGCAACTCTTTTCTTGACTTCTTGAACAGTGATTAATCTTTTCTCCTAGTCTCTTTC

CUST\_742\_PI426210822 TTAACACCATGTCTCTGAGCCAGGTTAGTGACGATGTCCTTTGTGATATC

A\_16\_P18407870

TTTTGAATAGCCATCAAAAACAACCTTCTCCTACACTAACATTTAAGAGCGTGAAAGGTGG

A\_14\_P202456 GGCCTGTGTTGCTGTTATTCCTACTGATCTGTTCCCTCTGTTTTCTTTTTGATTTTTG

A\_16\_P17807458

GAACACACAAAAGAAGATTTTCGTGCTTTATCCTACTCTCCTTATCACAAATCTTGGCAT

A\_14\_P133159 CCTACCCAAAATTATATTCCGGGTTTCCAACGATCTTAATCAATTTGGAACCTAATCTCT

A\_14\_P101840 AGAGGTAAATAGGAGAGACAGATGAATAAACTCCCACAGACAAATTCCTAAGCCTCT

A\_16\_P21182655

AAATACACCAACCATTTTTCAACACTTGATTACACCCGAGAAACAGTCTTTTTGATGATTC

A\_14\_P102787 CACAGATGCTGAGAGATGTAGTTTTAAAGATAGACACATTGTTGCTAAACTTGGGGTTC

A\_18\_P26820581

AAGCATACCTTCTTTGCATTCCTATTTTTCAACCGCAATCTTCTAATATGGCATTTTTTGG

A\_16\_P17843154

ACCTGGCATAAAATTGAAAACAAAAGGAAGTCTTTGATTAATGACCTCTGCTAATCCTT

A\_14\_P123683 ATTTGCTATGTAGTGGCACCCTGAAAAGACTCATTTGATAAATCCCAAGTATAAGATGG

CUST\_3896\_PI426210822 TTTTCTGTGTTCTGGTGAAAGTCTTTTCTGTCTTTCCCTTTGTTTCTTCGA

A\_14\_P110266 CTCCAATGAAGAGTCGCACCTACCTTATTGTGCTCATACTTGATGGGATCTT

A\_14\_P116235 CTCCAGGTTGTTGAATTGACAGGAAGAATGTCTATATAGGTTTCTAAGTTCACTCAGTTT

A\_14\_P101553 CATTAAAATGAATACAGAGTCACAGAGACAGACTACATTTTCGCAATGGGTGGTTTAGATT

A\_16\_P38909067

TTTTGGAGTCTTCTGTTACAAAAATGATTTTCATACAAACTTTTTCTCACCAGTCCCTTTCC

CUST\_547\_PI426210822 TGCTCTTGGAAGCCAAGGAGCAGATGGGAGGCCACCCTTGTTAT

CUST\_6849\_PI426210822 AGACATCTTAGAGGAAGAACAAGAAACAGTGCTGACAGGCCAGGAA

A\_14\_P112167 ATAAAAAAGTCATGACCGTCCCTATCTTGCCAATCTGCCAGGACTCC

A\_14\_P109562 TCACTCTTTTGGTTAAGAACAACATCTGGTATCCCAAATTTAATTTTCAGCAAGTAAGTGG

A\_16\_P00997481

AATATTGGCTCTTTAAGCAGATCACTTAGTTGTCAAAAGAAATAGGAGGCAAAACCTTGGC

CUST\_2294\_PI426210822

CCCAAATTAATGCTTGAACAATCAACAACCAATAATTTCTGGTATCCAGGGACTCA

A\_14\_P124411 TATGTCAAACCTGTTTTGAAAATGACTATCTGTGCAAGTTTTCCCTTTCTGGTTAGAACCA

A\_14\_P127543 GCCACATATACCAGAATCACACACAATTCTGTTTCAAGATGCCACTATCTTTTCAAACAT

A\_14\_P116590 CCTGTATGACTTTGTACCAAATGCTGTCTTCTTTTCTCCAATCAAGAAATAATAATCC

CUST\_8521\_PI426210822 TAATTTCTGGCATTGCTGCCCTCTGGGTCAATGTGGACTGAAAACC

A\_14\_P123923 ACCTAATGCTTTTTGTGTTTTTCAGATTCTCTGAAGTTACACCCATCACAGAATTTTCAT

A\_14\_P136846 ATACAAGAATGATTAGGCATGCTGGTCCTATAAACTCCAAATAAAGTTGTTTTCGGTGC

CUST\_1254\_PI426210822

GATTTTTTTCCCTTTAATGTTAAAAGTGGTCTCCACAAGGGATAAAAATCAACGAAGG

A\_18\_P12263502

CCAGTTTCTCTAAATGCAAAATATGATTGAATCAACTGAAGTAACGCCAAAGTGACATCC

A\_18\_P23673695

AAAAAGTGGAAAGCCTTGAATATTTAATGAGATTCAGACTCTGAACATTTGGACAGGTCA

A\_14\_P129480 CTGAGAAGGATAAAGGAAAATACACTTTTTGAGATTTTCGATGGCAAAGACAACCATCAAC

A\_14\_P105818 CCTTACACAATCAAGGAAATGGTTTCTCTTTTCAGGCATCGACTCTTTTATCAAAAAGAAAA

A\_14\_P115332 CAGGTAATTAGAATCTAGGGATGTGTAGAAGGTTTTTGAGGGGGTAAAATTAGAGGAAAA  
CUST\_1158\_P1426210822 AGTTTCTGTAGTTCTTGGCCCTGTAAGAGGAGAGGGGTAGAAGATG  
A\_14\_P125389  
GAAAAAAACAAAATACATCTTTAATGCATGCTCTGAAAGACAAGAACGGGGTCAGAGAT  
CUST\_10297\_P1426210822  
AGGTGCTCTAAATCCTTTCCAGATTGTTAACACACTGTCTATGTCAAATCCTTACACT  
A\_14\_P104147 TTTTAGGAACTGTTCCCTTACATTGGGATAAAATAACTCCAATATGAAGAGAGCCTC  
CUST\_9361\_P1426210822  
TCCCAAAGCATTAAAATGTGTCTTATGGTTGTTTTAAGAAAAGAATGATAATTGGTGC  
A\_14\_P117387 CTTCAAGTGCAGATGGATTTGAGATGCTACAAAACCCAGTAAAAGATTCAAAAAGAAATGTT  
A\_14\_P106569 GCTTTTGTATAGGATACAATGAGTGTACCAATTCATCTCTAGTCTCTCTGATTTACC  
A\_14\_P115905 CGAATAATGTCATTGATTCCAATGATGTTCTCATGTCTGAAGCGCAGTAAGATTTTTATC  
A\_14\_P100418 ACAACCAAAGCCTGGAAAGTCAGTATTTCTCATCTCAAAGAACTCCAAGTTATTCTTTT  
A\_16\_P03109381  
AAATGGCTTGTTTAAAGTTGATACGAAAAAGTTAGATGTGTCCTAGACATTAAGGGAGCAC  
A\_16\_P17398907  
CCTTTTCACTCAACTTAGTTTAGTTGCCCTCTCTTAACTAAAAGAGTCCATACGAACACTG  
A\_14\_P138971 ACCCTGCACTCATCCACAATTCCATCACTGGAAATATTCACTTTAATGTTTGAAAATGTA  
CUST\_5093\_P1426210822 AAATCTCACTCAGTCATCCATCTGCCAGTATTTCCACCCTTTCCC  
A\_14\_P123770 AATGTGTTGATGCATATGTAAATTC AACAGGTCCCCAGTAAAAAAGTGATGCCTTACAAA  
A\_16\_P01262488  
AATCCTCCCTCAATTTATGAGTATCTGACACACAAAATGTCTTTTATACACACAGTGCTGT  
A\_16\_P02728938  
ACTATGTCACCTCCTAATATGCCCTTAGAATGCACATGTCACTGAAATAAAGTGCTCATCC  
A\_14\_P120459 GTTGTCATTCAATTTACACCAATATATACAAAATGCCAAAGGGCAAAGAGCCTCAAGAGTA  
A\_14\_P137414 ACATTGAATGTGTCATGCAATTAGCATTGCTGTTTTTTCAGAAGAATTGAAGCACTATCCT  
A\_14\_P127164 AACCTTGATGAAACAGAAATTATAAAATTAATCCAAATTCTCCACCTTTCTAGGCCACG  
A\_14\_P125221 CTCCTAGGATTTTGAATGTGGAAATGACGTGGAAGTGTCTTTTACCAAGAATGGAAA  
A\_16\_P36402365  
ATCTCACCTACGTTTTGCTTAATAAAAACCTATTTTCATGTCCACATCAAAAACCTCAGGACC  
A\_14\_P129857 GCCCAAAGCATTCACTTACCAAGAGTTCCAGAGATGATGTCAATCTTATGCATAATTC  
A\_14\_P126977 TCAAAAAGTTCTTTGGACACTCAGGCCTAACTAGTTATCAAAGAATCTATTTTAGAAACCT  
A\_14\_P113702 CTTACAATGTCTCAGAAAAATGGTGGGAATGTTCTTCAGATGATGTATGAGAAACCTGAA  
A\_16\_P21065561  
AACTAAAGTGAGGAACATTCAGATAAGATGCACTGTCAAGATTATTCTAAACCCAGCAT  
A\_14\_P111773 GTAAATTTTGGGCAGACTTACTACGAAGGTAGTAAAACAAGTGCACAGAGTCTTCTTTAG  
A\_14\_P202504 GTCATGATCTTTCAAAAAACAACCTCATATTCTCCCTTCTGGTAAATCTTTAAAGCCCTT  
A\_14\_P137581 CTACACACAGACACAGGCCCATTCGGTCATAAGTTTAAATGAAGTCTGAAAGGTAA

A\_18\_P17308693

ACCTGCTTTCCAAAATACATAACTTTCCCATTTATCTCAATTATCTCATCCTGGCTCATTTC

A\_14\_P139823 GCATCTGTAGATCGGAAATTCATCTCTTTGATGTCATTAAGTAAGTTTTCTTTCTTTAAA

A\_14\_P130045 ATTTTTACAAGTGCCTGTTTACTTAAACTAGGATGAGTGGACTTCTGCGTCTTGCAATAA

A\_16\_P00335259

GTGACCATGAATAATGTTTGTAAACAGCCACTTAAAAAATTTCAAGGAATCCCACCATGA

A\_16\_P02163645

CATGATTATAACAAGTAACAAAAGAGATTGGCCAACCTCATATCCATTGAAGGTCCCAAGA

CUST\_4924\_PI426210822

TGTACCACAACATTGTTAGGATAAAGTTTCATAAGTCTTATATGGCTTTGAACAAAGCAA

A\_14\_P133842 CACTTTCTGTTTATGCTGCTGTAAGAGGTTGTCAAGATTGTGTCGCCTTTTATAGTTAAA

A\_14\_P112392 AATAAGACTCTAACCAAAGCCATAAAAAAGAGTGTCCTTTTACCTCCTTCATGATACTCC

A\_14\_P121466 CTTCCAGATTTGGATTACCTGCGAACCATGACTCATATAGTCTTTGTAGATTTTGATAAC

A\_14\_P108610 GACATATTTGTTTGAAGAGATAGGTGAAAGATAGTTGAAAAGCCTGGGGGTATATTCAAG

A\_14\_P105896 TGACAACATTAGGGGAAACGTGGATAATGAACAGCGCACTTTTTTAGAATCTACATATCA

A\_14\_P104613 AGAAATCGAGACCACAGATACAGACATGACAGTTTACTAAAGAATAGTTGAATCCACTGT

A\_14\_P130152 TGCTAAAGGATATGGGTTTTATCATGCTGAAGATGATGAAAGATTTTAATCCAGTGGCTG

A\_14\_P131746

ACTGTGATAAAAAATGAAACAAAGAGAGAGTGAAACCCTCAAACAAACTGTGATCTCTTTG

A\_14\_P110768 ACCTGGAAAGCAAAGGAAATCCAAGAACCAGATCCTACCTATGAAGAAAAAATGGTAT

A\_14\_P109706 AATTAAGAGACTTTGAACAAAACTCTTCCCAAATCTAAATTTGATAGGGGAGGTGGAGA

CUST\_3718\_PI426210822

TAATAATGGAAGAACTTAGTGATGTTTCATATGTAGAGATTTTTCTCTAGGTCCTTCTCA

A\_14\_P111174 ATGACTGGATGGAAATTATAAATGCTGCTTTTATAAAGCACTCAGAGAAAGCATCAGGTG

A\_16\_P00629535

ATGACTACATGAACTACACACACTATCTGAAGACACATCAGAAGATCTGAAAACAGGAAG

A\_14\_P137301 TTGAGTAACCAGAGGCCACCAAACATGCACCATGTTTTCTATTTTTTTAAATTAAGTGA

CUST\_9324\_PI426210822 CTGGTTCTTCTGCTTTTCTATCCCGGCAGCCAGTGGTGACCCTTT

A\_14\_P126093 CAATAACTGAACAATTCCTTTATGATCTGAGACTTTCCATGTGCTCTTTCTCACTGAATCC

A\_14\_P132880 AGAGGAGAGAAATGAATCAAACAGACATACCAAGGGCAGTGATGATCCATTTTTAACA

A\_14\_P133985 CTGTCAGACATAGGACTAAAACCTCAGGAGATATCGTCTGAAAAGTTTAATATCTCCTGCA

A\_14\_P136519 CTAAAAGCCAGTTTAGAAAAGGACGCTGACAATCTGGCACTTTTCGGGAAA

A\_14\_P131154 AAATCTAAATTACACTTGCTTTTCATTGCATTCTCAGGGGGAAAAAATCCATTTGCTGTT

A\_14\_P135314 CTTTCAATTCATTCCATTCAAGCATTGCTCTCATGTGGCATTCAAGCATTCTATAGTGCT

A\_14\_P119700 GGGAGATAAAAAAGGAAGACATGGAGTATTCTACATAAGGCAAGCCCATGTTAAGTTAAT

A\_16\_P02025621

CCCAGCATCCTATGATACTTGACTCACTATAATTACTCTCAAGAGATGTCAGATCTGTTG

A\_16\_P20003238

GGCAAGGTAAACAAGTTAATACACACAGCAGTTATTTAGGTATATATCATGGTCAGAGCA  
A\_14\_P129808 GCAGAGGAAATAGAAAAAGGAAATCGCATTACTATTTCAGAGAGAAGAAGACCTTTATGT  
A\_16\_P16786587  
AAGAACTTTGCTCAGTTGATAAAACAATATCCCACATGCTCGATAATACCAGAGGAACTT  
A\_14\_P106142 AAAACGACGCTATCCCTATCCGTTGGATGCCACCAGAGTCCATTTTTTATAA  
A\_14\_P127862 CTTTACATGCCTCCAGCATCCCATGCTCAGTGTCTGTTTTGTTGAATAAAAG  
A\_14\_P115860 CTTGAGAAAACATATCACTATCAGACAGACATCCATTTTCCTGGAGATAAAGCATATATC  
A\_18\_P13295588  
GATGGCAGAGGATACAGAAAAGATACCAGTAAGAAAGTGACAATGAGTAGGTATAGAGAC  
A\_16\_P20082881  
CCATCATAACCTTGCTACACTGTTTCATAGAAAACTTCAGCCATTGAGAATGATGTCAT  
A\_14\_P125893 TCTCTTTCTTCTTTTTCTCTCCCCAGAAAGGATGATATGATGAACCTAGCCTGTAAATTT  
A\_14\_P130326 CTGTAAACTGCAGGATAGAGGCAAACCTCAATCATTAAATTTTTAAAGTATCCTGGCCCTC  
A\_14\_P138600 CTGACCGCCTGAAAAGAAATTATAAAACATGAAAATCGCTTTGAGGTGACCAAGTC  
A\_14\_P107085 ACGATGACTATTTGATACAAACCATAGCCTTTAAACTGAGAGGTGAAAGTTCTGATGAAC  
A\_14\_P123345 CTCTAGGAAGGGGAGAGAAAATCCATCTAGAATGAGGGCAACTGCTG  
A\_16\_P00685547  
CTGTCATTCAGTTTGTTCCTCTGCTAATTTAATCTTCCATTTTCCTTTGATTGGTGATGC  
A\_14\_P127436 CTATAAGGAAGCACAACCTGTAGACTCCAGAAGTTTTTGTGCATTTGCATGCTTTTAAAAT  
A\_16\_P01806232  
TGGACCAACAGATATCAATAGATACTTTTCAACCTACAACATCTCATTCCATATGTTGGC  
A\_18\_P16373953  
AAAAGAACCTTCCACAACCTCCTACTGAAACTCCAAAATCTCCCAACACATTTTGTAAAG  
CUST\_819\_P1426210822 AGCCTGGCCCGACAGCCCAAGGCTGATGGCCGTGTGTTGGTAAGT  
A\_14\_P130169 CCATTTTTTCTTTCTTCTTGTCAAATGGACACTGAATTGAGTTTGGAAATCTGAATTCCT  
A\_14\_P126995 GGATGCATTTTCTTTGTATCTTTAACTCAGAGTCCAGCAACTACCTGGCACACTATAAAT  
A\_14\_P127841 TAATAAAGCATAAACTCAAAAAGACCATTTTCATCTGGTTCCAAAGGGGCCGACTACTAA  
A\_14\_P106042 GGTTTTGTTTCAGTTTGTAAGATTTCTTTTCTGGCACTTTAATGGCTTGAGGTATCATT  
CUST\_1532\_P1426210822  
AGACAGTTGGCAATATAGTGTCTGATCCAGAAAGCAAGAAAGAAAAGGCAGAAAG  
CUST\_10411\_P1426210822 AAGCCCAGGTGCCAGCCTGAGGCAGCCACTTCGGCCAGGTCACAC  
A\_16\_P01415358  
TTATCAGAAACCCATTTAGATTAAAACTCCAATCTCAAACCTAATTCCAGTTTCTTCCC  
A\_16\_P19548274  
CCATGCCTATATTCGCTCAAACACCATTTTATGTTTCATGCAAAAATTTTGTAGTCCTCAC  
A\_16\_P21558701  
AAACATTTCAAACCATTTATCAACTGGTTTCTCTGATTACTAAAACCTCTGTTAGGCC  
A\_14\_P126633 ATAATGAAAATGCCAATTAACATCTGTTAAGGATGTGGACCAACAATGTGTCTTTCAGG

A\_14\_P122472 TTCTACTTCACCTACATTTCCACCGTAAATGGCTACTTCCACTACACCCATG

A\_16\_P02404387

TGCTCTAAGAACCTACTTAACTAGCATAGATTGGCGAAGTAAAATTTTCCTGACAGACAC

CUST\_8173\_PI426210822 TTTTCTTCCGCCCATGCAGGGTGAACCTTGGGAACCAACTGTGAAT

A\_14\_P112476 CTAAATTTTAAAACCACCCCAATGGATGCAGACAGTGATGTTGCATTGGACATTCTAATT

A\_14\_P114157 CTATATTTAGCAACCAGTTAAAGCAGTGTGGAATAGGCTCAATAAGAAGAGAGGGCAAATC

A\_14\_P120262 AGACAATTTATTTTTATTGCCTAAACTGCAGAGCATTCTCTACACAGCGTAAAGGAGAAG

A\_14\_P109072 CTTTTGTGTTAGAATTGGGAATGAGACGAGAAACAAAGCCACAGATGTGGTGA

A\_14\_P111496 CTGTTTCTCTTTAGTGGTAAATCTGGTTCAGAGTCAATATCAGAGCCTTCATCTGA

A\_14\_P136165 GAGCCATTTGGAAAGGACATTAACTATTGATGAGATATTTAGAGCAGCAAGAAGGTGAAT

A\_14\_P127094 GAATGAAGAGTTCATATCTCACCTATTAGAGACCACAATGAGCCTGTGTTTCAGGTATTT

A\_14\_P114095 CTGGAGGTGTGTTTACAGAGCCCCAAAATAAAACAATGCAACCAGGTC

A\_14\_P127169 AATTGAGAATGTCATTTTCTTTTTTCCAGATTCCTTGGTGTACTCAGTTTTTCGCCTACA

A\_14\_P111724 ATTATTCTGAGGCATGGGTTGTAATTTTCTCTATGATAGACGCGCCAAATAAATGCATA

A\_14\_P117818 CTCACCTACAGCAAATTATTTAAGACCGAGCATTGTCTCTGTCTGTTCCTCT

A\_14\_P113191 TTTTCAAAACCAGTTTCAAAACTGGTATTTCCAAGTTGCAGTTCCAAAGAACCCTTTTTTA

CUST\_5392\_PI426210822 CCAGAGTCCCAGGAGGCAGTGACGCTGTGTGCAGAAAAGCCAAG

A\_14\_P122918 AATGAGGAAATTATCCCACAAAGCAGATAATCCTAATGGAGGGCAGAATTCAGGA

A\_14\_P109818 ACTTTGTTTCTTGGAGTCCACTTCCAATTCCAAGGTGGGATGAAGTCTTT

CUST\_10286\_PI426210822 CTGCAGTGTTAGAGTGGGGCATAGAGCTTGCAAGGCTGTTTCAGC

A\_14\_P122153 AAATTATGTTCCATTAAATTCTGATAGCCACCACCTGTCAGCATATCCAAAACCTCCC

A\_14\_P109196 CTGGGACCTTGGAATAACATAAATTCAACATAAATTCATTAAGAGGGCCAGGTATAAGG

CUST\_3983\_PI426210822 CTGCCCTGGAATTGCTTTCAAGGGTCTTTTTTCATCTGTGTACAGAGT

A\_14\_P139706 AGAGGAATTTTAGCAAAACTACCTGATTATGCCCATGTTTCCCAAATACCTTGATTTTTTC

A\_14\_P107580 ACATATGGACATTGATTTGGGATCAGAGGAAATTTATGGGAGAGAGTTGTAACCAG

A\_16\_P01431074

AATTATGATGTGATGCTATCAACAACATTCACCTTCTCCTTTCACATATATTGTGCCCTCA

A\_14\_P126241 GTGTCTCATTAATCGTGGGCATCACTTCACACATCATTGCTTAAAGAAAGTAAGTG

A\_16\_P17233141

CTCATTCTTAAACCTTATCCCACATTCATGATCACTTCTCAGTAGACTACTCTAAATCCCA

A\_16\_P00685221

TGATATTTATGTATATGCTTTTTTAAGGACTACAATCCTTAGTTTCCTACTCAAGGT

A\_18\_P14735576

AACGAAGCATTTAGAGATTACAGACAGTATCTCCACGTCATTAACAATTAAGGTAAGCCC

CUST\_9548\_PI426210822 TGCTAAAATGGATGAAGCGGCAATTTCTCAGGTCCCTTCCAATGATC

A\_16\_P00382111

GCCCCATAATTTACAGTAATTGGAATCTCCTGTAATTTAAAATGTAGCCCCATCATTTG

A\_18\_P22841382 CACCAACACTGATTATTACTGGGTGACAGAGGCACATGGAGAAAATGTCAT

A\_16\_P00009155

CCTCACCTTCCCCATAATAATATATAACTAGCCAGCACTTGATATTAGTGGTTCCCAAAT

A\_14\_P125172 ATAGAGCCCATTATGCCTCATTTCAAAACACTACAGGCAGCATTACTTACTTTCAATACCA

A\_14\_P112371 GATAACAGAAATGTAGCCTGCATGAAACAGTATTCTAAATCACTCCGCAAATCATGTGAC

A\_14\_P137506 TGATGCCTTGCTCTATTTAGAATTTTCCAAATGAGAGGCTTTTTCTCTTGGTCATTATCG

A\_14\_P121891 TTTTTCTTTATATTTATTTCACTATTTTTCTGCCCCCTTAGATGATCCAGGGAGCAGAA

A\_14\_P102983 TATTTGTTTTCTACCATTCTTTACCAGAGGAAGGTTTTCTTTCCCTTCAATATTACCT

A\_14\_P107614

GGAAAGTCCAGGAGAAAATGGAAGAGAAGATTTTTTAGAAATCAACACACAATTCAACGT

CUST\_6764\_PI426210822 TTAATTTTTTGGCCTGGAGCCGTTTGGCACAAAGGACTTTGGGCTC

CUST\_1556\_PI426210822 GCAGTGTTGAAAGAAAGGCTATTTGAGCTGGGTTTGGCCAGAACT

A\_14\_P202082 ACAAATTTATCATCTAAATTTTGCTCTCAAGGACAAAACCTGCCTGGTCTCTCTTTTCACA

A\_16\_P17066975

AAAAAAAATCCAGAATGCTCCTTTAGTTGTGCAATTCTGAACAATTAGTTCCAGTGTGTC

A\_14\_P116603 CTGAAGAAAAGAAATCTTGGAACCAGCCGTAACCCAGTAAGGAATTGTGAAGTT

A\_14\_P126427 CTACTAATGTGGGATTTGGTCGTTTTCTGCAGTTTAAAGTGTCTCAATCTAGTTTCAGTT

A\_14\_P115787 GTGGGAATGGACTGGTTTTGATTCAATTAATTCTTAGGATGCTGAGGTCATCTATTTTTAC

A\_14\_P132093 ACGAAGGAAAATGTGCTGTTTTTCTCATATTCATCACAAGTCAAAAACCTTCTCTTGTTTC

A\_14\_P131029 ATAGATATAAAACATTAAGCCATACTTCTCTGGTTGCATCTGCAATGGCAAACCTTCTTG

A\_14\_P129467 ACAGAGCCAGGGTCAGCCATAGACACATCTCTATATTTATATATTAGACGGGGTCAG

A\_18\_P25480367

AGACTTTTGCTATCAAAAATTTTTCATCTCCCATATGCCATACTTTATCTTGCTGACTGCT

CUST\_1278\_PI426210822

TACTGAGTGCTGTGGCCTATCACAGAAAAAAAAGTCATATTTTTTTTTCAATGGCATAATT

A\_14\_P122248 TAGATTTTGGGGGATTTTTTTTTTTTAAACGATGAGAAGGGAATCCGGTTATGTTGATTTT

A\_16\_P17272207

AAAACATGTAAAAAACAGTGGGCTACTTATCAGTCACTATAGCAGACTTTTTAGGCTCCT

A\_16\_P16940433

AACCTATTTTTGGTCTCAGTTATCCAATTGCATATGTCAAACATTTCCCTGCAAACCTTT

A\_18\_P17226962

CCAACATGCATGCCAATTAATTTTTTTCACTTAACTCCATCACAACCTTCATATGCTCAAGA

A\_14\_P122732 AGAGTCAACTTTGGTTGAAAGAGAATACTCGCGTTGTGAAATGAAAGATTATATCGAGAG

A\_14\_P114828 GTTTTAGAGTCTTCATTTGTTGTGCAGTCTATGTCAGAGGAAATAATGCTGTTGTTTGCA

CUST\_2502\_PI426210822 GTTCTTCAGGTGTTTCAAGATGGAGTGGGGTAAGGTAAGGAAACAACA

A\_18\_P12696080

AAAATGTCAGAGTGCAATGAGAACAAAGTATGACTTATTTGGCCCTGAATAATCCTATGG

A\_14\_P116274 GCAAAATGTAATAAAATTTTCATGGGTCCGAAAGTTTTTCATTTTTTCCAATGTGAGAAAGA

CUST\_690\_PI426210822 CTTTCCACTTTAGATTTTGGTGTAACCTTTGTCCCTGTCAGTCTTGGCTCTAG



A\_14\_P137805 TTGATGTTGATGTTATAGATTGAAATTTAACTGAGAGAGAGAGAGGACCTTGAGATGGAAAC  
A\_14\_P100289 ACTTCTCATATCTTGCCTAGGAACTCCAGGCTTGTCTTGGCTCCAAAT  
A\_16\_P21334453  
AATAAGATACAGCAACTTTTTCAACTCTGATCATGGCTTTAAGCACTAGGATGAACCACAG  
A\_16\_P21196768  
AATTCTTTCTATGTGGGTTATACTATTTTGGGCAGCAACTATGTAAAGATACACCCCAT  
A\_14\_P126817 GGAACTACTGGATTTCTCAGTAAAAGCAAAACAAAACAACCATAGAAAAATACCACCGTC  
A\_14\_P110945 CTGAATTTACTCACCAGTTTCCCAAATGCAGGGTCAGTAACAAGAAGACCAA  
A\_14\_P108083 ACCGTATTTGAAATGCCCAATTTAAATCCTGTGCAACATACATGAGGGAATAACATTTTG  
CUST\_8775\_PI426210822  
ACATGCTTCTTTTTTTCCTCGCCTTACCCTCAATTTTTTTTTGTGGAAATTCAATG  
A\_14\_P123329 CTGGCTTTCATTCAATTACTCCACTGGTCATATTAGCCATGTTTTTCTTCTATATTGCT  
A\_16\_P01588669  
AATGAACACAAGAATGGTCTTATGGTCTTCTAGTCCTTAAAATGCCTCAGAGTCACTAT  
A\_14\_P130619 TTGAAGACAAAGTTTGGAGAGAAATAAACGTATTTCCAGTTGTAACCACATTCAGATGGT  
A\_16\_P20787750  
AAATCCTTACTAGTGACTGAAAACAAAAGCAGAAAACCTTAGTCTTCTATGAAGCCCATG  
A\_18\_P22842667 TTACTGGTCTCTGTGACCTCCATCTTTTTTCTCATTCTCAGGAAATGATTGACTT  
A\_14\_P100451 AGTGTGCTTCTGACTTTTACGGACTTGGCTTGTTAGAAGGCTGAAAGATGAT  
A\_14\_P103082 TAAATCTCCATCAGAGACCCATGATAAATCACTTACAACAGTATCATCCAGCAAAGAAGT  
A\_14\_P118025 CACGTCCAGATTGTGATTTTTTTCCCAAAAACACCTGAAATTAGAACCCTCAAAAATGA  
A\_18\_P22840125  
TACAGGGACTGAGGGTCAATGTTAAAACAATTAGAAACCAAATTAGTTGCCATCTTTTCT  
A\_14\_P129717 ATTAATTGGCATTTCAGACACCAAAATGCCAGGCAAAAATATGAATATCTTACTTGGC  
CUST\_2752\_PI426210822  
TATTCTTATCTCCCTAATAAAATGGAAATTGGTACTTAATTGGTAAAATTTTAAATAATT  
A\_18\_P15037165  
CCATTTCAAATTCTTGCCATATGTATGAAATCCAAGTCCTGTTAGATACCTGAGATGCTG  
A\_16\_P15566127  
ACGTTTGGTATCCGAGGTAAACAATTTTTGTAGCCGCTAATGAAATCTTTAAATCCTCTC  
CUST\_3737\_PI426210822 CATCAAGATGGATATACTTGCCCTTTAATTCAACAGGCACCTGTTGAATGC  
A\_16\_P30952542 TGCAGAGATGTTTCATGTCCAGGAAATGGTGGTGAGTTCTCCATTTGTTTT  
A\_16\_P16478718  
AATGGCTTGATTGAATTGAACCCCAATAACAATATATTTTCAATTGGTCTCTCGTTGAGA  
CUST\_8924\_PI426210822 TTTCTCTGAAACGTTGGTCTGGAGGCTTTGCCCTTTATTTTCA  
A\_14\_P123365 GTAAAATTTCTGCTCGACAATCCTGTCCTTCTTCTTTTTTTAGAAATTTTGCAGCAT  
A\_14\_P101243 ATTTTCTGTTGTTACTGGTTTTCCCTTAGCCCAACACCAGGGTCATTAAGAAG  
CUST\_8663\_PI426210822 CTTTCTCACACTGGAGGAGAAGGCTTTGGGATTTGGCTCTTGTTAA

A\_14\_P117980 GCGCCTTTGATTTATACAGTTGTAATTGGCTATAAACTTCTGCAAAGTGCCCATACCA  
A\_14\_P131707 AAATAGGCCCACTGACATACAGGACATACAAATGAGAGAGTTTTTAAAAATGCGATCAAT  
A\_14\_P138938 TGATTTTCAGCAAACACTACACAATGGGTGAAGCATGTATTTGAAATCCTGCCATTTCAA  
A\_14\_P111119 ACGATGCCTTTGATAAGAATAGGAAAAAGCCACACATTTAATTTCACTTCATCCAGTT  
CUST\_1513\_PI426210822

CTTTTGGCTGGTAGTACATTTTTAGGGACTGTTTTCTTGTGTCATTCTTACTTACTGTAA

A\_14\_P118041 CTAAGTGGGTGGCATGTGACCATTGCTGTTCAATTAAGTGGGATTTTTCTTTATTTAA  
A\_14\_P130857 ACCCACTCAATAAATACACATTAAGTGGCTTATACAAAGGCCTCCTACATTAATTCAGGAT  
A\_16\_P15532999

GTTGTCTACCTAAAAGGAGCACACTACATATTATACGAATCTCAGATACACACACTGTGC

A\_14\_P139575 CAGAGGCTACAATCCTTAAGAAAGGGCTGGATATAAACAGACTTATGAGGGATTG  
A\_14\_P120282 ACTTTGTTTCATGCCCTTTGAAGAGTTTGAAAACTTCTAACCAGTAATGATGTGGTAGAT  
A\_14\_P102371 AGTAAAGGATATTTCTTTCTAGTGGCTAAAATACCCCTACTCCTTTCTGAGACATTGTCT  
A\_14\_P117222 AAATCAACGTGCTTCTTTATTTTTTAACTAGATAGGCTCATTCTACTGTCTTCTCCAGG  
A\_14\_P119745 GCAAATGCCTATGATGGGGAGGAGAGTTTAGAAGCCATTTGAATTATTTAGATCTTGTAT  
A\_16\_P40091892

ACTGGTGAAATAGCATAGTCTACAATATTCAGTTTGCACCTTAACTTGTATCTCCTTCCC

A\_14\_P118235 CTAGAATCAAAATCTATCCCGTGGCCAACATCTTTCTGAAGGAAACATAGGTATTTATCT  
A\_16\_P01649401

ATTTGGAAAATGGAGTTCCTTAGGCCTTATTACTCATGAAACAGATTCTAACATTCCTGTC

A\_18\_P13123495

GTTTTCAACCTAGCCAATAGCATCACTTTAACTTTCCATTGATATAATCCTGGTCTTGCA

A\_16\_P17112696

ACCTTCAACTCATAGAAACAATGAATGAAAACACCATAGTTATAGCATTTTTCTGGGGCA

CUST\_5576\_PI426210822 GCTGCACAGACTGTGTGTGTAACATGGAGATAGTGACCAGTACATGTTAAGTA  
A\_16\_P21334970

AAATTGGATCTGATGACACAAAGCCAGTTTTACACAATTTTTTCAGAAACCTGGAATCAA

A\_18\_P22842467 GGGGACTTAAGGTTGGAGGCAGCAAAAAGTGGAAAGACTGGTAGATA  
CUST\_6718\_PI426210822 CATTGTGACTCCTCTGCTTCACTTTCTTCAGGAAGGAGTTCAGACTC

A\_14\_P109993 TATATGGGACATATTTACAGGAGTAGGAACTGTAATCATTCCAACATATCCCCAGAATACC  
A\_16\_P00633603

AGGGACCTGAAAGATTTACTGCAATTTACCTGAATGAAAACCTGATTTAACACTCACTACC

A\_14\_P112860 ATTGTGTTGTAATCATTCAAAGGATAACCAAATGTGCCGTGATGTATGTGAACAGGTAAG  
A\_14\_P106955 TGAAATCTTCATTCACTTTGATTAATGTGGTTATCAAGCCTCCCTGAAACTATCAACTC

A\_14\_P113618 CTCAAAAAGTTTCTGATCTTTGTGTTTCATCTGGGTCTAAGAATTAATCTTGTATTTGGGTGA  
A\_14\_P101307 ATGACCCCAAACCCAAAAGCCATGAACTAAAACCTGACACATTTAATTATACAGAGATCAA

A\_14\_P114259

TCTTCTGTGAAACAAAGATAAGGGAAGGAGAAGATAACAGAGAATAAGTGGCTTCTAAA

A\_14\_P138679 AGGTTCAATAATCTGTGACAAAATAACTGCTGGTAATGAGCATTCTAAACTGACAGCAGA

A\_14\_P202351 CTCACACAGCATCTAGAGTGTTTTACAAAATATAAAATATTATTATCCCTGCCCTGAATT

A\_16\_P37994396

CCACTTCAGTTAGTTTCAGGAAAGGCTATACCTAATACAGTAACTACACGAATGAACACA

CUST\_6561\_PI426210822

AAATAAGCACCCCTGGAATGTTTAGCACAAAACTCTATGCTTGATCGTTTTACTATTTT

A\_16\_P00466630

ATTTACCCAGTTGTTCAAATCAAATTTGCATATGCCACAATGTTTTTCTAGGGTCAAGAG

A\_18\_P12037764

AAATGGCAGACACAATTCTACTTCAATGCATTTTTTCTGAACTCAGTGGTCAAAAAGTAGCA

A\_14\_P107079 TGGTGACCAATGCATTACCTTCTGTTCCTTATGATATTCTCATTATTTCAICATGACTGA

A\_16\_P40527746

AGAAAAGTATGCCGACAACCTAGTAAATCACAGGAAGATCTCCTAAGTCATGGCTTGTTTT

A\_16\_P30952526 CGTGGGGGCTAACGGAAGGGCACATGGGATGTCTCTCCTACAGAG

A\_14\_P105916

AAAGACAGGGAAAGATGTAGGAAAAGCAAATCATTGGCTCTCTTAAAAGGAAATGAATTC

A\_16\_P21495799

AGGCATGGTCAGAAAAATCAAGATTTAATCAACTATCCACCCTCATTGTTCTCTTTTTCT

A\_14\_P113829 TTTGGAAAACCTCCAATATAATGCTCAATAGCCCCCTTCATCATATTGAAAATGGATT

CUST\_2183\_PI426210822 GACATTTGTGTAGGAGTCAGGTCCAACAGCCAGACTGTGTGTCTA

A\_18\_P11961562

AAAAATGAACATACCGATTGCCTATACAAATTGCCTCATTTTCACTATGAACTGGCTTGG

CUST\_2181\_PI426210822 CATTTCAGTGGTGCCTGCCATTGTATTTGCAGGAGACTGAGACATTT

A\_16\_P35917649

AGTTTGGGACCTTAAATCTATCAAGTGATGTTAATTAACCCCTTAAATCAGCAACCTCTG

A\_18\_P22841016

GTGATTTGTTTCAGGGAAAATGTTGTTTTTACATTTGTTAAAAGCAGCCATGGTGTCTCT

CUST\_3476\_PI426210822

CAGGGGCTTAAGCACATCAAGATAATTTCTCTCTTCTAGAGGAAGAGAAGTTG

A\_14\_P201962 ATTCTTGCTTAACTAAATACTCTCTCAAGATAAACAGGAACTTGGCTAATTGCTCACCCA

A\_18\_P25055917

AAAAAATACCTTCTACACATAATCAAACAAGTCTATGAAGATCAAAGCCTCATTACAC

A\_16\_P16191562 CTATAGAAGGAACACCAGTTCAGAAATGTCACCTGTTCATCCAGACAGGAT

CUST\_10392\_PI426210822 AGTGTTTTCTCTAATCCGAGGGGTCCTCCAAGCCTCCCCAGCCCT

A\_14\_P125613 GGAGCGTGGAACAAGAAGTTTTATGCGTTACACACCGAAACACAACCTGA

A\_14\_P200167 CACTGGTCAAAAACCAAGTAAGAAAGAGATGACAAGTTCAAACCTGGTTGGTTGAAAAAG

A\_16\_P19677953

AATGAAAGTAAAGTCCTGAGTCTCCGTATTATGAAACCTTGAAGTTACCCAATCAACTTG

A\_14\_P101032 TGACATTTTTAGAATTTTCATCTCTACACTTTCCAAAAACACTACTTGACACCTGTGGGTT  
A\_16\_P19112767

TGTGCCATTTCCCTATCATTCTTATCTTTAACCAGCCATACAAATATTGATAAGCCAGGA

A\_14\_P119125 AATACAGAATTATAAGATTTAGTATTGCAACAGGAATGGTCTGCTAGGGAGGATTTGGAA  
CUST\_3772\_PI426210822 ACCATGAGCACATGCCTTGAGGGCAGTGACCCTGGCTCCTATTGT

A\_16\_P37077445

ATCCTTTGCATACCTAATACTGTGCCATTACTGATTTTCTATTTCTCTCAAAAGGCCAT

A\_16\_P16191767

CAGGTCCTCAGTTCCAGAAAAGTGTATACTCACACAGGAAATATCTCTCAAATAACATGG

A\_14\_P126183

ACCCAGGATGAAAAGAACAGTGATTAAAAAAGAAAAAGCCCCAAATCTAGAATCTACTC

A\_14\_P114661 CATTCGAAGTGTTCGTAATTACACATTGAGGGACCAACTAGACCTTTTCTCATTGTAAAC  
CUST\_10441\_PI426210822 TGCTCTGTATCACCTTTATATAGCAGACATGTCACCCTGCTTCTACACAGATG

A\_16\_P00685088 TTAAATGGGGTTAGGGAGTCGTTGACTTGCCTTTTCCCTTCTAACTACAAG

A\_16\_P16739327

AAAATCCTTTCAATTTCTTGTGGGCACTTTGAAATGATTTTGCAATACTCAGTCTTGCTC

A\_14\_P200478 CATATCTCTAACACAGAGCAGAGTCGGCATTTCAGTATAAGAACCAAGTGAAAAGTGTTAA

A\_16\_P02686569

TGTCGTTTTGTCTTCTAATAGTTTGCCCCCTTATAATACCATGTTTGCTAATAACTCTGC

A\_14\_P120291 CTCTCTTCTTTCACCTGGAGTATGTTTCTGATATGCTATCTAGTCATCATCCTTTTTTCC

A\_16\_P17351046

AAAGTCACTTTCCAAAGATAGTAGCCCCCTTTTCTTACACAATCTAATGAGAACTAACCCCT

A\_14\_P127509 CCAACAAAAGAATGAAATGAAGTAATTAGTTTCTGCTATACATAAGCACCCCTCACTGCT

A\_14\_P200639 AATCTTTTTAATAAAAAGGAAGTTCCAAGAAGAATTTTAAAGAACTACCTCTAGGTGTGCC

A\_14\_P120388 GCTTCTTTGAAACTCCTGGGTTCTCCTTGATCTGCAAATCTGAACACATTTG

A\_14\_P120277 CTGAACCATTAAAAGAAAGAGTAAATTTGACTGGTGGCTTTCTATGAATTCCTGCTACT

A\_18\_P13467253

AAACTATGGAATAGGCAATATCTTGAGAGTCTATGAGTCAGGAAAGATGACAAATTCCCA

A\_14\_P132393 AAGGTCTGGATCTCACTCTTCTTCTTGAGGAGAATCTGATAAATGGTGTCAAACCTT

A\_14\_P119905 CTGCTTGGGTGTCAGGGATATGCTATGCCAGGTATATGCTAGAAGAAATACTATTAATG

A\_14\_P129635 AAGACGAACTCCCATCTGTATCCCAAGTCCAAAATAATCAAGAGGTTTTAGAGTTTATTT

A\_16\_P30952595 AGTCCCTCTCAAGGCCAGCCATTATCATAGAAAATCTTCAAGTAAGTTGTGTT

A\_14\_P117028 TAAAAGGCACTGAGGAAAGTTTCAGTTCCTACCTGTTGAATTCATAATGTCTTCCATATC

A\_18\_P16920977

CTCGGTAAGCCTACATAGTTGAAACCAGATGTTTACTCAGGAGTATAGTAGAGGATTA

A\_14\_P105556 CCACACTCCGAAAATAGTTAACTGTAACCAAACGTAAATGTTGAAAGCAGCAATAAAGAC

CUST\_1186\_PI426210822 CAGTGGGAGTCGATGCTGTGATGCCTCCACTGCATTTACCGCTTT

CUST\_7594\_PI426210822

CATGAGTTGTTTTATGCCATGAGGTTAAATTCTTTCCTATCATTTCAGGGGAGGTC  
A\_16\_P18124680  
ATTCACATTTTAGCCTATAACCTTCAAATCTCCACATTCATTTTTCTCCACCCTAAGTGC  
A\_14\_P127840 AAGGAGATTAGGATTTCTTTCAAGTAACTTGGGTATAACTGTTGTGTTGTTTCAATGGC  
CUST\_4820\_PI426210822  
TGAATGGGTTTCATCCTGTGATTGTAAATAACAGTTTTTTGTTTAATAATGGCATTTTGTA  
A\_14\_P112362 GCCAGGCTGGAGCAGGTTGATGTAATGATTATTCTAGACAGAAAGACTATTATATTTGCA  
A\_16\_P37131272  
ACTCTCAAATGAAGTGACCTAGACAATTATTATTCCTGAACTCCAAAAAATAGGCGAGA  
CUST\_10270\_PI426210822  
CTCAAAAATCTTTGAGAAAAATTGAGATGGGACAAAGACTCTGTGCCTTGTTC  
A\_14\_P117911 TAATTGTGATTCCCTTGTGATGACTCCTGTCTTATGACTTGTATAGTCTAGTCCCTCCA  
A\_14\_P118403 TATCCAAGGTCATGGCTTATCTAAACTTTTACAAGTTTCACAAATTGACAGATGCACACG  
A\_18\_P15959596  
AAAGTGCTGGAATGAAGAGATTAGGGAATTAATTGTATTGAGGATCCTCTCACTAGCAGA  
A\_14\_P109596 AAGACCATTTTGTTCAGTCTCTTTGTTTCTAGGGGGAAAAAATAAACAGACTTTTCT  
CUST\_9802\_PI426210822 AGAAGGACCTAGAACTGGGACTCTGAAGTATACAGCTGTGGTTTTAAACTCT  
A\_14\_P138245 TAGGATCATCTTCCACGCTTAACTGGACCATTAGTTTTTAACCATTAAGTAGTTGGGAA  
CUST\_6505\_PI426210822  
TTTGTAATTTTAAACTCTGAAAATTGAAAAGCTTTGATAGTTGTCAACAAAGTACCCAGA  
A\_18\_P14132080 ATCTGTAGATCCTGTGAAAACCTCCCCCTCCTTGCCTTCGTGACT  
A\_14\_P123781 ACTTTGTGCTATTACAGATCTACAATGCAGTGAGAAGAGAAGAAACAGAAAATACAGTT  
A\_14\_P201830 TGTTTTGTTACTCTACAGCACTTGCAAAATCGTCCTTGGTATCTAACAAACATGGATTCA  
A\_16\_P00685029  
ACATAGTGATGGAGTTGATTTACATTTTTGTGGAAAGTTCCTTATTTCCATAGGGCTGT  
A\_14\_P125116 CTA CTGACCTTTATTTCTCATCAACATTTTCAGATGGCCTGAATGCTATTAATGCTCACA  
A\_16\_P17855965  
AAACTAAATTAGTAACTGTTTTGCCTTTGTTACACCAGAATCCAACATTACCACAACCCA  
CUST\_4324\_PI426210822  
GCGAATTCAAATAAATAAGGTTTTACTTTTCTTTTGGGATTTCTTAGCATGCCCCGTTG  
A\_14\_P118820 TACTCTATGAAGCCAATCTTCCAGAGAACTTTCGAAGACCACAGACAGATCAGTA  
A\_14\_P127540 CCCCCAACCTGACTATCATGGACAAGAGATTTGATGGATAGAATAAAAGGCTG  
A\_16\_P35357880  
AAAATTTGGCCAAAAAGAGTGCTTAGGATGTAACTGCTTTCAGTTTCAACCTTTGATTC  
A\_14\_P123115 TATCATGCTGCACATAAAATTATGGACTGTGCCTCAGGTTAGGAGAAATCAGAATTTTCA  
A\_18\_P22840848 GTCAAGTGGAGGTTTCCAGGGCTCCTGGTTTTTCAATTTAGGGTTATTAG  
A\_14\_P135726 TTTCTCTCTGGTGTTTTTCTCCTTTTCTCGTAACTTTGCCGCCTATGAG  
A\_14\_P130394 ATTGTCATGAGTGTGGGTTTCATGGACGGAACAGAATGCACTTTGTCTC

A\_16\_P20775115

TATGATGTCAGCATGAATTTGTCTCTACAGTTACACCAACTAGGTTAAAAGATGCCAGTC

A\_14\_P121055 TACAAATGGACCCCATGTTTTTTTAAGCATTACCTTTTCTTAGAAGACTGCCATCATCTT

A\_16\_P02572483

CCACATCATTAACAATTCTCTAACATTTTTTCAGCATTCAATCAACATCTTCAATCCTTC

CUST\_2130\_PI426210822 TACAATACTGGGCAATGTGCGGATGGGTGTGGGGGAGGGACATTT

A\_14\_P200596 ACGTAAACTAAGTAGGCAGGTAGGATCTGAAGAAGGCACAGGTGCAAGTAAAATT

A\_14\_P130959 TTAAATTAGTCCTTAGGTATGCCTTTTCTGCCTTTTGTCTGTTGCTCACCTTTTAAGA

CUST\_856\_PI426210822 CTCTCTGTGGCTGAGGGCTTGTTCAGAGGGGCAAGACAGAATT

CUST\_1990\_PI426210822 TACTCTAAGGGACACAAGTTTAGGCTGGGAGCTGTGGGGGTAATT

A\_14\_P127699 ACATGTCACATGTGGCTTCGGCAAATTAAGTATGATTAGATCAACATTTTCTTCCCTAAG

CUST\_9545\_PI426210822 CAGAACCTTAGGTATATATTCTCACCGGGCGCTTGTTCCTCACT

A\_14\_P135377 CTCCATGCTAATGAGGATGTGCCAGGACTCCCAACAAAAACATTTTTGAATAATTTAAAA

A\_14\_P130141 CTGATTGAGGAATTTAAAAGACTACTCTGGTTGATTTGGAGAATGGATCAGGGG

A\_14\_P132793 CTACATGTTGGTTTGGTGCCTGAAGAAAAATATTTTTTTTTTCTCACGTCCAAAACACC

A\_14\_P104949 TTACCACAAAATGTGAACCACACTGGGGTTAGTGGTTTGCATTTTTATAATCAACAAATG

A\_16\_P39291711

ATGATGATGGAAAGTTCAAGAAACATCTGTTTTCCACATATACTAGGAACCTCTGCACTA

A\_18\_P22841613

CGCTTTTTTTTTTCAGCATTTTACAATATTTACTAAAGCATTTTATAAGCAAGTGAGTTGT

A\_14\_P108206 CTAGCATTGTTCAAATGTTCTCTACTTCCCTAGGAAGCAGATTCATGCATAATTGCATACG

A\_14\_P110134 CTCAGATCTCCTAGCGGCTTCATTTGAAACTCTCTAGTGATGATCCTTTAGG

A\_16\_P21627938

AAACTTCATTCTAAAGTCAGGAACAAGAATTGGAAACCTCATCACAAGTCAGAAGATTGA

A\_14\_P117989 AATATAGGGGGGAAAAAACAACAAAAAGACAAGCCCAGGGAGAAAGCACCATTAA

A\_14\_P130181 CTGTCTAGTCTAATCCACTTTCATATGAATTTTTTTCAAGCAATATATACAAAAAGACT

A\_14\_P116095 CTGATTTCCATAATGGCAAGCACCTCTGTGGTCTTTAGTAAGGTTAGGATATAATACCT

A\_14\_P104712 GATGCCATCCACACTGCAGATCTTCGTGTAGGAGTCCTCAATAGTG

A\_14\_P109793 CTTGTTTGACAGGAAGACTGATGCAGCATAAATAGCCCAGAGATAGTATTCTAATTAGCA

A\_14\_P116535 CTCTGTAATTTCTACTGTGTTTCTGTCCACTACAAATATTTACCCTGACTGCATACTG

A\_14\_P124657 TGGATAAAATTCAGTGCATTTTATCAGAAAGCCAGTATGGAAATTGCACTGTTCAATCCA

A\_16\_P34912029

AGCACGTTTTGGTTTTCAATAATGAGTAGGTGATTTTCATAACTGAATCTTCTGTGTTGTGC

A\_16\_P19433155

TGTTCACTTTGATCATAATGCCCAAATTTCAAACACTGATTCATATGACCAAGTTGAGTGCT

A\_14\_P130130 CTGCCCTTTAAGCCTTTATCTTTTTTTCTAAGTTGTTGACTGACCATGATTTCTAGTTTC

A\_16\_P02163258

CTGCCCTCTTGCTATATAAAGTCTGGACTTCTTATCCTATCATTAAGCCATTTCAATCA

A\_14\_P132374 GTAAACACCAATAATATTTCCATTAGTCTCCTAAAGATGTTTCATGCCATACTTCCTATGC  
CUST\_522\_PI426210822 GATCTGTTGGTGTGTTAAGGCCACCTGGGAGATGGCCTTTCCTAC

A\_14\_P101845 ATATTTTAGAATATTCTAAAAGGGTGCTTTTTAGACAACCCTCCCCAAGTTGTTGCTTTC  
CUST\_6146\_PI426210822

ATTGTTATTATATGAGGGAAGGTGAATAGGAACTCATCAGAAACCTGGAAAATGTTGTCA

A\_16\_P01841024

GACACCTGTAAGAGTCAAAATCAACCCAAATAAGAAGTTTACAATCACTGAAAAACTGCC

A\_16\_P58424392 AAATAGTTGTCTGTCCCTCATTGCTTCCATTGTTCTCCTCTACATCTCTGAAACTC

A\_14\_P122834 TATTTACTTTTTTCAAATAGGTAATAAAATAGACTTGGAAAAGGAGAGACATGTTTCCA

A\_14\_P101182 GTTGACCAAGTTGATTCTCATACCTGGATTACTTGCCAGAGACAGGAACTTC

A\_14\_P113296 CTGTATATGATTGGAGTGATTGGGAATCATAGTTGTATTATGAGTTGATGAAGTCCCAGG

A\_14\_P136238 CAGATGGAGAGGAGAACGTAGATCTGGACACCTGGAGTGAGATATTGAAAATAT

A\_14\_P110948 GGGAAAACACAAAACCTGCAATAAACTTCATCTTCTCTCCCAGGTTTTTCTTGAACAATTC

A\_14\_P107695

ACTTAGGAAACAAAATCCCAAAGGCAGCCAAAAGAATACTAATTTGAATCCTCCAAAAAG

A\_18\_P14134700

CCAGAAATACTGGGGACCCTTGAGTGGTAATGGAATTGGTTGTATATTTTAGTATGATAG

A\_14\_P112448 GTGTAACAGTGTGCGAAAGAAAATTGGAAGACCAGTTTCCCTAAAGTCGTTGTGTTAA

A\_16\_P17801763

AAAAAGGATACCTCACATGTTTTTCTCATCTCTCTCTCGATTTGTGTTAGTTGTGTCATC

A\_18\_P10037348

ACGTCCTTTGAGGTCTATATAAATTGTCCCACTTTGAAAATTTTCATTTTGAAACCTGCC

A\_14\_P120751 TGCTTTTCTATCACTTCAAACCTCAAAGCATATGAATAAATGTATTTACCTGTGGGGGAG

A\_14\_P122803 TCGAGAGATATTTTACTTACCCAAAAAAGGAACTTTCGTGTCATTCTTTCCTTGGAT

A\_14\_P108803 ACCATATACATGTAGACGACAAATGAAAACCTGTCAAAGTATCCTTCTCTCTAAAAAGCCA

A\_14\_P139672 ACATGACTGCAATAAATGCTCCATTTTTTCTCTTCCCAAATATTCTAAAAGGTCACACC

A\_16\_P35004752

CGCACGAAATAATTCAAATTGCCACTTTAAAAAACATAGAACACGAGAATAGAATACCGA

A\_14\_P124840 CTTGTTTCTTCTATTTCTGTTCTGTGCAGAATAAACTACTCTCTAAAGGCCTGTCTCATA

A\_14\_P135677 CTCATCCTTACAGAAGAAGGTCTCTGTCTTCCAATATTGGGAGTTAAGGAGG

A\_18\_P22842123 GCACACAGGCATCATTTCCAGCAAGTCCACTTGGTGTAGACTGTG

A\_16\_P16841382

AAACATACGAAACCATCTCTTTCTCTAAGCAGATTCTTCTCAATTCACATACAAGCACCT

A\_16\_P03702291

TTGCTTGGAGGATAAGGCTCTCGATATCTAGTAGCCAAATGTTGTGTAATACAGAACTAT

A\_16\_P19863452

AGAAACTTCTGTCTCACTTTCGTCTTACTAACTTGACAACAAAATTTCAACCAGATCCC

A\_14\_P111138 CTGAACTCTCAGGAATTATACCTGACACTGCCGTAAAATGAACAAAGGGAAGG

A\_14\_P123759 TTGTCTTATTTTGAAGGTTTTTAATCGACTTTGGTTTCCTCTTGTGAGACCTGGTGC  
A\_16\_P00684986 AAACCGGGCTCTCATAATCAGTGGGGAGTGTCTAAACCTCCATTTAG  
A\_14\_P131313 TGAAAGAATTTTATCAAATAAAAGTCATACCTCATGGGGAACCTTCTTGTAGGCGATCAAG  
A\_14\_P133681 ATTAACATGGCATAAAATACAATTTGTCTTGACTTGAAGTTCCCCTCACATCACGTTTTTC  
A\_18\_P22841427  
TGCTGTGACACATTTACAAAAGTGATAAGTTTATAATGATTTTGTGCTTAGAAACTGTTG  
A\_14\_P136301 AGAAAGAAGATCATCCATGGATCTGGTTTTAGGTAATCTGGAAAGACAAATATAACACCT  
CUST\_7746\_PI426210822  
TACGAAATTAGGTTTATTTTATCCTGCATTTATTTCAGTGGCACTCAAACATTGTAATTA  
A\_16\_P17424755  
AGAAGTCTACTATTACCTATAACCAGTCTTGGTTCAAATACGTCTTAAGTGTCCCTTTGG  
A\_14\_P201767 CAGATGATGACAGCACTACTATCTGAGTAAATGATGAACAAAATGCCTGAAACCGTG  
A\_16\_P00685360  
GCAGGACTGAAAATTCCATTTGTAAAAGGATGCAACTATGTTTTGTCTTTTTGAATACTC  
A\_14\_P100788 ACGTAGCAGATATAACCCAAGAGCATGAAAGAAGTATGGCTTATGGACTGGTATGTATGT  
A\_14\_P100519 CTCCTTTTTGCAGACACTGGGAATCAAACCAAACGCATGCAACCTT  
A\_16\_P02173191  
GAGATAGAGGGTAAACCTGTAATCCTGTCTGTAAGTAAATGCTACAAATTGCAAGAGGGT  
A\_16\_P21567914  
TGTAGAGCCAATTACATATAGAACCACTCTTTATTGCATTCCACTTAACTTGTCAACCAGA  
A\_14\_P136488 CAGTTTTTTGTTCCAATTACAAGCAGATTAGTGGAACCTTGATGTGATAGCCTGAAGATAA  
A\_14\_P119220 GTTGCCCTTATTTTGATTTTTTAATTTTTCTCCCCTTCTGGCCAAATTTCAAATTTTCCC  
CUST\_1978\_PI426210822 AAATAGCTCAGGGTGCTGCCCTAAAGTTAGCCTGGGTGAGATTAC  
CUST\_8494\_PI426210822  
TTGTTTTCACTATTGCTTTTCAGCTTTGAGCCAGCCATTCAAATTTTGATTCCAC  
A\_14\_P133385 TGGCAATTATAATTAGGATTTGCATGTCAGACACTAACTCATTCATCGTCAATCCTCAGA  
A\_16\_P02836433  
GGGTGCAAGAATAAGACAAATTGGCATGTAATCAAGAGGGAAAATACCAACAACCTATGAT  
A\_16\_P30952636 CAATATTTATGGATGCAACACGCATGGTCAACCCTCAGGGGAAAACCTGTTA  
CUST\_9718\_PI426210822 GTATGCATACGTGCCCAGAGTATCTGTGCTGAAGAGGTCAAGACAG  
A\_14\_P127730 CTTTTCTGTTTATCTGAAAAGAAGTTATACACCATCAGAATTGGAAGGAAATGCTGTTGT  
A\_18\_P10369871  
ACCCAGACAAGTAATTCCAAGTGATTTTTTCTGACATACATTATTAAGAGCACAGTAGT  
CUST\_1313\_PI426210822  
TGTATAATTGCCCTTTTTTTTTTTTTTTTTTTTACTAGAGCTGTGTCTGCCCAAATGCATTG  
A\_14\_P126761 TTTCAACTAGCAGTAAAATGGCTTAATGAAAACCTCTGTAGGCTTGTTTTTTTTCTGGCCTC  
CUST\_469\_PI426210822 GGGATCATCTTTGCTCATACCTCTGTAATCAGTGTGTGGAGCGTCA  
A\_14\_P126371



GACATTGAAGTTGACTTACTGAAGAATGGAGAGAGAATTGAAAAAGTGGAGCATTTCAGAC  
A\_14\_P102855 TCCAATTATATTGAAACACCATTCTTCATTTCAGACAGTTGATGCTGAGCAGTTTACAGTG  
A\_18\_P10670682

CACTTGCTCTTCTCTCTAATGGAACCTTTGAAGAATAACTGTAATTGAATAGTGCCTCCAC  
CUST\_10136\_PI426210822 CATAATTTAAACTTTATGTGCGAGGATTACAGTAGCCAGCCAAACCACCATGCA  
A\_16\_P58424088 AAGAGTAAATTTGATCCTGCCCGCAATGAGCCTAACCCAGCACCT  
A\_14\_P120465 GATTCTCAACGTCCACCTGCAGGTATATATTTAGAGCCACTAACTTTGTGGCATTG  
CUST\_1796\_PI426210822 CTCCCTTTTTGCATAGCGTCACTGGGAACTTCTTGTTAAATGGGGTTA  
CUST\_4511\_PI426210822 GTAAACAGAGGTGCTGGGCTCTGCTGAGGATAAGCTTTGTGATCT  
CUST\_530\_PI426210822 CTAGAGGGTGGATGTTCCAGATTTCAGCTGAGTAGTGTTCCTGTCT  
A\_14\_P131237

AAAGTGATAGGGAGGGAATAGGGTGAACCTGTGAGAAAGAAAATATCAAGAGAAAAAATTG  
A\_18\_P22841887 CTAACTATTAATTCTGGAGGACAGATTCCAGCCGTGGCTTTGCTGGG  
A\_14\_P139220 ATTACCTGCTCAAAAAAGTTTAATTACAAAAAAGGCAAGGGATGATGTAAGGTTCCGGTT  
A\_16\_P18087743

TTACCCCATGTATAAGAACTGTCTAGATTACTGAAACACAAAGTCCTGATAATTCACCA  
A\_18\_P13074091 ATCTTGAGGTCCTATTGGTAATGCCATTAGGTAATAAGGGAGAATGTATAGGGGC  
CUST\_9212\_PI426210822 TTTCCAGAAAAACCCAACTCCCTGCATCATCCCTCAAGAACAAGAAAATA  
A\_14\_P112020 GTTCCTCTCTTGAACATGAAAAACCCATATGAGCCTTTATCTTCTCTATGCCCTTTTAA  
CUST\_7455\_PI426210822 GATTTACATCCCGCCATACTCTGCTGTGAGAGAGATGGTATGCA  
A\_14\_P136721 TGGTTTCATGTCAAAGTTCATGGAAAAAATTTACTGGAGGATTTTTGAGTAGGACAGAGA  
A\_14\_P112748 CAGTTGGTTTAAGGATTAATGATGGCATAGATTTTAAGACAGGGCCAGAATTTTAGACG  
A\_16\_P37939241

ACAATGTCCATATCATTACCAGTCACAATAGTTTACGACCACTACTTAAAATCACAGTGA  
A\_14\_P110489 CTGCGGGATTGTTACCCAAAAAACCTTTCATCTCTAAACTATCTTTCCAAATAACCCAAA  
CUST\_108\_PI426210822 TGTAAGTTGCATGCCAACCTTTTGTAACAGGCTGTGTAAGGTGCTGATT  
A\_14\_P132421 ACCACAACCACTAAAAGCACTTTTACAAATAACACAGATTTCCACCCTCAAAAGATTCTA  
A\_14\_P106454 CTTTATATATGAGAGGAGAGTGAGGCTGGGAGAACTTGGTGTAAAAATAAAGCAAAGT  
A\_14\_P108412 GATGATGACCAATAGATGTTACCCTGACACTTCAGAAAAAAAATTTCTATTTTGAATC  
A\_16\_P18565432

AGCATCCATAGTCATTACCTACTATCACAACCTACTATCAATCGATATAAGAAAGGCCCC  
A\_16\_P20763708

AAGCAGCATGAATAACTCCTAGTTCATTGCAAGTCTTCTAAGAAATCTTTTACTCAGGCA  
A\_14\_P202093 CTAACTCAATGACTATTTGTCCATTTTGTGGTTGCTTCTGTATACCATTTGGCGAATG  
A\_14\_P200530 GCTCATCTTTTCATGAAAGTCACAATTCACACATTTTGCTTGGTAGGAAATATTTTATA  
A\_14\_P200739 TTTTGCCTTTTTTTTTTTTTTGGCCCTTATACCTCTTCGCCTTTCTGTGGTTCCATC  
A\_14\_P122805 ACTTAAATGCTCACTTCATCTTCCCTAGTTCTGAGGGAATCTTTATTCATTTTCTCATAAC  
CUST\_8220\_PI426210822 ATCTCAGCTGGAAGTTGCTGGGCCAGAGATTATCACCAGATGTGT

A\_18\_P22839403 GGAGGCTTAAGGAATAAAAATGATTGGGGGAGGCAGAGAATATGAAGGAAATGT  
CUST\_7143\_PI426210822

TAGAGGATTTTTAATGGAGATCAGAATTTTCACTTATAAAAAGTACCATTTACACATTTTCG

A\_14\_P112481 AGACTTCTGAAGAAGAACTGCAGTTGAAATCCTTTTCCATTTCTGTGAGGAAATATCTTC

A\_14\_P126618 CTTGACATCAGAAAACTTACCAGAAGTAGGTCTTTGCCTAGTTCATCGATATCTGTTAC

A\_14\_P137081 AGACATAAACACTGCCAAGTGCATGTTGGGACTGTTATTAGGAAAAATCTGGC

A\_16\_P18131693

TTAGTGTGCTCAAACCTTCTAAAGAATTCCATTCTTTCACATTAACAAAGAGTCACGGAGG

A\_14\_P113997 CTCTTGTAATACTCAGCCTCCTTAATAAATATTAATGTTGTTACCTCGCCTGCACTCCAT

A\_18\_P10642860 AAACCAGCACCTGACATAATTTATCTTCACCTGCCATAATTTTTCTTGCTTCCAGAA

A\_14\_P120732 ATCCCAGGAAAATTAAGGCTTCTCTTAAACACTAAAAAGGCATGTAATTGCTTGTAGCA

A\_16\_P17388939

GCACTGCCACTGTAAAATTACTCAATGAAATCTACATTGTCACTACTCAGATATTGCCCT

A\_14\_P201660 CTGTGTAATTATCTGTAACCTTCATCAAAACACCAATAACTGCCAAACCATCAGC

A\_16\_P20334142

CCCCTTCTACCAGAATCTAACATCCATGCATAGAACCAATGATCTAAACATTTGTGATTC

A\_16\_P39399189

AGGGAGGACAAAAATAAGACAGAAAACCTACCAAACAAACAACTCAAGAGAGTATTTTCA

CUST\_9472\_PI426210822 TTCCCTACTCAGTGAGGAGAATGAGTGTTCCATGCAGACTTTTATGCTC

A\_14\_P136469 ACAGTCTATTCTTCTGAGGATGGGTCTGAGGAATTCGAGACCATAGTTTTGAAG

A\_14\_P202171 CACTCACTGAGATCTTCATCATTTAATTTAATTTTTCCAGGGATCCGGTTCTAAACTCA

A\_14\_P121845 ACTCCTCAGTCAATCTGTCCTTTCTAGTCAATGAAAAAGACAGGGTTTGAGGT

A\_16\_P00061254

ATCAATGTATTCATGACGCAAATCATTTCCCTAACATCTCTGTAACCTCACTCTTGCTGGAT

A\_14\_P136472 TCTAACATTGCCATCACAGTGATGGTTTAATTGATCAAAGCATGGCTCCAAAATTAAGTT

A\_14\_P117711 ACGACTCTTGCCAGGCTTTAAGTGAATGCTTCAAATAAAAAGGAGTTATCAATTAAGAG

A\_14\_P139883 ACAACATCAGCCCTATAAAATAACGTGCACTGAGGTGTAGGCACAGG

CUST\_8762\_PI426210822 CACTTATTTTGCTGGCAGCAGCAGTTGACAGTGACACTGATTTTTAAAGCC

A\_14\_P135123 TCAATATTTCTACTCTTACCCCATCTCAGATATGCAACAACAAAATGTCTCCTGCTTTT

A\_14\_P101234 ATATTAGCAAAACATAATTGCACAAGCATGGGAAAGGTTACAGTGATCATCAGTCCTAAC

A\_14\_P114820 ATTCATTTAGTTTGCATAAACTCTCCTTCTACTCAAAATGCTCCAAAATCAGTGGCTT

A\_14\_P131225 CCAAGGAATTATTGCCTCTAAAGGTGTCCAAGAAAGGCTTGAGATCTGAATTTCTT

A\_16\_P00975546

GTCACCTCATCTATATGTTCTAAAATTACCTCTGATTCTTAACCTCGACTAGCCAAAGCA

A\_16\_P20756857

GCTTTCCATAATACCACCTTTTCTGTAAACATCTGCCTTATTTTCATCCCAAGTCCTTATA

A\_14\_P133032 CATCCCCCAACCAAACCTTCTTTTTGGTTTTTTGTTGTTATTTTACTTCACCATCTCTCT

A\_16\_P37114608

AAAGCCTGTAGATTGGATAGTTGTATCTGATACATGGAAAACCTTAATCCAGAGAAGCCA  
A\_14\_P138989 TTCTTAAATTATAGCCAGTTGTTTGGGGAAGAAGATGCTGATCAAGAAGTATCTCCTGAC  
CUST\_10037\_PI426210822 AATTAGTTTGGCAAGAGGAGGAGCTTGGTGTGGGCTTTCTGAGT  
A\_14\_P112580 CAGGGGCATTCAATTTTATCCTGAGAGCAGTGGAAATTTAAGACAGTTTTTTTTGGTTTA  
A\_16\_P03293496

AAAAAATGTGTTTCGTCCAGAGAGTTGAATCCTCAAATCACCCAGATAATCAATATTCGA  
A\_16\_P21400015

ATTCCTCTCACTACCAATTCTTAGGTAATAGTCACCGTTTGATATGATAATGTGTTGGCC  
A\_14\_P135036 AAAACACACCTCTGCTCTTAAATAGCCTAATCTTCTGCTGATCCATCATCTAATACAGTC  
A\_14\_P122948 CTCAGAAGGTTATTCTATAAAAGCCAAAGTGTTACTTTCTTGCATTGAGAAACCAGAGCA  
A\_16\_P20002071

GATAAACTGAGCATCCAACCTATAGGATTTTGAGACTGTTACATGTTACCATCAGTTGC  
A\_16\_P39804236

CTCCACTCATAACTCTGCTTTTTAGTTACACCTTCTCAGAATAATTCTCTAGACCACAC  
CUST\_1106\_PI426210822

TAAAAATAGAGGATGATATAATCAATCAAGAGTGGAGGGATCGTTGGTTTCAGAAACGC  
A\_16\_P20062515

AAACCATTAACAGTGTGGATAAATCTAGTCCCAATAAGTCACCACTACTACAGTTGAGAC  
A\_16\_P58424082 CTTTCATCTGCCTTTTCTTTTGTGCCTCATCACTGCCTTGGGAG  
A\_14\_P116624 GACCTCCATAACACCAATACTCTCACTGACATGAATAGTATCACATTCAAAAGTGAAGAT  
A\_14\_P129668 ATGGTGAAATGCCTGAGAAATAGACTCTTATGAAAGTTCTTTGTCTTGAAGTCAACATT  
A\_16\_P17403618

TAAGTATTCTTGTAATCTGTCACAATCACCTGATTAACCTGTCATCATATGGTAAGCCCC  
A\_14\_P133100 TTTTCACTTGCTTCATTCTACATTTGTGCAGCGTTCTACCCTATGTCAGTGATTAGAAA  
A\_14\_P115299 AGATACCTTGAGAAGAGCAGAATCAGAAATTAACCCAAGGAACTCTGGATTAGTTCC  
A\_14\_P100722 CTAAAGGGTTTACTATTTTTCGAATTTTCAGGTTGAAAAAGTCGCACTGAGATGTCCTG  
A\_16\_P30952503 ATTCATTCTCCTCTCTCTGCACAGTGGCAACACGGAGCGCTCTGAAT  
A\_16\_P21193756

ATGCTGTTTAGGTCACATCTATCACAGATGCTAACTTAAGACACTGATACAAAACCTGAC  
CUST\_8573\_PI426210822 CTCAGTAGGGCCTGAGAATGCTCACTGGGTCAGGTGTGATTCAGA  
CUST\_2284\_PI426210822 ATAAGGAATGGTCCTTTATCCAGGACCTCAGACTTTCTCAGTTACACAATAGC  
CUST\_6305\_PI426210822 CTGTCCATCACAGCCTCCCCTTAGGGTCATTAACCTCAGTCCCTAC  
A\_14\_P117777 GCCTGTGTTGGCTGCATTTATTGTTGTCGATATTACTTTTAATTAGGACAAAATTCAGGC  
A\_14\_P131898 CGAAACTGAATGTCAGAATTGATCTCATTTCAACACTCATTCCAGAAGTAGAACTTCTG  
A\_16\_P21369155

AGGTTCCCAACTGTAATATTCTATCATGAGAAATGTTTTTACGCCTCTTTGAATCTTGG  
A\_14\_P112952 GGAAAAATGCTGGTTTCAGAATTCAAACAATAAACTTTTTCTTAGTCCATCCATCCAATGC  
A\_18\_P14133146

TTTATGCTGAATGATTGAATCTATTCCCAGCCGAATGTTTTCTGAACACCAGTAAAAAT  
A\_14\_P135067 CACTAGTTTTGATAGATGCTTAAAAGGTGCAGTGAGGTTGATGATCCTGAATACACAAAT  
A\_14\_P124404 GATGGAACAAAGCATGTCTTACTTACAACATAACTGCTCATTTCACATTTATCTGCCTGT  
A\_14\_P122748 CAGACATTGGATCAGTGAAGATCCTAGGAAAGAGGCTGTTATTCTCATTATTTTTGCTAT  
A\_14\_P126561 GAATATACATGCTGCACCACAGAAATGGAAGACAAGTTAAGCCAACAAAGCAAACCTC  
A\_14\_P139942 GAAGAAATCAAGAGTGGCTGACTTTAAGCAGTTAGATTAAACATCAAATGCATTTCATCCC  
CUST\_8581\_PI426210822 GAAACCAGCACTCATTCTCTGTACTGCACTAGGAGGTGACCCCTT  
A\_14\_P120013 TGCTGTTAAATCAGTTCTGTCCCTTGCAACTTTCTTCTGATATCTGAAIGTTCATGAAGG  
A\_16\_P01017444

CATTTGACTGGTGTCTTCTATGATCATCTAACTCTCCCTAAATTACTACAACCCTGTTTG  
A\_14\_P138048 CTGTGAATTCCTTGATTGTTCTACTGTTGACTGATTTAGGTCACTCTAATGAGGTTTCCTT  
A\_14\_P124507 CTTTTTCCTTTTGACAAGAGGAACCCACGTTAACTATTCCACTTCCCTTTCTGTTATG  
A\_14\_P125571 CTGCACACATTAGAGTAAACAAACCTCATTCTTGTTTTTTGCTGTAGCATCACATTCACT  
CUST\_1019\_PI426210822 TCTGAGTAAGCAGCTCGGCTCTTCATCAGCACAGCAGTGACATCT  
A\_14\_P126646 CTGACAGGAAGACTGATGTTTCATGGGTAAAATAATACTGATTTTACTACAGGGAGACAGA  
A\_16\_P41270336

ACTCTTACTACCAACTAAAGTTTACTACCATCCTCTCTAAATTTTTTCACATCCACACTCT  
A\_14\_P132759 CTATTATCTTTTCCTTGCTTTTCCTTTCCCATCTCTGGTATTCTAAGCCTCCTGCTATC  
A\_14\_P105352 TTCCACTGAGTTTTGGATTGGCAGTATATTTGGCATATCTTTCAAATCTAGCCATCTACT  
A\_16\_P18066158

ACTATTCTTCCACTATAAAAAGTTGTGTGATTACTTAGTATGCCATCAATAACCTCAGCC  
A\_14\_P126211 AACTTAAAGGCATCTGGCTATGAGTTGCCGATCATCTTCTTGTA AAAAGTTCTGAGTATTT  
A\_18\_P10010448

TACATTAGCCTCAAAACATACTTCAAATACTTCGGTCTCAAAAAACCTCTCAAGTCCA  
A\_16\_P03594709

AATGAACATCGATTGACAGGACTAGCATCATTTACCATGATTCATTA AAAAGAAAGTGCC  
A\_14\_P200379 GAACGCTGTGTTTATCCTTCCTGAAATTCTAATCTCTAGGAATAGCAACCCACATTATTT  
A\_14\_P113061 GTTTCTTCAACAGGAGAATTTTACTGTGTTTCTTTTGGTTCCATTGTTTGGAGACATTCC  
A\_14\_P117627 CAAACCAAGTTATTCCTAGAACATAATTGTGCTTTTAACTCCCACTTTCTCATTCTTTT  
CUST\_2144\_PI426210822 AAGTGGGTTGGGGTGTGAGGTGGCATCACCCTCATTTCAGCATG  
A\_14\_P126554

ACCCAAAATATAAAGAAAGGAGTTTGGTAAGCAGAAGAAAGAAAAGGTTTCATATGGTGGA  
CUST\_2556\_PI426210822 TGTA AACTTCTCATTTTCAGATGTCACTGTTGGAGCCTTCATGTCCGACA  
A\_18\_P10869647

GGTTGCATCTTTAACA AAAACAACATAACCACCTACTAATAATAATAGTTGCCGACCACT  
A\_16\_P00685563

ACTCATAAGAATGCTTTTCAGAATGCAAAATTTAAGTTTGTGGGTTTAAAAA AAAAAACAA  
A\_16\_P30952643 AATATAAGCCTTTTATACTGATTATGTC TTTTATATTTGTATCGATGTTTTATTATTTCT

A\_16\_P20803219

GAATGACATTTAGTGACCAGAATACAAGACCTTTGAGACCATGTTAATTTTCGCCTAACA

A\_18\_P11758649

TTCTCTAGTCCATAAACTCTCTAAGTAACCTCAACCATTTTCATATCTTCCATTCCCTGCA

A\_14\_P133349 GTAGAGCAACAAAGAAATATCATTTCCAGTTATGAGATTAGCAAAATGAGACAACCTGGT

A\_14\_P105006 CTTAGGGACAGTTAATATAAAAGATTAGAGGAGCAAGGTCTAGACCATCTACTTCTGCTA

A\_14\_P101461 AAACATGTCTCTTATTTTCAGAGTTTATGCGAATTCCATGTGTGGATGCTGGATTGATTT

A\_14\_P201788 TTTTGATGATTCTGAAGTCAAAGTTACTGAAGAGAAGGACTTTCTGAATTCTCTTTCCCC

A\_14\_P100032 GTTATCGATATCAGCATTACTTTACACAGATATTTTTGATCAACTGAAAGCACCACCCA

A\_14\_P114826 CTACATGTTCCCTGATCTCCTTAGACAACCTACCTTTCTACGGACGTGGGAT

A\_14\_P114955 TAAACTCCTTGCAAGTTGGTTCATTTGTAGGAGGTGAAGATAAGTTAGAGTAGTTTTTCCA

A\_16\_P15426376

TGGATGAAGGAGATACATACAAAGAATTAGAATGGGCCAAATAACTATTAACCAGCAGGT

A\_14\_P126914 ACTATCATGTTGACTTAGAGGTCTAGGTTTTTCAGACTACATTCTATAGTGGTCCACGTAA

A\_14\_P132253 TGTCTCTGCTGATAGACTCCTTCCAGAATAACTCAAAGGTCAGTTTCCAATCACTAT

A\_14\_P202500 CTACCTGAAATCAAATAAAGATCATCCATTTTTATGGATGGTTTTCAAGTGTGCCCAGATT

CUST\_3242\_PI426210822 GAAGAGAATTTGGGATGCATGGTGTGTGCCAAAGAATAAATGCAGGTGT

A\_16\_P19171705

AATTGTAGCAAGAGAAAGCATAACAGAAATGGGATACTGATTGAATGCACACAAAGGTAT

A\_14\_P118695 GTTCATCTATTCCCAAGCAGTGTCTCTTAGGAGGTTTGAGATTTTTAGAACCAATCATA

A\_14\_P139782 CTTCCACAAAAGATTTGGCTCTACCTTGGATCTGCTAGTAAATAACTAATAGGCAGGC

A\_14\_P117300 GAGGAGGAACAGTCTACCATGATATGGGTAATATCAATTTGACTTTCTTTACAACCAAAA

CUST\_5870\_PI426210822 CAATTCCTCGTGAGAAGTCTTTGCATCTCACATGGCTAAGAGACAGTACTTT

CUST\_9712\_PI426210822 GACCCGTGGGCTCTAAAGAAGCCACTGCTATGGAAAGTTGTATTC

A\_14\_P103527 GGAAAGTTTCTGATGCAGTTCTGGAACATCATAACTGTCTCCTGAATATTAGCCATTATT

CUST\_6592\_PI426210822 GATCACATGAACAATAACTGGAATGAGGAGGCAGCCCCTCCTC

A\_14\_P100755 ATCCCCCTAAGGTTTGTGTAACAGTCTATCAAACTATGCCATTTTCTCCTCAAATTCTA

A\_14\_P111822 AAATTGACTTAATTCCTCGAGATAGGCCGTTTGTATGTGCACCCTCTTCAAAAAT

A\_16\_P15887593

GCACATCATACTTAAATTTGACTCCATAGTCCAAAAAACTACCAAAAAATAGCATAGCG

A\_14\_P112942 TAAGATGTAGGGATTTTCAGAGCCAGGCAATACATTTTAGTAACAGTTAGCCAAGGTAGTA

A\_14\_P110378 CTTCAAACCTCAGTGTCACTTCATTTCTCATCTTCTGACGGCTCTAAGAGG

A\_14\_P109972 TTGACTGGCCTTTCTAAATTTCTACTACTGGAAGGCAACAGGAAATACTGAAAATATCCAA

A\_14\_P132647 GACTGACATAAACATACTTACTCATACTTTCTATGGAGTCTTCTGCTTCAGTGACATAG

A\_16\_P20063076

CCAGTCGACCAATTTAGAAATGTGTGTAATGTGAATCTACAGAACAATCATCTTACCTCA

A\_14\_P118317 CCATGCACACACAATCACACTTACCTGCACAAGTCTGAAACATCAGTCTATGTATTT

CUST\_3207\_PI426210822 GTACTTTCTCACGGCCTCACTGTGGTCAGCAGAGCTGAGGCAGCT

A\_16\_P16139691

ATCTTATATCCCTAATCCTTCTTCAAAGCACCAAAAATTCAGATCTTCCAACTTTTGCCA

A\_14\_P127713 ACCTGGAACCTTCTTATGAGAACTTACCAGTTCTTCTATGGGAAAAATAAGAACTGTTCA

A\_14\_P116459 AAATCTAAAGTTAAAGATGTGCAGAGGAAATGAAAAATGGGGTTACACACAGGTGGTTTA

A\_14\_P133731 GAGACACGAAGATCTTTAAAGCATTACAATGTTTGTGTTAGTTTTCCCTTATGGGTGCTG

CUST\_1650\_PI426210822 GTTTTATGTAGTATGGGCTGAAGGGAGAGGGGTGTGAGCACTGGG

A\_16\_P18091091

AACCAACCACACAAAAATCTGAGTAGTTAATGCAATAAGGTAGATTTCCACACATCTT

A\_14\_P100106 ACTTCTTAAACTTCACAATAAATCACAGCATCTTCCCTAACAGGAGACAGATTTCCAAAA

A\_16\_P21361591

TCCGAATTGCATTGGTATGTTTTGTATCTTACAGTAGTGACTCATTGAACTGAGACAGA

A\_14\_P114067 TAAATTTCCGAACAACCTTATGTCAGCAAGTCTGGCCAAGTTATCTTTGAAGCAAGATCAA

CUST\_3518\_PI426210822 TGCATTTGGAAGGGGTCAAGACTCGTTTCATAGTTTTTTGGGGGATTAAA

A\_14\_P104617 TAAGAATCTGTAAACTCAAACAGACTTCCTTCATTGTTGAGGATATTTACAGGGTGTCC

A\_16\_P17961220

GATTATTTTTTAGTGGGTGAGATTCAGTCTACAGTTTTCACTTACTCACCTAACCGTAGC

CUST\_4026\_PI426210822 CTTCAGGTGGCTTTAATCTTCCCTGGATGCTGGTGGTCTCCAGA

A\_14\_P113999 TCTTCTCGACTACTGTTCTCAAGCACAATCTGTAATGGGAAAGGGAACAGATT

CUST\_2927\_PI426210822 CTAGCATAGGTGAAGGTGGTGAATGCTTTGCCCAAGGGGACCCTG

A\_16\_P18327032

ATGCACCAATCAAGTCTATATGAGCCTTCAGTTGTAAATGTGTTTCATTTCAAGACTGTC

A\_16\_P35312969

AATAAATGACAACCTACGAATCAACAGTCTGCCTAACTTCTAATTAGTCTAAAATCGTCCA

A\_14\_P106216 CTTGTGCATTA AAAACCATTTGTTTACTCTATAGGTCCTCCTTTGGAACCTTATTGACTTG

A\_14\_P101834 TTGGAATTGCCTCTGCTGCTCCATTTATTTTCATCATGATCAGGCAATGTCTTAGAAA

A\_14\_P114629

TTTTAAACAAGGTCAGAAGATTTGGAAGAAGGAAAGGGTGATTATCTGCAAGTGAAAAAG

CUST\_9345\_PI426210822

ACAAGGGAATTTGAGGTTTTACTGTTTTGACCTTAACAAGTTTTTCATTTGAAATGTAGGA

A\_14\_P105559 CTTGTTTCTTTCACAGATGAGTTTATAGAGAGAACAACCTTTTAGGTATGGGTAGGGTGT

A\_14\_P131320 CTGTGAAATTTGAATTTTGCTTTAAATAAATGGAACCTCACATGTGTCAAGGGATTGGGTT

A\_14\_P112009 CCACTAACCCAGAAGTTTTTAAATTAGTTTTTCTACAATGGACTGAAGATACCCTAGGGA

A\_16\_P40987605

ACCACCAATAATCAATAAACCCAGTTACTAAAACCCTAACGATTGTCAAACCTTTAGAGT

A\_14\_P120065 TTCTTTCCAGAATCATTGATCAGCGATTCGAGAAGGTTTCTACTTTGTATTTGGTGATT

CUST\_10100\_PI426210822 TCTTCCCTTTACAGAACCGTGGCTCTTGAATGTCCTTCTAGAGTAGC

A\_16\_P37317166

ACCATTGTCAAACCTTACTACATCAACATCCATCAAATGAATTGATTACATCTACATGCTCA

A\_14\_P202461 AAGGCAGGGATAAAAGACATAGGTAAAAACAAACAAGCAAAACAGACTTTTCTGTGGC

CUST\_2980\_PI426210822 CTGGAGAGGAGCAGCAGTTGCCTTGTCCTCAGCTCAGTTTCTGTG

A\_14\_P121780 TTTCATTCTTGGTATCTATCCCCTTAGATACCATACTTAGAAATCAGCCATGTGTGTCT

CUST\_1979\_PI426210822 CTGCCCTAAAGTTAGCCTGGGTGAGATTACTCTGCCTGGGTCTC

A\_14\_P106659 CCTGTAAAGCACAACTGTTTATTTTGCAGTGGCTTCTAAAATTATAGGAGTGAGGCTAG

CUST\_8728\_PI426210822

AAAAATCATCACACAAGTAGGAGTAAAATAATGAGTATTTGAATAATGCAACTAGAGTTG

A\_14\_P127158 TTCCTTGTCTCTTTCTTTCTTTTATTGATCTCTCCCGAAACTTGTCC

CUST\_2972\_PI426210822

ATTTAAAATGTCAAAATTTAAATCAAGGAAAAGTACTAATTAGGCAGTTCTAGAGATGAA

A\_16\_P02806434

TGGCCATCATTCGACTTTATCTAGCCCTAACTTTATTTTGTAGACACTAAGTTCTTTGCT

A\_14\_P133297 GATTCACCTGTTGGAATTTTGCAGGACAGACTTGGCCAAACTCTTGATATTCTAC

A\_16\_P41697716

ACAAGGACATATATAAAAACTGATTAAAGCCTAACTTCTCTATTTGAAGCAACATGAGA

CUST\_5005\_PI426210822

TTTATGGCTATATTTCCAGAATATGCTTTTAAAGACTGTGGTCACATTTACCTTGGTTAG

A\_14\_P117996 AGCATCTTCTTGAAATATGTGAGAAAAGATCTGTATCTGCTTATGAAAGGGACGATGTGA

A\_14\_P131200 TAAAATATTACCTAAAATCTGATCCGATTCTCTCCCATTTTCTGGTTCTCCTGGATCTG

A\_14\_P105663 ACCATTTTTCATACTGACACTCGGAAAAAAATGTTCCACTTACATTTTGCCAAGCAAGG

A\_16\_P17512475

AATTTTGCAGCAAAATGTGTCCAATGTTGAATTTTCCAGGTTCTCTAAAGTATGTCTCGT

A\_18\_P22841543

CTTTTTTAAAAAGTAAATGTAAATGTATTGCCATATTTCTCTTGAAAAAAATTATCACA

A\_14\_P107054 TATTGACCCAGAAAGCGATTCTTCACTGATACACTGTCTGCAAACATATCACAAG

A\_16\_P21596217

AAGATAAGCAATTTACTTCTCAGGACGTTCTAAGTCATTCTAAAATGGAGCCAAGGTCTG

A\_16\_P03506832

ATTTTCCCTGCATTTTCATATTGGCTCTATAAGTTGGATTTTGTGAGTGGTTTCTGACA

A\_14\_P139591 TTTGTTTGTFTTTTCAACTTCCAGGCGAAACGTTTAAACTGAACTATGCCACTTACGG

A\_14\_P113267 ATTAAGAGATGGTTGAATTGTGGCAGTTGCTTCTACTACATTTCTTTCACAAACGTTCTT

CUST\_2051\_PI426210822

TTTCTTTTATACTTATTCTACTTCTTGCCAGAAGAAATGAGACATTCATGTCTTTCTG

A\_18\_P15974474

GAAAACCACCTGAAATATACTTACTCAAACATGGTTTGAATTAAGCAACTGACTCC

CUST\_67\_PI426210822

TGAGAAAAGTGTFTTTGAGTTTCTTTTACTCCAAATAAAAATAGCTATTTTAAAAGAGT

CUST\_4504\_PI426210822 GCCTCTGCTGTCTGCTCTGCCCCACCCTGTCTGCTGCAGAGGGGAG

A\_14\_P123785 TACCTGGAATTATTCCATACTTCTATTGAGCAAGAAAAGGAGAGAAACAGTGAGGTAAGA  
CUST\_7118\_PI426210822

AAAGAAATTGGTAGGTTATGGAATGATTGATTATATCCTGTGTCAGCTGGAATCCTGC

A\_16\_P18068438

ATTTCCACCTTTTATCCCATCTACGTGTTCTAGTTATTGCTCCAAAGTAGAATTGGTAT

A\_14\_P201817 GACAAGAGAGACAGTAAGGAAGATTTGAGGCTTTATATTCTTTAGATGCCTACTTTTGCC

A\_14\_P120858 CTTAATTCTGTTACCTCTAAGTGACTTCGTCTCTCAGCAATCACACGTTTCATCCTTATTT

A\_16\_P18698555

ACACCAGTTAGTCCCTAGAATAGATTAAAACATTTCCCCAAAAACTGAAAATGCAAGGTT

A\_14\_P119358 AGTTGTTAGCAACACATTAACCACTCCTTTAAACAAGAAAGATGGAGAGAAAAAGGGAAG  
CUST\_5752\_PI426210822

GATAGCAGAACTTGTCATTTCTAGTTTTTCCACAGGACCATAAAGCAAAAATTGGTGC

A\_14\_P202301 GACCAACATGCTCACTTTATAAACATATCCTCTCGCTATCTGTTACCCATTATTTCCAAA

A\_14\_P131759 GACTCATCTACTTGTTCACTCCCAACGTAAGTGGGTCTTGGATCAAAGTTC

A\_14\_P139224 TTGCAAGTTTTCTTTCTCTCTTTCCCTGTAGGTCAAACCTGGTTTCAGAATCGAC

CUST\_3781\_PI426210822 CACTTTGGCAAGGCCAGGTGGGATAAGTGCTGGGGCTCCTATGGT

A\_14\_P103053 TATGCAGGGTGCAAAAAATGTGTTTAATACAAGCCAGGGCTTATTTTCAGATGATTTTTCT

A\_14\_P130961 CTGCACAGAGTAGCACTCATTAATTCTTGGTTAAGGAATGAATCAACGAATGAATGGCT

A\_14\_P119465 CTGACTTACATATTGCGAGTTTGGAGAGAGGCTGAGAAGATTAGTTGTTCTTTTTTCATTT

A\_16\_P58424516

ACTCCTATATAACCCTTTACCCAGATTCACCCAGTGTTAACATTTTGCCTCATCTATTTTA

A\_14\_P136233 GTCCTCAAGTGCCTTTGTGATTAAGAATGTTGGTCTATGATTGCGTTTCACTGT

A\_16\_P17737416

AAAATCACCTTCATTGCTCTTAAGTTTCTGCTAAATGAAAAACATAGTCAAGGTGCCTGG

A\_16\_P58424574

GAGACAAAAGCCACATATTGTAATATTTCACTTATACGAAGTTCAGAAATAGCAAAAACT

A\_16\_P20781339

AACTCACACTTCTCTTATAAACGTCCCATTTTCAGAACTCACTTCTAGCGTTAATGGTT

A\_14\_P128161 CTATGAGACCAGTAAGTCACTTTTGGCTACTTCTGTTATGCTGATCAGGTGATAAAAATC

A\_18\_P13414784

ACTTGCTGTAGAAGATGAACTGAAGTTGTAACATGTGGATGATGGTTCAAGTATCACATA

A\_14\_P121079 TTCAATTTACTTATTATCTGAGAATGGTGATAGTCCCACACGGATTCTCCTTGGGATTA

A\_14\_P117902 ATCATATTCAGAGGTAACAAAGTAGAAATGCAGGCACTCATTTTTAAGTATACAATTTGT

CUST\_2614\_PI426210822

ACATGCAGATCTTATTAATATAAAAAGGGAAGGTGATTCCAGATGGTGGTAGGTGCT

A\_16\_P02031910

CCAGGAAAGTTTGCTCACTACTTCTGAATTCACACTATAAATGTCAATCGCCATTTGATT

A\_14\_P126722 CTTTTAAATTTTTACTTTTTAACAGTCTGGGGATTTGCTTGCCTGGTGAGTCTCATATGC



A\_14\_P134810 TCAAAGTGCTTTAATTCTGGAAACTCCACACATGTATTTTTCTGACTCTGAAAGCAAACCT

A\_14\_P129871 ATTACTGCAGTTTTATTACTTTGCTCTGATTTTCAGAAGGCACAACCTGATGACTTTAGGGA

A\_14\_P202006

ACTGAAAGCACATTAAGTAACAAAGGCAAGTGAGAAGAATGAAAAGCACTACTCACAACA

A\_16\_P00685095

CTATCCCTTTATCTTCTGTTGTAATGCCTGGTAAAGTCTTACTGGGAATAAAGTCCAATC

A\_14\_P103056 CTTGGAAAGGACCAGGTTCCAGTTGCCACGAAGTTACTTCTAAAACAAG

A\_16\_P00075878

ACCACATTTCTTTCAAGGTCAAAGCAATACTTCATGAAACATTGGGATTACCTTTTTGAC

A\_14\_P200723 GCATTTTACCCACAGGGCTTGAACCAACATTCAAAAATTTTATGTTAGAACCTGTAAAGA

CUST\_7191\_PI426210822 CTTGACTCTTCCTTGCTGTCTCTTCAAGCTATCAATATGCCCTCTCTATCT

A\_14\_P112540 AAGGCCAGTTACAGTGACAATCTGTGAGTTGTTTAAATCACATCTAGTCTGAATAGAACAA

A\_16\_P15766297

ATCTAAAGGCAGTGAAATGAACTAATCCATATGTTGCACATTCATTAAAACCAGGCAGTG

A\_14\_P119478 ACTGTCATTTTTGTCTGTGTGTTATTCTGTGAGACTTAGAAGTCCTCTAAGTCAGGATCA

CUST\_8829\_PI426210822

AAGCTTCTTAGAGCAAATTTAAACTCTACAAACTTTGGTCAGGGATTTGAACACATATTT

CUST\_6599\_PI426210822

CCTTCTCAAGATAAAGCTAGGTTAGCACTCTCTCATAACTCAAGCCTGAGGTTTA

CUST\_6624\_PI426210822

CAAACCCTTATATCCTTAATTACGTCTTCCATTAAGTGGTTATCCGATTAAAACCTGGCCA

CUST\_6361\_PI426210822

GGCATAAGTAACTCACTCCCAGAGGAAGTTAAAACATGTATACATACATATAGAATGTTCT

A\_14\_P134112 ACAATATTAATAAAAAGCCCCATGATGTGTATGTCTGAAATAATGCAAATATCTCACCCC

A\_14\_P110307 GTATTCCCATTTTCAATATGAATTTGTTTCTATCCAATGGATCGTCAACAGTAGCCACTG

A\_18\_P16087613

AGAGTAACCACTATAATACATTCCTTACCTAAGTGTTGTCACAATTTCCATCGTAGCAC

A\_14\_P124749 AAGTTTCTCCCAGTCATTTATTCTTCTTCTGACATATCCCTTTTACTCAGAATGTAGGTC

A\_14\_P126953 TGGCTTTTCTCCATTCAGAATTCACCTGTGAGCATTTTAGGAAATGAATTTAAGTTGTGA

A\_14\_P101911 CCACTCCATTATGATCAACTGGTATCTCAGCCATAACCATGGGCTCATATTTTAGAAA

A\_18\_P10397997

ACAAAAAATTTCCCTAACTGATAAATCCAATAAGACTTTCTCCTGTAAACAAGATCTGGCA

A\_16\_P20055606

TAACATCACAGTCAGAAACACATAGTCAAGTCCAGAGAATGTATGCAGGTATCGTAATTG

A\_14\_P130463 TTACTIONAATTGTTTCATGTTTTTCAGAGTTCTTGCCTATTAATAATTTTATTAATTTGGTTAA

A\_14\_P107964 TATGCCGCTGGCATCTCATAAATTCTTATTGAGAATGGCACAGGTATTAATAAAGTTTCT

A\_14\_P133999 TAGATTTCTCTTTTATTCTTTAACTCTCTGATTCTTCATGTCACCTCGCCCTTTCATCTC

CUST\_4343\_PI426210822

AGCTTCGCTAGTGAAGATGGTATTTTGTAAAAATTGAGATTCCCATTGATCCAGATCC  
A\_16\_P19077494 TCAACCTTTAGATCCCATAATCTTTACCTATACATTGCTCTAGTCCATTTTCATCCTCTT  
A\_14\_P107731 GTGGCTGTAACCTAATTTGATTCCATCTTTGTGTGAACATTCCCTTGTGTATTCCTTTGT  
A\_14\_P110910 AAAACCTACACTGAGATAAAGTGGACATTTTCTTTTAAAACTACGTGACAGGATTCCCT  
CUST\_6567\_PI426210822 CTTTCTTGCCAAAGCCCTTCCCGACTGAGATGGAGTTGATATTAGAG  
A\_16\_P36542037  
AATGCAAGGACATAAAAACCAGAGATTCCCAATATTCTTAAACCCATAGTTTCAACCTCA  
CUST\_623\_PI426210822 AATCTTTGAGACACTGTCAGTTCTCAGTCCTGCCAGGGAGGCAG  
A\_14\_P134575 ATAAGCCTATTCTTCCCTGATCACATGAGTGGGAGAGGTAGCCAAATTTTGAATT  
A\_16\_P18571716  
AAATCATTAACAGTTATTCTCCAAGACGATGTTATGATCAATGTTACCCCTCAAGTGCTCC  
A\_14\_P107127 CGTTTGACTCAGAGATTCCCAGAGACCCCAGCATAATAAACTAAATCCTCTTC  
A\_14\_P124728 ATGAATTGAAGTCCGATGTAGGTGATCTGCGTTCCAGGGATAACCATA  
A\_16\_P15318517  
AATCACCTTGTTTCATGTAATATTAGCAATTTACCTGTCTCCTTAACCACTAACCATCCT  
A\_16\_P00728094  
CTGACCACCTCAATTACTAACTTGTATCGTGTTCATATTATTCTAGCACAGCATGGAT  
CUST\_4165\_PI426210822  
ACCTCATGTGTGAACCTTAATATATTCTGCCAAATATTCTGTTTATAATATCTAACCCCTC  
A\_14\_P139574 AGGTATCAACTACATTTAACAAAAACACTGTTGCTGAGATAACTCACCTCTTGGTTTTT  
A\_16\_P39479988  
AACAAGACTTAACTTTTTACCTCAACTTATCCTAACAAAGTAACCTAAAGCAATTTCCCAA  
A\_16\_P40140365  
AATCAAGTTTGCCCATTTGTAGTAATAGGTCAGGATTTAGATACTCCATAATCCCACTGT  
A\_14\_P103847 CTCATTGCTAGCGTATGTAATCTTTTTGGTTTAAAGCAATTAATGCAGATACCTCCCT  
A\_18\_P22839760 TAAACTTTGTCCCTGTCAGTCTTGGCTCTAGGCTGGAGGAAGCAG  
A\_14\_P128927 TACATTTACATCAAACATCTAAGGACCCCTGCAGAAGTTTCTTTGCTATTGCATTATCA  
A\_14\_P111190 GGGCAATAGGTAGATTCAAGCAAAGTTTATGGAGAAGTTTATCTGAAACAGCACAATTTG  
A\_16\_P18575969  
ATGAGTCCACACGCTTAAATAGAGTTTATGGTATCTTAGAATAATTGGAGCAACTGCCAG  
A\_14\_P106930 AGAACTTACTACGAGTAAGTTTTGAAATCAGCCTCATTCTTGAACCTCAGCATAACAGGA  
CUST\_6957\_PI426210822 ATGCTCTGCCTGTGATGTGTGGTGGCCTCTGGCATTGTTGTAACCT  
A\_16\_P15152302  
TCAAATCCAGCCTTCATCTTTTACTAGGACCCTTAGATATGAACATATCTTGAACATCCA  
A\_14\_P131051 TCAGACTTTTTTATATGACATTGATTGTTAAGAGAAGGACTTGCCTTGGCTGGTTACATG  
A\_14\_P139786 TTCCCAGCACATTCCTGCTTTGAAAAGTAACTTTCCTAGTAATATTTCTAGTTGGACATC  
CUST\_6893\_PI426210822 TTTCATTCAGCGCAGGGACTGATTTTCATTGTGTTCTGCTTTCTCTGG  
A\_16\_P01614968

AAGGAAAACAACCTCCATCTTCTGACTTAATAATACGTTTGAGGTTGATAAATCACGGTGC  
A\_16\_P15186534  
AAGGGCTTATCTCATCCACAAGAATTTCGGTTAATTGCTTATACTACATGTTCCCATTTCA  
A\_18\_P22842263  
GAATTATAATAAAGAATACCACGGAATGAAAGCAAATGTGGTGAGAAGCAGAGTTGCCTT  
A\_14\_P100239 CCTTGAAATGTTTGAATGTAAATTTAACTGAGGAGGACTTCAATGAAGCCCTTAACTGTT  
A\_14\_P129489 CCAAAATTGATTTTTTAACTAAAATCCCCTAAAGTTAATGCTAATGACAGTAATAGTTCC  
CUST\_5337\_P1426210822 GCGTTTTCTGGAAACAATTTGTCCAAAGGCTCCCCTATCACTCTCT  
CUST\_7224\_P1426210822  
TAATCACAAGTTCCTTCTGCTTACAAAATGATTCATACTGAAATTTTTAAAAAATTTCTT  
A\_16\_P19370291  
AGCCAGGAATATAGGGAATAGAAAAGACACATAAAGCAGAAGAATGATTATGTAGCCTCC  
A\_14\_P102253 CTGAAAACACTACAGCCTGCTTTCATTCTCCATTTGATGAAAATGAAAGATCTAGACAACTG  
A\_16\_P17361928  
CTAGATGTCCTACTTAATGAGCATCGTATTCAATCTCTCTCTGAATAAATGTGGAACCCA  
A\_16\_P36231081  
ATCACAGTTTACTGGAGTCCGTAGACAGGAAGATTTATCATTACCTTAAAGAGTGAGAAG  
A\_18\_P12412937  
TCACATCTCAAGATCATAGAGGGATAAGATAACTTCATCAGGTAGAATCATTGAGAGCAA  
A\_14\_P119446  
TTCCCTAAAGAAAAGTAAGGACTTTGAGAATCAAAGAAGTAGAGAGGGGAATTTTCAGGTAG  
A\_14\_P121202 ATCATTATCACATAAACCCATGGAGTATGACTCCTACAATAAAAAATATATATACGCTT  
A\_16\_P20758081  
TCTTCTAATCCCATTGTCAAATGCTCTATGTCTATCTGAACTCACTATCAGCATGCTGA  
A\_14\_P115838 CAACATTCACACTCCTTACTCCTGAATTTCAATTTCCCTCTGATGAGTTCCTTTTTAAAT  
A\_14\_P126307 CTCTGGGGTAAAAGCATTTTCTTTAACCAGGTGTCTGTAAATTCATCATATCAAAGAGA  
A\_14\_P131878 ACAGAAAACATAAAGACAGGTAGATAATGGTTTGCTCAGCACTTTAAGTCTTCACAGAAC  
A\_16\_P17018086  
AAACCCACATCTTTTCAAATAATGTCAATCCCACATAAGTTCTAAGCACTAACCTCCAG  
A\_14\_P140007 GGAGAAATAATGGTTTCTGGTATATAGAAGTCCTCTGGCACCCCTAGAATAAACTGTATCA  
A\_14\_P114323 TTTCTTTTACCTTAACTCTGGTTGTCAATTTGTGTATCTTAGTGTCCAAATGGGTGACT  
A\_14\_P121757 TTTGAGTTGGTTCACCTTTCTCAAACATCATCTTAAAGCCTGTTTCAGCGGAACATTATATT  
A\_14\_P102689 ATGAAGTCACCTCATTCCAGACAGGGTTCAATTCATTATCAACTTTCTTTGTTTTCTTTT  
A\_14\_P125755 CTATCCTGACATGAAGAATCAAAGTGCATAAGGTCTACTTATTTTGACAACCACAATGCT  
A\_16\_P34282636  
AAACGATCACATCTAACTATCAATGCTCATAACAGTTTATGGAATTATCAGCCCAACTTGA  
A\_14\_P130385 CTTGGATTTCTATTGGTGTAGGAAGTATATGGGTTTCTATAGTGTATGGGTTTCTAAGGG  
A\_14\_P131613 CTTATTAACCTGTGCAGGTGTAGGAGAAGTGGAGAGGTTGATCTAAGGAAGAAAACA

A\_16\_P02775462

GCTATGTTCCCATTACACTTTCTTTGTAGAGTCACACTGTAATGATCTCTTCACAGATCT

A\_14\_P125827 TCACAGACTGACAAGTCATTCCTATTTTTTTATGTTGCCAGCAGAGTTAAGTCTCTTAGT

A\_14\_P114109 GAATGTCTGTGATGATGAATTTCTCTGTAAAAACCCTCATGGAACCAACAAACTCTATAC

A\_14\_P124199 AACTATCTATTGTGCGACATTAAGGGATGTTGGTATTACAGTAAAATTTCCGGAGTTAGC

A\_14\_P139173 ACAGGATGACAATTTCTATCATAAATCAGAGTTGAGAAATGAACTTCCATGGCTGCATTT

A\_14\_P137051 AAGCAGAACTAAGCCTTCCCTTTTATAATTTAGGATGATGCAGAATTAATGCCTCAGTTC

CUST\_4918\_PI426210822 GAGTGTGAGGAATGCCAGAGGGAGACCCACGAAACTGCCCTGCAG

A\_16\_P03258541

AAACAGCATTCCGGATGACTAATATTTAGCCTGCTCATAGTTTTTAAAATGGATGGACAGA

A\_14\_P135419 TAATTAATGCTGCTAATCCAAGGGCTCCAAATGACTGAGGAGCCTTTAAAATCAGTATAT

A\_14\_P135992 CCTGTGATTTTTCAATTTCCAAAATCTTCAGAAGGATCGGACCATAACAAGTCACACATT

A\_14\_P109371 CGAAAGTCAATTGTTTCTTACCTGGAAATATCTCCTGTGATTCAGTTTACCAATCCAG

A\_14\_P116648 TGGTAAAAAAAAAAAAATCCAAAATCTAACCAAAAAGGAAGTCACAACAAGCATTCTATAATA

A\_14\_P132681 AACAAAGGTAACCACAAACAGCATCCAGGCAGAGATTTGTAAATCTTCTCCTACAA

A\_18\_P10008813

GAAATGTGAGGGGAATATGACTACAGTCTATCAAATCCTGAAAGTTGCTTGTAGAATGAG

A\_14\_P126677 CTCAAAGCGATTTCCAATAAAGTGATTCAAAGAAGGATAACTCTGACCACTGGCATTC

A\_16\_P37158621

ACTTCCAGGACTATCTTAAAGGCTCAGTTAACTTAACCTCATGTGTTTATCCAAGTGTA

A\_16\_P02497703

ATATACCAAATCTTTCACTCCCTACTGTATACAAGTGTGTGACTTAAATTCCGCTCTAGG

A\_16\_P58424314 CTTACTCTCTTTCCACTAAACCCATGTGGCAGCCTCCTCCTTAGC

A\_14\_P105934 CTTCTGCCAGATTTTATCAAATTCAAATATCTAGGCCAAAGTTTCAGTCCAAGGGATTTT

A\_16\_P01341374

TATAGGATTGACACACAGTTTCAGTAAATGCTAGGGCTTAGGTTACTATAGATTTGCACGC

A\_14\_P105187 TATTTATGTATCAAAGTCACAGGCATCGGGGACAGGATTTTTTACATGAAATTACAGCAC

CUST\_3177\_PI426210822 GTAGGATGAGTGCTAATGGCCTAGCTAGCTGTCCACAGAGGAGGC

A\_14\_P123843 ACAAGAAAGTCAGATGCATGTTTCTTTCTTGCTACTACAAATCATGCCTACACTAATTCA

A\_14\_P137868 CTCACCTCATTCGTTCTGGTGCCAGCATTTTTCTGTTCTTTCAATTGCTATAAAACAA

A\_14\_P107051 AAATGAATCCCACCCCTATCTTTATTCTTCTTGCTATTTGCCAATCTACTTAATCTAG

A\_14\_P128190 TTTCTTGCTGATACCAATAGAAGATACTTCTCTCCACTGACCTGGATGTCAAAAATTTA

A\_14\_P105303 GGATTTTCTTTTTTATTACATACCTTTCTGTCTCCACTGATTTTTCTTAGGAGTTTCT

A\_14\_P139345 AAATGTTATTTTCTTTTTCTCAAAAATAGCAAAGCCATCCCAAGAATCCAAATGACAAAC

A\_18\_P15425589

GAAGGTGGAATATGAACTGAGAAACACATTTAGCATAAACGAATCTCTCTAATCTCTTCC

A\_16\_P00918196

AAAACAGAGTCTAGGGGAATGTTAAATACTCAGTTTTTTACCATCCTTTCTGCTTTTACC

A\_14\_P134039 CTCAGGGAACAAAAGTTCATAATCAATGAAGAAACATTAATACCAAATCCCCACAACA  
A\_16\_P00470680

ACACTCCCCTATTGAAAAATCACAACTTTTTTCCTTAACCATCCCTTTTTATTGTTACCC  
CUST\_9876\_PI426210822 ACACTCTCCTACCCCAGCTGCGGGAATGGAGGCAATGAAGTAGAG  
A\_14\_P112183 CCATTTACTTTTCTGTTTTACTCACTAAATAGCATGCTGCTAAGGGCAGACCATATCCTA  
A\_14\_P126596 AAGATGTATCCCAGATGTATGAGAACATTCTGCACCAGCCGCTACAGATC  
CUST\_2941\_PI426210822 CACAGCTGAAATCTTGTTCTGACGGAGAGCAGGAATTAATCAAACTTGCTG  
A\_18\_P14711067

AAAACAGTAAAGGCTCAATTTGACTTTGATCATTCTAACTGCACTATTGAATCAGGGAGG  
A\_16\_P18266007

CCTGAACTCTAATTACCATGGATACGATATCACTCAACAGAACTTTTTCTTAGGAGCACT  
A\_14\_P124086 TCAGGCAGGGAAACAATTCAATCTATTTGCTCTAGATTTCTCTCTTCTATCTCTGAAATA  
A\_14\_P112379 AGCACTTTGCTTACAAGTGAATGGGCTTCTAGGGCTAAGTTATTAGTTTTCAATTCCTTG  
CUST\_1440\_PI426210822

GCATTTCAAAAATAATGATATTGCTTTTTAATGGTACCAGAGACTTGCCAGGAGCCC  
A\_14\_P138749 ATGTCATTCTGCTGCTGTAGTAACTTCATCTGTCTTTCCCTTTGTAACATTCTGAAACAGA  
A\_16\_P00799080

AAACTTCCCAGGATGTTGTAACCAAGATTTAATCACACAGTAGATTTAGAGCAGATCAG  
A\_16\_P01170696

GTTGAACAGCCAGACTAAGTATTCAGATAACACTCCTTCATTAAGGTGTCAAGTTTCCG  
CUST\_8756\_PI426210822 CTTTGAAATGCCAGCCCCATGCTGCCGTTGTGTGGGGTTCCGAC  
A\_16\_P19620534

CTTCACTTTTTCTCCTTATCTAACCTTGGTATCCATCTCATAATGTCATGATCATGAGCC  
A\_16\_P30952229 CCGTGGTTGGGTGAATACTTAGCCATCTGCCTCCTATTTTCTTATCGTAG  
A\_14\_P200332 CTGACAAAATGGCTCGTTCTGGGCCTGCTGAGCCCTCTAACTTATTTATTAATTTATT  
A\_14\_P102993 ATTATGAAGACAGATAACACAGAAGTTCTTCTCTCTGCTGACTTCACTGGAGCAATCAAA  
A\_16\_P58424585 GCTGTTCCAGAGGTAGTAACCCCAAGCCACTTTACCCTCTAAAAGT  
A\_18\_P15249881

CGTGGTAAATCTTTCTCTCTAATCCTACTCAACACTTAGCATATTATCCCACACAAAGGA  
A\_14\_P115388 TGACAAACATTCTCTCATCCTACTTAGCCTACCTAGATTTCTCATGACGAGTTAATGCAT  
A\_18\_P12412397

AGTAGTTCTCTCGCATTTCTTGTTACAACCAATTAGACATTTCTTATTAGACCCAACCA  
A\_14\_P124241 AGCAGAAGAATGTTACAGAGGGCATGTGATTCTGTTTTAGTAAAGCATGATTCTAATTGG  
A\_14\_P103931 GGCTGTTTCTATGAAAAAGAAAAGCATGACTCATTGGCCCTTAAATCACACTAATTGTTT  
A\_14\_P127944 AAAGTCATATTTTCCAGAAAAATGAGAGAATGTGTCCAGCCCACTTTTCTCATTTTTGTT  
A\_14\_P136258 TTCATGTTACCATTGACCTCATGTGAAAATCAATGACTTCTTGTGCTTTGAGACTGAATT  
A\_14\_P129127 GTAATCATTGGGTTTTTCTGAAACCGGAAAAGTCACGAGTCTCTCTTTTTTCACT  
A\_14\_P200020 GTCCCCACTCAGGAATTGAAACAATTAATCTATTGATATTAGCCAGTGCCTCCATCT

A\_14\_P200981 CCCCTCTTAAACTGGGATCTGTGTTCTTTTTGTTCTGGAACATACCTAAAATAAAAACAT  
A\_16\_P15628615

AACTCATAAGGTGTTTCCAAACTCAAAAACCTCTAACGTTTCATGCTCTTAACCTTTTTGCTT

A\_14\_P106267 AAACAAAGTTTTTTTTGTGGGTTTCTCCTGCTCCCTCAAATAAATTTTTTGACTTCTCTTC  
A\_16\_P16192028

TTAAGGGGATGACAAAAACCTTGCTAAATTTAGTTTTTCACTTCCTCATTCTGATTGAC

A\_14\_P132507 AGAAAAAAGTGAAGTTAACATCTGCCAAGATATTTCCCAAATAAGACCGCTGTCAGA  
A\_14\_P200922 TTGTTACCATGTGATCAAGGCATCATAATTAATGCAAACCCTAGTTTCTAGTTGGGAAAG  
A\_16\_P18042627

CTGTAACCAAGGAAGTGAAAACAGATAGAAAAAGCAAATTCTCTGTGCGACAAGGATTAT

A\_16\_P16191497 ACACACATCAGACAAAGATATTTTGTGAGTGGCTCTAAAAATGGGGGCAAAACATG  
A\_16\_P01177741

CTACATGGAGAAGTGTTCAAGTATTGCGTGTCCACAATATAGACCCGGTAAATTGTCTTC

A\_14\_P131765 CTTGCTTGCCTTCTCTCAGCCAGTTAACTCCATAAGGATTTTCAGCAATAAT  
A\_14\_P103674 ATAGTCTGTGTTAGGCTAAGAGTCGAATAACATTGCCCTTGTAATTATCTTGTTCATAGCC  
A\_14\_P107439 CTAAATGTGGTATTTCCCTTTCTAGGAAAAACTTGACATGTCTAGGTTTCTGTTGAAA  
CUST\_2735\_PI426210822 CATTTCATCAAGCACTGGGAGATGGTCCATGGCAGGGAGGAGAGTA  
A\_16\_P58424129 CTTGCAAGTCCCACCACCTCCTATGCCCTCAAAACCTCTAACAAT

A\_14\_P102167 CAGTTCATGTTCTGTATTGAAATAGGTCTGGTTGATCGATGTCAGTCAGTCAGTAGAAC  
A\_16\_P16191527

TACTTGTGACTACTGTGGGACTTAAACACTTTTCAGACAATTCTCAGGCTGTTAGAAGTTA

A\_14\_P121512 ACACATGCATCACATTCTACCTGACATCCTTTTTTGGAGCAAGAAAGGGTATAAATAAAT  
A\_14\_P137270 AGAGCAGATGCAAATCAGGACAAATCTGCAATGTTTTTACACACATATAAAATGTGCTTG  
A\_14\_P113565 CTTTCAAAGTAACCTTTTACCTGGAAATGTGAATTCTCTCTTAGTTCTGGTCATCTGTTA  
A\_14\_P134696 AGATTAATTTAAAGTAGTCATGTAATGTTTTTTTTGGTTGCTGACAAATGTCTTTTTTATTC  
A\_16\_P39848300

ATTTTATGACCCCAAGATATGGCTTAGTAGTTCCTGAAGGAGTCATTCTCTAGTTCTCTG

A\_14\_P127486 ATGTGAAATAACGTTGTTTTTGGTATGTAGAGAAGACCTAGCGAGACATTTCAGTATGTCT  
A\_16\_P16460110

AGTTTCCTAAGAAAAAGTTAGGTTTTGTCCAAACTCTACACTTGAGATGTTAAAGCACGC

CUST\_7822\_PI426210822 ATAAGCTCAGCTCTCTTGTTCCTAGAGATGATGCTTTGGTTTACTCTTTTGGC  
A\_18\_P14264841

GCACTGATGATTACTGAATTTTTCCAAGAATACTCACAACCTCTGAGCATATTTACGTGG

A\_14\_P102005 CGATACACTATTGGCTTTCATTGCAACTCTTCCAGGAATAAAATGAATGAAATGTTAGTT  
A\_14\_P123112 CACAGTAGATCTAAACAGATTATGCAATAAGTTAGGGCACTCTAATGGCTCAGTTAGGTT  
CUST\_9058\_PI426210822 TTTATCCTCTCACAGGCCTGGCACCGTGGTGGCTTCTGACCATGA  
A\_16\_P18587740

AAAAAATCCAGTCTAGAAACAACCTGTCTACAAGATACGTTGCCTAACAGGATTAGTGCA

A\_14\_P136581 CTGTGTTGTCCAGATATTCTCCATAAAGATGGCATCATCAACAGGAAGGCCTA  
A\_14\_P105908 AAATGAAGCACAATATCCATTTTTGGAAAATATTTATTAATAAAACTAGTGAATGTGGCAG  
A\_14\_P139869 ACTTTCCGTAGAGGATACTATGGAGTGCTTTTGAGCATTGATTCTTCAAGTTGTGTTT  
A\_14\_P131519 CTCCCCAAAATATTAATCTGTCAAAGGAATAGAGGAATGTTCTTTCTAAAAGGCCTAG  
CUST\_2148\_PI426210822 GACGTGACATGGACAGAAAGATGCCTCTGGCCCTCTGTAGCTAAT  
A\_14\_P135700 GTGTCAAACCATTTGTCTTCCCAATTTTTCAAACCGTCATAAAATCCCTCTGCATAGTG  
A\_14\_P116627 AAACCATGGGGTTTCTGAGAAAGTTAGAGGGCAAGATACAACAGATAGGGAT  
A\_16\_P35064621  
GAGACACTGGACATACACAAGATACACAAGGTATAATGATTTTTGAGGCTTCGTTTTTTGAA  
A\_16\_P17196184  
CCCAAATTCTCCCTAATTCGACTTCTAACTTCAGATATTCAGACGACTAAAATCCATTGA  
A\_14\_P107138 TTTTCCATCACATGTCTTTAAGATTCTGGTAGTCACTTTAAAACCTGCCCTAGGATCTAGT  
A\_16\_P17215140  
AATATTTGGATAGATGCCCTACAATGTGTAATAGGAAGCAAACCTGAAAATTTGAGGCTG  
A\_14\_P100026 CTCTTGTCATCATTCCTGTGGCTGGAAATGGTATGGACAACACTTTATTCTCTC  
A\_16\_P15611312  
AAATACAACCTCCCAAAGTGTTCTTTAACCTTGTGTTTCAATTGGACTGCTACCTATAAGC  
A\_14\_P201564 ATGCTACGTATGTCAAAGTTTGGGATACTAGAAAACATATCTGCTGATATCAGACTGGTC  
A\_14\_P103415 ACGCATGATCTTACCACTTTATAATCACAAGGCATTTTGAACCTGACGTTAGATTACCTGA  
A\_16\_P39613359  
TGCCTACCAAAAATGTATCCCTCCATATTTAAATCTCTTGTAATGAATTCTCCTCACCAC  
CUST\_7225\_PI426210822  
TTACAAAATGATTCATACTGAAATTTTTAAAAAATTTCTTAAGAGTTTAGTGCAATTCAC  
A\_14\_P104464 AATAAATCCCTGTTAACATTTGCACCATGAATCCTGAAGAACTGGTATCCTGCTACTTA  
A\_16\_P38175198  
TGCTTACCAAATAGATAATGCTCACATTTCCCTATATAAGAAAAAGCACTTTACAGCA  
CUST\_2798\_PI426210822 CCATTTACTATGGAATTGGAGACCAAAGATGGATGGTGGGATTCGGA  
A\_14\_P131339 AACACTCATTCCCTTATGCTCAATGACTTTTTCTCACTCCTACATGCTATCAACATAAGGA  
A\_14\_P124762 ACACTGCTTTTGTCTGTTAATTTTTTTAGTTGTTTCCCTTCACTTTCAGTCTTCCACAC  
A\_14\_P139943 CTTCCAGAATTACAAAATCTGGGTCTAGTTCTGATCCTATGATTTCTGACAAATCTCAGT  
A\_14\_P124143 TAAATATTTTATAGCATTCAAGAAATAATACTACTCCAGGAAAGCACAGCGCAGTGCAGG  
A\_16\_P35193019  
AAAAGCCTCCACCTAGTTACTTTACTTGGCCTTTAAATAAGTTACACAGTTTGAACACC  
A\_14\_P114938 GCCGGGACAGCCGTGTTAATTTTGAATTACCTTTTAAAATTGTAAAAGAGGAATTGTTC  
A\_14\_P120515 TAATTTCTTTGGAGCATTTTGAATTTGCAGGCCTTCAAGTAATCCATCCAAACAAATTT  
A\_14\_P136849 CTAAATAGTATCAGTGAAACCACAGAGTATAACTTCAGACCACTTGTGGTTTTAAGGCAG  
A\_18\_P10504283  
AAAAGGGGCTATTAGACATAAGATACAAGGATCAGTCACCTTCTCATTAACCTCTCAAAA

A\_14\_P129043 TTTTGTATGTTGCATTAAGAACATGAGTCTTGGAAAGTTTTGGAATCCACAAGACCTAAGT  
A\_14\_P139603 ATTTCTGTTGCATCTTTTGTTCACAGTGAGAGAAAAACGCAAGAGTCTCTTCATTAAC  
A\_14\_P129466 AATAATCTGCTTTCGCGGGGAGAAAATTTAACTTTCCAAATGGAAGTGTTCCTTGG  
A\_14\_P127508 GCTGTTTCTTAGAGAACTTACTACGTTTTGTCTCCAGGATCACTTTTAAGAACTCTCC  
A\_18\_P22840903

ACTTTTATAGGCAACATCCTCTTTTCTAATAGTTTAACTTGAGGATATAAACCTTCACCT

A\_14\_P131830 GACACATGCATGGAAATTATTAATGCTATAAGAATCTCTTGATATGCAGTTTGTATTTTT  
CUST\_3141\_P1426210822 TGTCAGGCCTTTGAATGCCTGTGATTGGTGTTCCTTATACCTGCTGG  
CUST\_8297\_P1426210822 CAGGGAAGCACTGGGTGCAAGACACTGGATTAAATTGAGACAAATGTTT  
A\_14\_P114911 TAAACATTTACCAGTGTCTCAAAAGATGAGCGAAGATGCAAACCTTGTAGACTGCCAATA  
CUST\_3170\_P1426210822 GCAACATTGTTGCCAAGGTACTCAAGGTGGCTGATACTTTATAGCCAT  
A\_14\_P136959 TATAGCAAGAGAAGAATTCTACATACTGGAGGTCCTGGATCCCCTTTTTCTCC  
A\_14\_P101108 AGGCCAAAATGTTGGGAAAAAATCATTACCAGATTTGAAAACCTTCTGTGAAACACATAT  
A\_14\_P138186 AAAAAGCATTACAAGACCTAGTTAGCCAAAGACAGCCACAATTAATATAGTCAACCTTGG  
A\_14\_P201188 ACGATTTATGAAAATTCATCCAGACAGGCACTAATGAACATTTTGAAAAAAGATGGGAAC  
A\_14\_P109178 ATGCTCCATCCCAGAAATCAGTCTTATTTCTTCTCAGAAAGCAGAAACGTGAAAGAAAA  
A\_16\_P58424533 TTAGATAAACTCCTCCGTGATCCATTGCCTCAGGAAGTGCACAGCATT  
A\_16\_P16191708 ATCTGGAGGAACATCAGTGGGGTCTGCGACAACCTGTGACCACCT  
A\_14\_P122551 AAAGAATAGGAATGTTATGATGCAGGGGAACGCTGAGTAACTCAGATTAGGATAAATTGA  
A\_16\_P16191990 TAGAAAATAGTGGATTTAGGATGACAGACTTCAGAGCCCACTCTGTCTTACC  
A\_18\_P14131097

GGCACAGTTCTAAAATCTTTAAGCCTCGTTTAAATTTTTTACCTGTTACTGCTTTCATCA

A\_14\_P122864 AAAATTTTCATCCACGGAGACAACACGGAATCTTACTGGAAAAGTAGTTCTCCGATAA  
A\_14\_P113855 GAATAGCACTACTAAATCATGCCATTGATCCTTCTGGCCACTCTAGATTCTTTCTGTATT  
A\_14\_P201489 GAAATGTCTCAGTCATTGGGTTCTCTGAACATTCATAAAAGAGCAGAAGAGAGTCTAATT  
CUST\_65\_P1426210822 TCTAAAATGGCCCACTGAAACATGCAGACACCTTGAGAAAAGTGTTCCTGAG  
A\_14\_P107293 CTTGGCACAGTAAAGACTAAATTTAAGACACGATAGACAAACTGTGTAATAAATAGGGCC  
A\_14\_P105449 GACAGTGTGAAAGCAAAGAGATGTTGGAGATGCCATATTTGTTTCTTTTGTTCCTTTG  
A\_16\_P15253179

TCCACTTACTCCACTTATCTGGATACCACATAACAAAATGATACCTATGCTGTCTCAGAT

A\_14\_P200191 CTTTTGTGGTCTTTGGGACTAAACAGTAGTAAATAATGTTTTGCTCGTCTTTCCATCGTT  
A\_16\_P38407041

AATGCATATCCCTCATGTTGTTTCATTTATGTGACTCAAACTTTCTCTTTAGCCACTGG

A\_14\_P107530 CTCTTGGTTTCCTTCCTTGGAAAGAGAATGTCTGATCTAAATGTGGAGAACTGTAG  
A\_14\_P201838 GGTAGGAAGATTTCAAAAAGGCTTTCTCAAGAATGAAATAAAAAGGAACAGTAATGACCCT  
A\_14\_P113174 CTGGCTCAGGGAGATTGGTGGTGGGATAAATATAAATCAAACACTCATTAAATACATGA  
A\_14\_P109192 ACATACCATTTCTGCTGTCAGGCAAATCTTAGAAATTTCTACAAATCCCAGAAAGAATG  
A\_16\_P16265109



AAAATTTTCATTGATTAGTTGAATCCTCCTGGATAAATGGTTGTGCAGTTTTTCACATCCC  
A\_16\_P16717390  
GATGTAACCTCATTCTACACTGAGATATCTGACGTTTACATCTTAGAACAGAAACATGCCC  
A\_14\_P139876 CTCTCCTGCTTGTGCATGAAGTGAGAACAAATGAAAAGTCATAGCAGATACTCAGTTTAACT  
A\_14\_P129908 CTAAGTTTAAAGTAATAGGAGTGTCTAGTAGAGTTTCCTGGAAGCCAAACCTGGAGAATA  
A\_16\_P00454449  
ACCTTCCTACATCATAAAACCTCCCTAAAATATACACAATTCAATTGCACATATGGTGGT  
A\_14\_P100025 TATGCATCATGAACACTCCCTCATAGATCATATGAATAGAGAAAGAGGAAAGGGCAAAT  
A\_16\_P30952368 GAATAAAGCAGTCACAGTTCCTTATTTGTGACTGTGGTCTTTTCCTGTGACTCCATT  
CUST\_4522\_P1426210822 GGGAGGTTATGTAACCTGGGATGGAACAAATCCCATTTGGCATCTGG  
A\_14\_P133906 GAATACTGTGAATGAAGGTCTCAAGGGAAAAAGTCTAAGGGTCTATTTCAAGGCTG  
A\_14\_P133312 ACATCCAGAGCCTATTTTGTTTTTTATCATCATCATTGCCTGCTGTTTACCACTGTATAC  
A\_16\_P18313484  
ATCTCCTTAGCGTAGTCCATTAGTAGCATTGGAAGCATAATTCCACATCTGAATTTCTGC  
CUST\_826\_P1426210822  
GACTTTTATCAGAAGCTGTACGAAGATTTTTGTTATAAAAGCGTAAGCTCAAGAGGGGAA  
A\_14\_P111131 CACCAAATCTTAACTTGGTTTGATTGAGAAAACGGACAGAAAACACCAGTAAGTTGAATT  
CUST\_81\_P1426210822  
CTGTATTCTAACACTGATGGTTGTTGCTTAAAGCCGTTTCACTAAATTTAGATCTCTGGA  
A\_16\_P17067822  
AAGAAACTCAGTGTTAGAATAGGGACTCTTAGACTCACTTATCCAGAAACAAAGACCAAA  
A\_14\_P108548 AAGAGTGAATATCCCAAATTTGTCCCTGGAGATGGGCAATATGATATTAACAACACTACAAG  
A\_14\_P106601 ACATATTTCCAGTGGCCCAAACCTTTTATTAGGAAAATGGACGAATTGAATAGCAAATG  
A\_14\_P113619 GTTTCTACCCTGAGAACTGCTAATCAATGGGCCTGTCTTCATAGTGCTAGTAGAT  
A\_14\_P115236 GTCCAAAAAAGCCTATAATGCATCTTTTTCTTTCTTTCTTCATCTCGCACTAAGTCTTGC  
A\_14\_P139441 CAGAGACTGACTCTTGCCAGAGATGGGAGAAATAACTAATTTAGTTTTATTGTCTCTTT  
A\_14\_P119521 GTCATTTCCCTGAGTTACTGAAAGATGGTCTAATTTCAAAGTCCTTCTGTGTC  
A\_14\_P139192 TCCAAATTTGGGTTTTTATCTTAAACAGGTCAATGCTGCTGAATCAAAGATAACAAATTTA  
A\_14\_P130965 TTTTCACTATTCAGGAAGTTGAAACTAGGCTGCCATTAATCCATTCAACAAATAGTGAT  
A\_14\_P117303 TCCTTTCAAGAAGCGGGATTCCAAAAGTAATAATAAAAGAGAAACGAGACTTCCCTGTA  
A\_18\_P14134983  
CTGTTTCTAAGGAGTATAATTTGAGTTCCAAATTAACCTGGTCTTCCAAGTTGGGGTTTG  
A\_14\_P130922 TGGAAATTTTCATTTTCAGTGAGAATACAGCATCCTAGTCGATGTAGTTTAGTTTCCACTG  
A\_16\_P35527232  
AAAAATGATCCATGTAATACTGGTGTGAATAACTGGTTTCAGATCTACATTATACAGCCT  
CUST\_3726\_P1426210822 ATATTTTTGGTGGCCTCCTACACTATGGAAGACTTTCTGAAAGCCCATATCTC  
A\_18\_P16649871  
AAGTTACACAGGTCAGTGAAGTAAATCAATATCTATGGCTTTGTATTTTCTCACACGCGC

A\_16\_P02570937

AC TTGGGATATCACATGAAGAAGTAGACTGAAATATCAGATTTGTCATCAGGAATACTCT

A\_14\_P122192 TTTACATGCTTTTAATTCAAGGTTTGCAGATAAATGATTATGTGTGCCATCCTGTCTTGG

A\_14\_P102276 ACATTTAATCCATCCACTTA ACTAAAATGATGGAGTGCCTGCACATGGAAAATTGAAAG

A\_18\_P10435509

CAACATGAAGTGGATACTTGCAACTCTTAATGAACTGAACCAGATACTCAAGACAGATG

A\_14\_P121201 CAATACTCTCTTGTGCAGTTTTAATTTTGCCTTCCTTCTGTGGTATCTTCATTAGTTCTC

A\_14\_P107493 AAATAAAAGTTTCTGAGTCTGATAATCCAAGGGTATCTTTTAGA ACTCACTCACTGGTG

CUST\_2907\_PI426210822 CCTATGTACAGAGAAGGGACACCAACTGCCTCTTTAATTTCTGCTTTAGA

A\_14\_P107042 GTGAGTATCTACAATACCCTTGCTAGCAATGGCTAATATCATTCTTTTTGCTGACTTA

A\_14\_P136529 TGTATTCTTTTATTGAAGCAAGTATGTCCAGTACACCAA AACTGACGTCCTGCATTATG

A\_16\_P18388426

AAAGTGTATTCTTGCCTCATACTTTTACAAACATTTCTGGACATAATTCTCCCATAGCCC

A\_16\_P02842977

AAAGGGTTCCCAATAAAATAGTCTCAGAAATACTTTGTTCTGCCATATATTTGACAGCCC

A\_14\_P107907 CTGAAATGACTTACTTGGCATTAGCCATTTAAGATTTAAAGAGACAGCACATTCCCTCAA

A\_14\_P139764 ACTTTGTGACATTTGTCTTACAGCCATGAACATATAGAAATCCTTACAGTAAATGGAGAA

A\_18\_P10463557

ACTCCAATCTTTCTCCAGTTTTGTTCTAAAAGTGATTAGTTATCTAAAAGTCTGCGGCCAT

A\_14\_P101200 AACAGGAGTCTGAGA ACTCTACCCATTAGTTCTATTTTCTATGAGGCACAAGAATTCTCA

A\_14\_P139911 AGATAATATGACAGCACAATTGGATGCACAAAGGGAAGTGATGTATTCTTATGAGAAACC

A\_14\_P119218 ATGTGAGTAAACTGTTTTCAAGCCATAGATATCACTGTTTAGACAGTCCATGATTGGTGA

A\_14\_P104010 AAATGAGAATAGTGAGAGGCCAGATCTCTCCTCCATTTGAAAAGCCCATG

A\_14\_P137962 CACTTTCTCCTTCTCTAAATTCCTTCTGATATATGTAGATATAGGTATTCTCTCCAGAAC

A\_16\_P20297603

AAGACTGCGTATTAAGAGAAGTGAATGAGAGGATGTTAAGAGGTTAAATTTCTGAGCCA

A\_16\_P30952506 CATGACAACACCCTCGTGCTGATGGTGCCACTGATGCACGAGGTG

A\_14\_P113561 AAAAAAGTCTCTATCCTCAGACTCTCACCAGAGAAGAAGAGGTGATATCATCCTTTTAAG

A\_14\_P103629 CTTGTAGTAGAAATAACAGTTCTTAGTGTTTTTACTGTGGGCCTGAAGAAAAAATTCC

A\_14\_P127774 ATTCCATTTCTGGAACCCATTTGATCATTTCTGTTTTTGGAAATAGCATA CATGTATCG

A\_14\_P133879 ACAGTTGTTTTTATTACACGAGAGGATATTATAAAGAACCTGATGGCATCAATCACAGTG

A\_16\_P15988349

AAAAAAA ACTCTTCTATAGCACAAGTTTTTCAAGTGACAAATGAACAAAAGCATCACCGAG

A\_14\_P107335 AACTCCAAAAGATCCAACAAGGCTGATTCATCCATCTTTATCTACTTTACTGAGAAAAA

CUST\_1938\_PI426210822 TGCCTCAGGATTGAAGGACCCTTTTTTTTTGCAGGGCTGGTAAAAT

A\_14\_P102277 AGGAATCAGTTTTTTCCAACAAGTTTTTGGACTCCACTTTGAGAAATCCTGACCT

A\_14\_P104781 ATTCTTTCTCTGGGGCAAATAAAAATGTAGAATCAGAAAATTCAGGCACCTTGCACCTCT

A\_14\_P201014 CTGGGAACTGTTGACTCATCTGAAGTCTACTCTTGGCTTGATAGTTTTCTGTTGT

A\_14\_P131758 CTGGGTCTCGATGCATTCTGCTACTGTAATTTTCTACAAAGTCAAAGTCATACATAAACG  
A\_14\_P109885 CTTGGCATTACTGCCCCAGCCTCTTTTATTTTTTTTTGTGTGTGTCTAATAACCAG  
A\_14\_P135011 CTGTATGGATGATCCAGACATAAATCCATGGTTCCATTCACAAAAATATTCATAGGCTG  
A\_16\_P00005347  
ATCACCATCATCTCATTTTTCTCTCACTTACAGTTGAAAAGTCTAGCCTTCAAGCATAGTG  
A\_14\_P124149 GTAATTGGCAAACAAGAGACACACGTTTCAAGATACCCCAAATTTCTGAGCCAT  
A\_16\_P35208926  
ACTCCAATTATAAACACTTACCTACTTAGTTACACTGTCTTCATTACACATATGGTCCCT  
A\_14\_P132596 GACTTCGAAGATGTATGGAATTCCTCCTATGGTGTGAATGATTCCCTCCCAGATG  
CUST\_1449\_PI426210822 CTTGACTTTACCCATGAAATGATTTCCAACATCCAGTCACTTTCTGGGTAT  
A\_14\_P112354 GACTCTCAGTATAAAGCCAGACCCTCAGAGATATTGTCTATGCAATTCAAAAGGTTTAC  
A\_14\_P129942 ATGACTTTAGAAAAGCAAACAAAAGAACCCTTTCTCTCCATTCCAAGGGAATTGAATTAT  
A\_14\_P114208 TGCTCCATGGTGGGGCCAAGAGTCACTTCTAATAAACAGACTGTTTTCTA  
A\_16\_P18579370  
AAATGGTTCTTCATGCAATTATTTCCCAAGAGAAAATAATCCTTGCGTATGTAAGTGGG  
A\_14\_P102964 TCACTGAGATAAAGTGGAAGGCCTGTGAGTAGCATGTTTTGTTACATGTAAAAGAAAAAC  
A\_14\_P131903 CCTAGGTCTAAGTCAGGCAGCAAATGATGTATTTTGGAAGAGTAGCGGTCAAATTT  
A\_18\_P14136895 CTGAAAAGTGAGTTAAGTCTGTTGGTGCTGGAACTCATCACTGAGGAACAG  
A\_14\_P115888 AGAACCTCCTTTAACTCTGAACTCTTAACTCTTGAGAATAACCTACCTGTTTTAAGACA  
A\_14\_P100570 GGTATCCTGGCAAGATATTTCTCTGAAATAGTAAACGTGACCTTAGAAGTTACTGTCTA  
A\_14\_P130520 GGTAGCCTGATGGGTAAAACTTTTACCAAATATACTCCTGAAATAAGGATCTGTCCAA  
CUST\_2202\_PI426210822 CTGCACTGGGGAATGCATACATCTTCTCATGTCTCAGGACATCAGAT  
A\_14\_P132973 ATTATACAGAATACTCATATGTAGGCCTCAATGGACAAAACCAACAACAACAAAAAC  
A\_16\_P00685187  
TCACTGAAGGTATGTATTTTTAACTCCTCCTTTAAAGTGGTTTTCCAAAGTTAGTTGCCA  
A\_14\_P136047 CTCTGCTAGATTTAGTTTCTTGCTTTGGTCTCTTGGATTGACTAGTTCATCTATTCTGAC  
A\_14\_P129245 ACTTTTGAAAGAAAATTTCTTTCAAATGTAAGTATAACCTCATTCCCCTGGTCTCACTCC  
A\_14\_P129401 CCTGCCATGTGGTATTAATAAATTTCTGAGAGAATCACAACATTTTGCATTCTATCTGCCA  
A\_14\_P125298 ATTCACACACTGGTCTTCTGTGGAATAGAGAGACTGAACATCAAATTCAAAATTTAAA  
A\_14\_P114797 TACGCTAAGGACATGGTGACAGACTTTGATGAGAAACATGATGAGTATTTAATATTGCTT  
A\_16\_P00685405 GTTCTGGGGAATGTGAGCGAGGTGCTAGCCACATCTGCTATAGTAA  
A\_14\_P136478 GCCTTGGCTAACCAAAAAGTCAGTAAGTGCAATTTCAAAGATTTAAAACATCATTGGGAAA  
A\_14\_P136329 GATGCTAAAATCACTTCCATTTCTGAGAAAATGGCTTCAGAGTTTATACATTTCTCGCC  
A\_14\_P133336 GGAAAAACAGCCACACAGTGTTATTGTTACAGAACCATTAAATACAACCTTATACACAAGC  
A\_16\_P18342675  
GTTGCACGTGAACACTATTAACATAACACATACCTTTCTTATCATAATCTACTAGCATGAC  
A\_14\_P118290 GCCCCCCAAAATTATCTCACGTAGTCAACGAGTAAACATTTCTTAAAAGAAAAACAAAA  
A\_14\_P118606 AGCAACTATGTGGGACAGCAGTTTATAGTCACTAACCATCAGTTAACACAGATTAGTGTA

A\_14\_P105546 GTTCTGCTTTCTTATTCCATTGTCTGGTGGTTCTCTTTGCATCTAAGGGTAGAAATTATC  
A\_14\_P134717 AGATACTCACATGAACTGGATGATTTTGTTCAGCCTGCAATTCATACAGGCTCTC  
A\_16\_P41097420  
CACGAATCCTTTGATTATTTGCATTCCCTACATATTCAATTCTAGAGATCCTTTTAGCCA  
A\_14\_P118768 CGGAAAAAAAAAATTGGCTTTAGAGTTAAATTGAGGTTGCTTGCTGACGTGATATGAAGTT  
CUST\_3816\_PI426210822  
GTAACTGCAAAGAGGAGTTTTGGGACCAGGTTGTCTTATAGGTTTATTTTGAACAA  
A\_14\_P125381 CCATCTCAAAAATAATCATAATTGGTAGATTTTTTCCCCCTCCCCAAAAAAAAAGTAGTCAA  
A\_16\_P16382602  
AAAGTCCCGTAGGTTGGTTAATACTCATGAAGACTTAAAAGATTGCTTTTTGAAATGCCA  
A\_16\_P21699869  
TTCTTATAACCTGAAAGCACACCATCAATCTTTCATTTTTGGCAACTTGACAGTATCGTT  
A\_18\_P16303397  
AGCCAGTTTCTCTTAATCAAGCATCATATGATCAGCACATCATAGATTCTTTCCAGATCT  
A\_14\_P104916 AGGGAATGTGATATTGAAACCAAAGAAGAAAATCTATGATCAGTTTTTCAGCAGTGACTGT  
A\_14\_P136943 AATGGCTTCATATTATGCCATTGAACAATGCCTGTTAATACATTGTTTCCATTCCATCCC  
A\_14\_P119818 GGTGTATTTGGCTAAGCACATTCACATTTTCTGTATTTTTACGATAGTTGTGGTTTTTCAT  
A\_14\_P103238 TTTGCTATTTTTGCCTAGTTTTTCGCCAATCTACACTGATTTTGGACTGTTACCTAAGTT  
A\_14\_P106710 GAACATAATCTTCAGAGAACAGCCTGCAATATGACCTATGGATCATTTGGTGGTGTAAA  
A\_14\_P114112 TTACCTCCTGACTCACAGTAGTCTTATCTTCTTCTAAATGCAACAGGGATAGGTGAA  
CUST\_8007\_PI426210822 CATGCTAAGCCTCATGGCTATACTTTGGCTTACCTTGGATGGCCAT  
A\_16\_P18002462  
AACAGAACTTCAGTCTTAGCACAGATTTCTCACATTACAGAATCTCCATTAATGTTGGCT  
A\_16\_P41871275  
GCAGAATAAAGTTTTAACGCAGTAGTTATAGCATCCACATAAGCATTAGGTTCTTTCTCA  
A\_14\_P117355 TGCTGATCCCAAGTCGAAGATGCATTTCTCTCTGAGACATCAATATTTATGAGATTTAT  
A\_16\_P16191924  
AGGACAGTAAGTCCCAAAGTGTGAGAACTTTTATAGGCAACATCCTCTTTTCTAATAGT  
A\_16\_P15589040  
AAATCTCGCCTTTACCTAAAAGTGCTAGCAATTAGGACTACTCAGGATTATAGGCTCTAA  
A\_16\_P20134022  
ATGTGCTACATGAATAACTGCTACATTAGAAAACGGGTGACAATCAACTAAGGAAGACAA  
A\_18\_P22839583 GTTTGTGGGGAGGGAGGGAATCTTTGAGACACTGTCAGTTCTCAG  
A\_14\_P124383 TTAAATACCATAACATCTGCCACCTTACCAGGCAGTTTCAACCATAACAACAGAAGAATA  
CUST\_9279\_PI426210822 GACGGTTTTGTTTTGGTCCAACCTTTTGAACCTCAGGTCACCTTGCTATTATGA  
A\_18\_P22842669 AAGAATCACCCACCAGAGGAGGAGCATCAACACCAGGGCAGAGAG  
A\_14\_P126827 CTTTGTATGCCATTTGTCTGAACATACAAGGAACCGTGGGAAAACAG  
A\_14\_P108438 TATTTCCCCAGTTCTTTTTAATGGGGTCAATAATGGACATTTCTAGTTTAAAGGTGGTTGAT

A\_16\_P18869408

AAGTTGAGATGGTAAGCAAGATAAGGGTATTGAAATTTTCTCCATAATCATTCTCCAGGG

A\_14\_P108011 CTAATACCAGGCATATTTTCCAAAATGCTTAAGACTGAGATGCCCTGTTTGACAGATATT

A\_16\_P15557957

AAAAAGTCCAATATTTGGGTTAAGAAAGTTCTGAGTAAGTATCTGCGATGGCAACTTGTG

A\_14\_P127525 TTGTATGCAGACTTCCATCAAAACATTTGCTTTGCTTCAGCATTTCCTTAAATCAAAACC

A\_14\_P125222 AGAAAAGGGTGCATTCTAATCAGGAAGTTAGACTAATCTTGGACACACTCTCAGAAATAA

A\_18\_P15108048

AAACGATGGTTCATCATAGACAAAGAATAAACTCAGTAGGAAACTCAAGGACTTATCCCA

A\_16\_P15242265

AGACTTAAAATCTCAATGTCGCTTCAATGTCAATTTTCACTGTGCCATCTCATAATGCC

A\_14\_P104641 GTTTTGAAGTTACCCAAAGATTATTCTGCCATGGCCTCTGTTTTTTAGAAATTCAAGACT

A\_14\_P127624 ACACTGCCTACCTCAGAGCATAAATGCATACATTCTAGAGAAGGTATGTTTTGGATTAAG

A\_16\_P03427679

CATGATTTGAATGACTCATTACCCAATCATTACATACACAGTATCCAACCATCTCCACAC

A\_14\_P127724 CTTGGGAGCAGTTAGGTAAAGATATGTATTTTCACTGTATGATAAGCATAGCAGTGGA

A\_14\_P139202 AAAACCAACTCACCGTTTTTTGTTTCTTGAAGTCAGCCCAGATAAAAGTTTCAGC

A\_14\_P201003 GGGAGAAAGCATGTGATTACCTGCAGATACTTGAGTCAGCGCTATATAGACAGTTTAC

A\_14\_P103691 TGATAATATTGGCCATTAACATAGATTCAAGTCTTCCATACCTTGGCTCACAAATGATCT

A\_14\_P125126 CAAGGACCAAAAGCAGAACGCATACTCGGGCACTCAAGAAGTTAAG

A\_14\_P106320 GGAAGATCATTCCCTCTACTTTTCAATTTTCCATTTAACTCAAACCGTTTCACCCTAA

A\_14\_P104810 CTATGGAGTATTTTGTGCCCAAGCCCTGCTAAGTCATAGTTCCCAAATACTC

A\_14\_P121330 ACTCCAGCACTTAGTGACATTCGGGGTTTACTCACTATGTATTAGAAACAGACTAATTTT

A\_14\_P200352 TTTACTTATAGGAGACTTCAAAGCCAGATGGCCCAATGGTTGCAGGTG

A\_16\_P30952538 CTTCCAGGGTCATCTGTCAGCATCTTTTCCCTAATCGACTCTCATC

A\_14\_P102500 GAGGCTGGAACCTCAATTTTCTTAAAAGAATGATTTGCTAGAGGGGGGAAGAGAATA

A\_16\_P16752172

AAAACCTGAAACTCTTGTATCATGTCAAATACTCCAAAGATGTCTCTACTCACACTCCAT

CUST\_6902\_PI426210822 ATGCCGATACTTAGAAAATAATAAGTCTTTTCCGCCCCCTTCTGTCTTTAATCC

CUST\_8003\_PI426210822 GGGGCTCCCCGTATCCGCAGCCCAGCGTGCCTCCCATGTCTTCTC

A\_14\_P129868 CTCTAATGAAGTATTATTTTTACAGCATTGATGGTCTGGTTAAGGTGGGCACACTGAAAA

A\_14\_P106843 GAGGTTTACATTTCTTTTTAAAGTTCTTTCATCAAGAGTTTAGGTGCCCCCATTTGCC

A\_14\_P110431 CTCCAAAATTCCAGTTTCCAAATCAATTTCTTACATACTAAGGAGAAAAACACAAATATC

A\_14\_P101033 CAAAGTGACGGTCATTTTCTCTTTCTTTCTCCCTCTTGAGTCCTTCTGAGAT

A\_18\_P22839228 CACACAGCAATAGTGTAACCGAATGCCAGAGCAGTCCCTTCTTCTTG

A\_14\_P137913 TGTTTCAGTATTCTAATAAAATCAGCCGCAGTGATCCATATGGGATTTGTAGATGCTGTT

A\_16\_P20038963

ATGTAGTGTGACGTTTTGGATACAGATTGGCTTATTAGCAAAGCACCTTTTAACTGAT

A\_16\_P30924096

ACCATATCAGGTCTACTTATTTTTTTGCCCATTGTCAATAAAAGAGCAATAATGCAGCAA

A\_14\_P200479 GCATAGGCTAGAAATTGGACCACAAAATAATATAGAATTTGACATGTGGGTGAAGATGGG

A\_16\_P00685077 AGAAAGGTCACAAGCATCCATAGGGAACAGAAAAACAACCTATGAGGGATTTTC

A\_14\_P108774 TTGTTTCTCTTGGAACAGGTATAGAAGGGACATTTTATTTTAAATGCTGGAAGCCAA

A\_16\_P58424322

ATTTTCTACTCAGTCCTTTTACCTTAGTTTTGAAATATGAATGGACAACCAAGGAAACCCA

A\_14\_P115777 TCTGTTCTCACTGTTCTTTGAAAAAATATGGCTTGTCTGATAATCAGATAAGGAAGCAC

A\_18\_P17405455

ACATGAGTAATTTTGATGCCGGCTTATTTTAATCTTCAGTTAGTCAACTAGAGACCTAGA

A\_14\_P118311 AGAAAAGATGAGCCAGACAAAGCGATTGAACTGCTTAAAAAGGCTTTAGAATACATACCA

A\_16\_P15351436

AACAAGAAGTGTCAATTCAAATGAGTGATAGACCTTTAGTGTTGGATCTTCAGTTTGCAG

CUST\_8556\_PI426210822

CAAACTATATTTAGAATTTTCATAAAGTCTGTAACAGACTTGGCCCTAGGATGGCCAAG

A\_16\_P21085040

AACCCATTACACTGTTTCAATTTACGTAAATCACCCGTAAATGTTATCTATGCCAACCAC

CUST\_7231\_PI426210822

GTTTAGTAATTTTTCAACAAGTTCTTTTCTGTTTAAAGTGGGTCTCAGAAGTGGTTGCA

A\_14\_P111335 TTGCTAATTTTGCCACTCTCATTGCAACAGGTCCCTAAAATTCAAATTAAGAAACAGAC

CUST\_149\_PI426210822

GTAACAATTCAACAAAGTATGTATGTAAGTGTAAATGTTTAAACAATGTAAGTGTAA

CUST\_10048\_PI426210822 ATAGTTGCCTCCAGCCCCTCCAACTTGCATCTCAAGGACTACTA

A\_14\_P109919 ATGAACAGACACTTAATTATGAGGCCACGAGACAGCGGATTATTAATTTAAATTGTGC

A\_14\_P201997 CTTACCTTCTTCTTCTCCACCCAGAGCAAAGTATTTTGCCTGTTTA

A\_18\_P13623459

ACGGGTAACATTTAAGGAATCAAACAATTCATGGTAAGCCAATACTACTGAGAGAATGTC

CUST\_8832\_PI426210822 CAGTTTCTCTCACACAGACACTGCTGATCTCAGTAATGGCCCTAACTTT

A\_14\_P116449 GAGATTTGTTCCATAACTCATTTTCCATACTCTGGTGACAAATTTACTGAGTGTATCGG

A\_14\_P112555 CTCTGCAGTCAAGTTTGCTGTGACTGCCTTTCTGCTTCTGCACAT

CUST\_123\_PI426210822 GTCCTATCACCTTACAGCAGCATCTGCTCTGCTCGAGTGTCTGTA

CUST\_8096\_PI426210822 CTGAAAGAGGAGCCTGGGCGCTAAACCATGGGGGACAAAGGTCAC

A\_14\_P106160 CATTGAGCACAGTGTAAATTTCTAGCCAAGTGAATGAATCCAAGGAAATATATCAGGACC

CUST\_872\_PI426210822 CCTCTGCCCTGCCCACTCTGTCCTCGGCACTTCTCTTTCTTCC

A\_14\_P201343 AAGACATGATTCTTTTCAAATCCCTTCAGATCCCTAGGGGTGAAAAATAAGTAAATTGTT

A\_14\_P111850 TAAAAGTGGCCCCAGATATTGGCAAAGTGATTTGTGTAAACTTATCAAATTTCTTTGGG

A\_14\_P119401 AAGAAAGTGTATGTTTTCTGTAAGAGGGTAGGTAACCTAATTTGGAAGTTGAGGGGTAG

A\_14\_P111357 CAGTCCACGGGCATGTTTAAATCTGTAACGTGTATGCAATATAATATTGCTGAAACCTTTT

A\_14\_P135693 CTGTCCCTTCATCTTTATTAACACCCACCAAATCTGGGTTTTTTTTAAATTGTCCAAGTT  
A\_14\_P118624 ATGATATTGGACTGAGAGATCATTGATACAGGATCTGATTATGAAGATCAGGTAATT  
A\_18\_P24678991

GCAGGTAAACCCTAATACCATCTACAACCTCGTATTACCATAGAGTATATCTTCGACAAG  
CUST\_5155\_PI426210822

TGACAGTAGTAAAACAAGCCAAAAGAAGTTGACCATTTATGTGATGTGCAGTAATAAATT  
A\_16\_P01342815

CCACCTCCTTCTAGTAAACCTTGCATACAAATGTTAAAAAGTATATGTCTCAGATTCCC  
A\_14\_P114139 GCCATGTGGTTGTTTCATGATTTCTGCATTTTTTTGTTTAAATATGACATTGGTAGCCTGTTT  
A\_14\_P129180 ACATGAGAATGCATAGCAGAGGAACCTAACCTGGAATAAGGATAAATTTTGTAGTTCCAC  
A\_14\_P121450 CATACTTGAAGAACTGCCTCCATGAATTCGTCCAAAAAATCATCATATTCAGAACCCTC  
A\_14\_P117741 ACTGAAGAGGTTAATGTGCATCTGCCTCCGAATGTTAATGTGTCTAGGTGATG  
A\_16\_P35673842

ACCCAGTTCTACCATATTGTGTTTAGTGACACTAATCCTTCTTTATAGCCTAACCCCTTG  
A\_14\_P135906 ATAACCTTTAGCCATGTCTTTTTGCAGGTATCATCTTCACTAAAAGGACAAGCAAATGGAG  
A\_14\_P130640 GGAAAGAATGGAGGATTACTGAATAAAGCCCTAATGCAGACAGAAGTTACTACTATGTCA  
A\_14\_P122328 AAAAGAAGCATGACCTCAACAGCCTCACACCTACTTATATCTTGTAGTTCTTTCTGTCTA  
A\_14\_P134873

CAGAGAATGGAAAAAATTGTGACCAGAGACGTGTAGCAATGAACAAGGAACATCATAATG  
A\_18\_P22840857 CTCTCTGCCTGTTTCATACCTCCCCTGGTGGCTGATCCCATTGATG  
A\_14\_P137632 CCATCATCTCTCATTCTTTTCCCCTAACAAATCCCATTAAATTATCTCTGTCTTCCCTTT  
A\_14\_P123959 CTTCACTGAATGCTCGCTTGAATGGCTTTTGACTTTCAGGGGCTACT  
A\_14\_P201571 ACGTAATGAAAATTATAGCGTGTGTGCAAACCTTTGAGGGTTGATTATGCTGCAATTTAG  
A\_14\_P200665 TGCCTATTTATTGCCTATCCTTTATATAATTTTCTGCTCCCTTGGTGTAGCAAGTAAGGC  
A\_14\_P128041 TCTGTGCAACGTAAATCTTTTTTGGTGTCTCAAACAGTCTCCTTTAATTTTCGGTCTATT  
A\_14\_P100675 CGCAAGGTAGGATAACCTAAGGAGCCAACAAAGCCAAACCAAGCAATATAA  
A\_14\_P122872 TCTGTGAAATGTATATTTCCAAGACTTATGCACCGGCATGAACAGCAATAGAAAAAGAGA  
A\_18\_P17841043

AACCAGGCTTTAAAAAGAAACAGAACACTTAGTTAACAGAACCATATACTCTGGGTAAGT  
A\_14\_P133682 TTGGTGAGTTCCTGGGTGAAGATGCTATTGCAGAAAAATTTTTATTTCTGAAATGCATTG  
A\_14\_P119266 CTGTGTGACCATGTGTGCACATGGCTGAGTAGTAACCTTCTTTTTACCTTAATTTTAAATTT  
A\_14\_P120754 CTCTCCAGGCTCTGTCTACATTCAGTGTCTAATGGATTTTCAACCTTTTG  
A\_14\_P138558 CATAGGAATCTGACTTCCTCCAGTCTGAATGACATTTCTGATAAACCGGAGAAG  
CUST\_867\_PI426210822

ACTATTTTTTTAATGTTTTATGAAGTTATTGCATCATCCACTCAGTAAGCCACTGTATAT  
A\_14\_P105621 CCAACAAGTATCCATTTCAATTTCTGTCGTGTATCTATATGCTTTTCTGGAAAGAATAA  
A\_16\_P18108495

CACTGCACTGGAAGATGATTTACTGAACATAAGCAATATTTGTAAAGGATTATGCCTCCG

A\_14\_P127074 CTCACAGTAATAACATCACTCATTTGGACAACCTGTTGGCAGATATGAAATTCATGGTAT  
A\_16\_P18960311

TTTTCTGCTCAGTCATCATACTAACAACCTCTTTTTGTCTTCATGTATTCTATGCCTGCACA

A\_14\_P128562 CCATTTCTTTGTGGGAAGACAGGTATGAAATGTCAGCATTCCCTAATTCTCTTAATGTGAA

A\_16\_P16191270 CAATACCATCAGTTCATCTTCCTGTGTTCCTTTCCACCCAGGTTTT

A\_16\_P21544103

ATTGTAGAGGATAAAATGGAACCTATGCTACCTAAGTCACAGTTACCAGAATTTTTGCTGC

A\_14\_P100483 TAAGTCAAGCATGTTCAAGCATATTTCTCTTCCACTGTTGCATTTATGGGAACACTAGAA  
CUST\_2193\_PI426210822

TACACTGAAAGAAAGAAATTAATGCATATTTGTGTTTTGGGGTGGAGGTTTCATTCATCC

A\_18\_P25519780 TGGTTTTCCCATATGTTTCCTTAGCCTTAGTTTTGCTACTTACTTAACTGCTCAAGCCAT

A\_14\_P108623 CTTGTGGGATCTCTGAAAGAAGGCATGATGGAAACTACTACTATTAAGTAGAAGTCTGTA

A\_18\_P11645751

TGCTCAAGCCTAAAGAATATTGCTGTATTACTGGTTCAACAAATTCAACACTCTCCTGTA

A\_14\_P112979 ATTTTAAAGAGTAGTGTGCTTCTCTGCAGTGTTCCTACCTTCACTGTGATCCC

A\_14\_P112770 AATAGATATGGTCATAGAAATCACTGCCTTGTTAACCACTCAGTTCTTTCTGTTTTGCAG

A\_16\_P02434513

AAAAACCTTAATCATGGGATGGAAAAACAATTTGTCATCGGAGAAGAAATAAACTGGCAC

CUST\_1687\_PI426210822 GTGCAGGGGAATTCTGAAGGCTCAGGGGAAGGTCAGGTGGGTTTT

A\_16\_P35689418

ACTTTCACACAATGGTTAATTAAGCCTACGTCTGTAGACATAAACCGATCACTCCTTTTA

A\_16\_P19528803

AAAGATACATGTAGGTGCTCACAAATGAATTCCAATGTTAAACAGCAATCACTGAAGTGG

A\_14\_P103718 ATAATCCCATCTTCACTCAAACCTAAATGCGTTTTCAAAGTTGAGATCTCATCTCAAACAG

A\_16\_P16185087

GCTTGCAGACAAAATGTTTCATCCTTAGTAATTCATTCTTCCCTCCCTAAGTTGACTACAG

A\_14\_P125085 GAATCTTCAAGCCAGAAATTAGAGAATGTTGAATCTTGGAACTTGGAAACGTTAGAACATT

A\_14\_P202446 GTTTCTCAAAGGAAAGAATAACAAAAGATGGTATTTGTCTGTTGTAGCAAAGTTGTCCCT

A\_14\_P130487 CTGATGGATGAAAGACCACAATAAAACAAGATTAGCAGCAAACAATTTAATTGTCAGT

A\_18\_P14133175 ATGGAAGGGTAGGTATCATATGAGATGTGCATGTGATCCTGTGACAAGGAAAAG

A\_16\_P30952606 GTTGCTCCTAGGTGGTCTTCGAGGCCCTGCACAATCTGGAGCCC

A\_14\_P110366 TTTTTGTCCCAAATTATAACCAGTGATCTAGTAAACTGCCATCAGCCCTATCATTACCAA

A\_14\_P124869 ACCAAAGGTCGTCAATTATAAGCAAACAACCAGGGTCTCAGTGGGATTATTACTATTT

A\_18\_P18094759

ACATCTTATCTCCCATCTATATTAACACAACCATTTTCCTCATAACATACCAGTTAGCA

A\_18\_P25387129

AAGTGAAGTCAGCCAATAAAATGTTAAGGAACAGCATCTTCTTTTCCTATCAGCAACATTC

A\_16\_P17639805



TCAAGCAAGACTTTTACTCTCTCTCATTGACAATGTATGCCATTAATGTAAAAGGACCAG  
A\_14\_P131255 ACCATTCTCCTTTGCTACTGTAGGCCACTTTACAATGTATTGTAATTACCAGCATTAA  
A\_14\_P138040 AATTGCTGCTTAATTCAGAAAGTTCCCATCTCGTCGCAGTTTCCAGAAAAAAGAGAT  
A\_16\_P17232203

AAACTGATGCTCAATATGAGGAGACAACCAATATGACATTTTGAAAGACAGGTAAGCAAC  
A\_18\_P22841568 TCCTTGCCTTCGTGACTTCTCTGCAGGATGACTCGGGAAAGAGAA  
A\_16\_P38833876

ACAAGGGGTTGTTTCAATTACATAGGCCAAATAGTAAACGTGTATTTCAAAACTAGTTCCA  
A\_14\_P120374 AAAAGTTGAAGGCCTTATTCTACATTTACCTACTTTGTAAGTGAGAGAGACAAGAAGCA  
CUST\_8768\_PI426210822 CTGCAGCCAGCTTATTGGAGCTGAGACTTGTATAAGAGCCAGACC  
A\_14\_P111854 GGGATTCTGCATAGTCTCTCCGAGTTTAGGGGCAAAACGAAACCATA  
A\_16\_P19991978

AATTATCTCTATTCCCAACACATTATTGTTTCCAGTTCACATTATGCTCAGGAAGGATGG  
A\_14\_P115038 TGAGATGGTAGGGCAAAACAAATACAAATGAGACATCTATGAATGTCACAGGAATTGCTA  
A\_14\_P112593 ACCTTAAAAGGAACAGATTGCAAATACAGCCCAGAGAACATAAATGAGATATGATGCATG  
A\_16\_P00662791

AATCAGGTCTATTAATCAGATCAAGTGTCTATTTCTCACCATCTATCTCATTCCCATCCC  
A\_16\_P19634888

AAAAACAGAGAAGATGCTGTCTAAACATATTTGCCTCATATTCCTCCTAGAATCTCACCG  
A\_16\_P36230083

ACCCACCATATTGACTTAATTTTTTCTTAGATTGTGTTCTCCCCTTGATTTCTGTTCTCA  
A\_14\_P131605 CTTTCAGTTGATTTGCATCAACTATTTCCATTCCACAAACCAGACTTAGTGCTTTATGAT  
A\_16\_P03361705

AAACACCTAGGGTAGAATTTGATTTGATGATAACCAGATTGGATTACAAATGTGAGTGC  
A\_14\_P104533 TTTTTGAATGTATGAAGAGTAGCAGTCCCCTTTGGATGTCCAAGTTATATGTGTCTAGAT  
A\_14\_P121177 AAGTTAGAGGATCTACCTACTGTTGAGGCTCCTGGAGATCCTCAAGAAC  
A\_14\_P109518 AAAATGTGAAAAGTTTTATTCAAAATATCAAACCTTATGAGTCACCTAGGGGTTTCATAGAA  
A\_14\_P118324 ACCTCTGGAACCTGTCTTTGTTTCATGAAGACAAAAAATGCTTAAATCACTTTGATCTGAG  
A\_18\_P13581674

TTAGACCATTTTGAAGGTAAACATCATACTGCAAATCTACTACTGCTAGTCCACAGTTGG  
CUST\_8130\_PI426210822 GCTTGACTCCCTGCTATGACGGAAAGATCCTTAAAGCTCCTTATCTTGAA  
A\_14\_P109716 AGAAAAAACCTCTAGAAAGAGCATCCCCTCTCTGGTGAAGGCTAAGGATATG  
A\_14\_P132490 AATGCTTTTGCCATTAATAACCCTCCTGGTTTAAAGGAGGATGAAATATTGACAGAGAAG  
CUST\_5477\_PI426210822 GAAGTACAGACCTAGGTCCCCTCCTGACAGGGAAGTGGGGAGAAG  
A\_18\_P22840316

GATCCCTGTCACCTTGACAACATAAAGAATATTATTCTTCATACCAGCATTTCCTCAAAGCA  
A\_16\_P18537244

CCATCAACATCCTTCAGACAAGACTAAACATTCCAGACAATAACATCCATACAAGAAGTT

A\_16\_P41703160

TAACTAAAAGCACTAGTTCAGTTCCTCAGGTAATTCATTGGAAGTCACTAAGACTGGA  
CUST\_1164\_PI426210822 CTGTTGGCTTTAGGCATCTCCACCTCCCTGTTTTGTGGTTTAAACTA

A\_14\_P132580

CTAAACCCAGAAGTCAAAACAGGAAATTACAAGTCAAATGAACACATGCAGAAGTCATAG  
A\_14\_P139323 ATGACCTGTTAGGATGAAGACCAGTAAGTGTTTTTAATCATTTTTAGGAGCACCATAGTC  
A\_14\_P127415 TGAGATCATGATGTATGTGCTCATTGTGGTGTGACCATATGGCTCGTG

A\_16\_P00685214

TGGCCTTTATGTGTAAAGGAGATATTGATAAACCTTGGTATGAAAGACTGTAGGTCTCTG  
A\_14\_P121894 CTCTAAAGCAATGTTCAAGTGTATTTTTAGATCAAAGACCCATTGGAGAATCTGTGCGA  
A\_16\_P00612492

CCGTGAATCCAAGGCATAATTTCAATTTCTCAACACAATGTATGAAAGGATATATAGGCT  
A\_14\_P125551 TTTCTTTCAGATCCTCATGCTATGCACATATAACCAAATCAAGGCACCAGTATTTACTGT  
A\_14\_P118040 GAAAGTAGTTTACAGGAAGATGAACCTGAGAATGATGCTAAGAAAATTGAAGCACTGCTA  
A\_14\_P120631 AAACACATTCTGAAGGAATGAATTCATCCATTTATTCAACTTTCCGGTATGCAAGAACTT  
A\_14\_P116821 CACATAGAGAAACACAAAGTCTTATCTTGCCCATATTTAAGCAATGCGGTTTCCTCCT  
A\_16\_P02363725

AGTTGTGATCATCAATCCAGTCTCTAGAAACAAGGATTCTAGCACATTCTAAGCCTTAAA  
A\_16\_P15436244

GAGCAGGATGGATTAAGTACTTTCTGACTGTCATATGTCACATTTCCCAAGATTACACTA  
A\_16\_P16191415

CAGTATCAAATGCATTGTGATTGTGCTATGAGAATTTTGGGGGAAAATTCCAAACTTTA  
A\_14\_P102971 ACATCAGGAAGGTAAACTCAGTGACCCAGGAAACAAAAGTGTAAAGTTATAAAATGATGT  
A\_18\_P16235915

ATTTAGTGACTCCAGTAAGTTTATCCAAATACCCCATTTGATAATTTGTGACAGTGCCAC  
A\_14\_P139917 AATAAAAGGACAGCACTCTCTCACTCACCCTGAGGTTAGAGCCATCTG  
A\_14\_P111629 TGTATTTCAATTTCTGTAGTATAGGCAATTAGAGATAGACTCTGGCCTTCCCTGTCCTTAA  
A\_14\_P132313 GAAATTGTGTTTTATGATTAGGGTGAGAAAGTTGGTGGCGTGAGATTAAAAAACCGTTT  
A\_14\_P103097 TGTGTTTTCAATTTTTGAATTTCTAAATTTCTAGCAGAGTTTTTGGCACACTCTATGCACCC  
A\_14\_P131203 ACATACTTTTTTCTGTCTCTGTTCTTTCTCCTTTCCAATCCTCCAGTGTTTTAAATGA  
A\_14\_P102894 ATTGGGAAACTGCCCTCTAAACTAGAAACATCTGAAGATTCTCCTTTCTCCTTAAA  
CUST\_2526\_PI426210822

AGGTTCTTTTTATTTTTAAACATATAGCAAATTTAAAGACTATTGAAGAACAAAATTGATA  
A\_16\_P17525978

CTGATGTGTGAAGTTCCTCATAACACCAATCATTTAAACTATGAGCACCTACAAGTCTGT  
A\_14\_P103305 ACTGGAATGAAATTGACCCCATTAAGAAAGACCTTCATCACAGCAATGGAGAAG  
A\_16\_P18748538

CCGCAATCACAAAATGTTTTTCCCAAGGACTATAATTGCATCTGCATTTAGATAACCACT

A\_16\_P21432006

GAACCTGACATCAGATAGCCATCACTTTCAAGTAAAGCATTGAGCATTGATAGAATGGTC

A\_16\_P17830298

ATCTGTCAGTCATTTCTTGAAGGAAAAAGTAGAAGTGTTCATGAATTAGTTGCAACCG

A\_14\_P111577 GCTAGTGAGCACTGAAATATAAATTCTGAATCCTCTCCTAACTCCCGACTACTTCCTT

A\_14\_P113359 CAATAACAGATTAGCCCAAATAGCCAATTTTCTGTAGTTTCCAAGGATACAGCCATAGT

A\_14\_P104856 ACAGTGCCAAAAATCCTACATAGTTACTGACAAATGTGTGATCTTTTTACAGTCACAACA

A\_14\_P114264 AGAGAAGGCAGCAGCAGGATCCTCTTTGGAAACTTTTTTGATAACTAGCATCTT

CUST\_3148\_PI426210822 TATCCTTTGTTTCCTAGTTACCAAGGGTACTGGCTATGAGATGCCACGTA

A\_14\_P104652 ACACATTATCTTTCTCAAGAGATGTGATGTCCTTAAGTAACTGACCTGCCTTCATGG

A\_14\_P108574 TTATGTTGCATTTAATCTTTACAAGCGCCTGCCTGGTTTCAGTTAGTTTAATCCTAGACAT

A\_14\_P114114 CAGTGTGTTTCTACCACTCCCAATTGCTTCATAATCCCTTGCATGTGTGTAAATG

A\_14\_P133241 AAAACCTAAAATGTAGTTCTCTCCATATTCTGGATACTCCTGCCTTTTTCTTCCACTTTC

CUST\_8705\_PI426210822 CAATCAAAGAATAATACCAGAGGGTGCAGTAACAAGGCCAACAGAAGG

A\_14\_P120630 CTATGAGCAGGAGAAAGCAGTCTTCCAGTTCTACCAGCGAACGAAATAAG

A\_16\_P58424406 GATTGTCACAAGAGCCTCCTACTCAGGCCCTGTTCTCTCTCTG

A\_18\_P12553311

TCCTACAATCTTTCTGCCTTAAAAATCAGCATAAACATGTTTTAAGAGACCAGGAGATCG

A\_14\_P127850 CTGTCTGCTTATTTAGACAAGTGCCTAAGCACAGGTGAGTTTGAATAGTGACCATAATA

A\_16\_P17969587

AAATCGGGGATACTAAAAATACTTTCTGCTATTATCGTCTGAAAATCTTTCCTTGACCC

A\_14\_P107870 TTTTCTCACTGCCTGTTATCCATGACACCTAATTGTGTCATACAAACCTGTCTTTCTTAT

A\_14\_P115440 CTATTGAGCGCTAAAGATTCCACCAATAACTGAAGTCAAGCAAAAATTCCAAATGCAAAG

A\_14\_P136046 AACCAATACCTCTGTGCATTTCTGCCACCCAGGAATTGAAGTCCAGT

A\_16\_P36418286

AACCACATTACTTAGGACACATCCAATTTAAACACCAATCCACATATCTATTTCCAGACC

A\_16\_P00685300

GTTATTTTTAAGAATAAATTTTAAAAGGACAAAGTAAAACCTCCAAGTTGAACTTAATGGC

A\_16\_P20642190

CAGACATAAGGGGTTATGACTTATCCTCCAAAAACATAAAATACTTACGCGTCTGTTGTC

A\_14\_P123079

GAAATGAAGAACTGATTGTGAAACTGCAAACCTCAAATCACTGGAGTGATAAACAGGTTT

A\_16\_P17565506

TGAGAGAATAGGCCTTAATTTTCATCAAATACCTAATGTCCATTTAGCACTGACTACCTCA

A\_14\_P128462 GGAGGAAGGACTTCCCTGTGTAGTTTGTGCTGTAAAGAGTTGCTTTTTGTTTATTTAATG

A\_16\_P02037530

CTTTCAAATCCTGTAAGGTGCTTATGTTAGTCCAGTAGTGCAAAGTTGAGTAATACTCTC

A\_16\_P02526929

GTCTCATGTAATAACATCCAGCATTAAAGTCATTATCTTAACCTATATGTCAGAGACCCCA  
A\_14\_P136434 CCCAAAATGATTTCAGAGGAGACCAGTAAAATAAAATGTAGACCAAGGTCCTAGTTTTAAC  
A\_14\_P118332 AATGCATTTCTGATGTGATTGATGCAGACAATGAATCCTGAGTAACGTGATACAGACTGA  
A\_14\_P102236 CCTTCCCACTGTCCTCAGAAATAAGGGCTGAAAAGTGGCTTTTGTG  
CUST\_6239\_PI426210822 CAGTTGTTTGTGTTGCTGAACTCAGTCTTCCCAACACATACTTTTCTGTTGT  
A\_14\_P135260 GCCAAGGACTTTGTCTTCTTTGCTTGGTAAGTAACCCTACTTGCCTTT  
A\_14\_P134463 TAAAGGTTTCTTTGAAAACCTCCTTTCCTTAAAGCACATTTTCTGACATAAACTCATG  
A\_16\_P19560267  
ATTTTATTCCAACCTTTCACACCTAATTACCACGAATCACCTTAACAAGAAATCTGGTGC  
A\_14\_P106636 GTTAATTCCCATAACAGGATCTACGGAGATCAGAATTGGAAGACACTTTTCAAAATCTTG  
A\_16\_P17671680  
AAAGGCAGATAAAACGTTAGTATGCAAGTAAGCGAGTTTTCAAAATGAATGGTTCCAGAC  
CUST\_4303\_PI426210822  
AAATCAAGCATCCATTCCTCTGAGAGGTTATATAATCACTGAGAATAGGCTTCCACA  
A\_14\_P123631 GTGACAGGAAATCTTTTTATTGCAGATCTCTCAAAGGCCCTGGTTCTGACAGAAA  
A\_14\_P109909 ACTGAGAAATTCGGTATGCAATTTGCAGATCTTGATCACATGACATTTCTGATTTTCTCT  
A\_14\_P130174 CTTACTAAGTGCCCCCTTAGTTTTCTTGTTTTTATTTTTGTGTAGCACAAAGTCTTAGG  
A\_14\_P104335 CTTAGGATGGTGAAGAAGACGAAGTAAGTGCTGGAGAAAAGGAGCAAGATAGT  
A\_14\_P122489 TTATCAAAATCCTGGAAAACTAAATGGAAATGGAAGATGGAAGTGGTTGCTTCACTACA  
A\_14\_P102545  
AATAAAGCAGGGAGAAACAAAAAAGAGATAGACCCAGCAGAATGTGAATGGAATCATAA  
CUST\_3869\_PI426210822 ATTCTGTCTGGACATTAGCTGGAAGTGGGGCTGGACAAGATGAAC  
A\_14\_P201954 TGGTTGTGATACCTAACAGTATTTCCAAATTTCTCAGAGGAATTGTGAAAACAGAACGTT  
A\_14\_P121118 GGGATAATGAAATGAGGGAAGATTCCAGCAGCCTCCTAGCAGAGATTAATAAAATG  
CUST\_6948\_PI426210822 TTGCACATGGGATGTTTCTACCAGCATCTGAATTGGGGAATTGACATATA  
A\_18\_P10005642  
GGACCACAAGAAGATCTTAAAGACACAAAGAACATTCTACATAGTTTGTCAAATCCAGCA  
A\_14\_P122023 AAGAAAGTAAACAAAGTGGCACAATTAATGCTTGGTTTTCACTAGAGGCGATGACTGTTA  
A\_16\_P00384887  
CATGACACTTAGCACATAAAAAAGTAGAATCCACTTCAATAGATCCTCTTTTACCCTGCG  
A\_16\_P16191372  
TGCTTATGTTTAAAGTTGGATAGGAAGAAAAAATCCACACCAGGAGAAGATTGGTTGTAA  
A\_16\_P03110659  
ATGATTCTCGTTAAACTCGTTTTTCATGCTTAGGAAATACAAATCAGTTTCTCACGACCAC  
A\_14\_P116457 CTGATGTATTAATTATTAATTGGAAAGAGACTGCTCTGGAAACCCACGTTCTTTGCCATT  
CUST\_10060\_PI426210822 ATGGTGGTTTAGGGGATACTGGGGAGGAGACTCTCAGAAAAGAAA  
A\_16\_P00242153  
TGGGTAAATTATTGGCAAGCATTATAATCTTGGCATGAAGATACAAGTGAGATGGGTAGT

A\_14\_P101381 CATAAAGGATGCAGTCACCCAATAAGTTATATAGAATTCCAGGGTGGAAATCTAAGGAAG  
A\_14\_P114869 CCCATGGTAACTAATGCAGTAACTCTCAGGATCCATAAGACCTTTGTTTCTTTATGAAA  
A\_14\_P100392 AACATGTAATAGAAAGGATATCTCACTCCTGCTTTCAAAACATATGTTGTTGGAGCACAG  
A\_14\_P117842 GATAGGTTTGGTTTTGTTTTTATTCTTTTCAGGCTCCAGAAATCACCTGAAGATTTCT  
A\_14\_P138937 CCTTGTTCTTCAATTTTATATTCTATGTGTCCAGTAGAGTATCTGCCACACAGTAGGAGA  
A\_14\_P138299 TTTAAGGCTTGTGTGCAAATTTGTCTCAATCTTTTTTCCCTCCATGATTTTCCATGTG  
A\_14\_P128718 AGGAGTTTAATTGTGATTGTTCAAAGGATCAGTCACAGAATCCCTGAAACTTACAACCTTA  
A\_14\_P123694 GGGAAAGGAAGGATTTGTTTATTGCACTCTTCTGAAATAAAAGTTCTCTATCCTCCCT  
A\_14\_P129786 GAAAAATTTCTTGTGAGCAGTAGCCACTAGCATTGTAAACTCAGGTTGCTGAAAACTAAA  
A\_16\_P18933281  
ACTGCATCCACACTAGTTCTTTCCTAATTAAGAGTTGCAGCATATCACTGAAACAAAAGA  
A\_14\_P134456 GGGAAATTTCTGTTGTGGATAATCAAACATAGCCAATAAATTTTTTTAAACTCCCTTGA  
A\_16\_P18482778  
AATGACCTGTGCCTAAGATGAAGTTGAAGAGAAGTATGGAAAGAACTTGACAGTTCTTTG  
A\_16\_P40395403  
CCCCAAAAGTTTCCAATTTAAATCCCCAAAATCTCCAATTTAAATCCCAGTTATCTGTCT  
CUST\_2690\_PI426210822 TCCATTTCAAAGGATACTGTTTTTCCAACCTTCCACTGAGGTCAGTGTGTC  
A\_14\_P105456 GTTTACATATCCAGAAAATGGCACTGATGATTTTCAGAGATCCAGCGAAGAACATAAACCA  
A\_14\_P201798 TATTACTGATTGGGTAGAGGGGGAAAAGGAGAATGATGATGATAGTTTCCCTTCTGTCTAT  
A\_14\_P200320 CAATCAAGACTCGAGCCTTATCCATGACAGTGTCAATTTTCATCTCTCACTTTGTTCAT  
CUST\_3202\_PI426210822 TAACTGTCTTGTACCAGACTTTGTTCCATTCACCGTATTGGAGGGCA  
A\_14\_P127135 TGATTGTTCTTGCCTTCCATACATTTTTCTTGTATTATGAGGTGTTACTGAAGAGAAGA  
A\_18\_P14135852 TTTAAAGGAAGATGCAGAGAGGAATGTCTGACCTCATAAACAGAGCCCAC  
A\_14\_P103861 CTTGGGTAATGTAGTAAATAAACATGGTCCCCTAATACTATCCTGTTCTACTGCCCTTTA  
A\_14\_P134963 GACATTCTGTGCCTGGTTGAGCACAATGGAATTCATCTGAGCAACACATATATA  
CUST\_4803\_PI426210822 GTGAACAGAAACAGCAAGTCTCTGGAAAAGAGCTCCTTCAGCTGC  
A\_14\_P123983 AAAAGAAAAAATGAGAGACCATTTGTGAAAGAGCCTGACTCATAGTAGGTTGTCAGTATA  
A\_14\_P127827 CTCCTCACACATAAATACAGACACGCTTAACAAAAATAGTATATCATCTTCACAAGGAAT  
A\_16\_P02777239  
GATGACTTTGGCAAATAACACTCACAAATATGACATACCCCTACTGATAAATGCACACTG  
A\_16\_P20400389  
AAAATACGTAATTCCGTGCCCTAATCAAAGAGAACTGAAATTTGTCTAGTTCCGTGATTC  
A\_18\_P22841281 AGTGTTCATGCAGACTTTTATGCTCTACCCACAAGATAAGTTGTCCAAGCACTATT  
A\_14\_P115739 ATATTCATGTTGTTTTCAACATGTAGCGGGGAAAAGGGAAATTATGAGGCAACAATATG  
A\_16\_P19892472  
ACATTCAGTTTTCTCCTCAATTATACCACCAACATCAACTTAATCATTTCCTGCCTTTCA  
A\_14\_P131734 TGTAATAACGATTCACCCTTCTACTAAAACCTTTTTCCACACTCGAAAAGAACATAGA  
A\_16\_P19566103

ATAGTTTCATCCTATGTCAAATCCATAAATCCCTACACATTGATTGAAACCACATGCTGG  
CUST\_2245\_PI426210822 ATCTCTAGTGGCATGCTCCTGGGTCTACTGATCCCCCTTCGAAGGC  
A\_16\_P00717522

GTTATGGGCCAAGAGTATATTCAAGAGTGACTACAAAACACTACATTCATTGTCGTATCCCT  
CUST\_4242\_PI426210822 TGGAGGTAAGCAGCCCCCTGTTCTGGTCTTTTTCTTCCACTTTTT  
A\_14\_P201979 GTTTAATATTTTTCCACCCCCTCAATGAGTTAAGACACTTTAGCCTCACAGTATTCAATTC  
CUST\_3306\_PI426210822

ATTTATTTAACCTGTCCAGGTGGTCTTCTATATGTCAGTTCCAGACTAACCTGATCT  
A\_16\_P17761724

TTTCACATTTGATCTTAGAATAGCCAATATGTTCCCTAGCAAGAATAAGCAGTTGACCCA  
A\_14\_P110083 AGAAGTTTTCTCCTATTTTTGTCTTTTCATTCTCCACATCCTCTTTTTGTTCTAGTGCATGG  
A\_14\_P126235 GAAAGCATGACTTTGAAAAAGGGAAGCCATTCGAGATTTTAAAATGTTTCATGGACTATT  
A\_14\_P108958 GGCAGACAGACTTACGGCTTCAAAGAGACACCTGAAGAACTTGATCT  
A\_14\_P109390 TTTTACACAGATGTAAAGCACTTGTCAAAGAAAGAGGTAGATGAAGGTGTCTGTTAGAGT  
CUST\_9189\_PI426210822 CTTGGTCCCAAGTTCAGACCTGGGTCTTGACTCCATGACTGTT  
A\_16\_P19609512

AAGTGTATTCCTGCTTGGCTTTTACCATAGTCAAATCAATAACAAGGTTTGTGCTTCACTG  
A\_14\_P104502 CTGGGATGATTTTAATCCATAAGAGCACACAGAGGAACATTATAACATCCTGCTTCATTT  
A\_14\_P103695 AGGGAAGACACAGTATTACTCATATTTCTTCTTCCAAATACACAAAGGGTTCTATTG  
A\_16\_P03797707

TGAGAATGGATAGCAAAAAAATTGAAAATAATAGTTCTCATATGTTAATGCAAGGAAAAA  
A\_14\_P139682 CTCAGAGTGCCATTCTTAATTCATCCTCTCCCTCACCCTGAAATATTTAATAAAGTTCT  
A\_18\_P25612753

AACTTGCCAACTACCTATAAATTATTGCAAATCCTACCTCTAGTTAACCTCCTACTCAGG  
A\_14\_P104415 CTCTGTTTTTGGTGAGTTTTATGTATTGCCTGATGTATCAGTATTTTTCTCTCTGGGTTCA  
A\_14\_P108088 TTCTTGCTAAGTCATGATTATCTGAGCAGAGATGATTTTATACCCTCTAGGATTTGTCCC  
A\_14\_P122504 CTTTTTCAGGAGAATAAAGGCAGCCCCGTTGATGACTGAAAATGACAAAGCAT  
A\_18\_P15668711

AATTACATGAAACCCAGCATATAGTTCTCCATCATTTCATTCGAGGTAGTTAGACAA  
A\_14\_P109823 CCTGATTAACAACATTAACACTTGAAGTGTGTTAGATGCTGTGCTTAACTCTTACATCTC  
A\_14\_P132455 CTTTCAAAAATAGGTATTTTTTCATGCCATAAATTTGAATGAAATTAACACAAGTAATTTTA  
A\_14\_P135931 TTTTAAGAGCCTTCCAGCCCCTAAAATAAAAATACACATTCTTAGACACAGACTTCTTCC  
A\_16\_P16191456 AAAGCACTCTTTCTTCTTGCTACAACATCCTCCTCCCATCGGTAT  
A\_14\_P135536 CAGTTATATTGCTCACCAAAGAGGCCATGGTAAATCCAATGACTTCAATATAACCATCAT  
A\_18\_P15067418

AAGTTAGGAACAACAAAAGAGGTGAAGTTTCCAAAGTAGAATTTGCACATTGCTATGCTC  
A\_14\_P106090 GTGACATTTTAATTTACAGTAGTCCAGACACCTAAACAGGACATAGAAATGTCAACTGGT  
A\_14\_P202285 ATTTAAAAAATGTTGTCCATACCTGACATCCATTCACAATGGACTGAAAACCGAACCA

CUST\_10344\_PI426210822 CGTCTTTGGCTTGGCCAATAAACCCCTTTAGGGAAGTAGAAAGAT

A\_14\_P133137 AAATGGCATTACAGACCTATTTATCACATATCGGTAATAATCTCTAAAGATAAGAGATTC

A\_16\_P17560023

CCTTCACTTGAATAGGAATGTCTTTAGGATTGTTATGACTGATATTTGTTGGCTGCACAT

A\_14\_P114997 GATTCTATGCACTTTTAAGCACCTATGCGGAAAATTTGGTTTCTTGTTCAGTGACAAG

A\_14\_P107560 CTTTCATCTCTCATATGAGTGTATCTAGCACTGATTTACACTTCTTGGCCATTCTTCTG

A\_16\_P16191292 GTTCTTATGCTCACAGAAGTCAGAGGCCCGGTTTGTGTTCATATTCATGTAG

A\_18\_P22841650 AACTCAGTCAGGCCTCATGCCTCACGCAGCACCCATCTAAGTAAG

CUST\_10252\_PI426210822

TAGAGAACTGATATTTTTTCTGTTCTTGATGAGGTAATCAGGCAGTCTCTATGTTACATG

CUST\_8400\_PI426210822

AAGAGGCTTTTTTGGCATCAAAAATTTAAAGCATTTCACCCACCTGAAAAACAATGG

A\_14\_P107053 CTTCTGTGGACAGAGAATGAATACTACTCTGAGCAGTTTGAAGGAAAAAGTTAATACTGC

A\_16\_P16227692

AAAATCCCTGGTGGTTATCATGTAAAAATTCGATTTGTTTGATGCAATTAGCCAAACCTG

A\_18\_P13170930

AACCAGCAATGTTAAAACCCAGGTCTAGTCAATTTCTGTTTCAGTTTAGTTCAAGATAGTC

A\_14\_P122056 CTTGTGAAATGAAACAATGTGTCCACATTTTGGATGGATAAAGGATCCAGATTCATTTA

A\_16\_P21640235

TGACAAACCTGTAATCTATCATCTCACTTATGACTGTGCATTTTATTTTCTCAGCAACGT

CUST\_7190\_PI426210822 ACCCCGTGTCTTGACTCTTCTTGCTGTCTCTTCAAGCTATCAA

A\_16\_P01673163

AGTTGATTCATCCAGTAGAGAGAAAGGTATTGCTGTTTTACCATATGTGACCTTCAG

A\_14\_P139807 GCGAGTGCCACTCATAACAAACAGTGCTAATGAAGAACCTGATTTAAATGAAAACGT

A\_14\_P109541 GGATTCTTCCGACTTTCATCCAAGAATTGAGTTCTTTCTGTGAGCCTTTGATG

A\_14\_P138577 TACTCTAGATTAATTAGTGAGACATTTGGCACACAACATCTCTGATGCATTTGCTGGTC

A\_14\_P100061 TCTATATACATTCCTAAAGCATTAGTCCAGCCTGTCTTTATTTCCCCCTACTCAATAC

A\_14\_P104743 TTGTGTATGTGGGTTTAGGGAAGGGGACTTTTTATCCTGATACAGAATATCCATTTATTC

A\_16\_P20243151

AAAGAAATCAAACAAAGATCTGACTATATTCAACTGGTCCTAAATCGTTTTTGGCTCCCT

A\_14\_P127896 TAACACTTAAAAAAGTGGGACCAACATGAGACTGTGAACTTCTTCTTTTGCCAAGATTAT

CUST\_9262\_PI426210822 TCACCAAGTTCATGGAGCCCACTACTCTGTAAATTGTTGTGGATTTGTCT

A\_14\_P127935 CTGAGGAGTTAATCCTTGCAATAAAAAAGAAAGATTCAGAGATGCCCTGAGGTGAG

A\_16\_P20240181

CCTGTGCTATGTTAAAACCTTCTGGTTAACTATGCTGTCCATATTCTACACATTCACGTCT

A\_14\_P112440 CTCTTACTTACCAAAGGATTCTTGTGTCATGCCTTGCTTTTCACTTAAAGATTCATAGAG

CUST\_6874\_PI426210822

AAGTTTTGTTTTTCTTATCAAGTGATTCTTCAGATTATATCTACCTTTACCACAGAAAGGG

A\_14\_P119047 GGCCAGTGCCTACCAAATTCATGAATTTAAACTCTTTCAAAAATTCAGAGTTGGAATA  
A\_14\_P101625 CATCCCTTCAAAACTTGCTTTATTATGGTTGAGGTCAGAAGTATGAATGAAGACATGAAG  
A\_14\_P111569 AATACAGAACCCCGTTTGCTCTGGGAGAGCACAGAAAACAGTCTTCTATCATATAT  
A\_14\_P134038 CTTATGTTCAAGGTAGGCCTATGAGTCAAGAAGATTTTGTCCACTTGACTTTCTGTATT  
A\_14\_P201868 TTTCCAGTTAATGTCCTAAGTTTCTGTCTTTCTTAACCACACTCTGAATTAGCCATCTCA  
A\_18\_P17040818  
TCGTGTTTTTTTTTCCCTACAAAAGCCAAATTTCCACTAATTTAAAACCAAACAAGTGTC  
A\_14\_P134883 ATAAAGGAAAAATACGAGCCATCCATAAATGGAAACGGGTTTACTGTTGGATTCCCTTTA  
A\_14\_P135267 ATCCTTCGCTGTTTCCATTCTTGGTTTAAGATTTCCGTTCTTTCCAAAATTTTCTGAC  
A\_18\_P15008022  
ATTGACCATTCTGGAAACTAAGATTCAAGAAGTGATACAGTCCTCTTTTAGCCTAGTCTT  
A\_14\_P131775 GAGGGAAAGACAGAAAAATAATTCTGTGGGATCATGATCTGAATCCTGAAAGAGAAATAG  
A\_16\_P21065053  
AAACATGGACAACCTAATATGGTCAGGAAAAGCAATAACCTTTAGGATGCTAAACAGGAG  
CUST\_302\_P1426210822 CACTGTCACTGTGGATTTGCATGGGCCACAGGTCAAAGCCACACT  
A\_16\_P20865731  
AAACCAATAGGTCTGTAGTTTTGAGAGCATACGGTTTGAATCCACTTCAAGGAAAATGA  
A\_18\_P14133571 CCTGATCATTAGCCTCATTTCACAGAATGGCTTCCCTTTTGAAACAGTTCCTTCT  
CUST\_3204\_P1426210822 CCTCCGGAGGGTATAGGATTTTGTGATAAGGCACATCCTCCTGAG  
A\_14\_P132625 AATATAGTCTCCACAGCAAATTATTTCCAACCTGAAAACAGGGGACCTATCTATCTGTA  
CUST\_7454\_P1426210822 CATGATGTGGGATTTACATCCCGCCATACTCTGCTGTGAGAGAG  
A\_16\_P18397959  
AAATACCCCATAGAGGTCTATCACCTTATTTTACACCTTATAGACATATGCTCCACGCTA  
A\_14\_P122260 TTTTAATTTTACATACACAAAAAGAAATTGAGTTGGAAGCCCTGCCAGGGTATGAATAA  
A\_14\_P126630 ATTAGGACTACGGCATAAAGCCTATGAGAGAAAACCTGGGCAAAGTGGTAAGTAATTA  
CUST\_1398\_P1426210822 AAGGCGGAGGCTGGCCTGAAAACAGTGCTTCATGCTGCCTGAAAC  
A\_14\_P124135 CCTCTCTGAAGCGACTCTCCTGTTTGGAAACGGCAAAAAAATTTTTTTTTTCTCTTTT  
A\_18\_P14135541 GTAGGTCCGCTTCCCTCATTGAAATTTTCTAGGGAAATGGCATTTCAGACATTGTT  
A\_14\_P201632 GTGTTTGAAGTGAACGAGTCTATGTAGGTAATGAACATTCAGACAAAAGGTGCAGGT  
A\_14\_P101755 CTTCTCAAGTTTCTGGATTTGGTTCCCTTTTCATTTCTGTCAATTCATAACATGACACTCT  
A\_16\_P15334878  
AAACTGTCAAATGAAATTGCCTCAAAATCCCTATTACATGTGTTGAGAACTTGGTCTTC  
A\_14\_P129058 GGACAATAAAGGCAGTGTGTTGTGTTTCTAATTCAGAAAAGACTGGCTCATAAGAATCCA  
A\_16\_P17720685  
AGCCTTAGTAATGAGAACAGAATGAATATTACCCTGATCTATCCTTCTACTTTGCTCCT  
A\_14\_P111510 CTGCAAATTTTGAAGTGTGGTAACAATAAACACCTAAATGAAAGAAAAGACTAGAAATT  
A\_16\_P00483667  
TCGATCATCACCTATTCTCACAAAGTCATCTTCACAATTAGTTATACTTGCCATGGGAAT



A\_16\_P19157519

AATGCTACTGAGATGGATAACGTATAAAGGTATAAAGGCTATGTAACCACTGGATCTGGA

A\_18\_P10052449

ACCTCATATCAATCAACAACCAATTTTAACCTGACAGAACTAACACTATGCAAATCCAA

A\_14\_P123498 CTAGTAAAAGAGTAAGAGAAATTGCTCCTGTCATTTGCTTTTAAGGTGGGTTGACAAATG

A\_14\_P125970 TACATAAGCAGAATATGTATGGGGAGAAAAAAGAAAATGGTCAAGTGAGATTTGGCAGG

A\_14\_P102759 CCTTCCGTATAATTTCTACCATATCTACTTCCAGAGCCTCTGTATTTTAACCTTCCTTTC

A\_14\_P136586 TGAGATGTTTTTAAAACAGATATTATTGGCTGCGAATCAATGAGAAAACCTGTGTGATGGA

CUST\_6639\_PI426210822 CTTTCATCAACATGTGGCAGAAGGTAAGGAGGGCATCCCTGTAAAAA

A\_14\_P123223 CTCCTTCAGATACCACAACAAGCCAAAATCCGAAAAAAAAGATTCTGCCATATCG

A\_16\_P00298938

AGTTATACCACCAGTATACAGATGTATTTCCATACAACCTTCAATCTTTGGTAGACCCAG

A\_16\_P16191448

CCACTATACCATCCTGAGAGGGTAAATAATTCTGCCTATGACGCAGGTATAGAAATAAAA

A\_18\_P13731003

ACCCATTACATTCATGTAAAGTCGAGTTTGTAAGAGATTCTTAGTCAAAAATGTCACCCT

CUST\_8826\_PI426210822

AATGTGAGAATAAGAAGGTGAAATTTTGAATAAGAGATTGAATTACTTATCAGAAACGA

CUST\_5324\_PI426210822

CTAGAATAACAACATCATAACTGACTTATTTTCATCATTAAGGATTTAAATGCAAACCTT

A\_14\_P130274 ACCTCTTCTAGTGTAGAGTTCTGCTTGGCGACATTTTTAAATTCATCCCAAATAATTTT

A\_16\_P18536733

AGCATTCTCCCTTGATACCTCATAAAATTTGCCACAGTTAACTTAAATAACACCCACTG

A\_16\_P00245839

AAAACAATCTCCAGAGATGACTTAATGCTTACCTGAACTTCTCAAAGATCTACGCTGAAT

A\_14\_P124901 CTGAACTAGCCATATCAGTTCTTCTTTCCAGTCATTCAGCATTGTAGTAAGAAAACACTT

A\_16\_P03296617

AATCTCAGTTCTATCACAAGAAGCCAGTGTTAAATTTCTCTTCTTATAGTGGCTCAGAGG

A\_14\_P120148 CTAACAATAGTTTAAACACAAAATACGAACTAGCCCTCCAGGGATCTTTGGGGTCTA

A\_14\_P122026 ATATCATTTCTGGTTGATAGAGATGATCTTGAATGACATGGATGATTTGAGGACTGCTA

A\_16\_P40797717

AGAATCCCCCAGATATTCATTGTTAGACCACTCACTAAATTTCTACTGTGGCATTGTAAT

A\_16\_P19090557

AAAACACACATGAGCACTTAAAACCTTTAAAAACAGCCACCTTATTCTGTCTTTCCCTTCT

A\_16\_P02150909

ACCAGTAACCACAACCTATCTAGTCTTCCTTTGAAATGCTTTTACATCTACCTTGTCTTT

A\_14\_P129059 CTATTTTGGAGTATTGCTTAAAAGCCAGTGCATCTGAATCATCAATTGACCTGCGATAAGG

A\_14\_P139469 TAAGAACATCACAGTCAGGAGTGCTCTTTTGTCTTCCCTTCCCTTTAATTTTGTAAATACA

A\_14\_P122821 AACTGAAGTTAATTTTCTTAATTTACAATGTCTTGCAGTTGATGCTGGGTAAATGTGGG  
A\_14\_P109681 CACCTACCTTGTGCCAGCAGAAAATATTAATAGCACTAGGAAATACTCATGAAGTCACT  
A\_14\_P115373 ACTGAAAAGAGAACAGACAGGTGCTGAGACTGACAAGAAGCAGAGATGT  
A\_14\_P109763 CAAAGAAAAATTTTTGTGTTTCTCTATATTTTTACGTTGTCTGCAATAAATAGGAAAGAG  
A\_14\_P130837 TAACTAACCTTGCTTCCATTAACATGTTGTAGTTTTCAATTCCACTTTCTTGTCTGGAAG  
A\_14\_P132243 CTACACTGTCTTTGCTTAGAGATGCTAAAATGAAAGCAAATTTCACTGCATACTCCCTT  
A\_14\_P103489 TTGTATACATACAATTTAATTTTCTGGCAGATCTTGGCCAAAACCGGGAGTGAACAAATG  
A\_14\_P101737 ACACTTCCTTTTGAAGGTGGAAATATTTATATGTTAGCACTTAGGCTCCTTATCCCATGA  
A\_16\_P00596461

AAAACCCCTTTGTTTGGAAATAAGTAATATTCCCAATTTCTAGATACTCGCCATCTAG  
CUST\_1020\_PI426210822 CTTCATCAGCACAGCAGTGACATCTGGATGTGCAGAGACATGCAC  
A\_14\_P107376 ACTCAACATGCTGCGATGTGGTCACTAACCAAAGTATCTGCAGAATACATTTTTTAAAAA  
A\_16\_P18434867

GGCCACAGAAAACAAAATAAGCATATCCAACCTTCTAAGTTATTACCTACGCAAAGTCACC  
A\_14\_P131814 GAGGACAATTCACACTGATGTGCTCTTTGGATTGTTGAAAAAGGTAAGTACTAGATGCTCTT  
A\_14\_P114511 AAAAGTAAGCAAATCCCCTAAAATAGGGAAGGAGTATTTACCAGTGACATACGTTACTGA  
A\_14\_P202049 GGAATTGCTGGACATTACACTTGTTTTTAGGGTGTGCATTTTACAGAGGTTTAAATAC  
A\_16\_P00685192 CTCTCCTCACACTGACCGTGAGAGCGAGTGCTCCTCATCAACAAC  
A\_14\_P136863 ATTCTAAGCGTTGCTATCAATTCTACGCGTTGCTATCAATTCTACTGATTTCCCTGATCG  
A\_14\_P200280 TCCATTCTCCTCCTCCATTCTTCTGATCATCTGATCGCATCTAACTGG  
A\_14\_P105507 GCAAAGGCACTACACTGTGCAAATTACAATGCATTTTTGTAGGCAAATCCCATTTTATTC  
CUST\_2723\_PI426210822 GATCATTGTACACAGGGGCATCATTGTTCTCAAGCTACTAATGCCCTTAAT  
A\_16\_P01859415

GAAAAGTATCACCCCTGGAATTTTAGCATAACCTTTTCAAACCAACTACTAACCACCAAG  
A\_16\_P15865015

AAAGTTTGAATGCCTAAATCCTTATCTATCAATGAGATCGATTAAACCTCACCCATTGCC  
CUST\_1066\_PI426210822 CCAGGATTCATAAAGCAACAGCTGGACAGAAACCTGACACTCTGAA  
A\_14\_P105231 TTTGTTTTTATAATGAATGGGACTACATTACCCTCAATAAAAGGTGGACAGTTTACCCT  
CUST\_7637\_PI426210822 GCTTCCACATGGATGTTTTGACAAAATTTCAAGGAAGCAACTGGCTTTGTAG  
A\_14\_P111687 CTGACCTTACCTCATCTATAGGATCATTCTTTTTCTCCTCTCTTTTTTCGGGATAAA  
A\_14\_P124977 TATAGTATAAATATGAAAAGGTGATAAGTTGGGGGAAAACACATTTTCGGCGAAACATCCC  
CUST\_4130\_PI426210822 CTTCAGTCTTGACTTGCCATTCCCTTAGGGAGTTCCTCCTTTCA  
A\_14\_P105544 AATAACATTAGCAGAGAATGGCCAAATATTTATCCTTAAGTGCCTTGTACAGTGTTGC  
CUST\_9357\_PI426210822

TGGTAAAAGATTATTTGTTGCTTAAAATATTTCTTGCTTAAAGTGAGTTAACTGGAGTA  
A\_18\_P16014878

TGCCATTACATAATCCACTTAGAAGTAAGGCAATCTAGGGATGATTTTTAGCAACTAGTGT  
A\_14\_P109874 CTTCTGAGTCCATTTTCCCACATATTATGAAAAATTGTTTTTCCCAAGAAGTGTAAGGA

CUST\_1325\_PI426210822

TTATGCTGTATGTGAATCTTGATCTTTCTGTGGAATGGTTTTATCCTGGTCTTTTGGGA

A\_14\_P129149 CTCCTGCAGGTAATTAATACATTGGCATTGTTGGTCTCTATTATTCTCAAGTGAATGTGGT

A\_14\_P139163 CAGTCTCTGGTTTTTTTTTTTGGCATGCTTGATAGTTTCTGAAAAATTGTTGAGGCTGTAA

A\_16\_P41136875

GTCCTACTGAATGGCACTAAATTATCCACATACTCCTGATAGATTATTTCACTCCCTACA

A\_14\_P124995 TTCATCCAATGAGTCTGTAAAACCTTGTTGAAGGTTCTGAAAGAAAGGAGGATACAGAAGT

A\_16\_P41923130

AGTCTCACCAATTCATACAAGTTGTTTGGTTTGTCCACCTGAACAGTATGATTTTGAAAGA

A\_14\_P130985 AAATGATACCTTTAAGGTCAAATAAACTGGAAAATTGTCCTGTAGTCTGTGCCAAGGAA

A\_14\_P125266 CTGATTTGTCAGCAGTTAGAGAGATATATGGGCCACATGCAGTTTCTCTCAGGTAAATAA

CUST\_1475\_PI426210822 CACTGGGCAGCCTCCCTTCCCGATGGCACCAGAGCCTGGATTTTT

A\_16\_P18223580

AAAGCCAACAGTATTAGCATAACATCTCTCATGGAATCTAACAGAATCCTGAACATTGGAA

A\_14\_P102398 TGTGGAAAAATGCAGAGTTGCGTTGAGTTTCTACTCATAAAGAAGACTGTGTATCATGAA

A\_14\_P124213 CTTCTATTTCTTCTTGTCTTTCCTCCCATTTTCTCCAGTTGCCATGCTACTCC

A\_16\_P20281126

ACATGCTTCTGATGAATCACTGCTGTTAGTATTTAGTATCTCCTGATCCTCATAGTCCAT

A\_14\_P126162 GAAAGTGAATTAGAAATAAAAATTAGTGAAAATGCAGCCACTGAGATGCGGTTCCCTCTA

A\_16\_P02579913

TCCAACATTATGGTAAACACTCTTACAAAATGAGCGAATATGTAATACTAAGCCAGGA

A\_14\_P111815 GTCTGCTGTTTAGATTGTCGTTTACTTCCCTCCAACCTTTTAGTTTATTTTTATTATGTTG

A\_16\_P40368529

AATGTCAACACCCTCGTAAATGTAAAACGGACTCCAATCTTTTCATTTTTCTTGATTGC

A\_14\_P119166 TCAGCCCTCAAAAATTAATGACCATTGCCTTATCAAAACCCAGATTATAAAGATGGCAAT

A\_14\_P135617 CAACCTCTCCCAGAAGTTCTCAGATATTTAAGTTATCCTGCAAGATAAGTATATGCCTGC

A\_14\_P122883

TTGAACAAACGGAACAAAAACACTGAAGACAGAATGAGAACAAGCAGAAAGAACATAGC

CUST\_8696\_PI426210822 TGGAGGAGCTTCTTAAGTTGGGGCCATCAAATCAGTCGATATAATCCAA

A\_14\_P200355 AGAAACACCTGCTTTGAAGTCACATATTGCAGTGTGATGTTTGTATTTGAATAC

A\_14\_P202359 CATTTCATTACAAGCAGGAGAATGAATGTAGGACAAGTGTTAGGAAACATGGCAATAAA

A\_14\_P121131 TTAAATAAAAACACTTTATTGCACAAATCCCACAAAGGTCTCAGGCCCTGGGT

A\_16\_P03315157

AAAATGGGTTTCATATGAAGGTCTAGATACTCAGTTTCTGATGAAAATGTTAGCACGCTGT

A\_16\_P16999550

AGAAACAGATCTCAAAGTAAATCTCTGAAAACCCATTCAAGATCCTGATGAGTAAGAACC

A\_14\_P106238 ACATACAAATATGAACAACTTAAAAAAAATACAAACCCCTTGGATCACATGGGGGCTT

A\_16\_P16191285 TATGAGATGCCACGTAGAGTGGCAATAGTGAAGTGCAGGCCAGAG

A\_14\_P107251 TGGATAGAACGCAAACAACCTTGATTATTTAGGAATTCCTCTGTTTTATGGATCTGGTCTG  
A\_14\_P106386 TCTCTTACAGTGTAAGTTTACAAGTATTTTTCCATCTTAGATCCCACGTGATCCCTTAGG  
A\_14\_P200572 TCAGAGTATTTGAAAGAAAAAGTTAGAAGTTTAGGGTCTTCTAATGGGCCTTCTGATGTC  
CUST\_5565\_PI426210822  
AACAGTTTGACACAGAGCATCTCACCTCTTTCATAGGAAGGAATAAATTCATCAGAAC  
A\_16\_P21212239  
ACATGAGCAAATCTCTTCATGAATTCATAGCCCAAACAAGTTTATTGTCTCTCTTCCATC  
CUST\_1641\_PI426210822 CTGCATGGTGGGGAGCTAAGTATTAGTCACTTTTTCTAGCACTTGTGAA  
A\_14\_P202304 GTGTTTCATAACCTTATTTGCATGCCCAAGTAGAAATCCCAGAGTATCTTTGAACATGA  
A\_16\_P38607547  
CTGGCAAAGCAAAGTTAACTAATGGTCCTTAATTACAGAACTGATGTATCACACATGCC  
A\_14\_P200720 CTGCTGGGTTACATGTCTACGTGATCCATTCCACAGTTTTAGGAATTTTTTTTTCTTTC  
A\_14\_P135809 CCTGGTAGGGACAATAAAGGTTTTGGGTCTTCTGAGACTTTGTGTCTATCT  
A\_16\_P15179624  
TGGTCATATAATTTTCACAGATCCCCTTATAGTTGCTGAAAACAACCTCTTTTTCCCAA  
A\_16\_P19814970  
AAAATGTCCACTTTCAATATGTTTGGTGAAATTTCCCTTGCATTACTCTCTGTGTGAGACA  
CUST\_6517\_PI426210822  
AACACAATTTTATTTATAATCTTATAGCCAAAGTATGTTTCATATACATTGATACTATTTA  
A\_14\_P134803 CTGTATGGAATAGTTTGCTATATACTATTCCATCATCCCAATTTACACACTCGCTTTCCC  
A\_14\_P132391 CTATTTTGTCTGTCCCTCTACACTTCTTTCTGCACATGAATTCTACACATTATCCAAAGC  
CUST\_9782\_PI426210822 CCAGTGTCTGGACCTGTCTCAAAGGCCTGTTTGCCCTCCTCAAAG  
A\_14\_P134034 CTCCAGTTCAAAGCCTACAAAATCTGAGACTGTCATTGCTTTTATAAGGTAAGTTGATT  
A\_18\_P22841061 AGAAGTCTGGCCTTATCTGTCTGTCTCAGGCTTCTTCTCCAAGGTAA  
A\_14\_P130541 AAAACTCCTCATATAGTCCTCAGAAAAAGGAACCATCAAAGGCAGAAACAGAAGAAAGA  
CUST\_10142\_PI426210822 GACTGGGTTGGAAGATGCCTGGGCCTGGCATCTCTTCAAGACAAT  
CUST\_4610\_PI426210822 CCATTCCTGCCTGACTGGCAGTCTTCATTAATGTACGTTTATACCAGGA  
A\_16\_P17631905  
AACTTATGAATGACCTAGTCCTGAAAATCTCTCCATACCCATATTTTGCTGTTTGTGTTGC  
A\_14\_P202264 TTGTGTGAGACAGTTCATCTTGTATAGAACTGGCAAGACCTTCTTGAAATTGGATC  
A\_16\_P15050941  
GCTTACTCACGAAAACAAATTTCTTCTACCTACACAACTCCAATTCTCTATCTCCCAAAA  
A\_14\_P125912 CACGTGATTAGTTATTGAGATTTACTATTCCCTTTTTTCATGCTACCCATTCTGACTT  
A\_18\_P16741410  
AAAGGAAAACCTTTCGAATGTATCAAGAGCAATCCCTGTATCAACACCAAACCTTGATTCT  
A\_16\_P00850908  
AATTCAATACCCACCATTCATTCTAATAGTTTCACACCCAAGTTACTTTAGAACAACCTCTT  
A\_14\_P134199 TTGATGTTTCTCTCCCCACAGAACAATATGATACATCTTCAAAAACCTCAATCT

A\_16\_P01788137

TCACAGACTCACCTCAATAAATACACTATAGTGACAACCAATTACCAATAGCCTCATCTG

A\_14\_P138145 GAATTAGGATCACAATAAACGATAATGCAGGTTCTTCAATGGTGACTTTAATCTCTCAGA

A\_14\_P126243 AATATGAGCAAGTATCATGTAGGCATTTGGGAACTTGATTTTGAACACTCAGCAACATC

A\_14\_P131678 TAAGAGTCACTGTAGAGGGGTGCCATGTTGGAACAATTTTCAATATCACAGATACAG

A\_14\_P132318 AGAAAGAGGACAAGTCTGCATGGAAAGATAATCGCACAACTGAGCCTTCT

A\_14\_P132503 ACCAAAATGGTGCAAGAAAAGAACATGAGGTATTTATAACAGTTGGTTTGAACAAGTGCA

A\_16\_P36230421 ACCTTGTGCTGATCAAACCTTTCCGCGTGGCTTTTTATGACACTGTAAACAATTACT

A\_14\_P109776 GTTACATTGCAGATTTTAAATGTATTTAATAAATGCAACATGCAGATTAAGTGCAGTGTAT

A\_16\_P58424211

TGCGTATGTATGAGTCTTCAGTTTGTAGTAGTCTGAGTAAGAAGTATCAATTTGGGAG

CUST\_4919\_PI426210822 GAAACTGCCCTGCAGGCAGAAGGCCACATGCTCTCAGCACCAGTC

A\_16\_P17196631

AAGTTCGCAACGCTAAATAATTGTTTTCTCCTTAAGCCTTTTATTTACCTCAACTTT

A\_18\_P10526568

AGACCCAAGACACCAATATTTAAGGAGGCAGGAAAATACATATTTACAAAGATTCCCATC

A\_16\_P15949232

TGTTCACTCATCTTTGTCTAACAATTTTCAACTTTTGTGCATTAGACTGCTTAACCCACC

CUST\_6781\_PI426210822 GAGATGTCAGGACATTTTAGAAATCTGATGCCTGCTGTTACAGGCCTGT

A\_14\_P133017 GCCTGGATCTGTGGTTCAAATCGTTCATCCTGAGAACTGACAAAAG

A\_14\_P108281 GGTTGCAAGACCCTTCGAACACATTCCTGTATAAAGTATTTTGCCTATTTAAAGAAAC

A\_14\_P121456 TGGTTATTGAAAATACGTATTTATTTATTTATGTCTGTGAATTTTGCAGGGACACTTCTC

A\_16\_P00685486 CTCAAATGCAGCGTGGGATTTCCCTTTCATGAGGTCAAAGTCAAAGGTAA

A\_14\_P138591 TACTCACAAAACCACTAATTTGATTTGTCTGGTCCTTTATAAGTCGCAGAACGAGAGTA

A\_14\_P135527 ATTTTAACCAAATTTCTGGCAAGTTGATTCCTCAAATATTACCTCGTTGAGGTTGGGTTT

A\_14\_P130256 TTGTTATCTCTGTGTTCTATTTTCAGGATGGAATGGGAAACCTGAGGATCACAGAAAA

A\_14\_P119388 ACTAAAATTTGTTACCACATCATTGCTTCCCTTCTACAGGACGAATTGAGGCTTAAACTT

A\_14\_P109440 GACCTTACAACACAGTCAATTTCTTTCATATCAGTGATAATGATGGCTAGACATAGAAAT

CUST\_2073\_PI426210822 TGAAGATGCCAAGTTAAATAGTCCTTTGGAATGAAACAAATAGTTCCCCTGGG

A\_18\_P15509515

GCCATTTCTTGCAAGTGGATTCTTATAAGAACCCTTCATTCAAACCCTCTCATAAACATCT

CUST\_4065\_PI426210822 GTGGGATGAATGGGGATTCCCATGTTTGTCTAGTTACATATGGCCAA

CUST\_6689\_PI426210822 TGTTAGCTCCAGAGTGGTGTATGGAGCAGGGAGGTATCTTGTAGCT

A\_16\_P15918267

AAAGGAAGTGCCATTTTAAAGCATCTACTGTAAGTTCTCAAGTTCAAACCAATTCCTTCTC

A\_16\_P15119497

TCTAACCGATCAAAAACATTATGGATACAGTTTACCTCAGCAATAAGTCATTCCCAAGAC

A\_14\_P134895 CTAAGAATTGAGTGTAAATCTGGTGAATTTAGTGCTTCTGTAACAAAGGACGTTGGAGAA

A\_14\_P121058 CCAAGTATTCATCTAGGAAGCATGTTTCAGTTGATCAGACAGAAATGAAATTGCTGGTAAA

A\_14\_P111458 TTTAGTTGCTTAGGCTTGTAAGACCCATACATCTCTGTTTTCTTTCTGAATTCTGTTC

A\_14\_P132383 GAGAAAGGTTCCAATTTTTGAGCCATAGGACAACTCAGCAGCAGTGAAAAG

A\_16\_P31247642

AATTTTATTTAAGGGCAGCGAAAATAAGAACTTGACGTAGATGACCATTACTTGACACT

A\_16\_P16865758

ATCCAAGATTTGCCTACTAACAAGATTTCTGACACCAGAACTTCTAGATTGCCTGAAG

CUST\_4775\_P1426210822 GCACTCTTTCTTCTGCTACAACATCCTCCTCCCATCGGTATG

A\_14\_P102185 CTACCTGTATTTACCTGTTGTCACCTTTTCCAGATCCGAAATAACTGAATGGAGTCTTAT

A\_14\_P126724 CTCTTTACAAAAGTAAAGTGAGAATCCTGCTCTCTAATACATCTGCAAGACATCACCCCT

CUST\_4121\_P1426210822 CATTTCATAAGGATTTATGTGCCTTATAGGCCAGTGTGGGGTAAGGGG

A\_16\_P16770873

ACAACCATGTAAACGCTATGAAAACCTCTCATGTCAAGATGTGCTATCTTTAGAACAGGAA

A\_14\_P125951

AGTTAAGTAAAAGTGTGAAACCTGGACATGGGTTTTTAAACAAAAGGAAGAAGTTCCTT

A\_14\_P139650 CAAGTTGGAAAACCTAGAAAGCAACAGAAAACACAATAAGGTAAGTTCACCTGGG

A\_14\_P123042 CACTTGTTCAAACCTCCTTTATTTGATGATTTAGAAAAGACACTTGGATATGTGCCTTGG

A\_14\_P124735 TTTAGATAAAGTTAACCTTTGTTTCATTAGTAGGCACTCAACCGAGAAGTTTCTGGAGAGT

A\_14\_P121700 TCTATTTCTGCATTTACTTTATCCCTTCTTCTTCATGCATACACATGCACCATAACAGT

A\_16\_P20883161

AAAAAAAAGGTTTCATGATTGGGATTATTACCTTATGACGATATATTGGGCAAGCCTCGG

CUST\_481\_P1426210822

TGGATTTGGCGATCAACCAAAGCAGAATAAAATGTTTTATCCCAACCTTCCTTTTT

CUST\_6006\_P1426210822

GATTATTAGAGGAACTGACTTTAAAGAAGTTTCATAAATTTGCAGCTCATTAATTTTAAT

CUST\_6988\_P1426210822

TAAACAATGTAGGGGTTTGGAGAAAAATGCTAATTCCTTATCTCCCGGAAAAGG

A\_14\_P137102 CCTATATCTCGCATGTTGGAGTCACTCTCTTCTTGTCTGTATTTCCAAGATATCTATCT

A\_14\_P130442 GGAAGGGCATCTTTTTGGATCAAAAACAGAATTACTTTTTAGAGAACTACAAGCAGATC

A\_14\_P104566 AAGACCTTGACTTTCTTCGAGATCAATTTACTACCACAGAAGTCAGTATCCTTTCTTAAA

A\_14\_P200445 GCACATTTCCCTCTACATATGCAAATTCCTCGGATGGTGTAAGTTGTGAATTTGAG

A\_14\_P102982 ATGTTTAAAGTCATAAGGATTCTTACCTTTTATATCTGCCTGAACTGTTCTAGGTGGCTC

A\_14\_P137243 ATTATGTCTGGCTGCAGCACACTCTGAGAAAGAACTTATCCTCTCTACACATAAG

CUST\_8856\_P1426210822 CACAGCTGCTGTGACATCTGGAAGCATTAACTTTGTTGCCAGC

A\_16\_P01177130

GAAGACCCAATAATCTCATCCTGCTTTTAATGTTCCCAATACACCATCAGAACTGTATTA

A\_16\_P16828970

ACCAATTATCTCTGTCTGCTCATACCTTAAACATGCTTACCTTAAAAATTCATCCTCAGCC

A\_14\_P138355 AAATAAGTGGAGTTGGTGGAGATGAAATTGGATGTATGTAAGTGAAATCATCTGTGGATT  
A\_14\_P119593 TTTAAAAGGAAACTGCTACATACAACCAGGAGAAGTAACTGAAAAGCAGTATTGCTTTGG  
A\_14\_P139799 ACTAGCAGTTGCCAATGAAGAAGGCTTTGTTTCGATTGTATAACACAGAATCACAAAGTTT  
A\_14\_P107776 TAAGTCCTTCTTGCTTTTCATCATCTCCTTTTATCTGTAAAAATTGATCCCTTCACCTGAG  
A\_14\_P104154 AATAGCATCTTTCATGCCTGTATTATTCTGCACTCATTAAACTCAGGCTGTTGCAATC  
A\_16\_P18282667  
TCCTCTGTGTTTGCTTTTAATTCATCTACTGATCTAATCTCTGTCTGTATTACCAAGCC  
A\_14\_P125965 GCAGTGCATAAGAAAATCCTACAGAAAATGCCGTTAACTTACTTGGATGAAAATGTTTTTC  
A\_16\_P16963310  
AAAAGAGAACACAAGAACTACACATGAATGACCTTCTACTAGTTGAAAAGAAAGACCTG  
A\_16\_P18611127  
CCTTTTCCAGACTCTTCTTCTACTTGCAAACCCTCTATTCAAACCAAAGAAACAATTAAT  
A\_16\_P19077094  
TTGCAACTGCAGATAAGACTAATGGTTTCTTTGTGATAATGAGTTAAGCAGCCTTGATGT  
A\_14\_P127761 CACATCGTTACATGGGATAACACCGTCTTTTATTGTTCTTTTATTGCTATGTGATCTCCT  
A\_14\_P135109 ACTCCCTGTGAAATTAATACCAGGGCTAATCCAGGAAATCTAAAACCAAATTAATGCCTT  
A\_14\_P134357 CTATTGGCCTTTGCAGTAATCAAAACAAGACTAATATTGGCAATATAATCAGCAGGCACT  
CUST\_1447\_PI426210822  
TCACATGTGATTAATTTGAGTCACTGTGAACATCTCTCCACCTCCTTGACTTTAC  
A\_16\_P00040764  
AAACAAAAACAAACAGGAATCCATATCTTCCAGAAATATCACCTGGACTCTAGACAAGTG  
A\_14\_P117872 GCACCTAGACCAATCCTTGTA AAAAATTGGTTTAAGTAAGGATTTAAGGTCAAACCTGAAA  
A\_16\_P02043258  
TGCAGATCACAAATCATCCAATATTCCAGTATCCCAGTATTCAGAAATAACAAACGTGCA  
A\_14\_P104195 TGCTGAAGAGAAATCTGAAACTTATCCCGTTCTGTAAATTGATCCTGTTGCTTTCTTTTT  
A\_16\_P02736919  
ACCACGGAAAAGAAGTTAATTTATTATCCACAGTGTATGACTAAACAAAATCACTCCCC  
A\_16\_P16191498  
AAAAGGACAAAGTAAAACCTCCAAGTTGAACTTAATGGCAAGGAAGTGCAAAATGAGACT  
A\_14\_P124549 CTCATGAGACTGAAGTTGCATATTTAATACCCATGTGAACCAGTTACCTTTGCTCTATTT  
A\_14\_P113374 AGTTGCCAGTGCCACTTTTAAAGAAGTGAATCACTATATGTGATGTAAAAGTTATTACACT  
A\_16\_P00238751  
ACTCCAATCCAAAAAGACTAAATCAGAAGCATTTTCACATTATTCTATGGATGTTGGCTGA  
A\_16\_P38342128  
AAATCTAGCCATCTCACAGTTTTTGAATCTTGTGATCTCTAAGTCTCATGGTTCCAAAC  
A\_14\_P108273 TATTCCCAAGGCAGATCCTTAAATAAAAATATATTTTTGGACAGCCACATAGCAGAACCGA  
A\_14\_P113808 ACCTGCATCCCTATGTAAAAACGAAGTTTAGAATATAAATAGGCACAAGGGACAGAAAGT  
A\_16\_P03742349

AATCTCTTTGAAAACAGAATCCATTTGATACCCCACTATACCAATTAGAGTGTGCATGCAC  
A\_14\_P129151 ATGTTTTAAAGCAAATCCCAACAACCTCAAGTGATTTTCATTCTGTATCCACCTTCTGTA  
CUST\_8524\_PI426210822 ATGTAGAACAGGTCCTCCTCCCGAGATGCCAGCTCAGATGTTAA  
CUST\_3332\_PI426210822 GGTTGCCTTGACCATCTCCTCTGGGAGGCCATGTTGTGCATAGCT  
A\_14\_P111909 ATATTCCATCATTCCCCTTCTGCCACAAGAACAATAATTCAAACCTTATGCACTGA  
A\_16\_P17996457  
GCCTGATGCATACTTCTGTCTACAGTTAGAAAAGATATTTGATCATACTGAAGTGCAAG  
A\_14\_P129634 CGTAAGGTAAAAATCGAACCATGCTGTAGTCATCAATCTACAAGTTGTGGATTTCAAGAA  
A\_14\_P129591 TTTGGTTGCTTTTCCAACCAAATTATTATATTAGCCATGGGTAATTCACCTCCCAATTGG  
A\_18\_P16608717  
TCCTTACATACTTAATCTGCAGTTTCTATTACATTACATCCCTTCATAACCTCAAGAACT  
A\_14\_P201079 CACAGTCTTACCTTTGTAACCTCAACTTCTAGAAGTTCTGTGAAAACCTGAACAGCAAACCT  
A\_16\_P00498603  
ATGCAGAAGACTTCGTGGTAATGTTTCAGTATGACACAGTAACTCGAGTGTCTCATAAATA  
A\_14\_P124951 CTAGCCTCAGATGTCCCTTTTTAGATAAGTCATGTGAGACTTGAACGTGTTGTCTC  
A\_14\_P105147 TATTACTTATTGTTCCCTGATTACAGAGGGATCGTCAAACCTACTAGAACCTCTAGGTTTC  
A\_16\_P21474033  
CCCCCTTTACTTTCAAATTTAAATTACCTGCCAGACCTTTATTTCAAAGAACCAGTTAA  
A\_14\_P100538 TATTTTCACTGAGAGAGGAAAGAGGTGGGAACCTATAGTTTGAACCATATGAAACTGTGAA  
CUST\_1195\_PI426210822 TCGGTTTGGTTGCAGAGACTCTAAATATGTGGGGATCTCTCCAAAATGT  
A\_16\_P19098619  
TGCCCAACAGATATCATAATCTGCGTTAATTATGTCTACCTGGAAACATTGTTTTGTGTG  
A\_14\_P134733 CCATCAAACATCTTTTTACAACGTTACTAAAGATCAGCCACGTTTCTACTAAAAGGTCA  
A\_14\_P139200 AGAAAGGGGCATTTCTAAGTTATTTGATTCACTTCCTTTCCCAAGATGTCTCAATTGCT  
A\_14\_P122812 ACATGAATTCAGATTAATACTGTTGAACTGCTGTGCAGGAAGGAACATGTCTCTTAAGT  
A\_14\_P105305 TAGTTGAAGAGAGGTTGAGAGATTTATTTTTTCTAAGGAGAGGAAACTGTGGGG  
A\_14\_P201855 AATAATTTTTCTTTAAAACTCAGATATAGAATCATTCATACCTCCCTTAGGGCCTCCTC  
A\_14\_P109941 CTGACTTTTCTCTGGAAACAGTATAATGATCATAATGAGAATGAAGACACAGACCTCAT  
A\_16\_P20808301  
AAATCAACCAGTTCTCTATCAAAGCCTACCAAACATCTGTAAATTACCAACCACTAAC  
A\_14\_P117713 CTGGTTACAAGTGAGAAGGCCCTTTTTCTTCTCCCTCCTTCTTCATA  
A\_14\_P139723 AAAAATCTTCAAAAACCTATTAATGGATATCAGCCTGTTTGTGAGCCATTGTCTTCAGAT  
A\_14\_P123453 TAATCCATCCACTATTTTTAGGAATATATTGCTATTCCCCACCCATAGCAATTGTAAGC  
A\_14\_P111363 AAGTAAATGCGAGACAGTAATGGAAGCATCCTCTCTATGGATTTACATTGCTATACTGAG  
A\_16\_P58424436 ATAAAGGATGTGTTTTCCGGGGGAAGACAGGTAGGGAGTGGAGAGA  
A\_14\_P121312 CTCCTTTAACCAAAGGTATGTCCTCTATGTAGGTAGTTTATCCTTTGAAGAACCCAGTG  
A\_14\_P136141 CTCTCAAATATAATATGTCCTATCTGGAAAGCCGTTCTCCCTGAAAAAACGTGTATCTTT  
A\_14\_P120683 AAACCTGGGAAGTCAGTAGTTGGAGTTTTTTTATTATTCGTTGGAGGTTTTTTATTGCAAC



A\_14\_P107967 TTCCACTGAATGTAATTCCGTAACATCTCTAAAGGTCTCTAAAGGTCAACAGGTCTGAT  
A\_16\_P18021389

AAAACATAATTGTGGGATTAATGATCTCAGAACGTGAATTCAACTGTAGCACCTAACAGG

A\_14\_P127568 ATGTGAGTAGGGTAGGCAAGATGAATGTTATTTCCCTTGACTAGATGATGTTCACTGTTT  
A\_16\_P02654715

ATTGTAAGGGGAGACTCAAAATTTGCATAGTGTAACAAGACCATACTCAACATCCAGGATC

A\_16\_P17332238

GCTCAATGTACCCATTGTAATTTTCTGTCAGAGTATCAATAATTGCACATTCAACCAGA

A\_14\_P111816 ATCATTTTCTCTTCGATCCACCTCGTCATACACGTCCATGGCGAGTT

A\_14\_P135614 ACTGAAAGAGAGCAGGATCTTCATGCTCAAACACTCTACTCACTTCATTACTATTTTCATT  
CUST\_6652\_PI426210822 CCATCCCTTCTCTCTTGTTGGAATCCTCTCCCTATGGTTTTACATCTG

A\_14\_P107732 ATGAATCAATGATTCTGTGTTGTCCATTTTTCCCTTTGCAATCTTTTGCCATCTCTTCATT

A\_14\_P103237 CTGGAGAATGACTTGCTTTGACCAGTGAAAGTGAAAGTTCTGGCAGCAAT

A\_16\_P30952539 AGCATCTCTTCCCTAATCGACTCTCATCTGGTGGTGCAGAGATGTT

CUST\_7542\_PI426210822 GCCACACAGAGGGGCCTGCATCTGGGTCTTTTTTACAAAGCTTTT

A\_14\_P137817 TTCAAAAACCTGTTTAACTGCCTTAATAAGAATGGACAGTCTGCCCATACAGAACAAATT

A\_14\_P100943 CCCAGTTGAATGCAATGATAACAGAAAGCAAGAGAAGTGTGAGAACTCTGAAAGAA

A\_16\_P00729687

AAAAATGCATACCAAAAACCTCAATTTTGGTTAAGGATTTTCCGGTATTCTGTGCTC

A\_14\_P126696 CCAGCCATGTGTATGTATTTTCATTAGAATATGAATGAGAAGCCCTTTGGGAGAATTGTAT

A\_14\_P109508 AACAGGTAAAGCAGACTTACACAAGATAAAGTTATCCGTGCTCTCTGCAAAAAAAGGAC

A\_16\_P03672472

AAAAAACCCCATGTTTCATGCTACATTAAGCCTCATGTTTCCATTTCTCATTTTACTGCTT

A\_14\_P138876 GAATATGTGACCATCTTCAGGTATGGGATTTCTGAACGTTTCAAATTTCAATCAATGAGC

A\_14\_P105971 TCTCTGGGATAAGAGAGTCCAGATTGATGTCAGAAAGAAGATAATATTTCTGTCCAAACT

CUST\_6844\_PI426210822 GGAGTGCGGTATGGGATTCAGACTTTTTATCAGGTAGGCAGTAAGTGA

A\_14\_P106192 ACACAGCACACCTAATCATTGGCAGAGTGGTGTGAAATATAGCATTAAATACTGGCAT

CUST\_8157\_PI426210822 ATGCCCTGAGGGACTGATGTCACCCCATGTAGGAAGACAGATGA

CUST\_3056\_PI426210822

TGGGCATAAACCATGTGCTTTATAGAAGTCAGTATTACACAAAGCCTTGATAATTTACAGC

A\_14\_P104030 GTTATTAAGTTGAGACAGATGGCCAGTTATGCAAAAATCCCTCATATCTGATGCCTTTTT

A\_14\_P129177 GTTTTTCTCATCAAACAGGCTGGTTTTGGTTATGGATTGCCCATATCACGTCTTTA

A\_14\_P105379 CTATGTGACTTTGGACAATTCCTTAGCATCTTTCATACTCCAATGCTTTGTGTGAGATGA

A\_16\_P19612228

AATGAAAATTGAGTGTAGAAATGTGAGTCCTCTAGAGTAACAGTTGTGAGATAGTCCAGC

A\_14\_P139668 AGCGCTAAATCATTCTGGAATTTCTTTATTTGAAAAACAGCACTTTTTGACACCTATGCCA

A\_14\_P129274 ACTAACATTTTCAGGAAAGTCACCTACTAATGATCTAATGATGTCTGCTTGCCCTCCTTAT

A\_14\_P113275

CCAGAAAGGAAAATGAAAAGTAGTATCAAGAAAGCAGAATGAGGTCATCATAAGAGGACA  
A\_16\_P21257995

AAAAAAAAGTCCAAATTCAATACCATCACACACATCCTTTAAAAAATACCAGGACAAAA  
A\_14\_P106349 CCCCATCATCTGCTTACATGTTCCCAAAAAGGCTTTTAACTTCATCATTACATATAAC  
A\_14\_P115618 CACTTTACTGCTCATTCTTGAATGAGTCTCTTGAATATTCTTTTCTACCTTCCTAACTG  
A\_18\_P22112349

TCTGGTAAAACCTTACACTCCTTACTTTAGAATGCATTCACAAATAATCTCTGTTAGCCTC  
A\_18\_P14134433 ATCTGTCAATCCTCTCCACACCCTTGGGACCCTCAAATTGTTTCT  
A\_14\_P200938 ACATATTATACCTGTTGACTTAATAGAAAACCTCCCTTCTGGGGCCCTTATTGTGTTTAT  
A\_14\_P109128 CAGTCATAACAAGTATGTGTGTAATGAAAAGGCACATGCTTGTTTTACACACACACCATC  
CUST\_3891\_PI426210822 GATCCTGCCCTGTAAACATGCCAGGGGTCTCTGAGGATGGATGC  
A\_14\_P202095 TATGATCTTCACTAGGATAACAGGCCACATGTGAAAAGACTTATGCACTCTGATAAAG  
CUST\_5869\_PI426210822

AAATGAGTCTTTACAAAGCAACCAATTCCTCGTGAGAAGTCTTTGCATCTCACA  
A\_14\_P122628 AATTGGACTTAACTTCCCTTTATATGTCTTTCATTCAGATCAAACACCGTTTCTCTTCTG  
A\_14\_P134746 GTGTATTCTGGTAAAAGCAGGTGGTGTGATGTTTCTGGATAGAGGAAGGAAG  
CUST\_10341\_PI426210822 GAATGCTCAGGATCTCCTTGGCAACGTGGGTGAAGATACCTGCTG  
A\_16\_P58424520

CTAGAAAATCTGAACTATATCCTGATGGCACTGAGGAGCCACTGAAAGTTTTTGAAAAG  
A\_14\_P120242 AGCCAGTTACACTAACTACTTCTACAGTTGATTGTAAACTTTGGTTTATTTTTATTTGA  
A\_16\_P02973489

GGTAGAGGACGTCTTACTATTCATTTCAAGTTGTTATCAATTTAAAACGCTTACTGGTGCC  
A\_14\_P113562 TTTTTAAATCTTCCATTACAGCCATGCCTTTTCTTGGACATCCAGAAAAGGTTCC  
A\_16\_P30952471 TAAAAGAGCAGTTGTTCCATCTGGTGCCTTGGTACTTTCATTATTGCCT  
A\_14\_P120080 CACACAGAGAGGCTATTGTGTGTCACTTGGTGGGTTAGGAACAGAC  
A\_14\_P102174 ACATGATGTGTAATTCAGTTCAGCATATGTTTCTTCAATTATGAAACCACTAGCAATCCC  
A\_16\_P36782118

TGCTGACATTGCTGATGTATTAAGTGAAGTTCCTAATTGGAAAATTCTATATGACCCGGT  
A\_16\_P03575255

AAGTCAGGATGATAGACAGATTCTAGTGATCCAAAGAATGAGTTCCTTCTCAGTAGAAG  
A\_14\_P129689 ACGTTCACCAACTCACCCTTGAAGTCATCTCAAGAACAAAAGACAACCTGAAAG  
A\_14\_P112050 ATGAATAGTTTTTCGCTGAGATTTTCTTGACAGTGTCTGGATTTGAGCCAAATACTTCA  
A\_16\_P02896934

GGCCACAGTTTACTAGATCTATAAATTCCTCAGAACCCCTAAATACATTGGCTTTTTTAG  
A\_14\_P137003 GATGGTAATCTTCCAGATATTGTGAATAGTGGAAGTTTGCATGAGTTCCTGGTTAATTTG  
A\_16\_P17780287

TCACCATCTTTATTGCTAACTATAACCCTACTCTTTGCTTCAAACACTCATCAAAAACAGA  
A\_16\_P15642471

GGTTTTTATTCTACAAAGAGTCAACATCTAACAGAATCTTCTGAAGGCATACTCCAGTGG  
A\_16\_P58424350

TCTCTATGGGAGTAGTTTCAAAGTCACATTGTAAGGAGTGCCATCATCGAGATATTGTT  
A\_14\_P202072 CAATGACTCCATTTCTGATTCAGTTACTTCTCTGTTTTCTCAGAGCATCTTCCACTTC  
A\_14\_P109236 TCCGTATTCTTCCTTGAAGAACTGTTATCTTTACTCAATGGCTTCGTGGCTGTAAGTA  
A\_14\_P102649 GTTGACGAAATCATTAAGTACTGAGACTTTCGAAACAAATTGGAGGCGGAGAATGAAC  
A\_16\_P41871043

ATTCTCAGATTAGCAGTATCTTCAAGTGACAGGTAAAAGGAAACACAAGTAATCTCAGGT  
A\_14\_P138514 TCCAACAGTCTATAGTTATTAGCCTCTGTGCAACATTCCAATGACTGTTTCCTATTTTCAG  
CUST\_8885\_PI426210822

AGAGGTTAGATAGATGGTGATGTAGGAATCATGGCATCCAGAAAATGAGTGTGAT  
A\_16\_P19418541

AGCACTCCTTTTGAAACCTCACGAAAATTACTGCAATGATCTAAATTAGGGCTTGGAAAT  
A\_14\_P132480 ACAAATGATGTCCCTGAGATTTTATTCAATGAAAAAGAACAGCCTTGATAAAACCACA  
CUST\_8769\_PI426210822 TTATTGGAGCTGAGACTTGTATAAGAGCCAGACCTGGCACTTTAAACAGC  
A\_14\_P123212 GAAGTTCTATCTTTATTTCCCTTATTTTCCTCCCTCACAGTTGAGTGGATACTTTGAGGA  
A\_18\_P22840515

CACTGACCAAGCACTAGATACCCCACTGAATACTCCATATACATAAAAGCACTGAAGTAT  
CUST\_5446\_PI426210822 ACTGAGTGCAGGATGCAAGGAATCTGCAATCCCAAGT  
A\_14\_P200695 CAATATTGGCAGGGCTGTGATAGAAATTAGTCCTTCAGCAAGTCTGAAGTATAAGTTAGA  
A\_14\_P131030 AGAAATCCATCTGTGAAATGTATTTGCTTCATAAAGTGCACAATTTGCCACAAAGAACAC  
A\_14\_P125801 GTTTGTTTTAGTTTGTGTTGACAGTTGCCAGACTATGTTTACGCTTCTGGTTCTACTCAG  
CUST\_3406\_PI426210822 ATCAAGGTGGCCCAAATTGTGTCACTATTCTTTCCCTTGTCTTCTCCAC  
A\_14\_P133928 ACACATGAAAATAGGCTGTGCTTCTCTTGAGGCAATAATTGGATCAGAATTTTAGGATTT  
A\_16\_P18064836

ACTGGGCTTAATATAGGATTGCATTTTGATACTCAATCCATATGCTTTGTGGTAAGGTCA  
A\_14\_P108394 TAATTCTTGTTTTGCAATTTCCATACGTAATTCCTGAGAAAGACAACCTGGTAATCAAAGC  
A\_14\_P108683 TTAACAAAAGATAGTTTTTAAAAGGAGAAAAGGGTTCCATGAGGTGGTTTTAATGTGTCT  
A\_14\_P133673 GGTGAGCAATGGAATTCACAAAGTTGGACATTCCTACTGTTTCTGAAATAGAAAAGTG  
CUST\_4769\_PI426210822 CTTACGGATGCCTCCCTCCCTTCATGACTCACTGTGATCTACAA  
A\_16\_P20251542

CAAAGCCTCATGATTCTAAAAGTTTGTGTAGTCTAAATGTGAAACAGTGACATATCAGCA  
A\_14\_P133002 CATGGTAAATCGTTCTTCCCTTGTTTTTTCCAGTTCAGACATGAGTCTTGATTTTGT  
A\_14\_P104946 AAGGATTTCCCTTAAAAAGAACCAGTGAGGCAACAAATGCTGTTATTAATAATCCCTAAGC  
A\_14\_P118988 ATTGTAAAGCAGAGTCTACAGCAAATAGTTGCTGAGTTTACATCTCAGTTCAGTAGACTG  
A\_16\_P18274191

AAAAGATGAGCCCCAAATGTTTAATGTAACCCTTGTTTATAGAAACACCCATGTGTGTAA  
A\_14\_P135883 GTCATTTCTCAACTGTGATATTGTCTTAATGCCATGGGCATTTTCAGGGTTAACAAAATT

A\_16\_P01393009

GGGCTGGTTACAAATATGAATTTGGTTATAGGCGAGACATAGGATTAGTTCTAAGGCTTT

A\_14\_P136575 TCCCTTACTACTTAGTGCTGTTATGAATATGTTCAAGTGTTTTCCGTAAGTCATACCACG

A\_14\_P138482 CACAGACAGGAAATATACAAAAATTAATAAAGCACTTGCTCTTGCCTGGTATCCAGACT

CUST\_8585\_PI426210822 CTCAGCCACCACCATTCCTCAACCTCCAAAGGCTACTGAACAGCT

A\_14\_P137649 ACTCCATCAGAACACATATTAGGTCACAAATTGCTAATAAACTAAATGGGAGGGAGATTC

A\_16\_P21409272

AGAGACCTTACTATGCACATAATCCAAACATCATGAATGAAAGCGTATTATAATGGGGCA

CUST\_1669\_PI426210822 CGAGAATCTAGTGGCTTTTCTTCCATCTGTGTTCTGCCCCTATCC

A\_16\_P16576448

AAGGCATTACAGTTTATTGTTCATCTTGATGATTCCAAATTCACACAAATTACCCTCCAGT

CUST\_6184\_PI426210822 CAAGTTTTGTTCCCATTCGCTGAGGACAGCAGCAAAGGCAGATAA

A\_14\_P106451 ACCACTTTTTTTATTTATAGCAGTTTGTTTTTGCCTTGAGGCAAGATGGTTGACTGAGTA

A\_14\_P123824

CTAGAAAAGAGGCTAATAGGCTGTGACTTTGAAAAGATGACAACTTTGTGAACAAAACCTG

A\_14\_P115277 CCCACCTTGTTCTTGATCATCCACTTGACGAAGCGTCTGTCATAG

A\_14\_P110566 ACAATCTTGATTTATTGATGCCATCTCAGGCAGTTGCCTTTCTGATTAATAGAGACTAGA

A\_14\_P109067 TACAAACAATAGTTGGTAAGAAAGGGGTGTCGCTGCATTTAAACAGGCATAGGAATATAT

A\_16\_P17262509

CAGCATCTCCTTGTAAGTTTTGCAGTTTTCTTAAGATGTCTTATATATGCCACACTG

A\_14\_P105594 ATTTTGACATGTGCCGTTATAGTGCCGGAAGCAGACACTCTTCCTCATATC

A\_14\_P139136 AAGTTAATCAACATATGCAAGTTTGTCTTTCAGTGGGCATTGCACTCGGAACATATTTTT

A\_14\_P129765 TTTATTTTCTGGTGCTCAAGACAATGTAATGCTAAACTGACAAATGGGAATAGTCAGAGT

A\_16\_P35470286

TTTCCAAATCAGACTTTACATTAACGATCCACGATTCTAAACTATCCCCAGTTATCCAG

CUST\_10104\_PI426210822 GGAGCCAAAAGTGGTTGTTCCCAAAAGTGTGCATAAACGTGAATCG

A\_14\_P116999 ATAAAAAGCCAGAAGCCTTTGTCAATCATTCCAACTCTGAAAGCAAGAGTAGTATCACAG

CUST\_1985\_PI426210822

AATTAGAGAGTCTGCTATTAATAAGCAACAGTTTTCATGAGCTTATCAGTCATGCACTT

A\_14\_P113904 TACTTTATGTTTAAAATGCGATGCCACATTGGTTTGTGTTGCTCTTAGTTCCGGTAACCTAC

A\_14\_P119195 CTGAGAGAAGATCTTATGTTTATAAGAATCAGAGAAGCCATTGCCAGAGATCATAAAGTC

A\_14\_P108475 TCACGCCTTCCCTGGATTTCTAACAGGTTTTGCTTTATATTTTACTTTACATTTTTGGTG

A\_14\_P128936 TATGGTCTCCATATCACAGTATCCAGATGCCAAATGTAAGTTTTCTGAAGTTGAATGTT

A\_14\_P111979 ATTTGTCCATGCTCTACTAGAAAATAGCAAATTCAAAAGCACTGTAAAGAAAGCCTTGCC

A\_14\_P129276 AGGTTGGTTGTCTTATATTCATGAGGAAATCTATGCACAGGGAGGTAAAATGATTGCATA

A\_14\_P129238 ACTCTTCAGCATGCTGAGATTTTCTCAAGAACCTAAAGGTAAACTTACAAAATAGGTTT

A\_14\_P109461 TGGCAGTGACAAAGTGCTAGCATTTATTGTTATCTAATAAAGACCTTGGAGCATATGTGC

A\_14\_P106980 CTGCTACTAAATTTAACCTATCCTGTCTTCTAAGAATCTCAGATTCCAAAAGGAGATCA

A\_14\_P122694 CCTGATGCACAGAAACCAGATATGAGCAGATGAAATTTGCCTGGAAATCTCAAG  
A\_14\_P111016 GGTTGAATCCTTTGTCCTAACCAAATCTACTTGGAAAGTAAAATAAATTC AATCAGTAAA  
A\_16\_P40343496  
TCAGCATCTGAGACCTAATTTGATAACCATAACTCAAATATCTCATCAACTGAAGTTGCA  
A\_14\_P201394 ACTTTACTCCTAGGTAAAAGGAACCTTGATTTTTTTGCTCTTACCTGATGCAGTTCTGGTT  
CUST\_8111\_P1426210822 GTATGCCTGGGAAGGAATGTGACATGGAAGAGATTTCCCTTGTCAAAAT  
A\_16\_P02059277  
AAAAAAAAAAAAAGACAATAGCATAACATCTGATTCATCTGAACTTAGAGCACTAGACCTACA  
A\_16\_P15668484  
AAAGCACATACATTTCCATCCATAAAAATACAGCACAAATCTCACTACATTTTCTCAGGGG  
A\_14\_P104732 TTTAAGTTCCCACTTAACTTTAAAGAGATGAGACTAGAAATCTTAGATAGGGGCAGGGTT  
A\_16\_P37431192  
AGTAGATCAACCTCTAACTTCCTTATACGATTACACCTTTGTCTTTGAATTAGTGGCTGG  
A\_18\_P16223697  
TCTTCTTGCAATATTGACTCTGCATATCATCCAAAATGCTATTCAAGACTAGATGCCCA  
A\_16\_P17184332  
AAAATGTTCCCACTCTCTGATATATTACCATGAGTCCCAATGTAGTCTGTATAAGTGGAC  
A\_14\_P200565 GAAAAAGACATAAGAACACCAAGCAGGAATTC AAGAGTCACTGTGAAATAGTTGTGA  
A\_16\_P37602902  
ACAGACATTACCTTAGTCCTAAAGTCATGAGAAATAAATCCATAGACTACACCTTACCCT  
A\_16\_P17706490  
ACCTGAAGCCAGAATTCATAGAAAGAATCAATCTTGTATCTCAATCACATCAAATCCCAG  
A\_14\_P100531 TCATCTGTCTACCTTAATATTGCCTTTTGGGAATACAGTAGAATCTGGGCTATTATCAGG  
A\_16\_P17391397  
ATCTGGTAGGTCATTCTATTGAAGCATTTTCTGACTAAATACAGATTCCCTCAA ACTGCA  
A\_14\_P110076 AACACTAAACATTCCTTTCTTTTAGGAAATGCAAGAGAACTGCAGAATTTTGCACAGTT  
A\_14\_P102762 ACAGACCACATACCAAAGTGACTACGACAAAACCTACCCAGATTTCTTAATGCTTTTAAA  
CUST\_7176\_P1426210822 TCCCATTTGTTTCATCTGGAAAGAAGGAATGTTCTAGTGGGGCCAG  
CUST\_4797\_P1426210822 CTTTCTTTCTGCCACGCCTCCACCTTCCATTGGAGACTCCTATTT  
A\_14\_P107628 CCTCTTCTCTAACTGTGGAAAGACTTTACCTCTACCTAACACAGGAGTTCTTAATTTTAG  
A\_16\_P01006662  
TCAGTTAAGCCAGATGTATTCTCTAAAGGTCGACAGATGTCAAATTTGCACTAATCCAAG  
A\_14\_P202394 CAAATAACTGGTTATGAAAAAGCCAGAGTTCTAAAGTTAAGATGGAAAAGTGAGCCTGTG  
A\_14\_P107382 CCCAGCCTGAATCATCATAGACAGATTTGATTAGGAACCATTGCTATATCCTAAATCTCT  
A\_14\_P104965 CTGTAAATGGATGTCACCGACGTAGAAGACTTCATTATCGTTATTAATTATTGTAGCCCT  
A\_14\_P129014 TTAGAAAAGTTGGAGCAGCAAAGAAGAATAAAAATCTAATGCCTTCGCAATGTTTGGCAT  
A\_14\_P105674 ACTCATTTTATCTTATTTTTTCATCTAGATCAAAGTTTTACGAAGGGTGAAGGAGGAGAAT  
A\_14\_P126540 GTTATCACCCATACACTATGTGCTAGCCTGAAAATAACAGTGGACTATAAACTGAAGAA

CUST\_991\_PI426210822 GTAGTTTAATGTCATACGACAAGAGGCAGAATGTGGGCAAGCTCAGGTT  
A\_14\_P115529 ATTTTCTAAGACACTTCCCCTTTCTAAGACATTAATTTGCTGCTTGAGTTGCCATTAC  
A\_14\_P123774 CTCACAAGGCAAATTAATGGTATTAAACTCTTCAGCATTAGGCCTAAATTAGAGGTTTCC  
A\_14\_P130054 CTTCTCTAACCAGATAGATATAGGGTTCCCCTCTCAGAGCACCTATACTATTCTATACT  
A\_14\_P137115 GCAGTTCAATACCAGATTTGATTGTTAAGAAACGGTCATCCTAAAGACAAGAAGCTTGATT  
A\_16\_P58424252 GTTGGCTATTCTCTACTTCCCCTCTCCAGATCCATTCTCCACCATTATC  
A\_14\_P109999 TAACAAGTGTATCTCGATTAATAACCTGCCAGTCCCAGATCACACATCATCATCGAA  
A\_16\_P03303314  
TCCACATTGCTGTCATTTTTCTATAACCATCTATCCACTTATCAACCCATTTTTTTGATGCA  
A\_14\_P104434 CGGTGTATCCCAGTGCTATTTGAAAATTTTCATAGGGTAACAGTAAATGCCTCTAATCTT  
A\_16\_P02118929  
ACAGAGTGCTTGTCTCTCTAATCTCCAGGACACTATGAAATTTAATCATATGATGAGGAA  
CUST\_256\_PI426210822 AGAGAGACGTGTTTCTATAGTGGCCAAGGGGTCCAGTTGTCCCCT  
A\_14\_P102796 TGAAAAATTGAAATAAATACTCAAAAGTATTTGAAGCCCGTAGAGACAGGCAAGGCCTTT  
A\_16\_P32707886  
AAAAAAAAGTTCACCCCTTTTTAACTAGGAACTAGCATATTTAAATCTATGGGCTCACTG  
A\_16\_P01941165  
AATAGAGGTCTAGTAACACAAATTCACCATCATATCATCAGTTTAAACATCCTGTGCT  
CUST\_910\_PI426210822  
CCAGGTTTTCCCAGAAACAAATGATACTGGATGTAAAGATAGCATCAGGATTAGA  
A\_14\_P107391 GCTATCGAGTCAAATGAAAGCAGGTCAACTAAACTTGCAGAAATCTTCACAAGTTGTTA  
A\_16\_P00685121  
TCGGAAACTCAGTAGGAAAACCTTACGAATATGGAAACTATTTTTGCCATGAGGCATACATA  
A\_16\_P20401940  
AGATTTTTTTTAAATCTGTGCTCCAGAATATCAGATCCCTAACTTTGCTAAACTGCTGGTT  
A\_14\_P132714 ACAATATATGACACAGTGCACATTGAATACCAACAAGGTTGCAACGTTTACATTATAGCC  
A\_14\_P137835 TGTCTGACCTCGCAACATAGGAAATTAACAAAAAATAAATAGGTCTCACCATTGCCTTAG  
CUST\_5108\_PI426210822  
GGTAGAGCAAAAAAAAAAGTAAAGCATCAGGTAAATATTTAATAAAAATGTTTATACATGTA  
A\_16\_P18175100  
TTCCTAGTCATTTACAGTTGCCCAACTTATTTCAACTCCTTTTTTTTTAGCAGATTGCC  
A\_16\_P20864130  
AATGCTACTTGTATGGAAATTGTGGGTATTACTCTAGCGAAATATCTTGGCATTCAAGGA  
A\_16\_P19655137  
AATAATGACACATTTTGCTTTTCTGACCACTAACATCCCTTACAAGACTAACTTTTTTCCA  
CUST\_3313\_PI426210822 CAGCATGGAGGGGCCCTGGTGCTCTCTAAGGTGACCTTGGACATA  
A\_14\_P116308 AGCAACAATAATCTTTTTTTCATAGGTTTTCTGTGAAGACCCTGATTGATCGGTCTTGCT  
CUST\_6704\_PI426210822 GAGGTGCTAGCCACATCTGCTATAGTAACCATGAGAGCTTCCTGAAAAGTA

A\_16\_P16190990

CCTTACCTTTAAAGAATCTGTTGAAATCTGTGGATCTTCCCTAAGAAACACACAAACAC

A\_14\_P105752 GAAGGCATGGGTCAGGTAAAGATATCAAGTTGTTTTTCAGTTTTTGTGAATTCCTATA

A\_14\_P118586 AGAAAATATTAAAGTGAAGAAACGTTCCCTCCCTCGCAGGGAAAACCTTTTAAATACCTC

A\_14\_P110358 CAATAGACCAGAAAGGGTAATTAACAGAATATTTACAACAAAGCCAGATTTCTCCATGGG

A\_14\_P132319 ACATAGATGTCTCTGACTGTTTTACAGGCCTTACCTACCACCATATCCAG

A\_14\_P100279 CTATCTGCATACGTCATCTACCCTACTAGACTGAGGACAGATTAGTGTTCACAATAATC

A\_16\_P01643258

GAAAATATCTGGCCCAATATTCATTAGTGTGGCTTGATCGTTAAACAGTTACCGTGTGTTG

A\_14\_P132237 CTTACCTTAGAGCCACGTTTCATTAAAGATTATTTCTACATCTAGGATTTTGCCAAACTGC

A\_14\_P132459 CGTTGAGACTACTTTGCTTATGGATTATCTAAGACACATATTTATCCTAGTCACCACCA

A\_14\_P105872 ACCAGAATGGAACCCTTTCACTTCAAAAACCTCAGTTATAAAAGTGCCCATGATGAATAG

A\_14\_P135015 TTTAAGTCATAGGCACACATAATCAAGTTCGTTTTTCATTCTTACTTGTCTTTTGGCCTG

CUST\_2312\_PI426210822

TGGAGCCATTTATTTAAGAAAGGAAAGGAAGCTTTCTCTTTTTGGTGACTACTTTGTCA

A\_18\_P15806305

ACTGCTCTCTGTAGAACCATTTGAACAACCTTCATTAGTGTTCAGTTTATGCTCATAGAG

A\_16\_P19974826

AAAAGTGTATAATTTTGAGCAACCAAGGAGATTAGACATCTTTTCTAATGAGGCGAAGGG

A\_14\_P202463 GTTTCCTTAACTGTTTACTTCTTTCAGTGATTGTCTGTGCTTACTAATTTCCATAACCA

A\_16\_P32357701

AAAAAAGTCAACAATTCTAAAACATCCCTATTTAACCATTTTCCCTAATGATGAACGTA

A\_16\_P15212928

CCCCACTGATTTCAAATTTCCAGATACAAAAGGTAGGTCTTCTTCATAAACAGTTGGTAA

A\_16\_P39993305

TCCCCTGAAATTACTTATACATACATGCTAACAAAATACCCCTCATAACAATCAACTGAA

A\_16\_P15887183

AAAAGACCCTCTCTAAGATGATTTTAAGCAAGATCCTCATTTCTAGATCACACAAATCCC

A\_14\_P100419 CTCAAACCTCTTATATTTGGTAGGTGTCAAACACTTCTTTCATGAAGACACAAAACCT

A\_14\_P128335 TTCATTCTATCCAGATCTGCTTGACATTTACCTGGAAGGATGCTTTTCGATAAAGGTTT

A\_14\_P138191 CAAACTTTACCTATAGAGTTATAGGATTGGTGTATAAACACTGAAGAGAAGGCTGATTT

A\_16\_P20633773

ATGAATGACCTGTGTAGTTGATCCTATAAAGAGATGACAATTTACCAAGGCAGTAGCAAA

A\_16\_P21090582

GACACGAGTAGGGAGTGATATTGTCAATTATCTGAAGTTGCCCATCTAGAAGTTATCAAT

A\_14\_P125779 GCTCAAGCCTCAGGCAGTGAAACTGATTAGTTTTTAAATATGTATGTGTAACACCTGTT

A\_16\_P20173083

TCAGAGATTCTAAAATCACATGATCACATTTCAACTTGCTTGTAATGAATTGGGTGACGC

A\_14\_P136473 AATGTGAACCTTAGTGTATTTGTATTTTGTAGAAAATAATGAAAAATTTAATGGAGAAT  
CUST\_6924\_PI426210822 GGAGAAACGCAGATGTCCATTTCAAATCACAAGGCGGCTTCAGTATT  
A\_14\_P119688 TCAGCCCTCATGTCTAAAATGTAAATTGCCTCAGGTAGACAGATTTTATTCACTGTTTTG  
A\_14\_P129788 GGATCTAAAACCTCTTCCAAGTTATGTTGAAACTTTTCTTTGAAATCATCTGCTCTTTTG  
A\_16\_P17808779

CGGGTTGCTAGAATGAGATTATTGCCATTGTAAGTCAATCCATTTGTGTTCTGATGAATA  
CUST\_386\_PI426210822 AAAGCCGATTTCTGTCCCCTTCCTTTAGACATGGACCGGTTACTC  
A\_14\_P122922 CCATGATCCCACAAATCTGTCTATGAGGAGATTCTGAAGTTATAAAATTCCATGATTCTCT  
A\_14\_P104325 ACTAGTTTCTCACTCCCCTTTTTCTCTTCGGTAAAGTCTGTTTTTCATTTTTAAACTCA  
A\_14\_P104583 ATTTGAAAATCAAGACCCATACTGGCTTATAATTTCTAATTTTCATTGTTCCCCCGATGC  
A\_16\_P20114716

CCTGACTTTGCACAAGAGATTCAGTGAGCAATTTCTAATGTCATTTAAATCAGTGGTGTT  
A\_14\_P132867 ACTCCATATTTGCTGGAACAGGAAAGAGTTCTTATATTCCCTCCTATAGAGAGGAAAATG  
A\_14\_P102991 GCAAGGGGGGAATTAGAAACTGCTCTAGAAGGATTTTAAACAACTGGCTG  
CUST\_2873\_PI426210822 TAGAAATCTGCCAGAAAATGTGCTGGCAGTGAAATGGAGAGTTTGGG  
CUST\_10091\_PI426210822

ATATTTGACTTATACGGGAGGTCTTAATGTTTCCGGCTTATTGCCATATTCATATGTAA  
A\_14\_P139673 GGTATAAAATGGGATAATCATGGGCGAGATGGAATATCTAGTCAAATTAATTCAAGGCCT  
CUST\_9376\_PI426210822 CCCACAGGTAGAATGTTGAATGCACTAGTTCTCTGCTATCTGTTTCCA  
A\_14\_P132510 CTAAAGGGGAAATTTTGAGAGTCATTGAAATTCTTATTGAAAAGATGCCACAGATGTTG  
A\_14\_P101560 CAATTCATTCCAATTTTCTGAAATCCATTAGATACAGTGCAACCAAATATGCTCAGTGG  
A\_16\_P01238959

GATCACTTAGGTTTACAATAATCCCCAACACTACGTATTATTCCCATCTCAAAGCAAAT  
A\_14\_P118592 TGTTCCCTGGCTCTTCTTTGCCATCCTGAAAATTTTAAACATCTCAAAAGATCATTCATA  
A\_18\_P22840170 AACAACTAACTGGAATGAGGAGGCAGCCCCTCCTCCATGGTCTCT  
A\_14\_P200549 CTCTATGTTCTATCTCCTCGAAAGATGAGAATGTCAGGACTTTATCATTACAGAACCTCA  
A\_14\_P201631 GAATCGTCAAGGTGAAATGAAATGAATCATTTAATGAGAATCTTCAAACCTGTGGCACTGG  
A\_18\_P12032890

ACAGCCCACTTTGTAGACTTTTCAGAAACAGACCTAAATCAAATGTCCTTACATGTTCTCT  
A\_14\_P127901 ATGAGTTGAGGGGTATTCTGACAAAGAGAAATATACAAACATAGAGCCTTCCTATGCTTT  
CUST\_4231\_PI426210822 CTGCAGCCGTCTGCTTTAATTGTCAGAACAAAGTGAAAGCGAACTCAG  
A\_14\_P117060 AAGTAACTAAGTCTATGTAAAGGAGACAAGAGAGGCTATCAGGTATTTTCTGCATGTGTG  
A\_14\_P137532 CAAAAGACATGCTCCACCAACTTACAATAATTTTCAGGCTTCCCTTAAACATCAAAAGATT  
A\_14\_P138403 GTCACTTAAGGGGTAAGGAATTTAAGAACTGGATGAGGTTATTTCTTCTTTACTCTTCA  
A\_16\_P40400111

AGTGATGATAACCCCCTACAAATAAACAGTTTCATATCTGGGCATAACTAAGCATGAACA  
A\_16\_P19343903

GAACGGGAAACATATGTAATCAAGAAAGTCAGCACTTATACGAGAAAGAAAATGCCATGA



A\_16\_P02726804

AGTTCTGTCTGGAGTTTAAATCCCAATCACTAATATCTCTGAAGTATCTTTGCCATAGCG

A\_18\_P11591219

AAACATCTTGTTCTGCTATTTTTTTCTGCAAATAGGTGAATTTGAACAACATCAAGGCA

A\_14\_P117027 AACCACTTTTGCTTCATTTTGGCTTTCTCCACAGAAAATTAGAAAATGCTTTCATGAA

A\_14\_P135837 CTGTTGAAGTCTAGACTCCTAGGAAAATCCTGATGTCCTGCTTATAAATAGACATCCTAT

A\_14\_P113849 TTCTCTCCAGCAAAGGGTCCGAACTTTTCACCCTGAGTAGCAATGATTATATT

CUST\_2182\_P1426210822 CATTGTATTTGCAGGAGACTGAGACATTTGTGTAGGAGTCAGGTCCAAC

A\_14\_P126420 CCGTAACTCTTAAAATATTTTTTTTTTCAGATTAATGACACTGAGTTCTTCTACTGGAGA

A\_16\_P03656087

CGAACATAATTGAGTAAGCCAGAATAAATTGTTGCATTCTCTACATAGGCCTCCTTTTCCAC

A\_14\_P139923 TTAGAGAGATTAGAACAGGAGAGACTAGCATTGGAAGCGACTATCAAAGATAATGAGTGT

A\_14\_P122721 CAAGTCCACCAACAGTTTCTGTGTCCCACTTCATCTTTAATAAGGTAAGTATGATGA

A\_14\_P113797 AACTGGCTACTGGCTGCTTTAGTTACTAAGTATACATCCTAAGAAAATCTCGTAACT

A\_14\_P103976 TGGTTATATCTATTTTCTGATCTGTATTCACCCACACTTACTGTATCTCTGGATCCAAG

A\_16\_P16121172

ACCAGTATTCTTAACACTACCTCACTGTAAACATTGACTCTTCAGGATACCTTGTTTTTGA

A\_14\_P119145 ATTTTTTTTTTTTAACTTAGACTTTGTGTGGACAGTAATGACCTCACGTTTCCGATTGC

CUST\_1780\_P1426210822

TGGCAACCTAATGCTGAAGGTTAATTAAGGCTCAGAAAAATTTCTCTTGCTTTCTTAAAC

A\_14\_P129491 ATTGCACTGTGCTGCTAAAGATGTAAATATTTGTCTTCGACTGTGGCAGAGATTAAAGAA

A\_16\_P18410162

GCAACCAGCAAATATCTAATCAACCCCTACTATGTTTAAAGACAGTATCAATACTCACGGA

A\_14\_P139199 CTCTCTTCTCCTCCAGGAAAGAAACAAATTCTGAACCATCCATACTTGGCT

A\_14\_P124413 CTCACCCCTAGACAAAATCACTTCCTCTTTAATTGCTGTTGAAGAAGATTACACAC

CUST\_6440\_P1426210822 GTCTTTGGTCACCCACACCCACATTTGGCTGGACTGTGAGGCCTG

A\_16\_P15650438

AGGCCCTTCTAATCATATGCAAGAATTGAATCAACTAAAAACACATGTTTGGATGGA

A\_14\_P202560 GTGGAGAAACATCCTGTCAGAGAGAAGCACAAAACCTGTCATATTGAAAGGATCTAA

A\_14\_P115233 CCCCAACTACAAAACACTCCCCAAACCTAAGTTCATTGTCAAATTAATAAATACTGCAAT

A\_14\_P100786 GGAGGTGTTTCATTTACACTGTTATAAAGGTTTATTGTGCTGGTGAATACAGCCTCATCT

A\_14\_P134450 ACTCCCTCATCTGTCCTACACCAGATTATTAATAATATGCTTGTCTGCCAAAATACTATG

CUST\_5327\_P1426210822

AAGATAGTCAGCCTTAGGGAAACACTGAAGAATTTATTTTTAAACACATAAAGATTGCAT

A\_14\_P125368 ACACACAATGAGGTATTTATTCATATTCTGTCTCCTTCTGAAAAGGTTCCAAATGCCTTA

A\_14\_P108247 TAACAACATACTGTGAATTCATCTTGGTTACAAATGAGACTCCTTCAGTCAGTTATCCA

A\_14\_P112165

CTGAAGAAAGTAGAAAGAATAGTTTATAGAGAGTGAGGAAAATAGGGTTGCATTGGGTCAAA

CUST\_7050\_PI426210822 TGACAATCACAGTTGGGAAATGTGTAATCTCAGGGTGCCTCCTTG

A\_16\_P03385219

AATATAGTGTTCAGAATATTCACTGTCTCCATTACTCATACTGCTACTCTTGGTAGGGG

A\_14\_P118561 CATTTTTGTCTTTTTTTTTTTTTTTTCAGGCCAAGATAGCCAGGTTAACCAAACGCTTTGAA

A\_18\_P22841225 CATGTTGGATGCTGAATGCAGTGGGACAGACCCGGTCTATTTCTT

CUST\_9208\_PI426210822 CATCATGATTCATTCTTGAGAATGACTCCTCTGACAGGCCTCTTTTCATTGTC

CUST\_7168\_PI426210822

TTTTATTTTCTTGTGCCTCATGAATTAATAGGGCAGTGAGAGGAAAGAGCATGCATAC

A\_16\_P30952549 CATCATGATTCATTCTTGAGAATGACTCCTCTGACAGGCCTCTTTTCATTGTCAG

A\_16\_P15027344

AAAAAGTATGGAAATAAGCCTCAAAAATGACAATGTGCAGAATAGTTGACACTTACCCCA

A\_14\_P113428 GGGTTTGTGAAAGCATCTAGTTACATTTGGACACCCAGGCAGGTATGCTATTA

A\_14\_P124874 CTTTCTGGATTTCTCTTGAAGTGCTACACTGCACTGAATGTAAGGAATTGTTGCTTGT

A\_14\_P112453 ACTTCTAGAAAACAAACCAACCAAAAAGGGAAAATAATGCAAGAGAAGCCGTATTTTCTTT

CUST\_8274\_PI426210822 CTCCAGCATCTAGAAGTCGATATTTGTCTGGGAGTGTGAGTCAGAGC

A\_18\_P22840521

TGGCAGCAAAAAGAAAAGGTCATGGTTTTTATGTCTAAGACTTAAGGAAAATCTAAGTGAT

A\_16\_P36831913

AAAGCATCCATCTGCATATTTCTTTTTTTCATGAGGCTTAACATTTGCAGAAGTAGGCAC

A\_14\_P108084 AAGAAGAGATTTCTGAGGATTTCTGGTTTTCTCGCTTGTATCTCCGAAAGAATTA

A\_14\_P124293 CTTTCTACCTCATCAAATCCCATCTTGTCTGGATATTTAGGGACAACCTGAGAC

A\_16\_P58424578 AAACACAGATTCCTTTGGGGTGCAGTCTGAGGCTCTCCAGTTGCC

CUST\_8361\_PI426210822 GACCAACTAAGCCCCTGCTGTACACCCTGCTCTTGATTTACAGG

A\_16\_P00684989

TTGGACAAGAGGTTTCAGTTTTTCAAAGTCTCCATTCCATAAAGCAAATCTACATTTTGC

A\_14\_P127046 ATCAAGGTTAGAATCAATAGGGACAATTTCAATTTTCTTCTGTCAATGTTCTCCAGCAT

A\_14\_P128709 CTGGGTGTCTGTCAGTCAATTTATGTCCCAAATGTTTGACATATGTCCACAAATC

A\_14\_P109750 CTGTGGAAGGTTTCTATGCCAACCATAGCATATTTTCTTGTATTTTGTAGGCATGATG

A\_14\_P139890 GCAAACCTCATTATTATCTGTGTCATGTTTAGCAATGAAAAGAGTGATGCTGACTCAGGTT

A\_16\_P17179021

AGTTGATTGTTAGGAAAATCTTCATAGGCAGAATCATCATGATGCAAATAGGAGCCAAC

A\_18\_P16043577

ACAGAACAATGGGTTTTGTAAACTATCACATTTATACTTGCAGAAATTATTTTCATCATT

A\_18\_P22841597

GTTGGGGTGGTTTTTAAATAGTATTTTATGGACAGCAAGAAAAGTAGTTTTGCTTCTGGT

A\_14\_P139975 GTGGATAGTAACATACACCTTTTTGTTCCTTTTTCCCTCTCAAGTTGCTTTTGATGTTTT

A\_14\_P108345 TTGATTGATGATTAAGTGGTGTTTTTCCAAGAATTCAACTGCCATAAATCCTCCTCAAAG

A\_14\_P132299 CACTCAAACGGAAATAATATCAGCAATTTGTCTGCTAGGGGATGAAGTTTAATGACTGAA

A\_16\_P00685191

GTCAAGACTCGTTTCATAGTTTTTTGGGGGATTA AAAAATGATTAGAAGCAGATGGTGAG

A\_14\_P111249 TGTGTATAGGGGAAAGAACAGTCTTTAGTGTA ACTCTATGCTAGTTGTTTCTCATTGAGC

A\_14\_P102786 ACATCACTTTAAATTTGATCGAATGATACCATGTGATTGCTTCTGAAGGACAGGTTATGA

A\_16\_P21166117

GATGACTTAGGAACAGAAACAGTAGATAGTTCAAGAAAGATGCATCTAAGCCTACACTGT

A\_14\_P102285 ACTGAAATAAAGTGGGATTTTAGGACATAAGGCATAAGATAGGTTGGTTGCTTGACTAAC

A\_14\_P114753 CTTTAATGAGTGGTTAAGCATATGAATTCAGTTCCACAAAAACCTGCTTTGATACCTCA

A\_14\_P104100 CTGCGATTCATAACTACTCAGACTTGTCTTATATTACAAAAATGGGGGTTAAGGAGAAGT

A\_18\_P11489249

ATATCTCAGCATATCAATCTGATGCATGGATCTTGCTTTTAACTCTACTTGCCCCTAATC

CUST\_10145\_PI426210822 TGTTTAGGAGGAGAAAGTTAAATTGCTCAGAGGTGCAGGAGGGGATAACAA

A\_14\_P108496 ACAAAAATCATATCCGACAGTCCTTATTTTCTCCTCCATTTACAAAGGATTGAGAGACT

A\_14\_P124836

CTTTGTCACTGGGAGAAAAGATTGGAATCAAAAGGAAAAAATAAAACCCACCTCTTCTC

CUST\_8910\_PI426210822

GGGCTTTGTCTGGGGAACTTGTCTTTCTCTGATTACATGTAAATTAATTAAGCCC

A\_14\_P130238 AATTAATTCGTTGAGCACCTACTGTATGTGTCAA ACTGAGTGCTATACCCTTGACTTAA

A\_14\_P101565 GAACTTCTGAGGGACAGGTCTTCGTTTGCTTTTTCTGTTTTCTCACCAATTACATA

A\_14\_P102736 AGACAAGAAGAGGCTAACATGACTGATACCACTATAATTTAGTGTAAGTCATCTCTTACC

A\_18\_P12712430

AAATCCACTGGTAAGTTCTATCCTTCTATCCTAACAGTCATATTGGTTGGCTAAGCGTTT

CUST\_1908\_PI426210822

TAGTTTTTCTTCAGATGATTGTGATGAACTTCATAGTCCCTGTCAAGTCTTAAGATGAC

A\_16\_P18268076

GTTTCATGTGCTGATATCATATGTCTATTGAGGTCTGACTTACTACATTAACACACGCTGG

A\_18\_P22840544

TCTTCAAAAAAGATTACAATTCCTTTAATTTTCTTTCCCATCCTAGGGTGTCTCTTTG

A\_16\_P21633467

AGTTTCTTACCTTGTCTCTACTGCTTAATGACCCCATATGAACATCAAAGGCCAATATAA

A\_14\_P200918 CTTGGAGAAATCCAAGTGCTTTAGGGCCAACTAAATATTTTAACTATGCCTTTGGTATCA

A\_14\_P135989 TTCCCTAGTTAGGTGTCCTTTTCTGTTTTTCGAACGACCGGGTGAT

A\_14\_P112680 AAAAAACCAACTTCGTTCCAGTAAAATGTGTTTTCA TTGCCACTGGAATCCTTACAA

A\_14\_P109821 GAAGCCCAGAGATGTCCTGATTCCAGGAAAAGATGCTGTCAGTGAAT

A\_16\_P17018506

AAATGAGATAACACTGACGTTTAAAAAAACACGGATCAGAGTAAGATTGAACATGGGCAC

CUST\_1374\_PI426210822

TATATATGAAGGAATCAGGTTAAAATAATAGTAGTGCCCTTAACTCACAGAAATAGCATT

A\_14\_P110203 ATCAGAACTTACTAAATCCAGTAGTGAACCTCCTGTGGGGTCAGATAGCCATTG  
A\_14\_P139411 TACCGGATCATCTGGATTACTGAATAACATACTCTATCTGTCCATTTGGTCCATCATC  
A\_14\_P125288 TTATGGTCCAAACCAATTCCTTTTCCTTACGTGTTACTATCTTGGTTAAACATATGCACAC  
A\_14\_P137886 GTCACAAACTATGTTATGGTTTATGCCAGCACTTGCCCATATGGACATTTTTATCATACT  
A\_14\_P121950 GTGGGAATCTGTTTCATCTCCCATATCCCAGATTGAAATAATAAAATTCTCAATACATGGC  
A\_16\_P35099653  
TCTTTACAGTGGCATCACATTTATTCTTCAGAGCACCATTAGAGTCATACCATTGAATGA  
CUST\_3771\_Pi426210822 GAAAAATCTCACTATGTCCATGCCCAAGAGTTCCACCATGAGCACATG  
A\_14\_P121231 CAAATCAGACAATATGCATATCTTTCCGATAGATCAAGCACTATTCTGCAATGAAGGAT  
A\_16\_P17558545  
AAACGTATCCAGTGAAGCCTAATCATCATATCCTTCTATGTTTAAAGTTTGACGCTCCTC  
A\_16\_P41623610  
CCTGGACGAAGATAAAATCACCTAGTGAAGATAAAATCACCTAGGATTTCCAATTACCTC  
A\_14\_P104381 TCTCCACTTAACTCTTCTAAAATACCCAACCAAAAAGATCACTGTTTCTCTCAACACTA  
A\_16\_P20753813  
ACCTTTCCTAACATCCTCTTTACAGATATCTCCATCTTACCAGATATTCACACAAAGCAC  
A\_18\_P22841580  
GGTTGTCTTATAGGTTTATTTTGAACAACCTGATAGGCTTGGTATTGCTGGAAGTGGATAG  
A\_14\_P116076 CTTGCCCTCCAATGTTAGCAATTAATTATAGTGAAGATGACAAAGATGGACATGTATGGT  
A\_16\_P03235818  
AACTCTGGAAAGTGTGTTGATATGTCAAACAGGTGTA AAAATGCTCTTAAGCCACCAATGA  
A\_14\_P102396 ACTGTTTTGTGTGTCTAGATCAAATGATGCCGTTTGGAAAAATTTCCAGCAGTT  
A\_16\_P16359844  
CAGTCAGTCACAGGATTATTGCTCTATTACTTCTCTGTCTGCAGATAACTTGAAACCATC  
A\_18\_P22840889 CTATCTGTTGAATAAGTTCGTGACAGAACAGAAGTTCTACTGCAGCCACAAAGG  
A\_14\_P127083 CACAAATACTCTGGTGGTAAGGATGGGAAATTAACATCCTTATATCTGCCATCAATTTCA  
A\_16\_P18086912  
TGTTCAACCCTATGCTAATATAACAATTTCACTGAGACTACCTAATGTTCAAGGCAAGTG  
A\_14\_P129150 AGGATCAAAAGTAATCCCAAAACCAAAAGGAAAGGGAGTCTCAGACCCT  
A\_14\_P135303 CTTTTTAAGGTCATATATAAGCACCAGATGCTGCCAGAATGCTTTTTAAAGTTGGGCTATT  
A\_14\_P109326 TTCTTAGGAAATGTAGTTGCTTTCTTAAACCTCATCAAATTCATGAAGATTTAGCCGAGGC  
A\_16\_P17605909  
AACAGGAGTCAAGGATATACAAATTCAGCAATGTATGGATAACTTTCCCTTTTTTAACGC  
A\_14\_P200102 TAGCGACATTTATAGACTCTTCATTTGGTTGAAGGCCAAGGATCACAGAAGCATTTATC  
A\_14\_P132502 CTGGAGAAAAAAGAAAGTTTCGATCATTGATGCTCCGGACATCTCATCTTTAAAGAACAT  
A\_14\_P118395 CAAAGTCAATTA ACTGTGATTCTATCCTCTTTATGGGGCACGGATGAATAGTTTTCGTTT  
A\_16\_P00685119  
TCCTACCCTTTTGTGAAAGATACAATTAATATTGCTTATTAATACTAAAAAAGCATTC

A\_14\_P134098 TGTCTTCCTGTCTCCATATTTAGGTAGTGTGTCAGTGGCTGAGTATCACCG  
A\_14\_P106701 AAATTGTCCTGATTCTGGTTTCTGTCTGGTTACAGAAATGTTTGATAAAAATAGGCCAGA  
A\_16\_P17854392  
AAACACTTCACTAGACACGATGACTAACCCTCTTCTGGTAACTCAGAATAAAGATTTT  
A\_14\_P126210 CACAACCTGTTCTGTAATTCACAAGATTAATTAATAATGTCCTCTCTTCTGTGAGACCCT  
A\_18\_P16086733  
AAGAAGTGCATTTTTGGACTTTATTCAGTGCCTCTCTATTTTATAAGCACAAAACGGGG  
A\_14\_P110929 GTGTCAAGGAAACCCATTTGCTAAGGGACTACCTTCCATAGAGAAATTTAATTCCG  
CUST\_2053\_PI426210822 CATTCAATGCTTTTCTGACTTCTCCATTACCTCCTACAAAAGGACATGACCC  
A\_14\_P131876 AACTGTGGTCAAGTGGTTATCATTTTTAAATGGCAATGCTTTCTGCTCAAATTTCTTTAC  
A\_14\_P112735 ATTTTGCATTTTTTTGCACTGTGCGCTGCAAAAAGGAGACAATATAGACCAACATTTTTTTT  
A\_14\_P136842 AGAAAGAAAAAGATAAAATGCCAGGTAAGACTTTTTTTCATGATATACTGTGTTATTTTCAG  
A\_16\_P41594310  
AATTGTGCATACCGCATTAAATAACATCTTCAGAGTCAAGATTTTGTGTGATTGAATGGCC  
A\_14\_P127350 ATATAAACATGATAGACAGTCATCATATACCCCAGGAGAATGGAGGAAGTGGTTACAATT  
A\_16\_P19193558  
AAAAACCTAATCCTACCACTACCCTTTTCTCTAGCAATATAAATCAAATTTCCCATGACCC  
A\_16\_P16191819 ACTTGGCTGTGTATTTCCAGATCAGACAGATGTCCTCTGCAAATTTGTCT  
A\_14\_P100563 AAGATGATCTAATAGTTGTCTTATCTCAGCATCATACTCCACCCATTCTGGGACAATTCT  
A\_14\_P116128 CATCTGGCAGATACATAGAATCTGAGACAGTAGAGGGCACAGAGAAGCAAAT  
A\_16\_P21602147  
CTCCCAATTCTACATACTGGCTCTAATTTGTCTATTCCGTGATTATTCTGCTTCTGTGAT  
A\_14\_P108397 CTGAAATTGTTCAAGTTAGGCATACATTTATGTGTGATTTTTGGAAAGGCGGTGGTAATG  
CUST\_2951\_PI426210822 GGCAGGGACACAAGCTGCCAGAAGGAAAAACCTAAAGATGTGAAA  
A\_14\_P137549 CTAGAAACCCAAGATTACCCTTGAAGCACTTTCAATGGATTCAAGTGATTTAATGTAGAC  
A\_14\_P105380 GCAGGGGAAGGGGGATATAGAGGTCACAAGGAAATAAAAATCATCTTTCATCTT  
A\_16\_P00676829  
TCAGTATATCCCATACACCACTTTACTATGGCAGAATATACTAAGGACACAAGGGGTTAT  
A\_16\_P35209195  
TTCCCTCCCATTTAAATCTTAAGCAGCATAGTCTGAATAAAAATGCTCAGTTGTATGCCT  
A\_14\_P138096 AGCATCCACTATATGATCTTTGACACACATTGGCTTTTCATCACAAGTGCAGAAAAAAAAA  
CUST\_6276\_PI426210822 TTTGTGCTTTAGAGATTGCTCTGGACACCTCTTCCACTGAGGCTTT  
A\_16\_P17337308  
AAAATTGGATGCAAGATATCTACTTTGACAAAACCCATGAAATTGTGAGTTGGTGATACA  
A\_16\_P18662452  
GTCTCTGCTCTATGGAATAACAGAAACATTTCTACACTGATTTCTACTCAACAGATCCCA  
A\_14\_P117921 AGTATTAGCACAAAGGGAGGCTCTGAAATTGTGCATCTGTATTTGGTAATAAAATAGCCA  
A\_14\_P123858 CTTAGCATCTTTATTCCATCAAACTTTCTACCCCTTGACATTTCTGTGCAGTTTTGAA

A\_16\_P00685274

TGGGTGAAAAGAGTAGGATATAGTAAAATGCAAATGCTAGTTTAGTAAATGGCATAAAGA

A\_14\_P124050 GGAATTGCTCATTGTTGTGCCAAGTGACAACAGATGCTACAAAATGGTATTATCCTATACT

A\_14\_P111967 ATGATACAACCTTCTTACCAACAGACAGAGGGTATTCTAAAGCAATGGATGTCTAAAAGGA

A\_14\_P118206 GAATCTTGGACCTGAGGTAGTCAAGTTCTGGATGCTAGGATGTCAC

A\_14\_P116951 ATTAATGAAAAAGAAAGGAATAATCATAACCTCTTTACAGACTGGGTCCTGGATGTAGG

A\_14\_P105158 AACCAATTCAACAGTTACGCCTGGCATAATTGTTAATATTTGCCATTTCCATCATGTCCAG

A\_18\_P25679987

TCCATAGGATACTTAGTGCACATCTCTTTTATTGTGATTTCTGCCTAGTATATTGGACCC

A\_16\_P00685026 ATTCCAAATACAGCCCTTCAGTGAAGTCTCCTGGGGCTGTGTTAAG

A\_14\_P101699 AGTGCAGTCATCAAGGAATAAAGTTGCTGATTCATTCTTTACACTGAAACCCTTTGT

A\_14\_P138932 ATCTCTGCAGTGTCTTCTGGGCACTGTGAAGTCTGTTTATCACCAAAGT

A\_16\_P19866993

AGCCCTATTAAAGTTTCCCGTAAGACCTACAAATACTCATATTAGACTGTATACTCACCA

A\_18\_P14131488 ATTAGAAGCATCAAAAATACGCCCTGTGGCAGGTGCAGAATGCC

CUST\_6582\_PI426210822 GAGTTCACATTCTGCCCTGGAAGTTGCCTGGCTGCTTCCCTTAAT

A\_14\_P110486 AGATATGTGTTTGAAAAGTAAAACCCTCCCTACTTTTTGGCTATAGTGTATTCTGGAAA

A\_14\_P123749 ACCATCAGTGAAATATCATCGACCCTTTTTATGTCATTACAGTTTCAACCTTAAGGGAAT

CUST\_2177\_PI426210822 ACTCTTGGCACCTGCATACCCACTGACATTCCAGGAAGTCAGGGC

A\_14\_P120110 GATCTCCACCTTTTTAGTCTTCAAGAGACCCCTTCTTTTCTCAGAATGAAG

A\_14\_P108436 TGTTCCGGGAGATTCTGGTTACAATATTTGGTAAGTGTCTTAATATTGAGATACAGGGAT

A\_14\_P119618 ACCATCCCATCTCTATCACATGGTGTGTTGAACTTTTCAAGGTTTGTAATAAGTATTACA

CUST\_6004\_PI426210822

ATATTAGAATTGTTTCACATTAGTACGAAGGACCTCCTGGGATTATTAGAGGAACTGACT

A\_14\_P129048 GTTGGTTCGTGAAAGATCTTGTCCCTTTCTCTTGTCTTAGGAATCAAATGGAACAAT

A\_18\_P16506449

AAAAAAAACACCTCTAACCATAATTAAGGAGTCAAGCATATCCAGAGAATCTTTTCTTTT

CUST\_9611\_PI426210822 TCATCTTGCTGATTTCCCATCTGCTCGGTTCTCTCGGTTGGAAT

CUST\_4593\_PI426210822 CTCTTTGCTTTAGGATATGATGCCAGAAAGGGCTCGAAACTGGCA

A\_18\_P23421445

AATTTTCATGTGTTTAGTTCTCAACAATTCGACATGCAGGTAATTCTTTACGCGATGCTC

A\_14\_P129969 AAACGATGCTTGGAAGCACTTTTTGCTATTATTAACCCACTCTTCCATGTGACAAAA

A\_16\_P30691485

ACAGCCTTGATTCAGATGTTGAACATACAGAAAGTTCCATAAAAAAAGAACTGGTTTCT

A\_14\_P135596 GCTGAATTGAACACTATTGTGTCTTAAATACTTGCCTAAATAGTGCCTGCAAGACCAG

CUST\_2127\_PI426210822 ATGTTTTCTGAGATCAGGGATGAGGGACAGGTCCTGTCTACATCAA

A\_14\_P106558 CAGAAGGGCTTTATTTTCAAATAAACAGGCGGAAGCACTGTTATTTCTGTCAATAATCAC

A\_14\_P201940

TCTTTAGTCATGCTAGAAAAGAAGCAAACCTGGGAAGAGAAAAGACAAGAGAAATTCATAGG  
CUST\_10198\_PI426210822 AACTCAGTCAGGCCTCATGCCTCACGCAGCACCCATCTAAGTAAG  
A\_14\_P101048 CTTCCCAGGAAAACAATCTTAGTAAGGCAGTTTACTGCAACATGAAAAGAATTAGTTCTG  
A\_14\_P116009 ATAATCAAATTATGATTTGGACTAAACAAAGGAGGTGTCATGTTTTGGGAGACCCTAACA  
CUST\_6735\_PI426210822

CTTCTAAGACTGAATACAAAATATCCCCTGCAATGGATTTTTCTGTCTTCTAATGCAAAA  
A\_14\_P128703 GATTTAAACGGCACTCAAAATCTCCCTTTTTCTATAGTGTCCAACACTAGGCCAAAAGA  
A\_16\_P15740434

ATAGGAGACCTTCTGACTACATCAAACCTTCATCTAATCACATTTTACCTGCACTGAGAAC  
A\_14\_P101575 TCCCCTAGAACTTTGCTAGACTGATTATTTTTCTCCTCCTCTTAICTTTAACCATTTGC  
A\_14\_P130892 TGTTAATGCTTCTCTAGTAAGAGCAAAGCATCTCAAGGTTCTTTATTGCTGTCCATTTTC  
A\_14\_P136257 GAGATTCTATCCCCTAGTTACTTAAAGCATAATACACCAGGCTTCAGAGTTTACTTGCT  
A\_14\_P132381 ACATTCTTATTCACCTGACCTCCTGAAGAAAATGCGTAAAATTTGCACATGAGATTACTT  
A\_16\_P17945882

AAAGAATGCTCAAGGAATTAAGGATGTGTTGTTTCATGCTAGTCGTTTTGAGACTGAC  
A\_14\_P104435 CTCCTGGGATTGGCTGTGAGGACAAAACATAAGTAAATAAAAATATGCCATTTTCTCAACC  
A\_18\_P22841784 ATAAGTCTCCCTGTGCCTCTGAACTGGCTTGCCTTCTAGGCTGAG  
CUST\_3579\_PI426210822 GTCTTGGACGAGGTTGCACTTTTCAGCCGCTCCTGTGCACGTGTG  
A\_16\_P02384454

TGTATCTGGTTACTTAGAGCACAACTTTTTTAATACGTCATTCTGATCGACTAAGCCCA  
A\_16\_P15634865

AAGTCCTCAAATGTTATCATTTTATGCATTCAAATGGATAGTCAGAAGACCCATAAGGCC  
A\_14\_P137236 ACAAAAATTAACCAAAATAATTACCATTGTGCTGAAACTCTGGATCTCTAAGAGAGC  
A\_14\_P134526 GGGCCTTCAGAAAGTTGTTGATGTGCTGGATTCCATTAACAAAGGTAAATTTGAATTT  
CUST\_8140\_PI426210822 TTTGCAGACCACTGGAAAGTATCCCAGCTCATTAGCTTTTTGGAATGAC  
A\_14\_P125508 CCAAAAGGTTTGGTGATTTCTAGTTTAGGGAAACATGAATAAAGCATCTTTTGGCTTGAA  
A\_16\_P18407163

AAGTGCCATCTTAATTTTGAAGTGAGAGCAACTTACATCTAGAGCAAACCTTTTGAAGGA  
CUST\_30\_PI426210822 CAACCCCAACTTCCTGCAGGAGCTAGTTCACCTGTTTTTTATGTCA  
A\_14\_P124158 ATGACTTAATCAAGATTCTGAGAGTTTGTTTTTTAATACCCAAAGGGTCCGTGACTTCAA  
A\_14\_P200635 TAACATCTTGGCATGCAGAAAATAATTTTGGCTGCTTTGAACAGGATTGTTTATTCTACA  
CUST\_6034\_PI426210822

TCAAAATAGCCTTTTTGGCCGAATCCTCCATTAAGAAACCTTCGTTGTACTTTTG  
A\_18\_P23240461

AACTCCAAAAGAGACATTCAGTAAGAAACAATGTAGTGTCCATAAAAACAAAAACAGGCC  
A\_16\_P20231720

AAAAATGTCCTGTCACCTAAGTTCTCAATCTATTCACTTGTTTAATTCTCAGTCCACAGGC  
A\_16\_P18412992

AACCTTAGAATCCACCTCACTAAACACTGTATCCTTCAGTCTTAAAAGTTCCTAACGTAA  
CUST\_7127\_PI426210822 CAGTAAGAGACTGAATGAATAACAGGAAGCCCCTTGTTTGCATGGTTTCAG  
A\_14\_P139333 CACATTATCCGTCTTGACACTTATCCCAAGTCGACTGTAAACACAAACATAAACAGTG  
CUST\_6714\_PI426210822

GTAAATGCATAATTTAAAAGATTAATAAAAATAATCCCATAATCTCAGTTATACCAATAA  
A\_16\_P00379467

CTCGGTCCTCAATGAGTTATAGAGTATCATACTGTCTATGCTAGGCTTAAGATCAGGATC  
A\_14\_P107647 ACTCAATTTCTTTTGAGATGATAGATTATAGGGTTGACATGTTTTGGGGGCATATCTTTC  
CUST\_347\_PI426210822

CAAAACCTTTGAAAGGAAAAGAAGACATGTTAATTAAGCCTTGTATCTTACGTCTCTCTTC  
A\_14\_P108699 CCACTGTCCACCAAGACAACATTGATCTATTCTTCTCCTTTGACTTTGTAGCCTAATTATT  
A\_18\_P22841366 AGTGGCTCTTTCTGGGGCCCCATCTAGCATGAGCCTTTCACAGAC  
A\_16\_P16507912

ATCTGTTGAGCATTTCGTGTATGTAATTCCTAATAGTGGCTCTAGATGTAATGGTTTGC  
CUST\_2899\_PI426210822 TGGTGGGCTAGGTACTGCTGTCAGAAAGTGGTATCTTCTGTGGTATTTAT  
A\_14\_P133304 TGGAGGCAGAAAAAATCCCTCTTGAGTTTTATTTTTCTGTGACATCAGAAAACTTATG  
A\_16\_P38102222

CACACACAAATCACAATATCTCACAAATCCAATTTTTAATAATCACTTCCAGATTCCTCC  
A\_14\_P107022 ATATACTTTCTGTTCATTTTCCACTTTTGCTCGTCTTGTGCATGCAGAAATGATTCCAGAC  
A\_14\_P127879 CTTATGAGCATATGGACCATTAAAAACTGCTCTGATGTCAGCCATGCTATACACACAAAC  
A\_16\_P39863861

ACTTCTCTTCTCATGCTTAAAACTACATCAAAGCCTCTAGAAATTACAAAATTGGCCC  
A\_16\_P01568787 GATTCTACCCCAACCTTTTTTAATCTGCTACTCATCTTGTTTTATACCTGCATCCTATC  
A\_14\_P128086 TAGCCATTTAAAGAGAAAAAAACTGGCATCTGTGAAATTCCCAACATCAAAGCATGTC  
A\_16\_P00914495

CCTGAGATCTTATGTCCCTAGACAGAACTATAAAGCGTTTTTATATTAAGGTCTGTGCC  
A\_16\_P17654817

AAAAAGTGCTGTTTCTACTAAAATCTCTTAGCAGGAGGATCTTCATGTTTGGATTGTGCA  
A\_16\_P03113794

AAACCCCAATTCACCTTTGAAAGACATTACCAGTAACAATATCACAATCCACAGTTGTTCT  
CUST\_534\_PI426210822 GTTCCACAGCAACAACCAGATCCACGATTTTTGTGCCATAAAAGGG  
A\_14\_P114146

AGACACAAAAATCTAGATGTCAGAAAGAAAATATAACCAGGGGGTGAAATAGAAGGGAAT  
A\_14\_P107914 CCAGGGTGAGTAGAAGCATGAATAGTGTGTAATTGCTCTTCTCATATTTAATGTCAGTTC  
A\_14\_P130678 GTAAGGCTCACAATCACTTGATTGATTCATCAATCAAGCCTTGCATGTCATCATAGAC  
A\_14\_P115999 CTTCTTTGCTGCCAAGTATTTCTTCTGCCTACCACCCATTTGG  
A\_14\_P119452 CTGGTTATTTTGAGAGAACCATTCTTTCTGCACTCCAGGATAAACGTTTTCTCTG  
A\_18\_P22840302 ATTGAAGGTCACAGGAAGCGATCAGAGAGGCCTCTGAAAGATTTCTG



A\_14\_P107305 TAACAACCTGAGTATGGTGAAAGATATCTCATGCAAAGTGGAAAGGCAACATATAAACCA  
A\_14\_P127186 CACAGAACGCAGTCCCTAGGACACTTAGTAAGTATCAGGTTTTATTATTATCATTTGGAA  
A\_14\_P130144 TTTTGTAGACACGAGGCATGCCACTCTAGTATTAGGACACTCTTTCAGCAACATA  
A\_18\_P14134459  
AAATTAATGCATATTTGTGTTTTGGGGTGGAGGTTTCATTCATCCAAGAAATCATCTCAC  
A\_14\_P202265 GAGATTTTTCTCTGTTTGGCTTCCTTCTCTTTTTTCATCATCACTAAAATCTAAGGCCT  
A\_16\_P02296081  
TGCTGAACAATAATTCATTCACACCCCAATAAAAGTATGAATATTACCAATCAGCCCTCT  
A\_14\_P134082 TAGAGACTTCAAGGTCATCTCTGAACCTTCTGGAAGTGTGAAACGTTGTTTTCTT  
A\_16\_P39901904  
ACAAATTTTAGTGTTAACACAGTTCCTCAACTTATACCTTGTCAAACCTCTTCTACAAACCA  
A\_14\_P104059 CTACTTTTGACATTTCTCACTTGAATGGCATATTTCATTTTGTAACAAAAAATCCCCA  
A\_14\_P104254 CTGAATTTGCAAAGCAAGCACTTATAAAAATTAGATTGTGTGTTACGGGATGGCTTGTGA  
A\_14\_P103269 ACTGTTGGTTTAAAAAGAGGATACATTCAGGACAGGGAGCATGTAATTTTGTTCATTTA  
A\_14\_P122186 CAAGTTGTTACCTTAAAAGGGCTGATGGAAGCAAAGAGAAGAGGAAGTGGTT  
A\_14\_P114199 AATTAGAGAGACACCCTCTCCTTCCAGTATTCTTCTTTAAGTCTCAGCATGCAATGT  
CUST\_1448\_P1426210822 AGTCACTGTGAACATCTCTCCACCTCCTTGACTTTACCCATGAAATGATTT  
A\_14\_P134623 ACAATGCAAGAGTTTAGTAAGAAAAATAATCTTCCCCATCCCTCTTTTTTTCTCACCCTA  
A\_18\_P14135702 ACAACTGACTCAAAGACAGAGAGGACCATAATACCAGGGTTCCTCAGT  
A\_14\_P102990 ATCCTGGGACTCCAAACGATGACTCTGACATTAAAGGTATGTCTATAAGATCTTTGAGA  
A\_18\_P16812063  
AAGACTGATGTCTTAGACTGATGTTCTGCTATTCAATTCCTATTACCACTCACCAGAAAAC  
CUST\_2298\_P1426210822  
GGAAGCTGCACTTGTATTATTAATGTGGCTTTTTTAACCCATAGCTGTTTTTTTTACCCTCA  
A\_14\_P128218 TTTTGTGTTGAATGTTAGATGCTTAGTGTGAAGTTGATACGCAAGGAAAATGGTCCATGTT  
CUST\_2572\_P1426210822 AGGTAGGGGTTGGGGTAGCCTAACTCTTAAGCCTAACTCTTAAGCT  
CUST\_4320\_P1426210822 CTCTTTCCCATAACTTGTCCAACCACCATCCCTCTCCCAAGAAC  
A\_16\_P36182993  
AAACAAACACAAGCAAATTTATAATACCTAGAGACCATATACATCAGAAAACCTACAA  
A\_14\_P103387 GAAGCAAAGGTTAATTTAGCCAAACTGATGAATGAATGGAAAATACTTTGCTGCACAAA  
A\_16\_P18058850  
AAAGTTCTTACATCTGTTCTTACTGGGTCCTCAATCAAACATGATCACAAGGTTTTTTGT  
CUST\_3575\_P1426210822  
TATTATTACCTAGTTAGTCTGAGAAAGAGAAAACCTCATTCTGGATGGCCCATTTCTG  
A\_16\_P58424195  
TATCTGCAGAACTCACTCAAATATCACCAGTTATCTTCATGTCCTTGGTAGCAAAAAGAAA  
A\_14\_P136620 TTTGATTTATTATCTGCATCTTATCCCCTCATGTCTTCACTCTTGCTTCCCTCATCAAAGA  
A\_18\_P10578335

GACTTCCATTTATTGCATTGATTTTACCATCAACATCAGACTTAATAGGCCACCACATCA  
A\_16\_P15614179  
ATGCCTAATGTTGCTTTATCATGATTCTGGCAGGTAATCAATAGGAACTCTGTTGCATA  
A\_14\_P119551 CTTGGCATTATTTTATTGATTAGACCATTGACTTTATCTTCTTCCACCTGAAGATCATCCAG  
CUST\_8473\_PI426210822  
TCTATGAGTAAATTCCTATGCATGTAAAAAGAAAAGTTTTAGCAGGAAGAAGACAAAATG  
A\_14\_P101984 TGCTTTAATGGTAGAAGATACAATGCCTATTATTGTGATTTGTTTCTGACCGACAGGCTG  
A\_16\_P01866812  
TGTCCCTGCATAGACTATACTAGCATGATACTAACTCTTTACGTTCTTGCAACTGTATT  
A\_14\_P121114 AACACTCTTAATACTTGGGTTGGTCCATGTCAATTTTAAGATACTAGACAGTTCCTCTGA  
A\_16\_P01809640  
TTTCCATCAGAGACAATTAECTCCAAGTCAATATGCAGATCTTAAAATTCCCAGACTGTG  
A\_14\_P131923 GAAGAACGTAACCATTGCATGATTTATTTTTGCGCTTGCCGTAGGTAATACATATGTTGT  
A\_14\_P102837 TTTGGTGGACTTTGACTCCAAACACATCTTTTTAAGTTTTTTGTTGTGTGGCTGG  
CUST\_7274\_PI426210822 GCCAACCTGAACCTTGAAGCCTTCATTTACCATCAGTTTTTCTTTC  
A\_16\_P02945768  
AAATCAGACTATATTTAGTGGCTCTAAGTGCTTATAAGGTAACACCAAACCTCCTTAACCA  
A\_16\_P17643917  
AAAATCTTTCCCTTTCTCTTTACCTGATTACTCATACCTTTTAAAACCTCTGTCTAGGCC  
CUST\_2417\_PI426210822 CTTCGTGACTTCTCTGCAGGATGACTCGGGAAAGAGAAGGATAAG  
A\_16\_P15181715  
AATGAACTCCCTTGATTACATCCTGTTTTAGAGAACTAACCACCAAACAATTGCTTTTTGT  
A\_14\_P117914 CATTCTTCTCAAATCTCAACTTTTTATTTTTGCTTCACTCTACCATTGCCCTCTGGATTTT  
A\_14\_P112740 ACTCTACTGGTTTAAAGAGTTCTCAGTTTTACTTTTACTATAGACCTTTTTTCCCACCAGT  
A\_16\_P00527337  
TTCTCTGCATGTTAATAACATAACCAGAAGAATTTCCCTTATCACCAGTTTAGGAAACCC  
A\_14\_P109598 TTCCATGATAATAAGAAGCATTATAGAACAGTAAGTTAGGAAGACTGTGCTGCTGAGGG  
A\_14\_P100737 GTGGATGAAGGTGTAGATGAATTTTTTACCAAGAAGGTGACCAAAATGGATTCCAAGT  
A\_14\_P117808 TCAGTCATATTTTTCAGTTTCACTGTCTTGATGAGTGTGAGGATCTTCTTGATAAGTCA  
A\_14\_P102614 TTTTCTGTAAAAATTCGTCAATCTCCCACTAACTTTTCTTACATTCATCCTTCGGTCTTC  
A\_16\_P18036788  
AACCTTTCCATTACAGAGTAAGAAATCCTGCAAAATAGTCAAACAAATTAGCAATGGGGC  
A\_14\_P111093 AGCATCCACTCAAGAAATTCGCTGTGTAAGAAAATGCATGGATAATAATGCATATGGG  
A\_14\_P127437 CTTGTTTCTTTACTTCGGACTCTGCTCTTTGCCTCAATATTTAAATTGAAGTGGTGATCT  
A\_16\_P01457090  
TTTTTCCCAGACTTAAATGCTCAATTTGCATAAAGGGTAGCAGAGAATGTAAAAAGCAGC  
A\_14\_P101167 TAACTGTTCTAGTTCTTGATGGTTTTCTTCTTATTAACAGTTGGTGTCTTCTTCCCTGGC  
A\_14\_P105296 AGCATCGGAGGAGGAATGTGACATAATAATGATCGAAAGCCGAAAGTTTTAAAGTTGT

A\_14\_P131340 AAACCGACACAAAAATTTAAGGTTTGTAGTTGTTGTGATGACAAGGAATATCTCACGTCTGA  
A\_14\_P119162 GCAGCATTGAGTGATGATTCTTATCTTCGGATGGTAGTTCTTTATGGAGATTACTCTGA  
A\_14\_P114924 ATGGATCCTGGATGTTTTAGAAAAGATCAGACCAATGGATGATGATCTTCTTAAACTCTT  
A\_14\_P138871 GGTAAATTTTTATATGTTTACAAAAGGCCGTATGTTTAGGTCAATGTAGCATGGGAAGA  
CUST\_3638\_PI426210822 CTTTTATGACACTGTAACAATTACTGGGGTCATGCCTGGAGAGGTGG  
CUST\_1737\_PI426210822 GCCTGATGTAAAGTTGAGGAAACGTGTGTGGTCTCATCGTGGATAGAATA  
A\_14\_P102639 TTATTGGCTTTGTGGTATAGACATTTATCTGCTGGGTCAAGCCACTGTCTCAGTTTTATT  
A\_14\_P106452 GCACGTTGATATTATGGAAGATTTACAGAAAATGTCATCACTGGGATTAGTCAATGTGCT  
A\_14\_P108546 TCTATCAACTTCAAATCCTTGTGGGTTCCTTCCCTAAAATACTACTTATGATTACACA  
CUST\_7535\_PI426210822 GTCCTCACCAGCATAAGAATCCCAGAGAAGGCATTTTTTTTTCTCACATACTCTA  
A\_14\_P129530 GCAACTTGCAAGGGCTTAGAAGGAAAGAATATTGCATATGAATTCTCAGAGAAAACACTT  
A\_18\_P14796846  
AAAATGATTCATTGACACAAAAAATGGCATTGGATATGCGAATGGATTCCATCAAAGCC  
A\_14\_P139953 CTGCCAAGTGAATTACCTCAATTCCTGTAAGTCTCCTGATTGGTTGTATACATCT  
A\_16\_P19886561  
ACACTAGGATGAAACATTTGCTCCACATTAATTCTCTACAGAAATAAAGGCTCACTTCCA  
CUST\_3828\_PI426210822 GACCACTGGGAACATTTGCACCTTTCACCATGCAAACCTTGACAT  
A\_18\_P10080816  
AAAAGACCAAATGCATGCAAACCTTACTTCCATGAAACTTAAATTCAAACCATCCCATGG  
CUST\_150\_PI426210822  
GTATGTAAGTGTTTAATTGTTTAAACAATGTAAGTGTTTAACAAGTAACTGTGGAGAGCA  
A\_14\_P138047 GGTTACAGTTCAACACATAGGTAACCCTGTATATTGACAATTTAAGAAAGAATCCATTC  
CUST\_6339\_PI426210822 TTGAAGCAAATATCGATTCTACCACTACATGGCTGGGGCCAAAGTCA  
A\_16\_P19796926  
CCAGAAGTGGTTATCTATGAATGGAAAATGCATCTGTGTATCTAGAATCAGCAACCCTA  
CUST\_4841\_PI426210822 CCCCTATACCCAGTGTGCCAGACATCATCATGAGATGTAAGTCCCTT  
A\_16\_P03738552  
AAACGGCATATAATATTTATCTTAGAGAACATCTGGAAAATATGGGCAGAAAAGAGAAATA  
A\_14\_P137765 TGAAGTGGTGTGAATATGTTACTGGCAGGAGCAGCAGTTTTTTCACTAATAGTAAGAAT  
A\_14\_P122846 AAAAAAGCAGAGTATTTTTAAAAATGGGGAACTCTAAACAGGCTACTGTGTAGCAGGTTT  
A\_14\_P114304 ACAGTAAGTCCCTAACGGTTATCACCTCTACAAGTCTATCAAATAAAAGTATCCATT  
A\_16\_P39189901  
CCCTTCAACTAACCTAGTCTTGTATTGAGCAACTCTACACTTCTGTTTTCACTTCCCTTAT  
A\_14\_P100125 TCATACAGAAGGAGCAAAGTTACAGCAGACAGACAGATTAGCAGGGCAGATTA  
CUST\_5590\_PI426210822 CTCCGTACATACAGCCTGATGGGCACACATTGCACCTTCAAATTTAAG  
A\_14\_P100833 GTCCTTGGGTTTGGTCCCTTATGCTTCATTTCTCATATTTCCATTTAGTAGAGTTTAATA  
A\_16\_P18985348  
AAATCAAACCATCATTATTCTGGACTGATTATCCAATTAGAGAATGAAATAGGCCAGCCC

A\_14\_P125303 CACTGAGTTACTCTGTATTACTGAAATACACATGGTAGAATGAGCACTTTATTCTAGGGA  
A\_14\_P120764 CTGACAGCACAAAGTCAATTTGACAGTTTATTTCTTTGTAGCAGTTTCATATGGTTGAGC  
CUST\_4857\_PI426210822

TTGTTTGAGACATCTGGAGTTAGAAAAGTATCTGAGCTTTAAATGGAGAAGGAGTGG

A\_14\_P117346 CTGCTAAAAAACTCTTTGGAAGCACCTTTGCATTTTCAGTGAGTAAGGCTTAATGTTAATG  
A\_14\_P132573 GTTTCATTTGTTATTACATGTTTCCTGAATGCAGATTCATAGACTATCCTTTGGGGAACC  
A\_14\_P107451 AGGGCTGTTCTATTTCTGTTCCACTGTTATTCTTAAGATGTAATGCTTCAGAGAATTAGG  
A\_14\_P100506 TAGCACTCAATTTATTCCGTAGTGATATTGTAACAATACTGCCATTCCTTCTACTGCAC  
A\_14\_P101690 CACCACAAGAAAACCACTGACCTTATCAAAGAACACACTACCAAGTATAATGAAATTCAG  
A\_14\_P136286 CCAACATAATGACTAACAGAGCCCCTTTTATTCCGAGATGTCCTGGTTTATATGATAAAT  
A\_14\_P118169

TGAGAAAGCATTTCAGACTTCTCAGCAAAAATGGAAAGAAGAATGCAGAAGATTTGAACA

A\_14\_P136867 CAGTTCTCAGAATTTTAATATTCCTCAAATACAGTTTCTCTCCACTTTGGTCCAAGTGCA  
A\_16\_P58424484 GAGCCAAACTGAACTGGGTTGGAATCCCAGTTTCAGCCACTTAATA  
A\_14\_P100133 AAAAAAAAAGGTTTTGAGGAATGTTTTGAAAAAGAATGAAGGACTTTGGCCCCTCATATT  
A\_18\_P14136030

CAAAGAGGCTCACTAATTTTCATTATTCGATTCTTCCAACCACTGCACGTTACAAACAG

CUST\_5786\_PI426210822

GATTTGGTTGTTCATATCAACCCTATAAACAGTGTTGAATCCATGTCAATAATTGTATTTT

A\_14\_P139405 ATACTGTCCACAAAGACGATCCAAAAGAATCTTACAACATGTTGTATCCATCTACAACAC  
A\_14\_P106001 CATTTTCTTTTCTCATAGGGGGATTATTTCCAACCAAGCAGTCACAGGAACATG  
A\_16\_P01891264

CAAGGAGTCTTTAAAAAGCCCTACTCATGTTTCTAATTCTCACACCCATGTAATTCACAG

A\_14\_P102583 GAGAGAAGAAAAAAAAGCACTGGAATTACTCTACTGGTTGGAATCCAGATCTACAATACT  
A\_16\_P01532533

ACCACTGTGTA AAAATGTTAAAATGCCATTAGAAACCTGAGTTAAATCCAGACGAGTTCAG

A\_14\_P117289 CTGAGCAGATAAATGGAAACTGACTTTGTATGTATGACAACTTATGCGTGATAGAGGTG  
A\_14\_P119045 ATGAACGATATGAAGGCTATTGTGTAGACCTAGCCTATGAAATAGCCAAACATGTAAGGA  
A\_14\_P134024 GAAGATGTCACATGAACCGGACGCTAGAATTTAACCGTAGACAAAAGAAGAACATTT  
A\_16\_P15119813

CAGGCTACTCAAATAATTTACATGCTGTGTTTTAATCCCAGAAACCTCAATTATGGTGCA

CUST\_9943\_PI426210822 CAAAACAGAAGTCTGGGGAGCAACTGCCAGAAGGGGGCGATTTCC

CUST\_2674\_PI426210822 TTTGCTTTTATCTCAGAGGCTGGCACAATTTGTAGGCAGGACTGTGA

A\_14\_P114867 CTAAACAGTAGTGACATAATGACAAAATAGCACCCACCACATTAATGCCTTCAAAAAAGG  
A\_14\_P122103 ATTTTTTACATGAATTTATAAACTATAGTTTCACTGGATATAGTTGGCTGCACATTTAA  
A\_14\_P119115 TATTTCTGTCCACCAGTTCTTTCAAATGTGTTTTTCTTGGAAATAACTTACCCATTGG  
CUST\_6969\_PI426210822

ATTTTCACAAAATGAAGCCATTTCAACGATGTTGTCAATGTGTTTGGATTTCTGTCCTT

A\_16\_P37278934

TTATGTTAATTGATCAAATTAGATAACAAGCAGAATGGATTATAACTTTGTTGTGGGGT

A\_18\_P22841054

AAAGATTTATCAAGGAATGACATGGTCCCCACCCATGACACTGTAAATCCATAATTTG

CUST\_5551\_PI426210822

ATGTGGCAGGGGTTATTATTTTTCTAACCATGTGATTCTTTGGTTGAAATTAATAAAA

A\_14\_P122514 GAATCCAGCATGACATTTACAATAATAGGAACCAGGTGTGTTAACACAATCTCCATTAGT

A\_14\_P134235 CACAGCCCTTTACAATTTACAGAAGCCTGTTCCACACCTGAACATAATTTTCATTTTG

A\_14\_P100343 AACTAGAGTTAGGAAAATCAGGTCTATGAGGTATGGGATAGTAGGATGACTAGAAATCT

A\_14\_P126775 CATTTGAGAAGACTTTTGCCATCCTCAGGGAAAAGGACTGTGTCAAGAGT

A\_16\_P03056260

GCTTCACTTGTAAGAAAGGCACATAGATGACTATAGATTTTGATGTTGGAGTGGAAGTGA

A\_16\_P01637522

AGAAAGACCAATCAACACATCAGGTTCTTATTAAGTGTATTTAAGACGAAGGTAGGTCAT

A\_14\_P107969 ACACACCGCACTCATTTACTCCATTCACAAAGGTTTATTGGGTCCT

A\_14\_P120398 CAAAGTTTCTCTTCTAGCACATGTTTGGTTTAGATTGTAGAACAAGGGTTGGCAG

A\_16\_P01873804

CTACATACCGGCTTAGAGTAGATTCAATTCATTTACAGGTTATAATGGACAAAGCACCT

A\_14\_P111483 GTCTGCCTCAGAGAGATGTCAGGATTAATAAAAATGTTGTAAGGCATGTGGTGAGTATTA

A\_14\_P123982

TTACTTAAAGAAGAAAGAGGAAGAGACACAGAGACCAAAAAGAAACAGAAAGACTCTGAAG

A\_14\_P200029 TTGTGGAGCAGCCTATGTCATTTCCCTCACAGAAGGCTCTATTATTATAGCCTTAATAGAT

A\_16\_P03345251

AAATTTCTTCAATGTCCCTTTGAAAATTTCTTCAGCAACATGACTGATTAACATGAGTGGG

A\_14\_P103239 GTTTAACCTACTTTACTTTTTCTCCCATAGCATTATTTTCCCCTCAAGACAACAGAAACC

A\_16\_P03642751

AAAGACCAATCTAGTCCCTTGAAAAAATGAGATTTACATATCTCATAATGCAGGTGGGG

A\_14\_P136205 CTTTTTCCAAAATAAAGCAGAGCCACACACTGAAAGAACTTACGATGCACTTATTAG

A\_16\_P01618610

GGACATCATATTGACAATACATTTCCCTAATTAACATCCAATCTTTACCACTCACATGCA

A\_14\_P129066 GACCTTCTCTGTTTCAGTAAAAAAGCATACAAAAATGGCCCTTATAAAAACAAAGGGTT

A\_14\_P127093 CTAGTAAACCTCGTGTCATGGGCTATGAATGGAGACATAAAACACTGAAAATTCTACTAC

A\_16\_P19551397

AAAGCACATACCTAGATTCTTCAAACCTGATTTAGTCTCTAACAGTCCCTTTCTTACCAGG

A\_14\_P104132 ATAAGACTGTTTCATTATACATAATCACCACAGGATATTAGGCACTCTGACAGGGTTAGG

A\_14\_P127561 AAGGTAGAGTGACATTTGAGTCTGTGCAAAACCCAAATGAATCCAAATTTAGATCCTTTA

CUST\_1709\_PI426210822 AACCTTTGGGAGTGAGAGAACAGGGGATGTTGATTGATTTCCATTATCGTATCA

A\_16\_P16307372

GTAACCCACAATATCGTTTACAGGCCAAAATAATGGTATATCATGAGACACTTAGGTTCCC  
A\_14\_P117165 CGGCCAGATTTTGGATTGAATGCTTAGTAGTCATGCAAGTATCAAAAAGCAAGATTTAGA  
A\_14\_P139545 TAAGATTAAGGGACTCAGGATAAAGTCATCAGTCACAGTTACTGTAGTATGCGCCC  
A\_16\_P20698812  
ATTGGCATTAAAGTGTATCCAGTTCTTGCAGATTTGTATCTGATTAGTAAAAGGGACCAGA  
A\_14\_P119284 ACATTCCTGGTATTACATGTTATCGTGATTTGGTCACACCATGAGTGAGTTATGACTAAA  
CUST\_6736\_PI426210822  
ATATCCCCTGCAATGGATTTTTCTGTCTTCTAATGCAAACTACTTTCATAGATTTATTC  
A\_14\_P201875 GCAGAATAAAAATGGTTTAAATACCCACAGCAAATAGAGTAACTGACAAACCACCAAAAA  
A\_14\_P110041 ACATCAGAATTTCAAAGGAATTCATCTCATAGTTCTCAAATGTTTGCCGCACTTTTTCAA  
A\_14\_P115327 CTGAGAGGTTTGTGGAAAAGATGGCAAATGGGGAATAAAAAGATTTTGTGTCAACAG  
A\_16\_P16192022 ATTTGACCCTTTTGCAAACCGAGATGGTTTGGAGCAAAGGGAAGTG  
A\_14\_P116614 ACCAATTTTAGTCAGGCAGAAAATGGTAAACATGAGGGTGCTCTTGTGACTTAAATTTTG  
CUST\_5198\_PI426210822 ATTAACAAAATGTCCATGCACTCTTTCGTTGTTCCCCATACCCACAG  
A\_14\_P101691 AGGGTTTTTCTTCTAGAAATGCTGTTTGCATGGGTTTGGATTTTTTTATGGCTTACTTTT  
A\_14\_P117323 TAAACATATTCAGCATTTACACAGTGTTTTCAACACCTTCAAACTCTACCAGTGAGGTC  
A\_16\_P00941309  
AATGCCTGTTGGTTAATTTGTAGTTGTTAGATGAGACGAGATTGTCTACTTATTCCTGGT  
CUST\_6480\_PI426210822 GCTAATCTTCTGCTAAGAGTGTCTTCTCCTGCCCTTTCCATGTTAT  
A\_16\_P17811404  
CCAACGTCTACATATTCACGCTCAACCAGATTTAAACTTCCTTCAATCTACATGTTTGTA  
A\_16\_P19486632  
AAAAAAAAAAGTCAAAAATCCAAAGGGACAATTTTACATTTTCATATTGCACAGCAGACA  
A\_16\_P16740034  
TTACCCATCAAGATGTAAACTTCTTGTAGACATAGACTTTGCATACCCAGAAAAACAACC  
A\_16\_P41406695  
AAAAACTGACACCTTCTTGTCAATTAECTCAATTAGGACAAATGAAGAGAAAAATGGCGCT  
A\_14\_P110725 ACAGTCAGAATATTCCTGTTCTACTACAGTTCTGTTCTGTAAGTCACATTTTAAGTT  
A\_18\_P16315399  
GAACTCATTAGTCCATGGGATCTTTTTAACTACCTCCACTATCTTTTCATTTAAGAGCCC  
A\_18\_P27285455 CCAAAGTTACCTCCAAGCAGATAACTCTGACCCTGCTTCTCCTCTAC  
A\_16\_P18095346  
AGGAGAGAGGATGCTATTTTTCTATGCTGCAACAATACTCATTTATAGGGGCTGTTAATG  
A\_14\_P123258 GGGCTATCGTTATAGATCAGTCAAAGAAGTCATTTCTTGCTGCTTTTTTCATTCATAATC  
A\_16\_P41667937 GCACATATCTCCATGACTAAACCATATCAATTCTAAATCCCTTTTATATATCTCCTCATC  
A\_18\_P22841374 CTGTGAAGATCCTGAGTAGAGGCTTAGGTCACTGTGGACACAGTG  
CUST\_3236\_PI426210822 CTAATTGGGTTAGCTGGAGTGTGGGGTCACAAAGGCTTCTGATATG  
A\_16\_P17614805

CAAAGTGTGCTGCTATATTTTTGTCCCACATTAACCTTCATGCTGAAAGTCACTTTTTTC  
A\_16\_P03647092  
ACCCACAATATCAATTATGACAAGAGAACATAAAATTCCTTGCTTCTATTACCCTCAAA  
A\_14\_P128401 CTAAAGTTCACGAGGAGAAATACAAATATTGTGTATACTACCTAATGGAAAAAGTTGGGC  
CUST\_7406\_PI426210822 GTTCCTTTTCAGCACTTCCTCACCACAGCACCATTCTTAAGTTTTCTAGC  
A\_16\_P58424140  
CTTGAAGACAAAATGTGGGATTGTGTCTCACATTTGGTATAGTGCCTGGTGTATAGTAG  
A\_14\_P105778 CTATTAAGAACAATACCCGCTTGCATTCTCAGGCTAAATGTGAGAAACCAATTTTAGTCA  
A\_14\_P135586 CTTATTCTGATCACATCCAGACAGAAGCCCTTGTAGATCCCTGCAG  
A\_14\_P109530 GTTTTACTTTTTGTTTGTGAACTGAAAGATGTCCAGACAGCAAAGGAACAGGCAAAG  
A\_14\_P116743 CCCTTTGATATAACCGCATCATATTACTGAGAAGGAAAAAGCAGAAAAGCCATCCATTTA  
A\_18\_P22841792 GGGGCTCGTGGGTTTCCTGGCATGTGTATGAAGAGTTACAGATTTA  
A\_18\_P14135391  
CTATTTCTAGTCACATCTCATTGTCATGTTATATGCCATCTCATCAATTATTGGGGGAC  
A\_16\_P01741065  
ATTAGGCCATCATAAAATGTGACATCCATCTATTTTCTTAATTGCAGGCTTCACTACCT  
A\_14\_P119764 AGAATTACTGACCTGCGCTTTCTATCCCTGCTTTTATTATGGCTCCGACTC  
A\_14\_P122416 TACTGTGCTCTTCCTAAATAGGTAAGAAACAAGTGTCTTTCTTTGACCTTAAACAGCCTT  
A\_14\_P106733 TAGGCACTTAACAAATGTCAGATTTAACATTGGACGCGACTGAACCCTTTAAACATAAGC  
A\_16\_P35860931  
AAGTGGAAGTCGTTTTCTTAAGACAATCCATTTCAAATTTCAAATTTCTGCCTTTCAGAGA  
A\_16\_P16191098 ATCTACAGGGGAAAACAGAGAGGGGACAGGGTGTTTTAAAAGTGG  
A\_14\_P122841 CACAAGAAGTCTTCATATGTGAACGTGCCATTCAGTTGGTAGTTAAGAGCATTCAACTT  
A\_14\_P127175 ATTAAATAGTTAAATGACCCTAATTGTAATTACTGTGGATGGTTGCATTCAATTTGATTAC  
A\_14\_P104998 GATTTTCCAGTGAGTGCAGAAGGAATCCTAACCTTAAAGATTTTTACTAGAGAAAATCC  
CUST\_8442\_PI426210822 AAAAAGGAAGGCCCCGCAAGTATTACCATGGCTAAACTGAAAGAGTCTA  
A\_16\_P00298001  
AGGGACTAATGTAGCAAAATCACCATTTAATGGAATTACAAGACATCGACTAGTCCATGT  
A\_16\_P17022732  
AAAACATCATCCACCTACTGAAAGATTCATAACTTCACCTTCCTGATGATTTGAGAGTTG  
A\_16\_P00685107 CACAATGGCTGGGGAATCTTGAAGAAGGAGTAGGAGTTAGCAGACAG  
A\_14\_P133450 CACAGAAAATTGTGATGTTTGTCTTTGACACTCTCAGTCATGTATGGAGTTGAGA  
CUST\_5879\_PI426210822 AGAGAAGTGGTCTGGATTTGCTTGTGAAGGGTGAGAGGACATGT  
A\_16\_P15818075  
AATACATCAGGTCCGAAAACCTTTTTAACCCATGCTCATCTTGAAACAAGTATTCTCAAG  
A\_14\_P118500 AATAGTTCAGAGTCCTGTCTTTTGGCTGAAATCCATTTCTAAGTAAAACCTCTCCATAGTG  
A\_16\_P16860914  
ACCTTACCCAAATTTCTTTACTTCCATACTATCCAGCAGTTAAATAGTCTCCTAAGCAGAA

A\_14\_P135159 TGAAGTACTTTAAAGACTGAAGTTAACCCAGCAATCCCATAGTCCATGTGCAATATAA  
A\_14\_P109339 CTGCATATGTGATTCTCCAAACAGATAAGCAACTAATTATATTGCCCTTGGAAGCAAGAT  
A\_14\_P136770

GACCTAAAAAGGGCTTATCAAGAAAAAATGGTGAAGAGGGAAAAACAGAAGCGCAATA  
A\_16\_P15676441

TGTTATAAACCCAATGATTAAGTAAAGCACACCTGAATATACACCTAGACGGCCTACT  
A\_14\_P101512 ATGAAGGGAAAACAGCAGAGCAAGAGTGAGAACAGAGTTTCAGCAGATAAAAATGAA  
A\_14\_P134333 CTTTCCTGTAGTCTCCCTTCAATTTTGTCTCTGTAGCCCATCATCTCCAG  
CUST\_2510\_PI426210822

AAGAAAATAACGCAGTCTTGTATGAGGACACCACATTGTGTATTTTTGTACAGATAGGA  
A\_14\_P202511 CAGAGTCTGATCTTTTGCCCTGTAAAGCAGAAGAGATATATAAAGCATTGTGCATTTCAG  
A\_14\_P123592 CTTGCCACAGAGCATTCTTCTAAAATATTTTGAAAAAGTTACCATAAAAATGAATTACTGA  
A\_14\_P123169 ACTTAGGATCTACTCTTCATTCCAAAAGAACTATGAACATATCCCTTCTGGAGCACTTAA  
A\_14\_P131543 GTTCTCTCCCATTTGTAATAGTCTCACCTCCTTCTTGACAATGTTGATGTTACTT  
A\_14\_P106829 TGAGTGCTTACTATGTGCTTGGCACCACTGATTTACATAAAAAGTATTTTCCATTGTTGG  
A\_14\_P126798 ACCTGAATGCTAATGATGTTGCCCCATTGTGATAAAGCCATGGATATATCTTG  
A\_16\_P58424095

CTGTTGAATAGTTTTCCAGTGGTTTTAATGGTTTATACTGCCACTAGCAGTGTATGAAG  
CUST\_9518\_PI426210822 GGAAATGTACTTGCATTTGGTATCGAGTGGGGGAGGAAAACAATCAGATTTT  
A\_14\_P110444 ATTTAAAAAAGAGGGAATCACAATGGCCTTTTCCATTTAGCATTGGAAAGTTGAATTCT  
CUST\_450\_PI426210822 AGCTCTGATTCCCTGGTGACATGCTGCTGTTTCAGGAAATGGTCTC  
A\_16\_P02840585

TACAGCACTATCAGTTCATTTAGTCAACCCTAGTTAGATTCACCTCATTGTATCCCTTTTG  
A\_14\_P139922 GTGCAATCTTGATGCAGAGCCTAAACAGTCCTATGAAGAGAGACAGTGTATCTTTTAATT  
A\_14\_P106180 ACACAAACCAAAAAGTATGTTAGGTAATGATTTCAAGTGAATTTCTGGACCATTTCAGAGG  
A\_16\_P19960088

AACACTGGGAGAAATAGAAGATAATCTTATTATCGGGGAAATAGTTACTACAGCCACACC  
A\_16\_P16032903

TACAGAGTAAGGCAATCCATATGATGACTAAAGTAGGCTAAATATAGAGGGGAGAAGCAA  
A\_14\_P128230 TAGGGTGTAAATAAATACTCACTGAATGAACTCAAGTTTTACTTGCTGGCCAGGGAG  
A\_16\_P15276780

ACTGAATAAATGCGAAGTTGCTCAATAATCCAAGTATGTTAGAAGTCTCGCTGTATGCAC  
A\_14\_P133466 AGCAGAAAAATCAATTCAGATTACTTTGATGACAGTGAAGTCCAGTCTTCTCTGAAAGAT  
A\_18\_P22841386 GGTAGTCATCTACCCTGTCCAGCATCTTGCTAGCCTGGACATACTTT  
A\_14\_P122820 TCTACTTCTGCTAGTAACAGAAAGGATGAAATGAGGTGAAACTATTTAAGTGTTCCT  
A\_14\_P110093 GAAAGACTTTGGCAAACTTTCCAGTAGTTTCAGTAAAACACATCTGGAGAATCTCACG  
CUST\_9693\_PI426210822 ACAGTATGTCTATGTCAGTGAAGGTGCGGTGACCGGTGCCACTCA  
A\_14\_P129844 GAGCAAGAGTATACAAAAGTGTCTCCTACTTGTATGAACCAAATTTCTTTTGTTCCTCA



A\_14\_P112768 CTTTGATATCTGTAAAGAGAAGTGACTAAAGCCTCATACCTGAGAATTAGATAAACAGAC  
A\_14\_P125358 ACAAATGAGGGCCCACAATAAACACATTTTCGTAGAACGTCAATTGTATTCAACAGTAAA  
A\_16\_P16027445  
ACACACACATGTGCATTATAAAAAGCCACACAATACTTCAATTATCTTCCACTGATGATA  
A\_16\_P02068092  
GACACAAACAATTGCACATTTTCAACCATCTAACTGCTTGTTTTTCAATGATCCCAGTTA  
A\_14\_P136083  
ACCCCAAAGTGAAGTAAGACCTGAAAGATGGCAGTAAAACTTACAAGATGCAAATTA  
CUST\_2820\_PI426210822  
TCATTCTCAGCCACACCTCAAATGTTCTACCTTATTTAATATGTTTCATCCTTCTTGG  
A\_16\_P21660487  
AAAAGAGGTGTCAATTTTCGTTCCCTAATTTGTTCCCTCAAAGAGAGAACCTTATCTGTAA  
A\_16\_P16021018  
AAAAAAAAGTGCATTATGCCTTTTTTCGTCCTAGATGCCAATACAGAGGCAAATTTTACCT  
A\_14\_P119927 GATTTGTTTAATGGTGTCAATTTACTCCCTGGGAAGTAAGTAAGGATAAATACTGAGGCAT  
A\_14\_P115575 GACTGGATTCAAATGAGATGTCTCTGCAGGAGAAAAAGATCAGAACAGAAATTCTATTG  
A\_14\_P137574 TTCCCTGTTGTAAATAATGTTCTTGTCAGTTAATGCCTAATTGCTGCTCTTGCCTAGAAA  
A\_16\_P19781730  
CAGAATTTTCAGCACCTTTCTATAGAAATGGCCTACATCAGAATTATGCTTTTAGACCTGG  
CUST\_8376\_PI426210822  
AAGTAACACAGACCATGTAATGAAGAGGGTATGAGTGTGAAAGAAGGAAAAGAAGAAC  
A\_14\_P127146 TTTTTTCCCACAGATTCAGTAAAAGTTGCTGCCTTTTCAGTGTCTTATATAAACCTCT  
A\_14\_P129400 AAATGCAGGGTTATTATGGAGGAAATAACTCACAGGATGATTCATAGCCTGGCTAAATT  
CUST\_7606\_PI426210822  
ATTCGTTTTGTGACTATTTAACAGAAGGAAAACTTCTGAGTGAGCATCAAATACTTTAA  
CUST\_8999\_PI426210822  
TTTAACCCAAGCCAATTCAACAAACATAGCTTTTAGATCATACTTTTAGGTTTTTTTTT  
A\_16\_P58424337 TTTGCTGATGTTGAAGATGGAGTATGTGATGTGACGAGAATGTGGACAACCTTAA  
A\_14\_P104205 GAAAACATATTACAGGTGAGAAGCCAGCATCTTGGCTGTATTGAAAAAATTCATACG  
CUST\_7972\_PI426210822  
CTACAGCATCTTCAGACATTCATGGAACATTGTAGTATGTGCCATCATTATAAGGAGATA  
CUST\_4432\_PI426210822  
TTGTTTCTTGGCTTTGCTCTTTACAGCCTCTTAGAACTTGAGTTCTATCTGGATTC  
A\_14\_P108161 AAGCAAGTTTTTATTCTATCTATAGCACTGGAATCAGAAGATATGTGCCTGACTCCTCAC  
A\_14\_P114347 CTAGTCCTTCTCATAAAGGCTACAAGTCTGTAAATTCAGGCATCTTAGTGCCTTTTTAG  
A\_16\_P16667020  
ACCATGATGATCCTTATTCAACCTTTAATTGATCACACATCTCTTAATCAAAGCCACAC  
A\_16\_P03670224

CAACTCAAGTTCCCATGGTTTATGTCAACAAAAGAGATGTTATCCCTGCAATTTCAATTG  
A\_16\_P30952649  
CTTTGGAACCTTGCTGTTTAAAAAGACAGATGAAATAAGTTGAAGAAACCTCATGTAATGA  
A\_14\_P122647 GTTCTTTCAGGCACATTCACCACTAGAGAAATTACTTTCTTTGAGAACTACAAAGACACA  
A\_16\_P40614121  
GACACACTTAAAATAACGCACATACAATTTGGATTTTACATGCAGATATGTCTTCTCCCA  
A\_14\_P201586 TCTCTTGTTCATCCACTTCACCACATTTAACAAAAGTGAGTTTGGGTTTATATTTTTCC  
A\_16\_P21633552  
AATACTGTTTACATTTACACTGGTCTTTTTTTGAGGAACCTAAAACACAGAGTCTACCTGG  
CUST\_389\_PI426210822 GACAACCTGTAACACCCTGTGATATAAATAAATGCTGCCTGGCTGGCGT  
A\_16\_P15738978  
ACACAAATCTATTCTTCTCCTTGCTGTAATCTCCATTAATATTCTGGTCTGAACTGCGTC  
CUST\_3989\_PI426210822 ATACACAGTTGCATTTTCAGTGTGTTGATGATAAAAATGGTGTCCGTTGGTGAGCA  
A\_16\_P58424391  
AATTTCTCTGTTCTCCTTTAGAGAAAACTCCTCCAAATAGTTGTCTGTCTCATTGCTT  
CUST\_5416\_PI426210822 AGTGAGCATGTGACTGGAGAGGAGGAGAGGGAACTGCCGCCTCTG  
A\_16\_P20782115  
ACCCTCAGAGAACTAGTATATTTCCGGCAACTAACCAAAAAATAATCAGACACATGTATC  
A\_14\_P201839 GAGTCATCATCTACAGACTGGGTTTGTAAATTAGGGCCTAAAAGGGATATAAGCATAATTG  
A\_14\_P201673 CTGGATGAACTTGGGGATAAATGTGATAGCAATGTATCCAGCAGTAAGAAACGGA  
A\_14\_P122111 ATGCCAATCTATAATTCAACTCATGTTGCCTCTGTTGTTAATCAAAGCGTAGAGCAAATG  
A\_16\_P58424192  
ACTGAATGTGGAGTTAGGAAGAGATGCACAATAGCACACAGTTGTTTAGTATTTCCAATA  
CUST\_6002\_PI426210822  
TTTGCCAAGCTTACAAAATTACTTAAAACCTCATGGCATGGATATTAGAATTGTTTCACAT  
A\_14\_P200874 AATTTGTAAGTTATTTTTTTTTTAATAAAGATTTTTGTTTCCTAAAAATGCATCAAGTCTC  
A\_14\_P100762 CAAGATTTCTGCCACCAAAATCTTTTTTCGAGTCTGTCAATTTTTTTTGCCATCTTCTTTA  
A\_14\_P117770 CTACTATTGCATCCTCAGTGTCTGACACATGGTGTGGGTTCAACATTATTTGTTTAAATTA  
A\_14\_P122974 ACTTTCAAGTTGTGTATCTAGAAAGGTGTTCTGAAAGTAAAATGTCACACATTCTCCTGC  
A\_16\_P58424328  
ACTAACTCTCAAAAAGTCTAATGACAAGAAATCCCAGGATGATAACTGCAGCAAGTCTAAA  
A\_16\_P36230410 TTTCACAAGACAGCCCTAGCCCCAGTTCATGGGAGTTGGAACAAT  
A\_14\_P111522 ACAAATCTGGGAAAGACTTACCGCTTCAGCAAAAATCAGGATTAAATTTCAACAAATTGT  
A\_16\_P21481797  
TAGTTATTTGGTAACACTATCAAGTTTTCCCTCTTATCTAGAAAGCATTTCTCCCCTTCT  
A\_14\_P127051 GGTTGTTGCTCAGATGTTTGATTTATAGTTGGGCAGTGCTGTGTGAAAAAATTAGTAATC  
A\_16\_P58424598  
TGACTGAAAATATCCCAAAGGTTAGAATTTATTGCCTTGTTAGGGTATTAGCCAGTTTTGT

A\_16\_P20831887

ATGCATTTAGTCACTCACATATACGCTTTTTCTCTGTTTGTAAAGGTTTCATAGCACTCCT

A\_16\_P01636289

AACCAACATATTTACTAACATTTCAATCAAAAATAATAAGAAAACCTCGAAAGCACCA

CUST\_8614\_PI426210822 AGCCACGGTGGTGGCTGAGGAAAGACTATCAATTTTCACTGCTT

A\_14\_P132762 AATCTTTACAGAAATATTAGTGTGGCCAAAATTCAGTGACAACAGGTGACCAAGATGAT

A\_16\_P41106537

CCCCTTCATCTTATTCAAAGACTAGTGCTATTCTCATTTCATAATACTGTCTCCTCACACA

CUST\_4714\_PI426210822 TTTATTTTTTCAACAACAAAGGTGGTTCATAATGGTGGGCTGAGGAGGAA

A\_14\_P116391 TTCTGAAGGAGAATGAAATGACAGATATTTGTCATTAAACTGGGCTTCATTCCTACTTAA

A\_18\_P22842832 ATAAACTGCAGAAGATGGAAGAGAACAGTTTAAGTTTGAATGCCTGCTGATGC

A\_14\_P136936 CTTTCTCAGAATCCCCTTACCTATCTTCTTTCAACAAGGATAGAAAATCAGCCTCCA

A\_14\_P118207

GGTTCTGACAACAGTGAAAGAAAATGAACTCAATTGCTTTGAACAAACAGAAGTGAAATG

A\_14\_P139633 ACTCTGATTATACTTTAGTAAGTCTGAACAGTGGAATGCTCTTAAAATGGACCCTTATCA

A\_14\_P101348 ACATATTTACAATTTCCCCACACACCGACCTAATGAAGAATATTCTCTAAGTGTGCAGTT

A\_14\_P122059 AGAGATATCATTTGATTATTCCTTTTAGGATGTGACCCTTGACCTAGTGAATTAACCTT

CUST\_2554\_PI426210822 CGGTTGTGTATGGGCTTCAGCAAGTTTCTGAACGCTGTAAACTTCTC

CUST\_369\_PI426210822 GTGACTGAACCCAGCTCTGTAGCCATATCACACTGAGCACAGAGC

A\_14\_P114366 ACAAAAAGAAATCTTGTCTTACCACAGTGTTTTATAGGAGAGATTGGGAGAAATCATCCT

A\_14\_P113290 AAACCACACATCGATATTGTGCCAATGCCTTCAAACCTTCACAGGTATATTTTCACATCA

A\_16\_P15763204

CTGAAAGCATACTGTCCATTGCAATTACTGAATGAGCATTTAATCTCCATAACTAAGGC

CUST\_4716\_PI426210822 CTGAGGAGGAAGCAACTGAAGTAGGGGAAGCTCAGAAGTCTCTGA

CUST\_8319\_PI426210822 TTTTTCAGGATTTGGAAGGACAGGTCCACGTCATGAATGCCAGTTT

A\_14\_P119530 CAACCATTCTTACAGTGACCCATTGCTTGAATCAGTGGACATTCGTCAGATTTATG

A\_18\_P22841589 AGAGAGGTCAAGATTGGCTGGCCAGGGGTATTAGCCCTGAGATAC

A\_16\_P58424427 TGCTAAATGCTAGGGACTGTTCCAGCCACAAGGAGACACAAAGATCTA

A\_16\_P16904591

AAAGGCTAGACCATAAAGCAGAACAGATTCCCTTAAGAACCTTTTAAAGTCTTACTGCTT

A\_16\_P40453026

AATGACTGTTGTTTCCACAAAATTGCTTTACAGATTCTAAATGCTATCTCTGGGACACTG

A\_14\_P121100 GGCAGAAGGATTAGGAGTTAGTATATTCTCCTAAGTCAGTCTGTATATATAGGCTTCCCA

A\_14\_P121324 TTCAGGAAAAGGTAAACCAACTATGAATTGGAATTATGACAGAGAGAGTAATGGAAGAG

A\_14\_P113031 CTCAGAAAGCGTTCCAATAGAATTCATTTCTCATGGAGAGACCATGATTGATCTATTTGA

A\_14\_P103490 CTGTGTTTCTTGGGAAAACAGTAAATAAAACATGGACTGTCTTTAGAGTGAGTAAAGAC

CUST\_5206\_PI426210822 GACAGAGCTGAGATCCAGTTCCTACAGCCACAGTTAACACCCCCAG

A\_14\_P134753 CTTTCAAGACAATTAATGTTTTGGTCCATCATGCATCCATCCTCATTAAATGAATCGGC

A\_14\_P114241 CATTATCCTAAAAGTTGAAAATAGGTTAACAGTGCACCTGTTTCATCATGGTGAACCTCTGGA  
A\_18\_P13201809

ACCAAAAATTCTTCCTCAAACGAAATCTATATTTGACCTAATTTAACCGGAGACTACTC  
CUST\_8444\_PI426210822 AACTGAAAGAGTCTACGGTGTTACCCAGCATGCTGTTGGCATTGTTATAAAC  
A\_14\_P132244 TTTTTTTTTTTTGCCTTTTTTATTCTTGATGATCCTCAAGGAAATACAACCTAGGGTGCC  
A\_14\_P111980 GCATTAACCTACTGGGAGCACTTCTGAAGTATCCATTCATATAATAGTCACATGCCTTCA  
A\_16\_P00079051

AAATTGGTATGCCTGTTACTGAAGAAAAAGTGGGATAGTATTCTGGGGACATAACATTTTC  
A\_16\_P17201965

AATGATACACCCAACTTCCTCTAAAATCACTGAATTAACAGACCATAGCATACAATTTCA  
A\_16\_P01308591

ACACAGATCATTGTTTCCACCACAAAAAGAACTACACCAATCAACATTTATTCTGCAAGT  
CUST\_10015\_PI426210822 ATAACTGTGCCCTTCCCTGCACTTGACCGCCTCACCACCTAGCAATA  
A\_14\_P103377 TCACAGAATTATTTTCAGGAACTGCTTTTTCTCCAAGCAAAATCTGGTAGTGGGAAG  
A\_14\_P133989 TGTGAAAAAAGAACAAGAATTTTCTGCAAGGATCATATCTAAGTGCACCTTTTTGCTGATA  
A\_14\_P125458 TATGGTTCTTCCATCTGCAATATCAAAGACAAGAAGTCTTCATAGAGGATGTAAGTATGT  
A\_16\_P17591320

TGTCCTTCTCAGTAACTTAACTTATGCCTTCATCAGTATTAAACTATTCCAGTCCACGAA  
A\_16\_P00685035

GTTTTCCCCAGAAACAAATGATACTGGATGTAAAGATAGCATCAGGATTAGAGGCAAG  
A\_14\_P202405 TGCCGTTACATTGTGCAACATCTCCCATAGCATAATTTGTCATTATTATGTCATCTGCAT  
A\_16\_P02240142

AAACCTCCATATCATGTTCTCACTACTAAGGACACAATTTGCTAAAGAGAAAAGAGTGGT  
A\_14\_P123985 ACTTACTTTTATTAAATTGTTTCTGGCATCTGGATCGTATGCTGTAACCTGTCCAATGATA  
A\_14\_P201980 ACTGGAAAGACAACCTTAAACCAATCTCATATAACTTGAATTGAATGTTGGGGTGAAAA  
A\_14\_P113713 GCGATTAGAGAAAAATGTTAAAGAGGTATTGGAAGATTTTGCTGAAGATGGTGAGAAGAA  
A\_14\_P201056 CTTTCACAAATCATTATTGTCACAAATATGCACAAAACAAGTGGAGTATCCCCACACTAG  
A\_16\_P37419034

ACTCACAGAAGAACAATACAGTCATCCAATTGGTATTCTCTTCATAGAATCTTCACAGCA  
A\_16\_P00685347 CAGATGGATTTAGGTCACATCCTGTTCTTCCGTTCTCACCTCTTTTAC

A\_14\_P106660 CTTTTTCCACGTTTAGATCAGCATCCTGCTTCTTCAAAAAAACTGTAGAAGAAGAAAAAA  
A\_18\_P15112805

TTGGTTGAAGCATCTCTAATTATCACACCACTCAATCTTTATTACTTGATACTGGGCTCA  
A\_14\_P136441 ACAAGAATAAAGTCTGTTGGAATCTGTAGAGGTTTCTATACAGTGGAGGTGTGTAGTAAG  
A\_14\_P132822 ATTTGTAAACTGATGCCTGAAAATCACCTACTCAAATCCTGAGCATGATAACCTGATTT  
CUST\_3804\_PI426210822 ATTTCTGCCCGGGGTTTGGCCACCCTGGCCTTGGCTGACTTCTC  
A\_16\_P01600278

AGAAAGTTAACCCAATACCCTACAAAGATAAAGTGGCTTTACTGATAGGATGCACATTTCA

CUST\_8232\_PI426210822 ATTGTTGGAAAGCAGGACCCTGGGCTGCAGTCTGTGGAGACCTGAAA

A\_14\_P130832 CTCCTCACTCAATCCTTCATTCTTTCTCTTCTCTGTGCTCAGATTTTGTATGCTTTTTTA

A\_14\_P126879 TAGGGAAGATGCTAAAAGGTCCTGTGGCCCAATGTAGACACTGTAA

CUST\_8029\_PI426210822 CATTCTCACACATGCCTGACATGTATATGGTGAACACCATTTACTTAGGGCA

A\_14\_P133740 AACGTCTCAAATCCATCCCTGTGACTGACTTCTGTCTAGTTCAGAC

A\_14\_P119520 TTTTGTGTTGTTGTTTTTTAACTCACAACATATGCTCAGGACAAACAGTCATCAGTGCTTC

A\_16\_P15663255

AAGTTTGTGTTTTGATTGGTTACTCATTGCTTCCTCTTTGATAACCAAAGTATAGCATGGG

A\_14\_P100876 AGTTTCTGGAAAATGATTGGTTTGGAAAGACTTTGTTGCAGATAATTACAGCAAAATAGGT

A\_14\_P133374 CTTCCAATAGACAGGAACCAGGAATATCTATGTCGCTCTTGGGAGTAAAATCATTTTAAT

A\_14\_P114113 CTGATGATACTCTTTCATGATGAAGGAATTGGCTGGTGCCAAGGTAAGATG

A\_14\_P109270 CAATCACTTATTCTGATTATAAAAATGATGACCTACAAAGAGACCCATGTTTCCACCCAG

A\_16\_P21552639

ACTAAAACCCATCTTCCACTAACTTGTCTGAGATTTGACTCCATTCATTAACCCCTTTTCT

A\_14\_P112275 GCGGCGTGGATACAGTGACACGAAACACCCAAAATCTCTTTTGAAG

CUST\_2416\_PI426210822 TAGATCCTGTGAAAACCTCCCCCTCCTTGCCCTCGTGACTTCTCT

A\_14\_P115179 TTGTCCGCCCTCAGGTTTATGAGCAAATCGTAAATTCCTAATATCCTAGAAAAGATTTA

A\_14\_P136855

GAAATAAAAATGAAGTCTTCTGCCAAAAGAAGGAGAATTA AAAAGGGATGGTCACACAGAT

A\_14\_P125007 AATCCCAGAAAAGCAAGACGTTTGGGATCAGATCATTTTAATACAATTCCTTCCATTCAT

A\_14\_P110352 CATTGTAAATCTGACACTCGTTAAGATTGGGCTCCATGTTGTTTTAAATTTGAAGAGTC

A\_16\_P15208792

AATTGAGTTAGAAGTAGATTCCACCACATTGTCAATTA CTCCAATAAGACTCCCAAAAC

A\_16\_P20392165

TAGAGCCATTTAATCTCATTTGTCTCCCCATTA CTAACTTTATTAGTTGCTGCA

A\_16\_P58424069

ACTCCACTAACTCTGGGCTTTGTTAGTAAGGAAAATGGGAAGTATAAATATTGGGAAGAT

A\_14\_P101256 CTAACACACTTTTCTTTTATCATTTTAGTTGAGAAATGCTATGGTGAATCGAAAGACGGG

A\_14\_P136658 TGGAATTTTGATTAAAATACTAATTTTCATCCATGGGAGTTTTCTGATGCTCAGCGAGGT

A\_14\_P132392

AAGAACTCATGTGCAGAAGAGACATGGCATAATCAAATTGCTGAAAATGAAGAGGAAAAA

A\_14\_P131626 AGTAAAATGGAAATAGTCTCTGGGAGGCTTGGAAATCAATCAGTAGAAAGGGAAAATTAAT

CUST\_8956\_PI426210822

GGTGATGCACACACGAGTAGCATGAAATTAGCCATGTT CATATTAAGGAGCAATC

A\_14\_P122075 CTTAGAGTCCTTTAAGTCAAGTATAAAGGCTAACATTTTATTAGTCTGATTTCTGCCAC

A\_14\_P101380 ATACCTTCATAGTCCCTTGCTTCATTGAGATGTAAGGAAAACATAAATGGGCTCTCAG

CUST\_9815\_PI426210822

ATTGGAGCAGAGTCTCTCCTTTAAAAAATAAATGGTTTTACTTGCCTTTTAAATGCTC

A\_18\_P22843577 CCACCTACGCATGCACTGTGGTGCTACTGTTTACCTAAATCAGAAAGC  
A\_14\_P132475 AATGATGACAGAAGCTGACTGCCCAAGGTTTCTATTGAAATATATTGTCTAGGCTCATT  
A\_14\_P120070 CGCAGATTTTAGAATCTGGAGAAATGTCCCCTAAACTATTAACAGTCATTATCGTCTCTG  
A\_14\_P101506 GAGGCCTGGCTTCACTACAAGCAGTATGAGGAAGGTCAAAACTCTAATATT  
A\_14\_P115981 GGAGAGGATTATATTTTAAGGAAATGTTTGTGGCTTTGGCTGTTGTTAAAATCTGGCTT  
A\_14\_P116539 GGCATCTTCTGTGGCTTTGGGGTTAGATTCAATTTTCATGTTGTTATGTGGTTTC  
CUST\_1210\_PI426210822 TGGTTTTATCAGAATGTGTGAGAAAACGAGAGCTTTGGTGGGACGATGTAT  
CUST\_2097\_PI426210822  
TCCCTCATCAGTTAAACAGTCTTAAAAGTTGTACCTTTTTCTGTCACCTTCAGCTCATG  
A\_14\_P100945 ATAGAGGGGAAATAACTGGTTTCAGTGACTCTACCAGAGAAACAAGTTTCACATACTAAA  
A\_14\_P129034 TAAGGAAAAAACTTACCCTGGAGGTTCTCAACACATCATAAATTCAACTTCCCTTATCT  
CUST\_8911\_PI426210822  
ACTTGTCTTTCTCTGATTACATGTAAATTAATTAAGCCCATCCCGTTTTACAGGGCAG  
CUST\_5073\_PI426210822 CCTAGAATGGCTGGCTGGGTGAAATGGCTTGTGTGTCTCCTAAA  
CUST\_6250\_PI426210822 TGGGTTAACATGACCTGCCCATAAATCAGTTTGCTGCAATTGCAGTG  
A\_16\_P17994021  
AAGACCTTTAGCACTTCCATATAGATCTCAACATCACTCAAAAACTTTCTTCAACTGGG  
A\_14\_P134449 GAGGAAGAAAACCTGAAAAAGACCCCAAAGAAGAAGATGAAAATGGTAACTGGAG  
A\_14\_P119659 TTGTGTCACAAACACTGACAAATACATGTAAGATACAATTTGGTCCAAACGGAAATGAGT  
CUST\_6827\_PI426210822  
TTGCTTGTACTTAAGAAAATAAAATTATATGAAAATTAATGTGAAGCAGTAAATATAGGT  
A\_14\_P201201 GTCTTGAACCTCAATTGTGTTTTCTGCAGTTGGTAAACCTCACAAATGTGGATATTGTG  
CUST\_4460\_PI426210822 ATTCTGGAGCTCCTTTTTTAAAAGGAGTTACATTGCTTTGGGAGTTCAGGAC  
A\_14\_P201901 AATTACCTCATTCAAAGAAAGGTTTAAAGTAACTTTGGTGTAGAAGAGGGCCAAACTCAA  
A\_14\_P111966 AACAAATGTTTCCCTCACCTGAATTTTCAATTCTTTTAAACGTCTGATTAGCAGAAACGAG  
A\_16\_P21112234  
CTCCAAATCACCTTGATTCATATCAGCAGTAATAATCACTTGTGTTCTGAAAGAAAGGGC  
A\_16\_P02328958  
CCCGGCCTTAATGAGATAATCAATACTTGTCTCGGCTTAATTTCCATCTAATTGCTCTT  
A\_14\_P133702 TGTGTATTTCTAGTTCCAAATCAGGGTTCTGACTGATTCAGTGGCTGAGACAATATAAAA  
A\_16\_P02858968  
AAAACTTACAATGAAGATGATTGGCCAATATTGGAGATCCATATAAAGTTTGCTTTGCT  
A\_16\_P15050533  
TGCTATGGCAAATAGATGTCAAATAATTGCAGGTTCTCTCATTATGTGCATACTTTGGGT  
A\_18\_P14804998  
ACCTCTACTCTAACATTTACCATTCAAATACACTCTGAGAAACATATTGACTCACTGA  
A\_14\_P130107 ACTATGTGTCCATGTCATTCAAAAATGTGATTTTTTATAATAAACTCTTTATAACAAGA  
CUST\_9871\_PI426210822 GATAGAAAATAGTGGATTTAGGATGACAGACTTCAGAGCCCACTCTGTCTAC

A\_14\_P139722 AAAGTGCTTTGAGCCCCTAAAAGAAAGAAACGTGAAGTCTATACATTATCTTTGTAAGCC  
A\_18\_P22840526 TAAAAGGTTGCATGTTACATATAGAACAAGGCCCTGGGAAAGGAAATGGTCTGT  
A\_16\_P03396229

TCATTTGATCCACTATCCATGCTACAGAAATAATCTTCCTAAAACACATACTCCCCTGTT  
A\_14\_P109957 CTGGTGTGTGAGAGTATCTCCTATTCTTATTTTGTAGGATTTAGAAGGTCACCTCCAATA  
A\_14\_P123340 AGATTCTGTTATTGATATTCCAAGAAATATACACTGCTGTTCTCAGTTCATTCAGTTTCT  
A\_16\_P20165849

AACGAGTCACGATTTTTAGTAGCAAGACATTTTTGGCAAATTTCCATGATAAGACCTACG  
A\_14\_P102133 TGAAACTTCTTCTCCTCTGCATATGTAATCCAAGATCTGCATGTCTAGCATTCAAAGAAT  
A\_14\_P135644 CCTATCTGACCATCTGAATAGGCAAAAGATAAGATATCTATCTCTAAGCCATCCTCCTTT  
CUST\_5366\_PI426210822 CTACAGTTTGTGGATGGGCTGCTCCCCATTTGCTTGTTTCAGGTAG  
A\_16\_P00136215

AGTGGGCTACTTAAACTAGTGTGGAATAATGCAACTTTTTGTCATGAATGTCATTCAGAGT  
A\_14\_P103628 TAAACTTGTCAACCCACTTCACTTTCATACAAAAAAAATATGTTGTCAACCTGGCTCACA  
A\_14\_P201773 TTACAGGATGAAAGAAGTTGGCTTGTGCTCCTAAAGATAACAGTCTCAAACAGGTTT  
A\_14\_P117141 CTCTGACTTTAAATTCTGCCAGGATTTGTTCAACCTGAAACAAAAATCAGTGTTTAAAAT  
A\_16\_P17024454

TTTGATGTCATGCTTTTTCTTTCTTTAATTGCACTACCTCTAAATTACAGCCCATCGAC  
CUST\_1551\_PI426210822 GTGTGACAACACTATGGCTGTTGTTCCCTCCAACAGGCCTGTCTAGTAT  
A\_14\_P133708 AAAGTTCTGTCTTTTTGGTGGGAAAGGTGGGATACAGAAAATGAATGAATTCTATAATCAC  
A\_14\_P111005 ACTCACTTCTTTTTAGTTGAGGCCCTTCTAGTTACCACATTACTCTGCCTCTGTATATA  
CUST\_9425\_PI426210822 CCCAGGACAGCCCTCCTCAGAGGGCAAGGGAAGCTGGGTGACTTG  
A\_14\_P101905 TCTTCAAATGTTAGTATATTAGCATTCTGGCCTATCTGTGCATACTATGTGGAGTGGAAC  
A\_16\_P02341376

ATTTCTGAGACTCCAATACAAGACCTCAATCTCATCAGTTACTCTATTTCATTCTCGACAC  
CUST\_2851\_PI426210822

CCCATCTAGCATGAGCCTTTCACAGACTGCTAAGCATAATTAGAATGAAGGTCTA  
A\_16\_P15310792

CAGACGAACTCAACCTTATGAATCTGTTACCTTTAATGTTCCTTTTACCATCATAGCACA  
A\_14\_P102438 CCTATAGGAACTATGGAAGTTTACTGTTGCTCAAAGGAAGAAAAACATGTTTTGCCAACA  
A\_18\_P22840739 ATTAAGATGATGAATGAACCTTGCTGCTTGCCCTGGTAAGAGAGCCCTGA  
A\_14\_P104375 AAAAATGAAAATACCTTTAGCCTTAGTTTTTCTCTTGGCTACCCCACTGGGTCC  
CUST\_1744\_PI426210822

GCTGATGAATCTGGTGAAATCTGTTTTTGTGCTTAGCTGGGGAAAAAAAAGTTCT  
A\_16\_P02846723

GGAAGATGAGTATTGGCCTAGAGACAAAATCATAAATTAAGAGATGAAGAAGGTCCCC  
A\_14\_P126773 TAGTGGACAAGGTTCCATTCACATGCTCATATGTTTATAAACTGTGTTTTGTAGAAGAAA  
A\_18\_P12432479

TCTTTTCCATTTGAAGATAGGTAAACACATGCATTTTTTCCTGTATAGTTCTCTTACACC

A\_18\_P13620364

AAAACCTGAATGGACTGATGTGATACATGCAAGGCATTTAAAGAGAACTCTATTCTGAGG

A\_14\_P106872 TTCAGTGGCTTAAAAAATACTTTTCTGAGAGGATAAAGGGAGTGATACTGGAAGTTTTTC

A\_14\_P122712 CTTCTTTGCAGATGGTGGTATACTACCTGAAGGTATACAGAAAGGTTTCTGAAATTTGAA

A\_16\_P01416387

AAAAACTAACTTCATCCTGCAGATAAAAACTGTATGTGCCTTACAAGTTGTCAGACTCCT

A\_14\_P131536 CAATTTTGTATTGTCTTCTGTTTTGTAAAGGGAGCATTATGGGAGGAGTAGTTGAAGAAC

A\_16\_P16153604

ACGTGAGCAATGTTGAATACCAGACCATCTCTAGAAATTGGAATGGATTGATACTTAGTT

A\_14\_P107740 GAGATGAAAGGGAACGTCTTTATTTAGGAGTATAATGTTCTTGAGCGAGTGTTATGTCA

A\_14\_P202533 TTGGGGGATTTATCTCTATACCCACAAACGACTAGTTTGTTCCTCAAACCTAAATGATA

A\_16\_P15661877

ATGGACACCTATATATTCTTCACCAAGATTCAGCAATCAAGAATTGACTTTTCCCATCAG

A\_16\_P15876101

AAAAAAAGTCTAAGTGAATTGGCTCTACCTGTAGTTCTAAGCAATCAGAGATTTGTTTCT

A\_14\_P138475 TAAGGAACTTGTGTTGTCATATTGGAATTAAGTGTCCAAAATTACATCGCCACAGAGGTT

A\_14\_P101547 TAAATACACCTCATGTGGCATCAAACAAGAAAGTATATGTCCAGGTTTAAGGATCAGGAT

A\_14\_P103338 ATGTTATGTTAAGGCAGAGATGACAGCCACTTTTTGGACATGGAATGCTTTTTTTTTTG

A\_16\_P16191920 AGATGTCCACTCCAGAAGACAGACAGGGAAATTTGGAGACCTACAG

A\_16\_P02389784

ACAAACCTCCTCCTAATACTGAATACTGCTCAACAATCCTTTTTATTCTAGTGATTTCGA

A\_14\_P202206 CTGGTTTTGCTTTCTCTTGAAATCCGGATTGAGTTATTGGCAGTTAATCATTAATTGCAA

A\_14\_P117463 AAATGACAGTATCAGGCTCCAAGTGTTTCATACCTTTTTATTACAAAAATCAATAACTTAA

A\_16\_P03588331

CCAGAACACAATCAGTATCATTTCCACTTTTAACTTTACATGAATTTTCCCATAGGCAGA

A\_14\_P130835 GTGAATGAGTATGGTGTCAAGCCTCTTAATTACTTGTCTTGCCAGGCTTGTG

A\_14\_P109098 CTTTTCTGAAGTCTTTTTTAAAAGTTAAAAGAGAGGAAGTGTGCTCCAAGTGTCAGGATT

A\_18\_P22840847

GGATTTTCTGAACCATGACTCCCTCTATCAAGATAACTCATATATGCACTTTGCAAAAACA

A\_16\_P00676148

AATGTGCCTCCCAAATAAGTAAAAACCTTTTTAAGAAAAATAGACAAGGTTGTGGATTGG

A\_14\_P138148 AAATAAATATTTTTGTTTTTCCCCTCTTCTATCTTACAACAGGGGAATGGTGGAAAT

A\_16\_P00134028

AGCCTCAGACATGGTTTCTTTTTAGTCTACTCTTAGAAGCATGCTTAACAGAATCTTCAA

A\_14\_P110786 AGGTAGATGAATAGGATGGCAGAGATGGACTGAATGTGGAAGCCATCATAG

A\_16\_P36287489

AACGGATATCCTCTCACCAATAAACGTGATCTTTGATCCAAAAATTCTTAGTAATGCCAC



A\_16\_P17904758 TCCCCATTAACCTATTCCACAAATATCCTCATATGATCTGATCTCTATTTCCCCATAATGA  
CUST\_4098\_PI426210822 TCACTTGGAGTAGAAATAGAGCCCTTTATGATTCGTGTGCTGGTCTTTCTTC  
CUST\_8784\_PI426210822 ATGTCTCCCCAGTACACAGAAGCTGCTTTTCCAGCAAGTTCTCTTTGTTA  
A\_14\_P127777 TTTCCCCTTTCTTTTTCTAAACAAGAGAAGAAAAGCGTAATAGAGGGGAGAACACATAAT  
A\_16\_P16458174  
TTTCTTCCAGCAAATAAGAACTACTAATTCCCTCCCATCTATTACTGTTCAAGCAAGAT  
A\_16\_P16186536  
TATGGCATCATAATCTCTACCTAACAAAACCCTTAATCTGTTTTCTCTACCTCGTTGTCA  
A\_16\_P02166171  
CTAAGGAACTCAACTGCATTAACCCTTCTAACTGATATCATGGGAATCTTTTTCCACCAAC  
A\_14\_P107537 CAGGGTAGGTATGATTTTAAGTTCGACTATCTTCTTCCCTACTCCATTATTTGCAAAAGC  
A\_16\_P20258893  
AAAAGGTGACCCTTTTAAAGACATATTTGTTAGTTGTGAGTGACAGAGGTTACAGAGTCA  
A\_14\_P103953 AAACAAACAAATGTTTTAACGATTCCAGTAGAATCCAATAGGACTAAGGGCCTGGCT  
A\_14\_P109214 ATGAAATTCCTATGGGTCTAAAAGATCATACTGGACTACATTTCTCAGTCTCACTTCTCT  
A\_16\_P36411830  
TCAGCAATTTGCTCAGTTATACTTTACCTACCCTGACTAAATATTTTAAGTGCTGCCACA  
A\_14\_P131836 TTTGTTATTTGGTTACAGTAGGAAAGTCTGCAGTTGCCTAGTAAATATCCATTGTCCTCT  
A\_14\_P138349 GAGAAATTACTTTGGTTATGGAAGTACAATTGTTTCCTTCTTACTCCTTCTTCT  
A\_16\_P15670806  
AGTGTCTGCCAAGAATCAATTATTTTAAACGCTACTAGTCCTATCACTCCTACTCCTACT  
A\_16\_P02314207  
AACTTTGTATCATCAGAAGAGTTGCTTTTCTTTGAACTATCTGAATTACACTTGGGATGC  
A\_18\_P22839598 CTTCTGATATGGAGTGGGGCCTGCTTGCCTCTGTCTGGACTGACT  
A\_16\_P15947174  
TGCCAGTCTGATTCCTAATCTTTACCCATCACTTCTTTTGAGATCCAAATAAATACTTCC  
A\_18\_P22229971  
ACTCTTGCCTAAGAAATGTCTCTGATAATCTCCTTTTCTTAATGCATACAGTCCACAATC  
A\_14\_P109483 GAAAAATGGTCCCCACAGCCATAAATTAATTGAGAAAAGAAGGTTGTCATTATTTGAAC  
A\_18\_P16999062  
GCAACCAGAAGTTCTATCACATTTTCAGGTCAATAGCAATATCACCTTATATCTCAGCCT  
A\_14\_P135505 TCCACCCATGAATTTATGATTATGTAACCAACCATGAATAGGACATGGATGCTTCTAGTA  
A\_14\_P137438 CAACAACCTTACATCTCCAATGAATTAGTGTAACCTCTCCATGACTATCAGAGAAGATAGG  
A\_14\_P136910 GATTTCAAGTTTTCTTCTTGTGATTGAATGAAGAATCAGCAAGTTTCTTCATCACCTTCA  
A\_16\_P16907433  
AAGCCATAAAAACTAGTAGTTTCAAGGCAGAACATACATGTTAAATTCATATCCACCCA  
A\_14\_P134902 CCAATAACACAGACACAGTTCCAAGGAAGTTGATAGTCACAGGTATGTTGCCTTATAAAC  
A\_14\_P119257 AGCAATTCAATTCAAACCCGTTTATGGAGCATCAGATGTGGGATATTGAGGTGAATAA

CUST\_4280\_PI426210822

AGGAATAAACCTGTAGTTGGAGAAATAACAGTGTGACTTCTCCAAGACTGATTGG

A\_14\_P119285 TAACCATGCCACAAATTCATGATCATGCTGACCAGATAGCAAGAAAACCTTAGAAGATAA

A\_16\_P18249964

TGCAGACATACCTCCTTCTATATAGCACATCACTTTATTGATCGACCATAAGATTCATGG

A\_16\_P00414456

ACCTACATTTTCCTACCATAAATTGAACCATTTTCCTATCAAACCAATAAAAATGCAAAGTC

A\_14\_P105240 CGTATCTGAAGGCCACAATGATGTTCTTCAAATTCCTCCATTCCACATACTTGGATATAA

A\_16\_P15635009

CCCTATACCTATGACCAATTTACATCTAAGTTCTGACATTTAGCCCTAAAATCTCCTTC

CUST\_418\_PI426210822

ATTGTGGGGTTCTAGTTGTGTGTCTCAAATGAAATTTAAGATCTAGGCTCTGATGG

A\_16\_P00685256

CTGGAATTTATTTGCTGGAGCATTTTCCATTTTCATATTCAGTTTACACCTTGGCTGAAG

CUST\_7437\_PI426210822

ACAAAGAGAAAACACATGGGAATGGTAATTAATGAGTCCATGTTTAAGGGGCACTTA

A\_16\_P01455144

GCTTCTACCCAGTTTTTATATTGACCGCTTTTTTCATTCATTTATGTGCAAAAACCTTCCTG

CUST\_4967\_PI426210822

AAAAAACTTTTTTCTATCTACAAGTGAGGAAAAAATATTGACAGTGTGCCCAAGCTTC

A\_14\_P125301 CTTCAGAAGGAGGCAAGGATATGTGGATGTGTTAACTACTCTATATATGACCCGTTAATC

A\_16\_P58424091 CTCCCTAATTGCAACCCTGCTTTCTCCTCTCCAGAGGTAACCATTATC

A\_14\_P129409 AATTAGTAAGATGCCTTTTAGAAAATCCTAAGGAAGGAACCTTACGTCATCATGAGGCTA

A\_14\_P109753 ACATTGGCAAATGGGAAAATGACACCAATCATTTGATTACAGAAAATGGTTTTATAAATC

A\_14\_P135403 TAGCAAACCTTTTCACTGATGCCTCCTCTAGAAGCATTGGAGCACTTAATAAGATAAACTT

CUST\_5808\_PI426210822

GAGAAAATATTTTCAAAGACAACCTGTATTCTCCAGGGAAACCTGAGATGAAGACCAAG

A\_16\_P19140994 ACCAATTCACTCCCAATATATCAGTTATCCCTTCTTTGTTTCATCTCATGCTTTATCTTCC

A\_14\_P139825 GTGCAAGTGGACTGTTCTGTGGATAATTTAAGATAGATAAATAAAGCAATGCAATGGCCT

CUST\_1452\_PI426210822 TCAAAAGTTTCTACCCCTCTTCTTGCCAGCTTAAAATTATAACTGCAGCA

A\_14\_P103777 CCTAGTTTAGTTTGTGGGAACTTCCATAAACTAAATAAAGTAGAAGGGCTCCTATTGG

A\_18\_P14137797 GGGGAGTCTTGGATTTTAAATCTTCTAAAGCAGCACAGCATCTCTTGAAAAGAAA

A\_14\_P201468 ACAAAGACCTTAATTTATGGAAGGTCTAACAATTTGAAATTTGGCTGCATTCATCAGACC

A\_14\_P117344 CGCTGGTATTTCAAATGCTTCTGTAAATTACAATACACTCCTTCTACAAGACCTTTGCT

A\_14\_P134569 CCTTGAACATAACACTAACAACATATGAAACTGATTAGGAGGACTGAGGTGTTTGAAA

A\_14\_P135729 ACTGGTCTGTAGCATTACTGCAGTTTAAAAGGAGTCTCATGTTTTTAAAACCTGGTCAGTA

A\_14\_P136695 CATTGCTTTAAATAATTGTTTGGTTAAAAGTTGTGGTTTCCATTCTCAACCGAAATGCGT

A\_14\_P107912 AAAATTATAACTACACGGCATTCTTCTCCAGTTCTGACACCTTTTTAATAGAAATCACTGT

A\_16\_P17478034

TAAACCTGCTTCTCTATTTGAACTCTCTGATTTGTCCCATACTTACTACTCCTTTCCAAA

A\_14\_P113722 CTCCCTGACTCCTTTGATGTTCTATGAACACTTTAATACGTTAGAGATCACTTAATGCAG

A\_16\_P17649980

AAACCCTAATCAGTCTCCTCTTTCTGTATTTGTCATTGAATGTCTCCACAACATCAAAAA

A\_14\_P113998 CTTATGAAGGTGGAAAGACATCCACTTTATTCTACAGGTGGTAAAATGGAGATGAAAATG

CUST\_8958\_PI426210822

CATATTAAGGAGCAATCTAAGATCATTATTGCTGTTTCTCTGGCCTTATATTAATAATAGTG

A\_14\_P114129 ACTAATTTGTATCAGAGAAGGACTATATTCAGTAACATTGTTATGAGTTTACCATTTTG

A\_14\_P109665 ATATATGACGTGGACTACTTCAGCACAAATGTTTTGGAAAATTCACACAAATTTCCGGTTCA

A\_14\_P103685 TTTTTCATATAGACACAGTCTACGTCAGTGTAGTTTTTCCAAGAATCGAAAGTGATACGG

A\_14\_P108949 ACTATGCTGAATGCATATGTGGGAAAGACAGTATAATTTTTGGTCTCAACAGCCATAGAAA

A\_16\_P03003233

AAAGCAGGAAACCTTTATGTGATCTTAATGATAGTATTTCCCGATGACTAAAGAGAATCA

A\_14\_P119796 GGGAGGAGAAACTATAAAATGCTTCACTGCCATTACAATTTTAAAGAATTTTAGTTTCTT

A\_16\_P20839989

AAGGTAGGAAAAATGCTAGCATCTTCGTAACACTACAGAAATCTCAACTCACCAGAAAGTTA

A\_14\_P110883 CTTTCCCACTAATGACCGAGTTGCTGTGCTTTTTACTTCAGCAGATTTGTAAAAAAGA

A\_14\_P122154 ATCACTTAAAATACAATTTATCAAAGACACGAAGGGAATGTAGATGTTAGGAGCAAGGGG

CUST\_673\_PI426210822 CTTCAGAAAAGACTCACTCATGGGCTGGCCTGCGGTAGTCTTGCT

A\_14\_P105745 CTAAGCCTCCAAAGAAAAGAATCTCACTTTTTTCTCCCTCAGACTCAAAGACAAAT

A\_16\_P19899604

AAATAGCAAGACTGAATTAGCATCATGGTCACATATTGAACTTTCTTCACACGTTTGGC

A\_14\_P137648 CCTTAGAGAATTTATGGGGCTCAGCACTCCTGAACTCTTTAATTTAAAGATTTACTGCTT

A\_18\_P17208674

ATTGAGAAAAAAGCATCTTTTAAGACCCAAAAAACTGAACTAGCAGAGTAATGCCTTAT

A\_16\_P20487042

ATGTCCCTCACTAATACCACACTCAAGTTCATAAATGTATAGATCCCTCATAACACATCCT

A\_16\_P18993966

AAGTATATCTGGTATGTCAACAGTCAGAATTCCTCTACCAAAGACAGAAACCATGCAATT

A\_14\_P106409 ACCATCGATTTTGTGTGTATGCATAACTGCAAAAACACATACAGCCATAAGTGTCAGATA

A\_14\_P103242 CTGTATGCAAACAATAAGACAACAAACGCAAAAAGGCTTTTTAACTTGTTGCAGTTTTCTT

A\_14\_P127196 ATATTAATTAAGAGTGACTTCGTTAGCAACACGTAGACATTCATACATATCCGGTGGAAG

A\_14\_P103804 AGGCACAAAAAGGAATAGGTGAGAATGCAAGACAAGCAATTAATCCTATTATCCTTGTTT

A\_14\_P136092 GTTTACAGAAAGGAGTCAGTCACTAAAGAAAGTGTGAAAACCTGGGAGAGTAGGTCAAT

CUST\_9115\_PI426210822 ATTTCCCTTTCCAGATCCCACCAGGGGCAGATGAGGTGTACATT

A\_16\_P16191633 TGAGGAGTAAACACCATAACCAATTTCTGGGACAAAATAGCCTGAATGCTGTT

A\_14\_P109264 CTTACTACCCAACTTCAAAAAGTAGGACTCTAACAATAACTTCTGTTCATATCTCATCCTGT

A\_14\_P136212 CTGATCAAGTAGTTTATAGCAGAACTTTACTTAAACGGAAAATTATGGCCCTACTGATGGC  
A\_14\_P119877 ACTTAGGAGGGTATATTTCTTTTGCAGGAAGAAACCAATAGTTTTCTGAAAGCGATTGAA  
A\_14\_P127038 CTTCTGAAGACAAGGATCGAAGGACTATTTTAAACAGTGAATAATGAAAGAAATGAAGCCC  
A\_18\_P22841901  
TAAAGTGTTAAATAAACTGTTTAAAGATAGTGTGGGCGGCCTCGTTCTCAGAGAAAAGAAA  
A\_14\_P201803 GTTTTTAGGGTTCCTTGTGTTGAAATCACAAGATACAGTGACACGAGGTTATTGTAGGTG  
A\_14\_P106449 ACCATGTATTTGCAGGGTGTGGTGTCTATCTGAAGAATATTTTACTTTCAAAGGAAAGAT  
A\_16\_P30952626 AGATTTTTCGGAGGCCCCACTGATGCTGTTCTCTTCTTCAATTCTATCAAG  
CUST\_9258\_PI426210822 CTTGAATGCCCTCTGGTGGCGAGAAAGAACGATTGCATCTTCTTG  
A\_14\_P106900 AACCCAGTAAAACCCTAAATCCTTCCCCCTTTTAAACCACTATTCTTAATTTTGAGTATAT  
A\_18\_P14134209 ATTCCAAGACCAGGGTGCAGTGAATGACTGAGATCCCAAGATGAAG  
A\_18\_P15579111  
TTTTCTGCCATTCTACTAGACTGTATCTCTTTGATCACTACCTATGTGTCCAAATCACTG  
A\_14\_P138439 GAATGAATTAATGAATACAGAACACTTTTACTGCAACCAGTGGCAAGACATTCAAAGAGA  
A\_18\_P13153884  
AAGCACCATTTAGGCCTTTTATGATTCACTGCAAGCATTTTACATTTGTCAACATGCAAT  
CUST\_6823\_PI426210822  
CTTCCTTTTAAAGCCAAAAATTATCAGTCATTGTCTTAATGAAGGATTGAGAGAGAGAGAG  
A\_18\_P22841628 AGAAAGAAGGTGGGTGACTTTGGCACCGTCTAAAGTATAGGTCACATCT  
A\_14\_P136398 ACGCATCTAGAAGATGCAGCATTGTTTAGAGGACTTTACACCACATTACTTTGTTTTTT  
A\_14\_P106377 GTCATTGAAGAAGATGATGATGAGCAATAAGTAGCAAGTTCATTACATAGGTCACATCCC  
A\_18\_P15264412  
AACTTACCTCATCTCTAGCATCTTTAAAACATCCTTTCTGATGATAAATGTGTTTCATGCC  
CUST\_4486\_PI426210822 GGCTTGGGCGGCCTTGTCTGGTGCTGGAAGGCTCTCTTGGGTTCT  
A\_18\_P11851342  
AAACCTTTTTTCTGGCTATAAAAGACCCACAAAAGTCTATACTTAGCATCTACCCCAAG  
A\_14\_P131027 TCCACTCTCTGACCAGATAGTCTCTTAATGTAAACCAAAAATGTGTGGGAATACAAAATTC  
A\_16\_P01132839  
AAACCTGTATCATTTCTAGTCTATACCTTCAGTGATTCGATTTTTTTTTGCGCCTCATGTCA  
CUST\_1446\_PI426210822 GGAAGGTCTCCAGCAATGTCAGCCTCACATGTGATTAATTTGAGTCAC  
A\_14\_P124333 GGGTTTTGATGCTGTAGTATCTGATATAGTTATCCGCATTGCACAGATATCTTCTGTGAT  
A\_14\_P125826 ATTTTCAGAAATGCTCCCTAAAACAGGACCAATCAGAATGTTTTTTCTTGACAGTTCATAG  
A\_14\_P138795 AACATTCATTTATGCGCCATATATTTACCATTCACGATCTCTGGCATTTTCATCTAAGA  
A\_14\_P104390 CTCTTCTTCTGAAACCTGTAATTTCAATGTCTTTTCCCTTTCCCTTCAAATTTGTAATTC  
A\_16\_P16913146  
ACCCCTCCTTGACAAATTATTAATCAGTGCCTTGGATATATTCATAATGGTAGAACACA  
A\_14\_P108322 TGTGGTCCGTGTATGAGGAATAGTGTTAGAATACATCTAGATCCTGACATACTCTGG  
A\_16\_P01091480

ACCCAACAATATTTCCAGTATATCCAGATGATTCTATAAAAACCTGTGAGTCTATCCCCA  
CUST\_6341\_PI426210822 CCAAAGTCAGCTGGGCAGGGACATGGACGTGCTATTTTTTTTAAAGT  
A\_18\_P22841249 AAATTCCTCCTATTGCAGAAAGCATTGATTTGCAGTTTCCTGAATGCGAGGC  
A\_16\_P00920671

CCTCATCTCAATCTTTCAAGTGAATTTTCTCCTGCTAAATTGCTTCTGATGATCCAAGAT  
CUST\_3303\_PI426210822

ATATTGGTGCATATAGAGCTTTCCTGTTCTTTTTTCAGTAGTTCTTTTTCACTATTCCTTG  
CUST\_334\_PI426210822 GCTTGGTAAACTATGGCCTTTGGAGCAAGTGACTTCCAACATCTTCTTT  
A\_14\_P126599 AGAGCACCTTAGTCTGTTAAATGACAGGCAATGAGAATAACGCTGTCCATCAATATTTAA  
A\_14\_P114762 CTTATTTCTCGTAGAAACATCTTCAAGCACCATTTTCCCTCGAAAATATATCAGACATT  
A\_16\_P00519323

TAATGCATTCCAGGATATCCAGAATCAAGATCTCATGAAGAACAACCAATCCATCTCAG  
A\_16\_P36797540

ACCCATAAACTAGGACTAACAATTCCTACTGAATCCTTACTAGAGTATCTGTCTGTGTCA  
A\_14\_P106356 TGATTTTATCCACACTAATCATGGAATCCACAGGAAAGGAATCTGATTTGAAATGGTCAT  
CUST\_4623\_PI426210822

GGTCACTGTTAAGGAAGTTTGTATTTTTTTTTTTAACTTCCAAATAAAGCTTGAAGTGTC  
A\_16\_P16191227 AGATTCAGACCCTCTTGGACTCAGATACTTGGTTCTGTGAAGTAGTAGTGG  
A\_14\_P200215 GTGTATGTGCATGTCTTCCCTAGAAAGTTATGTTATAATGGTAAGGAATTCCATTTTGTG  
A\_14\_P109305 TTATAAGCAGTTCCTTGCAGAAGAGGTCTGTAATTATATGGAATCTTCACCAGAGATCTG  
A\_16\_P02262317

ACACAATGTGACAGCAATAAAAGATGTTCTCTCATTACATTTTCATTAGCAGAGACAACCC  
CUST\_1694\_PI426210822

GCTGAAAGATTTCCCTCTAGAAATTTTGTGATTTTAACTGTTTGCATAGAATTTTTTTTC  
A\_16\_P00685466

TCCAAATTTCACTACCTAACTTGGGAGAGGAATTTTGCATTAGCAGTTACATGGTTCAT  
A\_14\_P121807 TGAAAGGTCCAGGAGGCATTCTCCTTTTAAATATCTGTGAACAAAAAATTATTTTGGGACA  
A\_14\_P133173 TGCTGTTTTTCTTCCCTAGTTCTGAGAAATCGAGAAACATGATAAGGAATTGGCTGACTAT  
A\_14\_P202474 CTCCATAAAGTATTAAAGGCTCTCTCCACGACTTCTTCCCAAGCCAG  
A\_14\_P135164 CATTGATTGCTGCATAAGTCAAGTGTGGACATGTAGCAAAGATGCAAAAGTCATAAAACA  
A\_14\_P131443 CAATACACATCTATCTTGCTATGGATCTGTTTTTTTTTGTCTGTTCCCTTCCCTAACCAAG  
A\_16\_P03647839

AGTGATCACTCTAGGCAATGAAGAAGAACTTGATGAGGACATGTTAAATATCATGGTCA  
A\_16\_P20109293

ATGAACACCTTAGTAGAGAATGATCCTGTTAGGTGAATAAAAGGCTGATTACATACCCAG  
A\_14\_P111601 CATATGATCCCTTGCAGACTATTATTCTGGTTATTTTCTCCACCTGAGAATCTTTCTCTT  
A\_16\_P38949281

AGCACATTCGACAGTAGAATTTTGAAGGGTCATCTAAAAATAGATTCTCAATGACTGCA

A\_14\_P133395 CTATGTGCACAGGTCCTAGACTTTGAGAATCGATCTCGAACTTTGATATTGTTAATAC  
A\_14\_P108582 TTGTA AAAAGCAGAAAAAGGTTGCATTTGTTCACTTTTGTAAATATTGTCCTGGGCCTGTG  
A\_14\_P125028 CTACATTTTGTAAAGACCAGAAATGAGTCTTTTCAAACCAAAGGTTGGTGTGAGGACA  
CUST\_607\_PI426210822 CTAGTGAGTCCCTCCCTCTGGAAATGAAGGGTTTGGTGTGGTCA  
A\_14\_P102431 CTCTTGGTCTGAAAAGTTGTATCAAAAAATGTAACTAATGCAAATAACTCAAGATTTAT  
CUST\_3719\_PI426210822

GATGTTTCATAIGTAGAGATTTTTCTCTAGGTCCTTCTCATCGATAAGACCTGTTTCAAG

A\_16\_P17298353

AAAATCACCTTACTCAGTGATAAAGGAAGATATAGAAAAGCCTTCCAAGGATATACTCGG

A\_14\_P110733 ACCTATTCTCCAGAAAACAGTATCATCGACCATCCATGAGGTAATTCAGATTCATAATTC

A\_14\_P136992 GCCACTGATTTTCTAGATTACGGAACCTAATTTCCGGATTCTATGAAGGCGAAGATTACTG

CUST\_10194\_PI426210822 ATGGTGTGTCCAGCTGGTCCCTCTCACCTGCAGGGGGCTGGGG

A\_14\_P115357 CTAACTTGTCTCTATTTTCTCAAATGTGTAGTCAACCCGAAGAATCATCATAGCCATTG

A\_14\_P122854 CTTTTTTTTTTATTGTAGGCTTTGCACTTCTGGGAGGACATCCTTGTTTTCTTACCACA

A\_14\_P133263 AAAATGGATCACTAAATCTTTTCAAACCTTTCCCTTTACTTTGTAGGCTGATCTCATA

A\_18\_P14135318 ACACACACTTTTATATGCTAACCATTTCATTGGCCAGGGTGGGAAATAAG

A\_16\_P02184184

TGGGAACATATAGATGAGGAATTCCATTTGCTATGACAATTATTATTCAATGGCTTCCCCG

A\_14\_P135801 CTGCCTTATGTTATGCAATGGGAAGAAGGAACAATTGCCAAAACCTGTTTTAAATGTGATT

A\_16\_P17597696

AGATGCACATTGCCATATTTGTCATGTATGTTCTTCCTGATTGAAACAGTCTTTGTTTAC

A\_16\_P21672580

CTTATAGGACCACTGCATATCACAAAGATTATGTCTCTGACATTTTTCACGAGACCTCTG

A\_16\_P02141457

AAAAGGATCAACAGAAATAACCTGATGTGTATCTTTGCATACATTGCTCTATGCACCTGT

A\_14\_P129115 TTGGAAAGACAACAATAACTTCAGAATTTTCCCTTGGATGGAGGTTTCCTTTTTAAACCT

A\_14\_P114159

GAGAGAAACAAAAGAGCCGTATCTTTTTCAAGATAGGAAATCAAAGCAGAGACTTTGATG

A\_16\_P21571605

ATGAAGGTCTCCAAAAACAGTTTTTTATACCACCCTAGCATTTTTTTTACATTTGCTCA

A\_14\_P126037 AAAAAAAAAATCAGTAGAACAGGACTCAAGTGGGATCTGCCTGTATTTCATTATTTGTTGGA

A\_16\_P35914908

TGCTAGGATTACAACAGTATACTTGGTCATATAATACACATCCGCAATATTGATACTGGG

A\_16\_P00851134

AAGTCCTGAAGAGTCTTATATTGGCTAATGTTGAACGAATTAATGAAATCGGTTATGACCA

A\_18\_P16409445

GCCTCCAGATACTGTTAATATTCCATGCAAATTAAGTCTAATGCAGCACATCTAGTAAGG

A\_14\_P113756 TGAATTTGTTTTAAAGTAAGATTAATATAACAGTTAGCCAGGATTGGAGCCAGGATGGGG

A\_14\_P137297 CAGACCCATTAACAAAAGAGAGGGTTTCTTAGGAACAAAGCAACTATTTTGATTACTGAG  
A\_14\_P106425 TGAGGACATAACCAGAAGATATCTGTGTATTCTGTGCTACCTGAGATAAATGATTGGAAAG  
A\_14\_P128681 GTCATGAAGAGGGTAGGCAGCCTCATAGATATTGTTTTCGATCAGAGAGTTAAT  
A\_14\_P102384 GAAAGACCTGGTTATAGCCTAATTAGTAGTGATATTAACAGTAGGGGACTAGTCAGCATG  
A\_18\_P14132900  
CATGTCAGAACTAGAAAAGTTGGAAGTGAGACTTCAAACCTCTACCTAGCATTGAGCATAAG  
A\_16\_P01556147  
TCTAGGATGTCCAATAGTGCTAAAGATGTGATGCAAAAATTAATGGAACTTCAGCCTG  
A\_14\_P129869 ATTTAACAACAAACCAAATACCTTTATCGCCAAGGTCTCTGAAAAAAGTTGATCCACA  
A\_16\_P20020767  
AAGAAGTCCTATAAGGCAATCTCCAATTATTGATAGCATGCTCTTCATACATATCCCCAA  
A\_14\_P130364 CTTAAGGAAGATTCAAAGAATCAGGGTATCTTTTCTCCAAAAACACAAATGTCCCGT  
A\_14\_P122210 GACACGAAAATCATCTTTTTTTTTGTTAATGATCTTCGCTCCAAAGTCAATCTGACCACA  
A\_14\_P133796 TAAACTACCTTTTACCTACCTTAAAAGTATCAGCCAAGATTTACGCACCTCGTTGATTTG  
A\_14\_P125070 CAGATTATGGCAAAAACAGAAAGGGAGGCCACTAAAGTTTATCACAAGGCAGAT  
A\_14\_P127929 CTGAAAAAACAGGACGTTATTGTAAATTTACACTTTAGGTATGGGAGATGGAGAGATC  
A\_14\_P100341 CACACTCTTGGAAAGGATATTTTAAAGGAGGTGAAATAATTAATGGCTCCTCTCTAAGCAAT  
A\_16\_P16191219  
GTTTAAAGAAGTGTTTCAGGACCATGGAGTTCTAGATTTACTGGGTAAAACCTGTTCACTC  
A\_18\_P22842463 ATCTGCATTTCTGGTAGAACTAGTCTGTCTGCAGCCTTACTGTGTTTCATGTTCT  
A\_14\_P125420 CTATTTGCTCTTTATTGTAGATTTCAAGCAGATGCAGCCTGACCATTAGGGCCAA  
A\_14\_P108862 TCCATAAGACTAAGTTGGTGCCTAATTAGAGTAAAAACAAGGATGCAAATTGCTTCTTGG  
A\_14\_P139773 CATCTTTCAGATTTTATATCCTACTCCAGATCAAAAAACATCAATGTCTCTATTGCCCAT  
A\_14\_P110568 AATAACGATTGAGATAAAGAATGATACCCTTTCAGAAGCCATCAGTATACGAGACTTTCT  
A\_14\_P104574 GGGGGATCCTACTTTGTTACACATGTTGGGTTTCTGATAAAAAGAGAGTATTTTATTA  
A\_16\_P18912791  
AGAGACCAATCATCTCCAACAAATCTCTATGATCACGACATAAAATGTAATTCCTGGAGT  
A\_14\_P112276 AGTCAGTGCCATTTTAGAAGGAAAATATAGATGATCTTGATGACTTTAGGGGTAAAGTGG  
CUST\_6812\_PI426210822 GGAAGGAGAGGAGTGAGAGGGTCAACCGGAATGTAGTGTCCATG  
A\_14\_P107383 TTCTAAATCCCTGTTTTTCTTTAATGTGAGGCTGCATGAGCCATAATGCATTTAAAAAG  
A\_14\_P101569 ACAGAATGAGGACTGTCCCTTAGTGCCTTAACTTAATTAGCATAATGGTGCCTCCATTA  
A\_14\_P130798 AAAATGATAACAGTGTGTCTTCTTGTCAGTAAGCAGAACTGTTCTGCCTGTAAAGATTCT  
A\_16\_P16708048  
AATTGATTCCATACTCCTTAGGCAGATAACATCACAAACCTTATGAACCACATCCTAGTT  
CUST\_4043\_PI426210822  
CAATGTTGGGATCTTCATTTTGTATGAGAGATTTAGTTACAACAGTGTGAGGTGG  
A\_14\_P138329 CAGTGTATTGCCTATTTAATCTAGTGTACACCACAGCGTATTAGAAAGAACATGGAAGA  
CUST\_4016\_PI426210822

AACGTTTATTTTTCTGATAATAGGTCAAGGTTTTTCATAATTGAGTTTTAGGGGGGCTAAT  
A\_14\_P123399 TTTTATCCCTCGTCTTTATTTTAGCCGAATTTACAGAAAAGCAGTAAGAATGGTGCGAAG  
A\_14\_P105711 AGTATTTGCATTTTAAATTTTCAGTGTGTTTTATGGACCATGTGCTGCTATGTATGCCTG  
A\_14\_P125594 AGCCCAACAAATTCCTCTTCTCAAAAACAGTGC AACCCCTAAGCGTTTATTAAG  
A\_18\_P13436296

TCATATCATGTCAGTCCAGTCTAGTAAACAACGAATAAAATACACTCTGAATGAGCATGA  
A\_14\_P200609 CAGTCTATAAATACAGTCCACCCAGGAGACTAATAATAGTAACCCAGCCACC  
A\_14\_P119170 TTCTCTCTATTGTTTCAGATTTCGATGGGAACTTTAATACCAATGTGTCTAGAACAATTA  
A\_16\_P17853801

AAATGTTTCAATGGACAAAAAGGCATGAACAATATGACATTTTTTTCACCTGCAACCAACA  
A\_16\_P19619234

GGTGAAAAACAGAAGACCATATACATTACAGTGCAGACAAAATTAACCAAGTGATTCCCT  
CUST\_8283\_PI426210822

ATTCAGCTTTCAAATGCCTAACTTCTAGTCATCTTGGCAGTCTGATAAATTTAAGTTTTT  
A\_14\_P200687 CTTTAAACATCTAATATCAAATTATAACTTTGGTGTGCTGCCAAACTTAGCCTCCATGGCT  
A\_14\_P106740 CTAAGTAGTAATGACGTGCAGATTCTCTTTGCATTAGGATTGCAGATTCTAGTTGGAAAA  
A\_16\_P16191763 TTTTCATAGGATTGTCATCGTCACCTTTCAGCACTGTTATGCAAATTGGAGAGA  
CUST\_10426\_PI426210822

ATGTCCATGAATACAAAATTTTAAAGGATGAAAATCTTACCGTACTTTGGAACTTGCTGTT  
A\_14\_P112861 TTCTTCTATTTGCCTATAAGATCTTTTTTCCCGCGTTTATTCTCCATGCTCTTGATCAAG  
A\_14\_P100874 ATTCCTGGCTCAAAAAGAATTATCCCTTTCTCTTATAGCCCTGAACTTTTCCATATTCTT  
A\_14\_P133255 AATGATGTCCTCATCCAGGTTACCTGCAGGGGTTTAGATCTGCATTTA  
A\_14\_P100172 CTGATTTTTCTTTTTAGATTCAAGATGTAGGCACGTTGTATACAATCTGAGGGCATCAGT  
A\_14\_P137092 AAAGGAGAAAGATACAATTTTAAAGCGAAATGGTGGTGATATGCACAACCTTGCAGAAGGT  
A\_14\_P120332 AAAACTAAGTTCCTTTTTTCCAACAAAATTCTGTGTTTCTACAGAGTTGGTGCACACTATC  
A\_14\_P128532 AGACTGAAACTCTGTCTGCTCAAAACCAATGCATCAACATAAACAGTATTATTTCTTCC  
A\_14\_P137127 TTTGAATAAAAAAGAACTGAACAGTTTTGGGATGTCAATAAACACGACCTATCTCTGG  
A\_18\_P13076972

ATTAATTCTAACCTAATCTTCGTTGATGTTTACACGACTGCTCTTACAAAACCTGGTTG  
A\_14\_P125068 AAAACAGCAAAAATCCATCCTGAGAAAACAAAGTCGGTGGAGGGTGAC  
A\_14\_P113254 CTTTGTTTTCAAAGGGATTTTTACTCTCTTTAGGGGACCATAACTTTCTAAGGAGAGAGA  
A\_16\_P00685394

AACCCTTATATCCTTAATTACGTCTTCCATTAACCTGGTTATCCGATTAAAAACCTGGCCACT  
A\_14\_P101168 ATACATATATCCATCAATATATTAGTTTCTGCAGATAGGAGGGTCCAGAAGTGAGAAGGC  
A\_14\_P103406 TTACCTGCTTTAAAGAGGGAAACATATTCATCCAGAACCTGTGTTTATTTGATATGGCAG  
A\_14\_P119705 AGCATTCTTACCAAGGGACCTGGACATGTTATTTTGGAAAGGAAGGAGAAAAG  
A\_16\_P15519060

AACTCAGACTTGGATATCTACCTGCTACCTATCATATCAATATGATGTAGAGGAGTGTCC



A\_18\_P13461818

ACTTGGTCAAAATATGTTTCCCTCATTCTTTATGTTCTACTTGCATCTTCCTTAATCCTC

A\_14\_P139133 TTTCCCTTGCTTTCTATTGGACTAAATCGTTAAGTCCCTCCTAATCCTATTTGTTATTGG

A\_14\_P131795 ACCTTTTCTAATGCTAATATGCATTATACATCTGAGAAGTGTGTGCGTGGTGTATGTTGG

A\_14\_P102037 CTGAGCATCCAACCTGCAAATGAATAAGGAGGATAAAGTTTGAATGATTGTAAAGGAGTA

CUST\_3155\_P1426210822 ATCTTCCTCTACCCAACAAGTGGCATTCTTCACTCAAGCAAAACCTG

A\_14\_P201390 CTATAGATGAGATTTCTCCCCAGTTTTTGTCTGGCACAGTTCTATATCAATAGTTATG

A\_14\_P100881 TGGAGTTTCTTATGTTGCTAATATATAGGCAAGGCTGATGTATTTCCAAAATGCTCCCT

A\_14\_P137938 CTGGCGTGCATTATTTGGTTCCACAGTATACAAATCTTGATATTTCTCATAAATCTGTGT

A\_14\_P101172 TTTCCATTCCAGAAAATCAGCAGTCATCAAGACAGCACTTGGTAAAACATTTAAGATTG

A\_16\_P36487741

ACATCACATAACAAAGACCCCTAATATCATTAAACATCACTTATAACTAACCTTCCCCTGT

A\_18\_P22843028 GAAGGAGATGGGCCCAACTCACCCATAGGACACAACAGTCCATAT

A\_14\_P116727 CTAGGACTCAGTTCATTTAAAGATCATTGGTGTGGACACAACCTCTCACCCAATAAAC

A\_16\_P16191590 AATTCAGACATGAGATCTGGAGACTGGGTGAGAAGATTTTCTGAACCTCAGAAA

A\_14\_P133755 AATATAGGAATTTTTAAAAGTATAATTTAGGAAGGATTATAAAATATCTCTGTAAGAGGT

A\_14\_P126126 CTTCTCCACCTTCCCCAATATCTAATATGTATTTCTCATTCTTAGAATAATCCAGAATG

CUST\_5529\_P1426210822

AATATGTTTCTTTTATGGGTAAGAAAAAATAAAAAGCATTCAAGACCTCTCAGAAAAATA

A\_14\_P100124 CCATTTTATCTCGTCTTCATTTTCTATCATGGTGAGATCATGTAGACAGAGACAAAACCT

A\_14\_P126944 CTTTTTCCATTATGCATTAGCAACTGTTTTAGACTCATGTGAGCCACATGAAATCCATAG

A\_14\_P109525 TGCAAATGGAAAAAATGCAAGCCCATTGGTGGATGTTTTTGTAGAGTAGACTTTTTTTA

A\_18\_P13328116

AATTCTAGCCTAATTTGTCCATATGATAAAGCCTAATTCTAGCCTAACCTGTCCATATGA

A\_14\_P115976 ACCTTGAAACACACCACACTACTAAATAAAATAAAACAATTTTCATACCCTGGGCTCCTTAA

A\_14\_P138189 TTGTAGTCGAATATTCAGCACTTCTGGATGATTCTGAAAGATAAAACAACAAAAGTCAGTT

A\_14\_P111039 GTTTGAAAGCAGGATACATTGGAACCATATTGGTTACAAGGAATGCATCATATTTAGCCT

A\_16\_P03568708

ACAGTGACATCTTATTAACCTCGCCATCAATATCGAAGATTCAATTGCTACCGTTGCATT

A\_14\_P105890 ATTTCAAATCACACGCTTTCCTCTCTTCCACGGGAACAGCCTGT

A\_18\_P14132518 GAGTGCCCTCCAGTGGAACACTGTGCTTCTCATATTTGCATGTGTA

A\_16\_P16191067

GCATGCAGGACTATTTTTTTAATGTTTTATGAAGTTATTGCATCATCCACTCAGTAAGCC

A\_14\_P110905 TCTGTTTTCCCTCAACCCACTGGATCCATCTTTGAGTTATTTAATTCCAACTGTAATAAA

CUST\_5163\_P1426210822

CACATCAGACAAAGATATTTTGTGAGTGGCTCTAAAAATGGGGGCAAAACATGA

A\_14\_P103952 AAAGTTTAAAGATGTGGCCAGATGCATTTAACCTATTAAGCACAAAACCTCCCTTTCCTAC

CUST\_9551\_P1426210822

TCTGCTTCTACTTGATATTTTTCTCTCTTTCAACTAGCATTAAACATCCGAAACTGTATA  
CUST\_7820\_P1426210822 CTTCTGTAAACACCATCCCGGAGCACATGAGTCATGAACCATAAG  
A\_16\_P01559447

CGTTCTGTTTTGATACCAAAAAGTTAGCGTGAATAGCATTATTTTATACAGGCCAGGGAT  
A\_14\_P115074 GGAAGATATAGGTTTGAGCCAGATGTTGAGATGAGATTGAAGAAATCTTTAGACAGCAC  
A\_14\_P126146 GAAGGTATACTTCAAATTATTTATAAATAGCCATTGCTTGCTTACCCAGGACCGGAACTT  
A\_18\_P11802767

AAATTCAGTATGCCACATTACTAACTGCATTTGATACCATAGCCAGCAATTTCTAGTGG  
A\_14\_P132160 GTATTCTGGAAATGAGAAATTCAGACTTTCTGGGGTTTTTCTGTTTGGTATTTGAAATC  
CUST\_3685\_P1426210822 CAGATCATATAACCCGACAGTCAGCTGGAAACACTTGGTTCACATGAGAT  
A\_14\_P101487 AATTGCTCTATTTCTTTCCACGTCCAACATCTTTGACACTTACAGTTCCTGGAATATTTT  
A\_14\_P111632 TCTTTTGTA AAAAGACGAATGGAACCTGAACAGTAAATATAGCAAATGGAGCAATACCAGG  
A\_14\_P132621 CATGACACTTCCAACCTGTCACAACCTACTGGTAAAAATAAGATGGGGGAGAG  
A\_14\_P121943 TGCATTTCCAGGACATACGGCCATCTGATTCACTGCATCTTTATTTCTAAAAGCAAAAAA  
A\_14\_P107215 CTGTCCATTTAAAGAGACTGTGCCCTTTAAAAAGGACAGAAAAACTTTTTTCATTAGGAA  
A\_14\_P112845 TTCCTCACAGATCCCATAATTTCTGCTTCCCCTCACTTTTAGAAGTTAATTGATGG  
A\_16\_P36230132 AGTGAAGTCTCCTGGGGCTGTGTTTAAAGTGCCGTGTTACACCAA  
A\_14\_P111123 TATATGTTACCATTATCATTACCACCAGTTCCTTAATGAGGAGAAACCAGAAGTTGACA  
A\_18\_P26794895

AACTTTTTTTCATCCTTCACTAAGAAATAGCATTTCCTATAACACCTGACCTCAGCAATG  
CUST\_6780\_P1426210822 GTAACATTTCTGGTGGCAGGGAGATGTCAGGACATTTTAGAAATCTGATGC  
CUST\_652\_P1426210822 GTTCCCTTTTCTCCTTTTCCAGGCTGATGTGGGGTGGGTAGAATAG  
A\_14\_P102995 CTGGAGGCTCCAGGCATACTCTTTGGTGAGAAATGATTAATTTTATATTTTTCATTTTGA  
A\_14\_P106205 TGAGGAAATAGGACCGGGCCACACATACTTCACAGGTATTTAACAATCATCT  
CUST\_363\_P1426210822

GGAAGTACTGCTTCTCTAATCCATAACTGAGCATTCTCTCAATTATTTTGTAGACCAA  
A\_14\_P202326 CTTTCCCTTTTATAATGTGCGTGTGAATAATTTAAAGCACCAACTTTTGTATTTGCCGCT  
A\_14\_P119010 ACAGGTTGACTATTTAGGGTTCTTGCCACATTTCTTTTAAACAGAGTAGGGATCTGTAATA  
A\_16\_P17426966

AGATATTCCTATGGGACTGTTACGATATCTTACCTAACCATCACTGCTAACTCTAAGTCT  
A\_14\_P106161 CAGTTAAGACAGATAGTCAAAGACATCAACTTTGCGATTTTGGTAACATCCGATTAACCA  
A\_14\_P128913 CATGACTCAAACCATGTGAATCTCAACAAGTATGTTCCATTTACTATCTTGGAACAGTCA  
A\_14\_P123760 GATGACTTAGGGTGGGTCTGAATCCAGAATTTTAGCGATGTTATCTGGAATAGATTGAG  
A\_14\_P105717 ATGTCTGAGGAAAAGAAATTCATGTTGAAAGTCTCCCTTTCTAGGTTGGATGACCATAAA  
A\_16\_P17779489

CCATACAGTATAATTCAGTTGAAATGCATACTCTCACACTATATTTCTTTGCCTACCCACA  
A\_14\_P128843 CTGTTAATTTTACAGTCCAACCTTGCTAGTTTCTTCTGATCTGGCTTATTTTCTGGGTC  
A\_14\_P126107 TCAGAGAACCTAATATAGCACCGTTGAAACCATTCATTATCCTTCATGTGTGTATGCAAT

A\_14\_P110187 AGTCTGGCCACTACTTTGCCAAATTGGAATTTTGTGTTAAAATTTAAAAGAGATTGAGAGC  
A\_16\_P16191435 AGCAGGGATCTGGGGAGGCTTTTCACGTGGGGGTTGTTGAGATAG  
A\_16\_P17681856  
AATCCCTCAGTCTCTAATTAGAATGACTTACTTGAATCCTAGTTAGCCTTGACAATGCTC  
A\_14\_P102173 GGACATTTTCATTGTTACTTTGTGTTTCAGAAGGAACCATTGTGATTAATCCATCATTGG  
A\_14\_P116420 ACAATAACACAAACAACCTCTTTGTGGGTTTTAGGTTTCGGTAAAATTTAGTTGGGATCTTA  
A\_14\_P118775 CTAAGAGCCTGGAGAACAAGTTTTTATTAAAGTGGAGTCATGACATTGAACGTTTCATGTC  
A\_16\_P17698920  
TCAGACTCTGAAATTCCTATAACTGACCACTATAGATGATGAAAACGTCCCTTACTGAAA  
A\_16\_P36304468  
GTCTTCCCATGCTAAATTAATCATTCTGTTTTCAACCCTTAATTATCTTCATCATCCCCA  
CUST\_7236\_PI426210822  
TGAAACACCTCCCTTGTTTTTATTATGTTTGTGTTCTTCTTATATTTCTTTTTATTGCA  
A\_18\_P13303259  
TCCCGTTGACAACCTGAAATGAAAAAAAAATCACATGAGAAATGGTGATGTAATTGAGGTT  
A\_16\_P16542467  
ACCACGCACAGTAGAATTTATGGCTCCTTTATAAGTGTTCATGACTGATTCCAATCA  
A\_14\_P109904 AGTAGGATGTGCAATATCCATTTACCTGTTACCAATTTATCTTACTTTGTAGCCCCCTGGA  
A\_16\_P16544962  
GAGACTAAGTGCTCACTTACAAAATTGTTACCATCGTCACTTGAAGGATAAAGTTTTGTGT  
A\_14\_P200962 TTCATTTACTTTATATCTCTCCGATGAAGCAAGCAGGCCCTTTCTCTCATT  
A\_14\_P108980 CATATATTCAATGAAATCCATCTTAAAATTTGAGATTTGTAAATGAAAAGGGCTACCTAA  
A\_14\_P134249 TTACCATAAGTGCGGTCGACTGCTTTTTATTTTTACGTTGTGTGTGTTGGAAAAATGCTAA  
CUST\_1167\_PI426210822  
TACTATGGCTTTTAAGGCCACCATTATTTCTCAATGTGGAGAACTCAGTAATGC  
A\_14\_P109261 CGCATTTTTTTTTCCCCTTGCATTTTACTTAGGGCCATAAAAAGTAACCAACACATTTTAC  
A\_14\_P119463 CTGATGTCAAAGAGCCAAGATGAATTCAGAATATTACAATGGTGCTGTTTCTGCGAATA  
A\_18\_P10393863  
CCCCAAGATGCAGATATGTAAGCCAGTTAATAGGTCAAGGTCTCAAATATACTTTTCCTT  
CUST\_1247\_PI426210822  
AAACTTCCTATGGATTCCAAAGATTTCTGTACCACTCTATTATCAGGGAATGACTGG  
A\_14\_P110138 AAAGATGCCATACTCTCTGTTGCTTAACCTACAGGCTAGGCTAACAGTGCT  
CUST\_3199\_PI426210822 ATATATGGTGATAAGTGACTTTATCATGGAAGACCGCACAGGCTAACACCTGTT  
A\_14\_P202079 CATTGAACAGAAATTCCTGGTGTAATCAAATTAAGAAGTTTTTATCTTACGACCTATGCT  
A\_14\_P116446 GTGCAAGATTGATGTCTCCTACCTGAGGTTCTAAGAGCAGAGAGTCCATTT  
A\_14\_P122738 GAGACTGTCAATATTCTGAGATTTAGGAGGTCTGCTTCTTATGGCCCCATCAT  
A\_18\_P26793012  
AAGACTTAGAGTGCCAAAAGTGCCTCTTAAGTCTCCTTTAAAAGTAGCAAAATTCATCC

A\_14\_P131429

AAAAAAGACGCTAAAAAAGAAGCTGAACATCATTACATGTTAAAAACCAAGGCCAGCCAA

A\_14\_P116289 GTAAATCTTCAGAACCATGGTTAGTCAAATTTCCCTAAAGATGTAGCAGCAACTCTCCCAA

CUST\_9327\_PI426210822 AGTGACTACTGTCCCATGGGCCAGCCAGGCCAGTAGAGCCGCAG

A\_14\_P111657 CTTTTCTCAAGTCCATGAAAAGGCCTACTAAGTCTAATTACTTATGCCTCTCTTTGTT

A\_16\_P16703754

GCCTACCATGATTTTAGCCTTCACATATGCTTCACATAACCACTTAAATACCACAGTTTG

A\_14\_P116898 ATTTTTGGAAGTGTATTATTTTGGAACTAGTCTTGTGTATTTCCATTCTGTCCCCACTGTA

A\_14\_P136013 CAGGAATTCAGTAGGCTCTAGTAAGATGCTATACACAGTGAAATTTTTCCCGTCTTAGAA

A\_14\_P108977 GATGGGCTGTCTTTCCCTAGGAATCTCATGATTGTCAIGATTCTTAAAAATGGAATTTTCCA

CUST\_8835\_PI426210822

CTTTTCTTTTTCTTTTGCATTTTCTTCTTTCTGACATGTATGAATGCAAGCTGAATAGT

A\_14\_P103148 TGTTATTTTCTATCCCTCAGCATGCTTGAGAAACAGAGAGAAATAGCAAATGCCTATTGT

A\_14\_P104664 CTGGGCTCGCTGCCTGCTCTTAAGAAAAACATGTATAGCCTATAAATTTTTAAAGGATTC

A\_16\_P20231188

AATACCTAACCTTTCCATATCAACCTCTTCTTTAACTTTTCTGTTAGTAGGACCAGCG

A\_14\_P118717 TAACCTGACTCAGTAACTCTCCCAGAGATAACAAGTGTGTCTACTTGTATAGTGTAT

A\_16\_P16389753

CCATTGCTTTGACACAATCTATTTTCTTACTGATACTGAATGTTACTCACAAGGTCTCTG

A\_14\_P129649 AGTCACTGTCATCACTGCTGCTGTTACAATCATAACCCTCAGACAGAAGAAG

A\_14\_P120441 AACTAAAAACCAGAGGGCTGATGCAACAGAACATAAAGTTTTGTTTCAATCTTTTTTCT

A\_16\_P19516071

TTTTTCAAAGACTAATCCAGAGACCACTATCTATCACCATGCCATTACTCATAGACAAGG

A\_16\_P01766886 TCTTCCGAGAGTAACTGATGGTCATGAATTTTTTACCCTAAATGTCGCCACTAAAGAT

A\_14\_P110211 ACTGGACATGGTTTCTTCATAACCTCATCAGAATTTACTAGGTCATCATCTTCATAATTC

A\_14\_P113022 ATGCAGATTATGATAGAGGCTTCTCTTATCTACAAACAGGTCATCACATTCAAGTCCATT

A\_14\_P136929 GGTAGGTTAAATTCCTACCCGTGCTTCCATTTCAAATAGTTTACACATTTGTACATGTA

CUST\_864\_PI426210822

CTAGAGCATTTGTGGATAATGGTGCCATGGATAGTCCTGTCTAATTAATTGCATGC

CUST\_3167\_PI426210822 GGGAGCGGAGAAATACACCAGATAGACACATGTCTCTGAGACCTTT

A\_14\_P113291 AGGGAGACCACTTAGGAGTAATGCAGTGAGAATGGATGAGGCTTGATTTAAAGTAT

A\_16\_P15985940

ACACCTGGTTACTTTCTGATCCTGATTACTATATAACAGAGGAATAATGCCTTCATAGTCC

A\_14\_P112471 AGAGGAGAAAGAGTAGTCTCATGTTTTCTCAAGAACCAAGATGAATAGCAATACAATTG

A\_14\_P136548 CATCATCATAGATTGGTTTTGCTGAACCAGAAAAGAAGAGTTCGATATTCTTCTCGATGA

A\_16\_P01793828

AAAACAGTCTCGAAGCACAATAGTAGATTCACCAAAGAATCTTTGAAGACTACATCAGCA

A\_14\_P132262 GGTCTCAGTCTCAGTCTTAGATCAAGCAGATATGTAAATTGTGTTTTACACCAAATTGC

A\_18\_P19004684

AAAAACAACCGTCATCTCAAATGTGAATCACTATTAATGTTTCTGCCATCACTGATCTGC

CUST\_4749\_PI426210822

TCCTTTCTCACTACTGAGCCTTCCTCAAGACCTCCTTAACATCCTAACATTATAAATACA

A\_16\_P17851044

AAAACCCAGTGTCTTTCACTAAATACTTCTTGGGATTTATGCCGATAATGACTTCTCATG

A\_14\_P110626 TGGGTAATAAAGGTGGATGGCATGCCCTTTTAAAATATATTGATCCCTAGTTATCTTG

A\_16\_P35965395

TCCTTTTCTTCACAGTTTACTATTTGTTACTTACATATCCACTCACATATCAACACACCC

A\_14\_P125611 CTACATTTTTGATATCAACACTATTGACCGGATTTTCTACTTGGTAGCAGACAGCGAGG

A\_18\_P12390078

CCTGCTACTCCCGATAGACAAGACCTTTTTATTTTACAAAATACCTTGATGTTCCCTTGAT

A\_14\_P133251 CAAAACCTAAAAGAAGCAGCAATTCATTTCGCTTGTTATTGGACTTGAAACTCCCTTTGA

A\_14\_P127127 TTGGTCAGAATTCATGGAATTGTTCTGAGTTCATGGTGTCTTCTCAAAAAGCAGCAAA

A\_14\_P126226 CTGTCAGTGAGAGATGTTGGAATATATGGTCCAATGAAGCACATCCCTCG

A\_14\_P128326 CTGTGAGGTATGGCATCTAGATTTACTTTAAAATCTCAAACACTACTATCCCATGTCATCCG

A\_18\_P22839040

AGAAGTCTGTAATTTGCTCTATCCCTTGGATTTTAGTGTTCACTTGCTGCTTTCAGATG

A\_14\_P130097 AAAATTCTGTCAATTTTTGGTGTTCACTATAACATCGATGACAAGTTCTGATGCACCTTCT

CUST\_2483\_PI426210822

CACAATAGAATAGGGTGTTTTGCCTGGTGTTCAATTTTAAAGGTGAAAATAATGTTGATAT

CUST\_3580\_PI426210822 CCTGTGCACGTGTGTCCGTGCTCTGAGGTGGGAGGAAAGCTCAAT

A\_14\_P116495 GAATTTCAAGAAGTTAAAGACCTTAGAATATGTGGTTCTGACTCCACACTGTTGCATTTT

CUST\_7166\_PI426210822

AGGTTTCTTTGACTTGGCTGGAAGTATACAGCAACCATTTTATTTTTCTTGTGCCT

A\_14\_P127919 CTAGAAAAACATTTGAGATGTGACATTTATGTTGTTGAAGGTCTCATGGATACCCTCTTG

A\_14\_P131952 CTCTCACTTCTATCAAGTGGTTTTCGTGGTTTTCTTCTTACAATCAACAATCATTGTCACA

A\_14\_P102844 ACAGATGCTCCAAGAAGGAAAGAGTCTATGTTTACTGCATAAATAATAAAATGTGCTGCG

A\_14\_P135376 TATTTGAGAAGGGAAAGGAAATACATCACCTCATCGAAGTCTCCTCTACAATATG

A\_14\_P104134 ACAAAGCAACTTGACATCAGTTTTCCAAAGTGTGAAAACACTCATCTGATTGTTCTCTTCA

CUST\_2499\_PI426210822 ACATGATTTCAAACCCAACCCCAAGTGATATCTGGCCTAGGTCAAATTG

A\_16\_P16835628

ACCTTCAAACATGCAATTTCTTCTTGAACAAATCTCTTATTGGTGATCTGTCTCAA

A\_14\_P102474 TTTGAATAGAGGAGGGCATTFTTCCCTCTCATATCAATTCTAGATACCTTTATGGCAACA

CUST\_5174\_PI426210822 GGTGACCCTAGCACTGTATCCAGCTCTTCTCACCTCTTTAGGAATT

CUST\_8634\_PI426210822 CTGTAGACCTGAACCTTCTACCTGCTGACTTAGGCATGGAGAAG

A\_16\_P19793510

GCACTGTGATATAGATTAGAGATAGATGCCATGACTATGAAATCTTTTTCCCACATACACCA

A\_14\_P113444 ATTAGAAGGGCAGTATTGAGATTTCTATGCTTGGAGGTGGCAGCAATGGTTTTAAAA  
A\_14\_P110688 TAAATTTTAAATGCTTTGTGTAATTGGTTTGAAAAACAGTGAAATGGGTAAACGCAAAACT  
A\_14\_P126946 TTGCATGGTTTTATAGACTTTCCCTGGAGTGATGAGTAAAATGTCCGGCAAGATT  
A\_14\_P129661 TTCTACCATAGGGGTCCTATTAAGAAGCAAATTTATTCCTACCCTCAGAGATTTTGCAA  
A\_14\_P122751 TTAAAAATACTGTGAATTTTATGAACTTGCTCTGAACTGTCTCCAAGGGAAGGTGTGT  
A\_14\_P133863 CTTGAGAGACTCTTGAGTGAATTTTGAAGGTATGAATATGAAGGTGCAGAAAGAAGTGA  
A\_16\_P16191027  
ACTATGTGCCCAAATTTTAAAGAAAAATAAAAAATCACGGAACAAATTTCCCTCCATCTTA  
A\_14\_P132212 CTATTTCAATTAAACTGTCAGAATATGTTTCACACTTCCCAAACCTGGCATCTTACAGC  
A\_14\_P111917 CTATATGCATAGAATCCTTTTCATTGAATACCTGTTACGCACCGAGCACTTGAAGTTTAC  
A\_14\_P112559 CTACATTTGATTCCCTAGATTTTCAGGTTCAAATTTGGAGCCAAGAAACCAACTCGTTTAAAT  
CUST\_8713\_PI426210822  
TTCAAATGAAACTTCAATATAAGCCATAGAGTAGAATAAATATTAAGAATAAAGTAGGG  
CUST\_1430\_PI426210822 GAACAAACAAGTTCCTTTTGTCACTGGACTGCTTTCTGGCAGGTCTA  
A\_18\_P22841736  
AGTCATTCCTGTTTTGAAATTTCTTCCATGGTTTGTATTTCACTTTTATCATGGTCCAT  
A\_16\_P03741201  
AGGACAATGTTTGGAGTATAAGACAAAGTTTACAGCAACTAGATAATAGGCAGGGATGAG  
A\_18\_P24148312  
TGGATACCAAGTAACTTACAGCGTTATCGTTACTTTTATTACTGCCCTAAAACACGTAG  
A\_16\_P30952273 AACTTTCCTGCTCTCAACTGCTCTCTATCCCTTTAGGCCTGTGCT  
A\_18\_P12680656  
ATGACCTCTCAGATCTCTGTATCATCTGTTCTAACAGCATTCCAGAAAACCTTTTCATAGC  
A\_14\_P130783 GAGGGAACCTTCATCAGCCAAAATTCTGATGGCTATCTCATCTCAATTGCTTTAAAATTAC  
A\_14\_P120254 AGAAGCAGTCATTTAAAGAGAACTCAGACTGCATATTAAGTAACCTCTGCCCAAATGTT  
A\_16\_P17850468  
ATCTGTTATCCGTATTACTAAAATTTGCCTGTTAGACTCCAATTACAATTGTCGGCTGCC  
A\_14\_P130593 CTTCTCCCTCATAAGCAATAGACCGACAAGTTTACTTATCTTTGCCTTGCTTTTTTTTTT  
CUST\_1328\_PI426210822 AAGTGACCCACCCGATTGGTGGTCTGCTTGAATTACATTCATTAATG  
A\_14\_P114810 CGTCTCCATTCCAGCCGCGTTTTTATCCGATCTCTGTTTTGATTCAAC  
CUST\_786\_PI426210822  
TGGGAGAGAGGATACGGTTTATAATTCCGCACTGCTGCTATTTTTTTTTTTCCTATTTG  
CUST\_7778\_PI426210822  
ATAAATGCTAATGTAAAGTTCTCTAAAGTTAAAGCCAGTGTAGGCAATGATTGGAACCTGG  
A\_14\_P138744 ATCTTCGGTTTTAAAAGTTAAAGAATCTAAATTCAGTCCTACAGCGGCTAAGGCAAGAGTG  
A\_14\_P127985 GAGGAGAGAGGATATTTGCTGTGGCTGCCTATTTAGTATCTGCTTATTTAATCTCATTCT  
CUST\_9167\_PI426210822 TAATTTTCTGGTTTTAACCTCACATCCTGTCCAGCCTTCAGCTACAACCA  
CUST\_1191\_PI426210822 GGCCACCCATTGTTCTATAACTGTGGCCTCATGGTAAGTCTCCATAT

A\_14\_P114848 TTTCAAACCTGAGCATCAACAACAAAAACATTTGTATGATATCTATATTTCAATCATGGAC  
A\_14\_P117806 TGAAAAAAAAAATAATTGCATTCCTAACTGGCCTTGAATAGAAGGGAATAAATGTCCTG  
A\_14\_P114265 CTGCTATTCATATTTTTTTGGGGGGGAATACAGGGAAATATAAAATAAAATAAACTAAGT  
CUST\_7755\_PI426210822  
TTGAATGTGAATTTTCTACTATTTTCATAAGATAACATCCTTTGCTTCATATTTTGTCTG  
A\_16\_P01807519  
AACCTGTGGTAAAAAGCATAACAGATCATCAGATTAACATTGACCAATCTCATCAGCATCT  
A\_14\_P113352 CTTTACATGGTCATTTTACAGCCAAAACACTACAGTTCAAAGAGGACTGTTTTATGGCTAC  
A\_16\_P18264146  
AGAATTAGCACCCACAGAATTTTAGGACCTAACTGTAAACATGCATCACTGAAAACTTGG  
A\_14\_P119467 GGAAACTTTTCTGGAAAACACTAGTCTATCTTCTCTTGAGTTCTGTCTCAACATATATGTG  
A\_16\_P58424374 CTGTCTTCTGTGTTTCACTCTACCCCTCCCTACTGGTGTTTTATG  
A\_16\_P21096147  
CTGCAGAGTCAGAAAACACTATACTTTTCCCAGGTTTATTATTCACACTGTCTCAAGAATGC  
A\_14\_P136843 CATTATATGGTGAGTCAGTTCACTATGCCCTAGGATTTGAATTGCTGTTAAGTTTTGGAT  
A\_14\_P127439 CTCAAGTATCTCAGACAAATATTTTATGCCTTAAGTTGTAGGTGGGCTATTGGTATGTCC  
A\_14\_P128036 TTATTCTTACAGGATACCTCACAGTAACCGATAAGAAATCAAACCTTCTGGTAAGCCACT  
A\_14\_P111844 CTACTTCATTCATCATAGACAGCAGTTTATCTTTCCAGGTGAGTCCTTTGCATGGT  
A\_16\_P16570866  
GAAGCCACTAATAGTGCATCTCCTTAGAGTGTATATTTCTAGAATCCTAGTGTGCAGAGT  
A\_16\_P19648428  
AAAAAAAAAACCTTGTTTTTATAGCAGGTGGCAATACAAATTAATAGGATGCTAGGATGA  
CUST\_9120\_PI426210822 AGAAACTCCCGGCGGGAGACAGAACTAACTTCTGAGCTGTGACT  
A\_16\_P00174114  
CCATCTAGTAACTCAGTAATTCAACAAAAGAAAAAGACTCATCAAACCATCAATCCTACC  
A\_14\_P134365 TAAAGGCTTCTGTCCGTTCACTAACCATAACTTGCTTTTGGCCATCCTCTAGATATAAAA  
A\_14\_P111922 AAATACAGAAATCCAGGGGGAAACAAAGTAGAAAGAAGAACCATTGTTATTCTAATTCC  
A\_16\_P39807833  
AAGGAAAACCTAGTCAGTTATACTGTCCCAGTTATCATCAAACAAACCTATTGATCAGGA  
A\_14\_P126684 TAAGTGATTGTCCATCTGGCAAAGCATCTTGGGAATATTTTCATCCTTCTCGTCAT  
A\_14\_P100843 TTCTATGCAGATATTCTGATCAGAAGATGGAACATGGTAATCCTTTGAAGGGTCATCATT  
A\_14\_P138347 CTGGGAAAATATGGGCCAATGCTTTTATATTTGGAGTTGACTATGTCAACTCCATTATTC  
A\_14\_P121321 TGTAGTTTACCCCATGACTTTCTAGAAGTTAGAACAGTAGAGCGATTTTGGAGAATAAGCC  
A\_16\_P02225344  
CTATCCACTATCGATTTCTGTCTGAAACTTTTCTCTGTAAACTTTGATCTATGCCATGCC  
A\_14\_P105026 CTTGATTCTTCCAGGATTTCAATTTTCATGTTTCTGTGATATTTGGGACTTTTTCCAAAGC  
A\_16\_P20747681  
GATTTTCTGTTTAACTCTCCAAATTATTCGGCAGCATATTCTTAAAATCCCCAAGGTCTT

A\_18\_P14393233

CAGAGAAAACGCATTATTTGGTATCTACTCTTGCTAATCATCAACTAGTTTGTCCCTGTC

A\_16\_P01821612

GTCACTCCTAGTCTCTTTTTAACTCACTTTCTTATCTTGACTCTTAGAACCAACAACACC

A\_14\_P139818 GAAAGGGTGAAGTATCACTCTGTGTGTTTCCAGGAACCATCAATGAACATATTTAGAATA

A\_16\_P21178046

AAAAAATGTAAGTCTGCTTGTCCCTATGTATTTATGAAGTAGAACTCATTTCATCCAA

A\_16\_P18055764

ACTGCAAAAAGACCTGAATTAATCTAACAACTGGGAAAATAAAAATATCACACACATGCCAC

A\_14\_P121666 CACAACTGGGCCTCATCAATGATAAAAATAATCCTTTCTCTTTCACATCTGGACAAG

A\_14\_P122866 ACATTTTCAAGGAATTCCTTGAGAGGTTCTTGGAGAGATTCTGGGAGCCAAA

CUST\_8586\_PI426210822 CTAAGAACAGCTGGGCACCAGCTGGACATGTTAAGCCAACTGAA

CUST\_10128\_PI426210822 GCATCTTCTCATGCTTGGCGGCAGCAGGCCCTGGCTCTGACACAA

A\_16\_P03705788

AGCCATGGAAATGCTCAAATATAGTATCCTCTTACATGCATTTTCCACAGTATTCTGTT

CUST\_2534\_PI426210822 GATGTACAGATTCAGACCCTCTTGGACTCAGATACTTGGTTCTGTGAAGTAG

A\_16\_P00685137

CCATCTGGCTGAAGGTCCATCATATAGACTCTGCTTTCTCATCATTCTTGTATTTTTTAA

A\_14\_P110411 TTAATGATAAAGACAGTGGTGCCCATCTCCCTAAAGTATAGAAGAAAGTCAGCCTGT

A\_18\_P10245335

AAACACACCCATTATCTGACTTTACATGCTAAGAACAAATTTGACTGTTCGGTTTATGAGG

A\_14\_P109050 TCCTTTCCAGAAATTAATACTACTGTCAGTTTGATGTATATCCAAAGAGGGTGAAATATCCA

A\_14\_P130365 CTGGAGGAAGTAAAGAAGTACCTGATTTATTTTTGCATTCAATATCGTAGCCTGTGATG

CUST\_1989\_PI426210822 AGGACTGTTTGGCTGAGCTTGGCTACTCTAAGGGACACAAGTTTAG

A\_18\_P15388745

ACAGTGCTCTTCAATTCCTTACATTAACATCTGCAAAAATAAAAGGATCAGTATGTGTCAGGT

A\_16\_P03182200

AAAATCTGGAATCTGCTCTCATTTTCATTTTCACTGAACTGAAAATAAGGTAACAGACCCT

A\_14\_P113919 AGTCAGCACCGACTATGACATGTGTGATCGACTCTACTTTGATGAGATCTCTTTT

A\_18\_P22841624 TTTCTACCAGCATCTGAATTGGGGAATTGACATATACAGATGCCCGTGGAATTTAA

A\_14\_P116920 AATTATAGAGACCATTGGTAAAGGCACCTATGGCAAAGTCTACAAGGTAACATAACAAGAG

A\_16\_P16438644

GCAGTTTTATAATACAGCAAGGGTAACAATAGAGGAGGTTTGAAAGGTAATGACACATGC

A\_14\_P137343 GCATATAAATTACCTGGAATTTAAGGTGGTTTGAGGTCAAGTCTGTTTTTCATGGTAAGG

A\_16\_P03502532

AAGGTTTCTTACCATAGATCCATAGAGATCCTGTAGAACTCCATTGAATTCTGAAGGTT

A\_18\_P22070526

ACACTCTTCAGGAAGTATTCTTCAGTCAGCATATTAGATTTCTCATACCTACACCTGACA



A\_16\_P20166861

CTGCTCACAAAGAACAACACTTTTTCCCAATGTAGTTTTGTCTTGTGTATGAAAGGAAAACCTG

A\_18\_P14580255

TCCTGCTATGTTCTCAGAATAAACAGAATAAACACACAACATATCAGTATGAAGTCCCCTC

A\_18\_P22841270 AAAGAGAAAACATTCTCCCCACCACCCCCAGACACTTGATCATGTAA

A\_14\_P102981 GACATTCAATTGCATTTCTTTATGTCAATTGGGAAGGAAAGGATATCAGAGATGATCCTT

A\_18\_P14135133

AGAGTATGGCTATTTATTGAGTTTCATTTGGTCATAAGACTGGGCAGGTTGATTTCTTCT

A\_14\_P101264 CTAAGATACGCACTAAGTCACTCAGTCCTTATGGGAGCACCTATACTGCTTCA

A\_14\_P104349 GATTTTTTTGTTTCATAGTCAAGTTCATCCGAGAAGTAACACCATATATCAAGAAGCCATC

A\_14\_P134741

GCTGAAAACCCCAACAGGAATTAGTGATGGAAGAATTAAGAAACTACTAACAGCAGT

CUST\_7578\_PI426210822

GTCTTCAGTTCCAGAAAAGTGTATACTCACACAGGAAATATCTCTCAAATAACATGGGC

A\_14\_P124765 ACTCAATGAAAAGGATCAGAAATGCAAATAACACAATTATTTATTCCCCTGATGGTGGTC

A\_14\_P109301 TAAATATTTCCAACACTACAGTCTGGTGATGGAGTCTGACGCAGGAACCTTCTTAC

A\_14\_P139423 CCACCTTTGCCCAAACATACATACGTCAGTCTGACTACTTGGTTCTTGATATAATTTTTTC

A\_14\_P131718 CATCTCATCGCTTTTGGTGAAAGTCAGTCCAGTTTGTAAGATTCTCATTGTGAGTATG

CUST\_7664\_PI426210822

TAAGTTCCTTATAGCCTGGATCGTATTCAACCAATAGTTTTTCCCCTCTATTAATAATGC

A\_16\_P21427386

ACCTTCTCACCTATTAATCAAGTGTGAGTTCTGATTATCATCACGAATGAATCTTCACCA

A\_14\_P202423

TAAATACAACAAACAAGAAACCTGAGAATATGAGAATTCCAATCCCCTGACAGAGAAGAC

A\_14\_P122637 CATAAAAAGCACTGCAATGACTTTCATATGCACCTAGGATTAAGACCTTAATTTAAATTT

A\_14\_P127016 TGAAGTTCAGTATGTAAGGTAACCATTCTTCATCAATGTGGCTATGGCAAAAATATGACA

A\_16\_P21486154

CAGCAGTCTCCAAGAATATAGCGTAGAGTTCCAGAAATATAAAAATCCTGAATCTGCACT

A\_14\_P123775 GCCAATCTGTGTGTTTATTCAACCACACACTTTCTTTCTGCCATTATTCCATGTTCTAG

A\_14\_P120800 GAAGGGGGGTCCATTTTAAAAGTGCTTTTACATTGAATTTCCCTCCCAGATTAG

A\_16\_P03303151

AACATTCATCGCTTACATTTTCTAGAAGTCACCATTACTATGATAAGCACAAAGGATCCA

A\_16\_P21242224

ACCAAAAATAGAATGTGACCAGAATCCACATCTAATTTTCTCAAGTGAACCTTGCTCCAAA

A\_14\_P129821 CTAACAGGTATGGAAACATAAGTCCTGAGTTTGAGGATCGGGGCCTC

CUST\_3243\_PI426210822 ATGGTGTGTGCCAAAGAATAAATGCAGGTGTCCTGTTGTTACTCCATCT

A\_16\_P21628660

TATCAAATTAATCCCAAAGTAATACCATCAATTTCCCCTAAAATACCAACAAGACCCCT

A\_14\_P119273 TTGGGAACAAAAACACACAACCTACCAGCAATGTTTGGAGATGTAAAGGTAAAAACATTT  
A\_14\_P124091 GGTGATCCTCATTAGCCAGGTAGATGATAACAAGAATGGCAATAATAAATAGCAGAAGTG  
CUST\_3299\_PI426210822

CAAAAGCTTGTCAATAAATATAGAAATCTGTGTGTGTACCTCCTTTTATTTTATGCAAAT  
CUST\_5728\_PI426210822 AGTCTTGCTGGGATCCTCTCTGGTTTTAAGGCATTTTTTTTCTCACTCC  
A\_14\_P102289 CCCTTTCAATTCAAACATCTGAACATTCCTTCCTCACTAAATGGGAATTCCTATACAT  
A\_16\_P01698974

ACCTATCCTAGTCACTCGTTAATAATGTCTCAGTAAACCCTATTCTGTGTCTGTTATGTC  
CUST\_610\_PI426210822 CAGCTCTTCCTTTACTCAAGCCTGGGCTGCTTTCTGCCAGTAAG  
A\_14\_P119670 TTAGCCAATCAAACAGAATGGAAACCATAGATTAAATCTGTTTCCCCTCTGATTTGCTT  
A\_14\_P125589 GCAGGGCTCACTCATAATAGAGGTGCAATAAAAATGGAATGTTTGTGAAGGTGTAAATA  
A\_14\_P120799 CAATGAAGAAGACTCATTTCATAAGTTTGTGGCTCCTGAAGAAGTCCTGCCATTC  
A\_14\_P139045 ACCACCATATAGTTACTGACCTTAAAAACAAAAGGAAGGAAGGTCTGTTCTGATAAAGGA  
A\_16\_P16646409

AAAACACAAGAAGATTGAATAATGTGACCTAAATTTGGAAAACCTATGGTTGACTGCGCA  
A\_14\_P110501 AATTGCTGCTGATTGTAATCAACCATATACAGTGTGTGCTTAATAAATGTTTGTCCACTT  
A\_16\_P00471252

CCCAGTAACATGAAATATTGCAATTTTTAGAGCCTAATCAGATACTTAAGAGGGACCCAG  
A\_16\_P16590780

AAAACCTCAGGCTTATATGAATGTCCTTGTCACTCAGTTGAGATTAAATCCAAGTCTGTCT  
CUST\_7976\_PI426210822

GATTGGAGGCAAACTAGAATCTAAAAGACCAAGTCTGCCTTTGGAAATGGAA  
A\_14\_P129725 AGGAGATTAATAAAAATGTCCAGCAAATAGAGATCGCTACACGTATGTGTTTTCTTACC  
A\_14\_P118637 AAGAAAAAATGGGATGGGAAAAGGAGTAGTTGAATCTGAGTTTATCCCAACCTAGATAA  
A\_14\_P127647 TGATATTTCTTAGGTGTCAACAACACTACAGTTTCTATGTTTCTCCATCCCTATCAGGAAA  
A\_16\_P39897286

ACATTCATGCCATTGTAGAACAGTATGTAACACAACCTTCAAAAAGATTTTTCTTTAAGCCCA  
A\_16\_P00593564

ATCACTTTGAACCCTAGAACAAATATTTTTGACATCACACAGTATACACAGCAGAATCCCA  
A\_14\_P104611 ACATGCAGAATCCCTTCTGGGAAAAGGAATTTCTTTTTAAGTTCATCATTATGTTCTCTC  
A\_14\_P114922 CTAACATCTTAAAGGGTCTAGAACTGTCCAGATTTCCAATATTCTGCCTCATTGTTTTCA  
A\_18\_P11209640

AATCACCTATGCTGTATTGATTTTGCTAACTTTTTTCAGACACATGATCAACTTTCCCTC  
A\_14\_P139167 AATTGAGTTGGAAGAGGAGCCCAATCGTTCTTAATCATAACAGCAGGGTTTTGTA  
CUST\_7581\_PI426210822 GTGTATATGTTATTTTTCTGGAGGGCAGAGGGCATCATGAGGAAGGTG  
A\_14\_P101946 GGAAGTCCTGGGGTTTTTCTCTTCCTTCTTTGTGGTTTCTGTTTTGTAA  
CUST\_4422\_PI426210822

CCTGAGGCATCCTTGCAACATTAGAACCAGAACAACATTTTCATTATTTTATGTTAAACGG

A\_14\_P136977 CTTCAAGTCCGTCTTTTTCAAAAAACATTTTGAATGCTGCATGCCTCATGCTTCC  
A\_14\_P128943 CCTGTTTACTACAACCTTACCTATTGAGAAAGGCATAAAGGCTTCCCTTTTCTTAAACTGT  
A\_14\_P103452 TGTTCTTAGTCTCTTTCCATCTGTGTCTTGGCTTCTTCAGTCGGTTTAATTAACAACAAAC  
A\_14\_P200806 GGTTTGAAATTGAAATAGATGGCTTAGAAAAGTTTCAGGAAGGTAAGGATATTGACTGTGC  
A\_18\_P13858443  
AATTCACCTCCTTCTAAGCCATCTCAAAAAGTCATCTATCATGCAGACCTTTTATGACTCTC  
CUST\_5065\_PI426210822 CCAACACTGATTATTACTGGGTGACAGAGGCACATGGAGAAAATGTCATG  
A\_16\_P19909155  
ACCTCCTTGAAATATAGACCCATTTCAAACCATACTCACTAAGTTTGAACCCACATCTT  
A\_14\_P128367 TTTTGTAATAAGTGCTCTCTCTGCAGCAATTA AAAAGTGGCGTCATCTATGGTAAACACT  
CUST\_6350\_PI426210822  
GTGGAGGTATTTCTGGCTTCCTATAAGTGAGTTTTTCAAACCAGAAATTCAGTCC  
A\_14\_P202163 TGTGTGGCTTGTTCAGAACTTTGTTGTGTTTTTTAGACAGCAAAGAAAATAAACTGGAA  
A\_16\_P00685561  
TCCCTCAAGAACAAGAAAATATCTTCCACACAATATTTGCTTTTTTTCACAAAGTCTGGAA  
A\_14\_P136941 ATAACCCCTTATTGAGTATTTCTGCTGCCCCATAGATTAACCTTTAACAATGAAGTTT  
A\_14\_P201835 CTTAGTAAGTCAGTCTATTTATTAACAAGTCCTCAAGCCTCACATCAGTTTCGTTGTCC  
A\_14\_P117479 ATACTGACACATCAGATGAAAGAAAACCATAACTGCCAACTTTTCAGTTGAATCTTGTAG  
A\_14\_P120100 CTACCTTGATTATGGCATCCAGGTTTGTCTTAAAATACTGCAACCACTCCAGGTAAT  
A\_16\_P38184609  
GTCAAAAACCAATTCAAAACTACTGTCACTCGTAAATTACCTCACTTTTTTATGCTGAGTC  
A\_14\_P111224 CAAATATTGTTATTGATTGCTTTTTGTTTGTGTCAGCAGAGATTCCTGACTGGAGTGATAGGA  
A\_14\_P130556 TCGAGTCACCAATTGTCTGTCAAACCTAGTGAAACTAAAATCATATCATCTGGAGGTTACT  
CUST\_1270\_PI426210822  
AATTTTAATCTTGGGCAAACCTGTCTCCTATACTTCAAACGTGTTTCCATGTATTACGTG  
A\_14\_P105599 TTACCCTACCATTACACATGATCAATGAATTGTAGTAAACTCCAGCGCCATAGTTATTCT  
A\_14\_P202226 ACTGAGGGTGAGAGGTTTATTTAGCCTGTAATTAAGGAATGCCAAATTGATGAAAAACAA  
A\_14\_P132814 CCATACACTTCCCTACTTCTAGCCAAACAAATATGCCTCACACCCTTTTTAATCATTTAA  
A\_16\_P15658417  
AAAGAAGCCTGTTCTAATTCATCCTTTTGGATCAAGAGTTTTCCAAGTTGCAATTTGAAG  
A\_14\_P136800 TATCATGAAGATGGCTCTGGTCCACTATATTGGCCTTTGCTTTATTAGATTTTCATCATGA  
A\_16\_P17845497  
ATTACTATGTGGCTCTTTTCTTCTAATGAATTATCCAGTCTATTGTCCAAGTCTCAGCC  
A\_16\_P15847740  
CACTCATCTATTTCATTAATAACCCATAGTCAACTATCATTTGTATTTTTCCCCTCTGCC  
A\_14\_P100699 ACATTCCTTTTCTCCTGACTCTTCTAACTTCTGGCTTCTGGG  
A\_14\_P124406 CTCGGGCTTGCTTATTAATAACGCACAGAAGAAGCATCACTTCTCACCATCT  
CUST\_5697\_PI426210822 ACCCAGATCAACCCTACTCTTATGGGTATCAGCTTCTGGGTAAATACTCTT

A\_16\_P36230089 AAAGTGGTTGGGTGCACTGGCTTCCTTTCTGGAGACGTGCTTCCT  
A\_14\_P132185 TGTGTGCATATACATTACTATGCTGTGTGCGCATATACGTTATGCTGTGTTCAAATGCAT  
A\_14\_P115172 GCAAACAAAACTGAATAAATGCTAGAGTTAGATTAGAAACCAAGAGTTGTGGCATGTGG  
A\_14\_P112536 GAAGAGAGGAGGAAGAGAAATGAAGACAAACCAATCAGGATGGCCATG  
A\_16\_P03532301  
ACCAACTAACCATCCCTAAAACCTGAAATAACAAAGTCTAGAAGTTTATGGAAAGAAGGGC  
A\_14\_P111993 CTTCAGTCATCATTAAACTTCTCTGGACCAAAGAATCTACCTGAGTAAAATATCCTTTTA  
A\_16\_P38243453  
AATGCATGGAGTAGGAAATTCAAAGCGACATTTTTGATTATGTATGCATCAGCAACTGTG  
A\_16\_P01887321  
ACTGTAATTCAGTAAGAATGGAATAGGTTACATGTAACTTAACAGTAATGACCCCATGG  
A\_16\_P16969838  
TACTCCCTAACACAGTTTTTGCTCTAATATTCTGCACTTGTTTTATCTTTTCCAGCACAGT  
A\_18\_P14137483  
GATTCCAAAATGACTTCATTTAAGAGCAAAGAAAGAGTTAAAAGCAACTCATATGAAGGG  
A\_14\_P201318 CAATCCTGATTTTGTGGCATAATGAGACCTGATATGCTATGACTCTCCCTATCCTATA  
CUST\_8610\_PI426210822 TGATCTTCTTCCCTTGAGCTAATGTCTCTGAGCCCTCTGCTGTG  
A\_14\_P125297 CTCGCAAAGCAGGAGAAACCACTTTATAATCATTATGCCTGCAAAAACAAAAGTAATGT  
A\_14\_P119524 AACAAATAGAATAAAGGCATAAGTGCATCTCAAGTTGTCAGGTGCTAAATCTTTGTAAGGG  
A\_14\_P112346 GCTTTTATACTACATCTAATACTTGGCATAATCCCATCCCATGCCTCTTAATGAAAGGAG  
A\_16\_P15473035  
ACGTGTAATTGCTCTAGTATTAAACCCTCCATTCACTACTCTATACTTCCCGAAGTCTAA  
A\_14\_P139131 GAATCCATTGAAGATCTTCCCATCCAAACGTATCTTACGAAGACACAAGAGAGATTG  
A\_14\_P135169 AGACACAACCTCAATCCCACTTAAGACTAAAAGAATTATACTGAAACAAGATTTGCCAC  
A\_14\_P100726 TAGAAGTGACACATTTATACTAAGCATAACATGCGTGAGCAAAAAATAAGCACAGAATA  
A\_14\_P103336 ACATTCCTCATTCTAGGATCCTAGGAGTGGAATTTTCCATTTTCTAATATACTAAGCCTT  
A\_18\_P10255189  
AAAAATCCATACCTTTTTCAATTCTGTTTTCTTGCTGGTAATACTCCATCTACCCTCACC  
A\_14\_P104925 TAACAAGGTCCCTCAGTTCCTTAGTGACTCTAAATAAAGTAACAGCAGGTAAGACTCTTTT  
A\_16\_P00685120  
TACATGCTGACTACTTCCCTACTCATATGTATTTGTATTTTAATTTTAAGAGGCAGCAGGT  
A\_14\_P110678 GAGACTGGATTGAATCACTATGATTGCCAGGTATTCTACACTGATCTGGCTAATAAAATG  
A\_14\_P108795 ACACTAGTATATACCTGTTAGGTATATACTAGTGCTATGCATCTGCCAGAAGCACCTGAG  
CUST\_4600\_PI426210822 ACAGGCCACTTTGCCACTGGGCTCACCCACGCTGCTGCTGCCACA  
CUST\_982\_PI426210822  
ACTTTAAAATCAATTTTAGCAGTATGGAGTGATTATTTACTTAGTGATATATTTTTT  
A\_14\_P115772 CTCCCTTGATCTCTTTTATCATCAATTTATTGTCAATAAAAGTGGCTTTAGGAAGCCTCC  
A\_14\_P138730 TCTTTCTCCCTTCCATTTCTATGGCATTGTGATTTCTTTTATCACAATGAGCCACGAAT

A\_14\_P124237 CCACCTAATGAAATCATCACCTACAATTGGTAACAGGGGAGTGTAATTTAAATGGAACTA  
A\_16\_P16120490

AACCTGCAGTTGAGTTTTCTATCCTACGCAAGAATTTATTGCCTCATTGATGGATAATG

A\_14\_P119064 CTATTTTGGGGCAGTATTTACCTGGTTCAAAGACAATCCACAGTATAATCATTCACTCA

CUST\_5188\_PI426210822 GTCACCCCTCTACAAGGATTCTTGACACTTGCACCTTCTACCCACT

CUST\_2299\_PI426210822 TAATGTGGCTTTTTAAACCCATAGCTGTTTTTTTACCCTCAGATGTGGCCATTG

A\_14\_P131792 CCAGAATCTCTAACTTCCAACCTTGATGAAAGGAAATGAGGTAATGTGCAAATCTCACTA

CUST\_7131\_PI426210822

TTTACTCTGATTCAGAGGTCTAAAGGTGTTAGTTCCTCCTTAGAAGTACCAAAT

A\_14\_P115664 TACACAATTTGGACTTTGCTAAATTTTGGAAAGGTCATTCACTGCTGAACCTCTGTAAGGT

A\_16\_P03411004

CTGATTTGATCCCTGGAATAGAGACCATTTTGGAAAGTTAATTTGGAAGCCTGTAAGATG

A\_18\_P14891212

CATCCTAGAGGATTAACCTACAGTCTTAAAGCACATGAACAATATTGGAACATGATCGTGC

A\_14\_P109690 CCAAATTTTCTTACCTTGGGAACTCTGGCTTTTTTTCATCTGAGAAAAAAAATGCATGTT

A\_14\_P127584 AGACATTTGAGAAAGGATCCACATTTCTAGATGTTCAATTTCACTAAGCGGGAATGTA

A\_14\_P106989 AATTTTTCCATTGTAACAGGCAAAACTAGATGGTGGAAAGACAGCAATGGAGACC

CUST\_8377\_PI426210822

GGGTATGAGTGTTGAAAGAAGGAAAAGAAGAACAGGGGTTGCACAGAATATAC

A\_14\_P123289 GGTTATACAGGTCTGGCTCAAACCTTGTGTGAGTTGATATGGAAAAGAAAATTTGATTTT

A\_14\_P200967 TTTCAACTTTGAATTTTCTTCTTCTGTGCAAATTTCTCTAGTCAAGTGTGATATATCAAG

A\_14\_P116795 GATGTGTCATTGGTGACATCAAAGATCTGGAAGGACAATAATAGTCGCATTGATTCA

A\_14\_P110567 AAAGTTTAATGAATTACATTTTAAGAGTATCCTACACATAACAAAATATGAATTTCCCTGA

CUST\_5918\_PI426210822

TTGGGGAAAAAACTCACGAACATGAGCAGTGACAAGGAAGAAGTTTAATAATGAGTAAAT

A\_14\_P121980 GAAGAAAGGGAAGTTTGCTTGGTTTAGTCACTCCACAGAAACCCATGGTAAT

A\_16\_P36230430

TCTTCATACCAGCATTTCCCAAAGCATTTTTTCAAAGGATAGTAACGACTTTTATGTCAA

A\_14\_P121148 CTTCCCAACCTTTTCTCTAACTAGTCAGAAAGGAAAGTTTTCATATTTTCTGAGAATCTC

A\_14\_P138060 GTCTTAACTGGATTACAGGCTATGGGAAACATCTTGTCACTGGTTATTAACCTTTTLAGGT

A\_14\_P133236 TATAATACCTGTCCTGCTTTACCTTTGTAAGAATGCTTGGGTTTCATTTTCTGCCAC

A\_18\_P22840320 GACTGCCTAGGTGGCAGGATTTTGGATGGTAGTGGTGATGTTACTTATTGAT

A\_14\_P120656 AAAA ACTGGAAGAAAGAGGCAATGGATTGCGCCATTCTTCACCAGATCAAAT

A\_16\_P00524205

AGGACTTCACAAAGATGACTACTTCTATCAAACCTTGAATCCACAATTAATTCATGTCCAA

A\_14\_P129397 TGATTTTTACACTTGACTTTTACAGTTGGGTGATATGTGACAACTTTCCGTTTCTTCAGT

A\_14\_P134302 CTTCCAGATGAAGATCTATCAAAGATTTGAAGTCTTGTGTATGTGGTCTAGAGGAC

A\_14\_P104798 ACCTCTGTGATATGCTTTTCATATATTTATCATTCTGTTTCAGGGAGAGTGGTGAATATCA

A\_14\_P137183 TAACTCCCAACTAGTTAGCCTTTCTTAATAGTGTATCATTTAGTTCAGTGGTTCTCAGGC  
A\_14\_P129833 GATGCTATGTAAGGAAAGGATGCAAGGGAAGACAGTTTTATCCAAAACCTATTTTTTCCG  
A\_14\_P130053 ACAGCCACATGATGATACTATCATAAGGCAAACATGAGAAAAATCTGTTGGCTCTGATAA  
A\_14\_P116437 TAGAGTCAGATGTCCAGAGAACTAAATTCTGTGGTCAGTAAGAGAATATTCCTAACCAAGG  
A\_14\_P128535 CTGGGTGACTTGGATATTGGATATATCCATAACGAGCATCATATGAAATCAATCAACACA  
A\_14\_P132645 GCAATATATTGGAAGATCATTGAATATGAAACCCCAGGAAGCAAGGTCCATGAATGTAA  
A\_14\_P128657 ACCTCCCTCTCCTAAAAAATGAAAGGTATCATTGAGTTTTGTATTAAAACTCCAGGTTG  
CUST\_5407\_PI426210822 TTAGCAGAGTGAGCACAGATGTTCTCCATTGCCAACCTGGTTTCTAA  
CUST\_3535\_PI426210822 AGGCTTGAGTCAGCAGCACTGACTTTATGTGACCTAGTGCAGCTC  
A\_14\_P139596 TGTGTTTCAGTAGAAAACTCACATCAAATGCTTTCTGTCCGTTTTGTTTCACACACTTG  
A\_16\_P00315647  
AAGCCTATTTGATCGTTAATCCTGATATTTCCATTTCCAATTGAGCACTTTACAGCCTTC  
A\_18\_P22607139  
CAACTTGATTTGTCAAAATTTATCTGTGTTTTTATTCTGGATTGTGTATTTTCTGTAGG  
CUST\_2448\_PI426210822 CAGCTGGACATGTTAATTACCTGTCTGTCTAGGGAAAGACTCTGTAATGTGTG  
A\_14\_P101419 GAATTGCCAACAAATTCATGTGATTCTGGATATAGCCCCTTTTTGTAAAAGCAAATTTAT  
A\_16\_P19931596  
ACACATGTCATGACCTACTTGAATACCTTATGCGAAGAAAATAAACTTTACCCGTCCTG  
A\_18\_P14139458 AGATATTTACCCCTTCCCCATCTCTCCATCAGGCATCCTCTTTCAATGTTTAAT  
A\_14\_P127632 ACTTAGCCATTCAGGAATTTAGTATGAAGTGTCATCTATGTGACAGCCAAGAGTATTTGC  
A\_16\_P00059790  
GGAAGAAGACATGCTCTATAGTGCTAGTCATTGACGTTATGAGAAGAGAATTCCTTCTAG  
CUST\_57\_PI426210822 TACGAAAGCTAAGGTAGAGAGGGCCCTGAAAAAGGAGCTGGCTAG  
CUST\_727\_PI426210822 CTGCTTCTGCTTGGGAATTTCTGCAGTTGTGCCAGCAAACACCTG  
A\_16\_P03648772  
AAAGAAGAAATGCGTGACAATTGAAGACATGGAATTAATTTGGTTTTGTCTCTAACTGCCT  
A\_14\_P134692 TTACAACAAACACTGACATAGTAAACAAATCGCCATACTCAAACCTGAGAGATAGCATGCC  
A\_16\_P02588549  
ACACAGCCTGAATTTATTACTTACACCTTGCTCTTTATGAATATACAAGTTCTACTGGCT  
A\_14\_P134416 TTGGGAGACCCAGCAGATTGATAGGATTGACCTTCAGTTATTTTATGTTCAATCTTATA  
A\_14\_P137566 ATATACGTAAATGTTATATTTAAATATAAACATAGATTCAAATTTTCCTGAATATGCGCT  
A\_14\_P105625 GAAACTGTTGTAAGTGAATCAAAGAAAAGCATCTTGTGCCAGTGTGTTGAATTTATTCCT  
A\_14\_P126088 GTTGCACCTGTGTGTGCCAGGTGACATATTAAGTATGAAGAAACATTTATGATAGGAAAT  
A\_14\_P119864 CTCTTATCGCCAGGACTTATCACTCCGACAGGTAATAAAATCCATCTGATGATCAG  
A\_14\_P114351 ACTGACGGACATTTAATTTTTTTTTTAACTGAGGCATCATGGCAGTTTAATAGTGAGGTA  
CUST\_7429\_PI426210822 ATAATCATTGTGCAATGACAATTTGAGACATTTTCAGGGTCCCAGTTCCATCC  
CUST\_9532\_PI426210822  
CATTTTTCTGTTCTCAGCATTACTACAAATGCCTCATTCTGTTATCACGTTGAATTCCTC

A\_14\_P137605 TTACCCCTTCACAGATGCCCCATCTCTAAGGGCTATGAATTCCTCCAAATTA  
CUST\_7194\_PI426210822 ATTCTCCCTTCCGTCTCAGTTGGACTATCTGGACTTTTTGATTCTGCTT  
A\_14\_P118421 CCTCATTATTTCGACTTAATTGGCAATCGATCACATTTTTCAAGATGGTGTTTAGTCCAC  
A\_14\_P125904 TCCTGTTCCCTGTTGACATGTCGTTGTTTAAATAAATCTCACTTGCCACCAGTC  
CUST\_8658\_PI426210822

AAGTTAAGTTTTACTCACAATTTCTGAAGGTTCAATGGAAGAGATGGGAGCTTTATCTCA  
A\_14\_P133270 TGGCATAGATATCTAGAGATTGTCCTTCATATGTGATCAGACAGGAAATGAGAAAGTCAC  
A\_14\_P201052 CTTTTTTTACAGACACTGCTTTTCTTACAGTCTTCGGTTAGTTCAGATTGTATACCTCTC  
A\_14\_P138235 CCTCCTCTGAGCGCATGACATGGCAAAACATATATTTTATTTAAAGAGAACTGTTTACAG  
A\_14\_P200710 CAAACTTATCAGTTCAGTTTCTGTGGACAAGAAGAGGAAACAATTGGATTCTCAATCAT  
A\_16\_P30952309 CTGAACCTTACGGACAACACCTATTTAAAACTGAACGACGAAGTGATCATGAACAG  
A\_14\_P118014 AGTCCCATATTCCTATTAAGTCCATTTTCCCAAGAGATGTCACTGTTTGAGATAATAACT  
CUST\_79\_PI426210822

AGTGAGAAGTGTTTTTAAAACTTGGCATTATGTTGTACAGCTGTATTCTAACACTGATGG  
A\_16\_P00289148

TCACTGTCAGAATACATGCTGTAAAACTATTTACCTACATTTTATCTTCCAAGGGGCTA  
A\_16\_P00685197 GCATCCGTTCTGAATACCATGACTTGGCAAGTGAAGCATTCCCATG  
A\_16\_P15307249

AAAAGGATCATAACCCAATCTCAAATGATCAAAGTGGCTTCTCTTAAGCACTTTGTGTTT  
CUST\_8005\_PI426210822 TCCTTCCAACCCTGAGGGTCCCTCAGGCTCCAGGCCACATGCTAAG  
A\_14\_P123648 ATTTCTCAGGCTCTGGCTTAAAGAGCATATTTTTAGGCTTAAAAATGCACAAACCTTGG  
A\_14\_P107598 TGGCCCTGTGTTGTATGATGATTGTTTTTAGGAGTTAAGTAATAGAACATTTCTCTTGG  
A\_16\_P01358429

GCCCATTCTAACATATAGAACTTTATTATCCATACCCAGCACTAAATCTATCAGATCA  
A\_14\_P132045 AATGTGTCCTTTTTAATAATAACATTTTGTCAATGGAATCCTCACTGAAAGGAACTCTAA  
CUST\_4556\_PI426210822 AACCTCTGCCTTCCCTCCCCACGCCCCATATTCTGAGATGGTAG  
A\_14\_P123114 TATTTATGGGCATTATTGACATTCTGCAATCATATAGGTAAGAAGTTTGAGGAGTGGTCT  
A\_14\_P107283 GAAAACAAAGTCAGACTGAGACTGATCATAGTTTCTGTAAACCCTTCAGGACATTTAACA  
CUST\_7951\_PI426210822 AAGCCCTGACATGCTCCTGTCCCTGGCTGTGTACACCGGGGTATA  
A\_18\_P15894889

AAAGTATTGTGCAAGCATAACACTCTGGATAAGACTGTAATGATCCTCTGTTTCCTG  
CUST\_10214\_PI426210822 GGTTCCAGAAAAATGCAGAAAAACATTGACTCCATTGGCTTGGAAAGTGAG  
A\_16\_P00685101 CTTGAAAACCTCTTGGTTTGGATGAGAACCTATGCTCAAGTTGATCAGGTTTTT  
A\_16\_P36417207

AAATCATCATTGGGCATATAATATGATGGCACTAAACTCCATTAACCCCTACTCTTGCTT  
A\_14\_P122387 CTTTGACCAGACCTTTCAGTCCTATCGGAAGGATGATTTTCGTTATGGTTAGTATG  
CUST\_4241\_PI426210822 ATCTGGGTCTTAAACCACTTTGAGAAACACTGTCCTGGAGGTAAGCA  
A\_18\_P19315027

CACAATCATCCTGTAACAGTCTTAAGTTGTCTGTAAACCTCATTCCATCCAAATTCCT  
A\_18\_P13803395  
CCCAAGTGAAATGTGTTACCCAAGTACATCATTCTCATTAAACATGAACTCTTCCATT  
A\_16\_P18176387  
AACTTCAAATAACACCATTAGGTCCTAATCATATCAGAGGTGATCTAACATGACTTCCCA  
A\_14\_P132952 CAGCCATCTTTGCATTTCTCTCTTATGTAGCAAAAACATACTTTCTTTAGCAGGTTGT  
A\_16\_P16365506  
ATCCTAGATTATAGCCCATCAAAGAAATACACAGTGCTAAGTTTCAAACCTCAGTTGACAT  
A\_14\_P120886 GACTGGCTGTCTCGGTCATTTTCAGTGAGTGCTTAAAAAAGATGAGAGGTTAA  
A\_16\_P02356073  
AAAAACATGTCCTGGCAGTATTTGTTACTTATTGGGAGAAATGCATCTTACATTTGGCTG  
A\_16\_P00684980  
ACAACATATTATTTATTTCCCCCTTCATGTCTTTGAATAAAATTGATGCACCCAGAAGGT  
A\_18\_P22156458  
AGGATGGGGCATAATAATTAGGGTTAACATCAGAAAGTTCACATTTAAGAGCATGTTGAA  
A\_14\_P101159  
CTTTAGGAGAAAAGAAAAGAAAATGAAGCAGAAACAAAGAGGGAACCTTTCCATG  
A\_14\_P136608 GAAGTGCCTCTGAGTTTCCATTTCCCTCCCTCGTAAAAAACTGAGATAACAATC  
A\_14\_P112634  
CATGCAAGAACACAAAGCCAAGGGGTAAACTAAAAAAGAAGAGATTGTTTTATTGTGA  
A\_14\_P132936 AGTTAAACATGTAACACTTCCCATTTTTGTAAACACCTGAAGGAGAGAAGAGAGAGA  
A\_14\_P120408 GCAGATTTGTATCCTGTGTCAAATTCAGGTATTATTGATAAACCTTTTCAACCAGCAGC  
A\_16\_P01411508  
AAACTGCCCTTAGGACATCATATGCATCTTTGAAAGCCAAATACATAAGTGAACACATCT  
A\_14\_P121934 CTCTGGGGAATGACATAGTTGAACAACCTGAACATGCTTTTCAGAAATGATTACACTCATA  
A\_16\_P02742833  
GCACAGACTTCGATAAACAGTTACTATGAAAGAAACCACACTAACCATGAATGAAATGTC  
A\_14\_P112918 CTTGGAAGTTCATGTTAATTTAATGTGAACAGAAGCAACCCCAAGTTTCCCTGTG  
A\_16\_P18083012  
ATCAAACCTCCTCAAACATTCTATCCCTTTTCAATGCCATAAGACCTATATATTTCCCTCTT  
A\_14\_P118384 TTTATCCCTTTATGATAGTCCAATGTCCTTATCTATGAAGTCTTGCCTAACCCCC  
CUST\_6078\_P1426210822 AACCATAACAGTTCCTGCTTCCCTGCCTTGGGTAGGTCTGTGGGG  
A\_14\_P130687 GAGACCAGACATCTCAGAAATTTATCCACAGAAGTATTAATAACCAGAAATCGCCCC  
A\_14\_P109132 CTTCAAAGTGTCATCCCTCTTAGTAATTGTATATGGTGGCTTCTTTTTTTTAAAGGTCC  
A\_16\_P17859375  
AGTCAGAACACCACACATATTCATCCTTATGCATCTTCATTTTTCTAGTCAGCACTTCTA  
A\_14\_P103068 GATTAACAATTCGCTATTTAGAAGTAATGGGATTTTAAACCCTCCCTTCTCTGCTCT  
A\_14\_P115178 CTCTAGTTTACTTGCTCGGGAGAAGAACTGACTCGTTTTATTTAGTGCCTATTTAGCGA



CUST\_8919\_PI426210822

ACCCTAAAGCTGATGGAAATGAAATCCACTGGCTTTTATCATGAGAAGTCAAATTGT  
A\_18\_P22839967 TAAGAAGTCTGCGGTGGTCTAATGGTGGAGGTGAAGAGAAGAGGG

A\_16\_P02584131

GGCCTTTGTCTGAATCACAGTATAGATGCCTCCAAGTGTAAAAGGAAAAAAGTTTCTAT  
A\_16\_P00685592

CAGTAGGCATATTTGCATTGATCAGAACATAAAAGTTTCCAGAAACACAGAAGTGAATCA  
A\_14\_P108542 GGATCTTCTCTCTTGTGATGTTGAAAAGTACCTTAGTGAAGATGTGTTTCAACATGCT  
A\_18\_P15074788

CAGTTCAGAAAACCTAAACCTAGTTTCAGTCTACGGTCATCTCATTATTAGCATGCAAGT  
A\_14\_P113313 AAAAAAGCAACCATCTCCTTCCCCACAATGAGTGGTATGGAATCTAGAAAGAGAT  
A\_16\_P39568987

AAGGCTCATAAAAGCAGATTAAGTCTTTTAAATGTTTCCAGGATTAAGTACACAAACCC  
A\_14\_P120600 TCTGAGTATTTTGTCTTCATTTTTTGCAAGCAGCATCAGTGCATGATGCAACAAAAGTTG  
A\_16\_P37909110

ACTTGGGCTTTGAAAGGTTTTCTAAAGTAAGGATTATAAATGAGCACTCTGTTTGAAGC  
CUST\_1896\_PI426210822

GATCACCTCAAGAAAGAGGTGGTCTTTCTGAGTTGCATGAATTTATCTAAGTAGAGAA  
A\_14\_P120162 GAGAACCACAAGCATAGTCAGTCAGGGACAAAGTGTGAGTGTCAAGC  
A\_16\_P01834491

AATACAATACTTATGCAGAATAGTTTATGTATCATAACATGATACTTCATAGATGTGTGCA  
A\_16\_P36230627

TCTGGGAGAGCAGTTCTTTCTTATTGTCCTTTTCTGATTATGGGGAAAAAAAAAAAAAAAA  
A\_14\_P109810 TGAATGATAACCAAATTTTCGGCCTATAAATTTACAACCAAGAAAAGGAGTGGGCAATG  
A\_14\_P131818 AAACACTCACCTGATTTTCTTCTGGCTACACCTAAATTCCTGAATGCTTCT  
A\_16\_P15229694

AAACTTGGCTGATATGTAATGTTCTCTCTCATGGAACTTTTGTAAATCAACTGGAGG  
CUST\_4447\_PI426210822 CTGCTACTATTGTTACCAGGTGTCCTGGACCCCACTGAGAAGAC  
CUST\_9368\_PI426210822 CTTGGAAGTGTCTTCTGTGGAGTCTCTACCTCCTGTTTCTTTGA

A\_14\_P137091 GATCATAGTCTTCTTGGGCTTTCTTTATTTCTCGTTTCGCTTACATATGTATTCAGGTG  
A\_14\_P108454 AACTGTTCCCTTGTTTTTTTCAGAAGTGGGCTATGCACAAAGCCTACAG  
A\_16\_P17831507

AAACAAGCAGTTCCTACATCTTGCATGTAATTCACCTAATGTCCAATTTCAATGTCTCTCC  
A\_14\_P100112 GCTGCAAGATCTCATCGAGGTTCTGCCTCTTCTTGTAGTTGAAGTAGAAGTT  
A\_14\_P124214 TATAGACAATTTACTGGAACGAACTTTTATGTGGTCACATTACATCTCTCCACCTCTTGC  
A\_14\_P118851 AATTCCAATGCGTTTTGTTTTACATTAAGCAGAATGGTTGGGAGCCTGATATGACAAATA  
CUST\_3179\_PI426210822 ACCGCCCGGCTTACTGGCTGTGGGAACACAGCTATGGAAGCTGA  
A\_14\_P121254 AGTGCCCTAGGTCTGACACTATCTCCAATTTTCTAAGATTTTAAACCTTATCTCTTTTC

A\_14\_P112474 ATTTTCTCAGGGTTTTATTATTGTTGTGTTGTCCATCTACCTTCAGAGAATGAGTTAGGG  
A\_18\_P22842122 CTTCTCTTCCAAAATCTGTAAACATACTGTTTCCGCTTGGCAGTCTTGATTTGCTTTC  
A\_14\_P140005 TTAAAATATATGAAAATACCTTCGGAACAGAAAAGTAAACTTTATTAATATGAGGAGGG  
A\_14\_P112218 CACTACCTAAGGCATCAGGAGATAATAATTGTATCACTGTAAACCCATGTGGATTCTAC  
A\_16\_P18946313  
AGCAACACATAGTTCTTAATTCAACAATGGCATTCAAATTAACTTCAGTTCTGGCATTCA  
A\_16\_P20480104  
GGTTCCACTTAAACACTAATCCTAGAATCCTAAAACCTGTTCTTCCTGTAGATGTCATGGT  
A\_14\_P130696 TGAAAGGTGACTGATCTCACTGATTTACACAAAGCACTTCTTTCTAGTTAAGTGTATCT  
A\_14\_P137634 AGTATATATTCAAAACCCCTCAGTGGTTGGGTTGCTGTTCCCTACTATTTAGCATTCTTCA  
A\_14\_P125722 CTAGGTGTAAATACAGGTGTATCTTCATAGTCTGAAAAGACTTCATGGCAAGAATTCCCTC  
A\_14\_P114963 TTTTCTTTGGGTCTTGTTTTTTTTTCCACTTAGAAATTGCATTTCCTGACAGAAGGACT  
A\_18\_P14133741 GTTTTTGAGTGGAAGAGGTATTTTATGCTCCCCAGGTCTTAGAACCTGAC  
A\_14\_P137636 AGGAAAACGATTCCCTTCTAACAGAAATGTCCTGAGCAATCACCTATGAACCTGTTTCAA  
A\_14\_P112563 ATAATTCTAAAAGAACTTCTAGAGATCATCTGGCAATCGCTTTTAAAGACTCGGCTCAC  
A\_16\_P18204144  
AGTTCCCCTACCATAGTGAAACTGTCTCTTCTACATTCCTTACTGCATTCCCTACTATAT  
CUST\_2612\_P1426210822 CCTACCGCATGCCTGGCACAGTGTGAGCACTTCATTTGTGTTTCAT  
CUST\_6791\_P1426210822 CATGGTATTGACTGTTATGGCATGCATGGAAACAGACCTGGACATGAAAG  
A\_14\_P107941 TGTATTTCCATCTGTAGTTACATATGCTTTCAGACTTCTTTCTTTTCAGGTGACAGAAGGT  
A\_14\_P111866 TCTCATTTAGTTTGTATTTTCATTGTATAGAGCAGACAGAAAGATGTTGGGTCAAGCAAC  
A\_14\_P112122 CACAACCTAGAGAGTCATTCCCTCTGGTTTAAAGATGTCTTCACCCCTGCAAGAAATATAAA  
A\_14\_P133238 CAGGAATTAGTGACAATGAAGTTATGTAGGTAAGAGAGTAAGGTTCAAAGGGAAAGTTGT  
A\_14\_P111995 ACCTTCTACCATAGTTAATTTAATACAATCTGCGGCAGCAGTTATGTTTTTGAATGCCTG  
A\_16\_P15212153  
ATAATTCAGGTCAATTCTTGAAACACAGTATGAGACATGTTATCAATGCCTTTAGCCCTG  
CUST\_2644\_P1426210822 AAAGGGGTTGCTGAGCATGTCTGAGGGGCCAGCAGGCTGGATGTC  
A\_14\_P132964 AGAGCAACTGGTTCATAATTAACGTGATTAATAATTAGTTTGGCGCTATGGATTTCAATCCC  
A\_14\_P109387 AGAATCAATCCCTAAAGGATTTGCCAGATGTCAAAAATATCCTGTGTTAACAGTGAAAAA  
A\_14\_P133267 ACATTTGAGGTAAGAGTAATGAACAGTTTTGCCAGGGAGTAAGAGGATATTAACTTTACC  
A\_14\_P124706 CACCTATTAAAGCCTGAAAGAGGTTGCTCTGAAATATGTTAATAACCCGTTCTATGGAAC  
A\_14\_P100956 ATGCAATTTTCATTAACCTTCAACTGCTCTTCCTTTCAAGTCTCCAATAACTGATCTGCAT  
A\_14\_P120610 TTTTGTGTTGAAGAAGTCATTTGTCAACCATGGTAAACTTGCAAACCCACTTTATACAG  
A\_14\_P124852 TGAGTAGAAATCACTTAAATTTTTTTTTGTGTTTGTGAATTTGAAACAGTGTAAGAAATCA  
A\_14\_P201988 GATGAGTGTATAAAGTCACTGAACTAACCAACACTCTCAGGAAAACATACATGACCAATG  
A\_16\_P00890788  
TCAGGTTTAAACAGTTTTTCTCCACCCCTTATGTAATCTATAACAATAGTGACCTAGTGCATC  
A\_14\_P124197 GCAATAGCGATTTTCATACTTTCATCATCTGTATAATCGACAGGCCGCAGACCAAATATAT

A\_18\_P16166212

AAATGTATAGACCCTAGATTTGTTTCCTAGAAGAAATCCAGAAATCCTAAACCATGGACC

A\_16\_P36506876

AACCCAACTATTTCCATATGTGCTCTTGGATCTTAAATAATTAATAATGGCCATGACTCA

A\_18\_P27215729

TAAAATAAAAAAGCAAATTTAAAATGTGACAAGAACATTCCTAGTTAATTCCTTTTCAT

A\_14\_P137484 CACAATCTACAAATATACTGTGTGTCTGTCCACTTTTTACCCCACTTGTTTAATCCCTA

CUST\_3908\_PI426210822

TTATGTTTTGTAGATGCTAACAGTGTACATTCTAGAGAAAATCAGCTGGAGGGAGGAAAA

A\_14\_P118013 CTGTTCTTTTTGACTGATTGTTTTAAACAACGATTTCTCCATTAACCTTCTACTGAGCAA

A\_14\_P105823 AAAGTGCATGCTTCATTCTAAGGTTGTTGTCTAAATGTTTCCCTGTGTTTCTTTTTGTA

A\_14\_P133889 AACATGGATTCCACTCATGAACAGCAATGTGATTTTCATTGCCTTTTGATTCAATTGAATG

A\_14\_P136686 TGATTATTTACCCATAATAATACAATCCGTGTACCTGTGGAAACATAAAAGAGGCAGCA

CUST\_6283\_PI426210822 GAACTGAAGACAGGTACAGTCTTACTGCATAAGGGGACAGATGATGTT

A\_14\_P123707 TATAAAAACCTTTGAAGGAAGGCTTTTTAGAACGATGAAGACTTTTTAGACCCTTCCCCAA

A\_16\_P18549763

CCCCTTCTCTACTTGCTTTACAATTACCACCTAGTTTTATACGACATGGCATTACGTAT

CUST\_7837\_PI426210822

AATAAATCTTTACTTCAAGAACAGACCTTTGACTTAAAATTAAGCTTCTCTCCTGGTTT

A\_16\_P17116728

ACTGGTTAAGGAACAAAAGAGTGCATAGATTGGATAGTAAGAATAAGGTTGCAAGAACGA

A\_14\_P106047 CTTCCAATTTTGTGGAAGAGAGAAAAGCAAAACCAACAATTTATCCAGTGCTTTCAAAG

CUST\_8381\_PI426210822

AGCCCACTTTTTCTTGAGAATTGTCTGACTACTTATTTATTGGTATAATGGTTGTTATT

A\_14\_P106111 CTTATAGTGAAGTGAAGCAATCATAAATAAGCCACCCTTCTGATTGTCGTTCTACTGTATA

A\_16\_P36230144 AGCATCTGGAGGACATCTCTCTAAGGAATGGCATCTGAAAGTGTGTTTGAATAATAC

CUST\_6848\_PI426210822

ACGAAGAACAGAGGCTAGAGACATCTTAGAGGAAGAACAAGAAACAGTGCT

CUST\_663\_PI426210822

TTTTATGTGGTAACCATAGCAGAAAGGAACATAGTCTTGTGAGAGTACCAGGAGA

CUST\_8780\_PI426210822 GAAACCCCTCTCATGTAGGAAGAGGTGGATTTGGGGGATTATATGATC

A\_16\_P03466545

TTGGAAGAACTCTAACACTTTCTCTTTCTACTTCTACCTAAAACATCTGAAAGAAGGG

A\_14\_P126815 AACATGAGGCTCTTTAAGACTACCTGACCACTCATTCGATTATTGAATTTGAACTTCTT

A\_16\_P39409131

ACTCCAGAAAAACACAAAACCTATACCAGAAAATTGTGATTCAAATATGAACTGTGGCA

CUST\_7893\_PI426210822

TTGAGATCAGTTATATCCGAGACTGGATGCTGAAAAGATATATTAGAGTTTTAGTTTTATA

A\_16\_P00013104

ACTTCATCGTTAACATAAAGGAAAAACAGTAACACTTGTGTCAGAACTATACTCCTGCCA

A\_14\_P202208 AGACCTGCAGAGAATGAAACAGACACATAAAGGAAAGGTATGGGGTAGAAGAA

A\_16\_P36230967

TAGAATATTCOAAGTTGGTGCCAGGACTCATATTTTAGTAAACTGTAAAATCTTCCCTCC

A\_18\_P14253772

AAACAGAATGCCAGATTATCCTGAAACTTCTTTTAAAACAGTTGTAAATTCACCAGTCCA

A\_16\_P03741766

AGGTAGGAAGCCTGTTATTAATCTTCTTGCATCAATACTTACATTGTAAACCTATGCCGC

A\_16\_P19511510

AACTTGTTTATCACAATCTAAGTTGTGCATTGTCCAACAGTTTTGACCCATAAACAGTT

A\_14\_P102703 TGCTTATAGCATGTTTCATTCCCTTCTTGCATATGTTAACCCCATTTAGATTCTACCCA

A\_14\_P118559 AAATGTTTTTCTTGCCCTTTTTCTTATTGGACAAAAGCAAATTCATCCCAATCCATTCCA

A\_16\_P02730540

CGTGCCTGGCTATTAATTTTGATGATTACAAAGTGAAGATAAAAAAGAGAGACCCTGGTT

A\_16\_P03711530

AACCTACAAGAAGACCATCTATAAAGAATACAAGGATGACTCATAACAGATGAAGTGGC

A\_14\_P105571 TGACTTCCTGGCCATTTAATTGTGTTAGATTCATGGTGAATCAATTTTCTTAGTGAATG

A\_14\_P119499 GTTATAGGGGTAAGGAGGAGATAATTTGCTCATGGCTTGTTTTTCTTTTACCTTTATCA

A\_14\_P104145 CTGTGAAATTAGTTGTAAGTAAAATGTCTGACGGTCTGGATAATGAAGAGAAACCC

A\_14\_P200129 TGCGATAAAGTCTAGGTTCCCATATTTAAGACCAGTCTTTGTCTAGTTGGGATCTTTA

A\_14\_P104133 AATGTTTGCCATGAGATCTTTCTGGAAGTGTATATTCTGGAAGATTTGTTCCGGATCATT

CUST\_1823\_PI426210822

ATAGTATTTACATACAGTACTTGTCCGAAAGAAGACACTCAGAAAGCCCTCTTTCT

A\_14\_P122473 GTCAAATATGAACGGAGGAAAAACAGTGAAATTGCGCGAGAATGGAAAATTCATTTAATC

A\_18\_P17065235

GATATTAGTGAAGCCCTCTGTTGTTAGTTCTATGCTCTAATCTTGAGCCATTCCACAAAC

CUST\_5868\_PI426210822

AGTTCAAGGAAAAGTTAGGACAAGGAAAATGAGTCTTTACAAAGCAACCAATTCCTC

CUST\_8902\_PI426210822

TGGTATGCATGTCAAGTGCTCAGATAACATATTTATGTATCGCTTTTTCACTAAAGAGAA

A\_14\_P101533 ATGTATTATTTACATGTAAATAAGAAAAGAGAGCAGAATCCCCATATCCTCTTCAAAGGA

A\_14\_P130656 AAAATAATTCOAAGTTCCGATAAAAACTAGGGAGCCATTCTCTTGTGGACTTATCAAGAG

A\_14\_P114254 GTCAGAAGCCTAGTCTTGTTTTTTTTTACAGAGGCTTAATTTTCAGCATTTGGGGTCAG

A\_14\_P121320 GCCAGCCGTTAACAGAACTAAACCCAAGGTCACCTTACTTTACATAAAGAGAATATTTT

A\_14\_P126239 TTAGAGAGAATATCTATTGGTTAAAATGAGGTATATCTGTGCTGCCATGAAGTGTGCCAT

A\_16\_P00942089

AGAGATCTCATTGCTTGTAGTATAGTCTGCCAAAATACTTCTCATCCTGCTTAACTGTA

A\_14\_P201587 TATATTTTCCCAGAGAAACATCCTCATCTTCCAATGAAGTTTCTGTGCATGCCAGAATG  
A\_14\_P101523 GCAGAAAACAAAATTGGGCATCTGGGGAAATCTGATATTAATGCTCCTTACTAGTTCTTTC  
CUST\_10090\_PI426210822 TCTAAACTCCAGCCTCATATTTGACTTATACGGGAGGTCTTAATGTTTCCGG  
A\_14\_P114741 TTTCCGTATGCTAATGCTGTAGATCTTTGAAGTGTGCGTAAAACAGTAAAGGTGAAGTGT  
A\_16\_P58424132 AATCCTTCTGCCGTCTTGCTTCCACCCTTGCCTCTGGACAGACTG  
A\_16\_P02166352  
AAATGGTAAACATTTGCACCAAATTCATGTTCTGTGAGTAATGAAATGGGGACTGAATGT  
A\_14\_P121076 CCTATAATTTGGTGACAGGAAAAGAGCACAATCCTAAGAATAGAAGGCTTGAGATTTCAA  
CUST\_9580\_PI426210822  
ACATGTACATATAAAATATGCCTAAACCAAATTAAGAAACAAAATATATTCCATGGC  
A\_14\_P102215 AGGTCGCAGATATAAGTGTTTAATTTGCTACGATTACGATCTTTGTGCATCTTGTTATGA  
A\_16\_P18799710  
GAATAAGTTCATTCTCAGAGCAACGAGATTATGTGAACATGGTAAACCCAAGTGTCTTT  
A\_14\_P137603 ATCTTTCTCCCTCTACTCACGGAATTTCTGTCTATTAAGGTGATGTCTCTGCC  
CUST\_4961\_PI426210822  
ATCATCCTATCTCAGGAGGATGCTTGGATTTGTGTTTAGAAATTGGGTAACCTCAG  
A\_14\_P100457 AAAAAAGTTTGGAGAATTAGGTTAGGGAGGATTAGGAAAGGACCCTTGAGTGC  
A\_14\_P138271 GTAAAATTACCCTTGGTTTTTTTTCTGCTGAGAAGAATGGGTGTGTGAAATACACGTTAAT  
A\_14\_P110657 GGATCATGGAATGTGAATATCCTTTTTGCTGACACAAGGAACAAATGTTGGCTC  
A\_14\_P112958 ACACGTTATCTGGTAACATCTTTCAAGTTCTGCTTTTTCTTGAATTAATTTCTGCCTCTG  
A\_14\_P113284 CACAGTGAAAACAGGCAACTCAGTAAAATATCACCTTTGATTTATTGCAGTCAATTTT  
A\_14\_P134598 AATTTACAGAAAGAGTGTTACACCGTGCCTCCAAAGGTAATGTCTCATTACTCTAAG  
A\_14\_P117787 CTTACGTTTTAACTTCTTGTGTTACAAGGTTCTGTGTTAAAGTGGTTGAGTCTGGTAACA  
A\_14\_P100448 TCTGGTGACAACTGCTGATGAAAGAAATGAGGTGTGATTATGCTGTAATAAAATCTGTCC  
A\_14\_P114440 GTTACTGAAATTCAGGCCTATTTTACAATGGAGACTATCCTGGAGAACCCTTTATTTTA  
A\_14\_P122482 GAAATTCTTACCAATTTTTCTGCTTCTGTGTTCAATTCCTTAATTTCTTGATATGTTCC  
A\_14\_P116706 TAAATTAAGCCTCGGTTGAGCCCTTGTATATTAATAAATGCATTTTTGTCCTTTTTTAG  
A\_14\_P118597 TTTGATCTGTGGTAGTGATGATGACCGAGCCAACCTAATGTGGAAACGTTA  
A\_14\_P134172 GTGGGTGCCTAGGGATTGAGTGGAATATACTTATGTAGTATTTTTGTTGACAACACAAAT  
A\_14\_P116801 AGACACCCTGTTATGCTCCCACAGTTCCGTATATTCACCCACATGTA  
CUST\_4066\_PI426210822 TCCCATGTTTGCTAGTTACATATGGCCAAGCCCTTCAGCCTTTCT  
A\_18\_P27214302 ATGCGACTCCAAGTAACTTTTCAGCCCTCAAATGACCTCAGTATTACATCCTTC  
A\_16\_P37812191  
AACAACTGCAAAAATGATTGCTCTCAACTCAAATACACAATTTGTTCTTCTTTGTGCC  
A\_18\_P22841029 CTGTCAATGCCAAGGTGACTGTTGCCACACAAAGAAAATCCAAACACAG  
A\_14\_P120129 CAAATAAAGTTGCAAATATTAGTTACAAATCACACAAGGAAAAAGTCACCATGAGGGAGA  
A\_14\_P125306 AGAAAAAAGGTCCCAAATAATGGCAATTGCACTTTATGTTTAATAAATTCAGAGGCCAG  
A\_14\_P127717 AAGATCTTCAGTTTTCTTTGGACAAAAGCATACTACTATCTTCTTTTTTACTGTCAAGTTTC

A\_14\_P129413 TAAATCCTGAATTCAACAAAGGCAGAGAATAATTGATGGCTTTCCCATGTGTTTTGAAT

A\_14\_P101277 TAAATCTTTATTTGATTGACTGAATGAACGAAAGCAGCAATGCATTTAATACTCCCCCTG

A\_14\_P109224 GCTCTGACTTGAGAATATTTTTGTCTATCAAGCCAAGAGTGATAGACTGCTATGTGGTA

A\_14\_P133434 CTTTCTGCTTTTCTGTGGACTCCTCTTCTACATCAACTTGGCTGACCATT

A\_16\_P20750087

CAAGAACTTGGAACATAAACTCACCTAAGAGAAAAAGCACTATTCTATCTACTGCCTCTC

CUST\_3712\_PI426210822

TCCTGAGGTTTAGGAAATGGTGCTATGATATAGATTAGTTTTCTATGAATAACTTGGCTT

A\_18\_P23476383

GTCACTTACTGAACTTAAAATCATCACTGTAECTCAATGCATAACGCTATTCATCATCCA

A\_14\_P133449 GCAGCCAGAAGGAGATGTGGCAATGTGATTCCTTTTGTAATCTGATTATAATTGAACATT

A\_14\_P135966 ACTGGATTTCTATGCAAATGTTGGATTTCCCTGTGCTAATAATGACCATCCATCAATGAA

A\_18\_P10020844

TTTCAGCCTGACTTTAATATGCTGCATAGTTTTCCAACCTCACAATTCTTCTAACCTTGTG

A\_14\_P123324 GGCTTAGTCTTGGTTTTTCATTACTGAGGTTCCCTTGACTATATAGTATCTCACAATGTC

A\_14\_P113843 CTTTTTCTCTTTAGGATATGGAGGCACAGCAAGTTAATGAAGCAGAATCAGCAAGAGAA

A\_16\_P01823078

AGATCTGTTCCAGGCTAAATTAGAAAAGCATGCATTTCACTTTATTCAAGAGGTAGTCCT

A\_16\_P16786362

AAAAAACTAAAAGAGTTACAGAGTCACTGCATTACTCACACTATAGGTGTTCCCTCACCG

A\_14\_P134169 CTGCTGTGTCTTCAGAGTTTTGCCACATAACACACACTTGGAAAAGAATCTATTATAGTT

CUST\_6307\_PI426210822

GGCTACCTCACCTCCCAGGAGAAAAGATTCAAATCTAGGAGATTCATAATTTCAATATA

A\_14\_P122651 TACAAAACTGATGTTTCTAAAGATGGAAAGAACAGGTCTAGGAGGCAGAAGAGTATCTC

A\_14\_P104504 TCATGTGTGCATTTCCGGCTTTTGATCTTGAAGAAGACTCTAAAATAAAGAAAGAGAGGT

A\_16\_P21407377

AAAACAACCTCATCTGTGGTCATCTTGTAAGTGAAGTATTGGACTATAAGGACTCTTGAGC

CUST\_8325\_PI426210822 ATCATTCCCCACCTTCTGGGCAGGGCTGCCTCAGAGGATTTGCTG

CUST\_3767\_PI426210822

AAATACTGGGGACCCTTGAGTGGTAATGGAATTGGTTGTATATTTTAGTATGATAGTTCT

A\_14\_P133549 CTGTCTTTAGGAAATCACAACACAGAGAAGCAAAAAGGGAAAAAGTCTCCCAAT

A\_14\_P123391 GCATAGAAGGAGCAATGACTTATTCATTAGCCCAGATAGAAGGCCAGTCTTTTTTCAG

A\_16\_P18818573

AAGTGTTTTCTGTCTGGATCACTTTTCTGATTAATATGTGACCTTACTTGCTACATCCT

CUST\_4551\_PI426210822 CCTGGACATTTGCCTGCCTGGGGTTTTAAAGAAGGCAAATATATAGAGTG

A\_16\_P00685409 CTCTACAGAGGTGCTGAAACGTTGTTTGAAGCACAGATATGACAAGGTGAAG

A\_16\_P15748649

AGTAACACTTGATTCCACAGATACCACTGCTTACACATAAACTCAACTGACGGTTTTTAAA

A\_16\_P36658728

AATCTAGTAAATGCTGACAAACATATGCAACATCCCAATATCTCTTTACCCCTTCACTGA

A\_18\_P11687124

AAACATGAGGAGATCAGAAAAGACAGTCAGAGTTTGCTAATGAAAAGTCATCTATGCCC

A\_16\_P02973436

TGAGCCCTTCTTAAGTTTTCCACAAATGAAAACATTTCTTACATTGAGACATGAATGG

A\_14\_P120195 CTTTCTGTGCTCTGGGAATATTATGCTGGCTTGAAGTTTTCTTCAACTATGATTTACA

A\_16\_P16191898

AACTTGTCTTTCTCTGATTACATGTAAATTAATTAAGCCCATCCCGTTTTACAGGGCAG

CUST\_4452\_P1426210822 CTGACTTCCTGCCCCAGGCTCACTGCCCCATCCATGTTGCACAC

A\_18\_P22841024 CTGCACTTCCTGGACTTGTCAATGGAGGGAGGGTGTGTGACCCAG

A\_14\_P115554 ACGGGGAATGAGAATTTCTGGATAACTATCTTTCTGTAAGAATAATTTGTGGGTTTCAGGA

CUST\_6379\_P1426210822 GTATCATAGGGGATGTTGAGCTTGTGGGATGAGGAGCATCCAATG

A\_18\_P16270757

CCACCTACAGAATCAACATGGACTGGACCTATATGTTCTCCATTATCTCTTTTTTCGTAA

A\_16\_P20553800

TCTCATTTATTCCAATGGTCCACTTAGTATAGATCCTGCACTATCCTGTTTAGTTGCTTC

A\_14\_P125543 GAGCACAACCTGCAAGTCCCTTTTTCCCGTATAACAAAATATTTCTGACTCAAAAATTCT

CUST\_6981\_P1426210822 AAAAGGTTTCGCTGGGCCAGAGAGTGGCTAGAGACTCGATTGTA

A\_14\_P137598 ATCTTTGTTGTTCTTTGGCTCATTTTTTTTCATGGCTGAGGACTTTTTAGTGCCCAT

A\_18\_P15221747

CACTCACATTCCAGATATCAACCTGAGTTACAGAAGTTAAAACCTCTCCAAATACATCAC

A\_14\_P104557 CACTTGATTGAATTTGGAGACTTCCCAAATCTTTATATGAGCACGTCTTCTGAGTTTATC

CUST\_3507\_P1426210822 TAGATAAAAGGTGGCAGTGCAGAGGATGGAAGTGGTATTGCTCAGTG

A\_14\_P113328 GGTGTATTCCAAATTTAGTGTGAGTAGGAAACATCAGGGGAATTTTACTACTCCATCAA

A\_16\_P19999490

GGAAAGCCTGTTTTCTTTACATTAGCAAGGAAGTCACTGATTACTTTTTAGAGCCTTTGAA

A\_14\_P126627 ACTCTGGAGAGTCAAGATACAAAATTAATACCTGATTCATGTAGGAGAATTAACAGGCC

CUST\_6333\_P1426210822 CAGTTCTTTTCACAGTTAAACAGATGAGGCAGGAGGAGGGAGACTG

A\_16\_P00685363

GCCAGCAGTTTCCTAAAATGTAATATCATCACTATTATTGTTATTATATGAGGGAAGGTG

A\_16\_P20768944

GGACCACACAGATACATCTTCATTTTGCAGTATAACCCATTAACGTTCCAAATCTTCTAT

A\_16\_P21235781

GCTTGACTGAAAACCTAGATTTTCTACCATGCTGTGTTATTTCACTCTTCTCTGATTTT

CUST\_6693\_P1426210822 AGGGTGGCAGGAAAAGGAAGGGAAAAGAAACAGAACTACCCTTC

A\_18\_P16498859

AGTAAGAATGAAGACAAGTGTAGTGACTTCTGAGTATTGTGTCTTGATAATGATGTGCC

A\_16\_P00380218

AAACCACCATGAATCTGTTATATTAATATAAGCCCTCAGTCTTTATATTAGGCCTGCTGG  
CUST\_2734\_PI426210822 GATGTCCTTGGGGAGCCCACAGGTGCTGTCCATTCATCAAGCACT  
A\_14\_P106169 TTTGCCCTTTGTTTTTCACTTACCTTTTTCTGCAGGAATTGAACTAAACAATTGCTACTG  
A\_18\_P14579950

ACAGAGTTCTCACTGCAAGTTTGTTCAAATGATCTAAACTCAAACATCTGTTGTCTGAG  
A\_16\_P15814864

AGGGTGTCTATACTGAAAAATGACATGATTCCAAGACATGTTTCATTTACACCACTCTAGT  
A\_14\_P137821 GTCTCTTAGAAAAAATGCTGAAAGGACAAGGAACATTTGATGGGGAAGGTAAGCATTTA  
A\_14\_P101410 CTTGAGGCATTTGCAGCAAATCATTAAACACCTTGAGTTTGATTTCAGAATAACAGTT  
A\_16\_P41820079

TGCCATAGTCTCTGAACTATAGGAGCATCTTACTTTTACCTTCTCATAGCATTGTGCACT  
A\_16\_P58424113 GACCTCTGGTGGAAACTATCCTTCCCACTCCCAGATTCTCTATTCTAT  
A\_16\_P16783756

TCCTACCAAGGTTTCAACTTTTATACTTCAATTTTCATAGGCAAAGTAGCACTAGAAGT  
A\_14\_P139836 CAATGGCCATTTGTCAATGGGAAATTATTTTGGTTTAATGACATTTAAACTGGGGCTTTG  
CUST\_3034\_PI426210822

TCTCACTTTAAAAATAACATATTTCCCTTGAATCCCCAAAACAGTTAAAAAATAAAAAGGG  
A\_18\_P15950168

AAACCCTTTCAAATTACCCAATTTAGTGACTGTTGTGGCAAATAAACAAGGAACTCAAC  
A\_14\_P126199 AAAGTCAATCCTGTTTCTAAACTCTGTTTTGACCTCACTCCTAGTTCTATATCTAAGGCT  
CUST\_399\_PI426210822 AGAGCGAGTGCTCGGAAATGGAAGATGTGCTGGGCTTTTTGCTTT  
A\_16\_P01242350

AACTAAGGTGAAGTCAGCATATAGACCAGGAAGATACAAAACACTACGAAAACACTCAGGAC  
CUST\_3385\_PI426210822

TCAGAGGTACTCTGTATTTGACTGGATTTATTGGATAGTGTAATTGTTTCCATTTAAAA  
A\_14\_P108413 TGTATGCTCATGTGATACTATCACAGGCAACACTTACTATGCAATACGTTTTCCACAATC  
A\_14\_P126536 TGCAGCAAGAGTTGGCTTCATACGCAAAATGGGTTTTTCCCAAATGTGTAAAAAATTATA  
A\_14\_P104640 ACTCTCATGCAGAATCTCAAGTTGTTGCCCTTTGCAAATGATGATCTAATTCATACTAAG  
CUST\_7874\_PI426210822 ATATACGTGCCACGGGGCAGGGGTGGAAGAACCACAACAGAACAG  
A\_16\_P16975981

AAAAATGCCAAGATTGCAACTAGAAATTTATTTGTTGGGTTCAAATCAGATTCTCCATGCC  
A\_16\_P00642875

CAACCCTTGAGTTTTCAAATTTAAGCCAGTCCTTTTTATCCTTAATTCACACACCGATT  
A\_14\_P106597 GAATGGTATTTCCCTTGAAAAGAATGTGTGGGAACAACTCCAAACTTCTCTAGGTCAA  
A\_18\_P16871718

AAAATTACCGTGGATATATGCAGTTGGATCTACCCATAGTGTAACCTGAATCAGTCCTTTG  
A\_14\_P108836 TTTCTAGCACGCTATCCCCAGTATGTAAATAGTTTTGTCAATCTTGGTGAGTATAGCAGA



CUST\_2921\_PI426210822

AGCAGGTTTACAACGTATTTTCATAAAGCACTTTAAAATAGGAGTTCTTCCTGTCCCTAAT

A\_14\_P118568 TCTTTTTAGGGACTCAAAGATAAGCAGGAAATTGTCTCTGTCATTGTAGGAACTTTGTTC

A\_14\_P105840 GATAGTAAGGAGAGTCCAAAAACCAAATCAGATGAATCAGGGGAGGAAAAGAATG

CUST\_7794\_PI426210822 GCCTGCCTGGCTGCCAAGAAGACATGTGGCTCCATGATGACTCTG

A\_14\_P115446 ATTCTACATTATTGATATTTGAGACTGATTACGGCACAGCAGGAGGAGATTTCAGAGAAAT

A\_14\_P113769 GACGATCTGGACAGTCCTAACTCTGTGTTAGCAATACTTACTTCCGGAAAATTAATGCTA

A\_14\_P131560 CTCTCCCGTTGGCATGACAAGTAGTGCCTGTAATAATAATAACCGATCTTATTCAAACAT

A\_14\_P137897 ACAGAAAATATCAACCTCTTCCCTTTTGTTTACAAGATGTTTTGTATAAGCCTATGTCTC

A\_14\_P121661 GCAAACTTCAGAAACAGCATCTGAGACTAACTAATATGCAGTTTGTGAAATGCTGTGAT

A\_14\_P112541 AAACGTCTTTTTGTGTTTTTGAACAGGTTTACAAAGGAGGAAAACGACTTCTTCTAG

A\_18\_P22841025

AAGACTGCCTACCTTCCTTTTCAGAACTGCTGTTTAAATCCAAAGAGAACATAGACAG

A\_14\_P129913 TTTAATGGTTAAAATGTTTACTCTCCTTCTGTCAACCCTCACCTTTTTATTACACCCCT

A\_14\_P104626 ACTTGTCTGCAAAAATAATACTTCTCTTGAAAACACTTCTACAGTGAAAACAGCCCAAT

A\_16\_P02012934

AAACATCTTTGCAACATGTGTTATCAGTAACCCTAAATTCAGGTTAACAGTGAGTGCTTG

A\_16\_P18413626

TCTTGGCTTAGAAAGTAAGAGGTCTATTGCATACTAACCAGCATACTGTTAAAACACTGT

A\_14\_P125391 CAAGAAAAATATTTAAATAAGAACTCACCAAGCCAGGAGAATAATGAATACCTGGATGT

A\_14\_P126766 AGAAGAGGAAAAGGATTTTCATGTGAATTGAGGAAGTTAACTCATTGGTGTAGTTTTCTC

A\_14\_P104883 TAATACCAAAGAATTTATTGTAAATGTAGTGGCAAATACATTCAGAATAATCATCATTA

A\_16\_P16819096

ATGTCAGAAACACTCAAATGGTTCCATGAAAATTTTTATTGGCTATCTGTTCTACCTGGG

A\_14\_P102115 ATCAAAGGGGGAAAAAAGTAAGATTCCTGACAATTAGTTGAATCCTAAGCATCCTAGATT

CUST\_5951\_PI426210822 TTTTTGGAGGTGGGAGTAGAAGCCCTGAGGGGCTCAGGGGAGGAATT

A\_14\_P134149 CTTATTTTATTGTGTTTTTTTAAAGTGTCTCCTCTCCCTAGCGAGGTTGCCATGTATACAT

A\_14\_P122598 TAGGTAAGGGAATAATGCCAATACAGTGAGTGCTTACTTACTACCCAAAATGTTCTATCG

A\_14\_P200974 GAACCCACCTTGAATGTTTTACAGTGAGCATGTTTCATGTCTATCAAATTAAGACAATG

A\_16\_P19777936

CAGCAGCAAATTCCTCAAGTTTAGGTTATTCGGGTTAGATCAAAAAAAGAACAGTCAGA

A\_18\_P11574291

AAAAAAAAGCCGGTTAGAAAACCTTGGATCAGATTACTTAGAATGATATGCAAAGGGT

CUST\_7624\_PI426210822

TTACTTATTTTAAATCTTTCAAAGCACTTTTTTTCCTCAGGGCCAAGTGGACTCTTTGG

A\_16\_P20698697

AGCATTAGACACCAAAGAAGCAAGATTAGTGTCTACTTTTCATTCAGGTTGGAGAAAAG

A\_14\_P121469 TTTTGAGGTTCTCTTAAAATCTTGTCTGTCTGTGAATGCTGATCTGATGAGATGTGATTG

A\_16\_P18066302

CCACCTTTAGCATATTTACAACCCTAACTGACCTTATTAACATAGGCGAACCATCTCTA

A\_14\_P120417 GCTTAGGGATGGCACTAAATTGTATGATTAGATGAAGTCCCTATATAATGGCTCTCATTC

A\_16\_P18658135

ACCGATGAGAGCCATATACTATATTGAATTCTGCCTTAGTATTCCAATTACCTCTGAGTA

CUST\_10007\_PI426210822 GAAAGCTTTGAGGAGGCTGTTGAATGAGGCCACCTGGGTCAACAAC

CUST\_5184\_PI426210822

CACCTCTCTCCTCAGATGTCTAGTGTTTATTAGACCTCCATAGTATCTTACCAA

A\_16\_P41699205

AAAACCTCAGGGGACAAGTTATGTTACATGATACAATGGGATTCAGGACAATTCAAAGAT

CUST\_8497\_PI426210822 TACCCTGACATCCACCTTGAGGGTTTGGAAAATTCAACTCATTCTACC

A\_16\_P41579477

AAAAAATCCCAGATAACCTCAGAAACTCAGAAAACCATTTCTGACTTGCTATCCATTTCT

A\_14\_P118217

AAGAGGAAGTCTACACTGGGATTAATGTCCAGAGGATCTAATGAAAAGGAAAGAAAGAAG

CUST\_9084\_PI426210822 AGCATCATGTCCCCTTGACTTTGAGCAAAGAGTGCGGTTAAAACC

A\_16\_P30952469 CCTGTAAAAAGAGCAGTTGTTCCATCTGGTGCGCTTGCTGACTTTCATTATT

A\_14\_P138188 ACGTTGGAATCTTTCATCCCACAGCCTTTGATAAATGTAATTAAGTGTCTGAATTGGAT

A\_14\_P114163 ACAAAGTTACCATGGGAACAATAACATATACTTGTCTCCTTGACCCTAAAGATAATGTC

A\_14\_P129345 GAAAGAACCTGCCATCTTTCCTTTAAATTTACATAATTCTCAAGGCCTGGCGTTTTAAAA

A\_16\_P18152038

AATAAGTTCCTGAATATAAGGTGTTGCCAACAATCTATCACACAGGTTTTCAATCACTGG

A\_14\_P100118 AAAGTGGCAGGTGAGTAAAATTGTAAGGACAGATTTGGATTCTTTGACATTCCAGAAATA

A\_16\_P03050155

CAAGTTATGAGTGAGTCTCACCCCTATATTTCCACCTGCTATTACAGTGAGTAAAGCAAA

A\_18\_P14587092

AATAGAAATGTGCCCTAAAAGCATAAATGAGTATCACCTGAGAAAATTAGGCATTCCCGT

A\_14\_P110731 TGTGTTTCTGTTTTTGTAGACCTCAGTTTAAAAATCCTCCGAGAAGATAAAAAATGTCCC

A\_14\_P103084 CTACAATCTTACCTCTAATTGGGCTAATTTTCTGAATCTTACAAAACCTGGTCATCATC

CUST\_6109\_PI426210822

CAACTCCGATAAAAATAAGGACTTTTAAAGGAGATGGAAAGACACAGCAGGATATCT

A\_14\_P122388 CTGTTTGCTGGAGACGTTTATTAAGTTCCACTATATCTCCCTTTAGTGATGCCAG

A\_14\_P129417 CTTTGCACCTACCGGAGAAAAGGAAACAGTTGTATTCTGATACTGTGAGTGTATTTGGAA

A\_14\_P109179 GGTGATCTCAAAGCAATAGAAAAAGTTGCTCTGTCAGGATTAGATGTGTATGCACATAAT

A\_16\_P58424577

ATAAATCGGCATCTTCATTTTTAACACATTCCCCAGGGATTTTGTGGCCATTTAAGTT

A\_16\_P00685440 ATCCATGCTACTGTTCTGCAATTGTTCTTTTATTCTTTCTCTACTAATGTTTTACCT

A\_14\_P134518 GTAATTTTTGAGAATTAGTCAGGGGTTGAGAACCTTACATGAAATATCTCCCCTCACATT

A\_14\_P131690 CTTTCATTGTCATGCGGGAGTCACCATGCTTTGTAAGACATTTAATCTATAAGACTTGAT  
A\_14\_P127743 CACTACTGATTGTGTGACTTCCTCTAGAGAGAATGTCAAAAGTTACAATGTGATGGCTTT  
A\_18\_P15511524  
AATGGGACCTATGTAATTTCTGATTTTGAACCTATGCTGTCATCTAACATATGGCCACTTA  
A\_14\_P107336 TGGGGGTATTGACATCACTTTCCACTTCATAATGTTTCTTTTAGGTTTCAGGAAATAAA  
A\_14\_P115719 GGAGAACACAGTTTGAATTAATTAATGAAGTCTCCAAAAAAGTTTCATCCTCCTCCC  
A\_14\_P112525 GAATATGACCTGTAACCCATCAAAGAAATTGTCCCCTATGATGATCACAGTCGC  
A\_16\_P37683356  
ACATAACCTTATTCCCAAACCTAAAAATCTAGCCAACCTTCTTTTCTAAGTTCAAAGCCT  
A\_14\_P138859 TCTGCACTTTGAAACCTCTGAAAACCTTCTGCTTTTAGAAGTCCCACAGATATAATACCA  
A\_18\_P15563779  
AAAAAGAAACAAATCTTTTTTCCATTAGACAAACTCACAACATAGACCCAATGAACACCA  
A\_14\_P109079 CACAGATTACTGAGAATACTGGCAAGAAAATGAGTAACTACAAAATTGCAACAGGTTGTG  
A\_14\_P134700 GATTTTCTATTTAGTTGAAGGGTATGGGCCTAAGGAATGGTTTACTGTTCAACCTCATT  
CUST\_7448\_PI426210822 TCAGAGTCTGAAATGTTTACTGCTCTGACTGGCATCTCTATACCAGAA  
A\_14\_P107024 CATTATACCTTGGCACTTCCCTGCAAGTATATCACATTCTATTGTAAGCAATATGCCAAG  
CUST\_4035\_PI426210822 AAAAGGATGAATTTGGCCTTGGCTTGGAGCAGCCTTTAACAGAAACA  
A\_14\_P134558 CTCCTTTTATTCTTTTCTTCCAGAATGGAAGCCTGATCTTTTGTCTTATTTACGACGGC  
A\_14\_P120396 TTTACATGGCTGTTAATACGGAGGTTGGGAGGCAGTAATTGTAACCTTTATAAAGTGTGA  
A\_14\_P129767 ATGCTTTCTCTCCCCTATCCCCAGAAGATGGCAAAGTCTACATCAACAT  
A\_18\_P13921190  
AGCAACAAAAGTTTCTATCCAAAGAAATGTGCCTATGTTAACCTTTAGAGTAAGTGCGGT  
A\_14\_P129117 GTTTATTTTCCAGGACACCAGAGTGATTGTTTATTCCATAATCCCACAAAGGAGAC  
A\_14\_P115786 GACAGACACCAAGGGGAGCCATAAACTCCTTAAAATATGCAAATTTTCATGTATATGTGA  
A\_14\_P115973 GAACTTTGCACATCCAGAAACGCCATTTTGATTCTTTTTCCGGAACAAGTTT  
A\_16\_P16919146  
AATTCAGTAGGCTCCCAATACTATGTATTCAGTTCCAAAAGAATCTCTTCAGTGAGTCAA  
A\_14\_P134164 CTAATGTCATGTGTAAGAAAGATGAATGAGAGTAGATGCACGTGCTGGATTGAGTTTTTT  
CUST\_7741\_PI426210822  
ATCTTCTGTAATCTTCAGCAAGAAACCCTGAGAATATTGAACGTCTTTGCCAGAC  
CUST\_10016\_PI426210822 CACCTAGCAATAGACCTGCAGGCATAATGGAGGGTGGTGAGTGCT  
CUST\_10022\_PI426210822 GTTTGTGGAGAGCAGCTTGTAAGTTTGTGTCAGGGCAGTCACTGAC  
A\_18\_P12308384  
AGGTGACATCCTCTTTATGGAGTTACTTTCATCTTGATTCACTACTTGCTCCTCATTCAT  
A\_14\_P114687 TTCTTGTTTTCTTTTTGCCTGCTTGGGGCAAAAAAATATTCATGGAAGTCTTTAACA  
A\_14\_P200273 TGTGAATGTGAATGGGCCAAAATCGATACATCATGAAGTCTTTTAAACAGATGTAACCTT  
A\_14\_P125747 ACGGTCACAATATGCATTTATTAATGAATGTATTTATACACAATACAAACGTGCGGGGAC  
A\_14\_P108375 CTCTAGGCTAAGTGCTGGCCAGAAACATAAAAATTATAAGTCATATTGTCAGCCTCAAGT

A\_16\_P02591525

CCTTGCTCCAACACTATTATCTTCAAATATAGACTTAACTTCCAATATACTCAGTAGCCTGC

A\_16\_P18349102

AACATGTTTTGAGCACCATTATGTCTAACGTTAGGATAGATATTCTTACCTCCATGAGCC

A\_14\_P127374 CATGGAATGTTAGTCTAACAAAAACATTATTTATTTCCCAATTCTCTGACATTTGCCTA

CUST\_2433\_PI426210822

AATAAATATTGTTGAATCAGTGCTGCCTGTGTGGATATGTGATGAACTTAATGATGAATA

CUST\_7843\_PI426210822

AGCATGTAATATATGTATATGTGTATGTGTGAGATACACACACACACATACACTTATATA

A\_16\_P00457666

GGCATTTAAATTAAAGCAAATTCCTTAACCAGTCTAAATATTCCATCCTAGTGACACCA

CUST\_2179\_PI426210822 CAGGGAGAAATGAAGGGGACATTAAATAAATGAGTGCTGTGGGCATTCA

A\_14\_P125519 GTTTGTGGTTAAGTTGTTTATGGGTAATTAATCACTGCATACGAAATGGTTCCTCCACTA

A\_14\_P200314 GAATGCCACCTGCTGATGTCTGATTTATTCATCGGTTTTCTTGTCTGTAGTCTGT

A\_14\_P123560 TATACAGCAGCACATATTATCATACAGACAGAAAATCCAGAATCTTTTCAAAGCCCACAT

A\_16\_P02479612

ATCCAAACTATCATCAACCAATTCTTGACTGTGAACTACCATCTACTAAATCTGCCATGAA

A\_16\_P19221353

GAGGCCATTAGCAACTCATAACAAACACTTTTTTTCTTTGCAAGTTACTTAAGGGTAAGA

A\_14\_P201565 CTGAGCAGAGTCATTATTGGAGAGTTTTGTATTTATTAACAAATTTCTTTTTCAGTCTTT

A\_14\_P114952 CCTGGAGTGAAATACAGTTGTGATCTTATATTTGGTTTCTTTCCATTATGCAGCCAGGT

A\_14\_P200344 ACGCTGTGGGGAGGAAAAGTGAAAAAATCGTAAAATTAAGGTGTATTAGCATTTCAAACT

A\_14\_P129739 TGGTGTTTTCCCTAGATTTCAAGTTGTTTGAGGACTAGATACTGTCCTTTATTTTCTCTG

A\_16\_P20242988

TCCCTAGTCAACAATTTTCTCATTCCTCATTACCATTTTAAAGCAACCATTCCCATAAGT

A\_16\_P17105676

GTGACACATCCTTAACAGAACATTCATATTGCCTCAGAAATTCTTCTAATTTGCATCCCT

A\_16\_P00685069 GTGAAGTGTGCTTTCTGCATACTAGCCCCAGGGTCTTCAAATGAAA

A\_14\_P109434 ACTAGGAATTGGAGATCAGGAAATATTGTGGGATGATGAGAACATAATCACCAGATAGAA

A\_16\_P03182953

AAAAAAGTCAGTGCTACCGTTTTGAAGTATGTCTAGAGTATGGTTTTAATCCATCGCTGT

A\_14\_P124668 CAAACTTCACGCAATTATGTCTGAACATAAAAAACAATCACAGCAATTTCTTGGTGTCC

A\_14\_P102527 TATACATTGACTCTTGATGGAAAGACTTAAGAAGATCAAGGTCTCACCATTTGTCTCAA

A\_16\_P16462228

ACATACTTTGGCTACATTACTCAGTCTTTAGGCTTGTCACAGTTAGTTTCCAAGACCAA

A\_14\_P119918 TTTACTTTTGTTCAGTGAAACCTAAATTTGTCCCTTTGGCTTGAATTTCTGGTTTCAGAAAT

A\_14\_P120617 CGTATCTTCAGAGCATTGAGAAATATGATCCAGATCTTAATAAGTGGGAAATAGTGGGTA

A\_14\_P114372 CTTTTACAGAAGACCCTCACTCGAAAGATCCACCACTTATCTCCCAT

A\_16\_P19486109

TGCCACCTAAAAGATTATCTACTTTTCATCCACACACTGAATCTACAGAATCTACATTGCC

A\_18\_P14134788

TTATCACAAGAAACCAACAAGAAGATATCAAGGCTTTTTCTTAGATCTGCCAGAAGTCTG

A\_14\_P107762 ATTAGGCTGTCTCCTCTACCTAAGTTGTATGTCCAGGACAACCTGTAAAGATAGTTTATA

A\_14\_P138414 GATGCCTACACCAGTGAAAGAGGAACCAGTAAACTTATACCAAAGTTTGTGAACAAATAA

A\_14\_P131593 TTAATAAGGCTTCCAACAAGCCAAGTTTTTGGTTATCAGGTGGCTAAAAATGAATAGTCA

CUST\_733\_PI426210822 AGGGCATCTTCCCTCATGGAATCAGATACAGACCCTCCAAGACTGA

CUST\_9274\_PI426210822

GTGGATGCATTTAGAAGCATTGGAATTGTTGACATCTGATTTTGGGTAAAAAAAAGGAAA

A\_14\_P106475 CTTTAGTTTTTTGGTATTTGGCCTCTTTTAAAGCCTGTCCGATGTATGGGAGAAAACAAT

A\_14\_P114239 AAGTAACTTGTCCCTGCAACTGCCTTAGTAAACCCAAAGGCTCTTTTCAG

A\_16\_P03652939

GTTGTGCAATGTCCTAAATCTCAATGAATGCTAATGCTACTATTTGTTGTCATCTCGTCC

A\_14\_P115751 ACTTTTTAAAATTCGATGTAGCGTGTGAAATCAATACAAAGGGGTCAGAAATTCAGGTGA

A\_14\_P201769 AATACCAGGTATATGTTTCATAGTGCTGCTCTCTGTTTAGTTTCGTATTTATTGAGTCCCTG

A\_14\_P105056 TGGGTTGTCTTCATTAAGTTGATTGCAAAGTCATGAGAGACCTAGACACCGATTAAAAT

A\_14\_P126220 TGTTTTTAATCCAAAGAGAGTTGTTGAAGACTCTGAATATGATTCAGGTTCTGATGTCCG

A\_14\_P128849 AGTAATGCAGGTTTTCTTTAAGGGCCTGGAATGTATAGCCTTTTGACTAACTTCCTATTA

A\_16\_P39008151

GATTGCTCTTCTCTAGAAAAAAGCACATGGCTAGTTACTGTTAGTAAGTTTTGTCATCA

A\_18\_P14137141

ACAGCAACTAAAAAAGAAAAATGAAACATAGAACACAAAAAATCCAGGGTGAAAAAGGA

A\_18\_P26937643

TTCCTAGACTAGACTTCAAATTTCTATATAACTCATAACATGGCTAAATACCCTCTCTGG

A\_14\_P114216 TTTTTCACTTTTTATTGGCCACTTCAATTCTTTGTATTGCTGAGTCTCTGAAGGCTTGAT

A\_16\_P21257152

AATAGCAGACATAGCAGACAGAGTCTTGATAAGTTTTTACCTGATACAAAAAGTCTGGCG

A\_16\_P21388345

TGAGTGCTTTCTATCAACCATACCAGTGAAACTACTACTAATGGACTAAGACAAGCAGAT

A\_14\_P115765 ATCCCAAAGACCTGCTGTTGGAAATTTAACGTTTGTTTAAAGATCTTTAACTAAGGTTGC

A\_16\_P02834734

AGTATGTCACAGAATCCTTTTCATTCAAACAGATTCCTCATATTCTCTCCAAAAGTCTGCTTG

A\_14\_P106779 GTTTCTCCATGTTACAACATATAGGCCCTAAATCAACATCTTTTCTGCAGAATGAGATCT

CUST\_8851\_PI426210822 TTAACTGTGTGGCCAGAGAGAATAAATCAAGCCAGCAGTGCTGT

A\_18\_P13357880

AAAACTTAAAGACCCAATGAAGTGAAAACACCTATCATTGCTCTGGTTATGGGAAAGA

A\_14\_P114134 CTAATGGTAGTCTATATCACCCCCTCCAAAAAAGTTTCTGCTTTTTTTTTGCTTTTCTGTT

A\_14\_P139305 GATACCTGTTGGTAGGCTGCCTTTATAAAGTGTCCACCCAAGACTACTTTTATTTTAAAT  
A\_14\_P107110 CCATTTTCATATTAACCTTCTGTGGATGAACAGTTGGATTGCCTTAAAAATGCCGTAATACA  
A\_14\_P107421 AAAAAAAAAAGGAATTGGCCCCATCTTACCAAGTAATATATATATCGCCCATCTCTCTTCA  
A\_16\_P20588417

TAATGTATGTGTATCCATGGGTCTAGACATTCTTAACTGGGAAATTCTATGTTCTGTGCC

A\_14\_P114229 TTGGCTACAAGAATGTCTGTTACTGGCTTAAAGTATTTTGTGTTGTATACCGTCAGAT  
CUST\_1002\_PI426210822 ATTCCATTCGACCCCAGAGTGGTTATTTACATGTCCTGGGACAT

A\_14\_P118886 CTAATTCATTCTTCTGTAGGGAGAAAAAGGGCATCATCCCCATTCCGAA  
A\_14\_P120512 AGAAATGCCAGAGGTAGAAATTGACATTGATGATCTTCTTGATGCAGACAGTGATGAAG  
A\_14\_P113771 TACGACTGTCATTTGCTTTTATAGAGAATAGAATGACACTCACAACCTAACTACCTGTC  
A\_14\_P112232 ACGCAGTTCCACTTTACATTCACTTTCTAATATTATGCCTTTTTATCCTCTTATTGTATA  
A\_14\_P131188 TATTGAATTACACAAACAGAAGTCTTACCTCAACAGCAACATCTCCAGTGTTCCTCG  
A\_16\_P30952502 CAGCGTTCATTCTCTCTCTCTGACAGTGGCAACACGGAG  
A\_16\_P02563827

ATACCCAATCAACTTTCTAGAACATCAATCCAATTCTCCAAGTTAAACATACCTTCCGAG

A\_14\_P101343 CTTTCTTCTTCTCAATGTTTCGAGTGGGTGAAGACTTGTAAGAAGGGTTAAGAGG  
A\_14\_P132131 TAGGAATTCTACTTACTCGTTTTGAAGGACAGTGTTCATTCTTTTCATCCGTCATCTTTC  
A\_14\_P111874 ATTTTAGAATCCTGTGATTCTAAGACTCTTACTTGATTAGGGGAAGGAAGACATCGTAGT  
A\_16\_P02406947

AACACCTTATAAATAGTCCACACCATCTCTATATACCTCCAGTTCTGTTATTATCCAAA

A\_14\_P122787 CGATACCTAATTTCACTTCACATAAAAATTAATGGACGCTACTGTCCCAATACAAAGGCT  
A\_14\_P124672 TGAGAGTTCTGTTAAATCAGTCACTCAGTGAGAAAGAAAACAATTCCGTGAAAATTCTAC  
A\_14\_P114126 AAGGGTATTTATATCTGGCATTCTAGGAATTGGAAAATACCCAAATACCGTAGGAGAG  
CUST\_7239\_PI426210822

TACCCTCAAGTACTTTGAAGGTTTGGGGACAGTAAATAAAATTGATGGCCATTTTTTTG

A\_16\_P17847306

CTCTGTCCAGTAGTTCAATCTCTGTAATCTGAAGAAAATATAAAGCCATCAACCACTCA

A\_14\_P132417 TACAACGGTATTCTATTTAAAATCTTTGGAATTTGTCAATCCCACCATTCAGGATTCT  
CUST\_4349\_PI426210822 TCTGCTTATGATTCTCACGTTCTGGTCTGTGACTGAGGAGACGTG  
A\_16\_P00685384 CTGACTACATTTTTTAATATCTTCACTTTGGTGTTTTATTATTGTCAAATTAATTGCAAT  
A\_14\_P118238 CTTCCGTTGTCTTCAATTTGTGTAGGTTCTTCATCACACACAATTCAGATGATGAAC  
CUST\_5740\_PI426210822 TAGTCCTGGGGTGCAAAAGTCCCTAGAAGAGAGTTTTGAGCTGAAAT  
CUST\_5243\_PI426210822

TGTGATTTTCATTACAAATCCTATAAATTA AAAAGCAAACA ACTTCTGGGTCACTGGTTCGT

A\_14\_P122175 CAAATATGCCATTCATTGTATCCATGCGATATTTTCTAGTAAAGAGACCCAGTTTGCACA  
A\_14\_P200429 AACCTTGCCCGTCTTTATCTGCGAAGAAAGCACAGAACCCATGAAA  
A\_14\_P200550

CTAACAATAAATGTTTTAAAAAAGAGAAAAGAAACAGGACAGCCTGACTCCTGAGTGCTC

A\_16\_P20824430

ATCTGTTCCACTCTATTCTAAATTCTGCCTCAAAATTAATCTCTCCAAAGACCAGTTTGG

A\_14\_P127778 CAGAATATTTATGGGTCTTCTCTCTCTCTTCTTTTATCCCCCTTACTTTTCTTGCAA

A\_14\_P138509 GCAAACCTCTGATTCTTCAGCAATATCAACGTTTTAACATGCTCACCTCAGCAAAAAGTTAA

A\_14\_P119807 GAAACAATGATCTCTGTGGAAAACTGCAATATTTTCTCAGATCACACACCCTTAAAAT

A\_16\_P15930860

AAAAGAGTAGAAGGTTTAGGACAAAGATTTACCAAGAAATAGCAAGCATTCCAAGAGTG

CUST\_10164\_PI426210822 GCAAAGAGACAGGCTGCAGAATGTGTTTGCAGCCCTCTGAAAAG

A\_14\_P130825 GCCAAGAAGTGTGAAAAACATACACTCTACTCCTGTAAGTATAGATGTAGGTGTTACCGT

A\_16\_P35989595

ACAGAGAAATTCATACCTGATTCCAAAACACTATCTAAAAATATATGTCCCCTCCCAAAA

A\_14\_P114185 TTACAGAGAAGAGGGATTCTTGAGAGAACATTTCTGTAAAGATAGTAAAAATGAACCCCC

CUST\_1035\_PI426210822 CTTCTTCAGCTTTCTCCTCAGAGAGGCCCTTCCTTGACCTGCCTG

A\_14\_P133176 CTGTCTATGAAACTCTAAGGACTTTCCTAAAATGTCCCATTTTTTCTTGTTCCATTGAT

A\_14\_P136410 TCTCTCCATGTTAATACAGTAGACCTACTTCACGAATGACTGCACAATGTTCTATTAGAC

A\_14\_P111896 TAGAACTTTGAATTCCTACTGCAAGTCTCAAAGTTGAACTTCTTCACTTAGAGAAAAGGG

A\_18\_P14134356 AATCAATCAAGAGTGGAGGGATCGTTGGTTTCAGAAACGCAAAGCATGT

A\_16\_P00685373

AATGAAGTCAACCACAGTTTCTAATGTCTTCTTATATGCCTTCAGAAACACCATGCTCAC

A\_14\_P133379 TCTCTCAATTGAAGGACTTCAAATACTCTTCTGAGCAGCAATGCTGTTTTATGGAAAC

A\_14\_P131497 ACTTATTTTTACAGAAAGGGGAAGCCAGCATGTAGAGTAATTTTTACAGTAAGCAGGTTC

A\_14\_P103089 GAAGTTACTACAGTGGAAGGGTTCTTAATAACAAGGTCTACCTAGCATGAAGTATTTAAC

A\_14\_P134017 CTTTTAAAAATGCTGCTCACAGATCCTTCCAGTAGAAATTGCAATCAGTTAAACAGATGC

CUST\_1443\_PI426210822 GTACAGGGTCACTGGGGTAGCCCCAGCCTGAGGGTGCCCAGGAGT

A\_16\_P18223840

AAACTGTTGGGGAAATTTTATACAAATATGGCAGGATGAGAATATACAGGTTTCAGGGAAC

A\_16\_P18022515

CTTTGTCAGTTAATCCTCAAACCTAGACTATGCCCTTAAATTCCTATTCTACACCAACTG

A\_18\_P22841097

CAATTGAAAAATTAGAGTAAATGAACAGAGCCTGTGAGCATCCACCCTTTGTAGGTTATC

A\_14\_P130332 AAGTCAAAATTTTCTGGGCCAAGCAAGAACAAAAAGGTAAGTTGCTGGATTCACT

A\_18\_P13044950

ATGTGAATCTGCACATTTACAGCAGATTATTCACCTATGTCACAGATCCATCACATTC

A\_14\_P116300 ATAGCCTTAAGGATGTATTATTAGGCTAAGGGTAAGGTTATAAAGTTTGCACCTTCTCGGC

A\_14\_P114937 GTGTGATTTTGTGTGAGGTCTTATTCTCCATCTCTCCATCCTGAAAACCTGAAG

A\_16\_P15454470

AAAAAAAAAAAAACATAGACTTCATCATACTAAAACCTCTTTTAAATGTTATGCCCTAGCA

CUST\_4705\_PI426210822 AGGAAGATCTTGGCACAGAATGAGGTCAGAGTGAGAGAGGTCAAG

A\_14\_P139878 CTTCTTTGGTTTCTAAAGGAGTAACTGAGATGAACTGTCATGTGCTTGATTTCTAGTGT  
A\_16\_P19850856

AACTCACCTATTGAATAGCCATTTACCTAATGACTAACCCTGACATATGTGTTTCTCCA

A\_14\_P121964 AAGAAAAGAGCATTCTGAGATGCAGTGAGAATAATGAGACCATCAACCACATCATTCC  
CUST\_3426\_PI426210822 GGCTGCAGAGGCTGGAGTGAGTGGCTTTCAAGGCAAGACTGATAA  
CUST\_5709\_PI426210822

ACCATGTCCTGAAGTGACCTGTTGAATTTGCAAACTTCTTTTTTCAGTGTTATGTTTTAT

A\_18\_P22841358 CTCTGGCCAAGAACGACTGGGTGCTTGGATTTTCTGAACCATGAC  
CUST\_3409\_PI426210822 GCATCCATTCCTAAGGTCATTTGGAGAATTCTCTGTTCCAATAAGTGGGATC

A\_14\_P135589 GCATATTCTAAAAGAGGTATAAAGCCAGTCACTGTAACATGATGCAGATCCAACACATTC

A\_16\_P36230098 GTTCTGTTTTCTGGAGATGTTTGATCACTGAGTGAACAGGGACCCAATGATT

A\_14\_P136246 CATCCTTTGGCCCTGAGAAGGTTTTTAAATGTGTTATTTACTTCTCTAAACATGACGATT

A\_14\_P111731 TATGATAGTGATGAAGAAAGAATTATATAACATGACGGGTTCAAAGATCCCAGGACAGGT

A\_14\_P110294 ATTGGGCTTTATCAAGAGGAACACAAATTGGGATTTCTGTTTGTGTTAAGTTGGAAA

A\_14\_P103700 ATGCCTGAATACGGGAGTGGGCTGAAGATGGAGAATACATAAAGGTATCAATTTAAAAAA

A\_14\_P122190 AGACGGACTCAGAACCACATCATAAATCCTATACCCTAGAGCAAGTAAATTGAAAAAACA

A\_14\_P132512 ACTTACTTTTTTGGGAGTCCCTAAACTTGGCAAATTTTAAAGATTCATCGACCTCACT

A\_14\_P124626 TATTTTCGTCAATTCAGAGTAAAGGCAGATTCCTAGGACGAAATCAAGAATGTTTCAGAG

CUST\_8410\_PI426210822 CCATTCATGCTTGAAATGGGATTTCCAGACATGCCAGGATGTTTC

CUST\_9433\_PI426210822 AACTTCTGTGGTTCGTTCTTGTGATAGCATTGTCCTTTAGGATGCCATCATT

A\_14\_P133588

AAGAGCACATCCTGGACGAAGAAAATGAAGAAGAAAACGAAGAAATTGAATGAACTGTC

A\_18\_P12795510

CAAGGCTGTTCTGTCACTCTAAATTTGTTTCTCAAAAAAAAAAATTACATATTCTTGTGA

CUST\_3451\_PI426210822

CAGTAAATATTTGATTGGCCTGAAGTTAAGTGGGTAGGCGTAAAAAATTATGGAAGTATT

A\_14\_P129205 GCTACTTTATAAGCATTCTGAAGAGGTTTATACATCCTATAAGATTTCTGGGCCGTTGTA

CUST\_878\_PI426210822

GGCATCTGAAAGTGTGTTTGAATAATACAGGGACTGAGGGTCAATGTAAACAATTAGA

A\_14\_P112814 AATGTGTTGACACATTTGGAGGGGGTTAATTTACCAGTTATCATTTACTAGAAAGGCTTT

A\_16\_P16675484

GAGTGCCTCTATACCTACAAATACAGACTCCTAAACGATTCATAGAAAACCAGATCTA

CUST\_9479\_PI426210822 TTCCCTTTTCTCCCTGCCTTCTGGCCATTTAACTGCTAATTCAGAC

A\_14\_P106915 GGTCCGAGTAATAGCCAAAATTATGAAAATAATGACTGGCCATAAGATCAAGACAAGTGT

A\_14\_P122428 CTAAAAGCAGAGCGAGAAAAACGAAAGAACAGAACAGGTAAGCGAGGGAAATATAATG

CUST\_8565\_PI426210822 ATCACCCTGAGCCCAGAATGACAACAAGAGTAGAAGCATAAAAGCGAG

A\_16\_P01402841

GATGAGACCAATGATGTCAATTTAGAAAAGGACAAAAGAAAATCGCCTCTAAATCCCTA



A\_14\_P109982 CTAAAATAGTTAGGCTGGGCAATACTACATCTCACACAGAAGAATAATCTGGTCCCATT  
A\_14\_P134265 TGAAGTTTAGAAACATTAGACAACATCCCTCCTTCCAAAATACTTTTATTTAAAAAATT  
A\_16\_P39416516

GCCCATATCATTATAATCAATTGGTGCAATTCATTACTATTATCAACGTGCTACTTCCA

A\_14\_P112329 TTGTAAATATATACTTCTATTGATGTTGGTGTTCCTTCTTGTGTTGTCTCCAGGGCTG

A\_14\_P108354 AAAGTGGATGAAAAGGGGGTACTGTGACATTGCAGTTCAGCCAGA

A\_14\_P134127 AAGAAAAGTAATCTTTTCTACTGACATGTCTATAAACGTCACATCCTCAGCATTGGTTC

A\_16\_P36728855

TCCACAGTGATACTCTTTCCATTTATACCAACTACTTATAATATGTTGCATGAAAACCA

A\_14\_P134252 TAATAAACACCATCAAATGTGTTTCAGAGTGCTTTCTTTGCCAGGCTTTGGATAAATGTTG

A\_14\_P128888 CCACCAATTATCTGGACAAATATACTGATGGTCAGTTTTCTCATATGTCTGCTTTCAAT

A\_14\_P129547 CCAATATTCTGTTCGTTTAGAGACGTTAGAGAGTGATAAAATGCCAGTTCCAATTTACA

CUST\_7067\_PI426210822

AATGAACCTGTTTGGATTCTTATCTGTGCAATACAACCTAATGTAAGTCTACTTTGTA

A\_14\_P200877 AGATCTTTCTTTTGAATGTTTTGAACCCAACTACTTGTGCATAGATGTTGACTGTGTCAA

CUST\_9040\_PI426210822 AGTGTTCAAACCCAGGCACAGGGACTGTGTTTGGCTGCTCTGTTT

A\_16\_P37596083

AGAATGTTAGAATTCAGCCCAAATCTCTGTATTGATCATCACCTTATTGAGAAGACGAGA

A\_14\_P138589 GGTGCTACTGTTTATCCGTAATAATTGTGGGGAAAAGATATTAACATCACGTCTTTGTCT

A\_14\_P132970 GTAGCACTCATAACTCTTTGCTTTGGCTAGCAAGGTGTTTTCAAGATTAAGGTATATCAG

A\_14\_P121342 TCAGAAAAATCGAAGCGTCTCCTGCTTTTCCCACAGACAAAAGGCTAAAAATAAAAATAA

A\_14\_P129414 AATAACAAACAACACTGTGAAAGGCATAAAATTAACAAATGGTGATGGGTAGCAGTTCC

A\_14\_P201103 TTCAAGAACTTCCTGGATACTTTCATGCAGGTTTTTCATATATCATTTCTCCCCAAATT

CUST\_2223\_PI426210822 CTATGCCTTAAGGACGTGGAGAGCACATGGGGGAAAGGTGGGTAG

A\_16\_P18012310

CCCAAGGTATTCCATTAATGCAGTTTGTGGCAATATTTCTCAAAATGAATGCGGTAAAC

CUST\_7870\_PI426210822 AAAGGTGCTCCTTGACAGTGAGGACAACCTTAAACAGAGGTGTGAACATAA

A\_14\_P136891 CTTTGTTACTGAGGAGAAGAGATTCTGTAAAAGCCTTAATATTCGATGGATAGCAAAAGT

A\_16\_P03808649

CCTAAGAACAATACGAAGAAAAACATTCAAAACATGAAGTCTAAAGTAACAGTAGTAAGT

A\_14\_P100616 CCTGAATATGTGGTATTTTTTCAGGTCTTTCTGTGGAATTTGGAACAATTCTAGTTTACAC

CUST\_9108\_PI426210822 CTTCAATCTCCTTTTGAAGGGGACCACCCTGAACCTTTCAGAAAA

A\_16\_P02297767

AAGCCAAAACCTCTAAACACCTTCTGAGCATCTATGAAAAAGTATTTCCAAATCACAAGCA

A\_14\_P107091 CATACATTTACCTTTGTAACACTACTGTTACCAGATTAACGACCATTACTAGCGTGCTTTG

CUST\_8169\_PI426210822 CTCAGCAGATGTTTCAGGGAACGGCGTGGTGGGGAACAGTCAGGAT

A\_16\_P03326856

GGCACTGAAATAAACTGCTGATTACATCAATGAAAACAAATATTCTAGTCTGGGTGGT

A\_16\_P17898857

AAGGCACAAAAATAAGTCAATCATCACGTCTTAAGTATAGTGGAGTCATACCTTCTGTGG

A\_16\_P36230689

TGAATAGGAACTCATCAGAAACCTGGAAAATGTTGTCAGAACATTAGCCGTGTAATTTTT

A\_14\_P130568 ACACAAATGAGAAAAGCAGAATAACTGTTCTGCTAACTGCTTCATAGACAAAGGTCTTAG

A\_14\_P133786 TGTAGTCTGCAGGTTATCTTGTTCACTGGCTGAAAGTTCTGCATTAAGTAAATGTTT

CUST\_8027\_PI426210822

AACATTCAGTAGAATTCAGTGTGCAAATATTAGACCATTGCCTAGAATTCACCATAATG

A\_16\_P18674028

TACCCCAATAAGTATACATTCCTTCTCTTTTCTACTCAACATATATACACCCTCTTCCGC

A\_14\_P112402 AGTTGTATAATTCAAATCAATTTTCCAGAATGAATTATGCCCTTCTGTCAATTCAGGA

A\_14\_P103602 GTCTGGATCTTTCAAGTAGCCTTTGAACACATTTGGTCTCTCACACATATCTATG

A\_14\_P200025 GGACAATTATTACTACCGCTAGAAAGGAGAATGTCTAGTCCATGGTATCTGTAGGTAGC

A\_16\_P36866889

CCTGATGACCTAGCAAGAATCAATGAGATTTTTTGCCTGTCACAGATAAGTTATTGGTT

CUST\_1459\_PI426210822 AGAGATCTTCCCCCTTCCCTTCCACACAGCAATAGTGTAACCGAAT

CUST\_4309\_PI426210822 CTGACCTCTCATTGTCATGTTGGACTTGATTCTATCAGTTGTGCTCATGCTT

A\_18\_P22841592 CTATTTTATCCAGGAAGCAGACAGAGGATACGGATGGGCAAGCACTTCTAT

A\_14\_P123537 GTATTTGGTGAGGGACTTATATATTCCTATCAATTTGCCTAGAAAGGGACTGATAGAAGG

A\_16\_P16191246

TTATTTCTAGTATCCTATAAGGATGAACCCAGAAGAAAATGGAAAGACTAAGGTGTTGGC

A\_14\_P123186 TTTGGCATCAAGCCTACTAAAGTCATCACAAGATATGCCTTAAAGGATTTTCTTCTGTTG

A\_14\_P202294 TTGACCAGTAACTGTGAGATCAGAATTCACCCAAAGGAAGACATTTTCATCTCTGTATTA

A\_16\_P36037896

ATTCCTGGCAGATTAGAAATCACTACTCAACACATTTACTTCTATGATGGCAGCATTGAA

A\_14\_P104748 AGTATTCTTCAATGTTTGAAGACGATACTGTGACAGAATACATCTACCACTGTAATGTGC

A\_14\_P109487 ACTAACTGGGAGCATAGTGTGTTTTGGGTTTTAAAATGGAAGGATTCAAGAAAATTGTTT

A\_16\_P00717360

TGTAGCGCTTAAGGATATCAAATGACAGTATACCATGACAATCACAATAATCGAAGTCC

A\_14\_P124057 TTTTCTCTGTATCAGTTTCTGATGCCCTCTGGATCTACAAACATCTAAACATAATAGGGT

A\_16\_P02756702

CTTGTCCTCCTTTTGAATACTCCAAAAGATGCTTAGATCTGATTAGACTGAAAGTGCTC

CUST\_5535\_PI426210822

TGAATATTCCTGGACTTTAACTTTGCAACTGTAGAGGAGGATGTATAATCATGACACTTG

A\_16\_P02216279

GCAGAATCCAACCTCAATTATAGGACATTACTCGATTACCTAAAACTCTTIATCGTTTCAG

A\_14\_P136029 GCATTTGGAGCATCTTGAAAGAAAGAGGTTGTCAAGAATTCCTGTTATAAGATCCTAAAG

A\_14\_P118915

ATACAAATAAACAAAGGTTGGAAAAAGGGAAGCAAGATTCCACAAACCTATAAAAAGGG  
A\_14\_P127964 TCCCTGTCCTGGCAATATCTTGCTTTAAATAACAGGACAGATCATTCTTTCACAAATATG  
CUST\_5910\_PI426210822 GCAGGGGAATATGAATTTTCATAGGCGAAATTA CTCTGTCTGGTTCGAGTCT  
CUST\_6392\_PI426210822

ACAATCTCTAGAATCTTCTAAATCAGGAAATTTTAATGATTTTCACAGCAGTGAAAATTG  
A\_14\_P124305 CTATTTTCTATTTTGAGACCCCATCTACAGGATATGGAACTTAATTGCAGTCACTGT  
A\_14\_P112005 AAAAGGATAATGAAAGATGCTTCTATCACATCTGGTCCTAAATACATCCTCAAAGGGAAC  
A\_14\_P108709 CATGTTTTATACATCTAGATAACTTTGAATTAAGTGTCTGGGGACCGATGTGGGAAAATA  
A\_14\_P131239 TGTAGAGGACTTCAATTTGGTTTTCCCATCACTTATCGAGCAAGAATAATTTGCAGTTT  
A\_14\_P101504 ATGTTAGATCTGGTACTTTGGCATTCTCAGTATTCATGGAAAGTGCCTTCCACTG  
A\_16\_P16470978

AAATTGGATTTGAAGGATTTACTCGGCTAAGCCTATTGTTCTTATATCCCATTGACACC  
A\_18\_P22841226 GCACATTTGATGACTGTTAGTCCATGGAGTGGTGGGGGTAGACTAACTAT  
A\_18\_P22843390 TAGGCTCCGGAGACGTTCACTGTCTTCGTGCAGCCATAAAAAGTTAT  
A\_14\_P117351 AACTCAAAGTAAATGTCTTTATTCTTACCTTAACGATTGCTTTCGGTGAGTCACAATGTG  
A\_14\_P134203 TTGCGTTTGTTTTTAAAGGTTCTACTGTTTCTAAGGCTTATGGTGCTTCAAAGACATTTG  
A\_14\_P107620 CTTTCTCTACCCTTTTGATGTCCTAAATTATGTCCTTACTCTGATTTGGCAAACATGG  
A\_14\_P133211 CACCGAAAAACCCTTAATCCTGTCTTCAATGAGCAATTTACTTTCAAGGTATTTGTTAAC  
A\_14\_P128080 GGCAGCCAAAAACAAGAAGTTTCCTAGGGAAATACAGGGTGCTCT  
A\_14\_P106046 TGATACTTATTTTTTCATTTTTCAGTGGTAAGTGGTGGGCAGGTAAAGGGTCTTTTAACT  
A\_14\_P135493 CTACCTAACATTTACGAAGGGTGATAAGCAAGATGCCGTAACTATGGCTCATAATATTCT  
A\_14\_P133969 CTCTCAATAGATGGTGGTTGACGTTGGAATAACAGTCTGATCCTGACCC  
A\_14\_P200724 GCAGAACTTTTGTATCTGACTCAGTGTAAGACTGTTTAGTTCTTGTTTCAAGTAGTCTGC  
A\_14\_P124898 TTAAACCAACTCTTATCTTACCAGGGTTTACTGACTAGATTAAACCATAGTGGCCAAGTT  
A\_14\_P103829 GTGTGTCTTTTGTCTCCAGACATGATTTTGGGCTATAAAAATTTTGCATGATCCTAGTTC  
A\_14\_P135593 AATATTTGTTGGCAAAGTAGGTTTCACATCCAAATCCAGGTTCTTATACACATGCAAGT  
A\_14\_P201746 ATGTTTTCTTTTTTCTTTTTATTACATGATTTCTAAGTATATTTTTTCATGCAGGACAGTT  
A\_16\_P17890217

AACCAAGGCTCAA AATTAGGATTC AAAGAGAAGTGTA ACTGTTATTT CAGAAGGTGGATT  
A\_14\_P116266 AATGTGTCGTATGTGTC ACTCCATGCCTCAATATCACCTGAAGCATAACCAAAC  
CUST\_3321\_PI426210822 TCTGTAGGTAGCATAGATGGCCTGAATGTTTGGTAAGGGGTGCTG  
CUST\_741\_PI426210822 CACATTC CATGAACCTTAACACCATGTCTCTGAGCCAGGTTAGTG  
A\_16\_P18030304

AAAATTGACCTTCTGAAGAGCAATTACTGTTTTCCCTAAAAGTTCTAGACCACCAGTAAC  
A\_14\_P132658 CTCTTCATCTGTGCTCAGGCTTATCTGTGTTCTCATTTGTCTGACATTGAAAAGCAAT  
A\_14\_P117610

CACAAGTAAAAAACTGGAGAACAGGCAACATGGGGAGTATGAGATAACATAAATCGTAA  
A\_14\_P100359 TATGTTTTACTTGGTAAATTACATGTTCAAAGCCA ACTGAAGACTCCAGGGGTTCTATTC

A\_14\_P117498 CAAAGGAAAAATACCCGGGTGTAAAGATGACAGGCTTTAACACTTGGAATACTTTTAAT  
A\_14\_P200456 CTGAGAAAGGAAAAGACAGAGCCATTAATAATCTTTTACTGAATGGCATTCCCTCCTTTGAC  
CUST\_9235\_PI426210822

ACTTACATAGTGAGGGTGATATTGTTGAAAGCCCTTAGACTTGTTAGATGTAGTGATACC

A\_14\_P121364 GTTTAGAAAAGATCATGTAACAATTTATTTGTCTAACCACCTCTCCTTACCCCATGGTA  
A\_14\_P137309 GTGAGTGCTACTTTAGAAGAGATTCCCTCTAGTTCAAATGCAGTTACAATCTCCAAATAC  
A\_14\_P124524 ACAGAAAATAAACCCCTCATATTCTGCTTTAAGTTACAGCCAAGTTTTACCAAATCACA  
A\_14\_P113309 TAAATTTTCTTCCCTAAATTACATTCCAGATATCAAAGCAGTAATCTCAGCCCCACCTTC  
A\_14\_P112129 CTGCTAGAAAACAGGGAAGATATTAGCCAATATGGAATTGCCAGGTTCTTCACTGAATAG  
A\_14\_P100764 CAATTCACAGATAGGAAGAGGTCAATGACCTAGGAGTAACAATCAACTCAAGATTCATTT  
A\_14\_P103232 TAAGGACTGTTATTAATGTGACCCTTCAGATTTTGATCTTAGGATGTGGAACCTTCTGACA  
A\_18\_P14133709

CCCCAAAGCATGTCATTGCCATATTGAAGTTTTATTGAATTAACGGAGTATGTGAAGCAT

A\_14\_P106828 ACACTCTGTCATCATGGTCTCATGTTAGTTCCAGATGCTTTATCATTAAAACCTTCTG  
A\_14\_P120809 ATTCCTTTTAAAGAATAACTGCAATCTTTTAAAAGAAAAGTGTTTAAAGGTTGCAAGGTTA  
A\_16\_P03434255

ATTTCCAGTTCATTGTTACCTTCCCAAATGTCAATTTTTTCTCTCTGATTACACTACT

CUST\_9923\_PI426210822 CTAGGTGGTCTTCGAGGCCCTGCACAATCTGGAGCCCCGTGGCTA  
A\_16\_P17544907

GACTGCACATATTTTGAATTAGCACAAATATCACTCCTAGTCTTTTCATTTTCCCAGTAGG

A\_18\_P16896696

ACTATGTTTTAGATTTGTCTGTTTGTGGTTAAAGAGCAGGATGAAGATCCAGATTTCT

A\_14\_P115443 ATACCTTAACAGAGAGGAAGAAATGTTGGTTAATGACTTCCTTCTTTGGGGAATGATATT  
A\_16\_P21552744

ACCTTCATTTTAAGAGACTCTTCCCTAAATGACAAGTTGTGACTTCAGAACTAGAGAACA

A\_14\_P121914 ATGACATCTTGAAGAAGGGACAATCAGTGTGTCTCTAGTTTGTATCAAGTAGATAGCATT  
A\_14\_P100557 TGAAGATTAACCTTTTCTTCTTAGATCCTCCAATTCTGATCACTTACCGTGTCTTGTA  
A\_18\_P15785360

CAATCCCTTTTTATCTCCCAAACACTACAGTGTTACTTTTATAGATCAATGGCCACTCAAAAAG

A\_14\_P109427 TATTTTTTGCTGCTTATGAAAAACAAAGGCCATCATTGTTCAAATGGCCCTACTCATTTC  
A\_16\_P15973063

AAAATATAAAGTGGACCCATATAACCCTAACTGGACATTTTGTGTTGTGATGATTCAGGGAG

A\_14\_P100306 CTTGGGGTAGGAAGTTAATAATACTGTTAATTTGGGTTGTTGTTGGATTTACTTTGCTAG  
A\_14\_P131446 TAGGAATTCCATAGTGAGAATCTTGTGGGAATCTTGCTTTCCTCATGCTGTAAGATAAAT  
A\_16\_P01313668

AAACTACCTAATCATGAGTCTTCAAACGTATGTGGAAAGTATTTGGTCTTGAAACAGGTG

A\_16\_P39527062

TCACTTCATCCTGCATAACATTGACTGATCAAATTTCAAAGAGTTTATCTCACTGGTCC

A\_14\_P200261 TTGCAAAATGGTGGTTATTCTTTGTGAATAGAATCTATGAAAGCCTGAAAGTAAACAGAG  
A\_16\_P17120374  
GGCTGTGAACACTACATTTTAGATTTGAAGTTACATAGGAAATTACACCCACCAAAGTCA  
A\_14\_P114707 AATTGAGTGTGAGATTCAATGCCTCTGAAATGCTAAGTCTCAGATTCTATGACAGATGAT  
A\_18\_P22841933 CTTCAATCTCCTTTTGAAGGGGACCACCCTGAACCTTTCAGAAAAAC  
A\_14\_P119076 ACTAGACTTGGACTAAGCAAAGACTAATTAGCGAAGATGAATAAGAAAGACAATTTACCG  
A\_16\_P01141690  
TTAATTGTGCTCTTTTCCAATCTCAATCCCAACTAAATCCACTTTATTCTAGACTCTCC  
A\_14\_P114626 TTTTTGTATTCTATGTCCTTGCAACCTGTTTTGTATCTCTTCAAGGGTCGATTGTGTA  
A\_14\_P133426 TATTTTTTTCATCCATGATACTCACTTCCTCCCCTGCAAAGATCCAAAGCAGATGTATC  
A\_16\_P16191113  
TTATGCTGTATGGAATCTTGATCTTCTGTGGAATGGTTTTATCCTGGTCTTTTGGAAA  
CUST\_9038\_PI426210822  
ATGACACTTAGAAAAAAGATCAGAGGACTTTTCTGCCTCTTCAGTGTTCAAACC  
A\_16\_P19505270  
TTCCCTGACATCAACTAATTGCATGATTTACCTCCATTTATACCTCCTTTCTTCTACATG  
CUST\_2815\_PI426210822 AAGAAAACTCCAGGCAAACAACAACTAACAGGGACCTGAACCTACTG  
A\_14\_P131282 CTGAATTTATTGTTGTAAGATCAGGCTTTAAAATAACTTTGAGGAGGAGAAGCCCTTGAC  
A\_18\_P14275857  
TGCCACTGCTAAAAGAGAAATGACCTTTATGGATTTTGCTCTTCATACTTTGTAACTGC  
CUST\_5044\_PI426210822 TTGTGTTTGGAAAGAGCCTCTGCCCTCTGTGTCATGCTGCAGTAAA  
A\_16\_P15702114  
AAAGTAGCCTGTTTACCTCTAGAGAAAACTCACGTTTTTCATCTTGACAAATACTTCTGG  
A\_14\_P118782 TGTTTTATGGGCTTCAGTAATAACTGGCATCATCTGATTTTTATGTCCCAATTATCCTGC  
A\_14\_P115651 CTTGTTTCAGAAAATCCAAAAGCCACATCCAAAGATCAATGATGCTACCTTAAAGACATGA  
A\_14\_P106478 GGCCATGTAACCTCTCCTGTCCACATATGATAATACCATTCTGCATAGTATTACTGACTCA  
A\_14\_P132222 CTCCATAACAAGCATCATCTGTAGCATCAAATCCTCCTCGTTTTTGTATCTATACTTTGC  
A\_16\_P17302670  
GGCAACAGTCATTAAAGTGGATCTACAAAGAAGTTATCGCAATATAAAATAAAACCCCGTC  
CUST\_3259\_PI426210822  
GAACAGAACCATGTGTCAGACACTGTCAAGAAGGCCAATAACGGTATTATTGTTAA  
A\_14\_P131640 TGGTAGGTAGTAGGTAATGTTTGTGACTGAACTTTTTCAATTTATCCAGTGCTCAACCT  
A\_16\_P38656913  
CCTACCTGAATTCAATCATGTTCAATTTGTGCTACAAACACTTATATTAAGCCCAACCTT  
A\_14\_P102899 CTTTCGCTATGCTATTAGTTTCATAAATGTTCTCAAAGGGAGCGTATTTCAATGTGACCAT  
A\_18\_P26795972 AGTGGCCAACCCACCATCTCCACGTGGATCCTCTTCCCTGAGAA  
A\_14\_P127522 CACTGAGTTTCATCACCTCCCATGTAGATGGCAGAACAAGTGTTTAGAAATGTTTG  
A\_14\_P128273 AGTCACTCTTTCCAAGATGTCACCTGAATTTATGCCTATAACCCTAAACTAACAGGAAAAAG

A\_16\_P00685254 CTTATAACTGTGGTGTAGACCTCAGTCCAGACACCCTCCAAGAGATAC  
A\_14\_P139459 ACTCATAGTGGCAGATTCTTCAACCATCCGGTCTTTGTAAGTTGCTCACT  
A\_14\_P111133 CTCTAAGGAAAATACATTTACATACCATAAACTCAGACACTCTTGGAGTCCCATTTTCT  
A\_16\_P21250728  
CTTTGTCATTCACACATCTGAATTAGGTAGCAAATCCTATTTAGGCTCCTTTAAGAGGC  
A\_14\_P128012 TAAGCCATCAAAGTAAACGCAAGTCTACGTATGCTGTCATTAATTTCCCAAACCTTCAAC  
A\_14\_P110208  
AAGAAAAAAAAGATTCATTCAAAGAGCACAGGAAAAATGGAACATAAAGTGGTGTTTTGG  
A\_18\_P14867670  
TTACTCTCATGATCTCTGTTAGAAATGTCCCACTAAACATGTTACGTTACCAACTCTTCT  
A\_16\_P03050337  
AATTTACATCAACCATCAAAGACCATATCTAGAGGTGTTCCATCAAAGTCAGAGTTGT  
A\_14\_P200557 CTAAAATTGTGTATCTGGATGAATGTCAAACACACCTTTGTCAAGAGACTTGGAGAGAG  
CUST\_2410\_PI426210822 ATTTCTGTGGATGGCTTAACGGAGGATGGCAAGCAGCCTTCTC  
A\_14\_P128376 GATTCTTGGACATAATTTGAATCACTGGTGCATACATTGGTGATACACACACCTTAGAAA  
A\_16\_P16191777  
ATAGCCTGGATCGTATTCAACCAATAGTTTTTCCCCTCTATTAAAATGCGTTAATTTGG  
A\_16\_P36160207  
AGATGTTTTTACCCCCTCTTTTTTTCAATTACCAATATCCCAAATAGCCACAGTTCTT  
A\_14\_P104601 ACTTGGGTTTTTAAGCATGTTACCTTGGCTTTCTGGAAGAATTTGCATTTTAAAAGTTCT  
A\_18\_P17312425  
ATGCCCCAGTAATAATAACCATATTTTCAACTCAACCAAAGCATACCATCTAACAAAGGA  
A\_14\_P132439 AACTTGTCAAACAAAACGGAGCATGATGAATTAGAGCAGCAGATGTAAAATAGTCACTG  
A\_14\_P125295 TAATAGAAGTGAGGCTAAGAGAGGTGATTAGGCAAACATCACACACTAGTAATAGTGCAA  
A\_18\_P22839590 GTTTTACACACAACCTCTAACCATTCTTTTTCCAGATTCAGAAGGACAGGACA  
A\_16\_P02438849  
CTTCACCTATTTCTGTTGCTCTTAACTTTCCATGATACAATCTCCTTCTCCAATACAATGA  
A\_14\_P111264 ACAAAAATGTGTTCCCTTAGTCACTAAGCCATACTAACGGCACAATAATTATCAAGGTAG  
A\_14\_P137363 AACAACTAATTGTTAGAAAACCTGACCTTGACTTGCAAACCTTCAACTCTTTGGCATCTGTG  
A\_14\_P133384 TTTGTGTCTGATTTGATTTTACTGTTTTTTCCCTGATTTTATGGAGTAGCATTGTGACCT  
A\_18\_P22840147 CTTAGTTTCCTAGCAAGTGCCCTGTCCTGCTCTTGCCTTTCTGAG  
A\_14\_P130535 TTGGTTGTTGGTCTGTTTCCTTTGACAGTTCATATTTGCTTTTTTTCCATAAAGGTCTTT  
A\_16\_P02376168  
GGAAAACCTCTCCAGACTTATAACCAGATTTACAGCCTCATATGAACCATGATCAAACATTA  
A\_16\_P18088284  
ACTGCACTAAGAAAAACAAAGGTTGTAAGTCAGGATATGTTAAAGTTAGGAGCCTTGTGA  
A\_14\_P124517 TGATTTGGGTTTTGTTTTTATTACAGGCTTAGATGCCACAGGAACCTTTCTTTTCTCGTTA  
A\_14\_P102453 GCCATTATCAATCCATTTCCACTTACTTTCCCTTTCATCATATGATAATCCAATCCAGTA

A\_16\_P02954803

AACCCCTTTTGTTTCATTACTGCCTTAGACTTCGATAACATCTCCAATATGAAAGGGCTTC

A\_16\_P03534491

CCTTAATGCTTTCTCTACCTATAATCCAAGACTTTTACCCAAAAAGACTTTTACCACGGA

A\_16\_P00962519

AAAGAAAAGCGTTAAGTCCATCTTAATAGAATCTATGTGGTATAATGATGTGGTCAGCCCC

A\_16\_P19212627

ATGCTATATGCTCTGAAAAAAAATGAGGTCTAGTTGCTGGTATTACTTCTACTCATGCC

CUST\_7963\_P1426210822 TCACCTATAGTCCTGTCATTCCTTGGGTGCTCACAGTTTTCTGA

A\_14\_P101661 GATCAATTTCTCCCTTAATGAAAACAGCCTGGAAGTTTTTTTTTCTGTTCTCATTGGATA

A\_14\_P132713 CTTACCAGATCCTGCCAATGAGGGAATCATAACAAAGCCATTCCCTAG

A\_18\_P22839930 AAGCCTGCCTTCAGGAAGGATGACTGCACCCAGGCTGGCTGTCTC

A\_14\_P129542 ATCTTTTGTGATCGTCATCCTAACACAAAGTTTGAAAAGCCCCTTACTACTACAAATGTT

A\_18\_P13292470

AAAAAAAAGATGACCAGTCAGTAATCATGATGCAGTTGCTAATATTGTTTCACTGGAGCC

A\_16\_P00577792

AGAGAGAACCATAGTTTCCATCACAGTTCAAAAGTGTAAGCAAACAAAATTAAGGCCTT

A\_16\_P21381288

AGGCGAGCAATCATAATTACTGAGGTCTATTTTTATGTAGCATATGTGACTCTTACTTGGT

A\_14\_P104608 CCCTATCCCTCCAGAACTTTAGTGTCGTAAAGACACAGACAAATCCATACATAACTATAA

A\_14\_P104432 ATATTCATTGATCATCTGTGAGCCACCTAAATTGGAATAGCAAGGATCTCTCCTATCAAA

A\_14\_P129899 AAATGGAGTCACCAAGATACATTTAAATGTGAAGCCGTGAATAAACAAAGTTTCCAGACA

A\_16\_P17461827

GGCATCTGTTTTACAAAACATTTTTTCATGACACTATCCCAGACATACAAATTTTCGCCTG

A\_14\_P100723 ATGTTGAAGGTAACCTTGAGGATGAATGATGGAGAAATACTCATCCAGTTGAATATTCTGG

CUST\_4523\_P1426210822 AACAAATCCCATTGGCATCTGGGGACCCTAGTGTACCCACCCCTTA

CUST\_2114\_P1426210822 ATTGACTGGGGCCCTGCCTTGCTGCTGGAAGTTGGGTATTTCACT

CUST\_8571\_P1426210822 CTTAAAGCCCTCGGCAAGGGCCTCCTGTGGCTCCGCCCTCCCTT

A\_14\_P200895 CTTTTACTCACTGGAGCATGATGAAGATAAATGAGTTACAGTTGCCCTAGACTTTTTACGA

A\_14\_P202298 ACCTAAGACATTTTCATTGCAAAACAGAGAATTTTTAGAAAGTCACTAAAAAGCACTCCCT

A\_14\_P129143 ATCTTTTTCTCTGCCTCTTCAACTCCATCGTGTAAGGGCTCTACTTCATCTTC

CUST\_10271\_P1426210822 ACAAAGACTCTGTGCCTTGTTCCCCCTTAGTGTGAGTCCTGAGTA

A\_14\_P118636 TTCTATTTTGCTTTGACTCTAGATTGCCAAATACAAAGGGTTATTGACCTGGTTGGAAAA

A\_14\_P110381 CACCAGGCCCTTGTGTCTTGTGTTGGATAGAGAACAAAAAATTAAGGCTGATTAT

A\_18\_P22839239

AATTTTAAATGATGACGTTTGGCCAAGACAAGTAATAATAAAGGAGTGTGTGGCCTTCAA

A\_16\_P15237352

AAGGCAATCACAATCTTAACCTCACAGACCATAAACTTGAACCTATTAATGTGTGTGTG

A\_16\_P19708400

ATATCCGTTTTGGTTTTCAATAATCCTCTTTTCTAAGGGTCCTTCTCTATTACACAAATCCC

A\_14\_P101764 GTCACTTTTTTGAAGACAGTGCCACTTTTTCTTCAAGGTTACACCTACTACCTGAAAA

CUST\_853\_PI426210822 TCTTAAGGGCATCGAGCCTAGAGTCAGAGTTTGTCTCCTGTGAAAATATTTTC

A\_14\_P135885 GTTTAATAACAACACCGTGCGCATGATCAACTCGCCGGTAGGTAACATC

CUST\_1122\_PI426210822 GACAGCCCTCTGAAGAGGGAGGTGGAGTTCAATGTCCATGTGTAC

A\_14\_P119016 ACCTCATGGAAACAAGAGTTCACAATTTGATATGCATACTTCTGAAACTCTTCTGCATTT

CUST\_8160\_PI426210822 GTGGCCCTATGGGGTCAGCGTCACACAGCACCATTTGTTTCAGAAC

A\_16\_P16602861

GGACCTGTGTATTCAAATGTCCTTAACATATTTAGATGTGATATAACCGCTGTAGACTTCT

A\_18\_P14135457

ACCTAACATAACATATCAATTACCAAAAAAAGTTGTAAAACACCAGGAGTTCACATCCCA

A\_14\_P102362 TCATATGTAAGACGTTGCCTAAGAACCAGTTATCATCATGTTGCAATCGACATCATCTTT

A\_16\_P01214661

GCCTCTGGATAAAAAGTTTATTCATCTCAACACCTCTTGTATTATCACAGCGTTATGCACT

A\_14\_P111427 CAGCATTACATTTTTTTTTTTTTTGCAGCAACTCCACTACACATTTGTTTCATGGTGTTCAC

CUST\_6989\_PI426210822

AAAATGCTAATTCCTTATCTCCCGGAAAAGGGAAACCATCAGGAATCAGAAATG

A\_14\_P200493 GCAAATGAACTCTGGATATTGAGACTTGTGTAAATATCAGAGGAGGATAGATGGATGAGA

A\_14\_P124206 AGGTGTGTTAGACTCCTCCCTAGTTCTGTGCTCTTCTCTAGAACAGTGATT

A\_14\_P105332 TCTCATTTCCCTACCTTCACATATTCACAGTTGGGTCCAGAAGATGTGGAT

A\_16\_P03567707

AAACACATTTTCTTTTTGGCTTTCAAACATCATAGATCAAAGAACTTAGACCTACCAGTGG

A\_14\_P125500 ATCATACAGAGACGATGTGGACTCAGAGGCAGTAGTCTTTTTCTAGATTTTTTACCTACATA

A\_16\_P30952532 CTGAGACTTGCTGTGTGTGTTCCACACCCACAGGTCTACAACACT

CUST\_4247\_PI426210822 ATAATTCAGACTACGACAGCAATTAGAGGCAGGCAGCCTCCCTC

A\_14\_P200113 CGTGGCCTCATGCTTTTTGCTTTATTGATTTTCCACTCTCAGTTTAAAGCATTGAGATTA

A\_14\_P202561 TAGAATGAAGTTATTCCTTCCCTATACTTTCCACTACAACAATTCAGCCAAAAAGATGGC

CUST\_5809\_PI426210822 CTGTATTCTCCAGGGAAACCTGAGATGAAGACCAAGGTGAGGAAG

A\_16\_P16292863

ACCCTATTCTATGCTAAAAGACAATTCTCTCAGGGTTCTTATCTAGAGTGGCAGATATCT

CUST\_5162\_PI426210822

TGTAATCTCAGTGCTTCACACACATCAGACAAAGATATTTTTGTGAGTGGCTCTAAAAAT

A\_14\_P127510 CGTTTTTCATTAAGAGTGACAGGAGTGCCAGCACTGCCTATAAAGATTTAGAAAACAATGT

A\_16\_P15339402

ACCTCTAATAGACCCTACCATCATTTTTAATCCACATCCAAATTAACACAGAAGAAACAGG

A\_14\_P107727 TGTTTTTGTCTTTTAGTTGCCTTAGTATGATGTTTCCTAAGGCGATTAAGTCCACAGTGA

A\_16\_P21410934



AAAGACGATGTATAAAGACAATGAATTCTGAAAGACACATCTAGAGACCTACAGAGCCTC  
A\_14\_P113974 ACAGTGAAAATATCTCTGAGCATAAGTTTCAATCAGTTTTACCTGGAAAATTTGTGGTGTG  
A\_14\_P106401 TTTCACATGGAGGAGTGATAATTAATGCATCTTTACTATCTATGTGCCATGAACCCAGA  
A\_14\_P108344 AATTTTCAGAAGACAAGTTAATACATTGCTGTGTATACTCTCAGGCCAAGAATTTCCCTCAG  
A\_14\_P116550 GTGCGCTGCTTTTCTCGTGAGATGGAGGAAGGAAATACTAGAAGAAAAAGATTTTC  
A\_18\_P16131047  
ACTGACTTCAAACAAAGACAGTAAATTTGGAATAAACTTTAAAATCTGGCTCCAAGATCA  
A\_14\_P135320 CTGTATTTTCCATAATTCTTGACAGAAGGAAAGACGGGAGAACATACTGTGTGCCAATA  
A\_16\_P18795611  
TAGGAGGTAAACATTGGGATATCTGACTCACTTTACTAAATAGCACTGCCCAGAATGATA  
A\_14\_P202515 AAGATTTTGGGTTTCACCTCGTCTTTTCCTTCCTGTGAGATGTAATAATTGAGGAAAG  
A\_14\_P133792 AATACTTAGGAATTAATGAGAGCAACTGGGACCTTTTCACTGAGATAATCAGTGATTGTG  
A\_16\_P17976048  
CCGATCGACCAGATATAAATTATGACTACTAACTCGGATAAGATGTGATCTCTACCATCA  
A\_18\_P27215034 CATGAACAACACTATACAGTTTACTCAAGTCCACCCTCACTTAATGGCACCAACTG  
A\_16\_P16259488  
AATTCAATGCTCCCAAAAACCTATGAACCACAAAATCTGACAGATGGAAAATGGTTATTCC  
A\_18\_P17061316  
AATCACGCTATGTTGAGTTTATTGCAAACAAGGTTGTAATTTCTAGTTCCTCTCTTCAG  
A\_18\_P14134715  
AGGGAAAAAATAACAAGAAACAAAATATATGGATTTGTTTTGTCTTGAGGCAGACTGGA  
A\_16\_P35374299  
CATTGTCTTACTCAATCACAAAACCTTAACTCCAGATTAATCTGCTTTCCCTATGCTTGA  
CUST\_8686\_P1426210822 CATGCTTGACAGTAGACAGGCCTACCCATGATGTACGATGGGTATC  
A\_14\_P119263 GCGCACTCAAATTAATTTCCCTTTTATTATCCCGTGGTAGGTGTGGCATAAAGAA  
CUST\_9181\_P1426210822 ACTGGTCAGTTATTTTTTTGGTAGCAAACTCTGGCTTTAGAGTTGGACCATGA  
A\_16\_P16508211  
GACCTCAATTATGCTTCTCAGAATACAACAGGTAATGAGTAACGGAATTGTTTCATAGTGC  
A\_16\_P40415565  
AGACATCTGTCAATTGTAAAATATTGTTTGATGGGCCTATAGTCTATGCACTTGTGTCTG  
A\_14\_P109245 GATTTTTGGCCCAAAGATTTTAATAAAAACAAACCATGCTGCATGCATGACTGTTTATTGA  
A\_14\_P137833 GGCTGAAAACAGAGGAAGTCATGTTCTGTCTTTAGGGGATAAGAACTTCATGTTTC  
A\_14\_P129807 TAAAAGGTAGATTTCTCCTTCTAGGTTTTGTTTCAGTTGAATACCTGCTACCATCCATT  
CUST\_5923\_P1426210822 ACTGAAATGAGCAAAGCCATCTAACAGTAGTGAAGAGTCTCTGTCTATCTGGA  
A\_14\_P101614 CTGGTTCTAATCTTCAAACCTCTGTTGGAAATGGAAAAAATCGTATTTGCCAGT  
A\_14\_P100818 TCATAGTTTTCACTTTCTTCTTTCCCTGGGCAAAGAAAGATTATTTCTTTGTTTCCTG  
A\_14\_P127097 AAAAAACAACGAACTCAAGTCAGTTATGGGTCAAACAATGATGGTATTTCCATATCTAG  
A\_14\_P113450 CTCAGGTTTATTTTGATAAACTGAAAGCATCAGCCTTTTACCATCATGTCCCTGTGTATT

CUST\_5944\_PI426210822

AATTGCCTTTGCCTTTTCCTGTTAATACTGACAATTCAATACAGTCCCATTGCTCA

CUST\_9853\_PI426210822 TTTACAGCTAACCCCGCTGAGCTCAGTGTCTCAGTCTGATTCATAGT

A\_14\_P108599 TACATGAAATTTTGATTATGTCAAAAATTAAGAATCAAAAAGTTCTTGACAAAATAACT

A\_14\_P108550 AATACCCACATATCCAACCTTACCGACACAGGAGGTTTCATATCATTATTGTAAAGCACA

A\_14\_P131235 AATTAACAACAACCTTCGCTTTGAGATTACTAGGTGATATAGAACAGGAAGGCATGTG

A\_18\_P15669122

AGTCTTGGCTAACATCTTGTTTACCTAAACTTCAACAATTTTATCCTGGCATTTCAGACT

A\_14\_P129239 GACTGCTTATATTTAACTTGACAACCTCATCCTTATTGTCTGGAGGTGTAGTGGAGAG

A\_16\_P21414998

ATACCGGTCATAAGATCACTTTGATGTCTACTTCATTATAGAACTTACCTGTATGTCGGG

CUST\_9612\_PI426210822 CTGATTTCCCATCTGCTCGGTTCTCTCGGTTGGAATGCCTGATC

A\_16\_P20476504

ATATGGTCCTATTCTCCAATAACCCAAATATGAGCATGAGGTGATATTTAGAGATCCGTG

A\_14\_P113218 ACTAGCAATTTGACATTTTGTGTAACCTCACACTCACCATTTCTAATATACAGCCCATC

CUST\_9833\_PI426210822 GAAATAGTGCTGGTGAGAGAAGACGAGATGTGAGCCAGGAGGTAC

A\_14\_P125972 CTTTCATCGTCTTGAGAACCTGATGGTTTTGATTGCCATCTGGAAAAACAATAAATTC

A\_14\_P127071 AGTTGCTGTAGTGCTCATCAAAGGAACAGCCACCTGTAGACAAAAGAGATATG

A\_14\_P122459 AAGTATACATTGTCCTTTTTACTCAAATGTTTCAGGTAAGCCACAGTTAAGACTCAGAC

A\_14\_P200045 GAACTATTCCTCAGTGAAGCCAGGTCTGAACATTAGAGAAAATCATGCTCTGGTAT

A\_14\_P117283 ATGCCGCACTGTAGTGTGGCTGGTTCTACCACTATGACTTTAAAACATGTTTATATCATT

A\_16\_P18105924

AGCATTTTCTTGATCCCTCAATGAAACAAATTGCTCCATATCTTTATACATGGCATGCAC

A\_14\_P107303 TTGGATTTTGCCTTCATCTCTTGCAGTTGGTCCTTGAGGTTAGCAATATACTCATT

A\_14\_P110379 GAAAAGGTTCTATACATGTGGGGTCTTGAGGCTCCAGATCCTAAACTGCTTATAAAAATA

A\_14\_P126948 AAAGAGATGAACAGAAAGCAGATCTACTTATACAGGCGCTATAATGGCAATAAACAGGCT

A\_16\_P18054030

ATCCAAGCATCATTAACGGATGTCAACTACTAGTTCTTTGCTAAGTGTTAACTCTATGGG

A\_14\_P125375 CCATGCTTTAACTACAGATTAGTTCTAAGCAGTGAAAACCACAAAACCAGTAAGAGCATT

A\_14\_P129820 TGTGCTACTAAATCAATAAACTGAACAGAAACAATTTTCATGGGCTTTATGTCACCGGAAT

A\_14\_P108570 ACTTGTTACAGAAGAAACACAGAATACAGAATCCTTGCTTAGGATGAATCCCTGTAATTA

A\_14\_P138778 AAAGATAATGCTTTATGTGAGAATGCCAGATCCATTCCACGCACCGTTTCT

A\_14\_P139292 CTTGCTAAACAATGATTAAATAAATGCACTTTCTCACCCACCTTTGAGGACTTTACTGTC

A\_14\_P124731 TTCTCATGGTGTCTGGTTTCTGAGACCATCTGATATGTTAGAATGAACAATACTAACTT

A\_16\_P15896427

CCCCTTCAGTATGTAAAACCTTGTGTGTAAGATGATTTTACTCCGATAACCTTCAGTATGG

A\_14\_P131708 CACTTGCCTTAGCCTGTTTCACAGACTTGTCCACTTACCTTGTCACTAATTTG

A\_16\_P36793303

TGGCACTGTCAACTATATTCCTTTATATTTTTCTACACATTACTATACAAGACCCCTG  
A\_14\_P115802 CTACCATCTCCTATAAAAAGGGCATTAAAATTTTCCAAAATTTGGGATTTTGAACACCGTC  
A\_14\_P113613 GTTTCATTTTCATTGTCTTGTTCAGCCATTTCTTTTCATCCCTAAATCAGAATTTGAATCAC  
A\_18\_P16060305  
AAACCCTCATTTGATCTGAATATTCCATTCTTTGTTCTCTATGCTTGCAATTCCACTGAA  
A\_18\_P14134965 ATCCACCAGGAGGCCGTTTTGTGCTGGTCTAGGTAAGAGGAGATT  
A\_14\_P129966 ACCTACACAACAGTCTCTAAAGGTATAAGACAAGGGTGACACAAACACTCTGACAT  
A\_14\_P202041 AAAAAATGGCACAGAGAGAGACAAAATGAAGCACAATCTGGATTATAATAAAACTCTCAG  
A\_14\_P132368 CTGCCGAATGTTAAGAAATCCAATACTCTTAAGTGTCTGCTAGTCTGTAGAAAACAGATG  
A\_14\_P112449 TGACCCAATATAAACGGGTTTTACAAAGATTAATTTGAAAGAGGGCTCAAAGGACTTGGCT  
CUST\_1256\_PI426210822  
GGATAAAAATCAACGAAGGTCCATTTACAAATGAAAAGGAATTGGGGTTTTGTTGTATTT  
A\_14\_P125481 CCATTACACAAAGGGGTAATAATTTAGGGAAAGGGGACAGAGGATAGGCAAATTTATT  
A\_14\_P138707 GGAGGCTTTTAAACTCAGAAGTGGTGTAATGAAAACATGTTTATAGAATTTGGGTGGAC  
CUST\_8344\_PI426210822 CACCCATAGGACACAACAGTCCATATCTCCTCACTCTCTGGTTCT  
A\_14\_P103453 CTTGCTGCAATTTCTAACTTGGATAATTGCCCTCTAAACATCCATAGTTCTTTTGGATTTG  
A\_14\_P116965 CCGTGAATGAGAACCACAAGGACTACATGTTCCCTGGAGTGTATCCTGTTTATTA  
A\_14\_P138576 TCATAGACTAGGTTTTGAGATTAGTTGTATTTGAAATGTGCATAGCGTTCCAGTCACCAA  
A\_14\_P127398 AATAGCATTGATGACCCTTTTTTTTTTTTTTTACTGTGAATCCCGGATTTTGTGTGTAT  
A\_16\_P35994574  
CACACCAAAAAACATGTTTAGGAGATGATATACGAACTCTGTCTTACTAACTATCCACCA  
A\_14\_P106648 ACTCTTCTCTTACTCCTGTTTTTCTCTTTATTGTTGCCTACATGTTCTCTGAGAGAAA  
A\_14\_P132659 TGTCCGGTGGATTAGATCTTTCTCTTTAGACACTTCCACTTTGATTTTTGTTTTTAAAGT  
CUST\_6055\_PI426210822 GAGATAGTGGTACCACACAGTGAGTGCTAGGTGGGTTACTCCAGG  
A\_14\_P111145 ATTTATACCACACTCGGGACAAGGACACCTCTTTATTGCTGTTAGAAAAGGGT  
A\_18\_P17382702  
ACAGAAGCCAATCCTAAAAAAGTGACCATAATCAATAAACGTAATTAGTTTTCCCAAGTT  
A\_14\_P119827 TCCTTCTCCCACCTCACTTTTGCTACTTCTATATTTTTTATTCTCCTCCATCTTCTAGTT  
CUST\_5130\_PI426210822 TGAGTAACTTGAAATCTTGTGGGGTCAGTGTTTTGACTCTTTCATTTTGG  
A\_14\_P121521 TGAGGGATGACAATTGTGTCGCTCTGGTAGATGATTCTTCTTTTTATAAAAGATTGCTA  
A\_14\_P100200 AAGAAGAAATTTGGGTTCAAGTAAAGAGAAGATACTCATTAGTAGCCCTCATCACACAGG  
A\_16\_P01187384  
AAAACCTGGATAGTTCACTCTAAGCACAGATAAATAAGAGTATCATAACAGCATCAGCAGG  
A\_14\_P129134  
GGGAGGAACAGTAATAGAGGGAGAGTTTTGGTGAAAACATAAGGAGAAAGACAATAAATAC  
A\_14\_P120762 GCCATAGCCACCTTTGAAATGCTCTCTGTGTGTTAGAGAGATACTATAACCTA  
A\_16\_P58424349 ACTGTAGCCAAAAGTCCACCCAGATTCCAGGTAAGGGAGCATTAG  
A\_18\_P17371307

TCCATTCACAACAAATAGAGCCATCAATTTATCATATTTACCTTTTAGTTCAACCTCCT  
A\_14\_P115302 TATTCTGAAGATGCCTGTTTTGTAAACCTTGATGTGAATTTTTTGGTGTCTGAAATTTAC  
A\_14\_P116847 CGTCCAACACAAAAATTATTTAGGCGCAGTAAGGACATTCAATGTCATTTACATAATGGC  
A\_14\_P130212 TATTGACATTCTCACCATTGTAATATTTCTTTCCAGTGAGGAAGACACTGTGTTGTG  
A\_14\_P201766 ACTTGGCTGAAAACCTTACTTTTCATTATAACCTGGTAAAAGGTTGTAGAGGAATAGCGAAC  
A\_14\_P111905 CTAAAAGGAGGGGCTAAAGAAAGCATGTATCTTCCAAGGTATAAGTGAGTGGTTTCTT  
A\_16\_P00771949  
AAAAAATCACAATACCAATGTAAACTCCATTCATGAAAAGACAACAAATCTCATGCAAAA  
A\_16\_P58424478 GATTCCAGAGTGGTTCTGGCTCGAGGTCTCTTATGAGACTGCAGT  
A\_14\_P132603 ATGCGTCCCAGACGGAATACAACAGCACGTTTCATACTCCTTAATGATCTAG  
A\_14\_P115822 CCGTTTTAAATTTTTGGTTAATAATAAAAGTTAAAAGAGGGCGAGTATGAGCAAAGGCCG  
A\_16\_P02730599  
ACTGCAGCAATAAAGTTTTTGTAAATCTCCATAAGTGTAATGTTCCCACAGGTTCCAA  
A\_14\_P115157 TTCCTTTCTGCTTAGGGTCACCCAGGATGTGAAATAAGTAAGACAAAATATGCATTTTTT  
A\_14\_P103921 ATTGTTACTTACCTTGCTGCATCTAGAATCTGAAAAATCCTCCACCTGTTAAAGGAACAG  
CUST\_950\_P1426210822 TGAAATCTGAGTTGAGCAAGTCTTGCTGTTTTCAGAGAATGCTCTCCTTCT  
A\_14\_P120779 CTGTAGGACTTGGTTCATATTTTCATCTATGGATATAGTTTTGGGTCTTTTGCTGTAA  
A\_18\_P14133705 TGCCCAGTGAGTCTACTCCCTTCAGTATTTGTCAGATCCTGCTCAAT  
A\_14\_P118196 TACCGTCTGAGGAAGTGCTAGGGTTTTATTAATGACTTAATGACCATCATGTTTCATAGATT  
A\_14\_P110388 ATAGGTTCCCTTTGTGATCCTTGTAGACTTTTAGCATCAATAAAAGAAATGTGGGGGTTAC  
A\_16\_P15713361  
AAAATCTACCACATTTCTATCCTTTTTGCTCATTCTTTAATCCTCTTTGGCATAGTCCCA  
A\_18\_P16120321  
CCACGAACCTTGCTAATTTCTTCCATTGTATAGTATGAACTCAATCTACAAAGATCTGGC  
A\_14\_P109680 GGTTGTGGAAGAACCACGTTAACCCTCTAATTTCTTTAAAAGACATAAGGTTTGAAAA  
A\_16\_P20849674  
AAGCCTTAATGAAATCACTGTAATGATGATAAACCTGACTTGCTTAACTTCTAGCCACGT  
CUST\_8859\_P1426210822 TAGGTGCCTGGTGTCTTTCTGGTCTGCTACATGAATAGGCGTCAAAA  
CUST\_839\_P1426210822 AATTAAGCATCTCCCCCTTGTCGGGCCCTTGGGAGAGGAGGAAG  
A\_18\_P10824821  
ACTGTTCCCTACATGAGTAATGAATCAGTTAAATCCTTCACTGTCTCAAGAAATCACCAT  
A\_18\_P12914799  
ACCTAACATGCAATCACTTAGAATGAATTCACATGATAGAATCTGCAATTAAGCCATGGA  
A\_14\_P116514 AAAGAAAAAAACTGTTTGTGAAGAGAAAGATAATACATTTTACCCTTAGGCTCCAGGT  
A\_16\_P20581299  
AAAAATCAGCAGATTGCAGTCCAAGAGTTAAAATATTTTTAGGCCAAGTCACCATAGGTTG  
A\_14\_P133905 GACTATGTAAAGGCCATAAATTTGCCTCAAAAATGTCAAAGGAAGATATTCAGACCACAG  
A\_14\_P121309 AAAATAAACCACTGAGTGTCTAGCATTTGGGTCTGTAAACTCATCTACTAATGATTCCC

CUST\_3897\_PI426210822 AGTCTTTTCTGTCTTTCCCTTTGTTTCTTCGAGGGAGCTTGAGTGG  
CUST\_2475\_PI426210822 ATATCGGGAGGCATTGATATGGATGGAAATGGCTATCCTGGTAAGCTG  
A\_14\_P111753 TCTCAGTTGCAACACAACTATTTATGAGTAAATCTTCGTGAACGACTGAAAAGGAAGAC  
A\_14\_P117756 GCAAGGAGACAGTAATAGTCAGAAAATTGCAATTCTGTTTTCAAACAGGTTTTCCCTATG  
A\_14\_P138211 TATGACTTGGCCACTCTCTCAAAGGAATGGAAGCACCTGAAGGAAG  
A\_14\_P104584 AAATCAGTTCATTAGAGTGTATTTTTGCTTTATGTGACTTCTGAGCATGCTATGGGCTGA  
A\_14\_P120432 ACCACCATCTGTTTTTTTTTTTAAAGCATTTTTTGCTTTAAAAGCATCCTGACCCCAAT  
CUST\_3376\_PI426210822  
GCATGTTTGTAAATAAGTTGGTCATATCACTCAAGTCATGCCTGATACACAGATGTTTGA  
A\_14\_P117690 TTAGATTATCCGGAAGGTAAAAGGACAAATGCAATAGGAAGGATACAATAAAGAAAGGCC  
A\_14\_P110917 CTAGAATATCCATGACCTCCTTCTAAACGACTTGGACTTTGGGTAAAAATCTCTCTTG  
A\_16\_P19564334  
AGCACGTATCATTCAAACCTGTTACTCAAGTTATCCCCATCCTCATTAATAAACACTGA  
A\_16\_P18385794  
AAAAAGTGCAGTGGATATAGATAGCCAATCTTAAAACACAGTAGACCCAAAATTGGTGAC  
A\_16\_P20252363  
TCAACTCAACCTTTCCACTAAAGCAAAAAATGTTACATCTATATTGAAAGTGCAGCAAT  
A\_14\_P135588 TGTC AATGTAAGGAGATTGTGAATAATAATCTGAGTTGGATGCTGGCTGAAAAAATTGTC  
A\_14\_P119948 TCTTCTAACTTGTCTTATATAGTCAACGGCATGACGTCCAATCTGTGAATTTTTGTTGCA  
A\_14\_P137018 TTTTCCACTTGGGACCCTGTT CAGTATCTTTTGTAGTTTCAGAAGTTTTTTTTGTTTTGGT  
A\_18\_P14135192 CTGGCCACTTCTCTCACCCGTCACCATTGATGTGGTAGGAGGTG  
A\_14\_P201424 CATAGTCGAGAATGGGAAAAATTATAAGATAATTGAGGGAGGAATTGCTACTTCTACCTG  
A\_14\_P104943 CTTTTCATTTTCTTTGTGCTCTGACCACAAAAGGAAAGGAAACAAAAAAGTCAATTGTCT  
CUST\_6870\_PI426210822  
GCAGTAAAGCACCAGGTCAACTTTCAAGGCTTTCAGTGGCTAATTTTTTATGAC  
A\_14\_P135347 AA ACTATACCCTCTTCACTTTTCCAGTCAATTTCTAGGCATCGTTTGCATGGCTTT  
A\_14\_P200708 TATATTGCTTGTAAACAAGGTTGCCAGACTGATCTAAAACATTTCTTTTTGGCTCAGAGA  
A\_14\_P111761 AGAAGTATTTGGTGTCTCTGGTTTTCCACTGAAGTTATGCATTTTTGATGGAAGTTTA  
A\_16\_P00979829  
CCCACCTTCACAATGATCAGTAAACACCTTTTATCAATCACAAAATAGAGAGCCAGTCAT  
A\_14\_P116239 ACCA ACTTGGTAACAATTTCTTTCAATTTGCCTATAGGTGTT CATGTATTTGGATTATGC  
A\_14\_P128094 TTCGTAAAGTCGATTACACCAAAAATATTAATCCAAACTGGTCTGTGAACATCAAGGGTG  
A\_14\_P138648 TTATTTGAGCAGTTCAGACAAGGATAGGTTTTTATTCACCTTTGTATCACCCAAGGTAAG  
A\_14\_P139593 ATTTTCTCAACTCGACTCTCATTTCTTCCCTGCTGGTAAAATAGAAACAGGGATTTAAAC  
A\_14\_P113886 GGAGCAAATTTGTTGGCTGGAGAATTTTTGTTTTTAAATTAACAGGTAATGTATGCTTGCGT  
A\_14\_P123286 AAAACAGAAGGTGAAGCATTAGAGTGGCTTATTTACTCTAATACAGAGTAATCAAAGCAT  
A\_14\_P115875 CTT CATATTTAGAAGAGTCAGTTGCACTACTACCTTTTCTAATTTCTTTTTTTTCAGCAA  
A\_14\_P136062 AGTTTCATCTTAAATTTGTCCCAGGAAAGTTTCATCTAGTTTCTTTTTTTTATTCCTACCC

A\_14\_P134580 CTGTCAGGATTCCAATAGAAAGCCAGGTAATAAAGTTAGGAGTTGTTATCATTAGTGAGC  
A\_14\_P126966 TTGGGTGATTCTTGGTCCCCCATGGATAGGAATGATACCTATAAGATTCAGAA  
A\_16\_P00685066 ATAGCGGGCTTCTTCACCGAGGTGGGTGTCTGCTGTCTGGGCATT  
A\_18\_P22841763  
TCATCACTATTATTGTTATTATATGAGGGAAGGTGAATAGGAACTCATCAGAAACCTGGA  
A\_16\_P58424491 TTAGGAACTTTCTCTGGCTACAGGAGTGTGCTGCACCCGAGTCAG  
A\_14\_P132639 ACTAAATTTTATAACTTACTGTAAAAGCAAAAATGGCCATGCAGGTTGACACCGTTGGT  
A\_14\_P125636 CCAGAGATGGCACTCAAGATAAGAAAAAAGTGTTAATATCTTTTGAGGAGAACAAGGTTCC  
A\_16\_P58424613 AGCAATCCTGACTCTCACACTTGCCTGACATGAGGCCTTAAGGGG  
A\_16\_P16191488  
TTGCATCAGGATCTCACATTATCCAGTAAACCCAAATGCTGTAGGTAAGAGATGTAATAG  
A\_14\_P201420 CAGGTTACACTTGTGTCAAATTGATGTCTTTTATTTTCGGCCAAGTTTAGAAAATCACAA  
A\_16\_P20255215  
GCATAATTTTGCCTACAAATAAATTCCTATCCTTCCACATTTTATCTGACAACCTTGGGGC  
A\_14\_P100976 AAGAGGATCCGGGGACTATGCTCTCCATATAACAAAGAGATTAATAGAATTTTATGAAGA  
A\_14\_P114162 ATATCGGTTACAGACTAGAAGCAGCCAAAGATGATTATCGAATACGTTGTGAAGAGTTAG  
A\_14\_P122811 CTCTGTTATTGGCAGGCTTTAATAACAAGCAGGGTAACCATCATAACACTTAAAAGTAT  
A\_16\_P16953335  
AAAAGTAGAAAGATCATAGATTTCAGACCCATTCTTCAGATGTTAGCCATTGAGAGCATGA  
A\_14\_P134750 CAAAATGTCCGCCAACGATCACAAACTTTATATACACCACATGTCTTCTACAACAGAG  
A\_14\_P124804 CATCAGAATTTTCCAAGAACAATCAAATGAATGCATAGCCTATCTGTGATCAAGGAGAG  
CUST\_1018\_P1426210822 TAGAGTGTGTGCCTCTGAGTAAGCAGCTCGGCTCTTCATCAGCAC  
A\_16\_P35357242  
CCAAAGCACGAATCTTTTACATTCAGTGCAATAACATTACAGAATTTTCTGAGTCAG  
A\_14\_P100266 TCTTGAAGGATTATTGTTCCCTGAAAACAACATTTTGGGAAATGATGACCTATTGCATGTG  
CUST\_4144\_P1426210822 CTATTTCTGTATCCAGGTCCCCAAGAGGGCTACAGGGAAAACCTTC  
A\_16\_P01341330  
ACAGGGTTTCCAGAATTTTCAAGAGAACTGGGTCATTATTTTGTGCTAGTATAATGAAGC  
A\_14\_P139288 TTTCTCTCTAGGTATGCATCCATGTGGAAAGGATGTCTGACACTTTATACTGGAAG  
CUST\_9626\_P1426210822 TTTCTCAGGGAGCATGTTAGCATGTTTCTAGGACCAGCCACATCA  
A\_14\_P116552 AGATTAGGAAAAGAAAGAGTGTGTCAGGAATCTTAGGAAGTGAACAAGGCTGTTGACAG  
A\_18\_P14567839  
CTTTGCCATCCTATCTACAATCTTCACACAATCATTTAATGCGGAGAACCTAACCTTTAGG  
A\_18\_P22841563  
TTATTTACTACTGGTTCTCATGAGACACTCTTCCCACGAGATGTAATCCAAAAAAGAAC  
A\_16\_P15207807  
AAGAGCACAGCCAATTATTCAACATGTGAGAAAATGATAGGTCAGAAGACTGTATAAGGA  
A\_14\_P121389 AATGAAATTGAGTGCACATTTTATTTACCCATCTCATCAGGCCAACAAATCCATATGACA

A\_14\_P128857 CTTTATCGAGGTGCAAGTTTCAAGAGTGGCAAAAAAATGAGACCAAGTTTATATGCTCTA  
A\_14\_P138093 ACTTGTTTACCAAGGTTAGCAGCAGGAATTTCCATCTGGTAAGAAATTGGTAAAGTATTAG  
A\_14\_P132470 CTTCCAATGCCTTTATGATTTGTGGAATTCTGTATGTGGTCAAATCTGTATATGAGGATG  
A\_14\_P130528 CTTGCTTGAGATTTCCATATTTATGATTAATAAATTTCTTCTGCAGAGTAGGAAGCCGTGTC  
A\_14\_P119129 GAAGGAGAGAACATTGGTTCTTAGCCTAGAGGAAGAGAAGGCTAACGC  
A\_14\_P131767 CTCTCTTACGGTAGTTGAGACCTCACTTTCTTGTATTGAATGTGATGTTCCCTATAGTTA  
A\_14\_P118618 CTCAATGATGACACCATTCTGAATGACATAAAGTTAGCAGATTGTGAACAGTTCCAGATG  
A\_14\_P128738 TGCAATCCACATTGCAATCAGCAAAGATGTCATTTTCCACATATAAATCTTGTGGAATTC  
A\_16\_P16476026  
GGTGATAAATGTTGAGCAAGACCCTAAATTAGTTAAGTCAATCCAAGTGAAGACAATGGA  
CUST\_1307\_P1426210822  
TTTCATAAAATGTTCTCGCTTCCTCTTTAACCTAGCTGTTTAATTTATTTACATTTTTTTC  
CUST\_1113\_P1426210822 CAGCTCTTACAGGCTGAGAAGGAGCGATGGGCTCAGCAGGGTGATG  
CUST\_3078\_P1426210822 AGGCCTGAATTATGTTCTGATGGCTGACGTGGCCAAAAGGAGAA  
A\_14\_P111137 CTTTCTGTAAGATGGAGAGTTGTCATGATAAAATTTCCCATTAACATGGATCACATCCTTG  
A\_16\_P02489855  
CCATCTGTGTTTCATCTTTACATTTTTCTAATTTTTCTGTTGTGAATTTCACTGTCACTCA  
A\_16\_P20710576  
CACATTCATATCCCCTGCTAATTTTCATTGGGTGCTATATATGTGGAAAGTATTGGAAA  
A\_14\_P114768 ACTCTCAAGCCTTTGCTGTTGCTGTTTTTAGTTCTTCCAAATAAATTGATGATAATTCCC  
A\_14\_P135968 TATAATATTTACTCACCTTTGCTCTTCAAGTATTTTCTGGCAGAAGGAATTGTCAATGGG  
A\_16\_P17033432  
AAAATTGCACGTGTTTTTCAATTTAGTATTTATAAGGCCCTCACTCTATATCCTACAGCCGC  
A\_16\_P02681964  
TCAAACATAAACAGCATCCAAAAAATTTACCAACAGCAAAGTAGATTTTCTCTTTGGGC  
A\_14\_P202099 ACTGAGTAGTTTCAGCAGTTTCAAATGACTGAGTATTGCTGAAGTTTCATGGCAGTTTAT  
A\_16\_P19107257  
ATTGGGTTTTATCATTCTGTAAGCACTAACAATGACCATAGAATTCTCAATCACGTGGG  
A\_14\_P129498 TATTATTCATAATAACAAGTGCAGGCCCTTGAAAGTAGGTATCCCGTGTTTTGCTTTTTTA  
A\_14\_P106892 TTACATCACAAGATGCATAAACCAATTGACCCCATTTCTCAAATGGCTTATGGTTTTAGTAAG  
A\_14\_P123586 AGTCCTTGGGGTCTTGATTATGGACCTTGGCCACAACTTAAGAACTT  
A\_14\_P131133 ACACGGGACTACAAGAAGCAGTGAGATGAGTATTTCTAGTAGAATTATAGGTGATTCTGA  
A\_14\_P108306 ACTTAAAGTACTCACTTTCTTGGCTGTTTTGTTATAGGGCTGTGGTAGATCTACAAAAGAA  
A\_18\_P22840892 CCCTGCTGGATTGACTACATGAGCCTCTTTCAGAAGTTTACTAGCAAAT  
A\_14\_P108048 TTGTTTTCTTCTAGAATAGTATGTTCTCCTGTTTCTTATGTTAAGGGATCTGACACAGAAC  
A\_14\_P200578 TCTGGACTGAATCTTCTAATCTAAGCACATGAATTGTGTAATGGGATGGAACAGAAATGA  
A\_16\_P02679064  
AAAGTTTCGCAGGCTTAGATTTTTAGAAACAAAATAGACACTAGTTCTGACATCCCAAGC

A\_16\_P18268243

CCCTAATGTTCCACAGCATAAATACATCTTTGTTTCAGAGTTTCTCCAAGTTATCTGTGAG

A\_14\_P117666 GACTTGAACAATTCTGACAACATTCCTACATTTTCATCTGTGTGAAAAAAGGGCAAATAGT

A\_14\_P138469 TGTGACAGGCTTCTGATAAGGGAATCAATGTCTGTTTATTAAGGCAGATGCTCATAAAG

A\_16\_P58424321 GTTCTCTAGAGAAGAATGCAGATGTGAGCCATAAGCAGCCTACACACACATC

A\_16\_P20818701

AAGCCCCCTATACGTATAACTCCGGTTTTAAACTAGTGTGATTTACCATCAAAAAGAACAA

A\_14\_P128971 CATCTAAATAGCCTGTCTTTAATGGCACATGAAATATGAATGGAAAAAATAGTCCACCT

A\_14\_P137643 AGGAGCCAATCTTCCGCAAGCGAGAGTTCAATAAGGAGATCAAGTCATT

A\_16\_P19090128

AAATGCTAAGACCAAAAAGTTTGTTCATCTGAATGTAATCGCGTAATTGTCTTGACTCTCA

CUST\_9630\_PI426210822 ACCTGAGAATGCCATGTGAGACCTGTGTGACTGCAGAATCAAAGT

A\_16\_P18975974

TCAAGAGCCTAAGAAACTCCATATCCAATCATTCCCTATACCTAGAAATTTGGCCTAAGAA

CUST\_7137\_PI426210822

GGATCACGATGGCATTCACTCTTTTCATTCAGCAAAGTTATGTGTTAACAGGTATTAAGTA

A\_16\_P39590777

ACACCTCTGTAAAGTCTCATAAAACCATACAAAAACACAGTGATAAAAAGTTTTCTCTCC

A\_14\_P137561 TACATTTAATTTGGCATATTAGGAATGTAATGGCCAGCCACTCACAGCCTAGTCTCATAT

CUST\_810\_PI426210822

AATCATGACTGCAAGCATTCTTTCTCCAAAGTCTTTTTGCATAAAGATTTTCTAATTTT

A\_14\_P118203 CAAATGGAAACAACAGGGGATATTCAGATACATTTATTCAACAATAAGGCCAGTCAGGC

A\_18\_P16346264

CTCTGCATCTGAGTAAGAAAGTTCTTAAACCACTGTCTCTTTTTATGTCAACTTACAGGG

A\_14\_P100427 AATTTCCCTTCTTGGTTAAAATAAACAAAACAGAGTGAATGCTGTTGGCATTGCATCTAG

A\_14\_P110337 CTCTCCACTGGCTACTACAGCCCTAATGCTCTATCCTTTCCAAGAAATAAACAG

A\_14\_P125338 GTTTAGTTATACCTTGTGTTCCCTCATACTTTGGAAATGTGGCAATCCACTCTTCTTATCT

CUST\_4200\_PI426210822 CAGACTTCTCAGTCGGAAAGTGTCTTTGGTGAGCCTTACTATGTGACT

CUST\_3903\_PI426210822

GTAAGACTGAGACATCCAAAGACGTCTCATACTGTAATGTGTGATATTTATGTATATGCT

CUST\_7733\_PI426210822 GTCTACTGGCCAAGCTTCCGGGGCTGGGACAGGCAAGGTATGTCT

A\_16\_P19298463

GCTGCTCTAACATTCCTTTTTGTGATAACCTATCCACATATGAATCAAACCAAGTCCTAG

A\_14\_P117195 CCTAAGCAAAGATAGAACTCACAACCTCCTTGTTTTGTATCTGGAAATTATCCCAGG

CUST\_3982\_PI426210822 ATTCTCAGAACCTTCCAGAAGACCCTGCCCTGGAATTGCTTTCAA

A\_14\_P134959 CACATATAGATTTGATTTGTGTTGTGTAAGGATATACACAAATGCAGGCAAAGGAACCCA

A\_16\_P39802028

ACATGCTTCAGTTTTCCAAGGTAACAGTAAGATTTAAGTCATCATGTGTTACCTTGATG



A\_14\_P127819 TGAAGGTCTTGGGGTTAGCATCTTAATGCCTTTCAAATTGAACACTTTCTAGAATTTTCAT  
A\_14\_P111325 ACAATTATTAGTCATCAGCAGCATATAAGGGCGGAAGTGAAAGATTGTGTGAAAATATAC  
A\_16\_P02030386

AAAAAAATCTTTGTCGTTCTTTTCATACGAATGTCACAAATGAACATTTTAGCCAGGACCC  
A\_16\_P58424532 AATCCAGCCCTGGGGAATGAGTGATTGGCATGTCCCTTAGATAAAC

CUST\_1071\_PI426210822 GCCCAGGCAGATGCTGGAGAATTGGGCGCATCCTGAATGTGGTTT

A\_14\_P200640 TTGAGTCTTCTGCAATTGGTCACTAATTCATGCTTCCTGTGATTTTCATCCAATA

A\_14\_P117813 AATTAGCCTAACCTGTGGTATTAGAAATATTATCCGTTGGTCTGCTTGTGGCATCTTTATT

A\_14\_P119158 GGGACTGATCCTAGGACTTCTGATTGGGATTTACGTATGATTACTGAGTTTG

A\_16\_P20837481

AAGCCAGTCAATCTCCTTAATAACCAAGACCAAAGAATATAATCAGAGTGTGATGCAGA

A\_18\_P26795111 ATTTAATGACACACGCGCTTACCCTCCAGATGCTGAATTCACC

A\_14\_P104663 ACTGAAGAGTTCCATAGTTTTTCTTTGCGTGATTGAATACTGAGTTCCAGCATTTAGC

A\_14\_P139581 GTATATGTGTAAGTATTAGGATCTCAGAATCCTACTCTCCTCCTGTGGATCCATATACCT

A\_16\_P38203848

CAACCATTTCTGCCTACTGATTACTCATCATTGATTCACCAAGTTTACAATTTACCAGGA

A\_16\_P03511178 ATTGTCTCTTTGTGTTCTATCCATCAGTTATCCATGTGTTCAACCTTTTATCCATCTACC

A\_14\_P132123 AAGCAAAAGCGAACCTGCTATCTTGGTTCCAAAACATTATTCTATCGATTGGAAATTTTG

A\_14\_P201267 AGTCATAACCATCTTGGAAAGATCTCAACTTGTTTTATCAGAACTCAAACGCCAATTTCT

A\_14\_P102631 CTTTAGATTTTTCAGTGTTGGATTTAGGTGAAAACCTGCTGGTCACCTGAAGGAGA

A\_16\_P03791967

ATATCAATCCCCCAAATAATGAGACAAAGCACATTTTACCCTTGACTATTTACGAA

A\_16\_P00685489 ATCCTGTGATTTGGGTAACACTGCCCAAACAAATGGTGTTCACCATATACATAT

CUST\_1876\_PI426210822 GGGAAAGACTGAGTGAACAGAGGAATGAACTTTGGATCTGGACCTTT

A\_14\_P105812 CTACCTTACTTATTTTTAAATAGGTGTGTTGGTTTTGGCCCTGAGGAAGAATTGACAAAT

A\_16\_P02568927

ATCTCCCCAAAATGCATTTTTAAGGAATCAGAGATCTATGGAATGACAACCAAATGACT

A\_16\_P20014952

AACTTACTCATCACTCCTCCTAATCTTATCTCATTTCAGCCATTCTAATTACCCTTCTGTG

A\_14\_P101576 ACAAACACCCTATTTGAGTATATCTTATACTTGTATCAAGTCTTTCTGAGTGTGCCCT

A\_14\_P116417 AATCCTGGTATTTTCATACTACTGTTAGGAAGAGAAAGAATTCTGTTTCTCTGGGAATT

CUST\_6695\_PI426210822 AAACCTACCCTTCCAGGACTCCAGCCACGCTGCAAGGTTGATAAAC

A\_14\_P129813 GTAAATGGACTATATCGCAGTCTGCTCTTTATTTGAATGGAGAATGGAAACAGGTTATAA

A\_14\_P112060 ACTTTTCCAAGTTGTGATTGATGTTCCCTTAAGTTTGAGATGTCTGTGTAATCCTGTCAA

A\_14\_P104561 CTATCAAGATTCCTGGGTTACTTCGAAAACCTAAGGAAACCAAACATCAAATTTCTCATC

A\_14\_P109938 CTGCTACCTCAAATCCCTGACTAGCGCAGAGATGGGTTTTGTGAATTC

A\_16\_P35401399

TCTGCCTCAAATAGGAAATGAAATAGACCTTAAGATGTGTTATCAATATTCGCAGGCTT

CUST\_9642\_PI426210822

GAAAAGGAATTTATCTCTGAGAAGGCCTTCAGAAAGAAAATGAGTAGGCTCCG

A\_16\_P17303901

AATTGAAGCAAGGCACTATTTTAAATGTGCAACATCAGGATTATTTGTAGCCATGCATGC

A\_14\_P124484 CTCTATAGTGAATTAATCCCTCCTTTACCAATGCCAGGAACATAGGTGCATGCTAAATAT

A\_16\_P01138185

AAAAGTGGTAGTTTTGAGGATAACAAGTAGACACAGATTCTTTCTAGTTAACTCGAGGA

A\_14\_P100260 ACCAATATATTCTGACATTGTAGGCTCTGTTGGAACATGTATTACCTTTGAAGAGGGTAA

A\_16\_P30952446 AGTCTTAGGGGTTACTTGTGACTACTGTGGGACTTAAACACTTTTCAGACAATTCTC

A\_14\_P121043 ACCCACCTCCAGTGTTTAGTTCAATGTCAAGCATTAAATGAAACAGAAAATACTAGTAGG

A\_14\_P121068 ACTCCTACTTGGCTTCTATCCACCAACAGAAATTATACCATATAGTGAAAGGCAATTTTC

A\_16\_P00730037

CTTGTCAAACACTTTTCCTTTACTCGTCTTAACTTCAACTTCTCATTAGTCCAAACCTCTT

CUST\_8698\_PI426210822

AATCAGTCGATATAATCCAAAGCTAAAGAGTAAAGAAATTACTCCTGAATAACTGACCCC

CUST\_3172\_PI426210822

GGCTGATACTTTATAGCCATACTTTATAACCATGAGAATGTTTATTTCTGGCAGTTACTG

A\_14\_P129971 CTCAATGTAATCTGTCAACAAAAAGAATGTTATGCTCTGTTGATGCTTTTGGTGACTATG

A\_14\_P119564 ACATACACCGTCTAGGTAACAATGCTTTACCATCTGATTCAAATGTTTCATAAAAATGGC

CUST\_188\_PI426210822

GGCAACGGGAAGTTTTCAACCATTATCCAAACTCTGTTGTAGAATTA AAAAAGTGGA

A\_16\_P19172192

AGAAAATAAGACCTCCTTAAAGCACTATGTCTCCTACAATAAACTCACCCCTGTAAAAA

A\_14\_P118758 TTTTGTAAAGTCACAGGGCTGCTCTGCAGTTTCTCCTGGATACAAAGGTA

A\_16\_P18320932

AACTTTGCTGATAATTGTGCTCTGAACTTAGACTTAAGGCTCCATGATTAGATCCCTATC

A\_16\_P38247246

CTCAGGTCTAAGCCAAATGTAACCCAAATATTTGAACAAGTCCATTGCTAGTCACTTTTTT

A\_14\_P110855 CCAAAAACCCAAGTCCACCCATTTGTTCTTAAATGCAAGAATTATCTACCCAAATTTTAG

A\_16\_P58424413

CTTGTAAGTCTGGCATGTTCTATCTTCCCTTACCCTTTGTAAGTTTTCTCCACAGTTCTTA

A\_14\_P107702 CTGTTGATTTGCTTTTTAAGCAACAGTAAATTCATTCCTGGCTTTATCTATTGAGCCCCA

A\_16\_P01885546

CCAGTTTACAAATGACCATGATTCCTCAGTAATCAAAGTGCCTTCCAATTTACAAGTCT

A\_14\_P134583 ATTTCTTGCTAAGAGTCATTTTTGCTTATCTCACCATTTGGATATTTGCAAAGTCACTAAT

A\_14\_P129912 GTATTACAGGTAAGTGTTTTTCTCTCTTCCCTTTCTCTTCTCCTCACATAAACAAAGGAA

A\_14\_P139715 CTTACAGGAATCACACACTTGAAGCCACAGTGCAGGTAACAACACTT

A\_16\_P18148479

ACTTAAAAAAGAACTTGGTGGCCTAAAGATTTCCACTAGATAGTTGGCTGTTTCTCC  
A\_14\_P107246 ATTTTTTCTTTGATTGACAAAGGGTGATATTATCCACACAAAGACTTTCTGAGGGGGTTC  
A\_14\_P117586 ATGAAACCCAGCCATTGTTTAGGAACAAAGGTATAATCAGATCCTCATTCTATTCCAA  
A\_14\_P128457 CTTAGTGTTCATGGCCGAAGTTAGAAGTGATGGAATTGAACATTTGAAGTAAAATCTTCAG  
A\_14\_P115270 CAAGAGACATGGTTTACTATAAGATAACACATAACAATTGGAAAAACATGGCCAGCATC  
A\_16\_P18810253  
CTGAACAAAAATGATCTGTTGGGCTACATACATCATGACAAATAGTTCTTATACACCAGG  
A\_14\_P126500 AATCCATAATGAGTGACTATTTATTTTAGCGGTTCTGAAACTACGCAATGTGTGTGCAAC  
A\_14\_P102385 TGAAAGAATATCATAGAGATAGATGGATCACAATCTGGAGTCCAGTTCATTTCAGGGCT  
CUST\_2956\_P1426210822 GGCTGGCCAGGCTGGCTTACCTCATGGCCGGCTGTGGGCAACTTG  
A\_14\_P132851 TTGGATCATTTCAGTGTGGAGACTAAGCAGAAGTGAAAATCTCCTCTAACAAAATTAGC  
A\_14\_P130306 CATGTCCCATTTAGTGGAGACCTCTTGAATGCTATTTGAATTCTGCAGTATCATTTTTA  
A\_14\_P134776 TTAAAAAATATGTGGAGTCACTGGTCTTTTAGGAAGATTTTCAGACTACAAGACTGGTGC  
A\_18\_P22842450 TCTCCCGAGAGAAAGGTTTGAACCTCCTTAACTAGGGAGGAATAAGAGAT  
A\_16\_P16003896  
AAAATCCTCTCAGTGGAATATTCACCTTGTGCATACCATCCTCAATATAAAACCTCCCATC  
A\_14\_P139986 CTTTCAAGTCATCCCTTCTCAAAAACCATTCACAGCAAATCTCTGTTCTTTCCC  
A\_14\_P125573 ATAGCATAATTCGAAAGTGCTTGCTTGACTGATAATTTAACTCTCCACTCCCAACCATTA  
A\_14\_P121860 TTCTAAAGTCAGCCTTTCACCTAAATCTGAGGCAAACATTGTTTGCAAAAATCAGTTTTTC  
A\_14\_P113979 CTACAATCAGCAAATAAACAGAAGCACCTATCAGGCAGTTTGTAGTTTCCTTTGTATGTT  
A\_16\_P19877932  
TCTGTCTATCATGCTGACTCCATTACTATCTGATGGCATAACAGGATATTGCAAAAATTCTG  
A\_18\_P14136073 CTATGGGGTCAGCGTCACACAGCACCATTGTTTCAGAACAAATAGGA  
A\_14\_P102237 CTTCTCTGTGCCTATTGTAATGAGAAAGATACTAAGCCATAGTCAGACTCATCTTGCTGT  
A\_14\_P107991 GTGTTTTTCATCGGCAATCTAAATACGGCAATTGTCAAGAAAGTTGACATTGAAGCCATTT  
CUST\_1964\_P1426210822 CACAGAGTTTTAAGAGATTGTCCGTAGTTCAGACTGTCATCAAAGTGACTGCA  
A\_14\_P106537 TTTATTTACATTTTCTCTTAGAAAAAATATACAGATCTGCTGCCCTGTTGATTCCTCAG  
A\_16\_P03097106  
ATGGAAGCCAAACAATTTTCAAAGCAGGACTTTAGCGACTTAGGAAAACCATTTTTATTG  
CUST\_9977\_P1426210822  
TGATGAGCATAGTATTGCCTCATTGACCTTTTTCTCTGCATATATAGATATAGACCAG  
A\_18\_P15597156  
AGAAGAATATGTTTTAAAGCAATGTGGATAAAGGGACAGAGTAGGGTAAATGAGGAAACC  
A\_16\_P00685348  
GTTAAGATGGCAAAGAAAGAGCAAATATATTGAAATCTCCTGGAAATTTGGCTCTCTCCT  
A\_14\_P118898 CTATTCTTTTATCCATGCTGTATACCCTTTAATCTTGATGCATATTATGAGGACGGGGAC  
A\_14\_P123926 CGATATTTTATCTAGGACAGAAGATGTGGCTAATTTTTATTGAAGATGCTGCCTGTTTCTG  
CUST\_6845\_P1426210822

GATTCAGACTTTTTATCAGGTAGGCAGTAAGTGAGGTCTTGACTGAGAGAACAG

A\_16\_P35087519

GCAATTTTGGGGTAGTAATAGTTCTTATCCAACCTTCTCATACCTATACCCACTTTCTTG

A\_16\_P19331329

TTCTTGCAAGTCCCAACTTAGAGATTTGAATTGTTCAACTGATTAGTGTAGCGAAGCATA

A\_16\_P19936160

ATGATGGTCTAATTCTTGGAGAAACCTATCTGATTGGAAAATGCCTCTAAACAAGCATG

A\_14\_P114245 TGTAGTCTCAGACCATTGAAATGAATGCCTAAAGAGTTTCTACACACACATCCAATCAA

A\_14\_P119708 GTCTAAATGGAGTAGGGAGGTATGGGTTTCTCTCTGCTATAAAGTATGGCATTGAATTTA

A\_16\_P40440317

ATCCTATTAACCCACAACAACCTATTCATCAGTATGCCATATAAGCCTGATTTTATCCCCA

A\_14\_P131907 TAAGATTTCAAAAAGTAGGTGGAACTTCATAACTTCTGGATTTACAGCAGAAAGAGCC

A\_16\_P01767418

AAACTACCCTATCATATCCCTGCAGTTTTGTTGATTTTTATTGTCCTATAGTCCGACAGA

A\_16\_P18113922

AATAGCCATGCTCTAGTGTTACCACATATACATAAAGTCATAAACATTACACACACGCTA

A\_14\_P135553 TATCCAACCTGATCATTAGGGAGGTTATTAGGACAGTGGTTGAAACAGAAATTTAGGATA

A\_14\_P121927 AAATTATATTCTAAAAAGACACAGAAAAAGAAGGCAGACTTACTGTGTGCAGGCTCTGTG

CUST\_3364\_PI426210822

CTTCTAGTCATTCCTGTTTTGAAATTTCTTCCATGGTTTGTTTATTCACTTTTATCATGG

A\_16\_P03302315

AAAAAAAAGAGTCTCCTTCACTCTCATATTTTTTTGCCATGTATATCACTGAAGGTGGGC

A\_14\_P125895 TGGGGCTGACAGTCCTATTTTAAATGCTTTCATGAATTGAGGACACTCTTGATTTTATTT

A\_16\_P35875389

TCACAACTAGAATCTTCCCTAATTTCCCAATCAACTATCTTCCCAAATGTAACCACT

A\_14\_P121265 AATCTTCTGGAGATTTGTGCATGTATGTATAAGTGCGTGCACACTTCCATAAGACTAATT

CUST\_420\_PI426210822 CTCTGATGGGGGAGAGGCTTGTCTCAGGCAGGCATGAGTTGTTC

CUST\_9169\_PI426210822

TTCAGCTACAACCAGTGTGATATGGTGATATATAAAGAAGACTTCATTTTTCTAACAGTT

A\_14\_P125967 GGAACATGGATTTAAAAAGATTGAGGAATTTCTACAAGTTTACGATGTTACTTCCGGTAG

A\_16\_P00973202

CTCAAGTTGGCTTTTATTGACATCTCTCACACATTACCAACATTTTACTTACCAGACCTT

A\_16\_P02783439

AAGAAATTTTCTCACAGTTTCCAAAAATATCCACCTTTACAACCTTCATAGCAGAGGAAC

A\_14\_P131406 TGAGTGTCAAAGACTTTAAATAAAGAAAATGCTACTACCAAAGGTGTTGAAAGAGGAAAT

A\_14\_P120274 GTTGACAAACATTTATTGCCTATATTAAGGATTATTGCCAATTGCAGGATTCTCTCACAT

A\_16\_P17642961

AACAATAACCAACACATCAATTTTCCAACCTTACTTCCGAGACAAACCATTTACTTCTGTG

CUST\_5116\_P1426210822 TTCTGTTCTATGCACTGTGCTAAAGGGTGGACATGCTGAGATGAGTG  
A\_14\_P139944 CTCACCAGGGTAAGATTCTATCTATTTTGTCTTGGGAAACACTGGTTTTCTTTATTAAG  
A\_14\_P115129 GCAGAAGATGTAGATTGTGTGATGAAGGACATGGTAAGAGTCTTAAAATGCAATTGAAAG  
CUST\_5789\_P1426210822  
TTAAAAGCAAATATCACCAAGTCCAAGAACTGATCCTCCTCTGAACATGATAGCTG  
A\_16\_P17731782  
ACTGTTTTGAAGATACACCATGTTTCACTTTTTTCAACCGTAACAAATTTAGCCTGCTGT  
A\_16\_P16678078  
AACCTCTAGATTCTTACTTGCATTGAACCAACTATGCTGAGATTATCACCTTTCAAGT  
A\_16\_P01159970  
TTGTAGAGAATGGAAGACTAACTGAGCCTATCAATATTTTAGTCTCAAGAGCATTACCCC  
A\_14\_P131919 GTCTGGAGACAAGGTTATATCTGTGGAACAGATGCTCATTATAGTTCACATGCATATTGA  
A\_16\_P17705728  
CCATACTCTTTCCATGGCTATATATGCATACAGATCGTTAAACTCAACATGAAAGAACCC  
A\_14\_P108316 TGTCATTAACCTTTTGCCAAGCATCTTCCTGTGCTAAAGACAAAATGAGTTTTTGACATT  
A\_14\_P200743 TACATTTGTCTGAACTGCAACAACCAAGCATGGCCAAACATTTCCCATTATACATTATAG  
A\_14\_P121787 TGTTTTAAAGAATCATTTCATGAGGATGGCTATTCAGAGGATGAATGTAAACAATATAAAG  
A\_18\_P22839613 TGTGCACATATACACATTCCCACATGTGTGGGGAATGAGAGGCTACATAG  
A\_14\_P133341 AGCACAGACAATCTTTGCAAATCAGAAGTAGTCTTAAAGTCCCTCCTTGCAATTTTCAA  
CUST\_4359\_P1426210822  
AGAAAGGTACCAGCAGATTTTTTTAGATGTTCTAATTGATACCAGAAGCAAAGACGTAGA  
A\_14\_P201470 GAAGGGGGTTAGTTTAATGTTTTGATTTTTTATGTGTGGGGATAATTGGGGATAATTTGG  
CUST\_298\_P1426210822 GAGCATTGTGTGTGATCTGCAGGCTGAGGCTGGCTCAACTGCCTT  
A\_14\_P111593 GTGAATAAATCCTGATCAATATCGGAGGACTTCATCAGGCTACAAGAGAATCAACAGAA  
A\_16\_P19229635  
TCAAAGCAAAATTGGTAAGCAAAGAGTTACACATTTGTCATTATCTGTTGAAAGGAGGCA  
A\_14\_P134935 CTGGGAGAGGTTCCTTTTTTCAGTGTTAAGACATTCAATTTAGACTTCAGCATGGTC  
A\_16\_P38078154  
ATCAGTCTAGCCATGTTTTATCAAATTCCTCAAATGCATTTTTTTGTCTCAGCATCCT  
CUST\_4218\_P1426210822 TGGCTGGATTCATGACTATCTGGAGGAAAGAGAGAATGCGTGTCTTAG  
A\_14\_P116184 TAAACGGCCTACTTGTGTCTTCATTTAACTTGATTTTCCCCATCTTCTGTCTTATGAAA  
A\_18\_P11667149  
AAACATCTCTTGAAAATGTTTGCTTAATGCCTGTGAGATATCATCCTGTCTTCCTTTGAA  
A\_16\_P19580587  
AAAAGCACATCTAAACACCAATTGCATTATTCCTAGTTCCCATCATGAAATTTTCAGTCAA  
A\_14\_P126169 CTTAACTTCAGCACCCACGTGTGACTAATTAACCACACAGTCAGTTTCATGC  
A\_16\_P19728030  
ATGATCCTGAAATATTGAAAACCTCAAGACAAGTGATACCTTCAACATAGCCACAAATC

A\_18\_P14133920

CTGCATGTGTTTTGTGAATTCAAAGACCTCATAATCTTTTAAAATATTATTAATCTGT

A\_14\_P113058 GATCCGTCTGGTTTTTTACACCGTTTGTTAATAAAGCCTGAAACCGCTGTGT

A\_16\_P17853611

AATCCCCAAAATTATATATGACTTGTCAGCACAATTTCTCATTGAAACCTTGAACCAGCA

A\_16\_P58424615 AAAATGTTTAGCACTGCGCTTAGCACACAGAAGCCAGGGGATATTCATAAATGAG

A\_14\_P129932 GCAGGGTTAGAGATCATATAATTTCCCACTACAGGACTAAATAACGTAAACTTAAAACC

A\_14\_P101611 TAGGGATTGCATGCAAGACTTACATTCAGATCTCTGAAGTATTCATTGTAATCTAAGGC

A\_16\_P17897933

AAAAAACTTCATTTTCAGTTCATCACACCCATGTATTGAAACAGCATACTCATCTCTGTG

CUST\_4876\_PI426210822 ATCTTTAACGGAAGGGTTCCCACTGAGGGCCTTGTGTTGCTTT

CUST\_2578\_PI426210822 GAAGCACTGTTCATTCTGTCTCTTCATCTGTACACCCTGCATTTGTACCT

A\_14\_P127650 GATAAACGTTTGATAGTTGATGGTGAGTGGGCAGGAATCCTTGTTCCTT

A\_14\_P120418 AAGTCATCCATGATACCATACTTTCAGAAGGCACTATTGGCATCAAAGTTAACTTTTTG

A\_16\_P16645907

TGCATAATTAACAACCATACGTTTCTACATCTCTTGTCATTCTACATCTCTTGCCATTCC

CUST\_3565\_PI426210822 AAGCAGCCATCCATAGGTAGCCTGGGGGTCTTTTACAAGACAGC

CUST\_4907\_PI426210822

AATATGTTATTACAGTCCGAGACTAAAAGATGCTTTTGTCTTTACTGCCATCAGTGT

A\_16\_P02285672

AAAAAACAGTTCTAGGTAAATGGCTCAGAAATTGAGTTCTAGTGAAGTGCTTATTCCAG

A\_14\_P113488 CTCAAAAAGTTCTCTGTAAACTATGCTGTTATCAAATGGAACTACAAGAACGCGACCAA

A\_14\_P122809 CAGCATTTATAGTTTTTCATTCCACCCTTGATTGACATGCACAACCTGTGTCAGTATAACA

A\_14\_P119082 GGAGAGGGCTATCAGAGTGACTAGAATTACTGAAAAGCAAGGATTAATCTAAAGAGGATT

A\_14\_P106089

GAAGAGAAAATGACAAAGTCCCAAGAATGTGAAATTTGGGAAGGTGATAGACAATTCTTT

A\_16\_P17950159

AAAAATTACTCCTACGGAATACGTTGAACAGATTAGACTTGGGAAAATCATTGGTGGA

A\_14\_P135042 GCACTCTGACACCTGAAGTTCTTGAATGAAGTGCCTGTGGATGATATTTGTAG

A\_16\_P18135242

AAGAAGTTACCTGTAAGTTTAAACCAATGGCCTTGATTACTAGGAAATGCGATAACAGCAA

A\_16\_P15727845

TGGAAACTCAGATTTTGTATACGTTAGCATACTTGATTCTCATGAACAAAAACCCAGTCC

A\_14\_P104184 CTTTCCCTTCTTGAAAAACATTATTTTACAGTTCCAGGAGGCCCTGGTTACATTACTATA

A\_14\_P112198 CTTCTCAACCACTTCGCAGATGTCTGCCAATAATATCCTGATAAAATCCAGGAAG

A\_16\_P18225014

AACTCCCCTCCATTATATCCTGCTGATTAGCCATAACGAGTAAAATATATAGGTCTTGCT

A\_18\_P12436124

CCCTAATGAAAACACTACTAAGCCAAAACACTAACAAAAAAATTTAATGGTATTTTTGCAGG  
A\_14\_P123094 AAAGAATCACACCAGAAAAAGAACACAGGCCACTAGTTCCCATTTTTGGAAGAA  
A\_14\_P106093 AATCGAAAATATCGACACCTTAACCAACCTGGAGAGTTTGTTTTTGGGGAAAAACAAAAT  
A\_16\_P19847228  
CCTAAGCACATTTTTCCACACTTGTTTAAACATCTATTTTCCTAAATGTGAAGACCACCC  
A\_14\_P137426 TTTACTGTGCTTGGAAAGTGGCAGCAGAAATTATGAAATATAAGCAGAAAGGTAGTTTGGAA  
A\_14\_P128478 CAGTTTTTCCAGTTGTTTGATCTCATGATTTTGGACATGTTTGAATTTCTTGATCTCAGC  
A\_16\_P01490232  
ATGCTAACTTTTCAATCAGCCCAGTAAATCAAATAACAAACCTCAAGAGACATACGTGG  
A\_14\_P125829 TTTGAACATGTGCCTTTTCTGAATTATGCTTCCACAGGCCAAAACCTCAGTAGAGATCTATA  
A\_14\_P130089 TTAAATATCTTTAGCACCATACATTCAGGAACCATTTTAGCCTCTTTTTACAGGTGAGG  
A\_18\_P22841065 AAATCCACTGAAATGAGCAAAGCCATCTAACAGTAGTGAAGAGTCTCTGTCATCTG  
A\_14\_P117375 CTGTCTTCCATCTCTCTCAATTGAACTTCAAATCCACGTTCCCTTTATTGAAAATTCATGT  
A\_14\_P100879 GATATTTCTGGGTGAGAATTAGCACCCATGATCCCTACAATCCCTTACATTGTTTG  
A\_14\_P105497 AACTAAAGCAAATTA AAAACAGGATGAAAAAGACTGATTGGCTCTTCCTCAATGCTTGTG  
A\_16\_P15026797  
CCCCTACATATTCACAGAAAAAAGAGTGGGTGATGAGATATTGAAGGATTGGAACATTT  
A\_14\_P200268 GTTTAGGGCGAAGACGGAGTTGTAACCTTCTTAAAATTCCTCTCTCGACACTTC  
A\_14\_P112251 AGTAGCCTAAATATTGTCATGCTGATTTTGGTTTTTTCACA ACTACTTCTTCCTGCACACA  
A\_16\_P16192011 CAAACTTGCATCTCAAGGACTACTAGCCACAGACGCAGAATGATCAGC  
A\_16\_P18139727  
ACCCTTTCTCTGTGTCTACTAGCCTATCAATCATCATTACCCTTCTGACAATCTTATAGG  
A\_14\_P110648 AATGTAAACGACTTACCAGAACCACCAAAAAACAGCATGTCAATTTGCTCCAAAAGATAA  
A\_16\_P15690833  
TGGCTAACAACTTATTCAGAAACATATCATCATCTTACCTGCTACTGATCAGACTTG  
A\_18\_P10683346  
AACTTGTCTAACCTGATTTTAAAATGACTGCAATTCCAGACTAAAAACATGCTTCAGCCC  
A\_14\_P128382 ACACGTGTCACCCACTTAGGATTAAAAATACATTATAACAACATGACCCATAGTTCAGTCA  
A\_14\_P128768 ACTCTCGGTGATGGATGCTACA ACTGACTTATCATCTTTGTCTGAAAGAGCAAAG  
A\_16\_P16421107  
ATTAATCAAACGAATCTCATGCAATCAATCAATCAACCAATGTTCCCTTAGTCCTTGTCCA  
CUST\_6876\_PI426210822 AAAGGGTGGTCCCTTTCTTTTCAGGAGTGGTTCTCTCTTCACTTTC  
A\_14\_P107266 ATGGAGGAGTGTTTCATTGTATAATAAGTTATTCACCTGAGTATGCAATAAAGATGTGGTG  
A\_16\_P00526746  
ATGCACCTCATATAATGGACCTAGATAGAAGTTGGATGTTAGAACTCATGATCTTTGGAC  
A\_14\_P112185 CTGAGCAATCTGTGTTGGAAAAGTGTGAGATTTTTCAAGTTCAGAACTCCACCAATT  
A\_14\_P128805 GACAGACTTTTAAACAAATTTAAGGAGAATATTTGGAAGAGCCA ACTGTATGACAGCCAAC  
CUST\_6486\_PI426210822

CCCATCAATAGGCAGAGCATTTTACAAGCAAGTGAGTTTTAGGATCATTCTTTCAGAT  
A\_14\_P201397 ATTTTGTCTTCTGCTTTCTCATACTCATCTTTTTGGGGAAAATATTGGGAAGACTGGATT  
A\_16\_P16161879  
AAAAAAAACCTTACCTTCCCTTTTAAAAGCCTTTTCCAGAGTTTTAGTGAATCGCCTTGT  
CUST\_6519\_PI426210822  
CCCTTTTAAAGAATGGGAAGCATTGTTTGTGATTCACATTGCAGGGGCTATTTA  
A\_16\_P20480632  
TTTCTAGAGCATAGTTTTACAGGCTACCTGGTTCTCTATAGAGGGACTACATTATGTCTC  
CUST\_8331\_PI426210822 AGCCTTTCGGAAGGGCAGTTTTATAAGAACAGAGGAGTGTGAGCC  
A\_14\_P118158 TCAAACTTGCATAAATAGACACCTGGTAACTGATGTTACTCTTGAATTAGCCTTCGCTT  
CUST\_3337\_PI426210822 GAATGTTTCAGCATGGGAGCTGATATCTCCGATGAGCACTGTTTGG  
A\_14\_P114793 ATTTAAGGTATGCACAATGTCTGCTATGTGGCTGTGAATGAATGATTTTGC GGTTTCATC  
A\_14\_P107910 CTTACCATTATTATCCCCCAAACCCATTATAGAAATACAACAGAAATATTGGCATCCCA  
A\_16\_P15447505  
AACCTAATCAGAGAAAGACAGAAAAGATCCATCTTGATCTGCTATAGGCCTTCATTTGAT  
CUST\_9126\_PI426210822 CTTGTGGCCAGATGACAGTGCTAGCTCTTCACACCTGAAGCACAT  
A\_16\_P21256518  
TGGCATTACATTTGAACCTTAGATTCCCTAAATAATCCAATTTCTTAGAGCAGAACTGGC  
A\_18\_P22605648  
AGTTTTTGTATCCAGGACAGCATTTCCTGTGAATGTGGTGGATGTTATATATCACTCAATG  
CUST\_7754\_PI426210822  
GAGTGCTGGATAGGCAGCTTTTGAATGTGAATTTTCTACTATTTTCATAAGATAACATCC  
A\_16\_P02326021  
TCAAAGTGAGTCATAACCAAGACATTCTTTTCAAATCTACATAACTACCTGAAGCAAGCC  
CUST\_4899\_PI426210822  
AGGAATGATAGCAAGTGAATGTATAATAATAATAAATTAGGGGTTGATTGTTACGAGTG  
CUST\_7845\_PI426210822 TGATGTCCACAGGCCAATTAGCCAGGATTTAGGGTAGTGTCTACTTG  
A\_14\_P105920 TCTCCATTATCCAATCTCTCTGAAACATCTTGAACACTGATGATATGGCCCTTATTTAGT  
A\_14\_P132158 AACTAAGGGACCAAGAAGGAAAAAAAAAACCATCTTTTCGGTTTATTGAAGGAGCA  
A\_14\_P115415 AGTTATCTGTCTTGAAGGTTAATCAGTCATTAGGTGTGAATCATTCCTAAATGTCCCATC  
A\_14\_P120442 ACAGGCAGACTTTCACTCAGTAATAACTTTGTTTCAGGTGACTAATTACAGGATTTTCCTA  
CUST\_7841\_PI426210822  
TATTGGGCATTACAAGAGAACTGGAAACAGAGTTAGGTAAGCATGTAATATATGTATAT  
A\_14\_P201588 GCTAAGAGCAAAATTACACTGGAGTTAATGGCATAAAAGGATTAGGACTTCTGTTCTCTG  
A\_14\_P109218 CCTATTGCTCATTGTTTAAAGTTTAAAGGAGCATTGTTTAAACTCCCTTCTAAACCAGCAG  
A\_16\_P16191570  
CTCTCATTTGCCAATGTAAATAGTGATGCACAGTGCCTAAGACAAAATTGCTATCACTG  
A\_14\_P133072 GAAAATAATGCAGCATCTGCTTCTCTTCGTTGTGCGAATAACTGAAAAGACAGAAAAAAAAA



A\_14\_P136508 TACATTATTATGCGGAGTGGGCTTGCTGTGAATTTTAAAACCTTAACCAGAATCCTCATT  
A\_14\_P112124 CTTTTAAGACAACCACAGTTAGAGTGTGTTGTGGTGGACTGATAGCAGAGAGAGATC  
CUST\_9637\_PI426210822

AATGCAGAAAGTGTTGTTTGGAGGCCACAGAACTATAAAGATGAAGAACAGGA

A\_14\_P125903 CACTAAAGTAAAGTAATGATATTTCAAGTGTGTTTGTGCTCTTTGGTTCTTGTGTAGGT  
CUST\_2496\_PI426210822

CTTGGCTTTAGAGTTAATTATTGCCTGTGGTGGTTGTGGCTAACTGGATAAAGAT

A\_14\_P106862 CTGTTGGTAAGTTCCATATAAATCTTTGCTGCAGTGAAGTTTTTCTCAAAGCCAGAACTA

A\_14\_P119897 GATCATCCTTGAGGGTAAGACTGACAGCAATGACTGTCCTACAGGC

A\_14\_P111291 TGAGATCCTTGATACCTCTCTTTCTCCTCATAGTTTTGTCTATTATGTTGTTGCTGATGG

CUST\_7888\_PI426210822 AAGGTGATACTAACGCTGGCGATCCTGGGTCTCTGTGTGAATAAC

A\_14\_P131354 ACATTTACAAAGATGCGTTCAAATAGTGCTCTAAGAGTTTTGTTTCAGTGGCTCACTTCG

A\_14\_P120830 CTAATCTCTCATTCTCAGATCTCACCATTTTCATCCCTGTGACACTGACCTCT

A\_14\_P101024 AGTGCACCACAGAATAGGATTCGAGATTTACATATGCCTGTTTGTGATTTTATCTCAGAA

A\_14\_P124424 TACTTTGTTTCATGATCCAGTCAGCATCTTCAATGGCTCTTTAATAATCTGCTGGATTCT

A\_14\_P133959 CTATTTAGGTTGACACTGGATGTAGAACTACAGCCCCATGACAAAGTAATAGACTTAACT

A\_16\_P16319877

AAGTTTATTCGGAAACATTTGCTGTATTACTTTATTGCCACATGACTATATTGCTGAGCA

A\_14\_P134649 ACAAAGTAAGTATGCTTTCTGTCTACAGAAAGTCTCCTAACACTGTCAGAGACACTTACT

A\_18\_P14786404

AGTAGATGAACTCAGAGGAAGAGTAGATTACAGCAATTAGGGGATAAAAATGCCATTCAG

A\_14\_P105005 TGGCTACTGTAACATTATATTGGGGGTGCATTCAATCAGTAAAGAGAAATAAATAAGTAT

A\_14\_P120206 AAATCTATAAGGATTCTCTAGAGAAGATGCCGGTTATGGGAAAAGAATGGAAGAAGTAGA

A\_14\_P124839 TCTGTGGTGGATGAACTGGTTTGGCATAAAGGGGGTATCTTCTACATATTAGTATCTATA

A\_18\_P16350873

TACTGCATCTAATACCCACACTTCATTTATTTTGGCTTAACATCCGTCTTCTCCTTGAATG

CUST\_2522\_PI426210822

TGAGCAAGGTGTTACAGTTCACAATGGATCTGAATTTCTGATCTTGTGTTTTTCATA

A\_14\_P128912 AAACGTGTTTTAGAGGATGTGGTTAGAGAAGACAGCATGTAAGAATCATGAACTTAAACC

A\_16\_P01718966

GGAACTGCCAAAACCTTCACTTTATAGTTTTGTAGGTTGCAAAAAAATAATCTGATGTCCA

CUST\_776\_PI426210822 GTGTTCTGCACTCACACAGGCCCAAACCTGCCTCTTCTGTCTTCT

A\_14\_P119372 GCCAAGGATCTGATGAGAACGTTCCAGGATAAAAAAGATGGAGATCAGAAGAAG

A\_14\_P112270 AGTTAAGATGGAATCTTTTTCTTTTCTTTTTTTTCCCAATGGATAACAATGGGAAGGGGG

A\_16\_P38507768

CCCTTTGACATATTTATTACTGCAAGTAGAATCTCACTAATGACCTATTCCTGTATGGCC

A\_16\_P17004837

TAAATCCTCACTCTCATTAGTATCTAAGTAGCCCTTTTACTGTCCTAAATAGATGCCAGG

A\_14\_P107219 AGAATCAAATGAGTCCCTCTGGGACACTTGCAGGGGACTTATTTCTTC

A\_16\_P00061601

ATAGGAATGTGCACATTTTATAATCATGCCATTGGAAAAGTATAAGTTCTGCCCTATGGG

CUST\_3815\_PI426210822 AATAATGCCGTCGTTAACTGCAAAGAGGAGTTTTGGGACCAGGTTG

CUST\_2792\_PI426210822 GAGCCTGGCCCTTAGGGAACATTCGAGCAGTTAGAAAGCAGAAGT

A\_16\_P19613246

ATATGATCCCCGCTACTAGATGAAAAGATATTCTCTGATCCTTAAACCTTATGCACTTG

A\_14\_P108264 GTCCAGTGGCATAAGTCTTCTTTGATACCCAGTCCTCTACACCAACAAAG

A\_14\_P123679 ACATAACGATGGGACTCTCATAATCCAGGCAATATATAACCAGTTGTTCCATTTTCTTGA

A\_14\_P128813 CAATGATAGTTCTGTTACTTGTTTTGTCCCCTGCCCTAATACTTTTTCTCTAGTGAAAA

CUST\_9597\_PI426210822

TTAAGAAGTGTCAAGTCTTACAATGGAAATTTGCCTTTGGGAATGCTCTTAATATT

A\_14\_P139503 TTAATTAATTAATAAAAAAGTAAAGGCCCAAGACTCTATAGGTGGGAGAGGAATCTGCATCT

A\_16\_P20093289

AAGGGAAGAGAAATTAGCACATAGATGAGAAACACATGTTTAAAAACTCCTTCTGAGGTC

A\_14\_P137673

ACAAAACCTCAAGAAGAACAGAAGACGAGTCTGGTAGCAAAAAATAAAATATGCACACTT

A\_16\_P17056871

AGAATGGTAGAAAGATTTATGACCTAGAACACTCATGATGAATATGCAACTTCCCTCTGG

A\_14\_P127325 ACATAAGCCCATGCCTTGGGATATGCATACACCTTCAATAAATCAAACACTTAAAAATGT

CUST\_2402\_PI426210822 CAAGAGGGTCTGCTTCAAACGTTGGCTTTTAAAGAAATGTGCAGACACA

CUST\_5241\_PI426210822

TGCATTAATAAATGGTAATGATCACCATTTATTGCTTGCTTACAGTATGTCAGTCATTATA

A\_14\_P132876 TCTTTATCTACTGAGTGCCGGATATCAACCCAGGAAGCAAATTTAGGAATTAATTCAGAA

A\_14\_P109204 GTGAGAGTCATGCTTCACTCATTTTGAAATACCTCTCATTGTAGGCTCCAAGGTAA

A\_14\_P124226 AGGAGATCCCACAATGTATGAAGAATACTATAAGTGGACTGAAACACTTCATTGAATGTTC

CUST\_7148\_PI426210822

TAAATCTGAATCTTGTCATAGGAGGATGGAAGCTCAAGTTGTTAAAGGCCTAAAAGG

A\_14\_P138109

GAAAATAAAGAAGACTGTAGCAACAAGAAGCCAGAAATGGCAGTAGAGTCTCACTAACTA

A\_14\_P110190 GCCTAGCGGAAACTGATGGAAATGGGCAAGTTAAAAACAGACATTACAACCATTAG

A\_16\_P37493061

AACCAAATGCTAACGTTTTTTGAAATGATTGCTTCTACTAAAGATCCATGTCACTGCTAA

A\_14\_P102179 CTTGACACTAACTTGAAGGCTTCCAGATTTCTTCTTCTCAGCAGAAATCTTTAAATTC

A\_16\_P36230344 AGTCTTCAAGATGGAGGAAAGATGGGCACTTCCAGGACACAGATAC

A\_14\_P115733 GCAGTAAAAATTCAGCACTCAGATTGGTTTTCAAAGGCTGACCTTCCATTATTTACATT

CUST\_4893\_PI426210822

TGTCAGTTGTCTATCAAGTTCATTAGTTTATTCAGCTTATTTCTGAAGCTTTTGATGGGC

A\_16\_P40083455

ATGATGCCTATTGAGTCAGATAAACCTTGATAAACCTGTTTTTCTCAATTACACAAGCC

A\_14\_P115292 CCAGACACACTGCACTTCTTAAGCAATAACCAACAAGTTTTCCACAAGAAAAAATATC

A\_18\_P10226476

AACTGCAGGGAGAAAATATCAAATAATTCACAGAGCAACTCATTACACATTCCAGTCTC

A\_14\_P113424 ACCATTGGTTATTCTCTTGACAAACAATGGATTTCTCTCCAATTAATTCAAACCCAAACT

CUST\_4985\_PI426210822 ATGAGTTGTGCAAAGCCCAATGAACCTTGTAGAAACAACATCGTGCC

A\_14\_P200123 CTAACCAGGCTGACATTATTATCGGACACTTATGTATCAGACATGAAATGACTCCAGTAA

CUST\_6207\_PI426210822 GTTTTTCTCTGTTGGGCAGACTCAAAGCACTGAGGGGAGCTTTTC

CUST\_7725\_PI426210822 TATTCTGTTCCCAAAGAGCACCATATTCGTGGTCAAGTAAGGCCAGA

A\_18\_P12177891

CCCCTCAGCAGTTTATAAATCAAACAAAGAACATAGAACAATGCATAAAAATCCCTGTGA

CUST\_4666\_PI426210822 TCTTGTTGGTTTTCCCTGAGTGCAAAAGAGGTGGTGAGTCTTTCTAAATC

A\_14\_P114040 CTGATCCCTAGGGGCTAGAGATGCAATATTGCCCGAAGTATTTCTCTG

A\_14\_P110937 AGTCCACTTCACCTCATTGATCCTGCAAATGTGATAATCATTCTTACTATTTACCAGTG

A\_14\_P124578 CTGTTTTCTTAACGTTTCACTCTCCTGAAGACAATCATTTCCTTCTTGTAACAGATAGA

CUST\_4039\_PI426210822

ACTTCCTGTGAATGAAGAGTCTTGATATATATTTTTCTTTAACAAGAGAAAGCCAGGCTT

A\_14\_P117211 AATCGAAGTTTCTCTAAATAAGCCACTTGTCTGCTCTGAAGAAAATTTGGTTTTACCA

A\_14\_P125233 AAAAGTGTTTCTTTCTTATCTTGGGGAACAACCTTCTAAAGCCTCAAAAATAGAAGGTGTG

A\_16\_P02587320

AACCTCTCAGGCAAATTTTTACAGACAAAGCATAACTTATCCGAAAAGAAAGGTCTAAGC

A\_16\_P20893798

AAACATCATTCTCCTACTTGAATGACTTCCATAATTCACAGTCACCTACCAATACTTCAC

A\_14\_P104412 CCTGCCATTAACGAAACAAAATTAAGGCAGTTCTAACGTAAGTGAAATCATGTTCTTCTG

A\_14\_P120046 GTGCTTGATGATTGTGTGTTGCATTTCTCTGTTGGAAATGATACCTAGAATTTTAGAAG

A\_14\_P128776 ACACGATTAAGCCATCATTGTAGGAAAGGCTTTGCAGGAGAAAAATGTCTTAACTG

A\_14\_P105648 GTGCTCAATGGCACTGAGAATAGCCGAGTCAAATACTTCCTTCAAGTTCTTCT

CUST\_5604\_PI426210822 TAGATTAGTGTGTAAGAATTTCACTGCAGAGGCCACTTCTGGCTGAGG

CUST\_5274\_PI426210822 AAGTGCCCTGAGATCTGGTTCTGCATGAATCTTCTCTACCCTATTGC

A\_18\_P22841053

GTTGTTGTTGTTTCTTTGAGGTTTTCTCTGAAACTTCAGATTAAGGTAGTCCTTGAAGTG

A\_16\_P17831874

AATTTACGTCATCTGCCATATAAATAGAACCTACACTGAGATGCATGTTATCAACAGGC

A\_14\_P102041 ATGCTTTCATCGTCTCTCTCCCTCAAGTGTCTGGAACCTATCATTGAATTA

A\_14\_P123976 GTTTATGAAAAGTTATAGGGGTGTATGAATGAACGGGAAAACCTGAATGTAGTCCTTCAGA

A\_16\_P00760518

AGTTGAGGCCATATAGATTTTCATCAGGTTGTTAGATACACATTAATACATCCCTCATGCA

A\_14\_P201960 ATGGTAGGGTTCCTGCTAGGATAAAACATTAAGCGGCTGTAAAAGAAATAAAAGGAGG  
CUST\_9739\_PI426210822 TCCTTAAGTAGATGCACAGATGTGCAGTCAAGGGGAGAATGAAGACTC  
A\_14\_P109631 CTCTACTTCCTTCACTATTGCAGTTTCTAGTTCTGTTTCGTAATTGTTGCACAAGACTTTG  
CUST\_5813\_PI426210822 GATGTCCAGTCTTCAGCTCTCTGAAGCCTGAGACAGGAAACAGTT  
A\_14\_P126186 GAGAGGCAGACTCGGGTGTAAACGCAAAGACGGTTTCTTTTCATCAATAAG  
A\_14\_P130529 CTGGACATGCTACTTATGAGAACACTACTGAGTAACAAAAGATTTATTCAAATATTTAAT  
A\_14\_P122743 GAAGAAGGATGGTGCAGAAATTGATAAGAATCAAATAAACATTCGCAACTCTGAGACTGA  
A\_16\_P01437458  
AAAATTGATGCCAAATGTCTACATTTGAACAGCCAAACTAAAAACACCTCTCTTCTCACT  
A\_16\_P15525914  
AATTCTTCAGCAATACCTTTACCTTGACAAGAACGAATCATTAGAACATGTCTCCTCATG  
A\_14\_P103954 TATTGAAGCAAACCAGTTCTTTCCAAAGGTGGAAAAAGCGATACTTCAAACCTTCGAG  
A\_16\_P00639290  
CAGTACTGTGTATTGATCTTTTATTCATCTCAGGCTTTTAACTATTGCTTTGCCAGTGA  
A\_16\_P20000845  
AGTTGTTACACCTCACTTGAAATGCATTCCTTCTGGATTAAAACAGCAATTTCTCTTTGT  
A\_14\_P122307  
GGTGTGTTGGAAACTGAGAGCCCAGAAAAAAGAGAAAATTGGAATAATAATTTGGAAATG  
A\_16\_P17580237  
TGGTATAGAAAGCCTAACATAACTAGCATCACTTCCTAGATAATATTTAAACCCCGCCCT  
A\_14\_P122362 TATATGCATCTGCAAATATCCATGCTACATACATGGAAGTTAAGAATTTCCACTGGCCAT  
A\_14\_P202027 CAGGAGTTAACAATTAAGGTAACACAACCTAAACAGTAAGGGCTGTGTGCTCTAATAT  
A\_16\_P02367642  
ACCTCTTATAAGTATGAATTTTCCAAAGACCTCTTTTACTAACAAACTCGAGCAAACCAA  
A\_14\_P128730 AAGAAGGTAATTATTCTTCGTCTTAGTCAGATTAGGTATAGACCTACCCAAGACAAGCAG  
A\_14\_P138248 CTGTAATTACAACTAATGTGCACTTTGGCTTCCATTTCTGATCTTGCTGAATGATTCT  
A\_14\_P115217 TAGCAAGATAGGCTTTCTTTTAAAATTCCTGTTGCTTCTTGTATACAGCCTGAGAGGGAT  
A\_16\_P18074324  
AAAACCTTGCAAAGCACAAATCAAACCTCTGTTCTGACCTTTGAATCATGTGTTTTTCTTAC  
CUST\_2737\_PI426210822 CCATGGCAGGGAGGAGAGTATGGCTATTTATTGAGTTTCATTTGGTCATAAGA  
A\_14\_P101863 CTTTCTGAAGTAGCAAAGGAATGCAGCATATATCTCATTGGAGGTAACCTTCCTACCC  
A\_14\_P134394 CTTCTACTTTGACATAAACTGGAAATCATTTTCACTCCAGTTTAATCTGTGATACAGGG  
A\_14\_P128763 CTTCAAGAGAATAGTTCACATCCTGGATCTCACTCCTAAGAAGGTAGAGAAGACTG  
A\_14\_P135300 GGCCTTTCTTGTGTCTAACAAGAACAGATCTGCATCCCTAAAAGAAAAGGAACAA  
A\_16\_P16818451  
GATGTTCCACCTTCTATGTTTACATTTCACTTAACTTTGACACCTTAGATAGACTGAC  
A\_14\_P105153 GTTCTCTGAAGTTTGATCTCTTTCTGCTTAGAGTCCCTTCTCCTTTTTTCCCATATCTA  
A\_14\_P127352 ATCCTTTCTCCAGTAAATACACAATATGCAGTCTATAGTAGTGAGGACACATTTCTCTC

A\_14\_P111823 TGGATTATTTTAACGAAAACATAAGTGTAAGTGTCTTGCAGGTCAAGAATCTGACTCCAC  
A\_14\_P127192 CTACACTCCAGGAAATGCATTTGCTTTGAATAGGCTAAAGGAAAAACATTACTCATGAAC  
A\_16\_P20920604  
AAGTATCCACCCCTTTTACTTCATCTTGAAAAGTTGCTTCTTTCCTAAACTTCAGGTCAA  
A\_14\_P101000 AATATCCAGGCTCCTACTGTTCAATGTATGTTTATTTCCCTCCTTTTACCAGTTCCATAAC  
A\_14\_P135084 CCATGAGACTAATTTTCCACAGAAGCACTTTGGGAAATAGTGCTTTAAAATATGCTGTGT  
A\_14\_P121472 ATCTTATATTTTTTTCAGGTGCCACTTGAAGAATGGATGATGATGATTTTTGGTGGTTTTGAG  
A\_14\_P132375 AATTCTCTCATGACCCACGATTTAAAAAACACACAATGCTTAAGTGCTTCAAAAATACAG  
A\_14\_P136267 TTTCGATTCTTAGGAAAGTGGAGAATGAGGACATGAATAAAGACCAGATCTTGCTG  
CUST\_3749\_PI426210822  
AAATGGGAGTTGGGATTAAGCAGAGGTGAGGTTAAAGGGTTTGAACAAAAT  
A\_16\_P15278357  
ATTATAAAGAACCAAACATCGTGAAAATCAGGTAATGGTCATTGCTAAGGATATGAGGGG  
A\_14\_P102745 ACAAGATAGTCATCAGTTCCTGGCCTTTTCATAGTGATGTTGCAATAATAATTGCATCA  
A\_14\_P101489 TCAGATAGTAACACAGCATCAGAATGTCTTGCCTCATTGTTGGAATGTTGTTACTGAA  
A\_18\_P11203934  
AAATCCTATTCTCTGCTATATTACATAAACCACCATTGCTATCCATCAGTTTTCTTCCGA  
CUST\_8759\_PI426210822 GTTCTCATTAGCTTTCACTCTGGGGGAGTTTTCTGCCACAATGTGAAT  
A\_14\_P139174 AGTTGCTGAGAACCAGAATGATGGCTACATAAAAGTCTTGGAATCCAAAAAATAGAA  
A\_14\_P129257 ACCTCATTGTTGGGGAGAACCCTTAAACCCACTCGAGCAGATAATCTCC  
A\_14\_P100628 TGTCTGTTTCTACTCTAACATCACATCTTCATAACTGCGATACAGTGGTCATACCAAAAAT  
A\_14\_P112412 CTTACACTGTATTGGGATATACATAAGAGACAGAAGTTCTGGTCAAAGAAGATTGCCAAA  
A\_14\_P108391 CAGCACCAGGCCATAGAAAGATTTTATGATAAAATGCAAAATGCAGAATCAGGACGTG  
CUST\_8028\_PI426210822 GTTCCTCCCACATTCTCACACATGCCTGACATGTATATGGTGAACAC  
CUST\_5966\_PI426210822  
CCACTGAAGAGGATAAACAGAGTTGATGGGTTACAGTAATATTCTGTGGTTTTAAAAAAA  
A\_14\_P102203 CATTCTGTGTATGTTTGAATTATTGAGAAATTAGCCTTTAATGCTCTCACCTGTGCTCT  
A\_16\_P19335162  
AAGTTAGACAAACGATTTTCCACATTACAATGTAGTCTACTCAAAGCCTAAGGAATGC  
A\_16\_P35190145  
AACCAAGTGAATCAACCTAATCCCCTGAATACAGAATTTTAATGACAGGTCAATCAAACA  
A\_14\_P112890 CTAGTGATTTGCCTCAACAACGTAAACTTCCTAATGATTAGCACTTAATAATTGCATATA  
A\_14\_P200154 GATAACCTCATCCGTAAGGAAGTTTACATCCTCCTAAATTGGATAGGCTATGTCAATTCT  
CUST\_558\_PI426210822  
AAGTCTGTAATTTGCTCTATCCCTTGGAATTTAGTGTTCACTTGCTGCTTTTCAGATG  
A\_14\_P106024 TCAGACCTTTCTTAAACAAAGGGCTTAGTAAATCTATGGGATTTCTGTCCATCAAAGATAC  
A\_14\_P113260 ATATATTTTTATCTTTTCTAGGAAATGATCGAAATGGCCTAGATTTCAACAGGCAGGTAA  
A\_14\_P127380 CTTGAACATCTGAACAAACCTTTGCAAGTAACATGAAGACCCAATTGCTTCTATTGAATC

A\_14\_P117284 CTTTGAAGATCAAGATCTCCCAGATCAAGAATGACATCCAGAGAGAGAAGGTG  
A\_14\_P134423 CTACGGTTTTAGAGATCAATTTGTGGCTTGTGTGTTTATAATCTGTCCCTTTAGACATTGT  
A\_16\_P16191127 CTGTCTGGGCATTTCTGTTCTCTTGTGGGTGTTCAATTCCTTGCTTATATGATTTT  
A\_14\_P140008 CAAATCTGTTCGGTTTTGAACCTGTGACAGATTTAATGTGAAAAATTAGGTGAACTGAT  
A\_14\_P123722 TAGACACATACATAACCAATCATTAGAAGAACAAGTTTAGAAGGTGTGGAACCTTGTGCCTG  
A\_14\_P117276 TATTACTTCTAAAAACGCAATGCTGAGTGTGGCATTCTTCTGCAAAAATAGAGACTGGAA  
CUST\_5246\_PI426210822  
AATCCTGTTTTCTTTTAAAAGAGTCTTCAAGCTGATGAAAATTTTAAAGTAGCTTATAAC  
CUST\_4382\_PI426210822  
GTGCTATGAGAATTTTGGGGGGAAAATTCCAACTTTATTAATTATTGTATTGGGGAAAA  
A\_14\_P138798 GTTACTTTTCGATAGATCTGGTGACTTTTATAGATCCAAGCACCTTGAACAACAGGTA  
A\_16\_P36776064  
TGGGAAAAACATAAGAGAATCATAGGCTTGAGAACTAGTATAGAAAAGAGGCAGCAATCAA  
A\_14\_P130508 GGTCTTGAAGGCACCTTTCCAATCTCTTCAAGTGGTAAAAGAAAAGGATTCT  
A\_14\_P113210 TCAGGTATTCTATCTTCTTATAGATAAAAAGGGGTTTACCTCTTCCCTGAAGAAGAACCT  
A\_14\_P132412 CCGACTTTGGTATTTACGAACATATATCCAGCAGAATGCCAAAATAGCCTGAAATAGAAC  
CUST\_2663\_PI426210822 ATAGGTGGCCCCAGGGCTGGCTTAGTAACCTAACCAATGGCACCAG  
A\_14\_P132601 AAAGATAACCAAATTATCAAAGGTCACCAAAAAGCCACCCACTAACTCAGAGTTTGATTAA  
A\_16\_P15581055  
CTCAGTCAAGACTAACTCAAATCCCTTCTCATCTTTCATTTATTAATCATTCTGCTCCA  
A\_14\_P137320  
ACGGAATTAACACATTCATTTAGTCAGACAAAAAACAGACTAGAAAGGACAAATCGCA  
A\_16\_P02504267  
ACAAATCCTGCTTCCCTTATTCTTCCATTAACCCAATCCACTTGTTTATCACCTTGAAATT  
A\_16\_P01847752  
CCCTGTGATTCATCTAACTTACGTGTCGTATCTAATTTCTCACATTGCAAATCCATTCAA  
A\_14\_P114447  
AAGACAGAGAGACTTTCATGGACAAGAAAGAGCACGTGGAAACAACCTATAAAATATCTTC  
A\_14\_P116252 AGAATGCACTGGTTTTGTTTCCAAAACAAGAATGCTGTTTATTTGCTGATCAAAACTTGTG  
A\_14\_P107278 CTTAAGTTCTGGTTTTTTAAAAGTGTTAATCTGCTCAACTATGCCCTCCAATCCAAACAG  
CUST\_1731\_PI426210822 CCTGGAGTCCAGGCAGGGTGCGGTATTGCTTACTGCTTTTCATGA  
A\_18\_P22840129 CTTCTTACCGAGGTGGGTGCTGCTGTCTGGGCATTTCTGTTCT  
A\_14\_P118738 GGTTTAATGATTCCATCAATTTGGACACATAAACTTCTGTTCCATTTAAGTCTGCTCACTG  
CUST\_9747\_PI426210822 CACAGCACAGACTTACAGTGCCAGTCTTGCCAAATGTACAGTTTATTTTCTGTT  
A\_14\_P111573 TCATCCTCAACTTTTACTTATAAATGACAAATCCCAGTGGTTTTTGGAAATCCCAAAATTC  
A\_14\_P120066 ACATCTGCCTAATTCTCAATCCACGTCTAAGGTTAGAATGAACATTTGAATTAGCCATTC  
A\_14\_P103560 CTTATAAAGAACTTATTCCCAAGTTTTGTTCCATAATAACACCATTGTGGCTCTGCCTTC  
A\_14\_P100215 TTACTGTTAGAAGGTGGGAAATGGTAGAACATTGCTTTTTGAAAATATATTTGGCACCAT

A\_16\_P03448489

CTGGTAAGTTTCAGACCATTTTAAGGAGTATTCACCTCGACTTTTAAAATAGGCCATCCC

A\_18\_P13516828

CCACTGTAAGTCACTACATTTACTTGAACCACATAAGTCATAACTAATGAATACCCTGCC  
CUST\_9737\_PI426210822 AGTTGGCTTTGGAACCTTTCCCATTGTGTCTGGTCCTTAACTAGAT  
CUST\_6627\_PI426210822

TCACATGGATTTATTTTGTTCAAAGGTCGCATCACACAATAATCATCAGTCTCTCATGC

A\_16\_P19781923

TCCTTCTCTCCAGAAAATAAGCAACTTACCATGTTTTAACTACTCCTTTATCCTTTTCCC

A\_14\_P128854 CCATTGTTTTCCAGGAAAAAAAAAAGAGTATTAATTGTTTGGTCAGAGTTTGGGGATTCA

A\_18\_P22840160 CCCTCTGCTCCAGAGAGATGCCTTTCAGTTCCTTAGGAAACAAATT

CUST\_6619\_PI426210822 TTCCACCTCTGGGCCCTTACTCCTCTGTAGCTACTTCAGATGAT

CUST\_19\_PI426210822 CCGCAACTGCTGGCACAGACCTTTTCATAGTTGCAGCAGACCCTG

A\_14\_P134215 TTAAAGACTACTGTAAATAAGTAATAGACCCTCTTTCCTTCATTGCTGGCTACACTAGG

A\_16\_P19870888

GCTCCTCTATTGTCAAAATTTCAATTCCTAAAAAAGACCACTTTGAGTTATGCTAGGCCT

A\_14\_P112928 TAATGCCCTTCGAGAAAGACTCAGCACCTTGCCTGATAAATTGTCTTATAATATAATGGT

A\_14\_P200527 CTCTCACCTGCAGGCTGATCCTTCTTTTCACTTTCTGTCAATGTAC

A\_16\_P16472754

TCAGCCCAAAGTGAATGATTTAATTCCTCATAATCTGTGCAAAGTATTTCTCTCAACC

A\_14\_P102462 CTTTGGTGAGATAGATACGTAATCTTCGTAAAGACCTATAAGGAATTCCTCTGTGGAACA

A\_16\_P02967793

CTCATGTTCTCCACTTCTACAAGTTTTCTCTCCAAATGCATCTATACTCATCTGCATTGG

A\_16\_P15561600

TGCTTCCCTTAAGAGATCATAATCAGCCCTAATTATAGCAGAATTATCCTCATCCTTGTC

A\_16\_P58424446 ATATGACTAATAAACACGTTTTTACGTGCCCTCAGCCATTGGGACACTTATTTTAG

A\_14\_P117372 GTTTCTGTATTTCTGGCTTTCATGTAGAAAACCTGATGTCTTCTATACTTGTCCCTTG

A\_14\_P101127 TTTTCTATCACCGTGATCAATATGAAGACAATAACACACAATGATGATGATGCATTTCGC

A\_14\_P135822 CTCTCGTTCTTAAAGAGATAGGAAAGAACTGACCTACTTTCTATGGAGATTCTTGTAAATA

A\_14\_P124494 CTTAGAACCTGTCTTGTCTCATCTTCAAAAGGTAACCTTATTAAGATCCTTTGCGTCTGA

A\_14\_P100701 CTGCCTACATGTAATATTAACCACAACCTTAAAAAATTTCCAACAATCAAGGGCTCTGCG

A\_16\_P03189607

CTCAAACCTGTGATCTTCACTTCTGTATCATTAGGGTCCTATCAATCAATAACACACAT

A\_16\_P18178408

AAACCTTCTTTTTCCAAAATCTAGTCTGGTCAACTAATATTTGTAGTCTTAATGTGGCC

A\_18\_P16288520

AGATGTCTCCTCATATTCTACATAGTATCTGTGACTAGGTCAGTTTTATACACAGTGCCC

A\_16\_P37092717

AATTAGCCTTAACATATATCTACAATTAAACTCCATCCTCTTACACTATGCATATCCTCA  
A\_14\_P107201 TCAGTGATATTGAAAGGGCTGTTTATCTGCTCAGGTATTTCCCTAGTCTTTCTGTGAAATT  
A\_14\_P129981 GTGACCTAACTAAAATCAATAGAATCCTGGGTAATGAAATTTTCATGTGGCTAGGAACC  
A\_16\_P16969576  
AGCATTACGTATGGCAATCAAAATCTTCCTCATTATGATCCTGTGACCTACTATTCCAAA  
A\_14\_P103224 GCAGATTTACAATGGATGGTTTTGATTTTTCCCCAGTTTCAAACCTATTGACTGAAATGAG  
A\_14\_P134129 GATTACTTTGCGTATCGCGGCTTTAAATACCTCAGGCTTGATGGTGAGTATGAG  
CUST\_3665\_P1426210822 GCCCCGAAAGATCAGGGAAAATAAGAAGAAATTCAAACCCTTGTTTTGCTC  
A\_14\_P125207 GAATGCATTCTCATGAGTCACTATTGCTTCATAGATATAAATTGCCCTCTGCAGACCATA  
A\_16\_P00685531  
GCCAGTTAAACTTATTCCTTTTTTTAAATAGCAATCTGGAATGAAAATATCAGATGATCA  
CUST\_9653\_P1426210822 CTGTTACTGCAAGACATCCCCCTCAAACCTCCCGTCTCAGTCTGTGT  
A\_14\_P109070 GAGAAACAGGTCTATGTTGACCTAATCGACAGGACTACAAATATACATACAGAAAGCAGA  
A\_16\_P19156855  
CACTCAAAGATCACCAAATGTTATGCTGTATTGTCAACTAGAATGTGTCAGTGAGTCAAG  
A\_14\_P201413 CTGTATGCAGCATATCCACTTATCTATTACCTTCTAACCCAAAAGTTCTGAGCATCTTGGA  
A\_14\_P128100 CTATAACCCAAAAGTTTCTTATCACAGTCACCCCCAAACTCTAAACTTAGCCCC  
A\_16\_P18089676  
AAATGCCTATGCCAAGATTTTTCACTCATTAACTTCCAAACTTACTCATGTTTCCCTGT  
A\_16\_P02325843  
CATGCCTAGTAAGTCTTTAACAATAGCCCTTTTAAACATCCATACATTTAACACATGCCCC  
A\_14\_P127755 TTTACCACTTGCTACATGGGAAAGCAAATTTCAITTTACGACTTCACTCCAAACATTTAT  
CUST\_1503\_P1426210822 CTGGGGAAGGAGTCGATTTGGGGATGTGTGAGTGAGATGACATTC  
A\_14\_P136714 TTTTGTGAAGCACTGCTGAAGGCTTTTTACTCCAAGAAGGATCATACATTATCTTTGTT  
A\_18\_P17050997  
ACAGACGTAATTATTGTTTCATCCTCAATCTCATTTCCTTAGACTTAGCAATGTTCCCTGT  
A\_14\_P114357 TTGAGTTTTGAACATGATGAGTTTTTTGAGTAACAACCTAAAGAGGGGAACTTCTGAAACA  
A\_14\_P126157 AATGGCTTAACTAATATCGGGTAGCAGGCGTAGAGCAATAATAAAGATCTAAGGACATTG  
A\_14\_P134853  
TCAGCAGAGTGACAATTTAAAAGTTGCACAAAACCTCACCATCAGTAGAAAACATACAGAC  
CUST\_7839\_P1426210822 CTCCTGGTTTTGAAAGGAATTCCCAGTGAGGTATTGGGCATTACAAGA  
CUST\_10423\_P1426210822  
TATTAATAGTTATATAATTCCTCAAGCACTGATATCTGGCCTAAAATCTTGGAAGTAC  
A\_14\_P132234 CTGCAGGAGTTACTTGAGGAATTATTCCAGTTTAGAGGCTCACAAACATGTCTTAGATTT  
A\_18\_P27046755  
ATCTGACTTAACCTTCTAACTAGCCTCTTGCTCTCTTTTTTCATTTTAAAGTCCATGCCT  
A\_14\_P117219 TGCAGTCCTTCAGTCATTAATTGCTAATGCTACCACAAAATATTAACAGAAGAACGGGAA  
A\_16\_P16191118



GTGTGGAATGTGAAACTGTCTAATCCAATAACACCCACTAACTTTCTAGACTAGAGTTG  
A\_14\_P106084 CTATGGGAAGAGTTACTGCACTACCAGCAACAGCAGCATTACCTATAAGAAGAGTTAC  
A\_14\_P118246 TTTGAGGAAGTGGGCTTGCTACGAATGAGAGAATCTGTTTGTTTAATTTGGATAATAAAC  
A\_14\_P109175 TCTTTCTTTCTTTTTAAATGTTCTTTTCATTTTGCCAAGAAGCTGGGTTTCTGTTCCCTTTTC  
A\_14\_P110974 CTTCTGAAATTATAGAACTTGTGCTATCTCTGTTTCACAGGCACAAATCAAAGGATTTTC  
A\_16\_P18173254

AGGCATTTTCATCCTTAATGTTACTTAACACTTCAATTTATTACGAACCTAAATGGCCAGA  
A\_14\_P106113

CTACAGAAGGAAAGATGAGAGAGAGAGATCTCTTCTGAGAATTATCGAGAAAAACATCAC  
A\_14\_P139507 AAAAGAGGCCCAATTTTATCTCTTCCATCACCAATAAACCTTTAGTCTTCTTCTTGTGTG  
A\_14\_P103146 TCTTAAACGTCTCAAACCCATCTAACTCTTCCAAAAAAGACGCAGTCTATTCTTTACAG  
A\_14\_P137027 ATTTTGACAAAAAAGCAGTTTATCCAATGTGGGTTTGCAGAATGGAAAATCCAAATTGTT  
A\_18\_P22840709 GCGGGCTTTCCCTTTTGCTCTGGAAGGGAAGGAAACTCTGACAG  
A\_14\_P122304 AGAAGAAGACCCCAAAATGCACACTTATGGTATCATTTATACGTAGGTGCAGTGTGAAT  
A\_14\_P108691 GGCAAAACAGTATTAACGTGACCCATTTAAATTATACCCCAACTGCAGAAATCTTCCTTA  
A\_14\_P129886 CCAATTTGAACTTTTCATATTCTGGTAGGCAGGCTGTTTACATGTGAGGATATTTTAAAC  
A\_14\_P201996 TTATTTTTTTTTGTTCTGTAGAAGTGGGAATTGTGGATTCTTTCTTGCTTATGGGTGAGA  
A\_14\_P106002 CTCCGTTTATGGCCAATTTTAAACAAGGGATTGAGCCACCTGTTAACAAGAGAAAA  
A\_14\_P136593 ACTGTGAGAAAAAATGATGCATTAGGAATCTACACATTTCCCTGCAGTGTCAATTCTG  
A\_14\_P201040 ATTTGCTCCCTTGTAAACTGGCTGAAAAGTTTTAAAGGTCTAAGGGAGAATACAATTATC  
A\_14\_P134339 CTAGACTACCTGCTTTACAACCTGTTTGAATGATAAAGAGTGCCTCTCCAGTTATTGAGT  
A\_14\_P107393 TAGATGACAGCAATTTCTTTCTCTGACAGTCTTACCTGCAAGATAACGAATTGTCTCAAG  
A\_14\_P100068 CAAGTTTCTATTCTTTTATGCGTAAAATGAGGCCATTAATACTTTCTCTGCCTTCCTCAC  
A\_14\_P114364 CTTTGGAAAGAGAAAAATCTCTATCTGAAGGATTTTTTTTTTTTTTCAATGACGAGCGTGCC  
A\_18\_P14131085

TTTACATTTGGAGGTCTCATAGCCATTTGCTTTTTTTCTTTAATGTTTCAACCCTACCTGT  
CUST\_4385\_PI426210822 TCATGTTATTGAATTTTAAATTAGAGTTGCTGGGCAGCCTGGGCTGCCTTTTAA  
A\_14\_P108459 AGAGAGGGACAGTGTAATGCTATTAAGGATTAAGGAGATAAAGCATGGTAATGGTTGG  
A\_14\_P100364 GTGTGTGATGGGTTGTATTTGTTATGAAAACATTTTTTTAGTTTTTCAGTTCCTTTTACCTT  
A\_16\_P18001387

AAAGGTAGGTAAAAATGGGACTAGAATTGAACACAGTAAAAAGGCATTAACCATTTCCAAA  
A\_16\_P18056593

AAGGAAATTCACATTTAAGCAATGGTTTTGTTCTCATCTCTGTGACTCAACTATACCTGG  
CUST\_2064\_PI426210822 AATACAGACACACATCTCCACATTTCCAGGCTGATGGGGAGCTCT  
A\_14\_P134919 TAAATAGTGGTAAATAGTGAAAGCCTGTCTTCCCTAAATGTAAAGCCATCTGTCCG  
A\_14\_P111693 CTTTACTTTTTGTCATCTGCAGTTGACAGGATTGCACATAAATTCTCCAACCTTTTTTTTCC  
A\_16\_P01642780

GGGAGCGATGTAATTGATGATGATTTTTCTACATGAAAATGGGAAGACTGTAAGGAACAA

A\_14\_P137498 ATGGAGAACATACTAATCTTTTTCAAATGTTGACTTTCTAGTAGGTATTGGAAATCTAC  
A\_14\_P115490 ACTTATCACAGATTCTGTAGATAAGGCTTATATGCTTGTAAGGGAGCCTCCTGAAATAGA  
A\_16\_P30952496 CTTTTTCACTAGTATGAATTCAGCGTGATCTTTGATACAAGCCACCTGTCTGGG  
A\_16\_P15132870  
AACGATATTCTCCTTTTTCAATTCAGAAGCCAGAGAATACGAAGTTAATTACCTTGACCAAG  
A\_14\_P133868 ATAATCTATGTGGTCCTAAGAGGGCACAACCTATACCAAGTGAGGACACAG  
A\_14\_P128064 AGACTATCACAGCCTTATTTTTCTTTCTACAAAAATCCATCCTATACTAAAGGCTTGG  
A\_14\_P118879 AAAATAAACTTGAAATCACTTACTTTCTGCTCAGGGCTTTCTGAAACAAAAGTCCAAAG  
A\_14\_P112433 CTGAGTTGGAGCAGAGAAGTTTGAGTAAGAGATAAGGAAGAGAGGTGCC  
A\_14\_P111318 CGGATCCAGTTAACTTTTGCAGAGGTAATTTTCGTGGTCTCTTTTTCTTATTGAATGAC  
A\_16\_P00685001 TTTTTGCTTTGTAAAGTTGTCAGAGTGTTGTTTCAGTGAGGAATAGGAGGCAATTCC  
A\_16\_P01396841  
TTAATACTGCATCCACCCAATGATAAGATTACCAGCATCTTTATCCTTTTCATCACCTCTT  
A\_14\_P126139 CTATTGCTACCTCTTTTTCAGTGAGTCTGCCAAAAAAGAGGTGGTTGCTGAAG  
A\_16\_P18893194  
AACAGTATGGTAAGAATGCACCAATGTTTGTATTATAGCATATGTAGTGTGGGAACCTCAA  
A\_18\_P10712959  
GGAGTATTCACCTTTGTGATTGTGTAATCAAAAATCGTCTTGACAATACAGCATTCTCCCA  
A\_14\_P134105 GAAAGTTTCACAGAATTGTATCTGCAGCATTGAAAATATGGAAAATGTCAGTTCTTCTAG  
A\_14\_P125911 CAGCCAATGGCATCCTCTGTTTCTTTAACGTGAAAAGTTGTTGACCAATCATTAGAG  
A\_14\_P121617 CTAAAAAAACCCAGGTTAACCAATAACTTTCCATTCACAATTTCCCCTAATTCCATTCTC  
A\_14\_P118434 ATCTTTCTTGAAGGTAGAAGGGGACGTAAGCAGATATCCACTTTTGAAGATAAAATTAG  
A\_14\_P133104 AGTAAAATGAAGGGTAATCAGAGAAGGGATAAGATAAAAATGTGTAACCTTGCTGATGGAGG  
A\_14\_P125447 ACTGAACATTTTATAACGTGATAGCAAGCACTCCTTACCTTAAACAAAACCTCATCCGGATA  
A\_16\_P36945331  
ACAAGTCTTGCTCAAATAATCGTTGAACTCCAACATTATATCAGTCGCTTAAAAAGACT  
A\_14\_P110695 CTGAAACTCCTCTTTGTCATACTGCACATATAAAACGTCTTTTGTTCACAACAAGAGGAT  
A\_14\_P120244 AATTGGGTGGGAATCTTTTCCCCAGTTAGAAAAACAGATTTAAATAACTTGTGCTACTG  
A\_14\_P106845 TGGTGGCATATGAGTGGGCAAAATGTATTCAATTTCCAATTAGAATTTTCATGGAAACTGA  
A\_14\_P121874 AACTGTTGTTAAAATCCCAGATACCTTCACCTTGAAAAATAACCAGTGGTTAAATGTCAC  
CUST\_1911\_PI426210822 CCCTCTCACTGGCTATCTGGGGGGTGCAAGGTATAAAGTTAAAAAG  
A\_14\_P124353 ACTTCCTTCCTCGCCCTCTCTAATGATGTAATCTCCTTTGTCATAGTATTCCTGTT  
A\_14\_P128079 GACATCACTTACCCGTAGACTCAAATCAGGAGTTTTATACTTCAATGACCAGTCAATG  
A\_14\_P128307 GCTCAGTCAAACCTAATTCCAAAACACTAATGCTTTTATTTAAACACCACATCCTGCAAT  
A\_14\_P115404 CAGTCATTGTGTCATAATTTTTAGTTTTCCATATGATCCAAGTTCTACAACATCACAGT  
A\_18\_P20505506  
AAAACAGTCTCACTGCAACAAATTTCTAGGCATTGTCTTGCAATCTTGACTACTTGAGAT  
A\_18\_P22840728 GAGACAAGCCCAGCACACAAGTTCTTCCAGGTTGGGGGATTTTAT

A\_14\_P113772 ATCTTTTATCTGAGGCCAAGGAGTTTTTAGTATTTGTTAGACTGGACTTTGTGGTTTTCT  
CUST\_1241\_PI426210822

AAGTGTTCCCTTCCCTCTTTTTGTAGATGACCTAAAACCTTAACTCATGCCATGTTTAAAT

A\_14\_P111884 ACTTTGCACATTGAGGCTTATAATGAAACGTTTTCCAATCGGGTCATCATTAAATGAGCAT

A\_14\_P136324 CCAAGCCATTTGTTGCTTGCATTTTTAGGCTCGAGAGACTAAAGAGAACTATACTAAC

A\_14\_P121535 ACAGACAACAGTCAGTGGAATAGCACTTGTCTTTGAATTGAGCAGATAGAAAATAGAGA

A\_14\_P117093 AAATAGGTGGACATCATGGGATGGATGAGGTCATCATGAAAACAGATTTACTGGATTTA

A\_14\_P137630 ACACCTGTTCAAAGTGTGTTTTCTTGAATTCTGACAGATTTATGCACATGACCAAAAA

A\_14\_P132652 ATTGCCTAAACACAGTTATATGGATTACAGAATTATTTAGCCTCAAGCAAACCAGGCAGA

A\_14\_P118330 GATGAACTCGCACTTAGAAGATCAAGGCGGGCTGGAAAGCAAATTTTTAAAAAATGTAA

A\_14\_P100077 AAAGATCTAAAATAAAACCAACTTTTACTTCTCTCTTGCCACCCTTCTCTCCAACCTCCA

A\_18\_P22841410 CTCATTTCTTTTCAGGCATTGGTGAAGATATGGTCTGACTGCCCCG

CUST\_2220\_PI426210822

AAGGCACAGGAAAGAAAAATAGAAAAATGTATACCTTTTAAAACAACATTGGGGAAAA

A\_14\_P112002 AAAAATACCACAAAGAAAAGTCCCTCATAGATTTTGAACTCCATTCTAAACCAGTGGATGG

A\_16\_P03203125

TCAGCCACATTTTTAATGCTTTCACATTCATACACAGGTATCTAGAAACATTTATAGTT

A\_14\_P130466 TTTTAGATGGAGATGTAACAGTTAACTTTGAAAATTCAAACGGGCACATGATACCCATCG

A\_14\_P129834 ATACTGATTTTTTCATTTGCACTGCAGGTGATTTGCATGGGAAACTGGATGATCTTTTTTT

CUST\_3863\_PI426210822

CACCCATGCTGCCCATGGTTTATGTTAATGAATGAAATGATGATTAAGATAGGACAATT

A\_16\_P17065766

AAAACCAGTTACAATTTTCTGCTTTCTTAACAACACTGTTATGTTTCCATCCCTCTCTGA

A\_16\_P39113338

AATCTACGAGAAAGTCTAACTGTTTACAGTTAAATGATGTCCACTTAAGAAGTGCTCTGC

A\_14\_P114171 GTTGCTGCTCTGGAGTGCTCTTGATTGAAACAGAAAGGGAAAGATAACAAC

A\_16\_P16680567

TTCACTCCATAGAATCCTTTTATCTTGCAATCACACTAACTTGAGTGCCTTATACCTGA

A\_14\_P138176 AAATAGAAAAAGTACAGTAAATAGTGAGCAACAGGGGATAAAAGGACTGGATTTTTGTC

CUST\_5545\_PI426210822

AGGTAAAAGTAGAATAAGATAAGTTTTCTTAATATCTTAATCTTTTAAATTGATGAGTCA

A\_14\_P138073 ATATGTGGGTATCCACGTGAATGTCTCTTCATTGCTTCTCCATCTTTCTAAAAAGTAATC

CUST\_5010\_PI426210822

CCCTTTCCAATATAAAAAGTGTTAATAATTTACCCACTTAAAAGGTTAAGATCAAAGAGA

A\_14\_P130021 TAAATGGAAATGTAACCCCATCACCAGAACTATCTGTGGAGCCTGAATTAGCATCTAT

A\_16\_P21300588

AATTGTGGGAAAGACCAATAACTGAAACATCATGAAGGAAAATTGCGTAAAATCAGCAAG

A\_14\_P122913 ACCGACTCACTCATGGAACCTATTTAAGATGAAAGGTGGAATATTCTGAACAGTAATGTA

A\_14\_P102124 GTGTTTGAGTGCTTCAGATACATTTTTTCAGATACAATGTGAAGACATTGAAGATATGTGG  
A\_16\_P15175315

AGTGTCTATTGCCATGTTTCTGCTAAACACATTGCTATCTCATTAAAGACAACAACGGAAT

A\_16\_P35563512

CCAACAAACTCCATTACCTAAAATATTCTGAGTTTTTCCTATGTCTTGCAACATTCCAGTC

A\_14\_P133163 AATGAATCTGCATCCTTCTCCACGTGAATTTAACTATCATACCAGTTACGAACTATCAGT

A\_16\_P18084842

AAATGTTGTTTCTCCATAGCACATACTGTAACAAAGAATGGTAAGAAATCAGACAGGACC

A\_14\_P131976 TTAGTGACTTGATGGCACATTGGATTTCGATTCTGGGCCTGGTCTATGTATT

CUST\_3019\_PI426210822 ATTAGAAGCATCAAAAATACGCCCTGTGGCAGGTGCAGAAATGCC

A\_16\_P16360870

ACATCATGTTAGGCTTTTTCTTATCTACTCCACATGTATGAAATATCCTCAGGAAACCA

A\_14\_P125745 TGGCAGTTATGCCCTCAAACTGACTATATCAACATTTAAGGTCATGTATTTGTAGGCTT

A\_14\_P118736 ACAAAGCCAGAACACATATATCAAAGTAATCCTGAAGTATCAGAACAAAATAATAGGTAT

A\_16\_P37610947

TATTTTCAGAAATCCAGGAAAAAACTTACCTTCAGCCATATTTTTCTCGTGATCCTACAAGC

A\_14\_P138220 TTTTCAGTGACTGTAATTAAGTTCTCCTCAGGCTTCTGTGATTAGAGGTTATTTTCACCA

CUST\_9809\_PI426210822

CTCCATTGTATACACTGGGATGCTATAGGAGTTGAAAATCACTATGTTTCCAAGAG

CUST\_1190\_PI426210822 AGAAAATCAGGTGAAAGTGCTCAGCAAGGCCACCCATTGTTCTATA

A\_14\_P102175 TTCCATCTGGCACTCTCGACTCTTTGTAGATACTTGATTCAGTCAATCTTGATAGTAAAG

A\_16\_P37645645

CCCCTCAATTATTTCTACTTCTCCACGTTTTTTTATTAACAAATCTCCCTTGAATTTGGCA

CUST\_9806\_PI426210822 CTTGAGTTTGTTTCAGTGCAGCTGAGGTCAGGTTAGGGAGGAACAG

A\_16\_P19823460

AAAATCAGGAATATCATAAAATGAACGGGATCTCAAGATTTTTGGTTCACTCCTACACCA

A\_14\_P107152 TGCTACTGCTGTGTTTCTGCCACTTGGCATATATAATAAAACAGATGTCCTGTATTTAC

A\_16\_P20341737

TAAGTGGCATTCTCTTTACTTAAATCTTCTGATATGCATCATCTCCCCTTAATTCCTCT

A\_14\_P117059 AAGTCCCCCTCATCGTGGTATACTTAAATTCACACCATTTTAGGTTACGTCGTAATGAAT

A\_14\_P118148

CTTAAGAAAAAATCCAGGAAAAATAGATAGCAGTTTGCTCCCTAAAGAGGACAAAAGGAT

A\_14\_P115666 CAGGCTGTTTTACTATAGAGAAGCAGGCCTTAACTGTTACCTCTTCTGTAGTTACTACTA

A\_14\_P114025 CTTTAATTACTAATAATACCTGTTCTCTCCATCTTCTCTGCTTTTGAGCCTGGACTTCT

A\_16\_P58424234 AGTTTTCTGGAAGCCTCACATTATGGTTTCTGCTTGTATCTTCTTGACCAC

A\_14\_P133082 AATACTGTGTTGGCTGATGTTATTTAGGAGCCTGGAAATCTAAGGAGATTGAGAGGTTAA

A\_14\_P110069 GTCACCTCTTGTCTGCCTGGAACCTGAACTTCCTACTGAACTGAAC

A\_16\_P20389915

AAATGTGCTGTCCTGAATTTTTAAGTATTGCCATGACTAAGGAAGTAATGATGGATTCCC  
CUST\_968\_PI426210822

TTATGGCACTTAAAAAATGAGACAATACACCAGACATTAAGTACAGCAAAGCCTTCCTAT  
A\_16\_P01431632

AAACTCTTCTAACAAAGCCAAACATGGATTAACAGCGTTACATAAGTCTCTTCACAGCA  
A\_14\_P125909 TGTCGCTTTGAATATGTAATTGTGGCACATCAGCCTTTAAAACCAAATAGGATACACAGA  
A\_14\_P104270 AAAATTAATAAAATAGAACTTTGTTTTCTTCTGAGGCTCCTCTTCTACTTCTAGGTAGT  
A\_14\_P101273 AGATTTAACTGAAGTTCTTTTCAAAGAGCATGTAATCTGTGTCGGTCGGGTTTTAAACA  
A\_16\_P21480678

TTCAACACAATGCATTCATGTAGTTTTACTCCAGTGCTAAGGATTTTTGTTCAGGCTAAG  
A\_14\_P122869

CAGTCACTAAGAAAGGTGTAATCTAAAGAGATTCAGCGATATAGCAGAGAAAGGAAAGGA  
A\_14\_P117454 AAAGCCACAGAAATCTATTAACCAGTTATTCTAATACAGCCTCTGTGTCAGTCTCTGCATTT  
CUST\_1437\_PI426210822 GGCAGGAAGTGGCACTGTGTTGCAATCATAGTTTCATTGTTCCCTTTGTA  
A\_14\_P104093 ACATGAGCATCTGAGAAATTGTTGCTGCATATTGAAGGCACATACTTATTTACTTGGAGA  
A\_14\_P125524 ATTCACAGTGGGAGGTTTAACTGGAATCATACTATCGCTAGATATCATTCCACATGATAC  
A\_14\_P127952 CTCTGATGTAATGAAATTTTATGTAGAGCCCCATGGATAGACAACACTGTAAAAGTGGAT  
A\_16\_P17722658

ACCTGCTCATAAAAAACCATTATTTTCATGCTATTCACTACTTTAACTATGACGGACAACC  
A\_14\_P123505 TCTAACTTTTATTATCCAGAAGGGATATCAGAGACCAAGTTAGACAGACCATTCCTC  
A\_14\_P107340 TCATTCTCTTTCAAAGTCCTCTACCACTTCCATAGGAATACCACTTTACCAATTGTGTA  
CUST\_7031\_PI426210822 AATGTCTGTGTGAGACAGTGGCAGCCTCTGATGGGTTCCCTGCCGATT  
A\_14\_P121819 ACTGCTCAGAGGTATTCCTTTATTATGTGGTTAGCATAGGTTATACTTTGCTGACGATTC  
A\_16\_P02451365

ATAACGCATTAATATTTGGCCAAGAAGATCCTAGTAGTTGACATACATCCATGATCCTCC  
A\_14\_P125812 CATTTCTCCAATTCACAGTTTCTCCACAGACCAGAAAAATCGAAGTGAACACAG  
A\_14\_P135131 AACTTTTGAGCACAGTATCAATAAGTTGTTTACCAAATGGTCAAATTGGGAAGAAAGAGC  
A\_14\_P125302 GCAAAGAATGAATAAGGATTTGGCATATGATAGATACACAGCCTGTAATCTGGATGGATG  
A\_14\_P127655 GAGATCGCACTGTCATAACTGCATCTTTTATTTTCTTAATTCCAAATCTTCCCTCTCTCC  
A\_16\_P00324569

CTTATGTCAACAGTTAGAACTCTCACAATCAACCTCAATCTTCAAACACTGCTACTGCC  
A\_14\_P102040 CTCTTATCAGGTTTCATGCCCTATTCTAACGTCTTTAAAAATGTGACCTCTATACACAGC  
A\_14\_P110067 AATTTGATTATTCTTTCTTCACTTATCTGCTTTAGTTTGTGTCAGTCCCCACTTTGAGAGT  
A\_16\_P16774369

ACTGAGATTCCTTGGTAAAACCACACTATAACTTCACAAAGAACGTATTTACACACTGCT  
A\_14\_P125980 TTCCCAGCCACAAGTAGTTCTCTCTTATACTTACACAGATCACCCTAAGTTTGAAAAAT  
A\_14\_P117386 AGATTTTGTCTTATTAACATCTTGCTGCAAGAACGATCTCATCCAAAATTAATCAAACC  
A\_14\_P139810 TCATTCTCCATCCATAAACAAGGTTCTTTTCATTTGATTGCGAATGCTTCTCGATGAATAC

A\_16\_P41209567

GCATTGCTGGCAATATCTACTTGTGGTTTTCTGTAAAAATGCTGTGAGTTTAAGGACATT

A\_18\_P22840329 CTATCTCTCATTCTGCAAGTCTGTCAGTGGCACAGATGTGGACTTTCTTTA

A\_14\_P133061 TTATGGTTCGATGCCATTTTTTTTAGCAGCATACTCATTGAAAATCTCATCCACAACCT

A\_14\_P116796 CTTACAAACAGATATGACCAGAAGGCAATTGGAATATGAAGCAAGGCAAATCAGAGTTG

A\_14\_P128283

TACATTTAACAAAATAATCTAAAAAAGAACTAAAAAGGGAGAACGGGGCAAGGGACCTC

A\_14\_P116473 TCTTCTCTACTTTTCTTGCAGTAACAGAATTGTTCAATCTGAATATCCAAGGTGAGACTG

A\_16\_P18048718

TTTTAAAAICTTAAGCCATTGTAATGTTGAGGAGGTAGTGAAGAATGATGAGGCTACAGC

A\_14\_P111658 GATGTGATTTTATTTTAGAGTCCTAAGACACCACCTCACTTTCAAACACATTTGGCAAAA

A\_14\_P104999 ATAGATGGTAGAACTTTGGAAGTTTTACTTGATTAAGGACTACAGAATTGGGCCCTTAG

A\_14\_P100040 ACAACACTTGTTTTCACAACATAAAGAGGTGGGTCAGATTCTGAGTATCATTTTACACAC

A\_14\_P113380 CCTCCCATGTAACCTCAAATGAAAACACTACAGCAAACCATAAAATATGCTTTTTTAAAACGT

A\_16\_P16590199

AGTCACCTGTGGACTATACTATGAAAATTTCTGTATTGAATACATCCCTTTAGGTCTGC

A\_14\_P106746 CATTTATTTTTGTTGTTGCAGTGATTTGCTGTCCCTCTGAATACATAGAGAGACACATTGA

A\_14\_P123890 TCCAAATCCACTAAATAATGGCATTACTGATATCAATCTGAAATGGAGAAAGGCCAACT

A\_16\_P36230099

GTTTCAGAATCACTCCTGGGTTTGTAACCTTATTAAAGAAACCCACACAGAGTCAAACCTT

A\_14\_P132218 CTGGAATAAAAGATAGGATTTGAAGTGTCTGTTACACTTCCTCTAAGAGGTGTCTGATAC

A\_16\_P58424233

ACCCAAATAAGTTTATGCAGTAGAGTTTTATTCTCACACCGAAGTAATTCAGCATTGGTA

A\_14\_P127563 ATGGAATGTTTAATTTTTAGTGCAGTTTTCTGCCACTATCGGAACTGGACATCTAGTATG

CUST\_2939\_PI426210822

GTTAGCCTGAAACTCGGGAAGGAGAATTTGTTAGAATTTACAGCTGAAATCTTG

CUST\_6454\_PI426210822 GCTTGTACTTTTTTCTCCACCACATCACAGGTAATGAATGAGGCTC

A\_16\_P36230252

AGGTGAGGTTCTTGGTATAAGTACTATTTTTTATTTGAGAGATGTGATCATGTGGGAGT

A\_14\_P125581 ACTAAACATCCATTCTCCAATAGATGAGGATAATAGATAACCCATAGCCCCTGGT

A\_14\_P132057 CCTGTAAAACCTCTTGTCTCTTTTTCTTACATTATGACGTTTGTTCAGGAGAGG

A\_18\_P12546240

TCCAAGTCACACACGTAATAAACACAGAACGGTATTTTTTTCATTGATTAGTTTGGCAAA

A\_14\_P132989 TATAACAAGAAACAAAGATCCATTACACCTAAATAATGCCTGAGAAATCATGGCAGTGC

CUST\_8226\_PI426210822 CTCTGCAGAGCCAGAGGTGGCTTTTTCTGATGTCTATAATGGTCT

A\_14\_P118404 ATCATGGCCTTGACACAGAGATATCTTTGTGTTGGAGTTTTAACTCTCGAAACCTT

CUST\_9462\_PI426210822

ACTGTTGTAAATTTACTCTCTGACAACAGTGGAGACACCACATGTCAAATGTCAG

A\_18\_P16291797

AAAACAACAGTCTCTAGAGCCTTCATGAATCAAATTCAGACCCATCAATGCTTTCTACTG  
CUST\_598\_P1426210822 CTGCCAGGAGTTAGAAGTGGGATGAGTTGAGTGTCAAGGTGTTTG

A\_18\_P22841220

CAAGAGAAAGCCAGGCTTTTGATTAATAATTTATATGTCAATGTTGGGATCTTCATTTTG

A\_16\_P03441710

ATGGAAAGATACTTCACGTAGAACTAAAGAGGAACAACATTATAGCCCAACATCAAGCA

A\_16\_P20721252

AAACAGAATGTGCCACAATTTATCCCTCAAAGATTAACCTCAATCCTGGGTCCTATAATTG

A\_14\_P109751 CAAGATTCGGGGCTCAGACACATTGAGGTTTGCAATTTTATTAAGAAAACAAAATTCAA

A\_14\_P114382 ACTAGAAAAGTGGCATTGAGAAAGTAACCTTGAATCCAAAAACTCAAATTCGGATGCA

A\_16\_P41769557

CCTGCCAAGTAAAGAATAAGGTATGATTAGGAATCAGATGCTTACTAGTAGACTTCCTGG

CUST\_1492\_P1426210822 CTTGCTTATATGATTTTGGCAACCCTTAGAGGTGGGACTTCTGGAG

A\_18\_P22840340 CTGACTCTTTCAGACTGGGCAGGGAGGCATCTGGCCCAAAGGGCT

A\_14\_P129196 GAAAGCATTGACAGTTTTATGACAGCAAGGTCAAGGCATCTGCTAAAAATGTTATAAACC

A\_14\_P138626 ATGATTCTAAATTCATCTTCAATAAGAAGGGCCAAATTGAATTGACTGGGAAAAGGTAAC

A\_14\_P132109 ACCAGTGCCAAAGCATTCTATATCCCAGAGACTGAAACTCTTGAAATCACTATGACTAT

A\_16\_P18053675

CAAATGCATGAGTTCATTAATCTTCTTGACCTGTAGCAAAATATCCGAAAATCAACCCC

A\_16\_P01153833

AACTCTTAATGCTTCTTATGACAATCATCTCTTTTCACATATGACTACTAGCCTCTCTCG

CUST\_941\_P1426210822

CACCTCTAGGAGGGATGTGTTGTTTCCATACAACAAAAAGGCCTTTGAAATAAA

A\_14\_P114066 CTGGATCATTAGAAAATGCACCTTATGGCACTGTGATTTTAAGTGTTCCTTGTGTATCC

A\_14\_P121314 CTCTATAAGCAAGGATGAGATTGCCAAAATTCATTGGACATAATGACATTTGCACAGTG

CUST\_4461\_P1426210822 AAAGGAGTTACATTGCTTTGGGAGTTCAGGACACAGGCAGCCTGG

CUST\_7896\_P1426210822

TTTATATATCTCTTATCTTTTGTAAATGTATTTGGGCTTTTAGGGGTTTTGTTTCATT

A\_14\_P133276 CCAGCAGACATTAGTGTGAGTAACCTTATACCCCAAGAGTAAGGTAAATTTAAGATCTG

CUST\_8616\_P1426210822 GGGGTTGTGTGGACCCTACTCTGACTTCCCACAGCACAGAAAAAA

A\_16\_P36230755 GAAAAATGGGAGCACATCAATTTGATCTCTTTGCCATTGAATTCAGCAACCTT

A\_14\_P121175 CATGATGTTAAAAGTAAGCCTTTGACTAAAGAAGCCCTGGTAAAGTAGGTATCCTATCTG

A\_14\_P135413 TTTCTGGATTTTTTATCAAAATCTCTTTGCACTGCACCTCTGCTACACAGTTCTT

CUST\_9201\_P1426210822 CCACATTTTCTATTATTTGGCCCTGTTGATGCTACAACCTTCTGCCTTTCAGC

CUST\_9915\_P1426210822 CTTGGATTTCAAGTGCCTTTTCAGGTGCCAGTGAAAAATCCATCAGTTTG

A\_16\_P17353504

GGTGAACACCTCAGTAATACATCTGTTCTACTTCCATAACACTTATTCCTTAACCTGGA

A\_16\_P30022798

ATATCAATGTGACTCTCTGTGTAAGTGACAAATCATCTGTAATATCTGGCTAGGATCGCT

A\_14\_P200447

GCAAAAAGAATAAACTTAGCAATAACAAAAATGCACAAAAGATGGAAAGAAATCCACCC

A\_16\_P39291079

AAACAAAACACCTACTTTCTGCAAAAAATTACCAATTATATCCCTTTCTTTTCAGTTGCT

A\_14\_P114057 GGTCCCTCTACCTTAGTCACAGTAAAATGTGGCATTGTTATAGTTAGATAATACTTTGCTC

CUST\_4999\_PI426210822 CATCCGATCTGCAGCCAGGGCTTTTTCTACCGGGCACATCTTTGT

A\_14\_P137666 GAACTGAAGTCTACATTTCCATAAATGTCCAAGCCCAAAGGGGAATGCTCT

A\_18\_P16369530

AAAAAACACTCTAGAATTCAGCAAGATCCAAACACATTATCATGCTCATGTAGATCTTCA

A\_16\_P20486722

ACATTCTGACAGATTTCCCTTTAGTTGAAACCATCTCATATTATCACTTCCACAACCCTAG

A\_14\_P115616 ATGGGATGTTAAGCATGAACTATTTCAAGTAGTTCTGCTGAATAGAGCCACATTTTCTCA

A\_18\_P15103304

AAAAAAACCCTGAAATTCGCTCATTTGTAAAGAATGCCACACTTTCCTAGTTATCAGTGT

A\_14\_P110398 GTCTTTTGTAGGAATACAGATTTTCTGAAAAAGCCTTTTGTCTTCTGAACACATGCCAA

CUST\_4156\_PI426210822 TAGGAGGCTTGTCCTCCATCATGATTTAGTATATCATCCTTCCCAAG

A\_14\_P106471 CTTGGTTCCTAGAGAGCCATCTCAGTCATATAATAATTGTAACATCCATACAGCAAGAA

A\_14\_P120815 GACTGGAACCTCAGGAGTGTCTAACGTGATTATTAATCTTTGAACAAGTTAAATTGGTGGA

A\_14\_P104217 TTTCATTTATGTGGAAAGAATACTGATTGTTGAAACAGCATGACTCAAGATGTGGCAA

A\_14\_P121433 ACCTATATTGTTTGACGCTACACTGACTTGTCTTACTCCTAAGTCAGGCACC

A\_14\_P109975 CATATTTAATTACCCTGATGCATCCACTCTTAATTTTTTGAAGCAGTCTGTAGACTCTC

A\_16\_P34532849

TGACAACCTACCCTATATTCCCTCATTCAAAGACTTTCTCACAGAATTATCTTCTCCGAAC

CUST\_3924\_PI426210822 AATATGAGCCATGTGTGCCAGGTACGGGGAGCCACCTGTGAAGAT

CUST\_2139\_PI426210822 GAGGACACAATGGCTGGGGAATCTTGAAGAAGGAGTAGGAGTTAG

A\_16\_P38545793

GGGATATTCACAGGTATAGCATTAGCCAAGTAAACGTGTCATTAGTTGTTGTAATGTGCT

A\_14\_P100454 TATGGAAATGAAACAGTTGGTTTGGACCTGTGTCATACAAGTCAAAAAGGTTGGTTT

A\_14\_P133724 CTCTTTCTCTGTAGGTGAAGTTTCCCATGGAGTCAGTGAATGTCTTAG

A\_14\_P124093 CCACGTGGATTTCTTTCCAGAATCGGTTACGTAATTTCTTTTCTCCCTAGAAAA

A\_14\_P116333 AATTTATTAAGTGTGCCAGGGTATACTGCTAACTCATTGCATTTTAATTTTTCTCTAGAT

A\_16\_P16871944

CCGCCATCTTTTACTATTGACCTAGGTTATAACTTTGTCACTTTTCTACTCCAGTATAACCA

A\_14\_P131100 ACTTACAGTTTAACTACTTGATCTTACCTTGACCAGCAAAATTCAGGAGGCAATGACATA

A\_16\_P00347848

AAAGGGTGGTCAGTAGTTATTTTTGAACATATGTCATGGTTCTTGAATATAGTGCATTGG



CUST\_9749\_PI426210822 TTTATTTTCTGTTCATTTATGTTCGTCTCCATAAGTCTCCCTGTGCCTCTGAACTG  
A\_18\_P10645855

CCCTGAGTATCCTCTTAATAACCATACTGCTAGAACATAGGTATGTATGCTGTAGGATGT  
A\_14\_P112628 CGCAAAAATCCATATTCATTCCAATATACCCACACTTTGCTGTATGCCTCAAATGTTATG  
A\_18\_P10250520

CACACCTTTCGAACCTGATTTTAAACACAAACCTTCATCCTTTTATCTTAATATGATGCCA  
A\_14\_P132641 CTTGTTAGATGGTAAATATTAGTGGACCAAATGCCATATCATCCAGTCCTCCAAGAAAA  
A\_16\_P20138202

AAAAAACTACATGCTTGTTCCTTGTCTATCAAGAAAACATTTAAGTGGTGTGCTTTTACA  
A\_14\_P116182 CTTGTCTCTTTCAGTAATCTCAGGGGCGATATAATCAATGAGGTGGTCCTAAAGTT  
A\_18\_P16258242

CCTATCTGAGCACTACTTCCAAAACAATCATTCTTTGATTTGTATGACACTTTCCATA  
CUST\_1349\_PI426210822 TTTTGTTCAGTAGTGGAGAGGGCACTAGCTATTGTAGTCCCTCTCTGCA  
CUST\_6426\_PI426210822 CAGAGGTGAGCAGAGGCTGAGGAGTAAACACCATACCAACATTCT  
A\_14\_P121295 AGATACTGAGTGGGGTGTCTTTCCTCGGAAGTGTAGTAACATCAGGAAT  
A\_16\_P21338396

AAGGTTCAAGTCGTTATTTATGCTGAGATTCTTCAAAAACACGTTGTAATCTACTGCAGT  
A\_14\_P137927 TCTAACCTTCACCCTTCTTCTAAGGCCACTTTTATGCTAAATAAAGACACTGAGATAATA  
A\_16\_P35852388

ACAGGCAAATCCATAACTCATATTTTATGCATCTCTCATTTC AATTACCAAATGTGTCCA  
A\_14\_P111809 AGGATATGTCAGGTGACAAAATGTAGGATGTAGGGGGAAATTGTATATAAAATCTGATCA  
A\_14\_P113883 AGGTTTCCATTCTAACCCTTTCCTCTTTATTGCTAATATATGCAACTTCTGAGCCAAGAT  
A\_14\_P127687 AAGTTTCAACATGAACCAGCAACATTAACACTTAAAGCATCGATTCTAACTCACTACCTG  
A\_14\_P119945 CAGAGAATTTAAGGGAAGAGAACTTCCTTGCACTCTAGTGTATAGGGTAAAACCTGATAC  
A\_16\_P19543240

CCTTTCACCCCATATACCTCTCATCTGTGTTATCTGTATGTGCATGAAAATACCTATCAA  
A\_14\_P118157 GAAGATATCACAGTGATGTCTGCATTCAACCTGCTGCATTTGGTGACAAAGAG  
A\_14\_P112977 ATCAAAGTAAACATTTCTGCTTTCAAAGTTTTATTGAGATGTTGGGGAAAAACAGCCAAC  
A\_16\_P58424509 TAAGACTTTTCAATAGTCTTCCAATCCTAGCCACACTCAGGAGAACGTCTCC  
A\_14\_P116313 TTTGGCTCTTTCTAACCCTCCTTTTGGAAATCCTCAATATCTTTTTTTTTCCAGCAA AATT  
A\_16\_P19960060

AGTAAGCCTCCATCTTAGTATCTAAAACCTCATCCACTTTAATTACCAGAAGGCCATGTA  
A\_16\_P00685330 AGAATAGCGCTCTGAAAATTATAACTCTTCTCAGGCTTCATCAGCAGGCC  
CUST\_10355\_PI426210822 TCACGATTTGTGTAGGACACGTCTTATATGTGCATGCACTGTTGGCAG  
A\_14\_P125478 AGTCTTTGAAACTGAACAGCCTAAAATAATTCAATTCTATGTTGCACAAGCCAGGAGTTT  
A\_16\_P00063795

CCCCTATTCAATTATTCTACCTCCCTTGTTTAATCTATCATTAAGACTCAGTGACCCTACA  
A\_14\_P113487 TCTTCTGTATTACCTTGATGCTGGTAGACTGTAGTTTCTGGAAAAAATATCTCTGGAAA

A\_14\_P125256 AAAGAACTTGGCAAAGTTCTAGACACCTCTTCTGCCTCCTATTCTGCATTAG  
A\_14\_P116481 CTTGTGATCTAATAGGAGAAGTACTAGGACATGAACATCTGAGAAGTCAAGTAACAATATGGG  
A\_14\_P115556 TGTTACCCCTAAATTCACATATGCGCACTGAACCAGTCACCTCATTTCGGTAAA  
A\_14\_P136102 CTTGATTTCTTCTTGATCGATGCAAGTTGATGATAAAAAGTGTAAATGGACCCACGAAC  
A\_14\_P107132 GTCAAACACACTTATTCCAGGATATATTCAGAGTGACTCCAAATCCCATCTGTTGCTA  
A\_16\_P02528882  
CCTAGTTCTGAGTCTGAATTTATCTACCTTGTGTTCTCTTTATGTCTCCTTGTTCATG  
A\_16\_P20566082  
AAAGGAAATCCCAATCTTCTAACAAAATGACTTCTCCCATTAATCCGAAAACACTTGAG  
A\_14\_P117400 TTAGACTCAAGTATGGTCAGCGTATTCACCTGAGTTTTTTAGATTTTGACCTTGAAGATG  
A\_18\_P17645345  
GGAATCAAGTCACAACGTAACCTCCAAATGTTTTCAAAGTAATCACCTAAAGTCAGTCTA  
A\_14\_P114663 CTAATTTCTCCAGTGAATCTACTACATCTATCACTGATGCTAAAAGTTGTGAGGGACAAA  
A\_14\_P105722 ATCACAGAACCCTGCTTGCAGAATTATGAGGGACAATATACCCATATGTAATGAACAAA  
A\_16\_P16660233  
AAAGGTCATACTGAATATCAAGGACATGTATAAGGCTGTCACAATAATGAGGAAAAGGCT  
A\_16\_P58424326  
CAACAGAATGAGAGTCAGACTGAGTAGTCCATTAGACTTTTTATAAGCAAGATTAGAAAC  
A\_16\_P17993138  
CTCTGAAAGACATCTCTGTAAGCGAATAGTTATCTGGAAAAAAAATCTCATCAGCACAGC  
A\_16\_P39921278  
TGTGGACCCTTACTTAGAAAATCAAGAAAGTTAAAGCCGTCAGAAGTAACGTAAGTGTAT  
CUST\_6422\_PI426210822 GCAAATCTTCTGTGACAAATCCAGGGGACTTTGGAATAACTCTCAGATATGG  
A\_16\_P00685020  
AGGAAATAATAATTCAGCAGGTTCCCTTTCCACTTTAGATTTTGGTGTAAACTTTGTCCCT  
A\_14\_P135197 ACGACCTCTAAAAACAGAAGTTTAATTTATCAAGTAGGTTTGTGACACCTGCTTTATGCTC  
CUST\_1758\_PI426210822 TACACCTACCTGGGTGAGTACTCAGGGAGAGAACAGGTAAGAAAAG  
A\_14\_P127622 TACAAAACAAAAAACTGAATCACATTTACCCAACCAGTCAGAATTCAGGGTTTTTACAA  
A\_14\_P109433 GAAGTAGCCTCACTATAAGTGGTATTGAAAGCCAAAAGTATGATTTCTGCTCCCAAT  
A\_14\_P133306 CTATAAGATTAATAATCCCTTTCTTCTTGTAGAATGGAGCAACCCTTATGATACCCTGT  
A\_14\_P130894 TTTCCCAAATAAACAGCCAGCAATTAATCTTTAATGTTCCCTCCTCTGTTACCCATAA  
A\_14\_P100873 TGGTTTTAAAAAAAACATGAATCAGAAATGGTGTGGGTAGTTTAGAAAATGAGTTAGGTT  
A\_16\_P36539188  
CCAGGAACAACCACTATAATTTTTGTGTATTTGTTTCAGACTTTTACTAGGAACAGCCTCA  
A\_14\_P113730 TTCTTCAGCCACAGACTCTAACTTCCTATTATGTTGAAAGAGATGCTCAATATCACTCTG  
A\_14\_P135719 ACAAGATGGATAAGAACATGATGAGGTAAGAGAAATAGGAAAGGAGATATTTTGCTGTGG  
A\_14\_P122014 GATTCCAGAAATGTTTGCTGATGCCAACTTCTGCTTCTAGCCCTG  
A\_14\_P136297 CTGACCTGCTTCTGAGGACTTTGTCAGGTTGGTGTGAGTATTTATCAC

A\_14\_P106429 TTCTCAACTATATCCTAATGTCTGAGAGGCACTTCTGTCTTCTCCTTACTTTAGAAACAG

A\_16\_P39062896

AAGCATCTCTTCAACAAATCCATCTCAATAACACTTTCTGACAATCAAAAAACCTTCAGG

A\_18\_P15888261

GCACTCTCATTTTGTTCATGCTATTACCTCGATCAAACTAAGTTCTTCTTCTCAGTC

A\_18\_P11650943

AAGCAGAATATTTGTCCCCGAAAGATGTATAAGTAAATCATGTTAAGAGATCAGTGGCC

A\_16\_P19463866

TTGTCTAGCCATCAAACTTCAGTTTACACATCACCCCTTACGTAAAAGATATTTTCCAACC

A\_14\_P122898 CTTGGACCAAACTGGACCTATGTCTGAGTGTGCCTTGTTTTATTTTTAAAAAACTCAATCA

A\_18\_P22840529 ATAGAGTCTGATTGGTCCAATTGAGTTAAGCCTGGGTGCGCATGCC

A\_14\_P122907 ATCCTCCTCTGTAAGGGAAGGTGTTTATTGCTTCAATTATATCTTCAACTTTGGTGAATT

A\_14\_P110643 CTCCTCATCTTCATCTTCACTCTCTAATGGTGGGTCTGGCAAATGAAGC

A\_14\_P134113 ACCAGGAACTATTTTGGTGACAGAAGAAGAACTTAGTAGATGCATTGAGGATGTGTTAA

A\_16\_P17207783

AAAAAAGTTGGACTGTTACTGTCTTTTGTCACTTTCTCATTCTGCAACATTTTGGGATG

A\_14\_P127014 CTGTTACTGGCTGTCTTCTTAAACTGCCCATCCGACTTGGTTGTATCAAAC

A\_14\_P118669 CAGATGAAAGACTTAGGAAAACAAAATTGGAATTCTTATCATTTGATCTCAGCCAGCGT

A\_14\_P202378 TTTGCTTTCTGGGGGCTGATGAGTCATATAAAGGGGATAGAATCAAACACTCAA

A\_16\_P36231068

TATGTGACCAATTATAGTTACAATCATGTTCCATGTGACAATAGAATCTTTCCCCCCTTG

A\_18\_P14041422

GCCAACTTCCCTTATATTAAACTTCCCTAAGGACATATGACATTACTTAATGCACTCAGC

A\_14\_P118104 ATTTGGACCCTGACAGTAGCATGTGGTCTTAGCATGTGTGAGGTCTTAG

A\_14\_P107249 CTCAAATACTGTTTTCTTTTCACTTCCACCAAAGAACCTTAAGTTTGTAAACGTGCAGTCT

A\_14\_P136201 CCATGATTGCGCTCCCAGAGATATTTTTACCTTATGCAAATAGGTGATGTAGAGGT

A\_16\_P02162425

AAAAAAAAGGCAATTTGATCAGCAAATTCAGTTTCATAGTTATGCTAATGGTAGGGCCCT

A\_16\_P01937723

ACCTCCTATTAGCCATAATTTTTCTTCTCCTCTTAAAATCCATTCCCTCCAGATAATCT

A\_14\_P126250 GATTGTGAACTAGTTCCTCCCCACATCACTGAAGATTAATATTCAATTCTGTAAACCGAA

A\_16\_P16034334

GCATCACTCTTTCATAGTCTCCTCTTCTCTAATAGCAGTTGTAGCATAGATAAAAACCCAG

CUST\_1538\_PI426210822

TCAGTGATTCTTACCTCGCTGGAGAATCATTTTTATGACAGTCGACAGAGTTCTA

A\_16\_P16191263 CTCTTTATTTCTGCTTTAGAAAATGGGAGACCACAGTGCCTACTTGGTCATG

A\_16\_P21056920

AAAAACACACCAGAAAATGATGTTCTTTCAAGAAAACCTGGCAAACCAAGAAAATCCTACA

A\_14\_P108126 GTGTTATCAAACATTCAATGTCCAGATTCCAGTGGTTTCATAAATAGCCTAATTTGCTTT  
A\_14\_P119369 CATGATTTCTAAGGCTGTATAAATCTGGAAGATTGGCAATTTGACAGACTCTAATGCCAT  
CUST\_9657\_PI426210822

ATTTTCAAATAGCAGAATACATGATAAACTTGTAAGTCCACAGATGAGTCGGTAAGCTGC  
CUST\_8479\_PI426210822

CTATTTTGTGAAATTTCCCGTCATTTCAGTAGTTCACTTTACTTCAAGTTGTGACCTTCC  
A\_16\_P20320525

AGTAATTCACCTCTTTGATCTAIGTTGCCTATGTGTTACTATACAGACAGGACTTCAGGTT  
A\_14\_P120843 GTTTGTCTCCTTTTCTAAGAAGCAATTTTATGATCTCAGCATTTCCTAAAGCACAGATTC  
A\_14\_P131386 CTCTGTAAATGTGATCATTGTGTTAGGCAAAGAATTGCTCATCAACATGATGATCATGGA  
A\_14\_P133493 ACTTTACCTTGGGAAGAAGCATATGGTTCTGTATAATGTCCATTATAGTGCAACTGCG  
A\_14\_P127388 GGCAGGCTGAATAGGCTAGGATTCATAGGTCCTAATTTTATACTACAGTTCTCTGAACTTT  
A\_14\_P102731 GAATAATAATCAAAATGATTATTCCAGTCTCAGTGATTCCCAGTTCTCTTTGGATCTCA  
A\_16\_P18875459

TTGCAAATCTATTTTACACTGATGACTTAGCACTCAAAAACCTAAGACTCAACAGAACCC  
A\_14\_P116736 TCATTTACTAGCATTTTAGGATCCAGAAGAATTCCACCAGATTGCATGAGTTAGATTGGG  
A\_14\_P110652 TGCTGATGGTTTTCTCAAATGTCTAGCAATCCTTATTTGGCTATTTATACCCAAGAATG  
A\_14\_P129568 CTTCATGCTCATCCCTATCAGTTCAATCAATCAGATTACAATTTTGGCATTAAATGCCAC  
A\_14\_P201176 ACTTTATACAAAGAAAATTCAGCCCTACCCTGCATAATTTGAAGACACAGCAGAAAGG  
A\_14\_P110935 GAGAAGCATCAAAGATTAAGGGAAACAAAAGTTTGCTTTTATTCCCAAACTGTGCTC  
A\_18\_P22842116 CATCTGCCTCTGATCTTTCATGACCCCTGCTGGATTGACTACATGAG  
A\_16\_P16519668

GCTGACTCAAGAGAAATGTGAATTGAAGGTCATAGTTGCATCTAAAGTTATGCTGTCATG  
A\_14\_P105521 ATCACTTGCGTTTTTACCTTACAGTTAGGAATCCTTTTTGTCTATCCAACCTTTCCCAATA  
A\_16\_P17839019

CCAAGATGACTTTTTCTTACGTGATAATAGAGTGGATCCTTAACTACTGACATGACTGCTA  
A\_14\_P122294 ACATAACTGCCTTCTCATGTGAGGTGAACTTTTTTTTTTAAATGAGGCCTCCTTATTTA  
A\_14\_P127365 ACAAGGAATCAGCAATTACAATAAAGGGGGTCAATAAAAAAATAGCCATTACTGCAGAGT  
A\_16\_P00703556

GAGTGGTAGGAAATATAGCCTAACTGGAGTCTAGTATAAACTTTCAAGTGCAATGTTAGG  
A\_14\_P100329 CTTCTGTGCCGTAAGGATTGCATCGGACTAACTATCTGTATTTATTATTTGAAGCGA  
A\_14\_P107601 CTCCGAATTGATTCTTCTTTAGATTAGCACAAACAGGAGAAAGAAGATGCTAAACGTATT  
CUST\_6912\_PI426210822 CTTATCAGATGGAACTCGGCATTCTCAGAGACCCCTCAGTGTTTC  
A\_16\_P34219085 ATTTTACCGCAATCTGATTTCCCTGAGAATTAGTCTGTTTCCAAGGGCGC  
A\_14\_P118216 GCTTACGTTTGAAACCCTCTTCTTACATTTCCAGAACAAATAAAGCACTGAATACTT  
A\_14\_P123328 CACAGGGTGCAAATTCTGAACTAGTCATATTGTATGGAGACCTGAGAAAGCAAATTA  
A\_14\_P114263 TTCTGCCTTTTAAAAAATTCAGTGGTCTTAGGATAACCCAAAATCTGAGAGGTGTTAGT  
CUST\_9077\_PI426210822 TAGCCTGGGAAATAAATGAGGACTGACTGGGCAGAGAAGAGCAAG

A\_14\_P114678 ATTGATCTTGCCACATATTGTTCCCTTAATTGCTAGTAGTCATTTGATTTTGGTTGTGGTG

A\_14\_P125461 ATATTACCAGACATCCTCGGCATCTTCGTCACATTCTGCACCAAAGT

A\_16\_P20979655

AAAGATGGTCAAGTAAAGATGTAAGTCATACATACATCAACACAGTGCACCATTGAGGTT

A\_18\_P26663831

TCCAAGCGAAATCTTCTATGATCTCTCCCTCATTAATCTTTAACTTCTCTGGTTTACTCT

CUST\_124\_PI426210822 GAGTGTCTGTACCCGTCAGGTCTCTGCAAACCGGGCTCTCATAAT

CUST\_46\_PI426210822 CTCTCCTTTAGACACACTCCTCTATGGCAGACAATTCTGATACATTCAATTCC

CUST\_7546\_PI426210822 CTTTCCAGCACTGTTATGCAAATTGGAGAGACTCATGCCAAGGTGAAG

A\_14\_P139137 CCTAATTTACAGGAACTTTAAAATCCTCCCAACATTCTCCCCACTAAAACTTTTTCA

CUST\_6343\_PI426210822

TTTTTAAAGTAATACATATTTACCTTAATTATCTGAATGTTGTTGCTAGGGAAACCACTA

CUST\_860\_PI426210822 ATTTCTGGGGACAGTGAACAGCAATGAGGACCACAGGGAAGATTTA

A\_14\_P201513 AGTAACAGATTACTGACCTCTTTTCACACTCCTAGTGACCTCATTGTTTATTTTTTCA

CUST\_2163\_PI426210822

AATACATAGAAAATGTGAATAACAGCTCTCTGGATAGATGTTTAGTTTTATCTTTATCCA

CUST\_8820\_PI426210822 GTATCTCTGGGGATTGGCTCCAGGACATCCCCCATCTCTACTT

A\_16\_P00716535

CTTTTTGTGTCAAGTCGTCTCTCTACATAGATCAGATTTACCGAAGCAATCTTACTGA

A\_16\_P39279601

ATCCCAAACAATTTCTCCAATGTATTACGCACATAAACAAGTTTTTCTTCAAACCAGGC

A\_14\_P123690 ATGAGTTGATGTCAATATAACTCTACCCAATGTCATCTCACCCAAAGCCCTTAC

CUST\_4079\_PI426210822 TGGAACCAGCTATTGCTGCTTCTGGTGTATCATCCAAATGGGTTTTT

A\_14\_P101687 AGAAATTACTTCCGATTTTGGCAGTTACTAATGCGGTTAGATTATGAAGTCACCTGTATG

A\_14\_P131014 AACACAGCATATTCTTCGCACTGAGGAAGTTATGTGAAGGCACAAACAAAATGTAAAAA

A\_14\_P101099 AGGTTGAATTTGCCACTTGAGCCAGGAAATTTTCTCATGATTCCTAATTATTTCTGCTAA

A\_14\_P201153 TTCCATTGTCTACTATTATGAAGACTATGTATAACTTTTCCCCAAAACACACCCCTTCC

A\_16\_P16191913 ATGAAAAAAGCATCATGTCCCCTTGACTTTGAGCAAAGAGTGCGGTTAAAAAC

A\_16\_P01825011

TGTGTAAAGCGTGTACTTTTTAGGGATTCTTTCTCATTGGCTTCCATTTAAAAAACAGGT

A\_14\_P132084 ACAGTTCATGGTTGACTATTGGAGGTTTTCAAATGGATCCAAATTTAGGGATATTTTAGG

A\_14\_P102449 CTTCAAATATATCTGTGACTCTGTCTTCGTTGCTCTTCATCCCCATCAATTTTCATCAC

A\_16\_P18961588

ACTAGACAGTGATAGCAGTTTCAATAAGAAGTTGTGCATGTATTAAGCAACCATGTGG

A\_14\_P130911 CCTGATCAGCAAGGAAGAGTTTTCTTACAAGTCATTTGTCACAGTATCAAAGTAAATGCA

A\_14\_P128134 CTCATCAAGGAAGTGGATGCCAAAATACTCATGGAATTCTACAGAAACCAGTG

A\_18\_P15221502

ACAGGATCCACGCCATTTATCATAGAAATTGATTTTTCTCCAACATGTATTAAGGCA

A\_14\_P106714 ACATGAGACCCATAGTTCTGAACAGTAATAATTCCAGTGTTTAAGGACTTCTTCTTACCA  
A\_14\_P139271 AATCAACTGTATCCTTTTAAAATTTTCAGGAGCAGCATTCTTTCTATTACTACTATCTAT  
CUST\_8048\_PI426210822 GGGGGGTTTAAACACTTTTTTCAAAGATGAGAGATTTATGGGACCAGGAAAG  
A\_16\_P00354537

GCAGTTACAAAACCTTCATCTTCTTTGAAATGCAACAAATAGAGCCAAAATATGAAACCCC  
A\_16\_P01568969

AAAAAAATACCAAAAACCTCAAGTGCAGTAAATCATGTCCCTTTCCCAAAATCATCACAGAC  
A\_14\_P200110 TGGCCTCTTTTCTAAGTTCTATGCTGAGAACTAGCAGAATACATTCACTACTGGGTTTT  
A\_14\_P101166 TATCTTTCTCAGATTTGTTTTTTGGATTTGGATATGTCAGGTTGTTTTAAAGGGGAGCAC  
A\_16\_P15896897

AGCACCAAGTTACACATACACTATGGATGCAAAGGATGTTATGACCATTACAAAGAAGAA  
A\_14\_P120174 TATGGGTTTCTGAAATATCCAAAAAATTAACCTGAAGCAGGGGGAAAAATGACATCACAC  
A\_14\_P113051 AAATGCTTCTGCTACATTTTTAGGGTTTTGTCTACATTTTTTTGGGCTCTGGATAAGGAATT  
A\_16\_P16191993 CTTCTTGACAGAGGATTGAACTAGGTTTAGAAAAGACTTTCCCAAAGGGGAATG  
A\_16\_P35331882

AATGCATTCTACAGAAAACCTTTTTAGACATTACAACCTCTAACCTAAAAAATGGAACCTCT  
A\_18\_P22842074 ATAGAAGTATGATAAAAAGGTGGCAGTGCAGAGGATGGAAGTGGTATTGCTCAGT  
A\_14\_P102512 CTTTCTTCTTTATCTTCTTTTCAGAAATTCCTTACAGAGTCTCCCAAAATTCACATC  
A\_14\_P117242 CCTCTAACTTTGCACAAATAAACCTGTGTAGAAACCCACCCACACCTTTAA  
A\_16\_P00070946

TCTCTCTGTGTAGTAACACTTTGCTAGTAAGTTTCAGCATATTGAACTGTTCTGATTCC  
CUST\_9804\_PI426210822 CTGTGGTTTTTAAAACCTCTGTTTTGTTGGAGCCATGGGTTCCCTTGAG  
A\_14\_P132532 TGTCGAGCAAACCAAGGTAGAAGGAGAGTAGAAGTATCACATTACATAATTTGTTCTGAAT  
A\_14\_P129680 CACAAAGAATAATTACTGGGCCGACTGATAGCAGATGGTTTTACTCTTCAATTGCTTAAT  
A\_14\_P111285 GAAATGCATTACATTGGCAAAATCTTCAAACCTGAATAAGGCAATTCATGCCATACCTAT  
A\_16\_P30952391 ATTTTCAGATGTCACTGTTGGAGCCTTCATGTCCGACAGCGTGGT  
CUST\_8912\_PI426210822 ATGTAAATTAATTAAGCCCATCCCGTTTTACAGGGCAGCCTGGTGG  
A\_18\_P12421646

CACATTTTTACACTTCATTATTCTCCTTGAAATTGGACTTAGATATTTGCCCACTTGGC  
CUST\_4729\_PI426210822 TTGCCTTAAGACTGAGAAGCCAGCAGGAATGGCTGCTGCTAAGAA  
A\_16\_P19884572

AAAAACTTACCTGAATAAACTGGTTGCCTTAGAAATGCATCAAATGGCAAGTTCACTCAT  
CUST\_5686\_PI426210822 ATTATATTTAAACGTCTCTGCAGAAGGAATGGAAGGCTAAGAGGGTGGGAG  
A\_16\_P19512677

AACAATGTCTGAAAAAGCATTCCCTTATTCATCACTTCTTTATCTTACAGAGTCCAGCAA  
A\_14\_P127590 TCTGGACAACCTCCTGACATTCTGTGATATTCAGCATTACCCATAAACATTGCATGATTC  
A\_14\_P116071 GATAGTTCAATCTGGCTCTTGAGAAAAGGCAAAGCAGACTCAAATTTGTTTTGCTTTATG  
A\_16\_P18950674

CACTAGCGTTACTCACCAAAGAACTTATTCAGGTTCAATCCTAGCATAAAATTATCCCA  
CUST\_1396\_PI426210822 ATGTGTGTCCCAGGCCCTCAGACCTCTGGTGGGGCAGTCCCAGCTT  
A\_14\_P109987 GTTTGTGCAAAAATAATGTAAACGTCAATGCACAAAATGGATTTGGAAGGACTGCGCT  
A\_16\_P15022626

CCCTCCCAATTCAGAAAATGTAAACATAAGCACTTCATTTCTCATGCAGATAACCACATA  
A\_14\_P201978

ACTTGAGATAGTAAAAGAAACAAAATAGCAGGCGAGAAAACAGAAGATTCTGTTGTCCT  
A\_14\_P108694 TAGTGGATTCCATTTTGGATGTCATTGGTGTTAAGGTGTTATTATTTGGTTTTGGAGATCT  
A\_14\_P116859 TTTTATTTCTTCTTTGGGTATAGGGTTGAGGGGAAATAAGTTTTGAGTGAGAAATAAACG  
A\_16\_P16652918

AGTTGGCCACTTAATATATGCACCATTACTTCAGGATTTTCAATAGAGTCTGGCTTCAAT  
A\_14\_P108596 ACTCACACACACATGGGAGAATGCCTCCAAAGTTCTATAATTTGGAAGAATTAATGAAAA  
A\_14\_P132192

CCTGAAGGTATCCACAAAGTCTGATACTAGGTTTCCAAGTAACTAAAGAGAGAAAGAAAG  
A\_14\_P123504 TAAAGCCATCAATAAGGCCTATGAGGAGTATGTTTTATCTGTTGGGAATTTAGATGAGCG  
A\_14\_P112715 CTGCATTCTATCTACTGCTTTTTCTGTTATAGAGTGTTTGAGGAGAGGGACTGTAATTTG  
CUST\_9865\_PI426210822 AGACACCATGAGAGATTCCAAATGCAGGAAGTGATTTGATCCACAGCT  
A\_14\_P117114 TGCCTTAATCTGCTTGGGCAGGATGGATGCATTATTCTGATCTCAATAACATATTTGAA  
A\_14\_P117684 ATATAATCAGAGCCTTCTCTTTTTTAAAACTTCAGGCTTGAGGCAGAAAAGTCTGGAAAAT  
A\_14\_P108652 GTCTCGAGAGCCTCACATTTCTTCACCGCTCCTTGATGTTATTATTCAAATATGTATTT  
A\_14\_P112665 GGAAAACAGAAATGCCTCTGAGATTGTCAAAACGGTAAATTTGCTGATAACTTCTCTAAG  
A\_16\_P36424070

ATAATTTTAAAACCCCAACAATTCCTAAACTTCAGCCTAGATGTCAATGAATCACCCAAGA  
A\_14\_P113898 CACCCTAATAAATTGTAAAGCAACCACCTCATGGAGATTAGAGCAGAGATAAACATTGTT  
A\_14\_P115645 TGTTTACATAAACATCAGTTTCAATTACTGTGGGCCTCACTGCAAAATATCAACAAAAAG  
A\_14\_P200331 CTGCTATTTTCAGATACTACCACTTTGCCCCCTCTTTCTCTTCTGCTCAAAC  
A\_14\_P119492 GACCTTTCATGCTACAAGGCAGAGAGAACAAGAGCAAAAGATGAATAATGAACATCTTAT  
CUST\_6799\_PI426210822 GAGAACAAGCAGGGCAGGCACCCTGGCCCGACTCTTACACACAGT  
A\_14\_P126981 ACCAACCTCTCGTGGTTTTATAAATTACCTACAACCTTTCAGCATCTTGTTCCTGTAAC  
A\_16\_P17825326

AGATGATCCTTACAAGGTAACGACATTAATCACCAGCATCTTCTCATAAGATCTTTGCA  
A\_14\_P136002 CTCATCTGGTAGAGAAAAGTGTCTGCGGAAAAAAGCAACAGTGTGCTCATG  
A\_14\_P119042 AGACAGGAAAGAGGGGAGACCATTATTATCCACTGGATATGACCAGGAAGTTTAG  
A\_16\_P16389490

AGATCTTGCTTCTAATAGGTTCTCTACTAACTCCAGTTTGACTAACAGTGTCTTCTCCTA  
A\_14\_P116049 TGGATTACTGCGCCAGAAGTGTAGAATTAAGAATACTAACTTTAGGAGGTCTTTTAGAG  
A\_16\_P16191811

TTTAAACTCCAGCCTATATCACATATCAGACCTAAGATGTGTCTTTCTCTCTCTAGTGGA

A\_16\_P30952419 TATTGGCAGGCCTGAATTATGTTCTGATGGCTGACGTGGCCAAAAAG  
A\_14\_P124751 CTTGTTTAACTTAATATAAGTGCTAAGTTTTCTAGATGGGCACAGTTGCCTGCTAGGTTG  
A\_16\_P02726469  
AGACACCATACAGTCCTAAATCTCAAGTGTAAGAAAAGAAAATATTGATTCAAGTGAACCGGC  
A\_14\_P113726 CTATTCTCCCTGTCATACCTGTAGGCCAATTCTATTTCTAGCAAGTAATGGGAAATATTG  
A\_14\_P122991 TCTGGAACATAAACATCCTTCTTTCTCCTAAAACCTTTGCCGTAATTTGTTCAATTTAATT  
CUST\_6973\_PI426210822  
TTATTCTTGAGGCATTCCCTCTTTTATTTTCTTGGTCTTTTTGTGTTATTTGGAAGTGTA  
A\_14\_P116961 CAACATTTGTCTCTTCTACACTATGATATCCACAGAGCCCTAAAAATGACCTATAAACGC  
A\_14\_P125637 TAGACTTGGTTTTTACTGTTGAGTAGGTCCGTTCCCTTTGATCCTAGAAACAATATTAG  
A\_14\_P138276 TCGCTTACACTCCAGTAATTAATGCAGCCAGTCTTGCAATACACATGCTTTTTATATAACC  
CUST\_113\_PI426210822 CAAGTGGCTAAGTTCTTTAGGGCTAACTCCAAAGAAAACCCGACAGTTG  
CUST\_10052\_PI426210822 ACATATCTGGGAGAGAGGATCTGCCTGGCCAGCTCTAGTCAAAT  
A\_16\_P00685269 CTTACAAAACCTTTATTTTTTCAACAACCAAAGGTGGTTCATAATGGTGGGCTGAGGAG  
A\_14\_P134466 CAAACTTCATTTGGAAAGATTTTTCTTCTTTGGTGTCCACCAGTGACTIONACTGGTCA  
A\_16\_P01466788  
ACGCTACAAGAAATAGAGGTCCATATTCTCCAAGGTCTTATTTTCGCTGAATACAAGTAGT  
A\_14\_P110372 AAAGAAGCAAGGACATACAAAGAAACAACATCATTCTTTTGCAATGAAGCAGTCTAATTC  
A\_14\_P138163 GGATTATAGTTATATATTTGATAAATGCACTAATCAAATATGTGGTTTTCCGCACATGAT  
A\_14\_P127229 ATGTTCTCCATACCCGAGACATAGATCATTAAAGAACTGACAAAAATCAGTCATGATTTG  
A\_14\_P134849 TGCATATTACTCATTAGGAAATGCTTGAGAGGTTTGACTTTGTTCTTTTCCCAAATCTT  
A\_14\_P117424 TTAAGACCTCTTCAGAAAGGGATTTGTTTGCCTTAATGAATACTGTTGGGAAAAACACA  
A\_14\_P200032 GCAATCTCTTGCTTCCAAGAAAATCTACCAAACCTAGTTTAGCAACTTTTCATTTCTG  
A\_14\_P115986 GAAAATGAAATTCTATCTGTATCAGCCAGATTTTCTCAGACACATGTATTCACTGCATGA  
A\_18\_P15713811  
AAGTAATTCAGACTGGTAGTTTTCGACATTCACATTTAGGATCAAGTTTTACCTGATGCTC  
CUST\_9150\_PI426210822  
GTCCCAAACCTGTGAGAACTTTTATAGGCAACATCCTCTTTTCTAATAGTTTAACTTGAG  
A\_16\_P01164032  
GCGGTTTTATGACTTGGAATAACGTTATTCATACGACTATTAGCACCAATAATAACCC  
A\_14\_P110677 CAGAATATGAAGAAGCCCAGGATGCCATTGTTAAAGAAATTGTCAATATTTCTTCAGGTA  
A\_14\_P102335 AGAAATTAATGTGAACAAACTGGCTTAGATGGAAAAATAAAAAATAATTCCAGGACA  
CUST\_5038\_PI426210822  
TGAAACTTCAGATTAAGGTAGTCCTTGAAGTGGAGGCTATTAAGACCTAGTGTTATCTG  
A\_16\_P16701762  
GTAGCATATCTCCCTACATTAGCAATTCTTTAAAAACAGTCCCTAGATACTTAGCCCAGG  
A\_14\_P119888 CTACTIONGGTAGTGAAGTTTTGTTAGTTTTGCTGCCAAGCAAAGCATCTTTC  
A\_14\_P120949 TGAAACCATAGACACTCACATCCCTGTTCCATCTTCCTCTTTAAAACAGATTAAC



A\_14\_P112955 GAAATTACTGCTAAATTTGCTGCCAAACCATAAAGCAGAGGTTTTGGTTTTGACATTTGA  
A\_16\_P36230833 CCCACTAGTGTTGATGAAGGACGAGGGTCTCACCTTTCCAGTCCT  
A\_14\_P108676 ACGCAAAGATGCAGACATTGAAGCCATCAATGCAAGAGGTGACCAG  
A\_14\_P101656 CCATGAAAGATCTTGTCCAAGATATTGTCCTCCAGATACGTATTTCAGTCCAGATTTACAA  
A\_14\_P126196 ACACTTACATAAATACTGCATCCTTTTCCACAACAACAGCAGGAATCTTATAGGGAAATC  
A\_16\_P58424425 GTCTTCCTCAGACCTCCAAGAGACTGTGTGTAACAAACCTCACAT  
CUST\_5739\_PI426210822 AAAAGGAGAATTTCTAGTCCTGGGGTGCAAAAGTCCCTAGAAGAGAGTT  
A\_16\_P19433552  
AAGGTGGGTGTCTATAAACTAAGCAGACTAAAATTGTGCAGTTACTTAAAGCCAACCTCT  
A\_16\_P18916596  
AAGAGATGAATTGAGATCAAGGAAGTCTATGCACTCATCTGATGTTTATCAATGGCTTCT  
A\_14\_P121216 AAATTCTCAAGCAGCCTTTACACGTGTTCTTTTCCCAACTATAGTATCAGTTCCTATCA  
A\_14\_P110397 TGCAACATGCATTTTCACGACATCATGGGCAAAAAGTGTGTAGTTGTAGTTTTATTTT  
A\_14\_P132068 ATATCCTCTTGTFTCCACCTTTTAATGTCACATTATGTCATGAGCATTFTTCCCATCTG  
A\_14\_P116822 AAGCCATTGACTCTTCATCATTCATGGGACAAGGCACAAGAAGAATGAAGATAATTA  
CUST\_3791\_PI426210822 CTTTCATTAGTTTGAGAGAGGAGCTGAGCCACAGAAAAGGGGCTG  
A\_16\_P16064266  
AATCTTCAGAACAGCATTGATTACTCCATTAAGACTCTGTAGTTCCTGTCTTTCTTGT  
A\_16\_P00059681  
ATCGTATCTGGTCATTAGTGAGTGTTTTACCAAGAATCTGGAGTTGATAAGAGCAGAATC  
A\_16\_P00685453  
AACTGTAGGTGACAGAGCAAAGAAAACCTTTGAAAAGTTTCTCTTAGAGCCTAATAGCAA  
A\_14\_P202236 ACAGCAGAAAATGCAACTTTATCCCAAAGACTCAAGAAAAATAAAGCCTTTGGCTCAAT  
CUST\_9728\_PI426210822 CTCAGTGTGCGTGTCCATGTCCCATTAAGATGAATGACCTCATTGTG  
A\_18\_P22841085  
CAGAGTTAGGTAAGCATGTAATATATGTATATGTGTATGTGTGAGATACACACACACACA  
A\_14\_P109477 GTCTTTGAAGGATTTACTAATATTTATTAAGTGCCACCAACATTTCAACGGGCCACAGG  
CUST\_23\_PI426210822 ATTGCACTCAGCAGATGTGGCCACCTTCCAGTATCACTGACTCAG  
A\_14\_P130393 CTCACATTTTAAATGCCAAAACAACACGCTTTTCTTTCCTGTATCTGAGTCAATGTGAATT  
A\_16\_P01858156  
ATTCAGTATGTCTACACCACACTCATAGATTTTCCCTTACAAAACTGCATGGATTCTTGG  
A\_14\_P114851 CTGGTTTGAATCCTGTAGACAAACATACGTGTAAAATTCTGATTCCTGCTCAACACTTTA  
A\_14\_P103167 CAGAGTTAAGTGCCCAAGAGAAGAGTGAAAACCTTAGCAATGTAAATCTAGAGCATATCAG  
A\_18\_P14134616 GTATTTATGTAGTCTCCCATCCCTTCTCTTGTGGAATCCTCTCCCTATG  
CUST\_9945\_PI426210822  
GCGATTTCCCATTTGCTTAAAAAAGATCAGAAGGCGAACTATAGAACAATTCTTCCCTTC  
A\_16\_P16191095 ATCCTGTCTGCCATGTGTGTGGGCTGGGAAAGCCTCCAGGACAG  
A\_14\_P115934 GCTTCTCAAATGAAGACAGCAGGCTGACCCTACCTGTTTCTGATATTTAGC

CUST\_1283\_PI426210822

TATGTTTCAGTTTTGCAATTATAGATACACTCTGTAGACAAGTCCCAGTAGGTACAGAGG

A\_14\_P108560 TACTTTATATTTGAATAGCATATTTTGCATTTTGGAGGGGAGGGAGGCTTCTTACCTTTT

A\_14\_P116776 GTTCTGAAACCTGTGTGTTTTGTAGCCTAATGAATTGATGGAATGCACATGAACC

A\_14\_P202242 GGTAGTTAGAGAATTCAGTGAATATTTCCCATTTACTTCCACTCCAAGTAACTGCAGTTT

A\_14\_P109820 CTCCGGCTTTCCTGTTTGCTTTGTTAATTATTTTCGTCCCCAGAGGAAG

CUST\_8030\_PI426210822 AACTTAGAAAGTCCCGGTTAAAGAGTGTAACGCATCACTTCCTAAGGAGAG

A\_14\_P118908 CAACTTCTCCACAGCAAACACCTGAACACAGCGAACCTGAAGGTATAG

CUST\_195\_PI426210822 CTACAGCTTATCTCACAACCTGGGTGAAGGAGCAGAGGATGCGCAG

A\_14\_P100904 CGAATACCTTATTTCCATAGGTGTTTTCATCTGGATAATTCATGCTTCATTATTGGGCC

A\_14\_P117829 CAACTTACCAGCCTTTTCCTTCTCTGAAATACCTTGAATAGCCTGAAAAAAAAAGACACAA

A\_16\_P16612630

AGAGATACCGAGTTACAGATACTATATGGGCTAATGATAACGAAGATGACAAAACCTTCTT

A\_16\_P18120312

AAGAGTCATTCTGAGGAACTAAATTACAGAAAGAACACCATGTTAATGACAACTGACCAC

A\_18\_P16632285

AGAATACCCAGTAGTAATTATTCATAAGCAATCTGCGAGTATGTTGAATGGAGGAAACCC

A\_16\_P02412288

GAATGGACATGAGCATAAACTACTTTTTGACATTAGAACAGAGATCATATGTGTGGGACA

A\_14\_P116701 TTATATCTGTGCCTGTTGGCAGAATTATAGAAAGTCTATGGGTATATATGTGTGCGCCTT

CUST\_9137\_PI426210822 CAAATGTGTTTGGGTGGCCAGGCCTCGTAATCTCAGCAGAGGAAT

CUST\_4024\_PI426210822 GAAAGCTCACTGGCCAGCAGCCTGGAGCCAGTGGAGCTTCAGGTG

A\_14\_P129988 ACTTGCAGATACAGATAAGTCCATGTTTGAATCCTGGGTGCATATATTTATCCTTGTTTTG

A\_14\_P110635 TTCTTGCATATTAGAAAAAATGTAGGGCATAAAAACCACGACGAAGGATTCTGGCATT

A\_14\_P112464 CCTTCTTAGGCTCCTCTTTCACCTTAAATTAAGATTCATGGGCTCCTTCTGATTT

A\_14\_P124913 CCTAATTTGGAAAAGGAAAAGATGAAAATTTGGTGTGTTGAAGTTTGTAGAGCAGAGTGGT

A\_14\_P129234 ATAGAGGTCAATAAGACTTCAATCCAGTTTCAGAGGAGAAAAGGAAAGCCAATTAACATT

A\_14\_P122039 GGATCATGAGATCCAAAACCTTATTTTAAAGAGAACTTGTATAACTGGGAGTAAGGGTTGC

CUST\_4514\_PI426210822 CTTTCTCCTCATTTTTTCCCCACCTCCTTTTCATCATGTCTGTGTGAAAAC

A\_16\_P03099540

CTGGAATCATGGCAACTTAAACCATTAAAAGTATCCTACTGATCTCAAATACAGCCCAT

A\_14\_P127836 GCATTTTTATTTGGTATCTTTAAAAATTAATGCTGTCCTTCTGGCATCAGTGAGAGCCA

A\_14\_P112982 AGTCAACAGCCATGACTATCAGGAAATAGCCTTTATTACAAAAATCTGCATGTAAACAAA

CUST\_7091\_PI426210822

ATTGATGAATTTTCTGAGACAGCTGCGATTTGTCTAAACAAGGCTTTTCCTTCAGT

A\_14\_P107535 CTAATTCTAGGTATTATCCTAACTTCAGGCCAGGGATAGTTCCTATCCTAATTCCAATT

A\_14\_P200144 TTAAAGAACTTTTTTCGCGAGGGACAGTTCAACTGAAACTTCGAAAGCATCATTATTTG

A\_14\_P139747 CAAACTCCTGAGGTAAATCAGGGTCAGTAAGCATGCTGGAAAAGCACAAT

A\_16\_P03473720

CCTCTTTGATCCTTTATTCTCATCTTAGCACGTTGTAGTTTATAACCACCTGTTTCTGTC

A\_14\_P132216 ATGGTGCAAATTCAAAGAAAAGCACCCCTTTTCTTTCAATTTATAAGGCATCATTGACCT

A\_14\_P112358 AGAGATTATTATCTGTTATGTGAAGGTGAAGGTGTCTAGGGCAATCTACATGTGAGTTTT

A\_14\_P119317 TTATGCGGACAGTATTTTTATTCCAGCATGAAAAGTGAGATTTGAGATGATTTGGCAGC

A\_14\_P107492 ACACGTTTTCCATTTGCTAGTAGAGGTTTACCTGAATACAGTTGGTCATATATCTCAGTG

A\_14\_P130120 TTCCTGTAACGATCATTCTGTCACTAAATCCAACCAATACTTCTCAATAGAGTCACAGT

A\_14\_P115001 ACCAGGTGCTGACTTCTTAGAATTAAGCACAGAAATTCACATTACTCAAAGCAACATT

A\_14\_P104846 TCCCTTGTCTTTTTCAGGAAAACATTTTCATAGTTCTTAGAATGTAAGATGCCTACTGG

A\_16\_P30269560

AACCAATATCCACACTATTTGTGATTAATCTCACCTGTTGTAACAATGACTTTGCATGC

CUST\_9764\_PI426210822 ATCTTGCCCTTGTCATTGACCTTCAGCTGGCCTAGGTCTGGAGTT

A\_16\_P18891865

TGCACGAATTCAGTCTTATATTTTTTTCATAGAGCATGACTTTTTTATACACAGCAGCCCT

A\_16\_P00685620

TTTCCTGGCATGTGTATGAAGAGTTACAGATTTAGACCATGTATCTCTTAAGCAAAGGAA

A\_14\_P139530 TAATTGCAGGATGAAGGTAAAGACAAGGCCTTAAAGTCTCTCAAGCATTCTTTTCTAAA

CUST\_5418\_PI426210822 CAGTTCTCCGCTGGAAAAAGGGACAAAAGATTGCCCAAAGAATCAG

A\_14\_P119148 CACAACATTTTAGATCTTTTTCTTCTCTGGCCATTGGAAAATTCATTTCTACCCATTTT

A\_14\_P100689 ATTTGAAACCGAAGAAGAAAAAGTGCTGCCTTTTTATTCATCAGTATTGACTCCTAAGGA

A\_14\_P124511 GACTTTGAATTTATTTGTGAACAGACAATTGCACACTTGAAAATGCCAACACATAAGGGA

A\_14\_P200105 TTTCTCATTCTCTACTCCATAGGAAAGTCTCTATTCCACAGTAGCCAAGTGTG

A\_14\_P103219 CAAACATGGCTTCAAGATACCATCTCACATGGTTCTCTATTTTTACTACCCAAATCATCA

A\_18\_P11500578

ACTGGGCATAACAAATTTTCATCCATAAATCAGACATTTTGCACCTCAATTTTTACTCTCA

A\_18\_P14137017 CAGGATGGTGTTAACCCATCCACAGGGGAGTCGCCTTTGGCCTGC

CUST\_5527\_PI426210822

GATGAGCAAGTGGCAAATATTCAGTATATAGTGCAGATTGAATATGTTTCTTTTATGGGT

A\_16\_P17961645

TTACCCAGCCGTAAAAAACTACCTGTGACAATTACTAAACTCAGTCTGGAAAACAAAAT

CUST\_6518\_PI426210822

CTTATAGCCAAGTATGTTTCATATACATTGATACTATTTAGTTGCATTTTTATATGCTTT

A\_16\_P03146179

TCCACTGCTTTCTATTAGTTTCTAGATACAGTCACCATAAAATGAACTCATTGCCACAA

A\_14\_P126555 GACCTCCGCTTCTCATTCTCTTAAAGAACAGTGATTTTAAAGTAGGTTTAAACAATGGG

CUST\_10436\_PI426210822

TGCTAATGTGTGCTAAAGAACTGTAAGTGTTTTTTCATATGTACTTTTTATTGGAAGATT

A\_16\_P16954173

GTGCATTAAGACGTGTCTACTTATTTCCACTAAACGATCTTATCAACAGATGCTTACCTC  
A\_14\_P103751 TTACCTTTCTCTCCAAAATGTCCTAGGGTCTTCTTACATGACATTTACTCTTACTGGTTT  
CUST\_10287\_PI426210822 CTTGCAAGGCTGTTTCAGCCAGGGGTGGGTGGGGTGATTTTCAG  
A\_14\_P120454 TCAGGTATTTATCCTCTGGAAACACAATATAAGGACCAGCAAGTCCTACTTTGCTAAATT  
A\_16\_P17329657  
GCCATTTTGCTACTTTAAGAACTACATTTCCCTTCATAATAGAAGTCCACTTAAACTGC  
A\_14\_P201635 TTAAATAATGCTGTGGTTAAGACAAAAAGAGGACGGAGCCAGGGTATGAATATAAATGG  
A\_16\_P41421357  
CTGCAAACCAGTTTTATCCAAACTACCCATAATGTGACCATTGTTTTGCTAGTACTTTA  
A\_18\_P22840888 TTATGTGGAAGGAAACAGCACATTCTTGTGAGAAGATAGGTTTTGGAAAGTCCG  
A\_14\_P110450 TCAGGTCTGCTCCAGATGTTTCAGTAATAGGGAAATAGCAATAACCTGAATATCATACTG  
A\_14\_P108129 AACAAAGAAATCATCCACCAAACGCAGGAGCAGCCTAAAATAAGGGAAAATACAC  
A\_16\_P01113218  
ATTCCTTTCTCAGCATGTTTCAATCTTCTCAAATCTCTATTCTTTTCAGAAGTGCCTCATC  
A\_14\_P139737 CTGTGCCGTTTCTTCCCAGTTGATGCTGATCTTTTCAAATTTACACATTTTGTGAAAATA  
CUST\_9428\_PI426210822 GAATTTGAGGGTCAAGACAGTCTCTGAGCCAAGATGTTGGGTTTGT  
A\_14\_P139696 GGTCTTTCAGCAGGTGAATCCAGCAACATATCAAAGAGTAATCATAACCTTGATCAA  
A\_14\_P108198 CTCATGTTAACAATGATGGGCTTTGTAGTTCGGCATCCATTTAATTTGTATTGCTTTAGC  
CUST\_7567\_PI426210822 CTAGACTAGGAAGAGGTCCTCTCAGGCCCATCCCTTCATCTTCA  
CUST\_1769\_PI426210822  
AAACTGTATGCTTTAATTAATAAAAGCTGACAGTTGAACCTCCAGGGAAATAAACATTTTAT  
CUST\_6935\_PI426210822  
TGGGGGGAATTTAGAAAACATGTGTTAAACCTCTAGATTTCTTTTTTTCTAACTAACTGC  
A\_14\_P108916 GGTAAGGCTGAAACTATGAAGACATGGTGGGCTTTTAAATTAAGCAGGAAATATTCATCT  
A\_14\_P118064 GGGAAAGAAAGAACTTGACAGATCTTTTCAACTCAAATTAATGGTAACGATGATGCTGTT  
CUST\_1344\_PI426210822 CAAATGTAAGGGTTAGGTTTGTACAGTGCCTGTGAGCTGCTGTCAG  
A\_14\_P116943 TATACTTTTTGCACTTACATACAGAAGTAGCAGCAGCAATCAATCTTGTATTTGAAACTA  
A\_14\_P201512 ACCAAATACATTCCATTTCCCTAAGTAAGTTACTCAACCAACTAAAACCTCCAGGTTTCTCT  
A\_16\_P21043683  
TTCGCTTATCATGACCATTGAAATATCTTGGAACATCAGTGTTAGAAAAGCAGGAAGAAC  
A\_14\_P103010 AGAAAAGTCATCTGTGAGTGACTAGTTAAATTAGCATGCTTGACATTAACCTCTGGGTTGA  
A\_18\_P16898539  
AAAGGGATGTCATTCATAAATTATGCAGACCACAATTAATTATTTCCCTTTATTTTGGCAA  
A\_14\_P137304 GGTATTCATATCTGAGATCCAAGTCCCTCAAGTTGTAAGAAGCCATACAGAGAAATATTC  
CUST\_9082\_PI426210822 GGGGATGCTTGGGTTGTCTGCAACACATGAAAAAAGCATCATGTC  
A\_14\_P112574 CTACATTTTTAAAAGAAGGGCTTTGATACCATTTATGCGGTGATGATGACTCTCTAGAAA  
A\_14\_P139539 TTTCTTTGATCTCAGTCCTCAAGACAATTCATTTTTCAAATCAAGTGCCTGAACCAATC  
A\_14\_P123377 TTTACAGTATGTGGGCATACCTAACTTTTTACTTCTGGGACAAATAGTTACTGGCAACAT

A\_14\_P110900 TCTTGACCACATATGATCCATGAGGGCAAGATCAATGGGTTTTTATTTCACCAATATATTC

A\_14\_P139538 CTGCATATTTAAATACCGGTATTATTCTAATGAACCAAGGAAGGACGGAAGAAGCCC

A\_14\_P117234 CTGAAAACAATGTCAAGTCTCTACTGGACTGCCATATTATCCCTGCCTTATTGCAA

A\_14\_P127030 AACCTGTGTTTCATGAGGATTTATTGTGGTCTTAAGACATCATGTATAGTAACTGCTGGGC

CUST\_9103\_PI426210822 GACCCTTGGTAGGTAAGTACTGAGTTCCTGAGTTTTAGCTGAGGACTGA

A\_18\_P22842117

TTCAAACCTCTACCTAGCATTGAGCATAAGCAGGTCACTGACCACAAAGATATTCTGTT

A\_18\_P14134222 ATAAGGGATGTGTCCACAGCACGTCCACAGGCAGAGAGGATAAGAT

A\_14\_P101486 AACAAAGAATACAGGCCAAAACCTAACAAAGCAATTGGCCGAAATGTTAAGCCAACTC

CUST\_4602\_PI426210822 ACGCTGCTGCTGCCACACGTGGGGCCAAGGGTGACAAGGTTGCCA

A\_16\_P18076502

TGTGTAAGTTTTCTCCTATCCTCTAAAGCCTCACATACTTTCACAAAACATACTCACTT

A\_14\_P121688 AAGTATTAAAAATGACTGACCTTTGGGCCTCTGCTGTAGCACACATTATAAAGTAAGTCT

CUST\_9515\_PI426210822

TTTAAATTAGGCAAAGTTTTCAAAGATTTTAGATTAGGCACCAAATTGTTATGGCCTTGGA

A\_14\_P118894 TTAAATCTCCTTTTACTTCAAAAAGTAAAGAAAATCATGCAATGAGATGATCCTGTTGGGC

A\_14\_P130669 TATTAAAAACATGGCCTTGGCAGTTATTTTTCCATCACCGAGAGAGAGACAGA

A\_18\_P22841269

CCACCTGGTAGATAATCTGAGAAGTTTGATGACAAGTTTAAGCCCCATAATTTCTTTGAA

A\_14\_P133593 GATTGTGATACTGTGGTCATATGCCCGTGTGTTGTCACCTACAAAAATGTTTACTATGAAC

A\_16\_P20698594

TTGAACTAGTGTGGAATTCTCTTTCTCTTTTCAGTAGAAATAACCTTCACTGTCAACAGC

A\_16\_P39469311

ACATTGCACTAGAATAAACCTAAGAGTGAATGGAGTTATGGTATGGATGTGGATGTAGTT

CUST\_130\_PI426210822 CAAGCAGTCCCTTGGGGGAGACAAGGAGGATGTTAGAGAGTTATG

A\_18\_P11613917

AATTTCTCATCTTTAACTCTTCCCAATACACATCTCAAACCTCCCTACTGTAGATCCTT

A\_14\_P110511 GAAGCCAGGAACCAGTGAAAAGATGACCCTAATAGTTTAGGACCACG

CUST\_7495\_PI426210822

GCCCTAAGCTGGTATATGTTTCTCTGTTACATCAACTGCCAAGGCAATTACTTTAC

A\_14\_P128132 GTTCCCACCAGAAGTAATCATAACAAGGTCTGGAGCATCCTGAGTGA

A\_14\_P137159 CCAAGATGTGAAGTTCACCAAAGATACCTATGTTCTTGCTTTTGCAATTTGCTACAACT

A\_14\_P139106 GCTGCTATGAGAGAGAAAAAAAACAGCCACAATAGAGATTCTGCCTTCAAAGGTTG

A\_14\_P106406 GGATTCTGCATCATGTTTGTCTCAACAATTAGTAAGTGTGTGGTGTGTTTTCTTCTGA

A\_16\_P00639557

AATCTCATCCACTTTTTTCATCCTAGATTGTCAGATTAGACCGAACAATGGAACAGATAGT

A\_14\_P107693 TCGTTGTTTCTATAGTTATCTAAGAAAAATCCAGATCAGATCAGGCCACTCCTTCCAAAA

A\_16\_P00684995 CATGTAGTTATGCAGGAGAGTCACTGCTCTGTATTGGACAGAGGCTGATG

A\_14\_P126620 CACTGCTGTGCAAAAATATACGATCAAGCGAAATGTCAAGTATTCATTTAGGAAACACGG  
A\_14\_P138515 TTTTTTAATAACTAATGTCTTTTTCCATTTGGGGGATCCCTTTGATACTCTGAGGAAAGC  
A\_14\_P202486 AACATTGAACTGTTAGAGGAGTGCTCTTCCAAACAAAACAAAATGTCTCTAGGTTTAGT  
A\_16\_P02482087  
AGTGCAACCCAATTATGAGATTTGACAAGGTCATTAATATTTCCATGTGAAAAGGCAGA  
A\_16\_P20237487  
AAAACATAACTGGTATACACATGCGAATCCTCTAATGTAATCCAGTTCCTACTGTGTTGTG  
A\_14\_P201878 ATTAGCAAACAAGATAGGGCAAAATCAAGTGCTTAAATGGAGTGCTGTAACCTGGTTTTTT  
A\_14\_P108343 AAAATACATAAATACCATAAGACAAACTTGCCAGACTGGAAAAATGCACAAAGGGCATGA  
A\_14\_P114659 CAAAGTAAATTAATAATCTTTTGAAAGTGAGCGTGTTCAACTTCTGCAAGAGGAAACAGCA  
A\_14\_P120410 TGTTTTTCACAGAATGTTGATCCAGGTATGCCTGTATTTTTACTGTAAATTTCTGTGGCG  
CUST\_1368\_PI426210822  
AGTTTTTTTAGATACGAGTATGGTAGAATAACCCTATGTACATACTCTTTGGGGAAGAAAG  
A\_14\_P107562 TGTTTCCTAGGAAGTCCCATTATATAACTAGGTTTTCACTGTGTAAAAACAAGGCCATTC  
A\_16\_P02551134  
TACAATCTTCCAGTTTCACTTTGAAAGATCTCACTACATCAGCAATGCACATCATTTCAC  
CUST\_2309\_PI426210822  
CGCTAACACTCAGGGATGCATTTTGCCTAAAGAAGATAATTTCAACTCTTACTCAGAG  
CUST\_3111\_PI426210822  
CAACCTTCCCTCGCACTCTAAATAAACTTGCAAATGTTTTTCTCCTCTTGAAATT  
A\_16\_P17299009  
TGTTTTCTCCTAGAATGACATGCTATTACACAACCTCATGATTTTTTCATAAGTTGGCTCC  
A\_14\_P134834 ACTTTGTATTGGGATATTAAGAGATTTAACTTGGGTAACATGGCCTTGGGCCTTTG  
A\_14\_P117742 GTAAGATTAAGTTAGGCAGTCTTCTACCAAATGTGTAATGGAGATTGCCTCAAATTTGTG  
A\_14\_P126398 AGACTTTAAGGAAAGAAGCTTAATTGCAAAAATTCACTCTAAGTGTGGGCGTGACTAAGAC  
A\_16\_P38847686  
TTCCATGTAGACATTACACACTGAAAGGTTATACAACAAAATTGTGGCACTAGTTTTTCCC  
A\_16\_P00802846  
AACAATACAAGAAATTTGGCTTGGTATAAAAACAGTGACCTATTATAGTCTCCTGGCACC  
A\_14\_P123524 GTAGGAGAGTAATTTCAAGTCCTACTGTAAAACAGAATGCCATTTCACTTCTTCAAGTGC  
A\_14\_P132972 TGA CTCGGGTGGTGATCCTGGTATTTTAAATCTTTTGTATAACTAAAAGCAAGGAAAAAC  
A\_16\_P18199292  
GGCAACTGGAATCTAAATCATCTGTTACCGAAATAATAATATACGAAACATCTGGCTCCT  
CUST\_9842\_PI426210822 CATGGAGCACGCATCCAAGGGGATGAACAGCATCCCTAAAAATAATAAG  
A\_18\_P14134871 AGAAACTTAGATTTGGCCCTTGCTCATGACTCTCTTAGGGGATGAGTGT  
A\_18\_P10180697  
ACGGAATGAATACCTATAGCAATTTCTCACACATATGGCAATTTTCATACATACACCGTGA  
CUST\_4397\_PI426210822

AATCTATGACACTGTTGAATGAATAATATAAGCCCAAGGACTTGGAGGGATGAGAG  
A\_14\_P106749 GGAACCTTCTGGATCAACTAAAATTTCTGGAGAAATCACTTTATGACCTTTTAGAGGTGTG  
A\_14\_P110088 CTATGGCAACTGCATCTGTTTACAGGACCCACAGATCTCAGAGTCCATTAA  
A\_16\_P18303367  
ATGGCATTTTAAATCTTGACATTCCTTTTAAAGTCACGCCTTTTATAGATAAGCATGTGGGA  
A\_14\_P133617 CTCATCTGTTATCTTTGTATTTTACTCACAGGGTTAGACAGACTGATATGCCTTGTCACT  
A\_14\_P102297 AAAAGGGACTATTGATCTAAGGTTTGTGAAGACTAGAAGTCACAGTCATCTCTGTATAA  
A\_16\_P19867283  
CAGAGGAGTGACCCTATATTCAGAATCCATTCAACATCTATCCCTAACTACTCAACTTTA  
A\_14\_P114913 CTTACCACCCCACATGTCTCCTGTAAAAATAACCTTCACTAAACCATCAACACAG  
A\_14\_P102012 GGCAGTTGGACTGGGGAGAGATGTGAACCAATATAATAGGTTAGTGTCTTTTCTATATA  
A\_14\_P111420 TTGTCTCAAGCCCTAGATAAAAAATTTCTCCCCTACTTTCTCCAAAGCCAGATGATAAG  
A\_16\_P02199978  
ACCTTTACTGTGAATCAGTTTTGACTACTGTAAATGACCTCTTATTCACCATACCCTGTT  
A\_16\_P17099989  
AAAAGTCACTCCAAATTCCAAGAGTAGATACTGTTTTCCCAATCATTGTTTTTAAAGCCA  
A\_18\_P17309137  
GGCAATAATAAGAGACATAGAGGTATATGCCAGGAAATAGATATCCTTCCTACAAGTGGA  
A\_14\_P106255 AGATTTTCAGATGGCTGTGCAACTGCTTCCAGTCATACAGAAAAGAGTTTTTTTTCAATAA  
A\_14\_P100035 CAATATCTGGGTTTGCAAATCACTCAATTGGGTTTTAAGACCAAGCCCTAATAGTCAC  
A\_14\_P129461 TTCGCATGCATAGGATTTGTTCTACAGGTAGATTTTAAAAACACGTTAAAGGGCCTTAAG  
A\_14\_P115029 CATTCTAATATATCTCTGGAATATGAGGCAGTCCCTCCAAAGGCAGAACAAATAGTATTG  
A\_16\_P40223022  
ACGAGAAGCCATAAAACTTGAGACAGATCTGTGTTACCTTCTTTATAGTCCATAAGAACA  
A\_16\_P16511455  
ACTTTCTGCCCTTATACTTGCTAAAACCTTGTGTCTTAATCAGAATGCCAAGATCATGCAT  
A\_14\_P124559 TTTCTTCCAAAGGTATTTTCAGGGTAGTTGCCATATACACACTCATTATCTGTGAATAAAT  
A\_14\_P129934 TCTTGAATAAGACTAGAATTCTAGGTTGACAATATTTCTTCTTTGGCCTCCGGCTACATT  
CUST\_2546\_PI426210822 GGGTGGAGGGTGACAATTCCATGTTCTTCAGAACCTAGAGCATT  
A\_14\_P117579 TACTCAAAGCCCTTCTCTCTGTGTGAATACAGTATAATCCCCTTCATTAATACTTCAGAC  
A\_14\_P139078 ATCCACGTTTTCCCTGTTTTATTGTCAGCCATTCGTTATCTATGACATGAATTCCTTAAT  
A\_14\_P103417  
GAGAATAAGTCAAATGGGAAAAGAGATTCAAAAATAGAAAAAGGAATCATGTCTGGGCAGT  
A\_14\_P123573 CAGTTTCCTTTATAAGACTGTATAATACAGAAATTGAAATGGAAATCAGGCCAGCCCACA  
A\_14\_P128729 TGATCTAAGGTCTTCTGCAAAGATAATAAAATTAATGGCAAAGTCGCATGTGCCATCAC  
CUST\_5463\_PI426210822 ATCAAAAACACACCCTCTGGGGAATGCTGCCAAGAGGTTTTGATTTAAAA  
A\_16\_P58424624  
TGAGAACAAGACTCTACTGCCATCTGTTGGAAAACAGTTATAATAAACTTATAACACAT

A\_14\_P111118 CTGTCCAGGAATGCAGAAAACAAGGAAAAGTTAAGAAAGTCACTTCCAGAATGAAGAA  
A\_14\_P201925 TTCTGCATGGATTTTGTGTTTAGGAACAAAAGGAGAATTATGAGGATATTCAGTGTGCCA  
A\_14\_P114853 CTGTAATGTTGTTTTCGATTTGGGCTCAACAAATCAGTTTTACTTAATGCTCCAAGTGT  
A\_14\_P115274 TCTAGAAGACTTCAGTTCTTAGGTCTGTGTTTTCTTATCTTTTCAGTGTCTACCACACAA  
A\_14\_P130026 AAGACAAAGTTGGATCCAGTCAGAAAGGAAGACTTCGGGTTGAGAGAG  
A\_14\_P118620 AAATAAAAATGGAGAGAGGATTGTTGGCTTCAGATTTAAACACTGACGGAGACATGAG  
A\_14\_P101349 AGAAAAATCACACTGTAATGAAAAGGGAAAAGACTTCAAATCCTAGAGTCAGGCCTTATT  
A\_14\_P201253 ACAGTTTTGGTGATGTTATCAGTCTCTGACTCAAAAGCCTCTAATAACTTCCCATATTCT  
A\_14\_P111063 GGAAAAGCGCATCGCTGATCAATCCAGAGCAAGATTTTTCTTTTAAAAAATATACTGACA  
A\_14\_P130294 CTCACACAAGCACAGGCACTTAAATGTCTCCATTTGAGATATGACTATTTACCAAAGAT  
A\_16\_P19737144  
CCGTCTGCTTTCCATCTAATGGCTTAGTATTACCTAATAGTTGCTGATCATTGCCTTTTA  
A\_14\_P122171 GTCATTCCAGTGAGTGCTATAGTCCGTCCATATTTGCAGGAGATGCAATC  
A\_14\_P123043 GAACTTATACCATAAGCAGAAACCGGATACCCTTAGAATCAGAAGTATCTCCAACACTAA  
A\_18\_P12133435  
TCCAGATGTTTACTCCTAAAAACAGAAGAGTTAATTTATGAAAACACTGTTTCAGTGAGACA  
A\_14\_P116240 TATATGTCAGACTCCTGGGGTATAGTTAAAGGCTGTCTTGATTGGAAAAAACTATACCC  
A\_14\_P114729 ATGGTTGGTTGCAGTTGGCTATTATATCTATGTAACTTTCCTGGGATACAGTGGTAAGTA  
CUST\_7849\_PI426210822  
AATATGAGGAAGAAGATGGTAGGGAAAGGCCATCTATGGTGAATCATTAATGCC  
A\_14\_P116347 TCAAACAAAAACAATGAACTCTTTTCTCTAGGTATACACAGCAAATCACTGGTGTGTCAG  
A\_16\_P37665942  
TCAGGCTATAACCATAACCAACTATAATCTCCTATGTAATCTTTCTTATGCCCTCAATTCA  
A\_14\_P136589 TTTTCCCACTGAAATGTCTCACTTCCAATCCATTCCTGTCAATCCAGTTTAGATG  
A\_16\_P17060638  
ACAGTGGTTTCTTGTCATCAGTCTAGTCACTAAAACACTGTATATCGCATGAAAATCGTTCA  
A\_14\_P102723 GTGAGTCTTTTATATTTCTTTCCAGGAACAAGATAAATCAAAAACACTTTTCCCTGAGG  
A\_14\_P134667 TGGAAAACACTGTTAAAACAATAAATAACAACACTCCATGCCAGCAACCGAGTTGAGTAAT  
A\_14\_P127238 AGACCTTCTTTTACCAAAGCCTTAAAAGATATTTTCAAGTTGAGTAAGATGGGCTTTGA  
A\_14\_P134428  
CATGACAAATACAAACCAGAAAATAGTTTCAGAAAAGGGTTGAGCAGGCACACAAATAAAT  
A\_18\_P14136967  
TATTTCTGGCTTCCTATAAGTGAGTTTTTCAAACCAGAAATTCAGTCCCAGGAATGATTT  
CUST\_7502\_PI426210822  
TTTTCCCACTAAAGTAAGCACTGGTATGGTACATAGTATGACTATGGTAGTCCAGTATTG  
A\_16\_P17025233  
AGACTGTGACCATGTTTAGATATACACATTGCCTAACTAAGTTCTACGAATAAATGGCCA  
A\_16\_P16520779



AAAAAGAAACCCACAAAAACAATTCTGTCTACTTTCCTAAGAGCAATTCAAGACCATGG  
A\_16\_P02678120

TTCATTACCTCTGTATCCCATCAATAACCAAAAATCTTGTCCCTAGGAGTCAAAACTGAAG  
CUST\_325\_PI426210822

CCTCACCCACCATATTGACTTAATTTTTTTCTTAGATTGTGTTCTCCCCTTGATTTCTG  
A\_14\_P136355 CATTTTCCACACAATGAACATTTGAACTGTGTTTATGAAAATTTCTGGTTTGCACCAT  
A\_18\_P17204600

AAAGATGCTGTCTGAACATAATTCTTTTTTTTCAAGGTTCTACTCCTCAATGAAGCACCC  
A\_16\_P18277681

GCCAAGTTTTGTTTTCTATAGCGTTTCATTCCTAGTAAGACACTTTATCATGTGCGAGTC  
CUST\_3213\_PI426210822 CAGTTTTGGGGATGGGGCCCCTCCACTAGCCAGTCAGGCTGGAG  
A\_16\_P41768205

ACCAAGAATCCAAGACCTTTCAAATCTGACTTTAACTTTCATTAGTCTCATTGTCCTCT  
A\_14\_P131284 CCGTTCTCGGCAAACACATAATCAAACCTTCTCAATGACTTCAGGGTCAC  
A\_16\_P15792147

AAACACAATCCCAGGTTCAATTAACAAATCCAACCTCTTAACAATAATGATACCTCCCAGA  
A\_14\_P117415 GCTTGAAAAATGTGCAAAACAGCGTTTAAGACTGTAATGAATCTAAGCAGCATTCTGAA  
A\_14\_P138154 TACATTGGGAGAAAAGCCAGATATGTCATCGGTATATAGTCTGTTAACCAGACTGATAA  
A\_14\_P125285 ACTTCTTGCACTATGGCAAATCCTTTTTCTAGAATCAAAGAAGCCATCAGAAAAATACCAA  
CUST\_4726\_PI426210822

ACATCTGGAAAGAATTTGTCAAGAATTATAATAAAGAATACCACGGAATGAAAGCAAATG  
A\_16\_P39603454

ACCTTACTAAGCCATTGCATTATACAACCTAAGCCAAACTAACCATTTCATTTTTACCCCA  
A\_18\_P13723239

AAAATGCCTGCAGAAATATCTCTATCAGAAGCAACTAAAACGTATACAGTTGACCCAGAC  
A\_14\_P116856 ATAAAACAAGAGGGCTAATCATCCTAAACATGAATGTCTGCACAGATTGAAATTCCCAAG  
CUST\_9465\_PI426210822

GGTTCAAACCAAGACTACTCTTACAAGACCCTGGTTGGGAAAGTTTCATATAG  
A\_16\_P19821270

AAGAGAGATCCTCATTAACACAAAAATACCTGACATTTTGTAAGTAAAGAGACTCCCC  
A\_14\_P116783 TATGCAATATTTAGGGAGAAGTCAGTTACCTTTGTTTTTCATAGAGGTCAAATTCATGGCC  
A\_14\_P120742 TATACTGCCTTAGTGCCCTAACAGATATTCAGGAAAAGAAGTTTTTACACTAACTGTAGG  
A\_16\_P19579158

AAATGAAAACCTGTGCATTTGATTACTTTGTAGTCCACTCTGATGAACAGAAATGCAGACG  
A\_16\_P03806684

ACAGAACGAAAAGCAAGATAAAAATAGTATGGCCGGATCTTTTTTAAAATGGGACCACT  
CUST\_4052\_PI426210822

GTTTTAAAAAATGAAAATAGAGTGAAACAGAAATGGTAGAATCAAGTCACCTTGCTCATT

A\_14\_P133408 AAAGAAGGCAAGTGCCACGATAATACCACACATGATATTCAGGATATAGCACAGTAATTT  
A\_14\_P131462 GAACATTTAAATGTTTTCTAATTGCACATCAAAAACCTGGTTGAAGTCCACAAACGTGAGG  
A\_14\_P106447 ATAAGTGGTCAGGCTTCCTCAAAGATCACTTTATGCTTACTAATATCACATCAACCAGAT  
CUST\_2305\_PI426210822  
GGCCTTCCTACCCTTTTTGTGAAAGATACAATTAATATTGCTTATTAATACTAAAAAAG  
A\_14\_P108776 GTTCTCAGCCAGACTGCCAATCCTTATGGGTCTCTTCTTCTCCTCTG  
CUST\_9140\_PI426210822 AGAAAACAGTTTCCAGCGGTCTGTCAGCAGATGTCCACTCCAGAA  
CUST\_5514\_PI426210822 AGAGTAAGAAGTGGGACTGCAAGTGGTGGTGGTATTGAGGGAGGT  
A\_16\_P30952545 CTACCACTCCTGCCTCTACAATAAGAGGCTCCAGCATCATGATTCAATTCTT  
A\_14\_P110553 GGTAGGTATTATAGACATTCAGAGAGTATTTTCTTTTACTGCCCTGGAAGCATATAGGGA  
A\_14\_P131991 ATTAACAATTTACCAAAGAGATATTGATATTGAAGGAATTTGGGAGGAGGAAAAGAAACC  
A\_18\_P14811221  
ACCACATTACTAAATCCATTCCTATTAACCACAAAACAATAACTTAAAAGACTCAACCCA  
A\_16\_P16257310  
AAATTCTATGAACCTCCAATAGCATGCAAAAACCTTCATCTCCGTTATCCCTATTAACACTG  
A\_14\_P136860 TTAAATAGGCCAGATTTTATCCTAAAGGTAAGACTATGAGACCAGAAGCCTCTTGCCTA  
CUST\_2169\_PI426210822 TGCTAGGTATCCCAGTTGGGAGAGGGCAGAGGTTTAGCTATAACTAA  
A\_18\_P14213554  
AAGGCAAAAATAATCCCAACACATATACTGTGATGCTTCTACCTTGATTACTTACCAAGG  
A\_14\_P136889 CTATTCAAGCAGTAAAAGTAAATGAATCCCACCTTTACTAAAACACTTTTCTCTGAACCCC  
A\_14\_P124262 CTCAGGTTTACTCTTTGCATTGTGCTACAGTCCATTGTCTTAAGCAGATATAAGTGATTG  
A\_18\_P22841227  
ATCTTAAAACCTTGCAACCAGTAGGCCTTCAAACCTCCTGCCCTTTAATATTTATTGAAA  
A\_16\_P19307039  
AAAACAAGACACCAGACTAAATGTCAGTTTATGTCTGAAAACACTTGTGTCATTGTGAA  
A\_14\_P106830 TGTGGGAGTGAGAAATAACCACTGTTTTACCTTATTGGTCCAAGGATTATCTTATTGAGA  
A\_14\_P110159 ATCTCTGTCTCTTACTGATTCATCCATGTTGAGCAGATTGTCACTGGCAAATTC  
A\_14\_P118195 TTTTGACATTTAAAATCGCAAACAGATTCAAATGCCTTGGCTATAGTGTACAGCAAGTT  
A\_14\_P111927 CATTACAAGGCCCTAGAAGTAATACACATCGCAATTCAAGTCTGTATTCTTGAACCTTTTC  
A\_14\_P116175 GTATGGCCAAAAGAGTTTTATGGTGCTTGTCTGCTATAGTGATGTGTTAGCAAGAATTTT  
A\_14\_P128584 ATATTCTGCACACATAAATTCCTGGTCTTGGAATGCATTGCCACAGAAGGTCAAATTA  
A\_14\_P115323 TTTTTTCTTGTGAGTTTCTCTCACCTATTGAACTTTGTATAACCAGGATAGGTTTTGTAA  
A\_14\_P101448 ATGAAAAAACCATTCCTTCCAGTAACGGTCCACATAGTATACAACTCCAGGTAAAAATGT  
A\_14\_P120707 CAATCATAAGATACAGAAGCATTGTCCCTGTTGCACAAATTCAGATTCAACTCACTTTTG  
A\_14\_P104194 ATCTATCTAACAGACATTCATAAACACAGTAAGTGCAAGGTGAGTCTATCACAGCCCTTG  
A\_14\_P119430 CCTGGACAAATTCAGAAAAGTTGACAAAAAGTAAGGTTCAAGTTTTCTTCCCAGATT  
CUST\_5451\_PI426210822 TCAGAACCCTGTGGAAGATCAGGAAAAACTGTGGGCTAACCCAGC  
A\_16\_P16403983

AAACCTCCAATAAACTGTTTACATACTTCCAATCTCATGGATTCAAGAATTACACCGAGG

A\_16\_P21457939

GGAGACCTCATTATATTCTGCTCTAATCTACAACACAATCATAACGCAGTGATTACCTTG

A\_14\_P102504 CTTTTTCTGGTGAATTGAGAAAGAAATAAAACTATGCAGATATGCGTTCCATTCACTTG

A\_14\_P102600 TAAACAACGAGAAATTATATGAGGTGCACATTTTGAGTGGGGTATTTGGTGTCTAGGTTA

A\_14\_P105926 GGTCTCCTCTTCGTTTTTAACCTAACAGTTATTTACACTTCCTCCAAGGAGAACA

CUST\_7402\_PI426210822 AAATGCTGCATTGAGCCACAGCCCTCCCTCTGCAGCCTGTGCAGT

A\_14\_P104379 AAATCTCAGATGGTAIGTTATGTGTCTGGTCTGTTTATGTAGGAAAGTGATGCAGAATGC

A\_14\_P125556 CTTTCCTCATTCCCTCTTAGCCTTACGTAATGTCTAAAGAATGCCTAGCCTAATCAATAA

A\_14\_P109035 AGGAGGGCACCAATCTGACCATTAGCCAATTTAAAAATTTACGCATTACTTGTATACAT

A\_16\_P40866553

CTTTCACAAAAGCAAAAAGAAACCTATACCTGCTACATAGCCATTTTACCTTGAAGACTGA

A\_14\_P130001 CTTTTATGAGCGTGCAATGCCAGGACTCTTTGATGGCTACTTTTTAAGTGAAGATGT

A\_14\_P114017 CTGGGGAAAAGTTGATCTCTTACGCATTTGCATATTTGTTAATTTGAGATCCTGTCTTACA

CUST\_8335\_PI426210822 CTGGCTTGCCCAGGCACACAGGCATCATTTCAGCAAGTCCACTT

CUST\_1843\_PI426210822 CTGGTGCAGAGGTTTGCCAGCTGACATTGACCTGAACATTCTACT

A\_14\_P129688

CTAAAAAACTAAAAAAAAGATGGCTGAAGCCTGTGAAAACACTGGGTTAGTGATGCTT

A\_16\_P17430497

AACCTACAAATCTACAATGTGACATTCTCTATGTGTTCTTCTCTTCATCAACCAACAACCT

A\_14\_P117509 CAGGAGATAATCTTATCAGGATCTAGCCTCCGTAAAGCCTTACTGATATTGACATTTTCA

A\_14\_P101780 TCTTTTACAACACAGATGACCCCCAGAAGAGTGATTTTTTATGCTCATTCTATACCTAGT

A\_14\_P124017 ACTTTTGTGCAGTATTTTCATTGGCATTACTACTAGAAGATGGCAAGGGTCTGAATTAGA

A\_16\_P17749399

AAATAAGCAGTTGCTAGTTCCTTTACCAATTCAGGTCTGAAATGCTCTGATAGTTGTTGT

A\_14\_P130779 GTCTTTTGTTTTACACACATTTTCTGTTCCATTGGCTACAAATTTCCAGCAAAGTGAAAG

A\_14\_P109507 AACAACCGTGTAATAAGTAATAATTTGCCAGTGACATCCGTTGCACCTTCATCC

CUST\_4808\_PI426210822 CTTTGTCTCCCCAGGTGTTATTTCCAGAGGGCAACTAGGGAAAAT

A\_14\_P135299 TGTAACAGATTTGGCTAGGATTTTATGATGATAGATCTTCAGCAATTCCAGACTTCAGG

A\_14\_P126442 TTATAGCCCTGGCTATCTATCTACCTTGCTTCTTGGTCAAATTTGTTTCTTATCGTT

A\_16\_P35492755

GACTATGGTAGACCTACTTTCTGCATACAGAAGAGTCAACATTACCTGATAACCACAAAA

A\_14\_P123836 CCTCCTCTTCTATGCTTTGGAATACTTCTACCATAATTTTCAAATAGGATGCATTCGGTT

A\_16\_P40963184

ACACACAGAAAGAGAACAAGATAACAACCTCAATCTCCATAAATTAGTTCCCAATTGCCTT

A\_14\_P132871 TTAGAAAAATAGACATCTGTATTTTTGCATTTCTGTTCTCCCTGCCTGACTGCTGATGG

A\_14\_P125938 ATTATGCAGAGCCAGCCAATACTGATGATAACTATGGCAATAGCAGCGGCAATAC

A\_14\_P131450 CTTCCATCTCTGCTTTTATGATTTAGTTCAATTTGGTTTACTGTCTCTTGCTGGATTTTGTG

CUST\_7029\_PI426210822 GGTCTACCTGTGAAGCTGAGTGATAGTCACGGTAATTACAGTCACCTACT  
CUST\_162\_PI426210822

CAAAAGTCTCCATTCCATAAAGCAAATCTACATTTTGCATGGCCAGGTTTGAAATAGTAT  
A\_14\_P122053 CTACCTAACACTTTCTGCTAAGGGGTAAGTTTACGGATTGATTTCCAGATTTTTTTCCTA  
A\_16\_P21640146

AGGAGCAAAAACACTACAATCCAAAAGGAAAAGGTATGAGTTAAAGCAAAGTGTCTACAAGC  
A\_14\_P132371 ATTCCTAGTCTATTGGGTTTCCCTCCATCACCTAATAGGTTTTATTGAGCCAAGTTATAA  
A\_14\_P119578

TTGGAAATTTTTAAAAGACAGGAAAAAAGGTGGTTGAGGCAGAAAAAGGTAGTTCTAGAG  
CUST\_9690\_PI426210822

CCACATGTGAGAATTAAGCTCTGACCATCAAGAATTGAGAAAACTCTCGGTATAGTTTTTC  
A\_16\_P41751186

ACCCAGACCTCTCTTAAAACATGCCAGTTCATACATATTATGCTTATAAGATTCAAACGT  
A\_14\_P129348 GGCCATTTTGACATTTTGAACACTACCTGTGAAAATGCCTCAGATTTCAATTTGTTCATA  
A\_14\_P132627 CACTCAGGGTTTCATAGAAATGAAGATAGGGTGAATGACTTAACCAAACCTTTGAATGTA  
A\_14\_P105504 TTTTGTTCAGAGACTGTGAATACAACAATATCATTCTCCTTCAAGGGAATAAAATTTT  
A\_14\_P105445 CAGTGGATGAGATCAGCAATTTGTCAATTTACTTGGCATTTACAAAATGAACTTGGAGTT  
A\_14\_P120298 CTCTTTCATAGACAACTGGACCACATTGAGGGCCTTACATAGTCTACACTACTATAATT  
A\_14\_P117272 CTTTCTTTACAGGTCTAACATAACTTCATTGTAATTCAAGGCATGTCACCTAACATGCCT  
A\_18\_P13603798

AATGAAGTCATGGAAAGTCAAGAAAAATTAACCGTCTCTGGATTTATACACACTCTCCC  
A\_18\_P15961480

ATTTAAATTGTTCTGAAATGCACATCAATTCATCACGTCCTACTTTTTATGAGCATTGGCC  
CUST\_240\_PI426210822 GCTGGCCCAGCGAGCCTCCTGAACCTCGCAGGGCCTGGAGGAGTC  
A\_14\_P112876 TGAATTTTTATAGCCCTCTGCATTCCTCCCAAAGCACAAACTCATGGTTACCTGAATATA  
A\_14\_P122313 TTAATGTGTTGCTAAAAATCTATACTATCTTTGAGCCGAAATAAGAAGTCCCCCTCCTGT  
A\_14\_P111234 GAATCAGACAGACCATATATCTGCCTTCAGCCTGCAAATTTGCTATTGGGTC  
A\_14\_P112408 AGAAATGGACTTTGCCTGGGAGTTTTATCATTGACATTCCTTGAAGAAAGAGAGAAATTA  
A\_14\_P126831 TGATGGGTGTTTCTTATCACATCTATTTTGAAATTTTCATGGAGAATTTCAAACACATG  
CUST\_2464\_PI426210822

TGGCCTTCAACTGCCTGCTAAAGACTTGCTGATCACATTAGGATTACTTTTTTTTTT  
A\_14\_P103258 TCATCCAAGACAGTTATTGCAAGAGTTTAAATTTTTGAAAACCTGGCTACTGCTCTGTGTTT  
A\_14\_P202391 TACAGAAATGTATAAAGGACAAACAGAGCAGATTCTCCATGTCTAGCATTTTCGCTCTACT  
A\_14\_P134524 CTGAGGTTTGGATGTGTTCCCTCCCTGATTTTTAAAAGCATATTAATAGTGAATCAGGATG  
A\_14\_P135138 TTTGAGACAAGTCGTAGCAGAAGTATTCAGATCCTTTGAACGTGGCAATATATTCTTCTT  
A\_14\_P128782 ACAAGTCAATGTGGCAAAAAGTGTGAAGATGATATATTAACATGACTGCCATTTGGGAA  
A\_14\_P112712 CTCAGTCCGGCTGAAGGCTATTAATAATCCTTGAGATGATCATAACATTTCCATCAAG  
A\_14\_P120302 AAAGTGGTTGCAGTGAGATAAATATTTGCTTTGTCAGAGAGACAAGAAATCTGGATTTGT

A\_14\_P133552 GATCTCACCTGGAAACTGTATTCTGGACAGTCCTGAAGAATAAGCCATCATTATTAATA  
A\_16\_P21503314

AGGTCTGGTTTTGTATGAATTTGCTATAATCATGGTCTCCATCTACGTAATCTTGATCTGT

A\_14\_P120676 TTCTTGGTGTCCATAACCGCGCTTCCATAACTCTAACCCAGAAGTTGATT

A\_16\_P16717053

CTGAGAACCCTACTAAATGCCTTCTATATAGCAGACAAAGAAAACAGAATAGGACAGGTT

A\_14\_P102757 AAGGAATGAAATCAGGCTCTTTTTTATTTCTTCAGCAAAAAAATCTTCCACCTTCTTCC

A\_16\_P01954434

ACTACCACTACCAAAAATCAAGCAAAAAAGGATTTCGTAATACTTCATTGTAGGCATTGGA

A\_18\_P22840153 TATGCCTCATGATGCCAGGCATAAGGCACACAGCAACCAAGTGTT

A\_14\_P117102 GCTTCTGGCATGATTTGCATTTAGGGTTTTGGTTTTGTTTTTTTTTAAGTTGATGCATAGC

A\_14\_P116130 GGACTAGTAAGTAAAAATAAACTTCTATGGGATTTCCCAGTGGAATTACTGAGTGGTT  
CUST\_5156\_PI426210822

AAAAGAAGTTGACCATTTATGTGATGTGCAGTAATAAATTAGCAATTCAGAGTTGAGGAG

A\_18\_P15517586

CAGGGCACCATAAAAATATAATCAAAGTAGAGAATTCACCAAATCTTTCTAGAGTCAGGCC

A\_14\_P202490 CACCTTATATCTTCTGAAGCCAATGAGATTTGTAACAAATCGGAAAAGAAGACCATCTCA

A\_14\_P107428 ACTCATATGAGACGTTTTGTTTTAAAAACCATGCATGGCTTTCCAGACCATAATCTCAAGTT

A\_14\_P122348 CATGGATGTTGACATTGTCCAGAGCAGGCTTTGACATTTTCATAAGTTACTATTTTTTCTC

CUST\_3483\_PI426210822 CCCTGTAAAGAGCCTCCAGTGACTTCTGCTTATAACGCATTGACCAT

A\_14\_P120955 TTAGAATGAACTTAGAGTAATATGGAAGTTCCACATGAGTATGCGCTGAGAGGCCTATAT

CUST\_1393\_PI426210822 GAAGGCAGCTTAGACTTTGGGTTTCAGAAACATGAAAGTCAGTGATGGTAC

A\_16\_P16191011

ACTTTAGAAAAATACATTAATTTATTCAGACACTGGAGGCTTGGGAGTAGTTTTTGCAAAG

A\_16\_P15122145

ATGTTTTGTTCTCTTTCCAAAAAGAACAAAAAGACCCATCCTAGATCAATGCACTCAG

A\_14\_P133462 CCTTTGTTTCATAATTAATTTGATTTATGGCATCTTTCATGGATTGGTCCCGGAGTATGT

A\_14\_P115245 TTGTGTTTTGTTTTATTGTAGAATCTATACCCCATTCACAGAAGATACCGAGACTGTGGG

A\_14\_P139567 TACCATCTCATGTGATTTTCACCATAAGCATCATTTTAATGAATGACTTGGGAGTCTGAG

A\_16\_P20755866

TGCCAGTCTGAAATACTAGAGACTTAACTTGTTTCATGACTAGTCCATACTATTCTGAGT

A\_16\_P35823515

AACAAGATTGAAAGCAAAGTTAGGAAGAGGTTGAAAATAGATGAATAACGTTGGTCTGGT

A\_16\_P30952536 CCAAGCACCTTCCAGGGTCATCTGTCAGCATCTCTTTCCCTAAT

A\_14\_P139116 GTTCTGCAGTGGTTACCTTACAATTCAGAATGAACTTTGAACAAATCCCTGAAGACAAC

CUST\_7354\_PI426210822 CCCACTAGTGTTGATGAAGGACGAGGGTCTCACCTTTCCAGTCCT

A\_14\_P133982 AAATATTCACACTACCTACAGTGAAATAGCATGGATTTTCATCCATTATGCTGGCTGTTA

CUST\_2153\_PI426210822

CAGTGAGAAAGCAGTCTTTTCAGGATCTGGAAGTACAAGTGTTCAAGTACAAGTA  
A\_14\_P126143 GGATTGTTAGCATTCTACTTCCTGTGTAGGAGGTTTGTTCCTTTTCAGTTTTCAATTAAGC  
A\_16\_P18298075  
AAAAAAGGAAGGCTATAACAAGCAAAAGACTTTCATTATTTGAACTACTTTCCAGTGGCA  
A\_14\_P137473 CTTTCACTCTGACCCCTATATACATACAGACAACCTTATCCTCTGCCTGAAGTCTTGTAT  
A\_14\_P127073 AAAAAGGAAACAAGGGAATACTCTAGTAATTCAAAACCTCAAATGTAAGATTGGGGCTGG  
A\_14\_P137816 TACTGGATCAGGCAACATGCAATAAAGAACAGGCAAAAAGAATTAGAGCAATTGGATATG  
A\_16\_P17429919  
ACAATCCATAAATTCCCAGTGAAGAAAAATCTGCTCTATTATGATTTACGAAGCCACCTG  
A\_14\_P201164 GAGTTTAAAGTTCTGTTCATCTCTCATATTCCTCTTTCTCAGGGTGCTAGGAAAAAAA  
A\_16\_P01152503  
TTTATGCTGACTTAACTTATCCCCTAGGATTACTCATGTCTACAACCATTTCGAGTTCAG  
A\_14\_P136476 AATTTCCAAGTAAAGTTGTGGTTAAGGATTCCTGGGAATTGGAATTGACCTTTTTTCTAT  
A\_14\_P122426 GTCTCCCTTGTCATAGGGAAGCCCTAAAGAAAATGAAGGATGTCTATGAGAAG  
A\_14\_P104859 AATGAAGCCAAAGGAATTACATGTTTCGGGAGACTAACGAGTGTCTTTTCATCC  
A\_16\_P18736030  
AATGCCAGATTCTTTTTACTCCCAACTATTACTAAGCCTGTTAAGTTTTGGTTTCTTGCC  
CUST\_5901\_PI426210822  
AGTTAAGATGGCAAAGAAAGAGCAAATATATTGAAATCTCCTGGAAATTTGGCTCTCTCC  
A\_14\_P107197 TCCAGTCTCTAAATCCTGAATTTAACAAAGCAGTGATCAGAGTGAATGTATTTTCGAGAAC  
CUST\_2494\_PI426210822 AAAGCAGACCTTCAACATTCAATGCTGGCTGGCTTGGCTTTAGAG  
A\_16\_P16706949  
AAACTCTTCTCCTGAAATGTATTGCTGTAAGCATCAAATTTTTATTGGCTACCACAGG  
A\_18\_P11002119  
GCTATCATGAGGTTCAATTTCTAACAGATGAATGCTTAATCATAAAAATGCCCCACATAACC  
A\_16\_P17317878  
TATTTGTGTGGTCTACAACTTCTTTAAATTGCATTGACATCAGTGAATCATATGAGCCC  
A\_14\_P109749 TGCTTGGATGAGCATCAGAATTAACATGCTGTATGACTGTCAAGTTCAGTTTTCAA  
A\_14\_P136777 AAATCATGCTATTGCAGTAACAAGCCATCAAATAGAACACAAAGAAGCACTTTGCAAAC  
A\_16\_P00685503 ATCAATTCCTCATGTTACCTTTCCAGAATGATCTCACAAGAATCCCC  
A\_18\_P10608755  
ATCAGCCCATACCTTAGAATTTGACAGGAGACAATATCAAGGAAAACCTTCTCATCTCAC  
A\_14\_P118449 AAAGCAAAAATCCCCTGTAATTGCTTCCCTCCAAAATAAAGTGCTGACCATTGAACTC  
A\_14\_P120611 AGGTCATTTGGTCATGCAACAAGAGTATGTGATAGATAAAGTAATGAACTTCTGTTCCGGT  
A\_14\_P134130 TTATTTCTAAGGCTCTGTTATTTGCTGACTGTCTTCTGGAGACCACCTCTTTGTATCTT  
CUST\_6606\_PI426210822 AATTGCCACAATAGCTTGAGATCAGGGTCTTAATTTATTGGAGGCCGTTCAA  
A\_14\_P112881 AGTTTCAGGCTGACTTCACGAGTCTTTCAGGTAAGAAGACTTTCCTTTGCATTTT  
A\_14\_P111621 GCTTCGTGTTTGGAGGCAGATATCGAGTAAGTATTCAAACGACTTCAATGACTTG

A\_14\_P102401 GTAGAACTTTTTTCAGTGAAGAAAAGTGATGACTGTAAGGATTATGGAAACCTCTTCAGTC

A\_14\_P201443 AAATTGCTTAACATTTATTGCTTCTTTTGGGGTTAGCAAGTTGTAAGCCTCATTAGATGC

A\_18\_P17056889

AAGCGGCTCTTAGTAATTCTTCCCAGATCTGTTTTATTCCCATTCTAAGCATGAGTTTAG

A\_18\_P15535388

AAGAGCAAATGAAACTCTGTCATCTCGTTCCTTTAAGATACAGACCATCTGCAACATTTTC

A\_14\_P135242 CTCTATGAGAATGGTTATAGCCCTAGTTAACGCTTACAGGCATGGTTTTTATGTAGTTCT

CUST\_10260\_PI426210822

ACTTTCCTCATCGGTAAAATTGACCTTAAAATCCCACAGTTCAAAAAGACTATAAAAAGTTA

A\_14\_P200480 ATCTGTAGACTCTAATCTTGGTGTCTTTATTCTACATGGCATGGGATCTATGCCACAA

A\_14\_P136629 TTGGCACAATATATGTCTCATAGAAGAGTCTTCTAAAGGTTATGACCACTGACAGTGATG

A\_14\_P126890 GAAGAAGACCCAGGAGAAAAGATGATGACATGCTGTTTGCCTTATGAGTGT

A\_16\_P18806242

AAAACCACCATTCCCATTTTAGATGTCCAAATGCATATGTCAAAGTAAGAAACGTGCTAA

A\_14\_P100694 GTCATTTTTAGGCATCTGTGCTCAGTTAACCATCTTAATCAATCTTCTGTCTCTTCCAA

A\_14\_P121861 ACATTGGTTGCCAGGCTAATGGGGGAGCATGAAAATAGAATAAAGAGATTATTACATTTT

A\_14\_P133835 TTTTATGGAAAACCTTCATTTCCCTGCCATGTGTTTTAACTTAGGACATGGATAGTTGAGGT

A\_14\_P116906 TGTGGAAACAAGTTCTAGGGCACCCCTGATAATCTTTTTCTAATAATCCTGTGTAGTTTCA

A\_14\_P138049 AGCAAAGTTTATTTGGCATGTTACAACTAAATCCCTCAGATGAGATCCCCCTATATAG

A\_14\_P132985 CTTCTCCTCATTACATCATAGTAATCCAAATTGTCCTCATTATAGTCACTTTCCAGG

A\_14\_P110749 ATTTGCTGATTTGTGTAAATTTGGCATTATAAAGTATTTATATGGCTCGGTGCTGGCAG

A\_14\_P128835 GAGACTGAACATTTCCCTTTCTGAAAGTGATCTTTTCTAGTCCCTCATGGTTAAAACAAAA

A\_14\_P120642 TGGGCTCTCCTAGTTACTAAATCTAAGTAAACTATTGAATGCTGCCCTTTTCTGACTCTA

A\_16\_P38076675

AGACATACAAAGACCAACATAAATGCATAGGATTACACCATTTTTACCATTTGTTTCCCA

A\_16\_P00197233

AACACATGCTAAAAGTAACTACATTTTTGACGATCAACTCAAGTTAATGCTCCTGACTGA

A\_14\_P129253 AATAGACATTACTTTCCAAATCACCTTTAGAGATGCATGTCTTAATTTATTGTTCCCCAG

CUST\_6958\_PI426210822 TGGCATTGTTGTAACCTCAGGCACCTGAGCATAACTAGTGAGCCTG

A\_18\_P15518932

AAACAATCTGCCCATTAACCATAAATTTAGCAAGCACTTGTCATTTATATCCCACCCAC

A\_14\_P134225 TGTTTGGGGAAAGAAGTGTGTATTTGCATGAAAAAATGTTTGAGGAATGTTTTACGACAC

A\_14\_P127566 TTCGCAAGCCTTGGCTTTAAGTATCAGGGAGATTATGAATTAGAGAATTCAAAGTGAGAA

A\_16\_P35434903

AGACTCACCTTTGCTAAAATACTATTAATTTAGGCCAAAGAGAAATACTATTGCCCTGTGT

A\_14\_P125108 CTCTGGAAAGTCTTTGATCACATCATAGAACAACCTCTGCTACTTCTTCTCTAAATCCTA

A\_16\_P19477697

TCATCTTTCACCTAAATGCCATTTTCTTCAAAAACCTAACCTTCTATCCTTCAATTCAGA

A\_14\_P202081 ATAATGATGGTGCTGCTCTTCCAAGGTCTCATTTTTGAAAATGTAAGTGGATATCACTACT  
A\_14\_P129037 AATTACTTCCTTATGATGCTTCCATGGGAACACAAAAGGCTAGATAGGCAGATAATCTAT  
A\_14\_P100141 GCCTCTCAGAAGCAGCAAATTCACATATTTTTGTGGAAAGTAAGATTAGTCAGTTAACTGTC  
A\_14\_P101432 CTCAGTGGCAGAAAAAGCCAGATGGGAAAAAGTAAAAATCTGGGAGAGTATATTTCTT  
A\_16\_P02770448

TGGCCTCTTTTACTTAATCAATTCTGCAACAACCTTACTAAGAAGACAGGAGAAAATGAGC

A\_16\_P18052205

AGACTACATTTGCCGTATTAATAGGACAGTCATGGATTTTTAGGTCTCTAGTTTCAGAGG

A\_16\_P21474689

ATGAATCTTCAATCTTTCTTTTCTCATTACCTCACTTGCTGATCCATAGACCTGAGATT

CUST\_9620\_PI426210822

TGTGATTCTTTATATCTTTTTATTTTTATGCCATGGTACAAGTTGTGCTTTACAGAGCATT

A\_14\_P117981 AGTGACCTAATTTTCAGAAGATCATTACAAATCTTCTCTGGGCTTTCCTTTTTGCTTTTTG

CUST\_9382\_PI426210822 CCACAGTTTTTCCAGTCCCTGTCTTCTTCCAAATCTTTCTCCATCC

A\_14\_P114286 CTCTCCTCCCCTCTGGATTTCTCAGAGGTAACCTTTGAATTCGGAAAATGAA

CUST\_8732\_PI426210822

GTTGGAGGCCTTAACAATAAAAAGAAATGATAGCCTTTATTCTTAAAAAAAAGTATCC

A\_18\_P22840346 CTCAGAGTCTGAAATGTTTACACTGCCTCTGACTGGCATCTCTATACCAGAAAG

A\_14\_P118160 CACAGGAATGAGAAATAAATGCTAACGAGTTGCATCCTTAAATACAGTTGGACCATTTTC

A\_16\_P03642083

AACTAGCACAGAACAGAGGTTGATTTAAACTCCTTACACTCACTTCTCAGATCAATGAAT

A\_14\_P202547 GGCTTGCATGACACATAGGCTCCTTTCTATTCTTACATAACTGATTCCTTTTTCTG

A\_16\_P15322374

AAAATCTAGCCATATGCAGATTCCTAGTTTTGTTCTTAAATAACTCCTGGTGTTGTTGG

CUST\_9678\_PI426210822

CTAGAGGCAAAGTTTACTGCTTTTACTGTTCATGAAATAGACTGTGACTTGTTATTTATCA

CUST\_3042\_PI426210822

ATTGACTCTGAAATAACAGAGGTAGATCCTTCCAGGTTTATCTAGCCTGCATTTGA

A\_18\_P25388932

ACACTCTACGGATGATTAACTACTACCTGGAAAATCCTAATCAGAATCTCACACTGTAGA

A\_14\_P112015 ACAAAGAACAAAAGTGAAATAAGAACCTCAGAGATAATAGGCTCCACTCTTGTTTTCTT

A\_14\_P111391 TCCACATTTTAATAGACAGTTTTGTTGGTTCCTCTGTCCTTACCTGGGTCTATAGA

A\_14\_P107198 GTTGAAGATGGGGAGTCCCTCTAAATATGCTTTTTGTCATACTTTGGAGACAATAATGCAAA

CUST\_5542\_PI426210822

CCAAAATCAGAGCTATGGTGATAGCATAAAAATGCAAATGTCATTAAACTTGATTATATAA

A\_14\_P139001 ACAATTGCCTGGATTTGGTATTTTGAAGGCTATAAAAAAGAAGTTTGTATTCCCTGCTC

A\_18\_P12797961

TGAGTGAGTGAATAAATAACAATTTTTTTCTGAAGTTTTTTTTTTGTGTTTGCTTTCTGTG



A\_14\_P125935 TGCATCTTTTAGTGAAGAAAATAACTGAACATGGTTTTCTTCTGAAGACACAAAGTCCAA  
A\_14\_P100697 ATGAGGAGAGAAAAAATTGAAAAATGAATCCTTGGGAAAATCTTCAGTTACAGTTCGGAT  
A\_14\_P120520 GGCAGTGCATACATTTACACAATACATTTATACAAAAAATCCCACCTACTCCAATTCCC  
A\_14\_P121982 CTTTACATAGTCATCATGGTCACCATCATTATATTCTCATCTTCGCTATGCCCATGAGA  
A\_14\_P117465 AATCAAAGACAATATCAATGACAACTGACGGAAAAGGAGAGAGAGTAAGTGTCTTTTTT  
A\_14\_P114309 ACATATATTGATATGTAAGTGCATTAGTGGCCATTTTGAATCACAGTGGTGATCGTGTGA  
A\_16\_P17680762  
AAAGACCAAAAATAAGTTTTCAAACATGAAAGCCAGATGATGATTTGAAGAGGTCCTACACT  
A\_16\_P18825669  
AATGATTGCTCTATATTTTAAACGTCAGATAATGCCAGAACTTTTCAGACCCTACTTCA  
A\_14\_P118184  
GAAGAAAAGTGATTTCAGTGATTTTCAGATAGACTACTGAAAACCTTTAAAGGGGGAAAAGG  
A\_14\_P116194 ACAACGGTCAGTTCAGCATTTTCTTTTACCTTCTACTCCTCTTTTATCTCTAAAAGAA  
A\_14\_P101374 TTCTGCGTCTTTTCTACTTCATCACTTCTCCCTCCCAGGATGATGTCTATAAACTA  
A\_16\_P02601675  
AATGGACAACCCAAGATTGTCCTTAAGTTTTAAATATGGCTTAACCCAAGATTGGCTTAA  
A\_14\_P114642 TGTAGGGTCTGTCTCAGTATGTGATAAGCATTCAAAGATAATACAACCAGATGCTGTCA  
CUST\_6142\_P1426210822 AGATTCAATGGTGAGCTTACGGCTGGCATGCCAGCAGTTTCCTAA  
A\_16\_P40073554  
CATCTTGCATATGAGCCATGAACATAAGAACAAGGACACAATGTAAAAGACCAAATGCAT  
A\_16\_P19456392  
AATGTTTCAAAGTCACTCATACTGAAATTCCAAGTTGTGTTTTCTTTCATATCGGTCCAGC  
A\_16\_P15114019  
CACTTCCTCATAAAGCAAAGAGCAATGAGTATGTAGCATGTCATTCTCAAATGAAGCAG  
A\_14\_P125281 CTTCCAAATTAGCATCAGACATTCTGGTAGAAAAAAGCCAGTTGAATGTTATGTGTGTTT  
A\_16\_P18924596  
GGAATAGAGTGTTTAGTCATCTTTGCATTACGTAAATGAGAGTGATTGGTCTAAACTGGC  
CUST\_7505\_P1426210822  
GATTCCATAATTTAAATAACTAGTAGACTTTTTAGTTAGTTGAAAGGTAAAACAATGGTA  
A\_18\_P16269206  
AAAACATTCCTATCAGTGGAAAAAATGGAAATTGGTAATCCATGCTATGCATCAGCATCA  
A\_16\_P01450874  
ACTGTGCTAAAGTGTCTGATTTGTTTTCAACACTCTAACAACCAAAGAAAACACTGATTGT  
A\_16\_P16357195  
AAAGAGGATTTTACTGAAGACTGTCTAGAACCAACATACGTTATGAACTGAGCCCTTAAA  
A\_14\_P108250 ATTCTCTACTCACCTCTAGACAATAATCCTTGAGTGGGTGAAATGTTGCAAAAAAGAAAT  
A\_14\_P112187 CTCCTCGCCCCATAGAAATGCACACTCATACTTCTGAATACAAGATCAAAGA  
A\_18\_P15505201

AGGAAATTCAATATTAAGACATGAGTGGGAATGCTCCTTTCCATTGGTCATCATTGATTT  
A\_14\_P118165 CTCCTGGTTTTGACTGAGTCTTTACTTAAGGAAATCTCTATTCAGGGTTAACTTCTTGAA  
A\_16\_P16916129

ACACATGTTCCAGGTATTAATTCCTTTCTCTTCCTAAGTAAATCCATTCCCTCCTAACAT  
A\_16\_P36955328

TTTCAAGCCAGTAAGAACTCTTCCAAACTTTAAGAAGGGAATTAGTCAGTGTAACACAAG  
CUST\_6966\_PI426210822

TCAATTATAAGATGATCTTTATCTGTCCGCCTTATCTATCTTCACTGACGTGTATTTCTT  
A\_18\_P22841719 CTTCCCAGGTCCCTCCACCCTGCACTTCCTGGACTTGTCATGGA  
A\_14\_P139063 TAACAACCTCACCTTTCTTCACTGAATGCTACAAACTCTTAGCCCTTAACTCTGTAAACT  
A\_14\_P119001 TCTATCTGTTGTATATACTGTGCTTCTCTCTCATGAGATCTGCTTCACTAAGAGGGTTTT  
A\_14\_P119553

ATAGGAGAAGATACAAGACACTATGGAAATGCCTCTGATACAAGAAAAAGAGGAACAGA  
CUST\_1356\_PI426210822 AAAAGTTCTTCTGGGAACACAGGAGACTGGAGGTCACCCCCACC  
A\_14\_P137387 GTTCATAAGATCCTTTTTTATACAAGTGTTTTCTAAGCACTAACTGCCTCCCAGGTTCAA  
A\_14\_P108315 TGTATTCTAATGTCAACAGGATTGTGCTAGTTTAGATGCCCTGTTTGGCTCTAATCATT  
A\_16\_P00170349

GTGCCTCAATGTAGTCTGAGTTTACAAACTCTGTGGCTTACAAAATGCTTAGCAGATAC  
CUST\_770\_PI426210822

GTGCCTGATTAGTGTTGTTGGTATTCTTTGCTATAGATCTTCTGTTGACTGCTTTCC  
A\_16\_P15183221

AGGCTCCTTTTCCATAATACATTATCATAAACTTAGTGCTATCTTGATTTCCACATGCTT  
A\_14\_P138325 GAGCAGAGATCAAGAGGAAGGAAGTAAGTTGGAGGTTAGAGCAGAGCAAAT  
A\_14\_P202317 GCAGGATTTTCCACAGCAGTCACCTTGCCTTATTCAGTCTTCTTTTGCTAATG  
CUST\_863\_PI426210822 CAAGAAGGCAGCACTAGAGCATTTGTGGATAATGGTGCCATGGATAGT  
A\_14\_P122791 ATTAGAAATGCAGAAGAATTTGTATGAAGAGTGATTATGGCCTATCATTTTCATCGTGGCG  
CUST\_1127\_PI426210822 GATCATCAGTAGGCCAGTGTTGATCTGAGGTCTTTACACATTCTCTCATCTAATC  
A\_16\_P03551406

ACCCAGTTTGTACTTTTTTCTCCCAATATCAACAAAATCTTCCAAATTAACAGCA  
A\_14\_P120851 ACCCAATTATTTATTCCTTTCTTTGTAACATCCAAACTATTGCCTTGAAACCTTCAGTGC  
A\_16\_P01697336

CGATTTACAGCATTGATAGGTCTCCTTTTCTTACGTATATGGGCAACAAGATTACTTGTC  
A\_14\_P110775 CTTCAATTAACGGTCTTTTATATAGTCCCAATTTGTGTAACATGATGGATCTAAAAGA  
A\_14\_P116910 GAAGTCTGAGTTTATGATTGCCCTTACAGGAGTTTGCTGTGACTTAGATCTTGATTCAG  
CUST\_9018\_PI426210822 TATTACCTTCTGGGTAACCTCCACCCACGCCATGTGTAAGAC  
A\_16\_P19718805

AGAATACCAGAACATAGTATCTCAACTCAGAAGTCTACTCCGTATTTAAAAATGGTGCCA  
A\_16\_P18962844

TCTCCATCCTTACAACCTATTAATGCTACCTTACCTTACACAACTAGAGTTATGCCTTGC  
A\_14\_P105093 ATTTAAAGTGCTAAGAGCACAAAATAGAAGTGTTATAAGGTCATCTCACCAGCCAGATCT  
A\_16\_P18762240  
ACAGAAGAACCATGAATGTTAAACAATGTTCTAACAGTAACTTTCTTAGGTAGATCCCCT  
A\_14\_P117681 AAATCAACCATCTACTGAGTCATGCCTCTTCATCCATTACAATAATCTCATTTTAGAGGG  
A\_14\_P138943 CGAGAATTTGGTCCTAATCAAGGCCCTTACTTTGTCAATCAAATATTTGATACACCAAAA  
A\_14\_P111872 TAGGATTTTGGAAAAACAGAGGAATGGTTTATCTTCCGAGAGAATAGACCTAGATTCTGA  
A\_14\_P112058 CAAATTAATCTACCTAATTGCTAACTAAGGGAGTAGAAGAGAAGGAGAGAGTCATGGG  
A\_14\_P127904 ACTTGAATAGTAGGATTTTAAAGGGCATTGATAGCATACCAAACAAAAGGCCAAAATAAAG  
A\_14\_P132201 CTACTGAATACTGGGAAATACAGCCAGAATTCTACATTTTACTAGAAAATAATAACAGTA  
A\_14\_P130245 AAACCAAACCAATTATGATAAGGGGGTCTTTAAATAAAGGTGGGAAAGACTGTAGAATGA  
A\_14\_P135735 TCTTTTAATGGTTCACCCTATAGGTAATAACAGCCTGAACAATGATGTTTATGGGAAACG  
A\_18\_P22842067 GGCTTTGGACACTCGTGGTTTTTCAGTCTCCTAGGCTGGAGTAAAATTT  
A\_14\_P127668 CTTGTAATACCAATTTTAGGAACTTACACTGAGGAACTAGTGATGGGTGAACAGTTTGAA  
A\_16\_P01849525  
CACCTCCCTATCTGTAATGATACTATGTGGTGCTAAAATAAGACTTTTCTCTGCAAACACA  
A\_14\_P134509  
AAAAATGGAAAGCAGGGACAAGGGTGTGAGGAGTATAGGAAATAAAATACACAAGTATTT  
A\_14\_P109028 TTAATATTTTTATGGAAGAAGTGTTTAGTTCTGGAAAAGGTAAATGCTTGTATATATTTT  
A\_14\_P128916 ATTTTCCAACCTCAATGCAATAGTAGCGTATGAGACGACACTGTGATTATCAAATGGTA  
A\_16\_P19776880  
ACCTTAGTCAACACTACAACACATACTTCCCTTTACCAACAATAGAAGTACTTTCTCAA  
A\_14\_P120435 TATCTAATATGGCTTAGTCACAAGGCTTAACTAGTGATGGTGAAAGGATGGTAAGATGCA  
A\_18\_P14501375  
GGAGTCATTTTAGACCTGAAAACAGAAGTTTCCACATTTAAATTTTACACCAGCAGTCAC  
A\_14\_P122454 TGTCATGTTACATTTTAAACACTCTAGGATCTCCTGTTCTTCTTGGACTTCTTTTTTCA  
A\_14\_P113345 TGTCTCAGCCTCCAATTTATTTTTGTATTGTGATTTTGTATTTTGGTTTTTGTGACAGACC  
CUST\_9323\_PI426210822 TAATCATGCACAGCTCTGCAGCCTGGTTCTTCTGCTTTTCTATCCC  
A\_14\_P110168 TATAAATGGTGTCAATACCAATATTCTCACAATGCAAAGTCTACACAAAAGTCCCTTCCC  
A\_14\_P102298 TTTCTCTGCTTTGTTTTGATTCTCTAGCAACTTTGACTCTTTGAATGAAGATGATGCTGT  
A\_14\_P126370 CTGTGATATTTATGATAAACTTAGCCATTGCTGACTTACTACAAGTTCTTTCCCTTGCCAC  
A\_14\_P102304 TACGTGTAAATTTAGAGAGTGTGACAGTCATTCCATCTTTTCCCTTTGACAGTCTCTGAA  
A\_14\_P129179 AATACCAGAAAACCTAATTTCCCTGGAACAACCTGACTTTTTATCAGTTAGGAAAGAGTGA  
A\_14\_P129324 GGGATTCCGGTTCACAATGGATGCTGATAAAGAGAAAGATTTGCAGAAATTTCTTAAAAA  
CUST\_8838\_PI426210822  
CAAGTTCCTGAAATGGGTCAGGATTAGGTTTGCCTTAAATCTTTTTCTCAACAGAA  
A\_16\_P17514801  
ACCAGGATATTATGCCATTGATTTTGCATTCTCACTAACTCTTAGAGAACCAAAAAGGTC

A\_14\_P113423 AAATCTTGAACGCTGATGACAATGTTGCTGCAATAAATGCAATAATATCTCTCTGCACTG  
A\_14\_P132162 TATATCCTTCTGGACCAGGCTCTCCTCTCTCAATTTCTGGATATGTGCATG  
A\_14\_P136562 GTATGATGCCGATTTACCTCTGATAATATGCCACTCTCCTCATCTGTTTCAGTCATCT  
CUST\_9500\_PI426210822

TTGGGAAGAGGCCGAGAGGTTTTTTTTTAGCACTCCTAAGAAAAAATTAACACAC

A\_14\_P120641 AATCATTATCATCCTTATCTTTTTCTTGTATGCTATTTGGCGGGTACTGCAGTGACCTT  
A\_14\_P120225 AACAAATGGGAAAGAATGTTAAGTTAGTGGAGCGTTTGGTGGAATGGTGTGAAG  
A\_14\_P107827 CCATGCTCTTTCCTGATGGTATTTTGTGTTGATGACATCATCTACAAGATCCTACCTG  
A\_14\_P129782 ACACTAGTTAGCCTGATTTAGCCTCACTTTATGAAATGAGTAGGGAAGTATGGAATAGAC  
A\_14\_P119498 ATTGTCAGTGGAAAAATGTTTTAGAAATGAAACAGGTGGGGTTAGAACTTTGTTCCAAA  
A\_14\_P134782 AATTGTCTAAAGGCAAGCATATCTATACTATTAACCACATTACACATTTTGTCTAATTA  
CUST\_8372\_PI426210822

TTCTACTCTTTCCTACTCTTATAGTTTTGGGGGTGTCTTGCAATTAAGATGTAGTTCAG

A\_14\_P122085 CTTTTATTCTTGTAACATGAAAATATTA AAACTGGCATCTGCAAGTGCCGTCTTTTGGCA  
A\_14\_P111707 TTTTATGCAGGATTTAATCAGATTTCTGCAGGTTAAAGACTACAGACTTCCAGAGTGTCT  
A\_14\_P117719 CTTTCCTCATTAAAGTTTTTTTTAAAAACAATCCCAGCATAAAGTTGCAAAGACATTAAAT  
A\_14\_P112340 CTTCTTAATTTGACTTGTAAACTGTAATCTGACTTGACCACGGACCATGAGTTTTTCAAG  
A\_16\_P18254562

GTTACGTTGAGAAGATTAAGACTACACAGGCAGTTAGTTTTAGGGAACACCTTCTACAGTT

CUST\_7008\_PI426210822 GGTCTGCGACAACCTGTGACCACCTCACAGACAAGGTGACTTCTG  
A\_14\_P121092 AACATGAAGCCAGTCCTGACAATGGGCAGAACGAATTCAGTGATATCATTAAGT  
A\_14\_P139674 TTGCTTTTGCAGAGTGATGGTGATGATTTTAATTACATCATTGCATTTTTCCTTGGAAACA  
A\_14\_P114662 GAAAAACCTATGTATTTCCAAAGTGAGTTCTGACTATGGCTTTTGGAGGTGCTACAAAAAG  
A\_14\_P129519 ATTTGAATCTTGAACAGGTATGACAGAGATGGAGAGAGGTTAAAATTCATATGCAGAAGC  
A\_14\_P201462 TAGAAAGGTCCCTGATGACCTTTTATTGCTAATAACACACATCCAAAAAGGCATCTTTTT  
A\_14\_P105189 TTTATTCTTTGGTTGTTGTTTCAGCACTGAGTGGGTCTGTGGAATCATTACATGTTTAT  
A\_16\_P16191028 CTTCTATCTAGTGTCCAAGTGCTGTGATGTATGTGGATCCCAGAGTAAACTTG  
A\_16\_P03183348

AGTGGATGCATCATGGATAGTCTTTTTAAAAACAAGTTCTCATCTATTCAATGTCAGAGCC

A\_14\_P112960 TTCACATACACATTACCTTTTCATTACAGAGACACCAGGTTACAAAGAAAACCTTAAGAG  
A\_14\_P121123 GAAATCAACTTGGAAAGTCAAATTACGTGTGGCATATGGACTCCTGACGAC  
A\_14\_P129463 CTTTAGAATTTATTATTCTTGTATTTGTCAGGGCCTTCCATATCAAACCAAGGAAGTCCC  
A\_14\_P121082 CTTTCCTTATGAAAAATTATGCCACAAAAACATAGAGGAGAAAAGCACCTAAGTCTGTCT  
A\_16\_P00685015 CTTAGAAGCCAGGTAGAACTACTGGCTTAAAACCCTAGAAAAGCAGTCAGTATCC  
A\_14\_P116754 CTTAATTATGATGATGGAAAATGTCAACTCTGTGAACCTTATCAAAGAAAGCAGACATTG  
A\_14\_P136449 CTCATGCTCCCTTAGATGTTAGTTTTTGGGGCCAATACAAAATCTTTAGGTGGC  
A\_14\_P132982 ATGCATACCGCAGGTGCACACTAAACGCCGAATCTATAGAAAGTGGAAC  
CUST\_2908\_PI426210822 AACTGCCTCTTTATTTCTGCTTTAGAAATGGGAGACCACAGTGCCT

A\_14\_P108426

AGATGCAGGGAAGGAAATGAGATCAATGATAAATGAATGGAGAAAACAAAACAGTTTAGG

A\_18\_P15977500

CCTCTATGACCCAGTTTAATCAAGTATACCTTCACAAGTCGTTTCTAAATATGTTCCCTC

A\_16\_P21556188

AAATCTACAAAGGTTTGCCTGAGATTTTACCATTAGAGTCACTCTTGCTTTAAGGGACTA

A\_14\_P105961 ACTGAGAGAGGCAGTTTAACTCATTGACCCAAAAAGAGTGGAATAATTTGAAAGAAATG

A\_16\_P15309983

AAGCGTTCATCAAACCTTTGAGTCTCCATAGTAGTTCTAACACCATAGCCAAAAAGTTCTT

A\_16\_P00641499

GGTAGCAACAAAAAGCAAGACAATAGAGGACTGATGAAATACCAAGATGCCAATTTTTTTT

A\_14\_P100865 TTCTAAGTTTTACCCCTGTGAGGAGTGTGCTGAAGACCTAAGAAAAAGGTAAGATG

A\_14\_P112012 TTGGGTGTTTTTAAAACCAGTAATGCCAAAGTTATCGTGGACTTTTTGGAAGAAAATAT

A\_14\_P103333 AAATGTGAGGCTTTTCTAGCAGTCAAGTTGTTTGGGATGGCCCAAGTAG

CUST\_8201\_PI426210822 ATCACCGGGTGAGTAGCCTGGTCCTGGGTTGCCACAACACAGGAG

A\_14\_P122917 ATCCAAATGAACACTAGTTATGGAGGAAAGTTATACAAGCCACAATTCTAGTTCCTGAGA

CUST\_10362\_PI426210822 CTCATAAACAGAGCCCACCAATGTTAGTGAGCCAAGGACGAGAGAT

A\_16\_P03019799

GCACGGAACAAAAATTAACCTCCTCACCTACTAATTAGTTAATGATCACCTTGACCACA

A\_14\_P125763 GGCAAAGCGGAGCCAAAATAACCAACAACCTCTTCCAGTTTGAATTCAA

A\_14\_P102111 CAGAAAGAAGACATGATGAAATATGTTTAGAAACAGGCTGGGACTTCATGCAACTTCATA

A\_18\_P22841899 ACTACTGATATGGATCTGCCTGGTCCACATCATCTCTGGAGTGCTAG

A\_14\_P130596

CAGGCTGCAGACAGTGAAAATTAACAGAATAGGCAAAGAGAAATAGAAAGGTAAAACACA

A\_16\_P02861998

ATTATCAGTAGGGAATAAGAAAAGTCAACATGCTGAACTCATCTTGACAGACCTAATGCC

A\_16\_P15773220

AAAAAACACGTGATACTAATCAAGCAATGATCAAAAAACCTCTTGGTAAATCTAACCGGG

A\_14\_P131549 CGTATTTCTAGCACTTGGTAGAGTATTGTCCAGCAGCAGAGGTGTTCCCTTAAT

A\_16\_P15686871

AAAACCTGCCAGATTTTTAATATTCTGACCCTTACTCCCTAAGAGAGTAACTATAAGCCCA

A\_14\_P124403 ATCCCCACTTCACAGATAACAAGATAACATCTCAGAAAGGAGAAATCACACATTCAG

A\_16\_P03047357

AAGTCATCCTACCTAGATTTTCCCAAAGAGCAGTAATTTCAAACCCTTTGATTCACCTTTC

CUST\_291\_PI426210822 CTCAGGGTCTGAGGTTGAAGAACACATCCCAGATCCCCACACTAG

A\_16\_P19606239

AACTAATCCAACGATTCTCCAAATATGCCTAACTTTTTCACTCCAAATCTTTCTCATGG

A\_16\_P58424428

AGGGAAATTTCTTTATTTGGGAGATGCAAGAAATAATGGTAGGGGGTTGAAGTGATATAG  
A\_14\_P121785 CTTTAATGGTCCTTGATAGCCCAAAGTATGGTTGGCATTACATTTTTGTTTCTTTTCCA  
A\_14\_P115620 CACCATCCAGCCTCCTTTGACTTCAGTGAAGATTCATATAAATAATAAAATGAGGGTG  
CUST\_4721\_P1426210822 CATGTGTGTTTTAAAGGATCCGTGGGTTTTGTGGGGAGGGGCTGCAC  
A\_16\_P17610950

AAAATTGCTTGCTTTTATTCCATCATCCCACATGTTAATGTAATCCTAATCACCATGGCA  
A\_16\_P01118160

AAGTCAGATTAAGTAAAGATTCAGCCAGATCAGAATGCTTTTTTGCAGTCCATGAGAG  
A\_18\_P14132609 AGTTTCCTGCCACCCAGTTTTTATGAACATTCTCTTTGCCCATGTGT  
A\_14\_P102739 TTTTATGGCACAGGAATTTCCCTCTTTGAGTCATGCACCTTTCCTGCTT  
A\_16\_P18463894 ATCTCCTAGTCAACTGATCTCACTGATACATCACTCTACCTCTTTCATCTTTGTCTGG  
A\_14\_P129093 GTGAGGTCGTGGCCATCAAGAAAATCTTTGATGCTTTTAGGGATAAGACAGATG  
CUST\_4697\_P1426210822

CCATCCTGAGAGGGTAAATAATTCTGCCTATGACGCAGGTATAGAAATAAAAAAGACTAT  
A\_14\_P114154 CTACAGTGCAGGTGATATCAAAATGCAGGTGAGAAAAGTGGAGACAGAATACAGTAAC  
A\_14\_P111082 TCCAAAACAGGGACTGAAATTCAATGAGTTAAATGAATACAGAAGTCACTTTATGTGGGT  
A\_14\_P103108 AGGAAGATTGGGTAATGCTGATGTGTTCCATTCATGAAACTGTATTTGATACATAATCCT  
A\_14\_P139275 AAGACAACAGGATGAAGAGGAGAATCAAGTTGTCTATTTTCAGTAAACCTGTAGTTTACG  
CUST\_7015\_P1426210822 GCAGTTCACGGGCTATAGCATTGAGGAGATTAAATACAGGCCTCCAA  
A\_14\_P200680 CTCATATATATCCTTGGCCTCACAAAATGAAAAATTCTAACCTCCTCATCCTTCTATA  
A\_14\_P105837 TGTCCCTACCGTGAAATAGAATCCAAGTCAATTGTGACTGCAATTCCAAGTTAGTATTT  
A\_14\_P112888 CAATACTACCTTCTGTTGGTCCCCTGTTAGACAACATACCTTTCTTTGAAATGTAATG  
A\_14\_P111533 GTTTTTTTTAGTCTTACTTGATTGTTATGCAGATAGATTTAAGAGGGGCTCACCTTCCA  
A\_16\_P19952068

TTGGCATTACTTCAGATCATCCAACCTCCATATACTGCAATGTTTAACCACAAATTTTCCA  
A\_16\_P00161047

GAACGGCTTTCCAAATCATTCTAATAATGAGTAGCAACACAGAAAAGACCTTTTTTCC  
A\_14\_P101016 CCAAGACTGACTCTGGTAATGAGGATTTAGTCATAATTTGGTTAAGAGGTGATTTTAAAGT  
A\_16\_P18018344

AAAAAAGATCCTAAAAACGCCAAAGAAGTAATCGAATTTGGTCTGTTTCATCTATGCAGGA  
A\_14\_P117074 TTTCAGTGCTGCTTCATTAACCATAAGGATGTCTGTTAACAGTTTGAACCTAATCAATCC  
A\_14\_P120721 AAGACCATAAATCTATTTATTTCCCAAGAAACAAGTGGTCCAAACATGAAACAAGTGGTC  
A\_14\_P117066 ATATGTCCCTCTTCACCACAGTTACCACATTAGATTGTAAGTATCTATGTATCTCTGCCT  
CUST\_8918\_P1426210822

GCATTGTTTTAGCCAAACCCTAAAGCTGATGGAAATGAAATCCACTGGCTTTTAT  
A\_14\_P117047 CTTGCCATCCTTTGTAGGATGAGTTTGGCCTTTGAATAAATGATTAAGAGCAAAAGATT  
CUST\_6461\_P1426210822

TTTTTTTCAGCATTTCACAATTTCACTAAAGCATTTTATAAGCAAGTGAGTTGTAGGAG

CUST\_1498\_PI426210822 CCAGCTGGCCAGAGACCACTGGGCAGAGGAGGTGGGGTGGCTCAT  
A\_14\_P103057 CTCTGAGACAAAGATTTTCACAGTGATATTTAAGTTCAACATCAGCAGCAGGTGATTTCA  
A\_14\_P134497 TGAGCACAAAGATAACTCTCTTTTTGCCTGTTTTAAAAAATATCCCAACGTGTTCTGCAT  
CUST\_7433\_PI426210822 CTTCAACCTGCTGTTTCAGGGCCTCTGCCCTCATTCCCTGGAGGCT  
A\_14\_P118581 CCCATTTTCACATTTGTCTCCATGCCAATGTTTCATGTCAGATAGAACATATTTTGACTT  
CUST\_8321\_PI426210822 AGTTTTCCCAAGAAGCCCTCTGTGTGGTGGAGGCCTCAGCCAAT  
A\_14\_P104072 CTACTAGTATATGTAACCAACAAATGGCAGATGGTGGCCAGAAAATGCAGTATGTGTT  
A\_14\_P120142 ATATATCCGCTTGCCTTGTCTTTTCCTCCAAACGGGTTGATAAATACCAGTAAAT  
A\_16\_P18441449  
CCCTCATCTATTCCTCACTTCTCACTCTTTATTTGCTCTTTCTACTTATCTCAGCCAAAA  
A\_16\_P19780571  
CTCCAACAAATGTAGTAATTACCGTAGCAACTTAAAAGACTAGACTTTTTGGGCAAAGGA  
A\_16\_P02991290 ACCGTGTGATGCTGTGGGTATAACGATAACTCCCCCAAACGTAATCATAATAC  
A\_14\_P128122 CTTGGCAACAGATTTATTAGTTCAGAGTAGAAAGAGCAAGAGTCCAAGTGCTTTGATTGT  
A\_14\_P134263 GGATTCTTACGATTCATGGGAATCGATGATTGATGATTTTCGATAGTTCGGTAATCGCT  
A\_14\_P100740 ACTCTGACACATACATGTGGTTATCTTTTGCCCTGTTGTGATGGATAATTTGAAAAGAAG  
A\_14\_P121393 GAACATTTGTCACTGTATGTCAGCCAAGGCCTAGGACATCAATAATAAACTTTTCCCT  
A\_14\_P119640 CTCTGCCTAGAATGCCAGAGCCTAGAACTAAAATCTGAAGTCTTAAAACACAGTCTTAGA  
CUST\_2016\_PI426210822  
GGCTAACATTTTAGATCTTCTGCAGAAGATAACAAATGGGTGAATGTATCTAGCATGGAA  
CUST\_1472\_PI426210822 TCACTAGCCTCCCACTTAATGACTGTGGCTATTGCTCCTCTTTCTC  
A\_16\_P17602269  
AATTTCTTGATACATGGCATACTGGAATCTTATGATGAATTATTTAGGGGACCTGTGC  
A\_14\_P200608 ACTTATTATGTGCCAGTCTTTTCACATAGAAACACCTCACAATATCTCAGTGAGGTGAAA  
A\_14\_P139861 GAAGGTAGGAAGACAGTCATTGCTCTTCAGGTTGTTCTGTGCAGAGAATTAATTG  
A\_14\_P105551 TTGCACCATGTGCAAAGTTTGTACATTTATCTTTGGTCAAGGAGATTCTTAGGTTATTG  
CUST\_9682\_PI426210822 TACAATCATGTTCCATGTGACAATAGAATCTTTCCCCCTTGAACCTCACATTAT  
CUST\_475\_PI426210822 ACAAGGTGCCTCTTTCTGATGTCAGAGAAGTCACAGGTGATGGATT  
CUST\_5153\_PI426210822  
ACATAATGTTTCTGCAGTTTTGAAGCATTTCAAAAACCAGAGGATGGTCTCTCTCATTA  
A\_14\_P121686 AGAAGTGTAATAAGTGGTAGTCCCAGGAGTGGTGATTATTATTAATGCATCTCCTGATT  
A\_14\_P101668 CTTAAAATTTGGTGGATGAACCTCATTCTCCCTTTAATTGCAGAACAGAAATGTGTGACA  
A\_14\_P104378 GACACGAGTGCAGTAAAGAAAAACGGTTATGAGCGTAAAGTGACAGCCTC  
A\_14\_P200159 CTTGTTTGCCCAAGTAAAGTTAGCATCCTGGTCTCTGATCCTCTG  
A\_14\_P130287 ATAAAAAATAAAGACAGGTATCGTCTTTGAGGCCCTAACAAAATATTTCAAGCAAATGTT  
A\_14\_P129263 GCACTTATGAAATCTCAATATACAGTATGACATGGTGCCAGCAATTCTTCATTCTAACC  
A\_16\_P02399993  
AAACAAATGAAACTCACACTGAAGGAATATTGAGCAAGGAGTCTAGAACTAGTTCTGTCT

CUST\_398\_PI426210822 ACATCAAGACGGCTGTGCTTAGGCACAGAGCGAGTGCTCGGAAAT  
A\_14\_P131870 GTATCTTCTCTATTCAGTAACAGTGTCCATCTCACAAAGATTATGACCAGGTGAAGT  
A\_14\_P122058 TGCTAGGTTGTTTCTTGCTAAGTCAGTGCTTTGTTTCTTGCTATTCTTCTAAAAAACTG  
A\_14\_P133700 GGATCGTGGTTGCATCTGGAGAGAAAAAAGGATCAATCGACACGTTTTAGAA  
CUST\_7666\_PI426210822 AAAATCCCTTCTTACCTGTCAATTTGTATTCTCCCCATTCTGTGTCTGACATCTT  
A\_14\_P102202 GATACATTATTTGCCCTCTCGAAAGGCAGGCTCTGAATTTGATTCAGGTTTGTAAAC  
A\_14\_P106951 ACTGATAACACAATTTACCCTGAGCAGGGACCTGTAGTTTTGTATGATTCTTAGGATTTA  
A\_14\_P127911 TAGTGACTTCTTGAAACTGCATCTTCACCCTTGTTTCTTAAACAAAACCTCTCTATTTGAT  
A\_14\_P102709 CCAGAAATGGTGAAAATAAAATAAAGCAGGTTTTTCTCCTCTACCTTGACTCGTGTCT  
A\_14\_P103143 TGCCAGTGAACAGTTGTTATGTTCTAATTTGTTCTTCACCTCATGACAGGTAATGTTTAC  
A\_18\_P14139017 CTCTACAATAAGAGGCTCCAGCATCATGATTCATTCTTGAGAATGACTCCTCTGAC  
A\_16\_P58424482 CCTCAGTTCTTCAGTTCTTCTCCATATGGGTCCCTCCAACAGGTA  
A\_14\_P121909 TGGTTCCTTCAGCATCTATGATATTAACCTGTGACGTAGAGAGAAAACATTCTTTCTGA  
A\_14\_P126705 CTTTGCCTGATAAATGCCACACTTTCCTCCAGAAACCTAAAATTTCTAGGATAAGGAC  
A\_14\_P112157 ACTGTTGATTGACAAATCTCTACAGATGGATAAAGGATTACAGCATGATGGTTATGCAACT  
CUST\_3794\_PI426210822 CTGTAGGTCTCTGGGTGCAAAGTAATGGCTGAGCATGAAGCTGAATTA  
A\_14\_P116967 CTGACATAATGGGGATTAATTAGTTGATTGCTGTTGAGATGGTAACAGATTTGCTCCTAA  
A\_14\_P112032 AATCTAAGAAATATGATCCAGCCAATTTACTGGAACCTCACCCATTATGCTTGTCTGTA  
A\_14\_P110535 TGTTTATACACATAAATATATTCCATGGGTTTTTTAAATGGATGCTTAGGAATGGAAT  
A\_14\_P130972 AAGGAACATTGTAAGAAATGCAAAAAAGTGCTAGGTGAGGCTCAGGTCTTACTGATAATA  
CUST\_3648\_PI426210822 ATAAGAATTTCTCTGTGCCACAAATAATGCTCCCCACCTGTATAGAATGCC  
A\_14\_P127000 TACCCATAATCATCTTCTTGCGGCACAGAAATATTATTCAATTGGAATCAGAGTGGATCC  
A\_16\_P37454424  
CTGTCTTTAGCCATAGAAGTTGTATTCCCCATTGATAGATAACATCAGACTTTGCACCTA  
A\_14\_P122579 AAGCATGGCTCTGATTCTCTGAGATATTTGAGATTTACACATCCCAAATTA AAAAAGCCATT  
A\_14\_P106010 AGGCAGGATGTGTGTTTGATAGTTCATGGTTTATCTTTAAACCTTCTGTTAATTTCCCTT  
A\_16\_P01800112  
ATTTTGAGTGCTTCTCATTCCAAAGTTAACGCCATACTATACAACAAAGGAGATTCTTG  
A\_14\_P133047 TGTTAACATCACTATTGTAACCTGCAAGTGTGTGACCATACTTGTCAAGAAAGTCAAGTCT  
A\_14\_P102051 GTATAGGAAAATAAAAAGCGGAGAAGGTGTCTTCAGACAAATATGGTCTCTACGTGTTGG  
A\_14\_P100596 CTTTTTAACTTTTGATTCTACCCACAGGTTTTGTCAGTCCATAAACCCACATTTCTTAGA  
A\_16\_P40969646  
AACCACCCATATCACTCTTTTTGAAAATGTTAACATTGAAGTATTGTCCCTGAACAATGA  
A\_16\_P15577176  
ATGCTTTTATCTCATACCAAGAAACAGTGTCTTCTGAATTATTCCAAGCCGATTGTTTGC  
A\_18\_P16754102  
CTTCGTTACCTCCTGATCTAAAACCTTTCATAAACCAGTCTTAAGTAAACTTGTCTGCTC  
A\_14\_P103950 CTGTAAAGAAGGAAATATTGACAAACCTCATATGTTGCTGGGCCTGGAGTAATCTCTT



CUST\_10256\_PI426210822

TAGCAAGTCCTCAATTCTGACACTTATTATAAGACATCTGATCCAGAGCTGCATGTTT

A\_14\_P105083 TTACATATGTCACCATTTGCGTGTTCTCCAGTATTTGCATAGAGATTTGTGTTAGCAAGT

A\_14\_P133621 ATGTTCTAGGAACCCCTACTTGGAAACCTTTGATTAGAAAGTAAGAACTCTTCTGCTTTCA

A\_14\_P135639 ATTTTCAATTTATTTATTTATGTTTCTATTACAGGAGACGGCATGATACCCATGTAGGGA

CUST\_6400\_PI426210822 CCTATCCCTGTAGGAAAGAGAAATCTCGGAGCTTTCATTGCATGAAAACC

A\_14\_P127691 ACAAACCTTGCAAGTTGCATTCTGGCTGTAGTTAAATGTTTATCAAACATGTCCTCTTGA

A\_14\_P118543 CGAAGAGATAGTTTCCATGGTTAGAAACAAATAAGAAGGTAGTGTCTCAAGTGTGGAAT

A\_14\_P201824 CATAACTTACTTATCAAGAAGCCAAACAATAAAAGCATTACAATCAGTGGCAAGCACGCT

CUST\_5742\_PI426210822

GAGCTGAAATGAAAAGTTGTGATTATAGAGAGACATGAAATGTGTCCATAAAAAGGCCA

A\_16\_P36387159

CCACTGAAATTCTGAACTGACTTGATCATGCAAAAAGATATGCCTGTATTGTTCAACAAG

A\_14\_P132098 CTTGTTCTCTACTCCTTTGTAAATATAAGGCGAACAACCACTTGCCGATTATTTATGTC

CUST\_8023\_PI426210822

CTGTCTAGAAAGAGATGTCCATGTTCACTGTAGATGATGGTCCATTGTAATGGAC

A\_14\_P114483 ATTAGGTTTTTTTAATTGACTTCACCTGATAAAAGGCAGCCAATCCTTCTGTCTGTCATC

A\_18\_P16338662

ACACATTCACAATGACCTACAGAGAAAAAAAAGGCTCAAATTGTATAGCAAACCACTAC

A\_14\_P132079 GACAGATGTGTAGTTGTATGCATTTTTAATCTCAGCCATATGGAGGCAGAAATCCTACTA

CUST\_8763\_PI426210822

GCAGTTGACAGTGACACTGATTTTTAAAGCCTGCACATTCACATCAGAAAAGTC

A\_16\_P00136938

TCAAGTATAGCCTCAGATCCTATAATAAACTCCACCTATGAATAGTATCCCAGTCAACAA

A\_14\_P127354 CACCACACTACATTCTGCTCTTCAGTAACTTCTAAAAGTGATGGTAACACCATAGATACA

CUST\_3323\_PI426210822 ACTAGGGCAAGAAAAGAGGGGAAGGTTGGGATGCATAGAACTGAT

A\_14\_P136624 ACAGTGTAAGCCATTTGTAGGCTGATTTCTTTCTTAGTTCTTCTTCTTAGTAAAAGTAA

A\_18\_P14133616 CTTTGTCTTAAGACAGAGGGAAGGACATCTGGGAGTGATTGTGTAC

A\_16\_P21483480

AATGCTAGACTGAGTCATCTACTGCTTTCCAAATGAACAGAGTCAGAAAACTTGTATGA

A\_14\_P113550 TACAGATTTTCTGAATGGTCTTGCTTCTTTGTCTATCTTGTCTGATTTTCTCCTGTCTGA

CUST\_6873\_PI426210822

AGAAGGCATCGAGGGCTTGTAAGTTTGTTTTTCTTATCAAGTGATTCTTCAGATTATATC

CUST\_6132\_PI426210822 CTCTTTGAAAGCCCAATCCAGAGAGGAGGTAGATGGGCAAAAAT

A\_14\_P131802 CTTTATTTCTGAATGCCTGATTTCTGTCTATAGACCCACACATCTGAGTAATATGCCTA

A\_14\_P132087 ACCTTTCTGCATCTTTTATCTTAAACATATAGGGTGACCCAAACACTGCTTTGAACTTC

CUST\_9872\_PI426210822 ACTTCAGAGCCACTCTGTCTACCACCTCCTACCAGTAAATGTT

CUST\_4971\_PI426210822 ATGGCATGTAATTCTCTTCTGGAATCCAGTGTCTGGGCAAGTCCT

A\_16\_P02348790

GTATGATTAGCACTTATGTTTCCTAGGACAACCTGTAAGTGACAACAAACAAGGAAAGGAG

CUST\_3280\_PI426210822

TTTTTTTTTCTTGTTTAAGAAACAGATAGTTAAGAAAGGGAGATTAAGTTGGAGTTAATA

A\_16\_P17583729

TCTAAGCCACTTGTCTATAATACTTTCCATCAACTCGGTTAATAAAAAGGTGCACACACA

A\_14\_P117551 GTCAAACACAGAGTAATTCCAATACCTGAAACATAATGCCACAGGCAGCACTAATTTAAA

A\_14\_P101577 GAGGTTGGCAGAAGTAATTAATAACTCATTCTCTCTGCACAAGTTAGAACAGACACTTCA

A\_14\_P124415 CTTTATTAAGACAGGGGCGGTAGAAGAAGGTCTCCATGCTGAACAGATTACATTATG

A\_18\_P10728122

ACCAAGAACTCAAAAACCTCCAACCTCCAGAGAAGAATGACATTTTAATTCTAAAAATCCT

A\_14\_P130608 GTCTATACTGACTCTTATTTCTCAGGGAGATCACAGCAACCTAAATAAACAGATACCTT

A\_18\_P17001147

AACAAACAGGTTTTTCGATAACCAACTTCTTTCATTTTCGTAAGCACAATAGCACAGTGT

A\_14\_P109848 CTTAGTCCAAACAATGTCTGAAATTGTCCATCTAAAATAGAAACCACATGTTACATCTCG

A\_14\_P118427 CAATTCGACCTTCATTTCTTCAAGTGATGGGACTTCTTTTATTGGAAGGCCATTTAAAT

A\_14\_P128102 AAGGTTATTTATTAAGAGTTATTTTATCTTGATACAGTGGATCCTGCCCTCATCCCCT

A\_14\_P128883 CAAAGGATGCTTCATTCATGCTGATCAACTTCAGGGACAAATCCCTC

A\_14\_P134460 CTCATTTTAAAATTATTTTGATAAATATACAGTGGGAAGAATTACCCTACCTGTCTGTCCAC

A\_14\_P115489 CTTTTCTCTAGGGTCTTGCTGTGGAATGCCATATTAGAATGAGGTTTTTCATGTCTTCAA

A\_16\_P15908441

AAACCATAGCCTATTTTTAGGACAATGAAATTTGATGACTCCTCAACTATCCATGTCAGG

A\_18\_P14135862 CTAGCCAGTCAGGCTGGAGGCCTCTGGTGGATCTCACAGTCACAG

CUST\_7171\_PI426210822

GAGCATCTGAGCTTTTTTAAAGCAATGATTCACCCAGCTTTCTAGTATAAAAAACTTCTT

A\_14\_P111939 AGAAAGTGCGAGTTCTTAGAAATGATCGACGAGAAGGTAAGATTCTTCTTAATTCAGCG

A\_14\_P118253 GATGATTACCTGCAGAGCAAGGAATGTGACTTCCAGACCAAATTTGCACT

A\_16\_P01091228

CCCTTCTAGGTCTACCATATCAGTGATGTTAAGTGACAGTATCATCCATAAAACCATCTT

A\_14\_P119086 TGCCACTGAAATTAGAATAATCCTCCATACTACTCCCCAAAAGACAGAGGCAATGTATAT

CUST\_7336\_PI426210822 AGATGTGGGACACTCCTCAAGGGTTTCCAGGTGACCACAGAGGGT

A\_16\_P02009243 TCTCATTTTTATCCACATTCTATTTCACTCACTCAATACATTCTCCTTAATAACCTCACC

A\_14\_P117443 GCACTTGTTTTGCTTACATTGTTGAAGAATAAGTCTAATTGAAATGTATGGGGAGATGTC

A\_14\_P121746 TCACAGTAGAAACGTGTATGCCATCAATAGGAACAACAGATAAGCAAGAGTTATAGGTTC

A\_14\_P138536 GTCATTCTCAGTGTGTTTCTTAGCAACGAAAGAGGAAGTAGAAACATTCTTTCAAATTGC

A\_14\_P135814 GTTGTAAGATAAATTTTTCAGCATTACTAATCCAGCCTTGCCAATACCCATGGAGAATG

A\_14\_P118924 GACACCTGTIATTTGAGGACTTTACAGGTTTTTATTTCTCTTTGATCACTCACTTCTGGA

A\_14\_P113582

AGGAGAAATGAATGGAGAGTTTACTAGTTTCAGACTGAGTCAACAGTCAACACAAAAATG  
A\_16\_P21470443

AGTGCTGTTTGACAAGAATTCCTGTAAAGCCCTTAAGTTATTGAGTAACAGTTTAGTGCT  
CUST\_9355\_PI426210822

TCCTGATACATAAAACCCCAACTTTATAAACTGTAAATTGGTAAAAGATTATTTGTTG  
CUST\_9403\_PI426210822

AAACAGCTTTATTTATCCTCAACTCTTTGTGAACATGTCAATATCAATATCCAAATATCT  
A\_14\_P117651 CAACACGAATGTTGTCTAAATCATCCCAATTCTGCAAGTGGCATAAAAATCTGATTTTCAT  
A\_18\_P13675214

ATTGTTTTCTCTGCAGTTGACCCATATTTGGAAAAGCAAACCATAAACGGAAGATTGTTT  
CUST\_10076\_PI426210822

TGGAGGGGATTTCTTTAGGGAAAAAATTTTTTTTTCTCAAAAGGCTAACTATGACTTTT  
A\_14\_P202213

ACTGAAAAGACAAAAAAGGATAGAAGATCGAGGTAGTAAAGGCCATCCACATTTTAAAGG  
A\_14\_P108042 AACTACGAACCTCAGTTGAATCATCTGGTTTTGATAAAGAATTATCCGAAAACGATCGA  
CUST\_592\_PI426210822 GATAATTGGTTTGGACTTAGCGGGAATTAGTGGGCGATGGAATTACCAC  
A\_16\_P21572251

AAAAAGGCCCTCTAATGCATTTAATCAATTCTACTATTGTAATTACTACCCAACAACCTCA  
A\_14\_P103380 CATGAATCTCAGATTCAACATGATCATTTTTCCCCTGTCCCCAGAATCTGTTATATTTTT  
A\_16\_P18818785

AAAGCACTCTCAAAAACATGAACTCATTCAATTGAAAGCATGCTTTCTAGAATCCAAATCA  
A\_16\_P15713007

AAAATGTGTCCGACTAAACAGAACAATCGAATCATTGTCTCTTTCAAAAGTGGTGTGCATA  
A\_16\_P20540894

TGAGGCCTACCATATACCTATGTCAAAACCTGCAATTTATCAAAAATAAAGCCCGAGATA  
A\_14\_P117311

AAAGGAGAAAAGTTTATTGAAGAACTGGCAGGTCACATTAGAGAAGGTGAAATAAGGTAG  
A\_14\_P139959 TCTCTTTCCTCTGTTCTTCTCTCTATCCTTCTTTGGTCTGCTAAAACCTGTTATTTTAA  
A\_16\_P38610063

GTGGTCAAGAAGACAACATACACATACCTCAAATTAAGACTAATTTTTGCCTCCTATGAC  
A\_14\_P125238 TATATCACAGAGACTTTCAATGGTGGGAATAAGAAGGGGAGGTCCTGATATTTCAATTACT  
A\_14\_P131376 CTCACTTGAATATCTCAGATAACCGATGATCCTCCTAGTTAGTTACAGTTTTGGTGATGA  
A\_14\_P108933 GCAGAGCATTAGCAGAATTCACCATGCTTTGGGGATTAAAATTTTTAGGTCCATATTAT  
A\_14\_P130490 CTATTGACTTTTGTGCTGGGGGTTTAGAGAAAATCCTATCCTCTATTGTCATTTTCTTTC  
A\_14\_P132151 CAATCAGTTCAATTTAATGGCAAGTGAGATGATTGCACTCAACAGATCTTTACCAGATGT  
A\_14\_P106704 CAACATCATTACAGGCAGAACAGGAGGAATTAGCATAGAATGGGCAGGTGTAAA  
A\_18\_P15927628

ATGGTCCTTCACATCCAATCTTATTAGCATTTAGGTCATGGCATAAAAATCATCGTTTGC

A\_14\_P136817 ACGTCTCTGTGTCCTTATCCATGTGAATTTTCGCAATTAGAATAAATGAAAAGCAGGAAT  
A\_14\_P124982 TAAAGTCTCATTTAACATTTAACAAATCAAAGAGCATGTCAGAGGCTGGACATCAATGGC  
A\_14\_P126941 ACCTCCCAAGAAGAACAACCTTTAATTGAAAGCAACACTAATATAGAGCCACTTCCTGAAAC  
A\_14\_P107186 ATGATGATTCAGAACTCACTAAGAACCAGGACATTTATCAGAATGTGGCAGAAATGTTT  
A\_14\_P102619 CTCATGAGCAAGAAGAACATGAATTC AACACTCAACTTCTTCATTCAATCCTACAACAAT  
A\_14\_P133840 CACAGTCATCCTTGAAATGTGTCTTTTATGGGGACAAGTTCTATCTACAGGTATTACGTT  
CUST\_6058\_PI426210822 TTCCAAGAGGTGGTGTGAGAGGAATGAGGACTCACGCATTCCAA  
A\_14\_P116537 GAGTGCTTTATCCTTGCTAAAATACCTTACCCCAAATGCAAGAAACAAATCTTATTCCTG  
A\_14\_P106036 CTTCTTCTGATTACAGATGAGTCTCTCAAAGCCCTTCAGGAAGGCAGTTC  
A\_14\_P123600 TTTGGTTAGAATCTACTTTGTGTCTCTTGGATTTACCTGCATATACATTGTATGCCTCCT  
A\_14\_P116885 GATGGCAATGATATCCTGGAGGGATTTGTAGTCCTATGAGAAAAAAGAAGACTGAGTTAA  
A\_16\_P18505560

AAAAAAGTTGAGATTCAGGAGTTTATGTCCAAACCCAGATCTATTTTTGTGTAACTTGG

A\_14\_P130843 CTATTAATAAATAATATTGGGAGAATTCGGTTAATGCTTCCCTCCACCCTCAACACACA  
A\_14\_P112131 TTGAAGATGGAATTTCTCTTAATTGGGATGTGGCAATGAGGCTCTTTGTCTTGGATAT  
A\_14\_P133854 TTTCTTTTTGTGATCGCGACATAATCTGGAGTTAGGTTCAACTTTAAGGGATGTATTAGA  
A\_14\_P115487 GTGCTTAAGATTGTCTTGATCTGACATATACACCTTCTGGGTTATTTACTCATTGTGCC  
A\_14\_P200455 CTCGAACTAATGGTTCTTCTCCTTGACCTCAAGATGCACTCTTTTCTAGAGC  
A\_14\_P112149 CAAACGATTCATCGGTGACTATGAAAGAAATGCAGGTGAGACAATGCATTTGAG  
CUST\_9321\_PI426210822 ATGGCTGCTGCTTGCACTTCAGTTATTTGCACTTAATCATGCACAGCTC  
CUST\_10218\_PI426210822 CTTAGCCCATCATTAATCATTTCCAGCACCTTCAGGGTGGGCTC  
A\_16\_P00685608 AAGACCGTCTGCCACAGTTGTGAAGGCCACTGCTAACCAGGACAAA  
A\_14\_P118451 TAATGGATTTCTTGTGAGGCTGTTCTGATCTCAATGACCTCCTGATTGCCATTTAAAAA  
A\_14\_P138067 GCGGGATAAAGAAGCAATCACAGAAAAGCAGTCGGACCTAGTCAAGC  
A\_16\_P58424241 CTTCTCACCGTCCCACCTTGCTTGCCTGGCAAAGTGTTAACCTA  
A\_16\_P36861182

GTTACTGATGAACCTATTCCTTGACAAGTAACCATCTTTTCCATTTACATCATAGCACA

A\_14\_P110322 CTATTTAGTGGTTCGAAGTGACTTTAGAATCACTACCTTGAAATTCATCCAAAAGACCAC  
A\_16\_P19232439

AGCCATCAGAGAAAGATTGAATTGTTTCACATCCTAGACATAATCCAAAGTTCACAATGG

A\_18\_P22840694 GTTGAAGAGACAAGAGGGAGGATGGGAGGCTGCTCCAGAGATGAG  
A\_14\_P119187 GGTGTTACTTAATGCTATGTCCAAATCCCACTTAAAGTTACTTAATGCTGTGTCCAAATC  
A\_14\_P104543 GGTATTTAATCATCTCCTGAGCACTGCCTAAATGGAGTATTCATTCTGAGGGTGATTA  
A\_18\_P22842656

TAGAGTCTTTAAAATAACAGTGCCCTAACTTCTGAAACAAAAGAAGGAATTGAGTGCTGG

A\_14\_P201364 CTGAAAATTACTTAAAGGAAGAGAAGTGTCAATATCCTTTTTAACCTGACTCATCGAGGTG  
A\_14\_P104937 GGAAAAGAAAAAGAAGAAGAAATGAATTTCTATTTCTGTAGCATATCACAGCCTTCAGGA  
A\_14\_P118516 CATCGTCTTCAGAGCCCTAATCTTTGAGTTTTAGACACTTGAAAGTCCTAATTAGCATT

A\_16\_P30952375 TTCAGAAACTGTCTGGGCAGAAGATAAATCCAGTGCTCCGGATGTTTG  
A\_14\_P103578 CTGTATTGGAATATGTGGCTATCAATGACCCAGATTGTTCCTTTTACACCATTGGAAATA  
CUST\_9311\_PI426210822 AAGTACCTTCTGAAATGTGTCCGCAGGCCAGGCTGGAGGACTAT  
CUST\_851\_PI426210822 CCCGTGGCAGCATAACACAAGATGCTCTTAAGGGCATCGAGCCTA  
A\_14\_P110048 AAACCTGTAATCTGAATATTTAAGACACCCTCTAAAGAAGTGCTTCTCTTTTCAGAGAGGA  
A\_14\_P117460 AAGAGTAATTCAAAGAAGTGTGGGCCTTACTTGAACTTCAGAGATGTTGATCATGAATT  
CUST\_422\_PI426210822 TTGTTTCAGAGGGGCAGAAGAGAACTCCTGTGAAGGGAAAACATTTAG  
A\_14\_P137089 ATCTCACAGAACCATGAGTCGGGAAACAGATTTTGGGAAATGCTGATCATAG  
A\_14\_P201057 AACTTACAGTTGGCTAGGGAAGATTGGCTAAAGTTCTATAAACTGCTTTTTTACACCTTC  
A\_16\_P03036991  
CCTAAGGACATTATGAAGAAAACCAGAGACATTTTTTAACCTATGTAATCACTGAGTTGCC  
A\_16\_P00057783  
TTTGGACTGATATCTAGAATGGAAGGAGTGTGAAAATTTAGGAACTGTATCACGGCTATT  
A\_14\_P108303 CGAGTTTGATCTTATTCTTAAGAGATAGAATTGGGGAGTAGTTCTTCCATCCAGTATTGG  
A\_14\_P133421 TCAATTGTCAAATAATTTGCGTATACTGCTCCCTACACACACATACTAGGCTATCTCTCT  
A\_14\_P131163 CTGTGTATATACAGGGAAAGATTGAAGAATTACCAGAGATCAGTTGCTATGCAGTTGAGA  
A\_14\_P136973 CTCCGCCAGCAAGGATTTAAAATCACTCAAACCATTAACCTCCAGAATTTGCTTTTTTC  
A\_14\_P122634 TGTTTGAATATGGGAAGTTTTAAAGACAGAGGAGGTAAGATGACTCTAAATGACACAGTT  
A\_14\_P111932 CTTGGCAAAGATTAAAGGAGATTTTCAGGTTTTCTAGATTTTCTTTTGGCACAAATGGAC  
A\_16\_P16246739  
CAGGACCAGTATCAAGATCTCACATCATTCTCTTTCACAAAAATAGTCTGCCTTTGAATT  
CUST\_9829\_PI426210822 CCTCTAACTGGCTAGAATGTAAATATGTGTCCTGGGAGCAGCTGGAAA  
A\_14\_P200026 ATAACCTTCTCCAAGGGCTTCTGATGACTAGGGTGATTTTCTAATGTTTAGAGTATTCA  
A\_18\_P14672136  
AATCTCCAATGATTTCTACCTAAGCGTGAATGAAACATGAAAGGAGCAGTTCTAAGAAAT  
A\_14\_P104931 CTTCTTTAATCAGACTTTGTGACTTAAAAGTTTGGGGGTTTTCTTTGAAAGTTTCCAGCC  
A\_16\_P36138947  
CGTGCTCTCAAATGATTACACAAATCACTGTTGTAAATCACAATATCCCTGACTTTGGAA  
CUST\_6395\_PI426210822  
ATATTCATATTCTAAATAATTCATGTTTTCACTGAAATCTGCAGGAATCGAAAACAATAG  
A\_14\_P108238 TAGGGCAAATAATAGTGGTGATCTGGGTAATAGTTTCTCAAATAATGACAAGCAGAAGT  
A\_14\_P111230 GCTGTGACAGGATGGAAATATGGAAAGTGCAGACTTTAATTCTGGTTGAACTATTATTGT  
A\_14\_P109213 ACTAAAACCCATCAAATCCTAAAACGTTGGCACAAGGGTAGATCAGATAGATGTTATAC  
CUST\_6763\_PI426210822 CAAGGTAAAGCCTCATTTTAAATTTTTTGGCCTGGAGCCGTTTGGCAC  
A\_14\_P121856 GTTTCAAAGTTCAAATACTTCAAAGTGAATGGAAGTCTTTTCCACTTTTCTACCC  
CUST\_2616\_PI426210822 GTTTTAAGGACGGGAAGCTCTAGATCAGTGATTAGGCCAAGAACGTCT  
A\_14\_P136775 GTAAGAGACAGGGTATTGGGCTTCTGGAGAAACCTTTGTGTCCCTA  
CUST\_4786\_PI426210822 GTAAATGGCATAAAGACATTGAAGTGTCCCTGGACATCAGTCACGTGG

A\_14\_P101399 CATACTGATCGAAATGCCAGCATCACTGTATAAATTAGGAACAGCAAGCAATAATTGAT  
A\_14\_P108367 ACAAGAGAAACGGGTGCTGGTGAGAAAGGAATTACTTAGTAACTTTAAATAAAGATCCT  
A\_14\_P130176 CTATATTGTTTCATCCTCCCTATTTTGACTCACCTTTAAGCCTCAAATGTCCACTAC  
A\_14\_P135136 CTGTCATATGCTGAAGAATAACAAAGGTAATATGACAAGGAAAATGCACCCCTAATAGCC  
A\_14\_P132493 CAAGACCCTTCCTAAGTTCCTCACTCCTTCTGTGGTCAATGTCCTC  
A\_14\_P104578 TTTGTATTTGCATACACTGTAAGGTATGTAAGAGACTGGAAAATCGCTTTTCATGCTTCGT  
A\_16\_P20870563  
AAATGGGATTTTGTAGACCTTCATGCAAGGCTAGTTTATGTTAAACCAAAATTCTCGCA  
A\_14\_P132363 TAAGAAAGTAAAAGTTTTAAGAAGTGTCTTGAATTAGTCCAAGAAGCAACACTGGCTCC  
A\_14\_P125300 TGTCTGCTCAGTCAGGTGCCACAACATTCGGTCATTTATTTTTCTAATAIGTAGAGATT  
A\_14\_P109302 TCTAATGCCAATTACTGTTGTCATCACAGATTCTGCTGTCTACATCAATACACCTGAATA  
A\_16\_P21256315  
AAAAAGACAACCTTCTGAAAGGTGCAACATTCCTACTTAGGACTTGATCTTGAACCAGATT  
A\_14\_P134372 TACATTACTATCAGCGTCTCGAGATCGTCGAAGCCGCAATTAGGACTTTGTTTT  
A\_14\_P133612 GTCCATGATCCACATTGAGCGTTTTACACCTATCCCTGCTTTACTGTTCAATG  
A\_16\_P36706450  
GGGCCAAATCAGAAGAAATAAATAACATTAGTTTTGTTCCCTTAATTATCACCACAAGCGC  
A\_14\_P125511 CTAGGTCCCCTGATATACTGATGGATTATTTCTGCTGTAAATATGGTAGCCCAACTTA  
A\_14\_P124234 ATTTCTAGGACTTGTAAGGATTCTGTCAAAAATGTGTAACAGGGATGTATTACTCTTGCC  
A\_14\_P136611 CTTTTTCGAATGTTAAACCCTTATAAAAGATGCTGCACTAACCATTCTGTTTCAGACATC  
A\_14\_P111814 ACATGCTTACTATAGAAATGTTTCCAGGAACTCTCTGTTTCTGTCACTACTGATAAGTAT  
A\_16\_P18080187  
AAGAGCAGCAATTTAACTTCATATGACTTTCCCCTCAATGATTAACAAGAGTTCACCTTC  
A\_14\_P114489 CTCAAAACAAGACACTTGGGTAAATATGAAAACCTTTACATTTTCTTGCCTTTGCCAAAG  
A\_16\_P21258202  
GACCCACACCTAATAGACATACAAAGGACAATTAGAAGAGTCGAGAAGTAAAAAGCAAAA  
A\_16\_P20582406  
AATGAGGCACATATATCTTGGCATCCCTATTTGAACTGTGATTAATAAGACTGACGGAA  
A\_14\_P120654 GGGTATTTCTTTGGCAAAGACTTATTAAGAAGTTGAGAAAGTTTGGCAGACAAATGCATT  
A\_16\_P15676977  
AACCTCAAAACACTGACATACTATGAGTAGAACTACTAGAATGTCTCCTTTGGAATCCTC  
A\_16\_P15219640  
TCTGCATACTGATAACATAACCAATTCTAATTCTACTACTTACACAAAGCCATCAGACTG  
CUST\_7042\_PI426210822 AAAAAATGAGGTGGCTGCTCTCTGGGGTTAAGCAGAGAAAACCGT  
A\_16\_P16286667  
CCCTCAGCAAATTCCTTATCCTTACATAAAGTAACTACGAAGAAAATGGTGTCAATTGG  
A\_16\_P41696649  
ATCTTAGAACATCAAGTTGTGTCTTGATACCTAGATCCTCATATGACCAAACATTGGCTT

A\_14\_P110692 CTCAGAACCGCAAACCTTATAGAGTTTCTGTAAAGCAGAATGTCTCGAAGATTTAGTCT  
A\_14\_P102680 AACTATTTTGACCTACAATAGTCGATGGCTTTTCTCTTATGCTCCCTGATAATCTAGAG  
A\_16\_P15258589  
AATTTCTTCCAATCTTTTCCGTCTAGAAAAGCCACTTTTATCCTGACCTTTGAACAACAG  
CUST\_5811\_PI426210822 AGCAGAGAAATCGAGTCCATGAGGCTGAGGAGGCCACTGGATGTC  
A\_14\_P106311 TAACTGTGGGTTGCAGATGAAAGGAGTAGACAAATGAGTGATGCCCTCAT  
A\_16\_P01943461  
AGACAGGCAATTCTAGATTCCAACTACTAAATGAAAACAAGCAGGATTATAGGGAGACG  
A\_14\_P101765 CATTCACTCAAGTCAAGTCATTCCTTAGGTAACCTGTCACTCTCTAGTAAGGATTC  
A\_16\_P00685159  
GAAGTTGTGATCAGTAGAAAAGTAAATTGGCTAGAGTTCAGTTGTAGATCTCTGCACTTGT  
A\_14\_P101822 GGTAATGATGCACAAAAATAGGTTCTTTTTTCTTCAAGGCAAAATCAGTCAGAAAGCA  
A\_14\_P133600 TCTGGCATATAGGCTGTTTTTATGTGAAACCCTTCCCTCATTGAAATTGTATACAGAG  
A\_16\_P00135847  
CCTGCCTTACTAGGAAGAATACAATTAGAGCAACTGTAGTTTTTGTGGAAGATGGTAGCC  
A\_14\_P115874 TGAGGTGTTTGAAATATGGAAGTGAATAACTTCTAGGTATTCGAAACCTGTGATTTCTG  
A\_14\_P200601 ACTGAGGAAAGAATTATATCTGGATCCTTGGTGGTCCTAGGAGAGTGATTTTTTTTAGAA  
A\_16\_P21054550  
AAAAGATGTGAGCATATCCTGACACTAAAATTTCCAGTGACTCATGGTTAAAAGTCAGC  
A\_16\_P18782151  
AAAACCACAGACGATATAAAACATGTGCATTGGAGAATGAAAGTTCCCTCATTATATGCC  
CUST\_10086\_PI426210822  
AATGATACATTATGTTTAGTGAATAGTGATTCCGGTATCACACTGACAGTACGGTGCAGTA  
A\_14\_P124019 TCTTTCCTTTTTAATCATCACAGATTTGCAAACCTTTATGGCCTATTTTGGCCTTAATCTC  
A\_18\_P22841772  
TGCAAACTACTTTCATAGATTTATTCTGGATTATTTTTCTTTGAGGGAAGGCTGCTT  
A\_16\_P01119198  
GCAAAATAGCCCTGTAGAAAATTGAAGTTAGTAAGTGGTCTGAAAAAATGTGTCTCGTC  
A\_16\_P16243737  
AATACTCTTGCCTCTTACTAAGTAGCACACTATCCCTAATATTCCAAGGTGAAACTCAGT  
CUST\_3604\_PI426210822  
ACCTTCTTTCCACCTGTATTTGTGTTACTTGGATATTTGTGTTTTATCTTCTGTACCAGA  
A\_14\_P201367 ATCTCTCACCTCTTTTTCTGTATTTTCATTTGAGTCTTTAGGCCAGTATGCTAGTGATG  
A\_14\_P116547 ATGATGCTAAGATTGGGAGTGAATAAAAAGATGAAAGTTCTGGAGGTATATGTGCACATG  
CUST\_7277\_PI426210822 CTGCAAGGGCATAAAAATGGGGGACTAAATAGGGACCAAATAAGTGAGTC  
A\_14\_P107568 ATTAGTGCCTCAAGAAACAGAAATCTGAAATCAACTACACAACGGTTTCGTTTCAAATACA  
CUST\_7458\_PI426210822  
ATCTGAAGCAGAACGAAAAAATGGTATGGAAAGCAAGGCACCTGAAAAAATTTTCAA

CUST\_6260\_PI426210822 TCTAGATTTTATGAGCTTGCTTCCCTGACTCCATTCCAGGTGATCTTGATC  
A\_14\_P113002 AAAATTTCTTTCTGAAACATTGAAACCTCCTTCTGCTCACTTTCTTGCACCTATGAATG  
A\_14\_P109017 GACTTTGATTCTTCTTATATCGAGAGGACTGAATGCTTCCTTCACCAACCATTC  
A\_16\_P16612383

AAGGAATGCACATAAGTTACTAAGTCCAAGGAAAAACATTAGTGTCCATGAGAAAAATGCG  
A\_16\_P03586707

ATTAAGGGATGATTTCACTGATAATGTTGTCTTCTTCCATGATCTAAATTCAACCTGCCC  
A\_16\_P16500019

ACAACCCACATTCACCTCTATGAACATAGTTACGATTTACTTATTGCTCCCTTTCTAACA  
CUST\_6752\_PI426210822 CTACAGAGTGACAATTCCTGGGGTGCCCTGTGGGAGCAGTGAGAG  
A\_16\_P39068227

AGTCTCTTTTCAAGAAACCATAAACATGTTAGCAACCATCAAATTTCTTTACGCCCTCAT  
A\_14\_P136226 AATTAAGGTTACCTTTGTTCCAAAGATGACGAAAATAGTTGTCCAAAGGCTGATTAAGAA  
A\_14\_P115136 TATCACTATTACCATCTTGTAATGAAAATGTGACCTCCTGCCACAGAGTGCTTTTAGAA  
A\_14\_P131097 TCCAAGAGTGATTCAAACATCATCTATTATAAGTGTAACACCCATGATGAGAGGGAAGC  
CUST\_3837\_PI426210822

AAAATAGTACAGAAGTAGAGCTGGATGAGAATCCAAGTTATGAGAACCTATTGATGAGAG  
A\_14\_P131914 ACATGTGGTTTAGATGGAAATGTCAGGGAGTAAGTATTTCTTATTTCAACTTAGAGGAGG  
A\_14\_P110392 CTCACTTTCCAGGATGCTAACTTTTGTCCATTGAACTTACTACATAGCACATGATCAAAT  
A\_16\_P00089979

TGTAACGCATACTTTTTTACTCCTCTGTCATAAAAATCATGCTCACTACAATATTTCCA  
CUST\_8607\_PI426210822 TATATATGGGAGGTTTTTACGGGGAGCCTAATGAAGTGTAACCACTCCAAAC  
A\_14\_P116434

ACTGGATCAGAGAAAATAATCAATTTCTCTAGAGAAAAGAAACCTTTGTGGGAAACAGG  
A\_14\_P113920 AGACCGGAGATAGGATCTTGTCTAGAAAGATGCATACGTTTTGAATTGACACAAGAATA  
A\_14\_P137205 CACAGTATGTTGAAGAAACATGCTCTGAGTAGTGGCAATTTAGTCAGATTACTTCCATAC  
A\_14\_P104548 ATGACTAGCACCATTAGTGAATTGCAGTGGCAGGATAGATTAGAAGTAGATGTTATGATT  
A\_16\_P00916199

AAATTCCTGGTAAAATCCCAATTTCCAGCAAATACTCTTTCTAAGTTGTCAACCTCCTA  
CUST\_10233\_PI426210822

CCATGTATCTCTTAAGCAAAGGAACTACAGGTGCTCCTTGACTTATCATATTTTAAAGTCA  
A\_14\_P200390 CACAACCTCAGAGTAATAAGGTCAGGGTATTACAAAGATGGAGCAGGTGAAATTTGTTTTT  
A\_16\_P16932275

TATAATGTGTTGGTTCACTTTTACAATGTGTTGGTTCAAACCTCTACTCCATATCGTCGTC  
A\_16\_P19616829

ATGCCCTTAAAGTAGTATTCACCTTATCGCACTGTATCACAATGAGTTGCTAATACACCT  
A\_18\_P23422686

CTGTTTTGTTTTTTGTGGTCAGTATTTAATCTCCCTTATCTACAATCCTGCCAAACTTCC



A\_14\_P108499 CCTTGTAGAATCCAGTGAAAACCTCAGAACCTTCTCCCTGAAAAATGTAAATGTATACTT  
A\_14\_P105825  
CTGTGCAGAAAAAATTCAAGAAAATGTTGCTGTGAAAAGAGAAAAACAAATCTTAAGCA  
A\_14\_P200884 GCACAATATGACCAGGTTTTGAAGATCTATCAGCAAATGGGAATGTTTGTCCCTGGTATA  
A\_16\_P01300228  
GGCCACCTGTATTATTAATATTAAGCAAATCCCCAAATAACCTACTGTGATACTACCCCA  
A\_14\_P107386 GTTAATGTTTTGTAATGTCCTTTTAATGAGTGGTGACATAAAAGGGCTGCTTTGTTGTCC  
A\_14\_P117918 TCTGATAGTCAAACCTAGATAGTAGATTCCCCATTACGGAGTTCTATGTGGAAATACTCA  
A\_18\_P16495440  
ATTCCATTTCCATCCACTCTATAACTCTCACACATAAACGGATATCTGGAACTCAAACAT  
A\_18\_P10149273  
CCTGCAGAACCCAAAAATTTAGAAAAAGTAGAACCGTGTCAATTTCAATTTATCCATCCA  
A\_16\_P03183105  
AAAGCATATGTTCCCGATGATTGCTCATTCTCTTTCCAATAATATCTTTGCAGGACAAAG  
A\_14\_P103447 CAAGCCTATTTTTAGTAACTGTAAGACTCTGGTATCTGAGAAGATGCCTTATGCATGGA  
A\_14\_P117840 GTATCAGTTGTGTGCAAGCCAAGAATAGGAGGATGGTATGGTTGAGGTTTAC  
CUST\_48\_PI426210822  
TGATACATTCAATTCCAGGTAATCTCAATTTTTGGTGAATGTTCCATTGCATCTGAATGATA  
A\_18\_P14135505 GACTCATCAAAGGTTAGACCATGTCCTGAAGTGACCTGTTGAATTTGCAAAACTT  
A\_16\_P18340053  
AACATAGAGCAATTTTTCTTTTGAGACAGAAAATCCTCATTCTATAATGGCACGATGAGC  
A\_14\_P130884 AGCATCTAAATTTAATTGTATCTCCTGGAGAGATTCACTTTCTCCTCTTTCTTGTGTTGT  
A\_18\_P22840162 ATATACACACACGCACTGTGTGTGTATATGTCAAACCTCAGTGCTTGCCTTTGTT  
A\_14\_P108359 AGTAACTGGCTTTGCTATTATTTGAAGATCCAGAATAACACAGTGTTACAGAAACATCCC  
A\_14\_P100681 GTCTCTTCATTCAGTTTTCAAAGAGGTAATTTAAGTGCAACTATTTAAGGAACACAGGAAA  
A\_14\_P132067 TGTCCGAAAGAAGGAGTGATGTGGATAAAAGGACGATAGACTAGTTGAAAACATAGTAAT  
A\_16\_P16039797  
AATATCAGGTAATAAAGTTGCTTAATGAGCCTATTCACAAATATCCGCTGAGTAGTCCCC  
A\_14\_P104571 GCTTCTGCCTATTTACAGATAGGACTTATAAAAACCTCAATAAATGGTGATTGAGGCAGG  
A\_14\_P115849 GACTTCACTGATGCGATGGTAGGTCTTTTGGGTTACAATAGATAGGGATGATATAAAACA  
A\_16\_P00685172  
TCTCGGCTTTATGGACAAATCAAAGAAGATAAATAAAAGCATTCTGGCTTATCACACACC  
A\_14\_P126971 GTGAGGATATGAGGACATAAACATTTTCCCTTTATCCAAAGTGCCACATTGATCTTTTA  
A\_14\_P138805 GGTTGTCATCATATTTACTCAATATAAGTCGTAATGCTGATATGTATCAGGCAAAATAT  
A\_16\_P32193884  
TATTGAGAGTTACAGCAAGTGTTAAACGAGGTGAGTTCACATAACAGGAATTCTGGAACT  
A\_14\_P137189 AGAGGCATAATTTGTTTTAAAGTCCCTTAAGGATGGACAAGAAAACACTTAGTGGTTCTT  
A\_18\_P14077033

TCTAGACAGTGAGTATCTAATACAAGTCAAGACACAGTAATTACGCTACAGACAAAGGGA  
A\_16\_P19568190  
ACACCTTGCTGTATATGATGTCATACACTGATTCATCAATACCCTATATGTGGCTTTAGA  
A\_18\_P22840478 GTAGTTCAGACTGTCATCAAAGTGACTGCATGCCCTGTCTCTCTGC  
A\_14\_P137710 TCAAATAAGGTTTCAAATGAGAATCCATGAATGAAAGCACTTGGTAAACATTGAGAGTGA  
A\_14\_P109516 TTTCTTCTCTAGGAAGGATTAGTGCTTTTCTTAAATTCGACTCTGAAGTTCTGAAAAGCC  
A\_16\_P19976032  
AAATAACTGTTTTCTCCTACCAAACTTTGTCTTCTACCCATAATCCACATTCCAAT  
CUST\_6408\_PI426210822  
ATTCATGAAATGAGTGTATTTTTCTAGCTCCATTACAGAGATAGTTTTTATTATTTGCTT  
CUST\_2336\_PI426210822  
TACTCATATGTATTTGTATTTTAATTTAAGAGGCAGCAGGTAAATGCAAGTACAACCTC  
A\_14\_P122716 TAGCATAATGAAAGTCACTTTATGGGTAAGTACTAGGGCACTGAAGAGAAAGAGGTAGATAT  
A\_16\_P20978666  
TAGCCGTATGTCATCTATAGAAATATCGATGTGTTTTTCATCTGTGTTGCCACTACTTCG  
A\_16\_P02404754  
AAGTCTACTAACGCTAAATTTTCAAAGGTAAAGATGACTTTCCCTTGTATTCAACCAGG  
A\_18\_P10878060  
CCCTAAACACTGACCACAAAATTAATTATTTTCATGACAAGTTGATAATTGCTGCCAAGGA  
A\_14\_P103764 TATGATGAAGCGACATAACCAAAGACATAACGCAATTATTTTGATTTCAAGTCCAGCGCT  
A\_14\_P119078 AGGGCTGTAAAGTCATTTGGAATATTTGCTGCTTAAACTTTAAATGTTGTCCACTTTGG  
CUST\_5738\_PI426210822 ACAAAAAATTCCAGGGTGAAAAAGGAGAATTTCTAGTCCCTGGGGTGCA  
A\_14\_P105806 AAGATTTTCAATCAGTTCACCAAATAAAGTGATCTGATTGCGCGTGCATCTGTATTTTT  
A\_16\_P02051603  
AGAATGTTGAAAATTGTTTCTCAAATTAACCCCAACTCCTAAATTCATCCAGTGCCTCT  
CUST\_36\_PI426210822 GGCATAAGAAGGCTTTTCTTGTGGGAGCGTGTTAAGCAGCAGAAG  
A\_14\_P109547 AAAAAGTTACATGAGAGTGAAAATTTGTTATGACTGTTTTGAGAGTGGGACTCACTCTGA  
A\_14\_P135888 CAGGTCAAACAAGGCATCTCCTAGTATTGCATCCTACAGATGTGCTGTAAACAT  
A\_14\_P105260 TTATTTACATTTTTAAATCTTTAACTAGTATCTCTTCCCTCTTCCACCCCAGAGACT  
A\_14\_P200135 GCTTTTGTGATTAGACATGGAAAGGCTGTGTATTTGCAGTCTAAAAAGCCTTTTGGAAA  
A\_14\_P107408 TTTTAAAGTTCTTTTTCGGTAGTCCATTTAATCTCTCCTTATATTCTGCTGCACTGGGAT  
CUST\_8148\_PI426210822 GCAGGATGCTGGGGTGGGGGCGGGAGTGGGCCAGGATGGTGTAA  
A\_16\_P00685550 TGCCGTTCTCTAACATACTAATAGCACCTAATATTGTATTATTTCCATTGATATCTGAAC  
CUST\_2030\_PI426210822 TGAGAACCTATGCTCAAGTTGATCAGGTTTTTGGGGTAGATCTGAGA  
A\_14\_P110412 TGAGTCAAGGCCAAGAGGTGAAATCTTTAATACATTCAGTAGACTAATGAAGGAGGTAA  
A\_14\_P131790 AGATTATCTTGCACTTCTAGATTCATTCGATTCCTTCAATGTTGCTCATTGAGACAGGC  
CUST\_716\_PI426210822 TCTAAAGCTCAGCCGCTACAGCAAGGGGGAAAATTGATCCCTTAAT  
A\_14\_P127701 CTGAAAGCCAGTTAATAGTTCTCCTTCATCTGTTTTTGTATTTTGTGTAGCATCTCCTGC

A\_14\_P103287 CCTGCAATATTTTCCTTCTGAAAATTTTCTAACCCACTTTTCCTATTAGCATCATCCAAGC  
A\_14\_P119494 ACATACTCATAGTTTCTTATACACTCTCAAGAGGTATCCACTTCATTACTCCCCTTCCTA  
CUST\_4223\_PI426210822 TTGCTTTGAAGAGATTGTGTTCCAATTATCTGCCCTGTTTAGATGGCAGCTT  
A\_14\_P103746 CCATGTGCTAAAGGAGAGAACCCTGATGATGGAGAAGAAGTGTGAAAGA  
CUST\_9751\_PI426210822 CTGAACTGGCTTGCCTTCTAGGCTGAGTTCTGAGAGCCATCTGAG  
CUST\_7561\_PI426210822 GGAGTAGCAAAGTGGATGTGCCAACCCGAGGGAAGAGATTAGTAA  
A\_14\_P118772 ACTGAACTGAAGAGTGATTTGTATTAAATACATCCCTAGAAGTGTCTTTCAAATGCCTGC  
A\_14\_P126793 CTGCACTGAAGGTTAGTGGAGAAAAGAGTTTAGACACACCTAACCTCAAGTTAAAATGT  
A\_18\_P14134991  
AATTCCTCTGCCCCCTAAAGTATTCTTTGTCTTTAATCCAGTTGTTACAGTGAGTGAAC  
CUST\_6867\_PI426210822  
GCTGTTTCTAAGGAGTATAATTTGAGTTCCAAATTAACCTGGTCTTCCAAGTTGGGG  
A\_16\_P00807106  
ACCTTAAGAAACATAATACGTGCTCATATCCATAAGGTATTTTACTGTCTTTTCGAGCCCC  
A\_14\_P131623 TCTAAGCATGAAGGTGTCCAAAACCTCACCTTTCCAATTTTGTGCTGCAGAATTTTATTTC  
CUST\_2912\_PI426210822 CTCATTAGCGGGACACAAGCTGCTGTAGCCTCTGTAAATACTGTAGGAAATA  
A\_14\_P201519 CTCCTACCAAGAATCAAAGGGTGGAGGATCTTCAAACACAGGAAAAGAAC  
A\_14\_P116165 CTTGCTTGCTTACTTCTTGTGTGTCAGGGTCTTCTCATTGATTTTCTCTAGCACGTT  
CUST\_164\_PI426210822 GTTTGAATAGTATGCCTCTCCCCTCCAGCTGGTGACCCTGGAGA  
A\_16\_P39037933  
AGCAATCTAGTCTCTTATCTGATGCACATTGACTAATTTACAGGTTCACTTTCTTCACT  
A\_16\_P16168135  
AACCCCAAAGTGAACAATAACACCTTTAGTGACTCAAATGCTAATTGACTAGGTATCAC  
CUST\_7953\_PI426210822 TATACTCCGGAGGGGCTGCATCATATGGTCTTTCTCTTCGATTAC  
A\_16\_P17343781  
AACATTATCTCCCTAACAATACTATGTTTTTACTCAGCCATACCAATCTGATAGGAGCC  
A\_14\_P200251 ATTTACGCAGTCAGGGAACAGGTGAGGAAAGAAATAAATAAGTGATTCTAATGCTGC  
A\_16\_P19034332  
AAATAGGCAAATACTCTTTGGAACTCTCCAATCCATCTATAATCTGAATCTGGGAGGTC  
A\_14\_P105281 CTTTATGTCTAGCAAGCACATCTTTGCACTCTTTAATACAGAGCAAAGGTAAGAAATTGA  
A\_16\_P00481443  
GCACAATTTCTAACTCTAGACTTTGCTCCACAAAACAATTTCTCAGTGATTTTTCAGAC  
A\_14\_P133810 CTTTCTGTTCAAATCAGGAGTTTGGAGATAAATAAAGATGGAATCCCCAAAGTGGATCAG  
A\_16\_P21504237  
TGTGGATCCATACCAGTAAGTGTCTCTTGTATCATAACTATCCATTCATTCCATCTTCAG  
A\_16\_P00160549  
GGCTCTATTCCAGATAGTCCTTAATGAAAACACCTAAAATCCATAACCTAGCAAAGATCC  
A\_14\_P130312 GGCTTCCTCTACTTCTTGAATTTGACTTTTTGAACATACGAAACAGTTGGAAACATTCCT

A\_16\_P36116366

ACTTGGAGACTACAGCACTGTTTTACTCTAGACTAGCAGATACTTTCCTTCACTTAAGA

A\_14\_P100636 AACCCGGTTTGCAGTGAATGGAAAATTTGTCTATGTAGATCAAAGGTAAACATTTACATG

A\_14\_P123838 CCCTCTGATCCAAAATACCTAAAATACTTTGTCTGTTAAAATCAGCAGCACAGTTCATC

A\_16\_P00685345

GGGACAGGAAATAGTAGAGTTCAAGGAAAAGTTAGGACAAGGAAAATGAGTCTTTACAAA

A\_16\_P15889634

AAGACATTCTTTGGAAAAGCAAGTTCTTCTTACTTCGAAATTACCATGACCAACAGTGAT

A\_18\_P22842100

TAATCCAGTTGTTACAGTGAGTGAACCTGATTTGTTCCAGATGTCCTAAGATTTAGTGAT

A\_18\_P14136304 CAGAGCCAGAGGTGGCTTTTCCTGATGTCTATAATGGTCTGGAATG

A\_16\_P03724526

AAAAAAAAAATCCTGCTAGTTTAAACTTCCGTGACAATCCAAATATTCCTACTCCCTAGTGT

A\_14\_P112681 GAGAAGAGTTGCAAGAAGTTTATGTTGTTCCGTGAAGCGAATGAACTACAGCAATG

A\_14\_P116782 GTGTTATAGGTCCAGTGGTTTACGTCTTGGATCTTGCAGATAGACTGATCTCAAAAG

A\_14\_P135137 CTGGAATATGACTTTGCAAATAAAAACAGTATCATCAGTCATTGGAAGACAAACCTCAGC

A\_14\_P111831 CTAAAAGACTTCTCTCCAGAGGACGTGTTTGGCTGTGCTGAATTGC

A\_16\_P01037112

CTCCATCTGATTTCTAACTACACCAGTCTCCATTCATAGTTTCTGTTCTCTAATCTCCAT

A\_18\_P12454964

ATCAACTTTGATTGTTCAAGATTATCATTGGAGTCTCAAGAGTGATACAAGAACCGACAC

A\_14\_P107082 AAGTTACCTCTTGAGGCCCAACAGGATTCCAAAAATTGTCTCATTTTTGTGGAAAT

CUST\_7214\_PI426210822 GGGGCTTCAATCTAGACCTTGCCTCTTTCTGATCACTGTTCTTGAC

A\_14\_P127729

TTAAAGAGAAACTCCCAAAAGGAAATGGGAAAAGAAAAGTGACACTGAATTTGGTAACA

A\_14\_P116784 ACTGAGCCCACACACCAACAGAGAGAAATATGCTGAAATGCTGTTTGAAG

A\_16\_P16466986

AAAAAATGGGCATTTGTAAATGTATGAGACAGGAAATCCTAAGCACATACGCTGTTTAC

A\_14\_P200960 CCAGAGGTCTAAATGAACTAAAACCTTGCCGATCTTTTAAAAACTTAGCCAGACTCAATCA

CUST\_7369\_PI426210822

TAGTGCTGCCTAAGTGTAAGATTTAAGCACAGCATTCTTTTCCCATGTGTCAATTTTC

A\_16\_P16191026

AAACTTCTGCACCAGTGACCAACAATATGTGAGAGGATGATTTGTATCCTCAAATATTTG

A\_16\_P17747587

AAAATGGTGGGAAAAGAAAACATGGAATTGGTGTTTACAAACTTAGTTGCTGACAAAGG

CUST\_5967\_PI426210822

AGTTGATGGGTTACAGTAATATTCTGTGGTTTTAAAAAATGTATGTTACAAAATAATTA

A\_14\_P135849 CTTATTGTTTTTCATTTTCTGGAGCAGGGTCTACAGGTTTCCACCAACAGAAGAT

A\_16\_P00537817

ACATTCTTGACAATTGATACCTTCCTTGAGTATCACTAAATCTACTGTGCTATGCTAGGC

A\_16\_P15398537

TTGCCATCTAAGTCTTTTCATAATTACTCAAGCCTAACATACTCAACACCTTTAGTCAGT

A\_16\_P02871203

TCAATTGATGTCAACTTTCCTCACTGATTTCCCATATGTAAATTACCTCAGAACTGCTTC

A\_14\_P106516 CTTTCATCTTAAAGAGAGAATGGCTGCTTTGGAAGATAAGGTAAGTTAGATAACACGGACA

A\_14\_P119803 AACTAAAGGAGAATGATTTTCTTTTGCTTTGAGGGACCCAGTTGTGTGTTACCTTCTTA

A\_18\_P22841748 ATATAATGATCTGGATACAGCCAAAGTCACTAAGCACGCTACACCCTAGCCTTTC

A\_14\_P202047 TCTGGTAAGAGATAATTTGAATTGTCTGAGGTTTTCTTCTTAAATTCAACCATAGCCACC

A\_18\_P17040086 AATGACTTCATCTCTGAAAACCTCATGTCCCTACTAGGCTAATCCAACACGG

A\_14\_P105852

GAAGAAGACTTCTACTTTTTAGAAGCAATAAAGGAAATTGCAGAGGAAAGGGTCAATAGG

A\_14\_P125236 CCCATCCTTCGAGTTCTCAATCTTCTAGAAAATCCAATTCAGGTGAGACATTATTTATAT

A\_14\_P115831 TGCAAGTAAAAAAAAGTTTAATCACACAGCACTTTATACAGATATCGTAAGCAGTAGGCA

A\_18\_P17191725

GATTTACCAGAAAATTCAAACACACTCTAAGTGACTACCATTCTACTGCCCATAGGAT

A\_14\_P131482 CCTGCGATCCTGGTTTTGTTTTTCAGATTTACAGATACCCATAACAACCTTGTTAAGA

A\_14\_P135699 TGTCATTTCTGATTTGTTTTTCAGACTAATATATTTTGGTGGTTATGGGTGTAGGAGACA

A\_14\_P133918 CTGCATGGAACTTTAGATCCAAAATTTAGGACTCTTGCTGAGATCTGCTTAAACACAGA

CUST\_4753\_PI426210822 CACCTCTGGTTATAGATTCTTAAGTGGGATGTCAAGCCCCTTCCC

A\_16\_P02549488

ATAGCCACGCAATTTGATTTATGAACATCCTTAGATCTTGACCCTTTCTTAGAAACTTGG

A\_14\_P114284 CTCATATATAAAAGTAAGATGTTTGCTCAAATGTTGTCTTTGTTTTCCCTCAGTCCCTGG

A\_16\_P36654180

GGCCTTCTCCAAATAATCACAGATTCCTAACGAACATGACCAAATTAGCAAGTTTTTACT

A\_14\_P107034 CTAGACTTCATGTTACTGTGAACATTTCTTCTCGTTTCATCCATTCTTCTCAGTTCATTCT

A\_14\_P106225 CAGTAAGGTGTTACTGCCATAAAAATGACACAGATGTTGGGTAGACTGAACAATCATTAT

CUST\_4354\_PI426210822

AATACTGTAAGTGGTTGCTGAGGTTTTACATATATTCTTTCTGAGCTTGTTTTGTCTAAT

A\_14\_P113445 AATATCACTTGCAGAAAGAACTCTTTCACAGGTCTTAAAGTTGCTTCTATCCACAGC

A\_18\_P22839214 AATTGTCATAATCGGAGGATCCTAGATCCCTGTGTAAGTGTGGGG

A\_14\_P134532 ATCTTTTTTCTATGCACTTACTTAAATTATCCCCAAGGTTTATCAAAGACCCAAGGG

A\_16\_P02126757

AACAGTCCAATTCAAATTAGACCTCACAAGCAAACCTACTCTGATTAGGGAAGAATTGCT

A\_14\_P123080 TGTAGACAAATGCCGAGACAGCCACGAAAATCTGAAATCCATACATATAAATACACAAGT

CUST\_222\_PI426210822 GGCGCCTACAACCTCGACCCGACGCGCCCCGTGCACTTCCAGGGC

A\_14\_P105253 GTGGAAAATCAGTCATGATTACAAACCTACAGAGGTGGCGAGTATGTAACACAAG

A\_14\_P106017 ACAACAACCTGCAGAAAACCTGCAGACAACCTAGAAGTCATTCTTAAAGAGATTTAATTATTT  
A\_14\_P200794 GTTAAATCCAAGGTGTATTGAAATAGCATTGGTAAGCCCAGAAAAGTCATTTGTGTGAAG  
CUST\_5159\_PI426210822 TCATTACTAATCTGTGGATAGTCCTAATCCCAGCCCTTTTCTTTCTGAGCTTTG  
A\_14\_P132611 CGTTACTAGGACAACCTAGAAGAAATATTGTTAATTTTGAAGCGGGAAACTGAGGAAAAC  
A\_18\_P16267809

TTTCACTATTTTGAGCCCAAATATTCTTCTCCATACTTGTCTAGATGCAGTCATTAGCCA  
A\_14\_P136468 ACTTCAAGCACCCACTACTATGGACAAGAAACATATGTTAGGAGACATGTCTGTTTC  
CUST\_3203\_PI426210822 CATTACCGTATTGGAGGGCACCTCCGGAGGGTATAGGATTTTGT  
A\_16\_P16191610 CAGGGTGGGGAGTGTGGGAGGGGATGGCAGGGACATGGATGATAT  
A\_14\_P107059 CTATGGCAACCACCCATCAATGACAAAAATCCTAGAAGGATGTATGTATAGGAAGTT  
A\_14\_P138313 CTTCTATGTTGAGTTTTCTGTAGTGAAGAACATTTGTAACCTCGCGGAAATGAAAATTC  
A\_14\_P124594 GATTTATTGGTGCCATGGCTGTATCTCAACAGTTAAGAAGCAGTTAGTTTTTTTGTGTTG  
A\_14\_P113963 TTTTLAGATTACTAAACATTCTACTTATCCACATGTGCCAAGATGTGCCATTTAGGTCTC  
A\_14\_P135918 ATTGTATTGTATTTCAATGTAAAGGCAAAAAGAGGAAGAAAGAAACCTCCCGAATAACAG  
CUST\_1412\_PI426210822 CACACAATTCCTATTCATGTCAGAAATTTATGAGGCTGAACTGGTGGTGTGTC  
A\_18\_P16096271

AAAGTTTGATTAGTCTAGACACCTGAGTTGAAAAATGACTGTTGCCTGATACTTCAAAGC  
A\_14\_P125377 TTAGAAAAATCACAAGGAAGTAACCAGACTAGTCAAAATCAGAGTGGAGTATCTTGCCAA  
A\_14\_P124024 ATCTTCTGCTTACCTTTCTATAAATTTCTTCAGGTTTCGGGAAGATGCACCTGAATAATT  
A\_16\_P40868181

TCTCCCATTCTTAAATTCTAATTTATTTTAGCCCCTCATTTCAGAAATATCCCCAAGGAGC  
CUST\_6643\_PI426210822

CTTGCTGACTTTCATTATTGCCTGGAATAGGCAATGATTCTACAAGCACTAATCCTT  
A\_16\_P17020404

ACCATCTGCCTGCTTTTAAAAATCTCCCTAAGGATCATAAACATGCTTGTATCATAGTCA  
A\_14\_P115100 GCAGTTGGTAGCCATGATGATAACCTCCTTAAAGTGAGGGATTTCTGGAAAAC  
CUST\_1384\_PI426210822 GGATCGGATAGGTGGTAGAAGGATTAGAAGTGGATTCTACTCTACCTTGAAG  
A\_16\_P03551574

ACTCTCCATTACCTTTTATTATCCAAAACATTAGTTGACATCCTTTCTATCCTTCTCCC  
A\_14\_P104371 ATCTTCACTAATCTCTTGCTTGGGATTTACCTCGTTCTCACTCCTGATCTCAAATC  
A\_14\_P111147 AGGTCTCCATTTCTGGAATTATCCAGTTTGCAGGTTACCAGTTATATGACAATGAG  
A\_14\_P137413 TCTGTGAGAGTATACTTCAAAAAGTGCCCATTTACAGTGAAGAATCTGGCTATGTTTCC  
A\_14\_P130072 GTAACAGGACAGAGAATATTCGTTTTGTTAGTATCAGGTATGAGACTTCTCTTAGGGCAA  
A\_14\_P134407 CTAATGAACTAAATGAGGTTAATCTGTTCACTACACCCATGTAGCACATGACTGGGATG  
A\_14\_P121173 AAAACCTCCTGTAATCTTTCATTCAATCAGAGGGTATTCTTTTTAAGGCCACATATAGCC  
CUST\_5013\_PI426210822

TCATAAACACACATGAATACTATTTTCAGGAACATAAAATTCAGCTATTTCTACTAACAGA  
A\_14\_P114628 CTCCTGGTTTCTCTTAATGAAAAGTTGTTTATCTTCTACCCAGTGTGAATCCTGTTTGAC

A\_18\_P14132300

CTGAAAGACAAAGGGAGTTTTATGCCATGGTATTTTGACGACAATGTTGAATCAATTGTT  
CUST\_10208\_PI426210822 AGCCAAGCAAAGCTTGGCTTGAGTCACCTCCTCTAGGGTTTCTAT  
CUST\_2777\_PI426210822 TTGGTAATGAGCCACCAAGTCAGGGCTCAGGATACCCGTTTAGCT  
A\_14\_P200715 TTGAGAAAAATGTTGGCAGGTTTATTTCTAAGGAAAAGTTAAACAGAATATTCAGACTAT  
A\_14\_P135839 AATAAGTATTTCAAACATCTCAGAGGTGAAGAGTTCAAAGGCATCAGTTTTTCATCTCCT  
A\_14\_P111244 AGCAGCATCTACCATTACTGCTAGGACTGGCAGATTAGCACATTTACAGTTTTTTTAATT  
A\_16\_P17742971

AAAAAGAATACAGCAAGATCTATAGCACGGTGTAATTCATGAGTATGTAAAACCTTGCACA  
A\_16\_P20922288

AAATCAGGTTGTAGTTCAGTGTATAGTCAGTTTGTTCATGAGTTTTCCATTACAGGTCTC  
A\_14\_P124498 GTTGAAGAATATGGTGTATCCTGACATAAAACTGTTCTTCCCTCCAGAGTGTTTAATTC  
A\_14\_P114596 CTTCTGTTTTATTAACAGGTTTTATGCACAATGAGGGAATCAGCATAAAGATAGGAGAAT  
A\_16\_P00500291

CCTACATTTTCCCAGAGTAGTCTAATGAGTTATCACCCACCTTTATACATTCCATCCTACA  
A\_16\_P18000406

AAAAAAAATATGAAATGTGACACTGACTACAGAAATGGTTCATACACTAATACCTGCTGG  
A\_14\_P112627 CAATTCTTAACGCTGTTTCAATGTGTCTTTCCCCCAAACAATACACTTAAGACATTTAC  
A\_16\_P21257257

AAAATCACAAAAGAAGATAGTTGAGCCTAAAATGTGATAGAAGGCCCTAGACTTGAATGG  
A\_14\_P108678 TAAAGTTTTATCAATATCTTCACTTCTGGAAAACACCAGTGTATGTGGTGAGAAGGGATC  
A\_14\_P127674 CTGACAATTAAGTCTCCTAGCAAAAGAGAACTAGCCAAAGTTCACCAAAAACAAAATACTT  
A\_14\_P113303 AAACAACAGCAAAACTACCAGTTACAAATATAAAAAGCCATACCATTTACAAAGCGGGCT  
A\_14\_P100609 CTTTAGGATCTACCATACCCATTGACTAACTATGGAAGATTATACCAAAAATAGAGAAAAT  
A\_16\_P02873701

GCCAGCAATTAACATCTTAATGACATACCCTTAACTTACCAACATTTCTAAAAGCCTGGA  
A\_16\_P18234695

ACTCACTGTAGATATATGTGCTCATAGGATATCAAGTTAATCACCTCCATCATAGAGTCT  
A\_14\_P106813 TACTTTTAAAAAGCAAGAACACCACATTTTTCTGGGCATAAGAGACAAGGTTGCTTTTTTG  
A\_14\_P100692

AGAAAAATATTAAGGAAAGCCACGTGATGTCACAGGAAGGATACAGACAAGTTCTAAAG  
A\_14\_P109682 TTTTCTCTTTACAGACTAAAACCTTCATTTTACTCTCTCTCCCTTTCATCCTAAGCCA  
A\_16\_P02555120

GGTGAACCTAACTTCAAATTTGTCTTCCCCAATGAAACATACTCACATCGTCAATTTTT  
A\_16\_P15879065

AGGTCCTACTTCCCTATGAAATCCTGGTAATTTATTCATAACCAAGACCTTCTGAAT  
A\_16\_P16196839

AAAAACATTGCCAAATATAGTGGACTTCCTTATCTGGGTTGTATTCTTCCCTGTTACATC

A\_14\_P123270 TGTGTGCATAAACTGTTAGTCGTGACTGACTTGGTGTGTTGCTATTGTGTTTCTATATAC  
A\_16\_P16857505

CCCAATCTACCTCTGTAATTTGATTCCCTGATATTCATAAGTAAGTCTTATGCCCCATG

A\_14\_P114215 AGAAACTTTGGGGAAGAGACCAGAAGTGAATATAGACAATGAAATCATACTGGGGAA

A\_14\_P202358 AATTTCCCCATTTAATTTATTAAGCCACTCAGAGACATAATGACCTATTTGGGAGTTGT

CUST\_1199\_PI426210822 AAAATTGGTCTCTGGTTTGGCACTAGGACATGGCTTCTCAGGTGC

A\_14\_P122967

TCTAAGAATAAAGAAAAAATTCCTCAAGTGACAAGGGAGGAACAGGTGACTGACAAAGAT

A\_14\_P114388 ATCCGGTGACATTTCTGTAATGCTTCATTCAAATAAAGACATTCATAACTTGGCAGTCTG

A\_14\_P119439 GATTGGTATAGACGATGAGGACGACAGCACCTTCACAATAACTGTTGATCAGAAAA

A\_16\_P03650765

ACCACTCATACTTTTTGTCACTAACCAACTTACCTTGCTATCTTACTGGTTTTGAACTCT

A\_14\_P200926 TTATACTAATTTACATCTCTGGGTTTCCCCATGATGCTGTAAATGACTTGAACCTCA

CUST\_6535\_PI426210822

TAGATACAATACCGATAATAATAATGATGGTGTAATGAGAATTTTTTTAATGCAAATATA

A\_14\_P115091 GTATTGCAAGGTTAGGGAAATGGACAATGAGGAGCGATTGGGATAGTCTC

CUST\_1959\_PI426210822

TTACCTTCTCAGCGGTATGTGTAATCTGTACATTCATGGGATTCATACTCGCTTTAG

A\_14\_P102200 ACAGTATACAGCAGAAGGGTGCTAAATCTTACAAACAAGTAATAGGGCTTCATTTCTTC

CUST\_1713\_PI426210822 TCTGTGCTGACTTCCTTGGGTGACCAAATCATTCTGGGAACTTAG

A\_16\_P03650194

ATCAAGTTCACCTTTCTTCACTGGAAGAAATGATGCAATAATTGTCTTTAGTGTCCCTGGC

A\_16\_P17785728

AAACAAAGCACCCCTAATTTTGAATGGAGTTTCTAGCAGACGATAAGTTTCTAGTAGGCAA

A\_16\_P00685132

ATAATTCATGGATTGCCATTTGTTTTCCCTAATGAGGGCATCATATAGATGCTCAGTG

CUST\_3920\_PI426210822 AGTGTGTTTAAACCCCTGGCTGGTTTTTCACTTGGGGTTCTCATT

A\_16\_P21495932

AAACCCAGTCTACTTACATAAAATCTCATCACTAACCAATTCTGGTCATAGAAAGCCATT

A\_14\_P109492 CTGTCCCATGTGCCACATATATATTTCTAGAAGGAATAATTTGGGGGGATTTTCATATA

A\_16\_P58424261 CTAGGTTGAATTTTGATTTCTCAGGCCTCTCAGAGTTTAGTGTAGAAATGGATGGCTT

CUST\_5177\_PI426210822 TAAGCAATGCATGTAGCGGCTAGGGCACTGAGGTCCCGTGACCTG

A\_14\_P130987 ATCTATTTAGATGCTGTTGAAATCTGATGCATCTGCTGTAAGATTCTTTATGTGGACTC

A\_14\_P200513 AAATAGAGGCAGCATCGCACTCTTGATAGAAATGAGAAAATTGAGACCCAGATCG

A\_16\_P00872386

TTCCCCCTCACTTTTAGAATAGCAATTGAATAGCATAACAGTAGCCTTTACATTTCAACCT

CUST\_738\_PI426210822 CAATTTCTCAGGTTCTAGGTGTTGAGCTCAGGGCAGTGGGAATTAAG

A\_14\_P116381 GGCTTCACCTATACTCCCTATACTCTATGCCATTGTTTTTAGGTCTTTACCTCATAGTCA



A\_18\_P13854256

CTTCATATACTCTTTAGTTTCCCAATCCCACCTTCTAACTTTGCCTGCTTTCTTTGTTTTCT

A\_14\_P128295 CACTGAAAACCTTCCACACTCAAGTCTCCCTGTATTCAATTGCACTCTTAAATTG

A\_14\_P132552

GAGAAGTAACTTTGAAGTGACTTAAGAATTGCAGAAAAAATCAGGCCTTTAAAAGAAGGA

A\_14\_P130166 ACCAGATAATAGGGTATTAATCTAACACCACAAATCATTCTCCACTCTCCATCAAACAGA

A\_18\_P22841560 AATTCTGAAGGCTCAGGGGAAGGTCAGGTGGGTTTCAGCAGTGAG

A\_14\_P111796 AGTTGAACATTATGGTGCAGAATGGTAAGAACTTGGGTGAACTTTAAACTAGTCAAAGT

A\_14\_P133658 ACTTCAAAGCAATTTTTGGCTGTGAAAATGCTCTGCAATGATAGTTGTTGTTTTATGAGC

A\_14\_P121526 CAGTAAGGCAAACCATCATCCCTTAATATGAGTATTTGATGCAAGTGAATGACCTTTAGT

A\_14\_P103131 CTCTTTGTAGATTTCGCTTTTTAGATCTGGACATCACTATCTGAAAATCCCTCACAATTCA

A\_14\_P138705 ATGGAGTGCAAGAATTAATGTTAAGTTACCAGAGAAAATTGAGGTATTAAGGGATCTGCG

A\_14\_P113130 TATCCACATTAAGCACATTAGAAAATTGCCTATTGTAGTGAGAAAATGGGACTTGAAGGG

A\_14\_P101114 TGATGATTAGAGCATCTAAAAGACAGTCAAAGAAGTCTGAATAATTGGATATATGTGAT

A\_18\_P14135760 GAGACTCTCAGAAAAGAAAACAATTAGGCAGGCACCCCAAAGGAGTTC

A\_16\_P17052696

AAAAAGAAATAGTGATTGACCTTAATTCACAAGATGAGAAAGGAAGTCCTAGAAGGCAGC

CUST\_6967\_PI426210822

ATCTGTCCGCCTTATCTATCTTCACTGACGTGTATTTCTTATTTTCAAAAATGAAGCCA

A\_14\_P128963 GATTAGAACTCTGTAACCCTCAGCAAGTTTCATTTTTGTCATGACAATGTAGGAATTGCT

A\_14\_P118707 ATCAGTGTCAACCACAAATGGGTAACATGTCTTTGGACAAGTTAGAAGTAACTCTTTTTAC

A\_14\_P136772 TATATATTCATCATTTTTGTTTATTTCCCTTCCTCAGACAATAGTCAGGAGTTGCCAAGGC

A\_14\_P106379 AACATCATTCTTTGCCAAGATGCTATCCACTCATCCCCAGAATCAAAG

A\_14\_P107667 TACAACATAAAATAACTACAAAAATAAGCACTTTACTAACAACAGGATTCTCAGGGAATG

A\_14\_P120675 GTTAATGTCAAGGAACAGTTCATCCTTCTGGGTCTGTATGTTTAAACTGAGAGTGAATAT

A\_16\_P36712295

GGTAGAGCACAAAAAATCTAACATTAATCTCAGCCTAAAAACACGATAGGAAATCCCA

A\_16\_P21172707

AAGACACCATTC AAGGTATCATCATTCCCTAGCATAAAAGGAGAATAACAATGGACTCAT

A\_14\_P100395 CTCTGCAAAACCCACCCTTTTAGGTCAATGCCTGTCAATTGTATAGTTTCAGAAAAA

A\_14\_P124464 ACATAACTGAAGCCCCTTCCCTTCATAAAGGCCAAAAGTCATACTACTTTAATAACATTG

A\_16\_P03604832

AGCAGTTATACAGGTCAAAAATCACTTCATCACAAATGAAATACGGTCAAACCTACCACAA

A\_14\_P119353 CTATGGAGTCTTTGCACAGTGCCCATACCCTAAAAATTAATAATGAAAACCAAACCTCAA

A\_14\_P126905 ATTTCTCTGAGATCATGAGTTTGTTTACACTTGTCTCAAGCCTATCTATAGAGACCTTG

A\_14\_P107963 CCAAAGCAATATGCCCACTTAAAGTTTTAGGAGGTTGAATATAGAAGTGGTGAATTGGTA

CUST\_8733\_PI426210822

AAAGAAATGATAGCCTTTATTCTTAAAAAAGTATCCTATTGTAAAAATTGTTATTG

A\_16\_P15833139

GTTTTACCAAACAAGAATGACTTATCCTACACTCACTAATTCTTTCCCTTCTCAAAACC  
CUST\_6887\_PI426210822 AGCAAATTGTGTTACAGCCGGGAAACCAAGCATTGAGCAACAGAATG

A\_16\_P02496051

AAAAGAACACAAGAAAAGTTGAATGTGGTGAAGTAGATAGAAGTAGATCCTAGGCAAAGG  
A\_14\_P118843 ACCAGTCTCACTCCATCTTCTAGAGTTTTAAGGAATTCTACTTGAAACTCTACCATTCC  
A\_14\_P124737 TAAAATCCAAACAAGCACCTCATATATTACAGGAGGCTGTAAAACAAACTTAGCCTTGTG  
A\_14\_P107889 AGTTGAGTTGATGCAACCATTGTGGTATTCACTTTCCTCATGTTTATGATGAATATTTTG  
A\_18\_P14136831 TTCTCCTCATAAAGTGCAGTTGGCACCAAGGCCTCAGAGACACG  
A\_14\_P132081 CTTCGTTTCTTTTTAAAGTGATTATACCGTAGATGCAGTTTTGTAAAAGTGTCAATTCCA

A\_16\_P36149370

TCCAGATAGTTGATCATATTCAGCCTATACTTGTFTTCACTCTCAATCTTTCTGTCCTGC  
A\_16\_P02187753

AGGTCAACCTGGTTTCATTATGGCTTCAAATGCAATTAACACTATGATTTTGGTCTCTT  
A\_14\_P200648 ATGAGGTTTATTCGCACACCGTGAAAACAGACACATCTTGCCATGATCTCT  
A\_14\_P118379 AGCCTTCATACATAATTCATTATATGGGCCAGGAACCAACAGGACTACTGGTAATTTTTT  
A\_16\_P38660113

AGCATCTGTTCACTGTAATGTTATCTTAAATTCATGGGCTGTTTTAACTCTTACCTCCT  
A\_16\_P17995010

AACAAACTTGGTTCTTTGTATCCCTACACCTCTCTTTATATGTTCTTGTGCCCTATTTGT  
CUST\_10419\_PI426210822

GTTACCTAAAGTATTTTTATAAATAAAGCCTTTTATACTGATTATGTCTTTTTATATTTG  
CUST\_2289\_PI426210822

TATTTGCATTTCTTTTATTGGATGGGTCAGTGGTTTTTCTTACGAGCATAAGGTAGAAAC  
A\_16\_P21430285

AAATGTATCATTGTTTCAGTTATTCTGCTACCTCCAATTTATTCCTTGAGTGTGCATCCC  
A\_14\_P127385 TCTCTACGTCTGTAGAACTAGCCATTCAGATTAATCTGATTAACCTTGCCTAAATGTG  
CUST\_8703\_PI426210822 GAGCATCAACACCAGGGCAGAGAGGCAGCAACCGCAATCAAAAGA  
A\_14\_P108396 ATGGCAGATAACAGGCAATGTGATAACTGTTGAGGATACAAAGATAATTGCTACCTTCAA  
A\_16\_P01719943

CTACCTGCGTTACCTATTTAGCATCCTTTGTAGGAATTGGCTTCTACTACTCATTTTGT  
A\_14\_P113780 GGAGAAAGCCTAAGATTTGGGATTTTATGATCTTTATGCATCACTTACATCCACACAGAAA  
A\_16\_P17352493

TCCAGGTCCCGTAAAATAAAGTCATCTTATAACATTCTAGCACATATATCTCCTCATGCT  
A\_14\_P100028 GGGAGGAGAAGAAAACAATCTTAATGCAAAAATCTCTAACGAAGGCTTACTTACACTTCA  
CUST\_3294\_PI426210822

TTTTTAAATGGTTATAAAAGTTGTCAAAGAAAGGATGTCTTTCAGCTATCCTATTTTTCT  
A\_16\_P02296498

CCATTCAGTGCTAGAATGTTCCCTACTATCACACCACTTAGTTGATGTTTGTGATTTCAAG  
A\_14\_P111070 ATTTACCTTCTAAATTATCAAAATTGGGGCAGGTTGAACAAAGGAAAACAAAGAAACCCA  
A\_18\_P11941336  
CACAATAGGCCCTTATACTGGTATTTGTGTCTCTTTTATTTGCTCTATTCACAGCCTAT  
A\_16\_P17431668  
AAAAGTTCAATAAAAGGCCATCGAATAAGAATTGGAACCTCTAGAAAATCTCCCAGGTTGT  
A\_14\_P126744 ACATTTTCCCTTAAGGATTCTCTTCTTTTGGATAAAGACAATGAGAAATTTCTAAGTGTG  
A\_16\_P03464781  
ATTCTGACTCCTATTCCAAATGTTCCCAATATATCTGGTCCTATATCTAGACACCATTCC  
A\_14\_P132127 TTGGTTTATAACTTGAAAATTCTAAATAAGTAAATGAATAGCAAGATTTCCCTGCCCTGAT  
A\_14\_P105036 TTTGAATAAAGGAATCTAGGTTTTATACAGTGGCTACCATTAAACAAGTGAGGGCTGCAA  
A\_14\_P101255 TTTCTTTTTCTGATAGGCAATTATTTGGGATATACCTGTAAGTGTGGGGGCCTT  
CUST\_2721\_PI426210822 ATCCGCCCTATCACCTGGGCTCTCTTTGAGGGATCATTGTACAC  
A\_18\_P17243403  
GCTCACCATCATTATGTGACAGAATCCATTCAAACACTAAATGATTGTCTTCCAGCAAAT  
A\_16\_P02135949  
GCCACATACCAAATAAGGAATTTCCCTAAAGGTTAACTTCTAATCCAGCAAAACTTTGC  
A\_16\_P21400266  
TTTTTTCCAGACAATGACCAAATGTTCCATAATATGCCATGTGCTTGAGTTATGCAACAT  
CUST\_1879\_PI426210822 GATAGAGTCTGGTCATATCTCCAGGGCTTGGAGAAGTGGAATCT  
CUST\_4270\_PI426210822  
TTCCAAATTCCTCTTAAGAAAAGGAAGGAGAGTTTGTTTTTCTCAGTAGAGTAAGTAGT  
A\_14\_P133334 AAATACATCATGAAAGTATGTAACTTTCGTTGAGCAGGAAATTCCTGTATGCTACAAGG  
A\_18\_P10861826  
CAGTCACCACTGCTAAACTTTTTCTTCCAGTAGACAACCTTTCATGTTACAAAAACAACCTTG  
A\_14\_P139364 ATAGGAGACCTGAAACCTATAAAGAGAAGTCTAGATTTAAGGGGGCCTAAGTCC  
CUST\_5470\_PI426210822 AGTGAGGGAGGACACGTGGTGTCTAAGCAGGTGGGCAGAGTAGAT  
CUST\_6005\_PI426210822  
TAGTACGAAGGACCTCCTGGGATTATTAGAGGAACTGACTTTAAAGAAGTTTCATAAATT  
A\_14\_P100577 CTCAGAGACTCCAAAGTCATCATTTAAAAGGCTTTGTGCATTGCTATCAGAAAAATGCTAA  
A\_14\_P108716 CATGTTTTTGTAAAAAAGTTAAAGGCAGAGTAGTCCACATGCACAGGATCATGAGATTAG  
A\_16\_P01722387 TTGTCTTCTCTTTAGATGAAGATGATACCAACAGACTTGGGGAGGTGATC  
A\_14\_P200573 ACTTGAGAATACCCCTTATCTGAGTATAAAGAATCCTTGAGTTTTGTCTTGGTTTATCA  
A\_14\_P132597 CCTGCTATATGCACATTCCTTAAGGTAGGTCTCATGCTAAGGACATTAAGTATAACTACT  
A\_16\_P20882199  
AAATTGTGAAGCATCATCATGACATAGTCCATAAATCACACTACACAAAAAGGAACTGG  
A\_16\_P00000964  
TTTCGCTAAGTTGAATGAAATCCATTTTGAATCACTGCATTCATTGAAATCCCATGTGAG

A\_16\_P19035992

ATAGTTATATGTTTGTGCGACTTTAATGGCTAGTGCAGATCTCTATTTAGGCTTCCCTTGG

A\_14\_P137097 AGATCAAAGCAACCCAAAGAGCAAGAAGGAGAAGAAGAAATCCGACAAGAG

A\_16\_P20320239

AACTTATTTCCCTACTGAAACAGACAAAAATCCAACCTCTACCTATTATCTCCTTCCCAACC

A\_16\_P17202830

TACTACTCTCATACGTTCCATAATAAGCACTGTCTGTATTGTTTGAATGACTGTCCTGAAG

A\_14\_P124792 GGATAACAGTAAAAAAGCCTTGAGTTATAGTTCCTCAGCCTAAATTCTTTCTCACGTGTT

A\_14\_P104060 TGCTTAATAAACGGGTCTTTTGACTTCCTCAGTCTGACTTTTGAAGAGCAG

A\_14\_P138593 TTCCTTCAITAGTAACTGTGGCTGCCTTAGTTCAGGATCATTTTTAACTTTCAGTAGTT

A\_14\_P131512 GGCCTGGGGATAATAGTATAGAATGATGTTGCAAAAATAAATCTAAAACCCAGTTCATG

A\_14\_P112868 GATTTTTTTTTTTTCATTTTCATCTTCAGGGTCTTTACGGAATAAAGGATGATGCTTCCT

A\_16\_P17537883

ACAGAATTGGTTGTTTCTCATAAGCATGACTATCCCTTACCATTGTCTACTGCTTTGCT

CUST\_6900\_PI426210822 TTGCCCTGGTAAGAGAGCCCTGAGGGTGGATGCCGATACTTAGAA

A\_16\_P03463245

GCAAAAACATATCACTGTCTATGAAAGAAGAAAAAATGTATTCTTCATACTTACAGCA

A\_18\_P14586503

TGACCCTTTAAACCCCTATATTTAAACACTAGTTCCTTTGATCCCAATACTCAACACTTCAC

A\_14\_P130625 AGGATTTCTGAAGGGAGACTTAGAACCACAGAGAGCCACATAAGGTAA

CUST\_4230\_PI426210822 GTAGATGACTTCGGTGCCTCCCTGCAGCCGTCTGCTTTAATTGT

A\_14\_P101602 AGCAAACTTGTCAGTCCCTGTAAGTCTTTCCTCTTTTTTTTTTTGTAACCCAGATTGAAA

A\_14\_P123439 GATTGACTTTATTTGGCCCACAGAAGGACAGTCTTAATAAGCAGCCAATGAATGTC

A\_16\_P40418118

GTTTTTCCTAATACATACCCTCATCCTAATTGCTATGCACTCAAATAACTTACCTTCCCC

CUST\_2385\_PI426210822 GCAATGGAATCACTTTGCTTTGGCCCAGATTTGTATTATTTCTGCTGGGTAAATT

A\_18\_P11795379

AAAAATGAGTCCTCACAATGTAAGCCTTTTCTTAAAGCGACTTGTTATCAAGCAGTTCAG

A\_16\_P16465321

TGGCTGTTCCAATAGACAATCTCCTCAGAACCATTTATATCATTATATGACCTTAGAGGC

A\_16\_P19344485

ATCCCCATCAACCAAGAATTTTTTTTACATAAACCAATTCTGCCTTAGATCAACCATCATCT

A\_14\_P117119 GTTTGGATTTCTGATTTTATAACAGGGCGGCTGGTTAATATCTCACACAGTTAAAAAA

A\_14\_P112295 CTCACCTTAGGAGAGAAAGGTTAGAAACCAAGACCAGACTCTACACAC

A\_14\_P136841 CCAGGCCTGACTCAGGACTAACCTGAGTGCCTTTGAATTAACAGCATATA

A\_14\_P127037

AGGAATGTAATGAGAATAACTGCAGAAGAAATGAGTGCCTAATAGAAGAACGGGATG

A\_14\_P124958 ATATAATTAGGAATGGAAGATAATCTTGCCAGAAGCCTTTCTTACTCTATTAGCCTGGCC

A\_18\_P10092238

ACGATGATCTGTAGTCCTTCTCTAAGTAGTGGCATAAACAGTATAGGTAGTAAGGAACAC

A\_16\_P58424548

TATAGAAAGATGCCTAGCCTCACTGGTAATCAGAGCAATGCAAACCTAAAATGAGGTTTT

A\_16\_P20941046

ACTAAGCATGTCACAAAACCTAGAGAATCAAGAAAGGAACATGTTGATGAGTTTTGTGTG

A\_14\_P136700 GTCTAATTGCATTTTTTCTTCTGTTTACAGGCTGTTGAAAAGGCAAAACCTAGGAATAAT

A\_14\_P105532 AAACTGTAAGGCCTCAAACCAGTTAGGACAAGTCCCTTTCTCGTAATAATTTATTTTCATT

CUST\_5099\_PI426210822

TAGGTAAGAGATGTAATAGGTGGTATTTATTAAGTGGTTTTAATAAAGTTTTGTGGATAG

A\_14\_P108907 GCAACTTGCATTTTCGTAGTTTTGTTTTTACCTTTTATTTCAGACAGCAGTAGATGATGGGA

A\_14\_P114152 CTAGCACAAGGAGTTTCATCTTGCAGTCAAGGTGAGAAAAGAACTGAGATGAC

A\_14\_P201023 CTTTGGCATGGTCTCTGCTTATCTAGACAGGCACATAATTCAGGATAGTGTTGAAAATTA

CUST\_6697\_PI426210822 ATAAACAGCGGATGTAAATGGCATCACCCAGCACCGGGTAGGATT

A\_14\_P121029 CTTTCTGAAGTAGAGCAAAAATCAGGGCATATCAATGTCTATATTCAAACACTTGGGACA

A\_18\_P10858023

CATCTGTAAGCCCCATCTTAGTTTTAAGAATAGCCATCAGATAATTCTTCTCAGCCTTTTC

A\_16\_P16291713

CTTACTCATGAATGTAGCAAACACTATCATTACCCAGGTATAATAATAGGCGAGGGGCATC

A\_18\_P14132706

AGCATCAGTGGGGTTATGTGATTTTCATAGATGAACAATTTTTGCAAATATGTTAATTGA

A\_16\_P15193450

TACACCCTTCATTATCCTTCAAACGTATCTTTTTCTCTATTTTGACTCTTGCACAATCC

A\_14\_P128395 ACAGAACTAAACTTTTTATTTATATGTTGTGGGGACTGCATAACTAGCCCAGGAAATGACT

A\_14\_P117754 CTAGCAAAGAGCCTTACCTTCTTTCAGCATGCCCACTTTTAAACACTTCATGAAG

A\_16\_P17392389

GCAATACAGAGTAAGTGATAACCATCCTAGATCCTTCGAATTTCTTACTATGGCATTGA

A\_16\_P03300021

ATCCTCTATGAAAACATGAAAGGGGTTTGAAATTGCATCCAATAAACACAATGTCCATCT

A\_14\_P137998

CTTAAATGGAAAGAGACAGGAAAGAACATGGTTAAATCACAGAAAATGAAGAAAGGGAGA

A\_14\_P125838 ATACCACTCCCTACGGTCATGTTGATAAATACTGTAAATCCTGAACTTTCTGTTACTGAT

A\_14\_P201671 ATCATAACAGTCTTTGCCTTGCATTTGTGTGTGTTACCCAGAATGTAAATACTCTATTA

A\_18\_P10049904

AATTGTTCTGTCACAATGTATGCCATTATACCACTAGCAATATGGAATGCTTAACGGTGG

A\_14\_P116152 AGTTCAAATGTTTTTTCCAATTTATTTAGAAAAATAGACTCTGGATTCACATTCACCCC

CUST\_4441\_PI426210822 TCTGAGCATCATCCTCGTGGCATTCTGGAGCATGAGGACCCAAGG

A\_18\_P14134786

ACAGAAAGAAACATCTGGCACTGACAGGAGTCTGCTTTGTGATCTTTTTGG

A\_14\_P202158 CCCTCTGACAGATATATGTTGCATTCTTCAGAAACCAGGAATAGTATTCAAGACAGTATC  
A\_14\_P109867 CTTCCCACTTTTGAATTAGATCATGGCTCTTTTCTTCCACTCTGTTCCACAAATTCCTTT  
A\_14\_P128381 ATTCTACTTCCTTGGACTTTATAATCTCTACTGGTGACTCACACACCACCTGGATTATTT  
A\_14\_P133841 TGGCATACTAATAAGGCTTTTGTGAAATGTCAGCATAGACTCTTTTTTTTCTCATCCTGCA  
A\_14\_P123591 CTTCTGCCCTCCCAATGATCCTTCCCTCCCAATTTTTATTAATTATATTCTCCTCTAAAAG  
A\_16\_P18607975

AAATAAATTCTCTGGACCTCTTAACTGTTAATCGTCCCTCTGATTCTCATTATCCCTCTGC  
CUST\_8922\_P1426210822 AATGGCAGCCTCATAACAGAGGCTGTGCATTGGATTATACTCAACCTTTC  
A\_16\_P00512153

AAACAAGTTTGCCACAAATCAAAATGCTTGCAACATACATCTCTATGAACCTGTTCCATC  
CUST\_1388\_P1426210822 GAGGCTGGGACATGGCCTGCTCTCTGATCTAGATTTGATTATAGGAG  
A\_14\_P124184 CTGTGTTTTGGGGGAATAACAGTAATGTGAGTAACAGCAGGGAGTAAAAATGAGTTATTT  
CUST\_8267\_P1426210822 CCTAAAACAGCTCTTGCCATTTGGTAATGCTGGGAACCTACTACTACTAAAA  
A\_14\_P112366 AACAAGTTCTTTTAAATAATATTCTTACCCCAAGATAGTAGGGAGGCATTGTCTTCAAAT  
A\_16\_P02244063

TACTTAGGCATCAAGACTCAATGTCAAAATCAGAAATGCAAGTGAAGGAACAAAGAACTC  
A\_14\_P103179 TAGAGCAAACATTGCTGATGTTCAACCTACTAGCAAACATTTCCATTCAATGATGTTGAG  
A\_14\_P109523 TTCCTTTCCTGAGAGTTGAAATGATGGCTTTAAAAAATGTCAGGATTAGTTGGGCATTTA  
A\_14\_P103390 TCCTTCCAAGTGTAGATCCAATGGAGACATACTCGGGTATCAGATAAGAAATCAATATTG  
A\_14\_P100375 ACACTGAAAACTTTTAAGTGATGGACACATGAAGAAGGCTCATTAGATTGTCTTCTCTAC  
A\_14\_P109673 AGAACAAAAGAAGTGGTTTATACCTGTGTATACGCCAAAGCCAGCAGAGTCAC  
A\_14\_P116304 ATGTGACCTACGGGATAACCAGAAATATCACAAATTGTTTTTCCCAGAACTGCAGTTTAA  
A\_14\_P104057 GTCGATCCAGTGTTTACAAGGGAAGTGAAAGCCAAAGTGAAAAGGTAAGAGTT  
CUST\_2662\_P1426210822 AAATTAGCTCCCTGGAGATAGGTGGCCCCAGGGCTGGCTTAGTAA  
A\_14\_P121286 ATAAGAAAATAGTTCCAGAATCAGCACCAAAAATAAGGGCCTTGGTCAATAACTCTCTC  
A\_16\_P16636838

AAGTCTGTCCTACAGTTAAGACAAAGGTTATAAATGGTGAACCACTGTTATCTAGAAGGG  
A\_14\_P112646 CTAAGCATCCAGTCTACATCATAAAATGCAGGTTTGGAAGATATGTCAAAAGTCTTGTGT  
A\_18\_P22839602

GTAAGAAGACAAGGCCACGGAGGTCAAAGATACAGAAAGATAATTGCCATATATGCTATG  
A\_14\_P109800 CGATTTAGAAAACCATGCCTTCTATGTGCCTATGATGAAAATAAATGCCCTACTGACAAA  
A\_14\_P137384 GTTTTTCAACCACATAGAAGTATTTTTAATTGCTCTCTCTTTTTTTTCCCCTCTGGAACCTC  
A\_16\_P01268943

GGCCAGTGAAAAGTAGATTCAGTTTCTAAAGAAATCCATCAGTCAACATTTATTCAAGCCT  
A\_16\_P41569435

AAAACGTAACCTTCAGTAACCTCACCATTTTTGTCTTTGAATAGACCCACTGAATCTTCTAC  
A\_14\_P138118 ACATTTTCTCAGAATGAATGATACATCTCTGCTTTTCAGCCTCCCTAAGCCATTAATTTAC  
A\_16\_P15048429

CAGTCTAGCCTACAGAACTCTATATTCCACTCCTTCTAGAATCTTGTCTTAGATTGTTGG  
A\_14\_P133912 GATGGGAGAACTCAGAACTCAAGCATATAGATTATTCAACAGTTCACATAGCCAGATAGT  
A\_16\_P00685171

TCAAGGTGGCTGATACTTTATAGCCATACTTTATAACCATGAGAATGTTTATTTCTGGCA  
A\_14\_P101186 ACCTTAAATGCTGTGACTGTATGAAGATGGCCCATATTAGGTAGAACCAATGTAAAAGAG  
A\_14\_P136000 CTTCATTTTGTGCAGCCTGAAAGGGGCAATCACATAAGGTTCGGTTTTGTAAATATAC  
A\_14\_P113754 CTGATGCTCTCATTACATTACACCTATATTCTTCCCCTACATTCCTTCTTTCAGTATTTGT  
A\_16\_P18472856

AAAAATAATCCCAGTGCCACTAATATGTGTATTTGTCTCTACTATGGGAAAACCTCACCT  
A\_14\_P134351 CTGCAATTCTTTATTCTTTGGACTACCTTATTTGTGCTTAATCCCCACAGTAAAGAGCAA  
A\_14\_P113833 TCAGCACAAATCCTCATACTTACTCTTGGGTTTTGAACTTTGTAATGTTGAAACAGCATT  
A\_14\_P130408 CCTGGAGGCTGTATTCTGTATTTTATAATGCTAAAAATGAGAATAGAGGCCAGATGACAC  
A\_14\_P111485 ATATTCTGCTTGTACTAGTCAGACTGCCAAAAATCATTGTCTCTCTCTTGTAGGTT  
A\_14\_P106357 TAGTTATGTCTAGTGATCAGTTTGTAGATGTTGTAGTCACCCAGGTTTACAATTGACAGC  
A\_14\_P139846 CATTCCAAAAGTTAAAAGTTCATTCCAATAGGAACATAAGCAAAGAAGAGGCTTCCAGTT  
A\_14\_P136643 AGAGAACTAAGTGGTTAAGTATTGTGGCCTCTGACAAATGATGACCCACCTAAAA  
A\_14\_P103001 ACACATCCCATTCTCTTACTTACTTTGAATCTGTAAATGCTGTTTCCAGTTGATGAGTT  
A\_14\_P117331

CTGAAGGCAAAAACACTGGAAAGAATTAGATTAAACCCAAGAAAACACCAAATATCAGG  
A\_14\_P111689 AACACTGCTCTTCTGGCTGCTACAGACTTACTAAAAAGGCTCTATTCTACCAGTG  
A\_14\_P109161 CTACAATTCTTTTATATTTAGCCCAGGATGACAAATCAGTGGACTATGCTTTTCAGTGGT  
A\_14\_P117668 ATATCTTTCTCTTTCACTATACATGTTTGAATAGGTGCATTTTTGTCTCTCAAGCAGCC  
A\_14\_P131769 AGCCCTCTGTTAAAGTGAAGCAAAGAACTGTTGTGGATTATAACGTTTAGAAGTTCCAA  
A\_14\_P109439 ACAAATTTACTGTGTGTCTTAGAAGAGTATGTAAATTTAGAGGGAGGGGGCAAAGTTTT  
A\_16\_P35636117

CACCAAGATTTAACCACATACATTCTTCCATATGTCATGTATATACAATGTTAACCCCTG  
A\_16\_P19781944

AAAACCCTGATGTCATAAAATAGGCAAGAGTGAACTAATGCCATGTCATGTAAAAAAGA  
A\_16\_P20767936

GCCATGCCTAGTTTGTATTACTGACCTTGTATGCTGATTTAAAGATGGATGTTGGTAAAC  
A\_16\_P39956916

CCCCCATGAATCATTTAAACCCATACATATCCATGTTTTATTTCTACTCCTTAAAGGCTC  
A\_16\_P00403605

ACTTGTTTCTGCTGTCTTCTTACTGCCAACTTATTCATTACCCTGATCATAACAAGA  
A\_14\_P121060 AGTTAAAGTCTGAGCAAATTGGAATATGTCATTAATTCATTTGGGGAACATGTGCTGAGA  
A\_14\_P132667 ACTTAGTTAGGTTGCTTTTATTGGTGGAGGGTAACAAGAGTGGACATAAATGTTTCATTT  
A\_14\_P107299

CACCAAACCTACGAACTAAAGATTAGTGAGGTGAAAACAGTGAAATTAGTGAAACAGTGA

A\_16\_P19856815

TCTGTACACATTTCAAGATTCAATGCAAGACTTACCTATTACATATGGCTCCTCAAGTTTC

A\_14\_P132195 CTGAAATAATTGACTAACGAGTTTATGTACCAGGGATGATATAAATCGTTGCTATGATA  
CUST\_2280\_PI426210822

TAATGTTATTTCTTGTGTGTGAAGTGAATGCCCTTCTGTATATTTCCCTTATCCAGGAAT

A\_14\_P109927 CAAGATCAGAAAAGAGATTAAGCATAGGTAGGTTTGTGTAGTGCTGTTGAAATCTAACC  
A\_18\_P25683657

AGGCCTCATCCATATGCTTAAATACTCTCTGAAACTTACATATCAATCACTCAGTTACCA

A\_16\_P19182506

TCTAGGTTAGCGGTTTACATTAGTCTCAGGTCAGTAATAACTCAAATTCATTCTCTTCGG

CUST\_2770\_PI426210822 ATTACGGTGGATGTCTCCATCTTCCCTCCCGGGCTCCATCAACATC  
A\_14\_P135808 CTTACCTTCTCAATCTCTGGCACAGTTCCTTGAGCAGTAGATGAGTTTGGTCA

A\_16\_P15652668

CCCCTCAAAAAATGCTTAAAGATAGACCTTACATCTTTCCTACATAATTTTGTCTCCAGA

A\_14\_P125741 TGTTGGTTCTTCTATTTGTATGAGAGAGTGAGATTCTTGGAATTGTAATTACCCACATA  
A\_16\_P02049205

ACATACAAGCAAATCCCTTAATATATGATCCAAACTACTTTTAAGATCTCATCTCCCACT

A\_14\_P121191 CTTGGTTTCTTCATACACTAATAGACAGCAGTCTACACTGCTGAGGTCAGTGTG

A\_14\_P137524 CTTTCAGAAGGGGCTTGATACATTATTTATGAACTTATCAAGTGAAAAAGCACCCACTC

CUST\_281\_PI426210822 ACTAAGAATCATGCTGTTTCAGGAGATCAGCCTTCAAGAGAACCAGTTTTCAA  
CUST\_9732\_PI426210822 AGGAATCGCATTCTGGGTGGTAGACAGCTGACCCTCTGTCTTAG

A\_14\_P133340 AAAGAATCAGTGAACAAAAATAAGTGGCCATAGTGACCTCAGTTAATCATTGAAGTCTGA

CUST\_1288\_PI426210822 TCTAGTCTGGAGTGGCTGCTTACTGGGAACATTTGGTTTCAGTATCTG

A\_14\_P101324 ACCAGAGTGAACTTTGTAAATAAAAATATAGTCTAAGCAACAGAGGAGAATCAAGGCCAC  
A\_16\_P16793531

CACCTCCATCCTTAGAAAGAACTCATTAAAAGTGTGCTGGTTTATTCTTTAACTGCTCA

A\_14\_P122543 CAGGTGATGATACATCTTCCAACATTCAAAGGCTCTGTTATAAAGCCAAATACCCAATC

A\_14\_P139511 CAGAGCCCAGTTTATTATACCTTAAATCTGTCTTTGAATCAGGAAAGTTAAGATGCTGCT

A\_16\_P18087926

ACTGTTGCCTACCTCTGAATTTTTAGCATCTGACACTGCTTCTAAATTACATGATGGTTT

A\_14\_P102663 CAGCCAGCATTCACATCTTGTCTGGTGTTCATGAAAAGTTTCAAATTGCTAAGGTT

A\_16\_P19497421

AAAAACAACCTTAGATTTGAATGCCTGTCTATGAAACATGCCTTATCCAGTTTAGCCATCC

A\_14\_P136716 AGACAACATCCCTTTTATGATCCTCTTTGTATAGCACCTAACAGTGAGTGTCTAACTAT

A\_14\_P134280 ATATTTGCCCTTCAAGACTGCCCTTTTTATGTTTATCCTAACCTGCTATTACCCTATAAA

A\_14\_P101665 GATGTAAAATGCTTAGGGGGAAGGAAAAAAAAAACCACCAACAACATTGTTTGGATATTT

CUST\_7261\_PI426210822 GTACTCTTCAGCACTCACTGTGCTAGTATCCCTCTCAGGCGTATGAAT

A\_14\_P139880 AAAATATTTAAATTTGCAAGTGAGATATTTTTGGCCTTAACTTTTGAATTTCAATGTTTTTC



A\_14\_P125340 GAAAACATTCTTAAATATATGAAATCTCACCTCTAGTGACCTGTCATGTCGAAAGCCCCA  
A\_18\_P24967352

AGTTTCCCAATCCATCTAGACTTCAACATTGAATTTGATTTTACAATCTCAGGGACTTGA  
CUST\_6265\_PI426210822 CTGTCCGGGCAGGCTGATTGCTTTTTAGGATTCCAAGTTTCAAAAG  
A\_18\_P22841556 GGGAGGCTGGGACATGGCCTGCTCTCTGATCTAGATTTGATTATAG  
CUST\_6760\_PI426210822 CTCCACAGAATATAATGTGAGTGGTGTCCCTGGAGATGTACAGCTCTATG  
CUST\_9746\_PI426210822 CATGTTTGACATCTCTGTTTCATCACAGCACAGACTTACAGTGCCAGTCTT  
A\_14\_P126194 GGTTTTGTTACTGTTCTTAACTGCAGGATATGTTGCAGTATTACTTGAATCTGACAGAGG  
A\_16\_P01277585

ATGCACTTTACATTATCTCTGTATCTAAATAAAAACCCATCTAAACAAGTCCACTTCCCAA  
A\_16\_P15245428

ATGAACTCTCATTTGCTATAGCCAGAATTATCAACACACCTATCGAAGACTACTCAGACT  
A\_14\_P132361 GCGCTTCAGAACTGAATCAAGGGTTCCTTTGTTTAGAACCCTTGTAACATAATTAATCACC  
A\_14\_P114531 CACGGTGTTTAGAGAGGTGCCGATTCGTATTTGGTCAAGGAAGAGTTAAA  
CUST\_425\_PI426210822 ATCATAGGACCTGCTGCCCTGGCCCTGCCCGTCTTGCTGAGGAAA  
A\_14\_P129889 TTATTAATGGAAAATGGAATGCCTCGTTAACAGAAACCTTGATTTAAAAATGGCAGAACA  
A\_14\_P107412 ACTGGAAGTGAAACATGAGGAATGCTTTAGTGTAATGTGGGAGAACTTTTTTTGTAAATTT  
CUST\_9219\_PI426210822

GGTGGTCCTCACTCGGAAGACACCAGTTTTCTATTTGATATTTATTATTTCTAAATCTG  
A\_14\_P124153 CTCCTGCCTTCCTTTATATTTTAAAAATAGAGAGATAAGATTGCGTGCATGTGTGCATATC  
A\_14\_P130478 CTGAAGATGGCAAAGGAACAGAAATTTTTTTGTTGTTTGCTTTTTAGCATTACACCTCA  
A\_14\_P102255 GTCCACGTTCTCCTTGGTTTTGTTCTTGAGGCAAGACTTGGTGTC  
CUST\_1639\_PI426210822 CTTAGAGAAGCTTTCATTTGTGTGTGTGACATTGACACTGGCTGTTTCCTG  
A\_14\_P127346 TTTAGTGTTGGTGGGTTTTTTCCATTGGAAATAGTGCCTTTGTTTGGTTTCAGAACT  
A\_14\_P110295 ATGGAGAATCGTGTGATCAGTGTGCTAAATCTCTCTGCCTGTTTGGACTTTGTAATTAT  
A\_14\_P122231 CTCATTTTCAGATGATTTTCGAGGGTGCTTGACAAGATCTGAAGGACCCT  
A\_16\_P18282926

TCCCATATTTCCCTCTATTCTTTCTCTGTCTCCAAATTATGTTAGCCATCTTCAAATC  
A\_14\_P124868 AAATATTTTTCAATGCACCTTTCTTTTCAGGGTGATGTTGCAAATGAAGTGGAGACTGAA  
A\_14\_P130820 GAACAAATTTAATCATTTCTTCTGTTAAGCACTAATCAGTATAGTGCAACTCCTGGTTCT  
A\_16\_P20137745

ACGTCCAATGTAAATCAAGATACCAGTGAGAGTCAACAATATGAACAAATGCTCCATACT  
A\_14\_P202390 TGCTCTAATGTATCTAGTTTCTAAGTCAGACTCTGTTGTATGAATCCCCTCTCTTGTGTA  
CUST\_2422\_PI426210822

TTCTATTGTACTTTGAAAACAAAGCATTCTCTTGTCTCCACAGTGAGGACATCA  
CUST\_9772\_PI426210822 CATGGGCATTGCCAGCTGTTACAGTAGGCATATTTGCATTGATCAGAACATA  
A\_14\_P113494 CCACCTCAATCTTTTCCATGGTGAGGCTTTACAAATTTTAGTTTTCTCTAAGAAGATAGC  
A\_16\_P19782823

AGGTTACAAACGTTAAGACTCAAAGGATCTGTATACTGAGGCCTATATTTCCATGAAGTG  
A\_14\_P201106 TAAAACCAAAATATATGCTGGCTAATGTCATCTGGAAACTGAAAGTCGATGTTTCAGCAAC  
A\_14\_P138451 CATGAGGTCTAGTTTTAGAAAGGAAGTAACTAAATGAATGGTTCTCAAACCTCCACAGA  
A\_18\_P13244028  
AAAAAAAATCTAGTTGTAATTGCCAAAATGAAACCATGAACAGCATTGGAAGTAGCCT  
A\_14\_P120397 AAACCTAAGAGAAAACAAAATCAGGAAGAGCCAAGGTTTTTCCACATTCATATAGCAGTG  
CUST\_129\_PI426210822 TACTCACACAGACCCCAGAAATGCAAGCAGTCCCTTGGGGGAG  
A\_14\_P110565 CAATACTTTATTCATCCAGACTCCTTGGGCAGAACAGGTATATATACCTGGATTAGTGAA  
A\_14\_P104686 AAAAAAGAAGAGTGGAAGAAAATTTTCCAGAGGTTATACCTCCAAGTCTTCAGTGTGTTA  
A\_14\_P124825 GCTAGGCATTAAACTTTAAAACATTTGAATCATTAGACCATAATGCTTCACCCTAACGAT  
A\_16\_P39058012  
ACATCTTCCATGAAACTTACTCTGAAGCAACTGTTTCATTTATACTCCTTCAACCTGAGAG  
A\_14\_P137804 ACGAATTCAGAAGCAAGTAACATGTCACCTGTAAAATACCCAGGATAGTGTAATTTGTG  
CUST\_3427\_PI426210822 AGTGGCTTTCAAGGCAAGACTGATAATGAAAGTCGTGTTTGGGTGG  
CUST\_3093\_PI426210822  
TTCTTCTTTTCTTTTAAAGTTGGCCTCTGACAGCCCTTTTATTTATCTTACTGTGTTGAT  
A\_16\_P02985252  
GTGTTGAAGTTTTCTGTTTATACCAATGTCCACCTCTGATCAATCTTACATTCAGTCTCA  
A\_14\_P134144 ACAAGAGAGGGATCAGACTGTTATCACCTGATTTAATAGTCACCACTATAGTTATCAAC  
A\_16\_P15404249  
AAACATCTCTGCTATCTATGAAGAAGGTCTCCTAAAAGCATTCAACTTATGCCCTCTAAG  
A\_14\_P133258 ATTTTCTAGTCAATAAGCACAAGCCATGGATCGAGACTTCATATCATGGAGTCATAACTG  
A\_14\_P134371 ATAACGAAGTTGATTGACCTGCACCTTGACATGTAAAGATGTATAAGAGTGCTGCTTGAAA  
A\_14\_P107589 TCCTTCTCACAAATCTCTTCAACATTACAGAATCAGAAGGGTCAAAATTAGAATAGCCTG  
A\_14\_P125720 CTTTTTCTGTCCCTATTCATTCATCCATCATTTTTTGGCATGTGATTTTTTAAACACTGGC  
A\_14\_P124066 GGACTTTCATCTCTGGAAAGGTGAAACCTTAGAAGAGAAATGGTATATATATCCCTGAAG  
A\_16\_P00939445  
AACCTTCTTATTCAACTTAGTTTCCCTATTGGTCATTCTAACCATCTGACATCTGTGCT  
A\_14\_P139210 ATGCCTTTTCCAGTTGAATTCACGATACCATCTTTGTGGTCATGAGTTACTATATTAAG  
A\_14\_P111461 GGCTGCTTTTCTTAGTCTGATACCAAGCAAGGCCTTTTCTGAATAAAATTCATTTGACTTT  
A\_16\_P17585071  
AAACGCCTTCTTCAAAGTAGTAGGTTGTCTAGCAGTCTAGTTTTTAGCAGTGAAACTTAG  
A\_14\_P114355 CTGGAGTGGGAACCTTACTGACAAATCAGATACTTCCCCAAAATTTAGAAGAATAATGTC  
A\_14\_P132472 CTCATTGCATCTGGGTTTCGTGGAAAAACAATCCTCTCGAGGGTAAC  
A\_14\_P114698 CAAATGTTGACCTCTAACTTGGAGAAAATAGAGGGAAGCAGAAATATAGGGTGCTAATTT  
A\_16\_P17779370  
AAGCAAGTTTAAACTAACCCTACATACCTAACCCTGAAATGGATGTATCATGTCTAGC  
A\_16\_P00685517

CCATCTTTTTTCCTCATTCTCAGGAAATGATTGACTTCTGAAGACAGAAAATGGAGAAAT  
CUST\_5061\_PI426210822  
TTATATGCACATTCTTGTGACAGGCACAGTGAAAGATTTATCAAGGAATGACATGGTC  
A\_14\_P109194 TAAATTGAAGAAAAATTCCTCCAGCAATAGACAGTCTATCAGTCCAAGTATTTACTTCCT  
A\_14\_P108282 CAAACTTTGATCCTTCACCCTCTGCCTATCCTGATTTGACATTGACTTTCTG  
A\_14\_P128183 GAAGTGTACAGTCTCATTGTCATAAGAGGCAGTAATGTTTTTCGATGGCTATTTGTAAGT  
A\_18\_P22840288 AAATAACCACTGAACAAACTCTGTATAGGCACTGACTGCTGCTCAGACTTTGG  
A\_14\_P106412 TATCTGAGCATAACAATGTTTTGTTCTGCTTGTGATGGCAGGAGTTAACATTTGAGTCTAT  
A\_14\_P136338 CAGACAAAAGACCTGTCCGTGCTGTAGGAAAGAGGTGAAAAGGAAAAAG  
A\_14\_P103576 ATTACTCTTTAGCCTGAAGTTTTATCTTATAAATCTTGTTTTCTTGGGACCGTGCAGCTG  
A\_14\_P119554 TTAAACACCATGATCCATCAAAGCCTGAAAACAATGATGAAGCAAATGTCTGTAAGAAAA  
CUST\_6464\_PI426210822 TACCCAAATTTATTTCCCTGGACGTCTACTTCACAAGCAGTAACATAAGCAAG  
CUST\_8287\_PI426210822  
ACCCATAAAACATTTTTTCGAATGACAAAACAGAAAATGTATACTTTTATAATCCAGTTTT  
A\_14\_P114257 CTAGCCTACCCTCTGATCAATAGATCTGAGTAGAAATCAAGCAGTTCTCTAAACATCATT  
A\_16\_P18004603  
ATGTCTACTTTCACTGGCATAAATCCTATCTTGATCCTTAATTTTTCTCTAAGGCCTGGAC  
A\_14\_P108715 ACTTAGTTCAGAAACCTTAAAGGATTTGAATATTTCAAATTGCACACGTCCTCCAGCAT  
CUST\_4036\_PI426210822 CTTGGAGCAGCCTTTTAAACAGAAACACGCGTAACTTTCTGCAGATG  
A\_14\_P107206 GCGTGAAGCCTTACTTGTTCTCAGTCATGTTTACCAGACGTATTATCATGCATTTTTGT  
A\_16\_P02687472  
GGGCCAGGATATCAAATTAAGAAGATAAGAAGTCAATTTTGAGGGGACAAGCATTTTTTTT  
CUST\_9870\_PI426210822  
AGAGCTGCTCATTGAACTAGATAGAAAATAGTGGATTTAGGATGACAGACTTCAGAGC  
A\_14\_P118159 CTTCTTTTCAGGGTCCATCATTATACTTGCAGATTTTCTTGCCAAGACCTTTTTTTAAAGTT  
A\_16\_P16191813 CATGGGAGCAGAGGGTGATTCCCTGGAGAAAGCCCAACAAGTCAC  
A\_18\_P14134014 GGTTCCTGGGGCGGTAATTCTAATGAAGAAAAAAGCACTGGCCACATCTAAAAT  
A\_18\_P11757870  
CCTGTCAGCCATATCTCAAGTTTATGTCTCTGAGGTCTTAGATATACCCATAACCATACT  
A\_16\_P02213891  
AAGCATTGGTATTTTAAAGCAGTTGACACTAGACAAGAGTAAACCTAAAGAGTCCTAGGAC  
A\_14\_P121815 AATCTTCCTGGTAATTCCAGCGCACATTTATCTTTTCTCTTTCATGTCATTTTGCATTT  
A\_14\_P112282 TGTAAGGCAACTGATCACTTGGGAAAACACAGTTTGTGTGAGTAACAAGGTATATAAGAA  
A\_16\_P01813467  
ATTCTAATTTCCCAATTCCTATTTCATGTTACGAAAGGCCTTATAGTTCTCTTACCCTCTA  
A\_16\_P02381187  
AACTGAGAAGAAAGACCTTTGCTGTATTCCAAACACCATATCCTTAGTCTAAAGACTCAA  
A\_14\_P122104 GCTCTTTTTCTTTTTTATTATGCACACCATGTTTCTGTATATCTCAGATGATCTTAGCG

A\_16\_P21287953

ACTTAGGGAGATAACGGTTGACTGTATAAAATGAGAAATATGTCACACTACTCACTTGTA

A\_14\_P114310 ATTGATTTGTTCAAATCAGACTTACTCTCCTCTCCCCAAAGTGTCTTCTTTATTCTT

A\_16\_P36821029

GTGATGCATTGTTCCATATCCTATAAAAGAACTTTCTGAAATTTGCTAAGTCGTTTGCCA

A\_18\_P22841606

TCTATTGCATTTCGTCTGGACCCTTTTTTCCCCTTCACTAGCAAGCATAACAATATATTAT

A\_14\_P133413 GGGTAGACACAGAAAGTTTTTCCATAAACTAATGACTGTTTCACTAGTGAAAGCGTTC

A\_14\_P200428 GGCTATTCTCTCACTTGGGCCAGTAAGAAAAATCCAAAAAAGTTGTGCACTCT

A\_18\_P14137439

TTATTAATTATTGTATTGGGGAAAACATCATGTTATTGAATTTAATTAGAGTTGCTGGG

A\_14\_P135674 CTGCAGAACCTTGGCCTGAAAATGCTACATTATATCAGCAATTGAAAGGTAAGTCTTGTT

A\_14\_P200472 ACAAACACCTTGTAGACACCTTATTTTCAAGGTCTATTTCCATAGACCATCAAGACAGA

A\_16\_P21623053

ATATCTGTCACCTGAAGATATGAGTCCCCTCTAAGTCTTGAGTTATGCACCTCAACTACT

A\_14\_P114781 AACAAACAATTTCTGCCATTAGAAACCCTGACATGTAGTGGGCAATCGCTG

A\_18\_P22839953 ATTTGCTCTGGAAGTCCCGCAGTTCCACTGCCTCTGTTATCACTA

A\_18\_P22840899

AGCAACATGATTTAACATGAGATATAATTTGAAGGGCTCTTTAAGGCTGCTAAGCAACCA

A\_14\_P135446 TGTTCAATAATTTGTTTCCCCGGCTCTGCTAATTTGCTCTCAATTTCCATATGTTTAAACATAC

A\_14\_P104793 ACAAGGTGAAGGAGATTAGAGTGTCTGAATACTCTTTGAACTCCCCAAGTC

A\_14\_P129430 CTGTTAATTTATGACTCTCTTGTGAAACTCTTCATCATCTCTCCATTGTCCATGGAAAGA

A\_16\_P00685549 AGAGGGGCTGACTTCTTGGTGGAGGGAGAAATTTGTAGACAAGATTTATAA

A\_14\_P116888 CTATGGAGCAACGTAAAAGATACCTGCCTCTTCTGATCTTTTACAAGTGATACATCTGAA

A\_14\_P124393 GTAGAAGAGGATCAGGCATCCAAGTGGTTAAGGTCAGCAGCGTTTG

CUST\_2581\_PI426210822 ACCCTGGGGACCGGGAGCCTCCTGCCCGTTAGACAGCACGTCATT

CUST\_4029\_PI426210822 GTAAACAGGTCAGCGTCTTGTCTCAAGGGCGTCATCCTCCAGG

A\_14\_P116174 AAAACCCAGTTTCTTAGGAAACGCAAACGATTTATTATCCAGATTATTTGGATAAGTCCT

CUST\_7463\_PI426210822

ACATTGAAAATGACATATACAGACACAGAAAAGGTTGCTCAGTCAACAACCTTCTGCAG

A\_18\_P13990415

ATCCCGAATCCTGCTATAATGGATGTTTGTTCACATCGTTCCTACTCATATGACACATT

A\_16\_P15903015

ATTGTCCAATGCCAAATTAACACCTTCTCATATCCTTCATTTGCTAGTGTTTTCTCTAC

A\_14\_P201251 CTGATGGGGTTACCATACATAAAAGTAGTATTTATCGAGACATAAAATCCTGGAGCACAG

A\_14\_P124909 CTGCGATGTGCTGAAATAGGGAAGGCATATTGTCCTCTGTGTATTACATTAAATATAAG

A\_16\_P58424247 TGATGGCAAAAATCAAGAGGGGCATGCAGAAACATGTGAGACCTCTTAAG

A\_14\_P101831 AGCGAACAACAAAGTGCTTCTTTGTTGTGTTTATATCTTCAACTGTTTCATTACCCTACT

A\_14\_P130533 GAGGACCACACACACAGAACTCCTAAAAATGTTTTATTTTAAACAAAATGCTCAAATATCT  
A\_14\_P100933 TTTGCAGTTCCACTTGCACCTTTTTGTTTATTGTGTTTTATTTTTCAAAAAGTCGGTTGCT  
A\_14\_P114219 CATAATGAGACGGATGCAAGACCAGAGATTGTATAAGACATGAAAGACATGATTCCAAAT  
A\_14\_P135226 AAAGAGATTTTCCTGAACATTTTAGAAACATCAACAAGTTCTTTTGAGCACAGGTGGATG  
A\_16\_P15238123  
CAACATACCAACCCATTACACATGATTTGAACTTTTGCCTCAATTTTAGCATTAGGATGG  
A\_16\_P00817469  
TCCATCTGCTACTAAACACACCATTTTCAGTTAGATCTTAAATATGTTATCGAAACCTGC  
CUST\_7355\_PI426210822 TAGTGTTGATGAAGGACGAGGGTCTCACCTTTCCAGTCCTTGGTC  
A\_14\_P200469 AACAGATACACCTTCTTTTAATATGCAAATACAGTTTAGGCATCTGCATGGGTCAGTTA  
A\_16\_P00685188  
AGTGACTTCTGCTTATAACGCATTGACCATCCATATTTTAAAAGAGGTTGGAAGATGTCT  
A\_14\_P113675 CTTCCAACCCACTGAGTTAAGCAATAAAACGGTCTGCTGTCCTGAC  
A\_16\_P37575690  
CCACATATACCTAAGCCATATATTGTCTCACACAACCTGATCAAAAAGGAATTATCAGAACC  
A\_16\_P00648448  
GATAACAGGAATAAGTCCCAAAACTAATCCTTGAGTTTCTGATATTAAGTGCTCCCCAAT  
A\_18\_P14131309  
GAATATATCCAGAAACAGTGGGCCTTTTATAAATTAAGCCTGCCATTCTCCAATTGCTTA  
A\_14\_P202104 ACACTGGATTACCATTTATTCCGTATTTGGATAACTTGCCAAACTTCAACAGATCAATTG  
A\_16\_P18615210  
ACCAGATAAATTGGATAAAAAGTAGTAACGTCCTAGTCAACAATGTAATTCCCCACTGAA  
A\_14\_P127665 CTTAGAAACCAGGGCCTTGCTGCTATTGTATTTTTTTCTAATTAAAATTCAGAGTATTAA  
A\_14\_P126489 TAAAATAAAAATATTTTCCATCCACAAAACGGTTTTACATCAACTACTGACCAATACA  
A\_14\_P130999 TTATTACCTTGGTTCGATTTTTTCTGTTGTAGAATTTCTCATCAGGTTGTTCTGAACATG  
A\_16\_P01642345  
AACCTACACTATTTGTTTCACTTTTCTTCAGAAAGAGCCTATGAAATATGAGTTTCGGGG  
A\_14\_P121329 ACTCTGCACATCCCTTGTTCAAAAAGCCACAGGCTTAATAACAATAGCAATTATACTACA  
A\_14\_P117905 GAGGGGATCGAAGTTTTCTTTTGTCTATTGCAATCTCTTTGGACTTCTCAACT  
A\_16\_P58424490  
ACTCATTATATCATTCCAGCAACGCTGTGGGTTAGGAGTTACTATCTGTATTTTTACAGG  
A\_14\_P116297 AGCCCATGCAAATCTTAAATGCTTACACTTATGTTTTGAAAAGCTGGATTGATAGAGAAAT  
A\_14\_P201584 AAAGGAAGATTTACAAATTTGATGTAGCAGTAGTGCGTTTGTGGTATGTAGGTGCTGTA  
A\_14\_P127226 CTAGGGGATTTCAAGGCCATGATATTTACATTACAGACCAAAAAGAACTGTCACTG  
A\_14\_P111015 ACACAAAGAAATGGACTAACTGCAGTTAAGGAGAAAAAAGGTTTGCTTCTTTTCTGATA  
A\_16\_P03455704  
TGCTCACAAATGTCCATTGTATGATTAATGTGCAGGAATTGGAGTTTGTATTAACAGGAG  
A\_16\_P00685206

CAAAGCATTTTTTCAAAGGATAGTAACGACTTTTATGTCAAAAAACAAAACAAAATTTTG  
A\_16\_P17020298

AAGTCATCTTGTCCAGTCTATATCTATCACAGATCTCATTCTTCACATTTACCAACTCCC  
CUST\_3715\_PI426210822

TATGCCTTCATATACCTTTTCTCTCTACTCATGTAGAACTCTTCTTCAGCTTCATGTTT  
A\_16\_P18225421

AAAACACCCACTAGAGAGTAGGAGTCAGGAACTAAGCAAACCATTTAACCATTCTAAGT  
A\_16\_P20239160

TACTGCAAGAGTTACATTATTCCTGTTGCCATATTTACATCACTTTAGATCCAGACAGCG  
A\_18\_P22840156 CTTACTGATTAATCTGAGGCTTTTTGCTATGAGTTAGGAATGTGCAGGACAGGCAG

A\_14\_P134305 CTTGTATGAGGGATTACTGCATAATAACGTAACGCACACCTTACTGGATTCTCCATATAT  
CUST\_9583\_PI426210822

GACTATGCTCTCACAATGAGAGCATTAAACATTTGGTAATTAACATAATTTAATATGCCA  
A\_14\_P113766 CCCACAGAGCCTTAAGCAACTACTTCTGTGAAGTATTTTTGACTGTTTCATGGAAA  
A\_14\_P106808 ACATGGAGGTATCTCCCGAATCATACAAATTAATGTGAAGACCGTTTATGCATACCTT  
A\_16\_P00364736

AAACTCTGAAATTCAGTTCCATGTCTATAGTTGAGCCTGATTTTACGTAATGCTTGCAGT  
A\_14\_P107281 ACCTTGTCTAGGGAATAAGTCTTCAGTCCAGAAACAATATAGATGTGATGTGTGATTA  
CUST\_6824\_PI426210822

CTACATACTGTAAAAAAAATAGAGACAGTGTTAAACTGAACATTTTTTAATTTAATGAG  
A\_14\_P100170 CTATTTTCTGACTGCAGAATTAATCCAGAAACAGTTGACCTCAATAAGTTTCTTCTTCT  
A\_14\_P200256 TTTTTCAAGGAGCCATTATTATAATTACAGCCATTTACATACGTTAAAAAAGGAAGGGTC  
A\_14\_P124187 GATTTAAATTCGGCAACTCACCTTTTGTCCCTTCACTCCATGGCAGTC  
CUST\_6927\_PI426210822 GGGGCTCAGCTTTCACGTATATGAAAAGCTTCATTTGTGTATTCACTGCGT  
A\_16\_P01829868

ATTTGTAGAGAGCATTTTCGTTTCTAGGTCAAATCGTCTTAATACACACAGATCACTCTGG  
A\_14\_P107469 AATAACAGGAAAGAAGACACTTACTCTGGTGTGTTGCATGTTTCTTTTTCCCTAGAAACA  
A\_18\_P14132171 CAGCACAGACCTTGACGTGATTATTTTGGTCATTCTAGGGAGAGCAAAAGAG  
A\_14\_P123711 ACTCTGTAAGAAGGGCTTGTCTGTATGCTTCATACATTTTAAACAATCTGCTCCAATCTT  
A\_14\_P120028 TACCTCTTTAGGTGATAAATTTGTGCGTATACTGTCCCTTTTCTCCATCCTTCTCATAA  
CUST\_1477\_PI426210822 CTGGATTTTTGAGGCTGTTGATTCTGAGACTTTCCTTCTCTCA  
A\_18\_P15768901

AAGATTAAGTTGATGTCAGAGTTAGAGAACCAGTGTTAGGATTCAGAGTTTCAACCACAT  
A\_14\_P136711 ACCCTTCAAAAATTTAAACAAGAATCCACTGTTGCTACTGAAAGGGTATTTATCCAAGTT  
A\_14\_P111056 TCCTGTGCAATTTCACTAGCATCTGACTGTGCAGTGATTTCTGTAAACAGATTGACATA  
A\_16\_P16535188

ATCTCTGGCTTTAACTCCTACTGTTTCTTCAACTCTATAACTCTTATGCAGGCTTTG  
A\_14\_P103154 TGTCTCTTAATCATAATGTAGTTACATTTGACCATAAACGCCATAAGGCCAGGATGCTT

A\_18\_P13520805

AAATCAACCTGGATTATAACAAGCCCTGTGTTTATAGATACTGTTTAGTGTCCCTTCTCC

A\_16\_P20358491

GACGCAAATTCATTCAAGCAAGAGAAAGTTAGATGCCTTACAAATTCACACCTCTTTTTG

A\_14\_P120039 GAATAGAGAAAGAAGAAATCAGTGACTTTCGCTCCTCCATACAATTCAATTTGGCTTAAG

A\_18\_P16716880

AAAAAAACCTTGGAGAATTTTGATTAGGAGGATACTGTGATCATATGAGAATGGCAGTGG

A\_18\_P22840849 CTTCTCTGCAGGATGACTCGGGAAAGAGAAGGATAAGGAAAGAAAGTCAAAG

A\_14\_P136698 TTGTTTTAATGTGTTTTTTCATCTATGATTGATTTTTTTTTCCCTGGGAACCAGGGTGGAAA

A\_14\_P138760 ACCAGTTCACATTCAAGCACCTACTATATACAAATGTATTTGCTGTGTGCCACTTATTGG

CUST\_3289\_PI426210822 GGCAAAAGGGGACGCCAACCTTAGATATGAGGTCTTCTGAAAACCTTTTAAA

A\_14\_P138725 AAAAAATAGTCCCTTTTACAGTTTTTTTTTTTTTACCTTTGACCCCTCTGTGGGTGTCCTAAT

A\_14\_P135796 AAGAAAAACCCATTTTTTTTCTTAAGGACTTACTAGCCAAAATTTCTTAAACTTCGAGGA

CUST\_478\_PI426210822 TGCTTTACGCTGAGCCACCGAGTTCTCTGAACTGCAAATCCTTTTA

A\_16\_P36196349

TCACCTTAAACTTGTTACTCATAGCCCATAACTCTTATCATTCTTTCTCAGATAACCCA

A\_14\_P118539 GAGTTCATTCAAGAGTTCGTGTATCCTGTTTCAGGTATCCGGGGATTT

CUST\_3031\_PI426210822 TTCTGTTGCTTAGCCATCTTGCCTTGTCATTCCAGGGACAGAGAT

A\_16\_P39948628

GCGTCTAGAATATAAACATCAAAAAATCCTCCTTTGATACTACTAACTCAATTCTCCCC

CUST\_5666\_PI426210822

AGCATGATGTGTGATTTGCAGTGACATATCTATAACCACGGTATGTTTGTAGTGACTACT

A\_14\_P138968 GCAAGATACAAAAGTCCTGAGTGGGCGTCTCATTTATGGCACACTGATC

A\_14\_P117834 AAATGGTCTAAGATCACACAGAGAAAAAGGAACAAGGTCAGGCCACACAG

A\_16\_P15006018

AGAAAGATGCATAATGGAATTCATGAGGATAGGGGAAGATCTGAGTTAACATTGACCATA

A\_14\_P139783 GGATCATCAACGCTTTGGATCCAGTGAAATTATATGAATACATCCTTCTTCTATGATC

CUST\_3333\_PI426210822 ATCTCCTCTGGGAGGCCATGTTGTGCATAGCTGGAGAACAACTG

CUST\_9587\_PI426210822

ATGAGGGATGAGGAGTACACATAGGAAATTTTTGTGATTTTCTTCATTTTGATTGTATTG

A\_14\_P123204 TTCAGGGTTTCAGCCTGATAATAAGGATGGTATTGAAAGCATGCATAATGATTCTTAGTG

A\_16\_P16481164

AATAGGCCCATGTCAAAATTAGTCCCATGTCTACTGACTAGTCATTAAAATGTAAGGTCA

A\_16\_P16191845

TATTTAGAAGGGTTCAAGTAACACAGACCATGTAATGAAGAGGGTATGAGTGTTGAAAGA

A\_16\_P21579477

AAAGTTTGAAACCTATCTTACAAATAAAGTCCTGACCATTATGGATCATGTCCTGCTTCG

A\_16\_P02888002

AGGGGCATCAATGATTTCTAAGTCTTTAAAAAAAATCCACAATGTTGAAATCAGACTGCT  
A\_14\_P128503 ACAAGAATTCTGCAAAGCAGAAGAGGTTGATGAAGATAGTGTCTATGGTGTATTTGTCTC  
CUST\_8039\_PI426210822

ATGAGCTTCCAGAGGTCATAAACTGCAGAAGATGGAAGAGAACAGTTTAAAGTTTG  
CUST\_1395\_PI426210822 GTCAGTGATGGTACCGACTTCCATGTGTGTCCCAGGCCCTCAGAC  
CUST\_9926\_PI426210822 GATCATCGCCATCAGTTTGTGGTGGGAATCCTCATCTTCCTGCT  
A\_14\_P123758 AGATGGCAGAGACGAATGCAGATTCTATTTTGGTAGAGATTTTCAGTCCATTCAACAATTA  
A\_16\_P36230307

ACATATAGCAAATTTAAAGACTATTGAAGAACAAAATTGATACAACACCCAAGTGGAGAA  
A\_16\_P18159204

AAGAGTATTTGTGTTGATGCAATAGCATCTTTCTCCATAGAACTTACTCAGATGCCCTTC  
A\_16\_P18065923

AAGAGAACAATCCAACATAGAGTCTCCTACAGATGTATATGAATTCCACAGACAACCTGAG  
A\_16\_P38568350

AAAAGGATCAGACCTTTTAGAAATGTTCTGCTACACAGACTAAGAACTTTTCAACCAGT  
A\_14\_P138953 TGTAGAACACTAATCGATCTGTAAACCACAGGTATAAGCACTTTGACTGGTTATATGAGC  
CUST\_10434\_PI426210822 TTCACATCTTTATCGCCTCGATCAAGTGTGGAGTCACATGCTAATGTGTG  
A\_14\_P201989 ACTGATCTCTTTTGCCACATTTACTTAGAACTAGTCTTCACTTTTTTGGGTCTCTAACTG  
A\_16\_P18191136

ACATCGATTTCTTTTCAGACCAAACATTTTCAGTCAAATGCAAATAGGTCTTCTCTAGGC  
CUST\_1804\_PI426210822 GAACAGCTCCTTTGAAGCTTCGAGCCTGTGGTTTCTCTTTGTATACACATTA  
A\_14\_P103516 TAACTCTAGTATTTTCGTTCTTCTTTCACAATTGATGGTGTCTTATTTTTTCTTCTCCC  
A\_14\_P115757 ATCCTTGGTGGAGTAGAATGCAAACGAGTTTGCAAATACTGTAGTTATTATGTAGTTGCA  
A\_14\_P110313 CTTTACCTGAAGAATAATATCTGGAGGCATTTTCATGATTTAGGAAACCTATCCCATGCCA  
CUST\_5970\_PI426210822

TAACAAAAGCTTTGTTGGGAAGATTGTTTAGGTTTTTTTTGTGTGTTGATTGCAATTCCAC  
A\_18\_P14133960

AAGCACCTCAGTAGCATTTGTAAAGAGATGACACCTTATGTTCTAAATATTCTCCCAGTA  
A\_14\_P200906 AAAAGAAGATGGTTTCACTTTAATATAATGCTATTATCTTAAGACTTAATGGAGTTGCTG  
A\_14\_P201400 ATGGAACCTAAGTATGTTTCAGGATTCTAAAAAGAGCAATGGTTTACAAGGAACTTCTGC  
A\_16\_P01417526

GCAACCCACAGGTATTTTATAAAGGATCCTGCACATCTTTATGTAGTCTGCTTATGTCTA  
A\_14\_P201747 ATTGACTTCGTTTCAGTGACTACTATTAAGATTTTCCAAGGACTGACTCATCCCAAATTTT  
A\_18\_P11959763

AAAAACCATAAGCAGTTCAGGGATGAAATTCATTGTCTATTTCTCATTATCTGTGCACCC  
CUST\_1015\_PI426210822 GAAGTGAACCTGATATCAGAAGTGAGTAGTGAATGCCCAGGAGAAGTGGAA  
CUST\_4115\_PI426210822

CCATTTGCTCTTTGAAAACCTTGTGTTTCTGTTGGAAAGAAAGGTTTGATTTTGGAAAGTTT



A\_14\_P132134 AGAATTCTTGTGTCTCTTCTCCCTGACTTACTCACTATGCTGCTTAACCAAAC  
A\_14\_P137608 CTGAATACCAACTGGGATAATTAAGGCCAGAGCCTTCTTTTTTAATTGACTCTCCAATA  
A\_16\_P01703098  
ACTGAGCACTTAATTGAATCGAAGCACTTTTATTTGCTTAACCAACGTCTTATGAAGTCC  
A\_18\_P16227040  
AAAAGTGATGGCTCAATAGTTTCAGGAAAGTAAGAAGGAGAAGGTTTTAAGTAATCGTGC  
A\_16\_P19551284  
AATTTTTGTTTAGCGACTCAATAGCAACTATCCTACAAAGGTCATTCTAGTCTGCCAGTT  
A\_14\_P132452 CACGATGGAACACTTATTCTGGTCCTTCATCTTGTATATGACCTATTTTCATCCTCTTTG  
CUST\_1565\_PI426210822 GAATATGAAGGAAATGTCAAGGGGCTGGGTGGCCAGGGAGCTGTG  
CUST\_5253\_PI426210822  
GAGTGTCTACAAGATTATCATAGGTGAAAGTAGGGTTGGATGCAGAGAAATAGTAAGAAA  
A\_16\_P19798279  
AATTAGAAGGACTGTTAGCCCTAGTTAATGTGGTCAAGTGATGTCAATTGTTTAGGTGAG  
A\_14\_P122832 GTTTTGTTTTTAATAGGATTTACCACTTCAGCAGAAAAAGAGGCAAAATTAGTTTATAGC  
A\_14\_P130859 GTGTGTCAGTGGCACAATGGAGATGGGAAAGAGGTCTTAGCAATTTCTT  
A\_14\_P125808 ACCCAAGTTCAGATAACTAAACGTTAGGTTCCCTGAGACTTTGCTGACTTTAGTTATGTTT  
A\_16\_P00685288  
ATTTAGAATATAACTTTTACAGGGAAGAAAGGGGTTAAAATGTCTGGTGCCATCTGTCAC  
A\_18\_P15164888  
CCTGCACCCATATTTGTATAATCACACATTCTCATCTGAATTGGATCAAGAGTCTTTGTT  
A\_14\_P132594 GTCTGGTGGTGATACCTTTACCCCCTAAGATTCTTTCTTAGTTTCTATTATACTCTGTCA  
A\_14\_P120572 TATTTTATTTTATTTTGCCTATTCTGCAGACATTGGGTTTTGCCTATCACAGATGAACAAA  
CUST\_2404\_PI426210822 GTGCAGACACACGTACATGTTTGTTTAGACAGAGCCATGTGGGATGTA  
A\_16\_P00011259  
AATTAACATGACCTTTAAGAGAAGTGATCAAAGCAGAATACACATAGTATACCTGGGGAA  
A\_18\_P14133498  
TTTTGGGAGGAAGAGCAATCCTTATACCTTGAAATGTGTCAGATTCTAATATTTGGAGTG  
A\_14\_P126513 ATAATGAACAACTGATACTCTCCCTTCTCAACATGTGAGTGTATTTGAGATGGAAGTTC  
CUST\_6620\_PI426210822 TACTCCTCTGTAGCTACTTCAGATGATCCCTGGTGTCTCTGTGCAA  
A\_14\_P135655 GCATTAGGGCATTATTGCAGTAGGGATGGTGTCTAACAACAATATAAATGCATGCTAAGA  
A\_14\_P134234 AACCAGACCTCTGTCTACTTGTGGTGGATAGAAATATTATAGAGGATAGGAAACTGTAAT  
A\_16\_P18099108  
AAAAACACACCTACATGCTTTTTGTCATCATTGATTACTGATTGAGAACCAAACACACTGA  
A\_14\_P110248 CTTTCATTATTGACGTCCACTGTGTTTATAGGAGTTGCTGATGAATCTAAATCAGAACCT  
A\_14\_P101618 CCTGTTTTTGGTCACTGAGGTTTCCACTTCTTTATTATTATAGGCAGCACATCATGATAT  
A\_16\_P15274677  
GCAAACCTGATATAACCAGGAGATTTGAAATTCAAAACACATGATATCTGAGTGAGTCCCAA

A\_14\_P101450 GGACACTTAATCTGTGCCAATGTTTATTTAGAAAGCAGGGATATATCTAGTGTGCTCTGA  
A\_16\_P19075686

AAAAATGGCAGGTAACACTAGATGGTGGAAAAATAAGTATGTAGAGTGTCCCTTCAAA

A\_14\_P131241 GAAGATTTAGTCGCTGGGAAACAGGAACTTCATGGGGGTTAACAAAAGAAA

A\_14\_P138569 CATCCAGATATAAGAAATACAATGCCCTATTCTGTTTTTGTCTGGGTGAGGCTAAAAAAC

A\_14\_P118794 CACGTTTTTATCCTACAACACTCTCTATCACATATACCAAGACTGCTCTTCAATGCCTTA

A\_14\_P122653 CAGGGGCAGATCACATGTGCCATGGAAAGACTTAAAAAGTCAGCGAT

A\_16\_P02355921

GGAACTACCATGTGATTGTCAATTCTTTTGATCTACACCCCTTTCATTCTGTAAACATCT

CUST\_9745\_PI426210822 GCATGGGGCATGTTTGACATCTCTGTTTCATCACAGCACAGACTTAC

A\_14\_P132449 GGTCAATATATCTGCTTCCCTTTAGTTATGGGTAAAGAAGAACTGGTCATAGTCCATATT

A\_16\_P36230629 CACTAGGCTCTGGTGAGTGAATAGTGGGATTGCTGCTAATGCTGAGATT

A\_16\_P19223456

ATCTTTGCTGCTATTACTGAATGCTACTCATGTTTCCTTATACTACTGGCTCCACTTCAA

A\_14\_P114513 AATACGATAAGATAGTGCATGTCAAGTGCTTAGGACATATTGAGCGCTCGGAGTTAGTT

A\_14\_P132651 TGTGTGTGAACAATGACGAGAACAATGTTGTCTTGCTTTCCCAAAAAATAAGACACTATC

A\_14\_P123574 ACTTTCCCAAAGAATCACAACATCAGGGGAAGAAAGACAAAATTATTTCTGGTGTAT

A\_14\_P120523 AGTATCTGATCTTGTAATAATCCTCAATTTGCATTACATCACTTTCTCTTTGCGACTTCT

A\_14\_P107494 AAACTGTAATCTGAGAAGGAAGGATCCATATTTCTGTTATGGTTTTGCCAATGTGAAA

A\_14\_P130180 TCTTCCTAATCACCCCTTGATTAATCACCCTTAATCATTCTTGCCCTCTGAGT

CUST\_1428\_PI426210822 CTAGTCTCACTCGCAGCCCTGGTGCAAGATTCTGCAGGGAACAAA

A\_14\_P107961 TAGATGGATATTTGGAGGTTTTCTCAGGAAGAATCATGTATCTTTCACAGTATCGCAAGA

A\_14\_P103523 CTTTGCTTGACTAACGCCTTGCCAGTTTTTTTTTCTCATAATTTCCCAACCAGAG

A\_16\_P40236443

ACCAGCATCGTTATTAGTGACACCAAGATTCAAATCATTGATTTAGCAACACTCCTTAGT

A\_14\_P126821 ACGGATAATTTATACAATTTCTTTGGGGTTTTATTTAGGAGACAAACCATGTGGGAGACAA

A\_14\_P107557 ACTTTGGAGAACCTATTTTCTTACCCTATCACTGCTGATTTCTTTGATCTGAATGAATG

A\_16\_P15311595

AATCAGGAAGATGTATGCAGTATTCTAGACTATGGTGGAAAAATGTGACATACCCCTTTC

A\_14\_P133298 AGGGATTTCAATTGTTCTTTCAATTAATGATCCTGGAAAAGTTTCACTCCGGTTTTAGTTT

A\_14\_P134682 GGGCTTTGTATGCTTTTATCTATGTCTGACTGTAATTGTATGTGGGATACATCTGTGTTG

A\_16\_P00685053

TGACCTAAAACTTTAACTCATGCCATGTTTAAATGTTCTTAAATTTGGGATTGTTGAAGT

CUST\_1613\_PI426210822 ACATGGATCTGTGGCCTTCTGGTCATAGCTATGTTGCCCAAAAATATT

A\_14\_P120822 GTTTTCTCGGAGTGAGAGAAAACCTTTTTTAGATATCATCTGAGAGGTAAGAGACTGTT

CUST\_846\_PI426210822 CTTGTCTGCCATTCTGGGGAAAGAAAGGGAAGAAGCTGACTCATC

A\_14\_P123867 CCAAAGCCCTAGAGAGAAAAGTTTGCCCTACCAGGAGAATCCCTAAA

A\_14\_P116444 ATTTTTATCCAAGCCTGTGTGCTTTATTCAATGACTTTTGTATTCTGGAGTGGATGAGAT

A\_18\_P14136108

GGTGGATTTTTTCATTAACACAGAAGCTTAGAAAAATTTTAAATGATGACGTTTGGCCA

A\_16\_P58424240 CAGACGGAAGCAGTGATTCTTGAGAACTTTTGGAGGTAAAGACACTAGGAGTA

CUST\_4160\_PI426210822 TATCCAGGAAATGGCCTCCCCAGCAGTGTGCATAGTCCCAGGGAA

CUST\_6483\_PI426210822 TTCATCCTCTGATCATGTTTATTTTTCTCTCTGGCTGGAATGTACTCCCTGTTTTT

A\_14\_P132519 ACAATTTGTCCTTTTTAACAAAGTATAATAAAACATAAAAACCCCAAAAACAGAATACTT

A\_14\_P114998 AAACAAATGATCAGCAGATAAGCAAAGCCACGCGCAGTATCATGACAAGGAAT

A\_16\_P18898805

ACGAAGTTTCCAAGTCCATAAAATAAGAGTATGGTTCATTCACAAGCACTAAAGCAATGG

CUST\_3433\_PI426210822 ACACAGATGCAAAAGCAGATCGCTACAGCTGGATCTGGGTAAAGG

A\_14\_P101245 TAAAGGAGGTAAAACCTACTGTCTTCATTGGAGTGCCTCAAATTTGGGAGAAGATA

A\_16\_P16671077

ATTAAGTTCCTTGCTATTGTCTAAGCCATTCATACTCCAATAACTGAAACGCCTTTC

CUST\_5489\_PI426210822 CTGAATTGACCCAGTGAGGTAGTCATCTACCCTGTCCAGCATCTT

A\_14\_P103405 ACATCTGTGATTTCTGAACTAATGGTGCTAATTCAGAGAAATGGAAAGTGAAAGTGAGAT

A\_14\_P106663 GTAGTAGCAAAATGTAGGTGCGGGGGGGTTAAAATAATTTTTCCATGAATTTAGAAGAGT

CUST\_3532\_PI426210822 CTCTCTCCTCACACTGACCGTGAGAGCGAGTGCTCCTCATCAACA

A\_14\_P116025 TTAATCTCAAAGACAGAAAACAAGCACAACCTATTTATAAGGTTCCCACTCAAACCCCAT

A\_16\_P03203060

TTTTGTGTCTCCAGAGTTTCTACAGGTAAAGATAAGCGAGTATGAATTCCCCTTTATTC

A\_14\_P116053 TCCCAAGGTATTTTATGAAAATGGACCTCAAGGGCACAAATTCATAGCATATTATATGGC

A\_14\_P100146 TTAAAACCTACCTCTGATGCAGGAGGATTCTCTGAGTCATAGAAGAAGATTTTCATGCC

A\_14\_P125836 TGTGCGTGTTTTATCTTTGAAGGAATGTTGATATTTGGTCAGTATGAACATACAGCAGCA

A\_18\_P10521178

AAGACCGAACCCTAATGTTTCAAGTCCATGTAAAGATAAATAAGATACTGCCCTCTAA

A\_14\_P113014 AGCACATCAAGGTTGACTTCTCATCCTTTTTGGGAAGTGAATTTAATATTGAGGGTAATT

A\_16\_P38824335

ACCTCTGACCTTTAAATTGAGTAAAATTTACCCCAATCCTTTGAAAATCTTCGCATACT

A\_14\_P117570 CTTATATGTTTGGCCTTCAACAAAACGAAGTTTCAGTCCAAGTTGCTATGTCAGACAG

A\_16\_P15403329

TCTAAGATAAGGTGTTGCACATTTTCATTTTTCATGTAGATGCTTTAGAAACCCTTCTGG

A\_14\_P200217 TCCAAAACAACTTTATTTACATAGAGATAATAAGGATCTCAATAACTCAAATGCTGAAT

A\_16\_P36916061

AAACGCTAATCACAAAACCCTTATACTTGTTCOAAGAGTTCTTAAACAACATGTTTTTCGT

A\_14\_P115101 ATTATCCTTTCCACTGGCTGTATTTGCTTTTTCTTATTCATGTAAAGCCTTCCTCACAAT

CUST\_491\_PI426210822 CTGACTGCCTGTCAGGAAGTCAAGAATCCGAGTTTGGGGGCTTCA

A\_14\_P107089 TCAAAGGGAAATTAGGCGCTAACTTTTCTCACATAAAGTGCTATGAATAGTCTCCATCT

A\_14\_P125131 TGGAACATTCTGAAAAATCTCAGAGAAGTGAACCCTTACAACTTTGTTTTCCCTCATA

A\_16\_P18081602 TCATACTATCCCTCCTTTTATGCTGTATGTGGTAATCCTTGATTTTTTTGCACTGATGCT  
A\_16\_P35115669  
CATGTTTGTAGTGGAATAGTTCATGATACAATGAAGATTGAAATGTGACATACGTAGGGC  
A\_18\_P16729180  
AAATGACTCATTGACTCACGTGAACATCATTCAACTTTTCAACTTTTTGGGGATTAGGTAT  
A\_16\_P58424072 GGATACATTGTAGGGTTTGTGGGAAGTGAGTCAGGAAAGGGGCATAAAAT  
A\_14\_P123913 ACTTGAAGACCTGAATCTTTCCATCCTGAAGGCAATGGGCAAAAACAAAGAA  
CUST\_10120\_PI426210822 TGGTGCTACTGTTTACCTAAATCAGAAAGCCCTTATCGTGTGAGCAAGTG  
A\_14\_P132705 GATTTAGTAAGCCTTAGAGAAATGCAAGAAATTTAGGCAAAGCCATATAAGAGGGGAAA  
A\_14\_P119953 ACCTTTCTATCTGTATCTTTGCAGTTTCTTCGTTACTCATATGTAAGCCTCATGGTAAGC  
A\_16\_P17824091  
TACTATAAAGTGATCTACCACTCAGAATACGCTTTTCATAACCACGTCTCCTCTCATCTT  
A\_14\_P103495 CTTGCTTGCCTTCTTTTTATAATCCATTATTTTCTAATAAATTCCAGGAGATTTCCGGTG  
A\_14\_P119860 TTGAATGCCTTCCCATTTAATCACTTAATTTAATTTGCAGAGCACACCGTGTGCATTAG  
A\_14\_P134697 CTGTCTAGGACCACTCCTCAATAAACATACCATTTCTTCCCTTATTAGCATATCATTGTC  
A\_14\_P117312  
GGAGGAGTCATCATTAGAAAGAAAAAGGAAAACAGTCTGCTTAAGTCAAGTGAATAAG  
A\_14\_P134238 AATGACGGGAAAAGATGGATCACTTTTGGCAATAAATGTCACATCTGATCTTAACTTGAA  
CUST\_8433\_PI426210822 AACCACCATCTTCCAGTAATTCGCCAAAATGTCGAACACAAAGGGAA  
A\_16\_P20988110  
AGTGCCATGCTTTGAAAATGATTTCTACCCCATTAATAATACTCCTAAATTCACCTTAA  
A\_14\_P127664 AAAAATGGAACCAATTAGGGCTTGTCTTCTATGTTTCTACCACTTGAATATTGTTGATGCC  
A\_14\_P107664 GAATTCCAACCTGATGGTCCACTCGAATGTGACCTTTAAACTTTATACAGGTTGTC  
A\_18\_P15325920  
ATCCACAGATTATCAGACCAGAGTCACTTTACAATATGATAAACATCCACTTTTCTCACC  
A\_14\_P117056 GTTCTTTTCTTCTGAGATGGAGATCTTTTCAGACCAATAACCTTCCCTGCCT  
A\_14\_P105572 CTGTGGAAGAATGGAGTCCTTTCAATGAAAATAAACTAGAGGCAATACACAACACAGTTA  
CUST\_8349\_PI426210822  
CACTCTGGCATTCACTGCTGTGGCTAAATAATAATTTTCTTTCTTCTTGTGGCCT  
A\_16\_P20409258  
AGGCACTTTCTAAAATGTCCTACATCTCAAATAACAGTCAACTCATTACCACAGAGTCAA  
A\_14\_P133992 AAACAAGGACCTGAAACATCTAAAACCTCCTTGTGATTCTATAGGAAGGAGATAGGTGCT  
CUST\_9050\_PI426210822 CTGGGATCAGATGACGACAACATTTGAAACAAAGGGTCTGCTCTCTTT  
A\_14\_P131470 AAGTGAGGACTACATTGCAAGTAAGGATCTGTGAGTGTGAGAGAATAGAGATGAGTTATA  
CUST\_7216\_PI426210822  
TTCTGATCACTGTTCTTGACACTGGATCTAAATTAAGAAAAACATTAATCTAAAAATGT  
A\_14\_P122904 TTACCACCCTTACTACTTACTGTGTGATTACCGCTGTGATTACTTACTACTGTGATTACC  
A\_14\_P100110 ATAACCAAAGTGCAAATGTGTGATAACCAAACCTGTGATTTATGACTCTAGGAAGTGAAAC

A\_14\_P128252 AGAATAAACACCCCTGAGAATGGCATCATAATGTTTGTGATATGGTTGATGCTCACTATA  
A\_14\_P130150 GGAGATCCCTGGATTATAAGGCGAACTTGATTAAACAATAAGGAAAAATCAGGTTACTTG  
A\_14\_P119509 AAAGATACTCACTGTGTGTGCCTGTAACCAGATCATGAGAATATGGAAAGATATTGTGG  
A\_16\_P16767239

TACTTCACAACCTGGTCTTACTTCTAGTCTTCCCACCTATCAAATCAATTTACTCATTGCT

A\_16\_P30952338 AAAGCGAGGGCATCCTTGTGTGAGAGCAGACACTGAATGCTTTGT  
A\_18\_P22840328 CTTACTCTGAGGTGTGGAGAAGGCTAGAGAAGAGTAGAAGATAAGGTGAAGAG  
A\_14\_P102676 TAAAGATGTATAAAAAGTCCTCTAATCTCACATTCCCTAGAGATGGTCACTCATTGCCTTG  
A\_14\_P100134 ACCTCTTGTGTAAATAGTTCCTGTTCTATGAATCTACCCACTTTAAAGTAGCCAATCA  
A\_16\_P15619402

CAGACTTCATCAGATACCCTATAACTCTATATTTCGTAAGATCTATCAGTTCCTCCTGTG

A\_16\_P17550706

AAGAATTCCTTTTTAACGCACATTTTCCAAAAGACACTCCTAATTTAAAAAGCCGCTTCC

A\_18\_P14134160

CACGTAGTTGGACTCTGTTAAAAAACATTTTTAAAGAATGAAGATTAATTTTGATACACA

A\_14\_P117501 TGATACTTTTCTATGTATATGGAAAAGTAGGAGTAATCCTGGCTGTCAGAAGGACTATCCT  
A\_14\_P200643 GCCTGGTGTATGAACACATCCTTATCTAAGTTAAAGGCTCTGTAGAAGTTTATAAGGATA  
A\_14\_P107637 GTGATATTTTTCATATTAGCAAAGGAAAACAATAAGGGAAGACATACCTGATTCCTGGCC  
A\_14\_P133938 TAAACGCTCTTACCTGATGGAAGAAATCATCCATGAAATGATCTTTCTCAACCACAACAA  
A\_14\_P123065 TACCAGAAATACAGCAGCCACTTTGCAGAAAGGAAGGATTATGTCAAATAGTTAGAAGAT  
CUST\_5840\_PI426210822 AAAGAGACTAATCCAGGACTAGAACACAGGCACTGAGTTTCAACCTCAG  
A\_14\_P135948 TTCCCTGTGGAAACTGTTTCCTTGATAGTGTATTATTGCAGCCTTGGATTATTTGACTTA  
A\_14\_P112363 CACTAGAAATTTGTTTAGGGTCCAGTTGATTTGTGTATTTTTGTTATCATTTAATTTGTA  
A\_14\_P117557 TGTCTATTTTCAGATGTCTTCAAGAACCCTCAAACTGAAGATATAGTAGCAGTGCAGAAA  
A\_14\_P129632 CTTTCCTATACCCCTTCCCATCCATGGCTTGTTTTTGTGTTTGTATTTCAGAACAG  
A\_14\_P136406 ATAAGTGGAGTATGAAAGGGATCTCGGATCAGAGAAAGGATGTGGGACAAA  
A\_14\_P111734 ATATCTTAATATCTCCAGATTCCTTCTGCCTTCTAAATTGTGTGCATCACATCTGACAT  
A\_16\_P17315074

TTCATCCCAAGTAGTTAACCATGACATTGTTTATTCAAGCATTATAACCTGTTTCAGTCCC

A\_16\_P38375629

ACATTCTCACTTTTTCAAGAATTCTAAGACTGCAATATCTATGGAACTTTGTGGCAATGT

A\_18\_P23418641

ATTCTATACATTTTTTTAAAAAGTCAGGGGAAACAGAAAGGAAATGGAAATTCTGGGCCC

A\_16\_P37837983

AAGCCATAAAACCAACATTTACTTTCCAAGTTGAAAACAATTTTTCTCTCTCTTCCGTGC

A\_14\_P104068 ATAGAAGTCACACAAGCAGATATTCTATGGTGTAGTTTTAGTATAATATCTAATTACGGG

A\_16\_P01412730

CGCAGTAATCGGTCTATCTGCTAATCGTTTACAATTGATTGTCTCCTACAGAAAAGTGTA

A\_16\_P00363916

TTTCCCCTAAGTAATCTGCAATAAAATCCTTGGATAAGAATGACCACAGACTCAATTACC

A\_18\_P14133402 AGAAAATGGTTCCAGAATAATTGGAACAGAAGCCATTCCTTAGACAGCAAAGGAG

A\_14\_P133716 GATCAGAGACAGTGGAGAGAGAAATGCAATAACCTGAATCAGAATGTCAGAGGTTAAAA

A\_14\_P105982 GAGTCTGGTTTCCTTTTATAGGAAATAGGTTAACTTGAGAATGAACCCCTTCTTAGCAC

A\_14\_P135430 CAGGTGCATGATCTTCCTAGTTCTCTTTTATTTCTAAACTCCTTACACATCCTTTGGTT

A\_14\_P133106 TTGGCTTACATAATTAAGTGTGACAGGTAATATTTTCATATCTCGAACCTCAATCCCA

A\_14\_P104163 AATAACCAGATAGCCTCTGCTTTCTTTTTCCTTTCTTCGGAATGAGAGACTCAAC

CUST\_9127\_PI426210822 CCAGATGACAGTGCTAGCTCTTCACACCTGAAGCACATTAGCAACA

A\_14\_P138680 ACTTTGTTGCGTTGTTGATCATGATTAATTGAGTCTGGTCAAAATAGCGCCTTTTTCTA

A\_14\_P125047 TATTTTATGCCAATGGCTTGTAGGTTTCATATCACTCTGGATCAGTCACAGTAGACTTAC

A\_14\_P118563 TGAACACAACATATTAAGCACTCTTTTGTGAATAAGGCCCAAATCACTAGTCTTTAGGG

CUST\_3122\_PI426210822

TTTCTGACTGATAGTTTGAAAAGTCTGCAGATTAGAGATGAAGTGCCTCCTGTTAGT

A\_14\_P101453 CTCTGCACTGCGAAATGTCATGAGTAAAGAAATTTAAGAATTAAGCACTGAGAACGTGTT

A\_14\_P109249 TCCATTTTATTCAGACGCACATTTGTATCCTCAAGCAATTCCTGAATGTTTTAGTGTGT

A\_14\_P135108 GTAGTCTGGGCCTTTGTATCATTTTCTAGTGGAAGAATGATTCAGTCTAGTATACCAAC

A\_16\_P58424090 GAATGACAACATTATCCGCACCCCCAGCAATTCCTCCCTAATT

A\_16\_P15852400

AAAATGTCTTCATAGGAGTTTTGAGGAGAACATTGTCTATGCTATCACTAAATGCCTCCT

A\_14\_P101097

ACATAAACTACAATTGCAAAAAGAAAATGGCAGAAAAAATGTCCCGGGAAAGACCTTAA

A\_14\_P120256 GATCCCCTGCCAAATCAAATATATCTTCATCCTTCATGGTGATGAGACTGGTG

CUST\_616\_PI426210822 TGGGGAAGCTTTGGCTTTGGGATCAAATGCTGAAAGCAAACCTAA

A\_14\_P113743 TGAATCTATTTCTCTTTAACAATTACAGGATGGTTCAGCAATTTGCTGTGGACTTTGAGA

A\_14\_P123392

TGCAAAAAGAAAAGGAGTGTGATAAACTCAGAACAACACAACAGCAGTTGGAATTTCAA

A\_16\_P00908665

GAAACCACAAATGCATTGCACTCTAAGACAATGTTGTTTGTGTTTCGCTTATCATTTTTAG

A\_14\_P115244 CCTCATAGCATCCAACCTACTTGGTATTAATGGGTATTTGCAGGATGGAAGTAAATGAAAT

A\_14\_P104219 AACAAATCAGACATGTAGGAAAGGTGTTGTGCTTTGTTTAAATCCAACAAGGTCATAAGAA

A\_14\_P112782 TAGTTCCTTTGGAGATTGTATTCAACCCTGAGGAATGGATTAACCTTACAAAAAGTATCT

A\_16\_P00685262

TACACAGAGCAAACAACCAAAATTGAAAGCAAACAGACTCTGAGTTGAGAAACCTG

A\_14\_P138122 ACCATCTTACTGAACTGTCTTCACTTACATTTTTGCTCAGTGGTCTTCTTTTTGTAATGG

A\_16\_P15993170

AAGCAGGCACTAAAATTGTATTGGATAATCCCTAATGATGCTTGATTTACCTCAATGTG

A\_16\_P15572124

AAAACAGGCTCAAATACTTTCCAATGCCTTGAATGTTTAGTGAGAGATGTGAAACTGGTA  
A\_16\_P17715178

AATGCTGAATCACTAAAACCAACCCTTCTAATGTAGACAAAAAACCTCTTGAGTCCTATC  
A\_14\_P139478 TTCCCTCCATCTTGTCTTTCTGGTAAAACAATCAAATTTAAAAATCATTCTAGGTGCC  
CUST\_8566\_PI426210822 GACAACAAGAGTAGAAGCATAAAAGCGAGTGCATGAGGTGCTGTAGTGAAG  
CUST\_7909\_PI426210822 CCCAGGTGGAAAGACAGCAGTTCCTACAGCCTTCTCTTCTGTT  
A\_16\_P00685323 GAATGCTGCCAAGAGGTTTTGATTTAAACACGAACCTTCTTTCACAACACAAGT  
A\_16\_P16981894

ACTGAGGAACATCTAACATGACTTAACAGAGCAATATCATGTGCTATCTTATGGGTTTGC  
CUST\_9029\_PI426210822 TTATCTGTCACATCCCTGATAAATGTCTCTGTGCTGCTGTTCTAGCTGGTT  
CUST\_3107\_PI426210822

CAGTTAAGGCATTTTAAAACTGGTTGGACTAGATTCTTCCCCCTTGACTACTTTCTATT  
A\_16\_P03499615

CTTGAACCTAATCCTACAGGAAGAAGAACATCTGTCTCTGTTTCTTCAGACATTTTTGCT  
A\_16\_P15428995

AAAAGCCCAACCCTATTTCAATAAATCTTCATGAATATGCAAAGAGGAGTAATTGCCCT  
CUST\_7756\_PI426210822

TATTTACATAAGATAACATCCTTTGCTTCATATTTGTCTGGTTTTTCGGTACAATCACAAA  
CUST\_4111\_PI426210822 GGTGGGAGGCTGCAGTTGAGAGGTACAAGAAATGTTCAATGAGGG  
A\_18\_P10113721

AAATATTTAGTTCCATTTTGAACATCTTTAGATCCCAAGCATTAAATGCACCAGACCCT  
A\_14\_P113310 TACCCTATGGCACTAGCAAGATCTTCCCAGTCTATTTCAATAGTATCTTCCACATTTATT  
A\_14\_P137187 ATCTCCTCTTCCCTCAACTGATCCCGGATCTCAGGGGAAACAGATATA  
CUST\_6539\_PI426210822 TTGTGCTAGCCTTTACTCAGGCTAGATTTATGATGGCAGCAAAAAGAAAAGGTC  
CUST\_5053\_PI426210822 CCATGCTCTATGCTTGGCCGCCTTCCATCAGGAACACTCACAC  
A\_14\_P101220 CTGATTGTGTCTATTGATATTCCTCTGGTCTTGTCTTGTATAAGTTGTTACTGTTTTCT  
A\_14\_P130545 GAGAGGCAATGAGGTTATTCATTAGATAAGTGGTGTGTTAACATTTGTGTTGTATTGCCT  
A\_16\_P38210020

CTCTCCTGATGTGACTAAATTCTTACCTTTACCCTTAGTTGAGACTATTTGATTGGCAGT  
A\_14\_P120172 CTAGCCATTAGAAAACACTGCATTATATCTTTTACCAGATTACCCAGGTGGAATTTTCA  
A\_14\_P106448 AGTAGATGAAAACATGACTGCTTCCACCTATAGTCTGAATAAGATCCCAGAGAGAAATTT  
A\_14\_P200843 CTGGCAAATAAACTGGAGTTCAAGTGGGAAAAAACAAGGTATTGTTTCAGACTTATGATT  
A\_14\_P110694 ACCCACTGAATGGATAAAAAATCTTCTCTTTTTTACGCAAGAGTTGGTCTGTTGGAAG  
A\_14\_P128789 CCGTTTTGCTACATCAGTCCATTTCTCCTCTGCTGCATTATGATATTCCTAGTTCAATTA  
A\_14\_P131965 ATCAGTCAAGGCTTACTTCTCCAAGACACCCCAAGTATTTTTTGTCTTCTAGATGAA  
CUST\_890\_PI426210822

CCTGTCAGAGCTTTCTGGGAGGCAAGTATTTACTTTTTAAATTAATAAATGGGAAGGATATG  
A\_14\_P103590 GGTCTTATTCATCTTCTCTAAGGTGATTTATTACCCAAGAAACATTTCTTAAAGCCCT

A\_16\_P36230781 TGACTTTACCTTGAACCTCCTGTATAACGCCAGGTAGAAAAGCCTCACCT  
A\_16\_P00684997 CTGACAGAGAAAAGGTGTTTCAGCCTACTTGGATTAAAACGGGGATGAAGAAAA  
A\_18\_P14136437  
TCCTTTTCTATGTCTTCAGGTTGTTTGGTGAATATTGTTCTTTTTTTGAATCAGGAGTTGG  
A\_14\_P130087 TAGAAAAGAATGAAAGAAAAGCCAGTTTGTTTAGTCAGTAACTCTTGCTTTGGACTCAGAG  
A\_18\_P22842133  
CAATCTGTTGTTCTCAATTTTCCTGGCAGGAAAAAAAATCTTTTCTGAGTAGGAAGGT  
A\_14\_P107933 ACTAATCTCTTTAGTAAATTAACCTCAAAACTCACAAAGGAGGTAAGTGCTAGGTGCTGGT  
A\_14\_P111151 CTGCAGAGTTCCGCAGATGGCTTGAAAAGTGTCTTACATGCAAATAAATAAAAACAAAAGG  
A\_14\_P137644 TATTCCTATTGTTCTATAATGTCCTACCTTCTTGCTCCACACAAGTCGAAAACCTCATGTT  
A\_14\_P117098 ACACGATGAGGGTATGCTTGAATATTTAGAAGATATAATTGGTTGTGGACGGCTAAATGA  
A\_14\_P120485 ACCATGAATGCATTGACAATGGACCCCAACACAGATTGGATTAAGAGAAGAATAATTC  
CUST\_9316\_PI426210822 TGCAGACAGTTTTATTGCCTGTGCCATACTTGCCACTGTCCATAGAG  
A\_14\_P102389 TGATAATTACCTGTGCATCTCGTTTCTTGAACCTCCTGAATTTGATTTTCGTGCTCCATAT  
A\_14\_P122901 CACTTTGAAAACATCCCACTCTGCTTAGGTGGAGAAGAGGCTGTAGAAG  
A\_14\_P107400 GTCAAGGTGAACAGGATTTCTGGGATCAACATAAAAACCAATAAGAAGTCCACCTAATAA  
A\_14\_P136025 CTCATCAATTGTGCTCAGTCTCTTCTGGTATCTACATGTAATAAATCTTTCTCCTTGTC  
A\_14\_P104164 TAATTAGTGTTCCATACCTCTCATTGTCTAATGCGTCGGGTCTTGGCACTACAATATTA  
A\_14\_P104683 CTGCCTTCCCTGGGTCAACAAGATTTATATACAAATTCATCCCTAAGTCATTTGTAATTG  
CUST\_2549\_PI426210822 TTCCATTCTTACAAGATCATTGTATAGCCCAGACAGTGGTCTGCTGAGG  
A\_14\_P202198 ATTTCTCTTTTATGTTTTTCATTAGGTGTGCCTTGCACATACAAAAAAGAACCTGTTTCGTA  
A\_16\_P16492234  
ATGATTGCCGTCAATTTAAAGTGTTTAAACCCCTTGATAACCATTCTACAGAAGTTACTGAAC  
A\_14\_P115213 GGAAAACGGACTGTTTGGCTTACTGAAGGAGTAAAGGCTACATAGACTTCTAATTAGATA  
A\_14\_P132103 CATTCTTCATGCTAAAATGAACTATTCAGAAAAGTCAACAGCAGAGTAGGAACACCTGTC  
CUST\_5723\_PI426210822 GAGATAATTTAGGAAATCAAGTACAAGGCCCTTGCTGTGTGCACTTATACCTGG  
A\_14\_P136418 CACTTTTCTCTTTTTTTCAAAAATACACAAATTACGTTCCTGTTCTGCATCCTGCGTTT  
A\_16\_P20535598  
AAAAAAAACACAGTTTTCCCTAGAAAACCAAGGAATTTAGTATTCCTATGGGAAATGGGC  
A\_14\_P201530 ACTGACTACATATCCTTCAGACCTGAGTTGTGTTTAAATATCCTTCCTAAGCACTTATGGA  
CUST\_4048\_PI426210822 GATGGAAAGGTTGAGGTGGGAAGAGAGTGAGGGGGAAGACTCCAT  
A\_16\_P15630217  
ATTGTGTTTATTGTGTTAAATGCTGTCAAAACTGTCTACTCACTGATTTACCAATCCCAG  
A\_16\_P03063843 TTTTTTCTTATTTTTTTAAACTATAACGACATGCCATCATTCTATTATTCAATCTTTCT  
A\_14\_P111108 AAGATTTTTGACAGAAATAAAGATGGTCGGTTGGATCTAAATGACTTAGCAAGGTGAGTT  
CUST\_5608\_PI426210822 AGAGCCTTAAAGGTGGAGTAGGATTTGGGTCCTCAGGGAATGGAG  
A\_14\_P136235 TTCATCCTTTTTTGTCAATTGCTTTTTCCATGTTTTTATTGCTCTACCTTTCTTTGAGAGGC  
A\_18\_P13816249



AAAGTAATGGAGCATCATAGATGGTAAGACTACTAAGGAGTATGTAAAATCAAGGAGTGA  
A\_14\_P116609 CTAAACTTTCTGACTTAACCATAGGTGCTGTCATGGATTCATCCAGAAAATAAGACGGT  
A\_14\_P139107 ATTATTATAACTTCTCTGTAATTTCTCTGAAATAAAATTGAATCACCTGAGGTGCAAAC  
CUST\_9101\_PI426210822 GTACCTGTTCAACACACTTAGAGGACCGCCTCCCTCCACCTTGAT  
A\_14\_P115503 CTCCATGATCATCAGGACCTTGCAGCATTGTAAAAATGAGAAGAAGAACAAGGC  
A\_14\_P103782 GTAGCATCTGCTATTTGCATATTTACCTGGTAAGTAACCATGGAACACAAATGACCTTTT  
A\_14\_P105088 GAACTCCATTCACTTTTATCTCCATCAATAAAGTGGCCTTTCAAAAAGAATCTTCTCTT  
A\_16\_P16976219  
GGTCAGAAGCACACATTTATGAAAACAACCTTGCTTACAATAATGTTACAACGAAGCCTGT  
A\_18\_P15965452  
ACAAATGTTTTTCATAATGACGGTAGATTGAAGTAGATTTTATTCTCCTCCATCCTTGCTT  
A\_14\_P137257 AAACAAATATATTGAGAATTTGCCTCTTTATTGATAACATAAGTGCAGAGGAGATAAGGG  
A\_14\_P200619 CTCTCTTCTGGCCAGAAAGACTTCCTGTTTTACAGGTATATGATCTTATCTGTGTTGATA  
A\_14\_P100178 TATTCACCTGATCCTTAACTGAGATTGAAAAGATGGGTAAGGAAAACATATGGACATGTA  
A\_16\_P18397817  
AGACCCCCCTTTACATAAAGTATTGAGTTCAATTATGGATATACAACCTTAAGGCCTCAA  
A\_14\_P107669 AGATTTAACTATCAAAGGCTCAGGGGCTAATTAAGTACTGACTTGGGTGGAAATTTATATT  
A\_14\_P102218 AGGCCTACATGCTTTGTGAACAAGTCCCTGTAATTGTTGTTTGTATGTATAATTCAAAGC  
CUST\_3848\_PI426210822  
ATGACCCACTTTTTCTGAGAAGGAACTTTCCCTTTAGGAGTGGTAATTTAGAAGA  
A\_16\_P00282649  
AATCATGTCAGTCACTTTGTCAACAAGAATAATCTCATTTCAGTAAAACCTCCGCTTACCC  
A\_14\_P108577 CTCTACATTAAAGTTTCTAATATCTCGAAATGCGGCTGCTTTTCAAGGTAAGTGGATCTT  
A\_16\_P02038928  
ACCTATGAAGTGTTAGCAATACAACACTACTAAGACTGGCTATCAATCAAACCAACAGATCA  
A\_14\_P117969 TTTGGACTGGACAAAATCTATGACTAAAATTTCTAGGCAGAATGATCTATAACGGGTGGA  
A\_16\_P02338023  
TCTATGCTCCCAGACACATATAATACAGACCTATGATAATTGAGGAGAGAGTTGATGACA  
A\_18\_P14132333 CACTCTGTTAATAGTGGCTGTCATTGCATAAAGAGATGGCCAAGGAGATGAAC  
A\_14\_P200745  
GTTAGAACAGAGTGGAAAGAAGTTAGAACAGAGTGGAAAGATGAGGAAAGAGATAAAAAGA  
A\_16\_P21136865  
TCAATTTAGAAGACAGTCTCTGAAGATTTTGCTACCATTAGAGAAAAGTTAACCTCCTCCAT  
A\_14\_P124595 CTATTTTTACCTGCCATTTCTTTGGCAGCATGAGATCTAACAACAAGAGACTTTATGTCAT  
A\_14\_P133505 TGAGCGTCGTTTGCATCTGAAAGTTTCACAGGGATTTCAGTAAGAACAAGGATTTATAATA  
A\_14\_P110280 GAATTGACTACCAACAATGAGTCGATTGGATGAAGCATTGTGTCACATACTTTAATTCCAG  
A\_14\_P127704 TCGTCACCACATATTGTTTCCCTAATCATATAAATCATTTCATGTGGAAAGCCCTCATGTA  
CUST\_4411\_PI426210822 CTGAGTATGCAACTGTTTGCTTTTCGACCTTACAGCACAGGCTTTGG

CUST\_4042\_PI426210822

TTGATTAATAATTTATATGTCAATGTTGGGATCTTCATTTTGTATGAGAGATTTTCAGTT

CUST\_8275\_PI426210822 TATTTGTCTGGGAGTGTGAGTCAGAGCTTTGTTTCTTCTCAGGAATGTGTT

A\_16\_P15215474

GGTCTCTGCTCTACCTTTATTAACAAAATCCATATCCTACACATACTCTGGAAAATGTCC

A\_14\_P116413 TAGTGTTTAAAGTGGAGGTTAAAAAGAGAAATTAGTGACTCTCCCTTTCTGATTTTCGGA

A\_14\_P100926 AATTGTGCAGCATTAGCCACAGTTCTGTTTGCAGTGACATGTAATATCACATATTTTCAG

A\_14\_P120437 TTAAAAAAAATGTTTCATTGAGCACCACCAAAAAGCCAACAGAATATGGCTCTGGGTAG

A\_16\_P35551486

ATAACTCCCCTAAACATTACCATGAACTCTGAACTATCTTACAGAATCCTCTGTTATGCG

A\_16\_P02240204

GACCTAGGATAGATACATCAAGCGTAGACCAACAACCTAAAATACATCTCTGAAGGCAAA

A\_14\_P200309 GCCTTCAACTCCTGTTTGAAGTGGCGATATAGGATCTTATTGTGCTGATTTTCAG

A\_18\_P14136696 ATGTCTCCTTGTGACAGTTACGCAAGAAGGAAAGTGAACAGAATGTGGATC

A\_16\_P17814725

GAACCTCCAGGGTGATTTATACAGGTATAAGGAAACACAAACATATACTCTTGTTGTCCG

A\_14\_P103041 TATTTATACATCTGGATTGTTCTTTTGTCTAAAGATGGGGAAGGGCTTGATTTACTGTCC

CUST\_4788\_PI426210822 GCTGTGGAAGGGAGACTTAGGGTGTGGCTTTCCCATGGACCATG

A\_14\_P136231 CTGTTTTTCAAATACTATAACTGCTTCCCCAGTTGGAAATTCTAAGGATCAGTATTGACC

A\_14\_P137161 GACCAAGGAAAGGGTTATCATATACGCAATCAAACCTTATAGAAGGTTCCCTTCTATAGTT

CUST\_8678\_PI426210822

AAATTGTAGGGATGAATGATAATTTTCTAAGGAGATATATCAATGTCTTTGCCATAGGGT

A\_14\_P116359 GGACATGTAAATGAAATGTCTCTATTGCAGAACGTGCTGAGTTTATGGGATATTTACTACT

A\_14\_P136628 AGAATTAATCTCTATAGTGAGTTAGTTTTGTGTTCCAAAACCAGTCACTAGAGCCACTGT

A\_14\_P117084 TTGTCAAGATGGTATATTCATTTTCAGGACAGCAGAACTACTCATCAGCCACACTTAGT

A\_16\_P17435620

AAGATCACTAGAGTTTGAAGGTCAGTACTAGAGTTTTTTTACAGCAAAAATCAGTTTGGGTGC

A\_16\_P38185225

AACTTGTTTATCACTAACTCTCCTAACACTTAATCTGAACTAAACCAATTTTCCACCTT

A\_14\_P105086 ATATTAATTAATACTCTTGACAGCGATATAAACTTGGAAAGCCCAGAACTGAGGCAAGAC

A\_14\_P102984 CCCACATAGGCATTTTAGAATTCAACTTTATTTCTTGCGAGTCTAAAAAATTGACCCTG

A\_16\_P36504834

TCCCTATGATGTCATAACCTAATACATGTAGAATGGAAGAAGTATTGCCTAATGCCTCAA

A\_16\_P18566812

AACTACTAGCAGAACCTATCCAAGCATTCCCTATATCCCCTTTTTTCATAGTTTTCTGTGA

A\_16\_P20205310

TGACCATTTACACAACATGTCACCAATTCCTGTTTTAGTATCATCTTAAATTCGCATCT

CUST\_1971\_PI426210822 ATGCTTCTCACTGAGCCTGTTTCACCAGCCCAACATTACCCCCTT

CUST\_7908\_PI426210822 CTTTCCTTTGACCTTGGTTGGAAGCCATGTGCCAGGTGGAAAGA

CUST\_3251\_PI426210822 AAATAAGCAGGCTCTTCAGGACCAGGGAAACGATGGCAACAGTTC

A\_18\_P22841912

ATGATTAGAACTTTTTTCTTCCTGGGCTTAGAAAACATGTTGGTATAGCCAAAGAAGCAG

A\_18\_P16675733

TACAATCCGGTATCATTAAACATTATCAATGTCGTTCTCCTACTAATTCTAACTGTGCCCC

A\_14\_P105478 CAAAAAATGTGCCATATCATATTCTTACCAAACATTTGCTTTGATTGGTGGCTCGGTC

A\_16\_P00685046

CTGTGAAAAATGTTTGTTCCTTTTTTTTTCTTGGGTCTGATTACAGGTATTTTATTTTGGGA

A\_14\_P134589 TCCTGTGCAAGGAAATACAACACGCTGAAGAATTTCTTATCAAACCTGAATCCAAAGTT

A\_14\_P110413 ATACACGAAGGAACTGAGGTATATAGTGTGGCTCAGTCTCTGGATAGTAAATATTTCCC

CUST\_5453\_PI426210822 AGGGTTGGGGCAAAGCTGTGGAACCACCTTTCACAGTGCTTCAGA

A\_14\_P115991 CTCAAGGGGGAAAAATTACCCCTTCTGTTTATTTTTGGCACATATCAAAAAGAATATTCC

A\_14\_P112166 CTACAATAGCCAGCAGTTGGCTACATGTTAGATATCTATACTCCCCTTCCTTTTTAAGAC

A\_14\_P131366 CTCTGATTCTGTCCTCTTCTCTGATTCTTCTTTCTGGAGTCAAATATATGGGATATA

A\_14\_P201718 CATACTTTCTTTTATGCCTTTTGAAGCCATTTCTCCTTCGGCGATTCATAACCTTA

A\_14\_P138572 AGAATTATATCTGGAAGAATCTCAGGATACATATCAGAAGCATCTGGTGAGTCTCAAGAC

A\_14\_P103478 ACTGCTACCCATCCGTCAAACCTCAAAGTTAATGTCCTTCCTTCTGAAG

A\_16\_P21479787

AAGTGACATCTAATCTGTGAGTAAATGGGAAATGAAGGAAAATCGTTTAGGCAGAAAGAG

A\_14\_P117091 ACAGGATAAGTGCTGAATTCATTTAATAGGAAGTTAAACCAAGAATGAGGTGGATCTTCA

A\_14\_P112117 CTCTCTCGCCATATTCCTCTCTGTAGACCCAGAGACCATATCCATAAC

A\_18\_P22839786

ATCAAGCCACACAGCCAAATGGAAATACAATAATAGATTGAGGTCACATTGACTGTTTTC

A\_14\_P132206 CTTTATCTACCTGATCATGCTGCGTCGCTTTAAGCACAAAGCCCCTC

CUST\_613\_PI426210822 GGTTTCCCCGTGGTGGACACACAGTGAAGAATTTGACTCATGTAA

A\_14\_P118312 CTTGCTTTAGGGTTTAAATCTAATAATTTTCTTATCTCCCTTCAGGCTCCAGTTATGCT

A\_14\_P118093 TTATTTCTTTACTTTGTCTACTAAATTCAGAGTCCTTTGAGGATGCCATGAAGTCAATGC

A\_18\_P12858622 ACCATACACAGTTCTACCATAGTTCTACCATTTTTATTTCATTATATTTGCCATCTCCC

A\_14\_P116131 TGCTAACCAGCAGTTTGAACCTCTTTTACAGTCCAATATTTCTTGGGTATCTAAATC

A\_14\_P131167 ATTTGTGCACTGAACTTAATTTTTTTAAGTGGGTCATAAAACACTTGGTCTTCGTCCTTC

A\_14\_P100639 GGGCAGCCATTTAAAGCATTTGTTGTTATTTTTGCTTCTCTTATAGGTCATCAAAAACCT

CUST\_2714\_PI426210822 TTACTACTCTCTGTTGACCCCATCTCCAGCATGGTGGCAGC

A\_14\_P112160 CTTCTTGGATTTGCTTATTCCCAGCAGTGTTCAATTTGAATGATATTCCAGATCATGACTA

A\_14\_P121488 GTGATATGGAAAACCATTTTCTCTTTTCACTATACTCAAATGCAGTCAAGAATCCTGGT

A\_14\_P110030 CTCTTCAGAGAAGCATAAAATCATGTCCTTGAATGGAGAAACCCGACTCTGAAAG

A\_14\_P129571 CATACTTTGAACAACCAAATGTGCATTGAATACTCTGAAACCGAAGGGACTGGAT

CUST\_9537\_PI426210822 TGTCTTCCCTCAGAAGCACACTGATAACCCCAATATACCCACAATTCA

A\_14\_P137014 TGAAATTATCTTTTAAGTGAAAAAACATAGGCACTGGCACTTACAAAGGGTTCTTTCTG  
A\_16\_P32715884

AACCCATGACTTACCCTAAATCTCCTGATATGAACAATTAATCTACTGGGAGGCTTTTC  
CUST\_9405\_PI426210822

ATATCAATATCCAAATATCTGGCTCTAACTGCTTGGAACCACAGCACACATCTTG  
A\_14\_P110621 AATGGACGAAGACCTTTTGGTATTTCTGCCTTAATTGTAGGTTTTGATGATGATGGTATC  
A\_14\_P119300 CTTGGATGATTGTGAAGTGATTGAACTGCAGCAGCGTCCGAAGTGATTAATAT  
A\_14\_P126100 CTGAAGGGTTTTGAGGTTTCTCTTAACGAATATCAGAAATCTTTATCTCTCAACCAACTG  
A\_14\_P136253 AACAACTACTTCCCTCACTGCACACATATTTGAGTAAATATAGTAACACTGAAGGGACA  
A\_14\_P103927 TAAGAATGGCCGATTATAAACCCAGATCTACCAAGGTTAAGTGCCAGGCAA  
A\_14\_P137580 CTAAAGACCATTAGCCTATACATATGTAATGTGCATTTATCCCCCAGTGCATTACCTT  
A\_14\_P126864 CAAGGAACACGATGGAAGTATACATGTTTGCATAAAACAAAACCTGAAGTGTATCTGCAGA  
CUST\_9180\_PI426210822 TCTGGCTCAGGGCAGAGACTGGTCAGTTATTTTTTTGGTAGCAAACT  
A\_14\_P123874 GAGAGTGTGAGAAATATTTTCTGTTAGAGACACGAATATGTTTCAGCCGCAACAGG  
A\_14\_P136204 CAGAAGGAAATAGAAGACATGTAGACTAGAAGACATACATGTGAGATGAGCCCAGTGAAT  
A\_14\_P128976 CTTTTTAATACCAGGGATAACCTTTGCTTTAGGGTCCATGTAAAAGGGAGATC  
A\_16\_P39783626

AATTTTCCACACATTTCTTACTTCTACCCTTGATCCTATACTAAATCAGAAAGCCTGAG  
A\_18\_P22840703 GTCTCCTCCTATTCTCAGAGCAGAGAGCCACGAATGGGGCACTCG  
A\_16\_P15513371

ACCCCTGATACTTGTCTTTAACCTTAGTGCTCTATTAGAACTCTTTCAGTTACAAGGAAC  
A\_14\_P101800 TATGGAAATATCTGTGGGCAGAAAATACAAAGTTGGAAGCAATACCAAACAGTGGCAT  
A\_14\_P120385 CTTATTTCTTTCTCACATTGGGTGGCTTCTTCTTGTGTTGCCTATCTCCTGGT  
A\_14\_P103078 CTACCTTGCAAGATTCTTCAAAGGATTTAAACATTTTAAAGTGGGAGAATAAGTAAATGCA  
A\_14\_P108931 CTCAATTTCTCATACTCAACAACTTTTTGTTTCTTCAACATTGTGAAAGAAGAGAGCGGT  
A\_14\_P108782 CATTTCTCTACTCTGTTTTCCCTTAGAGGAGATTTTGAAGACACACATCGCACACT  
CUST\_6746\_PI426210822 CGTGTGCTGTCCAGCCAGAGCACAGGGTATTATGGCCAGCAACTG  
A\_16\_P18578271

CCCCTCCCTGTATCAAATAGACTGCAGTTTAAACATAAGGCAATAAATTAACCAGCAT  
A\_14\_P118534 CCTCCTAGACACTTTACACAGATACTTTTGCAAAAGTAGGAGTATACCATTTGTAACAGGA  
A\_14\_P124034 TTTAATATTCTGAAGTTACAAGATCACAAGTGCTGGGGATGCATATGACTGACATGAAA  
A\_14\_P101794 CTGTGTCTTTAGCAATGTGTCTCTTTGGACGGATGAAATGGTTCAAATTGCCATTTTAT  
A\_16\_P00939893

GAACATCTACTCCAAAATCTCAAATTTCCCTTGCACTGTTACATGATTCTTGCCACAAA  
CUST\_1296\_PI426210822

GGTCACTTTTTTTTTTCTGAGAGTAGAGCATGACATAATGCATAGTAAGTTGCATGTCTA  
A\_14\_P126608 CAGCAGATGGGCCAAGTTTAGTTCAAGAATATGCATTTTTGAAATGCAGATACCAATAAG  
A\_14\_P103626 ACCAAGTCCCTAAATGCTGCATTTTCATCTGCCTATTTGTTTTTGTGCATCATCATTTGTCAT

A\_16\_P16871604

AAATCCCTATGTATCTGGACATCACTCTATCTTAGAAGTAGATATGCCAGGATTCGTAGC

CUST\_5244\_PI426210822

TATAAATTA AAAAAGCAAACAACCTTCTGGGTCACTGGTCGTCTTTTCTGCTGTGTTCAAT

A\_14\_P109322 ATGACAGAGGGAAAAGCACTCCAGGTAGTGATAATGCTCTCGTCCTAAG

A\_14\_P102191 CTATAACTGGGTTTATGGCATGGGTTGATTTTCTCACTCTACATAGTTTGTAAGTTGGT

CUST\_9095\_PI426210822 AAATGGGTCAGGCTGGAGAATGCTGAGGTTTCCAGGCTAGTGGTTT

A\_14\_P131023 CTGAAAGATACTCTCTGGAAAGGCTCCTGTTTTCCCCTTGTGTCACA

CUST\_783\_PI426210822

GATACAGAGGTTTCATTCTTGCTCCTGTTTGCATGCAAACCTGTTCTATTTCTGTTTTG

A\_14\_P110726 AGATCCCTGGCAGCACTTGAAGAGAACCTGATTCGTATCCTGACAAATAT

A\_14\_P129657 TAAATAAAGATACACTGAGTTATGCTGGTGTCTTTTTTCTGGTCAAGCACTAGCCACTT

A\_16\_P16817504

GAACACTGTTTTCAAATACATGCTTATCATTCTAACCTCATGACCTCTATTTTCATCCCCA

CUST\_9384\_PI426210822 CATCCCTGTTTTGGCGCCATTTTCTGGTTATCTGGATCAGTGTCTT

A\_14\_P105783 AGATTTCTTTCTTCCTTTGCAACAGAATCGAATTCTCTGGGTTGATGAGAACAATTTGAC

A\_16\_P21598421

AAAGAAATTAGGGAATAATAGACACATCCTGAACTTCATTTCTCCACATGTTTCCGTAGG

CUST\_896\_PI426210822 ATCCCCAAGGAGCACAATATTGGATTCCAAGGTTGGGTTTGAAGA

A\_16\_P19498053

AATTTTCCCCTTGCCATTAAGTATCTTTCTGAATCATTGTCTTAATACCAATTGCAATT

A\_14\_P201314 CATTGAATGCCTACAGTGTGGTTCTGTTAGAGAACAGAACATTTAAAACACTTGACTC

A\_14\_P109071 TGCTCACTTGATAAATGTAGATAACACGTTACAATTTACTCTTGGAGTCCTTCCCTTTCT

A\_14\_P121470 ACTTAATGATGTAACAATTATGCATTGTGTCTGTGTTGCTTGGAAAATCTTTGCCTGACT

A\_14\_P133284 CTTTCCAAAATAAACACAGAGATACATCATTCTGTAGGGAACCAGAGTTTCTTCAGAAAC

A\_14\_P125406 TATCATGCTCATTAGCGTATAACCTACTATTGTTGCTGGTCCATTTATTAGCCCTCTCTT

A\_14\_P139692 TCTTCTGTGTGAACTGATTTCCCTGTGTGATGTGCAAAAAAAGGTGCAATCTAAAATTA

A\_14\_P135739 ACTAAGAAATATCCAAATATAATCAGGGTGATCAGGGAGTGAAGTCTCTGAAATGCATGA

A\_14\_P101002 AATAAAAGAATATGCCAAGCGAGATAAGCAGTGATGCAATAGACAATCCGTGTCCAATTA

A\_14\_P111612 CTCCTTAAACTCATATTATTAGCCAAAACAAAATGGCGCTCTGATCTTGAGGCTAACATT

CUST\_1917\_PI426210822 GTACATAAAAATGCTTCTTTCAATTAGACCACCTGAGAGGCATGGGGAAACTG

A\_14\_P133346 CAGTTAGTTGCTGACTCGGATGCAGAGAGTCGGTAACACCTTCTC

A\_14\_P124085 TGGCTAATTAGTATATTTACACAGTTGATGGGTTGAGCAGAGTAATATATAGGGTTTACT

A\_16\_P03345555

AGGAGGCTCTTAGTTTCTTATGGACTCAGCGTAATTTCAAGATTAATTTTCAACGTGCTGT

A\_14\_P110014 AGGCTTATTGAAGTCCAGCAAACTTCATTACAGAAAGGATGCTGAAAATACAACAGAAT

A\_14\_P200048 CTAAAAAACAACCATGAGGTCTTTCTAAATAAATTATGAAAAAGTGCAAACCTGCAGGT

A\_16\_P03099937

TTCTGTGAAAATTGCTGTAGTCCCTTGAAGCATAGTAGCATAAAACTGTAAGAGAATAAT  
A\_14\_P126208 CTCCAAGGACATGCTTAATGCTTATTGTGAAGAGTAAAACTGTATTTGTGGGAGCAATT  
A\_14\_P113531 ATGTCCACAGGTTCCCTCCTAATAGTATACATGGGATTTTGCCCCTTTCTGTAAAAAA  
A\_14\_P119725 ATGTGTAACCAGCACTCACCAAATCTGTTAGTTCCTTGGATTCAACACCCTATTAATTTT  
A\_14\_P135742 TTCTTTTAAAGGACTTAATTGAACTTAGCCAACTGGTCACTGACTTCTCTCTCCTAGTGA  
A\_16\_P17218846

ACACTAAAGATGCACTTCAATAGTCAACATAAGTCAGAAAGAGTTAATACACCTCCCCAA  
A\_14\_P108814 CTTGAGCCAAAGTCTTCCTTTGCTTTCAAAAATCCTCACAACATTTAAAACTCACCAA  
A\_14\_P107240 CCACTACAGCATGACAGCCTAATGCTTTAGCATGTGATTTTATTTCTTGTCTGATTTCTG  
A\_16\_P00884917

GCTGGGTTTAAATCGAATCAAATCCTTCATTTTATAACGATCCTTGTGAATTGTCCAGAC  
CUST\_10317\_P1426210822 GATTACATTCCTTCATGGCATGTGACCAGCCACATCTGGCCAT  
A\_16\_P30952609 CTACGTCGTGGGGTGGATCATCGCCATCAGTTTGTGGTGGGAAT  
A\_14\_P106593 CAGCCTTTTTCTGCATGATCCAGGAGCACATACCACAAACTACCAC  
A\_16\_P20313097

AAGAAGATTGATGCCAAAGCAAAATCAACAGTTAGGAGGCTTATTGATTGCAGAAAAAGT  
A\_14\_P114868 TTGATGGCCTGTTTATTGCTATCTAGGAGTGATTTGGAGAACAATGCATGTAAGTCTGA  
A\_14\_P101181 CTGTAATACCATGCACTATGTTAGCAAAAAATATCATTGTTTGTGAACCAAGGTGAGG  
CUST\_1134\_P1426210822 GAAGACACCAGTGAGGCAGGGGAAGTAAGAATGGGAAGGGAAGG  
A\_16\_P19502279

AAAATCACTTCCAATCAAATCATTTGCTTCTAAACTGTCATTGCTTACTAATACTCCCTG  
A\_14\_P122915 ACAGTATCCAGAGAAAGCCAATCTTCTCTAGCCTTATTGATTTTGTCTCTTAGACTTCTC  
A\_16\_P16062175

AAAATGGGAGTCCACAAAAGACTATTTAGACATATCACCTGTCTCACAAGTATTTTCCTG  
A\_14\_P121197 CCTACTGCTTACAATTTTAAAGAATCTTCACCACTCTGTAATTTTCAACCAGAAGTCCTC  
A\_14\_P105014 GAAGTCAGGTAAAAGTTACCTTAGAAACATTACCAGTTCCTGTGAACACAAATGTTAAGG  
A\_14\_P135451 CTCAAGTTTACCATTCAAAGAAACCATAGGCATTTCAAAAACCTCTTTCTAAACTTTGGT  
CUST\_9048\_P1426210822 TATCTGACCACCTCAGCCTGGAAAGTAACAGCTCTTGACTTCCCT  
A\_14\_P128066 CTTCCAGAGTTTATGGTAGAACTTCACTGAAGTTGCTGATGCCAATGTGGAATAAA  
A\_16\_P21422927

AACTTTAATTTGTTTTCAATTTGCGGTATTCTCCATGAGTAGGATAGCGATTTCCATCCTC  
A\_18\_P15082215

GCTGTGTTCTGATATAACCTAGCATTACTTCCTAAGTTCAATTTTTGGTTTCGACATACT  
CUST\_9105\_P1426210822 AGGACTGAAGGTGTGACTGCAATAGGATTAGCTGGTCTGAATCAGACTTAT  
A\_16\_P20319867

AAAGAGTAGTGTAAGAAGTAGCAGAACCAAATCAAGTTCAGTCCTAGAAGTCAACAAGA  
A\_14\_P104081 TAATTGACTAGGGAAGGATCAGGAAGACAAGACACATCAAAAAGGGGAGGTA  
A\_14\_P100050 CTATGCCAGGATCTGATATTATTGAGTCTGGTTTTCCCAAATGAAGATCTTGATTTGGAT

A\_16\_P03541785

TGCATTTAAGTATCCCATAAACAAACATCACCATCTCATCTATTAACCAGTTCTCAGACCA

A\_14\_P123794 GGAGTGGACTTATAGTGTTGTCCCTACCTCATGTAGGGTTTTAGTTTATTCACTAGA

A\_18\_P16733409

ATGTATGTGTAGTTACAATTACGTTCTTTACCCTTAGGAATACAACATGATACCCTCCCC

A\_14\_P118631 CTACAAATTCCTTACGTAATTTCTCCAAGATCTCCTCATCAGACATTTTAGGCTTCTTCT

A\_14\_P102107 GCCTTGGGAAAGAAGGGTTTTGTTTTTTAAACTGGGAGCCTCATAATATATATGAGATTA

A\_14\_P116213 CTTTTAAGAGAAGTCAAATAAAGCCTTATTTTGGCAAGAGGCAGAGTTGGGATTTGAATT

A\_14\_P110802 CAAGAAAATGCTACAGGTGAACTACTTACCTCTTTAATTTTAGAAGCAAGTTCTGCCTT

CUST\_7005\_PI426210822 AGTGTGAGCTGTAATCCTATGGGCTTGAAATAATCTCTGCTATGGGCTCTTT

A\_16\_P15675705

AAAAACTGGACTCTACAACCTGGTAAGTGAGCAATTACAGTTAGCATTTCATGGATCTCTTT

CUST\_4108\_PI426210822

AAACATGGTTTTTAGTGAGGAACTGATACTTAATAAAGTTTGATATTTTTAGTTCTAGAA

A\_16\_P16192015

CTAGAACTTCAACTACAGACCTCTTGTTAACTCTGATTCCCATGTCTACAACCTAAGAAT

A\_14\_P202565 AACTCTGACCAGTCACTAATCCATGACAAGTGAATCTAAAAGGAAAACAAGTTTTAAAAA

A\_16\_P36230935 GTCTAGAGAATGTGGCAGTAAAACATTTGTGGGCTCTGACAAACAATGGTCTTC

A\_14\_P116448 CCCCTGAAGTGGTTCTTGGTTCCTCTTGTCACTGGATAGGAAAATTA

A\_14\_P102159 CATCTTGGCAGTGGCTGTTGGTTTTCCAGTAAGTATCCACGTATACATTC

CUST\_7674\_PI426210822

CTTATACTTGATCTTTGTATCCAGAATGTTGCCAACATTCTGGATACAAAGAAAAGCACC

A\_14\_P200975 AAAGGAAGATATTAAGCATAGGACTTGGTCTGTAAAACACATTTGTAGAGAAGGCCCTTA

A\_16\_P01310709

TTCAAACATCCTAATACCTGACAGAAAACCTCGATATCGACCTTTTTTATCTTGTGCCAAG

A\_16\_P15195298

AAAAGAAAACCTATGTCAAACAGGTGTTTTAAGATTCCTCAAGTTAATAGTCCAGAGAGGG

A\_14\_P131838 CTAAATTTACTAAAAAGAACTCTTTGCCCACTTATCTTTTCGAAAGTGCCTCACAGCAG

A\_16\_P15732374

GAATCACCCACCTATAGCATGAATTCAGTCTATCAACAACACTAGAAACAGAAACACAAG

A\_14\_P102956 TACTATAAAAGTCCCTGATGAGATAAGGACCCAAACTAAGATGACATAAACATTCCTTTC

A\_14\_P128432 ATTATAATCCAATCTATGACTGCCTTACCGCATTTTTCTCCAGGAAAATATTCCAGATGT

A\_14\_P131924 AGCATGCCAGGTTCTTGTGACTCAGCACTTATTTCTGTAGTTTTAAAAAAGAA

A\_14\_P131915 CTGTTTCGTTAAAAATAGTTGATGCTTTTCCTTCCAGGTGTGGTCAAACCTCAAGAAATAG

A\_16\_P19474373

ATCGATCTCATCTTCTCACTATTACTTCTCCCTTTTTGACTTTACCTCATCGTTCTACTG

A\_16\_P00642812

TACATACCAATATGCATGCTTAGATATTCCACACTCTTCTTATGTTGAAATGGGTGCTC

CUST\_8417\_PI426210822 CAGGTTGTTTGGTGAATATTGTTCTTTTTTTGAATCAGGAGTTGGCAACCCAC  
A\_16\_P15717911

AAGAATTCTGACTATTCCACACATGACTTTTTCTGAAACCTACCAATGTTGACATCTCTC

A\_16\_P35973644

CCACCACTCCATTAAACATAATGTCCATAATCATCATACCTCTATTCTTTTACCAATCAC

A\_16\_P01021661

AAAAAGACTCCATCTTCCAATACTCTGGTCAAAGTTCTTTATCTAGGTCCAATACAACC

A\_16\_P30952629 GTTCTCTTCTCATTCTATCAAGCCCAGGTGCCAGCCTGAGGCAG

A\_14\_P120888 GAAACAAACTTTTCAAGGCTTATATTCAACCATGGACTTTATAAGCCAGTGTTCCTAAG

A\_14\_P137250 CTATCACTTCATTTGTGATTTGTGGGGAAATATGCTCTTGAGGAGGTGTATCTTCATC

CUST\_6082\_PI426210822 ATTTCTCTGATGACTGTGTAGACAGTTGGTCCATGGTGTGTGGCT

A\_18\_P22840143 CTTTTAGCCCCACAGTTGATTTCTTATTGAGCCTTTGGAAAGTTCCTTGCC

A\_14\_P127997 CTCCTGTGATGATGAGAATCTATATTCGGAAAACATTCAACATATGACACTCTCCTAGTG

A\_18\_P10016219

AGGAAAAAGCGTTAACCTAGAGCACTCAATAAAGATCAGATACATTCCCTTAGATCAAGGC

A\_14\_P202509 AAACCTCCAGTGCAATCAAATATAGACCAGTGGCTGTTCATTTTCTTGGGAAATAAAAATA

A\_16\_P30952244 GAGATGCACCGAACTGGACATGGCTCGAGGTGGGTGACCATTACT

CUST\_6792\_PI426210822 GTTATGGCATGCATGGAAACAGACCTGGACATGAAAGGATAAGCTTCAAG

A\_14\_P138997 CTAGTTCGATATACACTCAGTATAAATCCAAATAACCATTCTTGTTAATTATCCAGGCA

A\_18\_P22842485 CTCCTTTCCCTGTTTGGGTGCCTGGTGAAGTCCTTTTGTTCAAATTCTAATAG

A\_16\_P18267912

ACATCCTTAGGTCTTTCCTATTGTTAAAAACAAGCAAACCTCAGAATCCTTTTTCTCAAACCT

A\_18\_P22840852 CCTGTGACTCCATTTCCCTATTATCTGTTTCAGAAACTGTCTGGGCAGAAGATAAAT

A\_14\_P131268 GCAAAAAGCGAAAGAGTCCAAAATCTAAGCAAGTCTTAAAATGGCCTTGATTCTACATAAC

A\_14\_P123686 CATAAACAGTTTGGTCTTCCTGGAATGACTGAATTGACATTTACACTTTGTTTGTAAAGGC

A\_14\_P121196 ATCACTAACTCTGTTTCATCTTTTGCAGGAGATACCTTCCCGGATGCAGAT

A\_14\_P105391 ACTTCAGTTGCAGCCAAAATTTAATTCCCTAAATCTAGATCCTCAAACCACCTACTTTTTT

A\_18\_P22840327

CCCATTTGCCAACTGGTTTCTAAGAATATTTGGAGGATGAGTAAAGTAATGTCTTCCATA

A\_16\_P00644845

TTTTCACTTTTTCACATGAATCTAGCATTGAATAGGCCTAAATATAAACCTGCTTCCCTCC

CUST\_7147\_PI426210822

TAGTGGATAGATCCAAGCTTTAAATCTGAATCTTGTGCATAGGAGGATGGAAGCTCAA

A\_16\_P58424298

GTTACCCCTCATAAAAATGAGGACAAGTATTTTCTCATGTGGTTTCTAGGACAAATAAGT

A\_18\_P22840152 CCAAAAATGTGTGACTCGCCCAAATTAAGTGGTGTCACTCTGATCCTTCTTC

A\_14\_P139264 GGTATCCTCTATCTGCTTTGCTTGTCAATTAATTTTAAAGTCTCAGTGGAAAGAGATATGTCC

CUST\_205\_PI426210822 GAACCCGAGCGCCCCGTGCGCGGCGGGGAGGGGGCAGTTCGGGGC



A\_14\_P200961 TAGTAAGGCAGACATGAATGAGTTTTAAGAACTGAAGTTTGCTGCTACCTGGAGTTACTA  
A\_14\_P200893 TGAAGAGGGGAAACCAGAATAAATTATCTTTTGGAAAGGACAATTTCTTGTTTGGCCATT  
A\_14\_P119253 CTTGAACACGTTCTCACTGTTAATGAAGCCAAATCCTGAGAAGGTGGACT  
A\_14\_P202465 CTAGAAACCTACACTGTCACCTTACTGAGATTTCTGAGTATACTTTTCATATTGCCTTAA  
A\_16\_P19599611

AGACTTCCTATAATCACAATCATCGTCTATCTCAGAATGTAGCACAAAAGATAACCACTGA  
CUST\_7450\_PI426210822 TATACCAGAAAGGAGAAGAGGGGGACTAGATGTTTTTGTGTGGTAGTCTC  
A\_14\_P126687 AGCCAAAGCCTCTTCACTATAGATTCATGGAGAAACACTGATGCTCAATATTTTTTATC  
A\_14\_P121507 TCTCCCCATGCCAAGATAACTGAAAAATAGGAGAGCATTGTTTTTCAGTTGAGAATTTTTA  
A\_14\_P139827 CCTGTTATCACCATCTTGGGAAACACAACAGCAGAAAATAGAATAATAATTACCCAACAG  
CUST\_4577\_PI426210822 TTTGTGAATGCAGGAATGAGGAGAAACAGTAGTGAATGAACTTGAGTCCCT  
A\_16\_P17649265

AAAAGCCAGTGTTTTTGTTTTGAACCAATTCATGTTAATTTATATGCTTCTGACCAGGTT  
A\_14\_P105763 TTGGGATTGTCATCAATTTCTGAAATTCACATGGTCTGTCACCTTTCCTAAATTGGAAAA  
A\_16\_P16226341

AACAGCCATCATCAAAAATGTCAGAATCATCAGGAAAGCATAAAAAACAAAGTCTTTCCC  
A\_14\_P136674 TGTTCTGAATGGAATTGGCTGCAGTATTTTTTCATCTTTTAAATTAATGGAATGTGGCGGA  
A\_14\_P130737 TTTCCCAACAATTAGCCTTATGCTTTCCAAAAACAATCCCAATGTTTATCTCTATTTCC  
A\_14\_P138896 GAAATCTACTTGATCGAGGTTGAGGGTCAGGACTTTTTGGTAACGGTTATTATGAA  
A\_14\_P124361 CTCACAACTTTACTTTAGAAAAATATTCCTGAGATACCTTGGGAACCTCAAGACAACAC  
A\_14\_P202374 AAAGCCAATCAGACAGGGCACAGTGAAGTATTAATTTACCAACTATCTAATGTCTTTGGT  
A\_14\_P109142 AGAGTTTTAACTGTCTCTCTCAAAAAAGACAAGGTTTATTTCCAGAGCAGTCTTGTCAT  
A\_14\_P130178 AGGAGAAATAAAATATATTAAGTCCATGAATTCAAGTGGGAGGTTGGGAGAAACAGATGG  
A\_16\_P00685070

AAGGCAGAAAGTCTGAAGTTTTATTTTCACTCTCAAACCAATAAATAGGAGATGCTACCC  
CUST\_7531\_PI426210822 GCACATGACATAGGAGGCTCCAGACAACCTGACTCAAAGACAGAGA  
A\_14\_P105698 ATCATTAGGTAGGACTCTACAGCATTGACTTTTTTACATTGTTTTAAAGTCCTTCCTTCA  
A\_14\_P104245 GTGGGAGGTATAGCACTTGGAACTCTGGTTTTGGAAATCTTCCTATTTTTGAAAATATAGC  
A\_14\_P138177 GACTAGTGTCCATAGGATATGTTTTGAAACACTGATTTCTTGTAAGTTGGAAATTGGTC  
A\_16\_P38146140

CCCAAATGCCTAATGCCTAATCTCATACTTACCTAGAGATCACTGTCAAATAATGGTGTT  
A\_14\_P130059 ACGGGATGGTAGCAAGTTTGCAGTACTGTTGTTTTTCTTTTTAATGAGGATTAGTAACA  
A\_14\_P111810 GGTTTTTGAAAGTTTGGTAAATTGTAACCATTCTGGTTAGTGCATTTTTAGGGACAGG  
A\_14\_P120156 AGGCAACAAATGGCACCTCTTGTTATTACTAATGGAGCAATAACAACAGCAACTTTG  
A\_14\_P121576 CAACAATAATGATGACAAAAATAAACCTGGATAACGCGGTGTAATCAACTTGCATAATGG  
A\_14\_P110915 CTTACCTTATTTTCTAAACCTGCATACTCTCCTATACCCCAGCAGCCAG  
A\_16\_P18859865

AAAGCAGCAATTAACATTGATCCATGTTTGTATATTGTGACTCAAATAGAGAAGGGGGC

CUST\_8217\_PI426210822 TCCAGAATGCTGTATGGTAACAAGCAGCATGGCTCCTGGGATTA  
A\_16\_P17136345

AAAATTTAACTGGTTGTGACCTATGTTGTTCAATAACAATAGTGACAAGCCCTCTCTAGG  
A\_14\_P110038 TATTTTCTTGGGCAGGAGTATGATTTGCATAAGGAAAAAATCACAAACAAAAACCACA  
A\_14\_P120739 CTGTGAAGGTTGTGAAGGTATGTGAGTTATGTCTTGAAAAATACACACATAGTGAGCGC  
A\_18\_P17401877

ATCCCCTTTTACAGATAAAAATCGCAAAACTTTTTCTGTTCTTATCAAGAGACCAACCTGTC  
CUST\_5286\_PI426210822

GTCAGAATGACACTTTATTAGATGCTTTAGAACTGCAGAAGCTTCAATTTTAGAATTTTC  
CUST\_2584\_PI426210822 GCTGCAGAGGTGAGGGACATGAGCTGAGGCCAGAGCTTGCTGAG  
A\_16\_P03336756

CCGTTTCCATATTTTTTAACACTCATAGTTTTCCATCAATGATACCATAAGCACACCTCA  
CUST\_2772\_PI426210822 AACATCACAGCGCCTCAGTGTACGACGGACAGCAGCCTGTGAAC  
A\_14\_P115452 CAAAGAATCACAGCAGAATCAAGAGACAAAATTTAATATATGCACACAGTTTTATATAT  
A\_14\_P110654 GTAGCATGGTCTGGCAGTTACAGTTTATGTAGTTTTTTTTCTTTTGTGGAATAAGGACG  
CUST\_4896\_PI426210822

GCTATTCAGAGGTCAATGAAATAGACATGAGTACTCTTCACAGACCTTACCGTCTAAT  
A\_14\_P109654 AGAACACATTAACCTAAGATGAACCAGGACAAGTCCCCTAAACATCAGGATGAAATTTCTT  
A\_14\_P100153 CTATCCCCTTGCGCAGATAATTAGACTGGAGTCCAGAGTGGATCCTTAATTT  
A\_14\_P112803 CTCTTACCTGTGATCATGGACTTCTTGCATTCCATATATATATATTAGGGGAAGCCAACCA  
A\_14\_P114563 AAGGGGAGTTGAAAAATAGGAATATATGAATGGCTCATAAAATGGAATGATGGCAGGAA  
A\_14\_P106279 CTTTTTGGCCTTCTAAAATTCCTACCTTTGTAACCCTACTTCAGTTTTACTTGGTTGTT  
A\_14\_P127751 CTGTTGACTTGTATGATATCCACAAATAAATATTTTCATGGCGGTCGTGTTGAGGCATG  
A\_14\_P202330 TGTGAAATCGTTCCTCTTCTCTGACTGAGACGTCAACAGTATGGTCACTGTATAT  
A\_16\_P18609034

TCTCCCATGTTTATTCAACTAGTAATCATCCAGTAACCATTCATCCTAATAATCACAAAGA  
A\_16\_P20902178

AAAAGAAATCCAGTGCTCACATAACCTTTAATGTTCTCCTCCAAGCAATTTTTGATGAGT  
A\_14\_P104901 AATATCATGTTTATTTGTTGAAATCAGGCCACTGACAGCCATTTCTGTGATCTCTGAAAAA  
A\_14\_P105344 GCAAAACTCAATATCCCGTAACAGAGCCTGATTTTTCTCTTCCATGGAGTTAATAGTAAT  
A\_14\_P125817 CTTTTATCTAGAATCTTTCAGCACCAGTTTTTTGATCTTCATGGAATCATGGGGTTTTTCTC  
CUST\_1400\_PI426210822 TCATGCTGCCTGAAACAGGGGTGCCTTTAAGGGCTTCCCCTTGCT  
A\_16\_P00685130

GTCATCTTGCTTTTGGAGAAATATTTCTTTCCACTAAAATTTAAGAAAATAACGCAGTCT  
CUST\_2761\_PI426210822

AGAAAAAATGCTCACAGAACATACTAGCCCTTCTCTCTTGGGATATTTTCATGCTTTAAT  
CUST\_1367\_PI426210822

AAAATCAAGTTGTATTTTTAAGTTTTTTAGATACGAGTATGGTAGAATAACCCTATGTAC

A\_14\_P119613 AACTTACAGGCATCAGACAAAAAGATGTCCTATCATTGTCTATTACTACCTACAGTCTC  
A\_16\_P02068951

AAAACATTCATGCGACTTGGAATTTTAACACAATGCCATTTCCCTAGTTTAACTGAAAG

A\_14\_P107418 ATTTTCCTGTAGAAAAGACCAGACCCTCCTTGTGAGATAGGAAATCTGTAGTGAG

A\_14\_P104891 CTACAGATAGCCTTACCTGAAGCCAGAAAGGTAGAGTTAGTCTGGTCATGATGT

CUST\_4633\_PI426210822 AAGGCCACACAAGGAAGAAGTGCAGATGGCAGGGGATTCCGGTGG

A\_14\_P127938 CTTGGTGGTGTCTCCAATCTCTTTTACTCTGGGAAAGTTACCTTGTGTTGAAATTGTAG

A\_14\_P100222 TTCCATTAAGGCACCAGAAGAGAAATCATTTTTTCCTTTTTTGTTCATCTGCTCGTCATTA

A\_16\_P01136065

TGGACACTTTGACATATAATGACTGCTTACTGTATCTGTAAACAAATCTGAATCCTTGATG

A\_18\_P22839427 TGTCTGCTCTATGAATTCTGGGCTAGTGGGGATCATGGGGATTTTGTAATTATTTT

A\_14\_P114387 CTGCTGAAATTTAACTGGGACTAAAGTGAGCACCAGGATCAAGGTAATGTAATGTAATAA

A\_16\_P21296790

TTTTCTTGCCAAGTGATATCTATGTGATATGCACTAACTCTGATCCTAAACAGTCACCTC

A\_16\_P18885350

ATACTACCTGACTAACTTTCTTTGGGAAATTATCTGGTTATGACACTCCTCAACAACCT

CUST\_53\_PI426210822 AAATCACCAAAGATGTTTCAGGAGTCTCCCTCTGATGGCCACAT

A\_16\_P39474479

CCCAAATACCTTTTCACTCAGTATCAAAATCCAAAATATCAGTAAGTTATTTCCGCACA

A\_14\_P104296 TAATTTTATCACTTTTCTAGTTTGAGTGCTCAGGGAAGGCATGGATCTCAAATATCAGGA

A\_14\_P129914 CAATATGGTTACACTGAGTCTGACTCAGAAAGATAAATGCACAAATCTATAACCCATCCC

A\_14\_P109581 AATTACCTCTACTCACCTTCACATCTGAACTTGACAGTTTGATTTTCCCTTGACCTC

CUST\_5098\_PI426210822

TCCAGTAAACCCAAATGCTGTAGGTAAGAGATGTAATAGGTGGTATTTATTAAGTGGTTT

CUST\_6720\_PI426210822 AGACTCCTCAGCTCCTCATGAGAGGCCGTCCTGAGCCTGGTCCTG

A\_16\_P20036163

ACTCTACCAAATGATTCAAACCCACAACCTTTATTTCAAATATTTTCAACACTGGCCTGC

A\_18\_P12929919

CCTCAGACATTTATTGCACCTCTTACATATCCGTCAAGTTTCTATAAGTCTAAGCCTCTT

A\_14\_P113777 AGCCTAAAAGATAGACAACCTGAACAAATACTTTACTTTGGGGTAGTAAGTTCTGGAATG

A\_14\_P118147 GGGAAATCTGAAGCGAGTGATGATAATATCCTTGAAATTTTTGTTTGTGCCTTATGCTTG

A\_14\_P129736 TTAATTTAGGACCCAAACCAAATCCTCTTGAACAGCATGCATTAAGCCCAAGTTTATAGA

A\_14\_P106984 TCTTAATGAATAAAAGCACTGACACTTCTTTAAAAGGGAATAGCGTGATGCTATTTACAG

A\_14\_P116731 ATCCAAACTGTTTAGTAAAGTGAGTAAAAACCTGAAAGTCTGTTAGGAGATTCCTTGGG

CUST\_1508\_PI426210822

GAGAGACTTGGTTTTACACACAACCTCTAACCATTCTTTTTCCAGATTCAGAAG

A\_16\_P18713853

GAGAACTCACAACTGTTAGATTACTCCAAGTTCCAAAATACGCAGGAAATCCTTAATCA

A\_14\_P138863 AAGACAAAATAGCCTTTATAACTTCATTAGCCTCAGCCTTGCTCTATATCCTTGCTCTAG  
A\_14\_P127518 TCACTCAGAAAACAGCAACATCATGGAATAATTTGAGGAGTTTTCTCCACTTTCTTTGA  
A\_14\_P107879 TTATGACCACATTATTTCAATGTCATGGCTTTCTGAAGGAAGTTATCTTCTTATTTATTT  
A\_16\_P00513108  
GCTGAATTCCAAAAATGGCAGAATTACCATAAGACAGGCAACATATACTTGAGACAGAAG  
A\_14\_P114555 GAAATAACCATCTTTAACCCACGCTGGGGATCTAGTTTTGTTTAAATATGGGTTTTGTTT  
A\_14\_P109409 AAATAGAACATGAAGAAAAACGTTTATTATAAACTTAAGAAGCAACCAATCAACCAAAT  
A\_14\_P132092 TCAGTTCATTTTGGTTTTATTGGCATTGTAATAGACATCTCCCTAAATTCACCTAGGCTAA  
A\_18\_P13552593  
ACCTTGGAATATATGCCTTCTCTGACATGTTAAAACCTTGCTATTCCACATATCTTTTCCC  
A\_18\_P10124894  
AGATGAGATTAGTGGGAGATAATTTCTGATGAAGTAACAATAGGAAGAAGTTGAGGCCT  
A\_14\_P129262 GGGAGGGTTGTTCTTGGGAGATATAATTTTGACCAGAACACTGTGCGATGAAA  
A\_14\_P134801 CAAATGGTGGACTGTTTATCTGCAACTTTTCAAGATATCCATCAGGTATTCTGATGTCTG  
CUST\_5214\_PI426210822  
ATAGATGAACAATTTTTGCAAATATGTTAATTGAAGAGTAATTGGTGCTTTTTTGACCCT  
A\_16\_P00406975  
ACGAGGGTTTGGATTAGATTCTTATAACGAAAACCACTAAGACAAAATACCTCAGCATAA  
A\_14\_P103663 ATTAGTTTTCCAAACATTTTAAGAAAAATCTCCAAGCAAGCCTATTGCCCAATTAACCT  
A\_14\_P112765 ATGCTACTTGGTAGAGGTGAATTTTTGGTAATAATTTTAGGACACTGTAGTTCCTGGACA  
A\_14\_P131319 CACCCCTACATTTTTTTGAAATAAAAATAAGGAATTTTATTCTCACTTCTGTGTTTCCTGC  
A\_16\_P17718434  
ATCTTAGCCATGATGTTCAAGATTGGAAAGCATAACTCTATGTGATGATCATTGTCCGTT  
A\_14\_P131062 GAGTGCTATGAAACTGACCTATTTTCCTAATTGGTTAACTGACTTCATCTCACATAACCT  
A\_14\_P128306 TGAAAGATCACCAGAGGGAAAAATGTCTAGTCTGATAACTTTGAAGAAAACATATTGACC  
CUST\_8942\_PI426210822 CTTTATTTGAACACTGAAGCTAGCAGGGACTGTCCAAAGCCAGAGC  
A\_14\_P138936 ACAAGTAACTCATAATTAATTTTTTTACAGGATCCCACTTTGCGCACCAAACAGCCTATC  
A\_16\_P18067502  
CCTGAACAATCAACTGCTACCATATTTCTTTCGTCCAATAGTAATTACATTTTTTCACACCA  
A\_16\_P36231094  
TGTTCACTTCATGATATTTAAATCAGGGTTGTTGTCATTACAACCCTTTCAAGACCTAGG  
A\_14\_P101491 CTCCTTAAGGCACTTCATAAATTAACCATTTCCAGGGATTTCCCCTCACACAT  
CUST\_901\_PI426210822 ATGGAGAATTTGAAAGCTGCAATGGGGCGTGAAATGTCTCAGTGAC  
A\_14\_P136585 TCACCTAACCTAACGTAACCTTTTAAAGTCATCTGCCATTTTGGAACTTTTCAAAGCAT  
CUST\_9267\_PI426210822  
GAAAAACCAGGAATTTCTTGCCTAACAGCACACTGTAACCTTTAGTGCTCTTGCTAA  
A\_14\_P122937 CTTTGAAGAGAGGCATTTACTTGTAACCTATTGCTAGTCTAATGGTGCCAGAAATGAA  
A\_14\_P139877 AATAAAATTAAGTCACCAACCGTGAGTTTTTTGGATTTTTCTGATAGTGATGAGTGCAGA

A\_14\_P108457 GTTTTGCTTCCCAGCCTCTGCTCATAGTCCCATATTA AAAATGGGTTATTAATAACAACC  
A\_14\_P115935 ACACAAATGCCATTAAGAAAGTGTATTTTTCTTGACACACTCTGCAATCTTGGTTAACA  
A\_14\_P116997 CTTTGGAAATTGGGTAATACACTGTAAAATAAGTAAGGTCTAGACCAGACCTTGAAGAT  
A\_14\_P102252 CAGTTGTATCACTGGAATATGGAATATAGCAGGTTTCCTATGTTTATGTGCCCTGTG  
A\_14\_P104644 TGTGGAGTTAAGGCATATGATAGCATTGGGAAGAAAATAAACATCCCTTGTAATAGGCCA  
A\_14\_P107923 CTGTTTCTCTAAATGAACACAATGACACATCTGCTCTAAGAACCGCCAACACTG  
A\_14\_P139413 GAGAGACCACAGGAATTCAGATATGGAGTGAAATCTTCCTTATCAATAAACCTGATGGTA  
A\_14\_P120276 CTGATCAATATTTTTATTTCCAGGCTTGCACAGAAATCTGGAGGCAGTATCACCTAAC  
CUST\_4451\_PI426210822 CTCTGCACTGTTAGTCCTCCCTGACTTCCTGCCCCAGGCTCACTG  
A\_14\_P113968 AAATGTTGAGATTATCACAGTATTCTGGAAGTGGACTTTTGAGTTAACACCATTGGAAA  
CUST\_911\_PI426210822 AAATGATACTGGATGTAAAGATAGCATCAGGATTAGAGGCAAGCCCCTTC  
CUST\_9625\_PI426210822 TTCACTAATGACAGGCTCCAGGGCGTTTCTCAGGGAGCATGTTAG  
A\_16\_P02165444  
ACCCTGTCTAGTGCTAATAGA ACTGACAAGAGGAAATAGTATTTAAGCAATAAGAGGGCT  
A\_16\_P18582907  
AAGACGATTGTGTAGTCCTAATGTTCTGTAACAGCAAACCAAATTTGGATTCTGTAAGG  
A\_18\_P13517614  
AGTCCACAATCTTTCAAAAATGCCATTTATGCTACTACTGACTGTATTGCCACTAGAGAA  
A\_14\_P102207 CTTACACAGCCTTCCCAGAATTTCTCTTACTCCAGGAGAGGAAG  
A\_16\_P00877046  
AAACAAGGCACATATTTTTTCCCAACAAACATGAAGTTCAAACATTACTCACCATCTCTT  
A\_14\_P112101 CAAAGCAGTTGACAGTCAGTGGTAATTA AATTGTCTCTCTGGTTCTGTGACTGAAG  
A\_16\_P17554583  
CCAAGATGATATATGCACATATTCCTAATTACTGTGAACTCCTCTTATGAAAACATCCCC  
A\_16\_P02347434  
TTGAAATAGGACTTCATTAATTGCATTCCCCTATTGATTCATTACCATGAAACAGCCTGG  
A\_16\_P58424380 CCTGCAGAAAAAAGCCCTCTGACAAAGAGATGGGGATACTGACTAGATAGAA  
CUST\_8965\_PI426210822  
TTACAGGGTCTTGAAATGAATGGTGATACGTGAAAGTATTTGTCCTAGGATTCATTAATA  
A\_14\_P107193 AAAACATTGTTTTCAAAGCCAACCCCACTACTTAGTCATCATTTAGAGACTAGACTATCC  
CUST\_6278\_PI426210822 TGAGGCTTTGTTTTTAAAGAGGACTTTCCAGACCCAAGGGAATGGA  
A\_14\_P100119 CAACAGTAGCACAGCACCATCTTCACCCTACTCAAACAAGAATGATATATTTTTCTTGAT  
A\_16\_P20116162  
CCACCACATTACACTCATACTAGTTATATAATTTTGCCTACTTCACTACAAATTCTCCCC  
A\_16\_P01829228  
GTCATTTGCAACCAAATCAGAAAATGTTAGTTTCGATCTCCTTATGTGTAAGACCTTGACA  
A\_16\_P19311454  
AAAAACTGCAGTGTA AACTTTCACATTC AAATCAGATAGTCATGACTAAGGTAACCCAC

A\_18\_P14506220

AAAAATAATGAGGTTAAGGAGTATTCGGTAACTTGGCTAACCTATTCACCTGAATCTGCA

A\_14\_P127043 AAAATCATGATTCTTCATGATTACAAGAACTTCAGAGAAGGTTTTTAAGAAAAAGTGGT

CUST\_8795\_PI426210822 AATTCCTTTAATTTTCTTTCCCATCCTAGGGTGTCTCTTTGCTCTCTCCATATT

CUST\_9750\_PI426210822 TTTATGTCTCTCCATAAGTCTCCCTGTGCCTCTGAACTGGCTTG

A\_16\_P20772321

ACAACCTCCTTTTAAGAAAAAGAAATCCTAACTCCGTGTATTACTCTGAGCAATTGCAGG

A\_14\_P124948 TTTCGGGAAGAAAGTCCTTTTTCTCTTCTCTGTCTATGAAAAGAAAAAAGAAACGAT

A\_14\_P119881 TCTCTGTCTAGGCTTTTTGTTGAGTGGATATCACCCGTGGTATCGTCAATGATAAATA

A\_14\_P101068 ATTGTCAAGATATAGGAAAACAGAAACATCACAAAGGGTGGAAATCTCTAGCCATGGTT

A\_14\_P128389 ATAGTCAGAAATGCCGCCTGAAAGGCGTTTAATATTGTCACAGAAAAGAAAGTTAGATTAC

A\_16\_P03588161

GAACATGACTGGGGATATAAGTGGTTCTTTAAAAAGATGGCATGAAATAAGCCTGTATCA

A\_14\_P129957 CGAGAAGTAAGAAACCAAATAAGAAATCGATCCTGCAATATTCTTTGCAGTTAGGGTCT

A\_14\_P201252 CGCGATCCTCAAATCAGCACTTGTCTATTTTCATAGGCGAAATGTAGATCAATAAATTAT

A\_14\_P121668 TCATCTCCATGCATATTTGCCACGTATTTGAACTCTGGAATCCCAATTCTGTGTT

A\_14\_P134114 TGAGAAAAAACTTAGACAAGAATTGACAGTAATTCTTCACTATTGAGGCTGCAGGGATG

A\_16\_P19431333

GTTTAGCATAGAGACTCGGGATCTTATCTTAACTCAGAAGTCTACTAATCACTCAAGT

A\_14\_P107025 ATCTAATCCACTATCACATCATGGACTGCTTTCCTATTCATCTCATTTTGATCCTCAAGA

A\_16\_P17356093

TGTCCATAATTAGCATTGGTTTACTTACTTGATCACATCTCTATCTAACCCTCTCTCCAC

A\_14\_P118838 CAACATGAAGTTCTAACTAAACAATTACATGACCAAACATCTGATGGGAAGACAGAAGT

A\_14\_P122366 GGGAGGAGGCTAGAGGATTAAGGTCTGTATACATCTTTGCATTATTAGACATTTTTAGCC

CUST\_3805\_PI426210822 CCTGGCCTTGGCTGACTTCTCATGGATGCAGCAAAAACCCAGTAG

CUST\_8271\_PI426210822

AGTTGTTGTCTATTTCGGACTTAGTCTCAAAAATCTGCCATTGTTGTGTTTAGGTGAG

A\_14\_P134742 CAACAGTTAATGATTGACTAACTCTTGTGTTCACTCTGGACATTAACGAAAAAGACTGG

A\_14\_P107083 TGTAATTTTTTCTCTGCACATCGCACCTGATTAGAACGGTTTTCTAATTCATCTTGTA

A\_14\_P133467 TATTAGTTTGAGTTCTGACTGACCTTCAGGTTGATATTGTGCTATAATCGTCACTGTCTG

A\_14\_P139353 ACCAATGTAGAAGAGAGTTTGAAGAGAACTAAAGAAAACGATGCTCATCTTGTGAAAGTT

A\_14\_P131616 ACATCCGTGCTGTGTCATTGTTGCTCTGCTTCTTCAATGTGTCAG

A\_16\_P03604610

AAAAATCATGGACCAAAGAACAACATTTTCAGCACAAGACTCCATTATGGGAATTGAATCT

A\_14\_P128312 TTGGTAGAGTCTTTATTTGCATAGCCTCAAATAGGTTATTCGTTTCTAACTTGGATGG

A\_14\_P122727 TCTTACCACAAAACCTGCACATTGGTTGATAAGGCTATTTCCATCTTACCAATAAGCAATC

A\_16\_P40635737

TTTTTCAGAAATGTGCTTCTATAACTCAATTGTTGCATGCAGTGAAACTAATGGAGGACTT

A\_14\_P111900

TTTTTCCAACACAGAAGCTAGAAATGTGAAACAATAAAACAGGAGAACACTCGACTACAGA

A\_14\_P107925 AATTTAAGTTTGTGTGGAACATCCCCGTAGTTGAAGTGTAACAATGTATAGGAAGGAAT

A\_14\_P105089 TGTAGTCTTCTTTATAGATTTCAAAGTGCTCTGGAGTCAGATTGATTGTTTCCAGTTCCA

CUST\_7404\_PI426210822 TGCAGTGTCAAGGGGACAGTGGCTGCATGATGATGTGCCTAGCAG

A\_14\_P132730 GAAAAATAATAAAATGGCCACTTTAACATATTGTTGCCTGTCAGAGTGAGTTTCTCTCCC

A\_16\_P16190984

TTTGACCTAGTAGTTAAGCATTTAGGAAATAATGAGAGGCAGATAAAAATCTACAAATGT

A\_14\_P132366 TGATGAGTCTTACATCAGTGATGTGAGTGATAATATATCTGAAGACAACACCAGTGTTGC

A\_14\_P125227 AAGTGTAATAGTGCAAATTCCTGCGAGATTTACTGCAGAGAAAGATTCTTTGAAATAC

CUST\_1794\_PI426210822 CACTCATGATACATAACTTACAGGGAAAGGCCCTGACTCCCTTTTTGC

A\_14\_P130113 AATACTGGTGCAAACCACTGAGCAAAGACATTAATTTTATATTTTTGTGCCCTTTTTGG

A\_14\_P117464 CTAACACTATGGTAAATGCCTTCTATGCACATTTACATGGGGGATGGATAACTTTTATAC

A\_16\_P00757296

AAAAAGATCAGCCTGATTTCTGAAAACCTGATTCTTGAATTCACATCAGTTAACACCTGCC

A\_14\_P138247 TACATCCTCTTCCCAGGCATGACCAAGACTGGCATAGACCCTTATT

A\_14\_P126499 CTTAGCGTTAACTCACATCACTGGTAAATTTGAGATCTTGCTCACGTTCTGAATT

A\_16\_P20028115

GGGCACTGATAAAAGTAGTTTGAGAATCATGAAGAGTTAAGTTACCTCATTGGAGCAAAA

A\_16\_P18210742

ACCAAAGAATGAATAGCCTACTGCAAGATTACTAGACTCATAAACAGTTCCTTGTCTCT

A\_14\_P116729 TTTTCCAGTGTAACCTGCAGTTCTCATTGGATTTGTATACTTTGAAATTCGGGATAGTCT

A\_16\_P00324429

CTAGAAATCCTTCCCCTTACATAATTGAGACATCTCCTTTCAACTCTAACCAAAGTTCAA

CUST\_2814\_PI426210822

AAAGGCTGATTTAATAATAGAAAGAAAACTCCAGGCAAACAAAAACACTAACAGGGACC

A\_14\_P112964 TCACTTTCACAGCCTACCTCTTCAATTTCTTTTCCAAATCATTACTAATGCCCAATCAAAT

A\_14\_P201889 GGAAAGCCAGCCAAGAAAGAGCCCAGAAATATTTTCCACAAAAATGTGTAATAATATA

A\_14\_P117924 AAGTGATTTAACCAACTCACAGTTAAGTGTCCTTCATGATGATCTGGGAAATGAATGAAT

A\_14\_P119013 GCCTCTGCTTCTCCCAACAGCAATGGTAAAATGTGCTTTCTTTAGATTATTTAAAAAC

A\_14\_P103438 CTGAATTGTGATGATTTTAAAAAAGGAGAAAGAGATGGGGATTTTATCTGTCCTGATTAT

A\_14\_P110453 CTAGATTTCTGAGGCCATTTCTTGCTAAAATTTCCCATTTGTAGATCTTACCTTCTTT

A\_14\_P101316 CAAATCTTCTCATAACACGAGGCAGATACCTGTCAATTTAAATAATCATCACTTTA

A\_14\_P112284 ATGCAATCCTAAGCCCCTTATCGACGTGACGTTATTAGAAAGGGATGATG

A\_14\_P114404 AAAATAGCACAGTGCTAGGCCAATTAATGTTTGCTTTTTTTCACTTTTTCTAGGAAAGC

A\_14\_P111436 TTATACAGAGGCAATCTGAAAAGCCATTTTAAAAACAACTTATACAGCCATCCTGAAGC

A\_14\_P124096 CTCTATCACACGTGGGCCATTTAGAAATGTATTGCATCATTATGTTTCAATTCATTCA

A\_16\_P00451757

TTTTTCCCACACTACCATAGATATCATTATCACATCTTTCAACCCTTACTATCAGACCTT  
A\_18\_P22841219 TAATCTAGACCATGAAGGAGGTCTGGATCCTGGGGAGGGAATCCG  
A\_14\_P116077 AAAGAGGTATCACCTGCTGATATAAAATTGTGTGTGTCTCCTTTTGCAGTTATGAATCAG  
CUST\_6549\_PI426210822  
GTATTGCATTTACCCAACAAGGAACCTTTGAATGGTAATCCTAATGTACAGTGATGAATGA  
A\_14\_P131791 ACAGATGTTAGGAATTATTAATCCTAAAATATTGAAACACGAGAGAGGTGGAGCAGATGC  
A\_14\_P132956 CCACTCCTATGTAACGTTTGAACCTCTGAAGAATTCTTATCAGGCATTTCAAATTACTCT  
A\_14\_P105987 GCGTAAGCCATGGAATATACAGCATCAATTACAAATTGGACCTTTCCTTCTGTTTCATA  
A\_14\_P109757 ATTTCCAGGGATAATAATTCCTCATCTGCTTATTTGACCCTCACTTTCCTTTTAGACTTT  
CUST\_9784\_PI426210822 CCCCTTGAGACAGATCCTCATACTCCCCATTTTCGTCTGTTTTGTT  
CUST\_10211\_PI426210822 CTTCTGCTACAGATAGAACAGTTAACAGAGCCGCTTGCCCCCTCAA  
A\_14\_P106270 TTGAAATGGAATGAGTTAAATCTAGGCCAATTACCATGAAAGGGGATGTCCATCAAATAT  
A\_16\_P36230543  
TTTATCTCTGACATCAATCAAACCTTGAACACCATCAGCATGGGCTTTAATGAAATTCTCA  
A\_14\_P113566 ACTTACTGAGATTTCTGAAATAGGAAAAATCTACTCATACCCCTATGAGGAATAAGCCCT  
CUST\_9351\_PI426210822 CAGACTCCTCGTCTGCTTGGCCTGTAACGTTGGCAATTATCATCAT  
CUST\_2398\_PI426210822 CTCTGCCCTCGTCCCAGCCACAGCATACTTAGAAATGTAGATC  
A\_14\_P122337 CAGTTTTCTAATGAAATTAGACGGAGAATGAGTTTTACCATTAAGGACTCAAGGCTTTCC  
A\_14\_P110994 GGACATCTCAGTGAGTCCCTTGTGGACTCCAGACCTTATGTAGAAA  
A\_14\_P129357 CTTCCAATACAAGTAATACTATGCGATGTCTTGAGCCTATGGAGTTAGACATTCGGTTAT  
A\_14\_P134102 CATGTCATTCACAACCGTGTGACATTTTCAAACATATTTTCCAAAAAGTTGGTTCATGT  
A\_18\_P22843032 TCATTGGCCGGGGATGCTTGGGTTGTCTGCAACACATGAAAAAAG  
A\_16\_P41012295  
TTATCTTCGTCACCTACTGATATTAGTTGCTCCAGATACTAATGCAATTTTCCTGGCATG  
A\_16\_P21361435  
AAAGAGACATGCTAAGAATTCGTGAGTTAAAAATGGCAACTAAAATGTAGTTAGGCAGGG  
A\_14\_P113962 ACCTATTCAAACACAAATCAGACTTTGCCAACCTTGGCTCAAACCCCTTTAAT  
A\_14\_P110671  
AAATTGACCAATGTGTGAAAGAAAAGAAGTTGAAACGGAAAATACTAGGACAATCATCGC  
A\_14\_P201646 TGGTAATGGAATACCAATTTGTGAGCCTGGACCTGCTTGGCAATAATAAATAAATCTTAC  
A\_14\_P116825 CTTATTTACCCCAATGTAACTACTGAGGGCTTTAAACAACCTTAAACGTCTCTGCAACAAA  
A\_16\_P36566664  
AAACATTCTATTGTGGCAATTACAAATAGTTAACTCACATCCTTTGAGATTCCTATCCA  
A\_16\_P15081151  
ATGAGAAATAGGTTTCATCATTCAAATGCACCTAGGTGAAATTTTGCAGGGAAAAGTGAG  
A\_14\_P104774 CTGTTTCTCACAGCACTCAGATCTCCAAACACTTAAAATATATCTTAGGTGTCTAGGGT  
A\_14\_P117679 TCTCCTGCCAGAGTCTTTTCTGACATCTCTCTGAACAACGAGAAG  
A\_14\_P132920 CTCTGAAGGCAAAGGCATAAGTCCATCAATGAGTAATGGAAGATGAAATAAAATGCCATA



A\_18\_P10961166

AAAGTTCCAACCCTAAGACATAAACCACTGTGCATTTTATACGATTTATCATTGTCAGCA

A\_16\_P01309202

AAAATCTTCTGCCTAAATGACAACAAATGTTCTCAGTTCATTCTTACTAGCACTACCTGG

A\_14\_P113662 CTGGAATTTGAGAAATGTAGTTAAGTTGCATCATGAAAGACAATTCCCAGGATGTTTCTG

A\_18\_P10892081

CTGCAGTAAATCAGTAAACCTTATCACCTTTCTGATTACCAACATCATATCAACCTGAGA

A\_16\_P19964751

ACAAATTTGTTGCAATTTTCATCTGCTTTCTATGTTTCATTGTTAATTGCCATCCTTCAGCC

A\_14\_P201573 TTTGATAGTCTCTCGACCCTCTAGAAAAACAGATGGATTGAAAAAGGAATTATGCTCTG

A\_14\_P109167 CCAAACAGATTAATAAAATATTTGAAAAAGAAGCGTTCAGTGCTGTCTCCATGGCCATTC

A\_14\_P123447 TTCTTCACCGGTTTGCTGTTATATTTTAAAATATACTGATGGGAGGCATTCTTGCACATC

A\_14\_P138476 CTTTTCTCAAGACAACACTACATAAGCAGACAAAATTGCAAAGATCTGCCCTGTGTGCG

CUST\_8941\_PI426210822 TTCAAAGACAGAACTCTTTATTTGAACACTGAAGCTAGCAGGGACTGTCCAAA

A\_14\_P107748 CTGACTAAATGACAATAAATAATGTTCAAGTGCACCAAAAACCTCCCATCCTCACCATGC

A\_16\_P02505429

ATTCTACTGCCATACCTAAACTTCTTCAGGTTCTAATCTACCTGTATCACCAAGGAAGAG

A\_14\_P112465 ATAACATTATATGAACTGTGTTTCCTACTTGATTAATAAAATATAAAGAACTGAGTGTTTA

A\_16\_P00653123

CAGCAAGGACATCTCAAATACCAATGTATGAATTTTACCGACTTTGATGACTGTAAGGAA

A\_16\_P20198867

ATTTGGGTTATGAAATAGATCCCCCAACTCTTGACAGTAAAATAGCATGAAGCACTAAGT

CUST\_2395\_PI426210822 TTGCTGGAGGGGACACTGCATAGAAACCTGGTCAAGTGGAGGTTT

A\_14\_P129513 CCAATCAATGCTTTGTATTCTCAAAAACTTTCATGTCAACACATTTTTTCAGAGCCTCACA

A\_18\_P22842109 TAGAAACCAGAGACCCAGAAACCCAAAGGTGGGTTCACATGGTTCGC

A\_14\_P113263 ACTATCAAGTGTGCAACAAATCTTACCTTCTAATAAAGGTGGCTCATCCTCAAAGTTGT

A\_18\_P17137654

AAAATATCGAAGAATACTACTGGCATCCTTAAGTCATTGATCTGGGTTTATGCTCTCAGC

A\_16\_P18179744

GGCAAACATCAACCTTGTAAGTATTAAGCAGCAGTTCTAAAATCCACTCTGATGACAGTT

A\_16\_P58424218 ACATTTTTAACCAGGCTTTCTCAGGAGATTTGGTTTCGGCTGGCACT

CUST\_5815\_PI426210822 ACAGGAAACAGTTGTCTCCCGAGAGAAAGTTTGAACCTCCTTTAAC

A\_14\_P131501 GTTAGCAAGAAGCATTGAGGGTAGGCCTAGGTTAGTCGTGTTAGTTCTTC

A\_14\_P103156 AGGGGAAAGAAAGAAAATCAGGATTAATACTAGTCCCTCCACATTCATTAACAGAATCTC

A\_16\_P03159032

ACCCTTGTCATTTGTCAAAGCCTTTTGTATAACCATGCTCTTTATCTATGATTCCACAG

A\_16\_P17457042

ATGGCTTGTCATCATCTATGTGATACAACCTGCAACTTTTTAGCACAATTTGAGGCCTT

A\_18\_P16584376

AATAGGCAATGGCATATAGTTTTTCAATATCGGAACATGTTCTCCTTTTTTCACATTGGGG

A\_16\_P17166417

GTGGACTTCTGTATCTTTTCCAACCTCAGTGATACTTTGTATAAACTCCTATAAGCCATCA

A\_14\_P119579 CTTTTTGGGAAAATGAAATGTAGTTTTCTAGTTTCCCTCCCAGGCTATGATCTCGAG

A\_18\_P17124959

ATATTCCCCATTACTATCTACTCAAATGTTCTGCTACACTTTCTCGTAAAGGTCAGTGAC

A\_14\_P116225 GCTTGTTCATACTGAAAAATGTATGAGATCACCTACAGTGGAGTTTAGTCAGCATAACAC

A\_14\_P122819 TTGAATTTGAAACTGTGAGAACAATTCGTCACCTTCTTTCACTCCTGACATTGTTTCCA

A\_14\_P129918 CTAGTAGCCCCCTACTACTCCCCATTATAACTACTTCCAAAAATAAAGAAAATGTTT

CUST\_7295\_PI426210822 AAAAGACTCTGGCTGACTCCTTGTGATAGAGCAAACCAAGTTGAGTGTT

A\_14\_P128388 TCAGTGTGTTGGGAAAACCAAAAACCACAACCTACAGAAATTCATCTAAAAATAAGTCCTG

A\_14\_P133203 CATAATTGCATTATCCAAAAAGCCAAACCCTATGAAAGGTATCGCATTGTGGATGAATAC

A\_14\_P132169 AAGAGAACAGAAAGCCAATTTGCTTCATGCTTAAACTCCCTAAGTAGGAAAAAATCACA

CUST\_2367\_PI426210822 GTTTTGTTTGGTTGCTGGGTGGAATCCCTGTAGAGAACCACAGTAT

A\_16\_P15958657

CTCACCTGCCATTTACTTTATTCATTCCCTTAGTTTTTCAAAGTCTACATTCAGTCCACT

CUST\_7897\_PI426210822

TGTTTAATTGTATTTGGGCTTTTAGGGGTTTTGTTTCATTGCTATTTTCTAAGTAAGAGT

A\_14\_P127725

ATGACAAAGATGGTGGAAATTGAAGTAGAGGAAAGTGATGAAGTAGGTGGAAAAATGTTTT

CUST\_2381\_PI426210822 CAGATTCTTGCAGGCCAGGTCCTGGACAGAGCAGGCATTGTGTG

A\_14\_P122550 AGCCTGCAAGTATGATTTAAAAAATGGAAAATGCTTCTTTCAAGCATGCCTAGATTTGG

A\_14\_P201407 ATTACAGCATTTTCATGTTTAAAGCCAGATTCCCTGCCAGGATATTTTCTGCTTGAATTAAT

A\_14\_P112967 AAGAACTTTTTATAAGAAGATACAATTTGAAAATCTTGCTGTGCAGCCTTCCCATCTA

A\_14\_P132468 CTTTTCCCTTTTTACATTTTCTTCTGATCCTCATAACAGATAAAGACATTGTTTTTATT

A\_14\_P201917 TTAAAATAGGGTGCATTCTGGTCTGCCAAAAGACGATTAAGTCATTTCCCTAAAGAAAAC

A\_14\_P106477 CTGATGCTGTAAACAATGACTGTTGTTGTTGTTTTACTGTTATTATCCCCAAAGCGGC

CUST\_9576\_PI426210822

AGTTGGTATGATGTGCCTAAAATAGCAAATTAACCTTCTACTTATAATAAAGGTGCAGA

A\_14\_P136187 TTAACGAAGCACTAGGGAAATTTTTTAAAATTGCGTTTTGAGTTTGCCGCGAGCC

A\_16\_P02028533

AAAAAGAAGATGGAGAAAAGCATATGGTGTATGAACATTCCAATATGATCACGGAAATCCA

A\_14\_P132831 CTTGCACAGGGAACCTTCATGCTGTTTGAAATTACTGAGGTCTTATACATAAATCTGGAAA

A\_16\_P02516610

GAGATTGCTTAGTTTTATGAGATCACCTAGGGTATACACTCAATACATATCTCCCATCCC

A\_18\_P22840155 ATAAACTTACCATACTTGGGTTACGGAAGTTACCCAGACTCGGGGT

A\_14\_P101230 AGATAGGTGAAGAAAAGCAAAATGATCAACATGGAATTTGCAAGTAACCAATGACCGTC

A\_16\_P16498572

GGATGTAGAGACCATTTGAGAAAAAGCCATCTATGTGCTTTTACATGCATTTTCTAGGC

A\_14\_P133404 CAGAAGAAAATTCAGATGAATTATCTGGTGAACGACAAAGAAAACGCCACAAATCTGATA

A\_16\_P01595425

GGATGCGCAGTCTTCTATATTGCTATAGCAAATTTCTGGTCCTAAAGAGAATTATCGGTT

CUST\_8627\_PI426210822

AAATAGGCAAGAGTAAAGTGTCCGTATGCCTTCTGCAGATGTACAGCAGATAGATAT

A\_14\_P107416 CTGAACAATCTTCCCTTCCCTAAATAAATTATATGACTGCAATGTGTGTGACATTCATAT

A\_14\_P115857 AGAGCCTGCTGAGATGAAGAAATCACTTCATGAAAATAAGCAAAGACCACACATTTTTTA

A\_16\_P21082103

AAAGGGGATATCAAGTTAGTGTGAAGAGTAAACCATCTCAGGAAAACAGTAGGAATTAGA

CUST\_10053\_PI426210822 GATCTGCCTGGCCAGCTCTAGTCAAATGTCTACTCCCATCAACT

A\_16\_P41638248

AGAACAGAAGCATAATTCCTGCAGTTAAATTCCAATCTAAGATATTTGACCTTCACACGA

A\_14\_P112330 TGCAGACCAATTTGAAGATAAACTACATCTGTATTGGAACGCCTGAAGATTTTCTATTG

A\_18\_P12800143

AACTCCAGAAGGATAGATGACTAAGGGAAATTAATAACAGGCACCATTAAATCTGGTTC

A\_16\_P16476102

ACACGAAGGTATATGGAGTAAAGTGCATGCAATTAAGGTTTAAATTTTCTGTTGGTGTGCG

CUST\_7630\_PI426210822

CCAAATTTCACTACCTAACTTGGGAGAGGAATTTTGCATTAGCAGTTACATGGTTCAT

A\_14\_P129983 ACAATCTGCAGTTTTATTTTGGGGTTCTTGACCTTTTTCCACTTCATATTCTGTTTACAA

A\_14\_P118871 GTTTTCTTTCCTTTCATATGTTTCAGACAGATTCTTTCAAATGGGACAAGAGTTTGTGAA

A\_16\_P15196442

AAATGGTGAATGTGTAACAGTTTCCAAGTGAAGTGAATCATATTCTGTTAGCATGGAGC

A\_14\_P101583 ACTATAATCAAGCAGTCATTCTTTATCATCTGCGGCAGTATACAGAAGCCATATCAGTTG

A\_16\_P19961583

TGAGACAAATGACGACAGAATGAGTTAACTTGCTGTAGGAGATCATTAAATTCTAAGCCAA

A\_14\_P132307 TCAGGGTGCAATCAAATAAGTAGTCAGGTTCAATAAGGGAAGGGAAATTGTTATTTTCT

A\_14\_P137760 TGAAATATTGTTAATGGCTATCACCTTGTCTATGGAATAGTTTGACCTGCTGCAGATGT

A\_14\_P134788 CTCTGTGTTGTAAATTTCTGTTTTGGAATTATGTGGAAGGGTTTCTATTTCTGGCAAGCAA

A\_16\_P21065891

ATCAGCATTGCCACATATTACTCAAAACACAAGAATTTCAATTTATTTCCCATAGCACCTG

A\_14\_P102895 ACTGCTCAAAGGAATGCTTATAATTAGAGGATGGAGAAAACCAATAATCAGAGGATCAG

A\_16\_P31764200

GACGCTGACTTTAGAAATAGCCGGTGATTACAGATTTAATTCATGTTATTAACCTCCCTGC

CUST\_3137\_PI426210822 GTCAGTCTTAGATTACATTGGCTTGTGGTGCCTTTGGTGGGGTG

A\_14\_P100980 CTAACATGAATTGTGTGAAATTGCATAATGCTGTAATGCTAATCTACAATATGTAATGCT

A\_14\_P129758 GATAATCACTTTCTTATATCCCTGTCTCTGGTCCATAATAGGCGCTTGATATTTGACACA

A\_16\_P00355774

TAGTTCATGCAGACTCTAAAATACAGATGAACTTCAAAGTTTCTTTTCCATCATCAGCG

A\_14\_P118361 TACAACCTTCAACTATAATCTTCCCTACCAGGTTTGAGAATAGACCCTGACTTATCAGGA

A\_14\_P111034 TCCTTTAGAATCACTTCTGAATATGTGAAGTCAATGTTAAAACACTGCTGCAAAGGGTC

A\_14\_P128156 TTGCAAGAAAACCTAGCCAAAATCTACATCTTGTGTTGCAAGAAAACCTCACACTCAAGAGAA

A\_16\_P03228308

GTCCTGGTCACTTTGTTTTGACTTCAAACAAAATTCACACTCAGGCACTAGTTTTTCTTT

A\_14\_P130204 ACAGCATTCACTATCTTTACTTTCATGAAGTCATCAAGTTCTGACCCAATGCTTCATTATG

A\_14\_P136656 CAGCACAGTCTAAATCAGGTGAACACTCATTCTCTACAGAATTTGGATGATTTGATTCT

A\_14\_P131333 CACTTACCAGACCTTAAAAAAAAAAAAACAAAACAAATCTAACACCAAAGTGCCCTTACCTT

CUST\_7218\_PI426210822

AACATTAATCTAAAAATGTCTAAAAAGTTAGGACATTTAACCTATACTATAACAAGAAGT

A\_14\_P201170 TTCTCAGGCACTTGGAGCCATTCTATAATTTTGAGAAACATTTGTCCATTGGTTTACAT

A\_14\_P107900 AGAGTTCAATTACTTTCTGGTATGATTCATCCAGTTCTTCCATATTAATAGGTGGCCTAG

A\_16\_P00685051

TGTCTGATGTGAGAACATCATTACCTACCATATGTTCTTTGGTTTTATCAGAATGTGTGA

A\_16\_P02448130

TGCCAGTGACATAGAAATATTGCTTTAGTCTTTAGTCCCACAATAACTCAACATCCATTT

A\_14\_P117073 TTTTGGCACGCTGGTGTTTTTGGTGTAATGAATCCACATTGTAAGATAATCCTTCATAAT

A\_16\_P38554796

ACTACCGATCTTGCTCAAAGTTACCATTTACCAGTTACTTAAATCCCCTTTGAATTGAC

A\_16\_P16884998

AAAATGACGCTCTGATAGTTCTCTGACTCTTTTATGGCCAACAGGAAATGTAACATTACT

A\_14\_P104529 ATCCAGTGGTCTTTCTTCCATAAGAAGGAGATGGAGCCAATTTCTGTAAGGA

A\_14\_P201924 TTGTAATAAACCTTAACTGGCATAGGAAATGGTATCCAGAATGGAATTTTGCTACATGG

A\_14\_P113623 CTGATTCTGTTCCCATCCCTTTACTGGTGGGAAATTAATCTTAGTCACTATTTACTTTC

A\_16\_P15487337

AAAGTGTAAGTCCAGAATTCTGATTCCTCAAAGATTAAACTCACTCCTTTCACATACACC

A\_18\_P16572208

CTCCCTAACCTACAATTTCTTTACACTATCAGTCACTTAATTTTAGTTCTTTGCTCCCC

A\_14\_P119391 TCAATATTGTTTTCACTGTGTTTATCCCCCTGCTTTCATTGTCTTGTCTACTTTTAT

A\_14\_P115436 CTGGCACAGACTAGAACAATATGCAAATGAGTATAGATGCAGGCAACTCCTAGAG

CUST\_6571\_PI426210822 TAGGAGAGACCAACCTCTCTGACAGTCCTGCTGAAAGATGAAAACAA

A\_14\_P106243 CACCTGGAATTTTAAAAAAGTCAGAAATAAAAAACAACCAGACATCCCAATGCAGATGGC

A\_14\_P114240 CCTTTGATATCTCCCTAGCCTAGAAAAATTCTAAGAAATTCTGAGAAGTGTCTTTTGGGA

A\_18\_P13108939

CCCGGACAAATCCTATGTTACCAACAGTATAACAACGCAATTTTATTTACACCGACTAGA

CUST\_2870\_PI426210822

GCATGTTTCTGTCACTTTCTCTGGCATTTCATATCTCAATCTTTGCAGTAGAAAGAGAAAT

A\_14\_P109812 TTTCTTGTATTTTTATCCTAGGGTCTCTATGGCAGTGTAATAGTGGCAGGAGGAAACA

A\_16\_P17298635

AAAGAACTAGACTGCTCAAATGATGGTAAGTGCTCTTAGTTCAACTTCATACTTCAGCC

A\_18\_P22840154

AAACATTGGTCAGCAAGGGCATCCATATAGTGACATGCTGTATGTCATCAAAAAGAAG

A\_14\_P112326 CTTGGCTTCTCCTTGCAACTTTACTTTTTCTTTTTTCTAGGAACTGAGTTCAATGATTC

A\_16\_P15653636

AAAAAAGGCTAGGTTTCATGACAATCATCCCATTTTCCTCATTACTCACCCAGTTTATAA

A\_16\_P21409004

AACCAGCATATTCAGCATTAAACCATACAAAAAACCTATCAATTCCCTCTAACTCCCC

A\_16\_P01163430

ATAAACTGAAAACACCTAGTCTGTACATTAATTTCTGTTCATGAATTCCACATACGGC

A\_14\_P119899 CTGTTGTTGTCCAGTCCCTGTTTCATCAAGATATTCATATTTGGCTTAAACTGCTTCTTAA

A\_14\_P111271 GTTATCAGCATAACTGGCTCAAGTTCATATTTCTAATAAGAAGCCTTTGTGATTCCCCTT

A\_14\_P135319 ACGTTTTATCTGAAAAGGACATTAGGTTCTCCAGATCCAAGTCTGATTTTCTCTCTAGTA

A\_18\_P11907511

AATGTAGGGTCTTATACAGTGATTAGTGGCATCAAACAAATTCATCTTGACAGACTCAT

A\_14\_P119982 CTGGTGAAAGCAATGCCACAAATTTAATGTTGGGCATACTAAATTTTGACACCTAAAGAT

CUST\_7426\_PI426210822

AACTCTTGAAAAGTTTCTCTTAGAGCCTAATAGCAATAACCATTACCATGGTGGCAG

A\_14\_P100425

GGAACCACAAATGTAATCATCATGGCCTCAAAACACACAAAAACATAAAGCAGTAAAAAA

A\_14\_P126202 CTTATTAGAACAAAACATGTCACTCTTCCCCTACAATTGGAAAAAGATGGTGGCTTAAACAG

A\_14\_P123855 TCCTAAGTCTATGCTTCAACACTTGTTTCATTTACTCTTGATCAGAGACACCGTTTGATTC

A\_14\_P109748 GTGAAGTCAATTTTCTTGTTGTGGTCTATATCCAAGTGATCCATGAAGACATCAACCATA

CUST\_5086\_PI426210822

TCAATGATTTCTGTTCTTTTTACTTCCCTACTTGCAAAGACTCTGGAAATGTAATGATGGT

CUST\_3329\_PI426210822 CTCACACAGATGGCACTAAGGAACCGGGAAGCTGGGCTTTGGAGA

A\_14\_P114014 ATAAACAAACAAATAACCTCAGGAGTCAGAGGAAAGCAGCATTTTCCCTAACCTACGAATT

A\_14\_P105704 CCCATCTCCTATTTTTGCATGCACAGATTTTCGGTATTCTATCCTAGTGGATGGTT

A\_18\_P17035414 CCCATTCTAGGGGTCTTGGATTACTCTCCCCTCCCTTATCCCTA

A\_16\_P01167403

AGGAGAAACAACATTTTCAGAGTCAAAGATTTCACTTCCCTCAACTATTCATCACAAGCAAA

A\_14\_P103563 CCATTTAATATCTTCCCTTCTCTGTGCTCTGTAAATTTCCATTTCTAGACTTTCACCTTGCT

A\_14\_P126985 CATCTAAAGAGCCTTTCTTTGCTGCAAATGAGTTGTCTTAGTGACTTCTGACATGCTT

A\_16\_P02759051

TCAGCCCAGAACAGTATTTTCAGAATTTCCATTATGTTTGTATGCAAGAAACCAAGAGAAA  
A\_14\_P201784 TCCAAAGCAAATTTCCCTAACATGTAATCGGGGAAATTTTTTACCTTGAGCATCTCTAA  
A\_14\_P135902 CTCATCTCTCCCACGTTTCCGTTCTTGTAGCGGGAAGACACTTAA  
A\_14\_P132858 GATGGGTAGATATCATTAATCTTGGGGTCACCCTGTAAGGGAGACAACCTGACTT  
A\_18\_P16303118  
GGGCTCAAATTACTTGTGCTTAATGTTTAAACATTTAAGACTACCTAGAGAGTGCAGGC  
A\_14\_P100340 AGGGAGGGATTTCTTATCCCGTTTGTACATTTTGAGGATAATAAAGGTGTGTGATCT  
A\_18\_P15467651  
CCACATCTCTACTTCACATGAAAACAGCATTGACCTAAAACAAATACAGCATTCTATAGA  
A\_14\_P135707 ATTGTCACTGACACTCTCTGTATTTATCTTGTATTTTGTGTCATTACCAACAGCCTC  
A\_14\_P135652  
AGTGGGAAGATGTAAATTAGAATAAGAGGATCTGAGAAAGGAAAGGCACAAAAAATGAC  
A\_14\_P108845 GGTATTTCTTTCTCTTCTGCTTGCGCATTAAGTTTTAACAGGTAAGTGGTGTATTGAAT  
CUST\_4674\_PI426210822 CTCAGGGTGAAAGCTGGCTAGGAGCTATTTAAAAGGGGTTGTACCTTA  
A\_14\_P202223 CAAAAGTCCTGGAAATGCAGACATTTTCCCTGAACTGGCATATTGAAAATGAATGAATTA  
A\_14\_P117385 ACCTATAGAAATTATGAGAAAGTATGCAGCAGGCTCAGATTCTAGCCCTGAGAAATAATC  
A\_14\_P132717 TTAAACTTCTGCTAAATCTTCTCGGCTTTTCAATTCTTCTTTCTATCTCTGTAGTAAA  
A\_16\_P16191863  
GTGTTCTTATAAACGATCACCCTGAGCCCAGAATGACAACAAGAGTAGAAGCATAAAAAG  
A\_16\_P00049569  
ACAGATCAGTCCCTTAACTACTATTTCTGTTTACCTTATCTCAGTTTGTTTACATCCAC  
CUST\_2221\_PI426210822  
TAGAAAAATGTATACCCTTTTTAAAACAACATTGGGGAAAAAGTGCTATGCCTTAAGGACG  
CUST\_10382\_PI426210822  
TAAATTATTCCACAGATGGCTAAGATCTCTCAAGATACTAGGTTTATCAAAAAGCCAAATA  
A\_14\_P107272 ATTGTTTCTACTTCCTGGATTTGTTGGGTTTCATTTCAGTATGCATTCCATAGTGAAACTAT  
A\_16\_P03745287  
GTTCCAGAACACTTTTTCACTTACTTTTTTTTTCTATCAGAATTTACCCATCTAGCATCCA  
A\_16\_P02187827  
ATGCATTCAAGGTTCAAGTTCTTTCTTTAGTAACCCATGATAAATCACCTTCCTGAATCA  
CUST\_10206\_PI426210822 CTGCAGGACCAGCAGACACAAAAACCAGAAAGCACACTGTTCCCTT  
A\_14\_P130679 CTAAAACAAGATACACAGTGGAGACCATGCAGTTTTTTTTTCTGCATTCTTCTCTGAGTA  
A\_16\_P18237892  
AAATTGACTCAAATTCAGAAAATCCACGTGTATTCTACTTCTTCCAATCTGCAGTCTTC  
A\_14\_P136298 TTCAACAGAAAATGTGACAGATTCTTAGGTGCAACTTTAGAAACCTAAGTTTCAAAGGA  
A\_14\_P108929 AGTTAGATGCTGCTAAAGGGACAGACATGTAGGAATTTTACATTAGGGTTGTTCTGATTT  
A\_14\_P139934 ATCATCTGTTGAAAAATATGAAGAAAATTGTGGATCAAAAACAAAAGGTAGTGACCACGG  
A\_16\_P02156902

ATGGAAAGTATATGAACCATGATTATGATAGAACACCAGAATGAATGATGCCTGATGTGG  
A\_14\_P200688 TTCCCCATGAGTGGACTCATCAGATGAATTTACTCCATTTATATAAGAAGCAACTTACGT  
CUST\_2467\_PI426210822 TTCTTTCAACAACCTTTAAGACCAAGTGTCCCTAGGGGAAGCTGGAATAAAGCAGT  
A\_14\_P118300 GGTCGTCTAAATTAACAAAAGTTCAGGACTTTTTGTTTAATGGCTTGACAGCAGAAACTT  
A\_14\_P103550 ACAACTTTGATGTGACTAAAGGGAAAATCTTCATTGAGTGGATGAAAGGAGCAACTAC  
A\_14\_P111492 ATTGAGTCATAAGTTAAGGGTAGATGGAGATTTTCCGCCTTGAGCAGAAACGT  
A\_14\_P122458 CTAGTAAGTTACTTTTTCTACTCCTTTCTCAGGTCCCTTTTCCTTTTCTTTCAATTAC  
A\_16\_P15991447

ACTGTCTGATCCTAACTGACTGTCTGATTCCCTAACTGAGTGTCTGATCCTAAATTGAAT  
A\_14\_P130861 TTACATAGACCTCTACAAGTAGGGAATGTTTTCTGAAGCAGAAGTTAAAATGGACAGCAT  
A\_14\_P139206 TCCTTGGACTTTGTGTTTTTGATTGTATGTTGATATTCTAAAAACATCTATTTTAATGTT  
A\_16\_P19888178

TTTGCTTTTATAACACTTAATCCTCAAATACCTGCATGATCAACTCTACTTCCCCTACA  
A\_14\_P128724 TTGAGGGAGACCTCTTCTTTTGCAAAATGCAATATAAAAAGCCAGGTAAGCAATAAACAG  
A\_16\_P18188482

ATCTTTTTAAACCTTTACTCGGTAATTTTCTCACTTCCTATGAACTACTCCATCCATCCG  
CUST\_1257\_PI426210822

CCATTTACAAATGAAAAGGAATTGGGGTTTTGTTGTATTTTTGTTTTGTTTTGTTTTGG  
A\_14\_P134549 CTTGTCCATTCTGTTTGGTAATTGTAAGAGACACGAATAACTGTCCAGTGGTCAC  
A\_14\_P102626 ACTCCCATTGATCTGGATCAGAGACATATGTAATAACAATTTTCAGGGTGTGTTTTTCT  
A\_14\_P116454 CAATTCACCATGAAATGAGGGAAAGTTGTGATGATGTCATGAATTTTCAGGGAATTAACTAT  
A\_14\_P113739 AAAGCAATAACTGTAGTGTAAGCCAAATTTTGCAGGTTTCTAGTGTGAATGTATTCCA  
A\_14\_P121928 AGGCAATTTTATTGGTCTCTTTGAGGTCAAATTTGAGAAGATTCTAAAAAGTGCTGATG  
A\_14\_P127085 GAAGAGTTAAAATGGATAAAACATAAGACAAGCGAGATTTGTTTGTCTCCACTGCACTGA  
A\_14\_P127601 CCACAGTGATCTTCAACAAATGGCTCAAATTTACCTCTGAAAATACAATGAGTGTCTTT  
A\_16\_P39244098

TAATAAAGGCCGTTTATAGACCTAACTCTTGACATGTAATGGATGGGTTACTTTCATCCTG  
A\_16\_P01932194

AAGACAGATTCTTGACACATTATGTCCATCCTGAGAAATTAAGTAAAGAAATGAACCTCC  
A\_14\_P101370 GAGAAGTATGGCTACAATTCATACCTCAGTGAAAAAATTTCACTGGACCGTTCCATTC  
CUST\_5805\_PI426210822

AACTTGAGCTGGATTCATTGAAATCTTTTTTTTCTGGCCTGAAGGAAATGAAGAAA  
CUST\_6728\_PI426210822

TTTTTGTTTAATGAACTACTATGTCCTTAAATCTCAGCTTAGGGAGCCCGTGTGC  
A\_16\_P03617483

ACATAGACCTGAAATCCTATAAAGTTCATAGCCTGCTAATAAATACCAGCCTTTGATCCC  
A\_14\_P135021 CTTCTATAGTAGTATATTTTCAGTCAGACTTCACTGGGTAACAAACCACCTCCAAACCTAA  
A\_16\_P03705951

TGATCACTGGATGGTAAATGAACAATGAGAGACTTGTATTATATCAGGGAGCAGTCACT  
A\_18\_P22842447 GTGGACAGACCATGGCATATTTTGCAGTTTGGGGAGATCGTAGATGT  
A\_14\_P118958 AACACTTTTTGGAAACAACCTCTGGTTTAAGAATGTGCTTGCAACACCAAGACAAAAGTAA  
A\_14\_P130262 ATGGAGGACAGTAGTCACTGCCCCATTTTCCATGAAAAGTAACATGAATC  
A\_14\_P130486 ACTTGCTGAGAAGACAAGGTTATCCCATTTTACAGGGAAAAGTGTTAAAATCTGTATTGT  
A\_14\_P116788 CTCCCGTTTAAAGGACCCCAAAATGCCAGATCGATTTTTCCACATAAAAATCTC  
CUST\_5953\_PI426210822 GAATCCCCTGATTTGCAAGAAAGGAATTGGCCACTGTGTACTCGTT  
A\_14\_P100476 CTGCTATCTTATTGGACTACAGTAAATATTTTTTAAAAGGACACCAATGAGGGGCACCAT  
A\_14\_P123669 CCACATAAAGGAAAATAAAGTTCACAATTGTTTCATCCAACCTCCGGGGATAAAAATCAAG  
A\_14\_P137331 AGTCACTCCTTTACGAACCCAATCACTCCAGAACTTTAGAACAAAAGTTTCTGAGTT  
A\_14\_P129141 AAGGTATGCCCTTTTACTCAGAAAAGCAGACGGATATTAAGAAATGAATTAACGCATCCT  
CUST\_9333\_PI426210822 AGGAGCACTTCCAGGTGCAGAGAAAAGCTTAGAACAAAAGTTGACCT  
A\_14\_P139291 AAATGTTGGGAACAAAACAGGCTTAGGAATAAAACATGCAGAACACGCACATAAAATTAC  
A\_14\_P127055 CTACCTTTGACGGATGAAACCTTGTTTCCAGGATCAAATACTTTTCCGAATATATTGAGA  
CUST\_3247\_PI426210822 CATCCTCTAATCCTGTACAATACCTTGAGAGCACAGGCCTTTTGTGAGAT  
A\_14\_P114418 TGACACACTTGAATTTGTGGACTTAGAATTTGAAACTCCTACATGTGTTTTTGTCTCTGT  
A\_16\_P15397824  
AAGTGCTGTCCATCATCTATAAGGCCAACTTTAAATTCATTTTGTACGTAAGACCTTTC  
A\_16\_P00978345  
AATCATAGTCCCAGTAACTGTAGGAACTTCCGATCTATTCAAGACCAAATAGAGGGATAC  
CUST\_3506\_PI426210822 TTTCAGTGGCATAGAACTAGATAAAAGGTGGCAGTGCAGAGGATGGAAG  
A\_14\_P123875 AATTCGTTTCAGTATTCTTCATTTTGGACAACAGCAACCTGCAGTGCAAATGTGAGTTGA  
CUST\_10282\_PI426210822 AAGACATACATCAGTGGTAGCTCTGATCTCCCATCCAAGAGATTACGCATAG  
CUST\_1031\_PI426210822 CAATGCATCTGTCCATCTTCTTCGCCAGTATGCGGAGCTCTCATG  
A\_14\_P109945 CTCCTATATTCTCTACCTCTGCCTCTCATGCTACATTCAAAAGCCATCTATCTACTCTC  
A\_18\_P14134223 CTGCCTCTTCTGTCTTCTGGGTGGGTCTTGCCCCCTTTCCTGTAGC  
A\_16\_P21527369  
AACTCTCTATGTGAATAAGACATCATATCCTACAAGCCTTACAAACTTTGACTGTCCCTG  
A\_16\_P18244694  
AAAAACCCATCAGTCTCATACTCTATGTTCTCGTTTAATTTCCCTTCTTTCCACACACAAC  
CUST\_9130\_PI426210822 AAGCTTCCTCTCCCTGCCTAGAAACCTGAAGCACCGATGTGCAGA  
A\_14\_P132342 TCTCCTTTTTTTCATTCCGATTTTTTTTTGCATGTTTCTTTTTGAAATGGGCAAAATGTGTA  
CUST\_1736\_PI426210822 TTCCTTGTTAGAGCCTGATGTAAAGTTGAGGAAACGTGTGTGGTCTCA  
A\_14\_P201282 TGGATTTGCACTAAAATCTAAAGAGGACTTGTTTAGACACAGATTTTTTTCATTCCAGGTCC  
A\_16\_P19866377  
AAAAAGTATGGGTACTCTAACACTTGGAATGCAAAAAATGTCACATTTCCCCATTTTGC  
A\_14\_P102618 CAACAATGAAGGGTTCAAGGCATTCATGAGAGTTAAGGTAGAAACCTTTGCACTAAAAG  
A\_14\_P114979 GAAAAAATAAACACCCACTCCTATGCTTGGTGTCTTCTTAACTGGCTAATAAACACAAT



CUST\_4057\_PI426210822 GATCCTTTCCCCTCAGGACCCATCCTTGGGGTCGTCCAGTCCTTG  
A\_16\_P17118595  
GCTTCTGTAAACATACTGGTTTTTCATCTAGGCATTGATCCTTCATTTCTTCGTAAAGCA  
A\_18\_P13076126  
TACTTCCCAATTTCAATTAAGCATTTTGTTCATCAGAAATACTACCCACCTCGTAAAGG  
A\_16\_P21542035  
TGCTGAAAACATTACACTAGTCCTGATGTGTTATATGAAGTCCATAGAACTACAGGTTGG  
A\_14\_P117581 ATTGAACTGAAACGCTGATTGATGAACTTAATTCCTTAGTGTTTCATCTTTTAGCCCTGTCA  
A\_18\_P22841276 GTATAGAGATGGGACCATAAAGCGATTTCCCAGGATGATGTGCTTGGAG  
A\_14\_P111710 CATCAGATGTCATATGGTAATTAACACTACATTTGGGAAGCCCTTATCTAATTCACAGCCCT  
A\_14\_P116353 ACGCCACCTGCTTTGTTTTTAAAGGATTGTTCAATTTAACTTGTCGGCATGTAATAGATA  
CUST\_7251\_PI426210822  
TTGGAGCCTAGTAAAATCCATGCTACTGTTCTGCAATTGTTCTTTTTATTCTTTCTCTCTA  
CUST\_6489\_PI426210822 GCTCAATTGCTACCTGTCTCTGGAAGCTTCATGTAATAACTTCAGTCAACAGTG  
A\_18\_P22841603 AATGGCTTCCTTTTGAAACAGTTCCTTCTGAAAGACTGTTTTAGCCTTGGG  
A\_16\_P20032638  
AACTGACCATTGTCAACATATTAGACATCTGTTACAGAAAACCTGTGTATCTGTATGGCC  
A\_14\_P124169 AGCAAGAGATGTCCAGAGACAACCTTCTAAGTTTCTCTTTATTTCTTTTGGAAACAACCTC  
A\_14\_P118264 TAGCATAGGAGGAACCCTTAACTAACTCACATGCTCAGTAAGTGATAAATCTGGAATTTT  
CUST\_596\_PI426210822 GGCTGTCCCTGAATTACTGTGACAGTCTGAATAAATTCCTGCCAG  
A\_16\_P02297461  
ATGAGGATGACACTTTTTTCTACAAGGCTTACCTAAAAGTAACCTTCTCCTCGAAAAGAT  
CUST\_9025\_PI426210822 TGGTGTGGGGCTCAGTATGTGGAATAGCTACTATGCAGCCTGG  
A\_14\_P120646 ATCTGTCTCAACACGTGTATAACTCTTTAACATAATTGCACTTCCATTGCTCTGGGTA  
A\_16\_P01817076  
CCTCTGTAGTCCATCTCTCTTTAATTAGCCCTATACTCCAAATAACTCTTCCATCATCTA  
A\_14\_P116192 ACACTCCAATACTTACAGGAGGGTGAAAATCTGTAACACATAAAAGAGCCTAACTTTTA  
A\_14\_P106134 TAGTGTTTGGGCTGTCATGAGAGTGACTGCATTGGCAGAACTTGAACAATAA  
A\_14\_P123431 GGTCATACCATTGTGCATATTTGGAACATACTTCCGTATTGCTGAGTGCTATCATAAC  
CUST\_3182\_PI426210822 GAAGCAAGGATGAGGGGAAGGGGAGTGGCAGCCGGGCCACCTCCT  
CUST\_1840\_PI426210822 AAGGTGAGGAGAAACATCTGTGGAATAGCTGGGGTCAGACAGAAG  
A\_14\_P122152 ATATAGAACACACAGGGTTCAATTTGTTCACTCTGCAACCAATTTTACTTTATTACTTTATG  
A\_16\_P18560963  
AGCCATGCCTGATTTCTATGAAATAAAGCCTTAAGTAAGTCCCTTTACCCATGATAATGA  
CUST\_1586\_PI426210822 AAGTCAGGCATTGGGCTGAGTGGAGGCAGGGAGTGGTAGGAGGAA  
A\_14\_P100053 TTCCATAAGGAATGTAAAAATATGAGATGGGATCGACTAAGTATTTTATTGGATCAGGTA  
A\_16\_P20522017  
ATCTTTCTTGCATATTTTGTTCAGTTATCCATCAATCAGCAATTATCAACTCCCTTCCCA

A\_16\_P16191666 GATTTGATCTGTGGAACATCTCTGTGGTAACTGAAAAGATGTAATTGGCAACTGG  
CUST\_5110\_PI426210822

ATAAAAATGTTTATACATGTATATTGACTGTAGGTGTAGGGTTAGTCTATTGAATAAAGCT

A\_14\_P138807 TTTTCTGAAGTAGTAGGGATCCATTGCAGTGTGCAAATTATATGCTTTCAATTTTCGTTGC

A\_14\_P109215 AAGTTGGTCAATGTATTTAAAAGGCATTCTTGGTTAACTAAAGGACATTTTTGCCCCTCTC

A\_14\_P105554 CTGGGACTTGGTCCTCCATGCAGTTTTTATTTCTTGTACAGTGACTGATAG

A\_14\_P115328 AATCAAAAAAGTTAGTTGTAGAACTTCATAACATTCTGCCAGTGACATGCTGGAAGAT

A\_14\_P105923 AACTCCTCAGTATAAAGCCAAATGTTCTTCTTATCAATTCTTATTTACTCCATGCACAG

A\_14\_P110968 TAATATATAATGGCTGACATTTTTGGAGGAAGCAGGATCTTTGCCCTTCTTCTATCTTCCAT

A\_14\_P115317 ACACAATAATGTAGATAATGGCCTTATCTCTATGCCAATTTGAAAAACAGCCAGAACT

A\_14\_P139736 TCTACTCTGTTTCATATGTCAAACCATCACCTATGGGTGATAGGATAGTAAGAATACCTCT

A\_14\_P200199 GTCTCCTTTTATTTATACAAACATACACACCGAACTGGAACGTAATTTGAAGTTGGGAGG

A\_18\_P15070184

AACGTGGACAAGATTAATAAACTTTCTAGGAGATGAGGAGAATAGATCCACAGTTGCT

A\_14\_P119512 GGGGAAAATTTTTGCTTTCATCTTTTCTTACAACCTTCCCTACTTGCTTTGTATCATGA

A\_14\_P126260 TGTTTCCGTTTTATTTTTCGTCAATATTTTCACTGCATTTTTTACATCAACAGAGTTGG

A\_16\_P30952280 CTATGAAGCCGACCACATCTACCCCATGGCTTCTGCTACATCAT

CUST\_4626\_PI426210822 GAGTGGTGATAATTTCTGGTTCTCCCTAGTCATCTCCCTCAAGAATTTCC

A\_14\_P129477 ACATGTGAGTGAGCAATTTGCAAATAACTGAACAGTAAGCAAATAACTGAACAGCGTGG

CUST\_1531\_PI426210822

TTTAAATCCAAAGAGAACATAGACAGTTGGCAATATAGTGTCTGATCCAGAAAGCAAGAA

A\_14\_P131911 ATCGAGACCTAGCGGCTCGGAATATACTGGTCAATAGCAACTTAGTATGCAAAG

A\_14\_P122691 GGCCTGGACTGTATTTACTGACACAGAACATTAAAAACTTAAAATGTTAGGAAGGGAATC

A\_16\_P30952575

TGTGGATTTGTCTTTGTTCTTAATTCCATTGGAAATTTTTCTGACTTTTTCTTCTCAGGAC

A\_14\_P137739 ATTCTCCTTCAAGTCAACCTTCAACCTTTCTAATCTTTCCTAGATGAGGAAAATTATCCT

A\_14\_P106925 CATAAGAAATAAGGCTAGAATAGAAGGAATAGGGACGAGAGGCCTGATTTCTGAAAGTTA

A\_16\_P18549333

AAAAAGTTTTTCTTCATCTGAATGAATTGCATTTTTCCAGTAATACAAGCCACAGTTGC

A\_14\_P124374 TGTGGCATGAAAGTAGAAAAACAACCTGTACCTTAGCAGTTTAAATGTAGGGCATTGATGA

A\_14\_P137741 CTTCCAGATGGGAAATAGAATGTTTTATAAAAACTCAAATTCAGTAGGCCTGTCAGG

A\_14\_P131195 TGAAGATGTCACATCAAAGTCAAACCTTTTTCAGGTTATTGGGTTTCTGAAACATAACTGG

A\_14\_P108543 CTCTTACAAGTTGTGAGGAAGTCATATCTTAAAGAAGGATCAGCCTCCTAACTTCTTGATA

A\_18\_P10119847

GTGATATAGCCAAAGAGTTAACCTATCGAAGTCTCACACAAAAAGGAACAAGGTTTTGTT

A\_14\_P116438 CGCAAAGCAAATTTCTGATGAGCCATAATCTCTGAGTGTAATACTTCTACATGAAGTGA

A\_16\_P15709664

AAAACCTCAGAATCTCTAGGTCTAGGTTTCTTCTTATAGTCTATCCCAAATTAAGTGGC

A\_16\_P03123170

GACAGTTTTCTATTCTGACAAAAGTCTTCAACATTGAAAGGAACTTCTGAACATCAGTCC  
CUST\_8853\_PI426210822 CTGACTGAAGGCGCCCGCCTTATCAAGGAGCCCAAATGTCCTGT

A\_16\_P02197212

ACACCGCACACTGATATTTTTACAGTTCAGTTAGACTTTGACACTTACACGTTTCAGATAG

A\_16\_P37614893

AGCAAAACCAATTTGTTTTCTATCCAAAGATTTCTACACAGTCTTACCCAGTAGTGTTG

A\_18\_P11847623

GCCTGTGTAGTAATCCCTTTTATTATCTACTCTAAGCCATAAATGATTCTATCCCAAGCC

A\_16\_P58424536 AAGTCTTAGGATGTTCTCTTTCTGATCTGACTTCTGCCTCTTCCCTATATAAGGACTC

A\_16\_P18293710

GCCATGTTCTAATTTTTGACCTTGTGCTTTTTTCACATGTTCCATATTTGCTTTGGACAAT

A\_14\_P135603 GGTATTACGAGTTTTCGTAGACTGATCCTATAATTTTTAATTTTCATGGCCTTCTAGTTTT

A\_14\_P122905 GTAGTAACTTGGTCTCTACTGATAACGTCTGAAAGGTAAGAGATCTGCATACCATGAAAT

A\_14\_P201557 AGCAAAATTGACTTATTTTTTCCCTACTTTGGCTTCAGAATCTCACTAACTGGAACCTT

A\_14\_P112314 GTTGATGAAAGTATCATCCTTAAGGATGGGTCTCATGGAACATGAACACTATTTTTCCA

A\_14\_P123484 AGTGGGTGATGAGAAGCAAGGTCTTCAAATCTGAATCAACAGCAAAAAAACAGAAAA

A\_14\_P110532 CTGAAACACCAGCAAAAAATTCACTCTTTTCACAAGCAGGTATGGAAAGCCCTTATTTAT

A\_14\_P138966 ACAGAAAAGTGTGTAATAATAAACAAGGCTGAATTTTGGGGAGTGCCTTGTTTG

CUST\_1361\_PI426210822 CTTGTTGGGGATGTTGTTTGTGGGGCAGCCCTTGCCTCTCTCTG

A\_14\_P133319 AAGAAGGTATACTCCAAAGTTTGTAAACGGCTTCTCAAAGTCACTTATCTTAAAGTGGAAG

A\_14\_P121855 AAAGATTGGCTGATTCAATGAGCAAATGCATCTACTGTGAGAATATTAAGGTAAGCCTG

A\_14\_P105708 ACTTATTTGCCAAACTTAGAGAAAGTTAGCACATCATCAGGAATCAAAGGGTTTTTCAGAT

A\_16\_P17804183

ACACCTTAATTCAACACGGATGTTATAGATTGGATCTTTTAAAACCACGCAACCATATGC

A\_14\_P127150 TGTGTTTACCTCTTTCCTCAGCCTTCTACTTCAGAAGGTAAAGATTTCAATTCTGAAAG

A\_14\_P128168 TGAAGTCCTGTTATTCTGACTACAGTCTTTGTGTATACTTCTGTGTCTGTTATGTTCAA

A\_16\_P19844812

ACGGAAGTATTTTATTGACAATGTTTTTTGCCTATTCTCAAACAGATTACTCTTGGTC

CUST\_320\_PI426210822 AAGCTGGCTACTCTTTGTATTGGAGTGCTTGTCCCATAGCTGTTC

A\_16\_P19790941

ATACATGGCACTTATGAAAAGTCAGCACAATTATATCAGAATTGTTTGCAGTCATTGGGG

A\_14\_P137910 CATGCTTCTGTCTGTATTATTTTCATTAGATAATGAGATAGGCTGCCCTTCTGTCCATCA

A\_16\_P00547739

AAAACATTTTGCAATGTCCATGACTGCTTACCTAACTTGTTTTATCAAAAATCCAAAGTCCC

A\_18\_P23554542

AAAATAAAAGCAGACCATAAATGAGGTGAACATGAAATGGAATCTATAGTGAAGTGGCCC

A\_16\_P30952484 TCAAAGTCAAAGGTAAGGGACACAGACGGGACCCTTCTCAGCAG

CUST\_7745\_PI426210822

TGAAATGTGAAACTGAAAATTACGAAATTAGGTTTATTTTATCCTGCATTTATTTCAGTGG

A\_14\_P114170 TACTTGTAATAGGATCAAGGAAGAACCAGTCAAACCCAGGGAAGTATCGATATATCTG

A\_16\_P00928244

GGCCTCCGATTCATATAAGTAAGAAGGTCCATTACTAAAATTCAAATACGCGTTGACTC

A\_14\_P117814 CATGGGATAAAAAATGATTACCTCTATGATTTTAACTGCTTTCCTCATTGCTGTTGTTT

A\_14\_P120101 TCAAGATGAATGGTCACAAAGGACTACTAAGGGAAGATTTTGAAAAGGCACAGATATTTT

A\_14\_P120521 CTAAATAAGCGGCAGTTTGAAACAGTTATTCATTTGTTTCGAGGTTCGCAATAATAGCAACT

CUST\_339\_PI426210822 AGGCTTGGGAGTAGTTTTGCAAAGGGCTGCTCTAGTGCCTGAAA

A\_14\_P114902 AGAGTAAGTTTTTAAATTGCAGTGGTGTACAGTATACCATGGGAGTGCCTGAGAAAATG

A\_16\_P16508565

ATGTTCTCTAAGTCTCGATAGTAGCAATAGATCACAGAACTAAACTGAGTTGCCTGATT

A\_18\_P22839987 AAGAATAGATAACCACTGCATCACACCAGGGTCACCATTACACTGG

A\_16\_P15641347

AAGTGTCATCAACAAAGTAGTCTGAAAGTCACAGGTATATGAAGGTAAGGACAGTTCTT

A\_14\_P108603 TGTGTAAATTTTCGTCCACACAATTGCATAGACATGATGTAATTGCAGACTGAGTTCTTTG

A\_16\_P16191259

CATCTAGCATGAGCCTTTCACAGACTGCTAAGCATAATTAGAATGAAGGTCTAGGCTTAG

A\_14\_P112843 CTAATAGTTGTTTATTAGGAGGACTTGCATTCCCAAGAGAAATCACTGGAATCCTGTAA

A\_18\_P12319847

GACTCACCCAGATAGATTACAGATAATTCATCATGTCTTCTGATGTATGTCCTGCTGAA

A\_16\_P00685333

TGACATATCTATAACCACGGTATGTTTGTAGTGACTACTTTTTCAAAGACAAGATGGAGGA

A\_14\_P201731 GTTATCAGGAACTGTTGCCGTTATTACATCAGATGGGAGAATGATTGTGGTAAGTCTTT

A\_18\_P11595211

CTAGGTCCACGTCATCTAGATATTCCTAGCCTATATGAGTATTACACATCCCGCTTTTCT

A\_14\_P130803 ATGAGCCATATACTTAATTTGTTCAAATGATATGCAGTGCCATCTGATCAAGTCCCATC

A\_14\_P104253 CTCAGATTACCAAGACAGACCCAATATCCATCATTATCCAACATTCATACAGATAACCACA

A\_14\_P118089 CAGATGTCACCGTTCAAAGCAAAGTCCAGAAATCCCGATTACAC

A\_14\_P120831 TGTAGTGAGCGTGGAGAAATTTGGAAACACCTATTTCTTAACTCAAATAAAGTCCAGTTT

A\_14\_P137968 AATGATTTCCCCCTTTTTTTTAAAGTGCTCCAGTTTTTCCCACCTTATCCATCC

A\_16\_P18299357

GAGTGTCTAACATCTATAACAGACTAGGTTCTGATAAACATTGAATTGAATCTCCTGGCA

A\_14\_P121185 CAATAACTTCCGGTCACTTCTTCCAGATGTGTCACCCATTATGAACAAGCATTATAATAT

A\_16\_P20275791

GGACACAGATGACAACTAATATCGATAATGAGACAAGAAAATTATGGTCTGGATGTCTG

A\_14\_P101165 CATGATGATCACAGATGCAGTCACATTTTCTGAGTTCTTGTCTCTCTGCCAGT

CUST\_6566\_PI426210822 TTTCAGGTGTTTGTAACTTTCTTGCCAAAGCCCTTCCCGACTGA

A\_16\_P03064762

AAAATGGCCTAATTAACCAACTTGTGAAATACTGACTTCTACATATTCCTCCCA

A\_18\_P13102847

ACAGTTACCGTTGAACTTTCTATTCTGACGTTCTCTTTTCACACTCGTTCAGAAATACAC

A\_14\_P139971 CAACCAGGGTTTCTATTCTGTGTGCTGACCATTAGTTGGAATTTAGCATTCTTAAAAGTA

A\_18\_P22843392 ATTCACAACTGAGGATTTGGACCACTTCAGAGTGAAGGCAAAAGTCTCAG

A\_16\_P38747153

TGTTCTTATATGACTACTGACCACTTTTTTCTAGACTAAATATTGAAACACTTGGCCAG

A\_14\_P104469 AGAGAAGTAGAAAATAACTGCATTTGTATTTCCCATCTCTCTCATCAGCCATCTTTTGAG

A\_14\_P137188 ATCAGACTACCATCACTGTGTGAGACTAAGGGTTATCTCTAAATTTTTGCTAGTCTAAGC

A\_14\_P112303 TATTATATTTGAAAGCCTTTCACGGGTTCCAGTCACTACAGAAGAAATTCATCTT

A\_14\_P121356 TTTGGATGAAATGATTCTCACAGCATCTTAAGAAAAGTTAGTGTCAACCCAACCAAAAAAC

A\_16\_P15099357

AGCACTGCTATGTTTGCTATTTATATGTTATTCCTTAATTTGAAAAAAGGTCACACTCT

A\_14\_P104738 AGCCCATGGGAACACTGCTTATTTTCAGGTGCTTTTTCTTTAATCATATTCATCTCAGTA

A\_14\_P110405 TCGCTGTAGATGGTTAAACTGATACCAAGGATAGGTAAGGGAAATTCCAAATTCATTG

A\_16\_P41753396

AGCCTACCACTTTTTCTAAGAAAATAAGTGTCTTTTATACAAGCAAAATAGTCTCACCA

A\_14\_P202548 AACCATAAAAAGTTAAACGATGAAGCCGAGGGCTAAATCAGTTTTTCTAAACTAATTTTG

A\_16\_P16725060

AAAAGTAGTCTCACAACTTAGTGTTCAAACCTTCATCTTAGAAGTTTCAGGC

A\_16\_P30952658 CAAGACCCCGAAGACATTCACATCTTTATCGCCTCGATCAAGTGTG

A\_14\_P133503 ATGAAAGAACTTGCTTCCCTTAGCCTTTGTTCTAGAAAATAAACTTGTGCACCTTTGACC

A\_18\_P22842143

GTAAAGTTTCTGCTTGATAGTGCCATGGTAGGGAAATGTGACTTCTCTGGAATTACAA

A\_14\_P200937 CACCCTCTTTTACTATTTTGTGAGATCCTGTTCTGCTAAAACATTAGTCACAACCTGCA

CUST\_6407\_PI426210822

ATTTTGATCTCATAATACATATTCATGAAATGAGTGTATTTTCTAGCTCCATTACAGAG

A\_16\_P19997862

ACCCACCAGTTCTCTATTATCCATTCCTGAACCAATTGAAGATATTTACCTTTGAGTTTC

A\_14\_P136482 ACGTGGACTCAGAGCACAGAGAAAAGAACTAAAATGCCTTTTGGCATTTCAGATATTT

A\_14\_P131773 ACCTTCTGCCTTACTGGCTTATAGTTTTACTGGGCATATCTCATTCATTTCAATTCTTC

A\_14\_P109363 CAAGATTACCTTTTCTTCTTCTTCCATAGTTTAAATTTGCTACATTGGGAAACTTCA

A\_14\_P200604 CTGGTCAAATCAGATGTTACTTTTTTTTTTTTTTAAATGTGCAGTGTTATCTGCACTCCTT

A\_14\_P116599 CACAGAACATTGCGTAGGATTATACTTTCTCTCAATAGGTAGTCTTCTTGCTGCAGTAAT

A\_14\_P106806 TAAACACAGAAATTAACCAGTTGATTGAAAAGAAAATGATGAGAAATGAGCCCATTGAAG

A\_16\_P00685181

TTAGTATTAAGAATGTAGTAATTAACCTCCTTTTGAATGATTTTAAAAGAATTCCTCA

A\_14\_P106856 GATTTCTGCAGGCAGTAATAGTAGGGTTTGGTATAACCGGCAAGCACTCTT  
A\_14\_P119735 AATACTTGCAAGAGACGAACGGCAGGAAGTGAATGAAGGAATAGATACATTTTTAAGATC  
CUST\_2145\_PI426210822 CACTCATTTCAGCATGGGGGGGCAGGGGACTGCATGGGAACCATA  
A\_16\_P58424414  
CCTTTGTAAGTTTTCTCCACAGTTCTTACCACAATCTGACAGACATATTTGCTTCTTTCT  
A\_14\_P104761 AATATGAATAATTTTTAAAAATAAAGAGGACTTCTGGTTGAGGTGGCTCTGTCCAGGGGAT  
A\_14\_P201825 TTAAGGCAACCATAAGATAGATTTGAGGATAAATCCCAGTAATGATATTTGGTGCTTAGT  
CUST\_965\_PI426210822  
TAGTATGAAATGCAATATTTGGATCTTCTAGGAATTTTCCAAGATCACCCCTTAAATAGT  
A\_14\_P202228 CCATACTAATTTTGAGAAGGCTTTCTTGTAAGTATGTGACAGATACTGTTTCTCCACTT  
A\_16\_P41710994  
ACTTTATTAGTGCATCAACCTATTCCTTCTGTAAACAGTTCAAGATCAGTTTGTCTCTCT  
A\_14\_P126470 TAGAACCTTCTGTCGTTACAAGTTCTAAGTTTGGTTTTTATCTCGCAAGCAGCACTA  
A\_14\_P137398 AAAAATTCACCTTGCCTTTGAACATGACAGGTGTTTTTAAATCTTCAGTTGCGTTAAGGT  
CUST\_1193\_PI426210822 GTAAGTCTCCATATGGGCCAGCTGTGCTCCTTTACAACATTGGAAG  
A\_14\_P201995 AAGTCTGTTTCAGAACTTTAGGGCCTTTGAAATATTTCTCAAGCCTATTTTCATGAGATC  
A\_16\_P01852901  
CCCTACACGTATAAATTGAATGCACCATTGTTGTTATTCTGTATTTCCATGACCTAGCAC  
CUST\_474\_PI426210822 CACCAGCTGACTCACAAGGTGCCTCTTTCTGATGTCAGAGAAGTC  
CUST\_5517\_PI426210822 AAGGTTGGTATGAAGAAGGGTTAGAGTTGACTTTTCACCATTGTCCCC  
A\_16\_P00685033 TCAACATCATCTTATTACTTATATTGTGTGTATAATTTATTTTGTGGCCATATGTCCCTT  
A\_14\_P103192 CTTACTGTTTCACCAATTTTTCCAATATTTCTTGTATCTCCTACTTCTCCCTGTCAAAAA  
A\_16\_P00685141  
CTAACTGATGTTAGATTTTTGAGTTACTTTAGGTTTTGGGTGGGACTAGAAAAGCAGGGA  
CUST\_5855\_PI426210822  
AAATAGGATTACACTTTGAATTTCTTATTTCTTAACTAGTATTTTATCTTTCCATGATT  
CUST\_211\_PI426210822 GCCGCTCGGGGCCGCCCTGTGCTCGCCTTCAGCGCCCGCTCAGC  
CUST\_4816\_PI426210822  
CCATCAGCATGGGCTTTAATGAAATTCACATATGTATCAGAACTTGTATTTTTTCCTT  
A\_16\_P02483549  
TCCCCCTCAAACCTAAGTAACTTGTAACCTACATACTATATCAAAACCTTTGCTGGACA  
A\_16\_P01693993  
TTCCAACAGTTTCTTTCTTTTATGGCAATTCATACCACTGATAAATACAGGCAAAAAGGG  
A\_16\_P37397965  
CTGACCTTATACACCAATCATGCAATGAATACTTGTGATTATCCAACCTCATCACAGAGA  
CUST\_2806\_PI426210822 AATCAACTTGCTAGCCCAGCTCTAGAGACTGGATTAAACCCAGAAC  
A\_14\_P106505 ACAGCACATTGAAAGGGAACAACAAGTTTTATTTATTTTTGAGCCTTCAGTTTAGTGCTG  
A\_14\_P100684 GAGTTGAATTTACAAAATCACCAGCCTTCTGAGAGTAATTGGCTAAAAACGTTGACAGAA

A\_14\_P106721 TTTTCTTTGTTTCAGGTTTCCCCTCAAAAAACCTATAAGGTAAGTTTGCTCAATTACACT  
A\_14\_P123934 GGAAATTCCTTGATTTTCAATGATACTGGAATGATCCCCTATGTGATTCACTAGACAGTTG  
A\_14\_P123936 ATGCAGAGGATGACATCTGAGAAGTCCTTCATGGCACAAGGCTCT  
CUST\_6917\_PI426210822 GCACCCCCAGCCTGTGTTTGTATTTCCCTCACCTGGATTACCTGTG  
A\_14\_P129210 AGAATTGCAGAAGTATGCTGTGTTTATTTTCCAAAGTCTCATTTTGTGCTGATCCAGATG  
A\_14\_P136534 ATTGTCATGAGAGCCAAAATAATTGTAATGTGAGTGCCCTTGCTAAAGATCAAAGACTG  
A\_14\_P137222 TGCTTGCTTTCTGATTGCCAGTCGTTTATTACTCATATTTTGACAGTTGTTAGTCTCCAA  
CUST\_435\_PI426210822 ATTGTTCTGGTCTCCTCACTCACCTACAGAGCCTGCTTTCTCAAG  
A\_16\_P19934525  
AAAAAGTGCATGAAAATAAAGTGTGGAGACTCCATAAGATAACATTCTGCTTCGGTGAAG  
A\_18\_P22839768  
AGTCATATTTTTTTTCAATGGCATAATTTTATGAATTTTTGGGACACTACACTATAGACT  
A\_14\_P132554 AACTCATCCTTTTCTGACATACCCATTCAAAAAACTACTAACCAAATGTCCACAATCCT  
CUST\_6901\_PI426210822 AAGAGAGCCCTGAGGGTGGATGCCGATACTTAGAAAATAATAAGTCTTTTCC  
A\_14\_P129049 TACACAATTCTAAGAATAGTTCAGTGTTTTATTTCCCCTATGAGTCTAGGGTGCCTGTTT  
A\_14\_P137556 TTTCAGATCTCTATCTACCATTTCGGAAGTTTTTCAGAAGCATTATTCGTCTTGGTTTTCTG  
A\_14\_P118428 ATTCTGCAAGGTCCCATGAGAAAGTAAAGAGATTACAGTCCATGTAGGAACTTTGTTATA  
A\_16\_P30952481 CTCAAATGCAGCGTGGGATTTCCCTTTCATGAGGTCAAAGTCAAAGGTAAG  
A\_14\_P126872 GTTCTTTCAAGATGTAAATACTTGTCATCTTCCCTCTGAACCCTGCCCTATGTATAAAAGG  
A\_14\_P124754 TCTGCTTTACAGCATATTCTAATAGAATACCTCAGCCCCATAAACACTCTCCTTATGCAA  
CUST\_4049\_PI426210822 GAAGAGAGTGAGGGGGAAGACTCCATGGAGCATGACAGGCATGCT  
CUST\_4534\_PI426210822 CCTCAGCTGTAGACCTCGGGGGTCCAGACTTTCCCTTGCACACAAA  
A\_14\_P115537 CTGTGGTCTTATTCATCAGTAGGCAATCACAAATTCAGTTCATTTCTTCATGATCTGA  
A\_14\_P131828 GAGAGAAATTGGCATTGTGTGATGTGTCCCAAGATTTCTTCTATGTGCTTTATTTTTGT  
A\_14\_P115243 TTTGCACTAACCTTAAACCTTGGGGTTTCCACTTGGTAAAATTAATTTCTGTCTCTAA  
A\_16\_P17873304  
AGCATGGAATATGGGAAAGAAAACACTGTTAATGGCAATTCTGGTAACTCAACAAATGTT  
A\_14\_P124422 TCAACTATGAGAGCCAATAAGCAAGAGTTGCTATATCATGTGGCTTTATTTTCTGGGATA  
A\_16\_P02530532  
AATGGTAAGAAATGTAAGCGTGTGATCTGTTTTTAGAACGGAAGCATAACAGATCCA  
A\_14\_P132941 ACTTTGCGTTAAAGTGTATCCTGCATGTGTTCTATGGAACAATATGTGGACTGTTAGTAT  
A\_14\_P112317 CTTTGTGTTAGAATCAAACGTGTTCAAAAAGTCCATGAGAAATCACATCGATTGTAACCG  
A\_16\_P18818688  
CCCTTGGCTTTATCTAACTTGTCCCTTCAACTAAACAAACAAAACACTACAAACACAGAAC  
CUST\_6324\_PI426210822 CAGCCTGCAGATCTTGGGAATTCCTCTGCCCCCTAAAGTATTCTT  
A\_14\_P125479 TTGGTGTGATTTTTCAGAGTTTATGATCCACTAACAGGATATCTTTGCTTTCCTATCACATT  
CUST\_1996\_PI426210822 CTCAATTCTGTTCCCTGCCGAGTTAGAAGTGTGTACGCCAGCCTA  
A\_16\_P21346450

AAAAATCAGTCAAGAACTTTGGAAAATATGGCAAATGATGTCAAGAATCATCCACCTTCC  
A\_16\_P00492711  
CAGTCAATCATAAACTACCTGATCAGGACAAGTAAATAGATTAAACTTATACCTCCCCC  
A\_14\_P100440 CTTTTCAGCATTAGTTTTGTGGCTCATGGGAAATGTTACTTAGCATCAAGATGTGG  
A\_14\_P103831 AGTAGAAAAGTATTACCTTTCTGTCTGGCTTTAACTATCACTTCTATATGCTTCATTG  
A\_14\_P123260 CTTTCCTTTCACCATTTATGGACTTTAAGGATGTGGATTTTATGCTTGTTTTCTTCTCT  
A\_16\_P18108766  
AGTGGATGAAGATGAATTGCTGGATGATTTTCACTGAGTGCATAAAGATAGGTAATGCA  
A\_14\_P120460 CATTAGAGCAAATATCAGGTGGAGTCCAGAGCAATCAGCAAAGTTATAAAGTTTGTCTA  
A\_14\_P126919 AACTCACACAATAGTTGGATCCATAGTATATTCTACAGTGCCTTGGTTCTCAGAAAAT  
A\_14\_P117640 CAGTTAACCTCAGTTATTCTCCTGTTTTCCCAACGGCAGAATAAAGGATTTACTTTTTTC  
A\_14\_P128053 ATTTCTTTTCATCAATTCAGATGACACATCTTTCCAAAATCAACGGTGACATTGCCCA  
A\_18\_P22841921 CCACCCTGGAGGCCGCCTATGACAGTTCGCCATAGGCGAACTGTT  
CUST\_10308\_PI426210822 GAGATAATAAGGGGGCAGACTGTTAAGTTTCTGCTTGATAGTGCCATGGTAG  
CUST\_845\_PI426210822 ACTGGACAAATGGGCCCCAGAGGGGGCTGAACCCTTGTCTGCCATT  
A\_14\_P119066 TAAATAGAGTCACAAAAACAGAACATTGATGGCCACAACAGCAACCTGGTCAATATTT  
A\_14\_P123565 GAGTGGGTATCTTTTTTCTCAGAGGTGAGTTACTTTTAAGTAGCATTTACAGTTCCTAAA  
A\_14\_P130257 GGAATTAATAAACCTCTGGATGTTAAACCACTGAGATTTACAGGGTAATGCTTTACTTTG  
A\_14\_P118100 ATTTTAAAAAACTGATAATCACACTGCGGTAGGTCATTCTTTTGCCACATCCCTATAG  
A\_14\_P137079 AGGTGTGTATAACAATCCACAAAAATATGTCTAATCCACTGTGTGCCTGACATAAAGTTC  
A\_16\_P18089203  
TGTAAGAAACAACTGCAAATTAATCTCTAGCATCACAGAAATATTCCCCATTCCTGCC  
CUST\_4678\_PI426210822 ATACCCAAAACACAAGGGGTCTGGGGCCAGCGGAGGAGACCTTGTT  
A\_14\_P132056 TGCACACATTAGCAGGATGTTTTGTAGAGCCATCTTCACACAAAATAAGGTTTGCTTTT  
A\_14\_P116404 ACCTGCACCCATCTGAAGAACATACTAATGTATTGTTACTTAAAGAAGAATCATTTACCA  
A\_16\_P16191073 AGTATTCTCTGGTTCTCTTTGTCATTTCTTTCTAATTATCAGGGCTGTCCTTATCTGTT  
A\_16\_P18383123  
AAGCCTTTTGTGTCAAACCTTTCCTGTCTTGTCATTAACCCAAAATAGAACTATCCATT  
A\_14\_P128639 AACTTGCATTCATTTTCTTTTAATGTTCTGTAACCATAAATGTCCCTCTCCTAGGTGT  
CUST\_5029\_PI426210822  
CTGTGTTTAAAGTTCTTGGAGACACTTCTCTCTTCCAATAAAAAGGCTTTTACTAGATGTT  
A\_16\_P36231080  
TTCAAATCCACATCTCTTTTGTGCAAACCTGAGTCGTGTTTCATACTTCATCTGATTTTA  
A\_14\_P132426 TGCTTGGAAGTACATGTTTTGTTTTGGAATTACACTAACGTTTTGTAACACTGTCTCAC  
A\_14\_P136951 AGTGCTATGACCTTTTGTCCACCATGGATATATCTGACTGCTTTATTGATGGTAATGAAA  
A\_16\_P01137072  
AAAAAGAAGTCATGCCACATAATGCATTTTAGCCAGTTGAAAAAGTTTATGGTGCATCCT  
CUST\_8878\_PI426210822



ACTTACTTCTCTTTAATCTAAACTTATGACCTAAAGCATATTTTCAGGCCTCCCATGAAGT  
A\_14\_P120729 AAGTGGGAGTTTGTAAGTCTGGCATTATTTTATGTAATCAAACATCAGAGACTTTTGACAGT  
A\_14\_P120905 ATTTAGTATACTTACTTATGATAAAACATACGAGCCATGCCCATTCCTTTGCTTTTCCCCT  
CUST\_4906\_PI426210822  
TCAGCTGCCCTATATAAGGAATATGTTATTACAGTCCGAGACTAAAAAGATGCTTTTGT  
A\_14\_P113563  
GGGAAAAGAAAAATTGAACCAAACAGCAATTGCTATCTCTCTCAGGTTATGCAAAGAAA  
A\_16\_P17811807  
ACCATGCAATTTAAAGCAAATGTTCTATTCTGTTACCACAAAGTTGAGTTACTGTGCAGA  
A\_14\_P110877 CATTTATATCCCATGGAATCAGTGTCCACACACAGAATATGTTTTTGGAAATGGTTGCATGA  
A\_14\_P201886 TTGCAGCAGAATAAATTTAGAAATGGTGCACACTGAATTTAGTCTGATAAGCAAGTTCTTGGG  
CUST\_1293\_PI426210822 TGAATTCCTGCTCAGTTCTGAGCTGGGGTTCTCACTGAAATGTGACT  
A\_18\_P14803647  
AAGGGACAAATAACTAGAAGAGATACTCATTCTTGGACTTGATAAAACCAAACAACAAA  
CUST\_9328\_PI426210822 CAGTAGAGCCGCAGGCAAGAGAGCTGAAAGCTGTAGGGTGTGCATA  
CUST\_3851\_PI426210822 AAGAACAAGCCCAATGAATAGTCCCTTATGGGAGGCATCTCAGCA  
A\_14\_P110666 AAAAAAAAAACTTTGACTTTTAAATTTATATAGTGATATGCTGACAGGCTGACACGCAGATG  
A\_14\_P103994 CTGCATGGCTAAGATGCTTCATCTGGAATGGAATCAATATTCATAGTTATGTCAATGAGG  
CUST\_2211\_PI426210822 ATTTTCTCAGGAAATTCATACCTGAGCCATGCATGAATAATAGGCACAGTGACG  
A\_14\_P117478 AAACCTAGCAAATCTTTATGCTGGAGTAATTTTTGTGTGTGTGCCAGGAACTCTACTAGA  
A\_14\_P200766 TATCAATGACATAGGACGGACATGTGTTTTCAAACATTAACATTTTTGCCCACACTGAA  
A\_16\_P38325223  
TGGGAATCAAGAATATACACAAACTTTGCATGTTGACAGTGATAGAAAAACGTCCTAGTG  
A\_14\_P136372 GATTTTGACCTTACCTTGTGCTTGGATTTTTGGTGAACCCAGTATTCACAAAACTG  
A\_16\_P21624228  
AACAATACTCAATTCGTGCAATTTACTAGAATGACCTGAAGTAAAAGTAGCCAGTCCCTT  
A\_14\_P104865 CTTTCTGTCTTAAATGCAGTTATGTGAAGAATACACTAAATTTGGATGAAACTAGATGG  
A\_14\_P110574 CATGGATTACCAAGAATAATCTTAAAGCAATCTTCTGTTGGGACACTTAAGCACATTCA  
A\_14\_P102987 CGAATCTAAAAGGAATATGACAAAGCCTTCAGCGTGGTCTCAAATTCATGGTTCATAC  
A\_14\_P105824 ACTTCCCTTAGAGTTCCCCTAGAGTTCTCCTATACTTTCCCTATAGTTTTTTTTATAGTTC  
A\_14\_P121134 GGCTCTGCAGTATTTGGAATCTCTGCATAATGAATAATATGGGCAATTTCCCTTTGCATAT  
CUST\_3720\_PI426210822 TTTTCTCTAGGTCCTTCTCATCGATAAGACCTGTTTCAAGATATGGCAAGCC  
A\_16\_P16331210  
AAACTGTTTCACCTAACTCAAACACATAAAGGACTTTCAAAAACATTTGAGCATTCTG  
A\_14\_P118439 CTTCATTTGCGCAGCAAACCTCACTTTTTTTTTACATAGGCTGTTTCTGGTCTAGTTTGATG  
A\_16\_P17666444  
AGCACCTCAACATTAATTC AACCTCAACTAACTTATCTGCTTCTCTCTAAAACAGTCT  
A\_18\_P14135997 GAAGTTGCTGGGCCAGAGATTATCACCAGATGTGTCTCCAGTCT

A\_16\_P15485826

AAGTCAGTCAAACAATGTGAATTCCTAGACCTTTTTGATTAATGATACAAATGGCCACGA

A\_14\_P133412 TCCCTTTTTGCTTCCAAACTCCTCAACTGGGAACCTTCATATGTGCAGTATTTATATT

A\_14\_P114602 CTAAGTTTCCTAACTTGTCCATCCAAATGTGATCACCACGATTCAACAATTTGGG

CUST\_4449\_PI426210822 AAATGACATGACCTTCTGCATCTCCTCCCACGCCTTGGGCCCGCA

CUST\_8175\_PI426210822 GAATGTAGGTTCAAGAACATGTACCCAAGAGCCACGCATTTTCCCAA

A\_16\_P15226815

AATATGATCTCCCTTTCATTCTCAATACCTGCATGATTACCAATTCGACAAGGATCTTTC

A\_14\_P105422 ACATCGAGTAAATTAATGCTTTTAACTCGCACAGAAGAACAATGAGGCATAATTGTGCTC

A\_16\_P20652222

AAAAGACTCACCTGTAGGAAACACAGTAGATAATACAAAAGGGCTTTC AAGTTAGTGTGA

CUST\_9656\_PI426210822

ATTCTTGCTATTTTCTTGATATTTTCAAATAGCAGAATACATGATAAACTTGTAAGTCCA

CUST\_2966\_PI426210822 GCTTTGGAATGAGTGGTCAGCATTCTTCTTGCCTCCTCAGGCAG

A\_16\_P01002509

AGGAACTAACTCTTCAATATTTACGACCACTCACTGAAAATACATCATTGTTCCACTGGT

A\_16\_P19409771 ACACTGGTCTAGCACTATTGTGTCACTGAATTCCTACAGAATCTTAGCAGTCATTGTG

A\_14\_P112482 GCAAACAGTTACTGTCTAGTCCCATTTACTTGGAACAGACTTTTTCTTCTTTTCCTTG

A\_16\_P00314050

GCTCAAGGGGAGAACTAAGTTAGACATAACCATGGTAACTAACATGCAATTAACTCCAATC

A\_16\_P00469447

CTTCACAATGATAGGAAGAACCAACATTACAGGATCAAAAACATCCCTATGAATGCTTG

A\_16\_P15144913

GAAAGTAATGCAGAGACTACAATAGGGATCTTGCCAGAATAGAACGTATTTGCACCTCAT

A\_14\_P123429 GTGACACACATCCTAGAAAGAGACATCAGGGGACCACAAGAGTATTCTCTTT

A\_14\_P112736 TGAGAAAATGCACGTAAATTTCTAGAAAGTGTCTGGCATATGGTAGAAATGGAATGGTTT

A\_14\_P116290 TTGATTCTAAGGATATTTTAAATCGATTCTCTCTTGGCTCTTCAGGGTGCACAGTCATATC

A\_16\_P20082961

AGAATTAGGACTCAAGAGTAGAATTCCTTTAATCCACATAGACTTACAATGGTGCTGTGC

CUST\_9486\_PI426210822

GAGAGTTTAGAATGTTCTGGTAAACCACAGTGTTAATAAGTGGAAGCTAATGGAAATAG

A\_16\_P01666102

CCACATGTCTGTTATTCTTGTGACTTGTATCATTTCCGTATTACCAAGTTGAAACAGCC

A\_14\_P134384 GATGTCCCAATAGAACCGTATCAGTGAACATACAGATTAGATGGAGAGAATTCTGACATT

A\_14\_P133445 TGAAAGATCATTTGTGGTTTGAACCTTGCTAGAAATGAAAGTCATTCAACATTGAAGATC

A\_14\_P108464 TTTTCCATGGACCTTGTGACCAGCAAGAACACTGTGATATAGGGTCAAAG

A\_14\_P123111 TGTGTCTTGGGTGGGAAATGGCTTTTTTTTAAAAAATAGTTTCCTATAAAGCATCAAAAA

A\_16\_P02850651

TCTTTGCTCTTGATGTCTTTTTAACCTCTATTGAATCCTCTACAAAACCTATTGCATGGC  
A\_14\_P100145 CATAAAATTGCCTTTCTGAAATGATTACCCTTGTAACGGGCTGTCAGAGAGCAATTTATA  
A\_14\_P110632 CATTACTCAAGAGAGAGAAGATGACTTAATGGCTTGCATTTAGCCACATCAAAAAGC  
CUST\_9227\_PI426210822

GGAAAAGGGATAAATCTTTGCAACCCACCAAGCACAAAGTAAAATGTTTCTTCC  
A\_14\_P125805 TGTGAGTTAGAAAACCTTGTTAACTTGCTCAGATATGACAAAAGAAATCCCACTTCACAGC  
A\_14\_P111630 TGCAAAACAAATCTAAATGATCTTCTCCCTGAACAAGAATAATCACTGGCTCATGTATCA  
A\_14\_P118813 ATTATTGTGACCCGTCGAAATGGTGAGTATATTTAGAAGACTTGGGAAGCAATGCTTAAA  
A\_16\_P00344687

AAGTGCAACCCAAAAATAGACCATGCAAGTTAACTACTATCTTTCTGATACTCTCAGTAGG  
A\_14\_P127955 TTTTATTTCGTTACTATGTGGATGTTCCACAGGAAGAAGTGCCATTCAGGTAAAAAATTC  
A\_14\_P115543 GACACAAATATCCCACCATCCCCCTCATTATATTTTGGGATCTGCTAAAAAAAACCTATG  
A\_14\_P103497 TTCATGTGTTCCCTATGAGAAATCATGAATCATTAAAGGAAATTTGGCTGATTTGGGGAGA  
CUST\_1047\_PI426210822 CAGGACGCTGATCCCTTGCTATGAAGGTGAGCATGGATTGATTTTTTC  
CUST\_8916\_PI426210822 GCAAAGGAAGAGGGAGGAGGGGAGGATGCAGGGGCATTGTTTTAG  
A\_14\_P120322 CACCCACCCATTTTAAATGCTAATAAAAAGAAATGAGTGCATCTCTCGTAACTATCACAGT  
A\_14\_P130749 GCCCTGCAAACAGAGTCTCTGGCTTAGGATGAGATAAAATTCTTATGCTTATTTTGGAAA  
A\_16\_P19203135

GGAAATGTGAAAACAACCTCATATGCTACACATTGCACTAAGTATTCCTCCAGAGAAAAA  
A\_18\_P14136391

AAGTGTGTTTTGAGGCCACAGAACTATAAAGATGAAGAACAGGAGAAACGTAGTTAAT  
A\_18\_P24214815

AAACCCTTTCAATTTAAGTAGCATGTTTACTAATCTTTCCATATTTTCCGCAAAACCCAG  
CUST\_6723\_PI426210822 CTCACCATGCCCCACATACTCACTTGAATCAGTCGCCACTTAAT  
A\_16\_P38954438

AGTGATCCACCATCTTTTAAATAATTCATTCAAACGATATTCAAATGCATATCACCTCCA  
A\_16\_P21087384

AAGTTGAATCACTAGTAACTCACACTAACTTCCATTTCAATCTGTGACTCCTCAAGGTTA  
A\_14\_P103265 GACATAACTAAGCCAGGAACTTTAAAAGCCTTCTAGAAATAGAGGCACTGTATGACTTG  
A\_14\_P137505 AATTTTGTCTTTTTTAAAAACCCAGGAACTTGGATACGATTGGTGTGCTGTTGATTTG  
A\_16\_P00685272

GGAATTAAGGTATTTCTCCCATATTCAAGGACTTCAAGTTTCAATTACCTGTCCAGAAAACCT  
A\_16\_P00798457

CCCTACCAAGATCTAGTTTGTGTCAGACATATCACTTATTTCCACCATATTTTTACCCC  
A\_14\_P133254 TGAGGACTGAACTGTGGACTTTACTATTATAATGATAAAAATAAAAATGCGAATTACT  
A\_14\_P121004 GAGATGATGCTTTTTTTTTCTTACCTAAGATAACTCCCAAAGTAGGCAACGATGTTACA  
A\_14\_P107905 AAACCTGTGACATAAGGCTGGTAAACAGAAAAGAAAATCCAACAAGGACTTACTTGAC  
A\_14\_P138508 ACTTTACTTGATGTAACACCCAAGGATGCAAGCCAGGTTGATCCCAC

A\_14\_P133416 CTGGACATGATCCACATTAGAGACAGACATGCTGTTTCTGCTGTTTGTATTTTTTTTTTTT  
A\_16\_P03725514

CCTGGCTGAAAATAGGTATGCATTTGGTTACATATTCCATATAACCATGATTTAGTGTGCC

A\_14\_P121204 TTTGCTTCCAAAACCTCCCAATCTTATTTACCACAAGGAGATTCCTTTTTACAATCACTT  
A\_18\_P14080776

AGGAATGGACTAAATGCTGTCTTTGATCATCAACATTATTTCGAATATTAGGCTCACGAT  
CUST\_6235\_PI426210822 CAATAATCCTAGACTCACCCATCCCGGCACAGGCTTGTTACTGTG  
CUST\_5169\_PI426210822

CAAGTTGAACTTAATGGCAAGGAAGTGTCAAAATGAGACTCTGCATGTAECTCC

A\_14\_P109083 CTCGGGTGCATAAAAGAGTTCCAAGAATACTGACAGTTATCAGAAAGGAAAATCCTAATT  
A\_14\_P130534 GTTGAGTCATGGTGCAGGATTGTTCTCTGCATACAAATGGGATAAAGATGAG  
A\_14\_P202479 GTTAAGATGATGTCTACCCTCTCATCAATAGAAAGACTACCAGACATTATGTATTTCGCTG  
A\_16\_P00685477

AACCATCAGCCTTGATAAATGCTAATGTAAAGTTCTCTAAGTTAAAGCCAGTGTAGGCAA

A\_16\_P19769301

ATGTCTAATTGGCTGTTTGTGTAAAGTATGGGCATATCTATATGTTGGGTTAGTTCCTCC

CUST\_9614\_PI426210822 AGTCACTGCAGCCCCATCTCATAACATGATGCCCTCAGGTTTAC  
A\_16\_P16235318

AACAATATGCAGAATTGAGACAAATAGGGAGATACAGAAACATCATCAATGCCAAGGAC

A\_14\_P117769 CGGCCTATGTTTAAATACTCAATCTGAATCCACTTGTTGATCGAAGAATTATATTTCCAA  
A\_14\_P133444 ATCTTTACATTTAAGGAGTGAATGGAGACCACAGATTAGTCACTTAAGTGTGGTCACTT  
A\_14\_P103482 TGCCTCACTTCAAAACAGAGTTACAAGTCCAAAATTTTTGTTTTTGTCTTCTCCTGTT  
A\_14\_P101633 AGATTCTTCTCTCAGTTGATCTGGATTTGTAGCCTAAGGAAATAATCTCTAATTGTGGA  
A\_16\_P35686788

CCTTTCCCCTAAGTAGTTTATTCTACAGATACCACTAGTCAAATCTTCAAAAACACAAGGC

A\_16\_P02743986

ATTGCCCTAATAGTTCTACAGTCCTTCAGTATCATCCTACCCTAAACTCTAAAGAGAACT

A\_16\_P21556867

AAAATCACTGACTCTCTGACTCACTGACTTTTAGTCTCCAATTTACATCTAACTTCCCAA

A\_16\_P19643097

AAAATCTTTTACCCATCCTGTATCTTCTTTTTTCTTCTTGCTGTCAAAATCAAACCTCCC

A\_14\_P125634 TGTCAAATAAACTTGCTGTAAATCAGCCAGGAACACGGGTCTGCAATCTTTCTATATTA  
A\_14\_P130564 GGATATAGGAGTATCCAAATTTAAGATTACAGAGATGGAACAATTTCCAGTGGCAACAAA  
A\_14\_P118697 TTTAGGTTCCCTTCATTAATGCCAACCTTACTGTGCAAACCTTGCTTTATATGCCAAATT  
A\_14\_P105334 TATATGTTTGACTTTTTATTGTTTTCCAGGGCAATGTCACCTTTTTCTGCTCCGAACC  
A\_16\_P03089359

CATCTCTTCCATTACTTCCAAGAAATCCACACTTCAACTGAATCAAACGAATCCAATAAC

CUST\_1100\_PI426210822 GTTTTTCTTTCTCCTCTGTATCAGCATTTGATCAGCTCTGGCTGGGC

A\_18\_P22841909 CAATAATCCTAGACTCACCCATCCCGGCACAGGCTTGTTACTGTG  
A\_14\_P129418 TTGCTGAATGTATTTGCAGATCAACCTAATAAAAAGTGATGCAACCAATTATGCTAGCCAC  
A\_14\_P113294 GGAAAGTTTAAAATTGCAACAGCATTAACTTTTTTTGACCAGCATACTGTTGTTGAGCA  
A\_14\_P202074 AACTAGGCACCACTAACTTTTATCCTGCTTTAATTGGCTAATTGTTCTAGAATCAATCCC  
A\_16\_P16191204  
ACACATGACTTTGTTAGAAGCAAGGGAAAAAAGTTAGGAAGATCTAGGTTTTGTTCTAGG  
A\_14\_P134303 ATTGGTTTATGGGTTACTGCATCACAAGTATGCCAACTTTGTAGGAACCATCTCAAAT  
A\_14\_P101408 TCTGTGTAATAAGGGAAGGTATATATAGAGAACTGTAAGGGACAGGTATGTGAAAAGCA  
A\_14\_P135574 CTTGTTTTAATTAGACTTGGACTTGCTGTCATACACATGCTGCTGATTTTCACTCT  
CUST\_8438\_PI426210822  
AAAACATGGAGTTGTTTTTTTTGGCCACGTGTATGCAAATCTATAAGAAAGGTGACATTAT  
A\_14\_P123866 ACAAACCTGTCACCCTTTGTAATGGTCAGAGAAAACAACAGTGTGTTGTGATATCATTGTAAA  
A\_16\_P18747621  
TTCAGCCTGCTATATTCTCCAAATAGTTTTTCATTGGCTTTGGTTTCATCTTATCAAGAGG  
A\_14\_P109455 CCATGAGTAACATTTTCATTTCTTGGGACTTTTTAAAGGATGAGGAAAAACACAGTCATCC  
A\_14\_P132293 TCCAAATTTATTTTAAATGTTAAGAGTCCAGGAGTTGGCAGCAAAGTGCAGAAAACAGAA  
A\_16\_P36847278  
AAACTAGGGATTATCTTCAACTCCTCTGGTATATGAAGAAATATGGCACCATTAACAGGC  
A\_14\_P120316 GAACACTTCCTGAACTGGTTAGTCTCTGTGGTGTGCTTATAATCTGTAAAGTTAGGAAC  
A\_16\_P30952565 GTAAGGATTTGTTTAGTGGTTGGGGTAACACGGGTGGTCCTCACT  
CUST\_9604\_PI426210822  
AGACACAAGATCTTTGGAATCAACATACACATCTTTTAGAAATGGCAGCAGCTTGTC  
A\_14\_P105746 TAGTAGAGTCTTGTAACCAGAAACACAAAGTCACTTATTTAGCAGTTACTGTGGCATCAC  
A\_14\_P128941 CTCAACATAAGGTGGCCAAAAGGAATCACTAATTTTGACATATGGATCATGTGGAACATC  
A\_16\_P03380649  
CACTTCTGCGTTATTCTCATTTCTGTTCTCAACTCTTCTGTAAGTCTTTCTGCAAAAACAG  
A\_14\_P113583 ATTAGAATGTAACCTGAAAGATCTTAGACCAGCAACAGATTATCATGTGAGGTGAGTTAG  
A\_14\_P109796 GTCTTCTGGGCAGGAATTACTGATAACTGTTATTATAACCAATGCAGACTTTAAAATCCC  
A\_14\_P102836 TCCTTTTAAAGTGTATTTATGAAAAATGCAAAGTTCAGTGAGATGTGTGTGGGAAGGAGA  
A\_14\_P100812 AAAGACAATTTTGACAATCCTTTTCCTTGGAAATGCTGTGAAACACAACCCATTTTTTAATG  
A\_14\_P127558 AAAATGGATACTCACATTTTTTTACTGGACCTTGCTCAAGAAAAGGATGGCTAAAAAATG  
CUST\_1765\_PI426210822 TTAGCCAGGGCATCTTCACATCTAGCTCCACAAACACAAGGTAGAG  
A\_14\_P129704 TAAGAAGGAAAAACACACACCACCATCCATAAATCCAAATGTGAGTAGACCAGTA  
A\_16\_P01732256 CTCGCCGTTTCATTCATCTGAAAAGTTCTAACAGTTTGCAAATACCCTCTACCCATA  
A\_16\_P02559353  
ATCAAGAGAAGGCCAGAATATCACATTTGACCTTAGCATAAAGTGAGCCAAATCTCTAAAA  
A\_18\_P14137556 GCTCAAAGCATGGGAAGTAATCAGTAAATGGCCAATTTATCTCTCCCTCACAG  
A\_14\_P121677 GATAGGAGTGACTTAAATTCTCCAGTCGGTGGAGGTATAAATAACTACATGTAAAATTA

A\_14\_P126930 GAGAAAGATTGAAGATTCAATTCCTAGTGGTTTGCTTTGTTCCCAAATAATGCTGTTGAT  
A\_14\_P135204 ATCACAAGATGGCTCTCATGTGCTGTTCTGGGGACTGCTGTTATGAACAATA  
CUST\_137\_PI426210822 ATACAGGGTCCAGAAATACTCACCTGGAGGAACTATGTGTATTTCTGCTATAG  
CUST\_6996\_PI426210822 GAACTCATCACTGAGGAACAGCCTATGTCTGTGCCTTCAGGGGTG  
A\_14\_P133880 AATGAATACATGAGAGGTGGTAAATAATAGCGATTCAACAAGCATTTTCTAAATGTCCAGA  
A\_14\_P134126 CTTCTCAGATCCATTTTATAACAACCTTAATATGCTCAAGTATTTTCTGAGGGGCAAGACT  
A\_14\_P130260 CAGGAGGGTTTGGTATTCAATGCGTGTTTATTTTACTTACAAAAGAAATCGCCC  
A\_14\_P120280 CTACCAATTATGGGATTAGGGTCTGGACTTTTCTTTCTTCTGTTTCTAATGGGAG  
A\_16\_P21664539  
CCTGACCTGAGATGTATAATGAAAGAAGTTAGTAAGAATGGAGGATTCTTGTCAAGTTCA  
A\_18\_P22843040 AGAATGTGTAAGGTTTGGCAACCCCTCCAGAGGTCAGTGGGTTAT  
A\_16\_P00391457  
TGCGTATATTTACCCATACAAACCTAGATCAGTTATTGTGCTTTTCTTCTCTATCACT  
A\_16\_P15326798  
GAGATCTGGGTTAGGTAATTCATTCCCCTAAAAAACTTTATGACACCGTAATTCACACT  
A\_16\_P19431457  
CTCATTTTTTCTACAGATCTGACACTTGAAAATCTTTGACAGGAACCTAAGAATCAGCAGA  
A\_14\_P128850 CTTGAATCCACAGCCTTCATTTCAATAACGACCATTTAATTTGTTTCTTGGCAGACT  
A\_14\_P124628 GCCACAACGAATAAATAGTTAGATGGTCTCCAGTTTTGAAGGAGTTTAAAGTCTTACAAA  
A\_14\_P125699 ATTGAGCAGAGTCCAGATGAGGTCACACACTTTGAAGTAAGGTTTTGAACTAGATAATA  
A\_14\_P134299 GGTTTTTTGGAAAAGTATTTATAGATCTAAAGAACCCTTACCATCTCATATAGTT  
A\_18\_P10133787  
CCGATATGGGATTGTAGACTAATGGAGGCTAAACTATTGTGAAACCATCCATCACTAATT  
A\_16\_P17232950  
AAAAAGTGTGTTTCCCCATACAAACTATTTCTACTTCACCTTCTGAAAAATGTCGAGACA  
A\_14\_P121187 CAGAAGTAATTTGAATAGCCTGTTTCTTTAACCCCAAATTTGGCTAAAATTGGCCTAAAA  
A\_14\_P112252 AGGGCTGTGATGGAAATAATGACTAAAACAATTGAATACCTTCAACCCAATCCAGGTAA  
CUST\_7135\_PI426210822 CTTAGAATGGCATGAATGTTGGCTGGCTTGATCATGAGTGGGATCAC  
A\_14\_P137831 AAGAAGGCACAGGTGCAAGTAAAATTCGTCAATTAACCCTATTTTGTATTACGTTCCAT  
A\_14\_P126524 GAAAGGTCTTTTTAGGTTATGGGTAGTAGTTTGGAAAGCAAAAAGAATAGCACACTGTTC  
A\_14\_P113523 TAACAAATTCAGTGTATCCTGGTCTCTGTGGTAGACTAATTACAACCTTACCAAACAAC  
A\_16\_P00907634  
TGTGAACATTTTGTCAAGTCATCGCTGACATTATCACGTCACTATAGTGTTCAGTTAG  
A\_14\_P113916 TAAGTGCAAAAAGACCAATGAATGCCTTCATGCTTTTTTGCCAAAAAATACAGAGTTGAATA  
A\_16\_P38424367  
CGGTTATGCAGAAAATTGGAATCTTCATGTATCTAGAAGTTAAAGAGAATAGACACCGGT  
A\_16\_P01981216  
GTATCCAGATCCACATAACCATAACAACATCCCTATACAATCAAAAAGGTAGAAGAGTGTC

A\_16\_P01900908

AATCGGGGCATTTCCATAGATAGTTACTCATTAACACTTTGATACTGTATACAAGGTCGG

A\_14\_P133932 AGAGATCCAGGTAAGCATCCTGACTCTGATCCCCTTAGGTAGCAAAG

A\_14\_P122376 TAATTAACACAACCTTAAGCATCCATGTTGCCATCTGCACAGTCTAAATTCATCCAGAGA

A\_14\_P137701 GAACAGCCTTGAGGTTTGGGTTTCAGGTCACTAATTCATTCAACAAACACTGAT

CUST\_524\_PI426210822 CTTCTATCTAGTGTCCAAGTGCTGTGATGTATGTGGATCCCAGAGTAAA

A\_18\_P15162599

TGCCCTCAACATAAAAAAAGAACAGTTGAATCAATCACAGATTACCTATGCACAAAAACA

A\_16\_P21513261

CCTAGATTCTGTAGCCACATTTACTTCTGACAATGAACTTCTATTGGAAACCCATTTT

A\_14\_P136783 CTTTCAGTCTCACTTGAGTCATTGGTCAGCCACCTCAGCAATAATGCTAATAATAATACC

A\_14\_P116886 GTTGAAAAATTCAGTGGGTTGCCAGTTAGGGAGGAATCCATTCTATTTTGTAGGAT

A\_14\_P108370 AGTCTCTAAAGAATGACCTTCTGTAAGCCATTTAATTCGTAACAAAGTCCCTGAATAGCA

A\_14\_P115532 ACCCATCATCACGTAACATTAATATTCAGAAAATTGCCACATTTTCTCAATGTGCTGGAA

A\_14\_P102697 GGTGGAGTTTGAATTGTTATCTTTACCTGTAGGTCTTTGAAGACTAATTCGATGTTTCA

A\_14\_P115498 TAGAAAGTCCCTACGCACCGTCTAATATTTCTACCCCTTTTTTTATTTTTTCTCCTGATCA

A\_16\_P41625070

ACACAACCTCAAACCTGAACTGACCTAAATATTAATCACTTTTTTTTTCCACATAACCGACA

A\_14\_P134657 CTTTTCTCTTTGAAAAAACTGTTCTTTACCTGTTAATGTCTCTCTTTGTTTTTTCATCTG

CUST\_9564\_PI426210822

AATTTTAATTAGATTCTATTGATTCATTATTTTCTCCTGTGTGCCTTTATTTGGGAAATA

A\_14\_P100919 ATGAACCTAATCCTCATTACCATGAAAATGCTGTCATACAGAAATGTTCAACTGTAGAGG

A\_14\_P121705 TCTTGTTGCTAATAGAGGAGAAATTGCATGTCGGGTGAGTAGAATTTTCGTCTTATTTTC

CUST\_799\_PI426210822 AATGCCTTTTTCTCTTGCTGCAGGGTCCTTGTGGGCGCACCAAAG

A\_18\_P14135771 ATTGTATGTGTTTTTCATGCAGGAAGAAGTGGGACATGCAAAGGGGCTCTTTATAAT

A\_14\_P121213 CTTCGTATCACTGTCTTTGTCCAATTGTGTTTTTTTTGTAATATGACCCAGGATTAACCTGGT

A\_16\_P36230460 CATTCTGCTTGGCAGTAGCAGATTCTAGATTGTCCTGTTTGCTGGTTT

A\_14\_P122352 CTCTTAAAAAAACTTACCATAACCAGGAAGATCATCTCCTCTTCTCTCAGTTTTTCAGT

CUST\_7298\_PI426210822

ATTTACTTTTTCTGGATTTATTTTCACAAATATTCAGCTCAGAATGTGCCAGGGAGGG

A\_18\_P13304801

TGGAAAGTAATGACATTGAAAAGAAGTGAATAAATCACAGGTATATAATTCAGCACCAA

A\_14\_P117252 TGGTAATATTGCTAATGTAATGTAATTGTGTGCCCTGCTATTTCACTCTGTGACTATGGC

CUST\_20\_PI426210822 CTTTTCATAGTTGCAGCAGACCCTGGGGCATGTGGAGGGAGGACC

A\_14\_P137121 CAGGTAAGAGCAATTCAGTGCTGCTCTATTAGTAACTTATAATGGGACACTGTTGTTTTG

A\_16\_P03590108

CCTCACTAAGCATAACATGCACTATTATGAGACAAGGTTCTAAATCTATGTAGGCAGGTTT

A\_14\_P114177

CAGGAAGAAGGGAAAATAATCCACTGGGAGTGAAAGTGAACCTATACCAAATAAAGAGTA  
A\_14\_P109554 TAAAACGTTT TAGCAACTCGCCAAGAACTGGCACACTTTACCTTTTTAATCGCTAAGC  
A\_14\_P113489  
ACACAAGAAAAAAGCACTATGAAAACAAACCAGAAGAAATGCCACAAAGACTTTAGG  
A\_14\_P122345 TGGTAGAACCTTTAAGAATTTCAACAATTCAGACTAAAATTGACCACTACCCACAGAGAC  
A\_14\_P113381 TATATTTACTGAATGAAACTCTGCCCTTAAGTAAGGTCCACGTGACAATTGTTGGATCA  
A\_14\_P123446 TTCTACTATACCTTTTATTGACTCACTGTCTCATGTCAGTCACCATGATATACCTGGAAA  
A\_14\_P201808 CCAACATGAAGCCATCAAAACAAGTGCAACGATAATTGCCTGGAATATTCAAACAG  
A\_14\_P113173 AGAACTAAAATGGTCTACTGCAAAATTGATCAGACCCAGAGAAAAGTAGTTGTCAGGTAA  
A\_14\_P110646 ATTATTGAAAGAACTCAGCAAAATGCATAGTGTGGTATGAAAGGGGCAGAAAAATAA  
CUST\_8921\_PI426210822 TGAAATTGTTTCATGAAATAATGGCAGCCTCATAAGAGGCTGTGCATTGGA  
A\_14\_P201323 CTCACTTCCTCCATAAAGGTGAAGAACATCTTGATGAATAAACAGTCAACTACCAAGTT  
A\_14\_P139135 GCACAATGATCTCAATCTGGTTACAAAGCATGATTCCAGAGAAGAAGGTTGATTAGTAAC  
A\_16\_P38181048 ACATGCCAATCATCCAATTCATCTTATTTCTTCATGTAATATACTATTTCTGCCCCAA  
A\_18\_P16592975  
AATGTGAAGTTGAACCCTATAGGAAGAATGATTGCAAAGAAATCTCAATTCACTGTGCTG  
A\_14\_P136757 ATTAGCATGTTCCAAATAAAGTGATACTGGCAACAAATCCCTGTGCAGCGTCT  
A\_14\_P138230 GGGGAGGACATATGGAAGAGATTAATTTCTCTTGCAATTTAGGGTGCTAATTTTGTAATC  
A\_14\_P128008 AATACCTATCAAATAGATTGTCTCCAATTTTTTACACATCACTAAAATCAAGGCAGTTAA  
A\_14\_P126048 CTAAGATTAACTTCATATTCTGGAGGCAGTGTGCTTCACTTGCACCATGCATACTATAAA  
A\_14\_P200421 CTCTGTAGAGTTCAGACTCCTCACTTGTGTTCTAAGTCTATTTATCCTATTTATCCCCTG  
A\_16\_P21573199  
ACAAAAACCAATCGATGCCTAATTCTTAACCCTTGTTTACCTACTTCTTTTGCCTGATTT  
A\_14\_P123729 ACATTGATTAGAATTTGCTGGTCCCCAACCTTCATTTATAATTTGCCTTCAGATTCCTAA  
A\_14\_P103469 CTCGCAAGTTGATAAATTTGTTAAGAGTGTGAGGAATTTTGTGATCATGCTTCTCCACTA  
A\_14\_P124607 TAACGATTCTTTCTTCTCTCTAGGGGAGTAGGTTGCATCTTTGTTGAAATGATCC  
A\_14\_P136103 AGACCTGTTGATTACCCCATGTAGGCATTAACACTCCTTTCACAAAATAAATATCCCTT  
A\_14\_P107347 AACTACTGTTTTGGAATAATCCACAGTCATAACTGGCATAGACATGAGTTTATCTTGGTG  
A\_16\_P03599814  
AAAACAGGATAAGAACTATCACTTCAGGGAAACAAACAATAACAGCCATCAATTCAGAG  
A\_16\_P21136177  
TAGCAATTCCTGGATAATCTGACTGATCTCAAACCTTTCATTACCACCTATACATGAAGGG  
CUST\_3538\_PI426210822 CTGATGTGTGTTAATGGAGGGGGTGCCCCCTTATAGGAGGGTGGTG  
A\_14\_P127090 ACTATCCCTAAAGACTGGAGATAAGCATTGGAGGCTCTTTTAAAAAATGCTAGTTACTGA  
A\_16\_P02785786  
ACTTAGATACAGACAATTGTTCCAACCTATGTGCATTTGAAATCTAAAACAGTTCAGCCCC  
A\_14\_P109914 AACATTCATGTATTTACTCCCCAGATACAACAGTTGTTGTTCTAAACAAGGTGAATAAAA  
CUST\_4213\_PI426210822



AGTAATAAGGAATCCTAGGGGCTTCCTGCTGTATTTCTGTTTTTGAATTTGATTAACATG  
CUST\_7586\_PI426210822 GTTTTGAATGAGCAGAGTAGAAGGGGGTTTGCAGGTGAGAAGGAA  
A\_16\_P01802403

TGCATCCTGAAGATCCTAAACAAATCGTCCTTCTATTTTACTATGTGAACAAGATTCCAC  
A\_14\_P107124 TCTTAAACAGAAATGCCTTTGGAAGATATATACCCACCTGTCTCCAAAGATCTATGGTC  
A\_18\_P14135872

TGACTACTATCTTTATTTCAAACCCTGAAGTCCTAAAATTAATGTCACCACAGCCATTGT  
A\_14\_P133477 ATTTGTGAGGGTAATAAGTTCATGGGAGGTCCAAAGACAAAGTATGTAGTCCATTCTAT  
A\_14\_P105548 GATGCTGCAACTTCTCTTGTACAGAATCTAACTAAAGCCATTGATTTAGGAAAGTGGAT  
A\_14\_P129358 CCCCCTGAATTTTCATCTCTCTCTCCCCAGTTTATTTATGGAGATTCTTAGTTC  
A\_14\_P133214 TCAAAAACCTTGCTCTGATAGTCCCAACTGCTCTTTCTTTTGATTTCGTTCCAAACAAGTTA  
A\_16\_P00132948

AGGCACATAACCAATACAACCTAGGATTGAAAATCTCCAGACTACGACAAACTCAGAATAT  
CUST\_4472\_PI426210822 GAAGATATTCCAGAGCTGGGTGGAGAGTCAGGGTGGAGTAGAGCT  
A\_14\_P112600 ACTAAGCATGGGTCAGAGGAATAGAATGGATTTGTTAATTTTACCCTAAATAAAAGGCGC  
A\_14\_P200343 GACGGCTGATGTCAAAACATAGTAATACTGCATCCGAGTCGCTGTAGCAG  
A\_14\_P119506 CTGATCCATAGAAGCACTCAATAATAAGCAGGACAACTATCTGGAGAAAGGAGAACAC  
CUST\_5748\_PI426210822 CCATGTTTTTAAAAATGTTGCCTTTGGGCAGAGGGGATAATTCTGCAAACTG  
CUST\_3226\_PI426210822 CTTTGATCAGATGTGCCTTGCCCCATCCTGCCTGCTGAAGGCTTG  
A\_14\_P127769 CTATACAGTCTCTGGAAAGGCATTTCTTTAGGAAACATATTATTTATGATCATTGGGGAC  
A\_14\_P129283 ACCATTTTTTAAAGTGACCTATGTCCCAAGGCTCTATATAGAAGGTGAAAGTGACACTTA  
A\_14\_P116775 TTTGGGGTGAGCAGTTGATTTGTCACCAAATACTTATTCACATCTTATGTAGGACAGTTA  
A\_14\_P107768 CAATGCCCTGAGAGAGGCTTCTTCAGATGCCTAACAAAGGAATTTGAAAAAAAATCA  
CUST\_5596\_PI426210822

AACCTTTTTTTTCATTAACCAGAGGAGTATTTTAAAAGACTATAAAGCTGGAAGCAATTCA  
A\_14\_P139875 AATAAACTTGGCTTTTAAGAAATCTACCCTGGCTCTCATACCATGATTTTCATCATCAAG  
A\_14\_P132523 TTGATATTAAGTTTCTGTATATGTTTCTATTTTGTCAATTCAGGTTTATCGAAATTCCACC  
CUST\_575\_PI426210822

GGATAAAAATTATTATTGCCAACCTTTTATGAATACTTTCTATATGCCAGAACCACTGTG  
A\_16\_P15904401

AAATCAATCCTGGAATTCACGAAGAAAATTA AAAAGGCTAAAACGAACTGTCATAACCCC  
A\_16\_P18149067

ACGTGGCAAAAATTTTCAACCTGGTTTAAAGATCCACTTCCACTTTTATGTCATAGATGAT  
CUST\_3554\_PI426210822 CATGGGTCCTTCTGCAATTTGTGAGAAAATGGTGGCCTCCTATATTT  
A\_14\_P132082 TAAACTAACAAACCCTTGGTTTGGGTTCTTCTAATACTGCATTTTATCACAAAAGGGACT  
A\_18\_P22840545 CAGTTTCTCTCACACAGACACTGCTGATCTCAGTAATGGCCCTAAACTTTCTTT  
A\_16\_P00592090

TGAACAAGACAACAATAGTTTGTGTTAGTTACACCCTACATTCCTTTCTCATCATTTCC

CUST\_3576\_PI426210822 GAAAGAGAAAACCTCCATTCTGGATGGCCCATTTCTGGGTGGATTG

A\_16\_P15937594

ATTTTCACAAATGGACCCATTTTTTCATGTAGCAAATCTACCGTCTACTCTTACACAGTC

A\_14\_P114346 CTCTCCAAAGTCTTTCAGAAAAGTAAATCCTAAATTCAGTGATGAACTGGCTGTTTTAAC

A\_16\_P16017452

AAACTCATGGAACATTCAATCACAACTCCAACAGTTCTCCAAAATTTGATTTATTCTGGC

A\_16\_P00685481

ACAGCATTGAGAAATTATTCTCTGGTTTTCTTATTGAAATTGCCAATGCCTGTTCTCT

A\_14\_P122567 ACCATCGCCTTTCCTTTCAACTTCTTCTCTACTGATAACATCAGTTCATTTATTCCATAG

CUST\_1004\_PI426210822 ATGTCCTGGGACATGTGGCAGGGGGGCTGTAAAGAGGATAAAGTC

A\_14\_P134838 CTAACAGAAAACAAAAATTAACAGCATTATCTGCAAGAAGCAGTCTGGGCTTCTGATAA

A\_14\_P124179 ACTGCAGTATTAATGGGTACAGAATGGCTCAAATATATCCCTTCATCTCTCAACGT

A\_18\_P22840114 AACTTGAGTTATTACCTTGTATGCTGCAGGGATTGTTTCCTTGTGAGTGTGTAAG

A\_16\_P00685304 CAATTGAGGTTCTCCAGAGAATTAACAAAATGTCCATGCACTCTTTCGTTGTTC

A\_16\_P02019913

AGGATCCAAACTATGAACACTGATGGTTGACTCTAACTCCATATTCTTTTCAGTTTTCTC

A\_14\_P105643 CCATTCTTGCATTATTTCAGTATCAGGACAGAATAGAGTTCAAGAGTATTTAACAGGACAA

CUST\_6840\_PI426210822 CTCCAAAACAATGGCAGGGGGCTAGGTCCTGACTCTTTCAGACT

CUST\_4260\_PI426210822 TTAGCTTGTGAGAGAACCTGTTGAGTCAAGATGGGCAGGGGATTTTAT

A\_14\_P134268 CGTAAATCGAGGAAATGCCAAAAGAAAGGGCAGTCTCTTCTGAAGTTTAATTTTAATGG

A\_14\_P122455 AAGGAGTAGAATCGACGACTGTAGATTTGTGAGTAGAATCCCATTTGTAGTTAACTTGG

A\_14\_P118375 CTTGTTCCAAATATGGCATTATCTTTTCCAAGTTCTAGGGTTTAGGCATGACATAATTCC

A\_16\_P00685400 TATACTTTTTAGAGGGTGTGAAGTCAATTTTTGACCACCTACTATACACCAGGG

A\_14\_P131958 CTCTCTTCTGGAAGAATCCTAATATTATTAATAGCAAGTCTTCCACTTGTAGGGCCTGTT

A\_16\_P19160432

AAAAAAGACACAGTTAGGAATTTTGTCTGGTAAAGATTCAAATGTAAACCCGCATCTGTG

A\_16\_P20579679

GTGTTTTTGGCTGAAGAGTAAAACTAGATTAATGACCTTCAAACCTAGAATCCACTGG

A\_14\_P105031 CTCTCTTGATCTAGATAATCTGAAACTGTTGGAGGTAAGTTTGCCTTAGATTATGGACT

A\_14\_P115587 ACCATTTCTGTAGCCGTAATTTCCCTTGTGCGACTGAAGAGCAATATGAAATGTATCTAGA

A\_14\_P115530 CAAGTGAAATGATTACTAGTCAAATCCGTCAGTGATCCCGAGTCCAGAAAC

A\_14\_P105070 ATGACATGATTAATTTTCATTACTTTCTTTCCATCTCTTGCCTCAGATGCATTTGAGCCT

CUST\_6478\_PI426210822 AAGGGAATCTGGATGTGCCCTACACATATCTACTTGCCTCTCGCTAAT

A\_16\_P18818403

AAGTCCAAAGGCTGTAAATCAATACTCCAATAATCAGATTTTCTTTTTTCATTTGCACCCT

A\_14\_P129716 AAAACAACAAAATAACTTTCTAGTCAGGGGAGTAACAGGACATCATGGATGTGTAACAAT

CUST\_6629\_PI426210822 AATCATCAGTCTCTCATGCATCTTCATCCTTGTGATCTTCAGCCTCAGC

CUST\_1324\_PI426210822

AGATTATTAGGAAGAATATATGTTATGCTGTATGTGAATCTTGATCTTTCTGTGGAATGG  
A\_14\_P108346 CCAAATGACACAGTTATGAGCATAGACCTTTTATTTTCCAGATGTTTGACAGTGTAACA  
A\_14\_P112188 ACCAATGACTAGGTTAGAATGTGAGGGCTTATTTTCCATTTTAATAACTCCCTACATCAC  
A\_14\_P128240 CTGCCGAATTAGTCCCCCAATTGCTTTCCAGTGTTTCAACTTATTTCTTATATGGTTAC  
A\_18\_P22840689 AAAC TATTTTGCCATGAGGCATACATAGTCTGAGGGGCATTTATCTATCCAGACCAT  
A\_14\_P112359 TTTCAATAAGCAAATGGACTTGGATGTGAACAACAGTCAGGTGCAAGTTAATTTTCATTCA  
A\_14\_P135258 ACAAGAAAGAAGAGCAACATGGTCATTTCTTTGGCAATTAATAGCAGCATTGATTTTACA  
A\_14\_P100325 GATGCGATTCTTTTTCTTTCTTTGCTCTCACTCATCTCTACCTTTTCTTAAAGGATAIG  
A\_14\_P121823 AAATTGAAGGAAATAGAACATACATCCCACAAGTATGTTTTTATTGCCTGTCCCTCCTCAT  
A\_14\_P119658 TGCTTGTTTATTTGTCAATTTATTTCTTCAATAAAAATGATTGAGTGCCAGGCACTGGGGA  
A\_16\_P19318449  
AAGATGCACATTAGGGATAGTTTCTAGCCTTCTATTCACTCTTAGTAATTTTGCACCAGG  
A\_16\_P20024271  
GAAGAGCAAATCGATTCAAGTTTTTTTTCCATGCATCTTTGAACATGTAATCACAAGCCA  
A\_14\_P120004 CTCCAGTTGAACCTCTGTAGGTTTATTGGAATGAAATTTAGTATCCTTTCTTAGGTCTGT  
A\_16\_P01175622  
GGTCTGCAAAATCCTATTATCCTCTCAAGTCTCATTCACTTAGTCAAGGAAAATGCTAC  
CUST\_2760\_PI426210822  
ATATGCCCTTCTAAAACCAGAAAAAATGCTCACAGAACATACTAGCCCTTCTC  
A\_14\_P134073 CTTTACCAAGGTGGCATAATTTGATATGGCAGAACATGTATTATGTGATTTTCAGGAGTTCC  
A\_14\_P138789 AGGAAGACAATTTTCAAATTGTTTCATGTTCCGCTACAAAGCAACGACTATTAACAATGCA  
A\_14\_P105955 CTGTTTACCATGAATACCGTCTCAAATTCATTCAAGATCTCTTTGTCTCAAACAACACAGA  
A\_16\_P21503821  
AAGTGCACAGTATTCAGTCAATTGCTTATCTAACTTCAACGTTTGTGAAATGTCCTACT  
A\_14\_P127885 AAGACCTGAACAGGTTTTGCCTACCTGGTCCTTACACTACATCATCATCAT  
A\_16\_P15600614  
AAAATGTCTGCAATGTCTCATTTTACATCTACAAATGCTATTAACCCAGTGGAAGGCTTG  
CUST\_4216\_PI426210822 CATGGGGATGACACCCACAAGATGTTGGCTGGCTGGCTGGATTCA  
A\_16\_P15859643  
ACCTATCCCTCCTTATTTCACTGTATCTTTCTATTAACTAATCCCAGGATACCAGAGC  
A\_16\_P00330870  
ACTCGTCTCCTTTAAAGTATAATGAAATTTCCCATTCACATGCTTCAATTTAGATCCTCCC  
A\_16\_P00341934  
TCAGTCAGTCTTATACAAGCCTCATGCAATATTAATAATGTTTATGCAACTCTTTCTGTGC  
CUST\_1661\_PI426210822  
TGCAGAAAGCTATCTATTTTTATAAACAGTGAGATACCCCTGGGAACATCTGGCTTA  
CUST\_6257\_PI426210822 TCCGTAAATCATTTTGTGAAATTGCAGTGAGAGGGAAGGTACCAGGTA  
A\_16\_P36807334

ACCCAACATACCATTCTTGTCTCAAATACTCTAAACCTTTTGTCTATTTCATCTACGAT  
A\_14\_P138006 GACAAAATTAGAGAACGAGACAGCAAAACATCGCAGGTGAGACAAATGACTGAG  
A\_16\_P02867227

ACTACCAGCCATCGTTATTAGCATTTCGTAATTATCACCAGTAATTGTTACCACAGTTTTTC  
A\_14\_P102513 AAATGCCTTTTAGGAAAGATAGTGGAAAGCCTTCTCTTTTGTTTTTAACAGCCATTGCTTA  
A\_14\_P118473 AGCAATGAGGAGAATAAGATGATCTCTGAAGTCTCTCCATGTTAGTATTAGATGAAGCAC  
A\_14\_P129937 GTCCTTACAAATCTCTAAGTTGGGGATTGCCTAACAAATAGACTGACTAGTAGCAAGTCA  
CUST\_4352\_PI426210822 TGATGGTGATGGTGGCAGACAAGAGCATGTCACATTTAGAAATACTGTAAC TG  
A\_16\_P19976500

AGTGCTAATCGGTATGAAATATTCTCTTCAACCTCAGATTAAATATTCACCCCTCAGTCCC  
A\_14\_P121026 AGGAGGGCAGTAATTTCCATCTTCTCTGTGAGAATCTACAGAAAATGATGAGAAGAG  
A\_14\_P105637 GGGGGTGCGGATAGTATGTGTTGCATTGTGTATTTTTTAATGATATTAACAGTGCACAAA  
A\_16\_P30952550 ATGATTCATTCTTGAGAATGACTCCTCTGACAGGCCTCTTTTTCATTGTCAGG  
A\_14\_P119150 AATTCTCTTGCAATTTTCTAACTTTACATCCTCCTTCATTCTTTGAGGGAACACAATGCC  
A\_16\_P20836777

TCAGTCCCATCTGTCATTATAGTCCTCTACACATTATTTGCTCTTATCACACAAAACCAT  
A\_14\_P132400 TGACCTAAAATAAAACAATAAATATAATGGGAGAGTGTGCAAGTAGATTCAATCATAACCT  
A\_16\_P18430580

GCCACTATGACACCATAAATGTGTATTTGATGAAGATCAAAATCTACCTCTGAAGTGCAC  
CUST\_6215\_PI426210822 TTTCTAGATGGTGAGAGGATGGGGATGCTCAGAGGGACAGTGAAG  
A\_14\_P125950 CTTTGTAGTTCGGAAGAAGTTGGGTCTATAGATTTCCCCCTAACTCTCCATTGAT  
A\_16\_P15503899

TCGTTGGTCCAGTTTAATCTCTCGTTCAGATCTTAGTAGTATTAGCCCATTCTATAGGAA  
A\_14\_P111058 GGTTCTTCTATCATTTTCTTGTCTCTGGGAGAAGAGATAATGGAATGATGGAATGAAAGG  
A\_14\_P106944 AATATGACATGAAGAGAGCACATATTCGACAATTTCAAGTTCTTTTCATAGCCTTCCAG  
A\_14\_P202147 CTGCAGAGATATCAATGGGAACAGAGGTTTCAGAAGAAGATATTTGCAATATTCTGCATC  
CUST\_5321\_PI426210822

AGTTGGGGTGGTTTTAAATAGTATTTTATGGACAGCAAGAAAAGTAGTTTTGCTTCTGG  
A\_14\_P103499 TTTTATGATGTATTTCCACTTGGAATGTTTGCCAATATGATTGAGGCTGCATTCAACTT  
A\_16\_P02927746

ACGTTAGAACTAGTGCTAAACAGTGACTTGAGATATTCAGGATTTTCAGATGCCTAGACT  
A\_16\_P01075594

AGAATCCAACTGTTAGCACTAGATATGCCTGAAATGCAAAATTAGAAGTGATTGGAAGG  
A\_16\_P15203883

ACAACAGACCCTATACTTGACCTATTCCTTCACATGTGATTACTCCATAAATTGTCTCTT  
A\_14\_P106259 ACATTTAGACGCCAGTATGCAGAAGCATTTCTCATATTTCCCTAAGTTCCTTAATATCT  
A\_14\_P119065 TTTATGAGGATTGTTGTTGGTGATGACCTTCATAATTTAGGTTGCAGAATACTCTAGAGG  
A\_14\_P130322 ACAAATATGAGTTCTGAGAAGACTAGAACTGAATTTGGTGTCTGTCTGAAAATGAACACC

A\_14\_P122434 TAATCTGGGCTTTTTGTATCAGCAGAATAAAAAGAAAAGTCATAGGTGAAGGTCTTGGTC  
A\_14\_P136779 CTGATTCTGCCTTCCCTTCTTACAGGCATGGAAGTTGTAAAGGTTGGA  
A\_16\_P18394456  
AAAAGATGAACATACCTTAAGGCTTTTCTACAAAGAAAGGACACTACTCCAATAGTGCA  
A\_14\_P120547 ACATAACTCACTATACGAACTCAAATCTACAGAAATATACTCCTTAGGCGATGAAGGGC  
A\_14\_P108797 TCTGGCCCTTATTTCTTTTTAAGATCATTAGGTTTCTCTCATGTAACTGTTGCTGCTTC  
A\_14\_P102343 ACACACAATTAACCAAAATAGTGACCGTAATAATAAACTGAACCACCTGAAAGGCCTGT  
CUST\_9019\_PI426210822 AGGGGCTGACTTCCCTGGTGGAGGGAGAAATTTGTAGACAAGATTTATAA  
A\_16\_P58424594  
CCTCTATCATGAGGATCTTTTATCATCATGAACTTCTCCTTTGTAGCACTTCCACAGTTA  
A\_16\_P15986068  
TGAGAGGACAGAATTTTTAAACATTTTCATAGCATAGGAATAAGGTAGACATCCCATTCCA  
CUST\_5473\_PI426210822 CTGAGGTGTGGAGAAGGCTAGAGAAGAGTAGAAGATAAGGTGAAGAGG  
A\_16\_P02535951  
AGAGGCACTGCTAATCTTTTTAAAGAATTGCTAATCTGAGATATCCCTGTTAATACCTGCC  
A\_14\_P101232 ACAAACCAAATCTCTTTTTGATTTTCAAGGAACTAGGTTCCCTGCCAAATTTTGAATCT  
A\_14\_P103794 TGGTCTGTCTTGCTTTTAACTGGATTGTTTAAATTTGGAGAGGACTATGTTTACTAACACC  
A\_14\_P111120  
AAACAGAAGAGTTTCAAATGGGCTAGTTTAAAGGGAAAAAAGACGCTTTACCTAAGAAAAC  
A\_14\_P127326 TTGATGCCATTAAATTAAGTACTGCTAGACTTTGCTGCTTTCCCTAATCAGATGGAAAACAATG  
CUST\_51\_PI426210822 ATTTAAACCATGAGTGGGTGGGACCTTGAGGAAATCACCAAAGATGTTT  
A\_14\_P126769 TTAAATTTAACTCAAGGCAGATCCCAGATGCTCTGCAGTTAACTTATGAGTATCTGTAGG  
A\_16\_P16573389  
CAACCACCACTTACAATTTCTACTGAATTCTTCCATATTCTATGCATTCACAGGTGAACA  
A\_14\_P131959 ATCACACTCCCGTTTCTGAAGTTAAGTATTTCAAGTTGCTTAAATCCTGTAAGATTGGAT  
CUST\_7107\_PI426210822 AAGTAGAGTATGATGTGAAGTCTTACCCTTTGTGAGTCAGGGGGCTTG  
A\_14\_P132570 CATAACCAATCCTCCCTTTTTAAAATTTCTCTGAGACTTCTTCCCAAGTTAATCATCAA  
A\_14\_P200653 TCTAAAAGCAAATACATTGAGTATTCATACCTGTCTTCATTTGAAACACAGCCCAAACA  
A\_16\_P58424525 CTCAGCCCTCACCCCTCCCAATCTATCCGCAAACCTGGGCAGATTC  
A\_14\_P202014 TCCAGTCTGTAGGCTTAGTTCTGTGTCTTTATTTATATGGATCCCAAGATGAAGAGTAGA  
A\_16\_P18459515  
ATTTTCCTCCTACTACAAAAGAGAAGAGTCTTAAACAGGATAAATACATAGGACCCCTCCC  
A\_16\_P36923664  
AAAAGAGAAAAAAGCACTTTCTGAGAAGTCTTATTGTGCCTCTTATAACAAGTTTGCAGCC  
A\_14\_P200242 ACTTCCATTTAAATGGCAATTTAAATTTGGATCTGGTTTACAGAACGTGAGTCTACACACT  
CUST\_10237\_PI426210822  
TTAGTTTTTATATTTTATCTTTAGCCATTATCTTTAGTTGAAGTCATTATCTTTACTTAA  
CUST\_5100\_PI426210822

TGGTATTTATTAAGTGGTTTTAATAAAGTTTTGTGGATAGGTATGACACCATTCTTTTG  
A\_16\_P30952528  
CAAAGAATCTTAGAATATATATTGCATGACAGGAAATGGAGGTCTGCTATTTTCCACTGA  
A\_14\_P113689 ACATGTGTGCTTATGTGTTCTCAATTTGCCAATATCCCTCTTACCTCAAAATCATAAGT  
A\_14\_P105519 ATCCTACAAATAGTTACTTTGTTTTCTTAATATCTTCACAGCATTCTACAAAGAGAAAA  
A\_14\_P118742 CTCCACATACTCTTTTTCTTTTTGGATTTCAGCAGTCCCTTTTTCAAAGGATTTGTTGTTG  
A\_18\_P15060299  
ATTCTCTCTGGCTTAAAAGCAAATGACACTTACAGTCTAAAGACAAAAGTGAACCTGATC  
A\_16\_P01834402  
ACAGGAAATTTTTCTCTTCAAGTAGTCACTGAAAACCAAAGAAAATATGCCCATTTGTTGG  
CUST\_3540\_PI426210822 TGTGGGCTATAATTTCTTCTGCATTCTCTGCCTATTGCTTGAAGGACAGTG  
A\_16\_P18027378  
AAATTGGAGTCACACACAACATTAAGAAAAATGGAGGCACACAAATTGATTAAGGGTTG  
A\_14\_P134916 AGGCATTTCTTGATAAAACATTAATAAAAAATGGGCCAAACGTGGGAGATCATGAGAATG  
A\_14\_P136456 GAGGATTATTTAAATCTTGCTTAGATAAAAAGCAAATGGTTTGAAGCCAGAGTGGTTA  
A\_14\_P111616 GAAAGATACTTACATGTTCCCAAAACAATGGTGTGGTGAATGTGTGAGAAAACTAACTT  
A\_14\_P135288 GAAATTTTCATGTCAAGACCATTAATAATGCAAGAGCGATGAACTTTACAAAGAAACCGA  
A\_14\_P120871 ACAATGACAATTATCAGGATGTTATGGAAGGTTAACAGCATGATCATAAACAGTGCATGC  
A\_16\_P00685189  
GGAACATAATCTCTCCCTCTAGTGTTTTGGAACAATCACACACAAATGTTTATATCCACA  
A\_14\_P125223 TTTTAACAAATATGGTGATTTAAGTAGTGGAGAGTCCTACCTCTCAACTCACTTTTTTCAT  
CUST\_2389\_PI426210822  
TCCACATTGCTCTTTAACTCTCTCTCGAGTTTACCACGGAGAGTGTTTATTTTAAAGAT  
A\_14\_P116584 GACACATCCAACGAACATGCACCTGCATATTCTTACCAACAGTCTAAGTAAGTCTG  
A\_14\_P115097 CTCAGGGAACATGGGTAAAGTTTTGCTGATATAAATTCATCTATGACCCCAAATATTGC  
A\_18\_P22841897  
AAAGACTGTGGTCACATTTACCTTGTTAGGGAAGATAGTGACTTATAAAAACCTCAAAC  
A\_14\_P136908 AAATTTGTCTTGTAGTGTTTTATATCTCTGGCACCTAGTAACCCTCTGGATGTAGTCATT  
A\_18\_P14137594 CTGACCACAAAGATATTCTGTTCCCAAAGAGCACCATATTCGTGGTCAAGTAAG  
A\_16\_P01569493  
TTCAAGTGTAGTCATCGTTTTTCACTGTTATCCATAAACTGTATACCTACTGGCTAGA  
A\_14\_P129799 CATCTGTTCTTCTACCAGACCTGGATTCTGCTGTATCTAAAGAATAAAAATATGGATTTAG  
CUST\_1594\_PI426210822 ATGGGGTGTGAGCATGTGCTGGCTGTGCTCATGGTACAGCAAAGT  
A\_18\_P22841562 AATTCTTTGGGAAACATGACCTCTGAGGGGCCTGAATTGTGAACTA  
A\_14\_P119728 CATCTATCTTTCTACCAAGACTGCCATGACAGAGCCACAAATGCTACAAAACCTG  
A\_16\_P16648930  
AAAAACCAATTGTCGAAAGAACCAAAAACATCTAATTCAAAGGATAAAAATGCTCGGCCA  
A\_14\_P124598 TTTTCTTTCCAGGTGATGTGCTCTATGAACTCCTTCAGCATATTCTGAAGCAGAG

A\_14\_P131848 GAACTGTGCTAGGAGAAAATACTGTCAATAGTTTTTCAGATACTACGCTGGTCTAGGAAAA  
A\_14\_P136458 AGACTCTAATTTGTAGTAACAGTCTTAACAGGCTGTTTTTCAGAGACATTAACCAGCAACTT  
A\_16\_P00695321  
GGATGTGGATTTTTGGCTAAAAATATTTTTTCCCCTCAAATGACATAGCAACCACAAAAGA  
A\_16\_P32848969  
GTCATGCTTTGTTTTATTCTTGAACCTTTAGTCCCATGTATGAATCCTGAGTGTTACCCT  
CUST\_781\_PI426210822 CCCTAGGCAGCTTTTCAGTTCAAGATGGAGGATACAGAGGTTTCATTC  
A\_14\_P115486  
CGGGAGAAAGGTCTTTAAAAAAGGCTTTATTTGAAGGCAAAACAATGAAATCCACAAGA  
CUST\_6650\_PI426210822 CCGTAAATGCCACAGAGTGCCAGAGAAGTGTCTGTATTTATGTAGTCTC  
A\_14\_P111957 GTTAGTCCCTAATAAAGTCATTGTGACTTTAATGACTTCGGCAGTTGTTTCATTCTGCAA  
A\_16\_P15622532  
AAGTCTTGACTTGTCTCTATTCTATTCTTGCTCATCTGCATTCAGATCCAATTTGCTTCG  
A\_14\_P114136 AACGTTGGGTCTTTCGTAGTCCATGTCAGCGTCCATTTATGAAACTCTGTAA  
A\_18\_P15562248  
AACTCCAGATCTCAAATAAGTCAAGTGTGAGTCCATCTATCGCTTTGGTCAATTTCAAA  
A\_16\_P41686030  
TCAAACCTACAACAAGTGCCTCAAATTTAACTAACTTCCTATCTGCTATTCCTCTCCTGA  
CUST\_2905\_PI426210822 CCTTTGGTTTCTTCTTCTACCTGGCAGGGTTCAAGCCTATGTAC  
A\_18\_P14136554  
GGCAATGATTCTACAAGCACTAATCCTTTCTGTGGACTATCATTTAGAATGATTAGAACT  
A\_18\_P14140290 GTTTGTGAAGAGCCTCTTGGCTTTCCTTTGACCTTGGTTGGAAGC  
A\_16\_P00685370 AGTTGTTTGTGCTGAACTCAGTCTTCCCAACACATACTTTTCTTGTGTGCC  
CUST\_8269\_PI426210822  
CACTACCTTACTAAAATAATGCACTAAACATTGAAAATGGATGAGTTGTTGTCTATTTCGG  
A\_18\_P11571871  
GGACCCAGTATACATACTCCTTTTACACATCCTTATCAAAACTAACTCTCATTTCAGG  
A\_14\_P102976 AATTCAAAATTCTCCTGGTTGTAGAGGTGAAAAAGTAATCAGGTTACCACCAAAAGAAAT  
A\_14\_P130460 GTGAGAATTACAAGCATGTAAAGCCAGTATTTAATTCCTATGGCGTGCAGAAATGTTGAG  
A\_14\_P118155 AGCGTCTCTTTTTAGGGCACATTGCATAGTTTCGGGGATCAAATAAAGGACT  
A\_14\_P115366 AGTGGAGTTACTGCTAGAGTTTAGAGGGGGTTAAGAAATGAATATACGGAAAGGAGATAG  
A\_16\_P15009889  
AAAGCCAATGCAATGGATACAAATTGGATATCTCTGGAATCATTACATATCCATGTCTG  
A\_14\_P105999 ATTTTTTAACGCCTGGACCTGAGAATCTCTACACCTCAAAAAGGCTTAGTTGTTTTTCAT  
A\_14\_P137044 TTTTACTCATCCATGTGACCATGAGGAAATGAGAGAAATGCTTACACACAGAAATGGTAA  
CUST\_3489\_PI426210822 GGACAGACAACCTCACAGCTCCTGCCACAGTACAGCATGGAGCCTC  
A\_16\_P19600382  
AAAGACCTTCCGCTTTATGAATTCAGTTCCATCATTACCTAGAAAGCCACTCAAGATATA

A\_16\_P40365647

ATTGATCTACTCATTATACCCTAACCCAATCTCCAAATGTTTTTGTGTGTCACCAAAACCA

A\_14\_P124188 AATCTTGGGAAAACCTGCATCTTAAAGTATATTTAAGAAGAAACCAGAGAAGTTCCACCT

A\_18\_P14140300 CATGTGCCAATGACATTCAGTGGGGGCTTGTATTATGCTTGGGAGTAAATATT

A\_18\_P16980434

ATTTCTGTGCGCATACCATTCTTAGTGTAGAATTGGAACCTTAAATACTGGAACCCTGCTC

A\_16\_P20382122

CAGTGAAAGTTTTTGGATGAAGGTTAGTAACGTTTAGCAAGACTTAGGAGATGCTAATCG

A\_14\_P116134 TTAACCTTGGCTTTCAGAGTTTCGAACCAACGTGGCCTCAACCAGATTT

A\_18\_P11140340

ACTGTGCTTCTACTTTTTCCAAGAAAAGACTGAATAGGCTCTACCAATTCTTTCAAGATTG

A\_14\_P138137 GATACAGTTTTTGGGATATATACAAGGATTGCCTTGATCTGGCACTTACTGATACAAGCAT

A\_16\_P36993954

AACTGCAATGCATCTTGACATAGGTCATTTTTGAGAACTAAGTTGTTATAACAACCCGTG

A\_16\_P15384473

GCCTATTAGTTCTCAAATAAAAATCATGTCACGTTCACTTATGTAAGCCTATTCCCCAGC

A\_14\_P119117 CTTGATTGCCTTGACGAGTCCTAGGAATGATGGTCAAAAACATAGTCTTAAAGAGATTTT

CUST\_5228\_PI426210822

TCTGTCAAGTCAATATTTATAACTGAACTAGTTCAAACAGTTCAAGCATTGTCTCTCTCCT

A\_14\_P134269 TTCATTGATTAGGGCCAGTTGATTATTTTACATTCCCCTGAGAAAGCACAGTTATAAAGC

A\_14\_P101009 TTAGTGGCTAGATTGCCCAATTCAATTTTCTACGTATCAATCAGTGCCTAACGTTTTAA

A\_14\_P129618 GACTACCACAAGAACAGGTCAATCTTTGATTTACATGCTTTTTCTGCCTCTATGAAAGAAA

A\_14\_P130148 CTTTAGGAATCATTAAACCCTGACTTGAACGTTACATCAGGGACTAGTATAGAGACTAGT

A\_14\_P115826 GGTTTCAGATTTTCAGTTCTCAAAAAGATAAAAATGGATGTTGTATGTCCGAATACCTCTTC

A\_14\_P124296 TAATTTGATTTTGGCATGTCTAGCAACTGGGATCACTGTATTTTTTCTTTTATCAACCA

A\_14\_P110729 AGAATATTGTTTCAGGCACAGAGTCCCATTCAGCAGGTATGATTTCAATTTAAGGCTTTA

A\_16\_P16114209

ATATTCAGAGTTCTTTAAACCTGCGTCTTTACAATGAAGCCTACTGTTCATGTCTCTAGG

A\_18\_P17259518

TCAAGGCTGCTTAACTATCTAAGTGTCTCATCTCAGTCAGTATAGTCTCAAATGAAACC

A\_14\_P125387 CTAAGAAGGCCCTAAAATCCACTTCCACATATTATGTATGCTAGGTCTATGTTGGGATAA

A\_14\_P129290 TCCATTTTGTGATCCTTTCCCTCTTGTCTTGTGTATTTTCTCGTGTAAGTTTTTTGGTA

A\_14\_P121619 GTCAATAAAGGCAGAATTTACTGTGCATGAACCCACATGAGCAAATCTTAAGTTAATCAC

A\_16\_P38941657

CTTCTCTTTCAGAACCCTTATCATTAACCTTAGACATCACTACTGTTTTCTTCCACAGTC

A\_14\_P120143 CCCTCACTCAATTATTAATAACCAGTGTAATCATTGCGATGTGTTTCAATGTCTGGTTTG

A\_14\_P101038 ATTTACCTTTGACTGTTGAAATCACCCCTAGAGGTAATCACATTATAGTGATAGATGA

A\_14\_P129997 CTTATAACTTTTATTCAGATAGCATCAATCAGGGATGACCAGAACACATTAGGACCCAG



A\_14\_P114910 CTAGAGTTCTGGTTCTAAAATACTTCCTTCCCAAATTTCTGTCTTCCAATGTGTCACTTA  
A\_14\_P112027 AAAGATACCATTTGATTTTCGAAAACATAACACATGGTTAGTCCTCTACTTCATGGCTGG  
A\_16\_P20087947

AAACTCCTTGAAGATATCAATATCTCTTGAATGCTTTCCATATTCCTTATGAAGCCCTGG  
A\_14\_P125044 TGTAATAAGTTTCCATTCTTTTGAGGAAGATAACGAAGTCAGCGTTTTTCAGAAGTGGT  
A\_16\_P40020949

CAAGATCACTGTAATTAAGGCTATGCAATTGTAATCATCGTATGTCTCTGTTTTTCGGGC  
A\_14\_P126490 CTAGGAGATTCCTAGATTATATCTGCCAAGCAAATACCTTAAACATCCACCTGAAATCCT  
A\_16\_P18876492

AGCCACACTAAAATTGCTTTGTTGATAAATTCAATCACCTATGCTTTAGTGAACCAACA  
A\_14\_P112068 CTAATTCTGGCCCTTGTACTTTAGATTTGGGCATCTGTATCATCGTTAATATCATCATC  
CUST\_6008\_PI426210822

TGCAGCTCATTAATTTTAAATTTTAAATAGGCCCTCCACAAAGTGTTTTAGGGAAAAAATA  
A\_16\_P02260774

GCCTAGATTACAGCAAACATGTTTTACGTTAAAAATTGGGGAAGTTAAATTTTAGGGGGC  
A\_16\_P19325015

AAAAACCTAGTTCAGCACAAAATTATATTAGTGTCCACTTGTATTACTAGCCACAGTCA  
A\_16\_P18648783

TCAAATCTTCCCTCAAATGTCTACTAATAATCGCATCATTCTTCATTAATTCACAACA  
A\_18\_P22839218 CTGCGGAGGAAGCCACGATGTTCTGTAAACACATAGATACAAGCACATTC  
A\_14\_P116011 TTAGAACCATGCATAATCAGACAGTTTAGCATGAGGGTTTCCATCTAGGATATGGAAATT  
A\_14\_P137612 GAGAGAAGACTTGTTTAGTATTTTGCCATCAGCACAAAGGAAAACCAGGAGAGA  
A\_14\_P128268 ATACCAGTTCATTCCAGAACTTTCCTTATGGTCATCTTTGGGTGGAGC  
A\_18\_P22843202

TTATTCTTTCTCTACTAATGTTTTACCTATGGATGTCAGTTCTACTTCTCCTTGGGG  
A\_16\_P20247646

TGAAACAGAAGATCAGCAATTAAGACTCTATGCAGTTCAGTCTTATCTCACTTTACTGGA  
A\_14\_P104143

AAGAGAAGGGAATCAGTTTGCCTAGAAGAGGAGAAGAATGAGAATTTGTTGATGTTTAAA  
A\_14\_P134061 CTTGGATATGGGTGTGCATTTACATAAAAATTTCCAGCCTGTTTAAATTTACGTGTAA  
A\_14\_P114373 TAGATGCAACCAGGCATTATTTATGTCACTGGAGAACACAATTATATACTGAAGAGGCTC  
CUST\_8065\_PI426210822 AGAGGCCCAAGAGATGCTACTCAAGAGAGGGCTTAATTTGGAAG  
A\_14\_P100583 ACAATGGTTTCTTTAGTCAGGGGTAGGGGAAATAAAAAATTGAATATCACTGGAATACCA  
A\_14\_P200968 CTTTAAAGTAAGATTTAAAATGCGAAATGGATCAGGGAGATAGGTGGAGAGGTGACTAAT  
A\_14\_P125603 TAGTCCATTATTGGTTGGCCTTTGATAGGCATGATCTTCGAAATTTATGGATTTTTTCTCT  
CUST\_10082\_PI426210822

TTATTTTAAAGACCTACGTATTTCTAGAACTTCAACTACAGACCTCTTGTTAACTCTGAT  
CUST\_5220\_PI426210822

TATATGTGCAATTGCTTATAAACTAATATATAGTCATATTA AAAATCTCTAATCTGATTGA  
CUST\_1646\_PI426210822 AAAAAACA ACTATGAGGGATTTCCAGGAAGGCACTGTCCCTCCCT  
A\_14\_P131308 GCAGACCAGGAAAAACAATATGATGGCAATTTTTCTTAGGAACTGGTAAGTCAAAACAA  
CUST\_1734\_PI426210822 CCAGAATCTGTGGTTGAGGTCAATGTCAGCTGTTTGTTCATTTCCCTTGTTA  
A\_14\_P128746 GATATTTCCACAGATTTGACTTGTCTGATAAGGATTCCTTTTTTCGACAGCAAACCC  
CUST\_618\_PI426210822 ATGCTGAAAGCAAACCTAATGGGTTTAAAGTTTTTAATCCCCAGTTGCTGTCC  
CUST\_8445\_PI426210822 CCAGCATGCTGTTGGCATTGTTATAAACACACAAGTTAAGGGCAAGATTCTTG  
A\_14\_P113639 TGTGTTCTGTTCATTTTGAAAACAGAATTCTGAAAAGAAGTGTGTAAATGAGTTCATAT  
CUST\_7599\_PI426210822

AAGAGTGATAGAAAATAAAAATAACTTGATTTCATTAGATGGAATTCAACTTGAATTCTTA  
A\_14\_P107863

AAAGTTTATTTTTGGGCCCAAGAGTTTCAGATAACCAAGTAACAAGGAAAGAGTAGAGAA  
CUST\_2256\_PI426210822 ATGGCAAGAAGTTTGAATAGCTTCATCCTGCCATCAACTCTCCTTGTTTCT  
CUST\_2595\_PI426210822

ATTGAGGTTAGATTTGTGAATCTGGTTGCTCTAGTTGGTGCTTTTCATGATGTCATC  
A\_14\_P132010 TAGACCATAACAATCATTTTTAGTGTTAAGCGAAAACAAGAAGGTGACGCAGAAATGCAG  
A\_14\_P118957 GACAATAAAGACTGGAGACTCAGTTGAATAATACAAAAGTGTTAATACTACCAAAAATA  
A\_14\_P100973 CCAGGCCCCAGGAAAAAAATATTGATGAGGATTAGGAAATCAAATTCAGATTCATTACTT  
CUST\_7064\_PI426210822

TTACTGATCTGACCAATTAGATATGTTTTAATTTTTTATGACCGGAATCTTTTCCTTCA  
A\_16\_P39829191

TCATCTACAAATCCTCAATCCATCTGATCAAATTCACCTTAACCACATTCAAAGCATCA  
A\_14\_P132515 CAACAGTGACCAACCACACAAATTTTAGTTTCTGTAATCTTTGTGTATCTAGGGACTT  
A\_14\_P125575 CTCTGGACTAAAGGAACCTGATAAACACCCTAAAGAAATTATGGGTAGGTAAGAATTCAT  
A\_16\_P21281996 CTATCTGTAGTTTCCCCAGTTAACAAAATCACAACAGTCATTCCCTGGTTGTTCTTGC  
A\_18\_P22839794 CCAGTTGGGCCTGGGAATCTGTTTTCAACGTGTATCCTGAGTCATATT  
CUST\_6891\_PI426210822 AGTGCTGGGACAGATTACAGCCTTCCCTTCACTGCCGCTTTCATT  
A\_14\_P100423 CTCAAAGGGAATCTAATATTAACCAACATCTACCATGTTTCAGCCATCATCCAGGTA  
A\_14\_P133406 ATCAAACCCATCTTATAAATCAACAGGTTGACACAGCGTAAGAGGGATGGTGAA  
CUST\_7595\_PI426210822 CATGAGGTTAAATCTTTCCTATCATTTCAGGGGAGGTCCCCACTTGTT  
A\_14\_P127764 TGAATCTGAGGGCTTCAGTCTTATCCAGCACAGGATGTATCTGTAGGTG  
A\_14\_P137559 ACATTTTATCAGACTCAGACATTTATTACTCAAATGGAAAGAGGTGAGTATGGGGGATG  
A\_14\_P106422 TTCCTTTCATCTTGTCTCTTCTTGTCCACTCTGTCAACACAGTAACAATAGATAACA  
A\_14\_P105919 CTCTCCAAATTTCTCTTTTTGTTGATGCAGCATTTATATACCAAGTTATCCAGAATGGCC  
A\_16\_P18721933

AATTTGTAACCTTCATCTCACTCCATAACCGTAAGCATTTCCAAAAATTCACCTAACAGA  
A\_16\_P36230247 GAAACTGGTCATAGTGACAAAGTTGCTGACAAATTCACATTCCAGGGATT  
A\_16\_P19183001

TTCTGCTATGTTTGTTCATTTAGTCACAACCTTTCATGATTCTACCTCCAACACTCACC  
CUST\_8265\_PI426210822  
ATCAGTTAAACAAATGAGTCAACCTCTGATCTCTCCAGGAACCTAAAACAGCTC  
A\_14\_P106187 GAAACGTTTTACTGCGAGATGGAATATTCACCTCAAATCTCACAACGTTAACAGAAAATG  
CUST\_8621\_PI426210822  
GAAGCCAGGTTGTAATGATCATGAAAATAATAGAGGGGAAGAATGACAGACCTTTCT  
CUST\_9041\_PI426210822 GACTGTGTTTGGCTGCTCTGTTTGGGGCCCTGTGGGAGGAAACCT  
A\_14\_P116255 CTTGACTTTACCTGTTTTTATGCCGAGTCTTTAGCAAGTTTCTTCCAAAGGGAGC  
A\_14\_P101071 GCTCTTCTGGGCAAAGTTGATTTAAATAGGGCACAGGATTTAAGTCAAAGTGAAAAAAA  
A\_16\_P58424500  
TTCTACCACTTTCCACTGAATACCTATTGTTTTTACACCATCAGAAAGTTGAAAAATCTT  
A\_14\_P136692 CAATATGTGTGAGAGAGAACTTCCTCAGACAAGATACTTAATTTAGAAGGTTTGGGCAA  
CUST\_4908\_PI426210822 GCTTTTGTTCCTTACTGCCATCAGTGTCTCTCTAAGGGAGGGCG  
A\_18\_P14139480 CTAAGCCTCATGGCTATACTTTGGCTTACCTTGGATGGCCATGTATTTCTCT  
A\_14\_P112142 CAGTTGCATACTGTTTGTTCCTTGGAGTCAATGTCCCATGACGGTTTTTCG  
A\_16\_P17847137  
AAAAAATACCCAGTTGCAATTCAGAATTCTGAAGGATCTTTGGAAAGCAATAACCTACAG  
A\_14\_P117353 AAACAACATGAGACATCTGACTGCTGAAAACAATCAAGAACGTGCTCTGAAGGTA  
A\_16\_P00806607  
TTTGTGAGTAACATGCATAAGTCACTATCCTAGGTAATGGAGTTTAGACAATGGATCTCC  
A\_14\_P200812 CTCACCTTGACATATGAGCAGGATGCAGTAGAAAATCATGAAGCAGCGAATGTTATT  
A\_14\_P114949 CTAGAACATTAATAATGACCCTTTCATGAAAATCCAGGGCATATTCATAACAGGAGTCAG  
A\_14\_P104224 ATTTACTTAGAACAACCCGTGAATGTTTGGAGTTTTATGAGTGGAGGTTTTATGGTTAA  
A\_14\_P113837 TGAGGTAGGGTTCCATTGCTATTTTTTAACCAGGTAGGTTATATTGACTAACCTTCACTT  
A\_16\_P02796731  
AGGACCAAACCTAGTCACTTAAAAACACTCAAACAATATCGTCAGAACTGAAAATTTTCCT  
A\_18\_P14135208 ATGGCCATATCTGCCTCTCTTGCCCTTGCCACTCCACTTCATCAT  
A\_16\_P19891359  
CACCTGCTAAATTCTATCAATTCTCTTACCACTACATCTTGAAAATTATCTGCCATTCCC  
A\_14\_P112456 GGTGATTCAAACCTCTGTGGGGTTTTTGTTCCTTCTGTATATTATTGGGCATTAT  
CUST\_9439\_PI426210822 ACAGAGTTGGATTTCCACTGTGGAGCCAGGACTATTTATATCTTCTTAGACCT  
A\_14\_P129839 CTCCAATTATACACTCCTTTGCCTCTTTCCGTCATTCCATAACCACCCAA  
A\_14\_P139184 GTCTGATTTTCTTCCACACATTGTTAAACCAGATCTGAGCATTAAGTATTCAAGAAAGCC  
A\_14\_P129742 CTCTAACGTGATGGTAATTTTTCCACTGGCTGGAATGCTAGACAAAGTATTGTCATAAAT  
A\_14\_P101216 CAACACGTGAATATTTACAAAAATAAAAGCATTACAGATAAGGCTCTGTCCACCGCTCTA  
CUST\_10058\_PI426210822 TCATATGTCTCCCACGGAGGCTAGTGGGGGAGAAAGATGCAGGAT  
A\_14\_P100262 CTCTGACAAAGATAACCAGTCAAGCATAAAAATGGGAGTTGGTTGTGTCAGAATACATTA  
A\_16\_P19658454

TCCTTGAAGAAAAACATTTAGCAAATTCCACATCATAAATTACCATGACCCTCACATACC  
A\_14\_P108879 CACCTGGAAGTCTGGGAATGAGGAGATTGAGATAAACTTTTGAATCCCAAACAT  
A\_16\_P18998744

AATAACTATCTGCACTTTCAAATGCAAGGTCTTGCTTAGGTTTGAACAACACAGGTTTT  
A\_14\_P117334 CTAGAGACAAAATTGGCCACCGAAACATATTTTTCTGAAATGTAATTTCTCCAACCTCCTT  
A\_14\_P115531 ACTGGATGGGACATCTAAGTGGTCTGCAAAAATAACCATTACAGGTAAAAATAAGTCTTC  
A\_18\_P22842099

TTTATCAGACATTAGTGGGAGAGAAAAAAAACAGTTGCTCATTGGCTTTTTTATTTGCC  
A\_16\_P15985587

AGCCTTGTAATCACTGTTTCAGCGAACTATACCTTTAATGTTGAGTTAICTTCCATAAGT  
A\_16\_P03469327

ACCACTTAGAGTAACAAAATCTATTCACCCTAATAGCAGAGATTTCTACTTCATCCCTGG  
CUST\_3010\_PI426210822 TCTTAATAATGGCACCTCCTGAGAGTTTCCAGGTCTCAGATCCCTT  
A\_14\_P112920 TTTATCATCCCCAGTCTATGGCAAAGGAACTAGATATCAAGACCATCGTCATGG  
CUST\_7318\_PI426210822 AACAGAATCTTGGCCCTCCAGAGTCCAGCAGCTGCACTTCTGAAT  
A\_16\_P15222363

AAAACATTAGCATCACTATTTCCACATTCCTTTCTGAATAGGGTAAATGATTCCCTCTC  
A\_14\_P200099 CATGGTCTTTGTGTTTGGCATTACTTTTCCTTTGCTGTGTAAGTGAACCTGAGTTTTTTC  
A\_14\_P200850 CATAAACAGGGCTCAGGTTTCAGATTCTATGCAATTTTCCTTTCTCTTTAAAAA  
CUST\_8933\_PI426210822

TTTTCAGTTAGAAAGGGAGAAGACATCTAGAGTTAAAGTTACGATCTTTTCCTTTCTGTG  
A\_16\_P00685080 GCATCTGTTATCCCATGAGCCTTCATGACCAGTATCTTTGGAGTTTTGTCTATA  
A\_16\_P17251402

AAAAATCTCACAGATTTAATCCTAACTGCTAAGTTGAGAAAACCTCATTGGAAGCACAGGC  
A\_14\_P139283 ACCGAAGTGGAATGTTTGAGTTGTTTGAAAAAGATGAAATACTTGTGAGTGGTTTTCAAT  
A\_16\_P58424273 GTGTCTAGAGCAGAATGAGGGTGTAGGTATTAAGAGACGAGGTCAGAGACAT  
A\_16\_P18574600

AAAAAATCCCACTTCCAGTTGATTTACTTAAAGGAGACTACTCTGATAAACCATCTGTTCC  
CUST\_7490\_PI426210822 GGCATCGGGCTTTTCTTTGATGTGTGCATGATCAGAACACACTAAGAG  
A\_14\_P105219 GAAGAGAACAAAGAACCTGTTCATTTTCAGACTCATCTCCAGTATTTCTTGTACATGTA  
A\_14\_P112870 ATGTGCACTTTGCTGAAATCTCTTTAATAACGTTCTCTAATGTCTAATACTCAATTATCA  
A\_16\_P21098276

ATCTCAACCGACAGCATAAATGAATGTGAAACTTTGAGATTGCACAGTGTAGTAGAGAGT  
A\_14\_P105336 TTAGTCAAGTTTGAGGAGTCTGAAAAATATTTTCCAGAAGATAAAGTCTTGGGTCATCGA  
A\_14\_P102305 CTTTTCTGGTGTGTCCCCAGACTCTTCCTCAATCTGGAGAGAAGA  
A\_14\_P100158 CCACCGAGTTGTCGCCATAATATTTTTAATAATGTTTGCATTTCTTCTATATTGCTAACT  
A\_14\_P135467 GTTTTGTTTGAACATGTATAATGAAAACCTGGAGACTAAGAACAGTAGGTGATGACCACA  
A\_14\_P125694 ACACATTGAACTGCAGATACTACACGCACCTTTTACAACCTATTTTTCTTTCTCTGTGAG

A\_14\_P116190

GAAAGAATCAGGTTCAAGACAGAAACAGGGAGACACAAGGTTAATGACAAAGACAAAAA

A\_14\_P130081 ACTCTTAAAAATATATGCCAGTCTCAAATTAGCCTCCTACTGCCTAAGTCTCCAAAGTT

A\_14\_P122113 ACTTCTCAGTTGCTGCTTCATGTGTCATGGATATTTTGACAATATTGTTCAATTTGCAT

CUST\_8088\_PI426210822 TTAAACAGAGGAGTCTGTTTTTCAGGCTGAAGCAACATGGGCACG

A\_14\_P102941 ACATAGGAGACTGGCAGCCAGTTCTCAAGATACACCCTGTGAATAAAAAAAGAAAAAA

A\_14\_P107952 ATCCTGTGAAAAATAACGGTGCTTGTGTCACTAGCATAGAATAGCGACAGGAATAGA

A\_14\_P103205 AGAGACTGATCCTTCAACAAATGCACATTTTCACTGACTCCAAAAAATTTCAATCAA

A\_14\_P114974 TAGTTAGTGGATTTCTAATCATGTTAAAGCAGGCCTTTTTATTAAGTAGCCTCTTCCCA

A\_14\_P118412 CTAGTTAATAGCCCATGACAAATCCAAACGCTGTTAGAGGTCTGACAACCTAGATATTA

CUST\_3519\_PI426210822

AGACTCGTTTCATAGTTTTTTGGGGGATTAAAAAATGATTAGAAGCAGATGGTGAGAAGA

A\_14\_P118459 GAATAGTGTCTTTACTCAGGAAGATTCCATCTCCCTTTCAGTTATTTCAAGAATTTCC

A\_16\_P21534971

CCAGGACACTTAAGATGCACTTACGATCTTACCATGCACATTCAATTGTTTCATTCAAAAA

CUST\_8671\_PI426210822

TCCAGAAGAGATATAAAATAAATATCATACCATTCAATTCCTCCTCCTGCAAAACCAATTG

A\_14\_P106146 AAAATTCATTTTGTCAATTTGTATTCTCCTTTAAACTATCGGGCTTCTGACTTGCAGC

A\_14\_P133042 CTCTTGGGTATCTCATTCCCACTTATTTAGAGTTAACTCTACTACTGTTCTCTTGAGGA

A\_18\_P16229793

AGGAACCATGACTCCTAAACTATCACAATCCTATTTTCCTTTTATGCCTATTGTTTCATGCT

CUST\_7945\_PI426210822 GTAAGGGACACAGACGGGACCCTTCCTCAGCAGCAGGCCCCAGC

A\_14\_P129175 GGACAAATGAATCCCAATCATCCTCTATAATTAATACTGTTATGGACAGTTGGAGAA

A\_14\_P132529 AAAACTGCCTGTAATCACGCCTTAGAGAAAATGCCAGTCTTTTTGTGGGAAAATATATTA

A\_14\_P117934 CTGCATTCCTTGGATTTTTTTAAACAATGAGATTACTGTCTTTCTTCTAAACTGTTTCAC

A\_16\_P02085250

TCCTTTATACAACCTATATCCTTTTCTACCTTTTTTAACACTCTTAACTCTTACACTCCTCC

A\_14\_P134448 CTAAGACCCTGGCATTGAAACTGGTCATCCATCTCGACAGATTCC

A\_14\_P106940 ACAAAGATATCTTCATCCGTGATGACATCAGAGGGGCTGAACTTTTGCATCT

A\_14\_P138862 AGCCCAATTTGAGAACCGCCTTCTGATTCAAGAGGCTGAATTCAGAG

A\_14\_P127115 CTTTTCCCCTTATCATTACGAATGGTTCCCCACCAGGTTTCAAAATTAATAAATAA

A\_14\_P104746 AAATGGGCAGTTTTTCATATTCCTGCAAAATTCCTAAGATTTATTGGAGACTAGGCCTCTT

A\_14\_P109138 AAAAGAGTCCGACAGCGAAGAGGAAACCAAGATTCAAAGAAATGTTGAAGACTC

A\_16\_P16191554 ATGCTATGGAAATCCACTGTTTGCACAGCCTGGACATTAGGTAATAGTTTCC

A\_14\_P114242 AGGAATAGGGGAACATATCCACATTAATAAGTTATATACACATCAGTTCCTGTGGTTCT

A\_14\_P106314 GGCTTTAGGAAAGGAAGTAGTCGAGCAGGATAGATAGTCTCATTCTAAATTATGGAAAAC

A\_14\_P116787 CTGCTTGGCCAATTCACTCCACTTCTCTGAAGTTAATGTTATTACCAACCATAAAATCAA

A\_14\_P117432 CACCACCAAATAAAATGTTGCGGAGATCTGATAGTCTGAAAACAAATACAGTGACAG

A\_14\_P135225 CTCTTTGGAAAGGAAGATGTAATGAAATTAGTCTTCTGAACTCGTCTCTGTAAAGCCA  
A\_14\_P117766 TGATCAGCAACTCAGATGCAAAGAGACAAGATCCATAGCAGGCCAC  
A\_14\_P124623 TGAAACCTACCAGTAGGAGGTAACATTTGATTGACCTTTCTGTTTGAATGTCAATCTTTT  
A\_16\_P00685207  
AGACTTCCATTAGTCCTGTTGTGACTTAATTGTTTTGTTATATTTTTGGTGGCCTCCTAC  
A\_14\_P114539 CTGGGGCAAACAACCAAAAACATTTTAGAAAACAATTTATCTGTAAATTAGGACTTGCCC  
A\_14\_P135295 CTCGGATCCCTGAATTTGATCCAGGTAGATATATTTGCTTAAGCAAAATCTCATATCCC  
CUST\_1611\_P1426210822 GCTTGCCTTTTCTGTGAGCTGTTGTCCTCCCAAGCTGGACATG  
A\_18\_P22840885 AACTCATCACTGAGGAACAGCCTATGTCTGTGCCTTCAGGGGTGA  
A\_16\_P00302727  
CTGTGTATCAACACCACTAGTCTATTTTTCTGTTCATCAAAGTTCCTCATTAAACGTGAG  
A\_14\_P115348 CTCTCTTGCCTTCTTCCCTTGCCTCTCACCTGTAAGATATTATTTATCCTATGTTGAAGG  
A\_14\_P102230 GAAGTCTGTTTCTTCTCCGATTATGAGAAGTCATCACTGGCTTAAAATCCAGGGTATAC  
CUST\_7709\_P1426210822 TTATTAAGAACCTGTGCTCACCTCTGACACCTCAGTTGATTGGGGAAT  
A\_18\_P25305327  
AACTGTGCTCTGAAAACCTTAAAGGCTTTTTTGATAGTGTTATGGAACCTCACAGATCAAGG  
A\_14\_P125419 CTTTAAACAGCAACTTTACCTTCAAAAAGGACCACACATTTTTCTCAAATTCAGTCTGAG  
A\_16\_P17690937  
ATGGGAGGTATCTAAAGTGAACATAGCATACTCACCGATAAATGACCTAGAAATCAGATG  
A\_14\_P139006 CACAGCATTGCAGCCATTTCTTGTACTCAATATACTGGAAATATTTTCATCTAGGCATC  
A\_14\_P138210 CTTTTCAACAGTCCCTCAGTATGCGACTATATTTTTGAAGTGTAACAACCTTGACTTTGC  
CUST\_7296\_P1426210822  
GCTGACTCCTTGTGATAGAGCAAACCAAGTTGAGTGTTGTATTTACTTTTTCTGGATTTAT  
A\_14\_P123870 AAACACAATCCAAAGTTTATAACTGTGCCACTTAATCTTCAATTTTTCTGGGCCATATG  
A\_14\_P105328 ATCCTCTTATAGCCTTTTTCTGGAAATTCAGATGGTGTGTTGTAATATTGTGCAAGTGT  
A\_14\_P103021 ACCCTATCAATCTGTGTGTGTTCCATTTCACTCAGACAACTTTTTATTTCAGAATGTGA  
CUST\_5941\_P1426210822 AACAACTGGAAAGAATCTCCCCAGTCTGTTGTGATTCCCTCAG  
A\_14\_P115641 CTGAGTCCCGTCTCTTAAACGTTATGAAATCTGTAAAATCATGGAGCACAATTTACCT  
CUST\_2119\_P1426210822 AAAGCGAGGGCATCCTTGTGTGAGAGCAGACACTGAATGCTTTGT  
A\_14\_P122386 GCACTTTTATTGGAAAATAGTGAGATGTTAACTTAGAAACGGTTTAGGAGATGCAACCC  
A\_14\_P118583 GAGATGAGAAGGGACAAATGCCAGGCTTTTCCCTTATTACTATTATTGCTTCTTGATAT  
A\_14\_P103707 TTAATATAAATAAGTAACTAAAGCAGAAGCAGGAGAGGAACAGAGATGAGAGCCCTCATC  
A\_14\_P200293 GAGGAAGGGCTCATGCCCTTATTTATGGGAACCATTTCAATTCTAACAGAATAAAC  
A\_16\_P58424137 GTTAGTCTAAATCATCAGAAAGCAACATATCCCATCCCTGCCCCCAATGTT  
A\_18\_P10176830  
AAAATGTCCTGTCAAAGTTATCAGATCCATTGCCTAACAACTTCTATCCTAGCCAATTG  
A\_14\_P101233 GTTCACATTCTCCCTTTTTCCACTGTCTGCACAATTATATCCATAGTCCCTAGAAAGAAAA  
CUST\_7584\_P1426210822 GAATATCATGTTTCTCCAGGGAGGGCTCAGTGACATGGAGCAGT

CUST\_813\_PI426210822 AGAACATCACTCCTCAACCCAAGTCTGGCTCTTCTCCTCTTTCTC

A\_14\_P106277 TTTGCCTGTTGGCTCATGAAAGGCTTTCATAGAAATTATAGTGGTATTAGCATAACCAGT

A\_16\_P19173310

AACTCCTTACACTCAGTTTTACAGTCCTTCAAATCTAACTCTGAACCGGTTGAATAATTT

A\_14\_P202222 CTTAATGCCTTCTTGGTCATTTACAAGGTATCAGACAGCAAATACCAGGAAATATGACAT

A\_14\_P102678 ATGGCTTACCTTTTAGTTTTGCTAGTGAAAAGGATGTCAAAGACTATGATGGCTTTTATGC

A\_14\_P112394 ATGGTAAATTTCACTCCGAGAGGAAGAAAGGTTGATAATCAATCAAAAATGAGGTATTC

CUST\_2819\_PI426210822

GAAATATTTACGTGAGCTAGTTCATTCTCAGCCACACCTCAAATGTTCTACCTTATTTA

A\_14\_P132984 TCAAAGCATGAACAAAACCTTAAACAAGAGAATAAAGAGGGGTTGTTAGGTGGAGACGTG

A\_14\_P106027 CTGCCATGTATTTACACCAATAACTTGTCCATCTGTAGAGGAAGGCTGAAATAATCAATT

A\_14\_P117010 CTCATCTAAGACTAGCCTGAAGTTGGTCAGATAGGATGGCTTCTTCTCTATCAAG

A\_14\_P119374 TGCTGCACTGTTAAGACAAATACAATTGAGAAGATCATCTATGGAATTTGTCAGATGGTG

A\_14\_P101528 CTGCACCAAATAAAAAGGTTCCAATGGCTTTGTAAATAGTGGCTATGTAGTTATTCCTGA

A\_16\_P18446765

ACCCCATTCATCTATAGACATCTACAATCGAGGCTTTACATTCTCTGAAAACAACAAACA

A\_16\_P01590569

AAAAACCCAAAGTAACTGTTCTAGAAGTTCAAACACAAGTTATTCAGCAAAGTGCCTTCT

A\_18\_P22840715 CTATGGGATTTTGCCCTCATTCAACAAGCAGAGGGCCTACCCTTA

A\_14\_P112610 ACGTGGAGTCTCAGGAACATAAGAAGGGCTTATTCCTATAAACTGGATATTTGCTGATATT

A\_14\_P126545 CTTACAAGGAAGGTGTAGGAATTACAAAGTGAGGCCAAAAGATCATGTTTAGCCATTCTAT

A\_14\_P121965 CTTCTTGTTACTTGGGGGAGGAAAGAACTCCTGATCATTGGCCAAAG

A\_14\_P122852 GAGAGTTGTGGACTTTATAGATGAAGGGGTCAACATTGGCTTAGAGGTGA

A\_14\_P139260 CTGAGGATGGTAACCGTTCTCCAGACTCCATATCTATGAGAAGGGAAAATGTTAAT

A\_16\_P37035470

CGTGCTTTACCATTTCTATAGTTATTGTGCGCTTGTCTTATTCTAACTACTGGCTTAGC

A\_16\_P21423787

AAACTCTGTCAGCCAAAATTTGAAATTTTGACCATGTTTGCTAAGCATATTGCCTTCTAA

A\_14\_P136373 CTTTAGAACTCCTGTTCTGAAACCCATTTTGTGTCAGCCAATGCTAAAGAATGTTTTTTTG

A\_14\_P118744 TCTCACAGGGTGATCAAACCTTGCAGAGTCCTCAAATGATAATTCATTTGGATTAAGTTT

A\_16\_P16733665

TCCAAAGCAAATCACTTGATTTATAACCAAGCACTCAATTTTCTCAACACAGTTCTTCAGA

A\_16\_P01625422

CTTCCTTATCCTTTGTCCCCTAATAATACTGACCTATAAGCCTATTTCTTAGAGCCCAAA

A\_14\_P123031 TCCCATTTTGATCCATGTTTTGAGTTAATGATCAGCCTAGTTAGGTTTTGTTTCCAAGA

A\_16\_P36111539

ACTTCAGATGATTGATCAAATGTCTCAGCCAAAGATAATTCAGGAATCTACAAAACCTGG

A\_14\_P137374 CTTCCAGGCCTAAGACTAGGTTTTGCTGTCTACAGCCAACTATTCTATTAGTTACAAAAC

A\_16\_P17052080

AGACCTTTACGTTTAAATAATATCTCAGCCATAGCCTAATAATATCAACCACTCACCCCC

A\_14\_P122538 GATTGACCTATGTAAGACATTGTCTTTCTATTACTGCTACTTCAGCATGGTGGAACACA

A\_14\_P200813 CACTTCGGCACTGTTACAGAGTAACTGGCACCATTATTTTAAAACATCTTTAAAATGTGG

A\_14\_P139969 CTTTGATACATATTGGCCCCATGGAAATGTTATGTATATTCACAGTCCTGGTAACATTGT

A\_14\_P118691 TGTCTTGTGTCTCTATGTTTTAGTCCTGCTTGTGTGCTAAATGAGACAACAGAAAACCTGAA

CUST\_9114\_PI426210822 GATTTTCATTCACCGCAGACTCAGTCCTCATTTCCTTTCCAGAT

A\_16\_P18865467

TTTTGCTGCTCAAAAACATTATTTTGTCTCTCAAAAACATTATTTCAATCCAAGCCATTCA

A\_14\_P100735 AAAGATTTAACTTCCTTGCCCCATTATTTTCTTATAAGTATTTTTTGACAAAGGCATTTT

A\_14\_P105476 AAACGAAAAACGAATCAGAAGATATAGGTTCCGTGCTTACCAACGCATTCTTTTAAAACA

A\_16\_P01780707

GCACTAACCTCCTATTTAATAACACAAGCATTCACTTAACTATAACCATCTTTTGTCCAC

A\_14\_P114179 ACATGCAGAAACTGTTTTTCATAGTCACCATGATGAAACTCAAATTTGGCCTAATTACAA

A\_16\_P18306887

ACACACCTGCCAATTTTACTAACATTTTCTATGGTCACTTACTAATGCCAATGAACAGTC

A\_14\_P136913 CTTCCCTAAATATTGACAGTATCTACTACAGTGTGAAACGTGGTCAGACTATGCCAATGA

A\_16\_P17014662

AAGCCATTTTCTTTCTATGATACTGGAACACCTGAACTATAAGTTGAAGTGTGCTGATGT

A\_14\_P132768 ACTAAGCATTCTTTTCCCAATACGCATTGGTCTTTGGTTTTTATCTTGCAGATTAGGT

A\_14\_P126435 TTTTCTTTCTGTTTTTCTCCTTGAAGACATGACAATGGATGAAGTCCGAGAATTTGAACG

A\_14\_P200395 CTTTCTCTGATCACTGTTTAAAGCCAAACCACTCCTATTCCCTATGTTTTCATCTCTTAC

CUST\_3485\_PI426210822

CTTATAACGCATTGACCATCCATATTTTAAAAGAGGTTGGAAGATGTCTAAGTACCAGCT

CUST\_5531\_PI426210822

AAATGTGGTAGGATTTTGAGTAAGTAGAAGAGTATAAAGAAGAATGTTGATCCTAGAAAT

A\_14\_P133933

CAGAGGAAAAAAACCAAACCTGATTACATGGGTTGTTACCTCAAGAGAAAACACTAGAAT

A\_18\_P17591218

CTCTCAGGGAACCTAATTAACCTGTAGTAAAATTTGACTCCTGTATTTTTGAACCAGTTA

A\_14\_P136166 GAACTTGCTCATGCTCCTGCTTGACCTATGCTTAATTGTTAAGTCCAATGTATTTAAAAGC

A\_14\_P138038 CTCCATATAGGTCTCCCAAATCTTTTTGAAATGTTAGTGATCTGAGAAGTCCAAATGAC

A\_14\_P123480 CAGTCACGTGATGATCTCTTGAGAATTATAGAAATGGAACGATTGCAATTACACAGAGAA

A\_14\_P123148 CTTTAACTTTAGATTTTTTGGCTTTTTCTCATTCGATGTGTGGGAACTCTCACAATCTGT

A\_14\_P130964 TATTTGTGAAGGGTTTATTATAGCGCCTCACACAAAATAATTCCTGTGTAACCTGGTGGC

A\_16\_P03077440 AATCTATCCTCTGCATGCATTACTTTTGTTTAACCCTTTTATCAATTTCCCTACCTTGCCC

A\_14\_P117561 TCTTATGTTCTTGGATTTTCTCCTTAGAAAACCTCCTGGAGGGTGAAGAGACTAGATTTAG

A\_14\_P114878 CATCTCTATCAAAGTAAGGTTGAAGGAGATTCCGATTCATATACGCACATGCTAGAATGA



CUST\_3595\_PI426210822 GTGTGAAACGTACTCCATTTCCAGAGCCAGCTGCCGAGCTTTTTTC  
A\_14\_P123482 TTGTCCCAGGAGCCCTTTTCGATGATTCTGTTTTACTTTATTGAAAGACTGTTACAACCTT  
A\_14\_P107602 CTGCTCTCATAACATTTAGAGACATTTGCATTATGACTGACTTAAGTGGAGAAATCTTGT  
A\_18\_P24808845

AAAGAGATGTTCTTGCTGAAATGTTTTCCAAACTCAATAGGAGAGTGTGTCAAATAGCAAA  
A\_14\_P113394 CAATGCAATTCTCTCCTTTGTTGAAGAAAACAGAACTCATCCCCTTCAGAGAATG  
A\_14\_P200844 AACTTCAATCTCTTTATACTGTCATTACCTCAGGCATCTTCAAAGAAGTCAGACCTAAT  
A\_14\_P133535 TGATTGTTGTGGTTAATATGGTTAATAATGTTCTTTTTAGTGACTTCAGATGAAAGCAAT  
A\_14\_P114987 AGTATTTGTATCAGTGATCTTATTCATTCCACACACATTCTTCTTGAACCTGGACACTGC  
A\_14\_P109670 AAACATATGATTTTTATCTTGACAGTGTCCCTTTAAAAAATCAAAGCCGCACCCCGC  
A\_14\_P103293 CTGACCTCAGAGGAGTTTAAACGCGATCTTCACATTTTACGACAAGGTAAGAGA  
CUST\_3868\_PI426210822 GTGATTCAAGAGGCCAGACATTCTGTCTGGACATTAGCTGGAAGTG  
A\_16\_P20535285

ACATCTCAAATCCTTCTGAAAATTAATGGAATCCATCGACCTAATCTCTATCATGGGC  
A\_16\_P03457972 TTTATCATTAACCTCTACCCTGACTTTCTACTCACTCTCCCCTCTCTGTTCCCTTA  
A\_16\_P02770604

GGCCTGAACATTTTAAATCAACTGCTACATTGACACTAAGAGTTACTGAATTTCCAGGTT  
A\_14\_P110669 AAACCTCTCATCTCCCTCCCTTTTATAGTTTCTTTAAGATTAGGCCCTCCTCAAGTAAG  
A\_14\_P114361 AGATGTTTCAGAGACACTGCATGTGAGCATAGACATATCTTTGGATCTTCATAAGTAGATG  
A\_16\_P18939061

AAAACATCTTGGCAAACCTATAAATGTTACCTGTTCTCAATATTCAATACCCTGAGTCCC  
A\_14\_P126959 AGGAATGACAGCAATATAGATAAAAATAGATGGGTGAAGAGGGGAAATTCCTCTTTAGA  
A\_14\_P132727 CTGCGAGAAGGAAATGTGAGTGCAAACCTTCATTCTGTAATAAACTTCAGATTTGAG  
A\_14\_P129768 TGTGATATTGTTTTACTCATTACTTCAGTCTACGTGACTTTCCTTTCTAATGGGAACCACT  
A\_14\_P132914 GTTAAAACCTTAGTCCCTAATCTTCCACAGTCTACAGCAGTTTATATGGAAACACTGTCTC  
A\_14\_P133286 TGCTGAGTTATTTTTCCATCCTAAACCCTTATGATTTTTTCAGGGATTTGCAATTCATCC  
A\_14\_P130451 GAGCATGATTCTAGGAGGCAAACAACACTCAATAAATGCTTTAGTAGATAAAAGCAGATA  
A\_14\_P133483 ATATTCCTATTTTCTGAAAATTCTGCTTTTGAGAATGCTTTCTGTCCCGTAATTGTGTA  
A\_16\_P16449022

ATTTGGTCCTAGATATGATCTTAAGGGATTTGCTATGAGTAGGAAAGATGACAGATGTCC  
A\_14\_P130900 CTTCTCTCCTTCCTTGCGCATTCTTCCCTTTACACGTGATTTTAGTTATTTACTCAA  
A\_16\_P19105499

AGAAAGATGTATCCTCACCGTATAGCACTTTTCTGAGCATATAACTCTTGTTTTTCACACC  
A\_16\_P16191196 CCAGACTGTGTGTCTAAATCAGAAGGTGGACTCTTGAAGCACAAGAACT  
A\_14\_P119414 CTCTGTTGCAACTTTGGCATAAGAGAGTAAACACATGGTTTTCTTAAAAAGGAGAAGTA  
A\_14\_P202300 GAAGGGTCTTTCTACCCTCACAGTAGCAACTAGCAGGGTTTAGTTACT  
A\_18\_P22839614 AGGGCCTTGTGTTGCTTTTGGGAATGGTGTAGAAATCACGTGCTTAG  
A\_16\_P18648733

AAAGTGTGCTTTGAATAACCCTACCTCTGTTCTATGTTACTGCTCAGATCTTTATCTCAC  
A\_14\_P100255 TACTCTTGAATACTTTGCATCTTGGGATACTTACTACATGTTCTTAGACAGAAGGACAGG  
A\_16\_P02191312  
GCCTCTGAAGAATTTTCAATATGAGCATTAAAGAAACAGTCCATATGGTTCAGAAAAGCCT  
A\_18\_P14137450  
TGCTTATGTGGCTTCATTCCAGTGGGAGGTTTCATATTTTCTTAGTTATGTATCATGTAGT  
CUST\_4777\_PI426210822 GTATGCACCCCTTCTAGGAGCCCCACAGGCAATGACAGGAACCC  
A\_14\_P118035 CATAAGATCCATGTGCAATTAGAAGGAAGAAAATTCATTATTCATTCAGCATGGTCCTGG  
A\_14\_P126335 GTCTAGATTTTGCTCAACTTCACTGAAACTGGGCATTAATATGCATCCTGAACATAGTT  
A\_16\_P02179233  
TTTGAAAGCAACTCAAAGTGAATTCAGTATTGATGCATTCACCTTACCAACTTTTCTGCCT  
A\_14\_P137475 TTATAGGTTGTGTGCTGGTGCTTCTGAAGATATTAGAGAAAACTTCATTTGAGTTCACC  
A\_14\_P112420 TTTTCTTGTGCCTAGCAGAATTTTAGAGTTGGATCTTTGTCTCATGGATGCTCTTAGG  
A\_14\_P139230 TTCAGAGTCTTCTGCGAGCAATTAATCAGTATGCAGATATGCTGAACAAAAAATTTCTG  
A\_14\_P112446 CTAAGTATTTGGGGCAAAGTGAACCTCTGCTTCCAGACTTCAGAAACAAAT  
A\_14\_P118316 ACAAATCTTAACCAAGAGAATAAAATTGGCTATTTTAGAGTCTCCTCCCTCCATATGAC  
A\_14\_P125506 ATGCTTTTACAGGTTAAACTCTAGAACATGTTCAATGCTATGATTGTATGCCCTGGTAGA  
A\_14\_P128710 GATGCAATTTCTATCATAACATGTGGACAGAAATTTTCTGGAAGGCTTTTCGATCATATC  
A\_18\_P14266833  
TCACTGCTATATGATTTACCCCGTATAAAGTTGACCTACAATTCTTACATCCTTGCAA  
CUST\_6834\_PI426210822  
ACTTACCATTGCTTAAGTATTGGAGTTTTTGGTTTAGGGATATTGACTTTTTTAAAACCA  
A\_14\_P138575 TGTTTATTGAGTGACTGAATGAATGACTCATGTTGCTACTTGATATGTTGGCTTCTGAGT  
A\_14\_P111833 CAAGCATCCCTAAAGCCCATATCCCTGATTTTTTCTGACACTAATTGTGGGT  
A\_14\_P108539 CCTTTGCCCTCATCTCTGTGTTTACCCAAGTCTCTCCCTCTAGTC  
A\_14\_P123793 CTCTCTAGTCATTTCCAAGACAAAAGTGATCTTCAAGCAAAATTCAGGCTAGTGCCTTT  
A\_16\_P30952268 CACAGAAAGAAACATCTGGCACTGACAGGAGTCTGCTTTGTGATCTTTTG  
A\_16\_P02296553  
ATCACATAACCAAAGTGTTAATTCACGGCTTGACTATGAATTCTTCTCATAACCTTCTGG  
CUST\_10159\_PI426210822 TTTTGCAAACCGAGATGGTTTGGAGCAAAGGGAAGTGAGACTGCT  
A\_14\_P120725 TACTTGTATTACTTGCAATTATCCTGGGTTTTGATACAAAGTGAGACATTGGAGGAAGCA  
A\_18\_P25851401  
AACACCACAATAATCTAACACAACAATTGAGTTTCCAGAAAAGTTCAAAACCAAGGG  
A\_14\_P132565 CTTTTTCAGAGTGCAAATTCACCTGCACCAGTGGTAAATGCTTGTATCTTGGTT  
A\_14\_P113418 CTTCTTCAAATGAGACAGAGCCAAATCTTTTTTCTGAGTCTGTTTTCTTCATTTCTATT  
CUST\_3636\_PI426210822 CAAGGCAGTGGTGCCTCCCTTCTTCTGCCAGAAATTGAGGTGTT  
A\_14\_P100621 ATCCCTACTTGACAGCACAAACTACCTCTCTCGAATTTTCTTGAATAAACATCCATACTA  
A\_16\_P19784593

CCCCACCAATACTGTATTAGTGACAATCATAATACCTTTGAATTCATGATGTCATTCCA  
A\_16\_P18754634  
ATAATGCCACTTTCACATAGAAAAGGCTGATTGTATGTAGACCTCATTTCCAATCCATCT  
A\_14\_P111317 TTTTCTCTCACAGGCTCTGAAAATCATGAAGTGGTCTTCATACTACATCCCTATACTTT  
A\_14\_P126800 TCTTTAACCTTGGGTGCAATAATGGTTTTATCTGAAGAAGGAGGTGATGAATTCTTTTTTC  
CUST\_9691\_PI426210822  
CTGACCATCAAGAATTGAGAAAACCTCTCGGTATAGTTTTCCAAACACACGAGTCATATTT  
A\_16\_P18658989  
AGCATCTGGAACAATAGACAGTTTGAAGTTAGAATCTGCTTAGACAACCTTTCTTACTTGG  
CUST\_992\_PI426210822 CAGAATGTGGGCAAGCTCAGGTTTTGAGAGTCATTCTGAGTGTGTC  
A\_14\_P126954 CTCTTATCTTCAATCAGTATTATAGGCAGGAGAATGAGATGACATGTGAGGTCCAATTCT  
A\_16\_P34347884  
ACTGATGGAACTATTTTTCTGCTCATTTAACAGAACATCTGCTCAAATTAATGACCATGGG  
A\_16\_P17857117  
AGTTTCCTTTGATGCTTCTACTGTCTTACTTCCCATATTCAGTTTAAACGTTAACACCTGT  
CUST\_7430\_PI426210822 ATTTGAGACATTTTCAGGGTCCCAGTTCATCCCCTAGGAATCTG  
A\_14\_P200832 ATATAAATTTTGATTTCCACGGTTACATCGTGGTATCCTCCATCAATTTTGGAAATAGGCT  
A\_14\_P116511 GGTTTCTACATCTTGTCTTGGCATCAAACAAGGAGAGAAACATTCAGCCTAATACTTTA  
A\_14\_P125202 ACTCCTCCTGTGGTGCCAGAAAGATATAATTAATAAATATAAATCACACTTTCCAGGCTTG  
A\_14\_P102871 CTGACATCCGTGTTGAATCACTCATGTCAAATTCATCACTTTCTATTGAACTTTTCATCCT  
CUST\_6119\_PI426210822 CTTCCAGAGGAGGATCCCCAAACCCAGAGAGCTATTTAGAGTTTG  
A\_14\_P138072 ATCTATTGTTAGTGCCATAGGTCTAGAAATCTTGGTTTTCTATGACAACACTCTGATTGGT  
A\_14\_P106524 TTTGCACATGCTTTTACCATTCTCTTGAATTTGTAAGAGTCATATGAAATCCACAATGT  
CUST\_4912\_PI426210822  
GGGCATTTATAGGGGTAATAACTTGAAATGATTA AACCTTTTTTTTTTAAAGCTTCATGT  
A\_14\_P113000 ACTTTGGTAGATTTGCGGATAGAAATTATTAGGTAAATAGTTGGTTCTCCCTCTCTCTCT  
A\_14\_P101123 TGGCATAACGTTATGCTCCAGGCTCTTGATATATAAGGATATGTTCTAGAGTTCCAACAA  
A\_14\_P120261 GATACTTATTCTGGAAATACTTGTGATATTCAAGCCAAATGAAAGCAGTAAAAATGATA  
A\_14\_P108970 GGGCTGTTAACGTTAAATATGAAAGGCTGTGTTCACTCACAATATGCCAGGAAATATTAT  
A\_16\_P19945764  
ATTGGTTCACCTCAAATCATCCAAAAGTTCCTGTTTTTAAAATGTCACCACTAGTAAACCC  
A\_16\_P01906920  
TGAAGTAAAATCTTTTTCAAGTGAGAAAAACCCTACAAATTACCTGCTAATTCATTTTGGT  
A\_14\_P115413 CTGCTTTTCCCTCATTGAAGCAGGTGTAAATTAGGAGGAAATGGATCTGTCTA  
A\_16\_P00813600  
ATTCAACTCCTTATCAGAGACCTTTAACCCCTTATACAATAATGTATCCATGCAGGTCACC  
A\_14\_P105540 ACATTTTCAAGATAAAGTTCTAAGTTCTAGTTCTAAGAGGCAGTGTCCATCCACTCAGGT  
A\_14\_P112176 CTGCATAAGAAGCAATTTGGCTTAGGGATGGGGTGTCTCTTAAAAATGTATTTAAACTG

A\_14\_P126917 CCACTGCCATGCTCATCTGCATATGTATGGTTTCATTCGTCTCATTGTTGAAGAA  
A\_14\_P112731 GTTAGAACCTTGGAGAACACTTGACTAGAGAGTTGATGATTCACCCACAGAATTCAAATT  
A\_16\_P15610270  
AGCAGTAGAAAATTTCAAGCCACACTTCTATCTCAGTTTCCTCTATATCACCTTTGGATT  
A\_16\_P03799230  
TCTTATGTTTAGCAAGGTCTGTGCATTCTCTTACAAAGGTCTGAGAAGCATTAAAGACT  
A\_16\_P02943140  
AAAAATCCAGTTACACTGTCCTTATATTTTGGATCAGTGAAAACACTATCACAGACTGCCAC  
A\_16\_P18472161  
TCCCTTGCGATATCTTTAAACACAAAATGGCAGTAATAATTACATTGGCAGTTGAAGACG  
A\_14\_P109315 ATGTGAAAGAGTTTAAACAGCATATGGCCTTGACTTTGGGCTTTTCTTTATATTCCTCAT  
A\_14\_P112514 AGTGTTTTATTAACAAAATCTTACAAAAAGAGTCTGTCTCTGGGGTAAGGTGCACAGG  
A\_18\_P17043266 CCTCTGACTCATCAACCCTATTCCAGCATGTTCTCACTGAGCCTGATTAT  
A\_14\_P128715 GTTGATGCCTTTGGAACGTCATTCATTCTCGATGTCGTGCTAAATCAGTAAGT  
A\_14\_P118855 AGTTTCTCTGTTTAAACATTCCTTGTAAGAAAGAGGAGGAGTTCATATCCAGCATAGTTTG  
A\_16\_P15487687  
AAAACCACAGGTTTCATCCAAAAGATAGAATTCAGACTGAGCAATATGAGTTGCCTTATC  
A\_14\_P201705 CTACAACGAATGGTTTGAGATTTTTACTACTCCTAAACAGGAATGGATGCAAAAAGTCAG  
CUST\_3366\_PI426210822  
TTTATTCACTTTTATCATGGTCCATTTTTACTCTAGGAGTTAATTCAAATTTTGGAAAGCA  
A\_18\_P14469384  
ACCAATCCAAATATCTTACCCCGTATTTTCATAAAACCCACATCTTATGACTATGGAGAGA  
A\_16\_P18699760  
TTTTTAATAGAACTGATACCCGATTTAAACATCACCATCTATCAAAGCACAAGAGCCCA  
A\_14\_P118276 AATTAATTATTGGTGGATAAGGTGGCCCAAATGTGTTTTTTGGTAGAGAAGTGAGTTTG  
A\_16\_P18925736  
AAAAATACGCTTCTATCTTGAGCATAACAACCTTGCTAACAAAAGAACTCTTCAGGGAGA  
A\_14\_P134137 GACAGAAGAGTGATTCATTAACAATTGCTCAGCCACAATTCTCGGATATAGGGATTCAA  
CUST\_806\_PI426210822 GGTGACCATTACTGCTGTGGTGGAATGGGTTCTGTACCCTTATAC  
A\_14\_P112316 TTCTTGGTGGGTTATAATATGTCGGAGCATCATATAATAGGTAACACCTTGGAGATGATA  
A\_14\_P200878 CTGGCCCTAAATATAACTTGTTATTATATGTAGGTTCTCAGAGTGTGGCTCCATTCTCA  
A\_16\_P41629145  
TCTCTGCTTAATTCAAAGGTGTATAGGTTTCAGGTCATAGCATAGTTTAGGGCAAAGAAA  
A\_14\_P137736 ATGTAAATAAATTAGAACATTACACTTGAAGCAGAATTCTGCTCTGACCATCCACCACAG  
A\_14\_P130842 AATGACTGCCCTACACATTCTCCGGTGACCTCATCTACTTTTTGATTTTAAAGATAAAATAC  
A\_16\_P02953387  
AAAGTAGTATTCAAGCCAGTTTAGTCTTACATTCTAAATCACCCCTCTATGAAACCTCT  
A\_14\_P100716 TTAATTATGAGACAAACATGAAACAGAGACCCCAAAGGTCAATGTGAATATTTGCTAGG

A\_14\_P137809 ATGGATTTGCATTTCTTACATGTAAACCTTGCTAAGGTAGCAATGCTAATGGTCAGAGTT  
CUST\_499\_PI426210822 C TACTCTTGGGGGGATGCTAGGGTTCTGTTTTCTGGAGATGTTTTG

A\_16\_P19851673

AATGATCCTTCTCGAGAAATACCTTAAAACTTGCCATGAAACTGTTTTACTGTTGCGTC

A\_18\_P11118873GGAGCATATTTACAGTAATCTAGAATGTTCTTTGTCATCTGTATACACCTCTCTCCTGC

A\_14\_P131523 GTTGAAAGATAAAGATTTTTTTGGGATGCTGGACATTTATTGAACACCAACTGCATACCAT

CUST\_8455\_PI426210822 AGCCTGAGCTGCTGGAACCTGTTCCCTATGAATTCATGGCATAATAG

A\_14\_P134022 TAGAATTGAATTTCACTGTTTTTAATCGGGCTCGTTCTTTCTTCTCAACTCTGTCAAAGT

A\_16\_P03591773

AAAGTGAGACCATACCATCATGTCTAACTGCAACTCTAGACTGTAAGTTACAAATCAGTG

A\_16\_P19937204

TCTACATCATGACCATATGGACTGATACTATTCTGTAGCCAAAAATCTATGATGCCTCT

A\_14\_P114486 CACGTTAAGAAGCCCGAAGGGCTTTTCAGAAATCGGTTTGAAGTTAGAAATG

A\_16\_P02734852

TTCAAGAGAAGTGTCATGCAAGATAAGGCTGAAAAGACGTTTAAAGATCCAAGAGTGAAG

A\_18\_P11763827

CCAAGTTCATGCATAAGAAAACCTTAGGTTACGGATATACTATGCAAGTTACATCTCTTCC

A\_18\_P15308933

AGGGTGTCACACTATGTAATGTTGAGATTTAACCAAGATTAATTTGTTGACCAGTAGGCT

A\_14\_P102054 TTGGGAAAACCAGTGTCACACATTTGTTAAGATACAAAACACTACTGTTCAAAGTTTGTCCA

A\_14\_P121573 AAGCAAATGTTGGGAAAGTATTTACTTTTTTCGGTTTCAAAGTGATAGAAAAGTGTGGCTT

A\_14\_P111443 TGTAATTGGTGATGTTTTTCAGGATATGAAAAATATAACACTATTCGAGCAGACCCAGCAT

A\_14\_P131749 ATGGTATTGTCTGTAATAAGGTTAAGATTTCTTCACCAGGGCTCATAGCAAGAGAACTAT

A\_16\_P30952245 TGGACATGGCTCGAGGTGGGTGACCATTACTGCTGTGGTGGAAAT

A\_14\_P133998 ACTGTCAACTCAATAAGCATGGGCAAAAGACACAGCATTTTCTACGAAGAAATGTATATG

A\_14\_P111232 CACTCATCTAAAGAAATTGCCACTTTACTCCATTTTGCCTTGTTGAAAAGTTAGTAGCAG

CUST\_9851\_PI426210822 TAAGAAGCCATCTGGGTTAGCACAGGGGGCTGGGTTTTACAGCTA

A\_16\_P18792004

AAATCTTGAAATCAAGGAAGTAGGAGAAAACAGTCAACAGTTAACCAGCAACCAACTTA

A\_14\_P125137 CTGGAACCTTCAGGTATGGAATATGACATTAAGTATAGCCTATTTTGTTTTTTCCAGGG

A\_14\_P118414 ACTTACGTTTCTGAAAGATTAAAAACCTCTCTGAGGATCTCCATTCTCAATGGCATATGTT

A\_14\_P202389 TAGTATTCTTATAACAATCAAGTCCTCCATGACTTACCTTGATGTTGTCTGCATTAGGGG

A\_16\_P20096282

AAAAGTGCTTAGTCCTTGACTTATTGATCACTTAGTGATACTTTTCTGTGGAGATCTGA

A\_14\_P115331 ATGAAGAAATGAAATATGAAACCTTTCCACAGTGCTTCCCATACCTGGATTCAGAAATTT

CUST\_6355\_PI426210822

TTACAGGGGTGCACTATGATCTCTCTCTGGAGTTAATAACCATATGGATCTGTTTT

A\_14\_P121430 ACACACTGATGAGTGTCTTGAATTACAAAAGGTAGGATTGTTTTCCATATGCTTTTACA

A\_16\_P19106696

ATGAAATGTAAGTAGCATTGTAGAACTAGGAATTGGCATCATTTAGGACCATTACCCGA

A\_16\_P00235877

AAATGTATGCAAAAATGTCTTCAGAACCTCCATATTCTCAGGTAAAAGAATTCCAGTGCC

A\_16\_P16898547

GCACAGTGGGTTATAAACAGTCTGATTATCTCAAATGATATCCATGCTTGATCTCTCTTG

A\_16\_P17025050

AAACTGGCTTCATGAAAACAAACAACACTTCATACCTGATTACTTTCTCTAGAGTTCTGG

CUST\_6640\_PI426210822 AGAAGGTAAGGAGGGGCATCCCTGTAAAAAGAGCAGTTGTTCCATCT

CUST\_10184\_PI426210822 AATATTGGGCTGATGTTGCACTGTCGACATCTCGAGACAGAGACATG

A\_14\_P107804 CTAAAAATATTCCTTTGTTGAGTAGCGATCATTGGCAGAAGTGGGTATTTTGCCTCTTA

A\_14\_P130285 TATTTTCATGCTTGCCTTTCTGGCCATCTCTGATTTATATTGTGCCTTTCTATTAAGGCA

CUST\_1953\_PI426210822

AGTGACTATTTTTATTTGAGAGATGTGATCATGTGGGAGTCAGTACTTTTTAGAAAATT

CUST\_2046\_PI426210822 TCACAGTCCTCTTGCCTTCACTTCTCTACTAGTGTCTCCAACCTAGATTTA

CUST\_2273\_PI426210822 TACCTCCTACCACTGGCTACAGTGGGCTTCATTTTCCTCCCCCTT

A\_14\_P129279 TGCTAACTGGAGAATCATATACAATAACATCTGAAGAAAGGTTTGCTGCTGAAAATGGTG

A\_14\_P139477 TAATGTGAAAATTCTCTCAGTAACACTTCCGACTGCACTGTATCTTCCCATTCTATTAG

A\_14\_P111505 ACTCTCAAAGCGCTTGCACGAATTAGTTGGTTTGGGTCCTAAAAATAGTGCAAAAATATT

A\_14\_P109010 GGGATCTCAGAATAAACTGTAAGCAACTTCCACAGACTCTCATCTAAAATTGTTGTTGA

A\_14\_P131705 GCACAAGAAAATAGAATGCTTTATTTTTGGAAAGTAAGAATTACTGATGAGCAACCATAAA

A\_14\_P136543 GTCATTGATTTGGAGTTTCTAAGTCAGTATATGTGCGTTGGTAATCTTGAGGTAATTTTG

A\_14\_P125804 CTTCTCATAACCAGGCAGGAAACTCCTCCTTCAAATAAATAAATGTAATTAGTTATCAAG

A\_16\_P02310059

ATCACCCAATCAACAGAGATTTTCATGCTCTACCATCTTAACTAACACAAGTAGCATCAT

A\_16\_P15853500

AAAAACGCAGGTATCAGTGTATGTCCAGAACTCTATGCCTTTTGCTTTTCTCAAAAAT

A\_14\_P101213 AAATATTTGTTTCCCACTTCTGTTTTCAGGCTCCTATGTTTCTTTTAAAAGTGATCTGC

A\_14\_P105130 ATTATTGCCTGATGGGCTTATTTTTCAGTGTGTAAATTTTACCTCCACTGCACATTCA

A\_14\_P127460 CTGCTAACCTTAGTGGAGACTGCTCACTTGTCAATGAAATATTCAGGTTACATTTTGGAT

A\_14\_P133639 CTATTTCTGTTTAACTTCTTAGGATCTTGCTCATTGACCCTTGCTGGGGC

A\_14\_P120494 GTAGTGCCCATGATGATGTTATCTTACGGACATTCTGAAAACCTTTCTTGACCCTGA

A\_14\_P103765 CAAATGAACTCAACAACCAAAGGATACTGTTGGATTTTCATGTCTCTATGGATGATGTTCT

A\_16\_P17300030

AAAACCTGAGAGATACAAAATTGCCTTATAACGAATCAGAACCAAATCTTTAAGCCAAAAGA

CUST\_7392\_PI426210822 AAGGGTCTCCTGGCCAGCCCTAAAGGCCCGGGCTGCTCTGCTTAC

CUST\_6739\_PI426210822 ATTTTTCTTTGAGGGAAGGCTGCTTATAAAAACATGGGGTACACATGGATG

A\_14\_P133921 ACACCATCGAGTCATTTAGTGCTCATATTTCTGGATTTTATAGTGGTTGATGGAATAGACA

A\_14\_P127202 TTGTTTACTGTGTTGGTGTGAAAGATTTCAATGAGACACAGGTATGGTAATGGATTTCT

A\_18\_P22841084 CCTGAAGAGGACAATCACCAGGATTTAGGGGAGTGTTTTTGTCTTTATTCACTTT

A\_18\_P14057873

TCGGTAAAATATTACGTTTCATTTTCAGCAATCATCCTTACACTACATAATGAGCACCACA

A\_14\_P135890 GACTGAGCAGGTCAGAAGTGGCAATGAAATTACCTGCTACGAGAACTTC

A\_16\_P01975348

GCCAAGAGTCTATATTTTCAGATGCTAAATAGTCAGATGCCTTAAAGTGTAATCCTTCCCA

A\_14\_P112214 ACAAAGGTTTGGCAAAGTTCAAAAAGGCCTCTTGGGATAAAAAATGAATTCTACAAACAT

A\_14\_P121609 AATAATAATTTCCACCACCCTGGGAGATATGTCTTCTTGAAAAGTGTCTTTTGCTGAA

A\_14\_P135670 GGTCAGAACATATTTTGCAAGATCTAGTGCCTAGTGTGCTTTTCTGATGTAATAAAAGG

A\_14\_P100290 CTTGCACTTTCTTTCTCATAAATGGTAACGTCCTCTATTGGTTAAGCAGTTCAACTTCA

A\_16\_P21481775

TATGCAGGTAATCTGAGTGATAGCAAGATATTACAGGGATATGGCCTTAAAAGTGGATGT

A\_14\_P117527 ACCATTTGAGTGTAACCTCTGGGTAAATCCATTTTTAAAAAGAAGCCTACTCAATCTCA

A\_16\_P18952308

CTCAAGTCCATGTTTCATATTTTACAATCATCTAGCATCCTAATTACCAAACCTTCTCCCA

A\_14\_P125654 CTGAGAAATTGTTTTCTATATGTAGAAGGAAAACCTGAGCATTTGCAGGCATCTGGTTAA

A\_14\_P134707 AGGCAACTTACATATATTACTTAGAAGAGAGTTTCTAGATTTACCCCTCTATTCCCTCC

CUST\_5439\_PI426210822 TGGTCCACACTCATCAGATTCTGGGATGTGCGGCTGTGTAGAGAA

A\_16\_P19519774

AATTATCCTCAGCAGATGTTTTCTTGTCACAAATCGTATATTGCCCCACAATTATTCTCC

A\_14\_P137919 CCATCCCTTCCTTACTTGCAAGATAAGATATCCAATTAACAGCAAATACAGACCTTACAC

A\_14\_P124477 AGGAAAACCATATTGAGGCTATTGAGTGTGAAAATTTGGAAAATCTCTGTGTTGTTCTTC

A\_16\_P39147649

CAAAACCTACCTACTCTATGAAGTCTTCAACATAAACCTCATCTAAAAGTGGTCATTGCC

A\_14\_P137996 TTTTGGGTCTTTTTTCAGTTTTGGGGCAGACTAGAAGAAATAATGCTCATTGGTATAAT

A\_16\_P16191119 CTGAAAACAGTGCTTCATGCTGCCTGAAACAGGGGTGCCTTTAAG

A\_14\_P130546 ATACTCCTATCACTACACATAACCCTCAATGCACTCAGTATGTTCTATGTTACAGTTCA

A\_14\_P123522 ACCTCTAGTTTCTAGTGTTCGCCAGTGAGTATGCTATTTGCTGTAGTTTCTTCTTTCTC

A\_14\_P114625 CAGTGGAGAGAACTAAGGATCAGTGGTCATAAGTAGCCTGAATTCTATTTCTATCTTTGA

A\_14\_P133337 TGTAGAAAAAGAGGATCACAGATCTAAGGTTTGTAGTAAGAGTCTGTGGTTTCCAGAAT

A\_14\_P106058 CTGTTGCCAGTATGTTACTCCTTTGAAATATACTCATGATGTAAAAGGGAAATGGATCA

A\_16\_P20905138

AGGTCAACATAACTACTCTTAAAAACAATATTGCCAGTGATAGCCTTAATCCATCCCTT

A\_14\_P138473 GTCTCCCAAACACATAAAGGTTGATCAGATTTAGGGAAGCCAAAATTTTGACAAATACAA

A\_16\_P35462921

AAACCCCATCTATAGTTATGTTTCCATTATATTCCAAACTAGAAGTGAATCATTGCCAAA

A\_14\_P136105 GATGAGACAGGTTTATTTACCTGTCTCGTCAAATGCAATGTCCATATCAAATTTTGAAAG

A\_14\_P202376 GAACATATATCAAATATCCATGCGCTGAAACCCACATACCATCACTTGGCAATTTTTTTAG  
A\_14\_P116282 AACTTACCCATCAATCCAAAGGGGAAGAATGTGTTTCTTAATTAGATCCAATATTGCTTC  
A\_18\_P22839946  
CAGCCTTTTTCTTATGTTTTAAGTTTGCCTATGATGTCTTTATCATCCTGGCAATAAACA  
A\_14\_P101631 AGAGCCAACCAGATCCTCTGTAAACTGTAAAGATCACAATTTTACCATTAAAAACAGTTCC  
CUST\_3192\_PI426210822 TAGCAGACAGTGGGGCCAGCATGAGGGGCTGGGCTGCTTTGTTTA  
A\_14\_P127573 ATTGATTACCAGTGGTTATACTAAGAAAGTGGATATCACATTTATTCCACGGAGGGTAAG  
A\_14\_P117425 AATTTGGGGGAGTGTTTAGAGCAGTTTCAAAGATGAGAGCAGTAGATCAAAGTAGAATTT  
A\_18\_P22842821  
AGAGAACAGAGAACGAAGAACAGAGGCTAGAGACATCTTAGAGGAAGAACAAAGAAA  
A\_14\_P125964 TTTCAGAAAGCACGTTTTTCTCCATGTGCATGCATTACCTATTCCCCTAAATAATCA  
A\_16\_P37502649  
ACACAAGAATACCCTAACTACATAAACTACATTACATGTCTACTCATACTGCTCTTT  
A\_14\_P112008 AATTCCGATCTGTTTTGCTCTGCTCGTTCGAATTGTTCTGGTTCCATCTTC  
A\_16\_P30952264 ATGGCCGTGTGTTGGTAAAGTCCCTCCTGGGGGTGCTGTGGGAAGG  
A\_14\_P119392 TAAACCATCCTAATAAATCTATCCTAGAACAGGCTTTCCAATGGCCAAATTTAAACCAT  
CUST\_5318\_PI426210822  
TCACCCTATATGCTGTTATGTAAACAAGTAATTTTTTAGGATGATGTCAGAACCTGATGT  
A\_16\_P16014712  
AAGGCACAATCAAGTGAAATCTCTTGTCCAAGGTTTCATTCATTTAAGACATGTTAAGGTA  
A\_14\_P106459 AATGAGCCCTAAGACAATATTTAAATGCGTTCTTGGCCAATGCACTTTAAGATACGATACA  
A\_14\_P109609 GTTGCCAGTTTTTGCATAGCATGAAGTGGTTTTATCTTTTCTCCGATGCTATGTTAAATC  
A\_16\_P15618474  
ATACCTATTGTCAGAAGTTCAACCAAATGAGTTTTACGGAATAAAAAGTGCCATTGAGGAG  
A\_16\_P03323049  
CACTCCATAAGGCTTTGATCCTAACAGTGTTCATCAGTAGCAGTCATCATTGTATACTT  
A\_14\_P125783 TCTAAAAGTTCTCTTGAAGTTACAGATTCCTGAGATCTTTATCTGGGAGAGCAAGCATT  
A\_14\_P128620 TGTTATTTCTAAACTGAACCTTTCATTACTTTCTTTAGCCAAAAAACAGGCCTGCTGCAT  
CUST\_134\_PI426210822 GAGACCATGGGAAGGGCACTCTAGAAAAAAGAGCACAGGAAAAAGTAT  
CUST\_8476\_PI426210822  
CTGAAAGAGAATATGGTAGTTTTCAAAGTTTGGAGATTTTTAGATGCATGTTAGAAGTGTTT  
A\_14\_P102581 TAAATTTAGGAAGCAAGGTTTCGTTAGGGGAGAGAAAAAACACCTACATGGTTATCTCTA  
A\_16\_P17888368  
TCATGTTCTCGGATTTCTTCATAAAAGCCCTACAAATCTTTCGAATGATTCACCACAAAC  
A\_14\_P125625 AATGGACAGGACGTGTCTTTCTTAGACAAAATCTACCAGGAAGATATCTTTCCATG  
A\_14\_P138684 CCCAAAAGCACTCCTTGAACAACTTCAGTTCCTTGTCTTCTTCTTGATAATGTTT  
A\_14\_P131457 CCTGTATTCATGAAAGGAATTTTACATAAACCAACACAGTCTCTACCATTTCTGGTTG  
A\_14\_P131768 CCATCTGTAAAAAGTGGAATGATTTGTGCCTAATGTTACAATGATAGGGGCTAAGAAGAA



A\_14\_P117215 CTAATCTGTTAGAAAAGCTAGAGTTCATTCCCTGGGCGTCTATCCCTAGAAAATGGAC  
A\_14\_P104055 GAAATCCTTAGATATTCCACATACACGCAATACTTTAAATGCCAATCCGAACCTTCCCTCA  
A\_14\_P100955 TTTAGAGAAAGGCTGATTCAATCTCTCCAGGAGTTTAAAGAAGATATACACAACAGGCAT  
A\_14\_P104422 GCGAATAGAAAAGCTGTTAAGAACTATTAAGTTCTCATTAGTGATACCCCTGGATTAGGGC  
A\_14\_P119672 CAAATACACCGAGAGGAGATTCTGAAAGTCCTTGGGATTTTGTGTGGAAAATG  
A\_14\_P128237 GGTTTCATTTTGGCCAAAGCAGTTGTTCCATGATAAACTAAGATCACATGTGTTTAAACAT  
CUST\_4947\_PI426210822 CTTTCTTCTGTTTGTATCTCGTTGGGCCCTCAGCTGTGACTGTGGA  
A\_16\_P35719831  
CGAGCCCCAATTTTTAGATACAAAAGGATGATAAAAGTGAAATAAAGTGGAACACTGACC  
A\_16\_P19794092  
AAAACGTCAAGGAACAAACTGTTATCTATTCAAAAATCAAAAACAAAGACCGATTTCAGT  
A\_14\_P136974 CAGAACACTGGAGACATAATTCTCAGACCTGCGACATATCAAAAAGTTTAAACACATTTGA  
A\_14\_P119459 AGATTCTATTAACATTTTCTTACCAGCATTTTGCAGACGTCCTCTCACTATTTCCAGCC  
CUST\_948\_PI426210822 TGGGACAAGGCCCTCTTCCCCTTTCTTATGATTAGTTGAAATCTG  
CUST\_4286\_PI426210822 AAGATGTCTGTTCCACTTCTGGCCTAAGCAATCCTCAAGCCTCTATACTTA  
A\_14\_P201703 AAATTCTTTCCAATTTGTATACTGAGACCCTCTTCAAGAACTATTTGTGTTCTTTGAGC  
CUST\_7598\_PI426210822  
CAGCCTATAAGGCAAAGGAAAAGAGTGATAGAAAATAAAAATAA ACTTGATTCAATTAGATG  
A\_14\_P103351 CCTTATTCAAGAACAGATGAAGAAAGGCCACAACCCAACTGGATTACTAGCATTAC  
A\_14\_P129750 GCCTTGGCCAAGACAAAAAACCAGAGTATGTTTCCTCATTATTATAAACACAAGTTTCGC  
A\_16\_P03436672  
CCAGATATGCATTATATTACCTACCATTACATTCTACTTCAATCAAAACCAATCACTGC  
A\_14\_P200275 TTAACATAGGATTTTCATCCTAGAATGACTTTTCCCCAAAAGATTCAATCTTAGGCCTC  
A\_14\_P130875  
CTTTAAAAGATAAGGTCTCCTCCCCTCAAAAAAAGGAAAGAGAAAAAAGAGGGCTTTAA  
A\_14\_P133698 ACCTTACAAAGCCACTTAAAACAATAGTGTAATCTATATTCATTGACATAGAAAATGTC  
A\_14\_P118281 ACACGTTTTGATTAAATTTCTATTTTCAAAGTTAGGTTGTGGGTTCTTGAGTGTTCGCTC  
A\_14\_P108030 TCACAACCCAACAGTATGTCTGTAATTCATGGTGGTTTGTTTTATGTATAGCAGCAGAAA  
A\_14\_P122818 CCTCACCTATATCCAGAAAAGTTACTCTTTTCTAGGTTTTCCAGAGCAAATGATATTTT  
A\_14\_P200259 TGATGTTGCCTGTTTTCTTTTTAATAGGAGAAGTGTTTGAAATTGAAGAGCATATCAGCG  
CUST\_7667\_PI426210822  
ATTTGTATTCTCCCCATTCTGTGTCTGACATCTTGTAGGTGTTTGTAGATGATTGG  
A\_14\_P105938 ACATTAAGATGGACTTCTTATCTGGATAGGTGGTATCAACATCTGTAAGCACATTAACAC  
A\_14\_P116871 GGCTTTTCCTTACCTACTAGAATTGAGTTTTAGGTGGCATTTTGGAAATCATGAACTATG  
A\_14\_P116636 CTCACATATAAACTGTAATAATGATTTTCAGAGGGTCATGGAAGAGGAAGAAACGAATCAGA  
A\_16\_P17771542  
AACCTAGGATCCTCTAAAAGCAGTTTTTATTCTCTTTAATCCTTCTGTCCCAATATTGG  
A\_14\_P134067 AATGTGGACAAAGGCCTGAAAACACTGTGCTTATAGTTTGAAGCATTATATTTGCAGT

A\_14\_P126961 CTAAGAAGCCATAGAGAGTAATTTTGGAGTCTTCACTAACGGAGTAATAAGAAAGGGATG  
A\_18\_P14133372

GGGTTATACATTTTCAGACTAATGATGATATCCATTACTATATGTGCAATTGCTTATAAAC

A\_14\_P127421 GGTCCCTAGATAGAATAATAATATAGGCATCTTTTGGATTTGGTTTGGTATCATGCCTTTTT  
A\_18\_P21944667

ACCAAACCTCATCCAAATAACAAACCATCTCCAATTTTCTAACTTTACACCTAGGATCCAA

A\_18\_P13189800

AGGCACGTGAGAGGATATATTAAGGCTGCATTATTAATGTTTGGCTTTTACCAGTGAATGAA

A\_14\_P106240 AACTTATCCCATCACATTTAAAAAATCAAGTTCCTTCTGCTCCATCTTAGGGCTGTTTT

A\_16\_P16191229 GCTTCCATCCTTACAAGATCATTGTATAGCCCAGACAGTGGTCGTCTGAG

A\_14\_P100221 GTGTATACCTGAGTGCTTTTTCAAGGCATCTTTAATGGTGATGAAGTTTTTTAGTGACTT

A\_14\_P113978 TGATCTGACCTCTGAGCACAGAGAAATACATTAATGGAAGAGGCTCATAAAAAAGATTA

A\_14\_P139899 TACCTGGAGCCTCACCTCCAAGGAAATTCATGTTCTCCTTAATGGAAAAAAAAAAAA

CUST\_9255\_PI426210822 TGAGCTGTTTTCTCCCAGTTGCTTGACTTAAAGGCATGCTCTGGT

A\_14\_P117562 CATCCTTATTAACAATATGCAATGCCTTCTCCCTGCAAGACTCACTACAACACTGT

A\_16\_P30952276 CTATCCCTTTAGGCCTGTGCTCATCGCTGGAAGAACATCTACTATGAAGC

A\_16\_P36082586

CCTCTTGACGAATTGATCTCATAAAATGATGCCTTGACATTCTTATCTTTGCAACCACTA

A\_14\_P127141 CTCTATTTGACTTGGAGCACGACTTACCAGATGAATTAATCAACTCTACAGAATTGGGAC

CUST\_7263\_PI426210822 CGTATGAATACGTCAAGCCACTTCAGCATGATGGCGTTTAAGTTTTAGCTTGT

A\_14\_P116969 GAGATCAAGCACAACACCTTATAAATAGTTGAACTTTAGGTTGAAGTGGATAAGAGGGT

A\_14\_P119698 GTAAAAATAAGAGCCTGACATTCTCTCCTCTGGAACAGAGTCCTGATGAACC

CUST\_1255\_PI426210822

TAAAAGTGGTCTCCACAAGGGATAAAAATCAACGAAGGTCCATTTACAAATGAAAAGG

A\_18\_P10088930

TTAATCAACTGTCTCGTCATTTATTCCTACTTGAATTACCAAAGATGCTTGCTTATGGGG

A\_14\_P102529 CTTGTCAATCAGAAAACATGCTGTCTGCTCATTTTTGTTTATCCACTTTCCATCCTAAAT

A\_18\_P16896621

AAGACACAATACCCCATCCTAATCTTGCTAAATATGAGACATTGGACCAATCCTATAACA

A\_14\_P115163 GGGAAATCTCCTTCACATTTTGTGCTAATGTGGAAATATTATTTAAACCCCAAGTTCAG

A\_16\_P36230810

TTCTTTGACTTGGCTGGAAGTATACAGCAACCATTTTATTTTTCTTGTGCCTCATGAATT

A\_14\_P114462 AGTAGAGTGGAAATGGTTTAGATTTTGCTAGTTATTGAAGAGGTTGTGTGTGGATAACTG

CUST\_4911\_PI426210822

GGTTAAAAATCACATGGTGTGGGCATTTATAGGGGTAATAACTTGAAATGATTAAACCCT

A\_16\_P00191828

ACCCCAAACCCACTATATATGTCTACTAAGAACAAAACCTCAATAAAAAATATGCCTTGAA

A\_16\_P01411179

GATTTTCAGATTTGACTTTGTTTCTCCCAGTAGAAAAAGCACTTCCATGTGAAAAGTTCA  
A\_18\_P16741684

AAATGTAAAGCACTTCACCAACATGTTTTACTTGATCCTGAGATACTGTGCGAAATGTTCC  
A\_16\_P16683152

AAATCTAGTGCTCGTGTTAGAAAAGTGTATAGATCAAGTGTTCCTAGTTTGCAAACCA  
A\_14\_P102220 ACTGTGCTTACTCATGCTAGTTGACAATTTTAGATATGCACATGGAATACCTTTCAGCAT  
CUST\_9684\_PI426210822 ATGCTGAGATGTAGGATGAAGAGGAGGGTGTGTAAGGGTCATCA  
CUST\_5993\_PI426210822

TATCCCTTACTTAAAACATGAGAGTTAAGTTTGGATGAAATGACATGAATATACTATTA  
A\_14\_P136662 ATTATAGTGGAGTAGCAGTTTGTGAATCTGGAGTCCTTGGTTCAATCACAGAACAAGTA  
A\_16\_P18822306

ATCTGTGCCTCTAGTTTATGGTAAACCATCTGCTTTTTAATTCTCAATTCCGTTTCGAG  
CUST\_9401\_PI426210822

TCTGTGGAATGCCAGGCCTAGATTTGCTCTACACAATTAACAGCTTTATTTATCCT  
CUST\_3079\_PI426210822 GCCAAAAGGAGAAGGGCCAGATGCCAGGGTCTACTTTGTGCTG  
A\_16\_P18644442

ACTTTGCCATCTCAAAATTGTCCTCTGTAAATTCACACAGTTCTAATTTACCTACCCTAA  
A\_14\_P107577 ACTTCACTCTCAGGAATTTGAAAACTTACAATTTGGTTACCTTTGTTTGTGTATGCACA  
A\_14\_P127884 GTTTCCCTTAATCCCTTTTTCTGATGGGGACATAGGATATAAATAAGTGTAGAAGATT  
A\_14\_P129105 ATGCCATTCAAATTTTCATCCTTAGAGCATCCACAACATCAGCATAAGTATCTTTATGC  
A\_14\_P122650 TTTAGCAATACTGCTCTAGGCAGATGACAAATTCGGAGAGGATATGAAACTGCTTGATA  
A\_16\_P16776396

AAAAGTTTTTTTGGCATCACACCATAAAGTCGTATTGGAAATTCGAAGTATCTGTCTTGG  
A\_14\_P131936 ACTTTAATAAACTATGAGTAAACTAACAGAAGAGCACTCCTGCGTATTAGAGAATCCGAA  
A\_14\_P201961 TAACGGCAAGATAAAGGGTAGAGATTGTGGATGAAGATAGGAAAGAATCCAGAAGG  
A\_14\_P127300 CGTTTTCTTGCCATTGAAAGAGAACTGGGAACTTAGATAACAGGAAAATCTCCACATAC  
A\_14\_P105234 AAATAAATTACCGAGAAAGCAAGATTACGCATGGTAAGCGGAGAGAATTTTCACTGTAGT  
A\_14\_P108452 GAAAGTTCTAGAATTTGAATTGATAAACATGGTGGGTTGGCTGAGGGTAAGAGTATATGA  
CUST\_8503\_PI426210822 AAGACCTCTTTGGAGATGGGGAAGAGTTAATTACGAACCAGCTCCT  
A\_14\_P115840 TTTACATTAGAGTCCATGATATAGGGTAAGATGGTGGCTTGTATCAGCATTCACTGGATA  
A\_14\_P107806

TTTTTAAGAAGAAAAAGAAGGCCCTGAGTCAAAGAAGATGCCTCGAACTAAACAAATTCA  
A\_14\_P135115 TTAGCAAGTGGCACTGAAGAACTATTCAGTAAACATGATTTCTCTTTCCCATCTAACAG  
CUST\_10064\_PI426210822 CTCCTGCAGGATTTTCATCGTTGTTAGTGCTGCTGCTGCCTGAATT  
A\_16\_P02966376

AGCCATAGACCAGTTTTTAGTTGGGAAGTTATGTCATCATACTGACACTACACAGACTAC  
A\_14\_P133309 GCAGAACCCTGGTTCAGAAGGAAAATATTCATCAGATACAAATCTTATCCTAATTTGATT  
A\_14\_P106572 GGTTTCATATTGATAGTAAAGTAGACTTTTTGAAGATCGCCCCTCCATTGTCTTCTTTTCAA

A\_18\_P22841217 GTTTGAACAAAATGGGCCTGATCTTGGGCTTCTGAAGTCCTGTATAGTGTAAG  
A\_14\_P123131 ATCTCAAATGATTTAATTACTGACTTGAGTTTGTGTTGTCTCCTTAGACTTGTGCACCAT  
CUST\_2032\_PI426210822 AGATCTGAGAGTGGGTGGTGCAAGGAGGATGAGATTAACCTTTGA  
A\_16\_P20001075  
AGTGCTCCAGCAATTGATAAGTCCCAATGATTATAGGCTATTATTTTGCATTCAAGTGAA  
A\_14\_P132549 TTTGGTGGGAAGAATAGAAGTAGGTGCCTTCTGACCACAATTAACAGTCAATTAATTTT  
A\_14\_P134066 CACCAATCCAAGAAGCCAAAGCCAGTTTTATTTTACAATCATCTTTATTACAGTAGGATG  
A\_14\_P108737 CTCTTAATAGGCAATAGCCCTGAATCACCTCTTCTACTAAAGTTTCTCATAACTGGCTTT  
A\_14\_P107643 AAAAATCAATTCTCACGTCTTCAATTAATGATTTTCAGAAGGGTTCATCACCCGGAAAA  
A\_16\_P21401877  
AAAAAATCATTCTCTTGGACCATGACAACCTTTGAACAAAACCTATTCTCACAAAATTTCA  
A\_16\_P18643638  
AACAGTTTCTTGAGATAAATCAACAAATCCCTAATTGGGTTACAGTAATCAGATGTGCC  
CUST\_8908\_PI426210822 ATCGCTTAACTCCAATAAAAGGCCATCCCCATGCCTGGGAAATG  
A\_16\_P20592128  
CAATGATTCATGTCGATGTAGTCAATGTCCAAAAATTGTTTTCAATCGCACAAAAGATCCA  
A\_14\_P112663 ATACTCAAAGTGTCCCTTAATAGTGTCCCTTCCCTGAAATAAATACCTAAGGGAGTGTA  
A\_18\_P13383000  
AATTTACTTCTTGTAGCCATTACTCCTGTTTACAATCTCACATAAATGCTTACCAA  
A\_14\_P131979 CTTTCACAGTTAGTTAGAACTTAGAGACCAAAGCCTGCTCTCTAATCCAACATCATTTT  
CUST\_1105\_PI426210822  
AAGAAGAACAACTTCATCTTAAAAATAGAGGATGATATAATCAATCAAGAGTGGAGGGA  
A\_16\_P02367878  
TGGCTGACATCATGATAAGAGATCTACAGTGAACATTAATTTTCTGGGCTAGTCATTCTT  
A\_16\_P38464390  
ACGTTTAAAGCCTTACTGGTTAGACATAAGTGTTCGTTTCCTTTGAAAACCATAGTCTCAT  
A\_14\_P124671 CTACCAGTTACGATGGCAAACAGCAGTGACCGAGATCGTCAACAG  
CUST\_3991\_PI426210822 GTTGGTGAGCATCTTGGTGGTGAGGAAGTTTATACGACCACAGATG  
A\_14\_P136866 AGCCGGATAAAAACACATACACCAGAACTGGTTCAATAGTAGATATGCATGCAATAGATT  
A\_14\_P116145 GTAATATAATGTTTTGACTACAGGAAAGACTTCTGTTGTTGGTTGGGGCAAGTAATGTCA  
A\_16\_P17660543  
TGAAATCGTGACCTTGAAACTCTTATGCAAAAAAAGCCGTTAATCCCAATTTGTAAAGT  
A\_14\_P109692 CTTCTTTGAATGAACATATGAGGGCTAATTTCTAAGTGGCTGTTCTTATGTGCTTGAAA  
A\_14\_P125646 ACTGGCCATCTTCTTGGGAGGATAATTTGAAAGATCCTAAATATGTTAGAGATTCCAAA  
A\_14\_P132422 CTTACTTTTGGAGTTTACCTAAAATTTCTGAATGTTATAATTTTTGTGGCCTCTTTTAAAG  
A\_14\_P127243 CCAAATCTGAATGATGAAAGCCAATTACAACTAGAAAATGAAAACAGACCCCAGATGC  
A\_14\_P114037 AATGTTGTTCTAATTCGGTGGATGAGTTGCCCATATAAGTAAAATTGCAGAATTTACAGC  
A\_14\_P132380 ACTTGAGTGTTTTTGCAGGGAGGAATCACAGATTGAAAGTCTGAATATTTTAAATGATGG

A\_14\_P116105 GACATGATAAATTTAACTCCAGGGCATCTGCTCCAGAATCCTTTAAACAAGAAAGGAAAA  
A\_14\_P130614 GGTTTTGTAAATAGTCCCTTAATTGAACTCAGCATTGGTATCATTACCACCAAGTTCTGCA  
CUST\_2029\_PI426210822 CTTGAAAACCTCTTGGTTTTGGATGAGAACCTATGCTCAAGTTGATCAGGTTTTT  
A\_16\_P20260079  
GTGACGATAAGAATTATGTAATATAGCATATCCCGAGATTTAGTAAGAAAATGTGCCCCC  
A\_18\_P22843214 GTCATTCAGTGCCGCTGGCATTGTTGGAAAGCAGGACCCTGGGCT  
A\_18\_P22843035 GCCTGCCTCTGAAGGCCACGGGACTTACCTGTTTGTGTTGTCAAAG  
A\_14\_P135627 CAGAAGAAAAATATTGCAAATGTGGGAAACATGATGGGTCACAAAGTGTGGTAGAATATT  
A\_14\_P101493 AACAAAACAGAGATTCAAATTCACCCTCCTTTCCCAATGGTAATTACCAATCTTTGAAAT  
CUST\_4417\_PI426210822  
CCTGAAAGACAAAAGGGAGTTTTATGCCATGGTATTTTGACGACAATGTTGAATCAATT  
A\_14\_P106156 ATACCAATAAATACAGTGTCTATCTAGAATTTGCTTTGGAAGTTAAGCAGTCTTGGGCTT  
A\_16\_P21496237  
CACAGAGAAGTGATGATAAAACCCTAAAGCCAATGAACTAACCAGATAATCAAAACAGGT  
A\_14\_P128121 TTTGTGGTCATGTTAGCACTGATTAATTAGTAAACCTTCCACGTTTTCCAGTCAGTATCA  
A\_14\_P104981 TGCCATTTTAGGGTTGTCATTTCTATCCAAGAGAGGATCTTTACAGGAATTCTTCTGATA  
CUST\_5449\_PI426210822 TGTTCCAAATCTTTTCTTGAAACCCAAGATCACCACAGATTCAGAACCCTGT  
A\_16\_P19295746  
TAAATGCCCAAATGGAATCTTATTGGTCTATGATAAAACCCCATCTAGTCTATGGTAGGA  
A\_14\_P125237 AATATTGAACAACCTTCAGTCCAACAGCATTCTAATTTCTCCCATGATGACTACATTGATG  
A\_18\_P16116085  
TAAGGAGAGAGGTATATATACTCCCAAAGTTAATAACAGTTGGTCCTAGAACCAATTCCC  
A\_14\_P200363 ACTATTTTTTTTTCTTAGACTTTCAAGAGTAGCAGAAGAGACAATAAAGGATTACTTTGA  
A\_14\_P109145 CAGGTGACTGTAAACTAAAGTAAGTTAGACCATCAAATCATGCTGTATGCCTTTGTCTT  
CUST\_8458\_PI426210822  
CTAAAAAATGAAAGACCTCTGGACTGTTTAAAAAAAAAAAAAGAAAAAAGAAAAATCCTTAA  
A\_16\_P16152588  
AAACCTCTGAATATCCTTCCATTTCCAAACTTACTGAAATTCCACTTCACCAGAATGATT  
A\_16\_P02516094  
TGCAGAACGAATACAATTCACCTAATGATTAATACCATAAAAAATCGGCATATTGATCCC  
CUST\_6529\_PI426210822  
AGTAACAGATGGATAAAACAATAAGAGAAAGAAGGAAGGAGTGAAGGATGGACG  
A\_18\_P22840682  
CATTTATTTTCATGCCTTTCTTGTGTTGTGAGATTTTCATATTCCTACTTGCTTGGCCTTG  
A\_16\_P16931516  
AAATGCTGTCTCCAATATTTTTACATGTTCTCCTAACCTATATGTCCCATTGTCTTTCC  
A\_14\_P110283 CCTCACCAATTTGCTTAAATTAGTATGTGCCCTAAAATATTCTATGTTTGTATGAGAT  
A\_14\_P107703 CTGTTAGTGCCGCAATAAATGCTCAATCATGTGCCAGAGTTGCATCTCTTTC

A\_14\_P118209 CAAAGGCATCACTGCTATCAGTGTTTTTAAGTTTCTTTCCAGAAGTGGGATGATATACTT  
A\_14\_P106282 AGCAGAATTATTCAAGCAAGGAAACAAAGTAGAAAAATATCTTCTTTCCCTTGCACCTTGG  
CUST\_2484\_PI426210822  
TGCCTGGTGTTC AATTTTAAGGTGAAAATAATGTTGATATTTATTTTGGGGTTTTAAACT  
A\_14\_P106026 AACTATCTAAATGCTTACCTTGCTGCACAATGCTTTGTGTTAGAGTATGCAAAGTGTAGG  
A\_14\_P119437 GAGCCATTAAAGCAGTTTCTTAATTTTCCTCTTTTTCTGTATCCTTCTGTGTTTTCCA  
A\_14\_P109583 AAGGGAGGGTTGCACATGCAAAAAGTCATAGATTATCTCAGATTCTTCTTTAAGAGCATC  
A\_14\_P101361 CTCTTTGCCTTTGTGTAAAAATAAAATGGAATAAACAAGTTGCACAGAAGTAGTTGTGG  
A\_16\_P17700173  
AAATCAGGCTTAAATCTTTGGTGATCAGAACATCATCTCAGGAAAAGTATGCTCTGAATG  
A\_18\_P13026061  
CTTACACCAGTCTGATTTTAAGTCAACACAATTAGCATTGATCTAACACATGCCCTTTG  
A\_14\_P135433 GATTGTAGTTCTCCCAGCAAATGTGCATGTGTGTTCTTATCATTACCTACAAGTT  
A\_16\_P30952621  
CCTGTCATCCTTGGTCTTTGTATCTTCCATATTTGGAAGAAAAAATCTTCTCCAGATTT  
A\_14\_P133116 ACGAAAAGACTAGGAATCTACTATGCACCAAAACAAATTATTTGGTATGAAAAACGGGCT  
A\_14\_P201913 TCTGGTTCTGGAATTCCTTAAGTCTGCATTTTTAGTTCAATGAAATGGCTTATCCCAAT  
A\_16\_P00113405  
AAGCACAACCTGATAATTCCTTTCTCTTGCTTAAATATCTTTGGTTAACGCATACAGGA  
A\_14\_P131240 GGGGTTGTGCAGGTGTGAATAAAGAGAATAAGGAAGTTCTTGGAGATTATACTCAGAAA  
A\_14\_P120030 CTGAAATTCATGTGTCTGTGAGCCAGAAGAACCTTTGTATGTTAAAAGAACTACTTTC  
A\_14\_P106690 GAAAGTTCTTTCCAAGAAGTGCTATCAATTAAGACATTCCTTCTGGCATTTCCTTCTTCTT  
A\_14\_P136195 CTTTAATTCATGATTACCCATTGTGTGCTATAAGGGTTTGCTAGCCTTCTTGGAAATTA  
A\_14\_P131926 TTTTACCACTGGCTTCCCCACTATTTTAAGATGTAGATAAGTTCAGTATTCAGGTTCACT  
A\_16\_P16173548  
AATGTCACTGTCTCACTAACTAAGCAACTGTCTTTTTCTTCTCTGCATAAATCTAGCCTC  
CUST\_9605\_PI426210822  
ATACACATCTTTTAGAAATGGCAGCAGCTTGTCATCTTTATGAGCAATCTCTCCCT  
A\_16\_P19911866  
ATCCTTTCCAGTTAAACAAAGGCAACCTATAGTAGCAATAGATGTGTCATTCCCATAACA  
A\_14\_P122768 CTCGAGTCTTCTTTGATCTTGCCATATATATTAGGGCCTAGAGTCAAGAAGTATTGAGTT  
CUST\_2625\_PI426210822 GTTGAAGAGACAAGAGGGAGGATGGGAGGCTGCTCCAGAGATGAG  
A\_14\_P107584 TAGAGACAACCTTTTCAATTTGATCCAAATTTGAACTGGCCAACCAGTCTTTAAAACACTG  
A\_14\_P131028 GATCTTTTATGTGAAAGATGTAGAATTCTCGGGCAGACTTTGATTATTTATTCATCCCC  
A\_14\_P131341 CACTTCTAGATCACAGATTCTTTGAAGGCAGGGATTATGTTTTGTTCCACATATATGTTG  
CUST\_4041\_PI426210822  
AACAAGAGAAAGCCAGGCTTTTGATTAATAATTTATATGTCAATGTTGGGATCTTCATTT  
A\_14\_P122999 TATTCTTGGATTCACTAATTTCCCTGCTCAACAAAGATGGGTCAGTATGTTCTGTTTTTT

A\_14\_P110750 TTTCTCACGATCTTATTTTTATTTCTTGGCTGTTTTAGATTTCGGGTTTTGGGTGTTCTGA

A\_16\_P16347980

AGTGCAGGAAGAACAAGTAAATCCCCTTAAAGAACATTGAATCCTATTACTACCAGAGAA

A\_16\_P00685006

GTCTGTTCTGACCAAAAAGGACTTCTGTGTTGAGTTTAAATTAGCAACAGTAGCAACAAT

A\_14\_P104776 CTCTCTCTAGGCTACATGATTCCCTGAAAGATAAGAACAATGTTATGTTGGGGATATTG

CUST\_3235\_PI426210822 CTTGTCAGGCAGAACCTTGTGGAGTGACTAATTGGGTAGCTGG

A\_14\_P116733 GATAACATGCTTGGAAAGACTTACGTCAGTGATGCTTTGGATAATTTCAAACCCGGTC

A\_18\_P22839781 CCAACTGTGGCCTCTGGCTTGTCTTCCAGCAATGTGTATCTGTAG

A\_16\_P17974297

CAGCCGAGACCTAACAATATCTGCACTGAATTCCTATTATGTAAGAAAGGCTTTCTAGTC

A\_16\_P36538808

AAATTTTTCCCCCACAGAAATTATCTTTTGTGCAAAATCAAAAACACTATCTTTGGCCCA

A\_16\_P01819775

AATAAAGTGAGGACTCTGCATATCAAATGGTGTTCATAAAGGTCACCTCATCTCTACACAG

A\_14\_P108775 ATATCTCTGAGAGTAAATGATTTTCATAATGTTTGGCCACAACACTGTGTGGAAAGTTTCT

A\_14\_P135925 CAATCTAGGAGAATGTTGGTCTTCTGCGACTGCCACTGTTACTTCTAATTGTTGTTTTT

A\_14\_P120349 AGAGGAAGAGTCATTAAGAAGTATTTTTAAAATGTGAGTATTTAAAATTATGACAATTT

A\_14\_P200712 ATCTTTGCCCTTTTCTCTTCCCTCCAGCAAGGACAGTAGATGTTAACTGTTA

A\_16\_P16125407

TAAGTTTTTGATCGTATCCCTGTTAGCATAGACTCCATAATTAGAAACGATGACACCCAA

A\_14\_P200087 AGAGGCGATGGAAAGAAAATAGTTAGTTACCAGGTAAGGATGTTTAATAGTCAGGTTTAT

A\_14\_P201648 GGAGGGTTTTGTTTTCCACATTTTTACCCTCAAGTTTTAAAATTTTTCCACCTCCTTT

A\_14\_P131539 GTGACATGGTATAAATGCTCATCTTTTGCTTGACTGTTACTAGTCTGGGATGAGATAAAG

A\_14\_P103389 TTTGAAGTGCCTGAGTCTGGATCTTTAGTATCTTTATTTCACTACTTCTTCTAATGTAA

CUST\_548\_PI426210822 AGCAGATGGGAGGCCACCCTTGTATGGGGAGCTCCAGCTCCAC

CUST\_6591\_PI426210822

TATAAGGAAAGGAAGCTGATCACATGAACAATAACTGGAATGAGGAGGCAG

A\_14\_P200441 TAGGCTATGACCTGGTTGATCCAGGTGCTGAACTTGCTAACTCGAGTATA

A\_14\_P126551 CATAGATGCCAGTGGACATTAATTAGTGCAGTCCAAGTGGACATTAGGGTAGC

CUST\_24\_PI426210822 CACCTTCCAGTATCACTGACTCAGACACACGCACCCAGCCCTTGC

A\_18\_P23918141

AAAAAAAAGTCTGCTAAATTTTCATGTTTCATCAACCCTTCTTAGACCCAATGACGTTGTC

A\_14\_P130283 GGGGAGGCAAACTAATTTTCAGATAAATCTGGTGTAGTAATTTGACCTAACAGAAAAGTGA

A\_16\_P19694620

AAAAATTGTGTGCTCAGGAGATTACAACAGACCCTATAATCCTCAGAAGACTTTTTCAACT

A\_14\_P127698 CTTCTGCTCTAATAGAATTAACAGCCTACTTAAAGCAGACAGGTGTGAATTAGATTACC

CUST\_5982\_PI426210822

CTTCTGTTTCCTCTTTGCCAACCTTTTATTTTAGACTTCATTTAGGATGAAGGTGCTG

A\_18\_P16864908

CTAACACCATCTCCTTTTGTTAATCATCGACTGCCAAAAATTCAAATCCCAAGCAGATT

A\_18\_P15365447

ACGATAATTGAATTCTAAGACCATATCCACGAAGTTATAGTTGAACCTGAAATCCTCCTT

A\_14\_P131083 GTCTTAGGTAATCTATTTAAAGAAGACACCAGAAGAAGCCTACAGAGCACTCCTGTCT

A\_14\_P112175 CACTAATTAGAGCCTCGCATTAACTTGGAAATGATATGCATTTTGACCTTGGAGAAGAA

A\_14\_P138981 CTTTGTGACGGGATCGCTTTCTCCATCGAACCTTCTAGTTGCTTATT

A\_16\_P16570976

GAGATTAATTTAACGTAACCTCTTTCTATGCCCGTGTAAGTATGTGAATCGCAAGGCCT

A\_16\_P20991665

AAAAAAACATTGCAAATCCAGTAATCCACATCACACTTTAGAAGATGTCCTTGAGTCTCA

A\_14\_P133243 CTCATTTTTATGCTTCCACAACCTGCTACTCCCTAAGTCTTTCACTAATTTGCCAAAATA

A\_14\_P136067 CTAGCAAGTCCAAAGTCATGCGTAAGTAAAATACCTCTGACCATTACTCATACACAGTTA

A\_16\_P17589772

TCGCTATTATCAGGCAAGACTATTCTAGAATCCCCTATCATCCATTCTCTATTTACCTCA

CUST\_2898\_PI426210822 CAATACACAGATACCTGTGGTGGGCTAGGTACTGCTGTCAGAAGTG

A\_14\_P134548 CTCCAACACTTTTAGTATAAAGAAGATCCGCTTCCTGGTGAGTTCGCCC

A\_14\_P123064

AAGAGATGGGTAAGCAAGAGGAGATATTA AACACAACAAAACACTCTCCATCAATGACC

CUST\_7007\_PI426210822 ATCTGGAGGAACATCAGTGGGGTCTGCGACAACCTGTGACCACCT

A\_18\_P15211905

ATCCTCCCTCTTTAAAACATAAACTACCTCATTTTCTTACCAGTAGATTGTGTTGTCAT

A\_16\_P02734922

AAATGGTCTTTGCTCATTGGATGACAATCTAAATTCAGATCGAAAGAATGTGGTTGGAGA

A\_14\_P134688 CTCTTATTTGCTCGAAGAAAGCAATCTGACTACAGAGGCCAAATCTACAGACATTAAATG

A\_14\_P118058 TCCCTTTCCACTTCAAAGAAGAAAACAGTTTGATCTTTACTCTAAGGAAAAAGAGACACA

A\_14\_P100783 CCAGCAGTGTTAGAAGACATGGCAGCACTTTCTGTATATTTTCATTGTTTTCTTGAGTTTT

A\_16\_P02797320

ACTGACCATTACATCTTTCCATTCTAATACATCCTGTAAGACCTGATTTAGTCCTCAGAG

CUST\_735\_PI426210822 ACAGACCCTCCAAGACTGACCTGGAAGGAGACACTCCAGTGAGGG

CUST\_8770\_PI426210822 AGACCTGGCACTTTAAACAGCCCAGCAAATAACCCAAAACAAAATGAACA

A\_16\_P02913103

ATAGCACTAGAGATCTAAGGTCCTTTTGAAGTGTAAATGCTGTCATACTACCAACTTGCT

A\_16\_P00763238

AAACAACCCTTGTTTCTAAAACATTGCATACATCTAACAGAAGTACCATTCTTACCTT

A\_14\_P138410 CTGCTGCTCCAGACTCTTGACTATAACTAATGGATGAAGAACGTATAGTTCTCAAACGTA

A\_16\_P00298569



GAGCCCTCATAAAGTCCTTTCACTTGACCTTAATTACACAAATGGATATGATTCTACAGG  
A\_16\_P17268334  
ATTACAAAACCCGATTTAATTTCCCTCTCGATTCCCTAGTATTTCCGTATTGCTCCTTCAT  
A\_16\_P18647740  
CTGATAACACAACACCTCTTCAAAACTAGAATCTCATTGAGGGTTAAATGATGTCCAAGT  
A\_16\_P21283681  
TATTTTCCAGTAAAGGCTTCTATGACCAAATGCATTTGAAGGAATGTTCCATATGCTCTC  
A\_14\_P132754 AATTTTGGTAAATGGAGGAACTCTCATTTTAAAGGCAGAAAAGAGACTGTTCTCTAAGTC  
A\_14\_P129847 TCTTAAAATTGGGATTATTGAAAAACAGCAGATTTAGCCGCAGTAGAGACTGGGATAGA  
A\_14\_P133875 ACAGTTGATTTTAAAGTTCTGTGTGTGGTTTCTGAAAAAAGTCACTTGGAAATCCACAT  
A\_16\_P15051917 AGTGGAATCCTGGCTCTCAAACGTAGGCCTAGAGGAACAGATGTAG  
CUST\_1192\_P1426210822 TGTTCTATAACTGTGGCCTCATGGTAAGTCTCCATATGGGCCAGC  
A\_14\_P113596 ACTTTTCTCTCTCATCTTTCTGAATCTGATTATTTTCTTAGGTCTCTACCTGACCACAGA  
A\_18\_P14134336 GAAAAGAAGAACAGGGGTTGCACAGAATATACCAAATGTTCTTATCACCCCTCTGG  
A\_14\_P107696 TTTCAGGCAAATATTCTCCAAAGAGGCCAAAATTACTTAAGGAATTAAGTGGGGCAATTCA  
A\_14\_P110445  
CAAAAAGTAACGTTACCAAAGAAAAAGTCGAGATTCACCAATAACAGTTCCAAATGTTG  
A\_16\_P20259674  
ACAAAACTGACCATCATAGGATCATCATGTAACATTCCCCTAAATTCACTCTGAATCAC  
A\_14\_P201447 CCCACCATTTAATTATTCTTCTGTTGACCACCCACATTTAACTCAGTTTTAAAGACATG  
CUST\_5803\_P1426210822 CGTCCTTACTCTGACTCAGAGGAAAATGCAACTTGAGCTGGATTCATTG  
CUST\_10365\_P1426210822 GAAAGGTAAGCTTTGGGCTACAAACGTTGCTTCACTGTTTGGTGGT  
A\_16\_P21387125  
GGCCTATCAGTTCTACATAGCATCTACAAGCATAACATTTTCCATCATGGTTTTCTGTCT  
A\_14\_P139272 CTTCCACCTCTAGGATTATAAATTGGTATACTGTTCCCTGGCTTCATGCTATAAAACTGG  
CUST\_1935\_P1426210822 AAGCTTCTTGGGTCTTATTGTGTGTGGCTTTTATAAGTATTGTGGTTCAGGAGC  
A\_18\_P13000503  
CACAACTCTTGATCTAGTGTGAGAATGTTGTGAATGCAAAGATGATTCTTGTAGCAGTG  
A\_16\_P03717438  
CTCTCTCTCTCGTAAACACTTTTCAGAGTTCATTCTTTACTAACTGCATCAAATCTCATGC  
A\_16\_P58424626 GTTAACTTATGCTACTTGACAAACCACCCAGTATTCAGCGGCTTAAAAGCAATATC  
A\_16\_P20439006  
AACACATGGAAGAAGTAAGCACATATCTCTGGTTTGTATTATCTGACATTCCCCAACATG  
A\_16\_P02468748  
AGCCCTAAACTTACTTCGTAGAGACCCATCTAAACATTCTTACTGTGAATCAAAAGAAGA  
A\_14\_P116758 TCAGCAAATAAAAAATGCTGTATTGACTAGTGGCCTGAAGAGATACCTTTTGTGAAATGG  
A\_14\_P111240 AAAACCCAGAAAGAGATTTCTTTTGGAGGCACTTTTAGAAAAAGGATACTTTCAAGGTGA  
A\_14\_P201843 ACTGATTTAAATAACAACCTGAATAGCAAGGACCTTCTGGAACATAATCTTACATTCACAG

A\_16\_P17121489

AATAAAAACCCCTTACGATTTTTTAACCATGTAAAGTGCCTAGTTACATTAGCCTCTGGGG  
CUST\_7957\_PI426210822 CACAGCCTCTGCACTTTAGCACGTGCCATTTAGTTGACCTTCCTA

A\_16\_P02518070

CCTCTACATCCCCAATTTTTAACATACCTTTACCAAAAACTCATGTGATTGTAGGTAG  
A\_14\_P200988 CCTGCAGTAGTATGGTCCTTTACTGACTCATCTGATGTCAAAGTAGTCTGAGAATATAAA

A\_16\_P01346177

TGAGACTCCCTTTATTCTTAACACTCTTAGAAGCAAGTAATAGAGCCATCTTCACTTCTC  
A\_14\_P119152 CTATTCAACCAGAATCCCGAGGTGTTCTTTCTCTACGAGCCAGTGTG  
A\_14\_P132928 CTGCTGCATGTAGTGGTATCCAGCCTTCATTATCAGGTTGATTAATATTTGCTCCATTTT  
A\_14\_P119367 ACACAGCAGGAGTTGTAAAAGAATGCTTCCTTTTTATTATTAACACTGAGAATCCATGCAG  
A\_14\_P114013 GTCTTCCACTAGGCTGTAAATTCTTTAACATCTCCAAGGCCTGATAAAGGTTTTTGAAT  
A\_14\_P139925 ACGTATAAAACCAAGTTTTATTTACATTTTTAGAAACCTCACGGTGCAGGGAAAATGATC  
A\_14\_P200920 CATGGCTCCTGTCTGCTCTTACTTTGTCTTACTCAAGGATCTTACTCATAACACTAACT  
A\_14\_P139964 TTTTTCTCTGCCAATTAGCAATAATGCACATGAAAACCTAAAGAAGTGGCTATCCATT  
A\_14\_P114398 AGGCCACCAGTTTCTACTTTCTAAGAACTTTTCATGTTGATATGTAATAGAACCTCTGCA

A\_16\_P21249101

TGGATATGTGAATTAGTCAAAACTGAATACGCTAGTCACACTTTGTATGTTCTCTGAGGG  
A\_14\_P115795 CTAAACTATTGATGACTCTTTTTGGCAATGTTAAGTTTTGCTCTGTTTTTGGTTGGTGCT  
A\_16\_P16889880

ACAGAATGAAAATTTGAAGAAAATGTTTATAAGTTGAGGTTGAAAGAAAAGGGAAAGAA  
A\_14\_P106332 CACGATTCTTACCCTTTCTTTTGAATCAATCTGGCTTCTGCATTACTATTAECTCTGCAT  
A\_14\_P125438 CTTCCCTTGCAGAATATTGTAAAACCTCACATTTTTCACTGTAAGAAAAACAAGATGAA  
A\_16\_P18916789

GCACAGGCCAAGATTAAATATATTTCCCCCTCAATTTAACAAGTTGCTGACCACAAATAT  
A\_14\_P135748 GATAAATGGCCAGTAACCTTTAACATCTTCTAAAGCCAAAGTCACACAGAAAAAAGTCTG  
CUST\_5856\_PI426210822

TTTCCTTATTTCTTAACTAGTATTTTATCTTTCCATGATTGTGCTTAATTTTATCTTATC  
A\_16\_P01830816

TGAAATCCTTCTAGAAATTCCTGCTATATCATCTCCCACTTACATAATCATTGCCCTTA  
A\_18\_P13308005

TTTAACCCACAAATGGAAGGGTAATTCTGGCATGATGGTGGTTTTAGCAATGTTAGTAAT  
A\_14\_P201235 CAGCATTATAAGGACCAGCATTCTAAGTCATAGGTGCCTTGTCTTTCAAATATTTGGAT  
A\_16\_P37786293

TCATGTGAAAGGCCTACAAATTGCTACTTACAGGTATCAGAAGAATCTGCATGTGTAAAA  
A\_16\_P19366306

TTCTACCCTAATTATTCATACTCAGTTCTTCAATCCCAAATAACCCATAGATGCCCTT  
A\_14\_P124316 GCCATACTCCACTGACGTTCTGCCAATAGGATAATTCAAACCTGCATTACTTAAATAGGATA

A\_16\_P41664870

TGGAATGAGATACAACACAATGTCACTCATGTAACTAAAAATACTTGGACACCAAAAACA  
CUST\_3279\_PI426210822

TTCAGAGGTGATCAAAACTTTTTTTTTTCTTGTTTAAGAAACAGATAGTTAAGAAAGGG  
CUST\_3099\_PI426210822 TTCTTTTGGAGAGGTTTCTCATCCTCTCCCCTCTATGAGGCTTGGTA

A\_14\_P100315 GAGATACTTCAGTCTGACATACCACAATCAACTACAATGTAATTGGAGGGAAGAGCC

A\_14\_P138808 GCATTTTTCCGTAAGCATTGAGTGTAGCCAAAAGTTCTTCGTGTATTGCTCTC

A\_14\_P102407 CTTCCAGAATTTTCTATCAGAGGGAACCAAACTGCCAACAAATAAGTTTTATCATGAAAC

A\_18\_P14136582 AAAGCAAGGCCATCATATTTCTCATTGCACATGTTATTCTTGTGATGTGCCAGACAT

A\_16\_P00287228

AAAAACGACAGACACATGAATAATCAGAATATGGGAGCATAATGACTAAGTGGAAGTTGG

A\_16\_P18771040

GCATTTTCCCAAACCTTACACATTATCAACAGAAACACTAAAAATTAAGAGAAAAGCAGCC

A\_16\_P58424097

GTAATTGAGAGAGAAAAGACCAGAGGGAAGGTGAGTATTTGATTAACTTAGATAGGAGG

A\_14\_P118260 TTGGTGGTGAAACCATAAAAAGCAATAAAGGTAATTAACACTACATTGTGCATTTTCCCCAGA

A\_14\_P202025 CAACCTTCTCTTAGAACAGGAAAGAGCAGACTGTATACAACTTCAAGCATTGTT

CUST\_6219\_PI426210822 CTCATAGCGGCCTTCTCCTGAGACACCCGGGAAGGCTGAGTCTA

A\_14\_P123684

TGAGGACATGGTTAGGAATTTGTAGACAAGAACTTAAAACAAGACTAAGCAAGGTGAATG

A\_14\_P107189 CTGTTTACATTAACATTGGAAAACCTCAGACCTGGAATCCAGAACCTCAAATCTGT

A\_16\_P19391125

AAAATCAAATCTCAATTCTCCAGGCTTAGCATTTACGACTCAAGATTGGATTCTGAAGTC

A\_14\_P125502 TACCGTCTTTAGAAGAAAATCACACCTTTACATTTCTTCAGGAGTAAGTTTTTCAGGTCTG

A\_16\_P01981107

ACTCACCACAATGGCTAATTCTTTTGCTTTCATCTTTACTCTTAGTTACTTGCCTCTGAT

CUST\_4212\_PI426210822

CTTTGGAAATACGTACAGTAATAAGGAATCCTAGGGGCTTCTGCTGTATTTCTG

A\_16\_P02702204

TCTCTTCGTTATGTAGAGCATCAACTTCACACAAGTGTGATTATTAGGTAGTGAGGAAAG

CUST\_5512\_PI426210822 AGGGAACAGAGAAGCTGCAGCCACAGCCAGGCCAACAGTTACAGA

A\_16\_P18177692

TGTAAACTTCTCTCTGTCTACACGTGAAATCCAATCACTTCTACAAGGTTCTCTGTAAAG

A\_14\_P121753 ACATTCCTGTGAATTTGGTAATATTATGAGTGGATGGTGGGATTTCTCAGAATTTAACCT

A\_14\_P107256 TCCCAAATGACATAGGACCATTCTTTTTCTCTACAATAAATACCTCAAGAGCCTATCA

A\_16\_P36010991

CCAAGTCATGAAAGAATCTAGTGCATAATGACATCTGGATCACCTCTGACAATTTTTAA

A\_14\_P123803 CTTGTTTCTGTTTCTTCCATTGCCCCAGAACTTGGTATGAGTTTTGATTTCTCCATA

A\_14\_P109619 AAAAAGCTGGCTCATCTTTTAGTGCTATAGTTAAAATGGCCCAATAAGGAGAATTCCCAAT

A\_14\_P122623 CATCTAAAATAACTGCATTGGGGCCTGGCATAACATATTTTAATGAATGTGATTGTCTG

A\_16\_P35197083

GCTAGCCAGGCTTTATCTTTATGACACTAACGATAATCCCCTGTGTAATTAAGTGTAGAG

A\_14\_P117153 TGTCATGTTTTATTTACTTTTAGGATAAGAACAAGAACTGCGTCCCCTGTATGACATT

A\_16\_P38959407

TGCCAGAACTGCTTCTATAGATATCACTTGTTCATTAATTTACATACTGTCTGATGCCC

A\_14\_P127330 AGAAGGCTATGAATCCATAAAAATTTATGGGAAGCTTTAAGGGATATCCAGAGGATCCTA

A\_14\_P114814 ATTTCTAAAATGTGGAAAGGCCAACCTGATTTTTCAGTTAACAAATCTTTGCAAACATAT

CUST\_7086\_PI426210822

TAGACATTACCCTCTGGAGTGCCAGGTGCTTTGTGAATTAGATCTTTCTTATTACAT

A\_16\_P02989179

CGTATGGAGGTTTTACATTAGAGATAGGTATGGAAGTTTCTATAAAAACAGGTTGCAGCC

A\_14\_P133571 ATTATCATCATCATGAAAGTATCTGACCCTTTCTCTTTCCTCATGGGTTGAAACCTATGA

A\_16\_P19718942

AGGCACCTTCATACAAATTACATGCAACAAAAACATTTCTTATGCACTTGCTATTCAGGG

CUST\_2994\_PI426210822 CAACTGTGGCCTCTGGCTTGTCTTCCAGCAATGTGTATCTGTAGC

A\_14\_P130030

GAGAAAAGATGGCAGAATTCACACATGAGTCTATGAGACAGGGAAAGAATCAATAAAAATA

CUST\_85\_PI426210822

GAAACAGGTTGGAAATATTGCACCCAATAATAACAGTTTAACTTTTGGCTTATGAAATAC

A\_16\_P19246646

TGTTCCACATCCGTTTATTCTAAATTCCTTGAAAATTTTACCTTCTACCATCAGCCATA

A\_14\_P103028 CTTTTCAAAGGCCACATCATCATTAATCCCCTTTAGAAGAACTCAAATATGCTATGAGCA

CUST\_8886\_PI426210822

ATGTAGGAATCATGGCATCCAGAAAATGAGTGTGATTTACCCTTTGATAAAAAGGGAA

CUST\_202\_PI426210822 CAGGGCCGGCAGAGCCTGTAGTGACGGAGGGGAGCAGCCTTATCT

A\_14\_P110973 TGTGGTAGATGAGTTAAGGCTGTGGTTATAGGGCGTTGCCAGTGATTTAATTTAATATT

A\_16\_P19200794

ATTAAAAAAGACACCTTTTCTGATACCCATTGAAACAGTTCTCAGTCTTTTAAACCCTCGT

A\_14\_P123300 TAGGGGAAATACTCTGGCACAGGGAAGATTAAAGACAAAATGCATTCTAACACATAAATG

A\_14\_P113571

TTGAGGGAAATAATTGTTGAGCGAGTTGAAAGAAAAAAATTGTAGCAAGGAACTTCAAGC

A\_14\_P125814 TTCAGGGTATTTAGTGCATAGAGATAAACATGAAATATAAGATCATGGGCTACCTCTGGG

A\_16\_P00756372

AAAAACTCAATTTTCAGTTAACTTCCCAGTCATTACATGATGAAAATATGTCCCTTCCCTG

A\_14\_P126256 AGACAGGAAAAATGAGGGAAACCCCTTGCTTAAAGACACAAATATTACAACCTCATTAACA

A\_14\_P119961

AATGAAAATCCAAGAAAATGTGTGAGCAAATGAGGCTAAAGGAAAAGTCCAAGAGAAAG  
A\_16\_P36230235  
AGATGGCAACCTAATGCTGAAGGTTAATTAAGGCTCAGAAAATTTCTCTTGCTTTCTT  
A\_16\_P01096760  
CCCAAACCTCCGCTTAATGTTACCTTATCAACCAAATTGTTCTACCACGATACACTTAAT  
A\_14\_P108551 GACTTTGCTGCTATTTGAGCACAGTGATATTGTTGTCATTTCACTACTCAGTGTTTTGTT  
A\_16\_P40506599  
ACCATCAATTCAATGTATGGCCTTAAACTCATCATTTTCACAGAAATAAATCCAGAAGTCA  
CUST\_6551\_PI426210822  
AATGTACAGTGATGAATGAGGACAGAAAACAAGTTCTACAGAGATTTTCTGGCTTGAC  
A\_14\_P131444  
TAGGAGAGAAAGAGATAGTTTCTGGAACAAAGATCATTTAAAAAGAGCAAAGGTAGGTG  
A\_16\_P17042087  
GGAACCTTGTAACAGCCTATCTTAGAGTATTTCCAACAGACCAATTCTTTCATCCTTTCA  
A\_18\_P14927453  
AGCGTTACTTAACACTTCAAAACATCACCTTTGATAGACTTCTTATTCTAAACAACCCCA  
A\_14\_P117859 CACAGACCAGAGTCTACATAAACCTCCTGCCCTCTACTTTTTCTCCTAAATG  
A\_14\_P201710 GTCTAACAATATGAACTGATCTTTTCTTCTAAAGTATAGAATAATTACAGGATAGATCAG  
A\_14\_P100400 ACTTGCTATTTTTGCTTTCTCAGATTGCAAAATTACGCCAGCAGTTGCAGAGAAGTAAAC  
A\_14\_P200522 CCATCCATTCTTCAAGCCACACACATCCTAGAGACAGTTTCTTCTAAAATACAAACC  
A\_14\_P116375 CTATTGAAAGTGACTTTAATTTTGTCTTTTCATCACCCACCATTGTTCTTAATCACCCCTCA  
A\_14\_P115519 CTGGGATGGTGGGAATAAGGAACCATAAACTGAAAAGTATGTAAGTTGCATATGCTAAAT  
A\_14\_P132166 CTCAACAATTTGAAAATTAGGAAAATGGTCTCCCATCAGCATTCTTTATGGCCTGAGAA  
A\_16\_P21122264  
TCCCTATGGCTTATTCGAATCTTCTAATCTTTTTCTGCTAAGCACATACTACTACCTGCT  
A\_16\_P18960042  
AAAAAGTGCTTCCCTTTGTTAGACTGACACTCTTACAATAAGATGTGAACACACATAAGG  
CUST\_2553\_PI426210822 ATTCCCAGGGCGCGGTTGTGTATGGGCTTCAGCAAGTTTCTGAAC  
A\_14\_P123240 ACCTCTGGAAATAAACGAGACTGAAAAAGTGATGAGAATTGCAATAAAAGAGATTTTGGT  
A\_14\_P121108 AAACCAGTGGGGTCTTAAGAGTGATTTTCTTGGTCAGAGCAGAAGTCAG  
A\_16\_P30952412 AAAAGAGGTGGCCTCATCACAGTGTGTCCGGTCTTTCTGACATTTT  
A\_14\_P133455 GACTTCTTCTATAGGCTCATGTTAATGTCAGCAGATTCTCACGTTTGTTCATCTTAACCT  
A\_16\_P41734721  
ACTTTCAAACCTATCTCCCAAACTTCCCATTAAGGACTGTATACTCTAGGTGAACTGAAT  
A\_14\_P103580 CTCACCTCCATGTAAAGCGTTTTTATAGAAAGTCAATTTCTGAGTTAGGGTATCCAC  
A\_16\_P38087392  
ACACAGTTTCCATCACATACTCACTTTTTAATATTTCAATAGTCCATCTCAGTTTCCTT  
A\_16\_P03798352

ATTATCTCCATTGAGGGTCAAATACAAGTGCTAAGAAGACAGAATGTTATGCGGTAAACA  
A\_14\_P102430 GAACTTCATTTTATTGTGGATACAAATATGAGCAAAAATGCTTATGGGTGTGGGTCAAGA  
A\_14\_P113896 GACAATGATCTCATTGGTTAGTGCTGAACAGTCCTCATTCTCATCGGCTATAAAGAG  
A\_14\_P116393 GTGACTTCCTTCGAACCTCACATTTCCCATAAAAAAGATGGCGCCATTG  
CUST\_8068\_PI426210822 ATAGGAAAGGGGATCGTGGGGTGGCAGCTTCTCCCCTCAGTAGCAT  
A\_18\_P11940212

CAGCAAATCTTTCATTCTATACATACTACATTCTCATCAAAGTGTAACTCAATCTACG  
A\_14\_P120670 TAAGGACTAGTCTCCACATACAAAATTACTTTCCAAGGTTTGCTAACAATGCAATTCTG  
A\_14\_P109752 ACAGTAAATATGTTTCAATAAAACCACCAAAAATGGGCAGAGACAGTTTAGAACATTTCT  
A\_16\_P19593199

CTTGATACTCATGTTATCTTTCAAAGTCATCCCAAGTATCAATCATCTGACACCTGC  
A\_16\_P15167189

CACCATGACCAATATGAGATGGAACCTTTGCATATGATATAACTCAGTCAAGTAAGTTGGA  
CUST\_10009\_PI426210822 CAGCTTTGCTAGTCAACCCAGAGCAGTATCTCATTTCGGCTCACATT  
A\_14\_P116212 AACTTCCCTGTCACTTTCTTCCCTGGAGCAGGTAAGAGGGTTTTGTTTT  
CUST\_9064\_PI426210822 CTTCCCAGTCACCACCATTTTCATGGTTTCAGTTTGCACAATGTC  
CUST\_6085\_PI426210822 GAGCCTTTGTCTTAAGACAGAGGGAAGGACATCTGGGAGTGATTG  
A\_16\_P19789423

ACACTTTTACTTTCTTCTATTCTTCTCTATACCAATTTAACTAACCACAAAACCAACAGA  
A\_14\_P103017 ATTCACTTTGAACATATGCAGAGTGGAAGCACGACTACTTTCTATGAATAGCAATGTGAG  
A\_18\_P15657359

ACTTACAAACTTCTCCATGTTAGACTCCATATTGACTCATCAAATTCATGCAAGGCTTCT  
A\_14\_P128752 CAGTTTTCTGCTAGAATACCTTATAAGAGCCAAATATGTTAAGCCCAGGTGCAATTTGTT  
CUST\_3331\_PI426210822 TGGAAGTCAGCTCACTGAGTGTGGGTTGCCTTGACCATCTCCTCT  
A\_14\_P134816 ACAATAACTTTCTCACTTTTGACTTACTTGATTCTTACAATGCCTGTTTTTTGGCCCTAA  
A\_14\_P110256 TTATCGTCTCGACTGAATGCTTGGAAAGTGGGCAGAGCAGTATAAAAAATCATTGATTTAA  
CUST\_348\_PI426210822

AAGACATGTTAATTAAGCCTTGTATCTTACGTCTCTTCTCGAAGAAATTATTCTTTGT  
A\_14\_P121406 ATGGCAGTATCAATTGTCTGTGACAGTGATTAAGGAGCAAAACACTTGGTATGTATTGG  
CUST\_6909\_PI426210822 CTCGAGGCTCTAACACAACAGCAAGCTCTTTATCTTGCTTTGTTGGTCT  
A\_14\_P137822 AAAAATACGGTCTTCCCTCACTGCAGACACCATGCCAGCGTTTTAAATCAAG  
A\_14\_P110268 TAATGGAGGTTTTTTCATCCTAGGAAAGAAAGAACATAAGAGGAATAAGTGCAGAGCATT  
A\_16\_P01992492

TGGCTGCTAAAAATGCTTGTATCTGGTCTTTAAAAACATTCTTTACTCTCGTAGGCAACT  
A\_14\_P113910 TCTGTTCAAGCAGAATCGCAGTCTTCTGAGCATAATGTTTCAGGAATGAGTATCATTAAA  
A\_14\_P138155 CTGACGAAGAAGGAATCATAGGTAATTTTCATCAACTCAGCACGATTTGATTCATTAGTA  
A\_16\_P03699869

ACAAAGTTGTCCACCAATAATTCTCAAACATGTAGTCTTATGAACGCAAATGTTGTAGC

A\_14\_P202555 AGGTGGAAAAAATTCCAGACTTTTTTAGCACTGTTTTTGTTTAATGGTATATTTTTATT

A\_16\_P16190976

TCACCCCTAAACTGCCTCCAACAAATATCATCATTTTTAATATTTTATGTTTTGCTAAGCCA

A\_16\_P16121584

GTCCTATTGCAATTATGATCCAAAACCTTTGAAATCTGCTTTGATAATCACCCAACACCTG

A\_14\_P130557 TCACAGAATCTGTAGATAAACTCATTAAAAGATTGTCCCATTTCAAATCACCCCCAAGT

A\_14\_P119999 CTATGATATCACAGTAACCAATTAAATACTATCTGTAACCTTACATACTTGCTTGAATA

A\_16\_P21423927

CCCACCTAGTCCGATATTAACCCTATAAAAATGTCTCAAATAAACTCTTATTTTCGTGGCC

A\_14\_P200257 TCCTGGAGAAGCAAATTATGATCAAAAAGTTTGCTTACTGATCATTTGACCAAGGTTAAGT

A\_16\_P15448795

AGTGTGGCTAAAATCTGGATATTTCTGATCATGCTTCTTTGTGCTAATCTTGGACACT

A\_16\_P30952554 AGAAGGGAACTGCTCTTTCCAGAAAAACCAACTCCCTGCATCAT

A\_18\_P22840512 GTTAACCCCAACGGGAAAGGAGAGGGGACTCATCAAAGGTTAGAC

A\_16\_P15666843

ACTGCAGATCACTTCATCACAGTATATCCCTCCAGTCTAAATTTCTGATATCAAGCAAAG

A\_14\_P129526 CTCCATGCTGACAACCACTTTACAATGAATGAATCAACTGGAAAGAAAAGATTCATGAAG

CUST\_4686\_PI426210822 TTTCAGCAGATCAGCCAAGCTGCAGGATAGGTGACAGATATGAAACG

A\_14\_P132534 CTTTAATAGCGTAATAACATCTTAAATTAAGGAGGCACCATCATGTCCTAGTTCTCAGCC

A\_14\_P118309

CTAAAAAGGCAAGAGACTGTCTGACAGAAAGGAGAAATTTAAATAGAACCATGTGACAGA

CUST\_3324\_PI426210822 GGAAGGTTGGGATGCATAGAACTGATGTGTGGGAAACTACCTTCATC

A\_14\_P121012 CTTGCCTTTTAAATTAGGAACCTTCGTGCTGACTTAGAGCAGTTATCTCTCTATCCATT

A\_14\_P119810 TTTTAGATTCTCTGGATTTCCACACTCAAATTAACCTAGGAGAAAAAAACCACACATGC

A\_14\_P137693 ACAAAGTGTGTTTGGAGGTGTTTCTATCTGGTAACTAAATTCATAATGGAAGTCCTATG

A\_16\_P16110265

TTCCACAATCAAAGTCACTAATGTCAAGACAGTCTGAGAAATATACTTTTCCCAAGTC

CUST\_668\_PI426210822 ATCTTTTCAGTGGCTTGTCTGAACTCTGGGCCATGGTAATCTCTGT

A\_16\_P20091777

AACTTTTCCCCTTTTAGAATACTTATTGGAAACCCATACAAAACCTCATATCTCCTCTGA

A\_14\_P132171 GCAATGCTTCCGATTCTCTGGAGTTAATATTCGATCCCGATTTTGTTCAAAGAGTTCTAA

A\_14\_P111673 TTGTGATATTGTCAAATCCGAAAAACAGATTTAAATGTGACAGGCATGGTCTGAGCC

A\_14\_P112140 CTTTGGATACAAAATAGGGTTAGAGAAGACAAACACCATGTCTTCAGTTTCTTAAGTTCC

A\_18\_P22840732

AGGAAATTTAATGATTTTCACAGCAGTGAAAATTGATATTCATATTCTAAATAATTCCA

A\_14\_P112831 CTAAATTTAAAAGGGGGTTATTGTAAGAATATAGGGGATCTCAGAAATCAACTGCAGGA

A\_16\_P16400274

AATTCAACAAAACCTTATCATTCATGATCCCAAGTCTTGATCTCTCTTAATACCACTGCC

A\_18\_P11899805

GGGCTTGGGAATGTATAATAAAACAGATAGCAAACATTGTCAGGTAGAGATGGACTGTGAA

CUST\_1369\_PI426210822

GGTAGAATAACCTATGTACATACTCTTTGGGGAAGAAAGGCTCGTACATGAAC

A\_16\_P17170322

TCAGAAGGAATACGGATTACAAACCACATATTTCAAACCTACAACTTCACGAACATAGGT

A\_14\_P103930 AATCTATGAACAAGAACATCTGGGAAAATCTCCAAACGAATCCAGTGCTTTAGAAAAACA

A\_16\_P17712184

AAGGCAATTCCTAACCTTTTCTCATATAACGCAGTATAACAATAAGTTTTGCCCCTCTTGT

A\_14\_P135312 CTGTGAAGGCGTTGTCTCCAATCAGTGTAACCTTGTTGGAGTTGAGTAACT

A\_16\_P16028201

AAACCCATGTTACTCTTAACACGGTATGTCAAAACACTTTTATAACCAGAGAATCCTGCT

A\_14\_P137034 GAACTAAACTTTTTCTTTTCTAGGTCATTTAGGAAATCGTAAATCATGTGAAGATGGGAC

A\_14\_P112887 AACTGACATTGCATAGACCAACTCCTTTCCAAAATATCTCTGATATACTCTCCAACCTCT

A\_14\_P132949 GTCAAGGGAGAGAAGGGGCTCAATAATGTCATCGTAATCATCTTCCTCTGTAT

CUST\_160\_PI426210822 CATTTCGTTGGGAAATTGGACAAGAGGTTTCAGTTTTTCAAAGTCTCCATTC

CUST\_5826\_PI426210822 CTTGTGTTTGCCAGAGGACTTAGGAGGATGTGGATAAAATCAGGCTG

A\_14\_P110404 CTGGTGCTTATTGAGATTTGCTGTATTTATATCAATAAAGTATAGTAAAGCAGTTTGATT

A\_14\_P115054 CTGTGGAAACTAAAGGGTGTGAAAGTTTTTGTTTTTTGGTTCCAGAAAACCTACAAGG

A\_16\_P03774299

CCTTGATTTCTCACATATCTAACCAGATTCATCATTGCAACATTTACCCACCTATTTGGT

A\_14\_P128721 GAAGACAGAAATCAATTCCACGCAGAGATATTCTTGGCTTTTCGTTTAGAGAGCAATAAA

A\_16\_P00800669

AGCCATTTTTCTAATCTTCTGATAATGTGACCTTGCCTTTCATACTTTTTGGATTACCT

CUST\_7842\_PI426210822

ACTGGAAACAGAGTTAGGTAAGCATGTAATATATGTATATGTGTATGTGTGAGATACACA

A\_18\_P16196200

AACTCCATCTTGGCATTTTAATTTGAACTGTGCAATTCCTTGTTTTGTAATACTTCCACC

A\_14\_P110569 TATGGAAGTATCATTCTACAAGCCATGGTAAACCAGGGAAAGAGAAATAAGACTATGTT

A\_14\_P137811 GATGAGATTGTTGATGTCACTGCAGTTGAAAAACACAATGAGCATAAAGGGTTTTTGAA

A\_14\_P129173 ACTTTATAAAGCATCCTTGAGTTAATGATGCTTACAAGGAGTGCCCTAACGTTTGCATTA

CUST\_7271\_PI426210822 CATCTGGGGAGCTTGGCACACAGGACAGATCCTTTCTCTTAAGTG

A\_16\_P58424622 CTGCTTCTCAATGAGAGGAGTGGCAAAGCCTTAGTGGCTGCTTTTTATC

A\_14\_P137140 CTATTTCCGCCACCAGTATTTTTTTAATAGTCAATATTTAGAAATTGGCACCAACTGGCCC

A\_14\_P137096 TAAAAACATGTTTTTATGACCATTTCTTTTGTCCAAATTGCCCACTTCTTCTGCTCCAA

A\_14\_P120813 ATAAATAAGAAAAGACGAGTTGGACCAATGGAAATTAACACCAACTATGACAAATGACTT

CUST\_6753\_PI426210822 GTGGGAGCAGTGAGAGGGAGCTCCTGGGGCCGGGGGGTGTGCTGCAT

A\_14\_P106994 AACTGGGGAAATTAGAAGAAGAGAAGTTGAGTTTCTAGGGTTAGCAGAGACTTAAGTATT



A\_14\_P121710 AGAGTTTAGCCCGGATGACAGGTGTGATGACTAATGACAGGAAAAGCAA  
A\_14\_P111654 CACTAGAAGTCCTCTTTACTCCTCCCTCTTTTTTACATGTCCCATGTTAAATTCATTA  
CUST\_8843\_PI426210822  
AAAAGTTACATTCTAGGCTCTTGGTTAATTTGAGCTTGGCTAGAGGGAGAAAAG  
A\_14\_P136136 AGAACCACATATAGCCAGGACCCCTAATCATGTCTATTTTTAACTTCTGCATATGATCTT  
A\_14\_P129155 CTGAATCATTACAGGATGTTAATCCTTTGTGAAGTGGATATGGATTGGGTATAGATTTTGG  
A\_18\_P18924658  
CTTGTGTAGATGTCATGATTCCATTACCTTTTACCATTATAGTCTCACCACCTTGAATA  
A\_14\_P108785 TTTGAACCCACTTATTGCCTAATTAGTCATAGTTTGACAATTGCCCTTGTATTCCACCAT  
CUST\_8406\_PI426210822  
TTAAAAATAAAGATGGTAATACAAGCTCTCCTGTCCTCCTGGCTCTGATGAGTGAAATA  
A\_14\_P105750 TTGAGTCACCATATTTCTTGTGAACCTCCAAAGCACTGGAAGACTTCTGG  
A\_14\_P126833 TTAAAAGGAGTTCTTGGTTTGTTCCTCCCATTTGTATCATAATTTGTGTAAAGCGTGTTTTG  
A\_16\_P03796337  
AAAAAAAATGTTGCTAAGATCCTACCTGAACCAACTGTGAAAGGCTTTC AAGTTGAATG  
A\_14\_P132698 AGTTTGGGGTATTTATAGACTATTAATTTTCTGACTGAGCCAATAGTGGTTGGGGAACCTC  
CUST\_1651\_PI426210822 TGTGAGCACTGGGGGCGGAGTGGCGTGGTGCGGTAAAAACAAGAG  
A\_18\_P22841751 GAACATCACATTCTTCATGAGAATCACACCATTGTCCTCTGTCTGCCCT  
A\_14\_P109645  
ACAGGAGAAAATAACATGAGACAGAGTAAGAACTTTAGTTGGGACATGACATAAAGAGG  
CUST\_10038\_PI426210822 CTTTCTGAGTGAGTGGTGCTTAGAGGAGGCTAGGAGACAAGGCTG  
A\_16\_P16191360  
AGAGTCCTGTGGGTTATTCTGGTTGTGCTATTCTTAAATATTGAGTGTCCAAAAGATT  
A\_14\_P111859 CATGAGATTCATAAATCTTAGACTCCGTGGCTTCTTTGGTCTGGAATGCTTAAACTACA  
CUST\_9660\_PI426210822 CGCAGGAAGTCTGGCATGGTGTCTGACACTGGACACAGCTATC  
CUST\_5779\_PI426210822 ACAGGATGCTTCACCATAGGGGCAGAGACCTTCTGCTAAGTCATA  
CUST\_9179\_PI426210822 GCAGGTCCCGTCTGGCTCAGGGCAGAGACTGGTTCAGTTATTTTT  
A\_16\_P20908443  
AAAAGGCAAAAATCCAAATCAGTCTTGAATACTAGTTAACAACCTCTGGAAGTAGTGAGGG  
A\_14\_P200626 TGATGGACGTTTTGAGTCTGGGAAAAGAATACTTCATTAATAGAAATGGGAATGTCAGGA  
A\_14\_P106998 ATGCAATATGGTTATAGACACAGCCTGTGTCTTTTTGCAAATCAGTAGCATATACTATGC  
A\_16\_P18978869  
AGCGCTCTCTTTAAAGTTCATATTCATCTAGAACATCTCACACCTTACTCTTACCACT  
A\_14\_P109102 CATAGGGGTCTTTGTGGAGTATATCATCTCTCCTAGTCAATTCTACATCCGGATCTAT  
CUST\_2713\_PI426210822 CAGTTCCTACTGCCTCTGTTATCACTACTCTCTGTTGACCCCATCT  
A\_16\_P58424434 CTTTGGTGACCAGCAGATGCAGAGTTGAGATTCCAACCTCTGTTTCTTGT  
A\_14\_P119212 TTGAAGGTATATCAATTGCTATCGTTGTATGATCGAAAATCCTTCGTTTAAAGAGGCAG  
A\_14\_P125920 CATAGAAATGTTCTTAGGACATGGGGTCTTTTATCTCTCTCACGTGAGAAAAATTGGTTA

A\_16\_P18711865

TGGGTAAAATGTATAGTCACTAGGAATAACATGTCAACACATCTTGATTGAAATCGCCAC  
CUST\_2026\_PI426210822 TCCGGTTAATTCCTATTGCCTTCGAGTAATTAACAATCTGTAATTGTGCCCTCTC  
A\_16\_P19035271

AAACCCAAAAAACAATAAGCAAACCCTTCTTTTATTTACCCCATGAGAGTTCTCA  
A\_14\_P118018 ATTGACTCTTAGGTAAATAATTCTAGAGGCTTCAAGAAACCATGGTCTTTCTTCATCAAG  
CUST\_8850\_PI426210822 CAGAGGCTGCCCTTTAACCTGTGTGGCCAGAGAGAATAAATCAAG  
CUST\_9026\_PI426210822 AATAGCTACTATGCAGCCTGGTCAAGGAAGATGGAGTGGGACAG  
A\_14\_P113853 CAGGTTCTGAAGTCTCCTTTTTGTCACCTTTGATCTTCTTCATCCATATGGGTCAAAA  
A\_16\_P03761398

AGCGTAATCTAGTGCATATCAATTTTCGTTTTTCAGAACTGAACTTTGTAAGTCAGGCAACT  
CUST\_9411\_PI426210822 AGTCTGTGTTTATGTGGGTGCCTGGGATGGAGAGGTATCTAGTTC  
A\_16\_P00741744

GCATTCATTTCACTGCTATATACTTCATTGTTCAAAAATATATACAGACCTCTTCCCAC  
A\_14\_P108701 CTTACATATGCACAAACTAGCAACTTTTCTTATGTAACACTTCTCTAGAGGCATTCCTC  
A\_14\_P111635 CTTGTTCCCCTGTGCCCATCTCTTGACGTAAATCCATCTTAACTACAAAAGAAC  
A\_14\_P114138 CGATGAATTTCTGTTGGAAATCTTGACACGACATCCTGTAAAAACAGATATACATCACT  
A\_14\_P108300 CCGTGAAAATGGAGGAAGAAATTCGACAACAGGTAAGACAAAAAATCACAGAATGAC  
A\_14\_P126575 AGTAAAATTGGCTACTGTTCTTGACTTTAAAAGAAGGCCTAAGTTGGTTTGGTTAATCTC  
CUST\_8163\_PI426210822 AGAAGGAGAGGGGATGTGAGAGCTATTTAAGTGCTGTTGCCATTCAG  
A\_14\_P129094 ACAATCTCTGTGGTAGCAGAAATATATGCACAAAAACAATTCAAATAAGAGTTCAGAGT  
A\_14\_P134069 CACAGGGCCAATCTTCAGGCTTATGGCTTTTGGAACATTTTCTTAATTTAATAGAGAACA  
A\_14\_P120674 GGATAGATTACCGGAAAAGGGAACCTCCTGCTGCAGGAAAACCTACTACTAC  
A\_14\_P129291 TGGTATTTGTGTCAATAACTCTCTTCAGTTCATTTTCTTTGTATGCTTTTTGGACCAGT  
A\_16\_P16745739

CCTTTCTCCCTGAAAATCTACAGAGCAGACTAAGAATTTACCAAACATACCCATATACGT  
A\_16\_P30952592 GTTCTGCCCAGTCCCTCTCAAGGCCAGCCATTATCATAGAAAAAT  
A\_14\_P125203 CTTAGTCTGGGCCCAAATATTTTCAGTTAAAGACCTTTAAAAAAGCGATATTTCCACTCTC  
A\_14\_P102420 TTGCTTATACTTATAGATGCATCCCCTTTGTATACATTTCCAACCCAGGAAATCCGATC  
A\_16\_P21562095

AAAAGTTCTATGCAATTTCCCTTCATCTTGTCAAATCTATCTACAGACCATCTCGGAGAA  
A\_18\_P14413862

ATCCAACAGGAGTTAAAGTTCACCTGGTTTATTTATCATGTATACACTCATTTTGGGTCC  
A\_14\_P109832 CATGTTCTAGTCATCAGATGGGATCATGGCTAATGTTTCCAATATGGTAACCATTAAAA  
A\_16\_P16543238

AATGGCTTTAAGACAAATCTCCTGACTGTTCTTTTAAACCAATCTCAAACAAAAATGCC  
A\_14\_P121259 AAGTATAGAATAGGGCAAATTTGGGCTTGAAAGTCATTTTTCTGTGGCAGAGTTCAATAT  
A\_14\_P129260 GTTAAAATGGAAGCAGGAAGATTTCTGCCCTTCTAGCCTGTAATATAAAAAGAATCATGCT

A\_16\_P18799336

AATTCTCTCAATTAACCTTGCTTCAGATTGTGATTGCATTCGCTAATTTAATCAGCCCCAG

A\_14\_P119935 AAGTTATTCAACACTCCACGTAAACAAATGCAAAATATTCTTTAGGGACAGCGTAGCGAG

A\_14\_P101154 TATAAAATTGTCCCAGGAACATGGCTTGTAATGATTAATTTGGATATCCTGTTTCACCTA

A\_14\_P107304 CTAGGTATTTTGATAAAGGGCTACTGAGAGTTAGTCGACAGTCCCTATAGTCAGGTAG

A\_14\_P107813 GACCTTGAGGCACCTTTAATATAACCATACTTGTGCTGATCAAATGGAAACTAGCAAAA

A\_14\_P135349 AGTATCTATAGCCGATCGCTGCATCTAGATGTTTTCTTCAATCTAACGACGATCAAAGT

A\_14\_P117090 GATACGTGGGTTTTACATAAGTGCCTGTTTGTAAATTTATGGTTGCACATGGTGAGTAAA

A\_16\_P15146424

AAAAATGACTAGACTTGTATCTTCCACAATGAAAACCTCCCAAATGAGAGAGTTCTTGGT

A\_14\_P107232 TTTGGAATGATGGGAGATCATACAATTAAGTCAGCGACCTCGATCTGTTTCATGAAAAA

A\_16\_P02780993

AAAATTAAGGGTTGACATAGGGAAAAAAGCATTGTTGTGGTAATTTAGCCTTCAACGCC

A\_14\_P113105 ACTCTCCAAGGCAGTGAATTTGCATTTAGGTAAAATACGAAGACTGGGAAGTCT

A\_16\_P00712081

AAAAACCATCACCATCTTTACAATGACACAATGATCCACGATTTACCAAGGAATTTTCATG

A\_14\_P100721 CACCTCCTCCAAGCATCAGTAATGGTAAGTTAAAAGTTTTTACAACCTTCTACACATTTAG

A\_14\_P117213 ACATCTGTGATCTCTCAGCATTGATTCCTTTTACTTTAAATCCTGTCCTATGCCTAATGA

A\_14\_P127688 TCATGTTGAAACATACAGAACATATTCTCCCTAGATCAGAGTCAAACCTTGTGGAGGTATT

A\_14\_P135641 ACAAATATATTTCTCTATGGGACCAGATTGATTTGAGAGTGTTGTCCAGGTAAGTGTC

A\_14\_P118877 GAGATTTTCAGATCATCTTTCCCTCCAAAATCAATGACCTTAACTTTTCAATTCCTCC

A\_14\_P201540 CCACATTCTATAACCTTCCATTGCTTTCATGGTGAGTGAGAGAAATAAATGCCTTGGT

A\_16\_P36230419 CTTCTGCCCAGAATTGAGGTGTTGTCCCTACAGTGGAAACTCAAG

A\_14\_P202299 ATCATCAGTCTCTCAATGGAATGTTTCATGGTCAAATTTAAGAACTGTGTTCTCAACTCA

A\_16\_P01414655

AAAACACATCATTCATGAATGTCTTCATACCCATCAAACCTAAAGGACTGCATACTTCTC

CUST\_3627\_PI426210822

CAGCTTACTTAAAATATGTCAGAAAAGAATGAGGGAATGACTCAAACAATTTTCAGGAAATG

A\_14\_P117895 TGGTCAAGTTGGTTATGAAGAACC AAAAGATAATGTGTAAAACAGGAGTAATGTGTATGGC

A\_14\_P127121 TAATATCCCAAACACGCTTCTGACCATCTTTTATTCTGCTGATAATCATTCCATTGAG

A\_14\_P103933 TAGGTGAAGTGAGTTTTTAATGCAGTTGAATTGAAAATTGGGGTTCAGTATGTCTAGGAT

A\_16\_P15531167

AAAGCCCAGGCATTTAATGTAAAGGATACTACAAATTCCAGTTAAAAACTTCAGGCAGTG

A\_14\_P108010 GATGGCTTGGTTTTAATCTGGGGAGTCATGTCATATAGTGGCTAATAGTATAATCTTTGG

A\_14\_P123108 GCAACTTTGAACATGTTTTGTTTTGTTTTGTTTTAATTTTCAGGAGCACAGAGAGTTTCTGT

A\_14\_P111543 CAAAGGGAGCCTTTGGGTTTCAGCATCCTGTAAGGTAATATACGACTTCACAATAA

A\_14\_P122795 ATGGTTGTTTTTAGTCTCTGTGGGTGAGCATTAGTAGGTAGTTTCTGTATTTTCTCAGAA

A\_14\_P114417 CTTCTGTAAGAAAAAGTAGGTTAGGTCTAGAATGCCAATGTTTCGCATTTTCCCTGTAAA

A\_14\_P107688 GCAGTTAAGACTGAAAGTGAGTGGCTCAAGATGAAAAATGGAATATACTAACATCTCTGT  
A\_14\_P130090 CCCAACCATTACAGAAGTAAAATGAGCAAATATAATGTGTCAGTACTGAGAGGATATAGGCAC  
A\_16\_P17829713

AAGTAAGCAAAAAACGAAGGAAGAATTTCCCTATCAGGTGTCAAAGTGTATTGCAAACAT  
A\_16\_P01168799

TTCTGCATACTAACCATCCTTAAAAGTCCTATTGTGTTACAGACTCAGCAAACCATTGTT  
CUST\_9984\_PI426210822 ACAAAGCCTGCTCAGTGTGTTGGCATCTGAAAAGACAAGGCTTCTTG  
A\_14\_P103455

CTGGAAGAGAGGGAAAGGCAGACTTCTCAAAGAACATAGAGAAGTAAATAATTAAGAGA  
A\_14\_P116046 ACAAAAAAGATCCACAGCCTCAAATTTAGACTCTCAGGGGATATAGGGAAAAATGATTTT  
A\_14\_P202441 AATAATTTGCCTGAATCATCCTGGTAGTCACAGAGGTAAACGTTTTTGAACAATTGTTC  
A\_14\_P127092 GTGTAGATGATCAAGACGATGATGGTTTTTCTGTATTGTGAAGACTAAATGGATTTCCG  
A\_14\_P133632 CTTTCTCCAACCTCAACATTTGTGGATGTGAATATTTCAAACAGAATTCTACCACTGTG  
A\_14\_P139817 GCATCAACTTTTCAACTTCATTATCTTGGCCATCCAGTTAGTCATGTGTAAGTACTGAGTATT  
A\_14\_P200356 GTGATTCCTCATTTGTAAAACACTTGGGCATTTATAAAGTTCTGAGAATCTCCCTGACT  
A\_14\_P112321 AATCTACAAATTAGAAAAAGGCGCAGAATTTTGAATATTCTTGTCGCCCAATCAGGACAA  
CUST\_7479\_PI426210822

TCGTTTTAAACAGCTGGCCCATTAAGTAAAAATGTCAAAAACAAATATAGGAGAAAAGT  
A\_14\_P200628 GAACTGTCCTAGAAATTACTTTTTTTTTGGTCCAAATTACATCTTTCAGGTGACTTTTCACG  
A\_14\_P115989 CCCAGAATGGAATTACCTTTAAAAATTCTTTGAAATCTGTGTCTTCATCTGTCTTCTGCT  
A\_14\_P202128 CTCGACATAAAGCACGTATCCGTGGACTATTAGTGTCTATTACCCGGTAAAGTATATTTTA  
A\_14\_P101392 TTTTCTTTCATTTCTAATAGGCATCCTTTGGAACCTAAGGTGGTCAGTTTTACCAACTTCT  
A\_16\_P01834947

ACTTCAGGTTACATCTAACTCCTCTCAAAAATTTGCTCAAGAATTCTCTTCACTTTGCTG  
A\_14\_P104620 GTCTTTGAACCAAGTTATAAGACACTCTTTCTTATCAATGTACACCCCTAAAACAGTCA  
A\_16\_P15424280

AAAAAAGGTGCTTTGAATTTGAAATTAGGGAAACACATCAGTAAGCAAGTCAGTTGACC  
A\_16\_P19738124

ATAAACCACCCTAAATCCAAATCAGTATGTTAAACAAGAGGTAAACAGTGTTAAGCCAGG  
A\_16\_P01421232

ACTGTGAGGAATGAAAGAATCCACAGATAAAATATTGGAAAGAGTATTCATGTGTGACCC  
A\_14\_P100083 ATAGATATATATATTCTAAACCCGGTATATGGTAGGGGGATGGGAAGAGAACAAGAACAG  
A\_16\_P00685112

AGAAAAATGTATACCCTTTTAAAAACAACATTGGGGAAAAAGTGCTATGCCTTAAGGACGT  
CUST\_3275\_PI426210822 TTTCATATCCAACAAAATGCCTTGGGACCATGGCTTCAATCACATTACATGC  
A\_18\_P15170020

TAACCAAGTCGTTACTATTTGCTTTGTCTACTCTTCTTTCTGAAAAAATACATGCCAGCC  
A\_14\_P136811 GGAAGGTCCTTTTACCTTGAAAGTTGTTGCAGATTCAGGATTGGCAAGAAC

A\_14\_P129010 AAAAAACAGCAAAATAAACAAAATCTTACCTTTCCAACATACTGAGGATCTGGTCCCATA  
A\_14\_P121192 AATCTTCTAGTCAGGCTCAACACACTGAAGTCACATCAAAAACATCTCTTGAATTAGAG  
A\_16\_P00645892

ACTCAACTAGAATTATCCATGACTTCATAATTCATCATCATGTCTTTAGTCTTGCTCTCT

A\_14\_P131757

AAAAAGCCAAATTCAAGTCAAGTAGTAACAGTTGCTAGTCCAAGAGAATGAGTGCAAATT

A\_14\_P125624 CTCACTCCCATTAGAAAACCGACATATAAGTTCTCCCGATGTCATTTTTTATATTTTCCC  
A\_14\_P112348 CACAACTAAGTCTTAACAAAATCCAAATTACCAACAAAAAAGGCCGATGTGGTGAATGT  
A\_14\_P102482 CCATAAGACCAGGGTTGATTCCCTTGTATCTTTGTAATGTGTAACCTTTAGAGATGAGTGT  
A\_14\_P123999 TTCTAGCCATTCAGGATGTAGTATCACTAGTGATTCTGGGAGCAGCAGTCTTT  
A\_14\_P103419 GACAAAAAGCAAAAAGATGTGTGATGCTGTTAATAATTTAAAATGCAGAGCCAAAGCCAC  
A\_14\_P105876 ATTCTCTATGGCACGCTGGTCAAATATGTTTCTTTCCTTCTCTTGAGCAATCAGTAG  
A\_14\_P127663 GAGAAGGAGGAATATTTGGTCCCTGGTCAGTTTCTGCTTTGGTAAGTTCTAATT  
A\_16\_P17860260

AATGCTGCAACTCCATAAATAGTTAAGTGCCAGTTTGAAATAGTGTCTTTTTGTGTTGCTC

A\_16\_P18075229

ACAGAACCATTTTTGTGCGACTACAGTCTTAAATAAAATCTACTGACGCTATGTCCAACCA

A\_14\_P124724 CAAGCAACAAAGTCCCGAGCAATGAAGTCATCCACTCCTGCATCT  
A\_14\_P115431 ATAAGAGTTGCCTCTATTTCTAGAAAATGTGGAGCCCTCAAGAATTTTAATGACAGAATTG  
A\_16\_P00579698

ATGCTTCCCTGAACTTTTTTCATTAGTATGCCTCAAGAAAAATAAATCTGGATCATGCCCA

CUST\_5787\_PI426210822

CCTATAAACAGTGTTGAATCCATGTCAATAATTGTATTTTTTAAAAGCAAATATCACCAA

A\_14\_P200050 ACCAGAGGCATCAAACCTGCTTCCTTATCAAATCTATGTTTCATGCTCTAAGAATAAGAAGA  
CUST\_9109\_PI426210822 CTTTTGAAAGGGGACCACCCTGAACCTTTCAGAAAAACGTTGCTTT  
A\_14\_P202392 TCAAACTCACATGGATACATAAGTTATCAAACACAAGTCACTGGTTAATACACTCTGCC  
A\_14\_P110767 ACCTGCCTTCAAATTTGTAGATATTTTACCTCCTTGTATAGTATCTACAGGCAGAGACAG  
A\_16\_P36230544

ACTCTAGGGACTGAAGTAAATTCCTTAATTTAATGAAATGTATCAAGCAGAAACCCACA

A\_14\_P118077 AGGTAGTTTTCCACTGCATGAAATGACCTGTTTTTCTTCTCCACTAGTAGGATTATAGA  
A\_16\_P15044491

AAGTCATCTAAAACCTTGCCATTGATAGAAATGACAGAAATAAAAGTTGGTGGACCATTGG

A\_14\_P128076 CTAATTATCTGATTCAGGGGCCAATTTCCACTAGTTTTAAGTCAAAGTAAGTTTCATGG  
A\_14\_P106635 AAAAGTGCTGGGTGAGAGCCAGATATGGGTTGAAAATAATTTCTCATTAAGTGGTTTAA  
A\_14\_P120578 CACTCATGAAGATAGAGACAGTCATTTGGGAGATTTAAAGGGATATCCTCAAAACAGAAC  
A\_14\_P132810 CTATTATTTATTTCTAAAAGTAGGTGATACAGCCATATGATTTAACAATTCCTGCTCTAT  
A\_16\_P02586067

ACAAGCCAGATCTTCTTTATTGAAGTTTCTACCTACTCCTATTGTTCATCCTTCATTCTGA

A\_14\_P109415 CTAATGAAACAGAGGGCATCTCTTTATCTGGTTACTCCGGAATAAGTGGTAGAAACAAA  
A\_14\_P139361 CATTTGTCTCTAAAGGACTGTGGACTCATTAAAGAAGTTTAGTGGTCATTCTTACCATCT  
A\_14\_P108474 ACCAATGGCAAAGTTGATCCTGCTTGCTCACTAAATTACCTATAATACTCAAACTCAAG  
CUST\_3770\_PI426210822

TATAGATGATAAAGACCTCAGAAAAATCTCACTATGTCCATGCCCAAGAGTTCCAC

A\_14\_P108374 AGTGCACACAGTTTACCACGTTTCTGTGAATTGACACTTAATAAAGTCCTCTTGTGTATA  
A\_16\_P00275672

ACTCAGAAAAAATCCACATGATTCTCAGGTTTAAATCCCATCAAGGTTATGATTCAGGT

A\_14\_P126657 ACAGTTTGGAGATTCGGGAACATCAATAATATTAATGGTCAAAACATGTCTATAGAGCCT

A\_14\_P134864 TCCAGCAAGACTATGAATCTCTGTTCCAAATGCTTGTGCTGGTAAGTGCAGAAAA

A\_16\_P18310843

CATGGAAACCTTATCTTCAAGTTAATTTCAAACCGATGCCATTTAATTTCCCTCCTAACCC

A\_18\_P13466432

ATCTCACAGTCATTAATCAAGGACCTTCTAAATCCAGTTCTCCATAAGTGAAGTCAACTT

CUST\_8507\_PI426210822 AGCATCTGCAGTTGCATGCGTCTGAATGCATTTTGCTGAGTGCATTT

A\_14\_P106588 CCCCTTCTCTTCTATCTTATCAGCATTCTGAGCAGCCTCTATCATAGAACTTAAAAAA

A\_14\_P103262 CTTGCTGCCTGAATACAAAATGTTACCATTCAATCAGATGAGTCTCCATGAAGTTAGAAA

A\_16\_P21252739

AATAGAGATTCCTAACCAATAAAAATATCCCCATCACCAAGATTTTAAGGATGCCATGAGT

CUST\_6102\_PI426210822

TTTGTCTTTTTGAATACTCACAGTACCTAAGAAAGCATCACATATGATAAAGAAAAAGAC

A\_16\_P16191720

GGATCACGATGGCATTCACTCTTTTCATTAGCAAAGTTATGTGTTAACAGGTATTAAGTA

A\_16\_P16192036 CTCGTCTTTGGCTTGGCCAATAAACCCCTTTAGGGAAGTAGAAAGAT

A\_14\_P117936 TTTCTCTAAAGGTCAGTTTTGGGCCAGTTCTTGCAACTAAAGAGCAGAGAT

A\_16\_P02848442

ATTTCAACACGATTCAAGTTGAACATTTTTCTTACCCAAATTACCATGGTAACTTGCAGC

A\_14\_P111414 TATATTCACCTTTCTTCTCTCATACCCCTCCTTTACACAAACACTTTCTTTGTCAGCAAC

A\_18\_P14133141

GTTTCAAATTTTGTGGACACTAAAAAGGATTCATGAGAAACACTATATGGACACTGGGAC

A\_18\_P22842080 CAGATCACTGGTTGACCTTCAGCGGGCATTAAACAGCATATTCCATCAG

A\_16\_P17388357

CCCTCAAGGACTTTAACATTATAACCACTATGTCTGTCATTAAATACACCTGAGGTTGTG

A\_14\_P139656 GCACAGAGACCGGAATCAGCCACCTTTATGAAACACAAAATGTAATAAATTGTATAGG

A\_14\_P118360 TGAGATGAGTTCCTGTTCTGCTTAGTTAATAAAGGAATGAACAAAAACAGGTTTTCTCCC

A\_14\_P134260 TGAATCTCACTTCACTTGAAAATAACAAGTTCCTGATTTGCCCTTATGATAGTGCTGTAGG

A\_16\_P41402430

TTCTTGATGCAGACTATGTAACCTAAACATTCTTGACAAAGTGATGAGTTTGACCATTCC

A\_16\_P15953966

AGCCTTTGATCAATCTCCTACCTATGAAAGCAGATTAGAATTTTTATCCTCTGGCTACAG

A\_18\_P16163715

GCCTATTCAATGACAGATAAAATCCAGAGATAAATGCCAAAGATATAACCCCTGCCTTCAG

A\_14\_P133569 CTCTAACAGCCAAGTGAGCAAAATGAAACAGATTTCAACTCAATATTTGGACAAACCAT

A\_14\_P107563 CAGGATTAGGCATCTGAAAATAGATATCCTCCAAGTTCAAATCCTATTGAGTTTTTTCC

A\_18\_P23484342

ATGTAAAACCTCTCAATCTAATTCCACACCTATTCAAAGTGAATTCCATAGTTCAGCCTGG

A\_14\_P138074 TCAATGACAGGAAAAAAGCAATATAGGATCATCCACACTCCTCAAATCTTGCTTAATGAC

A\_14\_P123151 ACGGAAGAAGAAAGGTAAGAATATTTTTAGAGAGTAGAAAATCAGCCACCCATTTTGGAT

CUST\_9398\_PI426210822 GGGTTTGAGGGTTGTGGTCAAGGCAGGAAGATGCCTATAAAATGT

A\_14\_P100947 CAATAGTTCTGTAACGTCACAGTCTTGTATAATTCCTTCTGCACAGGACGCATTAACTC

A\_14\_P139678 GATTTCTTATTTGTTTCAGTGAGGAAGATTGGGCTCCTTTGGGCTTCTAATATAAATCAAG

A\_14\_P128917 CATCTCCCCAAAATAACTCACGATAGTGTCAAAGTCCAAAATTTTCATCAAAAATCTCAT

A\_14\_P101876 TCCCGAAGGTAAGTGAAGTACTGCCAACGTCCATGATTAATTAGAATATTGAAATTACGTATA

CUST\_1677\_PI426210822 GCTTTTGCAGACACTTGCTCCCTGAGAATTCAGTGGTGACTTTATGAAT

A\_14\_P123488 TCTGGTTTTGGCCTTAACTGTGAAGATCACAGAAACAGTTTGTGGTTCTAATTCTATT

A\_14\_P117614 ACTTTTCCCATTTGAATGAAATTTCCCTTTGTTCATTAGTTAAGTTCCCATGTATACTTGC

A\_14\_P133277 AAGAAGAAAGAAAACAAGATTCAACAGTCTTGTCTGTTCCATTTCCGAGTGTGCTTC

A\_14\_P122558 CTGAATAAATCAGGCCTCTCAGGCATGGACTTAAATCTGTATTTCAATGAACTCTTTCAA

A\_16\_P21243214

TGCTGGGTAACAAATTTAATAAAATGACAACATCCCTTGATATCTCTCTCATTCTTGGCA

A\_14\_P202145 GTCTGAATAACCATCTGCTGCTTAGGAAACTCAATGAAATGACATGCCTTTTTAGCAG

CUST\_6293\_PI426210822

TGTTAAAACCTTTTTTTTTTTTTCTGGTGCTAAAGAACAATTTACCTCCTAAGCCAAGA

A\_14\_P132202 TTTTACCTGTTCTCTGCCGCTTCTCTCAGTTCTCCGTCTAAAGTAAAAGATTTAAAACAT

A\_14\_P108034 ATCTAGTGAACCTAAAAAACTTATATCACTGGATTGCTGTCTGCATTTAACCTGCCAGA

A\_14\_P134230 TTGCATGATTGCTGGTGATAAACAATCTTCTGGCAGAATATAGTCGACTGTGACTTATT

A\_16\_P01010155

TGTCTCGATACTTCATGTTAAGAAAAGGTGATTCAGATATATATGTGGACAGGACTGTGT

A\_14\_P115341 CTCAACTTTCAACTACTCTTAATAATTCCATAAAAGGGAGAATTGGAATCTGGAAGGCTG

CUST\_5199\_PI426210822 CACTCTTTCGTTGTTCCCCATACCCACAGACCTGCCATCCCTGG

A\_14\_P103701 GGCCTCTCAGTTCTAAGCACTGACTTCTACTTTAAATTTATATACAAATCTCTCTCT

A\_16\_P18542733

TCCACTGTATGAATAACTGTAACATCTTTTCATCCACTCATAACTTAATTCGTCTGCAGG

A\_14\_P103690 AGTGGCCAACAATTGCAAATCATTTTAAGTGAACCTTGATCCAATGACCAAACGAACATTA

A\_14\_P137690 ATAGAACATAAACTCAAGTGCTAAGAATCTATCACACAGGGGCTGAGAGTATTTAATCCC

A\_16\_P16591672

AGGCTTTTTATAAGGATCATGCCAATTTTCTTACTCACACTTTTTTTACGTCACCCTTGC  
A\_16\_P30952567 GGTAACACGGGTGGTCCCTACTCGGAAGACACCAGTTTTCTATTTGATATTTATTA  
CUST\_35\_PI426210822 TAAAAACTTTCTGGGGGAAGGCATAAGAAGGCTTTTCTTGTGGGAGC  
A\_14\_P117739 TCACTTTTTCTGAGATCAAGTTTTCTATTGCAAATTGTTGACGTCGTTACTTTCTGCCTT  
CUST\_1883\_PI426210822 GAGACCACTGGTAATTGGAGCCTTCAGCCAGGAGGTCAGGATGAT  
A\_14\_P115146 TGCTAATAAAGAAGCCATCTGGCCAGGAATCATGCCAGCATGTGGATATTACTTTTA  
A\_16\_P17197292  
AAAAAAGGATCTCTAGAACGTGAATACGAAGAGAAAGAACAAACCTTTTATTTGCCACA  
A\_18\_P14134091  
CTTCCCTTTAGGAGTGGTAATTTAGAAGAAAAGAACAAGCCCAATGAATAGTCCCTTAT  
A\_14\_P113551 TCAAATCAGGAAGGAATTTTATACCATTATGGCCTCCTCTTAGGGGAAATAACAACCTT  
A\_16\_P15611133  
AGAACATCATCTGACTTATCAATTCTCACCCCTAGTAATGTTTGAAAGAAACCCAGTCGTA  
A\_16\_P38434450  
TCACTCCTACCCATATCAATGAAAATGAACAATGCCTTACTAGTGACAATCAAGGAAGAT  
A\_14\_P126168 ATTCATGGCTGCACCTAAAACATTATTTGCGTCCCAGCAGATAATTTGAGAACATAAAAA  
A\_16\_P20637812  
ATTTGCCATCATCAAAGGCTTTCAGACCTAAATTTCCAAGTTTTAAGCACTAACATGCA  
A\_14\_P107836 TGATTTTCTTTTTTCATGGTAGAAAAGCAGTCACTATAGCAAACCGAATGGTCCTTTGAT  
A\_14\_P118467 ATCTAATTCCAAAAGAAAAGAGTGCACCTCATTGGTCACTTAATTTACATACCACTTGGC  
A\_14\_P119720 GAGTGTGTCCAAAGTTGCAGTGAGAATGTATTTACCATTGGAGAAAATTTTACAAAAG  
A\_14\_P105690 ATTTACAAATCAAATTGATGAAGATACAGTCAAGACTTCTTAACAGAAGGGCTAGACCC  
CUST\_3470\_PI426210822  
TGTCTGCAGGGAGTTCCCAGTTCTTACTGCTGTCTGAGAATAAAACATAATATCTTT  
A\_14\_P130789 CTCCTTGAGGAAAGTTGCTGTGGAAAAGTTCAATGCAGAGAATTATTGGAAGAAGAAA  
A\_16\_P18550421  
TTTGTCTGCCATTAACACTTTTCATACCCATGACATTTTCTATTACCTTTGCATTGCTGC  
A\_16\_P02890903  
CTAATCTTCCCTACCTAATTATCCCCATCATGAATCAATAAATCATATGCCGAGCCTCT  
A\_18\_P15065722  
CATAAGCCTTTTCATATTTTCATTCCTAAACCTCTATAACCACATTACATTATCTTCAGCCA  
A\_14\_P113373 CTGGACATTTTTTATTTAAGAAAAGATACTGAGAACTGTTTTGGGGTAGAGGTCCTGTC  
A\_14\_P200213 TGGGGCTGAAGTTCTATTCACTTTTCATTTTTTTAAAGCCACACTCTTCTTATCTAGATCT  
A\_14\_P120425 AGTTTCACATCCGATTCCCTATTCCTTTTTTCTACTAACTTATCAGAAGTGTTCAGTCTC  
CUST\_8895\_PI426210822  
GAACCAGAATTTAAACAAGCAGATACAATTCCAAGGACCATGTTTTGTCTCATATGGG  
A\_14\_P125062 GTGGAGTCGTGGGCTAGGTAGATATTCAGGTTGACTCCCCATATTAATAAATA  
A\_16\_P16702086



AAGTCGATATTTTAAACCAGATACTTCAATGTGCTAACTCAAAAACCCTCTTTGTTCCGC  
A\_14\_P102922 CTTTCAATTGTAACATTTTGGCAAAAAGTGGAAAGTTCTTGTAACACCAACCCCATG  
A\_14\_P201753 ATAAAAGCAATGATCCTGCACTGATGGTATCTGTGCGAACTTTGGAAGTAGTCATGTG  
A\_16\_P00997352  
ACTCTGTTTTTACATCTTTTTGGCTGTTTGCATTTAAACAAGGATGATGAACTCACCTGT  
A\_14\_P137258 CTCCATGGACCCTTGGTGGCTTTTGTAATTAATTTTTGATGACATTTTGAGTTTTAAGA  
A\_14\_P104956 GTTTTTCTTTGTTTTGTTTTTAATAAGGGAAGTCTAGGCACAACTTTTCCCTAATGTCCC  
A\_14\_P103368 TATCTTAAGGGAGCCATCTGAATAGTAGTAACCGACAGGATCCCAAAGTTTCTCAT  
A\_16\_P02831944  
TCCCCCTCTCAATATTTTTTATTACTGTCATATTCGAAAATCCTAAAAAAGTCCCATCCG  
A\_14\_P124780 TCTAAACCCTTTGAACTTGTAATTGCTGCTGGTTTAAATAATGAACATTAAGGGGAGTT  
A\_18\_P22841885 TAGGGAAGATGCCACGGCACGGAGGTTCACTGGTTGTTTTCAIT  
A\_14\_P139466 AATTAATGCACCCAATTGAACATATATGCTTATCTCCCAAATCCCCAAATGGTAAGA  
A\_14\_P107567 ACAAGGCCACTGTATTTATAAGGGTGAGGAAACTCTTTACTTATGACCTGTAATTCTCA  
CUST\_7783\_PI426210822 CCATATGCATCCTGGTGGATACCAAGTGCCTGGCAGAAGTCATAG  
CUST\_4389\_PI426210822 ACTGAGGAAATGTCTTGCTGGCAAAGCTGAGTTCGCTCAGAATGT  
CUST\_8881\_PI426210822  
CTTGAAACTTGAGACTTAATGAAGGACACTGAGGTTTCACTTTTCACTGCTCTG  
A\_14\_P136599 CAAACCTTCTCCTTTGTTTTCTGGTTCTCTGCTCTAAGGTCTTCATATTCGCCTATT  
A\_14\_P130035 TTACACCCATGTGATAGGCAAATGAAAGCCATCGTGTCTAGAACTCAAATCTTTGAA  
A\_14\_P107812 AACTTGTAACCATCTTCTGACATGCAGTCAATGATGGGTTTCTGGAGTGAAATACAAAA  
A\_14\_P109316 CTCCTGTTATTTTTACTATTACAGAAGGCTTCTACTCTGAGAGATTGGGGCTTATTTAC  
A\_14\_P200992  
AAAAACAGATTTTAGGGTGGAAAAACAGTCAACTCACACAAAGAATGGAAAAAATACT  
CUST\_5643\_PI426210822 TGTTGTGAGGAGAGGATGAGGCCGTCATGGGAGCAGGTCTGACCT  
A\_16\_P36368974  
ACTTGCAAGAACCAAGATTGTTTCTACTAAAACAAGGATAACTGTAACTGCCCTTTACC  
A\_14\_P129822 CCTCTTTTTTTTTCTGTAAATACATCTTTTCTTGAGGCATAAGCAGAGAGCGACCTAGAT  
A\_16\_P00072930  
AAAAAGAGGAATAAAGCAGACTAGATCGTTTTAAATTTCTTCATTAGCATCCACACTGAA  
A\_14\_P110531 CTTTACCAACATGTAATCCCCTGAGCAGAGTTTTTCAAACATAATCAAAGGTCCAAAATT  
A\_18\_P22840542 AGTGACCATGGGTGCTTACTGTGGGTGGGGATGACAGATTTTCAT  
CUST\_9955\_PI426210822 ATCACTCTCTCAAGGAGAAAGGGTGTCTCATCCCCATGTCTAG  
A\_14\_P135534 CCCTCATGTGTTTTGGAATTTCTTATCATAGCAGCCACATATCTTTGACTAAATTCCTG  
A\_14\_P131653 TAGAGCCAACACTGTCTATTTGGATGGTGTAGTGACTTCATCAATGACCTCGTAGT  
A\_14\_P113823 CAGTGTTGTATGTGTAGCAGGCACTTGAGTTTATATGAAGATGTTTCGCTTCAGTCAAG  
CUST\_10008\_PI426210822 CTGTTGAATGAGGCCACCTGGGTCAACAACAGCTTTGCTAGTCAAC  
CUST\_9289\_PI426210822

TGTGAAGATAAACTAAATATGCATGTTAGCCTCAGAGATTCCAATTATTTTTCTTTAGA  
A\_14\_P112425 TGGAGATGAATTACAAACACAAGCAAATAGGCTCTATTTATTTCTCACCTGAGGTTGTG  
CUST\_2091\_PI426210822 AAACTCCCTGGGTGAGCTGCCAACAACTCCAACAGTAAAAGAAAA  
CUST\_4208\_PI426210822 GCTTTGGCCACAGCAGATGGAAGTTTGAGCTGTGTTTTGTAATTCCTT  
A\_16\_P37336831

ACCAACTAGAGAAAACTAATCAAACCTTAGCCATCAATCAATACAGAGAACTTACCAA  
CUST\_100\_PI426210822 TTTCTGCCTCTTTTGAAAATACTGTGAGGAGCCATCTGGCTATTGACCA  
A\_18\_P22840144 ACTTCCAGTTTCTTTCTTGGGTGGGAATGCCTTGAGCCTCAGTTAATT  
CUST\_10101\_PI426210822 CTCTTGAATGTCCTTCTAGAGTAGCTCTTGGCATTGCTACCTATGGTCATTG  
A\_18\_P22841770

TCAAGCCTGAGGTTTATTCTTTAATCTTCCAAAAGCAAACAGAAGAACAGAAATAACCT  
A\_16\_P21575901

CTCCACACATGCTTTATATCCAAACCCACATAATTATGACATATTTTGGATGGCTTCAT  
A\_14\_P137334 ATAGGATTTTGCTTTGATGTTACACATAGATGATGCAGCATTACACACGTTTAAGGATC  
A\_14\_P122522 TTATAGCCTGTGGTAGTGCACATGGTTAACATAAAAAGATAAACTGGTTCACATCATACA  
A\_14\_P121602 AAACTGGGGCTGTTCCGATTTTATCAAACCTTCTTAATTCTGAACATGAAGATGTTTCAGG  
A\_16\_P21484614

AACGTTCAAATTGCTTTTTGTTTCATCTTCCAATGTTACCAAATTTCTCACTTCTCCACCA  
A\_14\_P116930 CAAAAGGGTTTTAGGCCTCCCCTAGGTCATGTATTAATAGTTTTTCCTTATAGGAA  
A\_16\_P17679369

GCCAATGGTTAATGATATGCTCCCAAATAGATATCTAGGCCCGATTTTATTACAAACCA  
A\_14\_P117563

CTACACAGTCAACAGATCTTGGAGTGGAAAAATTACTTCGACAGAGATAAGAAAAAGCAA  
A\_16\_P19459065

CTTCTGTGCACAATTCTATGTCCTATACCTTTGCCTTTGCAATCTAACATTCTTCCTTGT  
A\_16\_P41623195

AGACCACTTTAAGAACATTCCTCTCCATCAATTCATGATTTTCTTACTTTGACACCA  
CUST\_2104\_PI426210822

TCTTGTGTGTGAGATTTTCATATTCCTACTTGGCTTGGCCTTGTCAAATGTCTGATATAAG  
A\_14\_P118143 CTGACATCTGACCTTCTTATTCATTAATCATGTGTGGAACCTGGCACCCACG  
A\_16\_P00593398

AACCTCAACCAGATTTCAAGTTCAATGTATTTTCTCTGTAATCACCTTACTGTCTGCTTC  
A\_14\_P103464 AATGAGATAAAGGAATCTTCATGATTTTCTTTGTTGCATACCTCAGAAAGGTTTGAACGG  
A\_16\_P58424557

CATTCTGGTGGGGAAAGAGTAATAAGTAAAGCATATAGTTTATTACATGATGGTAAATGC  
A\_14\_P201802 GCCCTGCCTTGATTTTAACTTAAATTTTCAACATCCTACTGCATTTTATGCCATGTAGAC  
A\_14\_P114557 AATGAGCGATTTCTTCACAAGAAGAGCAGATAGGAAGGAAGTAAACATCTTGAAGTAATG  
A\_18\_P16130004

ATATCCATTTCAGTCTCTTATGTATCCATGTCCTTATCACATCTGGATCTCTGTCAAGTTT  
A\_14\_P132790 GTCTCAGTAAGGGGTGGAGGATTGGTGTAATGAGACAGTCACATAAATTGTCTAATTT  
A\_16\_P00685185 CTTTCAAGGCAAGACTGATAATGAAAGTCGTGTTTGGGTGGGAATCACAAG  
A\_14\_P117031 CCAATTGAATTTACCCTCACAACTTGGAAAGCCATAATCAGCATGATCATGCATGAA  
A\_16\_P00970368  
TTACTTTTCTTCTTCACTCTTCCAATCAACAATTTACGTTATCAACTTTTCTCCAAGGC  
A\_14\_P106252 CTTTTCAATTTTCAGAGTTAAGTTCTTCAACCTGGGGAAAAATAATGAATACCAGCCAAGT  
A\_14\_P122481 ATCACATAAACAGATGACATGTTTCCTCAGGGTGGAAAGTGTTCCTACTAAGATAAACAT  
A\_14\_P129829 GCCAGAAGTCAGCAAGTGACATTTTCAATTAAGAAAATAAAGTTTAATGTGCTGGGAAAGAG  
A\_18\_P22841367  
GTAGAAAGAGAAATGTAGAAATCTGCCAGAAAATGTGCTGGCAGTGAAATGGAGAGTTT  
A\_14\_P138102 CTTCTATAGTGTATGTTATGGGGTGGACAACCTAAGACATTTAGAATTGCAAAATGCCAATCAG  
A\_14\_P114104 CTATGTAACCCGGGCTTCTTATTCTCTCTAGGGCTTATGAAGTGGTTACTAAAATCTAAA  
A\_14\_P114845 TTTAAGGCACTAAGTCTCAAAAGTGAAGGCACCTGTTATACTTTGCTCTCTAATTTGACA  
A\_14\_P119453 AATTAGAATGTCACGTCATCTCCTCAGTATTCTACATTCCTAGAACATATCATCCCTCGA  
CUST\_3060\_PI426210822 ATGATGTTTTGCTTGTGTCAGGACACTAACCTGTGTTGGGTACACCTTGTTAA  
A\_14\_P119110 AGCCATTATGATTTTATGATTACTTGTGTTGACAGTATTCTCCTGTGGAATGTGTGATGC  
A\_14\_P130792 GTAGGAAATAATTTTGGAGTTTGAACCTTTTATTAAGGTAAGGACTAACCTGGACCAGGTG  
A\_14\_P127536 TTTTTTTTAGGAAAATTATAACCATTAGCAAGACTGGCATCAGCAAGTAGTTCGCAGTGTT  
CUST\_762\_PI426210822 CTTTTCTAGGCTGCTGGAGATAAGGAACAACGCCTGTTCTACTAAGAA  
CUST\_756\_PI426210822  
CAGGGTCATCCTAACCTCTGCTAAACACCTTTTCCACAAATACATAATATGTAATGCAC  
A\_14\_P123961 GGCAGTGAAGAGGAAATAATATTTCAAATAATCTGATAGATGAGTAGACACTGGCCAGTG  
CUST\_4854\_PI426210822 CTCATCACACTGCACAGCCCTTTGGCAGAGACAGGGAGAAGCTTG  
A\_14\_P129848 CTCCTCCACCAGAAAATAAGAAAATGTATGCGTGTGCGTTAGTTTTCAAGTATTGTTATAA  
A\_14\_P132776 ACCTCATATTTTTCACATTCTAGTCACCTTTAGGTTATATCTGAACTGTTTGGCAGTTCC  
A\_14\_P139745 ACAGATTTCTTCAATATTCAAAAACAGGAACTCAAAGATCTCTTCCGTGACTTTGACA  
A\_16\_P16166441  
TGCAACCCTTATCCTTTACACTGGACTAAATGGACTAAATTGCTGCATCAAAAATAGAAC  
CUST\_8743\_PI426210822  
TACAGATAGGTATAGTGCAGAGATACTGTATCAAGTACTTTACAAGAACAAATTAATCTA  
A\_14\_P120029 CCAATGGGGCCTGTGTCCCTAGATTGTAATTCTTAAATATGTCATCAAAGTCAATATTGA  
A\_16\_P15693608  
TTCCAAAACCATTTTCTCAAGAAAGAGTGCTCATAATGTATCATCTTCACTGAACAGCC  
A\_14\_P110124 GTTGGATACCTGCCTTACAGAAATACGAAATTTAATTTCCCTTAATTCTGTCCTCTTGTG  
CUST\_6852\_PI426210822 ACTGCTGGAAGAAAGACAAGTGAGGAAGAGGGGTGATTGTGAACT  
A\_16\_P39579490  
AAATCCCTTCTCTTTCCATAAGAAGATATGACAGAGACAGTTAATATCCACATGAGCCTT

CUST\_4679\_PI426210822 AGCGGAGGAGACCTTGTTCCCTCTTGGGAGTTGCAGGGGAGTGTC  
A\_14\_P106861 TAAATCCATTAAGTGGATATTACATCCCCATTTGTGTTGATTCTGCTTTATTGGCTGGAT  
A\_14\_P118170 TGGTGTCCATTTAAGGTGGTAATGATACGAGTTTTTAAGTTAAAATGGCACTTAAGGTGT  
A\_14\_P132494 ACCTTTAAATCTTTCTCTCTAGGGCAGGATCATAACTGCATACACTTCTAATGGGGA  
A\_14\_P127100 ACACATTGCTATAGTTGTTTAGTCAAGCAGATCCCGTATCCAACAGCAGCAATATATAAG  
A\_16\_P16016109

ATCCATCTCCAACATATGATAAGGATGTAAGCCATCACTCAATAAAGTCACATATCTCGG  
A\_14\_P128468 CTAATTTATTCTCTCCATATTCACAGAAACAAAATAATGCATCATATAGCATAAATGTTT  
A\_16\_P16105783

TTTCCATGACTAATTCACCTTCATTTTACATGCCTTAAAGAGCATTGTAACTCCATAGGG  
CUST\_7660\_PI426210822 TATTTGCTTTTTTATTACTCCACCAGGCAAAGAGGGTGGCACCCCTG  
A\_14\_P139775 ACTGTATGTTTCTCTACTGTATGGAAAATAAAGTTTACAAGCACACGGTTCTCAGCCAG  
A\_18\_P14134929 CTCAGTCAATAGGACAGACAGATGAGGAGTAGACCCCCAAGAATCAC  
A\_14\_P132187 CTGAAATTATCGTCATTCCCCAAATCAATACAGTTGTATGTATCATCCCATCTCCTTCAT  
CUST\_5600\_PI426210822

AAGACCTCGATGAAAAATAAATCATTGCTGCCTTCATTGGAGTCACAGACAGT  
A\_16\_P02373176

TCTTCCAAACCTAAGTGTGATGTAGATACCTGAATAAAGACAACCTTTCTTATTGCCGAGA  
A\_14\_P135763 CTGTCTGCAGTTGAAAAGGCACTAATTCAAATGACACTAATTTAGAAATTGTCCTTGCTC  
CUST\_7461\_PI426210822

GGGAGAAAAGAATGAGCAAAACTATCCTGTAGAGGAGAGACATTGAAAATGACATAT  
CUST\_5363\_PI426210822 AATTTACAGACTCTTATTTACCCAGTCCTAGGGAACTGAGGTTTCATAGGAC  
A\_14\_P138452 TTAAGGACTATAATAAATGAAAATTTACCGGCAAGGGACTTGTGTTATCCTGAATAGAAA  
A\_14\_P116260 ACCAGCCTTTTGCCTGTCTAAAGGTAACAATAAAATGTAAATACCTCCTAGAAGAGATGA  
A\_14\_P135737 TGGAATTTAGAACTACATCCTATCAAAGAAATCCCATCCCTGGGAGTCAGGAT  
CUST\_6953\_PI426210822 CAGCTTGCCAGGGCTGTCATTTATCCTTTTTGAGGCCAGGCTTAC  
A\_14\_P103987 GATATAACAACAGAGAAGACCATTTTACATGGAGGCATGAAAACCTTTGAATGTGTAAGTT  
A\_16\_P38053856

GCCATGTAGTCAAGCAATAGACATAAAGAAGCCTTAGCAAATTTTTTTTTTGCCTTGCAGA  
A\_16\_P17787220

AAAAAAGGATAGCACATAATATGCCACTCTCCATCTTATAGAAACATGCAGGCTAAAG  
CUST\_9834\_PI426210822 AGAGAAGACGAGATGTGAGCCAGGAGGTACCTGGGATGGAAACAA  
A\_14\_P130990 TTCTCCACAGGGGAACTCTTTCTTCGTGATGACAACTTTCTCAAAACAGAA  
A\_16\_P17674762

AAAATCGCTGGAAGACAACAATATGACACTTGTAAGTCAAAGGAAAATATCAGGTCTACC  
A\_14\_P120380 CACTGTATACTTTCTGCTTCCACATTGTTATACTTCTCCAGGTCAGTTTGGTC  
A\_14\_P101605 AATTGCTATATAATGTCACCAGAACAATCCAGTAGGGTCTTCTTCATGTGGTTATACA  
CUST\_719\_PI426210822

CTTCTTCTCACTGGAGTTTTGTTTTGTACGTCATTGTGCATTTGAGTTACAGCAG

A\_18\_P26323191

AAAATACCACTGTAAAGGCAATGAGACTTTACTGAGATCCTTTATGACTTACGCATGCAG

A\_18\_P13542488

AGATATAGTTGCCTATGGGTATGTCAAGTATGAAAACTGCTGTCATTTATAACCCCTGG

A\_14\_P101987 GGCCCAAGTTAATTGATTTACAACCTGCTGCCTTGGCATGAGATTGAGAT

A\_16\_P35228012

CCAAAATCACTTTTAAATGAACACTCCTTCTTTTCTACACGATGTCATTTGAAATGCCACA

A\_14\_P113288 CTAACACTGTGGTTAAAGGAGAAAATTCATAGGAAGGATCTTACTTGTTTTCTGTGAAC

A\_14\_P129223 CTAAAACAGTTTAAACATCGATCTTTCCTTCTCCTACCTTCCAACCAACAGTCTTTATTC

A\_14\_P128040 CATGTAAACCTCCCACTTTCTAATTTTGTATCATAATTAAGGTAATGGGGGGTGGTAG

CUST\_6272\_PI426210822

GGAATTGCAGAGGATTTTGTATTTTTATATTTAAAAACCAGACTTGTGGAGTAATGTGT

A\_14\_P108566

AGTGAGAGAGGTGGGGAACAAAAGAGATAAAAACCACATTAGAAGCACTTACAAATAAAG

A\_14\_P115079

GGAGAAGGAAAAGTGTGGGTTAGAACCTAGGACTATTATTTATGAGACTGAAAAGAAGT

A\_14\_P114716 ACTTATTGCATAAAAATAACAGAAATTTCTGGCAAGCGGACTGGATTTCCAAAACCTCTTC

A\_14\_P132309 CTGTAAAATGATTAGACTTAAAACATTCATCTCTGGCTGTTTATGTGCCTGTCCAAACC

A\_16\_P15685188

AACCTGTGTAACAAATCATGGTAGGATGAAGAAAAACAGTGTGACTACAACAAACCTTT

A\_14\_P110540 TTACCGAGTAACAACCTCACTGACTTTAGAGTGTTTTTAATGCTTGGGGAAAAACTGTTT

A\_18\_P22605646

TGACTCTGTTATAAATGATTAATTATTTCCCCAGTTTGAAATGTTATACCGTAAAGAAGTT

A\_18\_P22841231 GTGATAATTTCTGGTTCTCCCTAGTCATCTCCCTCAAGAATTTCCAGTTACTTCT

A\_16\_P00685346

ACCATTGAACATGTAATGATAAAATTGATTAGTTATGATTGAGATGAGCAGTAGGAGGGA

A\_16\_P58424294 GAATGGTGTTCOAAGAGTAGTAGGGAGCCTCGGGACTAGAGTTTG

A\_14\_P115266

CTTCCAGAAAGATATAATCTGAAAGGAGAAAACGCTGGCAGAGTGATAAAAAGAACAAGA

A\_14\_P106879 AGAAACCGAGTCACTGTGAAAAGATGGGAAATTATCTCCTGCGAAAACCTCAG

A\_14\_P126819 TCCTGATGCCATTAGACTGAGATTTGAAGACATTCAGCAGAATAATGACATAGTCCAAAG

A\_14\_P135017 TTTTCAACAACTGCTGTTTCTGCTTTAAAACCTCCAATCCTGAAACAACACAACAAA

A\_16\_P21591204

TGAGCACCTCAGTAACTTTACACAATATATTTTTGGGAATGCTATGTGATCCATCTGTT

A\_18\_P25029379

GGCAGAACTATGAGAAAGTAACTGGATGAACTGAAAATGATGCAGATAGCAACTCTG

CUST\_7622\_PI426210822

TTTTGAATTTGTATTGGTTTTTTAAAATGTAAGATTATTTTACTTATTTTAAATCTTTC  
A\_16\_P39761860  
TCTTTCAACTCCTTTTAGACAAAGACTATACATCTCAGTATCCAAAACACTACACAACATCC  
A\_18\_P14138028 CCCAGACCACAGTTTTTCCAGTCCCTGTCTTCTTCCAAATTCCTTCT  
A\_14\_P104494 CTGACAAAATTAATTGCAAGTGAGGATCCATAGAAGAATGTATCCATGGAATCAAAGTGC  
A\_16\_P58424535 TAAAACCAAAGTATCAGGGCCTGTGTTCTTGCCAGAGGCACCAGG  
A\_14\_P103896 AGTTAAGAAATTCGGCAACTAGCAGAATAGTAATGGATGGGTAGGGAACCTTTAACACT  
CUST\_5628\_PI426210822 TAAATGAAACAATCATGGGAAGTCCTGGCTGGTCCGTGTGCTGGG  
A\_14\_P133126 ATGTGCTGAGGATGGTGAAGTTTTCTTAGTGGACAATTAATAATTGAATTCCTGTGATGA  
A\_14\_P123039 GTGTTCCGTCAATAACTGCTGTTAAGTAAATCTTGAAAAGCATTCTTCATCATCACCAG  
A\_14\_P131945 CGAGAGGGACTGATCAAGAAAAAAAAAATAGGGCAGATGGAACATAATGGTAATACTGATAT  
A\_14\_P124264 TATGATAAATGCCTGCCCATTTTGCAGAGCATAATGAATTTTCCTTTTAATGTCGGCAAT  
A\_14\_P121240 CTAGATGAAACCATATCCAGCCAAACTTGTCACTTACTATTGTGAAACAAGCCTTTCTA  
A\_14\_P132806 CAGACTCTTTTCTTCCAATATTTTGCACAGATGCCAAATGCAAAATGCACTTTCAAATG  
A\_14\_P117942 TTTTAAAACAGATTTTACCTTCTGTCTCTGACTCACTGAGGTGCTTTGTAAGGAT  
A\_16\_P17287056  
CCAAC TAGCATCATGTATGAGAACTTATTTGTCCCTTTCACATTTATACTCTAGCCCTGA  
A\_16\_P03642800  
TGAGAAACAGCATTTTCCAGACATCATTATCTACTTAGGCATCTTTGAAAATTCCGAGTG  
A\_14\_P105290 AATAGAACATAATGAATCTTCTCCTATGGGTTGATCAAATCTCTCACAGTGGAAGAAAAT  
A\_16\_P38173600  
CTCCAGTATTGCACACAAGAAGTAAATATATGGTATTCCATCGTTAGACTATTGGGTTCA  
A\_16\_P00203268  
AAGCAGCCAACATATCCAAAATCCTACCTGATACCTTTTTACAAAGTGCTCTAAATTTCC  
A\_16\_P17592667  
ACATTTTCATGTCTCTTCTTTCTGTAAACTGCTACCAAACACTGATATACTCCAATTGTTCC  
A\_18\_P14132964 CTATACTAGCCTTGTCCTGAAACATCTACCCCATTCATTTCCACCCTCTCTG  
A\_14\_P127702 AGTGACATAGACACTGCATTGACTTTTCTAGGGTTTAGTTTAATCTGGAAGCCTGAATTA  
A\_16\_P16354789  
AGTATTAATTCACAGCATTCTCACTAACTGGGTCAATGGAAAGAAGTATGGACAAGGAAT  
A\_14\_P119558 TAACTAAATAAATGAGAGCATTGTTAGATGATTTGTCCTGGGAGGGTCTTGGAGAATA  
CUST\_1562\_PI426210822 GAAGCAACAGGACAGTGTAGAGGGAGGCTTAAGGAATAAAAATGATTGGG  
A\_16\_P01613425  
AATTTCCGGCTGTTATTAACCTATCTTCTGATGTAGTAGCATTCTCACTTCCTGC  
A\_14\_P101545 CAGAAATTTCCCTTTCCCTAACCTTCTTTAGTTCAATTTAGTATTCTAATAGACGAGACTT  
A\_16\_P36230401  
TTCCAGTTCCTTACTGCTGTCTGAGAATAAAAACATAATATCTTTGGTCTTTCACAGAGGTA  
A\_16\_P38540085

GACATTTTCCAAACTCCATAGAAAAAAGCATTTCATAGTTCCACAGATTTAAAGCAGAAGT  
A\_18\_P22841944 TAGTCCAAAAAAGGAATTTGTCCCAGGTCCTCAGAATCACTGTCTAGGAAG  
A\_16\_P18069626

AAATGAACTGAAATCCGAAAGTTCTTTTTCTGACTTCAAGTTTTGTAGCATAACACAGT  
A\_14\_P126312 AAAAGGCAGTGCTGTGATGATGTGTCGATTGTGAGAATCTAAGTCAATATAAAGAGAGAA  
A\_14\_P117014 GCTTACCTTTCTTAAGAATTTTCTTCACTTTCACATAGTTCCCTTGTTTGACATACTCAT  
A\_16\_P19021348

CTTTCTCCAGAATGTAATCATTGTGCGACAAATGTGGAAGATTGTAGAAATGGCCAAATTC  
A\_14\_P113905 TCTATAATCGTGTTTCTTTTTTAAACAGGAACTACTTTGCTTCGCACTTTTTTCATGGG  
CUST\_6069\_PI426210822

GTGGGAGTACAGCCAAGTTGTAGTGTAAGTGCTTTTAACTAACAAGAATACAGC  
A\_16\_P19194424

AACCAATTGATACCCATACACCAGTTCTTTTTGTCATTATGACCAGTATATCGGCTCTAA  
A\_14\_P202029 TAAAAATCCAGCACATGTCCCAGTTCTAGTAAACACATGTCCCAGTTCTAAAAATCCA  
A\_14\_P135234 ATGCTTGAGAAACATCCTACTTCAAAGAGAACTGTGATCAAAGGGACAATATTGTCAAT  
A\_14\_P130401 CTCTGCTGGAATCCTATTGAGAAGGTAGACATTGTGCTTTATTAATATAGTCGCTCTTCA  
CUST\_3063\_PI426210822 ATATTGCTGGCTCAGTTGATACCTCATGATGGCATGAGTTTTAAATCAGGG  
CUST\_2151\_PI426210822 GGACAGCAGTGCATCGTGGAAGCAGGAGACCAGTGAGAAAGCAGT  
A\_14\_P119104 CTCTATCTCCCAAATATAATATTTTCATATCTAGGCCTGACATTGGGTCTCCTTGAGTTG  
A\_16\_P00022293

AAACACTAGACTTCAATTAATCGCATGGAGATAAATACCTCTAACGACTGGAAATGTGG  
A\_16\_P01250342

CAACCAGAGAAAAAATCCAGTTTATATGGCAGAATAAGCATATACCATGATCAGACCAGC  
CUST\_1509\_PI426210822 ACAACTCTAACCATTCCTTTTCCCAGATTCAGAAGGACAGGACACC  
CUST\_5934\_PI426210822 GCCAGCAAGCTCTCTGGAATATTTGGGTTTTGACATGCCAAGACTT  
A\_14\_P121387 AAGCAGAAAAAGAAAAAATCCAAAAGTGCAGAAGAGAAGAACCAGCCCTCCA  
A\_16\_P03065455

AGGCTGCCTTATTTGTATATCCCCTATCCACTTTACTATGAACCAAATGAGACTCTAATG  
CUST\_7732\_PI426210822 CACGTTACAAACAGGGCTGTAGCCTGGGTCTACTGGCCAAGCTTC  
A\_14\_P127758 GCCTGGCAGAGTGGGCTTTTCAATAAGCCTTTAAGTGAATTGTTAAATAAATGAATAATA  
A\_16\_P01464276

GTTTTTCATGGACCTGATATGGTAGATACCCATTCTCAATATTGTTTCATCCTGCAAACATC  
A\_16\_P00025930

ATTTAGGATATCCATGAGCATTCTAGAGCAAACAGACTCTTCTGAAGAATATGCATGCAC  
A\_18\_P20261980

TGGAATACAACCTTAAACTCAGAAAAGATTCACCTAACGTTCTCTCATTAAGCCATGTCCAG  
CUST\_1962\_PI426210822

GACATTCTGTAGCAAGATGAGTTATATGGGGCCAAGTTACAGCACAGAGTTTTAAG

CUST\_2409\_PI426210822 TTGTACTTTGGTGCTTGGACATTTCTGTTGGATGGCTTAACGGAG

A\_16\_P01622944

CACCTTTCAGAACTATAACTTCTAGACTCCCTAAAATAATATCAGCAAACAAAACCTG

A\_14\_P108324 TTAGAGCAGCATTACTTTCATATGGTACTGTATCAACTAGGTTGATAAGGTTCTAGCCT

A\_14\_P120303 CTTGGTTTCTGCTCCATTTTCCCCTGCAGAAAAACAAGAATAAGAAAAAGGCAAG

A\_14\_P112757 TTCAGGAACTCAATGAAGACCTTGCAGAAATGGGTAAGTTCTTTTCTCACAAGTAAGTT

CUST\_5282\_PI426210822 CCTTCAGTTTTCAGAGACAGGAGACTCCCATAGATTTTGTAGCAGGAAAAGG

CUST\_5771\_PI426210822

GAGGGAGAAACCTCTTACACTCAGGTCATGGTATTTATATGAATACAAAAAAAATTTAA

A\_16\_P21552419

GCAGGAATCAATTCACATAGTGCATCTTCAGTCACTTATAATGAGATCAACCTCATGTCA

A\_16\_P18577546

AACAGCATCAACAATGATTGAGCCTTAATAGTTCATTGCAAGTGAGAGTTGATTTCTGTA

A\_14\_P125918 GATGCCAAAAATGCGAATGACTACTTCATTAATGCCAGTTAGTCATAAAATGAGCCTTTC

A\_16\_P18153070

AATGTCAGTAACTCAGTTTCTAGTAGACAACGAAGACACTTAGACACTTTGCATCAGAAA

A\_16\_P00685424

TCTTGAGGCATTCCCTCTTTTATTTTCTTGGTCTTTTTGTGTTATTTGGAAGTGTAATCA

A\_14\_P115453 AAGAACTGGACATTTCAAAGAGAAAGTCCAAGTGCATGTATCTTTGTCATCTGGAATAT

A\_14\_P136099 ATCAAAGAACAACCTCCAAACGGCTAAAATAGGCTCAAGGTCACTATTAAGTGATAAAGG

A\_14\_P102957

CGAGTTCAGAAAACAAAGTGGAGAACCTCTGTGCACACCTGAAAATGAAAAATAAAAAAT

A\_14\_P102093 TCATGCCCTTAGGTCTAGAATCAAACCTCAATCTAAAGATGTTGGTTTCACACCTAAGTAT

CUST\_10345\_PI426210822 TAAACCCCTTTAGGGAAGTAGAAAGATGGTGGCAACAGACAGCT

A\_16\_P36230948

CTATTTTGTGAAATTTCCCGTCATTCAGTAGTTCACTTTACTTCAAGTTGTGACCTTCC

A\_14\_P118689 AATAAATTATACCTCTCAGAAAATTCAGCCCAAGAACCAGTTCTAATGCTTATGAGAGGG

A\_14\_P132588 CTCTCCTATCAATCCACTCACATCAGGATTTCTAAGAAATCATCCCTTTACATTTCCAAA

A\_14\_P132872 ATCACGCATCTCTGAGATTTTGTGGATCACTTAGTTCAAACATAGAGATAATGCATGCA

CUST\_6059\_PI426210822 GGAATCACGCATTCCAAGCAGAGGGAAAATGTGAGCAGAAGTATG

CUST\_4898\_PI426210822

CACAGACCTTACCGTCTAATAGGAATGATAGCAAGTGAATGTATAATAAATAAATAATTA

A\_14\_P109420 TTTCCATTCTTAAGAGTCCATTATGTTTCGTAAGAGCAAAAGAGTAGTGCAGAAGGCC

A\_14\_P130319 AAGGCAGTATAATCTCATTGTAGCACTAGTGTCTGACAGAGAACACAATAGAATTGGCTA

A\_14\_P102902 TATTTGAAAACCTTAATCCTAGCCCTCCACTCTAGAAGTCAGTTCAATGAGAACACAAACA

A\_14\_P134206 CAACTCAGACAAGGCGAATCAGTTGATTAACAAACAGTGTCTCAGGAAAGAACATAACTT

CUST\_9399\_PI426210822 TCAAGGCAGGAAGATGCCTATAAAATGTAGATCAGATGCCTTCTGTGGAATG

A\_14\_P100823 TTTTCTGTTGTATTGTTCAAGAAAGTAAAGAAACCCCATTAATTACCTTAGCAGCAGCCA



A\_14\_P129672 ATTGTTTAGAATTGGAGAAAGAAATTGAAGAACTCAGATCAAAACCTGTTACTGAAGGAA  
A\_16\_P34490662

CATTTAAAGGCTTTGTGACATGACTCACATCTAGGGCTTCTTGACACTATGATTTCTTTT  
CUST\_5819\_PI426210822

ATCTGTTTACATTTGCTGGAAAACTTCTTCCAGGGAAATAACTAGACAGGGCTTT  
A\_16\_P01702815

ATGAGTGTGAATCATGGGATGCTATCTTAATTCAGACCACAATTATATGTTTCAGCCTGT  
CUST\_5229\_PI426210822

AACTGAACTAGTTCAAACAGTTCAAGCATTGTCTCTTCTTTCTGGTTGAAGTTCT  
CUST\_6751\_PI426210822 CAAGGAACCAGCAAAGCCTCACTACAGAGTGACAATTCCTGGGGT

A\_14\_P109199 GATAAAATAATTGCTTCTGCACATGGTTTGAACATGTTTTCTTACTAGCATAGCCGAGT

A\_14\_P135664 GTTAGTGAGAGTTGGGGCAAACAGGATATCTTACTTCTGGATGTGTGTGACT  
A\_16\_P01213301

AAGCAGTCAATTCTCACCTATTGTCCATGCTTTTCTAAGTATATGTCCGGATTCTCTCAA  
A\_16\_P15504748

AAAGCAGTGACTACCTTTAAAATTCGGGATTACCTTTAAAATGTTTTTCAGGGAAACATCCT  
A\_16\_P18083869

AGATGGTGCTTGTCCATATATTTGTGAGGCTCTCCTATATAAAGTTACATAATTTGGGGT  
A\_16\_P02246634

ACTTCATCACACATCAGGTCACAATAAGATCTACATGGCTGTAAAAAACTCTCTAACGTT  
A\_16\_P39041043

AAACATCCATTATCAAGTATCATAACAAAAACCACAATGCTATCAATTCACAAGATCCCA  
A\_18\_P14138829 ATAAGTAGGAATAAGCAGCCTTGTTTTGGGGAAAAAGAGGGACAGACCTAGAAT  
CUST\_2407\_PI426210822

GTTAGTGTAACATTTCTTCAGTGTTCCTACAGTGTCTGATTTGTACTTTGGTGCT  
CUST\_7786\_PI426210822 TCCACTGACATGTTGCTTAGAGCTGGGGACAGCTTAGATTAGCCATAT  
A\_16\_P15617418

ATGGAATGAACTTAAGACTGCAATAGTGATAGGACTAAGAATAGGATTAGGTAGGCAGGA  
A\_14\_P123724 GAATAAATTGGCACATATTTTCATAATTACCTCAGTTATGAACCAGCCTTCATCAGCCACT  
A\_14\_P132336 CTTTGTGTCACGTGAACCACAAAATCTGAGTGAAAACGAAAGTCCATGAATGTC  
CUST\_1789\_PI426210822

GACAATTACAAGACTCTTTTCTTTAATTTATGCCCTAAATGCTATAATTCTGGATTGAAA  
A\_16\_P16142917

GGGACCTCCACTTAATACAGGAAACAAGTTTTAGTGTCATAGACCACGTATCTAAAAATG  
A\_14\_P126075 CTTGATCCTTCCTCGACATAAAATCCCAAAAAGAATAGATTTCTGATTGTCTTTCTCCTC  
A\_16\_P18598494

AAAAATGTTGACTTGCCTTAATCTAGTGAACATACCAACTGTGGAAAGTTATGAAATCCA  
A\_14\_P100652 TATCTCATCAAAGCATGAATTTCCAACCTCATTAACACTCCATTCTCTGCCCTAATCTC

A\_14\_P120934 TCATTTTTGAGCAACTAGATAACAACACTGGTCTTTTTTAGTCTTGACCAAAGGGGATAA  
A\_14\_P125129 CATGGAATGTTTTGATTGAGCAATGAAATAAACAGTCTCCATTTTGTCTGCTTGAGT  
A\_14\_P123697 ATACAGTATTTTGCATGGATGGTGGCACAGAGCCTTTATAGGAATATGGATTTTTTTTT  
A\_14\_P100669 TGTTACAGTATTGGTGTCTTTCCTGTGCAAACAGTTTTCTCATTTTTTTAATCTCTCCCT  
A\_14\_P111004 TGTTAAGATGAAACAGGCATCTGCTGTCCCTATTTTTTATGAATTCATCTGTCATGGAA  
A\_14\_P200431 GAAGGAGGACCAGTCTGAAGATAAGAAAAGACCCAGCCTGTGAGTTT  
A\_16\_P20010539  
GAAACTGGTTGATGTGATATAAATGGGAGGAAGATGTAATATATGAACACACCAACACCC  
A\_18\_P22841585 AGTAGCAGATTCTAGATTGTCTGTTTGCTGGTTTGGGGGCTGCA  
A\_16\_P00685427 AAAAGGTGAGTTATTTAGCATTGGAGGAGCCTGTTTGTAGCCATGGCTG  
A\_18\_P11324447  
TGCTCATCATACAAATAGATTGCACCACAGATTGTAAAGATGCCTAGAATTAGTCCATGA  
A\_14\_P122284 ATGTTAAATGAATTAATAACACACAATTTGGGGGCGGTGCTTTTCATGCACCTAATTC  
CUST\_3910\_PI426210822  
AGCTGGAGGGAGGAAAATGGCACAGTTCTAAAATTCTTTAAGCCTCGTTTAATT  
A\_16\_P20743868  
ATGGAATTTCCAAACTAGAGTTGTGATATGCAGAAAATCAACAAGATTGCATTGCTAGG  
A\_14\_P138771 TATTATAACCAGCGTTGCCTAATAACTGGTGACAAACCACTTATCTGTTTACTAAGGCAG  
A\_14\_P121088 GAGAGATGCAACAGGCTTTATTGTTGCAGCAACACTAACATATACGCCCCATT  
A\_16\_P16796310  
AAACATACAGACTCTACACCAGAAGTTCTTTTACAGACTCCAAGTTAGGAAAGTCTACTC  
CUST\_520\_PI426210822  
AGAAAAATAAAAAATCACGGAACAAATTTCTCCATCTTAGCTGATCTGTTGGTGTGTTA  
A\_18\_P18464457  
TACGGTCTTATTTCTATTTAGACCCAATTTAGAATGACTGTAAACATTACCCCATCTGC  
A\_14\_P128636 ACAAATCAGCAATAAAACAGTGTATGATGTCATGCTACATAGTTTGGTCTTCACAGTGGA  
CUST\_9364\_PI426210822 ATAACTCCCAAGTCACATATACAGACCAGGGTCCCTGTGTGCCCC  
A\_16\_P00459723  
AAAGGCCAGAGATTACATACAAACGCAGTGATATTTCTATTACACATAAGCATTGTGCA  
A\_14\_P137995 GTTTTAAGACAAATTTAAAACAACTTAACTTTATTTCTCACTTTCACTTAAAACCTTGA  
A\_14\_P134633 CTGGAGTTTTCAATTTCCAAAAAGTTTACCAGAAGGCATAACTTTCTTCACTCCCTTTAAT  
CUST\_1981\_PI426210822 CCACCCTGTCCCTAATCCTCTCTCTGCTTTCTGAAAGTTTCCATTATACT  
A\_16\_P02009835  
ACTTAAACCCTTCTCTTATTCTAAAACACTATCTATGTTCCCTGATCTAATCTTGGAGC  
CUST\_1753\_PI426210822 ATTTTATTGGGCTGGAACCATCAAAGTGCTGAACCTTACGGACAACAC  
CUST\_4722\_PI426210822 GAGGGCTGCACCAGTGACCAGTTAAGCCCAGTGGGTGATGCCTTT  
A\_14\_P119655 CTGATATTATATATGCTGATCTACTGCTTCAGAAATGTTTCGCAAGAAGCGCATGCTCTTG  
A\_14\_P101713 CCCATGAATTAGGAGAAGAAAAACACACACATACACAATTTTGTGTTTGGTGTTCAGAGA

A\_14\_P201543 ATATATACTCTCGTGTGAATGAAGGGACATCTTTGCATAGAAAGATCTCATGTTCCACCAT

A\_18\_P22842475 CTGACATTCTGTTCTTCCAGGCCTCCATCCCTGATTTTGGCTTCT

CUST\_511\_PI426210822 AGTTCTACTGGCTCCCACCACTTATTTAGGAATCTCTGAATTGGGGAA

A\_16\_P16540524

ATAGTTACTCAGTGAAATCACATAAGTTTCCCGTTTTTCTCTTGATGAAACCTCAAACCC

A\_16\_P37398727

CTCTCCTAGGCTTCCATATACCAACTTCATACTATCATTACAGTGCTTATTATACAGGGT

A\_14\_P106219 CAGACATATGACTACAATGTCTCATGCATCTTTTTGTGCTTTAGTTCATGACTGCAAAAC

A\_14\_P130671 GTTTCACTGGGTCCCTTCAACATCTTCAATGGCTTCTTCTGAAACAGAAGAAAAACAT

CUST\_7066\_PI426210822 GACCGGAATCTTTTCCTTCAAATGAACCTGTTTGGATTCTCTTATCTGTGCAA

A\_16\_P01349001

CGTTCCTTCAAATAATACCTCCAAAAATGACAGATTTTGTAGGCAACTCATATATGCAC

A\_18\_P22840299

AAGAAATAACTCTGTGCTACTTGTGATTACAAAAGAGAGTTTCAAAGAGCAAGTAGGGT

A\_14\_P119425 ACTTCCAATTCCTGCTTTTTGCCTTTTACTTCAGCAATCAATTTAACAAGTTATCCTTT

A\_14\_P113106 CTTTAGGACTGACATTTCTATCTTGAATTTTCATGCTTTCCTAAAGTCTCTGCTGCTAAGG

A\_16\_P02819767

TGCCAATTAATGACCACCTGATAGTATACAAAGAGTGCATTAGAATCAGTGACCCTAA

A\_14\_P126265 GTCCATGTGAATTGGGTCTCATTTTACTTGTATACAAAGTTTCTTAAATGGCAGCAGAG

CUST\_3340\_PI426210822 TTCTTGGGTGCAATGAAGGGCTCTTAATCTTCTGCATTTGGACACTTG

A\_14\_P116331 TTTCCAAAACAGGGTGTTACTGTTATCAATTTCTTATTCAATGGAGTGTTCGTTTGTGG

CUST\_8702\_PI426210822 GAGTAGACCCCAAGAATCACCCACCAGAGGAGGAGCATCAACAC

A\_14\_P110300 CACCTAAGTCTTTAAATAATACATTATTTCCGAATGTGTGTGTTGAGGTAGGAAAGGGGA

A\_16\_P16019663

TTGAAAAATATACGACGTCCATATGATTAAGTGCTCTTCATTTTCTTCTCAACCACAGGG

CUST\_5960\_PI426210822 CTTCAGGGTAAACTGCTGCTCTCCAGGTATGTCGGTGTTCCTTC

A\_16\_P16282158

AGGCTACACTGCAATGTTTACTGAATATGCTTCCATAATAGAGTCCTATTTCCCACTTTC

A\_16\_P18834981

GTGAGCATTGCAGATTAAGGAACCAGTGATAGGTAACAAATATCTACCTTGAACATCTG

A\_14\_P132088 ATCTTCTGGCAACTGAGTAATGTTGTTCCATACTGATATCCCTGGAAAACGTAAAGTTAAG

A\_14\_P118648 GAATTAAGTCATCACTAAAGGCAGAGGAAATCTCATTCTTGACCCTAAAAGATCTGGAG

A\_14\_P128827 GGTGATGACCAGTTAAATGATTTGGAGAGGACACTATGGGAGGTGAGTTTTTC

A\_14\_P115737 ACTTTGTTTTTCCAGTTTATGATCAGGAATTGTAACACCATTGAACTTTGTAAAAAGCACC

A\_16\_P17530731

AGTTTCCATTCTAGGTCTTGATATGAATCTCCCCCTATAAAATCCTTTAACTACACCACA

A\_16\_P18086544

AACACTTAATTCTAGACCTAGAGATGTCCACATTTCTCTTAATTTATGCTCATCCCTGG

A\_16\_P19583705

TTTGTCCATACCAAGCCTCTAATTGTCAAGATGATTCTGTTGAAAGATTCTCAATGAGAG

A\_16\_P03325445

CCTTCCTCCGTATTACATATCAACATATACCCATTTGTAATTTGTTGCCTCACGAAAAT

A\_14\_P103462 CTGTTCTGATTTTCCTGTCGTAAGATTTTTTCTTTTCATTTTCTCCAGGGAGGGTAAATCA

A\_14\_P132895 CTCGATCTAGTTCAAAAGAATTTATTTTATTGGCACTCATTTCATCAGTGTCCAGCAATGA

A\_14\_P201958 CCTGCAGCCAACTAATGTTCTCCAGGCTCCTTATCTCGTGTAGTTCCTTAATTT

A\_16\_P01462847

TACAGGCTACCATTCTATGACATTTTAATGATCCAAAGATCCCAAATAAAGAACAGGGC

A\_16\_P21592081

AAAACCAACTCTCTCTCAGTTCAAGTTCCCTTTATGTCTCACACTTAATTCCCAAATTA

A\_14\_P129083 GAAAAAAGGTCAGGTCATAACTACTGGGACACACACTATTTTAGATATAACTTGGGCTC

A\_14\_P128988 CTTCTAGAAAAAATAATCTGAGCAAAAAGGTCAGCAGCCCTTGCTATTCTTACTTTTCC

A\_18\_P14136713 AAGGAAAACCTCAGTCCTTTTGCCTTGCCTCCTTCTCCAGTTGCC

A\_16\_P21364201

GGCTTCTGACTTTGCATATCTGACAGGTTAACAATACCGTAGTATGTCCTTACGTATCAT

CUST\_7792\_P1426210822

GATTTTATTTTATTTAAAGAATTACCTTGTGGGTATGTCTGTGACTCTTGGGTGCCTGC

A\_14\_P119304 AGCAGGAGCCAGGACAAAGCAAACTTGTATCGTGTCCAGACAGAAG

A\_16\_P16512612

AACGTTACCTTCATTAGACTACATGCAAATCCAGTAACCTTTACTTTTCAGTGTGACTGTGACA

A\_14\_P134597 ATGTTTGATTGTGGTTGGATATATAAAGGAGTTTCTTTTCATTTTCAGAATGCCTCCAGTCT

A\_14\_P139436 TTAGGCTTTAAGGTATTATGGGAAGAGAAAACCAATGCAGATCTTTCTTCTTCTGGAATG

A\_14\_P100884 CTCCTGCCAGGTGATCCTAGGCTTCTCTGCACTCTAATAATTTATTGCTTG

A\_14\_P122187 ATGGAAGACATTAAGCGCTTATCTTCTGTGGAACCAAAGGTCTCTTCACAGAATTT

A\_18\_P27241407

GCATATTTCTAGATTAAGAGACAGCAGTTATTCAGAACATCAATTTAACCCTCAGGAA

A\_14\_P117058 AGAGTTTTCAACAGGACAAATGGGTTGATATGGTTTGGGTAATTACCATTATCTCAGAAA

CUST\_6258\_P1426210822 GCAGTGAGAGGGAAGGTACCAGGTAGAGAACCTCTAGATTTTATGAGC

A\_14\_P137902 CTTTATTCCATTTTATAGGCCGAGGAGTCTTGTAATGTAATGGCTGGAAAAACCCTAAC

A\_14\_P115427 AGGCACAGCGCTGCTAACGGGTAATTATTAGAATTAAGAAATTAACGAATTAGCACAGT

A\_14\_P108446 CCCTACTCTAACCACCTTTAACCTTCATCACCAATTTGACAAATTTTACAGGTGTATTAC

A\_14\_P115599 AGGAAAAGTATTGGACTAAGGGGTCTGAATTTTAAATCTCCATCCTGAACCTTTTTATCA

A\_18\_P22839780 GATGGTGGGATTCGGATGCTGGTGTACAGAGGCTTAGGTTTCTAAAAG

A\_16\_P36346333

GCATCAATTGACCAGTAGAATTCATTGCACAAAATTAATATACTACTTTTGAAGCCCTGC

CUST\_8822\_P1426210822

CCATCTCTACTTGAGATCGCCAGTAGGAATATTTTGAACAAATTCCTTTAACCCAT

A\_14\_P105364 GATCAAGCAGATTAATTTTTTTCACCTCCTCTGCTCATTAAATATTCATTAGAGGCTCAG  
A\_14\_P129194 AAAGTTTTGATTTTGTGTTAGTTCAGCAACCAGATCCAAATCAGCCAAAGCCTG  
CUST\_9832\_PI426210822 TTTCCAAGCCTCCTGAAATAGTGCTGGTGAGAGAAGACGAGATGT  
A\_14\_P101482 CTCTGTAGATCATCCTTATTCTTATTAGATGCTGCCTCACTGTTCTGACTTTTGGACC  
A\_14\_P117767 GACAGAAGGCAGCAAATGCATTGAAAGCAAAGTATGGAACCAATTATAGAGTTGGATC  
A\_14\_P102135 ATCTCCATCAAAGATAGCAATGAGCCAATAATGAATACTCAAGAGTATGGCTTTCCTCAA  
A\_16\_P16958016  
TCTTAGAACTGTTGTGAAAAACATGAGACAAGATGCTGTATAATAGACGAGCAGATGGC  
A\_16\_P17242013  
GCCCTACTCATTCTCTAAAATTCCACTCTGAGCATTTTTTTCCATACCTTTCCATACATT  
A\_16\_P18385022  
CAATCATCTCCTGGATAGAGTGATACCTGTAAGTGATTTCATTTTTCAAAGCAAGTCA  
A\_16\_P15884592  
AAAGTGACCACTGATACGTATTTCTGTAGAGATCTTAACTGATTCTAGACGTTGGAAGG  
A\_16\_P18514098  
TCCAGTAGTGTAATCACCAATGAAATACACCAAGAGCCAAATATTTTTACATGTTCTCCC  
A\_14\_P121841 AATATATTGGTGAGTGAAGCAATGAGCAACACAGAATCTGTCTCTGATGACTATTTTTGG  
A\_14\_P136056 ATTACAAAACAATTCGATGTTTTACATGTGCATGCACCCTGGATCAGTAATAGATCAGAG  
A\_16\_P03697177  
CCGCTTTCAGTTATCCATTCAAGTTTCCATTATTCAACCCTGTTCATTTTACAAAGTCAA  
A\_14\_P119147 ACTCAGTTCTAACTCAGAAACATATTCTAGCCATCACCTCTTTTCAGGCTTTTTGTAAAG  
CUST\_5428\_PI426210822 GTTCGTGAACTGGCTGGCCACTTGGTCCCTGAACTTGCCTCTGTT  
A\_18\_P22841647  
TTCGCCTAACTAGAAGTTTTGTTCTATTTTAAAGTAGATGAAACCTCATCTCTCTCCCAT  
A\_18\_P22840548 TTCCATTTTCCTTTGATTGGTGATGCACGCATTCAAGGGGCATCAAG  
A\_14\_P116526 GTGTAGAAGTTTGTTTATCCAAATGCATTGGTTCAAGTGGGCCACACAGATTG  
A\_14\_P110480 GTTTGTTTTGTTTTTAGGGTCTTCATGTTACTTTCTGCATTGGTCAAAGATCACTTAGT  
A\_14\_P130437 CTCACTCCAGATCCTTCTATCCTTAATTCATGGTATTTTGAGAGTTTGTGACAGCG  
A\_16\_P19587612  
CAGGGACAATACTCACTACAAGAAACTATATCCATGAACCTCATTCTCATAGACACAAC  
A\_16\_P02764957  
TCAGTAAAAATGCGCCTCATTCAATAGATTGCTACTGATTTAAGAACTCACACCTCATGT  
A\_14\_P117158 CAGCCAGATTTCGCTTTTGTTTTATAGAGTTGTTGCCTGCAATCTCTATCCCTTTGTAAA  
A\_14\_P126678 ACTCCATTCTTAAGTAGTCGTTTGAATATTTTCAGGATTTGAGGATATTCCTTCTTAGAC  
A\_14\_P104816 TTCTCTGTGTGTCTTCTTTTTTTTCTGCCACTAACTGACTGAATCTTTCTATAGTTTCC  
A\_14\_P128526 TATGCCTCAGCCATGTAAATATAAACAGATACATTGAATCATTCAATGTCCAGAGTGGGA  
A\_16\_P17828962  
CCAGTGTTAATTTCTGTTCATGTAACTACCAAAGAACAGATTTCCAAAGTGTCTCAAAC

CUST\_6285\_PI426210822 ACAGATGATGTTTCAGTTACAGTCATAAGCCTTTCTCACCAGGAGCACTG

A\_18\_P10239710

AGTTTGTGCTTAATCTCCTGATAGCCTTTACAGTCTATCTAGAACAACAAAATCCCAAGT

A\_14\_P108815 GAATCTGATGCTCTGCTGAATAATTTTCATTACCTCTGCACATGCCTGTCAAATATGAAAT

A\_14\_P137721 AAAGGAAGTGCTTGTGAAAAACAACATTGTGATCACTTCCAGCGGCGAA

A\_16\_P15988214

ATCTCACTGCAAGTCCAAGATACCAAAAATCAAATCCTATTTCAATTGCCACTTAGTTCTC

CUST\_10197\_PI426210822 CCCAGAACTCAGTCAGGCCTCATGCCTCACGCAGCACCCATCTAA

A\_18\_P22839793

TTTCCCTTGAATCTAGATAACCTGTAACCTTCTGTTACAGAATGAGATGGCTTATTTCCCT

A\_14\_P116222 TTGTATATATCTGACAAAACCTGGCAACATCTTACAGACTACTGACTTGAAGACAACCTCT

A\_16\_P00365660

AGCCCCAAATTAACAATTCTAGTAGGTCAGTGTATCTTTAACTGGCTCATCTCTATGAC

A\_16\_P15176518

CTCGATTTAGAAGAGCATATAGTCTAGCAGAGGAAGATAGATACTTCAAACCTCTCCACCT

A\_14\_P116682 ACTGCTGCTCTGAAGTAAGATTGGTAAACAAGGATTCCAATACAGACATTAATAATAGGCA

A\_14\_P101548 AAGTAGAGAGAGAATGACCAAGGTAGAGAAGGAATTTTGCAGAGGTCAGGTAG

A\_14\_P105473 CTTAGGTATGTGTTTCTGGCAATGGTAAGTTACAGTTAAAGGGACTATGGTTTATGAAC

CUST\_9497\_PI426210822

CTTCCATTAATTAAGTGTCCATTTTGGAGCACTATGGTGATATTTTTCATTATCAAGAGTTC

A\_14\_P120163 AGGTTTGAGAAATTGTAGTAAGGAAACAGTCCACTCCAAGAAAATTTCTTCACAAATTCTC

A\_14\_P139670 CTCATTTGAGCAAGATGCACAGTTGTAACCATATGACCTCCCGTAGTTTAAATTAAGAT

A\_14\_P103101 AACCGAGCAGGTTAACACATAAACATGGAAATCTGCTACAGTTAAAAAGGCGTATTGAAA

CUST\_6148\_PI426210822

CCTGGAAAATGTTGTCAGAACATTAGCCGTGTAATTTTTTTCCCTTCATTGTCT

A\_14\_P200303 AGATTCTCTAAGTCTCCTATTCTAAGATTATTCCAAGTCTTGGAGCATTCTACCCTCAG

A\_16\_P30952659 CGAAGACATTTACATCTTTATCGCCTCGATCAAGTGTGGAGTCACATGCTAAT

CUST\_8606\_PI426210822 GAGAGTGTCTGGCTTATATATGGGAGGTTTTTACGGGGAGCCTAATGAA

A\_14\_P126027 GGAAGAAGGGACAAATACAAGAAATACTCATCTCAGAAATTGGTGTCCAGAGTAGGAT

A\_14\_P104067 AAGAGGGACCCCCACAACCTCTAATTATTTTTATTATAGTTACCATTTGTGTGTGCCTTTT

A\_14\_P110439 ATAAGCCAAATGCTGGGTTGTTCCTGTATTTGTAAGGACATGAGTTTTTAAAAATGAATT

CUST\_1944\_PI426210822

TTAAGCTTTTTAAATAGGACTCCCAGGAGAGTGCTGATAAATATCTTTGATCATTGATTTT

A\_14\_P124101 ACCCTTAGATAAAAAGTAATGAAGGAAACCCCATATTTAGAGAAAGGCATTCTGCTGAGTA

A\_14\_P125682 CTGTAGAAATTGACAGATAGAGAATTTGCTTAAATTTAGAGAAAGGGGGTTTTCCAGAG

CUST\_3951\_PI426210822

TTTTATTTTTGAATCAGCTTCATATCTTCAGAACGTCCAACCTTAAATAATGGTTGGAGA

CUST\_439\_PI426210822 GGGATCCAAAAAGCATCTTCTCGGGGTTTCTGGGAAATTTCTCTG

A\_18\_P22842287

GATATGGAGACACCAGGGTCATCTTCAGTTTAACAAACACATGTCAGAACTAGAAAAGTT

A\_16\_P16191198 CATACATCTTCTCATGTCTCAGGACATCAGATTGCATTGTATCACTCTGGTCTTCAT

A\_14\_P134080 GAAGATATTTTGAGCCCCGGGTTAATTAGGATCTTTAAATTCTCATTGTGTGCTGACAT

A\_18\_P22840864

ATCAGTCCCAAGAGTCACCTTTGCTGATTTTTTTCCTATTATTCTTTCCTGTTATTCCAT

A\_16\_P20814965

ATGCTCCATTAGTCACTAATTTTCAAACGAAAAGTTCTGTCTTTGAAAACTCCTCTCCC

A\_16\_P15230850

AGGTGGATGTCATAATCTCGAATATTGTCCCTGTTTATTTTTCGATTGCTTCTTTAACG

A\_14\_P118687 TTTGTAATAAGATAACCTGCCCAAGATGCTGACCAATTCTGCAAAGTTACTACCCAATTTA

A\_16\_P02094076

CAGCCTATCATATCTGATGTGTCTTGATTATGAATGAGAGAGCATTATCAACTAGAGCC

A\_14\_P115483 GAAAAAAGGCAAAATTCCTATTAATACACTTCTCTCCAGAGGCAATCAGTGCTAATAA

A\_16\_P16633463

AAGTCCCGTAGAAATTTTAAGTCATTGTGTCTAGTCAACCACCTAATTTACTAACAGTCA

A\_14\_P137204 CATTATTCTGACTCACCTTATAAGCGCAAGCAAATTGTCAAGAAGTTTCAGAATCTGCTC

A\_14\_P114427 GTAGGGACATTCTTGTGAAATCAGACATTTACTAACCCAAAAATCTCAGACTATGCACT

A\_18\_P10060669

AGCCTTATCATGCTTTTTGAAATACCAAAAATAGCCCTAGGAGTATACACTACCACCTTC

A\_14\_P201088 ATACCCCTGTTTATATGAAATAGGCAGATAATTAGAGTTGGGTGGAGGTAAGAGTCTATG

A\_16\_P30952510 ATCACCGGGTGAGTAGCCTGGTCCTGGGTTGCCACAACACAGGAG

A\_14\_P119331 AAAGTAAAAAATTTCCCAACTCACTTTGTGTTATGTGGAGGAAATGTGTATTACCAATGG

A\_14\_P115900 CTGAGCAATGCATTCATTAATTCGGTCTCTTCTTTTCTTTTCTATTAATCTGTGCGGTAA

A\_14\_P136461 CTCCTGTCTCCCTCTTCTTTTCCGCACCTCCATCTTTGTGGATAATAAATAA

A\_14\_P116655 CATAAAACCAGTAGGCAGGAGTTGTATCTTACCAGTTTTGCAGATGCATATACCAACC

A\_18\_P14131746 CTTCCCTTTCCACCAGACCCTTTACCAGTGGGTGCTGGTAAAACT

A\_16\_P16191221

TTATTTGTGACTGTGGTCTTTTCCTGTGACTCCATTTCCCTATTATCTGTTTCAGAAACT

A\_16\_P01066752

AAAGGTTAATGGACACTTGACACTGTTTTCCCTATCAAAATATTTGCCAAATTCTGAGGCT

A\_14\_P108138 AGGTCACACTGGTCAAGAGAAAATGATGCTGTCTTAATCCTTAAATTTCTCTGAAAAGAT

A\_14\_P122779 GTGGTTTGTATGCCACTTATCTTGCCCTTCTCAGTTTCCTTATTTTTTCATTTTGTGAGAGT

A\_16\_P15156681

AAACCGATTCAATTCCTAAACAGACCAATTAATCTTCCCTGTCTTTAAACTAATTCCCCTT

A\_16\_P01852991

AGAACCACTCTATACTGTCTATGAGTCCATCTGAATACATCTATATGCCTACATACACGT

A\_14\_P115360 ACATTTATGGCTCCATTAATAATCAATGCTATCATAAATTTGGGCCGGTTAAAGTGGTGA

A\_16\_P58424360 CTGTTTGGGTCTTCTGGTCTCATTTGGGCCCCCTCTTGCATCTGC  
A\_16\_P38793769  
CCAACACATGACTCATTATTGGAACCTTAGCAACTATTCAGTACCAACTTACTCTTTCA  
A\_16\_P38407123  
ATCCACAGTTACCTAAGAACTTCATGCACATCCTATTTTTGCACATCATATTGTCTCTCT  
CUST\_4694\_PI426210822  
CCACAGTTTCTCATCTCTATTGTACATAGTAATCAGGGTCTAACATAGCTTCCCTTT  
A\_18\_P15674253  
AAAACCATCTCACTATTATGCCTAATTCATCAGACTTCAAAAACATACCTGAAGGTCAGC  
A\_14\_P200940  
AGCAGTCAGGGTGATTTAGTTGCTTTTTTCATGAAAGAAAAAGACTCAAAAGACAAGACT  
CUST\_5260\_PI426210822  
TAATTATCTGGCTTAATGCTAACTGCTTATTTGCTGACCTTCTGCTTTATTACAAATTT  
CUST\_1783\_PI426210822  
TCTTTTAATCTTCTGGAAAGAAGATAGACACAATTTAATGTAGCTATCAGGCAGAATGAC  
A\_16\_P01694674  
ATTCTTGCATCTGTTCTTGGAAATCACATGAAAAATAAGTTACCCATATACCTTGGCCTC  
A\_14\_P114903 GTCCTGGATCACGGGTGTCATGAACTTTGCCATCTTCCAAAATCTGAAAAATATAAAT  
A\_14\_P136337 CTGTCACCTTTACACATTTTTGGCAGATGATCTTGTCGTCATGATAATTTTTTTCCCAAAA  
A\_14\_P125753 CTGAAACTGAAGAATTCAGATGTTATCCAAAATATCCTTCAGCCAAACTCATTCCAAT  
A\_14\_P136960 AAAGAAAATATTTACTAACCTTTATTTCCCTAACATCACAGCAAGGTGTAAAGGAGTATTT  
A\_14\_P103715 AATGATTTGGGATTAAGAATGGGAGACGTGGACACGTATGCTTATTTGACCAGTAG  
A\_16\_P16191354  
GCAGTGACCCTGGCTCCTATTGTCTCTGTCTCTCTATATCTATAACTTTTAATCTTGAAA  
A\_14\_P112054 CTTTAGAAAGTTCTTAAGTGGTCAGGAAGGTAGGTGCTTCCCTTTTTCTCCTC  
A\_18\_P15675975  
AAAAAACCAGAACTAACCCATCTGAATCCATTCAAATGGTCATTTGAACAATACAGGG  
A\_16\_P15870506  
TGAGAGTCTAGTAATAGTCAGTGTTTCATATGTGTGCTTTAGATCACAATTCTACACGGAC  
A\_16\_P03229820  
ATGTTGAAATCTCACTAGGTTAGGAGTATTCATCTACTCACATGAACTCATACCACACAC  
A\_16\_P20363014  
AAATCCAAAGCCTTCCCTGTATAAACTGAGTAGTCCCTAATCCAGACATCTATAACTGAAG  
A\_16\_P20175631  
TAAAGTGTAGAATTGAAAACATGATGTAAGCGTCATCATTACTGAGGTGGACAAGTGAGT  
A\_14\_P120658 GATATTTTCCACAGCAGCATGCATACCATTCCATCCGATGCCAATACTGCTTA  
A\_14\_P138714 TGTATATTAATAAGTGAGGAACAGACTCTTGAAACTGTTTTTTTCCCTAGTGGCTTACCCT  
A\_18\_P13842550



ACCCTGGACATACCTTTTTATGCTATTAAGAAGGCTTCTAGTTTTGTTTACTCCAGTC  
A\_16\_P18205014  
TCTGGCAGCATCTTTTTGTTCTACATCCAAATCCCATTGTGATATCTAATAGAAAAAGCC  
A\_14\_P130867 GGATTCACCTACTGGGTATCAGCATGATGACAATAATGATGATGACAACCGAGATTTATT  
A\_18\_P14064914  
AAAGCAAGGAATGAAAAGTCAAAGCACCAAAGTAAACTATTTTGCCCTAAGTCAGGTC  
A\_14\_P122698 CAATTCGTATATTGCCAATGAGACCTTTGAAAAACAATTCTTCAGTGATGGTAGCATTCA  
A\_14\_P135409 TGCCAAAGCAATTCCAGAGGCTGAGAGAAACAAAAGTGTTTTTTAAACATCATTCTTAA  
CUST\_3713\_PI426210822  
TGCTATGATATAGATTAGTTTTCTATGAATAACTTGGCTTTATGCCTTCATATACCTTTT  
CUST\_1011\_PI426210822  
GTTTGAGGGAGGCAAACCAAGATGTTAAAACTGATTATTTTCAAAGCAATATTTTAAG  
A\_16\_P17875240  
TGCCCTTTAGATCTCCTACATACACTGCTATTTTTCTAACCAACAACATGCAAAAAATGG  
A\_14\_P118545 AATTAATAATGACTGACAAAACAATTCTAAAAATCTGATAGTGTCCCTGTTGGCAGGAGTG  
A\_14\_P108773 CCCTAAAAGAAGAGTAAGAATTCCTCCAATGGCTTTGTTTCTACCTTTGAAAATTACAGG  
A\_14\_P130349 TGCTGATTTACTTTTTAAGAATTGTAGTTTCTGGCAACAGAGGAAAGATCCTCAAGAATCG  
A\_14\_P104775 GCAAATAGTGCTTTGTGCATCTTGCTGATAATTATAATCAGGCCAAAGCAGGGTGT  
A\_14\_P117070 ACTGTCTGATGATGTGCTCTGTGATGCTGACAGCACCTTCTCT  
CUST\_7917\_PI426210822 CTCACTGCTTCAGGCTTTAGGAAGAAACCCTCTCTTTTCTTGGTGT  
A\_14\_P117881 ACTTCAAGGACTTGACAAATCACTGATTTGTTAAAAACAACCTTCTTTCTTCAGGAATT  
A\_14\_P115603 CCCAGTGGTTAGATTTTAAAGGATCAGACAGTCTCCAGGTTAAGAGAGACTCTATTG  
A\_14\_P106833 GACACTCCTGCCTCTCTGTTATCTTGGAATAAACTGTAACAGATGAAAATGAGACAAA  
A\_14\_P124781 AATTGTCTCAATGTTAAAGCCAAAACCTCAAATTGAGGAGCCTTGCAATACCAAATTCAC  
CUST\_3620\_PI426210822 GAATTTCCAAGCAGGTGCTTGTGCTGCTCTTGTAGCCTTTTGT  
A\_14\_P106020 TAGAATCCACACTGGGCCGTAATATAAAGTCACTTCTAGATTGGGCTCAATAATCATTTT  
A\_16\_P35653588  
ATTGCTTCTACTGCAAAAAACATTTCTGAGTTCTAAACTCCAAAACCAACTTTTCTTCTCT  
CUST\_10001\_PI426210822 AAAGAGCCAGGACCTGAGAAGGCAGACTCTGCCCTTGCCACAGA  
CUST\_1264\_PI426210822 GGAGGAAGGGAGGGAGGCCCCAGAGGACAGCCATGGCTGTAAGGA  
A\_14\_P104983 TGATAAATCTCAACAAATCTTTAGGGCCAGTGCAGAAGACAGACAATATACCAAACAAG  
A\_14\_P132135 ACTATATAGTGCATCACCGGAAGGTATTATGGTTAACTTAGAAGCCACAGTTTCTAGG  
A\_14\_P112776 ATTTGTTTGTFTTTGACTGATACCTTTCTTACGAGGGACTTTCTTTGTCTCTGGGTTG  
A\_14\_P101767 TGTTTTTTTAAACAGATGAAAACACACCATGTCATATCAAGCAGATCTTCACACATCCACA  
A\_16\_P16768888  
AAATCTTTGTTCAACCAAGAGTCTATCACCAATCCACATGTGCTATTGTTTCAAACAAAA  
A\_14\_P114210 ACGTTGTCGATTTAAAAACAATATTGGGTTTCCATTTTTTTCTGAACGGGATAAGGCAA  
A\_14\_P102231 TAATAAGGCATTTTTTTTTTCTTGAATGGTGTGTTTGGGGTTTCCCCTTTATTCAACTAGT

A\_16\_P16191130 TGAGAGACTTGGTTTTACACACAACCTCTAACCATTCTTTTTCCCAGATTCAGAAG

A\_16\_P17432262

CTTGAGTTCCAACCTCTTAGATTACCCACTGGATACTTCTACTGTCACCTCAAATTCATT

A\_14\_P119874 GTCCATGCACAATATACTATTTCCAAAACTAAACAAAATGACATTCTTACTCCACAAAG

A\_14\_P123035 CTGAAAGCAACCCTGATTCTCTGGATAAGATGAATAAGATCATATCCCCCAAAGAAATAA

A\_18\_P22842121

GTCTCTGTGTGAATAACACTGGCTAAGAGCACAGAGAGATGTTAGAAAATAATCATCAT

A\_16\_P02472972

GGCATCCTTAAGGTCTAAGTAGACACAGATACATGCATCTCTACCTTAGTAAGAGAAGTA

CUST\_10288\_PI426210822 GTGGGTGGGGGTGATTTTCAGGCCTAATGCTGACACCACTCCACT

A\_18\_P14133949

CGGCTGGTTAAAAATCACATGGTGTGGGCATTTATAGGGGTAATAACTTGAAATGATTAA

A\_14\_P123700 AACTATTGTTACTCCAATTATTTGAGGACTGACCCTCAGGGATTTTCTTTTACTGGAC

A\_14\_P107700 CTAAGTAAATATATGGTTGCTGAATTCAGAAAGTCTTTTTCTAGGGTGGAGAGGGTAT

A\_14\_P135510 TTGGACCATGTTTCTGTTAGCAATATTGGTTTGGTGTAGCAGTATTGGTTTGATGTTAG

CUST\_6552\_PI426210822

GCAGTACACTTTGTATCTTATGTTGACTACTAATAATGATTTTCATATAAAAAGCACAGCA

A\_16\_P16112618

AAAGCCTCAAGATTTTGAAGAACTAAAGGAAGGAGAAGAAAATAATGACCCAATCTCA

A\_14\_P113759 TCTAAAGAATCATGACCCACCCCAAATTGGACAATAACGAAATATACAGAATTGGACTTT

A\_14\_P134200 GGAATTCCTGACATAAATAGTGAAGACTATCCTTACATCTGGTTTCCACCTTATTTTCT

A\_14\_P128933 ACTTTACCTGGTGGATCTTTCTTGTGTCATAAATACTGGTAGATCCCAATGTCTCTATCTATA

A\_16\_P19025620

AATACTGAATCCAAACTAACCTATATACACTACCTCCTTGCTATACACCTTCACTCTGGG

A\_18\_P22842267

AACATAATGTTTCTGCAGTTTTGAAGCATTTCAAAAACCAGAGGATGGTCTCTCTCATTAA

A\_18\_P22841380 AGCATGAGGACCCAAGGCTGGGTCTGAGTGGATGACTGTAGTTAC

A\_16\_P15618080

ACTACCCAGATACGTTCTTTAAAATCTTCAAAACTTCCCCTTATCGACTTATGCTGTGA

A\_18\_P14938924

GGCACCAATGACAGATATAATTGTGTGTGTATGATACTCTTTTACTCATTAAACAACGGCA

A\_14\_P107505 GAATAAATCCATTTGAAGAAGCCATACCGTAACTGTCTTTCAAGGGATCATTTTGTCTCTG

A\_14\_P131131 TGGAAGCAAATATCAGAACATTCACCAAGGAAGGGTATACAATGGATAAAAAGAGTTTGA

A\_14\_P124108 TTATGAAAAAGATATGCACATACAAATAGAATTCCTTAACATTATTATAATGGTGCACAA

A\_14\_P127871 CTCAACTTGCTGCTGCATTTATTACATATCTTTCTGCTGCTCCTGAATCTCTGAGAAAAA

A\_14\_P109235 TATCAACAACCTGGGTCAAGTGAGATAGATCACTGGTTCATTATGATGGTTTGTGTTTATG

A\_18\_P17331723

AATGCCTGAAATCTTTTCAATTATAGACTGGAACCAAATGACTAAACAACCTGCCTTAGTGG

A\_14\_P100800 TGA CTGTCATATACAGAATTCAGGATGGCATTGAGGTTGACAGTCCGACAAAATAAATA  
CUST\_2974\_PI426210822 GGCAGTTCTAGAGATGAAATGCTTCCAGAATGATTGCACTTGGTGAATTGG

A\_14\_P129471 CCTGAAGGGAAAGGTCTATTGGTTACTTAAGGAGAGAGGAGGAAGAACA

A\_14\_P131322 ATCTTTGGTTTATAGGATTTTGGAGCCTTTTATGATCTGGAAC TATTGAGGGGTTTCAT  
CUST\_6974\_PI426210822 GAGATATCCAGGGCCTCAGAGGAAAATCTCAAATGGTCAGGGAG

A\_16\_P19971787

GAGAGGTTGATCCTATCCAATACAACCTGTCTGTATTATTCTAATTCTGTGCTCTCCTCA

A\_14\_P123303 TTTCTCTTTCCATCTCAGGAACTCAAACATGACCAGGAAGATCTTCACAAATACC

A\_14\_P132278 GAGTATGCTGTAATCTTAAGGCATAGGTTATTAGTGGGAAGAGAGTAATAGGTTGCTAGT

A\_14\_P129458 AGTTGCTCTGTTTATCTACCTGTCCAACATGTTTGACATCAACAGTCTGTGGAATAATTT

A\_14\_P128749 CTGCTGGAAGTAGATGAGAAGTGACTTTCATTTGGTGACAGAGCAGAG

A\_14\_P134007 CTTTCATTACTTAGGATGTGGACAGGTATCCTCACAGTTTCTCTGTATTATTAGTTGC

A\_16\_P16352705

AAGACCCCTGATAGTTACTTGAAACAAGCCAATAATAATTGCATTCAGATGTTTTCCAGG

A\_18\_P14134608 ATGAGATTAACCTTTGAGAACCCTTGCTAAACTTCTGAAGACTTCTGCCATT

A\_14\_P200921 CTTTGGGTCTAAAGTATTTTGATTTCTTCTCACCATCAATTTTGAGAAGCACTTGT

A\_14\_P107789 ACATTGACTATATCTTTGGTGTTTTTAGGTGGTTTACATCTTGGAGAAAAACATTCTCG

A\_14\_P138723 CAAGTCACATTTTCCCTATTTGAACTGCCTCGTATTAAAGGATGCTTAATTTGACATCAC

A\_14\_P104455 GTAATCTGCTTTAGGCTAAAATGGGACTTGATCTTCTGTTAGCCCTAATCATCAATTAGC

A\_16\_P00772102

ACTGGCCTGAGATATGAAGATTTGACAAACCTATTTTGTAATGGTCTAACACATCCAGAT

A\_14\_P110806 GAATAAATGCTCTGAGGGGATCTCATCATTAGGTAAACCTTGGTCTTTAGTATGTATGAC

A\_14\_P100129 ATTCTCATTGCATTCTGCAGGTCCTCCAGTAAACGTTACTTGCAATATTTTATCAACAG

A\_14\_P127077 ATTTGGACGCTATAGGCATTTGAGTTTGTAATCTTTCCAGGGAAATTTTATCAACTGGAA

A\_14\_P115319 CTTTCTTCCCATTGGCCCAAAAAGCAACTAGAGACACACTCTAAATTTTAAATGAGAAT

A\_14\_P119924 CTATCGAGCCAAAATGCGCCCTAGAATCTCCAGTAAGGTGTGATTAC

CUST\_8617\_PI426210822 TACTCTGACTTCCCACAGCACAGAAAAAAAAGGAAACAGGTCACTGTG

A\_14\_P200905 TATAATTCAGGCAGTTTGTGTTTCTGGGAATCACGGATCATGATGTTAATCATCCAA

A\_14\_P133694 ACAAACGGACTTAAGAAAACACCGGTTATATTTAATGCTCAGAGAGCACTCGGAATAATA

A\_16\_P16230800

ACACTTAGGATCTTTGACATTTTATACGAAGCACACTACTATTCTGTTATTGGCATGGA

A\_14\_P113952 AGTCATCTGTGTGTGGAAGGAAAAGAAGAAAGGGAGTTACTATGATTCCTTTAAATTGCA

A\_14\_P108978 CACATGTCACATCAAAGCAGGAACTGGTGAGTCTGTATTTTTATGGAGCCTAAAAC

A\_16\_P03446772

ACACTCATAACCTTTTCTCCATTATGAACGATCTGATACTCAGTAAGAAAATTGTGCCT

A\_18\_P11339746

CTTCTCTTCAAACAGGCCTTCATGATGTGTTTTAGTAAACTGTATGTCTCAGAACTGAC

A\_18\_P17276702

CTTATGTTGTCTCATCTATGCCAAAGGCTACCAAATTTGTATGCATTTGGGGTCTTTTTTC

A\_14\_P132034 AAGCAATGTTTGCAGCAATATAATGCCGTTGTAAACTACTGAGAGTATTGTATCTGTTC  
A\_14\_P131492 CTCCAAGCCACACATATATCCAATAGTGTAATAATAACTGGGTAAGGTGTCATAAGC  
A\_14\_P121910 CCATCTGGAGAAAGGCTCATCTTAAAAATCCATCCTAAATAAGAATCATAAGGTCAGGG  
A\_14\_P129212 CTTTTAGGTGCCTAATATTGAAAGGAACTTTAGACAGTCACAGCCTAAATCCTATCTTT  
A\_14\_P127357 ACTAGTTAGTATTTTGGAGACTGTTGATCTGTTTCTTGAACCTTTCCTTGGCAAAAAAGGA  
A\_14\_P123924 AAATGTATAACATTTGCCTACTTTACTCACTTGCACCTTGAAATTTTCAGGAGTCATGTCA  
A\_14\_P136425 CTTGGGAGAAAATTAGTTGCTTGCTAAATCATGGAAAACAACAATATCTTTTTGAACAAT  
A\_14\_P131710 CATTACAGCAGGGATGGAAGTCACAAGACAATGAGTGGAGCCTCAT  
A\_14\_P113679 CAGGGTCCATGGTTGGGTTTTTGTTCATTTTCTAATGTGTCAAAGTCCAAACTAG  
A\_14\_P128673 CTAATTATGCTTGCATCATCTTCTACAATTCGGTTTGTGCTCTTTTCTTTCCCAAGTAAA  
A\_14\_P125796 TAGTAGCCCTTAAGAGCAGGAGTGGAAACACAGACTTTTTTCTTTCTCACATTTTTTTAA  
A\_16\_P37790754

CAACAATGTGCTTTATGATCTAAACTACCTAACTCTTGATCCCATATAATCAGCCTTTCA

A\_14\_P110689 GGCCACTACTTACCTGTAGTAGTCAGTTTTAAGTTGAAGGTAAATACCCCTTCAAAATTT  
A\_14\_P127132 AGATCTGCAACTTCCTTTTTATAATTCATATTAGATGCCTTCGCATGCTTCTTGAAGGTC  
A\_16\_P17155289

TCCAGAACCATCTACATTCAGAACTCATTAAATACAACCTCACTAAGACATTTTCTAGGC

A\_16\_P17659210

AAACAATTACCAACATGTGTTTTAAGGTGCCTTTCTAAGATCCTTTGGGATAGTTTGACT

CUST\_4421\_PI426210822 TTCAACATTCACCAGTTCCTACAAGGTACTGAGTACTGCATTTATTGCTAGGG  
A\_14\_P100664 CTTTTACTAAGGAAGTCTTTGGAGGTATGTTAAAAGGGTGATTCTCAGTTTGGGAATTG  
A\_14\_P129509 TGAGTTTTAACGATAGTCATTTCTAGTTGAAGTGTTCAAACAGTAGTCTGGCATCTCTT  
A\_14\_P102238 GCTGCTTCTGGTTTTACTTTAATCGTTTCAAGTATTCATAGCCAAATGTGATCATTGCTCAA  
A\_16\_P18943532

ACTCACCAATCCATTGAAGAGTCATCTATTTCTAAGTCCTACTCTCAAACCTCAAAAGTGA

A\_14\_P105657 AGAAATATAAAATCCTTAGGGGAAAGGGTCACCGGGGAAATTTTAAGTAATAATTTCCAC  
A\_16\_P16715658

ATTACATGCTTGAATTTTCACTCCTTTGAACTATTACTCCAGCCAATAAAATCCCTGACC

CUST\_9451\_PI426210822 GGCTGGAGGGAAGCTATGGCCTTGAATTTTATTGCCTTTTATTGTTGT  
A\_14\_P112153 TTAACCTTTGTGCTTTTTATTGGCATTATCGTCATCCTTGTGCAGAACTTCAGTCTCCA  
A\_14\_P108662 GGTTGAGACTAGAAAATGCCTCTTTCTTCTTCTCCATGAAATGTGTTTGAACAAATC  
CUST\_6268\_PI426210822

AATCAAATCCAATGTATTTATCAGACATTAGTGGGAGAGAAAAAAAACAGTTGCTCATT

A\_14\_P102081 AAGAAAAAATAAGGCAAAAGTGCTCACAAGTATCAGAATAGATTTTGTGGCTCTGGTCT  
A\_16\_P17376893

AAAAAAAACGTGACAAGAGAAAGTTTGCTACCAATACACTTGAACCTTCTTATCTGCACCA

A\_14\_P102525 CTCTGCTGGAAATGGAGGAAACGTCCAGCACTATAGAATTAGGCCAG

A\_16\_P19805193

TCAGGTCCCATTAACATTAACCATGCAGAAGTTCCAATTATAGGTCACCATTAACAAAA

A\_16\_P00655186

AATCTCCTTTCTCTCATATCTTACTCTCTCTTCCCTTACAGTTATTTACAGCATCTCACC

CUST\_1504\_PI426210822 AGTCGATTTGGGGATGTGTGAGTGAGATGACATTCAGTCAGGTTGT

A\_16\_P03109803

CTGCAGACTTTTCCAATAAGCATTGACTCATTATACCAGTCCAGTATCATTATCCTGAGT

A\_14\_P116619 AGATAAATCCAAGTCTCTCAGAAAATGCTTTGAGGAAAACCGTTTTGAATACCAAAGTT

A\_14\_P201441 ATAAAAAGAGTTCTCTGAGAACAAGTCCCACTAGAAACATTAGCACCATTACAGATTCT

A\_14\_P123200 CTACCAAATTACTCTGCTCAACTCATATGTTCCCTGATATGTAACCTCACTACAGAACACT

A\_14\_P125241 CTAAACTTGTTTTAAACAACAGAAGTTTATTCCAAAAGCCACAAACCCAGCCAATACACA

A\_14\_P133111 AATGGCTTTACATGAATTTATGTTCCCTCATGGCAGATATGTTACACTTCCCTCTAAACAG

A\_14\_P134330 CTGAACTTAATATTGGAGAGGCCAGAAAACCCCTTGTTTTATAAATCTGCAAAAACCT

A\_14\_P105946 TATTCCACGGCATATTGTTACAAAGATTCAGAGAGATTCTTGCATCAAATCACATTCCTG

A\_14\_P124637 CAAACTGCTTATCAGAAGTCTATATATGTCACACGCATTAAGCCCTGTAGAGTCATGGAA

A\_14\_P128214 CTTTAAGCAGTCGGTTAGGAGAGCCATTAGGGTTTCTAGAAATATTTAAAACAGGAAAAA

A\_14\_P136377 GGATAACTTGAAGAATTTCTTTATGACTCATGGGTGTATTGGGGTATTTTTCTAAGACCT

A\_14\_P139884 TAGGTAATGACATCTCTACGGAAGCCTCTGCACTGGTCATTTCTGAAGAG

A\_18\_P22841286

GTGTGAGAAGCGTGCATGAATTTCTTGCTATTTTCTTGATATTTTCAAATAGCAGAATACA

A\_16\_P00389680

AACATCCAGTTGATTTCCAAGTTACATCATACTACTCCCAATTCTTTTCATCCTAGGTTA

A\_14\_P113796 CCCACCTCATTTCTCATGATTCTCCAAAGATTTAGTGTAATTCGGCCAACAATATTTATC

A\_18\_P24140835

AATGAGCATCCAAAATGGTAGAAATTAACACTCCTTCCAAAGTAGATTCTTTTCAGACTGC

A\_14\_P112818 ATGATCAGCCACGTGATTTTTTCAAGAAGAGGAATAGGGTGAATGAATCTCATCAGAAA

A\_16\_P16018506

ACCCTTCTATTGAATCTGTGTATATGATGTTCCACTTTAATAACTCCAATAACAGTGCCA

A\_18\_P14138602

ATGATTTAGTATATCATCCTTCCCAAGAGAAGTTTTGAGAACTTGTCTCTGGTATCCAG

A\_18\_P22841403 ACACAACCCCATGCTTTCAGAAGAAGGCGTCAGACCTCCTTGTAT

A\_16\_P17802116

TTTTAGAAATCATGCATCTATACAACTGGGTTAAGCATTCAATAGAGAGAGGTCAAGGCC

A\_14\_P112070 CTAAAGTTAATCTAGTCCACTGACAACCTTTGCACTGCCACTATTCTGAACAGAATCTC

A\_18\_P10320203

AATTCCTTCATCCCATAGGATGGTGAAGTTTTTAATTCCTGATATTGGGTCAAGTTCTAA

A\_14\_P124918 GACTTCAAAGATACTGACATGAAGCGGCTTTCCATGGAGATAGAGAAAGAAAAGTATGT

A\_14\_P131155 GGTAACCTTGCCCTACATTCCCATACTTTGTAACTACAAATATAGAGGCAGACAAAATAG

A\_14\_P102144 AGTCTTCTTCTCAGGCTTACTCTTGTATAAGGTATTGACTGAGAGACAAAAATTATCCT  
CUST\_2020\_PI426210822

AAGGATTATTTAAAATGAATTGTGGAGTTTCTGAGTATCTTTATGTTTCAGTTGTAGCTGT

A\_14\_P105403 CATACATCTGCTCATTAAGATCTTTCCTTATTGGTATTTGCTTGCAGACTGTTTTCCAGT

A\_14\_P111274 CTGTATAAGCAAGTCCAACATTCTAACTCAGGAGTCAGATACAGGAGGGACAATG

A\_14\_P100185 CTTTCTATTGCCATAGAGTGGTAATGCTGCCATCTTTTTGCTTTTATCAGAATCTGCTTT

A\_14\_P118136 CTTTTCTTTATAAATCTTCAATTACATACATCAAAAACAGACCTGGCTGTGTGCTAACCC

A\_14\_P200359 CAGAACTTTTAAACCAAGTTAATTAGCCCCATTCCAGTCTGCATCAAACCTAGAAATAAAG

A\_14\_P111798 CTGAGAATCCAAAAATAGGAATATCTGAAAACCTGGATTTCACTGGACCAGAACTACTCA

A\_18\_P15232019

AAATTCTTGGCTCAGAGTGAAATAGATGACCATGGAAAATGCATTAAGATCAAACCTCCT

A\_16\_P01799477

AATTCAGTGAATTTAGTCCAACGTTCAATTGAGTCTGCAATTTTCATAGTATCCTGCTCC

A\_14\_P120271 GTAGACTCAATCAAATACTCCTAATTTCCCTTAGTCCTTGTCGGTAACTGCAATATCATC

A\_14\_P115841 ACAATAAATTGTGTCAAGTTCAGAACTTTGGAATTGCTTTGATTTGCTTCAATGAGGCT

A\_14\_P127517 TAGTGTCACCTTTTGTTACTCGTATTTGTAGAAGCAATGTCCATGAATGAGCCTAGGAAAA

A\_14\_P114328 CTTTCTTCCACAGAAGTAACAGTTGTTATTCCAATCTTAGTATAGGAAGCAGTGCTAAG

A\_14\_P109355 CTTACTGAGAATGTGTCCTTTAGTTCCTTTTTTTTTCTTTCTAGACATATGATTCTTTCCA

CUST\_2160\_PI426210822 TGGAAAATGGGATGAAAACCTGCATGTACAACCAGTCCTCAGAAATATGCC

A\_14\_P113573

ATTTGTGGGGATTAAAGTTGAATGAATCTGCAAACCTGCCAAAGAACAAGAGTAAGAAAAA

A\_14\_P127143 TCTCTAATGCAGATTTTGTGTAATAGAGCATTGCTTAGCAACGTTAGGGCAGTGACT

CUST\_10080\_PI426210822

AGACTTTATAAGAGGTTAAAAGGGCAATTGAAATGTAGGATTATTTTAAAGACCTACGTA

A\_14\_P104546 CTACATAAGAGGAGTTAGGGACAGTGAGGTATGTTTTATCTGATTATGCTAGAATGCAC

A\_14\_P112850 TGAGAATTCATAAACAAGAATCTCCCTGTATATATTCATGGCCCAAATGACAATGGATCG

A\_14\_P117128 TGCTTGGCCCACTCACTCTTTTTCTATTTCTTATCTTCAATCTTTCCATCTTTCCAGTT

A\_16\_P02868945

CGTTGTAAATCCTCATGAAAAGTCACTTACAAAGTTCTCCTGCATACAGAGTAGTGGAG

A\_16\_P18978216

AGGAAATAGAAAACATTTTTAGTGACAGGCTATGCTTCATCATGAAAATACGGTTGGGTG

CUST\_3448\_PI426210822

TTTTCTTCTCATTTTTGGAAGGGGAATTTTTTAGACTCTTTAATGAGAGAGTCATTTTCT

A\_16\_P58424469

TGGCTATTGTGTATCATTCTTTAAATATCTGGCTGGGTTCAACTTGCTAAGATTTTTATTT

A\_14\_P109299 GACCATTCATTTACGAGAATAACCCAAAGGAAGGAAAATGAGACGCAGATAAACATATTC

A\_14\_P102997 ACTTTTTGACAAGTAGTAAAGTTCATCTTTATCGGGAACTCACCTGTGATGAAGTTCTACA

A\_16\_P16398286

TTAGACACAAAGTTTAGTCGGAATGCAGTCTTACATCCTATCCAGTCTTAAATCCAAAGA  
A\_14\_P133090 GTTTCCTCATCTACTTACTGTTTTTAGAGTAGAAGACTGCATCAATTTAGGCCCGATTC  
A\_16\_P01060126

ACCCTTCCATATTTCACTATCAAAACCACTACCAATTACTGAAATGTTACAACCTACCACT  
A\_14\_P200888 ATATATCCTTCCTTTACTTCAGTTCTCGTGTGTTGTGTTCTCACCTTTTCTTCTGAATTT  
A\_14\_P125818

AGGACCAGTAAAAGTTAAACTAGAAGAAGAGGTATAAACCAGGGGAAAACACTACCTAAA  
A\_16\_P17523232

ATTACTCACTATGCCCTTTGATCTTAAAGCACTTAGAAAACACATTAGACTCCCAAGACC  
A\_14\_P124789 AATATTCGCTCCCACCTCAGCGTAGGAAACAATGAAACCCTGAAACATTTATTTATTTAT  
A\_14\_P133097 TTACCTGTGTCCTGCATTATGATTAAGCCTTTTAAAGTTGTGGCTGAATCTCTTTAAAG  
A\_16\_P36702878

AAACAGATACATATGGGTAAATTGCCCTTTTAAAATCCCTTACCATTAGTTTGCCTTCC  
A\_16\_P39984074

ATTGAGTCTTAACACTAAGCAGTCTTCAAGGATAACACCTAAATCATGATACTCCCCTC  
A\_18\_P14135567 GGCCTTTAGAACCTCTACTTCTTTGAACACAGTGCTACTCTGCTCCAAAC  
A\_18\_P22841019 CTTCTCTCACTCCCCAGCAGGGCATCTTCCTCATGGAATCAGATA  
A\_18\_P17385392

AATTATTTTTTACCAGTCTGGTATCCATCAGGAAAATACACATCACCTCACTTCATTTTC  
A\_16\_P30952641 TTACCTAAAGTATTTTTATAAATATAAGCCTTTTATACTGATTATGTCTTTTATATTTGT  
A\_14\_P129772 ACTGAGACTTAAAAAACTTCATTTGGCAGTTGAACACCTCTATCCCATTGTAAGAAACA  
A\_14\_P104696 TCTTCACAAGTTTACTAAAAAAGTTTAGCCCCGCTATCATTTACTTGATCACTCTGCAA  
A\_14\_P124275 ATCCCTAAGCCCCTAACTTAATTACAAGTGAAATGCTAAAGTAAACTACGGTTTGAATG  
A\_14\_P124265 CTAAGAGAGGGAACCACTTTGCTGAATTTTTTAAAAAGTCCAACCTGCTCTTTTCATCTTTTA  
A\_16\_P17212065

GGAGACTCAACTAAAATCCCTCTACTCAATCACTCTACACTTTTACAGGCAGTATCTATG  
A\_18\_P22841222

AAATAATGTTAAGGATAGGAGGCTTGTCCTCCATCATGATTTAGTATATCATCCTTCC  
CUST\_869\_PI426210822 TATATGGGTGCTGGGCAAAGAGGAGCATCTGACACCATCTGCTTT  
A\_16\_P17763206

AAAAAGAACTTTCTCCATAACCTATTTTCCCATTTGATTTTCATTAGGCAAGACATCCCC  
A\_14\_P130802 CATAAAAGATTTCCCAAGATGTGCTGAACTCTGCAAAGACAAACAATAGTTGTCAA  
CUST\_9567\_PI426210822

CTGTTAGTTTACCTTGCTATCGAGTCTCTTTCCCTAACAAGAAAATGTCAGCCTTAC  
A\_16\_P19577694

AGGATCCAAATACAGAGAAGATTATGACACACTTACTAACACTATTCTACAGACAGAGCA  
A\_14\_P137323 GCAGCAGAGGGTTTTCCAGATCCTAGACAGTAAGGTATGCCTTATAGGAAAG  
A\_16\_P15854223

AAACCTCCCTAAACTACCTGAGTTCAATCAAGAGTCCTATAAAAAGTGAGCGTCAATTG  
A\_16\_P18384112  
ACATCAAAACTGAGTCATTTCAACTTCTTCACCTTCAAGATTTACTTCCAATCAGTCACA  
A\_14\_P125672 TATACACGTAGCCTCATCAAATTTGTTTCCCAAATGTAGATATGAGAGAAAGTGAGATT  
A\_14\_P119400  
ACTAAAGTGACGTGCTGCAAAGTTAATTTTGAAAAGGGAAGTTAAAATGTTACAGCAGA  
A\_16\_P16144536  
AAAAAAGCCCAAATTTCTGGTATAACCCACAAGACTCTTCAAAAATCTATAGGCTTTCT  
A\_16\_P16869646  
AGAGAACACAGACCACTTAAAAGTCAAATTTTCTATTTCCAAAACATAACAAACCTGGCA  
CUST\_1710\_PI426210822 GATTGATTTCCATTATCGTATCACCCAGGGGAAAACCCAGCAGAT  
A\_14\_P134761 ACTTGGTAAATTGCATTATTTTTCTGCAATTCTGGTGGTATGATTATTTGCCCCACATC  
A\_14\_P121052 AGAGTGGCATAGATTTCTCCAAATACTGTGATGTTTCATGTCATTTCGGAATTTCAATTCAT  
A\_14\_P118345 GTTTAAAGAACCTAAGCACCATTTAAAGCCACTGGAAATTTGTTGTCTAGTGGTTGTGG  
A\_14\_P102129 TAGCGATAAGCCTCTAAGCCTGAACTTAGCAGGGCTAGCAAACTTTATTTATTTCTAA  
A\_14\_P114083 GAGTAAATGCTCACTTTTCAATCCCCTTTAACCCAACATGGCCTCTCATTATTTT  
A\_14\_P123483 ATATGACTGTTTGTGCTCATTGTAATGCATGTGCCTTGAAGGAAAAGACTACTTTTT  
A\_14\_P109242 ATTATACTGAGTTGCCATGACAACCATATTTCACTACCCATGATGCCACGACAAC  
A\_14\_P128701 ATACTAGACCCATGTTATAAGTAACATGAGATCCACATGCAATTCCAGCACCACTTC  
A\_16\_P02942078  
GAACTGTGACGATTTAAGATGCATCTGAACTCTTTTAGATTTCCATAGAACCTCACTCAG  
CUST\_9939\_PI426210822 CTTACAGAGTGAAGGCAAAAGTCTCAGTTCTCTCTCTTACCTTCCCTTA  
A\_14\_P113258 AATGACAGAATCAAACCTCAATAATCAAGTGGACCACTGACAATATGAAGAGCCTCTTATT  
A\_14\_P125272 CCATTGTTTTCTTCTGTCATCCAAAGTCGAGGATCAGCATATGCGATTTTATTATATCTT  
A\_16\_P21303608  
AAAATATCATCTAAACTCATGAACTAACGCATTCTTCTCAATTATATCCCAAACCTCTACCA  
CUST\_513\_PI426210822 CCATGGTGGCCAGTGTTTCAGAATCACTCCTGGGTTTGTAACCTTTAT  
A\_14\_P111680 TTCCATTTGCATCCAAAGGCATTCTTATGTTGGTCTATTGGGATCTTCACACTATATGTA  
A\_14\_P122159 CTCATGGCAGGAATATTTTTCTTCTTGCCAGTTGCCTAAAATAACAGATTTACTAACCACA  
A\_18\_P14529235  
AAAAAAAATCAATGTGGGAATGCTTTAGATTTGTTGGGTAAATTACATGTGCTTGGCTGC  
A\_16\_P41734321  
TCCAGTGATTTGAGACTTGTGTTGCATTGAATATACTTTGAATTTACGTGTATCTCTGC  
CUST\_5796\_PI426210822 AAGGCCTTAGCACCTAGATGACATCCTCTCTGAAGTCACCCTCAG  
A\_14\_P123442 ATAGTGTAGACTATTTCAATAGTGTTAAGCGTTTTGACCCAGTCAAGAAAACCTTGGCATC  
A\_14\_P117198 AGCCACATTCAGGTCTAAAATGCAGCACAAAATCTTTATGCCATATGACTCATACTCAAT  
CUST\_4801\_PI426210822 TTAAACCAGACCTTATCTGTTCCATGGGTGCAGAAGGGTGAATG  
CUST\_5820\_PI426210822 AACTTCTTCCAGGGAATAACTAGACAGGGCTTTGGCCAACCTAGCA



CUST\_6051\_PI426210822 AGGCAAGTGCTAGGCACTGGGCTGCAGAAGTGAGCAGTATGTGAG  
A\_14\_P200387 ACTTTGGATTTGGTTAACCTGTTTTCTTCAAGCCTGAGGTTTTATATACAAACTCCCTGA  
A\_14\_P137067 ACACACTGCAGATACTACTTATGAGCCATTTCAAATAGGCAGTTTCTGTCAGCCATT  
CUST\_7240\_PI426210822

GTTTGGGGACAGTAAATAAAAATTGATGGCCATTTTTGTGCATGCATCTTCTGAATTGGT  
A\_16\_P38126147

TGAAGAACACAACAAAACACTCATATACCCACTACTTGCTTTAAAAAATAAACACAAACAGA  
A\_14\_P136194 ACCCACTTATTTTCAGGTAATTGCAACATAGAAGTCCCTTTATTGCTGACATCTGATTAC  
A\_14\_P119586 ACTAACACACAACCTTGGGATTAATCCTTGCCATTGACATTATTGATTCCTATTTCTCT  
A\_16\_P16123870

AGAGCCCCTTTAAGATTCTAAGATCTCTCCCAACCAATTCTACCTTATCTTACGATACTA  
A\_14\_P122927 GTGTCCACTCTGTTTCAGTTTTTTGAGCACAAATGGTGTTAGGTGACAGACT  
A\_14\_P131253 TAGTTTCTAATGATCAGGTGAAAACACGATCATTGTCAGACTAATGATAACTGCTTAACC  
A\_16\_P17919889

ATGGCTAGATTAGAATCGTGACAATCTACTTGATTTACCTGGGGAATATCATAACAGTGC  
A\_16\_P18394978

ACCACCCTAGCAAACCTTTACAATTCTTTACTCCTTTTTAAACATAAGCATTCTTACCCTCT  
A\_14\_P106294 CTCATTAAGTTTAAAAATGGGGGTGGAGATGATCCAGATTTGCCAACTCTTTTTAAG  
A\_14\_P100644 TAACCTCATCAAAGGTGATTTCTTGACTTTGCCAGTTCTCAATGTTGAAGAGCATG  
A\_14\_P121895 GCTTGGAGAGTCTGAGAAAGGCATGAGATGGACCTAAACAGACCAT  
A\_18\_P22839232 CTTTTTGCATAGCGTCACTGGGAACTTCTTGTTAAATGGGGTTAGGGAGT  
A\_16\_P16468903

TTCCAACCACTCTAACACATCTGATCATTTCCTTTTTATGAACTTTCCTTGAACAAGG  
A\_14\_P137691 CCTATACAGTTATATGGGTATGAAAGGGCTAGAAGAACAGTTTTGAGGATTGGGTTCTTC  
A\_14\_P125919 GAACTGTGAAGGGGAGCATGAAATGATAAACTGAATGTTAAATGGAACATAATGAGGTTG  
A\_14\_P111985 TCTGTGCTCTCATTCTCTAATTTTCCTTTTGTATTGTAGAGAAAGAAATGTCTCCCATGG  
A\_16\_P36230413 GTCTGTGGCCTCTGCAGTTTAAACAATGACTGTCACTTAAACCTCTTCTGAAG  
A\_14\_P106735 CCGGGAAAAAAAAGAAAACCTAGACAGAAACTCATCTATATATTCTGTATCTGGAGTTCCG  
A\_16\_P15906084

TCCTGCCTAAGACTATGCTATACCATTTACTGTAGACCATAACCCTAGTTGTTTATCATC  
A\_16\_P02999095

ACTGAAATCCTAATTTTTAGACCCTATTTCTGACTATTCATAATGAGATGCCAGAGGC  
CUST\_2688\_PI426210822 AGGAGATGTACCTGTGAAGGTCCCTGTGGTCCATTTCAAAGGATA  
A\_14\_P106908 AGATTTTCTATTTTAATCAAGCCTAGCCCAGAGCAACATTCTTCAATAAGAGGGATTG  
A\_14\_P119614

TCTTAAAGCAAAGGACAAATCATAGAGGACATAGAATTGGTGGAGGAGAAGATAACAACA  
A\_14\_P119124 CATGTTGACAATTTGCATTTGATGCTTCAAAAACAATCTGGCATGTTTTTATTTGCCTCG  
A\_14\_P113125 TATGTGCCTAATTGAGGAACATATGGTCTCTCTACTACTCCTAGACCTGCTAAAGTAAGA

A\_16\_P00592652

GCCCAATAAGCCAAATATCTCACAAATTTACAGACCTATGCTTTCTACATAATCACACCC

A\_14\_P107633 CTGCACTACAACATCATTACCAGGGATAGACACATAAAACAAAGTCATTTCCAAATAAGGA  
CUST\_2838\_PI426210822

AAAGGGAGTTACAAAGAGTTTCTACTATTTTGGCCTTGAAGCAGTGTTAGACAACG

CUST\_4179\_PI426210822

CCATTTAATGTGTTTTTAATGATAAAGAATCTAATAGTTATCAATAATGTTGGAAAAGTA

A\_16\_P40961315

TAAAGTTTGATATTAAACATCACTCTTTTCATGATGCTTGAGAGGTTACTCTGGGAAGAGG

A\_14\_P124256 CTACTAAGGCTGCCTTATCTTTAATTAGAAACCAAATTACCTTAGTCTGTTCACTGTCCG

A\_14\_P105498 AGATAAAGGAATAATACAGCAATAAACGTTTGTAGCCGACAGGTGACTGTCTTCTGTTT

A\_14\_P129206 TACACGACCAGAATAAAATGCAATATACAGTTAAGTCCACGGATACTCCCATTAATGAG

A\_16\_P00722876

AAATCATGTTTTTGATTCTGCACTTCACATATGACATAATTAGTCCATTACCCTCCTCT

A\_14\_P112503 TAAGGACATCAGGGTGAAAAGGCTTCTTTGCATACCTAGGAAACAAAGTTTCTTCATAAA

A\_16\_P03654475

CTCTTGCACTTCTAACAACCTCTAATCCACTAAAATACAGCCCAAACTATAAGTGACA

CUST\_6122\_PI426210822 GTTCTCCTTCTCAAAAGTGGCAGAATGGTTAGAATCATCAACTGCACAGC

CUST\_8263\_PI426210822 TGGGAGGTGTTAACAGCCCCTGATGAAGCCATCAGTTAAACAAATG

A\_16\_P39737383

ACCATGCCTGTCTACTAAATCATATTCCTCACTGTGGAAAATTATAACAGCATTACCTA

A\_14\_P136537 CTTAAAGATGACACCTTGCATTCCCTATTTAGGTGAGTTATGTCACTGTGTGTTTTTTGT

A\_14\_P137743 GCCAATAAAACGCAAGTTGCCTGAACTTCAAAACACAAGGGAACTTGTTTC

A\_16\_P16371252

TTCCAAGCATAGGTATAGTCTTTTGACACTGATTACTTTTAATGGCCATCCATTCTCAGT

A\_14\_P138055 GTGGACTCTTGGCAAAGGAGTTAATAACACTACTCACAATTCATGTCTTCATTCAATAAA

A\_14\_P112059 CTCACTGCTGCTAAATAACTAGGTGTGACAGTATTTAATGGAAGGCAGTCTACTTTTT

A\_14\_P122830 CTATTCTTGGAGAAATGAATGCGCTGGTTAATCAAGGATGAAAATTGGTATGTGCTTCTA

A\_14\_P200203 GTCCTTTGGAGACAGGAATACTTAAGAGGATTGGCAAACCGGAGAAAC

CUST\_214\_PI426210822 GCGGGCCCGACGCCCGCATTCCGCCCGTGTCCAGGCGCAGAGCTC

CUST\_885\_PI426210822 AAATGGCAGGCAAAAACAAGATACAGTGAGTGTCCCTATTTACATTTGGAGGT

A\_14\_P136790 TGCTTCTTGAGGTTCTCAGTCTGACTCTGCAGCCTCTGAATCTCTT

A\_16\_P02848904

ACCACCAAAGTTAAATTCCCAACATTATCACTCTCCTTAATTATAAGCCACTAAGACAAC

CUST\_2103\_PI426210822

AACATTTATTTTCATGCCTTTCTTGTGTTGTGAGATTTTCATATTCCTACTTGCTTGGCCT

CUST\_4554\_PI426210822 TTTGGAGCCCTGAACTTAGTCATGGGTGGATAGGGGTGGGCTGAG

A\_18\_P14132569

AGCCGTTTCACTAAATTTAGATCTCTGGAAAAAATTTGTTTGAGCATGGAAACAGGTTG  
A\_16\_P38207626  
AAGACATCATTGTTTGTCTTATTCAAACCATCAACGAATATGAGTTCATGGCATCTCCA  
A\_14\_P124862 ATCAACACGTGTCTCACTCATTTCCTTCAGAGCATCCACAAGAATCTAGAAGCAAAAA  
A\_14\_P100014 TTATTGATATACATTTTGTCTTTTATAAACTTCCGTTGGCCACATTGGGCCACTGTGCA  
A\_14\_P110655 CTCATTTTGTGTTTGTGTTTTAGGCTCTGTATAATCGGCTGGTTCCTTTAGTGAATGGT  
A\_18\_P14975624  
AACGTGTTAAAGATTACAAAGTCTCAGTTCAGATCATGCTTCTCATTGTTGCTCAATCC  
A\_14\_P108221 CCAAGGCTATAATACACAGAAATCATAAAACCAATGGCTGACAGTCTCCACTTCATTATT  
A\_16\_P16191533  
TGGGGACACAGTAAAGCATGGTATTATGGTAACTTCTACATAATTGGTCTCTAGTTCTAG  
A\_14\_P128793 ATATCTTGCCATAGGCTGAAAACCAGGTGATCCAGGATTCAAGTATATAAATGTTGATTG  
A\_14\_P104711 CTGTGTGCTCTGGGTATTTCCACATTCTGGATTTTTCAAATCCTTTTGTAAATTTTGGAC  
A\_14\_P115144 TTATTCATCCCTCCTGTGCCGTTTTCTTTTAGGAGGATATAAATGCTATAGAAATGGA  
A\_14\_P105213 CCACCATTTATTTGTTACTTGCAGTCAAAGAATCCTCACCAATGCACTCTCTAAATT  
A\_16\_P01832039  
TTTATGGTTTTGACACTACATCTCTGACATTTTGACGTGATACATATTCCATCAGCCTGAT  
A\_16\_P18061467  
ATTCATGTGACTGTGCTTGTATCTACAAACTGTGACTGAGTTGAGAAAATACGCTGTTA  
A\_14\_P116625 AGGAGGTTTTTGTAGAGCATGTATTACTGTGACAATAACAATGACATGCGCTTTGGAG  
A\_14\_P114494 ACCTATTTAAAATCTCTGTATTTTAAAGAGTTATTCTGCTCCATTGCTCCCCAGAGGATG  
A\_16\_P17953793  
ATACTAATTTCCAGTTATGGTTTTACTTGTGCCCTGTATGCTTAAACATTCCAGGCTGAT  
A\_14\_P106691 CACTACCAAAAAAGCCAGACCTTTTAAAATGAGGGGTCTACTCTTAGTTCATAATTCTG  
A\_16\_P20296548  
AGAAGGGTGTAGTCCATGAATTTACTTGAGATCAAGACATCGCATTTTAAAGGCTAAACTA  
A\_14\_P119747 AGTCTAATATGAACATCTGGATTTCAAGAGGTGCTAGGCTTGAGGTATCTTTATGGCTTA  
A\_18\_P26795776 GCTCATTATAACCCCTTCTACCCCATCTCATGCTTCCCTTAAAGCATAAA  
A\_14\_P103587 CTGTCGACCTAGACCATAAGTTTAGATGCAAAGTTGTGGACTGTTTAAAATTTTTCCGC  
A\_14\_P106522 CTCGCCTTTAGATTAGTGTTACTCAGTGTTTATGAGGGTTGTTTGTCAAGGCAAAAATAA  
A\_14\_P102161 CCCAAATAAGAAGCCACCTCTAAGCAAATAGTATATGTATAAACGGAGGGCGAATATAT  
A\_14\_P127176 CTAGTGGCCTGGAAATTCAAGTATTCTTATTGGTGGAGGCCATTTGTTTCTGATTA  
CUST\_2239\_PI426210822 CTGGACGATCTGGACAATGATGGGTTCCAGGTGAGTGAGTGCTC  
A\_16\_P21232819  
ATTTAAAACACTGCTAGTCTCTGAATTGATTAACAACCCATGTATAGACACCAAAGCCCTG  
A\_18\_P11825281  
TCCATATTTACCCTGACAATGCTCTTTTAAAGAACTGTCTCCCTAAGTATTGAACACCTA  
A\_14\_P130860 ATCAGGAAGATTACCCTGGACTCAGGGAAATCTAATCAGATTTAGAAAGATACAATCTCA

A\_14\_P102989 AAGTCACCATAAAGAGATGACTGATGACATATTTTAATCTCCATATTGGCCATCATGGTC  
A\_14\_P123587 CATCAATTATTAAGAGGTGTTTGGTGCATGATGGCTTCAGGAATCTTGATCAGAAGATAA  
CUST\_2150\_P1426210822 GTGAGTGGGGGCTGGGTTGGGGGACAGCAGTGCATCGTGGAAGCA  
CUST\_4393\_P1426210822 TTGCTTTGTTTGTGACATTTAGCTCCTTTTCTTCCTTTCCATCCCAAATCCA  
A\_14\_P118934 TGAGGAAGTTTTTCATAAAAGCCTGGGATCAACATCATATGAAACATAGCCATCAAGTTTT  
A\_16\_P19007163

ACATATCCAGACAACAGACTAAGTAAGTGGAGGCTTTTTGTAATGTGAAAGATGACACAT  
A\_16\_P16191840 GGAACAGCCTTTCGGAAGGGCAGTTTTATAAGAACAGAGGAGTGTG  
CUST\_619\_P1426210822

GTTTAAAGTTTTTAATCCCCAGTTGCTGTCCTTGATCTGGCTATAATTTTGCCTGTG  
A\_14\_P116395 AGATTAAACTCTTTTTTAGTTTACTCAAAGGCAGCATCCTCATATTGGGTTGGAAAACCA  
A\_14\_P128869 CAGGACTTTGGGAGTAGTGTCTTTATTCATTAAGCCTGAGGTCTGACCAC  
A\_14\_P200224 CTGGAGCAAAAATTCTTGACAACAAATGTTTCAAATTGGTGAGGTTTAGTTTATCACCAC  
A\_14\_P121510 TAAATAAAACTACACTGTAAGGAAAGGAGGCTTCTAGTCTCATGCTGGTTATGGTAGTC  
A\_16\_P32282441

AATGCCAACAAAAATATTAAGTTCCCATCATTGCTTGTATTCCAAAGTTCCTGTTTCAGG  
A\_16\_P39357124

CGGGGAGAAAGACTTTGTATTCCTTTTTTAAAAAGAATCAAACCTATGTGCCTGAAAGA  
A\_14\_P116060 TCACAGTTAAATGCAACTACAAACCCAGCAATTTTTAAATTGTGATTCAGCACTGCAAGT  
A\_14\_P120268 ATGTAACCTTTACCCATAACCTAGTTTTTGAAGGGCCTTTTTTCTGAACTCAGGCAATTA  
A\_14\_P133628 GGATGGGATTGGCCTAAAAAAACCGATCAATTTCTGGATTGTTTTTGTTCCTTAATCCTT  
A\_14\_P101659 GAGATTAGAGATGCTCAGATACAGTACTCTAGTATTAGTATTTTCAGACTGGGGGATACA  
A\_14\_P110957 CATATGAATTAAGGGCAAAGCCTTCTTAGGATTCTGACATCTGTCTATTTTTTCTCTCC  
CUST\_6574\_P1426210822 GCACGGGGTTTTTATGCTGAACATTCCACGGTGCTTAGTTATTTATTGAAGAAG  
A\_14\_P109450 GTTGTCAACTTCAGATACCACTGGAGAAGAAAATGCTGACCCACCAAGTATGTAT  
A\_16\_P00917652

AAAGCCTTCACTAAATCTAGTTGCTTAGAACCTCTGTATCAAATCTTTCTGTAGCCACAG  
A\_16\_P17069576

AAACAAATGACTTCCTACACTAACATTTGAAACCTACCACTGTTAGATATTTTGGGCACC  
A\_14\_P200450 ACGATTCCAATCCAGACGCTAGTGGTGAGAGTCTCCTCTTTTTCATTCT  
A\_18\_P22841064

TTATAAACATGAATTACATGATTAGGGCCTCTGGAAACTTGTGTGGGGCTATAGAAGG  
CUST\_488\_P1426210822

ACCAATGTCTGTTCTGACCAAAAAGGACTTCTGTGTTGAGTTTAAATTAGCAACAGTA  
A\_14\_P131436 CCTCCTTGCAATTTCTCAAAGACCAAGTAAAACCTTGTGTGCATCTTCAAAGAACTCAAT  
A\_18\_P22840524 GAAGCCCCTTGTGTTGTCATGGTTCAGAACTAGGCATTGCAAAGATAACCATTIA  
A\_16\_P15608067

AAGCGTGGATCTATTAGTCATTGACAACATTGCTACTTTTTAAATGAGCCACTGGTAGTT

A\_16\_P15946970

CCTGGACACTATGATTATACAAACTCTGGATATTGCTACATACCTCTTTAACTACCCACG

A\_14\_P135200 CTGAGACATACCCATTGTTGGTTTGTTCCTTGTAAGTGCTTCTCACTTGAATTATCTTG

A\_14\_P125776 AAATCTTTCAATGAACAAGTTCCTTAGATTAGGCAACTGATTGGTGATCTGACCTTTTCG

CUST\_4952\_PI426210822

TTTAATATCATCCCTCTGGCACAGATGCTTGAAAATCAATGGTTTCTTGACACATCTT

A\_16\_P18763159

CACCATCATCCAAAATACTAGTCCATCCGAATACTAGAATGAGCAACTTCTGATTAAACC

CUST\_9666\_PI426210822 CAGTGATACCAGCATGAAGCTCCTAGAAGAAGGGCTGGTGCATAG

A\_14\_P132418 TTAAATCTGTATTCTTTCTGAGTAGGTGACAATCCTAGGGCTTTTCATCCTTGGCATT

CUST\_3959\_PI426210822

CTGATTTTTTTCCTATTATTCTTTCTGTTATTCCATATTCATGCAGGTCTTGCAGCCAA

A\_18\_P15283841

CTGTTTGCATCATCAACATATCACGACCTCTTTTACATTGAAATTGTTCTTGCCTAAGCA

A\_14\_P202512 CTACATCATTGTAGTTTGCATTGGGAGCCACTTGGCCATAAATTAATATAAGCCATTCT

A\_14\_P200439 AGTGGCCCTCAAAAGGAGATCCATTTATTGAAATAATTTGAAGCCTGATATTTAAACAAA

A\_14\_P104149 CCTTACCATTACATTCTTATAGATTGGGAAAGAAAGACCTTTTAACTGAACTGCTAAC

A\_14\_P202540 CCTTGCATATTTGCTGATTTGATCTCTATATTCCAATATAGTGAATCCAGAAGTGGTCT

A\_14\_P108504 CTTATCATCTGGACATCCAGACTGGTTCATTTAATTGGTTAGCATTTATCTTTGCAGAA

CUST\_8424\_PI426210822 CTGGAGCTAGATCTTCATACATCCTGTCATGTGTGAAGACCTGGTAAGATTTC

CUST\_4732\_PI426210822 CCTCATTCTTATAGGAAGGATTCAGTTCTTTCCCTGAGCAACAGAAGTGCATA

A\_14\_P123473 TTTTATTTTTTCCAATTTTCCTGTTCTTGAAAGGGAAGTAGTCAGAATCTCCTTGGACAC

A\_16\_P17012701

AAAAATGTCTCTTCTGTCTTTTCAATGGATATCGGTTTGACATAGTAAGGTCTTGTCCAC

A\_14\_P137692 CTTGAAACAATCTGATGTCAGATACTGTATATCTACTTTTATTGCCAGGCTTTCTGAGCC

A\_14\_P131948 TAAAAATCTCCAGATTTTAAGGATACTCACGGGTGGCAATGGCCAACACTG

A\_16\_P01662587

ATCCAAGTCAACGTTTATGAGAATGCCATAACTTACATGTAGCCTCAATGGAATCAAGTT

A\_14\_P117429 TTATATTAGAAAAGTTGAGGAGTCGAGGAGCCTGTAATTAATTTTCTGTCAGTGACTGT

A\_14\_P125641 TGAGTCCTTAAGTTACCATTAATTGTCGTGAATAAAAAGTTGGTCTCAGTGAGTTTTGCA

A\_14\_P120211 TCCTTTTAAAGATGCTTGTGTAAAAACCATGTATGTAATTGCATGCACACACCACTATG

A\_18\_P26072545

AAAAGCAGTAAAGTTCGGTTCAAACCTACATGTGTTATACTTTTGAGTTTGCCATCAC

A\_14\_P136104 ATTAAGAAAGTAAGCGCGACGTCCGCAAAAGCATAAAAAAGTTTATTGGAGCATCACAG

A\_14\_P129084 CCCATGGATATGTAGAGTTAAGAACTCCTTAATTGGAAGGAGAAAGTCTATTCTATCCAG

A\_18\_P16456037

TACCCACACTGCATTCATATATCGTCAGTCTTCGTTAAGAGAGTATTCATAGACCATTGA

A\_16\_P02951387

AATTCTCATGACTTTTACACTTTTTGTCAAATCTTCTGCATAGAGACCTTCTGAGTTGGC  
A\_14\_P202393  
CAGTGAGAAAAATCAAGAAAAAATGAATAGTTTGCAAAAATTGGACTTCCTCCCCC  
A\_16\_P00897055  
AAAAAAATTTGTAAGCAGTAAACTTTACTCATATGCAACTCTACTCTTTAGACGTCTT  
CUST\_6548\_PI426210822  
TATGTGGTTGATATGGAAATGTATTGCATTTACCCAACAAGGAACTTTGAATGGTAATCC  
A\_14\_P120540 CAAAATATCTTACCCACCATTTCTTAAAACAAAACAGCCTGCAAAACCATTTCAGCATTC  
A\_16\_P15650903  
GCCAATTC AATTTCTTCACTGAACCTACTAGTATACGCCTCTTCAATATAGTCACGTTCA  
A\_18\_P22842646 TTTATTTGAGGGAGTGCTTTGGCCTGTTTTTAGACAGAAGGTTCCATACAGAAACT  
A\_14\_P108997 TGTAGTGTTTACATTAAGCCGCGTTTTTCATGACCAATCCTATGTCATTTCTACTTTGA  
A\_16\_P00490822  
ACTGCCCATTTCAACTAAACAAAAAATCGGCTAAAAGGATACAATTTCTCTCAACACAGG  
A\_14\_P133706 AGCACAAGACTGCACATTAAATTGCCTTTTTCTTGTTGTAGGTATTTGCCTGGAAATAA  
A\_14\_P115750 CAGGAATAAACTCCAAGTTGGTTTCATGTGTTCACTGCAATGAAGAGTTCTAGAATAAG  
A\_14\_P200063  
ATGAACTTAAGAATGAGGTTAAAACACAGAAAGTTTGTAGGCAGCAATGTAGCAAGGTC  
A\_14\_P111092 ATAGCCTTGAACCCTTTTTGCCTCTATAAATTTCCAAAAGCACAGATCTTCATGCAATTT  
CUST\_5340\_PI426210822  
AAGTCCTGTGTTTTATTATGCTGAATGATTGAATCTATTCCCAGCCGAATGTTTTCTT  
A\_14\_P118835 CATCAATTACAAAAGACAACACAAAATAGGCTACAAGAGTGTTTCAAAGCCTGTTTGTGT  
A\_16\_P39095071  
ATTCTCCTACTGTCTCTACCTACTACTCCCAACATAATGTGATAAGCAAAGCCTAAACAT  
A\_14\_P133439 CTACCAAGGACTTAACAAATCCCTAAGAAAGTATCAAAAGAATAGCCTGCAACTGATCTG  
A\_14\_P137119 TCCACGAAGACATTTTCCTTGATCATTCATATAAGCACATGTGTAGCAATTTAATATTGT  
A\_16\_P01550992  
AGCCTTACAGCCTTATACAGCCTTGAGTTATTGTAAATTTGTCTGAATATGACACCCATTT  
A\_16\_P16191368  
AAGCCTCGTTTAAATTTTTTACCTGTTACTGCTTTCATCATCACCTCTCACTCTCATTTTC  
A\_14\_P125968 AGATTTCTAGAGCCCTGGGTATTCAACTGATCACACGCAGGATTAAGAAAGATAATTTAA  
CUST\_4547\_PI426210822 TCTCCTCAGAAGCCTTGTCTGGGTCTGCATGGAATTACTTTGACA  
A\_14\_P113787 CTTACAATTTGTAGAAGATACCTGTGTATATTCCATGCTCCATTTCTGGATGAAGTCAT  
A\_14\_P202129 TTTATACTAGGAAAAACCAAATCATTTGCCAAATATAAGTAGCACCGACTTGTGGCACGC  
A\_14\_P107543 ACTTTTGATTTGTGACAATCAATGGCTTCTCTCAGTTTCCTAATTTCTTCTATTCCCTA  
CUST\_2832\_PI426210822 CACATAATTAAGCAGTCTGTCTTCTGTCCAGTGCCAGCTCATCACGTAG  
A\_14\_P119889 ACCTGGGTTCCAATGTGCTAAAATAAAGAAGTGAATATATAGGTATCACTTTTGTGAACTG  
A\_14\_P128329 GAAATGAATTTTAAATGTCTGGAATATCAAAGAGATGCTCAGTATTCCTTCAGGCTCTGGG

A\_14\_P109591 CACAAAACCTCAGTACTATATCTCTGAATGCTAGAAAGGACATTGAGAAGATATCTGGT  
A\_14\_P124589 CATTATAGGATACACTATACACACACATTTCTCCGTGCAGTTTTCCCCAGGATATTTATG  
A\_14\_P117232 GTCAGACTCCTGGGTTTCATGACTTACTTGCTAGCGTCCCTTCATTTTC  
A\_16\_P1885655  
ATCCAGGTATACTCATGATTTCCCAACATTGAGTCTCTAGAGCAAAATTCCATGTGTATG  
A\_16\_P01802652  
ATATAATGATTTTGCAGGGAGGTAATTAATGGGACATAACAGCAATTATAGCAGCAACG  
A\_14\_P128082 TTGAGACAACAGAGAATTTAACAAGGTTATTCCTACGCTTAAGTGTGCATACAATCTGG  
A\_14\_P117285 TTGTCTCTTTTCACTTATGTGTTAAGAATTTTCTCAATGTAATCTCAAAAATTTCTTTAA  
CUST\_1303\_PI426210822  
TTATAAAACATTTTCTTTGGATGATAAGAATGTTTTCACTGGAAATGTGCTTTGTGAAGC  
A\_16\_P16942131  
AATTTTGAATAAATGTAGGACTCCAATATCCAACACAAATCTGTGTACAAAACCCTGT  
A\_18\_P22841251 ACTGTGAGGCCTGGGACTTGAACCACATCAGTAGAAATTGAGGCTAT  
A\_16\_P15277752  
AAACCACCTCTACTTTCTAAACCACCTTCTATTATCAGAAATCATTGTCAATACCTGCCT  
A\_14\_P113809 TGTCTTTTGTAAATATACGCTCTGGATACAGTATGTGCTTCCCAGATGTTTACAGAACATA  
A\_14\_P132827 TATTTGGCCATTGGGAAATTGACATATTACAAGTCTTGATTTTATTCCTCCTCCACATGT  
A\_14\_P126667 ATACAAACAACCTGAAAAGTGCGACACGTCTTAACCTCCTTTACACAAATAAAAAGAAACC  
A\_14\_P124760  
CAACTCATGGAAGCAAAGCAACAGGAACTGAAAAGAATAGAAGAAGCAAAAACAAAAGTA  
A\_14\_P136038 GATTTTTTTATCTTTAACATCCCCTGAGAAGTAGTCATTGACCTCCATTTCTCACATCTG  
A\_16\_P02200219  
AAATTGACAGTCCTGGTCATATCTTAAAACCTCTCTCCATACACAAATATGGTGACTCA  
A\_14\_P200036 ATCACAGAGCAACCCTTATGGAGAACTTGCAACCAGGACCTGTC  
A\_16\_P16192046  
GTTTAAAAGACAGATGAAATAAGTTGAAGAAACCTCATGTAATGAATCCACCAGGCTGG  
A\_18\_P11783586  
AAAACCTCGACTCTGAATTTTCATTTCCCCTATGATAAGACTGTAGCATTCCAATTCTTGTG  
CUST\_6298\_PI426210822 AGTCCTGAGGTGGTAGAATTGAGGTGAATGAAGTCAACCACAGTTTCTAA  
CUST\_3843\_PI426210822  
GTATTGCACGGTAGGAATATATCCAGAAACAGTGGGCCTTTTATAAATTAAGCCTGC  
A\_16\_P18162445  
AGGACCCTTCCCATAATTTACCTTCTGTTTGCTTAATTTGCACAGTTAATTTTGGCCATA  
A\_14\_P118496 GTGCTTGTGTGCCAGGCAGTTTTGTGAAATTTCTCAACTTTAATAATCGAAATTCCTTAT  
A\_16\_P00908894  
TTCTCAAGTGATTA AAAAGGTAGAAACTCGTCAGTGTGTTGTGAAGAACTGAAGTGTGAATC  
A\_14\_P115267 ATGCACAAGGAGGCCTTAATGCCTAAAGAATCTCAACAATCTCAATTAGCATTAGCATT

A\_14\_P101423 GTTAGGGATGCTTTGGCCGCCACCAATTTTTCTCTAGTTTTCTTTTAAAATGTGCAT

A\_16\_P03150435

AAAAAGAAGCACATCACCCCTGTATTCTTTTGCATGTCTTTCATGACATGTCTTTCATTGT

A\_18\_P22842826

CTATGGATGTCAGTTCTACTTCTCCTTGGGGCTTTAACTAAAAAGGAAGAATTGTCTGT

A\_14\_P109543 TTCCAAATATTCATTCCTCTTCCAGCCTTGGCACATGAGAAATTGTCAAAGATTCTAAA

A\_14\_P120037 GACAACTTGACATGGATTTAGAGGAACACCAAGGTATGCTTCTGGTATTTTATAATGTA

A\_14\_P131140 ACTTGCATATCTGATATGCCATCTTCTGATATGATCCAGTCGAAATGGTAGAAAACCAT

A\_16\_P15775221

AAAACCTGAGGTTACATGGTCAACTATTTTAGGAAATGCTTCCTCAAAATCAGTCAATGTT

A\_14\_P103498 CTCTATCAGCCACAGATCTCATGGTGGCTGTTGCATGATAATGATAGGATAAACAAAATA

A\_16\_P00692447

TCATGCACTTCAATTTGTTCTTGCATCCAAAAACCTTCAACTAAGTCTCTGGTTATGATA

A\_14\_P103341 CTGACAAAATGAAAATGACTTAATTACCCAAGGTTTGGCATGTAAAGATCTTAAGAGGGG

A\_14\_P138416 GCCTTATGCTGATGGGCTGCTTTGCCCTAGATGTTGTGAAGTACTAGAGAATT

CUST\_6777\_P1426210822 AGAGAACCCGGTAGGATGGAAAGAGGCTGCCCATGTTGAACAAAG

A\_14\_P134752 ATTAGAGGATAAGATAGTAAGGTAATAGAAGGGTCACCCACAGATGCTTGTATCAATGTC

A\_14\_P110143 CCTTCACAGACAATACTGTAATTTTLAGAGGAGTTCCACATCATTACATCAACAGTGTGA

A\_14\_P136566 TAAAAGGAGTCCAATTTTCAAGGCTTTTCTGTAAACCACAAGGTCACAGATGTTTCTTTTAA

A\_14\_P113426 AGTTGACGTTTCAATAAGCGACATAGGCGTGTTAACTAGCCAAGACAGACTGT

A\_14\_P104360 AGGGTGTAAGTATTTCTGTGTAAGAGGTATCATGTCATTGCTTTGGAAAAGGCATAATAC

CUST\_9540\_P1426210822

TTTTTCTTCTCTGAGGTATGCTGTTTTTTGTCAAAACAGAAAAACACACTACTAGGAT

A\_14\_P102893 CTTATTTATATCATTTCTTGCCTTTACCAATTTCCCCCTTCTAGATGAACTATATTTGG

A\_14\_P109679 AGTTTAGACTTGGGATGAGAGACATCCACTGCCCTTCTCATGAGAAATTA

A\_14\_P132694 AAGGGAACATTTGAATTTCTAAGTAAAAGTGAACCCCAAATCAGGCTGAACATTAGAATT

A\_14\_P133210 CCCATTTTGAGGCCATTTTGAGCCTTACTCTTAAGTTCTCTATGAAGAACTACATTGATT

A\_14\_P125330 TTTATAATTGATGTTCTAGGTAAATCCCCTGTCAATGACTTTCCAGAAGTGTCCCCT

CUST\_7057\_P1426210822 CTAGAAACCAGAGACCCAGAAACCCAAAGGTGGGTCACATGGTCG

A\_14\_P105012 TGTCTTTTCTCACTTTAAAATGGGCTATAGTCTTTCTCCCATCAGAGTATTGATTTTGC

CUST\_4891\_P1426210822 CTAAGGCTCATGGGTGAGGCCTAAGAAAGGCATGTCAGTTGTCTAT

A\_14\_P111207 CCTCCACGAGGCACATTTTCACTTCTAGAAGGTCTTGTCCCCATTTTAT

A\_18\_P15691394

AGACAAACAACTTTCACTTCTCAGTAACCTAGCATGATACAACCTTTTCTCACTAGCATAGT

A\_14\_P109963 ACCTAGAAATTACCTTCAACACTAAAAAAGGTTCTTCTTTCATTCCTATCCTGCTAAC

A\_16\_P18172389

TGTCCTTTGGACTATAATGTTTGTCTGTAAAGTGTCACTATCGCAACTATGATGTGTGTT

A\_14\_P100634 CTGTTTGTGAATCAATGTATGACCAAATCCTTATTGGATTTCTTAATTTTCAGTTATACT



A\_14\_P106810

ATTTTGATTCACTGAAACAAGAAAACATCTGGAAGAAAATGTGGGAAAGTCCTGAAACAA

A\_14\_P118833 TACTCCAAAGTTGTAACAGAGATGATGAAGACTTGAAGTCTGCAATATAAAAAAATGCA

A\_14\_P108880 ATCTTTAAGGAAGTTGGGAGTTAATTAGATTGGAGAGAATGGGAAATTTCTAGCAAGGAA

A\_16\_P03525972

AATTCAGGGATGTGTAGGAAATTTAAAAGTTCAGTAAAAGCACTTGTTACTCAGTGATCTC

A\_14\_P121287 ACTCCTTTAAAATGTTAGGAATTATTCATTATAAAGAGCACATCAGCAGGCCAACAGACG

A\_14\_P129947 AGTTTGATTCTACAAAAGAAACCAAACATCAGAAATACATCCAGCATGGCTGGAGGTAA

A\_16\_P00159139 AGCAAGGATTTTTGAGTCCTCCCTTTACTAAGTTCATAGAAAGGCAAACACTAGCAGAG

CUST\_6032\_PI426210822 CTTAGGTTGGGTTATTTCTCAGAGGACCCCTGGCCTCTCAAATAG

A\_14\_P127152 TAAGGCTGGATGGTGGTAAAGTTCAACTCTTTGCTACCTTCTGAAATTTGAGAAATAGTAA

A\_14\_P106031 CATTCAGAACCAAGGTTTTGTATTTTCCCCATAAACATTCAGAATCTGATTTTCTGTTC

A\_16\_P19485954

AAAATGTAAACAGGATCGTTACTAGAGGTGATTTTTTCAGTGGTAACATTTTTTGGTCCCC

CUST\_3955\_PI426210822

GTAAAATCCTATTGCTTTCTGACCTTTGGGTTAGGATCAAGTGTGGTGTAAATAAAATATC

A\_14\_P116560 AATAAAACCACTTAGGATTGTCACAGGAAACAAAATAATGTGCCTCTTCAGTTTAAGGGA

A\_14\_P119697 TTTTAACTGATAAGAAGAAGGTGACACTTTGGTTTTCTTTTTGAAATCTGTTCTTGGG

A\_14\_P119629 AATCCCTGTGATTTTCTCCAAATACACATCACTAACGAAATAGTTTTGTTTCTTACCCA

A\_14\_P136764 GCTGCCCTATTTCTTAAAATGTGCCTCCACTACTATTAATTGGTTTTTCCATTTCTTG

CUST\_7865\_PI426210822 TTCTGAATCCTGTGCCATTTGCATGTTACATACATGAGCTTGCCATCCAT

A\_16\_P20888657

AAAAATCATGGCTATGAGACAATGAGACCATTTTTTAAACTGTCATGCAATTCAATCCCCT

CUST\_10077\_PI426210822

AAAAAAATTTTTTTTTTCTCAAAGGCTAACTATGACTTTTTGAGACTTATAAAGTCTCAA

A\_16\_P20671355

AGAAAAACCTAACATACCCAGTTATAACCTCTCTCTCCAGATCATTTTGTATCCAGATT

A\_14\_P125520 CGTTATCAATATTAATTTTGCTTATGCCAGGACTCCATCCCATTGGAGACAAACATTAAG

A\_16\_P17802573

AGCAAAAGAAGTCTGATTCATGCTAAATCTTCCTAAAACAGAAGTAGATCATTTGTGGGG

A\_14\_P117092 CTCACATCTGTTTCGAGTGGAGCACTTCACTATGGAATTCTCAACTTTTTTCTTTTCAG

A\_14\_P114422 CTGCAGGAGGAAAAGGCTTTTCGCGAAGAGATGAAAATTTTTCGTGAAAAAATAGAG

A\_14\_P108796 TTTGCTTGAGATTCCTTGAACAACAAATAGTGTTTTCTGAGCCTGCCAGTTATTACTTAG

A\_14\_P121792 AGACAGGTATGGTCCAGTTCCTCTTTTATATAGCACTTTATCATTCTCCACAAGTAGTTT

A\_16\_P37496521

AAACTCAGGTTGATCTCTCATCTTAACTGTGATTGGTTCAATTTTACCATACCGAAAGAA

A\_16\_P00067869

CATAGTAGGGCTAAATAAATGTGTCACCTTTATCCATCAGAGTTAAAGAGAATTGCCAGG

CUST\_309\_PI426210822 AGAAAAGCTGTGTGACATGAGCAGATTTGGCCAGTGTGGGAAAAG  
A\_14\_P120936 CTCTGTAGTAGTTTCCATACAGTCTGTCAGTCCTTTAATTAACCTGTATTCTTTCCAG  
A\_14\_P137984 TACAGTATTCAACTCACTCACACTCCTTTTAGTATCAGGACACTTAAATCTCATCCACTC  
A\_14\_P135976 TAAAGATATCTCAAAGGCTGCAGACTTTACCTAACATCGTGGAACCTTATAAGTAGCGCA  
A\_16\_P20256159

TATTCTCCCAAAGATATGTATACAAATGCCCTATAGCCCAATCATTGACTTCTTCCAAGG  
CUST\_1828\_PI426210822 GCATGAGAAGGTTGACAGCTGCCATTTTTTTCCTGGTAGTTTATGTTCCAA  
A\_14\_P118550 TATCTTGCAACAAGGTTTTAGTGCATAGCACAGATTTGTTTACATTTGTTCTTAGTGT  
A\_16\_P01729447

AAGCATGGTTTTAAAGTGTAACGTCTCCTTAAGAAGTCAAATGACTGTTGTTATCTTGCC  
A\_16\_P02730746

CCTCGCTAACACAGTTATTAATGAGCAATTTTCTGTAATTACAACGCAGTTATGCCAGT  
A\_14\_P138836 AGACCAGTTCAGTGGGATGACCTAATAATGTTGGATTTTGGTGAAAAAAGGTAAC  
A\_16\_P58424249 CATTCCATTGGCCAGAGCAAGTCATGAGGCCCAATCCATCAGTAG  
A\_14\_P118528 ATGTGTTTTCTCAGCAGTTTCTGTTAGATGGCTGTTTGCAGAAAAAGATTTAGAAAGTT  
CUST\_8439\_PI426210822

GGCCACGTGTATGCAAATCTATAAGAAAGGTGACATTATAGACATCAAGGGAATGG  
CUST\_6128\_PI426210822 TCTCTGGGTTTCTAGCTATCAGCTGGCTCTAGACCAGAGGTAAG  
A\_14\_P127794 ATCCCAATATCTGATTCTCCATTTCAAACCTCTCACTATCCTCAGTATCACGTCTAAAAA  
A\_14\_P128398 AGTAAGATAATTCACGTAGTTGTTTCTGACGAATTCATCATTGTAGTCTGGAGAAAAA  
CUST\_5019\_PI426210822

AAGTAAGATTTACAAAACAAACAAACAAACTGTTTTTCATCATCTTTGGTTGTAGTTTTA  
A\_16\_P02893126

AAACCCATTAGGTGTTTGGTTTCGATAGGAAGTCATTTTTCAAATTTGCTGTTTTAGAG  
A\_14\_P131525 CTTAAAACACTTGCTTTTTATGTCTTTTACAGGTTTACAGGAACAGATGGACCTAGTGGTTT  
A\_14\_P121138 TTCCATGGATACAAGGGTTACTTGCACAGTCATCAAATTAATTTACAATTAACCCCTG  
A\_16\_P01309991

ACTGATAGTCGTTTTCTTGCTCTAATCTCATCTGCTAAGTAATTCATATTTCCCTGCTGA  
A\_14\_P138214 GCCAATGTAAATTAGGGATATCCCAAAGTTTACTTAGGCAAAAATCATCTCTGATCTTC  
A\_14\_P102526

ATAAAGGAAAGGGAAGTGTGACAGACTAACACTAAGGATTTGAGTCTGAGTGATTAAAGA  
CUST\_9831\_PI426210822 AGGAAGGAGACCAGAGTATGAAGGCCCTGGTGTCTGAATTAGAT  
A\_16\_P00917120

CTGTTGTAACATAAAGTATTTTTCGTTCACTCATTGTGGAAACAACATGTTCTCTGTGTGC  
CUST\_5985\_PI426210822

GATCATTTAGCCTCATTTACAGAATGGCTTCCTTTTGAAACAGTTCCTTCTGAAA  
A\_14\_P136128 AGGTCTCCTTGCAAGACTTCGAAAGGTGAGAAGTTCTGTTATAGGTCTGAAG  
A\_16\_P17174017

AGCCTCTAACTTACAGTAAGTATAGCCCCTTTATATTCCTCTTTTTTCACCTTTAACCACC

A\_16\_P58424076

AATATTCTTTAGTTGAGTCTTTGTAAACATCCTGGTGAGTGGTTTTCCAGTTTGCTATTTGG

A\_14\_P121741 CAGTTCAAGGAGTCCACACATAGGCATTTCAAACGGGCTTTAAATACTCATCA

A\_14\_P134405 ACACAGGACATGTTTCATACTTCTTATAGCCAAGCCTAGAAATCAGGAAAACACCAAG

A\_14\_P119028 ATTTCTCCAAGAAAATGACCAGAATAAATCTTAACCAATTTATCTGTGGATGCCTGCGA

CUST\_6213\_PI426210822 AGACACTGGCTGAGATTTTCCAGCTTCGACTTTCTAGATGGTGAGAG

CUST\_3501\_PI426210822 TACAATGGGGGAAACAGAACAGAAGAAGGTTGGATGGTTCACCAA

A\_16\_P17649841

AACTAATGCAGAATGCTTTGATGTGTTTGACAGACAATTCCCAAATGTGGTTTTTAATCC

A\_14\_P121514 CATCACGATCACGATGCGTCCGTTCTTGTTCTTGTTCTTGACTATCTTCAICTT

A\_14\_P110981 TCCGGATCAAGAAGAATGAATACAGTATTCCCAAGGTGACTAATGATGCTTTAAGTTTAC

A\_14\_P108660 CTTACCTGTCTGCCATTTGAGGTATTATAAAGTGCTGTCCATTTTTGTGATCTGAAACAG

A\_16\_P00685566 ATATGAAGCCTTCAAGGCTCATTCTCCATGTGCCCTTTCAGCAGAAAC

A\_14\_P101821 AGGAGAACCACCAAGTATTACAGGAATTTAGAGGAAGGAGTGATTTTATCTACCTTTAAG

A\_16\_P00685290

TCCAATAAAAGGCTTTTACTAGATGTTTCAGTGACATAAAGTTGAAGACATAAATACTGT

A\_16\_P01505839

ATGCAATGGTTTTGACAACACTATCCTGAACTAACAGTCTCTTGTATCCATAATGGCCTATT

A\_14\_P126735 ATTGCCCTCAGTATACAAGGAATGTGCCACCAATAGGGTTGGATTTAAAAGTCTT

CUST\_6289\_PI426210822

ATAATGAGATTTGAACTGGAAGAAATGCTGTTCTTTTCAGTTAACAGTTGTGTTTTTTCCA

A\_14\_P117950 GAAGATCCTCAAGCACTTTAAACACGACAACATCATCGCCATCAAGGACATC

A\_14\_P110080 CTGCTGTTTCTCAGATGTATGCCACCAAACATAAAGGACACAATTTACAATACTATGAGG

A\_14\_P200941 TCTAAAGGCTGTATTTTGACGCTAAGTTTGGGACAACCTTTAAACTTAAAGTGTCTTTCCC

A\_16\_P03649869

GACAGTCTAAATTGGTTCCTGATTCTGTAACAAGTGGCTTATTCCCTAGTAATCTCTAGA

A\_14\_P200760 GAGAATTCCTTTGCAATTTTATGTTTGGATCACCCTGTAAGCACACTTTATTTGCATT

A\_14\_P101944 ATTTGGTCTATAATTTCTGTACCAAACCAGGAACCAGCCAAATTATAATACAGAGTC

A\_14\_P117029 TGTTACTTTAGACTGGGTGATGAGTCAGGGGAACCTTCTTTCCCTACTTCTT

A\_16\_P03656749

ATATACTTTTTTGACCTAGTCAATGGCCAATTTAACCGTCTCTACAGCATCTGAGATCTC

A\_16\_P18137271

TCTTTCTGTGCAATCTCTTTACTGCAAGTATTACCACATACGTTCTCTTATTTCAGATGGG

A\_16\_P18104291

ACCTACTAAAATCATCCAGGAACATTATACGTAACACAAATATCAAGTCTTCAGTCAGGA

A\_14\_P127288 ATAGAAAGTATCATGGGGTATATAACAACTGAATTTTTGGCTTCCAATCCAACTGGGC

CUST\_6164\_PI426210822 GAGGAGCAGTGTAAGGGACAGTCACACTCTGGGAAAGACATCGAA

CUST\_10028\_PI426210822 ACAGTGTGGGGGCAAGAGTAGGGCCATTGCCATGGGTCAAGGTAG  
A\_14\_P117030 TATATTCAATCTCAGTAACACTCCTTTTTCCAAACTCTGCCCTCCATCACAGGTAGTTA  
A\_16\_P15445023

ACATGTGGTCCAGTTATTTTTGATATTGCCAAACTTGCTCTATTGTAAGGCATGAAGAAC  
CUST\_4436\_PI426210822 TCATTTTAGGGAGACTGAGCATGGCTGGTAAATCTCAGTGATGGCTG  
A\_14\_P118455 ATTTTACATATTTTTTCAGGAAGTTCAGAAACGTTTTCTGACGGCATCCCCTTATTAG  
CUST\_8868\_PI426210822 CCATTGCCGAGAAACACATGGTTCTCATTAACTGCCAAGGACTAAT  
A\_16\_P15610990

TGATCCTGACCAAAACCATAAAGTGTTTGAAAATTTGCTTGAGAAAAAATCTTCGCTGG  
CUST\_5077\_PI426210822

GGCAGAGCTACTTAATATTGTATTTACCCCAGAGGAAGATTATTTTTTTCATTCTCTAAA  
A\_14\_P131069 GGGGGAGGTATATGATGAGCAGACTTCTCGGAATTCATAATAAATTTCTAAAAGCCTAC  
A\_14\_P107055 CTACACTCCTGCATCTGTCAAAATATTATTTCACTTTGTCTTGGTCTCATGCACTAATT  
A\_14\_P117037 GAAATTCAGACTATTGAAGTGAAGTTTACTCCTCTATTTTCTCTCTCACCAGATTGCC  
A\_14\_P200826 GGGGAGAATTTATTGCTCTTGCAAACCAATTATGGAAAGCAACTTAAGAAAACCAATGTT  
CUST\_6275\_PI426210822 CTTCAGGCTGGTCCAGGGGACTTTGTGTCTTTAGAGATTGCTCTG  
A\_14\_P108825 GGTGACATTGAAGTGGCCAGTCTCCTCGATCAGATTCACAATCTGTAAG  
A\_14\_P135459 ACTGAACTGATTCTACCTCCCTCCTCTAGACTCAGTAAACAGTGACTATTCAATAAATGT  
A\_14\_P115678 GTAGAAGACAAAGGTTCAATTTCTTACCTGTTCCGCCAAGATACAGAAGAGAGGTT  
A\_14\_P114817 GAAACCCCAAGTTCGGAGAAGGGACTGGGTAAAATCACAACACTAGTAGTAAATGTAT  
A\_16\_P19581936

AAAAAAAGTTAGTGACTTCAAATCTGAACTCCCAAGACATTAGTCAAAATACAGGTGGCC  
CUST\_7040\_PI426210822 CTCCCCTCAAAGGCAGAATGCAATTCTCTAAAGGGAAAAAATGAGGTG  
A\_14\_P136926 GCAACTTCTTCATCTGAATCTGTTTTCTGAATCAAGGAACTTCCAGTTATCTCTTTCAGA  
A\_14\_P112349 CATTTGACTCTCTGAATTCAGTCTCTCCCGCATGGCTAGGATCAAG  
A\_18\_P14133359 GTTCAGGCCTGAATGTCTGCTTGGATGTCCTTATCATACCAAGATACATCAG  
CUST\_5358\_PI426210822

GCTTACTTGGAGGCAGTGGCAGTAAAAACGGAAACAACAACAAAACAGAATAAAA  
A\_16\_P19260969

CTTTCCTCTTGAAAATCTTACCCCATAAACAATGTTGACTTTAACGTGAGCAAATGACAG  
A\_16\_P20110106

ACTTCTATCAATCATGCATTGGAAATACTCTGACATCGTCAATTCTACCGTGATCTACTC  
A\_16\_P18488005

ACAGTTCTAAGTGACCATTAATGTTCCAGAAATCAACTACCATTTGTTAAGAGGTCCAAC  
CUST\_1030\_PI426210822 CTCTGGAGAGCTGGCCAATGCATCTGTCCATCTTCTTCGCCAGTA  
A\_14\_P138160 AAGTGTGTTGGTTGTGGTTAGAAAAGTCAACTCCTTTCCCTTTCCAAAGCAATAGAG  
A\_14\_P108695 TTTGAAGGAATTACACTCTCTTAGTCCCAGAGTTTAAACCAAGTATGTAACACTCACTTCCA  
A\_14\_P135730 CTAAACAAAGCCACTCAAGCGCTGCTAAATACTTCATCAGGTTATTGTGTATCTCACTAA

A\_14\_P112883 TGTTCAAATAGCAAACCTAAGCAAGTGAATTTTTTTAAGGAACCGTGTGATGTCAGCACAT  
A\_16\_P41436292  
AGAAGTCACACACTATGATGTTTGAGGTTTCCAAGATAAAAAGAAAGTTCACAGTGACAA  
A\_16\_P20012163  
GAATCACAATGCCTATGTATGTATTACCCAAGTTTGACAGTTATCCTTCATGGTTTGTGT  
A\_16\_P00887513  
ACTCTACAGGATGCAATAGTTACCCTCAAACTATGGTCATGGCAGATAAAGTCTTTCTT  
A\_14\_P139895 CTGTGGGTAGAGGTTTGTGTAGTGGTCATTCATGTGTCTGAAATGATACATGAAAATTAT  
A\_14\_P120984  
AGAGCAAAGAACAAGAACAGTCATCACTGAGAGCATCTTTGGTGAGATACAGAAAAAATT  
A\_18\_P22841652 ATATTTATGGATGCAACACGCATGGTCAACCCTCAGGGGAAAACCTGTTAC  
A\_14\_P129032 ATGGAGTTTTCTATCCTACATGTGGAAAGTATAGTGATGGTTATTCCTGTAATGGTGACT  
A\_16\_P17242667  
CCCTTAATTCCTTCTATATTCTTTAAAAATCCTAATCAGCAAAATCACTCACAATACCCA  
A\_14\_P134620 TTCAGCAGTAATGCTTGAAGAAGGAGCGATTTTCAATTTTGTTCCTTCTGTTATGATCTT  
A\_14\_P125111 TCAAAAGCCAATAGTTACATTTCTAAGCAACGGAGCAGACCAAAAATGTTTTGTTTGACA  
A\_16\_P19683931  
AAAGCAAAAAGTAAAGTTGAACTGAAATCACTGCTACTTACCTGTTTCCCTCCATACATC  
A\_14\_P134491 TCTGGCTCTCCTTGGTTTTGTGCTATTAGATTGACAAATACCTCTTAATAAATCTCCTGA  
A\_18\_P22841761 GATTGGATTGTGCAGCCCATTTTTGTTAATAGCATTGCCCAAGTTAGGGAAG  
A\_16\_P03718148  
AATACAGCCTTCTAAACCTTGAGATGAATAGGAATTCATACTAATCCCTGTGACTGCAG  
A\_16\_P15626490  
AAATGCAAAGTGCTATTCTTCATATTTCCGGACCACTTCTACAACCTACACAGGGTAAGAAT  
A\_16\_P35551877  
ACCGCTGTTTTTCATTGTAAACATTATGCATGCTCTTGTAAGATATTCAAATCCCATGGA  
A\_14\_P116156 ACTGCCAAGATATATCCTCAGACAAAGAAATGTCCATTAGTCACTCACTAAAAGGGTAAA  
A\_16\_P20898821  
CCTCCTCATAGGTCAAATACAGTTCATTTGTCTCCAACATTCTTAGTCAAACCCAAAATA  
A\_14\_P109253 GATGGGGCAGGAGACTTGAGAGAATTAATTAAGTTAATTAATGGGTGTCCCTAAATTACT  
A\_14\_P135949 CTTCTATTACAGAAAGCAAAATTACAAAAGAAGAGAAGGACTATTAATTCAACAAATATT  
A\_14\_P106956 TGGGAGAAATGCTGGGAACATTTCTAGTGAAATAAACATGATTGAGCAATAGCAAAAACC  
A\_16\_P00916131  
GGCCTCATCTTTTCATCATTTGCATTAACAACACATCACAGTTAAAACATATTCCTCAAAGC  
CUST\_6140\_PI426210822 AGCACATTTCTTATCTATGTAGGTTGCATTTTCTCTCCTTGGAGAGCCTCAGAT  
A\_14\_P115185 CTGGTATCTCCAGAATTTTTAACTCCGTAATGTCACCTGCCCTGAAATACACAAAA  
A\_16\_P21704377  
GACACAACAAAATGACAAACTCTAAGAGACTTTTACAGAACTACATCTCAGTAGCATGCA

CUST\_6527\_PI426210822

TGATATTGCTCCTAGGAAGAATAAAAATCTGCTTCACAATGTCCTTTTTGGTATGATTTCC

CUST\_3262\_PI426210822

ACAAAACAATCTACTAGACGAGGGAATATGCACATCAGCTTTTCTGAGAAGCT

A\_14\_P128150 ATCACTGGTGTATGTCATTAAATCACTTGAAGGCAATTTGCAAAGAAATATCAAGTGTGA

A\_16\_P03708444

ACCATGGTATCTGTCAAAACTCCCTATAATATTATGCTCACGTATAAGTAGCAGCCTAGT

A\_14\_P121146 GTATTCTTCTGGATGAGACTGTTGTGCATCTTTATAGCACACTTACTTGACTCAAGTTCT

A\_18\_P14133345

TGATGCTTTATCATCCTGGCAATAAACATGCACATTTGGCCAAATCTATCAGTCTTTTT

A\_16\_P01535779

TCCATCATCTATCATTCACTGCACATCATTGAAAAGTGAATGTCTTCCCATCTTACTAGT

A\_16\_P58424470 TTGTTTATGTGCCAGAGGCTGCTCAACACTTTTTATTAACGTGTTTAACCCTCACA

A\_16\_P01672544

ACAACCTAGTCTTTCCCTCATTTGTCTTAAAGAAGTGCAAAGAGTCTTAACCAGTATGCA

A\_18\_P11085161

AAAACAAGTTTGCAGTAAGAGACAAGATGATCAGCAAGGTTTAAATCATCTCAATCTGCC

A\_16\_P03489814 ATTGGCTCCATAGACTTAATGCACCTATCTTATGGATGGAATGACGATACTTTGTGCTT

A\_14\_P113281 CTATTTTATTGGATGTGCTTTGCATTCTTGGACGAGGGGGTGTCTTCAATCA

A\_16\_P17092989

GTCCTACTCTCAGTCATTTAAGGCAATCTGATAAGTCTGGTGCATGAAAACTTACACTA

A\_14\_P116155 CTATCATCTAAATTCAGGCTTCCCCATTGATTTTTTTGAGCCCAAAGGTCCTAAAATAAT

A\_14\_P123551 CTCAGGATGGAATGGAAGTCCAAAGTAGAATCTCCCATTCCTTGATTAAGAAAATAGG

A\_16\_P00685168

GATTTCTGACTGATAGTTTGAAGTCTGCAGATTAGAGATGAAGTGCCTCCTGTTAGT

A\_14\_P109358 CACAAAGCCATAAAATCACCTTGCTGTAATAGGAAATCGCCTCTTTATACTTGCAATTA

A\_14\_P122965 GCCAAAATGAATCTGGAGTTGCTGTCCATAATGGGAGAATATATTTAGTTGGTGGATATT

A\_16\_P19397808

AAAAAATTATGAGTCTACTTGGACACCATTATCACAAGTTGAGGATTAAAGTGAAGGGG

A\_16\_P15607303

ACCAGTTATCTGCTCACAAAACAAAGTTGAAGAGAACAAGAATGAACATCATGCAGTTTT

A\_14\_P132702 TAGGTTGCAAAGTTATAAGTGTATGGAAGAGAACAATGACTATCAAAGTGCAAGCAGC

A\_16\_P18870083

AAATTCACAGTTGTGTGTCTATACTGCCTTCATATCCAGTTGAAAAATGGTCAACACATC

A\_14\_P102444 AGATAAACTTAAAGAGATATTTGAAACCCCTACAGAAATCAGTCTGGTCTAGAACTCG

CUST\_811\_PI426210822

AAGATCTTCTAATTTTTTTAAATAAAGAGTTATTGTGATTTTCTTTAGCAGAAAAAGA

A\_18\_P25335331

CCACAGTAGAGCCGAAATATTTCTCACCATTAGTTAATAATTTGTTATCCTGCAGCCCTT  
A\_14\_P122478 ACGACTCTTAGGTAATTCCTAGATGTTTTTCATCCGTTCTGATAAATTTGTTGTCAGAGTG  
CUST\_8159\_PI426210822 TGTAGGAAGACAGATGAGGAGCCAGGGCAGAGACTGTGGCCCTAT  
A\_14\_P122420 ATTGCTTTGAGACTAGGCCTATTGATCTAGAATAAGTAGTCAATTTGTAGTCAGTTCCCT  
A\_14\_P135897 CTTATAACTTTGGGATTTTTTTCTAGATGCTTTGAGTATTTGGTGCTGTGGATAAGTGGC  
A\_16\_P20123642  
ACCCACATCTCAAATATTACACTCAACATCTTGCATGGTAATTGTTTGTAGGCTCTAT  
A\_14\_P101129 GTTACTTTTTCTTTTTGCAATAGGTTCTTCTTGCTTTGCTGGTGATCATGTCACTTG  
A\_14\_P118892 CAGGGGAACCTTGAAATGTAATCATAGTTCCAAAACCACTTCCCTAGAACAGTGTAATAT  
A\_18\_P13305108 GTCTCTCTAAGTCTTTCTTCTCAGATTCCAATCTCTCTAAGTTTTTCTTGTGTCAGGTT  
A\_16\_P16191829 CAATACCCTAACTTCATTGGTCCATTGTTTCGTGGAACAGGCACTTACACA  
A\_14\_P202012 AAGGAAAATTCGTGTGCTGTAACCTGTGGTCAGTCATTTTTTCCAACCTACATACTAGAAT  
A\_16\_P19141676  
GCCTATAGGGCTTCTTCTAAATAAACTCACTTCTCAGATGGAATTACTCTAACAGTTGGT  
A\_14\_P121683 GTCTGTTCTGAGCCATTTTAAAGAGAGTAAAATGTGCAGGAAAATGTTCAACTGATTTT  
A\_14\_P127712 CCTCATACTAAGGAAAGAGAAAAGAGAAGTATAACCGTCTCTTCCCACAACACAATAA  
A\_14\_P118797 GCTTCTAAACTTAACTATACATTCTAATCACCATGAGGTCCTCAACAGACCTACCGTAA  
A\_14\_P123153 AAGCATGATAAGAAGCACATGACAGATGCATCAATAGCAGTTTTAGTTCAGAAAACCTTA  
CUST\_2810\_PI426210822  
ATTCAGAGCACGTGATCACCTGAAGGAAATGAATCTGGAGCTTTATGCATATTACT  
A\_16\_P18058360  
AACCAAGAAACAAATGACACAGCATTAGCATAGATGTCATGTTGCATCCATAGTAAGAGG  
A\_14\_P102033 TTATGATCAATCTGCTAAGGTTTCTGTTAATAGATTACCTGTCCAACCATTTCAGGAGAT  
A\_16\_P18162702  
AAAAAAAAGGCTGTCTTTGAATGCATCTCTTGCCAGAAAATGAGACTTTTAAACCCTTTT  
A\_14\_P107102 ATCTGTGTTTCTCAGATGGGGTTCAAAGACAACAAGGTGTCTGAATGA  
A\_14\_P137024 CCAACACAGGTTTTGGCATCTTTTGTGCTGTATCTTTTAAAGTGCATGTGAAATTTGTAAA  
A\_14\_P128199 CTTGCAGTGAGTTAAAGAAATTCTGTGCTTCTAGTCGCCATACAACTTGTTACATTCTT  
A\_16\_P00685041  
AAACAACCTCCACACACATTTACTTCTAGTTAATGAGATGCATGCTGAAGTGTCTGT  
A\_14\_P133070 TGCTTCTTTATTTTTCTAACCTCATCATTTTCTGCTTTGCTCAGTGGAGATTTTCCAAT  
A\_16\_P36230198  
GGAGAACTGATTTTATCCTGCATGGAAGAGGAGTAACTCAATTGACATTCTTTGTCATTT  
A\_18\_P15050478  
ATGTTAACTTTGAGGAAATTTGGTTATTGTGACAGGATAGATAAATGAACCGTATCGGGG  
A\_14\_P137986 TTTTCTGCCTTGAGATTTTTTTTTTCAAATGTCAAGGGGGCAGGGACAATGTTTTAAATA  
A\_14\_P135255 ATGAAAACCTCATTAACACTAGCATAAGCAGAGGGGGGATTTTTCTTTTAAATGATGCACTT  
CUST\_10305\_PI426210822 AGTACTGGGGATTGAAAGCACAAAGCCTGCCTTCAAAGAGTCCTA

A\_14\_P104785 AACATAAGGAACACAACAGTAAATCAATTTAATGCCCTTATTTTCTGATGGGTGCCAAG

A\_16\_P16988523

AAGTGGTCTCAAAAATTAGTAAAGTTGGTTTCTCTTACAAAATCTCCACTTAGCCATCCG

A\_16\_P21633637

AAAACCTCGGCATAGATCAAGAAGACCATAGCACATAAATATCCATCAACAGCGTTTTAT

A\_16\_P35757266

CAAAGGTGATTTCATTCTAATCTTCGCATTTTATATCCAGATCCCCATGACAAAAGTC

A\_14\_P103990 CTTATAGGATAAAAACCTTAATTTATCAAAGCCACACATCATGTCCTGCCTAGGTCTGTG

A\_14\_P122595 GAGTCATGTCCGGGAGCAAAGTTGTAGACATTCTGGAGAGAAGGTTT

A\_14\_P104162 ACTAACTTATGTGACGGTATGTGGCCTGAGAAAACAATAACAAGTTACTAATTTATTGGG

A\_14\_P123869 TCATTGGGGTGAAGACACATTCCTCTATGTGATATCAGAACTCAAGTGTAATTAAGAGT

A\_14\_P126284 AGTTTTGTGGAAGAAAAAAGGGTGGGCAAAACCAATGTAAACCTGATTTCTTTATTGTA

A\_14\_P120516 TATCCACTCTTCTCGTTTCCAAATCTCTCAACCTTCATTTTTAAAGAACTTTCATCTGT

A\_14\_P109647 CTTTCTATGTATTTTTAGTATACATACCTGGTGTGGTCTAGGACAACCAAATCAGCC

A\_18\_P14134611 GAGGTTCCCTCCCTTCTATTTCTGCTTATCAACATGTTTCTAATGTACACAAC

A\_16\_P03649774

GGAGAAAAGACAATAACCCTACAACAAAAACAAGCCTAGCAAATGATTTCTTAAGCCAG

A\_14\_P116186 ACATTGGTTTGGTATCTGATGAAAAGTGAAGGAAGCAATTTTACAAGAAAAGCCATACT

A\_14\_P128143 ACATAAGTTGTTCTGTGTATAAATAAAACAAGCCTGTTTTTGATCTTCCATCGCCAGAGT

A\_14\_P106611 TAGAACAGAGATAGAATTTAAATTCAAGGCCCTGAAGGCTGAATTAGAAATGCTCCTGAA

A\_16\_P17676984

AAAGCAAACTCAGAATTTTACACTAGGCCAAAGGAATGACTTTCAGATTTCCCAAATG

A\_14\_P113515 TGAAAGACACATTCCTTTTTCTCTTGCTCCTTAAAATACTTTGATCCTTCTGCAAAACCA

A\_14\_P201708 GGCACATTAAGCCTACATGTAAAAAATACATCAAGTCTAGATGGGCTTCAGTCATTTGA

A\_14\_P104537 CTCTTCAATTCTGAATTGTCTGCCACTTACAAGCAGAAGAAAGTTTTTTCTTTTCATTAT

A\_16\_P58424539

CCTATCTCACACTGTAAGGACTGAAGAACTAATTTATATGGAGTAATTAACAGAGATCC

CUST\_9954\_PI426210822 GTGCAGACCTGTCCTGCCTCAAGCATCACTCTCTCAAGGAGAAAG

A\_16\_P18700099

AAAAAGTTCAAAATGCAATCACTAATCCAATTTGTGAGACTTCTCATCATGGTCACAGCA

A\_14\_P101292 GATAATCACTTAGCAAACAGGTTAAGAAATAGTCAACCGAGGCTAACTCAGTTCTATGCA

A\_16\_P15983182

AAACTTCAATGCAGAATGACAGAAGTGTAAGAATGATGGAATATTTGGAGTATTGGCCAG

A\_14\_P123341 CTTACAAACAATTTCTGTATAAATTGACTGTGATGTTACCAACAGCAGCCACTTTCTTGG

A\_16\_P38572906

CCTCATGCTTACAAAACATTCACAATCATCAGAGTTAAATAGCATTCATTTTTTCACCC

A\_16\_P19950733

ACAAAACATACTGATGAAGGCTTTCTCATATCATTTGGCTAATACTTCTACGAAACCCAC



A\_14\_P119186 CCCAGTGAAATAGTCCTTCTCGATTACAAGAGTGATAGAAAATGATGGAAGTCCAATACT  
A\_14\_P123402 AAATAAGTGATCTCATTCTGACTTACAGTTTGAAAATAGGACATCAGAGGGAATGTCCTG  
A\_14\_P109266 CTGGGTCTTAAGTCAGACTTCTAGCAGTAGTATTCCAAAGAATTCATCCTCGTAAACAA  
A\_16\_P17111202  
ATGTCTACATTGCCCATGATTCAGAGTTATGCATACTTGTTATGACAATGCAGAAGGAT  
A\_18\_P23333229  
AGGCAGCATTTTAACCGATAGGTAGTGAGCATTATTAAGTTGATGACAATCCTTGTTGT  
A\_16\_P18583958  
AAAAATGCCAGAAAAAAGATTGTCAGAGAAAAGAGATTCCCCACATTATGACTGCATACA  
A\_14\_P102921 TCTCTTGATCTACTTCACTGAATATTTCAAGAAACACTTTAGAGCAGGGGCTAACACAG  
A\_14\_P114403 AATAACTGAAATCCATGTTTAAAATTTAGAAATCTCCGAGAAGCAAGGGATAATGCTGTG  
A\_14\_P112416 AAATTAAGGCAAACACTGAGACAGCATACCAAGGTAAGTAACTGTTGGAAGTGATAAATG  
A\_14\_P201125 CTCAGGCTTTTTGTTTTGCTTTCTAAACCACACCTATTTGTTAAGGTGTCAAGAATTGG  
A\_16\_P18886150  
TGATGTTCCCTGTAGTCCTTTACCATATTTAGGGCAGAATTTAAAATCGTCTCATATGCT  
A\_14\_P121742 TTACACTTACATGCATAAATTTCAAGTGGAGTTCTACAGGATATGAGAACTCCTTTCCCT  
A\_14\_P104185 TTTTCTTTTTAAAAATTAGAAACTCCCGTTATTGAAAATCGTAGTTCACAACAACCTGTA  
A\_14\_P114218 ACATGTTGTCTAATTATCATTTTTCCCAAATTTTGCCTGTAGGACTACTGTTGGAAGA  
A\_14\_P127020 TGTCTATTTCTAATTCAGAACTTTCCAATCTGTATCCTGTGAGTAAGTCTTCTGGCTT  
A\_14\_P106351 ATGGTCTATTTCCTTTAAATTTACACTTGCTAACAGGAAGACAACATTTAAACCCCACTGT  
A\_14\_P118212 TGGAATCTATGATCTGGGAGCCATTGGTGTAAATCAAGTCAAGTATCTAACATCTTCTTT  
A\_18\_P24596167  
ATTACAGTTCTAACTCCAGTCAGAAAACCTTGTAACAGAAAGATTTGCATCCTGTGATG  
CUST\_6366\_PI426210822  
TATGAACATAAAGCCACGTACAGTTATGGATTTAAAACAAAAGCAGAACTTAATTAATGT  
A\_18\_P13611438  
CCCAATTGTTACATCCTTATTCGTCATGTCTTGTTACTTTGTTGTATGTCCACTACCAAA  
A\_14\_P202131 CCAAGTATCTTGCTTTTCATCTTCCTGACTTTCTTCACTTGTTTCTTCAATTTCTGCTTAC  
A\_16\_P16333388  
TGAAAGCCCACTGTCATACTCTTAAGCAAATTTAATCTTGCTGTCAATGCTAGTCTCT  
A\_14\_P137310 ATAAAAATACCTCTTACACTTAAATCCAGGCATTGCCATTTGAATGACTTAAGAATATGC  
A\_14\_P201551 GCAGTCACCAATTATCAATTCTGATGGTGTCAAATTAATCAAAGGTGTAAACAGTGTCTC  
A\_16\_P00685004  
GTTTCAGGAAATGGTCTCCTGATAACTTCTATTGTGATTTGTTTCAGGGAAAATGTTGTTTT  
A\_14\_P118031 GAAATGCAGGTCTAGATTTATCATTTATGGAAGCCATTGTGGACTTCTCTCAACAAATTC  
A\_16\_P02187359  
AATATAAAGATGTGGCAATCATTTCCTCATTTGTCCATTTCAGTAAACATCTCAGCCTCAG  
CUST\_6459\_PI426210822

ATTACTTGGTGAGAAAGAAAAGCACACATATGTTACGCTTTTTTTTTTCAGCATTTCACAA  
A\_14\_P118656 TTATGAGTTTCAAAGTATTAAATGTATTGTGTTGATTCTGACAATTCTATGAAGTAGGAA  
A\_14\_P116840 CACTGGGTTCTCTTCTTTAAGGAATATCTTTATACTCATAACTTAAGGCTCCTGACCTA  
CUST\_9903\_PI426210822 GGGAAACTACAGTACAGCCTCTCGAACGAGTTTCTCCAATGTGCTA  
A\_14\_P100286 CACCCATTAGATCATCTTTCTCAGCGACTTCCTCATACTAAGGAAAGAGAAAAGAGAAC  
A\_14\_P131902 AGACCATATTACAGTTCAGATAAATCAGCAAATACTTACCACCAAAGGCATAAACTGGGA  
A\_14\_P111501

AAAACAAACATCAAGCAATCAAAGGAGCAAATATAGCAAAAACAAACAACCTCACAGAGAGG  
CUST\_2354\_PI426210822 GATTCAGCCCACAAGGCAGGAGGAAGAGAGCTTTGGGCACAGTTT  
A\_16\_P15940076

GAGGGATGAACTAATGCTCATATAGTTACATCTGGTTCTAGAGTTAACAAATGGGTCACA  
A\_14\_P116414 ATTGTAAGTGCAGTAAATGAGATACTAAAGTGCTATGGTCAAGGAAGGAAGACTGACATT  
A\_14\_P120436 ATAAGCCACTAAATAGCAGGATGAAGGCAACTTTTACATTTACCAAATCACCTAATAGG  
A\_16\_P17248717

AAACCCCAAAAAGAACCAGAAAATCTATTTTTAGTCGTATATGCCCTTCTATTTTCCTGA  
A\_16\_P18311483

ATCCCTGACACATAACAAAGTAAACCGAGGTTCTTTTATTTCTTACTCCCAAAATGCACT  
A\_16\_P36230643

TCTGCCTCTTCTGACTAATTAACAGCAACTAAAAAAGAAAATGAAACATAGAACACAAA  
A\_14\_P118919 AAACAAAATGAAACTGTGCATTTTTAAATAGTATAAAAGGAGGGTCCTTTTGTCCATGTC  
CUST\_6663\_PI426210822

TCCACAAATTGAGTGAGTTTTTTTTAGAGTAAATTAATTTGAATGAAGTGAAGTTTATATA  
A\_14\_P113362 GCCAACATGATGTTCAATGTCTTCCATTTTGAAAAGTTAAAGATACTGTGGTTCCTCTG  
A\_14\_P105420 TCATCTGATTTAGATTCTGGGTGCCTTCAGACAAATTAATCTCAATTTTCAATTTGTCCAGA  
A\_14\_P201840 CTTTGTATTAATGTCAGGCAATTCCTGTAAATGAAAGTCTGTTCTAGCACCCCAATTATG  
CUST\_2376\_PI426210822

TTAAGGAAAAAAAAGAAAGAAGCAACTATGACTGTACGTTCCCAAGCTGCTAATATGCA  
CUST\_4594\_PI426210822 CTTTAGGATATGATGCCCAGAAGGGCTCGAAACTGGCATGACTCA  
A\_14\_P111958

TCCAAAGTTAACAGGAACATTGTCAGGAATAGGGAACACTCAACTCCAAAGAAAAATTA  
A\_14\_P130874 GAGGCAGCCTTCAGGAAGAAAATAAAGTGAAGTCAAGAAATTTCTAGTCTCAGC  
A\_14\_P128014 ACTATACAGACCCTCTGGTGTCTTTGGAAAATGTTTTGTAACTGCTTTACCAAATCATT  
A\_14\_P135751 CATGTCCAACCTCTGATCATCTTCATGCATGTGTATCACCATACTGAGAATTCATATTT  
A\_14\_P109872 TCAATCTGCTTCTATCAGCCTCACAGTCAATGAAAATCTTTTCAAAGACCAATGAATGT  
A\_18\_P14758987

CAGTCATTTGCCATACATGCTATCGTAGTTAAAAGTCTATACGCTTTTTCTGTTATGAGGC  
CUST\_2576\_PI426210822

AATGTGCCATAAAAATATTTTATAATTTCTGCGGGTGTGGGAAGCACTGTTTCATT

A\_14\_P137678 AATGAGGGAGTAGAGCCATAATCCCTAGGGACTATAGAGATTGAGAGAGTAAATCTAAAA  
CUST\_1114\_P1426210822 AGAAGGAGCGATGGGCTCAGCAGGGTGTGGAGGCAGTGATTGTT  
A\_14\_P112334 ACATAGCAGAAATGGGTTAGTCTCCTTGGGAAGCATTCTATGAACACATTAGAATGGATTA  
A\_14\_P137225 CGTTCATGTTTGTCTGTAGGAAGTAATGAAATGAATCAACACTGATACAACTGGCAAC  
A\_16\_P21265807  
ACCTTCCCACCTTGACTCATACCTTAGTTTTCCATCATGACTGTTTCAATGGTGATTTATA  
A\_14\_P100452 GTCTGAAGATAAATTTAGCACTCTAGAGCACCCGAACCCTACAATCTTCACGAG  
A\_18\_P22842839 TATTTTCCTTTTGGACCTCAAGATCTGGCCCCAGACAAGGGAATTTGAG  
A\_14\_P134603 ACATACTAAATGAAGCCAGAACGCTGTTCCGGAAAAACAAAAATGTAAGTAGGCC  
A\_16\_P00684992 GACTCGTTCTTCGGCTACGCAGTTCTGGAGCATTTCACGACAAC  
A\_14\_P126823 TTGGGTTTGTGGTAAACCTAATAGGAATATTTGTTTTCAAACATGGAGGTCATGGACATT  
A\_14\_P109256 GAAAAACCTCTCAAGACTTTTTATATTTCCCCTTGAAGCCAATGAACCTCTACAAAATCT  
A\_16\_P38843638  
GCCTAACTTTACATTCCATGTTCTAACCTATGAACAATCATCCAGGATTTTTGACCTCAA  
A\_16\_P17617376  
TCACCAATAACTTCCTGTTTGTATTTCATATCCACTCTTACCTAACCTGACTTTCCTAGAA  
A\_16\_P39732581  
CCCCAAAGCAGTGATATAAGAATTTTGAAAACCTGAGATAACAGTATCACCTAAGAAAGCC  
A\_14\_P127742 CTTTGTTCCTTGGCAATGGTAGATCACCACACTGCTCATATAAACAGAATCTATATTT  
CUST\_2303\_P1426210822 ATCTATCATGGTGATGCCGGTGGGATAGTCCCTCAGTACTCAATG  
A\_14\_P104417 TATAAAAGTTAGTATGCTTACCTGAACCACCCAGGGGCTATTGGCAAAGG  
A\_14\_P105293 CTTCTTATCGTTCCTAGAGTCAAGCCTAGATCCCCTACAAATACCCATGC  
CUST\_942\_P1426210822  
TGTTGTTTCCATACAACAAAAAGGCCTTTGAAATAAAGTGTTTATTTTCTTTCTCTTTT  
A\_18\_P12195831  
AAATACCTTACCAGATAAGGAATAGCCAGACCCTTAAAATTCTCTATTAAGAAGCCGAGG  
A\_14\_P107385 AGCCACATCTACATTGTTGCCTCTAAAAGTGTTTGCAAATTAATATTTTGGCTGGTAT  
A\_14\_P113638 CTGTTTCGAAATTTTTTATTGGCGGAAAGGATTATGAGGTCGTATAACTGCACTCCC  
A\_14\_P121116 CTTGCAAGCACTAGAATCATGACATTAGAGAAGGAAATGACATCTCATCGAAGTCACATT  
A\_16\_P30952389 CTGTAAACTTCTCATTTTCAGATGTCACCTGTTGGAGCCTTCATGTCCGACAG  
A\_14\_P137430 CAAGTTTCACATTAAGGGTAAGAATCTTTGCCAAGTGCACACAATTCATCCTTTTGTAT  
A\_14\_P110610 AACTAATTACATTTTCAGGAGGACTTAATGCTATTTATGTTGTGCCTCTGCAGGCAAAG  
A\_18\_P17977249  
GGCTGTAACAACCTCAATTCTACTCATTATTGAAACATTCTTGACATTTAGACCTACTGCC  
A\_14\_P125352 ACATGTTCTTATGTAGGGTGTGAATGGCTTTACACAGATTAATGGGTCTATGTCTTCAA  
A\_16\_P16655417  
AACTGGGAGAAAAGAATAGACGTTGTCAATTAATCAATCCAATTATCGAGTGTCAACAACC  
A\_14\_P114538 CTGTTCCCTACTTTGTGTTCCAACCTATTTCACTACACATGTTTGAATAAAAACCTGTTC

A\_14\_P105496 ATAGGAAGCATAAGATTAAGCAAATGCACTCCCCTCAACTAAGAAAACACTACATTTCTGTG  
A\_14\_P133189 AGGATTTATAACAGCCAGATTTTCGTCAGGACTCAATAAAGGTAAAGACATCTTGGTCATA  
A\_14\_P128058 CTACAGATTGTAGTGGAGGAGTTCCTAGAAGATATAAATAACATCCTGAACTCAGGTGAA  
A\_14\_P100768 GAGGTCATCCACAGTGCTGTCCAAATACTACTCTCTGTAAAGTGTCACTTTTGT  
A\_16\_P00675272  
CCTCTTCACAAAATTCCTGGATTTTTACTTACCTACACCATCAGTTAGCATGTATCTCTG  
A\_14\_P132159 CAAAATGAATTTTTATCTTAGCCTTGTCATGAATATCCTCTGGAAGATACCTCCTCTGCT  
A\_18\_P17271272  
CACATGCATATCTGTTTGTTTAAACAACCTGGTCACTAATCTAGCAATAATGTCCTGAGGT  
A\_14\_P124743 TGTCTACTCAACGCTGACTTTACTTTTAAACAATGTTTTTCAACCAAGGGCACTATACAC  
A\_18\_P14881650  
TGTTCCAGGCAATACATTATCCTACCTAATCTCCATGTTTAGATCTTTTTTCTCATGCC  
A\_14\_P122719 GATATTTGTGGGCTAAGTTGGAAAACACCTTGGTTTTGATAACACTGTCACTATAAGAA  
A\_16\_P00685158  
GTCTGATGTAGAAGTAATTTCTTTGGGGTAATTTAAAATGTCAAAAATTTAAATCAAGGA  
A\_14\_P135509 CATTTCTTCTATTGTCCTAGATTCAATGCTATCTTCTCCACTGTCCTTTGCTTCATTCTTT  
A\_16\_P20085955  
GCCCTATGCTCCTATCATAAACATGTGCCAAATGGATTTTTTCATGTCTTTCTTTTCGTTTT  
A\_16\_P00008583  
CTTCATCTGCACTGTTACAATCCTGACTTTCTTCACTCATCGCTAAAAATATTTCCCTAG  
A\_14\_P139720 CTGCAGATGATATAGGAAATTGTTCTAAACATCTTCTTCCCCCAATATAGTCCAGAAAT  
CUST\_4631\_PI426210822 GCTGGGGAAGAAGAAAATCTAGGAAGAAAAGGCCACACAAGGAAGA  
A\_14\_P111768 CTGTTTCTTTGTTTTTTCTTTGGCGAATTGCATATTTGTGGTGAAAGACATTCCTGTCTA  
A\_16\_P41533255  
CTCAGGAATTCACCCATAAAGAACTACAGGAATTTACCCTATTAATCCACAAACCACATT  
CUST\_2115\_PI426210822 TTGCTGCTGGAAGTTGGGTATTTCACTCTTTGCTAGGCATTCTGGTTTA  
A\_14\_P131279 ACGACTTCTCTGCCTGGGAGTATTGAAAAGATAGACTCTGGGCTCAT  
A\_16\_P02567371  
AAATGGACATCAGAAACATTTCTCCTTAAACAGTTAGATCAACAGGCTATCATCTCAGGTA  
A\_14\_P110020 TATGAGACTTCTGGCTAATAATTGGCAAACCTGAACTCAATTTCCCCTCTCTTTACCTAAA  
A\_14\_P135846 CACTTCTGGAAAACCACTCATTAACCTTTCTGAATGCTGCTATTTAGTGTTATCCAAGGAA  
A\_14\_P110578 TATTTAAAGATGTAAGAGTAGTTGTATGGTGCAGTTGCCATGGTGGCACTAAAAACAAAG  
A\_14\_P121574 TTTCAGAAGTTGGGATATCTAAAGCAGAAGCCTTAGAAACTCTGCAAATTATCAGAAGAG  
A\_14\_P109657 TAGCAAGCCAAAGATGGAAACATTGACATCAGAATCTTAAGGAGGACTGAGTCTTT  
A\_14\_P121667 GACTATAAGTAGAACCTTTCTGATCACCTTGATTGGATAACTTGGTTTGGAGCATCTTTTT  
A\_14\_P129500 CTATATGCCATAATAATCTCTTCTCCACTGAGAACAGGTTTATAGGGAATCCCATTGATG  
A\_14\_P108108 ATACGAAGTCACATCCCCAACTCACACTGTGAAGTCTGTGAAATCTGATTAAACATC  
A\_14\_P201864

AGTAACACTCATCCATGGAGTGAAAAAAAAACAGCAAAGGCAAAGACAAAATTAGAGATG  
A\_14\_P123061 TTATGCAATGTTGTGATATATGAAGGACTCTATTTAGAAATGCATCTGGGTGCCATTCT  
A\_16\_P00685016

AACCTAATGGGTTTAAAGTTTTTAATCCCCAGTTGCTGTCCTTGATCTGGCTATAATTTT  
CUST\_1154\_PI426210822 AAATAAGGGATGGATGGGGCTGGCATGTGGAGTATTGGGGTGTA  
A\_14\_P201319 GAAATCCACCATATTTATTCCAACAAGTGTGCTTTGGTTTATTTGTTGACTAAGTAACA  
A\_16\_P15534448

AAAAAGGTCTCAGATGATACTGAGTCTAGTTGACTATGCCCTTAAATCTTGCTGTATTGC  
A\_14\_P135778 ATACTCGTCTAAATATGTTGGTAAAATGTAGTCATCATTTGGCATGTGTTTTGCTTTGGT  
A\_14\_P107610 TTAAGTGCTTTTTTTGTCTTCTAGGGCTTGCAATTTCTTTTGGTCCTAAGAATCGTTCAAT  
CUST\_3795\_PI426210822 TAATGGCTGAGCATGAAGCTGAATTAGACTTGGCCACTAGCTTACTTTGCT  
A\_16\_P15677687

ATTTCTTCATGAAACTCTTAATTCCTCCTGTCAGACTTAATACGCACTCAAATACCTGA  
A\_14\_P134860 TAGAAAATATGCCCTTATAGTCTGGAAATAGAGATGAAGTAGAGCACCATAACACTGAGA  
A\_14\_P124873 TGATGGGTGAAGGCTTTGGCAATAGAAAGAAGAATAGAATTCAGGTTTTATGTTATTCCT  
A\_14\_P100194 ACAGTTTTCTTTCTGGTTTTAATTTTTAGTTGTGCTTTGAGTCAGTGCAATAAACTAGAC  
A\_14\_P201589 CCATGAGCCGAGGGAGGCATACAACATATAATCACACTAGATCAGTAATAATTAACAG  
A\_16\_P03799257

GCAACCTGATGTGAGAAGTAGGATTGAATAGAAGTAGGATTGAATATTTTTTCAGAAGGAG  
CUST\_3752\_PI426210822 CTGATCTTGGGCTTCTGAAGTCCTGTATAGTGTAAGTGCTGACCTGAG  
A\_14\_P102992 CTTACCTATGATGTCATTTCTCATTGCTTCTGTAATTGGTATTGGTTTAGCAGCATCTGG  
CUST\_7980\_PI426210822

GCTCTTTGGTCCCAGTATCTAGTAGCTATTTGTAAACCAATGGTGAGAATATTCTGGT  
A\_18\_P22840479

AAGATAACAAATGGGTGAATGTATCTAGCATGGAAACAATCTCCCTCTTCCCTTCAAAT  
A\_16\_P19373707

GAGAGCCAAAATATAGAAGTATCTACTATCCCTTTGTATCTGAATTGTTGCAGTGTCTCT  
A\_14\_P112912 ACGTAATGGATGCAGATTATGTAAAAGTGATAAATATTGTGAGCCACATGACTATGAATA  
A\_14\_P101247 AATTCATTTTACCTTTATAATTGTGGTTTTGTAAAGGACAGGATTTTTGGCAACAGAAG  
A\_18\_P22843016 AAACCAGTTTTGAATGAGCAGAGTAGAAGGGGGTTTTGCAGGTGAGAA  
A\_16\_P01378894

GAACAGATGGCTAAAAAGACTTCTTTTACTTTTATATTCCCCGATTACTATCCACACAGG  
A\_14\_P116863 CTTTTCCATTTACAAATGATTCGTGACTGTAGTTTTTTGTTACCTTCTGTGCATCTG  
A\_14\_P119438 CTCACTGTCCCATATCACTAAGCAATTCACCCACTGCCTTGTAATATTCTTGAATTATTTT  
A\_14\_P130380 AAATCAATTTAGTAAACCTTAAAAACCAATTCACAAACCTCCCTCAGCAATGTGCTTC  
A\_14\_P117503 TTAAGGGAGAATATCACATCTGAGTTATTTAAAAAAGGCAGTTGTGTCTTCCCCTAACAC  
A\_16\_P36230897

ACAGCATCTTCAGACATTCATGGAACATTGTAGTATGTGCCATCATTATAAGGAGATACA

A\_16\_P19914778

CCTACTTGTGAACTTTCCATTAGTCTTTATACACATCCCTAATTCTCCAAATCTCTGGC

CUST\_7499\_PI426210822

ATGAAGTTCTGAATAAGTAAACCCTTAGCTACATCAGGCAGTTTATGAATGGTGTTTTTT

A\_14\_P112483 CAGTGGCAAACATTTTTTTAGAAAGTGATGGACATAGGAGATGCTGACTGCTTTTTAAAT

A\_14\_P127950 ACACTGAATCCATTGTCATCATATGCTTAATTTTTCTATCACATAAGCCCTCAGTGAAGG

A\_14\_P120759 TCTTGCCAGTATTACTCACTCCCTTATATTAATTCTTCCCAGTTCTCTTTATCCCTA

A\_16\_P02567280

GCCTTCAATACTGTCCACTCTTTATATTCCTTTACTTGCAGAATTTATAAAAGCCCCCAA

A\_16\_P16686258

GTGAGTCCTGGAACATAGCCTAATACCCATGAAATTGTTTTTTCACGCCTAATAGTGTC

A\_14\_P117923 TAAAGCAAGGCTGGAACCTGGCAGATTATGAAGCAGTAAGTATGATTATTTCCAGGATAC

A\_14\_P118967 ATAAACAGTCAGATTATGGCACATTTCTCGAAGAGAATGCCTTTGCTGTTTTCAACATA

A\_16\_P02151797

AGGGAGTGCATAGTAGACTATGTTGTTCAATTATCATGAGATTACCACATACTCTTGCCT

A\_16\_P03557598

GCCTGCTGTTAGTAAAAGACTGTCTATACCACTTACGTTTCCTTAAGCACCTATTCAGTA

A\_14\_P105375 CATAGAAACGATTTCCGTAAAACCTTAGAGCAGTTGCTTATTAGTTTAACTTCACCCCACT

A\_14\_P118728 GTCCACATTCACTTTTTATTGTTGAATAATTTGGGCGCATATGTGCCGGATAGTATACT

A\_14\_P114320 ACAATTTAAAGTGTCTGCATAAGGCTCTTCATTCTGGTGAATATTTTCATGAGGAATGGAA

A\_16\_P02182433 CTCCCTGGTAAGATGAGGATACATCTAAACTGGTTGTGCTTAAGATATTACTGCCTGT

A\_14\_P119267 ATCCATCAGGAGACTATTTACTCCACTACTGTAGGGGATACTGACAAATTAATCCATAC

A\_14\_P131134 GGTTTGAATTGGTGGAGGTTTCATGAGCAGTTTCCTCATTTGTGATTTATACATTGTAAG

A\_14\_P137989 TCTATATTTACATTTACATAATTAATTGAGATGGAGTAGTAATTTTGAATTCCATGTCAA

A\_16\_P02435458

ACCCCTCACTATTTTCATTGCCAATAAGAGAAATGACTTATTTTACGGGACTAATGCATCT

A\_14\_P102469 CTAGTAATTCAAAGATTACAGGTGTAGGCCTACATATTCACAAGATGGACAATGGTAAG

CUST\_7075\_PI426210822

TTTCATTAACTATTAGTACTTAAAATATTGACATGCTAAGTTTTTGTCTTCTCTTTTTT

A\_14\_P101187 TCCACAATTCACTTGAATGACTTGTTTTTATTGCAATAAACTGGGCTGAATTTGCTGCT

A\_16\_P02092412

ACAGAATGACACTAAAACCTTAAAGGACGGGAGTAGGAAAAACATCTATTAGTTGCAAATT

A\_14\_P119202 AATCAAATACTATACTTTTATCTCCAGGTAAAATGGATCGGTAAAATCGGTCCTTCTTTT

CUST\_5296\_PI426210822

TGAAAAGGAAACCGCTAAATTGTGCTGCTACTTTTCTTTGTCAGCTCAGATAAAA

A\_14\_P202472

GTTGAGTCTTTTCTTGGGTTTACACTTGGCTAAAGTAAAGGAAGCCAAACAAAACAAAAGA

A\_14\_P118348 AATAGAGAAGGACGTCTGTCTCCAAATTCATCCTGGATAACACTTCTGTAGAAAATTC

A\_14\_P110429 GGTTTATTGTAGAGGGGTCACAACACTGCCCAATTTCTAGTCATAATAAAAAATGAAATCTCC  
CUST\_2329\_PI426210822 TTTGTGGATGTCTGCCTGTGGAGTGGCACTGGCTCTGGTCTTTCT

A\_14\_P111507 GATTGTTCTATTTGCAATTCTTATGGAGGGAGTTATTATATTCTCCACTGATTGGGCAGT  
A\_16\_P18895876

AAGCCAGAATCCTTTACCATTAGATCTGACAACAGAAATTTACTCCATATCCCCTGATAG

A\_16\_P30952339 GGCATCCTTGTGTGAGAGCAGACACTGAATGCTTTGTTGCAACTC

A\_14\_P102217 CTAAATGTTGGGCTGAAAAAAGGATGCAGCCTATAAACAAGTATTTTTCCTGAAACCAAC

A\_14\_P103962 CTAGGAATCACTCACCTGCACAGATCTGAACGTAGTAATGAAAGGCAACATGATA

A\_14\_P102901 CAGTTAGGATGTATTTGACCATCTGTGAGTGTGTTTCAGAAATAATGGGTGAAGAAATCA

A\_14\_P123372 ACTTGTTCTCGTTTGTGGGATCATATCGGGGAAATGGATCATGGTCATTATCATTAAAT

CUST\_1869\_PI426210822 GAAACATGACCTCTGAGGGGCCTGAATTGTGAACTACGCTTGTG

CUST\_6937\_PI426210822

CTTTTTTCTAACTAACTGCAAAACAGCAATTTAATAATTTCTCTTTTAAGGGGAAAGG

A\_16\_P15244883

TGGATAGGCCATCTTAGAACTACTTAAAAAGCCATACGATTTAAGAACAATCCTACGATG

A\_14\_P112257 TTTCCCATCAGCAAAAATGCTGGATTTTCATACACGAGTGATGATAGGGATACCAATAATA

A\_14\_P115107 CCATGGGATCTAGGTATTCAGTCTAAAAGACAACAAAACCAGGTTGATATTTTCTTCAA

A\_18\_P16363449

TCACTGCTTTAATATTGATCCTAAACTCTTTTGCATATCACTGATGATGATCTCACAGGC

A\_18\_P11656870 CAAAAGGGCATGAGACATCCATAGATGTGAACTCCTTTCAGGGAGAGTATT

A\_14\_P121849 TTATATCATTCTTACCTTCTGTGTCCCCATCGCTGTAATCTAATTCAGTCTTCAAGAAA

A\_14\_P107081 TAAAATCCTGAGCACTTTCCTCCCACCCTCTGTATTACATGACATTCTTCTTCAAAA

A\_14\_P134400 ACAGTTATTTAAATAAACAAAATTTCTTTGGGTCTGACAGTAACAGAAACCTCAGCACTGG

A\_14\_P136475 CTATGTTGCCTCCAACCATCAATAAGTGATAACAAACAAAGGGGATTTGCAGTTAATTTT

CUST\_1259\_PI426210822

TTGTTTTGTTTTGTTTTGGAGAGAACCATAAAAGGCTAAGTTGATCCATTTAAAAATTC

A\_14\_P134730 AGAAAGATGAAACATGCTCTAGTTTTGAAATAGACACGGTTTTGATTTTTGCTGGTCTTCA

A\_16\_P17472845

AAAGCAGGAACTACTAGAGAAATGCTACTTCTTGACTAGATAAAAATCAGTCTTCACCCAT

A\_14\_P107517 CTGTTTAATACAACAATGATATCTTCTAGGTCTGCTTGAGAGTCAGTTCCTTCATGCCTA

A\_14\_P117910 CAGTTCGCCATGGTTTTTAAATCATCCTTCCAACCTGTATGCCTATGAAAG

CUST\_5223\_PI426210822

GAAATTTTCAGAAACAAGGTACACTGATTTTCTTACCCTTATTTCTGCTCTCATGACA

A\_14\_P103792 CTGCTAAGTGCCAAAATGAACATCCTTATTAACGATGGAGTTCTCATAACATTTGTAGT

A\_14\_P125914 CTAATATAAAAAGAACTACAAGATTTCAAGGGAAGAGGGACCACACCCATCTTCACAAT

A\_16\_P15531483

CAGCACACATCATTTAAAATTTCTTCTGACTTGTAATGTCCTAAGACCACTGTATAGCCTC

A\_16\_P18856123

AAGCAATGGAAATCATTATGGCCTAAGTAGAAACCAAACCTGAAACTTATTTACCTGACGG  
A\_14\_P123945 AAATCCATAGTTGCAAATACAGATCTTCTCCCTTCTCTTTGCTGGCATGTGG  
A\_14\_P128061 AACATCTATAGAAAATACACAGATGAGTGAATCGTGGACAGAGTTTACTATTTGTATGGC  
CUST\_6153\_PI426210822

ATAGGAATGGATTTCTCAATGGTATATTCTTGAAAGAAAGGCAAATGCTCAACCAAATG  
A\_16\_P02369988

GCCTAGTCCTTTATTACACCAAGATGCATAGAATATTCATGTTAGAGTTTCAAAGGTCCC  
A\_14\_P127579 AAAATTCACCTGAATTTTAAAGACGAAACAAAGAAGCTGTGTATCCATGGAGACACTTCAG  
A\_14\_P101043 CACCAACCTTCATTGTGACGGCAAGCCAAAGAGACCATTAAATAAAAAACCTGTAT  
CUST\_4863\_PI426210822

CGAATCTCCCATTTAGTCAGACACATTTTTCTAGTTTTTCTAGTTTTTCTACCCTTCAAAA  
A\_14\_P134715 AAATGAGATTTCTGGTAGCCGGTTACCTCTAAATCTGCTTACAGAAATAATCATGGTTTG  
A\_14\_P200422 AGAGGATGTTCTAAGAGACATCTGATTCTGAGGTTTTAAGAATCTATTTTTGGCAATGGG  
A\_16\_P03038462

GTCCTTGAATTCTGTCTAACTTGGGTAGTAGCCAATTTCTAACTCACCTTCAACTTCTT  
A\_14\_P105533 TTTGTCTCTGTTCTAAAGGTAACCTCGGGACCAAATGAAGATGTTTATACAGCAGGAATTT  
CUST\_4608\_PI426210822 CTTTTACGTGGGGGTTGTTGAGATAGGGGTCTGGCCCCATTCTCT  
A\_18\_P13685548

GCAATCAGCGTTAATTAAGAAGATGGGACAATAATTTGTGCATAATTCGGATCTTTTTCC  
A\_16\_P16287346

AGGAAAATAACTAGAAGAGGACTTTGCTATCAGACTAATTATGGACTACAATTGGGGTGC  
A\_14\_P115939 TGAGAACTTTAGATATTGCATAGCCACAAAGAAGGAGGTATCAGATTAAAATATGCAAGT  
A\_14\_P101416 AAATTGCCCATGGACTGAGAGACCAACTCCCTAGAGAAAAAAGGCCAAAAAA  
A\_14\_P123163 TATCTCCTTTCAACAAAGGAAACTGCTTTCTGATATCTGCAACATCCTGCATTTACAGAA  
A\_14\_P117055 AATTGCCATTAATTTTTCAACAAGTATATGAAGTATGGAAATCCTAACACCTGATTGACTT  
A\_18\_P22605318

TATTATGTGGGATCCCTGTAACAACCTGAATTTTTAAATGCTAGGATTATCCCTTCCCTAC  
A\_14\_P137282 CCTATTGAAAAGCAGCGTTAGCAGCCTTCCCTAAACTCAGAGTTTTAATAAAGGTGTGAG  
A\_14\_P134822 GCCTGCACTCATTCCCATGAATGCAGTTAATAGCCACAGAAATGTCACATTAAG  
A\_14\_P108107

CTTGGAGGGAGAAGACATCTTAAGAAAAAACTAATGTAAGAAATGAGGAAGTGAAAGTCG  
CUST\_7338\_PI426210822 ACCTCAGTGTGGACATTTCCATGTGTCCTCCTGAAACCCTCTGGT  
A\_14\_P110442 CTTCAGAACTTCCCTCAGAACTGGTCAAACCTTGCTAAATATCATTAAGCCATTGGAATC  
A\_14\_P114450 TCTGTTATGCATGTTGATTGTTATCATTATGATCATTCCAACACAACCTGCCTGATCTTG  
A\_14\_P126368 AAGAAATTTTCAGTAGAATAGCGCTACATTGCAAGAGAAACGGCACTTGTGATTTTTATCC  
A\_14\_P201547 TCCATAATGAAGATGGAAGAAATGGAGATGTCTCTCAGTTTCCATATGTGGAATTTACAG  
A\_18\_P12008112

CCCATTTACTTGTGCATCTCTCTACTCTTAGCACCTTAACTTAGACTCTCTTTATTTCCCA



A\_14\_P110813 ACTGGTTGTTGTGTATAGCATCAGTGACAACCTTTGTTTGTGGTTTGTGGTTTACCATCAAC  
A\_16\_P02743560

AAAAAAGAAGACACCAAACCACTTTCAAAGATGCATTTAACATAAAATCTGGCTATTCTT  
A\_14\_P102969 TTAGAATAGTCCTTATCAGTGGCAGAAGATCCTTCTGTAGTATATTTTCAGTGTGCTGCCG  
A\_16\_P15712148

ACACATCACTCTAGTTAGTGTACAAAGAGGTTTGAACAAAGATACCAAACGAAGCATCT  
A\_16\_P02099352 ACCATCGTTCTCTCCATCTCTCTTGGTCACTACAGTGGTGAGATCAAAA  
A\_16\_P41294399

AAAATCCTTACCACCCTAACTAGAATTCCAAAATCATTCCCAAGTAGCAATCAAAGTCAC  
A\_18\_P23921706

AAACCTACATGACCAGATATGATTCATTGGTAAAGAAGAGGATTAAGGCCAGAATGATGT  
A\_14\_P121264 GGTGGCTTAGTTAATGGGAATAAACCTTGGCTTTAATAGTGAATCAAGTTGTAAGGATGA  
A\_16\_P01922539

GAAACTCACACCTATAACCATCCTTCATCTACTCTATTGTTTCAGTCAAATCCAATTGCTC  
A\_14\_P108594 AGTTATCATGGTCATGACATCATAAAGAGTCCCACCTTGTCTTTCCTTAATAATAAGCA  
A\_14\_P108524 CTATCCTTGGGTAATGCTTTGTGACACTCTAAGGGCAATGATGAAAAATTAATATGGTC  
CUST\_6503\_PI426210822

GACAACAGATGAGCAATTTTGGTTTTATGGTTTACTCATGTTTGTAATTTTAAACTCTGA  
A\_14\_P119055 GGGAGGTCTGCATAGAAGTAGTGCTTCTGTCAAACAAGGACTTCTTGTTTAT  
CUST\_627\_PI426210822 TCCAGAGAATTTACCTGCAGATTACCCTCAAACATGAGACAGGTTTCAGA  
A\_14\_P126410 CTTCACTTATACTCTGCAATCAATAGTCACGTGCTTTCAGTATGTCCTTAGTGCAACAG  
A\_16\_P17992090

ACTGGAATGCATAAGATTAATGAAGCCTTTGGTTACAATTTAAAAGCCTCCCTATCAACG  
A\_14\_P105112 TGCTTCTACATTGAACACCTATTAACATCTTCTAATTCTAGTGTTTTGGGGGAAATGCTG  
A\_16\_P15803319

AAACAAGACATTGAACCTGTAATCAAGATCTCACATCCATATTCTACACACTCTGACCAT  
A\_16\_P01234803

GGCTCAGAATAATTACTCCACAATATTCACATGACTCTTTTACACCAGGAATTCATCTCC  
A\_14\_P109660 GCCTTTGTAATCCTCTTAGATGATGGCAGCCTACTTCCCTTGTGATTAAGAAGATATAACA  
A\_16\_P20245485

TAAGACCATGAATACCTCCATAAACACTAACCTACCTCTCATGATAAATTCTACCACTGG  
CUST\_8877\_PI426210822

TGTCAGGGAGCCAACCTCACTTACTTCTTTAATCTAAACTTATGACCTAAAGCA  
A\_14\_P116196 AGACCATTTTATTCTCACTCTCCATTTACCAGGCTCTGCAAGAGAC  
A\_14\_P130234 GGAAAAAGCAAATTTAATGGAATAATCCAAAATACATGAGAGCCATTTCCATTCAAT  
A\_14\_P117995 CTAAGAAATCAAACACTCACTCGATTGCACTTTATCAGACAAATCTTGGAGCCAACCTT  
CUST\_7551\_PI426210822

AAAAACAAAGTGTCATATTGGGATTCATCTGTGGCAGTTTGCAGAACATATCAGG

A\_14\_P139579

CCCCAGAAAGGAAAATTCAGGAAAACAAAAAGAACTCAAAGACAGAAATCTTCAGATT

A\_14\_P123069 TGCCCTTCATCAAATTATAGAAAAGTAGCATAACAAATAGGCTTGAGTTTCCTCATCTCCT

CUST\_504\_PI426210822 GGCCTCTTCTCACACCAAGGCTGTCTAGCATTAAAGACAGAAGTGT

A\_16\_P19340105

AAATCTGCACCTACAATAGAAATGTCATAAGTATCCCCCAATGGTATTTTGAATGACCC

A\_14\_P200733

CTACAAAAAATCTCTAAATGGGAGGAAAAAAAAAATCCCGTAAGTTGTCTGGGCCAAAAG

A\_14\_P103212 CTGATGGCTATGTGTGTTAICTCTATTTCTTTATGTTATCCTGGATTACAGAGCCATAGA

A\_14\_P138952 TGTTTTTATTTATAATAAAAATTGTTGGGGACACCTCAGTGCTAGTCTCTGGTGTGTCTG

A\_14\_P129540 CTTATTTTGTGAACTTGTGCTGGAAAGAAACAACAGCACCCAAATAAGGATTTCTCTATT

CUST\_7718\_PI426210822 CAGACTGACAGTCAGATATGGAGACACCAGGGTCATCTTCAGTTTAAACAA

A\_16\_P18547717

AAAAATGCCTCTCAGAATCATAACAAGTCTTAACATTCTAGATAGTTGTAATGGACCCAGA

A\_14\_P115565 CTGGCAGGATGGTAACATATGTTCCATAAAGAAGAGGCAGTGCATCATGATTAATATGTA

A\_16\_P18057235

GCCTACAGCAAAATAGAAAAAATCCAGTAAAGACTCCATAATTCCAAGATATTTGTGC

CUST\_6252\_PI426210822 TGAGAGGGAAGGTACCTTGTAGAAAACCTCTAGATTTTATGAGCTTGTTTCCC

CUST\_4403\_PI426210822

AGCTGATTTTTTCAGCATCCCTGGTTTAGCATATGTTGCATTATGTATCTGGGAAAGTA

A\_14\_P104029

CTTTAATTGCAAAGAAGACAGAGCCCTGAAAAGGCAGGCTAATAAATTAGAAATCGAGAA

A\_14\_P111719 ATCATTTAATATGCTAACAGGTTAAACAAAGGTTTGTATCCTTGGGCCCATTAGTCACAA

A\_16\_P00315982

AAATTCTTCGCTTGCTTTTTCTAATAGTCAGGCTAAAAAGGAACTTTTCACAAAGGAGGT

CUST\_106\_PI426210822 GAGTTATTACCCTTGTTATGCTGCAGGGATTGTTCCCTTGTCAGTGTGTAAGTT

A\_14\_P121317 CATGAATCATTACAGGATATAGCCAAAGTAATGTAACCTTTGCCCCGTTTATTAAGGCT

CUST\_3200\_PI426210822 TTTATCATGGAAGACCGCACAGGCTAACACCTGTTTTCCAGGCTA

A\_18\_P22841400 AGTGCTGGGACAGATTACAGCCTTCCTTCACTGCCGCTTTCATT

A\_16\_P16812267

AAAAATCTTTGAAACCTTGAGCAAAATACCTCCCAAAGAACAAAAACCAAGTTGTCAAGT

A\_14\_P100573 TTCCCAGGGTAGAAAGACAGATTGATTATCATAACCAGCGTTCTCACTAATTACTGTTAC

A\_14\_P130927

CAACAAAAATACAAAAAACATTTACAAAGATGCAAAACCAGGAAACAAGTTCATTGGAG

A\_14\_P129676 ATCATGGAAATGCAGGAATGCAGATCTGCAGAATTATGGAGCAACAGTAATTCTACATTA

A\_16\_P03652766

AGCAACCAAAGTCCATAATATCCTGCCTAAATTGAAAATGAAAACCTTGACACCTAGACTG

CUST\_7828\_PI426210822

CCAGAAATAGTTAAATAAATGCTGATATAAATGTTACGTTCTAGCATTTGGGAATTAACA  
A\_14\_P201389 CTAGGAGTAATTACTGGGAATTTGGTTTTATAGTCTGACCATACACGAGGAATTTGATTT  
CUST\_515\_PI426210822

GGTTTGTAACCTTTATTAAAGAAACCCACACAGAGTCAAACCTTCTGCACCAGTGAC  
CUST\_720\_PI426210822 GTTTTGTTTTGTACGTCATTGTGCATTTGAGTTACAGCAGACAAGGGCCA  
A\_14\_P106972 CAGTAGTTATGTGAGGAGCACTTCATCCTCTTCTGCAGGCTTTGACTACTC  
A\_18\_P14135239

GGGTGGTCTCACTCGGAAGACACCAGTTTTCTATTTGATATTTATTATTTTCCTAAATCT  
A\_16\_P33682286

AAAAATTAACCTTGTCTTCACTGTTTTGCTGATTCTAATACATACACAAACATCACACCCA  
CUST\_746\_PI426210822 CAGACTTCTGTTGTAIGATGTAGAGGCCTTGTTTGTCTGCCCTTTG  
A\_14\_P130293 AATCACAATAAACTGTTAATGCTATCCCAAATTTTATTATAAGCAGGCCCTACAGACTGC  
A\_14\_P114220 GAAGGAAATATCTATTGGGTGATAACTTTGTTGATGATGCCTTTGAGGAACAGAAGTCT  
CUST\_836\_PI426210822 CCCACTTTTGTGTTAAACTTCTTCATGGCATAAGCTGTTAATCTGAATTCGGTCC  
A\_14\_P104485 AGTGTATGGTAAATATGTAGGCACATTATTTATTGCTATTCTTGCCAGAAGGCAAGGGAT  
A\_14\_P121850 TACAATTAAGGTAATTTGGGTTGGCTAAACATTGCACAAATTCCTCAACTCCAACTGAAACC  
A\_14\_P123887 GTCCTACATTTTGTAGGTTTGGGAATTATAGTTTACAATGTAGCCAGGAAGAGGACTT  
A\_14\_P137583 AGAATGGATGGCCCCTAGATGACATTATGATTTTCATAAATATGGCACTGTGACATCATAA  
A\_16\_P19905744

AAATACGATTCCAATGATCTGGTTTAAACAAGACCTTAACTAGTGCCTAGAAGCAAAAACG  
CUST\_1485\_PI426210822 GTGGTTTGCTTCTCTCTCCTTCCCTTCCCCCTAGAGTATAAGAAGAAGT  
A\_16\_P18456777

CAGAGTGATTCCCTCTTATTTTACAACATACCAACAAACGTAGAGATAAACTGAACGTGC  
A\_14\_P121244 GCTATAAGAAAATCATCACCACAGAGGGGACTCAAAGAAGTATTTAGTGCATGCTTATTT  
A\_16\_P39046630

CAGACAAACGATTCTTCCATTTCTAAACCATGTTGCTAATTCGAATCTTCTACACCACTA  
A\_14\_P112729 CTAAATCATTGCCAAGGGTATATAATGTCTACAACCTAAATGTAGTGGCTCTGACACACA  
A\_16\_P00121610

AGGCCTTTCCTATTAAAACAGATGAACATAGTTGCCTTTATTGATTCAAGCAAAGACCAC  
A\_14\_P106535 TTTGATTTTGGCTGCAATTAGATTATCTGGTAAAATTCTAGCGGGTTCATGTGGAGTAGA  
A\_14\_P124537 CTGTGAAGGAAGAAATATCCGATACAGAACATGCAGTAATGTGGTAAGTATAAGGTTCTG  
A\_14\_P106619 AGGAATATTTTGTAAACTGTAAGGTGTTATTTATAGATGAAGGGCTACCACTGTTACCCA  
CUST\_7001\_PI426210822 AGAATCTCTTTCCTGCCAGAGCAGTCCCTTTGTCCACATGGGTTTT  
A\_16\_P00798521

ACTTCTACCATGTTAAATCCTCAGTTCTAGAAAAGTGTCTCTGAATCAGTAAAATCCCC  
A\_14\_P136981 AAACCCTCACCAAAGACTTATACTTGAATATTTTTTCGTGAGATCAAAGTCCCTTTGTTTTCG  
A\_18\_P22840670 TAAGAAATGAGCGGGGAGGGGAATCACTTCTTGAATAACCACTGAACAAAC  
A\_14\_P120314 TTAATGTTTACAGATTCAAGAAATTAAGCATACGGTCACGAGAGTGCAAAGTTCTGTGAA

A\_18\_P14134574

TCTAAATGCTAAGGAAATAAACACAATTTTATTTATAATCTTATAGCCAAGTATGTTTCA

A\_18\_P22840168 GTTACAGGGGTGCACTATGATCTCTCTCTGGAGTTAATAACCATATGGATCTGTTTTG

A\_14\_P109163 TTTTTTCATAGGTTGCCTGTTCCAAATTCTATGCCGTGGAAGAAGTTAAATATCCAGAAT

A\_14\_P138312 GACTCCGTATGGAGATGCTCTTTTTTGGAAATTCTGCCTCTCTTCCCTTCT

A\_14\_P138811 CTGTGCACATGTGGACTCAATAAATGTTTCATTGGTGACGAGAAGCCT

A\_14\_P113990 CTTCAATTTCTTTTGTCTTCCAAACCTGCAACCTGAAAAACGAACAATGATTTTCAGAAT

A\_16\_P02371433

AAATGGGTTGTGCCTAAATATACATTCAAAAGGTGTTTACCTGATTTACCTGACTCACAG

A\_14\_P116037 CCCATATGATGCAGAAGAATTTCTATGAGCAGAATTGGGCTTTTCCTTCTCCTTCTTAAT

A\_14\_P132364 GTCTTTCTGTGGAACATCATTTCCTGACTGGGATTCCCTGTGATTTTTCTCTTG

A\_14\_P137594 CTGCTGGATTTTAGAACGCTGGAAAATCTGATGTTGGCAATTAAGCCAAATTTATTCATT

A\_14\_P121579 TAAAGAAATCAGTCCTTCCCTTTCCGACTTAGTCCTCGGGAAGAAGTTTCAG

A\_14\_P109857 AAAGAAGGTCATTTGCATTCTCTAATTCCTTCTCCAATCTCCCTATTTTCTCAAGCATT

A\_14\_P202119 CTTTCTTCCCTGTTTTTAAAGATCTTTTAAAATGTCTAGAGAGACCCTGGGATCCAGTG

A\_18\_P15913522

AAAACGGATCCATGTTAGTCCAGATTTAAAACGTCATTTTAAAGATTTTATGTTTCAGGCCA

A\_14\_P128085 GAATCAGTTAGCATTACAGTAATACTACAGGATAGAAACCCCATGGGTGTTTTCTTGTTT

CUST\_7708\_PI426210822 TGTTAACTCATTGAGCCAGGTTATTAAGAACCTGTGCTCACCTCTGACAC

A\_14\_P100704 TCTTTAATAAACAGACAGTCAAGAAAAGACACCCATGCCACTTTGGAATCTCAAAAACAA

A\_16\_P16697306

TGCAAGTTGAACATCCTTCATACTCCAAATCAGCAACTACACTTATAGTATAGATTGGCG

CUST\_3567\_PI426210822 GTTCATGGGAGTTGGAACAATGGTGGGTCCAATGGTGGATGAATA

A\_16\_P16191333

TTCTTCTTGCTGTCCATTTCTAAGGATGAGTAAAGAGTTAACGTATTGAACTTGAAAGG

A\_14\_P138114

CTGATCATTTAAAAGTTTTTAAAAGCCAAAATGTGGAAAAGGGAAAGAGTAGGAGTGCG

A\_14\_P109980 AATCTGGTGAGCCTGTATTGGTATAACTCGTATTGTGAGGCTTTTGAGATATCTTGTGAC

A\_14\_P119070 AAGGTTAAATACTGTGGCCAGTCTACTAATGATCAGTTCTCATAAACAAATTCAGAACA

A\_14\_P105087 CTTTTGCTCCAGATGTATAACATAAAACAGTCAACAGATACCAAGGAAGCAGCAGC

A\_14\_P137131 ACATACCATTGCCTTTATTTTCTTTACGTTTGATATCCATTTCTTTGCTTTCTTCCAGCG

A\_18\_P14791255

ATGTGGCAAAGAAATAGAAAAGTCTCCACTAAACGTTTCATTTAGACCATCCTTGTGAAC

A\_16\_P15397914

GTGACTTCTCCTTTCACTAATCTACATCACACCAGAAAAAATGAGATAGTATTCCAGGC

A\_18\_P13125537

AAAAAAGCACAAGTATGACAAAGCAGAATTTGAGATCTCTCTCATCTTTTCTGAGCCTC

A\_14\_P132229 ACTCGTTCTATTTCTGTGGTGCTTTCTTAAAGAAAGGCTTTATTCAGAAGAAAATGACTT

A\_18\_P22840881 GTTCAGAAATGTCACCTCTGTCATCCAGACAGGATGCTTCACCATAGG  
A\_14\_P119308 GTCTGAGTTTCACATTTGAACCAAATAAAAATGCTGTCAAGAGAAAACCTCTCCAGTGCATT  
A\_14\_P107547 CGTTATAATGGATGTGATGCCTAATTATATCTACAGTTCAGAGAGTCTCATGGGCTATGG  
A\_14\_P128838 AATTAACCATGGTAGAAACCTGTGTGTTAATATGCTGAGGGAAGTTGCCAATAGTGAGAT  
A\_16\_P35554637  
TTGAACCCTAATCTTAATCCTGAATGGTCATTCCAACCTACAGATAAACTACCAGAAATCC  
A\_14\_P109394 CCTACATCATTACATTTTTTTCTGGGTAGAGTTTACTGAAGAAGGTCTTCTTCATGGCGA  
A\_18\_P27177955  
AAAGGGTATGAGGAGATGCAAATATTAGCCATCCTTCATTTTGTTCAACTATTGAACTGC  
CUST\_5001\_PI426210822 CATCTTTGTGCGCAGCCTGGTTTGAGCTGATCTGCACATAAACAG  
A\_18\_P22840474 GTCTAGCAGTTGTCCTTATAATAACCGGACAAGGCGGGAGAAGTATTATC  
A\_14\_P129320 AACATCAATTTCAACACTAATTAGAGAGGGAAAAAGAAGAATTTAGCGTCTCTTTGGGGA  
A\_14\_P108850 GTTTATTACCATGGTTACAACTTTTCAGAACAGGCCTCTGAGACATTGGACTGAG  
A\_14\_P124636 TTTGTTTGGGGTTGGTAGAAGGTGTTATTGGGAAAATTCAACTTCATTCAGGTATGTTT  
A\_16\_P38038979  
TCCTTAACCTTACAATCACTACATTAATCAACTCTCACAAGAAGTTCATATCCATATCACG  
A\_14\_P126605 AAGTAGTTGCCTTTGGTTCATCCATCTGCTAATAGTTCACAGAATACAGTGAAATGACATAG  
CUST\_4300\_PI426210822  
CACTGTATTTTATTTGAGGATAATAAGAAAGGGTTAAATAAATTGTATGTTGAGCACCT  
A\_14\_P122696 CTGCTTTTTCTCTCTAGATTATTACACATTCTGAATTGGAAGAAACATTACAGCCCTCCT  
A\_16\_P16191707 CTCATTCAAAGCCAGAATCTCTTTCTGCCAGAGCAGTCCTTTGTC  
A\_14\_P102262 CAGCAGAAATTAAGCAAATGATTGGCACAAACAGAAAACAATAACACCTCTAGCACA  
A\_14\_P119839 TTCTTTGGGATGCTATTTTCAGCCAATCTGGACACTTCTTTATACTCTCTTCCCTTTTTT  
A\_14\_P123570 ATGTGTGCAGCATGAAGAAAGTATTAGTGCTTCTCAGTGTTCTCAGTGTAATTTCTATTT  
A\_16\_P19048841  
AAAAATATCCCTTTGATTCCAAAAGATTGCCTTACTAGCAGAAGAAATGAAAATCCTCC  
A\_14\_P109037 ATCCTGAGGAAGGAGGGAGTTTTTAACTAACTTCACACACTATTGAGGAAACTTC  
A\_14\_P114005 TATATGAGACCAATTCTGTTCCAATTTGGCATTAGCAATCCACAAGAGCATGTTAAGTTC  
A\_16\_P02762222  
TCTCTGATATTCATCTTCTCGAGCAATAATAGCATCTTTGTCTAGGGAAAAAACATCTGG  
A\_14\_P101978 CAAAGGGCAGTTCAGGAATGACACTATCTACACATACATGGCCATATGGACAATT  
A\_14\_P120757 ATTAATTGACAATGACCCAAATCTCTTCCACAAGACTTAAAACCAAATTCAGGGACAAAT  
A\_14\_P113980 GACACCCTTAAGATAGCAAAGACCATCAGTCAATAGGGCTTTAAGACTTTATCTCTAAAC  
CUST\_3457\_PI426210822  
CATGTACTCCAGCTCTCTGTGTATGTTACACACACACACGTTTTTTCGCATAAAAC  
A\_14\_P133574 GGAACATGCTGAAATTCACCACATTACCACAGTATCATTTGTTTTCCCTTCATGTAAAGT  
A\_14\_P102331 AAGGCTATGTAAGGTAGATTGTATTTTCATGATGTTTCAGTGTTCTGACCATACCATTA  
A\_14\_P117723 AAAGTTTTTCAACTGGTTGCAAAGTGCCAGAATATAAAGAATTGGCTTAGAATAGCACCT

A\_14\_P132744 CATGCTACTTTCACTGAAGTAAGACATGTTATCCTCATCTTTGGAGATACTCATGACAAC  
A\_16\_P16435578

AATACCAGAGTCGTCTGTGTTTAAAACGTCATCTCCACTATTATGCACTAACCTGAAAGA

A\_14\_P120862 TTAGAGAATGCCACGTGAACACAAGAAAAAGGATGCGGCAGGAGTTAAC  
CUST\_4756\_PI426210822 AATGATCTCAGTTTAAACCTGCTGTCCCTATTCCTCTGTGGCCTATTCCTG  
A\_16\_P19055329

AAGAAATGCACTCATATGGATTTTGGAGGAGAATAAAGACACCATGTATTGCTAGTAGGGG

A\_14\_P130881 GGCAAAATTAGCAAATCTTATGCAATTTCCCATCAAAATGTCAATGCTAATCTGTCTAGGC  
A\_14\_P132878 GAATGAAAAATCACTAAGGTTACGACAATCTCCAAGGAGGTCCTTTATAACAAGTAT  
CUST\_3998\_PI426210822 TGTGTTGCTGGTTTGGGGGCTGCAGGGGTCTGCAGAGTGCCGCAAG  
A\_16\_P21495452

AATATGTCTCCTTTCTCTAAACTTTCTAGACTCCTGAACTTTTATCTACCAAGCCCTAGC

A\_14\_P128265 TTTCAGACATGGTGAAACTGAATAAAGCATGTCAATTTGCTCCTAGATAGATTCATTCTAT  
A\_14\_P102016 TGGTTGAACAAGAGTATTTGCAGGTAGAAGAAAGCATTGCTGAAAGTGCTAATACCTTTA  
A\_16\_P16191383 TCCAGTCTGACACAGGCTGATCCTTTCCCTCAGGACCCATCCTT

CUST\_3069\_PI426210822 GATTCTTTGAGCACCCCTGGCTGTGTGCTGCTTTCTGAGCAAGTCT

A\_14\_P109445 GCAAAGAAACAAGAACTTCTGGGATTTATCAAAGGATGATTCATTCTTGGTTTTATGGG  
A\_14\_P109296 GAAGAGCCTTTCATAAATGTCAGGATGAACAGCAGTGATGAGTCAAACAAATTTACTCTC  
A\_14\_P105323 ACAATTAGACAGGACAGTTATTTCTGTAAATTAATTGGGAACAAAGCCAGTCAGCCCATC  
A\_14\_P115680 TGAAATGCACCTATTCAGTCTCTGGAAACCCCTATCTTTTTTGGTATGTTCAATACCC  
A\_14\_P108789 CACATTCTTCTCGTGATGCTCAATCCTGGTTTTTCCATTTTTGTTTTATCATTACCTGTGA  
A\_14\_P106737 CTGTAGGCATGAGGAACGTTTATATTGGCTCTTCTGGGTGTATACATTAAAAGCAAAATC  
A\_14\_P125470 GTCTCCGCACTCTTTATCCATTTGGTTTTTCGATTTCCCGTTTTTGTTCCTTATTTC  
A\_14\_P121193 AGGGTTTCAATGTGTTGTCCCCAAAAGAAATTGTCATACGGAAATAAATTACATCAAAT  
A\_14\_P122437 CATCTTAAAAGCAGAGGAAGCAGTGATGACTTACGTCAAAGTGGTAATAGAGTCATATTC  
A\_14\_P134573 TGTGCTTGTCACCAGGAAGATGAATGTGACCATTTACATCTTGCAAAAAATACTTTTTTA  
A\_16\_P20148083

TTTTGTCCCTATTTCCACTTCAAAGTATACTTGCCACAAAAAACTACACTGCTTTCCTT

A\_14\_P101678 CAGTTCATGGATTCAGATGTCTTTTAAAGCATTATGCTATGCAAGAAGCAAAACAACAGTT  
CUST\_8821\_PI426210822 GACATCCCCCATCTCTACTTGAGATCGCCCAGTAGGAATATTTTGA  
A\_14\_P119785 CTTAGTTGGTTACAGGGTGAGTGAGATAACCAATGCCAAACTTTTTGAAGTCTAATTTTT  
A\_16\_P02965117

TCCAAACCTCTTTCTCTAAATTATCCTTCTCATCCCTCTTATATTCTTGCATGACACCAT

A\_14\_P120891 TCAATCAATTCTACAAAGGTAGAAAGGATCTTCTGAAATTGGCCAGCCAAAAATACATGT  
A\_14\_P105191 ATATTACATTGCAGTGTCCACATGAATAAGACCCTAACTTACCTCATATTTCTCCTCCTT  
CUST\_8158\_PI426210822 GAGGGACTGATGTCACCCCATGTAGGAAGACAGATGAGGAGCCAG  
A\_16\_P16896032

ATCTCAGAAGCGTAAAGGATTGAGCATTTTAAATGGGTATAGGATCGTCAAATGAGTCATT

A\_14\_P135348 TTGCCCTACTTTCTTACTGAACCAACTGATAATTAACACTCTAACTTCTGTGTTGCACTT  
A\_14\_P135790 CTGCCTTGGACTGTGTTTTTCCCTCCATAAATTATGGCATTMTTCTGGGAGG  
A\_14\_P106285 TTGTAGTTTTAGCGCTTAGAGGCATTTAAACAGCCTCTCTCCAGACTACTT  
A\_14\_P132036 ATGCTGGTTGAATTAGATCCTGACTGAGTTTACTTTGTTATACTGAATCTTCGAATTGCC  
A\_14\_P200238 TGCCAAGCCATTTTCAGTATTTTTGTTTATCGTGTTTACTAAGAGCCTACCCTTTAGACA  
A\_16\_P17402204  
TTGCACTATAGTTAATATCCCACCATAGATCCTATGTCAACTGTCATCTCTGATCTCAGT  
A\_14\_P114350 TTGAGAAAAGAGGAAAGGACTTGACCGGTCAAAACTTAAACGTGAGAACAATCTAAAAG  
A\_14\_P121900 CTGCCTTTGAGGAAGAACCAAGAATTACAAAAACACATACTAGGAAGATTATGCAAAG  
A\_14\_P200879 ATCAGCACAGCAAGCACTGTGAAAGAATTGTTATAAAAAGAGAGAAAATCAAGTTTTATC  
A\_18\_P10017650  
GGTCATTAACCTCACCTTTTCTATTTATACCTGTGCTTATCAGTCTTACGAACACTACTCA  
CUST\_8595\_PI426210822 CATCCATAGAGCATAATGAGGATGGGCTTACTCGCCCTATGGGCC  
A\_18\_P22841288 TTTTCTCACACCCAGGTGCTTTTACAGAAGTCCACATTTCCCTAT  
A\_14\_P137854 TTTCTCCATAACATGAATCAATGCCAAGAGTGAATTGTGAAACACACTTTGTTTTTCACT  
A\_14\_P101598 TCTGAGACAATCAGATTTTAAACAAGCCATTCAGGTAGAAAGTTGCTTTCTTTTTTGGTT  
CUST\_9618\_PI426210822 CAGGGCGTCTGGAGCATGCACACATGTCCTGTGATTCTTTATATCT  
A\_14\_P104284 TATTGAATGATAACTCTAGCATGTAGAACTAAGATCTTCAGGAAAGCAGCAGTGATGGCA  
A\_14\_P125027 GGGTGAACCAATATTACCAGCAAATCCTGGAATTCCTGAAATAATAAATAAAATGAACA  
A\_18\_P12617597  
AGGCAGAGAGGATTTATCAATAGAGGCTACAAAAGTAAAGGATTTACATAGGGTGTAGG  
A\_16\_P03706304  
AAGTATCACACACTACAAGGTGAGTTTATGATTGGTTTCATTGTTGTTGTTTCATCAGAAAC  
A\_14\_P202481 TATAACATCCATAGTTGATCGAGAGGTCCTCTTTCTTCATTGTAAGTGGACTTCATGT  
A\_14\_P109762 TGCCATTGATTTGCCTAAAAGTGTGTCAAAAGATTTTTTGTAGGATAACTATGGATGTCT  
A\_14\_P113521 GGGAAAGGCAAGCAGAAAGAGTATCCACTGTTCCAATCTGATTTTATTGAAAAGGAAA  
A\_14\_P120637 AATCAGAAACCCAGAGTGATGATAGTGATACAGTGAGTATTGCACTTTTGGAGCTTTTAA  
CUST\_4458\_PI426210822 CTGCATTACCAGCCAAGGATGTGATGCATAGTATTCTGGAGCTCCTTTTTAA  
A\_14\_P106293 ACATTTTTGTATTTGAAAACATCAGATATCCAAGCCATATTACTATAGTTCTCAGAAACA  
CUST\_2176\_PI426210822 TATTGGTACCTGTTGCAGGAACTCTTGGCACCTGCATACCCACTG  
A\_14\_P120509 CCAGAGGAACTCTGTTCCAAGTTTATTCAATGCTATACAAATCCTGATAGATGTTCCCTAG  
A\_14\_P109836 CTGATCCACCCTGGGTGATTATCATTCTAGTTCAGTTACAATTCTACCATAACAGCATAT  
CUST\_9011\_PI426210822 GGGTTCGTAAGTAAAATGGCAAAGTGGTAGAGGCATCTATGCTTCT  
A\_14\_P137845 CCTGTTGAAATGAACAATTGTCTGCCCCACAATCAAGAATGTATGTGTAAAGTGTGAATA  
A\_14\_P111801 CTTTTGGGTTTCTAAGTAAAATATTGGAATAATAAAAATAAAGGAAGTGACGACGGCGCG  
A\_14\_P108680 CCGTTTCGTATTCCTTACGGCCAGATTACTATTATTTACTTGAAGACAGCAAAAAGGAT  
A\_18\_P14137061  
AACCGATATCATTTTTAGGGTTTGGTTTCCAAAGTTGGAAATCAGTGTGTTTTAGATCAG

A\_16\_P18547480

TGTGGTTAAAGCCCTAATAAACTGTTCAAGATTAAGTGGCATACAAATTCAAGCAAGGTG

A\_16\_P17338943

AACCCTGCCCTTAAAATCCATTGACCCATAGCATTAGAAAGACTTTTTGTGAAATTTAGT

A\_16\_P16061323

AAAATGATCTGTGTTGGATTAAACCATTCTGTTTGTCTATCAAACCTTATGCTAGGGCC

A\_14\_P102998 AAAAGTTGGGAGAACTAACCAAGGAAGATGTGATTCTACTGCAAGCCCC

A\_16\_P16174951

AAAGGCAAAATCACTTTTATGGCTTTAATCCCAATAGCAATAGTGCAACTCTATTCCCAG

A\_14\_P110514 TTAGTTTCCAGATGTTACTGTTGAGAACATATCAAGGATGTCAGAACTAGGAACAACCTGT

A\_16\_P16773851

AGGCCTAGTTTAGTAACCAACCTCAGAAATTCCAAATTA AAAACTTCACTTTGAGATCCA

A\_14\_P104403 CATATAACTTTCAAGAAACAGCAGTTCTATTGCTATGGTCCTGGGACTTTAAGTTGCTTT

A\_14\_P139389 CTTGGAGTCATAATTTGGATGAGAAATCACTTTTTCTACTTGGTATCCGGCTCCATAGAA

A\_14\_P135853 GCTCTAAACTTGCTGTCAGTATTTAAGAAGGAACTTTCACGCAAAAACCTGTGTTTTTCAT

A\_14\_P124249 ACTGGGCTAATAGTTCAAAAAAGCATAAGGTTTTCTGCGGTTTATAACTTGAGGACTTTT

A\_16\_P17716579

TCACCCAATCATATACTACCTCAACAAGTTAACAGAGTATGATACAAACCAGATTTGCAC

A\_14\_P135429 TACCTTTTATATTTCCACAGTGAGTGTAAGATTCCGCGTCTGTTCTATTTAGCATG

A\_14\_P201966 CTGAGCAGATCGCATCAAATTTGGTTGTGTAAACACCAGAATTCTTACTATGAATGGTAA

A\_14\_P134481 AATGTTATACATTTGCCTACGAGTTTTATAAATGATGTTGCCTTCAGAATTTGTGTGAAG

A\_16\_P35035585

GCAAACAAGTGACTGATTTTGGCATCAACTGGTAGGATTTTCAAACCTAACATCATTCTTG

A\_14\_P111709 ATTTGCCTACTGGCTGGGAAGAAGCATATACTTTTGAAGGTGCAAGATACTATATAAAGT

CUST\_8095\_PI426210822 GATGGGGAGCACACAAGCACAGTGGGAATGGGGCTGAAAGAGGAG

A\_14\_P130770 AAAGAATTTACTGTCAACCTTGTGAGGGGCCAGGAATCCTAAAAATGACAGGATATAT

CUST\_3463\_PI426210822

GCTTTTAGACATTGAGAGAGGTGATTATGAAAGTACGATAGCTTGCTCACCACC

A\_14\_P126588 TTATGAACATCGTGGGTATCAATAGGAAAAGTCTAAATAACTCTGTGCTACACTTCCCTC

A\_16\_P16663158

AAAAAACTCCCAGGAGATTAAACAAGGATTAGGAAAACCTTCCAAACCTATAACATTCCG

A\_16\_P17392536

TCTATTTTTATCCTCCATGCTAACTCTACAAACAGGTCTCTCTTTAAAAGGTAACCTCCAC

A\_16\_P00432171

GTAACCTGGAGTTCTGTCAATTGAGTAGTCAATGTCCACATTCTTACCCAAAATGCTATTCT

A\_16\_P02549885

GTTTTTGAGTTTGGAGCAAGAATACATCACTGAGTTCTACCTTTGATAGATGCTAAACCGC

A\_16\_P00403341



CCTCTTTGGTATCCTGCTTATCTAAATCCTATACTTACAGACATCCAAAACATTGATCCC  
A\_14\_P115865 AGTTCATAATGTTTTCTAGTTTTCTGTCTTCTTTTGATACTCTGACCACTGCTTTGCATGA  
A\_16\_P01584689  
TTCCACAGATTTTAAACACAAGTCAAGGAGTCTTATAGACCATAATTCTTTCATGCCCATC  
CUST\_750\_PI426210822 ATTCCAAGACCAGGGTGCAGTGAATGACTGAGATCCCAAGATGAA  
A\_14\_P112599 GCTAGAGAATTTTTATCTGAAGAGGTGCCAAATTTTTCTCTCTCCGTTGAAGGACTATAT  
A\_14\_P122233 CTGCTGAGAAGAAGCAGAGATATTCTTACTCTTGTGGATTTTATAGTGCTCGTGTA  
A\_14\_P139147 CCAAGCATTACTTTAGTAATTTAGGACTGTCCCCAGGCAACGAAAGTATTAATGACAA  
A\_14\_P136032 AAAATGTTTTCTCTTTTTGTAGTTTTCCCTATCTTTGTTGTGGTGTATATCCAGAGGG  
A\_14\_P118082 CTAAACGTTCTTTCATCTGGGCCATTCATAGTTTTGCTTTTCAAGCAATTCCTGTAGTT  
A\_16\_P37522113  
AAAAATATGTTAGCATTTCAGTTGTATTTAGCCAGAAGAATACCAAATGTATCCAAGTCCA  
A\_14\_P129427 AAAGGGTCTTTGTCAACATTCCTTTTTCTTTTTCTTGTTTTTGGTTATCCCAAGGCTC  
CUST\_6290\_PI426210822  
AGAAATGCTGTTCTTTCAGTTAACAGTTGTGTTTTTTCCAAGAAAAAAGAAATACAAA  
A\_18\_P22839412 CTGCATACACAGCATAACAGACGTCGGGAGGCAGAGCAACCATGTC  
A\_14\_P128790 ACAACTCCACGAGGTGAAAAATATTCAGTAACTTGTTTACATAGCATTGTGTAAAGACT  
A\_16\_P01958749  
AGTCATTTGCCCAAATATGTTACTATGATATAGGCTGTTTGTGAACTATCTCTTGCCTT  
A\_16\_P02240684  
AGGCACATGAACAATTAACAAACTATTAATTGGACAGTCAGTGAAAATACCACAGACCTG  
CUST\_7203\_PI426210822  
AAAGAAGTGACACAGAACATCTAAGGCATATCATAAACCAATTTCTGACCCTGATCTC  
A\_16\_P16913859  
AGTTCCCCTAACATTATCCACATCTTCATAAAGATTAAACACTCCATTCATCTGACTGCT  
A\_16\_P18274917  
CAACACTGTCTGTAAACCATATTTATGCTACTCGTACATTATAGTTTAAACCACTGAGG  
A\_14\_P113656 GGTTGCAGGCTGAGTTGAAGTAAGCAAACCAGATAAAGATGTCAAAGACCA  
A\_14\_P129803 ACCAGAAAGTAAGTCCTCAGCAGGAAAAACACAAACAAAATTTTGCTCCATTTAATGTCT  
A\_14\_P121650 TCAACACAGACATAGTGCTGGAAATAAATGCTCTATGAGTAGGAGATTGGAATGAAGTAG  
A\_18\_P14138057 ACAGTTTTCTGACTTGGTTTCAGAATTCATTTAGAAGTCTCTGGGGCTGCTTCT  
A\_14\_P101744 GAGATAAATCAGAGGCTGACACTGAGTGACTTCCTCATCAAGCCCATTC  
A\_14\_P104071 TAAAATAAAGAACATACCCAAAGAGGAAAACTTTACCTCACACATCTGCCATTTGAGGAA  
A\_16\_P58424063  
TAGCCCATATCTCAACCATAATCATTATTAACATTTAGGGTAAACTTCCAAATCTCTTT  
A\_14\_P125444 CTAACACACATGTCTTAATCACCTATTGGTGCCAGACAAGGTTCTTGAAACAGAAATATA  
A\_14\_P130428 CTGAGCAACTCTCAGAGTTCACTTAGATATGGAACTGTTCAAATTTCTAACAAGACCTT  
A\_16\_P15208609

ATCAAGCCTGGTAATTTAGGTTTCATCAAACATAGCAAATGTATGGCTGAAACTCTCTCT  
CUST\_2456\_PI426210822

CAGAACCTGCATTAGGAATGGAAGTTAAACTTTATCCATTTTGAATTTCAACATGTCAAA  
A\_16\_P15633890

TGCCGCTAATTGCTATGATTATCGCTACTAATTACCATGATAGAAAAGGAAAGTCTGCTC  
A\_16\_P19762972

AAAAAGTTCTTTTTGTTTTCTTTCCACCGATACTCTGATTTCTGACATTCGCCAAAAAGAG  
A\_14\_P137617 CTTTACACTGCACAGGAAACACATCTATCATAATGCTTGATTGAATTGGAGAAAGGAGAA  
A\_14\_P137196 ATCCCTTTTTTCTAATTTCCAATCTGAGGAGGAAAATAACGTAGTAAAGGGACGCAA  
A\_14\_P100642 ACACTACAAGAGCAGAGGATTAAGGTTTTTTTTAGAAATGTGAAACAACATAGCAGTAAAA  
A\_14\_P119447 ACAACTCAACAAATGATGCTCAAACAATAGGCTACTCATTAGTGAGGAAAAAATAGCCA  
A\_14\_P132077 CTGTTTATCTTAGGTGAATGCTGGTGAGCAGCCTGGATTTTACTTTGTGTTAATACAATT  
A\_14\_P114960 CTCAACCGAAATGGGTATGAAAGTTGAAATGGGTATGTAAGTTGAAAACCAGAAGTTTTG  
A\_14\_P116269 TAGGGGACATGATATTTAAATAACTGTCATTGCATGTAGGTGTCCACAGATTTCAAGAAA  
A\_18\_P22843236 TTTCGGAGGCCCCACTGATGCTGTTCTTCTTTCATTCTATCAAGC  
A\_14\_P132729 CTGAACATACCCAAAGACACAAGCCAACTGAAGAAACATATCACCTTGCTCTG  
A\_18\_P11027732

GCCACAGCATATTTATCAGTTCTCTATCAATACTACTTTTCAACAAATACCTACACTGGT  
A\_14\_P123998 ATGAATGCATCCAAATGCTTTTGGATTCCAGTTTCTCTAGAGATGTCTTTTATGTGTCAT  
A\_14\_P135480 CTTGCTAGTTCTGTGTTTACTCAATGGAATATGAGAAGTGGAGACATTATGGCTCTCATA  
A\_16\_P58424616

GATATTTTCATAAATGAGGTGTCATTCGAGTCTGACCTTTAGTGTGGTTTGAGTTTTCCAG  
A\_14\_P127526 TATTGTCAGAAGATTATAACAAGATGACTCCTGTGAAAACTATCAAGGTAGGGAGTGAG  
A\_16\_P17798865

ATGCATTAATTTTTCACAAAGTCTTCAACTCCAGCAATTTAAGTTTTATCAAGGGCCCTG  
A\_14\_P124285 TTCTTCTTAAAATCCTAGACTGCCAATGTTTACAGTCTCAAGTCCAAATACCTTTGCATG  
A\_14\_P115000 AGAATATTTGCATTCAGTTTCTTCACTGCTCGAGTAAATTTCTGCTTGCTTAGATTTTCG  
A\_14\_P103871 AAGAAGTGAGCATTCTATTGACCGATTGCAAAGGTGAGAGAGGATCTCCAAA  
A\_18\_P14728572

ATTCAGTGGTCTATCGGTATCAGAGTCAGTATCTCTGTAATGTTTCATAGCCTGTCTTTGT  
A\_14\_P136906 TCATAGTCTTCTTCTTTTCATGAGTGTTGTCTTCGCCAATCAAGAAAATCTTAATCAGTGC  
A\_14\_P109151 GAACAGCAAATTCAGGAAAAAGTGGCGACCTTTGACTCATGTTGCTG  
CUST\_4590\_PI426210822 CTTCAGGTGAGAAGGATGCCTGCTGTCCTCGTGTGGACACAACCTT  
A\_14\_P123306 TAGTATCTTTTCTGTTACCTTACCTTAAACATGTCCCACTCAGTGCAAATAACAACAGCA  
A\_14\_P127386 CTATATAAAGACAAAGAATTTGGCTCCATGGTCTTGGAGGTAATAAGATTGTTCTTACT  
A\_14\_P117257 CAGGCTCTCTACTCCATCTTGAAGTTAAACTGCAAACAATATTAATGCTCACAAAACAGT  
CUST\_1486\_PI426210822 CTAGAGTATAAGAAGAAGTACGGAGAGGAACACGGCTCCTGCCAG  
A\_14\_P134781

GTGTAGCACTGACCAAGAAGAGGAAGAAGAGATGATTTTTGGTGAAAATGAAGATGATTT  
A\_14\_P114227 AGGCAAGTCAAGACAGGGATACCACCTACTGTCACCTCTATTATTTAACATTATTCTAAA  
CUST\_726\_PI426210822 CAGCCCTGCTTCTGCTTGGGAATTCTGCAGTTGTGCCAGCAAAC  
A\_14\_P120507 CTTCAAAAATCCAGGACTTTACAGGTATAACAGTGAAGTGGCCTGTGTATCACATAATACT  
CUST\_3649\_PI426210822 CAAATAATGCTCCCCACCTGTATAGAATGCCTGGGAAATGCAACACTG  
A\_14\_P126564 TATAGATGGTTTGAGGGTTGTAAGTCATACCGCAATGACAAAACAAAGTGAAATAGCAAC  
A\_14\_P126928 CTGCGCATTATTGCACATTTATATTCAGTCTTCTGATGACATTAAATGTAAGCACCT  
A\_14\_P135069 AACACTTAGGAAGTCACTAGTCCCTGACTTGAGTTTCTGATGAGGAAGCCTC  
CUST\_5302\_PI426210822 ACCCATGCCTCAGTGTGGTTTGGGTCCCTTCTGCCAGAGCTACT  
A\_14\_P111117 CTCTATACGAAATTCTTGGTCTGCATAAGGGAGCATCAAATGAAGAAATTAAGAAAACCT  
A\_16\_P15625984

AGCAAACACTGAATTTCCCTGGTAAATTCTAGCATGATCAATAAAATCCTCCTCCTCTGT  
A\_16\_P36820489

AGACATACTTCCCTGGTCTAAAACCTATATCCCTGTTCTAACTCATGAATTACAAACCA  
A\_14\_P202277 CTTCCCATGCTTTCATTTGTCTCTTGATGTCTTTATGACACACATGAAGTACTAGTAAGACT  
CUST\_1351\_PI426210822 CATGTCCCTGGGGGCATTTGGAGACCAAGTAGACATGCCAGGAG  
CUST\_2247\_PI426210822 CATCAATGTGCTGTGGGGAGATAGGACACGTTTAGAGGTGCTCTC  
A\_14\_P116780 TAGCAGGGTTGATTGATATTATTTTACATTGTTCTGGCAATCCACAGAAAGAGAAGAGC  
A\_14\_P114103 GTGCTGGCTACGTTAATTTTATTTTAGTGTTACCTTCCCTCACTGAAGGTATTTCTTTGTA  
A\_14\_P131303 CTCACGGAATGCTCTATAAAATTCTTCAAGAGCCAGGTGCTTGTCAGCATTAAAATCAT  
A\_18\_P14138738

CCACTTGTGAGTTTTCCGTCAGCCTATAAGGCAAAGGAAAAGAGTGATAGAAAATAAAA  
A\_14\_P123433 CTAATGCCTGCACAGATGAAGTTGACATCTGATCTTTCATGTCCTAATGAGAAAGAAGAT  
A\_14\_P124030 GAAAAATCTCTCAGTGTAGAATGCCTTCACTTTTCATCTCTGGACTCTCAGATCAATTAA  
A\_14\_P127345 AAATTACGCCAACAAATCTTTCCATTCCCTTCCATTCCCTCTGCAAGAATAAAATCAAAT  
A\_14\_P119420 TTTCAAATAGACCTAACTCCTCCTCTTCATCTTTCTCTGGTTTTCTCCTCTATGAGTAAT  
A\_14\_P117398 ATATACAATTGATGAAATTTTCTCTCATTGACTCTTGTGTGTCACATCTTGGTCTGGTT  
A\_18\_P12873129

AAAATAGGACTGACATGATTGATTCGTATGAGGATATGAAACCAAAGAAATTTTTGGCCG  
CUST\_18\_PI426210822 CTTCTGCCACCTCCGCAACTGCTGGCACAGACCTTTTCATAGTTG  
A\_14\_P115227 GAGAAGAGACGCTATTGATTACTCACAGTTTGCCTCTGAGACGGGAAG  
A\_16\_P02138926

AGAGAATTAGCCAAACTTAGTGTAGTATTCCACCATAGTAATGATTATCCTGGCAATTCA  
CUST\_252\_PI426210822 CAGGTAGTTATCTCTTGGGAGAGCCTGAGTCTCATCTCATATGGGC  
A\_14\_P107968 CAAATTGCATGTCTTTCAGTGGACCATCAGATGATTGCAACTCATTAAATTTACTATCC  
A\_18\_P14620336

AACCTTTCTAACAATGGCTGATAATCACTACTGTCAATAGTCTTCTAAAAACTTCCCAGT  
CUST\_3002\_PI426210822 GCTAGAGTTCAGTTGTAGATCTCTGCACTTGTTTGGACCTGCTATCCATG

A\_16\_P01732289

CTTGCTCTAAATTCACACATTTTCCAAGCCATTCTTCTCAGCAATATTGTCAGCAATAT

A\_16\_P21542824

AACATATGCTTCCTCTTCATAATCCATCACATTCAAACATTTGATTGGTCTCTTCAGCAC

A\_14\_P124592 CTCTTTCAAAAAAAAAAACGCAGGCAGTAACCGCTGAACTTGCATAGATAGAGATTTATC

A\_16\_P17101970

TATCATCTGCTCCTTATTCATCCTAGTTCAAACATTCCACCTTAGATTTCAGACCAAAGAT

A\_14\_P126049 CATCAGGGCACAATGATAGATTTTGGCTCTCCTCATATCATTCCATAAAGATAAAGAGTC

A\_16\_P17530794

AAATCACCAATTCCACATTAAGACCAACAACAACGTATTTATGTCATCTCCCTAGCAAAA

A\_14\_P131383 TTACAACCTTCTGATATAAACATTCCTCATAAGTTTGGAAATTTTTCATAACTCCTGGGGTA

A\_14\_P111067 AACTTTTTAGATGTTTCACCACTCTTTTGCAAATAAAGCATCCTTTCTGCTCTGTTGCAT

A\_18\_P13359683

CAAATTTAGGTTAGACAAGGGAATAACATGGATGCTTAGAAGATACAGACAAGGGTTGTT

CUST\_71\_P1426210822 ACTAAATTGCTAACATGTACCAGTTGCTTCCCTCATGCTGCGATGTGC

A\_14\_P108362 ATTGGTGCCATCTATGGCATGTGATATTGGATGGCGTTCTGTTGAAAGAAAATAAAAAAC

A\_16\_P19915096

AAAACCTATAGCCGAAATCAGTAGATACTGCCAAGTTAACATCAAATGACCCTTAAGTGCC

A\_16\_P37795273

TGAGTCATGACCTCGTTATAGATAATCACCTTCTATTTCATCTAAGGCATTCTTATCTCAC

A\_14\_P105245 CTAAATGTATAGACGTATTCCCAATCCTTACCCTTTCACCCAGTGTTAAGAAAGTTAT

A\_14\_P126666 AATTGGAACCATGGTGCAAAAAGAAGAAGTTCTGTCCTCGGTTACTTGACTATCTA

A\_14\_P119926 TTTCTTGGATATTTTTCCTGTGGGGATGTCCTGGTGCTTTTCCACATTA

A\_14\_P126225 GGGCAGTGACCTCCATCAGTATATTAATTCATTAAGAAATAAACCCGGGGAATGTGTTA

A\_14\_P118853 CAAACTGCAGTGCATCTTTGAGTAGAACTTTTGAAGACAATTTGTGGAAAACCTACATCTT

A\_14\_P116922 GGTAACCTGGATTCTTAAATTTTCTGGCTAATTCAGAGTCTCCTAATCTAACCTACTCTC

A\_14\_P121442 GCAACCATCCAATAAGGCATTATGCTTCTCTCACCTATTTTTTTCTGGACAAAAGAATTT

A\_14\_P132869 AACTCCTTCTACTATCCTTTTCATCTGTCTGCCCTTTATAGAGTGTGAAGAAAAAAGAAC

A\_16\_P18772873

ATAGGGACTGAACAATCATTTAATATCAGAATTGCCAACTTCAAATTAAGTGAACGGACCC

A\_14\_P114312 TGACCACTCAAATCAGCAACTTTGATAACATATCAAACTTTCTGAGCAAGTTGTGCTCA

A\_14\_P137487 CTCTCAACAACCTACAACCTTTCATATTCATGAGGTCAAACCTTCTACTCTCAGGAAAAA

A\_14\_P138165 TGTGAAACGCCCTCTTAAGGACAATAGGACGCATCTCGATTAAATGCAATGTTTAAAC

A\_14\_P101703 GGTAACCCACATAAACATGGTCTTTATCCCTCAGGATCTATGTTTTAATCAGGATAGACC

A\_14\_P131817 CACCATCTGGTATTCTGTGTTTAAACATTGAAGATTAGAAAGTGTCTGAGGAAAAGTTG

A\_14\_P136234 ATGTGAACATGATCTTCTCATTACCAATTCGTATTCTCATGTTAATCCATAGCACCTGCA

CUST\_2228\_P1426210822 CTACCATGACATTCTCCTTCCCTCAAAAATGCATCTCAGGCTATGGG

A\_14\_P113733 ACCTTGAAAAAATAACGTTTCATCTCTTTTCCATGTCCAGATGTGAACAAAGGCATCTAT

A\_14\_P137659 CTTCTTTTTTGACCAGAGGAAAATGCAGGACTCATTGAATAGTTATTTCTTGAATGCTT  
A\_16\_P00073017

ACAGGCCTTTTCAAAATTCAGTTGTTACAGCCTTTTAATAATACCCAACCTTTAATTGA

A\_14\_P131416 TCAAACATATTTATTTCATTATCTAGCCAGGGGTTGAATACTGGCAGCCTTGTATTTCTCT  
A\_16\_P01648090

ATTAATACAGTAATGCTTTATTTGAGATCCTGCTGAACATTCAGAAGATAACCCACCCA

A\_16\_P02555304

ATAAGAGACTGGATTGAAGTAGATGGCCTTCAAGTTAAATAGATGGTCCTTCCACTATGA

A\_16\_P18541084

TTTCAAGCCTCATACCAGTCATATAAAACCACGATAAACTTCATCAAAGCATACTTGGG

CUST\_7748\_PI426210822

CACTCAAAACATTGTAATTATAATTGTCAAAGATATCTTAGACCAAAGGCAAAAGATTAT

A\_18\_P11103567

AAGCAGATTTGGATAGAACCAGACTTATTCAACCAACTGACACTTAAGAATATAACCCAA

A\_14\_P101393 ATAACTCTCCTTGTAACCTTGATATCAAACACATTATCTGCCCTTCTACCCAGTTATT

A\_14\_P124347 TTTCAGAAATGAAGTCAGGTTTTTTGTAAGTAAGGAGAAGAAAAAGGAGAGGCCATTAGTTT

A\_14\_P114569 TTGTTCTCTTTTCTACTATGACACACTGTATCTCATTCTTCTCATCCAAACCACAAAGA

CUST\_8480\_PI426210822 TCATTTCAGTAGTTCACTTTACTTCAAGTTGTGACCTTCCAGATCCGAACCTTAG

A\_14\_P134050 CTAAAAAACCATCGACTATTGGGAGCAAGGAAGAACAATGAATAAGGGTATGAAT

CUST\_4804\_PI426210822 CAGCAAGTCTCTGGAAAAGAGCTCCTTCAGCTGCAAAGAACACAG

CUST\_6961\_PI426210822 GAGGTAGTTTGTGAGTGTGTATCCCTGAGATACGTAGCAGAACTGGG

A\_16\_P00685124 GGACTTCAGAGCCAAGAGGGTCTGCTTCAAAACGTGGCTTTTAAGAAAT

A\_16\_P00804189

AAAAAATTCATGCATTTTACAATCGACAAAGCACTTTTCACAGGATAATTTTCATGGCC

CUST\_7352\_PI426210822 GGAGTGGGGAGGGGATGGCTCCCCAGAGGGAAGGGTAGATGGATG

A\_14\_P133096 AGGGGATCCAATAAACTTAGTAAGATATTTGGAACCTTCTGATCCATTCTGTGCAGTGATA

A\_14\_P101126 TTTCATAAAAAACATTTACAAGATTGGTAAAATTCAGGCCAGTCCAATGTGACAGGCAC

A\_16\_P17974873

AAAAGACTTGAACGATCACTTTCTCAGTTGGCTTATTTTAATGGTAGAGGTGTATTGTCC

A\_16\_P18482472

AATAAGCAAAAGGACACATTTCTCAAGTGATCTTAGCACCATTTTCATGCAATCAATTCCA

CUST\_5636\_PI426210822 TCTGAAAATTATAACTCTTCTCAGGCTTCATCAGCAGGCCCCCAAAGA

A\_16\_P00085008

AAATCTGACTTGTGATTCCCTCTACTTAGGAACTATTCTCTATGCCCTACATCATTGTTC

A\_14\_P201826 ATATGACAACCCTGTGGACTGGCCACACAAAAACCCGTAATCCTAGTTTATT

CUST\_4333\_PI426210822

GGCTAAAGAAGTCTCAACACAAGGAACTACAGGTGAAACGTAACAATAGTAATTGCC

A\_14\_P114599 GGCAATGAGAGAAAAGTAAAAAATACCTAAGGTGGCCTTGTGTTCAATTATAGCAACAGA

A\_14\_P201679 CAGTAAAGCAATGACAACAGCACCTTGACATTGTTTTAATTCCAACGCTATCAGAAGTTA  
A\_16\_P17473306

CACTAGTTCTCACTTCAGTTGTAACATGCACATGTTCTCATTTTTAAACAAAGCCAAATGG

A\_14\_P134928 AGCACTGAGATCTCCAATAAGTAATTGTTAAATCCAGTCATATGGCGTGTTACAGCAAAA

A\_14\_P139295 GCTGGATAAATGAGGCAGATCAGAAAAAGACCTTCAATCCCAGAACACGAATTTATC

CUST\_1986\_PI426210822

ATAAGCAACAGTTTTTCATGAGCTTATCAGTCATGCACTTCTTGTGTGGCTTAGATCA

A\_14\_P106274 GTGTATTTAAACTATACATGAGATACACACTTCACTCTAGCAAACTTTCCCCAGAGCC

A\_14\_P124497 CTAGCAATTTAAATCTAGCATTCTCAGAGATGCCTTTGTTAATTTGTGTAGGGGCAGTT

A\_14\_P135823 CTGATTAACATAAATGCTGCTTTTAGGTTAACACAAAGGAACAACACTCAGGATCAGTC

A\_18\_P13228838

TCACTGCTGATATTCTAAAAATACCTCCATGTCCATACTATTATCCATTCTTCACGTCCA

A\_14\_P133443 ACTATAAACATAAAATCCAGAAGAAAGATGGTCTCTATTCCACCGAGAAGTCTGCATTTG

A\_14\_P113006 AAAGTGTGGTCATGCAGGCAGGACAATTCAAGACAGCATCACTATTTGG

A\_18\_P22843211

TCACTAATTTTATCACTCAATAATTTTATGTATTAAAAATGCTCATCCCAGACCCTGCAG

A\_14\_P124309 GAAGAAAGAAGGCAGGATAGTGCTTTTGAACAAGCCTATTTCCATTTTGAAAGTAGATTT

A\_16\_P17795234

TCCTACCCCTGTTTATCTACCTATCATAAATGTGCATTCACAGATCTCTTTTCCCATCAA

A\_14\_P201116 CTTTTGTCTTGTCTTTGCTTTTTATTTCATCTTTGCTTTTGTCTTCTCAGGGCAAATAGGA

CUST\_8954\_PI426210822 AGAATGCCATTGAAAACCTCCTCATTACCTTCAAATGGGGTGATGCACAC

A\_18\_P14135826

CCCCCCAGAAATTAGTATTTCAAAGTATTTTTGCCTATGGAGATTTTGAAGAGTTCTCT

A\_18\_P14132870

AAAGCCTGTTCAAGATTAACCTCTGAGAAAGAAATGCAAGAGGTAATTATGATGCCATGG

A\_14\_P125574 ATCCTCCATCAGAAACAGAAGAGAAGAACAATCACTGCTGCGATCTTTTATTCCAT

A\_18\_P25533243

AAGTGAACACAAAGGATTTAACCTTCATTAAACAGATCACGTGTATGATTTCACTGCAGC

CUST\_4834\_PI426210822 GGAAGGGATGTGTGATCTTTCCTGAGAACTGAGGCATGCTATTAAGCTTTAA

A\_14\_P202345 AATCCATAAATTTGGTTGTTTCTCACATCATGCATTCATGGGAATGTGTGAGAACTTTAC

A\_16\_P18354418

AAATACCATCCCTATTCAACAATGACAAAATGTTGAGCATTTCTATAACCTTCGTGTCCTG

A\_14\_P124420 AACTCACCTGTGCCTGTAAACAGTGCAGAAGATCTATAAGTGTGTAGCCAAATC

CUST\_6882\_PI426210822

AGCAGGAAGGACTTAAACATTTATGTGTTTGTATAACCTTTATTTGAGGGAGTGCTTTGG

CUST\_243\_PI426210822 CTCCCCGGTTTTGGGGAACCCCTGAGGAAGGAGTATAGCCTCTCC

A\_16\_P02297905

TTTCAAACCTTGTCTTGTATATTCCATTCAGCACTTTTTATCTTCTGTATTCCCCTGG

A\_18\_P13775394

TTGTCCACTAATCTCCCATTAATCTCTTAGTTCTACTTCCACGAAAGATATTACCATCT

A\_16\_P15546717

AAAAACCCTTGAAATGCCAAAAAATGCCAATAGAGAATACCAAATATCACACACGTTGC

A\_14\_P116845 GTCACCTCTATCAATGAGGACTTATCTGAGGAAAATAAGTTAGCATTTCAGGGATTATCAG

A\_14\_P102505 CATCCTTTCAAATATTCTACACAGGTTATTTCCAAAGACAAAGAACTCAGTGGGGATT

A\_16\_P17308399

AAACCAATTTTCCAAACTCAACAACAATCCAAGGAATCCAACAATATTGATGGCAGAATT

A\_16\_P03051655

AAAAACGTTTTGATTTCTCAAGTCTGTAAGTCTGAGGACTCAATTGATGACTACAGATCGTT

A\_18\_P22842842 CTGTATGCATACGTGCCAGAGTATCTGTGCTGAAGAGGTCAAGACA

A\_16\_P30952311 GTAAGAAAGGGGAAATGGGAGTGATTCCACCAGATTCACAAATTATTGCTTCATT

A\_14\_P123577 CGACTCCCTATCTCAGTTACTGTTCCATAATTTCTTTTCTTTTCTTAAGTCTGTTTC

A\_14\_P137254 CTCAATGCAACTTTCTAAAAAATGCCTACTACAAATCTCTTAACATAATGACTCTCTTAGG

A\_16\_P20865157

AGTGGTCAGACAACCTCTATCTCAGATATATTACGTAAACTTCCAATCATAACGCATGTCT

A\_14\_P116223 AAGATGTGTGGATTTTCTAAACACTGATCTGAGATCTCAAACACATGCAAAATAGGATA

A\_14\_P105340 AAAACGATTGTTAAGAACCAGAACTAACTTGACCGTTCCGGTTTGCACAGGATTGTTATA

A\_16\_P19770344

ATCCAGGAGGCCAATATACTAGTCATAATTTAATGAGAGGCAAGTCCATAATAAACGGTG

A\_14\_P134622 GGAATAAATGGCGTCCAAAGTCACAGATGCTATAGTCTGGTATCAAAGAAGGTAAGTTG

A\_14\_P101463 AACTTTTTACTTTTTTTTTTTTTTTCAGAATTGCTCCTGCGTTGCTAAGACAAGCATCATATG

A\_14\_P124417 TAAGACTGTAGGTGGACTATGTTAGTAGTTTTCAAGCAGGATGTCTGTATTCAGCATTCA

A\_14\_P100678 AATATTCTCAAATCCTAGATCACAGGGAGTTTTCTTATGGAGAGATGTTTGGATTTTGT

CUST\_7350\_PI426210822 CAATTGAGTTAAGCCTGGGTCGCATGCCACCTCCTAACGGGTTG

A\_14\_P128422 ATTTAACTAAGTGCACCTGTGATCTTGGCCAAAAAACCATTGCAACTCACAGTAAGA

A\_14\_P137567 TGCTTATAGGTATATAGTGGCTGCTGAGTGAATTACTAGATGTGATTCATACAGCCCTGG

A\_14\_P131604 TCATACTCTTTACTCTTCTCTGATACTGAGAGTGGTATTCTTGCAGTTTTTTACCTACT

CUST\_4537\_PI426210822 CTAGGCCTTTCCTATCAGCCTGTCTGTGGACCTTAGCCAACAGCC

A\_14\_P102067 GAATATCAATCCCAGCACAGCAAATTCTCCAAAATGTCAGGTAGGCTCTTATCTGAT

A\_14\_P131697 CTTTATCTGCCTAAAACCTTCAGACTAGTATGCACTCGGAGAGCATCAGTGATAAGGA

A\_16\_P17693931

TTTATGCCCTGAACTAATTTTCTGACCTTATCTTTGACTAATCCCCAGTGTAGACTTTTTG

A\_14\_P124123 CTTCTCTTGCCACACACAAAATTTGTAAGTGTGAGATAACAGATGTCAATCTGCTTCATT

CUST\_1442\_PI426210822 AGACTTGCCAGGAGCCAGGGGGTGGTACAGGGTCACTGGGGTAG

A\_14\_P124645 CTAGTATACATGCGCAGGGCCGCAATCTTAATCTTCTAGACAAAGAGAATAAAACCAAAC

A\_14\_P113029 GAAACAGATTAGTCTGCTCTTTAACAGCATAAGCCACAGAATAATAATGTTCTCTCGGTG

A\_14\_P121085 CTACATTTATGAAAAATCGTTTGTATATAGGAAGAGGACGTGGATCTTGGGGAAGGAATG

A\_18\_P15203549

AAATCCATGGGTTACTAAAAACGCTTGCATTACTTAATCATCATCATCTAATCAATTGCT

A\_14\_P121840 CTTGTGTTATAGAAACACCATTGGGCTGGAAGGTAGATGGATTATGCATATTCCTTTATT

A\_14\_P119097 GTCAGTAGAGGAGAGAAATACTGACTCAGTCAATACTGCTATACCCAATAGGAAAAGAAG

A\_14\_P118508 GGTCACATATCATATGTGGAGCGGGACATAACAACCTTCGGAAATTAATCTCTTCC

A\_14\_P121656 TTTCTCAGTGCTAAGCAAATAGTAAATATTCATGAGATACTGGGATTGTGCCCAGCATT

CUST\_621\_PI426210822 CTATAATTTTGCCTGTGGAATCGCTGCTGTGGTGTGTTGTGGGGAG

A\_14\_P119323 CCATTTCTAGTTCCAGAAAATACTCTGTCTGGGTCATATACTCCTAAACTAATCACTCT

CUST\_1378\_PI426210822 TTGTGGCCTAGGCTGTGGAAGGTGTGGAATGTGAAACTGTCTAAT

A\_18\_P14129197

AAAGACTTGCTGATCACATTAGGATTACTTTTTTTTTTTCTTTCAACAACCTTAAAGACCA

A\_14\_P121400 TTCAGAGAAAAAAGGAAGTGAGAATTCATAGAGTAATGAGAATGCAGTGTGTTGACTC

A\_14\_P110310 TATTTTCTCAAGTCCCATGACTTTTGTGAGTATTTACTTTCGAGTCTGTGACTCGAG

A\_14\_P200347 CATTTCACCAGAAAAAATGCTAGACAGCAATGAATTCTATTCCAAGCACTCTTTAGAT

CUST\_655\_PI426210822 GTGATGTATTTGACTACTGGGGTGCCTGCTACAGCTTGGCATCTT

A\_14\_P101655 AATGCATGCATCATGATTTTGTGAGTTAAGTTAATGGCAGTTGTTTGACTCTGAAGTTG

A\_14\_P112283 GAAGGACCTGATGGAAGGGGTAGTTTATATTTAACTCTGGTGCTGAAGCAAG

A\_14\_P105667 ACAGTAAAACATATTTGTCAATTCTGAGAAGGATGAAGGCATATTTCTGTAGCAGGTGATC

A\_14\_P102960 ACATTCTACTCTTCTTTGGCAAATAAAGATGAGTTCAAACATAAGAACTCACTGGTTCCT

A\_18\_P19352516

AAAATCACCCCTCAAGTATATCAAAAACCTTGTGTCAATGTCACTCAATTCACTTACCCAT

A\_16\_P16886828

GACCCTCTTAAAAATCATCTACTCTTCTTTATTTCCAGTCTTTAGCATATTCAGAAAGCC

A\_14\_P123353 GGCCAGAAAATCAAATCCTAGGCTATATCCCCTACTGTCTTTACTCTAAAATTGAACATT

CUST\_6797\_PI426210822 ACAGAGTGATAGAGGAGGCCATGCTAGGAGAGAAGGGAGAACAAG

A\_14\_P111265 GTAAAAGTTAAGAAAATACATAACCTCAGGTGTGGACAAATCATGTTGAATGGCTCTGTG

A\_14\_P101259 TGTATAGAAAGAAAAAGTGGCCTTGAAATGAATCATACTGAACTGAGTGGAGCAATGTT

A\_16\_P16191207 AAGGAGGATGACTTCGCAGGGGCGGTCTATATCTATCATGGTGAT

A\_14\_P104275 TTAAGTGTCCCTTCTCTCTGGGTTATTTTAGAACGATATACACAAGCAAAAGAGATCTACC

A\_14\_P111154

CAAAGATGCAATGAAACATGACAAGGTGAAAACAAACATCTGAGTTTTAAAAGCCTGAGA

A\_18\_P10346380

CTGCTTTCTCTAGTGAGTCTAAATCCATGCAAAGTATGTAAAACAACAACACTAGTGGG

CUST\_1097\_PI426210822 CAAGATCTCTGCAGGAGGCACAAACCCTCTCCCCTATAGAGTGAG

CUST\_5056\_PI426210822 AGTCATTCTCCTCACATACCCCACTCTCATCTGCTGCCCTCACA

A\_16\_P19308275

ATGTATGGCCATGTGATACTATTTGAACGTTTTGTCTGACAAGTTAGGGATTCTTTTTGC

A\_16\_P17986178



TACAAAATCAGGCTTCAAAGAGTCAATTAGTGGGTCCCTAAAAAATCTGTCTTTTACCC  
CUST\_1203\_PI426210822

ATATCCTGTTGGAACCAGGAAAAACAGAGGAAATGGGAAATAAAAATGAATTTAGGACAT  
A\_14\_P105950 ACAGTTCAGAAATTTTTCAAGGAAACAGTTTGCTACAAAGCACATAGTTTCCCTCTGATCA  
A\_14\_P130276 AAACAAAGATCCCTTACTGTGTAAACTCAAACCTAGCCAGTCACATTTTGTTTTGAT  
CUST\_9757\_PI426210822 ACTGGCTATTAGATGGAATCAGAATCGGGTGGAATGTCATCTCACTGTC  
A\_14\_P117871 TGGCTGGAAGTTTACATTGCCATTCAAAGTATTTGGATAGGAACTCACTGGTTTAGAAA  
A\_14\_P201854 TTGCCCTTATGGAGAAATAAAGATAAAATTCAAAGAAACAAATAATAATGTGTTGGCATT  
A\_16\_P03252347

GAACTCGATTAAGAGGAATCATAAAGTGACTATATGAAAGTTAAGTTTTTCCATCGTGA  
A\_14\_P119713 CTTGAAGGTTCTCCCTGTTGGTTCTGATTAGGTAACGTATTGGACCTG  
A\_16\_P17961721

TTACCAATGAGATTGTAACCTCGTGTAAGTTAGACAAAAAGCGCAGAAAGTGTTAATGCTCA  
A\_14\_P101756 CAAAGTCTTCATCCTCTCTACGATATTCTTCTTTGAATGTCCTTTGGGAAACCTTAAAA  
A\_14\_P138404 GAAGTCTTCCAGTTCTATCCTAAACTGTAGAACTCTCCAGTTAAACTACAGAGCATG  
CUST\_1923\_PI426210822 GCCTTCAGGATTTTGCTGGATATTCTAGTGTCAGGGCACAAGCAC  
A\_14\_P100857 CTTTATGTCAGAACTTGCTTTCTGGGAATGGATCTTACTCTGGGAGAACAGTC  
A\_14\_P128257 GTATCCTTCATTGATCAACGTAGATGGAAATGCAATTTGTGCTATAGAGTAAACGATGGT  
A\_14\_P104849 GAGATCCAAAAATGAAAGAGAGAAGTATCTTGCAAGTGACTTGTAGGGCAGTAGTAAGAT  
A\_14\_P134958 GTTACAAATACCTGTTATCCTTTGTAGAGCACACAGAGTTAAAAGTTGAATATAGCAATA  
A\_16\_P00538974

CCAGGATAATAGAACTTTATGAACACAGAGATTAAGCCTATTTAACCACAGTTTGCCCA  
CUST\_237\_PI426210822 TAGACTCGGCTTCACTCTCTGAATCGAAAAGTAACTTGGCTCCTCTG  
CUST\_191\_PI426210822 GTGCTCTGCTCGCTTCCACGTGGCTACTATTGTTATGAACAACAACA  
A\_14\_P110443 TCTCCTCTAAGTAAGTCCTAAACACACATATAAAGATTTTCCAGTTGAAGAGGTGCCAGA  
A\_14\_P117327 ATCTTGTGGAATCTCAGTATCTCACTATCTAAAAAGTCTCAGGCAGTGTAACCTCTCAAG  
A\_14\_P109997 GAGCCACCTGCCTAAATGCTTTTTTGAATCTTCCAAAGTTAAAATCCACGATCTATTT  
A\_16\_P58424111 CCGCCTCTTTGATCTTATCTCCTTCCCACCATGGTCACTCCAGAC  
CUST\_3197\_PI426210822

CTTTTTTTTTCTCCCTCTCCTTTTCCCTGGAAGTTTTCTTGCCATATATGGTGATAA  
A\_14\_P106716 ACTACCAAAGGGCTAGAGAGAACTTGAGAACAACCTTCATATAACATTCAGTTTTTTCAG  
A\_14\_P136135 TGGAACATATGCTTCCCTTTCAGAACAAATAGAAGAACTGATGTCTACCAAGATTTGTG  
A\_14\_P117990 CTCCATAACTTCTGTGACCTGTGTTTTCTCCTTTTGCATAATGTGTATGTGTTTGGTAGT  
CUST\_1281\_PI426210822

TTATGAATTTTTGGGACACTACACTATAGACTTGTTAAGCTATGTTTCAGTTTTGCAATT  
CUST\_3009\_PI426210822 TCCTGTATGCATTATTTTCTTCTTAATAATGGCACCTCCTGAGAGTTTCCAGGTC  
CUST\_2110\_PI426210822 GCACCTCATTCTGTGGGCATCAATCTATTTATCTTCCCTTGATAGGACT  
A\_14\_P109636 GAGAGGGGGAAATATTTTTCTCTGGGAGATTAGAATTTACTAGTGGATTCAAGTGTAAC

A\_16\_P03222371

CAAGCGTTATGCGTTTTAGTCTATTTAAGGAGCCACTTTTGAATATCTGCTTGTGAACTC

A\_14\_P129970 CTTTATGACACCTCATTTAGACAACCTGGATATCTGCTTTTCCAGGATTTGAATCTCCAAT

A\_16\_P19308104

AAAAAGAAGTTCTATCAGAAAATGGTCACTGTTTCAGAGAAATTCATCTAAACCGCCATGT

A\_14\_P110894 AGAGATGAACAGAATCATCTAGGTGCGTTAAGAACAGTCTTATCTTTCTGGTTAACAGGT

A\_14\_P113225 TTTCAATGAGATTAGACTGAAAATTTGCAGAACAGCGGTATGACCCATTGTCATTAGGAA

CUST\_6644\_PI426210822

TGCCTGGAATAGGCAATGATTCTACAAGCACTAATCCTTTCTGTGGACTATCATTTA

A\_16\_P19348443

AAAATGACTTCTAAAAACCTAAGTCTACAACAACCTCTCAGGTCATTATTCTTCATGCCCC

A\_16\_P38451861

ACCTGCGTAAACAGACATTAAGGACACATACCCAACCTTTAATCAGAGTTATTGTGCTTTT

A\_14\_P114522 TTTGTATTTCACTTAGGAAACGACAATCACAAAAAGGGGACTTAGCATTTCAAATGGAGA

A\_14\_P132562 CTGATCCTGATGGAGAAAATAAGGCTCAAAAACGGAAATAACAGGTCTTTCTCGATTATA

A\_14\_P131779 GCGGTGTCGGTGATAAATTGATATTTTTAAACTCTTTAATGGTGTGCGAGTGACATAATG

A\_14\_P121542 ACATCTGTGGTTGAAATTCAGTTCCTTTGTTTCATCTTTTCATTAAATTTTCCTCCTGAGGC

A\_14\_P125318 GTCCCCAGGAAATGGACAGAGACATTGATGGATTTGTCACCAATTTTATTAAATTTATTT

A\_14\_P118790 TGTTTAGACAGGTAACCCTGAGCCTACTCTAAATTCATTTGAAAAAGTGAATCTTCACAC

A\_14\_P119146 GAATGGTATCCCCACTACTTTGTTCTGACCAGCAGCAAGATCTACTACTCTG

CUST\_321\_PI426210822 GCTTGTCCCCATAGCTGTTTCAGGCACCAACTTAACTCTACTGAAATCT

CUST\_2892\_PI426210822 TGGATGATGACTTTGTCCATGGAATGCCTGGTGAATGAGTGCCAG

A\_14\_P137425 CTCTTGCCACTTACCATGCACAAGGTATTTATATGCATCAGTTTGTGTGCATTATCATG

A\_14\_P135978 ACTGGTATAATCACTCATTTACAGATGTTACGGGAGACACAAAGACAAAGAAAAGTTGGA

A\_16\_P01527291

GAGCCCATGAAGACACTAAGTAGATCTATGTTACATTTGGAACCAAGATACATAAGGTCA

A\_16\_P03065120

AACTGCAGAGCACTTTGTTATGGTTGAGACCTACCTTTCTGTATAATTTTATAACCTGCT

A\_14\_P107268 CAGAGTATCTATTGTTTTATGTCAAGAACATTTGCCAGCATTTGCAGTGATAACAGTCCT

A\_16\_P18307082

AATTTCTTCTTTACATAGGGCCAAAAATCTATTACCTGACAATACTGACGAGTTCAACC

A\_14\_P101740 CCTTGATTGTTTTCTAAATCATCAGCAACAAAAATGTGGACTTAGAGAAAGAAGTGTGT

A\_16\_P37619570

AGGCTATGAATTCACCTTTAAGATCAACTGACCTGAAAAAATCTCCCACTTGAACAATGA

A\_14\_P134628 GGTGAAAGGTAACACAAGGGGCAATTGATGAGTAGATAAGAGAATGATATGTCAAGAAAT

A\_16\_P01619268

AAGCAAACCTTCACATGCCTTAGAGTTTACTCCTCTACGATTAGAAACCTTTATGCAAGAA

A\_16\_P21082424

AAAAAGTTCACACCTAAGAGCACTATGAGTTGGAAATGCCTATTTTAGATGTGTTTCTCC  
A\_14\_P123320 GTGCCAGAACTTTTTTCATGATTATATTCAATCCAAGGCATTTTCCCTTGAGCAGAGAG  
A\_14\_P120341 AGCAAGAACCAGAAAGAGAACAAGTTCAGCCCAAGAAAAAGGAGGGAAAAATATC  
A\_14\_P113581 CTTGGTATTTGGAGAGGTGGTATCTTCTACAGAAAGTTGGAGTGGCGTC  
A\_14\_P201022 AGAATATTCTTCCAACAGAATTTCAATATTGAGTTTTTCAGGGAGTCACACCAATGTCACA  
A\_14\_P135637 ACTTTTGA CTACTGGTTGGAGCAGGTAGATCAGCGATTCTCTTGGATTATTATAATT  
A\_16\_P58424377  
AAAACA ACTGTGGAGATTTTACATCTTTGAGTATCTGCTGTCTTTGAAA ACTCATGTGT  
CUST\_8449\_PI426210822  
CATTAA GCACTCTAAGAGCCAAGATAGCTTCCTGAAACACGTGAAGGAAAATGA  
CUST\_550\_PI426210822 CTCCAGATAAGTCTGGGAGGTAGATCTACAGTTCCAGGATGGGATAC  
A\_14\_P122577 CTTCTAGGCTCACAGCCACACAAA ACTTTCTTTCTGCAA ACTGAATAGACAATTATTTA  
A\_18\_P22840727  
AATTCTGGCAGGCCTGTGATCTCTTAAAACAATCAACTCTTCAATTAGAAGTTCATGATC  
A\_14\_P137070 TGTAAGATGCTCACTTAAATCTTGCTCAACCAAAGTTTCTTCTGAAGACCTTGCTTT  
A\_14\_P119074 TCTTTTCTGTCAAGGACTTTCTGGGAATAATACTGGGGGTTTTGTTTTTGTGTTTTGAACT  
A\_14\_P121675 ATTAGAGAGACTTCTCAGTCTAAACCAATATTCTCAA AAGGCTTTGGTGTTTCATT CAGT  
A\_16\_P00662501  
AAAGACAGATGTAAAAGGGTGACTGACAATAACAGTATTAGGGACATGACTAAACACTGC  
A\_16\_P16031071  
ACTCATTCTGCATCATATACTTTTCTGTCTCTCCATAATTT CAGTATTAGGGTCCTCGC  
A\_14\_P118423 CAAAGGAATACAAATGGCATTCCATACTACTACTAATATGTGAGTTTCCAATTGGGCCAA  
A\_14\_P117250 GCTTCAATTAGGTCTGTTCAGCATGGGCTTATAAGAGATTAATTCTGACAGGATGAAATT  
A\_14\_P118535 ACATTACCATTAGTTTCTATTCTTTTACATCCCCAATGTCTCTCATATCCGTTGTCTTT  
A\_14\_P105198 GTGTGCCAAATCAAACATAACTTCAGCATATGTCAGATCTTACTAGAGATGGTGAACGT  
A\_14\_P101362 CGTCCCAAGAGGGGAAAATTGAGTCTAACCTGTTTAGAAGTAGAGATATAATCAAGAATA  
A\_18\_P22841411 GTCATGAATGCCAGTTTTCCCAAGAAGCCCTCTGTGTGGTGGAG  
A\_14\_P103273 CTCCTGTTTATTTCTGCATGAGTCATCATTCATTTTTCTGCTCAATCTTCTAAGTTCT  
A\_14\_P120881 ACTTTACTTTCCGCTTTCCGTTTTTCCATATTT CAGAAAGTTTCAGAAATCAGTCTTCTG  
A\_14\_P121099 CATCTACTTGAAAAGGAAGAAGAAAACAGCATTACTTATT CAGGTCTTTCAGAACGAGGG  
A\_14\_P111960 TTTTTTTCACGTACGCCCTGGAATCCCAATATATCTGTATATACCACTTACA ACTAA  
A\_18\_P15365780  
AAAATTGGCCAGTTAATGAGAAGAAACCTGTAGTCATCATTA AAAACCACTTACTTGGAA  
CUST\_3835\_PI426210822  
GAATAACTGCAGGGAGTAGAGAGATGAGAAAACATTAGAAAAAATAGTACAGAAGTAGAG  
A\_16\_P18266794  
ATGTATTCCGTTGTCCTAAATATTTCAAACACGT CAGTTTCTACTTTTCCAGACA ACTCC  
A\_14\_P106164 GTCTCTGTCCATGCTATTAGCATGCTCTAGAGTTAGGAGTATCCCAAAGACAAAAT TAAA

A\_14\_P201706 ACTCTGCCACTTATGCTAGTCAACAAGATAAAAACTTGCTTATTTAATGCTGCAAACCTG

A\_16\_P18193851

AAAAGATATCAACCCTTTCTTACTCCTTCTGCAATCGTTACATAACAGGTTTTTCGCTTGG

A\_16\_P39700061

AAACCCTACGATGTAAAAGTTCTCCTTAATGTCCCAAAGGCAATTTTTACTTTAACACA

CUST\_5388\_PI426210822 CCGAGCTCACTGTCTCAGAATGTGGGACCACCTACCAGCTTTACT

A\_14\_P135375 TCTTTCCAAATTGCCCTCATGTGACGCTCTTAAAGTGTTTATCTAGGAGTCTTC

A\_14\_P122355 GATGAACTATCGCATCTTTTATTTATCCCAATAGCAACTCAAACAAAAAGTCTGTCCCC

CUST\_4045\_PI426210822 GGGTGGTCAGGAAACATTCCCCCTGGGCTCACTTTTTGCTTAGAA

CUST\_5132\_PI426210822 TTTGACTCTCTTCATTTTGGTTCATGGTTCAGGATTTTCACACACCACTAAGG

A\_14\_P200047 GATATTTTTTCATCTCTTTTTTCCCTTGTACGTCATGGTATCTTCCCTGTTTTCTTTTCAT

A\_14\_P102650 AAAGACTGGAGCCTGGAAAATTTCTTCTTGTGGACTAAAACGCATAAAAAGAAAAAATC

A\_16\_P35595364

CAACAAACAATTTAATACTTGGCACCCCTATATATTCAACCCAAACTGATCATTGTTTACC

A\_14\_P118522 ACAGAATTACTTGGAGCATGTTGATTTGTCTGAGAAAACGTGAATACCAGTTTCATGAT

A\_16\_P17492336

AAAAAATTTCTTGTGGATGAGTTACTAATGCCCTGAAGAATTGGATTAACCACTGGTCAT

CUST\_6054\_PI426210822 AGAGCAAGAGGCTGGGAGATAGTGGTACCACACAGTGAGTGCTAG

CUST\_10137\_PI426210822

GATTACAGTAGCCAGCCAAACCACCATGCAGGAAGAAAACCTTTGAAATATGAAA

A\_14\_P129377 GTCTAAATGTGAGTTCTTAATTCATTTTCAGAGGGGATGCGAAAACAAGGCTTATTTCAAT

A\_18\_P22842069

TGGAAATTCACTTTCATTTAAATGTAATCTTTTCTTACTTCAGGGCAGTTGTTTCAGGGAAGT

A\_16\_P20923551

TTTATTTTCACAGATTCATAGTCTTTCATCAACAATCACCCATTTCCCTTGATGTTTCATGCT

A\_14\_P128282 CTAAAGAGTTTGATAAACTTGTGCCCCTCCTTAAGTTAACTAAGGATCCTTTTCATTCATG

A\_18\_P22840505 GTTAGCAGAGTCAGCGGGCAGGGAGGATCTGGATCCTGGGGTTGT

CUST\_2415\_PI426210822 ATCTCTCGTGCCTCCATCTGTAGATCCTGTGAAAACCTCCCCCTC

A\_14\_P201810 TACAGAAGAGAACCTTCTCTATCACCAAACTAACTTGCCTTCAGAATTTAAAATGGTCC

A\_14\_P123647 AAAACAGACTGAAGAATATGCTAGAGACTGGCTGCAATATAAGTGAGGTCTAATTGGTTT

A\_14\_P122321 CTATCAGGGTGCAAGTATCTTACTACTTAGCCTAAGGATGGGAAAATATCTCTTCCCTAAT

A\_14\_P112200 TTGATGTTGTGAAAATATCTAGAAATCGCAAATAATCAAGCAGATAACAGCCAGGAAGGG

A\_14\_P139831 TGGAAAGTAAAATTGGACTGGAAAGTTAACTTCATGTTCAAACCTTGAACCAGCATGAATTC

A\_14\_P113170 ACTATTCATGACATACAAAAAGAGTGCACAATCTGACTTTTTTCTTGTTTTTGTGGACAG

A\_16\_P03298686

CGACCATAATACAGAGAACATCACCTTTAAATTTGTCCCTCTTTTATCACCATCCACTTAG

A\_16\_P17517806

GGGAAGTCCATTTCTTAATCAAGTTATCTGCTCTTCACAAAATTTACAGAATCCCTAT

A\_14\_P108167 CTAAAAAGTTTGTAGAAATATACTTCATGATTCCTCAGCACAGTGCCTGGCTAACAGATACC

A\_14\_P105442 AGGCTGTAATGTGTGTGGAAGACAAGATGGATATATGGAATGATTAGTGCATATGACAAT

A\_14\_P122212 AAGGCTGTCTTTGCACTGAGTTTGGAAATTTACTATTATAAAGCCATATATTCAGCCCAT

CUST\_5912\_P1426210822 CTGTCTGGTCTGAGTCTAGACTGTTTCGTTGGCCAGCACGTTTTGCTG

A\_16\_P20736527

AAATAGAAAACAAGGATTGAGAGAATCTTTAGAGATCCAAAAAGATAGCACTTGTGGGGC

A\_14\_P130063 CTCTCAGCCTGTATCTCTATTTTCGACCTCACAAGGCAAGTCTGTAATTTTTTTGTGT

A\_14\_P119015 TAAACTGATTAATCAATGTGCAAAAATTGCTAAAGGCATCGTTTTCTGCTCTACTGGAAC

A\_16\_P01471650

GTCTCAACAAAGCCATTTTACTAGAATTTGACACCCTGATGACTAAAAAACCAGACATCT

A\_14\_P128901 GTATCTTGAAGATCCATGGTTTTGTTTTGCTCTATTGTTTAGTTTTTACTTGGGTGCAATG

CUST\_6212\_P1426210822 CCTTCCCTCCTGAGCAGACACTGGCTGAGATTTTCCAGCTTCGAC

CUST\_1146\_P1426210822

GCAAGAAAGGGTACTGAACTATCCCAAAAATACAATGGACTTAATGATGGTTAAATGG

A\_14\_P103543 CTTTAAAATGAGAAAATGTCAAAATGCCATTATCAAGCATTTTCTTACCCTCTGAAGAG

A\_14\_P100826 GCCTGTTGTTTTAAGAGAGAAAAAAAATCAAGGATATCTGATTGGAGCAAACCACTTCTT

A\_14\_P115987 CTTTTTCACTCAGTGATCTCACTCTGGTCTGTGGGATGAAAGAGGCAT

A\_14\_P127359 GACAATAGAAGTGAGAAGAGGGTTGTTTTAAAGCCGAAAATTCAACATAAATGCCATGTTT

CUST\_3005\_P1426210822 TTTCTTGCTATTGTCCCATTTGGAGTTGGTGTGTGACACTTGCAC

CUST\_8650\_P1426210822 AACAGACCTGAAAAATTGAACCACTTCACTTTATTGCCATTCTTCTGCAGAGG

A\_18\_P10671580

ACAGTCCAGGCTAAGTATTAATGATCTTCTTTGAAGTTAAACATACCCTTGCTACTTTCA

A\_14\_P125212 CTGCGTTTTATTATGGGTATGGTGATTTTTAATGAATGGGGATGGATAGGTGAGTCTAAA

A\_14\_P111968 AAGACTTGTTCAATGCGAATTTCCCCTTCTACATTGTCTATCCCTGTTTTTATATGTCTC

A\_16\_P15010845

AAGGTCAGTCTTTTATTCACGCCAACTTCTAAATTCGAATTATAGATGGCACTTGATCC

A\_14\_P122327 TGGAAACTTGGATCAAGAGGGTGTGACAAATAACCAGGTATGCATGCTTAAAAATTACTT

A\_16\_P18477508

CCCAGCCTTTTTTCTATATGTCTCTTATCATTCATGTTAAAAAACTCTAAACCCCAACC

A\_16\_P00924256

ACATACGAGACTTCCTATGCTTGATTTTCGCATAATTGAACAGACTATCCCCACTTTATTT

A\_16\_P02684841

ATTGAAGCAATGCCTCTTCTAAGTGACTTTTTTAAACAATATCTGTAAGCCACCCAAGAG

A\_14\_P112300 GAACTTGGGAAGCAAACAAAATACCTAGAATTAGACTATTACATACAAATACATGCCATT

CUST\_2635\_P1426210822 AAGATAGGAATAAGGTCAGGGCGAGGTTTCAGTTTGGGATGTGGAT

CUST\_1912\_P1426210822 CTGGCTATCTGGGGGGTGCAAGGTATAAAGTTAAAAAGTTGAGAATGGTACT

A\_14\_P133947 GTGGGGTAGAATAAAAATGATTAAGAAGTCTTGAGAAGTTTTAAACTGCATGCAGCCTA

A\_14\_P136487 TTTATGGGGTGGGAGGAGTGTAACTTTTCTTTAAACTGAATTCTAAGCAGTTTTTCAGTTT

A\_14\_P134770 GTATTGCAGACTAGGGTGGGAGAATTGGTAGAGGTAATGTCATGTGTATGTATTATTTGA  
A\_14\_P128873 CCTTTCTGGTTTCTCTCCCTCTCCAAGCATCTGTAAGTTGCACTCA  
A\_18\_P22843215 ATGAGGACCCCTTTCTGTTCTCCATCATTCCCCACCTTCTGGGCA  
A\_14\_P130222 ATAAACTTGCCTGAAACTCATGTTTGGGTGTCATAAAGTGTCTTTCTGAGTTATTCTCT  
A\_14\_P201109 GGCTGAGATTTTCTGATTCCACATTCTGCAACAATAAAATATAAACATGACTAACCAGG  
A\_14\_P122518 ATCTGAAAGAACTCAAATATAATGTCATGAGATCCTGACCATCACATTGCTTTCTAGGC  
A\_14\_P131350 CTGGCAGTAGGAATGGAGGGATGACTGTAAGAATAAATTCCTGCTGAATAGCAAT  
A\_14\_P139262 CTCTTCAGTTTCCAACCTGGAGTTAAAAGTATTTCGAACCAGAAAGTTACAAAAGCAGGATT  
A\_18\_P25508969  
CCCTGTGTTCTCCACTATTAGAGAAAACCTCATCATAGCGTAAATATTGAAATCTTCCCT  
A\_14\_P103064 TAAATTAAGTACACGAATCTCACCAACATAATTCGTGTTCTGTGGTTCCTGCC  
CUST\_8110\_PI426210822 CTGAGGCAGCCTGTATGCCTGGGAAGGAATGTGACATGGAAGAGA  
A\_14\_P114273 CTAGTTTCAGATTTTTCTCTAAGGTTTTGTAGGAAGAGAAAAATTGGTCACACTAACGCC  
A\_16\_P18841171  
AAATGACAAATGCCCCCTAATTCCTATTTATGCCCAAATGATTCTATCTGATGTCTTC  
A\_16\_P40426338  
ACATCTCTATGAGTTCTCTTAATTCACTGGTGCTAAATGATGTCAAAAAATCCAGGCTCT  
A\_14\_P110807 TTCAGGTTGTTTCCAGTTTGTCTCATTTTAGGAAAGATAAGCAGTTTATTGCTTGTCT  
A\_14\_P100319 ACTGAAGACAGACACATGCTAAGTTTTCTCACTGTAATCTGCCTTAGTCAAGTTAGAATT  
A\_14\_P111252 TGAGAATTATACCAAGAGTTGTGGCTTAACTGTCAGCATTGCATAAATTTCTAGCACCT  
CUST\_3606\_PI426210822  
GTTTTATCTTCTGTACCAGAGCATAGGTTATTTTAAAGCAGGGAGCTTATGGCATTCAAC  
A\_14\_P112003 CACTAGTAGATGGTAGAGTTTAACTAAGATCCCAATAGACGTTTGAACCTCAGGATACTT  
A\_14\_P103631 AATAAACTCGGAGTGGCAGACTGACAACTGTGAGACATGCACTTGCTAC  
A\_14\_P127737 GCCACTAAATACTTGAAAGAGGAACTATGACTGAGGGATATTCTCTAAGTTCTTCTCAAC  
A\_14\_P122030 CTACCTACTATACCCACCCCTTTCAGAGTTTTATGAAATCTTTGTAAAAGGTGTGATTT  
A\_14\_P100895 CAGCCTTCAAGTTCAGCAAATGCTTGTTTAATGACCCTGGTTTATAAATGTCTCCAAG  
A\_14\_P118947  
AGAGAGAGAAGAGTGGAACCTGACTTATCTAGAGAGAGAGATGAAAGAGATCTTATTGGCT  
A\_16\_P00254210  
CCTTACCTGAATGTGCCTAATTCTAGACCATTACCTCCTTTTATGACTTCCAACCTATAGA  
A\_14\_P131789 CTTGGTTATAACTCTGATTGCTGTGATGGCATTTTGGTAAGAAAAAGTTCACTGTTATGC  
A\_14\_P132282 CTGAGTTTGCTCCTTGTCATTTTGTGTTGTAATTCTGAACTTTTAAAATACCTTCCCCACAT  
CUST\_6514\_PI426210822  
ACACCTTATGTTCTAAATATTCTCCAGTATTCTAAAATATTCTAAATGCTAAGGAAATA  
CUST\_9722\_PI426210822 AACAAAGTATTGAAGGAATTTCCACGTGGACAAGGAAGATCAGGCATTC  
A\_14\_P129350 CAGAACAAGAAAAATACTATTTGCCATGCTATTACCTTGGCAGATGTGTAGGTGATAGTC  
A\_18\_P14137225

ATGAACAAAGTGGAAGATCAGACAGTAGAACAATAGACTGTATGAAAATGGAATGGACTG  
A\_14\_P135065 ACTTCTAATGACTGTCTAATACTTTTATGAGGCCACTAATTGAAGGTGCTAGGCTTTGTT  
A\_14\_P139134 TGGAACAACCTCCTCAAATTCACAATTAATCTGGGTCACCATTCTTGTAATTGTTTTCT  
A\_14\_P123047 CTCTCCAGCGTAAGGATAATTAATTCCTAAAGTAGGCCTACCCTGAAGTTATCAACTA  
CUST\_1133\_PI426210822 TTATTTTGGAAATTGTTCTAGAAGACACCAGTGAGGCAGGGGGAAGTAAGAAT  
A\_18\_P14166257

AAAGTCCGTCTTTAGAAAGGAATAAATTCACCTGCACACCAATTTATTCCACACTGGTAGAT  
A\_16\_P15498236

TGGCATGCTATCATCGAAAACCAACATAACACCTTGTCTCAGTAGTTTATATTAATTGCC  
A\_14\_P130384 GGTCACCTCAGGTTATCAATGGTGCCAAAAATCTGGATTGAAAGGTAAACCTTGTA  
CUST\_3238\_PI426210822 CACAAAGGCTTCTGATATGGAGTGGGGCCTGCTTGCCTCTGTCTG  
A\_18\_P14136375 ATCCACCATGATCTGCAAAGAATCCTTAAGAGAGACCCTAGTCTGTGTTTATGTG  
A\_14\_P138490 AAAAAAACCTAATATGTATTAACCTAACACCTAAGAGGAAACCTCTGGTAAAAAGAG  
A\_14\_P200101 ATGAGTTATTCAAAGGAAGTCAATTTTACCTGGTTAATTCTCTTAGTCGAGTCACCTCAG  
A\_14\_P117654 TATCCCTAACACCATCCTCCAGAAGCCCTTTAGAAATCTAACAATGTAAAGTGATTCTTT  
A\_14\_P126432 GGGTTTTGAAAAAGAACATGCAAAGATCTTTCTTTTGCACATTTTACAAAAACACCACCT  
A\_14\_P123807 CATAGGCATCTGTTTGCATACTAAAGTAGCACTAGATCATTTACACATGTAACAGGGAA  
A\_14\_P138827 ATAAGTTAGAACTGTTTGAACACACTCGATAGAAGACCAGCCAAGGAACTAAATTCAC  
CUST\_5107\_PI426210822

AAACACTGAAAGGAAGTAAGGGTAGAGCAAAAAAAGTAAAGCATCAGGTAAATATTTA  
A\_14\_P129330 TTGAATCTATCTTCCCAAACCACAAAAGTAAGAAGTGTTTCATTTTATACAGTGAAACAA  
A\_14\_P116881 CTATTTGATTTGGAAAAGGTTTCCTTTTACTTTAAACCATCAGAAGAGGAACCTCTGGTT  
CUST\_9793\_PI426210822

TCATACTTCATCTGATTTTATAGCAGAAATGATGTTGAATGTATTAATTTGTATATTCAT  
A\_14\_P116830 ACTGGAAAGATGAGATTGGTTCCAGCCATTTACTTGCTATTTTAAATCAACATCAAAGGT  
A\_14\_P109928 CTCATTAAGAGTAAGACATCTTTACAACAGTCTTTGAATGAAATCAGTGGGCAGAGTGTT  
A\_14\_P133619 GGAACATTGTTCCCTACAAGGACAAATGATGGCTATTACATTTTCCAAAACTACTACTG  
A\_14\_P138298 CTTTCATGAGGGCCGGATCTTACATTTGGTAATATAAAAGATGTTTACATTCACAAAAAGG  
A\_16\_P16191621

TTTTTTCTGGTGCTAAAGAACAATTTACCTCCTAAGCCAAGAAGGAAAAAATTCTCATC  
A\_16\_P18151438

AAATTGCCAAAGAATTCCTTCTTAAGAAGCAACAGAGTTATTACAGATTCCTGTCTGCAG  
A\_14\_P136407 ACAGAAGTTACTTTTTAATTTTTAAGGAGGAACCAGTGATGATTGGTGACAAATCTCTCA  
CUST\_6416\_PI426210822

TATCTTAGGAGACATAGAAATGTTGTGGTTTTGAGAATGGGCTTTTATATATTTGGCG  
A\_18\_P14775791

GCATCAACACATTTTACTCTCATGAAAACTGATATCTTTAAAATCTAAAAACACCCCC  
A\_14\_P126791 CTGGCCTGGTAACCACATGCAACCTAATTTCTGTAATACGTGAATATATGTTAATAGCGA

A\_18\_P22839400

GGCTAAACACAGTCTTCTCTTTCTGTAAATTTATATTCAGAGACACTTTGCATTGTTTTCC

A\_14\_P139519 CTCCTCAATAAAAGTCTCATCTTCTTCTTTCACTTCATCTCCCATGTAGGGAATATTGCA

A\_14\_P132664 AAGTATTGTTGCGTTCAGAAAGGCTCATTTGTGAAATTTTAAGGTTTTTAATACCTCGGA

CUST\_1390\_PI426210822 ATTTGATTATAGGAGCCAGTCAGGGGCCCCCATTTGTTTTGATTCCCT

A\_14\_P123161 GTATTCCAACCTGAGTATACAATGCACATCGAAAGGAGAGAGTGTGCTTATTGCCTAAC

A\_14\_P104488 CAGCAGAATAGAAACAATGATGACAGTTAAATGGTGAGATGAGAGTGAGAAACGCTGAA

A\_16\_P17998807

AAAAAATTGAAGCGAACCAAATATTTGAATGTTGCACATTGATTCTGATGACTCCTTGGC

A\_18\_P13213032

ACTCAAGTTGTTCTCTGAACCTAAAACACTTACACACTGAATTTGAACTTAGACAGGAAG

CUST\_430\_PI426210822 GGTGAGCATCTTTGCAGAGTTCCTCTGTCCCTGTGCCAGACTCTAG

CUST\_5076\_PI426210822

TTAGATTTTACATTTTGTAGGGCAGAGCTACTTAATATTGTATTTACCCAGAGGAAGAT

A\_14\_P123754 CTACCTGGACCTTTTGTCTTCTGTTTGACAACATGTTTAATAAATAAAAATGTCTTGATA

A\_16\_P19339435

AGACACATTCCACACATGATTTCTACTTGCATTTATGAAATCCATCTAATCAGCCCTACT

A\_14\_P122757 TTTTTTTGGCAATCCTGTGCATAACAGACCCAAGTTAGATTTTGCAGATTTACTGTTTGA

CUST\_5111\_PI426210822

TATTGACTGTAGGTGTAGGGTTAGTCTATTGAATAAAGCTGCCTTTCTTAGGAATGGTG

A\_14\_P125639 ACCACATCGCCTTTAAAATAAATTTGTAGGTGCACCATGTGAATTTCCAAAGCAAAGAAA

CUST\_7204\_PI426210822 CATATCATAAACCATTTCTGACCCTGATCTCGGAACAGGATCCCAGAAC

A\_16\_P19889539

ATTGCCTTACTAAACTTCATAGGTTCCCTCTAGTTGTATTCAACGTATTATGCAGCCTTG

A\_16\_P18529111

AAAAAACAAGATTGGTTTCCTCAACATTCATTTCAACCTTTCCTATTGCATCTTTCCA

A\_14\_P125915 TTTCAAGAGACTCTTACGACATGCTCCCCCTTATCTAGGAAATGACTTTTACATATACTC

A\_16\_P16134896

TTTTTTCCTGAAGCATCAAATTCCTTATCAGTTCGTAGCAGTCCAAATTCAGATTCTTGA

A\_14\_P121225 CCTCTGTGAATGATCTACATTCAGGAAGTTCAGAGCACCTAACCAAACAA

A\_14\_P132978 TTAAAATCTAATATTGTATTCTTGTCTTAAACAGTGACTTTGTTTTTGTAGGCTGCATCC

A\_14\_P126781 CTGCCGATGTTAGAGTGAAACTATCATTTTGCTAAAATTACTAGGTTGTCAAACCCACAA

CUST\_1809\_PI426210822

GATCTCACTCAGAATACTCTTAGGTAATCAGTCGCCAGTCTGAGAGAAATCAG

A\_14\_P114823 GTTAGTGTGAATTAGACAATTTAATCAAGAAAACTTCTGTGCCAAGAGTTGCAAGATT

CUST\_5328\_PI426210822

AACACTGAAGAATTTATTTTTAAACACATAAAGATTGCATTCATTCATCCTTCTCCACAC

A\_16\_P36142115



TGTCAAGACCTTTACAGATCCCATCTCCTATAAAGTTCAAACCTGTCTAATCAAGCATTCA  
A\_16\_P40401282  
AAAGTCACTGGATGGATATCAATCATGACTACCCCTAAATCATTGAGTTGCTTTAATCC  
A\_14\_P132196 TGGGATGATAAGTAAAAATGAACTGAGATCAGGTGGAAGTTACCCACTCTTGAATTAGAT  
A\_14\_P101715 ATGGTTATATCCACATCACGTTTGCCATTTTCTAATTCAGTGTAGGGAAGTTCTTCAAAT  
A\_16\_P18773285  
TAATGCTTCTTTATTGTCAATTTGCATACCTACCAGTCTACAAGTTACTTCAAAGCAGGCG  
A\_16\_P18337677  
GATAGTTTCTCTCATTATCCATGTAATCCACTAGATCCCAGAATGTAGAAAGGATGCAGT  
A\_14\_P200809 AAAACTAGTCTGTGGTTCTTTGCAGTTTCTTGTAATTTATAAACCAGGCACAAGGTTCA  
A\_14\_P105967 CTTCTTTTTGGAGACTTTGGGTCTATTGGCCTTTCTGTATAGGTGATACCCAATG  
A\_14\_P115559 CTGTGAAACAATCTGTGTTTTTCCCTCTTGCATTTATTTGCATCATAAAAGGCTACGTTT  
A\_14\_P138431 GACAGGTGGGTAAGAGAAATATAAGGAAGGAAGAGCAAAAAGGACTTGATTCTTTATTGT  
A\_14\_P118233 CAGGTCAGACAACTCAGTGGAGCATTAGATTACAGAGCCAAACTCTC  
A\_14\_P106218 AAATTTTAGTCTCTGGAACATCCAAAACCAAGCAAAGGGATGTGACTATTTTGAATGAAT  
A\_14\_P105612 GTTGAGTTGAATGACACAGGATCTTACTTTTTCCAAATGAAGTGAGTAACCCTTTCTTTT  
A\_16\_P35553090  
ACCCTCATCAGCCAATTACACTCTCAAATCATTAGTAGAAGGATCAACTTTACTCTCTT  
CUST\_7229\_PI426210822  
ATTTGCAAATATTTACTTAAGGATTTAGTAATTTAGTAATGTTTAGTAATTTTTTCAACA  
A\_14\_P126365 ACTCAAAGTTAACCTACCTGTAACTTTTTAAAACTTGTAATAACTGACCCTCCCTTC  
CUST\_290\_PI426210822 GAACATTTTTCTGTGCCTGCAGACTCAGGGTCTGAGGTTGAAGAA  
A\_16\_P21507196  
ACTTCTTCAAAGAGAAAAGATAGCCATAATACCAGTCTGTTTAGTAACACTAACACCCCTCC  
A\_14\_P104854 CTCTACTGTATCTATCCCAGGATATTTTTCTTGGACTTGATAGCAGATGGTTGACATAA  
CUST\_5547\_PI426210822  
TCTTTTAAATTGATGAGTCAAGAGATTGCAAACTTGATGAAACAGGAAATCACTGTTGG  
A\_14\_P111349 TGTTGGTGATGCTTTGTTCCACATATTCGTTCAATTTGAACTCATTATCCCAGGAAATAT  
A\_16\_P16370500  
AACCTTGCACCAAATATTAAGTACCCTTTCTATTATATCATTTTTGCCGAAATCATCCA  
A\_14\_P118617 AGATTGCCTCATCACTCTCAGATGGACTAGAACATTATATAGATACCAAGTTTCAAGTTTCA  
CUST\_1457\_PI426210822 AGAAAAGCTTATCTGTTAGTTTTCTTTCCACCTGGAGAGATCTTCCCCCTT  
A\_14\_P134551 AAGATCATTTTTTGTCCCAACAATTGCTACTAATTACAAAACAAGCACGCCCATACCTTA  
A\_14\_P133798 CTAAGCATGTGAATAACCTTGTGCATTTTTGCCAACAAGAGAATTTCTATCTTAGAACCC  
A\_14\_P124838 TGCTCGAATATTTCAAACAACCTGGTCAAGTCAACAATGGAATAGATTCAAATGAGGTAA  
A\_14\_P134271 AGGGTATTCACAGCACACAGCCAGTGCTTTATATATGTTCACTGAAAAAAGGACAC  
A\_14\_P131367 CATTGCAACAGAATAGCAGCAGTAATATCAGTTACAGCAATGCAATGCAGAAAGAAATCA  
A\_14\_P110161 GAAGTGGTGACTAGGCTTTCAAAAACCTCCATTGAATTACAAAGCACTATCCAGTTCTTA

CUST\_4224\_PI426210822 AATTATCTGCCCTGTTTAGATGGCAGCTTCCAGAATCAAGTTGGTCAGTTTT  
A\_14\_P138736 CCTATGTTATTTTCTGATCACCTAGCATTCCTTTTCTAACTCTAGTAGGGGACTGATAA  
A\_14\_P121732 AATGAATGGGCTGAACTCCACTGATGAAAACATTTGATAATGTGTAAAATAAAAGCCCTG  
A\_14\_P119011 TTTCTGTTAGAAAGTAATTGGCCTCTTCTTTGACTGTCCTAAATTATCTTTGAACCCTGT  
A\_16\_P40337416

ACCTATGGCAAAATCCTAATCAGAAAACTAATTAACCCTTGTCTCTGGAATAGTTGC  
A\_14\_P112091 AAAGAATGGATTCCCTGTTCCCTTGGCAGTCTTGTAACACTGCTGAAATCATC  
A\_14\_P114747 AGTCTTGGATTCCAAATATAAAATATGTCCCTATTCCAGTCGCTGCTGAATCTGATAGGA  
CUST\_3124\_PI426210822 TCCTGTTAGTGCCAGAGCAGAAGAATAACAGCTGCTTCTAGATGCTTCA  
A\_16\_P01975992

ACCAGGTCAATATTAAGAGAAGAGTGTAATCACATAGATCAGTATCAGACACCAAATGCA  
A\_14\_P107881 GAATGATCTGGGATTCAGGACATCTGCTTGGTCAGGATTTGTGTATAGACTTC  
A\_14\_P107090 CTCTCCTCCCTCTATAATTTAAAGAAGAAAAAGCACAAATTCAAAACCACTGTGCATT  
A\_14\_P108956 TTCGTGGAAATCCTAAAAAGCAACACCACATAGTGCTGGGCTGTATCC  
CUST\_4249\_PI426210822

CCCTCCAAGGAGAAAGAAACCCTCCACGTGTTTTATGAGTATATTCCTAATAATGA  
A\_16\_P18224213

AGAAGGCAAAACAATCAGTTTTATAATCCTCAGAGTCAGATATTGGAAAACCTTACCAGGG  
A\_14\_P103023 CTAGTTTTCTTCTGTGACAAGTTGATTTTATCTCCAAGACTTAAGGCCATTCCCTGTAAA  
A\_14\_P102773

AGCAATAATTAGAAAAAAGGAGAGAGAAAAGTGATTTAAACAGGGTGGATTCCACTCTG  
A\_14\_P107277 TAAAGGGGTTTTAATTATCTGGTTTTGTAGGACTGGTTAGGAGAATGAGTTGTTGTTGTT  
A\_16\_P18906235

GCACAGAAGTTCCTAAACTCATTCAAGGCGGAAAAATACAAAAACGGTAATCTTTATGG  
A\_14\_P115253

AGGGCTTACAAAACCTGCAAGATTTTACAAAGACCTTACAATAGCAACATAGAAAAGGGGA  
A\_14\_P131307 GTTATCCTCAGATCTAAAGATCCAACCCAGAGACTCCTCATTAACCTCATTGATGC  
A\_18\_P16238172

CACTGCAGTATACTTACCAACTTCCAACCTTATAATGTTAGAATGTAACCACTTCTCTG  
A\_14\_P115022 GCCATAAGGGAGAAGAGTTTTATTTGGGGAAAATAAAAGAAATTTCCACACCTTTGTTCTG  
CUST\_5897\_PI426210822 ATAAAGCCCACCTTTCATCTTGCTGAGACGTTTCATGCCATCCTTA  
A\_16\_P18549077

GCTCCCCTCTATAATTGTTCACTATAATCACTCATCAGTTTCATCTTGCACTTATCCA  
A\_14\_P133981 CAGACACTAATAAGACTCATAACATGGCATTGTTTAACTTCTCATTTACCAACTCCCAGC  
A\_14\_P128098 CATAAAGGCAATACACCAAAACATTGGCTGTCACTGAGAGGGAGAGTATTATTAATGTTT  
A\_14\_P137416 TTAATAAATTGCTAATCCAGTTTAGCCTCAAATCAGTTCCATCCCTTTTCTCAATCCCTT  
A\_14\_P108203 TAAGTGCTGTATTGCAATTAGTTTTATGTCTCTCTCCTCGATGTAAGTGATGAGTGGAGA  
A\_18\_P10306995

ACCCATGACACTTTGTGAACCTGCAGTTTTTTCATTTAGAACTTGACAGATTTTCATTC  
A\_16\_P16840272

AACTTCATGTAGAAATGGAACCTTCTCCAGATTCTCAGATAACTCTCTATGGACCTCTAC  
A\_14\_P100896 TGCTTTTTGGTCCGCATTTGGTAACTTCTTTATCATCTACTATACTCTGTTGTGTCTCTT  
A\_14\_P123605 ACTGATTTTGATGTAAGCATATCAGAGGGCCTCATCTTTTCTCCTTGTTTTCAAGTTATT  
A\_14\_P122772 GTTGGCTATACCCTCCTATTTAGCCTTTATTAGTGATAAAAGTTCGTAATTTGGCCTCTC  
A\_14\_P130778 TGGGCCTAGAAAGATCATTGCTTTATAGTGCTTCTCCTTTAGGAACTTAGTAAATACTGC  
A\_14\_P104136 CTCATAATTGAAGGTCTGAATTTTTGGGCTCCACTTAATTTGTTAAAAGTGGCTTGCAAA  
A\_14\_P138323 AAGTTTCTCCTCATCGAACTTCACTTGTAATGTCACTGTATGGTAACTACACACCTTAT  
A\_14\_P201726 GAGATGATTTATCATCTCCTGGTGTCTTTTTCTGTTTGTCTTCAITTTCCCTGGTT  
A\_14\_P126476 TAAACAACTGTAAACAAGAAATACCATCCCTCTCTTTACCTGACTAGTAAATAGTCT  
A\_14\_P125418 ACAGAGAAGACCCAGGAGAGAATATGGGAGACTCTATGAAACCAAAAAGAG  
A\_14\_P116107 TCTTAATTGCAGATTGATCTGGAGCCAGAAGGAAGAGTGTATGTGATCATCGATCT  
A\_16\_P16191584

CTTGTATTTCTAATTTCTATGAGTATTTGAGGGGTGGCTATTTTATGCTTGCTGATTGTA  
A\_16\_P39068634

ACCTGCTCTCATACTATACTTCATCTATGGCAAATTACCTTTACACTTCAAATTACGGCA  
A\_14\_P115705 ACTATATGCCTTTCAAGACTGCCTAGATGTAGAATCTATGGCAAAGGCCATTGCTT  
A\_14\_P113609 AGCATATCGTCAAGTTTTGGGTTTTCTTCGTTTTTTTTAAAGAGTGCTAGGTTGAAAGATG  
A\_14\_P105071 TTTTATCCACAGAATCCTCACTCATATCCTGGTAGCCTCATTAACAGCCATGCTAAA  
A\_14\_P110410 CGGATGGTGTTCATCACTCTTAAACATTTACCCCTCCAGTGAGTAGAACTGATATT  
A\_14\_P127815 TAAACACGGTATATATTTCTTTAATCCTCCCTCAACACTTGAATTCATCTATGAAGTCCA  
A\_14\_P202224 CCCTAAAATGTAGTGACCCGTGAAAAGGACAAATAAAGCAATGAATACATTTTCAGTCGT  
A\_16\_P36230939

CTTGGGCCTGCTTTTTTACATTTTCATCATAGTTTTTAAACAGACACATTAATTTCTCGACA  
A\_16\_P15946512

AAAATGATTTGAGGAGATATGAATAGGGTCCAGCATTATCAACTTCTTTACTCACCGAGA  
A\_16\_P02323140

GAGCAATTCTAGGAAGTATTTGAACAATGCCATTTTTTAGTCTTATGGTGCTACACAGGG  
CUST\_8680\_PI426210822

AATGTCTTTGCCATAGGGTACCATTAGGACATTGACTTCAATATGGCATGAATACC  
A\_14\_P113217 AGGGCTCCTTCTGCTATTTAGCGAACACTGAGCATTTAATTTACAAATGTTTGCTAGG  
CUST\_3268\_PI426210822 TAAGTGGCTGCAGCTCCTTCTTGCTTTTTGTGGGCAGATGCTCAT  
A\_14\_P110468 AAGCCATATAAATACAAAATCCAGACTCTCAATAAACTTCTACACCAGATGTGGACTGA  
CUST\_8170\_PI426210822 ATGTTTCAGGGAACGGCGTGGTGGGGAACAGTCAGGATGAGCTGAG  
A\_14\_P103019 TGCTCATATCAGAGCATCACAATCCAGTATGAGGGGGAAAATCTGAAAATAACTCTAA  
A\_16\_P03475637

GTTTGTCTTGGGCAAATTAGATGAGAGTGATCATGCTATTACATTAGTGCAATCAGACC

A\_16\_P38056205

AATCAAAACTACAGAAATGGGTTTCATAAGCATTTTCTCTAACTACTGCGTCTACCCAGA

A\_18\_P16432166

TCACAGTAATTGGCAGTAAAAGACTTTTTCATATTCAAGTGTGATTGATCTAGCCTGGCTT

A\_18\_P24764045

TGGATCAACCAGAATTCCTACAGACTAGAGTCAACCATAAATAACTTAACAGTCTAACAG

A\_14\_P113219 CCCAGCATGTATTTCTTTAGAAATTCCATAAAACGTGATTTAGAACACACTGAGCGTGAA

A\_16\_P15751304

AAGTGAGGACTTCTAAGTAAGTAGTAAAAATGAACCCACACCTATATCACAGAACCTACC

A\_16\_P00444195

AACATATTCCCATTACTCAGTGAGAGATTAGGCTTAAAACCATGAAACTCCAGAGATAGG

A\_14\_P129065 TCAATTGTTTTATTTTTATTTAGATAATTAGCACCATGGAGCCTCAGGTGTCAAATGGT

A\_16\_P36230559 TCAGTGTGTGTCATTTCCTTAGGAACATGAGTGTTTTTGGAAGGCCTTTGAT

A\_14\_P122586 TGGTTTCAGGTAATAAATTTCTTTCCCAAGAAAGCCCTCAACAACCTTATGTTACAGAA

A\_14\_P126462 GACTATGATTTTAATGTGATCCAGCCCATGTAAAGCCATTTTAGTTCAATCTCGGAGTTC

A\_16\_P01804548

CACCTGGAGTTATTACACCCTGTAATCCTAATGACATATAATCCTATACACCAACAGGAT

A\_14\_P128113 ACTCTTGTTTTTGATAACTGGTTTTGTTTTTTGTCAGAATTAATAACAATCACTGG

A\_14\_P103551 TATATTGCAAAAAGATAAAATACTGGCCTACAGTCCCTTATTCAAATAAAAGTGGTTCTGA

CUST\_7209\_PI426210822

GCTCTTCTCATGACCACAATCAGTTTACTAGGATTTTTCCATAGGCTCAAAGAAAAGA

A\_16\_P19813448

AAAGAATTGACTATGTCCGTATACTTTCTCAACCATATCTCATGTGTAATCCACTTGGCA

A\_14\_P112617 CACAGGGCAAGGAATTGATCATATTCTATTTTCCTTTCAGGAATTCATAAAATCCCTAGG

A\_14\_P107685 CTCTGCCTTAGTCAGAAAGCATTTAAGGCAATATGCAAAAAAGGATGTAGAAGAAATCCA

A\_14\_P201692 CTTTTAACCTTTATACTGAACAGGGCATTGTCTAAATATAGGAGCAGATCTGCAGATGGG

A\_14\_P118138 ACAGAAAGGTAACATACCTCACATTAGCATCAAGTTTGTCCATTACAGGAAATAAGCATG

A\_14\_P105019

AGGGGTAAGTGAAAACGCTTACAAAAATGTAGAACAATAAGACTACAAAACACCTAGAGA

A\_14\_P130975 TTCAATCGTTCTTCTCCAGACTCAGTCTCCTAGGGGTAATCTTTTAAATGTTTAAAGAGAA

A\_18\_P22839784

GGATGCTGGTTTTTCAGAGGTGATCAAACTTTTTTTTTTTCTTGTTTAAAGAAACAGATAG

A\_14\_P139223 ACCATCCCAAGAGGCTTTAACTCAATATCTTCAGGCAGAATAATAGTGAGTTCTTCAACA

A\_14\_P136464 AAAAGCATTGCATGTATTAAGTGCTCTTCATTAATACCTGGCTATCTGTTGGGTGTTTCAT

A\_16\_P03544473

AGAACAATGTAGTCACAAATTATTAACAGTCACTTTTGCTACTATCGTGCTTTCTTTTGCA

CUST\_10415\_PI426210822 GAGAGTGAGCTACAGAGCCGAGCAATATTTATGGATGCAACACGCATG

A\_14\_P131867 GTTAAAAGGCCTCTCTGCTCTTATGTAACAGTGGAATTCTCACCTTTTAAAAGAAGTTCT

A\_16\_P18063793

ATTGAAGCAGTAAGGAAAACCTTAGGATCCATGCAAAATACGAGTAAAAGGATGATGTGAG

A\_18\_P22841927 ATTTAGGGTAGTGTCTACTTGGGACAGTTGTGGGTGTTGCTTCTGG

A\_16\_P18195462

AATATTGTGTTTCAGACTGTCATATGATCTTCGGCCTAAAATGTATTCCTGTTTTTCCTGG

A\_14\_P100868 GGAAAATCGTGTAAGTTACTTGAATCAGAACTGCAAGTCTTGTTTCTTCTGTATCCATT

A\_14\_P114467 ATTTGACAATCCATGGCTGTAGAACTCAAAGAATTATGGAAAATTAACATGGTTCTGAGG

A\_14\_P135275 CTAATGCCATCGTCCTACGAGACAAAGAGATTTTATTTTAGAGAAACATTCACAGAAGGT

A\_14\_P104323 CTATACTTATCTCCCTATGTGCTTTTCCTACAACCTTGAGCCTCTTGGAAGACAAAATATG

A\_16\_P17204085

AATTGACTATCTTCCCAGTTTGAATTCACCTGTATAACTGTAAACCCACTTCACATTGTGC

A\_16\_P16470871

GAGGCAGTGATCGTTTAAAGAACAGATGCAAATATTCGAGAACATCAGACAATAGAAAAGTC

A\_14\_P126357 GTGAGGGGCGGACGACTACTTTTGTCTTCTTTCTTTAGACTAAAAAAGTTATTTTCGAG

A\_16\_P40376319

ACAGAAACACAAACTCTACGTTTGATGAAATTTAAAAAAACATTTGAATCCCAATCCACA

A\_18\_P22841583

GTTACTGCTTTCATCATCACCTCTCACTCTCATTTCCTAATAAGCCTGAAAAGCATGATG

A\_16\_P16326450

AATACCCATACCTCTACTACCTTGGAATAACACAGACTCCTCTCTATAACTTTGCTTTAA

A\_14\_P129220 CATCTTTATTCTGACCCTTCTTCCAACCAATGTAGTTTGTATGGAATTGACCTCAAATTG

A\_18\_P22841394 GGTTAGAATCATCAACTGCACAGCCTAGGTCAGAAGTGAAGTTTGTCTGTTTTAT

A\_14\_P125505 CTAGCCAGTCACCCTTTTCTTCAAATGTGCTGTAATAAAAGGGAAATTTTCATTCACTTG

A\_14\_P121723 TTTCTTTTTTGCAGGTTTCAGATTTGGGATATTGGTGTCTTCTGTTTTGGAGAAATTATTC

A\_14\_P127652 CTCCTGCGGATGAACTGAATAAGGGATAGTGAAGCATATTTTAAATGTTTGTCTATTGCT

CUST\_6409\_PI426210822

TTTCTAGCTCCATTACAGAGATAGTTTTTATTATTTGCTTCTTAGGACATGGCCTTAGCC

A\_14\_P135514 AAAATGGTTGGAACAAGCAGCCAGGAACCTTGAATTAAGTATAAGGTAATACTGATTTA

A\_16\_P03066654

TGCTGCCTAGAAATAATTCCTATAATCCAAGATCAACATCTCTGATAACATTAGCCTGCC

A\_18\_P14133549 GAATCAGAAATGGAGAAATGCTTCCCCACCTGGTGATTGCATCTTG

A\_18\_P14134554 GAGCATTGTGTGTGATCTGCAGGCTGAGGCTGGCTCAACTGCCTT

CUST\_8161\_PI426210822 GTCACACAGCACCATTGTTTCAGAACAATAGGAGGGAGAAGGAGAG

A\_16\_P36061872

ACACAGACAACCTCAAATTCATCAAGATCTTATGCCTTATCAATAGAAAACAGATGTCTT

A\_14\_P135628 CCTTCACAGTGAATAACTTACAACCTCAAGGCGAACTTATTCTGTTGTCTTATTTTTCTC

A\_18\_P22842073 CTGGGAGCACAGGGGAGTTTCAAACCTCTGGGGAAGGTGATCATTTG

A\_14\_P107529 TGTGTAGAACCCTTCTTTGAAATTTCTTAATCGGTGCATTGAGGTTTCCACATCTTTTTTC

A\_14\_P105404 CTTTTGTTCACTCCTGCATCAAATCAAACGGGGACTGGTAGTCCTCATATAAG  
A\_14\_P108283 TTTGTTTGTAAATCTGGATATCATCCAACAAAATCTCATTCAATTCGAGCAATGTGTGTCAG  
A\_16\_P1866689  
ATGCCTAAATACCACTTTTCCTTCATTTTAAACATAACACACATCATATTAAGCAAGCCTT  
A\_14\_P100189 GCAAGTATCCCTTGCTCACCAAAAACATATTCCGAAAATTGTGAAGATCCATGAAAAATT  
A\_14\_P133942 ATCAGGAAGTAGCAAACAAAAAATCAACATGCATAAAAAACAACAAGGTATCCCACAGTTT  
A\_16\_P18061984  
GCACGTTTTCTCTTAAATAAGAAGCAGGGTTTTAGGTAATCATGTCTCCTTAACAAACA  
A\_14\_P129570 ACTCCTGTCTTTTAAATTTGTCTCCAGGGCTTTTCACAGACATAGAATATTCCTCTCTATT  
A\_14\_P130938 GAAATAGGGTTCGATCACTTGACTCAGAAAAAAGGTGCTTGGTGAAATGGTAAGTTTAA  
A\_14\_P126521 ACAGGTCTAGTCCATTATTTCCACATTTAGCAGTAGTAATTGCTTTCTTTTACTCATTC  
A\_14\_P128119 GCTGCTCACGTCACTCATTTATCTTTTCTCACGAGGACTACTTCGGATAACAATC  
A\_16\_P37100823  
TCATAACCGTCATGTGAATACACAATACACTTTGTTCCCTCTTTTGATTACAGAGCAATG  
CUST\_1152\_P1426210822 TTTTATATGCTAACCCATTCATTGGCCCAGGGTGGGAAATAAGGGATG  
CUST\_6934\_P1426210822  
AAGACTTGAGTGAATCTGTGGGGGGAATTTAGAAAACATGTGTAAACCTCTAGATTT  
A\_16\_P19920956  
AACATTGCCTAGTGTAATCAAGTGAAATCATTTCTTTGAGGACAAACAAGACTTACCTGC  
A\_14\_P121570 TTCCACAAGAATGAGTGATTTTTCAATCTTTCATCAGGTGCCAACTCTTATTCAATAGGT  
A\_16\_P03546872  
TGCAGCGGTAATATTTAAGTCGACTAGTTATCCACGTTCCCTGAAACAATTTCTAAGGTTT  
CUST\_5724\_P1426210822 CAAGTACAAGGCCCTTGCTGTGTGCACTTATACCTGGAGCCTTATTTA  
A\_16\_P03587234  
ATCATCAACTGTGCTTATCAGATCCTTCATTTGTAAGTCCCTTGAAGAAAAAAGTGCAA  
A\_14\_P128896 TGAATTCGGCATCTTTACAGAAGAGACAAGGATCATGATCAATGAGTCTGGAAATTTTAG  
A\_18\_P16549590  
CCCTTGTCTTTTTAGTCTTTGATTACCAAAAATATGCCTCCATAAATACTTACGTGCGTC  
A\_14\_P126727 ATTAATATCTGAGTAACAAGGTAAAGTAAGGCCAGCGGTTTAGCCTCATAGTTAGGTGTA  
A\_16\_P41799699  
TGCTAGAAAACCAGTCAATTAAGTTTTAGAAAATCGGTCCAACCTATAGTCTCTGTTTCC  
A\_18\_P15961152  
AGGTCAAACCTTGAAGTTCTGTCCTAAAATTACACACATTCTGCCTTTAGAAAACCTCAGTG  
CUST\_2512\_P1426210822  
GTATTTTTGTACAGATAGGAGTTTTGGAAATTCCTCAAGACAACAGAGCCAGGAG  
CUST\_8927\_P1426210822 ATTTGATCTCAGTAACACCCTGACCTTTTCAGACTCCATAACCTTTTACA  
CUST\_3461\_P1426210822 TTCCAAAGTTAGTTGCCATCCCCAAAAGGGAGCTTTTAGACATTGAGAG  
A\_14\_P120050 ATAAATCCCCTTCTTGAATTTGTTGTGGCTGGAATATCTTTTGAATGCGTATTACCTATT

A\_16\_P19829861

AAAAACAAGTCACTTCTGGCAATTACATATGCCCAATTATGTTGTTACTTTCCACCTGAA

A\_16\_P18566037

AAGGCTTATGACTTTGCAATATCAATGAAAGGATTTAGGTTAAACTTTGCTCATCCTGCC

A\_14\_P127081 ACAGGTTTTATGACTCAGGTTAAGATAAAAGGTTGGGGATTTTAGGTATTCAGTCTGTAG

A\_14\_P106006 CAAGAGCAGACATTA AACATCTTTGTGCTTTGAAGAGAGTGAATTTTGGATAGTCTTGTG

A\_14\_P100550 AGACAAAAGCACAAACAATCATTCTAAATGAAGTGCTTTTAATTTTCAGACCAAACATTT

A\_16\_P18237168

AAAAAATGCTAGGGACCATATATTGAAAGCACTGTAAACTCATTAAATTTGACTCCCC

A\_14\_P109658 TTCTGCTTTAGTTTTTACATGAATGGTCCTAATGTCCGCCTATAGAAGATTTTGTGCACA

A\_14\_P118374 TTTCATGCTGTGTTGTTCCAACCTTTTCAGTTGTTTACTCAAATAAAGTCACACTTCCACA

A\_16\_P17642141

CCCAGACACTTTTGCTTTACAAAATCATTTTAATCTTACTCCTTTACATGCATTCCTGGTG

A\_14\_P108181 CTCTTCTGAACCCAACCTTCTTTCACAATGGTAACATCGCTCATGATGACT

A\_14\_P135879 TCAAAAGCAGAAATGAACACTCACCTCTGCCTTCGTTTCATCATCCTTTAAAACCTTCATAA

A\_18\_P22840733 TTTTTCTCCCACCACATCACAGGTAATGAATGAGGCTCATTTCACACAACATAC

A\_14\_P117160 AGTCTTCTCATAGCATTA ACTAATCTATTGGGTTTCATTATTGGAATTAACCTGGTGCTGG

A\_14\_P118998 CTGCAGGCTTACATCATTTTAGAGATAATTTTAGAAAACCTTGCAATTTGGCAGTTCCTCC

CUST\_4826\_PI426210822 ATGTCTTGCTCTGGACCCATGATATAATGATCTGGATACAGCCAAAGTCACTAA

A\_14\_P139318 CAGTATAACTATGAATCATACCTGGCTGGTTGTCCTTTGCAGATCTGTTGAGG

CUST\_8044\_PI426210822 GATCTTTGATACAAGCCACCTGTCTGGGGAAGAGGAAGTTCTCAG

A\_16\_P00686798

ATATGGAAGCCATAAGAAAAAGAGCCAACCATTGATTCTATACATTATACAGCCTTCCCA

A\_16\_P15742167

AGTGTTAAATCCAAGTTCATTACATCCCCAGATTTTTTCCACTATCCAATTGACAACACTT

CUST\_9375\_PI426210822 GAGCCCCTCCTGCCCCACAGGTAGAATGTTGAATGCACTAGTTCT

A\_16\_P17973106

AAAAACAATTGTGACCATGATATTAGCACCTAAAGCACTATTCCTTTTCTTAGCCTTGGG

A\_14\_P119619 ACACAAATGATGTCCTGGTTCTGGTTTCAGGTATTAATTGAAGAAACAGATCAATTATGG

CUST\_5062\_PI426210822 GTGAAAGATTTATCAAGGAATGACATGGTCCCCACCCATGACACTGTAAAA

A\_16\_P15934926

GTTAGTCAGAATCCATTTCCATCATTTCATCCAAAGACATTCAACTATTACACCGAGAT

CUST\_648\_PI426210822 AAGGCTCACTGGGGCTTGCTCAGGTGGGGATTACATATGTGAGTA

A\_14\_P109852 ATCACTATCACTTAAAACCCGTGATTTCTTGAGTATTGTTGCTACAGACCTATGTAGATA

A\_14\_P118356 CCCCTGGAGAATAACCTTCCAATATCAGAATTTATTTTCAGGCATGAATACATTACCAGAA

A\_14\_P130498 ATCTTTTTAAGATGATAACCTTCTCATTCACTCCCTTAACTCTCCATTGCTCAGAGTCAT

A\_14\_P104969 CTCTTGCTCATGTATATTATGACCTTCTGTGTTTTTTGTTTCTGACTTGAATAATTTAT

A\_16\_P00395338

ACCATCATCTAACTACCATGAACTCTTATTGAATCCATACTCTCATCTAAGACACCAGAC  
A\_14\_P105248 GCATTATGATCTTTCCTCTCTCCAAAGATGCTAAATTTCTGTGGGTTTTTTGTTGTTGTT  
A\_14\_P200014 TGCTTTGAAACAATCGACCTTGCAAAGTGGTAGAGAGCCTTATAAATTATTTTTGCAGCA  
CUST\_373\_PI426210822 CTTGAGTGGTCCCCTGTCACTGTGCTCTGGGCAGTGAGAAGTGT  
A\_14\_P117657 ATTCTCTTTAAAACACCCTATAAACACCTGGAAACGGAACTAAACGTAGACAAAACGA  
A\_14\_P107929 ATATTCTGGTGCTTCTTAGCAGCCTTCTGGAAGAGATCTCGCAGGTC  
A\_14\_P104309 GTTTTTTAGAAAGGATATTTTGACACAAAGAGAAAAAAACCCAACTGCTTCCAGGGTTAC  
A\_16\_P01393453  
AAACAGCCTCACGTTTTAAATGATGCTTAGAAAAGCCAAGACAAAACCTTAATACTGCCAG  
A\_14\_P105192 GAAGCAAGAAGGAGAAACGGAGGACAAAATACTTTAAATAGACTCATTCTGGTCTCTAT  
A\_18\_P16067202  
AAAAAGCCTTTTCTACCTTTCCAAAGTTCCTTAGTTGAGTCCCACAATACACATACTTTT  
A\_14\_P113109 TTGTCTTCTAAATTTTGCTCTTTTTTGACTGGTCTAGTCAAGTGACAGCCCGATTATTTT  
A\_14\_P136781 TCTCTCCCACTGAACTGTAAATCCTACTAAACTGTAATCTCTACCTACACTAGAAAGCAA  
A\_14\_P128610 GCTGTTGCTTTATTTTTAAATATGAAATTTGTAGTGACAAAGATTGCCCGCTGCCAAGGG  
A\_14\_P109986 TTCTTGATTTGTTTGCCATTTTTAACACTTTGCAAGGTAAGTGGTGTCTTTTTGCCTTT  
A\_14\_P110354 CTTTCATGATTAATAACCTGGATGGAAATTTTTTTGATAATGCTAAAAATGTTATTC  
A\_16\_P19325867  
AATGATGTCACCACATAGTATCCCTCTTACACGTTCCATAGATTGTATGCTTTTCCACTTA  
A\_14\_P136937 GTCAAGAAATTTAATATGGCACCAGGAGATTGCATAATTGACCTATTTGGCTTTCTGCA  
A\_14\_P201693 TCAATGAGATGACATGATGGAGTAGACAGGCTGATTTTGAAAGTAAAGAATCCAAGTTTG  
A\_14\_P133160 GAGGGTGTCTCACTTATGCTTCCATATGACATCCATTAATTTTTTTCCTCTCCTTTTCTA  
A\_16\_P17910655  
GGTCACAATAACCTACAAGATTTTTGACTGATTAGACAGCAATACCCATCAAAAGGACTT  
A\_16\_P15374259  
CCAAAATAGACCTAATCCCAGTTGAAATTAAGTGCCTAAACCTAAAAACCAGATCGTAGA  
A\_14\_P104809 TTCTCCTCTGTTCTTTTTAAGAATGAGATGAATCAAGTTTAGGAATTCAGGCTCTTGCA  
A\_14\_P201509 TGAGCAGTAGTTTGATTTTGTTGCAGGAAAGAGTGATTTATGCTTCCCTTTTCTTATATC  
A\_14\_P138181 AACACATCATGTTTGAACAGATAAAAAAATGCAGGCTTAGTAACACTTGTTCTGAGTCCT  
A\_14\_P116137 TATTGACTTAAAATCACACTCATTACAGGTTCTGTGTTTGGGAGAAAACAAAGAGCATT  
A\_16\_P38556234  
CTGTCTCAGTAAACCTCTACATGCTTCAAGTTCAACATTACATCCCATTTCATCCATATG  
A\_14\_P129142 TAGCAACAGACATGCCTGAATTGGGTCTTCATATGAAGAACTATTTTGCATATGCCTAT  
A\_14\_P118633 GAAAACCTAACAGCAAATCTTCCTTCAACAACATAGAAAACGAACCACCATTTGAGTTTG  
A\_18\_P14136211  
CAAGTTGTTTGAATGACTTAAAGAGATTACATCCAAATTGCCAAGACCTAGTAACTGCTC  
A\_14\_P105814 GGGTAAGACAATTCATAAGAATGTAAATAATGGGGTTCAGACAGTATTCATGCTACAGTT  
A\_14\_P110942 TATATATATATGTTTTATAATGAAGGATCACAGTCACTGGCCCTACCCATTCTCCTCCCA



A\_14\_P139108 GTGATAGAGCAATTTATTCAAACCTCTTTGTTTTCCGAAGATACATGGAATACAAAGCCCG  
A\_14\_P136147 TAAGTTCAACAGAATATTCTTTTGATGTAAACTTCGGAGAGGCGTTGTCAGCAATTGTGA  
A\_14\_P129535 AGTAACATGTTTTGCAAAGTGTCTTAAAGTGATAAGTCGTTATTCATCCCCTCAAAGTAGG  
A\_14\_P104532 AAAAAGAAATTGACCCTGAGCATAAAACAAGTCTTGGTGGATCCAGATCATCATATACAA  
A\_14\_P128174 GACGTGGTCATGTTGGAATTAGAATCATCTGATGGTTATTTGGAGTATTATGTGCTCAAT  
A\_18\_P14134733 ACTTTGGAGAGAGCATTGCCAGCCTGGACGATCTGGACAATGATG  
A\_16\_P20798644  
ACTCAGATTTTGGTCCATCTTTAGGCTTATGATTTCCTTACATTCTTAATGCTTTTCGATGT  
A\_14\_P124752 ATCTCGTGAGAGTTCTTATAAAAATAGCCAATGACCCATTCTTTGTGTATTACCTGTGTG  
A\_16\_P15714789  
AAAACCCTTAATTATAGCAGTGCCCAATTTAATTAACCCTACATTACAAACTGTCGGCC  
A\_18\_P13003567  
TCCCCAAAAGGACTAATTATATGTGAGCATGGTTTCAGTGTCTTATTTCACTAAATTTGA  
A\_14\_P101901 AGATTCCAACCTTGTTATTGCTACATTTCCATGTGTGCCCAATTCAATAGCGTATTGAAAT  
A\_14\_P132819 AATATGTCACATCATATACGTCATGAACAGAAAGAGAACTGGACATGTGTGATCCTACC  
A\_16\_P18231044  
AACAGGTGGAACCTTTTAAAAAATACTCTCTGAAGCACTCATAATTAGGACACGTTACT  
A\_14\_P120415 TTCTTCCGTTGTTTTTCCATGTGTCTAAGAGTTTCCAATCTTGATTCAGGAGTAAACAAA  
A\_14\_P126400 TGGGTAAAAATACTTTCAGTTCTCCTGAATAAGGCACTACCTAATCCCAAACAGTTCTA  
CUST\_50\_PI426210822 AGGTCAACACCTTAAAATCCCCTGCATTTAAACCATGAGTGGGTGG  
A\_14\_P137860 GAAAAGCACAGCAAGGATGAAATTATTTCTCTATTAGTCTGGAGCAGTTTATGATTGGT  
A\_14\_P132053 CAGAACCTTATAAAGGTAAAGCCATTTCTACAGTCCATCTCAGCAAAGTGATTGTTCTGT  
A\_14\_P106926 CTATATAGATATATTGGGGAAATATGAGAGTATGGCTGGGAGTCTAGTGAAGGGGATATG  
A\_14\_P109578 GAAAATGAGCCGGCTACAGTCATATGGAACAGGTCTGTTTAGCCACATC  
A\_14\_P200525 ACATAGAGAGACAGGTGGGCATTTTTGGGCTACCTGGTTCGTTTTTATAAGATTTT  
A\_14\_P114233 ACCCACACTGAAGATAACTTCTTTGGTTTTGCTGTGTCAGGAAAGGACAAAGAAAAAAAAA  
CUST\_5585\_PI426210822 ACTAGGCTCTGGTGAGTGAATAGTGGGATTGCTGCTAATGCTGAGATT  
A\_14\_P113982 ATCAGTTGGCTTTAGCAATTGGTGAGTATTTGTAAAGGTTCTGGAAACTGGAAATTAGG  
A\_14\_P112898 AAAGGGAAACTTATCTTCTTTTATGAATGGAGCGTCAAATAACTGGACAGGTAAGTCT  
A\_14\_P202094 TGTATTAGGATCACCATCATCAGAACTAATTTATTTTCAGGGCCCTTCATGATACTCTGT  
A\_14\_P131356 CATTGTAAGTGTGCGGATTTTTCTGGAAGTCTCCTGAATCCTGAGAAAGAATAAA  
A\_14\_P137726 CCTAAGTATCTAGTTCTGGAGCACTTCCTGTCTTTTCAAGATAATCCCTGCCAATT  
A\_16\_P35746286  
GCCCTAATCCTATTATAAGACAGACCAGATACCACTTATTTTTGCTATGTCAACCTTCCTT  
A\_16\_P19816503  
GGCATCCACATGTAATAATGAAATTCAGCATTAGTCAAAAATCTCAGTCTATTGCCTGTGA  
CUST\_6962\_PI426210822 GAGATACGTAGCAGAACTGGGGAAAGGACTGCCCAGTGAGTCTACT  
CUST\_3679\_PI426210822 ATCCTATACTTCCCTGGGCATGATACCCTTCTTTCCATCAGCTGTG

A\_14\_P126782 CTTTCGCATCCTGGCGAACACTGAAAAGGAAATAAACAGGTTGATAAGATGAAG  
CUST\_6832\_PI426210822

TTTTTTTAAAATAATGCTTGTTGATTTTTTTTTTCCATTTACTTACCATTTGCTTAAAGTA

A\_14\_P131890 CAGAAAAGGAAATGGTGGGAATTCAGTGTCTTTAGATACTGAAGACATTTTGTTCCTAG

A\_14\_P105638 GACATATCAAACATGCAAATACTTGAATCCAGCAGGCCAATAGTGAAATGTGAACACTTT

A\_14\_P120798 CTCTGCAAAGTCAGGAAGATAACTGTGAATGATACTCTTTCTCAAATTCAGGAAAACATA

CUST\_8674\_PI426210822 GCCTCTCTGGCTTGTTGTTTTCTTGCTATGGGGCAGTGATTCTAAAG

A\_16\_P19509665

AATCCTCCATTGAAACATGCTAGTTAACATAAGTCGCTCTACTCTGACATACACTTGTTTC

A\_14\_P120715 CCATGAATTTTCTTTCACTTTTGCTGGGCAGGAGTTAATAGACAAAGAATGCTTTCTGAT

A\_14\_P112305 AGGCAATTCGTGGTCTAAGGTAGAGGACGAAAATGAATTTTACTTAATGTTGCAATCAAT

A\_14\_P127253 TAACGATTTCCAAACTAATTACGAATATGGCCATACTTGAAAAGCCACTCCCTAAAAGTG

CUST\_6372\_PI426210822 AAGTCTGGGACAAGCTGTATAAGGGTATCAACCCAGGGTTCAGCT

A\_14\_P133986 GAGATACA ACTTAATCACAGA ACCATTGCTAGAAAAGCCTCCACACTCAAAGGTGT

A\_16\_P20983930

CATGAAGTCCCCTGATAAAAACCCTTATTCAAACAAGTCCAGAAGACAGAATTCTCATTG

A\_14\_P129046 CAGGAACAGTCATCTTTACGTTTGCATCCCGTAGCAATAACAGACAGTGGATA

CUST\_4117\_PI426210822

AGGTTTGATTTTGGAAGTTTTAAATGTACTGCATGATGTTGCTAAAATTTTAGTTCGTTGC

A\_14\_P133446 CACATATACATTGATTACCTACAGGAAAAACTGATGGGACATTCAAACACTGGTAGAGTT

A\_16\_P01647815

CCCAGTGTTAATCCAAATTTGCATAGTAAAGTCGCTTTTATTACAAGAGAGGTTGTGGTT

A\_14\_P117511 ATTACCATTACTTGCTTTGCTATAAATATCTGTTGACTCCTGTGGCTTTTACTCTTCTCC

A\_14\_P130664 GGGAGAATGATACAATTCAGCAATTCAGTAAGGTAAAATATTAGGGCAATGACTGAGAT

A\_14\_P138779 GCTCTTCTTTTTCTCTAGA ACTATTTTCAGAGATGCCTGGAATGTCTTTGACTTTGCTCACT

A\_14\_P128270 CTCTTACCATCCCTAATTCAACAGCCAAAAAACCTTGTTTCTAGGAATTCACATTTCT

A\_16\_P18053475

GAAACACCTCATCCTATGATTTAAGCACCATGGAATATAGAAAGCACATTA ACTATGCCC

A\_14\_P126743 TGCAAATGGCTATGGCCAATAACCATGTTCTTAGGACTACTTTAGAAGCCATGAATTTTA

A\_16\_P58424558

TTATTATGCAGATCTGAGCCCAGAGTTCACTTTCTCAATAAGTCTTCCCTGAACACTTTA

A\_16\_P17383588

ATTCCAAGTAGGCTATGAACAGATAAGGACAAAGAGACATTA ACTTTCCACACTTAACT

A\_14\_P108064 AATTCAGTAATTAATCCAATACTTTTCGTCATAGTGATTCATACTCTATGTTTATAGAACG

CUST\_4628\_PI426210822 CAGCAGCTCTCCTATGGCCAGCTCCACCACCAGGTCAGACAGTAC

A\_16\_P16191620 AGTCCTTACTGCATAAGGGGACAGATGATGTTTCAGTTACAGTCATAAGCCTTTCT

A\_16\_P03286480

AAAAAGGGAGACA ACTTATATTGTGGTTTTATTCCTCACTAATAGTTTTCTGGGCAACAGG

A\_14\_P129683 TAGAATATGGTCAAGTCAAATTACCCAGAGAGATCTCTAAGAATTTGCATGTGGTCAAGT  
A\_14\_P133231 CAGCAGCAAGCCCTCATTTGTCTACATTAATGAATCCTAGGAATAAACTTAGTCACTCTA  
A\_14\_P116929 TTAATATATAAAAATGCATCTGGCTTATTTGAATTCACAGCCGGTCCCCTTGTGTCTTC  
A\_16\_P36796517  
AAAGCAATCGTTCTTATCAAACCTTGTCATCAGTAAAATAATTTCCAACAACAGATGCTTT  
A\_14\_P101980 TTACCTTAAAAATCAGTCAAGAAAATGTGGGATCTGGAAGTCTCTCTTGGAAAGAGG  
CUST\_6738\_PI426210822  
CTACTTTCATAGATTTATTCTGGATTATTTTTTCCTTTGAGGGAAGGCTGCTTATAAAAA  
A\_16\_P21671868  
AAGATGCGTTACCATCTGGTTAGTTGGCAAAAATAACTTCATTCAGTCAGATCTCTGTTA  
A\_14\_P122274 CCATCATCCTTTTAGCGATGAATAAAATTGAAGGTGACAATATTAGTGGCGTGTGTTTTG  
A\_14\_P132812 GATGTGAACATGAAGACTCCTTCACTTAGAGAGTGGTCACACAAGCCATC  
A\_14\_P120510 ACTGGACAGTCACTGCCACTTTGCACATTTTGATTTTTTTTTTAAACAAACATTGTGTTG  
CUST\_8135\_PI426210822 TTTGAAGGTCTCTTTGCCTACTTGTAGATTTAGGGGGACATAACATTGAGACTG  
A\_16\_P03117842  
GACTGATTGCTTGACTGATACTCCAAATTCCATTAACAGATTCGAAACTCATCCAAAC  
A\_14\_P100491 ACAATTATACATTAATGGCTGTAATGTGAAGAGCATCACACACGAAGAGAGCCATCTTC  
A\_16\_P18003557  
AAAAATTTAACTAAGTCAACATTCCCAGAAGTATGTCTCAAGTAACACAAATCCTTGGGC  
A\_14\_P201593 GACCTATTTTCGTTGACAGAAACAGTGAGGTCTATTGGAAAGTTAGCCTTCAGTG  
A\_16\_P21362287  
AAACATACACATACACATTACGGTCACCAAAAAATGACAGCCTTTATCCCGAATGTTTTAG  
A\_16\_P02823298  
AATTAAGTCAGGCAATAATGGTGATTAGAGTTCTACACAGTTAGACAGGAAGATGACCTC  
A\_14\_P109697 AAATGTAAGCCTTTACCCTAAGGAGTGTATTTTTGTCTCTTTATGTTTTGCTGTCTGACTG  
A\_14\_P127084 GCTAGTTGCCCTTTCATATAGGGAGTAAAAGTGCAATTATGCTGCTAATAACCTTATCAGC  
A\_14\_P101613 TCTACTTTCCTAGTAATAGCCGTTCCCTTACCTATTTAAATATCTCATGTGGCCTCCATCA  
A\_14\_P131254 TAAGGTTCTACTTCACTGCTGTGAGCACAGTTGCATTGTGAAAGTTTTATATTTTCCAGA  
A\_16\_P16640176  
ATCTCTTGGGTAAGCAAATTGATGACAAGGATGATTCATATGTAAGAAGTACTGTCTGA  
A\_14\_P113192 CAGGTGAGAGGATTTAAAGTCAGTCACAAAGGCTTGGGAACAAAAGGAATTCT  
A\_14\_P125372 CCTTGGATTTATGGGAACCAGGGAAGAGTATAAAGAAAAACAACAGTAAGATTCTCTACA  
A\_14\_P127274 AAACCTTTCATCACTGACATGCTTAAGGTTCTCTGAGGGGTACACAACT  
A\_16\_P19011107  
AAGTAGCCCAATTAAGTACATTAGAACAGATCGTGATATGTGGAAGAACTATTAGTGAA  
A\_14\_P134899 TCACATACTTTGGTGACTTTCTATAGGAGAAGGACGATTTTTCTCTCGGGAATGTC  
CUST\_6504\_PI426210822  
GGTTTTATGGTTTACTCATGTTTTGTAATTTTAAACTCTGAAAATTGAAAAGCTTTGATAG

A\_14\_P136413 TTCTTGCCCTCCATCTTCTCTCTCTTCTTGTATATTTGTAGAAAATTCACGTGGAATGCTA  
A\_14\_P124376 TTCAAAGTCATCTCCATCGCTATCACTAACCATATGAACATCGGTGATTTGCTATTTAAG  
CUST\_301\_PI426210822 CTCTTTGACAGCTAGAGGGAGAGAGGCCAGGCCACTGTCACTGTG  
A\_16\_P15651483  
AAAGACTGGCTTAATTTTTGTACATGGTATACTTCCAAGTGCTTTTACCTGAAGAAGAC  
A\_14\_P201179 TCGATTTTTTCAAAGAGCCCTTCATTAATTTGGGAAAAGTTCCCTGTTCTATTCTTAGTGA  
A\_16\_P18755699  
AAAGCAAGACTTTCTCAATATTCTTTTACCTCCAGATTCTATCATTTTTTCCAAGCAGGGC  
A\_16\_P16751739  
AGAAGCCCTAAGATACTGTCAAGATGTTTTATGTTGAGTCAAATGCATATGAGTGACCAT  
A\_14\_P139432 AGATTTGTTTATTATTTTAAATGAACTTGGCATTCTCTGAGGCTGGTTTAAATGGTGCCC  
A\_14\_P122920 AGTTAATTACTATACGGTGACTGAGGTGCTACTTATGGCTTGCCACTATGCACAGATATT  
A\_14\_P118653 ACTTGCAGAAAACATTCAAGATACAAAAAGTCAACCAAATACTATGACCTCCCTGCAAAA  
CUST\_3039\_PI426210822  
TAGGTGTATTGACACTGAAGTCATATTTCTATAATGAAATACATACCTATCTATTTACTT  
A\_14\_P201523 TTGTCTGGACATTCTTGTGATAACATCACAAGATGAGGCTCTTGAGCACTTGAATTATTA  
CUST\_4019\_PI426210822  
TTTAGACTTTCTGAAAATCAGTCTCAAGAAACAAAACCCAGAGTCAAGTAAAAGGATGCT  
A\_14\_P116044 CATGTGAACAATCATAAACTTCTTCTTGCTCACACTGAGCCAATGTATCTTCTGTTCCT  
A\_14\_P121706 TCGTTCTTCTCCTCAGGTTTACTGTGTGAATGTGTGTATACACACACGTAAATATTTTC  
A\_14\_P130129 AAATCTTTTGTCCCAGGTCCCTGAAACTATTACACAGGCTTAATCACCACAGTATATTAT  
A\_16\_P18671168  
ATCCTGAAATAGTTACCCCCTTTTGTAAAGCATTAAACAGCAATTCTTATCCATTGTCCAG  
A\_14\_P128998 CTGCCATGTCAGTTTCACAGAAGCCTTGTAATTTCCCTGAGTAAATTTCCCTTCA  
A\_14\_P112939 TTTGTGCTTCCCCTATCATTACATAACCATGGCTTGTCATTATTACCTGCTAATTTTTTCC  
A\_14\_P115347 TCATGATGCCAGATACATAATGAAATAATCCCTCCAGGAACAACATCATGGAACCTTCAG  
A\_14\_P138371 CTTTCCCTTCAAAGAGCCATTGAGAAACATTTCTCAAACAGGAAATCCTTCTTTTACTAA  
A\_14\_P130838 GAGTCAGATGGCCGGCATGCATTACTAATCTATTATAGTGCGTATTAACAAATCCAAAG  
A\_14\_P139728 CATTTGCTATTTACAACAAATAAATATTGCCCTCCCAATCAGTAAACAAACATTTTTT  
A\_16\_P02710064  
TAATACTGCTGGCCAATATTTATCACTCACCATGTCAATATTTAACCTGTGATCCTGC  
A\_14\_P135951 TGAATTTGAACATCTTTCACACTAAGTTCAGACTCATGAAACCAATCTTCAGATGCTCTG  
A\_14\_P128784 AGCAAAGGTTGTTCTGAACAACACTTTTTTCACAGCCTTCGTGGGTTATAGTCTAAAAAG  
A\_14\_P122794 GGACAAGTATATTGGAGTTTACTGGGCCATCGGTATACTTTTTCTATTCTACTATTACCCT  
A\_14\_P102317 CACCTTACTTCCCAGATTTTTTTTTTTTTCAAACCTCTGAAGGAAGTGATGTTAGACGGAT  
A\_14\_P119247 ATTCTTAAAATAGGGATTAAGCAGATGTTTCTGCAAGCACACTGTCCTGCTTTGAAGATA  
A\_14\_P104553 CAAAATGAACCCGCAGAAGGCTTTCCTTGCCGGAAAGTTCAAAGT  
A\_14\_P120977 ACCGTCAGAAACTGGAGAGTTTCTATTAAGGTCATTTAAACCACTGAAGGGAAGAT

A\_14\_P109090 CTAGGAAGATGTATTTCTACACGAACAGAGGGAACCTTTAGTTTGAGAAATGATGACAAG  
A\_14\_P125522 GTCTCTCCTACTCCAGCCTTCATCTAGTGCTAACTGATTAATATTTCTAAGATGACCTTC  
A\_14\_P200012 AAAACTGGAAAATGCATATGCCCTCAGACTCACCTCTAATATGATCTTTGTCAGATCAAT  
A\_14\_P127213 TCTATGACATAAAAAGATGAACACATTTCCAGATCTACTGTGTTGTTACCTTCTCAGGA  
CUST\_6417\_PI426210822  
ATGTTGTGGTTTTGAGAATGGGCTTTTATATTATTTGGCGTAGATTATTAAGAAGCAGTT  
A\_14\_P116499 GAATGTCAGGAGCAAACCTGGCTAAGCATGAATGGACATTTAACCTCATACATGAAAATAA  
A\_14\_P120911 CAAGAGTGGATGTGTGTTCTCTATGGCAAAAAACAGGCACTGGAAAATTTACATATTTTT  
A\_16\_P58424178 TTCATTGATACATCCCCTCTACCTTTAGCGGTGCCTGGCCTATAGTTAGT  
CUST\_406\_PI426210822  
AAGTCTTAAAGGGCTAGACAAGGATCAAAGGAGAGGTAAGAAAAAGAAAAAGAAAAAA  
A\_16\_P02337900  
GTCATTCTCCTAAGCATTCTGAATAACATAATCTATCCTTCTCAACTATCCTTTACAGCA  
A\_14\_P106950 CTGTTTGATAACGGTCCAGGTTTACTTCACTCTCCATCAATGAACTGCCAAAT  
A\_14\_P116121 TCATAACACCTTGGACATTTACCAAGAACAATACTATTCAAGTTTGAATTTCTAGTGAGTTG  
CUST\_2849\_PI426210822 ATGCTGTTCCCGACCAGTGGCTCTTTCTGGGGCCCCATCTAGCAT  
A\_18\_P22841734 CTTTGATCAGATGTGCCTTGCCCCATCCTGCCTGCTGAAGGCTTG  
A\_14\_P113663 ACTAAATCAAGATGAGCATTAAAAAGAAGAAATCCCTGTTACCTTCTCACCACTGTGAC  
A\_14\_P138500 GGAAGGAAACCATTTTACTCTTTTTATTCTGCTCATTAATGATCTGAAAGAAGAAGATGG  
A\_16\_P16935480  
ATTATTGCTGACCCTTAAACATTATGATCTACCCATTGTTTTACATCATCCTCTGTTCCC  
A\_14\_P110291 CTGAACGACCCTCCTTTTCTTAAATAAAATATATTATTCTAACGTATGTGACGCTTATAT  
A\_16\_P00651055  
CCCCCTCTCTTGAATAATCACCACACTTCATTTCAACTTACTCCATTAAGAAAAAGAAAA  
CUST\_5891\_PI426210822 CTTCCGTTCTCACCTCTTTCACCTCCATCTCCACCTCCACCTCTA  
A\_16\_P02388383  
TAGAGTTTCTTAAAGCATAACTATTGAAACCCAGGAATTGTATAGCCAACCAAACCTGTG  
A\_14\_P122045 CTCATTCATTATCTCCTTATTGAGATCCAGCAGCATGCTCTTCTGAATCCTGCAG  
CUST\_1085\_PI426210822  
AACCTGCTCCTTCTGTAAGTGCTGGACTATTTATTTCTTAATTCCCCTCCTACTTTATT  
A\_14\_P102754 CTGGTTATGATAAGATATCTGGTTTCAGAAACAAGTGCTTTTTGTTCCAAGTATTCAGCA  
A\_16\_P01818156  
ACTTCCAAATTCACATAACCACTAGGCTATTTTACACACTCTTGCTACTTGTTCCTTTCTA  
A\_16\_P21553872  
AAAGTCTGGTTTTTATTCATGGAGAGTCTCATACCAAATATGATTTGAAGGCACTCAAAGC  
A\_16\_P03352649  
ACGGTTATCCCAATATACCTGTAAACAAACTATAGGCAGTGTTATGTTATCTGAGCC  
A\_18\_P22840499 TCCCCTCCAAGGAGAAAGAAACCCTCCACGTGTTTTATGAGTATATTCCTA

CUST\_3876\_PI426210822 GAGCATGGAAGGGAGGAGTCCTTGTCCATCGTGTCTCACCATCTG  
CUST\_7258\_PI426210822 AGAAAGTGGTGTGTGGACAGGCAAGGGCTGCCCTGCCCTTGGCTG  
A\_14\_P109073 AAAGAAAAGTATACAGGCAAGGTATTGGTTAGGGGTGAATTATTATTTTTTGGACAGCCT  
A\_14\_P134710 CTTGCTGAGAAGACAGAAAGCAATGTTGACTTTC AAGGGGGAAAATAAATATTTGAAGAT  
A\_14\_P201684 AAAAGGAGGAATATTTTTATTGACTCAAGCACAGGGTAGAATCAACATACTGCCTTTAGG  
A\_14\_P112090 GTAGCAAGTGTGCCTTAGAGATGAAGAAATGGCTAAGGAGGAAAGCACTGTA  
A\_14\_P126447 CCATGAAGAGATAAAATAGAGGCTTGAGTAGAGTAGATGCTGTCATTTTCAGGAGAGTAT  
CUST\_3051\_PI426210822 GCACATGGTCTGGTCCATGTACTGATTATAGAGCACGACTCAACTTTGTT  
A\_14\_P108114 CTGGCAGAGTGGACAGGATCCTGTATTA ACTTATTTCCAATATGGCAATATTTAGGATAC  
A\_16\_P00685167 CTGGCAGTGCCTGATGCTGCAGGAATGGCCAGACACTGACCCATG  
A\_14\_P137825 TCCCAGTTTTGATTAAGGGTAACTGTCAATTCCTGAACAGTTTCAGGTAAGTATGTATAGT  
A\_14\_P109047 TGTTTGGAGAAGGAGTCCCTCAAGTCTGTGATGTCATTAGAAA ACTCTCCAGAT  
CUST\_393\_PI426210822 CCTCCTCCTTCTCTGCCCCAGACGCCCTGGAGTCCAAAAGTGGTTG  
A\_14\_P202000 GGTCATCAGTGACCTGAATGGTAGTCAGATCAGTGTAGTCTTCCACAG  
A\_14\_P202325 GACCATGATCCTCTCTTTTTGTTTTAGAAAACAATTGCTCAAGTCTTAGTTCATCTACACA  
A\_14\_P201163 CTGTCAATCTCTGTCATAGGAACTGTAGCGTATTTCCCTTACAAAACAGTATTCTGAAGC  
A\_14\_P104045 TCCTCATTT CAGTAACAGATTCAAGTTTTCGCATCAGTTTGTTTCGATGAAGGATCACAA  
A\_14\_P200495  
CCTGTAGCGTAAAAATTATAGGCAGAAGGTGGAAGAGAGTGAAGAAGTATCTAAGTGACA  
A\_14\_P126789 CGTCTCATTTACAGTAAATCCAGTGGGTTGCAGAAATAGGACCTGAAACTGC  
A\_14\_P201042 TGATGAGAGTTACAGACCCTCTCCTCAGAAAAAATTTATAATGAACACACACACAAACTC  
A\_16\_P17091260  
AAATGATCACTGTAACCTCTTATGTCTGATTTATGCATTCCTCTTTACTGTCCCTCAGTT  
A\_14\_P114182 TTATAGAAAGACCTAGA ACTAAGAGAGAGCCTTGAAGACCTGAATCATTACCTGTTACTC  
A\_16\_P02726724  
AACATGTCTGTAAGAGTCTATGACCTTATCATCCTGAGTCTAACCAGACTAACTATCCCT  
A\_14\_P105033 TTTCCCTTTTCTTTTGTCTGTGCATTCATTCTGTCTTGATGTGTTGTCTTGTTTTAATCC  
A\_14\_P100998 GTGGGTTCCAATGCATATAGAGCCTGGCACCATATTGGTGTATATTAATGTTAAATAGC  
A\_14\_P200365 CTCGGGCATAGTTATGGGACACATTGCTGATATTGTAGTTGTTGACCTAGAAAAAAGAA  
A\_14\_P134635 CTTGGCTTTCTTATGTTGCTTTCATGAATGGAATGGAAAAAAGATGACTCAGTTAAGGCA  
A\_14\_P133015 CTACCTCTGGA ACTCAAGATTTGACCATATCTGTTTTGAGGATTCATTATGAACAAAGA  
CUST\_2638\_PI426210822 GATGAAGCAGAGGGTGACCACCCTGGTCTATTCCAGGAGGACAAG  
A\_16\_P16191519 ATATCTGGAGTTCAAGAGGCGTTTTCTGGAAACAATTTGTCCAAAGGCTC  
A\_16\_P15756759  
TCACAACCCTCAACAAGTTTTTCATTCATACTTTAGTCCACAATATTCTGCAGGTTTGAAT  
A\_16\_P36231001 AAACCTGTGTCCTCTCTCTTGCTCTGAGTCAACAGACA ACTCTTAGAAGTG  
A\_14\_P107039 GTTGATTCCCTGAATGACTATAAACCACCCATTTTCGAAAGCGAAAATGACCCAAATT  
A\_14\_P101404 TAGAGTGGTCTGACAGGTCAGAAAATCCCTTTACTGATCCTTATATTACTTAACTGATGC

A\_14\_P103832 CTAGTAAAAAGTTGTGTGTAGCACTGTCCAGATATAATGTGGCCTATAAACGTTCTGCAA  
A\_14\_P200126 CTGAATTCCTTAGATGTATTTTCTTGACACTTCAGTTTACAAAGACGCTTCACCTCATA  
A\_14\_P101495 TGTATTCACTAGAGTCAATTTTTTCATGTCACTTGGCATTGGAGATCTAGCATTCCAAG  
A\_14\_P133403 CTCAAAGAAAGACAAAATCTCCTGAAGTCTTTGGAAAGGGTAAGTTATCGGATGAGG  
A\_18\_P22840280 CTTGAGGAAATCACCAAAGATGTTTCAGGAGTCTCCCTCTGATGGC  
A\_14\_P136596 ACATATTTGTCAGGTTTCTTAACGTTCTCTTAATACGGTGTCTTTATTTAGTTCTCCCG  
A\_14\_P102002 GATCCAATTATATCTCCTAATTAGGATCCCTTTGTGACCAAGTGTATTCAATTTGGGACA  
A\_14\_P119343 CAGATCAGTTTTATGAGTCATATTCAGTCCATGCAAGGTAACAGTCCAGGCATTTTATAG  
CUST\_8033\_PI426210822 GCAGGTCTCTGGCCAGAGTATGTGTCAGGCTTGGTTTTACTGTTA  
CUST\_8926\_PI426210822

CCCTTTATTTTCAGTTTCAGATTTGATCTCAGTAACACCCTGACCTTTTCAGACTC

A\_18\_P14172901

CATCCTCATCTCCTATTTGAATTACTCTCCACTATGCAATTATCCTATCACAGAAAGTCC

A\_14\_P106418 AGTTAGTGCATCTGAATCATGCAATAATATGCAGATCCCAAGTCAAATGTGTTTCATGATG

A\_14\_P102695 CTTACTGTAGTAGAACATGTAAATAATGTGTTGACTTATTGCCCTCATGGGCTAAACTGG

CUST\_5836\_PI426210822 GTATTCCAAGGCTTTAGTCTGTCCACCCTCTGCTCCAGAGAGAT

A\_14\_P103885 TTGAAGAAAGAAGACTTACATCGGATTTCAAAGACTCCTTGGAAATCTGATTCAGAAAGC

A\_14\_P129289 GCAGAATATCTGATCAGAACATCATTCCCTCAGTAACTAGGTCTGTGTCCGTG

A\_14\_P131020 CTTCTTTTTCTTTCTTTTCAGAATGCTCAGATGCATCAGTTCCTTAATATACACGTGAAAT

A\_18\_P22842663 ATTTCTTGGATCCACAGAACAACCTCGCCATTGTTGGGCAGACCCAT

A\_14\_P104364 ACTTGTGAAGTCGGATTTTCAGGCTCTCAAACCTTTTTCTCTCTCCTG

A\_14\_P108697 GCATCAGCAACAATTAATAATATTCACCTGGTATCTGTAGTTTAATAATGGACCAACATC

A\_14\_P103650 CTGCTCCCATAATTCTGTAGATGTATTATGCTTTTTCTTAATCCCCTGCTGAAGCAAAT

A\_18\_P22841633

TCATCATTGAGATCAGTTATATCCGAGACTGGATGCTGAAAAGATATATTAGAGTTTAGT

A\_14\_P113841 CTTAGAAGAAAACCTATGTCCAGGACAGTAAGATGGGGTTTGTTCATCAATGCCATCTAT

A\_14\_P116740

CTGGTAAAAAAAAGTTTCATGTGCAACCAAATGAGGAGGAAAATAAGTCTCTCCATC

A\_16\_P16718245

ATACATTTTGC GTTCTCCATATATGTTACACTTGGTTCCCTAATTCTGACAGAACAAACAG

A\_16\_P03480991

CCCTTTAATCTCTTCACATCCTAACATTCTGTCCCTCATAATAAATGCTACCACTCACATG

CUST\_2132\_PI426210822 ATTTGTCCAGCCAGCAGTGGCCGAGCACCCCTCTGGGCCGGCACT

A\_14\_P200891 CTGACACAAAGGCTAGGGAAATATCTAAGTGTCTTCTTCTTGATCAGTATTTCTTACACAG

CUST\_7557\_PI426210822 ACCTGTTGAAGCAACAAAGAGAAAGGGAGGAAGGATCATCCTAGAAGT

CUST\_6041\_PI426210822 TATCCAGACCTTTGGATGTTCACTCTTCAGAGCCAGGGACAATGT

A\_14\_P132447 ACTGTGTGGCATATCGTCATCATCATCAGTATCAAAAAAATTTTTGGTTTTACGCAGTT

A\_14\_P120220 CTTAATAGCACAAAGGGATCATTCTTCTCTCCAACGTGTTGGTCAGAGTCAG

A\_16\_P17188634

CATTCTTCCTCATCATTTCTTTGCATTAACCTATCACCTCCTCTTAGCATTATGGCTCAC  
CUST\_2989\_PI426210822 CTCTCCATTGTCTCCCTTCCTGAGGGAAGGCAGCCATTACCTGG

A\_16\_P18145767

AAGAGAGATGTAGAAGACAAACCCTGTAATCACAATTTTCATATGACGCGTGCTTTAATGA  
A\_14\_P117848 CTGACAGAAGTCCCCTGTGTCTGTCTATAACAAAACCAATGTTCACTGTATAAATAACTTT

A\_14\_P133245 TTAATAACACTCCTTTGGCAGTAACATTTTTTTAGGGTTTTGGTAGTCAGTATTTGGGGT

A\_14\_P102896

AATTGAAAATGAAAGAAAAGCACATAGGAACAACACGCGTGGTTAGTTAGTAACTCAAGA  
A\_16\_P01770057

AAAATACACTGTGCTAGTCATTATAGGATCCCAAAGACAAGAGATGTATCACTCCCACAG

A\_18\_P14692943

ATCACTGCCTTTAGTCAGAAATATACTCACCTGATTGTCATTTCTCTAATCAACCAGCAG  
A\_14\_P104117 CTAAGGCATATTTAAACAAAGGCTCCAAAGGACCCCTTTCACCTGGGTCTA

A\_14\_P131901 ACATATCAGAATTAGCCAATTTCTGAAGATACTCTGGAATTTCCCCACTCTACAACATA

A\_16\_P16191586

GGCCAGAAACCCCTCTATTAGTTTTATTACCATTTCTGAAAAACAGTCACTAGTTTTGGT  
A\_14\_P200446 TCTCTGGTAAGAAGAGTGAAAGCAAAGAAGCCAAGAAGTCTGAAGAACCAAGAA

A\_14\_P119660 TCCTCTTCTGATATAACTGTTGATTTCAAACATGTAGATTTGGGATCCATGCACAATG

A\_16\_P18299533

ATGTCTACTATGTTCCACAGATAAAATACCAGGATCATCCATAAAGGTCAAAACTGAGT  
A\_14\_P102856 GAATTCACAATTCCAGGATGTTTTTCATTTGCTTGCGGAGTTATCGGAAGTGACT

A\_14\_P134173 AAGCCAAGTGTGTTGGTGTTTTTCTCTCCCAAGTGTTTTCCCATTTTCAGTTAT

A\_14\_P134775 TAAAACTTAGATTTTAGAGGAACATCACTTTCCTCTGGTTACAGAGGATTCAGGCAATG

A\_18\_P10993242

TCTCCTAGGACCTGTAACCTCTACCAATGACACCCTTTTAAAAATTTCAAATTAAGTCACC  
CUST\_165\_PI426210822 CTGGTGACCCTGGAGACACGCCCTTCAGGTCAAGTCTCTGTAAAA

A\_14\_P138043 ACATTA AAAAGAGAGAGAGAGAGAAAGAATCCCACAGGGCACTATTA AAAATACTTCTCTC

A\_14\_P201055 ATAATGTATGCTCTTAGATGGCAGTTAAACAGGGAAACCAACTGCAGATGCAAGTC

CUST\_10311\_PI426210822

AATGTGACTTCTCTGGAATTACAACCTGAGTGACCTGGGATTATTGACACATTACAAC  
A\_16\_P17138054

ATGTCTATGATGGTTAACAATGTAAACACTGGTTGTAAAAGTCAAAAATAAGGCAGGACC  
A\_16\_P40930336

AGTGCTTCCTAAATTGTGTAAGTTCTTCACCTACTTAGCATTCAATACATTTGGAGCCTT

A\_18\_P16889124

AAGA ACTACGCATGTTTGT CATTAGATCCATCTACAACATTGATACTGTCAATCAGCCTC  
A\_16\_P19124070



TCAGATGCAATTCATACCCAATGTTCTCCAAGTATCCTGGTATAGGTATTTTAAAAGCGT  
A\_14\_P121923 ACTCCAAAGGTTAAGGCATATTTGAGGGTTTTCCCATCAATTATAAGAGCAAATCATT  
A\_18\_P17090332

CCACAGAAGTAGACATGAAACTATTACCTGTAACCAAAACAAAATTAACCTCAGAGTGGG  
A\_18\_P16086758

AGTGAATGAACGGATCATTATACTACACGGACAATATATCACACTTCTCATGACAATGGT  
A\_14\_P135176 TATACTTGGTGAAGTACTAGATTTCCCATGGTCCCGGCTATGATGGGACA  
CUST\_9803\_PI426210822 TCTGAAGTATACAGCTGTGGTTTTAAAACCTCTGTTTTGTTGGAGCCATGGGT  
A\_14\_P134924 CTGAGAATATTTTTATGCTTCTGGTGACTAGCAAAGGCCTCAAATGTAGAAAAAGGTCA  
A\_14\_P122853 TCCCTGGTAAGATGATAATCAACATTCATTCAACATATATTTGAGTGCCAATCTGCCAC  
A\_16\_P38243580

AAAGAAAATGGTTGAAACTCTGAGACAAATTGATAGGTAGCATGTATAGTTAAGCCTGCT  
A\_18\_P22840525 TGGCTTGATCATGAGTGGGATCACGATGGCATTCACTCTTTCATTTCAG  
A\_18\_P22840358

TAAATATCATACCATTCACTCCTCCTGCAAAACCAATTGAAAATATTGGCCTCTCTG  
A\_14\_P114032 TGCAGTATTTATTCTTTCTAGGGTCCATCCCTTGCAATGTTACATCATCATCAGAAAATG  
A\_16\_P18641463

AATAAGATCAGACAACCTTTTACAGAAGTCTCTAAGCAGGATATGATGTTGACAACCCCAA  
CUST\_9116\_PI426210822 AGATCCCACCAGGGGCAGATGAGGTGTCACATTGCATCACATCAC  
A\_18\_P26042730

AACCAATGGGCATTACTAGTTGAACCTAAAGTCGCATTGTAACCTTAAATGTCATCCAATT  
A\_14\_P126625 TATTTCTGTAGTCGTGCTTTAACTTCATCATATGTGAGAAAATGCCATGTAACCTGGATGT  
A\_14\_P101644 TTTAGAAGTGAATCTCTCATGGATGCATCCTTTTTCTATGATGGAGACAGAAAAGGATGG  
A\_14\_P107101 TAATGTATTTTGATCGTTTTGATTTGGACACAATCGCAACAACAGTGCTCTCCATTTTTG  
A\_16\_P58424468 TTTGCAGGGGCAGAGCAGTTTTATGACAAGAAAAAGTCCCTCAGGTGAAAAAAT  
A\_14\_P117524 ACCTTTCTGGTATAAGTTATTCATTTGTCTCTGGGCCTTGGTTTATAACATACGGGAAAG  
A\_14\_P119928 GGGTTTTTGTGTTGTTGTTTTTTAGATTCCAGTCAAGAATACACTGATTCAACTGGCATA  
A\_16\_P36602890

AATGGACATACATGTTTGTGTGATTGAAAACCTGGTCTTTCCAACAAATTTGCACTGATCT  
A\_14\_P132506 CTAAAAAAGTCTGCACTCAATTCTACCTTGGCAGGAAGGAACCTCTTCTGTC  
A\_18\_P15305525

GAAATCAAACCTGTAACCTTATATCTCAATCTTTCCTTCCAATCTCATTCTTTAACCCCTCCC  
A\_14\_P140004 AGTTTTTTTAGAAAAGCAACATACAAGTCTTTCCCAACCAAGTAGAAAGGATTGGATCTAA  
A\_14\_P133577 ATGTAATTCTACCATCCCTGTAAGACACAGAGTAGCACCCCTAAATCTAGAAAATTAAGG  
A\_14\_P127948 TGTTTTTTAAACCGAGAGAGAAAAAGGATCACACATTTTAAATGAAGTAACTCTGGGGACA  
A\_16\_P00685244

CAGTGTAATTATTTGAAGACCATAAGGTTGGGCATACAGCATAGAGTATCTAGCCCTTAG  
CUST\_5560\_PI426210822 ATCTTCCAGATGTTGGCTCAGTTTGAGGAGGAGGAAAGATTCTGAGA

A\_16\_P40143401

AAAACCCTTTTTGCAGCATAATCACTTCAGTAAAAACATCTAACATTTTCAGAGAAAAGCA

A\_14\_P134176 CTCATAGAGTATATTAATAACGCTGGGTGTTAGTGATTAAGGGGACAAAACAGACATG

A\_14\_P105181 TGTTTGATTTGTGAATGGTAGCACATTATCCCTTCTGAATGGGAGTTTCTGAATG

CUST\_2658\_PI426210822 CAGAGGTATGTGGGTTAGGAATGCTATGGGCTGCAGCTAAGAGAAAA

A\_16\_P00685229

TCCAACGTTTATTTTTCTGATAATAGGTCAAGGTTTTTCATAATTGAGTTTTAGGGGGGC

CUST\_5139\_PI426210822 AAAGCAGAGAACACTGCATGGAGCCCAGAGAGCCCCTCTCTGCG

A\_14\_P107497 CTCCTTTCCGTCACCTTTACTAGGGGGTATCCCTTGCAGATAAA

A\_14\_P136976 AAAAAACAACAACACTAGAGGAAGTCTTCTTACCTGGGAAGATTCCTAAGCACAAAT

A\_14\_P119832 AATCACACTATTGAGGCTGTGGAAACATTAATCTAGTAGACAGTGACAGATTTACCACT

A\_14\_P139645 CTGTGAAGATTACCATAAACATTTGTGTTTCATGCCAGTTCATCTGTGCACTGGTATTTAA

A\_14\_P114352 CTTTTGGTAGGAGATAACTGCTGTTTTTAAAGGTCATAAAGGTGGTTTAAATCCATTGGAA

A\_14\_P109892 GAGAGGTGTTGTCACCTTTAGTAACATGATATCGTGGTGAAGAGTAGAAGTGTATATTT

A\_14\_P130909 AGAGTCGTTGTTTTTCTGATTCTTCTTGCTCCTCATCTATTTCCCTTTGTCTTAATTTT

A\_14\_P106803 TTCTGTATCGCTTTATTTGTCCAAATTAAGGCACTGTAGGTCTTTGTCTTTTCTTCTCA

A\_14\_P139554 GACACTCTGCAGTCATGTAAGAATGGTGGAAAGAAGATAGAGGGCAATAAAAAGAAG

CUST\_2685\_PI426210822

GCTTTTCTTCATCCAAAAACAATACTTGGAGTTGAAACAAAAAGGTTGAAGGGAAGT

A\_14\_P113709 ACCAATTAACCTAATAAATATCAACACTTTGGGACCCTAGTTCAAACAATGCTCCTGTT

CUST\_2450\_PI426210822

ACTCTGTAATGTGTGCCTCTTAGGAGCAGAGTGTTAAATATTTAGTACATATTTGGGAAG

CUST\_7061\_PI426210822 GTCCCCCCTTTTTTAATCAGTAACTTTGGTTTATTACAGCAGAACTTCCCA

A\_14\_P130353 TGTTTAGATTTTTTAGGATAGTATTTAGTGTGCCTGTCCAAGAACTGGCTTGGTTGGTA

CUST\_2766\_PI426210822 TAGTTCTTGTGGTTCTGAGAGCTGCTCCTTACCACGACTAAGTCAC

A\_16\_P01034545

TGACAAGAAAGCAGCATAATTTGTTAGTCAAGTTAGGTAATTCATCAGAAATCCCACACC

A\_14\_P118353 CTTCTCTTTCCAGTTACGGAGTTGCAGTTCTGGATAAGGTAAGCACATATTCACTTT

A\_16\_P58424196 AAAAGAAAATCCCGCACTATTGCATTTGGCTGTACATCTCTTTAGTCTGGAAAAG

A\_14\_P114183 GATGGCTACATGTGCAAATACACTTTCAAATTAAGAATGGGTCTGTGATGTCACATCTA

A\_14\_P135696 CAATCTGTTTATGCCCTCAGTTCAACTTCTACCTTTTAGGACTTATCTAATCTTAAGTTT

A\_14\_P139585 TGGACTTGTGCTGATCTATACTCATTTCTACTCTAGTGATTGCTAGATGTCAGGTATC

A\_16\_P31609094

AAAAAACTTATCTCTTTTCTCCTTAAATACTACAGACAACCTCATTTTATCGCAGCAGA

A\_14\_P115890 CAGCAATGTATCTGGGTCCACATCTGCCATGGTTTTTTTAAAGTCTCTTTGCTTAAATTT

A\_14\_P124957 ATTCATATCATATACTAGTAAAGTTTTGCCATTGAAAATTCACATTGAGACAGCGTGCT

A\_14\_P124681 TATCCCATCACACAGGCTAGTTAATCATGTATTTTGCAGAGCAGTTGCACATATTTTCC

A\_16\_P18252593

GATCCCTAACAAATAGAACTAACTGCAACTACAGGATCAATTTCTTTGCCTAAAGAGAACC  
A\_16\_P20392810  
TGTAGTCTTCCATATTCTGACAGAACTATCATTGCGTAGAATGAAGAGAACACAAAGAGG  
A\_14\_P201630 TGTATGTAAACCATTTATTCTAGTAAAGGCTGAATTTTCCAATCTTCCCTCCATCTTCAG  
A\_16\_P21246617  
ACCGTCAACCAATACTGATTTGTATTTTTTTCTAATATTTTGCTAGCATTTCCTGGAACA  
CUST\_3809\_PI426210822 CTTTTACTGGACAGCTTTAGAGTCCTGTGGGTATTCTGGTTGTGCTATTCTTA  
A\_14\_P101534 AGGGGAAGGGTGGGTCTAGACATACTATATTCAGAGAACTATACTACCCTCAC  
A\_16\_P03666401  
AGAGCAGGGCTATATATGAACAAGAAATGACGTATGTTTGATTTTATATTCGGTCCCCTT  
A\_14\_P118936 ATCTTAAAATTTTGAGTCTTGGTTTCACCCAATCTTAAAACCAGAGACTCTTCACTGTGA  
A\_14\_P113785 ATCCACAGATAGTTTTTCATTTTACTTTTGCTTTTTTGCTGCAGACAGGATAAATGGAGAAGT  
A\_16\_P16582378  
TAACCAGTCACATTCCAATATCCAAAATAACTGTCTGCATTTTATCTCATCTGAGCCTCA  
CUST\_4704\_PI426210822 TTAATCAATGTCCAGTGGGAGAGTCAGGGGGGTCAGGAAGATCTT  
A\_14\_P103264 AGTCACCTTTTCATCTATCTCACTTCTGGGTAAAGACTCACTGTCTGGCAG  
A\_14\_P107911 CTCTTTTTCTCTGTAAAACCTATAGGTGATGGGACCAGATCCTTCATTCACAGCACATT  
A\_16\_P18544349  
CCCTGAAAAATATCAAGACACATTAACAAGGTCCCTTATGTTAATTCTCATCTCCATCCC  
A\_14\_P125240 TAAAAGCATATATACCAAACCTGGTAAGAATGATTCCCTTCAGGAGCATGGGATAAGTAGA  
A\_14\_P130550 ACAGGTTGTTTTTAGTGAGTCTACCTGAGTCTCTGGCTGAAAAGAGTTCT  
A\_14\_P127715 AAATGCATCTACATGAAGATTTCCAATACACCCAGAAAGATGTTTTCAAGATTTCAAGCC  
A\_14\_P135442 GAGAAAACAGAGCAGGGATTTTGGAAAACATATGTTGAAAGGGTAATTTCAATTTCTTTG  
A\_14\_P106194 GCACTCTGCTTCATGTTTACTTTTTGTCATGTTGCATGAAAAACATTTTGCTTCATGTTTG  
A\_14\_P115392 AATTTTCCCCCATTTCCATTACAGTGA CTGGATGAGGCAAGTTA  
A\_14\_P104066 ATAACAAATTATCCTTACCTCACTCTCTATCCTGGATTTTCAGCAGGTCAATGTCTTCAGA  
A\_14\_P137399 ACAAAGTAGCATGGTATGATTTCTACCTAATATTTAATAATACACGTGCAACTTTTCCCT  
A\_14\_P202135 CTCTTGTTCTTCTTGGTTTCTGAGGAGTCCTCATCTACCGAAATAAATCTATTATTGTT  
A\_16\_P16635146  
AAACGTAACTGATAATTTCCCTGACATAAAACAAATACATGCTATCATCTCACAGTGCA  
A\_14\_P106961 CTTGCACATTTTATTTTTACCTTCAAACCAGAATTTAGAAGGTGTTCCCCCAGGTC  
CUST\_3195\_PI426210822  
TCTTTAGGTATTTTTTTCTTTTTTTCTTTAAGCCTATTCCAAATCTTTTTTTTTCTCCCTC  
A\_14\_P131194 GCTGCCTTGCTGGTTACAGCCACCGTTCTAGGTATATTAAGATCTAAACTTAAATCTTT  
A\_16\_P17663604  
AAATTCATGACACAACATCAAATTCAGTATTTGTCAATACTATAACGATCCAGGAAGCCC  
A\_14\_P126006 AGAAACCAAACCTTGGGGAAAATGTTTGGGTCCACTTGATGGCATTTTAC  
A\_14\_P102445

CAAAATCAGGTGGCTGAATTACAGGAATAAAACCAGATCAAAGACATGAAAAGAAAAAGC  
A\_14\_P139213 CAGGCAAAGAAGAGATTTTAAGGAAATTTGCAAGTGAATCTCCAAAGGACATGGAA  
A\_14\_P128762 TACCTCAGGTGGACTTATCATGACCTCAGACTATCAGGTATTCCAAGTTATTTTGTATT  
A\_16\_P01860076

GACTCTTAGGGCTTGATTATTGTGTCAGGAATCAAATTAATCTCCTAAGCATCCCTTATG  
A\_14\_P112254 CTATAAGCGTTATGCAATGGGGAAAAACGAACTCCGTCCACTAACAAAAGATGG  
A\_14\_P106132 CCAAGAGACAGAAAGAACTACAACCTTTTTATTTTAAAATGGAAGCAGTCTTTGGCTTCC  
A\_14\_P128449 TTGGCCAAAACCCTAAAAGTAAAAAACGACAGACAGACACGTGCTTTAAAATCATGTTG  
A\_16\_P01802776

AAATGACTCAGAGTCCTTTATTCCACTACATACTACAGAATGCAAGGATATGTTCCCTCTG  
A\_14\_P131955 TAATTGTATTATTTTCTCCGAAAACCTCACTCACCGAAAGGTCGATAGATTGAGGCTACT  
A\_14\_P106912 TTCAAAACTGCTGTGCTCTGCATAATGGCTTCAGTAGGTATTCATGAACATTTTACATCT  
A\_18\_P19568274

CCGTGCCGTAATTAGATATTA AAAATCTCTGTGCTTCATAAAATTACATGGAATGAATA  
A\_14\_P200095 CTGTTATTTGGGCAAATCAAAGGAAGAAAGAGACTATGGTCTTCTATTTATTGTGGGAA  
A\_14\_P109112 TATCGCAGAGTTATGCCTTTTTTTTTCTGTCACTATTTTATGTCCCTTATCACTGTGCCTT  
A\_14\_P135774 TTAATTATAGCCAGTTATTAAGTGCTCCTGATTCAGCCTTTTCAAAGTCCTCCTTTGC  
A\_14\_P130830 TATTAACATAAATGATTAGGTTTCAATCCATTTGCACTTGTCAATGAGCCCCCAGCATT  
A\_16\_P39577737

ACTATGTTACCCTTCATATCTAAACCATATCCATCCAATCAAACCTTTTGCTTACTACCTA  
A\_18\_P11352039

CCAGTTTGTAGTTACCCTGAATAATTTAAGAGTCAAAGGAATAAACCCCAAGTCAAACC  
CUST\_7596\_PI426210822 GGTCCCCACTTGTGAGTTTTCCGTCAGCCTATAAGGCAAAGGAA  
A\_16\_P21430875

TCCCCATTACAAATAATCACATTGACATTGTGCTCATTATCCACTAGTTTGAACCTATG  
A\_18\_P14135480 TGAAGGTCTGAGGTCACACTGGGAGAGCAGGTCCATATCGGGATT  
CUST\_5171\_PI426210822 CTCTGCATGTAACCTCCCATGCCTCTCCACTACTGATATGGATCTG  
A\_14\_P117358 CTGAGGAAAAGTAGAATTTAACAAGGCCACTGTAGAAAAGATTGCTGCATAACTGTTCAA  
CUST\_7158\_PI426210822 TCTGAAAGTCCAGCTTCGTGTGGGAGAGCTCTGAGGCCCTCTCCC  
A\_16\_P03684339

GCAATGCGATTCTATCACTGGTCTTAACTGATCTGTTGATAATAAACCCCTGATTTCCAAA  
A\_14\_P120774 ACTGGGAAAATATGACCTGTTACTACTCTGGTGAGCAGTTCACACAGTGAAG  
A\_14\_P104852 ATCTATGCTCTTCAGAATTGTAAAGTCGATTTCAAATCTGATATGAGGGGTTGGCTTTT  
A\_16\_P17058200

ACGTCTGCTCTTTAACTTATATATGCCAAATCTCCTATGAAGTTACCAATCAGAACAGGT  
A\_14\_P110293 ACTTGAGATCTTTTGAGAGGAATGAGCAAGAAATCAGATATTTGCCTTTTCATCTTCTGT  
A\_14\_P109805 ACTTTTCTTTTTAGAAAATCACCTTTTCTCCCCTAATTCTTCTGCAGAAGAAAAGAGGTT  
A\_16\_P21602869

TGTGACCCCAAATTATCTCAAATGTCAGTTTATTATTGGCCACCATTTAAGGAACACATT  
A\_14\_P126972 CTTGCAGTGACTTTCTGACCCATCCACCTGTTTTTTTGCAGATTGTCATGAATAAAA  
A\_14\_P110406 TCAATTCCTCTGCCATTTTCGCTTCAACAATTTCACTCAGTATTTGATTGTCATTCCTTGT  
A\_14\_P135757 CCATGGTTTTATATAATCTTTAAGAATAATTTTACCCTGTTATAGGTTCCACCATTAAA  
A\_14\_P138366 AAATGATAGCGCTTCTGTCACTGAGGATGGAAAAATCTGAAGATTAAGGGAGTTAATAAG  
A\_14\_P117134 AAAATCCCGTTTCTGAAAATATGGCTACTAAGATCATCTATGGGGAAAAGAAGACAA  
A\_14\_P128314 GCCCTTAATTCCAGGGCCTAACATGTGTTTTATTTCCCAAGTCACTAATTTAATGTATCATG  
CUST\_7769\_PI426210822

TGATTTTCATGAAAGTCTGCATCTTTTAGAGCAAGATTTCTGCTTCACTCTGTATTTGATT  
A\_14\_P137210 AATGACCTGGAGTGTTTTGCTATTGGAGGGGTTTTGGACTTAGTGCTTTTATATAG  
A\_14\_P122112 CTTATGTTGTCTAACTCCTTTACAGTTCAATTTACATCAAGGAAACAGAGAACTGTGG  
CUST\_1722\_PI426210822 TTAGTTGACCTTGCTGGTCTCTTGGTTTTGTTCTTCCAIGTTTGCAGTG  
A\_16\_P03786106

AGACTGGGTCAAGACTATACATGAAAGACAATTGCTAATCCAAATGCAAGAAGGAAAATG  
A\_16\_P18537410

GTCAAGCAAGATACAGCATAGTCTTAGGGTTAGATTGATAGAGTAAATCACGTTTAATGC  
A\_14\_P135797 ACGTAACAGATACCCAAACATCCTTGTTTGATTGTCATATTTTTCTTGTCCAGATACT  
CUST\_5937\_PI426210822 CTTTGGCTGTTGAGGCCAGTCTTGGTTAGAGAAAAGGCACTGTG  
A\_16\_P03681657

CAGCAACAACAAAAGAACTCACATTTTTGACTACTGTTGTTTAGTTACTAGAGCGTGCA  
A\_14\_P135135 TATAAGCCCTCTTTCTAATTGTCAGCAGAGTCCTTTCTGTAAATTCCTTTCCGTTTTTTG  
A\_14\_P130572 ACCTACTTATAATATTTATCTTTCTCACAGTCAGGTTGATTATCGAGCAAAACTTTGGGC  
A\_16\_P35249144

AGGGTATTGGTTCTCTACTTTTCATGCTAAAAATGCAAATTACCTACAAGTGGGACT  
A\_14\_P202425 CCATGGTGAGTGGAAGAAGCTTTAGGAAGAAATCCCACTGTTTATATAAGTTAGTGATCT  
CUST\_8063\_PI426210822 CAGGTCACCTGCAGCCTGAGGGCCTGGCTGAGCCTGTTGGCAGAG  
CUST\_5883\_PI426210822 GATCCACTTGTGGGGAGGCCCTGGGTGGGAAGTTGTAAGGACAAC  
A\_14\_P139683 CTGGTTTATTAAGCCTCTCAAAGAAACGACCACTTCTGTGCGCTATCATCAA  
A\_14\_P104918 AAGATATGAAAAAATTTCTGTGTATTCTGTCTCTCCTAAAAATGTGGGCCTCCTCTTCTT  
A\_14\_P130277 GTAGTCTCTAGGAAAAGTTCATGTTTTAGAGAGGCATTTCCATGGAAGCAATTTTCTGG  
CUST\_6135\_PI426210822 AAAGATAGCTGCCATCCCTCCCTCCATTCTCCCATGTGCTGTC  
A\_14\_P132241 ATTGAAGCCATTTTTTATGAAGGAAGTTGGCAGTCACTTTGATGATTTTGTGACCAATCT  
A\_14\_P134479 TTAATCATCCTCTGTGTGGCTCATGTTTTTGTCTTTCAACACACAAAGCACAAATTTTTT  
A\_16\_P19496476

AGGAACTAGGACTTACTCAATGCTTATGTATAGCCCTACTCCTAACAAGATGTCCAATAA  
A\_18\_P22841256 GACTGCTGGAAGAAAGACAAGTGAGGAAGAGGGGTGATTGTGAACT  
A\_14\_P123677 ACATGTAGGTAATTTTTCTGGTATGGGGATTCTGCTGCATGAAGTTTGACTTGG  
A\_14\_P129091 TGGTCCCTCCCTGACTCCATTCCTCTTTATAATAGCCATATTGAAGAAGCAATATTATTT

A\_14\_P123512 CTATGGGGTGGGAAGAGGAGAATGTTTGGAGAATACATTTTAAAACCTTCTATAAAACAG  
A\_14\_P105765 CTAAAAGGCAGCAAGATTCATAAATGCAAACAAACATATAAATAAACAACCAGGCCCTCT  
CUST\_1553\_PI426210822 ATTGTATGACTTGAGTCAATAGGCAGTGGGAACCACTGTAAGTTCACAAGC  
A\_14\_P200969

GAAGTAGAAAGGTTAAAAAATCAAAACAAAAGCCCATGAATGTGGGCTTATCAGAAACTC  
A\_14\_P130051 CTATCCACATCCAGGAACTGACAATCTGTTGATGTTAAATGGTAAGTTTTATAAAAACAT  
CUST\_995\_PI426210822 AGTGGCCTTGTCAGGGCCTTGGTGGCAGTGGCTTGAAGGATGAA  
A\_14\_P103897 TAAAAGAATCAGAATGATAAACCCCAACTTCAACTTCAGCATACTAGTTACCTCTGGAAA  
A\_14\_P110275 TTCTAGACATGGAGGGAAACATGGAAGCCATGGAGTTTATTAAGTGTCTTGGAA  
A\_16\_P18125287

TTCTGAACAGAAGACTTCAATCCTTGCTATTTATACAAACCCATTCTCTAGTTATGGCCT  
A\_16\_P00070273

TCCCCAGTCTATTCATGTAAATTGTGTCCCTTTAATAATAACAACCCATATTTCACTGGC  
A\_16\_P02728334

GTGTCTTGATCCATAAAACATTCAACACCAATAATTCCTTTTACCCTCCTAACATTCCG  
A\_16\_P03287417

ACAAAAGTCTAAATCAGTCTCTTAAGTCTGAAACACTAGACCATCCTTACATGAAACCT  
A\_14\_P104629 CTTCCCTAAAGTTCCTCAACCTTCCCTCAAGTTCCTACTGAGATG  
A\_14\_P135607 ACCACCGGGCTAGCAATTTAGAACTATAATCAATGCCTTAATATGTCCCTTCTTTTAGA  
A\_16\_P02629743

AGAACCTTCAATTCCTTACTCAAGTTGACTCTTTCAAATGACTCAAGTGTATCAACCTCT  
A\_14\_P112830 GACATTTATATGCTTTTGCCATGATTTCTTACAAGTCCTTCCCACAAATTCCAGCATTTG  
A\_14\_P100975 CTTACCTAGAAAGATGTTTAAATTCTGAACCAGGAATTGTCTCCAACCTCAGGCG  
A\_14\_P135501 CTTCCAGTGTCTCCAGTTACATAGTTATTGCCATCTGGAGATGCTAAACAATCTTAGTA  
A\_16\_P19964133

AAAAATGGTCCCTTAAAAATGAGCCTTAAAAATAAGCAGCCACTTAATACTCATTTGGGC  
A\_14\_P110440 CTTTGATGGTATTAAGTCTCCACGCATCTCAAACCTTAACTTCTACACCTTTCCAA  
A\_16\_P15077763

AGAGATGCTCAGGGATATAAACTTTCATAACCATACACATATTGCTAGGGCAAACACTG  
A\_14\_P133664 CTTTTTATTGAAGTTAAAGGTTACTTTGGAGTTTGTGGAAATGTGTAAGGTCAAATAC  
CUST\_636\_PI426210822 ATAACCAGTGTGGTGCATGAACCGATGCACCCACACTGCTTATT  
A\_14\_P107720 TTAAATTCTACTTCCTTTTCTCCTCACATCTCCAATATCGTCAGGTTATGGTGTGAATCA  
A\_16\_P41916840

CGAGAACGAAAAGATGACGAATGGAATGAAAAGTGATCTACTGAATGACTTTTTTCGAAG  
A\_18\_P10808068

GCTCCGTTATATTTCAACCTACCCACTAAGACTTAAATATCACACCCTAGTTCAGACAG  
CUST\_9366\_PI426210822 CAGGAAGGTCTTTGTGGTTTCTTTGGCAGAGATGAGCAAAGGGTA  
A\_14\_P102533 GCCCCACCTCTTGATTGCTTTCCCTTTTCTTATAGTTTTTTATGCTAATTCGTTCATT

A\_14\_P200700 TCAGGAAACAGTTCCTCTGGGTTTAATCATCCCATTCCCGATTCTTCTT  
A\_14\_P129684 CTACAACCTCAAAGAGAATCTGCAAAAAGTTCTCCCACACATGGTAGAAAGTCAG  
A\_16\_P00793344

GCCTCTATTGATGTTGCTAGTATTACTAATGTTACCGCATCTAAAATACCTGTGTCACCC  
A\_14\_P138623 TCTTTGCCCTGGAAACGGTTTTTCTTCATCCGATTGTTTGGATCCTGTG  
A\_14\_P100081 AAAAGACGTTATTAATACATTGCACAGTTTTTCAAATTTAAAAACAAAACCGAACGCTGC  
A\_16\_P58424341

AACGTGTTATTTTCGTCTACTTGTTATTGTATTTACCTCTCTAGAATGGAAGCCCAGTGAG  
A\_16\_P20696668

ATGGTCACTTTCTGAAAAAATTATGTGGTGTATCTAGCAGTCTTCCTGGTTATAGTCCAA  
A\_14\_P201265 CACATTTCTAATTTATAACAAATCTGTTTCCTTAATGGGTGGAAGGAAATCTGAGGACAG  
A\_16\_P19417593

ATGTGGAACATAATCTTTGGTGCTGATAAATGGCTTTTTTACGATGAAATTGACCATTCCA  
CUST\_6842\_P1426210822 GGCCTGACTCTTTCAGACTGGGCAGGGAGGCATCTGGCCCAAAG  
A\_16\_P15427499

TATCACCCATAAACGGCTATAAATATCAGACCAACAGATGAGATCCTAGATACTGCAGTT  
A\_16\_P21443070

ACTAATGCTTCTCTGGTCTAAATGTGATTCTATCCTTGCTACAATGAATCATTGAGGAGC  
A\_14\_P132074 CTAAGGGAAGGGAGGCAGAATCATCTCAATTGGCAAAAATAGTAGATATTTCTTGAAAC  
CUST\_9565\_P1426210822

GATTCATTATTTTCTCCTGTGTGCCTTTATTTGGGAAATACTGTTAGTTTACCTTGCTAT  
A\_14\_P110934 GTATGGAACCTGGGGAAACATCTCTTGAATCTGATGAGCCTACAGGAATAC  
CUST\_2236\_P1426210822 CTGACTGGGGATGGTGCTACAATGCGCACTTTGGAGAGAGCATT  
A\_16\_P16854282

TTACCCATATGACATTCTCAAATTGATTCTCCCTTAATATTTGTGTAACACCCATCTGG  
A\_16\_P19954074

GAAGCACTTACTCAGTAGACTTCCTTGTGAAATTGTATCTTTTAATTGGATGGTTGACCT  
CUST\_1065\_P1426210822 AGATGTCCTGAGGCTGGGGGGAGAGGAGACCCAGGATTCATAAAG  
A\_14\_P126112 CTTGCTTTTTTGTATAAAACCTTATGAAACTACAGCAAAGTAAAATGCGCTATTTTCATT

A\_14\_P126132 GTGGGTATTATGAGGCCGATGTGAATAGAAAACCTGAAGTCTTAAAAACATGTGCTGCTTT  
A\_18\_P10587136

AAAATTCCTCCCAAATGAGACTAATTTTGGCTCAGTAGAAAAATTCTCTCACCTCTTGT  
A\_14\_P126061 CAGGTAGATTGTTACCTTAATATTTTTTGTGCTGGGACCATCTACCTGCCTTATACTACAC  
A\_14\_P201172 CTCTTTAAGCCCTTTACCTGATAGAAATCTTGAGAAAACACTGGTGGATTATCATTGACA  
A\_14\_P134147 CTGTGGGTAGCATTCTGAGATGTTTCAATTTTCACTAATGATATGCAATTGGATTTG  
A\_14\_P101900 CTTAGTTCAAGAACTTGAATCAGTTCCATAAATCTGAAGCATATAGGGCGAGAGAGAGA  
A\_16\_P03287300

AAGTGCTTAGAAGATTTTGAATCAAACCTTTCAAGGGTAAATATTTGCAGTGACTIONCACCA

A\_14\_P108179 AATTTTTAAGGATAAAGATAAAAAACCGGACGAGACCAATATGAGCAACGGTGTTCCTTT  
A\_14\_P131119 CTAAATCATTCAAATTCATGGGTCATCAGTGACCCTCAAACATGGAGAGATTATACTTG  
A\_14\_P122730 AGGGCACCCCCTATTTATGTGTATTTATTGTTATTTATATGCCTCCCCAACACTAC  
A\_14\_P115456 CTTTTACCTGGTGTTCCTCATAACACTGACTTGAACTTTAAGGGAAGGAAAAAACACA  
A\_14\_P110459 ACAGTGTCTTACATTTTCCTATTAGTCAGAAAGAAGGAGAGAATGAGTGAGTGCTTGAAA  
A\_14\_P126101 CAGTTTAATGACCCTGACAACATTACAGAGTGCTTACAAAGAAAAGTGGTGCATTTATTT  
A\_16\_P19525783  
AACGTCCTCCATTCTACTTGAGCATAATTTGTTATATACCATATTGAACGTCTCCACAGA  
A\_18\_P13849252  
AGTTCATTGCACATAACCTAGCAGTTTACGATTAACAAAAACATCCACTTAGCAAGGAGA  
A\_16\_P20610010  
GGGTCATCACACTTTAAAAAGTTGGGGATAATTGAACAATAGGCCATATGAAAACATGAC  
A\_14\_P137939 CCATATGTTTCATAGTATGAGAGGGCTGACAAACAAGTGCTTAGGATAAACATTCTAGAGA  
A\_16\_P19724032  
GGGTTCTCAGTCCCTACTATATCACTACAGAAAAATGCATGTCAAATTGTCAAAGGCTA  
A\_14\_P130472 GAAATGTTTTCTCTGCATTTGCCCGTAATAAAGAGGTTGGTATCGCTAAACTACTTGTTT  
A\_14\_P129711 CCCTGACGTGTTTAAAAAATCATTACATTGCCAACTGTAAGAATTAGGAGATCGCACTTA  
A\_14\_P129024 CTGCTTCCCAAACCTAGTTTATTTCTTTTGGTTTGCTCTTTTGTTTTTATTTCATCTTCCC  
A\_18\_P14137835 GTCTCAGGACATCAGATTGCATTGTATCACTCTGGTCTTCATGTGTCAGTGATTT  
A\_14\_P136427 CACCACTGGAATGATATAAAGAACCTTTTGTGGAGATTCTGCCATGATTTTAGTCACATA  
CUST\_2243\_PI426210822 CTCTGTTTCAGAGGGGCAGCCTGCTCGCTGACTGTCCATCTCTAG  
A\_16\_P36430003  
AATCCAAAGGTGAGTTAAACATTCATACTTGTTCATCCACTATTTACATCTACTTTGGGC  
A\_16\_P02989522  
AAGTAAAGCAATAAAAAACAACGAATAAAGGCATATGTATCACC AATTTAACCTGCTTGGG  
A\_14\_P119036 ATTTGGCAAATGATGGTGATGAGAAAGTAGAGAGAACCTTGGATTTGTTTTCTGTTTTAG  
CUST\_2204\_PI426210822 CAGATTGCATTGTATCACTCTGGTCTTCATGTGTCAGTGATTTGGGGTG  
A\_18\_P22841036 CATAATGGCAGCAAATGCTTGAGGGAATCCCTGAGTATGCATCTATTTCTTGAATCAT  
A\_14\_P138397 AATTAGAGGCATAGAAGTCATACTGAATGCTGAATAGAAGAACTGAGAAGAGCAGGTT  
CUST\_7785\_PI426210822 ATAGGCAACTCCCAACCAGAGCGCTCTCCACTGACATGTTGCTTA  
A\_14\_P120243  
AATAAGGGAAGAAGAACTTCATTTAGTAGAGGACTGGAATCCTGAAACGAACAAACAAA  
A\_16\_P30952394 TTCTTCTCAGGTGAGAGGCCCACTCTTGCTCCTTGAATTGTGCT  
A\_14\_P110561 CTTTTTCTTCTCACGTCTCTGTGCCAAATATTTATGGTATATCTTCTGTCTCTTATCA  
A\_16\_P18276830  
TGCTCTGAAGTAATGAGAACCTGACACTGTAACTAATCTGCCGTAACTTTATTGAAA  
A\_14\_P131992 CTTGAAAGCCTCAAAGGTGTCCACGTCCTCAAAAAGAATGGAACCAATTTAAGA  
CUST\_2687\_PI426210822 AAAGGTTGAAGGGAAGTCCGACAGCTGTGGGAAGGAGATGTA



A\_14\_P106896 GCACAGGAAGGTTAGAAACCTATACTCAGTTGCCCTCTCCTTTTTTTTTTAAGTTAACAA  
A\_14\_P107459 ACCATGGTGA CTATATTGACTCAACTAGGACCATTCAGAGAGTGATATTAAGTTTTTCT  
A\_14\_P111594 AACTTGTGGATAGGGATTTCGTTCCCTGTCCCTCAGCAATAGTGTA AAAAGAGCAAAT  
A\_14\_P127559 ACACATTAACAGAGATACATGAAAACCTCCATGTCTATTTCCAGAGTCCACAGAATTCTA  
A\_18\_P22840171

TCCAAAAGCAAACAGAAGAACAGAAATAACCTATCCACTGTTTAAGATTAAAATGGCCAA

A\_14\_P137235 AGTGAGAAAAACGGTAAGTGTTCCTCAATTGGCTATTA ACTAAGTCATTTCTTCATGCTT  
A\_14\_P101039 ACAATATGCCACAATTAATGATAGCAGAAATACCCATGTTTGATACCACATGCATCACAC  
A\_14\_P126868 AGCGAGTGTCTATAATTTGCCTCTCAAGGAACTTTTGTATGGACTATGATCATTCAACTC  
A\_16\_P00237876

AGATCATTAGCAAACCTCACATGTGACATCTTGGACATTTTGAATCTGAATCACTCACAAAG

A\_16\_P58424396 ATATTGGACAAAATTGATCCTTCCTTTCTTGAGACTGTCCTCTGTGACCATGTG  
A\_14\_P138104 ATGCATAATGACTTTCCAAATAACAATATGACAGAAAAGAGGAGCCAAAAGTTTCCTCCA  
A\_14\_P131941 GATATTTTAGGAATAGAGAGCCTGTCGGTATATCCTTAAAATGTATGGCACAAAAGAGG  
A\_14\_P124659 TCATAACAAGATGAATCAATTTTCACATTCTGTGTGTGATCTATTTTGCAGGGCAGAGAG  
A\_14\_P120994 TTTCTATGTCTGTT CAGTATATGGCCCTTTTTCTCTTTTTGACAGTGCCTTTCTTTCTAC  
A\_14\_P102560 TATCTCATTCCCTACCTCTTTCTCACGTATTCGAGAGAGAAAATGATCATCATGGAAACTG  
A\_14\_P121901 CTTAAATCTCTTGTCCTGCAATACTTTCTTGATGGCGACCAGTTCTCCTGAATC  
A\_16\_P19950529

AGCCTTTTTTTCTCCACTACATTGATCACATACTGAGACTACACATTAGGAACACAAAGA

A\_14\_P111583 GATGTTATGGCAGAAGAGAATGAAAGTGAGCAGCAGATAGTCAATATGGGATCTATGAAC  
A\_14\_P125772 TTCAGATATCATTAAAACAATGTGTCTGCGCCTCTAAATAAAACAGGCCAGTCATGTTTC  
A\_16\_P00685258

CTGTAAGAATGTTTTGTGAATGCAGGAATGAGGAGAAACAGTAGTGAATGAACTTGAGTC

A\_14\_P122344 GAAAAATGAGCCTTTGTCCACTAGCACATTTATCAATTGCATTTTAGGGTGATTTTAGGG  
A\_14\_P101943 CTCCAAGATATAAGCAAGTTGAAACCGCTTCAAGATTTGATTTCTCTGATCCTAGTTGAA  
A\_18\_P15963387

CTGCAAAATGTCACTCCTGTTATCTTCTCATTAGCCCTATTT CAGTCTGAATAAAGCAG

A\_14\_P121564 GAGGTGAGATCCAGATCCGACCACTAGATCATCCTTATAACCGACG  
A\_14\_P121241 CAAATACAGATGAAAGCAAAACAAAGGACACACATGTATGACGTCATTTTTTCCTGGTTT  
A\_14\_P138597 ACCTTTATTATGTCCTTTATTTTAGTCAATGACCAAGGTAATGCTGCTCTTTTCCTCAGACC  
A\_14\_P104292 CCAAAAAGGGGTGAAAGGACTTCCTTTGATGATTCAGATTGACACATACAGTTATAACAA  
CUST\_1523\_PI426210822 ACCTCTCTCTTTTCCTCACTCCAGGAGAGCAGAGAGCTGGGGAAG  
A\_16\_P38418746

CGCAATTGATAGAAAAACAACTGCTTTTTCTCACATGTTATTGGTCATGAACATTGTCCG

A\_14\_P131373 CTCCTTCCAGTGGGAATTTGGAGACTTTTTGGTTTGTAAATATATCCCTTTTTCTAACAT  
A\_14\_P139725 ACAGAAGCCACTGCAAGTCTTGGCAGTAAAAGGTAATCTTTTAAAATGAAAATCTGTGCAT  
A\_16\_P01026586

TGCCCTATCTTACCAATAGCATCAGTTAGACATTACAACATTATTATTCAATACAGTGG  
A\_14\_P124181 TTATTTCATTTTTTTACCATGAACTGAGATCAGACAGTTGCGCGGCATCTGGAGATAAC  
A\_14\_P126020 GAAGCCAGGATGGATGGTTTTTTATTTCTGTTGTCAATGTTCAACCTGAATAAATTATCCT  
A\_16\_P16335725  
AAACAGGATCCCTCACATAATTTGGCATATCCTCTTAAGCATAAGAACACATCTAAGACA  
A\_16\_P15405486  
AAATGCGAGTTTAACATGATCCATTGTCAACTTGAGCAATTTCGAATTCCTCCTGGTAA  
CUST\_2225\_P1426210822 GGAGGTTTGTGTGTAGTGTATTAGGACAAGGCAGAGAGTGTAGTC  
A\_14\_P109977 ACTCCCCAAATTAAGAATATCCCCACCTTTTTTTTTTTTTCCCCTAGAGTAAAAACACA  
A\_16\_P03113209  
AGGGTCTTGCGCATAATTATTGAATGACTGTTCCCTAAGATGTAGAGTTGAGAACTAAAG  
A\_14\_P111959 CCCCCTTTGTTTGTAGTCTAAGTGACATGGGTCTCCCTCTCTTTC  
A\_18\_P11726801  
AGCCCCTTGATAAATCTTACTCTCCACTCTTTATCAAAGAAAAGAATCCCTGACAAATTC  
A\_14\_P126291 GTGCTTCATCGTCCTTTAAAATCCAAACGAGGTGATCTAGTGTCTTCCCTCTG  
A\_16\_P36942327  
ACCTCTGCTATGCAATTGTATGCAGTTTATTTATTTGGCCAGATTCTAATATGCTCCCTG  
A\_18\_P14510432  
AGTATTGCAAACCTCACTATAACCACAGGAGACAATGTTATATCATGAATAGGCTCTTCC  
A\_14\_P133415 CTGTGAATAGGAGGACATTATAGAAGAATCAGAGTCTACAAAGACCACTAGTTCACTGAT  
A\_14\_P100703 ATATTCTCTCCTTTTTCTTTTTCCAGATCGAAGCGGATTTCCGATTGAATGGTGAG  
A\_16\_P17192424  
AAAACCTTAATGCATGCTTTTTTCCCTTATAACCATCCTTGAGTATTTAAACGTAACAGCCTT  
A\_14\_P105770 CATCTGGCTGTGCAATTCTTGTGACCCTGTTACACACACTGGAGA  
CUST\_437\_P1426210822 TGCTTTCTCAAGCTCTCAAGAAGGAACAACACATATATGAGGCCTGAGTTC  
A\_18\_P14879678  
AAAAAACTTTCCCAAATTGCTTACCATTTGGAAAAATTGCCTTACCTTCTTCAGTCATCT  
CUST\_8484\_P1426210822  
TCTTAGAATATATATTGCATGACAGGAAATGGAGGTCTGCTATTTTCCACTGAGACTTGC  
A\_16\_P03655835  
ATGAACAAGTCTGAGTCACTATTGGTTAACAGTCTTCTGAGATGTTAAGAGTAGTCATGC  
A\_16\_P02623546  
TGGCAAAAACAAATGCATTATACATCATCAGAGGTATTAATTCATAATAACAGCGGGAGG  
A\_18\_P22840679  
ATTCTGTAGCAAGATGAGTTATATGGGGCCAAGTTACAGCACAGAGTTTTTAAGAGATTGT  
A\_14\_P119163 GAATAAGGAGGGAATGACGAATAATTTGACCAAATTCCTTGACTGAGTTCATGCTAGTTA  
A\_14\_P131572 TATGTTCAAAAAGCATTATGGAATTGAAATGATTGCATCTCATGGGCACCTTGTGAGAA  
A\_16\_P00924958

AAGCCCAGGAGAATCATAAGAACAGACTACAACACTGAAATCTATTACATTTTGCAGACA  
A\_14\_P128637 AATCCACATGAATCACTAATTGCTGATTTAAACCCAGACACTAAGCGAATGACACATACA  
A\_14\_P101438 CCATCTATGGGGAGATACCAGTTGTTGATTTTTTTTCTTACACAGAACAGTGTTTCATATCA  
CUST\_4875\_PI426210822 AACCTTACAGAAGCAAATCTTTAACGGAAGGGTTTCCACACTGAGGG  
CUST\_6801\_PI426210822 TATCTCTAACCTGAGCACCTCACTTTCTAGACTCCTAGAAGTTGTGGGTT  
A\_16\_P01453579

CCAGTTCCTCTTTCATATGCATTTATTTAGAATTTTGTCTCCTATTCAAACAGGTCACACA  
A\_16\_P00685619

CTTGAGTCACCTCCTCTAGGGTTTCTATGTTTCTTCTGCTACAGATAGAACAGTTAACA  
A\_14\_P106625 GCAGTTGATTAGGGAACATAACATCCATTTGCTGCTCCTTTGGTTTTATGGTTAAATTTT  
A\_14\_P201352 ATCTGGCATCTGGCTTTTGTGGTGTTTTAAATATTCACAGTATGAGAATTTGTCTCACAT  
A\_14\_P120081 GATGGCTATCCAATTTCTCTTGTAATACTGGTAGAAGCATCCTGCTGTTCCATTATTTAG  
A\_14\_P122225

CTAGGAGTCAAATAATAGAAGCAAAAATGACCAGAAGACAGAGAGACAAAAGTCAACAGT  
A\_14\_P137313 AATTCATTTGTTTCGAGTCATTCATTCATTGGTTGAGTCATTCAGTCTGTTGAAACAAGCA  
A\_14\_P105390 AATAAGAAAACCTACCATACAGCAAGGAGTATGGTTCAGCATAACGTTTGACGGTTTTAAAG  
A\_14\_P130933 GTTAATAAAAACCTTCTTGTAACGGCTAACTGCCACCTAAAATATGCTGGGTTTTCTGTTGT  
A\_14\_P128114 GTTAATATGGCTGATTTTGTCCAAGTGTGTAACATTAAGGTAAACTCTGAGACTCAACAG  
CUST\_9873\_PI426210822 CACTCTGTCTACCACCTCCTACCAGTAAATGTTCTTCCCTGAGAAT  
A\_14\_P131012 TACTTCTCTGAGTTTTAGTTGGTCTTTCCATCTATCACTGCATTATCTTGCTCATTCTTC  
A\_14\_P135080 GAAAATTCATTTGTTGCATTTTTGCCAGGTTGATGTTTGCAAAGCAGGGCACT  
A\_14\_P104866 CTTACATGTATGAGAATACATCTCCCTTTTCAGTATGAAAGGAAACACACCTTTCTCTGT  
A\_14\_P137239 AAGAGACCAGTGATGAGTGTTCCTAAGGTATGTTCTTGAGAAAAAATGTCTAGGAAGTT  
A\_16\_P18384949

ATCAGATTCTCACATTCAGTTAGTTCCAACCTTTACCTTCCAGATATCAGTGTATAGTCCC  
A\_14\_P102387 AAAGCCTTGACAATAATGGAATTTGTGTTAATAACCTGGGCACAGGAGAGCAGT  
A\_16\_P01819835

CCCTCATTCTCTGGCATTATACTTACTCCAACCTCACATATGACTGTGTTCTAAAACCTCAT  
A\_14\_P136384 ATTGAAGACAGGGTAGAAAGCATGGGAATTTTGTATAAACCTTCATTTGGCTTGAATAAG  
A\_14\_P102408 CAATTTTCATCTTGATGCTCAGAAAGATGGAAATTTCTTTTGGACTTTTGATACTCACTGT  
A\_14\_P111729

TTGATAACAAAAAATGAAGGAAAGAAAATCCTGTGAGACCACCAGTGGTTTTAGGAATACA  
A\_16\_P00685062

AAAAGATGAAAGAGTCCCACACAATTCCTATTCATGTCAGAAATTTATGAGGCTGAACTG  
A\_14\_P127814 CAAGAGGAACCAATAAACCTTCTGTGCAGAATGAGGGACTTTGCTGTG  
CUST\_7981\_PI426210822

TAGTAGCTATTTGTAAACCAATGGTGAGAATATTCTGGTGAGGGAGAAGACTTGGT  
CUST\_2660\_PI426210822

CAGCTAAGAGAAAACCTGGCTGAGGCTTTCAACTATATGACCTCAAATTAGCTC  
A\_14\_P126059 TATTTTCCCTACCTTTTTTCATTTCTTCAACATATGCAATCATGGCTTCTCTTTGGTCAT  
A\_14\_P138208 CTAGAAACCAACGAATATTGGTGACAGTATAGCACTGCATCAAAGGTAACATAGAATTGC  
CUST\_7284\_PI426210822 AGATGGGCGGGTGTGACTGAGGCTCACCATGGGTGGACTGAGCAG  
A\_14\_P127838 ACACTATTGATTGTTTATTCCCTGGCATTTTAGCCAGTCTGAGTCAGTTATCTTATACCT  
A\_14\_P123458 AATCTCAAATCAAGACAAAGTAAATTTGAGGAAGAGGTCTATTTACTAATGAGGGGCT  
A\_14\_P201089 CTAATCTAGTTCCCATGTGCAAACCTCAATCTATAGCATTGGGGTAAAGAATACTCAGTCC  
A\_14\_P100965 AGAAAAGGGGCATTGTTTTTCACTGCTTTCTCAACAGTTCCTGTGAATAAATGAAACAT  
A\_14\_P116129 TCATACTCAGAAAGCACAAAGCCTCAGGATTCCTTGCCTAGATTATTACAATTCCTTAT  
A\_14\_P137123 CTCACACATTTTAAATTTTCAAGGATTTGCCAGACTGTTGGTGTGAAAGCAGGAG  
CUST\_2929\_PI426210822 CCGTGGACGGTGTCTGTACCTACTCACTGGCCAGGCTGAAGCCTA  
CUST\_7400\_PI426210822 TAAAAGGCTGCATGCAAAACATTTCTCCCCTGGTAGAAATGCTGC  
CUST\_3241\_PI426210822 GAGATGATGGAGAAGAGAATTTGGGATGCATGGTGTGTGCCAAAGAAT  
A\_14\_P137101 TAAGTGATGAAATGAACTTTCTACCTTCCCATACTTAAGGTTTCTTAGCATAAGTTCAG  
A\_16\_P15728631  
CTGTTCACTGACTATTTCTAGGCACGTTGACTAATCATTACTTTCACACACCATGAGAAG  
A\_14\_P126938  
GTTGGGAGCATGCAGGTTTTCAAAGAGGTAGCAAATAAATTACTTGAAATGAAAAAAG  
A\_16\_P03097607  
TCCCATAGATCTTTTACACCTCCATTTGGTATCATGAAATAAAGACTAATTCCAACCCTC  
A\_14\_P134399 TATTTAGCAAGCATAGGCAGAGTCTTACATTGTAATAGTTTGGTGCAGGAGTTTCAAAC  
A\_16\_P21633682  
AACACTTTATGCACTGTATTGTTGTCCACTTGAAGAAGAAGCCAACCATAATTTGAGAAG  
A\_14\_P123029 TGAATTCCTGTGATGGAGAAAAAGTGTGAAGATGCTTAATGGTGTTTTGAGGCATC  
A\_16\_P35646476  
AGCACCAATACTTGATTTCCCTATATTCCTCATAGCCTGTATCAAAAGTATATCTTCCCAT  
A\_14\_P110706 TAAGACGTGCGGAGAATACATCTACAAGGGGAAGAAATTCATGCTCGGAA  
A\_16\_P19819880  
AATCAAATACTGTGATTGCCAATGTATTTCCAAAGTCTGGATTATGTAACGTGTGAGGG  
A\_14\_P105993 TATTTTCGTGATTTATAGACAAACGTATGGCCGAATGATGTGAAAAGCCACTGTGTTTATT  
A\_16\_P18898355  
ACTAACAAAAGAACCAAACTCTTAATCTCAATGCACTGTCTCAGTTAGGAAATGCTCATG  
A\_14\_P129067 CTTTCTTGATGTTCAATCAATCAGTCACTGTGTCCAGACATATTCAATAAACACAGATT  
A\_16\_P02762035  
ACAGCATCCTTCATCGTATTACTCTCCTGTGTATATAAAGACACTGTTATCCAAGTCTTT  
CUST\_3062\_PI426210822 TACACCTTGTTAATGGGCATATTGCTGGCTCAGTTGATACCTCATGATGG  
A\_18\_P17054767  
ACACTGACAACCTTAATGGAACATACCATATGCAAGGATTAGTTAATTGGCTCAACTCTCT

A\_14\_P101700 TTACAAATACCAAAGAAGGTTGGAATAGCACTCTCGCTCCCAATCCCTAAATAAATATTG  
A\_14\_P126670 GAGGTTTATGGTGTCCACTGAATCAATTTTGTGAGTCTGTAAATTGGTATGAATTGTCTC  
A\_14\_P128881 ATGCCCCCTAATTTCTCCTTCTCTGTCAACTTCTCACATTTGCTTTCTAAAAAATTCTTA  
CUST\_4712\_P1426210822 CCAAGTGTGTCAAGCCCCCTCTGCTTACAAAACCTTTATTTTTCACAACCA  
A\_14\_P139894 TTGCTTAAATGAGTGTGTTTTTCCATGAATGAATATACCGTGGTTCATATGTTAGCATGGC  
A\_14\_P102677 TAGCACGGAAGAGTTTGTCTTGCTTTAAAGATTAGCACATTTGTGCTTGATAAGAAGAAT  
A\_14\_P126423 TTCAACCCTTCGTTCTCTGAATAGGCTGTTTATTGGCAACATTAAGTGGAAACATTTTAT  
A\_14\_P103090 TCAAAGTAGACCCAAAACAATGGTTTGGGTAAGGTTGACTTTGTTATTTGTAGTG  
A\_16\_P19931904  
AAAAAGAGACAGAAATCTATCCAATTTAACTTGAACCAAATCTTCCCTACACTTGGC  
A\_14\_P107121 CTTGTGTATGGTCCCTTTGGCTACATCAAGAATCCCTACAACATCTTCGATG  
A\_16\_P41844404  
AACTTCTTGAGGCTTTTATCTCATGATTTTACTGCTAATTCTTTTACAATTCTAAGCAC  
A\_14\_P107761 CTGTTTCTAACCTCATTCTCCTGTTTTAGGAACACTTGTGTCAGGTTTCTATTTAGTA  
A\_16\_P16840006  
AGGCAAGACTGTAAAAAGAGACTACTCCATTTTAATACAAAGTGTCCATAATGCATCT  
CUST\_3367\_P1426210822  
TCCATTTTACTCTAGGAGTTAATTCAAATTTTGGGAAGCAGCAAGATTTCTCTGCAATCC  
A\_16\_P16757410  
AAACCTGACCCTAGTCAACTTCAATGTGATACATGAACAGATGATATGGTTTTGGGTATA  
A\_16\_P18682020  
AAATTACCTCCAGATCTACTTTCCTGAGTCAAAAATAACTTCATAGTTTTTTTTCCCCCT  
A\_14\_P131297 CCAATTGAGACCAAATACTAAGAGTTTTCAAGATTTCTGGTTTTCGTGAAAACTATAGT  
A\_14\_P100105 AGAGCATCTTTACAGCACCTTGATCCTCCATGACAAATGATAACATGCTTTTGAGTATTA  
A\_16\_P19320950  
CACGCTCTTAGAAAATTAAGATAATCCTTTGCATAGTTTTATTTTCTACCACTAAAGCCA  
A\_14\_P129123 AATTTTCTTCACCAGTTCATCCAGTTTCACCGTTGCTTCAACCAGAACAGA  
CUST\_6331\_P1426210822 CTAAAGTCAAGGCTGATGAGGATTTGAATTCCTCTGTTAGCTGGGAACC  
A\_14\_P200139 GCCTTCATTGATATGTTTGATCTGTTTTAGGATGAAGTAAGGGAAAATATTGCTCGTGGA  
A\_14\_P119236 CTAAAATGATCAAAGATCCCCAAAATTTTCAAGAGCAAGAAATATGGGGAAAGTCAACGTTAT  
A\_14\_P130056 ACCCCTTTTCTTGTTAATGGTAATATCTTCAATTTAATCACCTGAGGCAATCCTTGTC  
A\_14\_P109813 CGTGTCCCTTCTCCAGTTAGTTCCCAAGCACAGAAGAAAATCCAGC  
CUST\_10156\_P1426210822 AGAGACCATATCTCCCTCACTGCTGTCAACCAAGGACCCTCTCT  
A\_14\_P109724 AGAAAGAGAGTTAATAAAAGTTCATTTCTAGGCTCTGAAATGTAAACCTGTGAGACCTCC  
A\_14\_P100804 CTTTAGCAAATCCGTCAAGCAAATAACATCTTTCAGTGGGGCAGAAGATTATTAAGATG  
A\_18\_P14134545 ATCAGGAACACTCACACAGTCATTCTCCTCACATACCCCACTCTCAT  
A\_14\_P117240 CTTTTGCCCCACACCCTTATTTTTCAGATTCTGGATCATTCTTGTTTACAACCTGAAATATA  
A\_14\_P121222 CCAAGTGAGAATTTTTTCTCAAAAATTACAACTATATGTGTGCGCCATCATTTCCTAAAA

A\_18\_P14137203 ATTAGGGAAATGTCTCTGGCACTTTCCTTCTTGGCTGTCTGTGGAAC  
A\_16\_P40361404  
GCCCTAAAAGTAATTTCCCATCAAAATTTTCTGCTTGCTTTAAAACTCTAGACTTCGAGC  
A\_16\_P16191923  
TCCAAATTATTAGACTTAAATTTTAAAGGACAGTAAGTCCCAAACCTGTGAGAACTTT  
A\_16\_P16191248 AGATGTCTGCAGTGGGAGCAGAAATGGTGTGATTTACTCTTTGTTTTTGTGG  
A\_14\_P108909 AGTATGAGTAATTATTATCATGGAAATCATCTAGCATTGTGTTGACACATTAGGGGGAC  
CUST\_6542\_PI426210822  
TTTTATGTCTAAGACTTAAGGAAAATCTAAGTGATCCAACAGAATATTATTAAGCACCAT  
A\_16\_P58424551 TAGAAGTACTCTGTATGCTCTAAAAACAGAAGGAACCCTGGGTTCTGAGAATTTCG  
A\_14\_P118521 CTAAGTTCCATTTAAGTTTTACAGTTAAGGGTTGACATAAAGACATCAGTCCAGAGTCT  
A\_14\_P113325 GTATTCTGGAAGGAAAGATCTCCTTGTGCTTCATAGAAAATTTGGAAAATACCTGTTTGT  
A\_14\_P116747 CTGGTGTGACTGACTGTGTTGCTGAAATCCAAAAAATAAACCATATATTCGACATGAAC  
A\_14\_P100837 CTTATTACAATAAAACACTCATGTCTGCAAGAGGCATAAAGAGATATTTACGTCACCCC  
A\_14\_P136865 ACAGGAAAAGACAGAATACATCTTTCTCTCTTCTTACCAACCTTTGAAATGTTGTGAAGT  
A\_16\_P30952520 GACTGTGGGTGGGGATGACAGATTCATGCTTTCCTCTTTCAGAATCAT  
A\_14\_P108536 TGAAGTTATGAACACAAATTCTACAAACCACTCAAGTCCCATTTTTAAATTCCTCCTTC  
A\_16\_P16191711 ATGAAGATTTGCCTTCATCCAAGGGGAATGTCTGTGTGAGACAGTG  
A\_14\_P119997 TTCTTATTGTATTTCTATTTTCATGCCTCTGTTTACAAAATGAGTTCACAGTTACTACTTA  
CUST\_1466\_PI426210822 TTCTTCCAGGAGACTCCACACTGGGATGGCCACATCATTCCATTT  
A\_14\_P138121 CATGGGGAGTAAACACTCAGTTCATACTCTCCTTCTTCTTTATTAGAGTTCAGAAATAC  
A\_14\_P200889 CATAAAATGTTGTTGTAGGTTTTTCTGCTATACCACACCTTATGATTCCATCTACTGCCC  
A\_18\_P14265280  
TGCCAAATATCACAAATGTCTTAGTCCTAAAACGAGTCTTAAATAAACCAAAGCACTGGA  
A\_16\_P15975471  
ACATGCCTGTATAATATACCCCATCACTGATCATTACTCAGGACCTGTTAATACACTCTA  
A\_14\_P134679 TTCCTCTCTCTGTTCTTATGGGACTAGATACAAATTTTCTGCTGAGCACTAAATGAGA  
A\_14\_P105426 ACTCTGTGAAGTTAATGTTATGAGGGTTGGATGTGTCTTAGAATCTGATCATGGAGTTAA  
A\_16\_P35742149  
AGAAACCTCCGAATAGAATGTTTTTCATCCATAGTTAGCCATTACAATGACACTTTACCT  
A\_18\_P14132903 ATCTTGCTAGCCTGGACATACTTTCCACAGTGAACCTATCTCTCATTCCTG  
CUST\_6992\_PI426210822 CACCTGGTGATTGCATCTTGCTGTATGGGATCAGGCCTGAAAAGT  
A\_14\_P126152 CTTTGAGAACAGTCCGTAATAAATAAATTTGCTTTGCATCTGTATCCCCAGTATTTAACC  
A\_16\_P30952601 TTGTTTTCTTCCACAGGACAGTTCGTCTGTATCCAGTTCATGTCC  
A\_14\_P136196 TTAAGTGCAGTAAAGCCCAGTGTTCATGTTTTTTATCTGCTTCTATTATGGCTTGAGGA  
A\_14\_P107894 GTTTCATGAAAAAAGGATGAGGAAGTCCTTTAATGCAAGCAGTCTGGAAGAGAA  
A\_14\_P113464 CTCTTGATGTGAACATTGGAATTAAGGCTTGATATTTGACAGAAAAAAGGTAATTATCT  
A\_14\_P108873 TAACCAACCTGTTTTTATCTACGGTGGGAATCTTTGATGCCAGAAATTTATAAAGAGGTT

A\_14\_P111340 GGTTCATGAAACACAGAGAAGTGGTCTTTTTCTGGTATCTACCTACTTAGAAGCAAC  
CUST\_3468\_PI426210822 TGATCATTGGGGTCATTAGTAGCGCTTTGAGTACCATGGTGTCTGCAG  
CUST\_31\_PI426210822 ACTTCCTGCAGGAGCTAGTTCACCTGTTTTTTATGTCAGGGACCTT  
A\_14\_P113674

AGAAGGCATTTTCCACTGAAGAAATTTTAAAACAACAATGGGAGACGAAAGGAAAGTAAT  
A\_14\_P133797 CTTTGCAGTTCAAAGTTGCAGGTTCTCCTTTTGAGACAATCAGGTCTGAAG  
CUST\_383\_PI426210822 CACTCCCTGAGTCTTCTGGCGTCCTTTGAACAACAACAGTAAGTG  
A\_14\_P107634 CCATAAAAATAGTTTTTGGATAAAAATTCGAATCACTTCTGCAGAGAGAAAAGACCTGGGT  
A\_14\_P114410 AACTCTAACGAGTCACGTCAACATAACAATTCGAAAGATTGTAATGCGGACCTGCTA  
A\_14\_P137406 TAGGAAACCCCATCTGAGATTTTAATAAATCCCTCAAACAATAAACACATCATGGACAT  
A\_14\_P128598 CTCTTCTGAAGGAAGATAGAGTTACAGATTGAATCAGAGATATTTCTCTGTGATCCTTC  
A\_14\_P201408 CTGTTCTGAAAACGATCTTTACAAAGCAGTTCTATTAGGATACCCTGCTGTTGACAAA  
A\_14\_P102242 AACACAACCTTCTGTCTCAGAAGGGACTCCGGAAATACGTAAAAACAGAG  
A\_14\_P108698 ACAAAAAAATTTTCCAAAAGGGAAAGGCAGAGAATGGTCAATGCATACTGATTTTCATGA  
A\_16\_P01326582

TCTGTGTTTCATCTGTGCAATACCAGTGATTATGCTATAAGTCCACCACAGTTTAATATCC  
A\_14\_P116884 ATTTACATACAACCCCTACGTTTTTTTTGTGTTGGGAAACAATGTAATGGATGATGAGTT  
A\_14\_P201757 GCAACAACAAAGTTTCTAACACCAAATTACCTTTTTGGGCTTTGGTATTGTATGACGAAA  
A\_14\_P103481 CATAGAATAAAAAACAGATATGGTATCTAAAGAGCAGCATTAAACACAATCCCCCTCTGT  
A\_16\_P40356866

TCCTGAAGAAAAACACATACGTGCAGAATATTTACAACAATGGGAATAACTACAATGGC  
A\_14\_P103816 GTAGAAATCCAGACATACCGAGAGAAATTGACTTCTAAAGAAGAATGTCTCAGTTCACAG  
A\_18\_P22840705 CCATTCTGGATGTGCCAGCACTTTTCCCTACTCATCCCCAGTTATG  
A\_14\_P126388 ACTGACAGCATTATGTGATTGCAGCCTCATTGATTAGCATCGGAAATAATGACTTTAACA  
CUST\_8025\_PI426210822 GGTCCATTGTAATGGACCAATGTCCGTTGCTTTCAGGAAACATTCAGTA  
A\_16\_P16791939

GCAGTATCTTTTTAACAGCCATTTTACACTCAACCAAATAATCTACTTACCGAGCAGGAG  
A\_14\_P119996 TGTTTGTTTTGGCAGAGTCCAGAGCCTAAGGACCAGACTTTGAAAATGATTAAAATTTTA  
A\_16\_P36704179

CACCCTAATTTGTTAACATATCAGAACTACAGGCTCTTTTTTATTCTTGTGCCCAAGACT  
A\_18\_P14131103 AGGAAGATCTTGGCACAGAATGAGGTCAGAGTGAGAGAGGTCAAGATT  
A\_16\_P19777861

CTCAACCTTCTCATTCAAAAACCATGCCTAAACATCTACCACTTAGTAAGAAACATTTCTT  
CUST\_9474\_PI426210822

CAGGCACTAATTTTAATGATAGAAACCAAATGGAATGATGCTGGGTCATTTACTACTTAG  
A\_14\_P123013

TAAAAGGATAAGAAGAAAGGGTAATCCAACAGGCACTTGTAGACCTGAAAAATTTGAAAG  
A\_14\_P134180 TCTGAGACACACATCTCTTTTCTTAGTGATTATTTTCCAAAGTTCCATTTCTGACTCTC

A\_14\_P126924 ACATTTGAATCCTGTAGGCGTATAGAAAAGGTAACCTAGTAGATTTTATCCTGTTCT

A\_14\_P115592 GATTTTCCCACTGCCAAATATGAGGAATGCGCATGGCATAAGGGTG

A\_14\_P129741 GAAAGGCCAAGAGTTTGTGATGAGATTCAAGGTAGATATCCTCATCTTCTTGAACAG

A\_14\_P130947 GAACAAATATTTCAAATCACGGAGACCTCTCTTTACAGGAGGCCTCATCG

A\_16\_P58424106 GAACTTTCTGGTGAGATGGAGATGTTCTGTGTCTTGCTAGGGCCTT

A\_14\_P124307 ATAGTAAGTGTGGAATCCACCTAACATTAATTTCTAGACCTAAAAGATGGGTAGCCATGT

CUST\_4025\_PI426210822 CTGGAGCCAGTGGAGCTTCAGGTGGCTTTAATTCTTCCCTGGATG

A\_14\_P132324 CTGAAAATTTCTTCTTCTTTAAGAGGCACCTTTACCATATCAACCTGAAAGACATGAGAG

CUST\_6889\_PI426210822 GCATTGAGCAACAGAATGGTCTTAGGCAGAAGTGAGCCTCATCC

CUST\_2754\_PI426210822

TGGTAAAATTTTAAATAATTACCCAGCATCTGGTGGTTCATTTATGGCTTCAACCAGATG

A\_16\_P18308444

GCACCACCTGAATAATTTACCTAAAGTTTCTAATAACTGCTCAATTCTACTATGTGTCCC

A\_14\_P200385 CTGAAGCAGTTGTAATGATGTTCTCTTTGCTGTTAACAACATGTTTGTCTCGAAAAGCC

A\_14\_P101241

AAAGAATGTGAAGATTAATGTGGAGAAACACACAAAAACCATTTCATGACCACAAAGTGAC

A\_16\_P58424449 AGAGCCTCAGGGTGCGGTCCTGAGAATGCTTTTCTTCTGTGTATA

A\_14\_P129538 CTGGGAAGATCAGTGAAAGACTTGTGATTACCTCAGAAATGATTGAAAATATCCAATCTG

A\_14\_P102163 TGACCTCCTGTAAGGTCTTACAACACTCATTTGTGATTGAATATGGGACATAGATAGAG

A\_14\_P126732 ACGAAGAAAACCTCCAGTGGAACTAATATGAAATCTATTTGCAAATATGGGGGGAAATA

A\_14\_P102738 TGAGGTGATGGACATAGAAATAGATTATGGGAATGAGCAGCACCAGATATGACTAATGTA

A\_14\_P121475 TGTCATCTCCATCTTTAAGGCTCCAAGAAAACATTTAAGAAAACCTGTTAGGAAAGAGTA

A\_16\_P02986084

AAGTAAAGTGCACCTTTGAATCATCACACTTCCTAAAACCTGGATTAAGGCAACCATAGAG

A\_18\_P10964595

TCTGTGCATCCACATGTATGTTTTAGAACCAAGGTTAGAACTACTAAACCACTGAACTT

A\_14\_P120317 CTGCCATTGACTAGAATGGACGAAAAAGATAAAAAGAGAAGGTGACAGATATATTGCCTAT

A\_16\_P16601761

AAAATATCCAGGTTTTTCTCTTTCTAAGCATTCAACCATTGCAACTACCTAGGATTCCAC

A\_14\_P107646 TTCTTTTAAAGATGACAAAGGAAGCAGGTCTCCTGTCTCTTACATTATAGAGGTTAGATAT

CUST\_4414\_PI426210822

CAGTTAAGTTCAGGTCCTAACTCCAGTAATGAATTTCAAGCTTCTTGTTATTGTTTTTCT

A\_16\_P20176236

AAAATACATTGGGAACCTCAGTGAATGTTGTTGACTTCTATTATCCCATTGTCTGACTT

A\_14\_P131703 AAGTGAAAGTTGTTTATTGCTTGTACGATTTAACAGGCAAAATACGACACCAGGGATGT

A\_16\_P37233566

TCTTACTTTTCTTACCCATTTTTCTAGGTACAGTCAATAACAATGTCCTACATGGCAGT

A\_14\_P123276 CCCATGGGTTCTGACTTTAAAACATTCTCATCTCTTTCCTGTTTTCATCTTTCACTTTC



A\_14\_P111656 GCTGTGGACACCTAGTGA CT TATCAGGATAGTGGCACAATGACATCTAAGAA  
A\_16\_P02029902

ACAGAGCAACCTATT CAGTTATTACTCATACCACAAATACA ACTAAAACCAAATAATTCC  
CUST\_5587\_P1426210822 CTGCTAATGCTGAGATTGGATTGGGATTCTGGGCGCTCTGGGGAC  
A\_18\_P22840859 AAATAAGCAGGCTCTTCAGGACCAGGGAAACGATGGCAACAGTTC  
CUST\_8196\_P1426210822 GTTCATT CATTCTCCTCTCTCTGCACAGTGGCAACACGGAGCGCT  
A\_16\_P17410010

ACATACATGGCTTCATGCTATTTTCTCTTGACCTGAATCTTTAAATCATCCGTGTCTCT  
A\_14\_P136815

AAGAACTATATACTACTCAAGGGAGAGGAGAATGTTCAAGTGTATCCAGGAGGAAAA  
A\_14\_P128330 GATCAAATGCTGAGGACAGTGATTCCAGACTTCTCTATCTACAGGCTCTGTT  
A\_14\_P108089 CAGAAAGAAA ACTTAATGCGTATGACATGGATAAAGCCTATAGGTAAGGTAGTCAAGCAG  
A\_14\_P122217 AATGTCATTTAGACATACCTGATCCAGTGATGTTCTGTGTCATGGGCAATTACTC  
A\_16\_P16998683

ACTTCTCCAAGGCTAAAAACTCATCATAAAACAAGTCCTTGAAGCATAGATGATTGAGT  
A\_14\_P119329 CTGAGAGCAAGTTAAAGCAAGTTTATATTCCCACTAGTAAGTGTGCCCTCACAGC  
A\_14\_P106542 CTCAATGGGACATAGTTCTAGTTGCCATGAATTGCTGCAACTAATTCCTAAAAGTTCTTT  
A\_14\_P120564 ACTATGTTCCATACAATGAGAAGACTTGGAAATAAATAGAAAATGTGATCACGGCTCACA  
A\_14\_P139776 TTGACAGTGTCTTTCTGTCAAAGAATTTCTTTTCTCCTCTAGTTCAATCTCCATCTATCC  
A\_16\_P18869063

AAAATTCAGAATTCCTTGCAAAAATCACTTTGGTGTTTTTCTTGCTCTTAGGCTTAAGCC  
A\_14\_P111607 TTCGCTACATACTCACTGAGTAGTGAACTAAGCAATAAAGTCCATGTCATTGAAGCAAG  
CUST\_2092\_P1426210822 CAGCTGCCAACAACTCCAACAGTAAAAGAAAAGGCTTGTTTCATGTCCAT  
A\_14\_P136829 ACATTACATTCATCTGT CATTGGAATGGACCTGATAAGTATCCGAGTTTCTACTTTCTGA  
A\_16\_P15461723

ACCTTCCACCATTATTTACTTACCGAAACAACATAAACAAGTATCTACCTCTGGAATTCC  
A\_14\_P200853 GGACAATAAAAGTTTCGGAGTTGAACTATTGTGTAGTTTTGTTTGTGAAAGATTGTGCCC  
A\_16\_P02992191 ACAAATGCCTTTTTGTC ACTGCAGATATTTCCCAACACTACAGATATTTCCCAACACT  
A\_16\_P00685379

ATGTTGTGGTTTTGAGAATGGGCTTTTATATTTATTTGGCGTAGATTATTAAGAACAGTT  
CUST\_3516\_P1426210822 CTCTACCCTGCAAATCTTTTCCTCTTTCTAACTGCCTCTGCATTTGGAAG  
A\_14\_P130251 AGGTGGATGGTTTTCAAAAAATGTATTCTTTTTTAATAGGTGTAGGAGTCACTCTCAGGG  
A\_16\_P20326317

AAATCATGGTGTTAACTGATAGGAGATTTCACAATTCATAGCAGTAATGTCCTGGGAAG  
A\_14\_P110718 ATTTCTCATTTTAGTCAGAGCAGGCTACTTGAGTCAATAAGGTATTTAGCGGAGAAAGAA  
A\_18\_P22839222 GCTGAGGGCTTGTTTTCCAGAGGGGCAAGACAGAATTCTGTGTTAC  
A\_14\_P106699 GACACTTCTGTAGTCCTCCCTTCTTTTTCACACATGTAAATCATCAACTCACTTTAATTA  
A\_14\_P119669 TGCATGTTTCTTACATGTATACTTT CAGAATGAGGTCATCCTTTGTCTCTCCTGTTAGCA

A\_14\_P117403 CCAACTGCTTCTACCCTCCCCTATTACATACATCTTTCAATGTCCAAAAAGTTACAAAGT  
A\_14\_P134977 ACTAGCCGGAGCATATCAAAGTGGTAATCTGTATCAATAAATAAGACTTCTACTTCCAGG  
A\_14\_P101494 ATGTTTCCCCAAACAAACATGATTACCTACAAAATGGAAGGGTTCATTGACTGAGTAATA  
A\_16\_P32017354

AAGTAATCTCCACTACACAACAGATCTACTACTATCCACTACTATCCATACCTAGAAAAT

A\_16\_P15158364

CACGCTCTCCTTTTAATGTATAGACTCTCACCCACTATTTAACAACCATTTTCTCCTTAC

A\_14\_P127039 GCACTTTTCTGCAGATGATCAAGTGGAAATTTACTATGATGGCCTGTCAAATCTTGAAATA  
A\_14\_P124061 TTGGCTATTCTGGACGAAGACTCCTAGTTATGTGCCATGGTTTCCAC  
A\_14\_P109401 CCCATATATTTTTCTTAAAAGACTATGCAGAAAATATTTTTCTAGAAAACCTTTCTCAAG  
A\_14\_P109344 AATCATATGAAACCCATTGAAAAAATAGGAGCAAATAGGCCAGGGAACAAATTTTAGAGC  
A\_14\_P118678 TCTTACCCAGAGACTTGAGCATTAAAGGATGCCTTCTAGTCCAAGAATTTAACTATTTT  
A\_14\_P125732 GAAAGATAAAAATAAGTTCCTCACATTAGAGAAGGCTGAAATTGGGAATTAGCATTCTGGG  
A\_14\_P113460 TAAAGGAAACATTGTTCTTTTCTGGTCAGCCTTTGGGGATAAGGGGACA  
CUST\_2570\_PI426210822 CTTCTAGGTAGGGGTTGGGGTAGCCTAACTCTTAAGCCTAAGGTAG  
A\_14\_P124525 CACTTTGCAGAGAAGAAAATAAGGCTTAGTTGCCCGATTCTTCTGACTTTAATGTAAAG  
A\_16\_P37692550

CCTTCCCTTTATTGGATCAAAAATGTCACTTAGAAAATTACCACCATTACATAGTGTGCAGA

A\_18\_P11030206

AACTTGACAGACAGATCCTGATCATTGAAAAGCCTACTCCAAGTAATTAAGGAATAGTCT

A\_14\_P138083 CTGTGGGTTTGGCTGATGCCTTATCTTTATGAGTAAATCCCTTTTCTTTCATAAATAAG  
A\_14\_P105472 TGAAATGATACTTACAAATCTTCTTCTGTAATAGTTGGTGGCTCTGAAACAAGACAAAA  
A\_14\_P128513 GCCTTTGATTAAAAATAAAGGGCATAACAAAATCCACATTAGGCAGAGTGTTAAAACGCA  
A\_14\_P114173 ACCAGGAGAAGGAGCCCAAAGATACTGGATAAAAATAAGTGCTAAATGACCTGTATAGAAA  
A\_18\_P22842089

GGAGGAAAAAGTTGAACATTACTCAAGTGCAGATAGGGAAACAGTGTAAGAACAAAAAAC

A\_14\_P114337 AGTTCTGCTGACTCCAATTCCATTATAAATCTCAAGTAATTAAGTGACAAGAATCAGA  
A\_16\_P38114571

AACATGGCTGTTATCGCTTTCTACAGGAATATTACAGTTTATGAAAGTTCAGGCTAGCAC

A\_14\_P126305 GTTCTTTCTCCTCCATGCAGTTACACAAAAGGAGGGCTACGGAACTAAAAG  
CUST\_5599\_PI426210822

ATTGTGTGCTACTTTATGTAAGACCTCGATGAAAAAATAAATCATTGCTGCCTTCATTG

A\_14\_P103162 GAGAGAAGAAAATACTTCTCTGAGTGGGGACTGTCTCTAATTTCTAGTTTATTCTCATGC  
CUST\_8475\_PI426210822

AGCAGGAAGAAGACAAAATGCTGAAAGAGAATATGGTAGTTTCAAAGTTTGAGATTTTTA

A\_14\_P122848 TGCTGAATATTAAGGACGAAGAAGAATCTCAAAGCACCCTGTTTACTTAAAAGGATCAC  
A\_18\_P14133969 CTGAAGTAGGGCCAAGTTGGAAGAGGCGAGGAAGTTTAACTTTAAATGAAATTTG  
A\_16\_P17375340

AGATTGAAAACCTTCATTCTGAAACATTGGAAGACTTTCCTATTAAGCAGTGCTCCACTCT  
A\_14\_P120614 CTGGAGAAAGACGATCATTACCTCTCCAGAGTCTTTGAATCTCCCTAGAAGAA  
CUST\_3556\_PI426210822 CTATATTTCTTCCCTGACAGGTTACTGTGGGCCACCAGCCTCCTT  
A\_14\_P134836 GTCATATATGGCTTCTTTCTATTTCCAAGGCATTCCAATGTGTCCAGGAGGAAAA  
A\_16\_P17770617

AAGTTCTGAACAGTTGACTTATTCCTGATTCTCTGGTAATTAATCTCTATGGCCTTCTT  
A\_14\_P108219 GAAAATTGATGGAATAAGTGCCGCATTTTGGGACAGATATTCAGGGTTAATAAGGAAAAT  
A\_14\_P139588 AAGGAGGAGTTGGCAACTTTTGACCCTGTGGACAACATTGTCTTCAATAT  
A\_14\_P134070 CTGGGAACCACTTTTTCTTTTTTCACTGTTGATTGTCTTTCCTGTAAAAAAGAAAATTT  
A\_18\_P22839420 TGCTGGAAACTAGGGCAAGAAAAGAGGGGAAGGTTGGGATGCATA  
A\_14\_P112268 CTCTCTGGAAGCAAATTTGGGACATAAAGATGGAGGATAGAAATGTCAGTAAGTGCT  
CUST\_2018\_PI426210822 TATCTAGCATGGAAACAATCTCCCTCTTCCCTTCAAATGTACCTGGGTTT  
CUST\_5755\_PI426210822

GGTTTGTATTTAAAGGGAAACCAAGAGGGTTTTTTTTATCCTTCCATGGTTTCAAATCTG  
A\_14\_P132434 CAAAACCTTTTTCTCAGTGCTCACTTATCTATCACCAATTCGTTATCCAAACATGTCAGC  
A\_16\_P01346465

ACTGGCTCTAGGTGAACAATTATGCTAGACTGAACATAATTTAATCACTCTCGTGAAGTCTG  
A\_14\_P126788 ACGGTAATGTGTATATTTAAGTGTGCCTTGCCTGTTACAGTTCCTATATGCAACACTTT  
CUST\_6318\_PI426210822 TTGCATTTTCTGTGCAATGGCCAAGTGTAAACAGGCAGCACACATG  
A\_14\_P102933 ATTATGACAGTTAAGTAGGCAAGACTTTCCTCAAATCAATTCTATATGCCCTATGGCACT  
CUST\_6477\_PI426210822 ATCTTTGTCTTCAAGACCTAAGGGAATCTGGATGTGCCCTACACATATCTACTT  
A\_14\_P114504 ACATGCGTAAAAAGGGAAGCCAATTACAAGTGCAAATAATGTGGTATTCTTTTGTAACTC  
CUST\_9250\_PI426210822

TCATAAGAATGCTTTCAGAATGCAAAATTTAAGTTTGTGGGTTTAAAAAAAAAAAAACAATT  
A\_16\_P01881645

CCTTTTTGTGCTTCTATCACATATACTCCCTAACCTCTAAGAGTTCATAGCCTGAGAAAA  
A\_16\_P01896504

AAACAGAAATTGGATGAGTCCTACCTAAGATGACAGTCACCATTCCCTAATTTGAGAGTAG  
A\_14\_P113200 CTTCTCTTCCCCCTTACTCTTAAGAGTAAGGTTTATCTCAGTTGTGTCTAGGATTATTTG  
A\_14\_P114381 CTTACCTTGAAAACACAGAACCGTTAATTCCTTGGTTTAAAGCAGTTGCTAAGTTTTGTAA  
A\_14\_P124168 CACCTGAGGGTTACCTGTGTCTCCGATGATGATATACTTGAAGAGATAAGCATAAGT  
CUST\_988\_PI426210822

AATATCAAGGAGAGGAGTGAATGTGGTTTTGCAGCAGAAAAATAACAATAGATTGTTTTTC  
A\_16\_P18703660

AAACTAGAGAGTCCAGATGAGATCTACACATTCCAGTTCAATATCCTTGAGTTTAGGAAG  
A\_16\_P37968937

CCCTGATGCATACATTTTCCAAACCACATTTTCAGAAAATCACAATTTAACATAATTTGGC  
A\_14\_P201419 CTTTATGCTTAGTGCATCTTGATTATGCAATGAGGATGATATAAGGCATTCAGATGGACT

A\_14\_P108077 CTCCATTTCCATGTTGTTTCTCCAGAGAGATTCTATGACCACTTCCAAAAAACTG  
CUST\_7476\_PI426210822

GAATTTAGATCTTATCCATTGCCATAACCAAAAGCAACCCTTACTATTTGTGTGTGCAAG

A\_14\_P120910 TGAGAAGCACTACCCAGAAGTTGAGATTTCCACTAATCTCTAGTGCTATATAATCTGCTT  
A\_18\_P16193660

AAAAGTGCACCAACTCACTATTCCTCCAATGTCTTATAGATTCTAGATGTGAACTAAGCC

A\_14\_P104889 GCACATCCAAACATTCATAGTTTCTCAGGAAATTGTCTTCATTTTCAGGTTTGTGGTTATT  
A\_14\_P126679 TCTAAATCAGTAATATATTCGGTGGTGTACAGTGGGTAATGGCTAAATACGTTCTGCATA  
A\_18\_P22839951

GGGTGTTTTGCCTGGTGTTCATTTTAAGGTGAAAATAATGTTGATATTTATTTTGGGGT

A\_14\_P113636 CTCTACATGGATTTTCTATATCCCAATCACAATTCATCATGGCCACCACTTTCTCAATAA  
A\_16\_P02813119

CAGTCTCTGTTTCATGTTTAACTCTTATTCGAATCCACATACCTTTTCTAGCCACTTGAAA

A\_16\_P03115407

GGTGTTTATCGATTTCGAAGTCCATCTTTATATGTGTAAGTATGTGTCCCCAAATGATCAG

CUST\_6932\_PI426210822 ATCAATTAAGAAGGACGTTTCCCAGAGCCGCAAGACTTGAGTGAATCT

A\_14\_P103383 ATTTTATTTAGCAGTTTAAAGGCTATTTGCTTCTAAATTTGGATTGCAGCACTTTTCATTTT

CUST\_1355\_PI426210822 CTTTGTGTTTGTGCAGGAAAAGTTCTTCTGGGAACACAGGAGAC

A\_14\_P109746 CTCACCCTGAACGGGATTTATACACACATCACTAAAAATTATCCCTACTACAGGACTG

A\_14\_P104008 CATAATTTCTTCTTACTTGCAACAACTCCTGGATGAACAAAATCTTCTCAAATGTCT

CUST\_5372\_PI426210822 CTGGGTGTGCGGGAGGGGTGGGAGCAAATTCCTCCCGTGTGCCT

A\_14\_P121460 TAGTAGCATAACTGGAATAAAGGCAAATACTCATTGGGGTGTGACAGTAGGCAATTTTA

A\_14\_P122987 AATTATGGTTAGAATATATGGATGTGGTCAGAATATGAGGGCTTGGTTTCAGAACCAATG

A\_16\_P35297428

CTGTGAGATCTCCATAGAGTTACCCTCTTGTCAAAAGTTAACACAGGTTAAAAAATGCAAA

A\_16\_P17540290

AAAAGACTCTACAGGTAGTGTAAGCCACTCTATATTTCACTCATAATGCCACTTTTCTGG

A\_14\_P124515 ATCTTGGATTTCACTTTTCATTACCGTCTTAGAAACAAATTGGATTTTCTGCTCCAGAT

A\_16\_P19876294

AGTCTTCATAACATTTCTCCTCACAATAGTCCATTTCTACAAAATCTTTACAAGCCTTGA

A\_14\_P104517 CTCTAAAATTCCTTTAATCCCCATAGAGTAGGGTGTATAACACTGGCTAATCATCATCT

A\_16\_P00685278

TACTTCATGGAGAATCATGTATTTTCAGCCACTCAAGTATCTTTAAGGTCTAGGCCTTATC

A\_14\_P111042 TACCACAGGCCCTTATTCCTTCATAGTCATAATCCTAACAAAAATATACTAAGCAAAATG

A\_14\_P116767 CTTTTTGGGGAATTTATTTCTCAGGCTCTAAGGAATGTTACTTTTCTTTGCTTTGTATC

A\_14\_P124716 TATTTGAAGGTAAATAATTTCTGGCAGATAGCATGTGGGAGTGAAAAGAACGTAGCCATG

A\_14\_P102867 AAGAGTAAACTCTCTTTCTACTGTGTTTTATAGGAGACCAAAAATAACAGCCAAGGTC

A\_14\_P128142 TACTGCTTTTGTTTTTGAACTTCCTTTTTTCACTGTAGTTCACTACAGTTTGTGCCACAT

A\_14\_P124088 CAAATCTCAGTTCCTGTATCTTTGGAATGGCAAACAGTAACATCCTACCTAACTAAACAT  
A\_14\_P123307 AAGACCAGGAATATAAGTTTTCTTTGTGGACAGACACATTGTGTATCTCACCCCTGTTTT  
CUST\_2015\_PI426210822

TAGGGTATGAGTGGAATTAAGGCTAACATTTTAGATCTTCTGCAGAAGATAACAAATGGG  
CUST\_2531\_PI426210822

GATTTGCCATTTGTTTTCCCTAATGAGGGCATCATATAGATGCTCAGTGCATTTAGT  
CUST\_765\_PI426210822 TGGCTTGGCATTCTACTCTTTGAACATCAGTGTGGATTTTGTGTTGAAGTCTC  
A\_16\_P15206013

AATTGGTTCTATGCTCATACTCTGGTATCTCCTGTATCTCTATGATAAACTCAGCCCAAT  
A\_14\_P123259 CTTTGAATGAAAGCACCTTCTCTATCATGTTTTCTCAATTGTCCTTTATCATCTCA  
A\_18\_P22842137 CTCCCTCCCCCACACCTGCACTGGCTATTAGATGGAATCAGAATC  
A\_16\_P16245070

AAAACCCATCACTGATGTTCTTGATCAATAGTTGGCATAAATAAATCGTAGACATGTGGG  
A\_14\_P126278 CAATGGTGTGGATTATTTACTCCCCTCTCCAAAAAATATGGAGTTTTTTTTAAAGGGTTC  
A\_14\_P111350 AAATAATTCCTCCGTGAGGGGTATTTACAACAGAGAAAGGAAAGAAGGGG  
CUST\_821\_PI426210822 CGTGTGTTGGTAAGTCCCTCCTGGGGGTGCTGTGGGAAGGGGGTG  
A\_14\_P127816 CTCAAAATCCGTATATTACCTGCCCTGTTACAGTGACACATGTTTATGTTTATAGTCCTG  
A\_16\_P02262111

ACTGGCTCCAGAATAGATTTTACCTAAAACCTTATATTCCAAACCACCAAAATCTAAGGA  
CUST\_2624\_PI426210822 TACACCCAAGGGTCCTGGAGAGGTTGAAGAGACAAGAGGGAGGAT  
A\_14\_P121869 GATATCATCGATAATTATGACTACTCTCACACGGTTAAATATACACCCACCCAACAGGTA  
CUST\_3629\_PI426210822

TCAAACAATTTTCAGGAAATGGTTCAAGGCTGTGTAACCTTTAAGGAAAACCACA  
A\_16\_P15959952

AAAAAAAATAGCATTGACAAGATTTGTAACACAAAAGACTACCTACCAACACTAAGGGAA  
A\_14\_P123657 GGCCTGCATTTTCAAATGTTCTTGTGCTCTGTTATGCTTTATATTTTCATAGCACAGC  
CUST\_9918\_PI426210822

AAAATCGTTCAGCGGAGCTTATGTATTTATTTATTAGTAACAACAGTCTGGATACTTCTC  
A\_14\_P106911 ATTAAGCATCGATGTGACTGACAGAAACATCAGCCTACATAATTTTACTTCATTGACGTG  
A\_14\_P128564 TTATTGAGCACCAACTTTGAACCTGCACATGCATGATTTTTGCTCCATTGGTTTATC  
A\_14\_P105539 CTTTCTTTTCAGTATTTAGGTCAGTTAACGTCCATACCAGGATACCTGAATCCCTC  
A\_14\_P110490 TTGAGATTATGAGAAGACTTTCAAGAAATCTCTTTGTCTTTGTCTTCTAAGCCCTCGAGA  
CUST\_8286\_PI426210822

GCTTATGATCATCTTCTTCAACCCATAAAACATTTTTTCGAATGACAAAACAGAAAATGTA  
CUST\_3229\_PI426210822 CAGTCCACAGGTTTTGGACATCCTCAGTGGCAGCTACTGTCTAG  
CUST\_740\_PI426210822 GAATTAAGATGGGACCCACACACATTTCCCATGAACCTTAACACCATGT  
A\_14\_P110826 TCTTACCTCAAGAACTTCAATATCTGAATTGACGAATAAGAATTTGTGTGGATTGGACAG  
A\_14\_P112966 AGAACACATGCGCCAGTATGTAAAGGGTAAACGAGAAAGTTATTTTGTGTTGGATTTTTTG

CUST\_3050\_PI426210822 GTTTGATCACCACACTCGGCTACCTGGGAATAAAGGCAACTCCAG

A\_14\_P116827 AATATGTTTTACATCCAAGAACTACAGGCTTTACTTTTTGTGGTAGACCGTCTAAGAGAAG

A\_16\_P03702979

AAGGTTTGACACTTATTTTTGTTATCATGATACTGCATGTCACGTTAGGTAAAGGACTTAG

A\_14\_P100458 CTGTCCAGAACAATTATCCTTAAGGAGTGTGGTTAACTGTAATTCTTCCCTTCTTCTTTA

A\_14\_P116907 TAGATCCCTAGTTTAAAGACACTTGCAATTGCCAATAGTTTCAAGATACTGGCTTCGTAA

A\_14\_P128698 TCTGTCAATTAGACAATGCAAACACAGTCAACAATGTAAAAGGTTGTTATCAGTCTTAACCC

A\_16\_P16572007

ATTTTTTATGTATCCGAAGTGATCGTTTTCAAAGAACAAGCCATAAAACTGGACTCTGCAG

A\_14\_P123217 TTTGTCTTAAACAGATAGAGAGCACCAGAAGCTAGAATGTAAGAGATGACCTAGGGGAAAT

A\_14\_P106887 TGAGCCGCCATCTATTCTAGTTCAAAAACATACTATGCTTAGAATTTGCACTGCATAGTC

A\_16\_P19740810

AGACTAAACACAAAGACACTACAGTTTTTCAAGATCCATTTTTCAATTTCACTCACCCCT

A\_14\_P105729 CCTATACTCTTAGTTTATTTCAACCTCTGAACTCTGGCACTCAGAATAATTGTGAACCTG

CUST\_279\_PI426210822 CATTCTGGAAAAGGGGACTCTGAGACCAGCCCACTAAGAATCAT

A\_16\_P03747522

TATGGGTAATGGTGCATAATTCATCTTGGTTGGATAGAAAAGCATGTAAAAGGGAGTAGT

CUST\_43\_PI426210822 GCTAGAACTGCCCTTCCATTTCTGCAAAATTTTCATCTCCTGCCC

CUST\_10154\_PI426210822 AAACATACAGGCCACCACTCAGTGAAGGAGAGACCATATCCTC

A\_14\_P138025 CTCCCTTTCTCTCAACAGGCTTGGATCCATAATGCTACAAAGAAAAATAAGTGTCTTTA

A\_14\_P110063 GAAAATTCACTCAATAGCGCAGTCAGAATAGAACAGGCCAGAGTTTGTCTGTAATTATTTG

A\_16\_P15338176

AATCTGTGGCTAAATCCTTTATTTCTCCAAGTTTTTCATTACCATATGAGAGTCCAACCTC

A\_18\_P14136679 AAACCTACAAATGGGAAAAGTGGATGCTTAGAATGGCATGAATGTTGGCTGGC

A\_14\_P123356 CTTACTTAAACAAAATCATTAAATCCATCTCGGGGGACTCTACTGTAAGTGGATTGCTG

A\_14\_P122106 GAAATGAAAACGGCAAGACTGTAAAGTGACCCAGTTTTATTTGGTTTTGGAGGC

A\_14\_P109502 ATATCTCTCCTTTGAGGACTGACACATTCGTAGAACCTTCACTATCATCTCTATGTATTG

A\_14\_P124532 CTACTIONCAAAGTAATCTTGCATAAACTTGTCATGTCATACAGTTTGTGAAAGGACACCTT

A\_16\_P17844482

ACTCAACCACCTTTATGTCATCTTGTCACTAATCCATGTTTTATATTCTGTTCCCTGT

A\_14\_P200946 CCTGGGAAAATAAGATACACTGCCAATCAGAAGCTTTATCTCCTTCATGATTTCACTT

A\_18\_P14135176 GAGTGAGAGAACAGGGGATGTTGATTGATTTCCATTATCGTATCACCCAGG

A\_16\_P02951047

AACTTAGTTCTGGAGAATGTTTGATGAGAGAGGAGAATTTTACAACCTGTGATTGCAAAGG

CUST\_6296\_PI426210822 GAAAAAATTTCTCATCTAAACCGCCAGGCTTAAAGGTGGCTCCTTGTCA

A\_14\_P122341 ATGAAAGAGAAGGGGAATATCCCAACTCTTCTTCTAGCAATTTAGAGAGAAACAAATGAC

A\_16\_P16759829

AGTGTGATCACCTAGAATCTCTATGCCATCTAGTATTTAAGCCATGTTACTAATGCCTT

A\_18\_P26797395 CTCAAATTCCTCTCTAGTGACATCTGCTTCACCAACATTCCTTTTTTCCCCTTTT

A\_16\_P19786983

AAAACCTGGAGTCAGGTGAAATAAGCATTATGGAATCACTTTCAAATACACAACCCTGT

A\_18\_P12195150

TCTTTAGTGGCTTTGCATAGTAAATGGAATCAAGTTGAGACAAGTTCAGACTCCTTACTT

A\_14\_P125527 ACTACTTTTGCCTATGTTTCAACCAATTATAATAGCCAATTCTCTCTGCGTATCTCCCTC

A\_14\_P114338 CAGTGTCCCCTGCGTTCTAACAAAATAAAATAATTTGGTATCTGTTCTGTCCCTGAAA

CUST\_5862\_PI426210822 ACTGTGTGTGTATATGTCAAACCTCAGTGCTTGCCTTTGTTGGATGGAAAT

A\_18\_P13134947

AAACCATTCAATTTGATCCATCTGCAATTATTTTGGAGCACTATATGCACAGGAGACACTA

CUST\_5435\_PI426210822 AGAAGCAAGAATGGTAGCTTGCTGAATTGGCAGTTGAGTTACAGAATGCTC

A\_16\_P30952231 CTTAGCCATCTGCCTCCTATTTTCTTATCGTAGGTTGTGACAGAATGCCTTTTTTCT

A\_14\_P137918 TAAAATAAGCCATTAACCCAGGGTGGCTTTCATAAATACATGAGAACGACTGTAACCTT

A\_14\_P104895 GGATCTTCATATTTAGGTTAGTTACAACCTGTGCTTTTTATTTTTAGGGCTTCAGGAGTTC

A\_14\_P130793 TTCTTTAGTATTGAACTAATAATTTCTCTGATAACAAGGAGACATTGAACTGGCTGAGCC

A\_18\_P16739152

AAGAGAAAGTCTACTTACTACCTTTTTTTCATGCCTTCACAAACATACTAAATAGATCCCG

A\_14\_P109430 TCAAATACAAGATTGGGAGCAACTTAACTCTCCAAAATCGTTTAATATGACTACGCTTG

A\_14\_P119428 CTTGTATATGTGTGGCAGGTTTTGGTGCAAAAAAAGAGGATAATATTGTGATTTTTGTGT

A\_14\_P114636 CGCGTTTATTGACCACCTACTAAGTGCTAAATCCTTCTGCATTTGTTCTCACTTTGAA

A\_14\_P110844 AGTCGTGGTAGAAATAACGATCTTGAAAGACAACATTCTTTAACAGCCAGACTTTCTGAG

A\_14\_P130602 TCATTAAAGTGGTGTCTGAAATGGCTTATCCATGTTCTGTTGTCTCAGTCCAGAATATC

A\_16\_P00685584

ATTACATGTTGAATTTTCATCTTCAACCCAACTCTACTTACCTTTCAGGGAGTGATGAGTA

CUST\_9619\_PI426210822

TGGAGCATGCACACATGTCCTGTGATTCTTTATATCTTTTTATTTTTATGCCATGGTACAA

A\_14\_P121089 AGGGTCACTTTCTGCCATTTTTTGTACCTATTGCCTTATGGAACATTTTCATAACCTAA

A\_14\_P103229 CTAATTTTTAAAAACCAATCCTGCATTAGTTTTCTCTACTCTGGCTTTATGTCCCACCTG

CUST\_8694\_PI426210822

TTAAAATTAGACATAAATGGAGGAATGAATTGTTTTCCCAAGGATGACCTGGAGG

A\_18\_P11475125

AAAATTCCTTTCTAAAATTCGGAAGTTCTAGTCTTTTCAGGCTCTTAAGTCCCAAACCAGG

A\_14\_P118888 CTACGGGACAGCAATAAATCAATGAGATAGTTTGTGACAAATTAATTAGCAGGAAGTGGT

CUST\_3582\_PI426210822 GAGGAAAGCTCAATGTGGGTCTGTGAGTCCAGGGCAGGCAGGAGT

A\_14\_P116569 CGTTGCTATACAGAATCTTTGGATATGTGCATCAGTGGTTTTATGCCAAGTAAGTGCT

A\_14\_P137579 AATGCAGACTGCAGTCTGAGAATCTTGAGCAATGCATACTTTATGGCGACTACATTT

A\_14\_P108783 GAACAACCTTCTCCCTAGCATACCAACAAAAACAAATACCCCAAAATCTACTCATACTC

A\_14\_P134884 AAGACATGTTTTTAAAGTGATTTTCACATTTTTTGGAGCCTGATAAAGGACTCTGATCTCCA

A\_14\_P102422 TAATCCTTTTTTTTTTTCCTACAGTTATGGAAATTCTTGAAGCCCAATACTCCACTGGAA  
A\_14\_P115053 ACCACAGTCAAATATTCCTTCCATGGAAGAGCCAGATAGATTTTTTTTTTAAATATGGGCA  
A\_14\_P136765  
AAAGAGAAGCAGGAATGCACATCAACATTACTTAACATACAAACAAATGGAAGAAAAGCA  
A\_14\_P117862 ACTCATCACATTTCTTGTAGCCGGCATTGAGCAACTCATACTTGGCCTT  
A\_16\_P41430958  
ACCCTAAAATCCTGGTATAGAAGAGAATACTCATTCCAAAAAAAATATGCACACCTCAA  
A\_16\_P18256882  
CTCTTTAACTATCTGGACATTTAACCAAAGAACAGCATCCTTTAGAAAGATAAAAGCCCCA  
A\_16\_P18661930  
CCACAGATCATGAAACTTAGCATGCCAATAAAAACTTAACTCACTTGAACATCTACCAGA  
A\_14\_P135940 CATTTTCATGCAGTCAGTATCCTACACTAATGTGATTTCTGCCACAGCAGAATAAAGTAG  
A\_14\_P127739 ATTTGTAGTGGAAAATGAAAGTGGAGAACATGGAACAGCAATATTTGTGCTCTTCTCATA  
A\_14\_P107791 CTAGCCAGCATGCTAGGCTGCTCATTCTATGAAGTGTCTGTCAGTGAAAATTATAATGAT  
A\_14\_P101789 GACATAATTGCTAAATGGAGTGGAGGAACAGTGCTTATCAATTCTGATTGTGCAACAATG  
CUST\_5884\_P1426210822 GTGGGAAGTTGTAAGGACAACCAGAGTGATAGCTGGCATGAGAAAAG  
A\_16\_P20855616  
CCAACCTTTCTGATCTGAATTTACTTGTCCATTTTTGACTTATACTGCACTGACTAACGC  
CUST\_139\_P1426210822  
ATGTGTATTTCTGCTATAGTAATATAGCATAGTATTTGTAATGAAAAATTGTATTCTAA  
A\_14\_P107203 AAGGTTTTTGAATATGGCAAGATGGTGCAAATGTTAACTTTTCCATTTGTTGGTAGATT  
A\_14\_P138434 ACAGTGCAAAAAGATAATTCCATTTTACAATGAGATCCAAGGAACAAAAGAAGTTGTTGC  
A\_14\_P108973 AAATGATTGGTGGAGAAAACCTTTGAAGGTAAAGAAATGTTCCACAATGCCAATTAGTTTG  
A\_14\_P131161 AGTCATGTCAGAACAGACATCCTGGCAGATACAAAATGCAAGTAAGATATTTTAAACAGG  
CUST\_3486\_P1426210822  
CATATTTTAAAAGAGGTTGGAAGATGTCTAAGTACCAGCTAGACATCTTATAAATCCTAT  
A\_16\_P15021059  
GCAAGATCACCAAGAAATAGAATCAAAAAGACAGATATGAATGACTACACACAAGATCAAC  
CUST\_1833\_P1426210822 TTTTTTCCCTTCCCTTCTTTTTCAACCGTGTGCTTGGTTTCCGC  
A\_14\_P121587 TGTCTAGTCAATTACCTGTGAGTGAATTGCAGGAAAATTAAGTCACTTAGACTGAGGATT  
A\_18\_P20098996  
AAAATAGTATTCACATAAAGTTTCAGTAGAGTTTTAGCACAGAACACAATTAACCAGGGC  
A\_14\_P120696 TAATTTTTTGTAAAGGATAATTTAAAAGGGTTGGGGCTACCAGATTTTGTGTGGGTGAAC  
A\_18\_P14133885  
TCTTAGTTTGTGACTAAGAATTTGCAGCCTCCGAGGAAATTTTTTTTAAATTGAAGAAAA  
A\_16\_P16414612  
ACACCCCATTTATCATCACTACTTCATTCATCGCAAGCATTAGATTAATATTGACAATTT  
A\_14\_P117291 GCAGGTAAATATTATCGCTGCCAATCTGGATTATTGTAGACTGTGAAGTAAACCTAGCA



A\_14\_P130379 TTTCTTCCTCAGGTTTGCCTGCAATGAGATTTTCATTCTCTACATTTAAAGGACATCCTTT  
CUST\_4903\_PI426210822

TATAATATGATTCATATTGAAAGGAGGGGACTCCTGCAATGTTGGGAAAACGA

A\_14\_P100858 GGCTGTGGTATTTTACATATAACTGACAGGAAGAAAAAGAGAATGGAAACCTACATTTTC  
CUST\_4287\_PI426210822 TTCTGGCCTAAGCAATCCTCAAGCCTCTATACTTAACAACATTGGAATGTCAC

A\_14\_P118569 CCGACTGCTCCTGCATTGAGTGTGGCCCTTTTAAATGACTACATCATCTAAATA

A\_14\_P126391 GCTTAGGTCAGTTAACATATGAAGTGCATCTGTCATGATTGCTAGGCTATTTGCAATGTA  
CUST\_7552\_PI426210822 GATTCACTGTGGCAGTTTGCAGAACATATCAGGGGAGAGAGGTG

A\_16\_P21406146

AGCAAGACCATTTTATACCCCTTCTAATTGCCTTATTTAGTTAAGTGCCAAATGCTACAA

A\_14\_P129204 CGAGATCGTAATGTGAAAACATCACACAGGTAGAGTGTGAGATTTTAAACCTAGAGATT

A\_14\_P139331 ACATAAACTATGTAAGTGTCTAAATATTTGACTTCCCCCTCATCCTCCACCCTACATCAAA

A\_16\_P02737417

AAATGTGGTAATGGACACCTATAAGCAAGTTTCTAAAAGAAGGAGTTTTAAGGTAGTGGC

A\_16\_P39230099

ACTCCCATGTTTTTCTAGTTCTTATCATCAGTTTTTGGCATAATTAAGCCACAAACA

A\_14\_P103669 AATTCCTGCATAAGTGGTGTCACTTTACATACAACATTCTACAGGCTGTGTTTTTCCAC

A\_14\_P114436 GTTAAAATACTTTTTAAGTTTGGGTCACTGGAGCAAGACAAACAGTGAGATGTGATGGTA

A\_14\_P136733 ATATTGAAGTTGACCTGAAAGACACAGACAAATCTTCAACTTATACCCCTTCGTGTCTTTG

A\_14\_P107692 TCCTAGCCAAGGTAAGTCTAATTAAGTCTGAAGAACTTCTTATTGATACCCTTTGAAGGT

A\_14\_P133481 TGCTAAATTTGGATCGAATTCCTCCTAGAGTTCCAGGCACTAAAGTAATATCATCCACAT

A\_16\_P17349395

CCCCTCAACCTATATCTCTAATGAATCTCTCCTGATACAACATCGAATTGCAAGAAAA

A\_14\_P200692 TGGAAATCTCTTTGGGAGATCAAATAGAGTATTATGCCACTGTGAGTGTTTATAAACTGG

A\_16\_P16587327

AAGGTTAACCATCCCATCATTGCATCTAATTCAAAACATACCCTGGTAGAATTCAAAAACA

A\_16\_P35603473

AAGACCATTTAAGAGTAAGCAACCTCAATTTTTGATAGAACTCCTCTCATATTCTTTCCA

A\_16\_P21450125

AGGCAAATACTGTAAAATGGCTCACTTAACTCCTATTCTAATGTTGGTGGTATTTTCAGGT

A\_14\_P139626 CTCCCATGACTTATCCAGATTTTCTCAATATGGAGAAAAGATCACGATTCCCGTTTTATA

A\_14\_P104954 CAAGTTGTTCTTGGTTATGTGGAACCTATGTGCAGGAAACACAGACACAAAATTCCAAA

A\_14\_P101271 GCTGAATTGACAAGGTTTGCAACTTATTCAAGAGTTTTAAACTTTCTTGATTCACTTGTC

A\_14\_P117442 AGGGGGCTATAGAAACATCTAGAAATAGACTGAAAGAAAATCTGAGTTATGGTAATACGT

A\_16\_P41550863

GAAACATCACCTGAAGACTGAATCATTTTCATCCCTTATTTTAGCCAATATCTCAAAAACC

A\_16\_P00956669

ACGGCAAGATTTCTATTACTTAGATTCGCTATTAGTAAACCTGTAACATAACCAACAAGGA

CUST\_9277\_PI426210822 AAGGAAAGCATTGGAATTGGTGTCTCATGACAATCTGGCTGCC  
A\_14\_P201742 CTATTCAGCCAACAACACTGCACAGTCTTTTCAGAAGTAATACAGCAGGAA  
A\_16\_P20568493

AAAAAGCATTTCATGAAGAAAATAAGCCACAAATTCAGTAATTCAGTAGTTCTGGGTGG  
CUST\_4478\_PI426210822 GGTTCACAGCTCAGTCCGAAGACACATTGTTCTGTGCATGGTG  
A\_14\_P120123 AATGGTTACCTCTGGGAATGAAGACCAGAATTTCGAATTTCTTAATAGGCACTCTAAATT  
A\_14\_P122746 ATAGAAGGAAATGACATCTGGTTCTGTCTTCTTCTACATCTTAATTTTTGGAAAATATTG  
A\_14\_P139489 ACTTCTGGTATAGAAAGCGCTTTTCCAATTCATAGATCTGGTGGTTGGTGAAG  
A\_14\_P111924 AGTAGGGAAATGCTGAAAAATGTAAAAAATAGAGCCAGATTGGATTGCATTAGGCTTCAT  
A\_14\_P201271 ACTTATATTCTTAGAGACCTCCTAGAGGATTAGGAACCACTGGGTCCATTGTCCATAAG  
A\_16\_P19484575

TAATTGCACATTGAACAATTCTCCAAGGAATTTCTTACTCCCAAGTATTTTACCTCTCCC  
CUST\_7890\_PI426210822

GTCTCTGTGTGAATAACACTGGCTAAGAGCACAGAGAGATGTTAGAAAATAATCATCA  
A\_14\_P112652 CCAGGATAATCTAACATCTTGGGAAGATGGAGATTATCTGATGAGCATTACGTCTATGAA  
A\_14\_P201929 GCAATGAATGAAAGGCACTTTTCTAGATCACTGAGAGCATAAAGTGAAATAGGACAATCT  
CUST\_1309\_PI426210822

TAATTTATTTACATTTTTTCCCCATTTATATGGTGGTCCCTTGTAACACTGAGGGTAGTT  
A\_14\_P128654 AACACCCTACTTCCAAAAGGTAATTATGAACTTCTGTAAACATTTTTTACAGTTGAACTGG  
CUST\_4764\_PI426210822 GTAGAGAACAGCCAGGCAGAGCAGGGGGCCTGGCTGGATGTGGCC  
A\_14\_P135122 TAATGCTTGGTGCAGAGAGTGGATTGATCTGATAGGTAAGAGAAGACATTGTAAATGTAG  
A\_16\_P38077131

TGCATGTCTTACTCATTTTTGAATCATCACACTCATATCAATAGGGCTACAATGTTTCCAT  
CUST\_4772\_PI426210822 TAAAGTGGTCTGTGGATCAGTCTCATCTCCCCACTGGAGCTCCAT  
A\_16\_P36664681

ACTTTCTTACTTCTATCCTAAACATGACCTATGAAGTCCATTTGATTTAGCCACTACCTA  
A\_14\_P114635 GGCTTGAAAGCATGCCAAAAGTCTCATCTTCTTCTTAAATGTGTATCTTTAAGGATA  
A\_14\_P104239 ATTTTCAAATTTTTTGAAGAATCTGGAGGAACAGAGAGAAATTATGGTGAGTTGAGAGGG  
A\_14\_P103592 CTGAGGAGGTTTCATTCATTGGCAGTGAATACTACTCTTGCTCATTTCCAAAGTATTCT  
CUST\_7751\_PI426210822

TTGCTTTATTAGAGTCTTTAAAATAACAGTGCCTAACTTCTGAAACAAAAGAAGGAATT  
A\_14\_P101022 GGGGAGTCGAATATCTATTTTTCTTCTTAGTAAAATTATCTGCCAGAGAAACAATGAAGC  
A\_16\_P15496743

ATTCACATTTGATCATGAATAGAGGTAATCCACGTTTTAAAATACCAGGTGTTGCGTAATC  
A\_16\_P21360718

AAAGGGAACGTTATTCTGATTAGTCAGTTCTACAGGAAATACATAGAAAATTGGGATGGG  
A\_16\_P01455272

AACATGAAACATGAAATTCTGCTTTCCTGTTAGAGACTGTTCTGAGATACCATATGGAGC

A\_18\_P22843039 GATGGTTTGGAGCAAAGGGAAGTGAGACTGCTTGGCCAGCCCTAT  
CUST\_5411\_PI426210822 CTTCCATATGCTCAAGAGAAGATGATTTAGCACCATGCAAGGTAGAGAAGGAG  
CUST\_7729\_PI426210822 AAGGAGCCCGAAGGCCAAAGAGGCTCACTAATTTTCATTATTTCGATTCT  
A\_14\_P137454 TAAGGTTCTACCCTGATGCCACTTCTGGACCTCCTAGGTGCTAAT  
A\_14\_P132630 CCCAGAACCAGGCAGCCTAGTCTACTAGAAAAACCTAGGCAAATAATTAGTAGAAATTA  
A\_14\_P110512 CTTGTGTTATATTTTCGTTCCCTTACTTAGCATTTGTGGGACCAAAGCCAACAAACAA  
A\_14\_P123316 TTTTTGTTTCTCCCTTTATGCTGTTTTCTTTTTTCCAAGATTTCCACTGCTTACCATT  
A\_14\_P120935 CCCTAGTCTAGTTGTAATTACAGGTTCCAATTCCCCCAGACCTTAACGTCAATAAA  
A\_16\_P16138662  
ATCAGGGATAAAACAGGAATATCACCAAGTGCATTAGACATTTTAATAAGAGCCTTCTCC  
CUST\_3036\_PI426210822 AGTTAAAAAATAAAAAGGGTTACGGAGGGGATGACCTCTGGCACAGAAAAG  
A\_14\_P110466 TGATGCAATGATTAACCATTACCTCCTAGTCACTCTTAGTGTATAAGGAAGCGATTTTCC  
CUST\_94\_PI426210822  
TTATGTATGAAAAACAGGGCAAGGCAACTTTTGAAGAATTGCCGTTAAGAGGTG  
A\_14\_P137776 AAATTTTGAATCCATAAGAGCCAAAAGGGAGACATTGATAATGTTAAAAGCCCAGAAG  
A\_14\_P123825 ACTTGACTCCTTCATTTTGCAAATATGCATACTTTTCTGTCTTTGAAACCAATCCTTCAC  
A\_16\_P17697684  
GACTTGTGTAGATTCTCTCCCATTCAAATCTCAGAAAAAGCGTATCCTAGTTCCATATTG  
A\_14\_P201068 TTTCGGGGCACCATTTTCCTTGATCATTTCTGTTTGTAGTTTTTCTATCAGTCATTTTCAG  
A\_16\_P18899538  
GGGCAATAGTTTCCATGAAAATACAAGTATACATTAAAGAAAGAATAGTGTTCATTGAGG  
A\_14\_P105688 ACGAAATTGCAAATCAGACAAAATATTGCCCTTAGGACTCTGTGTGGTTTTATTCTTACT  
A\_16\_P34641824  
ACTCCACATGTTTTAAATTTCTGCTACTCCAAACTCAGCAGTATCATGGTTTTGCAACAC  
A\_14\_P105655 CTTTGTGTGTGCATCAGGAAAGTTCTCACTATATCAGTCTTCCAGGTGTTGTATTTTCTC  
A\_14\_P115225 AATTCATACAATCTCTGACTAAAAATTTTGTGTGACCAAATGGATCAGCAAGGTTCCAGA  
A\_14\_P137695 CTGCCAACCTGCTAGCCTAGGCATTCTAAACTTTAACATTTAGTAAAATGGTCTCAAATT  
A\_14\_P100820 ATAGGGCTCCCATTAAGTCTCATAAAGGAGGTATTTTGGACCTTGAGTCTTTTTAAATT  
A\_14\_P115606 GCTCTTTTGTATCAGTCATCTAAAGATTTAAACTTCATGATTTGCTGCACTGGTCCAAAA  
A\_16\_P19602165  
AAAGGCTTTAAGCAAGTTTAATTTGGTTTTCTACACGGTCTTATCCTTGCATTCACGTATG  
A\_14\_P139273 GTCTACTGGAAGGAAATATCCAGAAAATCACAGACTTATGCACAAAAATATTTGCTAGTG  
CUST\_7958\_PI426210822  
CCTCTGCACTTTAGCACGTGCCATTTAGTTGACCTTCCTAAAATAATTTTTTTTCTGAGA  
A\_14\_P104923 CAATGCCCAAACCAAACCTTTTTATCACAGATAGAGTCTAGCACAATGTAACAATTTGCA  
A\_14\_P202100 ACTACTTGGTCAACAGGATCAGAAATATTGTATAGCCATGGGCCTGTTAGTAAAAAATGA  
A\_14\_P136604 ATATTCTAGGAGCGCATCACTTACTTTGAAGTCTTTCTATTCTCAGACTTCTCTTAGTCT  
A\_14\_P106415 ATTACAAAGAAAATCAAGACTCTTAGCAGACTGTGATCATTTTTCTTTCCCTAATAGATA

A\_14\_P118727 CAAACTGTAATTCTCATTGAGATTTAGGACACTGACCAGGCTTGCTACAATGTAAGATT  
A\_14\_P139286 CAAATAGAACTGTGCGAACATACCTTTTCTACCGGCAGAAAGTCATTTTCTACTTCAATT  
A\_16\_P00685336

TTGAGTTTTCTTCTGTATTATCCTGTCCTATTGAAAACCTTGTGCAAAAAGTATGTGTGGG  
A\_14\_P200825 CATCATAGTTGGTGGCCGAGATATTGGTTTATTGGTTGGTGGATTTACCATGAC  
A\_14\_P109971 TCAGATTGCTGGACCAGTTCAATGATTTCCTTATGCGAAATGAGGTTTACATATGTTATAA  
A\_18\_P14135524 ACTCACAGTCTCTTGCCTTCACTTCCTTCTACTAGTGTCTCCAACCTAGATTTA  
A\_18\_P16283153

AAATCCTGTTTCAATATGTTAGACTGTGTAAACTAGATGAGCCACATGTATTCTCTGGGG  
A\_14\_P105055 TTCCCTGACACTAAAAGTTCACTGACTCTTCAAATCCTAGACTTGTCCAACATTATTTTC  
A\_14\_P118960 CTTTCATGTCTTTAATGTTGTGAATATAAATGGACTCTTCTAGGCAAACCAGCAGCCTCTG  
A\_14\_P112219 TCCACTTACTTTGAATAGACAAGATGTGCTAATCCCTGAAACTGGACACAAAATTGTATG  
A\_16\_P16191902

TCTGCATTATTACAGGGTCTTGAAATGAATGGTGATACGTGAAAGTATTTGTCCTAGGAT  
A\_18\_P14134288 CTTTCAGGTGAGAAGGATGCCTGCTGTCCTCGTGTGGACACAACCT  
A\_14\_P100006 TTTCTCCTTGTGTTTTGTTTTTACCTTTAATTGAGTATTGGGAAGTTACATGAATGCTCCC  
A\_18\_P22842655 CTGCCAGTGATTGGCACAGGGTATTTCATGTGCACTTCAATCAAATTTCTTTTCTT  
CUST\_4540\_PI426210822 CTGGATTAGGGAAATGTCTCTGGCACTTTCTTCTTGGCTGTCTG  
A\_16\_P19565469

AAAAGAACAAGGTATCAACCACATACGACTATATAACCACCATATAGATGCTGATTGGCT  
A\_14\_P101992 TGAAATTTGTGACAATCGCTTCAGAGCAGTCCATGTTTGTCCACAAATTTGTTTAAAGTA  
A\_14\_P100280 ACATCTATTTACAGAACAGAGACTTATTTACAGTGAGATGGAGGCCTTGGTGTGGT  
A\_16\_P19976200

AAAAACCCCTTCATAGTTACTTCTACCTCTTATCAAATGGCATCATTTGATTTCCCTC  
A\_14\_P136316 TCTATTATTTTTTTTAGCCTGCCCTCAAGTATGTGTTGTATAACATTGGTTGGCTTTGTGG  
CUST\_875\_PI426210822 GCTCTGCCTCCTTCGTGAAGCCTGTTAAGGGTTTTCTGGAACAAG  
CUST\_5480\_PI426210822

GGACACAGTAAAGCATGGTATTATGGTAACTTCTACATAATTGGTCTCTAGTTCTAGAAT  
A\_14\_P111745 CTGACAGAAGACTACTCATTAGCAGAAATGGAACTTGCAAAGTTTCTAAGAGTGTCAAA  
A\_16\_P17856226

CACCTGAAACTTCACTACTGACTACAACCTCCGAAAATGAGATTAATATAGTCCTTCCA  
A\_16\_P39726618

TGTCACACTGAATTTCCCTAAATACATATCAAAGCCCCTTATTTAAACTGTCACCAGTTC  
A\_14\_P101276 AGGGCAGATGTTAGAGTATACTCACAAGATTAACCTCCTCTGATTCCTATGCAAATACCTA  
A\_14\_P123254 AGTAGAAACGTTTTTAAAATTAAGTGTGAAAAACAAGAGTGAGATTCCAGAAAAAATTGTG  
A\_14\_P124796 AACAGTTGTAATAAAAACCTATGCCTGAAAAGTTGGTGGCTATTACACGGAAATATTTATA  
A\_14\_P124035 CTGATCTGAGCAATCTCCAAGGAGCCAGGCTCAAAGGATTTGGAAAATAAATATC  
A\_16\_P01808935

ACATGACAAACCTTGAAGCTCAGAAATTCTTACAACGATCATCTAAACAAACTCCTTCCAC  
A\_14\_P135877 TCATTCCCATCTGCCTTCATTATAGGTTCTAAGAAATATTCACCGTTCTGTCTTTAAAT  
CUST\_4145\_PI426210822 GAGGGCTACAGGGAAAACCTTCATCATGATGGGAGGGAAGAAAGAA  
A\_16\_P03312830

TGTTGCCGAATGTGATAATGTGTTCTAGATGCCTATGTAAAGTAGCCCTTTTTTACTCA  
A\_18\_P15961838

GCTGAGGCTGTAATAATACTGAGGAGAAAAGTTAAGGGTAGGCTGTTTTTCTGAGATTTA  
A\_14\_P133465 TTGCCCAGGCCCTTTGATGACATCACAACCTTGAAAGACAAAAAAAAAAAAATAAAATTGTG  
CUST\_10056\_PI426210822 AGTTGGGAGGGAGAGAATCCACCTGGCCCAATGTGGGTCATATGT  
A\_16\_P36230953 TTCCATTCCAGTTCCATGGCATCCCTTGTCTTTGGGCTCTGCTG  
A\_16\_P15223011

GCACTTTATCCCAGTAATCACAAATCCTTTTTTCATGTTCCGTTATCACTTCAATCTCATC  
A\_14\_P126342 ACCAAAAAACTATGTTACCGTTATGCAGAATAATCCATTAACCTTCAGGTTTGGAAACCATC  
CUST\_7383\_PI426210822 GAGGGGGTGCGGGAGGTACTTTCAGCACTCCCTCGTGAGATCATG  
A\_14\_P120036 TGGATTTAGGAATTGCTCTTGTCATACCCCAAGTTTCTAAGATTAAAGATTCTCCTTAC  
A\_14\_P138985 AATTCAAACTTCAGACAAATCCACTCTACAGGACCTATTGGCCTGTATAATTTGTGTTTT  
A\_16\_P02470462

ATTCCTTCCGAGACATCAAAACATGATGCTTAGGCTTTACTATCTTCCTTCGAATTAAGT  
A\_14\_P135265 CTTCTGTAGGAATTACAAGATTAATTAACCTCATCAACGGCAGAACCAGTTAAAGAAGAGG  
A\_14\_P200384 GGTGCCAACTTTATAGATCTATTAATAAAAGAAGTGGCAGGCTTACAGTTCTTGCCAATG  
A\_18\_P22842265

AGCATCAGGTAAATATTTAATAAAATGTTTATAACATGTATATTGACTGTAGGTGTAGGGT  
A\_16\_P15269874

TTTTTCCTCTCCAAATCCCTAATCTGCAATACACATACCTTTCTCCAGACATAACAATG  
CUST\_9161\_PI426210822

AAAGTTGAAACATTCTTGAACAACCTATATTTTACTCAAGGGCATTATAGACAGGGCAATT  
A\_16\_P58424488 TATTGAGTCAAACCTCTGGGGGTAGTCCCAGCAGTCTGTGTTTTAGCAA  
A\_18\_P16123360

AATGAGACGAATTGAAATAATGGTCTGAAAACCTGAATCGTATGGCATTTCATGTTACAGG  
A\_16\_P03790881

AAACCAGTTATGTGAAACCACCTGGTAGTTTTCTGAAACCAATCTTGTGGAAAATAAAC  
A\_14\_P118753 TAATATACTAATTACAGTAGGCTCAATACTTACCATTGAAACAGGTCCTGGAGAGCCTCT  
A\_14\_P130659 TAGTTTTCTCCCTAAAAACAATTTCTGTGAAGAAAACCTGGCAACTTATGAATCAGGATGA  
A\_16\_P00164450

CCAATACTGAGCATTACTAACCACATCATCTAAGAACCTCTGTAACCTGAAGTAGAGCATC  
A\_16\_P15174470

CATTATGTTAGAAAGTCACTATGTTGAAGCAAACCTAAAATGTGAGATGATCCTATGCTGC  
A\_16\_P16191655 ATCTGTTCTCACATCGCTGCCACTTGATCACCTTAGATCACATGATTTCA

A\_14\_P113665 GAGAGCATATCTTTCTCCTTCCAAATAATAAAAGTTTTCTGTTTCTGAAAAACAGGCAAG  
A\_14\_P108296 GTCATTTTGTGTGTCTAGAATAAACTGTATTCAGGTTGGAGTGAAGTGCATTGCAATTTTC  
A\_14\_P103243 AAATTGTATATTCTGGGGCTTCCAAAACCTATGTTGCAGGAAAGATATGACCTTTTTGCAA  
A\_14\_P134796 GAACTTTAAAAATTACAGACATTCCTACTGCCCTTCTCCAAAAAAGATGTCTTTTTCGAAAA  
A\_16\_P16628164

ACACATCCCCAAATTTACAATTTATACTCAGCAAACCTTTATTAACAGCACTTTCTTTCC

A\_16\_P03411819

AATCACAGGTAAGTCTTGTTTACTCGGTCATCATCTATTCATTCCTACTGGGCTAATTCATT

A\_16\_P02829106

AGAAAAAGGCATACATGAGAGGATGAAAGATAGTAATGGGATGATAAAAATGGAACCAGG

CUST\_5436\_PI426210822 TGAATTGGCAGTTGAGTTACAGAATGCTCAACCCAAGAGTCCCTG

A\_14\_P138770 TCTGACCTGATGAGAAATGCTTAGACCAGTTTTCTTCTACTTCTTTGAATCCATGATAGA

A\_14\_P122682 GGCCTCCGTATTGAATGAAAGACCCAGTGCAAAGACATCACCATG

A\_14\_P120829 TTAGATCCTGTTCTACCTTTTAAATGATGCCTCTCTTATATCTGTAAGGAATCTGATGCT

A\_14\_P106918 CTTTTGTTTTGTTTTTCTTAACATAGAAGGAATCTGGATGAGAACAATTGGTAGAGCCT

A\_14\_P109008 CTTTTTGGTCCAATTTATCTGGATCCTTCTATGAAGTCCATATAAAAATGTGCTCCCTGAT

A\_14\_P118848 ACAAATCTTTGAATTCAAAAGCACTAGTTGGCATCTTTCTGAAGGTGGAACCTCAATTAAC

A\_14\_P101231 TACCTGTTCTAGTCCTTTAACATTATAAAAAACACAGGGTTGGTAGCCATTCCAATAAAGG

A\_16\_P20043823

AAAAAGAGGGTGAGAAAGTAAAAGTAGTGTAATGACCCCTAATAATCACAACAATTGGCC

A\_14\_P139755 TCCTGTTGTTGTCGTTGTTTTAACTTTAGAATCTGAAAACCAGAAAGAAGTCTTGTGCAT

A\_14\_P106495 GGCCTAACCTTGATCTACTAAATTGGTCTTGAGTAGCACACAGGAATATTCTTAAGTCTT

A\_14\_P116014 CCTCAAATGTGTCCTGCAAATTTACCTCTTGCTTTCTCTGAAATGAAAGAAATCTATTT

A\_14\_P201770 GTGACAAAGTGGTCTTTCTTGTGGATTTGTGCTAAGAGTTTGTGTTGGTGATGTT

A\_14\_P114527 AGAGATGAGGGTCATTAGTTAATTCAATGCTTGTGAGCAACTACTTTAGGTGCTTATGA

A\_14\_P119757 AACAAACAAAATTGTAACTTACCTAGAAAAATCTCCCTTTGCCTCCTGTAGAAGAAAAAA

A\_14\_P126926 TTTTTCTTTTCCACATCTAGCCTCTTGTTCAATAAATCCCCAAGAATTAATCATCCAT

A\_14\_P127992 AAGGTTTCATTTCTTGCTCCTAATTCAGCATCAGTGCTCCTGATCTTACATTTTACTGC

A\_14\_P133226 AAATGTCTGAATTTGATGGAAAATAGTAAATCAAGCCCACTTAATCCAGATGATCCTCAGG

A\_14\_P123364 CCTGTAATTTTACCCAGTCTTCTATTTGGAAATACTCTCCAATTTGGTTGTTTTTTTGGC

A\_18\_P22842468

ACATAAGTCTGCTAAGCCATCCTTAATGTTTGGCGGGTGGATTTCTTTGTTTAAAAAATC

A\_14\_P124362 ACATCTTTTATAGACAAACATTAAGGAGAGACAGACTGTAAGACCCTAGAGGCTCATTTT

A\_16\_P01166749

ACTGCTTACCTTTCACTGAATCCATTTCTTAACTTTTCAATATTGGCCAAGAACTCTGAC

A\_14\_P122509 ATGTTCTTCTATAAACTTGCTCAAATGCTCCAGATCTCTGTCTCCACCCTCAAATTTAAC

CUST\_10357\_PI426210822 AGACTGCAGAGAGTCTTAAGGGTTTTCCAGTATGACTTGGGAATTGCAA

CUST\_1107\_PI426210822 ATCAATCAAGAGTGGAGGGATCGTTGGTTTCAGAAACGCAAAGCATG

A\_14\_P130629 TTTTCATTTTTTCATTTTTCTTTGTTTTTCAGGAAGGGATGAGACCATGCAGCCTGC

A\_18\_P12127536

TTTATTTGTGACGAATCATTTTTGGCCACTCTTTTTTCAGTATCAAATCCCCTTGAAGG

A\_14\_P126257 ACTCAGGTCTCAGTCTGGATGTTGAGGATGTCTGTCCATATTCAGACCTATATATATTTA

A\_14\_P131728 TTCACATTCCCACCAATTCTCAACAAAGAAGCTTGTCATCAGTTAACTACTTACAAACCTT

A\_14\_P125322 AGAAAAAGATTTAAACAAGGACTGAACTGTCTTTTTAAATGCTTGTCTTGCCTTCGAGG

A\_14\_P201546 CAGTTTTATTCTGAGTTTGGATATCTGGGGAAGTATTAGAAGTAGAGCAGCAGAAGTT

A\_14\_P201430

TAGAATAGAAGCCAGACCAACAGTGTTAAAGGAATGAAAAATAAAGCAGAAAAGGCAGCA

A\_14\_P128844 CAAGATGATTCCAGCAGTGGTCTTGCTCTTACTCCTTTTGGTTGAACAAG

A\_14\_P139666 ACTCTCCTTTGAGTTCTTCTGGAAGTTGTCTCTTTAAAATATGGACCCTGCTT

A\_16\_P19830971

AAAAGGCTGAACTAAATTCCCAGTTTGAAAGTATCAATCTTATCGCTGCATTTCTGAGTG

A\_18\_P17071145

TGACTTATAATCTCTTGGCTCATTTTTCAAAAGTTGACGTGTATATCTCAACCTCACTGCA

A\_14\_P105632 AGTATTTGTTTGGAGGCTCTGATTTAAGATTTTAAAGTCCTAGGGATTCATTCCAATGTTT

A\_16\_P38261117

ACAAATGTGTACCAATTTCACTATCATCATGCACCAAATAAGTCACTTCCTAGATTA

A\_16\_P17951929

GGAGATTAAGAGCCTTTGAACAGAGATTAGAATCGGTGTTTCTAATTTAATGAGCAGAAG

A\_14\_P106382 GGAAACCGGAATTAAGTTACACTTACAAACACTTTTTGCACAGACTGTCTCAGGTTATAGA

A\_14\_P134059 TTAAAATGGCTCTAAGGAAAGAAGGTATGACAGTGTAGCAAAGAATTCTGACCTGAAAAC

A\_16\_P02930285

CATTCACCTGAAATGAGACATTGAACTAGAAAGAACTGAGATACCTTTAATTGGCTGCA

CUST\_1403\_PI426210822 CAGAAGTGGGGTATTCTTAGCTCCCAGTGAGGCTGTCACCACCTC

A\_14\_P139833 CTGGAAGTTTAAAGGACAGGAAGACTTTGAAAAGTATTAATAGGATGATGTCATCTGGGGT

A\_16\_P19422068

AAGCCTTAATTTAATCCCAATACAGGACACATTTTTGTTGTGATAAATCCCAGTAGCCTA

A\_16\_P00508342

AAAATGTTTTTTTTCCCTAAAATTTTCCCTGAAACAATATCATAGACTTAGCCCTCCAGG

A\_16\_P16191842 AACAGTCCATATCTCCTCACTCTCTGGTTCTACCTCCCAGAACTCTTC

A\_16\_P19491576

AACAGGAACTGGAGAATATTGATCACTATAGTGTCCCAGATTTTTAAATGATGCCTGAAA

CUST\_7690\_PI426210822 ATGAGTAACCCTCAGCCAAGAGTGTATCATCAGGGCCTGAGCAAG

A\_16\_P17197010

CCCCTCAATTGATTTATAGTTCCTCCTACAAAATTCTGAGTTCTTAACATACCTACCTCA

A\_14\_P128133 AAGTAACAGAAAACCAGACCCCATCTGGCTGAAGCCAGTAAGAGAAAAG

A\_14\_P114278 TGAAGAGAGTCAAAAATGAGAGTAATATTGAGTATACAGTTGTTGACCCAGACCCATCATT

CUST\_10378\_PI426210822

GAAAGATGTAAATGACAGCAAGGTAGAATGCAGACCTGCAGACGCTTTAAACA

A\_14\_P122663 ACACGAGAATATTCATTTCCCTGTTTCATTGTTGGTTACTTAATGACCTTCCTTTGAAATG

A\_18\_P14135745

AAGCCACACAGAAAAGTATAATAATATGATTTTCAAAGTGAGCACTCAGAGAGCCCAC

A\_16\_P16191140 CTAGATTGATGGGAGACATCAGAACTCAACGGAGATGTTGACAGAGAGC

A\_14\_P134356 AATTTTGTAGGAATCATTATGAATCTGTTTATTACAGTGGTCAATTGCAAACTTGGGTG

A\_14\_P115743 AAGTTTACAGGTGTATCCCAGAACGCACTTTTAGGACAGTCATTGCGTGTTTT

CUST\_5332\_PI426210822 GTTAGCAGAGTCAGCGGGCAGGGAGGATCTGGATCCTGGGGTTGT

A\_14\_P136862 CACTCTCTCAGAATCAGCAAAGCAATTTTGGATGATTTATTACCTCCTGATATTCATG

CUST\_3929\_PI426210822 CGGGTCATGCATTCACCCACAAATATTCCATCTATCTCTGAACTAGG

A\_18\_P22839216 AAAACATTTAGAAGGGGAGCCCTGGGATCATAGGACCTGCTGCCC

A\_16\_P03793614

AACTAACTCAAGAAATTAATAAACCCCTCTATTCATTTTCATATCCCCTTTTGTGATGGCC

A\_14\_P105757 ACAGGCCAGTCTACACAGTAGGTAATTTCTGAGTTATCCAATTCTCTATATTAECTCCAC

A\_16\_P16605675

AAACTGAACTCTTACACAAATTCGAGCCATATTTTGTAGTCTCACCTAAGTATGCTGCC

A\_14\_P133845 CCTTTTTAGAACATACTTACAGAAAACTGACGCACAGCACAGGTAACAGTTTAGACTTT

CUST\_1705\_PI426210822

CAATGGGAGCTTCGTCTTAATGCTTGTAATGTCATCTCATTAGCATGTTTTGTGTTTT

A\_14\_P104385 CTGAATGAAAGAAAACAGGTTAATTAATTACCACTTGCCTGAAGAAATGCTATCTCAGG

A\_16\_P00685441 CTAGTATCCCTCTCAGGCGTATGAATACGTCAAGCCACTTCAGCATGATG

A\_14\_P120885 GGGCAGGCTCATTTTATATTTCTTACGGTTGTGTGAATTTCTTGCAATTATATGTAGCAA

A\_16\_P15896677

ACCCATTATCTGCAGATTTTCACATCTAAGCAAATAGGTTTCATATGAGTCCAGTTACCT

A\_14\_P103635 GTTCTTTATAGCGCTGTGTTTTCTCCTGGAAGGTTTTTCACACAGTGGTTTCAT

CUST\_4964\_PI426210822

TGTTTCATGGAGGAAAAAGTTGAACATTACTCAAGTGCAGATAGGGAAACAGTGT

A\_16\_P01623232

AAAATCATCAAGACGGTAATGCATAGTTAAAAGAACAGATGTAAGGCAGAAAACCTCCTCC

A\_14\_P118931 AGTATGACGTGCATTTCCAAAGGAAATTTCTGAATTTGATTTTCCAACAGAGACACTTATCAA

A\_14\_P139095 CATCAGGGTATTACAGCACAGTAAATCAGATAGTAGCCTTGAAGGACTCCATTTTC

A\_14\_P130273 ACTGTTAAGGGATGAATCTGACATCTGGACCTTAGAGAATTTTCTGAGATACTTTAAGGA

A\_14\_P118573 CTGTATGATTTCTCTGAGTTGATTACTTGGAAATTTCTACGCATTTCCAAATTTCCAGGACT

A\_16\_P16293636

AAGGCATTGACATCAACTACTCTGAAAACATTTAATAGTGATTCATACGTCCGATACCTT

A\_14\_P121210 ACTCCACCTTAAAATGCATCATATTTGGGTTTTGTTTATAACAGCACAGAATTTCCAAGAGTC

CUST\_508\_PI426210822 ATTCCATGTATCCCTCTAACCTCCTGGGGCTGCTTTGTTACTATCC



A\_18\_P14135778

AGCATTGAATTGTTGACATCTGATTTTGGGTAAAAAAGGAAAAAGGAAAGCATTGA

CUST\_5101\_PI426210822

TAATAAAGTTTTGTGGATAGGTATGACACCATTTCTTTTGAGCTTAAAGATGCTTAAAT

A\_16\_P19183107

AGTTTAGGACGTTTGGATCTTTCATTACATCTTGCTTGTGTTACTAAACTGATGCTCTGT

A\_14\_P113703 CTTCTGGAGTAAACTCAAATCGTATGTCATTAAGTTCCTTTCTGGAGTTTCTGAAATAC

A\_14\_P107348 GACCACATCTTTCTTTAAGGCCTTTATTGCGAAAAATTGATTGGTTTTCTTGAATTCTGC

A\_14\_P108679

ACAGAAGGGAAAGGAGATTTTAAACTCCAAGACCTCAAGACAGAGATACAAAAATACA

A\_16\_P18268832

ACATTGCCGTTTTCTTTTTTATGAACACTTACAACTTGCCATTGAATTCATTGCTGTG

A\_16\_P16259354

AGAGACCAACAGCATAGTTACAACCTCCAATTCAAAACAGAAAGACTGAAGATGAACTTTC

A\_14\_P101639 CTAACCTTCCTGCCTGAATTTTCAAATTTTACCTATTCCTCTAGGAAAAGGCCCAATACA

A\_14\_P202117 CTACATCTATAGGTTAGACTGCTATTGACAGTCTGGTGTCTCTGGGTTTTGTTGATAA

A\_16\_P17841702

AACTTCCAAATCCCATACTTTTTCTTTGACTTCCATTAATCTATGCATGATGGTCCTAGC

A\_14\_P109437 CTAGATCTTCGGGAAAAGGGATCAAGGAAATGACTATTCCTCAAATAAAATGTAAGTAT

A\_18\_P22841725 CGGTTCACTTCTGCTTCCGTTTGGCTAGAATTTGGTCAGATAGTTCTGTATC

A\_14\_P104707 ACCTGATTTCTTTTTCTAGGAGGTGGCGATAAGTTGCTATTTCTTGTCCAG

A\_14\_P126331 ATATATGAGTCATCTTGTCTTTCTGATGTATCTGTGTCACCTTCTTCACTTTTCCCCATC

A\_14\_P137830 ATAAACTTCCAAAGTGGTTGTATCGCTGATTCTACTCTTTTGCTAGATCACACCAAAT

A\_14\_P109834 ACACTTTAAAAACACTTTCCATACTTACTTGACAGTGCCACTCTTTAGGTAAGTCAGAC

CUST\_7283\_PI426210822 CTCTTCCCTGGTTGGCAGATGGGCGGGTGTGACTGAGGCTC

A\_14\_P139886

AAAAATTGAAGGTGGAAAGAAAACACAGAGGCCAAAAGTCCTTTCATCTAAAGTTTTACCT

A\_14\_P103972 CTCTAGTATGAAGCAAGAGTAAAGACTAAGGTTTCGAGAGCATTCTACTCACATAAGTG

A\_14\_P138352 ACTAAGAAGGAGGAAATCCAAATGGTGTGGAATAATCTCTCAATAAGGGAATTTCAAAGA

CUST\_9496\_PI426210822 TCCCCAAAATACCACTTCCATTAATTAATGTTCCATTTTGGAGCACTATGGTGAT

CUST\_7952\_PI426210822 CTGGCTGTGTACACCGGGGTATACTCCGGAGGGGCTGCATCATAT

A\_18\_P14139467

ACAGAAATTTCTGTCTAGAAAGAGATGTCCATGTTCACTGTAGATGATGGTCCATTGTAA

CUST\_1842\_PI426210822 CATGCTGTCCCTGGTGCAGAGGTTTGCCAGCTGACATTGACCTGA

A\_14\_P139075 ACTGTGTCTGAAATTTTCCATTTTTGTTGGGTGCTTTTTATATATGCAAAGGTAAGAAA

A\_14\_P129564 CTCAACCCAGAAATTTGGAATGTTCCAGAAGTCCTCATTTACAGTCGATC

A\_14\_P114290 CTCCTGAGAAATCGAGACATATATTTAAGTTAGTGAATGCACAGTCAGTGCAGTGATGC

CUST\_4664\_PI426210822

CATGTTACTATTAAAGTATAACCAGATACTCACATGTGACATTCTCTTGTGGTTTTCCC  
A\_16\_P17726004  
AAAACGTTATTTTCAGCATCAGTGAAATCTCATTACAGACTTCAGAAGAGATCCAAAGACC  
A\_16\_P19975043  
CCGTGCCTTATGATTTACAGATAAACCTCTAAGCCGAAAATATGTCACTAAAGAAGTTTG  
A\_14\_P135311 CTGGAATGTGAAGCCTCAGTCACTCTAAATGAAGAATTTCTTTTGAATGTTTTGTATGT  
A\_14\_P134453 GCCATAAAATTAAGAAAGCACTGCAAGCAAACAAAACCAGTCATTAAAGTTCTTGGCAG  
CUST\_7179\_PI426210822 TTTCTGAAGTCATCCATTCATTCTCTTCTGCTGGTGGGGACTTAAGGTTG  
CUST\_8259\_PI426210822 AACCAAGCCCTATCCTTGGGGACAAAGAGAAAACATTCTCCCCAC  
A\_16\_P58424274 GTGTAGGGCCTAGTAGACCATTGAAAGGACTTGGCTTTTACTCATTGCAAAG  
A\_14\_P106854 GGCTTCATTTCTTTTGTCTTTTCATGAGGCTTGTAGCACATCAAATTTTGAATGTCTTCT  
A\_14\_P101511 CTGGAAAAGGTTACAGGATGTAGTCCTCAATTTGAATGACTATTGCACTCTTAAAATGCT  
A\_14\_P124095 TCATATTATTTCTTTTATTAGTAGCAGCACGGCTTGGAAAGTCCTAGTGCCCTGATTTTAG  
A\_14\_P101502 GATAAAATGACCAAGAAAATGCAGAAGACCCTAGAGAACACCAAGTAGGTCTGCTAAT  
A\_14\_P127406 ATTGACCTTGGGCCCTGAAATACTGATATCTCCTTTGGGTAGAGTCATATGAAC  
A\_14\_P133181 CTCAAGAAGCCCAAAGGTTGAAGTCTCCATAGTGGAAGTTTACAATAATGACATTTTTGA  
A\_14\_P116588  
TTTTCAACAAGTGAAAAAAATTAACCTCAGAAGAATGACTTCAGATGAGGAACATGGGGAG  
A\_16\_P00900948  
AAGAGTGTGACTAAACTAAAAGCGTGAACCTAAATGGACTTTACAAATGGTTTTCCAGACG  
CUST\_7713\_PI426210822  
AATTCTAAATTAACCTAAGTGAGTTAACGTGGAAGCCGCTTTTACCAGCCCACAAG  
A\_14\_P125457 AAAGAAAACACTCTTGGACATAACTAAATGGGAAAACATTAGTTGTTAGCACTGTCCAGG  
A\_16\_P20046466  
CACCAGTTTTACCTGATTTATGACACTAGCATTCTACTGATATTCTGCTTCCAACCTCTC  
A\_14\_P114942 TTATTCCTTCTTTCAATTGCCATCATAACGGAATGCTCAAATTAACAATCACTCTGACTT  
A\_14\_P123503 CTCTATGACATTATGAAAATGTGCTGGAAAGAAAAGGCAGAAGAGACCAACGTTTG  
A\_14\_P114464 ACTGCCCTTTCAGGTTGCCAGTATTAATACAACGTTGTTTACAGAGTAGATGTTCAATAA  
A\_14\_P127781 GTAAATTAATTGTGGGAATAAAGATAGTAAGAAAGGCACCCACTACCAGAATGATGACCT  
A\_14\_P117208 ATCATGCACCTTTATTTTTCTTTAAAAATTTGGTGAAGGTTTCAGTTGAAAGATGCAAAGG  
A\_14\_P104387 TCTAACTAATGGGATCTCTGGAGTGTTAGTTAGGAAAGAGTTGCAGTTTCTTGGAAAATT  
A\_18\_P22840546  
CTTATGACCTAAAGCATATTTTCAGGCCTCCCATGAAGTCCTTGAAACTTGAGACTTAAT  
A\_14\_P128024 CAATCTAAACTGTCTGGATTCAATTTTATAGGTTAAGGAGAGTTTCTGAGGGTTTTGGAG  
A\_14\_P139952 CATTAGGAAATGTTTAAATGCAATGTTTCTGGGAGAAGGAATGCAGTAACCTATCACTTA  
A\_16\_P03121641  
ATCTCCTGATGAGGTTTCTTCTCCATAATGATCCAACAGAACTCAGTTTTTTAAACACAT  
A\_14\_P124808 CTGAGGAAAGTGAGTGTGCATTGGAACCTGAACTGTAGGATTTATGAATAAGTGATGAAA

A\_16\_P36230621 GGAGGTCAGTGAAATGTGAAGGTTGGTATGAAGAAGGGTTAGAGTTGACTTTT  
A\_16\_P17273160  
GCCCCCTCAACATTTTTACATTCATCTTCCAACATTAGATTACTTCTTCAGATGCTCACT  
A\_14\_P112879 TAAAGGCCTAAAAACCACTCGTAATCAACAACCTTAATATTTGGGAGGTGGGATTGTTACA  
A\_16\_P16305459  
AAAAATTGAAAGCAAACCATTACATTTGTTCAAGAGAAACAATCTTTCATGCTGATGCG  
A\_16\_P01697016  
AGGGTCTAAACTTCACACATAGGCAACATTCATTTACGTAAATCTAAACACGATTTGGTT  
A\_14\_P200021 AAGATAACTCTCAATTCAGGTCTCTTACTGGAGAATCTTACCTTCTACCAACAG  
A\_18\_P22841421 AAATGTGTTTGGGTGGCCAGGCCTCGTAATCTCAGCAGAGGAATG  
A\_14\_P114457 TTGCGTTTTCTAGAAGACCATGTCAACAGGAATAGAGAACACAACGAAAATCTAAATGCA  
A\_14\_P124418 TTAAGAGAAAAAACCAGAACACACTAAGGGTTATAGGCACAAATTCTCCTTATGCCCA  
CUST\_1359\_PI426210822 CTGCACTTCTGGACTTGTCATGGAGGGAGGGTGTGTGACCCAG  
A\_14\_P128601 ATCATGTTCTGTGTGGATCTCACATAAATCTAATCCTGCTCAAATCTGTGCTAAACTTTG  
A\_16\_P19145496  
AAACCAACACAGTTAAGATCTTGGATATTCTCTACTTGTTTAACAAACACTGTCTCTCCC  
A\_16\_P19197933  
TCATTACTGACTTCTCAAATCCATATCATTGTGCTTTTCCGAAAAAAAATCCCCTAACCT  
A\_14\_P202087 TAATCAGTTTGAGCCTTGTTGTTGAGACTAAACCAAAGATTTTGAAGGTTTTACATG  
A\_14\_P132585 AATTATAATATGCCACTCTGCAGGACAATATAGGACACATGTCACAACGCTAAGGAATTT  
A\_14\_P127104 GGTTGGTGGGACATGGTTGTTGATTCTTTAAACATTTTATTATGTGTTTCAGTGTAACCG  
A\_18\_P14134162 GTTTTGACTCTCTTCATTTTGGTCATGGTTCAGGATTTTCACACACCACTAAGGT  
A\_14\_P136356 AAACGGTAAACTACCTCATTTTTTTCAGTTGACTTGGTAAAACCTCCAAGAGGGTTATCTAC  
A\_14\_P135070 ATTTCCAACCTCAGTATTTACACACACATTCACTTTGTCTCAACCAATAGAGCAGAAAATCT  
CUST\_9233\_PI426210822 TATTTACAGCCCTGGCACATCTCACCTTTATCATTTCCTTTCTCATTCTTTTCTC  
CUST\_2268\_PI426210822 CATAACAGACGTCGGGAGGCAGAGCAACCATGTCACCAGGGCATGT  
CUST\_7990\_PI426210822 GGATTACATGTGGATGGCAGAGTACAGGCCAAGTCCCATTAGACT  
A\_18\_P11616646  
GCAGCCTTTCTTATAGAACGTTATTTCCCATAATCTACTATTGCATTTTCCATCCATCC  
A\_14\_P115800 TTGACCACTTTGTCTGACCAAATGTTTCATCTGTTGTCTGGTGCCCAT  
A\_14\_P103979 TAACACATAGGCTGAGACCTTCTCTCCTTCTCCTGATAGGTCTTCAG  
A\_14\_P102201 GCCTTCTGAAAGTGGAGGAATGAATAGATGCAGTCTATGCAGATATAAGTAATTAGAGGT  
A\_16\_P16675622  
AGTCTTCAGGCACAATCTAGTAATTCCTCATCCATTAGGTCCAGGATTTTAAACAGTGAT  
CUST\_3886\_PI426210822  
TGGGGATTTTGTAAATATTTTGGTAGCCCGTTGAGTTTTGTCTCAGGATTTTCAG  
A\_14\_P133039 CTCGGGGCTCAAAACCAATCTCATTTTTGAAACAGGAAAAATAATTTTTAAAGTGCACCTA  
A\_14\_P126755

GAAGACAGATGTGGAAAAAGATACTTAAAAAAAAAAAAAAAAAGTGCAAACCCAGCATGCGC  
CUST\_7065\_PI426210822

ATATGTTTTAATTTTTTTATGACCGGAATCTTTTCCTTCAAATGAACCTGTTTGGATTCT  
A\_16\_P03055328

TCTATCACATCCCAAATCAATTTTCAGACTTAGAACAAAAATGCATATCTATCCCCCTCC  
A\_14\_P139297 GCAGGAAAGAATAAATAATAGGAAATTAGAAAACAGTATTGACATAGATATTTCTGAAT  
A\_14\_P136731 ACCAAAAGTCTTTGTTCCAAAGTTCTGATTCAAACCTTTTAGCCATTAATTGTTTCCAT  
A\_14\_P128402 GATCAAGAAAGGGTTTCGAACACGGTGAAGGGTTATGTAACCTAATGTGTCTC  
A\_16\_P18666362

AACTATCTGCCATAAGAGAAAGCAAATCTTCTTCAGAGAAAGATAAGGACATCCATGAGG  
CUST\_6940\_PI426210822

GGGAGTCTTGGATTTTAAATCTTCTTAAAGCAGCACAGCATCTCTTGAAAAGAAAG  
A\_16\_P38997988

TTCCTTCCCAAATACTGAAATCAAATGATCAGCCATTAATATCACTAGGTCAGATGC  
A\_14\_P126558 CTGTGGGTGTGAACACGCATTTATTTACACATTGTCATCGGTAGGCACATAC  
A\_16\_P15875470

AAAACATCTGAGAATGACAGAAACAAACCTTCAGTGAAGTTATGCAGTTCCAGTCATGAT  
A\_14\_P120622 ACTAAAAACCACTAACATTCGTAATGTTACAATTACAGCAAACCTGAGGCTCCAGACATA  
A\_14\_P133138 AAAACTGGAATATAAGCAAGAACTGTATGTGTTACCTTTAAAAGGGGCTCATGGAAAAGT  
A\_18\_P22842643

CAGCCAAATAAGCATAGAATGAAGCAAACAATTTTTATAAATATTTACAATAGTAAGCA  
A\_14\_P110036 AGTCACCTTTGAGATGACTGGGATTTGCTTCCATCCATAATTACAATTTCCATCATAAAA  
A\_14\_P112783 CTCATACATCATTCTCCTCCAGGATTTGTCTCCATCAGATCCTTGTCTTTTCATATATT  
A\_16\_P03096907

AAAAGGCTGGACTCTAGAAGTAAAGTAAACCAGAGATAAACAGTTCTTCTCAGTAGTGAC  
A\_14\_P136771 AAATCACCTTAGAAATATGGTAAAGAGAGACCTCTGGCAAACACACTGAAGGTATTTACT  
A\_14\_P137228 GACAAAATAACTCAATCAGTCTTACTCCACCAGAATGTAATCTCAAGGGTGGTGAATAA  
A\_14\_P131642 CTCATCCTGGCTGAAGGTTTTCTCACATTCAGTTTCTCTCCAGTATGCAG  
A\_14\_P114281 AAACAGTTCATCCATTTAGTTACCTTAATGGCAGAGAGGTCAATTTTTTCTTCTTTGGGT  
A\_14\_P107613 CATATGTTGTTCTTATTACTTATTCCTCCAAGATCTGGAGATTGTGGAGGACTTGAAAAG  
A\_16\_P00685215

CTGCCTTGAGAATGCATATCATTGAATAATGTTAGTGGGAGGTTTTAAACTATCTGAAGA  
A\_14\_P129102 TGAACCTGAAAGTCATGTATCCACATTTAATGGAAGGCTTCTTACCATTTCAGCAATTTAG  
A\_14\_P104622 AATTTAGTTAGGCCAAGAGACATTCCTAGACCATCTTGAGGCACTTGAATGTTT  
A\_14\_P137633 CTTCTCATGGATTTAAAGTAAATGAATAAGGAGAGAGGCACCTAATTTCTACCTTGGTT  
A\_14\_P104158 AGAATAGTGGTTTCAGTAGATTTGCTTCTCTAAATTCATCATGACTTGCAATGGATG  
A\_14\_P108045 AAGAATTTACACCTTTTTTTGTTACATGCTTGTATCTGAAATAATTTCTACACCTGCCCAA  
A\_14\_P139688 CTTCCACCAGATCAAAGTTCATTCTTCATCTTTCCAGATGGAAGAAGAGCATAAATTTT

A\_14\_P102658 CTCCTGTCTGTATTAATTTCTTCTCATGCTCAGTATTTTTCTAACTTCCTCTGCTCTGTC

A\_14\_P124177 AATCCAAATAGAATGAGCAAAGCGGTTTTTTTTCACCTACGTTCCCTCAGGC

A\_14\_P113542 GAGTCTAAAAGACAAGTAGTGACTGTTTCTGCCTGATAGGCCTTCAGTCTC

CUST\_695\_P1426210822

TGCTTAGATAACCTATGAATCTGTGTCTGTGAATTTGGAGCCATGGCATTATCTGAAAT

A\_14\_P122364 TTAGTTGCAAATAAAACAAGAGTCTGCCTCATCCATTTCCAAAAGAAAAATTTCCGACTG

A\_14\_P200231 TACAGGTCCATTTGTCCCTCAGTGGGAGTTGATCTTTGATTCTACAAAGAACAATAAA

A\_16\_P34569974

GCAGAATTTCAAAGTTTTATGGCAACTTTTACAGAAATCACAGAAAAGAGACAGCGACTG

A\_14\_P138319 GGCGATTTTCTGTTTATTGCTCAAAAACAAGAATTCAGAAGCAAAGGTGGAGAGACT

A\_16\_P00442028

AATCAGGCTGTCAGAATTGTAAGAACCACCAAGTCATGATAACAAGGATATTTGCAAA

A\_14\_P129343 AATCTCTGCAACGTGGAGAAGACCCCAATTTGATCAGGTATGTGATATATATGTTATAT

CUST\_4860\_P1426210822

AAACTGACAGTGAAGTGTAGACATGAGGCTTAGAGAGATGCTAACTAAGTAGTCATGA

A\_18\_P17588987

CCCTATTCAAACCTTTTTGCTTATCACTGACTGACTTATGCTTAAACCTGAAGGAATATCA

A\_14\_P128081 GACCGTCAGAGACAGAGGTTTAAGCAGGAAGAGAGACACTTTCTTCTG

CUST\_346\_P1426210822

GAAAGGGAAAAGCAGTATAGCAAACTTTGAAAGGAAAAGAAGACATGTTAATTAAGCCT

CUST\_7955\_P1426210822 CGATTCACATGATGTACCCCAAATGTGAAAGTGAAGGACACACCACA

A\_14\_P135039 TGAGAAGGTAAGATTTAGATAAGTAAAGTTTGCTGGCTTACCCTCCCCTCAAACAAAATA

A\_16\_P16191688

ATGTGAAGCAGTAAATATAGGTCAGTTCAATAAATGTCTGTGTTGGCTTTTTGTGACTCCT

A\_14\_P135995 CTTTTTCAAAGAAGAAGTGATGGCTTGGTTGTGGAGAAGGCAGAAATTATAGGTTAAATT

CUST\_8239\_P1426210822

CTTTGATAGTGGA AAAAAGATTTACACAATTAGTTTAGATCAGGTGAGGACCCACTGAAC

A\_16\_P02520440

CTACTGAGTCCACATTTCTTTGAAGGCAGATTGGTAGCATGAGAACCATTTTTTTTTTTTC

A\_18\_P22843038

TTTTGAATAGTGTATTAGTTAAATTTTACAGTAATATACTCAGCATATTTTCAGGTGAAG

A\_16\_P58424256 CATTAATGGCTCCCTGCTTTGCCACAGGGGTCTCTTTTAAACTGAC

A\_16\_P41831926

CAGTTCCTAACTTGAATACTCATTTTTTCACTCGATCTCTATCATAATCTAAACAGTGGC

A\_16\_P20266317

AAATTCAACTTTTCAGTATGCCTATACTGTCAGCCATTAAGTGTCAGTAAGTCTTCCTG

A\_16\_P03723563

ACCTACTTCCTTTCAACTGATATGCCAATTGAGCAGAGTAATTAGAGGATGATCTTACTG

A\_14\_P104289 TATGTGCTGTTTTTTGCAAGAATTCCTAGGCTCCATTTTCTAATTCATACGTTGGCAAAT

A\_14\_P104531 CTATCTGCTCGAGACTCCGTTGTTCTGAACTTTAATCCATTTATGGCTTTCAATCCT

A\_16\_P17136278

AATGGCAGCAATCTTACTCATACTCCATCTTCTTGCAAAAAAAGGATCATGACTAAGTCT

A\_16\_P20343254

AAAACCGTTCTTAACTCGTTAGATAAGAGACAGTGTATTCCCTAATGTGATCAAAGCCGAT

CUST\_5276\_PI426210822 CTATTGCTGCCTATCAACTTGACTTCCCACCTTTGGGAGTCAGATG

A\_14\_P117725 TTCTTATCGAAGGTTAAATGGACTCTGCTCATAAACCTCTTACTGAGATGCTTCCCTGATA

A\_18\_P15741846

GCCTAAATGTGTATCCTAACTTGTTTTACATTCCAATCAATGACTTATACTGATCAGAGC

A\_16\_P16191830 CCATCTGCCCTTGGAGAATGTAGAGATTCAACTCTAAAGTGGAAACAGAGAAA

A\_14\_P139256 CTTCAATTCTTATCCTGCTGCATCCCTTAGGCTACCTATAAAACCATATTGAGAACTGTA

A\_14\_P121621 CTA CTCTCACCCCTTATAATCCTTTTCAGCACTAGGTCTTCCCGTCACCT

A\_16\_P15856722

GAAGTTCTGATGGTATTCAAACAGTTTGTGTGTA ACTAACTACGGCTGTTACTGAATGG

A\_16\_P58424625

ATAATAAACTTATACACATACATGATATCTGTGATGTGAGTGGTATCCCCAGCCCCTTA

A\_16\_P02820706

AAACATTTGCATGTCAATTTTTACTAACTGCTTTTTCTCTTCATATCCAGATACACACTA

A\_14\_P136237 ACTCCTTTAGCAAATCCTGTGTA AATAGAAGTTTTATTTGAACAAAGGAGAGTGTCCAGG

A\_16\_P19896292

ACATGCAACAATGTGGATTTTTCTACCAGAATATTAAGAATTATCTCCTGGAGCAAGCC

A\_14\_P134808 TTATTTTGTGGAGTAACTGGTGATTTTTCTCCAAAAGGAGAGATTCTGAAATTCCTCTGAT

CUST\_9123\_PI426210822 GACACTGAGGCTTAGGCTGTTTCTCACTCGCTTGCCCTGCCTTTC

A\_16\_P16875338

AAAAAGAGGCAACAGAATATGTAGACAGACATTTACCAATCATCCAGATTACAAGATGGG

CUST\_7237\_PI426210822

TATTATGTTTGTGTTCTTCTTATATTTCTTTTTATTTGCAGTACCCTCAAGTACTTTGAA

CUST\_1511\_PI426210822 CTTATGTGCCCGTGTGGTAGTAGCATGACTTTTGGCTGGTAGTACATT

A\_14\_P116463 CAAATAAGGTAAGTTGAAAGCATAAATATGGCTTGGGGTAGTATCTCCAAAAGGCAAAAC

A\_14\_P114565 CTTTAAACAGACATAATCTGAAATACTATGTATTACCGAAAAAGCCTAAAAAGGTGGCATT

A\_16\_P16847629

AGAAAAAATGCCAGAGTCAACTGTATAAGCCATAAGACTACACTGAATTCTACTGGATGC

A\_14\_P200929 ATTCTGCACAAGTTTGCTTTTCTGGTCTAAATAGCCTAAAAGGTAAACTGGGAAAATGA

CUST\_10292\_PI426210822 CTGCAAGAGATGACAGTGCCTTACCTTGTGTTAGCAAGAATTGCATACATA

CUST\_6469\_PI426210822

ACAGTGATAAGACCCCAGGTGGAACCACTTATAGCTGACTACATTTTTTTAATATCTTCA

A\_14\_P123539 AATTCATTGCCACATGCCACACATACATTATCTCATTTATTTATGTAAAAGCCCGTTTT

A\_16\_P36230820 CTCAGGCGTATGAATACGTCAAGCCACTTCAGCATGATGGCGTTTAAGTTTAA  
A\_16\_P16106493  
AAAACCTCTGACCAATGTTATTTTTTCAGCATCTCTATCCTCTCTAGCAATCATCCAACAT  
A\_14\_P132149 ACCTGAGATGATAGTATAACTACCCTGTTCCCCACATTTTTTGTCTTTCTTTAGGAAA  
CUST\_6196\_PI426210822 TCTTACAAAGTAACTCAGGCATTGATGTGGGGTAGAGACAAGCCCA  
A\_14\_P137061 CTAGATTTTCTCGTCACCCAGCCTCAAAAATATATGTGTCTGCAACCCTCAGT  
A\_18\_P22839970  
GGGTTATTTAGAATTCATATGTTATGAGGAAATACACTGTTTCAAATGCAGTTTTCTTTG  
A\_14\_P115161 ACTGTTCTGTAGCACTGTTCTAAGCCCCTCTATCCATATTTTTTTTACGTGATTGATTCA  
CUST\_7653\_PI426210822 CTTGTCCTGAAACATCTACCCCATTCATTTACCCTCTCTGCTACTATGT  
CUST\_7605\_PI426210822  
TTTTTAAAAATCTGAAAATAATTCGTTTGTGACTATTTAACAGAAGGAAAAACTTCCTGA  
A\_16\_P15745576 CTTCCCCAAAGATAACTTCTAATTTGGTTACTTCGTTTGTGCTCCATGATCAACCAA  
A\_16\_P02363419  
AGGGCATAACATGGTAAATTTGGTTTTCTGTTAAATCCATCCAAGAGTCAGTAATACAGA  
A\_18\_P25120042  
TCAAGCCATAAGAATATTGTTATTTCTGATCTCACAACAAAAAGTCTACGCTATCTGGA  
CUST\_3157\_PI426210822 CCTGGCTGCCAAGAAGAGAGATTGAGATGATGGTTAGAAGAGTTTGG  
A\_18\_P16116870 AAAGAGAGACCAACCCATTATACTCAACTTGGAAAGATTATCTGCATTCTGACAGCC  
A\_16\_P20673211  
ACTCTCACTGAATAAAAATGTCCTTGGCTTTCATAACTGATTTTTTTGACGTCATCTGGTTT  
A\_16\_P01771211  
AAAAGTCCATGTCCTACTCACATCAACTTTAAAAGTTCTTTATTAAGGGCTGTCACATCC  
A\_14\_P131018 CTGTATTAGGAGAATCTGACCTATGAGTGGTATGAAAAGGACAAACATCAAACGAGATTT  
A\_14\_P115339 TCCCATGTATAAATTGGGCAGTATGCTACAATTGTTTCTTTCTATGAGAAAATGCATCCC  
A\_14\_P135049 CTCTCCAGCAGATGCCATTTTGTCCGTGATAGTTTAATAAGTTTCTAATACCATGTGTTT  
A\_14\_P127331 TGTGTATTGGAAAACCTGTATGGCAGTGATTTATTCATATATTCTGTCCAAAGCCACAC  
A\_16\_P16347833  
ACTTTTGCCTCAATCAGTTTTTCAATTCTAAATCACTTTCAATTCTTCCAAATCTGACCTCT  
A\_16\_P17100488  
AGCATTCACCAGTCTCTTTTTATCAGAGCATTTTTTCTACACTGAATTTTGCAACTCACTG  
A\_16\_P18101554  
GTCATTGTTTCTGATTACCTGTTACTCAAGATGCTTTTTACAAAGAATAGTTCCAACCTA  
A\_14\_P125265 GTAACCTACCAATGCATTCTGTAAAATATAAACATCACAGCCAGAACCATCACATGGTTCT  
A\_16\_P20741016  
GGTCACATTGCTACCTTATTTCTATTTCAATTGGATACACTTAAAAGGATTGCCCAAGGAA  
A\_14\_P105642 CACTATGTGCTAACTGGAATCTGCATCTGGGTCATTTGTGAAAGCAACTAAATTTAACTT  
A\_16\_P03784044

AATGCAGTGTATGTCAAGTTCAAATAAGTTTTCCACATGCTAGATTTTCATCAGGTTTCGTG

A\_16\_P21525752

AATGCCCTAATGCTAGTCAATCTTTGGATCACATATGTAATACTCCTCCATAATAGCACCC

A\_14\_P113164 ACAACGAGAGACTAGATAGACTATTTATCAGTGAACATAACACACAGCACATACATGGTG

CUST\_8558\_PI426210822 TAGGATGGCCAAGTCTCCATCTGGATAGCCCAGCCTGTGATCAAA

A\_14\_P122979 CTGGAAATACATAGCACTTGCAGCCTATGTTCTGAGCAACTCTGTGAGTAAATAAGCAA

A\_14\_P123152 TGAGCAGAAATAAAATTTAAGGATACCATCAGTGGCATTTCATCTATACCACTGCAATAAA

A\_14\_P113243 GATGTTGTTCCAAGAGAAATCGGCCAAGGAGTATGGAGGATATGGTCTT

A\_14\_P202406 ACTGACAGACCTTAATCTTAATTACTGCTGTGGCTAGAGAGTTTTGAGGATTGCTTTTTAA

A\_14\_P125596 AATCAGAACTGATGCGTTTTTCCAGCACTACCTGTGTGCTGCACTCAT

CUST\_8962\_PI426210822 AAATGAACAGAGCCTGTGAGCATCCACCCTTTGTAGGTTATCCTGA

CUST\_997\_PI426210822 AGTGGCTTGAAGGATGAAGAGCAGAGAGCTTAGAAGGCTGTGATCTTAT

A\_16\_P17752399

CTTCCCAAACCTGTATCAAATGATTCTTGACTGTAAATGTGATTCCACTGTATCCAATCCT

A\_14\_P129367 CCTAAGTGTGAGTATCTCTGTATGGGTTTGAGAGTGAACCTGAGGATGTG

A\_14\_P201806 TCACTTTATTCAATGGGCAGAACACTAGATGTTCCAGCATAAGAATTTGTTATTTCCCTC

A\_14\_P110181 TTAAAGTGTGAGACTGCACACTATGAGATGCTGACAAAGTAAATAAGACATGGATTCTGC

A\_14\_P111451 ACTTCAGATCAGCAGTTTCCAATTTTGTGTTTCAGCAGGGTCTCTGAGAC

A\_14\_P111346 ATACTACTGGAATTACTTTCTAACCGGTCCTAATTGCAATCAAATCTATTACCCATTAC

A\_14\_P100126 TGGTTTGATAGTGTTTTTTAAAAGTAATATATAATGTGGGGTGAAATGGGAGTAGGGGGGT

A\_16\_P15671202

ACAGAACTATCCATTTTAGAATCAGAAACCAACATCCACTACATTA AAAACAGAAAAAGCC

A\_16\_P02401094

TTTCCCCCAAAAATCTTTTTTCTAGGACAGAAAATCTCTAACTACCTCAAGTGGCATAA

A\_16\_P17858383

AAAAAACAGCAAGATTTTGTGAGAGTAAAGTACTCAAGGTATGTCTATCTCACCAGATG

A\_16\_P36680645

TTTCAGAGAACAACCAATTTTTATCCACTTCACCAGATTTTAAATGAGCAGTTTCTCC

A\_16\_P17245787

AGTGTGTAATTTGCCGATTTCTATCTATCCACTTCACAATGTCTCTAACCTCAATGAACA

A\_14\_P129366 TTATTTGTTTGGCAAGTCGCTCATGGAAACCATTAGTGTCCATCAGTCATCAGAA

A\_14\_P201064 TGACCTACTGAATTTGCAGAGGCAGAAATTTTACAAGAATAGTAACACTAGGGTGAAATT

A\_16\_P00685595 AAACAAGAGGATGGAGAGAAAAGTTGTTTAAAGGTTAGGGGCTTAACCAAG

A\_14\_P201515 GTAAAGTTTTACCTAGTGCCCCACATTCTATTTCTGTTTTCTGAATCCAATTTAACTTA

A\_14\_P105992 GATGATAAACAGGACTTTTTCCCTTGTGTTGAACATTTATAAAGAGCGTGCTTGAACCTTT

A\_14\_P132976 CATTTTCAGACGAGTCCATAAGTGAACAATTTTATGATCGGTCACCTGGTAAGTGATTTCT

A\_14\_P105542 ATTCATTCTTCAATAAATAAAACACTTTGAAACTCCGGAGGACCACATCTTTCAAGACTT

A\_14\_P131374 AAGAATGCTGACGTGAGTTATGAAGAATAGAGAGTATTTGATGTATGTGGAGGCTCATT



CUST\_7717\_P1426210822 GGTCTTAGAGGAACACAAATTGCCAGACTGACAGTCAGATATGGAGACA  
A\_16\_P02203680

ACACCCTGAACATTAATAAACATGTATCCAATGCTCAAATCCCCTTTTGCATATGTATACGG  
A\_14\_P137352 AAAGAGGAAGAGAAGAAGCGGGAAAGTCATAAACAATCTTTGCTTAAGGTATTTTCTCTG  
CUST\_234\_P1426210822 GTCCCAGCCCAGAGCGTGGGGGGAGAGCCGCTAGAGTTGTCTCCT

A\_14\_P107723 GAGTCACTGCAAAAGAAAACCAAGATTGCACTGGAACATCCCATGTTAACAGATA  
A\_16\_P17266118

AGTGGTTCATAATTGTAGGATATAACACTAATGGGAGTATTAAGCAGTTGAAGCCTTTGT  
A\_14\_P106586 CTGGTTTTCTTCTGAGCCATTAGACCCAATCGATTCTGTGTTCCCAACT  
A\_14\_P118638 TTAATTTTACCTGTAGAATAATCCTGTGGGTCAAGTATTCCTGATTCTGTAGTGAC  
A\_14\_P126293

TCTTTCTACTGATAATTCTAAGGGAAGGATGAGAAGAGAAGAGAGAAGGAAGAAAAGTTGT  
A\_16\_P41162758

GCTTACTGATCTTTTTTTTTAAATCTGTGATGGTCAATCAATATTTCTCTCTCAGAAGGC  
A\_14\_P104282 AACTGTTTCAGCAACATCCCTTGTTCATCTGGGCTTCCATCATCTATGATTATAATTT  
A\_16\_P00056403

GCTGTTTCATGTTAGTCTTTGAAGTTAATGTGTATTTCCCTAATACCCACATCAGTCCTTCG  
A\_14\_P134736 AATTATACTAGTAACATTTTAAAAATTAACATCTTTGTATTTCAGCAGTCCTGGGTCAGGA  
A\_14\_P101250 TTTCCAGACCAAAGAACATGGAAGAATTCTCAGGTGAATACTATGTCATTAACCTTTAGG  
A\_18\_P13237615

AAATACTTGATCAATGGGTGCTAACATAATTAGGTCCCTAACAAAATTGCAGGCAAACTCT  
CUST\_336\_P1426210822 GGGTTGGTTGATTGACTTGGTAACTGATTGTTGGTCGTTACTCCTAAG  
CUST\_2056\_P1426210822 TTTCAAAGGATGCCTTTAGATTTATCCCTATGTCCAGAGTCACATAGACAGGAG  
A\_16\_P19195579

ACCCAGACAAACTATTCATTTCAACTACTCCAGAGAAAATCAAAGTCCATCTATCACATC  
A\_14\_P117488 TTCTTGTCTTTTCCACAACCTTCATAAAGGCTGCAATACATTCATTTCTTCAAACCTGACA  
A\_18\_P18859561

GCTGTGGATATCAGTTTTGCAATGAGTATTGAGAACACTAACCTAGCATAATGTTTGCCA  
CUST\_3999\_P1426210822 AGAGTGCCGCAAGGAGGAGGAGTCCCAGATCACTGGTTGACCTTC  
A\_14\_P122385 GTATTCTCTTACTACTGTAGCCTCAACTAAGGCAATTCTGCTATGTTTGTCTTCACTA  
A\_14\_P104304 GTAGTAAGCAAGGTGAAGAAGATTACAGACCACTGTTTGAAAATTTTGTTCAGACCTTC  
CUST\_5885\_P1426210822 GTTGTAAGGACAACCAGAGTGATAGCTGGCATGAGAAAGCCAGGG  
CUST\_9695\_P1426210822 GTAAGGAATGCTTATCCTGGAGGGCTGGGAGTGATCCAGTGTCAT  
A\_14\_P114965 CATTTGATGTGGATAATACAAATTTTACTCGCGAAATGCTACTCAGGGTCTCACTTTTGA  
A\_14\_P115507 CCAACTAGGAAAATGGAGAAATTAGCACATATTTTCAGAGGTCACAAAGTTCTGGAAATAC  
A\_14\_P102025 ATCCATTTACTCAATAGATATCCCCATGAGGCAGACCTTTCAAATATCCCTACATATT  
A\_14\_P123863 TTTATAGAACTTCTAGAAAGTTGCAAACCAAAAAACATGAATGTCATCATGTCATCTC  
CUST\_9471\_P1426210822 CTGAATGAGTGAGGGGTTGGGCATTCCTACTCAGTGAGGAGAAT

A\_18\_P14135985 AATCTCTTTCCTGCCAGAGCAGTCCTTTGTCCACATGGGTTTCTG

A\_16\_P00924138

AAGTAACCCAATAACAAGAATCACAATAGGCTAAAGAACTTCTCATAAGTCCACATGAGG

CUST\_5405\_PI426210822 AAAGAGATGTGGTCATCGAAACACTGAATGCAAAGGGTTAGCAGAGTGA

A\_16\_P19903493

ACTTTGGCTTTTGGTCTAATGGTTCTGCAAATAAGGTCTTAATGACGATATTTTACCAC

A\_16\_P01162599

GAACTACTATGCCCATAGCATTATTACAGTTTGCCCATATAAAGAGTTTTTGTGGCCC

A\_14\_P121083 CTTACAGTGGGTTCTCCTTCCAACACATTAAATTCCAAAACATGCATTCTGAAATGTAAA

A\_14\_P104539 TTCCCGATAATCAGGCTTAAAGGGGATGGTAACTGGAGAATTTTGATAITCTCAATATAA

CUST\_6040\_PI426210822 TCAGTTATATGGGATTTATCCAGACCTTTGGATGTTCACTCTTCAGAGCCAG

A\_14\_P106561 GCCTGAAAAGTGAATGATATAGGTATGTCTGTGTGCATAGGAGATTTAACTATGGTCACA

A\_14\_P114416 ACACTTTCCTGGATAACTCTAACCCCTCATGAAAAATTGGTTAGCATCAATCTTTTTGTCA

A\_14\_P102416 GAAAGATAAGAGTGGCAGAAGAAAAAAAAAATCCCGGTTAGGAGAAAAGTGGTG

A\_14\_P103652 TTCAGGAGGAAGAAATATGGGCTGTATTAATCAAAGTGCTGAAAGTCTCCAAGAATTAT

A\_14\_P117146 TAAGGACTTTTAAAGTATGTTGGTAAACTCAAATATCTTCCAAGTCCATCACCCATCTC

CUST\_5518\_PI426210822 TATGAAGAAGGGTTAGAGTTGACTTTTTACCATTGTCCCCACCCC

CUST\_2025\_PI426210822 CTGGGGAGGTCCGGTTAATTCCTATTGCCTTCGAGTAATTAACAATCTG

A\_14\_P110499 AGCAGAACATAACATTCCAGTTGTCGTTTCAAAAATCTCCAAGGAACAAAGAGGTAATAT

A\_16\_P58424107 AATATCAGCCATTCCTCCCTCCCTGCTGTCTCCACATCGGTTCA

CUST\_97\_PI426210822

GCTGTGTCAATCATTTAGACAACGATTATCTGGTATGTGAATGATCCAAACCCTTTTTTAT

A\_16\_P15482160

AATACCATTTTTACCCAATCTACATTTTGACAGATTCCAAGAAACACGATAGGTGAGTCC

A\_16\_P38922249

AGTAAGATTTGTATCAGGGCCTATTACCAATCTAATACCAACTGCAACCTAATAACCCTC

A\_16\_P38811993

TCTCAGACCCAATAAGAAGTTTAGCAACAAATGTCTCCTAATTTTCATGATCTCCATGTG

A\_16\_P15883343

TGCTACCTGAAAGTATCCATTGAGTTAAATCTAAAAAGTCTCAATTGACCTACAGAGCAA

A\_16\_P38222886

CAACTCTTCCTCATCTAAAAAGTGTCCAGAGAATATCCTCAACTACACCAAACCTATTTGA

A\_16\_P35121872

CCAAAATCACCAAATATCTAACTTTAGCACCAAATTAATTTGATAGCAAAAATCCAACCC

A\_16\_P02778198

GAATGCATGCATTAGACCAGTAGTTACAGAGAATTCATCCAAACATTATGAGTAGCAGGT

A\_14\_P127675

TCAATTTGGAGCAAAGATAAATCAACATTCTGAAACAAGCCTGAAGAGAGAGGAGATAAG

A\_14\_P113831 CTTCTTCTTACCATTCTACAGGTAAAAAGTATAGTCTAGCCAGCCAATGACACTGAAGAT  
A\_14\_P120724 CGCCAAATACAGATCAAGCAATGTAAATACGCTTTCTGGCTGATTTAAAATCACTCTGAA  
A\_14\_P114541 TACTACTGAAAATATAGAGTGTATGAAGGATTTCTCCAATTACATGATTCTAAATTGTC  
A\_14\_P123117 CTTGAAATTTATTAAGCGCATGTTCTGCTTCTACAGATGACTTTTTGTTCACTCACTCT  
A\_18\_P14138600 AATTTCAAGGGTCTCTGTGCTTATTTGTTTCTGAATTGACCCAGTGAGGTAGT  
A\_14\_P116744 GTTGACCTGGGATTCTCTACGAAATTCAGTAGGAGAGAAGATCCTGTC  
A\_14\_P134898 TTCAGTTCACAATGTTAAACCGGAATGCCTAGAAGCATACAACAAAATTTGGTGTGTATA  
A\_16\_P21423014

TACTGCCAATCTTACTCTTCCAATTCTACTCCTAATCTTTTCTCCTAAATGCTTGAATCC  
CUST\_5333\_P1426210822 ATCCTGGGGTGTGTGCTTTGCTCCCAGAGGGACATGAGTATCAAA  
A\_14\_P138110 CTTTACAATCAGTTTCATGATCAGAAAATAGAGCAAAAATTTCAATATTGTTTTCTTTATA  
A\_14\_P106694 ATGGCAACATCATTCTTCTTTAAGATCATCTGCTGTTTATTTCTGAAGGGTTTTCCAGA  
A\_14\_P126319 AATGACTTCAGCAAAGATGAATGCTCTCCAGTTGTTTAAATAGATGGGTAAACACTTGTT  
A\_16\_P21244853

TTCTTGCCACATTACCTATGTCACCATCTCTAGTCTCTTCCGTTCTAATCACATTTAAAA  
A\_14\_P117251 ACAATTTGGAGAATAATGATGACTTTATGGCTAGAAGGATTTACAGTTTTTTGGCGTTCT  
A\_16\_P19202447

CCTTCTTACCTTAAGGTTTTTCATACATCGTCTTACCTTCACTTAGATAACTCTCACCCTA  
A\_16\_P21543384

AAGTCTACATTCAAGTCTACACAGGTTTATGATTCTTACCTTGAAGAGTATGGGTCAAGC  
A\_14\_P123696 ATGAATGCTAAGGGAGTTATCCTCAATGCATTTGAACGTTATCGCCTTAAAACATGTATT  
A\_16\_P16623016

TCTCCCTGCTTACTGATTGTATACAAGTTGAATCACAGCCTTAAAAAATCAACCACATCT  
A\_14\_P135711 ACTATCTTGTCAAGATATGAGGGGAAGATGGAGACACTTGGAGAAAATGAGTATTTTAGG  
A\_14\_P125376 GTCTTGTATTTTAGCCTCTGGAAAGGGGTGAAGACATCAGGAAAGGTAATATCTCT  
A\_14\_P137372 TCTTTCAGAAATGTTTGACCTAGAAACAAATGAACATGTCAAGAAGGCCATAAATGACCG  
A\_14\_P113410 TCCTCCATTCTTGCTTCATGAAATGAGCAGTTTTAAAGTTGTAGAAGTATCAGCATCGAA  
A\_14\_P122010 CTTACCAGGCCCTATAGGCATTAATTGTTTCTGTAAAGGCAAGGATAAGTGAATAGTTCAG  
A\_16\_P00958212

AAAAGCCCTCACATATGTATCATGCTATTCATCACCTCCATGTTTTCTTGTCTGTTTTTCT  
A\_14\_P123214 CTCACACTTTAGGGGATCATTTTTCTTCTCCGTAAAAGAATTGGAGATGACTAGGTATTT  
A\_18\_P14131768 AAGAATGTGCTGGAAGTGGTAGGGGGAGAGCACAGACCCCAAAGT  
A\_14\_P202321 GATCAGTAAGTTTGATTTGGGAACAAAACCCTGGAGACTCTATAGGTAGGTGACT  
A\_16\_P19160099

AGTCTGCAAAAGTCTATGGCTTAACATCAACAAGATTTCAAACCGAAGTGTCTTTTGATG  
A\_16\_P41017399

CTTTGTTCTGTCCACATAACATACATTGTTTTCTCAACCTACTCTATAATCCCAGAGGC  
A\_14\_P105313 CTGCTTTCCTGTTAATACGCCATTCCTAGAAGAAAAGGTTAGAACCAGTTCTGAAGA

A\_16\_P03034674

CCCCTGACATTCTAAACCTATCTTGGGAATTCTCATAATATTCAACATAGCACAGAATCC

A\_14\_P132501 ATCTACCCCAACACTTCAGCAAAAACAAGATGAAGCAAATATGCAAAACAGTAACAATCA

A\_14\_P133166 GGCATGAAATAAATTAGGATCTTGTAAAATTTCTTGCCTCCATGTCAATTTCCGTTCAAGT

A\_14\_P103201 GAATCCCATATGCTGAACCACCAGAACAGCAGGAACTCTTCTGACTTTT

A\_16\_P15344585

AAAAACAGTTTTTAAGATGTGATTAAACCCCTGACATCAAACCATTTCATCATTCCAACAGGA

A\_16\_P00685157 AAAGATGTGAAATGTGCTGTTGGAGCAGGCCCTAATCAGAACTAGCAG

CUST\_1571\_PI426210822 AGATATAAACTGCCAAGTCTGCTTTCAGACACAGGGAGTGTGCGATG

A\_16\_P01265156 CCCATCTCTTCTCAATAATTATCCCTCTCTACTCTAATATTTTAAATACACCTTGCCAC

A\_14\_P122957 GAACTACCTTGAGTATTCTACTCAAACCTTATGTCTCAGAGTTCCCAATTTCCAAGAA

A\_14\_P104934 AAACATGTTTTTTTCAAAAAATCCAAATTTACTCCAGTTTTTTGGCACATCAGCCCTAGG

A\_16\_P01041706

TCCAAGGCTCTGCATAAAATATCCCTTTCTCACTTTAACGATTACAGTAGACTGAACCAT

A\_14\_P132214 ACTAAATCTCACACACAAGCATCAGTGTATTAATCTTTTCCAAAAAGGACTCCAACCTCC

CUST\_8588\_PI426210822 CTGAAGCAGAAACAGATTATAGGCATGGAGGGAAGGCTCATCTGTCAT

A\_14\_P106960 GACAAATTTGCCACGCTCACATCCTGAACAATACATTTTGTGAAAAACATTTCGTAATTT

A\_14\_P118167 CTGAAAAATCATCTACTTCTTTGTTTGTGGATTTGAGAGAAGATTGGGATGGTCTTAAGT

A\_16\_P01783483

ACTCTCTGTGTCCTAAAAATCAAGTGTGAGTTTATCATTAGTTTTTCTCAATAATCCCC

A\_14\_P116751 CTGTTAGTAATCGACTTTCAGACTGATCAAAAGCACAAGCAAATATTCCTGATTCACTGT

A\_14\_P126438 AAGAGAGAAGAAGATCTGTTTTCCGTGAACAATCTCCCAAATAAAAAGAAAATTCACATT

A\_14\_P126395 CTTTACAATGCTGTGACTTGTGACTCTTCAGAAGGGTAGACTATAGTGTGTGTGAAGTTT

A\_14\_P106128 GGTGTCATAAAAACCTTCATCAAATCCCTATCTCATTTCATTTCTTAGGCATTTTCTCTC

A\_14\_P133232 CCATCTTCTTGATCTGTCTTCTAATCAATATGTAGGCATTGAGATACCCTTGTGCTAAA

A\_14\_P120339 CTAAAACCTCTCTGGCTTTTTCTGTGGAAAACACAAAACCTAGAAATCCACAATGC

A\_14\_P130668 CTTGGGGTTGCAAATTCAGTGCATGAGTGAACTCAAATACAGTCAAATTAACCTTGAA

A\_14\_P113690 CCTAACATAATGTGGGAGCAATTGCACCTCAACTTTAGGTAAACAATCCTATTTCTTTA

A\_14\_P118485 CTTCTTACTTCATTCTATCTGATCTGAGCACCTTGAGTGGAATGTGGTATGGAATATGTA

A\_14\_P137680 AAAATAGCCCTGCAAAAATTCAGAGTCCTTGCAAAAATTGTCTAAAATGTCAGTGTGGG

A\_18\_P22841090 AACTCTTCTCTGCCTCTTGCCTCTTCCCATGGAGAGATGGTTT

A\_14\_P120944

CCAATTACCTCTAGAGGAAGAATGAGAAATACTGACAATTAAGTGCCACAAAAAGAGG

A\_16\_P00685616 GAATGAAGATGATGGGGTGTCTCCTTTTGAAGAAAGACACCCCC

A\_14\_P125790 TAATATTTGCTTGACTGACTGTTGCACTGAGTTTTTTCCCTATTGGAGTGGAAAAAGTTT

A\_14\_P125356 CAGTTCCTTCCAGATAAGTCATAACCACCACTATCGGATCAATCATTGCTATAGTTCTA

A\_14\_P139429 TGGAGTCTTATAAAATCTTTATAACTCTGAGTCAGGTTGGATCTGGGTCAATACCGAATT

A\_14\_P105084 CTGGCTGATTTTAACTAGGCTTTTTAAAAAATTGGTGCCAAATTCATCAGTGCCTATCT

A\_16\_P19746325

AAAAAACTTACATTTTCTTCTATTACCTAAATCAACCTTAACTCTCCTACTTAAACAGCA

A\_14\_P132038 TCTGAGGACTCAGAAAACATGATTATGTCCCTTTTCTCTTGTATTCTCGTAAATGTC

A\_14\_P117798 CTTTGGATAGGAAGGAAACTTGAAGAAATGATGACAACCTGGAAGAACATTTCCACATTAT  
CUST\_9020\_PI426210822

CTGGTGGAGGGAGAAATTTGTAGACAAGATTTATAATCTCATTAGGAGCTGTGCTC

A\_14\_P111383 TAATCCACAGGAGGATAGATTTGGGCAAATTTTCATCATAAAAAGTGATTCAACTCCACTAG

A\_14\_P101006 TTACCCAAGGATAAAAATTCAGGATTTCTTAAAGGATAGCCAATTGCAGTTTGAGGCTGTA

A\_14\_P128978 CTGTGTAGGGCTATCCATTTGACCAAGGATCACTATCATTTCATTGTCTATAAAATTCCTT

A\_16\_P02046045

TGTGGAATGCTTAGAGTTAAGTTGCTTCTTGTCTATATACTATGCTTAATCCTCCACCC

A\_16\_P19005355

ATCAACATAAGTCCTGATCCCATGATAAGAAAAAGCACATGTAACCTCACACATCAATTGG

A\_14\_P134345 TTAGGTGAATTGCAAAGAAGTGCCAGAATTTTGTCAATCTAGATCTCACCTTTTGACATT

A\_16\_P02038037

AGACAACTGCAACAAAGATAAAAATAAGTAACTGGAGAACTGTCATTGTAAGAGAACCGA

A\_16\_P20308013

TTAAAAACAATCCCTGACCTCAACTAATTTCTGCATTAATGCAATAGGAACTTCAGGCTG

A\_16\_P00685161 ATTGATGTCATTAAGCCGGAGCCTTCCCTAATGCCTGACTTCACTTACTTAAATG

A\_16\_P17988251

AAGTAAAAACAACGTCAGTTACATCATTTACATTTGGTATCCACCTAATAGAGACACA

A\_14\_P108710 ACAGGAGGCAGAATTCTTTTTTCTGTTGCCAGGACATGAGACAAGTAG

A\_14\_P108028 AGGTTTTGTAAAGTGTGAACTCCAATAAACACAGTTCCACTTTCCTTAACTTCTCAGAAA

A\_14\_P112285 AAAGATACCACAATAAAATGTGCTCACCAGTGCAAATTCCTTGTTGAGAATCATCTGCT

A\_14\_P125428 TCTCTAAAACCTGCATTTGCCCTCTATCAATTGTTTCTTTAGTTGAACCTGATAATACC

A\_18\_P17844175

GAGCACAGGCAAATTCTAGAAGGCTTTATTAGTGATAAAGTCATAACTGCTTCCATGTCAC

A\_14\_P100743 TTTTCTTACCTGCTTCTAAGTAACTCTACCCCTCATTTCAGACCAGCCT

A\_14\_P131763 TTCAAGGGCAGGGAAAAGGGAGTAAAAGGTGATTTTTGTCGTATGTGATAGAATATTTT

A\_14\_P129379 CTTGTGGGTTTTAAGTTTGGAGTTTGATGAACCTTTAAGTTTGGAGAGATAAACCTTTGA

CUST\_6111\_PI426210822

AAAGACACAGCAGGATATCTGTAAAGCCAGAATCATCTGGTGGCAACATATAATTGT

A\_16\_P00002518

GTGCTTGCATTTAGAAAAATTAGGCCCTCTTGAAAAATTACAGAATTATGCTGCCAGTGT

A\_16\_P17732633

TTTTTCTAACCAGCCTTTTACTCATTCTCTTTAGTGCATGTCATTCCTTCACTCTTAAACC

CUST\_8492\_PI426210822 AGATGTTTCATGTCCAGGAAATGGTGGTGGAGTTCTCCATTTGTTTTCACTATTG

A\_16\_P41826564

ACCAGTTTATTGAATTGCCTGTAATACTTCTATCTCAACTCTGATCAATCTGCTTACCAA  
A\_14\_P129651 GATTACTGTTGTTCTTCACCTCCAGTGGTTGCTCATAATCACTGAAACCAACAGAAATA  
A\_14\_P201178 GCCATCCCAAATGTGAGACTGCAAGGTAAGAATAAATTGTAAATTATGAAGCACACAAA  
CUST\_2736\_PI426210822 GGAGATGGTCCATGGCAGGGAGGAGAGTATGGCTATTTATTGAGT  
A\_18\_P14134584  
AAATGTGACTTCTCTGGAATTACAACCTGAGTGACCTGGGATTATTGACACATTACAACAT  
CUST\_7679\_PI426210822 CCTGCTGGATTGACTACATGAGCCTCTTTCAGAAGTTTGACTAGCAAATCA  
A\_14\_P128461 ACCTAGTTTCCCTTCTGAAAAGGTAAATAATCCTTCTGGCCTGATTTACCAATAAAGAT  
A\_16\_P00120695  
ATATGAAGCACATAACTATGGTCTTCCATCTTCTATCCACAAAAGTAATACTCACAGGGC  
A\_18\_P22843395 AACCCAGAGCAGTATCTCATTTCGGCTCACATTTCTCGAACGCTTACTTT  
A\_14\_P130846 TGATGTTCTTTCCTTCTAAAACCTTCACATTTCTGTATGGTTTTGGAACATAGACACAGA  
A\_16\_P00029215  
ATGCCCATGGTAATCAGAATACATTGTAACCAACTATCAATTGTGAATTGGTCAGACAAC  
A\_14\_P129608 TTTACCAGTCAAGGTCAAGGTCAGCATCTGTGGTTAAAAATATAGCATTCTGACCTAAAA  
A\_14\_P200108 TCTATTTGGTATCAAGAACTTGTGACATTCATTAACACTCCCATGCTAAAACACCACTC  
CUST\_2776\_PI426210822 CAAACACGTTCCAGGAGAGATTGGTAATGAGCCACCAAGTCAGGG  
A\_14\_P110196 ATTTTTACATATGAAGTGGTTGTCAATTGTTTCTAAATTAGGCATTTGGTGACCACGTG  
CUST\_9885\_PI426210822 AAGGGGCTGGACCAGTGGGCTTCAGCGATCAGTGAGGCTTCTTGA  
A\_16\_P18329296  
AAAAAATCTTGCTCAATTTTTAACAGAGAAGCCTTGTCTATTACTCCAAAAGCAGGTCT  
CUST\_5719\_PI426210822 ATGTGTGGGGTGAGAGGTGTTTAAACACACCCGGTGGACAGTGTC  
A\_14\_P200547 GTAGCCTAGGGTCCCCTTCTTCTTAACTTTGATGTCTCCAGCAAG  
CUST\_1067\_PI426210822 TTCATAAAGCAACAGCTGGACAGAAACCTGACACTCTGAACTTTTCAGCATT  
A\_18\_P14138884  
CTTAGGTCATATATTCTCACCGGGCGCTTGTCTTCTCCACTGCAAAAAATAATTCGTATTT  
CUST\_1625\_PI426210822 ATTTGGACCAGCTGGGCTGGCGTTCACGCCTGCTGTAGAAGCCTA  
CUST\_8323\_PI426210822 AGCCAGATGACCCCATGAGGACCCCTTCTGTTCTCCATCATTC  
A\_16\_P15883074  
AAACCTGGGGGCTATTTTTATTTTCTATGGACAGTAATACCTCTTTATAACAGTGCTGAG  
A\_16\_P39185766  
AATAAGTAACCAAGTTCATCATACTCATCCTGTCTAAATACATTGTTTCAGATACTGCCT  
A\_14\_P139240 GAGAAACCTATGTTAAGGCAATACCCTAGGAAGTTATGTTTAAGACCATATGACCCTAGA  
A\_16\_P19938401  
CAATCTTGACGCAGTATAACTAAAATACAAGGAACGTTTTCAACATCATTAGATGCCCA  
A\_14\_P114073 AAACCTCAATGATTGCAAAGCAAATTGCAAAGTAAAGGACCCCTCAAATTCTAAGACTC  
A\_14\_P129408 CCTAAGATTCCAGAAGAAAATGGGTTACCTTTTGTGATGCTGAATTCTCTCTTCTCAA  
A\_14\_P133196 CTAGGGAGATAACCACAGATATTCACCGGTGATAGATTTGACATCTTTATTTTGCGAAAG

CUST\_5828\_PI426210822 AATCAGGCTGAGGCCTTTTTTTAAAGGCCCAAGCTGGAGCTATTG

A\_18\_P22841378 CTTTTAACTTACGGGTCACCTGGTTATTGCCTGTGAGGCTCACTGAG

A\_14\_P109232 GTCCACTCATCACATAATCACATGGCACTTGATGTTTTAAATGTCTTTTCATGCCAAATT

A\_14\_P132190 GTGTTTTGTAATGCTCACAGATCTAGAATATTAGAGTCATTTTTTTTTCCAGGCCGGAGA

CUST\_8359\_PI426210822 ATAACACATGTCCCAGCTCACAGAGGATGTGCCTTCTGACCAAC

A\_16\_P39105099

AAAACCCTCATGAAACCTGTTTTCCCTAAATTTTTGTGCTGATTTTAAAACACACACAGCA

A\_14\_P124369 TCACTACCTGCTGACAAGCATTTTATGAAATGCACTTCTACAAATGGAACCTTGATTAACC

A\_14\_P132330 CCAGGTGTGGATTTTTATTTTCACAAAAAGACAACAATGTCTTCCCACATACAAGTATT

A\_14\_P125148

AATAATAGTGCACGTAGAGATAAAGTGCAAGTAGAGAGTTGAATTGAAAAGCCAAGAGGT

A\_14\_P126082 TATTGCTTCTAAAACCTCAGGACTTCAGATGCACAGTCTAGCCTGAATCCTACTT

A\_16\_P02583857

TGGCAACATGTCGTATTCATATTCCGCCTCTATAAGATACAAAGACCAACTATTGGATAG

A\_14\_P136859 TATTTTAAAACGTAACACTCACTGCCAAGATTTTCTAATAACTGTCACCTGAACCAAGCC

A\_18\_P14133809 AGATTTGATCTCAGTAACACCCTGACCTTTTCAGACTCCATACCACTTTTCACA

CUST\_6699\_PI426210822 GTAGGATTCTGACAGGACCCAGTGGCTAGTGAGGGGCACCAGGAG

CUST\_5677\_PI426210822 CACTACAGCTCCTCCCACCCACACCCCTCAATGCATGCATATAG

A\_14\_P120166 GTCGGTCCATAGAGCATTAGAAAGCAATTGACTCTTAAATAAACAGAAAAGTGCCTAATG

A\_14\_P127067 CTTCTGATATTCATGCAGACAATTTAGTTTTAACGGTGGGGGCATCTACCAGTAATTTAT

A\_14\_P115994 TCTAATGAGTTCTTTGTTCTGTTCTGCTGCCTTTTACGTTTTCTTGTCTTTCAAAAAGTG

A\_16\_P00685629

AGAGCAGTATTTATTAATTTATTCACAGATGGCTAAGATCTCTCAAGATACTAGGTTTA

A\_16\_P03212675

AAATGTAACCTTGACCTTGAGATAAGATGAAGGGAATTACAGTATACCCCTCTCCATAACC

A\_14\_P129592 TTTCTTGCTTGGATTAAACATTGAGGCATTGTCTTAATTGGTGCATCAATCAGCCATATT

A\_14\_P139215 CCAGATTCATCTCCCAAGGGAGATATGGGTAAATGCTGTTTTCTTTTTTATTAATGTT

A\_14\_P138079 ACCTTCTAGGCTACGATGAATGTAAGAGCATCACAGTAAATAGAATGCATTTCCGGATAT

A\_14\_P127379 GTTGTTATTAACACTAAAAATTAGGCAGAGACTGGAGGGGATAAGGATAAGAGAACAGG

A\_14\_P107874 AACATAAATAGAATGCTCAGGAACTTCATAAGGCAGACCACTTGTCTTCTTCATAGAT

A\_18\_P21988089

AGCACATGGAATAACTACCACACCCTATGTATTAATATTGATGATGAAAAAGGAGCACTA

A\_16\_P20043441

AGTCCTGGAATATATGCAGAACCATGTCTAACTTCATGTTATTACAACCTCTAGGGGTAGA

A\_14\_P117200 TTTTATTACGGCAACAAATTGAATCCAAAGAACATCAGGATCAATTTCTACCCAGCCAAT

A\_14\_P133198 ATAACAGTTATTTATAGACATGGCCTTCCCTTGGTAAACTTACCTTGCCATCTAGAAAA

A\_16\_P19966407

AAAACACTAAGGTTTACCCTCACTTCAGATCATCTTCATGATTTGCTGTTGTTCTTAACC

A\_14\_P122879 TCAGACAGTGGATATTTGGTATAGAGGTGAAGGAACCTACTTGTCAACAATTATTTGAGT  
A\_14\_P201681 AAAAAATAATCTGGCAAGTATATTCTAAGGTTGCCAAACACTTCAACAGTTGGTGGTTGA  
A\_14\_P126619 GCCACTAACATTAATAATGCAATGATATGCCATGGCAAGCATATTGTAAAGACGTGTTTC  
A\_14\_P136381 CTCTATTTCCCAAAAAGAATAAATGGTGATAAAAAGACTGTGTTCTGAGATCATGGAGATC  
A\_14\_P132853 AAAATGTTAATGGAAAAAGCATGGGTTCAAAATTGGACTACACCCATTACTAACCCTAC  
A\_14\_P129602 ATTTATAAAATTTTCACCCACCAGAATTTTGAACCAGCAATTTTGCAGATGTCCTTCACT  
CUST\_3249\_PI426210822 GCCTTTTGTGAGATCAAATACCTATGCATGACAGGCAAATAAGCAGGCTCTT  
A\_14\_P138287  
GGAAATAAAAGAGAACAAATGTAATTTTCCTGAGGTGACTAGGGAGTCTTAACGAGAAGA  
A\_14\_P115744 CAAATGTCAAAATGCTAATAGTCTGTTCCTTGTGGAAAAATGTTGAGTTTTCAATCGGGA  
A\_18\_P13396480  
TCTAACTATAAAATAGATAGCCTTTCTTTGTTTTCACTTTCCTATCATTAGCACCGTGT  
A\_16\_P01092580  
CCCTTCTTCTAATTCATGTATCCTCTTACGTAATTCAACTGCCAATAATTGAGAGCATCG  
A\_14\_P130200 GCTTTGTTGAATGTGGTATTTTTTACTTTTGTCTTTGTTCCGGAACCTTCAATCTGCTAGAT  
A\_16\_P17940668  
CCTCCAATTCTGAAAATTGCATCTCATCTTTTCTAAAACAAATGCCTTCACTTAAGAGCA  
A\_14\_P115623 TCAGTCCTCTCATTTTCAGACTACACTCCTTGTGGATCTTTCTTAATCTAAAAGTGAAGAT  
A\_14\_P127771 CCTATTTTTGTGCTTAAGATACTGAATGGAAAACCTCCATTGTGTGTTGCTGGACTGTTTT  
A\_14\_P136659 TACAGGCAAGGCAATTCAGAATTGAGTCATTTGTCTCTGAAATACTTTCTGGATTAAGTG  
A\_14\_P121569 CTCCATCAAGCATATTTATTGAACAACTGACTACACATCTACTGTGTTCTCTGAGACCA  
A\_14\_P125739 GACCTCAGCCACATAAATCCTTGGTGTAACCCTTTTATGCTGCCATTTAATTCTAAATA  
A\_16\_P01690770  
ATTTAAAAAAAATCCGTTGCACAGACTGAATGATAAAGCCTTCTGGCTTGAGGAAATTG  
A\_14\_P129665 CTCAAGAACAGGAAATGAAGCAGAAGTCAGAATTTTATCAGGTATTGCAATGCTCTTTGT  
A\_16\_P00203709  
CACATTCAGTCAAGTGTGCAATCAAATAACCATTACAACCAAGTTAACCTAGCATGCAT  
CUST\_9744\_PI426210822 ATTTTGGAAACATGACACCTGGCAGGCATGGGGCATGTTTGACAT  
A\_14\_P122661 ATTTTAAGTAAGCCTGTCTGTTTCAGACATACTAAGTGGTTTTCCATTTCCAACCTTGTTT  
A\_16\_P02634800  
AAACACATAGACAATGGGTTATGCAAGTTTAGAGGAGGTAAAAATTCTACTGAGAAGGCT  
A\_18\_P14134221  
TCTGCTTCACTCTGTATTTGATTTGCATTGTATTGTAGTCAGATAATCAGATGTCTGCAC  
A\_14\_P121864 TCCCAACCTTTCAAAGGAGGTTGATCTAGTATTTGGAGTAGAGATAGATTTTTCTCAGAA  
A\_14\_P125157 GAAAGTTCTTCACTACTACAGCATGAGTCCAGGAGCAATGAGGAGGTCTTTAC  
CUST\_2370\_PI426210822 CTCTTGTGGTTAGCGTGGAGCGTCTTTAGTGGGAAGCAGGGATAG  
A\_16\_P02226902  
TCAACTGTCATCTAGAAATTCAGAGTGCACTTTTTTACACGTTAAAGCAATAAGGTTCCCT



A\_16\_P00476010

CCATGCTGGACATTTATAGTTCAAGTGAGAGAATGCTTTAGTCCACTAACCTAGAAATGT

A\_14\_P102141 CCTTAAGTTGAACAACCTATATTGATAGTTCTCATTGTTTCAGGTAGTTCAGCAGCCTTCA

A\_14\_P101083 TCCTATCCACCTAGGACTCCCCTTCCACATAACCAATTATCATTATTTTGTATGTATTCT

A\_14\_P135947 ATTGTTCTGACCAAATTCATCTGCTAAGTGTTTATAAGCCTAAAATGAGGCCCTCATT

A\_14\_P127932 CTCATAGTGGCATGTGTGAATCTGACAAAATTAAGTGTGCATAGTCCATTACATGCAT

A\_14\_P200267 CACAGAAGAAGAACCGTAAGTGGAACACCTAATTTCTTTCTTTTCGAGTAAATTTTGAAT

A\_14\_P119280 AAAGTCTTATGACGTCGTTTTACTCTTTTCTCTCAGGAAACAATCTGGTGAAATGTGAT

A\_16\_P19180841

CCTCTAAGATTATGACCTCTAATTCTGTATCCCTGACCTAAACTCTTACTGATCTCCAAA

A\_14\_P122271 TCACAGTTTGCATTGCATGTGACCACTGTGGACCATTGACTATTAACAGAGTATTAATT

A\_14\_P135209 AAGAAGAAAAGATGTGTTTCTGCATTTCTGGAAGTCTATGCTGCATTTCCATTTGTTGAA

CUST\_9759\_PI426210822

AAATGTCATCTCACTGTCACAGATGTTATTCTCTTTCCACTTCTTATTTTATATAAATTC

A\_14\_P119288 GAACAGTTCCCATTTGGATTCAACATTTCTTCGAGTTCATCTAAAACATGCAAATAATTTT

A\_14\_P201006 ATCGGCTAGAGAGAGGGAGATCTTTTGCTTAGAAGAACAAAAACAGTTCCAGATTTT

A\_14\_P115774 CTTCCAGAAAAGTGAATAAACCACAAATGGTTGATTTATTTCTGACTCTCAGCCCGT

A\_14\_P110435 AGTCCCAGGTTTAGTCAAGTCATGTTTTCTTGACTTGTATTTAGAACTTGGAGAATTCT

CUST\_456\_PI426210822 ATGGTGTTCTCTGAAATTCCTTGCTTTCAAGGGGTTGCATGGAATTTAACA

A\_16\_P01375960

AAACTCTCACATCTGAAATGATAGATCCTTTACCAACATTGATATTATTTGGGACCAGC

A\_14\_P132143 CAAAAGAATAAGACAGGAAAGCATAGGGATTTGATTGAGTCAGGAAGACAATTTAATCAT

A\_14\_P139506 AGTATGTTTAGCAAGCACTGCTATGAAGACTGAGAATTGTGTGGCCAAAGTAAGTAATAT

A\_14\_P121081 TCATGTTTTCTAGCCTTAATCTCCATTAACAACGCCAATTTTGTGAGGGTAATGGG

A\_18\_P14132424

GGATGGAGGGGATAAAAAGATCACATGTTTGGTGAATCCTCTTTTAAAAACACTTAGAAG

A\_14\_P135972 GATATTGAATGGGTTTGGCTTATTACACAGAGTGCTTTTACAATCAGCAGACCATAAAA

A\_14\_P102515 TAATTGTTTCCATAGTGTGACATGAGTGAGTGAGTGTAACCGATGGGAACCAATATTA

A\_14\_P108023

AAGTGA CTCTGTAGAGGAAAAACCAAAAACAAAAACAAAAAGTCTCACTGATCCTTATG

A\_14\_P124922 ATACCAATATAGTTCTTTGACATGGCAACTTCTCTAACTTCAATGTGAACAGAGCCTCTT

A\_18\_P14026105

GTGCCTGCTTATGCATAACTAAATGCTCATAGGTGTTTCATATCATTGTGTGTGATCTTCT

CUST\_28\_PI426210822 GGCTGTCTCAGCTCCTGGACTCAGAATCACTATTACCTCCTCAAC

A\_14\_P116564 CTCAAAATTACAAGGCTAGCATATAACATTAATATAAGACCCAACCAATAAAGAGCCCAC

CUST\_2108\_PI426210822

AACATAACTTTGTGTCCCTCAGCTTGCATTTTTAAAAACAGCACCTCATTCTGTGG

A\_14\_P122004 TCAATATAAGTTGTGATGTGAAATCGAATCCACCAGCATCAATTCCTGGAGAAGAGATA

A\_14\_P116115 CTCCTGTTTCATCAATATGATACATTGCACTCTGACTTTTCTACTTCTGTCTTTCTTTGTGG  
A\_16\_P38587658

AAAAAAGGGCCCTATTCTTTTCAAGAAGTGAAGTATCCCACCTTCAATCATGTGACTCTAAT

A\_14\_P126832 ACTTGCTATTATTATTATCACCTCCTTTCCCATTTACCATTTACCCTAAAATCTGTAAC

A\_14\_P101859 TACACAATTTCTACTTTTGTGCCAGTAATCTATCATTAGCACTGCTTTCAGGGACAAAA

A\_14\_P128137 TATTTCTCCAGCAATGAATTCCTCATTTCACCTGCATTTCTTGGATCTCAACCTG

A\_14\_P131985 CATTATCAAGAAAGTTGTTCTGGGGCATTTTTGTATGCCCTGTCTCAAAGGTAATTTAA

CUST\_4059\_PI426210822 CAGTCCTTGGGCTCTGTTCTCTGATGTGGCACAGGTGGTCAGTG

A\_18\_P22841258

GTGTTCTGCTTTCTCTGGTGTCTCTTGTCAAGTTAATAGTAGCCTCAAGTAAAATTCAAC

A\_14\_P136003 ACGAGTTCTGTTTCTTTAGCATGTTTTACTTAGAGACATAAAAGTTGGACTTGGCAAATG

CUST\_131\_PI426210822 CAAGGAGGATGTTAGAGAGTTATGGTTGGGAAGCTTTGTCAAGGGAG

A\_14\_P128828 TATACACTTTTTCCAGGAATCCTCCTTTCAAAGGAGGAATGAAATCCATCATTCTGTATT

A\_14\_P117917 CTTTTTATTCAAAGAAAGAGGCAAATTGCACCCAATCTCTCTCCCTGTAAGATCTCATC

A\_14\_P131388 TACATCACCGCTACTCACGTTGTTGATACTAGAATCAATGTAACCCACAATATTCTTGTG

A\_14\_P129437 CATAGATAAAATGTTGCTCCAGTTAATTTTTTTCATCCTCCATTTTTGGAAATTGCCAGG

A\_14\_P109359 TGCAAGGGCTCTTTCAAGGTCTCCAGGGCTTTTTCCAATCTGATCTTATATA

A\_14\_P127734 AATCATAATTCTTGATTCAGGAAGCATTCTTGTATGCAGCATTCAAGCAAGGATGACTT

A\_14\_P138420 CTGTATCCTTGGCGAACTCTTCACTAAAAACCTATATTTCAAGCAAATCAGGAACTTGC

A\_14\_P100822 GTGATGTGACATTTCTTATCTCCTTGTGTTTCTTTTTCTGCCCTTTCAATCTTTGAATCT

A\_18\_P22842464 CAAAGGGCTGGAGGAGTGCGGTATGGGATTCAGACTTTTTATCAG

A\_16\_P19797473

AAAAGAAGAGCAGATGTTGAACTATAGGGACAGGTTAAATTTTGAAATTACAGTGCCATT

A\_16\_P20338474

CAGACGCTACAATTTCTTTGATCCACACTCCATTATTCATAAAGGCATATCAATTACTGA

A\_14\_P107760 CTACTACTGTTATTATTGTTATTGTTCTTGTGATGCGTCCAGTATCTTTCAGCCAAGGTG

A\_14\_P128287 CTCGCTATAAAATGTATGTGACCACCACAATGGAATTGCTTTGCCAGACATTTTTACTAA

CUST\_6511\_PI426210822

ATTTCAAAGAAAATTGTCAAGAGAAAAGTTAAGCACCTCAGTAGCATTGTAAAGAGATG

CUST\_6905\_PI426210822 CCCTGGTGACTTTACCTTGAACCTCCTGTATAACGCCAGGTAGAAAAG

A\_16\_P18971779

GCCTACTTCCTTCTCATTTTTTGGCTTATTAATGCTCTTTATGACCACTTATGCATCCAGC

CUST\_2111\_PI426210822 CAATCTATTTATCTTCCCCTTGATAGGACTCCAGGAATGGGGGACTTTG

A\_14\_P127239 CTTCAAGGACTATACTGAATTGGAAGAAGAAAATATCACATTGCAGAACTAGTGTCCAGC

A\_14\_P114686 CTCTCCCTATAAGGTGTTCTGCTTAGTAAGTGACTGGAATATAAATTTCTCAGAGT

A\_16\_P00459917

AGGACAGAAAATGGTGATTCTACTATAGAACATTTGCAATAAAGATAGACCTCCGTAGGC

A\_14\_P105169 TTCAAGGCTTAAAACTCCTTGGCCAGATTGGATAATGACAAAGATTTAGATCTTAGGAG

A\_16\_P20929733 TCCTCTTATCATCTATGCTGTCATCTTATCTGATCTGACCATCTTATTCAAACCTTCCTC  
A\_14\_P131075 AGCCAGGTTGATTCAATCTAGAATCTACACAGAAGGTGTAATCTCTGCCTGAGATTTA  
CUST\_333\_PI426210822 TATGTATGCTTGAATGTGTTTTTTACCCAGGCTTGGTAAACTATGGCCTTTGGA  
CUST\_2012\_PI426210822

TTAGAAAAGAAATAACTCTGTGCTACTTGTGATTTACAAAAGAGAGTTTCAAAGAGCAAG  
A\_14\_P135496 TCATCAGTAAATTGGACAGACTAGAATCTTCCTCAGGTGAGAATTGACAGGAAACTATAA  
A\_14\_P105228 AGGATTAGAAAGCACTACTTCCAGATCCTGTATTAGAAACACAAAATTGCTCATTGCTC  
A\_14\_P137948 TTCACGGACTTAACATTGAAGAAAGTATGCGGATGATAAAGCCAAGAGAGGTATATGAGA  
CUST\_4348\_PI426210822 ATATTTGGGAAGCACTGGGCTCTGCTTATGATTCTCACGTTCTGGT  
CUST\_2975\_PI426210822

CTCCAGAATGATTGCACTTGGTGAATTGGATAATGCGGTATGTCTGTGATTGTAT  
A\_14\_P117979 CAAAATTTACAACCCATACACAGACTATGTAAACCTTTAGTTGCACATACAGTAAGACC  
A\_14\_P108891 GAGTTTAACTATATTTTCAGGGAAAAAAGTGCTCATGTCAAGGAAGTACAGTCC  
A\_14\_P135041 CCATAGGCTTGTTCCTCATTACCTCTCTTATTCTTGGTCCCATACTTCTTG  
A\_14\_P125533 TTCCCGTCATTCACGTATAAAGAGTGGCTACCTTAAAGAGTCACGTTTCTTTTTTAAAGA  
A\_16\_P36986472

ACAAGTTACATATGGCTTCCAGAAATAAGGATGATGAAGATAGATAGTGAATGGTCTCCA  
A\_14\_P111546 ACTTTCTATTTTCACCCATCTAGGAATATGGCTCACAGCAAGTGGCAGACTTG  
A\_14\_P126987 ACTTAAGACAACATCATTACCATATTCCACAAGTGTGATGAGAATTCACCTTCAAAGT  
CUST\_5467\_PI426210822 GAGAGTGGCCTGTAAGTCCCACTGGCCATTGATACTTGGAAACAGG  
A\_14\_P120814 TTTCATTCCCATCTGGATTAGTGCAAGGAAATAAGACATAAAGATTCAATCCAAGAACCT  
A\_14\_P113887 CTGTGTGGATGAACAACAGTGCTTTATTGATGAGAGTTCAAAGTTCTGAGTGAGATTTTA  
A\_14\_P122255 CTGTGTCTTAAGTATATTTTGGAAAGGCAGGCTCATAATATGTAGTGACAGTAGAAAGCCT  
A\_16\_P17389363

CCCATTTCCCAATTCTATACATTTAGATAACCTGAATCAATTCCAATCGACTTCTTTTCC  
A\_14\_P126875 AGTGAAGCATTTTCTGAGTTAGCAAACGTTTTTAAATCTGGTTTCAGAGTTGTTCTGAAG  
A\_16\_P19075307

AAAATCTTTGACTGCACAGTAAACTTGTGTTTAACTGTTGTAGAACTTCGTGTCCAAA  
CUST\_8823\_PI426210822 CCAGTAGGAATATTTTGAACAAATTCCTTTAACCCATGGCAGAGGTTGCCTT  
A\_14\_P125115 AAACCCACTGATATGTCTTCAAGGGAAAAACCATAAATGTAGTGAGGATGCTATGATATG  
A\_18\_P22840324 AAAAAGAGGGACAGACCTAGAATGGCTGGCTGGGTGAAATGGCTT  
A\_14\_P100734 CTAGTCCTCATGAAAACACAAATCATAAATCCCCCACAAAAATTCATATCTCTGAAAG  
A\_14\_P116762 TTTTCTCATATTTCTCGTTTTTCTACTTTCATCCTGTCCACGATTTTGTGATTGAGAGAT  
A\_14\_P118222 CTGACTTCTCCACATGATTTTACTCGGGGAGTTTTTCTTCTCAGCATGTCATC  
A\_16\_P36551908

TGTCCAACCTCTCACTGAATAGAAAACGTAAAATAAACCAAACTCACTTTTCCCTTCCCTA  
A\_16\_P17856630

AAAAAATAAACTACCCTTAACTTTTTTCAAACCTCATATCATATGTATTTTTTCCCTGCCGCT

CUST\_9980\_PI426210822 AGATAGATTCTTAATTCTCCTTTTTCTCCAACCTCCAACCTCCTTCCTGCTGAGAC  
A\_16\_P16191641  
GTCTTATCAACTTCATGGTTTATTTCTGGGTAATTCATTTACCAGCATGCATTCAGGAG  
A\_14\_P134091 TCTCTTACCAATTATTTGGTGGTTGCTATTCCAAATAGGGACACAAAGAACAGATCTTAT  
A\_16\_P30952560  
AGAAAATATCTTCCACACAATATTTGCTTTTTTCACAAAGTCTGGAAGAAAAGTCTTGGT  
A\_18\_P14692008  
CAGTCAGCATTTTCTACCAGATACAAATGTTTCTCTCATTTACCTCTTTGTGCAGAAAGC  
A\_16\_P37017745  
ATCCACTGCTTTTACCCTATAATAGGCAAGAATTCAAAAATCCTGACAACATGAGTCATG  
A\_14\_P135545 CTTGAAATCCTCATTAAGATACTCTCGGTAAGAAGAATGCGAGATAAATTCATAACAAT  
A\_14\_P111982 AACACAGTGTGGCACAAATAAGTAACACCCATCAGTTCTTTAACTGTTCTTCATCAAAA  
A\_14\_P202165 CATGTCCTGGCTAAGACATCCCTGCATTTCTGGTGAGACTTTTGATGA  
A\_18\_P16211848  
TCTGACACACAAGAGAAATATACTCCATCCCATCAGCAATAGTGACTCATTTTTTCAGTAA  
A\_14\_P103123 CGTCCAGCACGTGAGATGAAATCATCATCCACCATATAATAAACAGTTCAAAAAGTCAC  
A\_14\_P201174 CTTCGCTTTTTACTTGATTCTTTGGCTGAAATGTTTTTCCCTCAAGTCTTGTTTCATATCT  
A\_16\_P01732620  
ATTACCAGCAAAGTATTCTCTTGTATCCAACCAGTTTAGGTCATGTTCACTCTTGTATGC  
A\_16\_P00845642  
CTGACACACCAAGTGAGTAACAAACTATTCCATGCCACTTTATTGAAGACTTGACAAATT  
CUST\_3394\_PI426210822 ACTCTGAAGACGCATGAATTGCTGACTGTTGGGCTTGCTTGGAGG  
A\_14\_P136536 GGACCAAGAATACGCTAATGAGTTGCTAATTTTGACAGGTGTGTAGAAAATGGTAGGTAG  
A\_18\_P22842096 TTAGAAGTTACAATCCCCTCGAGTTCGTGAACTGGCTGGCCACTT  
A\_14\_P100464 CAGGGACTGGCACATAAAAAGTGTCATTAATTGTTGACCACATTCAGAGACTGAAG  
A\_14\_P105614 GAATGCTCAAGCCTCACAGAAGTCAATCAAGTGCCAACTATAAATAATACTGAAAAAAG  
CUST\_2830\_PI426210822  
CTTAAGGAAAAAAGCTTTCTGATAGTTCTGGGACTCGTGTGTCTCCACATAATTA  
A\_14\_P107238 AGCCAGAGAATGTTCAATTCTATCTCAAGGACTTTGCTCTTAAAGAGATTTCTACATTTCC  
A\_14\_P122588 ACATTTTTTAAAATAATAAATCTGCCATAAAATGCATTATATCTGGAGACTTGCCTTGTA  
A\_14\_P113502 CGTAGCACAGGAACAATTTGATGACGTTTGGTCTGTCTGGTCACTGAAAAA  
A\_18\_P14637681  
ATACTTTAACCCCCTGAGTATAAATTGGTTTCGGATAAACTTAAAACAAGTCCTACTGCC  
A\_14\_P139564 GTCTGTTCTCAATGAGCACGACCGACTTTTCAATACAGGGGCTGAAT  
A\_14\_P116832 GCTTTGTTTTTGTCTCTCTCAATGTCTGGTTTTTCAGTTCTGCTGATGTCATAGTATG  
A\_16\_P02984902  
AAGAGTAGGATCTGTTAGGATTAGTCATAAGACTGTCAGTAATCCTGAAGATGGATGAGA  
A\_14\_P115190 ACAGAGTGCAAATGTTTATTTAAAATAAAGTTCTATTTATCCCTTGTGACCACTGCTGTC

A\_14\_P114986 ATCTGGGTTTTGCAGATTTTTCTTTTTTGAGTGATTAACAGATCAGCACTGAATAGCAAG  
A\_16\_P18380462

AAAAAAAAAACTTGTATGACGGAAAGACATGGAAAATACCATGACATAGCATTGGGATGC

A\_14\_P122824 TAGGATGTGACCAACTTGTAGAAGGGAAATAAATAACAGATGGCACTTTGCAATGACTTA  
A\_16\_P19668695

AAAACATTGTCTTGATACCAGAGAAAGCAATTTACCGATAGGTTTTTCAGTCATGCTTACC

A\_14\_P101907

CCCACAAGTGAGTGGAAGTTGAAATGGAAATTTAAAAGTAGAAGTGAAGAGTTTGAATCAT

CUST\_9818\_PI426210822

AATTTAAAAAATAGTAAAACGTAGAAAAGAGAAATAATATTCATAATATCAAAAAAACAC

A\_14\_P201169 TAAGACCATCAAGAATACAGTCTCTGTGAACCTAGAAGTGCACAGCAGAAGAATGGAA

A\_14\_P114007 CTTTGCCTGTGTAGGTAAAAGTAAATTGAAATTTGCCATGTTACTAGAGATCCGATGGAA

A\_14\_P119621 GTATACAACTATGTATTTTTTTTTCAAGTCCCAACAAACGACAGCACCCAATTAAGTGTGAC

A\_14\_P108094 ATCCAGGAGAATACATTCATCATAAGAATTGTGAAATTTCCCGTTTCAAGTGCCAAACTA

A\_14\_P130082 GGAAATATAAAAGAAGGGCGCCCTTAATATCGGCTTTTAATTCCTGAGAACAACATTTAC

A\_14\_P112542 ACTCATTTTTTATGTTCCAGGAGAATGCAGGTCAGGGATTATGGGCATTAATATTATT

A\_14\_P102877 TTCATCAAAGTCTTTTCCAGCCCTGGAAGAGTCTTATTTCTGTGAGTTTAGAAAAAGAAT

A\_16\_P38562992

GGAAGGCACATAATGATACTATGCTCTGTAATGAATCAACATGTTTTATCCTTGCTTCCC

A\_14\_P130115 CTCCCATAGGCTGAGATCATTTCCATTTCCCCTTCTCCCTTAGTC

A\_16\_P16505612

AATACCCTAATGACTACACCTTGAGAACTAAACCCTATTCTAATTGCTTTGATGCATGGG

A\_14\_P103883 TTCAGATTTCAATAAATGATGCTGAGGGGGAAGTATGAGGTCACATAGGATCATAAATCT

A\_14\_P125098 TTGAGGATAACAAAATACATCAGGCATGAATTCTGCTTTACCGAACTTTCATGTGACATG

A\_14\_P133433 ACTTGGAAGACCAGTCACCCTTCCTTCTGATATTTTTCTTATTATTCAGTCAAAAAA

A\_14\_P135126 GCCTGGTCATCAAAGCAATAAAGTATTATAGTGGTCAGGATCATTATGAAATTGTTGGGT

CUST\_6833\_PI426210822

TTGATTTTTTTTTTCCATTTACTTACCATTTGCTTAAGTATTGGAGTTTTTGGTTTAGGG

A\_14\_P100581 AACTGATTAATCTAGACAATGGTGAAATTCACCCTGTTATGAAAGTTCTTGGGAAAGCAA

A\_16\_P21117145

CCAAATACGAACTTGACAAGACTATAATTTGGCCTAAAACCTGATCCAGATGATCTCAAGT

A\_14\_P129236 CAAGGACATTTTTTTGTAATGTAGAAAAGTTATGTTTCACAGAGGTTTTTGCAATGCCCT

A\_14\_P113755 AGAAACACAAATTCAATTTCTGACAGAGCACACTATTGCAAATAGCAGCCCTCATATTAC

A\_14\_P130243 CTCCTTCTTTTGGTCTCAGTGATCTCACTTCTTTGGTCTCTGCTTTTCCA

A\_16\_P03329638

TGAACCAGTAGGAACACTTGTCTAATTTCCATATCCCAGCAAAAAATAAGTAGTCCAAG

A\_14\_P120395 GTTAGTGAAAAGGTCCCTTCGAATTCATTTCTGTTTCCCTTAAAAACAAAAACAAAAA

A\_14\_P135254 GGGAGACTGAAGTATGAATATACATAGGATTTCTACAGGCAGGATTCAAATAATTTCTG

A\_16\_P19910125

AAATGGGCTATATCGACCTTTGATTCAATTCCACAACCTTTGGAGAAAGACTTATATCTGC

A\_18\_P17326082

AAATGTTGAATGGACTTAAACTCAATTTCTAAACCCCAAGATACTACATAATTACTCCCA

A\_14\_P109030 ACAACTCCGATTTCTACTGATGTTATCTCCAGGATGCCTAAAACATACAATTTTAAAAGG

CUST\_6113\_P1426210822 CAACATATAATTGTCCTATGGTTGTAACCTTGATAGTGCTGTTACCATGGGGGTT

A\_14\_P132355 GTATTCTCCATAGGGATAGTCTCTTTGGCATTATTTGGTTTTTCTACGTTTTTCAGTCCC

A\_14\_P116610 AAACATCACATGTGTTTTTCAGTATCTCTGCAATCCAGTATGCATTCCAAATGAAATGTG

A\_14\_P133442 CTATCCAGTGGGCACTTCACTTTTTTTTTTCTCTTCAAATCCACTTACCCAGAAATG

A\_14\_P106620 ATATTTTTCCAGATGATTTGAAAGAAAACTAGACTATCACCTGGAAACTTTTCGGGGAA

A\_16\_P20290022

AAATCCTACTGTTATGAACATGACCTCTGATAAAAAGCCTATCTTGATGGCTATAACCCAG

CUST\_9967\_P1426210822

AAAGTCCATACTTCTCTAGAATTACAAATTTAGATGTAGGTGAAAACAGCCTCTTAGAG

A\_14\_P135391 CTTTTCCAAGAGTCAGAACACAGACCAGGAGAGCGTCTCTACAAAAGTAAAG

A\_14\_P121906 ATATGAATTGGGCTGTTGTATCTTCTGGCAAGAATCATCCATTTATTTTCAGGGATATT

A\_16\_P18538355

ACATGGCCTCATCTATAGAAAGAGAAATGACATGTGGAAATAATTCAGTAGGAGTTTGCA

A\_16\_P00013662

AAAAAAAATTTAATGTTCTCTATAATTCATCCATCGCAGAAGATAATCGATAGAGCCCGT

A\_14\_P101929 ACATACATCACCATCTGCATCCACCAGTCCAGTAACTTAATTTATTTTAGTTTCAAACAG

A\_14\_P132064 ACAGAAACACAGTTCATCAGTTTATTCTCAGATTTGAGATGCAAATTATGCCCTATGGCC

A\_14\_P129877 ACAAATGGACTGTTTCCCTAAAGAGTAAAGAGCAAGGACATTATTTGAGACATATCTGAG

A\_14\_P134256 TCTACTTGTGCTTCATCTAGAAAAATGTAACACTAATTCAGCAACTTCTGGGAACCAGA

A\_16\_P21711764

TAAAAATACAGAGCAAAATTTAAAAATGCAAAGAATGAGGTGAAGAGTTCAAAGTGGTCA

A\_18\_P15573179

AATAATGGCGTGAGTTAGTATTTTGGTTCATTTTTTCAGCAATTATGTCCTGCATTCTGGC

A\_16\_P41390842

AGGTCTCAGCAACATCTATATCTTGAAAATAGCCTTAACATGTAACATCAGAAGCAAGCA

A\_16\_P02343586

TTTCTTCATCAGAACAGCCTATTCTCATAGATTACATTGTTAGAAATTCAACCCCTTCCG

A\_14\_P106234 AGGGATTGATTTTATGGTAGTCCCTTTCTTTTCTCACCTCTTGACAGAATGTTTTTCTAA

A\_14\_P132128 CTCTCAGGAGAAGGGTGAATGGATACAAGGTGGTAAGCATAATAATCTACTCAATTATTG

A\_14\_P124586 GGTGCATCAGAGGAGTTTCACTTTGCTGTAGTTTTAATGTTTCACTGTAACATATGCTTC

A\_18\_P14132934

GGATTTTTAACAGCCTTGATTGATTGCTGGTCTTAATGGAAGAAAATGTGATCCTTTCTC

A\_14\_P138338 CTTAGTCAACGTCCAGACAATCAGGGTGTATTGAGCATCTTCTCTGATAAAAAGTATTTTG

A\_14\_P127327 CGAAGTTGAAAAAGTTTGTTCATCATTGCAGTATGAATGCCAGTTTCCTTTAAGTCTCTC  
A\_14\_P118466 TCACAGGAACACTTTTGACCAAATGATTGACAGAAACCAGTGAACATTTTCATAGTGAT  
A\_14\_P124370 ATAAGTGGAATCATCTGCTATGTCATTAGTGGAATTATCTGCTGTTTCAGAACTTCCAC  
CUST\_2\_PI426210822 GGGGCAGGAAGGCAGTCCATTCTTAACATACTTATGTAGTCACTTTTCTGT  
A\_14\_P114854 ACCTAGGGTAGACGTAGTGTGTGGATCTACAAATTTCTTTACAATGTAAAATTGTGTG  
CUST\_5521\_PI426210822  
CAGAATAGCAAGCAGCCAGGCATCGCCTTCTCTAAAGTGTTAAATAAACTGTTTAAG  
CUST\_8021\_PI426210822 CAGTAAGCTGACCAGTCCCACAGCAACAGAAATTTCTGTCTAGAAAGAGAT  
A\_18\_P13105063  
AAAACCTGCTGATGTTAAATACCTACATGAGAAAAATGAAGATCTTCATTTCCACAGCA  
A\_16\_P02641626  
GGTTCCTCAATTTCTCTTTAACTCCGGATTTTCTAATAACAAGCATACTCTCAGGAAATA  
A\_16\_P17778202  
ACTCATCAATCAACAGGTTATTACATTATCAGATGCTACTAGGATTCTGCAATCATGCTT  
A\_18\_P22840310 ATTTTCTCATGCAAGGAGGTGGGAGCGGAGAAATACACCAGATAGACA  
A\_14\_P100622 AGAATTTTCTAATTTTCTACTTTTCTAAGCAGTTGTCTTGCAAGTGAAGCCCATCCAC  
A\_14\_P115482 CGTTGTTACAGATGGCTGTAAATGACAAGTTGAGTCCTTCAGTGTCTCCTAATACTTC  
A\_14\_P110010 CTCATTCCGTTGCTCTGTGAGAATCATTTTTCATTTCAACATTTTCCTTTTCAGTCTTTGT  
A\_16\_P01888610  
AAAATTGCACTTAGTCTCTGTAGAGTTCACCTTTATCATTCTGCCTAATACTCAGCCTTC  
CUST\_119\_PI426210822 GGATTAGAACTACAGAGATCACTTTTGGGGGGAGTGCAGTGTTTCATG  
A\_14\_P118830 AAGAGGGATGCTCTGTATCAGATGCTAACATCAACACAATCCATTCTTCTTGTTAAGGAT  
A\_14\_P104961 ATAGACCCAAACTCTGTATGCATGTAGAAAATCCTAATCTTTTTTATTCCAGTGCCTCAC  
A\_14\_P103610  
ACGACAAATGGAAATGAGTAGTCATGAAAACAAAAGCAAAAACAAGATAAACACAGAGTC  
A\_14\_P110483 AAGGGCAGTGAAGGTCTATGGTTCCAACACTACAAAAACAAAAATTAATATCCTATTCCCA  
CUST\_1628\_PI426210822 GAGTTTGTTCAGCACGGACTTCTGTTGTAGATCCCGGGCACTCCT  
A\_18\_P22841947  
GACTATAAAAGTTAAATAAGTGAACATAACTGCATGTGTTTTGTGAATTCAAAGACCTCA  
CUST\_6767\_PI426210822 GGCTAGTGCCATGTTGGACAGAATCCTTGGATAAGTGCTTAAGGTACA  
A\_16\_P35039162  
AAGGGACCTACTTCTTTAAGTTCTAAAACGTGGAAATAGTATGTAACCTTGGCTGTTCTGT  
A\_16\_P30952417 ATTTTGACCTCTCATTTATTGGCAGGCCTGAATTATGTTCTGATGGCTGACGT  
CUST\_8054\_PI426210822 CAAAGTGGAATTGGATTTCTTGGGGATGGTGGTTGCCTAGTGCTG  
A\_18\_P15887840  
AAAATGTAGTTGCCTGGTTATATTTTCAGAGCATGATTCCCAATTAAGAGCAAAGAGCAAG  
A\_14\_P130676 ACTGTTAATCACATTATTATTCATTTTGTGATGAGGAAGCAAACCTCTAATGGTGCAGAC  
A\_14\_P123476 GGAATAAATTCCTGAAAAGACACAACCTTACTTGCAGGAGACTTTAGTTCTGTCAGCAAC

A\_14\_P123555 TAAATGGACACGGAGATCTTTTTTTGTTAGGTGATCTAACATTCTTGCATCTACCAAGCA  
CUST\_9031\_PI426210822 GGTGCCGTAAGGATTACGCATATGCCGTTCTCTAACATACTAATAGCACCTAAT  
A\_18\_P14580823

ATTAAGCAGAGTCCTAGAATGAGTCAGGAAGATAATCTGAATAGGTAGAAGACAACCCAC  
A\_14\_P119718 CTCACAGAAAGACAAATAAATCAGCATGTAATACCTCCTTAGGTTGTTAAGCCAAATGCT  
A\_14\_P137259 TGACTIONAGAATAAGGGGGCTGCGTTAGACTCCTTAGATTTTAAGGGCGGTG  
A\_14\_P119606 CTTGGTAGTGAAGGTAGGTGGGTATTTTCAGGCAGAATGAACTATATGAATAAGGAATTAG  
A\_14\_P102105 CTCAGAGTTCAATGACTTTGCAAATGTAGTTTCCAACCTTACAATTTTCACTATCTGTCA  
A\_14\_P133512 ATCGTTTATGAATAAGAACTTTATTCTCCCTTTATAATCCTATTACGACCCACTCCTGCC  
A\_14\_P101278 ATTAAGGAAGAGATGAGGAAATATGTCAGGGAGACTTCTGATATTTTCACTATGCACAATG  
A\_14\_P104268 TACTATATTGCTAATAATAGAGAAAAGTTAACAACAGCAGCGCCCCTCAATGGGAGTAGT  
A\_16\_P19760982

GGTTAATCATCTACCCCATACATACTTGAACAAAACCTGAAAATTTTGTTCATCTGGTTGCC  
A\_18\_P14131510 ATGTAACCAGGGACTGCAACTTCTAGGGAAAGGGGAAAAATCACTGTT  
A\_16\_P00912185

ATGTTCACTTTGTAAACTCCAAAAATAGAATCACAGAGAACTAAACAGAGAAGAGAGGGG  
A\_16\_P21003610

AAAGTGCTTAATTCCTGTGACTCCATCTTACAAATGACGAAGTCTTTTGCTAGAATCCTA  
A\_14\_P121223 TGTCACCAATAATTTATATCCCTTGTTAAAGAGAAAAAAGGAGTGAGAAGGTGTGTCTT  
A\_14\_P113307 CTCATTAATACAACAACCCTAATACCACAACCCTTGCTCTGAGTTTAAAAAGAAGAAACC  
CUST\_77\_PI426210822

GTTTTGCTAAGCCATAGGCTAGCTTTAATATTTCAATTGAAGTGAGAAGTGTTTTTAAAA  
A\_14\_P139848 TGAATATATCTAAAATGTCAGAACTGCATCTGGGCGTTTTCCATTTACTGATTTCTT  
A\_14\_P138605 CAGGTCTTCCACTGTTCTTATACGACAATTTCAAGGATTTGAAGCACAAATGAGGTTACT  
A\_16\_P00685055

CGTGTTCATGTATTACGTGGAATTATAGACTACCTAAACTGCATCTTTTGTCTCTCT  
CUST\_1897\_PI426210822

TGGTTCTTTCTGAGTTGCATGAATTTATCTAAGTAGAGAAAGAAGCACTGAGAGCTGTT  
CUST\_4915\_PI426210822 CTCTGTCTCCATCTGTAGGTGGTGCATGAGTATGATATAGTGTGCATGTGT  
A\_14\_P133995 CAATAATTTTCTTCCAAGCAAAGTGAAGATTGTATTTCTCTTCCACCTGCAAAAGTAGGG  
A\_16\_P16191780 CTCCAGGACTATCCATGAGTAACCCTCAGCCAAGAGTGTATCATCAG  
A\_14\_P117147 TATTGATGTTGTTTCTCTGAAAACAGACACTGAAAAACATCTGCTCAGGAAATGGTTTC  
A\_14\_P127166 GGAGAAGAACTGTAAAGTTCCCTCCCTCCCAATAAAAATATTCTGAAAATGTGTAATTT  
A\_16\_P21581510

GCAGTCCTAAATTCAACTCGCAATTGTTCTTAGAGAAATTAATCCCTATGTCTCGTCATG  
A\_18\_P22841764

CTGTCTTTAGGTGGAACAAGTTTTGGAAATTCCTCCTATTGCAGAAAGCATTGATTTG  
A\_14\_P120391 TTAGTTTTCACTCACTTACCTGGACAGATTTGACTGTGGGCTGCTCCTT



A\_14\_P100450 GGAACCCTGAGTGCATTTCATGACAGGAACAACACAAAGAATTTTTATAAAGGAAGTTTTTC  
A\_14\_P126767 TCTCTTTTTGCAGATAATAAGGAGATTTTTCTTTCCAAAGCAATTCACAAGTCCTTCCTA  
A\_14\_P128627 AGCCCCTCCGTTATGATCTTTGGAACCTCAAGGTGAGAAGATAGATCTTT  
A\_16\_P15068047  
CTGACTTGTTCTGCATGATCTAATTAACATAGAACCTTCAAGCATTAGATCTGTCAGGCT  
A\_16\_P17011474  
AAAGTTATTTCCGTCAGATATTCAACCTAATTTGAACTTGGTAATCGTATAACCCCCTGG  
A\_14\_P138636 CTGATGTGCTGAGAAACCTTCATAAGCCCTCAAATTGATCACATGTAGTAAATTGTTACT  
A\_14\_P138881 CTAAAAAATAATGTCCAAGATACTTAGGTCCTTCAGTCAAGATTTATTACAGAAGGATC  
A\_14\_P134755 CTTACCTCTGTGGATGCATTGTTAACTGTGTAATGTCAATACTTATAAAACATGGAGG  
A\_14\_P110112 CTGGAAAGAGTTAAGACAATTAGTATCTGGTTTTCACTCTGAAAAAAAAAATTACAAAATTA  
A\_14\_P105838 GTAGAATTTCCATAGAGGGAAAAACTAGGACACTGTTCCATTTGCTAATAACTTTCTTTT  
A\_14\_P107426 GAATCACTAATCAAGGTATATGTTTCATGTCACACTGATACAAGGAAGGTCTTAGAAGGTC  
A\_14\_P121718 CTGGGACATGAGATTTCCAAGATGAGGTTAAATTATGCTGATTCTACATTCGAAATGGAA  
A\_14\_P134920 TTAGTGGATGGAATATTTTACACACATCATAACCCCAAAAAAGGAAGACAGTTGATCCTT  
A\_14\_P114534 AGCAATACTGTTTGTCTTTACCAGGAAAATTTTACAATGTGAGTGGAACAGGCTTCTAA  
A\_14\_P200902 GAAGAAGACTTTTGTATGCTATAGAGTGTCTGGAAGAAAAAGATAACCATACGGGCTTT  
A\_14\_P110029  
AAAAGTCTTAGGAGAAGAGTGACATTTCTCTGAGAAACAAAAGAACCATCTCTGATCAAG  
A\_16\_P03416152  
TAACACCATGGCACCGGCGTATTTTTGAAAAGTGAAAGAATGAACAGTTCAATGCATAT  
A\_14\_P123567 TACATATAGGAATAGTGGCTACATCTTAATCCAAAAAGACACTCCATGCCAGAGCGAATA  
A\_14\_P133820 AGGAAATGGCTGACATCATTTTTTCCATGTAAAGTGCTTCAAGCACTTCAAACAAACAC  
A\_16\_P19567052  
ACTCTGTATCAATCCTTTGACGTGTTAATAAACTATCCAGAGCCACCTAATTTATGAAGA  
A\_16\_P21231603  
AAACTCATTGCATTCCAAAAGATCTAAGATAGAAACAATTTCCATCGAACCTTCTTGGG  
A\_14\_P101804 ATCTAACTTGAGAACAGGCTCTGTTCACTAACACTGGATAGCCCTAGTCTATGTATTTTA  
A\_14\_P103367 GCAACAAATGTTTCACGTATTTTGATCTTTCAATTCACCTGTGCAGATGCGTAAATTCTT  
A\_14\_P100608 TCAGTGTGTGACATGGTCTCATTCATTCATTCATACAATTTGCATAGCCCGTGAATT  
A\_14\_P109729 TTCAATTTTATAGAACAGGACTTTGAGTTCCTGAAGGTCAATTCAAAAGGATAGTTGCT  
A\_14\_P122761 TCTGATTAATTAGGTATCTGTTCTGCTTGATTTGTGCCCATGCCATACTAATCATTAAAT  
A\_14\_P119006 GCTAACGGGGCAGAACTGTTATTTTTAGGGTTTTCCACATCCAGTATGTTTCATAAGATTT  
A\_14\_P115509 CATAAGGACAATCTTTAACTTAAGCAACATGTCCTGAAGATGTCTTACAAGGGCAATCAA  
A\_14\_P101963 TGGAAGGGACAGTTTAATTCTTTTCCAGGTTCAAGGATGTGAATTATTGTGTCTTGTA  
A\_16\_P35236067  
CCCACAAAATGACTTGATAACCACTATCTAATGCTGATTGAGATATCGAAACCACTTGT  
A\_14\_P132224 TCCTTGAGGTCTTGTGTTGAAGAATATTTAGACATGGACAAAAGAGTAGACAGCACTGTAT

CUST\_1068\_PI426210822 AGAAACCTGACACTCTGAACTTTCAGCATTTCATGACATTTGAGGTCTGACTTT  
A\_16\_P15591488

CTACTTACGTTTTTTTTCCTTTGCACTTTTTCTAACCAATTCTTGCTTACCTTTCTCACA  
A\_14\_P137080 AGAACTTGTAAGGAGTCTTTAGTGAATGAGGGAGAATACTGGGAAGAGGGTAG  
A\_18\_P26797565 CCTGTGCACACTGAAGATGTTCCCTAACCATGGGGCCAACAGACT  
A\_14\_P136391 TAATCATAGTAAATTATTTGCACCTCACCTTGATGAAAGCGGCTCTCAGTGTCTGG  
CUST\_6491\_PI426210822 TCAGTCAACAGTGATATCTTTTCCCTGAGTTTCTCTTGCCCCTTGATCTT  
A\_14\_P115288 ATTTCCCGCCTCAGGATTATCAATGCAGAGAAATCTGAATTCAATGAGGATC  
A\_16\_P15141249

AAAACACTCAGATTCCAATGTGTTCTTTAATTTGCCATTAAAAATTGAACTGCAGGGCTG  
A\_14\_P121846 ATTTTTTGTTGATGAAGATTAGGAAGAAAAGAGTGAGGATTAGGCCTAATTTACTGCCT  
A\_18\_P14134675 CACTCTGAGTTCTACTGGCTCCCACCCTTATTTAGGAATCTCTGAATTGG  
A\_14\_P102258 ACATTTTTCTTTTCGCTTCACTTTCTCAATGAGGTAGGAGAACAATTCATCACAGGCA  
A\_14\_P128979 TTTCTGTAACCCATTAACTGAAGAAATAGATAAAAAGTTCTGGCATGCTGGGATTGATACC  
CUST\_8225\_PI426210822 TTTCTGTAACTCCCTCTGCAGAGCCAGAGGTGGCTTTTTCCTGAT  
A\_14\_P134833 ACATGAGACTTCAATAGGTAAAGAACAATACAATCCATTTACAAAGTGGGGCAAGAACT  
A\_14\_P139014 ACATGAGATCATATCAACAAAGCAGCAGGAATGCACCTAAATCAGATAAGATGCTTAACA  
A\_14\_P135465 GAAAAACCAGCATCAGGCTCTGAGTATTTATTTTCAGTTAATAGTAGTCTCCAGGGGAAG  
A\_14\_P127767 AAGCAATTGGCAGTATAATTACTTTCCCATGACAGAAAATAAATGCAGTTCACTGGAA  
A\_14\_P117229 TTCTAGTTTAAAAAGTTTATTTGCACTTCTTCCTAGTTATCAATCACTTGCTACACTTGT  
A\_16\_P20865852

AATCACTTCAAATCTCCTAGCATAAACACCTGTTTCATTCTTTTATATTTACCCCCACC  
A\_14\_P127332 CATGTGCAGATGGATTGATGCCTGACAGTTTCACTCTTTCACAATACCTAATTTTTTTTTT  
A\_14\_P131980 TTTTAATGGTTGGACCTAACTTTAGAGTTGGAAAAAAAATTGGATGTGGCAATTTTGGAG  
A\_14\_P202063 TATGGTCAGATTCATAGGAAAGATGATGGTATGACCCCTTGTAATGTTTTAATCTTTGGC  
A\_16\_P15468730

CACTCAGTGTTTTTGCTTCCCATGTATACCTTCTCATCAAGGATTGAATCATAACACATTT  
A\_14\_P123772 TCATGAGACCAACATAACAAAAAGTCTTTCTGGTTTGTAAACTGGGCTAAAGATCTCTAC  
A\_14\_P114448 CTTTTCTATAACTTTTAAATAAACCTTGGGGGGTGATGGAGTCATTCCTGCCTGTTA  
A\_14\_P128766 GAGGATCTTGGCTTCTTCATGCTCAAGAGCAGCCTTTAAGAAACAAAAGCA  
A\_14\_P111674 TACAATTTTTCTCCTTGTTTTTATTCCTGACTTCTTGATTCTTCCAGATTGAATGAT  
A\_14\_P139994 CTGAAGATACATGCCGAGTCAGCACATGGGTAGAGATGATGTAAGAGCAG  
A\_14\_P112720 AGTTTAAACATATTCAATTTGTGATGGTTATTTGCTCTTCCCCCTTACACTTGCAACAAA  
A\_16\_P19786891

GCCCCCTCCTAATTTTACTTATCAACGTGCTTCAAATCATCTACTGCGAGTCTAAAAATC  
A\_16\_P16191872 GGCTTTGGGATTTGGCTCTTGTTAATATGCAAGAAGGGGAAAAGTCAGAAATGATA  
A\_14\_P126792 AAGACTCAGTCTCCAGCCCCAAAAGGATCCTAAAAGTAACTTGTTGAAAATAAATCC  
A\_18\_P14216940

ATTACCTGACTCACTGAATCATCTCAAAGTTCCAATGTTTACCCTTCAGTCTAGCATAAT  
CUST\_4648\_PI426210822 AACAACTTGTTAAGTCTGCTTCTCCATTCCATTCTTTCCCGGCG  
A\_14\_P202516 CATTAGGAGAAAACACAGCCATTTCTCACTTTAAAAAGGACATTTTTGCTTTTTCCCTCA  
A\_16\_P16191197

TAAATTGTGTTTATAGTGAAAAAGAAGACTTGGTCATGATAAAAGCCAGACACTCGTGGG  
A\_16\_P36252064

TCTCCCTTGAATTACTTCTAGTCCACAAAAAATTGATCATCTTTCCTCTCACATTGAGA  
A\_14\_P101895 ACAGTAGTGGAAACCGGAGGCTTTTTTTAACTTTATATTCTTTCCCGTTTTCTCCTTA  
CUST\_7410\_PI426210822 CAGCTTGGAGGGAGGTAACATCTGGATGTGCGAGTGACAGCTGGT  
CUST\_563\_PI426210822 CAGTTGCCTCCCTCAGTGTGTCTGCCAAGACCTGAGCCCCAGGC  
A\_14\_P121769 TCCTTACAACATAAATAAGAAATAGACGTAATGGCTTCACTCAGTAGAAAAGTACGAGCA  
A\_14\_P105649 CCACTGATCCTTTGTGATTTACCTCAGAAAACATGATGGAAACAACCTGAATAATAAAT  
A\_14\_P108894 AAATAAAAGATTTCTTTTTCTCCAGTTTGTGTAGCAGTGTCTGGATCATTATGCC  
A\_16\_P02929637

AATGAGCACATACATGTTTTGTAAGTTTCTGAAATGTTTCATGAAGAGTAGTCATGCCCC  
A\_14\_P139221 TATTCCACTAAGCACAGGGGGAGATATAAAACGTAGTTTAGTAGGTTCTTCATAGGTTT  
CUST\_2436\_PI426210822 GTGAAGTTGTGAACCTCTGGTTGGTTGAGGGGGCTGTTTTCTAGAG  
A\_14\_P126822 CGTGAAGCATTGTGTGTGCAATACTTTTTCTCTAAAAGAATGATTACCTGACAGATTC  
A\_14\_P134789 CTCTTCTTTGAAATGAGGTCATTAAGGAAACAGAAAAAGAGAGAGGCTCCCTG  
A\_14\_P126983 ATATGCACCAAGCGATCCACATTTGCTCAGGCATTTGTATTTCATGTAATTCAGTTAGC  
CUST\_4153\_PI426210822

GAGAAGAGGAAGAAGCCAAATGAGATGGTTCGTAATTGATTAGTGGAAAGTTAAATAATGT  
A\_16\_P21652185 ACGTATGTCTACACCTATATCCTAGCATCCATATTATAACATTGTTCTCTACCTATGTGT  
A\_14\_P133656 CTACTTTAAAAAATGGCCTCTAAGGATATTCAGGGTGCAAACAGTAACCTGTTTCAGG  
A\_14\_P108986 TGGGACCAAGATAGAATCACTTATACTTGGTTTTATTTCGCCCCATAACCCTCATTAAAA  
A\_16\_P38246315

TGGGGATGGCTTATCTATATAAACCAGTAAACCTTTTTATTCAATACCCAGACATTCTGCA  
A\_14\_P104329 CAAGGTTCAATTTCTTTGTAGTAATCATTTTCAGAAGTTAGAGCATTAAACAGGCTCTTGTT  
CUST\_6828\_PI426210822

AAAATTATATGAAAATTAATGTGAAGCAGTAAATATAGGTCAGTTCAATAAATGTCTGTG  
CUST\_6236\_PI426210822 ATCCCGGCACAGGCTTGTTACTGTGGGCCAAGCCAAATTCTGAAG  
A\_14\_P103202 GACTGGCATTCTGCTGTGAAAACCAGATTACTTATTAGACTTTATCTTCAGTGAACCTTT  
A\_14\_P135263 AGAACACAAAATTCACCCAAGTGCAGTGTGAAATCCTTTGGTCTCTGA  
A\_14\_P112895 TGAGGTATAATGAATAAACTTGTAAATGTGAGGGGTAAAGGGGGAAAAAGGATGCTAA  
A\_14\_P110263 CCCTATGTGATGTGTAATTTTAAAGACAATCAAGGCAAGCAGATTTGTAGAACTCCAAAC  
CUST\_8505\_PI426210822 TTACGAACCAGCTCCTGGGATGGACTTCGCTGGCTCTGGGAACCC  
A\_14\_P118660 GCAATCCTATGCATCTGTAACCTTTGATAAATAAAACAATATGAGGGAAAAACCCTGCACA  
A\_14\_P121827 AGGCCACTCACTCAGTTTCGTTTCATCCGTGTGACATGTGTATTTGTTC

A\_14\_P104218 TTTCTTTTTTCAGAGTATGATCGGTTGGGCTTCCTCCTGAATCTGGACTCTAA  
A\_14\_P119867 GAATAGCCTCTATCAGAGAGGAGAATGCAATTC AATTTACCTGAAATTCCTTTTCAGGTAT  
A\_14\_P139348 GAGTGCATGAGATCTTCAAACGCATCTCAGATGAGGAGTGT TTTGTGCTG  
A\_18\_P14136099  
TAGAAAAGTCATTCTGTGGTTATTTTTAAATAGGCACAGAGGTAACACACTGACCTGAGA  
A\_14\_P117088 ACTTTCGTGTGTCAATCTCTTGT TTTTAATCCTTAGTCCCTTACTCAAGAATTACGCTGTA  
A\_18\_P15681668  
AGGTTTCTCCTAGCATTTAACACAAAAGTAAAAACCAAACACCAGTATTTTGAGATCCACT  
A\_14\_P121545 ACAGTCTCATAGGTTTTGGCAAGTCCTTAAGGGAGTTATATCTTCCTAGATTTTTTTCTC  
A\_14\_P104831 GCAAGATTCTTTGGGTCCAATTTATTTCAGTAACATTTCGGCTCTTCTATCACACCAATCT  
A\_16\_P01327395  
CCAATGCCAGAAATACATATCTATGTCCCCTAGTTATTTCTAAGGCCAAAATATTGCTCC  
A\_14\_P116869 TTGCCTTAGACACCAACTCTACAACATTACCTGT CATATACTGAAGAATCTCTTCTTCCA  
A\_16\_P16694788  
AAAGCCTTATTTACTTGCCAGATTACAAAAGCCCTAGTTACTTTTCATAGATCAATCCA  
A\_16\_P20843818  
AAAAC TTACCTTGATAACATCAACCCACTGTGATATTTCTCTTTTTTTGTGCCACATGGTT  
CUST\_7399\_PI426210822 CAGACCAGTGTCTGTCTCACGGTTTAAAAGGCTGCATGCAAAACATTT  
A\_14\_P121647 ACACATACTGGAGCAAATCCAACACCTGCATTATAAAAACAATGTTTAAAAGGTGACAGAA  
A\_14\_P120362 TCTTGGAGGTGGTGTATGGGACTTGATGAAATTCATTTATATGAAAAACATACGCCAAAT  
A\_14\_P122011 TGTAGATCTTGCTACTCCGTCTAAAACAAAATCACACATTGGCATAATCCCCAATAAGA  
A\_14\_P139727 GTCTTCTGGCTTTAGTGATCTTGAAC TTTTTTTTCTAGGGTTTACTGTGATTTTGCTT  
A\_16\_P41794197  
ACATGA ACTGCTATACTCAACCAAATAAACCC TTATAAATTA AAAATCTTCCCTCCTACT  
A\_14\_P107989 CTATA TCTTGGTGATCTTGGTAGTTGTCATAATAGGAGAATTTTTCAGTGCCTCTTCTG  
CUST\_436\_PI426210822 CCCTACAGAGCCTGCTTTCTCAAGCTCTCAAGAAGGAACAACACATAT  
A\_16\_P15382474  
AAAAAAATTC ACTTATGCACTCACTATGTGACATTGACTCATCCACTTCAACATGATTTTC  
CUST\_554\_PI426210822  
ATGTATTGCCATATTTCTCTTGAAAAAAAATTATCACAAGAAACCAACAAGAAGATATCA  
A\_14\_P112373 CCTTGTTGGCCAGCATATAGAAAATGTATCATCTTTCACATGGTAAAGGAAAGATAACAAA  
A\_14\_P134814 GACTTGAGGCAGAGGGTATCAAAGTCCCTTTCTTCTCAGTGCTCAG  
CUST\_7569\_PI426210822 CAAAGGAAGTTCAGCAGTAGCTGCCCTGGCCTCTGTTCTCAGTC  
CUST\_6700\_PI426210822 GCTAGTGAGGGGCACCAGGAGAGCCCCCAACCTGCTTAACAAC  
A\_14\_P131511 AAGGTAAAACCCACTTTTCATCAGCAACGATAAAAATATTTGGTGATTAATTTCTTCAGGA  
A\_14\_P129214 C TACTGACCTAAAAAGGAATTTACCAGTAACCATGGTCATTGAGACAAACCTAGTTTAA  
CUST\_3561\_PI426210822 TACGCTGTGTGCGGCAGAAAGGATTTCTGTACCTACAGAGAGCTA  
A\_16\_P37364434

TGCCAACATGATTACATATTCACCATCCAAATTCAAACTAACTCCTCTATTTTTTCCCGT  
A\_14\_P109704 ATAACTCCTTACTCCTTTTTGGTTTCCTCAGAAGACTTATTTCTCCTTCTCTTCATTC  
A\_16\_P15139878  
GCAGTTGTGTTTTAATCAGCCATCAGTTAATCCATAGTTACATGTCCCCAAAAGAATGAT  
A\_18\_P25247037  
AAAAGCCTCTCCCTAATATTTCCCTCCCTGATAGTTGAAATTAATTTACACAGACCAAAGG  
A\_14\_P106301 TGTGCTTTTTCTTCCCTAATAGGAGGAGAGTTGAGATCACTACTCTTTTCTCTTGTTATT  
A\_14\_P101060 GCCCTCTGTGCAAACAATCATATATAGGAGTGTGAACAAACAAAACCTTAAAAAGGCAGC  
A\_14\_P107447 CATGTAATCAGTTCAATCATGTGTCTTATTTTCTCCAGAAGCTGGCTGATGTTTGATTAC  
A\_16\_P39198174  
TGTTCTCACATAATCATCACATTAGCGTTAACTATAACCATCAAAGACAGTCTGATTACAT  
A\_18\_P10615457  
ACGCATCTCTTTCAATAAAGTATGTTTCTTCTAAGTGTAACAGACATCATCATGCAAAGT  
A\_18\_P12322153  
AATGCAATTCTTTTCAGTTCTCTCCTCATTCAAATCTTCTCTTTCAAATCTTTCCCAGC  
A\_14\_P115180 TGGGAAAAATGATCCATGAGGGGAAGTTTTAAAAACATTATAACAGACTTCCAGTTTGTA  
A\_14\_P109160 TTGGAAACTGACGGTCTAGTTAGTCTTCCACTGAGAAAGAATATTTAATTACTGCT  
A\_18\_P22841342 CTGATCTATATTTAGGGCTGGGGGTTCAACAATGAAAACCTTTTTGCTCACAATCTGAC  
A\_14\_P112849 CACATTTTCTCCCTCTCCCTTTTTTGACATTTATAGTTCAGACTTGAGAGAATGACACTA  
A\_16\_P38218266  
TCATGCATCAAATTTTGATTAACCTGCATCCCTTCTATTTCTTTTGCTTAACTCCCACAT  
A\_14\_P112104 AGTAAGACGGAAATCTTCAAATCTAAAATCAAGTAAGGATTTGGGGATGATTGTGCTGAT  
A\_16\_P17640228  
ACTTTCAACATGCAGATATAAGCAGTTCTAAGTCTATGCTTCAAATTACATGCTCTGGGG  
A\_16\_P18449845  
GCCTCTTATTAAGTCAAACATGCTTTTCTCATTATCAGCCTAGAATAATGCAATGACCTGC  
CUST\_8858\_PI426210822 ATGTAGGCTAGTTGAATGCCGATGCGTAGGTGCCTGGTGTTTTCT  
CUST\_9575\_PI426210822  
GGTCATCTGACCAATTTAAGAGTTGGTATGATGTGCCTAAAATAGCAAATTAACCTTTCT  
A\_18\_P14249593  
CACTTACGCCAAAATAGCAATAAGTCTCAGTGTTAAATCATGTCTCTCATTATGTGTAGA  
A\_14\_P112231 TAAAACGCTGTCTTCTTAATAGGCTCCTGGAGTTCAGATTTTTTCATTAATGTAATGGGC  
A\_16\_P01874804  
GTCTGTGGTTTTACTAAATTTCCACCTCAAAGATATGTAATTAGAGCCTCTGCAATCTGC  
CUST\_4836\_PI426210822  
GCATGCTATTAAGCTTTAAATGGAGCATCTCTAAGTTTCTTACCAAAAAGTAATCAGAC  
A\_14\_P131868 GTCAAGAGAACTTGCTACTAGTAATTATGAAGACACCTTTACGGTGAGCGTTATTA AAC  
A\_14\_P127830 TTCAGGGACATGTTGGAGTGATAATTTGTGAGGTGAAATTA ACTCCATAACTACCATTG

A\_14\_P125445 CTCAAGACATGAGAACACGACAAAGAGCCACATAATTTTCAGAATTCACATCTTTATGTGA  
A\_14\_P116202 ACACAACACTAGCACTGAACACTAATCTCACAACCACAAAACACAACCACTACTTTAAC  
CUST\_7016\_PI426210822 TAGCATTGAGGAGATTAAATACAGGCCTCCAACCACACAGGCCAT  
A\_14\_P123238 AAAATACGATTAAGAGTTTCGGCAGACATTCTTCCAGATCTTTTCCTAAGCATTGACATAG  
A\_14\_P134858 ACTTAACATTCTTAACTTATCTTTCAACAGAAACAGCAGCAGAAAGATGCCCTCATTCTC  
CUST\_5672\_PI426210822

GAAGTCTTACTTTGTTGTCTTTCAAGTGAAAAGTGAGCTATTTTAGTCTAATGGTAATTT  
A\_14\_P101180 ATAAAAGCCAAGATGAAGTCAGAAGAGAAGAGAAGAAACCACTTACAGAATGGGCATT  
CUST\_3526\_PI426210822 CTTTCTCTCTGGACCAGAGCAAGCCAGAGCCTCTCAGTCATCTTC  
A\_18\_P14134549 AATATGAGGAAGAAGATGGTAGGGAAAGGCCATCTATGGTGAATCATTAAATGCCATG  
A\_16\_P00392637 GGTTGCGATATTACTCATTCTAATCCTAACATTTCCCTTTATTATATGATCCCCACCCCC  
A\_14\_P106438 ACTGTAAATGAATTTTGGAAAACAGTCATTCACCAGAAAACAAAGTTGCATTTAGACGGG  
A\_16\_P41452447

AGTCCATATGCCAGAAGTTTAAAGAGAAATTCATCATTCCACACCTTTCTGTCTATCTAT  
A\_16\_P18209740

AACATCCTCCTATGCATAGTGATTTGCTTTTCCATTTAGTATCCTGAACCTTTTCTAGTT  
A\_18\_P16241692

AACAATCTGATTCCTGAAGATATGCCTGAATAAGTCCTTTTATCCAATATTCCTCTGTGC  
A\_14\_P121463 ATGGAGAACTCTTCAAGGACTAGGTCAATTGCACTGTCAAATTCTACACGATTTTATAC  
A\_14\_P132905 TTACTIONGAGATGATTTCAACACACTGCAAAAATTTAGAATCAATAATGCCAAATTGGCC  
CUST\_10139\_PI426210822

GAAAACCTTTGAAATATGAAATGCTTTTAAAGGAAGAAAAGTCCAAATGAGTCCCCTCTCC  
A\_14\_P129009 CTAGATCCATCATATGTCTAATTTGTGCTTTCAAATCTTTGTTCTGGAGGTGCAAATGGT  
CUST\_4342\_PI426210822

GAACCATGGTGTATTTCCCAAGCTTCGCTAGTGAAGATGGTATTTTGTAAAAAATTGAG  
A\_14\_P132735 ACTCGAAAAGGCTTTATCTATTTCTAGAAAAGCCAAGGTCAACAGAGTTTCCAAGTTCTT  
A\_14\_P111181 ATTCTTGAAGGATTTTACTTAAAGTAAGGATATACCAACTTATAGGGAGGCCCAAGTGGA  
A\_16\_P00504089

AAGAGGATAGCCTAGAAGGTTTATAAGTGTCACAATTCAAATTAAGACAAAATCGAGGGG  
A\_14\_P102531 TCACTGTGCATTATTTTGTGTTGAAGTTGGTAAATTTGGAGTATCCTGCAGACACATTTTG  
A\_18\_P10024350

AATCATCCATAACAATCCATTCCAGTATCAACAAACTATCAGCAAAGGTAACAATAGTCT  
A\_18\_P13760205

ACAAAACCTGTATTTTCTCTATTTTCGCACAAATATCTCACTCAATATCAACATCACAAGT  
A\_18\_P16924472

AGTAAGATGGATCACTGTTCTAACAACCTGAAAAACGGTCATTTATGGACTACAGAGTCAA  
A\_14\_P135896

AGTTGTTGCTTAGAATTCAGGCTGAAAGAAAGAAAACAAAATCTGACATCTGCCAAAAC

A\_14\_P120593 CACAGCATATGGCCTTTTGTAGGATGAAGTGGTCAAAAAGTCATCACAGATAACAAA

A\_14\_P103260 TTGGTTTTTGATTTTCGACTCTTGGTGGACTGATAACTCTCATGAAGTATTGTGAAGGT

CUST\_3065\_PI426210822 ATCAGGGAGAGCCGTGAAGTATGACACAAGGAGAGTCATTAGAAAGG

CUST\_6954\_PI426210822 GTCATTTTCATCCTTTTGTAGGCCAGGCTTACAGACAGTCTGGGCTT

A\_18\_P24903037

AAACTCACCTTCACCCTTAAAATTCCCATTAGCAGATTCTTCTTTTCAAAGGATAACCTA

A\_18\_P14586187

AGAACCAAGGTTTTAGTAAGTTAACCATTAACTCCGTCTCTCTATTCTAAGCACGTTAGG

A\_14\_P133364 GGTGCTGATCACTCTGCAGAATATGAATACTTCATTACGGATTGCTTATTATATGGCTCT

A\_14\_P117571 CTGAGAATGTAACCTCAAATGGTAGGTTTTATTTCACTTTAATCCGCCTGTGAGTTCACGT

A\_14\_P103966 GATTCCCTCTTTTAGTGATTGCTTTCTTCTCCTTCAICTAGTCTGCATTTTGGAGATTCT

A\_14\_P200249 CCAGAGATTACCAAGGTCAATCTATATCAACCCAGGTCACTCAGAACTCG

A\_14\_P114720 GTGTTTGGATCGAGTATGAGAGATGTCAGAGGAGATCTACAGAGAACCATGAG

A\_14\_P123579 TTTCTTAGAGTTACTTATTTTCAAGTTTGCTCCTGTGGCTGACAGTGAGAATTCCTTCAG

A\_16\_P01647594

ACATTTTCCCATACTTCAATGGACATACTTCCATTCTATATCTGAATCCCAAAAACACCG

A\_16\_P17467175

ACCTAGACCTTTCATTTAATCACAGACACCTTCCCTTTAAAATTTTAGATACCCGTCCAAG

A\_16\_P01023959

CTCCCTTGAAATCTTCGTTTCATAAATTCCACATACACATAACATGGACAAATCATTGTGG

A\_14\_P200691 ACATATTTTCGACCTCTGCCCTCTTTAAGTTATTTTCATTTGTCTTGTAGCCAGTATCAGA

A\_14\_P115622 CAGTTGAGAAACAAGGGCTCAATATGGAGGATTACGTAAGTGCCTGATTATGAG

A\_14\_P100532 CTTAAGGGCCACAGGGCATTATTATCATTATTATGAATAAGACTCAGTGCCTGTATCCTT

A\_14\_P118248 ACAATACAACCATAAATTCTTAAGACTGCCAAATAGTAGTGTCTCATCTGGGATTTCTCT

A\_18\_P17633234

AAGCAGTCCAAATTTTTGCCTTTAAGCACATTAGTAAACTTTTTCCATATCTGGGTGTCA

A\_18\_P17041097 CAGTCATATCCCCAAAATCTGTGGTTGGTTTACCACCACCATGGAAAC

A\_16\_P16790440

AAACACAGCCTTTTCAGATTCTGTAATTTCTTAAATCCACTCAATACACAACACTAGGATCC

CUST\_1640\_PI426210822 ATTGACACTGGCTGTTCTGTCATGGTGGGGAGCTAAGTATTAGTC

A\_16\_P16465646

AAAGCAGCATTTTCTTTGAATACTTGTTCATCATCATCCTTCTATGTCAGACTTTGTCCAG

A\_14\_P120366 CCCCAGCACTTAGCAAATACTCAAGTATTGCTCACCTTAGTATATGCATTTTCTGTAGA

A\_14\_P119050 TGCATACCCCATAGTGTTTAGTATGGCACAGTCTCAGTGGAAAGTCTTTAATAAATACTTG

CUST\_2883\_PI426210822 CTTCAGATGGAGGAAAGATGGGCACTTCCAGGACACAGATACCCT

CUST\_2628\_PI426210822 AGGTTGGTGAGAGTGATGGAATCTGGTACATGGGCTGGGGGCGAG

A\_14\_P117733 TGTCTAGGTCATAACATACCATTTGTAAAGTTTGTGTTTTTTCAGGTTTATCTTTGCAG

A\_14\_P105163 CAAATCTCCACAAAGCCTTGCTTGCCTGCAAACCTTTACTTCTGAAATGACT

A\_14\_P200995 ATGTTTATTTTGGTTTATTTTCAGTGGTTTCTGCACAGGGTCTACAGGCAAAGATAAAAC

A\_14\_P131187 GATGTCCTGACAAATATGTGACAAGCAATTCTTGTA AAAAGCAATGTTTCCCTCTCTTTT

A\_14\_P125910 AAAATCTGAAAGGTCTATATTATTTTCTTCTTTTGCCCCAGAAGATCTCTCAAGCACCAT

A\_16\_P02470476

GGTGCATCTGATTTTAATAGAGTAAGGCCACTAAAAGTCTCAACTATCCAACACTCACTTTC

CUST\_1663\_PI426210822 AACATCTGGCTTATCATCAACAGCTTCCTTCAAGGGGGGTAGGAT

A\_14\_P136279 CTGATGTAAACTCAAGATAGCAAATGCTGCAATTCTGAGATGCAAATCCATTGTTTTTCAG

CUST\_6240\_PI426210822 GAACTCAGTCTTCCCCAACACATACTTTTCTTGTTGTCCTGCACACA

A\_18\_P15344625

AGTTCCCATAGTAAGAGTTACAGTACTTTCAGTTTTGGTAGGAGATCATAAATTCCAGC

A\_18\_P21114512

TGAAGAAACTGCACATTTAATCATATTGCATCTGAGGAAAAAGATCTTTGTGTACCGTGA

A\_14\_P115013 GGGACGAAGTAGCCTTTTTAAATTTGGGGCCTCTTAAATAATCTGTAGGATATCTCAA

A\_14\_P131529 ACAGAAAAATAGTTAAAAATGCAATAGGTTGAAGTTTTGGAGATATGTTTCTCTCTGAAA

A\_16\_P17181058

AAGGGCTTATGTAGAAGAATGATGCTTATGTGATGCTTAACTTATTTATAGGGATGGCGG

A\_14\_P115025 AAGACACCTATTTATGATCTCCATTGCAATAAACGGTAAGGATTTTTTCATGGGTTTCTT

A\_18\_P13019608

AAAAATAGGGATTCATTTCGAATATATTAGCCAGGAGCATAGTTAGATGTTACCCAGGCC

A\_14\_P119636 GAAGATTTTTTTACAGCCTTTAAAGTCACAAGGTGTTTTGCCCTTCTAGTATTTTGTGT

A\_14\_P112292 CTGATTTCAAAGGTGGTATAAAATTTTCTCTGATAAGGTTGTGCTCACATGGCTGTTAGA

CUST\_1697\_PI426210822

AAAAATAATTCTGATTATTTCTTATTGCAGTGTGAACTTTAGAAAATAAAGGTAATCCA

A\_16\_P37380277

TCACAGGCTTACAAATGATAATCCAAATAAGACACATAAGTTCCAAGTATAACAACCCTC

A\_16\_P18459739

ACAGACTGACAAAACACTACTATGATTTTCAATTCCTGCAATCTGATTAATTTACCAGCG

A\_14\_P113116 AATTAACAATCAGCAGGTTTACAGAGATTCCTAATCTCAAGACCAGCAAATAGGGATCA

A\_14\_P130370 CTTTACAGTTAACACAACCTGGAGTAGCCATGCCATACTGTGTCTTTTAAAGT

A\_14\_P132520 AGTCATTAATCCTTGCAATACCTCAGTGTTATGTAGTGATGTTAATTTACTGCCCTGTGT

A\_14\_P115759 TTAAATTTGAAATGGCTCTCATTTCTTCACTAAAACAGGTTACTACAGCCTCTTCACTGG

A\_14\_P127027 CTACTCCTTCCGGAAGGTTGTGACAGTTGTGATCTTTTAGTATCTTCTGTAGCAAG

A\_14\_P113948 TACTGGGCACAAGCAAATAATCACACAAGAACTTGAGACATTATGACTGTCTTTGGATA

A\_14\_P123643 GGAGATTACATGAGAAAATTAGTGTTCTTATAGTGTTGTCTGCCCTCAAACAGTCTCTAC

CUST\_8252\_PI426210822

TTTGGTCATGTTTTTTAAACATGAGGTAAGTACTGATGGAATATATTTGCAAATTAGCATATTT

A\_14\_P139611 AGATAGCATACCTCGTTTTCTGTCCACCTCTGTCCATTCATCTACATGAAGCATA

A\_16\_P18776036



ACATGCGTTTTTCAAACAATGTCTAAAGTTAATCAGAGTCTATGTAATTCACCCCCAAAA  
A\_14\_P128603 GCAGAAACCTAGAAACATGCCATGATTCAAAGTCTGGTATTTTTTGGAAAGAGGAATTTAAT  
A\_14\_P104754 ATTTTCATCATATATCTTTGCCCTTGCACATATCTGTAAGCATTCCCTGCTTTTCTCTTTGC  
A\_14\_P126117 TATACCAACGTTATGTATTTAGGAATTAATTCCTGGGTTCTGTACACAGAGAGGAAATTC  
A\_16\_P58424495 ATTTACCAACTGGGAAACCTGGGCAAGTGATATAACTTCACATTCCAGTTTC  
A\_14\_P113358 ACTGCGTAGCCTCAAACCTCATGTATTCAATGCATCAGGTAGTTCATCTGTAAATAAAA  
A\_16\_P21620222  
AGGCAGAGGTTTAGTATTACTTGGAAAGAAGGTATTCAAATGGGGTAAGAAAAGTGAGTAA  
CUST\_2857\_PI426210822 CTGTACCTTGTGGGCAATGCGAAGCAACCTGGCTTATATCTGACATTA  
A\_14\_P131630 GAAGCCAAAGGCGCCTTTCTTCACAGTTTGGGAACTTACTGGTAGTAAA  
A\_14\_P111210 TATTCCAGTCACTACCTTGGAAATCAGGGTATTCTTTATTAATATGAGTCTTCCTGCTACC  
A\_16\_P03437689  
AAATGGCCCCGAAATACATATATTCCCAAGCAGTGTGAATTATCTGTTTTCTGACTGACTA  
A\_14\_P135140  
ATGAATAAAAACAGCAAAACCAAATAAAGTGGAGATGAGTGATTGAGTGAGGTAGATTGC  
CUST\_5893\_PI426210822 CTCTACCCCTTCACCTCTCCATGCCTCACAAAGTTGGACTGTCTT  
A\_14\_P102435 CTTCTCAGAGGCAAAGCAGAAGAAAATGACTGATGGATATTCGAAGACATTTTAGTTAA  
A\_16\_P15348215  
CTGTGGGGATAAGGTCTATATCCATGAAACAACCTGAAAACCAGCATATGATATGGAGAAA  
CUST\_396\_PI426210822 CTTTCTGGAGACGTGCTTCTGCTCCCTCTCCTGGGACACATCAA  
A\_16\_P02157325  
TTTTCAATTCTCTGCAAGTCGTCTTCATTTCTAACTGTCCAAATCCTATCATTCAAACCAA  
A\_14\_P106072 AATATTCCAAAAACCTTAGGAAACGGCAATTAAGTCACTTGTTAAGCCGCTTTATCCAT  
A\_14\_P201526 CTGAGAACTAGGACTTTTAGAAAAAATTTACTGTTACTGGTTTGCAGGATTCCAGACAG  
A\_14\_P122136 TCATTCAGAACCTCACAAAAATAATCATTTTGAACCTGGCAAGGAGAAGAGAATCATTG  
A\_16\_P36305614  
ATCAATGCTCCTCAAATGTAACCTGAAAAACATGTTTGTCTATTCAATCCCGGTATAAGCC  
A\_16\_P20016814  
AAACCTCTATAAAGGAAGGTTTTACTGTTGAAATGGTGTCTGAATTCTGAAGGGCTACAA  
A\_14\_P112644 CAGCCCGATGACATTGAAGTTAGCCAAATGTCAAAAATCTGTAAAGATCCTGATTTTAGA  
A\_16\_P16235388  
AGACACTACTGCTACTGAAAATGATAAACTGCTAGGTCACATAGAAACATGGAGAACTGT  
A\_14\_P139821 CTTTATCCGGTTCTCGCTAGCCATGTGGTTATTTCTGCTCAGTGTGAAG  
CUST\_6228\_PI426210822 CTTGTGACTGGACGCAAGGAAAGGATCTATGAAGAGAATGTAGCC  
CUST\_8817\_PI426210822 AATGAAAGAAATGGCTGCTTCCACTCTGTTAGTGGCCTCCTCAGACA  
A\_14\_P138258 CTTCAATTGTATGTTTAATGCCCTCCTGAAATCTATTTAGTGTGCAAGGAAGGTGATA  
A\_14\_P110423 CTTGAACTATAGTTTGGGTCCATATAGGAACCAATCACCAAAAACCTCTGGTAAACAGAATT  
A\_14\_P122101 GTCTCATCAAGAACCTATAGCAGCACAATAGGGCAAAAACACTAAATAATCGCATAGAGA

A\_14\_P119954 TTCATTCTCAAACCATTTTGTAAAGTTCACATCCCAGTTGATAACATGGCATATGGA

A\_16\_P17020481

CTGCTATCTTCTCAAGTTCAGAATCTCATGAAGCAAATCCATCAATTCATTCAATCCAGA

A\_16\_P58424110 CACTTCCCATTGCAGATCTGCTGAAGTCACAGCCATTCTACGTC

A\_14\_P105666 CTTTTTCTTTTTTCCTATCAGAACCTCAAATGACTGGCAAGGAAGGGGAG

A\_16\_P39935769

TCCCTAGAATTATCTCAGTCATTCTATTCCAAACAAACACTACAGAACCCTCTTTGTCTT

A\_16\_P16191783

AGTGCTGCTAATAAAGTGTTTGCTGAGAAIGTTTTCTGTAACTCATTGAGCCAGGTTAT

A\_14\_P100514 GCACAGGGAGATGAAGACAACCTCTCCAGGATTCTTAAAAAGCCAATC

A\_14\_P117420 ATTTCTGAAGATAATTTCTTTCTTGGATGTTCCATTTCTTAGGCCAGCAACAGTCTG

CUST\_9358\_PI426210822

CTTAAAAATTATTTCTTGCTTAAAGTGAGTTAACTGGAGTAACTCTTTTTGAATGACAAGCT

A\_16\_P21029710 AGAATACAAATGTAACGCTACTTCCAGAACTGATTCTCTACATAGATTGCTCCCCGTC

A\_14\_P130700 TAGCAACTGGAAAAATAGTCATAAAATAGCATTACAAGGGCTGAACAAATTGCCTTTCCT

A\_14\_P109444 AGATCATCTTCTTTTCATTCTCCTTTATGAATAGGTTCTGGTAGTTTCTCTATGCTGGGA

A\_14\_P137192

CAAACACAAGACTCAAATTA AAAAGAAAACCTTGAATCCCGAATTCAATGAGGTAAGGCT

A\_16\_P02865429

GATTTGAATCTCTAGGATAAAGAGGAGATATTTACACCATATGGAGTCTAAGTGCCTCA

CUST\_7987\_PI426210822 TTCTGTCCACATTCACCCCAGGAGGAGGGAAACCTCAATAAGTGT

A\_14\_P115582 GTTCTTAGAGATCTTTTGCAAGGGATATGAAGGATAAAATCCTATCTGTCCAATTGCTCC

A\_16\_P37615105

TTAGCCCTTGCGAGTAATATGATTTTCGTTCTGGACAAATTATGATTAAGGAATTTGGAGG

A\_16\_P01263202

AAATATGAGCAGTGTTACAATGACTAGAGACACGACTGAATTTTGATGCTTGGTGGATAG

A\_14\_P101351 TTGTTGGTTTGTGTGTTCTTTTGCCAAATCCTCTATTTCTCTGATGTTTTCAAATATG

A\_18\_P14766025

AAATAGAGAGCCTGCTATCAATCTCAAAGGAATACCATTATTTCCGTTGTCTCTATCTGG

A\_14\_P123170 CTATGTGGCTATTTCAAACATCCTCCCCATATAATATCCTGTAGTCCGTAATATTTACT

A\_14\_P200094 CAACCCCAAGTGGGAAGAAAAGAGGATAATATGCCTGGAGAATCCTTTTTTTAAAAAAA

A\_18\_P17209881

AAGACCACTTGATATACACTATTTCTGAAAGTCTTTGAACACACTGACAACAAAAGTTCA

A\_16\_P19219102

CCATTTCTAACTACACGATACCTACTAACTCGTCCATACATTTATTCACAGTGAGCCTC

A\_14\_P113790 TGCTAAAATTAACATTTGGAAACCTTAATTCTGCTTGGAAAACCTGTCAAAGACACCCTTC

A\_14\_P110347 AAGGACAAATGTGAGAATTATATAGAGCCAAACTTCAACTTAGTATAACCATGCACCACC

A\_14\_P139205 CACCTGTAAAGTTCCTCCAAAATTAACCTGCTGATGACTCCAAACCCTAAAAAAG

A\_16\_P01644367

CAAGGACTCTGTCATTTCAACTCACTTCCTATGTTTGTAAACGTCAGAAGCTCATAGCAG

A\_14\_P119197 ACGTTATACCAACTTTACTAATTGCAGTCAATTTTCAACTGATCTAATATTAGCAATTTT

A\_14\_P115805 TTCTCAATATGATCAGGATATTTTCCAAGATCTTATATAGGCTGCCAGCATATCAGATA

A\_14\_P119471 TCCCAAACCTAATACTTCTCCATTTTACTTCCACCTTTAAAGCAAGTCCTCTGTATAAGT

A\_16\_P00576877

ATTCTTTCTGGTTTGTATACCTCTCAACACCTTCAATTCTCAAATTAGTGCTCAAGGTC

CUST\_4110\_PI426210822 ATATTTTTAGTTCTAGAAAGAATTGTTTTGGGGGGTGGGAGGCTGCAGTTG

A\_14\_P101397 TTCAAATGAGAAAAAAGAACAGTTTCTTCCATGTGCTGGCACGTGGATGATTAGAAAAAA

A\_16\_P41084651

CCCCCAAATAAAAATTTCAATAATTTTCCCAGTCAGAATTTACATAGGCCATAGTGTAGCA

CUST\_2918\_PI426210822 CTTAGCACTGGGACACAGACAGACACAGACTTCTCACTCCGACTG

A\_16\_P18195314

AAGAGAGGGAAAAATCTAATTTGAGAACTGCACACTGAATCATTACCACGTAATGCTTC

A\_14\_P109386 TGCAATATACCATGAAGAGAGTCATGGAGTCAGAAAAATTTTAAAGCCACTGTTCATGTC

A\_16\_P58424518

TCAGTGTGCATTCCCAAGAATGAGGCTGTTCTCTTAATAAACTGTAGTATAGTTATCACA

A\_16\_P18599416

ATGTGTCTATACTGATTGTAGCCTGGTTAACTCTTATTCCTCTGTAAATGAAGACAACC

A\_14\_P100912 ACCCTGATTAATCTGTTTCAAGTGTGAATCTTTATGTGTTGGATTTTGTGGTGTCTTTC

A\_16\_P20274500

CCTAGTCCAACCTCCAATTTTAAAGATAAAAGAGAGTAACATTTGATGGCAATGGAACCT

A\_14\_P110176 GAAGCATAATAATTTCAACTTACAGGCTTTGGAGTTTTCCATGGAGAAAAGAAACCTGTA

A\_14\_P112457 ACTCAGGATATACCTTAAGAAGGTAAAAAAGTCATGGTTCCTGTATCTGTGGAACCTGTA

A\_14\_P126067 CCTCTTTGTATTTGGACGTAGAGCAAAGTGGTTGATACATTTTCACTTGCCTTGATAAT

A\_14\_P131820 TGATGATCCCATATGAATTCGTATGGTTCATGTCCTAGAAAGAAAGAACTACAATTCCTTA

A\_16\_P00918546

GGTGGATCATTGTTCTTCAGTCATTTGAATCAATAACACTACAGTCTAACTTTCAACACA

A\_14\_P117737 GCAATACTCTGGATTCTGATGGGTGTTAATGCTGTCAAACATGCACATCTTAATAAGATT

CUST\_3722\_PI426210822 GCCCTAGTTCTGATCTCTGGGGTCCTCACCATTTATAGACTTCCATTA

A\_14\_P127659 GATGCTTTCTTGTTTTCTCTGCTCCTTTAGTTACAAGATTTTTTTCTCCAGGAGTGTAAG

A\_14\_P121520 AGGGGCTTTATTTTGACACCACTTTGTTTCAATACAAACAGTCCAGAAAGAAAGTCAAG

A\_14\_P101833 ACTAGAGGGTAAGGGAATCAAAGGAGACATAAACCAAAATAGTTAATTTCCCTCTTTCT

A\_16\_P37077253

ACATTTCTTAGTCACTACTTTTACTGTATGCCTTCAAATTTAAGCAATCCACACTGT

A\_14\_P104649 GCCAACACATCAATATACTTGGGGACAATTACCATTACATAAGTTGAAACCCATAGTTCA

CUST\_10369\_PI426210822

TAGACACTTGTCTTACCATATGTGAAAAGTTGTAAGACCAAATGTAACATCAAAGGGCAG

A\_16\_P19855138

AAGCGCGTAGTTATTTAGCAAATCACTTTCAAATATCGTGTCAATTTTACCTTGGTGTCT

A\_14\_P122421

CCAGTTGTGGAAAACATGAAAAGTATAGAAGTAAAAAGGAAGAAAAATCACTACAGTCCC

CUST\_3092\_PI426210822 AGGAGCATATCCATTCTCTTTTCTTTTAAAGTTGGCCTCTGACAGCCCT

A\_14\_P115135 CGCAACCACACCTACAATACCTATAATCGGGCAGGGTTACATCATCC

A\_14\_P113449 GGTGAACAATGTTAGAATAAAATTGCTTTGGATCTTGCCTGGAAGGTGTTTTAAGTTTTG

A\_16\_P39930524

CACTCTTAGACATGCATTTTATTAGACATAGACCCTCTAAAACTATCACTCTTCAGCCA

A\_16\_P18420770

AAAACAAAGAAAACTAGGGACATTACTGAGCATCTCACCTAAAATGATAGTGAACCTGG

A\_16\_P30952596

CTCTCAAGGCCAGCCATTATCATAGAAAAATCTTCAAGTAAGTTGTGTTGTTTCTTCC

A\_16\_P16191200 AGAGTGTAGTCATTGGCTACCATGACATTCTCCTCCCTCAAAAATGCATCT

A\_14\_P130002 TACTGGTTTATCAGGAGGTTAGGAATAAGATACTCTTTGAGACATATCCCAATCTAGGCA

A\_18\_P16071489

AGATTATGGTCTAACATCACACTGCTTTTCTCAAACCTCAAACCTGGGTCTGTAATCATC

A\_14\_P127544 TTGGCACAAGATATAAAGACGAAGAAAAGAATGGCGTGAAACTGGTATGTGTTTTCTAC

A\_18\_P14133695 ACTGAGATGGAGTTGATATTAGAGCCATGGCTGGGACAACCTTCATG

CUST\_9291\_PI426210822

TCCAATTATTTTTCTTTAGAAAGACTAAATGTGTTAATCTGTACAAACCTATCCACGTGT

A\_14\_P132679 AGATACTAAATCTGGGGTTCTCAGGTTCACTCATTGACATGATATAAATGGTTAAAATC

CUST\_7106\_PI426210822 GCCCGTTGAGCACTGAACGACTGGAAGTAGAGTATGATGTGAAGT

A\_16\_P19429166

AAAAATTATGCCATAATGTTGCTACTGTCTACATCTTGCTTCTCATCTTCATTTTTGGCCC

A\_18\_P22841729 ATTCACCATTTCATGGGCTCTTTCCTCTGTCCTGTTCCCTGTAGGC

A\_16\_P31957234

TATCCAGTCCAAAGTATTGCACGAAACTGACATATGTCCTTACTTTTTCCAGGCATTATA

A\_14\_P109893 ATTTTCGTTTCTCAAATGGCCATCCTCCTGGCAATGTATCAAGAACTCTGAAAAAATATA

A\_16\_P17555942

AAAATTTCTACAGGTAAACTCAAATTCCTACCAGTTTAAAGAGATTTGCACTCAGAGCC

A\_18\_P22841594

GTTTAATATCATCCCTCTGGCACAGATGCTTGAAAATCAATGGTTTCTTGACACATCTTG

A\_16\_P38587241

AACCCTAAAAACGCCATACTTTAAATTGTCTGGTTCTTGTAATATTGTGTTTCCTGCCAA

A\_14\_P106249 TTACACTGTTTGTGCGCAATGGCATCAAAGAAAAGCATGGATTTGATTATGCAAAGGTAAT

CUST\_8900\_PI426210822

CTTCCAAAATATTTTATTATCTGTGGAAGGAAAACATTTTTGGTATGCATGTCAAGTGCT

CUST\_8577\_PI426210822 CTTATGGGACTTTGAATGGAGCAGGGCTTTCATTCTGGGGATTTG  
CUST\_2374\_PI426210822

CTCCTTTGCTTTGACAAAGAGAAGTGGTTTTGGGCTCTTAAGGAAAAAAAAAAGAAAG  
CUST\_4574\_PI426210822 AAGGCTCATCTGTCAAGTGCCAGCAGGGGTGGGTGCTGTAAGAA  
A\_16\_P15848443

TCCCTGACACCTACTAATATTGACTCTTCTACTACAGCACTTTTTTCATCTCACATCTCTA  
A\_14\_P104018

AAAGAAACAAAGAGAACATTGTCGTTCTTTAACTTGCAAACCGGATGAAGTAACAGAAA  
CUST\_7892\_PI426210822

TGTTAGAAAATAATCATCATTGAGATCAGTTATATCCGAGACTGGATGCTGAAAAGATA  
A\_14\_P134740

GAAAGAAAGAAAAGTTTTATAATCTGAAAATACCTGGTGGGTCTTGAACCACGACAACAG  
A\_14\_P104985 TTACTTTCTTCATGGATATTCTTGGTCTCACATACTTGTAATCAAGTTTTTCCAGCCTCC  
A\_18\_P12867533

TACTCCAAATCATGCAGTCTACTCCTTTAAAACCCATTGAAAATATAGCGCAGAGAAAACA  
A\_14\_P111456 CTAAAATGAGGTATACCTAGATGTCAAGTAAGACAGATCCAAGGTAAGTGGGTAGGAAAT

CUST\_10304\_PI426210822 CAAGGACAGGTGAGATGCTGAGTACTGGGGATTGAAAGCACAAG

A\_14\_P119005 TCTGAAATAGGATGAAAGCAGAAAGCAGATTAGAGTTGGAGATCATGACCACATGATTAT

A\_14\_P103060 AGGCAAAGTCAATCTGCAGAAATATTGGAGGGACTAAGAAAGTTATGCAAATCTCTACTA

A\_14\_P126089 ATGACATCTGCAATAAACTTTGAAGATTACAGATTTTGGGTTGGCGAGGGAATGG

A\_14\_P120093 TACCTCTCTTTGAACTCTAAGTTGTTGGATAGTGACCCTGATTTTGTCTATTAGCCTTT

A\_14\_P108893 ACCATGTAGCAGATGGACCCTTTTGAGGACATATAGAATCATCTAAGAATGTTACAGAA

A\_14\_P133048 ATACAGGTGATCCCCAACTTTTCTAAATGACCCCTCAAATTCATAATCTTAATCTGAGTAG

A\_14\_P101603 TTTGCTTCTGATTCACATTGTGCAAATGTGGTTATGGTTTTCTTCAGTCAGTTGAGTAAT

A\_14\_P139617 CTCCATGAACTGAGATGGTTCTTGCTTGTCATTTAAATATTGTGGCCTTAACCATATTTT

A\_18\_P22840672

TGCAATATTTGGATCTTCTAGGAATTTTCCAAGATCACCCCTTAAATAGTTTATGGCACT  
CUST\_118\_PI426210822 CTCTTTTGGAGGGATTAGAACTACAGAGATCACTTTTGGGGGGAGTG

A\_16\_P01893269

ACTTCTGACTTTAGAATCATTGGGACGTAGAATTTTAGAACTAGATACATGCTGGAGACC  
A\_14\_P132852 TTGTTTAAATTGAAATTATACAGGCAAGAGACAGGAAATGGCCAGAATTGTGATTCACCAT

A\_14\_P115264 GATGACAGAAAGAGTTTAAATTAACACTGGAGGGAAAAATTGGCTTTGAATTTCTGAGA

CUST\_4724\_PI426210822 CAGTGGGTGATGCCTTTTCTTTGTTACTTTTCATGCAGACATCTGGAAA

A\_14\_P126337 AGTCCAAGGCTTCTTCTTCTTTGTTTTGAAAGTTTTGCTTCTGTTACATTTTCGTATG

A\_18\_P16205319

CCTCCTCACCTAGAAATACACTCCCTTAAAGTCTACATAGAACCATAATTAGACTGACTCT  
A\_16\_P02124680

ATAATAGACTCATTCAACACAATGTTTTTACTCCAGAGTAAACTAGACTGCTTGAGCA

A\_14\_P109866 AAAATATTTCCCCACTCCAGTAACACAACCTTTCTTTCATGTTTGTAAAGGGTGCTTTCTA  
A\_16\_P21281963

TCATCACCCAATAAAAAAGGTAACGCTGAGGTATTAGAACATTACATTAGTTCCATGAG  
CUST\_5430\_PI426210822 TGAACCTGCCTCTGTTCCCTAGACTGTTTTTCAGAGCTTAGATTGGTGGATAGTA  
A\_14\_P113431 GAACAGAGCATTGAGTTCATTAGGGACTCTCTGATTTCCATTCGAGATGAGAAG

A\_16\_P01135735

ATAGGGTTCATTTAAAGGTTGTAAAGAAGGACAAGCATTACAAAACTTCAAGGCATCAT  
A\_14\_P139452 GAAGTATATGTTCTGATCCACAAAGAGAAAGAGGTGGTGATAAATGTCAAACCTGCAAAAC  
A\_14\_P118770 CAATATAACCCATCTGAACTTGGCTGGTCCTTTCTGTTATCTGACCTCCAG  
A\_14\_P123572 CTGAGGCACATGTGCCTGGGTTTCTCTACTTTTTTTTTTTGAATGATGTTAAACCAAAAATA  
A\_14\_P134378 CCTCTTGAAAGAATTGGAACCTGGTATAAATAAAGTCCAATCAAATGTCCAGCAGTGAAAA  
A\_14\_P106511 TAACCACCTACACAGTGGCTGACGTTGGAGTAAAAATTCTTTCTTCATATTCATATGCAG  
A\_14\_P100060 ACCTTTCTACCAAAACATCTTTTCATTTTGTGATCCTAAATCTCTCCTTTTGGTATCTCC  
A\_14\_P108506 AAGCATAGTTTTATCCAGGGAGAAAAATAAAAGGAAGCCATAGAATTGCTCTGGTCAAAA

A\_18\_P25668647

AGTTGTAAAGATATTGCTGACAATGAGAAGAATGGCTTGGAAGGAGTGAATTTAGAGG  
A\_16\_P58424217 CTGAACCAGAGTCTACCTCCATGTAATCACACACTCCCCTCCTATTTCT  
CUST\_4211\_PI426210822

CTAAATCAACTCAGGTCTGACCTTTGGAAATACGTACAGTAATAAGGAATCCTAGGG  
A\_14\_P117138 CTTAGAGTAAATACTTTCAGTCTATATTTCCCCATTCTAAAGACCTAGACTCTCCACTCT  
A\_14\_P124870 CTCAGATTCCAGTATGATTTAGCATATTTAACCTTATGTAGGTCAACAGCATAAACCTAT  
A\_16\_P02751606

AATCACCACACGTATTTCTGACACTTACTTTAACTCTAAACTTGCAAATCCAAGTAAGGG  
A\_14\_P202067 CTATTTCTGACAAACAAGGTGGGTTGTATATTGGAATCCAACCTGTAGTTAGTTAGA  
A\_14\_P104719 TTTTCTTATTGCAAATTTAGATTTGGATGGAGCCAGCCAACGGCGTTATTCTGAGAAT  
A\_14\_P200286 CTTGCAGGTGTGAAAGAATGTCGTATGCAGATTAACAAGGTGGATCCAAATTTCTAA  
A\_14\_P125117 GCAACTGCTTGATTTTTAGCGTATCCGACTGTGGAAAAAGAAGAGCAAAACTC  
A\_14\_P100243 CCACTAAACTCAAATGAAAATTGGGCATGAGAAGAGTAACTCCACACATGAAAGACTT  
A\_14\_P128517 AAGAAGACAGTGAAGCAGTATTAATTACCAGAAATCATTTTATCTGAGGTAAAGAAAAAT  
A\_14\_P102052 CTCTTAGGACTGCTTGAGTGAATTCTTTATCTGCTCCATACGTGTCCCTCA  
A\_14\_P118911 AGGACTATCCCTACAATAAATGATACATTGGCACATTTGGGTGTATTCATCAGTTTCTT  
A\_14\_P127876 TTCTTACCTGCACGATGTAGTCACAATCTTCCACCTCGAACGCAATGT  
A\_14\_P126899 TTGGCACTTACAAAACCAGAAAGCGCTATTGCAAAAAATAATCCAGATGTTAAAGGGAG  
A\_14\_P102624 CTCAGTCTACGTTGTTTTTCCTTATTGTCTCGTAAAGTCATTGGTATTCACATAGGCCTT  
A\_14\_P121852 ACCACCCCTTGCTCCTAAGAAACAGTTATCCTAACTTTTATCATAATCACTTTCTTGCA  
A\_14\_P128521 CATAGGATTGTTGTTGATGGCATAAGAGAGACAGAGAGAAAAGATAGAATGGAACATAGTG  
A\_14\_P138584 TGGGGATCCATTAGTATTTCCCAACTGTAATATTATAAGGGGGAAAAATCAGGTTATTAC  
A\_14\_P115293 AATCTGACAACAATGACTCCCTTCAGACTCTAAAAAAGTCTGTGACCTGACAGT

A\_14\_P105023 CATTCTATAATATTGCAGGAAGGCTGTCATCTGTAGAAATCTACTGATGAACATTCTGG  
A\_14\_P133855 TTAAATGCTTGAGGAGAATAACTTTGAATACGAGATTCCCTTCGCTCTTCATCTTTCTTG  
A\_14\_P105339 CTGCATCTTTTAGAGAACTTTCAGAGCACTGATTTTTGATAGACTAAGTGGAATAATTG  
A\_16\_P00590391  
CCCGAATTTGCTTGCTAATAAAGATCAAAATATCAGTCATTTCTCTCACAAAAACGTGT  
A\_18\_P15640458  
AAAACAAAGGCTATTAGTGTGGAAAGGATCGTATAGGCTTCCTAGAATACCCTTCTATTT  
A\_16\_P19058822  
ACGACCAAACATCATGAATTCAAAAATACTACTCAGAACATTATAATGCCTTCTTCCT  
A\_14\_P137485 TGCTTTAAIGTTTTTAGTAATTCAGATGCTGCAAGTCGATTGTGGTGAGTGTGCTGTAA  
A\_14\_P130290 TAAAACACTTGCGAAAATCCTACTGACCTAAAAAGATTTCTTCAATCTTCTCCTTGGCAA  
A\_14\_P126411 AACTTCTGACATTTGCAAATTCAGGAGTTGTCACAGCAGAAATGTTTAGACATATGCAG  
A\_14\_P115535 TTAGAAGGTTTGACTACTCATGGCAAATAGTTTTTGTGCTGATTTCACTCTTACTGG  
A\_16\_P00071651  
AATTACATTTCTGTTTTGTAACACCACTTTCTGATCATATATGCCTTATGGTCCAACAC  
A\_14\_P110156 AACATAACTACTCAACTCACATGAGCATATCTGATTCTTCTGCCATACTTACAATCCCT  
A\_14\_P126956 ACACAAATGAGGGAATGTATTCTTGTGAGAACATACAGTAGTTGCTCAGTAAATGCTGA  
A\_16\_P18499443  
ACGCTCTACTTGAGAAAAAGAATCCTCTTTACAGACAAGTGAGATAAATGACTCTCCTAC  
A\_14\_P113986 CAATTACCAACCATGGCTGGGTCATCTGAGGGAGTGATAAGATTATTTTCATGT  
A\_14\_P129216 AGAAACAAATATGAGATTCAATACAACCTGAGTTAGACATAACAGCACAAGCATGAACCCC  
A\_14\_P105116 CTCCCCACCTACAGTTAAGCAATTTAATTCACCTTTATCCAGAGTCTTTTTGCTTTATTG  
CUST\_203\_PI426210822 GCAGAGCCTGTAGTGACGGAGGGGAGCAGCCTTATCTCCGGGAAC  
A\_16\_P01721259  
CTAAACAGTCTGCACAAAAAATTAAGGCACTAATTCACAGATCCAGTCCACTACTGAA  
A\_14\_P107909 CTCCCAAACCTGCTTCTCTTACAGATATTCACACTAAGCAAGTGTATCTAGAAATGTGTGA  
A\_16\_P41685140  
CACATCTCAACTGTTTCCTTGTCACAAATGTGTGTCCTTTTCTCATAAGTGTATAACCAT  
A\_14\_P139117 CCCCTGAATTTGTTTCTATAACACTTTTCAGGGTGTGTTGCCTTTAAATGCATTTCTA  
A\_14\_P113369 AGTAGTTGACTCACCAAATGTCCAGTAAATTGTAAGGAGTCTCTAATGTTGAATTCATCC  
A\_16\_P15976241  
ACTAACCAAGACCTAAAGTCATCTTTACTCACAACACCATTCATACAAACACTTCTTTGG  
A\_14\_P117339 TTTTTTAAAAAAAAGCCCAAGACGTCAAGTCGGGGAACCTCAACATTGG  
A\_14\_P105035 AAATGATCTCTGTGATAGTTACATGTAATGGCAGCAAAAGCAAAAAGCATATACCTCCC  
A\_16\_P36262917  
CTCTACTGGAGCATTAAAAAAATTTCTTTACCATCGTGTAAGGTTTAAATGCAACTGACA  
A\_14\_P135004 CTTTGTAGAATGGGCTTTGTTTAGCATTAAACAGTAACAATCCAGGCCCTTAAATTATGG  
A\_16\_P02243053

CCTCTGTTGATTTCACTGTAGGCTTCTCATCTTAATCATCATAGAACTCCAGAGAAACAT  
CUST\_6662\_PI426210822

ATTGAGGTAGTTAAATTATTTCCACAAATTGAGTGAGTTTTTTTTAGAGTAAATTAATTTG  
A\_16\_P02861810

ATTGCTTACTTGAATCCTAATAATGGTGTCTGCTAATACATTCTCCATACTCTTCAGCG  
A\_14\_P102247 ACTTTTAAGGCTAATGGAGGAAGGTTCAAGCAAATAATTAGTGGCCAATCTCACTATCTA  
A\_16\_P02359545

AATGACTTATAATCTTGGTTTTAGCAATCATCTCAGTAATTCTGGTATGACTCTCCTCCC  
A\_14\_P130578 GACCACTTATTATGAAATATAGGAGAACTCTCACTTTAACTATGCCTGAACTGCCAGCAA  
A\_16\_P38137731

AACCATCCCAAACATGTATTCTCTGGACCTTTCTATGCAACTTCAAACACTATGACTATA  
CUST\_7566\_PI426210822 GATCTGTGGAGATACACTCTGAAGGTGCTAGACTAGGAAGAGGTCC  
A\_14\_P104113 GACAGCAGACAAAATAGCAAAAAGTAAGAGTTTTGTGAACAGGGTTCGTAACAGTCATTTT  
A\_16\_P15903137

ACCCTAAAAGAAGCCATATGAAGAGACTAATGAAATCAACACAATTACAATGTCCTGCTT  
A\_14\_P202567 GTGGGGTGTATAATTAAGACATTTCTTGTGTTTACTTAAGGCATTTGCCTGGTCATTA  
A\_18\_P18184958

AGTGACAGTGTACCTTATAATGCAAAATCATGCCATATTATACAAGAACTCCACACCA  
A\_14\_P127328 TGTGGAGCCGTAATTTTATGAAGATGCCAATCCACTTTTTGCACTTTATCTGTTGAAAA  
A\_14\_P129835 ATTTCTTCCCTTTCTGCAAAGTTAACTTATGCACATTCTAACACATTCAAATAATGCTC  
A\_16\_P17028914

AGGACACATCAACTACAGATAGGAAGGCATACAAGTATATTAGATAAAAATGTCACCGTGG  
A\_16\_P21497936

GGGTCAGTGTTATAGAAGTCTCTCAATAGTGCTTTTTAGAACCTGGATGTTAAGTGAGAT  
A\_14\_P114453 GGAAAAGAATGATTATTTGCAATTCAGTGGAAGTGGTGAGGGAATGCTAATAGGAAAATC  
A\_18\_P22842649

CCTAATGTAAGTCTACTTTGTAAGTATTTGTTCTGAGATTATTTGTTCTGAAGGAGGCC  
A\_14\_P114901 TAAAACCAGAATACTCACCACCAAACCAATTTTTGTCCGAATTGCAACTATAAAGTCTC  
CUST\_697\_PI426210822 CATGGCATTATCTGAAATTTCCAGGGTTCCAATGCCAGTTTGGGAG  
A\_16\_P03725413

GGGCAAAGAATACTCAGTATTGGCTACTTTTCATGTACATAATCACTCTTATCTGCATGT  
A\_14\_P105438 ACAGTGCTCATTAACCTAACCAATCCAGAATTAAGCAGCAATTATCTCCAACATCTCAGA  
A\_14\_P131780 AAACAAATGAACAAAAAGTGGAGATAGCGCCTTCTTATTCAATCTTCATTTGGTATGGTT  
A\_18\_P12762876

ATCTGCAATAACTTCCAATACTCCACCATTAGTCCATAGAATAATGGCTTCTCCAAGATC  
A\_14\_P117933 ACATCCGCATTCATTCATTCATACCTGCCATGAGCCTGGTATCTTCATTCCTT  
A\_14\_P114445 GATGTTTCACAACATGGACAGTAATGAAAGGATATTCTTAGGTGAAGTAAGAGATGTGGT  
A\_16\_P03069961



AGTGTGAAAGAGTTCTCATAAGTGAATGTTTAAACCAGGTGCAATTCAGTAATGTCATGG  
A\_14\_P126010 CTGACATACAGAGATGTGGGCTCTCCAAAAGTAAAAAGCATTTTAATTTAGGGCCTTTTC  
A\_16\_P03676610  
TCACATTACTACTTTTTCTGTATGCTCCTCAGTATTCCTTTAACCTGTAAGTGTCCCTGA  
A\_16\_P35310630  
GCATTGCGACAACAAAATTCAGATAGTAATTAGATTTATCCCAAGACTAGTTTGTTAAG  
A\_14\_P101101  
GGGTAAAAGAAATGGGGGTGTTTAAAGCAAGGAAAGAAAAATTTAAAAGGGTCCTAAATT  
A\_14\_P101334 AGCACCATCTCCAACACTTCAAGGAATGATTACTAAAGCAGAGTCAAACAAAATTTTCAT  
A\_14\_P126077 AGATGCAGTGAATCTTTGGTAAAAGTAACTGAAATTACAACAGAAGTATCATCCCCTATCGTGA  
A\_14\_P128905 ACAGGTTTAAACACATTTCTGACAGACAAAAAGAGATGAATGCGTGAGTCATTAATCCAA  
A\_14\_P133398 ACTCTCTTAATTTGTGCCATGTGGCTACATTAGTTGATGTTTATCGAGTTCATTGGTCA  
A\_18\_P22840495  
GAAGAGGGTGACAGAGAGTTGCTTCTTTTAAAAAAAATGTATTAAGGGCTATGTAAATAA  
A\_14\_P108422  
GATTTCTAAAAAGAAACCAAACCTCTAGATGAGAAACACTTACTCCTGAAAGAGAACCCTG  
CUST\_2287\_PI426210822  
TATGGAATTCTCCCTGATGGAAATTATGGCACGTAGTTTATATTTGCATTTCTTTTATTG  
A\_14\_P109992 CCGATGGCAACATAAGCCTGCTTGCGGCAAAAGATCTAAGTTTTTCATTTAATATAAAATG  
A\_18\_P11092215  
ATGCTAGCAGAATCAGACTTCTAAATCAAATGGAAACAGACTCTACTAAGGTCCCAGAA  
A\_14\_P133365 CTGATTCTCCACAATAAGCACAATTTTAAAATAAAGTGATAAGAAGTGTAAATTGCTGTCC  
A\_14\_P106506 CTAATGATGGAGTAGTATCACAACACTAGGAGAAATATTATGCCTTCACCAAGCCTTCCTC  
A\_16\_P00685560  
ACCATGGAGTATAAGGCTTATTTTACTCCTTAAAGTCTTCTTCTATTTCTAGTCACATCTCA  
A\_14\_P129231 AATATCAAAGGCACTAAAATATATCCAAAAGGCAGGCTAATGGAAAAGACCCATCTCAGA  
A\_14\_P127489 CTCTATTATACATCAGTGTCTCTGAAACCAAAGTCAATCTTTGCCATTGACCAAAGTCAA  
A\_16\_P58424300 AATTTTATCATGCTCACAGACATTGTGGGCAAGGAATTCGGGACAGG  
A\_14\_P100108 CCTCTTCTACACCTGAACCATCCATTTCTGACACCATGATTTACTACAGCAACTATTATG  
A\_16\_P30952388 AAGTTTCTGAACGCTGTAAACTTCTCATTTTCAGATGTCACTGTTGGAGCCTTCAT  
A\_16\_P35493430  
TGACATACCTGTGAAATTCCTATCTACCTGCAAACACTAGATATAGCAACACATTGCACAAG  
CUST\_8032\_PI426210822 CTCGGTGGCGGAACAGGAGCAGCAGGTCTCTGGCCAGAGTATGTG  
A\_16\_P20249298  
GGGACTACAAATAGACACTGATTATAACTGCATACAAAACAGATTCAACCACTTCAACTG  
A\_14\_P105965 ACCAATATCTTATGCATGGGGCTATATAAGGATGGCAAACCCAGACTTTGATAAACATTA  
A\_16\_P36230469  
GCATTTCTAACATACCCTTAAAAGGCATAAAAAAGTGGCATAGATGATGGCTGGAAAGAT

A\_16\_P30952331

GAAGATCAGGCACCTTAATTAAGATCTTTCAAGCATCAGGTAAAAAGGTGAGGTTCTTG

A\_16\_P19957210

AAGTTTCTCTACTTTTCAGATCACCTAAGAAAGACCTTAGATAATGTTTCTGGCGATGGC

A\_14\_P111221 CTTCTTCACTGCTAAGACTACCTTTTTCAGAAATGCGCAGAGCAAACATCTTTCAAAG

A\_16\_P03808715

AAAAACAATAAGCCGATGTGAAGTTCAGAGAACTAACTTAATTAGGAATCATTGCGGGG

A\_16\_P19018642

AACATTGATGCTCTCCATTGAATCATTCTCTGGATGTTGCCTAAATAAACCAATTTCTT

CUST\_4990\_PI426210822

TAGATGTGGTCTGCAAAAGGACCGAAGGTTCTTCTTTAACAATTCAAATTGAATAG

A\_14\_P133458 TTGCCATTGGTGATACAAAGGCTATAAAATATATGGCTTATAATCAAGGAAACCCAGGGA

A\_16\_P39782799

TCTCTGCTTTACTAGTCACTTTCTCTAGATCCAACAATCCAAGTGTAATCAACTCCTAC

A\_14\_P119981 GTATCATTTTCCCAAATCACTGGAACATGATGGCCTTGCTAGAGATCCATATAATG

A\_14\_P109462 CTAATCAGGTTTCAATTCAAGGCTTACTTGAAACTGTTTCATCCTGTTACATTCTGTGC

A\_14\_P101288 GTCTTTTTTCAGAGATTGCATACTCAAGAAGAGGAGGAACATAAAATACGTGATGTCTTCT

A\_16\_P41770446

TCACCAACCTTCCATCCTAAACTCTTTATGTAAGAATTCTCATAACTTCTGAACTCTGGT

A\_14\_P113207 TTAGAAAATAACCTTCCAGAAGTCTGTTTGGAGTTTCTTTTTTAAAAAGAACATCCCAATT

A\_14\_P123120 AGCAAAGGTGAGTTTGCCATCATCTCAGTATATCAGTCAATGTAATTTCTAGGTCCTAAT

A\_14\_P126991 CAATAAAAGCCAAACTTTAAATTTTGGATGACTTTGCCTAGGGAGTAAGTCTGTATCTGC

A\_14\_P202001 TTGGCTAAAACATCATAGCCACTTTCATCATCTGGTTCTAATGGAGGGCAAATAAGAG

A\_14\_P117946 GCTTTCTAAAGATGTTTAATTTTGTCTTTCATCTCCTGTGCTAATGAGTTCCACTGTCC

A\_14\_P133769 ACATGCTTTTAGGACAGAATGGAGACTTATACACCCAAAGTTTATCTGTGTTTGTGTTGTA

A\_14\_P103190 TCCTTTAATAAAATTAGTCCATCTAAAACTCCCAATGCCTAAGGTTCTAGTCGTGGAAG

A\_16\_P58424473 AGTAGAAGTTCOAAGGCTTTTTGAAATCTAGGCCTGGAACAGACAGCATCATTT

A\_14\_P124944 TTAAAAATAAAAGTGCATATGTCAGGTAACCATGACTGTCTACTGCCATACAATGCACCT

A\_14\_P119502 ACTAATTTTCTTTACTTCTTTAAGTGTAAGGAAGTGTATAGTCCCTGAAAGAGTC

A\_14\_P117925 ATAATTAATGCTTTTTGGATAGGCATGTTTCGAATCCATACTGGAGAAAAGCCATACAAT

A\_16\_P58424618

ATACAACTGCCCCAAATTGAATGGCTTTTCAACAACATTACATCTGACAAATTTCTG

A\_14\_P107520 GTTTTGATCCTTCTGTAAAGGAAAACAACAAGTCAATCTATCTTCTTACTGCTTCA

CUST\_4862\_PI426210822

CTAACTAAGTAGTCATGAGTCGAATCTCCCATTTAGTCAGACACATTTTTCTAGTTTTTC

A\_16\_P35263611

ACTTTACAGTATGCCACAAGATCTTTTATATACTTTCAGCATCTTTCTATAAAGACGACA

A\_14\_P138150 GAGAAAAGAGATGCATTATGGTTGAGAAAGCAGAGATCACACATAGGAATTTTTCCGTA

A\_16\_P17882448

AGCAGGTATATGGAAGGACATAGTTATCTCAACTTCACATTAACATTAGAGGAGCCAAC

A\_16\_P01913053

CTGCTGATGCCTTAAATCTTGATTTCGTATATTGTCTGACACTAAAAGAACCACGTGACTC

A\_14\_P125831 AGCAGGTGCACAAATACATTTTCACAGTGTGCTGAATGTCTTTATTTACAAGATATCATT

A\_16\_P00685513

TGGGTAGGAAATAGATAAAGACCTGATGGGTTTATTTTCATCTTAGTTGTTTCTACTCTTT

CUST\_6451\_PI426210822 GATATTCAGATTAACCTGATCTGGTCTCCTGCCAGTGACAGGCCTCA

A\_16\_P17623952

TGTCTTCCCTTAIGTCTATGTGTGCATATCCTTAAAACAACCCATTACTTTAGGTAACCTG

A\_16\_P16774142

ATCCTTGCCTACATACCTACCTTACAACCAAATGTTAGTCACTTAGTTCCTGTTATGTTC

A\_16\_P17837035

AAAAACACCATGCTTTACAAAAAATGCCATGCTTTACAAAAATCACACATTAGTGGGTGG

A\_18\_P14136579

GGTGTTACAGTTCACAATGGATCTGAATTTCTGATCTTGTGTTTTTCATAAGGGAAATT

A\_14\_P121760 CTA CTACTGCATCCAATTACATCTTTAAATCCTTTAGAGACTGGCTTTTAGAACTTGACCCTT

A\_14\_P138646 ATGTGAACAATCCTGAATTCAGGGCCTACTGATGGAGTCCACTAGTTA

A\_16\_P01770555

ACACCTTCAATTAACCCCTACTTTCTACTCATATCACATCTTGAATTTTACCTGGCTTCT

A\_14\_P133331 CTACTTAATAAGTGCCACTTCATGGGGTCAAGAATAACACACTGCTTCCA ACTACTAATA

CUST\_3590\_PI426210822 CACACTTGTCCTCCCACCCCTTGCTTCTCTATTTTCAATTCACT

A\_18\_P22841079 AGTAACCTTTCAGAGGTGCTCTGAGTCCTGAACATCGGAGATAGATTCTTTATCT

A\_16\_P16928153

CCGATCTCATAAGAACACATTGCATTATGTCCTATACCTGATCATGGAGTTACTCAGATT

A\_14\_P201664 ATTCAACCTGGCTTGATCAACACTGCTCAAAGAAAAAAAAAATTATACAAAATGTGCAAAT

A\_16\_P41492740

AGCACACCACTTAAAAGAACTACTGATTTAAGGACTATAAAGAATTGACATTGAACGAA

A\_16\_P02729184

AACTCCTGTTCTGTAAGTAACTCCCCAAAGACAGTAAGTTTCTCAAACCAGTTACTAAAT

A\_14\_P113501 TCTCTTCCATTTTGAGAGCCTATGAAGCAGCAAATAGAAGCCTAATTACATTTCTGTTCT

A\_14\_P108109 CTGCAGCCAAAAACAGTTAGCAGATGAAACTTTACTTAAAGTAGATTTGGAGAATCGTT

A\_14\_P130432 GAGTCATCCAGGTTCCCTTCCAAAATAGAGATGTGTTTCTTGCTTTTTAGTTTGATTGAAG

A\_14\_P123403 TGCTCATGCTTTATAGATCTCAGGAGCAGGTCAAAGTATGAAGCATATTACATAAAGTGC

A\_14\_P130375 CTCCATTTTACAGAATTACTGAGATTTCTCAGTTGTAACATGATGTCATCCTGCATGC

A\_14\_P138467 TTGAAGGTATGTGTTGAGTTAATGAGAAAATAAAATTTTGCCAGGGAATGTCAACTGCA

A\_14\_P115434 TAAGAAGATTTTCATCTTTACCACCTGTTCTGGATTCTTGGAACAGGTAAATTCATTGG

CUST\_2745\_PI426210822 GTTTGACCAACTGCATGGGGCTACAACATTGCAGTTCATGCTCATAATG

CUST\_10399\_PI426210822 ATGGGCTTCTTTTCGCCGAAGGTACAAAGAAATTATCGAAGCTGAGAAGAA  
A\_14\_P104400 CTGCAACACAATGTGTAGAACTTAACGGAATGAAGTTTTCTTTTGGAGGCTTCCAA  
A\_14\_P116340 ACTGCCCCCGGAGATATTTATTTTCTACAAAACAAAAAAGATAACAGCCCCAA  
A\_14\_P118746 CTAGACTTCGTGTCCCTTTCAGTTGGTAAATGGTTTTCTATAGAATCAATAATATTTCTTT  
A\_16\_P16219964  
GTTTACGATTAACATTA AAAACAAAGGTAACAACAATAAAAAGTAACAACACTCAAAAAC  
CUST\_10314\_PI426210822 CAAAGGTATGTGCTAGAGAATCCTATTTCCCTGTTACATCCTTCCACAGTTTCA  
A\_14\_P138668 CTGGAAGTAAACTGGATAAAGTTTTGACTGTGTCTCATACGGCAGACATTCAGAAAATTA  
A\_16\_P00685451 ATCTTTTTATTTCTGGTTGGGAAACCCTACACAGACCAGTGTCTGTCTCAC  
A\_16\_P16191387  
GACACTCTACTGTGGTTCCATTTGCTCTTTGAAAACCTTGTGTTTCTGTTGGAAAGAAA  
A\_14\_P105793 GAAATGCATTTTCTCTCCAGCGGCCATGTAAACCAGGAAACCTTC  
A\_16\_P16326158  
ACAAAACTCATTATCCATGTCAGTAAGCCTAATATTTCCCTACCTTCTAACACATTATGC  
A\_14\_P106688 TATTCTGACCACAACAAATTACTAGTGACCAGGCTATCGATCATTTAAACAAGCAATGCT  
CUST\_7302\_PI426210822 GGTGTTGTCAAGAAATAAATATCCCCCCCCACACACATAAATAGAGAACAA  
A\_16\_P16766867  
TGTCATCAGTATTGAAAAGAAAGATCTGAAAACCTGAAGTCTAGAAACCTGATTGCCAGC  
A\_14\_P125423 TTTTCTTTATAGGCTTTGATGCGGCCTGGAAGAATTGATAGAATCATCTATGTGCCTTTA  
A\_16\_P19632935  
TAATCCAGTTCCTAATTA AATTACCTCTTCATGACCCAAAAACTTAGTGCTTTTCGAGAC  
A\_14\_P119901 TACAAACGTTTTTGCAGGTTCTGCTGTGAAATGTGGTTTGATTTTTTTGGTGTGTTAATT  
A\_14\_P124845 CTGGAGTTCCTCCCATACTGTGAAAGTGATTTGTGGTCGTC AAG  
A\_14\_P112312 ATTTCTATATGAACCTCAGGAACAAAGA ACTACTTTCCAGCACCTTCTGAGTCTGATTTT  
A\_16\_P18157054  
TGGGAGTTTAGTCTAAAGAATAGAAAGCCATACGGACAATAAAA ACTCATTACAGAGATG  
A\_14\_P100019 CATAGCACTGAGGTATGGCTGGAATAACAACAATGCAAACGTATTTCTATCACATTTGT  
A\_16\_P03706335  
ACCTCCACATCCAATAATCAGTCATTAAGTTATCATCTTACCTTAACAGTTCACACCTT  
A\_14\_P104647 TTCATAGCCTTGCCAAAACACGGGCCAGGTCTTTAAAATTAAGCAATTAGACAAAATAT  
A\_14\_P121380 CTCACGGCTGGTGATTTTATTTTCTTGCTGTTAATGTCATTACATTCCTTAAAGGTCCTA  
A\_14\_P130196 ACCTGATTGCATGCACTTAAATGCAGATTATTTTGGAGTTTGAAAAGGGACTATTAATGA  
A\_14\_P117078 TTTGCAGGAAAAGTATGACAGTATGGTGCAAAGCCTTGAAGATGTTACTGCTCAATTT  
A\_14\_P118639 TCATTTAAATTAATGAATTGCCACTTTGGTTAGGACCCTATTAGTCCTCAGAAATGGGTT  
A\_14\_P127759 AGAAATCGCAAGATAATCTTTTGTCTACTTTAGGTCAAACGGAGGTTTAAATGTTTCTGGG  
A\_14\_P102375 ACTCACTTAGTTGACCATACCTGCATATGGAATTTCCCTTCTATCACAAACACACAAATGT  
A\_14\_P137037 TTACATAGAAGGATATAGA ACTTACCCTCTTTTTTCCCTGAAATCAATGCCCACTGTTG  
A\_14\_P118106 AGGGGGTAATGGGGAATTTTCACTTTCTGCTATACTCATGTTTTTCATTCTTGAAATGTAA

A\_14\_P125439 CTATTTACAGTTCTTGTCTGAGGCTATGTTTAAGCATGGATGAATCCAGTTCAATGA

A\_18\_P22839225 CTCCTACTTTATTTGGACAGAAGTCTCACTGGCTTATGTCCACATTGCCTTTG

CUST\_5745\_PI426210822 TAGTCCCAGGCAGATCCAGGAAGAGCACTGGGCTGGGAGTCCCAT

A\_14\_P110922 GGAGTCATGGTTTCTTGGTGTCTTGTAGAAATCAAAGTGCAGGAAGGTC

A\_16\_P58424581 AGATGAGAAGGAATTTCGCTTGCCAAGCATGAGGAAGAGTGTCTCAGTT

A\_14\_P111526 CCATACCTAACGTGCATTTGCCACACATGATCCTTAATCCATATTCCAATATATGACAAG

A\_16\_P00685501 CAAGGCTTTTGTACCCCTTGGGAAAGGAAGGACAAGGAAGTCAG

A\_16\_P17808201

AAACATTCCCAACTGATATAACTGACTGGATTAGACTGGTTTCAATACTTCTCAGAGACA

A\_14\_P136921 CTAATAAATCTTTCTCTAGAATTCATCACTTACCCTGTCTGGACTGGCTTTGACTTACA

CUST\_3845\_PI426210822 TATAAATTAAGCCTGCCATTCTCCAATTGCTTAAGACACTGAGGCCCATCAG

A\_14\_P102038 ATGTATATAGCATATTCATGTTGGAATTTCCCTGAGTTGTGAAGCCCAATCCAACAGATC

A\_14\_P135613 CTCAAATTGACCCAAAGAAGTTGAAAAGGAAGCAAAGTGTGAATATTTCTGTGAGTTTTA

A\_14\_P121156 ATGTAAGATTTTATTTGAATGAAAGACTTCATTGCACACCCAACCAACCAACCAAGAAT

A\_14\_P201393 AATAATAAATCCCCAAGATGGGAATTTTGTGGCCATTTATTACACCGACAGACTTCATTC

A\_14\_P136914 ATTTCTTATTGGTGCAATTTGCATATAAAACCAACAGGGGTTCCCTGTAACAGAAAGAAG

A\_14\_P112707 CTATTCCATTGCTTAGTGAAGGCTATTAGTGATATGCATTTCTGCATATGAATGGAAGG

A\_14\_P129306 TAGTTTGATTTATGATGATAGGGCTCAGGTAAGTGATTAGTTTTATTCTCCTGCCTGCTT

A\_18\_P14134510

TCAAAATCTAGGAGATTCATAATTTCAATATATTCCATTGCTTGTGACTATTTATGGCCG

A\_14\_P200872 ACATGTGTGCCTTTACAATCTTCTACTCCCCTCATCTATACCTGAAAAAAAAAAAAACAC

A\_18\_P22841724

TCCAGTTTTATAGTTTTTTCCTTCAGATGATTGTGATGAACTTCATAGTCCCTGTCAAGTC

A\_14\_P104178 GAGATCGAGATCAAACCGCTACGCAAGATGGAGAAGAGCAAGTCCTATTAC

A\_18\_P26795408 CTCTGGATTCAGCCCCATTCTCCAACACTACTAGAGAGACTGTTTC

A\_16\_P17428532

GGTTACCATACTGTGATGTGATTTAATACTGGCCTCATTACCAATAAGAGTCAACTACCT

A\_14\_P107239 CTCTTATTTTGAACGGGTAACCTTTGAAATGTTAAAATTGCCTTCCCTCAACCAG

A\_14\_P130782 CATTAGCCATTAGTTGAACTGTTGAAACAAAATCCAAATCATCACATCTTTGCAGGTTCT

A\_14\_P132378 GAGTTTTTCTTTTTTAATTTTAGTGCTCAAGGAGGATGTATTTACATGTCTGCCAGAA

A\_14\_P132807 GACTGTCCACTCTTCACAGCCTTCACATTTATTCAACTCCAAAGTAACAAATTTATCATC

A\_14\_P123048 AAATTTGCATCCTGACCATACTCTATATGCAAATTTGCATCTGGCACATTTTTGCAAACA

CUST\_518\_PI426210822

CAACAATATGTGAGAGGATGATTTGTATCCTCAAATATTTGAACACTTAATAAAAGGCAT

A\_14\_P114026 TAGGAGGAGCATATTATTTAATATCTAGAAGTCTAGGGCCAGAATTTGGTGGTGCAATTG

CUST\_10302\_PI426210822

CACACTAACTGATGCTGTTTAAATCTAGAGCCCTATCAGCTGTCTGTCTGATTCATT

A\_14\_P106069 AGAAATGGTTTCTGACTTGGATTTTATGCACCCATGAAATTAATAAATAGGGGACTACCT

A\_16\_P16226193

TGCCTTCTACTCATTAACTTCATAAGACCAACAGATTTCCCTACTGATAACACAGAACAC

A\_14\_P131233 CAAAAGGCAGTTTTCTTTGTTCTCAGACTAATGGATGGTTCCAGAGAAGGAAATGA

A\_16\_P36230104

TCAACACTGAAATGAATGAGATATTCTAACATAGACACACTCTTCATTATGTGTGGCCTC

A\_14\_P139540 TATGAATAGCATCAAACCTCAGCAAAGTTTTCTAGGTCTTCTTGGTCCTCCTTTGTTCATTA

A\_14\_P109454 TGTCGCACCACAGCATGTATTGCCATGATCATGAAAATGAATGAGGTTAATACATATAAA

A\_18\_P22841277 ATGTGCAGAGCAAGGAGGAACTCTGCTCCCACGCCTGATTTTAAT

A\_16\_P00303462

CACTTGAAATAGTCCCATGGTATCAGTTAGTGACAGTATACAGAATCAGTGTAGTCAAA

A\_14\_P103513 GAACACAACACAATCAGAAATTGAATGGGTTTGGGGCATATGAAAAAAAATTGGATGAC

A\_14\_P108292 TCTAATTGTAGTTTCTTTTGCAGGAATTTGAGGCACCTGAGTGGATTCCCTTCAATCAT

A\_14\_P117491 TTGAAAGTTCACAGTAATATGGAAAAGGTATACATGGGACTATTTCTGCCCTCGGAAG

A\_14\_P113377 GAAACCGTATTTTATCAAGGTAAATATGGAAATGCACCTTCCATAAGGGTAAATGTGGAG

A\_16\_P20298110

AACAAAACTTATTTACCCTTTAAAAACCTTGACTCTGTGATTCATTTTCAGTCGTGCC

A\_14\_P202384 GTCCTTTGTCTCTATTTTTGCCTTTGATCACAACCTCTCTCCTGTTGTCCCTTT

A\_14\_P132843 TAGTGATTTTGGTCAGCGTGTGTGCTATTTCCGGTGTTCAGGTATGTATCAATGGATATT

A\_16\_P03808101

TCTTCTGAATAAAGGCAATTTGCTAACTTTCTCGCTAAATAGGATTTGGTTTCTATGGCT

A\_14\_P122087 AACATTTTATTCCTGATCCTGGTTTAAATGTAAAAAGTGATGTTTTACTTCCCACCTTCTCT

A\_14\_P108255 ACAAGTTCAGTTATAAAAATAGCACATTCAAAGAGAAAAGGCTTGGCATTTTTTCTGATTC

A\_14\_P109066 AGTGCGAAGAAATGGGGTGAAAGCAGAATTTTATTTGTATGAGATTAAGAATTGACCGAA

A\_14\_P114593 TTTTCCGAACCCAGATTAACCTTTCTCAGGGAAGACTTTATTTCTTGGTTCTCTCAA

A\_16\_P01831072

CAGAAAGTCTCCCAGATAAATTCACGTTATTCAAAACTCTACATTTGCTCAATCCTGACA

A\_14\_P119965 ACAGAATCTGAACAGCACTATTATTATGAGATTTGGGATCAAAGAGGTGAACCTTTGAG

CUST\_1614\_PI426210822 GCCTTCTGGTCATAGCTATGTTGCCCAAATATTTTGGCCTAAGGTG

CUST\_3256\_PI426210822 CTAAGTGTGAGGATCAGTGACACCCTCTAGAGGCATTTAGGGAACTTTTTT

A\_18\_P13724491

ACGACCTAAAGTATCCATGTGACCACTTAAATATCGAGAAAATGTAAAGCACAGAAGTCA

A\_14\_P107248 TGTGGATATAATGTAGTGTTAATGCTGAAAAGAGCCTGAAGGAATGGTCAACATTCACTT

A\_14\_P101989 ATTTTCGATAGTTTTATTGCTAGTGTGTTTTTTGTTCTCTCTGAATGTGCTCTGCCTTT

A\_14\_P122737 ACCATTTACCAAAAAAGGTAATCTACTAGTCCACTGTCTCCAAATGACAATTCTCTTAGC

A\_18\_P22841906 GTTTCAACCTCAGGCTCCCCAGTGCGTGAAGTCAAGTCTCTTGATT

A\_14\_P139468 CTTCTTCATATTTACAAAAGAATACACTGGGATTAGTCTTCCAGACTCCAAGCCATTTGT

A\_14\_P137238 TCAAGTTTTTATGTTTTAAGACTAGAAAAAATGCATCACTCCCCCATAACCACATTGA

A\_14\_P137434 TATCGTAGAGTTTTCTTGAAAGAGCAAATCAACATCTACATCAAAGTTGCAAGTGGTGAT

A\_14\_P123496 CTGATATGAATGTCTTGAAGAGTCATGTGGAACAACCTTGTCCAAAATCAATTCATATGAA

CUST\_8635\_PI426210822 CTGACTTAGGCATGGAGAAGGCCAAGCTCCCTGTTTGATACTAGA

A\_14\_P100015 CTGGGCACAAAGTAGTTTTTTACGTGGTGGGTGTCTTTTTGTAAAAAATCTTCCTTG

A\_14\_P202113 TTTCTAAAACCTCCCACTTCTGTCAACCACTACCGTCACCTTTTAGAAATTTCTTGATTCT

A\_16\_P02645210

AAAGTAATTCCTCGCTAACTTGCTAATGATTAGTGATGACTCTATATGGGCCTCTACAGA

A\_14\_P117256 ACAACATCATGGAACAAATGGAAGATATTCCTCACTGAGTAGAAAAGTTGAACAGCACTA

CUST\_4456\_PI426210822 TAGAGGTGTGCCCTGGGTCCCACTCCCTCAAGTCCAGCTGCATTA

A\_14\_P118054 AGGACTAGTTAAATTGGTAACCAAACGAGTCCACCTTAAGATGAACAGAAATGTATAGGA

A\_16\_P03643140

ACCTTCTTGGAAGTTACTTGACATGTTGTGTAATTA AAAAGGACAAACAAACATTGGC

A\_16\_P36383835

CTACAAACATTAAATATGACACTATCTGATCTCAACATCTACTGCCTCATGTCTACTTGT

A\_16\_P17857776

AATATTGCTCAAGTAGTTTAGCATCAGACATATCGAACATTCTCAACGAGTATCTTCCCC

CUST\_5770\_PI426210822

CATTGAAACAGAATTGGGAGGGAGAAACCTCTTACACTCAGGTCATGGTATTTATAT

A\_14\_P139419 ATTCAGAGAAGCATTAAATTTGTGCTTTTCAGTCTGTTTTCTATGAAACGCTGGGATTCA

A\_14\_P118646 TTATAACTATTTACCATTTAAATGCAGCAGCCTTCAAGATGGTAATACTCTTGGCCACT

A\_16\_P17184448

TGTTATCCTAACTCATCTCTCCAGAAACAGTATGTCAATTCATAGACTCAGTGAACACTG

A\_16\_P40958529

CCAAGCAACCTCAGAATGAGAACTTCCCCATTAATAACCTTTAAACATGACCTTTTCATTA

A\_16\_P41098327

TCAGGTGCTGTAAACAACCTTCTCATTTTTAATCTTTCTATCCCATTTTAGCCACAACA

CUST\_8001\_PI426210822 AGAGGGTGATTCCCTGGAGAAAGCCCAACAAGTCACCCAGCAGAG

A\_16\_P40406032

TCAGTGTTTGCTTACTATTTTTGTAGAAGTCTTTCAAAAAAATCTTATCGTGTTATTGA

A\_14\_P130231 TTCAAGAGGAACACTTGCTTGTCAAATTTCTCTCAAACCACGATTTCTGAATTTTCTTC

A\_16\_P18534669

AAAAGTGTTAAATCCCCATAAACCATGAAAGAATGCAAGATTTCTAAGTAGAAGCCACGG

A\_14\_P127658 CTCTCAAACCAAACACTCAAATGAACTTTTCAAGTGATAAACTGCATCCAGAACTTTGA

A\_14\_P101088 GCTTCATTACACAGGCTTTTCATGTATGCAGGATGACTCAATGTTAAAGCATTAAATGG

A\_14\_P125154 GATTTTTTTCCCTCTGGCTTCACCTAAATCCCTATTCTCCCAAGACTACTTAGTC

A\_14\_P130383 TCCCAGAGCCTTTTCACTTGTTTTTCATAGAGTATATTACATTTTGCCTTCACTTAGTTA

CUST\_5538\_PI426210822

TCTTGGCTCAACTGTGAGCAATAATCATGAACCATAATAAAATTAGCACTATTTATTGGT

CUST\_4132\_PI426210822 TTTCACCCATCTTTTTCTCCCCATGGCTTGGCCATGCCACAGTGG

A\_14\_P201493 TTTTCCTATCAATTTACCACCCACCTTATCCAAGGCCTATTGAAAAAGTTAAAGGTCAAA  
A\_14\_P113557 TTCCCAAAGTAAAACCATAGAAATACAGATCCCCTGACTTGGGACTCGATATTAATTCA  
A\_16\_P15914867

ACTTCCACTCCTCTATGGTAAAAACCCTCTGAAATACACCTTTCTAAACAATATTGAGAA  
CUST\_9795\_PI426210822

GTATTAATTTGTATATTCATGAATCATATAATGAATCAGTGCCTTGGTTCAGGTGACAGG  
CUST\_5178\_PI426210822 GTCCCGTGACCTGGTTCAGCCTGCTCTCCTTCCCTGTCCATAGT  
CUST\_4592\_PI426210822 CTCTGCTCTCCTTGGCCTTGGCCTCTTTGCTTTAGGATATGATGC  
CUST\_5634\_PI426210822 GAGGCCCTGTCTTCAATCCCTGTACACAGAATAGCGCTCTGAAAATTAT  
A\_14\_P134596 ATTTCCATACAGTCTGACCGTGCAGTTGCTCAGTTCGGTCAAAAAGAAC  
CUST\_9907\_PI426210822

TCCCGTGTCTTTGTTTTCAAAGCTGAAACAAAAGGTACATTGTCGTTATCTGTTC  
A\_14\_P136397 AACTGCGACAGGATACAGTGGCTACAGTCAGAAATTTGAATTTGAAACAGGAGAT  
CUST\_7924\_PI426210822 CAAGAAGATGACAGGGTTGCCTTTTCATCCAAACCTTAGGAGGTCT  
A\_14\_P200953 AGGCCCTTTGTAGAGTAGAATATTAACATAATGTTGCAAACGTAAGTAAGGCCTTGCA  
A\_14\_P127547 CTGACTTGTGATCAATTACAATAATGATGGAATTTCAAGGTCAATGTCGTGCTGGTTTTT  
A\_14\_P108727 ATACTATCAGTTTCCTTGGTCTTGTGAATGTTTTGATCAGCAGCAAAATGTCATTCTGTT  
A\_14\_P109201 TATCCAATACATTTGCATGTCCCCCTTATAATCTCTGCTTTTGAATCTGCCATTACTGAA  
A\_16\_P19949674

AAGTCCTTCAACTAATTTCCCTATTTTTATACTTTTGCCTTCTTACTCATTGTGCAGCGC  
A\_16\_P00685144

GATTTCTGGGCTTTTCTTCATCCAAAAACAATACTTGGAGTTGAAACAAAAGGTTGAAG  
A\_16\_P00341542

ACCCCCATATTAACAAAACACCAGTTCTGTCTAAACCAATTTCAATTTATCAGGTCCTT  
A\_14\_P103436 GTAAAGAAATAAGATCATTTTCAGAGTCGAGAAGACAGTAAACCTGCTCATGAGGCAGG  
CUST\_7062\_PI426210822

AATCAGTAACTTTGGTTTATTACAGCAGAACTTCCCAAATTAAGTCTGACCAATTAG  
A\_16\_P35493517

GCCCTCAAAAACCTCATTAACAAAACACGTTTGATAATTCACCAGATACGTTGTTTTGCAAT  
A\_14\_P110105 CAAAATAATTTCTATGTTTGATTTTGATGTTATTTTGGGAGCAATTGTGGGGTTAGGGTTG  
CUST\_37\_PI426210822 TTAAGCAGCAGAAGGGGTCCCAAAACGTGTTTAGTGTTTACCCTTC  
A\_18\_P22606277

TCCTGAAAAATTTTCTTTCTGTATAGATTGAAATACTATTTTGTTCCTTACTACTACATTAC  
A\_14\_P112988 CTCGATGGTCAAATGTGTCTTACCCAAACAAGACCAAGACAAGCATTATTAGGAAAAG  
A\_14\_P108189 CTACCTGCAGATGAATGACGTGGTGAACCTTCTGCAAGACATACATTAGGTCAT  
CUST\_9252\_PI426210822

GTTTAAAAAACAATTATTTCTCTTTGTGAATTCATCCAATTTCTTGGTAGGATAAA  
CUST\_3599\_PI426210822 CTGCGATTCTCTCTGCTAACCTCCTCTCACCGTTCTCCCCAGG



A\_18\_P22842662

GGAGACAGATTTTCTAAGTTCAAATAGTATACTACAGCATCTTCAGACATTCATGGAACA

A\_14\_P121719 CCAAGATTTCCAGTGATGTCAATTTTTCAAAGGGAGATGATTCACCAAAACTTTAATTT

CUST\_2911\_PI426210822 GAGTGTTCAGGACCAGCTCATTAGCGGGACACAAGCTGCTGTAGC

A\_14\_P114989 TACTAAAGTATCCTGATTTGCAAGGTAAATTAAGGTTTTGCCATGAGCAACGTTCTGTAT

A\_14\_P105044 TTATGATTTTAAAAATCAACGGCTTACCTTGAGTTTGATTGTCCCTTTATCTAAAAATGA

CUST\_10024\_PI426210822 CAAGACCGTCTGCCACAGTTGTGAAGGCCACTGCTAACCAGGACA

A\_14\_P136151 GTTCTTTTTAAATCTTGGCCTCCCCTCTGAGTCTTAATTACGTGTTTCTGAAAATTCTTC

A\_14\_P113180 GATATGACCAAAAGGTCTATGCAGATGAAAGTTTTCACTTTTTCCAAATTGGTCAAGAA

A\_14\_P101589 TCATACCAGCAAGTCTTTCTCTGTAAAGTAAATTTGTCAAACACTACTATGGGAGACCTGA

A\_14\_P100237 TAAAAGGAATTTGTCAACTGGACTGAGAGACAATCAAACAGTCAGACACGGAACAT

A\_14\_P109871 TTTAACCAATCTCCATCAATAACTGTAGTTCCTCTCCCACTCTAATTTGCTACTACTGAAT

A\_14\_P201768 TCGCGATTTTGCTCTCTGAGCAGATTTCTCTATGAAAAAGTGCAGAGGAAATGTT

A\_16\_P03227645

AGAACTTACAGATCAGAAAATTACTTATCTCTATGGACTTAGCCTATAAGCACTTGAGCA

A\_14\_P112487 CATAACTGGGTCAGCCAAAGTAACCCACATCTCATTTTCAGAATGCATAAATAGAAATACT

A\_16\_P18033707

TCTGCTCATTGGATTTGTTGAACGAACTTGGATTCTACTAATTTGTTGACCTGAAATGT

A\_16\_P15133252

ATGCTCACATTGATGCTACTTCATTTTTGAGACACCAGTAAATAGACAGTCTCCCATCTA

A\_14\_P119473 CTTCTAAGCATCATCTCCACTCTTCTTGGACACATAATGGAACAATTATCTGGGAATA

CUST\_2725\_PI426210822 CTACTAATGCCCTTAATCTTGTTATGTCACCCCAGTGGTGTGAAGG

A\_14\_P101777 TGATCTGTTTCTGACAACATCCTACTGAGGCATTCACTAAGACAACCTAAGAGATTGATT

A\_14\_P110909 GCCTTTATTTTTAGTATGCCAAGATCCTCCAAATAAATAAATACATGGGAAGTGCCAGG

A\_16\_P19826665

AGGCTGATGGAATCTATTAAGAAAAAATGACGTCCAAGATTATTTGAGCAGTTAACCCA

A\_16\_P18154440 CCATCTGCTTTTTATCTTTCAAACATCTCTCCTCATATCTTACATACTATAGCCTCCCC

A\_14\_P127396 TATTTATTTGAACATCAAAATCCTTGGTGGATTAAAATGTGCTGGGAATGTGGAGCATGA

A\_16\_P18565541

ACAGAGCAAACTTTCATCTCTCAGTTATCCCCCATTATTTCAACCACAAATCAAGTAG

A\_14\_P200152 GTAGAAATCGCGATTTCCTTCAAACCATCTCTCTCATCTAGATATCATCAAGCCTAACATT

A\_14\_P103960 CTTATTGAAAGAATTGTCCTTAAAAAATAACCTGTGCATACGTATGTCCATCCAGGCATG

A\_14\_P114771 CTTGTTTGGAAATAAATCAAGACACTTACGAGTTCTTTCTTCTTCATGCACTCCATTAT

A\_14\_P107899 TACCTGTTCAAGTGCCTACTTTTCTTGGAGAAATTTGTCTATACATTTTGTATATGAAGGA

A\_14\_P105712 TCTGAAACTGAAATATTCGAGCATAATCTTGAGGAAGGTTTTCTTAGGATCCCATG

CUST\_5145\_PI426210822 CTTGGCCGAAACATCTATCCAGGACCAAATTCTTAAAACCCCAGG

A\_14\_P111534 TAATGGAAGGGAGATTTAGACACAAGGTGAATACTGTCAAATCTTTTTATCAGTCTCCA

A\_16\_P00707109

AAAAACCATCCTGAACAGATGAAAATCACGGTAGCAATCTAAAATACGAAATACTCACGG  
A\_14\_P139815 AGGGACAAACAGGAAATCCAAATGATTAATATGTTTGCAGCCATTAAACTGACTTCAAAG  
A\_14\_P122684 CAATTAATCTCCCAATAAATGGTTCTTATCACTTGGTCCCCAATTTGAGAATCATTAAAT  
A\_14\_P113274 ATGATCTTCTATTCCCTACTGGCTGTCTGACAGGGCCAAATAAATAGACCCAATATAAAAA  
A\_14\_P110481 GTTGTAGTTGATTGATGTTGCTGAGAACTTCCTTTGCTTTGGCTGTGTTTTTCAG  
A\_16\_P01167172  
AGAGTCATCTCTTTGTTTGCTTTTTATTTACCCAAAATCACATTTGCACTAGCATAACGGA  
A\_14\_P107404 TAAACACTAGCAAATGAAAATCAAGTTGATGGAAAAATAGAGGTCAAATGCCAATGGGCA  
A\_14\_P106403 AAATCTGTCTTCTCTAACATAAAAAATAAGGGACTTTCCTCCAAATCTCTGAGTAGGCCTG  
A\_14\_P126570 CGCCCTTATCCTTATTGATTGGTTTCTTAAAAATATAAATTGTCTTAGAACTTTTGGGGCG  
A\_18\_P13355493  
ACTGAGATACCAGAACTACCAAGGTTTTTTAAGAATTTCACTGGATTTTCATTGGATCGT  
A\_14\_P112667 GGATAATTCACCTTTGCCAATCGCAATCTCGTTAAATTCATGATCCAGACTCA  
A\_16\_P02572657  
AAATTGAATAGAATGTCTGCAAAAAGTTCAAAGTCTGTTACCTTGTTCAATCAACATCGCT  
A\_14\_P128516 TTTATATTTGTAGATGGGACTGACGTTAAGTGCTTTCTCCATTCACCTGGTGAGAAATG  
A\_14\_P111512 TCTTGTTATTTCTTCATAACTCGTCTTAAGTGTTAACCATTCTGGGAATCTTTGCCATC  
A\_14\_P129082 GAACTGCTCAGCACCTTCTCTTTCCATGTCTTATTTTTATATGTTTGACCATGTTGATG  
CUST\_2706\_PI426210822  
GATCCACTTTCCGATTTATTTCTAGTATCCTATAAGGATGAACCCAGAAGAAAATGGAAA  
A\_14\_P117776 CTGAACAACCTGCTCATGCATTCAAAACAACCTTGATTGAATGCCTATGTTCTAGACATTCA  
A\_14\_P106528 TATGGTTATTTGCATCGAATACCTACACGCCCATTTGAGGAAGGAAAGAAAATTTCTCTT  
A\_14\_P126586 TGTTTCTCTGAACAGACGCAAAAATTAATACAGCAAAAAGGAATATGCAAAAACAAGTCAAG  
A\_16\_P18576214  
AGGGATTTGGTGAACATACAGTTAAGACAGATAGTCAAAGACATCAACTTTGCGATTTTG  
A\_14\_P109254 GATATTTATTTCTTAGAACGGAAGGAGAAAATTTGGGGTGTATCCTATTTATGGTTGAGG  
A\_18\_P18333203  
AAATGAGAGGCCAAAAATCAGACAGAGTTAATCAAATTCACAATAAAAAATGAATAGCCGT  
A\_16\_P32391096  
AAAGGTGATAGAAACATTCAGTTAATAAGTCAGATGCTCCAAATTCAGAGATTCCCCAG  
A\_14\_P108552 GGAATCTTGTTTTTATTTTTTGGTGGTAAATGCGAGTGAGATCGAAATGCAAAGGATTC  
A\_14\_P111970 GACCTCTACATCAGCATTGTTTTTCAATGGATATAGCAACTCAGAAAAATATTGGGGAAAA  
A\_14\_P130457 ACCCAAGATGGAGAGGATCTACTGTTCTTTTTTTGATTGTTAACCATTCAATTTATTCTT  
A\_14\_P112082 ATTAAAAATATAAAGAACATATACCAAAAAGAGCCAAAAGTGTGCATTTTGCTAAAACCTG  
A\_16\_P18185508  
AGTGCATGCGTGAAATATTAGGAGAATTTAAACCAGGACTAATATTCAATGGCAGAGTCA  
CUST\_9688\_PI426210822 GTGAGTAGTTCTTTCTCTTACCCACCTCCCCACATGTGAGAATTAAG  
A\_14\_P122281 GACAATTTTACCCCTAATACCTTCACTGTATGCATACTTATCACCTCTTCTTTTCTGTT

A\_18\_P15331671

ATCCAGGCTTAGACCTATATTAGTATCATCCTAACTACTCTCCCTCAATATGACTTGCC

A\_18\_P22839952 CTATTGTCTGACTTCCGTTTGTCTGTGGCCAGATTGCTCTGGAA

CUST\_2988\_PI426210822 GATAGTCCAGTCTCGCTGTTCTCTCCATTGTCTCCCTTCCTGAGG

A\_14\_P108996 TCTACATATTTTCGGTCTTAATTAACCTTGGTTTAGAACATGTCCAGAGACCAGTTTCGAA

A\_14\_P100910 AGCAGGATGCAGGAGTCAGTGAGATAATCCAATTACGGTCCCAATAAAAATGTTATTATAA

A\_14\_P113372 TGTATAAACAGTAGAAACAAGGTTGACTTTATTCCAAACATAAAACACTTATTTTGTGT

A\_14\_P134389 CTCAGCCACTAAATGGACTGGACTTACCAATATAATTTACACAATCAGATAAACTTCTGG

A\_14\_P107213 CTTCAATTGAAGAAGTTAGTTGGCATCCATGGCTAGCAAGCACTTGATAAAAAGCAA

A\_14\_P108617 CTGGTTTCAATGTGAAAACAGTTACTAATCAATTTGCCGTATGCATGGTTACTGTGGATA

A\_16\_P16169951

AAAAAAAATGAGAACCCTTTTCCATAGCAAACTAGAGAATAGAAAAACGTGACCATTTGT

A\_14\_P108430 ATAGAAGTTGACTATTTTGGACTGCAGTTTACGGGTAGCAAAGGTGAAAGTTTATGGCTA

A\_16\_P58424087 AGTAGAGGCAGGACTTAAACCCTATGTTACTGCCTGTGCTTCTTACACTTTATCAC

A\_16\_P21663593

GGTGATGTCAAGTGGAAAATGGAATATTTTATACCGGTTAGTAAAAGGCTTAAATCCCACT

A\_14\_P125855 CTTGTCAATTCTCATTTTTAAGCCGTGCATTGTCCTAAAAAATAGCCAATGAACTCCATT

A\_18\_P15448300

AAAATGTCCTGCACATTCTATAAAACATACATCTCCCGATCTTTTATGTTCTGCCACTG

A\_14\_P119532 CATTCACTACTCATAATTCAGGACTAATAATAATGGGTATTATTTGGGTTCAATTCAGGC

A\_16\_P15377311

TTTGGCATCAAATACCATAATCTCTGTCTCTTTACATCATGTCAAGCATCTATGACCACA

A\_16\_P18250149

AAAAGCCAATCTTAATAAGTTACTGGGAATACCTCACTCTAGACCCTAAATACTGAAGGC

A\_18\_P15038421

TGTGTGTTACAGGAAAGATGTGGTAGAAATGATTTTCATAACTCGCCTTTAAAAAATCGAC

A\_16\_P02854595

AAGCACCATAGAGGTTTAAGTTTACTACTGCTGAAAATTTCCACATCAAACCTCAATGC

CUST\_5578\_PI426210822

TGACCAGTACATGTTAAGTACAGGCTTACTGATTAATCTGAGGCTTTTTGCTATGAGTTA

A\_18\_P14132493 TATAAACAGCCACACAGTGGTCACTTCTTGATAGGAGAGAGGTTAGGCTG

A\_14\_P107062 TTCTGCTCTGTTTCAGGAATACCAAATTGACATAATTTTTGCTCAGACCTGGACAGATAG

A\_14\_P128350 ACCGTGAACCTGAATGCTATTGGGTTAGCAATCATTAATCATTGCTTGTTTCATAAACAT

A\_16\_P21083318

TTAGCATGCACCCAGATAATTTCTTTTTTAACTTGGCCTTCATATTGCTTTTCAGAAACCA

A\_14\_P104094 GATGGAGATAAGGTGGATCCGTTTGGAGGAACCAAATCATTAGTTCTCTATCTAGATCT

A\_14\_P107136 TTCTTGAGATAATTAGAAAACGCATTGCAGAGTATTGGTTCTTTCCCTCTCATTAGGTT

A\_14\_P104794 AACCCCTGGAGATAAAGCATTGAAAACGATGGACATGGGACCCTTCAATA

A\_14\_P104514 CTCCATGAATATGAACATTTTAAGAACTGCATGCTAACCATTCCAGGGAAACAGAGATTA  
A\_14\_P110758 CTTTGGGAATTACTCTTAAAATTAGAGAACAGGGAATTTTCTGTATTCCCTCACTCTCCT  
A\_14\_P132566 CATCCTCCAAGAGCAGCGGTTTCCAAACTTTTGTATTTTATAGCAGCAGAAG  
A\_14\_P105402 CCATTGTTGTCTTTTATGGATTAAAGTATTTGACCTGCTTTTTACCACAAAGCACAACCT  
A\_14\_P103778 CTTCAAATAGACTCTTCACTATGCTCCAGTATGCTGCAGTCAAACAAAACAAAATACC  
CUST\_7278\_PI426210822

ACTAAATAGGGACCAAATAAGTGAGTCCATGCTTTGGAAATGATGACCTGAGAG  
CUST\_7625\_PI426210822 AAAGCACTTTTTTCCTCAGGGCCAAGTGGACTCTTTGGGAGGAGA  
A\_14\_P115755 GGGGACTCTATGGTGAAAATAAATGGGATTTATTTAACAAAATCAAATGCTATTTGCCAC  
A\_14\_P132825 AATCCACCCTCTATGTTATCTACCAAATGCAAAATGTAATAAATTCCTAGACCTGTCC  
CUST\_8070\_PI426210822 AGTAGCATGTGCCCGCCCCTCTCCAGGATAGCCATGAGTGCCTGT  
A\_14\_P113443 TAATCCAACATTACCCATCTCAATTCAAGATAAGACATTTATTTTGTGAGGCTCCCAGA  
A\_14\_P104837 TCACAGATGTGTGCTTTTCTACAGAAATAATTTTAATAAGCGTTTGGTAAGTTGTCCCT  
A\_16\_P19897785

AATAGCATCACAAAAGAGACAACAGGTTGACTTTCAGGATATGGGCTTTTAAGGATTTAC  
A\_16\_P03086910

GCCACTGGTTTTATCTACCTACGACTACATTCTTCAAAAACAGACCTACTTGCATTGTAA  
A\_14\_P133497 CCAGGACTCTGCCAGTGGGATGTAGCCCCTCATATATGTATATATTTACATCTATTA  
A\_14\_P138747 ACTGACTCAAACCAGTATGTATGCAAAAAGTTAAAGGGAGACAGTATTTTCAGTCCCTG  
A\_14\_P135584 GACACAATTTAAGATCACGATAGGGCAGGTCAAATGTGTAAGGAACTACTACTTCTATCA  
A\_16\_P38187761

TTCTCCCTAACCACTTTATCTTTTTGCTCTGCATATTTGAGGAACATTACACATGACTTC  
CUST\_3285\_PI426210822

TCTTCTTTATCTGGAAAATAACATGCTAAATCTCCGGGTCATCTTGAGAAATCAAAGAAA  
A\_14\_P132080 GTGACCTCAATACAATAAATGTGATCCCCACCCAAACTTGTCTGTGTCT  
A\_14\_P107754 CTTAAGAGCATTTCCATGAAACAACACATGCAGCATTCCAGGAACTTGATTGTTAAATTC  
A\_14\_P131889 AACATAGTCAGCAGAAGGGAACATAAGTATGAACCCAGGATAGAAATGTTTAAGAACAGT  
A\_16\_P18079285

AAACTTCATTAGTTGACTCTATCAAGATTCCTTACACCCTTAGAAAGTAGGTAGGACTGGG  
A\_16\_P18482657

ACTTAGTCAATGTCTCAATCAGATTTGCTTCTGTTTAGCAAGATAATCTTTTGTGGGGGA  
CUST\_2532\_PI426210822

TAATGAGGGCATCATATAGATGCTCAGTGCATTTAGTGATGTACAGATTCAGACCC  
A\_14\_P200299 AAGAGATTTCTGTAAATACATGAGAAAGTGATTCTGTTGACACCTCATTCTTCTGTCTGT  
A\_14\_P127625 ACAAAGGGAGTAAAAATCCTATTACACTTTGCTTAGAAAGATTTAAGGTGAAAGTTCC  
A\_14\_P119507 AAATGCAGTATAGGAGTGAAGCACAATATGATGGAAACCTCAACCCATCTTCACAG  
CUST\_4558\_PI426210822 CATATTCTGAGATGGTAGAGAACCCTTTCATTCTCCAGCCTGTCTCTT  
A\_14\_P107819 TATTTCAATTTGTAGTTGAAGTCAAGTATTTGCTGTTCTGAAGCAGTTGTTGCCTCTG

A\_14\_P122943 TATAAGAACATATTCAATAAAAGGCATTATTCCAGGTGAATGAGCCATGCGGAAATGTGG  
A\_14\_P135495 GGTATGTTTATGACCCAGGGATACTGTTTCATAAACAAAGGATTGGCTTACATAAAATGG  
A\_14\_P104498

ATGAAAACAAGAAAAACAGATATGGCAGTCCATGGAAAGGAACAAAAAGATGTCCAAAAA  
CUST\_5205\_PI426210822 GCTCAAGACAGAGCTGAGATCCAGTTCCTACAGCCACAGTTAACA  
A\_14\_P128278 TGAGATTACAAAACCTGTTTATTGGCCCAATACACTATGTTGGTGGGTCTTATAAATCAC  
CUST\_2588\_PI426210822 ACCACCCGTGAACCCTCTCCAAGTATTTCTAGCTGTATGAGTCAG  
CUST\_5330\_PI426210822 ATTCATCTTCTCCACACCGCGGGCAGTCTTCAAATTCTGGTTAG  
A\_14\_P130539 CGCTTGAACCTTTCTTCCCTCATTCTGTCCAGACTAATTTTCTTTTCATTTCTAAAATCAC  
A\_14\_P202336 ACATCAACATGTTTGATTTTTATATTCACAGGACTATTTTATCTTAAACTTAGCAGAGAG  
A\_14\_P110139 GCGACAGCTACATACCACCTTGAATTTGTAGCAACAAAATTGCTAGGAGAAC  
A\_16\_P00887235 ATTTGCCTCTGATATCCTAGTTGTTTCTGCATCTTCTTACTCTTTTCTTGACATTTTCC  
A\_14\_P123531 AAAATTTTGAAAATCTCATACAATGTGGGAAAAGTATACAGAACCCTTGCAAGAGACTC  
A\_14\_P100088 AAATTACTTTCACATTGAAACTTTCTTTCTTATTCTTATATCCAAAGGTGGGTGGCTGG  
A\_16\_P58424263 CAAACCCTGGAGTAGAGCCCAACATGGACCCTGAAGGAGGACTTA  
A\_18\_P12168712

ACAAAACCTCATTATCAGTTATTGTATTCAATTAACACGTCACCTCATACTAATCCCAAGCA  
A\_14\_P122243 TGCATAAATCCACCAAATTATATCTTCCCTTGAGGCAAAGTATCTCATTCTTCATGAGACC  
CUST\_2615\_PI426210822 TAAAAGGGAAGGTGATTCCAGATGGTGGTAGGTGCTGTGAGGATT  
A\_14\_P104155 TCCCCTGTTGATTTATCTGATAGTGTTCCTTCCATTGTCATAACAACCGGCTGCAAATAA  
CUST\_10354\_PI426210822 CATGACAGCTGGGTTTGCTTCACGATTTGTGTAGGACACGTCTTATATGT  
A\_14\_P139463 TAGTGACTTCGGTTTCAAGATGAGTGAAGATTTGTCATTAGAGGTTTGTGTTCCAGATC  
A\_14\_P102434 GCTTCCATGGAAATAAATTCACATACGGAATAAAGCCCTAGTCTGATGGTGTATCCTTAT  
CUST\_4243\_PI426210822

AAGCAGCCCCTGTTCTGGTTCTTTTTCTTCCACTTTTTTAAAAAGGAAATCAGTTT  
A\_16\_P16191191 GGAGCATATGCACATTTTCCCAGGGAAGCAGAGGAGGACACAATG  
A\_16\_P20069610

ACAGGTCAGAAGATTGAACAATGTTATAACTCATCACAGACATCACTATTCATTCAAGCA  
A\_18\_P22839960

GATACAGAAAGATAATTGCCATATATGCTATGCAGCCAGTTCCTTACCTCATGTGATT  
A\_14\_P127791 GTAGAAGTCTATAAACCAAAGTAGAGCATGAGATTTCACTGGACCCAATATGGAAACTAC  
A\_16\_P39713620

ACTGTTATTGATCCCAGTCCATTAATTACTCCTAATTTCCCTTGTAAGCACATAATAACA  
A\_14\_P111999 GAGATGACCAGATGGTGGTAAAATAAACTTTGCTCACATCTTTCTATTGTCTCGAAATG  
A\_16\_P00879299

AACTCCACTAGAGCCAATAATAAATCATGCATATTTCCAGATAGTGAGTGAACCTGGTTC  
A\_14\_P138327

GAAGCCTTACAAGAATTAAGAAGAAAATACCCTCCAGGGAAGTGTTAAAATCAACAAGG

A\_14\_P115286 CTCTACGAAAATAAGTATTCTGATAACGACCTTCAAATCTGCCAACCACTATTGCTA  
A\_14\_P109635 AAGAACTGAATAAAAAATGAATACCATATGCCTCCCATGCTTCCTAAAGAGAGCACTCTA  
A\_14\_P108911 GGAATCTGAATTTTTAACAGGTTCCCTCTTTATCCCTCTGCCAGGAGAATATGATTTAAGT  
A\_14\_P134081 TCCTAACTTGAACTTACTGTGCAAATGATAATCTGATCCGTGCTTCAATTTCTATCCA  
A\_16\_P16515083  
TCATTGTAATTACCATTGAGCCATCATAGTTTGTCTTTCAAATACCAAGTGACCTTCTGC  
A\_14\_P135794 CAAACCTATATACTGTTGGGCAGGATGATTGTAAAAAATAAATAAATCCTTCCACCTGG  
CUST\_4553\_PI426210822 GCAAATATATAGAGTGGGTTTTGGAGCCCTGAACTTAGTCATGGGTGGATA  
A\_16\_P38962961  
ATTTCTCATGTAGTTCACAACTCTCAACAAAATCAACTATTGCTGGATCCTCATTGGA  
A\_18\_P20945546  
TCTTACCTATGTAGAATCACTCAGGTTGAAGATAATTCCCAAAGTAACGTAGAACTCCC  
A\_14\_P104062 GCCTGGAGCCTAATTCTGTTGGTGGTGATAAAAACATAATAACTAGTATTGCAGTTTACA  
A\_16\_P00684073  
TCACACACTAATCTGAACAGTTAACATACACCACCTATTTTCAGTTTTTTCCCCTTACAC  
A\_14\_P124140 TGGACCAAGATCTGTGAGAAGTCCACGAAAGTCATTACCTTCATCGACTT  
A\_16\_P16464987  
ATTGGGTATAATCAAGAGACTAAAAACAAGTGAAGTGCATTAGAACTCAGACTTTCCCC  
A\_16\_P17010661  
ACAATACAGGTCTCATTTTCATAGTTCCTAGAAAACTTCCAAAGAAAGGATTCTGACG  
A\_16\_P19017579  
GGGAACAGATTGATTACTCACTAAATAATTGAAGACAACAACTAGCCACATTAGGGGAA  
A\_16\_P16318112  
AGTTCTACAACCTCAGTGAAAGATACAAGGAATATACCAGTAACATCTGTCAAACCTCACCC  
A\_14\_P102279 TATAAAGTGTTTCGCTAAGACAGGAACCTTTTTCATGTTGCAGAAGACTTTTGCAATCTGCA  
A\_16\_P15817759  
AAAAACTAAAACCACATTCAAATAAGCAGAAATCCAATAATACAGATGTGCACAATCCA  
CUST\_8050\_PI426210822 GAAAGGATGTGTCCTGGTTAAGCTTTGATGAATCCCAGGATGCTGA  
A\_14\_P121824 AGAATAACAATGCTTGATAATTCTGCATGGTTAGTTGCAGACTTTATTGACAGCCATCAG  
A\_14\_P114755 TTCATCAGTAATTTGGGGGAAAAATACATTTTTTACCCAGCCATCCCTGAAAAATAACTTC  
A\_14\_P103573 TTCTTTGTGCTTGTGCTTTGTAGACTCTGGAAAATCCCAAGTATGAACTGATCATC  
A\_16\_P00996824  
CACTGACACACACAAGATACAAAATATCCCTGAACTCTTTCATAAAAAGGCATCATTCTGA  
A\_14\_P122954 ATTATTCTACTATAGCAGAATAACAAAATTTGATGCATTAAGCCAGTTCTTTGCAACTGA  
A\_14\_P115685 TATCTGTAACATGCTCCTATTACAAGTATTGAAGTCTAAGGTGACATGATGGATTTCTTC  
CUST\_6009\_PI426210822  
TTTAAATAGGCCTTCCACAAAGTGTTTTAGGGGAAAAATAACAAGAAACAAAAATATATG  
A\_14\_P112365 TTTTAAAATATCTTCTTTCTCCAAAGAGTCCATTGCGCATTCTTAGAGTAGAGATGGGG

A\_14\_P116369 CTCTTCTGGTGGTGGTAAACAAGATAATTTGAACCTGTTTTCCCAGTTAACTTAAAAAGT  
A\_14\_P117399 AAGTGAGTCGTTATGAAGAACAGAGATGGAATTTTGGTCAAGAGCATTATAGATGCATTC  
A\_16\_P17580894  
AAAAACATTGTCTATTCCAGTTCAGAATGTATACCCTTGATTTAATTCCTGTGGGTTGA  
A\_14\_P106642 TGATTCAAGTCCCCAGACTGTCTCTGACTTAATCCCTTGGGTTCAAG  
CUST\_2232\_P1426210822 ATTTTGCCAGCAGGAGAGAGAAGTTTGGGTTCCCTGTAATTCTGCC  
CUST\_2797\_P1426210822 AGATGTCAGGGGACTTATAACCACTTACTATGGAATTGGAGACCAAAGATGGATG  
CUST\_2304\_P1426210822 GGTGGGATAGTCCCTCAGTACTCAATGGTAATTAGTGTGAGAGTGATATGG  
A\_14\_P200925 CACTTAACCAGATATGGCTTCCTTGATCCTTTGCAGAACTAGTCAAGTCATATGTAAACA  
A\_14\_P134210 GATCTTTGTTGTCATTCTCATCGCAGTGCTTTGGTATGGGAGGTGTTAGAAAAC  
CUST\_8293\_P1426210822  
TCCATGCAGCTTATTGACGTAACCTAAGATGAGAAGACACTACTATTTCATGCCTG  
A\_16\_P02045571  
CCATTTGTCAAACCCTAAAGTCTTGTCTCTTAATCTCCTTCATGCTAAAATTTCCAC  
A\_16\_P03338903  
ACACCCTGTCTAGAATTACAACAACATCAATTATGATCATTACCTGTCAGTCACTACTCT  
A\_14\_P118641 TTGTGTCTTCCAATTTCTACAAATAATTGAGAGTTCTGCAGCATTGAGAATGGTCAGCAA  
CUST\_2214\_P1426210822 CTCTGGCCAAGAACGACTGGGTGCTTGGATTTTCTGAACCATGAC  
A\_14\_P200548 TATGTTACACTGTGCATTTATTTACAAAGAGGTTAGAGAAACACACAGAATCTGGCCCC  
A\_14\_P121129 TTTTGAAAATATTTGTGGAGTTAGCAGGTCCACTGAGCAGATGATTTTCATGGCTTAGATA  
A\_16\_P58424156  
TAGAATTTGCATGCAATAAAATGCACCAATTTGAGAGTATGACTCCATGAGTTTTGACCA  
A\_14\_P121857 CTGTTGCAGAAATTATACTGTCAATTAATCCAAAATCATCGTGGTCACAATAAGGCCTGA  
A\_14\_P108653 AGACTTGTTTAAATTTCTCTTGCTGATTCTCTTGAAGACAATGTCACCCAATGTCATGGT  
A\_14\_P103198 CTGTTACACTATTGCTGCTGCTATGTCGTTAATGACGGCACAGCCCTTATG  
A\_14\_P125892 AGCCAGGACTATAATCCAGATTACCCAATTTTCTGATAGAATGAATGTGTTTTCTTATGCC  
A\_16\_P02300524  
CCCACCCCTTTTAATTTCTAGCCAAACTGAATGTCATCTTTTTGTCGAGAAATAGAGTAAA  
A\_14\_P123489 AAGTCAGAAAGGATTTAGGGCATGGGTGAAAGAGATTAACCAAATTTACTCTTTGACT  
A\_14\_P108297 TTTCAAACAGAAAGTCACTTGTAGTATTGGATGGTGTAGGGAAAAAGTCCATATACCTGA  
A\_14\_P201576 CATTGTAGACTAGTTCACAAATATAATTTCTCCTCACAGTCTGACAAGAGGTCTAAGGTTT  
A\_14\_P134031 TTCTTTCCATGACAACAGAGTCTCTCATCTCAGCACATGACATTTTGTGATGGAT  
A\_14\_P110584 GTTAACTCAGAACAAGATCACTTGCAAACACAGACCAATCCCAACTGTAGATAATAAAA  
A\_14\_P105565 AACACTTTGCACAGTTCGGCCATGTCAGAAGGTGCATTTTACCTTTTGTAAAG  
CUST\_4071\_P1426210822  
ATTGTTTGTGATTTTCTTGAGTATAAAAGGAATCCTGGCTGGGCATTGAGTGAATACAAT  
A\_14\_P115915 CACTCAAAGAAGGTCTCATCAGTGTTTCGGGAAGGCAAAAAGTGTC  
A\_14\_P200531 ATACCAAATTTGATGAGTTAAACGTCTCTTCCCTGTGCAGTTTCATATTAGTGGTGTTTTC

A\_14\_P122135 ACTGGCAAAATGGCTAGGAATTCCTCTTCAAATTTCACTTTTTAACTACTCACTACCTT  
A\_14\_P136961 CTGAGATGAAGAGCAATGGTTTATTGAGTCATGTGGTAATGGCAGGTTGTCTTTAAA  
A\_14\_P137964 GTTCTCTACCTTGAATATATAATTTTCCATTTGCACCTGAGGTGATAAATGTGACTGGCA  
A\_14\_P111156 TTAGGAGCAACCTTTGTATATTGGAGACTTCAGAGTAACCAGCAAGGAAGAGAAATCT  
A\_14\_P201357 ACATGCTCATGGAAGACCGTGCAGTATTGAAAGTATTTGTTAATTATCTGCTTAGTATTA  
A\_14\_P111827 TTTTTCTCTGAGGTCTCCTAGGGGTATACACACTTATCTGTAAGTTTTACAGAATGCAAT  
A\_14\_P104429 CAAACATTTTGTAAGTTATCCTTTTCATCATTGCTTCCAAACTGCCAGGCATCTGGATAT  
A\_14\_P103079 TTTTCTTTTCCCAAATCTTGCCACATCTGTCTACCTTCCTTTTTTCTAGCATTTTAAG  
A\_14\_P136109 GTGACATCCAGTGGACCCTCTAGCCTTTGATTTTTAACTCCAAAAATGAGAAACATTTTA  
A\_16\_P00469538

GAAAGTCCCCTCTACATGATACTGATTGTTACCCATGTTTTATCCTTTCTAGTAAACCC

CUST\_8683\_PI426210822

ATCTGTTAGAATATCCAAAGTTGGTGCCAGGACTCATATTTTAGTAAACTGTAAAATCTT

A\_14\_P117958 GATGATAAGTTCCTTTCTTTCTTTAAAGAAGTTGAAGTTTAGGAATCCTTTGGTGCCA  
A\_14\_P114545 GTGGTGTTCCCTTGGCAAATGAAAGTTTTATTTTCGTTTGGGACTTGGTGTTTT  
A\_14\_P108620 CATTAGACATAACTGGTGGAGGTCTACTAAGCATTGTCTGATTTCTTCGCTTATCTGTG  
A\_14\_P137361 CCTCATTGCTTCAAATCTGCTATGTGAACTGATGTTTGTAAAATGTAGACAAGATTCCC  
A\_14\_P110289 AAATGAAGGTTTCAGTTATGAGGCAACCCTCTAGTAAGGCATTGTAAAAGTTACTGGATT  
CUST\_8930\_PI426210822

ACTGCCTTAAGGGATGGGGAAAGGGTTAGAGAAAGCAAGTATTTTATTTAGAAGAC

A\_14\_P122342 CTTTAACCATTCTTATATGCAGACAACAGTTGATATTTCTACTTGGTGTGAGCAGTTTGC  
CUST\_6881\_PI426210822

CCACTTGCTAATCTGGATAGAGCAGGAAGGACTTAAACATTTATGTGTTTGTATACCTTT

A\_18\_P17041169 CAGGACAAAGCACCTGTCATTATGCCACAACATCCTACTGCACTCA  
A\_14\_P112030 TGAACCTGAGTGTATGATTTAATTTACTTGGCTTGTCTAACTTCGGCAAGGGTGCCTTTTA  
A\_16\_P02035321

AAACACAATGAAAATCTTTTCTTCGTTAGTCCCAAATTTTCTATAATCTGACTTCCCCAC

A\_14\_P110034 ACACTCACACTATGAAATAAATTTTCACAGCCTTTTTGGAGGAATTCTCTTAATGGGAAC  
A\_14\_P102170 AGTTATTGACAGGAAGGAACCTATGTTTTTCAGTAAACCATCATGGACCATAGAATAAGTC  
A\_14\_P112006 TTGGTAGGTGATTATAGGCTCGTAATCATCCTCTGAACGCTTCTTTTTGAGAGAAAC  
CUST\_179\_PI426210822 ACATCATGGTGCCACAGGTTAAGGAATACAGTGCAGGGTTCTGAAT  
A\_14\_P125661 GGAGAGAGAAAGAGATTTACCCAAAGTTCTCTTATAACCCAAAAGTATGGTTCATCTGAA  
A\_14\_P104063 ACAGGCCCTCAAAAAATACCTAAGTATGGAGGAGAATCTGACTCTAATAACACTATGCAA  
A\_14\_P118514 TTCAACCTGTTTCAGAGAGATGGATGACAATCAAGGAAATGGAAATGTGTTCTTTTC  
A\_14\_P137418 CTCTTTTTCTTTTTACCCTCATTAATAGGATTTAGATCCCATCACAGAAAAGCACCAT  
CUST\_9596\_PI426210822

CTGGATAAAGTTTATGATTGTTAAGAAGTGTGCTGCTTCTACAATGGAAATTTTGCCTT

A\_16\_P00685218



CCCATGCTGCCCATGGTTTATGTTTAATGAATGAAATGATGATTAAGATAGGACAATTGG  
CUST\_5082\_PI426210822

AAGTTTCCATCTAATGGTGAGGTGGTAAAGGAAATAAACTTACCAAATAGAAGAGGGA  
A\_14\_P112636 AGTTTGTCTTTTCAATTTTGAAAATCAGGAGAGATGGACTCATGGAAACCTGGATC  
A\_18\_P12836607

TGTCAAAGAAGCAGTGATTACAGATCTCTACATAGGCATGTAACTGGTATAAATTGGGG  
A\_16\_P03079802

AACGGTTATCGCATCCATTTAACTATTTTCTGGCTCTTTTTTTGATATTAGGCTGCAGG  
A\_14\_P138567 CTGGAACAGGATGAAAGGATGAAGAGGGAAGTGAGGATCTTTTTTTTCTTTAAAGATGAA  
A\_14\_P121594 GAAACATTCATTATTCAAAGAACAGTAGCCAATACAGACATACCAGCAGCGTTTATTCC  
CUST\_470\_PI426210822 CTCATACCTCTGTAATCAGTGTGTGGAGCGTCAGGACTGACAGTAG  
A\_14\_P120209 CTAAAATCCAAACATAAAGCAGAAAAACACTTAACAGCACTGAAATGTGTGTATCGCTGG  
A\_14\_P129809 ACATTAACACTACAGTTGGATTTTTCAATACCTATGTTCCCTCTCCCTCTTTGATTAACCT  
A\_14\_P103852 ATGGTAGAGTGAGATAATGCATCTACAGCACTGCTTGACTTGTTGTAAGTTCTTAATAGG  
A\_14\_P115581 CTAATCTGATGAGAGCCTCCATGTCTCTGTTCAAAGAAATTTGGGTTAGATTTTTTCATCT  
A\_14\_P110226 AACTGGCTCTGATTTTCATCCTTGACAGGAGATATACACGTAAGTTTTCAAAGTTGTATTC  
A\_16\_P20072069

AAAATTTGTGATAACGGTAAGAGTGCAAAAAAGAGCATTTTACGGGTTGAGTCATCACTT  
A\_14\_P114754 TTATGCAAAGGACTGAGGCCAATCCAAAATATCTTACTTAACCCATACCTTGTGAAAT  
A\_14\_P132555 CTTCTCCTCTGACATCCTAAACATCTTTAACTATTAGGGGTCATGTGAACCTTGTATGC  
CUST\_2781\_PI426210822 CAGCTGGTTTTGCAGGCAGCAGGCACACAGGCTGGACATCCTTTC  
A\_16\_P21656010

ATGAGGTTTAAAGTGTTTCCATTTCATATTAGAAAACCTTGAACAGTTTGCAAGGGAGGCAT  
A\_16\_P02663417

ATTTACCTGATTATGAATGTGATGCATACTCCCTATGGAAATTATCGGTCACTTGTGGA  
A\_14\_P117156 AGTAACTGTGATTTTAAAATCTTGTTAGCCCATATTGCGCCAAAGCACAATACCTTGTTT  
A\_14\_P137934 CACCAATGTTCCAATAATTATCGACACAAAATACATTAATGAGAAATCCCGACTTCTCT  
CUST\_10079\_PI426210822

GAGACTTATAAAGTCTCAAAGACTTTATAAGAGGTTAAAAGGGCAATTGAAATGTAGGA  
A\_16\_P03802077

TTGCAGATGGCTTTCATATGTTATTCAAATACATGACCACTAAGTTGATGATCCCAGAGA  
A\_14\_P107711 AATCATCATTTTCATCTCTGTATATGGATGCCTGTTTCTTAGCAGATAACTTTGCAGCCA  
A\_14\_P118978

CAAACAAGAACCCAAACAGAGCAAGAAGTTGAAGAACAGAGAGACAAAGAACAAAAAAG  
CUST\_5298\_PI426210822 CTCAGATAAAACAGGCCAGTGTGGGAAGAAGGGGCTGTCCTTTT  
A\_16\_P37105276

TGTTTTCTATGAAGAAGGATACAAAGTAGAGTGGTAACTTTCATATATGGCGGAGAAGGG  
A\_14\_P116442 GTAAGCATTTACTTAACTCCATTTGAGAGCAAACCTTCAGAAGTGCCTACTTCTTGATTGT

A\_14\_P122763 ATGTTTACCTTTCGATTTCTTTTTCTGAGGGTTTGAAATCATTAACTTTGCTTGGTCAT  
A\_14\_P118460 AATTCAAGAAACAGTTCTTCTGTGAGACAAATTGTCTTCGTGGTGAGTAAATGTGTGTAT  
A\_16\_P21156844  
AGGTAGGAACAGATAAACTGCAAGTTATCTCTGATGAACTAATTTCTTCCCTCGTGATTGT  
A\_14\_P114524 TTCCTAACATTGGAAAGGGAAAAGCAATCTACCAAATTTTTGGAAATGGTCAGAAATCCA  
A\_14\_P131693 GCAGCCTGAGATAATTTAGATTGGAACAGTTTGTGGGGACATTTTAATGGATATATTGCA  
A\_14\_P136546 TATTTACCTTGAAGCACATTGTGATCAATAAAAACAACACCATCACGCCAGTGGTATAA  
CUST\_26\_PI426210822 AAGCCTGCCTTCAGGAAGGATGACTGCACCCAGGCTGGCTGTCTC  
A\_16\_P18405798  
ACCCTACCTTTCTCAAAAAACCTTTCCATGACTTTTCTTCTCAAGTGCTAAGATTATGAA  
CUST\_9118\_PI426210822 ATCACGCCATCGCCATTACCCTGTTCCACAGGCCACCCCAGAACT  
A\_14\_P109889 AAGATCAATGCGTATAACATAGCAGGTTACCCAATTTTTGTGCGTTAGGTTTAGTGAGTT  
A\_16\_P16460599  
GCCTCGCTCATAATCATGTTAAAACCACCCTCATTATGTTGTATTGCCTGTAGAAAATT  
A\_14\_P107423 CTATTGTAGAAAACCTCATTGTCCCACATTGGTCTCCCAAAGGAGGTTTTCTGT  
A\_14\_P135704 GGTGAAAAACAATGGTAAAATCATCAAATGTTATTGTAATAGTTCGTTGATCACTGT  
CUST\_9240\_PI426210822  
TGCCGTATAGATGAAACATCATCAAGGTATGTATACGCATTTTGGAACCTATCATATAAA  
A\_16\_P19524539  
AAATCACTGCTATTAACCCTATCAAACTTCTGTTCATTTCTTGGGATTACTTGCACAC  
A\_14\_P104715 CCAGCACTTTCTTTTTCAAAGTTTACTAGGAAAAAATAAAAGTCACACTTCATTGAGCA  
A\_14\_P139868 GGGTAAAGTGTGGAATGTATATCTACATAATCTTAGGCTCACAAAACCTCTCCTGAGAAAC  
CUST\_8883\_PI426210822  
TTTTCACTGCTCTGGTGTATGTAAGTCTCAGAAAAGCAGTGGAAGAGGTTAGATA  
A\_14\_P102301 GGCTACACAGACAATGATCACATTATTAGGTTTGCACCTAAAAAGAAAAAAAGTCCCCT  
A\_14\_P110630 TTAGCAAATCTTTAATGTCACATTGACTGAAACCAGCCAAGTATCTGGCTTAACACATTC  
A\_14\_P139935 CTAGAGAGCCAAAGGAACAGTATTCAGAGTGAATGATGACAAAAAGTTTGTTTTACATGG  
A\_14\_P128303 TTCATAACCAAACCAATGTTATCTCCACAAATCTTTCCCTTATTCATGGGGAACTACTGT  
A\_14\_P125778 ATGTTTTTCCCTCCTCTTTTTAGATGGTAAGGTTGAAGTTACAAAAGAAGGTGTGAAG  
A\_16\_P17571705  
AACACTATTTGATACTGGTCTTTTCCCTTAGAATCACTCAAAAGGTTCTCTAAGACAGCA  
A\_16\_P17530849  
AATGTTCTACAGTATCTCGATATCCATCTCTGTAAGGTGAAGTTGTAACAGTAAGGCTCC  
A\_14\_P118850 AACTGGCAGCAAACATATAACAACAGGGACAACCTTTAACTAGCCAATAGCATTCTAGTC  
A\_14\_P201861 CTGTTTTTAATGAAACTGAAAAAATAGACTTGATCCCGGCAGGACTGTGATACAGAGC  
A\_14\_P132028 CGGTGATGGATAAAATCACATCTGTGAAGCATGGTGGGACACTCCATAATAC  
CUST\_6163\_PI426210822 ATTTAGGCCCCAGGGAAGGTGAGGAGCAGTGTAAGGGACAGTCAC  
A\_14\_P113001 AACTGATTTGGAAACCCAAGATGAGATGACTTAAAGGCTTTTATATACTTAGATTCCCTG

A\_14\_P108047 CTATAAAAAATGTATGTCACCTTTGGACTCTCTAATGTCACAGGGAAGGGGAAAAGAAATC  
A\_16\_P58424356 GGAAGGCCAGGTTACTTGGCTCAAGGCTCATGTTGTATGGGAAAAGTTAAA  
CUST\_7110\_PI426210822 ACTGTCTCCAACCTCCACCACCACCATCCAACCTCAGGCCCAATATC  
A\_14\_P120975 TCATAAGGTCACCTGCAAATGTTATCCAAGATAAGTCCTGGCACAGACGGAATAAAAAG  
A\_14\_P103065 TCCTATGACCCATGAATCATAACCAGGCCAAATACCAACTGTAAAAAGTTACTACATTCA  
CUST\_4557\_PI426210822 CCACGCCCCATATTCTGAGATGGTAGAGAACCCTTTTCATTCCCTC  
CUST\_1013\_PI426210822  
TTCAAAAGCAATATTTTAAGAAAATGCATTCACTGGCTGGGGTGAAGTGAACCTGATATCA  
A\_14\_P134492 ACCAATCTCGCTTTTGTATAATCTGCTTTCAAAGGAATGAACAGCAACAAAAAGTCACT  
A\_14\_P128071 CATGATTGGGGCTGGATGTTCACTTCTCTTTCCAAAAAATATGAAACACACAGTCTAG  
A\_14\_P123400 TTTCCCCCTTTATGAAACTTTAACTGCATACTTCAGTCTGGTGGAACTTTTGTGTTATT  
A\_14\_P133762 ATTCTTTTGTCTTCTTGAAGCAGATGACCAGGAAGTGTGCGGAAGAGAATTTTG  
A\_14\_P123965 GGTCTGATTATCCTCCTTCCAGTGATAGAAACACTTTCCTTGCTATTCTGATCCAAA  
A\_14\_P121593 AATGTTGAAGACAGAAAACAAAATAAAAATCTGTGAAATGTTTGCCACTGACGACATTCCA  
CUST\_6428\_PI426210822  
CAACATTCTGGGACAAAATAGCCTGAATGCTGTTGTACCTTGGAATGCAATAG  
A\_14\_P106319 TCACTGTCTTTGGCTGTCAGACAAGTAGATGATTAATGGATTAGGGTATTTTAGGTCTT  
A\_14\_P103026 GCTAACTACCTTCTTCAAAGATGAAGGGAAAGAAGGTGCTCAGGTCATTCTC  
CUST\_3255\_PI426210822 CAGTGATGTCATTCCCTACTGTGAGGATCAGTGACACCCTCTAGA  
A\_14\_P102712 AAGTTCTACACCCCTTGCAAGGTGCAAGATAAAGAGAATGTGGTCAGG  
A\_14\_P136417 CAAACATGAAATTTCTATGACTCATTGCCTCAGGTCTATGAACCCAGGAAATAAATCATTG  
A\_14\_P104559 CAAGGAAGAGTGAATTTGAAGCATTGAACTGTAAGATACACCTCAAACAATTATGGATGC  
A\_16\_P18166849  
AAAGAATTTGCCCCCTTAATCATTTTACCCTACTACTACCAGTCTTAATCCTAGAACCAGC  
A\_16\_P36230206 GAGTCGATTTGGGGATGTGTGAGTGAGATGACATTCAGTCAGGTTGT  
CUST\_7285\_PI426210822 GCTCACCATGGGTGGACTGAGCAGACGCCTGCCCTCACACACAAC  
A\_16\_P35400507  
TGCTCACTATCACACTTTATAAAATTCCTTCCATTTATCATTCACTATCTAAAAGCCCT  
A\_14\_P110471  
ATGAACAGAAAATGATGCAATGTATGAAAACTGCTTTGAGGAGAAAAACAACACAGTGT  
A\_14\_P103359 ATTCTCCAGGCATTTGCAGACTAGTATTGCAGTTATTTAAATGTGTAAACTCCTGCTGAA  
A\_14\_P124758 CAGTGAAGACCAAAAGCAGAAAGTTTTCCAAGATGGTAGCCAATGATATAGGTAGGAAA  
A\_14\_P136563 TTCTTAGTGGCTTTTCCAGAAGGCTAAGGAAATCATTTTCAGACTTAAGA ACTATGAAGCCAA  
A\_16\_P36013937  
AGCATTCTGAATAGATCCAAACCTTTTTTTTCATTCAACACACAGATCATTCACTGTTTCCT  
A\_14\_P135179 CTTGCTAAATAAATCATAGGAACTCCCAAGAAGGATAAGTCAAGCAGGGAGAATCAAG  
A\_16\_P58424365 GACTTGTTAGCCAATGGCTGGCTGATTTGGGGTGTGGATTAACTC  
A\_16\_P01259109

TAATCTTTACTCCCTGTCAACAAGTATCTTCTAGATGACCAAAAACTGACTATGAGACCA  
A\_18\_P17130346

CCTCAGCCTAATAAACTCACTGACTCTAATAACGAATTTGAAAAACAACATGTCCTTAGC  
A\_18\_P16434121

ATTTCTAAAAGCCTCTTAGTCCTTACCTCAGCAATCTATAGTCCATCCTTTCAGTGTT  
A\_14\_P124257 CTGCCTTTCATTTTTTAATTTCTCCAGATGAGGCAAGTCACCAAAGAAGACCTCT  
CUST\_5495\_PI426210822

TTTCTTTAGTGAAAAGCATCTTGGAACCTTTACTGACATTTTTAGATTTAAGCAGCCCAA  
A\_14\_P201583

ACATTTTCAGCAGAAAAGTGATAAACAGAAAGCGAAGCGGATAATATGCTGAAGAATGAAG  
A\_14\_P139255 AGAGGAATGTGGGCTATGTAGTCATAATAAATTAGGACACAGAGCCTGGTTCT  
A\_16\_P00700180

CTTCCAGGAGTCTGTAGATAACCTTGCCTCTTTTTACAAGAAATCTTTCTAATGCCATC  
A\_16\_P16577073

CACACAGAAATTCAGATAAAAAGCCATTTCCATCAAATCAAAAATCAGATGAAGGTGCCAT  
A\_16\_P36516209

TGCATAGAAATCTACATCCAATGACAAGTATTCCTAAGTGATCAAAAAGACCACATTTGGC  
A\_16\_P17705371

AAAAAATCACTGCTTTAGATATAAGGTTGAAAAAGATGGCATGAGTCGCTTTACATCCCA  
A\_14\_P200282 ATTCTGTGGCTTCTGGTCTGAGAGTTCACACATATGCACACAAATCCCAAAT  
A\_14\_P106626 GGCTACCTAGGATTTTTATAAAATGGCTTTTGAAAAGATAGTAGAGGCACAAAGAAGCCA  
A\_14\_P119878 AATCATTTGGAGTAGATGGGTTTGCTAGAATTAGGTGGAAGATGTCTAGAAAGAGTCTAT  
A\_16\_P21510788

AAAAAAAAGTGAGACCCATGATGTTAACAAGACCCTTATTGCCTATTCCCAATACAATGA  
A\_16\_P00685371

GGATTCCAAGTTTCAAAAGGAAATCAAATCCAATGTATTTATCAGACATTAGTGGGAGAG  
A\_16\_P18398549

AATGGAACCAGAATTTTAGACATGCATGTGAAATCACTAATGTAAAGAATCCTTCCCTGG  
A\_14\_P129138 ATGTTTCTTTACAGCGCCTCTTTTACAAGCATCAATCCTTAAATACATGTTTTACATTC  
A\_14\_P106188 CTCGACTCTCAGCCTGTTTGATAAGTATAAAGGAAAATCAGTAGACGCGATTAGATCCT  
A\_14\_P110133

TGGGATCAGTGCAAAGGATTAAGCAAACAGGAAGAAACAACATAAATTCATACACTCC  
A\_14\_P134567 TTATGTAGGGAGTGAAGGAAAAGAGATTACTTGGAAGATGTTTTCTATTAAGGAAGTCCC  
CUST\_2021\_PI426210822 TGAGTATCTTTATGTTTCAGTTGTAGCTGTGCCCCCCTAACTGCTTTT  
A\_18\_P20552937

AAATGTTTAAACATTGGAACCTATGTCTCTTGTATACATAACTGCATATGTCAAGTCTTGGT  
A\_14\_P202274 TAACACTCCATTTGTTTTCTAGCGGAATATTTTCGACTTGCTTTTCAAACTGCAGAGT  
A\_14\_P112067 ACTGTCTTTATTTCTAGCAAGGCACCTGTTTATTGCATTTATTGGTTAATATGCCTGCCT

A\_14\_P135201 GGCTTAACTCATTGTAGCAGTTTCTGTGCTCCAAAGACAATTTTTATCAGCACATATCAT  
A\_14\_P131799 CTTCAAGTCTAAAATTGGGTTACTTACTGTCCAGGGAAATCTTTTATCCTTACTGACATC  
A\_14\_P114487 ATTTTCCATAGCATGAAGAGGAACCCACCTCAGAATATGAAACCACAATCAGGAAAC  
A\_16\_P21401724  
ATTCTGCCAGTGTTTAAAATTCTGTCACTAATTGAATGAGTCATTAAGTTGGATGCCAGC  
A\_14\_P201815 AATATGTCAGAGAGATTATTGCTTTTGACCTTATCAAGTTTCTTGATCCCTCCTTACACC  
A\_18\_P14134137 ATAACCAGTGTGGTGCATGAACCGATGCACCCACACTGCTTATTAAGA  
A\_14\_P102808 TTTTTGTGATTTACTTAATATCTGGATCCGTTACAACCTAGTGCTTCATGAACACTTCG  
A\_14\_P120159 AGAATAAGTGGGATCCATTTCTGTGAACTCTTCTGCAAAGTTACTCACATCTAATTCATC  
A\_16\_P18334041  
CTCTATACCTGAGACATGAATTCAACACATCTAGAACTCTTATCATGCTGTCAATGCCA  
A\_14\_P115463 GTCTGCATCACTTTATCTCTACTTGCCTTCTTCTTTTATGATTTCTCTGAAGTGCATGC  
A\_14\_P101042 CAGACAAATTAGAGAAAACACTCCCTATCAAATAGGAAAAATCTGTTAGGGCTGCTTTTC  
CUST\_6868\_P1426210822 AGTTCCAAATTAAACTGGTCTTCCAAGTTGGGGTTTGGAGGCAGTAAA  
A\_16\_P18667225  
GGCACAGTTACAGAAAGATCTAGACTGATGATTAACAGCCCTAACAGAATTTTGGAAAA  
A\_14\_P139083 AAGGTGGAGAAAAGAAAGAGAGGTAAGTGAATTTATGTTGCAGCACAGTTATATAACACC  
A\_14\_P112368 GATGGTTTGCATTAACCTTTTTTTCAGATTCTCTCCTGGTGTAAATGACTACATTATGACC  
A\_14\_P136514 TATGGGGGAATTTAAAAAGTCCAACCTCATATTGCAAGTGCATTTGCCTTATCCATTCAA  
A\_14\_P116010 ATAGATTTTCAGTGACAAATCAGTCATCTTCAAGACCTTTGACAAGATTGCAAAAACAGG  
A\_14\_P116292 TCCTTTCCAACCAGAGACATTTCTCATGTCTTAACTTCTGTTTTAGTTCCCATCTGTATA  
A\_14\_P120527 ACTTTCTTCACTAGGCAGATTTAACTGCATATTCTAAGATCATTTTGTGACGGGAGAAA  
A\_14\_P103991 CTCTAGGTTATCCCGAGTCAAATCAGTGATGACCAACCTCTTTCTTACTTCAC  
A\_16\_P58424450  
TTTCTTCTGTGTATACGCATTCCCTGGATGAACTGGTCAAGTCTCATAACTTCATATCAT  
A\_16\_P03084980  
CTGAGGCTCTCTAAAAATATCCTTCATTGACTGTTCACTTTAGAATCCAGGATTGAGACT  
CUST\_6411\_P1426210822  
TCTAGGACATGGCCTTAGCCTTCATAATACTGTTTGTTTACAGATTTTCATGAAGGCAT  
A\_14\_P135535 CTTAAGCAAGTATCCCCTCCATTATGCCACCAAACAGTATATTATGGAACATCTGATTTT  
A\_16\_P02992444  
GCTTCTTCATTCAGTTGTATAGCCTTTAGAAGTTTTTCTTTTACACTTTCAATTTCCCTCC  
CUST\_7796\_P1426210822 GCTCCATGATGACTCTGCTTTTTAAGGTTATGCCCTGGGCATGATC  
A\_14\_P126965 TAGCGAAGATGATTTTTAAGAGATGAAGAAGGATGAGGTATGTAAACCGAAAGGCAGC  
A\_16\_P21700155  
TTAACATAGCCAATATGCTTCCCTCTGAGATATCTCCAATAATGTGCACCTGATTTAGTGC  
A\_14\_P128074 TGCAGATGTGGTCTCAGGGTAGACTTCATAACAAAAACATTTATTAAGTAGCCACAATC  
A\_16\_P02363481

TGAAGTTCACCTAAAGGATTTACGAGTTTCTGCCCTACAAGTTTGATGCAAAGTTCAT  
A\_14\_P137762 ACACACAAATTTCCAATTCTTTCCCAAATCAGCATTATTCTGTAGTGCAATAATCCAG  
A\_16\_P01152944  
ATCTATCTCACAGGATATTTTTTGCCTATAAAGGAGTTGGAATACATGAGTGAAGCAGGC  
A\_16\_P15632692  
GACCCCAAGCAAGAAAAATAATCTGTTACATTTAACACCTTTTTACTGTCTGGATCACT  
A\_14\_P102854 CTAGCGTGTGATTTTTCTGCTTTTAAAAGGATTTCTTTCTTAATCAGAATGCCTGCTGAG  
A\_16\_P18062487  
AAAAAATACGTAACACACTAAAACCTAACTCTACTTCCCTGACAGTAACTTCTCTGGGG  
A\_14\_P114976 CTGCTACATGGCTACACATACCCATGCAACTGTTTATAGTATTCTTCTTCATCACCTTAT  
A\_14\_P133893 TATAGATTGGGCTAATGGATACTACAGACAACAGAGAAAACCTTGTGAAGAGATTGGCTG  
A\_14\_P115851 CATAAAATGGGCATGAGCAGAGGTTTAGAAGCCAAGGTGCAGAAGTGAG  
A\_14\_P118329 TCTCCTCAAGTTTGACATATAATCAATGTTCTTGTGCGATTTCACTGCCAATGCAAGAATT  
A\_14\_P124727 TTCAGGAAAGAAGTCTAATTGGAGACTTAACTCATACCACACACTGGAATAAGTTGTCAT  
A\_14\_P139560 GTCTTATTTGGTGTCCACAACAGGTGGAAGTTGATGGGTGCGAACTAAATGTGA  
A\_14\_P139071 GTATCACAAATCCACACTGATACGAAATATGCATTAATGGTGTGAGAAATTTGGCTCA  
A\_16\_P16063162  
CCCCTACCCTCAATATTAGTATCACTGTCCTTACTCTTTATAACTGCAGGTTCCCTAAATT  
A\_14\_P201651 ATCAGTTAAGTTAAATACCAGTGGGTTGAACAAAGGCATAGGTAAAAAGTCATGAAAGGT  
A\_14\_P104399 AACATCCATGGACATGCATCTTAATTTCCCTTGTGAGAAATTTCCATCTTCTTTTTTTCTT  
CUST\_9800\_PI426210822  
TGGAGTCCGTAGACAGGAAGATTTATCATTACCTTAAAGAGTGAGAAGGACCTA  
A\_14\_P135762 AGTAGAAGATCACTTTCCTTCACTGTGCTGAGAATTTCTAGATACTACAGTTCTTACTCC  
A\_14\_P115871  
ATTTACAAAAAGGAAAGAAAAAGTGAACAAAACCACCCAGAGAGTATAACTGTTAGGGGA  
A\_14\_P200783 TATGACCATCCTTATTTTCAGAAATGACAATGCATAGAGGAAAAGTAATGTGTGCAAAGCC  
A\_16\_P19301932  
AAAAAATGCAATAACATGAGTGACATCTAATTATCAGACACTTGGCCTTAGTTCTCTTCA  
A\_14\_P119460 GTTACTTCTATTTTTGGGTTGGGTGAACTTTAATTTTTGGCATGAAGAACTTCCCTTTTC  
A\_14\_P138957 CTCTCCTTTTCTACTGACCATCTTGATACTTATTTATAACGAGAGGCAGTTGCTGGAC  
A\_14\_P114442 TGATTTAAAATAACTAAGATGAATTAAGGCAAGCAGTCATCGATTTGAATGGCCCCCTT  
A\_14\_P127182 ACCACAGTCCCAAAGTAGCAGAGTGTCATCTGCTTTGTTTCATATAGTTATTAATTCTGT  
A\_18\_P22840662 AAATTAGCATTTCCCATCGGAGACCATGGGAAGGGCACTCTAGAAAAAAG  
A\_14\_P125905 CTCTTGACTGTAGGCATATCCCTTTGGCTTTCTTCATTTATGTTCCCTATGAATGAACAA  
A\_14\_P139735 CTTTTCTTTATGTGCAGCCAACTGATACATAGTTGGTGGATACACAGATGATCATCTAG  
A\_14\_P122690 TGCTGTTTTATTCATTTCCCTAATTTTAAAGATTAAGCATGATCTTGTGTATTTGTATAAAA  
A\_16\_P19808773  
TCATCTGTGATAAAATCTACGTCAGACTTAAAGAACTGTGCGGTTAACAATGACTCAAAAA

A\_16\_P17892424

TATTGTAATTTTCTCACTGTAAGTTGACTGTTGATGTCAAAGTAGAATGTGTCCCCACAC

A\_16\_P41713274

TTCCCTTCACTTTAACATGAACCCTATTTGAACTTTTGGCTCCTAAATTGCTTCTCATCT

A\_14\_P116401 ATTATTTGTTGCAAACAAACAGTTGCTGATGTGCTGTTTCCTTGTAAACGGAGAGATAA

A\_14\_P126574 AACATTTTACAAAGAAAGAAGAAAATGCTTTCAGGATCTGCATATGGTGTGAGGAGTGAA

A\_14\_P136491 TGATACAAACTACTGACATACGTTTTTCAAGTTATTTTCTCCTTCTTCTAGGAAATCCCT

A\_14\_P107904 CCATTTGATCTGCCATCAGTAGGAGTGCAGTTATTTTCAATTATACCCTGCTTTTCATTT

A\_14\_P132589 CTCTGACAATTTGATCTCTCATTGGCTTGATATCCTATTCAAGCAATCACAAAGAGAAAG

A\_16\_P20419163

AAAAATCTTGCTCATTTTGCACAACCTGAATCATAGGGGATAAGTGTCAAGTTTGCTATGG

A\_14\_P136048 ATATTGATGATATGGTGGCAGGGATGGTTTTTTTTATTGTTTTTAAACTATGGCCAAAC

A\_14\_P122076 CTAAGTGAAGCATCGAAATGCTACATCTATTTGCCTTAGTAGTAGTTATTCAACTCCCCTT

CUST\_1171\_PI426210822

GCCATGTACAACATACTGTATTCTGAGCAAGTGTGTTGTTAATCATCATAGGGTGACTGA

A\_14\_P112552 GTTCTGCTTAGGAGTATCCAGCATTGAGGGACTTAAAATATATCTTCTCTTTGTCTTCA

A\_18\_P14149499

TCTTGGTTAGTAACTTTGATGCTGCTACATTTGATACAAATGATATACCGGACACTTGG

A\_16\_P35571273

AGTTTCTACTTTTCGCAAAAACCTAGCATTGAGATGTTACTGTATCAGAGTATTCCCAACCT

A\_16\_P20071424

ACCCATTGACATTTATTGTGGTTTGTGGACTTTTTATCCTTTTCGTTTATCAGCAGCATT

A\_16\_P36231116 CTTGAGCAAAGCCCTGAAGGTGAGCAGGACTTGGCCTGTGCCACC

A\_14\_P129699 TGACTTGTAGTTATGGTATAACATCCATGTTTTTTAGTTTGTAAATGCTTCTGGGTGGACC

A\_14\_P137095 TAGTTACATCACATAAAGGAAAATATGACATCGCATGCTGCCATGATAGCAAGCGTAAGA

A\_18\_P10679818

ACCAAACTATTATTTTAAAGACTAATCACACCCTCAAATTTTCATATGTGTACCTCCCA

A\_18\_P14134430

ACCGTTATCATTTTTCTTACTTTAGAAAGATAAGCCAAAAAATTTGACCTTAATGAAAAT

CUST\_4008\_PI426210822 GTAGAAGGGAGACAGTGACCCACGTGAAAAAGGATGGCTACAGAT

A\_16\_P02052277

AAAGAAGAAACCCAGAGATAATAATACACCCAAGATCATACTGATAGACCTACATGTGCC

A\_16\_P01393244

ACCTGTCCAGTTTTTAAATGCATGTGCCATTAGAGTTATTTGTACGCAGATCTTAAGG

A\_14\_P131858 CTTCTCTTCTCCTAACACTGTTCTACAAATCACAGACTCCTTAAATACCCTAATCACTA

A\_14\_P124332 GAGTAGACAGGTAGTCTCTTAAAGTCTACGTTTGCCAATAACCTTGCAGAATTTGAAAAC

CUST\_5257\_PI426210822

AAAAAGATCACATGTTTGGTGAATCCTCTTTTTAAAAACACTTAGAAGATTTTCCCTAAAC

A\_14\_P128743 CCACTTCTCCTCGATAACATTACTGTTTTTCTTCCGCCTTCTGGTTGACTTTAG  
A\_14\_P122782 CTGTATACATGATCCAGTCTGTGACTACCAGCCAACCTGAATAAAGCGGTTTTAAAAAAA  
CUST\_5009\_PI426210822

AACTCAAACATTTATGTTTCCCTTTCCAATATAAAAAGTGTTAATAATTTACCCACTTA  
A\_16\_P03576250

CATTCAAAGCCTTATTCTCACTACAGAACTGGTTACCCTTTAATTCTCACTTTGTCCTAG  
CUST\_1043\_PI426210822 TCATCGCTGGAAGAACATCTACTATGAAGCCGACCACATCCTACC  
A\_18\_P16240446

AGCCGATGTTAACAAATCCACCAGATTAATCAGTATGTAGAAAATGTCAAGTCTGTGTT  
A\_18\_P22841745 AAAAGCATCAGGACCCCTGATATCCACCTTGTTAACACCGTAGATGACTT  
A\_14\_P118446 TTAGGTAATTACTGGCATTTCATGAGGGAAAAAGGAAATCAGTGACTAGTGATTACAGTCT  
A\_14\_P113763 TATTAAATCTGTCTCCCATCACCCATCAGTCTTGTCCTAAAAACTCTCACTCATTAACA  
A\_16\_P02138706

AAACTACAAGTCCCTAATAGTTGATCAAAGGAAACCTCAGTAAGCAAATCAACATGTTCC  
A\_16\_P19526159

ACAACATCCACCATATTATATTCCCTACACCTGACATTTATCAGAAGTAGTAGCCAATGG  
A\_14\_P126568 TGAGGATTTTGATGATTGCCTAGAAGACTTTATTTTGTATAATCCTGAAGCAAAATGGC  
CUST\_7914\_PI426210822 TACACTTGAAACCTCTCCTCACCCCTTGACCCTCCCCACACCCT  
CUST\_4615\_PI426210822 GAGAGTATGGCCTGCTTTCTAGCTGATATCTCCCTTGCTCTCAG  
A\_14\_P124338 AATTCTTGAAAGTCGACCTGTTTCATCTTGATTAGCATCCAGGCCTTGGAATATTTTCAT  
CUST\_540\_PI426210822

TTCATCAGACTTTGAGTGTTGACACTCAACACTGAAATGAATGAGATATTCTAACATAGA  
A\_16\_P16966024

CACTTTCTGAAAACCATTTGAGTCCTTAATGTGCTAGATCTATAACATGCTCCATTGCAG  
A\_16\_P18969460

GCTGAATTCTTTTGCAGAACTACTGTGTGTCTGTTCACTACCTTTTCAGGTTTATTGTTT  
A\_14\_P115756 TTCATTGAGCAGTCATCTGGTTCGTAGACACCAGAGTTACAGAAAAGTTTATTGGG

A\_14\_P116675 CTTCTGTGCCTTTAAGTCCCCAAATCTCCACTCAGTCCACTTTGTCT  
A\_14\_P134255 TTAATTCTCACACCTGTGTTTATTTTTTCTCTACTCTGCAGGAACTGTCATTCTTACC  
A\_14\_P109385 GTCCCTGGTTTCTTAACCCAGAGAGACTGCGGAATGTTGAAAAGATAA

A\_14\_P108230 ATATCTTTTTTCAGCGCTTATACAAAACGGCACTATAGAACCCTCCATTTTACAGCACCATA  
A\_14\_P107151 AGTTGCTTACATTTCTCATCCCGGAAGCATGACAGCATTAAGACGACT  
CUST\_1626\_PI426210822 CTGCTGTAGAAGCCTAGAGGCACTTGGGTGGGAGTTTGTTCAGCA

A\_16\_P15685753

ATAAAAGCCCTGTTTGTAATTCTGCTTACCCATGGAATGAACTAATTTTTGCATCTCAG  
A\_14\_P200932 CTTTATAGACAGACATTTGAAGTTTTGCAGAATCTACCAGGTTTTCAAATTTCCCAAGGT  
A\_16\_P16918112

AAAAATTAAGCCTTGGGTAAAGTATCACAATTCATCCATGATTGGGAATCTCACTGGTA



A\_14\_P122347 TATTTTAAAGATTTTTCTCTCCACGCAGATTCTCTTCTGTTTCCTTAAGGGACTTGGT  
A\_14\_P138507 ATTACATGGACATCTCTGTGATTTAAATGACTGCAAAGATATCAAAGGAGATGCCATCAC  
A\_14\_P122280 AACACCTGTAATCTTACAAGGAACCTTTTTGGTTCTATCTGAATCTAATCCAACCTCCACT  
A\_14\_P115866 TGCGTCTTTAAATCAGTTAAATCAAACCTACAAATCCACTCCTCAGTTACGTAGTCACGT  
A\_14\_P108780 ATGAGGAATTACCTTTTATTATTCTCTTGCTCTTCTTCCTCTGGTAAATGGCTTCTGCTTT  
A\_16\_P19336853

AAAAAAACCCTTATTGTGGCAGATAAAGAAAACAGATACCCCTATTTCCCTGCTAAGTCTG

A\_14\_P101771 ATGGCTATTTCCCTGAAAGTTGATTTTTGTTTATCATTACTTGTTCAGATGCTACTGC  
CUST\_9413\_PI426210822

TGGAGAGGTATCTAGTTCAATGATAAAATTTTTGTCTGGGCTACATGGAATCATGGAATT

A\_14\_P125013 GATCAACTATCCTGTTCACTGAGTCTCAACACTGTGCGCTGTTGCATTAG  
A\_16\_P19934430

TCACCCCCTGTTTTAATAGATTGAGTGCCCAATTTGAAAATACTACTTTGTTGTGAGAA

A\_14\_P128088 ATTACCTCATCTACTAATTTGACATTTTCCTTCTTGGCAATGTCTAGTAATCGCTGCTGT  
A\_16\_P30952232 ATCTGCCTCCTATTTTCTTATCGTAGGTTGTGACAGAATGCCTTTTTCTCTTGCTG

A\_14\_P124528 TGAAGAACTCTTTAAGGTTGGCTAACAAGACACATCCAGAGGTGTATTTATTTG  
A\_16\_P00190329

ATTCAGTGCCTTATTCTCTTTTACAGAACTCTCAGTGAATATAACTTTCCACAGTTTCCG

A\_16\_P15486185

ACCACATACTAACCATCAGTAGACTAATGACTTTTTGTGCAGTATTTCTCAACATCTGGTC

A\_16\_P15943662

AGTGCTCATGCCTTAAACATAAGACTTTATCACCTGACAAGTGCTTTATCATGAAACTGA

CUST\_5399\_PI426210822 CCAGGAGTCAGAATTTATCCTTGCCTCCGCTGATGTCTAATTCTG

A\_14\_P115523 ATTATAGTCCCTCTGACTTAAATCTAGTGGTAACTGAGAAACCAAAGTCCAGTTTAGTT

A\_14\_P123378 TTTACAAAATCTATCTTTGAAGGCTTCTAAATCTGTCACTGAATTCTGAGGTGGTGCTG

A\_14\_P200689 TTTCTGTGAAACTAACACTTCTTTTCTAATTGCCCTTGACTTCACATTCTTTAGCCCATT

A\_14\_P124638 ACAGTAAATAAGAAAGAGGATATATTCTTGCTTTCTTCTCCAGATGTGTTTGGGGTGACA  
A\_16\_P36096103

AGGACCTTATTAATTTCCCCATCAAATCTTAGAACATGAATAACATGAAGCCTTTCCA

A\_14\_P132888

TTACAAGCACCAACACCAAAATTCTGTCTTCAAGGGAAGGTTACAAAGTTAAAAAAGAGT

A\_14\_P127610 AATGGAAAATATCTGAAAACACCACCAGGCATCCCAGGTAAGAAATTCACTAATAAGTGA  
A\_16\_P19849188

TCCTGAAGTAATAAAAGAACATCTGTAGCAGTCAATCTTGTCTATGGAGCAATTTACCA

A\_14\_P126907

CAGGAATCTAAGAACAAGGACGATTTGTATTCTTGGAGAAGCACATACTGAAGAAGAAAA

A\_16\_P35747321

CTGCTGCTTATAATCTCACTATTTAAAAAGATGCCCTAGTATTCTGAAACTACTTCCAGA

A\_18\_P11195878

AAATGCTACTCTATCAGAGACAGTGTTAGAAATACTTGGTTGTGGATATATCTCCCAGGA

A\_14\_P100862 CTGCTAGCCTGCCTTCTAATTTGATAGTATGGTATCACACTTAATTCAGAGAAGTGAAA

A\_18\_P22842258 AAGACTCCATGGAGCATGACAGGCATGCTGTGCCTGCCACAGCCAA

A\_16\_P15841282

AAAAATGGATAAGGTGATGAGATCAGAATCAACTGTGTTTCTTATGCAGAACTAGTGCTC

A\_14\_P108486 TATGGTTGCCTCTTGTTTTACCCTTGGCCTCTAGTATAGTTTTAAACACATCCATTAAGT

A\_16\_P00685310 AGATCTGGTTCTGCATGAATCTTCTCTACCCTATTGCTGCCTATCAACTTGACTT

A\_14\_P135155 ATTTTGAAGTAGATCCCATTGCTACTGAAAGGAACCAAACAATAATTCTTCCCCAAT

A\_14\_P110296 CTATAAGGCACTAGGACACATGGTAAGGCTGCAATTGTTAAAACACTGCAAGGCT

A\_14\_P131946 ACAAAGCAACCCATTTTCCCTGATTTTGCATTCTATTACAGGGAAAATAAGTCTCTGATG

A\_14\_P124950 AAGAGTTAAGGTGTTTGTCTACCAAGAGTGCTGGTTCTGCTTAGTTTTAGAAAACAATAAC

A\_14\_P124354 ATTCTTCTCAAGAACGAAGATTTGCTTTCAAATCCCAACAAGTTGTGCTTGAAATAGCAT

A\_14\_P105576 ACTTGGATATCCTCAGATCAACACTAGAAGTGAAAGGGTTTGAATCTATTATCTGTCAA

A\_14\_P110840 CTAAACTTGACTCTAACCTTATTTGAGAATCCACATCTCTGCTTAGGAACTTAGGTCTTG

A\_14\_P132347 CCAGTTTCTCCTTCAAGTATTCAGTGTTAATTTCTCAAGCACAAAGTGTCTAATGGTATA

A\_16\_P15770813

AAAGACCTACAAGGATTGAAGTTTTTTGGGAATTAACAGAAATACTCAGTAGGGCAACTC

A\_14\_P106063 CTCCAGTTCTAGAAAAACCACCAACCATCTAGTAGTTTAGAAAAGTTTCTTCTACAAAA

A\_14\_P139635 CCCTCCTCCAAACTGTTCTTAGAAACGACTTTGCAAGTATCATAAATATCCTCTATGTT

A\_14\_P114070 TAGCCAATACAGAGGAAATTATAGAAGGAAATTCGGTTGACTCATCAATCCAGCAAGTAA

A\_18\_P12988751

CACTGCGATTACATTCTTCAGTTACCTCTATGACAGCATGATGGTTTTTTTTTTAGGTAGG

A\_14\_P107956 AAAGCCATTGAATATGGAACCTCAAATTATCTAAGGTTTACCCAGAAGTCAAATCACCTG

A\_16\_P18224890

AAGTTTCTGACAACAACACATAAGGTCAAACACAGTTTCACTTGTAACAACGTCACTTTC

A\_14\_P119865 CCCCTTTGAATTTTTCTCAGAATGTGATTTGTATCTCAGACTGTTTGAATGACAACCTCA

A\_16\_P19175881

AAGGCCAGATAGTGTCTTCTATGATTTCTTGACAGTTAAAAAATGTGAGTAGCCTTCATCGT

A\_14\_P135712 TTTTAAGGAAGATGAACCAGCAACATTTTTGGAAGGCTACTTGGTGGTGTATCAAATT

A\_14\_P125033 AGACCTTTACCTTTGACCTATGACCCCTCTCAACCATACTGGGTTAATA

A\_14\_P132078 GCTAGGAGATTTACAAATTCCTCATCTTACAGATCTGAGGGCTATTCTGAG

CUST\_5830\_PI426210822 TATTGGGATTGTTCCCTCAGAGGAAAATCAGGAGTTTGGGCCATT

CUST\_6152\_PI426210822

TGTTTCTGGAATCTCTGGCTATAGGAATGGATTTCTCAATGGTATATTCTTGAAAGAAAAG

A\_14\_P111316 GACTTTGAGACCAACTTTCTGATCGATAGAACTTCCAGGTGAGACTCAGTTTC

A\_14\_P121479 ACAGTATCTCATCGTTCTGAGGAATGCAGTTTCCATTGAGTATACAGTAGTCAGAAAATT

A\_16\_P19744062

TGAGAAAGCCAATACACTGTTACAGAAATCAAACCTCTCTCCTTTGTTTCATGACCTAG  
A\_14\_P104483 ACACTGACATTCTCAGGTGAGAGTTCTATAACTTGAGCAAATCAAAGACAGTGGTATAT  
A\_14\_P106269 TTAATCAGTGCAAGCGAAATTAAGGGAAAATGGATGTAGAAAATGAGCAGATACTGAATG  
CUST\_599\_PI426210822  
ATAACTTTCCATAAAGCTTAGAAGCCAGGTAGAACTACTGGCTTAAAACCCTAGAAA  
A\_16\_P02707879  
AAAGAACTAGCCACATATTGTAGTGAAGACTCCCTTAGATCACATGACAGTATTTGAGA  
A\_14\_P133363 CTTTAGCCTTTACACTTGGCGAGTTTTTTAAGTTTCAAGTAGTAATGGTTTGTGGGTAAG  
A\_16\_P15210992  
ATTCCCTTCTAGGCTACTAATGTAAGTCTATAGGTTCTGTTCAAATCGATTCTCCTTCC  
A\_16\_P01199312  
GGGGCCTCTATATTCACAAACATCTATGTCTCCTTTACTGAATCATCATCCTCACTAATA  
A\_14\_P101345 CTGTCTTTAGCATTGCTCCTGCCTCTTGACCTACTTACCTTTTCAAGGAG  
A\_14\_P136786 GGGGCCTCACTTTAAGCAATCCCAGTAGTAAACATTGGATAAATCTAAAGGCTTTCTT  
CUST\_1135\_PI426210822 AAGTAAGAATGGGAAGGGAAAGGCAGCCCATGGAAGATGTACTCCT  
A\_16\_P16191971 GTATCTCAACCAGAGAGGCATCTTCAACATGGCAAGCAAGATTACTCCAAAAAAT  
A\_14\_P125071 CTGTGGTAAAAGGTCAACTAGAGCAAACCTTAACACCTCAGTCTTATACACATAAGCAACA  
A\_14\_P139912 AGAAACCCTTAAATCCAGAACGGTTTTCTGAAAACCAGCAACTGTGTTTCAACTT  
A\_16\_P39476555  
AAAACCTCCTAAGATCTGACTTTAGGGAGAAAATACCATTTGAAGTCTAAAAGCCAAAGCC  
A\_18\_P14134446  
AGTTTCTATTAAGCAGGACTGAAAATTCCATTTGTAAAAGGATGCAACTATGTTTTGTCT  
A\_14\_P129718 CTGTGGTAGAAACAAATTCAGATTCAGATGATGAAGACAAACTGCATATTGTGGAAGAAG  
A\_18\_P16277561  
AAACCTCTATCTAATTGATAACTGTGTCTTCAGTGCTACTTTTAAATCCCCCTGGACTT  
CUST\_9378\_PI426210822 TATCTGTTTCCACGACAGAAGCCAGGCTGCCCTTCTGCTCCACAAT  
A\_14\_P112993 TGAAGTTTTCCAAAGGAGAGATTCTTCAGATTGTAAATAGAGAAGATCCAAATTGGTGGC  
CUST\_9483\_PI426210822  
CCTGCTCATTGTCATAGTTCTGGTTTTAAAGTTTTATAGAATGAAATACTTGCCCAACAT  
A\_18\_P11312546  
AGCAATAGACGGGCACATAAGATACAAGGAGAAGTGAAGAATCTTAAGTCGAAAGTGTTT  
A\_14\_P127315 TATACGTTATACCAAGCCTCGCTGTTGTATATCTCTCTTCTGACCTTCAGAATACC  
A\_14\_P136069 TAGTCTGCTTAAAGTTGAATCTTGCTTTTACTATCAACTGATGACTTCCATTTTCCGTCA  
A\_16\_P03340613  
AAAAACTTGACAGATGGGAAATGACATGCAAGAAATAGTTTAAACACATGTTTTCGTGCC  
A\_14\_P131840 TTCACTGGGTTGTTTTCTTAAAAAATTCACGCAACTGACAGGAGGAATTGTCTTTATTC  
A\_14\_P121477 CAAAGTCGTCTCCCTTTCTTTTCTTAAACAGAACCTTTTCCAAAATTAACAATGTCAAATG  
CUST\_7728\_PI426210822 ATCAAATGCTTGTATGATTGGGAGGAAGGAGCCCGAAGGCCAAAG

A\_16\_P37304762

ATTACTGTTTTGACCAAGAGTTCCATTTCAACATTGCTTAATGTCTTCCCATTTAATGCC

A\_16\_P58424168

ATTAGATATGCAAATTCTGACTAGAACTCTGAAGGTGGGACCCACATCTGTGTTTTTAC

A\_16\_P00685459

ATGAGAGCATGAACAAAGGAATGTAAGATGTAACAGAAAACATACGTGTCTCACACATGA

A\_14\_P131061 CTTGACTTTCAGTCAGGGCCACAGTGAGCATTAAATTATTATTCCATACAGCCCT

A\_14\_P132174 TCGCTCTGGTATTATTAATGTTATTGTAATAGCCGCATGCTACACACAGAGAATTTCCCTG

A\_16\_P02126469 TCTCAATCTACCCTCTTCTTTAIGCTCATCCTTAACCTATCTATCTCATTCCCTCTGTAT

A\_14\_P102948 ATAAGGCTTCTCACTCTGTCTTACAGATATCTCCCCACAAACCTAAACAATTTTCGAG

CUST\_5792\_PI426210822

TAGGCTAAGAATCCTATTTCCCTGTTAGATCAGAAGTGAAGATTTTCTGGTACAGATTTGG

A\_14\_P102817 CTTTTAGATCACTGAACAGAAATGAAATCTTTGTTACATCTGGAGAAGCAGGTAGATTC

CUST\_871\_PI426210822 GCAGTCTTGCTAGGAAAGGCTTGTCCCTAAGTCCCCCTCTGCCCTG

A\_14\_P111071 GCCTTTGGCCGAGCATAGATGAAGATACTGGCTGCATAGAAGATTATCACAA

A\_14\_P113927 TTTAGTTATCCAGGCAAGCAGCCTTTTATGGTCAAATTTTCTATATAATTCTGGGCTTGG

A\_14\_P128954 CTATAAAATGCATCCAATTTTTCAGGTTTAAACACCTTCTAGTGCCTCCTTCTTGGTAAAG

A\_14\_P139092 GAAGTTATGCCATCCTGTGTTGGGTAGGCTAATGGAGAAATGGGATTTTTGTTTT

A\_14\_P109976 CTGGGCTATACACTTAAATGTCTAAAGGTTTTTGCCTTTCAGTTCATATCAACGCGAGTA

A\_16\_P15326959

GCTTCAACAATAAGGTTTTTCTAGTCCTAACACAATCACAATAAATCCTATGAGCAGGG

A\_14\_P135691 TTAGAAGAAGATCACAAATGTAGTCATTTTCCCTGATTTTTCTTATTCTGCCAGTAGCAAG

A\_14\_P124683 ATAAGAAGCCGATTTCTGAATAGTTCATCCCTCCTCGTCTTCTTTAGTAAAGATAACT

A\_14\_P202416 CAAGCAAAAAATTGTTCCCTTGTTAAGCACTGCCTTGTGATCTCCTAAGTTATATCTGT

A\_16\_P15888241

ACCCCTCAAAAAATTGAACTCCAGAACTATGAAATCAAAACCAACAAGTAATCTTTCAGC

A\_16\_P01203295

CTGACATGCAGTTTCAGAATATACGAGGAACAAGAATCTTAGTCTACATCTCTGGAGAAA

A\_14\_P134146 CTTCCAGAGAAGGTCATAAAATACCTTTTTGTCAATGTGAAGTGTCTGAGGTTCTTTT

A\_14\_P131086 CATAGGCTACTCACAGTTGTTATCTGATGCATACAGAAGTGTTAAACAACCAATTGCTAG

A\_14\_P137711 AACCAAAAGAATGTATGCTCTTGGGATAATTTGGCTCTGGTCTTAAATTGCTAATTAACC

A\_14\_P130423 AGACGCTTATACTCCAGGTATGTCTCAAATAGGAATAAATTTAAATGGAGGCTCTTTTCC

CUST\_2390\_PI426210822 TCTCTCTCGAGTTTACCACGGAGAGTGTTTATTTTAAAGATCCTTGTGTGCC

A\_14\_P114035 AAATCCAGTGATTTTACCTCCTCTGAAAACTTTTGCCCTCAATTTTGATACTAGTTT

A\_16\_P16980304

ACCTCCAGGATTTCTTCAATATTAATAATGGCCTATATCACTTTTTCAAATACAGCCCATCC

A\_16\_P00685213

GACATTGATTACACTATGAGTCATGTGACATTCCATGTTGATGTAGTTGCCAAAATGCTC

A\_14\_P133011 ATTAATGCCATTCTGGGGCTCAGTTGCAGGCAATTAATTTTAGACCTTGCCTTTAATTTA  
A\_14\_P114314 CAATTGGCAGCCTCTCACTACTCTTTCTGGCTAAAAGGAATCTAATCTTGTTGAG  
A\_14\_P111362 ACAGTGGTGAAGTGTCAAAAAGCCTATAAACCCAGAGACTTCTTATTTACATGTATATCT  
A\_14\_P123018 CTGTCTCCTGCTTTCTTGCCTTAAAATCACCTCCATCTTTATATTCTTCTGTTATACTA  
A\_14\_P116748 AAGCAAAGCCACAGTCATCCTTACTTGCATTTTTTTTGAACAAAAAGACTGCAGTGTATA  
A\_14\_P106757 CTCCTGAGAAAATAGGTCTGTAGATTACTGAAGGACTGAGAAAAGTTAAAATTTACATG  
CUST\_9835\_PI426210822

TCCATGTCGTCCATGCTGCTGTTTCCTTCTTAGAGTTTTGTTTTTTAATCTAAGATATG

A\_14\_P105437 TTTGAGAGGTGTTAAATATGGTTATTTATGCACTGTGGGATGTGTTCTTCTTCTCTGTA  
A\_16\_P16191779 TACATGAGCCTCTTTCAGAAGTTTGACTAGCAAATCAACAAAACAGTTCACCCTCT  
A\_14\_P134930 CCAGAAAAGGATTCTGCTGCTATCTGGAACAATGGCAGTATTCATGAGTCATTTATTTAT  
A\_14\_P120167 TTGTGACATCTGATATTGCCATGACACTTTTCTCTTCTGACATTCATAAAGTTGCTGTA  
A\_14\_P200998 AGATCTACAGATTTGGGGATTTTGTGTTCTAACATTCTTAACCATTCTGGTGAATTTGGA  
A\_14\_P125073 ATATTAAATTTCACTCCACTTACCTACCAAGGGCCTGGTTAAGGCCCTGTAT  
CUST\_98\_PI426210822

AACGATTATCTGGTATGTGAATGATCCAAACCCTTTTTATTTTTTTCTGCCTCTTTTGAA

A\_14\_P110919 AACATTGTATGCACATGTGACTCTTTTGGATTGAGAATACGTTGTCTGCCAAATAACATT  
CUST\_4327\_PI426210822

ACAATTAGGGAGGGATTCTTTCAAGTACAACATTTTCTCTAGCAATTATGGGGGTTTT

A\_14\_P126454 CTTGAGAACATTAAGTCCTTTGAAGCATGTTCCCTGGAGTCTATTAAACATTCTTTCTCT  
A\_14\_P122269 ACAAAGCAGTTCCCATTCCTTATATAGACACCCAAAGTAGAAAAAAAAGGGAACTTA  
CUST\_2637\_PI426210822 GATGTGGATGAGGATGAAGCAGAGGGTGACCACCCTGGTCTATTC  
A\_14\_P124934 TTTTTCCATGAATCAATCTTTATTGGTGTGTTGCAGCAATTGAATTATTGGCATAAGGCAC  
A\_14\_P123796 CGTAGCAGAGCAAGCAATTCAGGAATCTATGTTGGTTAATTACTTTTTGTTTTGTGGACAT  
A\_16\_P15015837

CTCAGCAAAAACCTTGTGAATGATTTTGGCCATAGTGCTAATGGATTTACACTGATTTTG

A\_14\_P134272 CAGGTTCTTAAATTTCTGAGGAGAGAGAATTCAAGGGAGATAACTCTAGAGTAGTGATTC  
A\_14\_P133751 CTTTTATTTTAAAGGTGATTATTAATGAAACATGGAATGCAGCAGAAATACATTCCCAAT  
A\_16\_P03000287

AATAGCCCATTAGTTCTGACATGTAATGTTTCCGTTATTGTTACAGACTGTTTCAGGTCT

A\_16\_P15211593 CTGACCACTCCCTATTACTCTCCTGCTTCACTATATTATGCCTGTTATCTCTGTAGA  
A\_14\_P104064 CTAGTATTTTACCTTGGGCTGTTGCCATATTAAGCACTTCTAGAGTAATCGTTTCCAT  
A\_16\_P01839045

TCCAAGGAAAAATTTTATAAAGAGTGGTTAAATGAATGAATGAATGGACATTTACTGTCT

A\_18\_P22840120 TTTTGAGTCACCTGAGCCTGATGGGGAGGGGAAGGTCTTTTTCTCTT  
CUST\_3832\_PI426210822

AGAGATTCTTATTTTAAATCCTTTTTCTTTTTAACTGCAGAAGGGAAATAATAATGGGATA

A\_14\_P125351 TGTAATACCAGGCAAACATTTTAAAGGTAGAATTAGCCTAAGGAGAGATATGTGGGTAGGA

A\_14\_P202180 GTGACCACATGTTTGACTTTTTTCAGATCTCTGCCTTTATTCTTGTTTGGTTTTATCTTGC  
A\_16\_P36230664

AGTAAATTACAATAAAAGTTGTCAACAGGCTCTTCTCTCCAAATTCCTGAAATGAGC

A\_14\_P125553 CTTGAACCCACCAAATTCCTATCAAGTTCAAAGACTTACCATTCTTGCTAAGATAATGTC

A\_14\_P114655 TTGATTAATGTTCCATACCCCTTTGGCAGAGTGTCTGAGGTGGGATTTTTTCATATAATTT

A\_14\_P115151 ACATACCAAAAAATCCAATATGTTACCACGTGTCATCTGCAATTTTATTCTCTCCTCTCCT

A\_16\_P17588976

AATGACACTCAGACCAAATGTTTCATGCTTGAATCTCTCATAAAATGCCTCTAATGAAGTG

A\_16\_P02305082

GAATATCTGTTCCAATAGACACATTCAATGTAACACTCAACATGATCCATTGCTATCCCA

A\_14\_P202518 TTAATTTTTTTTTTAACCCCTGGAAGAAAAGTGTGATTACACTGGAGGAATGCAATTTGGC

A\_18\_P15383334

ACAGCAATTAACAGAAGTACCTAGTCTCTACTCTTTTTTTGGTAATGTTCCACACATACA

A\_18\_P14132721

CTTTTGAATAAAAAATGCATCACCAAACCTTGGTTTTGCATTTTTCTCAGAAATGGCTCTG

CUST\_2955\_PI426210822 TAATCAGAAGTACGAGCCTCCCAGGGACAGACAGGGGCTGGCCAG

A\_16\_P15644366

TGCTCCCAACACAGATAATGGAAAATTACTTTGATTCTTCCCGAGTAGATACATTACTGT

A\_14\_P106256 TTTACCTTTCTCTGTCTTTTAGTGACTGTTTCAGCGATTAATTTCTTCAGTTCTTCTAGAC

A\_18\_P14138023 AAGACCTGGCAGTGCCTGATGCTGCAGGAATGGCCAGACACTGAC

A\_14\_P134202 TCACATTGGAAATAATCACGAGGAATCAATAGGTTTAGGCTAACTGACTGATTGGTTTTTA

CUST\_10083\_PI426210822

TTTCTAGAAGTTCAACTACAGACCTCTTGTTAACTCTGATTCCCATGTCTACAACCT

A\_18\_P22841646 GACCAGTGGGCTTCAGCGATCAGTGAGGCTTCTTGACAGAGGATT

A\_14\_P119811 GTGAAATCCAGGAATTCTGAACAACAGAAGTGTGCTCAATGAAGCAAGCACT

A\_14\_P130986

TAAGTGAGGAACCAGTTGCTAAAATATGCTGAAATAAAAGGGTAGAAAAAAGGGCTGCTA

A\_14\_P125782 AGTTGCCCTCAATATGAAGAAACCGGAAGTAAAAGCCTGTCAATCTTAAATAACATTTA

CUST\_6580\_PI426210822 AAACCCAGCTTTGAGACTCCTCTAAAAAAAATCTGAGTTCACATTCTGCC

A\_14\_P107656 ATTAATTTGATTTTGAGATTTGAGAAGTGGACATACATACTTCTATGGAAGGTAACAT

A\_16\_P00685546

CTGGTATCATTTCTCAGTTATTGTATGACTACTATCTTTATTTCAAACCCTGAAGTCCTA

A\_16\_P16938423

AAAGGCTACTCACTATCAGATAGGCTTCTTATTGCATTGTGAAATGTGAAATCCAATGG

A\_14\_P121665 AAAGGGTCACTGAGTAGCCAAAAATATCTTCTTTCTTGGGGATGGAAATGCAAG

A\_14\_P201329 ATTTTCAACTATGGTTATTCATCCAACCCTTGGATCTCTTTGAGTCTACTGATAATCTCC

A\_14\_P139314 CAGCAGAGATGCCAGAGCAGAATAAACAGGAGGATCGCTATCACC

CUST\_5292\_PI426210822 TAAGCCTCTTTCTCCATCCTAAGGAGTTTCTCTGCTTAATTGCAGTGCTG

A\_14\_P100148 GAGCAAATTGCAGTGCTCTCCCTTTTTCTTACCTTGCAGAGATATTTAATTTCTCTAA  
CUST\_888\_P1426210822

CTCATAGCCATTTGCTTTTTTCTTTAATGTTTCAACCCTACCTGTCAGAGCTTTCTG

A\_14\_P110613 GGTTACATTCAATCAGATAGTATTCTGAATTGCTCCTGGCATCTTCAAAAGATGAGGAT  
A\_14\_P121333 TAGTATAACCTGAAAAACAAAAGAGAAGATACATTTCTGCTCTCATGGGGCTCAAAAG  
A\_14\_P110202 GTCACTAACTTGTGTCCAGATTGCTTAGTCCAGTTGATTATGCTCAGAAAAGTATTTCTTA  
A\_14\_P110189 CTAACCACCAAGTTTTTTTTTAGAAGCAATTGGCAGTTCAGTCACTTGGAGTTTATTACAG  
A\_14\_P134077 CTGTTTCTGGGGCTGCGTTTATTCTCTTCCCTCTGAAGAAGTTAATTTTTTTTCCAAACAA  
A\_14\_P125824 TGATAGGATTTAGGAGTTGATTAGATTTGAGTCAGGGTGAATGGATAATTCCTGTAGGAA  
A\_14\_P127181 TTAATGTGCTGGGAAAAATATCCACACAAACCAGAGGCTGTTATACTGATGTCATTTCTA  
A\_14\_P101020 AACTTTTCCCAGTTTCTCAATGAAGCCATAAACTTTCAGATCTGATAGGAAAAAACAGG  
A\_14\_P115037 CTTTCTCTCTTAGTTCAGGCCTAGAGGAAGGTTGTTTTTGGCCATTAACAATAAATTCTTA  
CUST\_3673\_P1426210822 TTGGAGCGATAGCTGGCTGGATTCTTCTGCCATTTTGGCAGTTATATATTG  
A\_14\_P130570 TCCACTGAGTAAAACCTTAAATCAGTTTGGTTCCAGAAGCCTGAAAAACAGTAGTTTGAAT  
A\_16\_P16167474

AAACAGAACATCTCTAGGACAAATATTTGCTAGTTCAAGTCAGATTAACCTGGACCTTCTCT

A\_14\_P113629

GAGGGGAAAAGAGGAGAAAACCTGCTTACCAGAGTTTTAAAGAACTCATGATGGAATTAT  
CUST\_6773\_P1426210822 GAATGAGTCAGTTTATTTGGCTGGTGAAGGAGGAACCTAGGTTGGAG  
A\_14\_P125277 TTCCTAGGGATCCTTATACTCCTCACCCACAATCCCCAATACCAGTTATTATATATTCTA  
A\_16\_P16915922

AGCCCAGGCATTTAAATCTCTGTGAACATTGTTAAGTCTCCTTTTTTTCATTTCAAGTTGT

CUST\_5483\_P1426210822

TATTCTGCTTTCTAAGGTCAAATCTTACTGGACTGATAAACTTACCCATACTTGGGTTAC

A\_14\_P110918 AATTCGCTCCTTAACCAAATGTTATCGCAAGGGAAAAAAGACAAACAAAAATCCTGTAT  
CUST\_1081\_P1426210822

GCGTTCAGAAAACACGGTTATTTTCTTCAGTTTGATAGCTCGTAGTTTCAAGTTTCTCA

A\_14\_P138142 CCTCTCGCTACTGAAGCGCTTTTCTCTCTCACACTCCGGTTTTAAC

A\_16\_P36100316

AGTCCACTATTGCCTTTACAGACCAAGAAATTCAACCCAGAAAAAATTATTCTTGATCGA

A\_14\_P134162 TCTAAAGAAAGACCATGTCATTATGGCTTGCTAAAAATGTTGTTGGTCATTTTGCTCCTT

A\_14\_P117356 ACTTCATCAATTACGTCCTCTTCATATTCATCAATTTCTTCCCCATCATACTCATCTTCG

CUST\_61\_P1426210822 TTGTGACTCACCTCTCCAGCCCTTCACAGGGCACCTGAAGCACCT

A\_14\_P135909 AGAAGGGTTAGGAGGTCTGTGTAATAAATAAGAAATAGGTAAGTCTTTACCTGATGG

A\_14\_P102251 CTTTATCTGGGAGGGGCATTTTTATAGGACCCATAACCAATTGACAGTTAATATCAGC

A\_16\_P16587535

AATGAAAACAGATGATCTACAATCCAGACTTAGAGAATAACGTTGTTACTACTTTGGAA

CUST\_3045\_P1426210822 ATTCAGGTATGGGGGTGAGTTATTCTTTGCAGGAGAGGACCTCAG

A\_16\_P20373684

TATGGAAAGCAATATTGCAATGCCTATTAGCACATGACATTAGGTGAATTCTCCTTTGTG

A\_14\_P201307 TCACTCACCTAAGCCACTGAGAGTATAGAGTAGGTCCTTGGTATCCAAGAAAAT

A\_14\_P119337 CACTTACCCGCTCAATCATTCCATTTTCAATAAGGGGAACTCCTGACTTGTAG

A\_16\_P21527114

AAGACAAACAATAAGCCAGTTCTTTATTTCTGTCAAATTGCTGTTAGTTACCAAAGCC

CUST\_2627\_PI426210822 GATGGGGGGATGAGGTTGGTGAGAGTGATGGAATCTGGTACATGG

CUST\_9786\_PI426210822 TTTTCGTCTGTTTTGTTAGTCAGCGTCCAGTGTGTGAGCCCTCCA

A\_14\_P117655 CTGAAATTTGTCCCACTTGAATACTTGCTGTCAATTTCAAGTGTATCACATCTAAAAGAC

A\_18\_P14131904 CTTGGTTTCTCATACCTTTTTATTTTCAGTCCCTGGTGTTTTTGTCAICTTGTGTGG

A\_14\_P139437

TGCCTGGTTTCTACAGACCTCTGACAAGTTTAAAAAAGAAACAAACAAAACCTGTAAAACC

A\_14\_P105203 GGCAGCAGTTAAAAATTGCAGCCATACAATATCTCCCTTTCAATTCATTTTCTACAGTA

A\_16\_P21444762

GCTATACTATGCCTTTCATATTATTCTATTCCAACCTACCACTAGATCCTTCAGAGTCTTG

CUST\_5743\_PI426210822 TGATTATAGAGAGACATGAAATGTGTCCATAAAAGGCCACCTAGTCCCAG

A\_14\_P138739 GCAAGGATTTAATAGTTTAGTAAACAATTGGGTGAACAAGAACTGAGGCTGACTCCTAAG

CUST\_3273\_PI426210822 GATCTGCCAGGTGTTTTGGCCTGTTTCCATTTTCATATCCAACAAAATG

CUST\_4677\_PI426210822 CCTAGGGAGAGGTGATGGGACCATACCCAAAACACAAGGGGTCTG

A\_18\_P16292142

AGCAAGAACATGCAATTGGAACCTTATAGTATATCATGAACATCCCAACTAGAGTTACGGT

CUST\_3341\_PI426210822 TCTTAATCTTCTGCATTTGGACACTTGCCACAGAGGACATTGTGATTAGCAAA

A\_14\_P121517 TAGATGGATTCACAGATCCTTCAAATAACAAAAGTAGATTCTGCTTGGGTTTGTGTCAA

A\_14\_P106594 AAATGCAGGCTGAATTAATAAATGGACTATGAGAGTTATCTGGAACCTGGAAAAGACTGTTC

A\_14\_P137965 CAATTAAGGGACAAATTGCTTCTAGGTTTTGGGAATGGTAAAACAAGGACATTTAATTGG

A\_14\_P126794 ATATGGTGACACTCAATATAATCCTTTAAGACGTCAATGCTCAGCCGATTTAGAACTCTT

A\_14\_P116432 CCTTTTCTTCCCCAGAGAGGAATTAAGAGTAGACATAGATAGGGTGTTTTCTCAA

A\_14\_P109225 TAGCATAATCTTCTAACACTCAAGTCAGACTTCTTATTTGCCCTCACTAAAACCATCC

A\_16\_P18597727

AACCTGAAGGAGTCATATGTTTCAGTCCTTAAATAGTCTCTCAAACATTCCTAGAATAGCC

A\_14\_P122710 AGAAACCAAACACATGTAAAAAATATCATCCTCAATGCCCCCATTAACCTCTCTCTC

A\_16\_P18478247

AAGTTGTAGACTCACACACTTTACATATAACTCCAATAGTTCAAGTATTCCCTGGAGGAC

A\_16\_P16267835

GTAAAGGATTACGGAGATTAACATTCAAAAGACAGTCAACAGAGAATAGTCCAGAAGTGG

A\_14\_P122657

GGAATAAAGAAAACCTTCTCACTACTGAGGGAGGGACAGAAAACCTAGAAAAATAAACCAT

A\_18\_P22839963 CAGAAACATATGACCCACTTTTTCTGAGAAGGAACTTCCCTTTAGGAGTGGTA



A\_14\_P102417

GAACCAAGGAAAACAGAAATTCCTTGAAAACCTGAAGGCACATCAATACTGAAGAGGATGA  
CUST\_3688\_PI426210822 CTTAACTCTGAGCAAAGGTGTCCGTGGGTGGATAATCCCACCTCC

A\_16\_P19342847

AAAAGAGAATCATTTCAGTCCACTTTTTATTTTTGTCAAGCCTAAATTAATGCCTCAAGGAA  
A\_14\_P136520 GAAAGGACTGATTCACGATTATTTTTGGTAATTCTGCTACCCACCACGTTTAAACATAATG  
A\_14\_P122417 CTAAATTCCTCCTTTTTGGTTGTAAGGTTACCACTCTTATCACTTACCAAGACTATCCAAT  
A\_16\_P58424355 GAAGTTAGTGAGAGGAATTACAAAGCCACACAGCAAAGGGCCTGAGTATAAG  
CUST\_3383\_PI426210822 TTAAACCACCAGACGACAGCTTTTATGTTTGTACATTGGTTCAGAGGTTACTCTG  
A\_14\_P202522 CTAATATCAGACACTGGACAAAATTTTCCAAGAACTCCAGGCTACCATCATTGTTTTTATG  
A\_14\_P120293 CTGTTAAAAATTGCTGCTCCAATCCAGGGTTATTAGGCCAAAGTTACATAATTCAGATC  
A\_14\_P104206 CACTGTATTTGATATTTGTGATCAGTGATCATTGTTCAACTGCGAAATAGAGTGTTTTGCT  
A\_16\_P18351652

ACTTTGACTCCAAAACCTAACATCTAACAATTATGTGCATCCAGGTAATCAAAGTCTTGC  
A\_18\_P13101247

AAAATGAGGACCAGTAGACAAACTATTTTCACTGTAAAATAGGAGACAAGCAACATGCC  
A\_16\_P03142543

AAAGATTTTGAGATGCAACAATATTGTGACAACCTGACAACCTTCTGAGTCTTGACAGTGAG  
A\_14\_P117318 CTTTTCTTTTGCCGGAACCCAGATGTAAGAACCAGATTGTTCTTCTATGATCTGTTTC  
A\_14\_P133785 CTAATAAAATCAAAAAGACTGGGTTCTATCAACTGTGTGACAGTGAACGTCTCTGGTATT  
A\_14\_P107657 CTCCCATTCCTTTATCTGCAAGTCACTTGGCAACTATGACTACATTGTAATTAGATTT  
A\_14\_P101749 CGATAGGGGCTCACTAAATGTCAGTGTTTCACCAAAGTATTTTTTCCATTGTATTAAGAG  
A\_14\_P134312

CTCACAAAAGCCAGAAGACATCGCAAAAAGTAAAACACAAGAATCTAAAAGAAAACCCAGA  
A\_18\_P11845056

TTCATAACCCGTTGAAAAGAAAAAGTAGTTGCTTCTGAAATATAACCAGTATCTTCAGCG  
A\_14\_P121922 ACATCATGGTTAATCCCACTGACAGAAATGACAGCATTGGCGAGATTATTGTAATTCTC  
A\_14\_P117209 ACAAATCCAAGCAGAGAAGCAATTGTTTTATGTTTAAATTTACAAAAGAGACCCCAAAAT  
CUST\_6368\_PI426210822

AAGCAGAACTTAATTAATGTTGCTGTTTGGATTTTTTTCAAGTGTATTTGAATGCAGACA  
A\_14\_P122132 CCGCTCACACCTCTGTATAGTTTTTGAATATGAAAATTTGCAAATGTAGGCACATTTCTG  
A\_14\_P114145 CATTTTCATTGCATTTCTTCTGTGTTTTTCTTCCACCTAATGTGGCCTATAGAGAGATT  
A\_14\_P139319 TAAGTGAAGCAAAAGCATTAAATTTGTCCTGAGTAACTTATGTTTACCAATTCAGTGCTCC  
A\_14\_P137274 ATATACATACCTAAATCTTTCTCCTTTTCCAGAACACCAATAGAAAGTGATGGATGTCGC  
A\_14\_P120559 TATCTAAATAAAACCCCTTACCTTCTGGCCAGCCCAAAGTCAATGATCTTAAATTTGAT  
A\_14\_P133695 TACTGTGAGGCACAAATTATACTGTCAACCTACTGTTGCTATGGTTATATACTCCCACTT  
A\_14\_P118079 AGTTCCTTGACCTTTCTGGGTTTTGGACCTATTTCAAGTATCTTATTAATCTAAAGTGCCC  
CUST\_4034\_PI426210822 CTAGGGGAACTGAGAGGAGAAAAGGATGAATTTGGCCTTGGCTTG

CUST\_9203\_PI426210822 TTTCAGCTTTTCAGCCATTGTTCTCCACTTCAAAATGGACAAGGAGGAAA  
A\_14\_P118578 TTGGAAAGACATGAGTTTATGCTTAAAGCCATATCCTTCAGCAGTTTGGTAGAAAGAAA  
A\_14\_P108414 CTTTTCTGATAATTAGTAGAGGAAGGCAAGACTCTCCATTTAAGACAAAGATCTGACA  
A\_18\_P23434608  
ACGGTAGGATTTATCAGCGTCTCTGATACACTAATACACATTATACTTCTCCAGGAGAAG  
A\_16\_P21256422  
ATAGAATACCCACATTAGTCACTAGGATCTACCAGACCAAATCATACTTTTTGCCTCTG  
A\_14\_P124880 ACCAACAAAAATTTAATGATGCTACCCTCATACTGATCCTGTATTACTTACAAAGGACGC  
A\_14\_P135530 TTTGAAAAATGTGTAGATAATGACATAGAAAATGACAAGCCCAGGTCCATTAACCTCTCC  
A\_14\_P106922 GGTGAATGCTAAGAATGTGATGCAACTTTAGAGAAAACATTGTAGTGAGGAGGTCAC  
A\_14\_P109485 AATGCCAGTATCGCAGCGATTCAATTCATATCTTGATGATTCTCCACATATCCTTTTTCC  
CUST\_9388\_PI426210822 CTGGCTGGGGGGTGATTCCAGAGTCTTAGCTGTGCTCCCTTATAC  
A\_16\_P41872560  
AAAAACATTATTGTGTTTGCTTATTATATGCCAGAGATTTTTATGCAAGGTGCTACTCAT  
A\_14\_P135456 ACCGTTCTGAGGTTCTAGAAAGCAAGTAACTTATATCAGTTTACTAAGTGTGGGAAAGTG  
A\_18\_P22841648 CTACCTATGGTCATTTGCTGCTGCCTTGAGGTCCGGAGCCAAAAG  
A\_14\_P114547 GGCCTTGTTAGAAATAAAATAAACTGACTTATTTCACTAATGAAAACCTTCTGTTTCCTTT  
A\_18\_P22044392  
GGGACCTACTTGTAACATTTACTCCTTATTGAGCACTCTAACCAATATCCAAAACAAACA  
A\_18\_P22840906 AGACAGTTTTATTGCCTGTGCCATACTTGCCACTGTCCATAGAGCC  
CUST\_1590\_PI426210822 GTGCAAGCTCAGGGTGACCAGAAGAACAGAAGACCTGTGAAATC  
A\_18\_P22842462 GAATGAGTCAGTTTATTTGGCTGGTGAAGGAGGAACCTAGGTTGGAG  
A\_14\_P123022 ACTGAATATTTTTGCATTTGATCTGGTTTTGTCTCTCTTTTCGGAGTCGTTCTAATCTTT  
A\_14\_P118256 CAATCATCATAACAAAAAGCACATTTTTCAACATGTAGAACATTTGTCAGCAGTTATTTT  
CUST\_4591\_PI426210822 GATGCCCTGCTGCCTCGTGTGGACACAACCTCCTCTGCTCTCCTT  
CUST\_10014\_PI426210822 CTAGGCACTGGGATGCAGCAATAACTGTGCCCTTCCCTGCACTTG  
A\_14\_P108320 CATGGAAGTGCTCAAGTGTGGTATACACTCAGGTGCATTTTTCCAATCAC  
A\_16\_P19994105  
ACCAAGTGCACATTTAAAGTTCTCATGCCTGATGTTATTATTATTGTCCATTATCCTGTGC  
A\_14\_P107800 AATACTTACCTGAATACCTTTAACGGCACCTAAAATGAACACTGAATTTCTTTTTCTCC  
A\_16\_P18534179  
AAAATCCATAGCCCTGCTAAGATATTGTGATGTAAGGTATGTGATAGGGAACCAAACATT  
A\_18\_P16614579  
AAATGGTGCTATTTGTCTCAAATGCAGATGAAACATGGTTATTAATGCCTGAGGAAACA  
A\_14\_P137462 AGATCCCCATCTGTAAAGTAAGGGGAAAGATGATTTTGTGTCTTTTGTTCAGATTCTA  
A\_18\_P21937923  
ACTAGCAGATTCAAATGAAAACACTAGCAGATGATTCAAAAACACTAGCAGATTCAAATGACCAA  
A\_16\_P00685382

AGGCTCATTGACACAACATACAACCTTTGGACATCAGATTTTGGTGAAACTCAAATTACT  
A\_14\_P133098 AGAAAAATTACTTGGCCTTACAAACCACAGATCTAGAGTGCAAAAAGCATTCTTTGTTCT  
A\_18\_P14136251 AAAAAAGGAAGTCATGCTCTCAGCAGAAGCATTGTCAGGATATTTGTGGATGTCT  
A\_14\_P104828 GCACAAAACACATTCCCAAAAGAGACTCACACTCACAAAAGAGA ACTACATTATTACTCA  
A\_16\_P01289507  
AAGACCTAACCTCATTATCAGTAACTTCATCCTTTACCTAATCTCAATCATGGAAGGTGT  
A\_16\_P18388226  
AATTGGACCTACATTGAACATGGTAAATTCCTCCTCAAATAGTTGCTAATGGTTTGCTG  
A\_14\_P118381 ATGCAAAACATTTTATTATGAGGTCAGACTAGGATAATGTCCAATAAAAACAAACCCTT  
A\_14\_P116715 GCTGGTCAGAGCAATCTCTTCTTAATGGGGCACTTAAATTCATCTGGAAAG  
A\_16\_P17490003  
AAATTGACTTGTATCCTGAGCCTAACAAATTTCTCATTGCCTTAACAGTCTGATTGAGAAC  
A\_16\_P18528013  
ACACAGTGTGCATAATAATGCCAATTGGTCAGGTATTTTCATGAAGTCCCATATATGTCTG  
CUST\_10167\_P1426210822 CTCTATCAGCTGGGGCTGTTCCAAGAGCCTGCTGCTTTAGGACTG  
A\_14\_P114934 ATGCTGCCAGATAGTCAAAGGTGTTGATGCCGACTGTAGAAAACACAT  
A\_18\_P14131803  
CTCTGACCTCCAGAATGCTTTTAGTTTAGTATGAAATGCAATATTTGGATCTTCTAGGA  
A\_16\_P21425614  
ATTCTCTCACTGTCTATTCCCTTCATCACTTAAATTCATTCCCCTAAAATGACTCAGC  
A\_14\_P131310 CACTGGTCAAAAAGCATTTTCAAACAACAAATCAAACCTCTGCCGAATCCTGGAAAA  
A\_16\_P21171969  
AAACCACACCCATTTTTACAGTCACCAGCATTATAGTTTCCAATCCTTTAAAGTGAAGT  
CUST\_4746\_P1426210822  
TTATCCTTGCAGAAGTCACTATGAAATGAGGCTTTCAGTAAACAGAAGATGGGC  
CUST\_5417\_P1426210822 AACTGCCGCCTCTGACACCAGTTCTCCGCTGGAAAAAGGGACAAA  
A\_14\_P131076 CAGGTCCAGAGTTTTAGGTCAACTCTCCCCATTTAAGTGATTTCATTTTTTCAGA  
A\_14\_P129300 AACTGCTTGGTTTTAAACCATGCAATGAAAACCTTATTGCTGGCTGCAATATAATCAATG  
A\_14\_P117968 ACCCTGTCTTTCTTTAGAGTAATTGAACTAGCACTTTGCAAACTGCAGTTGCTTAATACA  
A\_14\_P114069 TTAAACAGTTCTTACCAACTGGGTGCAAAGGTGAAAATTAGGCCATAAAGATACATTTAA  
A\_14\_P120714 ATTATCTTAAGGACAAGAAGGAAGTTGGCTTCTTCCAGAGTATCCAGGCACTG  
A\_14\_P105518 CATGTTGTTTTAATTTAATATTTTCAGAGCACAGCAAGAGAGAAGGGTAAATATTCAGGTG  
A\_14\_P103257 CTTTGCCAGGTCATGTGCTTATTGTCTCATTTTGTAGTCTTTTAAAGTTGTATGAACCCT  
A\_14\_P139887 GGACTAGTCTAGAGGCAAAGAGACAACTATATGATTTCTCAAGGAGTTTTTCTGCTCAG  
A\_16\_P17438222  
AATCCACCAAGAGCCAATACATCAAATCAGGACTGTTTAAACATTGTTTTTTACCCATC  
A\_14\_P128429  
AACAAAACCTAGGTAAAAAAGATACTGCAGAGGCTCGCTAAAAAGAAAAAGACAATGGCAT

CUST\_5759\_PI426210822

CCTGAGATAGAAGGATTCCTCAGCTTTAATTTTCATGAACGATTTGCCTTTCATTGATTCT

A\_14\_P107031 CTGTCATTGAAACAGACATTGTCTCTCATCTTTGAACTTACTGAGCAACATTTAAACGC

A\_14\_P136778 GGGATTTTTGGTTTTAATGTTTGTGTTTTGGCTTTCTAGAAAAATCCACTGGTGGA

A\_14\_P120985 CTTTATAGAAAGAGCAAGGACATTCAAGTTATGAAGGCAAAGTGCTTTTTTCTGGTTAG

A\_14\_P133428 CTTGTTGACTTTGGAGAGTCTCTGTGCAATTCAGTTTCATCCACAGTTTCTTGT

A\_14\_P117184 CTAATTCTTTTCTTGAGTTTTGCATATACCGGATTCATCAAGTTCTGAATATTAAGTT

A\_14\_P112629 TTCTGTGTGCTGCATCTTTGTGTCTAAAACATCATGTGCAATTGTTTTATTTGGTTCTCT

A\_18\_P13081280

CGTTATTGGTATTTGCACAACCTCCTAGTAATGAAACCACATCTTATGACTCTGATTGACC

A\_18\_P25608266

AATGAAAGCCCATTAGAAAGAACTGACAGTGACTTACTACAGACTATACTCCCCTATGAT

A\_14\_P106360 TTATTTATCTCTTTACTTCCGTGTTTGCCTTCTTTCCTAGGTCCTAGACAGATTTGTCT

CUST\_1410\_PI426210822

GTCATAAAGAGACCTTGAGACTGCTTTAAAAGATGAAAGAGTCCCACACAATTCCTAT

A\_14\_P112640 AGATTAATGGTGAGAATAGGGTTTGGGACACACAAAGCAGTGAGCGAAG

A\_14\_P101647 ATTAAGCAATATCAGATCATGTCGACTACAGTGTTCCAGCCAAGGCTACTAAATTTACA

A\_18\_P22840685 CCAGACTGCCTCTGCACTGGGGAATGCATACATCTTCTCATGTCT

A\_14\_P106179 TATAGTTGCCTTTATAAAGTGTAATTGTCTAAAATATTTTTGTATCATGTGCCTTTGAAAT

CUST\_5164\_PI426210822 TTGTGAGTGGCTCTAAAATGGGGGCAAACATGACCCTGAGGAG

A\_14\_P118732 GCGTCTCAAAGACATATGGTCTTTTGTAAAGTGCCATGATCATTATAACAAGCAAGATGT

A\_16\_P17702082

ATTCACCCAAAACGTTATTTATTTGTGCTACAGAAAGGAATCAACTAGTTTCGATTTGGCA

A\_14\_P200924 TCGTTTTCTGGAGTTGGGATGTAGACATAGAGAGATCTGTTACATCTGAGATGAAAAC

A\_14\_P200726 ACATTTAACACATAAATGGCCATTGTCTTTGTCTCAGTAAAGTGTAAGGTGGACAATCTTC

A\_14\_P135354 CTTAGAGCGGTCATACAGAGACTTTGAATAACTTCAATTTGTCTTTGAACACAACCTTTG

CUST\_3788\_PI426210822 ATGAGTCATGTGACATTCCATGTTGATGTAGTTGCCAAAATGCTCGCCTT

A\_14\_P129268 GCATGAATGAATCACTACATATGCTTATAATGAGGAAGAGTTATGGGTCCTGAGTGTAAT

A\_16\_P03810483

CTCAATCTCATACCCGCTTGTCTTTCTTTTATCCACAAAGAGGTAAGCCATAACTTAGT

A\_14\_P128582 CACTCTATCCCAGAAGTAAAATAGATATACCTACTTGTGTGAAATTATTGAGTTTGT

A\_14\_P105424 TCATGCAAAGAGATGTAGATCACTAAATCTTGGCACTTTTACTAAATGGCATCTACCT

CUST\_4754\_PI426210822 ATAGATTCTTAAGTGGGATGTCAAGCCCCTTCCCTAATGATCTCAGTTTAAACC

A\_16\_P21481733

AACAGTCTTATGGTTGTGGAATCAACGTTACACTTGGAGAAGTTATTTTTATTGGTGAGA

A\_14\_P117249 CCAAGCCAAATGAATCCTGGGCAATATCCTATGGAAAAATATCTTTACTTATGCCAAGTA

A\_14\_P139623 CTCAAGAGTAGATGCTTGTGTCAAAGTCTTGGATTCTTGTCTCTGTCAATATTCATGAT

A\_18\_P14217533

GGCCCTTGATTCTTAAACATCACATTATCCATCCTTCTACTAACACTCTGACAGCAATA  
A\_16\_P35050626  
ATCCAAGTGAATCAAAGTTAGTTCACTCAAATTTCCACTGAAAAAATGTCTTCCAACC  
A\_14\_P133622 CCTGAAGTTAGGAAAATGACTAGAACTCTCATCTCCTCTTCTACAAAGTGTCTTGTAGT  
A\_14\_P117891 GTTCATTTTGTTTTTGAAGGTAGTTTGTGCCATAGAAACCAGACAGGGTGTGTTTAAAT  
A\_16\_P58424612  
CCACAAGCAGTGTATCAGAAATGTCTGTTTGCCAATAGTGGATGTTACCTTTTAAAAACA  
A\_14\_P102198 CTGTCTCAGTTTGGGGCAAGTTTATACGGGCAACAAAGTAAGAATTTTGTATTTATTCTG  
A\_14\_P100057 TGAATCAACTTGGGAGGAGTCAACCAAATGAACAATCTACCAAAAATTTCAAATAAAGTC  
A\_14\_P107594 AGAGTGAATAAATGTTCTGTGAGTCAAATTTACTTCATTGACCCTCTTTGCCTTCTCC  
A\_14\_P120326 GTTCACCTTTCCAGAGAAGAAAAACAATTCTTCCAGGCCGAGTGTAGG  
A\_14\_P104421 ACCTAAGAAATTTTAGTCATTGTTCCCTAGGATCATAGGCCCTTAGAAACTGAAACTGTA  
A\_16\_P18412882  
AACTCTTCATGTGAATATCTTGAGTCGTTAAAGTTTGTCCCTTACTCGATCCATATGGC  
A\_14\_P134624 TAATCTTTGATGCATGTTTGTGTCAACATAAACAAGAACCAAGTCACTTAAAACCTGC  
A\_14\_P128753 AGGGCAAACCTCAGAAAATGAATCTTTTCCAGTCTGTAACAAGTGCCTTGGATAAC  
A\_16\_P02418591  
GGTCTATGAACACCCTATATTTGTCACTGATATTAGACAACCTACCCTAGCATAGTTTCC  
A\_18\_P25815658  
CACCTTGCTTACTACCTGTATTCAAAGTCTTGACGATTTTACCTGTCTTAAAGATCCTTG  
A\_14\_P115394 ACGAGGACCCTATGGCAAATGCACAATTATTCAGAATTACATTTTATCGTTTTTCACATTG  
A\_16\_P18042544  
ATTCCATACTTGCAGAGAAAGTTTAAAAAAGTGGAGCATAAGTGGTTTTCCAATCTGTTT  
A\_16\_P01179695  
AATCATGGTCCTTAGTGTTTGACAATTAATCAATGTTCAATCTAGAAAGTTCCTCCCTCC  
A\_16\_P15277380  
AAACTTTTCCCTCATACTCTCTACAATCACACTACTCTCCTTAGAAAATTTGATGGGCTT  
CUST\_3911\_PI426210822  
TGGCACAGTTCTAAAATTCTTTAAGCCTCGTTTAAATTTTTTACCTGTTACTGCTTTTCATC  
A\_14\_P108833 CTCACCCCACTTTTCATTGTTTGTTCATTTACAGAAAAAAATGTTCCATTTGCTCATT  
A\_14\_P110870 AAAGCCAAACTTCTCATCTGGACTCAGTATATAATTCTCTCCTCGTTCTATGTCCCA  
A\_14\_P109727 GGCTTCATTTGTTCACTCTGAAAAAAGTTCTACATCAGAATGGAAAGACAACAATTAAGG  
CUST\_4778\_PI426210822 CAATGACAGGAACCCCAACCCCATGTGTGCACATATACACATTC  
A\_14\_P101795 ATTGAACCAAATCCCAGGTTCTTTTGTTCCTTGGGGGAGTAAATCACAAAATTTATTTA  
A\_14\_P200377 CTAAGGAAATCAACGATTTTGTATTCAGTTATGCTATGGCTTTCCAGTTTCAGAAATCTTC  
A\_14\_P130834 AATCCTGGGTGCTGTTACCTGAAAAAATAGCAGGTGTTAGACGAAAGAACAGAT  
A\_18\_P10730154  
GCCTGTCTATAAAGATGGATAATAATGTGACTGTGGTATTGAAAGTATCCATTGGCTTGG

A\_14\_P127537

TGGCTGAATGCACAGAATGCAACAGAACAGAAATAAACAGATGAAGAAATCAGTATAGGA

A\_14\_P138326 CAAAAGGCGCTCTATACATATTATAATATATTCGCTTACTAAATGAATAAGGACTTTCCA

A\_14\_P200334 GGGACAAGAATTGTGTTTAAATGAATCTTTTATTCCAGGGCCAGTCTAGTAAATGAATA

CUST\_7093\_PI426210822 GCTTTTCCTTCAGTACCCAAGGATTCTGGCACACAGACCCAGCTC

A\_14\_P201102 CTTTAAAAAAGTAACACTTCAGTTTTTCTTATTCGTTTTTCTCCGAAGGTAATTGCCTC

A\_14\_P104365 TTGGCATGTGTTTTTTAAAAGGCAGTTAACATGGTCCAAACCACTGTTTTTACTGTTTTT

A\_18\_P22843025 GAAGTCAGGCTGTGTGGGCACCTGATCCTGCTGCTTTTGCAAACCT

A\_14\_P129761 GCGAAGCACACCACTTGATTCTATTTTTTTTTTAAACACATTAATCTGTTTTTAAAGATAC

CUST\_8328\_PI426210822 CCTTCCTCCTGAGATTTTCTTGCCAGCTCATCCAGGAGCCCACTC

A\_16\_P20907453

TCTTCCAACCTCCATCATTTTTTTCATGCTGCTATTACTGCTTCTAATTTCCAAATACCCA

A\_14\_P139675 AAATTATAGTAGCAAAAGATGAATGAGAAATCTGTTCTAGTCCCAGTGAAGCAGGAAGG

A\_18\_P19018193

AGAGTCACACATTTTTTCATTTAGAGAAGATCCATCACAGATAAAACCAAACCTAGGGCATG

A\_16\_P17660645

AAAACACCCTTTTAAACAAGACAGTTACATAGCAGAGGTGGAATGTAGAATCAGATTTTGC

A\_14\_P109007

AAAATAAAGAAAAGAGCAAAAGTGGCCAAAAAATGCATGTCTGTAAATTTGGACTGACGT

A\_14\_P124366 GTTCGGAATACGATATCAGGAATGCAGAAATTCATGGGAGAGGATTTAAACTTCCATG

A\_14\_P101224 CTCACACCAGAGATGGCAGGAATCTGAAAACCTACTAGAATCAGATAAGTGTTTATTTTT

A\_14\_P138260 AAGTTTGACCAACAGGATGTGAATAAAATCCAATCCTAAATCTCTGACTGTTTCACATCA

A\_14\_P118280 GTAATGTGAAGTCTGTCTACAAAACCCACATTGATGTCATTCATTATCGGAAAACGGATG

A\_14\_P108900 AACTGGCTGGAGGAAATAGGCTTGTTCAGAGTTGTCCTTATACAAATGTATAAAAAG

A\_14\_P128951 CAGGTATTAAGAAATGGAGAGAAAATAAGCAGAATCCACCTTGTCTGAAACCCAGTAT

CUST\_2692\_PI426210822 GTCTGGGCTGCCACGTCTGTTTCCTGCCTGCCGCACTGTCTTCT

A\_18\_P13751224

GCAGAATTGTATTACACATGAAAAACCTTTGACTAACCTCTAATTGATTCCGACATTCC

A\_14\_P120565 TCCTTATACTTCAAGGCCTTATTCTTATCCAGGCTATCCTTTGTCACCAACAATATCACT

A\_14\_P138399 CTCTTGTTTTATCAGCAGAATTGATGTGTATTTTTTCTTGCCCTTACTTTTAACTTACC

A\_14\_P118110 CTGTTTCAGTGAAAGGAGAAGAAGAAGTGTTTTTAAATCGGCAAGAACTTTCTGAAAGGAA

A\_16\_P17247890

GCATGACCTTTGAAACTCTGTAAATCACCAAAAATTCTATGAATAAAAGCCCGTCAAACAG

A\_16\_P16998176

AATGCTTCCTAACAGTTTGAGTTATTGAGATGACCTCATTGTTTTTCTGAATCCTATGGC

A\_14\_P202194 AGTTTTAAAGAAGAACTGTAAATGACGGTGCTATACAAGTCAAAAAATACATGCCTGCCT

A\_14\_P111521 TGTTTTTTTTTTTTTTTTAGGAATGAAACGACAGTCCTTGCTCCACATGAAACAATCTTTC

CUST\_7012\_PI426210822

CACTTCTCTTTTTCACTCACTCTTCTTTCTGGTCCTCACTAAGACAAAATACAGAATACA  
CUST\_7704\_PI426210822

AATACGACTGTTCTGGTAAGGTTCAAGCTGACTCATCATTGAGTGCTGCTAATAA  
A\_16\_P16396654

ATTTCTGGAGTCTGTTTATGAGAAAGTTTGAAAAATCACCTATAATCACACCTGTTCT  
CUST\_8907\_PI426210822 TCAGACTACTTCCCATCTGTATCGCTTTAACTCCAATAAAAGGCCATCCC  
A\_14\_P118866 TGTCCAAACTTTTCCATTTTAGATTCTTTATAGACACGTCAGCCTAAAATCAGCCTAT  
A\_16\_P16329106

AGCATCCAAAAGAAAGAACATGCAGTGAATTGATACAAGTGCTATTAACATCACAGTGT  
A\_16\_P19307856

AACTAGTGACTCTATTCAAGGTGAAGCAAGGTATTTTTAGTAAATGTTCTCTCAGAGCC  
A\_14\_P102635 GTTATCATCATCTCTATGCACACTGGGAATTAACCTTCGTGATAAACCCATGTGTT  
A\_14\_P123635 AAACCAAAGTTGTAATTTTTGTTGGCCACCAGTGAAAAATGAAAATCTAGACCAAATG  
A\_16\_P38681703

CTCTGGACTTTCATAAAAACATCCTTTCCATATAACTTATCCATAGAAACATCTCCCCA  
A\_14\_P115583 GCATGTGCTCTATCAGGTGACAGATTCAAAAAGTTAGTCTGGATTACCTTTAAAGGAAAAA  
CUST\_1747\_PI426210822 ATTTCTCCTTTGTTGTGACTGTGGTTCTCATTGCATTCCCCTCCTC  
A\_16\_P19127279

AACGACTCAATGAAACAAAAAGTGAAAGACGAATAAAAAAGGTAACAGACTGAGAGGAGA  
A\_16\_P03463943

ATGGGCTTAAACCTTGCATCTAAATGCCAGTTACTTGCTAAGATGTCAAATGTGTCTTAT  
A\_14\_P135915 CAGAGGGAGTGATTTTTATGGGGATACCAACCCTAAGGATGACTGGTTTTAT  
A\_14\_P102113 CTCATGCCATATTCTCTACACTTGCACCTTTCTCCGATTGTATCAAATGGAAATTTGAA  
A\_16\_P02245404

AGTTGCTTGTTTAGTTAGTTGCCATCTTATCAGACTTGTCAATCTTGTTTACCCCAACTC  
A\_14\_P121607 GGTTGGTTCTCTTGCTTATTTCTAGAAGAAGTCAAGGGAATACTTTGTTCTACTCTTTCT  
A\_14\_P138737 CTTGATTTCTCTGTTGGAATTTGAAGTTTAGGTAGCAGTCACCATTATGCTCAAAGCG  
A\_14\_P126389 CGTGCCATATGATTTTATTTTACACAACTGTATTCCATCCATCAGTTCCTTTGAGTGTG  
CUST\_8058\_PI426210822 CACTTGGCTGTGTATTTCCAGATCAGACAGATGTCCTCTGCAAATTG  
CUST\_664\_PI426210822 AACATAGTCTTGTTGAGAGTACCAGGAGAGTTGGGGCGATGTTTGAA  
A\_16\_P58424452 CTCCACTTGCTGTCTAACACATTTCTCACACTTAAGATGTCCAAAATGAGTTCCTGAT  
CUST\_2930\_PI426210822 CTACTCACTGGCCAGGCTGAAGCCTAACTTGCTTGCAATCTCT

A\_14\_P127999 CTGGTCAGGTGTTGGTCTGTATGTCTCTAACAATCATCTTATGCTTGGTATAATTTATC  
A\_14\_P120251 CTTTCAGCATGCTGTGTGCAGAGAAAATGGGGATTTAGCAATTAAGGATTTATTTTCTT  
A\_14\_P119979 GCCATTTGTATATATGCAGTTCCTTATCTGCAGGCCTTAATTTTGACATTTCTGTTTTC  
A\_14\_P120024 ACAATACGAGTAAATGAAAAGGCTGTTAAAGTAGATGACATCATGTGTTAGCCTGTTCCT  
A\_16\_P15106416

CAAACAGCACATCCTAGATTTTTAGAGAACTCAGCATACTATCTGACCTGACCTTT

A\_16\_P00744654

AAAAATCCTACTTAACAAGCATACTCAAATCCTAAGTAAACTGCATTGTAAGGAGACCTT

A\_14\_P119536 GATCCAAATCCTGCTCTGATGTGCTTAACAAATAGCATATGTAATAACAATCCCCATTT

A\_14\_P124048 GTTACATTTGGCTAGCAATTTTTCTTGCCCCATGTAATTACAGGTGCTTCAGATAAAATC

CUST\_5756\_PI426210822

AGAGGGTTTTTTTTATCCTTCCATGGTTTTCAAATCTGGAAGGACAATTTGTACAGAC

A\_16\_P16995737

CTTCAACAAGCCTTAAAGAACATAGTTCCACTCTTCATGCTAATTGCCTATGCACATTCT

A\_14\_P126324 AGTATTACAAGTAAAATCCATGCTTCATTGCTTTCATACTGAGTGAATTACCCAGGGAAG

A\_16\_P18616450

GGAGGTCCATAGCAGTTACATTCAACTACTTTGAATTACATGGATAATGACACAGTTGAC

A\_16\_P01067577

AAGTTTTGGTTCATTCCCATATACACCATCAGCAGACTCTAATTCATTTTCATCAGTATCG

CUST\_3417\_PI426210822 ACATACAGACTCCAGATGTGGAAAAGCCCTTGCCATCTCTATCCTC

A\_14\_P201505 GAAGAATGAGGATTTAACTCTAGGTTGATGTGTGATGAATGAACTCCCTAGCATTGTAA

A\_18\_P22840135

TTATAGAGCACGACTCAACTTTGTTGAGATGAGTTAAAATTATCAGACGAGATGGTTCCC

A\_14\_P101599 TAGAGGTTAAGTTTAAAGTTTTCTCCATTTGTCCTGAGCAGGCATAATGTTATGCTTTGCA

A\_14\_P202076 AGCACCAACTAAATTAATCATGCTATTTAATTTAAGTATACATTTGGCTTGTGTCCTCT

A\_14\_P139638 ATCACCAAAGCATCCCCATAACTATCATTACTGGCATTGTCATCCAATTTAAAAATTCC

CUST\_9145\_PI426210822

GATGGATATTAAGAGCACAACACTACACACATTCGGATTCTCAAACGCCCAATAAACAT

A\_14\_P126501 AGAAGATATTAAGCAGATAAGGTGTTATTGAAAGATCTTTTTTAATATTTATCATTAATA

A\_14\_P122720 AAATTTATGCATCCAATAAAAAACCACTGCAAATGGGAAAACAAAGACATTGCTCCAACA

A\_14\_P104777

CTTGAAGCAGAAAGAGAGAAGATGTTATTGGCAAAGGATCTCAAAAATCATGACTTGAA

A\_16\_P03182537

CCTGGATGCATGTATGAATAAACTTCTACCATTAAGTCCCTGAATTATTTAAGCACTGCC

A\_14\_P137933 AAGAGCAGCACATAAATCCTTGATATTAGTTCCAAGTTTCAGATCTTTAAGTCTGCTGTC

A\_14\_P134027 AGTGCTGCGAGAAAGGAAAGAAACAAGTTTGCTCTCAGCGGGTAACTATT

A\_14\_P111064 GGACAGTGATTCTGTCTAAACAAGACAGTGAAGTCCAGGATTTCTGAAGACTAT

A\_14\_P120653 AAAAGATGATGAAGATGACAATGTCAACGACAATGAAGATAATTCCAGCCAGAGACAATG

A\_18\_P13285888

AGTGTGCACTTAATACCTAACTCCATCAACTGATATAATGCTAGACTGGGTTCTCATTGT

A\_14\_P113312 GTTCCCCTGAAAGAAATAATCGATCTGTGATCAAAAACAAAACCCCATAAAGAAAAGTC

A\_14\_P118766 GTTACAGAGACATCAATGAGATCGACATCAACATGAACGATCCTCTTTTTACAAAGCAG

A\_14\_P106899 GTTGACTCATCTCATTCACTGCTACACTCACAGTATTTTTGAGGGAAGGTAGAGAAATATA

A\_16\_P41412345



ACCATTATCTCTCAATAAGATTACCCTCATATCCTTAGTCAATACAACCTCCATTTTGGCA  
A\_16\_P19739442  
ATGCCTTGACAATAACCAATTCAAACCTCTTTTCAGTTCACTAAGATAAGGAACAAGATCCC  
CUST\_1616\_PI426210822 CTGCTTGACCTACAGGTCAGTGACCCTGAGCTTAACAAAGCCTTC  
A\_16\_P21457739  
CATTAGTTAACTCCCGAATAGCATAACATCCTTGTCAGATTATGTTTTCTCACTTCCACG  
A\_14\_P120711 CTTCTCATGCTCTTTTCTCAGATACCTTTACATCTTATTCTGTGGAAACATTGTTTCTG  
A\_18\_P22840869 TCACATCTCTGTCTGTGGGAAGCAGGGCAGAGTGAGGGAGAGTAT  
A\_14\_P115361 ACTAAATGTTTTAGGAATAAACAACCTGTAGAAACCACACTGGGACCTACAAATTGCACTT  
A\_16\_P16837971  
GGAGGCTACACAATGATTATCCCCAGATTAACAAACATCAATACAAAGAACTATGCTGTC  
CUST\_5151\_PI426210822  
TGAGACCAGAGAGTTCACATAACCTATGAAGACTGAAACAACATAATGTTTCTGCAGT  
A\_16\_P18236551  
AAATCAATTCCTATGCAGGATAACTACCAAATCAACACCATTGTCTCAAACCTTTCTGAG  
A\_14\_P124432 CTGGGTCTTGAAAGACTGGTAATAATAACGTTGCATGTTTGCTTAATGTTTTGTAAGGTG  
CUST\_9175\_PI426210822 GTTTTGTTTCTGATGTTGCTGTCACTCAGCACCGTTGCCATTGCT  
A\_14\_P118036 AAAGAATGTTCTTCCATGTTTTTTCAGTCACACAGACCTTTATTCACTATACCTAGAGTGC  
A\_16\_P02002951  
AAAATCTCACTGAATCTACGAAATCTAGTTCGTTCTTTGAAACAGTAAAAAGGGCTTCCC  
A\_18\_P15068341  
GCTTTGTCTCTAACATCCATTTTCCTCAGATTTTTTTTAAACACTATTAAAGGCTGCCTCCT  
A\_14\_P135421 CATCTAATATTTTTGGACCAACAGAAGAACCTCAGAACATACCCAAGAGGACAAATCC  
CUST\_9856\_PI426210822 AAGGTTTAGCAGACTTTTTCTCACACCCAGGTGCTTTCACAGAAGT  
A\_14\_P121616 CTGCTGTCCTGAGCAAAAAAATATTAGAGCATCATGTCAACTGTTAGACAATGAAGACT  
A\_16\_P19032070  
AAAATTCCTGTGGAATGTAAAATTGTAAGCCATCTAGCAAGAGAAGAAGTAGAGCAACCT  
A\_14\_P125540 CTCTTACACAAAAATGGAGCATTTTTTATTACTACTCCCTGGGCAACATATTTTCTCTGG  
A\_14\_P134931 AGATTTGCCAAAAAAGCATTCTGCTTTTTCTGATGACCAAGCCTGATTCTTTGTAT  
CUST\_5866\_PI426210822  
CTAGAAAAGCCAGTTTTCAGGGACAGGAAATAGTAGAGTTCAAGGAAAAGTTAGGA  
CUST\_2124\_PI426210822 CTTGTGCGCAGTTGACCTGAATGGGGACGGCCTCTCTGACCTGCT  
A\_18\_P14133315  
CCTCTGTAATGGTATAATATGAACTCAGGAGTTGAGATTTCGTAAAGCAGTAAGGAATGCA  
A\_14\_P103710 AACATGTCATTTCTCCCTTTAGTGACCTTTCTTCATTCAATTACCTGGTTTACCAAGAAT  
A\_16\_P16986384  
CGTCTGAACCAATATTCCCAATCTCTAATCTCAAACCTATTTTTTTCCTCCTGAACTGAT  
A\_16\_P00685298

GACCAGAGAGTTACATAACCTATGAAGACTGAAACAACATAATGTTTCTGCAGTTTTGA  
CUST\_527\_P1426210822 GTGTTGTGCAGTACACACCAGTAGGCAGCATTGCAGAGGGTCTTG  
A\_14\_P131177 ATCACAGATATAGAATGGTGACACATCAGATCTTTCCTGGCACCACACTCTCTA  
A\_14\_P121340 ACATTTAATCATAAGAGGGCTTTACTTACATCTAATTGTTCCCTTGTAGGTTCTGGTGAT  
A\_16\_P16191036 TGGTGAAAGCATCCTGGCTGTCCCTGAATTACTGTGACAGTCTGAATAAAT  
A\_16\_P20629722

AAAGATCCAAGAATCAGGAATTAAGCAAGAAGAGGATTACACTGTGTTGTTCACTAACC  
A\_16\_P02020484

AATGTTGTAGAGCACTCGGTATTTAGTAAGTTCCCAACTTTCATTGCAAGTCAGTAAGTT  
A\_14\_P134266 CTATTCTCACACATCTAACCTCTAGGCAACATGCACTAAATTCAAAAGCAAGGAGAAGC  
A\_14\_P129751 CCGTCTTTGGAAGATGTGGAAAGCATGAATGATTTTGATCCCTTGTTCAGAG  
A\_14\_P134837 ACAGACTCCAAACACAGTTCTCTCTACTCCATTGAGGTTTGTAAATGAACACGTTTTTA  
A\_16\_P20265872

TCTGTATGCTCATATTTCAACCTGATTTACCTGCAAACCTGTATCATTCTTTGTCCCTA  
CUST\_3022\_P1426210822 TGTTACATACCTCCCCTGGTGGCTGATCCCATTGATGTCATTAAG  
A\_18\_P15847415

CGGTAGATCAGTGAATAGAAGTACCTTAATGTCACTCAGAATATAGTATATCCCCCTTG  
A\_16\_P00340685

GGATCATTAAAAGAACCATTCTGGCTACTGTTATATACCTTAGAGCAATCCATCCAGAGT  
A\_16\_P02151216

TAAAGAAACCATCCTAATGTAAGTGTGATTTTCTCAGAATCAGTCATCCTCTCAATCATGCT  
A\_14\_P137705 CCCAGGATGTGTCTCATTGTTTTCAGAAGCCATCTTGAATTGTTTAAAATGTTTTAAAGG  
CUST\_4322\_P1426210822

ATCCCTCTCCCAAGAACCTGGCACAGTAAATTCATTAGAGCGAATTCAAATAAATAAG  
A\_14\_P126001 GGAGTTGCAAGTTCAGCATTAAATAAAACAGGCAAACAGTGTGAGAGCGTTTATAACT  
A\_14\_P112713 CATGAAGAACTTACAATCCTTTATGCTCTCAATGACTCACTTTATTTTGGCCATGAGACA  
A\_14\_P106399 AATGAATTAATGCTGTTTGCATTCACCTGTCCTAAGATGAAATTCATGCAAACCTGATTG  
A\_14\_P125617 TTACAAAACCTGTTATCAATTGGGTTTCTGAGGGAATCCTTCAACTTTGAAAATGTCTCTC  
A\_14\_P111570 AATAGTGTCTCTGAAGGCAGGTTTATTTAAATGAAATTATCAAGAGTCTGGAACCTT  
A\_14\_P113059 ATCTTGACCCCATTTTTTTATTTAATTTAGTTGATTCCCCATTGATTTCTTAAGAGGGGCA  
A\_14\_P115108 GACCTCTCCTAATGTTTGTGTTAATATGAGGTGAACTTACCCATGATTACCCGAGATCATA  
A\_14\_P116580 TTCAAGTGAGCATATCTCTCAAAGCAATGTCTCCATCCTATCCTGGCTTTAATTACAAA  
A\_16\_P20403787

TATATCTGTTTTCCACATCAATCTGACATAAATCTCATCAAATACCCATCCACTGTTGC  
A\_14\_P136290 GATCTCTGCTTTCCTGTCAATGAATGCATAGGTCTTTCTACAAGGTAATACATTTGAAT  
A\_14\_P132546 TGTTTTAGCAATACCATCCACATGACATGGGTGCTTAATGAGGTTTTTCAAATAAGCAT  
A\_14\_P126925 GTGTGCAATTAATAGAATTTAGTCTCATGGTATAAGAATGACACACGGGACAAGATACGC  
CUST\_4101\_P1426210822

CTGGAGGGCTTCAGTATTATCTCATGCTGTCATCTTTATGTTGTATTGGAAAAATCTGG  
A\_16\_P01667559  
ACCTCACTCTCTCATCATTCAATTCCACAATCTTGTCATCTTCTTTCAGATACCTTAAGT  
A\_14\_P120544 TGAAAGAAAGCGTGCTCTTAATTCTGTAACCTAGGCAGGTTCTAAGTTTACTTAAAAGA  
A\_14\_P108071 AATATACCATCAAAATGTGCAGAAATTTAACACATCTCCAAGTGGTAGAGGTGCTAAAAGCA  
A\_14\_P109176 TGTATTGTCCCTGAAGAAATTCAAAAATTTCAAGCACTCTTCTAGGTCGTTCCCCTGTT  
A\_14\_P119213 GAAAAGCATCCTGCTTGTAAGTGTCTTTCAGAGTCCTGGAAGTCTGTTTTG  
A\_14\_P112189 AACATCCCAGGTTCTCCTCATGCTCTTATTTAATCAGTCTCTCTAGAAATATTTCCAT  
A\_14\_P125317 CCGAGGGAATGCTACAATTCAAGTTTTTCATGTTTTCCACAAGCCTGCTATAAAATTATTAC  
A\_14\_P126787 GAAGAAATGTTTTTAAGCAATAATTACCTTGCTTCTTTTGATGGTGTCTCCTCTTTGCT  
CUST\_8389\_PI426210822  
CTATATTTCTTATTCCAGTAATATTGTTCTGAAGGAGAACATAAGACTTTCCATATGA  
A\_14\_P138945  
ATCGAAGGATGAAGATGAAAAAGATGAATAAAGAGAAAACCGACAAGGAGCAGTCCTAAA  
CUST\_6388\_PI426210822  
TCTTGGTGATTTTTTTTTTACAACAAAAAATAGAGCAATACCTTTCTTGGTTAGTAAAA  
CUST\_7175\_PI426210822 CTGCTCAGTCCTCCCATTTGTTTCATCTGGAAAGAAGGAATGTTCTAGTG  
A\_18\_P26793568 GCCTCTGTGTCCACCTATCCTTCTTGGCTCCATCTCACCTGCCTC  
A\_16\_P17692522  
ATGCCATTCTTTATGACTTCTGACCTATATCTTTCCACCACTCAATATTCTTCACAACGT  
A\_16\_P03385368  
AAAAAGCAAAACACAAAGCATCTGTAAACATGTTCTGGACCTTATAGGATAACACCTGAG  
A\_18\_P14134535 CCATCCTTGGGGTCGTCCAGTCCTTGGGCTCTGTTCTCTGATGT  
A\_14\_P131345 ATTAGCAATGTAATGAACCTTAAGTCACAGAAGTCTAGAGAAGTCCAAAGGAGTTCAACA  
A\_14\_P125124 TACCACAAAACAATAAGGATTCTTGGCTCCTAAACCACATTAGAAAACAACCTTTGTCTT  
CUST\_10439\_PI426210822 ACAAGAATTTGGATGGAAAACCTGATCCCTAGCAAGAAGTCTGCTCTGT  
CUST\_2666\_PI426210822 CTTTATCTGTCTTGCCTTGCAGAAGGCCAAGGCACCTTGAGCAA  
A\_18\_P22196401  
AGGTTTATGTCAATCTCAGATCCTTGATTGACTAAGTAAGGCATCAGTCATCTTGATTCA  
A\_16\_P17395580  
AAAGAACCTAGAATCTAAAGGGGTCTTTGACATAATACAGAATAACAGGTCCCAGAGATT  
A\_14\_P123862 CTCCAAAAAATGGATAACACCTTCTTTGGACAGGATTTTGTCTTCACTTTCAAACATTCT  
A\_14\_P130734 CCTAATAATTATTCAATGTGTGCTGCTTTTCATAGGCTCTTGCGCATTACTGCTTGTATC  
A\_14\_P110144 TTCTATCTATTCCCTTCTTTTCAGGTCCTTATTCAATCAAAGCCTTGATCAACTGAGCAC  
A\_16\_P16956558  
ACCTGGTCAGAACATATAGTTAATCAGCCTACTGGATAATAGAACATGTGAAGCAGATAC  
A\_14\_P106852 ACACATCACTTAACTGTAAGAATTTCCAAAATGAACTGATGACCAGTGATCTCTCTATC  
A\_14\_P131638 ATGCAATTTCTTGTTCCTTGGCCCTAGAAATAAAAGAACTTGAGAACAACATTTCG

CUST\_959\_PI426210822

TCAAGGCTAAACACAGTCTTCTCTTTCTGTAATTTATATTCAGAGACACTTTGCATTGTT

A\_16\_P02995148

AATTACATAACAAAGACACCTCTTTGAATCCTTTGAATCTGAGCACTTTTTGGTAACCCT

A\_14\_P102801 CTCAGCAGAATACCTGTAACCATTTTTTGCCAATCTTTGAAGTGGCTTTTATGTGTAGC

A\_16\_P30952500 CACTTTTTTCAAAGATGAGAGATTTATGGGACCAGGAAAGGATGTGTCCTGGTTAA

A\_14\_P117887 TCCCAGTTCATGGACTGCTACAAGAAATAAGTCATTTCTGTGTGAACAAGAAGAAAAT

A\_18\_P24086993

AGTGTCTCTGCCTTTACCTCAACCTTCTTTTTCCACAACAAAAATGGCTTTTTTATAGTAT

A\_14\_P111790 CCACAAGGTTCCCTGTTCATTGGCTCGAGAATAAACCTAAAGAAAAGTAGAGAATCA

A\_14\_P114834 ACCTAGGATTGAACAATAACTCCTAGTTAGTTGCATCTGGTAGCCATCCTTTTTTCATTAA

A\_14\_P123397 ACTGGGGGTAAAAAAGTCTTGGATTAATGCTGACTTTTCTATATTCCTCC

A\_16\_P16190983

AATACAGGGTCCAGAAATACTCACCTGGAGGAACTATGTGTATTTCTGCTATAGTAATA

A\_16\_P16191885 CTATCTTACGGGAGTTTGCAATGAGAATTTCTTTGCCCATGGAGTCCTTG

A\_14\_P101842 GAAATCTGTAAACATAAAATTCCTCTCATTTTCAAATATCTAAAGCCAGTTTTATGTTCC

A\_14\_P136424 GCTCTTAAAATGCAGATGCAGTTCTATACATAATGACATGGAAGGGTGATCATCAAAAGC

A\_14\_P133119 GATTCAAGAAATTTTTCTTTCAAATAACCCTGTCAAAGGCCTGGTTATTCAAAAAATG

A\_14\_P108561 ACACCTCTCAGGCAATGTTCTTACATTCATGAATGAGAAAATACATCTAAACCAGAGAAG

A\_14\_P133766 TACTTGTCACACAATTTCTCTTTTGTAGTTTTTAAGAAGCCCTCAGGAAAAAAGGTGTGA

A\_14\_P133369 TGTCACACCATGCATACATACATAAAATACACATCCTTCAACCATTTATTCCATGGCTT

A\_14\_P104341 TCTGATTGTGGGGATAAGACTGTTAAGGCTCAGGTTAATCTGTATGATAAACTTCAGT

A\_14\_P125353 ATCTCTCCTGTTCTGTTCTGCAGTGTCTCCAACATTAGCCTATACCTAATGTA

A\_18\_P22840886 ACTGTCTCCAACCTCCACCACCACCATCCAACCTCAGGCCCAATATC

A\_16\_P16965552

ACAGGTCTTCTACTACTCATAATTCCTTTCTTAGCAGTATTCCAAGTTTGATCATGAAG

A\_16\_P18570896

AGCATTCTTACCATGACTATCAACTATTAACCTCCCTTTACCTGAAATTCTGACGTTGAA

CUST\_1642\_PI426210822

CTAAGTATTAGTCACTTTTTCTTAGCACTTGTGAACAGCACCAGAAAGGTCACAA

A\_14\_P103881 TTGGCTTTCTGTAGCATTTCTAAAATATCCACTTTATTTTCAGCATGGTCTTCCAATGGT

A\_14\_P126004 TTCTGGGATATTCAAACCTGACCTTGTCCATTTCTCTACTGTCATCCAGAACAT

A\_14\_P127851 CTGATGACTTAGGAAGTTATGTTTCTCTTTTCGTGTGATGGTAAGTTTGTCTATGTTCTGT

A\_14\_P139586 TGCTAATAAACCTCAAAAACACAAAAGTCTACTTCACTAGCCAGAAATGAAAGCAGGATC

A\_14\_P118175 ATTGGATTGGCTAGAGAGATCAGATTTTATTGTTCAAAAAGTGGGCAAAAATTGGGCATAAT

A\_14\_P115127 AATCCATAGACATCTGACCTCGGCACTTAGCATCATCACAGCAAACCTAACTGTA

A\_14\_P112654 AAAAAGGTGTTTTTTTAACTTTGGGAGCCATCGACTCTTTGAGCATCTGCT

A\_14\_P137111 GTTAGAGTTGGTTCCTTATTGAAATGGTCTGTCTTCATTGTGGGGTTTTGTTTTGATTTT

A\_14\_P201272 GAAGTTATAGATCCCTATGTCTTCACTAAGTTCTTAGTATATTCGGAATGGCCCATGCTT  
A\_16\_P40043083

GCCACAGATGTATTCAAACCATAGAGACATGGATCTTACCATTTTCAAACCTTGCTTTGAT

A\_14\_P114930 CAGGATATGACTGAAGTGATCACAGTAGGATATTTGGCCACAAAAGACAAATAAATAAA  
CUST\_3883\_PI426210822 TTAAAGAAAGGAGGGAAGTGAAGTGTCTGCTCTATGAATTCTGGGCTAGTG  
A\_16\_P16773642

AATGGCCTATGCAAATGATGTAATTTAGAGCAACCATAGTATATGTGTTCACTTCAGCGC

CUST\_7675\_PI426210822 AGAATGTTGCCAACATTCTGGATACAAAGAAAAGCACCTCTCTGTGACT  
A\_16\_P17600406

ATTGGGTTAGACACTAAAAGAGCACATTACTTAGGGATCAGAAAATCACATCAACTTTCC

A\_14\_P103178 TCAATATTTTTCATAATATACATAGTCCGTGAGAGACATGGTAGGGCTATTTCACTCCCC  
A\_14\_P109381 ACTTCTTTTTCTTTATTAATTACTCAGAAGTCTAGGCCACAGCAATCCTACTGTTCTCCT  
CUST\_6983\_PI426210822

GATAGAAGATGGGTATATCTATCTTTCTCTGTACTTTATGAGCACTCTTCAATTATTGT

A\_18\_P17126482

ACCCTGCTAGTCTACTTAAGGTATGTGTTTCGATCTATTAGTTACTACTGCTAAAACCTCA

A\_14\_P101637 AATACTCAAACGTTATATACTGCTTAGGCAGGCAAAGAAATACTTGGGAATCTGAACTCT  
A\_14\_P126747 ACAATTATTATTCAGAGAAGGTGTTGGTCTTTCCTTAAAAGGAGCAGAGGTCTACCAAG  
A\_14\_P104783 AAGCAAGTGAATCTCAAGTGACCGATTTTGCCTGAGTAAAATCGGAATTAATCATATGT  
A\_16\_P01907552

TCTATGAAATGACTCAAAAAGGATCTCTCTCAATCATGTCTGAGTAGCAAAAACCTGACTTCA

A\_14\_P201411 ACGTAAACGTGCGTTTAGTTACATGCACATTAGATAGGAACTTTAATCCTTGTGAAACCC  
CUST\_2004\_PI426210822 CATCACCAAACCTGGTTTTGCATTTTTCTCAGAAATGGCTCTGCCTTC  
A\_18\_P22840494

CAAGATTTCTCTGCAATCCTCTCTAGTAGATAATAGTGTGTTTGGGGAAAAGTGAGGTAT

A\_16\_P00685326

ACTTGATTATATAAAGGTAAAAGTAGAATAAGATAAGTTTTCTTAATATCTTAATCTTTT

A\_16\_P15322937

TAATCACCTATCCCTTCACTCTAATGATTCCTAAACTGCCAATTTACTCATGACTCTCTG

CUST\_3504\_PI426210822 CTTCAAAGGATGTCACCATCTTGGATGTGATGTTTTCTGTTTTCACTGGCAT  
A\_14\_P116157 TGCACGGCTCTGTATCAGTGTTCAATGTTTACTGAATACAATTTAGTGTTCTTGTCTTA  
A\_16\_P03737844

CTCCACATTTTTAGTTCTCTTGACACTAGTCAGTATCTACTATAGTTCCTAGCCTACCGA

A\_14\_P127272 GTCAGAGAAAAAGAACTGTAAGAACTCGTCTACAAATAACAACCAGACTCAAGACCCTT  
A\_14\_P105867 ATTATGATTCTTTGTTACAGGCACCGAGAATGTTGTATTTCAGTGAGGGTCTTCTTACATG  
A\_16\_P02952343

AAACACATGAGAAGTTTATACCTGACCATCTCTTTTCTATCATTGGCTTCCTATCTCCTA

A\_14\_P101100 CTGACTTCTGCTGTCTCTCCTCAGATTTCTACCACTCCAAACGCC

A\_16\_P16191101

TGGTGGGACGATGTATAGGGAAAACACTTGTAAATTAAGGGCAAGCACTATAAAACAT

A\_14\_P124343 ACATCATGGATATCAGTGTGTTGGATGAAGCAGAAATTGATAATGGAAGCGTTGCAG

CUST\_7539\_PI426210822 GCTACATTAGCTCTTGGGACCAGTGTTCAAAGGCTAGTGTAGAACA

A\_16\_P37991881

CCCCCAAATACATTATTATTGTTTTTACAGCCAACATTCATAGACTTTCCATTTCCAGTG

A\_18\_P11735267

CCCTTCTAAGAAAACCTTAACAAGACTTAACTTCATACCCTTACTATTCTCCCATTTGCCA

A\_16\_P03436356

AAAATGAAAAAGCATGTAACCTGGTAGTTCTAGCAACTGATTTACTTCCATCAAAGGCC

A\_14\_P200504 ATCACCATCTACCTACTCAACAACAAGCACCTAGTGATAGCAGACGCCTTT

A\_16\_P20672918

AAAAAGTGTGATCAGATACCTTCCTCAGAAACGAAATCTAGAAAGAAGAGTAAGCAGTGT

A\_16\_P01925098

AAACTCCTATCCTTAATGTTCCCAATCTGTTTAAACCGAAGTCATCATAACAACCTCCTTC

A\_14\_P137714 GGACTTATGGCTCCTTCAGAGGCAATTAATCCATCTAGAAAGAAAAAAAAAATGGTAACCA

A\_14\_P201932 TGACATTAGTAGGTGAAGGAGAAAGTAACTTACTACCAGAAGGTATAATTCATGGGGAG

A\_14\_P116180 CTCTTAGGGAAAGGAGAGCAACCTTTTAAACAGAATGCCTAAGATATATACACAGCCTA

A\_16\_P15832227

GGAAAAGTCCCATACTAAAAGAGTCCTAGAGAATATACCCATCATGACACATCTCTTCAA

CUST\_5965\_PI426210822 ATGTGCAGATTTCCCCACTGAAGAGGATAAACAGAGTTGATGGGTTACA

A\_14\_P137451 TTCCTTGTTTCCCAAATACTCTCTGAACTAACTAGTTTCGAGATGTCCATCAGTTCTAT

CUST\_1038\_PI426210822 AAAGAAACATCTGGCACTGACAGGAGTCTGCTTTGTGATCTTTTGGG

A\_18\_P14134685 GGAGATGCACCGAACTGGACATGGCTCGAGGTGGGTGACCATTAC

A\_18\_P22840841 GTGCTGTGGGAAGGGGGTGGCACTCTGAGAATGAATGATCTGTTA

A\_16\_P16894421

AAATAGGCTTATACCACACTTAATGTCACCTCACGTATTTCTCTGTTCAAAGTCACATCC

A\_14\_P108073 CCACTCCTAATATCTAATACAGCAAGGGAATGGCATTCTAGCCTTAACTTTTGCTTCTTT

A\_14\_P124940 CTCCCGCAACTATAACGGGGTCTCGGGAAATATATATCAAATGAGTGAATGTATATACG

A\_14\_P101584 TTGGGAGAGAAGAGACCTGACAGATTATCTATACTCTTCATATGTTAAAAGACCATTTC

A\_18\_P14138184

AGGGGAGTGTTTTGTCTTTATTCACTTTGGAAAAATGTAAAGATTAGTCCTAAGCAGGG

A\_16\_P19532294

AACCTTCTGTGATTCCAATCCTGTCAAAAGAAACATCCTGTAATTTCTCCTTCAAATC

A\_14\_P125401 AAGTGCGGGTTTGGAAATGACACAAAGGTTATATACTGTGAACATTAGAATGAGACTATG

CUST\_3818\_PI426210822

ATAGGTTTATTTTGAACAACCTGATAGGCTTGGTATTGCTGGAAGTGGATAGATTTGGG

A\_14\_P138226 GGTTGTGGCCACAAAATTGAGAGAATATTTATTGGAAACCTGTAAGAATCAGTTTGTCTT

A\_14\_P128961 GAGGGTGAACCTTCGCTCTTTGCCTTAAACCTCTTTATTTTCATTGCAGTAATAGTTTTACG  
A\_14\_P122430 GAAAGAATTCTCAAACGTTTCAAATCAATCCAACATCTGGCAGTCTTCATCTTAAAGCG  
A\_14\_P126970 AGATTTTGGAAGTATACTCCACAAAAGCCAAGAATTATGTAAATGGACATTGCACCAAGT  
CUST\_9639\_PI426210822 GATGAAGAACAGGAGAAACGTAGTTAATCATGCCCTGGAAAGCTGGC  
A\_14\_P123472 ACTTTCCTACTGTTTTGATTCCAGGCTTTAACAAGTATTTATTGGCACCGAAGCAGAATAT  
A\_14\_P107199 CTTTCAACAGTGTTAGGTTTTTGTGTTGTTTGTGTTTGTGTCCATAAAGAGGAGTGACTTCA  
A\_18\_P22841936 GCTTGCTGCTCATTCCCTTTCTCTAGAAGGACCCCTAAGGAGTTTTAC  
A\_18\_P17260699  
ACAGAGCCTCTACTAAAATTTGATTCATATTGCCATTGCTTTCCTATAACACCTACACCA  
A\_16\_P58424104 CTTTCCAGTCAGTTCCTCTGCCCTTGGTGAGTGAACAACACTATTC  
CUST\_1922\_PI426210822 CTAGTACAGACTTGATTCCCAAGGACCCCTGGCCTTCAGGATTTT  
A\_16\_P01764808  
ATTCTAAAGGAGAGACTGTCTGCATTATCATCAACAGAGAAGTGTTTGTATAGAAGAGG  
A\_16\_P16191955 AGTGAGGAGAATGAGTGTTCATGCAGACTTTTATGCTCTACCCACAAGATAAG  
CUST\_1838\_PI426210822 ATTGATGTGGTAGGAGGTGCCCCACAGGACAAAGGCATCGGCAAG  
A\_14\_P135744 GATATGTCATTTGTTTTTGTGTTCCACTCTGGGCTCAAAGAAACGTTGCTAATGTTTTTC  
A\_14\_P135448 GAGCCAACCTCATGACAGAAATGTCTTCTGGTTGACTCCATGAAAGTTATCTATTATCAAT  
A\_14\_P130918 TATGTGCAGAATCCACTAATGGAAGTCATCATAAATTTGTTGCCAGAATGGGAATGTATC  
A\_14\_P104342 TTCCTGGATTTTGGTGAAAACAGAATCTAATCTTATATTTCGCAGCCTTAAGGTTAGAAGG  
A\_14\_P112586 GTTTATTTTACTGTTGCAGGTAATAGCAATAATTCCATTCCCATGACTCCAACCTCCAC  
A\_14\_P138688 GGCTAGACCTAGACATTATCTTTAAAATCGCAGGCTTTTTGAATGAGTCGTGTTTTTTTTC  
A\_14\_P128333 CTTTCTGCTGAAGTTCTCTGCCATTCCATCCATTTTCTTGCACATTTCTATTGTTATTTT  
A\_16\_P18078030  
ATTCCTCAATCTTAAAGAAACACTAGAAAGAGAAAGTCCATTTACTGCCTTTACTGCCC  
A\_14\_P138947 TCCATGACAGGGTTTTGTCAATTGTTGATGTTATTGTTGCTTCGTTTTATAAAAAAGCCAA  
CUST\_8687\_PI426210822 CCATGATGTACGATGGGTATCCCAATGAGTCAGTTGATGTGGG  
A\_14\_P126616 CTTCAATGTCACTATCATCCAAAGAAACAGGAGATTTTTTCGAATAAACTTCCTGAAATA  
A\_14\_P135525  
AAATTTGCAGTTAGTCGAGGAGGAAGAAACTTGAATAGGTAAAATACAAAGAAGAACAGG  
A\_14\_P131770 GTAAACTTAGAAACCAAATTTGTGTTAGAATATTGTCAACACGTCAAGCCTGACTGCTGTA  
A\_14\_P125773 GGTAATATACAAATTTGTGTTCAAGCAAACAAGCAAGCCTAACTTGGATCCTGTCTCAAT  
A\_14\_P132076 TTTGGTTTTTTTGTTTTTAATCTGTGGCTCTTGATAATTTATCTAGTGGTTGCCTACACCT  
A\_14\_P130694 ACAGTAGAAGTATAGACACAAAATAATCTGGCCAACATAGGGTGATGTTTGAATGAATG  
A\_14\_P130691 ACTTGGCAAAGTTTAACTTGTTCCTGTTCAATTTTGGTTTCTCTATGTTAGCCTTTGTTT  
CUST\_1454\_PI426210822 TTATAACTGCAGCAGCAGAACGCCCCCATTTGTTGGGTAGCAGTG  
A\_14\_P126384 CTCATTTTCCTGTGCAGAATATTAACCATCGCCTCAAATGTCACTGACACATATTTGTAT  
A\_14\_P137191 CTACACCTGCTAGAAAGGGACAAATAGGAATTTTTAAATGATGCTGCTGTGAGAATCAAA  
A\_14\_P108182 CTCCTCCCTCTTCCTTCTGCTAATTTCTCCATTTTAAATTTCTTTCCTCAAATGTTAATCC

A\_14\_P116524 CTGAAGGAAACTTCCAATGTTAGGCTTTTCATTTAGTTTCACAGAACTGCTCTTTTTGTT  
A\_14\_P138441 CACCTTACCAATCACTGAATGACATCATGTAATAAATGGCTGGCCTCTGAAAATCATTAA  
A\_16\_P18067099

AAAACTGGAAATTCAGGCAAGTCTATTGCATATCTAACCACCTTTGATACATCTTCTGCA

A\_14\_P110817 ACAAATCAGGATGTTTTCTACTGTCCATTGCTTTGTGTTTTAATAACAATTTGCAGTG  
A\_14\_P101296 GTGCTGAGGAACAAATTAATCCTGTAATTATTTGCTTGGAGAACTGACAGGATTAATCTC  
A\_14\_P116574 AGAGGATGAGAACACCTTGTGCAATCTCTAAATACAAAATATGATTATTGTGTGTCGTGG  
CUST\_9407\_P1426210822 CACACATCTTGCCTGTGTTGATTACTGGCAAACCTCCATCATTTCCCA  
A\_16\_P31056325

AGGGCTGCACTGAATAATTTTCAACATTCTGAAATTACCTGACAATTACATGGTATCCAC

CUST\_958\_P1426210822

GTGTGTATATATAATGATAATCAAGGCTAAACACAGTCTTCTCTTTCTGTAATTTATATT

CUST\_8350\_P1426210822 TGGCTAAATAATAATTATTTTCTTTCCCTGTGGCCTCTCCTAGGTGGACTTAGGG  
A\_18\_P22841723 GTCATATCTCCCAGGGCTTGGAGAAGTGGAACTCTGGATTCTGGATTAG  
CUST\_5783\_P1426210822 TTCTTGGTGTGGGATTATTCAGTCCAATTCTTCTACTTTTTTTAGGCCTCAGCAT  
A\_16\_P02583480

AAAAAAAACCTTCTCTCATCTCTCTGATGTCTGTGATACTGTGACCTCTTTAGTGTCAC

A\_14\_P118776 CCATCCTTGTATTTGCATACAGAATTTTGCATACATCCTTGCTGACTAGAGTTTTTTTTGG  
A\_14\_P111121 CAGAATTGTTTATTACCTTCTGTAATCCTACATTCTTGGGGACTCCTGAAGTAGATTCAA  
A\_14\_P101069 TGCCTTTGTTCTGGCAATGATTTTATCCTTTTCATCATTAAAGGAAGGGACTATTGGTTTAG  
A\_14\_P113568 AAATCTCAAGCATTTCATATTAATTAATGAGGTAGGTGTGTTATCTTAATTTCTTCTGTG  
A\_14\_P136017 TTCAAGTGTGTGCTTACCCCTTTTTACACATAACCCCTCCTCCCTT  
CUST\_7910\_P1426210822 TGGAAAGACAGCAGTTCCTACAGCCTTTCTTCTGTTTCTCTCA  
A\_14\_P118900 ACTTCTTTCAGCATGTTTGCCCGGTTACTGCTCAATGTGTTTCATCTTAAGAG  
CUST\_4516\_P1426210822

GTCTGTGTGAAAACGAAAGCTATTGTTTATGTAAAAGGACCAATTTGCCTAATGTCCC

CUST\_305\_P1426210822 AATGGGTAGAGACGAGAGCAGATCTGACAGAGAAAAGGTGTTTCAGC  
A\_14\_P104835

ATTACTTCTGAGGGCTGCCATTGCCATTACAAAAGAAAAAAGAAAGTCTACAGAGA

CUST\_2925\_P1426210822 AACAGCCTGTGGCCCTTGGAGCCTCCTGGCTAGCATAGGTGAAG  
A\_14\_P131607 AATCCCTCTTCTAGATAAATGGACAACACTAGTGGCTTTAAAAGTCATCAGCATGAATG  
A\_16\_P21196147

ACCTTTCCAAAAACAGTTCTGATCATATCCACCACCTTTTCTATACATCCTTTTCATGAA

CUST\_5371\_P1426210822 ACTGGCAGGCACATCTGCCTCTGGGGAAGGGGGCTGGGTGTCCGGG  
A\_16\_P38211453

CCAACTTAAATTGGTCACCATTATCCTCTTAGCATCAAATGACAGATGAACAAGAGCAT

A\_16\_P19769027

ACTGCAATTTGTCCTAAAGGTTACAACTCTGTAAACTATTTTAAACACCTTGGCTATCCC



A\_16\_P17699093

AAAAAGGAGCAAACACACACATACAAAATTTGGGCCTTTAGAAAAATTCCATCTAACCAG

A\_14\_P200255 AGGCAGCAATTATATCATAACTTATTGAACTTTTGAGCAGGACGTGCTGGTAATTTTCATG

A\_14\_P126708 ATTTCTTATGAATCAACACTGTAAACGGAAGGTAAAAATAGGAGTCCCTACAACCTAGGAAT

A\_16\_P02613521

G TTCACACCTGTTCTTTATCTTTTGCTAAGAAACCTCCATATTATGGCCATCAGGTAAAG

CUST\_7177\_PI426210822 GAATGTTCTAGTGGGGCCAGGCCCAATGTGGTATCTTCCTTTTCT

A\_14\_P133052 TTTATTATATTTCTAGACTCCTGTTTCCTCAAGGCCAATGATTTGACTCACAGTCTTTCC

A\_14\_P139424 CTGAATCTCTTAAATGCTTTGTTTTGTAGAGAGGAAAATATGATGTTCCCAAGTGGCTC

A\_14\_P127887 CTCATTCTCTGAATTCTTTGTGCCTTCACAGTAATCAGTATTTAACTGTTCTCCAGTCTT

A\_14\_P106755 GATCCCTAGGTCCCTTGTGTGTTATTGGCATACTCTCTCATATTATAAATTAAGGATGCC

A\_18\_P12896652

AAAGAACTCAGTCCTTGTAACCTGTTGAACCACTAAATTAACGCCCTTACATTTCTCTC

A\_14\_P136887 AGACAAAGTTTAAACAATAAAAATTCTCATGGTGTCCAGTTGTGCATAAATTCAGAGCC

CUST\_1189\_PI426210822 GTTATGGTGAGGAGCTCCCGAGAAAACCTCAGGTGAAAGTGCTCAG

A\_14\_P102555 TCACAGAGAGCAAGGAGAATATCTATACATGGAGTATCCTAGTATGAGTGTCAATACCTG

A\_14\_P121030 CCTATCTTTTTTATAACAGGAAAACCTGAGGTTAAAGTAGAACCCAGACTAAACTGCAGGT

A\_14\_P105588 CTGGTCTTAGTGTGTCAGGTCATTTAGTATCAGATGACTAGAAAATTTGCCAATCACTTCAA

A\_18\_P22843208 CTTCTGATTGCAACTGCTTTCCCTTTTTGGCCTCCAAGACAGGAATTC

A\_14\_P107356 GAAAAGGAATTCCAATCAGAAAATCCTTAATCGATACTGCTACGTGGATTACAAGAAGCA

A\_14\_P139655 AATACTAATGAAATGACGGCCTTTAAGGTTGTTGCTTTTTGAAGTCAAGTCATTCAGTTTG

CUST\_1721\_PI426210822 CCCTCTTCCAGTTTGTGTTTTTCCTTAGTTGACCTTGCTGGTCTCTT

A\_14\_P139097 ATTGAACAGTGATATTCAGGTGGCATCTAGGGGCATAACCACAAAAGTGA

A\_14\_P103802 TATTTAACAAGATTTTACTTATTAGTAATAACTCTGTAATCTGCATTCCCTATGTATGAT

A\_14\_P108631 TGACAGGCCTCCTGGAAAACCTCCACATATTTTTCAACTGCAGTATAAAGTCAGAAAA

A\_16\_P01003103

ACCTGGATCACCTAGTCTTACCTAGTCCTAAGGAATAACTGAACTTGTTATATTTCTTCC

A\_14\_P104811 ATAAGGAAATCCACTGTCAGTTCATAGGCCAAATAAGAAACATCACTCCCAATTAAGAT

CUST\_5102\_PI426210822

GTATGACACCATTTCTTTTGAGCTTAAAGATGCTTAAAATAGCTAAGGTTAAAAATGAGG

A\_14\_P122765 AACTTGATGTCTTATGTGGTAACCAAGACAAAAGCGATTAATGGGAAATACCATCGTTTC

A\_14\_P201147 CTAAAATGTCATGGTAGACCATGCACCACACTTGGAACGTTTTCTGAAAATATTTTCAAT

A\_14\_P123545 TAAGGTTTCTAAAGTTCTATGTCTGGAAAAAGGCAGAACCTAGACACAAGGTTACATAA

CUST\_9629\_PI426210822 CTCTGTACAGACCCAAACCTGAGAATGCCATGTGAGACCTGTGTG

A\_14\_P200391 TTACAGAAAGATCAGTTTCTAACAATGAAAATGTATCACCTGTTCTTAACTGTGTAAA

A\_16\_P36231052

GGTTCCTGCTCATTGTCATAGTTCTGGTTTAAAAGTTTTATAGAATGAAATACTTGCCC

A\_16\_P00152578

CACATGCATTTGAACTAGTTTGCAGATTAAGCATTAGTGTAAGAGATGAACTTAGAGCG  
CUST\_3503\_PI426210822 GTTGAGTGGGTCCTTCAAAGGATGTCACCATCTTGGATGTGATGT  
CUST\_6204\_PI426210822 CAGAAAGCATTGATTTGCAGTTTCCTGAATGCGAGGCTCCAAGTGT  
A\_14\_P113977 CTTCTGGTTGTATTCTCCATGAGTTTAATAATGACATGAAAAAATGTGGAAGCCGAGAGA  
A\_14\_P112078 ACACTGCTATATGGCCTGGATTTAGAAGTTCAAATACAGAAGGGTAGAAGTTAGTGAAT  
A\_14\_P137975 GACCTTGATAGTTCACCACCTCTGATGGATCCCTGTTTTAAATAAAAACGATTCACCTTA  
A\_16\_P16772303

ACGTTTTTGTCTGATAACAACCTACATTTTTTCCAGATCTCCATCTATGCATTCACAAGG  
A\_14\_P131567 AGGAGACAGAGATAACTCTTCCAATGTAATCTCCAGATCAAGAAAATAATTGAGAACAC  
A\_16\_P58424141

GATGTGGATGAATGTCACAGATGTTATGTTGAGTGAAGTTCAAGAAAAGGCCAAACCTAAT  
A\_14\_P125565 CTGGGGCTTGAAGATAAGTTAAAGGGACTGAATTCCTAACCTTTCTGATGACTTGAATTCT  
A\_14\_P136655 AAAAGTCTGGTCCTTTGTAAGTCTGACCATGAAAATGCTGATCATGAAAATGCTAAT  
A\_16\_P16108935

TTGCAAGGCACTTTATGTTGAGGATTTATGTTTTAGAGATTAATGACTTCATGCGGACC  
A\_14\_P131866 TTCCAATTGCACTCCCAATGCCTTCAAATTTTATGCATCCTCAAATTTTCTGTAATTAG  
A\_16\_P00592906

TCACATGGTTCAGATTAGACAGTAATTACAGTAATGATAACGTATCCTCAGATTCATGGT  
CUST\_1406\_PI426210822 ATAGACCACACCAAGTACAGTTTGGGGAGGAGGCACTGAAGTTCT  
A\_14\_P108598 GAGTAAGCAAAAAATATTAACGTCAAGTTGAATGTAATTGAAGCGACTTATTGGGCGTGG  
A\_14\_P100481 TGTCACACATGGACTCATCTTAAACTGACACCACAATATTCAACTATGATCAATGGAAGA  
A\_14\_P113889 TCGACAGAAAGATAAAGTTAATAAAAAGAAATGAACGTGGTGAAACTCCTTTACACATGGC  
A\_14\_P201532 ACTGACTTCAACACTTTCTCATCTATTAGTCTATGGTGCTATCCATTCAGGATGTAAACC  
A\_14\_P129075 CATAAATGGCAAATTCTGCAAAAAGCAGAAGAATATGAAAAGATGTCTCTTGAACAGGCAA  
A\_14\_P115541 TTTTACAGTAGTTGAAATTGGCACATCCAGCACTTTGTAAAGTATGCTATCCAAGGTAGT  
CUST\_3822\_PI426210822 TTTCCAGTATGTTGCCCACTGGTCTCATCTATCAGACTCACTTGAGAGTAT  
A\_14\_P113672 CTTGTCACAGTGCATGGCGTATAGGAAACAGTAATTGTTAAATAAACTACTGCATGGATG  
A\_16\_P03775753

TCTGCTCCCTATTATCAATCCTAGAGTTAGCCCTACACATTTTTTTGATCACTGCTAGATA  
A\_14\_P135818 AATGGCCAAGGGAGTTATCAAAAAAAGAGTTTCTCTTATGAAGGAGCACAAAGTTATTG  
CUST\_2669\_PI426210822

CATCCCAACTGGTTGTATTATTACCTTGAAGTGAAGTGACAGGATTTGAACTGTC  
CUST\_2361\_PI426210822 GTCAGGGTCATTCTCCACGCATCCTCCGGAAGCTTGTTCCTG  
A\_14\_P122256 CTAATGCCATAGAAGAGTGAATACAATTGTGGTTTTACATAGGCAGGGAGGTGTTTTTTTT  
A\_16\_P03130633

ACACGATTGAAAGAATTTAGATTTATACATTATCCCTAGTTCTTCATAATCTGCCAGCC  
A\_14\_P124619 ATGTGTGGACGAATCTGTTCCCTTAATACTTGCTTATCCTTTAACTTTAGAGTGTAC  
A\_14\_P103948 CAGGTCTCATCTCCATCAAAGAAAATACTTGAAAATTATGCCTGTTACCTACTTATGCT

A\_14\_P125615 GATGACCTCATATATCTGCAACCATAAAATGTTAAATCTCATAGGTTCCCTTTACGGCTGAG  
CUST\_72\_P1426210822 CACTACATTGGGATTACGAGCACCACAGCCCTCACTGTTACTCAT  
A\_14\_P110028 GGATTATAAGATTATTGACGCAGTTGTAATGAACACTGTTCTTAGACCTGTGCAGTAAAT  
A\_16\_P00357044  
CAGATCCACCCCTATATCTGACTACTCATCTTTCAAATGAATTCAGTGTCCCTTTAAA  
A\_14\_P108650 CAAATAAATTCTTCTGGTGATATCCAGAAAAATCTGAAGTCTATTGTGACTTCCCCACAC  
CUST\_2590\_P1426210822 TTTCTAGCTGTATGAGTCAGAGGAGGCAGAATTACACTTTGGAGTGGG  
A\_14\_P122318 AATTCAGACTACTATAGAAAGGGAAGGCTAGGGACTCTGAAACCACATAGTAAAAAAGAT  
A\_14\_P117182 TTCATCAGTGCTTGCTTTGGATCCAAGATGTAATGAGATTCTTCTTTCACGTCAACAAT  
A\_16\_P18004359  
AGAGTTGATTTCAATCCTAATTCACATACTCTTTTCCTCATCCTTACCTTTCAACAGACG  
A\_16\_P41868884  
AGGGAATTTAGAGGAAAGTTCTAAACAAAGATCACTTACATACCCAACATCGTTATCTGA  
A\_14\_P124837 CAGCAGTTCTTTTGTGATCTTGACTATTTCCCTCTGTGTGATTTTGGTCACTTCAATTATG  
CUST\_1622\_P1426210822  
AGGTTTATTTATTTTTGTAGATGAGGCTAACAGAGGTAGTAGATACTGCTTAGCAGCAAG  
A\_16\_P00685050 TTTGAATTCTTAAAAAATTGGTCTCTGGTTTGGCACTAGGACATGGCTTCTCAGG  
A\_14\_P136022 AATTTGGGGGAAATGGGCTAATGGTGCTTTTCAGAAATTAATTTTTACATTTGCTGACA  
A\_16\_P17432658  
AAAACCACTTAATTCGTCTAAAATCATATCCCCTCATTTATCATGCTAATCACTCCATGT  
A\_14\_P132479 CTTCTTCACACTGACCACTGTCTTCTTCTTAGTGCGGCTCTGCATG  
CUST\_4328\_P1426210822  
TTTCAAGTACAACATTTTCTCTAGCAATTATGGGGGTTTTATCTCCCAGATGTGATTTAT  
A\_16\_P21434263  
AAATTTTCATGTCTACATTATGGAAACTCAGAGGTTTATGGTCACATAAGAGTGAAAGGGC  
A\_16\_P00905823  
ACAGTAACACAGAGATACAGTAGCATCATATAAGGTTGAAGAAATAGAGATGAGAAGAAA  
A\_14\_P107370 AGGATACATTACGCACATGGTTTCAAATGTCATACATCGTTTTATAGATGAGGAGGGTCA  
A\_14\_P127752 AGCACACTTCGCCAGGTATTCTCCAATCAGAGAACTATTTTTATCTCACATGAATTAGAA  
A\_16\_P58424264 GACCCTGAAGGAGGACTTAGGGCTGTTGGGGCAGGGATTTCTGTT  
A\_16\_P39234643  
AACCTCGTGAAAATGGCTTAGACTAAAACCATTTTCGTCTCAAACATTTGAATGTTCTCTT  
A\_14\_P102466 ACCTTCCCTAGGTAAGGAACAAATGGAAAAATTTAGGCTAATGAAAACTTGACAGAAAC  
A\_14\_P133864 CTTACATTTCTTCAGTCATTGTGTGTAGCACAAGAGGGACATTAAGTATACACACTGAGA  
A\_14\_P126508 GTTTTTCCCATCCTAGTTCTCCCTATGCCTGAATATCCTGTCTTTTTCTTTTTTATAAGCA  
A\_14\_P201138 CTGGATCTGTTTCTGTAGTCGAGGACAACCTGTGATGTAACCTTTGAATTAACAAACAAAA  
A\_14\_P101635 GATCACTAAATTGTGGTTAATGGCTCGGGTATATAATTTATTTTATCTTCTTTATTTTGT  
A\_16\_P03725714

AACTGAAACCAGTCAATTCGATGTA ACTCAATCACCAGTGTGTAATGTGATCAGTG  
A\_14\_P139985 AAGGACTTGGGGAAAAATTGATTCAGTTATTATCAGCCTAGCCTTAGGAATAGAATTAGG  
A\_16\_P15712243

ATTGGAATTCCTTAGACTCATGTCTCTATTTAATCCTCCCAGATTAGCAGATACAACCTG  
A\_14\_P129930 TGAATCACTCTACATTGCGTAAACTTTAAATGGGCTGGTGTGATAGCCTGTATTAAAC  
A\_14\_P118046 ATCAGGTTTGGGTAGTATGTCTTCTTGATGCTGAAATGGAAAATAGAAGGAACACTATGTTC  
A\_16\_P01928211

AAAAGGGTAAAGAGAGTAACCATAGGGTCTCTATTTTTTCGTATTCAAGAAGCAGTCAGAA  
A\_16\_P35176199

TGGTAGTTGTCTTTGCAAATCAACTCTTGTTCTGTAATTCTGAGGAGATTGACTAGTAGT  
A\_14\_P122669 TACTCATTATGATGAAAAAACCACTGAAAGAGTCACATTTCTCCACTTCCTTCCGGATTA  
A\_16\_P16191492 CTCCTATGGGCTCACACGGGGAAACAGATGCTTTCCTATAACTCTG  
A\_16\_P00205386

AAGTTCCTTGTCTAATTTGGTTAAAAGCATTTCGTAAGTATTGAAGTTGGTGTCA  
A\_18\_P15900057

AAAAGATTTTTCTTCTCTGACTGTTGCAATAACACAGTTAAATCCTTCAGTTCCTGC  
A\_14\_P135449 CTATGAGAGACGCATCATGGTGGATAAGGAGGAAGTACTCTAGTCGTTTATG  
A\_16\_P02223395

AACCAACTCTTGTCTTTTTCTTTACCTGAAAATCCACTAAACCATTCTTGGAAAGCATC  
A\_16\_P16191223

GTGAAACCTCATGTTTTCTTTGTATTTAACACATTCAAAGGCTTCTTACTCTTGAGAG  
A\_14\_P135380 CAGAGTAGCCAGAAGAAATCTAGCACTTCATAGTAGCGCTACTGAAGCACTTACTATAAT  
A\_16\_P01101309

AGATTTTCATCCTCAAAACACTTCAAAACCTCTTTTTGCTCTCAAAAATCCACAAAACCAG  
A\_14\_P104404 AAAGAAAAATTAGTGTCAAAATTTTAGTAAACCTAGACCAAAGGTGGGACACGCATTAC  
A\_14\_P121152 CCTCAGGTCTATATGAATGGTGGCCACACTTTAATATATTATATGCCACTTCTCCTTGAT  
A\_16\_P17332902

AAATGTGGGGTGAAATCAACTTATAATTGAGAAATGATCTGCCTGCTTAGAAATACTGGT  
A\_14\_P119574 AAGATAGAGAATAATACAGATGCCTTTGCTCCTTCCTTCAGGACCAGTCTATAGATTATG  
A\_14\_P116305 GTTAGAACTGTGGCTTCTCCTGACTTCTAACCTCCAAATATGATCTTTGATTCTTAGTTC  
A\_14\_P201144 ATATTCCGGCCCCTCCGTTTAAAAGCCATCAGATTTGAGAGCAATAAGTCTT  
A\_16\_P19421715

ACCTGCCTTTATTCAATACCTCAAAATCAATTGTATGCCTGTCATAATGTTTGCATCCTA  
CUST\_8840\_PI426210822

TTTTTCTCAACAGAAGCCAAACACTTAAAAGAAGGGAGATGGCTGATTGAATTCTG  
A\_14\_P137917 CACAATCTTCTTCTTTGAACTGCCATAGCAATCTTTCGGTTTTATCTTGATATTGGTG  
A\_16\_P19394697

ATAATGGAAGGAAGATTGAGATTTCCCAGTATCTTGCAAATGAAATCAGAAATGCCAGCA

A\_16\_P16307177

TTTAGGACAACCATTATCAGTTACCACTTACAGAAACCTTTAGACACCTAATAACCTGGT

A\_16\_P02248368 ACTCAACTGAACCTTGATTGAGCATTCCGTGTGAGGTTAGTTCTGTCTGTAG

A\_14\_P102364 CTGACTTGCCAGTGAATTTGTTTCCAAAATGACCTTAGTTATCCATGAGATCTAAAGAGA

CUST\_3071\_PI426210822 GCTGCAGTCTCCTGCCATGGAAGGGTAGGTATCATATGAGATGTG

A\_14\_P104019

TGGAAAGAAAAAAAAGCCAAAGGGAACATCAGGAAAAATGAGAGTTCATACAAAATAGC

A\_16\_P30952557 CCCAACTCCCTGCATCATCCCTCAAGAACAAGAAAATATCTTCCACACAATATTT

A\_14\_P200319 CAAATTTGATTGGCTTACCTCTGAAATTGTTGGTCCACCTTTCATCTTCATCAAAATGA

A\_14\_P137256 CTTCACTCCATTCATTTATTTGCACATTTACCCTACAACCTGTTAATTGAACGGTGTGCTA

CUST\_2489\_PI426210822 AAAAAGAGCAGCACCCCCACCGCCCCCTGCCCTACTCTTGAAATAAAA

A\_14\_P135611 TTTAGTTTCCGCAGTAGCGTGGATCAGTTGCCACTTGGTGACATTTTAACTTT

CUST\_496\_PI426210822 GGAAAAGTTATTGAATTGCAATAGCAGTAGCTTCTCTGCGGCACCCCTTG

CUST\_4379\_PI426210822 ATTACTCTGATACCAGATGGCTTTGCGGCCTTCAGTATCAAATGCATTGTG

A\_16\_P38748769

AAACCACAGTTCATTAAGTGTCTTCAAGATGTTACCTACTTCGTATAGACTTAGCACTCC

A\_18\_P22841939 AAACCTCCCGTCTCAGTCTGTGTGAGAAGCGTGCATGAATTCTTGCTATTTT

A\_14\_P139386 TGTCATGCATTCTAAAGTGATTCTTATTGTTTAAATTAAGGGCGGTGGCATCCATTTTGT

A\_16\_P30952534 ACAGGTCTACAACACTGGCCCAAGCACCCCTTCCAGGGTCATCTGT

CUST\_10153\_PI426210822 TTGTTTGTGTTGCAGTTTGCCAAAACATACAGGCCACCACTCAGTGAA

CUST\_6705\_PI426210822

ACATCTGCTATAGTAACCATGAGAGCTTCTGAAAAGTAGTTATTTACTGATAAACTACT

A\_16\_P18948645

CCACTACGATGTGAACATATAACCACCAGACATACTTGATTCTACTCCATGCTATACTTG

A\_16\_P00287728

GCACCATTGCTTCTGATTGCATTTTAACTAACACTCATGATATACAGAGTTTGACC

A\_16\_P19764566

TGCCATCTCTGTAGTTACCAATTCTTCTAACAAGGTTAAGTGTATTACTGAGTCTGTCTG

CUST\_4475\_PI426210822 GAGCCAACAGGAAGGAGGGCTGGGTTCTTGTTCTCTGACCAATTC

A\_18\_P22840298 AAATTATTCTCGTATTTATTTCCCCAGTGTGTTGAGAAGGAACATTGGGTTCCCAAGAC

A\_14\_P101133 AGTGTTTTATAAGTGGCTGGGGAAGAACAAGAAAGGAAGGTAATTATGGTCTGAATTTTA

A\_16\_P01165650

TGTTTTCGAATCATTAGAGTCTCAAGTGAATGAACTTTATCCAACGCTATCCTGAAAGC

A\_14\_P121509 TTATGATGTCTCCGACTTCAGCATATAAAGTAGGCCCAAGAAGTCCTGTGAAAACAATA

A\_14\_P103727 AGATTTCTGTCTTGTCTAACACCTGTGATGATAATATAAGCATTTGGTTTTGCTTATGGGG

A\_14\_P134019 TAAACCGAGACCTGGAAAGTAACTCTGCACTTCCCATTGTTATTTAGATTATACTCAAGT

CUST\_7688\_PI426210822 AAGAGTACCATGACTTGTGTTTGTCTGACTCCAGGACTATCCATGAGTAAC

A\_16\_P15074127

ATTCCAACCTCCATGCTTAGTTCATAGGATCAAACCTTGTTGCTTTGTTTGTAGTGATGTTT  
A\_16\_P19739800  
AACATAGGATTTACAGGTTAGACTGGAAAATACGAGAAGATGACTTTGAACTTGCTGGTA  
A\_14\_P123805 TACAAAGACTCATACAATGGCTGAGAAACACATCAAAACCCAAGAGAAGGCCT  
A\_14\_P129956 CTTTCTTTTTTCAACCACTGCACACCTAAACAGATGATTAGACATTGAAAACCTGTCCCTC  
A\_14\_P116799 TCTTCTCAGCAGACGTGGGCTGTGAATCTTAATATCCACTCCATTTATTATAAAATGTGT  
A\_16\_P18848659  
ATACTGTTTACTGAAACCTGACTCTTCTTTGAATCTGATGAAGGAAAATCAACTGGCAAG  
A\_16\_P18064056  
GGCCTCCTTAACTCTTTAATCATTATGCAACATATCCCTACACTACATTTTCTGGAAGC  
A\_14\_P107038 ACCAACGTTAATTCTCTGTGCAAATAAACGTAGAACTTGAGCATTACAAGGTGAAAATT  
A\_14\_P121482 TCCAAATTATTGACCAGTAAACCTGTAGCACAGGATCAAGAATCTTTAGGTTTTCTAGGA  
A\_14\_P128337 ACGTAATCATACCAGCACAGTCGGCTTTTAAACAAATCCATGGATGTGAAGTTTAATACG  
A\_14\_P118673 CTTTCAACTCAGGAGATTATGAAGAAGCAGTGATGTATTATAACCAGGTGAGCAGATGTTT  
CUST\_6442\_P1426210822 CTGGGACTTGAACCACATCAGTAGAAATTGAGGCTATGGCACCTG  
A\_14\_P105996 TCATCAAGCACCAAGAGGCCATAAATTATTTGGATGAGATTAGCCACCTAAATGATTACA  
CUST\_3527\_P1426210822 AAGGAGCTCGAAGACATAGATACCAAAAGTTACAGGGGAAAACGGACAAA  
CUST\_337\_P1426210822 TTGGTAACTGATTGTTGGTCGCTTACTCCTAAGCAGTACCTGAGCC  
CUST\_4562\_P1426210822  
TTTACACCAGTTTTTTACTTAAACATGCTTATTAGCCTCCATTAAGAAAAAGGTAACCTT  
A\_16\_P39673584  
ACAACACTATTCCCATAACTCTGATTTTACATGCAGACATATTATGCTAATGAGAGATGG  
A\_16\_P15775740  
AGGAGCACTGGATAAACTAAGTAATAAACTCCCTTCATCAATTATCCTAAATCTTCCCCA  
A\_14\_P116164 TTCTCCTTTTTAATTTAGGTATCTTTTTGGATAATCCTGATGTTGTGTCAGAGGAAAATCTGT  
A\_16\_P16482278 ACCACATATATATTTAAAAGCATATATTTATGCTTATTTTCTCTCCAGGAACTTGGTTT  
A\_14\_P125160 CCATTTATCATAGCATCGTGGATGAGAGTGATTTGTGTCTCAAAATATCAGGTTAACCAT  
CUST\_9191\_P1426210822 TGACTGTTGGCCAGTGACCTAAGTTCAGTCTCATTTTCTCATTTCAGA  
A\_14\_P106683 CTATGGAAGACATTGTATTTTATGCATCTTGGCTGCCTCAATGTCTATCTGTAACGTGTA  
A\_16\_P17473645  
TCTGATAGTTTTTCTTCTCATAATTCTCTAACCCCATATATGCAAAGTCAGATCCCCA  
A\_14\_P139813 TCTGTCTTGCTTGAATCTCTGTTTTCTGTATTTTCTGGTTCCTAAATGCTTGTCTTTTT  
A\_16\_P16614017  
AAAAAGTGCATTTATAACCCAGAGACTGTCAATTTACCCCAACTAATCTCCATCTCATTC  
A\_16\_P16191268  
TAATTAGGCAGTTCTAGAGATGAAATGCTTCCAGAATGATTGCACTTGGTGAATTGGATA  
A\_14\_P110760 ACTTGAAAATTCTGTTTTAGCCAGTCCCAAAAAGTTATTTATCATGTCTGGACAACAATA  
A\_18\_P22843013 AAGGAGCATTGGGTGGGGCATTGAAATTGTTTGCTACAGTCGGTTTA

A\_14\_P109188 TTATCTGCTCCTGAGACTGAGCCCAGATCCCCAAATCTAATCTGATTTACAG

A\_16\_P18960482

AATAAGTTGACCTCTCTGTAATTCTGTCCCACCTTTTTCAATTTCTAAACCAGCAGTTCTC

CUST\_1636\_PI426210822

GAAAAAGCTGCATTGCTTATTGATGGGATTCCACAAATGTGATTTAGGTAGTGGTG

A\_16\_P02734440

TTGAAAATAACTCCAACAGTTTACCTAAGGTATCAGTTTGATCACAAGAGTCTTCTGCTG

A\_14\_P112406 ACTATTTTACAAGAGGAAAGATTAAGGAAAACAACAGGTATTCCCTTCCCTCTAAAACA

A\_16\_P00037786

TTATCAACTTCTCCTTGAACCATCTGAAAAAATTACGCTATAAATACAGTGGCTCCCAAC

A\_14\_P102448 CAGACAAGAGGTCTGCCTTATTAATAAAAATTCTGTGAAATAATAAGCCTATTATTA

A\_14\_P115149 CCTCCTTTGAAGATGCTCTTTTTGTCTGTGGTGTCTTAAAAGGATTATTGGTCTTAGA

CUST\_4158\_PI426210822 TTCCAAGAGAAGTTTTGAGAACTTGTCTCTGGTATCCAGGAAATGG

CUST\_4076\_PI426210822 CACCTTCATAGCTGACATCAAATGGATCTCCAAGCCCAAACACTAACAG

A\_14\_P122054 GAAAAACAATAACAAATCCAACAAAATATAACACACCTCAAATCTCTACCACTACTGCG

A\_16\_P17286946

TCAAGACCTTGTGTCATAAGATTGAGTCTACCTTATCTTACACCCTTACCATTTCTAAGC

CUST\_5379\_PI426210822 ATGAAGTCCTCATCTCTGCACTTGTGGCCCTGAGGTTGGCCTCAG

A\_14\_P109464 CTAATTTATAGTTGACGTTGAAGCCACATAAAAATGGTTTTACCGGTTCTTCAATTTGC

A\_14\_P201730 TATTGGTGATACAGATTTCTAGAAGGAAGAAATCCACATCAAATCCAAATCCACATCCAA

A\_16\_P37562150

CACCATTTAGCCATCTTCTAACATTCGATGTCCAATTATATCACCCCTCAAATGCTTTTTGT

A\_14\_P115250 AGAGGAGGCCACATTTTCTGTCCCTGAATTTAACTCTGAATTTATTTTCTCAATCAATA

CUST\_6056\_PI426210822 ACAGTGAGTGCTAGGTGGGTTACTCCAGGGCTCTGGAGCAGCTTC

A\_14\_P116251 ATGGCTGGAGTGATCCGCTGTATGAAAAGATATCTTCTCTAAGAAGAGACAGGAT

A\_14\_P122273 CAGTTCTCCTGGTAGAGATTATATGCAATGACAAATGTAGCAAACATCTCCTATCACCAT

CUST\_3420\_PI426210822 AGACACATCCAAGTGACAGGCCCAAGAGGGCCTCTGAATGAAGAC

A\_14\_P111013 TATGCTAACTGGTTTTTTTTGGCCAGGGAGAGTTTTGGGTTATTATCCCTTTTCTTTAATTT

A\_16\_P41740281

GTCATGCTTGACATAATCCTTGAAAAAATCTAATGTGACATGACAGATAACACAGCCACA

A\_14\_P131590 CAGCATCTTAAATAATACGTAGAATCAGCATGCTGTCTCCAAAACACATTTGCAGCATTT

A\_14\_P129949 ATTTAAATTTTTTGTGGTCTCGTCCCCTCCAACTCACCAAATTCGTCTTTATTCAAAT

A\_14\_P122601 CTTGTCCTCATTCTTGTTAATTTGAGTGCTCTTTCACTCTCCTCCGCCATG

A\_14\_P112323 GAACTGAAAAAAGGATGTAATTACCCAAACAACAATCTGGTCAGGACACTGGAATTTAA

A\_14\_P111963 GAGGTAATGAAGATGTTGTGCTTTCATTTTAATTTATTAGTTCAAATATTTTCTAATAC

A\_16\_P00685585

TTGCTATTTTCTTGATATTTTCAAATAGCAGAATACATGATAAACTTGTAAGTCCACAGA

A\_18\_P10699773

AGAAATTTTAAACATGTAAGGTCCCTATCCCTAGTAATATCTCTTTTAGCAGTTACCCTGA  
A\_14\_P103164 TTAAGATTATACCATCGACTCCTTTTCCACAAGAAGGACAGCCTTTAATTTTGACTTGTG  
A\_14\_P121211 GACCAACACTACTTCCTTGTCTCTAATGTCTTTTAAAAATCCCACAGGCCAATTATCTA  
A\_14\_P106228 AGTGTCTTGGTGTCTTGGTATCTGAGTAGATGTCTGTGAACAAATACACATAAATATGCA  
A\_14\_P138497 ATTTGCATGTGTCTGAATAACACTTGATATGAGTTTCGTCCCTTCACTAACGTCTTTTT  
A\_16\_P03802304

TCCAAAAATAAGTAATGTGTGTGGCAAAAAAGTTAAGAGAATTCAGGGTTACAATCTTG  
CUST\_2457\_PI426210822

GAAGTTAAACTTTATCCATTTTGAATTTCAACATGTCAAAACATTATCATGGTAGTCTAG  
A\_14\_P200644 TCTACAGGGTAGGCAACCGAAATACATATTCAATAAATAACGTTGAAAGGTCCATCAAAC  
A\_18\_P14136106 ATACATCTGGTAGGAGGTGTTACCTGGAAATCTGGGTCTTAAACCACTTT  
A\_14\_P137040 TTACATAGTGAGATCCCCTGTTGTTACTTTCTGAATCTCTGGTGTTTTTAAACTCCAC  
A\_14\_P107651 GGAAGGAGGAAATTCATACCAGCAGTTTTCAAATAAAGAATTGTTCTAATTAAGCGTCT  
A\_14\_P122893 ATTATTATCCTCTGTGACAGTCCTATGCTGGTCTGGGGATAAAAAGATGAAAGATACA  
A\_14\_P126231 TTGTTAGGAGGTGGACCTGTCAATAGGAAGGACAAAAAATTATTATCACCATACTCTCA  
A\_14\_P115197 ACCAGTTCTGGATTTGTCTTTTCCAACATTTAATTTCTCAGATGGCAGTATTTATCATCT  
A\_14\_P120216 CTTGGTATTTTCCAATTAGATATACAAATGGAGCCAAATTCAGTGGGGCCAAATTTTGAA  
A\_16\_P21478965

ATGGCTGCTGACTAAAGTATTGTATTTTGCAGGTGAAATGTATAGATGTTGTTTCAGGCTT  
A\_14\_P114207 ACTAATACACAGTCTTTGGATCAACAATGTGATCCTAAACCATTATCTCGGCAATTTGAC  
A\_14\_P124183 GAGCATGGATGGCTTTTGTGATTTTATTAACAAAAATACTCTGGTCCCAGAACACAGAC  
A\_14\_P124059 TGAAAGCCACTCAGTTATATTGTAGGATTTACACATTTTCTCCCTGGAAAATTTTGT  
A\_14\_P126483 TTTTAAGCCCAGTGGAAAAACAAACATACATTTACAATGACTTAGAACTTTCAAGTTCTT  
CUST\_5601\_PI426210822

AATCATTGCTGCCTTCATTGGAGTCACAGACAGTCCAGGAATAATTTACAAAGT  
CUST\_2598\_PI426210822

CTCTCTTCATTATCCTGAGCATCTTACTTTGGTTTGTGAGGATTCTTCTCAAATAAAACA  
CUST\_1060\_PI426210822 ACTTGGCTGCAGAGCCCACGGTGCTTACCAAGCATTATGAAGTCT  
A\_14\_P128225 TGTATTTGTCTGTAATAATTCCGATTACAAAAGCAACAGCCATCACCATCAGCATCATTG  
A\_16\_P20454292

AGACCATCTTAATCCACTCATTTGTAAAGTGTAACAAAGCATTCTAACTGAACTGGGG  
A\_14\_P105405 AGAGTGAGTCCATCCGGCCTGATGAGTTTTCTTGGAAATCTTTGA  
A\_14\_P129663 AATTTTGTGATGCGATTTTCAATTCCTCGTAAGAAACAAGTGCAACATGGAAGGTTTAGTCAA  
A\_14\_P122048 GACAAATGATGAACTTTCTGAGAAGGTGAAAACTATAGCAACCTCCTTGCTTTCTGTAG  
A\_16\_P15516104

TACAGACTATCCCTCTTCTATGAACTCATTCTTTCTCAGTGTATCAAACCTACCAATCTGC  
A\_14\_P116494 CTGCTGCATCTCTAACTAAGAACAGAAATAGGGGGGAGGACGTCTTAAAAG  
A\_14\_P112369 CTCCAGGTAAATCATGCAAGAAAAAATGTGTGGATTGAACGTGTGTGTGCATGTA



A\_18\_P14134224

GTTTCATAAGTCTTATATGGCTTTGAACAAAGCAAGTCTATTTTTTCATCATAGTATGGGT

A\_14\_P133815 ATGGATACTAACTGTTTCTCTTTTTATAGTGTGTTGGTATTGGACGAGATGGATCAACTG

A\_18\_P13201835

AAGTTTTCCATTCATAACCACTCTTTAGGGACATTATAGGGCATCATTTGGCTTAATTGAG

A\_14\_P134886 CTGCAGGAAAAGTTCTACCAAATCTATGACAGCACTGATTCCGAAAATGATGAAGATG

A\_16\_P18443091

AGCAGCCTTAACCAGTATAAAAAGTCACTATCCTTTTAAGTTACACTCCTCTCAAAACAGA

A\_14\_P105016 CTGAGTATTAGACACGATAAAGACTCTGTGGGTTCTATCCTGACTCATGTTTTATGGG

A\_14\_P112377 GCATACACCTTGCATAATCACAATAAGCCAAAAAAGTTTGTATTTACACAAGGGTAGTG

A\_14\_P111785 CATTGTTAGTTCTATCTTGGCCTTCATTGGAGTGATTCTGCTGCTGGTGGATAT

A\_14\_P135301 AGAAACAGAGCCCCTTTATGTATTTATTTATCAAAACACTCGCAAACCTGACCTCACTC

A\_14\_P122952 TTTTGTATGGCTAGATAGAACAATAACCGAGGATTCTATAAGAGGTCAGGCTTTGTTCAA

A\_16\_P00425845

AAGAGAATGTCTGAATTTTGTATGCAGGTATCTACATTACAGAAGTACTAGACCTCTGATCTGC

A\_14\_P202328 CTTATACCTGCGAATTATGTCAAAATTCTTGGCAAAAAGAAAAGGTAGGAAAACGGTGGAA

A\_14\_P109406 TTTGGCATTACTGGATCCCTCTCAATTATCTCTGGAAAACAATCAACTAAGCCCTTT

CUST\_5584\_PI426210822 GATAGGGCTTTGGCACTAGGCTCTGGTGAGTGAATAGTGGGATTG

A\_14\_P110690 TAAAGGGATGACTTGTTCCTCTTTTGTAAACTTTATCTGTTCACCCATTTTCAACTCAA

A\_14\_P124896

CTGAAGAGAAGAGACCACTGTTAGTAAAAGAAAACAAGAACAGCAATACAGGTCTGAAAA

A\_16\_P20486868

AAGCATCTGAAAAAGGTTATAATAGTGAGTGCTATACGAAGACTGAGTTATTCACCCTGG

A\_16\_P15591080

AAGATACTGGAGATGGAATTTACGAAGAGGGATTTAGAAGGATGGCACCAATTACAAAAT

A\_14\_P133860 TGTTACTTCTAGAATCACTGAACATCTCCCGAAGCATATCATATTCTACTAGTTTTAAGC

CUST\_5242\_PI426210822

GAGAATACACTGAGGCCAGTGTGATTTTCATTCACAATCCTATAAATTA AAAAGCAAACA

A\_14\_P118640 TAACTCAAGGCATCCACATCACTCTATGTCAACATACCTGAGAGAAAACATTTGCTAAAA

A\_14\_P128193 CTGACAGTTATAGAAAGAAAGTGGTTCTTGATGGGGAAGAAGTTCAGATAGATATTCTGG

A\_16\_P30952334

TCAAGCATCAGGTAAAAGGTGAGGTTCTTGGTATAAGTGAATTTTTTTATTTGAGAGA

A\_16\_P01027764

AGTCAAAGTAAATCTTCTGAAGCCTTAACAACATCTCTTTAAATTTTCAGTTCCACCCTTA

A\_16\_P20466795

AAACTCCCTTAGTTCAGTAACCAAACCTTTCACTAACCAATAGTAAAAACATGTGCTCTCT

A\_14\_P106616 CATCAAAAATGGGAAACATTTTGA AAACATGTTGAAACCCATTTATCAGCCTTTTGACCA

CUST\_6089\_PI426210822

GATCAAGCCATAGGAAATGCTGTCTGTGACCAGGATTCATGGATGTTTTTATTTTC  
A\_14\_P108135 TCTCTAGATACAACCTATTATTACTCCTTGTGTGCGCTTCCTTAGAGACTTTCCATATGT  
A\_14\_P109209  
TAAGAACTCTACCACTCAACACTGAAGAGAAAACAAGGCCATCAAAAATACTCGATAACA  
A\_16\_P00685613 CTTTATGCTTGCAAGATGGCCAGCACCTTCACTAGGCAAAGAGTAGTAG  
A\_16\_P00413067  
AAATCAGGGGACATCTATAGTCTCAAACCACAGTATACATATAAGGGTAAGCAATGGATG  
A\_14\_P133819 GTTTCCTTCAGTCTTATAAAGGGGTTGATAACCTGTTATGTAAGTCACAAGCCTTATGTT  
A\_16\_P00685303 GCACCTTCTCTGCACCACAGTTTTTTGCTCACACTCCTCCTATTTTTTC  
A\_14\_P107755 CACGCATTATCTCAATGCTTGAATAGTCCGGCAACTTAAGATAGTTCACACAAGTCATTA  
A\_16\_P20688288  
GGCAACCTTGGATAATGACAATTCCTTACATAGTTTACAACCTCTCAAATTGCTTTTTGCCT  
A\_14\_P110560 ATAATAAACGTTTACAAAATTATGAGACAGACGCATTGAAGACTGCAAGCCCCAAAAAGAA  
A\_14\_P119034 CTTCTTCCATTGGAAAATTTAAGACAAGTTCAACAACAAAACATTTGCTCTGGGGG  
A\_14\_P138786 TATAGAGGGGTCCACGAACAAGTGAAAAGACTCTTTGCTTCTATAATCAAAGAAATGCAA  
A\_14\_P131918 TAGCAATCTAGGGTGCAGTCTATGCCACAGAAATAGTAAACTAATTGGCTCATG  
A\_14\_P112606 CAACGTCTACAAAATGTAATCAGATGATACAAGAATGGTCATGGTGGCATTAAATCCAAG  
A\_14\_P112081 CATTTGAAGTGAAGTTTAGCACTGCTGAAAAATCTAGATTTCCACCATTTCTTAGAGTGG  
A\_16\_P16851531  
ACAGCAACCTGATTCTATATCCAGTCCTTTTTATGTCTACTTTTCAGTTTAACTAAGCCAG  
A\_18\_P22839407 ACAAACATGCTCTCAGCCCTGTTGACCATTTCCCCCTGATCTAAAT  
A\_14\_P116921 ACTTTAATTACACCATAACGACTGTTGGTTGTTGTGTTTGCAGTATGGGGTTTCT  
CUST\_3708\_PI426210822 AGTCCTTCCTTGATGAGACCCAGATCCCTGTCACCTTGACAACATA  
A\_14\_P132402 ACATACATCACAGTTGTAACCTCTGGTTGTTGCTAACAAGTGTGGTAGGCAATAATTAATT  
CUST\_1850\_PI426210822 ACTCACACTCTCGATTTCTGCACACTCTCATCTGAGGTTTTTTCACA  
A\_14\_P131813 CAAAATAAAAAGCCTTTTTCTGAATAACTTCATTGAAGGAACCACATTTTGGGAAATGCTC  
A\_18\_P26794167 ATGATCCTCTTCCATCAATCCACCTCCAGTTACGGCCAGAGAAG  
A\_14\_P201592 TTTTATAGTTGCCTTTCTAACTACTTAGCACAGTTTGAGAATACGTTAATTGCTATTTAC  
CUST\_9184\_PI426210822 TTGCTGCTCATTCCCTTTCTCTAGAAGGACCCCTAAGGAGTTTTTACA  
CUST\_4949\_PI426210822 CTGTGACTGTGGAGAACAGCAAGTCCTCAGTGAGAGTATTTGTCACCT  
A\_14\_P138768 AAAGTGGAATTATGCTGTTATTGTCTTTTTCTGCCAGTTTTAATAACACCTGCTTTTTG  
A\_18\_P22842491 GTTAAATTCTACAGAAGCAGGCAGGGTGCCAGTGTCTGGACCTGT  
A\_14\_P133974 TACTAATCAATGTTTCTGAGAGCAGTTGATATGTATGTGTGTGCATCAGCCATAACTTGC  
A\_14\_P125125 GGTCTGTAGACAAAAATTCCCAAAGATTTGAGACTTTATTGGGGGAAACAGATCACT  
A\_14\_P119829 GCAAAAAGACAAAGTAACTCTCAAGTTCTTCTTGTGCCAACAACTAGACTGCAAATAGTTA  
A\_14\_P138950 CATTTCATTTTTTGAGACGACGTTTACAATCTGCCCTGTCCTTTTTGGAGAAGTTTAGTT  
A\_16\_P03744487  
ATGCAATTGATTCAGAGCCTAACTTCATTTCTTCTAACTTCTAACTGGTTTTCTTCCAAG



A\_14\_P136685 TTACTTTTTGGTCACTTAGGATAAACTCCCTCTCTCTGAATTATTGTGGTTGGTAAATGC  
A\_14\_P126777 ATTGTGTGGCGCAGATTTTAAAAATACTATACTAGAAATTTGGCTGCCAAAGTCAAGCAG  
A\_14\_P132813 TCGATTGAGTGCTTTTTATATGCTGTCAATAGCATAACTGCTGCCAAATTTTATGGAGCA  
A\_14\_P106086 GATGTGCCTGTCCCAACCTTTATCTTCAGATCGCTGATGAAGAAAAAGAT  
A\_14\_P134641 TTTTGATGGCTGTTTTTCCCTTATGCATAAAGTGGGACCAAGAGGTGGTAAAAG  
A\_14\_P130132 ACTGAGTGGTAATGGATGATGCAGTTCAAATAACTAAGGTAAGAGAAATAAAACCAGAAC  
A\_14\_P110064 ATTTTTTAGGGATATTGGAGGGGACATTGAAGGATATTGGTGTGGGAAAATAATATGTTG  
A\_14\_P201998 TGGGATACCATTTTCCACCCATCTTGGAAAGTATTCTCTTTTAGTTACACTTTGGAATTAT  
A\_14\_P112139 TGCAGTGCAAAAGATATGAAACATCGGCTAGGTTTCCTGCTGCAAAAATCTGAT  
CUST\_2729\_PI426210822 AGAAGGTTGAGCGGTAGCTTAGGTGAATGCTGCCTGAGCAGATGT  
A\_14\_P135096 GTGAGATTGGCTTCAAACCAATACTGCCTTTGGAATATGACAGAATCAATAGCC  
A\_14\_P138732 TATCACCACCAAAGGAGAAGCAATCTGCATGGGTAAGAGGGGATGTTTATTTTTTA  
A\_14\_P139005 ACATCAATAAATGTTTCAACAATAATACTTTGAAAACAGCCACAGTGTCCAGGACAGGAT  
A\_14\_P133554 ACTTTAGAATTTCTGCCTAGTAAACATGAGACTCTTATTTAACACTCAGAGTTTTATGT  
A\_16\_P03208242  
TCCAGGAAAGATAGAACAATGGCACTATATATCCACAGAAAACCTTAGAAACACTATTCC  
A\_18\_P13686092  
TGGAAATGGTATAGTCATCATCGTAATGTAGCAGTCATTCGTTAATTTTTATGAGCCACT  
A\_14\_P117508 CTTTCTCTTATTCTAGACTCTTGTATGGTCTCTTATCATGTTCTGTTGTGGTAGGTGCAA  
A\_18\_P22841433  
GGTTCTTGCAAATTACTTTCGGTGACTTGTTCTCATGGGTTGCTTATTTTGAGTTTTTAT  
A\_18\_P14466256  
AATTCACCCGTAAATCCAAGTTTCTCTTCATTTCCATCACTATAACGTCTCCAAATTACAG  
A\_14\_P127502 GAGTGGTATTAAATGTAGATGGATGCCCTTTCACCAGTTACTTAGTGGAATAACAGGATA  
A\_16\_P17466255  
AGGCAATCTGACATACATTCTTACCTACCAAAGTGTATAATAACTTGCTCCAGACTGTTA  
A\_14\_P118918 GAAACAAGAAAGAGAATATGTTTCTTTTAGTTCCCTCAGTCAATTTTCTAAAGCCATGG  
A\_16\_P15753613  
TAAACTGCAACAGAAAATATCTTATGCAAGGACATCTAAGGACTTTGTGATAGGACCTCC  
CUST\_3320\_PI426210822 GCTCTCCTGGTCTGTAGGTAGCATAGATGGCCTGAATGTTTGGTAA  
A\_14\_P104191 TTTGAGTCTATCTCTTCTGCTAGAAAGGACTTCATCCTTTCACCTTTCAAGTGTCTTTG  
CUST\_1376\_PI426210822  
TAACTCACAGAAATAGCATTCAAAGGAGTGAAAACAATGGAAAGCATGCTTGTGG  
A\_16\_P01406910  
CCCGTCTTCAAGATAGGAATGATAAAGTATAGACTGTTGTCTCGGAGTAATGATTAGCA  
A\_16\_P58424604 TTCAAATCGTGACTGTGCATTTGAACTACACAATCCAGAGCAAATATCCTCTCTG  
A\_14\_P120431 TACTTCTATAACAATTCCTTTTCTGTATATTCATTCCTAAACCCATGGCCAAAACAGACTG  
A\_14\_P124435 ATTCTTAGAACAGGCAGAGAATCTTACAGCCATAGGATTTTAGACTCAGTATCCTTGAAT

CUST\_8240\_PI426210822 CAATTAGTTTAGATCAGGTGAGGACCCACTGAACCCCTTGACCCAAAT

CUST\_2174\_PI426210822 GTTTCGCTCTGAGGTTTTTCAGGCTCTTCAGGAAGTCAGATCTAAAACC

A\_14\_P134735 CATTCTTTCTGGACATCGCCTGCTGTCCAAATGACGCGAAATGTATGTT

A\_18\_P14134051

GTGCACGGTGGTAAATTTAACTGATGGAGAAATCAAGCAATTTTCCTGTGATCTTTTTTA

A\_14\_P102077 CACCTAACTGTTGAATGTTATGTTACTGAAGGAATTCATCAGGCTTAAAATAGCACCTGT

CUST\_3500\_PI426210822 TATATCCACATACAGGCCCATATACAATGGGGGAAACAGAACAGAAGAAG

A\_16\_P00685048

TTTTAAGGCCACCATTATTTTCCTCAATGTGGAGAACTCAGTAATGCAAGTTCTCTGTT

A\_14\_P110242 GTGGCTGCTGTAGAAGATGTTTCGAAAACAAGGTAGGTCATTACTGCTTTTTTAGGTAA

A\_16\_P19737541

AGTCAGATGCAAATCCGTAGAACTCATCTTCATGTTTCAGTGTCTAATGTGTCTTGACTT

A\_18\_P18100115

GCCTTCAAATCCTTACTAATAATTCAACCAACACATCTCAGAACAGTAGTATGCAAAGGA

A\_16\_P15954455

AAATTCCATTCTAAGCCTAACATTTTCATAGCAGACACCACTTGAATTTTGATCCCCAAAT

A\_18\_P22839048 CTTATCATACCAAGATACATCAGGTTCCCTGAGAAGGGACAGAAAGGCC

A\_14\_P139350

CAGCAGAGCACAAAATGTTATACTCAACACAATAAAAGCAACAGTGTTCAAAACAGTGTC

A\_14\_P129573 CTTACATCACCACAAGACGGAATACCTCTTTTCTTTTCATTTTCCCAGAATCGATAACATA

A\_14\_P102109 ACTTTTTTCCCAAGGCTATTTGCTCTTATATCTTATTCTGCAACATCTGCCAAAGAATT

A\_14\_P101346 ATGAAAATCTTTTCCAAATGCCGTGATGTTAAAGAACAACCTGCTCAGGGTTGGAA

A\_14\_P118122 GAAAAAGTTCCCTTCTCTACAGATTTGATCAAAAATCCCTGAGCCCAATAAAAGACATTA

A\_18\_P23882257

ATTGGAAATCCCCTAGTTTTAGTCTATCTCCTTCCTACAAGTGTATTATCATGGTCAAGC

A\_14\_P123809 TCCTTTCAGCAGAACTAATGGTTTGTGGATTTTTTTCTGACTAACAAACAGGTCTAACAT

A\_16\_P16826313

ACTTCTGAGATGCCTTAAAAACAACAATCTGACATGCTATTCCAAGTAAGAAACCAGTG

A\_16\_P58424455

ATACACCACATCTATTTCTCAAACACCCCTGTTGGCTGATCCTACAGAGTATCTCATAATC

A\_14\_P120722 GTCAGAATTATTTTTCTAACACACAGACCTAACATCTCCCCAGTTTGAAACTTTGCCATA

A\_14\_P105092 CTACCTCTGTCTTGAGGGTTGAATGGAAATTTAATGGATATGTGAAAGAGTCTATTAGGC

A\_16\_P16859187

AAACATCAACCTAAGCATCCTATAAGACTTGAGCAAAGAATATTCCTACCCCTTCCATT

A\_14\_P105479 ACAATGTTTGTGCAATTGTTTCCAAAACCTTTGAGATAACGAAACCCCTATTCAAATGTA

A\_16\_P39530688

CATTGCCTCAGAATACCATTATGATTTACTCTACCTCCTTAAATCTTTCAACCAATTCCA

A\_14\_P132233 CTGGCAAGATCATTAATGTTTCTTACTCTACCTCCTTAAATCTTTCAACCAATTCCA

A\_16\_P03058135

AAAAAAAAAACAGGCTGAGAGACTATAGAAAGGGATCTTTTTGACTGACATTGTTGTCTGG

A\_14\_P202312 CTCTTCAGAAGGATAGCAAAATCCTCAGTTAATTATTCAGTTGTGCATGCATCCACTTAC

A\_16\_P19294179

GCGTTACCTACCACAATAAAGCAAAGACTGAATCCGAATCCTAGACTGTTGAGAATATTA

A\_14\_P119891 AAGATCATGGGTCGTGGATGACAATGTTCTTCAGCACAAATTCTCTTTCTCTTCATATTT

A\_16\_P02189646

CCACCTCCAGAAAAATTTAAAAATTTAACCATCACTACTTAAAACTCTAGCAAAGCCACA

A\_14\_P134323 CTTTTATCTTAAAAAATAACTGCCTCAGAACAGATGTTCCCAGCCTCATTTGACCT

A\_14\_P113935 AAAATCTATCATTTCTAGAGTCTTGAGTCCGGCGTCTAGGATTCTGTAATTCGAACACTC

A\_16\_P01876342

ATCTGAACATTGATGTCACCTTTCTATAACACTGGAATACCAAAGAAACATTGGGAAGCC

A\_14\_P124588 CTTCTTCCACGCATAATTATAAAGAATAAGAATCGACAAAAATATTTTCTTTCCATAAT

A\_14\_P101203 TTCGATGGAGATTAAGAGATTATTCAAGCCATATTTGACCTCTCATGTTTGGTTCCATAC

CUST\_6818\_PI426210822

CAGTGATTGCAAGAAGCAGCTAAACTGGAGTTTGAATTTTAGAAGCTGCTAGAAGTAAAA

CUST\_9091\_PI426210822 AGACTGTGCAGAATAGGCCTTCTCAGTCAGCAGGCACTTTTTGT

A\_14\_P111826 TTTCTCAGACATATAAAGCATACCAGATGTTGAACATTGATAGTATCAAAGATAGTCC

A\_16\_P00685332 CTAAGGGTTCTGGCAGGCTCTCAGATGAACCTCTCTGGATCTTTAG

A\_14\_P110022 ATGACTTCTTTTTATCAGTGTAATGTTATGGGATATTAGAGAAGGGAGAGATGGGTGCA

CUST\_8071\_PI426210822 GATAGCCATGAGTGCCTGTGGGGGCTTCTGGGGAGTTACAAGATG

A\_14\_P102244 GGATTTTCCAGAAGATGACTTCATCATAACAGACTTCTTTTCATGCACAACAAATGCTTTTT

A\_16\_P16842851

GCAACACTTTGTTTTATTGTTAGTGCCAGATATCTCTAGTTTCTTGTTTCATCATAACCTGC

A\_16\_P30952648 ATTATTTCTATTAAATAGTTATATAATCACTCAAGCACTGATATCTGGCCTAAAATCTT

A\_14\_P103957 AAGAAAAAATCAAAAGAGATCTGAACCACCGAACAGAACCATAATATCTTCTGGCATG

A\_14\_P104142 GCCCTCAAACACAAAGGAACAAAGACAGTCCACTCAGACACTTATTTAATAACTGTAGA

A\_14\_P103427 CAGTCATCTCCTTAGACTCAGATGTTTGAACAAAGAGAATCGTGAAAAAATTTGGCTTT

A\_14\_P123860 AAAATAAGTGAACTATTGTGGATGGAGGAAGAAAAGGCATTTGAACCCTGAAGAATTTT

A\_14\_P125638 GAGAGTATGTGACTTAGAAAAGAGAAGCAGGCAAGGTAGGAAACATTTCTTTGCAATT

CUST\_6986\_PI426210822

TTTATATTACACCAGTAATTTTTAAGTAGTGTTAAAACTAGTAAACAATGTAGGGGTTT

CUST\_3740\_PI426210822 AAACATGATGCTGGGCTGAGCCCTGGGGCTTACCCTGAAGAGCTTT

A\_16\_P35901083

ATCCTGGTTTTGAATTTGAGTTTCTAGTTTACCAACTTTGATAGACACAGAAAGCACAGC

A\_14\_P127609 ATTGTGTTTTCAACTTTTTGAAAATCTTGATGGTTCTAGTTACCAGAGGTGTGTAAGGC

A\_14\_P202538 CTTTTATTTCAATGCCTAAGTTGGATTTCAGGTTGTTTGAGCCAATTTTGCAACACTGTCT

A\_14\_P129791 CACAAACATGAATTTCCCTTCTAAAGACAAAACAGTTGAAGTTTCTCAGTATTGCAATGA

A\_14\_P125602 ATCTTGAAC TTTTATGACAAATATGGAAAATATTTCCCAAATAGAAGAGCAATCGCCGA  
A\_14\_P134913 TAGGGAGAAAATTAATTTCTTCCAGTCATGCAGAAATGAAAATACGTGGAGCCAAACC  
A\_14\_P106775 ATGAATGCAGTTTGTATGGAAGACCTTTGAGACTGAGTAGATGAATTATTGAATGTGAGA  
A\_14\_P130632 TGATCTCCCACTTCCCTAAAAAAGGGAATTTCCATAATTTTGTTCAGGTTTCATTTACCTA  
A\_14\_P132746 TGTGACTGCGTGAAATATCAATACCTTCTCATTTTCAGTGTTTAATATATTAATAACCCAT  
A\_14\_P133174 TTTGTCAAAGGTTTGCTGCAAAGGGCAATCATAAAAACCCAAGTTGCTTATGAATG  
A\_16\_P20404310  
AAATCAACAGAGACAATTTGGACATTGGAATGGCTTGAATTATCCTTAAACAGAACTCAG  
A\_14\_P109311 CTACCAAGACAGTAATGTTCTTTTTCTCTTGCTTCCCATTTGTGGCTGTCTACATAG  
A\_16\_P16994048  
AAACCTGTATGAGCACATGAAAAAATTGCCATAGCATTTTGGACAATTGCATAATTGCCCT  
A\_14\_P111329 TCTTTTTCCCAAAGGAAAATTAAGCAACAAAAAGGTAATAATGATGGTAGGGTCATGC  
A\_16\_P00685186 AGATTTTATTCATGCCTATATTGTTAGAGAAAATCATTATTTTTAGTCAACGTATTAGTA  
A\_16\_P03068450  
ATAGATGTGGTTAGCGATTGAAATCCCATCAATAGGTTTTTAGGCAGTTAGAAAGTCACT  
A\_14\_P135261 CTAATTTGCTACCAATGAAAGAAGATCTGGCCTTGTGGTTAACCAATCTATTAGGTAAGG  
A\_16\_P15322297  
ATGGCTACTGATGTGTTTGAAAAGTAAGAATGAGAACAATTAAGACCATGGTTTTACAGG  
A\_16\_P16119842  
ATTAATTCTCCATGCCCTACTAGAGATAATGTCCAATAAAGGCAGATATCCATTTTCCCC  
A\_14\_P112442 TCAAAATTGGTTTTTGCCTTTTTCTGCTGGAGAAAGTATTGACTATTACCCATTCTCTCT  
A\_14\_P116397 TATGACAAAAATCCATGAAACAATGGACAAGTCTAGGTCAAGTTCTTCTGTCATACACTC  
A\_14\_P129176 CCCGTTGTTTAAGATTTTAATAAAGGTGGGGCAAAGGGTTGAATTGGTCGAAAA  
A\_16\_P37660797  
CTCTTCTCTACAATCTTTTTCTACAACCCATAATCACACTTAAATACTCTTACCATTTGCA  
A\_18\_P10430746  
AAAAACACAGTTTCAGACTTCAATGTTGATGGAAAAAGTGTATTTTACAGCACAAGCCAT  
A\_16\_P19307913  
AACTGATTTGACCTCTTTAATAGCCTACAGCAATAGTAGTATTACATAACAGAAGTCTCC  
A\_14\_P132882 CTTATTACTGATCTGGAAGAGTCCATATTCCGTGCTTTCATTGTTTTCAACTATGGCTTG  
A\_16\_P15680011  
AGTGAAGGTAATAGAGCCATTTTCGATAAGCACATCTACCACTATCAGGATTAAAGGTCAT  
A\_14\_P122310 CTTTCAAAGAACTGAATGAGATGTTTTCTTGAGCAAAAAGCCTCCTTGTAATGTCACAG  
A\_14\_P136614 GCAATCTGTGAATGTTAAAACAAATTTAATGTTCTGGGTGACATATACCACGTAGGTGG  
A\_16\_P15370156  
AATCCATTTGTGTTTTTCATAGAAACCTGAATTTTACATCCCCATGCTAAAGAATTTCCCC  
CUST\_820\_PI426210822 CGACAGCCCAAGGCTGATGGCCGTGTGTTGGTAAGTCCCTCCTGG  
A\_14\_P112233 ACCAAAGTCCTCTCCATTGTCAAAATATGACATGATGTAATCAGTTTCCTGAAATGGAAA

A\_14\_P134158 TCAAAGGAATTCCACTGATAACTTAAAGAAATATCCCCTGGTCAAGTCTAAGAGTTTCTC

A\_18\_P10713293

TGATTGGTAATGTCGTTAGCCTAATCCATAATCAATACTTGGATAATTGCTTCCTTGGGT

A\_14\_P138718 GTAACAATTTGCATGGTTGATACTGGGTTGGAAATCTTGCATATATAACAGTGAAAGGA

A\_18\_P13195835

TGTGTTGCTACATACAGGAGTTAAAAACCTTGATCTACACATATCACACAAATCAGGAGA

A\_16\_P15505086

AACTATACCTTCAAGTTGAAGCAATGTCCATTTTCCAGAGATTTATAGGAAAAACCAGCC

A\_14\_P123293 TCCAGATTTACGTAATAGGACAGTCCAAATGTTTTCTCTTAGTCTTTAAATTCTGGGAG

A\_14\_P125582 CATTTGCACAGTTTTTGCATGAGTTTTGTGGCACCTGGGTATATGTAAGTCATTTTTATT

A\_18\_P14520301

ACCGGATATTGTATTCTTTGAGTAACAGAAACACATGTTTCAGAATCAATCTAGCCAGTTT

A\_16\_P01978806

TCTCCGTAATAGGCTTATAACTCTTCACTTCCTTTAATTCACCTTATAGAATCCACTCACA

CUST\_2610\_PI426210822 CAAGAAGAGTGGTCGGGCCATGACAGCTGTAGAGTAGCATGCAAG

A\_14\_P110541 AATAAATATATTTTTGAATGGAAAGAAGGAAAGAACAGATCCTGAGAATCCTTGGACCCA

A\_14\_P138152 CAGCGTTTCACAACCTTCTCACCTTCTCTTCCATGTCTGAAAAAGACCACAA

A\_14\_P131379 ACCACTTATTCATCTTTTGTGCTGCTGGCTGTTGTTTTGAAGGTTTTAAGTTCTATTG

A\_16\_P37773753

CGTCCTTCAAAAAAAAAATCCCAATGTGTTTATAACTTGCAAACATTTGACTTCATGGCCT

A\_18\_P10749199

CCTCTTGAACAATGAAGTCTAATTTTCAGCAACTCTCATAATATCATCAAACCAACAGT

A\_14\_P117007 TAACAGTTGTTGGGTTGCATCTCATTTCCATGTTATCAATTTAATGTGGCAAGGCAC

A\_14\_P201823 TTACTTCCAACAACCTAAGGATTTAGATCACAACCATTTCTTCCAAAACACTAAGGAAGG

A\_14\_P122971 CTGCTGTTCTCCTTAATGAAAGGAGGGAAATTTTCAGACAGGCAAACTGCTATAAG

A\_14\_P132704 ATGTGCAGTTAGAATCCTCTTGAAGACTAGTAGGATGTGAGGTTGGAGAG

A\_14\_P131394 TCTCCTGTGTAGAGGTCTGGATCTGTGTAAGGTAAAGCATTCTACTATAGTAAGAGAATG

A\_16\_P40854807

GGGCCATTGCTATTATGATGCTGTCTTTTATTAGAGCAAGAAGTCATTTTTAACAGTCCA

A\_16\_P18281524

TCAACTTCTTCCCCATTAAATCATTTACTAGAGAGGAAACAAGACAAACATTTTGCCTA

A\_16\_P00360552

AAGTAAGAGTCCTTATTTGTATGCCCTCACATGTTATCACAAATCCCCAGATTCTTTTTT

A\_14\_P105389 ATTACTGTATAATATGTTTGTGTCTCTAAGAAGAGTGAGTCAGGAACTACCCTGGATGAC

A\_14\_P129499 GAGAAAACCACATGGAAGACTCCCAGGATTTAAATGAACAATCAGTAAGTCTTCATTCTC

A\_14\_P121630 ATTTAACTTGCTGCCTGATAGTTAACCAAGTGCATTGACAGAAATGAGGTAAGTATGTGA

A\_14\_P110845 CCACATGACCTCTCAAACCTTCCAAATAAAACGGAATCTACTTCTTCATCACTAGTTAGAA

A\_14\_P128653 CAAGTATCTGGAGAATACTTTTCAGGGCACAGGAGTTACTATGGATTTTATAATAGTGGCA



CUST\_4829\_PI426210822

ACACCCTAGCCTTTCAATTCCTTTTACTTTCATGGAGAATCATGTATTTTCAGCCAC

CUST\_6605\_PI426210822

TAAAATGGCCAACAATAATAATAATTGCCACAATAGCTTGAGATCAGGGTCTTAATTTA

A\_14\_P123075 CTTAGATGGAGGTGAAGGTATGAGTAGATTTATTCTGAAGGTAGACAAACCAGGATTTAC

A\_14\_P117237

CTCTTTTTGAGATAAATTA AAAAGTAAACAGTGGAGGGGTAGAGAGTAACAACAGTGGGAA

A\_14\_P111581 GCCTTTTTGCCTCTTCTGCCAATGTTAGATTACAAAAATGTAGTAGTATGTTTTGTTGGC

A\_14\_P110959

CTCAGAAGTCAAAGACTGATAAAATGATCAACAGAGGTGCAGTAAGACAAGAACTGAAAA

A\_14\_P102035 AAGTTTATACACTTCCAAACTAAACAATAAGGATTGTCTGACAAAGTATCCAGCAGCGTG

A\_14\_P107659 CTTATCAAAACTCAAGATTTGGATCCAAGTCACAACATATATTTGGGTTTCACCCCAT

A\_14\_P112212 CTCTTAAGAAGAACACGAATATCTTCTGTGATTTCAATCTGCAGTAAGAGACAGCATTTA

A\_14\_P130553 TATAGATCCAGCAGCATAACTAGGTATGAGAACCTTTAGAAAATACTGGCCGTCTTCTGA

A\_14\_P127583 TATTGTAAGAGTAAGGAGACTCAGAGAAAACAGTCATTTTCTTTAAATGTTGATTTTTCC

A\_14\_P139212 GAAACAATGAAAAGCAGAGGAACTTCCTTCCCTATGAAACAGGTAACAAAACACAGT

A\_16\_P41849988

AGGCAGACATTATAAGAAAAACAGGGAAACAATTAGAGATTCTCGTCAAACACTAGTTACCA

A\_14\_P121172 ATCTATATACATGCATAAAGAGACACCGAGAGACGGCAAATGTGCCAAAATGTTTAAAGA

A\_18\_P10418460

ACTTCATCACAAAATCCCATTACCTACACATACCAGATTAATTATATGCATAAGTGGGCA

A\_14\_P120484 AGGAGACAAGGAAATACATCAGATTTTTGAGGACCTTGATAAAAAATTAGCACTAGCCTC

CUST\_1370\_PI426210822

ATACTCTTTGGGGAAGAAAGGCTCGTACATGAACATTTAGAAGATGGATTAGGG

A\_14\_P112947 ATGATGTGATTATCAGTTCTGGTGGCCAATCATATGACCTAATCATATCATGGAATCACA

A\_14\_P129187 CTGTGCTACTAGTGGATTCTAACTAGACCTTCTGTTTTCAAAGGAAAGTGTGAAACTAG

A\_16\_P17053110

AATCAAGCCATGGCTAATGATGATGGAAGTAACACATTTATGCAACAAAAATTTGCACAT

A\_14\_P101889 GTTTAAACATGTAGTCAAAATTCTGGTCAGAGGCATCTTTGACTCCAGTTTTACCATCTG

A\_14\_P122938 TTGTAAAGGGAAGAAGTGGGATAGGATAGTATGAAGTGTATTGCCACCACTTTTATTTCT

A\_14\_P133739 CAAATAGAAAAGTAAAAACAGTCATGGCTTTGAAGTTTATGCATCAACAGAGGTCTCCTC

A\_14\_P104170 GTCATTCTACAAGCATTCAAAAAAATTGAGTGTGAGGAATTCTAAAGGGTGTTCACCTTGT

A\_14\_P121392 GATATGAACTACATTATCCAAAGGAAGAAAGAAATTTGGAACCCCTAGGTAAGTTCCCTT

A\_14\_P112472 ATTCCACTAGAGTGGGTAAATTAATTTCCAGTTTTTTGTTTCATGGTCCGGTAAAAACAAGC

A\_14\_P110861 TATGAAAGAAGGCACTGACAGAATTTATTGGGGAATCTTCTTGCCCTCAATATGATCAA

A\_14\_P114672 AGACCACTCATTAAGCACCCTAAAGGGACGACATTTATTCTTTTCCAAATGTTACA

A\_14\_P117849 GCGGTTGAATATTTAAACAAACACCTTGGGATGTGAGATTCATTACCTGTATGTGTGT

A\_14\_P136225 GCTGTGAGTGAGACATGCTGCAGCCAGTTTCTAATCAATTTTCTCATCATTTTC

A\_18\_P22840541 AGCAGGGAAGCACTGGGTGCAAGACACTGGATTA AATTGAGACAAA  
A\_16\_P16610454  
AAAAAGTCTGTATGGAAAGGATGACTTAGTTGACATGGTTAAAAGGTGTGCTCATTGACT  
A\_14\_P137993 ATACTGAGAGTTTCATTTTAGTTACAAAACGTGTTTTGGGGCCCATTTGTTTCATGTTTCTA  
CUST\_6612\_P1426210822 AGGCCATCATATTTCTCATTGCACATGTTATTCTTGTGATGTGCCAGACATGC  
A\_14\_P130396 GTGTTTATGTGTATTTGAAACTCCTTGATGTTAATAGTCTTGTGTAACCCAGGCATCTAC  
A\_16\_P02396659  
TATAGTTACCTTTCTTTAAATTCCCAACCGAGATGATTTAAGATTCCCTCCTTGCTGAT  
A\_14\_P127342 CTTTCAGACTTAAAGTTGCGGACATTCAAAGACAATACTAATTAGTCATCCAAGAGCCT  
A\_16\_P40328023  
GCTTGTTTAAACACATTGGAGCAGCATTAACTCTCACATTAATCTCAGAGAATCTTGGTT  
A\_14\_P200717 AGAAAGGTTAAATGGAAGAATTTTGGGATATTCAGATCTTTAAGGGCAATCACCAAATC  
A\_18\_P22840502 ACATCAGTCACGTGGCTGTGGAAGGGAGACTTAGGGTGTGGCTTT  
A\_14\_P133848 TTCAGGCTTTTTCTCCACACTTGTATGCCAATGTAGAGAAGATCATTATATTTGCAGTG  
A\_14\_P134012 ATATCCAAAACCTGCTTTCAGTCTTTATCATCCATATATCAGATGAGAGACACCCAAAAGA  
A\_14\_P115660 ACTAAATATACATTTGTCTTCATTATTATGGAACCTTGGGGTTGCTGGTGGTAGGAGACTT  
A\_14\_P115447 TTTGAATCCCTACAAATTTCTCAAAGGAGACACACCAGAGTTTGATTTAGATAGCCTAG  
A\_14\_P139214 CCCAACATGCCTTTTTTTTTCTCTTTTTGAAAGGGATAAGATTGTCATTCCCATTTTCAA  
CUST\_6377\_P1426210822 AGGACAGGGTCAGATAAGGTGGTAAGCTTTGAACAGAAGAAAGCGTATC  
A\_14\_P136186 GGATGAACTTTGTCACTAACTAATATTTTCTGACAATAGGATAGGCTACAGGGAGACTGA  
A\_16\_P18866139  
ATCCAACACATTGTATCATATAGCACCAATAGAAACCTTTAATAGTTGGCAAATCGGACT  
A\_14\_P108054 ATAATCAAATACAGAAATTCCTGCTGGTGGCTATCCCAAATTTCTTCATCCTGGTTAAA  
A\_14\_P109127 ACTCACGTAAGGCACTTATTTACAAGGTATGGACTTAAACAGAATCACAGCATTCTGC  
CUST\_9218\_P1426210822 TAACACGGGTGGTCTCCTCACTCGGAAGACACCAGTTTTCTATTTGATA  
A\_16\_P58424629  
CTGTTTGATTTCTCTATTCAAGGGGATTGAAACAATGATTTGAGGGCAAGTCATTTATT  
A\_14\_P112807 ACCCATGAATATTTTAATGAAAAGTTTCTGAGAAAAAGTTACTGGCAACCTGAGTTACAG  
A\_14\_P113300 GACAAAACCTGGTATTATTTCCCTATCTATTTTTCCACTTGCTCCCGGCAATACTATAAT  
A\_14\_P201647 TCCACATATACCTGAATCATCGGCCAATCTGCTAATTCTTTCCAAAACAGCAATACAATC  
A\_14\_P125984 ACTCCATTATGGAATATTTGGCATGTTTGATCACCATTTTTGTGATGCTATTGGCAAAC  
A\_16\_P00461004  
CTAACCTTAACACCAAAGTCTAGGACAATCATGGAAGTCTAATATCTCTGCCAAGAAGTCTG  
A\_14\_P110543 CATGTCAGTATATCCATTTTAGACTGGCCTTTTCAGAAGAAGAGAAATTTGCTTTTCCTTC  
CUST\_4162\_P1426210822 CTCATGAGCCCCCTCCTTCTCTTGACTCCTCTCCTAATGGTCACAT  
A\_14\_P120412 AAGTAGATGTGATGAGTGCTATGCTAGATTCTTTACCAAATGTAACCTCTCAACTCTGCTG  
A\_18\_P11254157  
AACAGTAAACTCAAGTAGCACAAATCACATCTAGTATTCTTGTAGACTCTCCTTATCAGT

A\_16\_P00164870

TCTTACTGGCTTGGTATTCATAGTCTCTATCCCTTAGTTCCTACTACCTGAAACATTCAG

A\_16\_P01023044

CCTCCATCTACCAAAAAAACTCAGTGTCTAAACCAAAGTTTCATAATGTTCAATTCCAA

A\_14\_P101046 CAACCAGACGAAAACATTCTCGCGTTGGGCTAAAAGAATACTATTAAATACATCATCTGG

A\_16\_P03128287

AAACCAAGTTCACAGCAGTATCCTAAGAAAGTGTCTCACTTAAAAATGCAAAGATGCTC

A\_14\_P121397 TTTTACTCATAAATCCTTTTGTATTTCTGTTTTGGGGACCAAATCTAAGGGTATCCTGTA

A\_14\_P127007 ATTGTTCTAGGGTCTCTGGACTAAAGTCTCTGAGTCTCAAATTCTAAAACCTCTAA

CUST\_2080\_PI426210822 ATTGGCAAGGCCACTGAAATAGTACTGGCAACTCGGTTTCTTTC

A\_14\_P135507 AAACAGGAAACAGCAGAAGTCTGAGATGCTGGATTTGGTTTTAGTAACATCATTCTACTT

A\_16\_P00685404

TGTAACATTAATGTCCAAAATTAGAACAGTATATTCCATTGTGAATTTTAAATTC AACAC

CUST\_5594\_PI426210822

CATCAGAAAGGGAGGCATATTTGATAGCAGGAAAAAGACAACCTTTTTTTCATTAACCA

A\_14\_P200672 CTTCTCCTCAAATTCTAAGTGTCTTTCTTTAGGTTTCCCTGGCTTTGTGAATGGAT

A\_14\_P110793 CTCTCAGGCTTTTTTTTTTAACAGCCTCTGTGGATACAGTTGAATAGTTGACTTTATTGG

A\_16\_P17422751

AGAAATCACTTGCAGACATAATTTCTCACTCAGGCTGTATATCACATCGTTTCTAGATGG

A\_16\_P16708470

AATTGCTTTCAAAGACTTTTAGACACTGTTACATTTAGGATCCAATTACATGCTCTCTGT

A\_14\_P129077 TGATAATGACAGGATCCTTTTTAAAAAATATTATTGATCCTAACGTGGCTGGTTTTAGCC

A\_14\_P116216 ATGTTATTTTCTTAAAAGGTTACTACTGGATTGACCCTAACCAAGGATGCACTATGGATG

CUST\_6499\_PI426210822

AGCTTAATTAACACCGTCTCTTAATTCTTCATGTTATAATCAATTTATTTGGTATTTTTT

A\_14\_P106232 GTGGATGGAGAATGTGCAGTTATTTATTATGCGTATTAGTTTGTAAACGTATCCTCTGT

A\_14\_P126652 CATCTATGTGATTAAGAGTGCCATCTGGAAATTAACCTTTGCACTACCTTTTGGATACC

A\_16\_P00685355

TCAAATCCATCTCTATTGAATGTGCTTTTTCTTATATTAAGATGTAAAATTC AAGGCTCA

A\_14\_P117819 TTATTATCCATTCTGGGTTTTACCAGTGATCACAAATAGGGGAATTATCTGCCCAATTTT

A\_18\_P12763166

ACTCATCAGTGTGATTTTTGCTCTTCAAATCTAGTCCTTATCTATTTATCAAGGCCACT

A\_14\_P115896 CTGTGTCACAGCAACAAAGAAAGAGTTGTTTTAGTAGTTTGTAAAACCATGATATGGTT

A\_14\_P111208 TTTGCTTTTTAAATCCCTAACTAATGAACCTTCAACGGTGCATGCGAACTTGAAAAACTG

A\_14\_P124634 AAATAGAAAGCATAGTCTTTACCATGGACCACTTAGGGTTGTCCTCTTTGCTAGATG

A\_14\_P127600 CTTCTCACTGTCCTTGCAGGCTCAGAAATGAAGTTTTTATAGTTTTACATATATTCATC

A\_14\_P125484 CTCGCATTGTGAATCTGACACAAGTGCTTTAATGGTTAGGAACAAAAGTATTTCTCTT

A\_16\_P16594889

TATATTGCCAGTTTAACTTTCAACCTTACTCCTTTAAGCCACTTTCTATACTGCCAACA  
A\_14\_P102188 TAATCCCAATTTATTTTACTTCTCCAAGAGTCAGTGGGGTAGGTGGAAGTATTTGTGA  
A\_14\_P130574 TTGATGTCTTTTTCCCAATTCATTGCATACTGGTGGAAATTTGGTCTTGAACAGAAAT  
A\_14\_P104353 GATCTTCTTATGACCTCTGATATCGTGTCTCAGGGTAGGATTTAGTAGAATTGAGAAT  
A\_14\_P108948 CTGACTTAAATGTGTTTCCTTTGATAAACTGTAGATGGTTGTTGTAACCTTTCTGCAAAC  
CUST\_2793\_PI426210822 TTAGGGAACATTTCGAGCAGTTAGAAAAGCAGAAGTGACAGGACTTTGGA  
A\_14\_P103757 GACCAAGAGCATTTTGGTATTTGGACAAAATTCCTGGATTCACCTTTCCACTATGA  
A\_14\_P110257 TCACTTGGACAAAGAGACAATGTGTGAGAAAAGTCTCCATTCTATTGATGAAGCAAAAAT  
A\_14\_P125122 GTGGCTATATGTTATCCAGAAGAGTAACAGATACCCCAAATACACTTGCTAACACAAGAA  
A\_14\_P133900 AAATGTATTTTCCTTCAGAAAGGTAACACAAATAAGTTTTCCAGTAGCCATTTTCATGC  
A\_16\_P01311920  
AACCAATAGTTGCTTTACCTAGAGATCTTATTGTCAAGAGGAAGAAAAGTATACAGGCTCG  
A\_16\_P30952655 GTGCATATAAACTGTGGGTGTGGCAAGACCCCGAAGACATTTTCACAT  
A\_14\_P132072 TCATTGAAGTTTACCCAAGGACTCTCATGAAATAATACAAACTTTTGTCTCTGGAAGA  
A\_18\_P13953082  
GCTTTCGTTATCAGTAGACCAATTTATCCAGGTAAAAGCAATTAGCATTCTCCAGTGAGC  
A\_16\_P18251059  
GTCATGGTATTCATAGTGTCTACATCTTTGAAGTTACCCTTCTCTGATTACACACACCT  
A\_16\_P19417415  
TTACCAAGTCTTACGAAACCATCCTGTCTATTGTTTCCTAGAGTTAGCCACTATTTCAA  
A\_14\_P125998 TTCAACTTGATGCAAAGCAGAAAGGAACTGAACACAAGGATTTCTAAATTAGATTATGG  
A\_14\_P126355 ACACAGTGATGCTCACCCAATTAATTTTCACTGGCTTGGGGATATATTTTTTTAAGAAG  
A\_14\_P118314 TGGGTTTCAGTATATTATTTGTAGGGCTTCAAACACATGGGAAATGGTTTGTAAATCCA  
A\_16\_P16698512  
AAGCATTGCTCGTCATTAATAATGTCACATGACCCAATTGAAGTTACAATTCACTTGTCC  
CUST\_3705\_PI426210822 TTTTTGTCATCTTGTGTGGCAGTGGCAGTGCTCCAGCTGATCATT  
A\_14\_P125710 CTGAGATATTTGCTCACTGGTTTATTTGCAAACCAAGAAAGCAGTTTTTAGTTGCGTATG  
A\_16\_P17426458  
CCCCACAGATGTTAAGTATGGCTTACTCATATCTTAGGAACTCACAAATTCAAGTTTTC  
A\_14\_P111450 GTTCTTAGTTTTTGCCGTTAGATCCCTTCAAACCTGGAAGTTCCTTACAATATCTTTCTCA  
A\_16\_P03579393  
AGACCCATGACTGAATCTAATAGGTGCCTAGTCCATAGTAAATCAGGCTTTAATTTTAGG  
CUST\_8806\_PI426210822 AAAGCCATAGGTCCAAAACCCGGCGTTCCCTCCCACCCAACTTTC  
A\_14\_P114925 AATGCAGACATGTATTTTTTTAAAGGTTAACAATACCCTTACTATGGCAACCCCATCCAA  
A\_14\_P126017 CTATTGCAGTTATTTTTATTACTATGAGTGGGATGTTTAGGGACTATGGGTGGGGCT  
A\_14\_P121842 TTTTGTAGGACCATCTTGGTTTTACCCAGACATAAGACATCTGTTTTTCATAGGCTTAACA  
CUST\_752\_PI426210822 GAGATCCCAAGATGAAGGTGGCTTTCAGGGCAGAGGGAAGGGAGC  
A\_14\_P126364 TCTCTATGTATCTTACATAACAGTGGAGGTGGTTTTGTGAATTTTGTGAGAATTGCAAAGG

A\_16\_P16191982 CTTGAGACAGATCCTCATACTCCCCATTTTCGTCTGTTTTGTTAGTCAGCG  
A\_14\_P107263 GCTCTTCCGATATTTTTTACACTTATAAACAATAGGTGTTTACTCAGATGCCTTCTCTC  
A\_18\_P17039634 GTCTTCTCTTTCCTCCGTTTTTTCACCTACCGTTTCTATCTCCCTCCT  
A\_14\_P121107 GAGACAACAATTACATCAATCCTCACAAACCATAACTTAAGACCCTTCCCTTTGGAAT  
A\_16\_P17099875  
AAAAGAACAGCCTATCTTTATAATTTGGGGTAGTGAGAGAAATAACAGAGCCCTTTACCT  
A\_14\_P138776 TTCCCAGCGAGTGGAAAACATTTGAAGAATATTATCTCGGGTATAGCAAACAAAAAGTT  
A\_14\_P121552 CTAGGTCAGAAGGAAACATACCCTCTCATGGTTCATAGTATTCACTGTATGTATGCTAG  
A\_14\_P109211 CATGAGAGAAGTTATCAAAAACAGACCTTTTTTTGGTAGACGGCTGAAAGTAGTTTCTGA  
A\_14\_P126900 CTGTGGAAGGGACAACCTGTTTGTAAGTATTCCCAAAGAAATGGGATTTTTTTTTATT  
CUST\_9709\_PI426210822 AAATATGCTTCAGTTGACTCAGGGGTGAGGTTCTGGAACCTCCCT  
A\_14\_P125787 CTGTAAACACTTTGACTGAATCAACGTTGAAGAATGTCCTCAAGTGGTAAATGTGC  
A\_14\_P104074 TGACAGAGTAGTGTGTTTTTCATTTTTATTCTTTACATGTGACCAAACAATAGAAAAGTT  
A\_18\_P22840894 TTTCTTTGACCTTGTTGGAAGCCATGTGCCAGGTGGAAAGAC  
A\_14\_P200176 CGTCACACCGTTATGCATTACTCTGTGTCTACTATTATGTGTGCATAATTTATACCGTAA  
A\_14\_P130872 GAGAGATTCAACGTGTATCTTATGCCTACACCAAACCTGGATATTTATGGTGAATGCAC  
A\_16\_P01907576  
CCCTTAGGTAGAAATTAACCTTCCCCCTTTATGGATCATTAAAAAATGGTAATAGCACCT  
A\_16\_P00448467  
CCTGTTACAGGCTCTATTACAGAACTTTGAAACTGGTATCTTAGGACTATGCTCTCTAAC  
CUST\_1563\_PI426210822  
GAGGCTTAAGGAATAAAAAATGATTGGGGGAGGCAGAGAATATGAAGGAAATGTC  
A\_14\_P137488 TTGAGTCTTGTTGCAAGGTGTTTACAGGGGGGAAATCTAAAATGAATTCATTACATAAA  
A\_14\_P133283 GTCATCTTACTTGAACCTCACAACAACCTCTTTAAAGCATTTAGGACACTTTCCATTGGTA  
CUST\_1550\_PI426210822 TCTCAGCAAACATTTAGATTGTGTGACAACCTATGGCTGTTGTTCCCTCCAACA  
A\_14\_P105266 CTTTTTTAACACTGCTTAGGAGTTGCTAAATTGTGGGATCAATCAGGGAGTTATTAGCAT  
A\_14\_P113083 CAGAATAAATTGCACAAGAGAACAAATAATCTCTGCTGAGTCACTCTGACTAGGAACAC  
CUST\_6117\_PI426210822 CAAAACCTGTTGGCTAGCTGAGGGATGAGAGCTCCATCCATGAAAAC  
A\_14\_P105463 TTCCAGAATCTCTTCATTTCTTTGCAATAACTGAAAACCCAGAAAGACACCATTTA  
A\_14\_P125954 TCTAGAAAATATTTATTTTCAGCCAGGAACTTTAGCAAACCTGTGGCAATGATCACTGGGA  
A\_14\_P136243 CTTCCGTTTCATCTGTGCTATCTCAGTCAATACTGGGATACTTGTAGGATTTTTATTTTT  
A\_14\_P117333 GAGAAAATAGCCTAGATCTTTTCACCGATTTTCTGCGTCAATCCTCTTTGATTAAGTATC  
A\_14\_P101841 ACTGTTTCCCAAAGTTTCTTGAGCAAAACACGTAGTTAAGGAGGTCTAAAAAATTGATG  
A\_14\_P125169 GTTATCTCACTGCCTCAACAAAGTATCTTGTGCAGAGTGGGCACTCAGT  
A\_14\_P134900 TAGAATGAATCTGCGTGTCTATTTTTAGGTGGATGAGTTGCTATGTTTTACCATTACTAT  
A\_14\_P110987 TCTCTCTCTAAACCAAGATTTTGTAAATGTTCTGCAACCAAACAAAGTATGGCTGATGG  
CUST\_10062\_PI426210822 AGACTCTCAGAAAAGAAAACAATTAGGCAGGCACCCCAAAGGAGTTC  
A\_14\_P115797 TCTTTGATTGTAAACTAGTTCCTTGCACTGATACATATCAATTTTTACAGTTTGTTCATT

CUST\_7453\_PI426210822 ATGGTAGAGACCCCTGGATGGAGCTCCATGATGTGGGATTTACAT

A\_14\_P120853 CCAATGGAACATAAATTCTGAACCAGTTCATTTTCGGCACATCCTGTTTATACGACTATTTA

A\_14\_P114090 CTAAATGTGGCCTTGGCTATTGCATCATCTCAACTAATCCATATCCCACTCCATAG

A\_16\_P02186095

ACGTGATGTGCCACTATATTTTACACGTATCTCTTGGTATGCACTTTTATAGACGCTCT

A\_16\_P38141098

TCCAAGAATAATTCATGCTTTCCAGTTTAATCACCATCAAAAAGTCTAACTCATGCACCA

A\_14\_P104409 ATTTTATATTAAGACAGGAGAGCATAATTAAGGGAGAACAGTTTTATTAGCATCACAGG

A\_14\_P104896 TTGCAATCTGTCATTTTCAGGTATTTGACCTGTCCAAAGACGACTTGATACCTCTATAATG

A\_14\_P120980 AAGACTAATGTTGCCTGTTTCTTGCATATAGTTATAGAAATACCCTATGCACGTGAGAGC

A\_14\_P133508 ACTTCTTGACTTTTCTCTTTTGCAGTTTAAACAGTGTATGCCAGGGAACACACATTCT

A\_14\_P202467 CTGTGGGTGGAAAAAAAAAATATTTCTAGGGAAAAGGTTTCTGATAATTTAACTGAACCC

A\_16\_P18357437

AAAAGTGAGAAGGACGAAAGTAGGAAAATGAAAATTGGACCTAGAGTAATACCAGCGAC

A\_16\_P19227521

AAATTCAAGTATGATGACACCATTTCATATGACCAGGAGTGATCTACTCAGTTCCCTCTA

A\_18\_P13308812

GTCCCCAAATTTACTGTTAACATGCCTTACATTGTGTCTAGACTTTGAAAAGTGCTTTA

A\_16\_P02352941

ACTCAGATGACTTCAAAGAATTAATAAACAGAGCAACTAAAATGTAATGTCTTTCCACCC

A\_14\_P130335 CTAATTTCTTTCTTAGGAATTGAGGCAACCTTAAGATGGTATATCATGATGCTTTGTGAG

A\_14\_P130481 TCGAGAGTTATAAGCCATTTACCACATCTACATGGATGCCACTTCTCCTTAAAGCATATA

A\_16\_P18807576

CTCAGTGCAATTCAAGTGATAACATCCTTTGTTTACATGTTTAATCCGATTTTACCACGG

CUST\_1621\_PI426210822

ATTAGAGAGAATTTCTGGGAGGTTTATTTATTTTTGTAGATGAGGCTAACAGAGGTAGT

A\_16\_P18995611

AGGGGTTCTATTTAAACAGATAAGCATGCTATTCCAATCATGAAACCTGAAGAGAGTTA

CUST\_4536\_PI426210822 ACTTTCCTTGACACAAAGCCTAGGCCTTTCCTATCAGCCTGTCT

A\_18\_P12499990

TCCATTACAAAACAACATAGAGTATACGTTCTTAAGCATCATCTGATCTAGACAGCCTT

A\_14\_P121349 TTGAAAAGAAGATGATCTAACTCAACTGGAAATCCACATTAGTGGTGAACACTGTCTCA

A\_14\_P126731 AATAGGGTATATGCCTATTACCTGCACCAAGGACTTCTCAATGGTCATAAACATTTCCA

A\_16\_P00559874

AAAAGTAGGATCTTCATCCCATAATGGAAACAACCATAACTGTATCACATGGAAAATCCC

A\_14\_P126170 TTCTCAAGCAGAATAGGTGAACAGATTCTAAAAAGCCAACCACTTCTGATCATATTTGTC

A\_14\_P111048 ATCTTTGAGAAATCAAATCACTTTGTTACCTTGGGTGGGTCGATATGATACTCGGTAGTA

A\_14\_P133218 CAACGCCATTCGTGGCATGTTGGCTTTGCTTGCATATATTTACCTTTTCAGAAAAT

CUST\_4007\_PI426210822 GTTTTGTTGAGTGCCCAGGTCATCCTGGTAGAAGGGAGACAGTGA  
A\_14\_P105135 CTGTGAAATGGGGGTGGCAGTTAGATTTTTATTCCTTTTAAACATAAAGGAAACCTAGAT  
A\_14\_P102222 GGAAGACCCCACTACCATCTTTAGAGCCACTGAGTATGCAACTATTAATTTTAAATTTAG  
CUST\_646\_PI426210822 TGACATGACGGAGCTTTCACATCAGAGTTCTCACTTCAGAGCTGC  
A\_18\_P22839757  
TTGCATGGAATTTTAAACAACCAAAATGAATTTTCGTCAGATAGTATCTACAAGAAGTCAGA  
A\_14\_P137953 CCTCTTGAGACAAGAAGTGTATCTTGTCCACAGTTCTTTAGTTTGTAAGCAAAATCTTCA  
A\_18\_P14175758  
AGAAACTTCATGCCATTTGACAGTTTTCTTGAGGTCATGAGCAAATTAACCAGTCAAG  
A\_16\_P00394072  
AAATGGGCCTCATAATTAGCATAGGACAATTTTTAAGCATGCTAAAACCTCTCATGTTGCA  
A\_14\_P130814 CGACATACATAATTCTTTCCTTGTCTCATGCTGGTCATTTTTTCCATTTTCATGACAGGTT  
CUST\_9577\_PI426210822  
AATAGCAAATTAACCTCTTCTACTTATAATAAAGGTGCAGATGTACTGATTAGACATGCTG  
A\_14\_P105936 ACTTCACTTATGTAAATGTGGATACCTTTTTTCGGGACCATTTTCGATTACTTTTTTCCCGAA  
A\_14\_P131405 ATACTGCAAATACTTTCACAGATTTTTTACCTGTCCTGTTTTTGTGTTTTGTTCTGCTCA  
A\_14\_P123174 CTGGAGACCTTGGCTATAAAGAATAATGTAATAACTGTGTTGCAATGTGTTTTTCTCT  
A\_14\_P117595 GTGATCCTTTGTCTCCTTTGGCACCCATTTCCACCCTAAAAGACAAAATATAAATAGTGAA  
A\_14\_P119552 CTTAGTTCTCTGGAATATTTATCTATAACCAGCATGAAAAAGGGGATCAGATCCACCATT  
A\_16\_P15534561  
AGTCAAATGTTGCTTTTAAACCTTTGTTCACCTTGCATTTTAGCATCACTCTAGTTGGAAGA  
CUST\_4498\_PI426210822 ACATAGATGCAGGGCACCTGCAGCTTTGTTTCAGGAGGAACTCT  
A\_14\_P105060 CTGGTCAAATTTGTCCAAGGGTCAGGAGCCAAAAAATTTTGTGTGAAAAAATATTTTC  
A\_14\_P114300 GGAGATTTTTTATCTGTTAGAATTTCTACCTCCTCTCCTATTGCCAAAAAGAACTGTCC  
A\_14\_P101460 CTTTTTTTTGAGAAGGAGAAGACTGCATGACTTTCCTCTGTAACAGAGGTAATATATGAG  
A\_14\_P138907 AGACTGTCCTTATACTGAAGTCAAAGAATAAAGATGAGTGATTTTTTTCCCCACACACTG  
A\_14\_P137976 GATTTTGTGGCTTTCTTTCTCGAGCAGCAGAAATCCTCTTGCCTTC  
A\_14\_P134101 CTCCTATGGAGTGTCAAGAATCATGGAAGTAAACATCTGAGAAACCTGTTGAAGATTATT  
A\_14\_P201415 TTACTIONTATGATTTAAAAACAACCAACAGAAAACATCCCCTGACTGTATGGCACTCTGTA  
CUST\_277\_PI426210822 GCTGATGGAAAAGGGTGGTTTTGTGGATCGCAGTACTCAAGCATTC  
A\_14\_P131585 TTACTIONTATGATTTAAAAACAACCAACAGAAAACATCCCCTGACTGTATGGCACTCTGTA  
A\_16\_P01071952  
TGTGTCCAGTTATACACCTTTACTTACGCTACTTGTATATCCAAAGATTTGGCATTGGT  
A\_14\_P200915 CCTTTTAAATTTTTGTTAATCATTCCCAGCAACTTATTCCATATGTGGAAGAAGATGGCTC  
A\_14\_P113817 CACACTCATTTTGTGTTTTGCTCTGATCTTTTGTGAGTCTTACTTTGATTTGCTCTAGTAGGCT  
A\_18\_P16125367  
TCCATTCAGATATGAAAAAAAATCCATTGTAGGAATTACCAGGGTAAAATAGATATTGT  
A\_14\_P122022 GTCCATGGATATCTTGTTTTTTAAAACGAAGATTTAAAAAATTACGGCAATGGCAGAGATG

A\_14\_P115972 GAAAGTCTATTTCACTCTCTTAGACTTCTTAATCACCGATATTTGCAAATAGGTTGCCAC  
CUST\_9149\_PI426210822

TAAATTTTAAAGGACAGTAAGTCCCAAACCTGTGAGAACTTTTATAGGCAACATCCTCTT

A\_14\_P139227 GGTGATCAGCATGGAAACCTAGTAGTGCTCTTACTCTGATCAATACATTGTCTGAAG

A\_14\_P111789 TAAGAAATCTGGAGCAATTTACACCAGATATAAGTGCTGCTTCTCACACATGAACACAAT

A\_18\_P13604272

GGCACTTGATCAGTTAAAACGTAAATCGTAAGCCAACTACTTTCTTTTGTGACCAAACCT

A\_14\_P113686 TGCAGAAATAGAAGAATATTGCATGGAAAGTGTTATGTAAGGTAAGAAGAATCTTGGGTAA

A\_14\_P120187 TAAGGATTTAAAAAAGAACCCAACCTTTGGACAGAGAGTCTGGAAAGGGCAAAAA

A\_14\_P128354 CTGATGATGTTGCTTTTCTTGGACCATACTTCATCATCATCCATTTTTAATTCTCCATTG

A\_14\_P100192 TTAGAACTTACCCCTTACCTGTTGAAAGGATCCTGTAGAAAACACTCCTTC

CUST\_8392\_PI426210822

ACAGATTTTTCTATGCTTTTAAAAATCGGTTATTCAACAAGCTACATAATTGTTTAAAGG

A\_14\_P102498 CTGGATTTGGTTGGTTGACTCTTACGATGAACCTTCATTATTGTCTGAGTCAGAG

A\_14\_P123008 TATAATTTGACTGCTTCAATCCATTGTAGTGGTAGACAGTAAAAGATTCTGGACCACTGG

CUST\_868\_PI426210822 TGAAGTTATTGCATCATCCACTCAGTAAGCCACTGTATATGGGTGCTGG

A\_14\_P120818 GAAGGATCAAAAGTGAAATCTGGTGTGAAGAGCGATCTTTCTACACAAGTGCTG

CUST\_4219\_PI426210822 GAGGAAAGAGAGAATGCGTGTTCTTAGGCCATGTTGGATGCTGAATG

CUST\_793\_PI426210822

AGCCACACAGAAAAGTATAATAATATGATTTTCAAAGTGAGCACTCAGAGAGCCCA

CUST\_4625\_PI426210822 AGAGTGAGTAGAAACCAGAGTGGTGATAATTTCTGGTTCTCCCTAGTCATCT

CUST\_4956\_PI426210822 CAAGGAACTCTCAGTGTTTGTCCATTTCTTAGGAACATGAGTGTTTTTGGGA

A\_16\_P20919612

AGATCAGTGTTGCTTCTACTGTAAACCTTAAGCCATCATATTATAGTCACTCCTTGAACCT

A\_14\_P118682 ACTTCCAAGTAAAATTATTTGGTCTTCTCTACAACCTCTCTAGGGTATGTAAGGTGGGTAT

CUST\_1198\_PI426210822

CAAGCTTTTGAATTTCTTAAAAAATTTGGTCTCTGGTTTGGCACTAGGACATGGCTT

A\_14\_P101813 CTTAGTTATGACTCCAGATCCTGAATTTCTTGTCTCAGAGGCAGAAGTGAGAAAAG

A\_14\_P124536 ACGGTAAGAATTATAAAGAAATCTGCATGTAAACAGAATTCCCAAGAATATTTGGCCGT

CUST\_5140\_PI426210822 ACTCTCTGCGCTCTTCCCTTCTATGGGCTCACACGGGGAAACAG

A\_18\_P14133113 AACAAAGTGGACAAAAGTCGACTCTGCTCTACCCAGTGTTGCTCTAACT

A\_14\_P136328 AGGCCAGGACCTACTTGAAGGTGAAGTCTTCTAGTTTGAATTTAAAAATTTCTTTCTGAA

A\_18\_P13891424

TTTATCACTGTGACTACAGATTGCTACTCTACATCACATTTTTTAACCAATCCTGTCCTGG

A\_16\_P15505308

ACCAGAGCAATGATGAAAATGAATAAATGGATAGAAAAGACTTGAGACCTAACTTCAGCC

A\_14\_P138351 GGAGCCACAAGATTTCTTTATACTCTGCTTTTGGAAAAGATGATGACACTGGTCAAAAAG

CUST\_5404\_PI426210822



ACACAAAATCCATATTTATCTCAATGCAAAAAGAGATGTGGTCATCGAAACACTGAATGCA  
CUST\_2246\_PI426210822 CTTCGAAGGCCCATCAATGTGCTGTGGGGAGATAGGACACGTTTA  
A\_14\_P118856

TGAAAAGTAGGACTACAGAAGAGTGATTGACGTGGAAAGTAAATACCAAAATCAAGAGGA  
A\_18\_P17060539

AAAACCTCCAAGTTTGAAGCCTCAATTTTATGCTCTGTCAAAGAACTAGTTTTTCACCC  
A\_14\_P135412 CTAGGTGTCATTACAGTGATCATCATAGGCTTATGTCTTGTCTGCAGGTAAGAGGATTTA  
A\_16\_P17433499

CCAATGACATGAACCTTTTTTATTCTACACCAAATTTTGCCATAATCTGAGATGTCTC  
A\_16\_P38365367

AGGCTGATGTTTTTTGAAAACCTTTTCTGTGCACTAATAAGTCAATATGAGTAAGGGCAGA  
A\_14\_P136816 TGCAGAGCAACTCTGTGTCATGACTATGTTATGATAIGTATATGGTTGTGTTAIGGTCTA  
A\_14\_P139041 CTCTCTAAGGCTGCACGAGAATGATCAGTTTAGGGAATAAATGTTCTAAATGTCTAACTG  
A\_14\_P126886 CTCAAACCTCTCATTCTCTCTCAGTATACATATTTGTTTATACATGAGGTACATACTGCT  
A\_18\_P22842469

ATCATTTAATTATATTAGGAGGTCCGTCATTCAAGTGCTCTTGTA AAAACTGTCTTGCCCTT  
A\_18\_P16384128

AAGCCAAGTGAATGTTGATTCTTACAAGCAGAAAAGTGAAATACACATGAGAAAAGTGCTC  
A\_16\_P16958591

AACCATTGATACACACTGTAGTCATCAAAAAGTCAGATCACACAGTCTATTCTGCATAGG  
A\_14\_P103812 ATATTTGGAAGTCATGAAGAAAACTGAACAGCATTACCGAGGAAAACTTCTTACTCCT  
A\_16\_P17309286

AAAGATAAAGATCCACTAACCTGTTCCATTACACATTGAAATCTGTTGGTCAAACCATGA  
A\_14\_P119307 GGAAAATAGGAATGACAGTGTCTTCAATTTCTTCTGGGTGTAATTTAGATCTGTGCAAAG  
A\_14\_P107252 GAGTTCAGAATGAGATTGTATTCTATTCCCAAACACTGTCTCATGTTATCAACTGGAAA  
A\_14\_P116185 TTCATAAGATGCGCCTTTAAGATATCCACACGAGGTTTTCCATCATTATCAAACACTTCT  
A\_16\_P17817947

TGGATAGTAACCCATTGACCAGTTAAAGTTAGCCTTACTCTTGGAGATTCAATAAACTCA  
A\_16\_P02397516

CTAGCAGATAGGATTCCATACTTTCTAATTCTAAACTGAACTTCTGCATCATACTGGT  
A\_14\_P125585 ACTAAATTTCTAGGTAACCAGGTATCAAATAATGAATCTGAGGATTCTGAAGAATGGA  
A\_16\_P01770953

AACCACCATGCAGATAATTA ACTACTTAGAAAATTTGATGACTGCTAATCCTTTTCTCA  
CUST\_7360\_PI426210822 ACTGGATTA AACCCCACTGAAGACAGTGGCGTGGGATGAT  
A\_14\_P124935 TGTGGATGTTGTTATCAATCCAGTATCTCTGCCAACCTGTAATTTGGAAA ACTGTAAATT  
A\_16\_P19929382

AATCTTACTCTGATTTCCCCTAGACTTTAGTAAATCTGAAACTCTCCAAATCTCAGGACT  
A\_14\_P200335 GGCTGACTTTTCTCTCTTTTTTACTTTAGGTAATTAAGAATCCAGTATCAGATCACTTTC

A\_14\_P129217 GTCAGTGATTCAAGGATATTTGGGAGATATTTTTGTCTCAGTGTATGGGAGTTCAATATC  
CUST\_10134\_PI426210822

GCTTTCCCAAAGCTGAGATGTTAGCAGACACTGGGAGCCATAATTTAAACTTTAT

CUST\_2906\_PI426210822 TTCTTCTTCTCTACCTGGCAGGGTTCAAGCCTATGTACAGAGAAGG

A\_14\_P132845 GAGAGGGTGCATATTCATTAATGTAAACTGAAGCAGGTAAGAGCAGGGTATTGCAG

A\_14\_P117258 CATCTAAAGAAATATCTGGCTGGGTGGAATATTTTTTTGCTTCTGTTAGACAGTAGGTTG

A\_14\_P121454 TCATAAATAACCAAGAAATGGGTTTCTACAAAGATGCAAAGACTGCTGCTTCTGGAATTC

A\_16\_P16191269

TGCGGTATGTCTGTGATTGTATGTTTTAACATTTTAGAGAAATCTGAAAGTTTAATGTGC

A\_16\_P00685025 AAACCTGCCTCTTCTGTCTTCTGGGTGGGTCTTGCCCTTTCCTG

A\_16\_P01623315

AAAACACCAAACATTCAGAAACAAAGTCAGACTAATGTTAATAGCAAAAATACGCAGGTA

A\_14\_P132274 CTCTGCAAATTTGGAAGCATCCCCATAAGGGAAAAAGTTCCCATATATTTTCTTAAACTC

A\_14\_P201680 CTAAGGTTGCTTTGTGTTTGTATATGGGGTTTTCTCTTATTTCTGTTACAACAGAAAGTC

A\_14\_P102935 CTTATTCAGCAGTATCACATCCCTGCCTTGCCTTACTTGGTAAAATTCCTGTATTTTTAT

A\_14\_P124486 CAGGTTGACTGTTTTTCTCAAATTGTATGAGTCCCTTTGAAATTTGTGGTCACTTTGG

A\_16\_P15965584

AAGACTGTGAACTCGAAAAACAAGAGACTTTTAAGAACTACAGATAGTTCAACCTGGC

A\_16\_P40082794

CCACATCAACACCTTTTTATTCCATTTGTTTCGCTTCTATTAACAGTTCTTACCTTGCAAC

A\_16\_P00595353

GGAAATGAGAGGACAAAGATTGATAGTAGAAAGGACAGTAATAACACACTACCTAGACCA

A\_14\_P109321 ATATGTTTTTGCCTTTTTAGGCTTTGGCAAACAAGCCAAGATTGACTTTGAAGAACAAT

A\_18\_P26791468 CAAGCACCCCTTTCAAACACAGAATGCAATCTCTCTGCTCAGTAACGAT

A\_14\_P104484

AGATTCTCATGCCAAGGATCTGACTGAAGGTCAAGAAAAAAGCATAAAATGTAAAAGG

A\_14\_P112766 GTGTGGGGCAAAGAAAAAACTCTCAGGATCATTGGTATGTAGACTCTAATTTTAAGTTT

A\_14\_P134396 ATTTTGCTTTTTTAAAAACCACTCACCTGACTTTTATTTGCAGCCACTTTGGCAAACAG

A\_14\_P101193 AGGATAGGACAAAATTTAAGCAAGATTTATATGCGTTCCAACTTTTCACTCAGGAATTCT

A\_16\_P01416188

GGTTTCTTCATAGGACGAATGCTATATGCTGTAATGGAAATCCCTTTTTGCAATCTAT

A\_14\_P134207 TATACTTGGGTGTGTTTCAGTGGGAAAAGTAATTTTCTGTATACAGAGAAGAGTTCTTTC

CUST\_589\_PI426210822 GAGACCAGGTAGCTAGAGGAGCCATAGCAATAGTTGTCAGCTGCATA

A\_16\_P03668043

GGAAGCATTACAGACTAAACTAACCTCCCAATTTAATCCTCAATATCTATAGAAAGGCA

A\_14\_P121528 AACTGAATGTTGTCTATACTCATGAGAGTTTCTGCCATGGCCTAAGTGAAATCTTGATA

A\_16\_P02566646

AAACCTATCTAAAACATTGGTTCCTTTTGGTTTTCTCTGACAATCTGAACATCATTAGCAA

A\_16\_P35527509

CAAGTCCTCACTTAGTTTTATTCAACCTTATTCCATCACAATTTCTCACCAACATCAGA

A\_14\_P130655

GTGCAAGTGAAGTCACTTGGATCTGCAAACACTGATTTGCTTAAAAGAGAAGAAAGAAG

A\_14\_P125133 CTGAGAGGAATAATATCCTCCTCTTCCATAAAAAGGCTGCACTCTACAAAGCAAATACTA

A\_14\_P127282 TACTGTTTTTGTCAACAGCATTTCCTCCAAAGTGCCTTCTGGAACGTTAGGTTC

A\_16\_P00685047

TGGTAAATTTCTGTTAGTTTTGTTTTTTAGGGTTTCTAATTTAAATGAGAAGTAAAAGCCAG

CUST\_9887\_PI426210822

GTGAGGCTTCTTGACAGAGGATTGAACTAGGTTTAGAAAAGACTTTCCCAAAG

A\_14\_P101509 TAGGTTGTGGACGAAGTGTTTATTTATCATGCCTGAACCTGCTAAGTCCG

A\_14\_P112531 CTTGCTTTTGCATGGAGATGCATCTGTATCTTTTGCCAAGAATTAAGCATTTTAGTTTCAG

A\_14\_P138570 ACTTGACCTGAAGGGACAATTGTTGTCACATAGTCTATTGTGTTGAAAATCAAAACAACA

A\_14\_P117008 TTAAGAGGGAGTGTTGATCTGCTACAGACTATTCCGTCATATTCAAAGCAGAAATCTTT

A\_14\_P135187 ACATATTCCTTTAAGATTCAATCTATGTCATCAGAAGAGGACTTTCTCAAACCTGGTCTC

A\_16\_P16108109

AATAGCACTGTATGTTAAAATTGATTCCCAAATGCGTCAAATGTCGTATCTGTGGTCTG

A\_14\_P200042 ACGGTTACTTCGGGAAAAGGGATTGCTGTTCAAGAGACTGTACTGAAAATAAATGTAA

CUST\_6094\_PI426210822

ACAATCAACTCTTCAATTAGAAGTTCATGATCTTTAATGGGCTTGAGTCCAGTTCCAAAA

CUST\_789\_PI426210822 CTAAATGTCCATGCTGTGTGTGGTGGGTGGTAGGAGGAGGAGA

A\_14\_P122464 CCTTTAAAATATTTTGCTTTTCTCGCGAATGGACTTAAACCAGTGTGTCAAATAGAGCC

A\_14\_P134986 AAACGGTAGTATAAAAATGGATGGTTTATCTGGAAATAGACAGCCAGCAATGCAGAATTT

A\_14\_P128343 CTCTATGAAATTACACAATCTTCTACTGAAATAACCTGCAGCCAAGGGACAACCTTCATT

A\_16\_P18929065

AAGTTCACCTTTGACACACAAATTGATGACATTTTCTGATTCAGACTTCTCTCTATGGCAC

A\_14\_P201032 TCACCAGAAGACATGAAAAATTTACCGACTTTTAGTAGTCTAAAAGAGCAATGCATGGTC

A\_16\_P01430792

ACATGTTCTCTATCGTTGAAAAGACTAGATTCCCTAACAGTTCTTCCATTCATAGCATT

A\_16\_P17083927

AATGTGAACAAATATGCCATTAAGATTTAATTTGCCACATAAATTTCCCATTTGGAAAT

A\_14\_P124714 AGAGAAAAAGATTTCTTTAAGGTGCTTGAAATTTATCTTTTGCATGGTATCCACAGTCCC

A\_14\_P115086 AAAATTTGACTTCGATCTTTCATTGTCTTCTTCGAGGTAACAAATGAGTTTTCTTCCCT

A\_14\_P122069 TGCTTATTCAGTCTTCTTTTGTCTAATGGATTTCAAAGTAACTTTCATGATGTTTCGTATA

A\_14\_P139757 ATCTCACTCACACAACACTATGTTAATGTCCTGTATCCTCTTCTGTCTTTATCATCACAT

A\_14\_P102190 ATTTTTATTGATAACTCAACACAACCTCTTCATTTTATGCCATGTGGTAAGCAACCTTGC

CUST\_6129\_PI426210822 TATCAGCTGGCTCTAGACCAGAGGTAAGGCTAGAGACCTTGG

A\_16\_P17838095

GTTCTCGTCCTTTTTCTACCTTTAAACTTACCTCTGATTGCATTCATACTTGCCTAGTTC  
A\_14\_P126768 AGTAAACCGCTTTTGTGTGATGTGATTCCCTTCGCTTTTTTGGAGGTTTTCAATC  
A\_14\_P102967 GATTGAACTTAAGAAGGCTTTCAGCCAACTCAATTGACTGGAAAAAATCTATTGCCAA  
A\_16\_P35586723  
AGGACTTTTCAGACCATAATCTTCAGACCAAAAATGTTAATGACAGAGGTAAGTGCAAAC  
A\_16\_P58424244 AACTATGTAGTTCATGTCTAGCAGGAGGACTTGGATTTCGATTGTTGATCCCTTG  
CUST\_315\_PI426210822 TCTTGTGTCAGTTGAGATGTGGGACTGGTATTCAGGGGTCCAT  
A\_16\_P03643685  
AGCGCTCAGAATATTCTCTACCAGTTAACATGCAGAATCATCTTTTTTCTTTTTTGTGCC  
A\_14\_P102742 ACTTCTACTTTCACTTCTTCAGGTAACAACTGCACTACATCTTTAAGGTCCTTTGAGC  
A\_16\_P02336804  
CCCCATTTGATATTTTAGCATGACCTAACATCATATGAGCCAATAGTTTTTCCCACCATA  
A\_16\_P16140679  
ACCCTCTGCTATACAACCTTCCTCATTATTGTCTCAAGCCAAGATAAATTACACACTTT  
A\_16\_P17165575  
ACCATATAAATGCTCCATGTTTTACTTCACTTTGTCTCTGTTAAAACAGTCTCCACAACC  
A\_16\_P00347610  
CCCCCCAACCCTAAATAATAACAATGTTCCCTATCAAGTATGAAATAGATTCACTTCCAGA  
A\_14\_P107144 CAACTGGTTTATCTTACACAATAAGCGTTTGGTCAGTTTCAAGATAAAATTTCCCAGAC  
A\_14\_P116697 TAAGGATGATATCTAATAACAGGATGGAAACACGCTTGTATGATGCCAGCACAAAAGATT  
CUST\_4663\_PI426210822  
TGATACCTGCCATAAAGAAACATGTTACTATTAAAGTATAACCAGATACTCACATGTGAC  
A\_14\_P124232 GTAAGACTCCACAAGGAACTCCAGAAAAGAAAACATGGTTTACATAATACACCATTGATC  
A\_18\_P16873943  
CAACTGCTTCAACCTTTTTATTTGACTAAAGATGTCATCCTATATAGTCCAGCCCCTATTC  
A\_14\_P111229 TTAAAGCCAACATAAACTTTAGAGATTTGGCTTGCACCGTGTGAAGATTTCTCTTTCT  
A\_14\_P103451 CAAGAGATAAGTCAACAGAGGTTGCAAACTGTGATCAATGCTTCTCGGAGATT  
A\_14\_P115879 ATAGTGCTGTGCAAAGCATGCTGTTTACAAACAAAAGGTGTTCTTAGATGACAGATTTT  
A\_14\_P123281 GGAACCAATCCGTCTCTCTTTTCTTTTGAAGTTCCCAATAAAATGAAAACAGGAA  
A\_14\_P100051 TAGAAAATAGGATAGAAGAACAATAGTTCACCCTAATGCCACGGATGTATAGGATGCAAG  
A\_14\_P131328 CTCTCATTAATATTTGAGTTAGAAGAACTTATTCTGGGCCTTTAATTTGTTGCATGTGCT  
A\_16\_P18662671  
TTGTGTATTATCAACTGCCCGTTTATGTTTCTACCAATTAAGCCCCAAAGATAACAGGAG  
A\_16\_P15814571  
AAGTTCTATCTTGCTTCTACAAAACCTTCTTCCCAGACAAAACCTTTTCTAATTACCTCCAC  
A\_14\_P125985 CTTTTTATTTTCATCTCCATAGTGAGTGAGGGATATTGATTCTTTCCCAAATGCTCACTC  
CUST\_5499\_PI426210822 ACAGATTAGTATTGAAATGATGTTCTTGGTCACTTCTGGTTCCAGATGGCCAA  
A\_14\_P134227 GCGCTGTAAGTTGTAGAGGAGTATTAATTTCTCTGTGTAGGAGAGATGCCAGATTAT

A\_14\_P115454 TTTTCAGTTTACACCACTCCTAGGATTATCCTTCCATAGGTTTCACTAAAAAATCTGGAG

A\_16\_P15927496

AAAAGGGTATGTTCTCAAGTAGACAACCGTTTTTGAATCCTATTCTAAACACCACTTGTG

A\_16\_P00732657

TCCTCTCTCAGATCTCATTTCAGTGATCATTCCCTTTACACATTACAAAATACAGCATCCT

A\_14\_P103110 ATAGTGGGAAAACACATATAAAGAAATAAGGGTGGACATATTTTGCTTTGGTTTCTCTAA

CUST\_2779\_PI426210822 CTAGTGGGATATTTCCGATGTTCCCTGTCGCTGTTCCCTCCAGCT

CUST\_3533\_PI426210822 TCCTCACACTGACCGTGAGAGCGAGTGCTCCTCATCAACAACGTG

CUST\_7484\_PI426210822

TCTTAAAAATACAAAAGGGACACATAACTTCATCATTTAATTATATTAGGAGGTCCGTCA

A\_14\_P102181 CTCAGTGGTATACAGAAGGCATCATATTATGCTTTTATACAGCAAACACTCAAAAATGT

A\_16\_P02093356

TCTGATAACTACCATAGACAACCTATCTCATTAGTTCCAAGTCTGATATCCCCATCATCAC

A\_14\_P136408 GAAGAAACCAATGAGGAGGATGAGGAGGAAAGTGACAACCAGGTAATGAT

A\_16\_P03047131

TGTGTTCCGGAGAATTGATAAGGACTGAAAGATTGCAACTTTACAAGAAGCATATCAACAG

A\_16\_P17445340

CCAGACCCAAAATTCTCTTGTCTTCCATGAATTTTTCTACTCTATTGTCATCCACATCTA

A\_14\_P110960 CTGCAGAGAAGAAATATTTTTCTTTAAAGCCTGAAGAAAAGGGTGAGGCTAATTTTCAAC

A\_14\_P117245 AGGAACTGGCAAGAGAAGATCATGAACTTGTCATATAGCATTGCTACTATACGAAATAAG

A\_16\_P02707029

AAGTGAGTTCGAACCGATACTGTTTATCTTAATGATTCCACGGCTATGTTTCGTTTTAAGT

A\_18\_P17537939

TGGACAAATTTTACCATCTCCCTATCTCCTATAACATCCTGTTACATCATATCACCATA

A\_16\_P15940284

AAAACAATTCAGTTCATTGAGCGAGTCTCCTTTAAAGGTAAAACAGTGGGAATCACATAA

CUST\_7122\_PI426210822 CAATGTGGGCAATGCTGGGTTGTAGAACATCTGTGATTTTCATGGGAT

A\_14\_P110629 ATATGGATGTGTGCGAAATGCAAGGAAATCTTAGGAAACAAGGAGATAGATGGGTAAG

A\_16\_P17848059

TTTGCTCCTCAAGGTATCCTTACAATAGAGACCCATTAACTCAGAAAATTAAGCAAGTCT

CUST\_922\_PI426210822

TTTCATCAGACTTGCCAAGGCTCAGACAACAAATAATTTAAGCTTCTAGATTATTTTTGT

A\_14\_P109830 AGGTCCTCAAGAACTCACTAAAGGGCATAAAATATGCACACAAATAACTGTAATAAAGGC

A\_14\_P201721 ATGTATTTATTTTTGCCTGTTGTGTGATGTAATGCAATCATGTTCCCTTTGAGTCTCCATC

A\_14\_P100352 CAAGAGTTTCAAATAACAAGCGGCAAGATTTTAGATAGCAAGATACCGACCTGTAAACTT

CUST\_8949\_PI426210822 GAGGGGTAAATATCAGAAAATCCAAATTTGGTGCCTAATGAACACGGGGT

A\_14\_P128139 ACTTGATTTTTTGTATTTATATGGCCCCCTTCTTCCCAAGAATTGAAAGCCTCAAACCTAG

A\_14\_P137000 TTTGATTCACCATCCTCATGCTAACTATGCCTAAAGCCACCTTTCTCTGA

A\_18\_P16319030

CCAGACGATGTTCTCTACAATCGGTTTCTTTGATACAGATACGTAAGTACTGACTTCCTTTTT

A\_18\_P22839798 TTTCATCCAGGAGGCCAGGGAGAAAGGGCCAACCTCAGTATCTAA

CUST\_4244\_PI426210822

TTCTTTTTCTTCCACTTTTTTAAAAAGGAAATCAGTTTGGTGGCAAATCTCCCCTTC

A\_14\_P109043 AAATTTGATGGGTTTCCTATGTTTTTACCCAGAATGGCACTGAACAATACCAAAATCAAT

CUST\_3633\_PI426210822 CTGGGAGGCCTGGTGGCAAGCAGTGAGACTTGATTAGGTGAA

CUST\_4567\_PI426210822 AGGTCAAGTCAGCAGGGTGGATTGAGAATATGTAGGGGGACGAAG

A\_14\_P136737 CTTATGATAGTTTTTCATGGGAGGAAATAGGTCTAAGGGATTAAGGAAACAATGTGACAGA

A\_14\_P138360 CTTACTGCAAGGAGGGCTTTAGCAGTGCTATCAGCCATTTACTCTAGTAAGA

CUST\_9838\_PI426210822 TTCCTAGAGCTACAGGACTCAGCTCATCACTCACAGATGAGTTTGA

A\_16\_P58424379 TAATTCAGACCAGCCACATTTTAAAGCGCTCAAATGCCACATGTTATCTGTAGCAAC

CUST\_555\_PI426210822

TGAAAAAAATTTATCACAAGAAACCAACAAGAAGATATCAAGGCTTTTTCTTAGATCTGC

CUST\_7417\_PI426210822 CAGCAGGCTGATTCTCCCTCTCCTATGAGACCATCCTCCATGT

A\_18\_P10592690

GGTAACACACTGATCATTCTGCAACATATTTTCTTCAACTTTACTAATTGAAATGTTCA

A\_16\_P00912621

AAAAGAGATGGGATGCTATTCTTATCCAATCAACCTCTATCCAAAATCACTGGTTTAGC

CUST\_9894\_PI426210822 GCTGTGATTTTTTTGTCTTTTGCAGTGAGGAGCTTAAATGGGACAGTGGT

A\_18\_P15521399

AGATGCTAGAGGACCCTATTAAGAACTGGAAATAATGATGAATTTTTCTATCCGTGGCA

A\_14\_P200017 GGATGAACATGACAACAGGACTCGACTGGTGGAGAGGATTGATACT

A\_14\_P111033 ATTCTAACTTTGCCTTACATAACATTAGGAGAAAAGAATAGGCAGGAAGTTGGAATCTGC

A\_14\_P129325 ACTCTTACTTCAATCTAAAGACCCTGCTACTGAATAAAATCTAAACTCCTTACCAACCT

A\_14\_P200420 GGCAAACGCTGACGATATTAAGAACTGTCACGAGTTAGAACCCTCCATGATGAAA

A\_14\_P132623 ACTTAACCACTTCCAGATTTATACAGTCTTCTGTGGAAGTTTAGTAAATGTCTTTTTTC

A\_14\_P125733 ACTGTGAGCATAACATTATTTCTCTGCCTGGTCAAAACAAAGACAAATGCAAATTACAA

CUST\_9791\_PI426210822

TTCAAATCCCACATCTCTTTTTGTTGCAAACCTGAGTCGTGTTTCATACTTCATCTGATTTTA

A\_18\_P22842259

ATAAACCTGTAGTTGGAGAAATAACAGTGTGACTTCTCCAAGACTGATTGGCTGATTTTT

A\_14\_P123182 CACACTATTCTCAGCATGAATTCTATACCTCTCCAGGGACCTCATCAATATCTCATTTTA

A\_14\_P115820 CTGAACATGGTTGCTTACCAATTCTGGAAGAGGACAAATAGTTCCAGTATTCATATACAA

A\_14\_P130374 AAAAACTTGCACAAAAATACTGAGGAGCCAATTAATTTCTACTTCAATGTATCTAATG

A\_14\_P132236 CTCAGATGATTAAGAATAAGGGAGATAATTATGTGTCAAGATGATGTAGCCCAACTCTGC

A\_14\_P137528 CTTTTCTGCTGATACATCAACAAAACATCACTGCTTTTTTGATAAAACTTCTGGGCTTT

A\_18\_P14136532 GGCCAACCCTGAACCTTGAAGCCTTCATTTACCATCAGTTTTTCTTT

CUST\_3946\_PI426210822

ATTTTTGGTTCTGATATTCTTCATAGGGTAGATATTTCTTTTAAGACTGTTAATAGTGTA

A\_14\_P139051 TTA CTTCAGAGTAAGGAATGCTTTAAATTTAACATAATCGTTACTGAGGCAATTAAGTG

A\_18\_P17237718

TGGGGTAAATTCTGAGACTAATGGAAAATTTGATAGCATAAGCACTAAGTTGAGGATCCT

A\_16\_P20550335

GGCATTGACAAGACTCTTTAATACTCTCTCTAAAATTACTCTATTTCGACAACACTCCAAC

A\_14\_P122955 ACCAGGAATTTGTGTAGCCCTGCAGTCATTTAAATTATGAATTCAATTTGGATTGACAG

A\_14\_P115183 AAACATTATTTGTGTATGCCATAGCAATTTATTTTGCCACGTTAGGAAACAGAAAGGGAA

CUST\_5192\_PI426210822 CACCATTCTTGTAAGGGCACCTTCTCTGCACCACAGTTTTTTTGCT

A\_14\_P133353 TTACACCTCTGTTATCTAAAAGTGTGTTGATGGAGTCCACTGAATTTGATTCTAAACCA

CUST\_4446\_PI426210822 AATTGTAGCCACTGTGACTGGAGCTGCTACTATTGTTCCACCAGGTG

A\_14\_P111751 TCACGAGGGCATATATGAAGAAGGCATTTCTATTTTAGAAAGCAGTTCGGTAAGTAAAAT

A\_14\_P136374 CTCACTCCAGTTGGCTCTTAGTCACAGGTAACGTTGGATTCCATT

A\_18\_P13005947

TGCAGATTATCTATGTGTTTTCAAAAACAATGAAAAAGCAGTCAGATTTACAGTCTCTT

A\_14\_P201202 AATGGAAAATAGGTTAACACATCAAAGTCAAGTAACAATTTTCTGCAAAGTGCTCAGAC

A\_14\_P130590 TCTCTAGGCATCAAAAATAAACACATGTCTCTAGACTCTGGAAAGTAAAGTAGAGGCTGA

A\_14\_P103968 GGAGAAGGTCAAGAATGTCTTTAATGAAACAAAGAATCTCCTTGACAAGGACTGGAA

A\_14\_P116571 GCTTTCTTGCTCTATCTGAAGTATCCCACCAGAGTTGTTTCCAACTTTATTTCTATAT

A\_18\_P14133374 CGATCGTGTGTTGAAGCAGCCTACAGCCTCAGTGAGCATGTGACTG

A\_14\_P137036 GTATTTCCAAACGGTGCAGGAAGCAGTCTTATCACTTTTTGCCATGTAATCATAAAAGTA

CUST\_4855\_PI426210822 CTTTGGCAGAGACAGGGAGAAGCTTGTTGTTTGAGACATCTGGAG

A\_14\_P108170 GTGACAAAGTTACACCCAAAGAAAAGTGGCTTAGAAAAGTCCCTGATGCTAAC

A\_14\_P200649 CCTATTTTTTGACGATATAGGAACCACGACCTCTTAAGTCTCTTAGTTCTCCTACTTTA

A\_16\_P00422430

ACCCCCACTACAATAGAGATGATGATATACCCTAAGTGTGCAGGTAATATTAGTGAATCA

A\_14\_P128483 CTCTGCCCTGTCTTGTTCATCAATTTTTGTCCAGACTAAGGAACGATATCAATAGTTAT

A\_16\_P00917205

TGTCAGGATTGTGACTATTATATGCAACAAACATCTACTGATCCAAAGATAAGGTGACAC

A\_14\_P134538

AGAATTTGAAAAGAACAGTTCATTAACCTTGGCAAAGGGAGAAAATAGAGATCACTGTGG

A\_14\_P124738 AAGTCATATTACCAATATGATGGATGTTTTCTTGATGACCTCACATTCAATTGGCCATC

A\_14\_P129015 TTATAGGCGTCTATGAACTTCTGGTGGAGGTTTAAGAAATGTTGGACCATTATCTTTA

A\_14\_P201641 CTCGAACATCATATACTGAAGATGAAGTTCTTTGGGGTCATCGTTTTTTTCTGTAATTT

A\_14\_P131005 GGTTGCTGATCACAGTAAAACATGGGCCTGTCCTGTAATCTGAAAATAAAGAATAAAAAT

A\_18\_P22841610

ATTTCTAAAGCATGATGAGATGGGGAAGCACAATTCAAACTACATGGCATAGTAACTCAC

A\_14\_P112443 AGGGTTTCAGGACTTTAATTACTCATTTTCAGGAAATTGCTTGGAAGAAACATTTTGCTT

A\_16\_P37685232

TGGCAGACACTAAAGATTACGCACCTTTTTCTTTATACTTATCATCTCACATTAGGCCAA

A\_16\_P00790499

CTGGTTGAAAGGTAAAAAGGATCATGACACAATTCAGTCTCAATTGCTAACAACAACAAG

A\_14\_P102307 AAAACAAATAAATGGCTCACCTTTATATACAATGGCTCCCTAAGATGATCAACCAGAATA

CUST\_2251\_PI426210822 AGTTTTGCCTCTGCATAATCCCTTCTCACCAGCTCAGTGTCTTTGT

A\_18\_P17084623

ATAGAATGAACTACAGAAGATTAACCCCATCCTAATGACTGATCCTTCCCTTTGAAACAT

A\_16\_P15366937

GACCTAGGCAGGATCTATAAACCTAACACAAAGCATCATGTGTAGTCATTGTAACCTTTGA

A\_14\_P106102 GAAGATGAAAGTGGGAGATAAATACACATCTTCCATTACTCTTAGATCTCTTCTGGAGTC

CUST\_4642\_PI426210822

GCAAACAAATCCAGCTATGTAATCCCTTTATTTTAGTAATTAGAGGTGGCACTGGGAA

A\_14\_P139400 GAACTTTTATACTGTTCTGTTCTCAGGGGAAAACATGACTGTTTTAAACACAGCAGAC

A\_14\_P109295 GTCATCAACTTCTATGCAGGAGCAAACCAGAGCATGAATGTTACCTGTGCT

A\_14\_P104544

TAAAGAATGCTGAGAGAGAATGTCACAAAGATTCCTGAAAAAGAAAAAAGTAACACAGG

A\_14\_P116103 TTCACACCCATTCTCTTATTTGAGGCTCTGTAAACTCTAAGGTAGTTAGAGTAGCCTTA

A\_16\_P16314251

CTGCCAATTTACCTGCTTTATTTTTCCATCTGACTCTTAACCATAATACCTACAGGCAAG

A\_14\_P107223 ACAACAGGTAAATAATAGGCCTTTTAATTTTCATTGACACCCTAATACTTCACTCCCTACC

A\_16\_P15611909

AAAAGGCAGATCAATAAACAGTGTCTAAAGGAAAATGAAGTATCCTAACTACTGAGGCCT

A\_16\_P00036840

CACTTCCCATAACTACATAGAATTGAAAGCAATTTTCTTGAGATAAGAGTGGAGATGGC

A\_14\_P134435 ACTGAGTATGTTTCAATAAGAAAAGTGTCCCAAAGGCTCTTTGCAAGACCAATATGAA

A\_14\_P131498 CCAGAACAATCTTGCATTGTGAGAAAAGCACATTTTAGGAGGTTTTGGTATTAAAAACCA

A\_14\_P129395 GCAATCTCAGTGACAATGCTTCCCATAAGTTCAAAAAGTTTCTTGGGTTTTATTTTCATGA

A\_14\_P135606 CTTTGTATGAACTGTGGCATAAAACAGATGGATCATTTTGCTGATTTTGTGAGTATGAGA

A\_14\_P114130 TCATTCATTGTTGGATAGGCTGTCTTATCTATCACTTATGAATGGTGACTCAACGGTAAG

A\_16\_P21673831 ATTCTGTCAAGTGATTTTTTTCTCTCTGGGTATAAGGAATTGCCACAGACAGCCT

A\_14\_P104382 GATTCTTTGCAGCCAAATCATTTGGTAGATTTCTATTGCCATTCGCCTTTCTGATTAAAT

A\_14\_P108201 ACAGAAAGCATAATCCTCATGTAAAGAAAGCAAGAATCCTTGTAGGAAAAAGTCTGACCT

A\_16\_P20340848

AAAGAGCCACAATAGTCATTTTGCTGTGTATGTCTTTCCAACCTTTTATCCTATCCATGTG

A\_16\_P00685146 GTGTCTCTTCACTTCCCTTTGTTCAACCAGATTTTCTTAAACGCTTTCTTCCATT

A\_18\_P22841406 TTTCCAGCACTGTTATGCAAATTGGAGAGACTCATGCCAAGGTGAAGG



A\_14\_P103059 TTGTGTCTTCCTGTTGGTCTTTGTTTCCTTAGCCTTGTAATGTCAAGTATATTCATTTCTG  
A\_14\_P106365 GGTATCCTCACTCACTTCACTATCCTGTTCCCTTTTCACTATTTTTTTCATTTTCTCCATC  
A\_14\_P112802 AGGAGTGGAAGATTTGGATTTTCATTTAATAAAGTCAATTGAAAATGAAAGTGCACCCCC  
A\_16\_P03585213  
AATGCAGGGATAAAAACAACAATGCTTTGGACATTTTCATGATGCTGAATCTACTGTTTG  
A\_14\_P135285 GGGCTATTATTCAAAACACAAAACTTCATTGAATATGCAAAGATCCTACAGCCCCTAAG  
A\_14\_P124516 AGTTTATTTTCCGATTCAAGTGTGACCGCAACAAGGGAAAACATGGCTTATACTGT  
A\_14\_P128087 TCAGCCTCTAAACCTTTTAATTTTTGACACAAATAGACTTTTTCTCGAGCAAGTTGTTCC  
A\_14\_P114580 CTTCTAGTCTTGACAGAAGTGGTTTCATGACAACCTTGTTTTTAICTTGCCAGAATAAGCA  
A\_14\_P132403 TAGTGTAATCGTCATCTAATACCTGAGGAAGGCTGGGAATCTTGCTAAAATGTGGTTA  
A\_14\_P117534 CTAGATGCCTGATACGGAGGACTTCTGATATCCTTTCTAAATATCTGCCTGTGAAGAT  
A\_14\_P137299 TTGAACTCACCGATCTCTCCACTTGTATCCCAGAATAATTAGTGATGTTCTGATTGATG  
A\_14\_P127638 TGTGTAATCTGGTTCTGTTCAAAAAAGAACTCATGGATTTTGCCTAAATGTAAGCCC  
CUST\_9390\_P1426210822 GCTCCCTTATACCCCTGCCCTTTCTCCTTAATTCATAAGCCAGATATT  
A\_16\_P21194738  
ACCTACCATTAACAAAAGACACACTGATTGACATTTCCCTAAATATTCTTAAAAGCACTGT  
A\_14\_P135780 AAGCCGATTATCGTAACCATCCAGAAGTCTGTCAAGAATTCTCGTAAAGATGGTAATGTT  
A\_14\_P200670 CTCAACAGAAAAATGCGTCCCATTGACGTCTCAATAATAAGTCTGATTAGGCAGATAAAT  
A\_18\_P13472874  
AAAAGCGCTGAGGAAATATAACAGAACAAAATCCCATTAACTACTGATGATGGCTTCTC  
CUST\_7663\_P1426210822  
CTCTTGGAACAATTTATTTATAAGTTCCTTATAGCCTGGATCGTATTCAACCAATAGTTT  
A\_14\_P138821 CCATATGCTATCTGAGTTCTAGCATTCCAAGGACACTAAATCCTAAATTACAGACCATGA  
A\_14\_P137156 TCTCTCCCCTGCACTTTATTGAATTTGCAGAATCGACATGAGTGATCTCCAAATTAT  
A\_14\_P202270 TCCAGAGAAATATCCAGGACTTTTGAAGTCTAGGCTTTCAAAGCATTACCTGTCAGATA  
CUST\_2922\_P1426210822  
CATAAAGCACTTTAAAATAGGAGTTCTTCCTGTCCCTAATAGTATTATTCATCACTTCAT  
A\_14\_P110966 CTGACAGCAACGATCTGAAAGTCATTATCATCTCGGGTATGTATCTGATATCTGTCCTT  
A\_14\_P116716 GTTTACTTTTAACTTCAATCTCAGAAAATTTGGAAGCATTACCATTAAACTTTTGATGAT  
A\_14\_P126441 GACGGCAGCAAGGTAGAACTAGATTTCGTTTAAATGAAATAAATAGTGTGAGCCCTCTC  
A\_14\_P112564 ATAAGTAACATGGTGGTCTTGTATACTCACTGGGAAGTCAGATTCTGTCAGATAAGTTT  
A\_14\_P136311 TTTGTTGTTTAAAATGGCGCTGGCAATAACTTCCTAGGAAAAGAAAAACGTTTGCCTTTT  
A\_14\_P130863 TTTCTCCATCTTATCTATAACTGTAGGCAGGACTGACTTGTCTACCCGAAGATTTTATTT  
A\_14\_P130726 GCATATTGCAGTTTATTTCTAGAGAAAGCATCAGGACTAGGAAGCAGTATGTCAACATGA  
A\_14\_P123116 TCAGTAGTCTCATCTTCCTCATGTTGTGACTCACATAGAACATAATTTGTATGGCAC  
A\_14\_P122466 TTTCCCATCAACAGAATGACATACACTGAAAGATATGAACAGAACAGTTCCAAGGAAATT  
A\_14\_P100501 ATTTTAAAGTAATTTGTTCTCTGGCAACTACATCTCGGGCTCTGTTCTCTCTAATTCCTC  
A\_16\_P19722178

AATACACCATCAAAAATGTATTGCGACACTGACTAAAATTTGAAGGGGAGTAAGCATTGC  
A\_14\_P128942 TAAGAGGCATCAAGGTCATAGGTTAAAAGGAATCTTAAATAAGGAGTATAGTGCTGGGGT  
CUST\_9889\_PI426210822 AAAAGACTTTCCCAAAGGGGAATGGACATTCCAAAGAGATGGCAAAG  
A\_18\_P14135001 CTTCCACGTGGCTACTATTGTTATGAACAACAACAGCCGGCGTTTACTG  
A\_14\_P133122 GGGGAGTGAGGTGTCATTTAAAAGGATAATGCTTTTGTCTTAAATCAGCATACTGCTTTTA  
CUST\_5928\_PI426210822 ATTGAGGGGAAGACTAACAAGCCCTCCATGGACCGTAGAAGAAAG  
A\_18\_P15380296  
ACGATGACTCTTACTTATCCATTACGCAGTTTCTCATATAGAGTCCAAACTCCCTTAGTG  
A\_14\_P121933 CTAGGATCAGGATCTAGGTTTGTATAGCATCTGAGCACTTATTGCTCCATTACAATTAGC  
A\_14\_P125409 CATTTTCAAATACAAAGGAGAGGTTATTATGTTAAATGTGGTTGCCCTTAGACCTATTCC  
A\_18\_P16805224  
ACATAGGAGACAATTGACTGAGATGCTATCTAGGAGAATAAAGAACCAAAAATGAGATCGC  
A\_16\_P19175770  
TGTGGGGATTATAAGTTACAGAACGATAAATATCACTTGCCTAATGAATGTCTACCTGGA  
A\_14\_P131829 GTGTTGAAATTCAAACACTGATAACTCGCTCTGTTATTTTGCATTAATCTGGTGATAATCCA  
A\_14\_P122533 CAATTATTTTCATCCTTTTCTGTGTCTTAGGTATATTTGAAGGCTCCCATGATTCTGAAT  
A\_14\_P114230 TCTCCAAAACAATTCTCAGATGAAAACGATTTGTCTGTCCTGTTTTCTTTTAGAACGTG  
A\_14\_P201834 AGCATTAGATCTTTCAGAAAGAATTGGGAATTCAAAGAGAAAGACTTGCCTTCATTCTTC  
A\_14\_P139248 CTAAAGTTGGAGAACCTGTTGCTGGACAAGTGGGAGAATGTGAAGATATCAG  
A\_16\_P35807401  
TCCCCTTCATACAACGAGAGTCTAGCACTATGTATAACATTA AAAACATTTCGATTTCCAAA  
A\_14\_P108461 CACACCCATGAGTTTTAAAACAGAGAGAAGGTGTTAAATATCACTGAGCATCACCAATG  
A\_14\_P200728 TTAA AATTAGCCTACCTTCCATAAGGCTGTCCAATTCAGGTTTTCTGTTATCTTTTGAA  
A\_14\_P126936 CAAAGACTCCAAAGTTTATTTGCCTTTCCTTTTTAATCCTCTTCTTACTCCA ACTCTTTA  
A\_18\_P25809849  
AAAAAACCATTTCATGCATTTTCAGAGTGACCAGTTATTTTAGTTGAACCTGAGCCAGG  
A\_14\_P123685 TTTTGCCGATTAACACA ACTATTTGCCAAGTCATCCAGTCTAGAAGGTTTTTTATTTCCTT  
A\_16\_P21686737  
TGACAAGGGACATTAGACTCTATGCCAAGTATGTTAGTTGCTTATATGAGCCAAAATGA  
A\_14\_P132295 TAATGTTATCACTTACCATGAAGGCATTCATTCTTCAATATGCACCATTGACTCCAGTGA  
A\_16\_P21490345  
AAAAAACTCAGATTCTTTGCCTTTGATCCTTTCTCACTCTACATCCAATCAGATGTCAAA  
A\_14\_P122576 ACCAATTTTGATGCAGAATTTTATGACTATATAAGGAAAGACTGCCATGATTTCCCTGT  
A\_16\_P03689214  
TGCTAGAAATCTTCTCTAATGATGTTCTCTCCAACCATTTCATATAACACTGAGTCCTCTC  
A\_16\_P21095131  
AATGGTTACGATGTCCTTAGTTCATTTACCAA AACCCCTAAGATTTTCATAAATGTGACA  
A\_14\_P131681 AATAGTTT TAGATAGTCTCATGAGACTAAGGAGACAAA AATTAGAGCCCATGGTCTCAAGA

A\_16\_P38218517

CCGCCACATTATATATGAACATGTTGATTACAATGTGCAAAAATTGAATGTCTGGAAGGG

A\_16\_P01163977

GTCGGAATTATTAAGCCCGTAAAACTACATTGTCACATCTGAAACTGTTTAGCCATTGAA

A\_14\_P119007 CAGCACATTTTAAGCCTATGGTGTGTTTGTACATTTTGGCTGTGTATGAACATATAACTG

A\_14\_P137281 TATCAGCCTCCTAGGGGAAAGCAATGGATCCAAGCCTTCTTAGTTTTATTTAAATCAATA

A\_14\_P118926 CCTGATAAAAAAAGTTTTTATAAAATAGAAGTCCATTGAATTTGAGTGTCTTTACAGCC

A\_14\_P109765 TTGTTATCCTCTTCCAAATAGGACATGGTTGAAAGAGAAATAATAACTCCAAACCCACAA

A\_16\_P15884200

ACTGAAAGATTGCTCAAAGTTAAGGTCTATGATAGCAGCACTTTATGTAATGTCAAACCA

A\_14\_P115749 ACTGGGAAAGTGCATTTTATGATCTTGTTAGAAGAAATGGTTTCTCTGGGATCCTTTTAA

A\_14\_P111139 TGCAAATTTATATCCATCATCCGAAAGGAGCCAAAACCCAAGAAAAAGGTATAAAGGAAA

A\_14\_P124458 AACTGGAAGGTGTTATTCCAACCCTTTACCTGCCTAAAAGAAGCATTAAAGAGTATCAAA

A\_14\_P106928 GTGCTCTTGTGTGTCATACTTCAGGTTTATTGGTAAACATAAAACCCTTTAAACCTGAG

A\_14\_P121070 TGTGTCTTGGGAGATACTTAAATTTAGCACGTCAAATTGCTTTTGGAAAATGTTTATCTG

CUST\_204\_PI426210822 GAGGGGAGCAGCCTTATCTCCGGGAACCCGAGCGCCCCGTGCGCG

A\_14\_P138537 ACTGACTCTTTCTCCTTTAGTGCCTACCTATACCTTCCCTGTCTTGCTG

A\_14\_P138963 AGACATCATTCAGTTTTATTTCTTACTGCAAAGTTAGACACAGGCCACACTGTTGATAAG

A\_16\_P21585265

AATCTCCTCCACAAAACACATTTACCATGACCAATTCTTTAATGATTCCACTCTGAATGT

A\_16\_P00781806

AAAGCATGGTGCTAATCTTGTATGTATCCTATTCAACCACTTTTCAAACCTTCGACTG

A\_16\_P38196183

CCATATTTTGCTCATTGTGTCAGAAATCCTCAAAAAATATTCCCCCAATATCTCATCTGTGC

A\_16\_P03171983

AGGGCTGATATTAGGACTAAAGTTCCAATCTTGACTTTGTTTAAACAGACCAAAAAGCAAC

A\_14\_P114248 TCTACACAAATGGAACCAATCTTAAAGAAAATACACGTGTCCCCTGACTTCAAACATATG

A\_14\_P118430 AACTGCTAGAACTTTAAAAGCATCTCATTCGGTTACGTGTCCGCCTG

A\_14\_P127839 TTCATGTGCTGGAAAATAAGTTACCAGTAAAACGTGACTGTGAGTTACTGTTGAAGAGAA

A\_14\_P139646 GATCGCTTCCAGAAATTTAATTCATTTAACTTTTTAGTGGTCAATCGATAACCCTCCAGAG

A\_18\_P14134411

GCACTTCCTGTGAATGAAGAGTCTTGATATATATTTTTCTTTAACAAGAGAAAGCCAGGC

CUST\_3513\_PI426210822 TTGCTAGTGTGCTGGGTGGAAAGATTCCCTTTCAACTCAACATGTGTG

CUST\_691\_PI426210822 GTGTAAACTTTGTCCCTGTGAGTCTTGGCTCTAGGCTGGAGGAAG

CUST\_5028\_PI426210822

CTCAGTACAAATCGTGCTGTGTTTAAAGTTCTTGGAGACACTTCTCTCTTCCAATA

A\_14\_P122353 GGACGTCTTTTACTACTGCTTCTGATTTGTCCCATTTCTCTTATCCATAATTTTGCTTCA

A\_14\_P106526 ATTATTTCCCTACAGCCCATTTTTAAGGTTCCAGTAACTTTCAGAATCAAAGGAGACAT

A\_18\_P14136388

AATTTGTGGAATTCCATTGAGAAGTGTGTGTAAGTTCATCATTGAGAACGTAATGACTGC

A\_14\_P135048 TCTTTGCAGCAAGAACAGGGAATCACTAAGGATTGAATTCAATCAATTGGAAGACATATT

A\_14\_P120999 TGATTCACTCTGCTTTTCAGATGGTTTGTGTAGAGTGGAGGATGAGAGAGC

A\_14\_P113403 GAAAACCTATGAACCTGGACAAAATCAAGGGCCAGTATCAAGCACGATATATATAGGTAG

A\_18\_P14136744 CAATACCCTAATTTCATTGGTCCATTGTTTCGTGGAACAGGCCTTACAC

A\_16\_P21394880

ACCTTGAGTCACAGAAAAGTATTCAAAAATAGGACCAATTATTGACAAAATATCGCCAGGTTG

A\_14\_P105897 TTTTAACTGGTCCAAAGAATCCAGAAAATCCACATTTTCAAGTCTGTGCCAGAATTATTG

A\_14\_P105727 GCATTGGCTTCTCCAAGTGTCAAGGTTTAGGATTATATTGTTATATTGATCACAATGTGCT

A\_14\_P137042 ACCATGGAAAAACACTTTTATCACTTTTAAAGTAACTTGACTATGTTACCCTGAGTGCT

CUST\_1535\_P1426210822 TTTATTTTCACTCTCAAACCAATAAATAGGAGATGCTACCCTCCAACCCCAT

A\_18\_P14132368

TCAATGATTTCTGTTCTTTTTACTTCTACTTGCAAAGACTCTGGAAATGTAATGATGGT

A\_16\_P15513555

AAGCAAATAAAAGTAAACCAGTCAATCATGAACTTGAAGTTATTAAGCACGGGGTGG

A\_14\_P133960 GTCCCCCATGACAGTGCCTGAATCCAATAAATCACTGAAAAGAAAAGAACAAAAA

A\_16\_P18074722

ACCTCTCCCCTTATTATCTATTGAACAAAGCCCAAATACCTTACCTTGTATTTCAAACA

A\_18\_P22841776 GCTGAGCCTGTTGGCAGAGGCCCAAGAGATGCTACTCAAGAGAG

A\_16\_P21489073 CCCACTACCATTTTTTCTTTATCTCCTACTATTCTCTACTACTTTGTTTTCTAGCCACC

A\_14\_P200753 CTTTTTGCCAACTTCCAAATCAGGAGTTGGCTTTAAGTCTTCTTCTTCATGGTCTT

A\_14\_P100223 GTCGGACCATTTTAAACAGTATACTCACTGACTGTAGGTATTAACCCAAAATTCAAAACCA

A\_16\_P30952476 ACACACCTGCCTTTTGTGCAGCCGGCCCATCTGTTGGTGCTTTTT

A\_14\_P118269 CTGCAGGATAAATCCACTTTGGTTTTACATTTTGTTTTTATATTGCGTCAATTCAGTGT

A\_14\_P110645 CTGTGAAGAGTGATAAAGTAAACCAAAAGCCCCATTTTGTCTGAGTTGGAACCA

A\_14\_P131894 AAAAGGAGATCCATTTTTGAACTACATCTGCAGCGAATGGTAAAATCCAAATCTGTTAGT

A\_16\_P02203129

TGCCACAATCCAGAAAATTATGAGTTCAATAAACCTTTTCAGTATAGCAATTTTCACACCA

A\_14\_P109398 TGTCTGAATCATCTCATTTTTGAAGTGTGTATTTAATGTGATGATTTCCCTCCCAAAGT

CUST\_4692\_P1426210822 GAAAAGGCAGGATACGAGGTAGAACTCCACAGTTTCTCATCTCTA

A\_14\_P117366 AATAGTTCTACTTCCAGAGTGACGAAGTGGAATAACTTCCAGATATAAAATGGGCATGA

A\_14\_P138159 TCATTGAAAACCTCATCTTCTACCATTTTATGGTGGGATACATGTCAATTTCCACATCT

A\_16\_P18469534

AAATCTTGCTGTTTGGATATGTGATGTAATTCAGAACTGAAGAGAAAAACGATGTCTCCC

A\_14\_P121632 ACCCTTGAAAATAACACCCAAGCAGACTAAAATAATGGAGCATTGTTTTTACAAGACAAC

CUST\_7208\_P1426210822

CATTTGAGCAAAAGCATCAGTAGCTTCTCATGACCACAATCAGTTTACTAGGATTTTT

A\_14\_P122654 CACCAAAGAAAGATGGTGCCATCTCAGACAATACTAAGGCTGCCCTTA  
A\_14\_P139320 CTCCTAAGCAGTTTAACCAAATGTGTGGTTAGTGTTTTTTTATTCCCCTAAGACAGAAAAG  
A\_14\_P119409 ACACAGACTTTTTTCATTGGCAAGCCAACTCTGAGAGAGGTAAGCATCTATCAAAATTATT  
A\_14\_P136045 ACTATGACACAGACCCTTTCTCTCTACGTCATGACAGAGTATGACTGTAAG  
A\_14\_P135537 ACCGGAATATCATAGGTCTCAATAAAGTTTTGTAAATGAAGGGTTGCTTGCCTATTAC  
A\_14\_P201083 CCTCAAATGACGCTACATTTGAAATTAAGAAATGTGATCTTTATCTGTTGGAAGAGGGTC  
A\_16\_P36230937  
CCTTCCAGTTGTTTCTCTGAAGGTAATTTTTACAGTGAGTTTAAAGTTTGGTATTCAGGC  
A\_18\_P14134503 CAGGGAGAAATGAAGGGGACATTAATAAATGAGTGCTGTGGGCATTCAGT  
A\_16\_P19023012  
AACTCCAACCTCATTCTTTTTCAACAAATGCTAAGGAATACACTCATGCTACATTGTTGA  
CUST\_4055\_P1426210822 ACAGTCATGTGTGGCTAGGACACCATGTGGTCCAGTCTGACACAG  
A\_14\_P102746 ATAAGTTTAAATGTCAGGGAAAAGTGTTTTAAAGAAGTGCAGTCACCTGTGGTCATTACT  
A\_14\_P200022 TTGGTTTTTATTCCACTTGGCATTTCCTGAAAGGAACATTAATAAAGTCATCTTAAGC  
A\_14\_P137546 AACTGAAGGGAAGTAAGAAGGTATGTCAAGTTCTCTTTAATAGTTCCAGATACTTTCCCA  
A\_14\_P116345 TGACACTGTAAACAGCAATGGTGACACTCTCAAGGTGGTTCTGTAGAGTAGAATATATA  
A\_16\_P00183415  
ATGAATGGGTTGCTACAACCTTTTCAAGTCTATATGCTATGAATATCCAAAGGGCTACCAA  
A\_14\_P100870 CTTTCTTCTGATCAAGTGTATAGTTGGTCCCCTAGTTCCTAAAAGGCTTCAGAGAAAA  
A\_14\_P101861 CTATACATGCATGGAGACAAAAAATCAAGGAAGGAAAAGAGTCCTGAGATGGG  
A\_18\_P22840912  
CTTGCCTACTTTCTCATCGGTAAAATTGACCTTAAAATCCCACAGTTCAAAAAGACTATA  
A\_16\_P00854074  
AGCCACTGACATAAAACCTACATACTTGACAATCTAGTTGTTTTACATTTCTCATGCCT  
A\_16\_P37405320  
AAGCATACTTTCCAAGAGGTAATCAATTCCTCTCCAATTATATCCTTTTACTGCAT  
A\_14\_P123548 TCTGTGTGGTATTTATAATAATTGATCATGGTGCACATTTTCAGTGAGCATTTGTCAACCC  
A\_14\_P118868 TATTATCCACAGGCCCTGAAGCCAGTGTGGAACCAGCCTTATTTATCATTAAATTTAT  
A\_14\_P122272 GTTCAGCAGTGGTAAGAGTTGTTGTTTTTAATTGTGTTAACAGTTAGCAGATGACCAGAT  
A\_14\_P124046 ACTTTCAGTCAGTATCTGCAGAATGTTTGGGCTGATACATTTCTCAGTAATAAAAATGTGG  
A\_14\_P117481 TTAAATTTTCAGATAAGCCTTTGAAAAAAGAAAACAAGATTCTTACCCACAGGAGGCTGG  
A\_14\_P111130 AGTATATCTTAGCCTTGAGGAATGTTTCCACTTGGACATAGTCGATAGTTATTTCTTGAG  
A\_14\_P120823 GGCAGTAACACTAAGTTGAACTTTAGAAGGATAATAACTTTTCCCTCTTGTCATGAGTGG  
CUST\_10125\_P1426210822 CATCTGCCTCTGACCCTGTGCAGCTCCTGGCGGCCTTCAAGAAAAG  
A\_18\_P12692240  
AACTCAGATCCCATCTTTCTTGTTATGCCTTCTTCCTCTAATCTCACAACTTCTATCTCT  
CUST\_1712\_P1426210822 CCAGCAGATATCTGTGCTGACTTCCTTGGGTGACCAAATCATTCTCTG  
A\_16\_P40334218

GACAGACCTCAACATACCTTTTCATAAAACATCACTCACATTCTTATAAAATACCCATCA  
A\_14\_P105003 ACTCTTGGGCTAATTTGACTAAATCAGAAGATCTGGGAGAAGAACTCACATTTCCATAAAA  
A\_14\_P103036 AGAGAAATTCTTGTGATGAAGAATATGAGTTATATCAAGATCCCTCACCATCCATGGAG  
A\_14\_P200413 AGAAATTATCAACAGGTGCTCTGAGATGATCTATTTCCCTAATTCCAGGAAAGGTGAGTTG  
A\_14\_P136280 CTGGAGGAATATATACAAGATGAACTTGGAGGGAAAATAACTGTTTCATAAGATAAGCCCT  
A\_14\_P118917 CTATTTCTGAGAAGACATGATCTGTTGTATTGGCTGTTAACTGCTGTGGGTATATCTTGC  
A\_18\_P14134907 GAGTAGTTTTGCAAAGGGCTGCTCTAGTGCACTGAAAGAGTATAGAACCCTACATG  
A\_18\_P16933677  
TCACCCCTTACTCAAAGTTAGTCATTCTTTTTTTACTGGTCCATGAATGTTTGTAGAGT  
A\_14\_P102818 ACACACATGTAAGATGCAACTTTTTACCATTTCACTTTGGACTGTTACTGTTTCCATGAA  
A\_16\_P02629942  
TAACCCCCAGGTAATACTACAGAATTTCCGATAACCATGTATTCCCTTATCGCCTTTAAG  
A\_14\_P112592 CCGGTGATATTGTGTCTGTTTCGTGCACAGAAAATGAAATATTTTTCTTGAAAGGAGATA  
A\_14\_P107496 TACTATCCCCCTACCCAAGAGTCTTGTGCAGATGTTTCATTTTAAACATAATTCGTTCC  
A\_14\_P111412 GTTGCTCACTATTACGTATAATCCTTTTTCTTTTCAAGGTAAGGCTGAGATCTCCGCTAG  
A\_18\_P22154235  
TGGTCCCTGATCCATTTATCTTTTGACTACCTTATCCCAATTAAACTACTAATGTGCTCA  
CUST\_2288\_PI426210822  
AAATTATGGCACGTAGTTTATATTTGCATTTCTTTTTATTGGATGGGTCAGTGGTTTTTTCT  
A\_16\_P58424102  
GATCTAGCAGAAAATATAAGATCTTTGGAATCAGATGGTTCTGACTGCATTCAAAGCCCA  
A\_14\_P201895 GCATTCTCAACCTTTCTACAGGAATACTTACCCATCAGAATCTCAGACCATAAATTACTCT  
A\_14\_P111718 CTGAAGGGTGCTAGGACAGAGGGAGCATGATAAAGCCATAAGTAAGATGT  
A\_16\_P17183602  
TTAGTAGTCATCTACCTATAACTGAAAAATTGCTGCCAAAAATTACATGTGCTGCCAACC  
A\_14\_P134627 TTCTAAGTGACCATTAACACTCCTCTATCCTATTTTTATTCCAGATGATTCTGAGGTG  
CUST\_2041\_PI426210822  
TATCAACTTCTTGGCTTCGTAGCCATTTGACTTTTTCTTTTCTTTAGGGCTCTTCT  
A\_14\_P124502 CTTGCTTAAAATCTGCCTTATCTAAAAGTCCATTTCCCTTGTCCAACGTGTGAAAAT  
A\_14\_P127586 CATCAACCTCTTTGTTACCTTGGGTAGAAATTGAACTCCCCCATCTG  
A\_14\_P106054 AAAGCCTGCCTAAAGAAGCACACATCTGCCACTTCATTATAAAAAACAATTTTTCCCTTAA  
A\_16\_P16286241  
TTTGAAGTCCAGATCTTACAATGACCTGCAAATTAACCCTATGTTAGAATCCTCTATGCA  
A\_16\_P19179334  
AAAAACAGTCAACTGCTCAGTAAGATTAAGTTTCTCTCTGCTCATATACTGTGGTGTGTC  
A\_14\_P122142 CTTAAAGTAGCAACACAGGCAGTAGGAACTGGTCTTTCCCTAATAACGTCCTCATTTT  
A\_18\_P14853369  
GGGCTCCCTTTACATAAATATCACCATATACTACTGGAACATAAGCATCTATTGAATCAG

A\_16\_P00149546

CCTGGTGACTTGTTAAAAGACTTCAAAGGATAAACTTCAGACTAGAAATCTTACTTGCCA

A\_16\_P16095962

GCCAAAGGAAAACCCATTTATAGTCATATACTTCCGTGAACCTTTGATATAACCCAGTTA

A\_14\_P120338 GAACAAGGAATTGTTGGAGATTTTGACTTCACCAAATCTGTGGTAAGATATCATGGTTTT

CUST\_5732\_PI426210822 TTTAGAAACGTGGCTGGCATCCTTTTTTCTTTTCTCTGACAGCACCAG

A\_14\_P113667 ACTAGCAGATTTTCATTGTAGCAAATCGAACAATACCAAGCAGTTACCTAGGTGAACTAAG

A\_14\_P139549 ACTGTTTCATCTTCATGTTTTTCAGAAACAACATAGCATTTCATGATCTTAACCCCAATTC

A\_14\_P107214 CTTGCAGTATGAGTTTAAAGCCAAGAACATCAAGAAGAAGAAAGTGAGCATTATGGTTTT

A\_14\_P106941 TTCAATAGGGCAGACCCATTAATAACATAAGAATCCAACAACACTCTTTTTTCAGAGTCG

CUST\_2620\_PI426210822 GAAGAGATCAGAGGTGGTCACCCTCAGCTTCACCCTCATCTATGT

A\_14\_P113723 CTTCAGATGGAGCCCGTGAACCTACGAACGAGTGAGAGAATATAGTCAGAAAG

A\_14\_P139091 AAATCAGATCTTATCAAGAGATGTGGACCGTGTGAAAAGAATCACTATGGCAATATGGAA

A\_14\_P114488 GGTCTCTTTCATACTGTAGTGACTTTTGCCATTTTTTACTATGGGTCTGGGCTAACAT

A\_14\_P117183 ACTAAGAAAAATAAACTTATTGCTTTTTAAGGGTGATTTACCAGGGAGGAGTTTGGTGG

CUST\_531\_PI426210822 GGATGTTCCAGATTCAGCTGAGTAGTGTTCCTGTCTCTACCTTCATTGAAT

A\_16\_P19314013

ATCAGTCCCAACTTGATTAGGAGATAGCAATCAAGGACATTAAGACTCTAGCATATCC

A\_16\_P15649179

ACCCATAAAAATGTAGTTAGTAGTCGATGTTGCCTAAATAGAGTCTCGAAGCCTACAATC

A\_14\_P109662 GGGAGTTCGAATCCCAATCTCAACGCTAGAAATAGAATTTTAGCGTTGAAGTTAGGATT

A\_16\_P03644810

AAAAATGTCCAGATGATTCTGTCAAGTAGATGTGTCTAGTCATCATTAAACCAAAACCCC

A\_14\_P116394 TTGTTTTGGGGGATGAGTTAGGTTCAAAACACACAAGAATTACAGATTTTCAGAAGTATA

A\_18\_P22841418 TTCATTCTTAAAAGCAACATGACACAGAGCCTTGCCATGGCAGG

CUST\_807\_PI426210822 GTGGAAATGGGTTCTGTACCCTTATACCTTGCTCTTCTTCTCCAG

CUST\_1433\_PI426210822 ATAATAACCGGACAAGGCGGGAGAAGTATTTATCCTGCATGGAAGA

CUST\_117\_PI426210822 GGATGAACTGACTTTATGGGCCTTGCTCTTTTGGAGGGATTAGAACTAC

A\_14\_P130469 CTTCAACCAAAACCCAGAAAACCTCTGAGAAGTTTAGGATCTCTTTGGTCCAACCT

A\_16\_P38563423

AAGTTCATTCTAACTCACATATCCTGTTGACACAATCATTTTTAAACATGCTGTCACCAC

A\_14\_P133872 CTAAATAACACAGGAAACAAATTGGCAAATTAGACTTACAAGAAGTCTCACCCGGTATCA

A\_14\_P111752 TATACCAGTTGTTCTCAGCGGGAGTTTCCAATTAACGATTTAACGATTACCCTAATTC

A\_18\_P16665554

ATTTAGAAAAGCCTTTAGAGAAGACATTTGAACGAGATCCTAAAAAATCAGTGGGCATGA

A\_14\_P128519 CTCTGTTTTTCTTTTCAATGTATGCTCTACTAAAGCCAAAATGATTCATGCCCTGTTACC

A\_16\_P03748592

TGTCCTGATAACCACAAAATTCATGTTACATAGTGTGCCTAGAAGTTAAACCAGAAGTA

A\_14\_P129525 CTCTAGAAATTTATTTTGAGAACCGCAGATCTGTGGAGATGGTCAAATTGCAAGTCTAAA  
A\_14\_P129647 TGATTAGCAGGCAGACAGACGTGCAAAAACCAAAGGAATAGATTCATATCATTCTAGAA  
A\_14\_P129428 CATCTTGGTATTATCATCCTTTCTATGGCACACAGGATATGGTCCCAGTTTTTACAAAAT  
A\_16\_P01995455  
TCATCTCAGTCAATCAGATTCCATAGACAATAACCAGGTTTCATAACATACATGCTCTTCC  
A\_14\_P131683 CACTGAACTATTAATCTTTCTGGCCATCTGTCCGCATCTGTGTGCTGTT  
A\_16\_P00685504 GAATCCCTGCATGACAACACCCTCGTGCTGATGGTGCCACTGATG  
A\_16\_P02227050  
AGTTTTCTGTCTGCTGTAATACCAAATCCACAATCTACATTCCATGTTATTATTCCGCCT  
A\_16\_P18220612  
AAAATCAAAGTCAGTTGTCATAGCCAAAGTCTTTTCCTTTCAAGCATGGTATCTGGATTC  
A\_16\_P00725726  
CAATGGTGAATGTGAAATTATGAGCCCATCTAAGTCATTAAGTAGGAGTGTGCATAGGCTA  
A\_14\_P116994 ACACCGTGAGGTAGAAATCTTCACCGTGCAAAGTGGAACCAGAG  
A\_16\_P00685198  
AGGATGAGTAAAGAGTTAACGTATTGAACTTGAAAGGAGAGATTTTTTTCCCTCTTGTA  
A\_14\_P103743 ACCCCAGAAAGATCTCAATGAAGAAGGACTCAATATATGACATCAGCAGTATTCGTTTAA  
CUST\_6670\_PI426210822 AGACAACAAGGGGAACAAGTGGACAAAAGTCGACTCTGCTCTAC  
A\_14\_P107581 GCCTGATCTAACATAACCATAATTTTCATAAAAGACATATGAGCACTCTAAACATCGGGAG  
CUST\_5924\_PI426210822 CTAACAGTAGTGAAGAGTCTCTGTGCATCTGGAACCTGGGGGAAGCTACTG  
CUST\_8953\_PI426210822 CTTCAGAAGGATCTCCCAAAGAATGCCATTGAAAACCTCCTCATTACCTTCAA  
CUST\_10143\_PI426210822 GGGCCTGGCATCTCTTCAAGACAATCATAAAGGCCTGTTTAGGAG  
A\_14\_P108651 CTAGAAACATAACTGGGGAATTCAACATGTTTTATTTTGCCAGGCCAATGATTTTCATCAA  
A\_16\_P16905645  
AGAAGTGATACATACAAACCATACAGACCCTTACATAAGAAAATCTCAAGACAGAATCCA  
A\_18\_P14135247 TCACAGAGAAAGATTTCTCTGATGACTGTGTAGACAGTTGGTCCATGGTGTT  
A\_16\_P19221693  
ACATCGCTCCTATTCCATAGATATCCAACCAGAGGAAATATCTGAAGTTGAATTGTAAAC  
A\_14\_P116486 GAATATTTACTGGGGGAAAAATCAATTTTTCTGTGCTGTGGAGGAAGCATTTCAAAGTAA  
A\_16\_P01901963  
GTGGCATAACAAGATACTTATTTTGGCTTATAGTTACCTACATGGATTTTACATCTCAGCA  
A\_18\_P16308761  
TGCTCATTGTAAACCTAGGCTTCTTGTTTTACTGTTCCCTATCCAAATCTTGAGTATA  
A\_14\_P110396 CAATCTGCAAAATCTTCTAGAGCCTGTCTTCTAGAACCCTTCACGTTACAGACTGAAG  
A\_14\_P132648 TTTGTTIAGTGACTGAGGCCAGTTTTTGGTTCCACTTACTTGAAATTTTTTTCTAGGGTA  
A\_14\_P103476 GAAAGCCCCCAAAAATATAATCACCGACTTTACAACTGAAGGAAGCAGGTTTTG  
A\_14\_P104241 AATGATTTCTGGGGCCATATACTGCAGAGTTCCTAGGACAGAAACAGGA  
CUST\_4266\_PI426210822



GACTTTTAAGGGGAGGAAGATGGCTAAATGTATATGGTATTTCTTGTTTTCTGCTCTTAC  
A\_16\_P20762928  
AATAGAAGGGTGCATCTTATTATGAAGACCTCAACTAGATTAGTTATTCCAGCACACAGG  
A\_18\_P15550434  
AAAACCTGGTTACTACATCTCTCCATGAAGTAGTCTTTAACTCTTTGAGGCAGAGTATCAC  
A\_14\_P130475  
AAGAGATTTGGAAAAAGTTTAGTTGGAGGGGAGATTAACCTAAAAGGAGTGTCTTCAAAG  
A\_14\_P120597 CTAAGACATCATAGCATATAATCACAGTTTTCTAATCTACCACCCTGTCAGGGGGCTAAAA  
A\_14\_P100817 TCCCAATTGCCCCAGATGTTTCAAGAAATATTTAAGTCAGACATAATCTGAGGCAAAATC  
A\_14\_P110039 ACCTCAACTCCTCTTAAGGGACAAAACCTCTTTGAACTTCCAAGATTATGTTCTAGAATC  
CUST\_3252\_PI426210822 AAACGATGGCAACAGTTCTGAGTCTGATGCAGGGATGGCAGAGAA  
A\_14\_P109610 AGTCTCAATAAGGAGCCCTTTAGGAAGAAGTATAATTTAATCACGTTTGATTCCCTTGGAG  
A\_16\_P03411478  
ACAGTTCAGTTCACCAAGTAAGGATGTGAGTAAAATGCTAAAAACAAAAAGCCACTGAA  
CUST\_9683\_PI426210822 ATAGAATCTTTCCCCCTTGAACCTCACATTATGCTGAGATGTAGGATGAAG  
A\_16\_P00421886  
CAAGGACACTCTCACAATTCTAGTGTGTGTAGAAATCATCAAGTGAATATGGCCTTTAAC  
A\_14\_P128825 AAAATAAATGAAATTCTAGTTTTCTGTGCTTCCAGTTGGTAGAAGCAGTAGAAGGGAGGA  
A\_14\_P106853 GGGTTTATATAAGGAATAAAGCCTTTTGATTTGTAGCGAGCAGCGTCTGTATGTGTCAG  
A\_14\_P103182 TTTTCTGAAGACCAATCTCATGCTTTAGGTTGAAAAGTTGGGAATCCAGAATAATATTTG  
A\_14\_P127575 TTTCTGTCCTTTCTCTCCATATGCACCATGGCCATTTATCTGTTGAATGAAATATTTCAA  
A\_14\_P200837 CAAATAGGAAATTGTCAAGTAGGAGACAAGGAGCAAAGTCCTATCACAGCGG  
A\_16\_P01624696  
TTACATAATTCCCACCCATATAACTCAGTCCATACAGTTCACAGTTTTTCATTCCCTCATA  
A\_14\_P106649 TTTCTTTGTATACATATTGCAGTTGCTTCCTCCTTCATCTCAGGTAAACCTATTGACCAT  
CUST\_4510\_PI426210822 TCTCGATTTTTGGGGTAAACAGAGGTGCTGGGCTCTGCTGAGGAT  
A\_16\_P03602449  
TTCTTGGTAAAAAGATTACTTTGTTTTCTTTTCTCTGAGAAAGTGGTTTAGGGGCTGTTG  
A\_14\_P125345 GTTTACTATTCTGCACCGACTTCTCTCATTCCACACGGACTATAACAAGTCTTT  
A\_14\_P103311 GAGATGAAAAAGAAACGAAAACACCACAAGCAAGTGACCTGCCAGGAAC  
A\_16\_P21372768  
AGACCAATCTATGAACTGCCCTGTAAAAATTCATACTAGCCTTCTTGACCTAATGTTT  
A\_14\_P133979 CAGTAATGCAATGCAGGAAGTTAAGTTTTTAAAGGTGATTCTGTGCAGTAAGGTATAAAA  
CUST\_3634\_PI426210822 AGGCCTGGTGGCAAGCAGTGAGACACTTGATTTAGGTGAAGGGGG  
A\_16\_P03295429  
AAGTCTAAAGAACACCCTATCAATTAGAGCCTCAAACAGTAATTCCTCACTTATCAGTG  
A\_16\_P21546173  
AATTTTCACCTTGTGATCATCATAGTGAATTCAGGATATCTTAAGCCCACCAACTAAGA

A\_14\_P124271 TAAAAAATTAAGAATGATCTCTTCCCTACCCTACCAGATAACACCCTGAGGTGGAAAG  
A\_14\_P105267 ATGCCTGGACTGATACAAAAGTCAAAAAGAACTCTGATGCTTCTGATAATGCACATTCTG  
A\_14\_P139150 ACCGTAAACAGGGTTTGAGAACGTTCAATCAATTTCTTGATATGAACAATCAAAGCATT  
A\_16\_P18761482

TATTGTTACCACAACATCCTTCTAGTCTAAGAGATAGTCAAACTTACCCCATTTCTCTGA

A\_16\_P18250863

CAACAGAAGTGTTTAGAACTCAAGTCTGTTCTTACTACACTATGTTTTCTCCAAGACAC

A\_14\_P126095 AGAAGAATGGAGAAATCATCTTACCTCATAAGTGCTGGTGATACCAGATCTGTAGAACAC

A\_14\_P133322 GCACAAAATGTGTTCTTTTGAGCATTTTTCTTGAAATGTCCTGAGGCTTTTTTCACATTAG

A\_14\_P137367 ACAGTAGCCGGAAGTTCCATTACCTAATTGCTATTCTGTTACTATCAATCATAGTTCCC

A\_14\_P114774 CTGAGTTTCGTGTTTTATTGTTTTTTTTATGGCTTAGCCATGTGGTTCGTTGTCCACAT

A\_18\_P22841942 CTGGGCTCCATCATGCTCTGCGCACTTCTGTTTAGGAAACGTTTT

CUST\_8876\_P1426210822 CCCCAGCTGTCAGGGAGCCAACCTCACTTACTTCTCTTTAATCTA

A\_14\_P137982 ATGTTGGTCAAATTTAAAAAATGGCACTGACCACAAGAATACTACAATTAAGCCCCATG

CUST\_7737\_P1426210822 CAAGCATCTCTTGTGCCAGGCAGACCAGCAAATGAGCTGCTTCTT

A\_16\_P02851069

CACACAAATTCATCGAACACAGTAAAGTCTAACATGCAATAGTCCCAGAACTTACCAAA

A\_18\_P11096651

AAAAGTCTATTCAAGGGGACTAATTAATGATGGCATCAATGTTGTTCTCACCTGTGAAC

A\_14\_P105168 CAAGGGAGCATTCACTGGCCTTTACAGTCTTAAAGTTCTGTAAGTAACTGAGTGT

CUST\_6711\_P1426210822

CAAAACAATTTTTATAAATATTTACAATAGTAAGCAAATGTAAAAAAAAGTATTGCCATG

A\_14\_P128018 TTAAATATGTTTTTTGTCTTATCCTACAGCACTTCTGCTAATGAGAAGGAGGTGGAGGT

A\_14\_P132855 CAAAGAGTTTATTTTAGAGGACAAAAGTAGGAGTGGCTATAGTGCTAGAAACGCTTTTCT

A\_16\_P39854376

ACTCTGTTTTCCATTAGAAATCCATCAAAACCATAACCTTATCCATCAAAATCACACCATT

A\_14\_P200057 GTGAAGAATGAGATGGCCCAACTAAACCAATTTGGAATCATTAAC TACAAAATGTCAAAC

A\_14\_P128871 TGTCCCCTATATGAATATTCTGTTACGCTTGAAAAATATTTTCTCCAGCGTTGGTTACTG

A\_14\_P111051 TGTCAGTCACTTCTTCAAAACCTTACAGTCCCTCCTAAGT TACTCTTCATGAGATTTTCAT

A\_14\_P121297 CTGCTCCATCAGCATACTTCTAACACATTCGTATATTCATTCAACCACATTTACTGACAC

A\_14\_P121848 GACTACAGCGATGAAAATGACTATACTCACACATCCTATAATGCAATGCACGTGAAGCAT

A\_18\_P12535541

GCACACATGTTTGTAACAATTGGCTTCTCAAACTTGTAAGAACTACTGATGGGTAAACA

A\_16\_P17188350

AAAAGTTTGAGCAATGCCACTAGTTAGATGTTGCATTGAGGAAATCAAGTCTCAGAACTT

A\_14\_P106754 TTAAAAAATGGTCTCATGGTAAGCAGGAAATTTCTATTGCTGCTTGCTCTCAGATACCTA

CUST\_1330\_P1426210822

AATTACATTCATTAATGTAGGCTCCATGCATTGAGTTGCGGATTGTGAACATTTGGAA

A\_14\_P106464 AGAACACACTGTCAGAGAATACTGGACACTGTAATAAGAGCCAACTTTGATGAGGTA  
CUST\_3944\_PI426210822

GATTGGTTGTAAAAGTTTATTTTACATTTATGTGAAGTTTATTTTTGGTTCTGATATTCT

A\_14\_P133635 GACTTCATTACTTATTTATTTACGGGATTGCTTATTTAATTTACAGGCCTCCTTCCCCGA  
A\_16\_P20808915

AAAATTAACAGACATAGAGTTGAATCATAACCCATGAATAGGAGAATTCTTCCCAGCC  
CUST\_6024\_PI426210822 CCAGTCTGGCCTTTCAAGTGTGGTCAGAGCTAGTTATCCTCTGTG

A\_14\_P112000 ACTAACCAAATTAATCCTAAGAATTAGAATGGATTGCAGTATCTGTAGGGGGATTGTGCA  
A\_16\_P17119215

CAGCAAAGTTCATGTAAACCAGTAGGTCATAGTAAATCCTAAAATGTATTCCCACAGTGA  
A\_16\_P00685110 ATTCAGTGGTGCCTGCCATTGTATTTGCAGGAGACTGAGACATTTGTGTA

A\_14\_P201000 AGGGGTCAGACAAATGTTATCTTTTGTTTTTCTCGTATCTTATAAGTTCCTTCTGCCTT  
CUST\_5072\_PI426210822 TAAGCAGCCTTGTTTTGGGGAAAAAGAGGGACAGACCTAGAATGG

A\_14\_P101332 TTCTATTGACCTAGAATAGCACCAAATTAATGATGATAGGGTGGCTGGTCAATTTGTTTTG

A\_14\_P137194 CTTTCTTCATATGAAGATAAGGTATAGGGAAGAGTCATATCTAGTATTTGGGAAACTGAA

A\_14\_P125770 CAGTCATCATTACTGACTTGGTGAAATATCGTCTTTAATCTTAAGATCTGAACAACCCCT

A\_14\_P103340 AGACATTCACAAATCAGATAAAACTGGAGAATGACATTTGTCTGTAAATGGCTTCTTGGT

A\_14\_P124824 GATGCACTGCTTTGCTTCTGTGCATCAAATCAACTGTTTAGAAGCATTATTTCTGCGTAT

A\_16\_P21270478

AGGTGGCCCTAATAAAAAAGCAGCAAATGGATATAAAGTCAGTCTTAAGGTGTTACTTGT

A\_16\_P36682377

GGTTCCAGAGATTTTCGTATTTGTTAGCATTCTAACTGGTTCTGTCAAATGAAGAAGCATA

A\_14\_P101447 CTTATTCTCTTGCTTTCATTTTCAGTGTGACAGTGACAGTGACCAGGAAGAGAAG

A\_18\_P14133184

AAGGGATAAAAATCAACGAAGGTCCATTTACAAATGAAAAGGAATTGGGGTTTTGTTGTA

A\_14\_P101005 ATAGCAGCGTTCCTTTTCCCTGCTGGTTGTGCGTCTTGTAATGAAGTGAATTT

A\_14\_P139261 ACTCAACGTGTAGTCCATTATGTTTATAGTAAACCAGCAGTGCTGATCGCTTAAACATTT

A\_14\_P116765 CTCAAAGTCTCAATGTATTGACAGAAAATAAGGCTACAAAACATGTATTCCAAAGGTCC

A\_14\_P139130 CACAGAGTGATGAAATAATTACTTACATTATCCCTGATCTACCTACTTAAAGGCTTTGGGG

A\_18\_P22840513 AAAAACTTCTTCCAGGGAAATAACTAGACAGGGCTTTGGCCAACTAGCAG

A\_16\_P19079737

AAAAACCCACACAACACTGTCTAATCTACAGGTGCAACAAATAAGAATTAAGGCCAATTTCA

CUST\_6001\_PI426210822

TAGATTAATAAGTACACACGTTTTGCCAAGCTTACAAAATTACTTAAACTCATGGCATGG

A\_18\_P22840136 GCCTCATCACAGTGTGTGCGGTCCTTTCTGACATTTTGACCTCTCATTATT

A\_14\_P121773 TAAGATGGTAAGGTTTTGTGTAAGTAATCTCAAGCAGAGTCTGAGACTCCTTAAAGTAAGG

CUST\_1805\_PI426210822 CTTTCGAGCCTGTGGTTTTCTTTGTATACACATTAGAGGCTCTTATCAGCTG

A\_16\_P02541259

AAAAAAACCCCCTCAATCTTCTATTGGTTTAGACAGATTCGTTCAACAACCACAGATAGT  
A\_14\_P122621 GAGATGATGAAGAAGGGTAGCCAACACACAATAAAGGCTCCCAAATGATC  
A\_14\_P111838 ACCGATATTAGTCCTACACCAATTGAAGTGAAATTTGCAGATGTGCCTATGAGCAC  
A\_14\_P107046 TTGTTAATTCTGTGCATCCCTCCCATTCTAACATCCTGTTACCTAGAAAATCATCCATACA  
A\_14\_P117099 GATTCCCTGAATGTCAACTCACTGTCTTTTCAGTATAGGTTTAATCAAAAAGTGTTCAGC  
A\_14\_P104768 CAATTTTCAGTGTTCTTTGAAGTGACTTGAATATTCCCTCTTCTATGCTTCTAACTGCCA  
A\_14\_P131182 GTCGGGATCCTCTACTCCATGCTGCTAGAGGAGGAAAAGGAAAAAAT  
A\_14\_P131510 GACTCCTTCAATTATAACCACCCTGATTATGGGCACTATGATGACAAGGATAC  
A\_14\_P119177 ACGTTCAAACCTTTGGGATTGGAATGTTAATTTTCTCTGCATTATCATCCATTCATTCAC  
A\_14\_P110061 GAAGCCTTTTTCCAAGTGTTAATATATACCCTTGGTTGCCTGAACAATTAGAAATTGT  
A\_16\_P31963402

AAAATTGCATACAAGGCTTTGTAACGATCAAGTGCTAATCGATGGAAATGTTAAGGTAGA  
A\_14\_P103531 CGAGATTACTACTATGACACCTTCAAAGGAGATGACTACAATGAGGAGAATCCTACTGA  
A\_16\_P00685354

AATAGTCCTCCAAACCACTTAAATATTAATTAGCATTACTTTTACTTAGGGCAATAGTGG  
A\_14\_P115021 ATAGGAAATCTTGCCTTTCAGTGAAAGGAGGAGGGGGAAAAACAACATAAAAAATTTATT  
A\_14\_P102700 ACTTTCTATGTTTATGAAAATTGAATATGGGAGGCCTCATGGTATACCACCTGAGAACTA  
A\_14\_P126276 CTCAAAGGTAAACTCCAGTCCCCTTCCCAGAAAACAGAAAATACATGTAACATTTTAAAT  
A\_14\_P136016 ATACTAGCAAAGATGTTCTTGCTAGTGTTCCTAACTCAGTTATCTCTCATGCATCTCTTG  
A\_14\_P133343 ACTTTGGATGGGAATTATAATAACAAAACCATCTTGCAGGTAACATGGATGGATCAATCT  
CUST\_5730\_PI426210822 ACTCCCAGTTGCCCTGCCATGTCTGGTTTAGCAGCTTTTAGAAAC  
CUST\_4601\_PI426210822 CTCACCCACGCTGCTGCTGCCACACGTGGGGCCAAGGGTGACAAG  
A\_16\_P00269778

GACCCATGTCCCATATTTAAAGGCTTCACATAGACTATATAATCCAAGTTATCCCTCTGT  
CUST\_1249\_PI426210822

TATCAGGGAATGACTGGCTTTTATTTCTAGTGTGTGTTTGCATTTCCCTAGGACAG  
A\_14\_P119915 CTAAATAAAATGACCCTTCTGTGCGGAGTTTATCATCATAGAGCCAAGTATCTTCATG  
A\_14\_P136288 CTTAACATTTTGCCAAAAGTTACATTTTCATCAAAGCCTATTCTCAGAAGCCCCATAGATC  
A\_14\_P113216 CTATACAATGCTTTGAATCTTTAGTGGAAAAAGGTTTTGGCTGGTCACTTCACTTAACT  
A\_14\_P111041 GTTAAAAGAGTATTAAAGCAGCATTTTATCATATTTGGGGAAATTCACCTCTCCACGTCC  
A\_14\_P115269 AAGGTTGCAGTAAAAGTTCAATGTAACAGTGAGATTTATCTGTCCATGTCCTTTCTTGT  
A\_16\_P18073730

AAAACCTCGGTATTTATCTTCAAGGACTTCATAGTTGAATTGACAGATAAGGCAAACACC  
A\_14\_P136574 GCACCTCGTAGCGGGAAGTCAGGTTTTCCAGTAAGATAAATTCTGAGTAG  
A\_14\_P106159 TCAATGTCTCTGTGATAATGTCTAGGAACATATCCTTCACAGTAGTCATTCTGTATTCCG  
CUST\_9789\_PI426210822 GGAGAGAGAAAATAATCACACTCAGAGACTCCACTTCAAATCCCACATCTCT  
A\_16\_P16468149

ACTGAAGTTGTCTCATCCTAATTTCTACCTAGACACGAATTCTAATGCTTTCAGTCTCAG

A\_14\_P131311 ACGATGCCAGCCTCATTCTTGGGGTTTTTAATGGTAATATCTATAAAGAATTTGGTTA  
A\_16\_P00685505 AAGCCCCATAATTTCTTTGAACATTCCATATACCTTTATGTGCATATATTCTCATCCGCC  
A\_14\_P131033 GGTGGAGGCAGATGATGTAGATGATGCAAAAATCTTTTCATTATTATGGTATCTTGGCAA  
A\_14\_P126322 TGGTGTCAATTGAGTAAAAACAAAACAAATGGGGAGAAAAAAATCTCCGGGTAAACG  
A\_14\_P132409 AATTTCCCAAACCTTCCCTGCAAATGGGATTTCAAATGTTTCAATATTGGCATTTTTCT  
A\_14\_P116466 TACATGGCTTTTTTTTTTTTTAGGGTAGAATTTTCAGAACAAATTCTACGTTGGTGCAGGC  
A\_16\_P16191703 CCTCAGAGGAAAATCTCAAATGGTCAGGGAGGTCCCTTCTTAGAGAT  
A\_16\_P39530426  
ACTACCAGAGAAAAAGTTCATAAAAATGTTATGTCCACCATAAAAACCCTTAATGTGGCAT  
A\_18\_P15530330  
GAAGTCAAATGCTGTAATGAATCCAAATGCTGTTAGAACAATGTTGAGTGCTACATTGCT  
A\_16\_P01817354  
ATCTACCATTTAACCCATTAAGTCAATACCACATATTGAAATTGTTTCATAGCACTCCCT  
A\_16\_P02044130  
ACTCACACAGAACAAGAAACCATACGTCTGAAATTATGCTTGAAAAACAACCTTCACTCTC  
A\_16\_P03810470 CGGTTTTTCTTTACGGGTGTTTTCCAAAATGGCTAATTCCTGGAACAGATGAAG  
A\_14\_P201717 CTGAGATGGGACAGGATCAAAGTTGATGAAATATCAAGAGAGGTTAATAAAGGAACATTA  
A\_14\_P136761 GAGAAATACTTTCTAAAACAATGGTAAACTCATTCTTTTTAAGGTCCTGACTGCCAGAGG  
A\_16\_P00685255 CTCCAGCCGATATGCCTACTGTCCACCCTACTCCACATAGATG  
A\_16\_P58424498  
CACATTGCTGGTATATATCTGAGCCAATAATCAAATTTGGGACACTAATGCCAAAGGTTT  
A\_14\_P200328 CCTCGACTTTTTATGAGGTCAAAAATTACATGGTGATTTTAACATGCAAAACACTCCAGT  
A\_14\_P106324 CTCCTCATTTTAGCACAGAAAGCCATGGCATTGCAGTCCTCTTTTATATTTAGATACTGT  
A\_14\_P108093 ATAATTTAATTTCTAGGACATCCTGAGACATAGTTAGATCCTAGGGTGCTAACTGTGTGC  
A\_14\_P108595 CGTATTTCCATGCTATGTTTACAAATGACATGATGGAGTGCAAGCAGGATGAGATTGTA  
A\_14\_P137794 TCAATGTGCTGTATTGAGACAAGGTCGTATTTCAATCTGTGAGAGAAAATAATCCCATTG  
A\_16\_P20275573  
AACTTCCAATCCATGAAGAAAGACGAGATCAAGTAAAAGCCTAAGTAAACTGTCATGCTA  
A\_14\_P128541 TTGTGGATACTGACAGATTTTATAAGCATCTGTGCTTGAAGGCTGAACAATCACAAAATC  
A\_16\_P18776584  
AAAAATCCGAGCATAAAAATTTGGTTTTGTATGTAACAGGAAGATTAATAGGCAGTTCCTCCC  
A\_14\_P104340 CCTTGTCAGCCACTCTGTATAACTCTCCTCGAATATTTACCATGTTTATTCTTTACCTAT  
A\_14\_P107802 AGACTGTTTCAGACTAAAGATGAGAAAATGTTTCAGACTAAACATGGTCGAAAATATCCCGA  
A\_14\_P118846 AAACCTGGCATTTCAGAGAGTCTCTGATTGTGACCTTCTGTGTCTGAGT  
A\_14\_P202333 CTGTGTTGTTGCTTCTTGTGAAGGCCATGATATTTTGTTTTTCCCAATTAATTGCTATT  
A\_14\_P111141 ATGTGACTTCCATGCTTGCAAACCATTTGGACAATCTAAATCTGTTACCTCTTCAAAAAC  
A\_14\_P200211 CCCCAGCCTCTTCTCTTTTCTTCTGCTAATGGAATAAGAAAAATAACTTTAAAGTTCA  
CUST\_4473\_PI426210822 GTGGAGAGTCAGGGTGGAGTAGAGCTGTGTGAGGGTGTGCATGAG

A\_14\_P115221 GCAGGAGCCAGGTATTTACAGCCATAATGTGTGTAAAGAAAAACACGTTCTGC  
A\_14\_P110005 CTCAGGACTTTTTACCCTCTGAATTGAGTGCCTTTGAGTGACACATGCTAATAGAAATTT  
A\_14\_P135223 GCAGCAGAGATGGGCAGAAGCGAGGTGTAAATTTTCTTAACAATATATAATAAGTCTTGC  
A\_16\_P36230474  
AATTTTGTGGGAATCCTTTTGGCCTTAAACAAAATAATGATGAGAGAAATCTGCCTCCC  
A\_18\_P21446798  
TGCTACTGATAACATACCCATAGAACATGACATCTACCAATTATTTACCAATGGGAGACTG  
A\_14\_P104554 AGCCAAGTCTGTCCCTTTAATTTATTCATCTAATAAATACAGCAAACATTTGTCCGGACAT  
A\_14\_P123157 CCCGCTTTCTCTAGATCATTGCAAGTCACTGCTATTACTGGAATAAACTTAGTATGAACA  
CUST\_5831\_P1426210822 GAGTTTGGGCCATTGGCTTCATGGAGAACCTGTACTTTGTACCAA  
A\_14\_P138413 ACAATTGTAAAGACAAACAAACGAAACCTCCCTGCTTATTTTTATTTTTACAACCTTTTA  
A\_14\_P129697 AGGTCCACATAACTGTGTGCTAATTGTCTTTTTTCTGTCTGTGGTCTTTTCCATTTTTTA  
A\_14\_P100107 CTTGAAAACCTCAAATCCCAGTAATTGAATAGAATGCACTGACCCTGAGGATAAGTTATCA  
A\_14\_P118995 TGCTAAGTTTGGAGAGGAGGCTAAGATAGTTCAGGAACCTACAATTATTTCTTTTCATG  
A\_14\_P114018 GTTTTGTCTCTTCCCTTTTAGGATCAATCTCCCCATCCAGACCTACTCT  
CUST\_6737\_P1426210822  
TTCTGTCTTCTAATGCAAACTACTTTTCATAGATTTATTCTGGATTATTTTTTCCTTTGA  
CUST\_6743\_P1426210822  
CTCCTAAATAAAGCTAACTTGAAAACACATTATAAAAGAGGGCTTAATTTGTTGGTGGCT  
A\_14\_P108941 TGAGCACAAAGTCTGGGGCTCATAGCCAAATAGAGATAATTAGCCTTCTACAATATAAACA  
A\_16\_P17348274  
ATGTCTTCGTCATTACTAGTCAACCCTTTCAAATCTCTTTACAATTCAATCCTCTCACCT  
A\_14\_P123427 CAGTAATAATGTCATGTTTTGAGAAGTTCAAGTGGTTATCTTTCTTTGCAGTCCAGGAAC  
A\_14\_P133134 CCAAATCTCCAACAAATATGTTGGCAGAAAAAGTCGTTATGTGTTATGCTTTCGAGTATG  
A\_14\_P108881 CATACTGTCAAATATGACGAAAGAATATCTGCCTCAATGACACCATTTACAGGCAGTAAC  
A\_14\_P108402 GAAAGTATTTATTGACCAAATTAACAGGTCTTTGGAGAATTACGAACCATGTTCAAGTCA  
A\_14\_P122496 TGTCTATCTTATTTAGATATACTCCATTTGTAACCTCTGTTACGGTAGTGTGGCACTGCT  
A\_14\_P115555 AGAATTTGTCCATTTGCATTCGGAAAAGAATGACCAGCAAAGGTTTACTAATACCTCTC  
A\_18\_P22840853  
ATTTGCCATTTGTTTTTCCCTAATGAGGGCATCATATAGATGCTCAGTGCATTTAGTGAT  
A\_18\_P12805181  
AGAGCAGTGAGTATTCTTTGGTATTAATGTCACCTTTCATTTGTGAGTGTAAGGCAA  
A\_14\_P106353 CTGACAGCCTGTAATAATTGCTTGATAAGGAGTATATAGTTGTCAAACAGCATGCAAATTT  
A\_14\_P101498 TCGCTATGGAAGTCCCTGATGAAATCTTCATTTCCCTTATGAATCAGTCAGGTTCT  
A\_18\_P22842108 TTTTLAGACAGAAGGTTCCATACAGAACTGCATCTGGGCAGGAGAACAAAG  
A\_16\_P15478849  
ATCACAGGTCTTATCTTTCCCTCTATGTATTTGGATGTCTTGAACCAACTTCTCAGTTAT  
A\_14\_P128224 TACAAGCCGACATGGATATTCCTGTGCCTTCAATTTGCTTCAATGCATATTCCTTTT

A\_16\_P58424540

AATGGAATTTTTAAAGTCAAAGCAGTAGAAGCCACAGTCTCTGACCACAATGCAATAAAC

CUST\_8448\_PI426210822

AGAAAATTAATGTACGTATTGAGCACATTAAGCACTCTAAGAGCCAAGATAGCTTCCTGA

A\_14\_P114433 TAAATGTCTACTTTGCCATAATTATACAAAGAGCCCAAATGGGCAATTA ACTCCAGTTGG

CUST\_7217\_PI426210822

ACTGGATCTAAATTAAGAAAAACATTAATCTAAAAATGTCTAAAAAGTTAGGACATTTA

A\_14\_P133305 GAGGATTGTAAGAGTGTCTTCAAAGAAGTGACTTTTATTTTGACACAGACTGTGAGGAT

A\_14\_P105377 CCAGACCCGCTTAAGACTGAAAAGAAAAATAAGGCTCAGA ACTTTTAGTTTTTATACTT

A\_14\_P132193 TAATCAAGTAATCCTGCTAACAAAAGACGGTTATACATGTCACACTGCCATGAAGTGTGA

A\_14\_P136834 CTGTGAAAGGAAAAAAGTCCTAACACCATGACCCTAATACTCTCACTCACCTTAG

A\_14\_P110340 CTAGGTTGATTGTTAAGATGGCTTCAGTCCAGACTTCTTTTGGTTTAGTGAGATGATATT

A\_14\_P118878 TAATTCTTTACTTTCTCTTTCAGGGTTATAAGAAACGCACCTGACTTAAATAACATGTAT

CUST\_9978\_PI426210822

GACAGTACTGTGAACATCTTTCCATATTGTTCAAAGCACGTTTCCAGCACATCTTAA

A\_16\_P00685316

TATAGTGACATGCTGTATGTCATCAAAAAGAAGGTGTTCTGACATAGACAATTTCCAGA

A\_16\_P17062232

ACTTACTACGTGATGTTACAGCACTTTTTACCTATTTCCCAATTAGACATTCTGCAACT

A\_16\_P00292909

CTTTCATGGTCAACATCTTGCAAATAATTTGTCATAGGCTGGTATCTCAATTTCACTGA

A\_14\_P118657 CTTAGTTTTGTGGTCATCTATAAGAGACTCCATTGAGATGGTCGGTATTTTGAATTCAGT

A\_16\_P17345417

GTGCTACCTCTCAGTGCTAACTTGTATGATCACTCCTGTTTATTTAGTCCATAGGCATTT

A\_18\_P10926220

GTGCAGATTGAAGAACTTGTGGTTAATTATACCGAATCATCTGATGATGAGAAAAGCAGC

CUST\_10148\_PI426210822 GTGTGTGACTGGCACCTTTAAGAAATACCTTCAGCTTATATAAGCCAGCCTG

A\_14\_P125977 ATTGCTGCTCATTGATACTAGGCTTCTAAGAGAAAAATTAATTCCATCACCTTTGCGATG

A\_16\_P20341660

TGGCCCATAATTATCACTCAAATTATATACACACACTTTTTTTAAAAGCCCATCTCCCTGC

A\_14\_P105628 TTATTCTAGTGTTTTTTTGAAGTTTAACTTTATTGCTCTATATACTTGCCAGTGGGGAA

A\_14\_P200618 GGGATATAGTGGGTATGTCTGAGAAGGAGGAAAAAGGGCTTGAGTATGAGTA

A\_14\_P114249 CTCTGAAATCACCACACTCCTATTTGCATGATGTTCCATAGAGATTTTGACACTAATGAT

A\_16\_P03808634

CCACTAAGTGATCTGATGTCTCCTGAGAATATCTTTGACTTAAGAATTCCTGGTTCACA

A\_16\_P16191403

AATCCTCAAGCCTCTATACTTAACAACATTGGAATGTCACCATCTTAAAACCTTGTC AACC

A\_16\_P16847961

CCACCAACAGATAAGACTATTTTTTCCAAACTCAACAACAAATTCTTTATTTAACCCCA  
A\_14\_P121489 ATGGAGCCATATTTTTCTGGTCATAATTGTGTATCAGGTTCAATTCATGCTAATGAGAAAGG  
A\_14\_P137464 AATGACTGAGAATTAAGGCAAACACTTTATAAAGTAACATTCCCCAAAGACAGGTTGGAA  
A\_14\_P124459 GTGGATATTTGGGGATCTGTGGAATAGTATATTGATTTCAATCTCTTTTTCCATTGTGT  
A\_14\_P135986 GGTTTTACAGAAATATATAAAAAATGTTGTGGGGACAGAGATATGAACTCACCTCGTTC  
A\_18\_P22605811  
GCAGTATTACTGGTTGTTTTGATGTAAATTACGTTTAAAGGTTTATTTTAAAAAGTGTGC  
A\_14\_P103899 CCCTTAAGTAGTTAAATATAGGAGGAGAAAGAATACATCGGTTGTTAAAGCAGGAGAGGA  
A\_18\_P22842634 AGAGTAGAAGAGGAGAGGGAGAAGAGTCACTCCAGACGTCAGAAC  
A\_14\_P111545 AGACACCGAATATTTTCTAAGGGAGCACAGTTCCATTCTAAGCCTTGATATAGTTTATG  
CUST\_8720\_PI426210822  
AATCTGGAATGAAAATATCAGATGATCATAATATAAGAGTTAGAAGTCAAGAGAGATGGA  
CUST\_7025\_PI426210822 TTATTTAGCATTGGAGGAGCCTGTTTGTAGCCATGGCTGCCAACAT  
A\_14\_P108655 TGAATTAGATTTTGAAAACCTAATTTTCAGGGCTCATTTTTTCTGTGGCCCTAAATCCAT  
A\_14\_P121795 ACACCAGAGAAATATCATTCTACTCTACAAAAGGTGTGGTCTCTAACCCATGTTTA  
A\_16\_P18602081  
GTTCTCTCATTTTGCAGTTAATTTACCCCATTAACAATTACAACCCTTTGGTCTACTA  
A\_14\_P136091 AAAGTGAAAAACAAGTTATACCTCCTCTGAAATGATATACTGTTTGCCATTCTGAGAAGA  
A\_16\_P15660570  
ACTGGCAAGAAGATTGAATCTAATGCAAAAAAGCCCTAATTTTTCCCTAGCATCTTTGTT  
A\_16\_P16931672  
TAACCTCTATTTCACTACTAAATCCTTGTCTTGCATGAAAGTTACTCGTTGGAGATCCA  
A\_14\_P115438 CTATTACTTATGTGCTGATCTCTTGACATTCACTCATTAGAAGACCTTACTCCTTCAAGC  
A\_16\_P38480775  
AGCCTATGTCATAAAAGCAAGTATATAAAACAGTCATTCCTATTTCAGATGTTCTTACCCA  
A\_14\_P113798 AAATTCACATTTCACTTAGATTGCTACTCAGAAAAAGGCAGGAAACAGTTTTGTTTTGCC  
A\_18\_P25853317  
AAAATTGGCTGCCACATTTATATGCTGGTTTTGTTCTCATCTATGCCAATCTCTGAGAAA  
A\_14\_P100416 CCACCAGTCAAACCTATGGTCTGGCTTTTTTTTTTAACCAACAGTAAAGAAAACCTTTTTGG  
A\_16\_P15997841  
AAACAGCACCCTTATTTTCTGATCTAATCCTTAATAAAAGTGATCCCACAATAATTGCA  
A\_14\_P119434 TAGACTACACCAGCATTATTTACTAAAATACTAACATCTCCAATTTCTGCCTTCACCTTC  
A\_14\_P137308 CTCTTTTACGTCCTCAGATCAACGTGATTGAGGACAAGAGGAAGTTTGACATC  
CUST\_8563\_PI426210822 CTAAGCAAGTAGGAAAGCTCTCTGTGTTCTTATAAACGATCACCCTGAGCC  
A\_14\_P131731 GACTCATGAAATTGCTATCAGAAAAGCAAACCTGCTTCCCCTCTTTTCGCCAT  
A\_18\_P22841934  
GCAATTTAACAGATGCCTGTGGTTAGCCATGGGATTGTAAGCACAATTCTAAATTATGAA  
A\_14\_P100422 TACTTCTCTGTGTCCCAACTCTTCTGTTTTGTTTCTCCCATCAAAGTCAAATTC



A\_14\_P202570 GCATTTCAAGAAACCACATCTTACCTGAAAACCTGGCTGATGAGAGTAGATTATGTCC  
A\_14\_P101158 TGCCTTAAAAGAATGAAAGGAAAACCAACATGAAACACCAAATAGTGTGTGTGAATCTTC  
CUST\_8277\_PI426210822  
CTTCTCAGGAATGTGTTTCATATAAGCAACATTGAAAGCATTGCTGCAAACCTGAGCTT  
A\_14\_P133648 TCATCAAAAATTCTGGGATTTAAAAGTGCAGGACTAACACTAAGTCTAGTTCTCAACCAC  
A\_18\_P15319312  
AAAAACTTAAGAACATCCAGCAAATAATTGATCAGGATGACACTAGAATTCAGGCTTCCC  
A\_14\_P105238 TACTGTCTGATACAGAATATCAAAACAAGAAATACAAAATTTCTTATATTTGCATAAAAT  
A\_14\_P130957 CACGCTAAATGTCCTCTAATGGTGAATTCTTCAATCCTTCATTCTCTTCTAGAGACATTC  
A\_18\_P10643014  
CCCATCTGTCATATTTATCAGGAATTTCTACACATCCCATAATAATATGAAGTCTTCCCC  
A\_16\_P00329217  
GTGGAAGTATTTTCGGTAGAGGTTTCTAGTTGACTTACACATAAATCATTGATACAACCCC  
A\_14\_P115961 CTAGAAATTCATAATGAAGAAACCAGAAATTCAGAAGGGTAGTCCTGAATTATGTGGAG  
A\_14\_P127047 ACGGGTTTTATATTCTAATATTTTCATTCTCATTGGGTAGATTGCCACTGTCGTAATCAC  
CUST\_9606\_PI426210822 GCAGCAGCTTGTTCATCTTTATGAGCAATCTCTCCCTTAATTTCTGGATAGAGAC  
A\_14\_P108055 GTAGTTTCAACATTGTGCATGATACAGTTGCAGAGTTTTAAAATTCCTTAGCAGTGCTGTT  
A\_14\_P201501 CTTTCTTTAATTGTGAAAAATTTTTTTTCAGACCACATCTCAGGCAAAGTCCAGTGTCTG  
A\_16\_P40087187  
ACCCAAATAAGTCACTATTACGCCTAGATGTATAACCAAATCATCAAAAACCTGAACCGA  
A\_16\_P02712658  
ACAATGGTATAAGAATAAAGAGCACTAGTTTGTCTACTCTAAATGATTCCCCTCCTCTC  
A\_14\_P123387 GCATTTAGCATACAATGGTGCATAATGGACCATTTTTCTGCATTTACAGCATCTCATCAA  
A\_14\_P114276 ATATCCCTGAACCATCCTATTCTGTCTCAAAAAATAATTTCCCCTCAAAGTTCTAACAGT  
A\_18\_P14132244  
AGGACAGGGAATCCTTCTGAAAATCTAGTTACATAAATTTATGTTCCACCACAAGAAAA  
A\_14\_P124856 CAGGTTAGCATCCTATCTGAAAAAGTTACCATTTGAATTCATGCAGTCTGGGAATAATGA  
CUST\_5051\_PI426210822 CATTCTTCATGAGAATCACACCATTGTCCTCTGTCTGCCCTGCCT  
A\_14\_P127231 AGTTTTCCCAAGTATCAGTTATCTTCTTCTTTCTGCCACTTCCTTTTTCTACTC  
A\_16\_P00685475  
TAATTGAATCTTCTGTAATCTTCAGCAAGAAACCCCTGAGAATATTGAACGTCTTTGCCAG  
A\_16\_P18716263  
AGGTATTTCCCAAATCAGACTTATAACATCTTTCTCTTACATACCTACTCCCACAAGG  
CUST\_9797\_PI426210822  
CTTGGTTCAGGTGACAGGAATGCATGCATTCATGTCTTTATTGTATACAAATCACAGT  
A\_18\_P13104284  
TTTCCACGTTCTGTATGTAATTTCCAGTGATCTGAAGTTTTAAGGCATAATAGAAAGGCC  
A\_16\_P02614939

CAACAAACATGGGGATAAATGAATCGATCAAACCCGATTCTTGAAACTTGTCTTGATTC  
A\_14\_P111613 GGCTGGATTCCATCGCCACAGGACTTTAGTTAGAATTAATTCCTGCTTGTAATTTATAT  
A\_14\_P138909 CATTACCAGTGCAACTTATCCCCTTCGCCATCAACTTTAAGTTATTCTCATTATTTA  
A\_16\_P17037657  
CCCCAGCGATTTAAATAAAAGACAGTGACTGAGTAACTAAAATAAATGGAACCAGGTTGT  
A\_14\_P103234 ATGTGGAAGTTGTTTCATTACTCAACATTATTGCAGCAGAAGCCTGGTGAATATATCCTTA  
A\_14\_P128553 CCAGTCTGTTTTGTTGCCTATACCTTAAACCCTTACCCTGCACACTTG  
A\_14\_P201372 TAAATGTCACCAGTCATAATAGCAATGAACTCCTCTTGTTTACTGTGGTAAGAAAGAAA  
A\_18\_P13087678  
TGGACCTAGACTATACATACTAAAATCTCTTCGATCCACTTTTCATCTACAAGGAAGCAG  
A\_18\_P14338176  
AAAAGCCATAACGGTATCTTTATCTTCCTTCTGAATCCCATAATGTAGACATGTTCTCA  
A\_14\_P119962 TTCTTGCTGGTATTGGTTTAGACGTCAGTGTATGGTTAGGTCCATTCTTCTTAGAG  
A\_14\_P119256 TGATGGTATTGACTGGATACTCTGTGTGAGCAATCTTGCTAGGATCCATGTTACTTATAC  
CUST\_6863\_PI426210822 ATGGATAGGCCCTAGGTCCTTATTTCCCTCCATGGGAGGGTATTGT  
A\_14\_P129655 TTACTIONTATGTTGCATCCTTCTTTGTGAAGTATATGCTATCATTGAGGGGCCATATTGGTT  
A\_14\_P118443 GGAAAAAGTGGTAAGCAGCCCTCAGTTTAAAATGAGGACAACGATTTATACAGTTAGAA  
CUST\_1150\_PI426210822 GCCCAATCTTCCTTCCCATGGGCGCACACACACTTTTATATGCTA  
CUST\_8352\_PI426210822 GGGATGACAAATAATGACAGGGTGAGGGTCTAGAGAATGTGGCAG  
A\_14\_P139849 AACCTTCTAAAACATAACTTTAATCACCTCGTCTATCCTTCCCCTAAATCTAGCAATGG  
A\_16\_P30952517 AAATGTTTGCTTCTCAGAATGGCAGTGACCATGGGTGCTTGACTGT  
CUST\_2886\_PI426210822 CTCAGCAGAGGGTGCTGGCCAACCTCTGTCATCTCCAGGCCTCTGC  
A\_16\_P03777048  
CTGGTCCTGATGAATGACATACTTTCACCTTGAAAACCTTTGGTTTCTCAATCCTAACAAAG  
A\_14\_P202387 ATCTTGGGGAACAAGTGGTCAACCAAGTCCTTCCCTATGATTCATCTAGAGTAA  
A\_14\_P111452 TCAAACCTATTCACCACAGAACCCTTTAAATAAATTCCTCCCTGCAGAATTCAAATCTCAT  
A\_14\_P103343 AGAAAGGAACTGGAATATGGAAATGTTGACGAAGCATTAAAGTGGTTGATCAAATTCT  
A\_16\_P30952530 AGGAAATGGAGGTCTGCTATTTCCACTGAGACTTGCTGTGTGTGTTT  
A\_14\_P129322 TACCACTGCTTTATTGGAAAGCATTAGCATTGGAGTAGGTTGTTGAAACAGTGAAGATAA  
A\_14\_P123949 CAATCATTTGCATTTTGCCTGAAAAGTTACTTTCTCTGGGTATCCTCCCTCTCTATTAAA  
A\_14\_P104654 AGAGTTAAATATATTACCTTGGTCTATTTTCCATGTTGCAGATGCACTTGCTTACCCACA  
A\_18\_P15828406  
TTGCTATTTTAACTAGAACCCCTATGATCTGCCATATTGAAACACCAATACTTCACCAGT  
A\_14\_P137754 ACATTTGTTTCAAACCTTGGTGATGCATTACAACCTTGTTTTCTTATGTAATAATAATGA  
A\_14\_P129968 ACATCTTGTGTTTGCATAAATTATAACATGGTAATTGCATAGCCATTGTGGGCAGCCTAT  
A\_14\_P117652 AGTTGGAGTTAGTGCTTCTAGGAATTGTAAACGAATTCAGCAGTGTAGACCTAGAAAAAT  
CUST\_3113\_PI426210822  
TTTTTCTCCTCTTGAAATTGTTTGTAAATACACTTTGCTGCTAATTCAGGAGGCCAG

A\_18\_P14133299

AACTGCAAAGAGGAGTTTTGGGACCAGGTTGTCTTATAGGTTTATTTTGAACAACCTGATA

A\_14\_P138829 ACTATTTATAACCACTGCTCTCTTTGGCAAGGATACTCTGTCCGGGATCTACTTATTATTA

A\_14\_P115956 GGTTATAATAGCAAAAATCAAATTGTTTCAGCCAGAACACAGACGGGAATCTATTTTCATGTG

A\_14\_P137752 CCACATCTTGCTAAGTTTTTAGAATAGAGATAATATCTCCAGAATAGGCAAGCCCATCC

A\_18\_P11683278

AAAAACCATAAAGTTGCATGAAACCTGAATTACTAAAGAGCGGGGATTATTGTGTTTCAGA

A\_16\_P19636132

AAAACCTTGGATTGCATAATCATTGGTGAACCTATGATCAAATACCCATCAATGCCTCTT

A\_14\_P125363 CTCGGCATCACTTAAAATGTTCTGTAAAGTTCTCAGGATGGTATTTAATAAGGCAGCAAT

A\_16\_P19023523

TGCACAATCCAAACTATACCATGTTCCAACATCGAGTTAAATAGGCCTCATTCTATTCT

A\_14\_P119314 CTTCTAACTTGGTTTTCTGGTTTTGGATGATCATGCTCTCCCTTTGACTTAAATGAGAC

A\_14\_P100729 TATATTATCTAATGCTTTTTTCAGGCCTTCCATGATAACCTCTGAGAGACTGTCCAATAGG

CUST\_1273\_PI426210822

GAATTATAGACTACCTAAACTGCATCTTTTTGTTTCTCTCAGAAAAATTCACAGATTCAGA

CUST\_5749\_PI426210822 AGAGGGGATAATTCTGCAAACTGCAGAGCCATGGAGTAAAAAAAACACC

A\_14\_P131552 ATAGTGAACAATAGAAATTCCTTCCGTTAATGTGCATTTCCCTCAAATAAGTGTGAGT

A\_16\_P16191238

ATCTTATTAATATAAAAAGGGAAGGTGATTCCAGATGGTGGTAGGTGCTGTGAGGATTCTA

A\_14\_P108669 GTCTAGAAAGGTGGGTCTCAGTCCACAGTGATTCTACCTATAAGAGCAACATAA

A\_14\_P101883 CTTTTCTGTTCTTAAACTGCCTTTACATTGGGTCTCTGATTCAGCAGCAAACAAA

A\_16\_P16191422 CTCTTGCCTTTCTGAGCATCATCTCGTGGCATTCTGGAGCATGA

CUST\_7902\_PI426210822

TGGAAATTGGAGGACCTCTGTACCTTCTTCCAAAATCTGTAAACATACTGTTT

A\_18\_P15306037

AAAACCTGGATAGAGTCCCGAATATATCAATACTGGCAGTAAGGTTTTAGACACACTTGTG

A\_14\_P103923 TTTGATTTTCAAAAAATGTCTATGTGACTGTCCCTATCTTAAGGGGAAGTTGAAAGTGGG

A\_16\_P17715537

ATTCCAAGTCATCACAGTAACTCAATCCTTTAAGCACATAACATTTCAACCCAGATGAAC

A\_14\_P110046 TAATATTTTGCAGTGCCACCAAATCTTCATAAGCAAGACGGATATGCATGCAATCAAAA

A\_14\_P105017 AAGAACTGCTTGAATATATCCCAGGTTGGTTTTTCATCAAAGAACCTCGACAAAATTATC

CUST\_5295\_PI426210822

AAGCTGCATATCCAAAAATGAAAAGGAAACCGCTAAATTGTGCTGCTACTTTTTCT

A\_14\_P113415 TATACTCTGGGAAAACACAGCAGACTGTTGTTCTCACACATATCACTATGTTTCAAATGT

CUST\_7245\_PI426210822 GACATAAGTACAAAGTGAAATGAGGCGATGTCAGGATCACCTGTGCACAT

A\_14\_P117035 CTTGTGTTTCTCTTGCAAAAACAAGCAATCACACGAAAGGCTGTGCCTTTG

A\_14\_P102366 CCATGCACAGCCTAAGAATCTAATTCTTTCAACATTTTATTATAAGGGGAGAAACCAAGG

A\_16\_P00055980

GTCTTTCTATCATTACACCTCTCAAAATCCGATTCATACCACTAATCCTGCCTTCATTCT

A\_14\_P134163 GTAAATTTCCATTAAGTAACTGGCAAGTAATGGATCCAGGTCTACAATGCTCTATCTCCTAATG

A\_14\_P121493 CAGTCCATTACTCCTGTGTAGACTTTGCTCAGGTATGAACATTTCAAATCTTCAAAGTAA

CUST\_1587\_PI426210822 AGTGGAGGCAGGGAGTGGTAGGAGGAACCGCGGGGCAGGAGTGT

A\_14\_P135554 CTGGTCTTTCATGCAAGTAAAATTTATAGACATGTGAATACTTCTCTTGTGGAGGCCAC

A\_14\_P110306 ACACAATAATTGACTGTCTCATCTTCAATCAGTGGGTTTGATCAGATTTCTACATTATAA

A\_14\_P116272 CTCTTTTCATATCAGAATAAGATACAAATTCATCACCCTTCATTTTTGCGTCCCTTGT

A\_14\_P117706 CTCGAGTGAAGGATCTATACACAAACATGGCTATTTGCTAGTTAAACAACAGGATAT

A\_14\_P119370 CTAGTGTCTCTGGGCTTTTTAGAGGCTGAATTACATGAGTATTTATACCTGAATTACAC

A\_14\_P123623 ATACCAGTGATAAAGTGTCTCCACACAGGTTCTGGGACCATTTATAGTC

A\_14\_P118643 CTTCTAGTTCTAAGAAGGACTTAGGATACAGGCAGAGGCAGGATCCTGAG

A\_18\_P14137012 CTTCACTCTCTGAATCGAAAAGTAACTTGGCTCCTCTGCCTCCGG

A\_14\_P113642 GGTGATGACTGCCAATTGAATTTTTAGTTGAAATCACTGAATGCCTTACACATATTAGCC

CUST\_3512\_PI426210822 CTTCTGATGCTCTTGCTAGTGCTGGGTGGAAAGATTCCCTTTCA

A\_16\_P35787601

TCCAAAATGCCCAAATGATTCTATTTCGTGTGATCCTTATGTGGCTGTTCTACTTTT

A\_14\_P104575 TGTTGTATAAGAAAGAATTTGGCTTTTGTGTCAGGAAACAGTGACTGTAAAGAGAAGTGGT

CUST\_8983\_PI426210822 CCGGAATAGGGGCTTACTGTCTTTTGATGCCTTGGTTCTCAGAGTA

A\_14\_P134374 TAAGCCAAAGAGGAACTTAATGTCATACCCCTTTCTCAAGGAAAGTTTTATCTACAACAC

A\_14\_P200611 TGATTTTCATCATTGGAATTACTATGTCCATTTCTTCTTAACTATCCCATTGGTCTGTGGC

A\_14\_P138814 AAACCAAGAGTTTGGAAAGTAACTTTACTCCTGTCATTGAGGATATTGGAAAAGTTCTTG

A\_14\_P116664 ACTACAGTCAAGATGAGGAGTCCAAAATAATGATCAGTGACTTTGGATTGTCAAAAATGG

CUST\_3904\_PI426210822

GACGTCCTACTGTAATGTGTGATATTTATGTATATGCTTTTTAAGGACTACAATCCTT

CUST\_3793\_PI426210822 ATTGATAAACCTTGGTATGAAAGACTGTAGGTCTCTGGGTGCAAAGTAATGGC

A\_14\_P104506 CGCCGCCCTTTAACACAGTCTGGATTTAATAAATTCATATGGGTGTTAACTTAAACTCA

A\_16\_P15319276

AGACAGTCTATGTTAGGCCAATCTCTTGTATTATTAGCAGTTGAGAATGGTTTTCCAC

A\_14\_P101141 ATCTTTTTCTTTCCCGTGTCTTTCAGAAGTGGTTAAAGTCCTATGGCTATCTGCTT

A\_16\_P20493129

AAAAAAGTCATCCTTAAAATTGCCACTACATTCTTCTAATGAAATCTGTGAGGCTTGA

CUST\_7527\_PI426210822 AGATGGGCTTCTCTGGGAGCACAGCAGGTAGGCACCCATGTTGG

A\_14\_P125432 GCACATTGTTAATGTTTAAATAAGTGTGTTGACCAGAATGGAATTTAGCCTGAACGATTGC

CUST\_597\_PI426210822 ATTCTAAGGATCTATGAGCTCTTGGGTGCTGCCAGGAGTTAGAAGT

A\_16\_P36422624

GTGTGGTAGATATTTCCATTCATCGTCTGATTGTTTGAAGTATCTAATCACCCCAATT

A\_14\_P128200 AGTGTATCAGTTTTAAACTTACAATTCATACACGTTATCAAGTCAAATCCAAGCAAACG

A\_14\_P131563

GAAAGCAGACAAATGCTCTAAGACAAATAAATGAAGGCAACGGAAAACAAAAAAGTGTCA  
CUST\_7418\_PI426210822 CTATGAGACCATCCTCCATGTGGGTCCCATCCAGGAAGCTGCTTC  
A\_14\_P200702 CATTGTGAACGGTTACTAACAAAGGCATCCCCTAAATGCTAAAAGATCTTGCCAT  
CUST\_4336\_PI426210822 TACTTTATTTGCGAAGGGGTGGTGAACACTAATATGCCTGACTCCATAGAG

A\_16\_P15813886

AGGACACAAGCCTGAATATTGTGACTCTTTCCAAGATTCTTCAGATATATCATGCTCTAG

A\_16\_P03750324

GACTCACCAAAAAAATGTGACTAAGCAGATAATGGAGCACTAAAGAAATCTGAGGTTGT

A\_14\_P133186

TTCAAAAACAAAAGCAACTAAACCAAAAAAACCCTAATTTCCAGAAGTTGAAAAGCACCC

A\_14\_P113103 TAGAAACTGGAATTTAGCGAGAATACATTCTTTCATACTGCCTCCTCCCTTGTTTTTCTG

A\_14\_P134684 GTCCCTAAAAGTGAATTTCTGAGGACCTCAAATCCATGTCCTTTCCTTAGCAATG

A\_14\_P139301 CATTCTCTACAGATGACAGATTTATAGCAACCTGCTCAGTGGATAAAAAAGTGAAGGTAG

CUST\_9253\_PI426210822

ATTTCTCTTTGTGAATTCATCCAATTCTTGGTAGGATAAATTAGTGAGCTGTTTTCTCCC

A\_16\_P20186470

TAAGTAACGGGTCATATTTGGAGTATCACACATCTCAGTCTTGTAGAAATTAGGAACAGC

A\_14\_P123436 CCATGCTAAACAGCCTGCGTTTTATATGATTTCTCTACCCAGCCAAAAAATAAATGG

A\_16\_P00685318

ACACAAAATCCATATTTATCTCAATGCAAAAGAGATGTGGTCATCGAAACACTGAATGCA

A\_14\_P132444 ACCGAAACACTTAATTGTGAACCGCTAACATTGAAGAAATTTTGACAATTCCGATTTGAT

A\_14\_P119665 CAATTATTCAGATGGGGTCTGCAAGTAACTTCGACTGTGATGTTAAGAATGGTGAATTTA

A\_14\_P123782 CTATTTTCTGATGTTATAGTTGAAGGGGGAAGTATGTTAGTTTAAAGAAACCGAAGGCTGT

A\_14\_P100097 AGAAAATAAAAACAGTTTACCTGACCCTGAAGTGACTATAAACTGTTGTAATCCCAAAT

CUST\_6862\_PI426210822 TTGAGAGACTGAGATAGATGGATAGGCCCTAGGTCCTTATTTCTCCAT

A\_14\_P120860 AATTCCTCCCCTCAAAGTGACATTGATCAGATACCTGTAAAGATAAAAATAAAGGAAGA

A\_14\_P139516 TGATCTTCCCTTTTTAAATATTCAGCCTCAATTTTCTTCCCATTCATCAGATTGGCTTGA

A\_14\_P122541 CTTATTCTTGGTTTGTATTTTCTTAAAGTTGGCGCTTGTATATTGTAGCAGGCATCTTGG

A\_16\_P20603092 CTTTACCACATATTCCTGCCTCTTATTGTGTCTTTATTTGTCTCATCTTCTGCTCTAAC

A\_14\_P109618 GATCTGTTGTTATTCCTCTGCTGGAATGTTCAATTGGATTATTTCTTTAAAGACAGAAA

A\_14\_P119330 GTCAAAGAATCATAATCTTACCCTTGACTCTATTGATTGCTAAAGCATTTGGATCTGGCT

A\_14\_P107380 CTTGGTAACACAAAATTCTCACACTTGTCAAAAAAGGGGCTATCCAACAACC

A\_14\_P106741 TATGACATGAGTGGGCTATATGTGAGTTAAGTGTGAGAAAGATGAGAAATTTCTTCCCTTT

A\_16\_P37826301

AACCCTCAGAATGCATAATAATCTTGCAGCAGAATATAGATTATAGGCTTGTGTTGACT

A\_16\_P03604532

AAAATATTTATGATAGGACACATTAGAGGCCTAGACCAAAATGAAATACCTCCCTCCAGA

CUST\_1292\_P1426210822 TAGCTTTGGTCCCAAATTGAATTCTGCTCAGTTCTGAGCTGGGG

A\_16\_P21258156

ATGGAATGATCCTGTTACCATCAGAAAAATGTTTAGCCCATAGAAAAGTAAACCTATGACC

A\_16\_P17571185 GCATGGTATATCTTTTTATATCTCTTCTATCATTCACTTTTGAAAACATTAATCTCTCTC

CUST\_8128\_P1426210822 TTGGTGAAGATATGGTCTGACTGCCCGGAGGGCACCCACACACA

A\_14\_P116631 GTAGCAGCAGATGTAGTTTCAGACTTGGAGTAAACTGTATAAACAAAAGAATCTTCCAT

A\_14\_P124267 ACTCTAATGAAACAACAGTCCAACCTCGTTTTTCGCATACACACATAAGAATTCTTTTCT

A\_16\_P02965852

TATTAAGCAATATCACCTTTAGCCTTGTCAGAACCTCTAACAAGACCTTTTCAGACC

A\_14\_P116719 AATTACCCATCCCTGTTCTACAGACACACCTTGTGTCTTAAGTATTATTTTCAATGCAC

A\_14\_P123432 ACTGACTACAACCAGTGTATTCTTGATTTGTCACCACTTTTTCAIGTCTTGTCTTCT

A\_14\_P106286 TTTGCTAAATCACATGAGTTACAGCATTATTGCTGCCAGATTACAAAGGAAAACAGCATG

A\_16\_P36230051

TGGAAATATTGCACCCAATAATAACAGTTTAACTTTTGGCTTATGAAATACTTCAGTGGG

A\_14\_P114864 ACTGTTGTTTTCTAGGGAAAAATAAGTGCTGATGCATGATGTATTGCAGTTGTTTTGAAA

CUST\_2656\_P1426210822 TAGATATATATTGCCCATCGTTCCTAACCTCCTAAGGGCAGGAGG

A\_14\_P130455 CTAAATGCCACCTAGAGTTATTGGAGGTCTGAATTTGGAAAAAAAACCTATGTCCAGGAG

CUST\_6497\_P1426210822 CATTGAGGAGGTGCCTGACAGTCCTCACTTATCCCTGTAGCTTAATTA

A\_14\_P102550 CTGTTGTGATTGAAAGATTGGAGAAGGGGTAGATAGATATAAAGCAGGAAGACCAATTT

A\_14\_P135174 CTTGAGATTTTTACCTTCCAAGTAAAGGAGAAAGCAGCCTCCAAGAAGCCAA

A\_14\_P108987 CATTTTCTGAAAACCTGGCAATCCCATGTGGACTTCTGGTAGAATGAGCAAT

A\_14\_P123597 CTTCTTCTCCTAGAATGCTAGAATCACACCAAACCCCTATGTAAAAAAGAAAAGAAA

A\_14\_P139140 TAGCCTTGGGAGATAAAATTTAGGGGTTTCTCTGTAAAGATTTTTGTTGTTTGTGTTGCA

A\_16\_P01324133

CTGCATATGAAACATTCCTACCCAATTTCTTGTCTGTTTTTTTATTATCAACCATGCCTCT

A\_16\_P02290732

AGAAAGTCTCTTGGGTCAACATATTCTTAGCGATAACAGAAGATCACTCCAACCTGTTCTA

A\_14\_P110479 TATTTAATATAGTTATGTTAGCACCTTTCCCAACCTACAGTGAGTTCTCAGAAGTTACCA

A\_16\_P15343497

TGTCTTTCCCTACTTAAGTCAGACTATACAGAACTCGTCTAGGAAAATTGCTTAATCCAC

A\_14\_P109949 CTAGTAGCCAATTTTAAAGTCTTATGAAACACAACCTTTTGAGGAGAACTGGTCTTTTGG

CUST\_3733\_P1426210822 ATTACTAATCTATGACCAGAGGAAGCAGCCACTGCATACGTGGGTGT

A\_18\_P16781221

AAGGAAAATGACTACATATAGGATTTCACTCAAAAGACCATCATTTACTTCATCCCTACT

A\_14\_P120075 ATCAAAGATTTTTTTCTTTCTTTTGTAGTCTTACCTGGCAGTGAGGAGAGTTCAATTAAC

A\_16\_P01332971

CCTTTACTGCACTATTCTCTGAATCTACTTTGACTTTTGAACCTCTGTTGGTAAACTGTGC

A\_14\_P127355 TCGTGGGCCATATCCTTATAGGCCATTAATTTGTTAATTTCAAAAACAGCACAGTGT

A\_14\_P138249 AGAAATGTTTGTCCCTTGACTTGGATTACCCTCATTGATGTCTACTGGTTTTGTATTA  
CUST\_8382\_PI426210822

ATTGTCTGACTACTTATTTATTGGTATAATGGTTGTTATTGTGGTTGTCCTGCAGGAAGG

A\_14\_P122470 CAACCTCTGAATCCAAGGATCTACTCATCAATACCGCTGTGCATTTCTGAAAG

A\_16\_P20194707

AAGTGATTCATTTGCTTACTGTTAAGTTCATCCAGGATTCCTTTAAATACCAAATCCCCA

A\_14\_P136676 ATGCTCATCAAGATGTTATTGATGACATTAAGTTCTTGGATCACTGTGCTCAGATCTTCA

A\_14\_P118055 GAGAAGTTTGGGAGAACGCGGTCTACTTTGTCTGCAATTATTCTCCAAAGTAAG

A\_16\_P35667332

GCAACTCAAAACCCAAAATCCAATCTCATGACTTTTGAGTTTATAGTAGGGTGAGAAAAC

CUST\_7390\_PI426210822 GCTGCTGGTGGGGACTCACAAATGGGCATGCTGCCTGCCAGCAAG

A\_14\_P109966 GTCCTCAACATCTATTTATGCTATAGATGTGTATGCTACCCTCTAAGACAGTAGTAATAA

A\_14\_P137696

CAGGGCAGCAGAACTTCCAGAAAAGAAAAAGAAAAAGCCAAAGGTAAGTCAACTAATA

A\_16\_P00908480

AAACCAAAAACCTCTCCCACTTATCCTGTCAAAGAATTTCTGATGGTTTCATGTCAAACCTC

A\_14\_P128525 AAATTGGTAAGCAAAGTCTTTCAAAAACTTTTGGGCTCATTAAAAAAGGGATGGTCAAAG

A\_14\_P118642 CTTTTGGCTCACCTTACTTTATGCTGAATCCTATTTATCAATGTCCTACAACGTGTGAAT

CUST\_7815\_PI426210822

GGTATAGAATTA AAAACATTTGGTCAGGGCAGTTGACATGGCCAGTATAAACAGCT

A\_18\_P14136199 GAGCATGACTTAGAAAAAAGATCAGAGGACTTTTCTGCCTCTTCAGTGTTCAAA

A\_14\_P104616 GTGTTCCGTGGCCACATCACATATTCTCTCAAAATCTCTATTAATAATAAGGATGCTAGG

A\_14\_P131346 ATTATTATGGGCTGTTCTCATGTTTTTTCTAAGGATGATCATATCTGGGATCCTCAGTTC

A\_14\_P131687 TGTAAGGAGCGGGTAGAATACGTTTATCAAAAACATTGGAGTATGTAATGTGAGAGGTTT

A\_16\_P16110721

AAAAAAAATTGAGCCTTCTCTAACTTGACTGAGTTAGCAATCTCACAAGAATGAGGCTG

A\_14\_P133109 TTATGTATTGTTCAAGGACTTTTTTTCTTCCTTCTCAGTTTGCTTGTCTTATTGGAACCT

A\_14\_P100188 AAAGATAACAATGTCACAGCCGTCCCTACTGTTTTGCCATCTACTTTAACAGAACTATAT

A\_14\_P121949 GATTCCATTATCCAATCGTTCTTTGATTGTTACCACATTTTGGTAAGTATTTGCTTTTCC

A\_14\_P115783 AGCATTCCAAGATCTTTGCATCTTCAGAAAAACACCATTCGCCTATGTTATTTAGGCAAAA

A\_14\_P126122 GATAATTTATTTCTTGGATTCTTACAGGGCATTCTACTTGGACAAGTCAAATTCACCACC

A\_16\_P15011708

AACCCTGGACTGATAACAAATCTGTTTGATATATAGTGGGTTGAATTCATGATTGCCATC

A\_14\_P101479 CTACCCCTGTTCCATTGTCTCCACCAGATAGTGAGTATCATTTTCTTCATCCAT

CUST\_7377\_PI426210822 CATGGATTGAGCCACAGAGGGAGGAGGGAGGGTCTCAAATTA

A\_16\_P20103938

TTGCAAGTTCCTTACACTCTCAACTTTTTATCTGGCAAATTTGGTTACTGATATCTGTCC

A\_14\_P130167 ACCATTGGTTGATAATTATAATGATTCATTTGGACTTGAAGAAAGATTGTCCCCAGGCAC

A\_18\_P22842480 ATAGAGCATAATGAGGATGGGCTTACTCGCCCTATGGGCCCTGGG  
A\_14\_P117678 TCCCAGCATAACCACATCCTTGCTTTTTCACAATTTCCAATTTCTTTTAAATTTTCCTGT  
A\_16\_P21206774  
AAAAATATCAGCCAATTGTTAAACTCACAGTCTTTGATTACCTGAAAGAATTCTGTGCCT  
CUST\_2443\_PI426210822  
ATTTACTGGGTAAAACCTGTTCACTCCTGTCTGTGAAGCTCCAGAATCTATAGATCA  
A\_18\_P14137595 ATTTTAGAAATCTGATGCCTGCTGTTACAGGCCTGTCAGGACTTTACCACTC  
A\_16\_P16936819  
AATCTTGTCTTATTGTAAAAAAGCCTATTTGTTTCCTCATTACACACCTTACAGTGGAGT  
A\_14\_P123347 TTGATTTTCGCCCTTAATTTTAGAATAACTTTAAGTTCTTTCTACAGACGGGTCTCTGC  
A\_14\_P137689 GTGGGTAAAAGCAGTGAAAGTGAATTTACTCAGTATACCACACACCATATTCTGAAATCA  
A\_14\_P110545 CTGATCCCTCCAATAGTGACAGACTACTTTTTTAAATTTAGAAACTTGGGACCCTTTTAG  
A\_16\_P00648618  
GCATTCTCTGAGTCTGTCATAGCAAATCACATGTAATTCCTTCTACCTACTTTCTGTTCT  
A\_14\_P125751 GTCACTTATGTTATGCTTAGCATCCCACAGCATTTGTAAGTTCTTCCTGACTTCTAACC  
A\_14\_P136752 AGAGTTTTGCTCCTCCCTTTTCTTGTTTTTACACTTGTTAAATAATGTTAGACCACCACA  
CUST\_3126\_PI426210822 CTTCTAGATGCTTCAGGGCTGTGTATAGAGAGATGCCCCACACAC  
A\_14\_P135572 CTATTTTTTCTCTCCTTTTCTTTTCTTCAATAAAAAGAATTA AAAACCCATCTCCTCTCT  
A\_14\_P121381 AACATACCCAGTAGCAAATGGTCTTCATCAGTTGTATGAATGATGTCAATAGGCTAAACA  
A\_14\_P118511 AGGAGCAAAAATGAGAAAAGAAAATCACCCCTGTAGGCAGACACATACAAATGTATAGATC  
A\_14\_P121826 AACAAAGACTATAATAGCAGATTATAATGCTTTGGTGAGCACTGTGCAAAGAGACCACATT  
A\_16\_P16885830  
AACAGAAGTGATCTTCATACTCTTACCTTTTCTAGCAATTCATGTAGCAATAAGATGGGG  
CUST\_248\_PI426210822 GAGAAGCTCCTAGGATATAGGGAAGAGGAAGGTGAGGGAGCACTT  
A\_14\_P113923 AAAAGACTTTCACCAATGGGTTTATTTTAAAAGGAAGCAAATTAACAAAACCTATGGTGAT  
A\_14\_P116168 GCCAATTGAAAAAGACATCTGCAAACATAGAACTGTTTTTTCTGCCAAATATGTGAGCAT  
A\_14\_P106630 ATTCAGGAGAACTGACTTTTATTGAGGAAGACAGGTCAAATGTTGTTTGGAGTC  
CUST\_4123\_PI426210822 GAGAAGCTTGCCTCCTTCAGAAGGGTCTTCATTCTAGAGGGATAT  
CUST\_9053\_PI426210822 ACCTATGGAATCAGCCCTGATTCACACTTCAAACCCACTACTTCATGAA  
A\_16\_P18721986  
ACAAGAATATGTTACGACCCTCTAAGTTAAGATCAGTTAGACGTTTACACTTCATGAAGG  
A\_16\_P03692266  
ATATCACTCATATCTGAACCTTTACCCTAACCATTAGTCCTTTGTTTTCAAACCTTCCAGCA  
A\_16\_P17662915  
GGGAAGGTTGGTAGAGTTACTCCAAAGGTTATGATAACAAGGTAGGAAGAGATTAACATT  
CUST\_4496\_PI426210822 CAGCCGATATGCCTACTGTCCCACCCCTACTCCACATAGATGCAG  
CUST\_4172\_PI426210822 TATAGCCCATCTTTGTTCAATTGATTCAGATTCAGCCCTTGCCTCCCATAT  
A\_14\_P115528 GACGACCTCATCTTTACCAGCAAGAAGTCACTCTTTGGGAAGATCAAATCATTTAC



A\_14\_P114308 AGCAGGAGGATTTTTTAACAAATTGTTGAGTCATGGCTATCTTAATGCAAGACTTCACTT  
A\_16\_P38497183

AAAACCTATACCTCTTTTGGCTTACCGTATGTTGTTTCATCATCAACTGGCTCACTTAAC  
CUST\_4757\_PI426210822 GTCCTATTCCCTCTGTGGCCTATTCCTGTGCTACACTCGAGCCAAG  
CUST\_3967\_PI426210822 GCATTGTCTCCTTTTAGCCCCACAGTTGATTTCTTATTGAGCCTTTGGAA  
CUST\_6541\_PI426210822

GCAAAAGAAAAGGTCATGGTTTTTATGTCTAAGACTTAAGGAAAATCTAAGTGATCCAAC  
CUST\_7950\_PI426210822 CATAGCAGCTGGGGCGGCCACTGAAGCCCTGACATGCTCCTGTCC  
CUST\_1502\_PI426210822 ATGATTTCTGTAGGAGTCTGCTTGACTCTGAGACCTGGGGAAGGA  
A\_14\_P132145 CATCCTTACCTGACTTTTATGTCTGAGGTTCCCAAGTTAAAAGCATGCTTTTGAAACAA  
A\_16\_P01709086

TTCTGGTCTACCAGTGCAAAAGTTGTAATCTTGTGTTTCCAATGTATTATTTATGCCAGG  
CUST\_10398\_PI426210822 CTTTCTGCCTTTCAGATGGGCTTCTTTCGCCGAAGGTACAAAGAAAT  
A\_14\_P129566 TCCCAGAAGTTCTTGGAAGAATAGCAGTAGAAAAGTAATGAACATCACACCTTGTCTAAA  
A\_14\_P137547 AAACCTATCAACTAGATGCACAAGTTTTTCAAATTTCTTTCTGCAATGTAACCTTGACCCC  
A\_14\_P137570 AAAACCTAGATGTTCAAATCCAAACATCTACCAAACCATACAGATTTGTAGGTCACAGT  
A\_16\_P19421582

AAACATTTCTGAGTCAAATACCGTTAGGAAAAGTTTCAGCATAGATCTTTACCTCGAACC  
A\_16\_P58424401

CTCAAAATCTCCTTTAAAACCCAATAGGCATTTGGATTTTCTCTGCTGAACCTTCTCAA  
CUST\_2525\_PI426210822

GGGAAATTGACAAATTCATCAGGTTCTTTTATTTTTAAACATATAGCAAATTTAAAGACT  
A\_16\_P01394704

GGCAATCTTGCAGTTATACTTTTTTTGATCACCGTAATCACCTCTCTAAGTCCATGTTAG  
A\_16\_P19864014

AGGCCACGTAGACTAATGAATTGCCCTGGAAACTAATATGCATTTTCTATAATGACTCAA  
A\_16\_P00947340

ATAGTTCTGAATTAGCCTGTTATATGCCTGTTTACCTACAAAAGTCTACTGTGTTTGG  
A\_14\_P106993 TGGAGTGTGCCTTGATAGTTCGTTTCATGCCTGTATTGATATGATGTTTATTTACTTTTCT  
A\_16\_P15886264

AATAGATTCATTGACAAGTAAGCGACCTTTCAAATGCATTTAGATGATACCAAGAGACCC  
CUST\_1507\_PI426210822 AGATACATGAAGCGTGTGAGCATCCCCCTCCTAGCAGCCTTCTCTC  
A\_18\_P22842120 GTCTCTGTGTCTACTCAGAAAAGACTCATGCTGTGCAATTAGAGTGTGGC  
A\_14\_P201916 CATGGTGAGAGAAGGGACATACTTTCTGCGATCCTGACACAGAGAAG  
A\_14\_P138595 TTAACCTACAGAAAAAATTCCTTCAAAGAATGGACGATGAGGATAAACAGGTAAACAGT  
A\_14\_P120745 CTGTGTAACGTCTAACAAAACAGCATAAGGAAAACAGGTGTTTGAAATGGAGACATAAGT  
A\_16\_P16191757

ATTTAGATCTTATCCATTGCCATAACCAAAGCAACCCTTACTATTTGTGTGTGCAAGTC

A\_18\_P17293538

AGAGCAGATGGTATATCTATTAAGTCAACACATCTTCCTAAACATATGGCTGAACAGGT  
CUST\_5892\_PI426210822 CTCCACCTCTACCCCTTCACCTCTCCATGCCTCACAAAGTTGGAC  
CUST\_156\_PI426210822 GCCACTAAGGCTAATGGAAAACCTTCAGATTCCTTCTTGAAGTGAGAGCATA  
A\_14\_P129534 CTCTATGAGAATCTTGGAGAATACTTCATTTTTGACTCAAAGACAGTGAGCATAGAAGAG  
CUST\_8677\_PI426210822

GACCTGATTTCCAGGAGGTAAAATTGTAGGGATGAATGATAATTTTCTAAGGAGATATAT  
A\_14\_P129650 GTAGGAATGCTCGGGCTAAAGGAATGTCATTTTACAAGTATGGTATGATTTTATAGAAACC  
A\_14\_P133000 ACAGAATGTTTCTGATTTGGGTGATGGTGATTTTCCACTGCAAAGTTAACGTTTAATTTT  
A\_14\_P135134 CTGAAAATAAAGCCAAGTTTGGGGATGTATTAATACTAGACAAGGAGCCAACCTCCC  
A\_14\_P112922 CTGGTATAAAGGGAAATGGGGGAACGAGGAAACATAGTGGTGGCTTAATTTATATATAA  
A\_14\_P111852 CTTACTTTGTCCTAGTAACTCCTCACTATGGAATTATGTGGTCATGAGAGATTAGGTTGA  
A\_14\_P200868 ACTTTTACAAAGGAACAAAGAAGGGAAAAGGTATTTTTGTTTTGTTGTTTGGTCTGTAA  
A\_14\_P118115 TGAATGAATCATTAAAGCCAGCAATTATAGCACCTACTGGAACCATAAAATTTTTGT  
CUST\_7115\_PI426210822 GTGGCTTTGTGCTATTGGCATGGTGGGTCTGAAACTCTTGTAGAC  
A\_16\_P15566502

ACTGAAACCAGTGATCCTAACATCTGAGAGGTCTATATTTCTACCACTGATTTACAATGC  
A\_14\_P202004 CATTTAGTAGGGTTCTATTACATAAACAGTAGGGTTTTTCCTCTCCTGACCTTATCCGTT  
A\_16\_P30952450 ACAATTCTCAGGCTGTTAGAAGTTACAATCCCCTCGAGTTCGTGAACTG  
A\_14\_P102096 TATGGGGCTATCCATTAAGATGGAAAGAATACTGTAACATGTAATCCAAAAGGGGATAAC  
A\_14\_P106893 TCCTTTACCATCTTTTTTTAGAGGCATTCAGAAGTCCAGTATTTTCGACATGGAACAGATA  
A\_14\_P108096 CACTCAATTGCACACTAATTTTGCAGTTCCTATTTTTTCCCCTTATCTTTCAAACACCAA  
CUST\_253\_PI426210822 TCTCATCTCATATGGGCCATTCGACCCGGAGACCTTCACCAGAAG  
A\_16\_P16789540

AGCCTACCTGTCTCTTAAATGATCAACACCATGGTAATAGTTTCCAATAGGTAATACCAG  
A\_14\_P104868 AAATTACCTTCATTAAACAGAGTGTTAGCCTCTTCAAGGACCTCTGTAAATTTGTCACCG  
A\_16\_P58424120

ACTTAACATTTTTGATCTTACTGAGTAATCACATCATTCTCAGATAAGTATTCTTATCCT  
A\_16\_P15031050

AAAGAAAAAAGGGCTGTTTTCCAGTATTTTTCAATAAATAGAAAGATGTGCCTCCCTGA  
A\_14\_P125152 TGCTTTTTCTCTGTAAAAGCAGGGACATTTCTTTTTAACGTATTTTTTCCAGTGGCTAA  
A\_16\_P21153930

AATTTAAAAAGAAACGTTGTTGGCTTGAATCTATTGCTGTTGATTAGTTTGTGACCCAC  
A\_18\_P22841212

CTGTATGCATTATTTTCTTCTTAATAATGGCACCTCCTGAGAGTTTCCAGGTCTCAGATC  
A\_16\_P17283881

AACCCATATTACTGAGAACACAATAAGGAGATCATAAAGGAGGAAAATATGTTTGGAGCA  
A\_16\_P00935185

ATCCCTGGTGAATATATTACTGGACACTTATCAACTTAGAATGAATCACTCTCTCTGTGG  
CUST\_8525\_P1426210822 GATGCCAGCTCAGATGTTAACATCCCTCATGATGTTCCATTCCAGTTC  
A\_14\_P131538 CAGACAGCCTCATAACCTCCTACCCTCCTGTATCCCTGAAATAATGTTG  
A\_14\_P103410 GGCCTTTTGTATAAAAAAATCTTCAAGTGCTCATTGTTCCCTGAGTGACTCACTTGAG  
A\_14\_P201121 CTAAGCAAATGTGAGGCAAAGAACCTTTTCAAAGTGGGGAAATGTATCCTATGTATAGA  
A\_14\_P125948 ATCTCTGGTAAAAGATCCTTATAACCGGCTGAACACTACAAAACATTGAGAAGTGAAGTA  
A\_14\_P120020 GAATGAATTTAGAGCCAAACTGTCCAAGGCTTTGGCAGTGAGTATTTTACTTGATTCTG  
A\_14\_P116464 CTGTTACTGCATTTTATTGCCATCAAAAACATCTTGGCTGCATTCCATTTTGATTGACA  
CUST\_1956\_P1426210822 CTACCTGTGCCCTGTGTTTATATGGCAGTGCTGTCTGCTTGTGG  
A\_16\_P36097236  
TTAAGAAGTCACTCTTTTAGTCCAATACAAAAGCATAACATAATAGTCACTCACCACGC  
A\_16\_P16120128  
GCACATCTTGGACTAATGTTAATAACTGGGTTATTCAAGTCTTAAGTCTCAGCCTTGTC  
CUST\_5615\_P1426210822 TGAAGCCACTTGTTCACTGGCTGAGGAGTTGGATGTGATTCTACG  
A\_14\_P136513 AATACCCAACAGTCATTAAGCAATACCGTTGAAATAAAATTCAATGTTTTACTTTTT  
A\_14\_P126548 CTGTTAGCCTGATAATCCTCTAAACGAAGTTCCTGAAGGGAGGGAAAACATATTTCTAA  
A\_16\_P21631988  
GAGCAATCTTGTTTATGTTTGTACCAAGATTTTCAGTCTCAAGGCTTTATATGCTCCCT  
A\_14\_P114875 CTGACATGCCAAAATGCCACTCTGTTTTAATAATTAAGTGGTTCTTTGGGTTCTGTTTAC  
A\_14\_P133347 TTTCCGGGCTTACATTCTTTCAATAACACTTCTTCCCTAAGACATTTTGATAACTACACG  
A\_14\_P134777 TCCTATTCAAGACGTCTGGAAAACACTACATTTACTACTTTCAGAGTGTTTCATGAAAGCAT  
A\_16\_P19174002  
AATTTAGGACCACATTTATCCGACTACCTCTCACCTTATTTACAGCAACCTAATCTGTTT  
CUST\_4361\_P1426210822 ACCAGAAGCAAAGACGTAGAAACCGTCATGTTATAAACATGAAAGCCCCA  
A\_18\_P22841040  
ACATGAATTCAAAGAGGTTTGGGATAATTTTATTAATGATAAAACCATAAAGAACTCAGA  
A\_16\_P16191315  
AATTATGGAAGTATTGGACTTGAGCAAACCTTTTGACAAATAGCGCTCTCTTTCTCTCTTG  
A\_16\_P16288495  
TTATATGTTCCCAATCCGACTAATTAATGTCAAATTCACATAAGTTTCCAACCTCACCCC  
A\_14\_P135632 GTATGCTTAGTGTGAGTGTGACTCTTGCCACGTAGAAAGCACCAGATGTTATATTTTAAT  
A\_16\_P35150510  
GACAACCTCGACAGTTTTTTTTTCCAACATTTTTTAGCATCCTGTCACTAAACATTCCCAT  
A\_16\_P20520281  
AGATCTTGGTTGCAACTTTAGTATTCATTTTGTCCATTACTACTCCCTTCAACTACCACA  
A\_14\_P112597 TAGCCTGTCTAACACCAAGCCCCAAAATGAATGAAAATATGTGGTTTGTGTTGTTGTTA  
A\_14\_P136511 GTTTCTCTCTTTAAATTGCCCTGAGAATTGAAACTCAGAGGAGCAAAGTCTAAGTTT  
A\_18\_P26822629

AAGGCAATAGAGAACATAAGGCAATTCATGTTATTCTCAGCAAATCAAGACTCCTCAGT  
A\_18\_P11765044  
TAAAAACTTTCCTACTTAACCCCAAGTATTCAGATATCACACTTTGCAAATCATCCACAGC  
A\_16\_P02332284  
CTCCTGGCTTGTGTATTTTTGTGTGGTAATTGAATTCCAGATCAATTAGGATAACTTCGT  
A\_14\_P130690 CTGCATAAACTTCCACCTATTCTTAGCACCTGTCACAAGGCTTCATAATCATTTCATTAC  
A\_16\_P19797191  
AAAACCTTAATGGAAAACAGGGACAATAACAACACACTAAAGGACTATTTGAGGCTACCTG  
A\_14\_P139551 TCCTAATCCAATTATCTCATTTGATCCTCACAATCCTTTGTATACAACCACACCTGGTAA  
A\_16\_P16063429  
AAAAAACTACTCAAGACTATTTCTGACCCATGTCTAAACATTTCTACTCAAAGCATCCCC  
A\_14\_P130527 ACAGAAATATAAGGAAATGAAATGATCGTTAGTAGGGATAGAGACCTTGCTGTTTCAGTTG  
A\_14\_P124782 CCGTTGCTCTTCATAACAGACTCATCTTCACTACTTTCATCTTAGAACTATAATGCCTGTTT  
A\_14\_P201312 AATTAAGGTGACACCAAGTTCAAAAACAACCTTCAATGTTTCGAAAAGTGCTTGATTCTT  
A\_14\_P120376 TTTGGACTAGATGAGTTTGATGACTGCAGAGGGAAAGACCTCCAAGACTTA  
A\_14\_P137954 TCAGATATCGGGCTGAACGGTCAAAGACATTCACAACATGGATGGTAAATTTATGTTTT  
A\_14\_P115218 TGACTIONCTTTATTACTGTTACCTGAGGCCTTCTTGCCAAAATAATCACAATAACTCC  
A\_16\_P16723012  
AAAATTGCATGTGTTTAGGTTATAAACAGCCCTTTACAAGAATCAGATGACATCCCCATT  
A\_18\_P12176566  
AAAATTAGCCTTCTGTTTCCTAACTACACAACCATCTATCTTCATACCCATTCTGAACTG  
A\_14\_P128320 GATTTTTTTTTTCTATTGTGACTTTTCTACTTCTGTCATCACTGCTGAGCCAAGACAGAC  
A\_14\_P135240 CGAGAATTTATACAAACAGATATGAGACGAATGAAGAGGACAAGACCCTGCAGGAA  
A\_14\_P110287 GTGTGGTGTGAAAATCAACATGTCCTTCAAAAAGCCTAAAATGTGACAACCTTAGAAAC  
CUST\_8997\_PI426210822  
GGAAACACATGTTATTCTAAAATGAACCTAGGTCCCTTTTAAACCAAGCCAATTCAA  
A\_14\_P115951 AACAAATTAACCTCATCTTTACTGCCTTTCAACCATGTGTATGGCTATATGTCTGTTTGAGG  
A\_14\_P122316 ACCAATTGTATGCGAATCCCAAATGTCTCTAAATGAGAAGAATCATTTTTTCATGGTGAAC  
CUST\_2052\_PI426210822  
TACTTCTTGCCAGAAGAAATGAGACATTCATGTCTTTCTGACTTCTCCATTACCTC  
A\_16\_P01849682  
AGGGTCATCAATAGACTGAGAAACGAATGATGCAATATTGTCCCAAATATTTGCTCAAAG  
A\_18\_P10710176  
GGAGATAGTGAACATAAATTAATGCAGGACCTAACACCTTATAAAAGAAAACACTACTGT  
A\_14\_P127780 ACTCTAAACCTTTAAAAAAAATCTGATTTATGCAGCAGAGATGGGACAGCCACTTTTTTC  
A\_16\_P00000285  
TGCCGTGTTACTAACTCTAGTATGTTTCTGTGTCAATCGCTGTGAAATAAAGTCTGAAAA  
A\_16\_P00455518

CTAAGTCAGTTGTCAACTAGGATTTCAAATTCACCTGTTATGGAGAAGATGCAGTTTACC  
A\_14\_P126760 TGCAAAATGTCCAAAGCAGCAACTGTTTGGGTATAACCTAGACGTCATTTTTTCATAAATT  
A\_16\_P18954121  
AAACATCAGTTTATACAAAGCATCTAAAGTCTCCTCCAACATATTCTGTTTCATCACCGGA  
A\_14\_P122711 AGAAGTTACACATGAACATTTAGAATCTCACAGAGTCTGTGTGTTTGCTTCATTGGCTTA  
CUST\_3480\_PI426210822 TATGTGTTTTTCATGCAGGAAGAAGTGGGACATGCAAAGGGGCTCTTTATAAT  
A\_14\_P127147 GAACCTTAAGGGGTAAGAGACAGAACTGTCTGCTAAACAGTTACAAGGGAGATTAAATTT  
A\_18\_P14133710  
TGGTTGAAATTAATAAAAGAAAAAATTGTTCTTAGATTGGGAAGATTGTCCAGGAGCC  
A\_14\_P129056 CCTTGATTTTTTTTTTTTTTAATAAACCCATCATCCCATTCAGCCTGATTTCTACTGCAGG  
A\_16\_P03303979  
TGGGAGAAACAGGTTTAAATGTAATAGAGATGGAAGAGTGTATGTATGGATACTGCTCTC  
A\_14\_P112913 TGTGAACTAAAAAATGGGAAGCCCTCCCCAAAAAAGTGCATAAAATGTTATTTTTGCA  
A\_14\_P127322 CTACATATCATTCTGTAAACGGTTCGTCTTACTAGATGCTTTGTTGGTTTACAACCTAGA  
CUST\_1658\_PI426210822 ATGAGTGTA AAAAGAATGAGTGGATGGATGCTCTGCTGTGTTTCCCAGT  
A\_16\_P17589366  
AGTTCATAAGGGTTGCAAAAGTTCTACTTGATCTGCTCACATATACAATTGTTCCTTTCC  
A\_16\_P16352403  
GGCTCAAAGAATTCATATCTCATGTTAGTCACTATGCTTTCATCTTCCAGAATCACTTCC  
A\_16\_P35285937  
GGTAAACCTACTCCAATCTAACAGACTACACCAAGTAATATTATGCCAGATCATGGAACA  
A\_16\_P30952330 AATATCTTTGATCATTGATTTTCATCCTAACTAGATTTTTTTTTTTTTTCATTCCATAGGTTT  
A\_14\_P136072 TTACCATGAGAGGCATACAGTGGACAAAATTGCACGAAGAATTGTTTAATCACTTCTTTG  
CUST\_6267\_PI426210822  
GATTCCAAGTTTCAAAGGAAATCAAATCCAATGTATTTATCAGACATTAGTGGGAGAGA  
A\_14\_P200119 ACCAATGTGCACTTTGACTTATTACACAAACATGAAGAGAGACCATCAGTTAAATTTGCA  
A\_14\_P105847 CAATGTGATGACTTGGCTTAGATTTTTCCCGGATATAATAACCTGAAAAATACATTGACTC  
A\_14\_P123971 ATGTGGAGTCGCTCATATCAAAATCCTCGCTGCTCACAGAAGTCTCATC  
A\_14\_P107621 ATAACAACAATTTGGTGAAGAATGGAGTAGTTTGAACATTCAGATGTTCCATTGAGAAC  
A\_14\_P105134 ATGGTGTCTAATTTGCTACTTCTCATCTGCCAGGGACTAATAAAGCAAATTGACAATTTT  
CUST\_3434\_PI426210822 CAGATCGCTACAGCTGGATCTGGGTAAAGGTGGCAGTGACGCGTC  
A\_14\_P135172 GACTTCGTCCACTGTAATGCTTTGCTTCTTGCTAGAAATTTGTTTCACATTTCTTCTGT  
A\_16\_P02979836  
AAACCTTTCCTAATCTTAAACTCACACCATCCTAGTATTGATGCTGAATTCATCTTTGGG  
A\_14\_P200064 TGCCCAACATCCTCTTTGAAAATAATAAGTATTTTGACATTTTGAAGGATTGAGATGGGC  
CUST\_105\_PI426210822 GCATGTCCTTAAGGAACTTGAGTTATTACCCTTGTTATGCTGCAGGGATTGT  
A\_14\_P105767 GGCTTATTTTAAACAGGGATAACCATTTCTGCTCTTCTGATTGTTTCTCTCTAGGATC  
A\_18\_P15549646

TGCAGGTCTTCAATAACATGTTATGAAACAGATAAACCCCTATGCTCACAATTACATCCT  
A\_14\_P127513 ACCCATCTCTTTTTTTTGTTCAGTGTCTACTACCTGAGAATATTGTAGTCTACCATGATGT  
A\_18\_P14137022 ATTTCTGTTCTCTTGTGGGTGTTTCATTTCTTGCTTATATGATTTTGGCAACCCCTAGA  
A\_14\_P110728 TACAGAAATGATCTGCGCAAATATAGATGTCATGGTCCCCTCAAAAGTCTTTTTGGTT  
A\_16\_P18540233  
AATCACCACGAAAGTTTTTGTACAGTTCAAAGTTACCTAACCGCATAAGTCTTAAGCAG  
A\_14\_P100166 GACTTTTCTTGACTTTCTTTCAGGCTAAGTCCTATCAGCCATGGAAACACCATTG  
A\_18\_P16219689  
AGTGAAGCATTACTGTAAACTCCACTTAGCATAAAGGGTCTTTTAAAAGTCACTTCAGCA  
CUST\_4581\_PI426210822 TGTTTGGTAGCTGTACTCCATAGCCTGAAACCATAGCACCTGATGAAATTG  
CUST\_2634\_PI426210822 GGCTCTCATCTTCTGAGCCAGGCCCAAGATAGGAATAAGGTCAG  
A\_14\_P134712 TCAGTAACTAGTTATAACTGTGGTGTGAAAAGCAGTGTGAGAAGGAGTAGACCC  
CUST\_1026\_PI426210822 GCATCCTGGCTGCTGGCACTGCTCCAGTGTCTGTTAGCAGAGCTG  
CUST\_7677\_PI426210822 TCTCTGTGACTTCTCAGATCCCATCTGCCTCTGATCTTTCATGACC  
A\_14\_P134631 CAGGTTTCTGATTTAGGCACACATGAAGAAGAAAGGAATGTATAGGCTATTTTGAAGA  
A\_14\_P121139 GCCAAGGTTTCAGATTTTTGAATATAATGAAAACACCAGGTCAGTCCTGCTTTGGTTTTA  
A\_14\_P120188 TATCTCTAAATAGTTACCCAAGCAATTCTTCACTGTGTTAAATTGCCACCTTGAACACG  
A\_14\_P125936 CACTTCAAATTCGGTGGCTCTAATCTGGACAAAATATTTTCAGAGGCTATAATTCCTTC  
CUST\_471\_PI426210822 TCAGGACTGACAGTAGGGCCATTGGGACTGGCCCAGAAACAGAAT  
A\_14\_P125538 CACATATTTGTTTTATATATTTTTAGGCTGGGGGAATAAACGACTCTGTTTGTCTCCC  
CUST\_4945\_PI426210822 GATCAGCCCCCTCAATGACCCTACTCCGAGCATGGGCTTTCTT  
A\_14\_P117096 CCTGTAACCATGGAGTAAACTATAACTGTGGAAATCGACATGAGACGTAAATAGGACAT  
CUST\_6093\_PI426210822  
CAGGCCTGTGATCTCTTAAAACAATCAACTCTTCAATTAGAAGTTCATGATCTTTAATGG  
A\_16\_P17541610  
ATGTGTAACCTTCAACTATCAATTTGCTATCAACGTGCAATTTTATCCTCCTTAAGCCCCG  
A\_14\_P138041 CAGAAAGGTATACCTGTTGAGACTGATTCAGAGGAGCAACCCTATTTAGAAATGGATTTA  
A\_16\_P02350745  
AAACTTTAGTTTCCATTTATCCCAACCCATAATTGAGAGTACTGTGTTTGGTGAATAGC  
A\_14\_P123302 CTTGCAGTCAGACATCTCTCCCCATTGAGACCATTTTTACTGTTGGTGAA  
A\_18\_P22839226  
AAATACTGTTGAAGATCATATTGGCACAATTTGGTTGGTAAGTGTTCCTTCCCTCTTTTT  
A\_16\_P16191253 ATCAGCCAGATGTCAGGGGACTTATACCATTTACTATGGAATTTGGAGACCAAAG  
A\_16\_P00349320  
TTGTCTTGTAATTTAAACCATACCCCAAATACTACCTTAACCTGATCCCTTGACTTACC  
A\_14\_P134516 CCTATGTCTGAATGACTCAGTTTTTTTTCTTCCAATGGACTATAGTGAACATGGTTTTTA  
CUST\_9731\_PI426210822 CACACAGAGCAGGTGGGAGGAATCGCATTCTGGGTGGTAGACAG  
A\_16\_P36112609

AAAAAGGATGCAGTATTCAAGTAACATCCAAGAACCTACAAAATCTGCTGCTTTTTTGCT  
A\_14\_P115766 ATGGATCAACTTTATTGAAAGTGAATAAACAGAGATAATGTGGCAAAAAGAAATTTTCCC  
A\_16\_P16829281  
AACTCCCAGGATAACATTACTGAACTTTGCTTACAAAGAACTAACTTTTTTCAAGGCCA  
A\_14\_P133177 AACTAAGGTCACAGAGAGACAGAATTAATACCAGGTAATTCAACTTTCAACTCAATT  
A\_16\_P20021757  
AATGTCACGTGCTTTTCTTATCTTTGTCCTCTGAGTCTTATCTTCAAAGCAGAATCTTCA  
A\_16\_P30952396 CTTGCTCCTTGAATTGTGCTGTTTCAGGGTGAGGGATGGAGCCATT  
A\_14\_P107575 AATTGCCAGACTTTAAGAAGGCAGAAGACGGAGGCCAAAAGCAGCAATATTTAATAGTTTT  
A\_16\_P16854447  
CCATGTTCTTATCACTTAACCCTATAACTCTAAGTCCACACAATGCTCATTGACACATTG  
CUST\_5510\_PI426210822 TGAAGTGAAGTGTACATGGAAGAGCTGGCTTCTGCCTACCCAG  
A\_14\_P118604 GCACAAGTATTTAGTGTCTGGACTGATAAGGTTAATCTCAAATCGCCCAACCTTAA  
A\_16\_P18506531  
AGGCCTGAGATACCATTATTAACATGTAAAAGGATACCAGATATTTCCCTAAGAACCTGC  
A\_14\_P138112 GTAATAAAATCAAAGTTGTAGACCTCTGGCATGCCCTGATGTAGAGTTTTGTTGAAACG  
A\_14\_P126155 GTGTTGCTGCTGTTTTGTCATATAGACAGAGACTCCATCAAGGTAGGACTCAAAA  
A\_16\_P21026004  
AGGAAGTATACACTGTTTGCATTATATCCAGAGTTCAGTTAATCTTTCTCAACAAGGCC  
CUST\_3693\_PI426210822 CTTTCTCATTCTCCTGTCACTACCATGCTGCAGTGAGCATCTTGG  
CUST\_6299\_PI426210822  
GGTAGAATTGAGGTGAATGAAGTCAACCACAGTTTCTAATGTCTTCTTATATGCCTTCAG  
A\_16\_P00915560  
ATGCAGTTAGCAAATGTCTTTATTGCACAGGACAACCTTCTAAGTAATAGCCCTCATGGA  
A\_14\_P113127 AAGGCTTTGTTGAGGCTCCTTAATAAAAGAGGGCAAGGCGAAGAGAAAG  
CUST\_8500\_PI426210822 CCAGGGGACCTGTGATACCTGAATTTCTACATTGAGACCATTGGTTA  
A\_14\_P117660 TATGCACATATGCAACATAGGAGGTTGGCAAAATAATGCACTATTTCTTAACAGCCATGT  
CUST\_4614\_PI426210822 AGGGCAGAGTGAGGGAGAGTATGGCCTGCTTTCTAGCTGATATCT  
A\_14\_P116876 CTCACAGTTAGTTAAGTGCCATGAAGAAGAAGTAAATGAATCAGGAGGCAGTATAACCATA  
A\_18\_P14135510 TTTTTGGTGAGCAAGAGATGAGAACATCAGGGAGTCTGGGATGAAAATGAATTC  
A\_14\_P104689 ATATCTGCATCATTCACTTCATCAAAGTTCTCTTTGGTCAACACAAGCGTGACTT  
A\_14\_P100131 AGCCAAGCAAGTGGCTTTTGGAAATATACAGAAGAATATGATCAGATATTTGCTCCTAAGA  
A\_16\_P02471908  
AAAACTTCTCTTACAGTGAAAGTCATAGTCCAGGAGAACTTTAGATGTGGAACCTTCAG  
A\_16\_P19245055  
GGTTTCTATCAAATGCCCATTTATTGAACAAGGACTCACTCTACATTGACTTAACTCGAA  
A\_14\_P107918 CTCAAAACAGTGCTTCATTATAAATTAAGTGTCTTTTCTATGCCAGTGACAGATTGCATG  
A\_14\_P121338 GTGAAAATCTATCATTTAGGGTTCATTCAGCGAACTTATGAACACTGTGCTGAACTGATA

A\_14\_P202139 AATCTGTCAATAAGACTTCCCAGAGTGTTAATATATATATCAGAAATGCACACAACAGAACC  
A\_14\_P116501 GCTGAGGTCTTTCTGGCCTACTTTCTTGTCTTGGTTTTGTTGAAGGAAGA  
A\_14\_P120259 CTTATTTAAAATATTGGGGGAAGAGGACAACCTCAAGAAACGTATTCTTCTCTCCCATGAG  
A\_16\_P01638060  
AAGTGAAGGCAAGTTAACGTTTCTGTCCTATTTGCTGTGTAGTCATATTTTTGAGATACCT  
A\_14\_P127614 CTTTTTTGTTAATCTATATGCCCGCCCCAGAGGAAATGGTCTTAGTTTTGTGAACATT  
A\_14\_P134877 TGTGTGAACAATAACCACAGCCCTGCCGTTACATTGTCTAATAACATTTCTGTAATTACA  
A\_14\_P138519 GTCCTATAAATGTGACCTTGAGGATGACTGTGGAGACAACAGTGATGAAAGTCATT  
A\_16\_P38241004  
TGCCTAACATACCCTCATTTCCTAATTTGCAGTATTTTAACTGAATCACTTAATTTCT  
A\_16\_P00196591  
GTTTGACTCGAATCTAGAAAGCAATAAACTGAAATCTTTAAATCCATATAATGCCCCACA  
A\_14\_P128581 CTGGATTACCATCATTATCTGCCCTCTGTTTTTTGATGGGCTTTGTGAAATGACATTTT  
A\_14\_P116887 CAGAGAATATAAAAATACTCTGGCAGTTACTTAGGTAGTTGTGGTTGAGGGAATCAGTGTA  
A\_14\_P139750 ACATTTTAGCATCTGTTTGAAAGGAACCTAAAACAACAAAGTATAATTGGCTGGCTGACA  
A\_14\_P113696 CTGAGTCCATAGGCCAGAAAGACAATAAATTTTTATCATTTTGAAATAATTGAATGTTTT  
A\_14\_P124860 CTTTCAAATAAAGGCCCACTTCTTCAAAAACCTGTCCACTCGTTCATTATGATGAATTCTT  
A\_14\_P115714 GTTGAGTTAATGTGTTTTCTTTGACCTCAAACCTTCTGAAATGTTTCTGGGTCTTAAAGA  
A\_18\_P13726062  
AACCAGCCATTTCTTGTTTAAGCCTATTGTGATCATCTAATATCTTGCTAAACGCCATCT  
CUST\_6879\_PI426210822 GCTCAAGATGGCACCAGGTGATAAACAGATCCACTTGCTAATCTGGATA  
A\_14\_P134650 AAAGGAAAAGAAATGGATGCTCCAACCTAAAATTGTGAGTTCAGCATGTGGAATTAACCTGG  
A\_14\_P105623 CATACCCAAAGCCACAAATTTTCTATCTAGATAAGGAGTTGCTTGCAGTGTGATATAGA  
CUST\_1160\_PI426210822 TAGAAGATGCTGAGTATTTTTCTAGAAGACTGGACTGGACGGGTGGG  
A\_16\_P38760456  
AATCTACCCCAAAAAAAGACAAAGTTCTCATGAATCCTAGACCAAAGGAACTTACATGAA  
A\_14\_P129521 AAAGAGGGAGATAAGAAGACTTTCTTTGTGACCATTTTCTAAAGGTGTTGAAAATAAGGC  
A\_16\_P02875819  
TTCCCTTTTTAAAATAATAAGCATGTTTTATTTTTATAATTTAATGAACAGATGTGTTGA  
A\_14\_P136185 GTTTGGATCAGGGTCTGGATCTTTCAGTTTCAAATTAATGCCTAGAGAAAGAAGTTATG  
A\_16\_P20045201  
AAACCTTGCTAATTATATCCACTATCAACTGCTCAACTTTAACTGGACCTTGCTGTTTCT  
CUST\_6012\_PI426210822  
GATTTGTTTTGTCTTGAGGCAGACTGGAAATGCTGGAAATTTATTTTGGATCGTAGAAAA  
A\_14\_P132732 CTCTGTAAAGCGACCTTCAGACGTGCTATTTATAGATGTCTATAGATTTATAGATGTGTG  
A\_14\_P135453 AATCAAGAGGAAATGCACTGAATTCAAAACTTCTGAAACAGGCATTTTTTTGGACCATT  
A\_14\_P111036 ACAGACAGAATACTAATTCGCCAAGAATAAGGACACATTGAGGTATTCTCTTTTATAC  
A\_14\_P200350 GGGGAAGTAGAAAAGACTTGGTTTACTTCTCTCTTATATTCTCTTGCTCTTCTTTTCAG



A\_14\_P136317 GAAGCGACAAAGAATCTTATGCAGATTGGCGGGAAAAGGAGGAAACATG  
A\_14\_P121461 CAAAGGAAGTTTACTGTTCATTCTCCTGATGCTTCATCTGGAACAAATTCTAATGGGATA  
A\_14\_P109953 GTCACCACTTCATTTTTTAAAAAGGATCACGTCTAATGCCCATTTTCCCAACTATTCTTT  
A\_14\_P105569 TTAATACTTCCCCTCTGTAATTTGCATTTGAACAGAAAATCCAGGGTCTATGTAACCTC  
A\_14\_P111883 TTGTTTTATGCCTGTCCCGCTTTTGTATTTGATTTTTGGTTTGGATAATCTCTACCAGC  
A\_14\_P137231 TAGGCAGTAGAATGTAATCACTGCTTTAAACTTGATACTGCTTAGGGAGAGAATCATTGG  
A\_16\_P16540123  
TGCAGTGTTAAAGATAGCCTCTTTTTATTTCCTGTAGTGATTAGATCGACGTGTTTACA  
A\_14\_P131170 ACTCAGGCATCATATGGTGATGGCTGGAAAATACTTGAATATTACATATGGCTATCATGG  
A\_18\_P14136145  
TTGACAAAAGTCTTTGAACTCTTGAGGTGTTTGTATGATATTCTGTGTGTCAGTTGCACATG  
A\_14\_P120598 TTCCAAAGTGCTAAGTGCCATCTTAGCAAATAAAAATCTCCCAAATTTCTGAAGTGACTT  
A\_14\_P139660 TTTGCATGTTCATTTTTGGAAATTAGGTATTATCAAACCTGGCCACAAAAGCAAGAGGTA  
A\_18\_P14134581  
TTCCTAATAATGACAATAGCAGCAAACAAACACCATAGTGGTGATTTTCATACTCATGAAA  
A\_14\_P117954 TTGTGCTAATTTCTACTGCAATTTATTTTCTCATCCAGCAAGTAGCAATTTTCAGGTGAC  
A\_14\_P137866 CTCAGAGTAAGTTTTGGAGTGACAATCCTGGCAGCAATTAGAGCAGAG  
A\_14\_P112302 TCAAACCTCCTTGGTGTCTCTGTTGAGCAAGAAAAATTAACAAACAGGCTAATAGTTGGAT  
A\_14\_P101609  
AAAACATAAACTATTAGAACACCAACAGAGGTAAAGGTTGGGAAAAGAAGTCAGGAGAAAC  
A\_14\_P127362 CTAGTGTCATGATGGATTTGCACAACCTTCACTTCTGAGTTCTGAATACATTTTTTTCTGC  
A\_14\_P134668 TGAACCTAAAGCACATCAGCCTCTGATGACATGTGAGAAGTGCATCAATCCTTTTATAAA  
A\_16\_P16632591  
ACACTTCACTGCTCTACATCTCAATACAGCCTGAATCTTATTGCTTTTTCTGAATATGACA  
A\_14\_P134028 AATTTACCAGATCCTCCTAGATGGTATGAGATGACTTCATTACATTCCAAACAATCTGT  
A\_14\_P120481 TTAAACAAATTTATTCCCATGCAGACAACATGACTAATTGTATGCTACCCAAGAGTCACC  
A\_14\_P122778 TGTATTATTACACTTAAGATCTGCACCAAGTCCAAATCCCCTTCTGACACCAAAAAGTAA  
A\_14\_P119271 CTTCTGCATCTCTTTTCCATGTAACATTTTAAACAAAAGCACTATCCTTGGTCATAACTG  
A\_14\_P135847 CTCCGATCCACACTTGATTCTCTTATACGCTACTTTTACTCAGAGTTTGAAGGTTGTG  
A\_14\_P115768 ACAAGGTAAAATGGCTTTAGTCGTAGTTGCTTCCTAACTTTTGTGCTGAAAGCCAGTTTT  
A\_14\_P113593 TGCTCTCTAACAAAAAATTAAGACAATTCCTAGTCACTGTCAAGTGCTAAGTGTTCCCTCT  
A\_14\_P105528 TTTTCAATGCTGAAGTATTTTTTAAGACTTCCTTTTAGTCAACAAGTGCCTTCATGTTTT  
A\_16\_P18852504  
AACTATTCCTTTTCCCAAATTACCCTAGTGATGTTTTAATGCTCCTTATAAACCAGTCCC  
A\_14\_P118445 CTTCTAATAGTTCAAAGACAAGGTGCAAGAAGAATGAGTGATTGAGGGTGTGAAATGAAT  
CUST\_1811\_PI426210822  
TCTGAGAGAAATCAGCCACATGGTGAGGAAGAATTGATCATGATATGATGTCATC  
A\_14\_P114796 TATTCTAATGGTGGCAAACAGATCTCAAAGTGCCAATTACTTCAATGTCATCAGTCTCTT

A\_16\_P00685452

CTTTTCAGCACTTCCTCACCACAGCACCATTCTTAAGTTTTCTAGCCTCATTATTTTAG

CUST\_1999\_PI426210822

TCCATGTTGTTCTCCATTCAAGTAGACCTTTTTGCAATTTTAACTATCCGAATAGGTAC

A\_14\_P117941 GAATACTGGATTAGGGTAATTTGGTCCTCAAGAGGCAAGTTTTTAAATCCTGAAGAACAA

A\_14\_P114184 CTGGTGGATTAAGTGAGAATTCATACTCATTGCACAGTTGGCTGATATCTTAAGTGT

A\_14\_P120226 TGTCCCAAACACTGTTTGACATTTTAGTATCAACCAAGTCTCAAAGTACTTCAATCCTG

A\_16\_P00380064

CAGGTTAGTCAACAGATTACATTCCTTAAGTTTTCTCTAAATTATTGAAGGTGGGCCACA

A\_16\_P02697161

AGAAACTTACTCTAGGTGTCCCTAATTAACTATACTTCCAAGATTTTGCATAAGCCCCTC

A\_14\_P109513 CATGAAAATCTTCCATCCTCTCCATACATCCCATGCTATCCTCCATTCC

A\_14\_P122174 AATAGAAATGTGCTCGTCCCACTTCTCAAGTCCTCAAAACCTGGAAAG

A\_14\_P119203 CTTTTCACACATTGCATCAGTTTCTTCTAGATAAGAAAATGAGTGTAATTTGGACTTG

A\_16\_P02761662

AGAACACAGCAGTATCTAAGAAGCACATAGACTCTAAAACAGATTTTTCATCTTGTCCCC

A\_14\_P119883 GTTTGGATATGCTGGGTGTCCTATATTTTATCTAGCAACTTAGAAGACATGTTAAGGTGG

A\_18\_P14137391

AACTTTGAGTATGTTAAGACCCCAGGAAGGCTTATACTTGATCTTTGTATCCAGAATGTT

A\_16\_P00366787

GGTGTTACAACCTAACTTTTCACTCCAGTTATCGAATGTGTTCAAATAAAACTCCAGCA

A\_16\_P21421442

CACCGGCTTATGATTTTTTCAGAATAATGTGAACTACATCCCTGATTACTAGAGAGACCTA

A\_14\_P135336 TGGAGTTGACTTGGTTTTGAGAGATTTCTCTTCACCTTTGTTTTCTCCTTTGAGAAAAA

A\_14\_P103699 CTTACAGAAGTTTATAACCTTTCAAAAAGTAAATAAGTCCAGGCTTGCCTGATTCTGCC

A\_14\_P201277 GAACTGGCTGCCACTTTAATATAACTGAAAATTCATTTTGAGACCAAGCAGGATCAAGTT

A\_14\_P105308 TATTGTTGATTCCGTGGAACTCACTAAACTGAAAAAACTGACATCCCTCATCTTTGT

A\_16\_P18300768

TTATGGAAACTCAGCAGCATATATCAAACATTCTCTACCTCCTGTTACTTAACTTTTGCA

A\_14\_P112024 GCGATCAGAGTCCATAGCACTGGGTGGGAAAACATGAAAAGAAAATAAGTGA

A\_14\_P130887 CTTGCTTATCGCTCAGTTAATCCTCAGATGTGTCCATTTTCACAGCATCACTATTGTATT

A\_14\_P136751 AATAAGTGCAATTTATCAGTAATGGGTTGGGCAAGCCCATTCATTATATTGATGACATT

A\_14\_P122299 ACATACACTGAGGATTTAGTAAATGTGGTGTAAGTATGGTGCATGCTCTTTGTTTTGTTT

A\_14\_P112554 CAAAGCAAGATTGGAAGCATTACATATTTCCAGAGGGTCAGAGAGTCATTACTGTTTATG

A\_14\_P136979 CTTCAATTTGGATAAGGAAGTAAAAAATTCATTCGACCAGAACTCAGTTCTTTCTCCA

CUST\_7941\_PI426210822 GTGAGCTGCTGGAATCGGACTTCTCAAATGCAGCGTGGGATTTT

A\_14\_P123954 AGTGATGGCCTGTTTTGGCTTTTGTAGGAAAACCTGAAATAATGTGTTTCTGAACTATTGT

A\_14\_P134999 CTCCAATATGAAGGGTAATTGGAATTGGTATTTTCAGTTGGTTGCTGTTTCATCCACAA

CUST\_3083\_PI426210822 GAGAAGCTGCAGCTGACTTACATGGAGGAGACGTGTCGTCACTAT

CUST\_9070\_PI426210822 CTTGTCAGTGTGCTCTGCATCCTCCTTCCTTGTGTTGGGTGCCTG

A\_16\_P02205370

TCAAGTTTCTCTTAGTCGCTTCTTGTCTATTTGAAATCTGTAACCTTAAACAAACCACGC

A\_14\_P139572 TTTCTCATCTACCTGACTGTTGAAATTGACTTTGATGAGGACTAATTTTGTCCGTTGAAA

A\_14\_P106440 TAATTCTCACACCAGAGTGAGGTGTATATGTGTTAGAAATAGGGGATACACATATGTCCA

A\_14\_P105530 ATTATGGTCTCTTCCAATTTGAAACTCAGACTCTTTTTTTGCAGTCAAATTCACACGCTA

A\_16\_P19246770

ACCTGCTCATATAATTTTCTCATCCTTTCCTTCAAGTTATTCCTTAAAAACCTCAGCCAA

A\_16\_P15623492

ATCTCACATCCTAACATGTTTTGTCTCTGGCATTCTTAGTATGTCCTTTACATTGCAGAA

A\_14\_P138317 GGCAAATGGTCCTTGTATATAACACTGTCCAGTTTTTCCTGCTACATGAAGATAAAAAAGA

A\_18\_P14137379

CATTATCTTTACTTAAGGGGATGACAAAAACCTTGCTAAATTTAGTTTTTCACTTCCTCA

A\_14\_P202564 GAATTTATTATTTGGCTTCATGAAAGATGCATGTGAGGAGAAAGTGAAATGCTTTGTCCA

A\_14\_P120492

ACATACAAAATGAAGAAGGAAAAATGAGTTTTGTCTTCAGATAGAGGCTGAGGAAAATG

A\_14\_P127313 GCACTTAAAAAGAGCCATCCTTCCCTACTTTTCACAAATGAAGATTTCTCTTAATCACAG

A\_14\_P121862 ACCTCAATTTCTTTTTGTGCAAGATAACGATTTACTATTAGAACACACGTCCTCTCTGTG

A\_14\_P114295 GTTTCTAACTCTTAAAAAGACAGAAAATCACCAATGAAGTCCAACCCTTAGTGAGAATCA

A\_14\_P202437 TGTATAAGTGCATCAACTTTACAGCAGTTAAGTTTTCCAGTTAGAGGTGTGTATATTTCC

A\_14\_P102682 ATAATTAATAATAAAGTGACTTTTTCAAACCTCTACAGTCTGTGATCAAATGCGTGAGGT

A\_16\_P16191520 GAGATTTCCAGTCTGCCCTCCAGTGTCTCTGCATGCATTCTACTC

A\_14\_P113746 ATGGATAATCATATTGTAACCTTGTCTTTACCTCCACAAAAGCCACCTGAAGTGATCTCTT

CUST\_9211\_PI426210822 GAAGGGAAACTGCTCTTTCCAGAAAAACCCAACCTCCCTGCATCAT

A\_14\_P110747 TATTTTCTGGAAGGGGTAAGAGATGCTGTCTTGAGCCTTTGGAATCTCG

A\_16\_P16745171

GTTAGTTATGCAGGTCAATACCTTAATGCTTGGTTACCATGGAATGATTAGAACCCTTCTG

A\_14\_P129895

GCTGCTGAAAAAATCGGGTAAAAAATAAATTACAGAGGGGAAGTGTGACAGTAGGAAAA

A\_14\_P106483

AAGAATTTAGAGACAAAATAAATGCTCTAAGGGAAAAAGACAAGTAGCCAAGGAACGCTG

CUST\_9940\_PI426210822 TCTCTTCTCTTACCTTCCCTTAGAGCCCTAACATAGGATGGTGAGA

A\_14\_P102914 TATCTGGATATTGAGTGCAAGGACCAGAATAGCATGCAGTTTTTTCAGATGTTGATGTATT

A\_14\_P201359 AATAACAAAACCTGAAGACTGTTTCTCAGAGACATGACACTAGAGTGGAGAATAAATCCTA

A\_18\_P22842474 AAGAAACCCTGAGAATATTGAACGTCTTTGCCAGACAAGGAAAAGTGGGA

A\_14\_P103759 CTTAGGACTTGCTGAATATACAGATCATGTTTCAAAGATACAGTATTTTTGTATTTTTTA

A\_16\_P37963449

AAATCCCTGATTTCAAATCTTGGTGTTCACAAAACAGTTTCCAATGGTCATTGATTTCT  
CUST\_7307\_PI426210822 CTTGATCCTGGGCTCGCAGGGCTGTCCGCTGAACATGACAGTTAT  
A\_16\_P01411793

AAAAACTTCTTTTCAGTAAGATGATCCATACATCCTCAGTCTGTAAATTGCCTGGTAACC  
A\_18\_P16211726

AAAAGAAAACCATGGTAAACATTGCTCAGTCTCATACTCCTACCTCTCTATGCTAAAA  
A\_16\_P16300998

AGTATGTGCTTCTACTTCACTCTGAAACGATTTCTCCTGAACTTAATTTGTTTACACCTT  
CUST\_4948\_PI426210822 CCTCAGCTGTGACTGTGGAGAACAGCAAGTCCTCAGTGAGAGTAT  
A\_16\_P16191216 ACTTTGAAAACAAAGCATTCTCTTGTCTCCACAGTGAGGACATCAGGAAG  
A\_14\_P128742 AGAAATAGGGCCCACTTGTTCAGTCTTCAATGGACTGTATAGAGGGAAAGAAATATAAT  
A\_14\_P118336 GCCAGGGTAAAAACTAAACTACAGGGAAAGGGAACAAATCATAGCATTTCCTAACTC  
A\_16\_P16191230 GTATGGGCTTCAGCAAGTTTCTGAACGCTGTAAACTTCTCATTTTCAGATGCTACT  
A\_14\_P139902 CACTGGATTGCTTGTCTATAAAGAACATCTTCCAGTAACTAAGATCGTGATTACAGACAC  
CUST\_1093\_PI426210822 TATATGGACTGAGGACCCTTCTGGGTAAGTGTGACTGAGGTGACACAGGTA  
A\_14\_P117342 GTTTTCCCCCTTTCATTTTCACAGAAAAAGAGAGAAAGACTAGATGGTGAAAACATTTA  
A\_16\_P15694580

AAGTAACTTGCTTCTTATCACACCAATATTGTAAAGCCCTGATACAACCTAACAGACAGG  
A\_14\_P106040 ATATAAATTATTGTTACTTGACTTGTGACTGGTCAGTCTCCAAATACTCCTTTCCACAG  
A\_14\_P112184 CTTGTCAATTTGTGTCCATATCACCTCACGTTTCAACTGCACTTGAACCTTGACTC  
A\_14\_P127996 TGTTAATACCACCAACGCAATGGTGCATACCAAAAATAATGCTGTGTAACCAACAAGAAC  
A\_16\_P19058094

ATCCTGGTAATCTACATGTTCTTTAAACACTGGATACTCTGAGATCAAGATTACACACAGC  
A\_14\_P108640 CTACAGGTTTATTTGGATCAAATAATAGGAAGCCTTTTCCAAGAAGACCAGAATAAGCC  
A\_14\_P133194 GAATGACAGAAGTCAGCAATTGCCAGCAATGCAGACTAAATATTTATTAGGTTCCAAAAT  
CUST\_2313\_PI426210822 AGGAAGCTTTCTCTTTTTGGTGACTACTTTGTCAACCGTCTATGCTAAGGC  
A\_14\_P117051

CAGCACTTTAATTCCACAAAACTCAGAAAGCCAAAACTGATTAGAACACTCCACAACAG  
A\_14\_P127122 CATCCTTCCTTCACCCATCAAGCACATCTCTTACATCTGCTTCATGTTATACAC  
A\_18\_P15356343

AACAGTGTGCTTTCAAGATACCTTATTGAATTACCAGGAAAAAATGATCAGACACAGAGG  
A\_14\_P100548 CTTTAAAAAACAGAGAGAACATTGTTTCCATCACTCAACAACAAAATGAGGAACTGGCTA  
A\_14\_P114097 GATGTCCGATTTGACTGGTAACTGAAGTGCAACACTTAATGCCTTTCTTTAGTTCTTT  
A\_16\_P15630632

AAAAACTCTTTTGTAAATGCGTATATTCTTTCCCTTTGAAAGTTTCATTCTGCCCTTCCC  
CUST\_1494\_PI426210822 GACTTCTGGAGTCCCAGATACTTGAGCCTCGAGGGAGCAGATTCT  
A\_14\_P137896 CATACTGAAAAACAGAGACTTTAAAGGGTTTTACTTCTCACTGCCTATTTTCATTTTGGCC  
A\_14\_P133542 CGCAAGCCCTATTTATTCAGTCTTCACTATAACTCTTAGAGTTGAGACGCTAATGTTTCAT

A\_14\_P110591 AGTTCACTATCAAATCTACTAAGAATCACACAAGGTAATTATCTTGCCTCAAGGACCACT  
A\_16\_P17178294

ACACTTGTCTCATCAAAAAGTGCCTAACTAAGATCGTTTACTTCAAACACTTGTGTTTCC

A\_14\_P110978 GCACGTGCCAAATAGAGATTGTCTTTTCTCAACTTCATTGTTGATAGACAAATAAGAAG

A\_14\_P201605 GGACAATAACATATCAAAGAACTTTCACACACCTAAAGATAGCATTTAGCAGCAAGTTAG

A\_14\_P111792 TCATTGAATTGAATTGTCTTTTGCTTCGGTCATGTTTCTAGGGCCTACATTCACTATTAG

A\_14\_P130936 ATGAAATACATCAGTGATTCTTGAGAGAGACAGGGTTTGTGTGCATTGGGG

A\_16\_P02850531

GCAAAGGAATACACTACTGTCTCAATGTTCTAAGATCTAATTCATGAGGGACTCTACACA

A\_14\_P105891 TATTAATAAATATGCAAAATATGGGAGTGATGATTAGGTCTGCCCTAATTCAAATGCCTC

A\_14\_P104495 ACAGATTTACTGGTGTCCGGAGTTTAACTGTAATACTGTGGAATGGTAGGTTATTTTGTG

A\_14\_P134131 ATACCGATCAGAAATGAACAAAATTTGCTATAACTTGGAACCTCAGAACAGAATTACTCTC

A\_14\_P128985 AAGCAAATTCCATAAGTGCTTTTATTTTATTGGAGATGAGCAGGGGAGGCACTGAAAA

A\_14\_P122487 TTCCCTCATTCCCAGAAACATAACTACAAAATTAACCTCTCCCTACAAGTGTGTTGCAAAT

A\_14\_P112039 TGGTTTAAATTACCCACTGGGAATATGATTATGCTTAATCTATGCTCAGTTGAAAGGGGC

A\_14\_P100046 AATCCTGACTAGGCTGAAATAGTTAATACTAGGGTGGATGTAATTCACACACAAGTTGAT

A\_14\_P132115 CAAAGCAGTTCTGTTTTGCAAGAGTGAGAAATACTTTTGTGTTGAATTCTCATAGTCTCTG

A\_14\_P119226 TTTAATAAGAACATCTGCCTGTTCTTTGGGACTTGTCCAGCAAATAACAGGAAACATTTT

A\_14\_P118315 GTAAAAATATTAGGAGAAGGGCAGTTCTCATGAGAAATTACCTGCTGCTTTTTGCTTTTC

A\_16\_P16192023

CTAAGGCAGAAACACTTAGAAAACAAATCTGTGAAATGGCTCAGAGAATGTGTAAGGTTT

A\_14\_P121332 AGATTCTCCACCAGTTTTTCACTCTGTGTAACTAAGATTCTTCAAGGAACAAGAAATCAT

A\_14\_P103226 GTTCAAGTGTTTTTCTCTTAAATTCAGTATGTTGGCCTGTGAGTTACGGTCATAAAAGTA

A\_14\_P139980 GTTATTTGAATCGTTAGGCTGTCCGAAGAAAAAATCAACTAAGATCGCCATTCTGTCTA

CUST\_3899\_PI426210822

CTTGAGTGGCAGGATTATTATTAAGAGTACTTTTTAAGTTCCCAACAATTAGATAGGAAA

A\_16\_P01672434

TCACCTACCTTACTGCATAATTTACTCAACTTCCTAAGAATATCATCATGTCCCAATCA

A\_14\_P105791 CTGCGATTTTGTGCTAGAAAGAGTGATATGACTTGAGGTCTTCAAGTAGTAAGGTAATTTG

CUST\_2875\_PI426210822 AAAATGGGCAGGCCTTATGGAAATGTGATAGGAAATGAGGTGGAGG

A\_14\_P132172 CTATTTCTGAGGATGAAATGGGAGACATATGCCAGCACCTGATGTAAGTTTATATAATG

A\_14\_P200731 TATGATCTGAGGGAAGACTCTAGAATTCTCCTTAAGTGAAATGCACAGCCAATTTTAAACA

A\_14\_P105989 CTTTGCCTTGAGACTCTGCATTCTGTTGCTTGTGATGGTCACTTTGTTCATATAAA

A\_14\_P200079 TAATGGATATTTCTGAATGTCTCTTTGGCCAAATGAGTCTGGAAAATGATGTGCTAAGGT

A\_14\_P122498 TTCTGGAAGAAGAGAAACGAGCAAAAGAACTTGAAAACTTCTAAATACACATATTGATG

A\_14\_P114324 ATTCAGATGTACATAATATGGTGGGATATCAATTTACTTCTTCCACACATGTGGTTGTG

A\_16\_P15784559

ATTTACAAGGTCCCTATATGATACAAGGTTCCCTATATGGAAAAGACAGTCATCTCAGGAC

A\_16\_P18287911

AAAAAATACTCCCTTAACCTAATCAAGAACACTATACTTCTTTTGGATCAAGGTTCACTA

A\_18\_P22840465

TTTTTTGAGGCTTCTGAAAAGCCAATGTTGTTTTACCCCAACATTTAATCATTCCAATA

A\_14\_P139276 GTTAATAACATATATAAATAATCTATAAAGAGAGAACAGTTATATCAGAATAGAGCATTT

A\_14\_P113873 AATTTTGGTGACACTGTGTCAATTTGCTAGAGAGGAAAGATCACTGTTTGATAGGCTTTC

A\_14\_P103159 AAAGACCACGATACAGTATTTAGGACAAAAAGGAATAATCCTGAAAAGAACCTGAATCCA

A\_14\_P200590 AAATGTATATTTGTCTACATAAATATATATCTATTTTTCTGCCAGAGAAAGGTGGGGTC

A\_16\_P17160885

GGAACAAAACACATAACATCCCTTAGTCAATAGAACATCCCTTCTTGTTAATGGATTGA

CUST\_6911\_PI426210822 CATCCGCTTATCAGATGGAACTCGGCATTCTCAGAGACCCTTC

A\_14\_P122359 CCCTCTGATGCTTTCTGATCTCAGTATTAGTTTTCTGATCTTTCTTGCTTCCCCTTATTT

A\_18\_P22841364 ATTGGCATCTGCACAATCACACTGGCCAGGGGTAAGAGATCCAAT

A\_18\_P13201499

ATCAAGTGCTTCTATTTTTCAAAGAACTTTCAAGTCCATTGCCTTATATGATGCTCCC

CUST\_3011\_PI426210822 TCTCAGATCCCTTCTGGTGACACAGCCTTGCCTTGTAAGTCAACT

CUST\_644\_PI426210822 GAAGGTCTTTTCTCTTCCAAACCCAGCATGCCCTTTGACATGAC

A\_14\_P121979 ATTTAACAGACCTAAAATAAATCCTATTAGGCAAGTCAGTTGAAAATGCTCGTGCTGCTA

A\_16\_P03378871

AACCAGATGATTCCTGCTAAAAACAATCATTTCGAAGATCTGATTAGCCCTAAATATGCC

A\_14\_P121246 AAGAAACACCTCTCAGAAATATTTTCAGAAAAGTTGCAGCCAAATCTTCAACTACCTAGGA

A\_14\_P200615 AAACACCAAAAGTAGATGACCAAAATTTACTCTGAGTTCCGGAAAAATTTTGAGACCC

A\_14\_P120551 TACTTTTTAAATTTACTCTTGCAAGACAACTGCATGGCCTATCCCCTTGATTTC

A\_14\_P125374 AGAAACACCAGTCTCCATTGTATGGGTTTTCTGAAAATAGTTCAATGATTCTCCTGCATT

CUST\_5484\_PI426210822 ACTGATAAACTTACCATACTTGGGTTACGGAAGTTACCCAGACTCGG

A\_16\_P03512746

TTTAACTCCACACATGCTATAAAGACCCACTGTATTTGTAAAAAACTGAAGCCTTCCATG

A\_14\_P123310 GTCCAATCGTTATCCCTACCACGATGGAGAGAATCCTTTATCGTCTTAGGTATG

A\_14\_P108586 ATTTGGAAGTTGGCATTGTTTTCTCTGTATCGTTAAACAATTTCTGCAGAACTTTTACTCA

A\_16\_P17993252

AAAGTCCAGAAATTATGGTGTGACAGTAGATTGTGATAGAACATGAATCAAAACCTGTCC

A\_14\_P134817 ACCCAAATAAACCTCTTAATGCGTTTGTAAATAGTTTGGACATCTGAGTTTCCCTCT

CUST\_3682\_PI426210822

GTTTCAAACAGTTGTGCAAAACAATTTCTGTTTGTGGTTATCATGGGTAGACTAATACCT

A\_14\_P114880 ATTTTTAATTTTCAGCAGAAGGTGACAACAGGCTGAATTGCTTTTCTCAATACCAGAATTC

A\_14\_P123419

GCTAACAAACAAAAAGGAAAATAAAAAGACAGCAAGGACACGATTAAATGTTGAGTGCAG

A\_16\_P19955269

ATTCAGGTATTCATCGTAAGAAACCATTCATGGTCTTTGATAAACTAATGGCAATCTGGG  
A\_18\_P19659876  
AAAAAGATGAAGAACTAAAGCATTGAAGCACTTCTTTCCAACATTGTCAAACCAGTGG  
A\_14\_P137366 CTGCTCATTATCTATATCCCTGCCAATATACTACACTCTTACTGGGGTCTGGTTTAAAT  
CUST\_5444\_PI426210822 TGAGCCTGTGCCTGATTTTGTGCAGCAGCGCTGGCCAGCTCTGAG  
A\_16\_P01674671  
AAGTCAAAGACACACTAGTTATCTGTTTCTTGAGTTACAATCTACTCTCCATTCTAGCGG  
A\_18\_P11215844  
CACACAAACCTATGCTCTATATTCCTTTTTTCGCTTGTATCTTGTTCATTTCAGTGACCAC  
A\_14\_P101185 TAGATCATAAGATTAGGTTTAAATTATTGTTTACACGGATCAGGCAGACCCTGAGTTTGCC  
A\_16\_P40393696  
ACCACTGTAACCTAACAAATCTAAAATGACTCATCTCATAACCTAATCAATTTTCTCCAACC  
A\_14\_P117602 TAAATATGTCACCTGTAATGGATACAGAGTGCTTGGAAATTTCTTCATTGGCAAAGTCAC  
A\_14\_P138889 TTCATCATGTGTGTTACAATAAACTCTACCATCAGGTCTGAAAGGGGAATAGAGAAAAAC  
CUST\_3729\_PI426210822  
CTAAATTTAGCTGGATTTTTAACAGCCTTGATTGATTGCTGGTCTTAATGGAAGAAAATG  
A\_14\_P138364 GAACAGGTTTCCACTTTCATTTTCATGTGAAGCCAGTTTCTTCCATTTGTTTAAATCTTAC  
A\_16\_P18300134  
AAAAATACTCATGGGAGGAAATCTAATGTCACCTGTAAATAACTGCTAGATGATCCTGGC  
A\_16\_P35601506  
GCTTCATGATCGATTTCAGTGTGACAATCAATGCAAATGGTGTAAGAGTATCTCATTGATC  
A\_16\_P20903738  
ATCGTGGGAATTTTGAGATTTAGTTCACTGTAGACAACAACATGACTATGCACTACTGTT  
A\_14\_P137305 CAAAGGAGACTTTTCTAAATCTCAAGTCCTTTGCTAATTTTTCTTTGGAACAACAGCACA  
A\_14\_P118074 GTAAACTGGATTGTAGAATTTACCTCTAGATCTCTCTTGACTTCTGTGGATCTCCAG  
A\_16\_P17381167  
AAAATGTTTCAATATCTCCTAGAACTTTCCTTGCACCATTAGAAATACAGGTCCACCAC  
A\_14\_P108963 GACTGACCTATCTCACTCTCTCCCTGCTTTTACCCTTAGGGTGATTCT  
A\_14\_P111031 AACGAAAGTTTGTGTAGAGTTTCAGTCTTGTTACTTAGTCACCAGTATATTGGGGTTTTTC  
A\_14\_P121739 GTCTAAATCACCGTATTTCCCCTGGAAATATTTAGTCTGAAACCTGGAGGGAG  
A\_14\_P121975  
AAGCATCTTACTTTTTCAACTTGAAGAAAAGAGAAGAAGAAGAAAACCCTAAAGTCAG  
A\_16\_P18187960  
AAAACAATCCACAGAACAAAACCAATAAGAGTGAATGAACATCTGATTTGATCCTGGTG  
A\_14\_P133537 TTTTCCACATTCCACAAGACAAGGTCTTTTGTATTTTGTGCCACTTTTTATGTAATAT  
A\_14\_P200514 CTTTCTGAAAGATGATTCTCCCACTGGCCCGAATAACTGAATATGGACAAATG  
A\_14\_P200067 ATGGCAGTCCTAGAGAAAAACCCTGTTAACCACATTTTATAAGTTGTTTTTCCCAAAGG  
A\_14\_P135222 TGGGTCATTACGTAGTTGTTTGTCTTATTTGTGAAAAGTGTTAGGGTAAGGTCAGGATA

A\_14\_P135490 GTTCATGAAAACGCATATTGGGGTAGAAAATAAAGCAAAGTTGGAAGTGAATTAGGAACA  
A\_14\_P200160 CTAGATCCTTAACCTAAAGCAGTCTCTCCAAAATCTCACTGAAATGCCTGAAGCA  
A\_16\_P01983931

ATCTGAACTATCAATCAACAGAAATCTCACGTATAGTTGAAGGCAAGTCATAAGAGTGGG

A\_14\_P119341 AGACGTCTTGAATCAAAATGGTAACTGATATCTTTTTGGACTGGGAATCATATCAGTTT  
A\_14\_P106417 TTCATGAATACTCGGTGAATTGAGAAAAGTGTGGACAAAGTAGTGAGATTTTTACAAAAC  
A\_14\_P117617 TGACATCTTTAATCCAGCATCTTCTCTGTTTCTTGCCTTCTTTTTCTTCTTCTTAGA  
A\_14\_P131040 TTTTAGTTGAAGATCCTCTTTGTAAGTCCACTCCCCAAACTTCTGAGGATC  
A\_16\_P35153977

GAGGGTTCATGAATCTAAAACTTTGAATGAAAGCCAAATAATCTGCTCTGTAAGAGGCT

A\_14\_P108878 ACAAATAAATAGATCATCTAGATCAGGGACATTCTGTAGTGGAAGCGTTTTAGGCATCTT  
A\_14\_P137796 AGTGGGAGACACTTCTGGATGGTAATGAAATGTCCTAAAAAACAAGAGCGATATTG  
A\_14\_P102687 CTGATACTCCTATAACCAGGCAGGTTCTAGCACATTGTGAGTTCTGAAAAGCATAATTA  
A\_14\_P108469 ATTTAGTTTGGAAATGAAAAGAAGACAAGACATTCAGGGAAAGGATTACATTCACAGCAG  
A\_14\_P123424 CTAGGCCTTATATTGTCAGTGAAATGGGATTACTCTTGGCTAATATAGGCAGGGGAATTA  
A\_16\_P03810283 CTGTTTTGCTTTTATACCTCGAAATCTCAGGACACTGGGCATCATTAAACAATGATGA  
A\_14\_P123179 GTATTCAAATAATGTCTGAAACACTGATATGGAACAGACACTACCAATCCAAATGCAAT  
A\_14\_P137362 CTCTTAATTATACAGAGCACATGGCTGAGAACGACAATGCTCTCTTTTAAACAAAAGAGA  
A\_14\_P100090 ATTATAACAACGCTGTGTGTCATTAATCCACTCTGTAACTGCAGAAATACAAAAGCGTC  
A\_14\_P110829 CCTGCCACTTAACTGAATTGATGGGGAAATTTGTGTAAATAAGAAGTATTACGTGAAGC  
A\_14\_P115773 CTTTGTCATTTTGAGGACTTTGACACATGTATTTGTAGCCAATGCATAACTTCAGACTTG  
CUST\_1623\_PI426210822 ATGAGGCTAACAGAGGTAGTAGATACTGCTTAGCAGCAAGAGAGGATTTGG  
A\_16\_P38952337

ATCCTTCATGTTACATTACAGAGACAACCTTACATTTCTACCTAACCATTAATGTGCCTT

A\_14\_P116741 ACCTCTTTCCTTATTCTTCACTTATGGCCCAAGCAATAAATAAAGTGCCTTATACACT  
CUST\_1297\_PI426210822

GAGTAGAGCATGACATAATGCATAGTAAGTTGCATGTCTATATATACATTATTATGTGCC

A\_14\_P109139 TCATATTATCGAAGATTACCAGTTCATTATTCAGACCGTCTTCATTGTATTTCTCACGGA  
A\_14\_P101045 TTGCTGTCTCTAGTTTCTTTGAGAAAGATTTGTCTGTATTAGAAAACCTACTTGCCTGCA  
A\_18\_P17381264

GAGGACTGTGATCTATTAACGCATGCTTTTTTATAACACTTTCATCTTAGTGAACCACA

CUST\_6878\_PI426210822 CTTTCAAGGCAAACCGCTCAAGATGGCACCAGGTGATAAAAACAGAT  
A\_16\_P21010800

AAATTCCATAAGTCATTACCCACCTACTAGAGAAAATGCAAAAGATTTACACTCCCAG

A\_14\_P100888 AACATCAACTATTTTAAAATGAGAATCACAAAACCTTTCCACATTACTTCCCACCTCCAC  
A\_16\_P16171514

AATCCTAATTCTCAGAGGTTTTCTTTCAAATAACTACATTCTACATTTACCCAGGGCTC

A\_14\_P131098 TCTCCTAAAATGCAGTGTATGTGCTTTGAAACTTGTGAATGATCTGCTGATTTGTGCTA



CUST\_2382\_P1426210822 ACAGAGCAGGCATTGTGTGGGTGAACTAGAGGAAGGAATCAGAAA  
A\_14\_P135503 CTGAAAATCAGGACCAGGAAAAGATAGAGGGCCACATCACCTTGTAAGTTT  
A\_14\_P116626 TGAGCCCATGTTGTCGTGAAAAATTCATCATGTAATTTGTTTTCGAGTGCTGTAAAAT  
A\_16\_P01335130  
AAAAACCTGAAATCCAAATGCTTATATGGAACCTATCTGACATGTAAATCACTCTGCAGCC  
A\_14\_P121750 AATTTATTGTAGACCATGACAGATGCTCATGATGGACATTTTATCTGTCTGATCCTGATC  
A\_18\_P16397042  
AGCCCTGAAATACAAGATAAGCCCTGAAATACAAAATAAACCTAGTCAATGAATTCTGA  
A\_14\_P110616 CATGAATGCTGAGATGTTAATAATGTTTCATCTCTATTCTAGGGAGTGAATAACGGTAGT  
A\_16\_P40438524  
CAATTGTAAATGATCACAGAAAAATGCCTCAAATGAATGTATCATATCCTAGCCCCACC  
A\_16\_P17253954  
AGCAAAGAAAACCACCATAGACCCTTATTCAGTTTAGAATGTTTTTCCCATCTTACTTCT  
A\_14\_P136723 GAGGAAATTGCTAGTTTATTCCTGGTAGAGGAATTTCTGTATTTGAAAATTCTCCAGAAG  
CUST\_55\_P1426210822 ATCTGGGAAGCCCTGGAGAGATGTGGATTTGACAATTTACGAAAGCTA  
A\_14\_P103369 TATCTAGGCATATGAGACAGGCTGACACCTTCTTTCAAGAGGAGACTTAGAAATCAG  
A\_16\_P16650256  
AAAAGAGAATGAGATCACCTTTGTAACATTTTCTCACTTCTATAGCCTGTTACTTACCA  
A\_14\_P114137 CTAGTCTTCTATTTTACCTCAAACAGTTCTCAGAGGTGACAGGAAAGATGAGAAAACATT  
CUST\_1617\_P1426210822 CTACAGGTCAGTGACCCTGAGCTTAACAAAGCCTTCGGAGCTATG  
CUST\_4391\_P1426210822 GAATGTGGACTGTTCCATTTTTCTGTTGTCCAACACTTGCTTTGTTTGTGAC  
A\_14\_P127756 GAAGATGGCAGCAAGGATGTTATCTAGGGGTACACATATAGCATGTAGAGAG  
CUST\_2469\_P1426210822 AAAGCAGTCACAGTTCTTATTTGTGACTGTGGTCTTTTCTGTGACTCCATT  
A\_16\_P16109669  
CAGACTTCAAATGATACATGTTTTTACCAAATGCTTAGTAACTCTGTCAACTCTTCCA  
A\_16\_P40116780  
CCTAGCCTTACAAACATCAAACCTGATTTGAAACCAAGAAGTCTTTTTTACAATTTCTGC  
A\_14\_P133896 ATCAGCAGCAAGACACACCATTTTATGCTCTTTTTGAAAGATAATTAGAGTTCCCTTTTGT  
A\_16\_P01460931 AGTCAGTGATTCTTTTTCTGCTTTTCCAATCACATATGATCCCCGATTACTCTAAACCTC  
A\_14\_P127645 ACTTATGGCAAAATCATAGAGCAATACTAACACAAGTGGGACATATTCGACTCTCTCTTT  
A\_14\_P126846 CTTACAGGCATTCTTCTGCGGTGATAAAGTGGCTGTTACGTAACCTTTTTGAAG  
A\_14\_P101311 CCTGCCTTCAAAGGGTCTCTTACAGCATGTCTTTCTTTTTGGAACAGATATGAAGTAAT  
CUST\_9147\_P1426210822  
GAAGTTTGGAGAAATGAAGAAATAATCAACTATCTGTGTATAATGTTTAACTTAATCATG  
A\_14\_P200183  
GAGAAAAGAGGAGAATCAAAAACAAGTCATCACACCAAATTGCCTAAGACTGATAGTGAT  
CUST\_201\_P1426210822 GAAAGAGAGACAAAGGCAGGGAGACAGGCCAGCAGGGCCGGCAG  
CUST\_3210\_P1426210822 CTTCTCTGCCTCAGAGTTCACACACCCCGGCTTATCTTCCCTCTT

A\_16\_P01730041

CCCAAATGAATGAGAATGTGACCTCCTTAAGGATACATCATGTATTGGATAACCAACTTAG

A\_16\_P02384092

TGCAGACACTTTACAGTCTACTAATTCTAGGTTTCATAAGAAAAGTCTCACATTCAAGCCT

A\_14\_P117949 AATTAGAATCAAGTCTCCTTTTTATCTCAAACCGTATGGCTCTAGGACATCTGATTGAGA

A\_14\_P112857 CTAGGCTCTAATTTGGTTCTGTGAATGGCAGTTGCAGAAAGTAATTTATTTGGGTCTTAA

A\_16\_P16191577

AAAGAACACAGGAATTCCTCTTTTTTCCCAAGACTTCCATGATATTTTCCCTGATAATC

A\_16\_P19343680

AAGCATCTTCTACTGAATTTTCGTTGACACTGAACTTCTACTGTATCAAGCAGCATTAT

A\_16\_P17537351

CCTACTCCTATCACCTCAAAGCATCAAAGACAAAAATTAATACTCGGCCATGACTTTAAG

A\_14\_P135680 TTCCCTTTAACGATCTGTATTCTGGCCCCGACACGTTCTCTGAATTCATAT

A\_14\_P127745 ACTTCATAAAAGGCCTTTCCTCGCCACAAAATAACTTCTCTTCCTTCCTTCTAATTATTA

CUST\_7723\_PI426210822 CTCTACCTAGCATTGAGCATAAGCAGGTCCTGACCACAAAGATATTCTGTTC

A\_16\_P58424232 GTTATAAGCAGAGAGCACCAAGACAGGACCCAAGCCCAATTTGTGTT

A\_14\_P115124 AATAACGACAAAAGGCTTACGATACAGTTTTTTTTAATGCAGGTTGGTCAAGATCTCGAAT

A\_14\_P118002 GAATCAGGACTCCAATAAATTCACAAAAGTTTGAACGAAATTTTTTCCACTGAGGTCCAG

A\_14\_P109887 CTAAGAACCTTGTGTTGTGTATCAACTGCAGTTGTGTTTGAATGGGAAGCAAAATATACA

A\_16\_P58424310 CTTTGCCATTTAATGTAACATCACAGGAGTGAGAACCATCATATGTCCAGTCCCTC

A\_14\_P110140 CTGATTTCCATAGCAGTGGACACATTGTTGTTAATGGATGGAAGATACATAACACAGCAA

A\_16\_P35990147

TCTGTGCTCCAAATAATTCAACATACTCTTCAAACCTCTGACAAAATCTTTGACCCATTT

A\_14\_P112824 CAACTTTCATTCAATTGTTTAATAAACTTCTTTGCCTTTCCTGTTTGGATAAGCCAGGG

A\_18\_P22840291 CTCAGCACGTTACCTGGGCGAGTGGGTGCAGTCTCTGGGGTGGGT

CUST\_8385\_PI426210822 GCTTGGCAGTGATAATGACCAGAAGGTGAAAATACTGTGGAAGGAGG

A\_14\_P108233 TATTATTTTTTTAAGGGTCTGAAAAGCCCTCAAGAAAGCCTCAGTGATCTTGGTGC

A\_14\_P104701 ACTCACACATTTGACAAAAGTTCCTTAGATTATTGTAGCACATACCAAAGGAGAGAATC

A\_14\_P123323 GTTGAAGGCGCCTTGCAAAGTATTAACAGCACTATCAAACCTTTAATTGCGTAGTTC

A\_14\_P103774 AACCATACAGCGTTCTCATAATCATGGCATTATAGTGGCAACCAAATACTTTCCCTTAAC

A\_14\_P102628 AGAGTAAATGAGGTCCTTTATTGGCTTACCAAACAGGCTCTTTGGGCC

A\_14\_P201791 TAATATGGTTTTTATCTCCTGTGGTTTGGAGAAGTTTCTGCCTCAGTAGTATGAAAGAGG

A\_14\_P107483 ACCATCACAGACAAACCACATCACAAAGTTTCTTCATCTCAAATTTTCTTGCAGATATTC

A\_16\_P17040751

ACATGCAGTAAACAAACTTTGAGAACAGATTGATCCATACAGTTATAGGCAGTTGATCCT

A\_14\_P106155 GTGCCTCCTAACTTACATGTATGTTACATGCCATTTTGTGTGCACAAAATTGTTTGTAGA

A\_14\_P201972 CTGACAAGCCTTCTTTATCTTGAATATACAGACTAACACCATGCTAAAACAAACAAACAA

A\_14\_P104513 CATCAAAGTTACCTACTTTTGTTTTTTGTAGCAACAGAATTCAAATTTCTCTGCCCTTGTCT

A\_14\_P123235 CTTGGGCATGTGTGGTATTTAAAAACCCCTCACATGATGTTTTTAAAACAGATCAATTC

A\_18\_P11088492

AGAGAAAGGCAATCTCTAGTTTTCAAGAGTTCTCATATTGGTGTCACTTGTAATGGGTA

A\_16\_P21459710

AAAATGTGATCTACAAGCATGAAGATGAATTCTCCTTTCCGATCCATAGAGAATGCTAGA

A\_14\_P116341 TAGAGTCTGACCCTTTGCATCTTTTGGAAATATTTCAAGAAATACATAGCCAACCTCCAAG

CUST\_2574\_PI426210822

CCTAACTCTTAAGCTATTTGCTTTTGGCCAAGAACCTTCCATAATGTGCCATAAAAATAT

A\_14\_P116172 CTATTTTAGACATTGATCTAAAATGGATCTTAGAGCATGGATTGTCTTACCCGCTCCCTG

A\_14\_P127056 AAAGGGAAGTCTTTTCTGGTGTCTTCAGTCTCAAACCTCTTATTTATTTTAGAAAAGG

CUST\_5676\_PI426210822 CACTTTGGGTCTCCATTGTGCTGGAAATCGTCACTACAGCTCCTC

A\_16\_P17200874

AAACATCCACACTTACTTTAGAGAGGCATGACTATCAATGAGAACATTTGAAACTTCG

CUST\_1735\_PI426210822 TGGTTGAGGTCAATGTCAGCTGTTTGTCAATTCCTTGTTAGAGCCTGAT

A\_14\_P136216 GTTTCTTCCCTTTTCCACAGAGTGACATATCTTGGGCATTTACCCATATTGTAAATTTTT

CUST\_3325\_PI426210822 CTGATGTGTGGGAAACTACCTTCATCATCCAGCTCAGGTGTGAAG

A\_14\_P106446 TACCACTTGTCACTCCTAATATAAGTGGGTGTCCTGGTGACTATTTCTGATATTTTTT

A\_14\_P113876 CGGATCCCTAAGACTGTAACATCTGCTACATACATTAAAAACAAAACAAAACAAAAGCAA

CUST\_571\_PI426210822 AATTTCAATCTCTGACTTAGCGTTATGTGGTGTGGATTGTACTGCTCTCCC

A\_16\_P00766889

GTGGCACAAAATTCTAACCAGATAACCGAGAAAAACACTAAAGATCAATTTGACATCAG

CUST\_163\_PI426210822 CAAATCTACATTTTGCATGGCCAGGTTTGAATAGTATGCCTCTCCCCTC

CUST\_10412\_PI426210822 CAGGTCACACGACCGGGGCCAGCACCCTTCCTTTAAAGATGAAC

A\_14\_P139079 CTGTGTTGGACACTAGAGCCATTCACACATGGTTCTTACCTAGGGT

A\_14\_P100890 ACTCACTCAGTTTTGGTTAGTGGAAGAATACTTGCACTTACAGTTTTGCTAGTAGAATCT

A\_14\_P119071 ATTTTCTGGTAGGCTCTGAGAATATGCATCAGAGACACCTGTAGCACAGTTAA

A\_14\_P125816 ATACTATAAATGTGTTGTTGATGCTAAATCATACCAAATGTCTGCCTTCTTGAAGGCAG

CUST\_235\_PI426210822 CCGCTAGAGTTGTCTCCTCCGCCGCCAGCTAGACTCGGCTTAC

A\_16\_P19920810

ATTGCTCAGTGATCAATCATTGACCTCCTGATTAAGTGAAATTTGCATCGGATCTATC

A\_14\_P130034 CAGTCTTCCCAGGAAAAGGATCCATAGATTTCTTCAATTTTCCAAAGAGTTTGTCTGAA

A\_14\_P119766 GGATTTGTTTTTTGTTTTTTTTTTTTCAGAATAACGTCAGCATGTGCTGAGCATCTGACTCA

A\_14\_P114302 GAAAATCAACCATTCTAGCACTTGAGGCTAATAACCTTTTTTATTTTTGCCTCTGTCAATG

A\_16\_P02984934

TCAGAAGCCATAAGAGCATTACAGGTAGATAGAATCCAAGGGACGAAAAATGTAGACTT

A\_14\_P122827 AGCAATAAGGCAAGATAAGAGAGTGCTTGGTTATGCCTTTTTACTTTGAGAATACACTGA

A\_14\_P137978 TAAAAATGTCTATTTGTGTAATCAGGGTATTTTTTCCCCTCCAAACCTGAACATCTCCAA

A\_14\_P105578 GAGTTCTCTTACCTTTAGATTTCTATGGCCTCAACTCAGCAATAATAGGCATTCACAGA

A\_14\_P139465 CACAGAGCAGTGGCTCTACAGTTTCTTGTGGCTGAATTAAGCATTAAAGAAATGTTTA  
A\_14\_P100016 GCTTTATACAGACTTTGGAGTCTATGCTCCAGAACATTCTGAAAACAAAGTCCGTTTTAT  
A\_14\_P110748 TGGGTTGATGTTTCATCAACCCAAGGTATTTTGTAAAGCACACAAAGTAGCAATAGTT  
A\_14\_P139218 CTCTTGAACGCTTTTATCTGTTCTTGGTGAGTCTAAATTTTTTTTCAAAGGTTGACTTGCT  
A\_16\_P18185131

TGAACACATGTCCCTATTTTCATGTCATAAGTAAAAAGCCCTATTCATCCTACCTTAGCA  
A\_14\_P123099 TTCCAATTCTACAATGGCATGCTATATAGCCCCCTAAGGGATAGAGAGAACTTGAATATG  
A\_14\_P116957 GACTTCCCTGCCCCAGTGATGACAGTTAAAGATGGCAAAAATGAAGA  
CUST\_7002\_PI426210822 AGAGCAGTCCTTTGTCCACATGGGTTTCTGCAGTAGCCCAAGTTT  
A\_14\_P131666 TGTTAATGGGAGTTTTCTATACTTCCAGGAGCCAATCATTAGAATTTGGCTAATAAAAAAC  
CUST\_5226\_PI426210822

GAATTTCTGGAGTTCTTTGAATTCACCTGGTTTTTGGAGCTCTGTCAAGTCAATATTTAT  
A\_14\_P115110 ACCAATCAGCAGTAAACAAAGATGTAGACGTGAAGGTAAAGTTCCATTGGCTATAGTATT  
A\_14\_P110108 TTTAGTTTTTAAAAGAAGCCTTTTCTTCATAGGGAAATAGCCCCAGAGTATCCAGTATG  
A\_16\_P16243361

TCCCTAGCAACTTTTTGAACAGACAACCTTTACCTCTTTACCAACATCTACTTTAATTCCT  
CUST\_2762\_PI426210822

ATACTAGCCCTTCTCTTGGGATATTTTCATGCTTTAATTAATGCTGGGTTGAAGG  
A\_14\_P118247 GTGTGAAAGCATTTCCTCCCATCAAATCAGACTTTGACAAAGTGCTTGCCTTTC  
A\_16\_P17825547

AACTACTCATGGGCCAATTTAATACTCAAGGGCTGTAAAATCTACTCTTGAATCACTGAA  
A\_14\_P116557 ATAGAGATTGAATGAATACGTGAACATGCTAATGGATAATACATCTCCTGAAGGCCAATC  
A\_14\_P116976 CTTTCAAGATGTGTCTTTCACAAAATAATTATCCACAAGGTCTATCTGTCTGCATTCTTGGC  
A\_14\_P128538

AACCACTTACAAAACCTCAAAGAAAACGTAAGAAGAATTAGGAAAACCTGAAAGTTTTGTTT  
A\_16\_P17448512

AGACTACTGTCTTAGACTATGCCAGCAATCTCTTAATGAATCTGCAATCTTTTCTTACCC  
CUST\_934\_PI426210822 AGTTGTGGCCGTGCACTGTGGACCTGGATGCATGACAAAGGCTTT  
A\_14\_P111830 CTAGAAGAGAAGTTTACCTGTAGGCTATAAAGGAGCAACAGCAAAGTTCTTTACATGTAT  
A\_16\_P16191328 GATGAATAGTTTATTCACATGCATCCCAGGAGATTTGTGTGAAGAGGGTGACAG  
A\_14\_P119051 CTACATAACATATTTGTGTTGTGTGACATATCATGTCAGAAGCGAGGATGGTCTTAGGG  
A\_16\_P30952325 CAGGACAAAGGCATCGGCAAGGTGAGGAGAAACATCTGTGGAATA  
A\_16\_P00788014

CCTACCATGATTACTTCTATAACCGTGAACAGATACTGTATCATCCGATCTTCAAAAACAGA  
A\_14\_P112723 TTGAAGCACAGTGTGGATGTTAATGTGTGGCTAAACTGAGCAAGAAGAAAACATTATGTG  
A\_14\_P122515 CTCCATATTCTCCATCTCTTTCTTGTTCCTTTTCCAATTTTCCAAAACCTTTTCTCTAACATCCA  
CUST\_4621\_PI426210822 ATATTTGACAGTGAGGAGCAGATAGAGTTTTTTTAGGCAGGGGTCCTGTAAAG  
A\_16\_P19104185

ATCACGATAGCAATTTTAGTCAGTCGTCAAATCATAGAACTGGAACCTCTCTCTTTACTGC  
A\_16\_P40993496  
TAAGCAACTACCTGCAATTTTTTAGCATAAGGCCTTGATTACAACAAATCTTCCTCATCC  
CUST\_8987\_PI426210822  
CAAAGTAGACATTCAAACATTCTCTGAGTTTTCAAACCTCAAGGAGCGTGTGACTTC  
A\_14\_P102073 TTTTGTCTCTTGGCCAAAATTGGGAAAGTGAATGGAGTGGTCTTAATTAACCTGTGTTT  
A\_16\_P00685396  
ACATGTTCTAGAGAATTCCAGTTTTAGGTCAGTAGTTGTGAAAGTAAGGGCAGATCACT  
A\_14\_P104006 TATGAATATCTGAAACTTACTTGTTTGTTCAGGATACCTTTGCCATCTGTGTCGGCTAAA  
A\_14\_P103392 TATAACTTTAAAAGGAGTAGAAGGGCTTTTTGCAGAGTTATTACGTTTGAAGTATACTTT  
A\_14\_P122860 TTTTAAAAGGTGTAAACTGTGAATTGGAAATTGACGAATGTTGGTCCCAGCCTTGTTTAA  
A\_14\_P121200 CAAGGAAGAGATGGGGAGGATACCTTAAAGTAGATAAAGTATATGTGGAAAGGAAGTGAT  
A\_14\_P202459  
TAACTGAACAGAAGACTGAACAAATGGAAAGATATCTAAATGACAACAGTGGCATCTGAG  
A\_14\_P118616 AGATCCATCTTCCCCTGACACCATTGTATTATGTTAAAATATCTGTGAACTAGGTCAGAA  
A\_14\_P101830 GGACACCTTCATGATAAAAAGTGGTCATCATGGATGAAAATGAAGGTTAGGCATTATTTAC  
CUST\_2699\_PI426210822 GGCGCGTCAGGGACCAGGCAAGGTGGAGACCAGCTCTTCATGGTA  
A\_16\_P16191314  
AGTGGGTAGGCGTAAAAAATTATGGAAGTATTGGACTTGAGCAAACCTTTTGACAAATAGC  
A\_14\_P103571 CATCTTTAGGACAGGTAAGGAGATGGATGCTAAGGGTGCATTAGAAGACAAC  
A\_14\_P104635 CTCTTCAGATTCCTTTTTCTTTGGTCCAGTTTCCCTTATGGGAGTCCTTAAAAGTAA  
A\_18\_P15711406  
AAAAGGAAATAAGGATTTCTCGGGTTATAGTTACGACGATAAAGTGCCAGATTAAGAGCA  
A\_18\_P12018491  
ACAGTTGCCCTTACATCAATCTCAAGAGATTA AAAACCTCCAAAATGTTCCGTTTTCC  
A\_16\_P17617959  
AAAAAAAACAGGGACCATTTTCTTCAAATGTTGAACAGCATCATGTTTGAGAGAAGACA  
A\_16\_P17825201  
AGAGGGGAATGGAAAACACAGTTAAATAACCACCAGTCCTTATGCATATTTATAGATCGT  
A\_18\_P16812409  
GGAACCTTATCTACACCACTCCCTATTACATGTCTATTTGTTCTACCTCAGAAATACAGTC  
A\_14\_P100984 TCAAGTGGCATGCAGAAATATTGATAAAGCGTGGATTCATATATTTTCTGATCGTTTTCCC  
CUST\_461\_PI426210822  
TTCACAGGCATAATATTCTTTAGTTGAGTCTTTGTAACATCCTGGTGAGTGGTTTTCC  
A\_18\_P12837424  
ACGCTATAAACTAAGAGACGTTAAATGACATTAGGGAGAGACTAGTAAGAGAGAAACCAA  
A\_14\_P202271 CAGTTAGAAGTAAATCAAACAACAACAACAATACTAGTCCCTCTTGACAACTCTCC  
A\_14\_P137050 CTATGACAATATCCTTCTGTTCTCCCGTATTAAACTTTGTTGCATTACACATGAAACCAC

A\_14\_P130114 GCAGATACTCAATGGTTTTTAACTAATCCTCTCCAACCTCCATCTGTATCCTTTTGTTC  
A\_14\_P106621 GGATAGTTCTGAAAATTATGGAAAATAAACTCATCTGGTGC GGGAAGAGTAGAGACAGAAA  
A\_16\_P20683181  
ACGCCACTGTGTTTGTAAATACCTTAGATAAGACAGCATTGAATTGATTATCCCTGGATTT  
A\_16\_P40727155  
AGCGCCTTCTGATTTTAAACAGATTAAATCCATCCAGATTTTTATCCCAGGCATATTGAC  
A\_14\_P113555 CTAAATCTAGAATACAGGGTTAGGGAAGGAATCTTAATGTCTCAGTGGAGATAAACACAC  
A\_16\_P20065838  
TTTGAGCATAAAGTAACTACCCTCACTATCAATGAACTAATGTAACCCATCTGCTATTCA  
A\_14\_P129317 ACTCTTTTTGCGTAAACTTCTAGTTTAAAGTAAAACATACAAAACCTCACAAATTA  
A\_14\_P110923 CTTTTATGTAAAGCAACAGCAAGCCTCTTTGTCAAGAATCTGTTTAGAAAATGTCAGCAG  
A\_14\_P139968 CTTTGATCCTAGAAAAACCAAACAGGACATCCAGATCATGAAAGATGGCAAATGCT  
A\_14\_P128426 TGGAACCTCTGTGAAGTGCTGCTCATTGTTACTGAGATACACGGTAAGAAACATCTAAAA  
A\_16\_P19389595  
CACAGTAAGACCTCCTATATCCTTAAATCCAAAATGAGACTATGTGATAACTGCTCCCTT  
A\_18\_P17380348  
CCATGGAAAGTTTTTCAACAAGTCTCAAACACCTAAAACACTGAAAAAATCTACTTGGAA  
A\_14\_P124329 CTGTGCTGTTTGTATTTGTTCCCTTGGGTTTTTTTTTCTGCCTAATTTCTGTGATTT  
A\_14\_P126538 AGCATAGAACTTGGTTACTAGTAGAAACCTTTGAACTTTTTTGAAGAAGTCTGGAATT  
CUST\_3443\_PI426210822 CCTGAAGCCTCATTGCGTGGGATAAGGGGACTAACATATTCTGTG  
A\_14\_P120264 CTTCTCATTATTGTGTGATAGTAAACAAGAAGCCATCAGGATTTCACTTCAAATGCAC  
A\_14\_P121046  
ATACAATAATGAAGGTGGAAATAAAAACAATAACAAGGAACAATCGGGTGGACAGCGAT  
A\_14\_P128572  
GAGAAGAACAATACAAGCACTCAAATAACGCTCAACAACTTCATGAGTAGGCAAATCC  
A\_16\_P18646495  
TCGTGATATCTAGAGTATAATGTTCCATAACCAAGAGACCAAATTGCATACCTCCTCATG  
A\_14\_P107005 TGATATGCTATGATTATGACTTTTGTCTAGCCAGTCACATCATCCGTCACCAAAGAAAAT  
A\_14\_P200155 CTCTGATCTCCTAAGAATTGGAAGACTGAGAGAGATATCCTGCAACCAACT  
A\_18\_P22841049  
GTCATTTGTCTTGTTTAAGAAGGGGCGACAAACATTTCCAAATAGGGATTGACTTTTAAAG  
A\_18\_P22842661  
TATGGTGAATCATTAATGCCATGCAGTTCTTGAGACAGCATTTGAGAAATTATTCTCTGG  
A\_16\_P18271294  
AAAATAGATGACTTTTGGCTTTTGGCTAAATGCAAGAGGATCTTTCAGGTATCTCCAAAA  
A\_14\_P138239  
ATAGGAAAGGAGGCACAGACCACAGATAGCAGAAGAGAAAGGAATAAAATAAATTGAGAT  
A\_14\_P135533 TCTTTTAAATTTAATTTCCAGGAGTTGTTGAAGACCTGTGGTTCTGTTTAGGTGCATT

A\_16\_P16999046

CCCTGAAATACCAACATTGGCAAAATTAACGAATCTTCTGTAGGACCTAGTTACCAATAG

A\_14\_P125206 CTTTAGTCACTGAACATTGCCTACTTACAATTCTTATTCTTTCTTGTTCCTGTGCAACGT

A\_14\_P113491 TTGGAGGGGAGGGAGAATTTATTAATAAAAAGAATCTTTAACTTTAAATGGTTTGGAGAGG

A\_14\_P202449 CATGCTTTAACATATGAGAACATGAGGAGTTTTCTGCTGCTACATTGTTTTGCAGACTAG

A\_14\_P111775 ATTTGATTAAAGGAATTTTCAACCCTGAATTCTACATATTGGGATCTGCACTGTCCCTTG

A\_14\_P113614 AGGATTTCTGTGTTTTGCAACAGGCTTAAAAAGGCTTCCCTTTACAAGTTAATGTTTAT

CUST\_3074\_PI426210822 ATGTGATCCTGTGACAAGGAAAAGAGGTGGCCTCATCACAGTGTG

CUST\_5157\_PI426210822

GTGATGTGCAGTAATAAATTAGCAATTCAGAGTTGAGGAGCTCATTACTAATCTGTGGAT

CUST\_3465\_PI426210822 CACCTCTCTCCTCTGCTCCTGGGAGCACAGGGGAGTTTCAACTCT

A\_14\_P103875 CTCATCCTTTTCTGCAACCTGTTTGCTCACTGGTTTATTTGTAAATTGGGGCTAT

A\_14\_P107513 TAGTCCCAGGAACATAACTAGTAAGACTCAAGGTTTCAGAAAAATGAAAACACTCACACTGA

A\_14\_P119357 GTGATAGATATCTAGACCCCAAGTTAAGTCTGTGTGTAACCAACTTACATACTCCCTT

A\_14\_P130164 ACATTACATTACAGAATGGTGCAAAGCAAGCCGACAGTGACATCCCTCTAG

CUST\_1612\_PI426210822 TTTCTGTGAGCTGTTGTCCCCTCCCAAGCTGGACATGGATCTGTG

A\_16\_P19822374

AAAAGGATTCAACCAACAATAATTTCCAAGGGTTCATACTGAAAAACATAAGCCAGCAAC

A\_16\_P03303914

AATTGCAGAAGCACCATTATAACTACAAGGATAAGACCTCTATTTAGGACTTTGAACCCA

A\_14\_P202161 AAACAGATCCACAAATTTTCATGTA AAAAGTGACTCCACATACAATTGTGGTCAGAGGTTTA

A\_14\_P112517 GTTAAACGTTAAGTCCCCAGAAAACGTTTGCATGATCTGCATTCTCTTCTGATAATACAA

A\_16\_P36244742

ACACTATTCATAACACCTTTCAAAAAATGTCATTTCAGTTCTATTCAACCCAAGTCTACAA

A\_14\_P132915 CCTTCTTCTTACACCTCCCTTTTCTGCAAAAATCTTGTTTTTTACAGTTTTATTTTGTTA

A\_14\_P124721 ATTAGTAGAATTCAAGGCATTTGCTGTTCTCACTCTTTCCATCTGAACATCTTCATCCTC

A\_16\_P17566286

AAAAGAAAAGATAGTTCTCCCATTAAGTGAAACCTGTTAAGTATCATTTCCACAGCCTGC

A\_16\_P32097903

GATAGGTCATTCTTCAGGAAAAAAAAGCATAATAGCCCATTTAATACACATTGTCAGCAC

A\_14\_P111721 CATACAAAGTAACAAGAGATTCCTAAGAAACGCAAATCCTTGAGTTTCACGCACTTCATG

A\_14\_P120899 TCATGTTGAAACCAAAAATCTCACTTCAGGACTGTAGTTTTAGACTTGCACCTTTCAAAGA

A\_18\_P22841914

CCTTCTTGTCTGAAGGATATATTACAAGCATATTGACAAAAGTCTTTGAACTCTTGAGG

A\_16\_P19253676

CAAAATGAGGAATTACAGTGCTTAGATCTATCACCTCAACTTTACATGACTCCTACTTCC

A\_14\_P129964 ACTAAAACACTAAAGGACATTTAAATCTGGGGAAAGAATCTCTCTGTTGGGAATATGGAT

A\_14\_P103833 AGCCCTGTCCCCAAGATACAGGCTGTCTGGACAGCAGATATATATTAATATATTAGT

CUST\_101\_PI426210822 ATACTGTGAGGAGCCATCTGGCTATTGACCACTTCTTCCTTCCAC  
A\_16\_P18507827  
AAGTTCCTTCTAGAGAGCCAATATGAAACATCATTACAAGATGTCAGATACAGTGGATGC  
A\_14\_P202254 CTGCTGGAGAAAAACAGTAGAATTCTCCTGTTGTTGAATCAAATCAAATTCCATTTTCC  
A\_14\_P134373 TAAGGGGAAGACTCCTTGAAAAAGAAAGTTTTTGCCTTCTTGATTTTACTTTTCTGTAG  
CUST\_4018\_PI426210822  
TGAGTTTTAGGGGGGCTAATTTTAGACTTTTCTGAAAATCAGTCTCAAGAAACAAAACC  
A\_14\_P106557 CCTCTTGCTCCCTTCCAGATAGAACAGGAGAAAAATAATCTTTCCTTAGTGGTTTTATTA  
A\_14\_P122002 ATGTCAGGCCTTTGCTAACGATTGCCTAAAATCAGGCTATTTAAAAAACAACCTCTC  
A\_16\_P00685457  
AGAAATTAATTTTCAAAAAATGACTCTATTGAGATTGAATTTAGATCTTATCCATTGCCA  
A\_14\_P105119 TGCAGCCCTTAAACACACCTGAGAATAGTTAGGAAAATTTTTTCTTCTCATGGATTACA  
A\_18\_P26895097  
TGTTCTAAATCTTCCACATAACCTCAACTTACTCACCCCTAAAAATTTTCCAGTGCTC  
A\_14\_P114049 CTAAAAATATCAGGTAACCTTCTGCATTAAAATTTCTGCCATCTGAAGTGCTCCCACTACT  
A\_18\_P14130867  
TGACTGAAGTAGAGTTTCTTTTTTAACACTTATATGCACATTCTTGTGACAGGCACAGTG  
A\_16\_P18204017  
ACCACACTGATTCTCCTGTAATATCATTCTTCCCTATCAAATGTTTAAGAGAAGCCACAT  
A\_16\_P03688746  
AGCCTCACAATTTGATCTACAGAAAAACATGGTCTACAGAAAAACATGACTGATGAGAAG  
A\_16\_P18959276  
AATCCACATCACCATATACTTAGTCACTAGATGCTATCCCCATTTTTGTTCTTCTGAA  
A\_16\_P21633756  
ATTTTCCAGGCTTTCAGAGATTACAAAATAGAAATCTACCATGCTCTTACATCCTAGGGA  
A\_14\_P138009 CTGCATGAAGCAAGTTTCTCCGCTTGCTTTATGAACCAAAATTTAACTTCTGATTCAATT  
CUST\_8420\_PI426210822  
TCTATCAGTTTTTATCTATTTATTTCTTTGAAGTGGAACCAACTATTGCAGAAAACCAAAG  
A\_14\_P115068 GGCCATAAGAATTACACTACCTGCGATTTTTATGGTCCTTTCCTGCCTTAATACTTATAG  
CUST\_889\_PI426210822 CTTAATGTTTCAACCCTACCTGTCAGAGCTTTCTGGGAGGCAAGTATTTACT  
A\_14\_P124711 TTTCGTGAGGCTTTTGTAAATAATTTGATACTAGGGACAAGAAGTTTCAACCTGTGCTT  
A\_14\_P137198 ATGTTCCACAGAACCAACAACCTGGTATCTTCCAGGAGATGGCTC  
A\_14\_P108057 CTTTTTCTCTCAAATGGGTAGTATGCTTCTCAAAGTTAAAAGCCCTGTCTTCTACTTTGC  
A\_14\_P128711 ATGATTCTTCTTACATTAAGAAAATCCATTCCTCATTGGAGGTGTAGGAAAATGCACC  
A\_14\_P131160 TATTCCTCATGTCAACAATCCAGGGCAAAAAGGAGAATGTATTTAAAATTGGTTCACA  
A\_16\_P19412245  
AAACAAGAGAGCATTCCAATTTTGTGTCAGTCTTAGTATACTTGCTACCTAAATGGGA  
A\_16\_P17172219



AAGGAACTTCCCATATTTATTTTAAGGATGTTGCCCATATATTACCCGTTGCCCTATTC

A\_16\_P21292516

AAACTATGGCTGACAGTTAATTTTATCGATACCAAATTGTGCAAGTTTAAACTGCCTGCC

A\_14\_P116275 CTTGTAGGTGTTCCCTCTTTTTCTTTGCTGCAGAAGAGTGTGTGACTCACAAAAA

A\_14\_P127492 AAGTAGTAAGCCTATTCTTTTCACATTCTGAGGCAAATGAGAGCCATAGGGGTAAATTA

A\_14\_P201336 ACAAATGCAAAAGTCTTGCCTTAAATGATCCTCTTTTCCTTCTTTTCTCTTGTTCCTT

A\_14\_P127260 GGATTCTGAGATTTGCTTTCATACCTTTGTTGTTATAGATAAAGACGCTCCATGATCCAA

A\_14\_P101792 AAAGGTTAGTCCACGTAGGAAATAGCAAAACAAAACAAAGGAAAACCCCTATTATGT  
CUST\_9461\_PI426210822

TATAATGATTTTGTGCTTAGAACTGTTGTTAATTTACTCTCTGACAACAGTGGAGACAC

CUST\_10109\_PI426210822 ATTCACAGCACACACAAGCCTGAAGGTCTGCATGCTTTATGCTT

A\_14\_P101951 GATTCCTTTTCTGGCAGTAGCAAGAGCACTTGGTAAGTAGGACTTAATTTGGTGAAAT

A\_16\_P21246795

TGATGCCATAGCCCCAATTAATTAATCTCTGCAGTAACTTTTTTTTTCCCTATTTTCTAGACCAT

A\_16\_P35630049

AAACCTAGCAGTTAACGATCCTAGGATTTTTCTTCCAATGCAAAGTATTAACACTGC

A\_14\_P106278 GTGGCCAACTAGCAGAGAATAATCTTGAAGGAATATTTTGTCTTTTGTCTTGATCACAC

A\_14\_P139496 TGAAGACAATTGGCTTGGTGACTGCTATTAATCCTCCAAATATTGGTATAGAAGAGAACT

A\_14\_P116153 TAATATACAGAGTTACAGAGTGCAATGAGAACAGATACTTGTCTTACTCTCTGAACCC

A\_14\_P138335 GTATGTGAAATGGAAATGAAAGCCCGTCAGTTGAATAATCGCAGGAGCAAACTAAAA

A\_14\_P124611 TGGTGTATTGACTCAGTTAAAACAATCTGTGTTGGGGATCATAATTGAATCCATAAATGG

A\_14\_P130330 TGGTGAATGTTGTAATGAAGTGGGTATCTGGAATGATTTACATAAGTCACTGTCAAAGC

A\_14\_P102542 GTTTCTGTCCGGGGCTTGTCTACCCTAAATATCAGGGTATTTTTTATAGTTATGGTAAC

A\_16\_P19181224

ACCCTGTAACTATTTGAACTATTTCTTGAGAACCTGGAAAATTACAAACTGGCAAAGACA

A\_16\_P37980292

ACCAAGAAAAGCATAATCACTATCCCCTTAAAAGCCAATTAACATCAAATAAAAACGA

A\_14\_P139958 CTGTCTGATCACTGCATTTGATCAGGTTTGTGTTTCCAATGTTAGATAGGAAGAGGAT

CUST\_7937\_PI426210822 CTGCTCCACACACCTGCCTTTTTGTGTCAGCCGGCCCATCTGTTGG

A\_14\_P104225 GGTTCCCTGTGGAAGGTTCTTCATGATATTAGTATTTTACATTCTTTGATAAGGAAAGT

CUST\_5196\_PI426210822 TATGCCTCATGATGCCAGGCATAAGGCACACAGCAACCAAGTGTT

A\_14\_P114349 TTATCCACCATTCTCTATGTTTACCTTAAACATCCAAAACAACAGGGGACATTTTTGAAC

A\_16\_P18410022

AAACCCTCATCAAAACAAAGACTCCTTTTAAGATTCCATCAGTGGTCATTTATTTCAAGC

A\_14\_P134600 AATTAGCACTTGATTTACCTGCAGTGTTTCTCTGCTAACATATGCAATTTGCAGTTCTGA

A\_16\_P16191642

TGTCAAGAGAAAAGTTAAGCACCTCAGTAGCATTGTAAAGAGATGACACCTTATGTTCT

A\_16\_P16192024

CTGAAGAGAACTATAAACATGAAGTCTTGAGTTAGTCCAAAAAAGGAATTTGTCCCAGGT  
A\_18\_P12173926 GGTTCCTTGTGGAAGATAGTCCCAGAACTTCCCTTTGGCCTTGAAC  
A\_18\_P22841069 AATGAGGACTCACGCATTCCAAGCAGAGGGAAAATGTGAGCAGAAGTAT  
A\_14\_P107478  
GAGCAAATCATCCTAGAGAACTGAAGGAAACAGAAAAATCCTTCAAGGACTTTCAGAAG  
A\_16\_P16360809  
TGGACATATGGCATATTGATCTGAAGACAGGAATCAATATTTCTTTACCTGATGGCAITG  
CUST\_1541\_PI426210822  
TTTATCATCCTGGCAATAAACATGCACATTTGGCCAAATCTATCAGTCTTTTTTTTTTTTT  
A\_14\_P137028 ATTTTGTTCACAGGACTCACTGGATCTATCTAGCACTTTTGTGTCTCTGGCTTTG  
A\_16\_P19951029  
GACTGTTCTCACCTATCGTCTTACACAAATCCATAATAATAATTGTTCTAGTTCCTCGCA  
CUST\_3115\_PI426210822 CTAATTCAGGAGGCCAGGCTTTGATTAGCTACAGAGTGGCCCTTG  
A\_14\_P125139 CTGTTGGCTGCGTCTCATCAAAACCTGCATATTCACCTTAAAAGAGAAATAAAAATAGGG  
CUST\_1497\_PI426210822 CTATTTCTACCTGCCCGGAGGGCACCAGCTGGCCAGAGACCACTG  
A\_16\_P16307780  
AAGTGTCCAATTTGATGAATAGTAAATGCATAGGAACTTCAACATAAAAGCCAGGTAGGT  
A\_14\_P120466 ACACCTAGATGGTAACCATGGAGGCCATGCCTATGATCTCTCAAAC  
A\_16\_P00572666  
ACCCATAATCCACACAACAATTAGATTTTTGAAGAAAAACCTATCACTGGAATGAAACCA  
A\_18\_P14134899 CTTGCTGCTGGAAGTTGGGTATTTCACTCTTTGCTAGGCATTCTGGTTTAG  
A\_16\_P58424573  
CTACTAAAACAAAACGTGTGTATCCTATGACACAGCCATTCTACTCTTGAGTATATCCCC  
A\_14\_P107958 ATGTGAGCAGCATAGTTGATATTTACCCACAAACACCTGTATATGCGTGCATATACAACC  
A\_14\_P124533 ACAATGACTCTACATCTCCTGTCTTGAAAGTGTTAAGTAGGTCAGTTGCTTTTTATCC  
A\_14\_P111770 TTATTTTATTTGCAACTTCAGAGCCACTCAGATACCCAGAGGTGGGATGCTATTTTC  
A\_14\_P136609 TTGTAAAACAATATGGGATTCAATGACCAATGAATGGTGTAGAGTGACATGAGATCAGAG  
A\_14\_P131905 AAATCCCTGAACTCTTGATAGATCTCTATAACACAAGGACAACACTACTATTACTACTCCGC  
A\_14\_P122332 AGAAAGGAGCCCAGTTCTAGAAGAGTATAATCTGGGTCTTCCTGCAG  
A\_14\_P126014 CTTTCACAAAGTTGTGATCATACTTGATAGAGCCTATTAGAATACCTGTCCCCAAAAATGA  
A\_14\_P100407 ACAGCCCCTAGGAGGCGCATAGTGTTAAGGATGATGAGTTTGCCTTAACTAT  
A\_14\_P119462 GGTAGGGACATTCCCATATAGATTCATTCATTCATGCCATTCATGTTTGCATTCATTTA  
CUST\_5863\_PI426210822 TATATGTCAAACCTCAGTGCTTGCCCTTTGTTGGATGGAAATTCAGCAGCACT  
A\_14\_P113178 AATCAAAATCAATGTATACATGCTACTCGTTTACAGGTGTATATTCAGTCGCTGAACAAA  
CUST\_3029\_PI426210822 TGTGGAGACAGGGCAGGGCTGGGTCTATCTGCCTTCTGTTGCTTAG  
A\_14\_P126527 CTGGAAAACACAGGCACTACTAGTAACTTTAGATTTGGGACTAACCCTTTAAAAACATG  
A\_14\_P202331 AAGTTTACTTGTGATTTCAAAGATTGCCATAAGCAATGCATTGTTCTGTGCTAGGTCATT  
CUST\_7611\_PI426210822

GTACTTTGGGCTTTCTGTTACGACTGGTTGACTTAGATTTATTTGTTTATTTAGCTTCTT  
A\_14\_P134179 AACTTGATGGAGTGGTTTTGGTTATTATTGACACTTTCACCTTCTGCATGCTAACCTGTATA  
CUST\_973\_PI426210822 GCCTCTTTTCACAGCCCCTCCAACCTCAGAAATACAATAAAACATGGTCAA  
A\_16\_P02040857  
AAACTGATAAACTGACACATCATAATTCAGACCTCGAAATGCAATCAGATGCTTATCAGG  
A\_14\_P127800 CTATAACTCATGTTGGCTGTATGTTAAACTTGGCTATTTTCTAATCAGTGGGCAGATCAG  
A\_14\_P133908 CTAATTGAAGATACCATCATATCTACCATGTCTTTTCTGGGGTTTTCTTCCAAATCAGTC  
A\_14\_P133279 ACCCTTTTGGGAAAATTCACACTCAGATGCAAAAATACCAGGCTAAATACATTGCTTTG  
A\_14\_P109369 TCAAGAAGATTAGACCAATAGGTTTTAGAACAACAGATATGATGCAGGAGAAAGGTGGAA  
A\_16\_P21566539  
ACCTGCATAGTCTTAACTTCAGTAGTATCTAAGAAATGACAAGTGTGATATAACCAGGCTT  
A\_14\_P107181 TCGCATAAATGGAAACTGGTCTTTCCTTGATTTCCCTTTGAAGTCACTAATGAGTATCTA  
A\_14\_P134261 GTGCAAGATGTCTCCAATGTCTTAGGAGAAAAAGAAGGAAACTGTCCGGTTAC  
A\_14\_P121925 TTTATCCTGAATGTGGTAGATGCTTACTTAGTGTCTGCCAATGACTAAATGAAATGCAT  
CUST\_8659\_PI426210822 GTTCAATGGAAGAGATGGGAGCTTTATCTCAGACTGCAAGCTTCACTTGAT  
A\_16\_P17389196  
AAAAGCCTACCATGTGTTTAAAGTTGCTACACTTGAAAATTGATATGTTGAGACTCACGC  
A\_16\_P17337951  
CATTGAGACTAAAGCAAACCTTCTAACTTTCCTACCTTTATTCACATGACCACTGTGTT  
A\_14\_P110697 ACAGTTCTTATATATTCTCCTATTTCTGCCTTTACTTGTAAGATCTTGGGGAGGATGCT  
A\_14\_P130670  
GAATGTCAGGAGAAAAATTTTTTCCCAAAAACCTCCCAACTTAAAAAACAAACACACAA  
A\_14\_P116484 TAAACGATTTTATATTTCTTAGGCACTACCTCCTAGGACAGAGAAAATGGCTGTTGACCA  
CUST\_2140\_PI426210822 CAATGGCTGGGGAATCTTGAAGAAGGAGTAGGAGTTAGCAGACAG  
A\_14\_P124202 CAAAAACAACAAAATGGTCAAGACATAATCGCGCCATTACAGAATTTACAGCAATTGTGT  
A\_16\_P01411664  
AACCTTCAAGGTAGTAGTATCCACATCCACAAATGTTTTCTAAAAGTCCATGGATAACT  
A\_14\_P100008 ACTATGGAAAAGATTTAAGTCGTTCTGGTTTTCTGTTTTGCAAGTTCAGCAGAAAACCTAA  
A\_14\_P137519 ACTAAGGTTGCATTTCAACTGGTCTGTAAAGATGCTATAGAACAGGCCACTGTAAAACA  
A\_14\_P124471 CTTTAACTTCAATCTAAATTTTCTCCCCTCAGTCTCAACAAAAGGACTTGTCTTCTGAC  
A\_18\_P22841581  
AGTTTCCAGAAATACAGAGATTCTTATTTTAATCCTTTTTCTTTTTAACTGCAGAAGGGA  
A\_14\_P109115 GGATTGATGAGAAATCCTGACTTTGGGATGTTGTTGGTGAAAACCATTTTCTCTC  
A\_16\_P00685352  
CCCCACTGAAGAGGATAAACAGAGTTGATGGGTTACAGTAATATTCTGTGGTTTTAAAAA  
A\_14\_P121731  
CTTGAATGAGCCTTGAAGAAAAGAAAGTATTTAATTAGGGAGAGAAATGCAGAAGCAGCA  
A\_14\_P137857 TGGATCAGCCTCTTTATTGGTAGTGGTAGTAGCAGAAGTGAATGGATCACAAAATATTTTC

A\_18\_P13285164

TAGAAATACCCCTTAATATGCACCATTTGTGTAGCATACTTACGTAAGTGTAGGCCTAGC

A\_14\_P202435 CTGCATACATTTCTAGTTTTTGGTGAAGCATATACTTTTTTCCTGAGTGGTGGTAT

A\_14\_P118153 AGTTTGAAGTGAAGTACTTTTGAAGTTCAGCCAGTATATGAAATTGGATATTGCAGCAGTCA

CUST\_1162\_PI426210822 GAGGATGCCGCGCGTAGTGAGAGGGCTCTTGTCTGTGCTCTGTG

A\_16\_P02685984

TGTGCCAATATTCTTGCTAAGTTACTACTTTTTGCACATTACCAGAGAATAGACTTCCCG

CUST\_9799\_PI426210822

TATTGTATACAAATCACAGTTTACTGGAGTCCGTAGACAGGAAGATTTATCATTACCTTA

A\_18\_P14134494

AATCAACTCTTCAATTAGAAAGTTCATGATCTTTAATGGGCTTGAGTCCAGTTCCAAAACA

A\_14\_P111300 CTTATGATGGCTGCTTTTTCTTAGCCACTATCTTATTACCTGGATCCTTTATAACTGGA

A\_14\_P130109 ACCTTAAGTATCTGTCATTTGTAGTCTCTAAACAGATCATAAATGTTCTTGCCCTGGTTC

CUST\_4238\_PI426210822 CTTCCACAAAATTC AATTGGATACATCTGGTAGGAGGTGTTACCTGGAA

A\_14\_P107500 CTTACTGTTGCCCTTTTTCTCCTAAGTATGACCTGTCAGCCTCTACATTCTCTC

A\_14\_P128394 CTATTTTGAAGATGAGGAAGAAGATTCTAGCAACGTTGATTTACCTTACATTCCCTGCTGA

A\_14\_P113206 CAAATTGCACGTGCATATGCATTTTTACTATATTCCCTCAGAGACCGTAAAACAACAACA

A\_14\_P124151 CTGTCCAATTTTGCTGGAATCATTATAAGGATCAAATGGATCCTATCGAAAAGGATTGGT

CUST\_1638\_PI426210822 TAGTGGTGGCCTTTGCTTAGAGAAGCTTTCATTTGTGTGTGACATTGA

A\_14\_P105602 CTGTGTTTTTTCTTTTTTATCAAAGGACAAGAGGAATTTCCCTTCGTGACCCTCCG

A\_14\_P137932 AGGAAGGTTCTTGATTTCTCAACTTGGTCTGTTCTTAATATCTTAATCCATGAGCCTTTT

A\_14\_P138100 CTTTTTCCCTTTGCCCTTTTTCTTCCCATCTTTGGAGCCTTTGATCTTCTT

CUST\_3637\_PI426210822 GTCTAGTGTGCAACCTCCTAATCTCTTGGGAGACCTTGGGATTGT

A\_18\_P11586817

ACTTACCCAAGACTCTAGTATTTCTTTTTGCCTAGATACAACCATCACCTTACTTTCATC

A\_14\_P138266 TTCTTCTGTCCCTCTGTCACATGGCTTGCCTTTTATATTTGCAACACACAAAAG

A\_14\_P119816

AAATTATAAAAACACCATGACCATGTGACATGAAAAAGAAGCAGTAGAACATGGGACTGA

CUST\_126\_PI426210822 AACCGGGCTCTCATAATCAGTGGGGAGTGTCTAAACCTCCATTTA

A\_14\_P119922

ATAAAAGACAGGCAAGTTAAGATATTGGTTCAAGAAGAAATGGAAAGAAGAGGGATGGAA

A\_18\_P22841267 GTCTGTTTTTCAGGCTGAAGCAACATGGGCACGGCAGTGAGGCTGT

A\_16\_P15563667

AAGAGACATACGGTTTATAGTGCTATAAGAAGTGAGAAGTAACTCGAGATCAGGAAGGG

A\_14\_P135270 TCTTCTCCTTTTTGTCCCTCTTGCTTTAGGTAGTAATGCATGCCTTAAGATAATAAAAGGT

CUST\_4928\_PI426210822

TGGGTTATTTAGAATTCATATGTTATGAGGAAATACACTGTTTCAAATGCAGTTTTCTTT

CUST\_8889\_PI426210822

AATAAAGCAATATATGCAGGAAATGCAGAGACAACCCAGTGAATAGGTGTGCTG  
A\_14\_P109694 TCAGTAGATTTTGGGAATATACCATAGTTTACAATGGCAGGTGTTCCCTCCCTTACCTTG  
A\_16\_P17830660  
GAGATCAGAGAATTCTATTTCCCATAGTTCCTTAGGAAATCAGAAAGAGAATCTCACCAG  
A\_14\_P136845 CATAGAAAGCACACCTCAAGACTGATTCCATGTTTAGCAAGTTATCTCCACATTA AAACT  
A\_14\_P112975 ATAGTCCCATAGAAGATATCAGTTGTAATTAATCACAGTCATATATGTGCCTGTAAACCC  
CUST\_5946\_PI426210822 TACAGTCCCATTGCTCAGGCAGAACCTATTTTCATATATAAAATTCCTGCATCCC  
A\_16\_P16191952  
GGAATTTACCCTCTCTTAGAACAGTCAGTGTGCTGTGACACATTTACAAAAGTGATAAG  
A\_14\_P120808 AATTTGAATAGGGTGATGTGATAGAGAGGACGTTAAGTGGCTAAACATTCTACATTGGAT  
A\_14\_P110969 ATATTTTTTTCCCAAACCTGTAAGGTTTCACATGGTGTGTTTTGTTTTTCTCCAGACTTCA  
A\_14\_P127425 CTCATACGGATGCATAAATAACCGAGA ACTGAGTAGGAAGGTAAATATGTATGTTCTCTG  
A\_14\_P118590 TTGTCCCCATTGCCATTCATTATTAACCGATAGATGCTGCTCAGGTCTTATGTTAATAAT  
CUST\_3066\_PI426210822 TGACACAAGGAGAGTCATTAGAAAGGCAGAGGACATCATGCTTCTCTC  
A\_16\_P20302099  
CTTACTTCCA ACTACAATTTCCCTGATAGACCCTCAAGATTAGTTTACTTGACCCCTCTG  
A\_14\_P120344 CTTATAAATGGAACCAGAGCAGAAGTCCCCAGACTCAGGAAGTCAACAG  
A\_14\_P107162 AATTGGACAGATGTGGAACAAATGCAGTCTTAAAAAGGACATTTCTTATAACCCATGATC  
A\_16\_P16477147  
AAAAAAGAGTTCGATCAAACAGGAATGACATTCAGAACTTATTGTCTTTTTCCATGCTG  
A\_14\_P116236 GGATTCTTTTGATTTCTCGCACTTCTGTATGTTCTGTAATTGCAACTCTCACATTTGCAT  
A\_16\_P36426557  
ACTCAAGGTTTAAATGATTTGGCTGTTATTGAAAACAAGCATCATTGAAATTGAGGGACC  
A\_14\_P134282 TATTACCAACCTACAACTTCACACACCTTTAATGTGCAGTAAGTTGAGGATGCTTGTG  
A\_14\_P201385 CTGCATTACAGCATTTGTTTTAGCATATGGGCTAATGACA ACTA ACTATCAAATGTGTTG  
A\_14\_P119398 GCGACTTTC ACTCTGCTTTTTTAACTGGCAAGACGCCATCATCAGCAA  
CUST\_545\_PI426210822 GATTGTAAATCCTAGAAATTTGCCTGCCGTGTTTCTTCTGTGCTCTTGGAAG  
CUST\_512\_PI426210822 TATTTAGGAATCTCTGAATTGGGGAAGGTAGCCATGGTGGCCAGT  
A\_16\_P16498349  
AAAATGGGGCCA ACTAAAATATCCTAAGAACAATACTATCTTCTGAACCCCTGAAATCTG  
CUST\_9419\_PI426210822 TTGTGTTGTTTCTTCCACAGGACAGTTCGTCTGT CATCCAGTTCATG  
A\_16\_P16835401  
TCCCTTTTTGACAATTCCAATCCACACATTTTGCTAATTTTTCAACTCCAAATGCACTTAA  
A\_14\_P131752 AGTTTGAGTGTCCCTTGTTCTGAAAGAAATGTAAAAATTGGCATTGTCAGTGTAAGTTA  
A\_14\_P108770 ACATGTGCAGATAAGTTAAAAAGATGCCATACAAGCACTCTGGATTAAGCAGAAGAATGA  
A\_14\_P101966 ACGGACTTTTTCTGAACTATGTTTTCAAGGGAATCTTGTTTTCTCTCATATTCTCAGAA  
CUST\_769\_PI426210822 TAGCTCAGCACAAACCGTGCCTGATTAGTGTGTTGTTGGTATTCTTTGCTATAGAT  
A\_14\_P119411 TCTTTTTCTGCACTCAAGCAATCGCCAACGATTATTTTAAGCAAGATTCACATCTCTAAG

A\_14\_P112840 GATCAGTTAGGAAGCCAACCTTATGCAGGTAGAAGTGAGTAATTATACTGGGTAATAACT  
A\_14\_P109356 CTTAGAGGATAAGCACGCATTTACTACAACGCTTAATTCCTTCTAGCAGCATTTCTCTTC  
CUST\_6608\_PI426210822

TTGGAGGCCGTTCAAGAATTTGCAGCTCTTAAGTTAATTTTTTCACATCTTGTTTGG

A\_16\_P58424089

TACAGTTATCACAAATTTGTATAATGTCACTGAGGTTGAATGACAACATTATCCGCACCC

CUST\_3114\_PI426210822 AATACACTTTGCTGCTAATTCAGGAGGCCAGGCTTTGATTAGCTACAGAGT

A\_16\_P30952491 AAGAGAACAGTTTAAGTTTGAATGCCTGCTGATGCCAAATACCACTTCCTTTTTTC

A\_14\_P129669 AAGTATTTGCAGAATAATTCAGTCAATTCTGTGATTAAAGCCGAAATAAGAGTCTTTTTG

CUST\_9697\_PI426210822 ATCCAGTGTCATCTCGATGCAAAGCCCCTTGCACAGCACATCCAC

A\_14\_P100446 AAATACTGCTCCGTTCCGCAGACTGTAGCACATAAAAATCCAAAGCAAGGTTT

CUST\_1149\_PI426210822 GTGAAGAAATTAGCAAAAATGATTATGCCCTGCCCAATCTTCCTTCCCAT

A\_14\_P109921 CCTAATCACAGATTTTAGAATAGTTTATAGCCAGGAACATTTAGAGAGAGAAGCACACCG

A\_14\_P104186 TAATGTCCCTACCTCTTTGGGATTAATATATTTCACTATCTGACGTGGTTCTCCTTGCT

CUST\_6950\_PI426210822

GAATTGACATATACAGATGCCCGTGAATTTAACAGAGAATGTGAATGTACGGCTA

CUST\_9155\_PI426210822

TAAATCCTGGAATGTATTCAGATCAAAGATAAAAATAGAGATAAATTTAGCAAATTTTGGT

A\_18\_P22841287 TTCTGCTGAAAACATTTATTCAGCCCCAACCACCCTGTCTCCCT

A\_18\_P14167291

ATCCATGGAAAACGTGCATTTAGATAAGCACCATAAATCTAGCAACTAATCCTGCAGTGT

A\_14\_P115785 ATGAACTAATGGGAATTATCTTTCCATTCTGATGTGTTTTTGTGCCTGTGTTTGCTTAA

A\_14\_P130652 CTTGAATAAATGATGAAGATCAGCCAAGCAACGTTCACTTCTTAAAAGCGTTTGTGTTTGT

A\_14\_P108919 TACATTTTATTTTTAGTTTCAAGATAGAAAAGAGGGTGGCAGGCTTTTACTAGCATGCC

A\_14\_P132999 ACAATTAGAATAGTGGTTAATATTATTTAGCCAGATCTGCCAACCACCATGATGATCA

A\_14\_P119814 TATGCTTATGTGGAATGAAGAGGAAAAAACGGGTTCAATTTTCATGGTTTCATGCTAGAT

CUST\_7853\_PI426210822

AAATTATTCTCTGGTTTTCTTATTGAAATTGCCAATGCCTGTTCTCTAGGTTCTAAGAG

A\_16\_P16191420 CCTCATTTGTTGTCTTCTCTCCTTGGGAAATCTTCTGCTATCAGTGAAAAAG

A\_14\_P112838 CGACTTGTTTTTGGAGTTTTTGTGTTGCCCTCCAGAACTGTAGGAAAATAGTTTATCTCAA

A\_14\_P107097 CTGGTCTGCTGCATATTTGTTTTCTTCTTCCAGCATGGAGATATGGACCAAAAAG

A\_14\_P136877 CTGTGATAACAGCAGCAGAAATAACATGCATTTGCGACAGAGAATTATAGAAATGAGGGA

A\_14\_P121158 ACAGAGTTTCATTTTCTTCCCTTTCCATCTCAAACCTTAAATGCAGTAACAACCTGGCTTTA

A\_16\_P16200129

AAGTAACTCCCCTCTAGGAAAAAATGTGGCTATACGATCTTCATAAAAATCACACTGAGAA

A\_14\_P103982 ATTTTCCCCCTTTTCTGATTATTTGAGTAATACTGTCTTTTACTTAAACCCCAATCTC

A\_14\_P108080 TAAACATTTTATCATAATAGGTGTGGCCATTAGAAAGACCTTATGGGTGAAGAGAGAGT

A\_14\_P138522 CTATATGATCACCAACACAACACTTACTACAAAAGGTGTAGGAACATATCTTGAAAAA

A\_14\_P134086 ACCACTTATTTTCAGAGATATAACTACAATGAAAGGAACCATTTGTTGCTCAAGTGGATT

CUST\_3932\_P1426210822 GGGCACCAATCTAATGGCTCTTCTGGATAATCACTTCACATGGGAATC

A\_18\_P22843220

ATAACACAGAAACGTGAGTTAACAGGAAACACATGTTATTCTAAAATGAACCTAGGTCCC

A\_16\_P16243616

AGAAGAACCATTCTCCTAAAACTAATGTGGAGTCAATATACTTATCCTGGGCATGAAGA

A\_14\_P133783 ATTCACATCCTATAACAATGGTTTAAACAAAATGGAGAAGGAGGGTTGCCTTTTCTTTTAAAG

A\_14\_P100492 AAATTGATCTTATTGTGACCCCCAGGAACTCACTGGCTGTAATTCTATAGAATAGATCAA

A\_14\_P116306 GTCTGGTTATGCCCTTTGTTTTCTATTCTTAATAATAAAAACACAGCAAGGGGTTTGGT

A\_16\_P00550290

TTTCAATCCCTGAGTATTAAGTAAGCAATAAGTAGCAACCTCACTATCTACTCCTCAGC

A\_14\_P103520 CCCTTTCTGGGTAGACTCTCCATTTAAGCAATAAATAAACCTCTTCAGGGCAATTG

A\_14\_P138387 CGCTAACCTCTGTTTCGTGTCTTATTCTCAAACCTCCAGCCAGATGTTTAATAATAAACGG

A\_16\_P16480386

AAATCTTAGGGGCTGAACATATAGTTTTGCAATACAGTGTGATAGCAGTCAAGAGTCCA

A\_18\_P26959600

AAGTGGATGACATGTATTAATGCAGCATTTTAAAGAACCTTAGAGACACCTAAAGACCAT

A\_14\_P135117 GTTATTAAGGAAAACCTAGAATGCTAGAGGCCAGTTAGCCTAATAGATTCAAGGTGGTTTC

CUST\_1906\_P1426210822

TTCTTTTCTCCCTAATTGCAGAAAACATGATCCAGTTTTATAGTTTTTCTTCAGATGAT

CUST\_9599\_P1426210822

TGGGAATGCTCTTAATATTTATCATATCAAAGTGATGACCTTTCAGCAATCTGAATTCCT

A\_18\_P14137371

TAGTAATTTTTTCAACAAGTTCTTTTCTGTTTAAAGTGGGTTCTCAGAAGTGGTTGCACCT

CUST\_1871\_P1426210822

AACTACGCTTGTTGGTTCTTTATCATGAAGGTACAGGAAATCCAGATTGAGTAGGTA

A\_14\_P200638 TAGTAGACTTTTTGTTTCTTGCAGATTTTGTATCCGATTTCAAATCCAGAGGAATGTGAT

A\_16\_P02449791

AAAATGATCCTATGCGTTGAAGATGTGTTAAAGAACAAGTCATCTATATTGCCTTTGGGC

A\_14\_P124543 TACATCTAAAATTTTAGGCAGTGAAAAAGCACTTTGTTGACAAGGAGTGTGGAATGATGT

CUST\_6716\_P1426210822

AATCTCAGTTATACCAATAACAATTTGAGAAGAAAGTTGACATTGTGACTCCTCTGCTTC

CUST\_7481\_P1426210822

AACAAATATAGGAGAAAAGTAAGATAATCTTGGAAGGCAAAGCCTGTCTCCCTATATTGT

A\_18\_P14136229 AGAGATCAAGCCATAGGAAATGCTGTCTGTGACCAGGATTCATGGATGTTTTTATTTT

CUST\_4589\_P1426210822 CAGCAGATTGGTGTCTGGCCCATCCACTTCAGGTGAGAAGGATG

A\_14\_P129440

CTGATGAGAAAATAACGCATCCAAGAGGATCCACTTAAAAAATGACAGACTACAAAGAC

A\_14\_P127951 TTAAGTAAGCACAAAGGCCACATATCATTAAGTCTGCTAAAACAAGTCACACAACACATCTGT  
A\_16\_P16135020  
AACTGTGTTGTTGTCTAAAAGGAAAGACCAAAATTATCTAGAGAGTTCTCATCTGTGTGG  
A\_14\_P117173 GATCCTAGCCTTGAAGTCACTGAAGGTGTTACTGCAAAGTTTCTGCTCTTC  
A\_14\_P112781 AGAAATTGTAAAAGTTTCTGATTGGCTTTCTAATAATGTCTGAATGACGCTGTTGGGAA  
A\_18\_P22840138 ATGTCATTCCCTACTGTGAGGATCAGTGACACCCTCTAGAGGCATTTAG  
A\_16\_P18247477  
ATGGTTGCAGTATATTACAATTTTCAGTTACAAGGCCTTTTACAATGTGTCAAGTCCCAG  
A\_16\_P17218484  
AACATTTCTTGAGGGAATAGATTGCTACTTGCTGATAAGATCTCTGACAGTAAAGGTAGG  
A\_14\_P127233 ATGTATTGTGCATAGCGATATATATTTGCTATTTCTATTGCTATTATTGTCAAAAATTAT  
A\_16\_P17731635  
AAAACCAGCACTCAAAAAGAATCAGGTATTGGTTCTACATACGAATTTGAAATGAGCAGG  
A\_16\_P19013250  
AAAGACAGTTCACAGAGATTGATGTAATTGCTTCCTGTTAGTAGGTTAGGCTTCATCTTT  
A\_14\_P111030 AATAAGGGCTGAAAACTGTGCTGTTGGTAGAGACTTAGATAATCAAATAGCCTTAACCA  
A\_14\_P110129 ACAACATCTCGACAGGTTGTTTCCGGTGTATAGGAACTTCTGTTAAAATCTGTTTCATT  
A\_14\_P202155 TGAAAAAACTACTATCTAAGTGGTTTACACTGACTTGTGCGCTGATCTAGTGAGTTAGGA  
A\_16\_P15446632  
ATCACTCTAATATGCATTAGAAATGGATCCACAGGCATTATCCTTAGACGTGTTACAAGG  
A\_16\_P58424289  
CATGATGTCATTTCTTACACATTTCTCTTGGCCAAAGTAAGTTCAAGGGATGGGAAAATAG  
CUST\_5126\_PI426210822  
TTCTTCACTCTCTAAACTGCAAATCATTTCAGGGTAATTGTGCTGGTTCAGTTAGC  
CUST\_3808\_PI426210822 TGGTTGGCAGCTTTTACTGGACAGCTTTAGAGTCCTGTGGGTTAT  
A\_16\_P38692124  
AATAACCGTGCATCAGTTATTCCATCTATGCTTGTGATTTGAAAAATAAGGTCCCTAACC  
A\_14\_P115513 CTCACACAAACACCTAATCACACATCCCTAATAGATAATCATGATTTTTGGTTCTGGACT  
A\_14\_P111157 GACATGCCACTAAAACAGTGTGTAAATGATTTTTACTCTTCATGCATTGACTGGGAATA  
A\_14\_P127866 GAGTTTCTTGGGGCCAGTTTGCACAGTTATAGTGGTAAGCAAATACTACAACAG  
A\_14\_P201030 CTCTCAATATTGCAGGCAGTAAAATGATCCAAAATTACGGGTCATATCCACATTTCTTCA  
A\_14\_P100911 CACTCATTATCTTAAACCTAATAAATCCAGAGTTTATTTTGGTTCTCCTCTGTTGCCCT  
A\_14\_P113768 TATTCTTTACGTTTTAGATAGAAAGCGAAATCTTGGATGCTCAAGAAGAACGTGAGACTC  
A\_16\_P00909947  
AGGACACAGACACCTAGAAGTTCTTTTTTAAAAAAATCACTGTAATCTCAGATCTGCCC  
A\_16\_P17585789  
ACCTCCTCTACAACAAACAGAAGTTAGACAAGGTTTTTAAAATTACCACCAGATCTTTGAG  
A\_14\_P106538 ATGCAGGGAATTATGGGGCAGAAATAGTTAAGGCAAGGAAAGAAAATAGACAATTGTTAT



A\_18\_P22841344 CAGTCAGTATCCACTGCTTAAATACCAGGAGCCTCAGTTTCCCCAAATATAAG  
A\_14\_P100889 TGAAAGAGGTAAACCTCTATGTCCTAATATGGAAAGACGTCCAAGGTGTTTCATCATTAA  
A\_14\_P137126 GTGTTAGTCTGGTATCCTTTTCCAAAACCTTGCTAAATTCAGGTCTAGAATCATGTATGT  
A\_18\_P14134195 ATGCCGATACTTAGAAAATAATAAGTCTTTTCCGCCCCCTTCCTGTCTTTAATCCAG  
A\_16\_P19930991  
CCCTGGTTTTGTAGTTATCCAAGTAGCAACTCTTGGTAAGCCTAAAATCTATACGCTTTA  
A\_14\_P136392 CTGCCTCCTCAATTTCTCCTTTAAAATTAATAATACTAGCAGTATACCAGCATGAGCCC  
A\_16\_P36424317  
ACAGCAAACCTCAATACAGTTCTTCCACATCAATCTTTGTTAATTCCCTGAAAATTCCATT  
CUST\_6482\_P1426210822 CCATGTTAATTTCTGCCACCTTCATCCTCTGATCATGTTTATTTTTCTCTCTGG  
A\_16\_P00685099  
AGTGTATAATTGTCATTATCTTTTGAATAAAAAATGCATCACCAAACCTTGGTTTTGCATT  
CUST\_4858\_P1426210822 TAGAAAGTATCTGAGCTTTAAATGGAGAAGGAGTGGGGAGAACTGACAGTG  
A\_14\_P130156 GACAGTCCCGATACCCAGTTCTGATGTTTGTTCAGATATTCCTGAAATAGGAAAAAC  
CUST\_9507\_P1426210822  
GTTCTCAATTTTCTGGCAGGAAAAAAAAAATCTTTTCTGAGTAGGAAGGTTTGCC  
A\_14\_P130371 AAATATTATCCCTTATTCAGGAAATTGATGACAGTGCTGAAGACTTACTTGGATACCTCC  
A\_16\_P40581836  
ACCTCCCAAGTAAACATCGTTGGAATCCTCATACTAAGTATAAATATTATGGACTTTTGT  
A\_14\_P106191 CAGTAGTGGACTTGGAATTCGCAAATCGTCCTCAAACGTCTTCAG  
A\_16\_P16005566  
AAGATAGCAGGTAATATTCTAAAGCCCTCCCTTACTAGTAACTCAAGATTTGAACCCTTG  
A\_14\_P105062 GAACAGCAGTGGACACTGAATCAGGAGAACACTGATCTGGTTCATGTTATTA  
A\_16\_P02171459  
GACCAATCAAGTTCCATTCATATCCACATCCACATTTATTGAGAATCTACCTTGACATCA  
A\_16\_P21077533  
TTCCCCAACTAAATTGTAGACACCCTCTTCTTATATAAATTCCACAAATCTTCCCTATGG  
A\_16\_P03280422  
ATGCTACTGCTTTCCCTATTTAAAGAAGGCTTATCTGATGACTAGTCTGATTCTTAGATT  
A\_14\_P111040 TCTAAGCACAGCAAATCTCCTACAAACAGATCGGGATTCAAATATTTCAATCTACAGTCT  
A\_14\_P115455 CAAAGCCTGGGATACGACTCTCACCTCTTTATCTGCTTCTAACACTC  
A\_14\_P127651 GTTATGCTGTTTAGCCAGCAGTTGCTAAGGTTTTGTTGTGTTTGTGTGTTTTATGTCATA  
A\_14\_P139191 TAGTAAAGTGTTTAGAAAATAGTTACATTCATTGTGGGCAGTGTGCTCAAACATTCTTAT  
A\_14\_P109250 ACCATTATTTTATGTTGTGCCAGTGAATCCAGTTGCCAGAAATAAGTCTGAATGTTTTCA  
A\_14\_P104078 TACTTATTGGCAGATATAAATGTGATCTCCGCATCTATGTTTGTGTTACTGGCTTTAAGC  
A\_14\_P104675 CCTGACTTGCTTATTATTGCCCTCTGTTAGGAGAGCCTTTTTAGGTTATATGTATGGTAA  
A\_16\_P41061800  
AATTTAGGATTTTGCATCTCTGCTTAGAAATGACTTCCTCATGCTTAGAAATGACTTCCC

A\_14\_P108492 AATTTTTTAACTGATTCATTGTTTGGAAAGCGCATATTGCTTCCCTCTTCCCCGAATTC  
A\_14\_P135659 GTGAGAGGAGAAGTGAAGATAATAAATGGAGTAACTTAAGTAGTTCATCATGGGATCTGG  
CUST\_5476\_PI426210822 CTGATGGCTTCTGCCTTGACTGGGAAGTACAGACCTAGGTCCCCT  
A\_14\_P123578 TTTCAAGATGGTCCCTCCTCAGTATTCTTAGAATTCTTTTTCTTTGTGAACTCGTGCTTTT  
A\_14\_P119229 AATGATAAAAGATTCACCTCCTGCGGGGGATTACCAGTCTACAATAGAAGTGAAAAAAT  
CUST\_330\_PI426210822  
TTTTTCTCTTTCCCTTTTTCCAGTATTCCTTGTCTTAGACCTTGAATGTATTTTTTGCT  
A\_18\_P21404221 TATTTTCTTTGTTTCCTCTTCATTGCTTTTTTTTTTTTTTCAGTTTGAGATAAATTGTAGG  
A\_14\_P114860 ATTTACCTCCCTCCTTTCTTTTTGTTCCTTCTCCCCAGATGTGGTGAA  
CUST\_713\_PI426210822  
CAAACCTGCTAATTCTTCTCACCTGTGAAAACAGCTGGTCTTATGAAGCGCAATAT  
CUST\_7780\_PI426210822 CAATGATTGGAACCTGGAAGCAATCAGAGCACAGAAGAAGCCTGGT  
A\_18\_P16483963  
ACTAGCAATTTCTATATTCCTCAGTATCTCCATTCACCTACATAATGCACTCAACCAAT  
A\_16\_P16154655  
AGCATTATCAGCAAATTGGAGATATGATACAGGGAAAAGTGATAAGTTGAGATTATGCCA  
A\_16\_P18615723  
TACTGCCCATATTTTTGTATGCTTGGATAGTTTACCCACATATGCACAAGAAGTCACAA  
A\_14\_P134166 TTTTCCAAACTGGGAATTTGCCCGAATGATTAAGAATTTCTGGGCTACTTTGGAAT  
A\_18\_P10188226  
ATTGAAGGCAGTATATCTGACAGTATAGGACAATTTTGACTCATCTGAGGTAATGCTTGC  
A\_16\_P15827690  
ATCCAGTATGATACCCTTTAGCAAAGTGAATGACAATGGTATGCCACATACAAAATCAGT  
A\_18\_P14135733  
GGGTAAGAGATCCACTTTCCGATTTATTTCTAGTATCCTATAAGGATGAACCCAGAAGAA  
A\_16\_P36230236  
AGGCTGTCTTTGCTTGTGTAGATGACAATTACAAGACTCTTTTTCTTTAATTTATGCCCTA  
A\_14\_P122407 AAGTCCATGAAATGTCACTTTAAGCAACTGTAGAGAGTAGAATGGTGTAAAAGGAAGGTA  
CUST\_624\_PI426210822 TGAGACACTGTCAGTTCTCAGTCCTGCCAGGGAGGCAGCTGCGG  
A\_14\_P134612 TGGGACACACGTAGATATTTATTTTAAACATCTGCTGAAAAAGGAAGTGGTATCTGAGTCC  
A\_14\_P105184 AGTTTTGGATTTTATTTGAACAGTCTCTTGACTTCTTCCTATTCTGTTGATTACCTATC  
A\_14\_P111313 CTGAGCCTTAGGAGTCCTACCTAAAAGGTTTCTTGCTTGTTTTTCTATTACACTGTCAC  
A\_14\_P122608 TCTTTCTCCTGCATGCGCAATTTATCCCCAGATATAAAATTGCCTGCTTTGATAATTA  
CUST\_10018\_PI426210822 GTGAGTGCTGCGCAGTAACTGCTCTGGAAACTGAGAAGAAGGTGC  
A\_14\_P112342 TCCAGAGCCTGGAAAAGAGGAAGAAGCACCTTACCAGGTATCACTATT  
A\_14\_P136705 ATCTGGAAGACCCCGGGTGATTTCAAACCTAATGATCCAGTCCTTT  
A\_18\_P14136347 ATCCCTTTACACTCTAAGGGTGTGTTTTCCCCGATAATCAGGCTTAAAGG  
A\_14\_P106421 GAAATCACTACTTGTGAAGTAGAGATGCCTTTTTGTCTAATGGTTTTTCGTGCTGAACTTA

A\_14\_P137468 ATTGAGGAGATCGTTTTTAAATGCACAAGAGTGCTGGAAAACAAGAAGAGGTATCTATG  
A\_18\_P10519536

TCTAAACTTCGCCTACTACATATATCCCTTCTCTTCAACTAAACCAGACTTCTAGAAGCA  
CUST\_4323\_PI426210822

GGCACAGTAAATTCATTAGAGCGAATTCAAATAAATAAGGTTTTACTTTTTCTTCTTTGGG  
A\_14\_P126753 CTAAGGCTGAACACAAAACCGCTAAGCACTCCCTAACCTTGTCACCTTG

A\_14\_P119275 ACTTTTTCTCACCCCATATAAAGAAACGAAACTGAAAATCTCCTCTTGAGTCACAAGAT  
CUST\_8602\_PI426210822 ACCAACCTGCCTCTAGCTTTACCAAAGAGTCTTTTTGTGTTTGGC

A\_14\_P120015 TATCAAACATTCCTTTATATTGTCGGTGTGGGGAGTTAACAACAGCATCATACTGTAACA  
CUST\_974\_PI426210822 CCAACTCAGAAATACAATAAAACATGGTCAACCTTGAAGCCAAGGGCT

A\_16\_P03489722

ACTAGCAGTATACCCATGAGTAATAGGAACTTCTTGAGAATAACAATCCCATCTGAGAGA  
A\_14\_P120634 CCAGCATTAGCATAGAACCTAGCACATAACACATTCAATGTTAATTGTTGGTGTGATTCT

A\_14\_P101190 GTTGATTCACCTTCTCAAATGCCTACTGTGTTGTTATTTTTCCCTTGTGCTTAATGATT  
CUST\_2045\_PI426210822 CTTTCTGCCACTCACTCACAGTCCTCTTGCCCTCACTTCCTTCTA

A\_16\_P30952395 TTCTCAGGTGAGAGGCCCACTCTTGCTCCTTGAATTGTGCTGTT

A\_14\_P121702 GTCCTTTCACAATGAATTTAAATCCCTTGATGTTCCCATTTAACAGATAGGAAAACGGG  
CUST\_6617\_PI426210822

CACCCCCCAGAAATTAGTATTTCAAAGTATTTTTGCCTATGGAGATTTTGAAGAGTTC  
A\_14\_P119333 CATTCAAATAATGAAGTCCAGTTTTTTGGAGGGCATCTGGACATTCTGCAGCATTTTA  
A\_16\_P20482495

AAAAATCCCTTCTGCAACCATAATATACTAACTTGGAAAGATTGTTATGCTGTTTCTCCCC  
CUST\_5461\_PI426210822 TGTTACGTAAGTGCTGAGATTTTTACCAAGGCATCGCATTATCTCCCAA  
CUST\_5212\_PI426210822

TTTGAAGAGAAAAAAGCATCAGTGGGGTTATGTGATTTTCATAGATGAACAATTTTTGCA  
A\_14\_P104914 TGTTCCCAGTAGGGGCCACACAGAAGGCACAAAACCTTATTTTATTATTAATGAATAATT  
A\_14\_P109061 AAGTCTGTGGTTTATCATTTTTCCCTGTCTTTCTAGGACAAATGGCCCACAAC  
A\_16\_P17066381

CTGCTCAATAAGGTCATGATTTCCAACCTGTATCTCTTAGTTAGTTAGTTGCCCTACCA  
A\_14\_P107608 CATGTTGAGTCCATTAATAAAAAAGATGATCTAAAGCGGTTGCCTGTGTAGGTGTCTAT  
A\_14\_P107743 GTTTGTAAGTTGGTAGGTGAATGAATCATTTTCATCATGCTCAGTGGTGTCTCATCAAAA  
A\_18\_P15288601

AAAGATCTCGATCTTTAGCAAAGTATTCTCTTGACTGATGATTTGTCTAACTTGCCCGAA  
A\_16\_P00685180

TGGGTAAAATTTTTTATTTTAAAGAGGTGACTTTCTATTTACAGTTATTCAATTTACACTGGG  
A\_14\_P116772 CTGGCCAGCATGTATCATAGCCTTCACAAAACCATACATAATTAACCTGTTGAAGAGAAA  
CUST\_9965\_PI426210822 AGGGACCATAACTGCAACTTCCTGACACCAAAGTCCATACTTCTCTAG  
A\_14\_P106600 AATTGCTAATAAATCTGGAATGGATCAGGAGAAAAGGAAGAAACAAGTCAATCCATTGTG

A\_16\_P01139307

AAACGCAATACAGAAGAATCTACTTGTGATCCTCTCTACTATAGGACACTGAAAATTGCC

A\_16\_P02277425

AGGAAGATAAGGTAGAAAAGTGCTACATATGCATTACACACTTAATACTCAACACTCCCG

A\_16\_P03643454

ATGAACTCCTCTGCTATACAAAGACTTCCGTTTATACTCTATTTGAAGGTGGTTACGATC

A\_14\_P202251 GAACCACAGCAATGAATGGCTTTGCATCCTTGCTTCGAAGAAACCAATTTATC

A\_16\_P16089164

AAAAAATGTTTTGCCTCTTTACTGGAGAAAATCAAAACACTATTTCTGAGATGCACGCC

A\_14\_P107807 GACTGGCATACAAAGTAAGAAAATTCCATCGTGCACAGATACACACGTTTTGTAGTAAAT

A\_14\_P134542 CTTGGCAGACTCTTCCATTTTTGATTCTAAAGTTACTGAGATTTCCAAGGAAAACCTTACT

A\_14\_P101626 CACAGGGGCATATGACAACCAAGTGACGAACTTAATTAATAAATAATCACACTGCAAACCTA

A\_14\_P111820 GAAGATTAATCAATAGTTATGTTTTTACCTTAATGCATTGTCTCCCACTCCAAGACATCC

CUST\_6884\_PI426210822 GTGCTTTGGCCTGTTTTTAGACAGAAGGTTCCATACAGAACTGCATCTG

CUST\_7192\_PI426210822 TGTCTCTTCAAGCTATCAATATGCCCTCTCTCTATCTTCTCCCTCTGGAATT

A\_14\_P118149 TTCTAAATCTATGTCATCTGGATTTATGCGATCAGTCTAGAGCAGATGTGAAGGAAAAGG

A\_14\_P131490 ACCAGAGCAAATGCTGCGTAACAGCAGAGGAAAATATTTATTATATGATCAAAGCCTCA

A\_14\_P118262 TTCTGAAAATTTCCAAATTACCTAATTTGCTTTCCAGCATTTGGAATTTCCCCCATGA

CUST\_9197\_PI426210822

TTACTCCTTAAGTCTTCCATTTCCCTAGTCACATCTCATTTGCATGTTATATGCCATCTC

CUST\_1332\_PI426210822

CGGATTGTGAACATTTGGAAACCAGTATTTTTTTTCCCTCTCTGAATTGCCTTCTGTTTA

A\_14\_P200015 CACATCCTCTGCTCTAGCCAGAAGGGCCTTTTCAGCATCTTTGAAAT

A\_18\_P22839958 AGAAAGAGAAAACCTCCATTCTGGATGGCCCATTTCTGGGTGGATTG

CUST\_8036\_PI426210822

AGCTGTGACTTTGGCCTGACAGTCAGAAAGCTATACATAAAACTAAAGCTTATCATGC

A\_14\_P109733 AGATTTCACTAAAAGGATCAGCAGGGCTTTCTCTGGCACATATATTTTCCAAATTTTTCA

A\_16\_P21004318

ACCTGTTTATCACCATACATAGCCCATAGACTCAGTGTAATTTGTTTCATAGCCTGACTAT

A\_14\_P114944 CTTTCTGAGCAGAGGTGTCTGTCACTGATCTGTTCTGTTTCAGATGTGC

A\_14\_P110485 TCGTGAGTTTTTCTATTCACTATAGTGAATGCTATGTATGGGTTTGTCAAAGTGGTGTGT

A\_14\_P117227 ACACCTAGCATCATGCTAGTTGAAAAGAACTCAAGAATTACAGATATTGAACTACCTGCT

A\_14\_P110437 AGTTCTTACCTTGACGCTTATGAACCTCTACTTTGCCAGGTAACCAA

A\_18\_P14135117 CAGTGTGGAGCACACATCTAGAGTCCTCCTGCCTGAGGGCTGAGG

A\_14\_P102211 CCTATTCAACCAGTAACAAGATGAAAGAAGGAGTTAATATCACAATCTGTTTCCAGATCA

A\_16\_P41565513

ACCTGCACAGAGTATAGTCAAAGAATTTCAACCAAATCCTTTCTGTTGATCCAACAAAAT

A\_14\_P122640 TGAAACTTGTTGATGTTATCAGGTTCCATTAATGTTTAAAGACCCTCCATATCCCTACTC

A\_16\_P19534516

AACACAACCTCAAAGATTAATACACACTGGCAATTTAAAAGTAATCCCTCACTAACCCCTG

A\_16\_P58424315 CTGATGTCCTACTGTCTTTTACTGTGCCAGGGGCATTTCTCT

A\_16\_P16495076

GATTAAGTGGGGTGAATAGATCTTGACAAACATAAGAAATTGCCATATCCGAAGACACTG

A\_18\_P14138036 CACTGAACGACTGGAAGTAGAGTATGATGTGAAGTCTTACCCTTTGTGAGTCAG

A\_18\_P16402900

TCAAAAGCATTATACTGATTGACCATTCAACAATCCAAATAATGAAGCATACTTGACGGA

A\_14\_P130649 GATACCACTGGAGGGCAGGAAATCCATAAGAACAATAATTTCTAAAATCTCTACCTAG

A\_14\_P105864 CTCTAGAGGTTACTTAAGGGGAACAAAAGGAAGATACTTCCATTTGGTATTGTTGGTTTA

A\_14\_P134340 AAAAGACTGTAAAGACTACATGGCCAGTTCCCACTGCAGGAAACAGAATGATTTT

CUST\_6915\_PI426210822 CTTCCCTTCCTCCTTGAGAGGACAAGAGAAGGTGGCGGGGAGCAG

A\_14\_P122753 CTCTAGATCATAAATCATAAAGAAAAACAAGACAGAGGTAAAGTCGCAGGTGTGACCTT

A\_14\_P117161 CTCACGTAATGCATTGCCTGTAACAATGTAATAAAAAGCCTCTTTCTTTTTGGGGTGG

A\_14\_P120049 CTTCTCCTATATGATACCATTCACTACTTTGTTCAATTATCCAGTCTAGACCTGCATCTT

A\_14\_P107354 CAAAACCTTTTACATTGGGAGTTATTAAGAGCGCCTCCTTTTGGTGTATTTCGTTTACAAA

A\_14\_P121050 TCTCCTAGCATTCTGTTAATATTCCACCATTAGGTTTTTCTTTGGGTCTTCTTGATAG

A\_14\_P116362 TTTTCTCCTAATGACTTTTCAGAAAACCTGCAATCAGACCAATGCCTTAGTTCTCAAATGT

A\_16\_P01320131

AAGGAATAGCGCTTCTACTTCAGATTCTTTTCAAAAAATGTGGGATGACATATTGAGGTC

A\_16\_P17272553

AGTTGTTGCTCATTAACCTTGTATAACGTGACATCTGATTCTTCCTTAACACAGGTAACA

A\_16\_P15976044

AGCCATCAAACTAATTCTCCGTGATATCGTCTCTAAAATGACCTGAAATGAATTCCTG

A\_16\_P00969137

TGCACTCTTTGATCTTACTTCCCATAATTTTTACAACAATCTACAATGACTTCCTGTCT

A\_14\_P136217 GAATGTTGGGATGATACTCGAAAATGCTGAAATCACCAATTCCTAGAATTTTGGCATCTG

A\_14\_P124427 TTATGGAGAGAAAGGGTGATGGATGCACAAGAAATTAGTGAGATGCGTTTTATGGAAATA

A\_14\_P119845 CTCTGCCTTACCATAGTATATGTTTGCTAAATGTTAACTGTTTGTATCAGAGCACCTG

A\_14\_P128027 AGGCTTAGTAATCCTAAGAAATGGGTAAACAGAAAAAAGGAACATTCCTTTTTCTAGTGCT

A\_16\_P35376867

AACCCACATTTTACAACCTTTCAAAATACCACAGAAACATCAATCAATAAAACCAGGGTT

A\_14\_P100640 CCTTCTCTTGGATCAAGAGTCTCTTATTTGATCGAGGTCTGTTATTAGACTTCCTCAT

A\_14\_P202084 CTTGGTGGAAGTTTTTTTTTTCTTCCCTATTTTGGTATTTCCAAATCTTCCAGCATGAAT

CUST\_10403\_PI426210822 AAAAACCAGTGAGCTGCCACACCAGTCACATGACCTGATCACTAG

A\_14\_P134586 TATTTGCCTTGGCATTAGACTTTTTCTTTTGCTGCTTGATGGAAATACTTAGGTTTTTGGT

A\_14\_P116031 ATACCTCTCACATTCTTTACAACCTCATTTGGTGCTATGTAAACCAATCCAAAGGAGTT

A\_14\_P125586 ACAAAGAAAAACAAAAGGTTTTGAAATGACTGATTTCTCCACCACTCTCCTAGAAAG

A\_14\_P133645 AAAGTGAACATGAGTTCCGAATTCCTGCGTTTCAAGTGGGGTAAGG

A\_16\_P15858746

GTCCGATTCACCTTTTGTTCCTCAAGTCTTTACCATCATTGCATATTACGCCTACTTCTAT

A\_14\_P105246 CACAAATAACCCAGAAACCATCAAAATTATTTTTGACCAGCAACTTTCTCAATGTCTTGG

A\_16\_P18994816

ATGAAATCCCAATAACAATAGTTGCTTGCATGTTAACTCCACTTTGTCTGGTTTCATTGC

A\_14\_P107719 CTAAAAGCAAATAGGCAGGCCTCATCTTGAATGACATCATGTTAGTGTGTTTATCCC

A\_14\_P138315 ACTTTTAAAAAGTTTGAAAATTAGAGGACTGGGTGATCTCAAAGGGCTTTCCACAGTAA

A\_14\_P110873 TGATCTTAAAAGGGTTGGCTAACAAAAACCCTGATTCTATTTCTGAAACAACTTTCTCCA

A\_16\_P03188881

AATTGGCACAGACACTTAATTATGCATCTTGACATCTTTGACCAAAAACAAAATGCCAAG

CUST\_10131\_PI426210822 CCCCAGCTAACCCAGACCGCTCTTCAAATCTGAAATGGATCCTA

A\_16\_P36230979 ATTTGGGGGATTATATGATCCAACCCTCTACCTTTGGACAGAATACAATCGAGAT

A\_14\_P102436 ATTGCAGAGATTTATTTCTTTATTTGTCTAGTTAAAAGGCACTGGGAAAAATGAGGCCA

A\_14\_P129359 TTTCTTCTTGTGGACTCTCTGCTCCTCTAGAAGATTCACAGCAATGCT

A\_16\_P19932424

AGCCATAGTGAGAAGATATATTAGGCCAACTTATTAACCAGCATACAATTAAGGGTTCCC

A\_18\_P14417295

AACAAATCACAATATCAGACCTTAACTCAAGTCCACAAATTGCAATTTTGAGGGGA

A\_14\_P119733 TCTTATAAATCCCATCTCTTGAAAATATTGCCCTTGATATGATAACGGCAAGTCTGTCT

CUST\_10381\_PI426210822

CACGTGAGAGCAGTATTTATTAATTTCCACAGATGGCTAAGATCTCTCAAGATACTA

A\_14\_P107709 ATAGTATTTCTACCTTTTCTTTCTCAAACATTCCACAGAACAGTCTTACCTTCGAGGAG

A\_14\_P101531 TGCTTAGCAACAACAACAAAAAATTGCTCTCTCAGATCCATAATCCATACTCAGTGAAAG

A\_16\_P30952615 CGTGCTGCTCTGGAAGGTGAGTCTGGTGATTGCAGGTCCCCCTGG

A\_14\_P200650 CTCCAGTCCCCTGAAATGAAATGTTACCAGAGCCAGAACTATGGCAAAT

A\_14\_P111007 GCTTCTTCCAGTATTTGATTGAATAGAGTTAAAGACAGAATCTTGACTTCTCAGAGGACG

CUST\_9976\_PI426210822

CACATCCCAGAAATAACCATGATGAGCATAGTATTGCCTCATTTTGACCTTTTTTCTCT

A\_16\_P18197855

TCCTTGCAGTTTAGAAAATTCGTGTCTATAACAGAAAGCATTCTTACGTAACCTTAGAGGT

A\_14\_P133074 TGCACCGACTGATACTATTATTAAGTCAATGATGTCCTTCCCTTCTTACATCAAAATTG

A\_16\_P16531893

CTAGGTCCATGGTATCGTATCAGGAACTTAAAGTTAAGGTATATTGACAACACTGCCTT

A\_16\_P17589674

GAAAGAGTCCTTCTAAGAAATCAACACACATAAACTGGTTTAGATTACAGCCTACCTGG

A\_14\_P103246 CTTAGAAGTGATCATTTTACCCTTGGTCCAATCAGCGTCTACTTTGTCTAATTTCTCTT

A\_14\_P119027 ACCCAGCCCAGGAACTACATATAATAATTTATCTTTTCGCTTAACTTGTGATGAACATGG

A\_14\_P103356 TGAACCTTGAAGAAATGGATGTGTAATAGCATCAAAAAGTGACAGAAGATGGACACTATG  
A\_14\_P109714 ATTTCTACATGTTATTTTCCAACCTTTTTCTGCTGTTACTTTGTTGCAGCCTGCTTAAA  
A\_14\_P125035 CATTTTGATGGTGTCTTTCATCCCAGCAAATCATATCAATCTATGGAGGGTTTAGAGC  
A\_14\_P128292 TAAGTGACCACAAGTGACCATAAGTTCATGTATTCTTTTAGGGTTTCAAGCACATAGGAA  
A\_14\_P124514 CTTGTAAATGGGTGGAACCACAAATCAGCGAGAGGCATTACAATATGCTAAAAATTTTCA  
A\_16\_P01543034  
AATAACCCTTGGAGTTTTTCTACAGTGAAGTTTAGGTATGCATACTATCAGATTTGGGGC  
A\_18\_P17387093  
ATACCTTGGGTTTCATTGTTTCATTCTGTTATCATATGTCCAACATTCATGCACCTGTCTTTC  
A\_14\_P129485 GAAACTACTGACCACCCTTCAATTTTGTTCCTACTATTTAACTGCTGAGTTATTGCACATT  
A\_14\_P110943 GAATGGGTTTACCAAGTTTTGTGTGTAACCTTAACCACCTATAAAAACAAAAGCACACTTAT  
A\_14\_P128247 AAATAAGGTTGGAAATCAAATGGAGGCCATAATATGGGGTGTTTTATGTTTGGTTGAATT  
A\_14\_P200551 CTCGCGTTGCTATTTACAATAGTTGTGTTACTATTTCCGTTGCTATGACTCATAGTCACG  
A\_14\_P200519 GTGATTTTGGAGCCTCCGGTCTTAAAGGGCAGGAAATACACTTTGC  
A\_14\_P101924 ACTTATTTGCATATAGCATACTTCTAGGTAATTTTGTTTAATAAAGATGAAATAATATTT  
A\_14\_P121538 TAGCAGTGTA AAAAGGTCCAAGACCACATTTACTTGAAATTCTTCTCTTTTCTGATTTGT  
A\_14\_P100024 GGATGATCTACGCAGCCACATGACCTTTTTCATTTACATGAGGCCAAAAAAAATTATTAT  
A\_14\_P121940 TTGTATCTGACTCACTTGGCCCCATCACTCAAATGTTTTGCAGAGGATG  
A\_14\_P114968 CTAAAGTCATCAAGTGTTCAAGTGTTC AAGGAGGGTAAGACTATTAACAAGGACTTAGC  
A\_14\_P116062 GCCTCTATAATGAGACAAGCCCTTAAACTCATGGAATTTTTTTTAAAGAACATCATGGCA  
A\_18\_P22839975  
AGAATAGCAAGCAGCCAGGCATCGCCTTCTCTAAAGTGTTAAATAAACTGTTTAAAGATAG  
A\_14\_P131412 GCAATTTCACTTGGGCTCTTTTCTCTCTAAAATGCTTCTCATGAGTATTTGTATTAC  
A\_18\_P22840314 AATTTCAAGGAAATGGTTCAAGGCTGTGTAACCTTTAAGGAAAACACACGGA  
A\_14\_P133324 GCAACCATTTCTGATGGTGCATTAACATAACATTAAGGAAAGGTAACCTAACAGATTTGC  
A\_14\_P134097 CCCCAATAATGACAAGTGTGGACAATCTCTGTGGTGAGTAAAAGGAACAATACA  
CUST\_4525\_PI426210822 ATTCCTGCAGTGGACTGAGTGCCCCCTGGCTGTATATTCAAGTC  
CUST\_2914\_PI426210822 GTAAATACTGTAGGAAATACAGACTTTTCTCTGTAGGAGGTGAATCTGCCTTGGC  
A\_18\_P10725049  
TCAGCAATACATTTAGCCAGTTCTTAACTCAACCTATTAGTCTTGAATCTACTGGAGTCC  
A\_14\_P121843 ACAATCACTTATTCTCAAATTTAACTTCTGTCCTACCACAGAGGCATTTAATCACCAAA  
CUST\_5886\_PI426210822 ATGAGAAAGCCAGGGTGACAGAGGTGAGGAGGGCACATGCCAGAT  
A\_16\_P18549171  
GATCTACTCAGTAGTTTTTCTTTCTAATGAGAGCATAACCATCTAAGTAACTCACCTTCCC  
A\_14\_P119541 TCATCATATGTGACAGACATTTTTTCAAAGGCTGAGGGAGCAGCAAAGTATACTTAGTCA  
A\_18\_P22842283 GACTTTGAAATCCCAGGAATGACTTTGCTGTGTGATTAAGTGACAGAGGC  
A\_14\_P123425 AATAGTTTACCCTGAATGACATCACTAGTCATCATCAGGCAGGAAATGTCTAGTTTTACT  
A\_18\_P22842493 ATGTCTTCCCAGGAGGCCAGGACCTACTTGTCTCAAGTGGCAAAG

CUST\_758\_P1426210822

TACATAATATGTAATGCACTCTATTCCAAGGCATGTGGGAGATGATCTATTTTCATGATAC

A\_14\_P133730 AACTAATATAATAGTGCAGGGCAATTTTTTGTGGGAAGAGCATCCAAGAATTCTGTTT

A\_18\_P16627949

AAAACAAGAAAAGGGCATGTAACTACTCCGTAAAAACAATCCTATTAACCTGAGGTG

A\_18\_P14527266

AAAACGGACTCTCTGTAGTCTAAAACATCAGCATTAAAGAGTAGGCCTTTGTTCATGAT

A\_16\_P03330109

ACAGCAAAGAATTAGCCCAAAAAAGTCTTCTGAGTATCCACATTTGATGTCAAGTTTTCT

A\_16\_P17653415

TCAGACCCAAATATAACTCACTCAATTTTGCTGAAAACCTAAGGATTTAAAGGCTGATCA

A\_14\_P105124 ACAAGAAACGAAAACTCGCATAAATTCAATTCAGTTTCTTCACTGTGATTTCTCTGG

CUST\_5887\_P1426210822 TGAGGAGGGCACATGCCAGATCTGGCAGCTGCATGTCACCAGAT

A\_14\_P112376 AACCAAAGGTGCATTGTGGTCTAATTGTGGATTTCAAGTCAAGTTAAGAAAAATATAGCC

A\_14\_P100959 CTTCTCTGGACATAGACCTCACTAATTTGTATCCCTGCCCCGAG

CUST\_2006\_P1426210822 TGCCTTCCCGAGAACTCTGCTGGCTTGTGTTATTTAACATTTCCAAAAC

A\_16\_P20334922

AAGGCAAGAATAGACAATGACCAAAAACCTATGTATGACAAGATAGAATGGAGGATGCAT

A\_16\_P21617573

AGAAACACAGTTGGTATGATCTTCCAAATTCAACCCATTTATTTAATAGGCAGGACTTGG

A\_14\_P136012 CTGGTTTCTGAAGAGGTCAGAATGATCTTTCTCCATACTGACTTTTAAACAATGTTGATCA

A\_16\_P17501500

CGATCATTTCTTCACTTCATCTGATAGCAGAATATACTCAAATATTTCCCCAGTTAGCCTC

CUST\_3560\_P1426210822 TGATTGTAGTGAGTACGCTGTGTGCGGCAGAAAGGATTCTGTCAC

A\_14\_P123850 GCAGCATTATGATTCAGAAGAACTGATAACATTGAGGAATACATTTGTGGAGCACAGAT

A\_16\_P15446959

CCAGGCTTGACTATGTTCTATAAAGAAGATCCTCTCAATAGACTAGATTTCCCTTATCCAC

A\_16\_P17661247

TCATTGCTACCATCATATGCAGATAGTAAACAAGAAGATCTTCTAGGTTGATCAGATGCC

CUST\_8037\_P1426210822

AGTCAGAAAGCTATACATAAACTAAAGCTTATCATGCAAATGAGCTTCCAGAGGTCATA

A\_14\_P136858 CTAGTTTTCTTAACTCTAAAATAAGACAGTGGGTTTCTCAATGGTTTCTTAGTCAGGGTG

A\_16\_P15952763

AAAACAGCCACATTTCTTTTTAGGACCTGCAAACTTTACATTTCTAGCCTAATTTCT

A\_14\_P118922 ACGTTACCCACATAGGGAAGAAGCTTATCCAGACTTTAGGTTCCAGT

A\_14\_P114153 TGCAAAAGAACTACCTCGTCTAGCATTTCCAGGCATTATGGGTAGATATTTTACATTCT

A\_18\_P14137284 GAGACTTAGGGTGTGGCTTTCCCATGGACCATGGTGGGTCTTTG

A\_14\_P139154 GTGTTATGATAAATAGAAACCTGTAAGATCTCTGGAGGGGCATTTTTTGTGTGAACATTG



A\_16\_P03456224

TTTCCCTGAGAAGACATAGAAAAGAAAATCAACTTTCCTAAGGCATCTCAGAAACATAGG

A\_16\_P21382471

ATGTGTGATCATAGGACTCTGACATCTGTAACAAAACTCCTGGCAAATTGATCATTCTA

A\_14\_P103337 TACAAAAATGTGTTGAAAACCCGATTTGTTTTGTTCACAACCAGTAAAGAGAGATTGTGTG

A\_14\_P104141 ACTGTTCTCTTGTTACGTTTAGTGGTGTGTTTTGCTGTTTTGTTTTTAAACAAATGATGC

CUST\_3342\_PI426210822 GACACTTGCCACAGAGGACATTGTGATTAGCAAAGGAAGGCACAAAAA

A\_14\_P133838 CTGATGGGTCCTTGTGCGAATGATAGAGGAGATGACTAAATACCATAATAATCAGTCTG

A\_14\_P117450 TACCTTGGCTTCATCTGGAGGCTTCATGGGAACATTTCTTCTCTGAAAAGTAAAT

A\_14\_P108767 GGTGTAAGGTCAGCCACATATAGTAGGACGAATCCCAAATCAGAAATGACCTAATA

A\_14\_P120976 TGACTIONTAGTGGTTAAAAATAAGCAGCATATAAAAAAAGTGACGAGGAGAAGACATGGCC

A\_14\_P107825 GTAAGATGCTGTTTGTCTGTTTCATGTGCTTTTTATTAAAAACATAGGCAGGACTGATCAGA

CUST\_6609\_PI426210822 CTTAAGTTAATTTTTACATCTTGTGTTGGATCCTCAGAGCCCGTCTCCAAA

A\_18\_P15877060

ATTCCATTTGCAGACAAGAAAATACATCTACTGTCCAATCTACATGTATTTGTATGGCCG

A\_14\_P134894 CTTGAGGCTGAAGAGGTTCACTATCTGCAAAGATATCTGATAAGTCGTTTAGTTCCAATA

A\_14\_P128669 AGTTTGATGCAAAGTGAAGTTTATTCAATGTTGGAGGCCTCACTATGTTCTCTAAGTTT

A\_14\_P124725 GGTTTCTTACTCAGGTGATAGGTTAATTACAGATCTGTAAGCATTTCCTGATTCCCTATGG

A\_14\_P110798 ACATCTGGCCATTCTGAGTGCAGGCTATTTCTTCACCATATCCTTCTAAAATAAGAAAAG

A\_18\_P14652939

ACCTCCCATACAAAGTTAACCCTACTTACCCAGAGATAACTCTTATACTAGTCCATTGTA

CUST\_2708\_PI426210822 AGAAGAAAATGGAAAGACTAAGGTGTTGGCCTTCTTTCAGGCACTGCTATT

A\_14\_P119959 GAAAAGATCTAGAGCCATACAAAGATAGCACTAAAACATTTATTTATTGCCTCTCCCATTC

A\_16\_P30952326

CTTTTAAATAGGACTCCCAGGAGAGTGCTGATAAATATCTTTGATCATTGATTTTCATCCT

A\_18\_P14135145 AGCCAAAAGTGGTTGTTCCCAAAGTGTGTCATAAACGTGAATCGTGACAT

CUST\_8258\_PI426210822 ATACCCAGAACCAAGCCCTATCCTTGGGGACAAAGAGAAAACATTC

A\_16\_P16542188

GGGTCCTTCTACTCTAATTCCTAACCCTACTTTCTTCTAAACTCATACTGAGAAATG

A\_18\_P22842648 GGTCTGCGACAACCTGTGACCACCTCACAGACAAGGTGACTTCTG

A\_16\_P18864656

AATTGGCCTAAGCAACAATAGAAGTGGACTCTTTGTCAATATTGTCGTTATCACTATCCA

CUST\_5447\_PI426210822 TGCAGGAATATGCAAGGAATCTGCAATCCCAAGTCTGTTTCAAATCTTTTCTTG

A\_14\_P201580 GATACTTAAATGTTTCAGCCTTTTTAGATGTGCAAGAGGACTCCTATGAGACACTTTTTCAG

A\_14\_P113529 AGATTTGGGACTAGTTGCCGTAGTAAAGACTAACTTGTTTAATCATTTTCATATTGGGTCC

A\_14\_P137380 ACAGAGAGCATTTTAGTTCTATCACAAGGTCTAGAAGTGTCTCTACAGTCACAGGAAG

A\_14\_P129111 ACGGTCAGGTTGACTATCCTGCTACAGTTAATCCCTTCATATCATATAATGAGGAACTAA

A\_18\_P26794864 CCCCCAATCTCCCTAGTTCCCAATATTTTCTCGGATCCCCAATCATATACTT

A\_14\_P104944 ATAAAGATGTAACCTGTTCTTTTACTCCTCGGTCTGTTTCTACTGAAGCCATGTATACATC  
CUST\_401\_P1426210822 GCTTTTTGCTTTGTTAAAGTTGTCAGAGTGTTGTTTCAGTGAGGAATAGGAGGC  
A\_14\_P104326 TAGCAGGATAATAAACCACAGTTCCACAAAGAAATGATGCTTCAATGCCTATTTGTCCCTA  
A\_14\_P133078 TCGACAACCTTTTCTATTTTACAGTTATCGCTACTGTTCTGATGACTCTCAAATACGCAGC  
A\_14\_P104838 GGCAAGCAGCCCCGGTTCAAATACAATAGTGGCATCTTATTATTTAGTCTTATGGCTAAAT  
A\_14\_P121428 GTGGAGTTTTAGAGAGTGTGAAAAGTGTGTGTTGTAAATTAATCATGGCATTGACATC  
A\_14\_P200595 GAAATGATTCTAGTATAGGTTCTAGAAATGATTTCTAGTCCAACCTGGGCTCTGTAAGAT  
CUST\_8463\_P1426210822

CCATCTTTTTCTCATTCTCAGGAAATGATTGACTTCTGAAGACAGAAAATGGAGAAAT

A\_18\_P11455759

AAAGGTCATAAGGCAGAACTCTCTCAAATTCCTTTGTTTAGATACCAAACATTTCTCCC

CUST\_6123\_P1426210822 AGTGGCAGAATGGTTAGAATCATCAACTGCACAGCCTAGGTCAGAAG

A\_14\_P121311 ATGTGATGTCAAGAAATAATTTGGAAGCACCTCCTTGTAAGATGACAGAGCCATTTAATT

A\_14\_P132430 GAAACAAAAAGTTCTGAGGTCATTCTTTTACTGATTAAGATTGGGGTGGTAGGTATTAGG

A\_14\_P129827 GTGCATAGCGATATTACAGTGAAATCCACTGGTTTAGATGTAACAATCAGAACTAGGTGA

A\_18\_P22839601 CAAGCCCTAGTTCTGATCTCTGGGGTCTCACCATTTATAGACTTCCATTA

A\_14\_P126603 AATGCAAGATCGTTCAGGTTCTGGTCAGTAAACCCAGGACTCATC

A\_16\_P40186488

AACCCATACAGATTTGCAATAAACAGCATCATTTTCTCTTCATTTCTTAATACACCCAAA

A\_14\_P138869 CTAAAGAATAAGACTTAGGTCCAAAATCCTATTTTCGTGACACAACCTCGACCTTGATCACA

A\_14\_P130852 AATTTGGAATCTTCCCTTGAAGAGGTGAGAATGTATTATTATTTCTAAAACCTTGGGGGTT

A\_14\_P117419 CTGATGACTATTGAGGATGAAGGAGTCTTGGACAAGATGGTATAGCCAGATC

A\_14\_P117510 CTGCCTGGAGAAAGCCTATTTTTACATAATGCAGTTTTTTCATGGTGTTTTTGTTTTTACA

CUST\_7316\_P1426210822 GCGCTTCTTTTCCACTGTCTGATTCTGGGTCTCTGCTTCCCTCAT

A\_14\_P134009 TATGCCTATTCCAGATGACGGTGTATTTAATTCTGACCTAAGATTGAGGCACTGCTATA

A\_16\_P03070788

AAGTFACTGTAATTCTCTGTTTACCTATCCATGTTCCCTAGTATGGATCATCATCAGGTGG

A\_14\_P128973 TTTCCACACTAAGGTAAGTTCAGACTAGATTGAACACTCCAGAATTTTTTACTACAGAC

CUST\_6564\_P1426210822 GAGAGGTTGGTCTTTGTGGAGTCTGTTCCCTTTCAGGTGTTTGTA

A\_14\_P126835 TTTACTAGATCCAAGGCTGCTCTGTAAAATAACTTGTGTTGGGATTCTTTACTGAGAGTT

CUST\_1353\_P1426210822 AGGAGCAGCCAACCTGCTGGGCCCCACGGCCTTTGTGTTTGTGCAG

A\_14\_P117747 AGATGAAAAACATTCTGTGCATTTTCAATTTGTGTGTTTTCAATTTAGATGGTTGAAAGGG

A\_16\_P37313853

AGTCACACTTCTAATCACTCTGACTTACCTACTTGAGATCGAATTTCAAATATGTCCCTG

A\_16\_P21481681

AAAGCAAAACAATTTCCCATGTCAATACAGTGAAACCGAAATAATATCAGAAGCCCATA

CUST\_1040\_P1426210822 GTGATCTTTTGGGGCCAACTTTCTGCTCTCAACTGCTCTCTATC

A\_18\_P11758131

CCACGACATAGAACTCTAATGAATCAAACCTTGATTGCTTTTCCTTATATCAGTGGTAGGT  
A\_14\_P121214 TCCTATTTAAACTCCATTGACAAATCTGTGTATAGATGCACTTTCTCCTCCTGGAGATGA  
A\_14\_P131724 GGGGGAAATTCTCTTTGCTGAGATACTATACTAGCATGGGGAATTTATATTCCAAAAACA  
A\_14\_P129278 TTTAAGAAAAACGAGATGAACAACGGGTTCTGTAAAGGTCTACAGATTAGATTGAGCAAAC  
A\_16\_P16861686  
CCTGAGAGCCCTAAATCCATCAATCATTCCATTGATTAAACTGTCTTTAAACTATCCCTT  
A\_14\_P113784 TATTATTATTGGTGTTCGGAGTAGAGTTCCAAGGTAAAGAATGAAAAGGATGGGAATCTG  
A\_14\_P112854 GCTCAGAAGACTTACTGGTACTGGTTCCTTCTTCCCTTTTGAAGGACTT  
A\_14\_P131215 AAAAATGGCAAAGACCTAGGTCAGAGCATAATGCAGTTGAAAAGATGAGATTTTTCTGAA  
A\_16\_P58424291  
CAGGCAGCAAACCTCTAGGGACTGAAGTAAATTTCCCTTAATTTAATGAAATGTATCAAGCA  
A\_14\_P119336 ACTAAGAATGCAGCGACAAGTTCAATACCTTCTATAAGGTCTTCGATTGCTTTCCTTACT  
A\_16\_P16956429  
AATGCAGTAATTACACCCATATTCCTAGAAACCTATTTCAACACGTTTTAGTTTGTCCCT  
A\_14\_P113265 ATATTAAGGATGACAAATTAGGAAAGAGCCAAATAATAGGTACAGGTTAAGGCCTGAGA  
CUST\_8848\_PI426210822 TAAGCTTCAGTCCCGGCTGTCCGTACAGAGTGTGGTTCAGAGGCT  
CUST\_912\_PI426210822 GATAGCATCAGGATTAGAGGCAAGCCCCTTCCCTTCTCACTCTCT  
A\_16\_P21653467  
ATCCCTTTTACATTGCATTTGTTTCGGTATTGTTTCTGATGTTTAAACACAACATGAAGACT  
A\_14\_P104474 CACAAATGCCAAAGGGAGACTATATTCACCTACCTATAAACTCTACAGAGTTGTTGTAGA  
A\_18\_P13085885  
GCACACTTAATCAATAGCAGCAATTATCCAAGTAAATCTTTCATATTCAGTCATCTGTGG  
A\_16\_P37313932  
CCCCTGCTTCTAACTCTATTCTAACCTGATACTTGTGTAGTCAAGAATGACCTAAAAACA  
A\_16\_P02725105  
GGAGACCCTCATATATGAGCCTAAATTAGTATATGCATCATGATATATCTGCCACAGCGT  
A\_16\_P16296005  
AATATTCTACAATGCCCTCAATGCTTATCTAAACACATGGAGATTTTCCTTCTTTGACCC  
A\_16\_P03000080  
TCTCTCAACAGATCTATCCCTACCTACTAGTTACATTTCAAAGAGTCCTCAAAATTACGG  
A\_14\_P102783 GAACACACACCACCTCATGCCATGGACAGTATTAACCTCTGGTATCTG  
A\_14\_P117927 CTTGAGAGACAAACAATTAAATGTGGCCTTTACAGAAGAAAATAAGGAGGTCCTTAGTGA  
A\_14\_P114802 CTGTAAGTAGAATCCACCTTACCAGGAAATATCCATGATGGATTTGTCAAACAGTTCATG  
A\_16\_P21367813  
AAAAAAAAGCGTTCTAGGTTCAACTCAGGTCTTTGTAATTGTCATTATGACATGGAAGGA  
A\_14\_P132616 AGAATGGCAACCTGCACTAAGGACTTATTTTCTTTTCGTTTTTTGGCTAAGTTGATTCAATA  
A\_16\_P02861646  
TCCTGCTCCAATAATTTCCCTATGATATTTATGCATTTTCAGATCTAAACATCCCCTCCTC

A\_14\_P125852 AGACATGGAGTCTGTTGAATAAACATTTGGCTTATTGGTTGACTCTTTGCTAAAAGAGTT  
A\_14\_P132168 ATATAAAATTCTAACCCCTATGATTGCAAAAATAAGGATTGCAAAAATAGGAGGAGGCCG  
A\_14\_P108005 CCCACTGTGATTTTTTTTTTTAACATTGTAAGTTTTTTCATATCCCTTTTGGGAAGTGGG  
A\_14\_P132408 TATTCCTTTTATTTATCTTCACAGATTCTGGAACCTTTTCAAAGCCTGACTCTCTTCTTG  
A\_16\_P03663266  
AAATCATGATGCTAATCTCCCAAATAGGGCAATAAAATGTTGAAAGGTCTTAAGGGGTT  
A\_14\_P135717  
CAGATTGACAACAAAGACAGTTTCAGAAAATGACAGGACTGGGCAAATTAACAAATGTTT  
A\_14\_P123028 CTTTTAACTTAGAACAAATTAATGCTGAGGACCTCACACCAGAGGCAGCATAAAAAAG  
A\_14\_P200412 CAGGTGACTTTTTTAAAAAATGCTGGGTTTAAGAAAGGCAACCAATAAAAGCCAGATGCT  
A\_16\_P37309870  
ACTGCACCAGATTAGAACAACAGCAAAAAATTCCTCATTCTTGCTTTAACCTCTCTTAT  
A\_14\_P134410 CTGAGGCTTGGGGAAAATGCAGAGGCAAACTAAAAACATTTTTAGTTATGCTAATAGCAT  
A\_16\_P19921464  
GTAGACTCGTTTCGATGAAAAAAGGACTTCTCACATCATAAGCATGAATCCAGACTCTAG  
A\_16\_P21396040  
CCAGAGTTACAATCTCAGAAGTTGCCTAGTTAATTATGCCTTGCTATAGATTGAGGAAGA  
A\_18\_P22840678  
TCCAATCCATACCACCAACTAATTTTTAAAAACAGGAATAAAGGAAATATTTCAAGAAACA  
A\_16\_P15537629  
ACTTGGAGTTTTTCTGTGATATGACAAACTAGGCATAATCCTATCTCGGAATTGTTGAGT  
A\_16\_P15765390  
TCCCAAGTAATAATTTTCATACCCTAAATAAAGTCCCATCCTATCTAAATTGCTCCAACA  
A\_14\_P118410 ATGGCTCAGGAATTAACCCATGTCTAAAGAAAAAGCATGGAATTGCAAATTTGTCTTT  
A\_16\_P17772297  
AATGGCAAGATAAATGAACTTTCATCCTCTTAATCCTCTATTCCATAGTGCTCATCTCGG  
A\_14\_P129802 TGTTACAAAATGATCCCATCAAGGCCCTCCATAATTAACACTCAAACTATTTTTAAA  
A\_14\_P122609 AGACAAAATTGTGGCTCACACTTGTCCATTCTTTCTGGACAACCTTCTAAGAAAATTATCT  
A\_14\_P136409 GCCTGGCACTTGTCAAACCTTTTCAAACCTTTTAGTGCTACTTTACAATCTTTTTGTTTT  
A\_14\_P100551 ATCCCAGAGAGGATGTCCATTAATTTGTAAATATACTGAGACTTCATTTTGAAAGGCTC  
A\_14\_P106272 TTATGTTGCCTACTTTACATTTTCCAGGAACATCATTTACAGCGAGCAATTTACAGCACAG  
A\_14\_P111367 TTTTAACCTACTTGGTTTTGCAAAGACATTTCTAGTGATGTTTTGGGAAACTTGTCTTCC  
A\_14\_P200576 GAGGACCAGTTTATCCAGCACATGGACAACATCTTCGACTCCATGA  
A\_14\_P118254 AAGAGAGGCCATTGTATGCCTCTTTACCAAATAAGTGCTATCTTCTCCTCATTTAATCA  
A\_18\_P22841727 GCCTGCCTTTGTCAGCACGCAGGCTGGCTCCTTTGCTTTGACAAA  
A\_14\_P126125 GATTATGCTACTGGTGCAATTGGATCAGTGTATGATATGGATGATGATGAAATGGACCC  
A\_14\_P119474 ACATGATGCAGGATTTACCCAGTTTCTGAAACCTCTGAGAGTTGTATTTAAATGTGAAAA  
A\_14\_P123670 CTTGACAAAGGTCCAAGAAATCTTIATTTCTTCTTCTTTTTGATGCTGTTTGTCTCCTGA

A\_14\_P111115 ATAATGTTGGATGGTGTAGGAATTATTCATTCCCACCCCATTATACACATAAGAAACCTT

CUST\_9738\_PI426210822 TGGAACTCTTCCCATTGTGTCTTGGTCTTAACTAGATGCACAGAT

A\_18\_P12455894

AACTAAGATCCTATGTGGTTTCCTTTAGAACTGATCTGATTACACTCTCCATTGCTTTTCG

A\_18\_P13302146

AGTCAGTCTAGAGAGAGTCTAAGAATAAGATCAATTGTTTAATCTAGAGATTATAAAGTT

A\_16\_P20703566

TCAAACAGCATAAACTCCGTTAAAGATGTTTCCTTGAAAGGTCTAACTTCATGTATACCCCT

A\_14\_P110101 TTTTACTTCTGCACAGTTGAGAGTGTGAGGAAAATTCTCTGAGGGGGAAAG

A\_16\_P01764212

AAGGCTTTATGATACCATCAACCATAACCATAATGCCAATTGCTTGTAATAATGGATGTGG

A\_14\_P123606 GTATTACACAGAGATGCACCCAAGATTCTTCCAACATTCTATTCCGTTTTCAAAAACCTAC

CUST\_4296\_PI426210822 AGACTGCTGTGCATAGGTCCCTTGTCCTCCAGAGTAGCTCACCTG

CUST\_4941\_PI426210822 CATCTCAGCATTTCACCGCTGTCTCGGTATGAGATTATGGTGATGT

A\_18\_P22841888 AAAAAGGATGGCTACAGATGCATGGCTGCATGGCTGTGCATCATC

A\_14\_P135886 CTTGAGTTATTTTCTGAGTAATCCAATAAAGAACTTTTGATGACAGCCAGAATGTGTTAG

A\_14\_P139700 ACATCCTTGTTATTTAAATTGTTCTAAGACCTTAGAGAGAATAGCAGATTGCACCCCAAGA

A\_14\_P133271 ACCCTAGATTTGATGCAAGGCATTCCAGTGACAGAAGATCTTTATTCCATATTTACCAAG

A\_14\_P103433 AAATATGCATTTTGCATGACTGAAAATTTTGCTAACTGCCACATAACATTTTCTCTCCC

A\_14\_P111413 TGAACCCTGATTTAAGAATTTCCAAGGCTACCCTCGCCATCTCTATTTAAATTTATAGAC

A\_18\_P13511511

ACCTTTAACTGCCATTTTATCTTCTTGCTGACATACATTTCCAAAGACATAAAAATCCTCC

A\_14\_P136610 CTTCTCTCTCCCACTAATCATCATGTGAGATTCAGACCCTTTAAGGATGTAGAT

A\_16\_P16754217

GGATTGATCAGAATCAATGTTTGGCATAATTGCGATATCCTACTGAGAATCACTTTCTGT

A\_16\_P58424154 GACTTCACTAAGATAAGGCCTCCCTGGTTCTGTAAATTATTTCCCATGTGAC

A\_14\_P126025 CATAAGAGTTATCTGTTACTGTTACCTATTGGTTTGTCTGCTATGTCTGTTTCTCTC

A\_14\_P118972 ACCTGCCTATAAACAACCTATTTCTATTTTAAAGTGAGAAGTGTGGATAAGCCTCACTCTT

A\_16\_P16502970

AATTGAGTCACTCAAATCTTCTATTAAGCAATCACTGTTTAGATAGCAGCATAACAGGGT

A\_14\_P109481 GAAAAATTAATTCACACTCTGAGGATGTAAGAACATGTCATAAAGGAGATGACATTGGGC

A\_14\_P111655 AAGGAGCATACAAACAATGGTTGGGAACATATGCCAATTATGGAATAGGCTATGTATTT

A\_14\_P101969 GGGGTGTTTAGAGTCTAGTTTTTAACAATATTTTTGCCTCTCCTAATGTTTTCTTCAGTC

CUST\_7253\_PI426210822

TCTTTTATTCTTTCTCTACTAATGTTTTACCTATGGATGTCAGTTCTACTTCTCCTT

CUST\_7428\_PI426210822

CAAGTCAGTTTGAAAAAACATAATCATTGTGCAATGACAATTTGAGACATTTTCAGGGT

A\_14\_P108703 AAGGCTGCTCAGGGCCTTATAAACTGTTGTAGACAGCCCTGAATGT

A\_14\_P122599

GAAACTTTAGCAGTTGCAGTGCAGAGGACTTTGAGAAGTTAACTTTAAATAAAGGAGGAA

A\_14\_P103304 TCATGTTGCACTGCTTAGCCATTATATCCCTGGATATCTTACCATTTGAAATGACAGATT

A\_14\_P138293 GTCAAGCCAAAAAATGCTTCCCTGAAGATATAATTAAGGCACTCTGTAGGATATGCAG

A\_18\_P16046871

ATGAGAATACAGTTTAGAAAAGAGAATGCTAGTTTGATCAGAGTTCACAGGATACACCAGC

A\_14\_P138759 CTGAGTGGAAATTGAAAAATAGAGGGGAAAATGTCATTTCTTTCTAATGGCTTCGTTGAA

CUST\_1185\_P1426210822 CTTTAGCCTCAGGCCTGTCACCTGGCCTCTCAGTGGGAGTTCGATG

A\_14\_P108717 GTTTAGAAACATCTTTTTGAAAATATCAATCATTGGCATTCTTTGTTACTATTGGCTCAA

A\_14\_P109168 ATGTTGTTCTCTATAAACATCCCATCATATTATGTCTCCCAGACCACTGACAATTTTTGG

A\_14\_P111301 TGGCAGTGGGAACTCAGACTGGTGCTTTAAGGCTGTATCCTTTCTTTAA

A\_16\_P19250158

CCTTAAGACCTCTACTTATCCTACTTTTACTGCCTGTTATAACATCACACTGTCACCAAT

A\_18\_P13318620

AAACATACAGTGCCTTGTGATAGTCTTCTTCTGAAAGACCTCTAGAATTCAGATTCCAGT

A\_16\_P19490508

AAATAGAATGTGGGGATAATGTCATTGACTGTAAACCTCATGATTGAGAAAAAGATGGGG

A\_14\_P201797 CCAATGTCCAACTTTCTCACATACTGTAGATAAGTTATTCACAAAACTTTGGCCTGTT

A\_14\_P112318 AGCAACATTAGGCATTTTTCTAACCTGCCTCTTCTGGATATGATATAGGTGTCCTTTTT

CUST\_3916\_P1426210822

TGATGGAGTCATAAATCATGTCTGTAATGAAGATGTGTAGGCTTTGGTAAGATCTCAC

A\_14\_P119037 CTAGATCTGTGAAACTCATTAAAAGTCATGTATTTCTCAGAAGGCACATCTCTAGGGATT

A\_16\_P16625676

AGGTTTTAGGTCAGTTAGTGCACCTTACAATTCTGTCATAAAAAATTCATATCCGGTCACC

A\_14\_P115747 ACATAAACCGGCATTTTGCAAGTGTTATTTTTTTTTTCTACTTGCTGAGGAGTCTTCTTC

A\_14\_P123849 AGACAACTTGATATTTAACTGGTTTTCTCTTCACTCTTCCTAACTGGTTTTCATGATG

A\_14\_P100143 AAAGAGTTAAAAATTACAAATCTTTAAACCACATCTGGTTTGTGTGTTCTCAGAGGCCAC

A\_14\_P113937 CAAAACAAAGGTCAACATGTGGGAATGAATTTCTAGAAGAAGGAAATTAGCAACTGATCC

A\_18\_P15124996

AAAACCTACCAGATCAAGTAAGTTATGTATCATCAAAACCAATTCATCCATATTCTCCAGA

A\_18\_P16615813

AGATTCTCATGATTCCTCTGGTATCACTTAAGTGTGACATGACTGGTTTTTTAGTGTGTA

A\_14\_P138292 CATAACTACTTGGAGTTTTTTAAAACCTGCATTATTTCTTTGTTCCCTCAGTGTCTGACAAT

A\_18\_P14134710

TTAAGCACATCAAGATAATTTCTCTCTTCTAGAGGAAGAGAAGTTGCTGATGTTGGTT

CUST\_4384\_P1426210822

AATTATTGTATTGGGGAAAACATCATGTTATTGAATTTTAATTAGAGTTGCTGGGCAGCC

CUST\_7409\_P1426210822 TTATTTTAGAAGGGGAACTGGAGGCAGCTTGGAGGGAGGTAACAT

A\_14\_P122903 CTCTAAATCCATTTTGATTTTTTCAGGACTTGATGGAATGGACAGGGAAAAGTTTCCAC

A\_16\_P41469901

CACAAAGACATAAACTTAGATTTGAACTACATCCAACCTGTGATTGGAAAAAGGTGACCTG

CUST\_2033\_PI426210822 CAAGGAGGATGAGATTAACCTTTGAGAACCCACTTGTCTAAACTTCCTGAAG

A\_16\_P18535471

TTCCATCTTTGAACAATCCAACCAGAAAGTAACCATCAGATTATCATGCCTCTTGTTATC

A\_14\_P132771 GTGTCTGAGATATACATTTTTCTGAAATGTCAAAGGTCTACTTCTCAACATTCTAATGGA

CUST\_9821\_PI426210822

CTGTTTACTTTAAAGGGTTCCTACTGTATTGCTGCAAAGCTGAAGTCTTCTACGTATTAG

A\_14\_P118005 ATTCGGACGAGTTTTCAAACACTGGGGGAAACACGTTTTTGACTAGAAAAATAAAATAAA

A\_14\_P137756 CTAAATTCCTTCTTTCTACCTAGTAGAAGGAAATTGGTATTTGGAAAGGCATGCAATTC

A\_18\_P26797182 CCTCCTCCATTACCGTAGTCCCTCCTTCCGTTACCATAGACCCTC

A\_16\_P01978709

ACTTCTTTGCAGTATACAAGGACTAGCAGTTAATATTGACCCAATCTTATATACGTGGCT

A\_16\_P21463569

TTAAAGAATGCTACTTAGTCTCTCATCTAGTTCCAGTAACATCACTCCAAAACAGGTCTG

CUST\_7415\_PI426210822 TCAGAAGGGGCTCTCAGAGTCCATGGGCTCAGCAGGCTGATTCTT

A\_14\_P105450 ATTTACAACCATCAGTGGAGTCCAATGTCTCATCATACTTTCTCACTGAGACCTATTTTA

CUST\_3058\_PI426210822

AGCCTTGATAATTTTCAGCAGCTTCTGGTAATGTTCTGTAGGTTTGTTCATGATGTTTTG

A\_14\_P135228 TAATACAGAAAGGAAATGCTCTTCTGATCCAAGAAGTTCAAGAAGAAGATGGAGGAAATT

A\_14\_P134747 TCATATGCTTAGTGCAGGGATCACTGCATCAAAATTCTGAGTCTGTTGTTTGAATAAAC

A\_14\_P107682 ATTTTTAAACCAACCAGCAATTTATTCATAAAGATGCCCTCATGTGATGGTTATCTGCC

CUST\_3680\_PI426210822 TTCTTTCCATCAGCTGTGTTGGAGAAATGTGGCATGTGGCAGATG

A\_14\_P100611 CTCAAAACATGTTCAAACACATTCAGTAGCAAAGATCCACCATTGGCACACACATTAAG

A\_14\_P111946 CTTTGCATCTTTACTTTGAGACCTGCTTTGTGCCAGATAGTCTGAACATTTTATGTCATT

A\_14\_P103884 CTTAGCATTGTGAGAGAGCCCTCTGAAAATCATTCTAATTCAGATGTTTCTCATGAGATT

CUST\_6809\_PI426210822 CATGTTCTCCCCTTGGCAACAGATAAATTAGTCAAAGAGATGAGAGTTTGGG

A\_14\_P133240 ACTCGAAGTTTTGGCCAAATCTTGTCTATCCTCTCTTGCTCAATCTATAAGTGTTTATCA

CUST\_9420\_PI426210822 GACAGTTCGTCTGTCATCCAGTTCATGTCCC GCGCCAAGGTGAAG

CUST\_7205\_PI426210822 CTGATCTCGGAACAGGATCCAGAACAGTTCAACCTGTAATTGCTTTC

CUST\_9659\_PI426210822 AAACCTGAGGGCTATAGGCTGCGTCCAGGCGCAGGAAGTCTGGCAT

CUST\_10061\_PI426210822 TTAGGGGATACTGGGGAGGAGACTCTCAGAAAAGAAAACAATTAGGCA

CUST\_3543\_PI426210822

TTGTGACGAGTCAACTGACTGAGCTTGACTTTTTTCAGCAGTTTTTTTTTAAACTTCACT

A\_16\_P15127012

AAATGCTGCTTATCTTTTCACTGCACCTATAAATATTCTTAACATCACAGTCAACTGGGA

A\_16\_P01154268

AAAAC TTTCTCTCGAATCTCTGAATTCTCTTATCTGGCACAATAAATGAGAAAAGCCTGC

A\_16\_P00481337

AACCACGTCATTAATCATCAGAACTATCACAATAACCCCCTAACTAGTTTATTTCCCTCT

A\_14\_P125264 TTTGTGTGCTGTAGAGTCTAGTAACTCACCTTCTATTTCCCTTAGAACAAAAAGTGCTTT

A\_14\_P103044 AACTAACTTGAGGGTTCAGCCATGTTTCATGAATCTAGTTTGTTCATATGTGTTTCAATGT

A\_14\_P106431 GCCTGTTTATTACTAGGCATTGTGCTAACTCATATGCATATGTCTGTTCCCTCAGTTTTTG

A\_14\_P136153 CTAAAGTCCAACCTTATTCATTTGTTTCATAATATGCAAATATGCACCCCAAGTATTCAAAT

CUST\_4869\_PI426210822 CCTTTGGGTGGGTCTTAAAGCAGTTTCATGGGAATCTATAGGCTATTGTGTAT

A\_18\_P22841900 GGACTCGGCTGTTTGAGCCACTTTCCTTTGACACGTCTCAGACTT

A\_14\_P130639 TTTATCATCTATATCACATCTGCCATTTGGTGTAGAGCCTAGTAAGAACTAATGCTGCCT

CUST\_3811\_PI426210822

TCTGGTTGTTGCTATTCTTAAATATTGAGTGTCCAAAAGATTTCGTGAACTGCATCTCAG

A\_16\_P00685500 CTTTGCCTACTTGTAGATTTAGGGGGACATAACATTGAGACTGAGCAGTTTCTTGAA

A\_14\_P126918 TTTTTGTGAAGTGGCAAATGGCTAAAAATCTTACTCTCTATGGTATGTGAGTGGAAGTTG

A\_18\_P22842071 ATCTGATGCTTGTAGACTAGTTATCTTAGTTTGCTTCTCCAGAAGAGGCTCCTCTTC

A\_14\_P139407 ATCGAGATTTTGCATAACAATAATTAGAGGAGAAAATGCAGGGTAGTAGAAGAACCACACA

A\_16\_P00911714

AACTCGTTAATCATGTGCGATATGTGATTCAGATGTTTCTTCAGTTGCTAAGTAAGGAGGG

CUST\_4095\_PI426210822

TGCGCAGAACATGTGAAATTTAAGTAGATTTGTGGAAACAGAAACACATTTTTTATTTAGT

A\_14\_P106048 TCAAATGAAATGAAATATCCTGTTCAACACTGAACAGCCTTTAGACCGTCAGTATTGCTA

A\_18\_P18176711

AAACACTATCACACCTCAAATCTGCATACCTTGAGATTTAAGTGGGTATTGTTGGTTTTG

A\_14\_P120340 TCAGTTTCTTTGTCTGGAAAATGGAGCATTAAATGCATGTTACAGTATAGCACAATGCCTA

CUST\_3215\_PI426210822 AGTCAGGCTGGAGGCCCTCTGGTGGATCTCACAGTCACAGGCGAAA

A\_16\_P16191083 GTCATGTCCAAGCAGAAGGCAGGGGCATGTTTAGTGTGGCAGAAG

A\_14\_P120041 TAAAAGGTACATGTTGCTTCTGCAGTTGCATTTTCAGTCTATAAAAGAAGCAGCAC

A\_14\_P120496 ATACATTTTTTTTTTTGTCTCACCAGTCTGCTGCTGACATTGGGCAGATCCAAG

A\_14\_P201956 ATGAGATAACACTGCCATGGTGAAATGGTTCATCTGAGATTAAGCACATGTAATACTGAA

A\_14\_P137785

AACAAAAATCCAATGAAGGATGGCAGATGCAATAAAAAGTTTCTGAGGAAGCAAAAACAA

A\_16\_P18353338

AAAAAAGTTCGTCTTGGTAAATCTTGCTCAAACCTATGACGTCTCTTTAGATTCTGAGG

A\_14\_P108772 ATGACCTATCCCCTAAATCTGGATTTTAGAGTTGTAGGATAGGGCCAATTACCAG

CUST\_3537\_PI426210822 GACCTAGTGCAGCTCGCCAGCCCACGCTGATGTGTGTTAATGGAG

A\_18\_P26796290

ACCTGATTTCTAATAGCCACTGTTCACTACTCATAAAACCAACAAGAATTAAC TTTCCCT

A\_14\_P119371 CTATATCCATCCTTTAATCCAACACACACCTGCAATGATTA CTGTGCAACTATTTTGCTT



A\_18\_P22843011

TTTCAGTGGCTAATTTTTTATGACAGAAGGCATCGAGGGCTTGTAAGTTTGTTTTTCTTA

CUST\_3057\_PI426210822

TATAGAAGTCAGTATTACACAAAGCCTTGATAATTCAGCAGCTTCTGGTAATGTTCTGT

A\_14\_P202092 CAAAGTGCTGCTCATTCAAGTCACAGATGCTACCATGTTATGCAATGAAACAGTAAAATT

A\_14\_P101554 TTAGACACAGAGAAAGAGGTCTTTTTCTCTTCCATCTCGTAAATAATTAGAGACCCAAA

A\_14\_P108163 CTCTCAGTATAAAGCACAAAATAGTCTTCCATAACATTAGAAAAATGTCACCCCGCACAT

A\_16\_P17992498

ACCCATAAAAAGTCTGGTCTTTTTCTTAGAACTCTGTAGTGCTCTAGTTTATGCCATAAGT

A\_14\_P107596 CAAGTTCAGCAACATCGTGGATAAGTTTGTGATTGTAGACTGCAGATACCCCTAT

A\_14\_P120533 TTCAGTCAGAGCCTAAAGTTACACTCTCTACACATACTGCCTATACATGTCAATGTCTTT

A\_14\_P106520 ATGAGAGATAAATGTTAGATTTGGCATTGCTAGAATTCAGCCATAGTGAATGTCGACAA

A\_14\_P100224 TTTACCTGCAGATAATCCATTCGGTTTAAAATCAGATCCATGATGACTACGCGGAG

A\_16\_P00287782

AATTTCCCTCAATTTAAAACCCAAATGATTTCAAACACCCCATATAGGATCAGCAAGAG

A\_14\_P102112 CTGTTTCTGATATTTTCTCTACAAGATTCTGTAGCCTTTGTTGCGTGGCATGTGATACAT

A\_14\_P139945 ATCATGGAACCTCTTCTAAAAGGTATATGAGAGAATTCCATGGCGTAATAACGTTTTTCAG

A\_14\_P119397 CTTATTCTCTGGCACATCCTCAAAGGTCAGGCACTCCTGTATCAAGAG

A\_18\_P17318473

CTAGGTCTGAATGTCTACACTCTTCGACTGCTAATACAGATAAGAACCGACCATTTGTAG

A\_16\_P00974051

AACAATCTCCTTAAGTTCCTAATTGACCACATTATCAGTGAACAGACCTGTCTTTTTGTTG

CUST\_4607\_PI426210822 AGCAGGGATCTGGGGAGGCTTTTCACGTGGGGGTTGTTGAGATAG

A\_18\_P12278457

AAAAGACAGTTGACTTGAAATGTAGGAAGCCCAAATGAATTCTGAAATAGAGTAGAACCG

A\_14\_P125243 GTGCAGATTTTGTGTTTGTGTTGTA AAACTTGTGTCGTGTGGCAAACAACCGAGAAATATAC

A\_14\_P122838 GACGAGTTCTTTATGCTTATGGCTATTACACGGGAGGTTAGTATATATTGACATTTGCCA

A\_14\_P133344 AGATCACATGAAGAGAAAGAGCGAAGCCAGCAGTGAATTTGCAAAGAAGAAGT

A\_14\_P113253 GAAACAAGAGGACCTTGGTAAAATAGTGATAGTGGCAGACTTTTCTCATAAGTGGATAAA

A\_14\_P109964 TAAAAATTTCCAATGGGCGGAAATGAGGGATGTATAGGAACTCTCCATACTATGTTTTAC

A\_14\_P124730 AATGAAGAGTGCAATTTACTAAACACATTGCTATAAAACTGGTGTAGTAACTCTGGGCCA

A\_14\_P109886 CTGCAATCTACAGGAGGAAATATATTTTATGTGTTAATCAAGGACTGACTGTAGCAGATC

A\_14\_P135144 GCTGATTATGGCCTCTGTGTTTGTTCATACCAGTCTCTCCATATTAGA ACTTTTTCTATC

A\_18\_P14137355 TCATACAGAGGCTGTGCATTGGATTATACTCAACCTTTCCTCTGAAACGTTG

CUST\_4033\_PI426210822 CTTGCAGCTGGGCACACAGGGCTAGGGGAACTGAGAGGAGAAAAG

A\_14\_P117695 AGGTAGGTATCGAGTGGTGTA AAAAAAACGCTTCACAAGAGTTTTTCTTTATAGCCTTAC

A\_14\_P138564 CTAATCTGTGTGGTGATACCAACCGATGCATTCCCTGCAGTAACAGTTC

A\_16\_P39934991

AAAATTTGGGAAATACTAGCACTTCATTCTTTACCAAGTTGTCACCTCTATCACTGCAAGC  
A\_14\_P135424 GCCAAATAAGAGAGAAACTGGGTAAGGGATTTGCTTACTCCTTTTGTATAACATGAGAA  
A\_14\_P118396 CATTATAATCAGCATTCTGCACAGGGAGCAAGTTTTACATGTTAACCCCTGAAGAACTATG  
A\_14\_P107582 CAAAGATCAACCCAAATCATCCAACGGATTCTCTTGGGGCAGAAGAT  
A\_14\_P109611 AATGGCCAACACAGTATGAATTATAGTTAATCCCTGAGAATGGCAGACTTGAGTATTTTG  
A\_14\_P103152 CTGTTGGCTGCAAATTTTTGACAGATAAATCCTCCTGGAATCTGAGTGACAATGTAG  
A\_14\_P119325 ATACCTTACTACCATCTTTACCTCTCCAACATCATCTCCTGCGTTTTGAGTTAATGTTAT  
A\_14\_P106462 TGTTCTATTTGTGGCAGTCGCGACTTGAGAAAATTAAGGTGATTTTGTGCATTTTAAA  
A\_14\_P123806 ACTTCTCTAAAACACACTGACATGTCACCAGACATGCAAATACATACATTGTCACACAAA  
A\_16\_P02447056  
AAAAAATTCAGAAACTTTGCTCTTTTGATCACTGGTCATCAAACAACCCTAAGGATTTCC  
A\_16\_P20779525  
AAATACAGTAAAATCTCCACCAAATTGAGAGAATATGTCGAGACACCATACTGAACTGCA  
A\_16\_P21604219  
TTTACCTCCCTTTATCCAGTAAATAACAATCTGACCTAGAAGAATTTCTAGAGAACCGA  
A\_14\_P133911 TCTCTATTCTCACGCAGACGTCTTCAGTGGGTTTCTCTCAGTCAAATACAAATCATA  
A\_14\_P137057 CTCCAGGAATAATGATGATGATTAATAACTGTCTGAGATAATGCTGCAGTTGCTTGTGC  
A\_16\_P36315100  
TTAGAAGTATCGCTTGTAATAGAGTTTTCTCTAGTTCAACGTTAAGTATGTGGCATGGC  
A\_14\_P125467 CTATTGTGAAGTAAAATGTAAACTGCTTTTAAGTCATCCAAAGACAGCATGCGGAAGGTA  
A\_14\_P111681 CCCAATGACATCTTTGCTGACTTGGAATCCTACCCTGACTTCTCAGAAAT  
A\_14\_P115081 TTGCAGACTTACTTTCCCAAGCAGATGACTTAACATACTCTTGAACAATGCTCTTTACAT  
A\_16\_P03377904  
AAATTGGCCCAGCATCTTAAGATCTGTATTGACTTTAGCCTCATGTGGTAGTTTAATGAT  
A\_16\_P01909119  
GAGTCTACTCATCCATTGTAGCATAATGAAAGCATTCCCTTATCTATTATCACCTAGGCAC  
A\_16\_P19434670  
CTGACCGTGAAGATTCTTACCTACGATTGCAAATTTACATGTCCACGTTATTGAACAAAT  
A\_16\_P01720696  
GTCTGTGCTATAGACATATCTACGTGTTTTACCTATGTAAATACTGCCCTACTTTG  
A\_16\_P35940693  
ATCGTTGTCATGTCTTCGATAATCAAACCTGCATGAGTAATTTACAGTTTCGCTGGATAT  
A\_14\_P113712 TGATTCTTAATTGGCATACAAAGAATGCTTTGTGTCTTGTAGCCTGTAATTTGGTCAACT  
A\_14\_P111053 GAGCCCCATGTGGGACTAACCTTGGCTTTACGACGTCAAAGTTTA  
A\_14\_P132111 GGGTTTAACTTAGAAGAGATATCCTCCCTGATGAAAAACCTCTAATGCTTAGAATCCAAT  
CUST\_1763\_PI426210822 GGAGTTAGTTGGCTTTGACGCCTGTTGTTCTAATGACTTACATCTTTAGCCA  
A\_14\_P119555 TGTGGCCTGGTTTAGAAGAGTGGTCTTTTAAAGTGTGGGGACAGAAAGAAAATATTATAAC  
A\_14\_P110618 GCGTCAATAGCCAAGAAGGCATCTTCTAAAGCCTGAATATAAGCAAATAGTCTAAGAC

A\_14\_P124453 TCTTATGATATAGTTTTGGGCAACTTGCTTTTCCAGCACACACAGAGTTAGATAGCATT  
A\_14\_P128761 CAAATTTCTAGGAAATTTTGATATTTGTTACCAGAGAATTCATGGAATCGTGAAGGGCCT  
A\_14\_P118438 CCACCTTTTTTCTGCATTTACCTTCCTGACATCAATTTTCATATCCTACTTATGTAGCAA  
A\_14\_P121592 CAGTAACACATACTTATACATGGGGTTTGCCTGGCATATAGTAATCACCAAACAAGTAAC  
A\_14\_P105619 CATCAACGAGAATTTAATGACTACTTACCTTTGTCAGGATGATTTAAAAGCATAATTCGT  
A\_16\_P00685574

ACTGGGTGTTTTAAAAACAAGTTGTTTGAATGACTTAAAGAGATTACATCCAAATTGCCA  
CUST\_1138\_P1426210822 AGTCTCTGGGGTGGGTGCTGGGGCCAGTGTGGAGCACACATCTAG  
A\_16\_P19837426

GGATCAACTGTAAACTTGTTCAAAATATGGTTCTGATTATACTTACCCCAACAACCACC  
A\_14\_P119774 GCACGGAGTAGAGGTAGGATTAATCCATTGGAGAGAATAGTGTAAGCATTTCAGA  
CUST\_5498\_P1426210822 CAGAGATGGAGGGACAGATTAGTATTGAAATGATGTTCTTGGTCACTTCTGGT  
CUST\_2611\_P1426210822 CATGACAGCTGTAGAGTAGCATGCAAGGATGTTGTGGTCACAATAATCCATTA  
A\_14\_P128994 CATAGTCAAAGACGAGAAGGATGCTAAAGATGAGGAGCCAGGAGATGACAT  
A\_16\_P58424316 GCATTTCTCTGGGAAGCCTGCCAGCCCTCAGTCTGAACCTTTGG  
A\_14\_P135158 ACAAGGAGATTCAGATGTGAGCAGGATATTTATAAGTGTCACAGGAAAATTATTGGATCC  
A\_18\_P14134688

AAATACACTGTTTTCAAATGCAGTTTTCTTTGTGGTGTCTCAGCAGATACTGAGTTTTGCT  
A\_14\_P137009 CTGTCAGATTTAAAGATCTTCCAAACTTTTTTTCTGCCTTCTTGTATTCTGGGATCCT  
A\_14\_P114739 TAAATGCGTTTCTTTTTCTTTACCTCCAACAAAAGATCAATTAGTGGAGTTTGCTTGCTG  
CUST\_4685\_P1426210822 CAATCAGTATTGCATTTACAGCAGATCAGCCAAGCTGCAGGATAGGTGA  
A\_16\_P02256829

CCCGTTGTTGGATATTTAAAGGACTTGTCATTTATCGCTTCTGTAACATTTACACGCTT  
CUST\_341\_P1426210822 TCTAGTGCCTGAAAGAGTATAGAACCTACATGGGGGTGACTTAAAGGATCA  
A\_18\_P22840900 GAGTCAACAGACAACCTTTAGAAAGTGCCTGACTGAGCCTACAACATGGAAAT  
A\_14\_P122432 ATAGAGAAGACTGACTTCCGGTATCTTCAGGATGTAAGTGAATAAAGGATGTTTTCTGTT  
A\_14\_P130958 CTCTAGAAGAAAAGTTTTGAACCTTGCTGGGTCCCTTTTCATTTATATAGTGCTTTACAC  
A\_14\_P103659

AGAGAGGAAGTCTCAGAAAAGTGTCCCAATGGAGAAAAATAACTTATAAAAAGCAGTGT  
A\_14\_P100137 CTATATTTAGACTGATCTAAATACCTAAATGCCTCCAGGAGCATTTAATAATAGGCACGC  
A\_16\_P19595463

AATGGAAGTCATACACTAAGTTCATCCTGTTCTTTTCATAAACTCAAACGCTCTCAAAG  
A\_14\_P117644 TTAAACCCATCTTCTAGGTGACTTCTTACATTTCTATTCTGTTCTTTTCAGAAGGAAGCC  
A\_14\_P136819 GAAATTCCGACTCTTTTCATTAGATATATGCTATTTCTTTTCATTCTTGCTGGTTTATACC  
A\_18\_P15959445

AACTCTCTCCTTCCAAAAGATGTTTTAAACACACCTTAAATTTCTGTGGTATCTGAGTGAG  
A\_18\_P15526995

ACAACTGGTCAATTCAGGTAAAAAGAATCCCACATTTTATTTACACGTGCTCTAAAGGA

CUST\_6291\_PI426210822

TAACAGTTGTGTTTTTTCCAAGAAAAAAGAAATACAAATGTTAAAACCTTTTTTTTTTTT

A\_14\_P110996 GCCACATAGAAATCAATGCAATACTTTCTTAAGGGGATATTCCATCAAACCTGTGAAACTG

A\_14\_P117919 CTCAGAGATTTCTGGAGGTCTCTTCACGCTGTCTTAGATCCTATAAATTATATCAGCAAT

A\_14\_P136443 GGATGTGTTTAGTGGTTTTTCATCTTCTGGTCACTATTTTCATTCTAGGTTTATCCCCTTTA

CUST\_6913\_PI426210822 CATTCTCAGAGACCCTTCAGTGTCTTCAGTTGCTTCTGCAGGC

A\_16\_P18183856

GCAAATGGAACCACCTCATAAATGTATCTTTAAATTGTCGTATTCATCTTTGCTTCGCCT

A\_14\_P100187 CTATATTTTAGTTTTCTATATGAGATGTCCTTCCTTTTATCTGGGAGACCGGGGATACAC

A\_14\_P120849 ATAAACCACAAGGCAAAAGGTTAAAGAAACCTGTTTTCTGACTTTTCCCCTCCAATT

A\_14\_P202227 TTTTATTCCAGGTCCTAGAAAGTGCTCACAGACATTGATGGGTTTTAAAACAAAAACAGA

A\_14\_P111343 GTGTTTGTGGTGTATTAATAAAGTTTTTGGACTCTTCAGGAAGGGGCTCCCTT

A\_14\_P100618 CTCAACATAGTCATACTGGCACATGTAGTCAAACCTCCAGGCTCAACATGACAAAT

A\_14\_P115839 GTTGAATATTAACAGTATAGCAGTGGCACTGGAAAGGCACACTGATTATCATCATT

A\_16\_P03042334

CTAAACAAGGGCTAGGTTATTACCAACAAATGATTACACTCCAGGTTGTATTGAACAGAG

A\_16\_P19614871

AAAAAGTTTCAGAGTCCTTTGAACACATATTGGTCCCAATGCAGTTATTTTACAAGCATT

A\_14\_P124148 CTGGAGTAACTCCAGCAGATTCACCAGAAATATGTAAATGTTATAATGGCAGTCCATTT

A\_14\_P123326 GGGCATGAGTTTTAGCACAAGGAAAGACATTCATCATAGGTTTGTAAGAGATGAAATTCA

A\_14\_P129445 ATACTCTTAATGCTGACCTGTTCTAATGGAGAACTTCCAAGCAGAATTATAGTTTTCTGA

A\_16\_P40416652

CCACCACAACCTTCTAATCTACACAAATTTCTCCTTTCTCTCATATGCTAAAACAAATACA

A\_18\_P11241583

AAAAACCTTATCAGTGGCAGAAAAAGATTACTTTACTGGCTCATGTAAATTGTGCTTCT

A\_14\_P139281 ACCTTTCTAAACCTCTCTCCCTCTGTGATGGTTTTGTGTTTAAACAGTCATCTTCTTTT

A\_14\_P132669 TCCAATTTGTAATCTAGATATGTTTTATGGAGATGTAACCTGGTGAAGCATCGTTGCGTGT

A\_14\_P121328 TTCTAGGAATCCATCTGTGGACAATCACCTAATGTTTCAGATTAACCCATAAGAGAAAGA

A\_18\_P14139043 TAGGAGTGTTCTCTTCCTAGAGCATGCTTTCTGAGTTGTTACGTGAACATCTA

A\_14\_P121791 AGTTTTCTTCTTTGAGAACTATCCCAGATATCATCATAGAGTCTTCTGCTCTTCCTCAA

CUST\_4688\_PI426210822 CAGATATGAAACGATAAATGTGGAGGCAGGGAGACCAGGTAAGAAGTCT

A\_14\_P119920 CTATTTGAACTTTCCCTATCACAGCCTAAAAAGCACTCAGACATTTTTATCAGCATTCCA

A\_14\_P102098 ACCATCATTATTTCACTCTTCTGGGCTTGAAAACCTTAATCATCCTTGCTTTTTTTTCATCC

A\_14\_P138264 CACAGTGAACACTCGTATACCCGCTCCCTAAATTTTACCGAAACATTTTACTATATTTCC

CUST\_2463\_PI426210822 AATAATAAAGGAGTGTGTGGCCTTCAACTGCCTGCTAAAGACTTGCTGATC

A\_14\_P132177 TACTGAGTTTGTACCTCAACAGCATCGCTGATTAAGGCACAGAATCTTCTTGATTTAT

A\_14\_P114378 ACTTGTGCTCTTCATGGATTTCCAGTGTTCAGGTATTTGAATGCAGTAACGTATACTTA

A\_16\_P37557329

ACACAAGATCATGTTTCTTATCTTTAGCACACTTCATTAACCTCTGTTTCTGCATCTACCA  
A\_14\_P115182 AATAGTTACTTCTAAGAGGGCCACAGAATAACTATACTCATCTGTCAATAACCTTCTGCCC  
CUST\_8150\_PI426210822 CAGGATGGTGTAAACCCATCCACAGGGGAGTCGCCTTTGGCCTGC  
A\_14\_P107208 TTAAAGTGCAGATTGTAAAGCATATTAGGAAGGTGCCCAGAATACCAATGTCTCCTG  
A\_14\_P103361 GAGACTTACTTGGGTAGCGATAGTAGAATTCGTTCTCCATGTCGCTCAAGTTC  
A\_14\_P100316  
CACTGGAGAAGGGAAAATATTGGCTGACAAGACAAAAAGAGGAAAAAATAAAGCAAGACT  
A\_14\_P126032 AATCATCAGTTGTGAGATACTGCAAGATTCTTGTAAAGGAGGATGTATGTATGGATTGA  
A\_14\_P125146 CTGGCGAAATGTGATAGTTGTTATTCCGAGCCCATGAACCTGAAAAGATAGTTTATTTTA  
A\_14\_P116376 AATTATCTGGTATCTTCGACCATAACCATTATTTGTGGGTGGATCTGGAAGACTGATATAT  
A\_14\_P201642 GTTGATTGCATGCTCTTTGTCCTGTAATGTGTGTGCAATGACAACCTGTTTCTGTTTAA  
A\_16\_P18194984  
ATTTTCTCAGATTCTGCAAATTGCTCGAAAATGATTTAAGCCCTAGAAAGAACTCCTACC  
A\_14\_P121104 CTCCGAATTATAGTTTTAGTCTTACTTGCAAGATGGTAAATGGAATGAGGAAGGATGGAT  
A\_14\_P103363 TTTGCGGATACCTCCCTGGGCCAAAATAATTAGTTAAGATTATGTTATCTGCTTCTTTTG  
A\_14\_P128549 AAACCTATCTTCTCCCCAGAATTTGAGTTTGAGGAAGAATTTAGTAGAGACAGGAGAG  
CUST\_9704\_PI426210822  
AAGTCCTGGTCAGTTTACTCTAAATCAAAGTTTCCAGTCGTCATGATGAGTATGATCAT  
A\_14\_P128767 ATTTTGAATAAAAATAAGGGCAACATGGCACAGACCAGTGAGATCATAGCATAGTAGTGA  
A\_14\_P113142 GTTGTAATGGTCTGCAAGACCTTTCAGGTCTGAGACTTACCATTGAATTTTATATAACCT  
A\_16\_P01829688  
AAGCAAACCAGTATCAAATCGACACAGAATGATTATCAACGTATATATCCCTTGTGTAGA  
A\_14\_P134868 CTTGATTCTTATGGAGTGACCTACAAATAGCACATGTATTGAAAACACATCAACCAGTCT  
A\_14\_P123871 CTGAGAGGTGCAAACAGAAGAGAAAAAAGAGCAACATCCCTTAGGAGAG  
CUST\_1928\_PI426210822  
TTCTGTTGTAATGCCTGGTAAAGTCTTACTGGGAATAAAGTCCAATCCATAACCAC  
CUST\_925\_PI426210822 AAGCAGTATTCTCTGGTTCTCTTTGTCATTTCTTTCTAATTATCAGGGCTGTCC  
CUST\_9230\_PI426210822  
ATGACAATGCTTTCCAAAGCCTCCTTTTTTTTTATCTTTGGTTACATTTCTCTAAGCTCCT  
A\_16\_P17406208  
AGGAAACCTAATACCTCTTGATTGGAATTAGAAGAACTTGCTACTTAATGATGCCCAGA  
CUST\_9711\_PI426210822 CTTCCATACCCCCTCACTGGACCCGTGGGCTCTAAAGAAGCCACT  
A\_14\_P104625 ATGGTCCAAGGAGAATTACTGGGACAAAACATAAAATGACTGATCATTTAAAGTGGGTAA  
A\_14\_P108760 GTTGAACACTTATCCCTGTGTGAACATTGAATTACTTTCTGTCACTGAAACTGAGGTAT  
A\_16\_P37852851  
AGTCACACAAAGGTAAACTGTTTCTCAAATGATCATTTACCACAATAATTGTGTCTCTCC  
A\_14\_P134421 GGTGTCATATTTTTACCTCTGAAATCGGTTTCTCATAGACATCTTCTCCTATGGATTCT  
A\_14\_P125441 TCTCACATGTGTATAGAGAGTGGTGATATTTTCTAGCCAGGCAGAAATTAGCGGAAT

A\_16\_P00007758

GCCCCACATGTCATAAAAAGTTCCTCAGCAAATATTATCTAAAAGTCCACAACAGGTAAA

A\_14\_P123083 ACTCTCATTTTAAGCACCTTCTTTCCTGTCTCTTGATTGTTTTTCTGAAGGAAGTGTA

A\_14\_P124814 TATTTTTCTTTTCATCTTCCTAGATGCCTTGTAAGAAGGTCAGGAATAGTAAATGGGAGG

CUST\_8603\_PI426210822 CTAGCTTTCACCAAAGAGTCTTTTGTGTTTGCCCAAAGCATTCTTGAGGT

A\_18\_P17093684

TCACTAAAGTCACCTTGTAACAGAGTTTACTGATCACTTATACCTCGTCTCACAGTGTTA

A\_16\_P17393741

AAATCCTCAAGTTCCCAATGAATAAAACCTGAATTCATTATGCTTACTAGGTGCCATCG

A\_14\_P131617 TAACACTTTGTTTTGTCTTTGTGAATAGGTTTCATCCTAAGTTCCACTATAAACAGGCTCAT

A\_16\_P17305677

AAAAACTCGTGCAAAATTAGAATGTGTGAATACTGATAGAACCATCGTAGTTCTGCTCCT

A\_16\_P01766920

TGGTTTTGTAATTTGAAGTCCAAGGCCGTGAATCAACATAATCTACTTATCAAGACCAAA

A\_14\_P102589 CTAGGGAATCAAGAGAAAACCAGGCCAATACTTTATTTTGAATGGATTCTAATGTAGCCT

A\_14\_P201209 AGAAAAGCATGACGTATTGTTTACTTGAGCATGAATTGATTGTTGAATCCAAACCAAACG

A\_14\_P123416 GTCTAATTTACCTACAAAACCTGGTCACACTAGGAAAACGATAAACCATGAACACATAGT

CUST\_8022\_PI426210822

CCCACAGCAACAGAAATTTCTGTCTAGAAAGAGATGTCCATGTTCACTGTAGAT

A\_16\_P58424149 AGGTAAGTAGGATAGGGTGTTCCTCCCACTTTATAACAAGGATGCTGAGACTC

A\_14\_P100176 ATGAATTATGCCCTGCTTCCTGGTTTAATTGCTTTTTGCTGAAGTTGATACAAAGATGAA

A\_16\_P37042281

GTGTCCTCAAATGATAAAAAGATAAGTGGCTGTGATAGAACTATTTACCTACCATCCTGT

A\_14\_P114285 CTCCTGAGTGCTTTTCAGTTCCGCATTTGTTTGTATATCTGAAAAGAAAGAGGTTATAAA

A\_14\_P137359 TAATCAGGCCAAATATGTTACATCCAAAAGTTGGAATGTTGGACAGCCTTTGAATTATGT

A\_16\_P20259624

ACCCACTCAGTTTGATATTACTCAACTTTAACACGCTTACCTTCTTAACCTATTATGAAC

A\_14\_P201744 CTGGATTGAGGATTTAATTTTTGTTTAAAGGGACAATTTTTGTTGATGGGTTTGCCTTCT

A\_14\_P201780 CCACTAATGATGTCTGAAGAAGGCTTTGAGAATGAGGAAAGTGATTACCACACCTTA

A\_16\_P18078851

CAGCCTTATAACAAATTGCCTCATAAAAATGTTCCATCCAAATACCTCTATTGCCAGCAAT

A\_14\_P116023 TTAGCATAGCAGGACAATTTCCATAGAAGCCACTTATGATGCCAAAAACCAAATTCAAA

A\_14\_P128542 TACAATTAGTCTGAATGCTACATCTGGCATGGTTACATCATTGAACTCTCTGACAACAC

A\_16\_P20177104

TAAATCAATGTTGGCTTCTCTACATGCGTAATTATCATTCCTCAACTATTGTTGAATGGGCC

A\_14\_P137136 AATCACAGTCAAGAACTACTGATGTAATAATAATCGGCTTCCTTAGAAACGTTGAGAAAG

A\_14\_P113861 AAAACCATTTCTACTATTTCTGTGTCTCCATCCACTTCCCCTTAATTATCCTTTATCTT

A\_14\_P114101 CCATCTCATCCCCTTTTGCAGATTTAAGGCAGAGTTCAAGGCCTTTAAAAAGTATT

A\_14\_P117457 TGTCTCCTTTCTTAAGGGTGGATCAAATTTCACTTGGCCAACTAAAAAGAAAAAAAGT  
A\_18\_P14135618 AAGATTTTCATTCACCGCAGACTCAGTCCTCATTTCCTTTCCAGAT  
A\_14\_P135171 CTGAGAATAAGGAGAACCTAGATCCTTCAAATCTGGTAATCCACACTCATCTTTTCTTTC  
A\_18\_P22840871 CATTCTCTTGTGGTTTTCCCTGAGTGCAAAGAGGTGGTGAGTCTTTCTAAAT  
A\_16\_P31210751  
ACAGTTGATCCCTAAGTAGAAACCATAACAAGTCCTCTCTTATTTCTAAAGGTAECTCA  
A\_14\_P124263 CTCTAGAAACGTTTGCTGGCATACTCTAACAGCATAATGATTCTAAAGAAATTAATC  
A\_14\_P113167 ACTGGTTTGTATCTGTCTTTTAACATTACACATCGTCTAACTGGTGCTGTTGTTAATCTG  
A\_16\_P36361341  
AAGTTACCCCAATAAGTCATATTGCTCATCTACTACAATTTTCATTTGCCATGGAAAAGA  
A\_14\_P134444 CTTCAATTCCTTACCTTTAATTCCAAATCATTTTAATTTCTGCAGCCAAAACGAGTCTT  
A\_14\_P113685 TCTTCTGACACCCCTAAATCTTTATCCTTCTAGGACAAGCGAGAATCCC  
CUST\_9488\_PI426210822  
GTGGAAGCTAATGGAAATAGCTAACAGGTTTTCTACACGTAGAATCCCTTGTGTAGAT  
A\_14\_P112509  
GCACAAAATAACAGAAAGTTACCAAAGAATAACCTGGAGAGATGAAAAGATGAGATGAC  
A\_14\_P132991 ATCAAAATATTCTAAGATGGAGATCAAGACCCTGCTTTTTATCTAACTGCCATCCTTCTG  
A\_14\_P132173 TAGCATCCAATCATATAATCATTGTCTCTTTTTATGAGGGTGGAAATTGGCTTGAGAGG  
CUST\_5227\_PI426210822  
ATTCACCTGGTTTTTGGAGCTCTGTCAAGTCAATATTTATAACTGAACTAGTTCAAACAG  
CUST\_4671\_PI426210822 TACAGCTTAAAGGGGAGTTAATGGAGCCCTGAGAATGTCCTGCTC  
A\_16\_P03808597 CAGAATCACAGGATGATGAAGATGGAAGGATGTTAGCAATTAGAGTTGTCCCATACT  
A\_14\_P122356 ACAGTGCATCTATCTGGTGGACATGAGTCAAACACTACTGCAGGTAATATGTCAGAAATAA  
A\_14\_P101570 ACATCCTTGCTGACTTTGGGTGGCTTTTTTATTCTGTTTCCATTTTTATAAGCAAAAAT  
A\_14\_P107955 ATTTTGGGGGCATTAACAACAGGGAATAAAATTTAACACAAAATCAGGTGCCATTTAA  
A\_18\_P14134165 GCAGAGCCTGTAGTGACGGAGGGGAGCAGCCTTATCTCCGGGAAC  
A\_16\_P18283768  
AACAACGGTTTCAACTCATTTTCTACATTTCTCTACCTGTGCTTCTTATTACTACTGCCA  
A\_14\_P108156 ACACACTCTTCATCCTTTTAAACCATCTTCTCAGTCAAATCTCCTGCAAACCTTAGTTTTAG  
A\_14\_P101455 CTTTTCTACATATACTTAAACTCTGGTAAATCAGAGAAGATAACCATCCTCTCTCACCCA  
A\_14\_P111898 ATCGATGATAGGATCTTTGTCTGCAACAGAAATGGGGACACATGTGTCACATT  
A\_14\_P201305 CTCTGCCAATAAGAAATCAGTATCTTTTGTCTATCTCCCATGATATCCATTGGTCTCTCTA  
A\_14\_P100658 ACCTACATGTGGTTTTCGTAATAAAACATTTGTATTTAATGAGTTGGCATTAAATCTTTG  
A\_14\_P130624 TTGGTATTATAAATGCCAATTAACCTATGGTGATGGTTGCAGAACCCATTATAAACCTCC  
A\_14\_P111646 TAGAGCACATGGTTTAACTAAGGGACTGACCAACTTCCCAAATATAATCTTTCTCAAGAA  
A\_14\_P123369 ACCTGAATCCCAATGGAGAAAAATTTTCTAGAAATAAAGTGTTACCTGCCTGTCTCTTT  
A\_16\_P17397506  
CTACGGTGGTATATCTTATCCCTTGCATCACTTTTCTAAGTATTTTGGAGCGTAGCAAAT

A\_14\_P126592 AGAACTAACCTTGAGCCGCCCAATATCTCTGAAACGCTATTCGCTTCAA  
CUST\_2758\_PI426210822

TGCTTTTATTATTGGGACGCTAACTATTAATTTACTAGGCAATATGCCCTTCTAAAACC

A\_16\_P18953330

TGCGAAGGTGACCTAGTATTTCAGTCTCATTAGCATTCTCATTATAATTACAGCGATCAG

A\_14\_P120699 CTATACATAAAGACATCAGAAGGGCAGCAATTAGTAAACAGGCCATTCTCTTTAAAGTCT

A\_14\_P128892 CTGCAGTTTCCAAACTTTTGATTAGCAGTATTCTTTTTTTTCTAAATGTGGAACCCAGGA

CUST\_3796\_PI426210822

TACTTCTGCAGCTGCCTTGAGAATGCATATCATTGAATAATGTTAGTGGGAGGTTTTA

A\_14\_P128055 TGTAGAAACCCAGTGACAAATATTGTTACCTTTGGACACTTGTTTGTCAATTTATACCGG

A\_16\_P03801637

AACTCTCAGAGATCTGTTACATTTTCCCTCATCTTATTAGGCAAGTTCCACTAGTGAAGT

A\_16\_P17864814

GGCTTAGGCTTATAACGATATTTGCTCAAAATCTTATTCAAGATTGACGAACACTGGAGC

A\_14\_P110488 ACAAACCTTTATTATGTTATTATTCTGTGCCATCATCCTAACCTCAATGGCACTCCTCTG

A\_16\_P00685573

TCTTGTGATAGCATTGTCCCTTAGGATGCCATCATTATGTGAATGTTTCCTGCTATGATT

A\_14\_P134438 GTTTACTTTACAGACATCAGATTCTGATTTCTTCATACCATGTTATGTGAGTCTTGCCT

CUST\_8408\_PI426210822

TGATGAGTGAAATAGTGCAAATCAGCATCCTTTTCTTCATTGCTTACCCCATTC

A\_14\_P126390 TTGTTTCTGCCTCAATTA AAAACATCTGCCACATAAATGAATACCAATTA ACTCATCCT

A\_18\_P15247756

AGTCTCTTTTTCTCCAATTCCATTCCAATTCAACTCAAAAAACATTGTAACACCTACTCT

A\_14\_P135189 CTATACCTCTCAAACAGTAAACCTGATCAGTAAATGTGATCTTCTAAACAGCCCTCATTC

A\_14\_P124692 TTTTCTTCCCCCTAAATTGGCACTCAGAGCAGTAAAGTTAACATATATATCAGTTGGTCTT

A\_14\_P200536 CAGGACAGACAAAGGCAGAGCCAAAGAAACCAAGAGAGGAGAGAATTATTT

A\_14\_P131358 TTTCTATCAAGAGCAAGTCTGCATTTCTTATCGTTTGCAAACCTGATGAAATTTCCACCTT

A\_14\_P139734 CTTGACCCAGTTTGCTTTCCAATCAAAGGGCATTATTTTTGAATGTCTCTTTGTGG

CUST\_4707\_PI426210822 AGAGAGGTCAAGATTGGCTGGCCAGGGGTATTAGCCCTGAGATAC

A\_16\_P15788241

AAAAACTTTACTTTGAGTTTCTACAGAGAACAATTTCTCCCAAATAATCCCCATACGCC

A\_16\_P38043038

TGGCATTGCAATTCTCTAGTATTGTAACAAGCATTACCTTTCTTCTAGCACATACAAA

A\_16\_P18564294

AGAGAACAGGATGACTAACTCAAATGAGAAGCATAGTTCATAGAGACTCATAACTCCCTA

A\_18\_P11568525

ATTATGGAAGGAATAGTTTTGCTCAAGAACCTAATGCTTGCTCATATTGTAAACCATGGC

CUST\_8234\_PI426210822 AAACAACCTGTGTGTCAGTTTTCAACCAAAGCCCCAGCTTGGAAAAATG



A\_16\_P00005050

AGCATGTTTATTTTTATGACACTGCATTTCAAATCCCAGAAAATGTTGATGGAATGGCC

A\_14\_P134952 CTTAAGATATTTATTCAATGCTCTCACATTTGGCCTCTGTGACCCAGAAAAGCGGTA

A\_14\_P110843 CCATGACAGCACAAATGTTAATAAATCTATCTTACTTTTGCAACTACTTCCTAGAATTCC

A\_16\_P15609657

AAGTTCACTTCGAAGGCTATTTGCTACAAATCCCTTTCAACAATTTTATCTTATTCCCA

A\_14\_P113282 GTATCTTTCCACTTGGTGGTGTAAACTCTTCAGATAATTAGAAGTTTTCTGTGTCACTCA

A\_14\_P135815 ACTATGCATTTCTGTGGTATAGATGTTGTGGATATATTTAAGTATTTGGTTACATGGTTT

A\_14\_P126292 TTTGGCCCTAATTGCCTTACCCTTAATAAACTACTTGGAAATATGTTTGCCTGTCCATA

CUST\_7819\_P1426210822 GTAATCCATGACATCCCTTCCTGTAACACCATCCCGGAGCACATG

CUST\_7321\_P1426210822 TTTGATGTCCAGTAAGCCTGAGCAGCCCTGCAAATACAGATGAGC

A\_18\_P11857882

AAAACCTGTTTCAGAAAGACAACCTTGTATATTCTCCCTACTAGCATGAAATCATCCCCTAT

CUST\_7198\_P1426210822 CCTGGCCAGGGGTGTCATTGAGTTTGGGTGCCCTCAGAATGCTAC

A\_16\_P19491256

TGCCTAAAATGATTATGCTATTCTACCCACTTTTCTTTGACTAAAATGACACAAAAGCCA

CUST\_9736\_P1426210822 CTCAGACTTATTTGGTGGTCAGTTGGCTTTGGAACCTTTCCCATTTG

A\_14\_P135060 ACTAAGATTGTGCTCAATACACAGAAAAGTTTCAAACCTACTAATCCAGCGACAATTTGA

A\_14\_P115595 TCAGAATCAAGTATATGGAGATCAATGGGATAGAACTAGAATAGGTGGACACTGTCATTC

A\_14\_P102764 AGCGAAGCCATATGACATGTATATTCATTTTTGCCAGTCTTTTGCTATAGGACTGTTTGT

A\_16\_P01260795

AAAACAAAATCACCTTAGTTGTACGTTTCTAGTGAGAAGATTCCAACCTGAAGGAAAAT

A\_16\_P01239105

ACACACACAGTTCTTAACGTCATAGTCCTTATAATCTAGATAAACTTTCCACAAAAGAACC

A\_14\_P100001 GTAAGGTCAGATATGCCCCACAAAGACATGATCTGGAAACACACACA

A\_14\_P113250 GCCTAATATTTATGCATCCTAGTATGTGTGAGGTTTTGTGAGGAATGATAATAGAGGCCA

A\_14\_P127451 ACATAGAGGAGAACAATAACATTTTTTCTATTGAAAATGACACGGGGACCATTTACTCCA

A\_14\_P130532 AAGAATATATAACTTTGTGAAATTCTGCCACAGTGGAACCTACAACAAAGAACCAGTGTT

CUST\_10394\_P1426210822 GCAGGTCACACCTACCCAGGGACAGACTGCCTTGGGGTCACAATG

A\_14\_P117320 AGAAATAACCATAAATCCCATTGCTAATTAGCCTCATCCTCATGACTGATTAGTCAAGA

CUST\_284\_P1426210822 CACATAGCTCTCGCCAGCTCCACATCTCCCTCTCTCACTTACTC

CUST\_9076\_P1426210822 ATGAGAAGCATTTGGACTCCGGTAGCCTGGGAAATAAATGAGGACT

A\_16\_P41717846

CCCTTCTTTATCTAGCATTGAAAAGCGATATATGTATGCACTAAACACGGGGTTATCTCA

A\_16\_P15386435

AATGCCTCTGTGTATGAGTAAATGCTTTCTCAGTCAAATAGAATACCGAACAACTCACAT

A\_16\_P18587965

AAAACCTGGATTCCCATCATACTGTTTTAAACCAGCCAATTTATATCAGAGTCCTCTAGGTA

A\_14\_P127503 ATGCACTGTCTTATTTTCATAATGTTTGTGGACCAAAGTTAGCCTACTGAGTCCTAGAAAA  
A\_16\_P16883142

GCTAGTTGTATTTCATGCTCCCTAATTTTCATCAGTCCTAGAAAACCAAATGCAACCATTG

A\_14\_P122147 CTTCAAGAAAAACAGTGGGCATGAAATTATCCAGCCCTCATAATACTGGGAAACTATTTT

A\_14\_P201884 TAATACTCAGGGCAATAAAGACTTCTTACTGATTAAGTTAGACAGAAATTATCTTTTTCT

A\_14\_P101758 CTTGATTATGGCGAATTCAACGTGTCACCTCGGGTTATGCTCTAATCGTCATATCAAA

A\_14\_P128689 CAGGGATTTAGAGATACTGTTGTTACTTCTGCATGTTTCATTGCAAACAGAAGGTTCCCT

A\_14\_P109340 AGTTTAAGAACTTATCCAAATCACATAATTCATTACCCAGGGTTCAAATCCTAGTCTTTT

A\_16\_P20741571

AAAGCATTTTCATGATCAAATTCCATTCCACTTCAATAGAGGCAGTAAGTCATCATCGTC

A\_14\_P119642 TGAGATTCAAGTTTTTCATCCCAACTGGATTAGACTTAGTTTGCAGAAGAGACCGTAG

A\_14\_P127113 GTGACTTCTCATTAECTCTGTAATTGATGAGGCTGTCAGAATGTAAACTGCACGCTAATT

A\_14\_P138926 CATTTAAGTATCTCTGAGTATTGTCAAACCTGCACATTCCTGTGAGTCACATGTAAGAGCA

A\_14\_P115657 TGTCACCTCACAGTATCTCTAATCATTACACAACCTCCATGAAGAGCATTAAATGGCTCA

CUST\_3335\_PI426210822 AGAACAACTGGGGATGAATCAAGAAGGGAAAGGGTGTGGTGAAT

A\_14\_P137266 ATATTTAAATTACCTGAACAAAAAGAACAAAAACAAAATGCATGCACATTTCTATTCTAC

CUST\_4291\_PI426210822

GCCTTCAAACCTCCTGCCCTTTAATATTTATTGAAACCTTGGTGGAAATGAATTCT

A\_14\_P100246 TTCACATAGTATTCACACTCAAGCATGAACTTACATCGACACATATGTCCTCCCTGATAC

A\_16\_P01820453

ACTGAGAAGGCTAGATAAAGTTCTGTATACTCATAACCTACAGATGTGTCATTTCTCCAG

A\_14\_P110583 ATAGACTGGAAGGAAAGAAAAAGGAGATCCTCTCAACATTGCGATTGATAAGATGACTAA

A\_14\_P133316 CAGTTGTATAAATATTAGCCATTGTTATTTTCACAGGTGAGGAAACAAGAGATCCCAACAC

A\_14\_P135619 TCCCCAACTACTAAAGCCTTTTCCATTTTCCATTTTTTTTTCTCCTCACTTAAAATCAA

A\_14\_P127438 CTCTTGCAAGTCTTATGATGCTCGTTCCTGTCTTTACCTCTTATCTTTGGAAAAAACTA

A\_14\_P103625 TGATAACGTTTCTTTGTAAAGAGACGAATATCATCTGGGGTTTCTCTGAAATGTAGATG

A\_14\_P118004 GATTAGACTTTCTCATTTTACATCTTTTATTTTCTTTTTGCATTGTCAAATCCTTCTCA

A\_14\_P108194 CTCCACATAGTCTGATAGGACTCCTAAAAAGCATTTCAGTGCCATCACAAAAC

A\_16\_P03049374

AAAAAAAAAAAAAGTAAGCATCGGTATCAATATCGCATTCTTTTAAAAGGTAATGCATGCA

A\_16\_P18095431

AGTAACCTCCTGTCCTTAAGTCTATTGGACCATATTCACCTGAGTTATACAACTTTATGG

A\_14\_P124359 TTTGGGAAAAACTTCAGTCATTGCTGTAGGCAATGGATTAAAACAAAACATCTAAGTGG

A\_14\_P105121 CTA CTACTGTTTTATGGATGTCTGTGTACATGGTGTGAATGTCTCTTTTATTTCAGGGGAT

CUST\_10346\_PI426210822 AGAAAGATGGTGGCAACAGACAGCTCCTCAGCTCCACCTGCCTTC

CUST\_5874\_PI426210822 GTTTTGATGAACAGTGTGCTGGTATTGGCTCTAAGCTGGGGCATC

A\_14\_P133105 CCAGCATGTAGAAAGTTTAAATAATTCCCCTCTTTACAACAAAACAAAACATACCCCTT

A\_14\_P122655 CTAAGATGGCATGCTTTGACCTTGTAATGTCTGGGCTACTTTTTAACCATCTTTTTAA

A\_18\_P17391670

GGTCTTCCCATTTTTTTTTTAAACACAATTCCCATACTTACTCAACAGAGAACATCACACA

A\_14\_P121817 ACAATTTTCACTGCAGTGTGCCTTTTTTCACTGGATTATATGGCAAAAAAGTGTGTTGAA

A\_16\_P30952570

TCACTCGGAAGACACCAGTTTTCTATTTGATATTTATTATTTTCTAAATCTGGTTTTAAT

A\_14\_P108378 GGATTTACAGCCTTCTTTTCACTTGTATGAATCAGACAAGATCTAGCATCAATTTGGTTGA

A\_14\_P136320 CATCTTACCTAAAAGTTTGTTATTCTAGGCTCATAATTGGTTGTCCCCACAAATAATGC

A\_14\_P136116 AAATTTCTGATGGTTAACACATCACATTACCGACACTTTTGAATAAATGACTCATTCCC

A\_14\_P118453 ATTTACCTGTTTCCCCTAGGGTTTCTAAAGGCAGCAGTCATTTTGTGGTAAC

A\_14\_P127034 TTCTGGAGAACATGACTTTGTATTCAGCAAAGTTTGGGCTAGTCAGTAATTTAAGTGCA

A\_14\_P129472 ACTTTTCCCTGTTTCTACTTTCTATTCTCCGTGTTTTTATCACACCTGCTCCC

A\_14\_P139019 TTCAAAGAGAACACACTCTATTCAACAGGCATTTACAGAAATACTACACGCCTTTACAA

A\_14\_P113334 GATCTTTACCGTCTCCTAAGATTCTGTGAGTCAGAATACTTTTTGTCGTCTTTTAGGTTT

A\_18\_P25858490

GCCTATACCTTTTTTAAAGTATAACCCAACGCTACCTAGTTTAATTTGTCCAAAATGCCA

A\_14\_P132432 GTTGGATTATGGATCACCCAGTGGCTGTTTCTGAGATACAAGTAAATCTAATGTTT

A\_14\_P101734

GTGCAAGAAAACACTGCAAGGAAATAGTAAAATGTGTAAAGTTCAAGTTCCAATGAACGC

A\_18\_P22841622 GTGGAGAAACGCAGATGTCCATTTCAAATCACAAGGCGGCTTCAGTATT

A\_14\_P132058 CTATACCAACAGAAAATCTTTTTACATGCCTATCTGATTTGGCTCAAAATGAAGGAGCAG

CUST\_4426\_PI426210822 GTTAGCATCCAGAGTGGCATGCAGTGGCAGAATTGGAGCTGGAAC

A\_14\_P202064 TAAACAACCAGTGTATATCTGTTCTGCATGTTTCATTTCGAAACGACTCATTGTAAAGCAT

A\_14\_P132556 CTAAATAAAGCACCCATAGCATAGAACTGAGTAGTAGAAATAGCATGTGGACAGGTCTT

A\_14\_P138686 GCTCCCTGCTAACGTAGAAACCCTCACATCTGTGATTCTATAGATGTG

A\_18\_P16797588

ATTTCTCCAAGACCAATTTTCTAAGTTACTGATGGCTATAGTTTGGACACTTCTACATGC

CUST\_6081\_PI426210822 GTCACAGAGAAAGATTTCTCTGATGACTGTGTAGACAGTTGGTCCATGGT

A\_14\_P123348 CTAGGTTTACAGAGATGTTACCTTAAGCCCTGATGAAGTCTTTTCTTAAAAGAGTGAC

A\_14\_P134892 GGGTCTTTTTGTTGTAATGAGGCTTGATTCTAACATTGGGCGAATATTTGTTGATAA

CUST\_2749\_PI426210822

CCCTGAGTATGCATCTATTTCTTGAATCATGGCATCTGCTATAGGAAATCCTCTTAAATG

A\_16\_P30002978

CACAACCTATTTAGTTATTTGTGAACATCATAAGGACATAAAGTTAGAAAAGCCCAAAGG

A\_14\_P118367 ACATCATAATGAAGTCCACGAATTGCAAAATTTGGGTCATACTCATACTTCTGATTTCT

A\_14\_P103223 CTTGTAAAAAGGAAAGCATATTTCTCTGATTGCCCTTATGGAGAAATAAAGATAAAATT

A\_14\_P122394 CACTTCCATTATTTTTGTCATCAGCCTTCATTTGATGCACTTAACTAAGTAGAAAAGCCC

A\_14\_P108768 GCCCTGATGGAATTCAGCCCTAACATAAAGGCATTCTGTTTGATTTTTTCTACTTTGTT

A\_18\_P13299226

GTGCAGGGAAGAGAAAATTGAAGATAAATTGACAATTTAGTGATCGGGTATGTTGAAACC  
A\_14\_P111266  
ATGAAGGCAAAGAATACCTCCAAACCAGAAAATAAACAAACCTCTGAAAATCTCAACTT  
A\_16\_P00685392  
AGAAATAACCTATCCACTGTTTAAGATTAATAATGGCCAACAATAATAATAATTGCCACA  
A\_16\_P30952439 CTACAGCCTCAGTGAGCATGTGACTGGAGAGGAGGAGAGGGA  
A\_14\_P110701 ATACATCTGAAAATTTTACCTCTGGAGAATGAGTTTCCAAAGGAACTAGATGGAACACT  
A\_14\_P134290 CGTTTTGATTTTGTGAGAGCGTAGGTTCATCCTCGTAAACATATCAGTAGACCTG  
A\_14\_P134590 ACTTCTACCAATCCGCTGAGGGCCATTGTTCAAATATTGACTTTTATAACTTCTGTATA  
A\_14\_P113868 AAATATTTTGTCTTTTGTACCTGCAGATTGAGAGGATACAGAATGCATTTCTCTGGCAG  
A\_14\_P135756 CAGCCTTCATGAGATGTTAAACGAAATGTCCGAGTTCAAAGAGTTGAAGAGTAACC  
A\_18\_P16368107  
AGTGAAGGGCTAATACTTCTCAGTTACTCATATCTGAAACAAACTCCTCAATCCTCTCAG  
A\_14\_P138521 GCAAAGCCAAGCAAAACAAAGCCATTTAATTATTTCCATAATAATAAGTCTGGGAGAA  
CUST\_2440\_PI426210822  
CTGAGTGCTTTTGTATTTCTACAGTTTAAGAAGTGTTTCAGGACCATGGAGTTCTA  
A\_16\_P58424080  
TCTATGCAGATCTGATTAAGTCTCAGTCAACTCAACAGAGATCACTGGGCAGAAATA  
A\_16\_P15418304  
AAAAACACTGATTTTCATAAACAGGATCAGAAAGATGGAAAAACCAAAGATTCCCACCT  
A\_16\_P17299478  
AAATGCCTGGCTTAACATTATCAGAAAATGACGTTCTTTTATGAACTTCCAGTCAAAGA  
A\_14\_P109313 AATTTCTTACCTGGAGTCTTTTCTGACTCTTGCTTTCTCAAAGGAAAATTCAGGGG  
A\_14\_P133743 CTTTCAAATGATCAATCAATTAACCACACAACAGCCCAGATAAGGAATGAAAACCAACA  
A\_16\_P15812537  
CAGTTGTCTTCTACCACTCTTATGAGCCAAATTTTGTCCATCAATGACCTTCTGAAAATC  
A\_16\_P02693603  
ATGCTTGCCAAGTTAATCTCACTGATTAGAACCTATGTCTATGAGAGGAGTCTCTAGAAG  
A\_14\_P119022 CACAAATCAATTAAGTCTGCCAATTTTATGTTTAAACAAAGTCAGCCAACACATTCTT  
A\_14\_P125332 AGTTTTTAATGCCATCTATGTCATATCAAGGTTTCCTAAATATGTAGTTCTGTTTTGGGC  
A\_14\_P200419 CAGTTTTTTCATGTTGTAAACTAAAGAATTTTCGCTCTGCAGTTTGAAAACTGTGGCCA  
A\_18\_P11715508  
TTGTTCACTAAAACATACCAAATCAATTTTAAACCACACAATTCATTGAAATAGCCCAA  
A\_14\_P135799 CAAAGTGGGGTTTGTATTTGGGAAGGGTTAAAGAGCAAGAGCAGAGATCAT  
A\_16\_P41619142  
AAACAGTCTTCATGCCAGAATACCCTTTTTTCCACTATTTATTGACTTCAGTGAGTCTTG  
A\_14\_P104940 CTAATAAAAAGCACTGCTTTTACCAGGACAACCTTTGGTTTTTCAAACAGAAAACACTAGTCT  
A\_16\_P17951356

AAAAAAAAAAATTCTGTGGTCACATGACTTTAAAATGCATTGAAGTTGACATCTTTGCAA  
A\_14\_P104757 TTCTCTTACCTCTTCCAGGAAAAACAGAAGCCTATTTGGAAGCCATCAGAAAAAATATTG  
A\_16\_P16715330

AACGAATGGAATCTTCTGACAGTAATACTATCTCCCATTTTTCTTAACTATGGAAACCA  
A\_14\_P128910 TACTTAATAAATCTATTGCTGTCAGATACCCTTGCTTGGTGCCAGAGATGTCCTTTTATT  
A\_14\_P120108 GATTGGCCAACCAATTCATGCCTTTCAGTTGATAACCTTTCAATTTGCCATTAAAAATTG  
A\_14\_P130992 TATTAATCCAGAAGTAATATAAAACCAAGGGAAAAGTGACCTGCATGCTCCATGAAACTG  
A\_18\_P12136458

TGCATCCAATGTTTATCGTAGTTCTGAATATCCATCGTAGATATCTTACCATATGTAAGA  
A\_14\_P103399 GGGTCTCCTCTTGATTTCCCTTTGCTCTTCAAAGATGAAAAACGAAAACAAAACAAA  
CUST\_7032\_PI426210822 CTGATGGGTTCTGCGGATTGGCAAGGTGGTTAGAGCTGTGTATT  
A\_14\_P108824 AGGGGCTTCTAGTTCCAGGCTTATCTATCATGTGCTATGAACTAATTTTCTGGTCTATAT  
CUST\_5673\_PI426210822

TTCAAGTGAAAAGTGAGCTATTTTAGTCTAATGGTAATTTTAACTATGTTGAAGCCATA  
A\_16\_P03646190

CCCACTGAACATTCACATTATGTCACCATTACTTCTCAATGCTTACATTCATTGCTAG  
A\_16\_P17418468

GAGTGTTTTTGGTTTACCTTTATGGCATCTCATATGAATGCTTGTCAATTCAGCAAATTCG  
CUST\_9104\_PI426210822 GAGTTCCTGAGTTTTAGCTGAGGACTGAAGGTGTGACTGCAATAGGATT  
A\_16\_P20671788

TCTTTGTCCTTCACATTTATCCATCCACAGTAACATTAATGACTTCATTTGCTCCAAACC  
CUST\_4455\_PI426210822 TCTCTACCTGCAGCCGCCATCCCCTAACAGGTAGAGGTGTGCCCT  
A\_14\_P103575 CTGATTATTTCTGAGATTTAGATCTAAACAAACTCAGCATGACGAGGAAGCACACTTCA  
A\_14\_P109494 TCTTCTTTTTAAAAGAATGTAAGGGCAATGAGAAGAGCCACTTATTGTGGCATTGTTCTT  
CUST\_271\_PI426210822 GTTGATTTTATTGTGTATTACCAGCCTGAGCGTCCTTAGGGGTGG  
A\_14\_P112649 CTACCACCATAACAAGACCACAAGACCAAAAATGTCAATTGTGTTACCAGCAATAAAC  
A\_14\_P125934 GGAAACTACAAACAGGAGTAGGCTTGTGCAGCATTAGATTAGTTTTTAACTGATCAA  
CUST\_7670\_PI426210822

GTGAATTAATGAATGTACAGATGGATGATGTATAAGTCCTTTCAGAGGGAAACTTTGAGT  
CUST\_353\_PI426210822

TAATTAACCTGTTTTACAGGTGAAAAGATGTGTTGTCTCTAGGGAAAGGGAGG  
A\_16\_P19422801

TCTGCATTCCAGTTCCCTATATTAATTCATAGCCCCAAATTTTAACTTTCAGAGCCTC  
A\_18\_P10733822

ATTTGCTGCCACATTAATTAATCATCTGGACTGAGACTTATTGAATGAATGGAGAGGTG  
A\_16\_P18682966

TACTGATTTACCCACATCAATCTGATTTACACACCAACCTTTATTTTGATGCTTCCTTGG  
A\_16\_P21632578

AGCCATTCTAGTTTATCTTGTTGCTTCGCCATATTAGTAAAGTGCTTTCCTTGTTAGGTT  
A\_14\_P135491 AAACAGAGTTCTCTCAAAAATGTCTAAAGGGATTGTAGGTAGATAACATCCAATCACTGT  
A\_16\_P36288218  
AAAAATTAACCCTATCTTTTTTGAGAGAAGCCAGTTACAATGCTTGATGCTATCCCTGAC  
CUST\_8980\_PI426210822  
ATCTTTATTTCAAACCCTGAAGTCCTAAAATTAATGTCACCACAGCCATTGTAGTATGTG  
CUST\_3660\_PI426210822  
TTTGGAACCTATTCCACTATTGAATTATCCGTATTCTTTGGTTTTATACCTTTATTCCCT  
CUST\_9350\_PI426210822 GATTCTACAACCGTGGGGGCCCATCCTGTGCCAGACTCCTCGTCT  
A\_14\_P111142 GATACAATCTTGATTATCACAACCAACACACAAAAAACCTCTCATTCCACTTTACCCT  
A\_16\_P18816551  
AAAAAATCAACCCTCTAAATACCTCTACTTCTTTGTCTGCCTATTATCAATTGGCCCAA  
A\_14\_P200369 AATTATACCCAGCACTGTAAGCATCAAATACCTTTCTGCATGACTCTTTCCAGAATGTG  
A\_14\_P123187 TCCACATTCTAAGAAGATACAGAAGTGATTGGATTATGCTGCTTGTGTTAACATCAAGGT  
CUST\_5190\_PI426210822 CTTCTACCCACTCTGGGTCAGAAGCTATTCTTCCCTCATTGGATTG  
A\_14\_P104893 AGGAAGCAGGCAGGTTTCAGAAATATGGGAATTTTAAATTATGTGAATCTCTATCATCAGC  
A\_14\_P114656 GGAGGCTACTAGACTGATTATAAAACATACCCGGATTCCAAAAGTATCAGAACATTAGGA  
A\_16\_P00685260  
CTTTCCTTCTGGTAAAGCATAAGGAGAGGACTCAACAGTAAGGACTAATATTTGACAGTG  
A\_14\_P129364 AGGGAACAGCAGAAAGTCCTTCATGAAACCATTAAAGTTTTAGAAAGATCGGTGAGT  
A\_14\_P120576 AAGGTAACAGGGTAATCAGGTAACAGAGTTAAATGACATATAACACAGGTGGCAACTTAT  
CUST\_9779\_PI426210822 ATGACACCAGCTTGGCAACCTCAGGTACGTTAAATTCTACAGAAGCAG  
A\_14\_P106109 GATAAGCAATTAGAAAGCAGTAACTTCATCCTCCTACTTTTCAGTATGCTAAGGCATGCA  
A\_14\_P107519 CCAAAATATAACCTGAGAGTGAAGACGACTTCTCTAGGCATAACATAAACCTTAATAGCC  
A\_14\_P137960 GATCCCAATACATCTGATATGTCACTAGCAGAAATGGATTACAAAAGGAGCCTTTTCAAAA  
A\_16\_P01722803  
TTCACAAGACTCAATTTTAATCTTTCATTAAGTGAAAGGGAATCAAAACTACAATTATAGA  
A\_14\_P111299 AAGCAAGAAAGACCTCTTCTATGACTTTGTAATCTAACAGAACTGAAGAGATGAGTGA  
A\_14\_P111061 TCAATTTCCCCACTTCCAATAACTGAGAACTTAAAACCTTAAAATAACCACAAAACCTGC  
A\_14\_P139808 ACTGAAGTTTATCATAATGGACTATTACATTTATGGGGTCAATATAATGGGTCGTCAGG  
CUST\_7264\_PI426210822  
CCTTTAGTTATTTTTGTCTAATTCTTCTTTCCCTGATACAGTGCCACCATAAATCCC  
CUST\_5767\_PI426210822 ATTCCTGCACTCTTATAACGTGCCACATGAAGGGCAGTTTTGGATTCT  
A\_14\_P110847 GACCTGCCCCCTTCAACAATCTACATGCATATAAAGTAGGAGATGAAAGAATTCT  
A\_14\_P200166 AGAACATCTCCTGCATGTAGACCAATATTAACCTTTCCCTCCGTCCATCTTTAACTGC  
A\_14\_P136093 TTACCTAATTTTATTTTCAGAAGACACTAAGAATGAACTGGTCTTCGAATCCTAAGGAGGT  
A\_14\_P138063 CTCATTACTGTGAGGTAAGTTTLAGGGAATTAGAAGGTTCTTTAGAAGAAGACAGATCCTG  
A\_14\_P139337 CAGATCTGTGAGGACCTCAGGTTGTGTATACCTTCTACAGGTGAGTG

A\_16\_P01108393

GCTGCCTAAATCCTTTTATTGTCCACAAATTCATAATCCTACTTCTCCTTGATCTTCAT

A\_14\_P116498 GTTACACATATCAGGAACCACTCTGTCTTGCATAAAGTCATGAAGTTATGAGGAGATCA

A\_14\_P103354 AGTGTCTCAAAGACACAATAAACTTCCTATGGTCTGCACTGTTGTGATATTACATTTTTG

A\_14\_P123246 AGGTTCTAGGTGATAAACATGGGAATGCTTTATGGCTTAATGAAAGAGAGTGCTCAATTC

CUST\_5233\_PI426210822

CTGTGCTTGTGCATAAAGTTTTGTTAAAATTATTTTAGAATTTTCTTCTTTGGCTTTAAT

A\_18\_P14188665

ATTTCTGAGGCATATATTTACTTGAGTCACTCAACGATGATAAGAACTCCCACACCTTCT

A\_14\_P111462 TCAAAACAAATGCATGCTTGCAGTAGTTTAGAGAATCTCAGATGGTTCATGACCTACTAA

A\_14\_P117220 TAACCCAAACACCAAATTTCTTTCATCTCACATGAGATTAGGCAGATCAGACTGAATGTA

A\_18\_P22841549 ATGTTTAGTGTGGCAGAAGGACGATCCAGGCCTGCATCCTGGCTG

A\_16\_P30952467 CTTCTTCATCAACATGTGGCAGAAGGTAAGGAGGGCATCCCTGTAAAAA

A\_14\_P110348 CTGTAGACGGTCCATGCTCAATGGTCCTCTACAGATATGAAACTGGTTCT

A\_16\_P41239072

ACCTAATCCACAAGTCAAATATTTTCAAATACAGACAGATGCCTTTAAAGTCCAACACA

A\_14\_P130836 TCTTGAACACTGTGTCTAGTGGGCAAATGTCATTGTTACCTCTGTGTGTTAAGAAAATA

A\_18\_P15530443

AATCTGTCCTTCATCTGTCATCAGAAAACAAATTCCTCAAATACAGACGATTAACCTACC

A\_14\_P111807 AGTTAACTCGTGCTTTCACCTGGCAAAGGTTTATTGCCTTAGTGATGACAGAAT

CUST\_1272\_PI426210822

GTGTTTCCATGTATTACGTGGAATTATAGACTACCTAAACTGCATCTTTTGTCTCTCA

CUST\_4894\_PI426210822 CATTAGTTTATTCAGCTTATTTCTGAAGCTTTTGATGGGCCGGCTATTCAGAGGT

A\_14\_P115397 CTCTTCACCCAGTCCATCCGGATATAAACTTCAAAAATTACCATTTTATGATTTACTGG

A\_14\_P124100 ACTCCAACATTTGATATCCTCTGACAAATAAGGTTTGCTGAAGTCTTTCTTGACAGATTC

A\_14\_P129611

GACGTTTTAAAGAAAAAAAACAACCTTCTGTCCTAGAAGACACAGACTGACAGAT

CUST\_6039\_PI426210822

ATACTTAGATAACAAACCTGTGGTTCAGTTATATGGGATTTATCCAGACCTTTGGATGTT

A\_14\_P116029 AACCATAGAACATGGGAATAGGTTTTATTTTCATCTCAAGAACATTTAAGTTGGGTGAAG

A\_14\_P137924 TAGGTCTCTCTTTAAAGTAATAAGCGAGAAAATATGTAACAGGAGGAAGGAAGGGGAAT

A\_18\_P22840893

AGGTGGAAGAGAGACCAGAAATAGTTAAATAAATGCTGATATAAATGTTACGTTCTAGCA

CUST\_3776\_PI426210822

ACTTTTAAATCTTGAAATAGTTTAAGATTCATAAGAAGTTATAACTCATAAGAAGTTTTAA

A\_16\_P19441069

AAATCACAGTGAGCCATATTCATAAATGATCCATTACAAGTCTAGTATTCCCATGTGGA

A\_14\_P139234 AACAGAGAACTGATGAATTCACCCCAATTCTGGGTTCTTTTTACCTGTGAAAAAAATTT

A\_14\_P136975 CTCCTGAAGATCTGTGCTTTCCAACAAGTACTACCCCTTGAAGCACATC  
A\_14\_P122278 ATGGTGCTACTTTGAACTGCTTTTCTTTTCTCCTTTTTGCACAAAGAGTCTCATGTCT  
A\_16\_P16589600  
TTCTTCCACTTGCAAAAAGATAATACCATGTGCCTACAATTAGTTTACTCATTGCCCTTG  
A\_14\_P100390 AATGTCAGTCCAAGCAAATACCAAAGCAACGCATCGATTTTGTGGAAGTCAATTAGA  
A\_16\_P02326264  
CCCTGCCTAAAGTTTATTACTTACTCTATAACGAGACCATATTAGCAACTACCAATAGCC  
A\_14\_P110804 AACAAAGTGTAGTCCACTGTGGTGTGTCTCCGATGTAATCGTCCGT  
CUST\_7146\_PI426210822  
CACTGCTGACAGTCATTAGCTAGTGGATAGATCCAAGCTTTAAATCTGAATCTTGTCAT  
A\_14\_P110773 CCATGGGACATATGAGTAAGGAGAAAATGATGGATATCCACAAGTAGAATTTTTTTCTCC  
CUST\_6762\_PI426210822 GTACAGCTCTATGGCCCTGGAGTCAAGGTAAGCCTCATTTTAATTTTTTGC  
A\_14\_P130096 GAATTGAGATTCATCATCAAAGAGCAATGCAGCGTCGTTAAAATAAAAAGTGTGCCTTTT  
A\_14\_P129000 CTGCATTAGAAAAGGAAATCGTAGTGAACGGAAGGGAATACGTGAGAATGTATCATTC  
A\_14\_P119094 TCCAATGCTTGTAATCCTCCACATATTCAGAATATAGGAGCAACTAATCAAACATGTCA  
A\_14\_P120090 CAGTGATATATGGCAAAATTATTTAAAGTGCTTGAGGAATTGGGGAGACTTGCTGCTTAT  
A\_14\_P129441 CTCCCTATCTGCAAGATATTCTTGTCTTAATAGTCAAGTTATGTGTAATGCCAATCCCAC  
A\_16\_P00685249  
CCAAATCCACACCCTTTCTTCTGTCTTTTGCAAAATCTATGACACTGTTGAATGAATAAT  
A\_14\_P121019 CCTGGTTTAGAATTTCTATAACATGTGGATTCTTCATCTTGGATTGTCTTTCAACCTGA  
A\_14\_P104523 TTCCTAGGAAACAAGCATATTAGGGAACACTACTGGTGTAAATGAAAGAAAGAAATACCAC  
A\_14\_P135789 ACGCAAGATTTCTTGCATAGGTTTAACTTTACATAAATATCAAGCCTCCTACAACCTG  
A\_14\_P125688 CATACTTCAAAGCAAACATGAGACTCTCCTGGACTAATCCATTTTCAGAGAAGAAAATCA  
A\_14\_P124431 CTGTTGTCCCAAAAATATTTTATGTGACAGAGAAGGCTTGGAACTATTATCCCTACACAA  
A\_14\_P109701 CAACTTTTCACTCTATAGACTGTTTTAAGAGTTTTGGGGTTTTTTTAAATTGGGTGGTTTG  
A\_14\_P100226 CCTATGTCTGTATTTTTCAGGAGAGTCTGATTTTGGTGACAGTAACTCCTTAGATCTCTC  
CUST\_5459\_PI426210822 AGAGAAGGGTTTTGGGATTTGAGATATCCATCCAGGTGTTACGTAAGT  
A\_14\_P121784 AAGCACAATGCAGGTGAAGATGGAGATGGAAAAAAGTTTCTATCTTCATATATTTTGG  
A\_14\_P137146 ACACAGCCTGTAAAACAGTCTAAATTTCCAATTTTCAGAACTTCAAATCTTTCTGCACAGA  
A\_14\_P131168 GATGCTCAATGTAAACGTCCAGGACATCTTTATTTACCACCTAAAGGAGAAGAACAAAA  
A\_14\_P102400 ACATTA AAAACAAGACAAACCTAAGACAGGATTATACAAAGCACTTACCACCAAGTTGCT  
A\_16\_P00685246  
ACACAAGGAAACTACAGGTGAAACGTAACAATAGTAATTGCCTTACTTTATTTGCGAAGG  
A\_14\_P123363 AAAGAAAATGTTACCAATTAGGGATCTCCGTTTTTACAAGCAAGTATAACAGGACTGATA  
A\_16\_P20352743  
AACACCAGAACAGAATAGTGTGATGACAGAATTCCACTTAAAAGATTCTATTCCCTTGG  
A\_14\_P126285 ACCCAACATAGTGCTATAAAAATAGAAGGTAGACAAGAAATACACACAGGATGGAGAACT  
CUST\_8799\_PI426210822 CAAATCCTGTGCCTCTTCATCCAACCCCTCCTCATCATGAATCAT



CUST\_6320\_PI426210822 CAGATCGTAGCAGCGGGCCCTTGCCGGGTCAAGTCATACATCGCT  
A\_14\_P104150 CTGTCTTCTATCTAAGGAGCCTGAGCACTGTGTTTTAAGATTGTGAAATTCTTTGAGATT  
A\_14\_P134026 GAAGCCTTGAGATTGCAATATTCTATCTATTTTATGGATGGAGAAGGCAAGGAAATTGGA  
A\_14\_P113520 ACCTCACCCACAGGCAGAGATTTCAATACAATCTATATTATCTCATATATAGATTTCTTC  
A\_14\_P131047 CTGTAATTACAGATCTCTGTGCCTTTCTTGAAGTGATACACGTTCACTGCCGT  
A\_14\_P133302 GAGCAGTGTCAAAACATTGAGGACTCTCTTAAATCAGAAGATGAATGAATGGATGGAAT  
A\_14\_P130145 AATGGCAAAATTTTCTGTCTGCTTGGACTGATTTTGTGTAAGAACTATGGAACAGGTA  
A\_14\_P122973 ATTTTTTTTTCCCAATGACTCCCAAGTCTACTCGCAAACAAATACATTGTAGAAAAAAG  
A\_14\_P129486 GAAAACCAACTGGAAAAAAAATGAAATTCCTTATCTTTCGCATTTTTCGGTGGTGTTCAC  
A\_14\_P134058 GTGAAATTCCACCAGATCTATTATTTCACTTAGAGAAAAGGGGACAAGTCTCCTCTTAAA  
A\_14\_P102446 CTCTGCTTGTTTTGGAAAGATATGAGAATTATTTTTTCTGGTCCAATTTGAAAGTCTGCT  
A\_16\_P02994730 TATTGAGGGTAACCCATTCTCCGAGTTTGAGTAACGGTTAACAGTGGCATT  
A\_14\_P139957 TTGGGAAAACTCAGAAACCCTGACAGTAACTCAGTATAGAAATACCCATTTAAAGCATC  
A\_14\_P125725 ACTCATCTTTGAACTTAATCCGAGAAGCAATTTGTCTCATCAACATCTCTTTGAGGTAAT  
A\_14\_P112874 AAGGATACTAGAATGGAATGTCCTGCGTGACGAAAGCCTTCACCTG  
A\_16\_P17573085  
AACTCAGATTTCCATCAAGATTCGTAAAACCTTATCCTGCCATTGTTGAATTCACTACTGG  
A\_14\_P134576 TTCCCCTATTCTCCTAAGATTCCAGTCAATAGACTGTCCCATTAGTTATTTAAGATTCT  
A\_16\_P00442543  
AGAATGTAGATTGTGCTAAATTAATGTCGCCTTAACAAAGATAGCCAATGAGACTGACCT  
A\_14\_P119000 CCATTGATACATGTTTGCCATGATAATCAAGTCGAATGGGAACTTCTGACGTGAATCTAA  
A\_14\_P121036 ACAAGCAGATTAGATCATTTCACATTTACCCCTTCATGCTGAAAAGGTGATTCACTATG  
A\_18\_P13172035  
TCATTTGCTGAATTTCTTCCAGATAAAGAGTGGTTTTCTTATTCGATACAGTTAGAGCCTC  
CUST\_8582\_PI426210822 CTCTGTACTGCACTAGGAGGTGACCCTTTGGCCTGGTGGCATTCC  
A\_14\_P128523 CTTTCAAATGCAAACCAACATCTGGTATGGATATCTTCTGAGGCTTTATACTCATTCTG  
A\_14\_P134432 ACCAGAATACAAAGACAGATTGAACCTCTCAGAAAACACTACTTTGTCTATCAGTAATGC  
A\_14\_P112079 GTTTTGCTACTTTTTCTGGTAACTTGTTAATAACCAACTGTGTCTGATCCGAAATTTGCT  
A\_16\_P19042284  
AAACAAGACCAGTCCATATTAGAGACATACACCTAAACACAGATCTTAATCTAGCCCAGT  
A\_16\_P40994850  
AAAAGCAATCAAAGTGAAAAACAATGGAACTACATAGACTATTTCTCCATGAATTCAGCA  
A\_14\_P128891 TCCAAGGAAGATGGAATACTTGGAAATTTGTTTGTGCATGCACCTTCTGAGTATTTCAAGT  
A\_14\_P126373 AATTTTAAAGTTCTTAAAGTTACAGGTGCAACTGGGAAAACCCAACTCAAGACAGTCTTA  
A\_16\_P19769219  
AGTCCTTACATTCATTACAATAGTTAACTTACCCCATATCCATATAGATAAGCCCTGGA  
A\_14\_P103339 TTTTTTCTACTTTCAGAGCCATTGACTAATAGTTGAGTATAACACAGGTTGTGTTTCCGG  
A\_14\_P130047 ATATGTCACAACATCAACAAGCATGTGGCATTGTCAGGCAGGAAGTGAGTAT

A\_14\_P138354 CCTTTCCTGGATTTCTAAACTGCTCAATTTTGACTCAAAGGTGCTATTTACCAAACACTC  
CUST\_9485\_PI426210822

ATGAAATACTTGCCCAACATGAGAGGTTTAGAATGTTCTGGTAAACCACAGTGTTAATAA

A\_16\_P01408227

AAAGCAACCAGCATAAGATTCAAACCTTAGTTTTGCCTAAAATCCTAATGTCTTTGAGCC

CUST\_5237\_PI426210822

ACTTGGCCTCAGTTTATTCTCTGGGAAATAGGTTCTTGCTACAGGTACAGTTTATAATAA

A\_14\_P103434 CAAGTCGCAACTTAAAAGCAAAGATTAGTTGTGTTGTATACTATGTGTTTTGTGTGGGTG

A\_18\_P15018034

ATTATTCATCCAGAACGTCTTAAACTAGCCTTTCCTTCTAAGATCTTAACCTACGGCAA

A\_16\_P17965436

ATCCCTCTCTAAACCAATAACCAACATCAAAATTAGCAGTGGAATCATAAAGTCATGTG

A\_14\_P126091 CATTGCTGTTTCATTGTGGCCTATAGCACAGCCAAGTTGGAACCTTCTTGT

A\_16\_P17198782

AATGTCTATGTCAAACACTAGAAGATAAGAGGACTTGTTCATATGGTAGGTGCAAGACC

A\_14\_P123616 AGTTGTATCTTCATTCCCTTAAGAGGAAGCATCAACTGCAAAGACTGCTCTTGAATATAA

A\_14\_P123245 CTTTGAACACTGAAAGAAGAACCCGATGAGTTCATGATTTAAAAGCAACAAAAGGGATA

CUST\_2923\_PI426210822 TTCCTGTCCCTAATAGTATTATTCATCACTTCATTCTTGGCCTGGGAACAGC

A\_14\_P103594 CTAAGAAGACAGCGAGAGAACCTCTTAGAAATATGCTTTTTATTATCTGCACACAGAGATA

A\_16\_P00072777

AAAAAAAAAACCAAAAGGTTTCAGTCTATGAAGTTGTTGCTATCTAAACACTCCCAAAACCC

A\_18\_P11333043

TGTCACCTCCTCTTTATCTAATTTTGCTTTGGTGATTTGTATTACAGACTCAGTGCTCTT

A\_16\_P18327283

AATCTGAAGGAGCCTACTAATTCCTCTCATAGAATTTTACTGAATAAGCAGAGAATGGG

A\_14\_P138587 ACAGAAGACTCATGTTCTGTTGGGAGTTACTAATTACAAGCAGACCTAAGAAGCATTAAAT

CUST\_2196\_PI426210822

AAGAAATCATCTCACCTTGACTGTTTTCAAGGTGTAAATTGTGTTTATAGTGAAAAAGAA

A\_16\_P19403198

GGTGATGACTAGCAATCTGTTTTTTTTCTATCCACTCAAAAACAGCATAAGCCATAGCAA

A\_14\_P135322 AATAAACTGTTTTAATTCCTCAGGTCCCAAAATGGTAGAAGTCCAGAATCAACAGTTTCA

A\_14\_P121417 GCAGGAATGAGAAAGCAAAGCCAATCTCTCATTTAGACCTGGCTTCTTTCTT

A\_14\_P128279 GTTTCCTCAAGAATTCACAAGTGAGACAGAACAGGGGAAGAGAAATGCTATTTTTTTTATT

A\_16\_P39618677

GATGTTTTGACTTTTCGAGAATTGACTTCTAATGCACGGATTTTATATGCCTGAGGACATT

A\_16\_P20063509

ATGCTTATCTAATCCTATCATTTCCCTGGCTTACTCTTGAAATAACCTACTGACGGTCTTC

A\_16\_P00034019

CCAGCCAAGAATTTCTTTTCAAGATATCGTCATCATTCTTAAACAACATTCTTAACCCCC  
A\_14\_P119817 CCAATGACAAAGTGGACCATAATTGTTGGATGGCTATGTTGAATATTATGGCAACTTTAC  
A\_14\_P130571 GCATATTAATCGCTCCATTATTTTCATACCATCTGTCTGATCTGGAGTCATTCCAAGTTTT  
A\_14\_P139491 TGAAATTGTGATTTTTTAAAAGAACCCAAACAGAGGCACCAGTTTCTCTCATGAGTGAATA  
A\_16\_P30952639  
ACCCTCAGGGGAAAACCTGTTACCTAAAGTATTTTTATAAATATAAGCCTTTTATACTGAT  
CUST\_9531\_PI426210822  
AACAAATTTTCCACTTAGTCCATTTTTCTGTTCTCAGCATTACTACAAATGCCTCATTCT  
A\_18\_P14132901  
GTGGTCAGATTGACATGTGTGTATATATAATGATAATCAAGGCTAAACACAGTCTTCTCT  
A\_14\_P129326 TGGCCAGCACTTTTAATCAAGGACTTTCATATTCCACTTTATAACCATCCAAGTTTCAGA  
CUST\_2530\_PI426210822  
TTTAGGAACACTATAATTCATGGATTTGCCATTTGTTTTTCCCTAATGAGGGCATCATAT  
A\_14\_P201460 TGTGAGGTTTATGACTTCATAAATATTTTGCCACTGCTTTATCCTCATTCTCCATCTGG  
A\_16\_P20786413  
AAAACGATGACAACAAATGACACAAAATCTTAGTTTGCATCCATATAGGGCACTATCCAC  
CUST\_3917\_PI426210822  
TCTGTAAAATGAAGATGTGTAGGCTTTGGTAAGATCTCACATGTGATGTTAATAACAATA  
A\_18\_P22843015  
CCACAAAGGCCTATTACAGTCTTTAAGCCTGATGAAGTTCTGAATAAGTAAACCCTTA  
A\_14\_P112847 CTCTTATTTACACCCGTCTGATTGAGAGGCTCTGTTCTTCACTACAGTAGATTACAGT  
A\_14\_P200265 TGCCCGTTGTCCTTGTTACGGAACCCAGTTTCTGCCATGATAAAAT  
A\_14\_P103696 TCTATTGCCATGAGAGTTCTGTACGGTCACTTTACTGTCCCCATCAT  
A\_14\_P105882 ACCCATGAAGATATGTATATTGTCATTGGATGTATGATGAGTGTTGTGATTGGAAGTAT  
CUST\_431\_PI426210822 TGCCAGACTCTAGGGGAAGGTGTAGGTCCGCTTCCTCATTGAAAT  
CUST\_4118\_PI426210822 ACTGCATGATGTTGCTAAATTTAGTTTCGTTGCTGGGAAGTTTTGGATGAGCT  
A\_14\_P138642 GACAGGTAACAAATAGGTGGGTTGTCACCGTTATTTCCCAACGCATG  
A\_16\_P36636292  
AGGGGAAAATGACTGTGAATGATCAGCATATATTTTCAGAAAATCCTGCATTAAAGCACA  
A\_16\_P21442646  
AAAACCTGCAGAGATTTAATGTGTCAGGGAATAGATGTGAAACAAGGGATCATAGGAAAAG  
A\_14\_P108241 TAATACTTTACCTTTGGTCAAATACTAGGTTTTCAAATGTGTCGTCTCCTTCTCCTTGGC  
CUST\_4107\_PI426210822  
TGCTATTTAATCTCAAGCCCAAACATGGTTTTTAGTGAGGAACTGATACTTAATAAAGTT  
A\_16\_P00643270  
AATTAGATACATGGGAAGCACATTAATCCAAGAGCATCTGTAAGACTTGACATGAGAGTG  
A\_18\_P22843216 AGTTTTATAAGAACAGAGGAGTGTGAGCCCCTGTGAGCCCCACG  
A\_14\_P200436 TGCATTAACACTTTAGCATAACATAACTGATGAAACGTTACCTGTATTTACCTAA

A\_14\_P107313 CATCATCTATTGGTTGACTGCTTGTAGTGGATTGCTTATTGGTAGAGGATGATCAACAT  
A\_16\_P00685498

AACCAGTATTGCAATTGTGAAAGGTTCAATTTGTTAGAATAACATGTCCACACAGCAGCA

A\_14\_P131546

GTAAAACGGGTGAGACTGTTGTTGAAGAAATGATAGCAACAAGAAAAGTTGAACAAGATT

A\_16\_P16191607 CTCTCCTCACATCCCAGCCACGCATCAAGGATGAATGGACATGTG

A\_16\_P03709792

CCCTGATTTTGTGCATCTTTCATTTGATTCCCTATAGCACTACGATTTCACTGTCTCGATTA

A\_14\_P124313 TATTTCTGAGCAGATATGGTAATTGGCCTTTAATGTTCTGGAATGACACAGATTTCCAAAG

A\_16\_P20267549

AGCCATTCTTAAGATGTGAAACTTACTGCTAGACCCTGATAGAACTAGTCAAATCGAGAT

A\_14\_P114724 AAAAAAAAAATTCTAAGTTTGTGATGTAGAAAAAAAAATCTTCCTAGTGTTCAGCCCTCCC

A\_14\_P101573 CCGTCACCAGTTCTTATCTTCCACCACCTTATAAGGGACTTATAAAACCTTATAAACTT

A\_16\_P02666597

TTCACAGAGCACAAATTTAAAACCCTGATTAGACCTTACCAAAGAACAATCCCCATTAAAA

A\_14\_P137478 GGCTGATTCTATGTTGTATGCTTGGTATGGCTAGAAGTTGTGAGTAAAAACAAAACCA

A\_14\_P137167 TGTGGCAATCACCAACAAAATAAGAATTCCTGTTGTGTGTATCTTATAGTCAAGTAGGGA

A\_14\_P130369 GGTATGCATTTTGTTCAGCAGATTTGGTTTTATGCACTCATGCTCAGGTTGAAAAGTATA

A\_16\_P15422813

ATCAACACATTTGCTAAGGAATATCAGTGATTGGACAAATACAAAATACCCAGGAGATCC

CUST\_2308\_PI426210822

CTTAGAATCCCAAGTTCGCTAACACTCAGGGATGCATTTTGCCTAAAGAAGATAAT

A\_14\_P110331 TGCCTTCATTCTAATTCAGGAAAAGTTTGAGAATCAATGTGGTAATGATTGGGCTCTCT

A\_14\_P135025 GAACCATGAGTCCCTTCTTTTAACTGTTACTTCCATTGAACATAAGGCAATAAAACCTAC

A\_14\_P128820 AACTGTAGAACTGGTTGTCAACTTTGCTTTTGCTCATGTTGTAATGTTTGGCAATATAT

A\_16\_P17832664

ACGTCTACCCTCAAACTTTTAAACAATCCATCATAAAATCAGATCTTTGCTGTCACTCAC

CUST\_9093\_PI426210822 CCCATGGTCTAGGCAGGAGTCATTTTTTTTTGCTACAGTGGTGAAAT

A\_14\_P109522 GAATCTAAGGGCTATAGGGTCTTAGAACTCCTGTGATATGGACTTACAGATTATTAGCAT

A\_14\_P114743 AAATGTGCTCTGTGAAGAGTAGTTGATCCAGAAAAATCACTGAAGTATTGCACTTTGTT

A\_16\_P36230432

ATGTAGAGATTTTTCTCTAGGTCCTTCTCATCGATAAGACCTGTTTCAAGATATGGCAAG

A\_14\_P103643 TTGGTTTGATGTGTTCTTTTATTCGTCTTAAAATGAAAGCATTGCCAGTTTGTGTGGATC

A\_14\_P201822 TTAATCTTTAGTTTTGTGTCAAATGGACTGCAGAAACAAGATCTGTCACTGCTACTGTTC

A\_16\_P18843555 ATCATATCAAGTTATCCTCACCTTTATCTCATGATACTATCCCCATTTACTATCCCCAG

A\_14\_P201299 ATGAATAAAAGCCTGTTCTTGTAACCTTATTCAACTTTTGCCAAATTCCTACCAATCACTT

A\_14\_P118029 CCCTTTATACTCATGAGGTTTTACAATTGTGAGTTTAGGGGTCGGCTCCATTTTT

CUST\_7028\_PI426210822 TTAGGGTGGTGAGGGTACAGGTCTACCTGTGAAGCTGAGTGATAG

CUST\_297\_P1426210822 CAGCTGAGCAGGCAGCCAAGCCAGCCGGAGCATTGTGTGTGATCT  
A\_14\_P119154 ATTTTGACCTAAGAAGGTTGGACAGGAATGAAGATATAATGCTTTTTCTAAAACAGGGCT  
A\_14\_P109129 CTCTTAGGGAAGCCACCTCAAAACACTTTTCATAGAAGTTCCTCATCATGTT  
CUST\_8031\_P1426210822 AAGAGTGTAACGCATCACTTCCTAAGGAGAGCCTCGGTGGCGGAA  
A\_16\_P00502514  
GCAAGTTGTCATAAAAGTAGTCAACAGTGAATCATCTTATAACAATCAAGGGAGTAGGTG  
CUST\_8435\_P1426210822 ATGTCGAACACAAAGGGAAAGAGGAAAGGCACCTGATATATGTTCTCTAGG  
A\_16\_P39950345  
CCTGAGCATTCCATACTCTCTTTAGTCAAATCTCTGGGTTGATAAAATTGATTACTGAGG  
A\_14\_P138358 CCACTTTAAGGCAAGTCATCTAGTTAATTTTTCTTAGTCTCATGCTTGATTCTTCTCCCT  
A\_14\_P120970 GTAAAACTTACTCTTTTAGAAGACTGGATTTTGTCTGATAATAATATCATGGAGAGGGG  
A\_14\_P120785 CTCCTCTTAAATCAGTCATCTTTTCTGGGTTTCAGTTCTACTGTCTGTGAAATTAGAGAG  
A\_14\_P113956 ATACAGTCATTTGTTTATTTGATAGGTGGGTTTTTGACACTAGGGTTTCAACGGATCTAA  
A\_16\_P21216990  
AGGCAATTAATAGGAGTGAAGTAGAGCAAATAAAAGGAAACACTATTAAGGCAGAAGGT  
A\_14\_P125195 ATGCCTTCATATTATTGATTTTAAACTATTGTCTACCCTCCACCAAGGGATACTGCAATG  
A\_16\_P17240009  
AAGTGAGAGACTGAGTATCCTAAATTTACTGCCTTGCAATATACATGAAACGCAACTCAG  
A\_14\_P106328 GAGGTAACAGAAGAGCAGTCAATAAAAGAAAAATTTCTTTAAAGACATATGGGTGGGAT  
A\_14\_P124356 CCGATAAAAGGATTTTGACTTGGGTTTCACAGGAAGGAGGTATGCCATC  
A\_14\_P112773 TGTGATTAATGTCTCAGATTATTCAGTGACGTTGCACTGGTATAAAATCTTACTGGGAAT  
A\_14\_P132849 TGTATTTCTGAAAAACACCCAGAGTTTTATTACCATTAATTCAGCAGAAAGTTCGTTGCA  
A\_14\_P125459 AGACACTCGCTGATTAATATTTGGCACCCCTGTATTAACAATTACAAGTTTGCTCTGAAAC  
CUST\_4934\_P1426210822 AACTCTGAGCCCCAGGGGTCCTATGGATCCATGAGCTCACAGACT  
A\_14\_P106742 ATTTTTTAAAAAAATGTTTCCAATTACCCTGATTACAGACAACACTGTGGTAGTCTCAGCCC  
A\_16\_P36410630  
AAAAAGCATGAAGTATATCAACAAACAGCCTTGTAATTCTCTGACCCAACAATAACCACT  
A\_14\_P103784 TGAGAAGTGATGTCTAGAGATTAAGCAGTCAATCTTAAGTCAACTTCTTCATCCACTGTG  
A\_16\_P02302466  
GGTGTTCATTTTACTCTCCTTGCAATTAATCTGATGAGTTAACTTAGTAGTAGCCAGCA  
A\_14\_P125737 AGCCATAAGATTGACGAATTGTTATACAGGATAACTGAAAAGACGACTCTAAGCACACAG  
A\_16\_P36556463  
CTTTCTAACTGCTCCTAACACAAAATATACTTCCATTGATAAATCTTCCAGTTGTAGT  
A\_14\_P123002 AGTGAAGACAAACATCATTCATTCAGGAATGTGTAGCAACAGAATTCTCAAATCAGAAA  
A\_16\_P17096957  
GTCCTCTCCATTTGAATTTCTCCAACATTGCTACCTATACTATTCGCTCGACTTACAATA  
A\_14\_P106608 GCACTTCAACTTTTCCAACAATGACCCATCAATGATCTCATTAAGTGCTCAAAAAATG  
A\_18\_P22841913 CTTAGAAAACATGTTGGTATAGCCAAAGAAGCAGCCGTAAATGCCACAGAG

A\_14\_P126015 AACACTTCTCCCATTTTCAGTAAAAGGATGAAGCCAGTTTCTCAATGAATAAAAAACAAGAG  
CUST\_3755\_PI426210822 TTTTATAGGGACCCTGGAGTGTACCTTGGCTTCTGATTA AAAAGCTAGGTT  
A\_16\_P21556579

AGCGACTCAGTCTAAATTCCTGGATGGCTCAATAATTATATCTGCAATACCACCAATATC

A\_14\_P101320 ACGCAGAAAAGTCTCAGGACTCAGA ACTACACCATAAATGCAGGATCTTTTTATTTCATA  
A\_14\_P136110 AGTCCATTCATCAGTCAAAGGAGGAAATTAACAAAGAGCCTTACATGATTAAGGAAGAAG  
CUST\_2789\_PI426210822 AAATATGAGGGCTAGACTGAAGCCTCATTGGACCACAGGTCCTATG

A\_14\_P128495 GATGACTCACAGTTCTGATCGGAGTCTCGATCAATATCCTTAATTTCTGAACACAA

A\_14\_P101874 GAGACAAATGCATAATTTCTGTAATATTGTGCATACTCCTTAGGACTTCACGAGAGACG  
CUST\_10141\_PI426210822 AAATGAGTCCCCTCTCCTTTCTGCAGCTCCTGACTGGGTTGGAA

A\_14\_P139409 AATAATAAAATCACTCCCTACCTTGAAA ACTTTACAGAAGCATTTTTAATTTTACAACAC

A\_14\_P121017 ATCCAGCAAGTAGTGGATAAACTCTTTGAACTTGACTCCAGATCCATTAATTAATGCTTC

A\_14\_P115941 ACACAGAGGAAAGTGGTGACTCACATTCATCGTTGTAGTATAATTTGTGTGTGTA AAAAC

A\_14\_P138810 ACTTGTTCAGAAAGTTGTGGATTTTCCTTACCCATCTCCCCTTTTTATCAC

A\_16\_P58424161

TAGAATTTACATTTGGTGGGAATATACAGTATGGACTCTTGTTTCTGGCCTCTTTTAATC

A\_16\_P36230970

AAGGGCAACAAAAACAATGTAGGACATCCAAACCACTAAAGAAGAAGAATTTAAAACAT

A\_14\_P126475 ATCTTTAGTATAAACTGATTAAGCCAAA ACTTCCCTTTCCCGAAAAATCCTCAAATCTGG

A\_14\_P135363 ATTTAGTGAGAGAAGAGTTAGAGCAAAAGACAGTGGTAAATGTTTTATTCCGTCTCCATG

A\_14\_P122863

AACCTCACAAACGAGCAAAAAAGAAA ACTGTGAGGAATCATTTTAACTCAGCAACAATTT

A\_14\_P125057 TAGAAAGCAATTTGTAGAAACCACTGATGAGGGGCAACCTTGTAGATTGCAAAATTAATT

A\_14\_P101090 AAAGTGATGTCTACATAGAAGACGAATCGTTTTTATGACCTGGTTAATTAGAGAGTTGCT

A\_14\_P112819 GACTTTTCTCTTCCCTGCTTGTTTTAAAAGTTTTCTGCATGTTTACCAACATAAACAT

CUST\_3218\_PI426210822 CTCTCCATGCCCTGCCTGACCTTACCTTTCTAGACCCATCTTCTG

A\_14\_P128682 TCTGAAGAAAGAGAATGTGATGCTTTGAGATGGAGATAAAGAAATGAAATGGTGT TTTTCC

A\_16\_P19578803

GTCTAAACCAAACTAATGCAATTCAAACCCAAGTATTCATCCATGTCCGTTTTATCTTC

A\_18\_P14249262

ATTCCAACCAACTAGATGTATCCATTCGAGTAAGTTATCACATCCATGAAAAAAATCCCC

CUST\_3437\_PI426210822 TGTTTTGAGGAAAGATTCGGAGCCAGCTAAGGTTTTCTGAGGGCC

CUST\_1816\_PI426210822 ATGACAAGTTTGGGGATTATATGGCAGCCTGTACAGGATTTATGCTGGC

A\_16\_P30952582

ATTTACATGCTGCTGAACACAGAAATACTGAAAAAGGTAAGCCCTAATGAACCGCAC

CUST\_4856\_PI426210822

ACAGGGAGAAGCTTGTGTTTGTGAGACATCTGGAGTTAGAAAAGTATCTGAGCTTTA

A\_14\_P202103 GCTTTCAGTTGGGTGGACGATGATTATTGTTCGATGTGAATAATAAGAATGTGGATTTAGA

A\_14\_P109080 TTTATGTGATAAAAATCGGTCAACTGTTTTCCCCTACCTACACTACTTGGAGGAAAGATA  
A\_14\_P102821

CTGGAATGAACAAAAGGAGGAAATTAAGAACAAAAGACGACGCTCATTACGTAAGTGTT  
CUST\_5347\_PI426210822 CTCACAGCTCAGCAGCCACAGGCATGGCCATATCTGCCTCTCTTG  
CUST\_10209\_PI426210822 TGGCTTGAGTCACCTCCTCTAGGGTTTTCTATGTTTTCTTCTGCTACAGATA  
A\_14\_P122218 CTTTCGTTGGCTTAAATGCTAAGGATGATGTTTCAGCACTTCTGTCAAAGCCATTC  
A\_14\_P105834 AGGTGGGACCCAGATACTATATGAAGGAGCCACCTTACCTGCTTTTTT  
A\_14\_P138924

AAGAGAAAAGATACAACCAGTGACAAAGATGATTTCGCTAGGAAGCCAACAAACAAATGAA  
A\_16\_P16680885

AAATGAAAGCCAAGAGATTAGATGATTAAGACCCATACCAGTTATAGACAGAGCCAGAAC  
CUST\_6043\_PI426210822 GGAAGATACAATCAGTTAAGTGCTAGTGGAACCAGGGTCTGAATTTGGTTG  
A\_16\_P19940920

CCGTATCTTAAGCCATCAAGAATTGTGATAATCAACTGACTCAATTTAACTGCATCAGCA  
A\_14\_P107831 TGTTAATAATAGTAACAGTTTGCATGTCATGATGGAGCAGCCACAATGAGTTATGCTACC  
A\_16\_P16822082

AAAAAAACACTCCCATATTTCTACCCCTTTGTAGACACAAAAGCAAAGTAACAGTCTGTT  
A\_16\_P37949207

CCAAAGAATTGTCTTCAACCAATTACTTCCAATACCCATGATCTAGAAAGCAAATCCATG  
A\_18\_P22843210

CATATTCGTGGTCAAGTAAGGCCAGAGTCTAGACTGACATCAAATGCTTGTATGATTG  
A\_14\_P111360 CAGTTCTCCTCCCTTGTGATTGAAAGTAAATGATCTCCTAACTTCTACCTTGTTAAATG  
A\_16\_P16958228

AGATTTACTCACACTCAAAACTCATTTCGTCTAAATTGTCAACCACCAAGAAAATTGTGT  
A\_14\_P117782 CTTTATTTCTTCCCATGAGATCCCTCCCCGACCTTTTACAGGCATATATCATTTTTAATA  
A\_14\_P112225 AACAAAACCATATCCTGCTGATATTGTAGTTTCAGTTCAAGGATGTATATGCATTGATGGG  
A\_14\_P108465 CTGCTCACCACAGATAACAGATTACCTTATGAAACCACACCTTTGAACTTTTTCTCAGT  
A\_14\_P114050 AACTCAGGTCTTCTCATTTGGGGTCAAGAGTCTTTCTATGCTGTAGTTATAGAGTAATCT  
A\_14\_P108158 GATCTTCTCAGTAGAAATTTTTTTTGGTCACAAGTAGCATTGACCAAACCTCTTCAAAT  
A\_14\_P102702 TCCCACTGTTAGTCAAGGCCAAAATATGGGAAAAATTTTCTCAAAGACTACAAAAAGTC  
A\_14\_P120165 AGAATCGAAAGGAAACCACGCCCGAGAAAAACCAATTTAATGCTTCTGTTCT  
CUST\_5083\_PI426210822

GGTGGTAAAGGAAATAAACTTACCAAATAGAAGAGGGAGAAATGAAAAGGAAATATGA  
A\_14\_P132693 CTATTGGAAAGAAATCCTTGATTGACCGTCAAGTTAAAAACAGGTCCTTCTCCTC  
A\_16\_P18997516

CTAGCACTTATCCCAAAAATGTCATATTAGAAAGCACCCCTATAACCAATTAACACTCTCA  
A\_14\_P132248 TTACATAATGCTGTATTTTACAGGGAAAAAAGCAACCCCCAAAATATCACAGACACAT  
A\_16\_P38630134

ATCAACACCAATTTAAGAACACAAATCCTCTTACACCTCAATCTATGCATGGATGAAACT  
A\_16\_P03544835

AATGAGGAAGAAGGAACAATTCAAAACACTATCACATCCCCATTATTCAAAGTCTCTCTAGC  
A\_18\_P16733185

CTCACTCTCAGCAAAAATGAATCCACTTATAGAGACTCAGAGCAAGCATAACTTCTCAAG  
A\_18\_P22841601

TTGCAAAACTTCTTTTTTCAGTGTTATGTTTTATTTTTGCAATTTGTGGGGGGAAAATGCA  
A\_18\_P11753773

ATTTTTGTCCAAGTGTATTCTGTCTTCCATACAAAACACTCTAACAGATGAAGGCTAGT  
A\_14\_P123413 CTAGTGCACAGATGAAATGAIGTTTGATTTTTTTGTTTTCTCTCTGTTTCAGTATCCCCT  
A\_14\_P120491 AAAATCACCCCTTGTCTAATGAATGTTGAGTCTCACATTTTAATTTGTGAATAATTTCCCC  
CUST\_8736\_PI426210822

GTGTATATTATCAGGGTTCTCAGCATAAATGTTGACTTCTATTTTTGGTGAAGCAGAATAT  
A\_16\_P35563765

CTCCAAAATTGTATTCTTTGACCTTTTCATGAGTCTACGGAAATTACATGCTGACACACT  
A\_14\_P124890 TCCTGACACTGTCTCCCTCAAAAAATACTATTGGGACATGGAAACAACACTACAGATATAA  
A\_16\_P17747693

GGTGGGCTTCTAAACTAAAATCTTCTATGACAATTCAACTGCTTTATACAGGTCTGACTG  
A\_18\_P10927473

ATTTTGCTAAGTCCACTTACAACATTACAGGCTGAAATCCTAACTTTATGGAACAATGCC  
A\_14\_P124185 TCTTTCAAAGACTCTTTTAGATAAACACGATGAGGCAAATCAGGTTTCATTCATTCAACG  
A\_14\_P101389 AGGTGTTAGAAGGATGGAACATGAAGAAAAGTTTAAGGAATGATTGTGATTTGGCCTTTA  
A\_14\_P110711 ATTAAATTTCTGCAAATTCAAACTGAATGGGGCTTTCTTCTGCTGCCTTCCAGAG  
A\_14\_P107098 GAAAGTTCTTGATGAGGGTCTCAATGGCCCTCTCCACATCACTGAATT  
A\_14\_P136039 TACTAAACAAAATGATTTTCTTTCACAAATTGACAAGACACTAGGTGCCCTCATGAAGGT  
A\_14\_P200610 CTTAGGTATGCTTTGATGCCTGAGTTTTATGCTCTGAGCCCTGTCCC  
A\_18\_P14319042

AAAAAATGAAAATGGACAAGTAATCTAAGAGTTGTAGGAGATGTCAAATAGGAGGACT  
A\_14\_P134283 CAATAATTCTTCTCATGCTTCTAAAATGACCACACGTGCTTGGACCACTATATTAGGTT  
A\_14\_P128748 ACCTTTCAACAACATGATGTTTTCCCTTGCTAAGGCAGAGTCATATTTTAATACAAGGAT  
A\_14\_P117705 ACAATATAGATCTTCTGTCCAATTTGTATTTTTGGACTGTGCGCCAAGAATAATGCTCAAT  
A\_14\_P115342 TACTGCTTTCCAGATTTTCTGAATACCTCTGTGATGTTACTAGATTGCACCATCTCTTTT  
A\_16\_P16291571

ATACCCTAGTTCAGATAGTTGGCACTTCTTCATTTTTGACCCATTAATAAATTTGTGACTCC  
A\_14\_P200128 TCAGACTCATTAGAAGCCATTTTGGACTTTTTGGATTTCAAAGTGACAGCAGCATTATC  
CUST\_6749\_PI426210822 AGGCCAGTGCACCGTGTGCCTGCCGGGCAAGGAACCAGCAAAG  
A\_14\_P106064 CTGATACTGAAACTTCTTTAAAGTTTTGTGCATAATCCCCATAGAACGACTATAGTTCCA  
A\_16\_P37088558



TCACCCCAATACACTTTATTTCCTAAATGCATCTGTCTTGTCTTATGTTATACACGCACA  
A\_16\_P16265741  
GAAGTCTGATTGAACATACAAACTCTAACCAGATAAACTGATTCTGCATCTTGAAGGC  
A\_16\_P58424237 TAGAAAGAACTTGGACTTTGGTGTCCAAAAGACACGGGTATGAATTCTGACTCTA  
CUST\_9293\_PI426210822  
GTACAAACCTATCCACGTGTGAATGAATAACCTTAGAAAAGTCATTCTGTGGTTATTTTT  
A\_16\_P02734501  
TCACTAATATAAGTCATGAGGACCCTAGGAATAATAGCATCGCATAGAAAATTGGAAGGA  
A\_14\_P107093 ACAAAGGTAAAGTGCTGTCCAACCTTGATTCTGAGACACCCTAAAATATAGTAACATTAGG  
A\_14\_P103147 CTACCCTCTCTCAACTTCATTCATTCATCCAACATTCGCTGGGGGATTT  
A\_14\_P135618 GCCTGATGTTCTTTCTATAATGGACTAATGCTGTAAATGTAAATACTTTCAGGGCCTAG  
A\_16\_P02398743  
AAAAGTGCATCTACCAGACCTACATCTTACAATCTGAATGGCAAATTCTATGCACATCAG  
A\_16\_P03644462  
CACCTTCAGCATTTCATCTTGTTCAGTCATTTACATTATACCATTATAGAAAACCTTCCCCC  
CUST\_4844\_PI426210822 GCTGGATGAAAGAAGCAGCTACATTCCCATTCAAGGTGTGCTGAG  
A\_14\_P121042 GAACAAAGAGTCGCTCATCTGACATTAATGCACATTTGTTCTCTAAAACTAAAAGTCTG  
A\_14\_P138856 TCACTCTTGGGTCATTTTAAATCTCACTTACTCTACTAGACCTTTTAGGTTTCTGCTAGA  
CUST\_10364\_PI426210822 AGTCTCTCAGAGCATGGGAGGAAAGGTAAGCTTTGGGCTACAAAC  
CUST\_5769\_PI426210822 GAAAACAGCCCATTTGAAACAGAATTGGGAGGGAGAAACCTCTTACAC  
A\_14\_P112259 CTGCTATAAGAAGTAATTAGCAACTTCAATTATGCCAGAGTCCTTAAATGGACTTCAGGC  
A\_18\_P21311859  
TTGTCCCTTTAACAGATCTTATTAGTTTATAGAGCCACTTGGAAATGACATCTTCTGTTTCC  
A\_14\_P124442 CATGACCAATCTGAGTCAATATTATTTCTTTCAAAAAGTGGGGAAAGGTAGCCTTATTGT  
A\_14\_P106114 CCCACCCTGTGTGTGTTTATGTCATAGTTACATTAATTCATTTCATTGAATACTCCACA  
CUST\_714\_PI426210822 CTGTGAAAACAGCTGGTCTTATGAAGCGCAATATGTGACTTACCCAGT  
A\_14\_P201349 AAAAGGACATAGGAGATGGACTAAGATGTCTTGGACCACCTTTGTGTAACAAAGAAATAA  
A\_14\_P101558 ACCATAAAAGAATCTTGAGGATATCTTTAAAAGGTCTGCTCTCTTACGAAGGTGAAGTGT  
A\_14\_P109926 TTTTTTTTACCGTAAAAACCTGTAAAGGAGTGGTCAGTTTTTTAGATGAAAGGTCATAGGA  
CUST\_725\_PI426210822 CTTGCTTTGATTTCCAAAGGGCTGTGGGTTCCAGCCCTGCTTCTG  
A\_18\_P12528314  
ATTCCTAGGTCCTACTGTAAATGCACCAACTATTTTCATATCAGTTCCCTACCAGATTCTC  
CUST\_2971\_PI426210822  
AAGTAATTCCTTTGGGGTAATTTAAAATGTCAAAATTTAAATCAAGGAAAAGTACTAAT  
A\_16\_P20750122  
AAAAGGATCGCTTCTATTAACCTTGAGTTAGTTCAGAATGTTTTCACTCCTTCAAAGTGC  
A\_14\_P135786 GGATTTGAAAAATCCAAAATATGGTGCTTGAGTTGTTTGTGGACCTGGATAAGTAGTTTT  
A\_14\_P110052 TCAGTAACCATGTCAGAAAGATACAAAGAAGTGAAATCACCTCATATTTTTACTCCCCTC

A\_18\_P22843041 AGGAAGAGGCTGCTGCTGCAGGGTGGATACCCCAGAACTCAGTCA

A\_16\_P18855804

GCAAAAAGTAGAACTCTTGACACTCAAATCCTACACTGTAGTAGTAAGGTTTGTATCCCT

A\_14\_P126737 AACCCCAAATACCTCCAATGTCACACTGGCACAGTAATTCTCTTATTAATTACTGAAAA

A\_14\_P121986 AGAATCATTTCGATATATAGATGATACCCCCAAAAGTGGTTAATGGGGTATTTCAACAAT

A\_14\_P114653 ATACACTAAGAAATCTTTGCTTTGTCACGCTTATGAAATGCTTGGGGACTTAGAAATCTG

A\_16\_P03297200

TGTTTGCATGCATAACAATGATAAGACTAGTCCCAAAGATATATGCCAAGAGGAGAGAA

A\_14\_P102487 CTGGGTGAGTAGTTTAGTCTGAAATGACAGAATATTCATTTTTTCGTCTCTCTGAGATAGT

A\_14\_P110803 CTAGGACCAATTCTAAAACCTTGGAAGAATATTAGGGAGATGAATGAGAGAGGTGGAGA

CUST\_9154\_PI426210822

TTATTTTCAGACATATATAGTAAATCCTGGAATGTATTCAGATCAAAGATAAAAATAGAGA

A\_14\_P126248 ACCATATGTGAGAAAATAATTTCAAAGGCAACAGGGAACCTCATGTGCATGAAAAATAGG

CUST\_1675\_PI426210822 CTGCAGGCTCTATCCTCCTCTCTATTTTTTTTTCTTTAGGTACTIONCTGGCTTTTG

A\_14\_P127581 AGTATTGGTGAAGAGATAGAAGAAGACCTTTCTGTGGAAATAGATGACATCAATACCAGT

CUST\_4791\_PI426210822 CTCTCTTCCCCACCCAGTCCTTTAAAGACCCACCAGCGACTTTG

CUST\_286\_PI426210822 ACTTACTCCAGTTGCTGGGTATAAGACCGAGTGTGTCTGTTCTTAACACT

A\_14\_P130183 TCTGGGGTTCGATTCCGCACAAGCCTTTCATCAACATCTTAAAATAGTAACT

A\_14\_P121150 GGCCTGGCAAATTTAAGGGTTCGAGAGGTAATAGTGGTTACCATTTTATTGCTATTATTT

A\_18\_P10759092

TCTGTCACAACCTTTACCATCTGTCAATAAACGCTCTTATGAATCCATGTTTCAGCATTCTA

A\_18\_P16931404

AAAAATCCTTGAACCTCGTAAAGACTAAAGGTAACAGTATAATAAACAGTCAACCCAACCA

A\_16\_P17380289

TGACACATCTTCTTAACCGAAATTCCCAAATGATTCCACTAATAGTCACAAAAAGAGG

A\_16\_P01648659

GCTCTATTAGGTCAGAAGATTGAGAATGGTAACTAAAATGGAAATTATGTGAAACTGGCC

A\_16\_P01567807

CCAACCTGTTCTTTTCACTAAGTGTGTTTGCCTCTAGTAATCTTTAATTTTCCGCCAAAGG

A\_14\_P138848 GATGTCCTTCATGGAACAGTTGATAAGTTCAATTCATCAACATTTACCCTACAGTCTGT

A\_14\_P118365 TAAGATTATTGAACCTGTGAGGTTCAATAAGTGAGTTTACTATCCAAAGAGGAAATTGGT

A\_14\_P104438 ACATGAATAACAAGTTGAATCTATGTTGTTTTCATAGGGACTAGAGTCCATTGGACAGTC

A\_14\_P113118 TCCCAAAAACAATCCTCCAACCTCTGTTGGAGACTTTACTAAGTCTTTTAAAGGAGTTTAT

A\_14\_P139991 AAATCTTGGTCGTGATGACAGAGTTATTGGTGATCATGGAAAAGAAGCAAGGTAATTCTA

A\_16\_P00266851

ACCTCTACCCTATTATTGCATTTTAAACAGTCACAGGATTCCACTAGATGACCAAGTTTT

A\_16\_P17818502

CACAAAATATTACAATCCCTACTGAAAGACCACATAGATTTGACAGGATTCAGGCTACTG

A\_14\_P121628 CTATTTATAGTTTCAGCCTTTTGGGCAACAACATCTCTTCCAAGTTTTGACCTTTGGTAT  
A\_14\_P127940 CAGAACTCAGTCCATCTTGAGGTTAACATAGATATACCGGATGAACTTTAGGGAAGAAAA  
A\_14\_P128655 GGACTAAACATTTCTGACAAAAGAAATTCACAGAGGTGCTGAGGAATCTAATGCATTAGA  
CUST\_6610\_PI426210822 TTCACATCTTGTGGATCCTCAGAGCCCGTGCTTCCAAGCAAG  
A\_16\_P01796724  
ACTTGAAGCCTACTTTTTAAACCATTACAAATATTTCTGCTTATCCCTTACAAATACCCA  
CUST\_9863\_PI426210822 CATCTTTCCTAACAGTTCCTCACAGTTCATCTGTACAAGACACCATGAGAGATT  
A\_14\_P130395 ATTAGAATTTAAAGTAAACACTTAGCAGAAGAGGAGCGACTTTAAGTCAGAGAGACCCTT  
A\_16\_P03019654  
CAGGGGAAGTTTATGTCTTCTACACAACCTGGTCTATGTGTTTTTCGTCTGACAATAATAAC  
A\_14\_P110825 ACCGATCACTCTACACTTTTTTCAGAATTTTCAGAATCTGTGACATTAGATCCTTTTTCTT  
A\_14\_P113388  
ACTTAGACTGTGAATCTAAGGAGAAGGGGAAAAAGAGAAATATTAACCTCTGAGGAGTTCA  
CUST\_635\_PI426210822 ATGAGCAAGAAAGCACCCCTGTGAGCATAACCAGTGTTGGTGCAT  
A\_14\_P132420 ACCCATATGTCTCATCAATATCACATATTGTTTCAGGGGAGGCTTATTTGAAAGTAATGTG  
A\_14\_P120835 CCTTTCCTTTGTAACACCACTTGAAGTGGCAAATTTATTTGTGTAGTTTTTGGACCAGT  
A\_16\_P21116218  
AACTTGAGTAGAGGCACAGATGAATGACTAGACCGAGTAGTATCCATATTCCTGCTAAT  
A\_14\_P111046 GTGAAGGTAGTCTTTGCGCTGTCCTTGGCAGTTACAGATTTCTGCTTATTTTTTCAT  
CUST\_1574\_PI426210822 TTGGACTTAGGGACTGGAGTCCTGCCTGGGGCAGAACTTAGATT  
A\_16\_P40929481  
TCGCAAGTTGAGTTCTATATAATGTCAGTGTATACCTATAATAGACTCCTAGACCCCTCT  
A\_16\_P19202142  
AAAAGCCTAAAAGATTTGTGGTAGAGATCTTTAATCCCCATTGTAGAGATGATTTGGCTC  
A\_14\_P201187 TTCTTCTAATTCTCTTCCATTCTTCCATTCTCCCTCTACATGAGAAGGTTATGTCTTTGA  
A\_14\_P113512 AACTGCCTATTTAATAACCCAGATATCCCCACCTCTCCACTGAAGTTAATTATAATGAA  
A\_16\_P01598838  
ACACAATATTCCTGTTCTCTGTCATATAACCCCAAAACTTCTTTTTCTCTTATTCCCAA  
A\_14\_P103127 ACTAAAAAGACAGTCCAGACTCAAACCCAGTCTAGACTCCACCTTAGTT  
A\_14\_P119351 GTATGCAGAGGTGACAAACAATTTGAAAAAAAAAATACATTGATGATTTCCCTCACTTCCC  
A\_14\_P106196 AAGTATGTCCAAATAAATTGTAGTCAGAGAAAGGTAAGGAGTTCTTTTAGCACCATATTT  
A\_16\_P15854116  
AACACCACTGTTTAAACATCTTCCAGATTTGCTTAATCTCTACCGCATTATTAATCGGCT  
A\_14\_P134355 ACTGGCATTGTGTGTCATTTTTTCTTCCATTTTGGTTTTGAGTAGTGGTGTGATAAG  
A\_14\_P100366 CTAAAGAGTTTTAAACCTCAGACTTAGTTCTCACAGGCACTTGATGTTGCAATATGCAT  
CUST\_754\_PI426210822 CTTTCTACATCCCCAGGAAAGCTGTCCAGGGTCATCCTAACCTCT  
A\_14\_P107821 GCCTTAATTATTGATTGGAAATCACTGCACACAGAGTTTTGTGACGCAAATTCCAAATAAT  
A\_16\_P03475125

TTAGTTTTCTGCAATCCTTTTTGATATCATCCAACCTTCCTCTAACTTATCCTGCTGTC  
A\_14\_P124000 ACACTGGACTTTTGGCTTTATTGTAGTCATTACTGTTACAATATTGATAGCACTGTGGAC  
A\_16\_P35366840

AGCCTCAAAGCATTGATTTTTCAAGTCATGATCCTCTAGAAGTACCTCTTAAAGTAATC  
A\_14\_P109441 CTCTGAAAACACATCTACAAAAGCAAATGAACTCATCTGCAAAAATAAAAAGCACATATCT  
A\_18\_P14133807 CTGTATGGGCTCTGCCTCCTTCGTGAAGCCTGTTAAGGGTTTTCT  
A\_14\_P137039 GTTACTCTCTCCCCATTCTTTGAATTTATTCCCTCTAATCTCCTTTCAGAATAATTTGC  
A\_16\_P39605407

TACGTTCTGTCAATTGTCAAATTTGCTTCAATCTTCAAATCAATTTTTCGCTCACTCCTC  
A\_14\_P201097 TTCTGTGATAAGTATGGTTCATTAATAACTCCATATATTTATAACGTTCCAAAGGACTTA  
A\_14\_P127875 TTGTTCCCATATCCATAGGCGTTTTAATGATCTTATAGTAATCCTGGAGAGCAGAGAGC  
A\_14\_P104989 GTGGACCATCAGCCTCTGAATCATTTTTTAGTTTTGAAACCACTGATACAGATTAGAATAGT  
A\_14\_P105283 TGTTTTGTAAACTTGGCATCTGTAAAATAACCAGCCATTAGATGAATTCAGAACCTTCT  
CUST\_9142\_PI426210822 GAAGACAGACAGGGAATTTGGAGACCTACAGGCTTTGGAGTGAAAA  
A\_16\_P19648193

TCCAGCCCCTACATAAATTTGCCTTAATACACTTAATCCTTATAACAATTTTTTGCCAGA  
A\_14\_P132350 CTGTTTGGATCTTTATCATTGGTGACAAGTATTTGGGACATGATAGTGTCACTTGGG  
A\_14\_P119740 TGCTCTAACATTTTGACAAATAACCCCTGTGCTGAAAGAGAAGTATGTTCTTTTGATACG  
CUST\_9226\_PI426210822

AATTTACATTCCAAATCCTATTACCTGGAAAAGGGATAAATCTTTGCAACCCACCAAG  
A\_14\_P113054 ACAAAAATCAAGTTAGAAACAGTTGATCCCACGTATATTTTTACCCAAGATGTCCGATT  
A\_14\_P101023 ACACAGTATCTTGGATAGTTGCATGACTACTCTGATGAGGCAGATGATCACTTGA  
A\_14\_P100759 CAATGGATTACGGGTATATACTATTGTTCCAATTGTGTGGATGACAAAATAGGACAACGT  
A\_18\_P19047365

AAGCAGGACCACACTTTAAAGAACTGATGTTTGTATAGCCAGTATGACTTAGTGTAAGC  
A\_14\_P112937 AGGAGGACTGGAGCATACTTTGGTATAAATTGCTTGCCTGAATAATGATGTTAGAACCT  
A\_16\_P20848523

AATAGTAGGAGAATATCTGAACTCATGACCTAAGACGAACTCTACATGGTTTGCAAAAAGC  
A\_14\_P118154

TGACAATTTTGACAAGAAAAACAAAATAGTATAAAGCAGGAGGAAAGTGGCTTAACTGAA  
A\_16\_P16486515

AAAACAAAATGCACCTATCTAATGGTTCTGCATCAAAACAATACGAACAGATAACAGGGG  
CUST\_8295\_PI426210822 TACTATTCATGCCTGGTCAGAAAGCACAGACTGGCTATGTAACAGCC  
A\_14\_P105049 AAACGCCACACTGTAAATTCTGACATCGTTTTAATGATACGTTTAACTGAATTAGCCCAGT  
A\_16\_P39694160

AGTTACCTCATCATATCCACAAGCAACAGATTTATGGTCAATTGTATCTCATGCTAGGAG  
A\_14\_P117621 CCATCTTTTATTTGTAGAAACTGGGCACAATGATAAATATCATCAATTGTCCAAAGGAAT  
A\_14\_P105486 ATGCTCAAATGTCTTCAGATATCCATGAATTCATTCTATTCTGCACTACTCCCTTGAAGA

A\_16\_P36445550

GTAAGCATACATAGTCTCAATGGCTTCTTCTGATTTTGGTATATCTTAGGCTTTTCGGGT

CUST\_6941\_PI426210822

TTCCTAAAGCAGCACAGCATCTCTTAAAAAGAAAGCCATGAAAGACTACTAAGCTAA

CUST\_804\_PI426210822 GTGTTACACCAACCCTGACCGGAGATGCACCGAACTGGACATGG

CUST\_6616\_PI426210822 GGATGGGTAATGAGGATTCCACCCCCCAGAAATTAGTATTTCAAAGTATTTTT

A\_14\_P106494 ACTGAGAGCCTAGCAGACTTAAAGGACAAGGTAGTAAATGTTTTATCACTCAAAAATCCA

A\_14\_P122769 TTTTCTCTCTGTTTTTGCCTTTTCAGGTATTACACAATGGCCTCGTTATGGAGATG

A\_16\_P01422417

AAAAGACGACACAATTAGTATGATAATTGCGGAGTTTAAATGAACACCTTGCTTCACTTCG

A\_14\_P131293 TATCTACATCAAAAACCCAGAAATCACACAGTGGATATAAGAGGAAACTCTGACAGTCATT

A\_14\_P105050 TTCTTCCCAATTTTCATGGCTTCCAAGTTCTCTTTCTTGATATCTTTAGATTGCAACTCT

CUST\_766\_PI426210822

TTTGAACATCAGTGTGGATTTTGTGTTGAAGTCTCATTGTCCAAGACCTTTTCCAAAT

A\_14\_P101621 AAAAAAGGATATCTTACTTGCTAGGTGCTCGATCTTGCAAATTAGTTAATGCAGCAAAGT

A\_16\_P18744419

AAAAAAGATGCAGGCAATTTATTGGTGACAAGTCTAGAAACTATTTTCCAAGGAAATGGG

A\_14\_P113493 TGACCCTCAAGATATGGAAGGGTAAAAACATACGTAAAATGCAAGGAGTAGCAGAATG

A\_16\_P39993996

AAAATGCCACATTTCTTTGAATAAATGCTTTGACTTAACAATAATGTATGCATACCTTCA

A\_14\_P130411 ACTTGGTAAATAATCGGAGTGTGTCAATTGAGTAATGAAAAACATGAATGGCGTTGAACT

A\_18\_P11876955

AAGGCAGAAACATCTTTTATGGAGACAGATAGTGAATGATACCTTCCGAATGGTAAACAT

CUST\_567\_PI426210822 AATGTCACTCCAAGGTTGGACCCTGCCCCCGTGCCTCTGCTTTTC

A\_16\_P00353772

AAAAAAGAACTCTTGGATAAGGTCAACGAATCTGTCCTTACAAAGATCTCTGTGTTTTCA

A\_16\_P18736358

AAAAGATGACAAGGCTTAGTTAACTGTGCTTTCCCTAATTCTCAATTCCAGAGTCATTTTC

CUST\_7768\_PI426210822

TTTTTCAACATCACTTTTCATTGATTTTCATGAAAGTCTGCATCTTTTAGAGCAAGATTTCT

CUST\_9144\_PI426210822

ACAGGCTTTGGAGTGAAAAAGTGATGGATATTAAGAGCACAACACTACACACATTCG

A\_18\_P14135346 ATTGCTCTGGACACCTCTTCCACTGAGGCTTTGTTTTTAAAGAGGACTTTC

CUST\_8189\_PI426210822 AGAGTGCCCTTGATAGATATGTACAGGGACCAAAAACAGACTGAAGGC

A\_18\_P22841345 TTGTTTCTTGCAGCCTTTTCCCTTCCCTCGGACGTGATGAATTCT

A\_14\_P136879 TTGATTGAATGAATGAAAGGAATAAAATGACCATGTGATACTGAATGAGTCACTCCCCAT

CUST\_5039\_PI426210822 CTTGAAGTGGAGGCTATTAAGACCTAGTGTTATCTGTCTCAGGGAGGTG

A\_14\_P125343 TCAACTCCACACGTCCATGCAACTGAAGCGCTTTACATAGGATACAGAAAA

A\_16\_P01816849

AAAAGGTTGAAGTTTGACACAGAGAATGAGTCCACAGCATTATATCCCATGGAAAAATA  
CUST\_2495\_PI426210822 TTCACCATTCAATGCTGGCTGGCTTTAGAGTTAATTATTGCCTGT  
A\_14\_P128741 TAGTGGTCTGCTGTTACACAAGAGAGTCATTGCATTTTTAAAAAGTCCATGTCATCAAAT  
CUST\_1955\_PI426210822

CAGTACTTTTTAGAAAATTGGTTTGAAGGCCCTACCTGTGCCCTGTGTTTATATG  
A\_14\_P102544 ATAAGAAAAATACAATTACGGGAAGGCTGCACTGACTCTCAGCAGTTTLAGGTGAC  
A\_14\_P136401 GAATACTGAGGTTTGTGTTTATCAGACGTAGTGTGGAGCATATATACTCACTACAGTG  
CUST\_8849\_PI426210822 CTGTCCGTACAGAGTGTGGTTCAGAGGCTGCCCTTTAACCTGTGT  
CUST\_6127\_PI426210822 TTGTTTAGTGAGCACTGACCAAGCACTAGATACCCCACTGAATACTCCATATAC  
A\_14\_P119495 CCCAGTCCTTTCTCCAAGTTCTTTTCATTCATCATCTCCACTTTCCGATT  
A\_14\_P122238 AAAAGAAACAATTTGATATATAAATACAGAGGTTTTTCAATAGATCATGTTTATTCCCAA  
CUST\_5094\_PI426210822 AGTATTTCCACCCTTTCCCGCAAAGAGGAGCTCAGTGTCTGTCTC  
A\_16\_P02131761

ATGGTGTGGCAATAATTTCTCAAGCATTCCATTCATTTTCATGTCCTAGGTAGAAATAACC  
A\_14\_P128837 CCCATCAGATCCTCAAGATTTTCTTACCTTGTAATAATGTTCCAAGAGAATCCTGACTAC  
A\_16\_P00609536

TGCCTTTCTCAAATACATATCAACCAACATTAGTAATTAATATCCTCATGACATCCCTCA  
CUST\_2985\_PI426210822 TGTTCCTTTCCACCCAGGTTTTCTCTGAGCTCAGCTAGTTCATCT  
CUST\_8815\_PI426210822 GTGGAAAGCTACTCATTCTTCAAGACCCAGTTCATATGTCCTCTCTGTCAA  
A\_14\_P102118 ACAATCTCAAAGGCATTTGGGGCCTAGTCAAGGATAAAGGACTGGAG  
A\_16\_P21521649

AAGGATGAGTGATGAATGCTATCTTAGTGACAAGAGTCTAGAAAATTCAGTATGCATGG  
A\_14\_P119493 TTGCTGCTTTAGTCCCGATAGGGTATTTGACCCCGATATATTTTAGCATTTTAATTCTCT  
A\_14\_P113863 TATTTTTATTCAATAGGAATGGGATACGTTTACAGGTGTGGTTGTTGGAGACATGTTACG  
A\_18\_P12045508

AAATGAGAACAAGGTATCTCACAGAATTTCAAGTATCAGTAATCCACTTACTACCGTAGGG  
A\_14\_P120704 CCAAAGAACTCCATTTATGTCCCTTGTGTGGCAAAAATTTCTCTAACAACCTCAAACCTA  
A\_14\_P114523

ACTCACAAGCGGGTAACTAGGTGACAAGAAAACAAAGATCTTATTCAAAGAGGTCTTAC  
A\_14\_P101750 CTTTATTTGAAGCAGAGGAAGGAGTTCTATCACGAACCCAGATATTTCTTACCCTACTATTA  
A\_16\_P21660044

GTGACATGCTTGCTCATATTTCTCATCCTTCTTCTACCTATTGCATTTTCACCTGAGATAT  
A\_14\_P105081 CTAGGAAAGAAATTCAACATCACCATTGCTTTGCCCTCAGATATTGTATTCTGTATTCA  
A\_16\_P00685208 TAAAAGAAGCCCATGGGATTAACAGACATTCTGAAACACCAACCCTTAGGAAAG  
A\_14\_P113324 AGATACACAGGTGGATTTGAAAGCATTCTAAATGCTTAGTAGCCAATTATCAGCAAGGAA  
A\_16\_P03761864

ACCTGAAAGGAGAAGATAGTGTCAATTACCAATCATCCTTGAACAATAACAAAGACTGAAA

A\_14\_P114294 CTATTTCTTCTACTCCCCAGCACCTACGAAGTTTTATTGAAAATCAGTGCAGGCAAATAT  
A\_16\_P21613142

ATCTAGACTGGAGTCTTTAAACAAGTAACTTGGCATTTCAAAATCATTGCTTCTCAACCG

A\_14\_P103093 CCATTTGGTCCCCTGGACTGTCTTTGTTGATTCTAACTTGTAATAAAGAAAATATTATT

A\_14\_P134605 GCAGAATAGAAATGTGAACCCAACTCCTGATGGCCTACTTGACTTATTTAATTAAAGATGA

A\_14\_P128355 ACATTTTAAGCATCAGTTTTTCGTTGTTAAATGCCGTATTCTCTTGGTGCTACTGCAAATT

A\_14\_P107604 ATGTGATATCTGCAGTTTCGCAAGTTGTTAGTGATCCATGTATACAATACAACCTGCATT

A\_14\_P102794 CTTTCCTTGTGTTTTTAGAATCACTGATGGTGCTGAGTTTAGTCACTGACAACAAAGAGT

A\_18\_P23435464

CAGGACTGATATGGAATTTTTCTGGTGGAACAATTAGGTTAGCACAGTCTGATGTAATTT

A\_14\_P139546 ACTAATATTTGCAATCTGCTGGTATTTTTAACATGGGTTTACAGAGTATAAACCCCAAGG

A\_16\_P02847502

GGTTTTCCCATTTTCTTCTTACTTACCATCCATATACATACCCTCTAGTCAAAAACCA

A\_16\_P16371607

AAAACCTTGCTTAACACATCTGGGTTCTAGAATGATATCTTTCCTGGTCTATTGGCTACTT

CUST\_3308\_PI426210822

CAGACTAACCTGATCTGATGCTTGTAGACTAGTTATCTTAGTTTGCTTCTCCAGAAGAG

A\_16\_P19201740

GATTAAATGAACTCACTCTGATGTTCAATTTCCAGACAATAATTGCCCTTCAGAAATGCC

A\_16\_P00511300

TGAGATCAGAATACCTATTATGAGTCTATAGCCTACCAGAATCACTATCACGAAACGGTG

CUST\_6545\_PI426210822

CCAAAAAATTATCTGGATAGAAGAGGAAATTTTTGCTTTAGTTGCCTTAGTGATTGAGCA

A\_14\_P107355 ATCATGCAAGGGCCAAAATAAGGCCTTTATGTAATTTGAAATAAAAATATTAATCATAA

A\_18\_P22840532

CATCTGAAGCAGAACGAAAAATGGTATGGAAAGCAAGGCACCTGAAAAATTTTCAAAG

A\_14\_P113811 TGGGATGTTTTATTCTGCTTGAGGGTATTTTGGGGTAAGTTTGTTTACAACTTGTTAA

A\_14\_P124510 AACCAACAAAGGGTGAAAATTAAGTAAACTTGATTGTTAACTTGTCAGACTGGAGTCC

A\_14\_P115208 TGGCTTTTATTCTGAGGGTATTTGAAGGTTTTGAGATCAGAATATGAGTTAAATTTCCACC

A\_14\_P130300 ATAAGTCATAAACAAAGCAACTCACGTGCAATCAAATAGTTTACAGTGGGGGAGTGC

A\_16\_P20050749

TACTTAGTGTCACCGTTTTCTAGAAATCAATAAGACTATTTGCCCTAGACATAGTTTCC

A\_14\_P122120 CTCTTATAACAACCTTCTCATCAAAGGCATCTCTCACACAAGCAATGCGCTGC

A\_14\_P112112 CTCAAATCATGTGTCAGCCCTGCTAAAAGTTTATCCACCATAAGATAAAGACAAAGGAA

A\_14\_P124943 CTCCTACTTATGTCCTTGCAGAGATTGAAGACATGCCGCTATTTGAGCCA

A\_14\_P100677 CTGAGGCCAAAAAGAGAGGAGGAAGAAGATTTTATAAGGTAAAAGGTCCATTTTCTAAG

A\_14\_P201633 ATAACCAATTTACCATCAATGACGCTAACAGTCAGCATATTTTAGGCTTTTTGCAATT

A\_14\_P109991 GATCTGAGTTTGAAATATTCACATAGACAGTCCAACGATCTATAATCTGTAGGGTGGAGA

A\_14\_P116425 GTCAGTTTATTGTTGCTCATGTATTTGGCCCTCATGTTTCGAGTCCCTGTTTTTAATCA

A\_14\_P138131 CTTCTAGAGCCTTTTCTCTTTCTATTTATTGCCCCGGAAGGCCTAGGATAAGT

A\_14\_P102767

AGTTGTATGCAGTTAAAAATGAAGGTCTTGAACCTTGAAGGAAAAATCTGAAGAGAGACT

A\_16\_P36230239

TAAGCCTAGGCAATCTTTTCCTTTGTTTCTAGGTTCTTTTGCATCCATATTTTTTCACT

A\_14\_P129372 CTTTTAATTTAATGCACCACTTTATGATTTTGTAGCCGGACAGTTTCTAGGTGATGTGG

A\_16\_P18953425

GTATGCCTGTGGAATTACAATTGTTTAGAGAAGCTTCGGAATATTGACATCATCGAACTGT

A\_14\_P132219 TAGGTTTTGAACAGGCTCATTTTTATCTTTGAGTCTTAAGGATTCCATAGACTCCATTGC

A\_14\_P129559 ACGCTGATTGATGATAAGCCATACTGTGCAGAGAAAAAGGCAACTCCAATTAAGCTC

A\_14\_P134005 GCCCTGAAAGGTGTCCTGTGTGTTACAAGTCAATTACTTTTTTTTTTTTTTCCCAAACA

A\_14\_P124723 TTCTTTTTCATCCCAGAAGGAGAATGGACAAAGTAAACAAAGGTAAATCATCTAGATTTAA

CUST\_1877\_P1426210822 AATGAACTTTGGATCTGGACCTTTAGGGGTAGACCTGTGATAGAGTCTG

A\_18\_P15052842

ACCCCTGAGAAAAGGTTAATATATCCCCTTAAACATTCTTAAGTGCCAAATCTCTCCTAT

A\_14\_P202443 CTGAAGACGTTTCTTTAGAAATATCATAGTATCGAGGAGTATGGGGTAAGTTGGTGAACG

A\_14\_P112333 AGAAACCAGGATTTAGAGAACATTAGCCAGTCTATATATACTCCAGCGATAGGCCAATAA

A\_16\_P00008411

AAAAGCATCTGTGTGTATCTGTTCCAGTGTTTTTGAAGTTATTGTTACCCCGATGTGTTT

A\_14\_P138392 CTTCTGCTTGGAGGATTTGGTTTTTTGGTCGTCCTGTATTTTCATTTCAAATGAAATATT

A\_16\_P19315560

TTCTAGCCAACCTTCTCTAAAGAATGGAAAAGCTTGTGTATCTGATTTTACATGATTGTG

A\_14\_P137525 AAGTGGAATGGCTCATTATTTTGTTTTTGTGGGAGCAAGAACAACCATCTCAACAAT

A\_14\_P127382 AGATTGGAGTATGTCTCTTTCATGTCCAAGTGGATATTATGGAAGCTCGATATCCAGATA

A\_14\_P126955 TAGTAGTGTCTTAAAAGTTTTATTTCCAGAAAGGTGAAGTGCTTTGGTGGTGTAAAGGAAC

CUST\_4209\_P1426210822

AGCAGATGGAAGTTTGGAGCTGTGTTTTGTAATTCTTTTTTAAATGTTTCGCCAGAGCAT

A\_16\_P19264015

ACGTTTTGGCTGTTTTAACTTATACTCCATAAGCATTAAATCCCACCTCTCTTATTCGCA

CUST\_3856\_P1426210822 CTAGGGTCCAAGCTCAGGGCAGGGAGATCTACTGGAGGCAGCGTAT

A\_14\_P101013 CTGAGCAGGTGTTGATTTCTGCTTCCCCATTCAATGTTTTTTGAC

A\_16\_P21534335

GCCTTCCCTAACAATTTCTACAATAGTATTCCAATTTTGGAGCCTGAATTTCTTTCTCAC

A\_14\_P122363 AGCAGGCTGTGCCAGGAAATGTGTAATCTTTAATATAACAGTGGTTTTTTGTGATTTTAT

CUST\_3611\_P1426210822

AAATAAATGATGGAGTAGGTTCCAGCGTTGTTTCTTCTTGTGCTGCCATTTCTAA

A\_16\_P03294375



AAAGCATTTTGCTGAATTAAGTGAGTGTCCATAATTCTGGGTTGTTCTAACTCTAAGGAG  
A\_16\_P17406441  
ATCTCTTTAAACTTTTGTGTAACCTCCCTAAGACTTATCCCATCTATATCTACGACCAGG  
A\_14\_P113238 AAACAACCTGATTGAAGCCCACGAGCAGGGGAAAGACATCGATCTAAATAAGTAA  
A\_14\_P116195 ACAATGATCCACGGGTCAACGTGATCACATTCCTTCTATCCTTCTTGTATTATTATTT  
A\_16\_P16842002  
ATCTATCAGCCTAACTGCCTATTGATCATCTCTAGTATGAAATCTGTGCTCATTAGCCTC  
A\_16\_P39039112  
ATAGAACCAACATTTTTTCTGACTACGTAGATTCAAATCCCCAAGTTACTTTCACTAGCC  
CUST\_1289\_PI426210822 TTACTGGGAACATTTGGTTTCAGTATCTGCACAGCAGTTTGTCTGTCCAT  
CUST\_7386\_PI426210822 AGGAAATCTGAACCTGCTGCCAAAGAAAACCTCGCTTTGCCTTTTGTAAAAA  
A\_14\_P104636 GAAAGGAAGGCAAGAGGACAGACTATACACCTTTCAGTTGCCTGAAGATTATTCT  
A\_16\_P35931921  
AATCCACTAATCCACTAACTAAGTCAAATCTCTTCAAATAACTTGTCTCTAGCCATCTT  
CUST\_4793\_PI426210822 GACTTTGTGAGATTCTAGACTCCTTTCCCTCGTACCTCCTAGCCTTA  
A\_16\_P58424308 ATCTTTTATGCGGCTTGGGGTCTTGCTCCAGGCTCTCATGGCCGTT  
A\_16\_P02040978  
AAAAAAGTCTACAATAAGCCAGAATGAAATTTCTAGACAATATCCACGTGACCAGTCAGG  
A\_16\_P19872421  
AAACCATAAGCCACTTTGTAATGTGATTTGAAGGAATTAGGGAAGTTTACAACAGTTTGT  
A\_16\_P35728232  
ATCAGACTACTTGGACCAAAAATTATGTCTGTGATCATGACATCTTCATAACCACTCCTA  
A\_16\_P40425379  
AACTGACCACATAAGCATTCTTACATTCCATACAAGCAAAAACCTCTAATTCCTTATCCT  
A\_14\_P127521 ACTGCAATCTAACACAATAAAATGGGAGTAATATTTTTAAAGTGTTGTTAATCTGCGACT  
A\_16\_P02612749  
CTACAGTCCTTTAAAAGAACCTACTCTCATGACTTTTTTCTCAGATTTACTCACGTCTTCC  
A\_14\_P135180 ATACACATCACTTTGAAACCTGTTTTCTTTCCAATCTAAAATGAGTTCGGTTCTATTT  
A\_14\_P104542 CAACTAAATATCCTTATCCAAATCAATAAAGAGAGAATCCTCCCTCCAGAAGGGTTTCTA  
A\_16\_P19411165  
GGCAATCAGTCTACATCTAATAAGTCACCTATCCTATGTCAAAACAACGTCAAAATCCAG  
A\_14\_P135827 GCCACAATTAATTTTTCAAATTTTCCAGTTAGTTCTGATTTTCAGGTCATCCAGAAGATCC  
A\_14\_P122708 GAACAACTATCTAACTGTGCTGGGGATTACCCGGTCAGATTTTAGAGATAAAGAGC  
A\_14\_P106976 GATCTTAAAAGGAGGGGAAAGAAAGAGAAACAACACTGAGTGGGAGGTAAAAGT  
A\_16\_P16751410  
ATGTGGGCACTCTAAAATTTTCTTACTGTCTGACTTCTGAATCAACAATGTTATTGCTGC  
A\_14\_P124230 AGTGACCCTTTACATACTTTCTTAATTTCTGGAGTAGTAGTCTTTTTGGAGGCTGCTT  
A\_14\_P110047 TAGTCTCTTTCATTTAGCCTATTTACGTGTATGACTTTCTTCTTAGATCCAGAATCACC

A\_16\_P15469428

AACTAACTAACCCTATCACCAGTAGACCAAATTAGAACTTATCTCCTTTGCCATTCCA

A\_14\_P118667 AAATATAAACCAAACCTGGATAACGAGAATTTTGTGTATCCATTTGGCAAATGCTCAGGG

A\_18\_P22840860

TGAGGTCTTCTGAAAACCTTTTAAAATTTGTTTATTTTTTTGAATCAGTAGTGTGTATAGTT

A\_14\_P120771 AATCGGCTACAATTTCTCTTAATCCCTCTAATGCTTTCTAGGTGTGGATATCAAGAAAC

A\_16\_P20053368

TCTGTGCTATCAGAATAATCTTCCTTCAACATAAACATGATCCATTATTCAACACCCACC

CUST\_7643\_PI426210822 GTGGCCAGCTCCTTCCCAGCCTTGCCAGCCCATTGTCTGCATTTG

A\_14\_P123298 AAAATAATTCAAAAAGGGGAGAATTTTTTTAAAGGGGGGAGAGTTGTCATCTCAAGAAAC

A\_16\_P18510318

TTGCCGAATTTACAAATTCAGCCAATCTGTATCTGAATCACTCTATAACTAAGCCTTGT

A\_16\_P01906483

TGCCTTTTTTGCAGAAGTTTGTCTCAAATTTGGTTTCTCTTAATAACACAAAAGAACCCTCAA

A\_14\_P102881 CTTTTCTCCCCAGTTAATGTTGCAACTTGTAGTCCAATCAATACTTAGTTAACAGTTCA

A\_18\_P22840874 ATTGTCCTCTGTCTGCCCTGCCTGTGAGACGGGCCATGCTCTATG

A\_16\_P02378739

AAGGGCATTTTTAGAAAGCATTTCGCCAACATTCACTATTTACCACCATAAATGTGACTC

CUST\_6052\_PI426210822 AGAAGTGAGCAGTATGTGAGCCCTGCTCTCCTGCTGTGAGCAGAG

A\_14\_P119427 GCTTTTCAAATTCAGACAACATCTGGTCTCTGCAGAGAAAAATAACTAATTCACACTGTG

A\_14\_P130275 TTTTGTATTAATGGTGACCTAGTTTTTATGAGACCTTTCAATGAAGTGGATTGCTTCTCT

A\_14\_P127299 TATTTCCCAGCCTGTAAATGGCTTCTCAGTTTTGCTTTGAGTAATCAAAAACCACTATT

CUST\_6460\_PI426210822

AGCACACATATGTTACGCTTTTTTTTTTTCAGCATTTCACAATATTCACTAAAGCATTTTAT

A\_18\_P12784335

CACACTGTGGAACCATTACATCCCTTCTTTAAGAGATACTCGTAACCTAACTCATTAGTA

A\_14\_P138432 TAAACAGTTTTGTCAACTGCTTGAGAGTAGCGTCTGCTTTACAAAAATTAACAACAACAA

A\_16\_P58424246 TATCTTTCTAGAACCAGTTGGCTACTGGGGCAGGTTCTTCTCATGGT

A\_14\_P128448 TTTTGGAAAGAAGTGAGGTTTAGACTTCTCCATGTAAACCATGAGCGTGACACTTT

A\_14\_P117916 CACAAAATGCATACCATGATAGTGGACTGGAAAAAGTTAAGTCATCCACTTAAGATGACA

A\_14\_P105928 AGGACTTGAAAGAGGACCTTCAAGAATATGTCCACTGAATTAACGAGTTTCATATAACAG

A\_14\_P133996 GCTCTGACTAAGGGAAAGTTCTTGATTTCTGCACTGTTTGGCATCTCTTGATATTTAAAA

A\_18\_P22840510 ATCAAATCATGATGACCTTTTAGAGTTGGGGTCTGCCCCCACTGAT

A\_16\_P02601363

TTAGGGAACCTTCGTGACAATTTCTCAACTTTGCCTAATAATGACTTATAACTGTTATGCA

A\_14\_P121447 AAAGTGGAATTTCTTGACCTGGTAAAGTTCAACTGAAGGTAAGTGTATTCAATGTTTGC

CUST\_9654\_PI426210822 CTCCCGTCTCAGTCTGTGTGAGAAGCGTGCATGAATTTCTTGCTAT

A\_14\_P118127 AGGACTTCCTTTCTGTTATAAGGGGTAACATTATTAACCTCGAGAATGTTTTTACGCCAGA

A\_16\_P20494446

CTCAAAGACTGATCATCCCAAGATCTATTTTTCCAACTAATGGCACTTTTCTACTGT

A\_14\_P118393 AGATCACAAAGCACTATCACTTTTACTGCTGTTACCATAGCAATGAGACATAGAGGTTCA

A\_16\_P16191489

GTGAGATGTAAACACTGAAAGGAAGTAAGGGTAGAGCAAAAAAAAAAGTAAAGCATCAGGT

CUST\_5118\_P1426210822 AGATGAGTGTGAGTGGCCTCTGCACCAAAGAGTTCAGTCTAATTCTG

A\_14\_P121486 CAGGCCATTTTTTAAGTTGGTTACTTCAAAGTAAATAAACTTTAAAATTCAAGTGATGCC

A\_14\_P115441 GTGATCAGAGTGTAGAACAACATGGACATTACGCTATGCACCTGGAATGAAAAAGAAA

A\_16\_P02251135

CATTTGAGCCCTTAACATTTTTTTTTGAGCCTTTGTATTTTCCATTATCGTTTTCCCTCG

A\_14\_P116206 GACAAAGTTTACCAAATGAAAAGCAAACCTCGGGGATACTGTCTGATCATCAACAAT

A\_14\_P109275 AAAAGTAAATTTTTTTTCCAAGACTTCTTTCCCTGTTCTTTTCGCATGTAAGAAACCATGAA

A\_14\_P122183 AGAAAAATAAAAAAGAAATTTTATTACCAGATAGGATTTGGCTGAGTCTCCAGAGTCAA

A\_14\_P129293 CTCTATCTGGAGAATTTAGTAAAGTTGCAGATGAAGAGGAGAGCCGCTTGCTAATG

A\_14\_P112655 GCATCAGGTATATTTATAAATTGAGAAATGCAATACCTGCCCTCCTGCTTAAGTAGTCTC

A\_18\_P10638448

AAAGCAAACCTTGTAATCCACTTTAAAGAAAGCAAGTGAATACATCCCAGTTGTCCTA

A\_16\_P58424269

TTGGAGATAAAATGGTATCTGTAGGTAGAGTTGTGTAGGTGGAAGATGAGATGTTTGTAG

A\_16\_P19306250

ATTCCACTCTCTAGCCTATAATAGCCACTCTTTGTTAAGTCATTCTATCCTCTTTCTGCA

A\_14\_P112085 CTACTAATAATGGGAAAAATCCTTTGGCTGTGTTTATTGGTGAGACTGATTAATCTGGCA

A\_14\_P201670 GAACAATAAGTAAATCCACAGGCTCCTGTTGTAATCTCATTCTCAGACTCATGTTTCTT

A\_14\_P137240 CTTGACAAAGCCCAGGGTCTGCAAATGCAATTAATGAATTTAAGCAGTCTGTAAGTATA

A\_14\_P101757 GTTTTCCATTTCTGCAAACCTGTCTGTTTCCCAGAATCTCCCTGTCC

CUST\_1567\_P1426210822 GTAGAGGAAGGAGGGTTTGGAGCCAGGCTTCTGGAGAATGGTGGTG

A\_14\_P124045 AGGAAACGCTCTTCTTTTAAAAATTACTCTATTATTATCAAATAGAACCACAGTATCCAA

A\_16\_P15936074

ACTGTCAGATAACGGATGACTCAGATTTCAAATGGATATGATTACACGGACTCTACTTCT

A\_14\_P100332 CTCCTCAGAAGAAATTATTACCTGAATCATAGATGATCCTCTTTTTCTTGCTGGTTGCT

A\_14\_P114099 CTTCCGTTGCTGCTGAATCTCTTGAGAAGGTTGATCATGAACTTATAAAAGTAAGAATT

A\_16\_P18128820

TTCAGCCATCTTATTCTGCTATTGAAACACTTCACTTAACTCTTCAACAATCCTACTCCT

A\_16\_P18134269

CAGCAGTCATCACTACAGTTTCTTAATTTCCATTCCAAATTTTCTACACATAGACTTGGC

A\_18\_P17014058

AACAGGCCTTAAAACAATATCCACAAACCAATTCAACTACAACATATAACAACATGAAATCA

A\_14\_P127482 CTGACTCATTTTTGTATTCTCTGGATCTGGTATACATCTGGTAAGCATTCAAGTCA

A\_14\_P124204 GAATTCTATTCCTGAGAGCAAGGATGAAGGCACTCAAAGTTTGACAATTCTATGGAATTA  
CUST\_2024\_P1426210822 TACTCCTTACTGTCTGTGCCCTGGGGAGGTCCGGTTAATTCCTAT  
A\_14\_P123808 TTAAAACTGCAGTTATACTTTGCAGGCTAATTCCCGTCTAGCATTATGCAAAGATCT  
A\_14\_P137203 ATTTAAAAATGGAATTCCTAACCACAATGTGTGCACCTCATCATAGGAAGGAACACAAAT  
A\_14\_P110801  
AAGGAAGAAAACAAAACATTACTCCTACCTAGCCAAAGGTAATAAAAACTGGGACAAAAG  
A\_14\_P113433 ACCAAGTATCTTTTTTGGACAATAAGTCTTCAGGTTCTTCTCCAGAAAAGGAATTGATAC  
A\_18\_P13720853  
GCCTCTAGAACTGAATCAATGCTATCTATCCTATGACCCAATATTGAAAGAAGTGAACCA  
A\_16\_P03365334  
AAAGCACAGTCCTAATCGTATTTTTCCCACTCAAAAAAGTTAAATAACTACTCATTGCTT  
A\_14\_P136923 ATTCTAAACATCTTGAGTCCAGGATTTTTTTTTCTTTTTCTTAGTGGCATTACAGAGTC  
A\_14\_P123265 CTGATTACAGTGAATTTCCATGTTAATTAGAGAGGCAGAACGTCTGAATATCAAGAGGTG  
A\_18\_P14131880 ACTTTCCTTGCACACAAAGCCTAGGCCTTTCCTATCAGCCTGTCT  
A\_14\_P121037 GCTTTAAAACTTTACTTGGCAAACCTCAGCCATGATTTCTCAACTCAGCAACTTAAATGC  
A\_14\_P109052 GAAACATACTTTGACCATGAAAACACGGTGGATGCACCTTTCTGTCTAAATGC  
A\_14\_P111856  
AGAGATGAATTCTGCCTAGGGAAAAAACTAGAGAAAAGTCCCACAGAAGACATAAGATTT  
A\_14\_P122871 GAAGAAGAGTCTATACCTGCTTGGAGGTAAAACCTTCTCTTCCATGTAGTAATCACAATT  
CUST\_5424\_P1426210822  
TAAAATAAACAGTCTTAGGGGTTACTTGTGACTACTGTGGGACTTAAACACTTTTCAGACA  
A\_14\_P112028 TAATTCACACTCATCAAATTTTACTCCCCTTAAATCCCCAACTAAAAAGTAATGGCCAGT  
A\_16\_P17713006  
AAAAAATAACACCAAACCTATAACACTATCTTAAAAGTTAGCAGATTAGAGTCCACAAAT  
A\_14\_P127546 CTCATATATATAGAGACAAGTGCAATGTTCTCATACTCCAAGTCTAGTCCAGAAGTGTG  
A\_14\_P135009 ATTTCAACCAGGCATAAATAAGGCTCAAAAAAACCTCTTTATTGTGATATAAGTAACCC  
CUST\_698\_P1426210822 ATGCCAGTTTGGGAGACACAGTGGAGGAAGAACCTGTTGTTTTCTT  
A\_14\_P111311 TGACAAGGAGGAGGAAAAATAGAATCTTAAGAGACATTAACAAATGACTATCTCTAAGTG  
A\_14\_P139339 ACTGGAGGCTGCAATTGAATTCACTAAGAAAGCAATAACTATTCTATCCAAGGTAAAGT  
A\_14\_P102978 AAAGGTTTCTCAACAGTGATCGCACTCAACAGTTTTCTCTTGAGAATGGAGTTGATAAT  
A\_14\_P127279 CTCTTTAAGCATCTCTCTCCAAGGAACACAAAATTCTCCAACATAACCTCACCC  
A\_16\_P18068200  
ATGGCTCTATTGAGAAACCAAAGACTATGTAAGAACATATTGTTTTTCGGCCCTAGACTAG  
CUST\_4094\_P1426210822  
CGTGTGATGATGGCTAAGTGCGCAGAACATGTGAAATTTAAGTAGATTTGTGGA  
A\_16\_P19717565  
AAAAAAGCATATTGTGTTGATCATCCACCAAGATAGTCTCAAAAGATTCTAAGCAAGGGG  
A\_14\_P122531 GAAAAAAAATAGTGAAGGAAGACTGGAGAAAGGTTTCATCTGGCTTCATAACAGTCTTTT

A\_16\_P39438284

TTGACATGTCCATTGCTATAGAACCACACTACATAGAAATCCATAGGTCCTCTTTAATCC

A\_16\_P01728953

AATGGCAAATCTCTTAAGTAACTTCAGTTCTCAGACAGATTAATGCAATTTTCCGGTGAG

CUST\_9383\_PI426210822 CCAGTCCCTGTCTTCTTCCAAATTCTTTCTCCATCCCTGTTTTGG

A\_14\_P128986 CTATGGAGTGTAAGAATCTGAAACTGCTGACTCCCATCACCAGGAGTC

A\_14\_P101355 TGCTTTTCTTTTTCTTATTTAAGGTTCTCTTAGAAGCACAAGATATGGCAGTGAGAGACC

A\_16\_P15049251

ATTTCTCAAAATGAAATCCCAACTGAAATCTTTTCTTCATTACCCCTTTCCTATGACACG

CUST\_2679\_PI426210822 AAGTTTGCTTCCCTCAGATTAGCTCCGGGGCAGGTCCTGTGTGTCAG

A\_14\_P107817 ACATTCTCCCTTGAGGGAAAAAAGTGATTATTTAAAATATGAGTAAAAGCCATTGCT

A\_14\_P110869 GGCTAAACAGGATGATTGCTTTTGTCTGTTTACTGAAAAATGAGTTTAGAAAAGGCTAGC

A\_14\_P124503 GATCATCCACAGTTTTGCATACTGTTTTGACATCCCTGTTTGCTCTTGGTTC

A\_16\_P18866267

AAGAATTCTGATGGAATGGCTTTTTGTCTAGTTGAATAACGCAATATTCTCTTCTGTGCC

A\_14\_P129626 TGGGCAAAGATATATTCACATAAAAGCCATCAAGATGATTTTCCTTTCGGTAGAAAATCC

A\_14\_P109150 AAAGATTGGGCAAATTCACAGTAAATCAGACATCTTGAGTTGAAGAATTGATTCTCCTTC

A\_16\_P16191506

AGGATTGTAAATGAAACTATACTTGGCCTCAGTTTATTCTCTGGGAAATAGGTTCTTGCT

A\_18\_P22842841 AGAATCAAAGTGCTGGTTGCGAGGTGCCAATTACATGTTGAATTTATCCTTCAAC

A\_16\_P00052961

CAGTGCTTTGCCATTTAACCACAAATCAGTTTCATTCTCAGTAGTGTCTAATTGTTCCAT

A\_14\_P120457 CGTATCTCGGTGTGATTTCCCTTTTTAGGGAAACATTTAATAAGATACAGAAACCAGATTTG

A\_18\_P22841070 TTTTTATTTTCTCTCTGGAGAGCATGAATTCTGGCAGGCCTGTGATCTCTTAAAA

A\_14\_P116346 CTAACACCCTTTTCTCACATCATCTTTGCTACTGTATAGAGAGGTGTATATGTTGTGAGT

A\_16\_P00429928

AAACCCAACATACTACAAGTGAAAGTAATCTGCATTGTAAGGTTTGTATGTGCCCTAGT

A\_14\_P101319 GCACAGTAGATACCACATCAACAGTGCTCAAAAAGATTTATTGAATAACAAAACCAAGCC

A\_14\_P112040 GTCCTGCTGCTGTATACACTTTTTGAATTTTCAATCACTTCTTCTGTGGTCATCTTCTT

CUST\_10133\_PI426210822 CTGAAATGGATCCTAATCAGCTTTCCCAAAGCTGAGATGTTAGCAGACACT

A\_18\_P13144068

AAACATCCTAACACTTGACAGATGGATATTCTTAAATGTCTCCAAGGAAGAACCTAAACC

A\_14\_P125700 CTTCTCACCTGATAGAGCAGGCACTCAACAAATACATGATGACATATTTTTAAACAACCA

A\_14\_P118812 TAGAAATATTTACTTACAATTTGTAACATTTGGGGCTATCCCGCGTATGAATTGAAAACC

A\_14\_P135436 TCGTGACAATGCTGATACTATCATTTTTCTGTGTGTGCCATAAAACGAAAAACAATAGTGG

A\_16\_P02789696

AAAAGGAGGCAACATTTTTAAATAGGGCAGCAAGTAGATTTAACCAATAAACACTGGGAAA

A\_14\_P104521

TAGAAAAGTTAGAAGAGAAGATTAAGAGCCAATTAAGAACCCTCTGAAGAGCCTCTGC  
A\_14\_P201114 ACAGTTGAAGTTTTTTGAGCACCTACTATTTTTCAAAGCACCAGAAGTTAACAAAAGGAG  
A\_16\_P02867075  
AAACAAAGAATGCCCTGAATACATATACAAGTCACAGTGCACCTTATTTTATCTGGGAAGG  
A\_16\_P17665904  
ACATACAAAAAATTCTCCTCTGAGTTAGACTTTCCTATGTTTATACTCCCTTGACAACCC  
A\_14\_P109514 ATTTTTCTCCAGAGGAATAAAAATAACACAATTCCAGTTCCTAGAACAGTGGTTCCTAA  
A\_14\_P137679 AGCAGCCTTGATATAAACTGACTATTATTAATTGAGTGATTGTCTCAAAGGCCCTCCCT  
A\_14\_P133495 CTCTGCTGAATTATTGCTGGTTTTTAAATCACTGAATGTGGTTTGTGGAATTGTTCTCAT  
A\_16\_P19754335  
AAACTTTACGATATCCAATGAACAGATAGACAATGGTCAGTTTTAATAGCCCAGCAATGC  
A\_16\_P58424152 CTTACTAGGTGAGTTTCCTGGGCAAGTCCCCTGACCTTTCTGTTT  
CUST\_8989\_PI426210822 ACTTCAGAGAAGCAGGCGATAAGTCAGGGGGTGGGTCATGTTTAC  
A\_14\_P104568 TTATTCAAATGTAGGAAGAATCAAATTGACAGCAACTTCTAAACTGGGTGCTCTACTTCC  
A\_16\_P16514481  
ATGAGTCTTTTCAAGTCAAATGCAAACAATTCCACCTTAAAATAGCAGACCTCACCTTAA  
A\_16\_P20251646  
CTCAGCCACCAGTATCTTAAGAGAATTTATAATGCCACTTAATAGCCAATTCTGCCATCT  
A\_18\_P14136104  
TCAAAACAATCCAAAAGGAAAGAATTTATGAAGAAAAAATAAATGTATAATAAGATGGA  
A\_14\_P113297 ACTGCCTTTATATGTCTCCTCTGATTTTCATTTGTTGGTGTCTAAATCGAATACCTTACAA  
A\_14\_P110839 GATCTCAGCCGATCTGCATATAGATATTCTGATTTCTTTTTAACCTCGTCAAATGGCATT  
A\_14\_P104926 CTTTCACCTAGCCACTTAGAAACAAGATCAGAGGAAGATATTGAAAAAATGTTGAGTTG  
A\_18\_P22839394 CTCTGGACCAGAGGGTATAAACAGCCACACAGTGGTCACTTCTTG  
A\_18\_P17038319 CACTGGACTCCCCCTTTCATCATCAAAGCCAAATTTTCTTCTTGTTCATCTAG  
A\_16\_P00431922  
TACTCAATGTCCTTACCTATTTCAACTTGGATCTAACTTTATCTTTAAGACACAGGCCT  
CUST\_9010\_PI426210822 CCAGCCAGCTGATGGGGTTCGTAAGTAAATGGCAAACCTGGTA  
A\_14\_P137879 GGTCAGTCTTTTTATAGCATGGATATCTCCAGTTACATCATTTATTTGAAATATGGTCC  
A\_14\_P127829 CCAAAATTTAAGTGGATTCCACTGTATCACACTGCTCACGTAATTTGTGATTTCCAAAAT  
A\_14\_P118897 GTCACCGTTTCATCATCCTTGATACAGACGAGTATGTTTTGAAATACATGGAGAG  
A\_16\_P17953364  
AAGGACAGATAAAAGTGAGCAATTCATTTGCATCTCAAGTCATGACATTTGCCTTGTA  
A\_14\_P109255 TCAATTTTTCTACAGTGTCAATTCAGGCTCTTTGTACATAGCGAACCCAGTCAT  
A\_14\_P105099 CCTGCTGGGATTTGAGGGTTTTTCATTACACTTCTGCTAGGATAATCATTTCCATTG  
A\_14\_P112520 TACCACAACAGTATCATCTTCTAATCCTTCAATCACCTCACACTTATATCTCCCATAATC  
A\_14\_P121820 TATATTATTTTTCTCTCTACTAGTCACAACCTACCAGGAAGGGAAGTTTTCACTCATTC  
A\_14\_P127923 GCATGAGTGAGGAGTAAGATGGGGAGACCTCACATACCTATGAAGAC

A\_14\_P116954

CAAGACTAAAACAGCAACAATAACAAAAGCAGGAGAGAAAGATTATATGGCCATCAAACC

A\_14\_P136132 ATGAGATGGAGTATTTGTCATCAGTTGCTGTGAGATAGATTGGAAAAAGAAACCGATTAG

A\_14\_P137447 CTGCAATACACATGGGGATCAATTCCTCCAATTTTCATGTTTCCTTACTATGTATGTATCT

A\_14\_P117955 CTCCTCGTGAAACGAACTACATGGTATTTCCCATCATTAATGATTGCATTGGATTCTTC

A\_16\_P16191110

GGGTTGCTAAGTTCTAGGTAAAGGGAACGCTTTAAAGATTACAAAACCTCTTTTTTTGGTA

CUST\_1079\_PI426210822 CACTATTTAGCCCAGTCGAATCTGAGCTTTAAGCGTTCAGAAAACACGGTTA

A\_16\_P36230406 TCTTTCTCTCTGGACCAGAGCAAGCCAGAGCCTCTCAGTCATCTT

A\_16\_P03512101

AAAGGAATTGCAACCAGAATCTATGGTGTATGGTTAATACGTGTTACATGCTAACTGCAA

A\_16\_P19251509

ACATGGAGTTACCCAATACATGTCTTGTGATGAATGATATATTTGGACCATGCCATAGT

A\_16\_P01359907

AACTCAACTCTAATGAGGTCTATTTTCCTGCTAACACATCTAAAAGGCTTCCTATTGCTG

A\_14\_P130382 GAAATGAAGATATAGGGTTCAAGGAAACATGACACATTCAGTTTTAGAGATTGGAGCAGA

CUST\_7579\_PI426210822

GTATACTCACACAGGAAATATCTCTCAAATAACATGGGCAGTGTATATGTTATTTTTCTG

A\_14\_P108495 TTATATGGGAGTTACTGGGTGAGTCCAACCTTGAAGTTGAGGATATTTTAGACAAAGACAA

A\_14\_P128177 ATTGTTTTTCTGGACTTCCAAATCTCAAGTGATAAGACCAGCAGAAGCAGGTATACAAAA

A\_18\_P22843014 CTAATTGCGTATTGATCACCGAGGTTCTTGGCATCGGGCTTTTCTTTGAT

A\_14\_P114371 AGGGGACATATAAATCTCTGGTCCATAGACTTAAAAAAAAGTGAGAGAAGCAGATTCTC

A\_14\_P110868 AATCCCATGTTTAGCAACCTACCTTGAATTTTAAATCCTAAGTGCTTTGTTCCTACTGTT

A\_14\_P103297 CTCTGACGCACACGGTATTAGCATGTCTATTTAAAGTTATTAGGTCCCATATAGCCTTTT

A\_16\_P18453251

TCCCTCGCTTAAAAAGATGACAAAAGTTCAAGAGTTCCTTAGTTATTACTTGTTTGCTGC

CUST\_4989\_PI426210822 GACCTGATAGATGTGGTCTGCAAAGGACCGAAGGTTCTTCTTTAA

A\_14\_P107579

ACAAACAAGACTGTATTACAGGTAAGGTCATTTGGTGAGAAAAAAAATGCATGGCACAAA

A\_14\_P131910 AGTTAGTAAGAACCAGTGAAAAAGCAATCACTTATGATCCTGGGCTTTGAAAAATCACTG

A\_14\_P127112 CAGTTTGGGATACAGCAAATACTATTTTCAGAAACAGCCTATGAGGTATGTTGTAGCCATA

A\_14\_P200852 GCAAGTGCCCTTTTCGTTCTCTTAATAATAGAGTCAGGTCCCTTCTCCAAG

A\_14\_P117295 TGTTTTAAATCTTATTTTTCCCAACTGGCATATAGTAGGGTGCTCAATAAAGGTGGGTTG

A\_14\_P128539 TCTCGGGGAAATCTGATGAAAACAACTGTTACAGTATACCTGCATTTTTAAAGACTGGTT

A\_16\_P17208020

GCCATGTGAAAAATCTCAATTGCATCTCCATTAATTCAAAGAACTCATGATAGCCCTTG

A\_14\_P135806 CTGCCATGTCAGTGCTTAGAGGTGGTGATAAAGAGACTCTAGAGAGAGATAG

A\_18\_P14134591

TGTCATCAAAAAGAAGGTGTTCCCTGACATAGACAATTTCCAGAATATATGCTAAGTGA  
A\_14\_P132487  
GACCACACAATGAGATACAAAAGACACACATTTACTGATTTGTGAGAGAGGAAAATCAA  
A\_14\_P130190 GTATAAATGGAGGCCGCAATCATGACACACAGACCTGTCAGGAAGAAAG  
A\_14\_P134819 CTTCAATTTCTGTGTCTTTTTTCACTACATTATAAATGTCTCTTTAATGTCACAGGCAGG  
A\_14\_P116142 ATTTGCTGCAAAAATAAAGCCTGAACTGGGGAAGAATTTGTTGCTATTTTTTGATCAGTAG  
A\_14\_P134211 AAAGAATGTGATCTTTGCTTCCCACATATATCCGGTCCTGATCTTCATCCATTAATAAAA  
CUST\_1801\_PI426210822 GTAGCATAGACCCAACAATCCTTCTACTCTGGGGTGTTTGCTCCT  
A\_18\_P12153627  
TGTGTTATGCCATAGATCACTCAATAATTTGTTGTACATATATGCTTCTCTGCCAATCC  
CUST\_128\_PI426210822 CATTAGGGTCCTCTACGGTACACTCACACAGACCCCAGAAATG  
CUST\_5983\_PI426210822  
CCTTTTATTTTACTTCAATTTAGGATGAAGGTGCTGGTCCTGATCATTAGCCTCATT  
A\_14\_P103607 CTTTTGAGGCATAAAAAGAGGAGCATAAGTTCTGTCTATTAAAGAGATCAATTGTCCAGT  
CUST\_4089\_PI426210822  
TGAAGTGTTTTTGTTCTGTTTTTAATTAGGTTGTGGTACAAGAGGAGCAATTAATAAAAAC  
A\_14\_P134354 ATAAGAGGTCAGCAGCAAGGTTGTTGAATTACTGATGTTTTCCACAGTGATTCATTTTAA  
A\_14\_P137448 TATATGATAGTCATTTTTGTCATAGCCGTTGCTGTGATTCTGTTGGTCTTCCAGGTCTT  
CUST\_2897\_PI426210822 GTTAGCAGGACGGCTGCATTTGGGCAGAGCAATACACAGATACCT  
A\_14\_P103924 CTCGTCTCTTGCAGTGGAATAAGTCACATCTGATGGACATTTTCTGTGCTTATAG  
CUST\_4276\_PI426210822 CTGTTAGTCCATGGAGTGGTGGGGGTAGACTAACTATCTGGTCTTAG  
A\_16\_P37925802  
AGCAACTTTCCAATGATTTTACTGTTTCATACTGCTCTAATGCCTTAATACATGTGGTAA  
CUST\_7342\_PI426210822 GTGTCTGGAGCCATGGTGGCTGGTTGTCCCTCCCACTTAGGGAAC  
A\_16\_P17471165  
AACCATCTTTATTTAAATAACCTTTAAACACTCAATACTGTTTTTTTTGTCACCCTCTGCA  
A\_14\_P130484 GAAAGTGAAGTCTGTCAATTTAGTTTTCTATAATCCACAACCACTTTAAGCCTCAACAC  
A\_14\_P104468 CTTTTCTCTCTTCTTCATTCATATTCATTCCCAACACCTTAGAAGGTGTTGCTTAATTTA  
A\_16\_P36664782  
TACCTGTGCCAAATCTATAGCCAGTCTCATATCTTCTTGCCACTACAATACTAGAACTT  
A\_14\_P134033 ATTAACAAACCACTTACTCTTGAATTCTCTTCTAGTTAACACAGGCATCACTACTTCCAA  
CUST\_2272\_PI426210822 GACGTCTTTGATACCTCCTACCACTGGCTACAGTGGGCTTCATTT  
A\_16\_P00316694  
TAGAGTTCAAGGCCAATATCTAATCAACTGTAAGTCTGCAATATCTGCTGTTTTCTCAGG  
A\_14\_P120811 GTTTGTATGTTAGCCCAAAAAGGTCAAATGATTGGTGATACATACCATGTTTTCAACTCG  
A\_18\_P20463789  
GAAAATCCCACCACTATAATCTACCTTCTCATTTGTCATCAAATTTAATCCTTGCATCCA  
A\_14\_P130548 ACTTAATATATGATATAAAAACCAGCAGTTAGCCAACTCTTGGGGTGTGAACAAGCAAC



A\_16\_P36624456

TTCTGCAACATTTATTCAACATTCCCTAACAAACTTTCATTCTTGAGCACTTTTTGCC

A\_14\_P122891 CAAAGAAATGCCTACTTACAACGTGAAGACTTTATTCCAAGGATTGAGATTTTGT

A\_14\_P129384 GATATGCCTTGATTTAGAATGGCATCAAGTTTCCAAGTCAATTACTTTCAAAAAGGCTCTC

A\_16\_P20452600

ACTGATTACCACTGAAATTGCCAAATACATTAAAAACAACTCAGACTAACCAGACTTCTA

CUST\_10180\_PI426210822 TTCACACTGCCTCAATTAGAACCATGTGCCAATGACATTCAGTGGG

A\_16\_P16649681

AGGAGAGTATACTCTGTAATAGGACATACCAAAAAAGTCATACACAGTATAACATGGGCT

A\_16\_P16957856

ATTAACCACCACAAGTCTCTAATTTTCCAGAGTGCAATTTTACATCTAGTCCCCAAA

A\_14\_P137963 AGAAAGTGCACGATCCTGAAATCAAGGAGATTATTGGGGAGTGTATCTGCAAAAA

A\_14\_P121578 AGTCATGTCCAAGTCTGGCTTAGTTATGTTTTATAAGCGTGGGGTATGGAAGG

CUST\_10025\_PI426210822 CACAGTTGTGAAGGCCACTGCTAACCAGGACAAAGGGGGAGCATG

A\_16\_P36743570

ATTTTGTACTTCAATGGCCTACAATTCAACCTGATCCCAAGACTTTTGTATTTCATCT

A\_16\_P21084250

AAAATGTGTGTAATGTCACATTTACTTTAAGGCATCACCAGATAAAATTGCAGGACCCAC

A\_14\_P104106 CTTAGAAGGCCTCCAGAATCTTCACAGTCTCTATCTGCAAGGGGTAAGT

A\_14\_P129113 ACAGGCAAGAGTAACTAAACTTCTGGATACAAGTAAACCAATACTTCTTTCGCAATGGA

A\_14\_P114601 AAAATTTAAAGAATCAGTCTCTGAACCTGAGCAACTACTCTTCTCTGCCATATTATTGG

A\_14\_P106924 AACTGGCTAAGACCCGAAATTAAGCAATGATCCATCTTATGGATTCTGTAGGCTTG

A\_16\_P30952320 CATCCTGTTTCAGGCTACGCAGTGACCGCTGGCCACTTCTCTCACC

A\_14\_P111887 GTTTTAAATAGTGTAGAAAGCATTGCTATATGTATTTCCCTGCCAGGGAGTCCCCAAAA

A\_14\_P109106 GAATAATTTGTCTGAAGCATCATGTGTTGAAACAACAGAAGTCTATTACCTGTGCACTA

A\_14\_P123529 TAGTTTTACACAGTCATAGACAGTTCCAAGTTCAATATCAGTTGGTGCTGTAGCATATCG

A\_14\_P102563 GATTCCGTTTCTAGAAATCCATTTCTAGCCTCGTTTCATATGAAGATAGTGTATTCTCAC

A\_14\_P106171 TTCTAACATCACATTTATCCACCTTGATCTAGGTTGCAGTGAGCATCATTCCATTAAG

A\_14\_P111746 AGTGATTCTGTTTCTATATAGAGGGGCAAACCAATCTTCTAACTCATTTACTTTGCAGA

A\_14\_P202367 AAAAGCATCATCAATACAGAATCTGAGGGCTGCAGAGGTCTCAAAAAACCACAATTATA

A\_14\_P119587 GCAAAACAAAGGATCCTAAAATCCGAATCGATGCTGGACGTTAAACCAGAC

A\_16\_P02697912

TGACTTAAACAAGGATGATTTCAAGTGAACCCCATGTATTATATGCAAACCTTTTGTGTGCAT

CUST\_2401\_PI426210822 GACTTCAGAGCCAAGAGGGTCTGCTTCAAACCGTGGCTTTTAAAGAA

A\_18\_P14131629 TCTAAGGAATGGCATCTGAAAGTGTGTTTGAATAATACAGGGACTGAGGGTCAAT

A\_16\_P19832215

AAAAAGCCATAGTTTTCTGCATCCTAATGTATTCTATATGCTGAACATAAAAATGCCCT

CUST\_10103\_PI426210822 TACCTATGGTCATTTGCTGCTGCCTTGAGGTCCGGAGCCAAAAGT

A\_14\_P105325 ACAGATGCATGCACATGAAAATACGCAACTCTGTGTCTACATATATACATCACACCACAT  
A\_14\_P131664 AGCATACCTGGTATTTGGCTAACTCTGCTTGTAACTTTTCACTTTAGATCTTTCTTGTT  
A\_14\_P135821 CAAATCTCTAGTCTTCTCCTACTACAGGGTATAAAAATTGTTGATAGGAAGAGCAGACAA  
A\_16\_P21005073  
ATACCTTGGTAGAAACCTGTTTCGTCTGTCCATGTTTAAACCATTACTTTAGTCAGCATT  
A\_14\_P138942 TGGGAAGATCATCTTTATGCCGAATGGATATATAACACAGTGTCCAAATCTAAATCACAG  
A\_14\_P125309 TTGACCGAGAAATGCTAGAAAAATTGACTGTATCCTATGATGAAGCAGGTATGTTTGTTT  
A\_16\_P01818472  
AGAGGGATGGTTCTGTAATAACACACGAAAATGGGCTTAAAGTGATTAAAAAGTAACACC  
A\_14\_P139385 TTTGAGCACATGTGGTTTATTTAATCATTTCGTTTCATCTTTCTCTGATTGCAGTGGAGTTT  
A\_14\_P122423 GTTGGTTACCTGGAGTGACATGAAATTTTCTGAGAGCATCTTATATAGCATATCCTTTGC  
A\_16\_P02520735  
CCAGACTACAGTAGATGAACAGCAACTAGTTCACTACTTCTTGAACTCCATAATCATAGG  
A\_14\_P133220 TGGTAGAGTTGTCATCTTTCAACAGGAGCAGGAGGTAAGTGTTTAAAGTTTATTGTCTAA  
A\_14\_P105739 AGCGACGATTATGAATATGAAGATGAAGCCAAACTTGTATATTCCCAGATCACTATGAA  
A\_14\_P118927 AACAAATGGAAATTGTGTGTGGAAATATCGACGTTTGGTCTCACCAACTATTTTCTTAT  
A\_14\_P121735 AATCCATGAAACAGGACTTCAAACCTGGGGATTCCAGAGTATTTCAAACCTTTGCTAAAG  
A\_14\_P126557 TCCAAGTCTTATTTCAATCAATATCTGTTTGCAGAATAGCAGGAAGTATCTTCAGGGGAA  
A\_14\_P101824 CGAGACAGTATGAGGACAGCCATTGCCATTGTTGCACACATGATCTTAC  
A\_16\_P19348440  
CAGCCATGACCCTCTATTATTACATAGTAAGCACCAGACTAAAAAGTAACCGTCCTAAAT  
A\_16\_P58424422 CATCATTTTCTACCCCTGTATCGTCATTGGCCACTGGAGGGACGC  
A\_14\_P103761 GGATCTTGGTGTGATCTAAGTAAGGGGTAATGATTGGTAAACGATTTTTTGTAGTGTGTAA  
A\_14\_P125023 TTTCAGACTTGAAGAGCAAAAACAAAACCAAAGAGTCAGCCTTACAGAATGATATTTTCGT  
A\_18\_P14614982  
CTGACAGGCCTTATTCTCTTTCAAACCATGCAGATAATTAGTCAGACTTCTATTTCTCTC  
A\_16\_P18198137  
AACGTAGACATCACTTACTATGCTTTAACGGTGAATTTAGGATTCCGGATACCTTGTTTT  
A\_14\_P110212 CTATATTTGTCCAGGAAGAAATACTGTTGAAGATGTGTCTAATGAGAGAAAACCTGTCGGC  
A\_18\_P14533216  
AAACGCTAAAGGTTACCACATTTTTCTTAGTTCTACTCATTGACATACTCCACAGAACT  
A\_14\_P120834 ACAAATTTATGGGATTACTGAAGAGGGATCTATCAATAAGTTCAGGAGATAATGGACGG  
A\_14\_P131191 AGCAAACTGGTAATTGATTTTATCCCAATAAATCACCAGCCATTAATTTTCTGTGGCTC  
A\_14\_P118406 GGGGGAGACAGGGGGTTCTACTCAAATAAACTGATGCCTACACAATAAA  
CUST\_2085\_PI426210822 GTAATCAGAGGGGAGGAAGATGGCCTTGGCATATCACTGGGGAAG  
A\_16\_P39513717  
GGACTCCAACCTCATTTTCATCTACAAACAAAAGTTTAAAAATCTATGCTTAGACCAAAGGG  
A\_16\_P00412224

ACAGAATTAGCAAACCTATTACAGCCTATCATATCTAGTCCATGAAATTCAATACCTAGA  
CUST\_3129\_PI426210822 CATGCCCTCAGATGCTTCTCAGTGGGGCTGGGCTGTGTCTTCTG  
A\_16\_P00645271

CAGACACTTAAGACTTCCCTGAATGCTTTTTACCTCATACCTATCTTTAACATTGGTCAG  
A\_16\_P18695163

AGGACAATGTGACAATGTGATAAAGAGGCCACTAAAGAGAAAATTAATAATACCCTATGA  
A\_14\_P128331 TAAGCGATTGGCTCTGTATGATTAATATTTGCAAAGTCGTGTGTTTGCAGCACTTTATCT  
A\_14\_P137950 ACTACTTTGCAAAAATAAATGGAGTTAGCAATGGTCACTGCAGAAAACCGAATGTGTTAAT  
A\_14\_P201077 AGTGGGTTACATAATAGAAATCACATTGCAACACACAGTCTTACCTTGGATCTACAGAAA  
A\_16\_P02058066

GGCAGTCGTCTATTTTACTCAAATGGTAACCAAAAATTTAACTAAGATACTCTCCCCAGAG  
A\_14\_P108515 GCTGTCTCTCCAGAGGATCTTCTGACCTACTCAAGGAACATTTATTAATAATCTATTG  
A\_16\_P21492697

AATTCTGTATTACCTAAGTCTCCAAAAATCAAATGCTGCATTAGACTACTTAAACCCGGG  
CUST\_4790\_PI426210822 GGTGGGTCTTTGGGATCCCTCTCTTCCCCACCCAGTCCTTTAAA  
A\_14\_P136004 AATCCAGAAGGATAACACTCACCTCATCCTGATAATCTGACAAAAAGGGTG  
A\_14\_P105251 CTAAGTCTACTTGCAACCAAAAAATAGAGATTGTCATTCTCCACTCTCAACCAAATTGCT  
A\_18\_P13014902

ACTCCTGATAAAATCCCGTTAGCCATAGTTCAACTTTATATTCCCTTGATCAGTCTTGTGT  
A\_14\_P118574 TATTTTCATCTGAAGACTACGGTGTAGAGAGGTGCTTAACTTCAGGCCACATAATTAATC  
A\_18\_P22841071 CAAGTTTTGTTCCCATTCGCTGAGGACAGCAGCAAAGGCAGATAAG  
A\_14\_P132997 CTTTACCTACTTCTGCAGGTTTCATCCAAGCCCAGATATTACTGAACGAATATATTGATGT  
A\_14\_P114956 ATATTTAGGATGACAGGTGTCAGAAGTCCACAGACAAAGAGATCTTTGTCATTATGAAAG  
CUST\_6042\_PI426210822 AGCCAGGGACAATGTGAGGGAAGATACAATCAGTTAAGTGCTAGTGG  
A\_14\_P135143 TCAGGTAGAGGTTGAGACTCCACTGAATAAACTCTAGGTTCCCATTTCTTTTCAG  
A\_18\_P22842677

CATGCATTCATGTCTTTATTGTATACAAATCACAGTTTACTGGAGTCCGTAGACAGGAAG  
A\_14\_P133491 GAGAACAAAGTCATCGCGGGGTTTTCCCTTTTAAATCTGCTCTTCAAACAA  
A\_14\_P128136 AAAAAAAGATGGAGTTTTCTAACGTGAGGATGAAGTCTACACTTCAGATTA AAAAGGGTT  
A\_14\_P102293 TTCACTGAAGACCAGACTAAAGAGGGGCTTGTCTAATAGAAATTCATCTAAAAAGTTGG  
A\_14\_P113261 CCAGCATGATTTTGTCTGTAGAGACTAAACAGCCCAACACTCCTTCTTATAAATAAAT  
A\_14\_P103494 AGAGTCAGGTATTCTGCAGACAAGTAAACCTTTTATTTTAAACCACAAATAGTCAGCAGG  
A\_14\_P107739 CTAGAACAATTTTTTTCCATGCCAGGAAAGGTTAATGGCAGCATAGTGTCTTATATTGCA  
A\_18\_P17359653

GGTGAGAGTGGTTTTCTATTTGCTTTGTATTGTTTCATACCTGACCCATTCATAAAAGAGT  
A\_16\_P30952605 TGTTGCGTTGCCTCCTAGGTGGTCTTCGAGGCCCTGCACAATCTG  
CUST\_2451\_PI426210822

TAGGAGCAGAGTGTTAAATATTTAGTACATATTTGGGAAGAAAGATACAAGCTAAATATG

A\_14\_P124055 AAGGACAGCGTTGTATTGACAAAATTCAGCCCTCAGTCTAGTCTTGTAACGATAGA  
A\_14\_P115617 AGAGAACGCAACACACAACATTAAACACACATAGAGAGTGAAAGAGAACAAGGCATC  
A\_14\_P139268 CTCAGGAATTTATTATGGCATTGAGACTAACTGCTGGAAAAATAAAAGGAACGAAGTCT  
A\_16\_P21209424  
ATGCCCTAATGAAAGTGAAACTTAATGAGAGACTACTGATACTTCCTAATACCGTGTGTG  
A\_14\_P200779 TATTCATAGTGGGACAGCATTACCGACAAGCAAGGTAGGTAATTATGGATTACCTGATAG  
CUST\_8091\_PI426210822 AAGAAGCCCTGTTACACCTGTGTAGGTGGTGGGCACGAGAGTGTA  
A\_14\_P121110 TAGCCCTGAATAGATGGCGGTGACTTTTTATAATAAGGTCCTTTTGGTGATATTTTCAAG  
A\_14\_P122491 ACCTCCTCCCCTTTACTGAGTTATTAATATATTCTCCAGGGACTCTTTTTCAGATAACAAT  
A\_18\_P15630656  
AAAAATGTTAAATCAACTGGAGTCGACAACAATCTTTTTCTTTTCAGACTGCACATTCC  
A\_16\_P17799872  
AAAGTATCCCGAGTTTATGATTTCTATCACTAGACTTCTAGCCATTTAACCCCATAGTC  
A\_16\_P17385468  
CAGTATGAAAGCCATCTTAACTTTAACTTCACATTTTCCAGAATTTCAACTTGCCACCAC  
A\_14\_P106367 CCAAAGAAAATACCAGCAGCCATTCATAAATAACCAAGCAAATCAACACACTCACTAGAT  
A\_14\_P126710 ATGTAAAAGAATGGGTTTGCTCTGAGATGAACACTCCTGGAAGATCATGATTATCTAAT  
A\_16\_P03718374  
GGCTTATACATGCAGACTTTGTAAATCTAAGAATAACAGAAATCGTTGAGATTACACAGG  
A\_14\_P136133 CAATTTTCTGGAAAAATCTCTTCCAGGTAATGCCTTAATGGAAAAGCCCTCTCAAATTTA  
A\_14\_P139915 GATTACCATCATTTGCCATCTAGTTTAGGGAGGATCTGTTGTTTTTCTACCCATATTAT  
A\_14\_P115748 GATAGGATACATTTGGGGCAAGTTGTGACAGGATTTAACCTATAAGGAGATTAGTTTTGT  
A\_18\_P14135964  
ATTCAGCATAAGAGGGAGTAATTGACATTCTACATGGCAAAAAGACCCTTGAAAGATAACA  
CUST\_5907\_PI426210822 GATATTTTCCCTGATAATCAAGGAAGGGAGTGTTGGCTGGGACACTTTTTT  
A\_16\_P16286801  
AATTTTGAAGTGAACCCAGAATAACTTTTTTTCAGAATGGATAACTAGATATGCCTCCCCC  
A\_14\_P124137  
GGGGTGGAGACAAGAGAAATCCTTAAGAAAGAATTAGAGAACAACATAGCACTTAATGAA  
CUST\_3014\_PI426210822 GCGTTAAACAAGTTGGGGCAGATGGCTCTGCTGACTAGGAATTTG  
A\_18\_P22840882 TCTCCTTGACCCCAGTAGTGTCCAAAAGAACACAGGAATTTCTCTTTTTT  
A\_18\_P11256098  
AACATCACCAAGGAAAATTTTAAAACCCAATGAAGCAATTATCTCCATAAACCACAAGGG  
A\_14\_P125176 CCAAAAACCTTTAAATTGTTCCATGGGGGACTCTGAATAAGTTAGCAGTTTAGATAAGCAG  
A\_14\_P114015 ATGACCAGTTGGGGTAATTCAAATTA AAAAGGAAAAGATTTGTTTGGAAAGTAACTGGTGT  
A\_16\_P01888948  
TTTCTCCTTTCCATAAGCATAAGAACCCATAGGCTTTACATGATCCAAAAAACAAGGA  
CUST\_365\_PI426210822

TCAATTATTTTGTAGACCAAATTTGTCCTAATCGGAGGATCCTAGATCCCTGTGTAAGT  
CUST\_7443\_PI426210822 GATTTCTTTGTTTAAAAATCCTGGTTTGCTTGAAACTGGCTGCCCCATTGAAG  
CUST\_3181\_PI426210822 AACACAGCTATGGAAGCTGAGGCAGGAAGCAAGGATGAGGGGAAG  
A\_14\_P108326 ACTGATCACCAAGTTTCCTAAAATAGCCAGCAAACCTCCAAAAGGTGAATCTGTAAAAG  
A\_16\_P16484054

AAAAAAAAGCCATGCAAAACTTAGGTTTATGATCTCAGTGAGCATCCATATCTCCTGAAC  
A\_14\_P130856 GATCCTGCTTCTCTAAGCAATACCAGACATAAAATTCCCCAAAGAGAAATAAATTGAGCA  
A\_14\_P108490 ACAGCAGTCTTGTTAATCACAGCAGGACAGTTGAGTATATTCTCTCAGAGTTCTTTTG  
A\_16\_P00766567

ATGCCAAGATTTTCAGTTATACAGCATTGTTGTTAATTCATATGAAGAAGCCTTTCGACAC  
A\_14\_P132917 TAGGCAGGTAGATCAGGAAGATGCCTATCAGAATTGTAAGAACTGCCATCTTAAATTTT  
A\_14\_P121796 CCGCATTCATCTGTTGAATTGTTACAGGATCCAGACTAATGTTTATTTGTTCCAAAT  
A\_14\_P201117 AAATCAAGATTCCGACAGTCTTGAAAACTCTTATGGGCACAGTCTTTAGTGAGTTAGAT  
A\_14\_P137812 CATAAAGGATTCTGGTTGATCTGAAAAATGAAGTTTGGTATCAAAAATGTCATGACCCTG  
A\_14\_P118185 CTTAACAGAATGACTTTAATGCTTCTTCAAGTTTTCCATTTTCTCCACAGGGCTTTGTT  
A\_14\_P122789 GACAATCAGCGATATGAAAGGAGACAGAGTGATATGAGTGGGATGAGGAG  
CUST\_6734\_PI426210822

GTCCATTAGTTATGTATTAGCTTCTAAGACTGAATACAAAATATCCCCTGCAATGGATTT  
A\_14\_P200594 AACAGTTTCAATAAGACCCTTTGTCCTCATGGCTGAGTAAAATGAAAATTCCTTCAATAA  
CUST\_5291\_PI426210822 CAGAGCCCTAAGCCTCTTTCTCCATCCTAAGGAGTTTCTCTGCTT  
A\_16\_P18208357

AAATGCATTTGCCTTAGCGTTTAAAGTAGACTAAACATGTCTCTTCGTTAATCGTCACTGG  
A\_18\_P14132071 CACGCGTGAATCACTGTGTTGGGAGGGTGTGAGATGTGCTCCTTG  
CUST\_8561\_PI426210822

GCATCTTCATCGTATGGAAAAGTAAATTCCTGACATCTCACTAAGCAAGTAGG  
A\_18\_P22841263 ATATACAGACACAGAAAAGGTTGCTCAGTCAACAACCTTCTGCAGGCTCAAAGC  
A\_14\_P139800 CTCACGACCCTTTAAACTGAAAACGGGTGAGTATAGTTTACATTCTTTTTCTTTTCTT  
A\_16\_P58424361 ATTACTCTTACAGTGTGGCCAGGGCCCAAATGGAGAGCAGCAGT  
A\_14\_P120626 GGAGGTCACGTCTTTCATTCAGACGCTCCAATGCTTTTTCATTTTCAGTTTGTTA  
A\_16\_P18323868

TGTATGCTTGTTTAATCCAAGATGCTCAATTCCTTGAAGTAGAAAATCATGCCTTACACA  
CUST\_2106\_PI426210822

TGTCAAATGTCTGATATAAGGAGCATTGTTTATTATGGTTGTAACATAACTTTGTGTCCTC  
A\_14\_P121758 TACATACCACTTTGTATTAGTTCCTTGTGTTATGTGTGCACCTCCTACTCTTTAGCAGAAC  
A\_14\_P123712 ACACCCTCACCTTTCTTTATGCAGATATACACATGGCCAAGATTATCTTCTTTGTTTATG  
A\_14\_P131085 TGGTAAGAAAAGGACATTTTCTGCTCATCCTTTTGGTCATAGGCCTGATTCCATAT  
A\_14\_P110713 GATTTGTTTAAAAATGTGTATCTCTTTGGATCACTGCTGACCAACCTAATCTCTTTTCTG  
A\_16\_P15706361

AATGTGATTGAACTGTATCCCAAACCTTTGTCATAGGAAATCAGACTATATCTTTTCGGGG  
A\_14\_P116949 ATACGGTCTGTGAACATAAGTCAGATGAACTGAAAAAAATGCAAATCACTTCCTGTGA  
A\_14\_P116244 CTTCTCTGCAATCATAGAAAAGTTTGAAAAGGTTTCATTGATGAAAGCACCTTGCATTTCA  
A\_14\_P116585 TTTGATATATGCTAATCTTAATTGTTTTCAATTCGGTTGTTGCTCCGGTCCCTTGT  
A\_14\_P104745 AGCCAATAAAACATTACAGATGTGGAATTTGTTTTATTCCTGTGCCAGTCAAGTTTCAG  
A\_14\_P108702 TGAATGTTGTGTTGAATTGAGATAATCAGGGATATTGCCATGGAAGGTGCCAATTTTAAA  
A\_14\_P117433 ACTCAATAAACTAGAGCGCTTTCAAATTTGGTTCTTCAAGAGTTGAGCAGTCTTAAGCA  
A\_14\_P202436 TGTTAGATTGAATTACATCACATGAAACATCAGCCAGAACATTGACAAAAGTCACAACCTT  
A\_16\_P58424227 CTGTCAATCCAGAACACCTACGTGTGGCCTCTCAATGTGGTCTTTT  
A\_16\_P38199698  
AAATTTGTCTCCAACCTTTTAAAGCCTTACCTTTCTATGGTAATTCTACAAACCCTGCACC  
A\_14\_P102605 CTAGCCTGTTGTCTTACCTCACTTTGCTGTAGTTTATTAATCAAAGAGTTACTATGTGCC  
A\_16\_P20453286  
CTGGTGCTAAACCCAAATCATAGATAATACTCTAGGTAATAGTTCTGCCCCGTTTCTTCT  
CUST\_4814\_PI426210822  
AGTATTAGTCTTTATCTCTGACATCAATCAAACCTTGAACACCATCAGCATGGGCTTTAAT  
A\_14\_P201249 AGTTATTTCCATAGTGAGCACTCCAGGTATACAGAAAATCATAGGCAGGTTTCCACAT  
CUST\_3169\_PI426210822 ATGTCTCTGAGACCTTTATGGTTCAAGAGGCAACATTGTTGCCAAGGTA  
CUST\_375\_PI426210822 TGGCTAGATGGACCAGAATATCCTGGACAATGTTCCAGATGACGTT  
A\_16\_P40526686  
GACAAAAAGTAAGAAAGACTCCAGAACTTCTGAATGAACTTGATAGAACACACAGGTGAT  
A\_16\_P00685216  
CTATCAGACTCACTTGAGAGTATTTTCATTATTCATCTAATAAAGGAGTATGTGAGATTCC  
A\_18\_P14136256 CCATCCTTACACCCACTTCCTCCTGTTTTCTTCTTAGTTAAGATGGCAAAGAAA  
A\_14\_P100944 TATATTTCTTCAAGTGCTTAAGATTGATGCTGCAGACCAAGTCTTCTCTTAATTCCTGT  
A\_18\_P11397265  
TATGGGCCAAATATTGTTTATGCAGCAGAACTCATCTACATCACATAATTCCCTCTTTCT  
CUST\_5533\_PI426210822  
AGAATGTTGATCCTAGAAATATTCTATCTGAAGTAGAAGTTGAATATTCCTGGACTTTAA  
A\_16\_P58424228 AATGTGGTCTTTCTGCCTGGGCTGACTTGGGTTTCCTCAGAGCAT  
A\_16\_P02866415  
AAAGCAAGAATGATCTTTATCATGACTATAGGTTTCACTATTCCTCGTCTAAGCAGAGGC  
A\_14\_P113874 TGATTCCAACCTATCTGTATACAGTCAGACTTCACAGTGGAAGAAATGTCCTTGTAACCT  
A\_16\_P15333590  
AAACACTGCACTTCATTTTAAACCAGACAATCCAATATCTTTCCCTAGCACACTTTTGTTC  
A\_14\_P137373 AAGCCTTCATTGTTTCTTTTTGACAGTAAATCACTGTCCTCTCTGTTAAGTAGGCATTTT  
A\_14\_P108295 CTTATTAACAAGAATTTAGAGGAGAACTGACGGTAAGACATGAGATTTAGCACACACA  
A\_14\_P125752 CTGGTATTTCTTATGAATAGGATGACACAGGTCAAATAGTCTTCCAAACTTAGCAGGTTT

CUST\_3346\_PI426210822

CTTTTTTGAAATGGAGCTGATTTAAATATGTAAGTATGGTCACAGCATTGACACTTCAGT

A\_14\_P109873 TAGGGAAGACTGGCTCAGAGGTTACCCAAAAGAACATTTTTAGCCTCATTAACTTAATA

A\_16\_P01648198

TTAGTTAAATATCAAGGAATGGCTCTGATGATGAAATGTATCAGCCTGATCCGGTAGTTT

A\_16\_P16696921

ACACTTGACTGACTTGTAGAGAACACAAAAAATCAGCACTATAACTAAGTATACAGGGA

CUST\_1302\_PI426210822

GGGTGCTAAGTTCTAGGTAAAGGGAACGCTTTAAAGATTACAAAACCTCTTTTTTGG

CUST\_5814\_PI426210822 AAGCCTGAGACAGGAAACAGTTGTCTCCCGAGAGAAAAGTTTGAA

A\_14\_P125220 CTGTAAATTTCTTTCCCTTGTCTTCTTATGTCTTTGCTAGGATGATGCTTGTTTT

A\_14\_P115170 GTAACATTACCTGTTACATTTGAAAGCCTGGTATGAACCATTTAGACCACAGTTTGAAAC

A\_14\_P105306 AACTGGGTAAACATTTCTCAGAGCCTTTACACATTTTCATTCTGTGAGAATGAAAACATG

A\_14\_P128251 CTGGGCTCTCTCATTATAGCATGTAAACCATAGACTTATAACCACAGAAAGTGAATGAACT

A\_14\_P112308 GACCCATGCTGGGCTTCAATATGTTTTACAAAACCTCACATGTGAAATTTTATTGCTATT

A\_14\_P100964 CAAGAAACCAGAGAACCAACAGATACCTTTATGTAATTCTCTAAAATAAGCAGGGTAGGT

A\_14\_P100168 TGAGAACTTGGCTTTTTGATCATGGCTTGCAGATTTTCAGTATGTATGTTTAAAAGTTTAT

A\_14\_P129686 GCCATTTTCAGAAGAGGCTTAGAACAATTACTTGAGGGGTGAGGTATAAAATTTTTCTTT

A\_16\_P21067089

AGAGAAATAGCCTGGTGTATCCTACAAGACAATTTCTTAAAATGTGTGAGTAATGGCT

A\_14\_P138291 TCTTTCTTTTTAACACATCTCTTACACAGAATGAATAGAGCCAGAGGCCTTATGACTAC

A\_14\_P137611 CCTCAGTTTCTCAAATAGATAGATATATATTTTTCCCTTAAATGAGATGAAATGAGTGG

A\_16\_P00685375

CTGATTTGTTCCAGATGTCCTAAGATTTAGTGATTCCGGAAACTACTCCTAAAGTCAAG

A\_14\_P115089 CTTTCAGCATCAATTAACCTGACAGAAGGACTACCAGCACTCTCCATGCTA

A\_14\_P106486 GATCCCCACTTGCTTTCTCTGCTCAGGTTATCATGGCTACTAATAGGATTGATATC

A\_14\_P201130 AAGTCATGCATTTTGTGGCAAGGGTTTCGTAACCGATGCTCTAAAGACTG

A\_14\_P108197 AAACAAGAGCCATTAATAATCTCTTTGGTTTGAAGCAAAGTTGGGTTGTGTTGTTATTTT

A\_14\_P126528 AAGGTAGAGAATTCCAGGCAACAGTCTGACCAAGGGTGTAACCAGTTTATTA

A\_16\_P21147753

AAAACCCTTTAATCTCAATCCAAGTTAACTACGTCGAGTTAGAGAATTAAGGTGTGAGTT

CUST\_3318\_PI426210822 GAAAATGGGAGATTTTTCTTGATTCCTGCAGTTGGCTTTGTGCCCTTG

CUST\_3264\_PI426210822

AGCTTTTCTGAGAAGCTGCAGATGTTTATAAGATTGTTCTTCTATGTTTCTGAAGGAT

A\_14\_P112742 TTTAACTGCACTCTTTAATTGAAAACATCTTTCAGGTCCGCTTTATTGGCTGTAAATGCT

A\_16\_P16552801

CTGAGTTACTCGGTTCTATAGCAAAAACCTCTCTGTTACTATGCATTCTTTTTTGGGCTA

A\_16\_P19988907

AAAATTAAACCGGTATCCATACACTAGGTTTCATTCTAAAAGAAAATCAGGCTCATCTGG  
A\_14\_P133062 TTTTAAATTCCAGATTAATTCATGGAGGACAGATGTTAAATGGATTGGCAGGTCCA  
A\_16\_P20454838

AACCCCTCCTAATTTGGTAGATACATTATATAGCACTCCTACAATATGGACTTGTAGCGA  
A\_14\_P124065 GTCAAATGGGACCCTATTTAGATTTTGGAAATCAGACTAGTTACGTGAACTTTCCATTATG  
A\_14\_P119113 CATGTTTGGACAGTTTCTGTGGGTTTCAGTTGCTTTGATGTGTTTCAGAGTTTC  
A\_14\_P121143 TGGACTCTTAACAAAACATGATCAGCAAAGGTTACTTGTGAATCTGTATTTCTGTAGCCA  
A\_16\_P39555269

ATGCATTACTTTTCCAGTTTGGCATTGATACATAGCAGGAGTTCAGTAGACATTGACTAC  
A\_14\_P114778 CTCACATAATAAAAAATCTTAATTTCTTAGCACACAGAGCCGCTGAAAACGACTGAAGAG  
A\_14\_P202409 GTCTTAGATGTAGTCAGAATAGGAAAGAACTGAAAAGGGGGAATTATTGGGAAACTAT  
A\_14\_P108151 TCATTGGGGCCTTTAGTAACTATTCCATAAGTTCTTGAAAAGGAGATGTGTTCTCAGTTT  
A\_14\_P120541 CCACTTGTGTAATTGAGTGCCCTTCAGAAGAATTAACCAATTAGCAACAAATGACAATT  
A\_14\_P104721 CCATTTCTTTTATTTTCAGATGTAAGTGGGAATGTGACAGCAACACGATGTTTTGATATG  
A\_14\_P108480 TAAAGCAGTTCGAGCGTAAATGATAAGATTCTAGATTAGGATGGTGACAAAGAAAGGGAA  
A\_16\_P15510091 AAAGTCACTCACATACATATCATTAGGCCCCAGTATGATAATCTGAGCCATCTCTCTC  
A\_16\_P16191499 ATATGGATCTGCCTGGTCCACATCATCTGGAGTGCTAGGGTGAC  
A\_14\_P113084 ACTTTTTAATAGGACTGATGTTTTCTGAGGACACACCTCCCTAACCAAAATTATGTTTCAT  
A\_16\_P21066426

TCTCCATTAGACACTAAGCACATCTCTAATTCATTCTTAGATAACAGAGTTCCTTACCCA  
A\_16\_P39872849

CGGACTGTATCCTGTTTATCATCTTGTTCCTGTTTTTATTCTGATTCAGCATACTGCATG  
A\_14\_P124268 ATAAGGAGTGCTCATCTAATTTTCTGTAAGTACCAAAAAATGCAAACGTCTTTGGAGA  
A\_14\_P119866 CTCCTCCCTGGTCCATCCAGATGCAGACTCTTATGAGAACATGGATAAT  
A\_14\_P110239 ATCTACCCACATTGAGCCGTTTTGCTACATTATTACATTACGATCACTCAAACAATA  
A\_14\_P103083 TGAAATGTGAATGTTTTATGTCTTTCAGGAATGGATATAAATTTCTCTACTGTTCTGCC  
CUST\_3724\_PI426210822

TTTATAGACTTCCATTAGTCCTGTTGTGACTTAATTGTTTTGTTATATTTTTGGTGGCCT  
A\_14\_P122024 GGGTTTGGAGATTCTAGACCTAATCTTTAATTCAATTGAAGGATTCTCCAGACAATC  
CUST\_2887\_PI426210822 AACTCTGTATCTCCAGGCCTCTGCCTCAGGAACCCACAGCTGAG  
A\_14\_P106502 CAATTTGGAAATTTCTTTTTTTTTGGTGGTCTTTTCCACTTTGGAAATAAGGCTTAGGGA  
A\_14\_P137342 TCTAATCCCATTGTTTTTGAATCTACCTTGAGACTGTTACAGTCTAAAGGACACCTCAT  
A\_14\_P104391 ACAGTGTTTAACCGGGTGTTTACCTTCCAGTCATTAACATCTATCTTTCCAAGTC  
A\_14\_P133867 CTACTCACTTCTGTATCTCTCCTAGTTGCCCATATGTCTTAATCTTGGATGAGGAAG  
A\_16\_P17874808

TCTACCCAGAAGAGAATAATGAAAACCTTACAGATGATATCAAATGACCTCTCCAATA  
A\_16\_P15894942

GACCCTTTATGTTTTTCAATCTGTTCCACCTATATCCACAAATTTATTAAGTCCACCTAC



A\_14\_P137377 ACCGAAATATTTTCATGGAAAAAATAAAGAAGGCTAGATTTGAGACCACCATCTGATTGG  
A\_14\_P139657 CTGCTGATTGTGAATCTCAGAGTCTTAAGAGAGAAGCCAAATATATTCCTCTTGAAATG  
CUST\_4930\_PI426210822 TTTCAAATGCAGTTTTCTTTGTGGTGTCTCAGCAGATACTGAGTTTTGCTGC  
A\_16\_P02136905  
ATAGACTCTAAGACCATGTCAACCAAAGTAGTTCAAACACCTGTATGTCTTTAGTCCAA  
CUST\_6779\_PI426210822 ATGTTGAACAAAGGGCCAGTAACATTTCTGGTGGCAGGGAGATGT  
A\_18\_P22840146  
TGATTTTTTCAGCATCCCTGGTTTAGCATATGTTGCATTATGTATCTGGGAAAGTAGCATA  
A\_16\_P18309190  
AAAACGCTGTCCTGAACAATAGTCATGTCTCAATGTAGCATAACCTTCTCAATTTGTTTC  
A\_14\_P132041 CTCAAATGTAGCCTTGCTATTTTCAGAGGATCTTTCATTTGATATTTGATGCCACTTCAAT  
A\_14\_P114919 AGCATAAGCCCCTGCAACAGAATAAATGAGGCATGAACATATATATTAAGGAAGGTTTCA  
A\_16\_P21428666  
CTGTTTCGTCCTTATTATGAAGAATCAAAGCAGAAAACAATTACTGACCCTTTCCTAGA  
A\_16\_P15791645  
CAGGAAACATTCACATTCCCAACAATTAGAATGTCACCACTCTTTGTTTCATTCTTTTGAA  
A\_16\_P36230498  
CAGAATGTGGACTGTTCCATTTTTCTGTTGTCCAACACTTGCTTTGTTTGTGACATTTA  
A\_14\_P129451 TCACAGTTATGTATCTAAAATCTGTATCATTGGTCTGCAAAGTTGTGCTCACCTCAGTAA  
A\_16\_P01456205  
CCACCATGAATAGATGTGAAATCAGAAAAGCAAATAACGTAGGTGTCTTAAGGAACTTGA  
A\_14\_P103401 CCAAGGAAACTTGTGAGTTAGTCATTTGAAGTGGTCACTCTCACATAGAAAATCTATTT  
A\_14\_P135061 CTAAATCTGAGACGAAAAATAACATGTGCAAACCTCCCTGATTGCCTCATTTCTTTTT  
A\_14\_P104802 AAAAAAACTGGAACCCATCCAATTTTCCAAATGAATTGTCTCTCATTAGGGTTGTTTCTA  
A\_14\_P118828 CCCTTAGACAAAGAGGAAGGATAATCTTTTTATTTTCTTAAAACCACTTTGGGAGTGCAT  
CUST\_1539\_PI426210822  
ATCAGCCTTTTTCTTATGTTTTAAGTTTGCCTATGATGTCTTTATCATCCTGGCAATAAA  
A\_14\_P120878 CTATAGTGAAAGTAGTCTCAAAGATTGTTTCATAAATCATCAGATTCACCTAATTTTCTA  
A\_14\_P103276 CTCCATACAATCTCCAGGACAAACTCGTAGATGATGAAGGCGATGAG  
A\_14\_P100708 CTAGAACTCTGTATATGCATGTGAGGCTCTTTTGGCTGTCTTAAAATATCCTGTTTCTA  
A\_14\_P105312 CTACTTGATAAATCCTTTTTGGCTGGCACTTCCCAGACTTCATTTTCATATACCAGTAAAA  
A\_14\_P119537 CATCTCCACCATCTTGGGGAAGTAAAACCTTGATGACCTCTGCAACAAG  
CUST\_6247\_PI426210822 AAAGCCAAAGGCAGCTGTGGCTTCGCTTTGTCCCCAGTAGTCACT  
A\_16\_P16279801  
AAAAATCTCTGAACCATCTGCAATAGGAGTTACACAAAGACCACTAGATCAGAACCTAGT  
A\_16\_P00685011  
TGGGATACTTTTTTAAAAAGTAAATGTAAATGTATTGCCATATTTCTCTTGAAAAAAAAT  
CUST\_1471\_PI426210822

TGGAGTAAATGAAATAATTGTCAGTACTAGCCTCCCACTTAATGACTGTGGCTATTGCT  
A\_14\_P106434 CCTACACATATCAGGAATAGTTGGTCACCCAAAAGGAAATTAATGCATAAGAAGGAGA  
CUST\_6506\_PI426210822  
AAATTGAAAAGCTTTGATAGTTGTCAACAAAGTACCCAGAAAAGAAGGTTGCCCATG  
CUST\_5804\_PI426210822  
TCTGACTCAGAGGAAAATGCAACTTGAGCTGGATTTCATTGAAATCTTTTTTTTCTG  
A\_16\_P36230553  
GTTATTACAGTCCGAGACTAAAAAGATGCTTTTGTCTTTACTGCCATCAGTGTCTCTC  
A\_14\_P123025 GTTAATGCTCCTTTTCGGATATCATATGCATTCTCTTCTAAGAAAACACTCAGGTGTTTCAGT  
A\_16\_P19169363  
AGTGGAATAAGTGGAGATATTGCTATGAAAAGCCAGTCATAATATATTCAGGAATGGAA  
A\_14\_P110123 TGTGCTTTCTTGATTAAGGAGATTATTCTGGACTGATACAGGGATTAATCCACGAATTG  
CUST\_9247\_PI426210822 TATTTGCCACTACACAGGTGGAAGTACATAATGTAGGAAACGTGTCTGTG  
A\_14\_P134388 CAGTGCTTTGGGGTCTTCCTTGTAACCAACTGCAGCAAGAATAAAAAAC  
CUST\_9934\_PI426210822 CTTCTTCATGGCACCGGTACAGTGAAGGACAGTGACCCTTCAGG  
A\_14\_P126269 ATCCTCAATAAATCTCCTTTTAGATACCTCCTCTTAGATGAAATTCACACTTCACAAT  
A\_16\_P20585615  
AAAATTCAGTTAGGAGGTTCCAATCTAATGCTAAATGTTTGCTCAATGCACTTACACTGG  
CUST\_4542\_PI426210822 CTTCTTTGGCTGTCTGTGGAACCTGTCTCTACATTCTAACCCATC  
CUST\_2149\_PI426210822 ATGCCTCTGGCCCTCTGTAGCTAATGGAGGGTGGGTGAGTGGGGG  
CUST\_9310\_PI426210822 GCTGGAAAACCCACGTCTGGAGAAGTACCTTCCTGAAATGTGTC  
A\_14\_P112710 CCATGCTTCTGCTGATGCTGACGTTATCATTATTACGATACTGTTGTTCATTGATGTTATC  
A\_14\_P105695 ACGAAAGGACTAAAATGTTGCTATCTTGTAATGTCATGCATTGCCAAGTGAATTGTCTT  
A\_14\_P202080 TGATTTTGTGTCTGTTTGGGGAAAGATGCTGAAAATTTTGTCTGAAGATAAACATATTT  
A\_14\_P101076 ACCATTTCTACAGCACAAATTATAGATGAGTTTCTCTGCAGTCACACTGTTGATTTTCATCA  
CUST\_10096\_PI426210822 CACTGCTGACCGGTTGCCCACTTCACTGAGGGCCTTTGAAGACAG  
A\_14\_P116287 CTGCCTATCACAGATGTTAAACAAACAATTGATTGTTTAATGACTCTGCAACTGTGGTTT  
A\_16\_P36381486  
AACTGTAGGGAACACTCAGATAATTAAGACAGCACATGGTTTTATACTGGTTCTTTGGTCTT  
A\_14\_P110818 CAGGAAAACCAAGGACATTGGTAGAGATCCAGATGTCCATCATTGGTTC  
A\_18\_P17365329 GGCACAGATCCCATTTTATCATTACCTTCATTATTACCTATATTGACATAATTTCAACTG  
A\_14\_P139186 CACGATGATGGGCATAGAATTTGTGGTGCACAATTGGTGATGAGTGAATTTTCTT  
A\_16\_P17547716  
AAGAGGACTGAATTCATGTTTTTTGAGGAGATACGTAAAGAAACTCATACCCATTCATTG  
A\_16\_P01370760  
AAAAAATTCCTACAGTGCATTAAGATGAACGAAATCGTTAGTAAATTTTCCCCTGTGCA  
A\_14\_P119680 TCTACTAGAAGAAAGAAAGGGTTTTGTTACTAGGAGCCAGATTTAGTCTCTCTGCTTAAC  
A\_14\_P115235 TATCTTTTTTTCAGCACAGTGGAGAATTTACAGTCTCTCTCAGTGATGTTTTATTGACATGG

A\_16\_P18319386

AAAAATGCACATCAATGCAGAAATTTCTACTCCGTTCTGTTATCTGAAAAGTCACATGCC

A\_16\_P41036667

AGCCAAAACAATATTCAGTATAATGGACTACTTTATGCAGTAATACCTGAGAAAGCAGCA

CUST\_2441\_PI426210822

CTACAGTTTAAGAAGTGTTTCAGGACCATGGAGTTCTAGATTTACTGGGTAAAAGTGT

A\_14\_P138979 TTGGTGGTTGGTTCCTTGGTATAAGCATCTTTTCCATCTGTTAATATAGTTCCATATAAA

A\_14\_P128075 ACAAGATTTGGAAAACCAACTGAGAATAACTCAAGTATCAGCACCTCCAGTGAGTATATT

A\_18\_P22842829

CCAACAAAGGACACTGAGGCTACTCAGTAATTATTAATGAGAGCATGAACAAAGGAATG

A\_16\_P30952586 TAAGCCCTAATGAACCGCACTTGTGGATGCATTTAGAAGCATTTGAATTGTTGACAT

A\_14\_P107885 AGCCCTGCTTCCAAACTTTCATTCTAATGGCAGACTCCATATAACAAAAAGAACATTCT

A\_18\_P22840331 AAAGAAAGAGCAAATATATTGAAATCTCCTGGAAATTTGGCTCTCTCCTTGACCCC

A\_14\_P110903 GCTTCTTCTCCAGGGCATCGTAGGAATACTTGATCTTCTGGAATTCGAAG

A\_14\_P127696 TGAGTCCTATTCAAAGAGAATCCTAAAAAGATGTTTTCAATGGGGAATGGCAAAAATCAC

A\_14\_P135692 TCTTACTACTGGGCATCCACATTTTACTTGGCTTACCCTCATAAATCTAATCCTACAGTA

A\_16\_P00685591 CATGTTTGACATCTCTGTTTCATCACAGCACAGACTTACAGTGCCAGTCTTG

A\_14\_P100796 GAGTCTTCTTGTATGCGGCAACATGTCCACATTCAAAGACTTAGAAATACATGCATATTT

A\_14\_P115619 ATGGATTAGGTAGGTCATTGTTTGGTTTTTTTTTTTAAAGGACAGTTAAGGTGGGACTTGAA

CUST\_5665\_PI426210822 CCCACGGGCAAGAGAGCATGATGTGTGATTTGCAGTGACATAATCTAT

A\_14\_P117599 CTAAATAAACTCTGCCTTCTCGAGCCCCTGATTGTCTTATTAATAATTTCTTTGCCTCT

A\_16\_P00023751

AGTGCCTATCATCTTTAATAACACCAGCATGATTACTTTTATACCTCCCAAAGAGCATCAC

A\_18\_P15875526

ACTGCCTAAGTTAGAGTCTTTACTGGAAAACTACTACCATCATGCAATCTTACCACATC

CUST\_8407\_PI426210822 TGTCCCTCCTGGCTCTGATGAGTGAAATAGTGCAAATCAGCATCCTTTT

CUST\_3271\_PI426210822 ATCACCTGGCCACCAGGTCTCCTGAGAGATCACACCCTGGGATC

A\_16\_P18764332

TATTTTCTGGACTTCACTATTCTTTAAGAACATCCTTTTAAAGTTACCAGAGTGACACAGG

CUST\_8200\_PI426210822 CACTGATGCACGAGGTGGACACGTCCATCACCGGGTGAGTAGCCT

CUST\_6493\_PI426210822 CTTGATCTTCACCTGTTCTTTGGCAGGTCTTATCAACTTCATGGTTT

A\_14\_P105111 ACCATCACTTAAGAAACAGAAATGCAGCAATTTCTCTCCACACAATAGCAAAGATTTTCT

A\_14\_P103475 AGAAACTTACAGTGAGTTTCTTTTCTCAGAATACAACCTTGGAGAAGAACAACAACAT

A\_14\_P129311 CTTATTTTACATCAGAAATATCTCTAATCTCCTGATTGCACAGGAGAGTCTCTAACACC

A\_14\_P103661 CATGTATGAGATCTCCTCTGTATGATCCCCACTTTTTTATTCTCATATCTCTACTGCAT

A\_16\_P00887631

CTACATCTCTAATTCAGTGTTTAGTAGACAGACGGTAATATTTTGGCTTGCAGATGAAT

A\_14\_P121678 AGAATCAGAAAGGGATTTATTTGGTGTCTATAAGATAAAAGCCACAAGTTGCTAAGGAGC

CUST\_4400\_PI426210822 ATGCCACATGTTTTAGTGTTGGCATGTTCCCTCATTTTTGGGGAT

A\_16\_P21530274

TGATCCAAACTCACACTTTATCGTCTTTCATTTATTTACCCTGTTTCGCTAAAATACATGA

A\_14\_P124985 TCTGTGCCCCATCTCACTAGCACATACTCTTCAACTATCTTCTTTCTCATATGTTTTAAG

A\_14\_P126718 TGAGCACCTAATGTATACCTCCTCCCTGGGCTCAGTTTTCTAAGAAATAAAAACATTTAA

A\_14\_P116602 TAACTTAGTGTGTTAAAGTCTTCATGCACACTATTATGTGTTTGGCCCTTCTCACCTGTATC

A\_16\_P20256070

CCTTTTACAGTGAACTTTTCTACGAACATGAGACTTCATAAGAGCAGTGCTATGTATGT

A\_14\_P117801 CTGGAAAATAGAAGACGCTGCAATCAGTTAGAGACTCGCCTCACCTACTAG

A\_14\_P134092 TTGGTCTTCTTGAGTCCAAGAATTTAAAACATGTGCTCCAGAGTCACTCACAATAAAATT

A\_14\_P124505 TGTTGCATGGATTTTTAATTCTCTGGCTACCACATAGTAGAGAATGGAATGAAGATTTCC

A\_16\_P19593775

AACACAAACCTTACTCGAATGCTTATCAGTCTAGTCTACATGTCTAACATATGCATAACT

A\_14\_P107666 CAGCAAGGATGCTGATGCGAAAAAGAAGAAAAAAGAGTTGGGTAGGTAAAGGTTT

A\_16\_P02889956

ATACCCATGTGGAGATCATTACAGATCAGACTCACATCTAGAGACTGTGTTTACATGATC

A\_14\_P133149 CTTGCCACTTGCATGAGCATGTTTTTATTGCTTCTAACCTGGATTGAAATCTATGACTT

A\_16\_P00685552 CATGTCATGAGAAGCATTGGACTCCGGTAGCCTGGGAAATAAATGAG

A\_18\_P14132295

TGCAGTGGTTTTATCCATTTTTCAACATCACTTTCATTGATTTTCATGAAAGTCTGCATCT

A\_14\_P117682 ACTGTGCACCGAAATGATTGAAATGCCAACATCTACCTTAGAGGTTAGTCTTCGAATATA

A\_14\_P202267 TTTGGAACTCCAACAAATTATCTCTATTAGTGGGTTTATTGACATAACTGGACATAACA

A\_14\_P132661 AGAATTATGTGGATTATTTTTGCATCTGAAGAAAGTATTAACCTCCCCACCTCAAACA

CUST\_5481\_PI426210822

TTATGGTAACTTCTACATAATTGGTCTCTAGTTCTAGAATTATTCTGCTTTCTAAGGTCA

A\_14\_P130356 ATGCGGGTAATGGAGTTTATGTAACATTGAACTCAATGACTTTGGAACTTAAAAACAT

A\_14\_P115716 GGTAATCACCTGCCTTTGTTTCTTAAATTTAATTGCACCTTGATTCATTGGTCTCTCCAT

A\_16\_P15159690

AGTTTTCAGTCCAAATCATCCTCTAAATTGCTGTGTAATCTGGTCAAGGAATATCATGC

A\_14\_P137855 TGGGCAGTGCTAAGGTTTTGTGTCTAATGAGTCCTCTTAAACAAGAAGGTATTGTTTTTTA

A\_14\_P130868 ATTTGGCACCATCACTGGAAACACTATAGATGTAGATCACGTTGTCATGGGAAC

A\_14\_P111953 TGTGTGGTATACTGTTTGCAGGGAATGCTGGAAATCAGAATATAATTAGGCAAAAAGAGA

A\_16\_P16191658 CTGTGCCTCATGTTATATTAGTGTAGGCCTCAGGGCATTGCTGTCTATTTTTTC

A\_14\_P138263 ACAGTATAGTTCTTTCTCTGAAAATCTTCAGTCTCTTAGTTCCAGATGGGTTCTCTATGG

A\_14\_P116100 AGTGATTTTTTGGGAACACAGGTTTTGATGAAATATTAACCTATATTACAGGGGTGACGCT

A\_14\_P115389 TTCACACATGAGGTCACCCCTTAGAAAATATTCTTCTCTTCTCCACC

A\_16\_P16031949

AACCGCAAATACCACTAAGTATAGACAATGAGTATCAAAGGAATAATGACGCATTGCTCT

A\_18\_P13012954

AAGTGC AATTACTGTCAA AAGAGTTCAAAAATAAGCATT TAAAGTGCTGAAGAGGATTT

A\_14\_P111954 TTTCTCTGGAAAGTTTAGGAAATCTGGGAACGACTGAAAAACAAGGTTAATATCAGAGT

A\_14\_P125012 ATTCATGTGCAGATGTGTATATCTCCTCTCTCCATCTTCCTTTTGCTCTCCTG

A\_14\_P116453 TGATTTGTTTCATCTTGTAGCAGAAACCGCAGTCTGGATCCAACATACATTACATTACAGTA

A\_18\_P22839593 AGAGATGAGGGATGGGGGGATGAGGTTGGTGAGAGTGATGGAATC

CUST\_1937\_PI426210822 GTATTGTGGTTCAGGAGCAGTGGAGGTGATGTCTGCCTCAGGATT

A\_16\_P20226095

GACACCTGAAACACTCAATCTGTCATTTACTTGAGCCACTATAATGCTATCTAGATGGTT

CUST\_3928\_PI426210822 ACAAGGACAAGGGATGCCGGGTCATGCATTCACCCCAAAATATT

A\_14\_P107624 GTCTGAAATGAATCTGTCTTGAACACCAGGAGCATACTATTATGCTGCTCTTCACATTT

A\_14\_P131932 AATTA AATTTCTCACCTGTTTGTAGGCATAAAATTCTTTGTGTGCTTGATGTCTTAGCCT

A\_16\_P18031907

TGACATGAAA AACTGTAGTCACTTCATATTTATGCCAGTTCACAAATATCTCCTTGCTGT

A\_14\_P201984 TTGAAAGCCAGTATAGCAAGTTGAGACACAGGTTCAATTTGAGCAAAAATTTTCATGCTCAT

A\_14\_P134762 ACTTCCTATATTTCTCAGATTATTTCCATTTTCATGCTACTTTCCCTTG CAGCACTCATC

CUST\_9634\_PI426210822 ATTTTCATCTTCAACCCA AACTCTACTTACCTTT CAGGGAGTGATGAGTAGGG

A\_16\_P02548314

ACACGATGTTCAAAA AAGAAGCAATAACTCCATTAACCATTTTTGTCTACACAATGTCAAT

CUST\_6557\_PI426210822

CTGCACAAGCAAAT TAAAATAAAAAGGGAAATTTCTCAGGGAATAAAAATTTCTTGAAGAT

A\_16\_P00685245 TTGTTTTTCTCTCCTCTGGCCTCTACATCACTAAATGGTCACTTCTCTTCTAG

A\_16\_P17888908

AATGTTCTGGAAAATGTTCACTTCTCAA AATGACA AACTCATCTTTCAATCATCTCCTCCT

A\_14\_P123859 GGACTTTCTCAAGTTGCCAAGTAATTGGTTCTCTCACTGTGCATTGATAATGTATACTTT

A\_16\_P16646134

AGCCTCCGTTACAAATTATCTTAAACTTCTTTTTCACTCAACAATACTTCCACTCTTTCA

A\_18\_P10903628

AAAAAGTTCCAGTTCAGGTCAATTATGCTAATTAAATGCCACAAATGACTGAAATTGCC

A\_14\_P112557 ATTAGAAAATTCTGTTCTTGAGTTAAGAAGGGAGAGATTATTGTGGGCCCTGATACTTGA

A\_16\_P16691068

ACAGAAATTACCACTGTAAACCATTTGATCCTTTTAGACCTTTTCAACACATGCATGCAT

A\_14\_P129636 CCATTATTAAAGGGATAACTGAACTCTCCTAGTTCACTCAACCTTAGATTTTCTTCTCA

A\_16\_P03055798

AGGTCGATGTTAATTACATGGTAAGGTCTACAACATCATACAAATGGAAGTTACGTGAGC

A\_14\_P111786 GTAGGATTTATTAAGCATTATTGACTATGGATTTTCATCAGGGTCTTTGTGGGGAAATCC

A\_14\_P113063 TAAGTTTCTTGGCATGCTACTTATTTTCAATGACTTTGCACATGATTTGAGGGGAAATTC

A\_14\_P200186 CTGACACAAGCATTAGTGAGATGCTCCCTCGAAGAATAGTCTTGTCTTCTTAAG

CUST\_9908\_PI426210822

AAAGCTGAAACAAAAGGTACATTGTCGTTATCTGTTCTGAATCAAGAACATAGTGTGTCC

CUST\_2434\_PI426210822

GTTTTTTGTTTTTAAAAACATATAAAGTAAGCATAGATGCTAGTGTGTCCCATGGTGAA

A\_14\_P118773 TTATTGAACCTTCATCTTATGTTCCATCTCTCCCATGCTATTCACCCATTGGTCTAC

A\_14\_P123811 CCAGGTGTATAATCAGTTTGCATCTTAAAATACCTTATGGTGCCAGCAAGCATTGTATT

A\_14\_P116314 TGCCCTCGATTTGCATGAAGTTGAAAATTGTTGCGATTTATTTTTTCAAGAGATCATGTT

A\_14\_P100338 TGATCATCCCAGACCTGTTACAAGGGGATGGCATGATTATATTTGTTGTATTTAGAAAG

A\_14\_P107778 GTTTCCTAATAGTTTGGACCAGACAGACATGCACGGAGACTCAGAATACAACAT

A\_18\_P16232086 CCCCACCTTTACTACTTGTCCACTGTATTTAATTGTTTACGTTATGTCTGTATCTCCCC

A\_16\_P19570382

TTTCCCAAAGATCTTTTACCTTTCTTACAATTGCTCTCAATGGACATCAAATCATGGCTA

A\_18\_P14130032

TTGCTCATATCTCTCATAGAAAGACAACAGATGAGCAATTTTGGTTTTATGGTTTACTCA

A\_16\_P19693054

AACGTCCTCTATGAAGTTATGTTGTAAATCAGGGTAATAAAAGGATAATTGGGGCATTGG

A\_14\_P100739 GTGCTCTTCTAATACGATTTTATTCCTGCCCTGCTTAGAATTCCTCAATAATTCACCAT

A\_14\_P113023 GAATGTGTTTTATTTGGAGCAGTTAAAAAGTTTTGCTTGAGAATGATAACTGGAGAACCA

A\_14\_P128298 AAAAAAATGGGAAAGAAAAATGAGCACAGAATAGAGATTTCCCTTTTATACATATTGCAA

CUST\_5990\_PI426210822

TATTACCATTTCTGAAAAACAGTCACTAGTTTTGGTAGTTATTTTTCAAATGCATAGTG

CUST\_6532\_PI426210822

CAGACTTGGCTGCCCTATACTATTATCCTAGTCATCATTGTTAAATATAGTTGTGGTTGG

A\_14\_P132946 CTACAGTAGTGTTTATTTTCAGACTTTTAAAGCGTCTGAAGCGGGATGAAGGTGAAAGAT

CUST\_189\_PI426210822

CCATTATCCAACTCTGTTGTAGAATTA AAAAGTGGAAAGAAGAGAACACAGGCAGG

A\_14\_P102026 AGCATCTGTGCTGGTATTCATCATTATTCTGATGATCCGGTATAAGTTTTGCAACAATAA

A\_18\_P22841405 AGAGTTCATTTCTCTGAGTCCCTGCCCCAGAGGCACATGACATAG

A\_14\_P139522 AAATGGTATACATAGATGAAATTGATGTAGATCAGGAAGGAATTGCAGAAATGATGCTGG

A\_14\_P102137 ACTTAAAGACAGTGAAAATCACAGTCAGAACGTTGTTCCAACATCTTAAAGATGGTGAAA

CUST\_6655\_PI426210822 AGATGATACAGTTGCTGTCTCCAGCACACACATGTTCTAGAGAATTCAGT

A\_14\_P135746 ACTTGAAGCAATAGTAGTGGTCATGATGGTGAGAATAAAGTTGGGGTCAAATGACAA

A\_14\_P108277 CTAGTGTATCTTCCAACATAATTTACAAGGACTTGTGTTGCTGTGTGTAGACACCAAG

A\_14\_P135427 CATGCAGTCCTCAAACCTTAAATCTTGCCACTGTGTATTATCTGTATATTTTTGCTCCCT

A\_14\_P136139 GGTTCCTTATCATCATCAGTGCACAAAAGAAGGATTTTGAAAATTCTTAGCCTTGAGGAG

A\_14\_P103978 CTGTTTTCCATGCATAGTCTGTTGGGGAAAAAATAAAGTTGTTGGAATGTGAACACTA

A\_14\_P200459 CCGATTCCGTGGTGTCTTATACCAAGTGTCCATGATACCATTTGTGAGAAA

A\_14\_P120632 CTGCTCTGCTACTGAGAGATCTTTAATCAAAGGTATAAATGTTCCCCAGAGCATGAATA

A\_14\_P131034 AGGATGCACACAAGACTGTATGCAACTATTCTTGCCCAATATAGATGGAATATATTTGGT  
CUST\_2741\_PI426210822

AAGCACTTTGCTATTACCAGCTGGGACTCCACTTATCAAGTCTTTTAGGAAATTAC

A\_14\_P136995 CTTGGCCAACCTCTCAGAAGATGAGTATTATTCAGAAGAAGAGAGAAATGCCAAAG  
A\_16\_P20341480

CTGATTTGGGGCCTATAATTACAGAATGTGCTTTTCGTAAAATCTGCTTTGGTTTACTT

A\_14\_P122960 TCGATTTTTAAAAATCATGTCCTTAGGAGAGGAATTAGTAGCGTGGAAAACACTCTGCAGT  
A\_14\_P120681 AGGAAAATAATCTGAGTGCTAAGCATAGTTGCTAATAATTCCCCATCGGAATATGTATC  
A\_16\_P20292472

ATAGCACTGTGAGGAACTATAAGTTGTCAAACCAGTATGTATGGATTGAAGAGTGACAG

A\_14\_P100007 CTTATTACCAAACCAGAGTTTGCAGGTTGAATGTAGTATGAGTTAGAACTTCTGAGGT  
A\_14\_P115103 CTCCTGCTTGATCTCATCAATGCACTGAGATATGTATTTGCCTATAATGGGGGATAAAC  
A\_16\_P02596161

ACAGATGACTCTTTACAAATCTTCACACTATTTTGCTACATATCCATGCATTTCTCGTTT

A\_14\_P133883 CTCTCGATTATAGAAATTTCTCCTTTCTGTGGGTGCTTGCATAATTTAAATGCCTTCACA  
A\_14\_P121585 CTGTTTCATGGTTCTAAATTTGAATTTCTGTTGGGATTTGGAACCTTCAGACCTAAAAT  
A\_16\_P00545101

GATGGTCCAACGATTTTATACAGTTCAAACCTGCAATTTCTAAATTTCTATAGAGCCCTCA

CUST\_6729\_PI426210822 ATGTCCTTAAATCTCAGCTTAGGGAGCCCGTGTGCAGGCTCCTCA  
A\_14\_P130695 GTCCATGATGCGTGGACGCTCTTATTCAGAAATAAATAACTACCCACAGTCAAAGATTT  
A\_16\_P19727729

AAAAACTTCGTAATATCCCCTTAAAATACATTCCATCTGTATGCGTCTTCTAAATCCCC

A\_14\_P100199 TACAAAAGAAGAGTTCAAAGTCCCTATCATTACTAAAGGGATTCTAAGCCAGAGTCACTT  
A\_14\_P112417 GGACACAGGAACTCATAACGGAAGCATTGGAACAAAATACAAAGGAACTAAAAGCAT  
CUST\_8646\_PI426210822 TATGGGAGGCAGGCTGTGTCCACTTGCTCCTTAGAGATTTCTTTTT  
CUST\_2054\_PI426210822 CTTCTCCATTACCTCCTACAAAAGGACATGACCCCAGGCTTTCAA  
A\_14\_P134981 GGTGAGATTTCTGGTAGGACTAATTCAGGAGACTTAAAGCATCTCCTTATTATCAAGATG  
A\_16\_P17718203

CCATCTTCTCCAGAAATATACAACACTGAAAGATTCTCTACCAAACATGCATGAAAAGA

A\_18\_P22840867 TTTCATGTCTTAGCCTTGGGACTACATGTTTTCTCTTTCCCTTCTGGACACTA  
CUST\_1701\_PI426210822 GAAAGGAAGGACTGAAAGCCAGGGACCTCTGATGGATACAAGCAC  
A\_18\_P14133732 AGACGTCTTTGATACCTCCTACCACTGGCTACAGTGGGCTTCATTTT  
A\_16\_P16051463

TGGCCAACATCCACTTTTTATAGTCCCTCTTATTCCATAATGCCATTACTAACAATCACT

A\_14\_P136028 GTTAGTAGCCAAGAGAGAAGATAAGGGATGTCTTTTTCCAAGAAGGATGTCTCAC  
A\_14\_P123673 ACTTGTTTTTCTTTGATTCTTCAGAATGAAGAACGCTTACGACAGGCAGTTGAATFACT  
A\_14\_P131720 TGCTTACTGGTCTTAAAACAAACAGCCATGTCATGAGATCACATCACATCCACTATAAAA  
A\_14\_P119549 ACACTTAAGTCTAATAGAATGGAATTTAAAAGTCACAATGTAGAAAACAATGTAGGGTTTGG

A\_16\_P15600203

AGATATAACGGCATCTAAGTCCTGTATAAGAGTCTGCACCTAGATTGAATGGTTTTGCTA

A\_16\_P16382520

GTGCCAGTTTGTATATTAGCCTGTGAGATCCTTAGACTTAAGTTGTGTTACTTGCCAT

A\_16\_P02538009

AGCCTGTTTTACCAAACCTTCTCCAAAATCCTCTCTCAACTTTCATTGTTTTATCTGCAT

A\_16\_P02807174

TTCCCTCTACACTTCTCTTACAATAGATAACCATATTCTCCCTATCACTCTGAATCGAAAC

A\_16\_P20234863

GGGTTCAACAAGCATTCTATTTAAAGTAATGGTTCTCTCTACTTTTATTAGCACCCAGCAC

A\_14\_P120832 CAGTTTAGTAAATAACTCGCCTAGACCAATTTTCCCTGCCAGAAATTCAGCATTGATTA

A\_16\_P15952620

AAATGAATTCCTCCATGAGTCAAACATTCTGCATTATTTCCAGGTAAAGCCTTACTCAA

A\_16\_P21536536

ATTGGTTTAAACCATTTACTGATCCTAAGCACAAAGCATTGTTATGTTCTACCCCAAAT

A\_16\_P17202047

CTGTAGGACCTGTTAACTATCTCGAAGTAGTCATGTTAAACAATCGACCCAGCATTAT

A\_14\_P201009 ACGGAACTGCTTAGACTGATTTTTCTTCCCTACATCTCTGTTAGATCCTAAATCTTGATCT

A\_14\_P105289 ACTCATAGGGCTCATTCTTATGAACAGTTACGTGATCTGCAAGTTCTGCTGG

A\_14\_P137676 ACATCACACATCCATTTAATAGGAAGCCTCTGTGCGATGGAAAATAATTTCTCAGAATTT

A\_14\_P133573 TTTTTGAGACTCATGCATTAAATTCAGTAAACCAGAAAGTATTTAGAGGACTTCATG

A\_14\_P105100 AGCCAGTTTCTACTGTGGCTTCATAAATGCTGAGTTAATTTTTGTTTGCCTTGCAATTT

A\_14\_P117732 GTGCAATGGGAAATACCTCTCATCAAATTAATCAGAGGTAATTTCTTTCAGTATGAGTAA

A\_18\_P10632095

ACAGTCCATCACTCATGTCAATTCAGAAACTTTCACTCTATAACCATCTATAATTACCATC

A\_14\_P131581 AACAAAGTGAGGGATGAATGTTTTTCATCTGTGGTGAACCTTTATTTTTAGAAAGTCTTCATG

A\_14\_P102048 CTGTAATCTTCCACCCACTACTTATCACCCTTCACTGATTCAACAGAATTCTTTTCTC

A\_14\_P138231 CAGCCCGAGATCCAACAGTCTATCAACAAACACACATTTGCCAAGGATAA

A\_14\_P101877 GACACTTTCCCAATTAATAAAGTCCCTTCATAAACTTTGCTTCTAGTTCTTGCCAAAGATT

A\_14\_P117709 AATATGTAGTTATATATAGTGTGAGTAGAAAGCACGGGGGAACAGTGTGTAGTTTGCATT

A\_16\_P03772792

ACCTTGACTTACTTTTTAAATGCCAATACTTAGAGAACTACCAAAGAAGAGACCCAA

A\_16\_P21430666

AAAACAGGGTTGGAAAGATAGGTCAGAACAGATTCTATGTTCAATTCTTTTGCTACTACG

A\_14\_P114703 AGACCTCACGTTTCTATATTCCTCTAAAGCAAATCTCCTTTGGGCACAGACTTTAATCT

A\_14\_P134592 CTGGTTTAAATATGGATCAAATTCTACTGGGACAAATACCATGAAAAGTGGTATGTTCCAC

CUST\_9708\_PI426210822 ACAGAACCCATTTCTAAATTGAAATATGCTTCAGTTGACTCAGGGGTGAGGT

A\_14\_P121355 TGCTAGGAAACTGGGGATACTTGAGCAGTTGGGATCTGATTATAATAATTTCTAGGTTT



CUST\_10243\_PI426210822

TATTAGAAAATGTTAGCTAGGAAGACCTGTTCTTTATTTATTGACTTGCATTTATTGAGA

A\_14\_P112035 GCCACCTTTTTCTTTCTCTAATTAGTAGTTCTACTCTATCACTGGGTCCTGCATGAC

CUST\_9729\_PI426210822 CCCATTAAGATGAATGACCTCATTGTGTGAGGTGTGCTCGAATCTGC

A\_14\_P128217 TCCATGTGGTTGTCTAAATTATGTCTTGTGTTGTCGCCGAAATTATTTTGTGCTTCCAA

A\_14\_P128460 CTTTTACAAATGTTTCAGAGAGGTGGTCTTTTCTCTGTAGCAGTAAATGATCCTTTACGAT

A\_14\_P128552 CTCTACGGGACCAAGTTCAACTATGGCAGCATCATCAAGGCAATTTGTAAG

A\_16\_P19592266

AAGAAGACTTTCATTACATCAACAATTGTTCTAGTCACAAGTATGTCCATCTACAGGGT

A\_14\_P133949

GTCTATATCTGCCTGTTAGAGAGGAAGAGGCACAACCTGAAGAAAAACCTCCAAATAAAG

CUST\_1177\_PI426210822 GAGACTATGGAAGAGAGGGATGGTGGAAATTCGAGACTGGTCAATG

A\_16\_P16576274

CACTCAGGACACATTAACCTCTCTGTTCTAAACAACTAGAGGTAGGAGTTACTCAAAGA

A\_14\_P115598 ACTCCCGTTGCAGGAGACAAAATAAGAGAAATAAAAATTAACGGATCTTGGCTTTGATAA

A\_16\_P58424501 CATCAGAAGCAGCACCCGAGATGGACTCTCATGAAGGGGATTTAT

CUST\_9412\_PI426210822 GGGTGCCTGGGATGGAGAGGTATCTAGTTCAATGATAAAAATTTTGTCTGG

CUST\_3028\_PI426210822 CTGATGCAAAGCCCCAGATTCTAAGAGGCAGGTGTGTGGAGACA

A\_14\_P125996 TTTTTTCTCTTAATAGGAATGAATTCTTCCAAAACAAAACCTAGAACTGCAAAGCACCTG

A\_16\_P15322736

AAATTCTCAACACTCATTAGGGGTAAGTCAAGTGTCTTAAAGTATAACCCAAACTCCCTT

CUST\_3919\_PI426210822 ATCTTCTGCTTCAGGGACCACATTGTTCCAGTGTGTTTAAACCC

A\_16\_P03746095

CCATTATGCTCTAAATGCAAACCTTCAGATTCTAAATGTGAACTTCAGATTCTAACCTC

CUST\_2427\_PI426210822 AGGTCAGACCCAGAAAGATGGGACTTTTCTGATTCAAGAAGTTCAGTAT

A\_14\_P134865 CCATTCCCCAAACTATTTTGTGTTGTTCAATAAGAGTTAGAGAAATTGCGGTTTAAAAACA

A\_14\_P109952 AGATTGTGTCTTTATGTAAATAAAAAGTTACTCAGCATGCACTTCAGGCATGAGTGAAGG

A\_14\_P110642 ATAAATTCCTCTTTGTTCTCAGCACCAGAATAGCATTTATCACCCGAAATGACCTATTAC

A\_14\_P115707 TTTAGAGTAGTGTAGTTAGTTAGGGGCCAACGAAGAAGAAAGAAGACGCGATTAGT

A\_18\_P13683553

CGCTAGAAGGATTTGAATTTTTTGAAAATCATGCTCAGTTTATCTCATCGTGCTTACGCA

A\_14\_P104653 CCTAGATCCTATTTCCAGAACATTCTAAACTGAGAATGAACCTCAGATGAGAATGAATGT

CUST\_2538\_PI426210822 GGGTGGTAGGGAGAAAGGCATAGAACCCTGGAAGAGTAAGTACTT

A\_14\_P103864 AAGGCAAGAGGAGAGGATTAACCTCTTCTTTTTTTCAGTGAAACCATAGTGTCTGTAATTT

A\_14\_P100784 GGTCTAAAAGAGCCTTTGAGGAAGTAAAATGGAATCTTCAAATGGACTACATGCTGATTA

A\_18\_P18411020

AAACCTCAGAATGTTACCTGAACGTAGCAAGTTTTCTTATCAGTGAGATGTTTTTCAGAAC

A\_16\_P15639243

AGAGACTTCCATTTGTCAATTCACCTTCTCTACTCAACACGTTTTTTGTAACCTTCTC  
CUST\_7087\_PI426210822  
CAGGTGCTTTGTGAATTAGATCTTTCTTATTACATCACGGCCAGTTTTTTGTGGAG  
CUST\_239\_PI426210822 CTCTGCCTCCGGGCGGGCCGCGCTGGCCCAGCGAGCCTCCTGAAC  
A\_16\_P16980749  
GCTGATAGACTCTTGTGTTTATAGTTGTGCCCTGTGTTAAATTGAAAGCCTACACTCTAT  
A\_16\_P19990762  
ACTCTAGTGCTCGTCTTTATGAATAAAGGGTTTGGTCTTAAGTTCAATAGGTGCCTATTT  
CUST\_5566\_PI426210822  
ACCTCTTTCATAGGAAGGAATAAATTCATCAGA ACTCTCTAGGTCATGTTGCCAGAT  
A\_16\_P03000816  
CGTTGTTGTGGGGATTATATTAGTAAGATGCCTAGAAAATACGATTCAGAAGGAATGTGG  
A\_16\_P03463212  
CCACATACCAAAA ACTCATAAAAGGAAGAAAATAATAAGTCAATTTATACTGCCTGCAGA  
A\_14\_P107930 AAGGCTCCTTTCAAAGTCAAGGCTTTAACCAATGAGGGTTTCTGATTAAGTCAC  
A\_16\_P19308349  
AAATAAAGACTGCTTTACACCTCTTGTCTGTTAAAGGTAATGATGGGTATCTGGATGAGA  
A\_14\_P112445 TACAGTTTGGTCTTGTAAATTAAGCAAAGTGCTAAGTGTTTTTGTAGGAATCTTAGGGGT  
A\_14\_P139544 AGATACTCAGATCTTAATGGAGTGGAAAAACATGGCAGCAACAATTTGAGATGGTTTATT  
A\_14\_P139442 CAGCGTTGCTGGCTTCTTTACCTTCTTAGGAGTCTTTTTGATGCTTTTCTTC  
A\_14\_P131425 CATAGCCTTGAGTTCACTGAATATCAGTTGATAGTCTAGAGAGTATATTCTAAGTTATTT  
A\_14\_P131247 TTGTGTATGCAGCAATCCTATTGATGAAGTGCTGAGGGCTTAATCACTTTAACAAAATC  
A\_14\_P128995 ACATATGTATTCCATCAGGTAATTTTTACCTCCCCAGAAAACATATCAAGCAAGAGTTT  
A\_14\_P135371 CTAGAACAGACCCGTTTTTCTCATGAAACCGACGTTTTTTACAAAAGCCTGTTTGT  
A\_18\_P16720085  
CGTTGCATGATATTCTCAACTAGTGATAAGATCTGACAAGCAGTATGTTGATTCAAGGAC  
A\_14\_P113341 TTACCCACCAAACTATCATGGAAAAATGATCAAACAAGCAGTAGTTTACGCACATAGAAC  
A\_14\_P103253 CTATGCTCTGTTTCTGTGAAGGTTTTTGGTCCAAGACTTTTAAAGTCCCTAAATAGTGAG  
A\_14\_P105202 CTCCAAAATGCTACGGCTGTTGGGCTGACCATATGGTCCTTCATTT  
CUST\_2726\_PI426210822 AGTGGTGTGAAGGCCAGGGCTCCTTAGAGGTAAAAGGGTCTCTTT  
A\_16\_P40436081  
GCCCCACTTTGAAATAATTTATTCATGACCTTTTTTTGCAATATCCTTCATTTTCCAGAC  
A\_14\_P128957 TACTAACAATATGATCAGAGCAGAGGATGAGAACCTAGAAGGGTCAGTAAAATACTTGGAA  
A\_16\_P16571216  
TGAAGAAATTATGTGCTTTGTTTCTGTCGTTAAAGGTTCTAGTCCTAGTCAATTGCTTGG  
CUST\_7079\_PI426210822 AATACCAGCTTCCTTGGTGAGTATTGGGGCTGGGGTTCAGGCACA  
A\_16\_P02273411  
TGAACTCAAAGAACATTTTCATACCTTCATCATCAGACATATCAAGAACTTCATTCATCG

A\_14\_P112179 GCTTCTCTTTGGACCTAGATGAAGTAAGAGCCATCTAATGTTATATAATATGGGGATGCT  
A\_14\_P129045 CTCATCCTTATTTTGAGATTGAGAGAAAGATTTTACAACAATGTCTTCACACCCATCAGG  
A\_14\_P132816 CTGAGATCTTAGAGAGGAAATATAACCGGTGTGAGATCTAGCAATGCATTTTGAATCTTC  
CUST\_9561\_PI426210822

ATACTTAAAACCAATTCAAATAAAATAAATCCTCAATACTTCTTATTCCCTGGGGTAGT  
A\_14\_P126356 TTGTTTGTCCAAGATTTTATATTCCAGGGCTATTTTAAACCCATTTTGGATTGCTGTGTG  
A\_16\_P16668460

AAAGAATGGTTTGCAAAGTTTATAGGTTATTACAATCCCAGACAGTCTTTACATGCCCC  
A\_16\_P00910312

GTCCGCTTCTAATTAGTCCAAATGAAACTGTTATTCAAATTGATTGCTGTTGTTTCCGC  
A\_14\_P124164 TTTCGAAATTGCATGCCCAAACCTTTATGAGATCCTCACAACACACTTGGGAAA  
A\_14\_P102034 CTAACTTATAGGAGTAATTTACGGAGTGCCATAAATAGGAGGGCAAACCTTGAATGTGAG  
A\_14\_P125593 CTCAGAATTATTATCCCCCATCAATCTTTATCATTCTCAGATGCCCTCAAACAAGATG  
A\_14\_P111688 TGGATCAGGCTTCTACTATTGATCATCTTGTTAAATTGCTGATTTTGTGGCTAATGCCT  
A\_16\_P16755718

GATATCCTCTCAATCCTCAAAGATGGATAAACCTTCAGCAAATTTAAAACATACGGGAGA  
A\_16\_P15438659

AAAGTTCACCATGAAGTTCTCAAATTCAAACCTTATTACAAGTTACCTGACAACCTGGA  
CUST\_4969\_PI426210822 CCAAGCTTCATGGTAGGATGGGTGTTAATTGGGAATGGCATGTAATTCT  
A\_14\_P131732

GAAAATGTCCCCTGAAGACAGAGCAAATGCTTTGAAAAGAATGAGGTAAGAGAACTTAC  
A\_14\_P136432 AGTTGACATGCAATAAACTGCATATTCTCCCTTTGCTTTTAAAATGATGATCTGTTTCAG  
A\_14\_P128458 TAGAGGGTGGACATAGTTATGAGAAGGTCCGAACGAAGTGGAAAAACCTAA  
A\_14\_P117576 TTTAAGGGCATTTTAAAGTTATTTGCCATTGTGGTGGTCAAATTAGAGTGACAAGCCATA  
A\_16\_P01354725

AACCCACTATTTTTAACCAGTCATAACTCTTGCACTAAGTCACCTTAAGGCTGTAACCTT  
A\_14\_P103711 CTTAAGCCCTCCTTTATTTATTTACTGACTACATTAATAGCAAAGCCACGCTGCGTTCAG  
A\_16\_P18727714

ATGTGACCAATTCCCTTATTTAACTGATGAAATTATTGCCTAAGCAAAGTGACTAGGG  
A\_14\_P101085

TTGTAACCTCAGAAAAAACTTCAAGTAGGGGAAAGAAAAGGAAGAGGAGAATTGCTTAAA  
CUST\_5936\_PI426210822 AAGACTTGGCCCCAGTAAGGGCTGGGTGGGGCTTTGGCTGTTGAG  
A\_14\_P127640 ACCAAGATAACTGCTGTTTCTCCAGTAATGCTTTGGCATAGAATAAATAGTCTCTGAGTT  
A\_14\_P106834 GAGACAGGAAAGGGAAGGAGTCTTTCATTATCCAGGTGAGATTCCATGTAAAATAATC  
CUST\_3401\_PI426210822 CTGTGAACAATCTGGTTTTCTTGCTTTGTGCCTTGATCATGTGAGACCTAAG  
A\_14\_P133902 CTGCGTGTCTTGGAGATGACTATCACACTGGTGCCTGAGATATTCCTT  
A\_14\_P112029 CACGGATTTCTTTCTAGACTTTTCTTCATCCATCCAGGCATTTTCATACAAAAAGTGAAT  
A\_14\_P136064 TAAATCAACTTCTCCACCATCATTTAAGACGAAGACTTCACCTAGGATTA AAAAGGCAAT

A\_16\_P00965500

CCTGCACAAGATATCAGATTTTTAAACTAGAGTCACTCGAATTGTAGATCTTACCCAGGA

A\_14\_P122189 GCTCAGTGTGTATCACTCGAACTTTTCAAGTTAAATGTTATCAAGCAGTAAGTGTCTGTT

CUST\_6167\_P1426210822 TCCAGAGAGCCCAGCTTCTGTTCACCTGATGAGAGGTTGACACAAT

A\_18\_P16057262

AAAAAATGTGGCTTTCTAAATAGAGGAGAATTGTGGATTCACACATATTCATGGAACACT

A\_14\_P110888 CTGAAGTTGTAGGGGGATAAAGATCACACTCCACAGTGAAGTATGCTGTTATATATAGTT

CUST\_5822\_P1426210822 CTAGCAGGTGAAGTCTGGAGGGAGGTGGAAGAGACTGCTTCCAAG

A\_14\_P115717 CTTACAGTAACCTTTTTCAICTCCGATAAGATTTCTTCTCTTTTTTGGTTTTTGGGATGC

A\_18\_P15522764

ACCTAGCCACCATATATCAATCTCAGGTTTTTACCAGTCTATGTAAAATCTAACACTCCA

A\_14\_P124707 CAGATACTGAAAAGATCTAAGTAGGTGCTTAAGAACTGCTTTTTAAACCCATTCAACACT

A\_14\_P200621 ACTTACGTCCTCTCTGAGATGACAGGCACCTTTAGAATTTTTTAAACTTCAGGGTTC

A\_16\_P19163905

CGCACGAATACCTATAAATGTTTCTTTGTTCCAGTTACTTCTGAACTTACAGTGTCA

CUST\_590\_P1426210822

TAGCTAGAGGAGCCATAGCAATAGTTGTCAGCTGCATAGTTGGATAATTGGTTTG

CUST\_3314\_P1426210822 GGTGCTCTCTAAGGTGACCTTGGACATATGTCCTACAGAGGACAA

A\_16\_P18202452

ATTTTAGTGTAGTCATGCCAATATCTAACCAGAACGAGACATAATGATCAGAACAGGGA

A\_14\_P133812 ACCTTTTTCCCAAGGACGTCTTTCTGATCTGCTTCTCTCTGGTGA

A\_14\_P125503 TTAATCTTGTGTTTGGTAATCTACAGCCTGTTAGGGATAGGTGGAGGGATGAAGTC

CUST\_6405\_P1426210822 ATGACAGTGAGCTCCAACCTACAACCTATTCCAAGCTGAGAGTAATGGACT

A\_14\_P119820 CATTTCCAAATTGATTTTTTAGAGCAATTATTAGATAGTGGATCTCCAACCTAGCAGCGT

A\_14\_P109560 CTACCAAGGTCAAAGGCTATGACAACCTCTTTGCTATGGTGAGTGGAAC

CUST\_6500\_P1426210822

TTAATCTTCATGTTATAATCAATTTAATTTGGTATTTTTTGCTCATATCTCTCATAGAAA

A\_16\_P16489792

AATATTTCCCCTACTTTTTTTTACCTACACCAACATTAACATTGGCTGATTTCCCTTGACA

A\_14\_P121703 TAAAATAGATCCAACCGAAACCTGGATACTCTCGCTTGGAAAGAAGACATAAGTTAAATA

A\_14\_P201859 AATGGCATCTTGAGAATTTAAAAGGCAAACAAACAAACGCTAATGTGCAATTCTAACTCT

A\_14\_P118477 CTGCACTTGACTGACCGATTAAAAGATTTCCCTTGACTTTGAGAAACGATATTTAATCAG

A\_14\_P128264 ACTCTTTTTCTCAATGATTAGAGAGATGAAAAGATAACGAAAAGGTGAGGGTAGGGATAC

A\_14\_P112468 CTATGCTCCCTTATTGCCCTGTGCTAATAATTCAATATTAAGTGTGTCACCAATACAG

A\_16\_P20813431

AAAACCTCACTCCTACAGTTCTCATGGTATTCCTCAATAGATTCAGGCACTTTTTGACTTAT

A\_14\_P115138 ACTTCACAACAGATAATACACTATTCTTGTCTCCTCACATTGCCGAACAAAGTGTCTTAA

A\_16\_P15696005

CAGCCCTTTCTCTTCTAAATTATTAACCTGTGACTTCAATACCTATTCTCTGTCAATCCTC  
A\_14\_P102578 CTGTGATGCATACTCAGTAAACATCAACAGCCATTAAGTGTGTTTGTATTTGACCAGAT  
A\_14\_P102353 CATTTCATACAGGTAACCAAAGCAAGACAATTGGCTGTATACCTAGGGAAAAAGAAAGTAT  
CUST\_2101\_PI426210822  
GCATAGGACCAGGAGAGAATAACCTATTTCCCCATGTAACATTTATTTTCATGCCTT  
A\_14\_P131745 CATCTTCCTCTTCTTTGCATTATTTTCACTATGATTCTTCTAAAAGTCACCCGGTCCTA  
A\_14\_P109319 CTCAGGGAGGAATGGTTTATCACAGTCTGTAACTCTTTCGGTCACTCTTTTTTTTTTTT  
A\_14\_P202240 TGCTGATTTTCATCAACACATAGGCCCAAAGAATGAATTCCAGCATACCAAATAAATGAT  
A\_14\_P123162 CTCTTAATCATACTACGTTCCCTTGCATAATATTACAAGATCCTACTTTTGGAGAGTGG  
A\_14\_P112262 CTGGCTGTTCTTCTTTTCAGAGAGGAAATGGTTGTCTGAAGTTCTGCTATGAT  
A\_16\_P02066434  
AATCATAGTATCTTGGAACCTTCCAATTGGAAACAGTCATTTGAACATCTTGTCTGGAGG  
A\_14\_P133215 ATTTAACTTTCTTCTGTTTTTCATATGCAAATGCCAGGTGTCCCAATTTAAGCACTACA  
CUST\_4236\_PI426210822 AAGCTGGGTGCTGTAGTGGCATGACTATTACAGGTGGGGCCAGGA  
CUST\_45\_PI426210822 CCTACTCGTAACTCTCCTTTAGACACACTCCTCTATGGCAGACAACCTC  
A\_14\_P135163 TAGAAGGAAAGTTCAACATACAGCACAAATTCTGGACACATTGTATTGGTTTGATGCTC  
A\_14\_P125313 CCATAATTATGAAGGAGAGCCAAGAGGATGCCAAGTGCATTAATAACATTTCTCTCAAA  
A\_14\_P110983 CTACTTCATGGTTGGCTAATTTGGGAAAATAGGCACCCATTTTAGAATTCAAATAACACC  
A\_14\_P131003 TGTTCTGATGGCTCTACTCTTTGAGAACTTATCCTAAAGGCTTTGTTTTTGTATTTCTCAG  
A\_14\_P200586 CTGGCCAGAAAAATTTTAGAGTGCTAAAGACAGCGTGTGCATGGATAGTAGC  
CUST\_8905\_PI426210822 TGGAAATCTTTTTGTGTCACTGCCTCTCTCAGACTACTTCCCATCTGT  
CUST\_9593\_PI426210822  
AATTCACATCTTTCTGTTCTAATTGGTATTCTTGCCTATTTTCTCAGCAGTCCATGTTT  
A\_16\_P16241775  
AAAAACCAGTGTGATCCTATAAAAACCAAGCCATTGCATAAGAACCAAAGAACTTCTAGAG  
A\_16\_P16728619  
ATAAAGAACCAACGATTCTCCTATGAAAACTCACCGTAATATCCCAAAGGCTGAACT  
A\_18\_P15838215  
AACCCAGTGAGTATATGTTCTTCTGAACTATCTGAAACCACTTCTAACATACAAACCAA  
CUST\_2034\_PI426210822 TTTGAGAACCCACTTGTCTAAACTTCTGAAGACTTCTGCCATTGAGTTC  
A\_14\_P121184 TCTTCACTCTTTCAGAGTTGCTGGAGAATGTAACCCTAATCCATAAACCAGTGTC  
CUST\_366\_PI426210822 ATTGTCACCTAATCGGAGGATCCTAGATCCCTGTGTAAGTGTGGGG  
A\_14\_P121959 CTCAGTATAAGACATTTGATTTAGAAAACTTAAAGTCAGGGTAGGAGGTTTTTTGGAGGG  
A\_14\_P118259 GAAATAAGAGAGGGAAAAATCATTGCATTCAATCAAAACCTTATGCTCTGATGCCAACT  
A\_16\_P03057959  
AACACTGCTGAACATCAGAAGAGGTCAAGGGAAATAACTGAGAAAATAAGACAAGGAT  
A\_14\_P110913 ACTTAAGAAAAGTCCATTCTGACCTGCATACTGCCTCTTGCTTCCAAGATCAAT  
CUST\_4141\_PI426210822

TTAAACAAAATAATGATGAGAGAAATCTGCCTCCATAAGTCATAATCTCAGCAGGCTC  
A\_14\_P136996 ACTCATTGCTTGGATTAAATTAATCGGACTTTTTTTTCTTTAAGTTTCAGCACCCCTAGGG  
A\_16\_P02047568  
AAAAAACTATAGGACTATGGGAGTTTAGTGAAAGTCAATCACATTTTGGTTTACAGCCCC  
A\_16\_P00597130  
AGAGTGGCTACTGTCTCTTTAACTTCCTGTCACTATTTATACATGAAAAGAGAACCCAG  
A\_14\_P119286 AATTTTCAGATGTTGCTGAGTGGGAGGCAGTTATAATAACCTATGCAAGCATTATCAAGA  
A\_16\_P01997557  
CAGCGAAATGATGGATGAATTCTGTATAGTGCCTACTCAATAAATATATGAAGGCCACC  
A\_16\_P36230971  
ACACAAAAAGAAATTGACACATTCACAGTCATTGCAAGAAAATTTATTGCTTTCCCTCA  
A\_14\_P108874 CTACCTTCTCACTTCACACTAGGTGGCTCACTAAGAACATAACTATACAGTCTAAATTA  
A\_14\_P100098 TTCACATTGTGTTTTAGTTTTGGGCTAAATGACTTAGAGGGACAAGTATGTAAGTGGAAC  
A\_16\_P00655538  
GCCTGCTGCTACTATGATAACGTGTCAATATTAGTCAATGATACTTAGATAGAGACTCGC  
A\_14\_P101669 CTTGCCTATTTTGGTCTTTAAGACTTTTGTGTCAGTCATTATTTTACATACAGCCTTTGCC  
A\_14\_P126386 AAGAATTACCACACCTTAAAGAAGAAATACCCTTTGAACTGAGCAATTTGAACCAGAAAT  
A\_14\_P123585 CTTGGAAAAGTTTTCCGTTTTTTTTGGTTTTTCAGGGCAGGAAGCAAACCTTGCATA  
A\_14\_P135341 CACATGGGACAGCATTGATCCTCAAGGTTCTGAAATACAAATAGAGGTTTTAACATGATA  
CUST\_2113\_PI426210822 CAGTTAGCTTTGTCTCACATTGACTGGGGCCCTGCCTTGCTGCTG  
A\_18\_P11557912  
ACGTTTTCTCATCAGTATCCTTTGCTAGTTCCAGATATTGCAACATCACTACTGTTCAAG  
A\_14\_P125180 TGAAGCCTGACTGCAAGATGAAGGAAGGACCTTTGGAATGTAATAAATGATTTCTAAAAA  
A\_14\_P107289 AAATGTCATTCACCCATCCCTGTTCACTGACTCATGCATGTAACAAAGGACTA  
A\_14\_P131453 CACAGGCTAATTTGTTTCACTGTCTGTCTCAGATGCCCAGGTATTTGAAGTC  
A\_14\_P118011 GAGTGCATCCTCTCCCCAGTAAAGAAGACTTCTTGAAAAGTATAGATTACGATACTTGG  
A\_18\_P14133574 CAGGTGGCTTCCTTTTCCAGTATGTTGCCCACTGGTCTCATCTAT  
A\_14\_P123865 TAATAAGATTGTTAAAAATCCAATAGCATGAATGTCAATATTGGCAGGGACAGCCACAGG  
A\_14\_P109348 ACTATTAGTCCCTTTGGCATAACAATAGCAGAGCAAATACTTGTGGCATCCTTTTGAAAAC  
A\_14\_P134072 TGGTAGAAAGTAACTTTCAAGTATTCCTGTAATCCAACCTGGACTTACAGATAGCGATCTC  
CUST\_8302\_PI426210822 ATGACAGATTTTCATGCTTTTCTTTTTCAGAATCATGTCTCCAACCTCCTTTGTA  
A\_16\_P17030954  
AAAAAAGTCGAGAAAGTCTCTGTATGCAAATTGCTTCCACAAGTTAACTCCAAGATACCC  
A\_18\_P14135438  
TGAAAATACTGTGGAAGGAGGCCAGGAATACGGAGAAAATGTTTCTATATTTCCCTTATTC  
A\_16\_P18808955  
ATAGACCAGTAATTCAGGCAAAGAATGAAGAATTCCACCATCTACTTAACTGCCAAAAG  
A\_14\_P129172 ACATTGAGATTTTGTATTTGCTCTAATAGTGGCAGGATGTGGAAATGACCCCC

A\_14\_P108641 CTGTTCCCTGGGCCCAAATCGAAACGAAAACGAGGACTTTATTATAAAAAACGTTG  
A\_14\_P117124 CTTTTCTGGCAAGGGACTTTGCATATTGGTTTTGCATCTCATTACTTCTCCATTG  
A\_14\_P100288 CCCCTAGAGTCCTGGTTGAAATAAATTA AAAATGCTACTCATATCTAGAACCAGAGAGAGA  
A\_16\_P18223075  
AATGTCATTATCCGTATGTGCTCTCGATTCTTACCTTGTAATTTCTCAACACTCTTTTCA  
A\_14\_P129208 TGGCTTTTGTGTGTA AACGTCTAGAAGTTCAGTTAAATTACAAGATCTACCAGATCTACCG  
A\_14\_P111834 CATCTGACTTCTCAAAGACTTTAGACCTTGACTTCAGTGATTTGTTGTAGTCTTGTATGC  
A\_14\_P110394 ACTAATCAAGTTATGCTCAGTCCCTAGGCTGCGTGCTATATGCCATGATGTT  
A\_14\_P106266 AGAAAGTGTCTTCTAAACAGCCTACCTGTCTTTTCCTTGATCTCACAGAGCAC  
A\_14\_P120072 CTGATGAGTGGTCTTCTCTAGATGTTACAGTGACTCAAGAATTAGTCTTGTCAAATC  
A\_16\_P15438002  
AAGGATGCAACCATTAGAAAATGTTCCCATACTACCATTAAACATTCCCCATTTATCATT  
A\_14\_P200662 CTCACAAACATTTTGTTCATAAGCAAAAGTAAAGAACAGCCCCAAACTGTGTGACTATG  
A\_14\_P118795 CTTCAAGTCTGCCAGAAATGTTACAGTGAACATTCTCAATGACCAGACTAAAGTGCTAA  
A\_14\_P127407  
ATAAGACAAGTAGAAGGAGATTTGGCCAATATCCAGAGACAGTAAAGTGCTTAAAAAAGG  
A\_14\_P119033 TTTGTATATGTGCTGGGTTAGTGACTGTGTCTTTGTGAAGCCCCATTTAGTGAC  
CUST\_8825\_PI426210822  
GCAGAGGTTGCCTTAATTTCAATGTGAGAATAAGAAGGTGAAATTTTGAAATAAGAGATT  
A\_18\_P13701419 CTTCCGAAACCGTTGTCTCAAGCGTGTCCACTTGATGTGATTA AAAAAGTTCT  
A\_14\_P117206 ATGAATCAACCCCTCACAGTGAACGAAGGGAAATAACACAGAAAACAATTTATCTAAACA  
A\_14\_P105591 ATGTGAATTGTCTGATTATTTGAGATCACTATGAAGAGGTTCTCTGGTTGTTAGCAGCAA  
A\_16\_P36523364  
TGA ACTTCTGTAGCAGTTACAATCTGTTCTACGTGGTTAGTTTTATAAACCTCCTGAGTT  
A\_14\_P116382 GAACTGGGGTTTTTAAACAACCCCTTTTGAGGAGGTAAATATAAATTGTATGAGCC  
CUST\_2539\_PI426210822  
AGGGAGAAAGGCATAGAACCCTGGAAGAGTAAGTACTTCCTAAATTAAGTTATTTAGG  
A\_14\_P109831 TTTTTTTTTTAAAGGATAAAA ACTAAAAAACCTCATCTGTGTTACTGGAGGTTAGGAG  
A\_14\_P106859 CAATTCAGCCCATTTCTTCTGCTCAGTTGCTTTGACCATCAAATAACACCTAATTATAGGA  
A\_16\_P18434134  
AAATTTACAGGCTCTATTAATCAGATCTCTGTCACTCTAATGTTCACTACCTCCAGTTC  
A\_18\_P14139012 CAGATGAGGTGTCACATTGCATCACATCACGCCATCGCCATTACC  
A\_18\_P22839582  
AGGGAAAAGCAGTATAGCAAACTTTGAAAGGAAAAGAAGACATGTTAATTAAGCCTTGT  
A\_14\_P119368 TCAAACATCATTCTATTCTGTGTGTTTTCTTCAAGACCACTATCTACCCGAGACATTTTC  
A\_14\_P138495 AACTTAAAAAATGAACTCAGATTA ACTTACTACTGCATATAATACTGATGAGCATA CATC  
A\_14\_P136560 ACGGGAGTCTTGGACTGAGATTTGATTTCAAATCTGAGATTTTTTCATTAGAAAGAGTTGA  
CUST\_4885\_PI426210822

TCAGTATTTCTCACTCACCCCTTTAAGACCCTAAAGGGAGAGTTATTAATAGTTTCAGAA  
A\_14\_P128568 CTTTGCACAGAGTGAAATCACATAGTGCCATGAACTGTAAACTGAATGAATGATTCAAC  
A\_14\_P139629 AGTTTTGCTTGACAGATGTTGTAATCAAGGGCCTACTCTAACAGTGATTTATAGTGAAGA  
A\_14\_P136616 GTCCAAAACATGAGTGTTCAGTGTCCAAAATGTAAACACAAAACCTCATATTTTTGGT  
A\_14\_P127268 AGAAATTCAAATGATACAGAGAAAGATGACTTACCCTTCATTTCTGGCCATAACAAGTT  
A\_14\_P106991 TTTTCTCTTCTCCAGAAAAGTCTTCCTCAATGTCATCACTCAATATTGCGAAGCA  
CUST\_5310\_PI426210822 ATTACTCATCCAAAATAAGATATGCCACGACTCAGGTTTCCCTCCTCAGC  
A\_14\_P201439 AAGACTGTCTGAGACAATGTGCACATCCTGTATGTGTGTGAAGGATCAG  
A\_16\_P00161412  
TCTCTTTTACTAATTTTCTTTTGTGGACGTTTTTCTGGCCACCAATAAGGTAAATTCCC  
A\_14\_P201061 ACTATGGTGTTCATAGAGGAGTTGCCATTCAAATTCAGTCTTGAAGAATGGCTTTATTT  
A\_16\_P02315410  
TCTTCACATACTCATTGACCAGAAAATAAGACCAAGAAATCTGCAATCTCATTTTTTCCCA  
CUST\_8387\_PI426210822  
AATACTGTGGAAGGAGGCCAGGAATACGGAGAAAATGTTTCTATATTTCTTATTCC  
A\_14\_P118008  
ATGATCAGGAATGGAATAAAGGGAAAATGGAGAGCAAAAATGAAGTAGGAATGAACTTCT  
A\_14\_P128493 TTTGGCCCAATTGTCCGCATTCAAGATCATAATAAAAAGGCTTAGGAAGTAAACTTCTT  
CUST\_5682\_PI426210822 ATTAGGTAATAGTTTCCCGGCTGAGGTGCCAGCTGGCTTAACAT  
A\_14\_P134178 TTGCCCACTTCTGTGTAGACATGGTTCTGGTTTAACTAATATTTGTCTGTGTGCTACTAA  
A\_18\_P22841206  
TTACGTGGAATTATAGACTACCTAAACTGCATCTTTTGTCTCTCAGAAAAATTCACAG  
A\_14\_P114428 TCTTTCATTCAAAAACCTCTGCTATATAGTCTTACAACCTCAAAAAGAACTGGCAAAACTC  
A\_14\_P201528 CCTTGTGAATGGGAGTTTCACCCTCACAATCCTGAAACAACAAAAGCAAAATATAC  
A\_14\_P123030 ATTTGAACGCTAATGACTGGAAAACCAATGCTGCTGGTTTTAAGGGTGAGAAC  
A\_14\_P131423 GTAAGTATATAGGTGCAAAATAATCCACAAACCAGGCAGAGACAATGTTGCTCATCAAAT  
A\_16\_P16190998 TAGAATATGGAGGGGTGCTCTGCTCGCTTCCACGTGGCTACTATT  
A\_16\_P30952410 ATATGAGATGTGCATGTGATCCTGTGACAAGGAAAAGAGGTGGCCTCAT  
A\_16\_P03000269  
CCCAGGGAECTAAAGAAGAAAACAATTAGTAGATTAATCTATTAGGTCATAAAGTTGACA  
A\_14\_P135388 CTGAATCTTGCAATTAGAACCCCATGGTCCTACTCTAATTCTGTAATACAGAAAATTGCTG  
A\_16\_P18123715  
TGATGAACCAAGGGACATAAGTATGCCATAACCATAATGAGATTGATACTAATTTGGACA  
A\_14\_P101454 CTTCACTTATATATGGCTGAAAAGTCTTACCTGACACTTAGCACTACAGTATTTGGCGAC  
A\_14\_P123234 TCCTGATTGGATGTCAGTGTCTTTTTGTTATGGCAAAGGTGGATCC  
A\_14\_P112790 TAAGAAAAGAAAACCAAGTCCAAAATCTGCTGGATCTATGGACATATCTCCTGTTTGGAG  
A\_14\_P115181 GGAACACAAGTCAGTGACAAACTTTAACCCAAAGAAATCTTTCAATTCCAAAATCACTT  
A\_16\_P16553405



AAACAATGTTTAGGGGGATAAACTGTAACCAGTTCAAATACTCTATCAAGGATAGTTCTGT  
A\_14\_P125214 TTTACTCTGTTTTCCCTTTGCTGGCTTATACTTCACATTTTTAGTGTTACTGTGGCATCGA  
A\_14\_P124963 CTGCCAGATGTGAGGCCTTCAAATTATTTATTGATGCGTGGAGTAAAGCACAAC  
A\_16\_P18883549  
AAAATCACATGTCGATCTACCTATGTTTTTCCCTCTGTTTAAAATAGCAATGTGACAGCC  
A\_14\_P105874 CCAAAGAGTGTATTTTTTTAAAAGTTTAAAACAGAAGCCTGATGCTGACATTCACCTGCC  
A\_14\_P137234 CCTGGTATTTTAGGGGTGATTTCTACGGCCTAAACATATGCATGAGGAATTACATAAAAT  
A\_14\_P138272 GCCACACTGACATTTTTCTAACCACAAAGCAACAAAATGGCCAAACATAATATTATGCTT  
A\_18\_P13661235  
TGAGCCACAAAACACTACTATCTCTTACAAAGCAAACCTACATTCTCATATTTTTTCTACCT  
A\_14\_P132893 CACTGAACATACTAGAAAAGTAGCCAGATTGACATAAATATATTTTTGTGTAATCGCCATT  
A\_14\_P109588 GTTCCTTTTGTGTTCAAGAATATAGTGTCTTTAGGTCAATTACAGTGGAGCCCTGATAAT  
A\_14\_P100807 AAAGAATAAAAACACTAGTATTGTTTTGGCCCTTAAATTCCCACCCAAATCGATTGTTCTGT  
A\_14\_P111206 AAATGAAGGGGAGAACAAAATCTTCAAATTCTATAGTTCTTGGTGACTCTTTCCTGATGA  
CUST\_9953\_PI426210822 GTTCATTTGGAGGTGGCCAGGGTGCAGACCTGTCCTGCCTCAAG  
A\_14\_P103069 ACTACTCTTACGTCTGGACCTTTTAAACGTGCATGTTAGAAAACACTACATTTCTTTATGG  
CUST\_9812\_PI426210822 AGAGAATGATTAATTCTGCTGAAAACAGGAGTAAGGCAGGCTTCTTGGGAAA  
A\_16\_P00910710  
GCCTGATTTTTGTTTGGAAAATTCTGTCACCATAAAGTATCAACTTAAATCGAGGTCCAA  
A\_14\_P200840 ATGTTAAGTGTCTGGTTTGTTCATAAGTGTGAAAGTTAAAATACCATTGTGGTCCTC  
A\_14\_P110761 GGGTTCATCTAGGAATAAATTTGGGCTCTGTGTTTTCTTTTTTGTATGGCATTTAGTGTT  
A\_14\_P128908 AATACTGAGGTTTCTGGGATTCTTGCTTTTCCTGCCTCAGTTCTGTATTTACTTCTTTAT  
CUST\_5408\_PI426210822  
CAGATGTTCTCCCATTTGCCAACTGGTTTCTAAGAATATTTGGAGGATGAGTAAAGTAAT  
A\_18\_P16654191  
AGAAGCCTACTTGTATTGTGTAGATCTCTGAATCTCTCTAAGACTTGTTCGATGAGGT  
A\_14\_P132785 TAGAAGCCTCATATAACCATGCTGAAATAATAGATACCAATAATGTGGCATCCCTCCATTC  
A\_16\_P21610034  
AGGTTAGCATACATGAAGTTATTTGTATAGTCACACAGTTTAAAGCCTATGATTACTCCCA  
A\_16\_P20587316  
ACTTGAAAACATCACTGATCCTAGAACATTCTCAAATATAACTCACACAAAGCAAGAGT  
A\_14\_P137720 AGAACTTGAGCAGTCTTCTTCTAGTCAGAGAAAATGGAAATGCATTGATTCATTGCATGG  
A\_16\_P58424330  
AAGCACACTGGACCTAAAGAATATTTGAACTAAAATTAAGTCTGGATTATGGGGCTACT  
A\_14\_P130538 AAGAAAGAACTGGCTGCCATCTTTTTTCAGTCATTTTTAAAATATGGCACGTTTTACTGCTA  
A\_14\_P108314 CTACACTCCTGATCCGCAGAAGATGCTCATGAAACACTTGCTGAATGAGTAA  
A\_14\_P134535 GACCTCATAAGTAATGCTTCTGGTAACTTTCAACTTCTCCTTTTTCCCAAGGCATAATTA  
A\_18\_P17717753

TGAGTGGGCATTTA ACTCTAATATACTCCCATTAGGCTAAAGATATGTAGAACAGAGCAG  
A\_18\_P14132880

CTAGATCTTCATACATCCTGTCATGTGTGAAGACCTGGTAAGATTCTGGCTTTTTTGT  
A\_14\_P130658 ATAATTACTGGTTTTGTAACTTGTTCTGGTAATGTCCTTCCCGGACTCTTTTTAAATGTC  
A\_14\_P129674 GCCAGTCTGATTACTTAAAATTTAACTTCTGAGGACTTTTACTGCCTGGTTGTAACAGCA  
A\_14\_P100635 TATTGTGGTTTCCGGGATCAACAAATTTCTCCATGAACTGCTCAGTTAGTGTG  
A\_14\_P133190

AGCACAGGACTAAATGATAAAGAGAAAAGAGGCTGCTTAGGATAAGGAAATAAAAGGTTG  
A\_16\_P16191773 CTTTGTAGTGCTTTCTTTGTCCTGCTTCTCCAAATTCCCAAGTGCATG  
A\_14\_P106172 GGTCCATCCTCCATTTAGGAGTAGGAGTAATAATTGTCTTGCTCCTTTACAAACTATTT  
A\_14\_P128563 CTATTCACAAGTTCTACTGTGATGGACATCCTCATCATAGACAAACCTCCTCTGTTTTAT  
A\_16\_P17637966

ACGGTATTGTACAGAAATATTACTTGC GTGCTTATAAAGGTAGAAAGTCTCCAAATTAGGA  
CUST\_3260\_PI426210822

CACTGTCAAGAAGGCCAATAACGGTATTATTGTTAAAAACAAAACAAAACAATCTACACT  
A\_16\_P37876584

TGCCTAAACATACAATGTTCCAAAGAGTCTACTTCACTTCATACTATATTCCCCTTAGCA  
A\_14\_P134431 TTCCCTTATAAGACCACCCTAGACATTCATTTTAGACAGATTTCTTTCACCTGTAGGAAA  
A\_14\_P110680 CTTGTCTGTCACTAGCCTCCAAATATTTAGCCAAAGGAACAAATATCTATGTTCCCTTCTT  
A\_18\_P22841224 CTTACTATGTGACTGGCTGATTCACTTTGTCCGCTAAGTCTTGGGAGAG  
A\_16\_P19550519

GAAGCATCCTAGTAAAAAGAGAGGTCCAAAAAAGTTCCAATACTAAGTCCTGGTTATTCT  
A\_14\_P131118 TTATAAGATCTGCTTTGTGTGAATCATAAATGAGATGTGAAGGTCATTCCCAACTTCACA  
A\_14\_P136403 ACAAATACCACCCTAACATATTAATTGGTTTTTTTTTCTTTGTTCTTCCTCAGGCTGTCT  
A\_14\_P139046 ACAAATAGTCAAGGAAAGTATTTGCTTTGTGTGTCAGACAGCATTCCAGAATGTTCTCTATC  
CUST\_3315\_PI426210822 GTGACCTTGGACATATGTCCTACAGAGGACAAGCCTCTCAGCTATAG  
A\_14\_P117582 CTATGGCTGGAAGATGACTTGTTTTGCTCCATGTCTCCTCATTCTACAC

A\_14\_P132113 TTTAATCCTTTCTCTCAGTTTTAGTCTCTTCCCTTATTTCCCTTACAAATCCTGGACTCTG  
A\_16\_P00184023

ATCGTCTATTATTCTTCACCTAGGTGTAAAGAGTAACTCATGATGCTCAATCTGTCTGCT  
CUST\_6176\_PI426210822

TTCATTTTCATGTTTTGCCAAACACCCAACATTCTCCAGTACTATGATAACTATTCTCTAT  
A\_14\_P127555 ATGTCTGTGTGTCATCTTCTGAGCCAGAGAAAAATAATCATGAAAACGATTTGCAGAAT  
A\_14\_P133132 CTTCAAACCTGAGCAATAAAGAAGATGATGATGAACGAGTGTTAAGGTGAAGCATCATAT  
A\_14\_P113099 TATCCTAAAGCCCTCCTTAGTCAATATTTCCACAAACCAACAGTAGTAATTAATCCAGGT  
A\_16\_P01832382

ACAGCACATTAACAAATCACTGCAAGTCATAGAGTAGATATTCATGCCCTCAATAGTTCC  
A\_16\_P19826615

AAAATACAAGGAAATCATGGCTAATCATTCTCCCAGTGGAAGAAATCTGTGAATCCTGA  
A\_14\_P102182 CTTTCAGAATTGACTCAAACATTTTGTGTGCAAAGTTTGTGAAGAGTTAACAAGGACGT  
A\_18\_P22839767  
GGCAAACCTGTCTCCTATACTTCAAACGTGTTTCCATGTATTACGTGGAATTATAGACTA  
A\_18\_P11316830  
CCTGCTTATTCTAGCCAAAAGAAATGAGACTGATTAATGAAAGATTTCATGCTGACTCAGG  
A\_16\_P03786541  
AACATATTGGCGAATCCTTTACAACCTTGACCCTTTCTCTTTAAACTTAATGCAAAACTGG  
A\_14\_P136742 TTGTCAATCTGAATAACTGAGAGAGGGCAGGTAGATATTTTACACCTTGAAGATTTGTTT  
CUST\_939\_PI426210822 CTTTTGTGGCCGAAGCACCCGGAAAGTGCCATTACCCACCTCTAG  
A\_14\_P115561 TTTGAAGTTCCATCTTTTCTTGGAATCTTCTCAGTCCAACCTTTTGTCTCAAATAGTCC  
A\_16\_P36288643  
TTTCCTACTGAAACAAAAACATCACAACCCATATGTAAGCCTCTTAGTTAAGATCCA  
A\_14\_P100946 CTAACCTTTTGCAGTGTCTTGCTAGACATAATGCTTTCCCTGTTATTATACTCTAGCCTGT  
A\_14\_P122377 GACACTGCCTGTTTTAGTCTTATCATTGAGAAAGTGGGTTTTTTTTTCAACCTTAGTGT  
A\_18\_P12396867  
AAACATTGAGAATCCAGTTGAAGTTGCTTAACGTGAATTTGGTGGACTCATTTTCAGTTTT  
A\_14\_P131125 TGGGAGACATCCTCTATAAACTTTCCCTCCATGAAATTCAAGGTATATTTTGTCTGCTG  
A\_14\_P105146 TGTTTGTTTTACCAGAGTGATGTTAGAACTCCAAAAGCACTAAACATGTCCATTTCGATT  
A\_16\_P01354268  
GTGGGATTAATAAGGAGAGGATATAGATAGTGATCACGTAGACTTACAGAAAATGCCTGC  
CUST\_4439\_PI426210822 CTTAGTTTCCTAGCAAGTGCCCTGTCCTGCTCTTGCCTTTCTGAG  
A\_14\_P121090 TTTTCATGAAGTCAGGCAACTCAGGATTCTCTTAACACAGTTACACAAGTTCAAAGTTTT  
A\_14\_P121714 TTAAACCTGGGAGTTTTTACTCTAGTCCTTTACCTCATGTGCTTACAAAGGCTTTTAAGA  
A\_14\_P128275 ACTAGAGTTACCGATTTTCACATGAGTCTAGATAGACTGGCATAGGAATCTATCACTTAC  
A\_14\_P111925 CTCACCAGTTTAAACACAAATATAAAGGGCAAGAACTTTTAACTGACTTAGTTTGGCCCTT  
A\_16\_P19878178  
ACTGTATTGAAATGTCCATTACTTGCTTCAACCTTGAATAAATACCCATATGACCCATG  
A\_14\_P128310 TTGCCAAGGATAATATTAATAAACATTCAAGCCTCAGACTGATGAGGATGAACATGGGTTA  
CUST\_9631\_PI426210822 TGTGACTGCAGAATCAAAGTGCTGGTTGCGAGGTGCCAATTACAT  
A\_16\_P01815673  
AAAGTAAAAATCATTGACAAACCCAAAGTGTCTATCTCGTAAGTGAATGTTGTTGGGCT  
A\_14\_P128069 CTCTTGTTTCATGTCCTTGAATTGATCTCTGCATTGCTTCTCACTCAAGATGATGG  
A\_14\_P103789 AGAGCCAGTGGGTCTATTTATAGGATGGTGCATCTAGAAAAGAAGATGAAATTTGATTTA  
CUST\_6783\_PI426210822 TCAGGACTTTACCACTCATAGGTTCTAAGAAATCTCCCCTCCCCA  
A\_14\_P129002 TATAATACAGACAAATGGGAATGGAGGTCCCAGAGTTTCCCGTTTTAAGGTATAACTTTA  
A\_14\_P123124 CTGAGTCAAATACAACAATAACAATACCACTTGTGTTGGGAAATGTGATATTGCTGGAGTG  
CUST\_4068\_PI426210822 ACTTCCAGTTTCTTTCTTGGGTGGGAATGCCTTGAGCCTCAGTTA

A\_16\_P20857177

ATTCTGGAAAAGAGATAACTTGCTATTGACACTCAACTGTCTAATCTAGTGCTGGACTTC

A\_16\_P19294921

CTTCCATCTAGATTTTACATCTGGCACTAAGCATTTTTGTAACTGCAACTCTTAGAACCC

A\_16\_P16922281

CCAAATTCCTTAGTCTTACAAGCATATGAAGAACAGCCATTTTCTGATATAACCCACAGC

A\_16\_P18982041

AATGACCTGCCTAGTAAAGAATATGAAATGTTAGCAAGTGATGTAATCTCCCAAGCATGT

CUST\_7714\_PI426210822 CGCTTTTACCAGCCCACAAGGGTTCAGCTTGTGTGTCTGGAAGA

A\_14\_P127844 CAAAGATAAACATAGAAGTTGGAGTTGTAAAAAGTGAGTTGGAATTCATGCTGCCATGA

A\_14\_P106410 CTACAGATGAATTTGCTTCTTACTTCAACAAACAGACTTCTCCCAAGATTCTCATCACAA

A\_14\_P101239 TGTGTAAAATTAATTCCCTCTCCTTCATCTTACTTATAGAGAAAGGAGTGGAAGGACAGT

A\_18\_P14960846

AAGTTACGGGAACAGACTAAATACCAACATGAAAGAAGAATTAGCAAGGACTGATAGAGG

A\_14\_P119255 CCTGTGCTTCTGGAGGACTGATTTGTTTGAGGGAATCATTCTATGCATTATATCCTAAA

A\_16\_P03464009

GTCTATCCTAGAGAATGTTTGTGTGTTTGACAATTCAACATCGTAGAGTTGATTTTGGGT

A\_16\_P19528309

AGTGGTCTGAATACACTTATGGGTAAGGAATGTTATCACAGAGGATTGTTTCATTCATCAT

CUST\_9868\_PI426210822 CCAAAGACATGAGTCTGTCTGCCTTTAAAGATGAGAGCTGCTCATTGAACTA

A\_14\_P118266 TCTGACAATATACTTGCCTTCCAAATGTCACTATTAATCTTTCCCCCATTCAGAACAGC

A\_18\_P17414254

TCAATCCTGCATAGAAAGGTGATGAATGAAAAAAGCGTGATTTTCATTTAGATGAAAATTT

A\_16\_P16701576

AAGGAGCCTATTTTGACATTTCTTCTGGATGATTTGTATAGCCTATCACTATCACACCTG

A\_14\_P117404 ATTATCAAGTTATTCCCAAAGTCTGATCTCCAAATTCAGAAAACCTCTCAGTTTTGGTTCC

CUST\_1063\_PI426210822 AGTCATTAGGCTCCACACAGCTTCTGGCTGCACTGTGGACAGAT

A\_14\_P138270 CAGATGTTTTAAGAAAATATTACTTACTTTTTCCAGGTCTTCCTGCTGCTGTTTCGTTGCC

A\_14\_P120071 TAAGGAAAGTAATAAGAGGAGGCTGCTTTTTGAAGGTCTTTGATCTTCCATGATGATAAT

A\_14\_P111338 CACTAGAGGACACCATTTCTCCACTACTAAGTCTGTAGTCGTTTATCATCAATGAAAAAC

A\_14\_P105858 ATCTTGATTTGACACTGGATATGGCACTGGGAAAGAAGGTATGTAGAGTCCATTAATAAATA

A\_14\_P104389 GATGTTGCACAAAAACCTGGAATCTTTTAGGAGTCTCCTCCCAGTCGTT

A\_14\_P132908 AATTATGAAACTAATCTTAAACCCTGTGCTGTCAGATACCCTGTTTCTGGAGTCACATC

A\_14\_P139444 AAATGTGGGAAGGAAGTTAGTGAAGTGGCCATGAATTTCTAAAAGTAAGATGCAGTTTTAT

A\_14\_P100604 TGTATGCCGCTGTCTGCCATAATGCTCTTATAGCAGGAAGATATTGTAAGAAAAAC

A\_14\_P115036 GGACAGGGTTTTTGACCATTCCTTAAATTAGGAACATTTACCGGAGTAATTAATGAGTAG

A\_14\_P100751 ACCTTCACAATTTCTTGAGCAATCTGCCTGGTTTTTGTGACATCCAAAACGATTTT

A\_16\_P00685402

GGGAAAGCATAAGTTTTAAAAAGATTATTAATAGAAAACAAAAGTAAATTTTACAGAGCA  
A\_14\_P112962 CTAAACCAACTCAATGCCCAATTCTCATTCAAGGATCTTATTAACAGACCTTTGATATGG  
A\_16\_P31520954

CCTTTCCCAAACCAATAACAATCTGAGTGGATGCATTTGATTACTGTTTTTCTAACATTC  
A\_14\_P101025 ACCAGACCGAGATGTCATTCCTTGGAACAGAAAGAATTACTTTTAATTGTATGGAAAACA  
CUST\_3860\_PI426210822 GCAAAATCTGAGCTGTGCTTATGGGAAGCTCGGAGTCTCACAAAAC  
CUST\_4413\_PI426210822

AGGCTTTGGGAGAAAACAGTTAAGTTCAGGTCCTAACTCCAGTAATGAATTTCAA  
A\_16\_P17057150

GAATGACTGAACCCACTAATATCTGCTCAAAGACCCTAAATTAECTACTGCTAAGACTCA  
A\_14\_P114786 ATTGTGTATAGAATGGAAGGGGGATCATCAAGGACATGTATCTCAAATTTTCTTTGAGAT  
A\_14\_P112733 CCTTTACCTTCACAAAACAGAAGCGGATATAAGTGGTCAAAGTGCTTCTGATGTG  
A\_14\_P131541 ACTTGATACAGTTATACATTTTCCACTTACAAAAGAAGACAATTCTGTAAATGAAACG  
A\_14\_P124542 CTTCAATCAAAGGTTTTATTTTTTCATCCGCCATGGATGAAAACCCAAAAAGTCCATTTT  
CUST\_5762\_PI426210822

TGAGGATATGAATGTTTTAGAAAGCAACAGTGTATGCCTTGATTTTAAGAGGCAATGAGC  
A\_14\_P106309 AAATAGTGACAGTGAATTTGTGAACAGTTGGAAAGATAAGGACATTGACCCAAGGTAGT  
A\_14\_P117451 CTCTTCAATCCAATTTGAATCACCAAGTCTCTTTTCTCATTATATGCTCTAGAGTGCTT  
A\_16\_P40516894

TTCATTCCTTCTAAATTCAAATACTTTTTCAGCGTCTAAGACCTCAACTGAGTTAAACTGGG  
A\_14\_P110619 ATTAAAATTCCTTACTAACCTTTCTCTTGAATCGAGGCTGTTAAGCATTTTCTGCAGTG  
A\_14\_P122038 TCAGAACAGAAAAGAAGTATAGTTCACCTTGACAATTCTGCAGATGAGCACATCATAGC  
A\_14\_P115335 GGCTTTATAATGGGAGACTTTTTATTATTTGTAGTTTCGACTAAGTGCAGTGGATTTCTTG  
A\_14\_P117662 TCTTTTAAGTGGAGTTAAGTTTGGAAACATACTACAATGTTGTGGCTCAGCAATTCTCAG  
CUST\_170\_PI426210822

GCTCAGATTATACGAATAACTAATACATGTTTAGCGTTTTATGGTTAGGAAATGCTGTCC  
A\_14\_P137688 TGTCTGTTTCCCACAATTCAGAAATGTCGTCGTCTTTTTTCTTTAAATACTGCCATTCC  
A\_14\_P106170 ACGCCTTCAAATTTTGAAGACATATAACTCCCTTTTTTCTTTAAACCTGTCCAATCTGTG  
A\_14\_P200904 TCTCAGATCACTGCAACATGGCACATTAGAACAGAGATTCAGAGACACAAAGTTAATAAA  
A\_16\_P58424562 AGTAATAGCACCTGCTTCAGGGAAGTCTGTGAGGACTGAATGTTAATGTG  
A\_14\_P133623 TATACAGTAAGTTGGAAGTATAGTGATCCCAAACAAAATAAAAAGTTAGTGTCAAAGT  
A\_14\_P201517 CAATGCTCGTGATTAATGCTGCCGTTATAAATTATGCAACCAAATTCTAGAAACAACC  
A\_16\_P18080709

AAAAAATGGCAGTCCATAATGCAGTAACAATAGAGATGTGTCATAGAACTCGAATGTCA  
A\_18\_P22840119 GATGGCCATGAGCAAGAAAGCACCTTGTGAGCATAACCAGTGTT  
A\_16\_P20778024

CTCTAAAACTGTCAAGAGTAGAGGTGTAATCACATTCGGTCTATGTAGCAACAACCTGAA  
A\_16\_P19892533

AACTCTCTAGTCTACAAAACTTTAGCACATACCTAGTTTGAATACCCGTGTAAGAAGCC  
CUST\_10069\_PI426210822 TCTCTCCCATAGTGTATAGATAAAATCACAGTTGAACTCCTTTGGGGGAAGAG  
A\_16\_P37226201

AATCAAGCCAAGGAATCATTTCATGACTATTTTGGCCATATCTACAATATTCTTGCAGGG  
A\_14\_P139851 AGGAATCCACATTTCAATAAGGTGTGGATACTAAGATTGGCAAAGAATAGGAGACTTTAG  
A\_14\_P103567 ATGGGATTAGAGCATTCTGCATTGGAATGAATCTTGTAGATCAAAAAACACTGAATTGGA  
A\_14\_P122140 AACTGCAAGCATGCTTCCTTTATTTATCAAATATTCCCTGTCCACATTGTAAATCACTC  
A\_14\_P138017 ATAACAAAGAGGAGATCAAATTTAGCATGGTGGACTGCTCGACAGGATATATTTGTAAGT  
CUST\_8899\_PI426210822

CAAAATCAACAGACCATTCTGCTTCCAAAAATATTTTATTATCTGTGGAAGGAAAACATTTT  
A\_14\_P106666 GGCTCTCATGATTTATTTTCTTTCTTTTGAATTAGGATTTGATCAGGAGTCTGGATT  
A\_14\_P130901 TAGACAAGCAAAACTGAAATGTAGATTTCTCTCTATTATCAGATGCATTTTGTCCCTCAC  
A\_16\_P02375824

ATTTGTCTAAGGGTGCCTTTATTAGTCAATGTAAAGTTCAGCAAAAGCAAACCTCATTCCC  
CUST\_352\_PI426210822

AGTCTAAGATATTTGCTTCATGCTAATTAACCTGTTTTACAGGTGAAAAGATGTGTT  
A\_16\_P19951507

AATCCATTGGTCCAATTGAACAACCTATGTTAGTCTCATAAGATTCCAATCTTAAGCCTGG  
CUST\_5617\_PI426210822 AGACCATGGCATAATTTGTCAGTTTGGGGAGATCGTAGATGTGCCT  
CUST\_9206\_PI426210822 TCTACCACTCCTGCCTCTACAATAAGAGGCTCCAGCATCATGATTCAT  
A\_14\_P133067 TGCCATTCATTTGGTCTCATACTTAAGGGTATAAAGTATTTCCATTAAACTGGCATATT  
A\_14\_P111486 ACCATGAGGGGAGAGAGAAGTGTGCAATTGTTTTTATTCTAAAAAAAAGTCTTGAAGTC  
A\_14\_P115661 GTTGCTTTTTCATACTTTAATTTCTCAACCCAAGAATAAAGAGATGGCTGGTAATATGC  
A\_16\_P02984646

AGTGCCTCCTTTCAAAAATAGATCTGCTTAACATTTATTAACCTTAGACAACCTGCACCAGA  
A\_14\_P102023 ACTACTTTAGACTAAAGAACTCTGGAATATAAGATACAGTAACTCCTAGGCCCTGGATCA  
A\_14\_P137453 CTTGCAGGTATGGGATAATAATTTAAGAAACATTGCCTCAGAGATTGCCACTTCTCAT  
A\_14\_P124843 CACTTGCAGTCTAGAACTATAAAGCAGACAATAAATACGCGTTTATTTGCAGCCACTTC  
A\_14\_P116538 CAGCATCATCTTTGCCGTCAAGACCTCCAATACTTCCGTCCTATC  
A\_14\_P201395 TTACTTTTTTGGGAATTTGCTCGCACTCCAGTTTAAATTTTCTTCTTGTGTTTCTTCAA  
A\_14\_P101885 GTGTTCTGCAAAAAACAAAAAGGATAGCCTCCGGCATTCCAGGTTAGAACATTAAA  
A\_14\_P118388 CTCAGCCATCAACTTCTAGTAGCATTATTTATAGCAGCCAAGAAGATGTGAAAGAGTTTG  
A\_14\_P100298 TCTGACCCAATGGAGCGAATCGTTGCGAGCATTATTTAATAGCATTATCTTGATGATGA  
A\_16\_P00222517

AAAAATGAGTCATTGTATGTGATTGACTGCTACTCATTTCACAATTCATACCCAGATGT  
A\_14\_P112809 AAAGCCAAGTGCATTATGTTTCCATATCAAACAGATGTGTGTTTATCTGATTCTGAACCT  
A\_14\_P104610 CTTTCTCATAGGAAGACCCACCCAGATATTTCCAGTTGTCTCCT  
A\_14\_P114335 TCTAATATAGCCTATTTGCCCTCTGAACAGCATTGAGATGCTTTGAAATTTTAATGCCCA

A\_14\_P131721 ATCTGTTTCTAGGTTACAGGCAGGTAAAGACATAGGTGATTTGACTTTGATTCCAAATAC  
A\_16\_P16658021

AATGGATGTGGATTAGAGATGGAGATCATAGACAAGGAATTAGAAATGCAAGAGCAACAT  
A\_14\_P200263 TCCTTGTCCCCTAATTATTCAAGGAAGTGACAAATATTGTCCAGACAACCTACATACACT  
A\_14\_P133135 TTTGGAGTGCAAACCTACTACTCTACATTTGGATCACTTTTTTGTCTTTGAGTTACCTGACT  
CUST\_9243\_P1426210822 TTGTGTTTTCTTGAGGAAGTGTACATGACTTCTTAGCCCTCTTATTCACCTAC  
CUST\_5837\_P1426210822 GCTCCAGAGAGATGCCTTTCAGTTCCTTAGGAAACAAATTGGCCATT  
A\_14\_P123071 TTCAACCATCAGAATCTTCCCTTCCAAACTCTTTCAGTGTAGGCTGATAAGGAATAA  
A\_14\_P109208 TTGGGGTAAATGAGATCTCGATTGTAGAGAAAGAGGATCCAGAATGCCAAAAATACAAA  
A\_16\_P02925206

ACTTTCCAAGATCAAATCGAATGTAAGTGCCTAAAGAGAAATGAGCATAACCAAGAAAC  
CUST\_5471\_P1426210822 GCAGAGTAGATGGGCTGGCCTTACTCTGAGGTGTGGAGAAGGCTA  
CUST\_6546\_P1426210822

AAGAGGAAATTTTTGCTTTAGTTGCCTTAGTGATTCAGCATATGTGGTTGATATGGAAAT  
A\_14\_P101782 CATTCATGCTGTTCTTAATGTATGTTTTCCAGTGTCTGGGACACAACCTGTCTCT  
A\_16\_P19871775

ACCTGAAGCATAGTTATGAACTCCTGAACTACTTTGAACAAAACGAGAACTCTCAGATA  
CUST\_877\_P1426210822 TCTCTCTAAGGAATGGCATCTGAAAGTGTGTTTGAATAATACAGGGACTGAGG  
A\_16\_P17971511

TGGATTACCATCTTCATCAGATATTGTTGTCGACTACAGAAAAAATATCCCAGCACGTA  
A\_14\_P134329 CAGTTTTTAAATGGGAGAGTCATGTAAAATTTTATGTTATCTTTTTGCATTCCCTTACCAA  
A\_14\_P116518

TGCAAAGGCAAGTAAAGGTGACTTCCAAGTGTTCAGTATATTAAGCAAAAGGAAGAAAA  
A\_16\_P41644857

CAGACAGAATTAACCTTTTCCCCTATAATAACATGGATCCTTTTTTAAAGACTGCTCCACA  
A\_14\_P127994 AGAATTCAAAAAGTAAGTGTGTAGATGTGACGCTATCTTGCTGATGCAAAGTTTCTCAAG  
A\_14\_P113750 TTTTTCTTTCCCTTCCCTTCATGGAAAATATAAAATGATTCAGGTCTATAGCCCCCTCAA  
A\_14\_P100433 AGATCTTGAATTTTGATTAACCTCAGGTGCTGAGTAGTGAAATGGTTTTTCAAACCAGAA  
A\_14\_P117532 TTGTGTGGATTTGCTTTCTACACCCTCATGGCTTTTTTCTGTCTAAACTTCTAAATTCAT  
A\_14\_P101210

TGAACACAGAATTAAGAATGACAAATGGGTGGATGGAGGTGAAAAAAGATTCTGTAAAGA  
CUST\_3277\_P1426210822 ATTACATGCTGTGGGTTTAGAGTGTGGATGCTGGTTTTTTCAGAGGTGAT  
A\_14\_P109756 ACTCTTGAGACTGGTGCTATTTGTCCCTGTCATTTTCTTTGTATTATGTAGGGCTGATATT  
A\_18\_P14136879

ATGTCACCATCTTGGATGTGATGTTTTCTGTTTTTTCAGTGGCATAGAACTAGATAAAAAGGT  
A\_14\_P107869 AATCCGTGGATTCCCTGAACAGTATGGAAAAGCAAACTGTGCAACTACTACATTATATCAT  
A\_16\_P16191726

AAGGAACTGATTTACTTTAATCACAAGTTCCTTCTGCTTACAAAATGATTCATACTGAAA

A\_14\_P106672 TAACAGTGGGAGCCCAGCAATGAAATATTCTTTGTTTTTTCATCTTTTCCTCTAATTTCC  
A\_14\_P107442 ATCAGGTAGAACCCAGGTTAGACAATAAAGGGAACTCATAAGAAGGCTACTTTTCTAATCT  
A\_14\_P100765 CATGAAAAAGGGAAAAACAATCACATGAAAACCATGCTTCAAACCCGCAACAA  
A\_14\_P128148 GATCCTAATCCTAACTGACCCCAGTTGTTACTGCCAAACATGTAAAGTTTATTATTTCCCT  
A\_16\_P16191495  
GTTTAAGATATGCTTTTTGGTTGACAGTAGTAAAACAAGCCAAAAGAAGTTGACCATTTAT  
A\_14\_P129549 GGAAATTACATAGGCACTGGCTTAACACACTAATGTCAGAGCAAATAAATATACATGGCC  
A\_16\_P15075306  
CAATTGCTTCCTTCTCTCTACAAGAATCACTCCAATCTGATAACTTTGCTATTCTCAAG  
A\_14\_P101983 CTGGCTTTTTTTGAAGAAAGTAATACGACTGAATTACTAGCATCATTGGTAGGTTTGGCA  
A\_16\_P30952314 GAGAAACATTTTCCTCTGATGGATGTTTTTTTTTCCCTTCCCTTCTTTTTCAACCGT  
A\_14\_P111653 ATAGGTCTAATATATCTGCTGCTCAGAGTGCTTGTTTTGACAAAGGTTTCAAATCGACA  
A\_14\_P125189 TGATATGTTCACTTACGGAGTATCAGGTCAACCTGAAAGAACTAATATAACCCCAAAGT  
A\_16\_P18980480  
GTCAACAAGACTACACTCGACTGTATGTTAACAAACCTAATTATAGCCCCGTGGTAATAA  
A\_14\_P200865 TACTGTCTGTTGTCAAGGGGAATATAATTCAGGTCTAGTCTTCTTATAATAGCAGAGGTCT  
A\_14\_P108192 ATGTTCCATAAAGTTTTCTTGAAACTAGTTCAGTTGGGGTAATTTTCCTTCTCATCCATG  
A\_16\_P17053650  
GACATGTAAACATATACTATATGACATGTAAACAACTTTATTTTATATGAACATGTGCC  
A\_16\_P03494065  
GAGAGGGAAAGAGAATATCACTTTGAGATTGCTTTGAGATGAATATACAGTCAGACATCC  
A\_14\_P111467 AATGTTATCCTTCTGTTCTTCTGAATACAAGAATGTCCTTCCAACCTCTTCTAGAACAAAG  
CUST\_5631\_PI426210822 CACCTGAAGGTCCTTTATCCCTCCTCCTCAGCTGAGCATACCAAT  
A\_18\_P22842125 AATCAAAAAGAACTAATACCAGAGGGTGCAGTAACAAGGCCAACAGAAGGCTT  
A\_18\_P16741866  
CCTGTCCATAGAATCCTAAAGAAAACCTCTACATATTGACAGTCAATTAGGATGTGCTTGC  
A\_16\_P00337008  
AATGGAACCCTGAATTAATCACTAATGGACTCAAAGTCAAAGCCATTTGAAAAACTCAC  
A\_14\_P111571 CTTTACAGTTGTTTTAGGAGCCTTTCAAGAAGGTTTACCCAAGTATTTAGGTGTGCTAAC  
A\_16\_P17199431  
TCACAGAACTTACAATGCTACAACAGGGTTTAATTCTTCAAAAACTAATGTCACTGAA  
A\_16\_P00685024  
ACCTCTGCTAAACACCTTTTCCACAAATACATAATATGTAATGCACTCTATTCCAAGGCA  
A\_14\_P118537 CTGAGGTTTCTGAAATGGCAATGCAGGAAAAAGATAACCAATTTTGAAAATCAGTGTGTA  
A\_16\_P03551905  
AACACTTGAAAATCACCTCAATAAGTATTCTGCACTGAGATAGTCTTTTATCTCCCCGAAA  
A\_14\_P201344 TTTATGTCACGAGCATTGAACAGATCTCAGAAATGAATATGGTAAGTGTGTTATTTCCAG  
A\_16\_P35727838



ATCGATACCTCCCTCTAACTAAATTAACATCTCTATGCCCTATCATTTCATCAAGCAGG  
A\_14\_P110542 AAAACCAAATAACTTTTAATGAGAAGGTCAGTCCGTGGTTTGGAGTCTTTGGAAAGAAATC  
CUST\_8546\_PI426210822 CAAGGAAAAGCCACTGGAAGGGACTTGGGCTCACACTTACAAATA  
A\_14\_P120713 CAAAAACCAAAAATACAAAAACCCATCACCATATGTTGTGCCACCATCTACCACAG  
CUST\_6547\_PI426210822  
GTTGCCTTAGTGATTCAGCATATGTGGTTGATATGGAAATGTATTGCATTTACCCAACAA  
A\_14\_P136240 CTGTTACCTGAGCGAACTATAGAAGAATGAAGATGTTTCATTCAAAGCCATATTTCCAATG  
CUST\_7715\_PI426210822 AAGGGTACGCTTGTGTGTCTGGAAGAAGGAAAGGGTCTTAGAG  
A\_16\_P36962897  
TGCTAAAGAACAGAAAAAATCATAGGATATTCCATTTCGACCAACAATATAACCCTCTGGG  
CUST\_227\_PI426210822 GTCCCGAGGGGGCGATTTAAATGTCTCCGTTGCGCGCGGCTCGGC  
CUST\_4099\_PI426210822 GAAATAGAGCCCTTTATGATTTCGTGTGCTGGTCTTTCTTCCTGGAGG  
A\_16\_P01448173  
GAGAAAATCAGGTTATCTACAGAATCACTAGTCATCAAATTCACGTAAAGAATAGGCAGT  
CUST\_9720\_PI426210822 CAGGTTTCACAGAAGGAGTGACCCCGAACAAGTATTGAAGGAAT  
A\_18\_P22841197 TTCTCTGAACTGCAAATCCTTTTAGCCAAGTGGATTTGGCGATCAACCAAA  
A\_14\_P102373 TTTGGCTTTTTAAAGATGGTGCTACTCGAATTTGATCTGAACTTGAATAGCATCTAGAA  
A\_16\_P01830878  
TTCCCATCTTCCCTTTACTAAGATACAATATTCAAGTGACGAGTCTACATTTTCCACAT  
A\_16\_P02652084  
CAGCCTTATTCTCCTATCCATGAAGAATTCCTATGAGACATTAAACTATGACAAAAAGCA  
A\_16\_P01294901  
GGGAGAATGCTCATAACTTTCTAATCCGGTAATAGTAAGATCCTATGCTACACTCTGAGT  
A\_16\_P20567596  
AACTGGACATTTGCATTTAAATGGGGACTCTTGAAGACTAAAAACACTCTAAACTCCAAG  
A\_14\_P129053 TACCTCTTCCCTCAGTTTCAGTGTCTCTTCCAGTTCTTGTATTGTCTGATTTAATTCTGT  
A\_14\_P133557 CTATTCAGAGCATTGCTTTTTTCAGCCTCTTATTAGAGTTGTTTGCATTTTCGCTTTTTCTCA  
A\_18\_P10818429  
AAAGGGGAATGATTGCATGAGTCAGAAAAATGAAACATCTATTTTAGCAGCAAGAGGCT  
A\_16\_P16005460  
AAAACCAAAAACCTGTCATTGACAAGAATGTGATCTGAAGATCATGAGAGAAGACTACAG  
A\_16\_P03059234  
GTGTGCCTAATAATATATGTAGAAAGATGCTCACTAAAATTCTAACATTTTCCCTCCACGA  
A\_14\_P131065 GACGAGGAACATTAACCTTGTATTTCAAGTTTGGCCTCCAGCACTCTTGAAG  
A\_16\_P16399010  
AGGAAGACATTTCTTGAATTTGGTGGGTAGTAGTAATAATGTGTAAAGCATCCTAACAGGT  
A\_14\_P139830 GGTCAGTTTGGAAAAATATAATCACCACATCTCAAGTCACAAGGAATCAAAGAGATTTT  
A\_14\_P106008 TCTGAGTTATCAAGAGCCAGGAAAGGCTTCAACATGTAAAACATAGGACTTGTTTATAGT

A\_14\_P126426 CAATGTAATTGTGCTGTAATATGGCAGGGTAGAGTCAATTCTTTGGTCTTTCTGGATAAT  
A\_14\_P110933 TCTAGCATAAACTTGGGACTTCAAAAAGATACTGAGTTCACCTTGCCACTTAAGGCTAT  
A\_14\_P138912  
GTCTTAGGTAGAAAAGTTTGGGGTTGAAAGAAAAGTGATGTCTGTTTCAAAGGAATGAAA  
A\_16\_P21251041  
CCCAATTCATTCAACTTTATTCACATTGAGCAAGGAGATATGTGTCTAATTACGATTGCG  
A\_16\_P17185648  
ATTTTGGCCAATTACCAAATCATGTATTGGATTCTAAGGACACTATCTCTCCCACATTTG  
CUST\_2255\_PI426210822 CATTTGGGACTTCTTATGGCAAGAAGTTTGAATAGCTTCATCCTGCCATCAA  
A\_14\_P105932 CTTCTCTATTAATACTACTCACCTGGTCTTTCTCATGAGAGGGAAAGAATCTCCATTAAATG  
A\_16\_P18074069  
ACTTGCATAGAAGAACAATTCCATGGATCATATCACCTGATTGACATCTTTCTGGTTTTG  
A\_18\_P17115433  
TGCTACATTTTGTGTTGACCACCTATGTGTTCTACTAACCCTCTATTAATAACTAAATGCCTT  
A\_14\_P133640 GCATTTGTGCTGCCTCGAGACTCACTTGAGAATTTTCAAGTTTTTCAATCTAAACATTTT  
CUST\_5959\_PI426210822 TTCAGAGGACTGTGCCGCAGACCTGCAGCTTCAGGGTAAACTGCT  
CUST\_8086\_PI426210822 ATTGCACAAAATCCAGAAGGGCTTCAGTGGGGAGGTAGCATTAAAC  
A\_16\_P16230553  
ATCTTAAAACAATCAGCATGCCCTAAGATTTGTCTCTACGATCCATTTTGATTCCGTGAT  
A\_14\_P104031 AAAAGTGGGAAAAGATTTGGCACTCGTTAAAGAGTAGTGATATTGAATGGGGCTTCT  
A\_18\_P15966672  
AAACACAGGTTAGGTTTGTCTCAGGTATCTTGTCTATTAATGCTAGGAATCTGTAAGGC  
A\_16\_P19510136  
AAAACAGATTTCAACTTCACTGTAAGTTCCTAATCTTAGGTCAAACCCAATTATGGCTCC  
A\_16\_P00276949  
AGTGTTTGGGGGCTTAAATTAAGAACGAAAGATAGCAAACCATCAGTGTAGATATTTCC  
A\_14\_P123868 AATTCACGATCAAAGTCCTTCATGCATTTTATGAGGAAGTTCTGGATTAAAATCATGGTC  
A\_14\_P107498 CTGGCTGTTTATATAGTTTCTCAGGTGCACTTTTATACTTCCCTTCGTTTGCATGTGTT  
A\_14\_P117348 AACAGCGGGAAGTATTTTTTCCATTGAGTAGATGAGCAGAATGAGACTCAAGG  
A\_14\_P130931 GAAACAAGGCATTACCAGTGAAAGTTAAGTTATTAATATTAATGTGTTTATTTACTTGG  
A\_14\_P139057  
TGAGAAAAGGAGCACCAAGGAATTCCTGATAAAATATGATACCTGTAACACAGGAAAAGA  
A\_16\_P21216376  
TCACTCACTTTGTAAGCCTTATCCTGACATACTATCTAACTTGATAACCCATTATTCCC  
A\_14\_P119975 TACTCAAATAGCATTATTCCTGATGATTAACAGCAGTGTTTCAGGGCTAAGTAGGCTTT  
A\_14\_P135224 ACTGAAATCCTATCAGGAGGATTCCTTCACAATGTATTTTATTTGCTAGACTTTGGTTGG  
A\_16\_P00685002  
AGAAAATTGTGGGGTTCTAGTTGTGTGTCTCAAATGAAATTTAAGATCTAGGCTCTGATG

CUST\_4170\_PI426210822 TCTCCTCTTTGTATCAAGCCAGGGGCCACATGTTGGAGTTATAG  
A\_14\_P110606 CCTGCTTTCAATCCCTTTCAATTACAGGATTTCTGATAGGAATTTGGAAAACAACCTAAA  
A\_14\_P116278 TATTATGAGAACCTACAGAATGGTGCTCCCTAGGGACTACTTTTCACTTGATAGTCTTTA  
A\_18\_P22841555

GGAATCAGGTTAAAATAATAGTAGTGCCCTTAACTCACAGAAATAGCATTCAAAGGAGTG  
A\_16\_P00685103

AACGGAGTATGTGAAGCATTGTATTTCAAAACCTGAGATAGGAACTTCACATATAGAGA  
A\_14\_P127470 ACTTGTGTATCAAGTTGGTGACAGAAGCGCAGAGTAGTTAATCCAATTACATCATATTTT  
A\_14\_P112884 AAGGAAACAAAGACGTCCCTTCCATAATGCACACTTAATATTTGATGTCAATCTGCAAAA  
CUST\_9370\_PI426210822 TTTCTTTGAGGGTTTAAACAAAGGTGGCATTTAAGTGTAAGCTCCTTGCATG  
A\_14\_P131701 ATGGTGATTTGAAGGAGGAAGAATTTACCTGAAATATTTTAAATTCATTGTCTCCTCATT  
A\_14\_P202524 CTTTGTTTAAAAAAAAGTGTTAAATGCAAATAAAGTCCAGTCACTGGCTGCAGTGCTCT  
A\_16\_P17097528

ACAGTTCAATTCCTATCTGACAGAGCCATATGATACTTTTTCTTCAGCACTCAAAATGCT  
A\_14\_P118130 AGTAAGCCAAAGCCAGTATCACATACCTTTTCGAGAATGAATTTCTTTACATACAATGGA  
A\_14\_P114196 TTGATGAGTATGAAGCAGGCTGACATTGGCAATTTAGATGACTTCGAAGAAGATAATGAA  
A\_14\_P105177 AATAGGATGCTTTGTTTGTTCAGTGAATCTTGTGCATCTTCAGACTACATTCTGTGTTT  
A\_18\_P13815663

ACCTAAGAATTTTGTCTAACACAACATCACCTTTCTAAGAAGTAACAAAGGCACTCTGA  
A\_14\_P138557 AGTCAGAAACCCAGTCAATCCCTAAACCTAAAGGTTAGGATAACAAACACTAAATCTACT  
A\_14\_P120325 TTAAACAAATTATTATCTTTACCTGAAGGTGGTGAATCATATATCCTGCATGCCCTGA  
CUST\_9912\_PI426210822

TTTGTTCACTTCATGATATTTAAATCAGGGTTGTTGTCAATTACAACCCTTTCAAGACCTA  
A\_16\_P20003025

AGAACCAAATATCCTTTGACTCATTCTTTGCGAGTTACACAAATGTCAGTATGCCTGAAG  
CUST\_8668\_PI426210822

AGGGCTAGAACTTTTATTCCAGGTGAAAGTACTGGATTTTTGAAAGAACTCTAGTGTTAG  
A\_14\_P125854 ATTTATTGAAGCATTTTGTCAAAGCCTTTCAAAGTCCCATTCCAAATTATCAAGGTAA  
CUST\_5281\_PI426210822 CTCTGTGGGGACTCCTTCAGTTTTTCAGAGACAGGAGACTCCCATA  
A\_16\_P15703060

ACAACCCTCCATAATACTCCTAAATTCAGCAACATTATCTACTAGAGTAGCCTTGTTTGC  
A\_14\_P135125 AAGGCCAAAAGTGTAACACAATGAATATGCATCATGACATTAACAATTTGAGACCCTGA  
A\_14\_P131776 CAACAAAAGCACCATTGCTCATCTATACCCCATTTTTATATTCAGTGGAAGTAAGTAACTC  
A\_14\_P123527 ACAATATTCTTTCTGTGGTGGTAGTTTTGCCTGCATCAATATGAGCCATAATTCCAATAT  
A\_16\_P19218864

GTCCTCTTACTAATTCATCTAAAATTGACAAACCAGAGAATCTATCACTCAGTCTCCTG  
A\_16\_P01070453

CCTGCACGTTCAAACCTAATGGAAACTATAGAGCAAATTTTTTTCTCCTAAGTGTTGTGG

A\_16\_P02051011

TCAGAGGGCTAAAAAACATTCACCAATGAAAATCAAACCTACGATCTTATACTACCCACA

A\_14\_P139824 GTAGAAATTTTCGGGTTCTTTCTCCTCTTGTGAGAATTTTCATTTTCATCTCTTGTGGAA

A\_14\_P110057 AGATAATTCTATCATGTTTCCCATTCCCAGAAGTCCAAGTCCCTGGCCTTTCATATTATC

A\_14\_P125433 TTTCTTATTTCTTTTTTTAAGGGGAAAAAATTTGAGTGCATCGCGATGGAGAAAATGTCC

A\_14\_P124849 GGATTCTTTGTTCACTGCTCAAACCATTACACAGAATGGAATAAAACTTTATTCTTTTT

A\_14\_P133127 GACTCAGAATTAGGCTTCAGAACCAGGACTGAGACCTAGAATCCAGACTTATG

A\_14\_P104405 GACTCCTCGAGGCTTCTGGTGTGTTGCTTTGCTCATTACAAAATACTG

A\_14\_P103891 CTAAGGAAGGGAATAAAAACAACCTTCCACATTTTGTGAGGCCAATATGAAGAATCTAAA

A\_14\_P124351 CTCCTTTTGTAAATATGGAGATATAGGGGTGAAAGTCAGTGCCTCATATATAAGGATTGCA

A\_18\_P15679410

TCACAATTTTACTCCAGTTACCAGACCTATTCCCTAAAGTAGAAAATGACCCTAATATCCCA

A\_18\_P22840497 GATTGCATAGCAATACTGCCTACCCAGAGTTGTTGTTCCAGGCTAG

A\_14\_P132766 TTGGGCCTAATCTGTAAATAAGAAGTTTGGTTTGGTTCTTTAAATTGCTCCCTTCTTTCA

A\_14\_P128179 AAAACAACCTATTGGCAAGCACAGAAAGGGAGAAAAACCACAAAAATCAGGGG

A\_14\_P115683 ACTCTAAGAAGCAACATCTCTAAAGGTTCCAAAAAATTTCTTTCCATTGCATTTGACAC

CUST\_3163\_PI426210822 CAGGCCTGCTTCAGTGAATTGGGACCTAGAGTCATTTGGATACAG

A\_14\_P201873 AGCCCATTTTTTCTAAAGTGAAAGTTTGGCTCAAAGTAATAAAGTGCTGACCTGAAAGAA

A\_16\_P02301424

AAAAAGATACAGGATTCTCATGAAAGTCCAAAGATTGAAACTTCAGTTTATCCAGGCCTT

A\_14\_P129607 AGTTGGAGGTCTTAGATATGCTATAAAGGACTGTTCTTGCATCACCTTATTAGGTTTGT

A\_14\_P114991 TCATTTCTCTTGTTTTTATATATTCAAGGCTTATTGTGTAACAGAACCTGGAGCAGGCTC

A\_14\_P120088 TTCTCAGAATTTCAATGATCTTTCTCGTCCCCTACAAAAGTTTCACAAAAGCAACAAAAT

A\_14\_P128697 ATGACACATTGTGAATCCCATATTTGGTGAACACAGAGAAGACAGTCTTGTATATATTCC

CUST\_2368\_PI426210822 TGGGTGGAATCCCTGTAGAGAACCACAGTATAACTCTTGTGGTTAGC

A\_16\_P03794764

ATTAAGTAAAAACACTTCAGTAGGATTTGCCCGATTAAAGTTGAACACTTCAGGAGGATTC

A\_14\_P135743 TCCGTTTCGTTGATATCAAAGACAGTTGAAGGAAATGAATTTTGAACCTTCACGGTGTG

A\_14\_P200196 TCTCTATCTATGCTTAATGCCTTTATGTAAAGTTACTTACTTGTGTTTGCCTGTGCA

A\_14\_P128809 CTGTCTACATCAAGTTTCTAGCATCAGGTTTGTATATGTTATAGAACCCATTAAAGCGTCC

A\_16\_P01772978

AGTTCCTTAGGTCTAATCACGACATAACTGGAATATCTGTAAGTTTGCAGTGTCTCACAT

A\_14\_P104301 GCCGAAATAATAAAATACTGGACTCCCTCTTATTGCCTTCCATAAACTCTTCACAAATGA

A\_14\_P127831 ATCCAGTGATACTGAAAATACACAACAACCATCAGAACCACATTATCTACGGCAGAATAT

A\_16\_P20361377

AGCAAACCTTGAAATATAGTTCACCTTCCTATCCAATTTGCATTTCAGTCATTTTGTGGTCC

CUST\_5943\_PI426210822 TCAGCCTGATGGCCTAATTGCCTTTGCCTTTTCTGTTAATACTGACAAT

A\_16\_P18067590

AATTGCCCTAGAATGAGTATAACCCAGTTTCCAGATACATAACACACATTTTGCCAAATG  
A\_14\_P201445 GTTAGTAAAAGGCTTTTTCTAGAAACATTGGGATGAGTTTCTACTTTTTCTCCTTCCTCAG  
A\_14\_P119761 TATTAAACAGGATGTGTCATGCTTGTGATACCTAAACCTGTTGTTTGATTTCAGTGTGAC  
A\_14\_P132540 GAAGTATTGGCTTTATAATATTGCATCTACCCCTTCTCTCTATGTTAGAACCTTTCCAG  
A\_16\_P19925593

GCCTCACTGTATGTCCATAATTAAGACTCCAAAGTAGTTACATCTTGTGAAGTCCAAGAA  
A\_16\_P00685322 ATCCAGGTGTTACAGTAAGTGCTGAGATTTTTACCAAGGCATCGCATTATCT  
A\_14\_P134011 CTACGCCCTCCTATGCTCACTCTTATTAAGCAGATCTTTCCTAGACACTTACAG  
A\_18\_P16276527

TGTTTCATGGCCTTAAAACTCAATACCACTTTAAAAACGTGCCTTTTAAAGATGTGCAAGT  
A\_14\_P102311 TTTTTTTTTGAACTTTTTGAACTCTCTGGAGTGAACCCAGCAATCTGAGGTTTTTGTTA  
A\_16\_P03798948

GGAGAGTCAACATCTACGATTTGGTTTTGAAATACAGAAGTCACAATCTCAAAAATGTGCA  
A\_14\_P116409 CATTTGCCATCTATTGCCAAATTA AAAAATCAAAAAGTTCTGAATACCAGGAAGGACACCA  
A\_14\_P101862 CTTGAAAACATTCATCAGCGATTAGAAAATTTCCAGCATCCAACCATTCTTTTCCTATTC  
CUST\_3657\_PI426210822 TACTTCCTCCAGACTCAGCATCCTGAGTTCCTTTGGGTTACTAGTTC  
A\_14\_P113033 TCAGATTCATTTATTCTCTTTCTTGTCTCTCTTTAAGTCAGTAGGGCCCTCTAACAGT  
A\_14\_P112177 AGAAAGTTATGGCTAATTTTCCTTTGCATCTTCCATTCTGGTAAATATTGCAGCAAAGGC  
A\_14\_P114479 CACTGTAACTGACCAATATTTGTCCATGAAGATTCAGAAAATCTGCTACTAAAATCCCCA  
CUST\_3926\_PI426210822 TGTGAAGATCCTGAGTAGAGGCTTAGGTCACTGTGGACACAGTGG  
A\_16\_P35135153

TGAGAGCACAATTTGAAATCATATGGACAGTGTTATAACATTTTATTCCCAAGATGGCCT  
CUST\_5630\_PI426210822 AGGGAGCAATGCTGTCCCTGGACTGGTCACCTGAAGGTCCTTTAT  
A\_14\_P107106 CTTTGATCATTTTGGGGGCATTTTCTGTCTTTTATTTTCCTTTTTTAAAACACCAAATCT  
A\_16\_P00402436

AGATGGATGGAACAATAAATCGTGTGGACTGTTGATAAAACCTTTGTGCTTGAAGAAAAT  
A\_14\_P117271 CTCTTAAAGTCTGTACCCAGATCATTCATCCTTCTAGTTCCTCACTTTCTTATTTACTTT  
A\_14\_P131496 GTCATGTGCCACATGTGGACTTGTTTTATTTCTCCTACTCTGAAATTTGTAAAATGTTT  
A\_18\_P22840166

CCTAATGCTTTTGCTACCCATTAGTGGATGATCAAATCCATCTCTATTGAATTGTGCTTT  
A\_14\_P120950 GAAGGTCAGGTATGATACCTTCATCGTCTCCTGTAAGTTTTCTCCTGATGGTAAA  
A\_16\_P16578645

TAAAAGTTATGGTCTGAGTCCAAATGTAATTGCCAGAAACCTTTTAGAGTGTGTTATCC  
A\_16\_P00912999

GGGGTTGATACTACTCTGAACAATGAACCTGAAATCATTCTGTAAACTGTCAACTACAAG  
A\_14\_P114269 CTTTTGAACAGAGTGGACTTGTCAATATCAGAGCAGAGCACCAAACCTGAAGATG  
A\_14\_P117168 ACTCTACCAGCCATCAGATATTGTGTGCATATCCTTGTCTTAGTGTCCATTTTTAATGAA  
A\_16\_P21256594

AGCCTTGACTAAAGAGAATTTTAGACATCAACATGCATGAATAGGTATTTGCGAGGAGAA  
A\_14\_P115673 AACTAATAGCCAGTGCAGCAAGCAGTAAATATACTGACTAGTGGCTCATACTTGCTTTAT  
CUST\_2003\_PI426210822

TATCTTTTGAATAAAAAATGCATCACCAAACCTTGGTTTTGCATTTTTCTCAGAATGGCT  
A\_14\_P114896 ATTTTTCTCCTCAAGTTGTAGCCAACATTTTGTCCGTAAGTTCAGGGCAAAC  
A\_16\_P38044585

AGTGGCTGCTTTTTTTTTAATGGGGCGATTAAAAACATAAAAAGTCGAAGGAATGATTCA  
A\_14\_P115051 CAGTTTGTCTAGTTTCAAATAACACTTTTTTTTTTTTGTGGAAACTTTCCAATGAAGGCT  
A\_16\_P03433651

CTTCAAAAAGGGAACATAATACTGAGTCTTTCACCCCAATTCCAATATTAAGCCAGAAC  
CUST\_8174\_PI426210822 GTGAACCTGGGAACCAACTGTGAATGTAGGTTCAAGAACATGTACCCA  
A\_18\_P22840697

AATGAAACCATAACCATAAAAACCTTGGGAACCTGGTTAGTGAGGGAGGATTAACAACATTTTC  
A\_16\_P00072454

ATGATCCAAAAAACACTTTCCTACAGTTCATCTCAAACACTACAGTCATACAAAATGCTGG  
A\_16\_P21420847

AGACATCCATGAAATTCTCTGTTGCATCATGAAACTGTCCTTCTAGTTCACCTCTTCTAT  
A\_16\_P02218442

AAACCCAGTAATAATGTCGAAAAATGTTAACTATCATGAGGTATTATCAGTAGACGCACA  
A\_16\_P01539929

AAACTTCACCTCCAGAAATCTTAGCACTTTGTAGAAAAAAGACTGAAATCCTAGGACAC  
CUST\_5402\_PI426210822 GGCCACTCAGTCTTTGGATTCCCTGCCCTAACACAAAATCCATATTT  
A\_14\_P108237

ACTAGTGCCAAACAACCAAAAATACAAAAGAGGGAATAGGAAAGACAGGACATAGATAGTA  
A\_14\_P124651 ATAAGTTCAAAGTGTAGCCTTTCACTTCACTTTTCTGATCCTACCATGCATTATGAAGTC  
CUST\_6223\_PI426210822 CAGTGTTTTCTTGGCTTCCAAACATAGCCATCCATTGGAGGTTTTATGT  
A\_14\_P113695 CAGAAAATAGAATCTAGGGAAATAGGGTCTTCTTATGGTTATCAGGAAACAGTCCAGGAT  
A\_14\_P109532 CAATGAGTAGTTAGCATTTGTGAGATCTGGGATGTTGAATTTCTCTTGACTACTCAGATT  
A\_16\_P38196496

AATGCTGTTTTAATGGTGCTATTTCACTACCATGGCTATTTTAGACTTTGACCGCTTTTG  
A\_14\_P111557 GTTTTTTACATTTTATATGAATACCATCAGCACAAGAGGTTGCAGAAGGAGTCAGGTAGT  
A\_14\_P101314 TGAAACAGCCACAGGAATGATGTTAAAAATCCTCTTAAGATTAGCACACTCAACCATTAC  
A\_16\_P36067254

TACCATCCCCACTTCTAAATGTTTCTCTAAATTCAGGTAAAACCTATTTTCACAAGCAA  
A\_14\_P122612 GAAAAATCAGTAAATGCACATGCCCTGTTGATTGGAGATCAGTAGTGCATCTTCATAAA  
CUST\_355\_PI426210822 GTCTCTAGGGAAAGGGAGGGAGAAGAATGTGCTGGAAGTGGTAGG  
A\_14\_P201700 CTCCTCTGCCTGGCTTTCTTTGTAAAGCCATTAACACTACATTAAGAAGGCTACTG  
A\_14\_P116935 AATTTTCGGGGTAAGATTGCTGCTCTGAGATAATTCTTGACTGAATATCACCTTTAGAAG

CUST\_2717\_PI426210822 CTATCTGTGCCTCGTGTCTCTTCACTTCCTTTGTTACCCAGATTTTC  
A\_14\_P132682 TAGTTGTCAATGCCCTGGCATTAAACCCTGCCTTTTTTGGTAAGTTAATTTTCATCTAAC  
A\_14\_P129479 TAATGTTTGAATTGCTTCCAAACTGCATGTTATTTATTCTAAACTCTCCCTCTGATAGGA  
A\_18\_P21541717  
ATGCTCTTTACACATTGTATAGTATATTATCCCAGGTAGCATAGGTTTTGAAACCAGGCT  
A\_14\_P201891 TTGACCCCAAACCTATACTTTAAGATTCAAATCAAAGTTTTAAGTCTCCCAAACACAGACA  
A\_14\_P125325 AATTCCTTTCCTCCTGTGTCTCTTTCATCTGCTGTAAGCCTTAAAATAAGAAAAAAGTCT  
A\_14\_P107345 GCAAAGTATCTATTTCCATCACCTTACTTATCCAGCCATTTTCTTCTAAAAGCACTTCT  
CUST\_978\_PI426210822  
AACCAAAACATAACTGATTTACCCACAAATTAGATAACAATAAGTGATTCAAGTTTGCGA  
A\_14\_P134615 CTGCAGACCGTAAGGATGATCTACCTCCAAATATGAGATTCCATGAGGAGAA  
A\_14\_P133777 CTTACTTGCAAAATATGTGGTCACACTTTGTGGAGACAGGTTTCTTGATCAACTC  
A\_14\_P130928 ATATGATTTCAAACGACTTCTCCAAAGATCAATCCTTCATTTTTTCAGTGATTCTCCTCC  
A\_16\_P17057507  
GAGACAATTTTCAACACCATATTTGAGTAAATTAATCCACGAGTCTATAATCCATCCCCC  
A\_14\_P125652 AGTATGCGCTACTGTCTGAAAACAATAAAGCAGATGCCTTTGTTTTTCAGTCGTTGAC  
CUST\_4637\_PI426210822 CAACCAAAATTGAAAGCAAACAGACTCTGAGTTGAGAAACCTGTTCTCCCTA  
A\_14\_P102501 ATTTTGCCTTGCCAAAGGAGATTAAGGAGTTAACTTTTTTTGTTTTAAACATTCCCCCA  
A\_14\_P134029 AGAGAAGAGGAAAACCTCTACCGGTGCAGGTAAGTGGTATGAGGCT  
A\_14\_P100396 CTTAGTGATCTGGGGGTACATAACAATCATAATTTATTTTCCCATAGTCTGGAAGTTAGC  
A\_14\_P110570 CCTTAGGTGGATGGTCATGTTTACAAAATGATTCAACTCTCCAGTATTCTGAAAATATG  
A\_16\_P03575612  
AAGTCATTAAGATCCTCACTCAACATATAAAGTCAATACAAAATAATACTTCCGTGCA  
A\_16\_P17124357  
TCCCCTCACAATATTTGACAAAACCTTAAAACACTGATCTTTCCATCTTCATTCCACTACA  
A\_16\_P18548778  
ACCATCTTACTCATCATAACTAAGAATTTTACTCTGCTAATTTTTTACCAGCCTGCCATT  
A\_14\_P120193 ACTGAAAATTGAAAGTGTTTAGACGAGTGAAAATTTTCTTTTCTGTTGATCCACGTGTTT  
A\_16\_P02588283  
GGGTATATGGTTTTTTACGTCAAAGTTCAGCATAACACATCAGACAATCATTCAAACTG  
A\_18\_P14138819 AATGAACCTTGTAGAAACAACATCGTGCCAGAAATAGCCTAGACCTCAGAG  
A\_14\_P116919 TATCTTGCAAAAATTTGTTTGTAGTAGTGAAACAAAGTCACTGATTGTCCCCGTTACTCTT  
CUST\_8516\_PI426210822 CATATGGAGCAGGTGAATATCTGAGCCGAGAGTTGAAGAGGACACA  
A\_16\_P03741292  
AAGTAGGCAATTTGAGAACTAGAATCATGGTAGAAGGGATGAATAGATGACAGTTACTGC  
A\_14\_P122726 CTCTGATTTATTCCGGACAGGAAGCAACCGTTCTATGATAACATTGAAGACATGATT  
A\_14\_P127198 CATCATTCGCCTAGAAGGGGTTGTCACCAAAAGTAAGTTACTGAGTTTCTTCATTACTT  
A\_14\_P118208 AGATCGATACCATGTAAAAACTCAAGACAACCTATGAAGAGGACAGTTTCTAGTGAGGGT

CUST\_5068\_PI426210822 GAAATGCTGGGATTTGCCTTGACCTCTGGCTGGGGGACGGGGAGG  
A\_14\_P107976 GATGCCACCAATACTTTGTTTACACATAATGTGTAAAATTACCATGCGGCTGTCCAAATA  
A\_18\_P15951674

TGACTCATTCTGATTAACTGTAGGCAAGACTTACTAGTGAATAACATTTTACTCTCGC  
A\_18\_P14271967

CCCTCTCACTTAATTTCTTGTAACTCAATCCTTTTGTAAATCATCAGATGGGCATCTGTT  
A\_14\_P109967 ACTTAGTCTTTTCTTATATCATCTGGAGATGAGTGATAGACCAACGCAAGCAGAACAAAT  
A\_14\_P125341 TCAATATGGAAGGGCTTTATGGTAATGTCCAGGGAAATTCGGCATGTTTTATTTAATTGT  
A\_14\_P119464 CACACCTTTCCTAAGGATTTTGACGAATGAGAATGAAGATAAACTGTGAGTTGAAAGTGA  
A\_14\_P108969 ATGACAAAACAAAGAACATACCTGCTACATTCTAACCAACGTAACCTTAAAGACGGCCTTCA  
A\_14\_P113034 TCCTGTGGAGTCTCAGATAGTTTCTTTACCTGTTCAATGAATCTGATTTTCCATTTTTCT  
A\_14\_P135057 TTGGTAATAATGGACACTTGAATCAGAATCCCGAGTCTATAATGGCACCATTAACAAAAG  
A\_14\_P200867 AGCAAAAATGGAAATCAACCACCGTATCTTTTCTTGAGTTCTTCGACAGAACTATCCTT  
A\_14\_P129726 TTTGATTTTCGTCATATAGCACAGTGCAGAAAACGGGTTGTGTTTACAATAAGTATTTCTC  
A\_14\_P107561 GAGTTAAGTCTAAAAAGTGGGTGAAAAGAAGCAAGTGGTTTTTGCTTTTGTCTTTCTTCTG  
A\_16\_P00651088

AAAATACACAAACAAGGTAACCTCAAGTGATCCAGAAAGTAATACCAGGAGATAGTGGAT  
A\_14\_P107986 CTCCAGCCATTATATGAGAACTGTGAAACCAATATGGTTTTCTTTATGTCTTGCTGCTT  
A\_16\_P02680807

CTGTTTTCTTACCAATAACTGACCCCTAAGTTCTTAACTTGTTTTGATAACCACATCCCT  
A\_14\_P200732 ACTGATAACAAGTAAGTAAAGGGATGTGCTAATTTTTTTTAAATTGTAGATGACATTCACA  
A\_16\_P15764080

GCAGATGAATCCACATTCAGAACTTTTCTCATTTCTACAATTATTTCTACGACCCCAAGT  
A\_14\_P201327 TAATTGCTGCTGCTTTCTAACATTTCTCAAACAGTCCTTCTATCAAGTAGACTCTGAGAC  
A\_14\_P112372 ATGTAAACCAAATATCCATGGCTTACCTTGGTCTTCAAAAACGTGACGTTAAATCTCTT  
A\_14\_P106190 AGGAACACCATAGGTGCCTAATGAGTAGGAGCCAGTGTGCTGATTTTTAG  
A\_16\_P03711250

TGAGTGTCTATTGCTGTCTTTGAAATCATACTACACCTATATATAAGGCCACCCAAGTGT  
A\_14\_P107179 GCCCGTTTACATATAACAATGTTGTCAATGTTTGATTGAAAATACCTAGCAGGCGACACA  
CUST\_2794\_PI426210822 GTTAGAAAGCAGAAGTGACAGGACTTTGGAGGCTCCTTATTGAGCTTGTA  
A\_14\_P124078 GTTGATGGCAACCATTCTTCTAATGTCAAACCATTTTTCAGTTAGTTCTCCCACAG  
A\_14\_P113317 GGCAAATTTTGTAATATGAATAAGTCATCACCCAGAATCCCTCCATATACATATCCATCC  
A\_16\_P16026736

GCTTATCCTCTCCATCACTAATTATTCCTGGTGTCATTTTATTTCAAGACTTCTGTCAGC  
A\_16\_P16306635

TCGTATGCCAAGATATAAATGTTTCTCCAGTTAAGTTCTCATTTTCAGCCATAGGAAAAA  
A\_16\_P18375460

AAAACCGAACTAATGTGTCCTAATGCACTTGATTTGAACCATACTAGGCATTCAAAAAA



A\_18\_P14576773

ACCTAAGTTTCACGACATAGACACACTTACATATTAGTGGACCAATTGAAAGTAACCTAC

A\_16\_P36230337 ATAGAACCAGTGTGATTGGAATTCAGAGCACGTGATCACCTGAAGGAAATGAAT

CUST\_10387\_PI426210822 CAGATGCATTTTAGAAGGAACAAACAGCTTACGTAATATCACCCGCAGGAAGT

A\_14\_P123020 AACTTACAGTAACTAAAAGGAAGCGGCAATTCTTGACCCTCAGAGTAAGGTG

A\_14\_P112064 TTTTAAGAAGAAAGAACGGAGAAAATGATGTCTGTGTTTCAGGCCATAATACTGAGTCTC

A\_14\_P109822 CATCCAACCTGGGACTCCAGAGTTTAGTCACATACAATTTTCTAAATGGAAAAAATCCAT

A\_16\_P03119008

GCCTCCCAAATATTCTTCTCCACCTTTTTTCTGATCAGAACAATTCATTTCTTTTCAACT

A\_14\_P139882 ACTTCTTTCTCTATACTCTTGTGTCCTGGGTGAAGCACACAATTTGAATTTTGTTACAAT

A\_16\_P16670215

ACAGTGTGTATTGGCTTGTATTTTCTGCTTCCAGTAAGATATTTACGGGAGACTTACAAA

A\_16\_P30952561

TCCACACAATATTTGCTTTTTTTCACAAAGTCTGGAAGAAAAGTCTTGGTAAGGATTTGTT

A\_14\_P118295 CTAGCACCCAAAACAAATATGCAGAGGCACACAAATTTCTAAACATGAACATACTCTGAA

A\_14\_P121866 GGCCGAAATTTAAAGATAATCTGGGTAATAGGGAGATTGAGACCAAACAGGTAAATTAAG

A\_14\_P128412 CAAGAGTTCGAGATCATTAAAACATCATTTAGGTAACCTTGCTTTTCAAATGAGCCCTGAG

A\_16\_P20628611

AAAATAACACCTCAACCAGTTTTTTCACAGAAACCCTAAAGGAAGAGAAAACAGATCGATA

A\_14\_P111415 CCTTCATTAAACAACCTGAAAGGACTTTGAAAAGCAAACAAAACCACCTTTTACTTACAG

CUST\_1578\_PI426210822 GAGTGTGCTTAGTGTAGGGCATGGGGGAGACACCTCCCTTTAGAT

A\_14\_P122810 GCTACTGCTCACCTGGTTAGGTGAGCCTCTAGGAAAACCTTAAAACAA

A\_14\_P122485 ATACACAGTATGATCTGTCTCTTTATACTGACAACTCCTCACGCCTAGAAGCCTTTAAA

A\_18\_P22839406 TTTTCTAGCACTTGTGAACAGCACCAGAAAGGTCACAAGCATCATCCATA

A\_16\_P15020504

AAAATGGTAATGCTGATCCCCAGATTTGAAGATGAATCCTTAGTAAAGACTTCTTCTGAG

A\_16\_P18196573

AAAACCATTGATCTAGGAATCTTTCAAGGACTGTGACTCAGTATCTCAACCCATGTATTC

A\_14\_P125385 GAAGATTTCCCAAATGTTTTACAAAATGGCAAACACTTGCACTTGAAATGGATAAGCAA

A\_14\_P116028 CTTCTAACCCAAGGACTCCTTTTTGTTTTTTTTTTATTAAAAGTATGACTCACGCTTGGGA

A\_14\_P101302 TTGTATGTATCAGGTGGAAAGTGCTTGAAAGAACAGAAAGACTTTTGTGTTATATCCTGT

A\_14\_P138400 CTCTAAACTTGGAAGTCATGAGAAAGAAGAGAGTGGAAAATAAAACGCATCATCCTTGT

A\_16\_P03643224

AATAACATCCAAAATAAGATCATGCCTAGACATATCCTGAAAAAATGAAAGCAATACCCT

A\_18\_P22842142 TCTTTTAAAATATTATTAATTTCTGTTTTATTTGTTTCTTTCAAAAATTAACAGATTTTT

A\_18\_P14136816

GTTTTAAAAGAAGGCAAATATATAGAGTGGGTTTTGGAGCCCTGAACTTAGTCATGGG

A\_14\_P113825 GATTTTTCAAGTTTTTGTGGTTCTTGTTTTTATGCCAACTAGAAGGTAATGGTGGGGTTT

A\_14\_P101215 GTAAC TGGGAATTACATCTGATAACAGGTGAAGGGTGAAAAAAAAATGAGAGTGCATTTT  
A\_14\_P124996 AAAAGGAATCACAAAACAAGAATCTTTCCAAAGTTGTCTCATT CAGCAATGTTAAGGCAT  
A\_14\_P131126 AACCTCTTCTGTCCAAGAAAAACAATGCATGTCATGTTTTTAAATGACATTGCAGTCTT  
A\_14\_P137035 CATTTTATTTCAACAAGATATTGAAAGCAAGAAGGGGACCTACACTATTTCTAGCCACTT  
A\_18\_P14133093  
ACCATTTGCTTAAGTATTGGAGTTTTTGGTTTAGGGATATTGACTTTTTTAAAACCAAGAT  
A\_14\_P119634 CTTTGAACATTCATGACTGAACTGAAAACAAGCCATGACTTGAGAAACAAATAATTTGTA  
A\_14\_P132433 ACATGCTTCACCACTGCATCTGTAGTTCCAAATAGATCAACCCCAGTTATTC  
A\_18\_P14134754 GTCAAGCCCCCTCTGCTTACAAAAC TTTATTTTTT CACAACCAAAGGTGGTTCATAAT  
CUST\_7474\_P1426210822  
TCAAAGAAATTAATTTTTCAAAAAATGACTCTATTGAGATTGAATTTAGATCTTATCCATT  
CUST\_2527\_P1426210822  
ATATAGCAAATTTAAAGACTATTGAAGAACAAAATTGATACAACACCCAAGTGGAGAAAT  
A\_16\_P19174163  
ATTCTTCAACTTGCGTTTTTCATTTAACGGAATATCAGCCTGATTCACTATTGATCTGCAG  
A\_14\_P104681 CTTAATTCCTATGACAAAAGCAGACCTATGGATTTAGACAGGACAACAAAACAGGAAATG  
A\_16\_P15426927  
ACC ACTCTCAGACCCAATATGAACAGTAAATACTAACGGTAAAGTGCAGATATCCAAAAC  
A\_14\_P127006 CTGTCTGTGTCTCTTCTTCTTCTTCTTCATCCTTGTCCATTTGCTCATAGAAGTCAA  
A\_16\_P16696152  
AAAATGCAGGTTAAGAAAAC TTTACTGCCTTCTCTAGTGTGATAAGATCACCTTTCCAAG  
A\_14\_P115971 TGATAATGTAGTTGTTTTTGATCGTGTTTGGCTGCATTATCATGGCAGCGTTATCCTTAA  
A\_14\_P108507 CTAAAGGAACCACCACATGTCAGTATGACTTTCTAACCTTTTTAATGAGATCTCATTTTGT  
A\_14\_P124979 GGATATAAAAACGAGGGCCATTTCCCTTCTATAATGTCAGTGATAGGTCACATATCTTCAC  
A\_14\_P131929 TCCAGGCTCTAGATTATGAACA ACTACAAAGCGTGAAACTTAGTATTGCTGTCAAAAACA  
A\_16\_P20866065  
ATCAAGCAGTTTGTCTTTTACAGCATCAAATAGTGTTCCTCATAAACCATAGCCTCTCT  
A\_14\_P105909 TTTAGTTTACTAAGCAAAAATAATCTGACCTTAAGTTGTTCTTCCAAAGCAGCAGTTGCGT  
A\_14\_P105600 CTGAAAAAGGCCAAATGTGGGCAAAAATACGGTCACTTGGAGTAAGTAGTTG  
CUST\_6047\_P1426210822 GAGGTAAACTGCTTTGGTTATCATTGAGCTCTCTTGATTCACTTGTCTGGGAT  
CUST\_10230\_P1426210822 GGGCTCGTGGGTTTCCTGGCATGTGTATGAAGAGTTACAGATTTAG  
A\_14\_P130502 CTAAGATTAAAACAAAACAAAACAGAACCTACTTCTTTCCCCATCCTTTGCTACCAATC  
A\_14\_P135044 AAGAGATTTATTTT GAGATTTCCACAAGTCCCTTGATAAACCCAGAAACCAACTCTGGTTT  
A\_14\_P102015 CACTGGCACACTACAAAGCACACCAGGTAAAAAGTAATACAATCACCACATTGTCTATA  
A\_16\_P02769331  
ACTTGAAATTGCCATCTCATTTTTGGAGACCTACAGTTGAATATTTGCATATCTCTGGAA  
A\_14\_P103484 CTTTTCTTCTCCATTTTTATTTCCCTTCCCATT CAGCACCACATGAATCAGAATTTTTT  
A\_14\_P127284 CCCGTCTCAGATGCTTTGGCTGAAGTTCTCTTGCAGGATTTAAAAGGAAA

A\_14\_P113039 AAGATGAAGGAAATCAATGAGGAAAAAATCTGGATCGGAAGTCTGAATTTGCATTTTGAT  
A\_14\_P110594 GTATCTGGCTATGATTTGGAACAAGATGCCATCTAAATAAATAACTCCTAGAAGAATGTC  
A\_16\_P03075548

CTTGTTCTTAGTTGTTCGGTTCAGATTA ACTCCAGCAATAAAACAGGGAAGTATTTGAGAT  
CUST\_293\_PI426210822 CACACTAGGCACCAGGCACGCGGGAAGCACTGTCAAAAATGGGAG

A\_14\_P119209 CTTGGACATCTGCAAATGATATTTAAACCATCTTGGCTTGTGCTTTATTCAAACATAATGT  
A\_18\_P22842823

ACACCAGTAATTTTTAAGTAGTGTTAAAACTAGTAAACAATGTAGGGGTTTGGAGAAAA  
A\_14\_P123164 TAGACTTTGTAATTTCCCATCAGTTTGTGTCTCTATAGATCACATTCCTTCCAGCACACT  
A\_14\_P128587 AGAGAGAGGAAAAAACACATTGTTTTGTCTGTGTTTTGCTCACTCTTAATTATGCCACA  
A\_14\_P112878 CTAGTTTGGAGAGTTATTAGGTATATATCTGGATGTAGACGCCGATCTGCTAAACCTTTT  
A\_14\_P138143 CTCTGACTTGGATTTTGGATTTCTCTCCTTTCTCTGCATCTTGAATCCCTTCT  
A\_16\_P36689225

AAAACCTGAACAACTTAAATAACAAAATGCTGCTGTTATAGATATACACACTTCGTCTGA  
CUST\_1815\_PI426210822 CTTTAGGGTTAGAGGGTGATGACAAGTTTGGGGATTATATGGCAGCC  
A\_14\_P126270 CTAAAATAGTGAACCTTTTTTTTACCTGATGTTCTGCATGAATGTTATCCCCAGTAGGCCA  
A\_14\_P101434 TCTCATTATCTTTTCCCTTCTCCTCTAGACAATCTTCTTTCAGACCATGCTAAAGAAAA  
A\_14\_P118859 GGTGCATTTTCTTAACTAGTCCTTGTAGTTTTGTTGTTGCCACCAATTCTGTCTTTCTA  
A\_16\_P20801746

GTAGCCAAACTTTTTGAACAGTATCATCCAGAGTAACTGACAAATGTCTAATACAGTGGG  
A\_18\_P22841372 CTGTTTCTATGGTGGCCCTGAGGGTTACTGGGAAGGATCAGGGTT  
A\_16\_P30952237 GCGCACCAAAGGCAGATTCCAAATACAGCCCTTCAGTGAAGTCTC  
A\_14\_P131839 CTTTGAAATGTGATGAAGCCACCAACATAAGCACTTGCCTAACAGAAATCAGTATTTCTT  
A\_14\_P129344 ATCATTTCAGTAAAGAGTAGTAAAAGAAAAACTCAGGCTGTCTTTCTGGAAGTTTCAT  
A\_16\_P01511750

AAGCAAAGCCACAAGTATATGAATTGTGTTGGAATACTCTCCTACTCATGAGTTACCTAA  
A\_14\_P124643 TTCTTTTCCCTAATATATGAGAGGATGTGGTGCATTAATATAGTGGAGAGAGAAAGGGGTG  
A\_14\_P105854 CATCTTGCCCAATGAGCACATATAACCAATAGTTACCAATGGTATATTTGATAAGAAAAC  
CUST\_1034\_PI426210822 CATGAACCTTCCCTCAGCTTTCTCCTCAGAGAGGCCTTCCCTTGAC  
A\_16\_P40222435

TGTTTTAGCCCTTCCACTTATAAGATATACATCCAAAAAAGGACAAAGCACTCCAAAGG  
CUST\_1929\_PI426210822

AAGTCTTACTGGGAATAAAGTCCAATCCATAACCACCAACTAATTTTTAAAAACAGGAATAA  
A\_14\_P200500 CCATGTAGTGTGCGACACTTTTGGAGAACCACAGGAATGTCCTTGATTAA  
A\_14\_P133249 AATTATTACTGATTCAGCAAGTGTCTTCTGAGTGTATGCCTTCTGAGACAATTGAAGTC  
A\_16\_P16270335

AATAGAAAACAGGGAATGAAAGCATATGGTAATTGCAGAAAGCCAACAAAACCTTGCTA  
CUST\_6560\_PI426210822

TAGAAACACTGTTTCCTCAATAAATAAGCACCCCTGGAATGTTTAGCACAAAACTCTATG  
A\_14\_P103172 AACGAACTATCACTTTTTTTTTCTTTAGAGTCCTAAGAATCAGCCTCTTTGGTGAACAGT  
A\_14\_P130098 ACAAATGTGTACAAAAGTAAGGATTCTGATGTGTATATCACAGACAAAACCTGTGCTAGAC  
A\_14\_P201842 ACAGTCTGTCATGAACATGTTCCCTGAATTCTATTTGCTGGGCTTTTTTTTTCTCTTTCTC  
A\_14\_P137787 CTTTCAGCAACTTGATTTTATCTTCCTGGGCTATAGTTTCATTCTTTGTAGTGGTCTCAA  
A\_14\_P118211 CTCCTAGGCATGAGAATATAGGGCTTCTGCTAACCAATATAATCTCATTGAGTCCAAT  
A\_14\_P103063 AGAAAATTTGGTGCTTATTGATCAACTATCCAACCTGTAGACTTGTGGATCTCAAGATACC  
A\_16\_P18279243

AAATTGCATGAAACCAAATATTTTGTCTAGGCTTCTAATTCATCTCACTTGCTGGTTCC  
A\_14\_P108101 ATTCCTTCTTCAGAATGCTGTGTCTCTGAAGAAACCAATGACTTTAAACAAGAGGTA  
A\_14\_P112467 CTTCCCAGAAAAATCCCAGTAATATCCAGCATCTCTCAGTATCTTCCAAGGAG  
A\_14\_P122107 ACACCCCTCACAAAGACTTAAATGAAGGTATGTCATCACAATTCACAAGTAGAAATTTCT  
A\_14\_P105871 GTGGGCTCATGTTTGTGATTGAGTGAATGATTTAATTAACGCCTGACTCTGCTTTTTTC  
A\_14\_P121252 CTATTTATTATAGAAGGATAAGTTTCACCCTAGTGACTCCTTCATGGACAGAAGCGGAAT  
A\_14\_P121251 TACCCATGAATGAGTATTTTTCTTGGAAGAGTCTCTTTCCTTTCTTCTTGTTTTTTTCC  
A\_16\_P58424226

CCTCACCTCTAAAGTTGGGATAATACTACAACCTTATTTAGTAGGATTGCTGTAAGGACCA  
A\_14\_P100778 GTTAAGGGCTCAAATTCTAACAAGGATCACCTGCTAGAGAGTTGGTTCAGAAATTTCTAAA  
CUST\_9935\_PI426210822 AGTGAAGGACAGTGACCCTTCAGGCAGGGAGTGAATCTTGGCTC  
A\_14\_P201261 TTTTTTCTTACTACCAAAACACACAGCATCATGGAGCATATCACATTCAGATTGTTCCAT  
A\_16\_P03791353

ACACCTACTAAAGTTAATGCCATATCTGGATTCACTTAAAAATCTTACCCCTTGACTCC  
A\_14\_P200996 ATAAATCAATTAATGTAAATACCCACAACCACTCTTAGGTATCTGCTAATCCTGGCTCT  
A\_14\_P136754 AAAGGACACAGAATTACAATTGACTAAATGTAAAGTTTTATTTTTTGAACAGTTGGACGG  
A\_14\_P129373 CTTGCCTACAGTAAAGCCTCAATGAACTGGAATCCAATTCATGGGGTATTTTTTTTTCT  
A\_16\_P21511036

CCCATCCTCTATGTAGTCAGACACACAAATTTTCATCATGTAACCTTCATGGATATAAACC  
A\_14\_P127908 AACAGATAAGTTAGTGGTTAAATTACAGAAATAGCAGAAGTCTTTGTTCTTGGGCCTCTG  
A\_14\_P131624 GTTGGGTATTTTTTCCAGAACAAAGGGTGAATGCAATGAATAGTCAAGTTTTTACCTTTC  
A\_14\_P117574 GTTTTTCAACAGTAGCATAAATTAGTTAGAAGCAAATTGGTCATCACGGTCTCATTGGTG  
A\_14\_P115272 ACCAAATTAATGCTCTACAAGGAAAAAATACTCAATTGCTTCTTTCATTAGATTGTCCAA  
A\_14\_P113050 AAATACCTGAGCAAGAAAGTTAGTGAATGTGGATACTTACCACATCTTCCCTTATCTCAA  
A\_14\_P108624 ATTTGTGGATGAGTGGTTTGTGATTAAGGGATGTTCTTGAACCTGGAAAGACTCATT  
A\_14\_P108921 AGGTTAAACTGCTGCAGTTAGAAAACCTTTGTCTCAAATCTTTTGTAGTTTGGGGTATTGT  
A\_16\_P00685087

GGCTCAGAAAAATTTCTTGTCTTCTTAACTCTTTTAACTCTTCTGGAAAGAAGATAGAC  
CUST\_1589\_PI426210822 AGGGGAAGTCCAGGTAGCTGTGCAAGCTCAGGGTGACCAGAAGAA  
CUST\_2446\_PI426210822 GAGAGGTAGTTTCCACATGGCCATCTTTTCCAGCTGGACATGTTAATT

A\_16\_P16197168

AAATGTTCTTTATTCCTGCCTCCAAATAATTGAGACTAAATGAAACCATTTCATTCCCC

A\_16\_P02282565

AACCTGCCTCTTAAAACAGATTTCAAACCTAAACCTCCTGGTTTTGTAATTTGATCCAAGT

A\_14\_P134223 ATAACTGTATGACATTTCTTTTCATCCGTCTCCAAAATCTCAGTATTCACATACCCTTCAC

A\_14\_P100953 ACTCAGAAAAATACTACTCTCATAAATGGGTGGGAGTATTTTGGTGACAACCTACTTTG

A\_16\_P00507901

AACTCATTCTGTGCATCACATATACTTGTTAAAGAATGAAAATTGGATTACACCATGCA

A\_14\_P137074 CAGAAATAGAGCCATAAAAAGAAATCTTGGTCTTAGGGTATTTGTCTGGGAGATTTGATA

A\_18\_P17116567

AAAACCTCCCTAGTCCACAAATCATCTTATTATCCAGTCTGTAATTTCTTTGTTCCATGCC

CUST\_6335\_P1426210822 TGAGCTGCCTTGAGGGACAGGGAGGGGCCACTGACTGGCTTATT

A\_14\_P102146 TTGAGCATAAATTCGATTTTTTTAGGTGGAAATCTGAAAAATCAATACAACCTAGAAAGAA

A\_14\_P112917 ATGATCAGATCCTCACCTGCTACCAATGAATGTGAGCACCATTGTTGAGT

A\_14\_P120294 AATTCCTTAAAAAGCAATTCTCCAAAAACAATTTGCTGAAGCATCCACTGGTTGAATGA

CUST\_1258\_P1426210822

ATTGGGGTTTTGTTGTATTTTTGTTTTGTTTTGTTTTGGAGAGAACCATAAAAAGGCTAA

A\_14\_P100154 CTTTGAAAGGAAAAAAATGTATCAATTTACCATCCCATCAATGACTTTTCCAAACACCAC

A\_14\_P102683 TTGGGTGTCTGTATCCTAAGAAGTTTCTGAAAAGATCTAAAGCCTTTTTATCCCATATCC

A\_18\_P14134872 AAATTGTGTTACAGCCGGGAAACCAAGCATTGAGCAACAGAATGGTTCCTTAG

CUST\_7186\_P1426210822 CAGAGTGAGGACCCAGGCAAGTTCATTTTTTACTCTGGTTCCA

A\_14\_P125031

TTCCTGGTCTTTTCACTACAGATCATCAATGGAAGGCAAAAACAAAACAAAAACCAAAA

CUST\_3621\_P1426210822 AAGCAGGTGTCCTTGCTGCCTCTTGTTAGCCTTTTGTGAGTTAATTCITT

A\_18\_P16152394

ATTTTGACAAACCCAGATCATAATCACTCCAATGCAAGATTCCATCACTTTTTGACTCAT

CUST\_773\_P1426210822

AAACAATGCATAAAACTGTAGGTCAGAATTATTTTTGTAACATCTGGAGGGGAGCTTACT

A\_16\_P16191559 ATGTTTTTAAAATGTTGCCTTTGGGCAGAGGGGATAATTCTGCAAACCTGCAGAG

A\_14\_P122102 CGAAAATACTGACTTATGCCAAAAGTAAGGCTAAGCATGACAGGAGTTCATATTTCTTC

A\_14\_P114890 CTCATTATGCTGATAAGCACTTCAAACAAAAGAAAAGGTCAGTAGGTGAATCAAGTAACA

CUST\_1569\_P1426210822 CTGGTGAAAAGGGGTTGCCTGAGAAAGAACCCATTGGGAGATATA

A\_14\_P119488 CGGCTCCCATCTCAGCAAGATCTTGTCAAAAGATGTCCGAATGTAAGAAAATTTAAGTA

A\_16\_P16343090

AAAAAGGAGTGTCTTTGTTCTTATGTAACCTTAGTAGCCCATATAATAGCCATGCAACT

A\_16\_P40963893

ACATAATGACAGATCTGTGTAAGAGCATAGCAAACCTTAACTCGGATTCTTGTCTCTGTAAG

CUST\_10057\_P1426210822 AGAGAATCCACCTGGCCCAATGTGGGTCATATGTCTCCACGGAG

CUST\_1795\_PI426210822 CATAACTTACAGGGAAAGGCCCTGACTCCCTTTTTGCATAGCGTC  
A\_16\_P19309061

GTGGCATCCCTCTAAATTAACCCAAAATCAAAGTATCATTAACTAGCCTGCAAATGA  
A\_18\_P12086293

ATTCTGACCTACCACAACCTTTGAAATTTTGAGATATTTCCAATAACCACTGAATCCAAGG  
A\_16\_P00096064

CCAGCAGAGTAAACTATCATCAAATACAAGTCATTTTCCCCATAAATAACAGCATGAAGC  
A\_18\_P16733280

ATTCCAGAGGAAAATAGAGTTCATATTTCTGTTGTGCAAGTATTTCTAAATGCCACCTGC  
A\_16\_P21033642

AATTTCAACAAGAGTTACCTTAATCAACTGGCAGGTTATTTCAAAGAACGTTAGGGCTATG  
A\_16\_P16430612

TAACCAGGTCTACAGATACCAGTTTAAATAACAGTGCATCAAAAAGTTTACCTGCTCACTT  
A\_14\_P102615 ATTGAATTCAACAGCAAAGGCCAGAGGTCCAACCTACGCTTTGAAAATCTTACAGTT

A\_14\_P131475 TGTGGACTGGAAAATCCTCTTTGCTTGTGTGAATTCTTTTTGAAATACACGTCATATCA

A\_14\_P139340 CTAAAACACTGAACTAGAAAATTAAGCAAATAGTTTGTTTATCTTTTTGCCCATTTGA

A\_14\_P116577 ACTTTTTTTTTTTTTTTAGAATGGTATGAGGTCACAGGTTGGTTTAAAGAGTGTGCCCTTTC

A\_14\_P135252 CTTGCATGGAGTTTGAAAAGGGATAGACGTAGAAAGGTGGAAAGAGATTAGGAG

A\_14\_P100132 TCACCCATGTTTGTGTTATGCAAATAAAGGTTTTCTCTCCATTGGTGTCTCCTTATAAA

A\_18\_P22839980

CTAACTAAAATGGGACAGCAAGACAGAAACAGTTTCTATCCCTGTAGGAAAGAGAAAT  
CUST\_1402\_PI426210822 CTGGGCCAGAAGTGGGGTATTCTTAGCTCCCAGTGAGGCTGTCAC

CUST\_9312\_PI426210822 GCCAGGCTGGAGGACTATGCCTCTGCATATGTACCTGTCTCTGTTT

A\_14\_P118512 CTGGTCTGGGATCTAGAAGATCCTGTTCTGTAGCAAGACGTTTCTCTGAT

A\_14\_P119923 GAAAAGAACATGTTTTTTGGTGTGTTCTAACTAGGGAAATGTCAGAAATGCTGTATAGCG

A\_14\_P124993 CAAGAAATGCTACCTTGCTTCAGAAGGTTTGAAGCATTTCATGAGGCCAAT

A\_16\_P00685106 TTTGTTGCAACTCAACTTGGTTGCAGATGGGCTCTTACTTCGGCT

A\_14\_P123564 CAACAGTGTTACAGAAACCCATTTCCAGAAAATCACTTCTTCTGCCATAGTATGAG

A\_16\_P16069341

AAGAGAGTTGATTACTCCATAAGCATCATCAATATCCTCCTCTGAGTCTTAATTCATCG  
CUST\_10323\_PI426210822 GTTTTTCTGGCCTTCTGTGGGTGTGCTGTGGGGATGATGTCTATG

CUST\_4345\_PI426210822 ATTGATCCAGATCCAGTTGGGCCTGGGAATCTGTTTTCAACGTGTAT

CUST\_68\_PI426210822

TTTCTTTTACTCCAAATAAAAATAGCTATTTTTAAAAGAGTGGAATAAATGACATAATAAT  
A\_16\_P00363015

AAAGAGGGCATTGTATTTTCATGATTTTTTGAAAACCGATTCTCAACCACATTTCTCCAA  
CUST\_5701\_PI426210822

ACACATGTGAAAACCATCTAGTTTGAAGTATGTGTGAGAAAAACAATAATTCACCCTTC

A\_14\_P105480 GGATGATAAACGAGGGATACATTTTCAGTCACAGCAAAGAAAGATTATGTGCTTTTCCG

A\_16\_P03566197

CCCCATACCTTTACACCTTTGATTACTGTGTTTACCAAATTCGTAGCCATTTTCAAGAT

A\_14\_P130685 ACTTTTGTCTGCTACAAGAAAAAGATCAGAAATACGTCTTTGCTTCTGTGGTATGTATCCT

A\_14\_P121584 TTTAAGACATACGCTCCATTAGCATTCCGATATTTTCAGAGAACTTTTTGGTATCAAGCCT

A\_14\_P102329 ATTAATTACTCCTCAAATTCAAATAGTCCTACTGGCCTTCAGATAGAGGCAAATGCAAGA

A\_14\_P110831 CTGAAGGGCTCATATTGACAATACCTTAATGACATGTTTCTCTCAACCTGTCCAAC

A\_16\_P03179391

AAAATGACACTGCTCTAGACGAATAACTATAGACTGGTATGGAATATGGGCATCTCAGAA

CUST\_4963\_PI426210822

TAGAAATTGGGGTAACTCAGTTGTTTCATGGAGGAAAAAGTTGAACATTACTCAAGTGCA

A\_16\_P18957149

TCTACCCACGGAAATATATATCAGTGCCATATCAGATTATTTTATCTCCTGATTCCCCTG

A\_14\_P136326 ACAAATGCTCAGTGTCAATTATGCTCTCCTAACGGACTATGTGGGTAAGCCTTATATATA

CUST\_7588\_PI426210822

GAGAAGGAACTCTTACCATGAGTACATTTCTATGAAGATTTCTGGCCAGGATTTTA

A\_14\_P123525 CACCCCTGATGTCTGGCTTTGAGAATGAGGGAGTAAACAGAATTTATCACATTTTAAAG

A\_16\_P00685520 GTGGAGGTTTCAGAAAACATTGTGTGATGGTGACAGTAATTTCTGGCATTGCT

A\_18\_P22840476 CCATCCTGTTTCAGGCTACGCAGTGACCGCTGGCCACTTCTCTCAC

CUST\_1232\_PI426210822

ATTTTCAAGCAACATAATAGTATTCTTAAATATTCTCAGAAGGTGTCTAACATATCCTGT

A\_14\_P131418 AAAAGGATCAATTGACCACAACTGCAGCAAGTGATCAGAGATAATCTCTACTTGAGAAC

CUST\_603\_PI426210822 ATACCAGGAGCCTCAGTTTCCCAAATATAAGAAGAGCTTATGAGGCC

A\_14\_P123528 AATTTCCCTTGTTAAACTGACTTCAGTAGGAACTCACAGAACTTTGATTGTGAACATC

CUST\_9970\_PI426210822

TATTATAGATGGATATTTTAAAATAAGACAACCTAATTTCTTTGGGATTACAAAATAATAT

CUST\_8625\_PI426210822 ACACCCGTTTCTCCATTCTGTTTGCCTAGCTCTTATACAAATAGGCAAG

A\_14\_P132040 AAATGTGTCCCCTCAAATTTGCTTTCAATGATGCATTTATTATCTCCTTGGGTCATTTTT

A\_14\_P112357 ACTCCCTCAAGATACTTTTACAAAACCTGGACTTAGGAATAATGAAAGTCGACAGAAAGTT

A\_14\_P123301 TTCTATATTTGTTTTGCAGGTGGAAGATGCAATGCTGATGTTTGATAAACTACCAACAG

A\_14\_P200216 ACATGAATTAATGAAGATGGCAACGTGAGGGAATAAATGGGGTTGCCGTT

A\_14\_P131039 AAAATCTGATACATGATAAGGGGGAAGCAGGTTACCAGTAAGGAAGAAGTATGTTATTCA

A\_14\_P106571 CTTCTTGCAATTACATCTGGGCAACTGCTGACATTTCTAGGATCAAAAACCTGAACTAATAT

A\_14\_P136448 CTTCTAATTTTCAGATTCCTGGTCAAATTTACTAAATATCTTGAATGTAATTTAGTGCCAA

A\_16\_P16771947

CAGTGTTAGTTCCATGATTTTACCCAAACAAGACATCACAATACAAACTCGAATTGGAAG

A\_14\_P119726 ATGGTATACGGGGAGTTCTTCTGTTTAAAGACTCCAAACACAAAATGATGTTCAAATTAT

A\_14\_P110863 AACCCATTGATGCAACACAATGCATGTTACATAATAATCACAGATATCATGACTTTGGGG

A\_14\_P134045 GACAATAAAATGTAAATCACTTTGGTAAGTAAAGACTCCTTTTCCTTTGGAGAAGGCAAG  
A\_16\_P15126510

TTAAATGCTATAGTCTCTCAACTCTCTCTAAGAACTGGAACACCAATTAACACTGGGGTT

A\_14\_P113951 AAGCATTGGTATCAGAAGGAAAAACCAGAACCTTTATGAGCAAATGATTTGCCAATTTT  
A\_14\_P106909 CTGAAGCAACAATTTGTTTAATTCTTCAGAGAATCCCAGAACAAAAACAGAGTCTTGAA  
A\_14\_P138883 CAGTTACATCTGGGAAGTCAGTGTCTCATTAGACGACGTTTGTATATGAAAAATGCAA  
A\_14\_P109367 AACATAAACAAGGCTTCAATGGAATGTGGAATGTCAATCAGTATGAACTGGGTAAATGA  
CUST\_761\_PI426210822 TTGTGAGGTGAATCCCTCTCTTTTCTAGGCTGCTGGAGATAAGGAA  
A\_14\_P136084 TTTCATAAGGGAAGTGTCAAAACAATTGTCAAAAGGAGAAGAATATTTCTTCCTCTTCT  
A\_18\_P15972727

GCACTTTTCATTCTAGAGTCTAATATTACAGGTAGCAGTAACAGTATCAAGTTGACCACC

A\_16\_P17574468

AACTGTAAGCAATCGAATTAAGAAGCACAATATGTAGACAAATTGATCTCCCAAGTTCC

A\_14\_P123977 CTCTTAAAAGGATATATAAAGAACTAATGCCTAGGTTCAACCGGGTGGTCCAGTAAA  
A\_14\_P131603 AGCATTGTTGCAAGATGACCTTTGTTCATGAATGGTGATGAACAGTCCACTAAAAGAAATA  
A\_14\_P106886 TTTTCTAAGCAGAGGCTGCCATTGCATTGTTTCCGTTTGTGCTCGATAAAAATAAGAA  
A\_14\_P111566 TTTTCAATCAGTTTCAGAAATAAGAGACCTGTATTTTCAGTTATACCCTTTGGGGGTGTT  
A\_14\_P128836

GAAAATGCAGCAAAAACAAGCAGAAAAAAGAAGTGAAGGTAAGGGCATTATCACGCTTAT

A\_14\_P115852 CCTATGTTGCCATCATTGGTAAAATGTTTGAAAATTAGGAATTTTGTGCTTTCATCCC  
A\_16\_P02136701

CTTTACCTTAATCTCCAGTAATCCCAAATAATCTCCCTACTAAAGATGACAAAGTCCCTCC

A\_18\_P14133369 TGGGGGTTTGAGGGCTTGAACACTTAGACAAAGGAAGGCTCTAAAAT  
A\_14\_P123500 GGATGAAGATATTTACTCCTATTGTGGAACATTTGGGACTTCAGATACGCTTTAACTTGA  
CUST\_4736\_PI426210822

ATTGTGCATTCTAATTATTTAGTTTGGAAAATGTAGTCTCTGTAGGTTTACCCTTCCCTG

CUST\_2155\_PI426210822

CAAGTGTTCAAGTACAAGTATTCAGCAAGAACAACATGGTTCAATGAAAACATTCTGGTG

A\_14\_P201444 TAGGCAATATATTCATGTCTCTCCTAAGAGAGGTGGTTTCAAAGATATGAGGTATTCCTG  
CUST\_8010\_PI426210822 TTCTCTCTCTCACAGCCTGCCAGTTTCTGACATTCTGTTCTTCC  
A\_14\_P119475 TCTACCCAGTCAGAACAATAATTTAAACTCGGGGCTAAGGGACCTTTATTG  
A\_18\_P16191791

ACCAATCATGATTTCTTTTACCCTTCAACTATACAGAGACTCTACAATTGCAAAAAGACA

A\_14\_P124363 CTCTAGTATTGTAAGGATACTAGCACCAATGAACAATCCCATCTGACCACCAATATCAC  
A\_16\_P03650865

GATCAGATCCAAAATGCAACTCAATTCATTCTACTCACTCAACATTCAAAAATTCATCCC

CUST\_9508\_PI426210822

GGAAAAAAAATCTTTTCTGAGTAGGAAGGTTTGCCTTTTTAGAACAAAACACGATCTTC



A\_14\_P106507 CTGTGCTTAGGCTTAGATACTTGGTTTAGAAATGCCTGCTTATTAGGACAGTATCTTCTG  
A\_16\_P02896500

AGCCTTGCCTTATAATCATAATTTCTCATTCCCTAGTCCCAGAATACTTTCCACTTAGCAG  
CUST\_295\_PI426210822 AAAATGGGAGGGCTGCTGTGGACAGCGGGCTGCTGAGAAAGGGCG  
A\_14\_P115474

ACTTCAGTTTGAGGATAAAAGCAGAAAAGTGAAAGATGCAAGCATGCAAGACTCAGATAC  
A\_14\_P137999 TTTGAACATCTTTATAAACCCCTGCCCCACCTAAATGCCAAACACCTAAGACTTACAAATT  
A\_14\_P201302 TTTCTGAATCTTCTTTTTCTGGCGTTATTGACACGACCGTTTGCCAGGTTT  
A\_14\_P110282

AAGAACACACAGACATAGAGGGAATGAATAAGATAGGGAAGAAACCAGTAAACTGCAATA  
CUST\_7515\_PI426210822 TTGAACCAGTTCTTCTTCTCCTCCTAGGCTGGGAACCTTCTCCTT  
A\_18\_P26792295 ACAAGGTCATCCTGATGTTGATTGGTTCAAGGTTAACCTTGGATGTTGGT  
A\_16\_P17595742

AGAGATATCCGTGCATCCTTATAATAAATTTCTCCTTGTAAATCTTGCCTTCGTGA  
A\_14\_P102403 TCTGTGATCCCAGCATTAGACATATAAAGATTATATGCCTACATAAAGGGCTGCTGATCT  
A\_14\_P106999 CTCTAAGTGGATTCTTTGTTTCTCCTCATTCTAAGTCTCCAAGTAAAAAGGACATTCAA  
A\_16\_P30952583

ACAGAAATACTGAAAAAGGTAAGCCCTAATGAACCGCACTTGTGGATGCATTTAGAA  
A\_14\_P132553 AAAAGTTGTGTGATAAATTCCACGCAAAAAGTTAGGGAAGTCTCAAATGTGTTATGCAAG  
A\_14\_P126156 TGAAAATTGTAGGGTTATTAGTCCAAATGTGATCAACTGTTTCAGGGTCTCTCTTACAA  
CUST\_8035\_PI426210822

CTTGGTTTTACTGTAAAGCTGTGACTTTGGCCTGACAGTCAGAAAGCTATACAT  
A\_14\_P138748 TTCACTGTTGAATAACAACTTAAAGTGCATTTACATCTGAGAAGCAAAGGACATCTCCC  
A\_14\_P112899 ACATAAAGTCCAGCAGTCACAAATGTTATCTATTATTACCATCGTCCTAAGACTGCAATC  
A\_14\_P134136 GGGAGGCTAGTAAATATCAAAAAGGAAAAGGGAGTGGGAATTGCTATCATGTAAAATATCA  
A\_16\_P35566263

CTCCCTGAAGTATCTGTGTAACCAAAACAATGTTACTGCTATATGACATGTTGTAGGCAT  
A\_16\_P02542452

AAGCATAGTCAATTACATCATAGATTACAGAGGATCACCTATGACTGTCAAGGAGAAACC  
A\_18\_P20962462

AAAACAGAAACACTCCTAGGATACCTATGACCAAGGTTATAAATACACCCCTTTCAATTC  
CUST\_6473\_PI426210822

AAATTACTIONGCAATAATGTATCTTAAGTTGGTCACTCAAGAAAACCTTGGTTAAATTCATG  
A\_14\_P117033 ACCACCTCAGTCAGCATTAGTTAAGAAAATAGCATCAGGTAGAGATTTAAGACAAGAAA  
CUST\_3425\_PI426210822 AACTTTCTGGGCATCCAGGGCTGGCTGCAGAGGCTGGAGTGAGTG  
CUST\_2458\_PI426210822

TTGAATTTCAACATGTCAAAACATTATCATGGTAGTCTAGGTGGATTTTTTTTCATTAACA  
CUST\_6189\_PI426210822 ATCATCCTGGGAGTGACGTGGGCCAAGCCTAGCCATGCAGCAGAA

A\_14\_P120840 GCCTGCCAAACATCCAATGTGGTGCTTGTGTTTGGTTACACAAACATTTTGATTATACTA  
A\_14\_P129514 CTATCAGGGATGTCAGAGACATTTTTGGAGTCAGTGAATCTCCTGTAAGTAATGG  
A\_14\_P122317 ATTTGGGGGCAAAAGCACTATGAGTAACTATTTTTCACTAGTTACTCTTCCTTACAAGTG  
A\_16\_P16773510

ATGAGCCCCATGTATAAGAGTAGGCACCTACAACTTTGATAACATCCAGTATTATTGTG

A\_14\_P202175 TGTTGGACAACCTCAACTAAATCTCCCTTCTATTCTGAAATCTCAACTTCCCTTTATTACC  
A\_14\_P200236 CTCTGGGAAGGTTGGAATTCCCGTAAGAATTATAGTGATCTATGTGTAACATAACATGAG  
A\_14\_P104832 GGATTCTTCTTCTCCCACTCCTTTTCCTTTAAAAAAGAAAAATCCCCATTTCACTTT  
CUST\_6338\_PI426210822 TTGTTAGAAAGAGGATGGCCTTTGAAGCAAATATCGATTCTACCACTACATGGC  
A\_14\_P116613 ACAACTTTGTCAATACTTTGAGGAACACTTTCACATGTTTGGAACTTAGGAGAATTGGTA  
A\_14\_P134437 ATCAGTCAATTACCTTCACTTAGGAGAGGAGAAAGAAAGCATAGCCCTCAGAC  
CUST\_394\_PI426210822 CCTGGAGTCCAAAGTGGTTGGGTGCACTGGCTTCCTTTCTGGAGA  
A\_14\_P129452 TAGCCTTGTGATTTTCGGAAGTATGGACTAAAATCACACTCCTCCTTACCTTACC  
A\_14\_P201331 CTCATATCCATGCTTTGATTTAGAGTTTATCTGGTGCTAGAAGAAAACCTAAAAGCAGT  
A\_14\_P100966 ACGAATGGCTTTTGTGTTTAACTGAGGGCACTTTTACAAAAGTCATCTTTCCATTTATTT  
A\_14\_P104090 CTGTTTTTTAACAGTTTGTAGGTGCTGTGTCATGAATCAAGTCTTCATTTAATGTGTT  
A\_14\_P110599 AAACAGTTTGCATTTGGTATTTTGCCAAGAGTGAAGTTTGTCTCAAGTGGGTTTATTTT  
A\_14\_P200463 ATTTTCTAATAACTTTTGGGCAATCTGAAGTTCTCCTGTAGAGGTGAATCCAAGTTGAGA  
A\_14\_P134670 TGTCAGTTACATTGCAGTATTTTTCCCTAAACTCTTTTTGTCTTTTGCATTTTATGTTTT  
A\_16\_P38956137

TCCCAAGCAACAAAAATATGATATTTCAACTGACATCTCCTAGAAGCATATGGTCTTCAC

A\_14\_P116294 GATTAATGGAACCTACTGGGAATCTGGTCAGTAGTGGAGGCTAAAGTTCAGATTTT  
CUST\_2631\_PI426210822 CCAAGATAGGAATAAGGTCAGAGCAAGGTTTCAGTTCCGGTACATGG  
A\_16\_P15469588

AAGCAGCACAGAACGTTTTATCCCATAACCAATCTCACTTTTACAGGTATCTAAGCAAAT

A\_18\_P13994157

AAAACATACAGAATATAGACCCATGGACCTTATTTTGAAAAAGACCCACCTACAGAGTAT

CUST\_8897\_PI426210822 TGTCTCATATGGGGGCTATTCACCTCATTTATTACCCAAATCAACAGACCATTCTG  
A\_14\_P115344 ACTCTGATTTCTGCAAATGTTTCAATGATAACAGCAATAAACACGTTCTGAAAAAATCA  
CUST\_5707\_PI426210822 GAAAGGAGAGGGGACTCATCAAAGGTTAGACCATGTCCTGAAGTG  
CUST\_489\_PI426210822

CAAAAAGGACTTCTGTGTTGAGTTTAAATTAGCAACAGTAGCAACAATAACACCAAAAAGC

CUST\_6330\_PI426210822 GTGATTCCGGAAACTACTCCTAAAGTCAAGGCTGATGAGGATTTGAATTCC  
A\_14\_P116114 GACTGTGAAGTTCATTACCATGGCTAGAAAAATGACAAAAGATTTTCTTCCTGTAGTGTG  
A\_14\_P125546 CAAATGTCTCTGAGCGCAGTTTTGATAATGTCCGGTCCCTGAAGGT  
A\_16\_P38240580

ACATGGAATTCCAACAATTGTATTTCATGGCTTCCTCAAATTTAGTGACAAGACTCATTGA

A\_14\_P202494 GGCCTATACTAGAATCAATTTGTTCCCTGTTAAAGGCCTTTTGAATTATACTGCAGGGCA

CUST\_8334\_PI426210822 CCCTCACTGAGCCATGGCTGGCTTGCCCAGGCACACAGGCATCAT  
A\_14\_P137990 GCATGAGGAAATGTATTTTGGAGAACAACCTCTTCACATTGTCCACAGTGAGTATATTTTGA  
A\_18\_P27215739 CTTCAATCCCTGGACCGACTGTAGTCTCCCTTCCTTCACTCTCTT  
A\_14\_P115955 ACCAAGTATTCAAATAATAGATAAGTCCTTACTCATGGGAACATGTCTACATGGGGACAA  
A\_14\_P128408 TATATAATCACAAATATATCTCCCTCCCCTTTGCTAGTGATTGTTACCAAACCTGCCTCTG  
A\_14\_P129250 GATCAGCCCACTACTTACCTTTCTCTATGTCCAGGCGAGGGTAAGTTTT  
A\_14\_P124508 AATCTGCCAGACTTAAAAAACCATCTTGTGTCTTTGGAGGTGCTGCTTAATACCAA  
A\_16\_P02197609

GCCAGAAACTTTTTCTTACCATCAGGACTTACTCAAAGAGACAGAAGTAACCTTTACCAA  
A\_14\_P123089 CATGAACTCTTCATCAAATCAGATATGAGGAGAAGTATGCCAGATGTTAGTGAGGACTA  
A\_14\_P117836 AGAAAGCCTTAACCAATCAAGAAAACCTGCTGGAATTCTTTCTAAACTTCTTTGAAGCATG  
A\_14\_P111643 ACACATTAACGTCGAAGTGACAGGTATCAGCATGCCATTACACTTGCAG  
A\_16\_P01449741

CACAGACCAGAAATGTTTATTTAAGAGTCAGCACAATTTCTTTTTCTAGACAAGTTTCTC  
A\_14\_P133110 TCAGGATTCCGCGTCATGGCTATCAACATGTTTTGTTTTGTTAATTTACGTTTCC  
A\_16\_P01581634

AGATTTTTCTAATCCTCCAAATGTTCTCCAATAAAATCCTCCCTTTATACTGCTGATGCC  
A\_16\_P16170021

CCCCAAGTAAAGTTTGCTCTCCACTTATACATCCAAACCACTATTTAAACATGAACTCAT  
CUST\_7693\_PI426210822

TATAGTGTGAATCTAGTACATGGAAGAGAATGTCTTGACAGCTGGGGTCTGTAATTC  
A\_14\_P126967 CTGCGCTGGATCCTTAATTCCTTCATTTAAGTTTTCTTCGATCTTCTAAAGAGAACTCC  
A\_16\_P35173218

TTAATCCCACAAAAGATAGTTGGTATTCACTACACAGAACATTAAAGACATACCTTGCCC  
A\_14\_P115699 ACGATTAATGGAGACTTGGAATCTGAGATTATTCATCCATATTGATACACCTGCAATTCC  
A\_16\_P18150149

AGCCATCATCAATTCATCAGTTACAATTACCATTTGCATCCATTAAATGACAGCCTG  
A\_14\_P105731 TTGGATTTCAAGGATCTTGCTTCTGGCTCAGAAAATGACAGAAATGACTCAGC  
A\_16\_P01618087

AAACATTTTCTCAATGAGTTAACTGGGATAACATTGCACAAATTTGGTTTTCTGCCTGG  
CUST\_3697\_PI426210822 TTTGCTGGGTCAATGTTACAGCCATTTATGTCCCCTCAGATGTTGG  
A\_16\_P02022137

TTCTGGATATCCACCATAAGTTCAAACCTGTGCTAATCAATGTAAACCATTCTACACCAA  
CUST\_427\_PI426210822 GAAACACCCAGAAATGGTGGTGGGAGCCCTGCCTTCTCATAACCT  
A\_16\_P39937710

TCTGTGATGCTATTTGTTCTTTTCAAACACACCTCAAACCTTTTTACTTGTGATCTGTGCA  
A\_18\_P22342618

ATTTCAAGAGTCCACGGATATTTCAAATCAGCAGTCTCCATCTTAGATCCATGACTTAC

A\_14\_P124915 AACTGTTATTGATTCAATCTTTCTGTAGGAAGAAGAACTGAAGCAGGGAGTAAGTTATGT  
A\_14\_P138455 GAAAATAACAGTCTCCCGAAATTGAAGAAAAATATTCCTGAACCTAGACATTACCCACAA  
A\_16\_P00469644  
GAAAAACCTGCATAGGATTCTAGTATAACTTCCTAGCAATATGTCTCCTCATCTCTACCC  
A\_14\_P103939 CTTGGTCCAGAACCTGTTCCAGGTATTAATACTTACAATGAGGTTCCCTATTCTTTAAGTT  
A\_16\_P38798376  
ACATTGCAAAGATATCCAGAAGTAGTTTTGAAGTTCCATGGATTCACTACTCAGATTAC  
A\_16\_P00684983  
GGAAATATTGCACCCAATAATAACAGTTTAACTTTTGGCTTATGAAATACTTCAGTGGGA  
A\_14\_P130338 ACGAACTAGTAATTTTGGGGGTCTCTCTAATCTGGTATTTTGACATGTTATAATACGC  
A\_16\_P21429405  
ACAGCCCAGAACATCTAAAGTATATCTTCCTGAGTTTCTACCTTATATCAATCCGACAAT  
CUST\_2166\_PI426210822  
AATAGTGAGAATATAATTTTCATATTTAAAAAATCGAAGTGACTGTTAAGCAGTGGCTG  
A\_16\_P21651646  
ACCTTCCTCAACGATAATGACCCTAGTGGACTTTGTTATCTCTACATGTTTACTACACAC  
A\_14\_P104287 CTGTAAGGAATGCTTCATAATGTTTTAGCCAGTAGGTAAAGCCTCCACTCATTTTTTCAA  
A\_14\_P111477 ACTTTTTTCATTGAGTGATGAAAGGAAAGAAAACATTGCCGAGGAAACCCAGTTC  
A\_14\_P106366 CTATCTCAGGCACAACCTGTGAGCCATGTGACTTTATTTTTCTATTGTTCAATGAAGTAT  
A\_14\_P113190 GCACCCACTGAACTCAACTTTCTAATCAACTATATGACATCTCTAGATGTATTAGAAGTC  
A\_14\_P122692 GCCTTGATGCCAATAAGTATATTAACGGAAATGGACTAAAAGCAAATGTGACTTGAAGCA  
A\_14\_P117686 AGATGGTCACAAGAACAAGAAAATATTTGTAGGCGGGTTATCTGCGAACACAGTAG  
A\_14\_P102186 CATACTCTGATTTGCACAGGGCTAAGTGTTACAAAGACATGGAAAATCTTGAACTTTGTT  
CUST\_3225\_PI426210822 CATGCTCTGCTTTGATCAGATGTGCCCTTGCCCCATCCTGCCTGCT  
A\_14\_P129442 TGAGCGTGCTTAAACAGAGTTCGAAACAAAACAAGCATGTCTTTAATTCTCCTCTCAAATA  
A\_14\_P123273 CATCTAGGGTATTTGGGTATAGCAGGTATAGGAGTATACCTAGTGCCACTGAGT  
A\_16\_P40032519  
CCCATCAGGCTATAAATCCTTCAGATTCTCACAATCCTTCTTATGATAACGTCAGATTTCC  
A\_14\_P116579 GACGGAAGTAGAGTAGAACCATTACATCTACATTAGGAACTACACAGAGTTGAGCATTTT  
A\_16\_P01045562  
AAAAACAACGAAATAAGCATTGACCCATAGACTTGTGTTTGAAATGTTCACTGATGCACT  
A\_16\_P15968193  
AGCGCTAACATAAGTTAACACTGATCAGTGAATCTAGTAAAAGTTTGACCTCAAGTCCTA  
A\_16\_P20056089  
TCTGCAACTTCTATTCTGATCCAATACTTCAATAAGCCAGTCATTACCTATCTAAAGCA  
A\_14\_P128847 CCGATTTTTGTTTTATTAACAATTTGTGGGAAAATGTTCCAGTACTGGAGTGTTATGTTG  
A\_14\_P118546 ACAAACAATAACTTGAAAATTTACCTTCTTTGAAATTTCCAATTTCTTGGGATGGGCCA  
A\_14\_P116427 ATAAAATTTCTTGTCTGGTTTTTCTCATAGGCACTTACAACAGAGTGCCTTTACACAAAC

A\_14\_P202150 ATCTCCCACTTCAAAACTGACCTTCATAAAACCTTTCAGAGTTGTTTTCTCATCATTAT  
A\_16\_P19835148

AAAGTGATAGACAAGTTTTTACACAGAACAGACATGAACACGTTATCTTAATCTCCCGGA

A\_14\_P107792 ACCGCTATTCATCACCACGATAATGGCTGGACATTTTAATAGATTCTGTGTGTAAACAAA

A\_14\_P100829 ATAAACCCACATACTATTTCTCTACCTCCAACACAGACTCGCAGAGGAAG

A\_14\_P122096 GTAATAAAAAAATCTAAGAGGAATCCCCAAGAGTTCCAACAAGTTTATTTGGGACAGAT

A\_14\_P136112 AAAGACATAGGCAGTGTATACCACCATAGCAATAATGGTTAGTAAGATGGTGTAAACAT

A\_14\_P125825 CCAAGAAGATAACAGTTTTTTAAAAATCCCCTTCTGATATGGATGTGAGCAAGCAGTGG

A\_14\_P201073 GCCTAGTGGGAAATCCAAAGGATTTGACTTTGTAAGTTACAAAAAATTTGGATACCTACA

A\_14\_P137783 GCTCTTCTGATCATGCGACTGGAAATACACAGTCTCCTTCCTTCACTC

A\_14\_P202398 CCAAAGTGCAGAGTCTTCAGAGACAGCCAGGAGAAATCAAACAGAG

A\_14\_P120605 CATCATATGCAAATCATGGGGAAATTCACCTCTGTTTCCTTCTAAGGGAATTTTTTTCC

A\_14\_P117785 TATGCAGGCACCTTGAAGGTCATAATGAGGTGTGTGAAATGAAACTCAGC

A\_18\_P22840862 AGATGTTGGGTTGGTCCTGGATGCTGCCCTGTAAGTCCATCACAC

A\_16\_P01872878

AGAACGCTCTGATTACTTTTACTAAAGCCTGGTCATAGAACAATAAGAACCAACCAAT

CUST\_6982\_PI426210822

GGATGGTGGGCAAATAAATGGATAGAAGATGGGTATATCTATCTTTCTCTGTACTTTATG

A\_14\_P126147 CTTAGATCTGGTGTGTTGATTTTCACTTTGACCAGATCTGCAGCAGTCTCTTTGTTAATAT

A\_14\_P138242 ATCTTTAACATTTGGGATGCTGCAAATGCCGAAGTTAAATGAAATACCTCCGGG

CUST\_3790\_PI426210822 GGGTCTGCTTTCATTAGTTTGAGAGAGGAGCTGAGCCACAGAAAAG

A\_14\_P116036 TGTATTCTCCCCCTTGAGGCAATGCTAAATTAACAAGTTATTTTGGTGGATTATCCTT

CUST\_1334\_PI426210822

AATTGCCTTCTGTTTAGACAGGGCTTAATAAAACCAGCAGCTAAACCAAGGAAAAT

A\_14\_P126951 CTATTAACTTTTCCATCCTAATGTAGTGTAATATAAACATGCCCCATGGTGTTTCCAG

CUST\_6916\_PI426210822 GAGAAGGTGGCGGGGAGCAGGCACCCCCAGCCTGTGTTTGTATTT

CUST\_452\_PI426210822

CTGTTTCAGGAAATGGTCTCCTGATAACTTCTATTGTGATTTGTTTCAGGGAAAATGTTG

A\_16\_P16746554

AAAATTCATTGACATCCTCAGTAGAATGACAAAGACATATCCAAGTCACCTACAAGTAGG

CUST\_5817\_PI426210822

CCTCCTTTAACTAGGGAGGAATAAGAGATGATGGCTTCTTAGATCTGTTTACATTTGC

CUST\_9522\_PI426210822

GTGGTAAATTTAACTGATGGAGAAATCAAGCAATTTTCCTGTGATCTTTTTTAAATAGGAG

A\_16\_P00288897

AAAAACCCCAAAAATAACACCTACATAAAAGACCCTCCTGTATGTAGTTTAGCAGCAAAG

A\_14\_P139093 ATTTAGGGAAATTATCGTTTCATGAAACTTACTTACACGCAGAGCAAACCTGGATGCAA

A\_14\_P136496 TAAAGAGGGAACTTTGGAATTTAGAAAACCTATCTCTTCAAAGCCTATTTTGAAGT

CUST\_3000\_PI426210822

CAGTTGTTTCAGGGAAGTTGTGATCAGTAGAAAGTAAATTGGCTAGAGTTCAGTTGTA

A\_14\_P137550 ATCTGCAAGACAGAATTGCATTCACGATACATACTCAGGGAAGGAATTTTTATCTATTTG

A\_18\_P14135111 ATTCACTGGCTGGGGTGAAGTGAAGTGAATGATATCAGAAGTGAGTAGTGAATGC

A\_16\_P15649895

ATATTTCCCTGTCAAACCCATTAATAGCAAACCTTAGTCCCATCTTTATCTCCAGAGTGAT

A\_14\_P139138 TGTTTTTTTCCCCAGTTTCTCTTCAGCAACGGGTAGCAGAATTGGAAAAAATTAAT

A\_14\_P121446 ACTTGGAGAGTAAACAAAAACGAGAAATGGATGAATAGACAAGACAGCATTTTTCTTCTG

A\_14\_P119393 AGAGTTACATGAAGAGGAGGCAGTCACTTGTTAAATGTATTTGATACTCTGGCATGATT

A\_16\_P15528615

AAAGAACCTCAGGAAAAAGTGATTTTGCATCTTCCCAGAATAAATCAGTCACTCTATCAC

A\_14\_P103222 CAACCAACATGGAAGAATTCTGAAAAGTTATTTATAACAGAGACCTCTAGTGCTGCACTT

A\_14\_P112069 TTGGTTTAATGATAACTTCCTTTCATTTTCTTGATTTGGGTTCCCTCTTGGCACACAATAC

A\_18\_P12343706

AAAAAAATTCTTTTATGATTACAGACAACGCTACAGTTATCAGTTTATGCATCTGCTGGA

A\_14\_P139644

CCTCAGAGGAAACAGTAAGAAGGGATAATCATTAAAGATAGTAAAACAGGCAAAGCAGAAT

A\_14\_P131465 CATGGTCGATCTACATATTGGTTGTGCATCCAGAAAATCTCTAGTTTCTAATAACTTAAG

A\_14\_P130765 ACTTCGTTTCTTCCGTAAGAAATGATCTTCTTGTCTTCTTAAGTATAAATGGAGCGATC

A\_16\_P02364192

CTGCCATTTTCTTAAATGCTCACTAACGTTATTTGACTCTCAGGATGTGTAGACATTTT

A\_16\_P16100735

CCACACCATGTTTTAAAATGTTTTCTCATTGTCAGTCATTATAACCACAGTAGTTAGGTAGGC

A\_16\_P19909327

AAGACCCAGATAAAAATCTCAAAACTTCTGTAAAGGCATTTCTGACTTTTTTCATCCACGA

CUST\_9975\_PI426210822

AGTTGTAAAACACCAGGAGTTCACATCCCAGAAATAACCATGATGAGCATAGTATTG

A\_14\_P117956 CAGGAGTTTTTGTGTTTTTTCGTTAAATCACAGAAAAGAGGAAACCTGTTTTGCTGTT

A\_14\_P128628 ACTCTGCATTAGGAATCAGGCTATAAGAAGTCCTTTATATAAAGAGGACAAATGCTAGGC

A\_14\_P128920 AATGTCCATAAAAACAAAGAGATCTGGACATGCCATCAATACAAGGCAAAGATTGAATCA

A\_16\_P03529343

AGACCTCAAATTTAAAATGAATTAAGAGCCAATCCTGAGAGAATACGAATGAGTGTCTGG

A\_16\_P00685235 CTAGAGGGATATGGAATGACCCACTGCTTTTTTGGTGGGAAACGTAAAG

A\_14\_P127236 CTGGGTAAATACAATTTTAAAAATCAGGCCTAGGGGAGTGTATATAGCAAAATAGCAAGA

CUST\_833\_PI426210822 ACAGGTTTTCTTAAAGGCACTAGGCAAAGTGTTTTTGTCCCCTCTC

A\_16\_P19908972

AAAAGATCCCAACTGAATTGTATTGATGGTTACATTATCCTTTGTTATGTGGAACAGGGC

A\_14\_P126676 ACACACTCAAGCACACATACATGTCTTGTGTTTTGAAGGTTTTGCTGCTTCCCTGAATTTAA

A\_14\_P125562 CTATGTCTCTGTGTGAAGGTGTGGCTATTGTCTGTGATGACATTGCCTC  
A\_14\_P129039 ACTAGAAGTGTGGCATTAGTTACAGAAGCCAGGGGTTTTGTCTTATCTATTAAAGACAA  
A\_16\_P36030843  
CCTACCTGCCTAGTCTCTATTTTTTCATTGATTCACTGCTTTAACATCTTTGCTCTCAAC  
A\_14\_P108377 TTTACGTCTGATTTCTGGCAGGAGGTCCTGAAAACCTCCTCCTGATAATTTTCATTAA  
A\_14\_P101952 TTGTATCTTACTTTATCCCAAACCTCTGTGAAACGACCATGTTGTTCAACTGACTTTCTT  
A\_18\_P13418374  
AAAAATGTCTTGCTGTATTTCATCATTAAATGGCTGTAATATTCCCAACAAAGAAAATGCAGG  
A\_14\_P102250 ATTTCTTCAAGGGAGATGAGCAATGCTTATGTCATCCATCTGCCCATTTTGTGA  
A\_14\_P105427 TCAGTAGTGACTTTAATTAATAATAATAGGGTTGGAGAACCTCTACCCTTATCCCTGCAC  
A\_14\_P132073 TTTGAACATTTCAAGCCATTTCCCTACTGGAATTTTCAGAGGGAGAGAAAGAAGAATCATAT  
CUST\_3820\_PI426210822 ATAGATTTGGGTTGCCTGTGTCTAGCAGGTGGCTTCCTTTTCCAG  
A\_14\_P103532 CTTTTGACTCTAATAGTAGGGACTACTGGCTTCAAATCTTTTTGGCAACAAAGTTTAGGT  
A\_14\_P129690 TGCAGGCGTTTTCCATTTGTTTCCTTTTTAAGATTTAATTTGGGAAAACCTTGGTTCAAAC  
CUST\_9192\_PI426210822  
GTGACCTAAGTTCAGTCTCATTTTTCTCATTTCAGACAAGAATTGCTTGTAAGGATGT  
A\_14\_P108601 ATACCTGGAAACTTGTTCACTTGACCGGAGAATATGTCATTGTCGTGAAATGAAACT  
A\_16\_P18156479  
AATATGCGGAACAAGGTAAAGTAGTCTCATCTCGTTTTAGTCAACCATATGTTCTGAAGG  
A\_14\_P118692 GCAGAGTGGCTTTAAAAGCACAATTTTTACCTATGGCTTCTCAAATAAAGCACCCATTA  
A\_16\_P03534077  
GCCAGGGAAATTAACAGTTGCTAATGGTATTAGGATGTAGTAAACTCTCTGAATGTTGG  
A\_14\_P201793 CTTGTTTTGTTTCCCATCAGAATATAACACCAGCAATCCTGACTTGTGCTAGTCATAT  
A\_14\_P138010 GTCTGTATTTTTGTCTCAGTATAGAGGTCCATCTAAGCACTTGGAACCTCTGTGAGAAATA  
CUST\_7357\_PI426210822 CTGAGTGCTCTGTGGCCATCTTCCACTTAAAGCTCTAGGACAGAC  
A\_14\_P110546 AAAAGGAAATTAGAAATCTGTAAAATGTTACCTTTCCCTTGTCTCTCTACAGTGGGAAA  
A\_14\_P120365 CTTGCAAACCTATTATATGCACCTATGCTAAATGCTTTGAATCATGCCTAGCATGCAGACA  
A\_16\_P15841804  
AAAGACTCAAGTATGAGCATATGGAACCTTATACACTGCATTGGTTAGACAGTCATGCTG  
A\_14\_P134237 TGACTATGAGGTTGGAAAAGAACAACCATCTTTGTTTCAAAAATGACCAGAACATTTAGG  
CUST\_1777\_PI426210822  
TTTCTGATCACAAAACCTGGTAGCAAATAGAAAGATAAGAACTAGAAATTATCATGACAGA  
A\_18\_P12260766  
AGACATATGTCCAACCTTACAACATCTTGCCCATTTTCTCTAATAGTTTTGTGCTGCCTG  
A\_14\_P137333 AGTGGTCTCCCCTCTCTTTTTGACAGGAAGGAACATGGAATCCATT  
A\_14\_P114322 ACCTGTTTTTGCGGGCTGCTCTTTGTTTTTCTCAAGTCGTTTTTTTTCTTC  
A\_16\_P01749700  
AACAGGCCTGTTTCAGATTTTCTCATTACCTCCGTGTTAAGTATCACTGAAATATTTTCC

A\_14\_P105888 ATATCCGAAGTATTGCCTTAATTTGTATTTCTGGGCATCTTGATATTCCATAAGACCAC

A\_16\_P17953597

AATGTTTCGTTCTTTGCTAACTTGATGCTCAAATACCCTCTCAAAATCTAAACACAAGCC

A\_14\_P103613 ACTAATATTCTTCAGCCTTCAAAACTCATGCTGTTTTATTTCTCACACTTGCCCTTCATT

A\_14\_P128592 CATCTTGTGGATATGAGGGAAGAGCCAAATAGACTACAAATCGGTTAACACAGAG

A\_14\_P201128 GTTTTTCAGGAAAGATTATATTGATTGATTGAGATTAATGCAGAAGAAATAGGCTTCATGGCCCC

A\_14\_P128554 ATTTCAATGTGCTCAGGACCATAATGAAAATAGGCCTTCAATACATAGAGAAGCAGAAAT

A\_18\_P14133940

CCTTCCCTCGGACGTGATGAATTCTCACTCTTGTGAATTTTTTTGTGATTTTTGTAAAAT

A\_14\_P138046 GCAGGTTTATCCCACAGTGTCTGCAGAAATGTGTGATTCTTGAAAGAAATTTACTGAAATA

A\_14\_P114996 CTAATAAATAACCTTTGGAGATCAAGGGTTATACTTTCTCTTTTGCCTCTCAG

A\_14\_P116489 CAAGATTATATGAGGTCCCTGACTTTTTGGTAAAGCAAAAATCAGTTCCCATGCTGTAATA

CUST\_9387\_PI426210822 AAGACCTCTGCCTGCCTCTGGCTGGGGGGTGATTCCAGAGTCTTA

CUST\_4843\_PI426210822 AGAGGGTGCCCACTGCTGGATGAAAGAAGCAGCTACATTCCCATT

A\_16\_P18196956

TCATACCCTGATCAATTTTTCTTCTCACCTGACACTTATTATTTTCATAACATGCTCCACA

A\_16\_P18048216

GCCAACCTGCTAGTTGAATAGTTATTCTAGAGACATTATCAGATTCTATTACTGCCAGGGA

A\_14\_P125396 TGAAACCTCCTGTTAGCACAATAAGAGTAAAAGCCAACACTGTCACATAGAATATACTCC

CUST\_6674\_PI426210822 AGCTGGGACTGCTTGCAGCTTTTTAATATTTACAGCATTGAACGGGGTT

A\_18\_P22839035 CTCTGGATCTTACTGGTTGTGAGACAGGGAGGGAAAGAGAGACAAA

A\_14\_P130858 CTGTTTCATGTTTCGGTAAAGCAGTCCTGATGATACCTTGAGAAAATATAAAAAAACTTCCA

A\_16\_P16996162

AAAAAGCACTTCATACCTTGGATTAATTTGGTTTCGATTTGTAACCTCTGAAGAGCACATGC

A\_14\_P137261 TGAAACAAACACTTGCCACTGCAAATTGCATTGATGTTGTGAATAATAGTGACATGATGT

A\_14\_P104993 CTTTTGTCCTGGCAGTCATAGAGTTAACTCAGTTTTTCAAGCAGTTATGTTTTCTGAGC

CUST\_216\_PI426210822 TGCTCGCCGGGCAGAGGGGAAGGCGGCGGCCGGCTGGGGATGGGC

A\_14\_P124172 GCAGAGTCATAGAACTTCTTTTCAGTGAATATCTAACTTTGGGCTTTATCTTCTTACT

A\_14\_P113329 ACCGTTTTGGAGGGGGACACTTCTTTTTAAACATGAATGTATTTTGTGATCAAATTTGA

A\_14\_P109616 TTAATACTCGAAAATGAATTCAAATTTGAGTTTCTCACTCCAGAGGGAATTAGAGGCTT

A\_14\_P106202 TTTCTTTTTAGAAAAGCCATCCTTTGAGAGAATGTTAATGAGAAAAGGGAGGGCAAGTATTA

A\_16\_P19996382

ATACTTTTACTGGATGAGCAAGAAGCATAAGAACCTCAAGATGACATTTAGAATGTGGCT

A\_14\_P118471 CATGGTTTCTCACTGGAATCTTAACAGATTTCAAAGCATATAAGTCTTGTCTCTGATGA

CUST\_2979\_PI426210822 TGAAAGTTTAAATGTGCTGGCATGCACACACCCCGCTGGAGAGGAG

CUST\_4087\_PI426210822 CTTCTTCAACCCCTTACATGCATTAGAACTTCTGAACTGTTTTTGTCTGTT

A\_14\_P117744 CTTACCTTATTTAAAGTGACATAAATAAAATGTAAAACGTAGGGATGCTACTGGAGGCT

A\_16\_P16975011



AAACCCTCCTAACACTGATCTAACTTACAAAGAGAAATAAACTATCACATCTGCTTCCT  
A\_16\_P18092553

AAGCAACTTTTGACTCCTATCGTCAGTTCTGAAGTCTTTCTTCCAATTAAGCAGTTAC  
A\_18\_P22841346

ATGGTGCCATGGATAGTCCTGTCTAATTAATTGCATGCAGGACTATTTTTTTAATGTTTT  
A\_14\_P114887 CAAGGTTTGTGGCTGGCCATACACATAGGCATCAGTTTAACAACCATCA  
CUST\_10331\_PI426210822 CATGGCATTCTGATGAATGTGGTCTTATGCTGGGAAGAAACCTCCA  
CUST\_2195\_PI426210822

GGAGGTTTCATTCATCCAAGAAATCATCTCACCTTGACTGTTTTCAAGGTGTAAATT  
A\_14\_P132909 CTTTGGACACACATTCATGTATAACAACACTACATACTAACAGAAAGTGAGGGCAAGAGAGA  
CUST\_4263\_PI426210822 GAGGTCATTTGTCTTGTTTAAGAAGGGGCAGCAAACATTTCCAATAGGGAT  
A\_14\_P115706 AACTGAATCCAAACAGGGAGTAACTCTCTTTTTTTTTCTCTCCTGCTTTACATACTTCAAT  
A\_14\_P113587 TTTCTTTTAGGAGAGAAGACGATCTGCACTTCGCATTTTGGCATTGACATTTAATTTTAG  
A\_14\_P132990 TGTGTTTTATAGATTCAACCTAGAATGACACTGAGCAAATTGCCTCTTCAAGCAAATGTC  
A\_14\_P113776 TGGCCAAGTGATTTAATTTGCAATGGGCACAGTGATGCAAAAACAAGATATTAAGACTATA  
A\_14\_P127897 AAATCCCCCTAGATGATGATGACCTAAACACCATAGAATTCAAATCCTCGCCTAC  
CUST\_4485\_PI426210822 CAAGAGATACCCACCCTGCCCTTGGCACTGGCTTGGGCGGCCTT  
A\_14\_P129023 ATAAGATTCAGAGTCCTTACCTGGTTAAATATTTTCATCAAAAAGTTGGTCGTTGTTCTGCA  
A\_14\_P201016 CTTTCATCTCCCATGTTTACAACACTTTGTGATAAAATAGTTGAGTGGAGCAATCACATC  
A\_14\_P201794 CTTGCCCTATACTATTTGAACCTTTGTATGAATTCAGGAATCTTGAATTTCTGGCAGAGAC  
CUST\_6210\_PI426210822 ATACATGAGCAACAGATAGCTCTCCCTACAGATACCATATTTTCAGGGACAGC  
A\_16\_P35357773

GTGTGATTTTGCTTTTCATGTCAATAAACCATTTGAGTCTACAAATCAGTCAATTGCTACCC  
A\_14\_P200570 GCAGCCACAGGCCTTTAAATGTATGTAGTGCTGATATTCTGAATAAGTTATATATGCACA  
CUST\_10216\_PI426210822 AAGTGAGTGTGGGGCTGCTGGGCATCCAGCTTAGCCCATCATTAAT  
A\_18\_P22839042 CTCTTTTCTAGGCTGCTGGAGATAAGGAACAACGCCTGTTCTCACTAAGAA  
A\_14\_P104180 ACTTGAGATTCATCAAGACTGAATTTTAAATTTCTAATTTCTCTCCCTGTGGGTTGGAAAC  
A\_14\_P106265 ACACAGTTTAAACACATCAATAAATACTTTAACTTCCACCGAGACTGCTCGTTTCACTGA  
A\_14\_P110587 AATCAACTGTTAAAAGTTTCGGCGTGATGTTTCAGACAGATAAAAAGGAACGGGG  
CUST\_3525\_PI426210822 ACGTTCTTTCTCTCTGGACCAGAGCAAGCCAGAGCCTCTCAGTCA  
A\_14\_P108547 ACAAACACTACCCCTTTTTTTGTCCCTTTTCACATTTTCCACCCAATAAATTTGTGTTAAT  
CUST\_3610\_PI426210822

CCCCAAAACACTTTATTTCTCAAATAAATGATGGAGTAGGTTCCAGCGTTGTTTCTT  
A\_14\_P133381 ACGGACACTTATGTGCAGCGTATGGAAAATGATCTTTACAGAAATCTTGTTTACATGCAT  
A\_14\_P103171 CTAATAGCATTATTCATATGCAGGTTGATGCCGCCTTACCTTTGGACATCCTAAC  
A\_14\_P201902 AATGCTTTATTTTTAAATCGTGTCCAATTTCCATAGAGAAGGTAGTTCCCTGCACAGAT  
A\_14\_P106044 AGGTGTATGAAAAAGACTGCAAGACAATTGTGAGGTTTTTAGTAGACTGGAGGTAGAATA  
A\_16\_P20759617

AAAAGACACAAGATTCAATACCTGGCAATATTCAACAGACTCAAAGTGGTAGTCTCTTCT  
A\_16\_P01345988  
AAAATGGACTTCAGTCAAACCTCTAAAAAGTGGCACAGATTGATAGATGTCAAAAAGCCAGA  
A\_14\_P139954 GGCATTTCTTTCATGCATCTGTTGACTGTGATGCCTAATATAACTGTAGATAGAGACACA  
A\_14\_P118240 GATTGTTTATTCTAATCTTTCCTCAGATTACCTGGTCACTGCAAACCTCCAATCTAGTGAT  
A\_16\_P18302951  
AAACTCGGAAGTCCATCAAAAAGTATTGTCTGTCAAGACTAATTTGGAAATCTCTCATT  
A\_14\_P117347 AAAATAGACACAACCTGATGAGTAGCAAGTCAAAGGTTTCTCCATTATGGAGACTAAGACA  
A\_16\_P01943567  
TGCCCAATACATGTTGAATTAACCAACCATTACCTGTATCCTAGCATAAAAAAGCAGAA  
A\_14\_P123967 CTTTTCAAAGATTCATCTCCTTACACATTGTATCATCCCTAAGTCATTGCAACGTGATGA  
A\_18\_P17316882  
AAGACACATACTCCTTGTCATTGAATAAATTGGTGTTCCAGATTACAGTCTCTTCTGAGT  
A\_14\_P118920 CAAGTGCTGGGAAAGATAATTACCTTGTCATCTTTGTCATCTTCTTCTCCTCGTC  
A\_14\_P109288 TACCCAATCTCATGAACCTCATTGCTACAGTTTTTGTGTTTGCTGTTGTTATATATTCC  
A\_14\_P101144 AAAGAGTGATGAACTTGTATTAACAGAAAAGGAAATGACATTGGACTGTCTGTGTCAT  
A\_16\_P17013581  
CATCAGTGAATATAGCCTATCCCACAAGTAATTTTGTCTTTTAGATGATGCACTGCTGG  
A\_16\_P18265331  
AAACTTTGATGCAGACAGTAAATATTTCTTCTCTCCAAGAAATTTTCATAGCCAGCATCC  
A\_16\_P01360036  
AATGAAGGGATGTAATTAGCCTGTAAACCCTGCTAATGTCTTGTAAGTCATTCAAGTGA  
A\_14\_P109504 ATCTCAATTGGTAACAAATCGTCTTGAATGGAATTGGCAAAGACTAATGATAGGACTT  
A\_14\_P119413 CATTATGTTTCCATATCCCCTTTAAAGGAGACATTAAAACGTCTGATATGATTGGACCAT  
A\_14\_P125971 AACCAATGAAGAATATTTAATGAAGGAAGGAAAATTGGTCTCACAAGCAGTAGGGTAA  
A\_14\_P101388 GCCCATGAACATGAATGCAACTTTTATGCCTATCAGCATGGTATTGTAACAGAAATGATT  
A\_16\_P03681454  
GTAGACATAAGATGGAGTTGGGTAACCTTTTACACTCATGACTAGGAGTAGAAACCTTTGG  
A\_14\_P138051 AGTCTCATTTTAAGATAACATGGCTTGAATTAGTCCTCCATGGAATATCAACTCTGAAGG  
A\_14\_P121351 AAGGTGGTTCTTACGTAAAAAAGTTCTTGCAAAATATGGTGTGAACCCTGAGAGAATC  
A\_14\_P137202 AAAATCACGCCAAATAATAACGGGACCTATGCCTGTTTTGTCTCTAACTTGGCTAC  
A\_14\_P105595 CCTATCCTTTTTCCCATGTAGAAAAATCGATGGGACAACCTGAGGAAGAAGATAACATTG  
A\_14\_P121040 AGGGGAATATGGTAATTGAATAATATAAACTCCAACCTTAAGATCCTCTGCCAGACAAAG  
A\_14\_P132139 TGATCTTGAGTTCCACACCTTTCTTCTTGGAAATATCACAACGTTTCATTAACATATTAGG  
CUST\_155\_PI426210822 CATGCTGTTCAGTTTGCAGCCACTAAGGCTAATGGAAAACCTTCAGATTC  
A\_14\_P137588 GATCGTATAGGAAGGTTTTGACACAAATTTTCTGATTGCCTCAAAGCAATATGTATATAT  
A\_16\_P15905479  
GAGAGATGAGCATAAAAGTAGCAAAGTAACTATTCTCCTTTCCACTTCTATGAGACTGCA

CUST\_3706\_P1426210822 CATCTTGTGTGGCAGTGGCAGTGCTCCAGCTGATCATTTTTATGG  
A\_14\_P106581 GTCAAGAATCTCAGAAATTATTTATTCTTCTAGCAAGCATTACTCAACCCCTACTGTG  
A\_14\_P120524 CCTGATACCAAAGTAAGTGGCTGTCATCATTATCAAAGTAGTCTCACACTGAAAATGTTT  
A\_14\_P100695 ACATGTTCAAAAAGACTAACCAGGTGAGCAGCATGTTAATTACCACTGCTTTTAAGAACA  
A\_14\_P107635 CTCCAGGTAAAACATACATGTAATTTAGACACATTGCCAGGATACATGTGTAAAAGTTCG  
A\_14\_P103374 AGTAGCAATCAATATGCATAGTATATACGATCAAGTTAGAGCAATGTGTAGGAGAGGCC  
A\_14\_P109021 ACACATCATTGATCCTGGCAGGATTTTTTAAGGGATTGTGCTTAAGAATGTTTAACTTTG  
A\_16\_P16743362  
ACATTTTACCTTACACACCTTTTAGATCCTGTTCTAACGTTATAACACATCATAAGAGCCT  
A\_16\_P03188645  
ACGACCTCTCGTTATATATCTTCTATCCTGATTGATTGCATCAGAAAAGCCATTCATCTG  
CUST\_196\_P1426210822 GAAGGAGCAGAGGATGCGCAGGGCTAGAACCTGGAGTCTAAACTC  
CUST\_120\_P1426210822 GGGGGGAGTGCAGTGTTCATGGGCTGGTTATGTAATAAACGGTATATTAT  
A\_14\_P118971 CTTTAGACAGCGCAATAGTTTCTGAGGCTGTGGGAAATAACAATAACAAGATGTAAC TG  
A\_16\_P19017048  
TGCCACATGCCATATTTTTAGAAAAGAAGCAAACCTTTAAGTCTTACTCCACTGAATCAG  
CUST\_9819\_P1426210822  
GTAGAAAAGAGAAATAATATTCATAATATCAAAAAACACCTGTTTACTTTAAAGGGTTC  
A\_16\_P36808753  
TTCACCTATCCCTTATTTTTAAACAAATAGCCCCCTTATTTTTAAACAAATAGCCCCCT  
CUST\_1131\_P1426210822  
TGTTTGTCTTTTTTTTTCTTGGGTCTGATTACAGGTATTTTTATTTTGGAAATTGTTCTA  
A\_14\_P201049 ATAACCCTCTAAGCCCCTATCCCTTGTCGATGACAGTCATCCTAATGATAATAAAAAC  
A\_16\_P15853198  
AATCTACCAATATACCTCCATTACCTTCTACTAAAGTCTTTTCATCTTGCCTATGCTATGG  
A\_16\_P36230240  
ATGCTTGAGAAACATTTTCCTCTGATGGATGTTTTTTTTTCCCTTCCCTTCTTTTTCAAC  
A\_14\_P136228 CTTTTCTAAGACCACAATCCATTGGCTTTTCTTTTCATTGAAATTTCTGCAAAAACAAG  
A\_16\_P58424621 TTTTTATGTGGTGGCTTAGGCTGAAAGAGAGCGCTGCCAGTTGTCTTAAAT  
CUST\_5694\_P1426210822 AGTTTGGCTCAGCAGGAGGGGAAAGGGGTGTTAGAGGAAAAGGCT  
A\_14\_P124348  
AAAGAAGAAAAGTAGCAAGGAAGTTAGCACTGAAGAGACACAAAGATCCCTAATTGTATC  
A\_14\_P119896 CTATATAACTGCTAATGATCTGTCAAATCAGGGGAAGATAACTGAACTGATCATTAGGG  
A\_14\_P124794 CTGAATTTCTCATGATTTAAGATGTTTGCATGTGTTAGAGGACTTTCAGGGCAGTATCAA  
A\_14\_P139829 GTAGTTCTCCTGAATAAACTGTATTTCTAAAAGTAGATGGTGATTTCTACCAGGAGGTGC  
A\_14\_P108166 TCAGGTTTGTGGCTATATAACTCCCCCTTTCACATTGTTGTTGTAAAGAAACAATGTAAG  
A\_14\_P113498 TCTTCAAAGAGACACATTTTTAAATCAAATAAATAAGGAAATGGGAGGAATCCTTCGCCC  
A\_16\_P40012614

AGTCCAAGTCTCATATTTCTATCAAACCTATCTTCAAACATATTTCTGTCATACTCCT  
A\_14\_P136500 GACTTCAAGGGTTCATTTGAACTATTATGGGCAATTAAGAGTTTTACATTTCTTTGTT  
A\_16\_P17172691  
AAGGGTCCAAGATTAGAATATGACTGCGGTTATAGGTCAAAGATTAAAGGTCTGTGAAT  
A\_14\_P103548 ACTACCAAGTTATCATCCCAAAGTGAAAGAGTTTTGTGCACATTTAGAAAGTCAAGGCAA  
A\_14\_P112902 AAACCTCCGTCAGATGTGAGTATGCAGGGCCCTAGTGAGAAACAGTT  
A\_14\_P135105 ACTGAATCTGATGTCTTCTCAAACCAAATTAACCTTACCATGCACACATACTGTTTCC  
A\_14\_P100275 CTTGCCCTAATCACTTCTAAACTCATCAGTGGAGTATCTTTCCATGTTAAGTCTCCTTC  
A\_14\_P113933 CTGCCTGAACAAGAGAAAAGAATTACAATTTGATCCTTAAAAGCATTCAATCCCATTTTG  
A\_14\_P103688 CTTCTTTGACTGTTTAAAGGTAGTTGATTTTCTTCATAGAACAGACTGACTTCCTGACA  
A\_14\_P110474 CTTCTCCAGTCGGTCTGTGCTACTATTGCTGTTAATATTAACATTAAGCGATGGAGTT  
A\_14\_P136269 AAAAAAGAGACACAATCTCTGTTTAAATATTTTCAGTAGCACAGCATGAACCTTAGAGGTGC  
A\_16\_P18092683  
AAATCCCATCTTGTAGCAACATAAAACCACTTTATTTCACTATGAACCTCACTCACTTGG  
A\_14\_P124767 CTGGAGCAGTCAATACCCACTTGGCATCTCCGTAATCACAGAGATG  
A\_14\_P134513 TACAAATATGCTTATCCAATAGAAGTCCATTGCTGTTTGGGTTCCGGATGCTTTATCTGAA  
CUST\_1156\_PI426210822  
TGTAAGAGCAGCCCCTTAGAAAAATGGGGGACTAAATTGAAAGTTTCTGTAGTT  
A\_16\_P03285814  
AAAAACACACCATGATCTCTATTTCTTAAAAATTGCACCTGATTGTTAAAAATCGTGCTCA  
CUST\_7838\_PI426210822  
GACCTTTGACTTAAAATTAAGCTTCTCTCCTGGTTTGAAAGGAATTCCCAGTGA  
A\_14\_P130282 GAAGGTTATGAGAAGAGCATTATTAAGTTTCCAAATTTAATTTGAATTCCAAATTCACCT  
A\_14\_P120923 ACATACACAGAGATTGAAGAATTTATAAGCCCAAAGAAGATACTTTTGGAAATGTGACAA  
A\_14\_P115968 TACAAATTTGGTTGTTTATTTTCTTAGTTCAACTTTGTGGGGAAACTTTTGGGTCCAC  
A\_16\_P38314481  
TTCTACTGAATAGCCCTATTATGGATTTTGGCAAACCTGTTATACCCATTGCTCTCTTCT  
A\_14\_P104271 TCATACTCTCTACAGTTGATTGCTCCAAATCTCAAGGTTTCTAATTCCTTCAAGCCTTTG  
A\_14\_P138004 ATGATGTCATCCTTTTTCTCCTCCAGTTTGATCGTTTCTATAGCGTCAGCC  
A\_18\_P12884596  
ATCTTCAAGAGAATTCCATCTGAGTAATCTGCACTCTCACTTGAAAAAATCTCTCCTGA  
A\_14\_P104932 ATGATGATGTTCCACAAATCTCAGTGAAAGAACTCAGTTCTTTATTCCTCTTTCCCTAT  
A\_14\_P112466 GTCTTCACAAACTTCACTGGAGATGTCACACTTTCCAGTCTACATGTGAAAC  
A\_18\_P10239123  
AAAAAGTGCATAGTTTCGATGAATCAGAGTCACATTTGATCTAATCACTCAAGCAATGCC  
A\_14\_P101236 TCTGAGACAGTGGTAGGCTTAAATAATACAAGACATAAACTGTGGGAAAAACAGTTCAT  
A\_18\_P22841435 CGATGTTTTATTATTTCTATTAAATAGTTATATAATTCCTCAAGCACTGATATCTGGCC  
A\_14\_P138634 ATTCTATGATAATGACACAACCTGTGTCTTCTCTTGCAAAGGGTAAATTTATACCAAGCG

A\_14\_P113232 GAGTTGTCTGTATCTGAAGTTTTCGTTTTGCTGTGTGTATGCTCTACTTTAAATTTTGGCT  
A\_14\_P136360 AATCAAAACAATCATCTCTCTATGTAGAGGTTGAAACCTAGTAGGAAGATACGATTCCCT  
A\_14\_P131434 CCCAAAGAACCCTTCTTTTGACAAGTTTTATCTAGACATGGGAAATTTCTAACAAAAGGA  
A\_14\_P132899 TAATTAATAATCTTTATTCTACAGCCACAATACCAAGACAACCACCTGGTTGGATCCTCG  
A\_14\_P122333 GCATCTAAAACAGTTATTCTCAACTGGGAGCAGAATAACTGGAACGAGTTGAGAATAATT  
A\_14\_P107456 CCTATCCCTACCCCATCATAGTATCAATGCAGGTGAATTTGCCAACTTTTAAAAGTTTAA  
CUST\_6847\_PI426210822 TGAGAGAACAGAGAACGAAGAACAGAGGCTAGAGACATCTTAGAGGAAGAA  
A\_14\_P116839 GAAGGCAGAGAAAATAAGCCTAAGGCCTCCAATCTAAAGATAGATTCTACTAATCCT  
CUST\_1053\_PI426210822 CATTTCCCAGCTTTCCACATGCTCATGATAGGGCAGCACTGTTT  
A\_14\_P120113 GTAATGTGGAATTATTTACATTGTATCCTAACAGCCTTCATTGGAAACATCATCCCCATC  
CUST\_9133\_PI426210822 AGGAACTCTGCTCCACGCCTGATTTTAAATGAGGGATGGATGCAT  
CUST\_650\_PI426210822 ATTACATATGTGAGTAGCTGGCACCAGAGGGGGCACTGGGTACCT  
A\_14\_P124067 CAGATGGAATTCTCCATGCAGTTATGCCTTTCAGAACAAAAGTCATAACCTACAGAAAAA  
A\_14\_P129801 CAGTAAAGCATGGGTCTTTTCAGTCTCGGATGCCATGACAAACAATATGTTAGTATAGA  
A\_16\_P03019697  
TCCAGACAATTAATATGCTATGCGTGATTCCCTATCTATTTATGAGAACAGGTCTGGTAGA  
A\_14\_P128305 TTAATTTGTAGGCACTGCCAGACTAAATTTATCCTAAACGTGAGATTGCTCTCCATAAGC  
A\_14\_P139636 GCTGAAACTGAAGCAAATTACAACATTCACGGATCTCAGAAATACAGACATGATCAAAGA  
A\_14\_P100377 AAATGGGATTGATAACTAACAGTTGTTGAACGCTTTCTATGATTCTACCCAGTTTGCATT  
A\_16\_P21481366  
AGGGAATAATTGCTGTATACACCAGACTAATACTATTTCTCAAGAGCACATCAACAAGTT  
A\_14\_P113408 CATTCTGTCATTAGCATTTTCTCCCTGTTCTTGTCTACATAGGTTTCTCTAAATGGAA  
A\_16\_P01446701  
AACTCCAAACTATAGAATCCACAAGATGTCGATCAAATGTATGAGGGAAGATGACAAAGT  
A\_16\_P58424153  
ATTCTAAGTCAAAACATGGTAGTTTCAACTTAGGATGGGTTTATCCAGATGTAGCCTCAT  
A\_14\_P122705 AATGAACAAAATATATCACCCAAAAAATCCTGTCCTCAAGAAGGAGTCTGATGTGAAAGA  
A\_14\_P135829 CTCTCTTCTCTGGTCCAAATTTCACTATCTGTGATGCTTCTTCTGACCC  
CUST\_2917\_PI426210822 ACTGTGCTTAGCACTGGGACACAGACAGACACAGACTTCTCACTC  
A\_14\_P110463 TTTGAGCCATCTCAAAAATGGAAGTTTTGGCAACAGTGCTTTGTAAATCATCAAGTAATCA  
A\_14\_P128680 ATTACTGAATGACTCATTACCTTACACAATTTGCCAAATTCAACACAGTCAGTTGCTTCA  
A\_16\_P18999206 ATTTGTGGTAATGATTCTATGCCTGCATTCTTGATATCATGTTCTGTATCCCATGCTTGT  
A\_14\_P137460 TTAAATACAATATTCTATAGAACTCACCTTTTGCCCAATTCATCCCTGGAATTCAGGTG  
A\_14\_P123704 TTTACTATGCTCCATGTAAGCACACATTTCCCATGATCTGGATTATTTACCAGATGTAT  
A\_16\_P19186533  
CTTTATGGTTCAAAAAGCATAAAGATCTACAGTCATGTCATAGGCAATTTCAATCCCCC  
A\_16\_P01387139  
GATGTTACATTCTCATGAAACTGCTCTAATTTCCCTATGTCCGTTACTATTCTGTTTCCC

A\_14\_P126662 AAATAACAAAGAAATGGAGTGGGAAATGGAAAATTACTCTGTTGGAAAACTCACCTTCT  
A\_16\_P21086887

TTCCAGTTTTTCAGAAAGAATTTTCAGAACTATCCAGACACTTCCTATAATTGCACCATTAC  
CUST\_2128\_PI426210822 ATGAGGGACAGGTCACTGTCTACATCAACAGAGGAAATGTGAGTACAATACT  
A\_14\_P132469 TAATGTGAGGTAAAAACAATGTTATTTTGTTCAGATGGCTAGCCACAACAGGGAATAC  
CUST\_7544\_PI426210822

GTCTTTTTTACAAAGCTTTTCATAGGATTGTCATCGTCACCTTTCCAGCACTGTTATG  
CUST\_8917\_PI426210822 GGATGCAGGGGCATTGTTTTAGCCAAACCCTAAAGCTGATGGAAA  
A\_16\_P21500443

ACCAGTCCTCTTTTAGATTGCCTTATAAACGATGTTTAATTCATCCAGCGAATTTGGATC  
A\_16\_P01173387

CCCCAGATTTTAAATAACAAATTCATTGACCAGTTCCTAGATAAATAACTCTGCCTACCG  
A\_14\_P110368 TTTTAGAGAGGTGTAGATATGTTGTTCCAACACTACATCATTTTTAGTAAGACGGTCCCTGT  
CUST\_9547\_PI426210822

ATTGGTACATGCCATGCTAATAAGTGTGCTAAAATGGATGAAGCGGCAATTTCTC  
A\_14\_P123192 TTTTTTAAGGTAACTCTGTCCTTCTTTTTCTCTCCCGGATCTCAAATTACACAGAAAA  
A\_14\_P128804 TCTTGTTAGTAATTAGATTCAATGGTCATACTCCAAAGCCTCATTAATTTGGGCTGGTTG  
A\_14\_P130794 ATGGCAAATTCACCTCTTTCTAGGAGCAATTTTTGATGAATCTGCCAAAAAGGATGATG  
A\_14\_P104167 ATAAATGTGGCTGATCAAGTGCATCATTACATTATACAGGAAGGATCTGAAATATGTGG  
A\_16\_P15720382

AAACATCCTATGCTTAAACATCCTATCAGCACATCCTAAAGTCAGTTTCCCATAGCATAG  
CUST\_544\_PI426210822

CTTTAAATGGAGATCTTTGGGATTGTAAATCCTAGAATTTTGCCTGCCTGTTTCTTCTC  
CUST\_4288\_PI426210822

TCCTCAAGCCTCTATACTTAAACAACATTGGAATGTCACCATCTTAAAACCTTGTC AAC  
A\_14\_P128687 CCATACCTTTTACTGCTGCATGTAAATTCTGTTTCTTGTTGTCATCATGATTTCCGGTT  
A\_14\_P100836 GCTCCTTGTTTTATTTCACTGTAAATCTAAACTAACACCTATCAGGGTCAAATTTGGGAC  
A\_18\_P22839771

TACTCTTTCTAGAACTAGCGTGGTCTCTTATGCAGGACAGATGAGTGTA AAAAGAATGAG  
CUST\_9290\_PI426210822

TGCATGTTAGCCTCAGAGATTCCAATTATTTTTCTTTAGAAAGACTAAATGTGTTAATCT  
A\_14\_P123494 TAGATATTAGGGAAGGGTAACACAGGAATGCTGTGCTCTCGTTATGATGCTAATATCAAA  
A\_14\_P115963 ATGATCCCATTAATGTTTTGCAGTAACTGAGGCATCTTTGAAGTCAACCTGGAAAAGAT  
A\_14\_P114764 TCATAAGGTCGTAGTATAAATCTGCAGTTTGGGGGCTACTATTCAA AATTTACTCCCTTT  
A\_14\_P116415 TGCCCACTAAGATTCTCCCTGCTTTGATGGA ACTATATTTTTATCATGTTTGGTTGTC  
A\_16\_P15140693

ACAGAACCATGTTAATACAAGAGTGTTTTTTATCCACAGAAATAATGATGCCTGGCATGT  
A\_14\_P135833 ACTATTTCTTCTTTTTACGAAATAGGTGATGAAGATGATCATGACCCTGAACGTT CAGGA

A\_16\_P00685469

CAATTTATTTATAAGTTCCTTATAGCCTGGATCGTATTCAACCAATAGTTTTTCCCCCTC

A\_14\_P107344 GTCTCTCAGAAGTGAGATTTGTATGCAGGCGTAACTAGATAGTGGTGCTTAAACAAATTC

A\_14\_P101776 AGATCATTTAAAGGATAAGTGATCTGTTCCTTCTGCATTCTAAAAAGGCTGTCTGTG

A\_16\_P00104948

ACTCCTTCTCTCATTTTTAAATAGGCACCATACTTCTTTATTACCTTCATCAAGTCCTC

CUST\_1619\_PI426210822

AGCTATGGATACCACCTGAATTTTAGCCTGACATTGAGGATTAGAGAGAATTTCTC

A\_16\_P00509342

GGTTGTAAACCTGATCACTCATTCAATTAGACCATTTGCTTATAATTAGTCCTAACCAGCC

A\_16\_P37367175

GCATCAGCCTAAAACCTTCTTACTACCACTGTCTACATGAAATTCTAATTCAAGAGTCC

CUST\_8639\_PI426210822 ATTGTCAGCAAACCACCTTGGCCTGCTGCAATGAGCAGTAGCTA

A\_14\_P131978 AACTATGGCAGTAGTTTCAGGAGAACCCAATGGGGATACAAATGTCACACT

A\_14\_P135871

GATCACTTTACTGTAGAAGAAATGAGGTTAACAGAAAAGAGTGAGGGAGAACAACAACCTC

A\_14\_P105373 ACAGAACGGTAGTAATACTGATAAATCTGAGCATTGGTTTTTCTAAAAACATTCACTGG

CUST\_5032\_PI426210822

TCAGTGACATAAAGTTGAAGACATAAATACTGTTTTATATTGTAAGCAGGACCAACTCTT

A\_16\_P19820793

AACACACCTTGCTATCTACCTTTAACAAGACTAAACCATATCCTAATGTAACCATGGACG

A\_16\_P17973985

TCCTTGCCCTCAATCTAAGAATACTCAGAACATTGTCATAGTGAATTTCAAGTATCTTCT

A\_16\_P00685570 CTGTTTTCTGTGGAGTCCTCTACCTTCCTGTTTCTTTGAGGGTTTAACCAA

A\_14\_P133570 CTCAGTTCCTGTAACCTCTAAAATCATCGTTGCTCTTTTCAGATTTCCCTGAGAG

A\_14\_P114552 TCGAAGAATATCCTCTTCACTGAGATGTTCTTCTTTTCTTGATTCTAAAACAAGTCC

CUST\_2218\_PI426210822

TATATGCACTTTGCAAAACAGTTTTATAAACTTGTACCAAAAGGCACAGGAAAGAAAAAA

A\_16\_P21665588 TCTCTTTACTCTTTCCACATCTAGTATCCCATACTTCCAGTCTTATTTCCCAATATCCTC

A\_14\_P201779 TATTAAAACAAGCATTTACCCACTACAGAATATCCCATAGGAGAAGAGGCTGAGACAA

A\_14\_P108025 GAATTACCCCAACTCTTATTGGCTATCACTGGTATTCTTATCTTTACTGTTGTGATTTGC

A\_14\_P104383 CCATCTGGGTCCAAAGAAAGGAGTTGAAGAATTTTTCTATCCATTTTTCTGTAAAGTCAT

A\_16\_P15612250

ATATGCTTTGAAATCCCAATTGATCTAAAAATGCAGCGTATCTCAAACCTATAACCCAGCCT

A\_18\_P14532086

AATTGACAGGCAATACAGTGTAATCTCGAAATGAAACTCAAGTTACTAGACAGTTTTGCT

A\_14\_P109586 CTCTGTGTATTGTGCCTTGTGGTGAGATAATAAATTATGGCCATGGGAAACATTGTATAT

A\_14\_P117210 GAAAAATATGCAGGATCATTAATTTTCGGCTCTGTAAATTGTGCTGTTAGGAAATGTTGAC

A\_14\_P103942 TGCAGATTGCAGAGACTGAACTTTCAGTTCTTGATTTGTTCTTCAGAATAATACCTGTTG  
CUST\_8742\_PI426210822

ATGAAATCTTACTAACTTATTACAGATAGGTATAGTGCAGAGATACTGTATCAAGTACTT

A\_14\_P110672 CTCACAGAACATCATTGTTGTTTAATCAAAGAATCTAATTCATTCCACTCTGATCGCTG

A\_14\_P121974 ATGGATTATGTTTTTCAATGAATGGATCTTACAAAGATGTTTTTCAATAAATGGAAGGAA

A\_18\_P16371399

ATGTGCCGTAGAGAAAATAAAGGAAGCAAGGAACCTTATTATCCCCTCTTAACAATATGT

A\_14\_P119311 CTTTATAGAAGGACTGTGGTTTTTGAGACCAATGCATGTGTGCTTTCAGATTCATTATTTT

A\_14\_P121008 AATCTGAAGGGCAATTAGCCAACCTCCTAGATCATCTCATGTTATATCCTGTCCAAAATA

A\_16\_P03806158

TCCAGGTAAAGGGCAATAGTTCCTAACACAATGAGAATCCTAGTAGTTAAGGCTCCTTTT

A\_16\_P19244160

TGTGTCCTATTTGTTTTAACTCACGCATACACTTACATATACAGAACACACTTTTGACCA

A\_14\_P128514 AGAGTTTTCATTTGCTTATTTAGTGAAAAACAGAGGAAAATCACTCGAGGCCAAAAGAAGC

A\_16\_P16191409

ATCACAGGCAGTGTAATTATTTGAAGACCATAAGGTTGGGCATACAGCATAGAGTATCTA

A\_16\_P30952466 AACCTCGGAGATGATGCCTATGATGCCAACGTGTCCTTCAATGTTTC

A\_14\_P124800 AACAGGGCTCATCATGGCAGGACTGTGATAGAGTCAGAAACTGACT

A\_14\_P119702 TATTCTGATATCCACATGTTGCAAGATAGAAAGTCTTTCTTGTTTCATCCGTTAAGGGACT

A\_14\_P115834 ATAACATTTGAGACTACAGATGCTGAATCCTGGCACATTTTTACAAATGACCTAAGACAG

A\_14\_P118780 GTTTTAGGTCCTGTTACTGAGACCTGGTTCATCTCCATTTATAATAAAGACCGCT

A\_16\_P19618711

AAAAGATGTGACCATGACCATTACAAGTCACTATCCTCATTCTTGAACATTATTTGGACA

A\_18\_P13549527

ACCATGCTACTCTTAGGTCTATGCAATACCAATTCCTCATAAATTTACAAAAATGCCTC

A\_14\_P104007 TCCCCATTGCATTATTGTAAATCAACCAATTCTGATTAAGCACTTTGGTCCATGTCATAT

A\_18\_P16743639

AGTCGCTAATCTTGTCAGTTTAACTTTCTGTAATCCCTGACAAACAATCCTAATATTCA

A\_14\_P129731 TGAACGCCTAGAAAATGAGCAGAATAAAGGATATTATCTTTGGAAGTCTTAGATGTGCAA

A\_14\_P131486 CTGGAAAAATTTTACGAAATGCCATTCTCTCTCGAGCACCTCACATGATAAGAGATAGAA

A\_18\_P14138616 AAAAGTTGGTGGTGAGGAGTTTGCTTACGTTTCATTTCCTTAAAAGCAACATGACAC

A\_14\_P134703 GTATGAATTTATTAGGCATTTAAACCCCCATCTGAAGAGATGAAAACCTCTGATTAGGCCA

A\_16\_P20164025

GAGATCTTCGTTTTCTCTAACACTCAAAAATAGATGTTTCTGTTATGCTCTCTCGTTGGC

A\_14\_P101485 GGAAATGGGGAGGAACTTACATGGAATGAGATTTATTGTGGTGTAACATAGTTCTCTAA

A\_18\_P14133504

CCTAGCCTTTCAATTCCTTTTACTTTCATGGAGAATCATGTATTTTCAGCCACTCAAGTA

A\_14\_P136717 CAAAACCACAGTATCTCTTACCAGAGTATTCACATCTTCAGTTTTATGGATGAGCATCCG



A\_16\_P58424208 TACAGCATTTTCCTGAGGGTTTGATTGTCAGTTGTGAGGGAATAAGATATCAAGG  
A\_14\_P104573 GACCTTTGAGGCTAGGCACTTTCAGAAATTTGTGAATATTATCCACTATTGTGCATAGTAG  
A\_14\_P136481 TCATTTCTTCCTATGAGAGATGATAAAAGACAGTGAAACCATCATGGGTCAGTTTAATGC  
A\_16\_P01879748

AACATGATCAACTTCTACTAAGGTGTCTGATAAAGTCTCATGATATCACCTCTCCTAGGG  
A\_16\_P21495089 GTTCTCTTACCCAATTCAACTGTGGCAGCCAATTGGGATAATCAGTCACTAA  
A\_14\_P137223 AGTGAAAATCTCAGGTTTCTCATGTTCGGAGTTTCTCCACAAAAAAGTCAGGATTAAAGAT  
CUST\_1895\_PI426210822 GACCTTCGATCACCTCAAGAAAGAGGTGGTTCTTTCTGAGTTGCAT  
A\_14\_P134815 ACGATTACAAGAGAGTGATTCTTTAGCCACCAGCATTGATCCAAAAGAAGATCACAATTA  
A\_16\_P16191612 CATTTGGCTTTACAGCAAACCTATGAACCATGTATAGGGCTCCAAGTTTTGTTC  
A\_16\_P19801556

AACTCAAATGAAATTGACCTGGTATTTCTACTTGAGTAAATGACAAGCAATGGAGTCTG  
A\_18\_P14137895 ATTACGGTGGATGTCTCCATCTTCCCTCCCGGGCTCCATCAACATC  
CUST\_5345\_PI426210822 AGTCATCTGTCCCTTTGCCTGGTCTCCCATGCCTCACAGCTCAG  
A\_16\_P30952422 CAAAAAGGAGAAGGGCCAGATGCCAGGGTCTACTTTGTGCTGCT  
CUST\_7543\_PI426210822 GCCTGCATCTGGGTCTTTTTTACAAAGCTTTTCATAGGATTGTCATCGTCAC  
A\_14\_P100424 ACTGATTAATAAAAGGAGACCTTTCCAAACCAGAGAAATATCATTGAACCAGGGATTAGT  
CUST\_9318\_PI426210822 GTGACAGCACTGGTGGCTGTAAGCCACTCTGATGTTTCCTTTATC  
A\_16\_P41376163

TTCTACCCTGCAGTGTTAAAAAATCACAATGAAATTCATAACCAAGTTCAAAGGAAGTGT  
A\_16\_P20161099

AGCATCTTGGATGGCTTAGACTATTGCCCAAGAGTAAAGTTTTGACTAAATTGACTATGA  
A\_16\_P03259828

AAGCCATACATTACATAGACTGCTTTTAATCTCAGCCATGCTACATTTTTTTGCACCTGT  
A\_14\_P116841 TTGAAATACCTTACCTCACATGCTCCATACTGCACCATTACTTGTGACATAAAAAATCACA  
A\_14\_P136442 GCTATACCGTTATTTAAACCATGACAGGTTCTTTTTGCTGGAGAAATACATTTGCTTTGC  
A\_14\_P116366 TGGGGAATAAGGTCTTCATTTATAGACCTTTTCAGTAATAGGAATGAATCACTTGAATCA  
CUST\_4802\_PI426210822 GTGCAGAAGGGTGAATGTGAACAGAAACAGCAAGTCTCTGGAAA  
A\_14\_P130399 TAGCCAAAGTTACCAAATGTGACTTCATGCCACACAATGTAAATATAATGTGTCAATGC  
A\_14\_P130323 TCCTCAGGAAGATTATTTACTTATAATCTCCTCCTCCTTAATTAGCAGTCTCAGCATT  
A\_16\_P00342437

AAAACCTACTAGCATGTAAGCAGGAATCTCTCTACTGTCATAGGTTTTACCCTAGTCTCT  
A\_14\_P137219 CAACCTCTTCATGAATCTTTTAATGAACATCTTTCTACCTGGAAGAAACCTTTACCTAC  
CUST\_2447\_PI426210822 TCCACATGGCCATCTTTTCCAGCTGGACATGTTAATTACCTGTCTGT  
A\_16\_P15701105

CAGATTATACATCACCTCACAAAATATCTCTACCCACAGTTCATTCTAAGATCCCAGTGT  
CUST\_9080\_PI426210822 CCACAGAGTCCCTTAGCCAGCCAAGGAAATGACATTGTTGGTCATT  
A\_14\_P119582 CTCTGATCCAGAAATGCAAGGAAAATGTATGTGACAAAGCAAGAGTATTTATCACCTCAA

A\_14\_P138488 AACTGACCTTCACTGAATGGTTATGGAAGTCCGTTACTACAATTCATTCTTGTGTT  
A\_16\_P21374107

ACACCTGATATGAAGTGACCTACTAACCATTACAGGCTATTACCAAAAATGTCACAAAGA

A\_14\_P107629 ACATGATGATGGGAAATTTTCTTAACCTTGTACCTTCAAAGGGTCTTTCTTCAGTCAAAC  
A\_16\_P20773722

AAAAACACAGTTGGTTTCTGTTAAGTCAACAGCATTGAATTTCCGGCTCAGATATTCAGT

A\_16\_P38271100

GCTCCTTGATTATCACTCTAAAATAGCCCATAAGATGTAAACACTGATCAAATGAATTGC

A\_14\_P109841 TACGATTTTATTCTGATAGGGTCTGCACATCCTTGTGGTTGCACTTCTATTTTCAAATG  
A\_16\_P00431691

AAAGTCTTCAGTGTGAATTTCAATGGTCACTCTAAGGTTAAGTGTGGAATTGTCTTACTG

A\_18\_P19702002

AGCACCATTTTATCTTCACTTAGTAACCTGGAGCAAACCTCATAATTTGTGCTGTAAGGGTT

CUST\_1841\_PI426210822 CTGTGGAATAGCTGGGGTCAGACAGAAGAGGGGAGCATGCTGTCC

A\_14\_P103445 GAGTCTCTCCTTCTCCTGTTTAAAGATTTTCAACCATTGTGGTAATTTCTAATGGTGT

CUST\_8311\_PI426210822 ATGGGATGTCTCTCTACAGAGGGCTAAGCTCTTGTGAGGAGAAA

A\_14\_P123193 GTCATAGAATCTTTTGAGTCTTTGTCAATTTACTAGGCCTTGAAATGAGAAGGTGGAAATG

A\_14\_P111047

AATTAATAAAAAAAAACTGTTTTAAACAAATGAACCCACGTCACACAGCAAGGATGCAAG

CUST\_1223\_PI426210822 GAAAAACCTGATGAGTGTGGAATAGTTTGGGAGCAGCATGGCAAATTAACAA

A\_16\_P19840547

ACCCAGATTTTAAGCAAAACATACAGTATTTTTCATCCAGGCTACTCAATACTAATCACT

A\_14\_P110791 GTAAGTTTTGGCTCCCTACGATCCTTTTCAAATAGATTCTACAAAAGTAGAGTTTGCA

A\_14\_P120300 CTGGGAACCTGAACACTAAGTTTTAGGCCAAAATGAGTGAAAACCTTTTTTTTTTCTTTC

A\_16\_P16579674

GACTTATGTATGGGTTATGGATTCACATACTTTTGACAGATTATCATTTCACCACTCCCC

A\_14\_P137423 CTGGATATGCCGTGGCTTATCAGGTATGGCAAATGCAAGTATAAACTTTAAAGCCAG

A\_14\_P103963 CACTTGCAAAGGGATGTGGGATATTTAGATCCTATAATATTGTTCTTGGTTTGGGCTAAA

A\_14\_P134651 ACAAGCAGAAAAAATACAGTGTGTTTTCTCACTGTTTGATATCAGGCAATGCAGGTAAT

CUST\_4267\_PI426210822

GGCTAAATGTATATGGTATTTCTTGTTTTTCTGCTCTTACTCTTCCTACCTCCAACCC

A\_16\_P00773113

TCAACAACCAATGAATTAACCTTGTGACTCCTTAACCTTTTATTTTCATCCAGACCTCAACT

A\_14\_P202483 TCTCAGAATTGACTTTTTGTTACCGCGTAGTATTATGCTGTATTACCCTAATAGTGGTGA

A\_16\_P19249952

ACTCATCAAAAACCTTCCAGATGTATTTTTATGCAGAGATAGTCTATAACAAGGCCACCA

A\_14\_P109785 CTTTCTTTTTGTTGTTTCAGGTATTTTTGAATAATTACCAAGCAGCCGAAGACCACC

A\_16\_P01267244

GCACATCCGCTTATATTTCTGTTTTATTATTGCTTCTTGTTTAAACATCCACACAATCAGC  
A\_14\_P110419 CTTGGTCCTGAATATAGGTTGGAGAGGTGATCAGTTAGAAGAGGTTCCCTAG  
A\_14\_P202202 ACATTTGAGATTTTTGTATATAGTGTGGCTGCAAGGCCTGTGGAATTAATTCGTTGCAT  
A\_14\_P132675 AACCCATCCCCAATAACACACACAGAGCACTGTCAGCAAAAATCTTTTTA  
A\_14\_P137249 TGTTATTCCTGCCAGGAAATTTCCACTTTCACACTACTTATTTAGAGACGTTTACTGA  
A\_14\_P117810 AATGATTCCATTATCTTCACTTAAAATCAGAGTCCTTGGTTACCCAGTAGTGTCCAAACA  
A\_14\_P125621 GACTGGATCTGTCTCATTATTGCTGTTTTACCACTCAATTCATTACACAATGAATCCTG  
CUST\_8378\_PI426210822

AAAGAAGGAAAAGAAGAACAGGGGTTGCACAGAATATACCAAATGTTCTTATCACC  
A\_14\_P130091 CTCAACACTAAACAACCTGGAAGGCATATGTTTTCTAACTTAAACACACATTTCTTGGGAGA  
A\_16\_P19344672

AAAGCATTTCATGACATCCTTTTTAGCCATTGTAATCATCCGTCTTTTAATAACCCCTCA  
A\_14\_P109901 CTATCATGTTGTTTCTTTCTTGCAGAAAACATGCTTTAAACTGCCACAGAATGAAGCCTG  
A\_14\_P124380 AAAATGGCTTACCTATTTATGTAACCTCAGGGCAACATAGGTTGGCTGCTGTAATTCTTGT  
A\_14\_P119863 TGGTCTAATGAGAATTTGAAAAGTTGTCTGGCTATTATATTGCATTTCTGGACTTGCACC  
A\_14\_P104602 TTTTATCTGATTTTCTGGCCACTCACTTGGCTTTTAACAGTGATCATTCTGTTCTTCAAT  
A\_14\_P138209 TCCCTTCCTTACCCACCTTTGGCTTTTGAAGCCTAAGGATACAACCTAGAAAAAATATATA  
A\_14\_P110131 CCAAATTTTCTACGTATAATGGCACATAGGGGGCTACAATCTAGTTAGAGAAGTCAGTTGA  
CUST\_2993\_PI426210822 CTCCACCACATTGGTTCACCCAACCTGTGGCCTCTGGCTTGTCTTC  
A\_14\_P116492 ATGGTTTAGCAAGAATTGCAATCAAACCTACAGGTCCTTTAGCAATTACCTCAGTGAATAG  
A\_14\_P136075 CTCCACAAGGTCATCCACTATATTCACAAGTTTGTCTATGATGGAATAATTACTCAAGCC  
A\_14\_P105931 GTTTGGGAGAATGAGTTAATGGCGAATGAACTTCTACGTCATGTGTTTATTCCATATCTT  
A\_14\_P102733 GGGGCACTTTCCTATGGTTTGTGCAATTTGTCAAAAAAATATGGATGAATAAGAGTTTG  
A\_16\_P41570917

AAGTTCGCTCAAATGCAAGAGTTTCCATGAAACATTCTCAAATTATCGTTTCTCTCCTT  
CUST\_6600\_PI426210822

GCTAGGTTAGCACTCTCTCATAACTCAAGCCTGAGGTTTATTCTTTTAATCTTCCAAAAG  
A\_14\_P104272 CTGGTTAATGCAAATGGGGAGGCAGTTTATTGCAAATTCCATTATAAGGTATGTGTTACC  
A\_14\_P114158

ATATAAACAAAATGACTCAAGAAAGAACAAGACGCTTGTCTGAATGGTGGCAAAGTTGA  
A\_16\_P21257777

AAATGAACTGGCTCACTTTTTTTAATCTGTCACTCCAAGTTAACACTCTCCTCTCCTATC  
A\_18\_P14611195

GGCTCCTCAACAGATACAAACCTTTCTCTTTTCTACAGCAACTTTTACATCAGCAACTAAT  
CUST\_4484\_PI426210822 TGTAGACCTCAGTCCAGACACCCTCCAAGAGATACCCACCCTGCC  
A\_16\_P16112689

ACCACACTTCAAATAGAAAGCATGCTACTAATAACATTATTTCAATCTCTAACCTTGTCCC  
CUST\_2831\_PI426210822 CTGGGACTCGTGTGTCCTCCACATAATTAAGCAGTCTGTCTTCTGT

A\_16\_P16191453

TATCCTTGCAGAAGTCACTATGAAATGAGGCTTTCAGTAAACAGAAGATGGGCATTTTC

A\_14\_P200468 TTAAACTAACATCCTGTCCTGGTAATGTCACATGAGTGTGATGTTGATCAGGTATACCT

A\_14\_P133523 ACATTATTTTTCTTCTTTGTTGGCAGGAAATAACTACGTGTTTGCCAGATTACTACAAGT

A\_16\_P16613288

AAACAATTTCGACCCATAGAATAAAAATGCTGCTTGTCTATGAAAGTCTTTACCAGGATCC

A\_14\_P131716 ATTTCTTTCATTATGTGTCTGGTATCTATTTTTGTTCTTTAGGACACCAACCTGCTGTGT

A\_14\_P138217 GTGGAGTGTGCCAGTGACATTTCTCTTATTTGTTTCATGAAAACAACTATTCTGAAACCA

A\_14\_P125437 CTGATGAATGTGTTTCATTTCTGTCAGAGCAAATGAAACCTGAAATATTAATGGCACGA

A\_14\_P102756 TGCAGAATCCATAAGATTCACGGAAACTTCAGAGGAAATAGGAAATTATCTGTGTAGAA

A\_16\_P17330294

ATACTAAGCATATGTGTTATGAGATCACCACTACCTTCACAGAACTTGCAATTTCAACCA

A\_18\_P10366586

CTTCTGAGTTGGTTAAATACCTAATGCTCCCTGTAAAACCATATACACGCCTTCAACTTT

A\_14\_P125029 TAAGTTGTTTGGTCTTACCTGTGGGTTTTTGAAAAGTGCATATTTTTCTATACGCTCCAT

A\_14\_P202506 TCTGACTTGAACAACAGACATTTAGAGTCTATTTTTCTTGCTTCTAGCCTCTTTCAGGAA

A\_16\_P18935331

GTTTACACAATGACTACCTCTTCATACTCAATCTCCTTGTAATGCTGTAGGTCTCAACTT

A\_14\_P123510 GACGAGAAGTGCCAGATTACTATTTATTTACCCAGACCTAGATAAACTAAGTGGTTTTTT

CUST\_4082\_PI426210822

GTGCATTTCTAACATACCCCTTAAAAGGCATAAAAAAGTGGCATAGATGATGGCTGGA

A\_14\_P121438 ACCTGTTGCATTTGTTTTATTCTTATTGGTTTCTGATTTGTTTTGCTGCTCATTTTGTAT

A\_14\_P131676 CATTTTTTCTAAGAACTAGAGGAAAGAAAAATTATAGGAACTTTTGATAACTCCAGCCCA

A\_14\_P136605 ATACTACAGCACCAGTTTCACACTAGTGTTGAAAAGAATTCAGGATCCTAGTTAGGAAAA

A\_14\_P132674 AGTAACTCTCTCATTTTCATCTCACCTCTTTTTTCAGGTGTCGATTTCCCACAACT

A\_14\_P129752 ATCAAATCTTCCTGTTTATTTTTTCATGTGTTTTGGCTGTAAATATTACAGGCCAAGTGGG

A\_14\_P110582 TTGAGTTTCCAGGCTATCACAATGAAGTTTGGTATTCTCTATGGCAGAATCTTGTGATA

A\_14\_P127505 TTAGGGATCCTAATTTTCAGTAATGGAGGTAGGAGACAACCAAATTAGAGGCCTC

A\_16\_P15735042

GCCACAACTACTGTCTTTTTGTTTTGTTTCTTCATAACTTCCATCCTTTACACCAAAGTT

A\_14\_P123723 ACTGAACGTAACACAGGTCATCCACAACATCCCCTTTTTATTGATATTAATCACAGTTAT

A\_16\_P20286296

AAGGTATCTTGCAAAGCAATGTAATTAACAGATTCACAAGTTTTTTAGGAGCAATTGGGGG

A\_18\_P22842292 GGGAGGTAGCATTAAACAGAGGAGTCTGTTTTTCAGGCTGAAGCAACATG

A\_14\_P104124 CTTTCTTTCTTTAGAGATGAATGAATCCTTATGTAGCGTTCCTTTCTAAACTGCACCTT

A\_14\_P118433 ACTCTCATACATCCAAAAGGAACTAATACTGACAGCATTACCACACTTTACTTTCTT

A\_14\_P111074 CTCTCCCAAAAATGTCCTTGGATGGAAAATGTCCTGCCTAGGATCAG

A\_14\_P101914 CCACCTCATCTACTTCACCCTTATAGACTTCTGTTCAAAAACATTTCCAGAGTTCTAAAA

A\_14\_P105725 CTGGGCTCTGAGTCAGACTGTTCGAAAATATTGGCCTAATATATGTGCTGTGATT  
A\_14\_P138920 ACACAAGGAAAGATGCTAGAATCCTTTAAACATGTAAGGATGTTGGATCACTTGACACAA  
A\_14\_P110776 GTATTCTACAATCCGAAAACACTAACTTTTCCGCTGCAACCTTTAATAATTGAGAGG  
A\_16\_P36150365  
CCTGCTGCTTTCAAAAACATAAATGCTCCCATAGATGATATTCAAATGGCATTCTTTCACA  
A\_14\_P131777 CTTCTGGCAATTCATTGTTACTGTTTTTTAAATCCTTTGCTGCCTTTGGAAGTTTTCTTG  
A\_14\_P110297 TAAACCACGTTCACTTATATTGCCGACAAGCCTCATACCACAACATAATGAGTTTTACAAA  
A\_14\_P102524 TTATAGTAATGTGCTCTGGTTACATTACCTGACAGACAAGATGCTGAAACAAATGACCTT  
A\_14\_P122302 TCTTTCTTGCTGTTCTCTTTGTTTTCGAATTTCTGGAAACTGCTTTTCATAGTATTCCCT  
CUST\_7496\_PI426210822 GACAGAACAGAAGTTCTACTGCAGCCACAAAGGCCATTTCACAGTCTTTAA  
CUST\_4817\_PI426210822  
ATTAGAATCTTAAAATCAAAATTGATGGCTTTATTTTTCTAAAAATGGGAAAATATCTCC  
A\_14\_P104087 TGTCAGAGGTTTGCTGACCCAAGACAGTATCGAAAATGCATATTAAGTCAATTATTCTAG  
CUST\_8575\_PI426210822 ATTCAGAGCTCATGACGGTTTCCACTTTGGCCTTATGGGACTTTG  
A\_14\_P114865 TAGATGATTCCTTCTCTTTGTCTCACTTGTTTTTCTTGTTTTCTGGAGGGAGACATGT  
A\_14\_P126232 CGGGCTTCTGCATCCATCCCTCTTTTTGTTTTTAAAATAAAATTGTATTTTTGAATCAAG  
A\_14\_P125803 CTCAAAGTTGGCATAATTAGAACCACACATGTCATAGATAAACACCAGTCCATTCTCTCT  
A\_16\_P17937614  
ATTTCTGTCTGTGGCATAAGAAACAAGTGGTGACAGTTACATAGTAATAACGTCTCAGTG  
A\_18\_P22841883 CACTGTCACCCTGGGAATAGGACCCCCAAAACACTTTATTTCTCAAATAAATGAT  
A\_14\_P113067 GTTCAAACAGCAGGAATGATCACAACAGTCTCCTTCACTTTTCATAGAATTTGATGAAATC  
A\_14\_P120795 AAAGACTCCAGAACCAGCCGAGTCTGTGAAAAAGGAATTCCAGGTTTT  
A\_14\_P122443 ACCTGCTACATGTCACAAATTAACAGTAGGACTAGTGAACCACATTTTCAGTGTGAAATA  
A\_14\_P108372 ACGAAATATTTTTATAGAGGTGCATAAACGTGGAAAGCCTGTGTGTGCTTTCTAATGTT  
A\_14\_P120180 CTTTACCTTTTATAGAAGGCATCTGTTTCTGTCATGTTTTCTTCCCCACCTATTAAAAAA  
A\_16\_P18294986  
CAACTCTATCACAGTCCCTGTAATGAGATCCACTTTCTACTTTCTAAATGATCACGAGTGA  
A\_14\_P117441 GCCAAAATACCACTGACATTTGAGGAAGAGAATAGAGACAGTTTGGTTTCTTACTTGTA  
A\_14\_P135646 CATCTATGAGTTGTATTTCAGAGGACTTATCAGACATGCATTACCGGTAAAGGAGAAG  
A\_14\_P133580 AGACACAGAGGTGACACAAACATGCACTATAAAGTGTCATGGTCACATAGGTC  
A\_14\_P108177 TATTTGATCTCACTTAACATCACTCATGCCAAGTTGAGTTTTTTTTCTTCTTTTCCCT  
CUST\_5090\_PI426210822  
TCCTAACAGCTTAAACAATCTCCTGGGATCATATTGGCAAACCTCTAAGATGATACAAGTA  
CUST\_7757\_PI426210822  
TTTGCTTCATATTTTGTCTGGTTTTTCGGTACAATCACAAAAGGATCATTTTAAACAATGGT  
A\_14\_P131209 ATTTTCAGGTTTTAGAAAATTGATGAATAACATAATATAGAAAGGCAGCAATGTGTTCCCA  
A\_14\_P123675 GTTCATTCATTCTGTTGCCCTTCAGATTGAGGAAATTGAGCGAGAGATCATCAAG  
A\_14\_P103328 ATTCAGTCCCAGTGGGTATTTGAATTTTACTGATTATCCCCCAAATATGTTATTTACCT

A\_14\_P111025 TTAACCAGCCTAAGTGACATTGTGCTACAATATTCAGGCAAATAGTGAACCTTCTTCAAA  
A\_16\_P00344561

ATAACCCTAATTCTGGCATCACACTTGTCTCTAGTAACACATACCACAACATTTTGAG

A\_14\_P133834 CCATACCATTGATCAATCAGTCCTTAAAACCGTTATCATGCCCTTTATTACTCTAACCTT

A\_14\_P202337 GGTAGGTTCCCTTACCTGTGAAATGGAGATGATGGTTAAAAACAACAGCAACAACAATT

A\_14\_P114168 TTTTAGAGTGTTCCCTATGTGTGCTTGGCAGACAGAGTTGTCTTTTTATTGCTTCCATTC

A\_14\_P102489 CCTTATTGATGGCCTACCCAACATCCATTCTCTACTCCCTCTACTCTGAT

A\_14\_P132007 ATTTTTATTATATACTGTAGGTATATTTTTATTACCAAAAAAAGGAGAATTTGAGCATGC

A\_14\_P119727 ATAGTTCACAAATCCATTGTCTGGTCTTGATGGGAATGGGCATTTTACTTCTAAAACATT

A\_14\_P202361 ATATGCCTAATTCTGTGATATTCACATACTAGGAGTTTGGGCCATTTTGTGGTTGATACA

A\_14\_P109054 ATTCCAGATCATACTTCTTCTTGCCCTTCATCTTGTCCCTGATCTTGCTGAA

A\_14\_P107146 TCACTCCATTTGGCAACAATCTTTAATGGACAGGCAATATATAACATTGCTGAAAAGTCTC

A\_14\_P121990 AACTAAACTCTGTTAGGAGATGTGCAACCCAGGCTTAAATTGTTTAGTCATTCTTTACTC

A\_18\_P22841930 ATATATTCTCATCCGCCCTAGTCCCTCCAGAATGCTGTATGGTAACAAG

A\_18\_P14180968

GGAAGTCACCAGTTACTTATGACAATCATATCCATAGCCTATCTTCACTTAGAACCCATT

A\_18\_P22840844

CTTGCTCAGTCTCTTCACATCTTTAGTCCTGATAATCCCGTCTGTATAATAGATTCCATA

A\_16\_P00685267

TGATACTGAATGGGATTATTCTGGAGATTAAAGCAATGGAAAGACTTTTCATGATCTAAG

A\_14\_P130607 AGATAAAGGCTTACTTACTCCAATCATAAAAGATGCTGCTGCTAAAGGTATCCAGGAAAT

A\_16\_P58424537 GCCTCAGTTACCTCAAACCTGGCAAAGGAAAGAGGTTGGACCAGAT

A\_14\_P112638 CTGTTGTTCAAGAAGCAACAATAAAATCCAGAATGGTGAGTGTCTTCAATATCTTTATT

CUST\_1080\_PI426210822

AGTCGAATCTGAGCTTTAAGCGTTCAGAAAACACGGTTATTTTCTTCAGTTTGATAGC

A\_14\_P111307 CGCACAGTTAGTGACCACAGATATAACACTCATCGTTTTCAAAGCCAACTAAAAGAAAAA

CUST\_5232\_PI426210822

TAGAAGACTGTTGTAGTCAGCTGTGCTTGTGCATAAAGTTTTGTTTAAAATTATTTTAGAA

A\_14\_P109393 GCAATGATGTATATTTCCACTTCCTGCCTCAGCACATTCATAATCAACAAGAAGTATTGT

A\_14\_P112794 GGAATAAAAATGCGATGCAACCATATTGAGCAAACCTGACAGTTTCCAAAACCTGATATAC

A\_14\_P107921 ACAAGAAGTTCTATGGAAAGTGAAGTGCCTACAGAAATTTCTTGATTCTGTATCATCTG

A\_16\_P01228640

AAGGAGGACAGTTCATACTTGATTGATAATGCCACGACAATTTAGAAATCTTGCTTTCTG

A\_14\_P132287 CTGGTTTCCCAAAGAAGTGATTTCTGATAGAAATCTGAAGGTCATCTCCAAGAAAAA

CUST\_7740\_PI426210822

TATGGTAGTAGAAATTTTAAATTGAATCTTCTGTAATCTTCAGCAAGAAACCCTGAGAAT

A\_14\_P100811 CCTTCTCTTTCCTGCTTATTTTCTTTCCACTTGGCTAATTTAAACCAACAAAATCATC

A\_14\_P136795 TTCCTGAGAGGCAATGTTTTTACTTTTATGCATAATTCATTGTTGCCAAGGAATAAAGTGA

A\_14\_P138468 CTTTCCCAATAAAAATGGAAAGAATATAAATTTATTCTTGGGTGTGCTCAGGTAGGGAAG

A\_16\_P17112880

TCCCACCTTTGTTACTATTCTTTCAAGATCGTAAGTAAATTCTCACCAAACACTCACTGAAC

A\_14\_P137253 AGGGACACAGAAAAGCCTAACCTGAATGCACATCATATAGAAAAAGGAGCATATTTTATG

A\_16\_P20176450

AAAACAATGTTGACTTCTCTACATGCACAATAATCATCCTACTATTGTTGAATGGGCCAG

A\_18\_P14958332

GAGATGACAGAAGATCAGATTATATCCCATAGTCCAGTATATTCTAATGCAGGCTAGCGC

CUST\_5999\_PI426210822

AAATATTAATTAGCATTACTTTTACTTAGGGCAATAGTGGTAGATTAAAATAGCACACGT

A\_18\_P22841058 CTGAGGAGAAGATGTTCTATGGAGAAAAGGAGAATTGGCCAGAGCCTTAAAG

A\_16\_P18089290

AAAACCTCCTCTGATGGTATTTTGAAGCATTAAATAGGAATTCTGGTCTTTCTATGGCAC

A\_14\_P110449 TTCCCCTCCACACTAAAACACATTTTTCCTTTAAGACTCTGTAAACTAAAGCCACAG

A\_14\_P106801 CTACAATAAGTGTATTCAATTACAGCATCCCAGGAGGATAGTTTCCACAGTCAAAACATT

A\_14\_P125674 GTATTCTTCTTGAGGTAATAACAAAGAAATGAGGTGTCCACTGCTTTCCACCATAACTAT

A\_16\_P21672082

ATACATCTGTTGTTCTTTGGTTAAGGAATCCCTAAAGGTGAAATAAGCAGTGTCAATGTG

A\_14\_P200145 GTTTCTGAATCTGGTTTTCAAATCCAGTGGAGCCTTTCAGTGAAATAGGTGACTATTAAA

A\_16\_P21498114

GAACCTTAAGGCTTACCATAAAAATTGCTTCAAATTGCAAGAAATGAGCGTGGAAATCTTC

A\_14\_P138632 AACTTGTAGTTGTTCTGTCAGATCCAAAATCCAGAGTTTTACTTCTGGAGATCAAAACAT

A\_14\_P128683 CTCTTCTCGCCTATGTTTTTCTTCTTTGGGGATGTTATCTGCTGGTGCTATGT

A\_16\_P02484835

ACCAACAAAATCTCTAGTTGAGTAATGTAATCTAACCTGAAAATCTGTAGCAATCAGGCC

A\_14\_P103364 ACATAAGTAGTTTAAAGAGGCAAGGCTTATTGATATCTTGCAGCCCAGTGAAATTGGATG

A\_16\_P02067856

ACTATTGTTTTCCACAAAATCATATCCCACAAGGCTATTTTGATGAACTTAAACCTCTCA

A\_14\_P121755 AAACAGAGTTACATCCCCTGGCTACTGTGATGATATATATTCTTAACTCTATGTGCCTTG

A\_16\_P16150892

ATGGGAAAAATCTGATGTCGATTACTTCCCTCAATAAGCACTTATTGTTTGGATTAAGGC

CUST\_9282\_PI426210822 TCATTA AAAAACCACCTCAACCAGTGCATCGGTGGCTCTTGAAGAATC

A\_14\_P103330 GTAGAGCAGGCTTCTACCTTTCGCAGAATATTCATAAATCCATGAAATGTTTCAGGAAAA

A\_16\_P15020769

AATGGCATATGATGATGACTCACTAACAGACTAAAAGGAAAAAATATCCGTCAACAGTCA

CUST\_8261\_PI426210822 CCCCAGACACTTGATCATGTAATCAGTCCTTAGAGGACCTTGTTG

A\_16\_P19307708

AAAACAGGCACCTTGTTTATTTTACATCTCTTTCATATCACCTCAACTAGACTATGCCT

CUST\_472\_PI426210822 TAGGGCCATTGGGACTGGCCCAGAAACAGAATCCTGAGCAATCTT  
A\_14\_P115605 CACCGTGGATCTTAACAAATGCTTGCTAAATTGACTTGAGCCAGGACTCAATAAG  
A\_14\_P127108 AAAGGCCTTTGTTTCTATTTTAAATTTACCCCTAAGACCATATTAACACCTGGCTGCT  
CUST\_8059\_PI426210822 CAGATCAGACAGATGCTCTGCAAATTGCTGGCTGGGCCCACT  
A\_14\_P114982 CTTTTAGAGTTCAGGAGTTCCAACAAAAGTTCAATCCTTAATAAACTGAATGGGCTCAA  
A\_16\_P02942201  
ACTCTACAACCCTAAAGAGGTAGTCACTGAAGAACTATTAAGCATTCTCTCAGTTGTGTC  
A\_14\_P119380 AGGAGGCTGATCTTTAGAGCCAATGCTCCAAGACTCATACTATTTTTGTCAAATAGGTA  
A\_14\_P118043 GCTTCCTTATACCTCTAATAAGGCTGAAGTAGGGACAGTTATGAGAAGGGAAATAGAAAT  
A\_14\_P106007 TCTTGAAAGAGTGAAGATCATTTGAATCTGCAAGGATGGTATGAAATTGCTTGGTTTAT  
CUST\_5049\_PI426210822  
GTGTCATACTCTGATCCTTCTTCCACTGAACATCACATTCTTCATGAGAATCACA  
A\_14\_P108723 TCTTTTCTAAGATTTTGTGCCATTAGTTTTAAATTGAAGGTCTCCCACCCATCTTTGTGA  
A\_16\_P18598857  
AATTCACAGACAATTTTTCTTGAATGCTGGTGTAACGATAGAAACACGACACATGA  
CUST\_2878\_PI426210822 GTAAGTGTGGGGGCCAGCTCTGGGTGAGGTGTCCTAGAATTCAG  
CUST\_8313\_PI426210822 TAAGCTCTTGTCAGGAGAAACCCTTCTGTGGTTGGCTGGTGTGGT  
CUST\_6598\_PI426210822  
ACTACTTATGAATGCCTGTCCACTTCCCTTCTCAAGATAAAGCTAGGTTAGCACTC  
A\_18\_P14133364  
TGCCCTACTCTTGAAATAAAATGATGGAGAAAGATTTGGAGTTAAAAGAAAACCAAGTC  
A\_14\_P122382 CTGGCAAGTTTAAACTAAGTGATATTTAGTCTGGGTGGGATACTGATCATGCATTTTTCT  
A\_14\_P120149 TAATTTTGTAATTAACATTTTTTTTAGCATGCTAAGACTAGTGTATTCGATGAAGTGTT  
A\_16\_P00685313  
TCAAGCCCCTATTTCTTAATTAATTTGTCACTTATTTCCATTCATCCTTGTGTGTGAAACA  
A\_14\_P111256 TTACTTCTCTCCAGTGTCTTGCTGGCATTGTGATCAGTTGAACTTAATTTCAAATGTAAG  
A\_14\_P126085 AGTCCCAAAAAGTTTCCAAATTCTAACTCCAAAATGATCTTCGGCAAGATATTTGCTTT  
A\_14\_P106375 AATGTCTGTCTTTTACCCAAACTACAACAGAACTCTTTGAAGACAACCTTGTCTGTTTCA  
A\_16\_P03767434  
AAAAGCAAATTAATTCCACCTGATCCATTCAATCTAGGCACTGATTGTAACCTTTCACCTG  
A\_14\_P201923 AAGATCAAATTTACCAACGGAATTTACCATCAACGTTAACGGAAATACGCGACAGGA  
A\_14\_P125150 GTGGCTTCACCAACTATAACGGATTTTGAGGACTCACCTACTTCAAAGAG  
A\_14\_P116645 TCATACTCATAGGAAAAGTGTTCACCACTCATGTTTCAACTTTACTAGAGTGTAAGGT  
A\_16\_P58424369  
CCTGTGACTCTGTCCCAAATAGAAATCACAGGTATTGTCAAATCAAGTTAGAGTTATTGC  
A\_14\_P133499 CTTCTCCATCTCTGCATGGATGCCTCCTGACTCTATTAGTTTTTTGATATTTTATTCTAT  
A\_14\_P127105 AGAACTCTTTGGGAATCTGTAAAAAGGGCCAATTTCCAGATAGTCCTAGTG  
A\_14\_P128026 ATGTGGATTCTCACCTGGTCTTGGAATGCCTCTCTTCTCTACATTCAT



A\_14\_P108664 CTGAAAGTAATTTTTATTCCCATTCCACAAATACTTTGAAACTGGTTTCTTAAGTTTCTT  
A\_14\_P127422 ACATTTCTGTTCGTATACTGTCCTATTACCGGTGGCTATCTTTTTGGTTTTCGTAATACA  
A\_14\_P131694 CTTTCCATTGCCGACCGCATTTTACTATCTTCAAAGTAGCAGGTAAATATAATGGCTTTG  
A\_14\_P139401 CATTCACTTCTGTAAGCAAACATTAGTGTGCTAGGAAAAATCTCTAGGAAGGAAACACT  
A\_16\_P17460824  
CCCCAAGAGAAAATTAACAGGTAAGGACTACACAGACATAAAATCAGCCCAATTTTCT  
A\_14\_P121942 GAAGCAAATTAATGACTCTGAAGAAGCGCAGGCAAGTGCTATGATCAAGGCAT  
A\_16\_P38238293  
AGCAAAGTCGTAGATCTTTTCTAATTCTGCTCTCATTAAGTTACTCTGAATCAAACCCA  
A\_14\_P119837 CTGGTTGACATTCCTTTATAGATCAGAAGATTTCTTGGTTATACATGCTCGTGATGATTT  
A\_14\_P120440 ACATATTTCCATTTTGATTTGATACAAGTAAAGATGCCTTTGTTTTCTGACTGAAGAGTT  
A\_16\_P36230731  
CCTTAGTGATTCAGCATATGTGGTTGATATGGAAATGTATTGCATTTACCCAACAAGGAA  
A\_16\_P03798223  
CCTAATCCCTACAAAGTTGAAGATTATGGTCAAAGCAAGTCTATTTGTGGTTCTGTAGAG  
CUST\_3080\_P1426210822 AGATGCCCAGGGTCTACTTTGTGCTGCTGGGAGAGACCATGGGTC  
A\_14\_P122226 GCCCCTTATCAAATATAGTTTCATTCACTTACTGTCTACGTCTGTTAGAAGACAGGTGAA  
A\_16\_P31675287  
TTCGACATACTGTTCTATAGAGCACTGATGAGCGATATAAAAGGTAAAGAGTTCTCACCA  
A\_14\_P132828 GTGTTTTGATACTTGTGTCAGGGAGAACTCCTGGGATGATGTTTTACCTAATACTTAATGAT  
A\_16\_P18144322  
ATTGTCAGAATGAAGCCCTTTACTTTCTTAAAGCAGTTTTCCGTTTCAAATTTTCTCCC  
CUST\_5218\_P1426210822  
AAAGGGTTATACATTTTCAGACTAATGATGATATCCATTACTATATGTGCAATTGCTTATA  
CUST\_10200\_P1426210822 TGTTTTGGGGCAATCTGTTGTTTCCCTAGGAGTTTTCTGGTTGCTTT  
CUST\_960\_P1426210822  
CTCTTTCTGTAATTTATATTCAGAGACACTTTGCATTGTTTTTCTACATGAATCCTTCCT  
A\_16\_P39398999  
AGCCCACTCTAAACTTCTTAGAATTACCATAATCTCTATGATACGGTATCTTCCATCGGA  
CUST\_7363\_P1426210822 GAGACAGAATTTCTGTCTCTCCTGTCAGAAGCCCTTTGAAGAACTCAG  
A\_16\_P36414819  
AAATAGAAAACCAAGTCTGATCACTACACTCAAAGTATTACTCTTACTACTGCTCCT  
A\_14\_P124574 AGGCTCGTTTTTGGTCACTTACGTATTGTGGAAAATGCATGCCATTCTGTTTTTC  
A\_14\_P126084 ATTCTAATAATGAGATGGAGATGTTTAGCCTTTAACCTGTGAAGATGGCAATTGTGAGTG  
A\_14\_P138690 GAACAGTTGTTTTCTCTTGTGCTGGGTGAGAAAAATCACACTTTTACTGGTTATCAAAC  
A\_14\_P105777 CAAGTGGTCTGGAGTAACGTTAAGACAACCTTGTATTAATCAGTGTCATGACTGAAGTAG  
A\_16\_P20400954  
TCCAGACAATCATCTCTTCAATGCTATCTTCCACTATTTTGTCAAGGTTCTAAATGAAGC

A\_18\_P21426240

GGTTACCCCAAATCTTTTCCAACAGGACAATCTTTTTAAAAGCACAGATAGATGAATACC  
CUST\_9085\_PI426210822 CTTTGAGCAAAGAGTGC GGTTAAAACCAAGTTGTGGGAGGATGGATA  
CUST\_7249\_PI426210822 GTAGATGAACTTGAGCACATGATCTCACC ACTTGAGCCTAGTAAAATCCA  
A\_16\_P38443676

TGCATTGCTTTTCAATTTTTCTCATGAACTTGACTAAGATTGTATTACCTCCACCAGT  
A\_14\_P103355 CTGACTATTTTCATTGTTTTGTTTTCTGCTTCCAATGTGCCATTTTATGGTGTGGAAGTA  
A\_14\_P107838 AAAGGAAAGGCAACTTTAGCCACATCATTAACAATAGAAAATAGCCACAGACTCACAA  
CUST\_3149\_PI426210822 AAGGGTACTGGCTATGAGATGCCACGTAGAGTGGCAATAGTGAAGT  
A\_14\_P135838 TTAGTTCCTTTTTCTGTATCAGAAGCCCTGTCTTACACAACACAGGCACACAATTT  
CUST\_9933\_PI426210822 GAGTATCCTGTTAGAGCTTCCTTCATGGCACCGGTACAGTGAAGG  
A\_14\_P127167 AAAAAAGAGAGAGAGAAAAAAGACTCCCTCTCTCCCCAAATCTTACAACACATTAATCT  
A\_14\_P134135 CCCTCTCATTTTATTTTCTTGCTGGCATTGTGTTCTGTTTATTGTTCTTAATTTCCAA  
A\_14\_P124192

GTAGCAATATTTTTGGATGAGAAGAGGTGAGACACAGAATGTCAGAAAAGTGAAAAGGTA  
A\_16\_P15648225

AATTGATCGAACCCAGTGATAAATTTCCCAAAGTAGTCTTATGACACACAGTGCATCTAT  
A\_18\_P14134307 CAGAAGATAAATCCAGTGCTCCGGATGTTTGGTCAGTCCATATCGG  
A\_14\_P116774 TCTTTCTCATTTTTATGTTTGACTGAGAAATCTCTTGCTGACCATATTCTCAGGTAGGCA  
A\_16\_P17855746

AGAGAAGCAGATCTCCTGATGTTAATTAGAGAAGCATGGGTTATATGGCAAATTAGAAGC  
A\_14\_P100020 CAGATATCTATTACTACAGGCACAGTTTTAAAACAGAAAAGACATAAGATATAGAGCAAAT  
A\_16\_P17020701

ATTAAACCACCAGTAATCAATCTTTGAAACCGTGTAAGACAATGAGAAAATCAGCATCCC  
A\_14\_P129838 CAGTATTGGGGGTGCTCTACCGATTGTTTTTGCCTATTTTTCTGAATTCTTGTCTC  
CUST\_7698\_PI426210822 TATTCAAAGCACCATGTTCATGTTCTGTAGGGAGATAGGCAGGGGAG  
A\_14\_P136400 CAATAATGTCATCTCTACTAATAAGGTAACA ACTGATTGGTTCTCACAGAGGAACTGCA  
A\_14\_P128498 CCGAGGCATTTCTTACCGCAGATACTATATTGAATACGCTGCAGAACATTTCTGAAG  
CUST\_9424\_PI426210822 TGGGAACCCAGAAGAGGTGACGGTGAGTCAGCCACCCCAGGACAG  
A\_16\_P20163425

TGCCCCCTCTTAATATAAAGTCTACACTGCTTAACATATTTACAAATTCGACCATGTGAA  
CUST\_5829\_PI426210822 TGGAGCTATTGGGATTGTTCCCTCAGAGGAAAATCAGGAGTTTGG  
A\_16\_P39133695

TGAACTCCAATAGGTCTTGACGATGATCCTTACATACGTATTTCCAAAACATATCTCTCT  
A\_16\_P38671947

AGTCTGGATTTTGC ACTAATGACGAAAGATACAGCAATCATCCTAACAGTTAAGCAAGAA  
A\_18\_P22840500 AACCACCATCCCTCTCCCAAGAACCTGGCACAGTAAATTCATTAGAG  
A\_14\_P105665 AGAGATTAAGAAGTGAGCAAGTCTAAGATCTTCATCTATCATACTCTTCTCCAGCATG

A\_14\_P139499 TTTGGTCTTACTGCTCTTAGGATTCCCTGGTATATTGACCTAAATACTTAAGTCCCATACC  
A\_16\_P19930671  
ATTTCCACTCTCACACCTGTAAGTTATTAATGACCTTTGAAGTGATTGTTGATGGAAGCA  
A\_14\_P120872 ACAATTGAAATCTATTTTTGATAAACATTCATACTTGCTGTCTGCACCGGTGCTGTCTTT  
A\_16\_P17898041  
AAAACCTCGTAGTCAAGTCTCCATCCTAACAGTTTAAACCCTTCTAATATGCCTGATTTCTT  
CUST\_9794\_PI426210822  
TAGCAGAAATGATGTTGAATGTATTAATTTGTATATTCATGAATCATATAATGAATCAGT  
A\_16\_P21511621  
ACCTGCACCATAAAACCAAATCAATGTGTATTCTGTTTTTACAGTGAAACCATGACTCTT  
A\_18\_P25343957  
TTTAGATCCCATTCTCTTAAAGTCTATCTGTGGCAATTTTAAAACCTGACCCCCAAATT  
A\_16\_P15171750  
AAAAAAAAAAGTCTGTCCTAAAAATACCTGTGGTTCTTCAATCTCTATAGCAACCCACAGG  
A\_14\_P128044 AGTTTACTATCGGTCAGTCACAGTTTTTTGTGGTATGACCGCATAAGTGAAAAAAGAAAT  
A\_14\_P121673 AAAACAAGGAAAAAAAAATGAGGCTGGTTTTGGATGTAATGGAATTGTATTCAAACCCCA  
A\_16\_P00685122 TTTTGTGGTTGCTGGGTGGAATCCCTGTAGAGAACCACAGTATAACTC  
A\_18\_P22839409  
CACAAAACCTGGTAGCAAATAGAAAGATAAGAACTAGAAATTATCATGACAGATGGCAACC  
A\_14\_P200071 AATTTGTGAAAATTATGAGATGCTCACCAACCCGGTGATAAACTTGCTCCCTC  
A\_14\_P138700 TCCCCAAATCTGAGTAATATCGACAGTGCATGAAAGAAAATATAGCATTTTTCATCCTGCA  
A\_14\_P128056 ATTAAAAAAAAAAGATAGTGCACCAACCTGCAAAAAAAAAAGTCATGTGCAATGATGTCATC  
A\_14\_P114713 TCATCACTCTAGCATTATAGGGTAAGTGTGGACTATTGTTCTAAAGAGAAGCACACTCTT  
A\_16\_P00640384  
AAAAACTCTCCTGATCTCTATTGACATTAATTAACCTATGAGTAAATAAGCACGTCTGCA  
A\_16\_P19847923  
AGAATGTCTGGCTTTTAATGATTACATCTTGTCTCAAACTGGTTAATCCCAAGACTTGC  
A\_14\_P120116 CTACCCCTTCTTGAGAGTCCAAGAACCTGGAGCAGAAATAATTTTTATGTATTTTTGG  
A\_16\_P00579245  
GCAGAGTAAGGACAATCAAGTCAAACTGAGTCAAATCCACATTAATAGAACTCTTTGCT  
A\_14\_P111742 AGAAAGAGTTATAGAAGTTGTGGAGAAACAGTTTGACCAACTTTTGGCTTTTTTTGATTC  
A\_14\_P200729 TCTTACAAAACAACCGTATAGGGGTTAAAGTATCAGTGCAAAGTCCCGTTCAAATATTGA  
A\_14\_P116865 ATGTTTGTATCTCTGAGTATTCAAAGGGAATTTTACGCAGACCTGAGTTTGTCTGG  
A\_14\_P100291  
CTGGCACACAATCAAAGAAACAGAATACATGTATGAAAGATTAAGAGCCCTCAAGAGAA  
A\_14\_P113701 CCTACCTTTCTCTTCTGGAGTTTTTCAGGCTTCTAAAATTTAACACCTTACTGCTGATCT  
A\_14\_P115301 CTATTTTCAGGTAGGATTGTTCAATTTCAATGTGTCTCCATTACTIONTCTTCTAGGGGTT  
A\_16\_P17024718

AAAACAGTGATGGGATTAGATAGAGCACATGTGAAATAAGCAAGTCAAAAAGTTCTTCCTG  
A\_14\_P107103  
CTCAAAAAGAGAGACTAGACGGAAAGAAAGAAAATCCTGAATTTTCAACAAGGCGTGAA  
A\_14\_P119455 GTGTCAGTACTAGTTCCAGGCGTCTGCTGAAAGATTTGGAACAGAAGATGATG  
CUST\_3686\_PI426210822  
AGTCAGCTGGAAACACTTGGTCCACATGAGATTGCCTATCTACATTTTAAATTTGGC  
A\_14\_P134698 TAGGGAAATCGGCATTTATGGTTGAAATTAAGAAGTCTTCAGAAGTTAAATCTGGGGA  
A\_16\_P15526181  
AAAATGGAGGTGACACTAAGATCTTCTCAATTGGGAATTTGCTGATAAGTTCAGTGCAT  
A\_14\_P130449 GACAGAGAGCAAAAAGGACAGCAATGAGAGCAGAAGAAATAACAGGAATGG  
A\_16\_P16936431  
AAATGAACTCCTGAAGAGGTTTTGGTATAACTGTTTTTCTGTCTCAATCGTGCTTACTTT  
CUST\_8631\_PI426210822  
CTGAACCACAGTCATTTCTCTGTCAGTTTGTAATTAATCACTCTTCTTGGGTACAT  
A\_16\_P37277395  
TGCCACAAACTGTTTAGTTTTCTCATCACTTTCAAGTCAACAAGTATTTTTCTACCACCT  
A\_14\_P125198 CTTGACAAGCAGATAAGTGACCTGAGACTGGATGTAGAAAAGACATCTGAAGAGC  
A\_14\_P101582 AAGGCATTCAACTTACAGGAAAGTATCTCTGAACAACACCAAAATCGATAAAACCGATTA  
A\_16\_P20335932  
AAAAAGGGACCTAACAAACCAATGGTTACTCTGTATGGACTTAGTCGTAATTTTTTCAGTC  
A\_14\_P122093 ACCTAGATCCTGCCTGTTTTGCAAAGTTCCAAATAATATTCTAGAACTCTGTATGGCTT  
A\_16\_P17239297  
ATGTCCCTCCCCATATAAAAACCAACACAATATGTTTCATCCAGTAAAATGATCACTGTTT  
CUST\_4770\_PI426210822 TTCATGACTCACTGTGATCTACAACCTCCTCAGAGCCAGCCTTAAAGTG  
A\_14\_P110059 ACTTCCATCCTACTTTTTAAAGTAATTAGTGCCGCTAGCCAATAAGGATAGCCTTTACATA  
CUST\_2942\_PI426210822 CAGGAATTAATCAAAACTTGCTGGGAGAGACCAGAGCTAGAGTTGATGAGA  
A\_18\_P16046020  
AAATTCATCACATAGATCACTTAAATTGGCCCCTAAAAAACTAAATCTGTGAGGCAAGTT  
A\_14\_P110816 AGAGGAATTCCTGGATGTAAGGCATGCACACTGTCATCTTTATGAGGTATTAACATTTTA  
CUST\_5092\_PI426210822 ATGCTGAAAGGAACAAAAGGAAATCTCACTCAGTCATCCATCTGCCAGTATTT  
A\_14\_P129625 TACTCAAGAAAACCTCAGTTGGTTGCTACTTTTTGTTGATTCCTTTTACCAGACATG  
A\_14\_P132163 CTGTGCAAATTAATGGTAACAGGAAAAGGCCTGTAAAATGTTTCAGCCAAGACTAAAAAT  
CUST\_7946\_PI426210822 CTTCTCAGCAGCAGGCCCCAGCCCTTCCACCAGCCACTGATTC  
A\_14\_P128115 ACAGTGTTTCACCAGAATGATGTGAAGATTCCAGATGCTAAACATGTATTTACCACATTT  
A\_14\_P126050 GGGATGACTTTAATCCTACCAACTTCCCTTCATGATCTTCCTGTTTTGCACAA  
A\_18\_P14642063  
AAACAGTGGTTAAGCACATTTCTACATCTACTGGCGTATAAGAAGTAAAAGTGGATATGT  
A\_16\_P36048828

AGCCCCTTTCTGAGATAAAATCACTGCATTTTTACACCCTGAACAATTAGACAAGATTC  
A\_16\_P02633690  
TGGTGCAATGAATCATAGTTAATCACTCAACCAAAAACAGTAAGTTCTGATTCAATTGCC  
A\_14\_P136210 CAGTGAATATATATGAGTAATTTGGGAGTTCTTAGGTCCATCAGACACTCCATTGCATTC  
CUST\_7547\_PI426210822 AATTGGAGAGACTCATGCCAAGGTGAAGGGCTTGGTGAGAGCAGC  
A\_16\_P19329943  
ACCATGAGTTCATCTTCTCCAGTTATATGCTTCCATATACTACATCCTGGATTCTCACTA  
A\_14\_P109044 AATCAAGAAATATAAACCAGATGTAGCAGTTTCTTGACATGGAGAACCAAGCCCATAATA  
A\_18\_P11101228  
AATTTTGTGCTACACAGGTCATATTGTAAAGTCCCTGCAACTACTACAAATGTGAAGGA  
A\_18\_P22607140  
GAAGGAAGCCAGGAGAAAACGCCTGGTGTACTAAAAAAAAAAAAAATTGTTTCTCACTCT  
A\_14\_P127017 GGAACAAGATACAACCTACCCTTCTACAAGCAAAAATAATCTCTCCTTCCCTCCAAAATAA  
A\_14\_P131949 TCACGTAACAAAGTTTCTGGTGATAGACAAAAGACTAACACATTTGGACCATTTGGAC  
A\_18\_P13744419  
AGGGTTACATGTATAGCGTATATTGACTTCAAGTGCTCTTTTACAAAACAAGTCCTGACT  
A\_14\_P125056 CGCTTTTGTCCAAACCCTTGTAAGTAAAAATGTCTGCAAGATATAATCCCTGTGTTTTCA  
CUST\_7509\_PI426210822 GGAATGGGGACAGCCAATGCTTCTCTGGTAAAGGGAGGCCAGTTT  
A\_14\_P110400 CTTTAAACCACAAAGTGTAACACTGTCTTTAATATTTGTTTTCTCCTCCTGACCAACC  
A\_18\_P14524899  
GTTGAATACAGTAAGGGAAGACAAGTATGAAGAGACTTTTATGTAGCCAAACAACAGTGC  
A\_14\_P121041 AAATCCAGACACCTTTATCACTATCCTTACCAAACCTTCTATGTGAGACATACGTCATCAT  
CUST\_8839\_PI426210822  
GGATTAGGTTTGCCTTAAATCTTTTTCTCAACAGAAGCCAAACACTTAAAAGAAGGGA  
CUST\_8866\_PI426210822 TACCAAAGTCGATAACAGGAAATCTCACTGAGGATAAACAGGGCTCATCG  
A\_18\_P16799660  
ACCCAAATTTTCATATTCTACTGCACAAAATATCCATGCTTTCCATATAACATACCATGCTA  
A\_16\_P19182651  
AACAATGCGAAATCCATCCATTCAAAATCCTTTGCTATTCCTTAAATTGTAGTGGTGTA  
A\_14\_P110357 ACCTTCCTTTTCAATGTGTGTTAAGTCACTTGTTTATTTCTCAAGATGTGCACACTCAAG  
A\_16\_P00056346  
TTGGTTAGGAAAAATAAGCATCACAGTATAGAATAGTCTTCAGCAATACCTACCTAGGGC  
A\_18\_P10639981  
ATTTGAGATTTGAAGTAAGTGTCCAACATCAAAGTTACAGTAACGTTCTCTCAGGTCA  
A\_14\_P121062 TCTGCTAAATTTCTAGCATGCATTTATTATAGGTTGGACCAAAGGGCTTAAGGAGTCATT  
A\_16\_P01831486  
TCGCTACCATAAACTAAATTATGTTTTCCATCCTAAGCACAAACATTTCACTAACACCCG  
A\_14\_P122670 TATATGCATATATATTTTACCCTCTAGGAGACTGGGAGAAGAGTGTGATGATGGAGACCT

A\_16\_P19932627

ACCTTCAACATAAAAATCCTTTGTAAATCTCCCTTGGTAGTATCCAAAATCGCATGTCTG

A\_16\_P17271367

GTTCTTATTCTTGCCCTCTAATATCGTTCAACATAGTGCCATTTCTAAGTTACTGCAGT

A\_16\_P00685032 TAGAGTCAGAGTTTGCTCCTGTGAAAATATTTCTCTCTGCAAGGAAGGATAACC

CUST\_6528\_PI426210822

GGAAAAAATAGTTTTTAAAAAGTAACAGATGGATAAAACAATAAGAGAAAGAAGGAAGGA

A\_14\_P112343 CAATGATTGTGCATTATAGAGTAATGAATCAGGCTCAGCAGCCTTGAAAGATGAATATGG

CUST\_2057\_PI426210822 TTATCCCTATGTCCAGAGTCACATAGACAGGAGGGTTCTAACTCAGCA

A\_18\_P11727702

TTTAAAGGATTCTAGGCAAATATGTATTGGTTCAGACACTATTTCGAAATAGGGCTGTTGG

A\_16\_P17265943

AAGAAAACAGCCACCTTAATTCACCTAGTCTCTGAATAAGTTCACTTAAATACTTTGCCA

A\_16\_P15006380

TCGTCTTGCCATTACACTAAATGCCGCCATTTATATCTGTGATACTTAAGTATGCAAAC

A\_16\_P32800226

TGCTATTTTGTATAAGAATTCCACTGCTATGACAAACATCCCCATTTTAGAGTCTGAACT

A\_14\_P112561 CTTGTTTCATATCCATATCCCCTGTATTCTCTGCTAATCTGCTAATGCAGTAAATTGGAG

A\_16\_P39703412

CAAATGTCACAAAACCCTCAAAAATTCCAAATTTCTAATTACTGCATTGACCCATTCTG

A\_16\_P37509866

AAAAAAAAGTCATTACGGTGTCAATTAACCTGAAAAAACGTGATTTTAACTATACTTTGCC

A\_14\_P136293 ATTGCACTGATCATTCTTTTTGTAGCCTGCTTTTATCACTTCTCAGCGTATTGTGAAG

A\_14\_P113879 AAAAGGAAACACAACCTTACCCTTTTTGCTTCTGTTTTGCTAAAAGACAATAACGAGAGC

A\_14\_P102264 CTTTGCTCATCCTTTATCTCTTTAACCTGTTTGGAGGAAGGGATCTTGAAAAGACATATA

A\_16\_P39157943

ATTCCTGCCTTACTAATGTGTAGGTCAGTTTATCATCTACCTAGCACCATCACTTTTTTTC

A\_16\_P17243778

AATGCTGACACAAACCATATTGAAATGGAGTTGACCTATAGTTCCTCATACTCAAATGCT

A\_16\_P30952479 CCATCTGTTGGTGCTTTTTCTTTTCAGGAGGAGATGGGCATCTCCT

A\_16\_P16121084

TAGCCCTAGACATAGAAAAACAAGTAGGTTGATTGCATCTTTATAGAGCCATATTGCC

A\_16\_P58424575

CAGAAATAGCAAAAATAATCATGATGATAGAGGTCAAGAAGGTGGTTACTTTCAGAGGA

A\_14\_P112779 CTGATGGCCAATATTCATCTTTATCCTGAACATTGCTTAGATGAGAACTATGGGGTAAAC

A\_14\_P132955 TTTATAATTCTGCTAAGCCAACAATTAGGTCTTGGCTATAATTTTCAACACAGTCCACCC

A\_14\_P105423 TTTGCAGCACTAATTTAGTCTCCAAACACTGATTATTCAGTGGTCATTATTCCAAACCTGC

A\_14\_P120607 GTGTCCCTATGGGTATTTGAGAAGTTGACATAAGCGACAATATTTTTCTGGCCTATGA

A\_14\_P111170 ATTTGACGGCATATTGCCATTTTACATCGTCTTCTGATCATACTCCTAACGTTACATAA

A\_16\_P03742524

CCTCTTTTCTAACTAAACTGTTCCCTGTCAATGTTATGCTTATCCTAAAATCCACTGCTTGC

A\_16\_P18328111

AAAAAATGACTGTCTTCAATTCTCCACCTTTAGTTTGAGGCTTACCAATTAATGTCCCT

CUST\_2577\_PI426210822 TTATAATTTCTGCGGGTGCTGGGAAGCACTGTTCAATTCTGTCTCTT

A\_16\_P19751210

GGCACATGGCACTTAATTTTGAAACCGTGGAATATTTAAATTACTGACTTGATGAAGGC

A\_16\_P18861081

TACTCTTGGTCAACTTTCCACTTGAATTTAGCCCTCATTACAAGTAAGAATACTACTACAGC

A\_16\_P40159071

TACAATTCCATCTAAGAATTACCATCCCCTAATCTAAGAATAACTACCATCCCCAAATCC

A\_14\_P107061 CTAAATTCAATGCTGAACAATGGCATGTATGATTCAAGTCTTGAGGTTTCATCTTTCTCAC

A\_14\_P104396 GTTTGGTTGCAAAAACGGAATAAATGACTGAGTGTTGAGATTTTAAATAAAATTTAAAGT

A\_14\_P125885 GAACGTCACACAGTCATCATAAGTCCGAAACAGTCCCTCAAATTTTTCTGATAAAA

A\_14\_P138422 ACCAAACCATTTGTTTCCATATAGAGGAAGTCATGCTCGCTGAAGAAAATAAAAATGCTG

A\_14\_P138774 AGTTTGCATTTCTAGGGTAAACTAAGGATGTCGTGAAATGGACTATGCAAGA

A\_14\_P108321 TATTAACTCATGTTATGAAAGTGGGTGCAAGACATGAGTGAATGAATGGGTTACAGAAC

CUST\_6373\_PI426210822 CCAGGGTTCAGCTGGAGCTGGGCCAGACTACTAGGTTGTGTATTT

A\_16\_P16696142

CCTCTACCTTACCATTCCAATTTAGCAAAAATAAAACACTCAACTACTCTAGTTCTGAGCA

A\_14\_P125072 CAGTCCTGTCTTTTACCAAAGATGAATGAAGCAAATGTCATGCTGCCTTATTAG

A\_16\_P15349689

ACAATTCAGCCTCTTCTAAACCATCCTTGTTGATATCTCTGCTACTTCCGAAAGTTAATT

A\_14\_P124284 GACATATTTTGGTGAGATCTCCCTCAAATGAAAGAATAAAATGCCAAAAACATCCTGTA

A\_16\_P15628006

AAAGCCCCAGTTCAAATTAGTATCTGGTATTTTCAATTCATTATCAAAAACCATGACCACA

A\_16\_P01238110

CAGGGTCATTAGTGTAATTTGTGAAAGACTGGAAGTAACTAAGCAGTGGATATCATAGCA

A\_14\_P131956 AAAAGGTCATTTGTAAACCTTTTCAATTTTGTAAAGTGCCCCAAATCTCTGTAGGAAAT

A\_14\_P138111 CTTACAGTAAAAGTATTTGCACCATTTTTTCTTTGCTGATGTTTGAGAGGTTGACGTAAGA

A\_14\_P135207 CACCTGCCTTCTTGCATCAAAAATAAGAAAAGTAAAAGACATGCAAGATAGGTTACTCA

CUST\_4933\_PI426210822 TGTAGAAGGATGTTTTCTCTCATGGAAAACCCCAACTCTGAGCCC

A\_14\_P103843 CTCTGAATTACTCTTAATGTATACTCTTATTTCTCTTCTCCTGCACCTCTCTCTCTT

A\_16\_P17400169

CATGCTCACATATATGTCTTAACTCACGAATCTGAAGCATTAAAGTGAAGGGACTGTTTT

A\_14\_P130580 CAGACATTTCACTTTTTCTCCTTAAATTTCCATTTGTTTTCTGGAAGGTTGAAAGAGACAG

A\_14\_P115368 CATCCGTATTTCTCAGGTTTGCCTTATCAGTGGATTCTTTGACACAATATTGATTCAATC

A\_14\_P110538 GTCTTTCTTACCATCTGGAAATGCTAGAACAGGATGAACACAAGAGTCCAACCTG

A\_18\_P14039174

AAAATTGACCAGGACTTAAAATGACTAAGATCCAGACTCAATTCATATCAGTTTTCGGACC

A\_14\_P128556 GTGGGAGGAACACAGTCTAGAAGAATTCTATATTCAAATTGCTTTGCAAGTGTCTAAGTT

A\_14\_P101439 GATCACTTTGAAAAGGTGAAAAGCACTACTGTGCTTCATTATTGATCACTCTCTTCTTTC

A\_16\_P21361354

AGAGATGATTCTTTTTGCAGAATGTTATCCAACCAATTACAATATCCTACCACGTTCAACC

A\_14\_P130182 TTTGTTCTACTATAGGGTCTGGTTACTGGGTGAAGATTCATCACTTAGAATATACAGAT

A\_14\_P132061 ATTTTAGGATTGGTCTGTTTGCTCTGGTGTAGGAGTGGCCTTAAAGAACTA

A\_14\_P128294 ATTCTGAAGTATGCAATCTGTTTTTTTTAAGTTAGTGGTGCCTAAACACATGCTTGCAT

A\_14\_P137730 GAGTCTTCAGGGTACACCCAAGTAATTGAAAAGACACTCCTCCACTTATC

A\_14\_P115261 CATTTAAAATCAGAAGTTGTCCAATGTCACAATGCCAGAATCACAATAGATGGAGTAGTT

CUST\_2487\_PI426210822 ATCTACTCTGAATGGCTTAGCACCAGGAGGGTGGATTTGTGTAGTG

A\_18\_P14850450

GCATTCCTTTTCATATTACATCCTGGTCAATTCTACAAACTTTTAATGCTCCCAACTTCC

A\_14\_P127384 GTTAATCACAGTGTGAGGTGTATCAGAAAATAGTTAAGTAAATGACAGAGCACCTGAATG

A\_14\_P129743 CCTGAGTCCCTGTATTAGGAAGGGGAAAGATCTTTTGATTCATTAACCATTAAGTTGATT

A\_14\_P118842 GGTGCTATTTTTCCCTGAGTCTAAAATAGGTATGGCAGCATTTTACTTAACTAGGACCAT

A\_14\_P132184 TGAAATATAGGTGAGAGACAAGATTGTCTCATATCCGGGAAATCATAACCTATGACTAG

A\_14\_P136160 AGCCTATAAACATGTAAACATCCCCACAAAAGAAATGGAGAGTGTTCTTTTTTCGTCT

A\_16\_P15713594

TATACCACTCTACATTCTTCATACCTATACTCCCAGACAATAATGAAATCGCCAAAGGAC

A\_16\_P17829601

AATGAGACATGAAGTAAGTCATAGAGACCTCAAACAGTAATATATCCTATGGGAACCCTG

A\_14\_P117001 CTGAACTCAAGGCGGAAGCATTAGATAGAGGGATATTAACATATCATTTACAGGCATAGT

A\_16\_P15953587

ACAGGTGTCCAGAGAAAGAATTACTACCCAACCTTTTTAAATTAACAACCATCATGATTCA

A\_14\_P122036 GAGCCAGAATGTTTCTTAACTTGTGCCAAAATGTCCAACATTTGGAATAATAATGGCAAA

A\_16\_P15150873

AAAAATTAAGGAGGTCATCATCTAGGTCTTAGCCAACCTGTAATACAGAGTTGAAACACGA

A\_14\_P113546 TTTTATTCTCGTCTTTTTTCCAATAAGAAACACCATAACTAATGACTTCAGAGAGGCTCT

A\_16\_P35855159

ACATCAGCAACACTGCAATAATACTCAGAGAACCTTTCAACATATTCCTTTTTCTTGT

A\_14\_P132963 AGCAAGTGAACCTGATATTCAATTTGTCAGGCTTTATGATGCTTGAGCCTTTAAAGTATGC

A\_14\_P132736 GATACTTATTTAAGAATGTATGTATTGCTGAACCTGAGTTACTTTCCCTCCTCTGTGGTC

A\_16\_P58424083 GTGTGACTTCGGATACACTCTTTAGGGCCTATTCTACTACTCCACCATG

A\_14\_P112908 CAAGTCTCCAGTAAATCAAGTCTTCCAGCAAATCCAGTCTTCCAGCAATTAAGT

A\_14\_P102110 GGAAAACAACCCTCAGTTATCTCTGGGCAGATAATGTGTCTTTTCATTTACTTGGTAATAA



A\_16\_P20851941

ATGAGTTTTACTCCTAACCATGGATAAGAGAACTGAGAATACGATGTGAGAAGAGTCTC

A\_14\_P128501 TTTTAGGTGCGAAAGTAATCAGTCAATCCAATATCCCCATCTTTGTCTTGAAACAAAA

CUST\_945\_PI426210822

TCCTCTTTTGGGAGGAAGAGCAATCCTTATACCTTGAAATGTGTGTCAGATTCTAATATTTG

A\_14\_P113338 TTGTTCTCTAACGACACATTCTGAAAGTGGGAGTTCTTTCTTTGGTTTATCTAATACAG

CUST\_9624\_PI426210822 CATAGATTCTTGAGGCTTTGCCTGGTTCACTAATGACAGGCTCCAG

A\_18\_P17264157

ATTGACTAGTGATCTCTTCATACCAACCTCATGTCTATACCTCATTGTCTTGTGTTCCAC

A\_14\_P127821 GACATCTCATAATACTGCAAAGGAAAAACCAAGTAAGAACGTCTAGGGTGGAGATG

CUST\_3562\_PI426210822 ATTCTGTCACCTACAGAGAGCTAGGGAAGCGCCAGGCTGAGGAAA

A\_14\_P139351 AAAGAAAGAGAAATTCAGAGGAATCGATAAACAAATGTTTCAGCCTTCATCTAAAGATA

A\_14\_P104351 TCTCACAAACCATTACCAAACCAAACTAGGGAAAAGACAACCTTACTGTTTTTCTGTTTC

A\_14\_P106121 GTGGCTTAAATCCATACATGGGTTTTAAAGTCGGGGAGACTATCTTAGGATGAAATAAAA

A\_16\_P17741463

GCCACTCATCCTCTCTTTATGACCAATAGTTGATGACTTTATAACTCTGGGCTTTAAACA

A\_14\_P131464 CATGGTTCTTTTTGTTTTCTGGAGAGTAAATTCCTGGAGCAATTGCTAGGCCT

A\_14\_P132437 CATTCTAGTTAACAATATTGTTACAATGTGTTTTTTCATTCTCGCCTTCTGCCTATGGCA

A\_14\_P136523 CTCCATTAAGTTCATACAAATGAGCAAGGCAGATTTTGTGATGATAATTTACGGCTCTGA

A\_14\_P117771 TCTGAGTTTTTCTGTTTTTATTCCCATTTAAATGGACAAACCACACTGTGTTGACTTCCA

A\_14\_P127556 ATATATTTGAAAAGGAAGAATATGGACCAACAACATCCTGAGTCTCAGAGCCATTGATTT

A\_16\_P36050609

AGACAAATTGACTGAACACTAAAATGACTGAGTAGAATCCAATCCTTCTAATGACTT

A\_14\_P117015 CTACAAGGCCTCTTGTTAATTGTGGGTTTTTATTTTTATTTCTATTACCCTCTCACACG

A\_14\_P106304 CTTTTTGCAAATGACGGAAGTAGAATGCCTTCAGACCTCCTAATTTCTAAACTCTTTAAC

A\_16\_P19006105

AATTCAATTGTGACTAAATTCCTAACGCTATGGATTTCCCTAAATGCTCTTTTTGAAGCCTC

A\_14\_P105173 AAAATTAAAGTCATGCTTCCTTGATACATACCTCAATTCCTGGCAACTTCTCACTTGGAAAT

A\_14\_P106359 CAAATCATATTCAACTCTAAAACAGCCATGATAGCCACACCTTTCCAGTAGTAAATGAT

A\_14\_P123581 TCTTATTTCTATCTCTTTGCTCTCTCCTCACTCTCAACTTAAGTTACCCTAGAACAGAA

A\_14\_P116899 GAGAGCATTTCAAATCCTCTAGCCAAAGTAAACTGTTGAAAAGTGAAATGGTTGCTATAC

A\_14\_P201142 AACTTCATTTTAAATTCACGCTTAAGGACCATGTTTGATTAGTTTCTTTTTATCCCCCG

A\_16\_P41841579

TCAACCATCCTTTTCTAGGC AAAAATGTGATTATCTCTTGGAACGATGTCAACAATTTCT

A\_14\_P120043 TGTTTTATAGAAAGAAAATGTGCGAAGCGTTCTAGGAGGAAATGATCGCAATGATAAGTGA

A\_16\_P21246483

ATCCATCTTACATCAGCCACTTCTTAGGAATGCTTTAAACCAACTCAACCTTTTTAGATT

A\_14\_P110608 TTCAACTACTATAAGTTTTCAAGCCTCTGAATAGCAGAACAGTTCCTGTTATGGGAATGTT

A\_14\_P121513 GAACAGAGGACATTTAGTCTTATAATGTCGCAACTATGCCTATCAGTTGAAATTTACCTGG  
A\_14\_P132733 TCTGTTTCACTATGCTCTTCTATGGGTGAGTATCTCTTTATGCTTATGTGAAGTCGTTTC  
A\_14\_P128879 CTTCAATTTAAATCTGGAAAAGATGATATTATGCCGAGGTAATCATCACCAGACTTCCCAA  
A\_14\_P118969 ATAGCCCTTCAGAATTCGAAGCAGCAGGAAACCACTGTGATATTTTTAAACAAGTATTT  
A\_14\_P128048 TTTCTTCAGAGCCTCATTTCACACCTGTCACATTTTAATCTGCAACTGGC  
A\_14\_P123247 AGTTTTTTGAAACACCATCCCTGTATGAAGCATAACATTCAAATATTCTTAGCAGTGAGCGA  
A\_14\_P127979 AAGCACTTACCTTCACCATTAAACCAGTATTTTAAGCCCTAGACTATAAGGCTAACTTGG  
A\_14\_P131793 ACAAAGTTATGGATATAGAACATCCTTGCAGACTATTTGTTTCACGACTTTAACATGGCC  
A\_18\_P14134359 GACTGGAGGTTCTCTGCACTTCTGTTTGATCTTCCCTGCCTGTCT  
A\_16\_P21660593  
ATCACAATAATCCCAAACAGGTCAATAATCTTCTCAATGCAGTATGTAAAGACAACCATG  
A\_14\_P101967 GAGTTCAGATTTGTGTGTAACCTGGAGCAGGTTCTTTACCAAGTCAAAGATAAAATTACC  
A\_14\_P138012 CTATCTTCTTCAGGAAAACCTGGGACAGCATACTATTCAATCTCTGCTACAAGTTCC  
CUST\_7760\_PI426210822  
CACTTTTTTCTAAGGGCTTCTCTTGATCTTTTTTATTTAAATCTTTGTCTTCTGAAGCAT  
A\_14\_P201273 TTAAAAAAATTCTTGCTGTGTTGGAAGTACGAGTGGTGGAGTCTCTGAAGC  
A\_16\_P38115662  
GGTTATGAGCATATTCCCATTTGTGAATAAATACCTAAAGTAACAACCTGTAATCAAGCA  
A\_14\_P114339 AAAGACAGAGAATTTTGGGAGTAACATCACCCCTAAAGTTCCTCACTTAATGAAGAAAATC  
CUST\_6633\_PI426210822 TACAGTATGGATGAGAAAACCTGTATCTAGCTTTGGGGGCTGTGAAG  
A\_14\_P109561 AAAATGGCAGTGTCTTCTCCACTTTGATATGCTAACATTTAGTAAGCACTGGCTTTATGA  
A\_14\_P100495 AATATGTGTCCAGGGAATGAAGAACGGTTACCAATGGCTTAGTATCTATAAAACAAGTCA  
A\_14\_P137272 ACCTTTTATGAATGCTTCTCCAAGAGGCATTGATATTCTCTGTTATCATGTGGACTTTTC  
A\_18\_P10641406  
AATTCCATTTGAGAAAGTTTAGGAAGATGTGACACCAGTAAAAACTGTTCTACCAGCAAC  
A\_16\_P58424421 GGAAGAGGTGGGGAAGCCCTGGAGCATAAATCACTCTGCAGAATT  
A\_14\_P100515 CTGTTATAAGCCTGTCTATGGACTTGTGGCTGAATCAACTAGCAGAATACTGAGCATTT  
CUST\_2380\_PI426210822 AAAGAAAAAAATTTCTTTAATGGCAGATTCTTGCAGGCCAGGTCCTGGA  
A\_14\_P121835 AAGAGCCTGCATTAGTATAGTGGAATGGAAGTATCCTTTTTTTGGGGGAAGTCTTT  
A\_14\_P123105 GATCAGTGGAAATCAGAAATTTCTCATGGCACTTCTCATTTGCATAAAAATACAGGGTTT  
A\_14\_P124769 ACCATTTATTTGCAGAATAAACATGGACTCAAACACTGAAACATGGAGTTTGTGAAGGAT  
A\_14\_P201150 GACAATAGGATTATTACAGGTCTTTGGGTAAGCACATCTTTGTGTGATTGGAAATTGGTA  
A\_14\_P121834 GAACAAAGCAGTCCAGATGGAGCCCTAGAAGAGACAAAGGTAAATGAAAAACAAT  
A\_14\_P138018 TCTGTCAATTTAAAGACTCGTGTTTACAGTTTTGTATCCAAGGCCGCACTGCTTT  
CUST\_8384\_PI426210822 CTGCAGGAAGGTCACTAACCAGCTTGGCAGTGATAATGACCAGAA  
A\_16\_P00524028  
CACCTCTAATATGGCTTGCTTTTCCTAGATTTAATTGGATCCAACCATCTATAATAGCCA  
A\_14\_P119326 ACCTCCATGATATATTCTAAGTTACTGGAAAATCCCTGTAACCTCACTAAAGGCTCTGAAG

A\_14\_P101809 AAATGAGGTCAATCTAGATTAAGAGGGATTGAGTTTTGATTTGTGGAAGAGGTGAATGAA  
A\_14\_P130171 AATCCAAGGCCCTGCCTCAAGGAGTCCATATGCTTTAAATGTCCAAAACTATATTTATT  
CUST\_7478\_PI426210822

TTACTATTTGTGTGTGCAAGTCGTTTTAAACAGCTGGCCCATTAAGTAAAAATGTCAA

A\_14\_P119849 ATAAGGAGGGGTAAGTTATGTGTGTCTTGGAAGGAGAATCATAAATCTTAAAACATGAGC  
A\_14\_P118495 AAATCCACAAGCCTCAGGAGATTGGTATATTGCCCTATTATCCCATAGAATTGAGTTATC  
A\_14\_P122130 AAGTAGGCCCATTAGGAGTTTGGATTTTATTTTGAGGGCAGGAGAATGTGAGATA  
A\_14\_P104703 AGTGTGGGTATTACTAAATGTCTCCTCAAAGATGGTAATGCAGATGAACCGATAGTAATT  
A\_16\_P00052481

AATGAAAGCCCTATTTCTCTAATCCACTCTATGGAAATGTGACTTTCCCAACTCAAAGT

CUST\_4810\_PI426210822

AGGGAAAATGGAGATGGGGTATAAACATCTGAATTCACTGTTAAACACTCCATGAA

A\_14\_P109283 TCTTTAGACAAATAGTGTATGTTACATGCTGTTATGCAACCCTCCCTTTTCCCCTTAAT  
A\_18\_P14135319

ACTAAGGCTAATGGAAAACCTTCAGATTCCTTCTTGAAGTGAGAGCATAAAGGAATG

A\_14\_P118484 AAATGGTGAGGTAATTCTTTCCTTCAAACAAAATCTGTTCTCTTTTTGGTCTCCATCAT  
A\_18\_P17282078

GCCACTTGTTAGTAATCTCACACTGCATCATTTTAAAAAACACAGCATTTTTGTCTGG

A\_16\_P58424162

CTCTTTAATCAGTGTGATGCATTTGAGATTCGTTTCATGTTGGTGTGTTGCTTGTTTTTC

A\_14\_P132772 TCTGTTTGATCCTTTTTTTTACCAGGGTCTTTTACCTAATTCACTTAATGTTTGATGAC  
CUST\_6660\_PI426210822

TGTCGTGTTAGTTATTATGTATGATGTACTTGATGTTTCTAGTAGAGGGTCACTGCTTTG

A\_14\_P113535 ACATCTCAGTGCTTCTTCCTTTATGTAACCTTTTCTTATCTGTCTTTGACGTTTTCTTCC  
A\_18\_P22840905

ATTTGCTTTTTTTCACAAAGTCTGGAAGAAAAGTCTTGGTAAGGATTTGTTTAGTGGTTGG

A\_14\_P129098 GAAAAGGGCATCTAATAGGCTAGCGTGTTAGCAAAGGTAACCTATCTAAAATGATGAGCA  
CUST\_8892\_PI426210822 GAAGATGGGTCTGAGCTTCATTCTTTACCTTAAGATGGGTCCAAGAGCTA

A\_14\_P103964 CTCATTGCTCTTATGGGAAAGTAGCAAGTTCTGAAGTGGCCAAAGCCTT

A\_14\_P117462 CTTGTTAACATGCAGATGCTGAAGCCAGCATGATCAAGTGTCCACCAAT

A\_14\_P105721 TCAACATCCTCAGGGTCTGGGAAAATATAGTATCGACCAGAAAAGTGTGAAATATGAAAT

A\_14\_P105064 GCAGATCTTCACGGCTAATCTAATAATGCAATAAGTGCACAAGTTTCAGATCACCATTTT

A\_14\_P119178 TATGTGATAAAGGCAAAAGTCTTATCTGTGGATTAAGAAAGGAATGGTAAGTGAGACTGT  
CUST\_7470\_PI426210822

GTTTAATATATTCCAACAAGTTCAGAACAAGCATACTAGATCTTAAGGCAATCTCATGGC

A\_16\_P30952612 ATCAGTTTGTGGTGGGAATCCTCATCTTCTGCTGCTGGCCGTG

A\_16\_P03074232

GAGCAAACCCAAATCAATTCTCAATCTGTGTCGTCAAAATTAATCAATGTTTCAGGA

A\_16\_P15896059

AAAAGGTGTCTTTAATGCTAAAGGTAAGATGGCAAGTTACATTTAGAACTGACCAGAAGG

A\_14\_P101976 AGGCATTTTCTCAGTTGCTTAATTCCCCACGAACTGCATGGATGCTC

A\_14\_P201377 GAACTAAAACACATGCAGTATATGTAAGTGATTACCTGGATAAAGCAACAGGGCATTAGG

A\_14\_P111326 AGGATGTATATAAGCACAAACATCCAAATCCTTAACACTGGGAACTAGAGAATGCTGTCA

A\_14\_P100802 ACTGCTTCTATAAGAACGTGGTCCCTGTATATTATTGAGGTAAGAAGGGGTATTTTTTTTC

A\_16\_P00403913

ACTTGATACGCTTGATACATTATCGTGTTCTACACCAAATAGGAAACTCTACAAAGGCAG

A\_14\_P115142 CTTCTATGGGATACATTTCCAGAATGGTTGTGTACCCTTTATAAACATTCTAGGCCAA

CUST\_4827\_PI426210822 TGATATAATGATCTGGATACAGCCAAAGTCACTAAGCACGCTACACCCTAGC

A\_16\_P16191796 CTCTGATGTCCACAGGCCAATTAGCCAGGATTTAGGGTAGTGTCTACTT

A\_14\_P130521 AGAGGAAATTCAGCATTCTTACCAGTGCTACTTTGTCTGTGTAATTGGAAATTCCTGG

A\_16\_P01449656

AAATTATTTCCATCTGCATATCAATAACTCTTATTCCAACCTGTAAAATCCTTCTCTTTA

A\_16\_P35465451

AGCCCTATACTACGCCTTATATAGCATAAGAAAGTAATGAATCTCTATCCTCAATGGCCA

CUST\_1305\_PI426210822

CTTTGTGTTTCATGCACACCATAGCTTAGTCATCAGTTATTTTCATAAAATGTTCTCGCT

A\_14\_P135768 CTTACCACTTTTTGGTTCCCTTCATTATCGGTGAGCAGCCATTCAATATCCA

CUST\_928\_PI426210822 TTCAGTGCTTCCCATCTGTCCATTTTTTTTTTTTCAAAGCCACAGGGTACATT

A\_16\_P03608407

TTGCCCCATCCATAAATATTCTCAATTCTCCATGAGTGTTATTTGCATAGACTTGAGCAT

A\_16\_P17926700

ATCACCCATCATAACCAGAGTTACCTACGTAAAGCATAGATTAATCATGACCTCCCTA

A\_14\_P202098 CACTTCTTGAAACATTACCCTTTCCGATTACACAAATATTCTAGCCGACAAATCTGATCA

A\_14\_P119149 AGCCAGTGAACATCAATTTAAATAACTTTATTTCAGAGGAATCCTTTGGTCCACTTCTGCT

A\_14\_P134824 CTCAGAAGACAAATGTGTTCTCTGGGGACTTGATTGAAACCATGTATTCATAAAAGTCTT

CUST\_1375\_PI426210822

TAAAATAATAGTAGTGCCCTTAACTCACAGAAATAGCATTCAAAGGAGTGAAAACAATGG

A\_14\_P104662 ACTCACTTCTGTTTTTGCTTCATGATGTCCTCAGTGTTGGGAAGGCAATTT

A\_14\_P117129 TTGAGCCTCTGGAATCTGCAGTTGAATTTTCAGCATGTTCTTTACAAATTAAGAATGAAG

A\_14\_P121431 AATCGGTGCATTATGCTTTAATTTGCAAATGGCATTAAAAATATTAACAGGGGCAGGTTT

A\_14\_P111945 CCATCGTATATTGAAATTTCTCATCCATGTCATCTTTCTTTGCTTTTGATAAGACCCAT

CUST\_6057\_PI426210822 CTCTGGAGCAGCTTCCAAGAGGTGGTGTGAGAGGAATGAGGACT

A\_18\_P13114736

AAATGGAAGAGACAAAAACAGACAACTTAGTCCTGAAAGTATTTCTGCTCACAAGAGGAC

A\_14\_P134004 ATTTTGATAAAACTGCCTATCTACCTTTGACACTCCAGCATGCTAGTGAATCATGTATC

CUST\_728\_PI426210822 CAGCAAACACCTGGGGAGGTGCATCCCAGGGCATTATTGAGGAGC

A\_14\_P117920 CAGCAACAGATGAACAGCCTCACATTGGAAATTACCGTTTACAAAAACAATAGGGAA  
A\_18\_P17167001

AAAGGGAAAACAAACTGCATTTAATCAGATTATGCTCAGTATCTAAAATTCATGGTGGAA

A\_14\_P107241 TAAATAATCAGGTTGTTACTTATCCTGTTAGTCATTCCCTAAGAATATTTTCTTCTCTACC

A\_18\_P14137032 GTAGTGAGAGGGCTCTTGTCTGTGCTCTGTTGGCTTTAGGCATCT

A\_14\_P132774 ATTTTGTAGAGACAAGGAAAAACATTTTGCAGAGTTTGGCTCCACTATTGAAAAAGGGATG

CUST\_2558\_PI426210822 GTGGTTCTTCTCAGGTGAGAGGGCCCACTCTTGTCTCCTTGAATTG

A\_14\_P102887 GCCTTTTTAATTTAAATCCTTGTCTTGTCACTTAACTTAATGGCACTGTGATAGCAGGC

A\_14\_P127373 TTCATTCTGTCTTGTTCACAGTATCTCCCAAATTGTAGAGATTTCTTCAGATATCTC

A\_14\_P100849 GTATAGTGTCCACTTGTAGGCATAGGATAGATCTAGAACTGATTTCTCACATGACATGAC

A\_14\_P100930 ACTATCTTCACTCCACTAACAGACTGAAAAGGACTTCTCAGAGAAGCATTTCGAC

A\_16\_P01095174

TTTTGGCAATATCTTCATACCTTTCTAACCTGTCTTCATATTTTTCCACAGTCACTCTC

A\_14\_P132779 ACCATCTAATACATCAAGGATCCTCGTGTGCACATACTATACTCTGAAAATACTGGGATG

A\_14\_P119929 ATATCAGAACCATGTAGTGAATCATTGATGCTGCACCTGCCTTAGTAGCCTGAAA

A\_14\_P113741 CTCCAGGAGGAGTGCTTTAGTCCTACCCCTTATTTACAGATGACAATCAG

A\_18\_P11456093

GCTTCTTCTCCAAAACACTACATGCTACATATGCAAGCAATACTTTACAAAACACTAGGAGGCT

A\_16\_P02119936

ACTGGAGAATGATACCACAAAACACTTAAATAACCTCAACCCAATATACTTTCTCCTGT

A\_16\_P35682541

CACCTCCCCTATTTTCAATTACCTGTATATTCAAAAAGCATTCTTAGAGCAAACAACACA

A\_14\_P129658 CTAGGAACCCTGGAGGTAAACAAAGACTTTGATCCATGTATGAGTGTATGTGTTTATGTA

A\_18\_P14137666

ATATAAATTCCTTCTTCTATTGAGACAAGTGTGTGATGTTGACTGCAGAGAGCATCTTG

A\_14\_P138861 GTTCCATATCTTTTCTCGTGAGCAGGACTTTACACTCCTAAGCCTCAAGTGAT

CUST\_1120\_PI426210822 CACATGATGGTCCCTGATGATTCTCTATATATAACCACAAGCACAAGGACAG

A\_14\_P127184 GGTCTTGAGAATTTTCAGTCCAGGGCTCTTAAACCTAGATAAACATAGAAGTGTGTATAGA

A\_14\_P106275 CAAAACAATAACAACCCACAGTTCTTCCCTGGAGACTGAATCCTGTTTAAAATAAAAGGA

A\_14\_P103694 TTTATAGAGTTGGAGGTTGCAACTCAGCATTTGCATACATTTATAACACCCAATTAGGGA

A\_14\_P114085 TTCCTTGAAGGAAGGGACTGTATCCTCTGTAACCTTTGTGCTTCTTAGTATGGCATAAT

CUST\_9475\_PI426210822 CAAATGGAATGATGCTGGGTCATTTACTACTTAGGGTCAGTTTTTCTGGCAG

A\_16\_P01947078

ACGTGAATGGTAATGGATAGTTTAGTTCCCTCTGAAGGTTAAATTCAGTCAACTTTGAAC

A\_14\_P104472 CATTGATTGCCAGAAAGAAAGTAACAGAAAGACAACAGGTTAGACATTTTTCTTAGACA

A\_14\_P105176 TTCATTAGAGCAAAGATTAAACGAAGTCCCAAGAATCATCCCAAAAGCAGGATTATTAT

A\_16\_P03418980

CCCAATACCCTCAATTTTTGCACATCTTTCTGAAATGTTTTATACAAACCTATTTCTGC

A\_16\_P19245278

CCATCCATATGAACACAACGTTTGGAAATTGTCTTCCTTACTGTCAAAAAATCTCACCTTT

A\_14\_P105807 CAAGCATAAAGTTATTTTCACACATTGGGAAGAAATGTTCCATTCCAATTTCAAGTGGAG

A\_14\_P200424 CTTTCATCTTACTTTGGCAAGAGAAAACAGAGGTATTTTTGCTCCTCTTCTACCCAAGT

A\_14\_P110710 TGTAAATAATTTGCGGTTTTGCTGCGTTAGGTTTTAAAGTTCAGCAGTAATTACCGTGAC

A\_14\_P200248 AGCCAAACAAAATATTTTATCAACTTCATAAGGTGCTTGTAAATTTTTCTCTGGAGCAGGT

A\_14\_P138113 AAGTCGTTTCTGGAGAAAGTGGCTATGCTCAAAATGGTGAGTCATTTCTAAGTTTTCTT

CUST\_7997\_PI426210822 TAATGCTACCACTTTCCTCCCACATACAGATGCTGGGACCTGAAG

A\_14\_P103599 AATGGCTACGAAGTGGATATTACAAAGTGCAGTTGAAGACTCTATCTCCAAAGAAACAAT

A\_14\_P135151 CATGGCTTCATATGACAGAACAAGGCAATCTATCAAATTTACAGGAAGAATCAACATGCT

A\_14\_P133866 TAAGAAACCTTTAAGCATTTTTTGTCTTGAGAGGCCCTCAGAGGAGCAAGTAATTT

A\_14\_P127044 GCGAGCATGATTATTATTTGTTGGTTGTTTGACTTTTTCTTTCCCTAAGCCCATAATTGT

A\_14\_P110785 TAATTGTGTGGGTATATATTTAGGGGCAATAACTTCTACCCTTCAGATCCCCTTTTACT

CUST\_9484\_PI426210822

TGGTTTAAAAGTTTTATAGAATGAAATACTTGCCCAACATGAGAGGTTTAGAATGTTCTG

A\_16\_P16191214

ATTGCTCTTTAACTCTCTCTCGAGTTTACCACGGAGAGTGTTTATTTTAAGATCCTTGTG

CUST\_7144\_PI426210822

TCAGAATTTTCACTTATAAAAAGTACCATTTACACATTTTCGTCACTGCTGACAGTCATTAG

A\_14\_P116058 TAAAACCAAATTGGTGTATCCACATCTTGTGCAACTCTTGTGTTGAAAATAAAGGAGCA

A\_14\_P109932 AGTAGAAAGTGATCCACGTTACAAAGCAGTAGATAGTTCATCAATGAGAGAAGACCTTTT

A\_14\_P200252 GATTAGAACTATGGTCAGTTGTAGTGCAAGTGTCTGAGCAATACAGGAAACATAGAC

A\_16\_P15272743

AAACAGTAAAAGTCTAAGAGAAGCGTGGTAAGTAGTTCTCAGTGTCTCATTGACATCTC

A\_14\_P201777 ATATTTAGGATTTTAGCCAGTAGTTTTGGGTCAAGCCCTAACCTGTCAAAGGTCAA

A\_18\_P22842118 CTAGACTGACATCAAATGCTTGTATGATTGGGAGGAAGGAGCCCGAAG

A\_14\_P119090 CTCAGTTTTGACTTGAGCATTCCCTTTTTGGAAAATCAAGAATAATGGCCCAATATTCT

A\_14\_P115377 GGACGGATGGGGGACAGTATTGTAACATGATTAGGATTTAGACGACAGGTATTA

CUST\_3631\_PI426210822 TAAGGAAAACCACACGGAGCCATTACCTTGTGTTGAAAGGCAGCT

CUST\_2164\_PI426210822

AACAGCTCTCTGGATAGATGTTTAGTTTTATCTTTATCCAAATAGTGAGAATATAATTTT

A\_16\_P17714409

AAACAACACTTTCCTCATGTCATTCTGTTTACAGTCATGTCTACATTGTTACATCGCATC

A\_14\_P122275 TCCACTATGGTAGAAAACCTTGACATTCATAGATAATGATACTGGGTTTTCTTTCCAAGA

A\_14\_P104043 CTAAGTAGATAGGAATTAGAAGTGACAGTGGAAAGAGTCTAAAAGATCATTCCCATGAGCA

A\_14\_P100730 CTGCTAAAAACATTTTTTTCTTTTTTTCAATGAGAAGACTAGTGATTACTTTGACTTTAG

A\_14\_P126969 TAATACCAAACCTGTCCCCAGAACAGGAGTATAGCAAAAATTTGGGAAAATAACAATAAGAA

A\_16\_P15617587

ACGAAAAGAGGGTTCATATTAGTTCACACTTGACAAATCACAGAGTCATACGAATGAGG  
A\_14\_P122930 CCTTCAATGGAAGGCACTGGCTATCTAAGTGCTCACTTATAAAGTATTTATGTTTCAGAGA  
A\_16\_P35672814

AAAGTCCACAAACCTCTAATGAACAACATACACACATTTTCATATTCAAACGGAATGCATT  
CUST\_5432\_PI426210822

AGATTGGTGGATAGTAGGTGCTTAATGAATGTTTTATTGGTGGGAGAATGAGTGAG  
A\_14\_P110109 CTTCATCATCAAATTTCAAACAAATTTCCCTAAAGACCCTCTGACTAACCATACCCAA  
A\_16\_P02999130

GCAGTTCTGAGCCAAGATATGAGAATTTTAATCACACCACATATAACAGAAGTCAACAGG  
A\_16\_P18275524

CGCTCCTAIGTTAATTCTCAGTCACTTATCCAAATCCTGCAACATAGATTCTAATCTGGT  
A\_14\_P121239 GTTTCTGAGGTTTGTGAGCCTGTCCTGCTTTGCATTCTTCAAACCATTC  
A\_16\_P16595618

AAGGCAAGAGAGCATTTAATGACACTCAGGATTCAAATAACTTTGTCTTTTGTGCATACG  
A\_16\_P18311091

ATTTCTCAGGGTATTTGACTACTATCACTACATGCAGTCATCTGAAATCAGACGTTTCAG  
CUST\_1014\_PI426210822 AATGCATTCACTGGCTGGGGTGAAGTGAAGTGAATCAGAAGTGAGTAG  
A\_14\_P121272 GATGTCAGCACTCTATAAAAGAGTTTTTTCATTTCTATCTTGGAGATCCATTAAGAGAAGA  
CUST\_1573\_PI426210822 GAGTGTGCGATGTTTTTAGAGGACGTTTGGACTTAGGGACTGGAG  
A\_16\_P19590921

AACAATGATCAATTCAGTTCTCCAAGTATTTGGCATTGTTAACAAACTGCGTAGAGACAG  
A\_14\_P102897 AGTGATAACTAGAAATATATTTTCTGTCCCTGTGCTTCAGTTTGAAAATGGAGGTTCCAT  
A\_16\_P58424430 GTTTTATACTCCTTTCCCAAGTGTCAAGAATTGAGGTCTCTGGGGCTATTTATATT  
CUST\_4597\_PI426210822 CCTCTTGCTCCTCCCCAGAAAGGGAGAGCCAGCTGAGGGTGACAC  
A\_16\_P39580147

GGAGAGGGTCAATAATCTGGAAGAATGAGATTAACAAAGTTGAACTCTAAATGAACCTGA  
A\_14\_P111323

GAATAGAAAAACATATGAAAGAAGATGGTTCTTGGGAGAAAACCAGAAGGATACCGATTG  
A\_18\_P18007708 ATCATCCCTCACATATTTTCTCTCAGATGTATACGCTTCCTATTTTCATATCCATTGCTC  
A\_14\_P128045 TCCGTAAGCCTCAAATTGATGTTATGAATAAATAGCCATGGGGGACTGTTCAATCAATAA  
A\_14\_P137870 GGACACATTTCTAAGTAGGTGCTCTTTATTTATTATGGACAACCTCTCTGATGAGGGACTA  
A\_14\_P109104 GCAATACAAAGTAGACCTCTTAAACCAACTCAATCTATAGAAGAGTTGGGCATCAGTGAG  
A\_14\_P123268 ACTAACTGAAGTATTTTTGGATTTTTTCAGCCAAATGCTCCTATCTGGCTCATACTCAATG  
A\_14\_P108259 GGTCTCTTGTTTACAAATATAGACAAATACATAGGAACACTGACTGGTATTTCCATGTC  
A\_16\_P03806389

AAGCAACATTTTCTTTGAGGAAAGCATATATCTTTCCCTATGATTTGCCTTTAGGAAAA  
A\_14\_P138146 CTTTCAGATCGCTTCGGAAGGAAAAAAGTCTATCTCACAGGTAATCTATTAGAGTATTCA  
CUST\_8465\_PI426210822

AAGACAGAAAATGGAGAAATGCTAGGGAAAACAAGAGAGGCCAAAGTTTTATAGAACCCAAA  
CUST\_2426\_PI426210822 ATAAAGGCAGAAGGAGTAGGTCAGACCCAGAAAGATGGGACTTTT  
A\_14\_P139378 AAACTTTAGCATTTCATTGCATTCCAAACAATTTCCATAAAGAGGGGAGCAGTTGAA  
A\_14\_P128590 ACTCAGTTGCACTTCTGAATAGGAGCCAGAAAAATATTCTAAAGTGGTATGATAGCACAT  
A\_16\_P58424222

CTGAGAAGGAACATGAACCATGTATTCCCTGAATGTCTTATTCCCTTAAAAATCCTGTGAT  
CUST\_612\_PI426210822 TTTCTGCCCAGTAAGGGATGCGGACAATTCCTGGGGTTTCCCCGT  
A\_14\_P119214 CTTCCATGTTAGGGGCCTATTTAATACTTACAATAATAGGAGGACTTCTCTCACATGTG  
A\_14\_P110195

CTAAAGAATCGCCAAGAAGACAAAGAGAGAAGGAAGGTCAAATGAGATATGGTTCTCTTA  
A\_14\_P101437 AACTGCTTATATAGATCAATGGCACGCTGTTCCCTATAAAAGAGAAAACACGCTCTGATA  
A\_16\_P16191344 AAACACTTGGTCACATGAGATTGCCTATCTACATTTTAAATTTGGCTTCAGAGGGAG  
A\_16\_P19912135

AAGTGTACCTCTAAAATGTATTGGTTCGAGGAATAAGATTCACTACAACCATACTGAGA  
A\_14\_P104267 TTTCTTCTCCTTGAATATTTTCCCAGGTAATGTTTTTCTGTTCAATTTCTGGTCACTTCT  
CUST\_931\_PI426210822 ATCTCAGCCTCTCTGTGATCCTGCTCCCCACCACACACCATTCTTA  
A\_14\_P108609 CACATGCTGTGGTCACCAAATTCTGACATTCTTGGTGAAAATTCTTCATTTGTGTATAAG  
A\_16\_P19473004

AACCTTTTTCTCTTACACTTTTCTAAAATCCCTCTTCCAAATATGATACCATCTGTGCCAAG  
A\_18\_P22840693 ATGCCTGGCACAGTGTGAGCACTTCATTTGTGTTCAATCTTTGTATTGTTTTCTTTTC  
A\_14\_P121032 CTTGTTTTTCAGATTTATCTTATGCATGGACCTTCAATGATAACCCCTTATACGTCCAAG  
A\_14\_P139170 CTATCAAAATACTCATCCTTTGTAACAAACCACATCCCCTATCCCTAATATAAGCCAAGA  
CUST\_608\_PI426210822 CTCTGGAAATGAAGGGTTTGGTGTGGTCAGAGGTGGCTATCCTGG  
A\_14\_P131070 CACAGAAGGGTAGGAATTTGCTATATTCGGAATTTCTTTACTTAGAGAAGGTAGAGGAA  
A\_14\_P138629 CCGCAATTAACACAAGTAAAAATCCATATCTATCCCCAACGGTAAAACAGTCACATAAC  
A\_14\_P136435 AATAAGGAGGGGCGAAAGGACATTTTTTTTTTTTCTTGCTCCCGCCTC  
A\_16\_P19461011

GGCTTGGCTCTATTTCTTTTAATACCCTGATTTAGAAAAACACTAACGCATATGAGACC  
A\_16\_P17093479

AAAACATGACAAAATCAGAGGCCAAAATGTTAAAGGTTTTGAACAGGCATTCAATCTGC  
A\_14\_P113349 CCTTCTAAAATTTTGTGACCCTTCTAATGTGCTGTCTCTCTGTCATCTTTTCTCT  
A\_16\_P21352220

AGAGTCCTATATTTGTTGAATTCATGTCATACCCATCAAGAGTATTCTCCATGTGCCTT  
A\_16\_P00062630

TGAGCGTTGTCAATACATACCTCTCAGAATCACCAAAAATCAATATGCACAATTTCAAGAG  
A\_14\_P107679 GCAAAGACCATGATATTTTCAATCTGAACAACACCAAGAAGATTTTCTGCATCTAAAACC  
A\_14\_P106460 AGTTGGCCTTTTTTCTTTGAATGTCTTTGTAGTGTGACTTGTGCAATAAGAAGTGT  
CUST\_367\_PI426210822 TCCTAGATCCCTGTGTAAGTGTGGGGGTGATCTTGCTTTTCCCAG



CUST\_5074\_PI426210822 AATGGCTGGCTGGGTGAAATGGCTTGTGTGTCTCTAAATTAGATTTTACATT  
CUST\_2505\_PI426210822

GAATTTGAAAAAATCCAGAATGGTCATGGAATTCAGGAAACATTTCTCTAAATTTTATAG

CUST\_7681\_PI426210822 AGTTTGACTAGCAAATCAACAAAACAGTTCACCCTCTGCATCTCTGCTCA  
A\_16\_P00999710

AAACCCAGGAGAGATACTCTACTACTATTAGCCATGTAAGTTATTCTCACATTCATCGGT

A\_14\_P117607 TTCAGTAACTACAGTTTTACCATTTGTCCTCAGTCTCCTTTATGCATCTGCAACTTTAA

A\_14\_P139590 ACTCTTTTCTGCACATACTAGATTTGCATCCTAACCTCTTAGGGTAAAATAGGGCTTCTG

A\_14\_P115338 CAGTCTAACACATAATGCTGAACATTAAGTGATAATACTGAGCAGAAATGGTTCCGGTCCA

CUST\_3641\_PI426210822 GTTCATGCACAGGCTCGAGTACAAGCCTTCCGGGGACTCATCTCT

A\_14\_P127021 TGTCATTTTCTCTAAGCAACGTGTGTATCTGTTTGTGTCTCAATGTCTTCTGTCA

A\_16\_P20274335

ATACCAGTGTCTAATTTTCGCTTCTACCCTATAATCCAATGAAGAACAAGGAAAGATGCA

A\_16\_P15443822

CACTTTTCTGCTTCCCTAATTTCTTTTTAAAATGCAAACCTGACATACATATGAACCAACCC

A\_14\_P106473 AGTATTTTACTCTGAATAAAGTGGATGACACTCTTGGTGACAAAGTCACAATTTAGGAGC

CUST\_6565\_PI426210822 TCTTTGTGGAGTCTGTTCCCTTTCAGGTGTTTGTAACTTTCTTGCCAAA

A\_14\_P107915 ATGATCCTGTAACCTTGGGGGCATTTCCCTTTTGGGAAGGAAGATGGTTTA

CUST\_8748\_PI426210822 GAAGGCCAAGGTAAATTGGTAAGTGGCTAAGTTGACGTTCACTCTTAACAG

A\_14\_P107931 GACCAACCACAAAATTTGGAGGAAATTTTGATGCATTGCCAAACAACCTCTAAAATATGCA

A\_14\_P119057 TTTGCACTACAGTAAGAACAACGCAAATAGAACTTTCTGATTATAGTCCATCAATGGCAT

A\_14\_P101566 TCGCTGTTTAGTTACTAGATGAACAAATCCACAGAATGGGTAAAGAGTAGAATCTGAACT

CUST\_388\_PI426210822 GTTACTCAGCTGCAGGGCTGACAACTGTAACACCCTGTGATATAAATAAATGC

A\_14\_P127481 GGGAAAACATGGTCCTTTATTAATTCAGGAAAAACAGGAACAAAGGGAATTCTAGATTTT

A\_14\_P129703 CTATGCAGCAGATGCAATTTGACCTCTAGGGACAGAATTACACTATGAAAAAGAGAAAAA

A\_18\_P16736877

AATTCTGTAATCGCTACTCACTAAATGAATCACCTTTTCAGTCTCCTTAAAGAAGTCTGGC

A\_14\_P130748 AGAGACAGAAATACTTGCAGACTCTTACTGCATCAAAGACTGAGTGGATGAAGTTGAT

A\_14\_P138670

GCAGAATGCCAACTAACCAAAACACAGAAAAAGAACAAGCCAAAATATTGACATACAT

A\_14\_P120227 CTTATACCATGTAATTGAAGACCAAAAACTAGTCTTGAATGCTACCAAGGAAAACCCAG

A\_16\_P16238555

AACTACTTCAGAATTTATTGGTAGATGAGCAACTACTACAGTCTAAAACCAAGCGAAGGC

A\_14\_P132414 GGAGTTTTTAAAAGCCATGACGTCCTTTGCTGAAATAAACATTGACATCCTCAACATAGA

A\_14\_P136437 GATTAAAGGCTACTCTCTATGATTAACCAGGTCCAAGTTCAGAAGAGTCTTTAAGGA

A\_14\_P129446 ATGGTAAAGAGCCTTGGATACTGTTCTTAAGAAGAGAGTTGAAAGTTAATTCTGAAGGCA

A\_14\_P112685 TTGACTGTTGCCGTCTTGAAAGTCTTCAACATCTCAATGTTATGAATATCTGCACTTACA

A\_14\_P136957 CTAAGAGAATTAAGATAGAACTAGGGGGCACACCCACGTGTTTTGGTTATACAAGAAATA

A\_14\_P134625 GTTCTGGAAGAAGATTATGATGAGACCTACATTCCTAGTGAGCAAGGTAACAAGTCT  
A\_14\_P139718 GGTGGGGTCTTACTTGTCCAGTTCCATAAAGAGACATGTTAATTACTTGACATTTTAC  
A\_16\_P16190971 CTTCCCTGTCACTGGATTTGATTTCGGAGTCATCCCAATCTCACAACATATTATTTATTC  
CUST\_7071\_PI426210822  
TGTTCTGAAGGAGGCCCAATCCAGTTCAGTTAAATCTGAAGTTTTTGATCAATTG  
A\_14\_P101870 AATTTTGGCTTGGCAGAATTAGTCATTTCTGGAATATTGTAGTTAATCGGAGTTGTGCTT  
A\_14\_P110650 TGCTTTTTGCAGTCATCGTTTACAGATTTTCCTTTGATAGGGAACATTCTTTGAATACCT  
A\_16\_P02392121  
TTACTTTTTGAAAGATGACTCTCCTTTGCATGTAAGTCAAGAAACAATATCCAGACATCCC  
A\_14\_P134205 ATGCTGTAAGTGAAGGCAACCAATGAGCAATCCTTCCTTCCCATAG  
A\_14\_P107130 AATTTGGACATCAAAGTAAGACCAGATGGTGACTTGTTAATTGGAGACACCAAATTAATG  
A\_16\_P03031951  
GCCTGTTTAAACATGATAATTGCATCTATCACTGAAACTTTATCATAATGCTTTGGACCCCT  
A\_14\_P201535 AATATTAAGGTATGGAGTTTCTTTGACCATTGTATCATTCACTCAGTGGGATCTCCAGTA  
A\_16\_P19705663  
TCTTTTTCAGAGAATAAGATGACTGCATATATGCCAACTTTAGATGTGGATAACCCAGCA  
A\_14\_P107985 GTCAAGGATGGTCCATTTATAGGACATATATTGTTGAGATGGGCTGATGGAAATATTTAA  
A\_14\_P120688 TAAATCTATCATGCAAAAAGTTTATTGGCTTTCTTAGCCTAACAGGTTTCTGTACCCCTTG  
CUST\_6855\_PI426210822 AGATCCTCTACTCCTGATCATGCTCTAGCGCACAGAGCACTGTAAG  
CUST\_6556\_PI426210822  
AATATAACCCACTTAAAAGACTGCACAAGCAAATTTAAAATAAAAAGGGAAATTTCTCAGG  
CUST\_7545\_PI426210822 TTGTCATCGTCACCTTTCCAGCACTGTTATGCAAATTGGAGAGACTCAT  
CUST\_1682\_PI426210822 ACTTGTCAGAGCCAGCAGCTTCTGCCAGTGCCTGGGCTCGTCTCT  
CUST\_4184\_PI426210822  
TACCAAGTACTACCTGATTCCAGATATTAGGAAAACAAGACAGAAGGGTTTCACC  
A\_14\_P112774 TCATTCTGGAATCCTGTTCTTTACTTTGTTACACGCTATTAATTCTCATACCTTCACCT  
A\_14\_P118198 ACCGCTACGAACAAAAAATCAAGATGCCACTATCACTCCAGAGACTATATATTCAACA  
A\_14\_P121622 CTACAATATCAACTAAAGGCTGGGAAATAAAATACCTGATTTCAAGGGCTCCGTTAACAAA  
CUST\_8945\_PI426210822  
TAGCTTATGTTGTTGTGATCATCAGACTGTTTCTGTTTTTTGGATTTTTGTCTTAAATA  
A\_16\_P38714936 GTCTACAGAGCCTAGAGGCATGAGGTGTAAGGAAAGCACTCCTTGA  
A\_14\_P104818 GGGCTGTTTTGTTCTTTTCTTTTTTAAGAGTTGGGTTTTCTTTTTTAATTATCCAAACA  
A\_14\_P200289 TTCATTTCTTTTCAGAAGAGGGTAGAGAAAGAAAGTGTAGCCTGATTTTTCTTTGGTGA  
A\_14\_P101540 ACCCTTCCTAATGAGATTCATGCACATGGCAAACTATGAAAATTGTGACGTTTTATTTG  
A\_14\_P118105 AAAGGGGAAGTATCAAATACTGCCATTTCACTGAGAAAATCCTAGGTGCTACTTTATAA  
A\_14\_P202065 CATAACATTCCTAATGGTCTACTGTAAATCTTGAGCAGAGAAAGAATCCAACAGACTTTT  
CUST\_9151\_PI426210822  
TTTATAGGCAACATCCTCTTTTCTAATAGTTTAACTTGAGGATATAAACCTTCACCTTAT

A\_14\_P111650 CTTGAATGAAATAAAGACGTGTCCTATCAGTTCTCCTGTTCTGGCATGAGTTATAACTAG  
CUST\_4868\_PI426210822 CATCAAGTGAATTTTAGAAGCCACACCTTTGGGTGGGTCTTAAAGCAGTT  
A\_16\_P03575322

AAAAAAAAAAAAACTGTGTAACATCAAGCAGGAATTCACCATTA ACTGTGAAATCACCCCA

A\_18\_P22841271

ACAGTCATTGCAAGAAAATTTATTGCTTTCCCTCAAAAATCATCACACAAGTAGGAGTA

A\_14\_P110558 GAGGTAATAAAATGGAAAGTTCTTAAGGTGGCATCACATGCTCTGATTTCCGGTAGATATT  
A\_18\_P22735188

GCAAATCCACTTGTA ACTCACATAGGCAATTTTTTCAGAAATCTAAATCTAGACCTTCACA

A\_14\_P102927 AGACTTTTAAATAACTCTTATAAAACAGGTTGGCGATCATTTCCTCAAGATTGGTTCCCT

A\_14\_P134729 GACATCTATACTTGAGTGT TTTATCTAGGAACCATTTTCGATTTATCGACTATGAGACCCG  
CUST\_5900\_PI426210822

CTTCCTCCTGTTTTCTTCTTAGTTAAGATGGCAAAGAAAGAGCAAATATATTGAAATCTC

A\_14\_P110936 GAAGGGGACA ACTGAAGCCAATCATT TTTGGTGAATTTCTTTGAAAATTAAGCATT TTTTA  
CUST\_7559\_PI426210822 ATCATCCTAGAAGTGGATACCAGTTC TTTAAGAAGAGTCCTGAGATGTACCCA

A\_14\_P121471 CGCCATCTCGAGGTGTCTAATCCTAAA ACTATCAGCGCCATGAATTTTATTTAAA ACTAC

A\_14\_P111262 TTCACACACAAATTAGTATCCTCTTT CATGTGCAACAGACCCAGTTTCTTATTTATCCAG

A\_14\_P116253 ACTCAGTGCGGATAGGCTGCCGGATGATAATCTTGTTAATATCATTGAATTCATTCC

CUST\_5926\_PI426210822 GAAGCTACTGTCCATAGATCTGAAATGTCAGAGAGGTTGAGACAGATTGAGG

A\_14\_P139112 TGCTATACAAAGTATTTACTGTCTGAGAACTACCCAAGTATACTGGAGTCATCAGGGAAA

A\_14\_P105634 TAGTAAACATCTCCTCCGCCTAAGTAGATGCAGTGTATATGCTATAAAACAAGGCAAAGT  
A\_16\_P02125620

ACAACACGGAGATTACTATTGTCATGGCCCTTATAGAAGAGATTAAA ACTCACCTGTTTT

A\_16\_P19645288

AAAGGAACCAAATCCATTTGTGTCAAAGTATGCAAATCATCAGCCTAAGAATAACCTCT

A\_16\_P16191038 AGGAGTTAGA ACTGGGATGAGTTGAGTGTCAAGGTGTTTGACCTACTACTG

A\_14\_P106514 AGAACTTTTACTTCTTTTCGCTCACTGCTGGATATGCTAATAGGTAGGGTTAAATGAAAA

A\_14\_P128289 CTCGGTATTGGTCAA AATGTGCTCTTCTCTTTTGCTGAGGTTTCATCTATCAATCAATA

A\_14\_P138059 AAGTGCTGTCAATTCATTTTATGAATGCTGATTAGGGAGTTTCAGTTAACTGCAACACTT

A\_16\_P00319690

GCACATCACCTTCATACTAACAACAGATTCC TTTTTTCTAAATTAATCTCCAGGCCAGAA

A\_16\_P01821154

CCCCATGACATAAACACATATTGACTCTTCAGCATCCAATATATTCTTGTTCCA ACTGAA

A\_14\_P101608 AAGTTTTCTCTCTTTT AGTGTCACTGTCAATGGCGCTACATGGACTTTGTAATAACCC

A\_18\_P22842296 CAAATTGTTTCTCCCTCTCTAACAGTGCCTTGGTGTCTGTATTGCCT

A\_16\_P40943031

GACTTACAGGCTATTATTCTCTGTCC TTAATCTCAGTGAAACAATACCTGGATTTGCTGC

A\_14\_P139774 GTCACTAAAAGAAGGTATGTTCAACAATGCAAACGTTCTTTTCAA AACCAAGTTTGTGGA

A\_14\_P115400 AAGACTATTGTAAATAAGTAATCGACCCTCTTTATCTTTCTTTCATTGCTGGTTACACTA

A\_16\_P38523396

AATGTTGACATATGCATTTTCCATCATTCGATCCAAAGATGATAGTGGCAAATATCTGGC

A\_16\_P21091551

CCTGGCCATATGTTTTGAACTTGTTAGGTCTTCTCAACAATAGAATTTTTGCATTATGCC

A\_14\_P110311 TACCTGCGAAAGTTAATTAAGGTAAAGACAGGCAATAGAACAAATGATCCATGCAGACAA

CUST\_5002\_PI426210822 TTTGAGCTGATCTGCACATAAACAGGCACTCTGGGTGTGGATGGG

A\_14\_P105272 TTTTCAGAGGTGGAGAGAGCCAGATTCATCATCAATGACTGGGTGAAG

CUST\_7873\_PI426210822 GTAGAATAGTAGCATATACGTGCCACGGGGCAGGGGTGGAAGAAC

CUST\_8598\_PI426210822 GACCCACGTGTGGCACAGTTTTCTGACTTGGTTCAGAATTCATTTAGAA

A\_14\_P127440 TAGAATACTTTTCTATCTTTATGGGTGAACAGGAGGCTTCCCTCAAGGATTTAAACTTG

A\_14\_P134245 TAAGGTGTTGACTTTAAGGTGAAAACAATTTTCAGTGGATGGAAATAAGGCTAAACTTGCA

A\_18\_P13395888

ACATCCAATAGAAGTGTGTAACAGGTTATCTTCTACCCATTTTTCTCAATATCTGTGTCA

A\_16\_P02860276

TCAACCACCAATTTGACATAACCAATTTAACACCAACCAACTACTTTTATACCTTTTCTCT

A\_14\_P123009 ATCTGGGTTCTATAGAAGGTATTCTATCTCTTTTACCAGAAACCATGCTCTTTTCTCAGT

A\_14\_P104917 AGCGTTGTTACTCAAAACATACACATAACAACATACCAGATGGTGTCTTAATGGTATT

A\_16\_P15526394

AAAAAAGTTCTAAGGAATTTCTAGGGTCAAGTAAGGTTCTAATGAGACTTAACACCACC

A\_16\_P18353529

CATGTGCTGGATCCTAATAACATCTTGACAATAATGTGATTACTAACCAGAGAATTCCCC

CUST\_2465\_PI426210822

GCTAAAGACTTGCTGATCACATTAGGATTACTTTTTTTTTTTCTTTCAACAACCTTTAAGA

A\_14\_P134619 ATGCTTGACTATCTTTGGCAGAGGAACCTTCGCCAGTTCATCTATAAGGTAG

CUST\_2285\_PI426210822 TCAGACTTTCTCAGTTACACAATAGCCATTGTCTATGGAATTCTCCCTGATGG

A\_14\_P111464 CTAATGAGTCCTGGAGCAGGCATTTAAATGCAGATTCCCTTGAATCTCAAAACATATTTTC

A\_16\_P18473139

AGGTCAGAACTTACAATTTCAATCCAAATCCTCTTATTATATTCATCTGAGTCCTGTGCT

A\_16\_P20363117

AAAGTCCTCCATTTACGTTCACTATCTGAAACATATGGCAATTTTGAGAACCGTGTTTTT

CUST\_8292\_PI426210822

AATCCCAGTGCATATTTCTCCATGCAGCTTATTGACGTAACCTAAGATGAGAAGA

A\_14\_P111765 CACCGAAATTGAGAAGAGTGAGTTCTCTGTGACTGCACTTATCTTTTATTGCCCAATAAA

A\_14\_P133614 TACCTCCAAGCATATGGTCTTCAAAAAAATACTCCACTGTAACCTTGAATTTTCCAAGAA

A\_14\_P137748 CTCCTATGTGAAAATAGATTCTTATTAGATGCTTGTGTTTCACTGTGTCTGCCATAGACC

CUST\_967\_PI426210822

AAGATCACCCCTTAAATAGTTTATGGCACTTAAAAAATGAGACAATACACCAGACATTAA

A\_14\_P132021 AGAGAGACACAATAGTTTAATTACTCTGCATTGAAAATCTCTTCGGGAGAAGGAGAAATC  
A\_16\_P36230570

ACTCATAGTTCATGTTAAATTTGTTCAAAGTTTCCATCTAATGGTGAGGTGGTAAAGGAA

A\_14\_P134404 CTATAGTGAAGTAAAGTTAATTTGGGGGGTCCATTTTTCAGAACTCCAAAATTAGAACCT  
A\_16\_P03609506

AGAGTAACCTCATTTTATGCATAGTATTCCCTCTCATAGCAAAATTCACTGAGGTTGTCC

A\_16\_P36961743

AAGCCATCTCTTATTCAACTAGCATTAAATATCAATCTTAATGAGTCAAAAAGCCAAACGT

A\_16\_P19867707

AAAAAAAAGGGAAATTTAACTTTCACCTTCACAAATCAACTGCATTCTTTGATAACGTCTTT

A\_14\_P123779 GGTGTTGAATTTGAATGAGAGACTACATACCCTATTTTCCTTTTTTTGGCAAAACAGTCAT

A\_14\_P134936 ACAGAGAGTTTAATAAAAAAGGCAGTGAGGGAATTTATGGGCAACCCAAGGATAATTA  
CUST\_9443\_PI426210822

ACAAGTTGTTTGAATGACTTAAAGAGATTACATCCAAATTGCCAAGACCTAGTAACTGCT

CUST\_1564\_PI426210822 AAATGATTGGGGGAGGCAGAGAATATGAAGGAAATGTCAAGGGGC

A\_14\_P134876 CTGAATTTCTGAGATACACATTTTCAAATCACATGCAAGTGAAGATGATGGTCTGTAGAA

A\_16\_P58424419

TGGATATACTGTGGATTTACCTTAAAAATTCCTCTTATTCTGTATTTAGGTTATTCCCAG

A\_14\_P124866 TTGTGGGTGTGCCATAAGAAATGGTTTTATATCTCTTGTCAATTTTTATATGGTCTCCTCG

A\_14\_P111152 TGCCTTTTAAATGTATCCCACGTTTTGTTCCTACCATCTTTTTTTTCAGATGATGATTT

A\_14\_P133560 ATCTACAAGTGGCTTAGGATTGAGGTGGAACGCAAGAATGTCTTATATTGGAACTTTAAT

A\_14\_P115854 CTATCGGAATGAAATGAAGAGTATGAAGAGTTATTCTCAAGATGTCACAGCACTGTTTTG

A\_14\_P135722 TCCCTGCTGATGATGTCTATTAGCCATTTTAAAGTTCCTGAAAATAATGAGAATATGCTC

CUST\_8651\_PI426210822 CTTCACTTTATTGCCATTCTTCTGCAGAGGCGAGCCGTGTAGCATA

CUST\_8000\_PI426210822 GGGGCATGGGAGCAGAGGGTGATTCCCTGGAGAAAGCCCAACAAG

A\_16\_P40925767

TGTTTTATAGGCCAAATCTTTTAAAAAAAACACATCTCTCTAATTTCTCTAAACATTTCT

A\_14\_P112941 TCATCTCTTTTACTTTTCAGAGGCTCTGTCATCACTTTAATTGGTTGTTGTTAGAGCAGA

A\_16\_P20176025

AGGGCAAATGAGAGAACTTACCTCTTGTGAAAATCAAATCAGTGACTTGTAAGGATAAAC

A\_14\_P105227 TACTATTCTCAAGAAAGCAGGTCAAATACTTTCCTGCAGGTAGTAATGAAGTTGTTTCCT

A\_16\_P18423797

AGTCTGCTATCCACTTGTTTTGTCCTTCTTATTTAAAGTCTAGTGAAGCCGTTATCCATT

A\_14\_P129952 ACGCTTGTTTATCATTGCAACAAATAAACACCCACAAAAAATCCAAAGGAACCTCAGTTT

CUST\_10088\_PI426210822 ACTGACAGTACGGTGCAGTAACCCAAAGACCTGTTAATTGATGGTCTAAAC

A\_16\_P19910350

AACACTGACTTAAACAGAATACACCAAATTTGCATTGTTATTCAGATCCTAGCAACCTGG

A\_14\_P110911 CTCACCTTATTACAAAATTGTGACTGTCAATCTCCTTTCCACATTCACTGTCTAACAGAA

A\_14\_P137153 CAGCATTGTTGTCTGCATCAAAGTTCCTTTGAACCGATTGTAATTTTTGCCTTTTGGTTA  
A\_14\_P138250 GAGGGTGAGCAAAGACATGGGAAGTCTACCATCATTTCACAAATAGTAACTATTTTAGAT  
A\_16\_P03396514

AAACTCAGTTTATCGCAGAGCAATTGATTCTATTTTGTTCAAAATATAGGCACCAACCCA

A\_14\_P139669 ATTCATTTTGGGCTGATAGTTTTGTTTAAAGTTTTGGATAAGGAGCACTTTAAAACAAAC  
A\_14\_P125436 CTCATGACCAGACAGAGTAGTAAAAGTAAGGCAATATCAAAGACCTTCCAACCCAAAT  
A\_14\_P124410 TTAAGGGAGATGAAAGGCTTCTCTTCTAAAGGGTCTGAAATAAAATCTGTTTGGCATT  
A\_14\_P133967 CTCCTGTCGCTCTTTATCACATCACCTTTTTAAATTTTTTCTACATGACCCCTTTTGAT  
A\_16\_P18002907

AAGCGACAAAATGTATTTTCATGGTGTAAATAACTGGGCTAACAAGATTCAAACATCCCA

A\_14\_P137149 GGTATGTCTTTTTATTCACTGACATGAGTGACTTCTTGAGACCATTGTGAGTCTCTTG  
A\_14\_P124496 TAGCCAATATGGGCTTCCCTAGGAAGAAAGGAGAAGGCCAAATAAAATAAACACCTTATTA  
A\_14\_P107706 TTCCCTATTCATCCTTTGATGGGTGGCCTGTTACACGTTTGAAATA  
CUST\_519\_P1426210822

ACTATGTGCCCAAATTTTTAAGAAAATAAAAAATCACGGAACAAATTTCCCTCCATCTTA

CUST\_9981\_P1426210822 TTTTCTCCAACCTCCAACCTCCTTCTGCTGAGACAGCCTCTGGTTT  
CUST\_4668\_P1426210822 GAGCTAGCCTGACTTCTTCCAGAGTCTTGGAGAGCACAAAGATGT  
A\_16\_P18990745

TGTTTTTACCGCAGTAATTCCCATTTGATTTGTCATCTCCTGTTAGGTATTCAATGTTCG

A\_16\_P01034637

AAAAGATGCCTTGATAGAAAAAGTTTCAGAGAATGTCAGGTAAACATCAATGCATGTCCC

A\_14\_P115291 GTGAGTGAGACCTGCGGATAGCCATTTTATCATTACAAATTTCCATATGAACCAAACCTA  
CUST\_8391\_P1426210822

ACATAAGACTTTCCATATGAACAGATTTTTCTATGCTTTTAAAAATCGGTTATTCAACAA

CUST\_588\_P1426210822 GATGAGATTCTTTGAGGGAGGGAAAGGAGACCAGGTAGCTAGAG  
A\_14\_P123437 ATGCCATGGATAGAGATTCTTACAGGACTCACGGAATGTTCTGGTGAC  
A\_16\_P58424191

AAGAGGGGACATGACTTTTGTAGCATTTTGCAAATTTCCCTGGTGAAATATTCTTATCA

A\_14\_P138666 TATATATATTTGGCCATTCTCTTCCGAACATTTCTGATAGTCTTGCTTGAAAGTTCCAA  
CUST\_9864\_P1426210822 CTCACAGTTCATCTGTACAAGACACCATGAGAGATTCCAAATGCAGGAAGT  
A\_14\_P102395 GCTTTGTTACAGATGTGTGACCAAGGGGAAAATGTGCATGACAACACTAGA  
A\_14\_P131526 ATACGTAGGAATGATCTAAATGACTCGTTCAAGAATCTGTGGTTTGTGCTAAGAACCATT  
A\_14\_P117623 GTCTGTGGTCTCTAATTCCAGCCACAGCATTTAATTTATTGCATGTATTCCTTCCACA  
CUST\_9681\_P1426210822

TTTATGTGACCAATTATAGTTACAATCATGTTCCATGTGACAATAGAATCTTTCCCCCCT

A\_14\_P110952 CATATACCTCACAAGTAATTTGTTTCAGGACTTACCTTCCACCTCCAAAAAATACATGAA  
A\_14\_P137390 TTCATGATGGCATGGTTTTTGTTCAGGAGACAACTGGTGGACATTGGAAT  
A\_14\_P200568 ATTAAAGAAAATTTGTTCTCAAGGAGCCCACTTGTGTCTAAGATTTCCATGATACGTCTCA

A\_14\_P115405 CTTCTGATCTTGGAGAAAATCAGGGAGAATAGAATATTCCTCCTACTCTTGTCTTCTATC  
A\_14\_P200162 TTGGTTTTCTCTGTAGGCTGGAAGTAAAAATGTTTCATTTCTACTTAGGGGTTAGCAAAATT  
A\_14\_P132424 AAAAGGGAGGGGGAAGAAACCAAGTTGCCAGAATTAACCTAACAAGGATTC  
A\_14\_P117986 AATTTCAAGTCTTCTTGTCTGTATGATAAAGCACCCAATTCTCCTGAGAATTCTTTTCC  
A\_16\_P15337102

AAGCCAAATGCTAATCTTGTATCACTGCTTGTCTTGTATACTACTTGTCTTAGGATTTCT

A\_14\_P118037 GACAATCTGTGTGCATCTTATATTTAAAACCCAAGTGTATTATGGGTTCAAGGCTTTTCAC  
A\_14\_P127949 GTCTCATCAGTTCACGGAAACTGCTCTCATTATGGTTACCAGAGACAACCTCTT  
A\_14\_P103882 CTAGATTGTTTAAAGTCTTTAACGAAATCCCATTTCTTCTCATTCTTAGTCTTTCCCAG  
A\_14\_P128351 GCCCCAGAAAGATCCAAGTGTAACACTTATATGGTAAGGTATATTGCCTAAACATTAAGC  
A\_14\_P101249 TTATATTGGACTCAACCTCTGCCATCCTTTTGGAGTTCTAATAAGTTGAGAAACTGGTTA  
A\_14\_P117194

CATTTCAAGTGGAGAATGAGAGGAGAAAGCCGAATGAAATACAGAAAAAATACTGTTCA

A\_14\_P137273 CAGCAACACCCAACAAAGCGTTGGACGGTGAGTGTGAGAATAAAT  
A\_14\_P138772 TGATATGAATATGCCTTATATGCTGATATGAATATGCCTTAAAATAAAGTGTTCACC  
A\_14\_P102108 TTCATAGGGACCGAATGCTGATGTTTGAAGAAGTTTCAGATATCTTCTCAGACCATAATA  
A\_18\_P14131895

ATGTTGATATTTATTTTGGGGTTTTAAACTGATCTACTCTGAATGGCTTAGCACCAGGAG

A\_14\_P123374 TGGCACATTTTATTTTAGGGAAACATGCACAATTCTTGGATTACAACAGGTGAAGATTCT  
A\_14\_P202048 CAGACCATCAGGGCATCATAGAATTGAGCATTGAATTTGCTACTGTAGGAGTATTTTAG  
CUST\_2276\_PI426210822

GACACATGACTTTGTTAGAAGCAAGGGAAAAAAGTTAGGAAGATCTAGGTTTTGTTCTAG

CUST\_3814\_PI426210822 CTTTGGGACAGGAGTAGGGGAATAATGCCGTCGTTAACTGCAAAG  
A\_14\_P105535 CACTAAAACCTTGGTGTAATTTCTTCCACTCCTTTTCCTTTCTCTATTCTAGACA  
A\_16\_P18835289

CTCCACACTATTCAAGAATCTGCATGTATTCATGAACACCCACAAATATTTAATCTCCCA

CUST\_104\_PI426210822

ATTTACATATAACCAGATTATAGTAGGCATGTCCTTAAGGAACTTGAGTTATTACCCTTGT

A\_14\_P123752 GATCCTCCTTTGTCTTTTCGCCTCAAATTCACATTTGCTCCTCTCTTATAAAGGAATTTTA  
A\_18\_P22605965 CTACATTAATAATATATATATTATGTATTAGATATTTTCTGGGATACAATTCTGTTGCCAAGA  
A\_18\_P17201878

AGTTTTCAAATACTGAAATTGCCACTCCTTTTTACAAACCTTTATGATCCCATGCTAT

A\_14\_P202307 AATGGTTGGAAATAAAATGGAAGAAATGAAAAGTAGAACATACGAGTGGTGGCAATGTTT  
A\_14\_P127225 ATAAGAACAGGCTGTTCAATTTATTGACCAGTGTAATAGATTCCCACATTAGTCTCAGACT  
A\_14\_P111423 CTCGTGGAAGTGTGGGGGAGTTTTGTTTGAATTGTAATATTGTTTTGCCAATTATGTAAA  
A\_14\_P126009 ACATGCATATAAGGAAAGCATTCTTAAAAGTTGGGATTCTATTTTCATAATTATTTCTCT  
A\_16\_P18547049

TTCATCTTGGCTAACACTTTTTTAACCACATCAACATGAATATTGACATTCTCCTGAGACC

A\_16\_P17798004

CCAACTATTCAAGATTCCTCCACTTACACAATATATTGACACTAACTCTGAATGCATCCC

A\_16\_P39894345

TGCGAATCATCCGCTCAATAGTTCTTGTTCCTCATCGCATAATTTTTCGAGTTGAAAATT

A\_16\_P18385071

AACAAGGCCTGATGTTTAATTTCTGTGAATCCTTCTGATATTCTTCTTTTCCTTTGCCTT

CUST\_8904\_PI426210822 TTCACTAAAGAGAATCTGACGGCATCTGGAAATTCTTTTGTGTCACTGCCT

A\_14\_P136735 CAAGTTCTCTCCTTGATGTTCTTCCCTGACACGATTATTGTTCGGCAATATTAAGAGA

A\_16\_P03133439

ACAGCATTATGAAAACCCACGGTGTATCTTAAATGTTTACATCTGCCTAATGAACACTCCT

A\_14\_P128786 AGCCAGGCCTACTCTAGAATAATTTAATATTTCTCTTTTCTAGTTTCCCATCCTCTGCCA

A\_14\_P105797 CCCTGGAATGATAATAACAACAGTAAACAACATTGTGTGCTGTTTGTGCATGCACTTATTC

A\_16\_P18066702

AATCCAGTGGATATCCAATGCTAGTTCTTTGCACACATTACATAATTTTATCCCCCAAAC

A\_14\_P122396 AAAACAAGTATTTTTATTGTTGTTCTAGAGGCTATTTTAGCCTGCAAAAACCCCAAAGAA

A\_14\_P113513 GTTCGTTTTTTAAGCACCTCCAGGGAGAGAAACTATTGTTTTCAGAATACACGCATATGT

A\_14\_P114650 TCAGGAATAAAAGAGATAAAAGTTGCCATCAATAACACTGAACATATCTGCTGAAACCCG

A\_14\_P122980 CTCAGACCACCAAGTCTCCAAGTCTTGTAGAAAACAAGAGCAAAATAAATTATTTTTGC

A\_16\_P02967698

AAAAAGCCTTAAAGTATTAAGAGAAGTGTATGCTGGCTATAAAAACCCAACACAAACGGC

A\_14\_P106606 CATCTCCTTCTCTATTCCACATTTTATTCTTCAAGCCATATGTGGTCAGAGAGATAGAGA

A\_16\_P40416452

GCCTTCATTCCACCTACAATAAAGAGGAATTGTCTAACACTTTAAATTGTTTCTACGGCA

A\_14\_P110186 GTGAGTTTTTAGAATACAAAGTATTTCCATACCTTCTTCCATACCACCTTCCATGATGGA

A\_18\_P15039394

AATGTCATTACTATCCAGAAGCATTTTTGAAAACAGCCATTTGTAACAGTGACCTTTCCAA

A\_16\_P01946686

GCACACAATCAGAGTTTAATAGAACAAAGGCCATCATAACTCACTTCTTATCAGTCCTCT

A\_14\_P127605 TTCTATACCTATTGCTGCAAGACGGCTGGGAATCATTTTAAATGAGAATAATGTGAGCAT

A\_14\_P114243 CTTAAGCACCCTGGAATGCAATAAAAAGGCAAGTCCAAATCTTGGTGTTTAATTTTACT

A\_14\_P138123 AATAGTTGAGTAAGAAGTAATAAGTAACAACACTGGGGGTTTTCTTTCTCCATACCCCTA

A\_16\_P19635429

AAAACCTCCACTGTAAGCATGTTGAACAAGGTTTTAATTAAGCAGTTCTATGGTTGGCA

A\_14\_P138295 ATTGTAAGTATCCTACTTTTTGTTTTCTGGATCCACCATGCATCACATTTGGTCTTCAA

CUST\_8472\_PI426210822

GTTCTCACCAAGTGTAATAGTCTATGAGTAAATTCCTATGCATGTAAGAAAAGAAAAGTTTT

A\_18\_P14136899 GAGTGCCAGGTGCTTTGTGAATTAGATCTTTCTTATTACATCACGGCCAGTTTTTTT

A\_16\_P36488447



GCACTCCTTCCTACAAAAAGTTCCTTTTATCTTGTTTAGTAAATTGCCAGAGGACTTCAT  
A\_16\_P15228147

TTGATAGAAGTGAACATCCTAATTATGCCCATGAGTTACATATATGAGATGCCTTCACCC  
A\_18\_P22840159 TAGTCCCAGGCAGATCCAGGAAGAGCACTGGGCTGGGAGTCCCAT  
A\_18\_P22842266 ACCAAAGAGTTCAGTCTAATTCTGGGGTTGGGGATAAATATGTTAGCCAGTAAAT  
A\_14\_P128663 CCTAAATGAATTGCAGTCAGCCAAAAATTGCTTTTTACCCGAGGACATTTTCTATTTTA  
CUST\_3064\_PI426210822 ATACCTCATGATGGCATGAGGTTTAAATCAGGGAGAGCCGTGAAGTATG  
A\_14\_P119242 TTATGAAGAAGGCCACCACATTGAGAATCAGGATGGTTAATATATAGACTTGTGAGAGAG  
CUST\_9301\_PI426210822 ATAGTTCTGGTTTCTCTGGTTTGCTCTGGAGGGAAACTGGTTTGG  
CUST\_2568\_PI426210822 GAATGGCTTGCAGGTATGAGATGATAACATCCTGGGAGCTTCTAGGTAG  
A\_14\_P112817 ATTCACAGCCTGCTGACCAAAGGCTTCATCAATGAAAAGGTAGGTTGC  
A\_14\_P137987 TTTCTGTGATAATTTAGAAAACAGGAACAAGTTTATGGCCTCACAGTAGAGCCTTACAT  
A\_16\_P16191904

CAGGGATGTAAGTGAACATAAAGTCAATGAATAACACAGAAACGTGAGTTAACAGGAA  
A\_16\_P41015987

TGTGGCTCCAATACATTTTTAATGTTTATTCATCCCTAGTGTCTTCTATCTGGATAGCAC  
A\_14\_P105485 CTTACTTCATGTCTTCCACCCTCAAGAACTCTTGAACAAGACCAACAAGAAG  
A\_16\_P39005029

GGGTAAATTGTTTCGAGTCACTGGATTAAATAGATTTTATAGCACAACGATGCCTACATCC  
A\_14\_P201579 ACATGCTCACCATCAACTCAGATTTTTGTCAAGAGGAATGAGACTGATGGAAATAATCAA  
A\_14\_P134310 TGATTTACAGAAGCAGCCATTCAAACCTCAGTTTCAGAGTTTGAAAGAACTTTAACAT  
A\_14\_P102017 GTGTGGATAATGTGTAAAAAGGAAGACATAAGTCAAATGTGTCCACATCTGAGACTCTCTT  
A\_14\_P129630 CCTTAGAGTAGTTATTACGTGACCAGTTATGTTGAGGCAAGACTTGATGAAGTTTAGTCA  
CUST\_5955\_PI426210822 GTTTGCCACTCAATCCTGCCCTAACCTTCTCTCTGTCTTTCTC  
A\_14\_P122625 CCTCATCTGCACTTAAACAATTCAGTCTGGATATATTATCTCATTCTCCAGTTGTATTCC  
CUST\_2507\_PI426210822

CATTTCTCTAAATTTTATAGTCATCTTGCTTTTGAGAAATATTTCTTTCCACTAAAATTT  
A\_14\_P131130

CAGAAAACACAATAATTGAAACAAAAACAGCCCATGGAAGAGGCCAGATTTATATGAAA  
A\_14\_P104773 ACTATGTGCACATTTATAACAAGTAATTTGTAAAGCCTGAGGTCTTTTTCTGTGATGCC  
A\_14\_P124787 CCCAGTGAATTCCAAAGGTTGTGAAGGGGAAAAACAAAAATAAGAATTTTATTATTTGCT  
A\_14\_P100240 CAGGATAAGTTAGGGGTATTATAAGAGTTCCTGTTTACTGGAATCTTGTCTCCTACTGA  
A\_16\_P02346279

ACGGCTTAGCATTTAGAAAAGACCTTTTTTCATCAAGTTACACATTCTATACCAGCATGGA  
A\_14\_P118844 TTTGGGATTTCTGAACTTCAGAAAGCCAGTGGTGGCTGGTAAGTAAGATTTTG  
CUST\_5700\_PI426210822 AGGGCACCATGGCAGAACACATGTGAAAACCATCTAGTTTGAAGTATGT  
A\_16\_P02536876

CTCAAAATTGACACACAAATACATCTATGATTGACTGCAGTAGTATTTGACAGTCCCAGG

A\_14\_P116673 CTTTGAGGAACCGTGTAAGTAAGTAAAACACTCAGCCGCCAAAGCCATAC  
A\_14\_P112548 AATTTGCTATTCATGCATTTTGTGTTTCTTCACTTATCCTGTTCTCTGAAGATGTT  
A\_14\_P104337 GAAGGAAATTGAGAAAATCATAGAACCATGTGCAAAAAATACAGGTGGCTTACCATTTCAT  
CUST\_10177\_P1426210822 CATCCTTGCTTCTCCTCCAAAGAAAAAATGAACAGACACATGCCCATG  
CUST\_9811\_P1426210822  
ATCACTATGTTTCCAAGAGCTCAGAGAATGATTAATTCTGCTGAAAACAGGAGTAAGG  
A\_14\_P125871  
ACACGAAAGTAAAAGGCAGGTAAGACAAAAAGGGCTGTAGTTTTTCTGAAATAACTCAA  
A\_18\_P17039554 AGTGAATCCTGTTTCCTCATGACCTCTCATCCTCCATCCAGTCCATAT  
A\_14\_P103655 CATTAAAGATATGCCATAAGCAAGGTTTATACGGCAGATATTTTCCACACTCATGGCAAG  
A\_14\_P130462 CTGCAGAATGAAAAGTTTTCTTAGAATGGGTAACAGTATCTCCAACATACATTTTATTTA  
CUST\_970\_P1426210822 TTCCTATAAGTGTCAGTGTGCAGCTGGCTATCAGACAGCACCATGAT  
A\_14\_P100362 CTTGATATTTTAGAGAAGAAGGAGAGAACAGTAAGGAATGTTGCTGCAAAGACATCGATT  
CUST\_9752\_P1426210822 CTGAGTTCTGAGAGCCATCTGAGGCATGGTTCTGCTGAAAACATTT  
CUST\_1568\_P1426210822 GTTTGAGCCAGGCTTCTGGAGAATGGTGGTGCCTCTGGTGAAAAG  
A\_14\_P200407 CTCCATGAAGTATTATAAAGAATGAACACAGAAACCAGTCACTGTCAATTGTTTCAGGACAA  
A\_14\_P111251 TTAGGAAGGAGACTAGAACAGAAATTATATCCAACCCCAACACTATAAAAAAGAACATG  
A\_14\_P105520 ACAAATAAAACCCAAAAACTGAACACAGTGTGCCATGAAACTCAGAATGTATCTGCAATA  
A\_18\_P13797583  
AAACCAAAATTGCCATCTCATTATATTCATCCATTATCAATCTCCGCTTTCCTTTTCTCA  
A\_14\_P103760 ACACGAAGGTTATTCGGAACAACTCTATTTCATCCGAATCTTCTCATCAGAACAAGTATC  
CUST\_3994\_P1426210822 CTGTGCTGCTGGTGCCACTCATCCTAGGGCATTCTGCTTGGCAG  
A\_18\_P14139751  
TCTCATGACCACAATCAGTTTACTAGGATTTTTCCATAGGCTCAAAGAAAAGACAGTCTA  
A\_14\_P131178 ATACTACGAGTAACTCTCCATTCAGTGCATACTCTGCACTCAGAGAACTGGTTAC  
CUST\_1082\_P1426210822  
TTTTCTTCAGTTTGATAGCTCGTAGTTTCAAGTTTTCTCAGCCTAATTTTGGGTAAGCTG  
A\_14\_P117299 GAGGTGAAATAAACAGTTTGAGGAAATGATGCAGGCAATCAAATACTTGCATATTTGGAT  
CUST\_8466\_P1426210822  
AAAACAAGAGAGGCCAAAGTTTTATAGAACCAAATGCTGAGACAGAAGAGGGGT  
A\_14\_P139795 AACAAATTGGTGGTCACTGCTGACTACGACTTCCTCATTCTCTATAGCCAAG  
A\_14\_P107021 CTCACAGTTCATTGGTCTGGCTGTGGTGAATCTGACCTCTCAAAAG  
A\_14\_P131723 TTACATTTTCCCTTAGAATCCAATAAAAATCTCCTCCATCTCTACCCTGAATTGTGCA  
A\_14\_P102900 TACTTGCCAAAAGCAAATGTATGCCTTCTCCTATATCACATCACTCTGAACCTCAAATTA  
A\_18\_P11455958  
AGGACAGAATAGCATAACCCTAATACACAAATCTTTGAATCTAACAGACAGACATAGGCT  
A\_14\_P134604 TGATTGGGCTGAATGGACTAGACTTCCTTTTGGAAATTTTTTATGTGCCTTTGTAAGTAT  
CUST\_9778\_P1426210822 TTCTGGCCACTCCATGACACCAGCTTGGCAACCTCAGGTACGTTA

A\_16\_P19889051

ACTGATATGCACTTAATACCGATAGAACTACTTGTAGCAGTAATAGGTTAAGGCAGGCA

A\_14\_P139388 TATTTTACCTAAGAACACTGGAACCTATTTTGGGGCTGATGAGAATCTTGGTCCAGT

CUST\_2701\_PI426210822 ATGGTACTTCTGTCCATCTGTGAGGCTTTGGACACTCGTGGTTTT

CUST\_2366\_PI426210822 TCCTCCGGGGCCCTCCCAGTGTGTTTTGTTTGGTTGCTGGGTGGAAT

A\_16\_P20907206

AGACCAAGTAACTGAAATTACTCATAGCATAAACCTGTAAATAACTCTTCTGGATGGGCT

A\_14\_P132615 CTATTGGCTTCTTCATTACAGGAGGAAAAAAGGCAAGTGAGCACATTTCTTGAATTTTA

CUST\_4966\_PI426210822

TAGGGAAACAGTGTAAGAACAACAAAACTTTTTTCTATCTACAAGTGAGGAAAAAATAT

CUST\_5561\_PI426210822 AAGATTCTGAGAGTGAGGCCCACTGCAGGAAGCAGAGCTGATCTT

A\_16\_P16244251

ATGCCAATCTATTCCTCTTCAACGTTTTGATCTAATGTATGAATTGTGACTCTGTCCTCT

A\_14\_P100426 CTACTIONGAGCCTTTGATCTAAAGCACATTATTTCTCTGTGCTTCCTTTTTCTTAAAGT

A\_14\_P112199 ATTTATTTAAAAATTTTTCTTAGCAGATCATGAGATCTGCTCTGGTCCACCCACAAGCAT

A\_14\_P110862 GAAAATGGGAATATGGAAGTAGAATTAGGCTTCAGGAGAAAAACATTAATGTATGGGCAC

A\_14\_P113518 ATTCCTGCTGACCTCAAGACACACTTGGTGCTTGCAGTGCTGATA

CUST\_2605\_PI426210822 TTAATCCAAAGGGTATTTTCTTTTTCTTCTTCATGGTGAGGGACAGCCTTC

A\_18\_P22841356 AGAACCTATGCTCAAGTTGATCAGGTTTTTGGGGGTAGATCTGAGAGTG

A\_14\_P125417 CTGACTCAGGTTGACTGCTCTAAGCACTGTGATAGAAATAGTCTGTAATAGAAATGCATT

A\_14\_P128057 TTCAGAGGAAGGACTGTATTCATAATTCTCCACAATATTTGGTTGGGTCAGAGTATGTAT

CUST\_9788\_PI426210822

ATAACATTTGCAAATATATTTTTGAAGGAGAGAGAAAATAATCACACTCAGAGACTCCAC

CUST\_7305\_PI426210822 GATGAACCCACGAGCGTGGTTTTGTGTGGGAGGATGTCTTGATCCT

A\_14\_P136743 ATATTTTAACTGGATGTTCTTGATCCTAGTTTTGCAGGCAACTTTGAGGGAAGAGAAGA

A\_14\_P129939 TCCAAAATACTTATCATTACAGGTTGAATAAACAGTTCTACAGACTGCTTCTTCCATGCA

A\_14\_P103015 CTCTCTGAAGCCTTTTGGTCTAATGTTTTGTGGTTCCCTGAATTATTTTTCTTATTGGG

A\_14\_P107999 CATTTCACTACCAGCAAGTGAGCCATGAATTAACCTTTCAAATTAGAAATTGGTCCCATT

CUST\_278\_PI426210822 AAAGGGTGGTTTTGTGGATCGCAGTACTCAAGCATTCTGGAAAAG

A\_16\_P16191405 ATTGTTTCATGACATAACCCAATGTCTTATGAGGCCTCATGAAAGACATGTCTGTCAG

A\_14\_P116428 ATGATATGGATTCAAACACTGAAAGCATTAAAGGGCATATAATTAATAATTCATGGGCTTAG

A\_18\_P22841918

TTTTTCTTTCAAACCTTCTGCAAGGGCATAAAAAATGGGGGACTAAATAGGGACCAAATAA

A\_14\_P113789 CCTGGTTTCCTTGGTTGCATAGCAGATTCACAGAATTCATTCCATGTCAATATTAATTAC

A\_14\_P105474 CATTCCCCTGTTTAGAATCCTTAAATAGCAAAGACCAGGAAAAAGGAAGAGGAAATAAAC

A\_14\_P132142 GCTGTGATGATCATGACCTCAAGTTCTACAGTAATTAGAAAGACCTTTCTTACATCTCAG

A\_16\_P02297314

CTCCTTCCGAATCAATTACCTATTCATTTTTCCAGTCCATTTAGCATTAAAACTTTTCGCT

A\_16\_P19535466

CCTCTACTGTTTTACATTCTAGTGCATATTCCACTTTCTCCATTAACCTTCCCTTAATCCC

A\_14\_P106004 ATTTGGCCAGGACAGTTGGCAGCAGCATTGTAACTGAAAAAGTAAAAAGA

CUST\_2934\_PI426210822 CAGTTCTGGGCTTTCACCAGAGTGTGAAACGAAAACCAGGAAGGG

A\_14\_P137520 ATTGTCTCCCCGACTTATCCTAATGCGAAATTGGATTCTGAGCATTGTAGCAAAAT

A\_14\_P136649 ATTGCACATTAAGTTACAAATTAAGTGGCTTGGTCAAGAATGAGAATGGAGTTGTGGA

A\_16\_P35438919

AAAAGTAATTTCCCCATAGGAAATCTTGATTACTCTCATCCACTCAGATCACTCTTCTA

A\_14\_P116875 TTTATTTTTTAAAAATGGCAGGTCCGTTGAGGAAATGTAAAGCAAAGTACGTTAAGGTG

A\_14\_P139990 AAATGTGCCAATTCCTAAGCAAAATAAACCTAGCAGAAAGTGGCTGTTTAGACTGAAAAT

A\_14\_P200476 CACAGCAGGGAAACACATGGAAATCAGGAACTAGCAAGACTCCAGAAT

A\_16\_P15712751

TCTACACAAGAGTTTTCTTTTTTCCCTTATGCTATGGACATCAACTTACACTATGCTGCA

A\_14\_P201203 ACTTGAATGATATGGCAAATTAGAAATGCAATTTTAGAAGTAATTACACTGTTGTGTAA

A\_14\_P109331 CATCTACCTCAGTCAGACTATTTACTGTCTTTCAGTTATAACACAAACTCCCCATGTGTA

A\_14\_P136997 TAGGAATAAATTATGCAATTCCTGAAGGGGGTTATGGTCGGATGTGTTGACAAATATAAG

A\_14\_P126073 AGAAGTGATGTCTAAAAGTATCTTTGCTGGTGTGAGAACTCCAGTTTCCAACACATATTA

A\_14\_P116502 TCACCTCATAGTAGCCGTCAATGAAAAGTGTATCATCTGAGGAGACACCC

A\_14\_P117214 CGATTTGCTCGTGCTTATGGAGACATGTATGAACTATCTACAAACACACAAGAAAAGAAA

A\_14\_P131210 ACAGTGCTGGCAAGTTTGCAATAAAGTATCAAATGTTTAGGCATTCTCAAATTCAGGAA

A\_14\_P100561 ACTGAGACTTCTATTAGCAAACAACCTACACTTGAAAGAATTGATCACTCAGTGTGAAGA

A\_14\_P102269 GCTGTCTCCAAGGACTGTGATGATAGGGATGCCTAAATTTTTTACATGTTGCTTAATATT

A\_14\_P100534 CTCAAATCAGGAGAAAAGTTGTCCGGCAGAAGTTGAAATGGAATCTGATGATACAACA

A\_16\_P03042643

AAAGACACGTCCAGATAAATGATTACATCTTCAGAAACTTGAAGCGTTTCCTTCATTCTC

A\_18\_P14134483

CCCTTTTCTTATCCATTGCTTTAATCAGAAATAACATATCAAGGTGGCCCAAATTGTGTC

A\_14\_P137837 GTCTTTTCATGCCTATTTTTATGTGTTCCCATAGTCTCACCACCCATAAAAATCTCTTTA

A\_14\_P124119 GTAGCCAGGGTAGCACTCACACTTAAAATAGCCCTTGTAATTGACACAGATCTG

A\_14\_P119601 CTGTTGTTTCCAAATGGCAAATCATCAACTAAAAGCACTTGTTTCAAGTTTTGTTCTGCA

A\_14\_P112215 ACTGAACTGTATCATGATCCTTCAAATGATGCTATTACTGCTCTGAGTGTTTACCTCACA

A\_16\_P17414691

TCTACTTTTCATGTGATTTCAGAGGATATAAGTTTTGACACACCACAACAAAATTCATCCA

A\_14\_P139909 CCGGCTGAAAAAATGCTTAGAGATGGGCATGAAAATGGAATGTGAGTAACAATATTTAAA

A\_14\_P105601 AAAAGGCATGATTATTTAGAAGAGTTTAAAGTGCCCTCAAAGAGAATACTCGTGCATAC

A\_14\_P103656 ATATATCGCAATAATTTCTCCAAACAATGTGCTACATTCTTACAAGTCTGTTGGGCT

A\_14\_P125692 TTGACCTTCCTCCTAATAATTTACTTGCCTTCCCTCATTTTTTTAATCCATGTATCCCT

A\_14\_P109656 CTTGGTTAAAGGCACTGTCCCTTGTGCAATCTAGAGGAATGCTCCT

A\_16\_P19920487

AGATTGGCTGATTA AATGCTCATATAGTCCACAGTATAAAAATAGAAGAACCCAGACTGT

A\_16\_P01485899

ATACAGA AACTTCCAGAATATCAAGTAAAGCAAGAGATCCTTCATCGATCCAAATACCTGG

A\_18\_P11701249

ACAAAAAGTCAGAGGAGAAACAAATCTAGATAAGTGGCTGTTAAACTTCATAGGGACTCT

A\_14\_P125797 ACTTGAAGCCTTG TAGTAAGAACAATACTTCAAACTTCAGGGGATGAAAATTGCAAAAG

A\_14\_P138433 CTCTGTTGCTGTTTCTGTTTTTTCCTCCTCTCAGATGCACATTTGTCCTGT

A\_14\_P106645 CTTCTGGATGCCCAATGGAAAGACCTACTTCTCCGTGGAAACAAGTAA

A\_16\_P19805908

ACACCTTTTAAACAAGTCATCATCAGTAATTTTGG AATAGGCATTAGATTCACATGGTTCA

A\_16\_P18472901

CCTAACTGAAACATTGCCTCTATTACCTGAAATAAACCTTCCTGATATGTTTGAAGTGA

A\_16\_P02057659

GTCCAGTATACATGAAGACCCATTTTACAAACACAAGTGACAATATCTTGCTTTGGAAGA

A\_14\_P115799 TTCTCTTTTGCTGTGGCTTCCTCACTGACCTTGGACTTTTATAAGTATGATACAAATCTA

A\_14\_P137004 TACCTCATGTTGTTAACAGAAGGGGCAGATTAAATCTATAAACAACTTGTTAGCACAGGT

A\_16\_P20831024

AAAAATCAGGTTAATTCACAGTGCTATTGTAAGGGAAAAGGGAAACATAACACACAAGGA

CUST\_8755\_PI426210822 TGTTTGATTTCTGACCTTTGAAATGCCAGCCCCCATGCTGCCGTT

A\_14\_P112432 CTGGAACACTTCAATCAGCAGAACACACTGCAAACATTTTCAAGGTTTATGACTTTAAAT

A\_14\_P112596 GATCTGTGACCTTTGTTCCCTCTTTATCAGGAATTGAAAAAGTCTTGGAAGATAGTAAAC

A\_14\_P100630 TTCATTTCTGTAGACTTGTCAAATTGCGGATCTTGGAGTTAAGAGAAAATCACTTGAAAA

A\_16\_P19910784

AAAAATCTTGCATCACCCCTTTTAAATTGAGAGAATGTGATTGCTGGAACAATTCAATGGAA

A\_14\_P104097 CTTTGTTT CAGAATGCTTAAACTTCCTTTTCAAATTTACTCAGCCCCAAAGCATCCATTA

A\_18\_P22840335 TCTTAGGACATTGGACCTCCGAGCAGCCTGCAGATCTTGGGAATT

A\_18\_P22841582

ATCATGGGGATTTTGTAAATTATTTTGGTAGCCCGTTGAGTTTTGTCTCAGGATTTT CAG

CUST\_4972\_PI426210822 CTTCTGGAATCCAGTGTCTGGGCAAGTCCTGCCTCTCAGATTAAG

A\_16\_P01696661

AAGCATTT CAGTGACAAATCGAAATTCACATTAGAAGATGAAAGTATAGGCTTCCACTGG

A\_14\_P103358 TTTTAAACATCTTTAACAGAAGTGTCCCCCTTTGAGGTGTTATTGCAAAGATTAACCTCAT

A\_14\_P201928 CTCTCTAGTTATACTTTGACTAGCAGAAAGTGACATGAGAGGTCAGAGAAGTTATGTTTC

A\_14\_P136209 ACCTTTCTGTATTCCTGGAGAACGGCTTTTATCTTTTTTAAATTCTGGATGATCAGGTAAA

CUST\_7788\_PI426210822

AGCTTAGATTAGCCATATCTCCCCAAAATTTGTATTTTTTAAATTGAATTGATTTTTTAAAT

A\_14\_P106764 GAGACTCTCAGAGGTGTGGCATCTGTGTAGATGTTGAAAACCTTTGCTCAC

A\_14\_P124186 ACTATTAATTATTTCTACAAATGCTTTGCAGGGGTCAGGGAAACATGGATTACACAAAA  
A\_16\_P36542443

AAAATAGTCTTTTCCATGACGAACACTACCAGTAAGTCAACAGTTCAAGAGCGATAGTTT  
CUST\_7233\_PI426210822

TCAGAAGTGGTTGCACCTTCAGCAGGCAAGGAAAATATTTATTTGAAGACGTTTA  
A\_14\_P122445 CTGCTCTCCCAAAAATAACATGATTGTGGGAGTCCCCATTAAAATGAGATATTCACATT  
CUST\_7294\_PI426210822 CATTCTGACAGTAGGAAGAGGAAAAGACTCTGGCTGACTCCTTGTGATA  
CUST\_9827\_PI426210822 GGGGACCACCGGTCTCACAGAGGAGAGGCCTCTAACTGGCTAGAA  
A\_14\_P106347 ATGAATATAGATCGATAACCATGTCTGTTTCATAGTAGCATATCACACCAGTCACTTGTGG  
A\_14\_P130131 AGAATATAAATGATAGTTTCGACTCGTCTGTGGAAGAACTTACAATCATGGGGAAAGATGG  
A\_14\_P128238 ATTTTAAGCAGAGCCTAATACTTACTGGAATCGTTGCTTTGAGCCATGCTGCTTTGATA  
A\_14\_P121567 ACTACAGAAAGATGTCTCATGTGAGAGCCAATTAACGTAAGGTGTATTTGGATTCTGTTT  
A\_14\_P139417 GCCTCACCAGTTAGTTAATGACAGATGTGTTTCAGTGCCATAAAGGAAAAGAACAG  
CUST\_1260\_PI426210822

AGAGAACCATAAAAAGGCTAAGTTGATCCATTTAAAAATTCAAGAACAAGCCTCATAAATT  
A\_16\_P17692448

AAGAGTAAAGCCACTTGTGAAAAAATTTTCGTAGACATACTGACCCTTTTAGCCATCTC  
A\_14\_P138135 AGAAATAGATTCTGCTCTTCAGTTCATCTCTGAAATCATTTCATCAGTTAACCAACCAAAA  
A\_14\_P139995 CAGCACTCATCAAAAAGTCCAGAGTAGATACACCAATTGATAAATGTGCTTAATTCTGGT  
A\_18\_P22841098 GTGGCTCATGGGGAACACTACTGTCAATTCAGTTTGTTCCTCTGCTAAT  
A\_14\_P111620 GCTTACCAAAACCTCAAACCTCTTTTTTGGACATTTCACTTCAAATAACTTTCCCATAGG  
CUST\_8396\_PI426210822

GGAGAAAGGCAGAAATACTAGTCTTGGGCCTGCTTTTTTACATTTTCATCATAGTTTTTTAAA  
A\_14\_P111057 CAAAAGAGATGAAGATTTCTCTGCTATTCTTAGATATCTATTGGGAGGGTGATAGGAAGG  
A\_14\_P120558 ACTTGGAAGTCATACAACACTGCCTTTGAATTAATATAAATGACTGAACTCAGCCTAG  
A\_14\_P113850 AAGCCTCCCAAAGAGAAGTTTCTAAAACCTCCCCAGGATCTTTTACTAAGAATTCT  
A\_14\_P134783 CCTTAACCTAATTTAACCTACCCCTGAACTCTGAGAGTGACAATGTAACCAACTA  
CUST\_3743\_PI426210822 AGGCTCATCCACCACTACAGCCACAACCATCCCTACCTGGAGAAA  
A\_16\_P16857823

AGCATACCCTCATTTGCATTTCTAAAATCGGATGTTTCTTTTCACATAACACAGTATCCTA  
A\_14\_P118059 TTTAGCAATAACGATGATTGATGCAGGAATCCAATTTGATGCTAACTCCTAGAGGCTAAT  
A\_14\_P126691 ATGCACTGGTGTGTTGAACTAACATAGTTTACAATGATGTGGGATTTAACGTCGAAATT  
A\_14\_P120218

ACACAAACACTTGTGTTGAAAAGAATGACTGAAACGTCTACTTTCAAAGAACAATGGACAC  
A\_14\_P125001 CCTGGTATCACCTAATTGAATCTTATAAACCTTTCCCCACTGTAAAGGGAAAAATAACTC  
A\_16\_P16292062

AAAGTAATCACCTGTAAAATTTTCACACTATCCTAGTCAATTCACCTCCATTCTCCTC  
A\_14\_P200372 CTCATATGAGCAGGTATAAGAGGACTAATTTCTCAACTGAACACCTCTGTCCAG

A\_14\_P108280 TTTTCAGTTTTTCCTGCATCTTATCCTCCTCCATTAATTTATATGCCACATTGACCTTACC  
CUST\_6421\_PI426210822 CTGGCACTTTGAATGCAAATTTCTTCTGTGACAAATCCAGGGGACTTTG  
A\_14\_P101784 CTCATTCTGATTTACCCCATCAATGATAACCATTATCATCGTTGCCTTAAGTATCCAA  
A\_14\_P133606 ATGAGGAAGATCATGTTGTCTATGGGGAGAGATTGTGATTTACCTGTAACACCAG  
CUST\_4555\_PI426210822 ATGGGTGGATAGGGGTGGGCTGAGGAGGGGGTGCAACCTCTGCCTT  
A\_18\_P14847631  
GCACTGTCTTTAATTAATAAATGAATAATTCCGCCTCATTAAATATCTTGACATTCTACCCT  
A\_14\_P200388 CCTGACCATTTCCTACCATGATAGGTAGATTTATAGTGGGGTCTTTTCTGTTTTCTATT  
A\_16\_P17683922  
ACTACATCTGGATAAGAGGATACACATTCCAAAGAATCAAGTGAACCTATAAAGCGAGGC  
A\_14\_P129814 TAGGAAAATATTAAGGCTGTAGTAACACTTCACAGGTAAAGGCTAAGTTCTGGGACATGA  
A\_16\_P17306195  
GGTGTAAGTATAAGTTGTCAATCACATCTGTTCTGTCATTGCACTTCACTATAACCTCCAT  
A\_14\_P119259 GAAGTATCCTAAGCAAATAAGTGCTTAGAACAGTTCTGTCACAAGAATGATCCCAAATGT  
CUST\_7222\_PI426210822  
TCCAGACTTTGAAAAAGGTAAATAAGGAACTGATTTACTTTAATCACAAGTTCCTTCTGC  
A\_14\_P105433 TACAATAAACATCAGATCTTAGATGAGGAAATAGTTGTATCTGCTGGGATGCAGTAAGGG  
A\_14\_P130419 CAACGCCTTTTCTTGTGTATTTGATTGGTCGTGCCCTAAAAAAAAAATCAATTAATGTCT  
A\_14\_P138948 ACATAGACCACTGATGAGAATATATTTCAACCCAAGGATTTTATAAATGCGCCAGAAGTG  
CUST\_9008\_PI426210822 GCATCAAGCCATGGACACTTTGGTGACCCTCCCTATCCTTGGAAC  
A\_14\_P115353 CCAGTATAATGTTCACTCCAAATTTAGACCTATTGTCAGGGTCAACTGTCTCTATCATCA  
A\_14\_P127390 AAAATGTGCAAATCACTAGGGTGTAAAAAATGATAAGACTTGGTCCCTTGTCCCTAAAGA  
A\_14\_P201756 ACTTCTACATTCTGGTTGTCATGTCCTTCTACGGCATTCTTCTTGATCGGAATCAT  
A\_16\_P58424167 GTTATTTTAAACAGAGGAAATTTAGCACTGGGAATGGGTAAACAGGTGATGGACGAC  
A\_14\_P126236 CTTCAAGGACCAAAGGAAAATAAGATTTCTTGTAAGAACACCGTGACCACATCTTTAA  
CUST\_7583\_PI426210822 GTGGGGTGAATATCATGTTTCTCCAGGGAGGGCTCAGTGACATG  
A\_16\_P02985999  
AAAAACATAAAAACATCTACAGGAAAGGTGGTAATCAACCTCAAAGAGTGTCTCATCCA  
A\_14\_P134534 CAGCATCTTCGAAAGACTTCTTGTCTTCCAAAATCTGAGAGAGAATTTTCTTCTCTC  
CUST\_10274\_PI426210822 CCACAGTCTAGAGCCTTGAATCACTTTGGGGAAAACAGAAAAGCTGT  
A\_14\_P117591 TAGTATATGCCAACAGGAAATCCAAGTGCTGTTTCATCAACAATTACCTAACAGGACAG  
A\_14\_P201019 GGAAGTGACTATTTGGTTTACCTTCCAAGCCAAATGTTTGAGCCACAAAAATTAATGATC  
A\_14\_P109672 AAACAAGAATCAGAGATTCCTTAAACAATTGATTTTATGCAGGGTTTTTTCCCCCATCTC  
A\_16\_P30952266 GTGGCACTCTGAGAATGAATGATCTGTTAGGAAGGCTGGATGGCAT  
A\_16\_P58424144  
CGATGCATAGTTCACATGAACATGCTAAAGGCTCTAAAAAGTTCCACAGTCAAAGAATTT  
A\_14\_P136902 CTTCAATGAAACTGTATTAATTGTCAATTTAACTGAAAGAATTACCGCTGGCCATTGTAG  
A\_14\_P138180 AAATCCATATTTGAAAAATTCAGTGACAGCCAGGGAATTTCTTGTGTCTGAAAACTTCC

A\_14\_P120921 CTAAGATAATTCCAATAGTAAACGGACAGATCCATTTCAGTTTGCAGTGAAACACCTAGTC  
A\_16\_P02670033  
ACTGGCTCAAAATTAATCTCCAAGGATCAAAATTTTACTTCAATCCATCAGAAATCCCC  
CUST\_4174\_PI426210822  
GCCTCCCATATCCCTCACCATGGATATGCAGTTATAAATGATTTCTTGTTAAGCATTTTT  
A\_16\_P35958012  
AGTGGACATAAAGAGATGCTCTTAGGATGCAATATGACGTAAGATCATTGAAACACCAA  
A\_14\_P201920 ACTCAGTAATGCAATGCATTGTAATTGACATGAGATTGAGATTCATAGGGAAAGGATCTG  
CUST\_2310\_PI426210822  
TTTTGCCTAAAGAAGATAATTTCAACTCTTACTCAGAGTTGGAGCCATTTATTTAAGAA  
A\_16\_P16192007 AGTATCTCATTTGGCTCACATTTCTCGAACGCTTACTTTGCCCCAGT  
CUST\_9836\_PI426210822  
GTTCTTCCCTTAGAGTTTTGTTTTTTAATCTAAGATATGACTTCCCTAGAGCTACAGGACA  
A\_14\_P122565 TCTATGACTGTGAGCAAAGAGTATTCCACACGAGACAAAGTGAAACTGATGAAATTTTCA  
A\_16\_P30952333  
TTAAGATCTTCAAGCATCAGGTAAAAAGGTGAGGTTCTTGGTATAAGTGACTATTTTTT  
A\_14\_P124391 AAATACAATTTTACCTGATACTTTGTTTTAAAAGTTATAAAAAGAACTCTGTTACTACTG  
A\_14\_P135256 AGACATTGTAAAAAAGACAAAGTCACCTGCGTTTAACTTTGAAAAACAACGTGTTCTTG  
A\_16\_P00449708  
GTCACCTAGACTACCAATCATCTGAACTTGATTTGGAATTGATCAGTAAGAAAAAGCAGG  
A\_14\_P202414 ATATTTTAACTCAGTTCTTTTTCTTCTAGTATCCAGTCCCCCTAATTAGAAGAGCCTGGG  
A\_18\_P22839402 CACTTAATGACTGTGGCTATTGCTCCTCTTCTCGCACACGAGGG  
A\_14\_P100814 ACATGCTCAAGCATTTTTATTGGCAAACAGTTTAAATCAAATAGGGAAGTTTTGTCCAT  
CUST\_1333\_PI426210822  
ACCAGTATTTTTTTTCTCTCTGAAATGCCTTCTGTTTAGACAGGGCTTAATAAAACCA  
A\_14\_P101214 CTGAACCTTTTAGAAGCCTTAATTATTTAAATCAATTCAGTGACTGTGTCAGACCTTAGT  
A\_14\_P122028 ACAACTGCTACTATAAAATAACTGTAATGACCTTTCAAGTTTCACCATCCCCCTCATGAGT  
A\_14\_P101403 ACGTTTTACCACAAGGTCTTGTATAGGGAGATACAATGATGTATTCTTTAGAGTGCTGAA  
A\_14\_P128656 GATTCCCTGCCTTTATTACCTTCTCCTCTAATCTAATCCATTCCACATTTGTTGCATTAA  
A\_14\_P120330 ATGAAAAGTAAAAATATTTTGCTAAGACACTCCAAGAAGTGTGGATGGTTTCATCCTCCA  
A\_14\_P126602 TTTGGTTAGGGTTAGATTCTGAAGAGTCTCAAATATGCTGAGAAATGGATTCTGTAGTCA  
A\_14\_P123308 ACTGTAACCTCACAGTGCTAAGAACAGCAAGCATTGAACACGGAAACCTGAT  
A\_14\_P125099 AACATAAGATTTTCAGAGATGTGGTCTGACTCTGACTCACATGAGTCTTTTTATTTCAGAA  
A\_14\_P117757 GTCTTGTGAGTAGGAGTGTGTGCATATCTTGCAAAAATTTACTTTTTCCCATACCAGTAT  
A\_16\_P16789269  
AATAGTGAGAGCCTACAGTTTCTGACAAAATAATCAGCATCGTTTTTCATTTAGGGAAGA  
A\_14\_P107012 CTTCCAAAAAGATGATTTCAAGGGGATGTTTAAATACTGGTAAGATTTGCTGTGAAGGTAG  
A\_16\_P00685202 TCCACTATTGAATTATCCGTATTCTTTGGTTTTATACCTTTATTCTCTTTAGTTGACCT



A\_14\_P127594 CTCATCCAAATTGCTGATGGCAGGACTAGCCCTAATTAGACCTTGTATATCATATCAAAT

A\_16\_P19774317

ACTGCCTGTGTCTTATGTATCTCATACCCCAAATTGAATAAACAAAACTTTAAACTCCC

CUST\_9194\_PI426210822

GAATTGCTTGTAAGGATGTTCTTAAGTGTGCTTTCAAACCATGGAGTATAAGGCTTATT

A\_16\_P03363860

AGCCCTGTCCAATTTTGAATATAAATTTTCTTGAATCTATCACATATTGCCCTGAGCAG

A\_14\_P139397 AACAAAGACAATGCGGCAAACCTTCAAATCTCACAGTGTATTTCTTAAAAACAGTCCTAA

A\_14\_P101468 CATTTCATGTTTAATTGTTTAATTATTTACCCTCTGCTGATTGCTAAGTCAGAGCATA

A\_14\_P105415 TTTAAGTGCAGTATTCATAACTGAATAGGGAACATCTAACCTGGTATTGGCACTTGCATT

A\_14\_P128379 GTGTTGCCTCTAAGACATTTTTATTTCTGTGTATCTGGGCTAGTCCATAGATGCTAAAAG

A\_14\_P124068 AGGTAAGATGAAAATTAACATTTGTGCGTGTTAAGGATCCATGTTTCTCTGTGTCAGATGT

A\_14\_P129090 TATCCAGGTGCTTGTAGAGTCTACGACTTTTTTCTTTTTTATTCTGTTGCCATGTTTTT

CUST\_6183\_PI426210822 CTTTACAGCAAACCTATGAACCATGTATAGGGCTCCAAGTTTTGTTCCCATTC

CUST\_3861\_PI426210822 AGCTGTGCTTATGGGAAGCTCGGAGTCTCACAAAACCTACACCCAT

A\_14\_P132106 ACGAGAATAATGATTTCAATTATTTTCTTCTTGCCTAGCCTCTCATAGTTGTAGCCAAC

A\_14\_P131547 TAGCACACAGCAAGAGTTCACCTATGTTGGTTATGATAATCAATAATAACTAGGGGGC

A\_14\_P137672 GGAGCAAAAGTAGAAATGGAACAAAATTGATGATGACTTCACAATATTCCTCACCTAGTC

A\_16\_P58424397

CTGACACCTCCTCATCTTCAACTCCTAAATGTGAGTCCTCATTTCTATCTATACTCATTT

A\_18\_P17879568

ACACCTAACATAAATTACCTCACACTAGTCTTTTCTTTTACACCTAGATTTCCCTACACT

CUST\_3345\_PI426210822

GCTTTGCCCGCCTTAAGTCCTTTTTTGAATGGAGCTGATTTAAATATGTAAGTATGGT

A\_14\_P138854 ATAACCATTGAAAATTCGTAGTCAAATGGTTTGGACTTCAGTTAACTCCTTTGCAAAGTG

A\_14\_P119563 GAAGGAAATTATACCACATTTAACTTGTGACTTTCAATCCTCCCATTTACAAATCCATGT

CUST\_8078\_PI426210822 GTGAACAGGGAGACACAAGCTTTGATTGGGGTGGTGGTTGGACAC

A\_14\_P120351 TTCCCTTCTCCAAAGAGTTTTTTGTTTGTCTTAGGCAACAAACCACCACATATTAAGA

CUST\_2413\_PI426210822 GTTATTTGCAGTTATCAGCTGCTGGGGGTCAGGGGGCATCTCTCG

A\_14\_P105363 AATGAGGAACTCCTGGAAGTAACTGCACCATCAGTGTTGATATCCAACCTCTTT

A\_16\_P16816906

GAAGAGTGCAGTCAATATCTAACAAGACAGTAGTTACGCAGTAATAGTCATCAGTTGTGG

A\_16\_P19891161

AGGTCAGTAATCTAAATCACAGTATCCCTCACTTTAACTACAACCTCCTTTTTCTATCAGG

A\_14\_P107790 GCTACATCTTTGACTATGATTACTACCGGGACGACTTCTACGACAGGTGAG

A\_14\_P106567 AAATCCGCCACATGTGAAAATATGGAAGGAAGACATCAGGAAATATTAGTATGTCAGAAG

A\_16\_P18183102

GAAAGTCTGGTTCACTCTTATTTTATCACAAACGTTGCATAATAAAACATTCTGGTGCC

A\_14\_P106450 CATTTTGGGTTTCTGTTTTGGAGACAATAAATTAATCTATAACCTAGGCCTGGAATTGC  
CUST\_2215\_PI426210822 TGGGTGCTTGGATTTTCTGAACCATGACTCCCTCTATCAAGATAACTCA  
A\_14\_P133115 TCATCACCTTAATTATAGACTGAGAAATGACAAGGCTAAAATAGTCAAGGGCTGGGAATT  
A\_16\_P30952324 ATTGATGTGGTAGGAGGTGCCCCACAGGACAAAGGCATCGGCAAG  
A\_14\_P113510 TTCTTCTTTGTAGGATTAGTGATTATATGGATCTGACCCCTGTAGATATCGTAGGGAA  
A\_16\_P03703781  
AAAACACCACATAGGATGAATTACCAGTTTCTGCTCTTGAAATCTATTGAATCACTCCTC  
A\_16\_P03436118  
AAAATCAAAAGAAACCTCAGTGGAAACAATTAECTCTCTGGATATATGAAATGCCCTAGGG  
CUST\_5795\_PI426210822 AGAAATGAGCTACCCTTCCCAAGGCCTTAGCACCTAGATGACATC  
A\_14\_P106437 ATGACAATAATTATAAATGTAGGTCACACTACAAGTGTCTCTAGGGACCATGACC  
A\_18\_P14134117 GCTTGGATTTCAAGTGCCTTTTCAGGTGCCAGTGAAAAATCCATCAGTTT  
A\_14\_P120892 CTAATCAGATATCAGACCTCTCTAAAAGGAAGCCTAAGACAGAAGATTTTCTTACCTTTC  
A\_14\_P134550 CACTGGATTCCACCACAATAGACGGCAGATGGGACTTTTGAGAGAA  
CUST\_6203\_PI426210822 TGGAAATTCCTCTATTGCAGAAAGCATTTGATTTGCAGTTTCCTGAATGCG  
A\_16\_P16403098  
AGAGGACAGGGTTATTAAGTTAAAATCCCATCTATAAGCATCGTTTTGTGCACATGACACT  
A\_16\_P17839472  
AAAACCTGCAATTGCTGATTGATTTCTTCCTTGATAGTTGTCAGGGTTCCTATGACTAAG  
A\_14\_P117738 TCCCTGGTTCAGATCATGCAGGAATTGCTACACAAGTATGTCTTTTGTACCT  
CUST\_6965\_PI426210822  
CAGTATTTGTCAGATCCTGCTCAATTATAAGATGATCTTTATCTGTCCGCCTTATCTATC  
A\_16\_P19116416  
AATGGCTCGCAGTATTTTATGGTTATTAACCTCCTGTTATTAAGTTCTCAATACGGTGGT  
A\_14\_P114770 AATATAGTGTAGAGGAAGGGCCTTCCAGGAGTTTCTTTAACATCAGTGAAATATTCTTG  
CUST\_1499\_PI426210822 TGGGCAGAGGAGGTGGGGTGGCTCATCTCGAGGCTACCCCTATTT  
A\_14\_P134639 CTCTACTATAAACTTCTTAAAACAGCCATGGTTCGAACTCATCAACAAGGATTATGCAGAT  
A\_14\_P113972 GACGTGTCCATGTCATCCACTTCATTTGTTTGTGTTTTAGAAAATAATCTTCTGCTTTG  
A\_14\_P134436 TTGACTAAGTGATACATTCATTTTTCTCAAAGACAATGCAAACCTCTGTCCAGAGTTAGC  
A\_14\_P125086 ATGTTTAAAGGAAATGTGCAGGATACTACATGCTTTTTGTATCACACAGTATATGATGGGG  
A\_14\_P201496 ATTTCTCAGTGGACAAATGGACAAACCATCTCTGTTTGAATTTGAATACACAGATACATG  
CUST\_9689\_PI426210822 CCACCTCCCCACATGTGAGAATTAAGCTCTGACCATCAAGAATTGAG  
A\_14\_P136785 GATTCCTTATGTGTCCTCCAGAGAGAACATAGACCTTTCAAAGATTCCAAACAGGTA  
CUST\_3411\_PI426210822 AATAAGTGGGATCCACATGGCTCAAGGAGCAACAGGCCTTGGAAAT  
A\_14\_P136191 AATTTCTCAAATCCTGACCAGCAGACAAGATAAATATGTGGCAAACCTGCCATTCTC  
A\_14\_P100171 CTATATTTTCATGAATTGTTCACTGCACGCTTTTGGCTTTTCTTACCTTTAGGGCTAAGAA  
A\_16\_P02006206  
ACTTTCTACTTTCTGCTCCCATCTATTCAAACACTTTTACCAGATCAGTATCCCTACAA

A\_14\_P128261 TGAAC TTTCTTGTCAAGTAAAATAAACTACTGCCTTCTCTAAGACATTCTTTCACAAACT  
A\_18\_P22839932

TTTAACTTTTGGCTTATGAAATACTTCAGTGGGAAAGTATTTGCTCAAATCTCTGCCTGC

A\_14\_P125765 TCTGAAGTCAAAGTGGAACAATAAGGGTTTGAAC TACTCCCATCTCATT TTTAAAGCAAAT

A\_14\_P126507 TCTGTCTCACCTTTTTGTTTGT TTTTGTAGGGGGATATGAGACTTTCTACTCGGAATATC

A\_14\_P112950 ATGAGGTTACAAATTTTGT TTAAGTTCAGCCATTATTACTTTTGGTATCCCAGAACATGAC

A\_14\_P139122 ACATACAGCCTTGGAACAAAATGAGAGAAACAAACACAGGTTTTATTGTCCATTTTCTGT

A\_14\_P106433 GAATCACTGGGGAGGACAGTTTCTGATTCTGGAAGAGAAAAAGTTGGATAAAAAG

A\_16\_P19454198

AATTAAGTGAAAGACTTTCTAAGCCATGCTCTTTTTGATTGGTGTCTTGTCAAICTGTGCG

A\_14\_P139600 ACGTGAGTAATGAAGAATGCAACTACATGGCTTCTTAGAGGCTGGAAGCTGAG

A\_16\_P41689642

CCCCAAAAC TTAGATATAATTCTCCTGCTTTGGAGTAAAATTGATAATGTTCCAGCCTGA

A\_14\_P134412 ACATTTAGAACTCTAGGTTTCATGTTTAAACCAACAAATGTGTTCTTCCAGTATGCCGTTT

A\_14\_P105451 AGAGGCAAAGAAACCCTAATTTTAAACACACCATTTAGTATGCATAACAAATGTGCAGGTT

A\_16\_P02125939

AAGGACTTGAAATACCATCCAAAGGCTGTAATTTTTTTCCCTACTTTCTCAGACATTTCT

A\_14\_P123132 TCATGCCAAAGTGAACATCTTGCTGGTTGAGAATGATCAACAGTTACAGAAAATCCTT

A\_18\_P14683380

CCCCTCTTTTATCCCTGTCTCATAAAACATTGGTATATGTCCTGCAAAAATTTCAACTG

A\_14\_P136896 GTCGAGACATGATGAGATCGAATATGATGTTCCCTTGTCACCTTCAAGGTATAGGT

A\_14\_P117431 TAGAAAGAGAGTGTCTACTTTTAGCCTATACTGTGGTAGTTGTTCTTCTAGCAGACTCAC

A\_14\_P108581 ATTTGCAGATATCTAAGGAGTGCTTTGAAATGAAAGATGAACTAAAATCTGCTCTGAGGC

CUST\_1702\_PI426210822 CTCTGATGGATAACAAGCACAGCCTGCCTCCTAGCTCCAGCACAGC

A\_16\_P15067513

AAGACACCAAATAATGACGTGTTTTTATTAGTCTTGTGATACTAGTATCCACCTAGGTCA

A\_14\_P113230 CTCTGTTTCACCATCCAATGGAAGGCTGGAATCTTCCTGCTTGAAAATG

A\_14\_P111666 TAAAAATAAATAATGGCACTAGCAGCAGTTACTCTAGATCAAGTGTAAGGGTCAGGCTG

A\_16\_P15988859

AAATGTCAACGGTTAGGTGAGTAAATGAATACCCTGGAATTGTATTACATCACTCTCTTT

CUST\_7940\_PI426210822 TTTTCTTTTCAGGAGGAGATGGGCATCTCCTGTGAGCTGCTGGAAT

A\_14\_P127918 AACATGATTTCCAATTATAGGTCTAGGGTAAAAGAAAATACTTATTTTCCCTCCCACCCT

A\_14\_P104459 CTTAATTTTTAGTTCCTGGAATTGGTGCAGATTTTAAATTTTCGGAAGGGAGATGTCTTT

A\_14\_P100372 AAACCTCTCTTTAAATTCCTGTAGACATTCTAAATAGCACGTTTGTAGACGATTACCCA

A\_14\_P200836 ATTTCTATAGCCTAACTTACGTGGTGGCAATGCCTTTTTTATTTCAGCAAGTCTGATTGAAA

A\_14\_P130094 CATCGTAAGGCCTCAAAGTCTCCTTGAATTTTTTTTTTATAGAGACGGAATTGTAGAATTC

A\_14\_P138738 TGTTGCTTCAATTTTTTGTGGGTTATCACTTCAATCTCACAAATGCTTTCCATGTAAGA

A\_16\_P00061076

CCCCACTACCTCTAAATGATGCCATTGTTTACTTGTTATTCTGCTTTAACCTGTTTCTTT  
A\_14\_P137137 GCAGTGGTTTCACTAGTTACAATTTGACCCATGATGAGTGTTCTTTGTAAGTGGTATT  
CUST\_5452\_P1426210822 AAAAAGTGGGCTAACCCAGCTCCTAGGCAGGGTTGGGGCAA  
A\_14\_P117268 CTGTTTGTGAAATTTGACTTTGGATTTGTTGAAGAGGGTTCTCATAGAGACTACCTCATA  
A\_14\_P122378 GATAGTAAACATGAAGCCATTTCACTTTGTCTTTTAAATGTCACCTTGAAATCCTCTGTGCG  
A\_14\_P131468 GGACAAAGAGGGATTATGACTTCAGTCGTGCCAGTCTACCTATTTCAAT  
A\_16\_P03649197  
CGCCCAGGTCAGTTTTTATAGATAACAAACATTTAACCATAAAAGAAAACATGCTCTCTG  
A\_16\_P01294807  
AGAACAACCTTGTTATGTCCTAAAATGGCTACTGTTCATATTCTGTGAGTGAGTGAGATTT  
A\_16\_P02219101  
AAAAAAAACCTCATCACCCAGAAAATTTACCAATCCATGTCAAAAATGACCATATCCATGG  
A\_14\_P125443 CTAGATATTTCCAGGTATGAGATTTTAACTAATCAATACCCACCTCATTGCAAGCAGCAC  
A\_14\_P109600 ACAGTTTCGCTGTTGCTGTAATAAGTGCAAAAATTTGTTTTGGATTGGACAGTTGATTCTA  
A\_14\_P120599 AAACCTCAGAAGTGAGATTATGATACAATCGGTTGGCAACTATCTAAGTTTTTCCCTAGGCA  
A\_14\_P128561 ACAGCGTAGACGAGTGGCCAAGAGTTAATTGCTAATGAAATTTTATACACAGAGATTCAT  
A\_14\_P112320 ACAAATTAACAAATCAACTTCTGGCCATGATTGGTGGTCATCAAATCTTTTCATCTTCTT  
CUST\_2668\_P1426210822 GAGCAACATGTCAAAGGGCATCCCAACTGGTTGTATTATTACCTTGAAGTG  
A\_14\_P139344 AGTTGAATACTGATTAGTCTCTCCCTTTCTTTCCATATTTGGCACTTGTAAGCAGGATTA  
A\_16\_P19610994  
AACAGCCTCAGGATGTATTAGAGACTCTTGGCATATCATCAGATTTTCAGAATTGATTTCA  
A\_18\_P11014178  
AACCTGGTGATGCTACTATATGACAAGAAAGTGAGAATTGAGGATAATGGAGTTATGAGA  
A\_14\_P133287 CCAGAGTGAGAGAACCTCCATCTAAAAGTTACATTCATTTAAAAGTTGCTCTTAAAGGTT  
A\_14\_P121137 ACTTTTGACCTTAATGAGAACCTAATCAATTAATACTCAGGGCAATAAAGACTTCTTACT  
A\_14\_P111358 TAGAGACACAGCATTCTTTGCTTGTTAGAATGCTACAGACTTTAACGTGCTGAGAG  
A\_18\_P13452811  
GAGAGCACCATAAAATTTTCATGCACAACCTATTTGAGGATCATATAAGGACAAAGGAGGAA  
A\_14\_P200260 AGAGTTGATACTTGTCTAGTAACTACTTACTCCCCAAAATAAGTAGGGTAACTTGTT  
A\_14\_P123552 ACTCCAGGATATCCACTAGGCTTAGATGCTGCCAAAAGAAAAAGATAAATGTTAAGTGAA  
A\_14\_P108150 GTCCAGAATCCCATCAAGCAGGATATTTCAAGTTCACTAAAATACTAAAAGCACAACAAG  
CUST\_6053\_P1426210822 AGCAGTATGTGAGCCCTGCTCTCCTGCTGTGAGCAGAGCAAGAGG  
A\_16\_P16887442  
GGGCTAGATTCAAGACATTAGGAACAACCTTGACAAGTAACTATGCTATGATGTGAAGAGT  
A\_16\_P19286601  
AAGGTAACTGTCCCTAAGTAACTCAATTCTGAAAACATGAGTGCTAAATGAAGTGAAG  
A\_16\_P01404762  
ACCTCATTGGGATTTCTAATAAACTGGACTGATTCATAAATAATTGGACTAGCAAACCA

A\_14\_P137411 GCATATGCTGATGTTTCAGGCAGTCTTAGCAAAGTATGATGGTAAGTTCTTGGGTATTTTT  
CUST\_1678\_PI426210822 CACTTGCTCCCTGAGAATTCAGTGGTGACTTTATGAATTGTCCTCAGAAATTC  
A\_14\_P111103 ACAGTATTTGCTTATAGAAGAGAAGTCAAGTGTGACCTTTATGTAGGAAAAGAAGTACAGGC  
CUST\_2408\_PI426210822 TCAGTGTTCCTACAGTGTCTGATTTGTACTTTGGTGCTTGGACATTTCCCT  
A\_16\_P00685257 TTGTCTGGGTCTGCATGGAATTACTTTGACAAAGGATGGGATGTTTTTCTAGGTTAT  
A\_16\_P00052625  
GGAAAGACAGGGCATTAAAAATAGAGAATGGTGATACTTTCCATTGTATGAAGGAGCAA  
A\_16\_P58424093  
ACCTGCTTTTGAACCTTTAGATAAATGGAATCAGACTGTGAGTATGCTATTGTATCTGGCA  
CUST\_10255\_PI426210822  
AGTTAAGAGTCCCTAGACTTACTTAGCAAGTCCTCAATTCTGACACTTATTATAAGACATC  
A\_14\_P135738 ACAAATAGCCTGTTCCACCATTCAAAAACGTAATCTGCATAGTAAGAGTTTCTCTTATCC  
A\_14\_P119826 CTGCCAAATAAGACAGATCTTTGGTAGCACACAATTTTTATAGACTTCTCATCATGTTTT  
A\_14\_P130049 GCATGAGTAATTAGCAAAGCCTTTGCAGAAACATAGTGTGGTGGTATGTCTTAAGGAAT  
A\_16\_P16791792  
AACCTCCCCTACCAAATTAATCAGTTAAGTCAATAAATCACTAAAATGGCCAGATGTCTG  
A\_14\_P122361 ATAAAAGGCAGATGACTAGGAGGAGTTCTTGACATGACACATGATGATAGTGTCTTTAT  
A\_14\_P113301 TGAACCCTTACCTCTGTTCTGCAAGGTTTTGCATTTGAAGTCATATTCATCTTGAAATC  
A\_14\_P116320 CATTGGAAGGTGCTAAAACAAGTTTTGATGAGGTCCCTAATCTTTGAAGATATGGTGATA  
A\_16\_P00685383  
AGCAAGTATGTATCATTAAAGATTTATCACAAATCAACCATATTATATCGTAAAGTAAAGT  
A\_14\_P132528 ACTGACACAGTCAAGATAATGGCAGCATGTATCATATCCCATGAGTGATATGATTGAAAT  
A\_14\_P113570 ATGACTACACACAATGGGCAATATATTTTTCCAGTAAATTGATGATGCTGTTTGGAAAGGT  
A\_14\_P131548 AGGTCAGGGCTAGAGTATGAGAAGTCCTAAGGGTTTTGTATTTTGTTTTTTTTTTCTAT  
CUST\_5619\_PI426210822 TCAGGGAGATTGGTGTGCCTGGGTATGGGGAGGCCAGTTAAGAAA  
A\_14\_P113719 CCAGTTGACATCCGCTGTAATAATCCCTAATGAATCAGCATTTAGAAGAGTCACCAAAT  
CUST\_2850\_PI426210822 CTTTCTGGGGCCCCATCTAGCATGAGCCTTTCACAGACTGCTAAG  
A\_16\_P30952572  
GTTTCATGGAGCCCCTACTCTGTAAATTGTTGTGGATTTGTCTTTGTTCTTAATTCCATT  
A\_14\_P126848 CTGAAGTGTATTGTTTCTAGAAAATTTCTGCATTGAAAGCCTTGAAGTCTCTATGGCACA  
A\_14\_P136470 CTGCTGTTTCATTTTCTGTGCTTCCCTTACTCATTCTCATTCATGCTTCTGTGTCTC  
A\_14\_P116421 TTCTCTACACTAAGGGAGAAGTGGCCCTTGCTTTCTGGCTTCACGAAT  
A\_14\_P110770 GATACGGCTTTACACAACCAGGAAATCATAACTGAATTCCTTCTACCTTTAAACCCTAAA  
A\_14\_P200049 CTCTCTGTAAGACAAAATAAGCAAACAGTCTTTCAAATTTTGGCTGCATGGAGTGTAATG  
A\_18\_P26112550  
ACAGGGTCTGAATCTCAATAAAGCCACTATGAGATGTTACAAAAAATCTGTAGTAGAGA  
CUST\_4926\_PI426210822  
TATGGCTTTGAACAAAGCAAGTCTATTTTTTCATCATAGTATGGGTATTAGAAATTCATA

A\_16\_P21613088

ATGCCCTACCAATTCCATAAGATGATAGTCCTTCTCTAGAATATTTCCAACCTGAGTAAG

A\_18\_P17035585 CTTTGAGACTGTTTCCAGACTAAACTTCCAAATGTCAGCCCCTTACCCTT

CUST\_9256\_P1426210822 TTGCTTGACTTAAAGGCATGCTCTGGTTCCCCTGGGTGGGAAAT

A\_16\_P15960450

CCCCCTAAAATATCAGCAACACTTAAACTGAGAGATAGGATTACTTTTGCCATTCTTACC

CUST\_10074\_P1426210822 GCAGTGTTGTAATGTGATAAGGGGCTTGGTGGAGGGGATTTCTTT

A\_16\_P01809221

CTAGGTGCAGAAGCCAATTTTATAACATTTTGTGATGATGCTTAGTTCACCTGACCATGTC

CUST\_6206\_P1426210822 CCACCCAAGGACGTTTTTCTCTGTTGGGCAGACTCAAAGCACTGA

A\_14\_P100648 AAATATTGTTTGAGCCAAGGAAGGAGAGTTAGGGTGTAATGATCAATAGATCATTGAGAG

A\_18\_P13324264

AAAAACCTTCATTATGAAAATGGAAGGACGAATTTATGTTACCATCATAGTGCTTCTGG

A\_14\_P132561 ACGTTCCTTGCAATGAGTTGACTCTGAAGGAAAACTATGTGCTTCATTGAATAATTCTCC

A\_14\_P123421 ATTCCTCTTTACATTTCTGTAGCATGTTAACCTGAACAGAAACCATTCCTCCTGTAC

A\_16\_P16265544

ATCCATTTGCTCTTAGTTCACATGAACATTCCTAACTGAAAAATGTTGTCTGTTTGCTAGG

A\_16\_P18444840

AAAAGGTCAATACAAAGTCCTTTGCAGAATTAACCAGTCTACCTATAGGGCAGTGATTAA

A\_16\_P00685543

AATGAAATCCACTGGCTTTTATCATGAGAAGTGAAATTGTTTCATGAAATAATGGCAGCCT

A\_14\_P112728 TCTATTTTCTCCAGATACACAAGAAGGGCCTCAACGTTACACTTCCGTAAACTG

A\_14\_P100460 ACTGCTTCACTTATACCTAAATTACAACACTGACTCTTAAAAAGAAGCATGCCAAGTCTC

CUST\_16\_P1426210822 ACTGGCATCCCAGGCAGTGTGATCAGGGCTTAGTGTCTGCTTCT

A\_14\_P138681 CTTCACTCTCTGAAACTCTTTCAACATATGCAGGTCTCACTTTAAAAGGTCTTGAAATGG

A\_14\_P126343 ATATCACAAGAATCACCTTCTCCAAGGAATATTCTCTAACTTAAATCCATAACCATCCCG

A\_14\_P108869 GTTTCTGAGTTAAGGGAAAGCACGTCTCTATGGCCCAAACCTCA

A\_16\_P19107606

AAAAGATAAACGAAAAGGAATGCTTTCACCTTTTCATCGACTATGGTATCAGTGCTGGATC

A\_14\_P112926 CGCAGAAAAGATGAAAAGGGGAATGTTGTTATGGTAGAGTGTGTTGAAGAAGGTCTTATA

CUST\_10168\_P1426210822 TGCTGCTTTAGGACTGGCTTTGGGCTCATGGTTTTTATTTGAGAGCATT

A\_14\_P134100 CTCTCTGGCATAAGAAAGCACAAAGGTATTGCAAGTAGTATCCTTGAACCTATTCCAGATT

A\_14\_P123542 TGTTTTCTGAGATTCTGATTAGTCCTTGAAAGTTGAATTTGTGTAGCATGAGACTAACGC

A\_16\_P03695149

ACATCTATATCAAGCATCCACATATGACAAATCAAATGACCTTGAACAAAACCTACTTAGC

CUST\_3246\_P1426210822 ATGTGTTCTTACCTGGATGACAGCTGTGCTCATCCTCTAATCCTGTACAATA

A\_14\_P129391 TGGTATTTCTAGCCTATGAATTTGGTTGCTTTATTTTGGATCAGAGTGATGAGATTAAGG

A\_14\_P201837 CTGTTCTAGACTTGAAAGTTCTCCTCCAGATTTATTTTGGCATTAGCCTAATTTCTTGA

A\_14\_P116851 GCCAGTTCCCAATTAAATGCTCTTAAAACTGGGTCAGTTTTCTTTAGAGTGCTAATCTTA  
A\_18\_P22841928 GTTAAAGAGTGTAACGCATCACTTCCTAAGGAGAGCCTCGGTGGC  
A\_14\_P104394 TTATTTGGGTCATCATGGTTTAGCATGTTGTATATATGTCTGGAGCACTTCATACACCTC  
A\_14\_P120962 CAAAGCCACTCTGTGGAGTAACTGAGCAAACGTTATCTTTTGTGCATGTTGTAGATA  
CUST\_1855\_PI426210822 CTTCAAAGAATGGCATTAGTGCTGTCCAACCTTCAAATCCCAAACCCTTC  
A\_16\_P37961436  
AAGTTAACTCTCAAACCTAACAAATTCATTATGCACATACTTTCATCAGTAACTCCCTACCA  
A\_14\_P130192 GCCATAAAAACAAACATGTAAACAAGGTATCAGAACTTTGGTTCAGTAAACATCTCACA  
A\_14\_P138631  
GAAGAAAGAAAGAAAGGGGTTGAGGATGCAATGAACTCTCAAACAGTTTAGGAAAATAAA  
A\_14\_P119404 TTGTTCTGTTGTGTTTTTAGGAACTATCCCTTCGACATAGTGACATTGTTAAACCTTGTT  
A\_14\_P117541 CAAATCTATTTTGCATGTGGTTTTGTATTTTCATGACAATTCTGAAACCACAGGTGTTGG  
A\_14\_P114375 TCATCAGGGTCACTGGCGATGATTTGATTTCAATTTAGAAAAGTTTCTGGATTGATCC  
A\_14\_P125729 CACTACTAAAAACCTAAAAATATCTGTGAATGGAGCAAGTTCAGGGGTCTTATGGAGGT  
A\_14\_P119710  
CTAAAGTTGATGTTTTAAAAAACCAATTTGGTAAAGGAAGGACTGGAAGAGGAAGTAG  
CUST\_7416\_PI426210822 CATGGGCTCAGCAGGCTGATTCTTCCCCTCTCCTATGAGACCATC  
CUST\_3388\_PI426210822  
CAATGGAAAAGATTTTCATTTAAATTTATTGAGATCTTATTTTTCCACCTCATTCCGTGCA  
A\_14\_P138095 TAAATTATTAATGAGAATATTGCACCACTTGAATGATTCCTCTCACCACCATGAGGGATG  
A\_14\_P114750 GAAGAGTGCCTCGAGTTTATCGCCATCATCTACGGCAACACGTTG  
A\_16\_P35465169  
AACCACCAACCAAATTTTTTTCCTTTTCCCTTACAGAGACTTCCTACATTTAGACACTCTA  
A\_14\_P102672 GATAGAGGGTTCATATATTTTTCTTCTCAAGGGCATTATTTTTAGCAAGTCAAACAAGC  
A\_14\_P118913 CTTTACGTGTGTAATTCCTACCAGGAAAGAATACATATCCAATAGATTGGAGAAAGCCA  
CUST\_8514\_PI426210822 GACAGTTTTTCCATAGATAGCTTGAAAATCAGGGCAGCAAGGCCCATATG  
CUST\_7022\_PI426210822 ACAGATGTACATGGTCCATCAGAGTGTGGCTCAGGGCCCAGGGTG  
A\_14\_P120118 TACTGTAACCTCATATACAAGTGAGCATGAAATGGATCTTCCCTTTTGTCTCCTTTGAGA  
A\_14\_P101677 CATTACACCTTAGTGAGAATTAGTCCATAAGACTTCCTCTAGTAGGATCAAGTTTAGAA  
A\_18\_P24125626  
AAACATAGGATGAAGAAAAAGTGGATCTACAACCTAGGGACAAATTTACAATGAGGCAACC  
A\_14\_P201433 CTCTAAATTAGGAGAATAGCATTCTCTCAGCCTATTGGTGTGAGAATCAGTCATTCAG  
A\_14\_P108838 AACATTTGTAGACAGAAAACCTGTTTCAAGAAATTGTGACGTGAAATCCTTGTAAGTGGTAGTT  
A\_18\_P14139237 AATTCAGTGGTGACTTTATGAATTGTCCTCAGAAATTCTAAATCTCTGCGGCAGGATC  
A\_14\_P131287 TTTTCGTAACAAAGAAACGAACAACCTTTGGTATGATCTTAAGCAAAAATACTCACTGAAAT  
A\_14\_P103529 CTTGGCACTGGCTGGTGTTTACAGAATTAATAAATTCTATGCTGAGAATCCTATGGTGA  
A\_14\_P124535 ACGCATGATAGATGTGAACTATTCTCTGGGTATCTTCATTGCCAGCCTGTTAGAT  
A\_18\_P17382123

ACTGACAATTA AAACTCATCATTTTTTTTTTTGCACTTACGCTAACATATATTGTATCCCA  
A\_14\_P119497 ATTGATTTTTCTTTAAAGTTTTGATGAAGGCATAATTTTGTGACATTCAAGTAACCTTT  
A\_18\_P17281731  
AGGACCTTTAATTCAATTA AACCCAAACATTGAGAATGAGTTATGAGCCACTAACCATGT  
A\_16\_P18827474  
ACCAGTTTTCAAGATGGACTAGGATTCTTAACATTTGCTGAATATTCTATGGTGCTCCTG  
A\_14\_P103398 TTTTCTATAGGAAAGGGGTTCTGAGTTGCAAATCAGAACTTGAAGATGAAATGGCTACT  
A\_16\_P19745174  
ACGCTCAAGTATTCTTGTATTATCTGTTCAACTCTTTGTGACTCTTTTAAATGCTGGAA  
A\_14\_P102259 GAGACCAGAGAAAGGAAAACCCACAGAAGAAAACCTCAAAGCATCAGTC  
A\_14\_P103378 CCAGAACTGCTAAGTGAAGGTGTCTTATAAAATTCATCATCTCGACGTTGGTAAAATAGC  
A\_14\_P202268 AAATCTGCAATCCCTTTGCTCTCACGCTCTCAAATAAAATAGGAAGAAAAAAAAAAGCAG  
CUST\_115\_PI426210822 GCATTAGATGCCATGTGCCCAAGAATGAGAGAGGATGAACTGAC  
A\_14\_P120433 TTCAGCACTGCCAGGATTACTGCTATGGAACAAGCATAGTATCTACTATTGTTACCATAA  
A\_14\_P124043 ACTTTCCCTCCTTCTATGCCTAATTTTAAGGGTCTAGCACAAAACCTTTTTGTTTTCCCTTG  
CUST\_1667\_PI426210822 AACAGTCATTTCTTGTCTACACCTCCTGAATTATCAAAAAGCAAGCCTTTCC  
A\_14\_P114272 ATTTTGGAGATGAAGAAAAAGTCATTCACCTGGGAGGGATTTTTAACAACATGCACTA  
A\_14\_P129496 GACATTAATCTACTATTCCCTTAGTTGGACTCAAGTCCTGGATATCCCTCTTATGTATGT  
A\_14\_P202261 GCAGTTTATACCTTGTACCTTTTTCTTCAGGATCATCTTCATTAAGGAATTCTCGTTTG  
A\_14\_P134419 TCCCTCCTGCTTTTTTTCAGACAATTTAATCTCTACCGAGGCTACTTGGTATTTTTTTTT  
A\_14\_P128699 GATATGTTCTTGAAGTAGTGAAGATTCAGGGACTTTATTCTCCCAAGTGTCATGAAAAAG  
A\_14\_P117952 CCTTTGTTCTTTTAGTTATGACTACTAACAGACCTGCTATGTCCTTGTTTCATGTCTCATG  
A\_14\_P201298 CAATTTTAACTCTTTAAAATGGAAATCGTTCCAAGATGCGTCTTAGATAGCATATGCCAC  
A\_14\_P102356 ATTCATTAGGGTTGTTTGAACGTATAAAGTGGTTGATTCAACGTTTCTGAGTTTTGCTTC  
A\_14\_P132591 CAAGAAGTGAAACAGGAAACTATCCCAAGTCTTCTGACATTAGCCTTAAAGGTAGTAAT  
A\_16\_P35487947  
AATGCGTATTTCAACCCATCAGTTACCTTTTCCAATTATCTAACTTGTGTTGCATAGCAC  
A\_14\_P124026 AAATAAAAAAGAAGTATCTGACAAAAGCATGGGTTAGAGGGCTTTTCTAATCTGTGTGAG  
A\_14\_P138031 AAGATGCAGAACACAAAGATACCCCTGGCTATTATCGAGTTTATTATTATGAGGCATTCT  
A\_14\_P136784 TTCAGATAAACAATTA AAAACATTCCTGTCTTGGCCATAGGTTTATGAACCATGGTGTGTT  
A\_14\_P131881 TCATCCTCAAATATCTGTTCCATACTAGGAGGTAAGAATCAGCAGAAAAGAAGGAATCTT  
A\_14\_P109466 TTTTCCAGCATATACTTACAGTAATTA CTCCATACTTTCCACTCTGCAGATATCCTGCA  
A\_14\_P126044 AAGAACCAATATCAGCAGTTTTATATGCAGGTAGGAGGGAGACTTTTACAGTATCACTTT  
A\_16\_P16387717  
ATTCTACCCAATCTAGAACATCAAAAAGCCTAGGTATCAACACTTTAGTATGTGAGGAGG  
A\_14\_P202496  
TCTGGCCATGGGACTTTGAAAAAGAAAAGAAAAAACCAAAAACACCAAACCATATTTTTCT  
A\_14\_P111600 CAGGTCCCCTTAAATCAAGGAAGGACATGGTGATGCTATCACTGAATCATAAAAC



A\_14\_P125792 AAAGCAGTTCTTAACTCAGTGGTTCACATATCCCTTAGGTATATCACATTGCATGCTTAT  
A\_16\_P03810258

ACATTAACCTTCAAGTATTCTACACATCAAGGAAAAATTTAGTGGCATACAAATGTCACC

A\_14\_P118218 GTTTTAATTCAGACGTAATCAGCCTAAGCAACTTTCTAGATGCACCTCGAAATCTAGCAC

A\_14\_P108279 CTGGGCTTTGTTTTTAAAATGTTACAGGTTGAAGATTCTCCCTACAATATCACTCTCTCT

CUST\_9992\_PI426210822 CACCTGGCTCTGCCTCTCAGGGGTGTCCTGTCTCCTCTGCACAGC

A\_16\_P16777335

AACTACAAACAAAACACTACTTTTCCCATATGCAAGGAAATCTCTCTTCATACAGAACAGTT

A\_14\_P103969 ACCCCTTACCTTAAGCCCTCAGATTCATTGATATTGCTTCAATTTATAATTGCATAGTGG

A\_16\_P36230730

TGAGAATTTTTTAAATGCAAATATAGTTGGATGCATTTGATTAACACTTGTGCTAGCCTT

CUST\_2392\_PI426210822 TTTCCCAATGTGAGAGCCCTCTGGGCATATGGCGGCCCTATGAT

A\_14\_P108335 AAAAAGCCTGGTGAAGTGACCCTTGGCCTTTCACCTTCTTGAGAAACAT

A\_14\_P200827 TTTGTTTATTCTTTAGATTGACCCTGCTACGGGAATGGTTATGAATCTGGCTGATCTC

A\_14\_P134530 AAATACTCACTGTAGGTGTAATCATTTTTGTTTGTTCAGGTCTTTTACAGCAGGTCAGG

A\_14\_P129692 ATTCAGCAGGTCCAGGAAGATGCCATTAATGAAACTTGTTTCTTTATTGTTCAAATACG

CUST\_8559\_PI426210822 GATAGCCCAGCCTGTGATCAAAGGCTGTGGGCATCTTCATCGTAT

A\_16\_P17393844

CTCACCTGGTTTTTCTACAACAAGAATTTCAACACCTAATTTCCCTCTAGCAAACAAAAG

A\_14\_P109223 CTAGATTGTTGCCTTTTGAAAGTTTCTTTCCTTCTGAAATGAAGGCAGGTGGTTTATAAT

A\_16\_P41658372

CCTCCAATACAAAATAAAGGCACTTTTCTCTTTATCTCTCTTCCCTGTAAACCATATCTCC

A\_14\_P121748 AGCATTATCTGGATCACTTTCAATGAGAAATGATGCAGGTGAGTAGGAATAGATAAGTGG

A\_16\_P20328762

AAAAAAGGCACTTTCATGATAACACTGCAAAAGTCATATGTGAAGTAAGGGATGTTGCC

A\_14\_P133587 ACACACGCAGACCCGCAGACATTTTGTTTATTTATTTAAAACAAACATCTGTGCGCTA

A\_14\_P129815 ATCCACCTATACTCACATCCCATTTCTTGTTCCTGAAAGTTTCTTCTTTACTTTC

A\_14\_P111933 CTTTTCTTAAAATGAACTTCTTGGTCATAATATCCCTTTCCTGGAAGCCCTCCTTTTAAAT

CUST\_7645\_PI426210822 ATTTGGCATCTGCGCTGGAGTCACTGTGTGCTCCAGTTCCTTAAAG

A\_16\_P17978830

ATCAGGCTTTCATGATATAAAACCTGTAATAGACATGGGTATTAAACACTTCACAGGGT

A\_14\_P106085 TTATCATTTTCAATTATTTCTATGGGGTCTTCCAAGAATCTTTAGCAGGGCGTGGTTTC

A\_14\_P115224 CTTTTGAAGACCTCGAAAAACAATTTTTGTTAATGAAGAAGGAGGTGGCATTATGGGTTC

A\_16\_P03375746

AAAAGTGCGTAGTTCATTGTGTTGAGCCTTTTACTACCTAAGGTATGAACCAAGTGAGA

A\_16\_P02188800 ATCTGTCAAGAACTGTGCTATATCCATCAAACACTGCATTACATCTCTCTAGAGGCAG

A\_14\_P102977 CAACTCACATCTAAAAATATGTGAAATCTAACTCCACGGAACTTCAAGAATCAGCCAAA

A\_18\_P11094238

GAGTTTCATTTTTTACCCGCCTTGTAATTCATACCGATCTTTCTGTTGAAATGCTTGTT  
A\_14\_P114393 ATACATGTTTGGGAATGTTAACCAACGTATTTGTGTCAGTTGTGGTTTTTATTTCGCTCTTAAA  
A\_16\_P17903954  
ACCAGTCCAGAAAATGACATTAGATCTGCTACCCTCCATTATAGTGAGACATATAGTCAT  
A\_14\_P120827  
CTGACTCAGTGAAAACCTGGAATTAAGGAAAGTCAAGAAGAATGAACTATGTCGATGCA  
A\_16\_P21373133  
AAGTCAAATCTGACCTAACTCTAGCCTACCATACTGATATTACACTGTTGTGCAATCATG  
A\_16\_P03594193  
GAAAAACTCATCCTGTATAAACGTATCCTTAACTCCTCATGAGAATATTGCCAAAGGTGC  
A\_14\_P119387 CCTACATAAATTTGGAGCCCAGGAAAATCAACTGAAAAACCATTAGAAAATGGCAATAGAC  
A\_18\_P16940073  
AAAGAAAAGCAATTCTAACTGTATAGCATAAAGCAAATGTATGAGATTGGGAGGATGTGA  
A\_14\_P201256 CCCAGATATTACTGAGAAGAGTGTATTGACTCTGAGTGTAAGAGAGTATGTGTTTTTTTG  
A\_14\_P136684 GTTACCCAGTAACATAATATTTCACTAAACCCATTAAGATGCTTGAACCTAGATTGGGGGA  
A\_14\_P112738 TAAAAAAAAAACCCACAGATATATGCAGATGCTTCTGGGATGAACCGTAGCAACTATTTA  
A\_14\_P125683 CCATCAGGAAAAGATGTTTTGCTAGTTCTAGAATATTCAGACAGTTCCAGAAACGTCC  
A\_14\_P113395 CAGCACAGAAGTTCAGGTATACAAATATGATTAAAGTTAACTGCCAATTTCCAGAGGCTT  
CUST\_7929\_PI426210822 AGCATTAGTTAGGAATGAAGAGTGGTTTTGTCTCTTACCTGTCTTCCCAG  
CUST\_10135\_PI426210822  
ATGTTAGCAGACACTGGGAGCCATAATTTAACTTTATGTGCGAGGATTACAGTAGC  
A\_16\_P03064961  
CTGGAGAGTTTGTGAAACATGTATCAAGAGAAAGAATACGGTAAGGGTTAAATGAAGAGT  
A\_16\_P30307187  
AACCTGCATACTCAACTAACACATTTAAATAGCGCTGTGAAATTATGGATGTTTGACATG  
A\_14\_P103857 AATGACCACAGATGCCTAAAAATGGTTAAATGTAAGAGGTAGGCATTATAGAGGATACCT  
A\_14\_P108470 ACTGGAAAGGCCACTTATATTTCTAGAACAGATTGGATTTTATGCAACCTTTTTTCCCTG  
A\_14\_P201149 TTCTGTGTTTTGTCAAGTGGGATTGCCTATCTCTAAAGAGCACCAGTTTAAAAAGAGT  
A\_14\_P135775 CTTTGCTTATTAAACTGAAACAATAAAAAGGCAAACAGGAGCATTAAAAAGCCTGACG  
A\_14\_P131493 ATTCTTTTTTCCCTCTGATATCTAATTGCAGGTAAAGCAACCTGAAATTCTTGCAAAAAGG  
A\_14\_P137683 ATGTCAGATTAATTATCCCCTGTAACAGACAGAACAATTACCCTTCACTGTTATCATCC  
CUST\_3326\_PI426210822 GAAACTACCTTCATCATCCAGCTCAGGTGTGAAGCCGCTGCTCAT  
A\_14\_P114673 TGTCTCAACACTGGTTGAATTTCTGGGTGAAATTTAACTATCATTTGTCTTAACTGAT  
A\_16\_P15356162  
AAAGAAGAAACCCTAGGAGTTAACTGCTATCATTACAAGGAATGAAAACCTAGTCTCCCTT  
CUST\_1824\_PI426210822 AAGAAGACACTCAGAAAGCCCTCTTTCCTGCCCTGATATCCTTGT  
CUST\_7088\_PI426210822 AGATCTTTCTTATTACATCACGGCCAGTTTTTTGTGGAGGGGGG  
A\_14\_P121998 CACCTCGTAATTTTTGTTTTTTTAAATAAGGAAAATGCAAAAAGCGAGGCGACGGCT

A\_18\_P14262114

GGCAGTTGTGTTTCATAGTCCTCTATTAATAAGTCACTCCACTAAAAAGATCATTAGGCA

A\_14\_P102804 CTTAGAATCTTCCCTTTTTTACTCCATTCAAGAGCAGCATTATAAATTTCCAGGTATGA

A\_14\_P125870 GTATTATTCTTGCAGTCACCTTAGGACTTTCCTTGTCCCTACCTACAAAAATCATTGAT

A\_16\_P39882731

ATATGCCTCTCCTGTTAATAAACAAAATGTGCACAACTGAGTATATTCGCCCTCTTTCT

A\_14\_P126857 TTTATATTTTATTTTTTAACTTTCGGCTGGCAAGTGCTGAATCCTAAGCGCACTATCGC

A\_14\_P115387 TCCCCCATGTTCTTCTGTGCATGTAGTATATTTTTCTATTTAACAGCCTCTTCACCATTA

A\_14\_P132988 CAAAGAGAAAAGGCCTTTTGAAGCATTTCTATTAAGCCACAAACATCACACTTTAAA

A\_16\_P15673247

AAATGATCATCCTCAACAACCTTACATCAAAAGCAAGTGTTTTCTTACAGTTCCTCTCAG

A\_16\_P00960717

TCTTACTAATCATCTACTCATCAGACTATGCATTTCTTACCCTTAAAAATTCAACCCTCT

CUST\_8207\_P1426210822 TTCCTCCCAGCCTTGAAAAGCAGGATGAAGCTTTAGCTGCAGTAA

A\_16\_P01844670

AAGGCCTCTCGGTATTATACTTCTTTTGAACATCTATTAGAATAAGGATCTCACAGGCA

A\_16\_P00395565

AGCACCAACTTAGAATCTTACAATCCACTTATGAATAATTTTCAGACGGATCTCATCATCA

A\_18\_P11705039

GGACAACCTGAGAACTCCCTATACCGTAACGATTTTATAATCCAAAGCGACTGATTTATGT

A\_16\_P16155987

GTAGGGTATTTCCAAATGTCAGCATCTCATTAGCAGATTAGAAAATAACATACGCTTGACT

CUST\_8597\_P1426210822 TGTCACCCTACCTACGGACCCACGTGTGGCACAGTTTTCTGACTT

CUST\_2882\_P1426210822 ACAGTTTGAAGGTCAGTCTTCAGATGGAGGAAAGATGGGCACTT

A\_14\_P110572 CTCTTTTAATTTGCAAAATCATTCTTAGAGTGGATTCTCACCTGGGAGAAGCATAGAGA

A\_14\_P135941 AACATGATGGTTTGACATGTTTCTTAGCATCTTCTTTTTTCGATCACTGGGATTAACTTG

A\_14\_P118498 ACAAATAGGAGTGTCTGTAAAGAGAGGGGCATTAATTATTAATGACAAACCCTGCAAATA

A\_14\_P138647 AGATATACAGTCAGTTTCACTTTCACTGTTTCTAAGTTTACACACACCCTAAGTGTCCAA

CUST\_9460\_P1426210822

ATTTACAAAAGTGATAAGTTTATAATGATTTTGTGCTTAGAACTGTTGTTAATTTACTC

A\_14\_P130254 TGGATTTGAGTGATGGTTGAAAATTAACAAAATGGGATATTCCTTCCCTTCCACACT

CUST\_9051\_P1426210822 GACGACAACATTTGAAACAAAGGGTCTGCTCTCTTTCTCAGTATCACACC

A\_14\_P119812 CCCCAGTCCGTAGTTTAAAAATAGCCTGAAAGGTAAGATTAAGACAGAAAATACTGACAT

A\_14\_P126200 TAAATACCGCAATTCCTCCATCATCTAGTGGCAATACAGATTACTTAATGCCAGTTACG

A\_16\_P21562695

AGAGATGATTGTGTGCATTTAAAGTTACTAAGCAACACTAGTCCTATTAGATGTCCCT

A\_18\_P22841779

AAGAAGAGAACATTCCAGATAGAGGAACAGTCACCACTTGTGAGTGTATGATGAGTAT

A\_16\_P00685551 GATGACGACAACATTTGAAACAAAGGGTCTGCTCTCTTTCTCAGTATCACACCTAT

A\_16\_P02496484

ATTTGAAATAGAATCCTCTTCCCAAATTACCATATTTCCAATTAGAACCACATCTTCCCC

A\_16\_P00711904

AGGTATCATCAACACTATCATCTTTATTCTCTCACTCAGTTAGAAAACACTCATTGGGCA

A\_14\_P100070 AAGACAATGCATGTTGACTGTGTCATTAGAGGGTTGAAAACCAAATATCTCATGATCAT

A\_16\_P41516294

ATATCCTTTCCATGACATAGTATTCACTCTTGTTTCGACCATTTCAAATTCCAGAATGCTC

A\_14\_P114460 ATAAATTTTCAGTATTTAGAAGAAAGTCAGTGGGTTCCCTTACACAGTGGACATAGAATGC

A\_16\_P01760633

CCACCTCTCCATAACTTAATGACTCTCCATAGAAAGATATAATTAGACCACACCATCTTC

A\_14\_P108962 TTTCATTCCAGTGCAGAACTGGACTCCCATCTCTTAGGAAAACATAACTGAGATTATTA

CUST\_2316\_PI426210822

GAATATGTTTTAATATATAATCTAGAAGAAAAATGGTCCATGGTGGAGGGGCCTGAAACT

A\_14\_P115312 TTACCCAGAATGGAACACTACATTGTGTGCTTTTCCATGGAAAATGAAATGACCATGTATTA

A\_14\_P126294 ATAAAACAATAACAAAACACTTACCTAGTGAGTGATGTGCCAATCCATGCACTAATGCTG

A\_14\_P201659 TTTGTTGAAATTATCTTAGATGTCAGTGTGAGGTGATTTAGTAAATAAATGTGTTTTGAA

CUST\_9909\_PI426210822

ATTGTGCTTATCTGTTCTGAATCAAGAACATAGTGTGTCCTCTAAGTTTTTCAGTACACT

A\_18\_P14300104

TGAATGCTATGAAGAACTAGGATGAGACACAATACTGCAATTTGTCTGACTTTTCTGATTG

A\_16\_P39649767

GCACAAGGCTTACAACATTATGTATCCATCCACATATGATTTATTCCACGGAATACTTGG

A\_14\_P135127 CAATCAGTATTTACCTAACCCTGCATCCCATCTGTCAATTATGATCAAGAGAATCATGTTT

A\_16\_P55112804 CAATGCTTCCTCTTTTGCTATTTCTGCCTCACAAATTAATGGAGTAGGACCTGATC

A\_16\_P00259788

ACCTTGCCTCACAAATAATATGCTCAATGGATGGTCATTAGTTCTCTACTTAACTACTC

A\_14\_P126218 CCCGTCCCAGATTTTACTACTCGAGTAATTGCCTCAAACAGTGAGGAATAATGT

A\_14\_P124550 TAAGTCTACACGTGTTTGCTATAGTTACACCTAACTTAGCATACCCAAGTCAACAGCAT

CUST\_7627\_PI426210822 GTCTCCATTTGATCACATAATTGCTTCTGATGCCAGCCAGTCTGCAAC

A\_14\_P105475

TGGTTCAAAGAAGCAGAAGGTGGAGGAAAAGAGAATCTAAGAGAAAATAAAAATAAGCCT

A\_14\_P202528 TATGGCCAAAGTGAACCTTAAATTGAACCTACCCTTGTTAAGTCAGAGTCCTTAATTAGGA

A\_16\_P00685600 GAAAAGTTGGGAAAACCTGCCTCATTGGAACATGGGCTCCAATTGCT

A\_16\_P18524227

ACTGGTTGCACTGACACAATAATTTACTGGCTTTTCCTATTTAACATGAAAAGACAGCA

A\_14\_P103894 GTTGTGATTTAATGTAGCAAATGAATAGAAGGGCACATTCAGTGAGGACTGAAAGAAATG

A\_14\_P138320

TAGAATTGTGTGCACTGCAAGAAAGACCAAGAATATACTCAAAAATTGACAGAAGGACAG  
A\_14\_P132919 TAGAACATAGATGTTTGAATATGAGAATAGTTCCCCGTCTGCCAGACAACACTACAACATAG  
A\_14\_P135455 CATAGTCACTGCAGAATACCACACTATAGTTTGCTCAGTAATGTGAACACTTTTGCTGTA  
A\_18\_P15505119  
TCTTAAGGATGAGTATCTCTTAGCGAAGGGTAATTTTCATATAAAGTTTGTGCATCCAAA  
A\_14\_P104567 GAATGAGAAAAACCATAGCAAAAAAAGACACTCTCACTGTGTTTTATTTCCTCGTGCA  
CUST\_6192\_PI426210822 CTGTGTTTCTTAGGAGCCCTGGCTCCAGCGCAGCTCAGGCGTAAG  
CUST\_8183\_PI426210822 GCTTGGCTGTCCATGGATGATGGGTGGTCCCTTCAGGTGAGACAT  
A\_14\_P111784 TCTTTGCATTTAGTAATTGTTTTGCAGCAAGTTAAAGAAAGCAACACTTCCACTCCAAGT  
A\_16\_P18514649  
AAAACCTCCATCATTTTTGTGTACCTCAAACAATTTCCATGTCTTCAGAACTTAGGATG  
A\_14\_P132047 CTGATGGTTTTGTTCTTAACCTGATTGCATGCCTATGTGCATGACTTTACACAGAAATTA  
A\_14\_P128645 CAACCAGGGGAAAATGAAGATATCACCATCAGTAGTAACTCTTCCTTTTTTGTTTAAATG  
A\_16\_P16129360  
AAATCATTTAATGATTTACAGCACCATAAGGATGAGATTATGGCTCCCACTTGACATTC  
A\_14\_P124107 TAGGGTAATGGTTTATAGTCACTTATGTGCCAACATAGATTTGGAAGCCAATAAATGCCT  
A\_14\_P138429 TGCTGTAAAACAGAGCAATGCAAGAGTTTGAATGAGGTTAGAGCATTTCTTCACACTTT  
A\_14\_P102679 TATAGGAACTGAGCCATTTTACAAGAGAGGAATTTAAGGCCCTTAACATATTGTGTTCT  
A\_14\_P129504 CTCAAGCATCTTCAGTTTCTTTTTTAGCACAGAAACATCAAAAAGTAGGTCTGTTTCTT  
A\_18\_P10580142  
AGCATGTTGGTCTTACTGTAAAGTCTTGCAGTTCCCTAACAAAACCCTAAAATTCACATA  
A\_18\_P14133688  
GACATCCAAAGACGTCTCATACTGTAATGTGTGATATTTATGTATATGCTTTTTTAAGGAC  
A\_16\_P19051893  
AAGAAAACAAATATGCTACAGATGTCTACCAATACCTCCAGATTGTGTAAATGTTGGCTT  
A\_14\_P117279 TTTTCTTCCTTGCTAGATTGAGAGCATTTCTTGTAGCCTATTTGCTGTTGATTTAATGGG  
A\_16\_P1517779  
AAAGTTTCCCATCCCCTAAATTCTACCATCCCTAAACTATCAAAGTGTCAGAGTATTTT  
A\_14\_P126680 TGCAGTTCCAGATAACTTGAAGAGGCTGACCAACAATGGCTGAAATATGAAAATACTATT  
A\_16\_P00301311  
AAGGCCTAGCATGTTATAATCCATAAATCCATTTTTATCACAAAATAAAACCTGGTTCCT  
A\_14\_P110456 ACCAATGTCCACAGTATTTTATGTGATGAATGACATCTTAAATCTGGCTGATAACGATGC  
CUST\_5409\_PI426210822  
AACTGGTTTCTAAGAATATTTGGAGGATGAGTAAAGTAATGTCTTCCATATGCTCAAGAG  
A\_14\_P102224 TAAATTTCAAAGAAAGCACACAAGCAAAGAAGACACTCTTCTTTTTCGAATCCTTGAACG  
CUST\_153\_PI426210822 AGCTTATAGAAAACGCCAATGCTAGGTGAGCTGATAGAGCATGCTGTTTCAAG  
A\_14\_P139118 GACATCTGATAATAGTGTAATTTGCCGCCAATCAAGTAGGGATGATATTAAGTAGCCC  
CUST\_9185\_PI426210822 TAGAAGGACCCCTAAGGAGTTTTACAGCACCGTGGGGGCTTTCTA

CUST\_247\_PI426210822 TACAAGACCCTGGGTGGAAGTGGAGCGGAGAAGCTCCTAGGATATA

A\_16\_P18721088

GCTTGATGCAGGAATTATAGTAAAACATAGGACTTCACTTCTCATAGAACCATACCAGCA

A\_16\_P16882754

ACAAAAATAACCATGTTGTAATGACTGTTTCCAACATCACCCCTGTTTCATCACTAGCC

A\_14\_P202166 CCCCAAGTTCTTTATCTGCAGTAAAAGAAAAGTTGCTAATGGGTCAGTTTTGTAGATTTT

A\_14\_P106794 TATTTTCTAGGAGAAAACCTTCAGAGCCTAACAAATAAATTGGCCTGCTCAAAGCATCAAG

A\_14\_P200520 CATCTCTGTCGTTTGTCACTGGAATCATCTCCATTATTTTCATCACCGAGTTCTTT

A\_16\_P16810246

TAACGAAGTGCTCATTTTAAATACAGTGTTAGTGCCTAGAATAGAAATCAGGGAAGCAGC

A\_14\_P120235 CTTTAGGGCCATTTTGAGTGCCAGATCTAGTTATTTTGTGCAATGCTGAGTG

A\_14\_P138826 AAGCCGCCCAAATTAGCCTTTTAATTAACCCTGAGGATTAGAATATTTGTTTCCTCTTTT

A\_16\_P41179550

CAGTTTCTTAAGTCCTTCGAATCATTAGTAAAAGCCTTCTATCAAGTGCACGATCTTTGT

A\_14\_P107147 ACAATAATTGTGTCCATAACTGCTGCTTTAGAAATTACCTCAATAGTTCTGCCTTGAAG

A\_16\_P02790183

ACCTATATCCAATCAGTTATCCAGACCAAATTTCCCTTATAGCCTAGTTTGAAACTGCA

A\_16\_P20297350

AGAAGCAAAAGTAGAGTGTCTTCTGTTTAAATGCTTTTTCAGAATGTTATGGGGAAAAGGG

A\_14\_P112951 ATGGTTTATGTCTATGGCCAACCTGATCTGATTCTGTAAAAAGACACTACCTTACTTACCT

A\_14\_P112907 TGCTGTGGAAGGAGAGATATTCGTCTAACAGTTTGTCAATCACCAAGAGGTTTATATTTG

A\_18\_P26375452 CTGGTCAGACCGTGACTGCTAACATGCGTTCACACTGATGCACTT

A\_16\_P15613459

AAAGGCACCAGTTAATGTCTGTTTCTTAATTGAAATTACCAGCCTTTCTTCCAATAGGAA

CUST\_9519\_PI426210822 CATTTGGTATCGAGTGGGGGAGGAAAACAATCAGATTTTTTAACCACATAACGT

A\_16\_P02562864

TCATCAAAAATGATCATAACAGGAATCCATAACCTTGTTTCATATGTGTCTTCTTTCACCTG

A\_14\_P101801 AAGGGATGATACCTTTTCAACACAAGAGTCAAAGAATTCAAGGGCAGCATGG

A\_14\_P124902 ACTCCTTTGATTTTCAGTTTACAAGCATTGAGAAAGGAGAAATCCCGAGATGCTG

A\_16\_P01644675

AGCAAGAACCCAGTTATATCACGATGGTTAATCTGTTTTTTTTGATTCACATGTAGTGCTT

A\_14\_P109404 AATCAAAAACAAAATGGTTCTAACAAGATGAAATTTGGTTGCTGACTTCTGTACACAAAA

A\_14\_P102623 CTATTGGATGCTTACAAGATTTCCACATGGTTAAATCCCTAGTTCTTCCCTAACTTCCACA

A\_14\_P138527 ATTGTCTTTTTATTTGGCCCTGATTAAACATGAGGTCTGAAGTTAGATTCTCCAAAACCT

CUST\_8773\_PI426210822

CACATTTTTATCTATGCTGCTCTTCCCATCATGAACACATGCTTCTTTTTTTTCCCTC

A\_14\_P107364

CCTGAAAATCACGAATGTAAGTCAGGAAAAACCAAAGAAGGAAAATGACATAGACCATT

A\_14\_P110907 TAATGCTATGTGTCCTTGACTATTTTATTAAACTCTCACCTCCCATGTTGCTCAAAGAAC

A\_14\_P117189 AAATTCTTCATCTATAGCACACTTTCTATTTTCAGGAGTCTCTTCATGTTTCAGGTTCTCC

A\_16\_P15968425

AAAAAATGCTTTGAAATAATCCCTTCAAGTGACAACAAAAGCCTATTTTTGCCCTTAGTT

CUST\_887\_P1426210822

CCCTATTTACATTTGGAGGTCTCATAGCCATTTGCTTTTTTCTTTAATGTTTCAACCCTA

A\_14\_P120856 ACTTAGGACTTGTGTTTGGTTGTTAAAGTAAAGTGAATCTCTTTCTCTCTGCTGGATATGA

A\_14\_P111370 CTCTACTTCACAGCAGGATTCATCACAGGTGACTATCACTTCATCTCCAGAATTTATAG

A\_14\_P127012 TAATGGAAGAAATGTTCAAATTCAGTGTAATGTTTCATTGAGAACGCAAAGTGGATGTG

A\_14\_P129073 GATTTCTTTCCCATTCAGGGAACACAGATTATTTTTCTTTTAGTTCTGGAAGCAGAGAT

A\_14\_P116531

TGGGTTAGGAAGGAATCATGAGGATGAGGGAAGAAGAAAGAGTAATTACTGTTTTAAAAG

A\_14\_P106778

GAACTATGAGAGATGAAAGAGTGATAGGAACTAGGAAGAAGTTCCATTAAGTAAAGGCA

CUST\_1110\_P1426210822 ACTGCCCCAGTTTACTCCTCCTTTTTCTTAAGGAAGAAAAGGAAAAGC

A\_16\_P41332769

AAAGAAAAGTGTTAATCCATAGAAAACCAATAGCAACCAATAAACTTTATCCTGTAGCGA

A\_16\_P37693938

AGACAGAGAAGTAACTAATAGAGCATGCATGATCCTCTTAGGTATTGTCATCAGTCTCA

A\_16\_P16814054

AAACACTTATATCCATAGCCTAACTATCATCAACCCTGATTCAATATACGTCTGGAGTGG

A\_16\_P15955203

AATAAGCAAGATGCACATCAGATTATTCTAACTCATCCATGTGATCAGTAGGGTAACAGG

CUST\_5269\_P1426210822 AGTCACTCAGATATTTCTCCCGAATTGAAATGCGTGTCTTCTTTGGCT

A\_16\_P20562007

AGGATGATCTGAAGATCATAAACTAGCAAGAAGCATGATCAATATTGGTGTGGGTCAGTT

A\_14\_P133519 CAGGGCACCTGTCTAGTGCATTCAAATATGGTAATAATGAAATCTGTCAAAAAGGGAATA

A\_14\_P105596 TCCACAATGACATGAGTTCTCAGTTGTTCCATGAAAGATTATTACAGTGCAACTACAAGA

A\_18\_P16227853

AACACCTAGGAATCATTGAGTAACACAAAAGTTGATCAAAGAACCCTACTGCTTAAACATC

A\_16\_P00392765

TGTCTATTGACTACGAGTTTTGGGAAATCATATGGAGAAGCATACTTTTTACGAAGGCTT

A\_14\_P102843 TTTAGACCTAGAAGGAAGTGGCATTGATTGGTTATTATAAGTGAAAAGGGCCCCT

A\_14\_P128686 TAACTCAAATCTGTAAATTATACCATGAGGATGTCTAAATCAAGGGGGCGATTTTTGCAG

A\_14\_P137439 CTTTTTTGTTTTGTAGGCTCTCAGAGCACTTTTCTAAAGAACTAGTTGGATGATGTTGAC

A\_16\_P01070108

AAAAACCCTAAAACAATTTACCTCCCACTGATGTATTAAGTATTTGCCTTACCACCCTAC

A\_14\_P128903 CCATGGTTCCATGCAGCAATTTGAAAACCTATGAACTGGATAATCTCTGGATACTTCTTTA

A\_14\_P106181 AACAGCAAAGATGCTAAGGAATTATTTGTATACCTCAGGGAAAGGTCAATGCAAATTCT  
CUST\_892\_PI426210822

TTAAAAATGGGAAGGATATGTGTTGTTCAAGTGCATTTTGAGAACTTGAGAAGTGC

A\_14\_P109459 GGTCCACCCTTTTTCTTCTCTTAAATGAGTCCTCAGACACTGGAG

A\_14\_P202257 GAATCTTAACAAATTCACCCACCTAGGACAGTCAGAGTTGCATTTGCTGAAATACTTC

A\_14\_P124892 CTTTTCCAAGTCCCAAAGTTCTTAGTTCACAATACCACAAGCAAAGAAATTTTGTAAGC

CUST\_5939\_PI426210822 GTGTCCCTGTAACTGCTGGCTGCCCCACCAACAACTGGAAAGA

A\_14\_P124551 TCCTTAGACTTGAAGAGAGTTTCAATCTGCAGACGGAGAAGAGGGTATGAG

A\_14\_P129332 CGGCAACTGGGAGATTTGTGAGTGAACACTGTTTCATCTTAATATGCTTCTGAATTTATT

A\_14\_P125671 CTTTCTGCTGCTATGCATTCATTATGGATTATAGGGGTTGCTTTTTTCAACCATGAAAG

A\_14\_P138553 TACCATTAGCATTAAATTTAAGATCAGACAGGATGGTCTAGAAAGATTGATGAGGCATCCT

A\_14\_P139628 GAGGAACGCACCTTATAGTCCCTCAAGTTAATTGTCTTGATGTATGACATGGTTTCAAGAT

A\_14\_P127250 GGAAAGGAAGGCAACCTTTGTTTTACTTTGCTTAACAATCAACTGGGGAATCTATTTAA

CUST\_923\_PI426210822

CTCAGACAACAAATAATTTAAGCTTCTAGATTATTTTTGTGCAGAAGCAGTATTCTCTGG

A\_16\_P17520166

AAACTGTTTTTTCCAAAGTAAGACTTGTTCACTCTGCATTATCTATCGTTTTCCCACTGT

A\_14\_P200214 TTTATTGGGTGCTGGTTCTTAACTCTGGACTTCTCTACAAGTTTTGTCAAACCTATCAAAT

A\_14\_P139665 CTTTGACCACCTGATATTGCTTACATCTGGAACCTTCTTGGCTTCTCATTCCC

A\_14\_P128445 TGGATCTTAAGGTCAACAGTCATGCTATAAACTCAACATGAAGACATCATTAAACAGGCT

A\_14\_P130355 ACTTAAGTGCAACATTTTCATTTGCTCTACTGGGGGCAGAAAATGTTTCTTTGTATTCT

CUST\_3581\_PI426210822 TGCTCTGAGGTGGGAGGAAAGCTCAATGTGGGTCTGTGAGTCCAG

A\_16\_P17002384

CTTGGCCATTCTTCATATTCGTTATTTGAACTTTCTCTTCAGTCCTTTCAAAGAAACACC

A\_14\_P104966 AACTAATGTCGTTATTATCAAGCCTTGCAATTTCCAGAGAAGACAAGAACCTATTCATGC

A\_14\_P107037 ACTAGTTCGATGTCGTTTCAACCTTACCAAACCTCTGCGGAACTTAGGAAATTATCTTTA

A\_14\_P200040 AGAGGAGGCTCTCAATAAATAATCGTGTAACCTTCTTGTGGTTCTGTTCTTGCTC

A\_14\_P118630 GTGAATTTAGTGAACAGTCACCATGTGTTCTTTCAAGATCTCTGTTACAAGTAAGTTCCA

A\_14\_P107207 AGAAGGAAATATATAGGAATGAGACTGGAAGGAAACAATTGTTGACTAGTCTTGCAGAGA

CUST\_2161\_PI426210822

ATGAAAACCTGCATGTACAACCAGTCCTCAGAAATATGCCAAATACATAGAAAATGTGAAT

A\_16\_P19577292

AGCATCCCCTTTCTCATTAACCTTTATCACAGCAACTTGATAATGTTCTGAGATCAATTG

A\_14\_P108822 ATAATCTCTAGAATTCCTATTTTCTACTTACAGGTCTTACTGGTCATGTCTGGTGTAGG

A\_16\_P19930291

CCTGACCAATAGACTATTTTTTCATCTCACCTATAGACCCACATGTTAAAAAATACCACC

A\_14\_P135034 CTTGGGTTTTAAATTTTACTTGTATAGATTAACATCAAATTTTAAACATTATAAAAGCAAT

A\_14\_P105430 TTTTGTCCATTTTTCCCCTTTTGTGCGATTATTTGCTCTTCTGATAAAATCCCCT



A\_14\_P121984 TAGAACTTTTAACTCAACTTCCCAAGCAAGATAAAGTCTGCAAGACTTTCTGGAATTAG  
A\_18\_P14131517 CATTCACTGCTCAGTCCTCCCATTTGTTTCATCTGGAAAGAAGGAATGTTCTAG  
A\_14\_P201686 CTTCAACTTTTAGTCAGCAGAGACCACACTTAATATTGATCTCTATCTGGTAATTCACGG  
A\_18\_P13004427  
TTTATAAAATTATTCTTAAGATCTGCCTCCTTCATAATGCTCATTCTCATGCTGAGAGT  
A\_14\_P123844 AGATTTATTTTCAGTGGTTAAGCCTTTGTAGCCATTTATCTTTGCATCCAATAGCCTGATG  
A\_14\_P105747 CTTCAACAAGCACTGTTTTTGGTTTAGGCTTTTCAGCAGCAGAACATAGGGTAAAAG  
CUST\_5374\_PI426210822 CTCCTGGGGCCTTTAGAACCTCTACTTCTTTGAACACAGTGCTA  
A\_14\_P129845 ACACTTTCTGGTTATCGTTGATCCTGTTTCGGAGAACATTGATCTGCAAGAAAAGT  
A\_14\_P135101 TCTTAGAATTGTTGATTATAAACCATAAATGCCATCCCTCAGTCCTGGCTTTTAAACAAGTG  
A\_14\_P133849 CTTTAAAGGAGATGGCTTTACTTGGATTCTGTGATCTGCAACTTCATGACTTTTAAAAAGC  
A\_14\_P128470 CTGCAGTTTCCTCCATCATCTTTTTTCAGTGGAGTTACCTTCTAACAGACATATTTCAA  
A\_14\_P125253 CCATAAAATTCTGTTATTCTGGATCTTTTTTAGAGCAGAAGACAATGACTTTGCTGATGG  
A\_14\_P200540 AGTCAGCAATCTGAGACAGGTCTTGCCCAAGTTCAAAAAAAAAAATTCTTTTTTTTAAAGGA  
CUST\_5319\_PI426210822  
TAAACAAGTAATTTTTTAGGATGATGTCAGAACCTGATGTAGTTGGGGTGGTTTTAAAAT  
CUST\_8093\_PI426210822 CACGAGAGTGTACTGGGGATTCGTGCACCTTCTCAGAAGAAGGAT  
A\_14\_P116862 AAGAAAATTATCCAAAAACAAAGAATGACTGGTAGCATTTTAGTCCCATACCTGGGGTA  
A\_16\_P17718100  
AAAAGTTAACCTGCTCAAAAATGTAACGGGATCTTTACTAATCAGGATCATAGGTTTTGC  
A\_14\_P119752 GGTTTTTGGTATAGTCTGGGACTTTTGACAAAGTTTAATGCTCGTTACCATACTGATGTA  
CUST\_3162\_PI426210822 GATTATTTTGGTCATTCTAGGGAGAGCAAAAGAGCAGGCCTGCTTCAG  
A\_14\_P126593 TTTTTCCTAAATACTTCCCCTTTGTGTTTGTGTTTCATACACATCTGGTTAGTAAACT  
CUST\_1248\_PI426210822  
AGATTTCTGTACCCTCTATTATCAGGGAATGACTGGCTTTTATTTCTAGTGTGTGTTTG  
A\_18\_P14136320 GAACTGAGGTTTCATAGGACCAATCTGGGTGAATGCTGCTACAGTTTGTG  
A\_18\_P22841759 TTTTAAAGGCATTTTTTTTCTCACTCCCAGTTGCCTGCCATGTCTGGTTTA  
A\_16\_P30952409 AGATTGGTAATGAGCCACCAAGTCAGGGCTCAGGATACCCGTTTA  
A\_16\_P16533574  
TCATGTCTTATCCTACAGGCTTTAAAAACGAACAATGAAAACCTTCTATTAGGGTTGCCT  
A\_18\_P22843034 CCAAGACCTAGTAACTGCTCTTTAACTATTTACCACCCCCTTCTCCTCCATAAA  
A\_14\_P115205 CTTAGGGGGCATAGTCTTTTTGCAATCACAATTCTAGGAGCCAGTTGAC  
A\_16\_P00645726  
AACACCTTGTGAAGTTGACAATGGCTTTGAATTAACCAATACCACATTTCTCAGGTTACT  
A\_16\_P03302931  
TTTCTGATGTTTCTGGCTAACTACTTTACTCTCTACTGACATACCTATTCTCTACCTCAT  
A\_14\_P137463 CAAGGCCTGGCACATAAATCTTCCCTTGGCTAAATAGTCAATCATTAAAATCTCTCTTGA  
A\_14\_P108861 AGACAGAGATGAAGGTGGCAAAAACGACCAAAGTCACAGATGGAAAACAA

A\_14\_P115088 ATTCTTGCTCACTTCAGAAGATAACGCTAATTAATCCAGATTCTAATCCACCCAGTTCTT  
CUST\_10234\_PI426210822

TACTTGTTAGATCATCAAATTCAGAGTCACTATCTTTAGTTTAGTGTTTATCTTTAGTCT  
CUST\_8814\_PI426210822 CCCTCTGGCTGTGGAAAGCTACTCATTCTTCAAGACCCAGTTCATAT  
A\_16\_P00048022

GCGTAGAATTTCACTTGTCTTGTTTCCAGTCATTAGGTTTTAGTCCAATTCGGAGTT  
A\_14\_P135194 GCACTAACATATAACATAGTTCACATACCTGAAAACATCATCATGTGCTGAAAGTTCCAG  
A\_14\_P109327 TTTGCCTCTTCCAATGACCAAGAAAGACAAAACCTTTAAACATTTCTGAAGATACAGTGAC  
A\_14\_P101209 GAACACTGGGAATTTTTAATTTTTATTTTGTGATCTCAGTCATTCTTTTTCTACCAGT  
A\_14\_P127798 TCAGGGGAAGAGAACTTTAGCAACTTGTTAGAGAGTGTGAAGTTTTTTTAAGCAGTAG  
A\_18\_P14767506

ATTGTATGCAGTCAAACCTTCTGTATCACACCTTAATCCGAAGAATTCCATTATTCTGCCT  
A\_14\_P202542 TGTGCTAGTGCTGTATTCACTTAGTCATTTAGGTCATGTCCAATCCGTTGTTTTCAATAA  
A\_16\_P00016149

AAGATTTGAACAAAGGAAATCACAAAAGCCATCTCTCTTTATTTTTTCATTCCCTGCCGTTT  
A\_14\_P130360 GCCCTAATTTCTGCAGACTGAGGATTGAATGTGAAATGCAAAATTAGAAGGAGACTATAT  
A\_14\_P100410 ATTTGTATTCAAGCAAACAAACACAAAACCTCTTAAAACGGCAGTTACAATCAAAGGTA  
A\_14\_P137328 TCTCATAATGGGATTTCTATCGACAGGCAAACAACATATCAGAGAAGAAGGTGAATTTA  
A\_16\_P21079656

GGCTCTAAGAAAATCTGTAGTTTAACCAGTTTGTAACATTTCCCCTAGAATGAAATGCCA  
A\_16\_P02727089

GCAGAAGTCAATATTATTAGATCGAGAATCTAGATGCAGAATAAAATTGGGGACTCCACA  
A\_14\_P108155 TAGAAAATGGTGCCATATGAGATTAATGTCATGGGTAAATGAGTTCTCGGATTTAGCAGT  
A\_16\_P40408315

TGGTCAATCCAGTTTATCCAAGGTCTATAGATATAGCCATGATTTGTCCTATATTCATGT  
A\_14\_P108020 TTTATATATGTTGCCCTAAGGGGAACTTCAAGTAGGTCCTACATACAGTAGGACAGTTT  
A\_14\_P128960 CTGTTTGTCTCTGCTGAATTACACCTGAGCAAACCAGCACTGATGTTTTTAAACATATAA  
A\_14\_P133212 CTAAATGACTGAATATATCAGCAAGCCAAGAAAGGCTGGGCATGTGGAAAGG  
A\_14\_P115876 ATATAGATCTTCTAAGTCCAAGTCCATCTCTCTGGTTCAAGATATCGAATAAGGTCTTC  
A\_14\_P122590 CTTCAATTATTCTGTGCCACAGATCAGAGGAAAGTAATTTTGAAAGGATCACAGGTTATTG  
A\_18\_P14134961 ATTAAGGCACCAGCATTACAGCATAAGAGGGTCTGCCTCTCAGATTAAG  
CUST\_10249\_PI426210822

TCTTGCAAATTACTTTCCGGTGACTTGTCTCATGGGTTGCTTATTTTGAGTTTTTATTTT  
A\_14\_P126601 CTGGAGATAGTCGTGGTGAATGTTTCTCTATTATCTTCTCTCACTTTGCTGCTTTTCTTC  
A\_18\_P13133168

ATCATCTTGACCAAATGTGTATCCTGACCTTAATGTAGAGACCCACCTAATATCTTCCT  
A\_16\_P21375474

CCCCTATCCATTTACAGAACTAGAACCTAAAAATATAAACTGATTCACCTTGTTTCAGCAGC

A\_14\_P127123 TGAGGCTGAATGAGTAACACAGAATCTTGGTGCCCTGTTTATTGGAAAAATAAATGTAAG  
A\_14\_P122714 TATTGGAATTATTTGGGAATGCTTTTAAACAATTTGTAATTATTTCTTTACAAACCAA  
A\_16\_P19330357  
ACTGTGCTCAACTCATTCTCATGCATCTTCATCTAAAACTACTCCTTCAATGCTTTTTG  
A\_18\_P22839599 ATAAGACCATGGGCCAACTTTCTGGGCATCCAGGGCTGGCTGCAG  
A\_14\_P135714 GGAGGTTTAGTTGGTCTCAGCACATCATTCTCTCAGGATAAGTAGAAGAGTG  
CUST\_9552\_PI426210822  
TTTCTCTTTTCAACTAGCATTAAACATCCGAAACTGTATATCATCACCACATTTTCATTTA  
A\_16\_P19296953  
TATCACTAAGACAGGAACCATAATCAGAACCCTACAGATTCAGAAATCCACAAAGTTAGC  
A\_14\_P116426 TTTTTTCTATGTAACCTCAGTGTGGACTAAATAACAGGTAGTCTCATCCTCATCTTGT  
A\_16\_P30952574  
ACTCTGTAAATTGTTGTGGATTTGTCTTTTGTCTTAATTCCATTGGAAATTTTTCTGACT  
A\_14\_P108908 CCACAAACACCAAGCACACATGGAACCTCGGCAGTCCTTTATTTAGATCA  
A\_14\_P113256 TTTATGTAAATACATGGCAAGTTTACACATGTTACTGAAATCATGTTACTCGGCAATTTG  
A\_14\_P139746 CTGGAAAGTCAGTTTGTCTTAATGCAACAACACCAAGTGTGTATAGCATATTTTTCCCTG  
A\_14\_P126921 GAGGGTTTTCAACATGTAAACTAATTTTGTGGAAGACGTCCACATTGTTCCATAAAATGA  
A\_14\_P119164 GCAACTGGTAGGAAAAGAAAATGTAATTTATGCTCATTGAAAGGAGGCCAGGTTTAAATT  
A\_14\_P110127 GACTTGATAATCCCATGTTTCTAGAATTCTAGAAAGGCTATAAGGCAGCCTAACAAACATC  
A\_14\_P116370 TGCTGGTAAGTTTAAATAGTTCAACATAGTGCCTTCTAGTGCAGAAAAACATCAACACTCA  
CUST\_6766\_PI426210822 TGAAGCAAGTCATTACCACAGTGGCTAGTGCCATGTTGGACAGAA  
A\_14\_P111407 TAATAATTTTTTTATCCTGTATTATTCAACAGGCTACAGTTCTTAGCAGGAGAGAGAGCG  
A\_14\_P106637 ACTTTGTCTGTGAGTTCATCAAGAAGAAAAAGTAACTTCCCTCATCCTACGTATTTGCTA  
A\_18\_P16716573  
ACTGATGAATGGTTAAATGCAAAGAGAATGAGGGATTTAGATATGAGAGCAAACACATCA  
A\_14\_P102651 ACATTTTTTAAATTATGTATTTACAGGCCCTGCTTGATACTCAGAATCTTTTGCCTGCACA  
A\_14\_P104423 AAGGAAGGCACTATCTTCTAAATTCAAGCACCTTATTTACTTTGATACTGTCTTACCCA  
A\_16\_P19560911  
AAAAATGCCAGATTTTTTTTTCTAAGAAACAGGTAGCAGATTCATTCAATCAATCTTGAA  
A\_14\_P130223 AACTTACACAAATAAACTTGTATTCCCTGCCTAATCTGAACCATGAGTTACTGAGGATTC  
A\_16\_P00685386  
GATGACACCTTATGTTCTAAATATTCTCCCAGTATTCTAAAATATTCTAAATGCTAAGGA  
A\_16\_P19345292  
AAACCACAAAATGTTTGAATGTCACTAACAAGTAGAAGAATAGTGAGTAGACTCCAGGCA  
CUST\_8009\_PI426210822 GCCATGTATTTCTCTCTCTCACAGCCTGCCAGTTTCTGACATTC  
A\_14\_P124010 GCATATTTGTAGTGGCTGTGTAAAAAACAAGCCCTTTTTCTTTTCTCGAGGAAATAT  
A\_14\_P126950 AGTAGGTGTATTAAGGCACCAAAAAGTAACATGGCACCCAACCCAAAAATAAAAATATG  
A\_14\_P111049 CAATAGATGCCACCGTTAATTACCTGGGCAAGATCCTTGTTGGAGTC

A\_14\_P102281 CTTATACACATGTCCAAGTTAACCCACCCAGTTATTTTTTAAATTATAATGAGGCCAGGT  
CUST\_5546\_PI426210822

AAGTTTTCTTAATATCTTAATCTTTTAAATTGATGAGTCAAGAGATTGCAAAACTTGATG  
CUST\_9007\_PI426210822 ATTGGTGATGCACGCATTCAAGGGGCATCAAGCCATGGACACTTT  
CUST\_3872\_PI426210822 ATCCTGGGGAGGGAATCCGCTTTCTGCTTTCTTAGGCACTAGGAA  
A\_16\_P17231260

TCCTGACAGTCACTTAAGATAGGCTCTCTACAAACAAATCAGCATCTACATACTCATAA  
A\_18\_P22842651 AATTCTCCCTTTCCGTCCTCAGTTGGACTATCTGGACTTTTTGATTCTGCTTCTT  
A\_14\_P112116 CACCTTTATAAACCTGAGAGTCTCAGTTACCCTTTTTTTTTCTTCTCATTCTGTCAATT  
A\_18\_P14139472

GGATTTTATTTTTATTTAAAGAATTACCTTGTGGGTATGTCTGTGACTCTTGGGTGCCTG  
A\_14\_P125606 ATGAGTAGATGTTTCTCTTTTGTGTGTGCACCATGTTGTTCTCATGTTGTCATTAAAGAG  
A\_16\_P15014804

AAAAAAGAAAGGAGATTCTGCAATAATGAGGTTTCTCTGATGCAAGGAACATCTTTTTGTC  
A\_14\_P123873 AACATATCGGAATCTCCATAAGGTTGGAGGTGGGAAAATTTATCTTTTCAATCTATCCTA  
A\_16\_P01791424

CTTACCGGACTTCTCTCAAAAATGCTGATACCTGCTGAAATTCTAGTGCATCAAAAAGAT  
A\_16\_P21175970

GCCAAAGTAAGAATATTTGCATGATTTCTGTTCTAGTCCATAATCAGCAGTCACTTGATG  
A\_16\_P58424126 CTTACCTGTTAACAAGTGGGGATATGGGTTCCCAGGGATGAGGGA  
A\_14\_P115399 TTCTCTTCTAACATTTTAGCAAGAACAGTGATGAAATCAACATACCTCGACTCATTGTC  
CUST\_4585\_PI426210822 TCCCCAGGCATAGAGTCTCTTCTGTGTTGGGTATTGTCTCTCTA  
A\_14\_P111837 CACTTGATGTTTCATGCGGGAATACAGCATGGACGCAATCTCACTCTG  
A\_14\_P201067 CAACTGACAGTAAAATATATGCTCTTTGGTTAGCAAAGCAAAAAGGGGGAAAGTATTGCA  
A\_14\_P132791

ACCAGAACAGGCAAAGAGATTGCTAAAATTGGAAAGTAAATTGAAAGCAGACAAACTGTA  
A\_14\_P128996 TTAGCAAACAGCATCCTACTATTTATATCATAGCAGATCATGATGGAGCCAGTGACAGTG  
A\_14\_P125326 CCTACTCCTTACTCCCTACTGAGAACTCTTTATATTACTCTTCCTTACCTTTAACCTT  
A\_18\_P22839230 TTGGACTTAGGGACTGGAGTCCTGCCTGGGGCAGAACTTAGATT  
A\_16\_P00685018

TGCTTCTCAAGGGCAATCTCTTCTACTGGCTCCAAATGAACATAATTATTTGTAATCAGT  
A\_14\_P102955 GAGTCTCTGTGATTACTGAAGTTGTAGCACTGTGGCATAAAATACAAGAGGGTGC  
A\_14\_P124037 TTGATCTGAGTTGCCAATTTTGTATACTTGATTAGTAATTACTGGTCCCCTTTTAAAGGCC  
A\_14\_P202255 AATTCTCTTCTGACTTCCTCAGTGCTAACTGGCTTTGGGTATCTCCTG  
A\_14\_P133393 GCTCCTTATCTCGTGTAGTTCTTTAAATTCGTGTTGGATTTTCAAAGCGAGGATGTTTT  
A\_16\_P03807788

ACTAGTATGTATCTTGAGTAACCCTTATGACAGTAGAGAACATTGCTGGATGCAATGTCA  
CUST\_6494\_PI426210822

TTTGGCAGGTCTTATCAACTTCATGGTTTATTTTCCTGGGTAATTCATTTACCAGCAT  
CUST\_8947\_PI426210822  
GGATTTTTGTCTTAAATAAACACCTTGGAACCACTAGCTACACAGAGGGGTAAATAT  
A\_14\_P114895 ATGTGATTATTATTGCCTTCTTTGGACAAGAGTTGTAACTTTAAAGCGACACCTGGATT  
A\_14\_P135956 TCTGAATTTTTCTAACTGGGCTTTATTCTGAAGAGTCCATTCTAGTGTCAATGGAGATTG  
A\_14\_P130869  
AGGAGTCATCATTTCAGTAAGAACTCACTGAGTGACAGAAAATGAAGACTAAAGATCA  
CUST\_505\_PI426210822 GCTGTCTAGCATTAAAGACAGAAGTGTCCCAGGAAAGATGGAGTACTCTG  
A\_14\_P132750 CACCAGATCCAAAATTAGCATTTTATTCAGAACGCTGGGGTCAGAGGTGTATCATTAT  
A\_14\_P115307 AAATAAAACCCATCCATAATCCATTACTTAGTGAAACAGTTGTAAATGTTTTGGGCCTG  
A\_16\_P17685079  
TGAGACTAACACTCCATGTGACTTATTTTCAGTGAAGCCCTCTTATACAAATTAATTCCT  
A\_18\_P22841245 TTAGAGAAAAGGCACTGTGTCCCTGTAACTGCTGGCTGCCCCAC  
CUST\_1886\_PI426210822 GACTAGGCTTGACTAAGGATAATTTCTGTGGATCCTCCTGGGCAGA  
A\_14\_P106532 CTCTCAAATAGCAGTATTCTGTTAGCACTTAGCAACACAAGTTTACTAATGGACCGCA  
A\_14\_P112914 TCATTATATTCTGAGTAGTTTTCTGAAGACCACAAGTCTCAAGTCAAGGAAAGTATCCT  
A\_14\_P139719 TTGCTATTGGAGGAGAGTTTTAAAAATACTTAGAGGTTGTATTGAATACTCTTCAGCAGG  
A\_14\_P129281 AAATTAACCAACCTTATTTTGATTGAGAGGATCGTTTCGCAGTCTCTGTTTGTCTTCTG  
A\_18\_P22841048 ATATCCACCTTGTTAACACCGTAGATGACTTCGGTGCCCTCCCTG  
A\_18\_P13438655  
GCAGCACCTCTTATAAATAGATAGCAGCACCTATTATAGAGAGTCATTTTAGTCTGAC  
A\_16\_P00685009 CTTCAATTGAATCCCTGGTTCCACAGCAACAACCAGATCCACGATTTTT  
CUST\_1280\_PI426210822  
TTTTTTTCAATGGCATAATTTTATGAATTTTTGGGACACTACACTATAGACTTGTTAAGC  
A\_16\_P01049070  
GCATACAATGTAACAAATTCGGAACTCTTATCTAAAACCTTGAATACACAACACAGTCC  
CUST\_5482\_PI426210822  
TTGGTCTCTAGTTCTAGAATTATTCTGCTTTCTAAGGTCAAATCTTACTGGACTGATAAA  
A\_14\_P138867 GTATGAATGAGGATAAGAGAGGATTGATCTCTGAGAGTGAATGAATTGCTTCCCTCTTAA  
A\_14\_P124974 CCAAATACTCTGTATATCCTACTGAACATCATTTCATCCCTCCCACTGAGAATTATAG  
A\_16\_P18907542  
GAGTAGTGACAACCAAGAAATCATAATCATCAAGTCTACAGTGATACCTAGACAAACGT  
A\_16\_P32262017  
AAAAGAAGGTCCTTCAAGGTAACAGTATTTTCAAGCCACTCAATTAATCCTAACCTGAAA  
A\_14\_P129120 TTTAGGCATAGTTACACCAAAAGTGATCTATGAGGAAGCAACTGACCTAGACAAATTCAT  
A\_14\_P127705 GGGGCTGATGTTATCAACTTTGATGGCCATGTTGTATTACCATATAGATTCAGAAACAAG  
A\_14\_P129271 TCTGATGCTCCAAACACAGAAAAAAAATCCAGGCAGAGTATTAGGAAACATGGATTTAT  
A\_16\_P19397917

AAAAGGGAAGTTGATGTTAGTGCACAAATAACCTAAGGCAGAGTTTCAGTATTCAACATG  
A\_16\_P00393927

AACAGTCACAGTCAGAAATTGTATCTATCACACAGACGTTTTGTTTACAATTGGAACCTG  
A\_18\_P10617547

CAAAGAGGAAAAGATATCTGCGTAATATTTTTGGCTACTCAAAGAAAACATCAGCATCTGC  
CUST\_1807\_P1426210822 CTCTTATCAGCTGCAGGGATTATCAAGGATCCGTTTCAGGCTTTGATCT  
A\_14\_P124709 CAAAGAAAGTCCTTTTCATTTTCTAGGGAATGTAAAAAGTCCATCCAATTGCTTTTCTGACA  
A\_14\_P111150 TACACAGACTTTTTTAAGATCTTGCACATCCAATGTCAGAATATATTCCATCACCCAGCA  
A\_14\_P134335 TTTAAAAAAAATCAGAGTGGGCGATTTGAGACATGATGTGTCAAACACACATACAAAAC  
CUST\_9320\_P1426210822 TTCCTTTATCTCAACCCAGATGGCTGCTGCTTGCCTTTCAGTTAT  
A\_14\_P105670 GTGAAAAAGAGCATTGTTCTCTTTTCTTCTCACTTGTGATCCAGACAAAACAAATATCT  
A\_16\_P19782364

AAAAACTTGGGGTCAAATTTTCTTGCTTATGGTCATGTTGAGTTTCATTAGCCCTACTAG  
A\_14\_P118986 CTCTGAGGACAATCTAAGTTATGAATAGTCTGGTTCTGTAAGGATTTGCATAGTTTGGAG  
CUST\_917\_P1426210822 TGAAATAACCACTGAACAAACTCTGTATAGGCACTGACTGCTGCTCAGACT  
A\_16\_P20457226

ATCCTCCCAGCAATTTTAAATACAGATACAAGACACAAGGACCATATTCTGCTTACAGTT  
A\_16\_P03652052

TATTGTTACCCCTTAACTAACGCAGATGAATACCTACCATCAAATAGGCCCAATAGAAA  
A\_16\_P20452383

AAAGAATGCAACTACAGTTCAGTCAACAAGAAATCTTTACCTGGACAGATTCCAAAAGTAG  
A\_14\_P111491 ATCTGCAACAAAAGAGTTAAGTTTCTGATTTTCCGTATCAAGCATCTTATGCCTTTGCTG  
A\_14\_P110796 CTATTAGTCTCCTGGTGCATGTGGGACAAAAAACATAAACACTCTAAACTGTGATAGT  
A\_14\_P100666 CAGGGACTAGGAAGGGTTTGCTTCTATCTATCAGTAACATATGCAGATAGCATACTATTC  
A\_16\_P17372955

AAACAATCCTAGATGAATGATCACAGAGACCTTCAATACTTTTCCCAAAGTGGTAAAGTG  
A\_14\_P132958 CTTCTGGGTCTATTAACTAGGTAGATCTTTTTCGTATTGATCATAATAAAAGTGAATCAT  
A\_14\_P121977 AGTTATAAATACACCTACCTGCTTTACCTTGACATATCCCTTGTTACTCTGCTTTCAA  
CUST\_7044\_P1426210822 ACCGTCAGGCAGGAGAGGTGGGGCTGTATTTGAGAGGGTGGGAGT  
A\_14\_P114757 CTCCATGAAGGAGCATTAACTTTTGGAAAGGAGTCATTTTCCACAAAGAAACAGTTCTTA  
A\_16\_P58424283

ACCCTATTTGCAACAGTCACTAATCATGTGATCTTCGGTGATTTATTTTACACTTTGTGG  
A\_14\_P124175 ATTTGGAAGTTATTCAGAGTTTGAATGATCTGGAGTCTAGAGATTTGGAGGATGATTCTG  
A\_16\_P01525783

AGGCAAATAACCTCTCTATACTGGATCACTCTTACTTCTTTGCAGATATCACTTGCTT  
A\_14\_P106784 GAATACTGGAAATAGACAGATCTTAAACAACAGAAACCTACTGCCTAGATAAATCCAGGC  
A\_14\_P100498 AAACCCAGCATTATCCAGAATTAATGAGGCTGCTTTATTACTTGCTTGAAAATGCATGC  
CUST\_8789\_P1426210822

CAATTCTCCATGCCCCATGACCCTTTCTTAGCTAAAATGAAAAATAATTGCCTAGTTC  
A\_14\_P124276 TCTTTCAGGTAAACAAATAGAAATATTATACACAAACCTGCGGAATGGACTTTAATTGCT  
A\_14\_P135666 AAAGACTGCTCTGAGAACTGTGATACTCCATGTGTGCTCAGATCTATTACTAAAAGTC  
A\_14\_P115426 GCTAAGCATCAGGTCAAACTATAATAAATCTTGCAAAATGTAAGCCAAAATACCAGCA  
A\_14\_P102428 CATTGTATCACAGTCATATGCATGCATATATTTGCCCTCTTCTAAATCCATGGCATT  
A\_16\_P17991022  
CAGACAACTTTACAGCCTTGTTACATACTACCTGACCTAACCTTATTCTTATGACTT  
A\_14\_P136241 CTGAGTTGTATGTGTGTCTGGAGAAAGTGTGTGAAATAAAAACCATATGAAACCCTAAGA  
CUST\_3209\_PI426210822 AGCTCCAGCCACTTCCTTGGCTTCTCTGCCTCAGAGTTCACACAC  
A\_16\_P03513812  
ATTGCTGCAGTAGGACTGTATTCTCAGTCAGAGTTAAGCCTTTTTTCTTACAAACAATGA  
A\_14\_P136189  
GGAGAGGTGACACAGAGTATTTTAAAAGAGCAGGTTAAGAACTTTTCACAAGGAATCAAT  
CUST\_6719\_PI426210822 ACTTTCCTCAGGAAGGAGTTCAGACTCCTCAGCTCCTCATGAGAG  
CUST\_10176\_PI426210822 GGCTGGGAGGGCATCCTTGCTTCTCCTCCAAAGAAAAAAATGAA  
CUST\_800\_PI426210822 GCGCACCAAAGGCAGATTCCAAATACAGCCCTTCAGTGAAGTCTC  
A\_14\_P115550 TAGCATACTTGCTCAGCCATGTAAATATACCCTTATTATCAGAAGAGCACCTTCAAAGA  
A\_14\_P115039 AGACTAAAGGTCATTGTAGTTAAGTCTTTTTACCACAAATTTAAGCAGTGGATGATGGG  
A\_16\_P58424603 GACTCTGTGTGCATTACCCCTTTTCAATTTCTGGGAAGGCACTGTTC  
A\_14\_P126649 TCTATGTGGTAAGTCTAGAATGATCAGTTACTGAAAGAAGAGGGAATCAGTGCTAGTGAA  
A\_14\_P126326 ACTTTGTATATAGTAATGTAGGGAAAAAGAGGGAGGCCTCAGGCTACAAAAGATGTTATT  
A\_14\_P131748 CCTCAGAGGCAGAGTCTACCTCTGGAAATTAGATATACCACCAAAAATATAGAAAACACT  
CUST\_7665\_PI426210822  
TCGTATTCAACCAATAGTTTTTCCCCCTCTATTAATAATGCGTTAATTTGGAGTCTTTGCT  
CUST\_9307\_PI426210822 CCAGGCCTGACTTAGAGCACCCTGGCCATCCTCTGATTCCATAA  
A\_16\_P19518568  
AGGCAGAAGATATTGTTGAAGGCATTTTGAAACATCACAGAAATTCACATACACCAAGAA  
A\_14\_P115131 ATTTCCATCAATATAATGGAAATAATCAGAGGAAGATGGCTATGGTTGCAGAGTTCAGAC  
A\_16\_P19757110  
AGCACTGGACTTGAAGATAAATCCTACAATTCATGAAACTGACTGATTTCGACTAAAGGAT  
A\_16\_P20141703  
AAGCAGTCATGCCTTTCTTTATCCTGTCAAAGTGAGAAAAATTGTTTCCCTTAATAGTCC  
CUST\_6956\_PI426210822 AGACAGTCTGGGCTTCCACTGCCCCATGCTCTGCCTGTGATGTG  
A\_14\_P125798 AGAGACAGATGAAGATGATCTTTATTCCGGCTATAATGACTACAATCCAATCTATGATAT  
CUST\_6899\_PI426210822 TGGCCATTAAGATGATGAATGAACTTGCTGCTTGCCTGGTAAGAGA  
A\_16\_P18550697  
AAATTCATGTTGAAAGTAGAGACATCTCTCACATTCACATACCAAAAAGCACATCTTCCC  
A\_16\_P00685268

GGGTAAATAATTCTGCCTATGACGCAGGTATAGAAATAAAAAAGACTATGAAAAGATTAA  
A\_14\_P120462 CAATAAAAAGGTAGAAAACATTATCTTATCTTTTACAGGGGCATCTGTGGCTGAATACA  
A\_14\_P116332 CTTTAGATTCTGCAGTTGCACAGATGACATTTTCTGTTTCCGTGAAGCCCT  
A\_16\_P36187390  
AAGGACTACCTAATCCAACATACACATGCTTTGATAAAACAGGACCATTCATCAGACATA  
A\_14\_P121522 ATCTGAAGGACTTGGATGAAGAAATCTTTGATGATGATGACTTTTACCACCAGGTGA  
A\_14\_P124294 CTGAAAAGCGTCTGTTTTTAAGAGTTAAACAGGAACCATCATGAAATTTATGGTTATCGC  
A\_14\_P110395 ACTAAGAGTCAGGTAGAAAGCAATTTGCAAAGCAAGGAAAGAAATAATTTCTTGATGGAGT  
A\_14\_P134153 ATTATGTGTCCCTATACATACAGCAAATAATTAATGGCGGTAATCACAGCAAGCAATCCA  
A\_18\_P22840676 GAAAGGAAGGACTGAAAGCCAGGGACCTCTGATGGATAACAAGCAC  
A\_16\_P00685204  
GTTGTGCAAAAACAATTCTGTTTGTGGTTATCATGGGTAGACTAATACCTGTCAGATCAT  
A\_16\_P58424549  
ATCCATTGTTGGTTAAGATGAAGAGAAATGAGCACTTTCAAATACTGCTGGTATGAAAGG  
CUST\_5346\_PI426210822 CATGCCCTCACAGCTCAGCAGCCACAGGCATGGCCATATCTGCCCTC  
A\_14\_P137625 CAAGATGATTTTAAATTGCACCCCCTAAAAATCCTTTTTAATAGTTATACATTTAATACA  
A\_14\_P113940 ATCCACGAGACTGTAAGTGTGAACGTTGCTTAATTTACTCTGAAAAATTATACGCTTGCA  
A\_16\_P17686064  
AATGGACTTTATAACAACCTTACTAGCGCTATACATCCAAAATTGAGTCATCTCCTACCAA  
A\_14\_P100715 ATGTTACAGTAGACAAAACAAGTTGGACTCTTTTGGACCTATAAACCCCTACTCTGAATAC  
A\_16\_P18062202  
AGCAAGCATTCTAATCATTCCGAGTTAAGATAACTGTTAAACATCTATACGGGCATGAGG  
A\_14\_P117856 AAGAGAGGATTTCAAATGAAAGTGAAAATTAAGTGCCAAATGATTCAACCTCAATTAGCA  
A\_16\_P15519533  
AAAAAGTCAGAAAATCAGCAAGAGGAATAAACATGTCAGAAATATTGTGGGATCCAGTGA  
CUST\_5847\_PI426210822 GCCAAGACTTTGGCAGGGATTGGATTGTGCAGCCATTTTTGTTAATA  
A\_16\_P00730279  
AGGTTTCTATCTTGAAGTCTGGAATTCTGATCACATAGAATCCTCACCACAAACTAGACT  
A\_16\_P02705657  
AGCCATACTGGAAGACAAAGTTTCATGGATTCTTAGTTAAAAACAATCCCCATCTTACA  
CUST\_744\_PI426210822 ATGTCCTTTGTGATATCTGCCAGCCTTTGCTGGAGTCCCCTTTGA  
A\_14\_P104436 CCGTGATATCCAGTTTGTAGTGAAAAAGGAGTGGACTTTGTTCTGAATTACTCCAA  
CUST\_6313\_PI426210822 AATTACTTGTCAAGGGACTATGATGGCCCTGCTAACCTGGGCTTT  
A\_16\_P17784497  
CAACAGAACACATCCTTTTTGTTAATCCTCTTCAAACATCACATTTGCTAGGTTCTAATGG  
A\_16\_P19434154  
TAGAAGTCAGTGATATTCCTTACCCCCTATAGATTCAATCATACCAACAGAAGGCTAAAG  
A\_14\_P114502 ACAATGAGTTTGGGCATATTTAATGATGATTATGGAGCCTTAGAGGTCTTTAATCATTGG



A\_18\_P22840506 CTCAGTGAGCATGTGACTGGAGAGGAGGAGAGGGAACTGCCGCCT  
A\_16\_P17972572  
AGGCATGATTTAGAGTTTAAAGAGGGGAAATAATGAAACTACAATAACAGGAAAGGCAGG  
A\_14\_P121546 TTGGTGTCTTTATAGGAAACTATAAAGCAGAGCAGTGGTGTCTTTAGAGGAAACTCATTC  
A\_14\_P112220 GTTTTTGTCTCCTTTTTCCAGAGGAATGTCGGGTCCTCACAATTCAAAACAATT  
A\_14\_P113736 TGTGTTCTTGCAAATCAAAGACCAAATACCCATCCAAAAAGTTAAAGAGCAAAGGCTATA  
A\_14\_P130807 AGATCATTTTTTCCATACATAGTAAATTAAGAGAAACAGTGCAGCCCTGAGTTGCAGATG  
A\_14\_P139802 ATAATGCAGGCATTTTTTGTTCAGTCTCTATGATTGAGGACACATGCAATAGAGACATA  
A\_14\_P130930 GAATTACCCAATCTCTCCCCTATCTTGAAAAAGAAGAGTGTTACCCACGTG  
A\_16\_P58424185 ATTGACTTCAAAGAGGGATGAGACAACCTTTCTGGGGCGATGAACATATTCTAAGAT  
A\_14\_P108380 TATACCTCTCAAATTTATCACCCTCAATGACACTGCATCAAATGACTATAAAACTA  
A\_14\_P200990 ACTACATCTTGGGGTTTGTATGTGTCAAAGCAAACAACACAGTTGTCTTCATTTAGGT  
A\_14\_P107794 TCACAGAGATTAGCCTTTTGGTTCATTCATTGCATAAAGAGTTTATTGAAAGGGTTGGAT  
A\_16\_P21567728  
AAAAGATTTACCGGTAAACTAATGACCTTTGGTATGGTATTTAAGCAGAAGTAACCCAGG  
A\_16\_P00299496  
ACCCAATAGATGACACATCATAAATCAGTGCTTTTTAAATGTTTGATGTCCTTTACACTCA  
A\_16\_P58424353 ATTTGTCCATGCATCTGGGTTACAGCAGAGGGTAGGTTCTAGGCTT  
A\_14\_P119260 TATGAAGATCCTCTACAAAAACCTTTAGACCCTACAATCAAATATCAATACCTAAGGGAG  
A\_18\_P15289265  
GACTCCTAGGCTTTGTATCTCACAATTCAAATTCACAAAGAAAGAATCTAATCTGCTCA  
CUST\_4539\_PI426210822 ACTGCTTGAGCCTTGGCTGGATTAGGGAAATGTCTCTGGCACTTT  
A\_14\_P200556 CCTTGGATTCTTGCTCTAGTCCTTACCTTGCCAGTTTTCTCTTTTTGACT  
A\_16\_P36208693  
ATGGGCTAAGGAACTCTTTATAACACCATCTTTGATAGTTAGGCATTAGAATTACCTTGT  
CUST\_7477\_PI426210822  
CATAACCAAAGCAACCCCTACTATTTGTGTGTGCAAGTCGTTTTAAACAGCTGG  
A\_16\_P00652052 GACTGGGATCTGATTATTCATGAACTCATTCATTTGGATCTATTTCTGCCAACTCAG  
A\_14\_P102664 CTTGCTGAACTCAGTATCTATTCAGTAACTGATATTTAACCACGCCCTGTGTAAGA  
A\_14\_P113229 AATGAGCATTATGGCCACTGGAGAGATTGAGATTAGATGGGAGATAGAACAGATG  
CUST\_4365\_PI426210822  
ACCACTACATGACTTCTTGATAAGATTCTTTCAACTTTACCCTATGCCTGGATCATGA  
A\_16\_P16981991  
TATCTCAGCATTGTCAGGATTTGAGTAGGACTTACCGAATAATAACGCTTTCTGGAATAG  
A\_16\_P15097081  
AAAGGTCTGATGGATCTGACTTTATGGGATACTTTTCAGATTGAAGGCTTCATACCAAC  
A\_18\_P14142564  
AAAGCATTAACAGTATTCTCATCCATGTCGTATCAGATTTAGACCCCTTCTCCTGAATAA

CUST\_7612\_P1426210822

CGACTGGTTGACTTAGATTTATTTGTTTATTTAGCTTCTTAATTTTCATATCCTGTGGTCC

A\_14\_P201254 AGATGACTTCTTAACACTGATCTCAGAAAGTGGATTTTCGATAACAACATACAGTTGTCTC

A\_16\_P15205587

GGGTATCTGCTCTGAAAACCTTTATTCATCTCGTCTACATTAACATCAGTTAAGACTGGCT

A\_16\_P16204047

AAAAAGGCAGATGTATGACTGTGTCATCCACAAATACCCTAGAAAGTTAAGTGTTAAACC

A\_14\_P117863 CTACAAGACGTGGAGAGCATGAACAGCAGCAGATTTGTCCTCAACG

A\_14\_P127974 AGGTTTGTGGAACAGAAATCAAAGACCAATTTTCTGAGAGAAGGAAATAACATCTGC

A\_14\_P114870 TCAAATATATGGAACAAGGACTAACCCTTTTAGACCTGAATAATCAGGTTAAGGGAAG

A\_16\_P15630299

AGCATTCCTAATCTGACATCGATTTATCCGAGACAATTTATGCTACTTGTCAAATCACCA

CUST\_1660\_P1426210822 TTTCCAGTGGAGCGTCTGACTGCAGAAAGCTATCTATTTTTATAAAACAGTG

A\_14\_P117089 GTTTTTTACATTTCAACTCCCCTTTTAGACCATGAGTAACTTGAGAGCAGTTGTCACATA

A\_14\_P127660 CTCTCCACCACTGCTTAGCATATACAAGAAATAATCGCTCTTTCTCTGCAGTTTTCTG

A\_14\_P106235 TAATAATTATTCAGGCGCCAAATGGTAGTTTGGAGAATTACTGAGGGAAGATTTTCAGAC

CUST\_10071\_P1426210822 GGAAGAGGAGGCAAACAGAAAATGTTGGTGCAGCATTATGTCAGA

A\_16\_P00253355

ATCTGCAAGTCCTGTATGTCTACCAATGATTGTATTTTCTGTCTTAAGTAGCAAGCCATC

A\_14\_P119176 ACCATTTTTCATTTGAGAAAGGATTATCATCTAGCACTGGGGATGAACATAACCAAATCA

A\_16\_P18009020

GGTCCCTATTGCAGTATTAACAATACATTATTTTCTCCGAACCTTCTAATTCATTGAGCC

A\_16\_P19501325

CCCTTGCTTAAGAACTTATATGCCCCCTATTCCTACTATTACATTCAGAACAGACTCTTCTA

A\_14\_P129277 TTTAGGCACAACAAAATGATGGCAAAGCAGGGACATAATTAGCATCCTGAAAACATTTT

A\_14\_P119122 GATATCAGCGATCTTCTCTACTTTTCATTGGGGAGCACTATGTCCATGTGAAC

A\_16\_P17518233

AGAGATGCATTGGAATAGGAATTCAGGTCAACACTTTAATGAGATGTCTGAAGAGTATGG

CUST\_2201\_P1426210822 GATATAGTGGGCCAGACTGCCTCTGCACTGGGGAATGCATACAT

A\_14\_P137108 TCATGCCACCCTCCTTTGTTGTATGTTAGTAATATTACATTTGGGGCAACAAAATAGATC

A\_14\_P105091 GATCTGTTAACCTCAATTTGCAGTTTTAAAAAGGTGTAACCTCACCCAGATTTATGGTTTT

A\_14\_P120455 TTCTCTATGTTTATTCTTCAGAGCAAATCCTATGTGAAACAAATCAGTGACCCTGCTGC

A\_14\_P111609 TTTTGAAATGCAGGTGATTTTCTTAGGAACAGAAGTCATTCTGTAACCTTGTCAGTGTGTT

CUST\_3250\_P1426210822 ATACCTATGCATGACAGGCAAATAAGCAGGCTCTTCAGGACCAGG

A\_14\_P202177 CTGTTCAAAGGAACTGTAGAACAGATGTCACAGATGTAACCTATTCTTGAAAGGAAGTCAG

A\_14\_P132628 GTATTCTTGCTTCATGTTGGAGAACACTGCACCAGCAGATGGTCTCATTTTTG

A\_14\_P118144 CTCAATCTTTTTGTCTAGGCAATCCTTAGGTGTCACATGGCCCTCTAGTG

A\_16\_P39014614

TGATTCTTGATCTCCTACGTGATGATTCTCTTTACCATAAAAGTTGCCATAACCTCTACA  
A\_14\_P126751 ATCCATTAAGTAGTGGTTTTTCAGTTTTGTTGATGACTTTTTTCTCTTTAACCTCCTGTTC  
A\_14\_P126746 CAGTCTTTCTTTTCTTTAAAATGGCACTATTTTCCCCCTGTCTACATATTAGAACTCCC  
CUST\_1615\_P1426210822 CAAAATATTTTGGCCTAAGGTGCCTGCTTGACCTACAGGTCAGTGAC  
A\_16\_P19729749  
GTCAATGTTTTTCAGTATGGGTTTTCGTAACTAGAAGTCTACTCACTTTCTCTTCCATCAAC  
CUST\_2377\_P1426210822  
CAACTATGACTGTACGTTCCCAAGCTGCTAATATGCATATGATAAGGGCAGAGATTT  
A\_16\_P58424306  
TCGACGGTAGAGTCACAGGTCTTTCTAATACTTTTGTGGTTTTGATGCCTACATTTTATAA  
A\_14\_P132721 ACAGAAGATGTTTGAGATCCTCTTGATGAAAACAGTGAGGCTGATAAGCG  
A\_16\_P00685362 ACTAAGGCTAGAGACCTTGGGTAAAAAGTCTTCTCTCTTTGAAAGCCC  
A\_16\_P00909262  
ATCTTTTTTCCATCTTTTGTCTAAGTGTGCTATAATAAATCATTGATCACACATGCCT  
A\_14\_P116891 TCTCTGGATGTTTATTAGAGTCACCTAGCACTTAAAGTGTTCGCTCCAGAATAATTATG  
A\_14\_P120084 CTGTAAGAAAGTCTCATTAGGAAGTTCACTGTCTTCTATGCTGAGCCTTAAAGAATTAAG  
A\_16\_P02842718  
ACTGATCAAATATCTTACATAGCAATTCATGTTGAACAACACTACTAACCCAACATTTCTC  
A\_16\_P17389708  
AAGGAAGCCTTAGAAAAAACACCTCAAAGACAAAACCTTTTCCATTGAAAACCTTTTCTC  
A\_16\_P16288079  
TGAGACTCATAGATCACGTTCACTCTCTATCTTACATGTATCATTGCGCTATTCTCCAAA  
A\_14\_P116396 TCTGATCTGATTGCGAAGTTACATAGATTCATCTACTGCTCGGCGAAGATTATCAAAAA  
A\_14\_P131561 ACACAGAAGGCTAAGTTGACATTTTACGTTATTTTCTAAAGTTTAGGCCACTTGGTTCTT  
A\_16\_P40426023  
TCCTTCTGAAGACATACTTTTGTCTTTTCCATCACATTATATCGCTTTCACATTTTCTT  
A\_14\_P101878 GTTTTGTATTTGTGCATTCATCCCTCTGCCTAGTTTAGATTTCCAGTTTAGCAATTTAC  
A\_14\_P112277 CTGCCACTACTTTGTGAACTATTATATGAATCTGAATTTGACAGCCAACCTGTGGATTAT  
A\_16\_P18199801  
AAAAACAAGACACCACTTAAGAAAAGACAGAGTGTGAATTTCCAAGCAACTTGAAACTTT  
A\_16\_P19444262  
AATGACCACTGTATGATTTCTGACTCAAGATCTGAAGATGAGGTTACCAGAAAACAATTG  
A\_14\_P134992 ACATTTAAGAGACAGTGACCCATAGAATACTGAGATATTTGACCTTGTGAAATCCTCA  
A\_14\_P121398 TGCTGGATGTGCTGTGCATAATAAGCCTTAGATGCAGCATTTATGCAATAAATTGAGTAG  
A\_14\_P130339 TAGGAATTGCCTCTTTTCGAACCCTGTAGGATTTTACTTCTTGACGCATCTGTTTATTAA  
CUST\_5133\_P1426210822 GATTTTCACACACCACTAAGGTCTAGGGGAAGCTTCTCAGCTTTCTG  
CUST\_1958\_P1426210822 CTGTCTGCTTGTGGTGTCTTTACCTTCTCAGCGGTATGTGTAATCTGTAC  
CUST\_4195\_P1426210822 ACATAAATTTATGTTCCACCACAAGAAAAATCAGTGGATGGCTGGAAGGCG

A\_14\_P130042 GTATTTTATTACACACCCTCTGCTGTGTTCCAACCTTTACTGTTCTTGAAATTCAAAAAGT  
A\_14\_P113486 TAAAGATTTTTAAAATCATTCATGAATGCGGTCTGTTTCGTTGCACAGAGTAGATGCTCAA  
A\_14\_P100002 TATATTTTTCTTAAATCTGTCTCATTGACTATTCTCAAAATCTGCCGAGTGGGGCCATTC  
A\_14\_P100631 CTAGTAACAACCTTGCCTTGAGGAATAGATCAAATCTTTGTTTCACAGACTGAAAAGTTGG  
CUST\_361\_PI426210822 GTGTACATCTCAAAGCATGTGAATGTGCTCTGTTGGTGGAAGTACTAGCACTT  
A\_14\_P109587 TCTGTTTATTTATCAGTGCCTTTGAAGGAGAATACACACATCACAAAGATCCTGGAATAT  
A\_18\_P10964971  
TTTTTTTGTAAAGCAAAGTATCAGACTGCGAATAGACACCAGTTTCATCTCAGACTCAC  
A\_18\_P14135095 CTCTCCAGAGAATTTACCTGCAGATTACCCTCAAAACATGAGACAGGTTTCAG  
A\_14\_P118750 TTATGCTTTTTGTGAAAGGAATGCAATTCTCATTGTTCACTTGGGGATCAATTAGTTTGAC  
A\_16\_P01655646  
ACTGGATCACTACTTTAGTTTTATTACTGCTCCCCAAATTATAACCATCCATTGTGACCAT  
A\_14\_P127496 CTTTTTACATATTAGAGAACTTAGGCCTTAATCATGTGAGTTTTAGACTCCCCCATTCC  
A\_18\_P22843223 ACATATACAGACCAGGGTCCCTGTGTGCCCCAGGAAGGTCTTTGT  
A\_16\_P18413521  
TGACAGTGGTATACAGTTGCTTTCATCTGTTTCAGATAGTTTGTAGAAACACATGAATGGT  
A\_14\_P135518 TAAATGTTGAGTTGTATCACGTTTATGCCTGGGAAAACCTCAATACCAGATGCCAAATTTT  
A\_16\_P16517406  
AGCCACTATACAACGCAGATCTCTGTTTTACGTGAGGATTCCAAATTACAAAATTGTGTA  
A\_14\_P134854 CTCTGGTGATAAGGACATGATGCTTTTACTGAACTTTCTTATCCTAGCACATGCTTCAAT  
A\_14\_P103555 GTGCCTTTAAACTGCATTTCTGTTTATGAGAGTAGCAAAAGATGCAGAAATGTCTGTTC  
A\_14\_P128170 GTAACCTCATAAAACATTCTTGAAAATTCTTAGTGGGCTTGCTCCGAGAGATGCTATCAT  
A\_14\_P201146 GAGAGTTTCATTCCCTGGGCTCAGTTCTCCAGAAGAAAATCAGCACAATTTAAATATTT  
A\_16\_P58424262 TTTCCATCTGACTCCATCCCGCATGGCAATGGGCCTTCTGTGCAT  
A\_16\_P15880703  
CAGACATTTCAAACCTGTAATACTTCCGCATCTATGTTTACGATTGCCTTCTTAGTTATGG  
CUST\_5334\_PI426210822 GTTGTGTGCTTTGCTCCCAGAGGGACATGAGTATCAAAGGTCTGC  
A\_14\_P100949 TCCTGTTTCAATTTAGTGAGATACCTGTGAATCAAGACTGTATCCTAGATGGTTTTCCAA  
CUST\_3038\_PI426210822  
GGCACAGAAAAGCAGTAAAATAGGTGTATTGACACTGAAGTCATATTTCTATAATGAAAT  
A\_14\_P101412 ACTGCAGGCAAAATGTTTCGTTTACTGATTGTTACTGAATCAATTCTGAAATTCTCACTCT  
A\_14\_P104012 CAAACTAAGAGAAGAGTGGAGACAATTGGAGACTCTGCCTTTTCAAAGTCTCATTTT  
A\_14\_P115460 ACATCATATTTTACATACACGGGCAGATAATTCATTAAGTTTCTTGGGGAGAGAGAAAGG  
A\_14\_P130581 GGAGAGTCGAATATCAATCTCCTCTTTCAAGTCCTGTTACATAAAAAAGAATACACAA  
A\_14\_P138311 CTTCCCCACTGATGAGAAGCAATTTATGATCTTGTGCTAGAAAGTTAATAATGCTTCACA  
A\_14\_P202539 AATGGTAGGATGCATTTACTCAACTTAGAATATGGCGCTATTATTATTATAAATGGTGGT  
A\_14\_P135045 ACCCATAGGTCTCCCATTTGTGTCATTATGATAAAATAGAAGTATGAGGTCAATTGAGT  
A\_16\_P58424155 GTAAAGTAAAGCGAGGCAGTTACACAATGGGTGGGAGACCCCA

A\_14\_P112933 CGATGGTTCTATTGATTATACTGTTTCACGAAGCCTGGAATGAAGCCACCAATGTTTA  
A\_14\_P111293 CATATTACCAACTTTTCAGATTTTTCTGTTAAATCAGCATTGAAAATTTACCTCACAGCCT  
CUST\_122\_P1426210822 CTTCTTGCTGCTAGCAGTCCTATCACCTTACAGCAGCATCTGCT  
A\_16\_P19053369  
AAAAATTTCTGCTCTACAAGTGATTTTCCCTCTTTTACCAATCTATGTTCCTTTTCCGTCA  
A\_14\_P100854 CTGGCCCTGAAAGGCCAAAGTTAAAACCAAACCTTCAAATTTTCGGCATTAGTTAAG  
A\_14\_P105256 GTTTTTCATTATCTAGAGACAATGGTTCCTGTCTCACTCAGGTTGAGGGCAAATAAC  
A\_16\_P16992059  
GCAAACCTAAGCCTTACATTTACCCCTGTCACTGAAAATTGAATCCATATTAGAGCAAAT  
A\_14\_P121658 TGCATATTGCTGCATTTTCGTTTCCATGTAGCCCTATCTTAGACATTTTTCTTTTACTGA  
A\_16\_P00624167  
CTCAAGATGCCTTAAAGTCTATCAAACAAGACCATGTTCTTCTCTCTACTTGAATAACC  
CUST\_2118\_P1426210822 GATGTTTCTAAAGCCAATGGGGTGGAGGAAAGCGAGGGGCATCCTT  
CUST\_5125\_P1426210822 CAGGTTTGGGAGCAACTACTTTTCTTCACTCTCTAAACTGCAAATCATTGAGG  
A\_16\_P15444070  
AAAAAAGTCATGGCATATCTGAAAACCACATTAAGTGGGTATAGAGTCATGTTTTCTCCC  
A\_16\_P39469121  
ATAGCAGCAACTATTTTTTCACCAGTCCAATTACTTCTCTCATTAAACCATCCATGACAC  
A\_14\_P113906 TGGCAATGTAAAATACTGAGGCATAAAACATCTGGTAAAATTCGCCTTCTAATGAGACG  
CUST\_6683\_P1426210822  
ATCATTTTTGATCTCTTTGCCATTGAATTCAGCAACCTTTGAAACCTTTGTGACAA  
A\_14\_P118141 CTGCTGTGGTGAAATAGAATATTTTTAGACTTCCTAATTTTTTTGGATAAAGCCTTAGCC  
A\_14\_P137628 TATTAGTCCAACCTTACCTTCTTCACCCATTGGATACTTGCTGCCAATTTCTGTAAACAC  
A\_14\_P107407 CTCTTTAAATATTGCTGAGCATTTCCTGGATCAGCATGATATTTAAAGATTTTTGTCCA  
A\_14\_P105709 CAGTCCAAGAAAATTATTTGATGAGGTGCTTGATAGAGACGTTCAAAAAGGTAAGCATG  
A\_14\_P137076 CAGCATTTACTGCAGAGATTCTAGTAAATATCTGTGGGATGAGGACGTGAATAAATGAGT  
A\_14\_P101251 CTTGAATCTTACTCATGAACACTCCATATATGCACACTAGAGATACCTTGTGATTCCCCA  
A\_14\_P106430 TGTGACTTTCGATTAATTTCTGGGAACGGATCTTGAGTGATGCGCGG  
A\_16\_P15666679  
AGGCGATGTTTATTCATCTATGCTCTCAGTAACAAGTTTTTAAGGTATTCACGCATCTCA  
CUST\_9111\_P1426210822 ACGTTGCTTTCCCGATTGAAGTGATTCCCATGTAACCACAGTCG  
CUST\_6022\_P1426210822 TCAAGGCTCAGTATAGCACCTGGTGGCTAAAGCTGCCTCCACTGC  
A\_18\_P22841746 CAGGCTCACTGCCCCCATCCATGTTGCACACCCCTCTCTACCTGC  
A\_14\_P127434 TCTATTTTCAGAAAACAGGTTTGCATACTTGCTAACCTACCTTTGAAGCAGTTGCTTCTAT  
A\_16\_P20212724  
AAAGGATTGAGTGTGATACCTTTTTTAACAGCACATTATCTCACCTTAGAATATGGCTGCA  
A\_14\_P109969 TCTTCTTCTCAGACATTGTTTTGTTCCCTAACAGATATTTTCTTTCGATTGTCTCCAT  
A\_14\_P120897 CCATTTTGAGTTTTTAAAGTGAAAGACTGCAAAAACAATATTTTGAAGTAGAAGAGATAA

A\_14\_P105407 TTCTTTGATCCAGTTCAAGTCTCAACTCCTCCATTGTTCTGCTAACAGATTCAGA

A\_14\_P116942

AGGAAAAATTCTGGGATGCCAGTTTAATCAAGCCACTGAAAACAGAGAAAAAAATCTTT

CUST\_5994\_PI426210822

GAGAGTTAAGTTTGGATGAAATGACATGAATATACTATTATGAACCAGTGCCTACACTAG

A\_16\_P00316322

CTACATGGATCAAAAAGACACACTCAAGTTACCAACTATGATAGCCAAACCCTTTATTTC

A\_14\_P126118 TTTACTTTTATGGAGTTTCTTCCCTCCATAAATGCCTAGCCAGATTTTCCTAATGACATC

A\_14\_P103805 ATTCTTTATTTTCTAGCATTGTGTCTGAGAGTAATCTGTAAGTCCTCAGGAGACTCTCAC

A\_14\_P202148 TTTCTAAAGACATACTTGTGCAGCAAGGAAAAGAACTCATAACCTTAACGCTTTGATTCC

A\_14\_P202179 CTAAAATGTCAAAGGGTTGGTTAGTTTCAGAAGGGCCATGCAATATTAATACAATGAGTTC

A\_14\_P101796 ACATAAGAAATCACTCCTCCAACGTTAGCCTAATTGAAGGGCTAGACTAATTAGTGAGTC

A\_16\_P16681048

ATGAGATTCCTGACTTGGTTAAAAACATCTGTGACCCTAGATTATACCATACATGGAGT

A\_14\_P132998 ATGTCCTGTGAACCTTTCCCAACTTCCATGTAAGTCATAAGACAAGACATTGATGAAAT

A\_14\_P113182 ACACTTGTAAGGATACTGTGAAGGTAGGTTTATATGTATCATATTCTACATTGGCCAGGC

CUST\_6942\_PI426210822

ATCTCTTGAAAAGAAAGCCATGAAAGACTACTAAGCTAAGGCGAATAAAAATAAAATTTTC

CUST\_3676\_PI426210822

TCTGGATTTAAAAGTGATGTTTATTCCATAGCTCTCCTGAATCTGACATTTGTTCTCTT

A\_16\_P15870829

AAAAAAAAGGTCTCAGTAGTTAAAAAGCGCTACGCTAAATTCTAGGTTTCTGTAAGTGGG

A\_14\_P109721 TTTGTATCAATTAACATTGCCATGGAAACAGTCTCTTGCTAAAATGGCTTAAGTCTTCAC

CUST\_4830\_PI426210822

TCCTTTTACTTTCATGGAGAATCATGTATTTACGCCACTCAAGTATCTTTAAGGTCTAG

A\_14\_P114804 ATGTGACATTATTTTCATAGTTTGGGGCTTCCATTCATCTGCTACTACTCGTTCTAAGAAA

A\_14\_P132524 CCACTCATTATTGGAATGACTCGGATTCAACAAAACCTTTTCTTTACAACCATCGTAGA

A\_18\_P22840661 CTAAGTTCCTTAGGGCTAACTCCAAAGAAAACCCGACAGTTGGCATTAGATGC

A\_14\_P200276 ATTCTTCAGAAGCCAGCCTTCAGACCTCTCACTGTGTTTTGAGATCATTATTATCAATTT

A\_16\_P00607843

AGAAAAAGCCAAAACCTATACATGTTGACTCATTCTTTTCAGCCTTTGATCCTTCTAGAAG

A\_14\_P110465 TAATTTCCAGTCAAAAATACGTCTGCAGTTGCCATTATCGAACTCACTGTATGTAAGTCAG

A\_14\_P126884 AAGAAGAAAAATAATAAACTTAGTTTCTGTATGAGCATCCGCGTAAGGAGGCTTCTGAT

A\_14\_P131295 ATCCTTCCAGTTTGGCTGTTATGCAAAGCAGGTGATTTGTCTTAATCAGATAAAAAGATAG

A\_14\_P115552 ATCTTTACTTCTGAAGAGAACATCCTTTGTATTGTTGGACTGCTTTACTGTGTAACCTA

A\_16\_P01303940

AAAAAAACCCTGCAAATCACTGTAATAAGGCATGCTATCCATCAGTTTTTTGGACCTTATT

A\_16\_P15456798

ACACAATGTTTTCAAAAAGCCACAATGACTATTGTCTCCATCAAAAGAACAAGAAAGAGG  
CUST\_3370\_PI426210822

TCTCTAGTAGATAATAGTGTGTTTGGGGAAAAGTGAGGTATAATAATACAGGAATTAGTA  
A\_18\_P22841088

TTTAATGTTTTTAATTTAATTCAGATCTCCTCCCAGTGCTGACTCTACACCAGTCAAGAC  
A\_14\_P115117 CTTTGTTCCTATCTTGATACAAAGAAAATTACTCCAGACTCCTATGCACTCAACTGGGTA  
A\_16\_P18441854

TTCCAGCACCTCAAAATTAATACTAATCAGCGTATCTATGTTTGGATCCACTTGTAGAACT  
A\_14\_P122823 GTTAGAGTATGTGTTTCTCTATATGTTTCCTGTATTTCCCTCTCTGTCAACTCCAAGAG  
A\_14\_P128940 ATGTTTGAGACACTGGTCCTGCAGATTTCTGTTTTTAAGTTACAGTTTCCATTGTGC  
A\_14\_P101104 AAGAACAATTTGCACTTAGAAAGATAATTCAGGAGGAAATGCAATGATGGGCTAGGAA  
A\_14\_P131330 GCTGACTGCAGGAATGCTTGAGATGCATGGACCTATTCATTTTTAAAAATTTATTGAGCA  
A\_14\_P113732 CGTAAATGGCTTGATTCCTCCTCTTAATTTCTTTCTTTGTTTCAGGTTTCATGTTTCATCAC  
A\_14\_P200052 TTTATGTATTTCACTACTACGGATTCCATATTTTTCACTCCTGAAATGTTACCTGAGAGTT  
A\_16\_P01413007

AGGCAGATCTTATCTACTCTGGTTGATTTTCTAGCATTAGGACTTTATGCAAATGGATCG  
A\_14\_P127686 GGGCTTTCATTAAGCACATCCTTTCTGATAAAGACAAAAAGATCTTCATGATTGTCATTC  
A\_14\_P104314

AAGTGAGAACTCAGTGAATCTCTCCTGAGAGATATTTAGAAAGAAGCACAGAAAGACAA  
A\_14\_P101294 CTACAGAGAAGATTCAGGAATTTCTCTGGAGAGGATAACTTCAGTCTCATTTTACAAACA  
A\_16\_P17991202

TGGAGATACTGAAATCACAATTCTTTCCATCTTGGCAATACAGTATAGTGAACGTTGACT  
A\_14\_P137117 AATTATGGTGCTACTGAAGAACTTACCTGATGAAATCTTTTCAGGTGGAGAATTAGGAC  
A\_14\_P120419 GACTGCGCAAACAATAATGACAATGCAATGACACGTGCCATAAGAAGAATGTG  
A\_14\_P109372 TTGTCTCTATCTTTTCAGCAAGATTGTCTTGACCATTTACTGGTCAACTTAAGAATGGAA  
CUST\_7882\_PI426210822 GAAGGAAAGCTCATAGCAGCAGCTACCAAACATCATTATCCGGCAGAAT  
A\_14\_P201964 ATTCTATTCGATCATCCTCAGCAAATTTAGCTAGCATAGTTTTTCTAAAGTTCTCCTCTT  
A\_14\_P201894 TCCTGTTACCTACATCAGTCAAATGTGGTTTTCTCTTTACATTTAGGTATTGCCAAAATGC  
A\_14\_P105493 TGTGAACAGCATCTTTTCAGTTTTCTTTTCAGGAATAAATTTCCACTGAAAGACAGAGTGAT  
A\_14\_P123968 AAAAAAAGAGTCACTACAGAAACAATTGGATGTTATTATGCTCTGTGAGTGGCTAGCAGA  
A\_16\_P16191719

GTGGGTCTGAAACTCTTGTAGACACCAAAGAAATTGGTAGGTTATGGAATGATTGATTAT  
A\_14\_P131574

TATGCTTGATCAGAGTGACAAGACTGAACAACAACAAAAAAATTTGTTTCCAGAAAGTGG  
A\_14\_P118600 GCTCTTTACAGATCTGTTATACTCGGGAACCTTTGAAGGTTATTTGAATGGCTGAAGAAAA  
A\_14\_P113955 CACAGCATCATTGGAAGTCACTTCCACAATAAGATCTTCTGTTCCAAGGATATCTAAAAA  
A\_14\_P124292 GTTGTGGAATTTCTATTTCAACGTCAACTCTGTATCTATGAGTATGTCTGTTCCACAGAC  
A\_16\_P20879178

CACATTAACAACCTTTGTCCTAGACTAGTAGTTCTTAACCATAATGAACCGTTGTCAACA  
A\_16\_P01575278

ATCGGCTGACTAGTAGAGATACATAAGGGGAATAGTTTTAATGAAACACGATGAGTCAGA  
A\_14\_P133925 CATCTGCTTGAAGAACTGTGATATTTATCTCATGATGAACCAAGGATGGATTGCAATTC  
A\_14\_P119831 AAGTGTGACCCAGTAAGAGGAATATTTTTATCAGTCTTCTGGAATCACTGAAAATTTCT  
A\_14\_P130328 AAATATGTGTGTTAAATATATTGAGTTTGGATTAAAATGTTGACATGATTTACATTTGA  
A\_14\_P112851 AATGAATGGGTAAATGAACAATAGCAGGGGCAGGACATGAACTTAGATCTCCTAC  
A\_18\_P16700092

ACTGCTTTTAAAGTCAGCCAAAGACTAAACAACATCTAATTCTTTTTCTGCTTGCAGTCT  
CUST\_2996\_PI426210822

GCAATGTGTATCTGTAGCCATGACTTTGCTTAAGCGAACTTGGAATTCACTTCATTTAA  
A\_16\_P18448396

TCATAGGGATGACTTCAAAGATACTTCACCTTATTTGGCAAAATCTTCAGACACTAAACT  
A\_14\_P126932 AGTGCATTAGAAGAGAGAACTCAATTTATTATCCAAATGAAAGGCTGAGATTGACTCCTG  
A\_14\_P103965 CTGGTTGTATCATAATGAGGAAGTCACCACTATTTCCGACAGTTAGTATTTTGGTAACTC  
A\_14\_P129433 CCAAACTACAGTTGCCTGTTTATTATTTTTCAAACAAAACAAAACAAAAGACATTCA  
A\_14\_P101667 ACTAGTGTGAGCGCTTCATAGAACTTATTCACCTGAGATGTGGCAACGTC  
CUST\_2386\_PI426210822 CCCAGATTTGTATTATTTCTGCTGGGTAAATTGTGAGATCAGGGCCTACT  
A\_14\_P121371 GCCCTTATGCATGCCTGAAGACTTCTACTGACTTAGTTATTGTTCAATTTGCATACTAGAA  
A\_14\_P139739 TACAACATATGGGCTGAAATGCACATTTGTATTGCTGTGTCTATTTTTTATTACCCCCAG  
A\_14\_P114108 TATTTACCATTTTTCCAAATTAGCAACTACCAGACCTCACGTGTTGCAGTGATAACACAA  
A\_14\_P107649 TATCAGGTGAACCAAAAGAACCAAAAAGCCAGGATACAGTCTTCATTAATTCTAGTAGGA  
A\_16\_P21223381

CCAGACCACAGAAATATCTCCTTTGACTGTCTAAAATCCATCTGCACAAATTATTTACCA  
A\_16\_P16961694

CAAAACATGATCCAGACATTCATAGAACCATTGAATTCGCTATTGCTATTCTGACTACCG  
A\_16\_P58424395 AGTTCTAATTATCCCAATTGTTCTGGCCTGTCTGCCATATTGGACAAAATTGATCCTT  
A\_16\_P00812432

ATTGGAGTCTTCAGCACTTTAGATATCATTTGCTACATCTTAAGCCAAAGATTTGCAGGAA  
A\_16\_P15959119

GCTTTTTCTCCAATTGTGATCTCTACCAAAGTATATACTTGACCTAACTAAGCCCTATCA  
A\_14\_P134939 ACAGATAATGGTGATCTCCCTTCTTATGTGTCTGCATTCATAGAAAAGGAAGTTGGAAAT  
A\_14\_P135634 GTGGTAAATAAGAGTGAAATAATTTACCTTGGGATGAAAAGCAAAACACATTCCAGGAGC  
A\_14\_P114334 GGTTCTTTTCACTTAATTTTTTACCTCAAAGAGTGTCTCAGGCTCAAACGAATAGATTTT  
A\_14\_P104692 CTGATGTGTGGAGAAGCCTCCATAGAGAAATACGTGTGAAAGATGCATCAAGAAAA  
A\_16\_P00043317

AACTGCTTTTTATTTCAAACGTTTCTGAAGAAAATTGGCCAATTGCTTACTTCAACTGTC  
A\_14\_P202352 TAAACTAACATTCTTAACATTCCATAACAAAAGGGCTGAAAAAGGTTGGTTCCACACAG



CUST\_9855\_PI426210822 CTGATTCATAGTCAACAATAAGGTTTAGCAGACTTTTCTCACACCCAGGTGCTT  
A\_16\_P37769002

TCCTCACATACTTCAAAATCCTACTAATATTTTTTAACAACCCCTTTTACATATCCTTCCA

A\_14\_P120471 CTCCGTTTATTAACAGCAATACCCACATCCTCTTCATAGCCTATTAACAACAGAGGTAAA  
A\_16\_P00285890

AAAAGAAAGAAAGCAATCATGTTTGGTGACTTAAGGAAAGATCTGTTAGCACTGTTTGCA

A\_16\_P01390675

ACACCTGTGATATTACTAGAGTTAACCATCTATTTGCTGTTTGTTCAAAGATGAGACTAC

A\_14\_P112095 CTATTACGCCACCTCTGTTCGGTTTTTACTGGGTTTTTCATATGACAACATTCTAGATTTAT  
A\_16\_P36230654

TTTACCTATTAACAATTGCATTCCTAGCCTATGGAAGGTCCTTACCTAAGCCAAGACTTT

A\_14\_P124373 CAAATAGCACTGATGGCTTTTATTGCAGATTCGTGTCATTACAAGGATAATCTGGGAATA

A\_14\_P116993 CTCTTGATTTTACCTTTTCATCTCGGCCACTACTTTGAGAAAATGCCTCTAAATATTTT

A\_14\_P202193 TTGGATTTTGCAACCTAACAGATTCCTAATACATCCCTCAATAAGATTTTTTTGCCCCTGA

A\_14\_P125403 TGCTTTGAGGAACTGTGTAGTAATAAAGGACTTTGGTTGATGATCAAACCTCTCCTTTTAC

A\_14\_P106631 TCTCCATGTGAAGACATAAAGAACAGAAAAATCACTTCTGGGCTGTGATAATATCAACGA

CUST\_767\_PI426210822 TTTGTTTGAAGTCTCATTGTCCAAGACCTTTTCCAATGGCTCGTAGCTC

A\_16\_P02191430

AAATCTGAACTCTTTAAACCTACAATTGGAAAAAGTAGCATAATCACATCTCATTCTCC

A\_14\_P122771 CTCCCAAATTTCAAATTTTGGCACGATGAATTATTTTTGTTTCTCTTTGCAGAGAGCCAA

A\_18\_P22842478

GCACCTCTGCATTTCTGAATTGCTTCTCAGAGTTATTTTATTTTTCTCCTTTGCTTTTTCG

A\_16\_P20772183

CAAACCTATTCTGTTTCCTAACCCATTCATTTCACTAAATAAAGGTTTCGAACCCCTATTG

A\_14\_P126887 ATCTGGTTCATCATTTGACTATTTTTTTCCCTAGATCATTGACATTTTCAGATGTGGCC

A\_14\_P105557 TAGGGGACAGAGAAAATCTCAGGTCTTAAGTTTACAGACTGTGCATGAGCATTTACAAT

A\_14\_P135487 AAAAGGAATGGGCAGACACAGGTGTATGCCAATGTTTCTGAAATGGGTATAATTTT

A\_16\_P00236389

CTTATTGTCCCTTGTCAAAATCATTGAACTGTTCTGATTAGCCTAAATCTCACTCAACAG

A\_14\_P118819 CTTAGAAGTCCCAAAGAAAGCATGTTATGTCACCTCCAGAAAAGTCTCAGGCTC

A\_16\_P30952611 ATCATCGCCATCAGTTTGTGGTGGGAATCCTCATCTTCCTGCTG

A\_14\_P106432 GTGCTGTTAGGAACTTGGTCTTCAAGATTTTAAATGCCTTTTTTGGAAATTGATCACAGAAA

A\_14\_P111419 CTTACTCCTTGATTGATTCTACTCTTCTCTACAAATATAGACTCCGTTCCCTACCACAG

A\_14\_P129639 CTTCTCTGATTTTCAGAGTGGACAAGATTACATCTGAAAATGCACCAACTAAAGAAACCAA

A\_16\_P01951036

ACCACAGATTAATAATCTCAATACCTTAATCTTACCAACATATTAATGCTGCTTCCCGC

A\_16\_P58424293 AAAGGTTTCCAACCCAAGGTTTCTGACCTGGAGCCCTGCTCTTTC

A\_16\_P15039599

CTGTGTTTCTGTTCTTACTTCAACCTCCTACCAAATGATGTATCACACCTGTATGAGTAT  
A\_14\_P109719 ACATGCATCACCATAACAAGCCTTTGGTGCTAGTCTGAGGAATTTAATACTGATTGATAA  
A\_14\_P124573 GGTCTGAAAAATGAACAGATTCAATCTTGTGTCAGCATAGTGTGTAAGAAAGTGAACCATCT  
A\_16\_P35650713  
CAACTGTCGCTATAAAAATTTCTCATTACAATTTTCCTGCTAAGATGTTCAAACCTCCTCCA  
A\_14\_P101147 AGTTTTAGGATGATTACAAAATTGTCTCTGATGATCTATTTTAGGCTTCAGAGTCCACGG  
A\_18\_P11321984  
AAGTCTGGAACTATCTGTCTAAACTTTACACCTTTCTCATACCTAACTAGGTTTTTCAGCC  
A\_14\_P130346 CAAAGGCCAACGAAAAGATGTGAAACTAGATAAACCTTTAACAATAATGCTTGAGGTGGT  
A\_14\_P108522 CTCACTGGGACATCCATAGTTGTTTGTATACTAGTAGTCTATGGGTTTGAAATACTCCA  
A\_14\_P120292 TTTCATAGGTCCCATGGCCCGTGGACATTGTTATAAGTTTGGAATGTCAAAAAATT  
A\_16\_P17911432  
AAAAATCTGATAGATGAATGCCCAAGATAAGATTTCACTTCCATTACCACTTACAGGG  
A\_18\_P11387973  
TAACCAGTCAAGATCTCATACCTCCATTCCATACTAATTAAGTCAGTTAAAGTCCTCCA  
CUST\_796\_P1426210822 GGGTGAATACTTAGCCATCTGCCTCCTATTTTCTTATCGTAGGTTGTGACAG  
A\_14\_P102708 GTCTCACTTTATTATGATTTATTATTATCTGCAGCCTTCTATGCCCTGGCCTAGGAACAT  
A\_14\_P119347 CCACTGGCAATCTCATTGCACTGTGGGTTTCAGTAATGCCTAGACTAG  
A\_14\_P138842 GGAAACACAGTCATACCATTCTGCAAGTTAAGTTTGCAAAACAGCCTCACATTTATTAT  
A\_14\_P100924 GACAAGGGGCTAGGAAAGTTTTAAGCCCTTTTAGAAACCTAATCATCACCAGTG  
CUST\_7234\_P1426210822  
CTTCAGCAGGCAAGGAAAATATTTATTTGAAGACGTTTATGAAACACCTCCCTTGTTTT  
A\_14\_P121258 ACAAAAAATACTAGTGTTAGTCCTATCATTATTCGGGTCCGCATGTTGTCTTTTGAACGA  
A\_16\_P16888820  
ACCTTACTTCTACAACCTCTACTTGTTAAACCCATGAATCACTATCCCAAGCATGAACATT  
A\_14\_P122902 GAACATGGTCAAAAGTTTACTAATCTAGAGGGATCCAGGTAAAGTCATACAACCAAGATT  
A\_14\_P101536 CCTTTCCAAAGACCATAGCCTCTGGATTCAATTTCTTAGCAGTTTTATAGTTCCTTTGTTA  
CUST\_2773\_P1426210822 CAGCCTGTGAACTGCCTGAACGTCACCACCTGCTTCAGCTTCCAT  
A\_14\_P138300 ACAGTGAAATCTCGTTGAGAATCTATTTTCTTTCTGTCTCGGCCCTGCTTTACTAG  
A\_14\_P101898 TTCCCTTGTGTGGAAAGTAAAGGAGCCTCACTACCACCTTTTTTTCTTT  
A\_16\_P16191446  
AAATGAAATTTGGAGTTTTTCACTAATACGCAGGACTGGTCATTTTGATACTGAATGGGA  
A\_16\_P18294160  
TCTGCTACTAAGATACAGAGAGTTCCTCATCAATCCTTTATACTCTAATACCAACCCTCC  
A\_16\_P00685175  
AAAGAATAAATGCAGGTGTCCTGTTGTTACTCCATCTGTTTCTGGTTTATGTGTTCTTAC  
A\_14\_P110472 AGCCCCACACCTTAGAATAGATTTCTGTATGAGAAGGACATTACATCCTGTTTTTTAAT  
A\_14\_P103916 ACAGTTCTTCGTGACTTTCTTCAGGTAATTTTGCTTATACAGACTCTCTCTGTTCTTTTG

A\_18\_P24988621

ATAAATGCTCCATGATCTCTCAACACTCATGCAATATCAAGTATTTTTTGCCTTCCTA

A\_18\_P12786038

AAGGAATTTACAACTGACACTAATTCAACATTTTATCCAAGTGCATAAAGTCCAGACCT

A\_16\_P17593012

AAAAATGCTGGCTAATAACCACACTACAAGTGCATTCTTCTTTATTGCCAACTTACACAG

A\_16\_P00685149 ACTTATAACCATTACTATGGAATTGGAGACCAAAGATGGATGGTGGGATTCCGGAT

A\_14\_P110808 GAGTTTGTGTCAGTGAAAATACTACACAGATAGAGAGATGGATGGACAGCCCT

CUST\_562\_P1426210822 TTTTGCCTTGCCTCCTTCTCCAGTTGCCTCCCCTCAGTGTGTCTG

A\_14\_P117755 GTAAATTACACAGAGGAAGAGATTGATGCACTGTTGAAGGAAGATGACCCATCATATGAG

A\_14\_P123546 GACTGCCTCATAGATACCCTACGAACCCCAAGTAAGAAAAAACGACGAC

A\_14\_P130806 ATATCATTCTTATGGTATTCGGAAACATATGACTCAAACACTTGACCAACCAGTGTAAC

CUST\_3387\_P1426210822

GTAATTGTTTCCATTTAAAACAATGGAAAAGATTTTCATTTAAATTTATTGAGATCTTATT

A\_14\_P110484 GGAAAATTGCTACAAAGAATGAGTTTTTTGGGAAAGGTATCACACTGAAAAAACCACTAC

A\_14\_P121462 AACCTTGCAAATATTTATGTTTTTTATCAAGGCCCTTTATGCAACACCAGGGATTTAAGC

A\_14\_P137471 ATTCTGACAACTGAAATTGGCCCTTCAAGAATGAAACAGAAACAGAAATGTTTCTTTGTC

A\_14\_P115041 ACCATAGGACACAGATAAAGGAGTGAAAATATAGACACAGACTTTGACAGCATGGAAATT

A\_14\_P131172 ACCTTATTTCTTGATGTTATTATCTGTTTAATGACTACTCGGTCTGCCAGCAACAACACT

A\_14\_P123486 ATACAGACAACAGAACGCATAGTCTAAAAACATAATTTAATGCATCGCGGTGAGTCTGAG

A\_14\_P101156 CTGTGTCTTACTAGAAACAACGCAAACCTCTCCTTCCCTCAGAATAGTGATGTGTT

A\_14\_P108058 CTAATGTGAGGTTTGTATCAACAGCAGCAACATTTAGTTCACTGGAGAAAATGAAAACAG

A\_14\_P119200 AACAGTGATAAGAGACACTTTGAGAGGTTTTACAAATACTGACTCTGCAACTTGGAGTTA

A\_14\_P127493 AAAAAGGAGATATTTACCACCAACAATGGCTACAAATCCATGCAGAAAAAAGCTTCGGAG

A\_14\_P117438 ATTATAGAGAATTATCAAAAAGATTCCAAATCCAGCATTAGGTCCCAAGGCCCTCACACAC

A\_14\_P112971 AGGTTGATGTGTTTGTGCTTCTTCTACAGCCAATATGAAAAGGCCTAGTAAGTG

A\_14\_P106361 ACAACTGTAGGAGAGGAATAAAGAATACCTGTTCTGTCAAAGAAGATGCATCCAATGATA

CUST\_4742\_P1426210822

TAAAGCAGTAAGGAATGCATAGTCAGCTATACTGGAAAATTTGGGAAAGGGAAATGG

A\_14\_P105848 CTGGATAGAAATGTGCATGTTCTAGTTTCAGTCTCTCTTTCTTCTTGAAAACAAACACTC

A\_16\_P17656468

TCCTCACCAAAAAAGTTTTTTTCCCTCTCAAATATATGCAACTGGACAATAACACTCAT

CUST\_3655\_P1426210822 ACTCGGGCCGTGACAGGCATCCCTTAGCTCTGGCCTTCTGGTTG

A\_14\_P136197 CTGACCCAATAGTTTTAGGAGATTGTAATCTCCAGATGGCAAGGTTTTTGTATGCTTAA

A\_16\_P18104874

ACACAATCTGACAAACAGTATTTACCACATGAACAACTTTTCATAGACGTTTTGCAGGA

A\_14\_P115232 TGTCCCTCAAATCTGCAAATCTACATTATTCTGGAAAGTTAATTTTGTGATCAGGCC

A\_14\_P129727 ATTCAAGAATTTGGAGGCTTAAATGTGAATCAGGCAATGCATATTTCTTAGGAACTGACT

A\_14\_P137856 ATATGCAATTCATCTTAATCACTAAAGTTGTCTCAGGCAATGACCTCTATAAGCCCTTCT  
A\_18\_P22840838

TAAGGTGCTGATTCAACCAAATAGTGGATAGTATAGGCTGGATTGTGCATTGTTAAGAAC

A\_14\_P117626 TACTCACTGTTGGGTTCAAAGGTAAATGCCAGTAATGTTGTCTCCAGAATTA

A\_14\_P127485 CTGATTCTGCCAAAGTCCCTTGGACATTTGAAAACCTTTTCAATCTTTTAAAAATGCATA

CUST\_630\_PI426210822 CTGGAATGGAGCCTTACAGACAGCTTGACCACACACAGGGAGCT

A\_16\_P17963769

AATTTTCGTTTTTGTGACAATTTGATTGATTTCTGTCCCTTAAACAGTCTTGTCTTCTGGCG

A\_14\_P101999 CATGTTACCTGTGTTTTTGGTCAAATATCTTGCTATTGCTAGGCTCTGGTGAAGAGTAAG

A\_14\_P103119 TTTCCCTAGTTGTCTTGTGTGTTTGGTTATTCTACTTTGTGGACATTACTGCTCCATC

A\_14\_P129424 TCTGATTATCACATTTCTAATTTGAAAGCCCTTCTTGAAGAGTAATCGAGACAGGAG

A\_14\_P103732 CACCCACCGGGATCCATAATATTGTTATACCTGTTCTATTAATTCATAAATGGCCTTCAT

A\_14\_P137049 CTATAGTATTGCTCGTAGCCTTTCGGCATAGGATCTAAGAAGAAAATAAATCATTACCC

A\_14\_P138734 CATTGTTACGTTGGATTTCTTGGTGTGCTGAAATTACGATTTAACTTCCCGATAAACTAC

A\_16\_P18193348

AAATTCAAGCAACACAACCTGATACCTATTGATCTTGAAACACCGTATTATTCTGTTCCCC

A\_16\_P00685617

GCTCATGGTTTTTATTTGAGAGCATTACTTCTGACCTAAGGCAGAAACACTTAGAAAACA

A\_16\_P18213013

ATAGATGAGAGAATGCACTATGTGAAGTCTGAAGTATCTGAAGTAGGTAATGGAACCAGA

CUST\_9837\_PI426210822

TTTTAATCTAAGATATGACTTCCTAGAGCTACAGGACACTCAGCTCATCACTCACAGA

A\_14\_P123407 TAAAATGAATTACGGTTGAATGCAGTGTATGGAGAAAATCCAGTGCAGTCAAAACATGT

CUST\_4474\_PI426210822 GTAGAGCTGTGTGAGGGTGTGCATGAGGGAGCCAACAGGAAGGAG

A\_14\_P106706 AAGTGAAAGCCCACATTCCTGTCTTCTTGTTCGATTATTAATAATGTAGACCCAGTAGTA

A\_14\_P124732 ATTTTAAGTAGGATTGTTGATGGAATTGAAGATGGAAACAGCAGTGAAGAAAGTCAGACT

A\_14\_P202421 CACCCATTTTTTTTTAGAGAAGGGGTTTTCTTCTTGAATGTCATATTCGTTGCATTTCTC

A\_18\_P14593056

AAACACCTTTGGTCCTAAGACTTATGATCTGAAGATGTCCTTTTGAAAGTATCTTCCATG

A\_14\_P101578 CTTGTGATCAATCTTGTCCATTGGACTCCTGGATGGCAACTTAATTTTTTTAAGTTTTTG

A\_14\_P125224 AGTCAGGTTTTGTATTAAGAACTTCATTCTGAGAAGACCCAAGATATGTCATAGGTTCCA

A\_16\_P58424180

GACACAGTAGTCCTTACCTTGAAGGTGGTCATCAGGATTAACATTACACAATGAATTT

A\_14\_P100257 ATTTACCTGCTTTTAATGTCTGTTTTGCAGATTGGGATCAAAGCCACTCACATTAAGTTA

A\_16\_P17498941

ATTTCAAAAATGTGTTCCAATCTCACAAAAAGAGTTATGTATAGAGTTCCAAGGAAAAGC

A\_14\_P202078 TTTAAAGGAAGTTTAGGAAACACTGTATTTTTAAGAAGTCCATGAGGCAGTTCTGATCTGC

A\_18\_P11168952

AGAATGCCTTAGACTTGAGTCAACTCAAACCTATGACAATTTTGCTAACATAACCCACTCA  
CUST\_8285\_PI426210822

TCTGATAAATTTAAGTTTTTTAAGTGAATTTGTCATAGAGTGGGGTTTAGGATGCCAAAT  
A\_14\_P116388 CTTTCTATATACAAATTGATTCATGTCCAGCCTTTTGTGGTTCATAATGGCCCCA  
A\_14\_P133761 CTTTTGAGAAATTTACCCAAATCTCCTTCATCAGATTTGCTTATGTGGTTATTATGAGA  
A\_16\_P00647676

AAGTAATTGGTGAAATTGGAAAAATCCCCTGACTTCTAACATAGATGGTTCTGGAATGAT  
A\_16\_P39712431

AAGGTGGGAGAATTACTACTTGACGGTTTTTTGATTCACAATTCATGAGCATTCTTAGAG  
A\_14\_P129309 TTCAAGACTCCTTAACTTTTATTTCGTGTTTCACAAACATCCCTTATACTTCCTGCTTCT  
A\_14\_P121690 ATCTATGCATATGTGATTCAGGTCATTGATGTCCATGTGACAGTGGTATAGTCAGTATGT  
A\_16\_P00685205

TTTTCTACTCATCCCCAGTTATGGAATGTCTAATTCTTTCTCATTCTCCTGTCACTA  
A\_16\_P20411619

ATTCAGAAAATAGGTGATTACATCAAACAGCCTCTATCAACAGGGAGTATACAAACCGTT  
A\_14\_P109186 CAAAATAAATCTGGCATTATAGGAAAAGTCAATAGGTTTACAATTAGAGCAAGGCTCCCA  
A\_14\_P124054 CCAGATTCCTAAGCACCTTCTGAAAAATCTTTTCAAGATATTCTGCCTAGGTAAGTCTGT  
A\_14\_P124402 ACATTTTCTTGCTGGAAAACTGCATTTTCAGGAAACCTGGAAAAAGAAAATACAAGATTG  
A\_14\_P138753 CTTAACCATTCAAATCAATGTCACCCATTTGCATGGCTTCAAGTACTAAGTTTAAACTT  
A\_16\_P01184564

AAAGAGTATCAGGAACAGTGTCAATTTAATGAGTTACCCAGAGTAGTCTCAACTCAGAA  
A\_14\_P133185 AGTTTTTCTTGTTTCCTTTGGGTAGGTGGCTACTTCATTGTAAAGGAGTAGAAAAAGTT  
A\_14\_P118558 ACAGAACTTCTGAACGTGGCACACAAATACACTATGGTAAAATCAATTGCTTCAACTGAA  
A\_14\_P126161 GACGAGGTATTTCAATTCATCTTTTGCTGTTTCCGAAATAATGATCACCCAGAAATCACG  
A\_14\_P103553 CTGTCTTACTATTTTCGAATAAAGTCCCACATTGTAAACTAACTTGTTTTCCAGGTGC  
CUST\_3566\_PI426210822 TTTCACAAGACAGCCCTAGCCCCAGTTCATGGGAGTTGGAACAAT  
A\_14\_P117308 AGTTAAGATTTCTAAAATATTTTGATGCTGAAAGAGGTGTGCTTCAGTTGGGTGGCAAAT  
A\_16\_P21239667

AAAAAGATTCGTAATTCACTTTTTAAAGCCAACCAAAACACATAACTGGGACATTCTGTGG  
A\_14\_P121712 TCAACTCTACCATGTGCTAGAGACAGCCAACAAAATATTCATGGTTCTTGAGGTTAGTA  
A\_16\_P16534694

AAGACATTTTCTGAAACGCAATTTCTTGATATCATATGCTAAACAGTTCATGCCTACCT  
A\_14\_P107522 ACAATTCAGTGCTTTTGCAGAGAGATTGGTGTCTCTCTTTTTTTTTTTAATAACGCATTGG  
A\_14\_P137593 TTGGTAAGAAATACCACCCAAGCAGAAAGAGAGACAATAGGAATTTTTAATGCATGGACA  
A\_16\_P37739653

TTCAAGGACTCATTTATTCTTTATGACAAACTTAGCACCAGAGATAGAAAAACCAGCACG  
A\_18\_P14134310 GTAACAGTGGAGTTTGACTCAGATCCCCTTGACCTCACTTGGCTTTTT  
A\_16\_P01847976

AAAGTTAGCATATTTGTGAATTATGCGTTAATCCAGCACATATTAGTTACACGCCCGTGG  
CUST\_4951\_PI426210822 CACTTCCTACTCTTGGTGTTTAATATCATCCCTCTGGCACAGATGCTTGAAAAT  
A\_14\_P121048 CATTACATTTTTTTTCCCTTGATGCCAGAGTTGCAGAAAGACTGAAGAGATACTTAACAG  
A\_14\_P125847 CCATCGCTGCTTTTTATATGCCTGTCACCATTATGACTATTTTATACTGGAGGATCTATA  
A\_14\_P101716 TTGCTGACAAATTGGATTGTGCATCTAATTTTATGGCTTTGTGAACAGAACGTGCCTA  
CUST\_8402\_PI426210822  
CCCACCTGAAAAACAATGGCCAAAAATAATGCAGATATTACACATGAACATTTGCAGAG  
A\_18\_P23501725  
AGTCACTTAAAGTAGGTGTCAICGCTAGTTCATTTTTCTCAATGTTGCTCTAATTCCCAT  
A\_16\_P16709446  
AAAAAAAAAAAAACCTTAGCATGCTTCAAATAGATTGCATATCTAGTTGCTAAATCACCA  
CUST\_3710\_PI426210822  
CACTTGACAACATAAAGAATATTATTCTTCATACCAGCATTTCCTCAAAGCATTTTTTCAA  
CUST\_6170\_PI426210822  
ATCTCCTGTACCCGCTTTCTTAAAGACTCTCAGTTGATGAATTTATTCTGAAATTCCAAC  
A\_18\_P14324579  
ACTCAACTATGGTATACCCCTAAACACTTACTAAACTCATATCTACACATCTTGTCTTAC  
CUST\_2965\_PI426210822 CAGTTCCGCTCAGGGCTTTGGAATGAGTGGTCAGCATTCTTCTT  
A\_14\_P128219 TTTACTGAAGAGAGCAATGAACTTACAAATCCATGTTTGTCTGAAATGTTGTTGGTGAG  
A\_14\_P126990 TAAAGTTAATGAGACCTCGATAATCATATTCTAGTCCACTGTAGCCCTCACCAAAAAGT  
A\_14\_P201599 GTCTGATTTATTGGTCAGGCCTTTTAATTCCTAATTGGTTTTAACCAAGTTTCCTCCAA  
A\_18\_P18275379  
AAAAAAAAAAGAAAATCTCACGTCACAATAACAATCACAGATAACAACTTGGGCCTGTGG  
A\_14\_P138066 TTGCCATGAAATCCTTTCAGAATAAGTAAATAAGTCTTCCCATGCACTCTCAAGTATGCT  
A\_14\_P115993 TTTTTTATTACATTCTGGAAGGACAAGAGACAGGTAAGAGCATGCATGTGTA AAAAAGTG  
A\_16\_P20645499  
TAGCGGAGAAAATAAGTTACACAAGGACCTAATTAGTAGTGAAAAGTAGACTAGCCTGA  
A\_16\_P03423565  
CCTGGCTGGAAAACAATAACGATGTTTCATGTATCTAATAATCATACTGTAAAGTATAATC  
A\_16\_P15878095  
ACAAGAGGTATCAAATGATTGCAACAAAGAACTCACTAGTCACTAACCTATCCAGAATT  
A\_14\_P102655 AAGCGCCACTTCTCTTGACCCATTTAAATAGTAAAGAGTCAGACATAATGAGGGTG  
A\_16\_P18090251  
AGGTCCAAACTGAAGATACACAATCAATTTAACCAAACATACTTTAGCATTGAATCCCCA  
A\_16\_P18282132  
AAATAAGGATTGTTTCAGAAAGTTTAAAAACACCTGCTCTTAAACTAGCCTGTGTGTGCTG  
CUST\_6602\_PI426210822  
TTCTTTTAATCTTCCAAAAGCAAACAGAAGAACAGAAATAACCTATCCACTGTTTAAAGAT

CUST\_1647\_PI426210822 TTCCAGGAAGGCACTGTCCCTCCCTTCAGCCTCAGCCCTGAGGGT  
A\_14\_P134132 ACTGGCCACTGGCATAAGAAATTCAACAATTTACAACTACAAAGGAAAACCCTTTATCT  
A\_14\_P136528 AATAATCTACCTCTCCCAAATGACAGATACCTTTTGGACCAATCCACAAATAAAATTGTC  
A\_14\_P103766 CTCTTCAACAACACTGTTTTGACAATGGTGGTTTTAGATGAATCTAAAATGCCACATATAAA  
A\_14\_P133272 CTGCAGTGA CTGCTCAGAGGTTTTATAGGATTTGCAGA ACTTATCTTACACTTTCTTA  
A\_14\_P112526 TTAAATGAGCAAGGCTCTGAAA ACTTAACTACAAAATGAGAGTAAGGGCTTTTAGAGGCA  
A\_14\_P106762  
TCAGAGAACAAGAGGTAAGACTTTAAGAGAAAACGTTAGGCAAAAAGGAATGTTTTCTAACT  
CUST\_8830\_PI426210822 CTCTACAAACTTTGGTCAGGGATTTGAACACATATTTCCCTCCCCCTCA  
A\_14\_P117507 CTTGAGGTTATAAACTTCGTAAGGCCAAGAGTTCTTGTAACAGTGAGTTTGCTCTG  
A\_16\_P20998654  
AAGACGTAGGTGATATTCATAAAGCCATTCATTTACCCATTTAGTCATCAGTTGGGCATA  
A\_18\_P16761753  
AATCTAGTTTCTGTCCTTACCATTCAACTAAATGGAGTTCACCTGAAAGTATCCTAGAGC  
A\_14\_P134094 ATAAAATGGTGTCTCTTCCAGTATGTCAGTCAATTTCTCAAAGACAAGCAATGTTTCCC  
A\_14\_P110237 CAAGTCCATATTAACAGAATTTTTCTCATTAGGGTAACATTCACCATTCTGATGTGGAGG  
CUST\_9005\_PI426210822  
CATTGAGTTTGTTCCTCTGCTAATTTAATCTTCCATTTTCCTTTGATTGGTGATGCACG  
A\_16\_P58424197 GTCCCCCTGGGAGTTTATATCCAGTAGGGGGAGACAGACAATAG  
A\_16\_P16191066 AAGACAGAATTCTGTGTTACCACAGATCAGTATCACAAAGGAGTCATTTCTGGG  
CUST\_7167\_PI426210822  
CTGGAAGTATACAGCAACCATTTTATTTTTCTTGTGCCTCATGAATTAATAGGGCAGTGA  
CUST\_3363\_PI426210822  
ATTCCCTTCAAAGTAATCACCTTCTAGTCATTCCTGTTTTGAAATTTCTTCCATGGTTTTG  
A\_14\_P132357 CACATGGAAATGTGGTAATTCGGATGCATTCGTGATTGCAACAGATTGAAGAAATTAGA  
A\_14\_P116450 CCATGAGACAAGGCTTAAGACTTTCCAGGGTATATCCAGTCTTTCGTATTAATGATTCAG  
CUST\_2318\_PI426210822 CTGAAACTGATCACAGACTGTCGTCCCAGCTGGCCTCAAACCAG  
A\_18\_P22840285 CTGTTTCTTCTCTGTGCTCTTGGAAGCCAAGGAGCAGATGGGAG  
A\_14\_P136618 TTGAGATTTGTCCCTCTACATTTGCATCGAAAGGTGAATAAGTTCAGTGTAATTAAGGTC  
CUST\_8461\_PI426210822 TCCTTGCTCTTACTGGTCTCTGTGACCTCCATCTTTTTCTCATTCT  
A\_18\_P22841414 TGTCACCCTACCTACGGACCCACGTGTGGCACAGTTTTCTGACTT  
CUST\_4939\_PI426210822 GCATACTTTGTGTTGGACAGTTATGGGGGATTGCTTTTGCCATCTCA  
A\_14\_P200828 CTA CTCCCTCCATCTAATAAAGAAAAGCAACATTGAATGGCAGCATCTTATCTCTGAAAT  
A\_14\_P103519 GTTACTGCTGCAAATACTGGGCAGAAGAAAAAGAATGGTCACTTGAAGCAGTTC  
CUST\_1016\_PI426210822 GAAGTGAGTAGTGAATGCCAGGAGAAGTGGAACGGGCTGGGCAG  
A\_14\_P124254 CTATCATCCAGGAAGGCATCTTCAAAGGGAAAGAGAGAAGATCGACCTG  
A\_14\_P111079 GGGATGATAGAATAGAAGTGGCCAGATAAAGGCTGCAGGAGAAGTCTTG  
A\_14\_P112025 AAACATGCTGATGTCAGTGTCTGACAATTCAGAACCTATATTACCTAGAAAGAGAAAGGT

A\_14\_P103134 CTTATTTCTGTTCTGAGCCCTTTTGGAAACAAGGTAGAATGTAAATAAATACATGGAGCCA

A\_14\_P105851 AGATTCGGAGACTTCTTTAACTTTTTTCTTTCTCCGTGGCATCCTTTTTGTCTAGAATAAA

A\_18\_P10940859

TGCGTCTACGTTAATTAACATGTTTTCTAGCACTCTTCAAATAAATACCCTCATGACACA

A\_14\_P108015 ACAAATATTAGGAATGGGCACAAATCTGTGGTTCCTGATTTTGGTCATTTTCAATTTCT

A\_18\_P14135646

TCAACATGAGCAGTATTAGTCTTTATCTCTGACATCAATCAAACCTTGAACACCATCAGCA

CUST\_1557\_P1426210822 TTGAAAGAAAGGCTATTTGAGCTGGGTTTGCCAGAACTTTGGGA

A\_14\_P134851 CTTCATAGTATCTGAGAAGGGAGAGATAGAAATGGGTTGTAGAGAGAGTTAGAAGTGATT

A\_14\_P138045 GAAGTTTATCAGAAAGAGAAAACCTTAAGGCTTTTAGCCTCTGTCTTATCTCAACGTCTCC

A\_14\_P123915 CGTTGCTGGGTTATTTTAAATCATTCTAGGCATCGTTTTCTCCTTATGCCTCTATCATT

A\_18\_P14669829

AAAAATGAGTGGACTGAACCATAAGTCACCATTGGACAAAACCTTTGGCATTACCTTTTAT

A\_14\_P121506 ATCCTAGAGTGTCCATTTAAATCATGGTTCCTGTTACTGTTACTGAGAAGAATGTAAGTC

A\_14\_P126480 AGAAAACATACAGTAATGGTTTTAGCCATTAACCAAAGAACTCCTTTAAGAGTGGGAGT

A\_14\_P103416 ACAGTTCAAAGGGAACGTTACTTATAGACGTGTTGTTTGAACAACGTGACTAGCAATAAA

A\_14\_P120678 ATCTCCTGGTAAAGTCAATTTTTGCCTGAGTGGTTTTAATTCAAATGCCTGAAAAGTTTT

A\_16\_P20459910

TCAATGCTATGCCAAAAAATCAGTTTCCCTTACATTTTCATCTTTTACTTACACGCACACA

A\_18\_P22841042 ATAGGACAATTGGACAAAAAGGCTGGGCCTTCTTAGGTGGGTATTGAG

CUST\_8276\_P1426210822

AGTGTCAGTCAGAGCTTTGTTTCTTCTCAGGAATGTGTTTCATATAAGCAACATTGAAAG

A\_18\_P13627283

ACTTTTCCAACCTATCAAATCACTTTAACACAAAACCTTACTTTCTCCTACAACCTGAATTGGC

CUST\_8264\_P1426210822 TTAACAGCCCCTGATGAAGCCATCAGTTAAACAAATGAGTCAACCTCTGAT

CUST\_4433\_P1426210822 ATTTCTGCCAAGTCAGAGGATGAAAGGGACTTCGGCGGAAGCCATAT

A\_14\_P123202 GTTCTTACAACAGTTTTAGAAAGCCAGCAAGCGGAGAATCTGAGAAATTAATAACTGAGTGT

A\_16\_P01673051

CAGGAACAGTTCAATGTATGTTATTTTCTCAGAGGCACATGTATTAATGAAAGGAGCAGAGAG

A\_16\_P00685470

CCATTCTGTGTCTGACATCTTGTAGGTGTTTGTAGATGATTGGTGAGTGAATTAATGAA

A\_14\_P106668 CTAGGGGGCAGGGATTCAACTACCAATTTGAGTTTGTATTCAATTCACAAAATTGTATTCA

A\_14\_P116578 GCCTATAACTTACTTGTCAACAACTGTGAACATTTTGTGACATTGCTTCGCTATGGAG

A\_14\_P137276 CTTATTACCATTTTCTGGAAGTTTCCATTGCTATAGCAATAATCTCCCAAACAACCACAC

A\_16\_P16107565

AAAGGACAATCTTGATGCACATTAATACTTCATCTCAAGCCAGAATGTAAGATTCGGACT

A\_14\_P200553 CGGGGATGAAAAACTGGTTATTGCAGAGATCTTGGAAGTTGCAGTTTTTTAGAG

CUST\_638\_P1426210822 CACTGCTTATTAAGAGAGGCAAACCTCTGGTTAACACCATGACAGCAGT



A\_14\_P138973 AGTTCAGTTTTCTTTCTGTATAATATAGTAAATTGTCGGAACGGAATCTCCACTCCGCGAA

A\_14\_P102841 CCATCTTCAGATACTTGTGGAGACCATAAGTGAGTTTCTCCCCTGGAAATAAAATA

A\_16\_P02000818

AGTGAAGCCATGTAACATTTGACTTTGTAACAATAAGATTCTATCACTATGCCTAGGACA

A\_14\_P121303 AATTCTTTGGAAAGTGACTCTCTAGGGTGC GGAGAATGGTGTGATTTACAAAATGA

CUST\_7053\_PI426210822

ATAAAAGCTTAGTCTTTCTAAATGCAGCCAAGCTCTCCTCTGACAAGAGATGTGA

A\_14\_P134208 TACAGGATTTTGATCAGCCTTCCTCGTGCTGGGAATGAATTGATTCAGTTTAAATATTTT

A\_14\_P132968 GCCTTTTGTCTTTCTTGGTATGTCATGAGGCAAAATAAAATGAAACTCAGTGCTGGTTAAT

A\_14\_P119510 ACCTGTGATAGACTCATGTGGATATTTTCATAGACATTGGTTATATACATCCACACTCTGC

A\_14\_P102065 AGGAGATTTTCATATACTTTTGATAGTTCTAGCAGAACAAGATAGTGCTGCTGCTCAACA

A\_16\_P19545678

AAAACAACCTTCATACGCCTCTTTTACTGTAAATGAGACCACAAAATCTTTGCAGCAAT

A\_16\_P17600767

AACGAGTTCAAATAGGATCTGCAAAAATGACCAAAGACATATTATTTAGTGAGGCCTGG

CUST\_2485\_PI426210822

GGTGAAAATAATGTTGATATTTATTTTGGGGTTTTAAACTGATCTACTCTGAATGGCTTA

A\_14\_P104368 GAGGTCAAATAATTGACCTGAAGTTCCATTTTGCATCATAAATTGAGAATTTCTTTGCCT

A\_14\_P106141 CTTTTTCACAAAGTAGATTAGCAATTGATCCTACTGTGTGTAGGACCACCTAGTGTCC

A\_14\_P118704 CTAGAAGATAATCTCTTCATGCAAGGTAAGTAAGTGTGGTGGCATTACCATACTGTGTAT

A\_14\_P201743 CTTTGCACGAGAGAAGACTTGTCAACTCGTTGTAAGAATTATATTTTACGGTGATTTTG

A\_14\_P110874 TGTTAGCAGTTTATTAAGGACTTCGTCTCAAGAAAGCGTAACTGCCTATATGCATCATTG

A\_14\_P120478 CTTATAGTCACCTCTTTTACAGCATGGAAGGTGGTGTGAGTTGTTTCAGCAGGATT

A\_14\_P135231 CATCTTTTTTCATTGTGCTTGGCAACTGGACATGACATAATTTAAACACACAATGGAGAAA

A\_14\_P122410 ATAGGGATTTATTTCAATGACGATACCTCCAAGACTTTTGCTTGCGAATCAGGTTTGT

A\_14\_P116075 CTTGGAAGACAGAGTTTCACATTGTTTTTGGCTCTCCTGCCAATTTTTTGAAGTAAGT

A\_16\_P00685390

GGGGTTTTTATGCTGAACATTCACGGTGCTTAGTTATTTATTGAAGAAGAATCTTTCTG

A\_14\_P117707 GGGATTTTGACATTTTCTTGTTTGATCGCTTGACAAATGGTAAGTTACCCAAAAGAATTC

CUST\_9771\_PI426210822 ATCATATTCTCAGGCCTTGTGGAGACATGGGCATTGCCAGCTGTTA

A\_14\_P102566 TTGAAGAATATGGACAATAAAGACCGATGTTACCACCAGGATAGAAAAACCAATTGTCTT

A\_16\_P19740085

TATCTGAGGTCTTTTGGAAAAATAATCCCGTGGTTAAGGTTTTACAATAGGCACTGTAG

A\_16\_P21048656

AATGAATACATTTATCTCCTTTACCACCTACTTTCTGACTCTGAAACTTAGGTCCTGTCC

A\_14\_P106310 CAAGACATGACCAGCCTTTGTGGGATTTGCTTGATTTATTTTCATGTATAGGATTTACTTG

A\_14\_P101340 TGATTTATTTAGACAACCTGAAACGCACCCTGGGAAGTGGATCAGATTTTAGATTTGACAA

A\_14\_P119101 AAGATCTACCTTTTAAAATCATGTTATTTATCTGTTGGAGGACACGGTTCTAACAATTA

A\_14\_P129331 C TACTCACACTTTCTCATAAATCTTGTTCCGGATGCTCTGGCCATTTCGATCATG  
A\_14\_P137293 G CTTCTGCCAGATTTGATTTTGAGAAACACAATTGAAAGCCAAACAGATTATATTGGCTT  
CUST\_2411\_PI426210822 GAGGATGGCAAGCAGCCTTCTCTGATCACTTCTAGGAGGGTTATT  
A\_14\_P137997 GGTCCCTTGTGAAGATGAACTTACACAGATGCTCTTTGTATGATGGAAAGAGAAGTTTTAA  
A\_14\_P201224 GCTGCTTTTACAGAGGAGTATAAGAAGATTAGAACCTAGATTTCAATGTCTCCTGCAATG  
A\_14\_P116483 A CTAATACAGAAGTCCTCAAAGAGGGACAGACTAACACATTATTGAAGTCAGTCAACAAA  
A\_16\_P19445080  
AGCACAGCCATTTTCCTAAAAACCTTGACTTGACTAATACTCTTTTTTCAAGCAACTACA  
A\_16\_P19147931  
AGAAGGTTCCCTCATCGTATATGCAATTTAACATAATGCTGGACATAGAAGACTTCACTGG  
A\_14\_P108081 C TTGGAATTTGCATTTTAATAGTCTGGGATATTTGAGTATTTGGCGATGCTTTCTTACTA  
A\_16\_P35216562  
ACCATAAGAGGACGAGAAGATGTTAGTAATTTTGATGATGAATTTACCTCAGAAGCACCT  
A\_14\_P123730 T TGCTTATCTATTCTCTCCCTCATAGCCCTCCCAAATTATAAAATACTTTTGAAAGCA  
A\_14\_P202488 G TTGGTGTCAATTATTACAGATCACGGCCAGTTGAAGCACTTCCACTCATTTG  
A\_18\_P13481059  
AGGTCAACTAAAATCCTAATCACCATTTACAACATCTCTCTATGAAGAAACATCCTCCAA  
A\_14\_P111747 A TTGAATATGAAGTGTTTCCCATATCCTTTTACGAGGTGAGAAGTAAAATTTAATGGCCT  
A\_14\_P106416 A TAATCACCTTCTCACTTAACACCTTGTGATAGCACCATCAGGGGTGA  
A\_14\_P137452 T TTATTCTATACATACTATCCCCACTTTCTCCAGCATCAACTGTTCTCATTCCATTGAT  
A\_16\_P19858217  
ACATAAAGTTCTGCACAAAACATGTATTCCAGACCCTCCTTCGAAACTAAAATCTTCTTT  
A\_14\_P133629 A ACTAATTATAATTGACCCATAAAGTCAAGGGTGAGTTGAGTCTATGGATCCTGGTTACA  
A\_16\_P19732468  
GCCGGCAGAAATCTTTATATTTTTTTGAAAGCAGAGTAACACTAGAGCAGGTTTACAGAA  
A\_14\_P113553 T GTGTATGTTGCATTTAAAAGAGTTTGAAAGTGGTCATTTACTTTTTCTTTTTAGGGGCC  
A\_14\_P118267 C TGATTTAACACAACGGACATTGCTGACTCCCAATGCTCTAAAATAAAAAATGATATGA  
A\_16\_P02759095  
AAAAATAATCAAACCAGTTGGGCATTATTTGAATCTTCCTATGGAATGAACAATGTGGCC  
A\_16\_P16862134 A C TACTATTTTTCCCTCCATTCCATATCTGAACTATTTTCTTCTATCAAAATTCTGTCCC  
A\_14\_P114342 C AGTTTGCAATATGACTTTGGAGGAATTCTCGGCTGGAGAGCAGAAGAC  
A\_14\_P127497 A TCATTTGTTTTCCACAGTAGTAGATGTTGGCTTTTGGTATGATACAGATGCCATGG  
A\_14\_P102506 G AACCCTATGGCAAACAATGGTTACATTTAATTACAGGCAAAGCCAAGAAAGAACGAAAT  
A\_16\_P18184396  
AAAAGTTCACATTTTGATCAACGTCACATATGCTTGAGATAAAAACGCTGCTAACGTCAAC  
A\_16\_P20001592  
ACTGTAGATGTTTGAGTAGCATATTGCCATCATACAAAGGTATCAAGGGTATTTTCACC  
A\_14\_P126063 G ATCTCAGTTATTTCCGTGAGAAAGATGAATAGTTCCTCGGCATCATTAGGGAG

A\_16\_P21556504

GACAAGTCCTCAAGGTTAGTAGTTTCCATTTTTCTAGAAAAAAAAACACGCCAAAACCTT

A\_14\_P125595 CAAGGCTTCTTCATTGGTGCTGTTATAAGATGGTGCTCCTATTTTCTTGTTTATACGTTCA

A\_16\_P15430851

TGAGAACAGTGTTGATTTTGCAGAAGTAATATCATGCTCTAATTCCTCTCTAATCCCAT

A\_16\_P03791027

AGGCCAATCCAAGCACTAAATATCGATTGAGAATTTAATACTACAATTCCTCACAGACA

CUST\_3559\_PI426210822 CTTCTGTTTTGCAGATGGGGAATTTGTTGATTGTAGTGAGTACGCTGTGTG

A\_14\_P137241 TTATCAATGATAGACTGCATGTGTGATTTATGAGCCAAATCACCATACAAAAGAGAGGAC

A\_14\_P105354 ATCAGTTATGGGGGAATCACTCTTTTTCCCTTACATCTCACTAATGCTTCTCTCTC

A\_14\_P109113 CTTTCTTTAACAGAGTTGGAAAGTGGAAAATTTGCTGTTGAAGGTCTCTGTGATTTCTGA

A\_16\_P18423617

GAAGTTTTATCAACACCATTCACTAATGCCTCTTTTCCTTATGCTCCAGTAACAGTT

A\_16\_P02755467

AAAGAATTGGAGTAACTGCTATGAATCAATTGGGAACTTAAGTAAAGTGAACAGGTCGAC

A\_16\_P18960959

TCACTTGTGTGCTAACTTTACCATCTTATTAATACTATTCAGTCAAATTCAGTATCACCCCA

CUST\_8537\_PI426210822 TTCCTAGAGCATGCTTTCTGAGTTGTTACGTGAACATCTACAGTGTTC

A\_16\_P17191738

AGAACAGATCAATCACCTAACTAATCAAACTCTGCAATATCTCCCTACTCTACTGAAA

A\_16\_P16497779

AAGCAATTCCTCAAACCAATTAATGCATAGATTAGGTTGTAAGTGTCCAGATATGTTTGGC

A\_14\_P127683 GCCTTTCTTTTATTATCTATCTAATAGATTATCCTGCTTCATATCTCCGTGGCACCAGAT

A\_14\_P134247 ATGAATTAACCTCCGTTAAAAATAAACGTATAACATTCTGTGAGCAAATCCATTTTGTCTC

A\_16\_P17558222

AAACCATGTTAGCCTCTAAATATTCGTCACCCTGTTTTACATAACATTCCACAAGTCAAG

A\_14\_P138310 TGTAACACTTGATGTTTTTTTTCTTCTATGAAGAACTGATCAGTGTGGAATGGAGGCAC

A\_14\_P114039 CTGTGCTTTAAGAAGTAAAATCTTGCAACTTAGCAGAGAAAGAGGTCTTGTAGGAAGTC

A\_14\_P135936 GCTAAGAGATACAGGGTTATGCATGATGTAAGAGAATAATGACAGGAAGCACATGATGAA

A\_14\_P114262 ACCAGTTTATACAGAAATGATCACTAAAAATGAAATGTATGCTGTTGGCAGTATCTGGGC

CUST\_3220\_PI426210822 CATCTTCTGCCACCACATCCCCTGGGCCCCAGCTCTTGTTCATGAC

A\_18\_P14133644

CGAGAATTGATCATTTTTCACTCTCACACAACCAAAACATGAAGAAAGTTAAAAGTCTCC

A\_14\_P107845 ACATTTTGTTTTCTTTATCACTTTTAAGGATCGTTTGGCTCATCATCGGTGGCTGTTATT

A\_14\_P112164 GATATTTTCAAGAGGACCAGAACTGGAGATATTACAGACTCCTTTCAATAGACTTCAGATTC

A\_14\_P137441 CAAAACAGGTTGGAGTCAATATCTCAGAATCTGTTCATGATAGTAATCATCACGCACTATC

A\_16\_P03779479

ATGGCTGCCCTATGTATAAACCAAAACAGGACTAACAATCAATTAGTGTCTATAGTCAG

A\_14\_P110789 TTTTTTTTAATTTTCAGGATGCCCCAGTGAAGTTGTGTGACTTTGGATTTGCCAAGAT  
A\_14\_P124493 GACATGTTCCAAGGGCCAAAACCTCAAATAATGTGACTTTGTAGATTGGAGAGT  
CUST\_549\_PI426210822 CCAGCTCCCACCCCAGGCTCCAGATAAGTCTGGGAGGTAGATCTA  
A\_14\_P102706 GTTTTTAAGTAGACCATTTTGTGAAAAATATTAGGAAGCCCTTTTGTGAGGTTCCCAAGA  
CUST\_2431\_PI426210822  
TGATGCGCAGCTTCAGTGTGACAAAGGCTGTTTGTACAATAAATATTGTTGAATCAG  
A\_16\_P21197449  
ATCCCCGTTTCTCCTTTTATTTAACAGCAATTACCCAACATCCTATTAACATCAACAGA  
A\_14\_P129455 TGTATGATTTTTCAACCTTTTTTGAATGGAGCCCAGGGTGTATTTCCCAAATTCTTTTT  
A\_14\_P123625 AGGAAAAAAACGTGCGAAATTCAGAAACAGCAATCCCAGCCCTAAAAG  
A\_14\_P130377 CTCTTCTTCTCCTTACCTACAAATGATAGAGGATTACGAAGAACTATACGGTTGGC  
CUST\_21\_PI426210822 GAGGGAGGACCCATCTTCGACTCCCCATTGCACTCAGCAGATGTG  
A\_14\_P113692 ATGCTGGCTTAGCACATTTTCTAGAATGTGATTTTTTGTGATTCCAGTGAAACTGACAT  
A\_16\_P38672746  
ACTGCCAGGATTTATTGAATGTCAAATCCCTGTAAGTGTTCCTTCTACTAAAAATGA  
A\_14\_P129410 TCTTCATCTTCTTATCCCTTAAAACAGCACAAAGTCATTGCTGTAGATTTTACTGAGGAGT  
A\_14\_P120587 TTAAAAAAAATAAGCATCCTTCTCATGGTCACACAATTGGTCCATACTGACACCATTG  
A\_16\_P19127506 ACAGAGTGGTTTGATGAGGACTACCCCAAGTCTGAACAACCTTGGAG  
A\_14\_P101323 GGCACGATCAGAAGACACAATGCTTGCAAGTGCATCGTTGGTAAACTATAGATATTAAT  
CUST\_2250\_PI426210822 GAGCTTCCAGCCCCTGGAGTTTTGCCTCTGCATAATCCCTTCTC  
A\_14\_P109899 GTTGGAGTCTACCAGACTGAGGTTAGAAGCATTTTCTTTGGCAGCAAGAAGATAATTTT  
A\_16\_P35523996  
ACAGGCATTTAGATAACAACAACCTATTTGATCTTCTCCTCCATAAATCATTGAGTTCC  
A\_18\_P13074194  
AAATTTTGACAAGTCCCTAGTTTGATGAATTGAAAGACAGGAAGATGACTACATCACAGC  
A\_14\_P111404 ATAGATAATTCTACATGGACAAAGATGAGCATGGTTCATCCTCTGAAAGTGAAGATGAA  
A\_16\_P17371863  
CCCATTCTGAGCACTTATTTTCATAAGCCACAAACTTTCTCTTTATCCTTCATAGTCCAAA  
A\_14\_P103130 AGGATCACTCACGTATTTTTCTAGATAGAGCGTGGGGTTGTCCATCAGC  
A\_14\_P108564 CTACTATTGAATGGCTCTGTAATTCAATAGTGAATGGAAAGTGGACAAGGCCGAACATTT  
A\_14\_P137921 ACCCAATCAAGGCATTATCATCAATCCCATGCTTTCCGGTATTAAGAATCAGTTATTTTC  
A\_18\_P16660978  
AGTTGTGGCATAATTCTCTATCATGGAAAGTTAAGACTTGAACAAGGAGATGTAGTGATGG  
A\_18\_P26795797 TTACTCTCCCCTCCCTTATCCCTAGGAGGTCCTGGATCACACTCC  
A\_14\_P101567 CTGTTTCTCTGACTCCTTGTGGCATCAGATAAAAACGTGGGAGTTTTTCCATATAATTC  
A\_14\_P119939 TTAAAAAATCATAACAAGACAGGACCGTATCACCTGGAATAATGTGTAATTCGTGGTTG  
A\_18\_P16650172  
AAACGACCTCCTGAAAAAATAATTCCTACTGACAGAGATCCAAATAATTGAAAGTCCTCC

CUST\_2332\_PI426210822

ACAGAAGGGGACACACATTGAGAAATTTCCAATCAACAAATATTTATTTATTGAACACTT  
A\_16\_P00685239 TTTAATTGTCAGAACAAAGTGAAAGCGAACTCAGAGTGGGACTTGGGATGG  
A\_14\_P133269 TTTGTCTGTGATGAATGTGGTGCAAGATTCCTCAGAACCACATGCTGATTTATCATAAA  
A\_18\_P17241765

GCAGATCTCCCTTAATCAGTTTATGTATCCAAAAATAGGAATAATAGTTCATGCTCGGC  
A\_14\_P102606 TTTGTCCTGTAGTAATAGATTAATATTCATAGATTGTTGGTGTAAAGATCTGAAGTGT  
A\_14\_P135929 ATACTTGTCTATATTCATATTTTCAAGAGGCTGAATCTCCTGAAGAAATCCAATATGC  
A\_14\_P122216 TACAGTCTGCTTTAAAACATGCTTTGGACATATATTTTAGTGCTCATACTGTTACTAATA  
A\_14\_P117542 TTGAGTTACATTGTTCAAGTCCTTACTTATTTTTTGACTGCTTGACATGACACAGGAAGG  
A\_18\_P12491357

TCATGCATGCATTCCTTAATCAGCAAATGTTTCGTTTCATTACTTAGTTTTGAAAACCCAG  
A\_18\_P14132463 TTGGAGCAGACAGGGAGCCATGTGTGGTTTTCCCTTGCTAAGATTTTT  
A\_14\_P108224 CTTACCTTTGAAGAATCAACTCTGCTTGTGTTTCAGAAATAGTCAGACCCAGTGTCT  
A\_14\_P131862 AGAGGATTTGGTAGAATTCGTGGAGCCAATGGCTTTGAAGGTTCTTTTAAAATACTAAT  
A\_14\_P108252 GCTTATGAAGATAGTGAAACCTTAAGATCACAAAGGGAGCACATGAATACTCGTAGATTTG  
A\_16\_P18153238

GCAGTCATTGTAACATGTTAGGATAGTCACCAAAATGCTGAAAAGAAACACATTTTGCCC  
A\_18\_P26951156

AAGATGTGAAACTCTTAAATATACATGGCAAATGATTCCACTTATGACGGATAAGAGGT  
A\_14\_P110172 TTCTGTTCTAGGGAACCAACAATCCTATATTTCTAAGCAGTATTGCCTTCTTTCAAGACT  
A\_18\_P13515065

ACTTGAAGGCCTACATAGTAATCATGTAAACACTCACTATTACTGCTAACTACTGCTTGC  
A\_16\_P00630598 CTGAAAACACAGACACCCTTTGGGGACATTTGTATTAATAAATGACCCACTATGTGAT  
A\_18\_P16389632

ATGGTGGTTAACAACCTTGCATGCTTCTCTTGATAGACACAAATCATTCTTTTTGGTTCA  
A\_14\_P123582 TAACCAAATGTATAAAAATCAAGGTTGCAATTCTGCAATTCTTGTGGCACCCAGAATACT  
A\_16\_P36230109 GATAATTGGTTTGGACTTAGCGGGAATTAGTGGGCGATGGAATTACCAC  
A\_16\_P03456577

TTTAACTCAAGGAGGATTAATTCAGTTCCCAAATTCATGGTTATGGTTTCAGACAACAG  
A\_14\_P115557 CTTTTATTTCCAAAAAGATGGAAGGCAAAGACAGAGCCCACTCACC GG  
CUST\_9671\_PI426210822 CACTCCCTAACACTGCCCTCACCAAAGATGCAAGCCTGGTATCTC  
A\_18\_P13003462 GACAGAAGATGTAATCAGATTCTGGGCTGAGTGAAGGAGTAACAGCCTAAGATG  
A\_14\_P111334 CTTTCGAACACACCAGTAATTCGAGTATGTTATAACTAAAGAGAGGATTGCTTCTGTCAG  
CUST\_8844\_PI426210822 TGGTTAATTTGAGCTTGGCTAGAGGGAGAAAGCGTGTGTGTTTCTGT  
CUST\_1245\_PI426210822

TGAAGTCTGAATTTTACTGTGCTTTAAAATTGTGATGGAAAACTTCTATGGATTCCAA  
A\_14\_P102778 GTTTGCAACAGGCTGTGAAGGCTGCAGAAAATTTATTTCCAAAAATGTAGCAATAAAAGTT

A\_14\_P129694 GAACTACTATCTTTTATTGTCTTCTTCACTATCCCCACTAAAGCAGGTTCTCTGGT  
A\_14\_P137928 CACAAAAGACCTCTTTATAGGAAAAGACAAGAGGTTCTAGCATCTGGAACATCATGAG  
A\_14\_P103744 GTCCTCACTCACAACCTGATAAGGCTTCTGAATGCCCAAAGAAACACATAATTC  
A\_14\_P124278 CTGAGGTGAGAACATCATCAAATAAGAATGAACCTCTTTTTGTGATGAGGAAATAGAGC  
A\_16\_P00909394  
ATTCAGAGAACTCTAGGAGATATATATGGTTGATGCAAAGATGATTTAAGGCATAGCCCCG  
A\_14\_P122082 CTGGGAGAAAACACACTTTATTATAAAACTGGGAAGGGGCCATTTCTCATTAAATCA  
A\_16\_P00685567  
CCCAGACAAGGGAATTTGAGGTTTTACTGTTTTGACCTTAACAAGTTTTTCATTTGAAATG  
A\_14\_P101938 AGACACACAACCTCATAACAGTTGATGAAAAATTGGTAAGGATTTTCTACTACACACTGCT  
CUST\_8371\_PI426210822  
GTTTTTTTCATCTTAGTTGTTTCTACTCTTTCCTACTCTTATAGTTTTGGGGGTGTCTTG  
A\_14\_P125174  
ACAGTCACAAGTTGAAGAATTACAAAAATCTTTACAGGATCAAGGCTCAAAGCAGAAGA  
CUST\_9730\_PI426210822 GTAGCCCAGAGCCCACACACAGAGCAGGTGGGAGGAATCGCATT  
A\_16\_P01322568  
ACCCATAACCATGATCTCATTATACTACTCCTAAGACACAGAATGATCCTAACCTACA  
A\_14\_P109219 AAGTTGTATATTTTTTTAATCTCTCGACTGAATGGACTTTGCACACTTTGGCCCAGG  
A\_14\_P201887 ACTCTCATTGACAATTTAGCCAAGTGGATTTCTGATTCTCCTGAGAATAGTGTGGATATA  
A\_14\_P100027 TGAGTGTCAAAGTTCTTTTTTCAAGGAAGTGGGCAAATCAACAAATCCATTGTGTAAT  
A\_16\_P02046451  
AAACTTCCATGATATGCTTCTGAACATCTAGCAAACCTCAAACATAGGACTGCTTCTCT  
A\_14\_P108065 TTGGTGGTTTTTTGTTTGTGTTGCCATCAGTGGGATCTCATAACAGACTATGGAATTTAATA  
A\_18\_P12072521  
AAAACCTCAACCTTCAAATAAAGGATCCCCTATCTCTATATTGAACCTGGCAATGAATACC  
A\_14\_P130891 GACTAATCAGATAAGTTCATGCTGGAGTACTGCAGTTCAGAGCAAGGC  
A\_16\_P16118873  
GCGTFACTCTCATATCTGTCATTGGTTCTATTGGTAACTGTTGAGAACTCATAACGTGA  
A\_14\_P123388 GGTTAACATGAACTTCAAAGTGTCTACCCCACAAACAAAATACAGTAAACATGACTATG  
A\_18\_P22841728  
TCAACATGTCAAACATTATCATGGTAGTCTAGGTGGATTTTTTTTCATTAACACAGAACT  
A\_16\_P02140046  
CACATTAAGCCTAAATACAACAGGACAGTTAAAAATAAAGACGAATGATCAGAAGGTG  
A\_14\_P101082 CTATCCATATTCATTTAGGGTGGAGTTTCAGATTTTCAAGTTTCTTGGATACACCTTTC  
A\_18\_P16861236  
AAAATGACTGTAAGGAGATCTGTTTGGTTAGTGTGATGAATCCATAAAGAAGCAATGGAA  
A\_14\_P115730 GAAATCCATTTGGAGTGTCCACCTCTAGGTAAGTCCAGCAGATTTGATTC  
A\_14\_P127954 AAGCACAAAAATATCTTACAGATGGTCTTCAAACCACTTTCTACATATCCGGAAAACTCA

CUST\_8992\_PI426210822 CAGCTGCGATTGGTGTAAATATGATATGGAAAAGTGGCCCAGGGATG  
A\_16\_P00795524

AACCATCTCCTAGTCCTAATCACTTCGTTAATTTTGTAAATAAAATGCTCCCTATGGACCT  
CUST\_2116\_PI426210822 TATTTCACTCTTTGCTAGGCATTCTGGTTTAGGGGGCAGCATAGCC  
A\_16\_P36940162

TCAGCCTCTGTCTAGATACTTCCTATTTTTGACTCACTTAAGTTTATTTTGCCTTGCTGG  
A\_14\_P100742 CTGAGGGGCCACGTCTGTAGTTTCTATCATTTTGCCTTAGTATTTTTGAAAAAGG  
A\_14\_P128968 ATGTTTCTAGTTCTGCTGGTAAACTTCTGAGTTTATTGGATGACAGATCCAGGTAAAC  
A\_14\_P127107 TTAAATTCAGTGTTTTTCCAAAGCCCCTTTCTACTCCAAAAGCACCCATCTTATAATCAA  
CUST\_559\_PI426210822 ATCCCTTGGATTTAGTGTTCACTTGCTGCTTTCAGATGTGGAAGGAAAAC  
CUST\_1480\_PI426210822 GATGGCATCCCTGGGGCCAGCCTGCCGCGGCACTCGTGGGAAGTG  
A\_16\_P37679690

CCATCTTTGACAATTATGGACTCCAGATTGAACAATATCTCTTTTTTCATTCTCTCAACC  
A\_14\_P133396 GGACCCTAGTTTAATAAAGATTCACCAAGTTTCACGCATCTGCTGGCCTC  
A\_18\_P14136404 CTTGCTCAGTAGGGCCTGAGAATGCTCACTGGGTCAGGTGTGATT  
A\_14\_P137483 CATACTTATGATGTTGTTCTGTCAGTTACAAGACCTAAGTTCCAAGAAGCAGCAG  
A\_14\_P127008 GTAGCAATATCAAGGGAATTTTGAAGTATGGAAAGTCCCAAATCATAATCAGATTGGAGC  
A\_18\_P14135402 TGTGGTGTGTGTGAGATCTGTAACCACACACAGAATGAATCCTTTTCGAT  
A\_14\_P119679 TGTGTGAGTGCTTTTAATGAAGTAACTTGCAATTTCTGCTTCTACATTGAGAGTGATTGA  
CUST\_9958\_PI426210822 ATTTGTTTGCCTCACACTCTCCTTTTCAGAGACCCGGAGTCCTTTT  
A\_18\_P16727488

AAAAGACTATCCATATTGCATACCACTTCAGACTTTTTCTACATAGACATTCACCCATCAA  
A\_16\_P18548277

ATCAGATATGTTGGGTATGTAGATTGTAAGTCATGGCTCATACTTAAGTTCAGGGATTCC  
A\_18\_P22842304 CCCAGTCCCTCTCAAGGCCAGCCATTATCATAGAAAAATCTTCAAG  
CUST\_8182\_PI426210822 TATAGTGGTAGGTTTGGTCAGGGCCTCTTTCTGGGCTTGGCTGT  
CUST\_2560\_PI426210822 GAATTGTGCTGTTCAAGGTGAGGGATGGAGCCATTCACCATTCA  
CUST\_2466\_PI426210822

ATTAGGACTTTTTTTTTTTCTTTCAACAACCTTTAAGACCAAGTGTCTAGGGAAGCT  
A\_14\_P102458 AAAAGAGTTGTGTCCCTAACACATCACTGAGAAAGAGTTTTTCAATTTAGTGAAAACCTG  
A\_14\_P136516 CCTACATTTACGAAATTTCTTTTAGACCTGCTACCTGATTTCCATTCAATGCTAGCATGT  
A\_14\_P105174 CTTAAATTCATAAGACTCTCCTTTACAACTCTTCTAAATGTGCTCCATGAAAGGCTGT  
A\_14\_P112778 TATATATCCTTAGGCAACTCTGATATGTGGCATCTCTGTGGCTTAGGTGAAATCATAGAA  
A\_16\_P17091816

ACAGTCTTTGAACTCTCACACATAGCATAATGAGTCAGTATAACCCTATTTATGAGCCTGA  
A\_16\_P40936103

TGGTCATATACCTTAAACACACTGTTACCTGAATTTAACTTAGCCTATCCCGATTGACAC  
A\_14\_P108239 GAATGTGGTATTTTGTGCAAGCACACATTTCTGAACATGCATTCAGAACGCATATACAT

A\_14\_P124666 CTAGTTTGGGAATAACCTTATCAACTTCCTGACTCTTTCTTCTTCTATCCTATTTTCCCCT  
A\_14\_P201134 ATTACTGTGACTGGATAACCAACACCTATGTCAAGCCTTTTGTAGTTCTCTTTTACCTTA  
A\_14\_P129975 ATAACCTTAGAAATGACTGTGACTAGCCTAACTCACCCCTTATCAACACTGGTAATCATT  
A\_14\_P139089 AACCCAGTGCTAATTTCCAGTTCCTAGTTGCTAATTCTCTCCCTCCACT  
A\_18\_P1370221  
TGTCTACTCACATAAATGCTCAACCACGAAACAAAATCCAAAGTGACTTTTGTAAACCTT  
A\_14\_P115310 ACTCACCAGTCTTCATTTCTAATAAACGCTTTTTCTTTTGTGGCGTTTCGAGTCTTTCT  
A\_14\_P200180 CTTTTCTAGCCTCTTGAAGGACTCTGGGTTAGAAGTAAATTAGGTCTGGGTGAA  
A\_14\_P111595 CTTATATTATCACATTTACATTTTGCCTGGCTCCAATGATGTGAGCCACATAAAAATGC  
A\_18\_P22841747  
ATCATTTCAAAGTGAGGTCAGTTACAGAGTGAATGGGTTTCATCCTGTCATTGTAAATAAC  
A\_14\_P129648 TGTTTACTTTGAGAAAGGTGGGTTGTGTATAAGTTAAAGCACGTAGGTGTTGTTTCTACA  
A\_16\_P17697819  
ATCAGAGAGGGATTTTAGGTATGCAGAATTTAATTACGCTCATTAGTATTAGGCCAGGAG  
A\_16\_P00423537  
ACTGAGTCTACCTTTTCATCCTATAATCTCAATACCAACAGAAAATAAACAGCAAGTTG  
A\_14\_P127377 TTGGCATTTTTTTAAAACTCCCTCTCAACATAGCAGTGGAAAGGTGCCATTTTCAAT  
A\_14\_P102949 CCAAGATAATAGTATCTAACTGCACAGAACAGAATATTTGAGTGCTAGTGAAGATGCCCT  
A\_14\_P107226  
GGGACAAAAATAGATACCGAAAGTAATACTTGACAAACAGAGTCAAAGTTGGAGGCTTA  
A\_16\_P15200395  
GTATCTAGTGCCTAAGGAGTTCAAATAAACAGATGAGGAAATGATGTAGCACAGAGATT  
A\_14\_P200177 AACTTGGAAAAATCCAGAAAGAAAAATAATTGATTTCAAGACCTTCTCCCCATTCTGCC  
CUST\_7104\_PI426210822 TGGGAAGGTGGAAATAGCATGGTCTATCCTGTTTTCTCATTTGCC  
CUST\_7927\_PI426210822 ACCAGGACTGCCCTAGGGTTTGAACCCAAAGCATTAGTTAGGAAT  
A\_14\_P138286 TATGGTATGATGTCTGTTTGCATAGCACTATCAGTTTATTTTTCCAGCCTTGATGAAGT  
CUST\_3095\_PI426210822 TTTATCTTACTGTGTTGATTTACGCCTTTAAAGGGGGGTCGTGGTGG  
A\_14\_P133714 ACTTCAGAAGAACTGATACATCTCTCAAATAATCACAAGATAATTCTGGCAGCAACAGC  
A\_16\_P15905400  
AAAAGTTTGATGAGTATTGGACGCTGTAACAAAACAAATTCAGTCATAAAATCTGAGCCA  
CUST\_3211\_PI426210822 CTCAGAGTTCACACACCCCGGCTTATCTTCCCTCTTCCCCGAGAC  
A\_14\_P128668 CTCAGCACATCCCCTGAAAACCGGCAGGTCTATTTGTAGAAGTTTCT  
A\_14\_P110684 GCAGGGACTTTATGTTTTCATGGTTTATTTTCAATTTACACAACCAAATGTGTTGCCCTAT  
A\_14\_P100358 GCTCAGCACCTGACTGTATCTGGATTTAGTCTGTAGCACAAAAATTTTCTTTTGTAGTCTA  
CUST\_5261\_PI426210822 TTATTTGCTGACCTTCTGCTTTATTTACAAATTTAAAGTGGGGCCAACCCTTCC  
A\_18\_P15183533  
ATACTGTCTGTTGGATTACCTTTGTCTCCTTGCTATGATCTGTCTCACTCTACTTTGAAC  
A\_16\_P00734800



CAAAGCCTTCTTGAATATCTTGACATACAGATGACCTTTAGACTCCATTTAGCAAGTTC  
CUST\_404\_P1426210822

ATTCCAAGCCAAGGAGAACATATCCTTGATTTGCATGAAGGTTGAGAATTAAGAACA  
A\_14\_P136956 ACTTAGTATGCAAATGAAGTTTGGCCTTGAGTTCCCTTTCTGGAGGAAGAG  
A\_14\_P118156 ACCACTCTTCTTGCAACTCCAATAATGAGTGATAATAACTATAATACAGCCCCAACT  
CUST\_1151\_P1426210822 ATCTTCCTTCCCATGGGCGCACACACTTTTATATGCTAACCCAT  
A\_18\_P10118357

CACAGAAAATTGTTTCATAATCCCAGAAACCATTTTATCAGCCAAGTGACCTAAATACTGG  
A\_16\_P00193119

AAAAGCCTTCTACAATCATAAACAGTGGTGTGAAACAAATGAAGATTGTGTCTGAAGCA  
A\_16\_P01293430

CATGCCTCACAGAAATATGATGATACTTCACACCATCTATCAATAGCAACTAGGATTGGA  
A\_14\_P103973 TGGACAGAGATAGAAGCAACCTTTATTTTATTCCTGAGCCACTGAGATGAGAATAAACAT  
A\_14\_P138456 TCTTGGCCTGCTTCTATGAAAACCTTCTTTGGGTGAATACATTTGCAGAGACATATAAAG  
A\_14\_P136672 CAAAATTATTTGATGCTTATTGTTACCTCCTTGGTTATTAAGAAATGTGAAACTCTAGGG  
A\_16\_P00958559

GGAATTTCAAGTAACCGTGGACTAAAGTCTTAAGAAAACAGACAACCTATCACTGCAGATC  
A\_14\_P108530 CTTATGTCAATCAATTTCCAGTTCACAGTTTCCAAGGATGTTAGAAGAGAAATTAGTTCT  
A\_18\_P14135708

CCCCTTCATTTTTAAGAAGAGTAAAGAAATTAAGTCACTTTGGTATTGGTATGGAGACA  
A\_16\_P18981165

AGGTGCTGTCTTCAGAAATAGTTTAGTACAGATGCCTAGTTTTAAAGTCTACTTGCTTC  
A\_14\_P201973 CTGCTTTAACAATTAAGCACTAATTCCTAGATGCACCCCTGATTTGAACTTCAATTTGAC  
A\_14\_P136963 AAACAGAGTAAAATGTGATGCGAATTTTCCCGACCAACCTGATTCGCTAGATTTTTTTTA  
A\_14\_P107009 TCTAGTTCTCCAGTTATTCAAATAAAAATGTCTACCTCTCCATCTAGCCATGATAGCAC  
A\_14\_P102789 CTAGCATACTATGCTCAATTCTGAAGTCACTTTTTTGGTTGTAGAAATGACTGTGTTTAT  
A\_14\_P103103 CCCACAGGAACTATTCCTTTGAAATTGCTGTCAGATTTTCAGATTCAGTAAGATACAAAG  
CUST\_3495\_P1426210822

TGTTTCACGTTGTACTTAGACATGCTGATTAAAACCTGAGTTGCAAGTGTACCATG  
A\_14\_P124844 ATAGTAAAAGTCATCTTACCACATTGCCTGCACAGATACAGGTTTGAATATGTGAACTCT  
A\_14\_P104471

TTGAAGAAAAAAAAAAAAAAAACAACTCTGAGGACATAGGGGATGTCAGTTTCCTATGGAAGA  
A\_14\_P111393 TGTTTTCTACAGCACCAAAGAAATTCAAATAGGAAAAGGAGAGTTGAGAATTGGGAATCA  
A\_16\_P36230771 CTCCTTTCTAGACTCCTAGAAGTTGTGGGTTGGTCTGATAGAGCCTC  
A\_14\_P133274 CAAGGACCGAGACACAGACATGGAAGGACTTCAGATACCATCTTATTCTAGA  
A\_14\_P105972 TAGCATATTTGTTACCGTGACATAAACACTCCAGAAAATCTCAGAATTGCAAATGCCTC  
A\_14\_P124243 CTCTACCTTCCTGCCTTTCCCTAATGTTAATTTTATTTGATGATGGAAAGCAATTGCACATTC  
A\_14\_P110497 TTTTCACTTAATGTGTTCTATTCAATGGCTGTTCTGATGATGCCTTGCTATGTTTTGTGG

A\_14\_P136270 CTAATCCGCAAGTGAATGAGTCCTTTACATTGTAAGTGGTCTCTCCTTGATCAAAT  
CUST\_4227\_PI426210822 AAGATCTGGAAAGCAAGACAATGTCTCAAAGCATCAGGACCCCTGATAT  
A\_16\_P19129858

TCAGATTTTCTAGGTCTCTTGAGACAATTTCCAGGTATATGTTCACTTAAACAAGACC  
A\_14\_P100983 CTGTATCTTCAAGATCTAGATCTCATCATTCTCCACTTGAACAATGTGCACCTCAAAG  
A\_16\_P18445432

AAAATCCTCTACAGTGAAAACCAAGTATCACATAGTTCACCTACAAAATGCTCGTTTTCC  
A\_14\_P111250 GAAGACTCTTTAATCTAACAGCAACACTTTAATCTAATAGGGCCATCCAATGTGTCCAAT  
A\_14\_P138560 CAGTGCCTTTAAAATCCCTTTACTTTTTACCTGTTTTTATTCTTCCAICTCTGCTTATGA  
A\_16\_P17090892

GGTAGCCTTTGCTCTTTTATGTTCCACCTTAAAAACATTAGTTACCACAATGCTCTTCTT  
CUST\_2400\_PI426210822 GCTGCTGCTAGAGTTCTTGGACTTCAGAGCCAAGAGGGTCTGCTT  
A\_14\_P139088 GTAGTTGACACCAGACATTGTGTCCACTTGGAAATTTATCGTGCCTGGATAC  
A\_18\_P11471008

GGTCCCTTTCAAATGTTTAATACACCCATATAATCCCAATCTTAATCTCTCACTCTCTTG  
A\_16\_P15925750

ACTCCATCTCAATACCATGATATGTGTCTTATCTCTTGACAACCTATGAATATAGGGCTGG  
CUST\_574\_PI426210822

ACTGTAACCTAGGCTCTCCAGGATAAAAATTATTATTGCCAACCTTTTTATGAATACTTTC  
A\_14\_P100263 CTCCTAACAATAGTTTGCCTTAAGTATGTGTGCAAGTTCCTCAGGTGGAGAATATTAGTA  
A\_14\_P122535 CTCGCTTAGCCTCTTCACTCATCAGGCTGGACCTAAAGAACAATATTAATGCAT  
A\_18\_P22840681

AAGGGTTTTCCAAGCACCTTAAAGTTAGAAAAGAAATAACTCTGTGCTACTTGTGATTT  
A\_14\_P101723 CTTTACTGGAATGATGGTTTGTGTTGATGTGACTTGGAGTGAGAACAACGAACAT  
CUST\_9183\_PI426210822 CATGAGCAGTCCTGCTTGCTGCTCATTCCCTTTCTCTAGAAGGAC  
A\_18\_P14419163

AACTCTTCTGACTATACTGCCAGAATTGCTACATAACCATTTCACTGAGAAAAGAGACC  
A\_14\_P132204 ATTGGACCTACTAAGCAAAGTCAGGCCCTAGAAGGTGACATTATGG  
A\_16\_P15845651

AGTGTCTACTGCTGTTAATTCTTAGCCAGTCATATTGCTAATGTATTCCAGGACTCCTA  
A\_14\_P117944 TTTTAATTCCCTTCGGATTCTAAGTGAGAAGGAACCTCTCATTCCCTAAAGATTTTTTATA  
A\_14\_P115017 GTATAACAACCTAGGGAGAGGACTTATACTTGCAATATGACTTTTTAAATCTGTCCCTGGGC  
A\_18\_P14134422

TCGTTGTGACTCTTGCTTTCTTAGAGGAGACAGTCTGATGTAGAAGTAATTCCTTT  
A\_14\_P110950 TAATACTTGTGCGGCTGACTGCATGCTTAACCTAATCAGGATAAGGAAAGAGCAATTCTAG  
A\_14\_P104101 CTAAGTCTGACCATCTGTAGAAAAATACATGCTTTTTGCTCTCTCTGACTCCATAATGAG  
A\_14\_P126043 ACCATCTGAGACATGGAGATACGCATATCCTTCTTTGTATTATTGCTACTACTATGGCAA  
A\_14\_P120514 GCAAAATTCCTTTCTCTTTTCCAGGTAAGAAAAGCAGTCTTTTGGAAATTTAACCTAAGA

A\_14\_P117043 TTCCTCGCAACTGTGGAGTTTAATTCCTTGTTGTTAATTAGATTAATCAGAGTGATCGCTG  
A\_16\_P58424096

CCATCCCTAGTCCCATAAATTAGTGGGCAAAGAGATATTAAGACAAGTAATTGAGAGAG

A\_14\_P113865 TGATGTCTCTTTGAAATCCTTTGAGCCTGCAGTTTTGAAACAAGGAGAAGAAATTCATAA

A\_14\_P121948 GAGGTGGTTTTCTTTGGGGCATTGGATTGATATTGTTACTTTGTTTAGAAACTTTCAGA

A\_14\_P131597 TGATTTTCAGTTATTGTGTTCCCTTCACTAGATTTAATATCAGAGGAACAACAATAGGTGA

A\_14\_P124917 TGTAGGCCTATGGTAATAATAAACACGTATTTTATGAAATGAGTCTTCTGTGCTGGGACT

CUST\_9668\_PI426210822 GTGCATAGCTGCTGCTCAGGGTGGCACAGCCCCCTCCACAGTCCTG

A\_14\_P125754 CTCTACCAGCAATTTATGAATGAGAGATGGACAAGACCATCAGGTATGTGGAGA

A\_14\_P130317 TGTTTTCCAGGTTGAAAGGAGAAGAAAATACAGTAATGATAGACTATGTCTTGCCTGACT

A\_14\_P116065 CTTATGAAACTGTTTAGTTCTCTCACATAGGATCTGCCAAATTGCTGACTTCTGCAAAAA

A\_18\_P14039708

AATCATAGCACCCAACTAACATATTCCTGGAGTGATAGAAAAGAATGCACTGTTTATCTT

A\_14\_P127962 ATTGGAGCAGATGGTTTTTAATAAAGATACCCAGACCCTGTGCAATTCATAATGATCTAG

A\_14\_P136952 ATTGATTATACAGCCTTCACTACATGAATTTCCCTCCCAAAGCACCAATTTCAAATGTG

A\_16\_P21538317

AAGAGTAGAGGTAGTGTCTCAAAGATAAGTATAGGGCTAGAAATTCATACGAACATCT

A\_16\_P19077517

TCAAACAAAATCACTCATGAGTTTCACCTACAAATGCAATCTTAAATGTGCCTGTGATCA

A\_14\_P109802 CTCTTCTAGTTCCTGCCTTGGAGTGTGATCCTTTCTCTTCATATAAATGTCCACTTAC

CUST\_6702\_PI426210822 ATGGCTTCAGGTGACCAGAAGTGTGGCTGGTTCTGGGGAATGTGA

A\_16\_P02140428

GGCTGGATGCTCATACTAATAGAGACAACAATGGTAATCATAAGAATCATAATGCTGGTG

CUST\_7391\_PI426210822 TCACAAATGGGCATGCTGCCTGCCAGCAAGGGTCTCCTGGCCAGC

A\_16\_P03336786

GGCTACCTGTATTGCTTACTCCATGAAACTAATCATGTTTTTCACCTATTCGTTTTTGCT

A\_14\_P137103

ACTTTACCACAGAGAACAAGAACAATCAAATAAAGGAAAACCACTAGCATTTTCGAGTAGG

A\_16\_P19155333

AATATGACATCTAGTGGCTTGGTAAAGAAGATCTGGACTGATTTTAATGGACACATCTGG

A\_14\_P100401 AGTATTTTGATCTCGCAAGCAAATGGCCTTTACATTTATGTAACCTGGTAAGACATCAGA

CUST\_6787\_PI426210822 TTCTGGATTTCTGCACTCATGCATGCCTCATGTGACCAGGGATAG

A\_18\_P11483136

GGGCCTCTAGAATATATCACCAAGTGAGAGATCTAATGCTATTACTCATTTTCCTTCGTC

A\_14\_P136071 ACATACAAAGGAGAGAGGGATGAAGGACTGATGGTTATGGGATGATGAATTATTGTAATA

A\_14\_P133710 GTGAATGACATCCCATAGGGATATTTATGAAATCACCTTGAGACACACTAATTTCTCTGT

A\_14\_P120319 GAGAGTATATATTTACATGCACATTTTTTATAGGGGGTTCAGAGCGTTCATCACATTCTC

A\_14\_P122926 GCCGGGTTCTGCAGAATCTTACTCAGGTTAGAGGAAGAAGTGGAAATG

A\_14\_P114401 AATAATTTATCCAAAAGAGTTGAGCATGCACTGTTCTGGCTCTTTTTGTCCCTTTCTTAA  
A\_14\_P125392 TAGTATTGGCAGATTATGAAATGCCATCTTTTTTTGTCAATAGAGGCCAAGGACCTTATTC  
A\_14\_P114421 CATAGCCCGAAGTGTAGAAAAGGCTCATAGGTAATAAGATCTGGACGTTCAATGTCATAA  
A\_14\_P135660 ACAGATTTACAGAAGCCTATCTACACAGAGTGAGTAAGGTAATTAAGCGGACATACAGT  
A\_14\_P102155 ACGGTCGTCCAGAATTTAAAATCTAGATATCTGAATCTCAGAATCTTGAAAGTTACTGAG  
CUST\_8751\_PI426210822 GCAATGAGAATTTCTTTGCCCATGGAGTCCTTGCCAAGTCTATGTCTTTT  
A\_16\_P17334721  
CCCTGTTAATGTCCCCCTATCCTATAAATGAACCTCATATTACCACAATCCATACATTTT  
A\_16\_P16389953  
CAGCCCAGTCTAGTATCTTGAAGGACCAAATTCATGTTGATCTTATACAAACTCCAAAA  
A\_14\_P135548 TGCCCAGCCTTTAATTTAGACAGAGGTGAATTCATCCCTAATTAGAATGGACTTTAA  
A\_14\_P123898 CTCTGCTATACATAATTAACACCAGAGCCCTCAATATTTTTTCTTTTGCAAAGATGGGGA  
A\_18\_P22842449  
GTTTGTATTTAAAGGGAAACCAAGAGGGTTTTTTTTATCCTTCCATGGTTTCAAATCTGG  
A\_18\_P22508537  
TTTGCATCTTTATTCATAGCATCCAACCTCATACTTAACTTCCCTTTACATCCATACGGT  
A\_14\_P139832 TGTCTGATGTTCTTCTCTAGGGCTTCTGTCTGGGTAGGATATCTTTTTTTTCATTTTAAA  
A\_16\_P00685284 TCTATTTTTTCATCATAGTATGGGTATTTAGAATTCATATGTTATGAGGAAATACACTGT  
CUST\_5112\_PI426210822  
TTAGTCTATTGAATAAAGCTGCCTTTCTTAGGAATGGTGGTCTCAAATGCACCAG  
A\_16\_P02571436  
ACTGGCTCAAGAATAACAAGTATAAATGTAGGGTGCTCATAATGAGACTTCATAACGTGA  
A\_14\_P114665 GCTTGCTTGACAGTTCCTCTGTGTCACTGACACAGGAAATCATTCTAG  
A\_14\_P139008 ACTTGTTTTCTGATTCATTCCTTCATTTTGGAGTAGACAGGAAAATATGTCCTTATCT  
A\_14\_P200839 AAAGGCCTGCAAATAAATAGCCAAGAAATCCCGCAAAGGCCTGCAAATAAAT  
A\_16\_P39683372  
ATGATGTTTCTTTTGATCTATACCCAGGATTTGACTGCAAATTATATCATGTTTGGGGCT  
A\_14\_P112722 GCTCTCACCACAATTATAAAAAGAGAGAGAATGAAGGGAAGGGTAGAATTTCTCTTTAA  
A\_18\_P24286174  
AAACAAGTCTTCGTAGAACTATCTCCAAAATCTGCATCTGTAGTCTTACTGACTTTTCTT  
A\_14\_P116485 GCTTGCTTTTCTGTTTCAGTATACATAATACTAAGGGGTAGGAACGCTATTTGCAATGAC  
A\_16\_P03553464  
AAATCTACCTAACTGCTGTAGGAATGTAGAAGAATAGATCAGAGTGTGAGTTTTCAAGGG  
A\_14\_P100308 ATGTGAGTGCTGTTCAAAAATTAGACTTTTTCAGATACAATGGTGCAGCAGAAATTGGATG  
A\_14\_P101242 TGGTTTTCTTTTCTTCTTTTCTTTATAGAAAAGCAGCATCTGTTATAGCAAATACCCAC  
A\_14\_P126518 GGTGCTCAGAAAATAGGAGCCTAAAAAAGGATTAAGGAAGATTTTACTGAAGATATGCTG  
CUST\_3528\_PI426210822 TAGATACCAAAGTTACAGGGGAAAACGGACAAAGCCACCAGCTG  
A\_16\_P20309623

AAACTGGCTGAGACTCCTATTCACTGAAAATCTGTATCACCTAAGAAATATAAACAGTCA

A\_14\_P113016

GAGAGAGCAGTGCTAAGAAAAGATCATCAGAAGAAATATGGAGCAACAGTTGATCTTTGG

A\_14\_P200936 TCTGCAGCAGGTTTAATGACTTGAATCTATCACCCCTTCTCAATATATACCTTTCTTGTT

A\_18\_P14132545 AAAGACAAGTGAGGAAGAGGGGTGATTGTGAACTCAGCAGGGAGA

A\_14\_P114303 AGAGAAAAAAGACAACCTGTATTCGCCCTGGAAAACTAATGTAAGAAATATTTTCTCT

CUST\_6221\_PI426210822 TGAGTCTACCTCACAGGTGTGCCTGATAAAATTTTTTTGGGCAGTGTTTTC

A\_16\_P17605985

ATACGACTGTCCAATTATCACTCAAATGTCAAAATCCATTTCAAGTCTACTACCTCTGGA

A\_16\_P39392151

TTTAAGCAGGACATGATCAATCAGCCTATGTCTTTTCATCTATTTTTGCCTGGAAAAATCC

CUST\_2623\_PI426210822 CTGTGCCTACACCCAAGGGTCTGGAGAGGTTGAAGAGACAAGAG

A\_14\_P138463 CCCTGAGAAATCGGTAAGGGTTTCTGGCATCTTTAATGTTTAATCTTTCATCAAATGAT

A\_14\_P201074 GTTTGCATTTGAAGACATTTATTTAGTTGGCAGAAGGATTATTTCAAAAAAGGGGCTTCC

A\_14\_P138215 TAGGAGGAGCAGAGTTTATCTTCTTAGGCTTCTACCAGTTTTAGAAGAAACAGTTGTTT

A\_14\_P115390 CTATTCATTCTAAATTTCTTCCAGACTCTGCCAGCACTTCAGTTGTAACATTGCTTTCA

A\_16\_P38427797

CATCTACAAATCTAGTTTTTGTTCCTCTCCTCATATGCTGATCCTATGAACACTACCTGA

CUST\_5508\_PI426210822

TCTGGTATGAGTGAAGTAAATGGAAGAGTGTTAGTGGGTGAACTTGAACCTGTACAT

A\_14\_P126066 AGCAACTAATATTCTAATTGAACTAAAGCACAGGATGCCAATTTACAATCCTTAGACCAA

A\_14\_P115808 GTTTATAATCATCTAAAGCAGGAAGAACCATCCTATTTTCATCCTCAACACCCAACACAAT

A\_14\_P132014 CTCTGATGATGATGATGAGATGGTTAGGAACCTGATTGCTCAGAAACCTGAAAATTATAT

A\_14\_P137719 CAAAACCATGGTCTCTCAATTGAGAGAATATTTAATTTTACAAGGCAGAGTCCTCCTTCT

A\_14\_P202233 CCACCTAAAAGGCATTCAGATTTTTGTTTTTAAATATGATGCTGGCTGAAAAGAGCATGT

A\_16\_P36735445

ACAAGCCTATGAACAATGCTTTGTCAAACCTCCATGACTATTCTTGATACACTTTTGAAC

A\_14\_P129960 CTTCTGTATTGAAATGCAAGAATTTAGACCATGATTTTCAATGCTCTGAGTCCCTTCTA

CUST\_749\_PI426210822 CAGGAGGAGCAGCAGCATTCCAAGACCAGGGTGCAGTGAATGACT

A\_16\_P17041073

AAATTGCTTACCGGTGTCATATATGTAAGAAAGCATGCCTTGATAGTTGAGATTTGTGGA

A\_14\_P130000 TTAGTCTCATCTATGTTTTTTAGTTTCTGACTATGTAGTGGAGGTTAGGCCTCCATAAC

A\_16\_P03373643

CAAGCCTACACCAATTATTAATTATCCGCCTAAATGTATACTACTTTACACATCCTGCTC

A\_18\_P17290222

TACAAAGATGGTGCTATCTACAGAATTATGGCTACCTGGAGAAATTTACCAACTGCTGAG

A\_16\_P03617935

TGGGATAAGCAGAACACTAGGTAAACAGAGAATTAAGACATCCTAAAAAACCTAAACCT

A\_16\_P02453659

AAACCAGTGCATTTCCATTTTAAACCCCTTAGGAAGACTTTTTAACTACTGCTCAATCTCCA

A\_14\_P122547 GTTCATCGAGGTCTTCCAGGAAATTATATTCTGGATCATCATCATCTGCTTCATCTA

A\_14\_P118033 CGGTAGTATATGGCTCAGAAACATTGCCATTTACAATAGTTCCCCAAAAAGCAAAATTCT

A\_14\_P102670 CTACCCCTCTTTTGAATCCAGAAAATGACAGAAATTGTCAGGGGACATTTGTTTC

A\_14\_P126664 TTACATGGTGTGGATGGCTAAATTAGCACAAATATCTTCATTTCTGGGAATGACAACTATG

A\_16\_P19672519

TGATACCTTGCAGTAAGTAAGTCGAAATAGCATGCCTGAAAATTTGAAACAGACCATTCT

CUST\_9780\_PI426210822 CTCAGGTACGTTAAATTCTACAGAAGCAGGCAGGGTGCCAGTGTC

A\_14\_P122137 CTAGTCTCACCCCTGTTCTGATCTTGGCTTTTCCTACAGATAAAAACCTGGTTTC

A\_16\_P18840501

ATCACACAGCCAAATTCCTACTTGAAAACACAACATATCCCTTAGTTTTACAGAGAATGG

CUST\_3549\_PI426210822

TGAGGTACAAGCTCTATTAAGCAGAAAATTTAAAGTGGTTTTCTTCTCCTTTTCTTG

CUST\_1426\_PI426210822

ATTTCTTGCTATTATGAAATTTGATGCAGGATTTGTTTCATTGCTTTGCACTAGTCTCACT

A\_16\_P37870593

AGACATTGTTACTGGACATCACTTGAGAGTTTTGCATATATAAAGCCCCAATCCCAAG

CUST\_8833\_PI426210822

CACACAGACTGCTGATCTCAGTAATGGCCCTAAACTTTCTTTTCTTTTCTTTTCTTTTG

A\_14\_P139395 CTCTTTGAAGATGGAAACGTCTTTGTAATCCAGATTTGCAACAGTGCCTG

CUST\_329\_PI426210822 ATTTTCTCCCCATCCTTTTTTCTCTTTCCCTTTTTTCCCAGTATTCTTTGTCT

CUST\_6106\_PI426210822

ATTTCTTTTTTGATGCATTCCATCAGAAATCAGTGGAACATTTTCATTGCTGTCTGGC

A\_18\_P10687256

AAAAATGAGATCCTGAAGTGAAAGAAAATCCATCTGTCAAATAATGTATCCCTGCTACCC

A\_14\_P132060 AAAACATTGAATTGAATAAAGATTCCCTAATGTTACGTTCCCAGTTACAAATCTGGGATG

A\_14\_P124468 TTAAGTGTGTTCTACCTACCAAAGGAAAGCACTTTTATTCTTCAAGTGAATCGGAAGAAG

A\_14\_P126338 GAAAGTGTCCATTCTAAAGATAGCAAAGGCAATGATTTTGTATCACTTCAGAATCCTTCC

A\_14\_P200434 AATCTGCATGTGTGGAGACAACTGCAAATGCACAACCTGCAACTGTAAAACATATT

A\_16\_P17975892

AATTCTTGTACATTCCCTATTCTTCCAGAATTCTTAGGCATGATTTTGTGGGTTGACCC

A\_16\_P00216302

AATACACAAGGCTTAATCCACTAACAGAATAGGTTGAAAATACTGAGATTCACCCTCCAC

CUST\_2319\_PI426210822 ATCACAGACTGTCGTCCCAGCTGGCCTCAAACCAGGAGCCAGTTA

CUST\_5958\_PI426210822 ACTGTTTTTGAAGGAATTGCCGTTTCAGAGGACTGTGCCGCAGAC

A\_14\_P129454 TCTTTCTTTTAAACTCTTCAGTTTTTAAAAGAGGGTGGGGGGAATGAACACTAAAATCCTA

A\_16\_P16037180

ATCATTTGCTCACACACTTATCTCTCTTGTAAACCGAAAAGTTATTGAGACGGAACCAT  
CUST\_3361\_PI426210822

CTGCCTCAAACCTTGAACCTTAGATATTCATTATAAGCATGATTCCCTTCAAAGTAATCAC  
A\_14\_P128254 GAAGATAATTATCCATCATTTCAAATAGAGACACACAACCTTAGAAGGCATGCTGGGATTG  
A\_14\_P102507 ATCCAAAAGGATATTTCTGGCGTGTTTTTCCCTTTACAGCCACTTCTGCGTATTAAT  
A\_14\_P119934 TTTTGCCCTTGCTTCTCCAATGTGATCTGAAGAACGTTTGTATCTTCTACCTCA  
A\_14\_P127068 TATGGTAACTGTAACGAACTCCTCAGGACCAGAGATCTTAGAAATACCAACGTATTTCTA  
A\_18\_P17052573

AAGAAGCATAAGGTCCTCAAGTATTTGGAAGATAGAGTAATTATTACTGCCACGAAGG  
CUST\_7446\_PI426210822 GATTCCCAGGACCTGGAAGACCACTTGCTCAGAGTCTGAAATGTT  
A\_16\_P36230447 GAGATCTACTGGAGGCAGCGTATCACACACTAGTTGTCCAAGAGATG  
A\_14\_P114839 TATATACATTCTGGCATTCTGTGAAGTTGTCCAGAAACAATGAGGCCACCAGTAATTA  
A\_14\_P113644 AAATTACTCATTAGAAACCCAGTGACAATGCTTATTGGATGTCCTGAGATAGGTCCAAA  
A\_14\_P128021 AAATTACTGGTTACACGTGACATACTCGGCTTTTAAAATCCCTATTGGTCCACTCC  
A\_14\_P133804 ACCTTCATTATTGACAATTATAGAAGCAGTTCCTGTAGCAGCATCTTTAGTCTGATATGT  
CUST\_7744\_PI426210822

GTTTTGATTGAGACTTTGCCTGAAATGTGAAACTGAAAATTACGAAATTAGGTTTATTTT  
A\_16\_P02494075

AATCTCAGAGAACAACACTAACATAACCAAAGTTGCTATTGTCAATGCAGTTGGAAATCG  
A\_14\_P135942 ATTGGAATCTCTGCCAATCTCTAAAAGAAATTGACTTGTCTTCTCAAACAAAGGACTA  
A\_14\_P121465 AATTCCATATGTCCAATGTCAAATGTCATTTGATCAAGACTTGCCTAGTGACAAAGT  
A\_14\_P126105 ACAGAGGTATAATTTTCATCTCCTCTCCATCCTTTCCCATTTTCAATTTCTGCTTCTAAT  
CUST\_4713\_PI426210822 AGCCCCCTCTGCTTACAAAACCTTTATTTTTTACAACCAAAGGTGGTTCATAATG  
A\_16\_P03193876

CTTACATCCCAGTTGTCTTTATTTGTAGAAAGTCCAGTATTGCATCTTGAAGATCCTCAC  
A\_14\_P139148 CTATACTTTTTGCCCTGGTAGTCTTCTATCTTTTTCTTTGAAGAAAAATCCTCTCCTTCC  
CUST\_7299\_PI426210822 TTTCACAAATATTCAGCTCAGAATGTGCCAGGGAGGGGAGGAACA  
A\_18\_P22841289 CTTGCTTTGCCTGGACTAGGCACTGGGATGCAGCAATAACTGTGC  
CUST\_3025\_PI426210822 CCTTCCCTAATGCCTGACTTCACTTAAATGCCAGTGGGCTC  
A\_14\_P107565

GAGAAAGAAGAAAGACCTAGAAGGTTGTAGATGGGAAATCAGGAATGATTTGAACTGATA  
A\_14\_P107384 TAAAAAATGCTATCAGAGCCAGGGAAAATATCTATGATGCTTCGTTTACATAAACCCGA  
A\_14\_P200065 AAATACCTAGTCAATGAAGGTTTAGCCATGACCTTGTAAGTCAGTGAGATTTCAATCTTG  
A\_14\_P103945 TCTGAACATTTGTAGAGGTTTCTGAGAATTGATCTCCAGATTCCATACATTGGGAAATTT  
A\_16\_P16923707

AAAGCCATTCCTTAAATTTGCCCTGATATGTCATTACTCATTGCTCTCTGTAACACTCT  
A\_14\_P135402 CTTCTCTAGGCAGGCAATCCTTCTCTGCAGCAGAAGAATTGAGTCTTTAGTTTTT  
CUST\_198\_PI426210822 GTCTAAACTCGTCCTTCACCCGGGTTGCTCTGGATCTTACTGGTT

A\_18\_P22841422 GTAATCTCAGCAGAGGAATGTGCATGCCACAGGGCTGCAGAAAAC  
A\_18\_P22841349 GCCCTGTAAGAGGAGAGGGGTAGAAGATGCTGAGTATTTTTCTAGAAGACT  
A\_14\_P200426 AATATGGGCCCAACATTCAGGAAACTGACATGAGAGTGAGGAGAAAGATAAACTA  
CUST\_1299\_PI426210822  
TATATACATTATTATGTGCCTGTATTACTTGCTGCTGAAGTAGGGAGTTGGCAAAT  
A\_14\_P126429 CAAGATATACAGCAAATCAGGGAAAAGCAGGTAGAAAAGAAATTTGGTGTATAGTCACCAT  
A\_14\_P118503 TATCTCTACACTGCACTATTCTTTTTATGAGAACCCAAGAATGTCATTTCTCTCAGGCTT  
A\_16\_P35222869  
CAGTAACAATCCTTAGACCTATGTTACCATTCTCCTAAACATTCTAGCCCATTAATGGCT  
A\_16\_P58424272 ATGAAAGAGGTTTTTAATCAAGAACTTGAAGGAGGTAAGGGGAGAGAACCATGTG  
CUST\_7550\_PI426210822  
CTTTGAAGGCTTTTTAGCAAAAACAAAGTGTCAATTTGGGATTCATCTGTGGCAGTTT  
A\_16\_P18830533  
AAATGACAGTAGCAAACCTAACTTTCCAGTTTCAGAAATTACCATCAGATTGTGCAGTG  
A\_18\_P21462271  
AATTCCAAAATGTTTTCTTCTTTGGTAGATTCATCCGGTATACACTGCTATGACCTTGC  
CUST\_10183\_PI426210822 TATGCTTGGGAGTAAATATTGGGCTGATGTTGCACTGTGACATCTCG  
A\_14\_P132900 ATCAATTAATTGCTTGGCTTTGTAAATTAGGGATTCCTGAAGTAGAATCCATTGCTCAT  
A\_14\_P134848 GAAAAAGATCAAAACACACGCTTACACTCGAGATTTCTCAGAACATAACTCTCATTTTCC  
A\_14\_P126901 AGAAAACACTCATATGGAACAACAATGAAGACTGCTGTCAAATCTGTCCCTTTGGTTAT  
CUST\_3138\_PI426210822 CTTTGGTGGGGTGTGAGGCTGCGCAGTACAGGCTCGTATGCAAAC  
CUST\_8042\_PI426210822  
GCTGATGCCAAATACCACTTCCTTTTTCACTAGTATGAATTCAGCGTGATCTTTGAT  
CUST\_3136\_PI426210822 TAAGCCATACAGCCCCGCCCGTCAGTCTTAGATTACATTGGCTT  
CUST\_1679\_PI426210822 GTGGTGACTTTATGAATTGTCCTCAGAAATTCTAAATCTCTGCGGCAGGATCTA  
A\_16\_P15725243  
AACCATTGTGTTTTTATACTTACTGCCACTGTTACAATTCACACTCCATAGCCTAAACTA  
A\_18\_P22841735 GGATCTGCCCAGGTGTTTTGGCCTGTTTCCATTTTCATATCCAACAAAAT  
A\_14\_P120887 CTTGGTTTAGGAGTATTACAATTTCCAATTTGACCTAAATGAGGGAAGGAAAATCAAGA  
A\_14\_P118664  
ATAACTGGGAAAAGGCTTGAGAGTAGGATGATAGAAATTAACATCAATGGAAAGGCAG  
A\_14\_P102063 ACCATTTCTCTCCAGTTTCCCTGACAGGCTGAAACTAAAAACAAATACACATTTATACAT  
A\_18\_P11910996  
GTGTTACGTAGAACTCCCATATAGACTCCTAAGTGCCATTTTACCTTTTTCAGCATTGTTG  
CUST\_350\_PI426210822  
TCGAAGAAATTAATCTTTGTTACTTAATTCATATTTTGCAGTCTAAGATATTTGCTTCA  
CUST\_1915\_PI426210822 CAGACAGCGGGACTCCTGGACCCAGTTTATAAAGTACATAAAAATGCTTCT  
A\_14\_P132710 GGTGTTTTCTTAACTATTCCAAGGGATTGACAAAACCTTAAAAAGTTTATCCAGGGATCT



A\_14\_P115517 GATGAAATGCATGAAAGGAAAGGTTAAAAATGATTCCCATGGGCCAGTTTTAGTAATACT  
A\_14\_P121652 CAACAACCACAAAAGAATCTAGGCATTAGAATGAACTACTGGAACCTGAGTCAAAGAC  
A\_14\_P123405 ATGGGGAAAATACACACAAAGGTCATGTCTGTTATTATTTCAGAAAACCTTTATTTCCCCTTC  
A\_16\_P15005189  
ATCTGGGTGCTGTAATTTAACCAAAAATAGGGTTTAGAATATCTGGCAATAGTCCATGTCT  
A\_16\_P16956207  
AATTCAGAAGGGTATATCAGTAGAAATCCAGTGAAAAGTGAGTAACTCATGATAGGAAGCC  
A\_14\_P116714 TATATAATTTTAAAAACTGAAAGGCAGGGAGAATTGGAGAAGGTAAAACCTCAAGCAGTCA  
A\_14\_P126165 GTGTATCTGAGAAAGGTCATGTGTGTCTTGTCTAGAAATGGTCAACATCACCACAT  
A\_14\_P128966 ATTTTTGATGAAACGTTATCTGCTAATCACAGGAAAAGCAAACCTGAATCTACGAGTGTT  
A\_14\_P111302 ATATTTTCAGGTATTTAATACGAAATGTGGAAGGGAATGCTGGAGTAAAATATCCCCTCTC  
A\_14\_P116506 CTCTCTGTTCCAAAAAAATTCGTCAAACACTGTGATTTGCTATCAAGTCACAACACAAAA  
A\_16\_P16603716  
AAAAATGGCTAGGATACAGTAGTGATAGGTTTCGGATCTCAATAAAATGTTTCATACTGCTCC  
A\_16\_P15020264  
AATTAATCAGAAATCAGGAAAAACCAGTGAATCGATTAGGTATCAATTGAACTCCTGCTG  
A\_14\_P119609 CACCACTCATTGGGAGCAACACAGAAATCTGTTTCAAACATCATTTTCAGGAAAA  
CUST\_4445\_PI426210822 GAACATCAGCGAATTGTAGCCACTGTGACTGGAGCTGCTACTATTGTTC  
CUST\_8657\_PI426210822  
GAGGGTAGTGGTCTTTCCAAAGTTAAGTTTTACTCACAATTTCTGAAGGTTCAATGG  
A\_16\_P40748879  
TGCTTTTCAAACCATAAAAGACCCACTTCCAAACTATTACCCACTTTTTAAACCATGAAG  
A\_16\_P02420847  
GCACTTCCTCTGAACATTTTACTGCTTTTTTCTGCTATCTACTTCTGGGAAATTTTCATGT  
CUST\_275\_PI426210822 TGTAGTTATGCAGGAGAGTCACTGCTCTGTATTGGACAGAGGCTGA  
CUST\_3068\_PI426210822 GACATCATGCTTCTCTCTCGATTCTTTGAGCACCCCTGGCTGTGTG  
A\_14\_P110552 TACTAATACTTCGCTCCAAGGCGTCTGTAAAAGAAGATATCTTTATTGGAGCAATGTTC  
A\_14\_P111018 GTGAGAAAAATATGAAAAGGAATGATTTGAAGGTTACTTTACCCCTTCCACTTTTTCTCC  
A\_16\_P00300511  
ATTTTCATGAGTGAACCAAAGACGAACTAAACTAACAAACTTCTATCTGTTCATCTCATGGC  
CUST\_8080\_PI426210822  
CAAGACTTGGTTATTTTCTATTGACACTATTTTCAAGATCACATAATTTACATCACATAA  
CUST\_9726\_PI426210822 ACAGATGGAAATGTTCTGCACTCAGAGCTTGGGTGCTGTGCTCAG  
A\_14\_P119157 TTAGACCCATGTACCTTTGAATCCTGGAAAACCATCTTCACCCTAAAACATTATAAAAG  
A\_14\_P132116 ACTCTTTCATGCTCTCAGATGTTTTAATTTGGTCAAACCTCCTGCAGGTTTTCTCTTTTAA  
A\_16\_P15372174  
AAAAAAAAGGCAACCTGTTTTACAACATTAATTGCGTATTGTAACCTCTGGCTCCTTTCTG  
A\_16\_P16191660

GCACTAATCCTTTCTGTGGACTATCATTAGAAATGATTAGAACTTTTTTCTTCCTGGGCT  
CUST\_3819\_PI426210822 TTGGTATTGCTGGAAGTGGATAGATTGGGTTGCCTGTGTCTAGCA  
A\_16\_P38238427

CTTAATCCTCACAAAAAATGTTTGCAATATGTGCTGAATAATCCTAGGAACCTTCACCC  
CUST\_6976\_PI426210822 CCTTCTTAGAGATGAGAAAGTCACTCAGAGGCTGCCATGGCCTAA  
A\_14\_P201379 CGTGTTTGGATTAAACAAATGTTATTAAGACTTTTCACAGAGACTCTAGAGTCTTGCCCA  
A\_14\_P119142 TGTTTGGGAGGAACACAAATAAGTGACTGATACTTTGTAATGGAGATTCCTTGAATCTAC  
A\_16\_P02340873

ACCACAGGCCTAAAAAATAAGACACTAAAAGTCAGAAACCACTTTTTTTTCATTCTTCCTT  
A\_14\_P131751 ACTTTATAATTGATAATTGCCATTATCAATATGCTCACCTCTTACCATATTCCAACAGG  
A\_14\_P108038 AAGGAAAAAGCATCCAGTAGGGTATGCCATGTAGAAGGAATAGTTTTTAAAGTTTTGTGT  
A\_14\_P123895 CTTTATAACCCACCCCTAGAAAAATATGACATCACATACTTTCTGCTTTGATGGAAGTCA  
A\_14\_P120863 AACTGAACACTTTTGAAGTAAATTGTTTCCACAGTCTGTGATCCAATGACAAGCAAACCTA  
CUST\_8488\_PI426210822 CTACAACACTGGCCCAAGCACCCCTTCCAGGGTCATCTGTCAGCAT  
A\_14\_P114731 AGAATGCTCTCTGTTGTGATGGTTTCTGAAAATGCAAAGTTACACTACCTTATTTTGGAT  
A\_18\_P22840839 CTTTTGGGGGGAGTGCAGTGTTTCATGGGCTGGTTATGTAATAAACGGTATATTAT  
A\_14\_P102079 GCAAGAAACCCCTCAAAGTTAGTTGTTCTTTGAATAGCAAAAAGAAGCAATTTCACTTCA  
A\_16\_P36230878

TTAAAGTAGTATCCAGGAGAATTTTGACTCCTTCAACAGTTAACTGATCTAACTCTGCCA  
A\_14\_P117714 ACAGATTACAGGTTTTCACTTTAATCAATTTAACTTTAAAAGGTTTCACTTTAATCAAT  
A\_14\_P115501 AGAAGATGACAAAGAGGAAGAAGACCATCAACCTTAATATACAAGACGCCCAGAAG  
CUST\_1103\_PI426210822

CTCTGGCCCTGTTTATATCTGTATTGTCCCAAACAGAAGAAGAACAACAACTTCATCT  
A\_14\_P128926 ATTTATGGAAATGGGCTCTTGAATAACAGGACGTTATAAAATCTCACCTGTAGAATTTAA  
A\_14\_P134728 GAGTAGGAATACAGAATCGTGCATCGTGTCCCATTTGACAAATTTTTGAGTTTATCTAGA  
CUST\_9850\_PI426210822 TTGCTGGTATGCAGATTTCAAGTGTCCCTAAGAAGCCATCTGGGTT  
A\_16\_P19896046

AAGACATTGACATTTTCTTTTCACAATGACACTAGAATTACTGACTAATACCACTCCAGGG  
A\_18\_P11741644

CAGCAGCAGCCAAAAAAGCGTGCAATCAGTTTCTGAACTTATTTAAACATTTG  
A\_14\_P124718 TTAACCCTGGGTATAACCAACAGGATTGCATTAAGTTAGAGTTTTTACAGGACCATTTACT  
A\_14\_P111283 CCTTTGGTTTTCTTTCAATTGTTTTTCTGAGTCATGTCTGTTTTTTCTTGGATTCTGTCAC  
A\_14\_P133299 TGAACAATTGCATAAAATGCCTTTAATGTGTTGTGCAGAAGAGTAGTAGTAAACTGCC  
A\_14\_P126121 CTGCCTTTGTTCAATGCACATTATTCAAATGCAGTTCCCCACAGAAATATGAATTAAGT  
A\_14\_P134831 TAGTGATGCCATTTCAACTGGTGATAATACCTACTGTGCAAACAAAATCTTAAACGCTTCT  
A\_16\_P21242158

AAATGGAAGAACCATGAAGTAATCTCCATTTGAGAAACAGTTTTTGCAAATTCAAAGTGGC  
A\_14\_P200351 TGTTCTCCCACTGTGACCTTCAGATAATTATGAAGATATCCCAGTTACTTTTCAGTCGTTA

A\_14\_P200338 GATCTTACTAAAAGGAAAAATGATATCAGTGACACAATAAATGGGACAATTGCAAACAGG  
A\_14\_P132002 GTGTATGCAAACATTGATTTAAAGCGGTCATCCATGCTTATGTGGTAAAGAACACACATT  
A\_16\_P18178576  
ACTCATGCTCTTTGATAATGTTTTTAAAAACACACAGGTCCTTCTTTAACAACACCCGGAT  
A\_14\_P100292 AACTAAGGGGAAATGTGAGAGGGGAAAAATGTGTCTACTTAGATGTCATTGTAAGTTCTA  
A\_16\_P16289185  
TCTCTAGGTAGATTTACAGGTTAGTCATAGTGCAGAAATATAGGACAGAATCAGTGTGCT  
A\_14\_P139421 CTCTGCCTACAGCAGATAACAGACCAAAAATAAAAATGGCCTTTAGTTACAGTTGATTTT  
CUST\_955\_P1426210822  
ACTAATGCTTTGGAGACAGTCCCTAGGAATTTTTTTAAAATGTAGTGGTCAGATTGACAT  
CUST\_2388\_P1426210822 GGCCTACACTTCTTCCACATTGCTCTTTAACTCTCTCTCGAGTTTACCA  
A\_14\_P102701 ATCAGAATTCTCTCTCTGACATCTATCTAATCATACTGCCTTATGAGTCTCTCATTTCCC  
A\_14\_P130418 GATTTAGACATACTGTCCACTTCTCTAATGCAAACCCACAAAATTGTTGACTCTTAGAGT  
A\_14\_P115166 TAGCGACCGTATCACAAATAGAGAAAAAAAGGCTTTTTCTTGAGTATTGAGTTGTCCTCA  
CUST\_671\_P1426210822 CTTGGGATCAGCCTGGTAAACAGCCAGCTGAATTAACTTCAGAAAAGAC  
A\_14\_P117006 AGAGAAAGAAAAACGAGGGAAAAATCAACAAAATGTGCGATGCAAAGAGTCGATTTTC  
A\_14\_P120154 TACTCTCATTTTTCTCCGAGTCAAATGTAGAAGATGACAACCTGACCTGGAAGCATC  
A\_14\_P107126 CTGACATATTTTCATCCACTGGAAAAGTTAACTTCAGCGACAACCTGAGTCAGGATGATT  
A\_14\_P133335 AATGGCTACTGATCCACAACCTTTTATGCTTCTATATAAAAGAAACGTAATGATGTGATT  
A\_18\_P16375821  
AAACAATTTTCAGTAAGTTGCATCTTTTTTATCCCATCTCAGATCAAATACTTAACAGACT  
A\_14\_P101080 ACCTTTTCACTGGGTTTTCCCCCTTAAGATTTAATAAAGTAGTGATTATTTTCCTAGGCT  
A\_14\_P115119 CTGTTTCATAGATTAAGGAAAGACCTTCCTTGTGAGTAAAATCCCAACTATTGTCAATTC  
A\_14\_P127286 TGGGAACAAATTTATTTTGATGCTTATTGAGATTAACCTTGCTGCGCATTTCATCGGGAA  
A\_16\_P21313334  
AAGTCGGAATTCCTACTAAATGCTGAAATCCCATTTCAAACATCACCTTTTTCTGTGAACT  
CUST\_7389\_P1426210822 GTCGAGCTTTCTTCAAGGGAGCTGCTGGTGGGGACTCACAAAT  
A\_14\_P119898 CTCTCCTGTCTTGTCTGAAATGGCTTCCCCACAGGACATTTTTAAATGATTCTTAATT  
A\_16\_P02367072  
GCTCTACCGTCTACAAAATGAAAACCTGCATTCTCTCCTCTAAGATTCTCATGAGGTTAAG  
A\_16\_P58424483  
GTGACAGCAATAGAAAACCTAAATTGGTGTAGGTAAGAGAATGTAGGGTTTTGCAAAC  
A\_16\_P16191407 CTA CTACTGACCTCTCATTGTCATGTTGGACTTGATTCTATCAGTTGTGCTCATGCTTT  
A\_14\_P121659 ATTGCAGACTGAGATGCTGGCCTGAGATTGTAATCCAACCTTGCATTGTAAAA  
A\_14\_P109732 GAGTCCTTTCAACTGTTTTATTCTTCCCGTTTTCTTTGAATGTTACATGTAGTGATTAAA  
CUST\_4299\_P1426210822  
GGGTCATGATGAGAAATAGCCACTGTATTTTTATTTGAGGATAATAAGAAAGGGGTAAAT  
A\_16\_P21423143

AAAGATAAAAATGCCTGAAGCCCTTAATCTACCACATGAAATTGTAAATGATCCCCAGTG  
A\_16\_P01695436  
TCCCTCAACTAAAATGAAATTCCATAGAAACCTTCTCTTGCAGATTAAGTCCTTCTACAG  
A\_18\_P22841769  
AGTTGTGGTTGGTAGATACAATACCGATAATAATAATGATGGTGTAATGAGAATTTTTTT  
A\_14\_P109620 CCAGACAGATTA AAAAGTTGCACTTACAAAGCAGTTGGGGCATTATTGACATTTAAACA  
A\_14\_P128887 CTGTCTCTTTAATCTGGTTGCAAGATGAAACCATTAATAGATGTCAGACACATTGGCAA  
A\_14\_P137858  
AAAAAGAAAGCGAGGAAGAAAGTGGAGTGTTGAAAGTAACAAACAAGATGAACTCAAAAC  
A\_16\_P16191234  
CTTTCATGATGTCATCTTTGCTCTCTTCATTATCCTGAGCATCTTACTTTGGTTTGTGAG  
A\_14\_P131824 AGTTGTGAATCGAACTTCTTGATTCGGTTTTTCTAACCTTCATATAAAGA ACTACGAA  
A\_18\_P16474560  
AAAAGCAGCCTTCAGAATACAATTGTGAAGTTTCATACTAAGAGCCTCATACAAACACTT  
A\_14\_P112896 TTCTTCTGAGAGTTACATATGTGGGAAGTGTTTGAGTTTTCTTTTTCTTCTGAAGGTGT  
A\_18\_P14796945  
ATTGATTGCTCACAATTCTCATCTTTAACCATGCTGAAACTTCTACTACCAGACACCTAA  
A\_14\_P108294 AATCCAATTCCCAAATATTCTTTTCTCATCCTCAACCTACCCAGACTTGTA AAAAGTCTAT  
A\_14\_P137242 AGGCTGTACTTAGTGGCCTTAAATCTTTTCTGAATGTCTGTTTCTAAGATCTGTGATA  
A\_16\_P16998380  
CTGTTCTACCATTACTTAAACCTCACTGGACAATCTACAATCAGACTTGC ACTTGGATAT  
A\_14\_P125378 TAGGCACACA ACTGATATAACAAATGAAGCAATTGGTTCAGAACAGTGGTTGTTATCATG  
A\_14\_P121054 GATTCTTCAACGTGGAAAAGATATAGGGTTACAGATTA ACTTCCATGGGGATGAACTC  
A\_14\_P201346 AGGAATCAAAA ACTTTTATTTCAGAATAAGCGTTAGCAAAAATGAAGGTAGGTGCCTCATAA  
CUST\_4741\_PI426210822  
CTCAGGAGTTGAGATTCGTAAAGCAGTAAGGAATGCATAGTCAGCTATACTGGAAA  
A\_16\_P00778440  
TATAGGGATCGAAGACAAGATAATCTACCAACCTGAGAATAAATGATGTTCCCTTGAGGT  
A\_14\_P103216 AGGTTTAAAATTTGTGTAGAATGGAGGAAGATAGGCAGATACTGTCTCATTAGCACTCAT  
A\_14\_P136577 CTTAGCAATCCAAACAGAAAAGGGAGACTCTTTTTCTTCTAGAATCTGTATGTCAATCCA  
A\_14\_P118462 TTAGTGAATAGCAGGAGAACCCCTGCAAGAATGGCTAAGAAGAAATAAATCAAAGTTTAG  
A\_14\_P126237 TGCAGACAACAACAGAATTCTGTTAAGAACTACTTCTGGGATGCAGTTTAAGAATCAAC  
CUST\_5582\_PI426210822 CTCTATAGGGTACATAGTCCTGGGAGAAGACGGGTTCCAGGATAG  
A\_14\_P126134 CTGCAA ACTTCTTCAGTGCATGGATTATATCCTTTCTATTTCTGAATGCTTCAAGAGACT  
A\_14\_P133140 TTCTTCTGTAAAGAGATGAACGCAATGCCAATAAAAATTGAACAAGAACAATGATCATCTG  
A\_16\_P16191988 GAGCACGCATCCAAGGGGATGAACAGCATCCCTAAAAATAATAAGAGATGAA  
A\_14\_P112793 CTGGTTGAAATATGGCATTGCGTAGGTAGATCAACAGTAACTTCTACATACATAGGCA  
A\_16\_P15217865

GCATCTTTGCCTTAAAAATGTTTTACATAGAAATGCCACTTCTTAGAATTGAGCCTGTG  
A\_14\_P134621 CAAGAAAACCAATCACACCTATATGAACCAAAGATGTCCAACAGCATTCTTGGAAG  
CUST\_6926\_PI426210822 CTTCAGTATTCCGCCGCGGGGCTCAGCTTTCACGTATATGAAAAG  
A\_14\_P138579 CATGCACAATATGTTACGTTAGCAACACTTTGCACAAACAGAAAATAAGGTTTATTGCCG  
A\_14\_P200427 GCTGGATGGTAAAGTATTTGAAGAAAGGAAAGAATACATGAGTTTGAATAGGAAGGCCCT  
A\_14\_P101008 ACCATTCTATAATTAGATTAGGAGGAAAATGAGAACCCACTGGTAGAAGAAGAAGCAACA  
A\_14\_P100163 ACAGTTCAAATATCACCCCATTTGCCAAACTTAAAATGCGAAGCAGAAACCATTCATATA  
CUST\_1786\_PI426210822 CAAGGTCCATGCCAATTTAAGAACAGACATAGGCTGTCTTTGCTTGTGTAGAT  
A\_16\_P01408623  
ATCAAGGCCAACTCTTTAAAACCTGGTTTTCAACTAACATTATCTATTAGGCACCACCATG  
A\_16\_P03035090  
CCTACTGTCTATCACTTAGTGTCTTGAAAAAATCTTACTAGCCTAGTCACAATAACCAGT  
A\_14\_P106298 ACTAATTAAGCCTCATTGCATTTTAGGATCACAGAACAATGACAAAAGACAATTTCTGCT  
A\_14\_P200153 CAGACAGGGTCATATATCTTGGTGCATCCATTAAGTTCATTGTAACATTTGGCCTAAAAA  
A\_14\_P100417 CAACCTTTAAAATATGTAACATTGGGCAGCAATCACACAACCTATGTTTACAGTCTGTGGA  
A\_14\_P119879 CTTTCTAGCAGATGTGAATAAAAAATGTTGCTTTAGGTAAACCCTATTTCTGGGAAACCTG  
A\_14\_P127882 AGTTTCAGAAATTCTAGGTCAAATGGCACTGAAATATTAAGGTATTTACCCCAACCCAA  
A\_16\_P17359865  
ACACAGTCCTAAGTTTTGTAGTTTTATTCTGCCTTAGATAGATAACCCCAAGTGAAGAAA  
A\_14\_P131035 AACAGCAGTTACAGTAATAGCGAGAGACGAATCTTCTTGTTGCTTAAATGAGAACATCTT  
A\_14\_P135244 CTGAGAACCTATGATCAACACGGAAGTATTTTCCTTCAATTTTATCACATCAATTCCTG  
A\_14\_P130179 GTATCTTCTGGTGAGAAGTATCTAAATATGGATGATCACAGTTCCCTGGGAGTGTATTATA  
A\_14\_P201879 CTGCTCAAGTCCTCAACAAAACCTTTTTGATTCTGAGAAGACTTCTTGTTTCATCTTCAAAC  
A\_14\_P114180 CATGATGCAAATCTGCGACACCTACAACCAGAAGCACTCGCTCTTTAAC  
A\_18\_P15938624  
AAAAAGCACAGTAGAAGAATAGAGCATTAGCACGTTATTATTCTCATAAAGGGTGGGTGG  
A\_16\_P01232111  
CAGTGTGAGATCAACTGTAAGAACCCAATCATTGTAACAAAACCCAGATTCTACTTCTA  
A\_16\_P15545592  
ATACATCAGCCAAATATCTGTATAGCCAGACTTTTCAGTATAACAAGGTTTCCAAGTCCC  
A\_14\_P128452 GCATTCTAGTAACTCGATGTTGCTCAGGGAAGACTGGTATTTATCCCTGTAGAG  
A\_14\_P102633 CTACTTCAGGAAATCGGCAGATGTTGCATTCTTATGCAAACCTTGGAATAAATTTATAC  
A\_14\_P131413 TTGCAAAGAGATGATGAGAGAATTTGGGGAAAGTATTGGAAGTGAACTACTGGACAT  
A\_16\_P01902342  
ATGCCGAAAACCTAAGCAGTTATACCAACTACACTACACTAACTACACCTGAATTAAGACT  
A\_16\_P17185348  
AAAATTCAGTTTTTTTTCCCTTAACACTATTGTTAGCACAGATCTGAAACAGTATGCATCT  
A\_14\_P131635 CAAAACCCTCACTTGAATTCATGTCACATAAGTTGTCTTTTCATGTGTTAAGGTTTAGGC

A\_14\_P139526 CTCTGAGGGAGGCATCTGTCTAAAGGCACGTGACCAGCATTATG

A\_18\_P27127748

ATGAAGAATGCCTTTCAGTAATCATGATCAACAACACTAGAGACTACTCCTTACATTTTCCG

A\_14\_P137031

AGTAGTGAAAGAAGAGTTTAAAGAGAGAAAGTTTGTGAGACTATCATGATGGTCAAGGC

A\_14\_P107019 ACTGACATTTTATTTTGTCTCTTTCGTTCTGTTTTGTTTCACTGTGCAGAGATTTCTCT

A\_16\_P20364031

AGGCATGTTACAGAAATAATGAATACACGATACCATATTACACAGGAGTTGATCTCTGG

CUST\_1173\_PI426210822 GACAGGGTGTTTTAAAAGTGGGAGGGCCGTGTGGAGAGAGAATTT

A\_14\_P113953 AGTTAAGTCGCAGAATGGAGAATTCATGACCCACAAACTTAAACATACTGAGAATACTTT

A\_16\_P02597542

ACCCTCAACCATGTTAGTATCCTCTACGGTTATAGTATAAAATTACTACGGCTAGACCTC

A\_14\_P100022 AATTTGTAACCTAGAGATCTATGTGACAGATATTTCTGAGTGAAGTGGAAATTGGGGACA

A\_14\_P137843 AGTAAACATGGTTTACTTGGAGAGTGTGACTGTGTTATATATCCATTTGAAGCCAATGC

A\_14\_P103763 AAAAAAGCCAAGAAAGTTATGCTCACCCGGTTATTCTCAAATAATTCCAAGATGAAGGTA

A\_16\_P16327213

GCCCAAGTTACACCTTTAAATTCAGTTTACATTCTAACCTCATATTCAGTTGCTTCCAT

A\_18\_P16445821

AAGCACAATGACTGAAATTCTGGACAAATTTGGAATCTAAGAAAGGATATGACTCATGCC

A\_14\_P138728 ACATTATTTGAAGTTTGGAGAAGAAAGGGATTTGGTAACAAAGGACAGCCATTTCCATTT

A\_14\_P121399 TTCTGTCTTTGTTTTGCAGTTGTTTCAGCACATCAAGCGACATAACATTGTTCTGAAAAG

A\_16\_P21468310

ACCTGCCCAATTCAAGTATAACTTCACTTCTACTGATACTTTTCACTGTCACTGCTTAAT

A\_16\_P19861629

CCCCAGATTAATGAAGAAATCCCAAGTAAAAGAACACAAAAACATCTAAGAGTGATGGAC

A\_14\_P120874 AGCATGCTGATATTGATTATATGGATGAGAGAAGGGACTTCACTTATGATTCAGTGGATT

A\_14\_P111277 AACCCATTAACATAAACGCTGTGTGGTTACAGATGCTGTGTGGTTAGAGATGTTTTG

A\_14\_P127029 AGAATTGGGAGTCTCCTTCTTGAACCTCAAATGGATCTTTGGAATAGCGTGATCT

A\_14\_P109101 CCCGTCATAATTCTTCTCTGACATTCTTCAGCGACACAGAGTTACTTTTCAGGAA

A\_14\_P117811 TCACAGATAGTATGTAACCAAGATAAAAGTAGGATCCTTGAGGATATTCCCAGGATTCTC

A\_18\_P16042805

TAGGGTCCTGCTGATTACATAAATTCTTATCCTGCTCTTCGAAGTAATTACCACATAACC

A\_14\_P130279 ATAAATCTCATTTTGTATCAAAAAGAGGAAGGGAGTGGAGCATTTGTCCTCAGAAAATACT

A\_16\_P34290303

ACCATTCCCAATGACTATATCCCTTAATGATACAAGTGTCTGTTCATCTCTGTATTTCCA

A\_14\_P111345 ATAAGTTTTGAGTGGGAAAGACTAACACATTTTTGTAGACCCTTGGAATGTGTGTGAATC

A\_14\_P131654 GGCAGTTTAAACACTTACTTGAATGATACACAATAAAATAAAGATACAAGCCACCCCGA

A\_18\_P22840680 TTCCCTAATCCTCAGCCCTCAACTGTCATTGCCAAGGTGACTGTT

CUST\_7537\_PI426210822

TTTTCTCACATACTCTAGGTCTCAATCTCTTAACTTCAAAAATGGCAGTGGCTACATTAG

A\_14\_P115060 TTTGCATGGTTTAAAAAAGCCATAACAATGTCAAAAAACAGATGCCATACTGAAAGA

A\_16\_P00328577

AACTGAGGATCATATACTCTGTGTTAGTCAGTAACCAAGAAATTCACCTAACTCAATGGC

A\_18\_P14138870 CACTGCTGCTTTTGGACATGGTGCTGTATCCCTTGATGGAGTGGG

A\_14\_P129887 ACAAGTGGACATATATCCTACTGAATCACCTGAGATTGTCCCAATTTCAAATATTCTGTC

A\_16\_P02312378

TCAGGAATCTCTGCAAAAAAGACCCATTAGTTCCTATCAGTTCTGTGCTTAACTTCAT

CUST\_5640\_PI426210822 AAATGATGAGGCAGCACTGGATCCTGCTGTTCCCTTCTGGGAAG

A\_16\_P03410131

TCTCTTGTGACAGTAATTTAAACATCTGTGGTTCATTACAAAGCAGTAATTGAGGGAATG

A\_14\_P126417 ACACTCAATGCGTGTAAGTCACTGAGTGAAATATAATGCACGGAAATAGTTTTACTCA

A\_14\_P114024 AAGAAACAGCATTCTAGAAACCTAGTCACTTCCTAAAGCAAAAGGAGAAACATTCTTTA

A\_16\_P00456961

TTCTAGTGGACTATTTTACAGTCAGTTACAGTTATTCTCACCATGATGTCTATTCTCCCC

A\_14\_P139404 TGACTIONGGAGGTTCTCTTACATTTGGTATTTTTTCATGACACCTATGACTATGCTTTGGA

A\_18\_P22841031 ATTGGGGAAAAAGTGCTATGCCTTAAGGACGTGGAGAGCACATGG

CUST\_6174\_PI426210822 TGACATGGAGGCTTCTTCCCATTAGCTTCCTAGGAATACTTTCATTTTCATGTTTT

A\_14\_P129778 CTGTTTGAATCATTAGTGTGCTTTCTTCTAAATGAACACCCTGCAAAAGAATCATGAGA

A\_16\_P18541560

AAAAATAACCCCTCTTTTACTCACAGAGTTTTGAAAATGGAGTTAGCCCATATCATCCAG

A\_18\_P14580297

TCCCATCCATCTACACTATTTTTTAAATCCACATTTCCATAAGGCTTCACATGTTCCAT

A\_14\_P125359 CTGCTGAGTGAACAGTAAGGAAGCATTCTCAATTTCAAGATGTCATTGTGGATTGATTAA

A\_14\_P139209 GTGGTAAATGTTAGAACAGCATCTCCCTGAGGGTAAGAAAAGTCAGACTAGTGATAG

A\_14\_P132110 CCTCTTTGCCCTGGAATCCCACAATTCCTTCAGGTCCTTAAATATTCAATATAAAAAA

A\_14\_P130530 GACTGACTGGATTTATGGTTACAGTTAACGATGAAGAGGAGAAGTACCCAGAAT

CUST\_5412\_PI426210822 TTAATGCACGATTTTGTATTGTTTCAGCGGAGGGTGCAGGACGTCAT

A\_14\_P113008 CATCCTGTTTGCCTCTTTTATTTAATGCCAAAGTTTTAGCCAAAGACATCTTCTACTTT

A\_16\_P18140475

ACAATCTGCCCTAAACACTAAAAGGAAAGGTCAAATTTTGTGAATAATTCCATGAGTG

A\_14\_P104021 CCATCCTATGATTCTCTGTCCAGATTCAAGTGAAAATCCAAAAAACTTCAAAGGGAAG

A\_14\_P105733 AGTAATACTGGACTTTAATGACTGGTAATGACCTGTAAAACCAAGTCAACAAATGTCCAT

A\_16\_P18999385

GGAATTAGTCATCAAATGCCATCTAGTTGACATTTCTGCCTATTAATCTCTTCTCCTGCATG

CUST\_9525\_PI426210822

TTTTAAAATGCATTTTATATTGAGTAGTTATTTTCATGTTTTCTTAAACAATTATTGTAT

A\_16\_P00062476

CCTATCATCTCTAGAACAGAAAAATTAACCTCCGAATCCTAACCGTAGAGTGGATCAATCT

A\_18\_P22840719 C TACTCTGCTCCAAACGCCCCCAAACCTTCACACAGAGAGTAGTAT

A\_16\_P00022212

GGTTTGACTGTATCCTAACTTACCATCTCGTTTTTCAATCAATTCACTGGAATACTTGCA

A\_16\_P19002322

AGAGATGTAGACTCTTTAGCAAGCACTATCATCATGAATATAATGGCTCTCTCATTCTGA

A\_14\_P122468 CTCTGTTCTGTCTGCCTTGCTGCATGGACTCTGTGATCAATTTCTTGAGTAT

A\_16\_P03414162

TTTGGTGCTTTTTTATGTGGCATTTTGACAATCCTTTGCTGCTAGTATGTGTAAAGACTG

A\_14\_P104928 ACATTGCATGTAGTTAAGCCACATTTTAAAAATAAAGGCATTTTTTAATCTATTTACCTG

CUST\_7961\_PI426210822 CTTTGAGTCCCCTAGACAACACAGAAGAAGATGTGGTCTGTCACC

CUST\_8340\_PI426210822 GGGGCCAAGACCTGGCGGCACTGGCCGGACCCTGTGTGGATGAAG

A\_14\_P130705 AACTTTGTCCTCCCTGTAGTGACTCCAACAACCTAAACTCAACAACGTG

A\_14\_P132310 ATTGTTGTGTATTTCCCTCCCTTTTTGCAATACTATCTACGCTGAGTTATCTATTGCCAA

A\_14\_P110495 TGACTTGACTGTATTCCCCTAACTATCTCCTGAAAACCAGACTTGAAATGAATATAATGC

A\_14\_P125865 ATCCTATGCTTAGTGTTTAGTGTTTATCCTACGTTTAGATGTTTAGTGGACCGTTCTGTC

A\_14\_P124377 GGGACTATGCAACCAAGAACTGGAAATAAAAACAAAGATAATTAACCATTTTATAATA

A\_14\_P132277 ATGATGACCTTACTTTTATATCCAAAGTGTGTTGAAGTTTTAAGCGCACTGATTCTTGCT

A\_14\_P122392 CTTTGAAGAGTGCGTATGAATACTGCTTTCCCAAGAATCATTCTGCAACATAAGATAAA

A\_18\_P24652527

GAAACATGCACTTCAGAAATACATCCCTATATCAGAAGGCTTTCATCTCTGTTCACTGTC

A\_14\_P136707 CTATTTGATGCTAAATTATGTTTGGAACTTACGTGCAGTGGGAGTTTGAAGAGGAATTC

A\_14\_P119526 ATTCTTACCTCTTGTTCCCTCAAAAATGGGCTGATATTTCTCAAGTGATAATTTCTTAAGG

A\_14\_P110408 CTGAGAACTGGAAATAAAAACAGGGACATATTAATATACACGCCAGACTGTGGATTGTAGT

A\_14\_P106041 GATGTTGACTTTGTGTTCTTCCCATATTAACATTTTCTTCATCTGGGGTTTCTGAAACAA

A\_14\_P200599 CTGAAGGAGCGAGCCATATATGTCCTCGTTCCGGATCATCAGTAAGGT

A\_16\_P16107178

GTAACAACCACATGTAATTCCTGATATAGACTGAGTGCGTAACATAAATGATACGGGGTT

A\_16\_P37200830

ACCAACATCCTCTAACAATCAAAGCAATCTTCTAGGAAAACAATGTATACAGCAACATGC

CUST\_10240\_PI426210822

GGGGATGACAAAACCTTGCTAAATTTAGTTTTTCACTTCCCTCATTCCCTGATTGACATT

A\_14\_P131274 GATCTTTTTCTCTTCCCTCTGAACTTAGAATATTCCTTGAGTTCTTGAAAATCCTCAC

A\_14\_P107632 TGCAGGTCTTTTTAAGCATTTGCTGTTCAATAATAAGCATCTTCTTTATGCCTAGTATTT

A\_14\_P100140 GTGACACCTTTTGAATTGAGAAGATAATATGAGAAGTTGTTCCACCTTTCAAGTCCTCTA

A\_14\_P101817 ACCATCACTGTTTCCCTTTCATGTCTATTTGTAACGATATTGCCTGAATCTGATGAATTT

A\_14\_P118145 TCTCACTGACTGACTAAGGATTAAGGCCTGAGTATTTACTACTGCTTAAAACCACATCA



A\_14\_P113503 ATTTTTTTTCTCTTGTAGGTTGGAAAAGAGACTGTTCAAACCACTGAGGATCAGATTTT  
CUST\_1751\_PI426210822 TTTTGGTAGGAGCTGGTGGTGTATGGGTGCTCCAGGGTCATTTTAT

A\_16\_P20774367

AAGAAAGGCATATATTAGATGACTTACCCAAAACCACTTTGAAGACCAAAAACCTCACAGC

A\_14\_P135688 AGAAAAGCATTACCTAAATAGTTGGAGATAATGTCTGCATATGTCTGCTTGATGGTGAGT

A\_18\_P16531566

AAAGACAATGAATTGTGTGTTGATTACATTAGATTGCATGACATCATATCACCTCCTGGC

A\_16\_P02273047

AAAGCAGAAATTTTACGCAATAACTTCAATAATTTCCCTACAGATACTCCTACTCAGACCA

A\_14\_P118347 TCCAGGAGTCTAGAACTTCACAGCCAICTATAATGCTTGACTCTGTGTATTTAATTCTTG

A\_14\_P112620 AAGAAATGTGAAACACTCCTATGTCTCCGTATATATGAAACATAAACCATAAACCACGGG

CUST\_1918\_PI426210822 AATTAGACCACCTGAGAGGCATGGGGAAACTGGTCATAGTGACAA

A\_16\_P30952434 GTATTTGTTTATTGTTTCAGCGGAGGGTGCAGGACGTCATCAGCC

A\_14\_P133732 AATTGCTGACACTGTTATTGGGGAGAAAAGATGCTACTGTATGCTCATTTTTCTCTTTT

A\_16\_P36289877

AACCTTTTGTCAAGTAGCATTCAATGAGTAAGCAAGGAAATGACTTCTACCTGTTTTTC

A\_14\_P127802 GGTTTCAAATAAAGGTTATTTTTCTTCCTGATCTTTTCTTTCTTCATGGGACCTCACAGAA

A\_18\_P18097567

TCCAATTCCTAGACTGAACAATCCCTTAAATCTGCAATATATCTTCCTTACCCTATGCA

A\_14\_P138002 GGACTGTCAAAGGATATTACTCATTTCTCTTGCAGCAGAATGTAATGAAAGACCTGTAA

CUST\_4564\_PI426210822 CTTGGGAATGACTCCACATATCAGTGGTAGGAGATGGAGAGGAGG

A\_16\_P21152946

ATGTCCATGCTACAACCTGAATGTTCCAGATCAGAAAACAGCACATAGTTTTCCAGAAAT

CUST\_10116\_PI426210822 AAAATCAGCTTCAGCAAAGCCCTGAAGGTGAGCAGGACTTGGCCT

A\_16\_P19555404 GAGACAATAGGAGTCTACTCTTGAATATGGGCACATCAGAACTTTGGCAGAA

A\_14\_P129994 ACTTAAATCTTGATGAAAGAGCAGTATTTATATGGGAGAAGAAAGGACACAGGAATGAGC

A\_16\_P20920022

AGACATTAATGATCTCATTTTCGTCTCACATGTCATGTTTAACTTAACCAAGGCCATGTTG

A\_14\_P119432 TTTATTGACGTCAACAAATAAATGTTGAATAAGGAAGAAGAGTTAGAATTGCTTGAAGCC

CUST\_10306\_PI426210822 AAGCACAAAGCCTGCCTTCAAAGAGTCTAAGACAAATGCAGGAGAT

A\_14\_P104751 CTTAGATTCTTCATGGAGAATTAGGAAAATACAGAAAGCCCTTTATTCTCTGCCTTCT

A\_14\_P134732 CTACAGCACATAGGAAAATACACATGGCTTTTCAGTCTACATTTTTACAGAGAAAAGAGA

A\_14\_P105716 CACGTTTTCAAATACCTGATGCTAGTTGAAAATTAGTGACCATGAGGCTTTCCAAGATA

A\_14\_P120666 TGCTCAATGTTGGTCATTGTCACTGTTATTTAAATGTAACCTTAAGGGAATGAGTGGTTTCT

A\_14\_P121226 TAATCTTGTCTTTCTAAGGAGATTATAAAAATCCCAAGGACAGGTGCCACGTCTTTTAAAG

A\_16\_P19421266

ACACACAAAAAACTTATCTACGACTGCTGGTATTTCAATCGAGTGTCTTCTTGACAGTTC

A\_16\_P58424602

TAGTTCATACATCATCATTCCATTCATAGCAAGGACCCAAAGAAGCAGGTGATGCTAAT  
CUST\_6036\_PI426210822 TTTTGGGCCCATAGCTGTTCTCACAGGAACCATCAGAGAAATGTTT  
CUST\_8362\_PI426210822 CTTGATTTACAGGGGAGAAAGGAAGGATGGGGTTAGAGCTTGTTT  
A\_14\_P113419 ACTTCAACTGATTTTTTCACCCGACTGAAAATCAGTGGGTATCTTGTTTGCATG  
A\_14\_P106580 GATGACTTACTGGGTTTGTCTACAAGGATTTTCCGATGCTCTGGGTTCTATTTT  
CUST\_2683\_PI426210822 CGATCAGAGAGGCCTCTGAAAGATTTCTGGGCTTTTCTTCATCCAAAA  
A\_16\_P16031404

AACTCACCAAATTCCTCTTCTCATACCCCTACTCTACTTGAAATCCTGTAAGAATTACCAA  
A\_14\_P124047 ACAAAGAAATAGAAAGATTATCAGTATGGCTCACCATAGAGGAAACATTGGAGATTGAGG  
CUST\_5201\_PI426210822 GATGCCGGTACCTGGCCACTGCTGCTATATTCCATGCTTTTGGAC  
A\_14\_P123465 TGAATGTGGTGAATATAGGAAGACCTTTTAGCAAAGATGCAGGCCAGTTTGTATTATTAGA  
A\_18\_P14136957

AAATAAACTTGCAAATGTTTTTCTCCTCTTGAAATTGTTTGTTAAATACACTTTGCTGCT  
A\_14\_P111148

ACAAGAAACAGAAATGAGTGAACAATTCTTTAAAACCCCTACAGAAAAGGAAAATGGCTT  
A\_14\_P113221 ACCAAGAAAGTGGAAATTTAGTGGAAATTTAAAGGGAATATTACTGGCACTCTCACAACA  
A\_14\_P126979 TTTATCATCTGTGTTCTGTTTAGTTGCAACAATCTCTTGACTAATGCTACTCAAAGC  
CUST\_6731\_PI426210822 AAGTTACAGAGACTCAAGGCCAGGCCTCCAAGGTTACCTATCTT  
A\_16\_P01712739

AACGATCCTTAGGAAATTAGTTTTGGAATCTTGATCAGATGAACTTTACAATCCCAAGCC  
A\_14\_P126473 TTACTIONTGTCTGTCCCTTTACGCAGCACTCTTTAACACTTGTGAAAAATTGTGTAAT  
A\_14\_P130392 ATTTTAAACATGCTGTAGTCAAGGTGGTGATGAAACAACCTAACAAAGTAAACCTTTGGT  
A\_16\_P18226811

AAAAATCCCTCTAATTATATCTTCCCAGATCACATTAAGCCTTCTAATATGTCCGTTCA  
A\_14\_P102673 TGACTIONTGTATCTTTCATCCTTGACTAAATTCGTGATTTTCAAGCAGCATCTTCTGG  
A\_14\_P104509 GATTTTAAATTCAGCCTCGAAACAAAAAATCCAATGAAGTATGGTTCTGTGTATCCTG  
A\_14\_P131742 ACCAGTCTTATCTTGTGTATAAAATCGTGGATCGACTAAAGGTCTTTCTACTCAAAGAG  
A\_18\_P14132096 CAGAGGGAGATCAACCTGAAAAGATCTGTTTCTGAAATATATGTGGGTGACCAAG  
CUST\_3497\_PI426210822 AGTGTACCATGGAACATAATCTCTCCCTCTAGTGTTTTGGAAACAATCACACAC  
A\_14\_P128070 CTCTCCAAGAACAGAGTTTCGTTGGGAGACATTTTGTGAAAGACAACCTTTCTGA  
CUST\_5895\_PI426210822 GAAGCTCCCTTTGGCACCTTCCCTCTGTCTCAAAGCTCATAAAG  
CUST\_3349\_PI426210822

GGTTATCGTAAGCTTATTTGTACAGTATGTGAGATGCAGTTTGTAGCAATTGCTATGGGT  
A\_14\_P118729 CATATTTCCCATCTCTGACTAATCTTCAAGACTCTAGAAGTTAGGAGTGCAAAAGGCTAA  
A\_16\_P01827736

CCCTTTCTACTGAACTCTATCCAACACAAACTTTTACTTTTTCAGATGTGCAGATTGAAT  
CUST\_1803\_PI426210822 GTTTGGATGATGGGTTTGGGGTCTAGAACAGCTCCTTTGAAGCTT  
A\_16\_P00916762

AGATTTTGTAGTTGCAACTCTTCTCTGGTAACCAAAAAACATCAGGACATTCATTGCAAG  
A\_14\_P108735 AGGATGATATGTTTGGGAGATCATTAAGATCTTATGGCTATGATGGGGTGGAAAATTGAG  
CUST\_900\_PI426210822

TGGTGCTGATAGAAAACCTAAGAACAAATGGAGAATTTGAAAGCTGCAATGGG  
A\_14\_P201683 TGAATAGGTAATGCATTCACACGTTGCAAAAAATAAAAAAGCATGAAGAGTGTGGATTGC  
A\_16\_P18837388

AGAGTTTTAGAACGTAAGGGACCTTAGATTTTAATCCGTAATGACCAAGAAAACCTGTGTT  
CUST\_9210\_PI426210822 CTCTTTTCATTTGCAGGTGGGCCAAGAGAAGGGAAAACCTGCTCTTT  
A\_14\_P139618 TCAAATCCTATCTTTCGTGTTAACTCTGCTACCATCTTTTCATGGTAATCATCCAGTTCA  
CUST\_8248\_PI426210822 CTAGCCCGCACTGCTGGGAGCCAGTGGGAATGAGTCTCCAAGCATT  
A\_14\_P131461 GACACAGGAAAAATCTTAAGGAACTTATAACTTTTATGGGATCCAGTCCTAAAGTAGATT  
A\_14\_P137929 CTTACACTTGTGGAGAGAAATTCAATAGTGATACATTTGTAGTGAGGAGAAAAGATGTGT  
A\_14\_P107143 GTTCTTCAGGAATCTAGTTGGAGTAGGCGTTTGATCTGTAGACATGAAAGAAAAGGAAA  
A\_14\_P108356 CAACGTTTGTCCCGAGTAGAAACATAAATAGGGCAGAATCGAACACTCTGTTC  
A\_14\_P201046 AAACAAATAATCGGAGCATTTTCATTTTCGCTATGATGATCGCTGTAATTGGCAGAATCAC  
CUST\_8711\_PI426210822

CAGAATAAACTAGAGATTTGTAAATTCAAGATATTGATCATTCAAATGAAAACCTCAATAT  
A\_16\_P21384352

AAAAATGCTTTATCTTTAATGTGCAGGCATTTGAGTAAACACCATGGATCAGCAATTTCC  
A\_14\_P107331 ATTATCTGTTTTCAATTCCTGGAGCCAGCGTCAGAGGCTATTTTCAGATGAGACAG  
A\_14\_P120200 TAGGCTCACATCACATCTGTGACCTAACAGGTATGTGCAATTTTTCTTTATTGTCCTATT  
CUST\_322\_PI426210822

AGCTGTTCAGGCACCAACTTAACTCTACTGAAATCTTTTTAAATAATGCTTCTTTTTTCC  
CUST\_3293\_PI426210822

AGTAGTGTGTATAGTTAAAATTTTTAAATGGTTATAAAAAGTTGTCAAAGAAAGGATGTCT  
CUST\_6585\_PI426210822

ATCACTTGACTTTGAAATCCCAGGAATGACTTTGCTGTGTGATTAAGTGACAGA  
A\_16\_P36230181

TTTGGGATTGTTGAAGTCTGAATTTTACTGTGCTTTAAAATTGTGATGGAAAACTTCTT  
A\_14\_P131582 ATGCTAGAACTACTTGAAGAAAATTAGAGAAGCATCCAGATAGGGACTTGTAAGGAGTT  
A\_14\_P137391

AGCAATGGAAAAATGAGTCCTCATAGAAAAGTTGAAACCAAATGACTTGAAATGAGGTAG  
A\_14\_P121761 CGCTAAATTCCTCAAAGATGATGATGTATTGCTCTCCATCCTAAAAGGAATTTAAGAGAA  
A\_14\_P104503 AATGCCAAACAATTCCTGGAATTGGGTAAATTTTACCATTACAGAAAGGACAAATTCCT  
A\_14\_P139777 AATTTGACCTGGATCTTGAAGGATGGTTAAGATTTACAAGATGGATTAAGATGGGGAT  
A\_16\_P00685598

CCTAAAAGGTTAAATAAGCAGTGCTAGGCATTATAACATCAGTATTGTGCCAGTCACT  
A\_16\_P17964896

GCCTAGAATCAATAACCACTGTAACAAAACAATGCTTGAAAATCACTTCACATCCTCTGA  
A\_14\_P130719 TTTATGGGTAGGTATAGTTTGGTCATGGCACTGGATACCTTGTAAGTCTTAATCTCTTAC  
A\_14\_P116110 CCTTTGAACTTACCAATTACATGTTTCTGCAGAACAAGATCAATGATCCGTAGACAGATA  
A\_16\_P21475030  
ACTGCTTCTTAAACGATTTGCTTCTCAAGAGAGATTCTCAACTTTACCCATAAACAAG  
A\_14\_P120086 AGTTTTAGTCCTGCGGTTACTAAATGGAAAAGTCAGAGATTTGTGCTATTTCAATTTGGT  
A\_16\_P37119441  
TGCTGCAGTTAAGTTGAACTATAACAGTTGTTTCATGAATATGAGCCTGTTACATCCAAGA  
A\_14\_P131712 CATAACTTGGCACCAGAAGTAGGAACGATAATTTGAATGCACAAAGAGAAGCTTTAAATGG  
A\_16\_P18540124  
AAATCACAGTTCCTAGTGATATCACTGATTTGCTTTATCCTACTCACGGTAGTTTCAGAC  
A\_16\_P20058397  
CTGATCAGTTACCATGTTTTCCACAAATTAACCTTATGTTATCTAAAAACCTTGCCCCAC  
A\_14\_P202036 TTAGCAGTGATGTCAGAAAAATTTACTTACAAAGTCTGTTCTGACTGGTGGTTGTTAGGA  
A\_14\_P200168 AAGTAGAAGCCTGGATTAGTTTGCAGCAACTCAATCCCAAAGGAACCAAAG  
A\_14\_P107366 CAGTTAAACAACTGATGCAAGTGAGTCTCCAGTGAGACAATGGTTGTAGATGTATTAAG  
A\_14\_P117665 ATGGGCATGGCTTATTTTCAAGTGCAATGATTGTAAATATTTTCAGAACCCTAAACGTGA  
A\_16\_P18518041  
GCAATGACTAGGTGTTTTATGCTGAACGTTGAAGATATTTTCCACTGGAGATTTAACACG  
A\_14\_P108944 ACTATTTTAGAAAAGTTGTGGGCTGGGTTGTATTTATAAATCTTGTTGGTCAGATGTCTGC  
A\_14\_P133723 CAAGTGGAAAAGGCCGCCAGGGACATTTTAATATGCATATTGTTGCTTTACATATAATA  
A\_14\_P101325 CTACATCAAAGCCACAGAATACTACAGAACTCCATGTAAGGTGAACTATCCTTATCCTA  
A\_14\_P134030 ATAGAAGGTCGTTTCCATCTTTGCAGTCATAGAACAGTCCGTCACCTTAC  
A\_14\_P134502 CAGATTCATTTTGGCTTAATGGTGCCTTCCCCATTTTAAAAGCGGTCTTTTACTCATAG  
A\_14\_P122116 CTATGTTTACAGCACTGGCCACGGAAAGGTGACAAACGATAGGAACAGAAATAT  
A\_16\_P15638192  
TTTACCCTTAATACGTTCTTAAGCCATGCATAACTCTAAGCCTGTTTTAACCATGTGCTT  
A\_14\_P126958 TTTGGAAGAAAATAAGCCTCAAGAAAATGGACAAGGTGACTTTTTCTTATGTCTGTTTC  
A\_14\_P122784 ACTGCCTATTCAGAGCATGCAGTAAGAGGAAATCCACCAAGTCTCAATATAATAATATTC  
CUST\_7247\_PI426210822 ATTCTGCTTCTCTCCAGGCCCTGGCTTCTTCTTTCCGGTAGAT  
CUST\_5650\_PI426210822 CTCAGATGAACCTCTCTGGATCTTTAGGGTGTCTGGCCCTCACGT  
A\_14\_P133668 ATGGCTTAAGCACTTTCTTAAGAAAACGCTGGAAAATCATTGACCAAGGAAATTAGGTTA  
A\_14\_P113227 GAATTGGATTTCTGGGCCTCTGGACCTAAGGGTAAATTTAAAATTTTTTCAAACATAA  
A\_16\_P20206048  
AAAGAGACAAGGTTGTAATTAGAGATGACACAGTCCTTTATCCATTAGCGACACACTATG  
A\_14\_P103170 CTTGCTTGTATCATTTTGGTTTCCCAGGTCTTGTTTCATCATCTGTGTTGAGTAAC  
A\_16\_P17081051  
AAACAGCCTCTGCTCTTATAAATCCACGTATCTGTATTTAACATGACAGCATTACCGAG

A\_14\_P109172 TTCTGAATATTTAAAGGTTTCTCTGTAGTCCGAGGCTTTAATATATCGCAAAGCCAACCT  
CUST\_1655\_PI426210822

GACAGGAATTACTTTATCTTACCCTGTTTATAATGTTTGAGAGGGGATGCAGTGGTATG

A\_16\_P01644685

TAATTGTATGGTAAGTGCTTTAGAAGTTACCCTAGGATTTGACTAGTTTCCATAGCAGGG

A\_14\_P121353 AAAATTATACCATTGGACTGAGAGAAGAAATTCTTTCACACCAAGTCCTTCTCTTCTTGT

A\_14\_P107811 CCTACTTTGATGTTCTTGTTCATCACACTTCTTGGCATTGTAGATTTGGAAGAATTGG

A\_14\_P104099 ACGTATCTTTTTAGTAACGATATAATTTGACGATGATTAACCAACCCGATCCTTGAAGGC

A\_14\_P115156 CTGGAGAAGAGATATCCTTTTCTGGGTAGATCTTCTAATTTAACTCATCTTCTGGCTG

A\_18\_P10064900

TGAACTGGTTCAGTAAAACATGTCACCGTAAGTTTGTAGTGAGACCACATTTAGACTAAT

A\_14\_P131082

TTTACACACAAGCAAACAAAAATTGAGAATTGAGACAAATAGGACAAATGGTCCCAAGTC

A\_16\_P21245566

GCCTATTTTTATTGTTTCAGGAGACACGTATATAGTGACGCCACTATCCAAAGACATCTT

A\_16\_P01187521

ACGCCCTTATACAAATCCTACCTTTTAGTCCAACCATAGATCATTCTACTTGTTCCTTGA

A\_14\_P103999 AAAAACCTCACAAAGAATCCCCTGCTCATTACAGAAGAAGATGCATTTAAAATATGGGTT

A\_14\_P110451 ACTTAAATAACTGGTATGACTAGGGATGTCAGTCACAGATCAGTCAAGTGGGAAATTTTA

A\_14\_P107499 GAATTTGAGCAAGGATTCAATATTGCTGTGGGCAATATATGGTTAGGCAAATCCTTCATA

A\_14\_P131043 TTTCGAGATGAAAAGCAGTTTACTTTTCATAAAGTAGCATGACACATCATGCCTGACTTGA

A\_14\_P127257 GAAGACTTAGATTTGCTTAATACATGCATGTCTAAGGGAGTTACTGGCCTCATAAACTG

A\_14\_P112454 TTTTTCAGGGCAATTTTGTATCATCGTTGGCCTTCCCATACACCAGGTTT

CUST\_8846\_PI426210822 GTTTCTGTGCACAAGTTACTACTCAACACACACCCTCTGGAAGGTG

A\_16\_P03262903

AGGACAGTCTTTCAGATTCTAATTGCATTCTTGTCTTCTCAAGTCATGTAACACAGACT

A\_14\_P106821 AGTTGCGTGTCCATTGCCACGATCCATTGCTAGAGAGAATCAGATAGATAT

A\_14\_P109970 CATATTCTAGGAAGAAAATAACAGATAGCCACTGCCACAGTAGTGCTGGTTAACAATCA

A\_14\_P124690 CTTTTAGCCACAAGTCAGGCCTTTTTCTTCTCACATTTAATAATCTTGTTTTTCTC

A\_14\_P102612 CTCTAAAATCATACTTCTTTAATTCTCTCTTCCGGGCTTCTTTCTTTAAAAGGAGA

A\_14\_P101084 TAGCAGCAAGGATTTCTAACCTCAAAGAACAATTAAGGCTTCTTTTATCAAGATTGCT

A\_14\_P112889 TCATTCTTACCTCTTTGCTCTCAGAGCACATTAATTGCAACTCAACCATAGCACATATTT

A\_14\_P124273 AAAAAATTACGAAAGAAAAGAAATCTCTATGCAAATGACGAACATGGTCTGTGGACTC

A\_14\_P109590 CTTTACTTGAACATTTTAAACACACAGGAAATGGGAGAAGACATTTTAGCAAAAAATGCC

A\_16\_P17212981

GCCTTAAAAAAGTCTCTGTTCAAGTTCTAAATTCCAGATTATAACATACCCCACTCTCCA

A\_14\_P201410 TACTCCCTGCACCTTAAAAAAGAACAAAATAAAGATGCATGTAACATCGCCTCTAAGCC

A\_14\_P124162 GTTACCTTGGAACCTTGTGAGGCTTTTCTCCCTTCTGGGTCTAAG

A\_14\_P110555 ACTACAAATTTCTGGTTTTATAGGCATGTATCCCATATCTTCTTGGTTGCTAATGTTGCT  
A\_18\_P14136342 CTAGTGGGGGATGGATGAGGGGCTAAGGCATGCTTTACCCCTGGCT  
A\_14\_P200137 CTTTGTGGCTTGGATTACACCATATAAAATCTTCAACAGACATTCATTCCTTTGTTTCAG  
CUST\_4479\_PI426210822 CGAAGACACATTGTTTCTGTGCATGGTGTAGCCAAGCCCAAATATTTA  
A\_16\_P18493228  
AATATTCATTGCTAAGACGGTATTTCTCTAAACACCATCTCTCAAAATCCCAAACCTGGAC  
A\_16\_P21611769  
ATGTGCCATAACACATACATTATCCCCGTGACATAAATACTGGTCCAGCAAATACTGT  
A\_18\_P22842647 ATATTCCTCCCTGGACCCCTCATTCAAAGCCAGAATCTCTTTCT  
A\_14\_P124548 TATGCATTTCCCAAATGTTAAGATTATTTCGCAACAGAAGAGGACTCAGTCTACTGTGAT  
CUST\_634\_PI426210822 CTGACAGGATGGCCATGAGCAAGAAAGCACCCCTTGTGAGCATAAC  
A\_14\_P111020 TAGGTCCCTGGTTGTCTGTAGAGGTTACTTAAACAAAGAGACTCTGTAGTTATGTTAGAAA  
A\_16\_P02421018  
CCAGCGCCTATATTCTTGTATCTCCACAACATGGTTTAATCTTTTAACAGTTGGCTTAT  
A\_14\_P139241 AAAGAATCAAGAGGACTATATTACCTTAAGTGTCTGCCATCTACTACCACATTGTTGAC  
A\_14\_P200785 TGTTTTGAATTTAAAGGAGATAAGAGGCGTAAAGTAGGATGCTCACTACAACCATAGGTG  
A\_14\_P113367 ATTACTTTATCACTCTGAGTTTTTCATGCATCAGAGAGAACTTTTACCCATAGGTGTCTTG  
A\_14\_P125324 AGTTTTCCAAAAGTTTCAAGATTCCATAGTAATTTTTCTTGCCCTTTTTCTCCCTGTCTAT  
CUST\_560\_PI426210822 TCACTTGCTGCTTTCAGATGTGGAAGGAAAACCTCAGTCCTTTTTGC  
CUST\_6014\_PI426210822  
TTATTTTGGATCGTAGAAAACTTCATGTGGTGGGAAAATGTTCACTTGCTCCAAG  
A\_14\_P103904 AATCTCGTCTTTCAGTGGCTGCATCGTTTTACCATTAGTTGAGGGAATC  
A\_14\_P200952 GTTGCAATTGTAGCCCGTCACTTTGGTCTTGGTGTTCATCTTGTTAG  
A\_14\_P201663 ATTAGAGTTTACCCTTTAGAAAGATAGGATTCAACTTGTTTGGTATCTTCCTGAGGCCTA  
A\_16\_P30952363 GCTGCTCTGTTTCAGAGGGGCAGCCTGCTCGCTGACTGTCCATCT  
A\_14\_P117319 TTAAAAAATAAATGCTCGAGAGAAAGGAATCTTAGGAACGGATTCCGTCTGTGAAATG  
A\_16\_P16952552  
TTGCTGAAGTAGTAAGGAATGTTCTGATGTGAATCTATTGTTAATGTATCAGCAGTCGGC  
A\_14\_P138494 ATTGTGGAATCCAGAACCTAGAATCTTGCAGTTTCAGAAATGTAGGATTTAGGACTCTAG  
A\_14\_P111706 ACTGGAGATCCACAGGAATGTTTTTCTCTTTTAAAGGGATCTGTGTATCATTCAAATTTG  
A\_14\_P122697 AGACAGAGGAAATACAACAAACAAAGGCTCTAGAAACAAAGGCAGGATACATCC  
CUST\_5849\_PI426210822 CCAGCCCCACCATCCATTAATTAAGCTTCATGGTGTTCACTCAGTC  
A\_16\_P21505368  
TTTTACATATTTATAGAATAGAAAGTGATTCCCTACCAAAATTTTAAACAAGAAATTAACA  
A\_14\_P128794 TCAAAAAGCCAATCTGGTAAACATTTGTAAGAGTCAAGGGAACCTGTTAAAAGCACTAAT  
A\_14\_P116132 CTCCATTTCACTGGACTGGACCATTTCTGAATGCTTGGCTTGCATTCTA  
A\_16\_P03497387  
TCCTAAGAGAATTTAGTTTGAAACTCCTACAGTCTGTAAAAGCAAATCATCACTTCCCTT

A\_14\_P118087 GATAATAGGATTAGGGAGGTGTTTATTTTATGGCATCTTCTCTCATGGAGTTCTTAGCAC  
A\_14\_P100922 TTTTATTTCCAAAGTGAAGACATAAAAATAGAAATCAGCACTGAGACCATCACCCCTGAGC  
CUST\_9037\_PI426210822 CAGGATGATGTGCTTGGAGCATGACACTTAGAAAAAAGATCAGAGGACTTTTTC  
A\_16\_P16405029  
AACATACACACATTTCCATTAGCCTAACAACTCAACTATTCTTTTTCTCATGTCCGTTTCC  
A\_14\_P113989 TACAAAGAACTGCATAGCGTATAATCCAAATGGAAATGCTTTAGATGAATCCTGTGAAGA  
A\_14\_P101003 CAGCAAATTTAAGGTGATACTTATGTCCTCTTCTGGAATATCCTAAAATTAAGAAAATG  
A\_14\_P101318 TTCACTCGTGCTTGTGGACTAACTATTGCTTCTTGACACTGTAACAACTCAAACATAAAT  
CUST\_3139\_PI426210822 CTGCGCAGTACAGGCTCGTATGCAAACACTGTCAGGCCTTTGAAT  
A\_16\_P17317452  
GGCATGGCAAACCTTTTAATCACAGGCATGAGTAACAAAGTTTAAGGTCTGGGTTTTTATA  
A\_16\_P15602068  
TCTAATCAGCACCTTATAAACTAGAGAAGTTAGGGATTTAGTGATGGAAAAGATAGGGGC  
A\_14\_P130542 CTGAGTTTTTCTGAAATCCCCTCAAAAACAAACATTTGAACAAAATCTGAAAAACCATAAA  
A\_14\_P133339 ATAAGGAAAATTTGTAGTTGCCTTTTCTTTTTGGTCTTAAATATCTTGATTGCTCTTATT  
A\_14\_P109585 CAATCAGGATAACATCACAAAGTTGCTGCTGCTTCAAATAACTTTCCATCTTTCTGAAGG  
CUST\_7817\_PI426210822 ATAAACAGCTATGTTGGTGCTGACAGGCAGCAGAAGGGTAATCCATG  
A\_14\_P129576 CCAAGTGATGGAAGAAGAACATCTTACTAGTAAAATCAAAGTGATCATGACCACAGCAA  
A\_16\_P16235783  
GGAATCCTAACCAATCAATCACCTTATCTCAAACCTTTTGCAATCCAGTTTTCTCACTTTA  
A\_14\_P200318 ACTTTAATACTCCTAACCTACCCTGCTTTTTTACCTACAGATGTCTCAAATCTGACCATT  
CUST\_7319\_PI426210822 CACTTCTGAATGCTGGTGGGCACGGACGGGGTTTGATGTCCAGTA  
A\_18\_P14136613  
GCACCATCCAAAAATTATCTGGATAGAAGAGGAAATTTTTGCTTTAGTTGCCTTAGTGA  
A\_14\_P120153 CTGACTTTATTTCCAAATACACTTTCTTTTTTAAAAACCAATACACTTTCTTTGAGGAT  
A\_14\_P108153 GAATTCTGACCATGGATACCCATCACTTTGGCATTTCAGTGCTACATGTGTATTTTATATA  
A\_14\_P102654 TTTATTTAGAACCAGTAACCCACAACCTTCTTCTGGGGATAGGAACAAAGAGAGAAAATTT  
A\_16\_P21537483  
AACATACAACCTTAAGGAGAAGATCTGATGAGGAAGCATTTGTTACACAAAAAGTTGAGC  
A\_14\_P118505 ATCACAAATAGATGCTCTTGGCCTCCATGATATCTTGGAAAAAAGTATTGATTGCTGACA  
A\_14\_P106818 TAAAGCCTAGAGACTGTAATGATCCTGGGCATTTGAAATTGCTGAGAGATACATAATAGG  
A\_16\_P02793971  
AAAATTGGACATCCCTAGTCTTTACTGACACACAAATAATGAGAACCCTTATGGATTGGAC  
A\_14\_P112480 CACTGATGATTATGACCCCCTTGGATATCACTTGTAGACATGTGTGAATGCTG  
A\_14\_P113136 TTTGTTTGTTTTTAGATCCGGGGATTTCTTTTACGGTTTTGATAATGTCCTTCCC  
CUST\_6300\_PI426210822  
CAACCACAGTTTCTAATGTCTTCTTATATGCCTTCAGAAACACCATGCTCACCTT  
A\_14\_P115602 TCTACAGCATTACCACTGTTAGCAAATATTTTCATGATAAATCAGTGTAAGCCACTCACTT

A\_16\_P16943368

AAATTCCCCTTAAGTAGCCTGTAATCTGATGCCTAATGTTTCATATCAACACTTTGTGAGT

A\_14\_P133728 TTACTTGAGAACAGGAGTAAAGATAGGTGAGATGCCACTGACTGACAGTATACTCTG

CUST\_6626\_PI426210822

GATTAAAACTGGCCACTCACATGGATTTATTTTGTTCAAAGGTCGCATCACACAA

A\_14\_P125431 ACTGTTGTCATTTCTAGTCTATTGACATGCACAATAACTAGCCAGTGTAAGTGGCATATC

CUST\_9049\_PI426210822 GAAAGTAACAGCTCTTGACTTCCCTTCTCCACCTGGGATCAGATG

CUST\_9096\_PI426210822 TGAGGTTTCCAGGCTAGTGGTTTCTTCTGACCACAGTAAGAG

A\_14\_P108103 GTGCCCATTTCAAATATACTTGTGACTCCATCCTCACACAAATTCATCCAGTAATGATAT

A\_14\_P107871 CATGAGTGCTACATACACTAATTTGAATGGAGTTAGAGCCAGAGTATAAGGTTCTGGAAA

A\_18\_P12446899

ATTGCAATGGTAAGTATTGTATCTGACACCCTTACCCTATAAATGTCCTTTTCAGATGG

A\_14\_P123318 GTGTATATCATTTTGTATTTCTATAGTGTGAAGCCTCAGTTTAGGTCATCTGGTGGTTC

A\_16\_P02334882

CCTAGAGATGCAATAATGGATTTTGTACCATCTTTGCTATCATAACAGAGAGAACTGCTG

A\_16\_P21049671

CTGACTCCCTGCTTATTAAGTGTCTTATTTCTCTGGTATTATCCCAGCATACTGAAAACA

A\_14\_P102071 CTTGCTGCCTGTTTAGGACAAAGTATTTTGGACAGATATCATCAACGAAGCCATTTTC

A\_14\_P116293 ATAAAACAAATTTCCAGGGTTGATGAAAACCTTTAGTATTCAGATGGTTCCCTTTTTGCT

A\_14\_P135475

ATAAGAGTCCATGATAAAGGGAAAAAGTGAAGAATCAAATAAAGCCAAATGCAGAAGAG

A\_14\_P114225 ATTCAATCAGTTTTACTTTTCAGAATGATTCTTCGCAGTGTGTTTGTGAAGTGTGCATG

A\_14\_P114200 CCCTATATTGTTGATACACGTTGTGACCATATGTTTCAGATCTCATTGTAACCTCACAGTT

A\_16\_P21616249

CACCCACTATTATCTCACTTTTCATTTCAAAAACCTTACTCTCTTTTGTCACAATCACTCC

A\_16\_P19825197

TTCTGACCTTTTACCAAACCTGATACTCAAGAAATTTGTGAACCATACTACTCTGCAAAG

A\_14\_P112484 AATCTCATTCCTTAGATGTATCTGTATGCAAGAAATCAAGTCATTCTGGAGGTTTCATC

A\_18\_P22841274 GACTAATTGTGTATGCTTCGGAAGCGCAAAAACAGGAAAACGCTTTTCTGACATAC

A\_14\_P136248 TCTTGGGGACTACAGAAAGAGCAAAGCGTAATACTCTTTAATCATAGCATGTTTGTGTT

A\_14\_P105631 TGTTTTTTTTGCAGGTATTTATAACAGCAATGATGTAGCAGTATCGTTTTCCAAATGTAGTA

A\_14\_P106045 AACCTTCTTTCTGCTTTTCAGAAATGAACCGGCATCACTATGCCCTGTATGT

A\_14\_P132339 TGATGTTCCCATACCAGACCCGCACCAGAAAAAATAAACTAACATTCAAATCTATCT

A\_14\_P119794 GCAATTAAGGTAGGTGCTGGGGAATAAAAGGACTAGGAAAATTATGCAAATGTTTGTAAAG

CUST\_1126\_PI426210822

CATTACTTTCTATTAAGTAGCTGTGGATCATCAGTAGGCCAGTGTTGATCTGAGGT

A\_14\_P119469 TGCGTCATAGAATAACCTTGGGAAGACATTTAACTATGCTTAGGAATCCAACCTTTAAGGT

CUST\_6543\_PI426210822



GAAAATCTAAGTGATCCAACAGAATATTATTAAGCACCATCCAAAAAATTATCTGGATAG  
A\_14\_P102568 ACGGAGGAAAATCTGTAAACAGTAATGTTGGGTAGCAATTTGGAATGTTTACTAGTAGAC  
A\_14\_P111416 CCCCAGGAACTACCTATAAAAGCGGCCATGTTTTACATATTTCTTGATTTTGTTTTGTTTT  
A\_16\_P36230609 ACTGTTCCCTTGGGGCTTGAGATTCTTGGATTCCAAAGGAAAGAAC  
CUST\_8002\_PI426210822 GAGAAAGCCCAACAAGTCACCCAGCAGAGACGGGGCTCCCCGTAT  
A\_14\_P133941 TTTTCATTGCAGAACCAATAGTCAGATTGGACCAATAGATACAATGGAGTCCTGTATTC  
CUST\_7774\_PI426210822 ATTAGATAGACAGTTTGCTCACTGGTCCGCGTTCCCAGTCAGCTA  
CUST\_1462\_PI426210822 CTTCTTCTTGCGGTCTCTGTGGACGGCTTGTTTCTTTTTGGATG  
A\_14\_P116169 ATTGTCATGATTCTTCATCCTTTTTTTGCTAGACATGCAACTCAGGAACAGTAAAGATTGT  
A\_14\_P105277 TATTCTCTGGAATAACCAGGATAATTCTTACCCTTTAGACTTTGAAGCGATTTCCTCTTT  
CUST\_228\_PI426210822 TAAATGTCCTCGTTGCGCGCGGCTCGGCCGCCGGGGGACGGCGGG  
A\_14\_P107475 ATTGGCTCTGGCTCAGAAAAGATGAACATACAGATCCTGGAAGATACCCATAAG  
A\_16\_P18320368  
TGTCCTCCCTTTAAAGAACTATCCCATATATTTTGCATAGGCCATTAAATAAAACCAA  
CUST\_3612\_PI426210822  
CAGCGTTGTTTCTTCCCTTGCTGTCCATTTCTAAGGATGAGTAAAGAGTTAACGTA  
A\_14\_P136740 GCACACAGAGACATGTGGACACGTGTTAACACATCTGCACAACTTGTC  
A\_14\_P122438 GAGATTGGATTTGGAACCAGATGCACATTGATGAAGAGAAAAACACCTCACTTC  
CUST\_1887\_PI426210822 CTAAGGATAATTTCTGTGGATCCTCCTGGGCAGAGGTTAGGAGCT  
A\_16\_P19575062  
AAAGACATCTAGTCACTTCTATTGGCACTGATTGGTCTATTAAGGATGTCTCAAGTGGAT  
A\_14\_P130923  
ACTGAAAACAAAAGGACTTCCCTTGAAATGACAGTTTCCACTTAAAAGATCAAAGAACAT  
A\_18\_P16314405  
AAAAAATAAATCAAAGCAGGAACTACCATTTTCCACAAGAAGATCATAAGAGAATGT  
A\_16\_P17849307  
TAGCCCTACTTTGTAAACAAATCACTGTGAATTGACCTCTATTTCCCTACAGCAATAACT  
A\_16\_P32194297  
ACGGTAAAGTGCATAAATTCTCTATAGTAGTCCTACCATCATCACATGTTACCTTTGCCTA  
A\_16\_P02151022  
AAAGGTTCTTGCTATAGATTATCCACTCAAGGCTTTGAAATTTTCCAGTTTTCATCTGA  
A\_14\_P129605 GTAGGTATCTGTGTTTCCATCTTCATCACTGTCTTAGGTTCCAGTTTAAACATCAGTTTC  
A\_14\_P137023 TCAGTTTTATATGGAACAGGTAGTAAATAACACAGTCAAGGCTTAGGAGTTTGGTCTGT  
CUST\_3194\_PI426210822  
GGCTGCTTTGTTTGGCTATCTTTAGGTATTTTTTTCTTTTTTTCTTTAAGCCTATTCC  
A\_14\_P137427 TCTTTATCTAAAGGAAAATTTGGCAGGAAAAGTAGACTAAAATTTCCCAACGTAGGC  
A\_14\_P130514 GATATAATGCAATCAGTTTAGCCAGGAAACAAAATGGCCAATATAAACTGTTGCAGGAAC  
CUST\_4257\_PI426210822

TATTTCAAGAGAAAAAGGAGGCCAGAATTTATAGAATCTAAAAATAGCAGTTGAAGTGCA  
A\_16\_P17483726  
CTCAGGAATCTCATAGAACCCCAGATGATTATGATATAACCAATAACATAAGACCCACCT  
A\_16\_P18151882  
TACAAATCCTATGAACAACCTACAACCTACAACCTATCATCAAATGCTAAGGTGTGG  
A\_14\_P131864 CTAAGAAATGGAAAAATGAAGGCATTTCTCTCATTAGCCCCGTTTTTCAGATACTCAATAC  
CUST\_9663\_PI426210822 TCTCTACCTCGTGCTCTGGAGTCAGGCAGAAACCTTTCTACTTTC  
A\_14\_P134545 TACTTAAGTAAGTCATGGAACATCATGAAATGTCAATTTCTCCCTAAAATAACACGGCG  
A\_16\_P33124402  
GCTAGACTGGACCTATTAATTTCTGACATGAGACTGCTCTTTTTACTTCAAGGAACCATA  
CUST\_7184\_PI426210822 CATTTGGGGGGAAATGAAACCAGAGGAAGTTTGGCTTTGCAGAGT  
A\_16\_P02731807  
ACTAAACTAGGTTTTTTAACGTTTTCAAAGAGCACTACCTTTCTAATGAACACTGCTGGG  
A\_14\_P113434 CTTACAGCATTACTCTCTGCTCCCAATCATGCTTGTCATCAGATAATATTTCCCTAATT  
A\_14\_P125644 AATGGTCCCTTCTGATCTAACTAGGAAGAAAGAAAGTATACACTTATAATGCAATTTGAT  
A\_14\_P135920 ATTCTTAGTTGCCTATATTGGCATCATCGGTGGTTAGCCTCTATTTCTCGAACT  
CUST\_4091\_PI426210822  
GAGGAGCAATTAATAAAACCTTCCATTTCCACATCTACTGTGAAACTCTGTGACTTCTT  
A\_14\_P103644 AGTTTACAGACTTCTTTTTTCCCTATATAGGCTTATGCTTGATTGTGTTTTGGTAGTCC  
A\_16\_P17133718  
AGCCACATTC AATTCAAACTCTGCTATTTCTCAAGAACATCCATAATTTCACTCAACTGG  
A\_14\_P126397 TAGGGGGAGAAAAATCAAAGACATTTTTGAAACTTTTTGAGACAAGGAGTAATTCTGAGG  
A\_14\_P107741 TTTCTTTTTGCCTGCTATGAAGAGGGAGGAAAATGACTTCTCTACTGTTAATTAGAAAAG  
A\_16\_P16191060  
GAGTTATTGTGATTTTTCTTTAGCAGAAAAAGAGGTTTGTGAACTGTTTGTACTGGTGCA  
A\_14\_P108817 AAAGTCATGACCCATCAAATACAGTGGGTATCTTTCTACTGGTTAATATTAGTTGAACCC  
A\_14\_P132255 AATCTCTCATGAATTTTATGTATCGCAGATGAATACGAGGTGGACTGGAGCAATTCTTCT  
A\_16\_P20661347  
AACTAGCCTCAATTTATCTTAAAACAGATGCTATCCTAGTTCTTTAGACAAGCAGTCCCC  
A\_14\_P132764 TTGAATTTCTTTGAAAGATGACTTACTCTTTGCTTTCTTTTCGCCTAGAGATGAGACATCC  
A\_14\_P130970 ATCATACCCAAAGTCACTCTGCCAGGTTTTAAACATTACTTTCTATTGTGTTCTGAAAT  
CUST\_9930\_PI426210822 GGGTCCCCACTCATAGATGCCAGCTCTCCTGCCTTTCCAGGGAA  
A\_16\_P00632384  
AACCTTTTTAGAACAAATATGTTCTGGTCTCAGACGTTACACGTTTCATTTTTTAAGAGGG  
A\_14\_P116990 CTGAATTCATTGAGGACCAGTCAATTTCTAAACTGTAAGCAATGTCACTCAAAGATGCTTT  
CUST\_1572\_PI426210822 CAAGTCTGCTTTCAGACACAGGGAGTGTGCGATGTTTTTAGAGGAC  
A\_14\_P114825 TTTTCATATTATTTTGTCCCAAGTTATCTTGTGTCAGAAGGTATCACTCCCACTGAAGCATTG  
A\_14\_P105110 CACTTGAAATAAATCCGGGTATTTTTCTTGAATGTCACACGCGTCCAGGTCATAC

A\_14\_P105186 TGTTTTCTCATTATGTTGCAAGCATGGGCTTCTCGTTTATATTTTTTTCTGCATGAGGAT  
A\_16\_P16292303

AAAAAAACCTTTCCAGAAAGCATTGTGTGAGTTAATGCTCTTAATCCTCTTGTCTCACGA

A\_14\_P131957 TCCATGGAACAAAGGGTTTTTTTTCTTTTTTTTCCCAATCTCTCAGAGTTTAAGTAAA  
CUST\_4889\_PI426210822 TCAGATGTTTCAGAGAGGCTTCCTCTCCCTTCCATGAAAGTTCTA

A\_14\_P114679 TGAGAAAGACATTCTTTTGCATGAACCATTCTGAGCCTATTAGTCTCCATAGACTTTGA

A\_14\_P104303 TCTTAACTTGGAATCTTCTTTAATTAAGGCTACAACCAGGGCAATTGTCCATCTGTTTT

A\_14\_P135816 TGGAAAAAATGGAAGAATTTGTTTGTAAAGGTAAGAGTGCAGTTTCTTGTCATTGTCATGC  
A\_16\_P18043480

ATCTCCTCCCGACTTTTATAAGTCTTATCTATAGGGAACACAACCTATTTCGAGACATACT

A\_14\_P135474 GAAGAGATGATCTTCAACCTTGCAGATACACATCTGTTCTTCAATGACCTGGAG

A\_14\_P114728 CTCTGAAATCAGGCAGTTCAGCCTGCACTTTGCAGATAAGTAAAAGTGAAG

A\_14\_P127096

CAAGAAGAGTTATGAGGTGAGGAAATGGGTTGATTTCTGAAAGCAAAAAACATGTAGAT

A\_14\_P200136

AAAGGCAAACCAAGATGATATACAAGACGGCCACATCTAAGAAAAAGGACAAATACAATG

A\_14\_P130968 CTTATCACATACACGTGATCTCATAACAGGATAAAGACTCTGTAAACATGGTACTCTGCA

A\_14\_P108216 TGTTAGCATGAATTGCTGATAACAGTGATTTGAGTGCAAACACTTTAGAAATCCGTCATC

CUST\_4285\_PI426210822 TTCTACTGTTCCACAACCCACAAAAGAAGATGTCTGTTCCACTTCTGG

CUST\_9089\_PI426210822 GTAGTCCCCTGCTGTAATGAAAATGCACAGACAGTTCATGAAGTGAGGAATTA

A\_16\_P16558089

AAGTGTGTTTGTTTTTCTCTTACAGGTTTCCTTAATGACAACAAAAAGGGAGTAATCC

A\_14\_P105262 CTTTTCTGAGTCCCTATTTTTACATTCTCAAGTGATTCATGAAGACATGGTTACTGCAAG

A\_14\_P136229 CTTTCATGGATAATTAATAGAATTTGGTGAGCACTGCAATACAGAGACTTCCAGAGGGAAA

A\_14\_P126999 TGGTTCTTATAGGCATAAGGGCCATGTGTTCTGAAATTATTTTGAGGCAAGAAGTTTTGA

A\_16\_P20270641

AAGAACTCACTGACCACTAAAGAGTAGGTAAAGCACTAGGAAAATCTGTGAGAATGAGTC

A\_16\_P30952435 TTTATTGTTTCAGCGGAGGGTGCAGGACGTCATCAGCCCGATCGT

A\_16\_P19180718

AAATGTTGTAACAATGCAAGGGATGTGTAATCATAGGTAGATAAGTGAAAACCAGGGAAC

A\_16\_P18101978

AAAAAACCATCAGGCTATCGAGAGTGTATCCCATAATTTTACTACTTGCAAAGCACCTAA

A\_14\_P201860 GCATCATTGTCCTTACTAGTTTTAAGGATACCGACACCCGAGAGAGGAAAG

A\_14\_P110350 CTAAAGTCAAGGAAATGTCTGCCATGTTTACTGCTGATTATCATGTTTCATGAGACGTT

A\_14\_P101017 CTCTCTAGTCTTGAGGCTAGACAAGTTTCTTCTCCTTTATTCTTGGAAGACTTTTCATT

CUST\_7134\_PI426210822 AAAGTGGATGCTTAGAATGGCATGAATGTTGGCTGGCTTGATCATGAGT

A\_16\_P35542067

ATGGTTCTGATCACAATCCAGAGACTTTCGTTATAAAATTATCCTTGTGCACCTACTGAT

A\_14\_P109979 TAAGGCACTAATGAGTTTATATGTTGAAAAGAACAACCAATCTCCCTTAGGGAAAGACAC  
A\_16\_P36581496

ATCTTCATTCTCCTGGATACTTCTGAAATGCACAACTGTCTTTTTCACTTTTAGGC

A\_18\_P11176299

AAACAACGGGGATGAAGATAAGAAAAAATGAGGTTGTCTTGAAATGGTGTAAATGATTGG

CUST\_1857\_PI426210822 AACCTTCCCAAGTTTGGCTTTGATTAAATGGAGCTAGGTCCAGTC

A\_14\_P202382 CTTGGATTAAAACGTGGGTCCTCAATAGGGAAAGCCAAGGCACAAAG

CUST\_8470\_PI426210822 CTGCAGATTGCCTGGAAACCAAATCAGCTGGCTCATGTAGTAAAAACAG

A\_14\_P139685 CTTCAAACGCATTCTCATGCTCAGACGAGCACTTTATTTTTTCATCAAGTTATTTTTTGA

A\_14\_P123720 CATTCTCCATGTCATTGTGTAATCCACTTTGCGATGCACGGAGGTCATAA

A\_14\_P120783 CCAATATCAAGTGAATGAATCCATAGGTTTGGAGGTGTTACCTCTCATTCAAGGTTTAAA

A\_14\_P129811 AACTGTAGTCATCGTAACTAAAGCCGGCTTTTTAGGTTGGCCTCTGG

A\_16\_P15275551

AAACTACTGCATTCAAAAGGAATTTGTTTTCTCCCTACATCTAATGTTGGCAATGAAGCA

A\_14\_P114495 TTTCTGCCTCTAACTTTCCGGTAGTTCCTACTAAAAAGAGATAGTCTTATGAACACTGGAG

A\_18\_P14386650

CCACTACAACCTTCATTCTCTAATTCGGTATTTTAACTCTTACTTATATACAACACAGGCA

A\_14\_P112421 AACTCTAAGTTTAGGACTCAAAACAGTAAGTTAAGTAAACTGCCAGGTAAGAGTAGGTCT

A\_14\_P125939 TCTGAAGATTTTTGACTTCAACCATACCTTATCTTCATTTGCTGGAAAAGATGGAAGCAG

A\_14\_P105878 GAACCTAAAGAACCATCATTTAAGTGCTCAAAATGGAGCCCTTAAAAAAAATCCTTCTGT

A\_14\_P200775 ATTCCAGAGTTAGGAAAGTTCTGTGGTTCATCATAAATCCATTTTCTTTCTTCACACCT

A\_16\_P02555857

GTGGTCACTCTTACCTTTGTGTATTTAATTTAGGGCAGTCAAAAACTTAAGATCCATGCA

A\_16\_P35048820

ACCTTTTCTTCTACGCATTGACAATTATCTTAATCTGTCTCTAACTGTCTTAGACGACA

A\_16\_P02593501

AGTCTTCACTAATCACCCTAGGTAACAATTGTTTACAGTTTAGGTCAATTTTCATGGAG

A\_14\_P107225 CATTTCAAATATATTTTTGCCAAGGTATCCAGGCTCTCTGTAATCATAACGGAACCAAGA

A\_14\_P129520 GTTCCCGTGAGAACTGAAAATAATTTCTTGAATCTACAATGCGACTTCCATCTTCC

A\_14\_P132164 CAATACAGTAATAGAGAACATTCTTCTCAAAACAACTGAGTTTCTTCTTCCCTTCCCTT

A\_16\_P01721808

TGAAATGGCAAAAACAAATAGACAGAACAAAATAAAGGTCACAAATCACTCACCAAAAAA

CUST\_3551\_PI426210822 TTTTCTTCTCCTTTTCTTGGGTCTGCTTTCTTGGGGCAAACAGAATA

A\_16\_P39828531

AACTGAGACATATGCCCACTAAAATCTCCTAAGTAATCCCTACTCATAATATTTTCCCAT

A\_14\_P131704 TTGATGCAGGAGTTCAAATCTGTGAGGATCCTTTGCTTCTCATGTTCTACCT

A\_18\_P14133582

TCCTGAAATGGGTGCAGCAGACACCAGGCAAAAATATTTAAAACATTTTAAATGTCTACAA

A\_14\_P110589 ATTGTATAGAGAAAGGAGGTCTTTTGCATACTGAATACATTCAGACGTGTTGCCTCTATT  
A\_14\_P135511 AATGCCTTTTCTTCTTGTGTTTTCAAAGCATAACAGACTGCTAATGGCTCTTTAAGACAACCT  
A\_16\_P30952359 CTGGACGATCTGGACAATGATGGGTTCCCAGGTGAGTGAGTGCTC  
CUST\_3006\_PI426210822 CATTGGAGTTGGTGTGTGACACTTGACACAGGTGCCAGTGTGTTTTCT  
CUST\_1205\_PI426210822  
TAAAAATGAATTTAGGACATAAACTCATGGAGCATATCCTTCAGTCAGTTTGTGTTGTGTT  
A\_16\_P16570374  
AAGCAAGGCACTAAGTCATTTGGTAAATTTGCCCTGGTAACTACTTATTCTGAAAAACAA  
A\_16\_P15612515  
TGTTGACTGGTGCTAATACTGATGATTATCAAGACATTTAAAGATCAACAAGGCCTAAGG  
A\_14\_P120281 CAGCAACACACAAGAGGCACAAAGAGCAAGATTTGTGGAAACAGTTCAGAA  
A\_14\_P103248 TTTGGTGATCTTCTTTCTCTGTGACCCTACAGAACTCTATGCATGATGATGTCATTTATT  
A\_14\_P118582 ACCTGGCACACATTACCTAATGATGATTCTTTGTAAGGAGGATTTTATAAAGCAATCCAT  
CUST\_7405\_PI426210822 GTCCATTCCTCCTCCTCCTCTGGGTTCCTTTTTCAGCACTTCCTC  
A\_14\_P101121 CTTGAGGTTTTTAGAGAAGTATTTTCTAATGTCCAGGGTGATGGTATGTGACTTTGAGAT  
A\_16\_P00345293  
ACACCAGGATACCACTAATGTGAACAAAACCGTATCTGGAAAAATTTGGAGAACTCTATT  
A\_14\_P137395 TTTCAGATAAGTTAGGAAAACCTGCAGATCTGAGGTTCCCTACCTGAAACTTCTAACTCTAG  
A\_14\_P107764 AGATTTCCCTTAAATTACAAAGTGGTATTATGCTGCAGAAATGTGAGCGGTAATGAGAGA  
A\_14\_P200031 GAGTCTCTAACCTTTCCACCCTATCCTGTTAACCCTTTAGATCTCTAGTATAAACTCAG  
A\_18\_P12666293  
AAAAAGCCTGTTGCTCATTGAATCAAAGACATTCCTAAGTGAGAGTCTCATTCCCTTT  
A\_14\_P131999 CTAAAGAAAACATAATTTTGATACATGGCTCTAAGGGAATGCTTCAGTTTTTTTTCCCCCT  
A\_16\_P58424259  
GCAGTTTCCAATCTTCAAAGCAGTTTTGTGATGTAGGAATTATGTTCTCCGTTTTATGAG  
A\_14\_P113339 CTGAACCATTACTGCTTAAGTGCCAAACAGATTCTTCTGTTTACAAATAGAGCACTTTCT  
A\_14\_P104576 CTAACAGTAAAAAATCTTGGTTTTTCATAGGTCGCTGATCTTTGATAACTTGAAGAAATC  
CUST\_4938\_PI426210822 TTTGAGGGAATGCTGTGGTGCATACTTTGTGTTGGACAGTTATGGG  
A\_14\_P139760 TTCCTTGAAATCTTCTGTGATCTGGAGAACACAGCAGGTTTATTTATGTTGTATTCTCA  
CUST\_1799\_PI426210822 GTTGACTTGCCTTTTCCCTTCTAACTACAAGTTTTTTGCCTGGTAGCATAGAC  
A\_14\_P138651 AATGCGAAAAGCAAGTGTTTCAGATGTAGTGTGTGAATTATCTTCCCTTAGTTTGATTTTC  
A\_14\_P135439 CTGTTTGCTCCATTTTAAACAAGGGAACAGGTAGAGAAGGGTCAGGAAGAAAAT  
A\_14\_P136380 GTCCTTGAAGTCACTACACCTTGATACAGTCTTTCTAGTAGTCACCATGATTCAACAG  
A\_14\_P116777 CTTCTATCCAAGTTTTGATTCCTCACAAAGCCTCTGTTAATCATGTGGTCAAAGATATTG  
A\_14\_P130216 GTATTATGTAAGAATATGTTATCAGAAGACAGAACAACCCTGGGACAGATTGGTTGGAAT  
A\_16\_P16244789  
AAAACCAATTGTAGACTAGAACGAGAACCTAGAATGATCTACCAAATCCAGTTTGTGACT  
A\_14\_P200693 CTCTGAGTGCCCCCTTTCTATCAAAGATTCTCAAGATTGTCTATCCAGTTAAATTGAAAA

CUST\_3287\_PI426210822

ATCTTGAGAAATCAAAGAAATAGCTAAGAAAAAACAGTTGCAGGGTTTGGCAAAGGG

A\_14\_P129746 ACTCATATACACATGCAAAGCATCACTTAGCACCTTAGGGAAGGTTTTCTTTACAATTC

A\_14\_P134585 GCATGTGGTAAACTATCAGTCTGTATTTATCAGTGATGGTTATTCCTAATACCCAGGAG

A\_14\_P123060 TATATTTTCCTAGTTTCTTTATCCTGGCAGCCTCTGACAGTCAGATGAAATCTCTCTTT

A\_14\_P126382 TGGCTCATTGCTTGGTGGGAATGGTATATTCTGTTTTTGGTTGCATTTGAATAATATCTT

A\_14\_P115009 TGCATTAATGCCAAAAAATGTTTCCCATGGCAATCCAGCCTAATATTAATTGTGGTATGG

A\_14\_P122384 AAAAGGTAGAAATGACCTCCAAGCAGCAGAGAAGGTAATGGGGCTAATGAT

A\_14\_P116525 CAAAGTTCACCTAAGTTCAGAGAGCAAACAGTGACATACGGCAAATTAGGAAATTTAGCA

A\_14\_P114587 CTCATTTTGGAAACTTTTCCTCCTCTATTAACATGGGAAACTGAAGCCCTTGAAG

A\_18\_P22842140

TTCCCTAAAAGTCACTATTACAAACAAAAATTCGCCTAACTAGAAGTTTTGTTCTATTTT

A\_14\_P134318 GTAATTTTGATTGGGTTTGGCTGAAGAAACATACTGGAATTTTTTTTTTTTTTGGTGGGGGT

A\_14\_P105063 AAACCTGAAAATGCTTAAATAGCCACCAGTAGAAAAGAGGGAAAGTAAATTAGGGTCCATT

A\_16\_P02017019

TCCCATCTGTAACATTGCTTCCCAGATAATTGAAGTCAACCCACATTTTCATTCTTAAAT

CUST\_1943\_PI426210822 CACCTGGCTCTTAAGCTTTTAAATAGGACTCCCAGGAGAGTGCTGATAAA

A\_16\_P03189288

ACTTCTTCATAGTTCACTTCCAAAACTGAAACTAAGCATGTTCAATTCATCTGGGCTAC

A\_16\_P16191766 AGTTGCTTGTGCAGAGGGAGAGGATGTGGGAGAGATGCTGTCAAC

A\_14\_P125077 AGAGTTTCAGGCTTCTAAAACTCACACTCATTGAAAATGTGTCACACTATTTCCAGTTT

A\_14\_P130772 CACTCAATCAGATTCAAGAACAGCAGAATGTTTCGAAAGTCCTCACCAACAAAACT

CUST\_6597\_PI426210822 CTGTCTGATGTCAGGACTACTTATGAATGCCTGTCCACTTCTTTCTCAA

A\_14\_P102299 GGAAAGGGGAATTAACCTGGCCACTGAAAGCACCAATAAGTTAATATAAATAGGATATCA

A\_14\_P123384 TCTTAGCAAAGGTGTTTAAAATGGAAAACTCAACACATCCCCTGGAAACAAATAAAAAGAT

CUST\_1555\_PI426210822 CAGGTGACACACTGGCAGATGGCAGTGTTGAAAGAAAGGCTATTTG

A\_16\_P35880420

AGAGATAAATCTCAGATGCAACTTTGAATCTTCTTATCCACTCACAGAAAAAATTCGGCC

A\_14\_P129215 TGTATCATTACCTTTTTTGGTGTCCCCAGCACTTGGCAAATTTTGAATATTGTGTCAATT

A\_16\_P21520489

AAATCAAGAGATCAAGAAAGTTTATGTGCACTGATTTTCTCATCTTTGGTAATGGGCAGT

A\_14\_P135971 GTCCAGGTGAGATTCTACTGGCAATGGCTCATATAAGAACTTCTTGAAGAAATCCT

A\_14\_P110365 TCATGAAGAAATATTTGCTAATTATACTCACCTCCTGCCTAACGGTAGTTGTACCTAAG

A\_16\_P36286861

CCCCTACCCAAAAATCAATACCAAAGCCTTATATGAGACAGAAAGGACAGTAATCTTTAA

A\_14\_P133471 ATTCTCATTCCTGTTGTGAGAGTGTAATTGCAGTGAAATTAAGCATCTGTGCATCCTA

A\_14\_P102106 TTAATTTACAGCAAACGCTTTGTAAGCACTCTTGTATTAGCACTGTGACCTATCTGAAAT

A\_14\_P109058 ACATGCTGAAAACTCAAATGGCTGAATAGAACTGAATTGGAGATGCTTTTCAGATAAAAAG

A\_14\_P119583 ACAGATCAGGGGTTTTAAATATGACAAACAGGAGTGTCTAATGCTGAACATTTTCAGAATT  
A\_18\_P16330160  
TCCCTGACAATAGGGATTGTAAAGATCCATCCTAGAGATATTAATAATATAGAAAATTATC  
A\_14\_P110660 TCAGGGATTAATCAAGTAATGAATTTAGCATAACTAATGTAGGCACCCCATGAGGCTTTG  
A\_14\_P120625 CTAGCCCACTCAATACTAGTCTGATGAATAAATGAAGAATGAAGGCAGGCATGCATATTA  
A\_16\_P18538487  
GATGTATGCCACAGAAAGATCTACAGCACTGTTTATTTTCAAGAATTCACATGACCCTTT  
A\_14\_P201818 TTAAGGGATCCTCTTGAGTAGAAGTTACATACGTTAAGTCAATGATTAGGAATGACTGTGC  
A\_14\_P123241 TGTTTAAAAGGAATATAGTCAGAGCAGCAGGGATGAAGCACATAAAAACTTGCCTACTACAT  
A\_16\_P01797636  
CCACCTAACCATCCTAACTAGTATCCACTATATTTCTTCTACCCTTTTCTACCAGACTG  
A\_14\_P108839 CAGAATTTTAAAATAAACCAACCTCTATTTTATTAATAATGTAGAGTTTGGGGACTGCAGG  
A\_16\_P18118942  
AAGTCTTTCAGTTTGTGTTCTCATAGCGTTAACCATAATGAACTCTTCACATACCGATGT  
CUST\_6468\_PI426210822 CAGGTTACACAGTGATAAGACCCAGGTGGAACCACTTATAGCTGA  
A\_14\_P137066 ACAAAGTCACATAAATAAGGTGCCGCATGTTCTTTTTAGTTTCCATACATCGTCTGTCC  
A\_14\_P130288 ACGACTTAGATAAATATGATGAGGAAGGTGACCCAGGTTAGTTTATCCACTTCTGATG  
CUST\_9601\_PI426210822 TCAGCAATCTGAATTCCTTTGGCTCTTGATGTGTTTCAGCAGCTTTTACCT  
A\_16\_P00685023 CTTAACACCATGTCTCTGAGCCAGGTTAGTGACGATGTCCTTTGTGATATCT  
A\_16\_P16548445  
TGCTGTATCCCATCATCTATCAGTATATCTCAATGAAACATAAACTACACTGGATGACCC  
A\_14\_P107302 CTACCCTTTTTCAAGTTTTAACAGCAACTGTAAACTCATTCCAAGTCTCATGGTTAAGAG  
A\_16\_P01858979  
AACTACCAGAAATAGAAGTGATTGTAGTAACTGCTTCCACATATTCTAGATACCCACCCA  
A\_14\_P111347 GTGAGTTAACTGAATTTACACAGGAAATGGAATCAGTCTTTTAGGCTTCAGCGCAGAA  
A\_16\_P03454417  
TAACTGAAGAATATGAAAACCAGTGAGACCATATTTTCGTTCAAGTGAGTTCGATTGAGAGT  
A\_14\_P115912 CTACAAAACCTCATGCCTTCAAATGGTAACTTCCCTATGGTCAAAAAGAGTAAATCATGAG  
A\_14\_P135227 CAAACATCCTTGTTACCTACCATGCTTGGCTTTCAATCCACTGGGATAAATAAT  
A\_14\_P102511 GATCCCCCTCAGGCTTTTCTTTTGTGCCTTTAGATATGTGAAATACAACACAGC  
CUST\_448\_PI426210822 CAACCAGTCATTAACGGCCCTGAGTGTGAGAGTGTGAAGGGCCGG  
A\_18\_P14753712  
AGAAGCATGTTCAATAGCACTAAAACCTGTATCTGTTAGCATCTTATATACTCTGAGGCCA  
A\_14\_P102946 TATTCTAAGTAGATGGGAACATCTGTAGAAAACCTTTTGTGCCTATGTCCAGATCATA  
A\_14\_P102502 TCGGGAGCCTTCAATGATGTAAATTTGTATTTCTTCCATTTTTATGGAGCCATATTT  
A\_14\_P114941 AAAAAAGTTCATGTTCTGATCACAAGCAGAGCCAAGGTTCATTTTTAGGTCAAACCTACA  
A\_16\_P17870476  
AAAATTGAGTCTCTGTAAACACTGACCAATTCCAAAGAGTTGTAACACAGATCATTCTGC

A\_14\_P131982 GGGAGCAGTTTAATGTGAGTTTCTGAAGAGTAGTTTTGCAATCGAAATTAGAAATGTGGT  
A\_16\_P20854516  
AATTAAGGGCTTTGTTTTTTTGCTCTCAGGAACCTTAAGACTAGTGGGGAAGACTAATAA  
A\_16\_P02816044  
TGCACCAAATACATCATCTACTAATGCACTGTATATAAATCCAAACATGCTTATTCCAA  
CUST\_10210\_PI426210822  
CTCTAGGGTTTCTATGTTTCTTCTGCTACAGATAGAACAGTTAACAGAGCCGCTT  
A\_18\_P22840173 GTTGATAAACAGCGGATGTAAATGGCATCACCCAGCACCCGGGTAG  
A\_14\_P136460 CTAACGTGTGCATGTTTGTATTCTAATTATCTATTCTCTATTCTGGTTACGCACGTTG  
A\_14\_P102622 GTGCCAGCCCTTATTTCTTAAGAATAGAAAACCTGTAGGAATTTGCATAGTAGATCACCT  
A\_14\_P200059 TACCTCAGGACTCAAACTTCTTATTCTTTCTAAGGTTAATCTTTCCCCCATGTTGTTAG  
CUST\_3112\_PI426210822  
TCTAAATAAACTTGCAAATGTTTTTCTCCTCTTGAAATTGTTTGTTAAATACACTTTGCT  
A\_16\_P21481837  
TGAGAACCAAATTTCCAGAATAAGTGTATCCTTTGTAAGTGTAGAATCAAGCCTTTCCA  
A\_18\_P11756181  
ACCAATAAACTTAAATCACACTCAAAAATAGGCTTTCACAATCAATAATCCACACTGTCA  
A\_16\_P02271750  
ACCTAAGTGGTCCCTTAATAGATGAATCTATCCCAAGGCATAATATCACCTTTTGTAGTGC  
A\_14\_P119399 AGTAACTGGATACCCAAAGGATAACAGAAATAGTCTGAAAGGAAAAATTGCAAATTCACC  
CUST\_3957\_PI426210822  
GTGTGGTGTAAATAAATATCAGTCCCAAGAGTCACCTTTGCTGATTTTTTCTTATTATT  
A\_14\_P101040 AGGTTGTGTTTTAGGGAGATTTGTGATTTAAAGCCTCAGATACTATGATATGCATGGTTG  
A\_18\_P22842672 TCTTTCCAGAAAAACCCAACCTCCCTGCATCATCCCTCAAGAACAAGAAAATAT  
A\_14\_P105341 CAGCCCTTACCTTTCTGTAAGTCACAAAATGGTGGTTAAAAGTCTTTTCTTCCATT  
A\_14\_P111636 CTGATGTTTCAGATAGAAGGAAACAATGGCCTATTGTCCAATAGATTTTAGGAATTGGTG  
A\_16\_P20963385  
AAAGAAATCCTGCTGTGAACTCTTTTGTGAAGAATGCTTTCCTAATGGAATTAGTCACCA  
A\_14\_P124229 CGTAGGACTCAATTTTGGGGTTAAAGTGGTTGATGATGGCTCTGAAACAAAG  
A\_14\_P123058 GACATCAAGTAAATAAACCTTGCCATAATGTGTGCCCAATGCCAAAACTGTAAGAAGAA  
A\_14\_P124978 TTAATTACTCATCCTCTGTCAAATTTCTTGACAAAGGGACAAAAATGAACACTCCTACCA  
A\_14\_P110399  
CCTGAGGGAAAAGAGCATGTTTAAAAGATTTTAGAGACAAGGAAAAGAAATAAGAGTGGG  
A\_16\_P03806384  
ACAGAACATGAGGATAGTAACTAGAACAAAGATAGGATTCAGATATTTTGGATGGTGGCA  
A\_14\_P134276 GGAAATCTATCATATGTGTATATCATAGATATGGCGAGAGGGAATATCCCGGTTCTCAT  
A\_16\_P19059090  
AAGGATGCCTAAAGTTTGATAATGCGTAGTAGATACTTTCTCAACATGATGAGTCTGTGG



A\_14\_P119596 TAGAGATGTCGACATTATTTCTAGTTATTTAAGCCACAGACCAGATCTGTCTGGACTTGT  
A\_16\_P16565073

GGGACCTTTTTACTCAACACTTCCTTCTGATTTGCTCTTTTGACATATCCTTTACTGTTT

A\_14\_P104424 CAAATAATACAGTTTCCCATTTGTTGCTACTGGACAAGTAAGCACAGGCTTGGAG  
A\_16\_P38293839

CATCCCCCTTATGATACTCATCCTCTAACAGCAATTGAACTTCAATACAATGAGTCATTCC

A\_14\_P121963 AATGGCTACCAAATAAATTCAAAGTTTGTCTGGAGCATTGAGAAAGTTTCATTAAGAGG

A\_18\_P22841595 GAAAATCAATGGTTTCTTGACACATCTTGGCTTGTGTGAGGGGCCATAACAATA

A\_14\_P115370 CAAGTCACAAGGGCAGGACCAAGGACAAGGCATTTACAACATATTTTCTTTTT

A\_14\_P200544 CAACCCACATCAATGAATGGGTAATTGACCAGCACCAGTTTGTGAAAT

A\_16\_P21597646

ACCTCTAAAGAGCCTAATAAACCTATTCCTCAAACCATCAGAATATCGAAGTTTTACGA

A\_14\_P134182 GCCACTGTGTTACCATTTTTATTGAGTGTCTAAGGTAAAGACACCTTTGAAAGAACACTC

CUST\_1039\_Pi426210822 AGTCTGCTTTGTGATCTTTTGGGGCCAACCTTTCCTGCTCTCAACT

A\_18\_P13322152

AAACATTTTGGCTCATGGTTACAAATTATGCGTTTACTGTATTTCATCTTCGTGCATGCAC

A\_14\_P115671 ATTTTATGAGATAAGAACTTGATGGAATTTCACTGATCTTCTTTTCAGCAGGATCCGCT

A\_16\_P15917459

CAGTTTTGCAATGAGAGAATAAACACTGAATCCATCATGTTGTCTGCTATGAAAAGTGGT

A\_14\_P110147 CTCCTCAAGAGGTTATATTTTCTTGGATACTCAAGGATGCTCAGAAGAGTAATTGAGCA

A\_14\_P107897 CATAAGAAGTTAACATGACCATGTAAGAATAAAAGAGGCTGCATACCGAAGAGTGTGAG

A\_14\_P136065 AAATGAATTGAGGGGATCATCCATGAAGTCTCTAATCACTTCTTTTCTTTTAGAGCACTT

A\_16\_P16191935

ATAGACATTTACATGCTGCTGAACACAGAAATACTGAAAAAGGTAAGCCCTAATGAACCG

A\_14\_P134117 TTACCATTCCTAATGGTTCCCTAACCTTTGGAGAGAAAGCACTTTGTGTATTATCTGAGAA

A\_14\_P111459 GATTAAGACCTCACAATATCACTTTTTTCCCTATATTTGTCAAGGCCATTATACGGCAA

A\_14\_P120400 ATTGTCTTCTGTCTACATAGTCACCTTTACCATGTAAGCCAAGAGAATAGACTGACTTA

A\_16\_P15144766

AAAAGGACTTCAACCAATATGAAGAGACCTTGAAAAACACAAAACAAATTACCCATAGCC

A\_16\_P18659566

ATTGTGGACACAAATACACTCTGAGTGTCTCATGATCTAGAAGTTCCTAAACTTCAGTT

A\_14\_P104593 AAGGGAATATGTTCTGAATTCATTTGACTCAGTTTCTCGCCTGCCAAGAATCTCTT

A\_14\_P134540 AAACAGTGGTGTCTTCTGAAAAATAACAATGAATTTTTCTGGCATTTCAACCTCTGAACCA

A\_16\_P40103957

ACCTCTAATGAAAGGAGACATGAGAAATAAGACCTAAAGACAATACTAAACAAGAACGGC

A\_14\_P121575 AAGTTTGGTAAGAAGCAATTTGGTAGGGGTAATTCATATTCCTTTATGTTTTTACCCGA

A\_16\_P16387856

AAAATCAACCGGTCAACAAATAATGTTAGCATTAACACCTCTTTATCTCCCTGGTCTT

A\_16\_P02865153

TCCTTTCTAAAACTCTCAAGGCTTTAACTCAACACCATAATTTAGATTAGAGAATTCCC

A\_14\_P125673 ATCATATACCGCTTATAAGAACTATGATTATTCGGAACCTGGAAGAAACAATGAACAGCC

A\_14\_P107707 ACTATTTAAAGGCTCAGTTCTGATCATGAGACCTTCCATCTGAACAGATTGTTTAAATCC

A\_18\_P22842490

ACTGCTTTTACTGTCATGAAATAGACTGTGACTTGTATTATTCATTTATGTGACCAATT

A\_14\_P136242 TTCTAAGACTCAGGTGACACAGACCTAATCTCTCTATGTGCTTCCATGATAACTCTTAAC

A\_16\_P37995554

AGGGAGTAAGTTGTATCACACTCTATGCTAACCATGTTTATAACCATTTATGCTTGCACA

A\_16\_P00685494

GATGCCAAATACCACTTCCTTTTTCTACTAGTATGAATTCAGCGTGATCTTTGATACAAGC

A\_18\_P17037019 TTTTATACGTTCCCTCAGTCAATATAATTTCTCTTTGCTATTTTCATCTTACCCATACACACA

A\_14\_P136958 AATTTGAATGTCAATATCTTTGCCTTGAAATGAATGGAAAAGTATTTGTCACTCAGCGGC

A\_18\_P22841911 CTAGATCTGTGTGGCTTGCTACTTTTTCTCCCACCACATCACAGGTAATGAAT

CUST\_2947\_PI426210822 GAAGCAGCCGGGGGCAGGGCAGGGAGGTGGCTGAAAAGTATTACTC

A\_14\_P128089 TTGCACACATTGGTCATAGCAAGAGATGTCAAGGTGTCATTAATTTTCACAATGACATAG

A\_18\_P14137445 TCACGGTGAATGCTCAGGATCTCCTTGCCAACGTGGGTGAAGATA

A\_14\_P130480 TATAGAAAGCATTCTGTGCCTACTTGCAAAAAGATTTTCAGATTTGACAAATAGTGGTGCC

A\_14\_P114515 AATTCCTTGCTATTTAACTCTCTCTTGAGATTTATCTTGAGAGACAGAGCAAAAAGTCC

CUST\_1350\_PI426210822 TAGCTATTGTAGTCTCTCTGCAGGGCCATGTCCCTGGGGGCATTT

A\_18\_P17738062

GACTCATCATTACCAGATACTCTTACAATCATATTCATAGAGAACTTTATTAGACCCCC

A\_16\_P20000653

CACCCAGTAGCCATCTATACCAAAATGACTCTCAATTTTATCAATTCCCACAGCATTTG

A\_14\_P112792 TTTATTACGGAAAATATCAAGAAGTAGAGGAATAGCACAGTAAGCCCAAAGTTCCCATCT

A\_14\_P122065 CTTGCCAGGGACTTAGGTTTATCCTGTTTTGTTTGCTACTGGTTACAAATTCTATTTTCT

A\_14\_P133737 AAATAAGTAAGTGTGTTTTATTGTCATCTTGGGTTGGAGGAAGATACTAAGACGCAGAGA

A\_16\_P36230259 TTTAGATTTATCCCTATGTCCAGAGTCACATAGACAGGAGGGTTCTAACTCAGCAAA

A\_14\_P135502 CTCCTCATTGGAGAATAACTACAGCACTTACTGATACATCTATGTTTTCTGATTTCTCC

A\_14\_P139865 CTTTTCAAGAGAGAAAAACGTGATATGATGGTACATCATATCAACCTTTCATTCTCCAG

A\_14\_P130359 CTTTCTCTCGCAGACGGAAATGGAATCCAGGGATTCTTCTACCCAT

A\_14\_P134998

GGCTTGGA AAAACAAGCATTCAACTTGTAGCAA ACTAAAAGAAAAAGGAAGAGAAGTTGA

A\_14\_P200206 ACTCACATGGCTCATAAATGAAAAACATGAAAAGCATTTCAGTATAGTCTGTTCTCCATCC

A\_16\_P20278694

AAGTGCTTTTAAATAAACATCCTGTTTACAGTAAGTTCCTATAGACTACTTCCCTGCCCC

A\_14\_P107756 TCCCTCTTGCTCTTTCTAAGTATTTCCAAATCCGTTGATGTCTTTTCTCCAGACTATAA

A\_14\_P113524 AGTTAGATTTTGCTTTCAAGATTTGCTTTTTCGGGCCTGATGATTTTAAAGCAAAAATCAC

A\_14\_P127139 CATTGCACACAACCCATTCCCTTTATTCTTGGCATTGCAGATTAGGTAAAAATATAGGAAG  
A\_14\_P102470 CATCAAAAACCAGAATAACAGATATGTGACCACGAGTTTCAATTTCTTTCTGTGGAAACC  
A\_14\_P131142 GAAATCTCTTCAAATCCTGCGATTGAGAGTCAAGTCCCAGTCGTCCTTTTT  
A\_16\_P58424432 GAGTGAGGCCCAGCACACTCTATTTTCTAATAAAAACCGAGAGATCCTTATGACTTTG  
A\_14\_P121163 CAACAATTTTTGGCCATGCTTGATAATTCTGTAGTTGTTGGTCTCTGAGACCAAG  
A\_16\_P02640836  
AAACTACAAAAACCGTTTAACTGTATCTGTTGATGTTACAGACCAAGTTATAGAAGGC  
A\_14\_P111892 CATCAACCTATTAATAACATTTTAAAGCCTTTTAATTTTCTGTGGTGTTTTTGAAGGGGA  
CUST\_6510\_PI426210822  
CATCTCAAATGCCTCCACAAATTTCAAAGAAAATTGTCAAGAGAAAAGTTAAGCACCTCA  
A\_14\_P137421 AACCAGCCTGTCTTCTGTCTCCTGAATTTTATTTTAAACATCTTTTAATATGTTGCCAGGT  
A\_14\_P132275 TCTAGATTTTTTGATTCATCAGGTGATTCTGGACAAGGATTAAGAATGTGGATCAAGCAG  
A\_14\_P126094 AAAGGCTTACTTCAAAGAATTCTGAATGACGTAATTACCAAACACATCCACCATGAGTT  
A\_14\_P124899 AAGTTTGTTTAAGGACTTAAAATCAAACACAACCATGTGTAAACTGCTAAATGAGGCTCC  
A\_14\_P138306 TGCCACTTTGTTTTTAAAAAGGATTTAAGGCAGCCTCTTTTATTAGAACATGCCTTCTCT  
A\_14\_P125785 GAATAAAGACTGAAGAAGAAGCCTTTTCAAGTAAAAGGTGCTTGGAAATGGTTCTATGAAT  
CUST\_6286\_PI426210822 TCATAAGCCTTTCTCACCAGGAGCACTGGACTCTCCTTTAAGAAAGTTTT  
A\_14\_P138330 CTGTTGGAAAAGAACAGCCTATTCTTCTATCAGAAAAAGTGATGGATGGAACCTTCTGTG  
A\_16\_P00685436 GTATCTTCTTTTCTGAAGTCATCCATTCTCTTCTCCTGGTGGGGACTTAAAG  
A\_14\_P109792 TTTAATTCTAGAACCACGTTTCGTTTGAAGTAGGAATGCTAGTCTGGCATAAACATAAAAA  
CUST\_1168\_PI426210822 CCACCATTATTTCTCAATGTGGAGAACTCAGTAATGCAAGTTCTCTGTTC  
A\_14\_P130295 CTACATGACTTGCATCTACTTTCCACATAAAAGATGACAAAGAATCCCTTGAATTTTCAAG  
CUST\_465\_PI426210822 AGTTACACGCCTTGTTC AAGGCCACCCAGCCTGAGAGATCAAT  
A\_16\_P18691762  
AACACTGTAACAGGTCATTATTTTTTCGAAACTCAACAAAGGTTACTGACTCACTTTTGCA  
A\_14\_P132305 CCATTGGTTTTTTCAGTCCACCTCTTCTAATAAAAATCAAAAAAGGAAACAAGAGTCAAAGC  
A\_14\_P108125 ATCCCTAGGATTTCTTTTAAATAACTGAGACACCAAAGTGCAGGAGATCATAGGAATAATG  
A\_14\_P105703  
CAACGACAGTCACAACATATGCTCTCACAGCAAGATAAAAAAACTTGAAAATACGCAGAG  
A\_14\_P124069 GATGCTTGATTTCTTTGTCTTCCATCACTTCATAGTCAAACCCAAGAAGATCAATAGGAA  
CUST\_1520\_PI426210822 ATGGAGGATTACAATGTAAAGCTCCTCATCTGGCCCCTGGACTT  
A\_16\_P00576794  
AAAAATATTTGCGACACTGAGTTCTATTATAACATGTGGTTTTCTTTTCTTGATTATGGCCC  
A\_14\_P100062 TCCTCAATGCTCCAAAAATATGCTGGAGTGCATTTTTACCTCTGTAATTTTCAATGTCAC  
A\_18\_P12866463  
TTGTGGATTGTGCCTAACTTAGAGCAAACTATCTCTATTTTACATTAGCCATCTGATCA  
A\_14\_P106674 GAATTGATAAGAATGACTTGATTTTTTTCAGTTGAATGGTCAGGAAGTGAATTGCCTTTTT  
A\_14\_P201494 CCCTTTTCTAAGGATCATATGAGTAATGCCAGGCTTATTGTAGGGAACGCAGAAAT

A\_14\_P202562 ACCAATAAGTGTCATATCCTCTGTAAGCAATTCCAGAACTCTTATTATCACTTGTCTGCT

A\_16\_P19151392

ACAAGCATGCATGATCTTGAAGGTCCTTGTATCTCTAAAAAGATGTATGACTCATTTCGT

A\_16\_P18124386

AATGAAGAAAAACATCATGTTCTATCCCAACATAACTTCTTTTAGTTCCATACCCCTCCA

A\_14\_P109745 ACTTGGCATATAAGAGATCTTTTACAAATGTTCCCTTTTCTCATCTACTGCTGTGATAGAA

A\_14\_P139149 GTTTTAAATTGGGAGAAGTAGAAACAGGTAATTTTGGATCTGGAAGACTTTGGAAAGGGAA

A\_14\_P111528 ACAGGCACTCTTAATCCTCACAGTCACTATATTCCAGTAATCCTAGAAAATAGGAACTGT

A\_14\_P101894 AGCATTCTCAAAGAAGACATTTTCCAATTCAGACCATGTTTCTCAGATGCACTTATTGA

A\_16\_P02390319

GAGGCAATCTAATCAGTGAATAGCAAGACTTCATCCGTAATACTAGGACAAAGATTCTCA

A\_14\_P129285 CTGAACGTAACATTTTGATGTGTTTGCAACTGGCTTCTGTCTTCACAGTTTCTTAATTAC

A\_14\_P117729 GGTCTGCCAATTCAAGTGACAAGTGAGAGAATACTTTATCATCATATTTGACATCTTTAA

A\_14\_P202221 TAAGTGGGGAATGTCACAGAATCACAGATGTCAGCATTAGAAAAGTGCTAAAGTTGAAG

A\_14\_P126942 CTAAAGTTATTGATGGTCCACATGTAGGAGAATTTCACTACCTTGATCTGTTGATAGAAA

A\_14\_P139222 ACATGCTGAGCCCAGTTGTATAATAAGAAAAAAGAATGGTAACTCTAAATCGCTCTTTCC

A\_16\_P00685541

AAGTTTCTTCAGACCAAAAAGAAGACTGCCTCAATGTTGTTAGACGCTGAGAAGTAATGATC

A\_14\_P130929 CTTCCAGTCTGAATGCTTCACCTGCTTTTTAATATAACCGTGCCTTAAATTTAACATCCA

A\_14\_P111714 CTACAAAAGGAAAAGAGTAATACCTGTAGGACTTTGAGAAACGCAATCTTGATTTGGCTC

A\_14\_P124145 AATGAGATCTGGGTTCTCACAATACTATGAAATCATGACAAGGAAGAGAAGACTGTTTGGAT

A\_14\_P134440 GCAAAATATTTTGATTTTACTGTATTGTTTCATGCTGCGAGCAAAATGGGTGTCTGCTAAG

A\_14\_P119772 GTGCCATGGTTTGGGTCATGAGGAGGTTTGATGACATAAAAATTATGCTCATAAGTATTA

A\_14\_P118128 CTCTCAACTTTATTTTTAAGGCCTGGAAGATGCTGTGTCTCTGTTACAACCTTAAAAGGAA

A\_14\_P118173 GTGATGCTTCTTGTGAAACTCATTTGCAGATCCATGTCCTAAAGCAAAAGCATTTACAAT

A\_16\_P19415899

TCCTCTAAGTTCACTTCCAACATTAATAAATCACCTCCTTTTATCTCTCAATCAAAGCAGC

A\_14\_P119748 AAAGGAAAGAACTGATGAGAAAACACCAGTGGCTGATCTATGTTCACTTTGAAATGTTTA

A\_16\_P18108889

CTAGCCCAGTAGTCTAAATTAAGAGTGAAAAAAGAGGAAAATCATGTAACCTTACCCCCAG

A\_14\_P102802 TGCTCCAAGTTTGGATAACTGAAAGTTCACCATTTTCTTCAATGTCACGTGTGTTTATTT

A\_18\_P11804772

TCTTTCTCCCAAACAAAACCTTACATGATCTCGACAAAACCTATGAATGCTCTTGACTACTG

A\_14\_P111375 GGAATAAAAAGATTCGATAAATGGAATATTAGCCCCTGAGGAGACACACTGAATGATGAA

A\_16\_P02530494

TTTTTCAGTATTTGTAAGCATTTTCAGCAGAACAATAAAGCCTTTGGACTACGGAAGTGAGT

A\_14\_P128447 CTTTTGCTGTCTCTGGCATTTCAGGCACAATTCACCTTCCTTT

A\_14\_P119721 CTCAGAATGACAGCCCCATAGCAATGTGAGGTTGCAAATACATGTAACATTTATAATGT

A\_14\_P105742 AAGTAAACCATTTTTTTTCCCATAAAGACCTCACAGTGCTTAGATACCTGACAAATCCAAA

CUST\_10173\_PI426210822 AGAATGTGTAAGGTTTGGCAACCCCTCCAGAGGTCAGTGGGTTAT

A\_14\_P106651 AGTTTAACTCACAGTCCAGGATCATGTCTTCCATTTGAGGAACTTCCACATTC

A\_16\_P00465058

AATGGAAACTTGTCTGCAATGGTAAAGCATGACTTTAACTTTAGCCAAATTACTTCCCA

A\_14\_P125966 AGCATCTCGGATAGAGGTCCTAATCTATCTAGTTGTTGGATATTGAAATCTTGAAAATTC

A\_14\_P105471 CTAAAACTCAACAACCTTCTTGGAAGATTTTCATGCATTTCTTAAAATTTCCCCTGTCCAC

A\_14\_P129338 AAGAATTCGTAAGATGCCATCATCCATTGACACAACCTTTTTTTAAATTCCTTATGGCTC

CUST\_5423\_PI426210822 GCTGCACAGAGCAGAAATAATGGCCCAAAGTTGAGAGAGCCGTG

A\_14\_P109183 TGTGACTAAAGATCATACTAATTGTTTTAGAGTATGGGAAGCAGTCTGAGGTCTGAGAGA

A\_14\_P128263 GTCAGCCCTTATCTTTATCTTACACGAAATTGAACACAGAACCTACCACTGTAAAGATT

A\_16\_P00914464

ATTCCAATACAAAACCACCAATTACTTGACCAAAGTCTTTTTACTCAAGTATTCCACGTG

A\_14\_P108924 CACACTGCAAGTTCTTGAGAATTCTCAGTGGACATTACGGTAACTATGCATAATAGGTTA

A\_16\_P03642239

CCTATCACACACTAAAAATGTTTTACAGTTATTGTTATTGCACACAGAAGGCATCTAGGA

CUST\_7572\_PI426210822 GTTGATGACACACTTCACTACCCTCTCCTGGAGCTCCCTGAGATC

CUST\_1037\_PI426210822 CTCTCTTCTCCACAGAAAGAAACATCTGGCACTGACAGGAGTCT

A\_14\_P112178 TTTCAGGGAGAAGTTGAAGAGATTCAAATCTTTAACTTTTGCAGGATCTACATCTTCT

A\_16\_P36230930 GATGACAGATTTTCATGCTTTCCTCTTTCAGAATCATGTCTCCAACCTCCTTTGTATATG

A\_14\_P105785 TTATACTTGTAATACTGTAGCCAGAATGGGAATTAACCCTTCAATATGACCTCCAAGGT

A\_14\_P127477 TTAATAATTGCTCATTGAGTTTTAAGTCACTCCCCATCATCTTTGTTCTAAGTGTCCCTC

A\_18\_P16735215

CACACACATAAACCCCATTAATACTTTCAACCATTGATAAAAATAGTCATTTTGCCCA

CUST\_526\_PI426210822 TATGTGGATCCCAGAGTAAACTTGGTGTGTGCAGTACACACCAGTAG

A\_16\_P18144556

TGCTTTACTTCTCCCATTTCAAATCTCATGTCCATAAAGTCTAATATTCTGCATCCCTA

CUST\_9672\_PI426210822 CACCAAAGATGCAAGCCTGGTATCTCAACCAGAGAGGCATCTTTC

A\_14\_P115978 CAATTGAAAATCAGAAGAGAGTTTTGTATTTGCACCTCCAAGCAGGTGAATTGAGTCA

A\_14\_P119630 TTGCAAGACAGCAGACTGGTATCTGATTCCTCAAGAGATTTGATTTGTGATAGGCTAT

A\_16\_P20764183

ACTGCCAGGTTTTAAATCACTCTCATCAAGACACTACATACACATAAGCAACTGTGAAAA

A\_14\_P202140 AAAATGTGATATGTCCACAGTGGATGAATTAGCATAATAGTGAAGTGTGACTGTCCAG

A\_16\_P16701927

AATACAGGTCTTTACGTCTAACCCTCTAAATTTTGAGATCAGTTAGCATATTCACCCAG

A\_18\_P22841397 ACTTTACCACTCATAGGTTCTAAGAAATCTCCCCTCCCCACCTCATTCT

CUST\_8386\_PI426210822 GAAGGTGAAAATACTGTGGAAGGAGGCCAGGAATACGGAGAAAATGTTT

A\_14\_P133101 TTAGCCATACGTTGACCACCAAAACTCTTCACCCAGATAATCATCAAACCTACATTCTG

A\_14\_P137056 TATAAACTGTCAACTAGGAGAGTCAAGATCTACCTAAAGTGGAAAAAGACCTGATTACCC  
A\_14\_P136157 CTTACCGTTGATTAGAAGCAACCGGAATGAATTCCTTGCACCTTCTCAAATTTATTATTCT  
A\_14\_P106978 TCATTCAAAGGCAATTGTCCCTATAACAATAGTTATACTTGGCTTATTTCTGCAGGAGCAA  
CUST\_5265\_PI426210822 AGGTAGGCTTCTAGGTCAGGTGGCCAGTTAGGGGTGCCAGGGTTC  
CUST\_3797\_PI426210822  
GAATGCATATCATTGAATAATGTTAGTGGGAGGTTTTAACTATCTGAAGATCACACAAC  
A\_14\_P136307 TACTGGCTTTTGTTCATGGAATTTTGAAATTGTTTGTGGAATTGGCTGCATTAAT  
CUST\_264\_PI426210822 CATCCTCTGGACCAGAGGGTATAAACAGCCACACAGTGGTCACTT  
A\_18\_P22840492 GAACCTGCTCCTTACACTTCTTTGCCTTGGTTCTTATGCTCACAGAAGT  
A\_14\_P108408 TAAATCTCACTCTACTCTTGGAGTGAGCCCCATTATATGCAATCTGATTTTGTGATTT  
A\_14\_P110668 CTCCACTCTGTAAAATGGTCACCCATAATAACTCAGAAGTCCGAAGTAATGTATCTAATG  
A\_14\_P137336 CTAAACATCCAATGGAGTTACTGATTCTCCTCTTCAAAGTTACATTAGGAGGATGTGATT  
A\_14\_P137774 GATGATTATGATCTCATGTATGTGAATTTGGACAACGAAATAGACAATGGACTCCATCCC  
A\_14\_P112253 AACATGCATGAATGAAGATGCTCTTTTTTAACTCAAATGGTGGCAAAGAGTTTTTCCTTT  
A\_16\_P00685351 CTGTCTTCTCACAGACTGTTTTTGAAGGAATTGCCGTTTCAGAGGACTGT  
A\_14\_P101328 AGAGAGGGGTGGAAAGGGTTATTAGTTTTGAAGTCAACTGGATATACATTACTTAGTTTG  
A\_14\_P201482  
CCTACCAGGCTTAAAAAAAAAAAAAAAAATCTTAAAGCAGTGCCTACCACACTCAAAGAAGAT  
A\_14\_P113721 GAGAAAATAGGTATCTATCCATCCCAAGAGTCAAGAGTTTTGGAGGGATTTTTAAAGGTA  
A\_16\_P21602684  
CCCAGAGTCCTTTTATATTGAATTTTTTACCATACAGCCATTTTCATATCAGATGCAGCA  
CUST\_3817\_PI426210822  
GTTTTGGGACCAGGTTGTCTTATAGTTTTATTTTGAACAACCTGATAGGCTTGGTATTG  
A\_14\_P126461 CAGACAAGACACCACAGCAATTCCAATTTTGAACAGAGTTTATTGAGGTGC  
A\_14\_P102852 CATCTCTAAGTGGCCATGTCTTTAGTCAGAGGTTCCGGAGAAGTTCATGTAG  
CUST\_9329\_PI426210822 GAGAGCTGAAAGCTGTAGGGTGTGCATATGAAGCCTTCAAGGCTCATT  
A\_16\_P16280383  
ATCAGGGTAATTCTAGGTTTTGAGATAGCACTAACTAATGGCATTATTTACAGGGTCACC  
CUST\_5824\_PI426210822 TTCCGATTTGTCTGATTGAAGCAGCCAAGCTTGTGTTTGCAGAG  
A\_14\_P123556 CTTAAAAAAGCAAACATTTCAAACAGTTGGCTAACACGCATGAACTAACACTCATTCAAGT  
A\_14\_P131940 TTTTCTCCCATGTTGGTCACTTACTCAAAGATTTTGCCCAACTGGTCG  
A\_14\_P118723 CTGGCTTTCACAGAGATACTCACTTATTAAGGTCAACTTCATAAGTCTGCATATGAGGTT  
A\_14\_P130907 GAAAACCTCGGGCTGGCAAAAAATTAACAACCTTGTAGTGCTGACATCAAGGTAAGTGT  
A\_14\_P114570 AAAC TAGGGCCTAGACCTGACTTAGAGATGTGTGTGGTCTGAGAACTTC  
A\_16\_P17491616  
ACAACCATATGTCTTAACTGAAAAGCCATCATGTTTCCTTAGATTTGGTCCCTTCATGATT  
A\_14\_P109594 CTTAATGGTAATTTCTAGTCTGAAAAAACAACAGAGTAACTCCCAACACCCT  
A\_14\_P104807 ACCTAAGCCTTTGCTATTCTCTCCTATTCCAAGTTTCAATTGAACTCCATCTTTACTT

CUST\_5785\_PI426210822 TTTTTTAGGCCTCAGCATGGGATTTGGTTGTCATATCAACCCTATAAACAGTGTT  
A\_14\_P106287 CTTTTCTCCCTCATCTGTAATTTTAGGGCATCCTAGAACGTTTAAATGCTGGAG  
A\_16\_P02107040  
GGTGTGATTTCCAGTTCATTTGTATATACGTTTCTTAGCATATAAAGCATTGACGAGGTC  
A\_14\_P129781 GTAATTGTCACATACAGTCTTTCTTCTACTTCTGCTTCATTCTCTTTGTGTCACTTTA  
A\_14\_P201871 AGACTTTCACATGTGAACACTTACTTTTTCTTGCTCTGGATCAACTGAAATTCAGACAAA  
A\_14\_P114019 CTTTCTGATTTTGCCTGACATGCTGAAGAACGCACCCATGTTAAAGAGCAT  
A\_16\_P20799904  
AATGCCTACAGTTCAATATCTCGAATATCCAAAATGCTTACCTTCCATATCTGGGTTCTT  
CUST\_532\_PI426210822 TAGTGTTCTGTCTCTACCTTCATTGAATCCCTGGTTCACAGCA  
A\_16\_P00486748  
ATGGAAAATCAGTGTAGACATAACTCTTTTCGACAGGTATCAAAAATAATCCCCTGATCC  
A\_14\_P139480 ATCCTGGTTGTCTTTACTAATTCCTGGCATTGCTTTTCTCCATTTGGAAACCAAATCTA  
A\_16\_P03713408  
AGACGTTTAAAGTGTGAGATGAACCCAGTATAAATAGTCCAATACGTGTTTGCTGTGTCTT  
A\_14\_P117517 GATCATCCTAATTTTTCCCTTGAACATGTCCAAGTTTTCTTGTAACCAAATGTCACAGA  
A\_16\_P03059795  
TCAGATTGGCATAATTTTCTGTTCATAAGCATTGGTTTTGATACTTACCTGACTCTTGAA  
A\_14\_P135663 GTTATGATTTACCTAAGCATATCTACTTTATCAACTGTGGTGATTCACGTGCTGTTCTG  
A\_18\_P16600106  
AAAATGATGGATTCACATTCACTTGGACATAACAGGCATCTACTTTCATCAAAGCAGAAG  
A\_16\_P38285164  
AAATCTACATTAACATCACAGGACATCTCCATTGAATTTCCAAATTGGTGATCATGCAGA  
A\_16\_P18418779  
TGTTATTCACCTGAATATAACCTCACTAGAACTCTACTTTGAATACACTCCCTTACTCCC  
A\_16\_P00721596  
AAAGGCGATGATTGAGTTACTTAAAGGGACAAGATTTTCTTAAGATTAATGGGGAAGGAA  
CUST\_9723\_PI426210822 AAATCAAGAGAGGGGACCCAAAAGGATCTGGGCAGAGAACCGAGT  
A\_16\_P15671842  
CATATTCACCCTCATAATCATTCTCCTCCATCAAATTCAGAATAAGATTACAGACCCCAA  
A\_14\_P102569 TTGGAACCTCATTGTTTTGTGGAGTGAATGTGAAGATGTGACCAAGGTGATTGAA  
A\_18\_P14138238 CAATGCTTTGGAAAAGCAAGGTGATTGAAGTTCACTTTTGAGTCACCTGAG  
A\_14\_P201594 CATGATCATTGACAACTTTGCCCTAGTTTCTTACTCATTAAACCTTGAAGTTGCAC  
A\_14\_P121881 GACTTCTGTAAGTTTTAAGTTCCTTGATGAGAAATAAATCAGCAAAGGTCATTGTCTCCC  
A\_18\_P22840737 CTAGGAGAGACCAACCTCTCTGACAGTCCTGTGAAAGATGAAAACAATC  
A\_14\_P109935 CATTCAAACATACTTAATTTGGGGTAACGTGATACAAAGACGGAAAAGGCATCATATTC  
A\_14\_P114075 CTTAATGTCCCTCCTTTATCTATCATCACTGAAACGAATTAGCAGTGACGTCCA  
A\_14\_P118619 TGACGCCATAAGGGAGAAGATGAAGAAAAATTACATGTCCAATCCAAGTTACAATTATGA

A\_16\_P39117409

ACTTTGACTCATGAGATTAGAGCAAATCTGTTCCAATACTTAAATCACTGGGAGAAAC

A\_14\_P131739 TTGAACATGCCTTCATCCTCTATAACAAGTATATCACGTAAGACACCTACAGTTTCCTTT

A\_14\_P124795

ATCGTAAAGCCAAGGACATTTCCAAATTAATAGAAAGGAAGGAAACAGAACAGAACTTG

A\_14\_P102815 GATTTAAAAACATTTACAATACATTATTTTTGCATCTGTGTTGTTGCATTCCCATTGGCT

A\_16\_P37994839

TGGCTCAAAAACAGTTATTTCCCTATTCACACTTAAAACAACAAAGTCAGTAATACACCA

A\_16\_P16248906

CACTTATTCTGACACCATCTAAAATCCTGAGTTTATGAACCAAGTGAGTCCATATATGG

A\_14\_P115668 TAGTTCTCAATTTAGGTCCCCTGTAATTAATCTCTGTGAACGTGGTGTTTTGTGTTTT

A\_18\_P22842257 ATTTTCAGTTACAACAGTGTGAGGTGGGTGGTCAGGAAACATTCCC

A\_16\_P39253845

AAACCACCAGACCACTTAATTTTGGTATCATAACGTTAAGAAGTTCGACTAAGAGTTTTCC

A\_14\_P102454 TGTTGAAAATCTGGGAACAGCATCATAGAAAACCTATATCCTCCTCTCTTAGAACATTGCT

A\_14\_P130531 ACCGCTACTTTAAGATAGATTCTGAGCATGTAATTACTGCAGTCTTGGCATGTAATTACC

A\_14\_P105710 ACTAAACGCTTGATTTTTGACTCAGGAGGAGGTTAGAGAAAAGCGTTATGAAGTATAGAAT

A\_14\_P138265 AACATACTTAACATTGTTACAGACAAATTGCTGCCATTACCAAGCCAAACAATTCTGTCT

CUST\_8950\_PI426210822 AAAATCCAAATTTGGTGCCTAATGAACACGGGGTCTTTTTCACAAAGCAA

A\_16\_P15995706

ATAATCAGCAGCATCTCATAATCTGATGATTTCTGTGTGACTTTATCTTCCAATGAGCCC

A\_18\_P13302789

TGCATTTAATCAACTCCAGACATTCAAGCACTTTATAATAGACCATCTTCCTGTTTGCTG

CUST\_4281\_PI426210822 CAGTGTGACTTCTCCAAGACTGATTGGCTGATTTTTGGACCCTCTTT

A\_16\_P16817716

ATACAAACACAGTGGTATTTCCCTAACTTTATACATTTCTTATTTCGAAAGACTGTCCTGGG

A\_14\_P202546 TATCCCATTTTCCAACCTTACTTATGAACAGTATGAGAACAAGGCTGAATTTATCCAGGTC

A\_16\_P35023263

GCAATGAACAACAATAACCAATTCCTCAAAGAAAAACCCATTCTTACTTTTTTCTTGGC

A\_14\_P139182 GTTGCGTTTATTTTTTCACTTCTTCTGAATCAGAGAACCTGCTAAGCCCTATCAAGCAT

A\_14\_P121803 AAACATCAAACCACAGTTCGCTCCAAATTGTTCTCGATGTTATATTTTTAACAGAATCCC

A\_14\_P120446 CTCATCCCATCTTAAGGAAGGAGTATGCCAGGGGTCTTAAAAAGCAAAAAATTTTA

A\_16\_P03734975

CCAGGCCATACTCCATATAACATACTATCATTTCTTTGAGGTCTTAATGATCCTTCCTTCT

CUST\_6414\_PI426210822 CATTGTACCACTAAAGGCTGATGTTGGCGGCATTATTCTTAGGAGACATAGAA

A\_14\_P109114 GTATTGAAGTGTAACAACTGTTCTTGCCACAAGTTGATTCTAGTCTAGTTCAAGACAC

A\_18\_P11038615

AAAAAAGCACAAAACAAGAAATGGCTAACTGAGATAACTATAACATTTGAGGTGGGATGA



A\_16\_P36230602

TCCCCTCACCCCTATATGCTGTTATGTAAACAAGTAATTTTTTAGGATGATGTCAGAACCT

A\_14\_P139394 CACCTGAGTCTCTTAACATTGTATCTGCCACAACAACGATGGGCCTTCTTAATATATG

A\_14\_P127161 CTATTGGAAATGCAGTTCACAGGTGAGCATGTTCTTTCTGGTGACCT

CUST\_9030\_PI426210822 CTCCACACATGGGTGCCGTAAGGATTCAGCATATGCCGTTCTCTA

A\_18\_P22839051 AAAAATGCATCTCAGGCTATGGGAGACCATCCTGCTAAGCAGGTA AAAAG

CUST\_8931\_PI426210822

GAAAGGGTTAGAGAAAAGCAAGTATTTTATTTAGAAAGACAGTTTTTCAGTTAGAAAGGGAGA

A\_18\_P14138486

TGACCTCTGGCACAGAAAAGCAGTAAAATAGGTGTATTGACACTGAAGTCATATTTCTAT

CUST\_920\_PI426210822 CAACTCAAAATGTTCAAGTCTAATGTGCGCCCTTTTCATCAGACTTGCCAA

A\_14\_P118670 AATATAGTTCTACTCATTCTGTGAAATTCAGAGATTCCCAAATAGAGACCTCACCTAT

CUST\_5536\_PI426210822 CAACTGTAGAGGAGGATGTATAATCATGACACTTGTCTTGGCTCAACTGTGAG

CUST\_2853\_PI426210822 TAATTAGAATGAAGGTCTAGGCTTAGCCATAGCCCCAGAAGTGTGGG

A\_14\_P130149 CTAAGTATTGTTGGTCAGATTGTTATAGTGATTCTCATGTAAAGGACTGTGCACACTG

A\_14\_P120230 CTGTTGTCCACAATCAGGGCAATGTGAATTATCTGAAAACATCTGGACCTAGAAAAG

A\_14\_P202130 TGTTGCACTGTATATACCCTCTTTTCTATGGTTACTATTCTCAAACCTAAGACTGGGGATC

A\_14\_P109943 CTGTCATTTAAAAATATGTATCTTGGAACCAGCCCAAGAGTCTCTTTGGAATTTGCTATG

A\_16\_P17587722

ATGTCACCTCACTGTCAAAAATATCATGCATACTGTCAAGAACATTTGAATTCACCTCAC

A\_14\_P102570 CCAATAATAGGCTTGAATAGTTTCTGAAATATTGCAGGCCAGTAGAAGAACATCCTTTCC

CUST\_6112\_PI426210822

GTAAAGCCAGAATCATCTGGTGGCAACATATAATTGTCCTATGGTTGTAACCTTGATAG

A\_14\_P115363 CTAATCCCTTGAAGATTGGGACCTTACTTGTCTTATTTGGAGGTGCTTGTTAAATTTATG

A\_14\_P108835 TGCAAGCATTAAATTAACCTATGACAAAGAGCACATTCCAGAGA ACTGTCTAAAAGTGGTGA

CUST\_5097\_PI426210822

TGCATCAGGATCTCACATTATCCAGTAAACCCAAATGCTGTAGGTAAGAGATGTAATAG

A\_14\_P117022 CATATGCTGGTGTCTACCTTCAAATGATATAACCAGTGATGTCTCTCCCACTTAACTG

A\_14\_P119421 GTCTTACTCTCAGAACTCTGGCTTGTGGACGTA ACTGGTAATTCCTGCAATTT

A\_14\_P114443 GTCAATTGCTGGAAGTTTGGAGTCACACTTAAATGCAGATATCTTGATAGATGACCTTG

A\_14\_P134561 TATAGACCAAATACATTCTCTAGTTCTTCAGACTCCCCAGAGATTCCTATGAAAGTTGTT

A\_14\_P132796 CTACCACTTGTCACTCATCGAAACATGAGGGATCTTTCTGCAGTTATCTAATAGGCAATA

A\_14\_P100376 TCCCACACCTTAGCATGTGTATATTCTATTTGTTATCAATTTGCACTAGTTTGTATGTTG

A\_16\_P01331431

AAATTGGGACAATTCAGTTAATTCTGTATGCTGCTACTAGAATGATGTAGTCACCTGTGG

A\_14\_P123404 ATTTTTTTTTTAAACCACAGAACTTGAATACATGAGGGAACCAGAGTTCAAAGTCCTATGC

A\_16\_P00163501

TCCATTTCTGCTTAATCTCATACTCCACATCCTTAACTTTACTCTCCCTTTTCAGTAA

CUST\_5391\_PI426210822 TCTAACTCTAACTTGTGAGATTGTGGGGGCCAGAGTCCCCAGGAG

CUST\_6522\_PI426210822

CATGTATGATTTGCATCATTGATTTTATGATACATTGTTGAGAGTATCTGTGATTTTTTTT

A\_14\_P137792 ACCTAAGATGCAGATGATAGGGTGCAACCTTGTGCATAAGCCAATTAATGTAATGCATATT

A\_16\_P20186999

AACTTTCCCTCATAACAAATATTTCTCTCCCAATTCAGTCTTTTCAACTCTGCATAAGCC

A\_14\_P100177 CTTATTTGCTTTTAGTTCTGTTCTGGACACTGTGTTACTTAGACCCAAAGAAAAGAACGA

A\_16\_P21511915

GGGTCATGGCTTTTACTTTTATTTTCGAAATATAACCATGTCTTTGCAAATAGATGTCAGCC

A\_14\_P120890 GTTGATGGGGATGGACATTGGGATAGATTTTGAGAGCAAGAGAGAACAAGAAA

A\_18\_P15535226 AATCTCTACCTATCCTCCTAAATGTTATCCTACCCTTTTTATGTGCATGTGCTTCTGTGC

A\_16\_P02264893

CACAGACAATGACAGACTTTACTCAAAATCATGCTCAAGATGTAATTACAACCTGCTCTC

A\_14\_P134537 CCATTCTCATTCTCTGATCCCACATTTAGACTTCTCTTTCAAGGACTTGAAAGAATTT

CUST\_8018\_PI426210822 CTGCCTCTCTTCTTCTTGTCTCTTCCCGCCCTGTCTCCATG

CUST\_509\_PI426210822 CTGCTTTGTTACTATCCCCCATCCACTCTGAGTTCTACTGGCTC

CUST\_7812\_PI426210822 TCTGATACACCTCTGGGCCTCCTTGAAATCACAGTAGTAGAAGAG

A\_14\_P139336 GAGTCTGCCCTGGATGCTCTGCTCATTAATTTGTGCTAATTAAGTGCCCTTTAAAT

A\_16\_P01209495

GCCAACGTGTACCAAATTTCCAATTTCTCAATTTTTTTTAAACTATCTAGCCACAACCC

A\_14\_P137513 ATACTGATGTTCTTTAAACTGCCTTCATCTGCTTTGATCTGCCATTTATTAGACTCTTC

A\_14\_P111128 AGTTGGTAACTCTATCTTCTTACCTGCTTTAGGAATGAAGGAGACTGTAGCCTGAAA

A\_14\_P118139 TTCAGACACAAAGATAGATGTTTTGGTCCAAGAGTCTGGACCATCTTGATATTCTATCTG

A\_16\_P40430729

ATAGAGCCCTTGATTGCTAAGAAGATTCTGAACATTCACAGTGGAAAATTTTTCTCTTCC

A\_14\_P105321 GAGTGAAATTAACCTTGAAACTCGGATCAACTGGCAGTCGTTGTTGGTAGAACG

A\_16\_P20414036

ATCACGAGATACTAACTCCAGAGATTAGTCCTTTCTTATTCTTCAGTTTAAATCCCAGGG

A\_14\_P139443 GGATAGTCCAGGAAATCCTTGAAGAAAGAGAAAGTAAAAACATGTATACACTGAGATCCT

A\_14\_P111222 AATATGCTTCTCTGGGATCACTCTATGATTACATTAACAGTAACAGAAGTGAGGAGATGG

A\_14\_P127197 CTCATAAGAATTTTTTCTGAATTTCTGCCCTCTGTCAAAGGAAGAAAATGACAACATGGA

A\_14\_P122574 AATTAAGGAAAACAGCCCTACTTACAGTTACGAATGTTGTTCCAGTCAATTTAGAGAAG

A\_14\_P130810 AATCACTATAATTACAAATTTGGTGTAAATCCTTTGGGTTATCCACTGCCTTAAAATTAT

A\_14\_P135570 GCCTTAACTATGAAAGAACAGCAAAAGCCATCTGGTTTGTATTTCAATGCCTATTTCAAT

A\_16\_P03241968

GACAATCATAGTCATCTAAGAAGAGGAATTATGACCACTTTAAAGTAGTTTCCCTCACCC

A\_16\_P02247464

CCTAGGAGACATTTATCAAGAAAATCCCCAGGATTACAGTAACTAAAGTGCAGTTAAGG

A\_14\_P104815 ATCATACTGGCTCAAAAGCCATTAATAGTAGTTACTGCTGGTAGTTGAGTCTTACAAAGC  
CUST\_5669\_PI426210822 AAAAGACAAGATGGAGGATATACAGCTGGTCAAAGAAAAGGTGTCCGGCTTT  
CUST\_6558\_PI426210822

AAAAAGGGAAATTTCTCAGGGAATAAAATTTCTTGAAGATTAGAAACACTGTTCCCTCAAT  
CUST\_6375\_PI426210822 CTAGGTTGTGTATTTAGAGAACTAGGGCAGGACTGCTGGAGAAGAAGC  
A\_16\_P15652758

GACTCTCTATCAGCAACAACAGATCATTATCGTTTCATTTTTTTCCTAAGGCTTCAACCA  
A\_14\_P135939 TGAGACCCAGCACTAAGCAAAACAGAATCATAAGTATATAAAGCAAAGCCATAAACCAT  
CUST\_6462\_PI426210822

TATTCATAAAGCATTTTATAAGCAAGTGAGTTGTAGGAGCTAAATATGATCAATTTTTTA  
CUST\_4074\_PI426210822 ATAAAACCCAAATGATGCTGTTGGCCTCATCTGAGCTGAGAGTGGT  
A\_14\_P108494 GGCAACTGTTCTGGAAGGTTCTGAGAATCACAGCATCTGTGGTCT  
CUST\_2504\_PI426210822

AGGTAAGGAAACAACAGTAAGAATTTGAAAAAATCCAGAATGGTCATGGAATTCAGGAAA  
A\_16\_P00921481

ACCCTCTTATTCATAGGTATTCAGTTCATGCACTAAACACAATCCATCACTGATCAGATC  
A\_14\_P130217 CAGTTCCTCAAGGATGGAGACTACCAACTAGTTGAGATCTTATTTCTGAATCCATACTTA  
A\_14\_P107369 TGTAGACAGTGTAACTTTTCGAACATTGAGTTCCTACAGTTAATGCACAAGAGGAAACAA  
A\_14\_P135344 ACTCCTTGTTTTCTTTTCATCATCTTTTTTTTTTTGTCAACCCACAGCCAACATCGTAA  
CUST\_2167\_PI426210822

ATATTTAAAAAATCGAAGTGTACTGTTAAGCAGTGGCTGAGATGCTAGGTATCCCAGTT  
CUST\_3866\_PI426210822 AAAAAGGCTGGGCCTTCTTAGGTGGGTATTGAGTGGGAAGTGATT  
A\_16\_P03434974

TCTGATCAGTCGTTTGACAGTAATTACACTTCTTATTTAGTATGAACGCTCTGAATTTGA  
CUST\_7493\_PI426210822 GTCCTCGTGGGCATTTCTAAAGCTTCAGCCCTAAGCTGGTATAT  
A\_14\_P102142 GCGCATATCTATGTTATCCATTTTTTGCCAAAATTGGGGTCATTCTGTAGTCAATGTTAT  
A\_14\_P121793 CGTTTTTCTCGAAGGGACAGAACTGAACCCGAACCTGTTTGACAG  
CUST\_5996\_PI426210822

ATGATGGCACATGATCTTTTCATTCATCAAAGGAAAGTAATACTAAGATTCCTTTTTCTTCA  
A\_14\_P137045 CTAGGAAGAGGTGCAATCTTTCTAAAAATTCAGCATCAGAAGTTGGGGGCTTAAATAAC  
A\_14\_P128489 GTTTTGCATATTATTGTGGGCAGTGGTGCCTATTCTAGGGATTTTAAACAGATTCTGAAA  
A\_14\_P119912 TTCAGTATTCCAGATGAAAAGGAGACCAGATTGTGGAACAAATACATGAGTAACACATTT  
A\_14\_P100179 AGATGGATACAACTCACAAAAGTAAATCCTCTACCAAATGCCGCATCTATAAAACACAC  
A\_14\_P135114 AGTTTTCAAGATAAAATGTAAAGGGTATTGTCCCTCAGGTTTTGAAGGTCCAAAACCTGCTA  
A\_14\_P137422 CAAGTGGCATCTCTACATGCACCCTTTTACCTATTCTGCAATCTAAGAATGCTTAAAAAT  
A\_14\_P132527 AACAGTTTACAGAGCACTTTTCATGTTCAGTAACAAGAAGTTGCTAATTAATAATCACCGGG  
A\_14\_P108989 GATTTTTGATGCAGAAATCGTCACCTGGCAGTTACAAAACCGAGCAAGTG  
A\_14\_P101888 TGAATGAGTGGGGTTTAAACCAGACATTAATAATCCCATCATAAAGGTCTAACTTAACTACC

A\_14\_P132551 CATGAAAACCTAGAAACCATAGTTGACTTTATAAAAAGCACGCTACCCAACCTTGGCTT

A\_14\_P129169 ACATTTGAGTTGGAACCTTGTGGCATAATTTTTTTGTGCTCTTCTTTCTTTTACCCTTT

A\_14\_P103819 AGAAATGAATAAAGGTAAAGGATTTACCTGCTCTTCTCTTTTCTGCTTTTCGTAACCTGCAG

A\_16\_P03808031 ACAGACTCAAATCTCTGCACATCACAAAGGACTCTGAGGGCAACAAAG

A\_16\_P15722779

AACCAATCAGTCTAAACCTCTCTAAACCTTGTAGTCATTCTTGTAACCACCAATGCTAAT

A\_14\_P129548 TGCTTGACACAAGATAATGTCTTTCCCTCTTTAAAGGAAACCGTAAAAACATTCTTTCCA

A\_14\_P136850 TCTTGCAATGCTGAATAAGAAAGCAAGCAAGCCTATATTGGCTTATACCTTGCCATAAAT

CUST\_5128\_PI426210822 GTTAGCCCCAAGCTGAGAAGACAGGCCACTGTGGTTTGAGTAA

CUST\_7632\_PI426210822

GCAGTTACATGGTTCATCTGCCTCAAACATTTGTTTTGACTCTAGCTTTTGCTTG

A\_14\_P121549 AGAATTATGTAATACGCCTGAGGAAGGCAGATTGATTTTATCTGAAAGATAGAGACCTCC

CUST\_2700\_PI426210822 CAAGGTGGAGACCAGCTCTTCATGGTACTTCTGTCCATCTGTGAG

A\_14\_P201504 TCATCTGAGTCAGTTTCATAATGTTGCCTCACATGGAACAAATGGATGATAAAATCCTAC

A\_14\_P118457 GACTGCAATACCTGCGTGGAAATAGAAGACAGAAAGGTGAGTCAATATTTTTTCATTTTAA

A\_14\_P132415 ACTTGACATGAAAAGATGACAGATAAGTATTTCTGTCAATTGAGATCCCAGGAGACATTCC

A\_18\_P22841384

TGAATTTTCCTTCCTTTTTCTCTCCATGCTTTGATCTGGATATTTCTATTGAGAGAAT

A\_14\_P101562 TAGATTCTAATAGTTTTCAATTCCGTGAGACTCTGCTTCCAAAATTGAGGAATTTCTGC

A\_16\_P17337086

ACACGCAAATGGAAAATAGACACACTTTTTGTTTTGGAAATGATGAATCTGTGCTTGTTTC

A\_16\_P00685094 CAAAAGCACTCACACTAAGATGGCAGTTCCTTATCTCATGGGAAGGTTATTTACT

CUST\_7024\_PI426210822 GAAAAGGTGAGTTATTTAGCATTGGAGGAGCCTGTTTGTAGCCATGGC

A\_18\_P14462270

AGGCTCCAAGAATTACCTAGTAAAAGTTTTTCTCTCTCTACTCATTACATCTTTCCCACA

A\_18\_P14136670 ATTCCTCTGCAAACCTCTGACAGAGAAAGGGATTTTGGAAACATGACACCTG

A\_14\_P1113159 ATCTTTTGACTTGCCAGCCTGATATCTTCCATTTCCATATTTGATCTTTCTTCATTCT

A\_14\_P115123 TACTCTGGGATTAATAATTGACATTTAATATGTTGACCATGGAATAGCCATGATCATGCCC

A\_16\_P16093363

TGCAAAGGCACCTCATTATTAGTGGACAGATAAGCACTTTTTAATGTTTCATGAAGAA

A\_14\_P127611 GGTGGATGAGGATGTTTTGCTTTTTATATGGAGTGGCAGGTTTGTGAGTATTCATTATAT

A\_14\_P115586 AATTAAGGCTGCCTTTGACCAAAGGGAAAATCATTGATTTATCGTTACTCTATTTGACCA

A\_16\_P18834919

AATCCTGAAGGAACCTTTTATGAGAGAAAAGACATGAACATACATGAAAGACACAGAAGGC

A\_16\_P39467664

AACTACACATTTGTTCACTCTCCTTTATAAACCTCTCCATATTCCTGACCACTTCTTA

CUST\_4691\_PI426210822 AAGAGAAGAGGGCAGGCTGCAGAAAAGGCAGGATACGAGGTAGAA

A\_16\_P01468368

AAATCAAATAAAACTATTTTACTGGTATGGCCTAACTTGTCTTAATGACCTCCCCTCTCC  
CUST\_6802\_PI426210822 CTCACTTTCTAGACTCCTAGAAAGTTGTGGGTTGGTCTGATAGAGCCTC  
A\_16\_P00311646

AAAGATTTTAATGTGCTAGTAATGTGGATTGTGAGTGGTTATCGTTCTTAACCCTTTCCC  
A\_14\_P116595 CTAAAAGAAAAACAAAGTTCCAGATACTAAAGCATGGTTCCTTTAGATAGAGGCATCCC  
A\_16\_P20314720

AAAAAAGTAGCGTGAGAATACTTTTGTAAACCCACCATGTAATTGTCAGCCATTTATCAGC  
A\_16\_P20261833

AGGACTTCAGCATAAACCTACTTCACATTTTTCCCCTTTACCAAAAATATCTGCGACTAT  
A\_14\_P100044 TTGGTAGCCTGAGAGGGCCTCTCCATTCTTTATTTCAGTCCCAATAAGTTAAA  
A\_16\_P36315654

ATGACAGTCCACACATTTGAGTTTGAAATGCATCGATATTGACCATAGGAATGAACAAAA  
A\_14\_P134241 CCACCCTATTGCTCCAAAATGAAAATCCTCTAACAGGTAGGACTTGAAGAATTT  
A\_16\_P03481633

AATGAGAGAAACCACCTATTTTTCAAACCTCAATCTGAAAACGAAGTTTAAAAACCTCCCTG  
A\_14\_P125405 CTGAAAGAAACAATAAATTGAGTGTGGATCAATTTGCATGCCAGCGTGTTCGTTTTTTTT  
A\_14\_P200315 CTTCTTAGACTATGGAGAAGAGGACAGTTAGGCAGACAGTAGCAAGAGGAGT  
A\_14\_P127569 TGCATGCTAGAATAAAAAGTAGGCTTGTCTAAAGAGAATGCAGAGATTTTGTAGGGTTT  
A\_14\_P128336 CTGATTATTTTGTACATTTGTTCAAAGAGAAGAACAACCTTCAGTTTCTCATTGCTACC  
A\_14\_P102368 GTATCAGAAAAGTGAGCCAGGCACTCACATAGTTTATAGTTTATAAAAAGTGAGACAGGCA  
A\_18\_P13362037

AGGTTTTGAACTTATACATGCTTCAATCTTCAGTTTTGATTTCACTACTTCCCTTGTGCCT  
A\_14\_P105538 AACAGTCCAGGCAGGTAGATTGCATCCTAATTTGTAAGTGTCCAGATTTTATAAAAATGA  
A\_16\_P58424271

AAACATAATTAACATGGAGATATAGAACATATGGAATATAGAGTATGGAAACACGAAAGC  
A\_14\_P127134 GACTCCTGCCTGATTGCTTTGAACTTCTGATAATCTATTTGATCACAGTGTCTGTTATTT  
A\_18\_P11266906

ATGCTTGTACACTTTACCTTGTCTGTATCACTTACTTATGTGATGTATCTCCTTTGCG  
A\_14\_P102577 AGGCATAGGAAACACACCAATATGCTGTGGTGGATACAAGATGATAATATTGAATTCTGA  
A\_14\_P137508 CACATGAGCCTTTTCTACTTCTAGGGGAAATATTTTCCACACTGATATACAAAAAGTGGA  
A\_18\_P17111012 AATTCAGTTACCATGGCAAATATCTCACTTTACCCCAATTCATCATTCCATCCCATAA  
CUST\_8827\_PI426210822

AAATTTTGAATAAGAGATTGAATTACTTATCAGAAACGAAAGCTTCTTAGAGCAAATTT  
CUST\_8403\_PI426210822

CAAAAATAATGCAGATATTACACATGAACATTTGCAGAGAATCCAGTATAAAGACATTTG  
CUST\_6168\_PI426210822 AATCAGTGCATCATCCCCTGCTCCACAGTGGATGATTGGCACTTT  
A\_16\_P00016393

ATGTTTATGGAGTGTCACTATTCATTTGTTGGCTATTCTAAATAATTGGCCATGTTGCC

A\_16\_P15915986

CCTCCCACACTTTTACTCTAGCCACTTTTTCCAATGTTTACTTTAATTCTCAGCATCG

A\_14\_P123832 ATGAATTAGAATTTCCAGTCTTTTGCATTTAGAGGATAGAGTCACAGAATTCCCCAGGAT

A\_14\_P103185 AGGTTTGCTTCATTATTCTGACAACACCCTATGAAATTGTAAAAATGCTAAGGAGTCCAT

A\_14\_P115472 CTTGATTTTGTCTCCAAGGAAAGGATAATTTCTACGTTATACAAGGGGTGACATACAAAG

A\_18\_P12176930

TGAATGCGTTACCTAAGATGAAATTAAGTAGCACAGATTCAGACTAACACTTGCAGAAGC

A\_14\_P133492 AGGACAGTTAGGAAGTATAAGATGAAAGTGATCGACATCGTTTGTGAATTACGTGCATTT

CUST\_5861\_PI426210822 TGCATGTGTGCATATACACACACGCACTGTGTGTGTATATGTCAAACCTCA

A\_16\_P03311761

ACAAATGCCATGAAATCAATCAAGTTTTTAAACCCCAAAGATCTAGGAAACACTGCTCTA

A\_14\_P132614 CCCTTTAGTTTTTGCATCAAGTCATAATCTAGAGTTAAGAGGGCTGCAAGTAACTCTAG

A\_14\_P107177 CTTCTTATCATTACTCTTTTCAGGTTCACTAAGAATCTTTCCCCAGACAAAATCAACCTG

A\_18\_P22841368 AGTTCCGCTCAGGGCTTTGGAATGAGTGGTCAGCATTCTTCTTG

A\_16\_P21330282

TGAAAGGGTCACGTAATGTTAATCACTAGGAAATACTTTTTGTCTCAAGTAGTGTAAGCCA

A\_14\_P102432 CTTTATAGAGGTGACAAAATCAAATCTGTTTGCCACCACCTCCTCATAATGTAGCCTAA

A\_14\_P108235 GGGTCCTAAAGCACTTAAATCTTCATTCACGGAGGCTCGTGAATTATATAATACAGACTA

CUST\_6999\_PI426210822 ATATTCCTCCCTGGACCCCTCATTCAAAGCCAGAATCTCTTTCT

A\_18\_P22843228

TGTAACACTAATTTTTTATAACTGTAAAGATGATTATCCATACTTAAAACCAATTCA

A\_14\_P107607 AAAGGCTCATTTATTTGAGAAAAGCAAAGGCATAGAAGGGATATTTTTGTGTAGGAATGG

A\_14\_P128068 AAGTTTTCTAGATAAAACATACATACCAGGTCTGAAATCATGTCCCCACTGACTACAGCA

A\_16\_P18861764

ATCTGTCAATCACTCTTTACTTCAACTTCCCATTCTCTGATACTCCATGATATTACACGC

CUST\_4706\_PI426210822 ATCTTGGCACAGAATGAGGTCAGAGTGAGAGAGGTCAAGATTGGC

A\_16\_P02207105

AACTCAGAGCACTATGTCAGTCTTGTATCCAAACATCCTAAAGTATTTCCATTTCTTTT

A\_16\_P16191895 GTGATGGGTTGTTACCAAAGTCGATAACAGGAAATCTCACTGAGGATAAACAGG

CUST\_8485\_PI426210822 AGGAAATGGAGGTCTGCTATTTTCCACTGAGACTTGCTGTGTGTGTT

A\_14\_P200542 ATCCCACTTTCTCAGGCCTATTGAGTTGTTAGTGATTTTTAATCATCGGAATCTCAGTTT

A\_14\_P132929 TTGAAAATGTTAGTTATATTAGAAGTATTGCTGGTGACCCTGGATGAATTCTGAACTCC

A\_14\_P121953 CTAAGTGAAGTCCCTACCAGAGTTAAGTGCCTCTGCAGAGTTGTGTATAGAAGA

A\_14\_P104990 TTTAGGTGGTATGCTATGTGACATAGGATGCGATGTGATATTACATCCCATGACACTATG

A\_14\_P108060 ACACACAACATAGTTTTCTGTTTTAAGTTGAAAACATGCGAAAATGGGCTATGTATGACT

A\_14\_P116658 CTAGGACTCATAGATTTCCCTTTTCTCATCTAAAATGCAAACACCTACCACAAAGATT

A\_14\_P110914 TAATTTCTTTCTGAATGTAATTTCAAATTATAGGTGCTTCTGTCTGTCTGGCCCTTGAGG

A\_14\_P136710 GAAACACAGGTCTTACTGGCCTGCTCAAAAATAAAAATTAGCCCTAAAATTTATCAGCAC

A\_14\_P130494 TGTTGAAGAAATTTTTCATTCTCTACAGTTGCCTTTAACCACCTTGCCTGTTGTATTTGGG  
A\_14\_P138203 AAAGAGAGTATTAGACACCCAGTAAAACTGCCATATAAAGAAGTTGTAATTGTTTGTGG  
A\_14\_P124341 TCTTACAGATCGTGACGTCTGCATCCACAGATCTCCAGGATTACACTTACTATTTT  
CUST\_7689\_PI426210822 CTCCAGGACTATCCATGAGTAACCCTCAGCCAAGAGTGTATCATCAG  
A\_16\_P03040062  
GCAGCATACCATTACTTCATACTAACTTCTGATTTACAAATTTTCTCTTCACCTATGCCT  
A\_14\_P137339 AACATTTCTCCTTTTCTTCTCTCCAGATTTATTGTAGGTGGCTCATTGTCTTTTTAT  
CUST\_1269\_PI426210822 GGTTTCCTTGGAGCCAAGAATTTAATCTTGGGCAAACCTGTCTCC  
A\_14\_P118181 GCATGTTACCCTGACGATCTCTGAATTATCTTTGATTAGACTCAGATCTTCACATGTCTA  
A\_14\_P125149 ATGTGGCTATCTGAATTTTCATGTGAAATCTCCAACCCACAATTGTTTTAAGCACTTTGG  
A\_14\_P101384 CTGCAIGTTTTTTTTGCTTGTAGTCACCTATGTATCATTAGTAAATGCTGAGGATTTGACA  
A\_14\_P107454 CAATTTCTCCTAGTGATTGATAGGCATTTTCATGATGATTTTATCACTTGGTGGACGATGA  
A\_14\_P117082 CATGGGTTTAAAGTTTTACATAGTGACGTTTTTCATTTGCACTTGCTTTTTCACTCAGTGT  
A\_16\_P16726730  
AAAAAGCATGCTGTATTTTCAGATCATTACTCAAACACATTTTTTTTTTACCCTTGACGCA  
A\_18\_P14135933 GTGCTCTGGGAAACGTCCCCACAGAAGAGCCAGCAAGATCTCTG  
CUST\_7850\_PI426210822 GGGAAAGGCCATCTATGGTGAATCATTAATGCCATGCAGTTCTTGAGAC  
CUST\_943\_PI426210822  
AAAGGCCTTTGAAATAAAGTGTTTATTTTCTTTCTTTTTCTCTTTTTGGGAGGAAGAG  
A\_14\_P127599 ATGTTTTACGATAACACAAAAGCAAGACACACTTAAAAACACCAGAATGACTGTCTTTGA  
A\_14\_P129412 GAAACATATAGGTTTTCTCCCTACCTCTCCACCAAAAAGCATAACACAAAATTTCAATT  
A\_14\_P125486 CTCTCCTTCATGCATTGTGACTTCCAGAACAATTATAATGTAACATGTGTTTGGAACTTG  
A\_16\_P16867576  
ACGCTAAAAATCCTAGGGTAAATGTCATTAACTGTAGTTTTAACCATTAATCTCAGCCCC  
A\_14\_P111494 CAAACTCAATCTATCATTGTTTGCTGGCAATTCTTTATTAAACCAGTTCTGCTGGATCAA  
A\_16\_P37193732  
GCCTCTCAGGAACATAAAAACGGTAAGCAATGTCTTTATTCACTAAAACGTTGATGATGA  
A\_16\_P20161059  
CTGTGTGAAAGACATCTACTCTTCAGTTTTGCAGTTAATGTAGGTATGTAAAGGGACTTCT  
CUST\_9271\_PI426210822  
ATTTACATGCTGCTGAACACAGAAATACTGAAAAAGGTAAGCCCTAATGAACCGC  
A\_14\_P126328 ACCACGAACCAGCAACTGCAAATTAAGATTTTTGTAGGTCATGATTTCTAAAAAATCCAG  
A\_14\_P134174 CCAGTGTAGGATATTAGAGTAGGTCTGAGAAGTATGTGTTATTAGTCGGGAGTTAGAATT  
A\_14\_P135434 AAAGTCCCATCAGGAGATATTGAATAATCATTGATAGAATGTCCAAACTCATCCTGTCA  
A\_14\_P134759 TAACTTCTTTCTTTTTTACCCGTAGGAAGTGAGAGGAGCCCTGGAAAGGTA  
A\_14\_P100592 GACCCTGAGTATCTCCTTCAGCATTTTTGACCAAACAATCACATGTTCTCTACATTTAG  
A\_14\_P122456 GCTGACATTCACTTGACAACAATATGATTCATTTCACTCCATCCAAAATGGTAAGATAGG  
A\_14\_P120387 GAGTATACTGGTTGTGCATCGATGCTAGTGACATGGTCACCTTAGAGACATTTTTTG

A\_14\_P129505 ATTCAGAGAAAAAGTGGGTTTACCCTTCTGAGCAGATGTTCTGGAATGCAATGTAA

A\_16\_P03703648

CCAATACACCTTCCTTTCATAACCGAGATTTTCATTAACACCTAGGGCTCATAATTTTCAG

A\_14\_P106411 CTAGAAGACGAAATTACAACACTACGACAAGTTTTGTTCAGCGAAAGAAAGGCATCTAGTT

A\_14\_P104448 ACATTTCCACCAGCAGGTGATCCACTTCTGTGCACAGTTTTTTGCTT

A\_14\_P123834 AGAGCACTTAAGATTCATACAGAAAGCACTGCTGATGAGGCAGTCATGGAAAAC

A\_14\_P125896 ATATGTTAACATAATTAECTTACAGATCATCAGGACAATTTCTTGGTGGCTCCAGTCTCC

A\_14\_P107068 ACCTTCATTACAAAGAGATTTTTGTTCAATTGCTGGGCCAAAGTGGGAAATATTAATTC

A\_14\_P115810 GCCAGATTTTTGACTCCATATTTTAAAAGCAGCCTTTGCATTTTGAACAGCCAAATTTAC

A\_16\_P15870905

CCCAGACTAGTTAAAATAACAAGACAGTAAAGTGACACAGTCTATGATTGACGTCTCCTT

CUST\_5219\_PI426210822

CTAATGATGATATCCATTACTATATGTGCAATTGCTTATAAACTAATATATAGTCATATT

A\_16\_P20818810

GTGGATACGTTGATCATTACACTATACTCAACTTTGCCATAAAACTTAGTGTATGCCT

A\_14\_P121515 TTCTAACAGATGCTTTCAAAGTTGTGAAAATCCCACTGAAGAGAGAAATCCTGTCAATG

A\_16\_P19079644

AGTTGCAATTCAAGTCAGTCTCTATTCCTAAAATTGCCTAAGGATATCCTACTCCAAGAG

A\_16\_P15933362

ACCAGACCTAACAAATCATAGTGAAAAATGTAAAACCAAAGTGAACTAATGTAGAGGGGG

CUST\_9195\_PI426210822

CTTAAGTGTGCTTTCAAAACCATGGAGTATAAGGCTTATTTTACTCCTTAAGTCTTCCTA

A\_16\_P38224945

AGTGATTCAGTATATGACGCACTACCTTAAAGTTAGCATTAAAGTCTTCTTAGTCAACCCT

A\_14\_P102918 CGTGCGGATTTATCAAATAGCCTTGAGGAAATATATATGTAAGTGACAGGCGATTTTTTA

A\_14\_P121912 GAGAAATCCACTTTGGCTTTTCGTGATGGCAATCTGGAAATGGAAGAAAAAATG

A\_14\_P114446 CATATAGCCCTGTTCCACCACTCACTTGTGTTTTTAATTTGAGACTGTCTGACTCT

A\_18\_P14134864 GATAAAGATACATGATTTCAAACCCAACCCCAAGTGATATCTGGCCTAGGTCAAATT

A\_14\_P117963 CTTCACTTGTCTTCAAGTTTACAGTTGGGGTCTGAAAAATATCAACACTGTAAGTATG

A\_14\_P139751 AGAGAGCGTAAAGAAAGAGTAACTTTTTCCAGTCCTTATGTTCTCATGAGAATAATCCC

A\_14\_P121537 CGCTCATTTGTGATTTTCAGGAGGATTTGATGAAGATGTTAAAGCGAAAGTGGAGAAC

CUST\_4284\_PI426210822

CATTTCTAGTCAGGAATTATGTCTTCTACTGTTCCACAACCCACAAAAGAAGATGTCT

A\_14\_P102302 AACTATGGTAGACTCTTAGCAAGTGATTGAAATGCTGACAAGACTTGCTTTAGCAGATAG

A\_14\_P101469 GACATGGAGGCTTACTCAAATCAGCCCCCTTGCCTAAAAAGAATTTTAAAATATTAGACC

A\_14\_P114452 ACCAGAAATTGACTTACGCAGTCAGGAGACTATTAATTATATAACCAAAGTCCAGAGGT

CUST\_212\_PI426210822 GCCCCTGTGCTCGCCTTCAGCGCCCGCTCAGCCCGCCGTCCGCGC

A\_14\_P121429 ATTCTTTCCAAGTCCCAAGGAATTAATTACTATTATATCTCATTACAGAAATCTGAGGT



A\_14\_P115520 TGGCAGTAGCACTAATGAGTTTCTGTATTTCTTGCTGAGTTTTTTCTGTGACTGATACAT  
CUST\_5348\_PI426210822 ATGGCCATATCTGCCTCTCTTGCCCTTGCCACTCCACTTCATCAT  
A\_16\_P18074469

AGGCGCTATAACATTCACATCATTTTTACCTCTTTTGTTTACTTCTCACAATGTTTCTGT  
A\_14\_P200854 ATTTTAGTTACCAGGGACAAAGCCAAAGCATGGAATTGAAGTTTCATTCTGATTAAACAC  
A\_14\_P115168 GTATACCAACTTTCATTATTCTTGAGTATAAGGAAAAAGACAGACGCCCTTGTAAGAACT  
A\_14\_P111431 GTATTTACTCACTAGGACTCGTCGACAGTCCATTATCTCTTGACATTCTACCATTTTAA  
A\_14\_P101015 ACTGACCTCTGGTAATTAATAATCCTAGTTCTTTTCTTTTGTCTTTTCCAGGAATTTGACA  
A\_14\_P108382 CTGCTTTGGGTCGTTTATTTACTAAGAGACAGCAAGAAGGGGTGTTACACATG  
CUST\_9330\_PI426210822 AGCTGTAGGGTGTCAATGAAGCCTTCAAGGCTCATTCTCCATGTG  
A\_18\_P16016823

CCATGATCACAGGTCTAACCCCTAATGACAAAAACCAAGACTTGATAGTTAGATAAAAAGGT  
CUST\_4459\_PI426210822

CCAAGGATGTGATGCATAGTATTCTGGAGCTCCTTTTTAAAAAGGAGTTACATTGCTTT  
A\_16\_P00685575

GTGATAAGTTTATAATGATTTTGTGCTTAGAAACTGTTGTTAATTTACTCTCTGACAACA  
CUST\_5519\_PI426210822 TTTTCACCATTGTCCCCACCCCTACAGGCTTCAGGCATGCAGAATA  
A\_14\_P201421 CAGTGTATCAATGCAAGCCAGAGTAATTCTACAGGACCATACAGATCTTTGGCAAATATA  
A\_14\_P132122 CTGTTTACCTGACTTCCCTGAATTCTGCACTCACATTTTAACTTGAATGTGAAGTAATGC  
A\_16\_P21561168

ACACTGAGGGGAGTTATAAAATAGGCATATCAGTTTCGCTAAATATTGACACCATCTGAT  
CUST\_390\_PI426210822 ATATAAATAAATGCTGCCTGGCTGGCGTGCAGCCTCCAGAGCGGA  
A\_14\_P111454 CTAAAAACCATTGAAACAGTGTATTGATTCCACAAAGAGGTGACTTGTGCTTGCATTTAT  
A\_14\_P114105 AGGGCGTGAGAAAGATAATTAAGTTAATGCAGGGGAAAAATATCTAGTTCTTCCTGGAAA  
A\_14\_P117423 ACCAGTGAAGGAAAGGGCTTGGTTTTATTTTTTAAATCTTTGTCGAACCTATGAAAATAA  
CUST\_9673\_PI426210822 GATGCAAGCCTGGTATCTCAACCAGAGAGGCATCTTCAACATGG  
A\_14\_P126261 CTGCAGTCACAAGTGAATTTAAAGATAGGAAGGGTTTTAGGGGTATATAATCCAGTTTCT  
CUST\_2412\_PI426210822 AGCCTTCTCTGATCACTTCTAGGAGGGTTATTTGCAGTTATCAGCTGCT  
A\_16\_P02929776

AAATGACCTACAGTTTCATTTCCACATCAAGAGATTTCAAGGCAAGATAATTTTCTGAGGG  
CUST\_6857\_PI426210822 ACAGAGCACTGTAAGCTCGTGAGGAATGTGCTTCGTACCTGGCAT  
A\_14\_P202091 CTGCAATCAGGAAAAGGGTATGTTGGTTAAATGTGCTTGGTTGATTTTCATTTTCTGTAA  
CUST\_5356\_PI426210822 AAGCTTCTGTGGCCCCGTACACGTAGGACTACCACCGCTTACTTG  
A\_14\_P106115 TTTACCTAATAACTACTTCTGTCATGTTGAGCATTCTTTGTAAACAAGTTGAGGATGGGG  
A\_18\_P22841230 GTTATCAGGGTGGCTCAGATGCAGGAAGTCCTCGCCTCTGCTGTC  
CUST\_1416\_PI426210822

CTCATGGGGTCTGAATTTCTTTTTATGTTTCATTTTTTCAAGAGTTACAATTGGGTGTT  
CUST\_10122\_PI426210822 CAAGTGTCTTTTCCAGAGCTGAGCTCCAGGCTCCCTGCTGATGTG

A\_14\_P115169 CTATGACTTTTATGCTTTTTTACCCTTGGTGTTTGTGCTAGTTTCCCAGATCAAAACAAT  
A\_16\_P01291345

ACCCTTCACAAAATTCATCACCAACTTAATTGCTTCTACAGTGTAACACACTCATTGT  
CUST\_6754\_PI426210822 CCTGGGGCCGGGGGGTGCTGCATGGTTAAAAAGGAGCATAAGGAA  
A\_14\_P113104 AACACCGACAGCAACCAATCAGATATATACAAATGAAATTAGAAGAAACACAGCCTCATG  
A\_14\_P110623 TGATTGACTGTGCACGTGAAATATTTTATTTTCTATTTACTCTCACAGATTTGGGTTT  
CUST\_7004\_PI426210822 CCTTGATAGGGCTGGAGTGTGAGCTGTAATCCTATGGGCTTGAAATAA  
A\_16\_P19006303

CCCATACTTATTCATCATTAGATAAGGCCAATGTGATCTATCAACATCTAGACTCTCCA  
A\_16\_P21324731

TGTGAGTAATAGTGTCTAAATGCAATGGATTTTCTTTAGTCAGAGTTCTCTAGGTAACCC  
CUST\_9701\_PI426210822 AAGAGATGGCCAAGGAGATGAACCACATGAAAAATGAGCCTCCTTC  
A\_14\_P130372 TGAGGATTTAAAGATGAGTGAACATGACAGGAACTTCAATCTAAAACAATCTGTAGCCT  
A\_14\_P105798 CCTAGTTTCAGTTTTAGCAGTTAGAATGGCCTCACTGAACAATTACCTTTTTTTTTTTT  
A\_14\_P117961 TACAATACATTCTGTTACTCTCCTGGAAGTCTTCGTTGTCTTTGTCAACTTTCTCTGG  
A\_16\_P17156345

TCTCCCTTTCTCTTAGACTCTACGCACTTAATTACATTTGACAAACTGAAGTTGGAAAAA  
CUST\_2856\_PI426210822 TTGGATGGCATCTTGTACTGTACCTTGTGGGCAATGCGAAGCAAC  
A\_16\_P15541946

AATGACCCAGATGTTTCAGAATAACTTTTATTAACCCTGCTAACTCAGATTCAGTTTGCC  
A\_14\_P135356 ACTATGACTTACTTAGCAAGTGTATGAGATGAGTCTTTACCAGACCTCTTGATTCTGAAGC  
A\_14\_P108467 GCTAAAATAAATTCATCCAAGATTCCTTTGTAGTTAAAGGGTCCAGTTCTGACTGGAGC  
CUST\_8601\_PI426210822 GGGTCCCTGGGCAGGACCAACCTGCCTCTAGCTTTCACCAAAGAG  
A\_14\_P202377 CTTGCATCTGATGAGTAGAAATTCAGCCTATTCTTTGTTTTGGTATGTATATATCTTCTA  
A\_16\_P16796758

AAAACACACTACCTTGTTCAATCTAGGTAACTGTGGCATATCAACCTTTCACTATCACT  
A\_16\_P19173214

ACCTCGTCATAGTTCTCTACATTAGAATCATGCTAGTTTTTTCAGTAGGTGTTTCCAAAGA  
A\_16\_P36230193

CCTAAACCTGCCCTCTTGACATATATATGAAGGAATCAGGTAAAATAATAGTAGTGCCC  
A\_14\_P110920 CTGAATGCTAAAGTTGAGGTCAGAAAATCAGATGGGGTTGAAATTGAGGTCAGA  
A\_14\_P137802 GAGTATGTTTGGGGGCGACATGTGTTCCATAAATATCTATTGTGCACAAAGTAAGTTTAT  
A\_14\_P110056 AGATGTCCAGGGTCTCTTCTAAAATTCTATCACTCTGGAAGATTAACAACAGTCTTACTA  
A\_14\_P103807 GTTGGATGGCCAGTTTTTCGTTTGTGCGTCATCCTCTACCTGAGAAAT  
A\_18\_P11082250

AAAAACATGTTTAGCCTGACATTTTCATTAATCCAAGGAGACTTTATTGAAACACTGCCG  
A\_16\_P00589313

ACATCGTTCAGTCAAAAAGTAAAACCTTAACTCAAGATACTCAAACACTACAAATGGCATCCC

A\_14\_P134539 CCCAGAATGTCTCTTGATTAAACCATTAACAATTCACCTTGCAAGTCAAAATCCAGCAAAA  
A\_16\_P17502091

TATCAGCCATTTAAGATGTCCTAATGAGTCACACTCTGATATACTTTCTGGAGGCACTAT

CUST\_9385\_PI426210822 ATTTTCTGGTTATCTGGATCAGTGTCTTTGAATCTGAGCCCACAGGAAGA  
A\_16\_P39744101

ATGGCCCTCCATACAATTTTCTTCAATGTTTCGCTATGGCAGAAATGAAAAAACATTACT

A\_14\_P120204 CTTCTGCTGAGGCTTACTAGATCAAATCTTAAAACTATGTTTCTCTCCACCTTTTTGCT

A\_14\_P201221 GGGAAATTTCTGATTAATTGGACAATTACTTCGTATTCTGAGTGAGCCAAGGCAATGTTA

A\_14\_P101091 TTAATACTTTGTAACTTTATCTTTGCAGAGTCTTGGACAGGTTTCTGTGAACCTTGTGT

A\_14\_P134665 TCTTTTCAAAGCAAGAAAATGGAACAGCATGTGTAGGAATCTTCGTTGTTGTGAGTATT  
CUST\_5109\_PI426210822

AAGCATCAGGTAAATATTTAATAAAAATGTTTATACATGTATATTGACTGTAGGTGTAGGG

A\_16\_P20751323

ATTCTCAGACTGCACTATGATCATTCTTTTATGTCTACTTCCCAATAAGTTCGTGTGC

A\_14\_P118798 CTAAAGTCATATTTACAACCAGAAAAATAACCAAGTTGTGACTGGAAGGGTGGATGTTAC

A\_18\_P14868684

AACCACAGTTTCAACTATTTTTCTCTAGAAAATTCGATCACCAGTAAATGCCTGTAATCA

A\_16\_P02994055

CCATGCTTTCATATCACTTATCATTTCATTGTGCTCATCAAATACCTTACTCAGTGCCTG

A\_16\_P18286926

AAATTGTTGCCTAAGGAAATTTCTCAAATGTTCCACTGATTTATGCTGCTCTGTAAGAGA

A\_16\_P00685606 CTTGCTTTTGCTGTGTTTGTTTAAAAAGCATGGTTGCAGGAGATGCTGTCATG

A\_14\_P111596 TTCACTTGTTAATTCTGTTTTGGAAAACAAAGTAGAATAACCCCTAACATGAGGCCCTCC

CUST\_6197\_PI426210822 GAGACAAGCCCAGCACACAAGTTCTTCCAGGTTGGGGGATTTTAT

A\_14\_P116291 CTA CTACTGTAGTGAGTTCATAGGTTTCCAAAAAGGCAAAATATTCTCCCTTTTCATAGGTA

A\_14\_P138596 TGCATGAAATAAAAATACCTGCTCACAATTTCTGTGCTGACAGATTAGGGATAAAAATGTC

A\_14\_P123049 CAGGACTATATCAAGAGACATGCTCTGATCTTTATGTTACTTGTCAAGTTTTTGCAGAAG

A\_14\_P200449 CCTCAGACAAGTAGATCATTCAAATTTGGTAAATCCAAAAGGCAATTCTAGGTGTGTTTTG

A\_14\_P111845 TGGATATGCAATATGGAATATCCAATATTCCATTGAAAGCAGTAGTGAGTATCGGCTCTC

A\_16\_P37149797

AGTGTTTATTCCATAACGTTACCTTCAAGTTATCCTGAAAGACACACATGACATACGCTT

A\_14\_P104235 GAGACACAGGACTCCAATCTTTGCTATAAATACACGTGTTTGGTGAGTGAGG

A\_14\_P120933 TGGTCAGTATTCTAAATGTGAGATGTTTTCTGCATGGGGAATGCTATGAGTAAACTTGTA

CUST\_8257\_PI426210822 CATCAAAGGCACAGCAAGAATATAACCAGAACCAAGCCCTATCCTTG

A\_14\_P110476 CTCTTTTCTGCTTAAAGGTGACATCTTTGAACACTTTAACACAAAGTTGACTCTTCTCGTA

A\_14\_P124675 TTTTACAGACATTTACCAGAGGAATTGAGGCTTGAATACCATAACTTCTTAACCAGCAA

A\_16\_P15751619

TGTTTTTTCTTCTACATCTCTCTTCAAACAATTTCTCAGTAACCTATTTTCATGCCCA

A\_14\_P105769 TAAGTCCCTTTGCATGTTAAAGTTCAACGGCATTAAAATCCAAATAAATTTTCAGGCCTG  
A\_16\_P33068766

AAAGCATTAACCTATCTCCTAATATCCCCCTTTCTTTACGACTCTTACTTCAGATCCCAT

A\_14\_P138086 CTCCTTAATCTCTTGAAGGAAACATTTAGGATCAGTCCTATTACAGAGGACAGTAACATC  
CUST\_5268\_PI426210822 TAGAGTGAGGGTGGGAATCAAGTCACTCAGATATTTCTCCCGAATTGAAAT

A\_14\_P113213 GAGGTGACAAAATTATTGGTGAAAGCCTAGTTGACCAGAAAATGAAAGCCAGAGTATTTA  
CUST\_3785\_PI426210822 GAGAAAGATCTAAACTGGACCAATTCATATGGTCATTGCCTCTGGCTTGTG

A\_14\_P114415 ACCTAAAATCAGGCTAAAGAATATTACCAGGAAGGCGTCGTTAAATGAAAATTTGGCAA

A\_14\_P125955 TGATCAAGAAATTAATCAAGACACAGTGTATGATTTTAATTTCTGCATTGCCTCCCCCT

A\_14\_P108615 CCCTTGTAATTTCTGTGGAGTGTTCCTGCCATTAAAAATGTTAGGTATTTCTTTTG  
CUST\_9810\_PI426210822

GATGCTATAGGAGTTGAAAATCACTATGTTTCCAAGAGCTCAGAGAATGATTAATTCTG

CUST\_1453\_PI426210822 GCTTAAAATTATAACTGCAGCAGCAGAACGCCCCCATTTGTTGGGTAG

A\_14\_P130202 TGTGAATCATTTGGGTTTAAGCAATGAGCATCACAGTGAACCTCACGGGAAAATATTAATT

CUST\_10169\_PI426210822 GACTGGCTTTGGGCTCATGGTTTTTATTTGAGAGCATTACTTCTGACCTAAG

A\_14\_P120685 CTAGAAAACGACTTTCTCCTGATCAGATGAAACACTCACCTAATTTAAGTTTTGAGCCTA

A\_16\_P18931826

TCTATCAACAAAGGCCATTAAAGACCATAAAAATAACCCATCCTTGACTGATTAATGCTGC

A\_14\_P202181 AAAATATTAGCAGGAACCGAATATTGTATCTGACGCATCCTGTAATACTGAAGAGCAACT

A\_14\_P130711 AAAATATCAGATACACAGAAAGACTGGAAGTTCTTTGAGGTGAGTCACTTATGTTTTGGT

A\_14\_P119348 TTGAAAACCTGAATTTTTTCAGAATGCAGAAGTGGGCACAAATTTAATCAAAGTGGCATCT

A\_14\_P118677 CTTGGGGCCAGTTCTTGCTTGTCAATCATGTTTTTGTGTTTTTAAGATAATACATCTGTT

A\_16\_P16757705

AGAGTGGACCAGTTTACCTTATACCTCTGAGAATAACCCAAAACCTTTCAAAAACCTCAAATC

A\_18\_P22841943 AGAAGGGGGCGATTTCCCATTTGCTTAAAAAAGATCAGAAGGCGAACTATAG

A\_14\_P123748 AATGCCCACTATTTTGGCACTGTGGACTATACTTCTATATTTAAAAGCAGTCTCCAACCT

A\_14\_P200188 TTCTCTCTCTTTTTTATTCAACTCCTCACTCTCAACTGGATCCTTGCTCAAATATCTCC

A\_14\_P132161 TTAAAATAAAAACAAAGAAATTGGGGCTTTGAGTAGGGTTACCTAGCACCCCAAACCTTA

A\_14\_P107552 AACATTCAGAGCATAGATCTGGATCAGGCACAACCTTAATCTTTACCAGAAGATAATTCAA

A\_14\_P112092 CTTCTAGAACCAAGACTTGTATCTGGTTCTTCTGATAGTTATTTAAAAGTAGCCCTGAGGA

A\_18\_P15961667

ATTTAGAGCGTTTTGAATGCATCAGAATCATGGTCTACACAACCTCATCTTTGCAAGAG

A\_14\_P126986 CTGAAAGGGCTGCACTGGAACAACACAGATGAGATATTCTACACATTAATCTACTTATCT

A\_14\_P113720 CCAGAGCCATAAAAACCTGACAACAGGTCCAGCAAAGAGACTGGATTTTATTTAGATC

A\_14\_P113093 TCCATATCCCTTTAAGTCTAAATTTTATGTCCTTACCTGATTTCCCTCTGAAAAATGTTT

A\_14\_P128651 GTCATAATCCTGCTGAAACTCATTTGGCATGATAATAGTAGACACCTGAAAAGACAAGAG

A\_14\_P106877 GTGAAAAAAGATCCCAGTATGATGCCTTCTCTAAATTTACCAGAAAGAAAGGACCTGG

A\_16\_P02693372

TTTTTTACACCTCTATCTGTTTTTCTACTGCTAAACCAATCTTAACCAAACCCCTGCTTCC  
A\_18\_P12903071  
AAGTCCTATTTTAGTCTTTCTGTCAACAGTCTTACTAGACCTGTTTCATCGTGAATAAAC  
A\_14\_P129537 GCCGATCCTACAGCCCTATCAAATGAAACAATTGGAATTATCTTTAAACATGGTGATGAT  
A\_16\_P16200206  
AAAGGCCAGGTATAATACAGTTCTCTTACATCTAGCATTGCTACACAAATCTAGCACACA  
A\_16\_P00685515  
ACACATGAACATTTGCAGAGAATCCAGTATAAAGACATTTGTTAAAAATAAAGATGGTAA  
CUST\_9444\_PI426210822  
AAAGAGATTACATCCAAATTGCCAAGACCTAGTAACTGCTCTTTAACTATTTACCACCC  
A\_16\_P18140752  
GTTCTTAAACTCCTCATGACATACCCATTTTAACTAAGCATAGTCAACTTTTAGAGCCC  
A\_14\_P120381 TGCTATGAAATGAATACTGTGTGCCTTCTTGCATTTAGCAGAAGGATGACTTAAACTGAT  
A\_14\_P108886 GAAGAGTGTATCTAAAGGACCTGGAAAGATAATCCCTAAACAGCCAATACACACATACTA  
A\_16\_P01672874  
AAAGCATGTCCTCTTTAAGAATGAGTGAGAAGTGTATGGAACAGAATCAAAACTGTCAGA  
A\_16\_P58424599  
TTGTGATTGACCATAGTTTACTTATCTATTGCCCTAATGTTAGACACTTAGGATATTGCT  
CUST\_2854\_PI426210822 CTTAGCCATAGCCCCAGAAGTGTGGGGTAAAGTGGAAAGAGGCTG  
A\_16\_P15615471  
AAAAAAGTTTCAACTTTTCATCTTTCAACCTTGAACCTCAAACCTTCAACTTTTCATCCTGG  
A\_16\_P37804667  
AAAAGTCACACTTCAGCAACTATCAACTATTTAGAATCATAGATCTCAGAGGGAAAAGGA  
A\_18\_P22839973 GGGGAGAAGAGGTTGGCCTGGGGACACAGTAAAGCATGGTATTAT  
A\_14\_P134709 ATGCCCTAAGTGTGAAGAAGAGTTTGCAAATGCAACAAAATATTTAATTACCGGTTGTT  
A\_14\_P130286 AATACACCTATGAGATAGCCAAAGTTTCAAACACAGTTATCTTAGTTTACCGGTGGAGTA  
A\_14\_P127706 TTTACAGAAATTAATGATCCTAAGGAAATATGTGTGGGTTCTTCTGACACATCCTACCAC  
A\_16\_P21453198  
TTGACCTTATTTACCCACCTTACCTTGATTATAACATGGACCCCTGATTATTCATTGAAC  
A\_14\_P102076 CTTAAAAGGGTAGTTGTGTTTTGAGGATTAGGCATAGCATGTGGAACAATGTTTACAATG  
A\_14\_P109842 AAGCAAAGCACACTAACCCAAAGTCTTTCTCTTTCAAGATAACAAGGCAAACCTTTATCAA  
A\_16\_P38637470  
AGTTGCCCAATAATTAATCCTCTTGCCCTAAATGTTCCAATTAAAGTTACATTGACAGAA  
A\_16\_P02465574  
TTGATCTCATCAAGCATGGTATCCTTTTTGGAAATATCAGACAGCATCCAATTTAGAGGAT  
A\_14\_P119622 CTTCAAACCTCTGGTTATTGTGAACCTTTCCATGTTCCCCCTAGTCATTGCA  
A\_14\_P115764 GACAACCTTTGCTTTGAGTAATAAACTTGATTGTAGGAATGTGGGAGGTGTTTTGTCC  
A\_14\_P201500 AATACAGATCATAAACGGGGAATCTGAAGCAAAAGTCAGAATTTTTGGCAATAGGGAAAT

A\_14\_P201399 CAAAATAACCAACCAGAAATCACTGTTGTCATTTGTTGTGATTATTGCCATAACCATGTC  
A\_14\_P127867 CTTGAATAAAACCAATCTGGAGAGAGGACAGACACATGGGAGTTATTAAGGAAGTG  
A\_14\_P137819 TACAAATGTCATTCTGTTTTGCATCTAGTAGAGTCTTCAAAGAGACAAAAACCCATGGAA  
A\_14\_P137815 CTTGAAACTACTGCTTGACGCTTTCTTAGACATCCACATTCTGGTTGAGGG  
A\_14\_P137652 TTAAACATTCACATCTGATATCTGCAAAACCGTTGGAAAAAACAAAAGAATACAATAAT  
A\_14\_P104524 TTGCCCAGTGAGAAGGAAAGCAGGTGAGAGACATTTTGTAGTTAAAGAACTAAAATTTT  
A\_14\_P116203 TTTTCTAGTGAAGTGTAGGATAATATTGTGAGGAAGATTTATTAGGGAGTGGTGCTTAGGG  
A\_18\_P12950485  
AGATGCTTCTATGCCGATTATTTCAAATAACAATACTTTTCATGCATGTTGATTTGCTCCA  
CUST\_413\_PI426210822 TTTCTACTCATAAAACACCCGAGGGCCTGATCTATATTTAGGGCTGGG  
A\_14\_P128588 CTGTCTTTGAAAATTCAAAAACAGTAGCAAAAAGAATAAACCATGACCAGGATGCTGAC  
A\_16\_P36231045 ACAGTTCGTCTGTCATCCAGTTCATGTCCCGCGCCAAGGTGAAGG  
A\_14\_P128694 TTGCTTGTCTTTTCAAAGAAGTTCCATTTTCTTTGATTCCCAAGTGCATTTTCTCTGA  
A\_16\_P00154642  
AATGAAGTCTCTTGGATACATTGAGCCTACAATCATTTTACTAGCAGAAATTTTCAGCCCT  
A\_14\_P136421 ATTTATGGCTGTTTGTAGATTATGGCAGAAGATCAGCCTGTAGTTCCTCATTGAAGAAATG  
A\_14\_P116813 AGGGGACAGTGGAGATTAAGTTCCGAAAGAAAGATCTGATAAAGTCCATGAGAA  
A\_16\_P03139960  
CACCTGTTACCTTATAGCATCTTTGCAAGAATCTATGGAAAACAGACAATTGGAATTGA  
CUST\_5063\_PI426210822 ATCAAGGAATGACATGGTCCCCACCCATGACACTGTTAAATCCATAATTTG  
A\_14\_P135566 CTGCCTTATACTGGAATAGTTAAATAAACATTAGGGGAACCATCAGCACCAACTACTTAC  
CUST\_615\_PI426210822 GAATTTGACTCATGTAACCAAAACGTGGGTCCCTGGGGAAGCTTT  
A\_14\_P130932 TAGTGAAGTGAATTAGAGGTAAACAAAATTATCCCATCCATCAGGTGTCTGATGGATAGT  
A\_16\_P18395295  
AAAAAAAACCTCCTGTTTCATATGAAGGCAGGTAAAGTGATAAATAGATATCCGGAGCCC  
A\_18\_P14134210  
TTCTTTCCACTAAAATTTAAGAAAACCTAACGCAGTCTTGTATGAGGACACCACATTGTGT  
A\_14\_P119014 ACGACTAAAATAGTCGCCTTGAGTATGGGATGTTAGCAATTTCTACTTTGTATTTCCCTA  
A\_14\_P102309 CAGAAGACTCTTGTAACGATTTTCCATTGCTTTTCTCTTTTCATTCACTTCATTGCGTAA  
A\_14\_P111509 CTGTAGTAACCAATAGACACGGACTTTGTTGGACCAGAAGCCAATGAAGAATTAC  
A\_14\_P116963 AAGTGTTAATATATGTTGAGCCTGGCTTTTAAGGTATTTCTGAATTATCTTGCAAGGGGA  
A\_16\_P36181045  
CCTGTGAACTGGAACTAGATATGAATTCATAACCTACGAGGGTATAAATGATGGCAAGA  
A\_14\_P131615 TGAAAAGTAACAGAGGAAAAGAAGCAGGTATGTGAGATAGCAGGGAGGTGAAG  
CUST\_6651\_PI426210822 CAGAGAAGTGTCTGTATTTATGTAGTCTCCCATCCCTTCTCTTGTGGAATC  
CUST\_8968\_PI426210822  
TTATTATATTTTAGTCTTTGGTCAATATGAAGAAATACTCAATAGTAAATCATAGCAACA  
A\_14\_P101871 ACACAAAGAAGTGGGACGTCTTAAGGTAACCTACTCTGTTGCTGAATCATTGTATTCAGT

A\_16\_P18302378

AGGGGTAGCATAAGCAAGATAAATCCTCATCTTCAGAGTGAAAATTGATATCTCCTACAG

A\_18\_P14137030 CTATTACGTGCCAGGCTCCAAGGAGAGGAATAAGTCCCACATCTG

A\_14\_P128737 ACAAAAACCCATTTCATATTCAAGGGATTATTATCATTTTTCCAGGGTTTTCTTCTCCATT

A\_16\_P39959667

TCCACAGGTAATCTTTACTTTGATTCAAGAGATGAAGCAAACTAAGCCTATCCTAGAGA

A\_14\_P113226 TTTTTGATGTTCTGAGTAGATGTCATGGTGATCATAGAAAGGACATTTGAAGCATAAGGG

A\_14\_P117606

GGAAAAATAATGAATATAGAAGCACTGGGTTCAAAAAGAAAGGAAGGGATTAAGGTCTGC

A\_14\_P100744 GAACTTTAGAGATAACTACAGGCAGTTGAGTGTCTCAACATATGAAACTCAACCCATTT

A\_16\_P18114532 CCTCAGTTTCCCTTACTACAATTTTCTGAACTCTACTAAGGAAGAGAGACCAGACTT

A\_14\_P119102 ATCTACTGCGTGGCTTGTGAGGAACTCGACTCAGACGTGGATAAAGATAAT

A\_14\_P122340 GTCTGAATGTATCTGCAATGCCAGATTCTCCGGCCAGTTCTGTGAAG

A\_16\_P21447937

TCCATCATAAGAACTTCTGACTGTGAAATAAACCCCGAGTAACCAGATTAAGTATGAAGT

A\_16\_P03700805

CCCACCATCATTTTTTAAAGTTGCCAAAATTATGTCCTTTGTCAATAACAACCTCTTACTCA

A\_14\_P133972 GGAGTTATATAGGGTTGTCTGTTGGCCTGATCTTTTTTCTTTGGCTTGTGTATTAGTTT

A\_14\_P131213 GGTAAAGTTGATGAATACCTTCCTTTCAGGAGACTGTTTCAAGATTTCTGTTTTCT

A\_14\_P124841 AAAGTGTCTTCTATCCGCAGATGTGGCTGTGATTGGAGTTCCGGATAT

A\_14\_P127036 AACTTAATGTTTTAACTGTTTCTTGTAGATGCACAGTTGGATAAGATGGGGTTCACAA

A\_14\_P100568 AGTAGAACTAACCCGTAGTAAGAGAATGCATTGGAAAACCTGCCAGGAGAAAAG

A\_14\_P124277 TCTCATTCTCATGTTCCAAAATACATGTGTGTCATTGTGTAAGTATCATGTTCTGGAGGA

A\_16\_P38488111

ACTTTCCTTTTAAACATGTAGGATTTGTAACGACATACCTAGTGTATTGAGCAAACCTCCA

A\_16\_P02753165

AATTCCAAAGCACATTAATGTTCTTACTTTCTGGACTCATCATTTAAGTTTCTGCCACA

A\_18\_P21505306

TTCCCTCAACTAATACTACCTACCCAAAATTAGTTGATCATCAAATCAACTAGTCTTCCAC

A\_14\_P114562 TAAATATATACCTCCAATGTTTTTGCAAGTTTCTTGGCCTTCCCTACGTAATTGGCTACA

A\_16\_P36230804 ATCTTTCTTATTACATCACGGCCAGTTTTTTTTGTGGAGGGGGGCAATG

A\_14\_P104051 CATAAAAATGAAAATGACTAACCTGGTGTACTACTACTCCATTTCCATTGACCACAGG

A\_14\_P140006 AAAAATAAATGAAATGCCTGAGTTAATGTGAACTTTGGGGCTTCTGCTTCATTTTTACCC

A\_16\_P01344226

AACACTTTTGCTCATATTTATCTCAGTGTGCCCTTCTAAACTTTCAAAATGTCTCCCGAAC

A\_14\_P104343 AACATTAATCGCTTGTGTGATATAAAGATAGCACAATCTCAGGTGGCAAATTCATGCTG

A\_14\_P107878

AAATTCATGGAATGATGGACAAGGCAAAAACCTTAAAAGACTTTGGGTAGAACGATCCA

A\_14\_P128799 ATAGGCTCTCCAGGAAACAAGGGCATGAATATGTCATATTATACAGGTAAACAGCATAGA  
A\_16\_P20543604

TTGACTAATGTCTACCAACCATGAAAACATTTACATTTGGCCTTGTTTTAAACCAATCCC

A\_14\_P121642 ACTAGGCCTCTCTTTTCATGTTTAATCATAATAAACTGGGTTGAAATATGCAGGTGAGACA  
CUST\_3547\_PI426210822 ATCTATTTCCCTTCTCAGAGACCAGGAAGCTCTTGAGGTACAAGC  
CUST\_3731\_PI426210822

GGTCTTAATGGAAGAAAATGTGATCCTTTCTCTTCCTCCCTTGTCATTAAATTATTACTA  
CUST\_6086\_PI426210822 TTTGTCTTAAGACAGAGGGAAGGACATCTGGGAGTGATTGTGTAC  
CUST\_4880\_PI426210822

ATTATGATTCACCTTTACTGAATGTCCCTTCTCTTTTCTTTACTCACTGTCGAACAGG

A\_14\_P129125 TTGAGTAGTCAAATAATTGGAGTCTGGAAGATGTGACCGCAAGTGATAAAAATTATGTGG  
A\_14\_P128622 CCAGCGGTGCTTCACCCTCTTGGGGATAACTTGCTTAGTTTTTAATAAATGT  
CUST\_809\_PI426210822

CAAAGGAGGTATTTTGTATAATCATGACTGCAAGCATTCTTTCTCCAAAGTCTTTTTG

A\_16\_P03582440

GCCACATCACTAGAAGTATCTACTTTATCATTTTGAACATGTAAGAGTAAACCTGCTTCC

A\_14\_P109615 ATTCTTTTAGCCTTTTTATTCTTGCTTCTTCAGAATGATCTCCAAGGTGGAAAAGGTAA  
A\_14\_P133252 AAGAATTGTGTCCAGTGTGATGTTTTTGGCTGTTTAGATTTGTATGTCTTCAAGTCTTC  
CUST\_6031\_PI426210822 CTTTGGACCGAAGCTCTCAGCCTCTTAGGTTGGGTTATTTCTCAG

A\_14\_P122208 TTCTATCTTTTCAGATACAACAGAGTGGACCACCCTAGTATCAGATTCTCAGGAAGATAA  
A\_14\_P122687 GCATTATAGTTAAGTCCAGTGTAGCAGGAAACTTGATGTTTACAACAGGATCATATGGAG  
A\_16\_P17314800

AAAAACCCAGATTATAAGAACTTGGA AAAAATCAAACAGGTCATCTTAACACCAACTGGTG

A\_14\_P121502 CTAGCATAAGACTGCAAATGGCCATTGCAACTGCCATTTCAAATTTCTGAAGATGTATTA  
A\_16\_P58424435 AGATCCTGAGATGAGGGCTCACATGCAAGTGGTTCATAAAGGATGTGTTT  
A\_14\_P123045 TTACCTGTGGTTTTCCAATATAGCAGTTGGCCTTATTTTTATTGCTTTAGAGATTGGTTGC  
CUST\_5554\_PI426210822

AGAAAAAATTGTTCTTAGATTGGGAAGATTGTCCAGGAGCCTGAGAGAAGTTCT

A\_14\_P112401 AACTTTCACAGTGGTTCCGCTCGACACCATTGTTTTATTATATTATATCAGCCAATTGCA  
CUST\_9159\_PI426210822

ACCAACAGCAAAAAAAGTTTTTGTCCCTACCATGAATAAAAAAGTTGAAACATTCTTGAA

A\_14\_P126303 TTGAAAAGCACAGTTTAAACACCTGATAATGGGTCTTCATGAACACTATGAAGGCATTTTT  
A\_14\_P103114 CTGACAATTAGAGGTATCGCATTGAGAACTACTCCTAACAGCAGTAGAACCAGCA  
CUST\_2969\_PI426210822

GTGACTCTTGCTTTCTTCTAGAGGAGACAGTCTGATGTAGAAGTAATTTCTTTGG

A\_14\_P112332 AACATCACTGGCAACTAGAACTTGTATGCAAGGGTGATTTTTATAACCGCAGAGTAAAT  
CUST\_729\_PI426210822 GTGCATCCCAGGGCATTATTGAGGAGCCGCAGGGCAGCCTGGGTA  
A\_18\_P22841359 AATTGTGAGATCAGGGCCTACACTTCTTCCACATTGCTCTTTAACTCTCTCTC



A\_14\_P126865 ACTAAAAACAATGAAAAAACTGTGATTTGATGGCAACTCTTTTGTAGAAGGCAGGCTTAG  
A\_14\_P117552 GACAAAAGCCTGTGAATCCTGTTGAAATTGTCAGAAAAGTCCTGTGAATAAATGATACTT  
A\_14\_P102209 CTGTTAGGTTTTGAAAATTCCATTAAGTTGGAAACCTTGGTTAAAAATGTAGGTGCCTGG  
CUST\_4009\_PI426210822 GAAAAAGGATGGCTACAGATGCATGGCTGCATGGCTGTGCATCAT  
A\_16\_P02072777  
TGAGCACAGTCATTTTTCTACCAGTCGATGTTGCAATGAAGATAAAGTTCCAAATCCTT  
A\_14\_P122659 TGAACCCCAAAATGTATTCTGGGAGAGGTCATGATCACAGTTATACTTAATAAGTTTTTC  
A\_14\_P132496 ATTCATGAATCGTTCCAACAAACTTGCTGTGATAGCAAGTCACATTCAAGAAAGGTATGA  
A\_18\_P17061851  
TGAAGGTGGACGTGTTAAAATCTATTTGGTTCATTGTTAGGATCACTCACATTACAAGAG  
A\_18\_P18183851  
AGGCTGATTCTAACTTGTTTGGAAAAGGAGTTAGAAACCTCCAAATGCTGTTTTATAGC  
A\_16\_P58424476 CACAATACAGTGGTTAAGAGTAGGGTTTTGTACCAGACTTTCTGGCTTAAATCTG  
A\_18\_P16186777  
TCGAAATTCTTACTCTCTATTTGGGATGTAAGCATGTATAAGAGAATATACTCAGCCCC  
A\_14\_P200227 GTTCTGAAAGATCCGAGACTTATGATCCAGATTAAGGCTGAGTTTCTCCTAAATGGAA  
A\_16\_P01129592  
AAGCCTTATAAGGAGATCAGATTGAAACCTCAGGTAACAAGATAGATTACAGGTGACATC  
A\_14\_P104397 TGGCAGTGAATAAGCCAAATAAATATATGTGGCAAAATGCTTCCTGAATGTATCACGTC  
A\_14\_P111641 ACCAAATGCACATTAACATAACTTGACCGGCTTCTAGAGTGGAATGACATTTCAAATAG  
A\_14\_P122264 ATGTAGAAGTGAAGAAATACTGTCTCTAAATGTTGAATGAATAACATGAGGGAACCCAGC  
CUST\_1481\_PI426210822 CACTCGTGGGAAGTGGCTGGCTGGCTCTGCTGGCTCCACGCACAG  
A\_14\_P135272 TTTTTTGAAGCATCACAAAGGTTATTTGTTCCACCAAGTTTCCAAAGAAAAGGGAATAAA  
A\_16\_P16191504  
CACTGATTTTCTTACCCTTATTTCTGCTCTCATGACAGAATTTCTGGAGTTCTTTGAA  
A\_16\_P01273380  
ACTTCGTGATTCCCATTAATTTTTTCAAGATGTATTCCAAATAACACTTATCACCCCCCT  
A\_14\_P124110 TGAGACTCCCCAATCTTAATCTTCTATACAAAGTGGCATTTTTGGTTTACAGTGTTTTT  
A\_14\_P118961 CTTCTGTGCTTATACCATCAAACCTTTGTATTTAAGAGAATGGCTGGCTTTCAACCCTAA  
A\_14\_P129361 CCAGAGACAGACAGCATGATGGAAAGAAAGATTTCAGACAGAAACACAGAGTC  
A\_16\_P18869399  
AAAGATCTAAATTTTTGTTTTCTGCTATCCTCCAGTATACCTGACACAGACATGAAAAGCC  
A\_18\_P14135490  
TATAAGAGTTAGAAGTCAAGAGAGATGGAAATGAAAGCAAGTCAAGATTCTTGTCTTGGG  
CUST\_1\_PI426210822 AGAGGGAGGCGGGGCAGGAAGGCAGTCCATTCTTAACATACTTAT  
A\_16\_P00543943  
AAAAACTTTTAGGTGTCCTAGTCACAATGCAAAATTTCTTTACCAATTCCAACCCAGGATA  
A\_16\_P20335316

ACAGATTTGTCCAATTCAGACCTCAAGTATGTTCTAGTAAGCCAGAAAAATATCTTCGGT  
A\_16\_P20082035  
AACAAATCTCATTTCAGATACTTTCCATTGTCCCTTTAAGTATACATTGCTGACAAGAGCC  
A\_18\_P18185707 TAAGTGAGGCTTAGGAGAACAAAGCACCCACCACTGCTGTTCTTCTTTAAA  
A\_14\_P118285 GCTTGTATTCTTTCATTTTAAAGATCAGATAGCGTGTCCATGAAGTCAAAAATGACACAGC  
CUST\_497\_PI426210822 ATAGCAGTAGCTTCTCTGCGGCACCCTTTGGGGATGCTTATTCAT  
A\_14\_P106544 AATATAGATCGTTTACCTACAGGGGCAACACAATTGATCCGTATTCCACTGCAG  
A\_18\_P22842658 CAATGATTGGAACCTGGAAGCAATCAGAGCACAGAAGAAGCCTGGTC  
A\_14\_P132477 TTTCTTGTTTCGTGGAAGTTTAAAGTTAAGCAGAAGTCATGTGTATATGAATCAAGGCAGCA  
A\_14\_P118150 ACCTTACAAAACCTTCGGCTTAGTCAGCACTGCTAAAAAACAAAATAAAAAACACATGGCA  
A\_14\_P124454 AGCAGCCAACATTTTAAAAATCTTTACTATATTCCAAGATCTGACACAGACCTAGCACTC  
A\_16\_P00685491 GTAATGCTACCACTTTTCTCCACATACAGATGCTGGGACCTGAAG  
A\_14\_P122044 CACTATAAGTCTACTGGAGGTAATGAAGTGAATAAACCCCTCAGTTCCAAAGAACTTTGT  
CUST\_7160\_PI426210822 GTTTTTCAGCTCGGGGTTACCACGTGTATTCCGTGAAATGCTCTAC  
A\_16\_P20170224  
TGGAACCCGATCTTTTTGCAAACCTTACATTTTTAGTTCTGAAATTGTTGATGACTCCAAA  
CUST\_1310\_PI426210822 CCCCATTTATATGGTGGTCCCTTGTAACCTGAGGGTAGTTTTATTCTCTCTTCAT  
CUST\_8737\_PI426210822  
CAGCATAAATGTTGACTTCTATTTTTGGTGAAGCAGAATATAACTTTAATAATGCTCCCTT  
A\_14\_P118057 CACTTTTTTTTTTTTTTACATGTTGGATTATTGCTCCATCAAAGGGCCCCAAAAGTTTG  
A\_16\_P17057028  
TGACCAACCTCTTTAAACACCTGCTCATCTACAAACTGACCAATTGAACTGTTATAATTC  
A\_18\_P14136873 GCAAAAGTCTCAGTTCTCTCTTCTCTTACCTTCCCTTAGAGCCCTAACATAG  
A\_16\_P41583696  
TTGGCATGATTTTCTTTTAAAGACCCACCTATATTGAGTGATACTGAAATCTTCACACGC  
A\_14\_P200088 ACCTACAAGTCTCTCCTGGGAGTCTACACTTGCCAAAATATAACTTAAAACATATGGAAA  
A\_16\_P18130788  
GAATAACCCAGGTTCTAACATCACTAGTCTATGTGTCATGTCTTTATGCCCAGTTAAACT  
A\_14\_P132504 TTGAGTTGGCATCCCCTGTTTATATTGTTAGACTCCGTTATTGTTTGAATATTTAGGC  
CUST\_2254\_PI426210822 CTTGGGGCTGGTCCATTTGGGACTTCTTATGGCAAGAAGTTTGAA  
A\_16\_P20938675  
ACTGAAGAAACCAAAGACCATATCCCAATTCACCTTTCTGAAATCATCTCCCGTTATTTTC  
A\_16\_P18781723  
TAGGAACCCATTGAAATCTTCTTTGTGCCCTAATACCATGATAATTAATGTTCTGTGGG  
A\_14\_P133162 TGCAACAAGCCTTATTGTTTCATTTTTACCACCACTACTGGGCTGTTGGTTATG  
A\_18\_P19089835  
TGTTTCCAGCCTTGACTATTTATCCAAAATCTCATCTTGCATCTATAATTGCCTTCACA  
CUST\_2888\_PI426210822 CACAGCTGAGACTGGGTTACCAGCCTTCTACTCTTTGTGCTG

A\_16\_P18180498 AGCATCCTACTGTATACGTATGCCTCAGTTTATATACTTACTTATCCTACTGATCCGTGT  
A\_14\_P133318 TCTCATCAATGAATCGATACAATTCATGGCACTTAAGTCTTAAATCCGAGTGCAGGTAT  
A\_14\_P126998 TTATAAAGAAGAAATACAGCCACCAGAGCAAATAACAAATCCTCATCAATTCCTCCCAC  
A\_14\_P107301 AAACACTACTGGTCAACACACTGATACTCTCAACCAAAGACATTAGCAGATACTCATC  
A\_16\_P17886513  
GTCCTTGGGTCATTAACATAGAGATGCAGTATACATCCTGACTTATAAAAGCCTGATGTT  
A\_14\_P137709 TCCATGTGATTCTTCAGTTTTCTTTTTATTCTCCATCACTTCCAATTTAACCATTGTCC  
CUST\_1056\_PI426210822 CTCTTGGTCCCCAAGGCCCTGCCAGAGAAGAGGCAGGTACAGAG  
A\_18\_P26373809 TCTCAGTGTGTGTCGGTGAATGAACAATGAAAGACCTAGACTGTGCGACTAG  
A\_14\_P114143 ACCTTGGTCTTCATAAACTTGGAGTGACTTTTGTAACCTCAATTTGTTTGAICTCTTCT  
A\_14\_P114651 AAGGAAACCAAAGACAGGATAGTTACCTTAACCAAAAACCTTACTCAGTTCCTACTTCTAG  
A\_14\_P134110 GAACCTCAAGAGGCTTTGTTTTCTGTGAAACAGTATTTCTATACAGTTGCTCCAATGACA  
A\_18\_P13952840  
ACTTTCTCTAATTGCTACCTTCAATGAATCTCTGTCAAATTTCCCATATTTCCCTTAACA  
A\_16\_P19114811  
AAAATACTTCTTGCCACGCAATTTTTTTTCTGCACATTTTGCAATTTCAAACCACAGAAA  
CUST\_7528\_PI426210822 CCCATGTTGGAGCCAGCCATGGTCTGCAGAGTTCATTTCTCTGAG  
CUST\_4505\_PI426210822 GTCCTGCAGAGGGGAGGCCCTGCCCATGGGAGAGTCTGCCTCCAC  
A\_16\_P01779686  
GGACGCTGATATACTGAATTCCCCCTATTAAATCCAATCCTTTGTTACCTTCATCTTTA  
A\_16\_P01174624  
AGGCAGACTTACCTTTCTATGATAAATACAAGAGAGTGACTCTAACCAAAAATTCCACCA  
CUST\_8390\_PI426210822  
AATATTGTTCTGAAGGAGAACATAAGACTTTCCATATGAACAGATTTTTCTATGCTTTT  
CUST\_700\_PI426210822 TTGTTTCTTGCAGCCTTTTCCCTTCCCTCGGACGTGATGAATTCT  
A\_14\_P118214 CAGATCCTGTTATAACTGAATGTCACTCTTTGGCAAATTTCTGCAGACATAAAAATGAACC  
A\_18\_P11483399  
ATTGGATGAACAAATTCCTATTTTAGCCACCAGATCTGAACTTAAGGATAATTCTGCCAC  
A\_14\_P101358 GATAAATATCTGCCATTTTTTCTCTGGCCTCTATAAAATAAGGCTGTTCCGGCTGTAACAT  
A\_14\_P123481 ACTTACCTTAAGATAACCATTTGTATTTAGCATGTTCCCAATTCTCAGGAATTTGTGTCTT  
A\_18\_P22841260 CCTTGGCTGGCAGCACAGGCTCTGCAAAGGGGGTGGGTGAGTGAC  
A\_14\_P107745 ACATGTGTGTGTTTAGTTAGAACTTTGAACACAGATTGAACTTGAAGGCATTTTCAGCAA  
A\_14\_P108339 AAGATGCTTTAAATAGCCTATGTAGATGTCTGGGAGGTCATAAACTGAATTTCTTGATGCT  
A\_14\_P123097 ACTGTAACCTTTTGTAAGTCTAGATTCAAAGGAGATGCTTAAAAGTGGATAAGGCTGCT  
A\_14\_P103574 CTATTAATGTCATGTGTTTGTATACAGAACTGTCTTCTCAAAGTCCCACATACCCCAT  
A\_14\_P123964 CTTAGTATGAATCACTGCTTTTGTACCCTTTCTTGGACAGAAACCATCCATGAATTTAG  
A\_18\_P11900676  
GAACCTGTCAAATGAACATACTCCACTATAAAAACACATAGATACACCTCATCTACCCA

A\_16\_P20109174

AAAAATAGCGAATGTCCTTTTCTAGCATCACACTAGATTTTACGGGTGATTACAGGAAGA

A\_14\_P114041 TCTTTCTTCTGACTGTGAGGAAATGTCTAAAGTATTCTTCTAGATAAAATGGGGAAGA  
CUST\_10187\_PI426210822

TCAAGTAACTGAAGAGAACTATAAACATGAAGTCTTGAGTTAGTCCAAAAAAGGAATTTG

A\_14\_P135900 CTGGTTCAGTTGTGAAAAGGAATCAACGATCCTGCAAGAGAAAGAG  
CUST\_8317\_PI426210822 GGTACTCTGCTGTGCAGGCCCTCTGCTTTTTCAGGATTTGGAAG

A\_16\_P58424443 CTTGAAGTCAATCAACCAGCCAGCATAGTTATTATTGTCCCGAGTCTAAACAT  
A\_16\_P15731853

TATCACCATGACCGCTATTATTAACCTCTCCCTCTTATACAAACACATTCACTCATAATGC

A\_14\_P122546 CTTATCTTTACTTAAAACAAAAGTCAGTGTCTGTAACATGCTTTCAAATAGATGTCAA  
A\_14\_P131101

CTACGTCGCACAATAAAGAAACAACGAAAATATGGTGCTGAGGAGTGTTAAAAGTAGAAG

CUST\_1738\_PI426210822 TCTCATCGTGGATAGAATAGGGGCCTGGCCTGTCGTGAATTCTGT  
A\_14\_P120526 ACACGGTATGTGCTCCTATCTCCTTTTTTAAAACACAGAATACTTATTCTCTAGGCAGTT  
A\_18\_P14996980

GGAACCTCATTATGAACTGAGCACTATTATCAAATGTGTCTTGAGAGTATTTTTCTGGC

A\_14\_P103149 AAATATGCACCTACCCCAAATATGGAAAAGCGGGATAGCCTCTGATTAATTCCTAC  
A\_18\_P14139250 AGATGCTGAAAGGAACAAAAGGAAATCTCACTCAGTCATCCATCTGCCAGTATTT  
A\_14\_P116144 TCTTTTCATTGCAGCGGATATTCAACTCCTTTGTTTACACTGAGAAAATCTCAAATGGAG  
A\_14\_P116551 TCCTGGGAAGTTTGATAACATAATGTAAGACAGGCAAAAACCAAAAACAGTATTGAGCAA  
A\_14\_P107678 GGCATGTGAAATCTGTAAATTGCTCATCCTGACCTTCTGTCTACAGTTTCTACTTTTATT  
A\_16\_P16465560

ACTTTTTGAACTAAGCCCTTAATCTTCACTACTTTGGACTAGAATGGAAATGTCACCAAC

A\_16\_P18924451

AACGTATCTGTAGAGGTAGTGGTAAGGATAAAAACAGGACAAATTTAAGGTTGGTAGCAG

A\_16\_P01326664

ACCTAGTGTGGTTATGCTTAAATCATTCCAATCCCGTGAAGTATCTGCTAATGTTGATTT

A\_14\_P138578 CTGTTTTAGGTGAGATAATAACATACAGTGTAACTTACACTCAGACACTGGTGCTGCAGT  
A\_16\_P18215796

AACCTCTACATACTTTCAGTCCACCTAACATTTCAAAGTCAAGAGATTTAAAACCACCATC

CUST\_5823\_PI426210822 GAAGAGACTGCTTCCAAGCTGGGTTCCGATTTGTCTGATTGAAGC  
A\_14\_P109033 CCTGTGTGTCGTTATAAACACAGTCGTAGAAGAACTGACAGTTGACCTATTTTCTACTAA  
A\_16\_P18168879

CACTTCAGCCTTTAAATTATCCATCACATAACACTTGAACCACTATCAGTCAATCTGCAG

A\_14\_P125740 ATCTTTAAAGATGGAAAGAAACCACCTCAGAATAGTAAGGTTTTGAGACACAAGACACTT  
A\_16\_P18430488

CTCTCAATCACTGACTTCTAAGTTGACAGTTACCCAAAGAATAGATCACTGAGAATCTCT

A\_14\_P120236 CTACAACCTTTGGAGACCTAAGGATCTGAATTTAAAATGAACAAAATTGGCTTAGCAGCAG  
A\_14\_P119868 CAAGTTGTTTCATTGACTATCAAAGCCAGAAATAAAGTTGGTGACAGATAGGCCT  
A\_18\_P14133500  
ATGTTATAGTCAGGAAAGAGCAGAATCAGCAGAACAGAAAATTGATTTAATGATGCGGAG  
A\_14\_P125510 TTAAACTGTCATTGAGCAGAGTCTGATAATAAGGACACTGTCAAATCACAGTTCAGATGT  
A\_16\_P01664294  
AGCCACTACCAAATCTTTACTCTTTCTGAGAGCATAATCACAGTCTCTAACTTTAAAGGG  
CUST\_6678\_PI426210822  
TATGGAGATTAGTACCAGTAAATGATCATATCCTTAGCTCTATAACTTTTCAGAGGGTGT  
A\_14\_P112524 TTCTCTCCCTGCCTTCTTCTATGCATTTCATAAGAAAGCACAAAGAAGATTCTATGTGA  
A\_18\_P15514845  
AACCACAGCATTTTATATACGAGACAAACTCTGTCTAAGTCTCCATTCTGAATTCCTAGG  
A\_14\_P120393 AAATTATCAGCGCACTAATTAGTTGACACACTAAGACCATTTATACCTGGCTGCTTAGAC  
A\_14\_P122300 ATACCTTTTGTGATGGTGTCTTCGATGCTTTCTCTTTACTGCACTTTCTTTAATCCTAAT  
A\_14\_P111476 GCAAAAAGAAATTTCCATGCCACTGGGAAGTTTCTCCATCACTGTGTG  
A\_14\_P122724 GTTCAATCTTCTATGACTGTCAGATTGATTCGGTTTTTTAACAGTTATGTCCCTTGGCTA  
A\_14\_P126068 GTAAGTCTTCAAAGACTTTGCTCCAGACCACAGCAGTATCTGAAAAACACAAAA  
A\_14\_P107503 ACTGGGGAAAATGAAGAAGGCTGTATTAATCTAGAAGACTAAGGTAGTTGAAGTAATGGA  
A\_14\_P104803 ACTTCTATACTGAAGGATAACTCATCACCATTAACACGATTATGTCTTACCTTCCAGGT  
A\_14\_P128233 AGTCCGTGCCCTTTTAGTTAGTTCTGCAGTCTAGTATGGTCCCCATTT  
A\_16\_P21160493  
AAAAAAGATGGAGTTACCCTAGCAACTGTAAGATCACGTGATGTTTCAGAATAACCGTAAT  
A\_14\_P120267 CCTGGCATTACACAATTTTAACTTGATTAATAATTTGGCCTAAATATGTCGGCTGTTCTT  
A\_14\_P122326 CAGTTTGACTTTCACTCATGGGGTTTTTCAAATTTCTAAAGCACAAAGCATCATTAATTCCA  
A\_18\_P11861329  
AGAAAGTCAAGAATAAACAGAGTATCATTACAGTTGCTTAACCAAATTTTCATTGGCTGCT  
A\_16\_P35918478  
AAACTGCCAAGATCTCTTACCAACACATAGATTATCTCTTTCTGTTTAGTTCAATGCCTA  
A\_16\_P03650444  
AAGACCAGATTA AAAACCTTTTGATACCTCTAACTCCGATCATATTGAAGAAGCACAAAGC  
A\_14\_P104871  
AGGATCAGAAAACAAGATACCAAATAAGAGCAGCCATTGTAAA ACTAGAGAAGGTTACGA  
A\_14\_P139605 AATCTTAAAGTGGTGTCCGTCTTGGGGCTTGTATTAGGAATTTCTTGGAGGAATAT  
A\_14\_P114812 AAAGTTATAAGATAGGAACTCAATCTCCTTAGTCCCATTCAGATGCTAACTGGA ACTCT  
A\_14\_P124449 AGATACTTCATTCACCAAAAAGTGTAGTTACTTTGCTTTGTGGAGTGAAGAGTTCAGATC  
A\_14\_P104069 TTATTTTATAGATGGGAGACAACTCTTCAATGCTGACTAGACTAGGGAAGATTGTAAGCC  
A\_16\_P02562432  
GCATTAGGATGCCCTCTTTAATTGCTTTGGTTCAGGCTAATTTGAAAACTGCTTTCATT

A\_16\_P16180787

ATAATTTTTCTACTCCTCACACATTTTCAGAAAATGTTCACTGATGTTTCATTTTGCTCCAGG

A\_16\_P21528699

AAAACACACTTTGATTGTTTCATAAACCAGGCTCAAAAACATTTGTTGACATAACCACTGC

A\_14\_P132619 GACATACCTCAGTCATAGCATATTACTCTTGCACTTTACACCTGGTCATTCAGGTTGAT

A\_14\_P136127 CTGTGAAGGATGAATACAAACAGAAATTCTCAGGACCTTCTTAATTGAATCTTATGTGGC

CUST\_5303\_PI426210822 TTTGGGTCCTTCTGCCAGAGCTACTGGGACATGTAATAAGAAG

A\_14\_P137613 GGGTTTTTTTTTTACTCTATTACTCACTGCCAGTAAGTAAAACAATTACCCTTCCTCCA

A\_14\_P128345 TTTACATCACCCAAAGAACCAAGCACAGTGCTATTAGACACAGATGTTTCAGTAACTATTT

A\_16\_P18227345

ATTACTAGTGCACAGTATCTCATTAACCTAACCCAGCCAATGAATTAGAGTCACTGAAAGG

A\_14\_P135426 GTAACGCTTTATGAATACTCGCCGCTTTTCTACATCGCGGTGGTCTTTAC

A\_14\_P104308 GTGACTCCAAATTCAGCCATCTGAATTGTTTAAATTTGCTAGTGGATTTTGTCTAATGTG

A\_16\_P03759464

TCAGGAAACACATAGTTGTTTATCCATTCCCATTGACTTTAAACACTTCCTATGACCCAAA

A\_16\_P03463324

AGACCTAATGTTAGATCCAGAAGTTACCCAATTAATCAAATACATAACATCACTGGCCCA

A\_14\_P200241 TCTGCTAGTTTGAGAGATATCCTTACAGAGTCAACTATTTTGATGCAGGGAACAAAAAGT

A\_16\_P58424352

ATAAAAAAGTCACCCCAAACTCGATGATATGAACAGCAATCACTGATTCCCATGGAT

CUST\_730\_PI426210822 GCATTATTGAGGAGCCGCAGGGCAGCCTGGGTACCTGCACCATTG

A\_16\_P03520870

CCAACTACAACCCTATTACAAATGTTGACTTCTCTCTACTATGATATCATCCCATTGCT

A\_14\_P131058 CTTAACTGATACTGTGATATGATGTGGCTGGACACAAAGTGCTGGGTTTTGTG

CUST\_4015\_PI426210822

AACCAGCCGTTACAACCTCCAAACGTTTATTTTTCTGATAATAGGTCAAGGTTTTTCATAAT

CUST\_4312\_PI426210822

AATCTAGATAACCTGTAACCTTCTGTTACAGAATGAGATGGCTTATTTCCCTGGGTAGAC

A\_18\_P24687334

AAAGTCACATCACACTGATAACATATCAGGGAGTTGCTTTAATGACTGACCATGCAAAAAC

A\_14\_P106584 CTCTGCTTTTATCACAGAAGAACTTCTGCTTGGGTGGCTGAACTCTGATC

CUST\_10356\_PI426210822 GTCTTATATGTGCATGCACTGTTGGCAGCAGACTGCAGAGAGTCTTAAG

A\_14\_P105027 CTGCTTTTTATCTTCCCTGTCTTCCCTCATATTTTCTTTTTGTGTCTTAAATGCTGTTGGA

CUST\_1304\_PI426210822

TAAGTTTCTGGCTTTATGCACTTTGTGTTTCATGCACACCATAGCTTAGTCATCAGTTAT

A\_16\_P18378894

AACCACAGTCAGTGATACTAAATAATGTAATTGCAGTTTTGTCTTCAACCTTATCCCA

A\_14\_P103914 TCAATAGCAGGTTCTTTGGGATGGAACCTCATAAGCATATTACGTTTTGTTTTGCAAATT

A\_14\_P133326 ACATTTATTTAAAAGTAGGTAGCAAGTTAAAAATGAATACTTGCCTGAAATCATAAAACA  
A\_14\_P125371 CTGAAAATCCAAATGGGGAAATGTCAACGTTTGGCAGACAATCTCAACTTCTTAATCAT  
A\_14\_P121188 ACTTACCCTCTCCACTGATTATATCAGGTTTGGCTTTCATCATTTTGCAAAATTGTCTTT  
A\_16\_P21209202

ACAATTGTCGTCTGTTAATACCCATTTCGATATTATCTACCTTTCCTCAGTCTAATCCCAC  
CUST\_3216\_PI426210822 GATCTCACAGTACAGGCGAAAGCCCAACACCTCCCCTCAGCATC  
CUST\_7996\_PI426210822 TTGTTTTCCAGCTGGTAATGCTACCACTTTCCTCCCACATACAGAT  
A\_16\_P16614913

AGTCACAATGTTATTATAACCCGAAAGTCAAGTTTACTGAATTCAAGGACACTGCTTCC  
CUST\_5442\_PI426210822 TTTAGTGCGATGGGTGTACTCGTATGAAGTAGGAGTGAGCCTGT  
A\_14\_P124691 ACATGTTACCAAATTATGAACTACATAGGGCAGTTTTAAACAATACTCTGTGGCTCCTC  
CUST\_7301\_PI426210822 ACATCGAGAACTGACGGTGTGTCAAGAAATAAATATCCCCCCCC  
A\_14\_P128612 ATACCTTGTTGCCAGAGGTGGTATTTGGTTTAGGGTTAAAGTGAAGTTACTTTAAATT  
A\_16\_P00684994 CTTACCAGAAGCCTTAAGAGAGAGACGTGTTTCTATAGTGGCCAAGG  
A\_14\_P134041 AGGTGGAGTTGGAATTGATATGGAGATATCTAAAACTTTCAACGCATCCTTCAAAAACA  
A\_14\_P117449 CTCTACCTGAACAAAGAGATGAATAATTCCATGGGCCAGTATGCCAGTTTGAAT  
A\_18\_P16928043

GAGCGTCTTCTAAAACTACCTAACCTCTTCTTCTTGGTCTATCTTGAAAATCCTTCA  
A\_14\_P138303 AATTCAAGAACTGCTTGCTTTATTTAGGGGTAAGGGCAAAGAGGGAAAGTAAAATGATGAA  
A\_14\_P130919 CTTATTTTTTGCAGGCAGAGATTGTCAAGAGGCTGAATGCTATCTGTGCACAAGT  
CUST\_10316\_PI426210822 TACATCCTTCCACAGTTTCATGATTACATTCTCCTTCATGGCATGTGACCA  
A\_16\_P21257523

AAATCAAGGGCTGTTTATATGGTTCTCTGGTGTATGTTACTCAGAAGATTCAAAGGAAG  
A\_14\_P136158 CGTGCTGGTAAAATGACATAACTGTCCACTTTTGACATTAACAAACCATGATTACTGAAG  
A\_14\_P111973 CCACAATTCCTTCCAATTTCTGCGGCTCCATCCTAAGCCAAATAAATTATACTTTAACAA  
A\_16\_P15629382

CTCAGACCAGGTAACAATTAAGTTTACAGAGTGCCATTTCTATATGAGAGTCAAATGCT  
A\_16\_P15378435

ACGTCTTACACACATGATACTGTTATTTTTCTGTCCTATATCTGGTTTACCCTTCTACCC  
A\_14\_P201332 GCATTTATAGAAAGACAGTTTTAGTTTGGGTGATTTCCCTTGGAACCTTAAAGTCTGGACA  
A\_18\_P22841640

GCACAGACTGTGGTCAACTCCTAATTTTTCAGTCTGAGGTTTCAATCAAAATGTTAAATTT  
CUST\_10309\_PI426210822 GTTAAAGTTTCTGCTTGATAGTGCCATGGTAGGGAAATGTGACTTCTCTGGAAT  
A\_14\_P129894 CTTTAGGCTGCATTAACCACTTTGTGATCTTTTACTGTTATGGACTCCAAAATAGTCC  
A\_14\_P116191 AAGATAGCATCCAATTAATAATTACTAGCACAGTTTTGTAGCCCCATGGAGAAGTCA  
A\_14\_P107984 CTGAGATGTTGAATTAATCCGTTAATATATACGATGATGGAAACCTGCTCTCCATTGTGA  
A\_14\_P104980 CCAACAAAATCATCATACTAATCCCTGGGAATATTTCCAAGCACAGTCTTACGATAACAA  
A\_14\_P121483 GAAGTTACAACCTGGTAGTAGAGGTCTTTTTTTCCATCTGGCAAATCTAATAAAACGTGA

A\_14\_P114521 CTCATAATCATGTGTTTTGGTCCTACAGATACCTTCAGACCTTCTGGATAAAGAATTTCTG  
A\_14\_P117409 CTCTTGGTCTTCTCAAATGGGTTTCATTTTCGTAAATACTTTGGTCTAACATCTTCCATGA  
CUST\_311\_PI426210822 AAAAGACAGTCTGGCCTTCAGCTTGGTACCCAGGGTAAATGGTAG  
A\_14\_P109206 CAGCAGACTAGCAAAATTGTTCAAATACCTTCTAAAAAAAATACACAGCCTTGTGGACTC  
A\_16\_P03809044  
CACTCCTTAAAATTCTTACTTGACATCTCATACACTCCCCAAAATTCCAAACTCATAGCA  
A\_16\_P30952381  
TGAAGATAAATGCATGAAGTAGAATAATTTTCAGTCTGGTTAGCAATCATCACATCCATT  
A\_14\_P133424 CATTGTGGGGTTGTAGAAGTGATGAGAAGCAACTTTTGGTCATGATTGACAACT  
A\_16\_P15501705  
AAAAATCGAATTTACCATGAAAGAACTATCTTCCCCAATATCTTCAGATCAAGCATCCAA  
A\_14\_P110370 TGGCTTGGAGTTTCTTTTCATATTCAGACCTAACTTTTTTGGCTTTTTCTTCTGAGTAAG  
A\_14\_P125497 GAAATAAATACTTCTGAATGTCCACTATATGCAGGTAACCTGAAAAGGCAGGTTACAAG  
CUST\_4220\_PI426210822 AGAATGCGTGTTCTTAGGCCATGTTGGATGCTGAATGCAGTGGGA  
A\_14\_P127435 AATCCTTGAAAGTCTATGATTTCTTATACCTAAGGGAATGTGTATCAGGAGAGAGGTGAT  
A\_14\_P139398 CCCTGAATTTGGTTGATTTGGATTAAGTGACGCAAAAAGTCAATAGAACCATTGAATTC  
A\_14\_P118490 AGAAGTTGCCTCAAAAAACATCTCTTTCACCTGCTGAGTCTGTGGATGATATTTAAAAA  
CUST\_3158\_PI426210822 AGAGATTGAGATGATGGTTAGAAGAGTTTGGAGGCTGAGCTCAGGG  
A\_14\_P122015 TCTAATCTCCCAACATCCACCATAGTGATTTGCACCTCATAACAAAATTTCAAAAACATT  
A\_14\_P128126 CTGTTTATTTAATTGATGGCCTCTGCCTTCTTTAAAGGTTACTCTGGTATTTAGCATGGT  
A\_16\_P17420035  
CAATGTTTTTTGTAACCCACACTTCTACTTTTCATATACCTGAAAATCTCACATTTGCCCC  
A\_18\_P14474449  
AACAAAACCAAGGAGATACTTCATGTCTGACCATTCTGAAACTCATTGGAAAAGTGTGAAT  
A\_16\_P18192554  
ACTGTGCACCCTAAATATACTTGGTTTCAAACCTCTGTATTTTCATTCTTGGCCTTTTCT  
A\_16\_P19743933  
AAATACTGCTTCAGTGATACAAAACATGAACAATGTCTGTGTGAGTGAAATTGGACTGTG  
A\_14\_P121257 AAAATTTTGCCAAAGACCTTGAAATGTTTGCAAGGTGGGTAGAGAACTTGATTATCC  
A\_14\_P122070 ACATTAACAGGAAGGTTCTTCTTAAGACAACCTGTTAACTCTGTTGATGCTGGCTTTAAAT  
A\_14\_P137477 GTTTCTCCCTCCTCAAAAAAAGAAGGGACATTAACCATGTGGAAAAACAAGTAGATTTTA  
A\_14\_P121808 GTTATAATTAGGTTGGCTTATCTGCGAGCCCTTTGATAAGGCTTCACTAATTTACTAACC  
CUST\_6637\_PI426210822 CTATGATGCCAACGTGTCCTTCAATGTTTCCCGGGAGCTCTTCTT  
A\_14\_P200622 TAATTTCTTGTAGTCCTTTGGGTTTGATGCTTTAATCTTGTGGCTTTTCCGTTTACAT  
A\_16\_P15948155  
AACCCAGCAATGAAATTATCACTACTGTGGTTATCTCTTTATTTAATCACCTGCTGCAGA  
A\_16\_P36522050  
CAGCAGAATGTTATTTAAAGGCCAATATAATGAATTCCTACATCCTCTAACAGATTCAGA



A\_14\_P128176 CCTGGCAGACTTGAATCAACTCCATTAAAATGAGTAACTTTGTTTCATTAAAGACACCATT

A\_14\_P115374 TGTCTCTGAAGTGATAAATTCTAAACTCTTCTTCCCTCTGCCTAATTCCTTTTGAAC

A\_16\_P16995547

AAAAACATGATCATGTGGGAAGAAGATAAATCAGTAGCAACTCCTGAAGGAAATGATACC

CUST\_2884\_PI426210822 ACTTCCAGGACACAGATACCCTCCACTTCCATCCAAGCTCAGCAG

A\_14\_P129832 TTCTTTGGGGTGCTTTTCAAAGTTTCTGTGTAATGTGAGAGAACACATTAGATCC

A\_16\_P18196509

AGACATCACTTTATGTGGCCTTCTAAAAACAGAGATACAAGTTTTAAAATCTGCCCTTCC

A\_14\_P136088 CTGTTGTGGGATCTGTATTTTTTTTTTAAAGAGAAAGCCTGAAGGTCCCTTGTAGTAAG

A\_14\_P121186

GAGGAATTGGAAAGATTGAAGGCAGAGTTAGATGAGAAAAGACAAATAATTGCTACTGTC

A\_14\_P134021 TTTCTGGAGGTTCTTATTACTGGTGCTGACCAGAACCGAGAGTTAAAGAT

A\_14\_P105368 GTGGCGGTGGTGTAGAAAAATCTGAAACACATAACAGGAAAAGCAGAATATTGTCAAG

A\_16\_P18446583

TCCGTCTTCCATGAATATTCTACTCCAACATGCCTAATAACATTCTTTGGTCTCTGAATA

A\_16\_P03328452

AAAACATCTGACCCTTTTTAACTTCAAAGCAAAGATCTGAATACCCCATCATCATTG

A\_14\_P112105 TACCATAACAATGAAAATGAAGACTTCTGTGTGTTACTGTGTAGACGGTGGCAATTAGAT

A\_14\_P129532 CATCGACTACCATGTCTTCATAATGTCGTAGAATGACATTGTCATTATTGTCCTGGTAGA

A\_18\_P14130781 ATTCCATTGACCCCAAGAGTGGTTATTTACATGTCCTGGGACAT

A\_14\_P124336 ATATCAATATGAATACTTACACTCAGCATATTTCTGAAGTTGGGAAAATTCCGAAGGGCT

CUST\_6994\_PI426210822 CCTGAAAAGTGAGTTAAGTCTGTTGGTGCTGGAACTCATCACTGAGG

A\_14\_P102779 TGACCTTAGAAGAAACCATTTTCAGAAGCGTAAAGACTAAAGTACACATTTCATCTCAGAA

A\_14\_P110699 TTCACGTCCTCTTACTCATCAGCACTATATGCAATCTATTCTCAAATTTGTCATCCC

A\_16\_P19310176

ATGCATAATATGAGTGAATTACATCACCCAAAGAGAATAGATAAAGTGTATCCAGCCCCG

A\_14\_P201442 GGAGACTATGAAATCACACTCTTAAAAATCTGTGGTGGAGATGACTGAACCAAGAAGA

A\_14\_P118124 TGAATTCTACTAACCTTGGGCATTACTTTCAGGTTAGCAGAATTAGACACAATATAACTG

CUST\_3734\_PI426210822 CAGAGGAAGCAGCCACTGCATACGTGGGTGTATTTTTAAAATTTGTGACAC

A\_14\_P125451 AAGAGTCCACTCTATTTTGTGTTCTATGATAACTCTTGCCCCTGATATCACAAACATTC

CUST\_323\_PI426210822

AACTCTACTGAAATCTTTTTAAAATAATGCTTCTTTTTCTCCCTCACCCACCATATTGA

A\_16\_P19551723

AACCATAGCAATAATTCACCAGTTCTCTGTAAATATACTTAATTAGACCAGTCTCCCT

CUST\_7006\_PI426210822

CCTATGGGCTTGAAAATAATCTCTGCTATGGGCTCTTTAAAATAACCCCAAGTAACA

A\_14\_P200855 ATACAACATTGAAGTATGTAAAGTTTGTCTTACCACCCAGTGGTTCCCTTTTTTATTTC

A\_14\_P104656 GACTACCAGTCTCCCGTCTACTTTTACACCTTCTACCACCACTGC

A\_16\_P15328392

GGGATCCTGTTTTGTCTATTAGCGTATATTCTTGTAACCTATTATGCATCCCCTGACTGT

A\_16\_P20329068

TCCACTAATTTTCCAGTGAATTATGTCTTCCCCTCATGATATCTCATATAGTATGGCAAC

A\_16\_P21651385

CTGAGTTAATCTCCACAATGACAGATTCCAATGACCTAGGTATGTTTGAGAGAAAACCTAC

A\_16\_P15087259

GTAGAACTGAACAACCTTCTACTATTTCTGCCAACAAATTAGTCTTAATTGCACTGTGGC

A\_18\_P25573713

CTTCAGCCACCAAAATTCTGCAGAAACGCAGATATAATTAACCAAAACCTCCATCATCA

A\_16\_P37918878

GGCTGTTCTTCCATTTACAATACGAGAGATCAAATTCACCTTGAATACATCTGTCAGTGAG

A\_14\_P132213 GGTTACCTGCTTTTTATTTTATTCCAGAAATAAGATAGTTACAGCATAGCAGTCATATGA

A\_16\_P40165275

ACCTCCTCAAATATTCAAAGCAAACCTTCATATCACTGATATATTATTTTACCTCCCC

A\_14\_P108288 GGATTTAGCACATAAATAGGCTGAAAAACGAAACCTGACCTAAACTTACACCTCATAGAA

A\_14\_P201297 ATTCAAGGACTTAGCAGTCTGACTGTTCTATCCTTCTATACTATGGTCAGAGAGTCTATG

A\_14\_P120689 AGCCAACCTTAGATATTATTGCTTTGGCTTCTTCTATAGTCTTCTTTAACACTTGCTTCA

A\_16\_P20011419

AGACATTTTGCAAATCAAGGGATATAGTGCTTACAAGAGATGATTACGACACTAGTGTCC

A\_14\_P106727 GCCTACTCTCTCATTCTTTTCTTAATGGATAGGGGAACTTTTGGAGTTTAAAAGACTTA

A\_14\_P128796 TGTGCGGTTTGGACTTGGGCATTTCTTAGTCTAAAATCTATGTTAAATGTAGGTTTCTT

A\_14\_P123457 AACGCTTGCTAATTTCTCTTACTTTCTAAGAAAACCCCTATATTTAGCATCTGCTTCCA

A\_14\_P130291 TTTTGCACAAGACTCAATCTTTCTATTGAAGTGGAATCCTGGACTGTTACTTTTCAGAAA

CUST\_2954\_PI426210822 TGTGCTGTTGGAGCAGGCCCTAATCAGAAGTACGAGCCTCCCAGG

CUST\_2338\_PI426210822

GTAAATGCAAGTACAACCTTCTACATGAATAATTGTCCTTGGCAGATAGAGATAAACTAGT

A\_14\_P124180 TATTTTCATGCTCTCTTTTTACCCTGCCGCAAATAAAATATAATGAGCCCGACGTTTAGA

A\_14\_P121878 TCCTTCCCAGATGGTTACACGGTTGAAGACATCATATTATTCTGGGATGACAAAT

A\_14\_P107796 TCAGTCATTTCTGTCAAAATTGGACCTCCCAAATGGAGTTACTATGTATCTATTTCCATC

A\_14\_P131556 CTTACTTAGAAATGACCCACATCAAACGAGATCCTTTTCATCAATTCCATTCATGTTATG

A\_16\_P00685231

CACCTCCAACCACAATTCTTGTTTTAAAAATGAAAATAGAGTGAAACAGAAATGGTAGA

A\_18\_P10526997

AAAGTCAACCTTGACAGAGAAAACATTAACCAGAGCCTTTATGATTTCTTTACCCACAAA

A\_14\_P108812 GTAAGAGCACATGTTACTATTTTTTCTTTTGAATGTTTCATCTGTAAAGGGACCAGAGT

A\_16\_P18867136

AACGCCATCGGATATTAAGAGAATTCCTTCTGAGTCTAAGCATTTCTAAATACCTTTCTCT

A\_14\_P103704 TTTAACGATACTGTGTTTCAGACTCCAATGGAAAAACAGATCATCAGCCAGAATTCTACA  
A\_14\_P136079 CATACAATCCATAACATAACCGAGGGCAGATATCAACTACTCAACATCTTCCTTGTTTATG  
A\_14\_P106106 ACAGAAGCATATACTGAGGAAGACAAATCAATGGTGTCCCATGCACAGAAAAG  
A\_16\_P16238393  
AGACATTTTGCACCCCTAGAAACTTTTTGTTAAGCCTCCATTTTTGTCAATTAATGCTGA  
A\_14\_P128578 TTGGTTATCATATTCACCCCTTATACTCTAAGAACACTTATAAAGAAAGCCACCCAACCT  
A\_18\_P15124447  
GTTGTATTGCAGTCAAGAGGAAATAAGGAGTTCCCAGCAACTGAAAGTTTTTCTTTCATG  
A\_16\_P15337393  
TTGCTAAAGTGACAAATTAACACCTGATTTTTCTTCAGACTTCTATCTACACTCCACAG  
A\_14\_P107133 CTCACTGATTGGCATAAGTTTGTGGTGTTCCTATCCCAGTTCTTTGGCTTTTACTAAAAA  
A\_14\_P121449 TAAAGACTCACCAGATAAAGGTGATTTTTGTCCTGAAAGGCATACTGTAATTGGGG  
A\_16\_P20230991  
CTGTTTTATGATGTTTATTGTATTCTGATTGACAAGTTCAATGGATGATGCTCCAGTCCA  
A\_16\_P01416316  
ATTGAACACAGTTTTACCAGTTCACCTTAAAAATGACTACTTAAGGCTGCTTATGCATGG  
A\_14\_P121637 AGTTGCCATGCATAATGATGACCTTCAACACATATGAAGTAAGATACAGCATTCTTTTTC  
A\_14\_P107717  
AGGGAAAAGAGAACAATAAAGTGAAACCAGGAATAGAGTTAGTATTA AAAACCGAGTGCT  
A\_14\_P201418 ACCTTGCTTATTTCAATCACATTTGTGAAACTCAATAAGAACGCCAGAATTTCTCAACAG  
A\_14\_P131156 TCTTCCAACATTTATTTGGTTCTGTTTTGCTCTTTTACAATTCTGCCTCCTCCAATCATAT  
A\_16\_P00309238  
CCCCTAAGTTATCTTTGCCCTGATTCAAAAATAGATACAGAAACAATTATTCCACCATCCT  
CUST\_294\_PI426210822 TGTCAAAATGGGAGGGCTGCTGTGGACAGCGGGCTGCTGAGAAA  
CUST\_10127\_PI426210822 CTTCAAGAAAGCCCATCTGCTGGCATCTCAGGCATCTTCTCATGC  
A\_16\_P39644578  
AGAAGACA ACTACAAAATCCTGCTACTTCTCGATTTCTTATGTAAAGATTTGGCCAGAT  
A\_16\_P00685385 CACCGTCTCTTAATTCTTCATGTTATAATCAATTTATTTGGTATTTTTTGCTCATATCTC  
A\_14\_P134382 ATACCTGACTACATACTCTGGTTTTAAAATCTTAATGACCCCTGGATTCTGATCTCTAGGA  
A\_16\_P38631816  
ACCTTGGCCAATCTATAATCAAGCATAACATAGTCCAGATTCTTTTTTCATCACTGACAT  
A\_16\_P38154662  
CCCTTCTCGTCATCATATAGAAATTTAGTTGCCAGAATCTAAAATTGTAACACCATCACC  
A\_14\_P136504 TTGTCTTGGTGCATGATTGTTGACTATGCTTGTGAAATTTAAAGGTGAAAAGTCAACATG  
A\_14\_P136804 TCAAATTAATGAGAAGTTGCACCTGAGATCACAGCACCATCTATATCGATGAAAACATCT  
A\_14\_P112072 GCAGGTAAACTACATCTTTTCTTTTCTGATCCAGTTATTTCAATTCCTAGCAC  
A\_14\_P121120 CTGGTTTTTATAGCAAATCCTTTGAAACAAAATCCAGGAGGAAAAATTGTGGGAAACTTT  
A\_16\_P00685449

CTAGAAGTTCATGTGACCTTTTCCTTTACCTTTTAGTGCTGCCTAAGTGTAAGATTTAAG  
A\_14\_P122290 GAGGAATGAAAGCACTTCTTTGCTTTGGCAATCATTTTCAGACCACTATGTGTTTGAA  
A\_18\_P10111147TGCAGACATGTGTTACAATTGACAATAAATTAAGTCTCAGGTCTATCCCTTCAGTGTGA  
A\_16\_P15651378

AAGGTTACATCTCTGGAAAAGAGCACAATCTTCAACTCTCTTCAGGTTAGATGCTTTAAT  
A\_16\_P21383298

AACACATCCTTGATTCTTTATAGCCCTACTCTTCTCCAATTTCAATTTTCCTCAAATTCCA  
A\_14\_P138332 TCAAGGCCATTTGTTCTTCAAAATCTTGCTTCATCTCTTTTTGCTTTCTCAATTTCTTTT  
A\_16\_P02205231

CTGCACTCAGATGTCAAGTTACTACAGGAAAATAAAGTGTGCTCTAATTTCTTCTGCAACT  
A\_16\_P21341852

GGCTTTACTGATAACTGGTTACTAAATTTCTACTCCTTGAACACATACTTTTTGAGCGGTC  
A\_16\_P01756410

ACGTCTGGGTAATAATTGACTTCCATTGATTTCTGAATGAAAAGTATGTTGGTCTCTTG  
A\_14\_P201869 AAATATTCTTGTCGTGCAGTATCAAGGCCACAGTGTGTATCACACTCTGAATTAATTC  
A\_14\_P134472 TGACCTTCAGAGGAGAAATATGAGACTGCAAGACATATCCATGGACATTTTCTATTTGAG  
A\_14\_P119241 ATCAACGATTTCTTTCTCGAAATGAAAATCCCATCCTTAGGATCTGGTGAGTATAA  
A\_14\_P101843 AGTGTTTTCTATTCTGAAAAGAATAAACTTTATTTCCACCACCTGTAGCAGAGCCATTTT  
CUST\_5799\_PI426210822 ACACTGAGCTGCTATTTCTGAATCACATGTCCCCAAAGCTGCCCT  
A\_14\_P130477 CTGCTAAATTTGTCTTGCTTTGTTATAGAGAATATTCATAGCAAATGGGCATTTTTTTCT  
A\_14\_P125881 GATTATAATGGATTCTGTTTACTCTGGTCTCCAGGTTGTCAAATGACATAATTTTCAGGA  
A\_14\_P139269 ACATTTATATGTCCCTGAGTCATAGATCCGGACTTCAGGAATAAAATAACTCTCTGTGCT  
A\_18\_P14139035

CTCATTTTATCAATTGTTGAAGTTCAGATGGTCAGGTAGAAATGAGTGTGATGGAGTCTT  
A\_14\_P136836 TGAATGTGACAAGGTATTACCATTAAAGCGTATGACACTGATTTTACTCTGCAGAAGT  
A\_16\_P20081290

ATGGTGCACCTTTCAAAGATAACCAGAAGATATAACCAGTTGTATGCTAGAGATGGATTTGT  
CUST\_2653\_PI426210822 ACTAGAAAAGCAGGGAGGGCTAGGAGACCACGCATGTGCAAGCAC  
A\_14\_P106230 AAGCCTTGTCAAAGGAAAATGGCAAATTTGACTCCTGGTTGTAAAAGACAATATCCTAA  
A\_14\_P126837 TCCTAAGTAAAAAATTCATGTTCAATTCACCAAATGGAATACCATGAGCATGCAACACAA  
A\_14\_P135556 CATTCAAAGACTACATTTTTTCAAGAGATGGAATGGGACACAAAGCAAGAATGAACGGTT  
CUST\_9060\_PI426210822 ATGACAGCTCCTTTCACTGAGGCTGACCCAGACTCTGCCACCAAG  
A\_14\_P108831 CCCAACTCACCTTGTCTATATGTCCGTCAAATCTAAATTCAGGAATTGAAATGAATACG  
A\_14\_P131588 GATTTCTTGTCATTGGGTTTGATGCAACGAACGTAATATGGTTCCTAAAGAAATAAATCA  
A\_14\_P102427 GTTGCCCTTCTGGTTAATTTTTTCAGAAATATACAGTGATTTTCTTGTATTGAGCACACA  
A\_14\_P200417 CTGAAACTATCCAAAAGTCAGCACTTCTGATTTCCAGCAATGACATTCAAAAATTATT  
A\_16\_P38222924

TTTCCTTCTACAGCCTCTAGAAATAGTTTTCAACACTTCACAATCTGCATTGTTTCTACT

A\_14\_P133486

CTAGAGTTCCAAGTGAAAGAATTTTGTCTAAAAGTAGGAAGTTAGCAGAGGAAGAGATACC

A\_18\_P11029729

GGCATAGATTCTAACCCCTTGTTTCAGAACATACAATTACTATTCAATCTCTTCCATCACCA

CUST\_696\_P1426210822 CTGTGTCTGTGAATTTGGAGCCATGGCATTATCTGAAATTTCCAGGGTT

A\_14\_P123469 CACAGAAAGGCAAACAGGCGGATGCTTATTACCCGATTTATTAGAGAGATCTCTAAAAA

A\_14\_P121047 TTGATGGGATTTAAAGTGCATATAACTGAAGGCAAAGTCCAAGGCCTAGAGAAAGATATG

A\_14\_P100878 AGAGGAAATAAAGACTTTGCTAATTGTCTGACATCTGTGTCCACTTGTCTTCTGGTTATA

A\_14\_P104024 TGAAAAGAGGCATAGGAATTTTCACTCGAATGCAAATACATGTGTCTCACAGTAGAATCA

CUST\_9857\_P1426210822 CTTTCACAGAACTGCCACATTTCCCTATCAGACCGCCATTTTCA

A\_16\_P15882285

AATTGCTCGATTACCTGGTTTGAACCTTACACTTTATCAGTCAAAAATTGTTTTGCCTGCAA

CUST\_7600\_P1426210822

ATAACTTGATTCATTAGATGGAATTCAACTTGAATTTAGTTTGTGACTAAGAATTTG

A\_14\_P122540 CTGCAGACCTTGTATGCTTTATGGAATTCATGATGACACTCATACAAAATGTGTCT

A\_14\_P105021 GTTTTTGTCCAAGAGGTTTTAAAGGAGCCCTGTAAATAAATTCATGCAAAGAAGTAGTTG

A\_18\_P22840480 ATTTGACTTTTTCTTTTCTTTAGGGCTCTTCTGGCCCTAACCTTTGCACCATT

A\_14\_P127334 GAGGCTGATCAGAGAGATACTTGGTCTCAGGCTTTAACTAACAATTCAACTTAACTTCA

A\_16\_P02464014

ACGCACCTGTTTAAATTTTCTCTGATCTTGTCTAAGTCTTCATGGAGTTTATCGTAAGT

A\_14\_P109395 TTCCAAATAAAATGGGCTCATAATAGAGTTATCAAAGCCAGTGAGGGACAAAGTAACCTA

A\_14\_P114293 TGCCCATAAAGTAGTAGTTGATTCTCCAGGAATAATCTGGCAGTGTTATTTTTCTTTTC

A\_14\_P101337 AAATATTTTTAAAGTCTTACTTCATGATGTGGTGTAACCTTGGGTCTGTAAACTGGGTTG

A\_16\_P21267346

AATTTTCATGGAATCACTAGACAACCCAGAACCATCAAATGTTTGAGGAAAACCAATCA

A\_14\_P112293 TGAATAATCTTCTAGGTTCCCTCGGGCATTTTAATTTTCATGTGTCTTTGTGTTGCTCTT

A\_14\_P118870 ATTTCTGACAATATTGCTTCTGCCTCACTTGCCATTTAATGTTAAGAGGCTTCTAGAATC

CUST\_6346\_P1426210822

TTTTGGCTCAGATCATCTTAGTAAATGCTTTTTTCTCTCACTTTTTGAGCATAAAAATGG

CUST\_551\_P1426210822

AAGTCTGGGAGGTAGATCTACAGTTCCAGGATGGGATACTTTTTTAAAAAGTAAATGTAA

A\_16\_P19914637

TCTTAAATCAGTCACTTAAATCAGTCCAGTGTCTTAGATTAGTCATTCAGCCTAAGCAGG

A\_14\_P107274 TTGTAAATCTCATGACAACACTTTTTGTGTGTTGTTTCTGACAACAGTGGTTGTCAA

A\_14\_P127433 GTGGTTTCTTTACAGTAATTTCAACAGAAGAGTGAGAGATGGAACCCGAAGAAGAAAG

A\_14\_P130236 TTCTATTGTCTAAAGTGCCCACTATAATAACTCCCCCAATTGTGTTTCAGAGAACTGTAT

CUST\_8414\_P1426210822

GTTTCACTTCAAATTAGTTATTTTCACTATGGTTCAGATATTCCTTCTTTTCTATGTCTT

A\_18\_P14135042 CTGTAGAGAACCACAGTATAACTCTTGTGGTTAGCGTGGAGCGTCTTTAGT  
A\_14\_P108917 ATATTTCCAATGCTTTGGGAAAGTTACTATTTAAAGGAGTTGTAAGTCAAGGGATGATGC  
A\_14\_P108590 GTAAGGAAGAAAAATGTAAAATACCCACAACCCCACTCCAAGTTTATGTAAAGTGTT  
A\_14\_P137836 GTAAATTCCTTCTCCATGCTATTTCCCATCGGATTCAGTTTTCAAAGAACCTCTAAAAT  
A\_14\_P114633 GGTTTCAGTTTCCCTGTATCTCTACTTTCTAAAAACATTCTTCTACCCAAACCATGCATAA  
A\_18\_P22841775  
ATGTCCGTTGCTTTCAGGAAACATTCAGTAGAATTCAGTGTTGCAAATATTAGACCATTG  
CUST\_443\_P1426210822 CTGTTTTCTGAGCTAGTGCTGAATGCTGGCTGGGGGCAGAGACAG  
A\_14\_P122460  
TCTGAACTGAAAAGAAACAAAAAAATCAAGGTTTGAAAGAAAAGGATATTCCCAGGTGC  
A\_16\_P00741979  
AATGACAAGGGCTTCTTTACAATTCGTGCATCATTCTATTTCTGTTGGAAGATATTCTCATG  
A\_14\_P121568 GTGTATGGATCTGTGGTCATTGTCCCTCTGCAGAATAAAGATTGCTCAGG  
A\_14\_P200881 CTTGTAAATTGCCTTCTTGCAGGAAACAGACCTTATCCTGACTTTTAATATATCAATGCA  
A\_16\_P00685100  
AGGCTAACATTTTAGATCTTCTGCAGAAGATAACAAATGGGTGAATGTATCTAGCATGGA  
A\_14\_P120604 CTTAGAGTGCTGAACTCTTTCATTATGGGTCTCCCGATCGAGTCC  
A\_14\_P101262 AAAAAATGCAAAACATACCTCCATTACAAAGTCATGAATCCTTTCTATAAACCTCAGGAT  
CUST\_2774\_P1426210822 AACTGCCTGAACGTCACCACCTGCTTCAGCTTCCATGGCAAACAC  
A\_14\_P131476 AGTAAAGGAACAGGGAAGATTATCATGGCATTGTATCCAGTGCTACAAATTTAGAGAGA  
A\_14\_P118386 AGACTTAATTGTAACAAATGGGCTCAAAATTTAAATGTGAAAAGTCAACTCTCTTTACG  
A\_14\_P131199 CCAAGAAGTAAAGTCAAAACCTGCCAGCAGAACACAATATCTGCAGAATGAATTTAT  
CUST\_2545\_P1426210822  
ATTATATAATGACTAATAAATATTTTCTGATTTAAATGTAATGAAATATTATCAGCTTTT  
A\_16\_P00841744  
GCCCTCTATCCTCTAATTCTGATGCTAAAGTTCTGATTCCATTTATAAGCCATCATCTCA  
CUST\_2252\_P1426210822 CATAATCCCTTCTACCAGCTCAGTGTTCTTTGTTGTTTGCAGTGGAA  
A\_14\_P109511 TCCTTTTATCTGCTTTCTGAATTCTCAATTCCTCCCAAATTCTTTGTCTTGATTTCTTC  
A\_14\_P131448 AAGAAGTGTGACCCAGACGTAATTTATTCAAATACAGTAGACATTTGAACAAAGGCTCC  
CUST\_4497\_P1426210822 CCCCTACTCCACATAGATGCAGGGCACCTGCAGCTTTGTTTCAG  
A\_14\_P114660 GACAGGAAGCACATAGTGAAAATATAATCCATGCTAACTACCTCTAAGGGGAAATTTGCT  
CUST\_6877\_P1426210822 CTTTCTTTTTCAGGAGTGGTTCTCTCTTCACTTTCAAGGCAAACCGCT  
A\_14\_P105399 CTCCCTCTAGTGGCCAAAAATCATCTTTACTGCTTTTATCAAATCTGCCACACATTTATAT  
A\_14\_P102459 TGGTGGCACGTGTAAAAATATATGTGATTTAGCCTTCGGCTGATCATTGTTTTCAATT  
A\_14\_P120995 CCATTGCACTGTGCTGACTCTGAAGAATTTGTAAGTTCTTCACATCACTTTAAGAATACT  
A\_16\_P00652615  
GATGACTCCTGCATTTATCTTTTACACAAATGGTATTCTCTACATACCTTCTTCACCTTG  
A\_14\_P104367 ACTTTTTGACCAGAATCAGTTGACCATCAAGGTCTTTCTAAAATTAGACTTCTCATGTCT

A\_14\_P110925 ATAAATGTTTGTACTATCTGATTCAACAAAGCAGTCACTCATTTCATGGAATGGATATG  
A\_14\_P201111 TTATAGCACATCAAGATGCAAATTTGGATGAGAGGAAAACACTACTTCTAAGGCTCCC  
CUST\_9734\_PI426210822 TCTTAGGAGTGACCCTTGGCTCTAATGGCCTCAGGAGCACATCAT  
A\_14\_P132208 GTTACCTGTGGGACTACAAAGAAAGCCCTGAAGAAAGTTACAAATATCTTTCACTAACAA  
CUST\_7801\_PI426210822 GGGGGAAGCCTTGCAACCTTTATAAACTGCAGTCAGGACTGTTTT  
A\_16\_P16191012  
ACTCGTCAAAATGAGTGAGGAAGGTAAAATATAGACATGAAAGGGAAAAGCAGTATAGCA  
A\_14\_P122882 TCAGATCTGGTGAAGTTTATCAATAATGATAAGAAGGTTGCTGAGATAAAAAGGTTGCC  
A\_16\_P00685435  
GTCCTTGTTTAAGAAAACCAAATGTAGGTTTCAGAATAGTTTCTTCTTTCTTCCACGTCTC  
A\_14\_P102089 ATAAGGAAGGAGAAAGAGCACATGCCATGTAATAATTAACAGCATTACGTATGACCCAA  
A\_16\_P18131284  
ACCCATGCTAATGAGTTGACTATTCTTGTGTGAAATGTAATCTGACTTCCATCTAACAT  
A\_14\_P131327 TTAGAAGGTCTCTCATCCTTTAAGAAGAACAGAGACAGAAAATGGTTAGTCACCATC  
CUST\_5703\_PI426210822 CTAATTCACCCTTCTCACTGACCAGTGGAGAAGTCTGGCCTTATCT  
A\_14\_P100625 AGCGGGAAGGATCAAATTCAGACATCTTCTATTTTAGATTTTCAGTTCTGAAAAACCAAAC  
A\_14\_P114194 ATAATCATATGACTTCTTAGCAGAACAAAGATGATGTGCTCCAAGGTGACTTTCTGTTC  
CUST\_7885\_PI426210822  
TTTATCACTCAATAATTTTATGTATTAATAAAATGCTCATCCAGACCCTGCAGTCTCTGTG  
A\_16\_P00618089  
CAGAAGACTGAGATTTTGGCTTTAAGAACATGAACGACACAATTTTTGGATTGGGAAAGA  
CUST\_8121\_PI426210822  
GCATAGCTTCAGGAAGCCCTAGGATCTGTAGCTTCAATAATATAAAAATTTCTAGTTTCT  
A\_14\_P106632 GAGCCCAGGAAATGCAAAGCATTTTCTGAGAGCAACAAACACTGTATATATTTGAACTTA  
A\_16\_P17828367  
AAATGCAAAAGTCTGTACAGTTAGATACCTACCTGCCAGTTATTGATCCTATAACCTGAG  
A\_14\_P126344 GACATGACCTGGCTTATGATAAAAGAAGTTTATCGCATTACCACTTCTTTTCCCTTTTC  
A\_14\_P104166 CTCATCCTATGCTTTTGGACACTTCTTCCCTGTTTATTACAATGACTATTCTCCAGGT  
A\_14\_P103824 ATCTTTCTTTTCCAGAACAAGTTCTAGGCACTAAGATTCTTAGCACATCAGAACTATCT  
A\_16\_P19853275  
CATTCCCTTCACTCACTAGTAGTAACAGGCACAATTTTACAATCCAACATGTTCTTTTCA  
A\_14\_P106785 GCAGGAGATAGTCTAACCCTATGTATGGACACCTTTTTGAAAAGGGCATTATTAGTTT  
A\_14\_P138722 TAAATCTGCATCTTAGAGTTGCTGATATACTTGGACAAGGGGAAAAAGAAGCATATTCCT  
CUST\_7894\_PI426210822  
GACTGGATGCTGAAAAGATATATTAGAGTTTATGTTTATATTTATATATCTCTTATCTTT  
A\_14\_P110004 ACAAATGGGTTGTTGTAATGGATGTTTTCTAGTTTTCTGCTTTTCTTACAGTGTCTC  
A\_18\_P10025653  
AAAACCTAATCTTCAGGAACAAAATGTCACCTTTGAATCCAACCTTACCATGAACTACTGCA

A\_16\_P16755815

TGCTAAACCTATATCCTACTTTTTACTCAGATTCTCCTATTATAATGCCACCAGATTAG

A\_16\_P03617628

TCTTTTGGAGCCCACAGATAAGTATCTTACAACCTTTGATAAACGAATACTGGTGAAACT

CUST\_4217\_PI426210822 AAGATGTTGGCTGGCTGGCTGGATTTCATGACTATCTGGAGGAAAG

A\_14\_P128124 CTTCTTGATGACAGACTACTACTTATCACTTGAACAAACTGGCACAATAATTGGCTCTTAC

A\_14\_P139604 TAGCCCTATCAACATTAGTTACCACACTCTAATACACCTCAATGATCTCAGGGTGTATTA

A\_14\_P101891 GTGACAAATAGTAGAGTGGGCATGTCCATAATTGAAGTGCTTTAGGAGATATTTTGAGGT

A\_14\_P110327 GCACTTCCATAATTCCTTAGAGATTTCCCCATTTATTAACATGGCATAAAGGCACAGAA

CUST\_2306\_PI426210822

AAAGATACAATTAATATTGCTTATTAAATACTAAAAAAGCATTCTTAGAATCCCAAGTT

A\_16\_P19571352

AAAAACAGAACTCGTTAACCTGTTTCATATGTGCATCTGTGCATTTCTTAGTAAGTGCAC

A\_14\_P107824 CGCAAATGTTCTAATCGAACATGTTTTTCAGAAGACAATGCAAGTAACAACCTCATCACTC

A\_14\_P105318 TCCAGATGACTGTTGAAGCCTGGACAGAAATAATCTTTGAGGAACTATTAAGGTTAAA

A\_14\_P113255 CTTATTCTAAAATAAAATGCTTTGGTTCTCCTGTGTGCCAGGAACAGCAGTAACTTTA

A\_14\_P130618 CTTGAATGATAGTGGATTTGAAATAGAATTATGAAACTCCATATGTCTGTGGCCGTGGAA

A\_14\_P123371 TGATGAAGCACAAAAAGTCATATATACTCTTATGGAAAAGGACTCTTATCCCAGGTTCT

A\_14\_P118515 GCATACATAGTGGAACGTGCTTATTTAATTCTCCTTCTTTCCGTATTTGATTTCGTGGCA

CUST\_6393\_PI426210822

AATCAGGAAATTTAATGATTTTCACAGCAGTGAAAATTGATATTCATATTCTAAATAAT

A\_14\_P119433 ACCCCTCAATGAATCTTGATGAATAATTCAATTTTCCCAAGTTAAGACCTAGTAGGTCT

A\_16\_P19006682

AATACAATCGAGTGGTTATTTTCCAGCATGGCTTATCTTCAGAAATCATCCCTTTGTTTT

A\_14\_P113617 TCTTTTCGCAACCCTTGACACACATAGGAACTGTTCTTGCCTAGGAG

A\_14\_P102216 ACCACTCTTCTTCCCATATCTTTCCTGTAGCATAACTTAGGTTTGTCTGTTTTTCTT

CUST\_4573\_PI426210822 AGTTAACAGGAAGATGGACGATGCTGAGAGGGAAGGCTCATCTGT

A\_16\_P58424318 ATCTCTTGCTGTTTTCCCTGAGACTCATTATCCCTGAAGGTCTTTCATCT

A\_14\_P104044 GTGATTTGATACCAACTATCAAATTTGACACTGTTCTCTGTTAAGAAATCGACGCTGCA

A\_16\_P03533637

CCCAAGTTAGCCTTGATAAATCTACCTAGTCAACAACTAATTCACCTGAAGTCACAATC

A\_14\_P107000 CTCAGCCACCAGGACTTTCTTTCTCCCTTTATTGCCTTTCTCATTCTG

A\_14\_P127165 GAGGTGATATGTAACACTAATAACTACACTGGTTAGTAGGTAGCAGGAAAACCAGTCTTG

CUST\_7701\_PI426210822 TGTTTTTCTTCATGGGTAGGAACTTTATGGCTCAAGCCCGAAGGATTC

A\_16\_P37958034

ATGTCACACTATCTATGCTGGGAACTATTTTAAAGTGACACCATGAGTAATATTGGCACC

A\_14\_P106515 TTTCAAAGAGACTCCCAAAATTCAAAGTCAGTTTTAGAAAGGCAGTGGATTACCTAGAAAT

A\_14\_P136881 GGTAGGGATATGGGTAAGTAAATATTCAACTGAAATACAACGGGGTAAAAAGAACAGGA



A\_14\_P117044 CTCATGCAGTTACACTCATTCAACATTTATGGAGTAGTATCTCAGTGAGGATGCATGTAA

A\_14\_P114921 CTGTTTCATTCCCATCAGGTGCTACTTTGATACAACAAGGATTCCCTATATGAAGTTTTTTC

CUST\_3642\_PI426210822 TTCCGGGGACTCATCTCTCAGCCCTGTTATTATTCTCAGGGATTT

A\_14\_P106726 CTCAGGGCTTGCAAGTTCATAAATAATTATCTCCACAGCCTATTCTTAGTAGCAACAGAT

A\_14\_P117105 TGCTTTCTCCAGGAAAGGAGATGAAAACGTTATATGTTTCAGTTGGTCAAATGCTCTA

A\_14\_P127530 CCATTTATTCTTTTTACCATTTGATGCATTTTTGAGAACACATGACGCTTCAGGTAGGAT

A\_14\_P201618 AAGAGAAACATTTAAAACTTTTCTGAGGTTTACCTCTAGGCTGTTAGGAATCGATGGTT

A\_16\_P02014935

TGACATTACTGGAACATCACATAGTTCTCTTATGAAATGAATCTCTATTGCTGAAGTGGC

A\_16\_P58424270 AAGATGAGATGTTTGTAGAAATCTTCATACAGCACTTGGCTTTCCCAAAGGGAACAT

CUST\_3821\_PI426210822 AGGTGGCTTCCTTTTCCAGTATGTTGCCACTGGTCTCATCTATC

A\_14\_P102999 CATACAGTTAAAAGCAACTCCTGGAGAAAAGTTTCTTTGTTACTCTCCAAGGAACTTAAC

A\_14\_P122006 CTGCTTATGAATGCAATTCAGTTAATTTTCCCGAACCACCCTATCTGATCAGATTATTT

A\_14\_P117762 CACATGGTGAAATAAAATAATATACACGTGACATGCCATAGTTTCAAATAGCACCATCTT

A\_14\_P119182 TACTAGGATTCTGCTGGAAGAAGTAAGAGTGTTCCACCACATATTTTCTGTTCAAGAGAAT

A\_14\_P116284 GTGGGAGAAAAATAAATGGTTTGTTCACACGTGTTTGTTC AACATAAGGTAGTTAAGACG

A\_16\_P30952402 CTGCAGAGCAAGGCCTGTCAATTACGGTGGATGTCTCCATCTTCT

A\_16\_P18768159

TTCAAGTTCTAGCATCAAATCCATCTAGAGTTTCAGTATTCTTTTTCAAGCACATCGGC

A\_14\_P127219 TATTATAACACAGCCTATGCTGGCAAATATTTTCATTAACAACCTTTTTGCTCCTTGGGTGG

A\_14\_P133926 TTTACTTCTCTCAGGTGACTTGGATTTTTTCTTTTTGTGATCTTGATGTTCTGTTTTGCAG

CUST\_6570\_PI426210822 GTTCATTCATTCAAGTGTTCACTGAACACCTGCTAGGAGAGACCAACC

A\_14\_P200930 ATGTAATTTATGTATTTTAGGCGCAGCCAGGTGACAACCTCTACTAGAATCACTATCCTGA

A\_14\_P122125 CCTTTCAGAGTGATACTCAATTGTCCTAAGGCTGATAATCAGACGTGTAAGGTAATTCTA

A\_14\_P130969 CTAAAGCAGCATCTTCTTCACTTTCTGAGCCATATTGAAGTGCCATTGTAATTGCTGATA

A\_14\_P135851 ATCCATAGCACTTTATTGGTTATAGAGCACCTTTAAAACATTGAACTTCAGGTCCGTAGA

CUST\_6325\_PI426210822 ATCTTGGGAATTCCTCTGCCCCCTAAAGTATTCTTTGTCTTTAATCCAGTTGTTA

A\_16\_P18923283

AATGCAGATTACCCTCCTGATAGACATAGAACTTCAGTTGAATTTTACACTCAACCTTCT

A\_14\_P123139 GATGAGCGAGAGAAGTGGATCCATGCCTTAGAAGAAACAATTCTTCGACATACT

CUST\_8891\_PI426210822 TGTGCTGCTTTAGCCTTTAAGGGAAGATGGGTCTGAGCTTCATTCTTT

A\_14\_P108328 AAGGAGTCTTTGGTTTTATCGGCACTGTTTTAACTTCAAAAAAGAATGGATTCATGCATT

A\_14\_P127393 CTGATTATTGTATTTTTTCATCTAGAGAGACTGAGTGTTTCATTAGGGTCTTGTGTCCCTAG

A\_16\_P15669697

CTCCAGTAACAGAATCGCTATTGACACTTTCATTAGACCCATAATTCAAATGCTTGTCTG

A\_14\_P131105 CAGGAAGAGGTTGACAAGGTGTTTTGTAGCATCAACTAAGATGTTTTCCCTAATGATATAG

A\_16\_P00528947

CAAGATGCAACAAAATTCATTTTCAGAAGTCCAAAGTTCAAATACACATCTACCCTTGCTG

CUST\_6245\_PI426210822 AACAAAGAAGGCTGCCCTGTGGCTCTTCACGGATGAAAAGCCAAAG  
A\_14\_P137155 CCTGCATAAACTGGACTAGATCTATGTTTCTGACCCCTAATTCTGCATTAAAATCATCTG  
A\_14\_P123819 CTCTGAAGATTTCCCCAGGAGGCTGATAAATAAGTCACTTTGCATTTACAAATTAGAACA  
A\_14\_P104669 ACAATACTAGCCATGGGGCAATTGCTTCTTGGGAATAATGTATTTCATCTCTTGAGTTAAAG  
A\_18\_P10522214

AAATTGTCCCAACCTCATATACATTACAGCAACATCTTTTGAAGGAATTAGTCACATCC  
A\_14\_P130599 CTATGTTATCATAGGGAATTACGATGCTCCAGAGTCGACCCACATTTTGGTATA  
CUST\_8893\_PI426210822

CTGAGCTTCATTCTTTACCTTAAGATGGGTCCAAGAGCTAGAACCAGAATTTAAACAA  
A\_16\_P01452868

CCAGGTGGACAGATGATTTTTAACTCTGGGCTTCAGAAAAATTTAATAACGTAGTGCATT  
A\_14\_P129836 TGTTACTAACCTTGATACTGAACTAGAGATTTACATTCCCTCTTGCCACATCTGTGTTTT  
CUST\_3196\_PI426210822

TTTTTCTTTAAGCCTATTCCAATCTTTTTTTTTCTCCCTCTCCTTTTCCCTGGAAGTTTT  
A\_14\_P119993 AAGACACTTTGATGAGTTAGAGTAGTTCTTAGCGCAGACAATATGCAAGATTCTAAGCCA  
A\_16\_P18678273

AAACCAGAAATAAATGTGAGTTACCAAGAAATTCCTTAGCCTAAGAACAAATGGGTCTGT  
A\_14\_P126614 CAACTTGATCCCATTTGTCTTCAGTTACTCTTGCCCATGAAAAATGTTCATAAATGAACAG  
A\_14\_P134025 ATGATACCCCATGTAAAATCCACCTTGTGCAAGATTTCTTGACAGATGTGTGTATAC  
A\_14\_P134262 TCTGTTTTAATCTTTTGTGTTGAGATTTTTCTGGATATGCTTTTAGGCATCTGGGGACTCT  
A\_14\_P121822 AGATACTACTGGTTGGCTAGCAAGGAAAATCCACGATTCTTCAGAAATTTATCTTTTTGT  
A\_14\_P200725 ATCTCATTTGAAAGACTGAAACCTTCACTGTTAGTTATAGTAATGCCTCAATCAACCTG  
A\_14\_P128537 CCACATGCAGAAGACAAGACAACGAGTTTTTTATTTATTCAAGAGTAAATTTCCAGGTGT  
A\_16\_P18526643

AAAATGAATAGTGCATAACAGAAATCACACCTCAGTGTAAGTCTTACCTTCCCTACAGGAG  
CUST\_304\_PI426210822 AACTGCCTGGGAAAGGAATGGGTAGAGACGAGAGCAGATCTGAC  
CUST\_4494\_PI426210822 TCTGGGTCAGAGGGCTTCTGTTGAGTCAGAGCCTCCAGCCGATA  
A\_16\_P17333287

AAATGACCACTACAATTTTCATGCCACAACGATAAGTTCTGTAAAGTTTGGTGCTTACTC  
CUST\_6618\_PI426210822 AAGTCTTAGTCCAGGGTTCCACCTCTGGGCCCTTTACTCCTCTGTA  
CUST\_6384\_PI426210822 CTATGTTTATCTGGGGCAAGTTGCAGGATAACCACAGGACAAGACTAGTAG  
A\_16\_P18215875

ACCCAGAAGGCTCTAAAATCAGTTACAATGATAATAAACCTTCTCATGAAGACTCACTGAA  
A\_16\_P00568198

GAGCCATCACAGTCATTTATTGTCTCTTCAGGTCTAATTCTAAAACACAGTAGCACATCT  
A\_18\_P14136260

TGTATGTGATTTCAAAGAATCTTAGAATATATATTGCATGACAGGAAATGGAGGTCTGCT  
A\_14\_P138020 AGATTTGTGAATGATTGATAGAAGCATCCAAACCAAGACTGGTTCATTAATGTCCCATAT

A\_14\_P134966 CTCTGGTTGTTTTATGGAGTATCTTGAGAATCAAGTGATTAAGGTGAGTATTGGTAACTC  
CUST\_759\_PI426210822

CTATTCCAAGGCATGTGGGAGATGATCTATTTTCATGATACAGAAGAAACCCCTTGT

A\_14\_P137106 TTTTGTAATTGAGGGTCTTTGCTTATCTGTGTAATATGAGATGACCAAATCAGTGGTGC  
A\_16\_P00701942

GTAGATCCCAAACAAGTTTACTGGACTCATTAACTTTAACAAATGACAAAGACACGCCT

A\_14\_P103244 GTTTCTGCAAAGATTTTCTCAAAGCCATAGAGGAGCATTCTCAGAATATGTTCTATGAT  
A\_18\_P13172979

AGGAAATCATCGACACTAAGTTTTCACAATTTGAATGATCTAAGCACCCATACTACCACT

A\_14\_P132017 GAGGCTATGTATATTTGCTAGTAAGTGGCAAGTTTTGAAGCAGATGATGAAATGTCTCAC

A\_14\_P138517 CTTCACTATCTGCATGTAAGTGCTAGAAAACACATCCAAATCTGCATACAACAGCGTG

A\_14\_P117991 AAATCCAATACCATAACATTGTGCAGATGGTGAAGATGTTATAATCCCCATTTGACAGAT

A\_14\_P135859 GTAGTGCCTTCTATATCATTTCTCCTTTGATCACTGTAATAACCCTGAGAAGTCTAACA  
A\_16\_P16452085

ACTAGAAACCTCGCTTATAGTCCTGATCTCTGATTTCTTGCACAACCTTGAAATAATCCC

A\_16\_P00685075 CTTAAACAGGAGGTCTTTGAACTCACTGCCTGCCTTGTCTGGAAGTT

A\_14\_P131509 AGCGCCTAATATTTGGACTACAAGTAATGGTTAATATCTTCTCCTTACCTGAGAAGCAG

A\_14\_P117137 TCATTCATTCATTGCACATCCGCTTAGTGTTATCACTGAGTTACATGCTTAGCATAAAGC

A\_16\_P03700442

ATGTCATTTGTGTCACGGTAGAATAAAGGTTGATAATTGTCATAAAACATGCACCTGACT

A\_16\_P16371406

ATCCCCTACCATATCACTACACAATTAATCTCATCCTCCTTAAAGAAGTTTCATTTGCCA

A\_16\_P58424235

TCCAGGGGAGACTAGAAAATGTCTTTTAGGTAGGCATATTGTAGATTGGAATAAAGTTGA

A\_14\_P119780 ATTTGGCCAGTAAATTTCACTGTTTATTATAATGAAGCGACTTGAACCATCCATTCCAGC

A\_14\_P125275 GCACAGACCTTCCCTCTTTTTATCAAGCAAAAGCGATAGACAAGTATTATACATACTCCT

A\_14\_P109713 CGTCTGCTGTCAGAGAACCAAGTAAAAAGCATGACGAATTTTTTTTTATTCTGCTTAGCAT

A\_14\_P108950 CATTAGTATCCCAAGGATTTGAGCACTTTCATCCAATAGTTTAAAAACACTAGATGATTT

A\_16\_P15680699

AGTGTCTACAACCTCCATTGCCGTAATCTTGCTTACATTATACCTTTGATTCTGATTCT

A\_18\_P22839238 CTCCAGTGTTTTGTTTGGTTGCTGGGTGGAATCCCTGTAGAGAA

A\_14\_P134386 CTGGAGTCAGGGATTAGGTAATACGGAATGCAGAAATAGTGTTTTCTTACTTAGATCATG

A\_18\_P17041636 CATTTTATCTTCTCCATCCTCTCCCATCTTGCTGTCCTGCTCACATTCT

A\_18\_P25190633

AAATCCTAGAAACCTGTTTCTCACTAACTCACTTCATAAACCCATCCAGAGTCATTTTC

A\_14\_P133853 CTCTCAAATCTGAACAGAGACTAAAAACCAATTTGCACATTCAGCATTATCACAACAG

A\_16\_P36954113

ATCTTTGCACTTTCTACCAGTTACACAGATAAAGTTCACTAGAAAACCTTTCCACCACAGT

A\_16\_P03578517

GCAGAACTCTGCCAAAATAGGAGGAATAATTACTGTGTTTTTTGATAGCATTGGTCTTGACA  
CUST\_2270\_PI426210822 GAGGTGGGGCAACCCTTGCCCAGGCCAGCCATCCAGACGTCTTTG  
CUST\_4980\_PI426210822

AATGTCTCATGGCCAGTAGCTTGGTTTTTTTTGCATGGTGTAGATTTAGAATATAACTTTT

A\_16\_P17639127

ATTTGTCACTTAGTGCCTAGAAATGGTGTATGCTTCCACAAAGATGAGTCTATGCCATT

A\_18\_P22841218 ATAGGCTTGGTATTGCTGGAAGTGGATAGATTTGGGTTGCCTGTGTCTAG

A\_14\_P134897 ACCATTAAGATGAAAATACAAGGTTAAGAGCCAACCAGTGAAGTTGGGTAGAGTAGAATA

A\_16\_P35303207

TAAATACTCTGCCCTACATTTATGCAGTCTTCCCTCATATTTTTGATAAATCCACACC

A\_14\_P109156 CTTGCCAACAGAATATGAGACACTAGAAAGCCATAGCATGCGGTTTCATCATGTTTA

A\_16\_P01572550

AAATGGGGTAGGTTATGGATCAAGTTTGGTTAAATCAGCAGTTTATAAACCTTGTTTCCT

A\_14\_P133586 ATGCAAACGAATGTATTTTTCAACATCACTATAATGTTCCCCTTCCAAAGCCATTGGTTT

CUST\_8633\_PI426210822 CTTCTTGGGTACATCGTGTGTGTGCTGTAGACCTGAACCTTCCTA

CUST\_9004\_PI426210822

CTCATGGGGAACTACTGTCAATTCAGTTTGTTCCTCTGCTAATTTAATCTTCCAT

A\_14\_P136118 CATTTCTTTTTTTATTTTTAGGGCAAAGATAACTTCTAAGGTCCTTGCAGCCTGTGACAT

A\_14\_P111080 AAGGTGAGAGGTCACAGTGTGTGACTAATATTTCTAAGTTCTAAGCATGAATTGTTTCC

CUST\_4471\_PI426210822 CAGGAAGATGAGAGGAAGATATTCCAGAGCTGGGTGGAGAGTCAG

CUST\_5381\_PI426210822 CAGCTTCTTCTCATTCTTCCCTGCTGCCACTCTCCTGTCTCCC

A\_14\_P132942 CATGCTTGTAATTATTTTGGTCTTCCAGTTTCAATAAAAAATTCTTCTGAAACCCCGG

CUST\_1206\_PI426210822

AAACTCATGGAGCATATCCTTCAGTCAGTTTGTGTTTGTCTGATGTGAGAAC

A\_18\_P14156278

ATCAAATTCCTTACCTTCTTTAGAACAGACACAATGACTGTCAATCCTGAGAACTTCA

A\_16\_P30952226 CCCGCTGACTCGTTCCTTCGGCTACGCAGTTCTGGAGCATTCCAC

A\_14\_P122425 TGCTGATTTGTTTGGCTTTCTAATTCCTTGGTTAAGTAGAAAGGAGGATCCTCTTTACAG

A\_18\_P14134588

AGGTGCTCTAAATCCTTCCAGATTGTTAACACACTGTCTATGTCAAATCCTTACACTAG

A\_14\_P126560 CTTGGGCAAAGATGTAAGTTACTTCATGCAAGGTGAAATTTAAATAAGGGCTGAAATGA

A\_16\_P15058566

AAATTTTTCCCTGTTCTTCAAGACAAGTCCTACCTTAAATGCTTTACTTTCTGCAGTGTG

CUST\_9888\_PI426210822

ATTGAACTAGGTTTAGAAAAGACTTTCCCAAAGGGGAATGGACATTCCAAAGAG

A\_16\_P20897856

TATGTTTCTGCCTTGACTATTCCACTAATGAAACCCTAAATTCACCAAAAAGCCTGTGTA

A\_18\_P22839756 TTGTCCTCAGGCAGGCATGAGTTGTTTCAGAGGGGCAGAAGAGAAA  
A\_14\_P134954 TTGTTTGTAAAGACAGGTTGTCATACAGTGGTCCAACCTCTACAAATGATTTGGAGAATAG  
CUST\_6124\_PI426210822 GCACAGCCTAGGTCAGAAGTGAAGTTTGTCTGTTTTATGAAGGGAAAAG  
A\_14\_P122072 CTGGAAGGGTAATTGGATACATTGTAGATTCTTCCAGAAGTTCACAATTTTCTTAATCGG  
A\_14\_P102869 CTGGTATATAGCACACCTCATTCCCATAGTGATTTGAACCAACTGACAGAAAAATTATGC  
A\_14\_P108229 GGATCCGTGAGTGATACTAAACGACGTATAATCAAGTATTATATCCAATGGATTCTGTGC  
A\_14\_P109121 ATTGGTCATATTTCTGTTTTAGGACACAAACATACGGATGCAGTTTTGAAAGAGGTCAA  
A\_14\_P118837 CACAAGAGGTAGAAGACTGAATTTCTGGGCAATAATCTGGGTTTATTAGCCTGATCTT  
A\_14\_P137590 GGCTAATGCTACCGCTTAAACGACTCAGCATCTCGACTTCCCAA  
A\_18\_P11367491  
AAGTGTCTGTGAATCTTTCAAATCAATAGCACTACTTACTCCAGATAAAGGCGTGAAAG  
A\_14\_P128397 CTCTGCTCTGTTTCCTTTAGAGAAATGTTATCTTCCACTATTTTTTCTTTGAGCCTGC  
A\_14\_P124075  
CAAATAAACAGACTTCAACTGATGGAAAAGAGAAGACTACTTCCGCTAAAGAGACACAAA  
A\_14\_P115082 GCGTGCGGAGTTTTGGAATAGAGGACAAAGATAAGCAAATTACTTTCTTCAGC  
A\_18\_P22840734  
ATCTTCACTTTGGTGTTTTATTATTGTCAAATTACTTGCAATAATGTATCTTAAGTTGGT  
CUST\_9893\_PI426210822 CAAAGGAGAGAATGACTGCCAGAGCTGTGATTTTTTTGTCTTTTGCAGT  
A\_18\_P16705600  
CATGACCTATTATTACTTGCGGTATAGTGACAAAGATATGCTTAAGAGAACTTGTGGTC  
CUST\_4850\_PI426210822 GAGGATACGGATGGGCAAGCACTTCTATCAGATGCTGGTTCTGTT  
A\_14\_P120534 ACTTGGTTAGAGCAGGGTTTTCAAAGTAACAGAAAAATTGATGAACACCAAATAGTTTGAC  
A\_14\_P139967 TGAGAGAGTCAATCAAATAAAACCCACAATCAAGTTAAGGACCAGTCCTGAATACAGATA  
A\_14\_P115667 AAGTATTTAGGTAAATTAGACTTAGTTTTGCTTGCCTTTCTCAGAGAATTGCACCCTGTC  
A\_14\_P116566 AGTGAAAGGTCTATACAGTAGAAGGAAGAAAAGTCACACCTGAAATCCTACTTATCTGTG  
A\_14\_P136312 TTTCAATATTGCTTGTCAATCCGGAGAACTTGTGAAAGATTTCGATTCTTGAGGAAGTTCT  
A\_14\_P113124 AATGGACTCAAGACTTACAACTGTCTTTATTTCAGAGTGAGACTGCGGAACATTAATAA  
A\_14\_P113248 AGGGATTGACATTATGTCTAAATCAGATGGAAATGGATTAAGAAAATCCAGGCTTAGGTT  
A\_16\_P17141514  
CTCTCTAGAGATACCTCACATCAGTTCTATGTTACCAACAACACAAAAGTGATTCTCAGT  
A\_16\_P16191100 AAGGCCACCCATTGTTCTATAACTGTGGCCTCATGGTAAGTCTCCATAT  
A\_14\_P120097 AAATGAAGATTATACTTTTGTGCTCCTGCATATTTATTGTCTTCTGCCACCTCTGAAGGT  
A\_14\_P104486 AAAGCCTCTTTGGAAGATTGCATAATGATTGCATCTACATTCTCATTGACACGTCTCAC  
A\_14\_P128490 CTTGAGGGAGGGCTAGTAGAAAGAGTAGGAAGAGTTTCTTTTACTTTAGCCATT  
A\_16\_P03479979  
ATCATATAGGCCATTGATCAAAGATTCTGCAGTCACACTATTTCTTACCATGATGGATT  
A\_16\_P41866335  
CATCTCATCAAGAATTAAGCATATCACTTAGTCACTGCATCTCAAATCTCAATCTGGAGT

A\_14\_P103733 TATTTTCAGTGGCGTCCTAAATGCTTGACAAGTAGTCAGTAGTGTCTTCAATTATACTGC  
CUST\_5562\_PI426210822 TGAGGCCCACTGCAGGAAGCAGAGCTGATCTTTAACCTGTGTATATAT  
CUST\_4135\_PI426210822 TTGCTTGCTTACATCTACTAACTGGGCAAGAGAGACCATTCTCCCATTG  
A\_14\_P128571 CCTCTAAGGCAAGCCCCAACCTATCTATGCCATAGTAAGATACCCTATCAATCTAT  
A\_14\_P125799 GTTTGGCTTGTATTCTGAGTTTGTATCTGGAGTGTTAACGTTTTTCCATC  
CUST\_9880\_PI426210822

GAAGAGCCAGTAAGTAATTCATTCAGTTGACAGGTAGCCTATAAAGAAGGCCAC

A\_14\_P101313 TAACAAAATGCTGGATGGAAAACAGAAGGCTGCTAATCAAATACTAGATGGTCTTCTGAA  
A\_14\_P108726 GAAACTGATGGGACAACCTTATGTTAAATTCAGATACTCAAGAACTTGTCTTGTGTGTC  
A\_14\_P135410 CATCCATATCATGACACTTTTTGGGTCACTATGGTAACTGAGTTCTCAITGACTAACTT  
A\_16\_P18477743

AAAAGAATTTGCACTCAAACCTGTTGAATCAGGACCTATCGAGTAATCAAGTAATTCTCCC

A\_16\_P16564655

AAATTCATTTCTCACAGATCTATACACTGAATTCAGCATCACTCATCTCAAGACCTTG

A\_14\_P202009 TTTATTTTTAAAAGCAACTTCTGAGAAGGGCTTAGAACAAATTTTTTCCCGGAGTGCCAT  
A\_14\_P136247 CTTTCAGTGTCTTTTTCACTTTGTTCTGTGTCCCTGAACTAAAGGAAAGACTCT  
A\_14\_P105370 GTGAAATTCGGATTGTTGACCATTTCTGGAAGGAGACTGTATAAGAAATAATGTCCGTTT  
A\_16\_P16032127

ATCCCAAGTAATCTCAGTGTGTTGCTCTAATACCCTCATTTTGCCTATTGTCTTCAAAGT

A\_14\_P126514 CCAACAATTGAATTCAGAATTCCAAAGAGAATTTTAAAAGGGTTTGAAGCCATTCCACTT  
A\_16\_P16507727

CGGACATTAAGATGTAGGCTTTAAAAAAGACACAGAATACAGTCATAGTGATTCCCTGC

A\_16\_P02698407

CATGGGCTAATGACCAATTAATTGCTCTCTTTGGACAGATAAACACTTCTCATCTTTTTTCT

A\_14\_P114093 TCCTCCATCTGCAAAAGTCAGCCTATGCCATTAATAACAGCCAAGATCATAAAATACAAA  
A\_14\_P136332 CTTGAGTGTAATATGAAGGATTATGCAGGCTTAGTTATCTTCCTTGTGGAGAGGCCTA  
A\_14\_P118219 CTTACCAATAAATCCTGGTAAATTTTCTGGTTATCTGATGGTTGATGAAGCAAGGGTTGC  
A\_14\_P120265 CTTTGTAACATGCTTTAATTTAATTTGTTTTTGCCTTGGAAAGGAGCATGTTTTGGCTGC  
A\_16\_P35715170

ACACTCAGATACATTGTAAAACCAGCCTATCATACTAACCTAAAGGAAAAAGGAAGACCA

A\_18\_P22839966 TTTTTGGAGAAGGCTGATGGGCTGGGGGGTGTTCCTCCGACCTGAG

A\_18\_P16017165

AGATGTGGACAAAACCATCAGATGAGGTTTTGTTTGATCATAGGACAAAATTATAAACAA

A\_14\_P120495 TTACTGTAAGTTACTTAAAGATCATTTTTGGAAGCAGGCGTGGTAGAGTCTGTAAATGAA  
CUST\_426\_PI426210822 CTGGCCCTGCCGTCTTGCTGAGGAAACACCCAGAAATGGTGGTG  
A\_14\_P124788 TGCTGTTCTCCTACATAGGAGGTGTGCTGATGAATTTTGGGTAAATAATCCTTTATGTAG  
CUST\_3609\_PI426210822 ACCCTGGGAATAGGACCCCAAAACACTTTATTTCTCAAATAAATGATGGAG  
A\_14\_P132221 TGAATAAAGGCTAGGTATAGTTCTTGATGAGAAAAATAGAGGAATAGGATGAGGCCTCTG

A\_14\_P112463 AGTCCAACCTGTCTTATAATACCAAATTCGCTATTCCTGACTTCAAGGTAAAATTCTTGG  
A\_14\_P128341 CTACAGAGAAAACCTCTGTTCCTGAAGTGATCAAATGTGGGTAAAATCTGGTGAA  
A\_14\_P136682 AAGCAACTATGTTACAGTGAAATATTCGTGGAATAGGTTAGGCCATTTACAGTAGACATT  
A\_14\_P106504 CTATCCTTGGACAGCACACAAAATAATCAGAAGAAGGTGCTAGCCAAAACACTCATT  
A\_14\_P104238 GTATTTCAATAACCCATGCCAAAGGGAATTTCCACATTTCTCCTTATTCTGTTGTCAATT  
A\_14\_P101049 CTA CTCTTCTGGATTGTTCTTTCTAGTCGAAGAATTGAATTTTACAAAGAATCCAAGCAAC  
CUST\_3947\_PI426210822

TCATAGGGTAGATATTTCTTTTAAGACTGTTAATAGTGTATTTCTTTTTATTGCCACT  
CUST\_7747\_PI426210822

ATCCTGCATTTATTCAGTGGCACTCAAAACATTGTAATTATAATTGTCAAAGATATCTTA  
A\_14\_P122089 GTCAGTGTGTGTGGAAGAAGAAAACATAATTCCTTACATCACCAATGTTCTACAAAATCC  
A\_14\_P102055 GGCCTCATCAGAAGCAGGTCTGTTCTCTCCTCTTTTCATATTACTTTGTATTTTATGGG  
CUST\_6065\_PI426210822 CAGGGAAGGAGAAAAGGGAGAGAAACCAGATTGTGGAACACTTATGA  
CUST\_7366\_PI426210822 AAAAGTGGGAGCTTTTGTGTCTAGAAAGTTCATGTGACCTTTCTTTCCACC  
A\_14\_P136070

CACAGAAAAGGGCTTATGAATTTACGCTTAAACAGAGAGAGACAGACAGTAAACATCAAA  
CUST\_4819\_PI426210822

AGTGAGGTCAGTTACAGAGTGAATGGGTTTCATCCTGTCATTGTAAATAACAGTTTTTTTG  
CUST\_1994\_PI426210822 ATAGGATGTCTGGGACATGGGAGGAGGCCATGTGCCTCCTCAATT  
CUST\_7604\_PI426210822

TTTAATTGAAGAAAACATAATTTTAAAAATCTGAAAATAATTCGTTTGTGACTATTTAA  
A\_16\_P19706136

TAGTATAATTGCATGAATACCGAATGAAGTCATTTGTTCATGAAGGTTCAAGAAAAGGGCC  
A\_16\_P01640693

AATTAATGATGTGAACTGAAGTTAACTTGTCCACCTAAGTAGATTAGAGTCAGACCAGCG  
A\_16\_P00685140 AAGATAGGAATAAGGTCAGGGCGAGGTTTCAGTTTGGGATGTGGATG  
A\_16\_P20359301

CTATCTAGTGCCTGAGTATATGAACCTTTAATCCATCAAGGAACTTCTAACACCATCAGA  
A\_16\_P21360576

TCCCCCGAATATTATAATGTTCTAACTCTACTGCTTAATGCAAAGTTAAAAGAAGTGT  
A\_14\_P111435 TTTTAGCAAATTTGGAGAAATTAGAGAATGTATGGTCATGAGAGATCCCCTACGAAACG  
A\_16\_P20010342

AAAGGTCCTCTCATGGTATAAAGTCATTTTCAACCTTAACTGTCAAGGCAAATCAGAAA  
A\_14\_P109786 AGCCTGGAGTAGGAACAAAAATTGCTGAAAAGATTGATGAGTTTTTGTAGCAACTGGAAAAT  
A\_16\_P35139681

CCCAAAATATATTAACGCATAGAATAAACCAACTCATTTCAGAACTAACCTTTCCAC  
A\_14\_P125635 CTAGTCTGTAAAATCCTAGAAGACCAGAATCATGGATGTTCAAAGAAGTAGATAGCCTCA  
A\_14\_P106346 TTTCTGTCTTATGTGGACACTGTGCAGTCTGCCATCTCTACCATGATTTT

A\_14\_P109558 ACCTGACTTTCTATTCTTAGGATACAGGCATATATTTTTTTGGTAGTTGGAAGGTGCGTAT  
CUST\_6150\_PI426210822 CCCTTCATTGTCTGCACCAGCTCTGAAGAAAAATGCAGAAGTTTGTGGATT  
A\_18\_P13532156

TGGTCCATTCATGTTGATCTACTTTTTGCATTTCAATCAAGTAGCCTGTGACTTTAGATC  
A\_14\_P108195 TCCCAGTGTCTAGAATGACATTCTTCTCTGCTTTATGTGACTAGTCAATTCCTTTTCCTC  
A\_14\_P133354 CTTATCCCTCTGTCTGTTCTGGATTCTTTTCATCTCATCCGCATACCG  
A\_14\_P115868 GCAGAAGCAGTGCAGTGTATCTGGGATTTATGGAATAATAACAGTATGTTAGGTTTACC  
CUST\_5711\_PI426210822

TCAGTGTTATGTTTTATTTTTGCAATTTGTGGGGGAAAATGCATTCTAGGCTTCTG  
A\_14\_P114644 TTTTGTCTTTAAAATTGAACCAGACCTAGAAGAATTAGAGTAATCTGTTAGCAGAAAATAC  
A\_16\_P00685174 TTGCTGTTGTTCAAGGCTCAGTCCACAGTTTTTGGACATCCTCAG  
CUST\_8512\_PI426210822 AAGCATTGCTCTCTATAGGGGCACGTGAAGGACATTCAGCCAAAG  
CUST\_4755\_PI426210822 GGATGTCAAGCCCCTTCCCTAATGATCTCAGTTTAACTGCTGTG  
A\_16\_P17145596

AGTCTTATTTACTCACCCATTGTAGAATCTCTCATCTGTCCTATTCTAGTTCCAGGTTTG  
A\_14\_P139557 TTTGGTTTTTAGGGAGAAGAAAATGGCTTTCCAGATAGCACTGGAGATCCTC  
A\_14\_P103379 CTATTTTTCTTGTCTCTGTCCACTTTACTGTGGCTGTCTTCAAACCTTTGACCAC  
A\_16\_P02101404

TCCATCAATTTCTCAATCATCACTCATTCTTAACACTCACAACAATCTTTCTCTTCTG  
CUST\_8666\_PI426210822

GGGGAAAAGTCAGAAATGATAGCTAACAGGGAGTGAAGGGCTAGAACTTTTTAT  
A\_14\_P128373 ATTTTGCAAATGTTGGCAAATCCATTGGATTAGCCTGGTGACTCCAATTTAAAGTGTATA  
A\_14\_P135286 CTTCTCAGAGGACATACCTTCATCATGACCTCATTGTTCAAGTTCTCACTGATGAT  
A\_16\_P17319231

AACGTTGGACATAGTAGTTGTAGGATCCCAAAAGAAGAATGCAGTAACTGGACATACTTT  
A\_14\_P101959 CTCACAAGAAATGAAATGTAATGCACAAATATGTTTGACTGGTAAAATCCCAGAGGCTTG  
A\_16\_P20008388

CCACATCAGTTAATGCTTGAGTTCTGTAAAGTGAATCACAGTTCTACTTCTTCAATTCCG  
A\_16\_P21168646

AAAAGACACTTTGAGGTATAAGGAAGTAGAGGACTAGATGAAGGATAATGCCGTTTTGAA  
CUST\_7901\_PI426210822 TGAGTCCTGGAAATTGGAGGACCTCTGTACCTTCTTCCAAAATC  
A\_16\_P18269840

ACCTCTTCATGTATTTTCATAGCCTAGTTTTGTAGCATCACTATGACTTCAACCTTCAAAA  
A\_14\_P116117 ATACTGCAATCGAAAGGTAATTTATGCCCACTGGAAAATACCTTGGAAGATATACACTCA  
A\_14\_P111161 GGTGGCTTTTAGGAACAGAAAAGTTTGTAGTAGTGGAAAAGTTGATCCTAGAATTTTCTTT  
A\_16\_P20894182

AAGTGATGAAACATGTCAAGAAATTCAGAATTATCCCATCTGTAAGAAAATCACCACCCC  
A\_14\_P113976 GTGTTGGAATGTTAGATGAGCCTTTTGGATTATCTTTCTATAATCTTATGCTGGGAACCT



A\_18\_P14134744 CCATTTAACTGCTAATTCAGACCTCCACCTGGGAAGTGAAAAAGAAAAGTGGTT  
CUST\_8738\_PI426210822

ATTTTGGTGAAGCAGAATATAACTTTAATAATGCTCCCTTAGGATTCTGAGAGAAAGTTG  
CUST\_6136\_PI426210822 CCATGTGCTGTCTGACCTGGAGGCCTTGTTCATAGCTTTTCCTC

A\_14\_P100121 GATCAAAAGAACAACACTGGGACTCATTGATGCTCTCAGTGGCCAAGT

A\_14\_P107285 ACAGATGTCACTAACTGACCTATTTTTTACATTCTGCATACAGTATATCACCTGAAGGCC

A\_14\_P139470 ACTGGATCTCTTAACTAGAGATCTTGTTCATCTCTACGTCATGGGTGGGAC

A\_14\_P108418 ATGCAGAGTTGAATGTCTTCTATGAGGAAAGTGTGCATTTTGACAGAGATCTTCCAG

A\_16\_P03718360

TTCGTTTGCAGATGTAAAGTTTTTAAGGAGAAATAACTCTGAATATGACCTGTGTGGTGG  
A\_16\_P01344709

AATTTGCTCTTAATCAGAAGTCACTACCACATCTCATGTGATTCTCCAAATAAATCCACC

A\_14\_P102659 GGTTCCCTCTTCCTTTTCGGAGTATGGATACTAATTGTTTTAATATGGGCATTATTTCGCA

A\_16\_P31112186

ACTGAAAATAAACATAAGCAATTAATGTCAAGGCATCTGTAGATTTTTTACCTCCACGCC

A\_18\_P22841752

ACCCAGAGGAAGATTATTTTTTTCATTCTCTAAATTGTTTAATTAAACTCATAGTTCA

A\_14\_P136505 TACTGACTTTTACCTCTTAGAAAATAGGACAACACGGACCACTTTGGACATCTTTAAATG

A\_14\_P118178 AAGATGATACAATAAATCTTACCAGAAATACCTTCATTTACCACATGCTGCCAAGTGGAG

CUST\_32\_PI426210822 GTTTTTTATGTCAGGGACCTTGGGGCCTTCCCTGTCACTGGATT

A\_14\_P123327

TTACATCTAAAATAGAGGGAGAGGGGATGAAGGGGAAAGTATGAATCAGTCTTAGAAAAA

A\_14\_P134713 TTTGTTGTTGTTGTTCTAGGGATATGATGATACATACGCAGAACAAAGTTACGAAGGCTA

A\_14\_P128400 TGCTGGAAGTACTAGATTTCACTGACAAAACCTTTAGTCCCAGTAGTTGACTTTAGTTTCATCAA

A\_18\_P22840360 CATGTAACCACAGTCGGGAGCACAACCTGGCCAAGATTTTTCATTAC

A\_14\_P120528 TGTTTCGAGTGGTTCAAGGAGAGATTTTCCTTTTTAGTTTTTGTGCTTACCTTTT

A\_14\_P106602 GTGGAAGATGGCTCTGATTTTCAGGGTAATAATAATGGTAGGTAACAATTAATGGCATT

A\_14\_P131349 TTACTTGCCTAGATCAGTTATCACCTCCGAGAATAGGTAATAATAGCAGAGAATCCTCAA

A\_18\_P14134817 ATTATAGGACTAGACTGTGGGATCCAGGAAAATGTTGCTTAACATCTCGTTGTTGG

A\_16\_P21115023

AGCATTTTCATGGCCATAGAATCCTATTACTCAGAATTTTCATGACTTGAGAGTGCTATTGA

CUST\_3421\_PI426210822 CAAGAGGGCCTCTGAATGAAGACGGATGAGCCGTGTGGACACAGC

CUST\_7504\_PI426210822

ACTATGGTAGTCCAGTATTGGATTCCATAATTTAAATAACTAGTAGACTTTTTAGTTAGT

A\_16\_P00924463

AAGAAATGTTGCTGATTTAACTGATGCTCTCTTTAACGCTAGTCCAAAATTGACAACC

CUST\_8227\_PI426210822 TTTTCCTGATGTCTATAATGGTCTGGAATGGGCAGGGAACCATCC

A\_14\_P113676 CTGCTTCTAACCAAAATTAGGATTTGAACTGACAAAGGGATTCTACTGACCAACACGC

A\_18\_P22843024 ATAACATTGAGACTGAGCAGTTTCTTGAACCTCTCCTCTCAGCAGCCA

A\_16\_P16457879

CAGAGCCTTATTTCAAGATTACTGGTCAATCTATGCCTTTTACTGACATTAACCTTCCTG

A\_16\_P36231029

AAATACTGAAAAAGGTAAGCCCTAATGAACCGCACTTGTGGATGCATTTAGAAGCATTT

A\_14\_P109177 ATAGATATTTCTTGGATAAAAAGACCCATTGCTGGACCATGTATCTTACTGGCTACT

CUST\_2317\_PI426210822 CTAGAAGAAAAATGGTCCATGGTGGAGGGGCCTGAAACTGATCAC

CUST\_8860\_PI426210822 TGGTCTGCTACATGAATAGGCGTCAAAAGTTGGTGGTGAGGAGTT

A\_16\_P21651494

AAACCTCATCATTAAAGTCTTCAGGTGTGTGTGTAATAGTCTTCAGGTCCATAITGTCTCA

CUST\_8600\_PI426210822 CAGAATTCATTTAGAAGTCTCTGGGGCTGCTTCTGGGGTCCCTGG

A\_14\_P128906 AGCATCTTGAAAACTTCCCCGGTATGATGATTGTTGGTAACTTTTTCTATAGTCAT

A\_14\_P129388 TCTTTTTGCTTCATTCTTGTTACCCCTACTCACACTTCCATCTGTATCCAAAATTGTGTT

A\_14\_P120821 CCAGAACAGAATGACTTTAAAACAACCTTAAAGACAGGTATCCTCGGAAACGGTTTTGTG

A\_14\_P120246 CCTGTTACTTATCCCCTTCTATGACATGAACTTAACCATAGAAAAGAAGGGGAAAGA

A\_16\_P35611884

AGTGAAGTTACGATGATATTTAGTCCAAACCTGATTACTACAGCATTTTCAGCCCTATTTT

A\_14\_P200161 GGTGTTAATATTTCTATCCTAGGGTAAAGGACATGTTTCAGTTTTGAAATTCCAGAGCATC

CUST\_2855\_PI426210822 GGTAAGTGGAAGAGGCTGGCAGTTGGATGGCATCTTGTACTGTA

CUST\_7343\_PI426210822 CACTTAGGGAACCAGGCCTCAGAACTACAGCTCAGAGGCCTACTC

A\_16\_P15271083

TTGAAGAGACTCAATTTACAGAGATTAGATTCGCACACAATTTTGAGAACACATCCATCG

A\_16\_P19617572

AAAACCTCAGAAGCCAATTTTATTTTTACACCCACATATTCTCTTTCTACAGTTACTCT

A\_16\_P18458384

TTCAAATGGCTCATTGTAACACAATTGAACACTCAATCTCTGTCATTGAACATCTTAGCC

A\_14\_P113960 CAGACTAGAATTAGGTTTTTTGTTTTGTTTCCAGGTGAGTTAGGAAGAAGACAGATCACTG

A\_14\_P126989 ACATATAGCAACTGTATGACACAAAAGAAGCCATGGATTAGAACTACACTGTCATACCAA

A\_16\_P03091907

AAAATGACCAATGTGTTATCAATATAGGCTACCCATCCTTATCATATAGGCTACCCATCC

A\_16\_P02206235

ATCTCATTCCTCGAAATATGCTTGCTATTTTCATGCTTGAAATCAAGATGTCTCCCAATTC

A\_16\_P19293127

ATACAGTTAGGTTACAATTTCCCATACATGCCACATTATCAGAACTTCTGTCTTTTCCC

A\_14\_P116541 TTTGGTGACAAATAAATTACTTAAATTGGACTTGGTTCCTGTTGAAAGGGTAGGAACTGAA

A\_14\_P139583 AGGTTTCGTTTATAATGTCAGCCCTTATATGGAGTATCATCCTGGTGGAGAAGATGAA

A\_14\_P124854 TTTGAGATTTAGCATATTAGGATCAGAGATGGTTAGCCTAATTAATCTGAAGGAGGCAGG

A\_16\_P20219445

AAAGAGGGTCCTGAATAATAATTGTCAATTGTCCTACACTAACACTTTCTAGTCATGCCA  
A\_14\_P113826 ACTAAGATGTCTTCAAGATTACATGAGATCCACATCTGAAGGTTTTTGCAAAGGACTT  
A\_14\_P133407 ACATGTATTTTTTATTTTTTATCAGAAGTGCTTAGACAAGAACAATAAGCAGGCTGT  
A\_16\_P02943768

GGGACTACTTTTTCACCTGTATCATGTCCAGAAAATTGACCTTGTCTACATAATAACCAA  
A\_14\_P102361 TGATGCTGGTAGAGATAAAACATTTAATGTCAGGGTTTACATAGTAACAAATTCCTTCTTA  
A\_14\_P112919 GAGGAGAATTCTTCACATCACGTTTTTCGCAAAGAGATACTGGCTTAAAGATAGGAGT  
CUST\_2938\_PI426210822 CTGTGTTTCCATGGTTAGCCTGAAACTCGGGAAGGAGAATTTGTTAGAATTT  
A\_14\_P130227 ATTCCCTGCCTGTTAAATAAATGGTCAGTTAACCTCAACAGTGATTTTCAATTTTTCAC  
A\_14\_P119545 CTTAAGACAGAAGCATTGTAACAGGAACAAATACTGGCTTAAACCTGATGTCTCTAAC  
A\_16\_P17458551

GATCAACATATTTCCACTATCTAGGTAGATGTGTTTCAGTTTTGCTAATTGAAACAAGCCC  
A\_14\_P112021 ACCGATGATTCTGATGATTTTTATGACTAACGTGCTGTGACATTGGTTTCAAATAAAGTC  
A\_18\_P14372403

GACATGCAGAATGCTAAAATGTTCCCATTAGTCCAACCTTTAATGGTTCCTATGTGTTTCAG  
A\_14\_P102557 AAAAATGGACTCACAAAATACCACTCCCATTTGAAAATGCCATTGAAAAGATATGATGT  
CUST\_7938\_PI426210822 CTTTTGTGCAGCCGGCCCATCTGTTGGTGCTTTTTCTTTTCAGGAG  
CUST\_7035\_PI426210822 TTCTCCAAGGTATCAGTTTTTCTCTGGGAGGGTTAAAGAAGGACCTTG  
A\_14\_P102874 TAAGGTGATACTAAAAACAAGAGGCAATGCAGGCTTGCTCATTTTCATCCGTTTACTC  
CUST\_7511\_PI426210822 AGTTTCAGCCCCTGGTGCAACAGCACCCCATGCATTCATCATGT  
A\_14\_P115403 CCTGTGGCCCCCATTGCATTCAGTTTATCTGTAAATATAATTTATTGAGGCCTTTGG  
A\_14\_P122704 TCTTTCAGTGCCTGGATGTTTGGTAGACTTGAATAGCATGTTTAGTGCATATGAGTTTAT  
A\_16\_P03787946

TACACACATACAGTATTTCCAACGGACAGAATTTTTTTTTTATTATTTCAGAATGTCCCCC  
A\_16\_P00685173 CTTCTCTGCCTCAGAGTTCACACACCCCGGCTTATCTTCCCTCTT  
A\_14\_P135329

GGAAACGTTATAGTATGAAGGACGAAAGAAGAGTCTACAAGGAAAAAAGAACAAGAATTG  
A\_18\_P11748595

AGGCATTTCACTCAATCATATAGGAACTACATTCAGAGAACCACAATTAGAAGACTCCAG  
CUST\_6661\_PI426210822

TTCCTAACATATTTGAGTGAATTGAGGTAGTTAAATTAATTTCCACAAATTGAGTGAGTTT  
A\_14\_P116971 TATCAAACCCAGTGCCTTCAAGTCAATATCCTCCTGCAAAAACAGCAG  
A\_18\_P12471029

ATAGGCAAATCATCCCTAATCATTATTTACAATTTACCCTAAGTCTTAAGGTCAGGCA  
A\_16\_P00685458 GCAGCCACAAAGGCCTATTCACAGTCTTTAAGCCTGATGAAGTTCTGAATAAGTAA  
A\_14\_P137386 AGGGACTAGAACCTTCTCTTACCTTCAGTTGTTGGAAATACTTCTCCTTTATTTTTAG  
A\_14\_P136767 TCCTGACTGCTACAAATCACATTTTAAAACATTTTGTGTTGTGTGCATGTATGTGTGTTGG  
A\_14\_P118187 CTAGAATCAGAACTTTATCTGCCCTGTAATCTCATTCATGCAACTCCTAGTATTGTGT

CUST\_7703\_PI426210822 GAAGGATTCCCCTCTGGGAATACGACTGTTCTGGTAAGGTTCAAG

A\_16\_P38790493

TACAAATGCCTGAACTCCAAAAATCTTACATGCGGTTACAGATCTTATCCCTTGAGTTAA

A\_16\_P18701807

ATTGAAGAGGTATCTCTGTGATTACCTAGTAGACCCATGCATTGATAACAAGAAGCAA

A\_16\_P18981861

ACCTAACAGATTACTATTTCGAGTTGACATTATTCTGCATCTTTTCGATCTTCTCTTGCCA

CUST\_10421\_PI426210822

GATTATGTCTTTTATATTTGTATCGATGTTTTATTATTTCTATTAATAGTTATATAATT

A\_14\_P134104 ACAATCATTCTTTTTTTAGTGCTTGATATTTATTGAAAATAATGCCAATGCTTTTTTCCA

CUST\_1949\_PI426210822

ATTTTCAGAGCTGACCGAAGATCAGGCACCTTAATTAAGATCTTTCAAGCATCAG

A\_16\_P18208912

AACTCACATCTTGCATCTACTGTCATCTCAAATAAACCCAGAGAAATAAAGAACGAGACT

A\_14\_P114559 ACCATCAACTCCAATATTGCAGTCATGTAAATACCACAACCATGAGTGGAGAATTACATA

A\_16\_P21234749

ATCTTCTTCCCAAATGAGAACAAGTCATATGCACCACTCATTTAAGACTCTTCAAATGC

A\_14\_P132443 TAAAGGATTACATTACTTACTCCCTAGAACTCCTTGGTAGAGGTAACCTGATGTTTTTTG

A\_14\_P139418 ACCACTTTTGGGAGAAAATAGAACTTGGACACTCTAAATGATAGTTTAAGGACGTTGTT

A\_16\_P00846810

AGCCACATGTCTAGTAAGTCAATTCTGAAGGTATATGATCTGACATCACAGCAAAGTAGT

CUST\_2279\_PI426210822 GTTGCCAGTTTGTGAGAGTAATGTTATTTCTTGTGTGTGAAGTGAATGCCCTTC

A\_14\_P131026 CATATGCAGGCATCTGGAACAAATAGGGCAGATGAAACCATTTTGGAGTCT

CUST\_9246\_PI426210822

TAATAAATAGGCATGAAAGTATATTTGCCACTACACAGGTGGAAGTCACATAATGTAGGA

A\_14\_P105697 TAGAATGACAGTCATTCTGGAACTAACAAGATAAAACACATAACCACAAACAGTCCCAG

A\_16\_P01895875

AAGACACAAAACAAGATTTCCCTTGTCTCTATAACAGTTCTATTCCTGATCACCAGTTTCC

A\_16\_P15127334

TCCCACAGTAAACTTATATGATACAAGCACCAAGAACTTAAATTTAGGGCAGCAAGTGT

A\_18\_P26792935 CCAACTACCCATCTCTGAACCATTTATTCGTTTCTCTGTCTGAGCAACCAA

A\_14\_P122029 AGAAATTACTGGCTTTGATAAGGATCTCTGCAGATGAGACATTTTATCTAGGGCAATTCA

A\_14\_P111086 AATCTTTCTTCCCATGCAAACAAGTAGTGATCAGTTTATACTTTGATATTTATGCTGGA

A\_18\_P14336094

AAAAACTTTGAATTATGCAGATGATTCCCCTATTAACCATCTTTACTCCCTACTTGCTT

A\_14\_P124419 AGAGACAACCCAGGGAACCTTTGTTAAAACAGAAGAACTTTATTTGAAATTCAGGGAATT

CUST\_2068\_PI426210822

CATATTGAAGTTTTATTGAATTAACGGAGTATGTGAAGCATTTGTATTTCAAACCTGAGA

A\_14\_P111547 AAGTGAAAAAGAGTGTGGTCTCATCCAGACGAATGGTCTTTGGCTTGATACATAA  
A\_14\_P108248 CTGCTTGGGGTGGAAATTAAGAATATGAGGATATGGATCAGTGTAAAAGAAATCACTGAA  
A\_14\_P123492 GAGAGTGAGGAGAAATGCATTAAGGGTAATGCTTTCCTGGATTAAAGGTAATGCATTT  
A\_14\_P202295 CAACAGAGAGGAAGTGACTGAATCCAAGAAGCACAGAAAAGAAAAAGGCATTC  
A\_14\_P120737 TTGCTTGTAGCATTTCTCAGTATTTATGGAGAAAATAATCACTTGCAGAAAACCTCTGGG  
A\_14\_P117350 GGCAAAAGACATATGCCTGATGGTAGCAGCAAACTACTTATATCTAACAGTTTGCAATTC  
A\_16\_P36230382 CTTTCTGTTCTTTTTCAGTAGTTCTTTTTCACTATTCCTTGATTTATTTAACCTGTCCA  
A\_16\_P17356945  
CTATCACTTCGTTTGTCTGACAGAATTGATGTTTACTTGGTCTCAATGTGACATTGCTTT  
CUST\_6554\_PI426210822  
TTTCATATAAAAAGCACAGCAAAGAGATCCATGTACAAAAGTAATATAACCCACTTAAAAGA  
A\_18\_P22839948 CGCAAACCCCTCTCACTGGCTATCTGGGGGGTGAAGGTATAAAG  
A\_14\_P131010 AATCACTTCAGGAAGACGAACAATAGATCCCTCCATGCTGGCAAAACATGAAAAAATAT  
A\_14\_P105868 GTTTCTGTATATTCAGTGTATTTGTGTTTCTTTGCTATTGGACTAGGGCAAGTGTGCAAT  
A\_14\_P100552 CTGGAAATTTGATTGGTTTTCTGTACCCAAGGGTATTTAAGCCTGTTTTATGCATTA  
A\_14\_P137337 CTCCCCAAATCATCACAATCCATTTTATTCCACAGCATGTTTAAGGGAATGTTATTTTCA  
A\_14\_P103214 GTGAAGGAGACAGAAAAGTTTTGCCAAAATATTAAGAGTCTGGCTTTTAAAAATCTACA  
A\_16\_P38204034  
ACTGATAACCTTTTACTGAAACCACTTAAAAACATCACGTCCTTAAACTATAGTCACCAA  
A\_16\_P15346846  
ACCCCTCATTTTTTTTCAATCTTACAAAAGGCCAAAATATCACAATGAACATATCCAGT  
A\_16\_P58424188  
TACTGTTTTTATCCTCATCTTACTGTTTCAAAGACAAGGCATAGAAGAGTGAAGGGACTT  
A\_18\_P19776340  
AAGAACCCTTTACTACTCCCTAATTAACTTCGTATTTGCTCCTTAAGTCTTCTCTCCTG  
A\_14\_P100654 ACTCAGTTACTGCAAAGACCATTTAAGTTCTTAAGTGAGGGAAGGTCGTAAAGAAATTAG  
A\_14\_P202309 AGGTTCAATCCCTGTAAACACACGAATTTCTAGAGTGTGTTTTTTTTTAAACCTCTCAAG  
CUST\_641\_PI426210822 AAAAGCAAGGTGATTGAAGTTCACTTTTGAGTCACCTGAGCCTGATG  
A\_16\_P00923823  
AGGTGATTAATCCTATCTGTTTTTTTTCAGGACTCGAACATCAATACCTTATCAACGCC  
A\_14\_P108545 TACAGAATATTGCCAGACCATTCACTTCTTTTTAATTCCCTTCGGATTCTAAGTGAGAA  
A\_14\_P112746  
AAAACAACAGGCAGTTCATCTAAGAAAACAAAGACACAAGAATAACTGGGAAAACGCTAA  
A\_16\_P15535226  
CAGGTTTCATGTTTTCCATGCATATTCATTTCTTATTACCAGTGCCATTTTACC  
A\_18\_P22839961 TTTTCAACTACCATTAGCCCCACTTTGGCAAGGCCAGGTGGGATA  
A\_14\_P114791 CTAGGGAAAAGAAGCATGTTTTATAGGCTCCAAAATAATGTTTAGAACTGAACTGGTGG  
A\_16\_P58424610

AATCTTTCATTATGTCGTTAGGTTGAAAGCCTAGAAATAGAATTGCCATCAAAGGAGTG  
A\_16\_P36106739

ACCTCCCATTAACCAAGATACAGTCACTTGAAGTCTAACATTCTGTATGTATAGTTGCTT  
A\_16\_P16347441

AAAAATTTTCAGACGACAAGATGCTAATTTTCGGCTAAATTTGGTGACAGTTTCGCATTTTC  
A\_16\_P00373095

AGTGACAGAATTTGGCATAACATACAACTTCGACACTCTACTTGTTAGTAAGACTTCCT  
A\_14\_P102693 TGATGCTGAGTTCTTTTTAAAAGACGTATGAAATGTAAAATCTCCCTTCCTTTCCAGAT

A\_14\_P121756 TAAGTCTAAGCCCCAAATATGAATCAAGATTGCCAAGTCTAAAAAACAAAAAGATTGCC  
A\_18\_P22841584 CAGAAGACCCTGCCCTGGAATTGCTTTCAAGGGTCTTTTTCATCT

A\_16\_P02525898  
GCAAAAACCCAAAGTATCTGAAGTTCTAGGCAATCTACTAATAATCCATAATGTTTCAGAG  
A\_16\_P16279426

AAAAACCCTCCATGTAAACAGAACTCATAATTCCTTCATGTAGCCAGTATGACATGTTC  
A\_18\_P14137485 GATTTTAATGAGGGATGGATGCATCCTGCAGGGCTCAGAGGTTCT

A\_14\_P200409 CTTTATAGAAGATAAAAAGGCCAGTGCCTCCATTTGTCTGGACACTTATGGAG  
A\_16\_P16302792

AAAAAAGACCCTGCAAATACATGAAGATGCTTTATCCACTTAAGGGAACAATGAAACAGA  
A\_16\_P17842211

AATGTTTTCCAACATTGCATATACATTTGGCTTCTATTTCCTTAAAATACTGACCCACCA  
A\_16\_P58424358 ATAGACACATAATGCTGCATCACAATGCTCCAGTCTAGAAGGGGAGAC

A\_14\_P103738 TGTTTATATGCAGGTGTATTTGTGTTTTAATTTCTTAAGTGGGGGTTAGGAGGCAGATTA  
A\_14\_P113036 TTTAAGGAGTTCTTGGAAAGAGATCATCAAGAGAGTTTTTGACCCAGCACTCAATCT

A\_14\_P134471 GGGACAATTCCAAAATTGGAACCGTCTTGTAACAGCCAAAAGCAATGATGT  
A\_14\_P105604 ATGAAACCTTTCTAAACATACATTTCTGATGAACGGCTTAATTCAGGAGTAAAGGTAG

A\_14\_P106759 CTGCTGGGGCTCCTTGGAGAGATAATTACGGAAAGAATTCAGCATATTCATTTTATCTAC  
A\_14\_P200882 TATCTTTTTGTTTTTGCCTTCCAGACAAATTATGAAAACAGAATATATAGCCTGAAAGT

A\_14\_P113203 CTGCCTCCTTCTGTGGCACCTCTTCCATATGATTGGGTTAGTAAAAATATTCTAAATAA  
A\_16\_P17360211

AAGAAATCAAGAAACCACTCAGTAAAGGTCTTAAAATTGGGAACTATGACAAAGTGAGGG  
A\_14\_P128488 ATTTGTATTATTTCTTCTTTATTCAGGCACTTTGTGGGAATTTTGAACAAGACCTCTGGC

A\_16\_P17962178  
ACAAGGCTGTATTTTTGAGATGTGGACATGAATCACTCAAATAATTTTATCAGGATGCCA

A\_14\_P116403 TGAGAAAATACATCTATTTCCCTAGCATTTGTTTGGGAGAGTTCACTGATCTAGAAGGACT  
A\_14\_P102532 CTCTACTTAGAATGTCTAATAATGACACAGATGGTCCCAATTTATTGCTGCCTTACCTGT

CUST\_2753\_PI426210822  
AATGGAAATTGGTACTTAATTGGTAAAATTTTAAATAATTACCCAGCATCTGGTGGTTCA

A\_16\_P16191239 CCATTTTCTGGTCTCCCAAGTCCCTTACCCTCTTGGAAAGAGATCA

A\_16\_P18797237

TTTCTCCATGAATATTGCATCATTCAGAGCCTTAACAAGTTTTTCATGCAAAGTAGCACTG

A\_14\_P122933 ATTGGGCGGCTTTGGTTATTTGAAGTAGATTTTCTTTTATTACCTTTCCAATGTCCTACA

A\_14\_P128466 CATTAACTTCATCGAATCCAGTGTTAGAACTTGAAGTGGCAGAGGAAAAATTACCTATGA

A\_16\_P01323516

TAGACCAACTAGACCCATATCAACCTGTTAGGTTCACTATTATACATCGCACATTAGTGA

CUST\_5909\_PI426210822

GACACTTTTTCTTTTGGAAATGTGGCAGGGGAATATGAATTTTCATAGGCGAAATTACT

A\_16\_P16191236 TATTTTCTTTTCTCTTCTTCATGGTGAGGGACAGCCTTCTCCAGGAGTTTG

A\_14\_P105461 CTGACTGTTCTGTTGTTACTTGAGGAGACATTCTGATTTTGGATTTCAGCATAAAAATTCTG

A\_14\_P131997 TATCACATCACCCACCTAGTTTATTTCCCTTCCCAGCACTCATTCAAATTTAAAAAGGATT

A\_16\_P00171805

AATGGTGTTAACATTTTGTCTGGTTAGGTATCGTGAATTTGTGATAGGTCATCCAGAAG

A\_18\_P11821194

ATGCTCCTCATTTCATTTACTGTCTCACACATCATCTAAGTAAGATCACAAATCTCTCCT

A\_14\_P134965 GTTGTTTTACCAGCCCAAGGAGTATTTTACTGTATGTTTTAGAAGAAGCCTAAATAGGGT

A\_16\_P21508396

ATTGGAGTGCTACAATCTTTTCAAGTAAATAGAATGCTCTCAATATTCCTCTCCCACGTT

A\_18\_P16120246

AAATTTGCCTCCATTAATACCAACTCACTCCACAATACAGATGCTAAAACAATTTACGC

A\_14\_P127629 AAAAGAGCCGTTGGGTTACTAGAAGAACTTCTAACTGAATTTACTTTTTCTTGGGTGC

A\_14\_P202028 CTGCCTGGCTCCTAATGATCCCCTTGTTTAAAAAATATTTTAACCACAAATACACGTATC

A\_14\_P130899 GCATTTAAAATAATAGGACCTACCTGTTGATTTGCCAGAGAAATCCAACAGTTTCAAAA

A\_16\_P16293392

CTGGCAAAGATTCAAGATTAAAACAACCTCCCATCAACATAGACTGAAAGATCCATTTCC

A\_14\_P137169 TTTTCATCTTTCTCATTGCTAGGTGATGAGATTTCCATCCATGCTGACTTTGAGAATACA

A\_14\_P111006 GTTTCTCCTGCAATAGACACTTAGATTTCTCTCTTGTGGGAAGAAACCACCTG

A\_14\_P100719 CTCACACAGATTCAGTCAGATCATCCTATGTGGCTGCAGACATTACCTAGAC

A\_14\_P116093 GAGAGAGGCAGAGAAATACATAGGATTTTTTTGTTGTTGTTAAACTGCTGACGGTTGATA

A\_14\_P104984 TTGCTGGATCACTGTCATTTCTCTCAGGTCATCTTTAACAGTGTGGAGAAGTT

CUST\_5552\_PI426210822

TTTTCTAACCATGTGATTCTTTGGTTGAAATTAATAAAAAGAAAAAATTGTTCTTAGAT

A\_14\_P105981 CAATCTCTAATTTCTAAAAGTGATACATCTAAGAAGTGTCTGAAATGCTCTTGCAGGTC

A\_16\_P00685540 CTGTGACATCTGGAAGCATTAACACTTTGTTGCCAGCATGTAGGCTAGTTGAAT

A\_16\_P19249573

TGACTAGTATCTCCAGCAAAATTCTGTTTTAATGAGGGCTAATAAGCATACCAGTCAGAC

A\_18\_P22512404

AAGCATGGAATACCAAAAACAAAACAATACCTTTTAAGTGACATCCTAGTGAATCTCCA

A\_16\_P00588477

CACCAATCATTATGCTAGTTTTAAACGTTATCCCCTTCTCTACTGTATATTCTGCCTCG

A\_14\_P121887 AAAGGAAGGCATTCTTTTTATTCTAATATGGCTAAGGTGGTGAGTGAATAACTGGATTG

A\_14\_P134787 AAATCAATTTTGTATTTTTTCCACCATGAAGGGGACTCAATAATCTAGCCCTACATTGCC

A\_14\_P105743 AATGAAAGCCCATGGACCACAGACTTGGCAACATTTGACATAAAATGTTATTGCTAAAAT

A\_18\_P13891245

AAACAAGTCCACTGTAAACTTTACCGGCTTGATATGCATTTACACCAATTAGTCGTTTTG

A\_14\_P134046 ATTTTAACTTTTATACAAAATTAACCCATGGAGCCTGGGATTACAGGTGGATGCCATAA

A\_14\_P138359 TTCCATGTTTTCTTCTAGAAAAAACTTGCAACTTTAACAAGGCTTCTTGGAGAGTCTGTT

A\_14\_P116325 TTATTCCTAAATATTAGGGTCTGGAAAAAACTATTTTCAGAGCATTCTACCAGCCCCATGA

A\_14\_P123633 AAAGGCACTAAGGTAAGTTAATTTTATGCCAACCTTGAGCAAAGCGTATTACTGCTTTTC

A\_14\_P110025 TAGTTTTATAAAAGAAAAGGTTGGCAACCTGTTAAGGAGATCTTCATGTGAAAAATACAT

A\_16\_P02838207

ATCCTTAGGATGGTTCTCAATTTGTTGACTGATGAAATCATAAAACGTAACGTAACCCTC

A\_14\_P118965 ATATCTTCAGGCAAGCATAAAGATGTGTGGCATAACATTGTTCTGAAACTTAAACACTGAC

A\_16\_P01591253

ACATTCAGATTAGTGACCAGTCTTACTTGAAGTAGTATATCACGTTGTTCCAATACCTGA

A\_18\_P14841273

AGCCAAAATTGTATGAATCTGACTCATAAATCACAGTCCTTACCCTAATATCCAACACTT

A\_14\_P132894 CTGCTTAAATTAACCAGGACTCACACACCATGTATATCAAGTTAGCCAGAATACACTG

A\_14\_P122516 ACTTATGGTGGCCAACCACAAAGATGGTGCTTAACCAATGCTTGTTTAATTAATAAGAA

A\_14\_P128286 CTAAATCTCATTAGTAAAGAGCAGTTTGAAAACCTAACACCTGAACTTCCTTTTGAGCCA

A\_18\_P22841415 TATAACAAATGCAATAATGGAGGCATGCCAGACCCAGGATGCTACAA

CUST\_3452\_PI426210822

TGAAGTTAAGTGGGTAGGCGTAAAAAATTATGGAAAGTATTGGACTTGAGCAAACCTTTTGA

A\_14\_P111603 AGTGAAAATGTTGATCAAAGCCATGTATCTTCATGGCAACTGTAATTAGACTTAGACTGG

A\_14\_P117932 AGTTTTTTGGGACAGTAATTTGAGAACTGGTAACAAAGTGGTGAAAAGAAACGCTAACTT

A\_16\_P32354056

AGTGAAACCTGATATTAGCAGATACACCTCTTCATAAGAAATTGACATGTTTCAGCCCTTT

A\_18\_P14134257

CTTAAAAGCAGTTCATGGGAATCTATAGGCTATTGTGTATAACTGGAGGGTAGCAGAAAA

A\_14\_P112880 CTCAATACTCTAGAACTCTGGGCATTGGAAAAGCAGTTTGAAAATCAATACCTTATTGCA

CUST\_657\_PI426210822 CTTTAACTGGGGATGGGATAGGAGGAGAGAGCCTTGCTTCTCAAG

A\_16\_P35183748

ACTGATTGTATCTCTAAAATACCTTCTAAGACCCATTAAAGAACTTCATGCTTGCTACC

A\_16\_P01141285

GCAGTCCTCTATGTATTTCACTTCTACTTCACATCTTCTGGGTTACTTGTAGAAGTTCGTT

A\_14\_P103561 ATACTCTTCAGGTGCACCTTCTGTTTCTCAATCTCTTTTTGAGTAGCCTGTGAAAAG



A\_14\_P120557 GGGCTTCATTGAAAGTGGACACTAAAGGTATATTTTCATTTGGGTTTTTAACTCAATACAG  
A\_18\_P17293756

AAACTCGGCAAACATGAATAAAAGTTGCACTGAAGGTAAAATATGCTATTCACCTGGTTC

A\_14\_P104084 GGAATCATGCTGGAGAAGTTCTGCAACTCTACTTTTTGGGTGAGAAATTACATTTATCTT

A\_14\_P200517 CTAGAAAGGCCCTGAGGTTAGAGATTCTCTACGTCTCGCTTCTATTGTTTCAG

A\_14\_P114321 TTACCCAGGACAGTGTATGACTTGTAATTTAGTCTGTTTTTATTCCAGGTCAGCCTACA

A\_16\_P58424304 CCGTTGGGAAGCGCACGTGGATCCTTTCTCAGAATAATGCTTTTACAT

A\_18\_P10897690

AAGACATTGTATATCTCTGAATTATGAACCCTATAACCTCACTATAACACAGCATAGTCT

A\_16\_P02778736

ATCCTCAAAGGTCAAAGTTTTTCATTTGGTATATCCATTGCCTAAATCAATTCCACAGTGTT

A\_14\_P138951 CCCCATTTTCTCTTAAATTCCTTAAAAAATTGGTGAAGGAACTAAGACATTGCTGCAAAG

A\_14\_P112494 AATATTGAAATTGCCCTCTTTTTTAAGGTTTAAAGAACTACCAGACCATTTTCCAATGA

CUST\_8255\_PI426210822

TTGCCTCTGTTCACAGCTCTATTTTTAACTGTATCATTATTTACTTGTCTCATCAAAGG

A\_14\_P116983

CTACAAAACACTACAAGGCAGGAGATGGCTTGGTTTCTGAAAAATCAAACAAAACATTGAAA

CUST\_6666\_PI426210822 ATGACTCAAAGGTACAGTGCTGGTATTCTCCCCTACCCATAATCATCC

CUST\_2657\_PI426210822 CTCCTAAGGGCAGGAGGCCAGAGGTATGTGGGTTAGGAATGCTAT

CUST\_1645\_PI426210822 ATCATCCATAGGGAACAGAAAAACAACCTATGAGGGATTTCCAGGAAGGC

A\_14\_P121863 CCGTGGACTGTCTGTTTTTGTAACTTAAGTTATTTTATCAGCACTTTATGCACGTATT

A\_16\_P16680421

AAATCTAGGCTATGAGACTTGGTTTTCTATACATCTCCTAAAACACCTACTACACAGGAC

A\_14\_P139431 TCCTCATCATTAATGCAAGTGGAAGGAAACTCTTCACCAAAGAATTGATCACATCATGAA

A\_14\_P112660 CATCGAGTCTGTCAACCTCTTGGTAGGCCTCTTTTCTTTCTTTCT

A\_16\_P58424320 GAACAAAATTACACCAAAGAGTTGTCCTCACCTTGAGGCAAGAGGGG

CUST\_4842\_PI426210822 ATTATTTTGTCTTGTGGGCTGGGGAAGGGCAAAGAGGGGTGCCCA

A\_16\_P20258011

ATCGGATCCATAATACTGTTGAAGACAATTTTGAATGGCAACTGTTTCAGTATCCACTGT

A\_16\_P16273753

AATAATCCCACATTCAGATCCATTTTTCCCTCAGTAAATTGTCCTATAACATGCTAGCCT

A\_16\_P18464870

GCCATCAAGAACCCTAAAATTCCTAAAAATACTTCTTCTTCAATTTCTGGTATCTTGCA

A\_14\_P105707 GCTGTTTTGTAAATTTTTACATGGATTGCATATGTAGTTCATCTTTATCCCGGCACTTTCC

A\_14\_P110667 AAATAAAATAGAATTTGCCCTACCTTGGTTTTGTAGAAGCCAAACCTCTAGACGGACAG

A\_16\_P39147729

TGTGCAAAACTCTAGTCAACATTATTCCTGTAACGAAATTTCTCTACTTATCTGCTTCCA

A\_14\_P106596 AAGCCAGTTGTCTTTACTATTGCTCAGATCATCAAGTTAGCCTTCTCCATATCTCTAACA

A\_14\_P107205 ACGGTCAGTGACAAAAATTGCTCTGTCTTCCACCTTACTAAATCGATTTACCTGTAAG  
A\_16\_P19673483

AAATGTAATTGTAGCAAAGAGAACTACAATGTGCTTGATACCCATTTTCAGAGTGCTTCG

A\_14\_P111337 ATTAGATTCTTAATAGGCTCTGATGGTTCACTGCATAACTTCTGAACTTTCCATGTTTGC

A\_14\_P122606 CATAGTATTTGCATTGTTTTATAAATAAATTCCACTTACTATCAATCCCCTTTGCCAGT

A\_16\_P58424359

ATGAGACAAGGATTTGAGTGCAAATAATTGAGTGAGCAGTGCAGGAAATGAAGAAGTAAG

A\_14\_P120636 CTTCTAATGATTAGGATTACCCATGATTTAGGCCACTACCAAATTAAGGAATCAATTGCC

A\_14\_P135605 CATGGCATGAGAACATCTAGGTTTGGAACAGATTCTCCATGAACATCAACTTTAGAAG

CUST\_7593\_PI426210822

ACCTTTTCATCCAAACACCATTCATGAGTTGTTTTTATGCCATGAGGTAAATTCTTTCC

A\_14\_P106200 CTGCGCTGGGAAACAATGAAAATGCGATACGAACACATAGACCACACATTT

A\_14\_P100369 GAGCACTTCTACACTTTAAATTGGTTTGCTTAGGGATGCAATTAACAAGCAAACATAGA

A\_14\_P112703 CTTTACTCTCCTTTCTCCCTCCTTCCAAGACTCAAAAAAAAAAGTCTAGATTATTCATCTCA

A\_14\_P108806 AAATTTGGATCCAAGAAAGCACATTAAGTCTGAAACCAAAGTGAAGAACTATCTCATT

CUST\_3398\_PI426210822

AGCTCTGGAAGTTTTCTACCTCCTGCAACTGAATTTAGTCTTAATTAGTACAGAGTG

A\_14\_P130299 CTTACTTATGGTTGAAAAGTGGCACACACAAAACGAACATCATCTAGCAGTGCC

A\_14\_P120311 GAAATGAGTCCCTTTAACAGATAATCTTTGGTTCTGGAGTATGATCATGGTTAGTGTCAT

A\_18\_P22843029

TGTCTGAGTTCTCACCAAGTGTAATAGTCTATGAGTAAATTCCTATGCATGTAAAAAGAA

A\_14\_P132180 CTTTGTATGGAAAGAGCCTTGACCTCACCATTAAGTGAATAGAATGGTGGGAAG

CUST\_4997\_PI426210822 AGACACGAGAAAGCCAAGCAGGGATTTTCAGTTACAGGTGAGCAT

A\_14\_P130623 AAATATCTGACAGCCCCATTACCAAAGAAATCTTTATTCTTCAGCAGGTAGACAACATC

A\_14\_P137433 GATTAGTTTCATCTGCTAAGACTATACTGGGATTGGATTCCATAGGTTGACTGGAAATAC

A\_14\_P127842 CTAAATAATTAATCATATTTGTGTTTGCAAAGGTTCTTCAATGCCCATAGTCAGGGCTGC

A\_14\_P129160 TTATTATCTTGTTCTGAATAAAATGTATTTACTCCAAGTCTGGATTGCTTCCATGTCTCC

A\_14\_P113432 TAAAACAGAGCACTAGCCTGACAAACATAATTCCTCAAATGCACAATGGCATTTCATTTT

A\_14\_P134451 GGCTCCAGGGATGTGCTTTGTCATATATGACAGAAAAGTCATGAGTATAAATTATGCATT

A\_14\_P119133 TTTGTCTTTTGGAAGATTTTAAAAACCAAAGCATAAACATTCTGGTCCTTCAGCAATG

A\_14\_P106331 GCTAGACAAAGAGCAGTGTCCAATATAAATTTCCCCAAAACATTTAAGACCTGTGAATT

A\_14\_P125841 TAAGACACGACATATTTCTTTTCATGTTGGTTAGTCCATTGATCACTTTTGTATGGGTTCC

A\_14\_P113088 ACTACACAGTGCTTTTAAAAAGTGTTTAAATGAGAGTTTACAGACAGAAGCCCGAAGTGG

A\_14\_P107525 ACGGAGAAAAGATCTTATCTACATGCAAAGTGATGCCGGGAGAGGTGATTAG

A\_14\_P136335

GAGGTAGTGAAGAATATTTGAGACTAAGATAAATGATGGGGGAAGAAAAGTGAACGAAGA

A\_16\_P03411125

AAAAAACCCAAATACCTCGTTATTCTAGTTATTCTGTGAAAATGCTCCCATAAGCACCTG

A\_14\_P118536 GTTTCTGCTTCAGGTCTTCACCAAGTCCCTTTTTACTGAGGACACTTTTCTT  
A\_16\_P03207640  
AGGAACTCTGTAGACTTGAAACCACCATAAATAAGAATGCTAGTTTACCTAACCTTTCCA  
A\_16\_P03719369  
CCTTGCTCGAGTCATCATCTACAAGATCCTCCACTTATCCTAAATTCTGTAAATTTCTAT  
A\_14\_P112022 CTTCTCGTCCTGGTCAGAACTTCAGGTTTACTCTGAGGTGGTCT  
A\_14\_P131686 TATTCTTCCCCTGCTCATTGATGATGAAAATACTTTTAAGCCAACCACAAAGATTGTTGT  
CUST\_7058\_PI426210822 GTCACATGGTTCGCCCTGTCCCTGGGGAATGCACAGGAAAAGAGCT  
CUST\_3228\_PI426210822 CTTGCTGTTGTTCAAGGCTCAGTCCACAGGTTTTGGACATCCTCA  
A\_16\_P17239671  
CATTCAATTTGCTCATTACACATTGACGAAAACATAACCTCTATAGTTGCCATGTCAGGA  
CUST\_4097\_PI426210822  
GAAACACATTTTTATTTAGTCATGAGCGTCACTTGGAGTAGAAATAGAGCCCTTTATGAT  
A\_14\_P107389 GAAAAATAACATCAGCATTACGCTCGTTGAGCAATGCCACCATTATCAATGAAGAGGTAT  
A\_16\_P16191252 AAGCATTCTTTTTGCAAATATGAGGGCTAGACTGAAGCCTCATTGGACCAC  
A\_14\_P135476 CAGCAGTAGATTCTCCTCCTCTATAATCTTTTTCTATATGGTCTACAGAAGGCTCTTCTA  
A\_14\_P126511 ATTGATGATTCCCTCCTAGAAATGAGTGGAGAAAATGAACTGTCTTTAAACTGGCTTTT  
A\_14\_P115542 TTTGCACCCTGTGATGCCATTTAATCAACCCTGCTTGGTTTTAGAGGATT  
A\_14\_P139412 AGAGCAAATTTGGTCAGGAGATGTTGGAAAACCTTAGTCATGACAGAGAAAAGATACAG  
A\_14\_P139698 TATAGAATATGAGGTTTCAGGAATATGCAGTGTGGCCAGTAAAGAGAGTCATTGTTAGCA  
A\_14\_P109642 GATAGTTTCTTAATACGAGGAAATGTTGTCATTGCGGTTCTCTGAACACAAGAGGG  
A\_16\_P18721667  
CCTAGTATTTACGTCAGCATTATGAATTAAGTCAGGTTCAACAAAAGATGTCAGGTTCC  
A\_16\_P00736647  
AATCAAAGTAAACACTACCAACAATCTTAAGCCTCAAATCCTGATTCATCTTGACCATCC  
A\_14\_P108165 GCTCATTCTGAGACCTAAATTTAAAGGGTCAGGCATTAGAAACAAAAGTGTTTCTTCATA  
CUST\_7749\_PI426210822  
TAATTGTCAAAGATATCTTAGACCAAAGGCAAAAGATTATTTGCTTTATTAGAGTCTTTA  
A\_16\_P16926056  
AAAGCATCACCGTATTTTCATGTTAACTTTTTCCCCTAACACTTACAATGTCTATGGTTTCC  
A\_14\_P111348 CCAGAAAAGAATTTCTTCATTAGCATTTAATCAAGACAATCCTGGGCTTTCTCTGTGTTT  
A\_16\_P18113064  
AAACTATTGCTCATAAATTCTGAGGAAGTTTGAACAACACTAATTCATGGAAGGCCAAGG  
A\_14\_P201963 AAAGAACATACATGAGAAAATGGGAAATAAAGGTGTCACCAAATTTGTTTACTTAGGGG  
A\_14\_P107441 AAACAAACGTTATTCCAGCCACACATCTCTGGGGAATGTTTCTAATGATGAAAGTAAGT  
A\_14\_P103295 ATAAAGGGGGACAGGTAGACCTGAAAATTATCCAAGTGCTGGCCC  
CUST\_1700\_PI426210822 AAAGTAGGGATTCCCTGTTGGGGAAGGAAGGACTGAAAGCCAGG  
A\_16\_P01612236

AAACTGAAATTCCCAGAAATTAGGATCTGCATCTGTAATTCCATCAGAATCTCCACATAG  
A\_14\_P124580 CACTGATATCCTTACTTTGACTTTACCTGTTTTTCGATGTTTCGAAGAAGTAAAGTAGGG  
A\_14\_P128573 AAATCAGAATTATAAAAAAATTCCGTTTCAACTGGTGAAACTGAGACCCTGTAAGGACAC  
CUST\_9543\_PI426210822  
ATGAAAAACTTCATTCTGGGCTGGTTAGGTCATAAACTACAGAACCCTTAGGTCATATAT  
CUST\_1142\_PI426210822  
TAATGGTAATTTCTGTTAGTTTGTTTTTTAGGGTTTCTAATTTAAATGAGAAGTAAAAGC  
A\_16\_P16191379  
AAACAAAACCCAGAGTCAAGTAAAAGGATGCTTTTTGGAAGTATGATTCTCAGAAGAAG  
A\_14\_P123435 AAACACAAGATAGCAGATTTTTAAAAAATTGTCACCAGGTATCCCTGCTGGATATCAAGT  
A\_14\_P109337 CATTAAAGGAATGAAAAATGGCGGTGTTCCCATTTCTAGAATTCCTTCTACTTCTACAGA  
A\_14\_P104648 AATGAAACCAAACATAACCTGCTGTAATTATCCTGGCAACAGTGATAAACTTTAGATTTG  
A\_16\_P18064273  
AAACTGCAGTCTCATTACATTATGTCACAATATACCAGTTAGAATTTGCTTCGTTCCCTA  
CUST\_9222\_PI426210822  
GTTTTAATCAATTTGACTTACAAAGGCACAGACTGTGGTCAACTCCTAATTTTCAGTCTG  
A\_14\_P112296 CTATATTCTCTCAACTAATTTTTCTGCCACTCGGATTACAATGATGCTCCTCTTTTCATT  
A\_14\_P104911 GATAAGTGCAAACCTTAAACCTACAAGATCGAGGAGGTGAAGTTTAAATAGTAAGTTCTAT  
A\_14\_P136984 ACCATTCTGCCTGCCATCATCTTTATTAAGGGCCAGTTGTATTTACAGACTATAGTATTT  
CUST\_1946\_PI426210822  
TATCTTTGATCATTGATTTTCATCCTAACTAGATTTTTTTTTTTTTTCATTCCATAGGTTTAT  
A\_16\_P02262387  
AACTTTGCCTTACCTTTATATCATCCCAGGTGTATAAAAACTCTTACCTGTCCTATAGGC  
CUST\_6837\_PI426210822  
AGATATATAATTGTTCAAATATGTGATGCACGTAATACATAATAGCGAAGTTTAGATAAT  
A\_16\_P00533559  
ACTTAGCACAGTTTCAATAACTCCTCTGGACCAATGATTAAATACCAACGTCAACAGC  
A\_16\_P36230333  
ACAACAAACTTGCTTTTTATTATTGGGACGCTAACTATTAATTTACTAGGCAATATGCCCC  
CUST\_1129\_PI426210822  
ACACATTCTCTCATCTAATCTTCCCAGAAGCTGTGAAAAATGTTTGTCTTTTTTTTTCT  
A\_14\_P105492 AGTTAGTTTGTGCTTACATACAGTCCAAATTACTTTTCTAATCAGTAGGTGGCTCTCCT  
A\_16\_P21396664  
GTTTCTCACTCTTTTTCTTAAACTATTTAGCCCAGGATTATTATATTAGCCACACGCCC  
A\_16\_P36608017  
TCCCATCGTGTTTTCAATGGGCATTCATTTAGCAGTCTTGGCTTTATGAATCATAAAAAT  
A\_14\_P131892 AAAAGATGTTACTACTAAACAAGTGTGTTAAGGTCAGTCAGCATTGTCACACGTCTGA  
A\_14\_P124352 CTACAAAATTATCCCCAGATCAAGTTACCAATTAGTCATGCATTGTGACTGAATTCCTGA

A\_14\_P118080 GGCTATTCACACTGACTGAAATGCAATTTCAAGCCTCCATGTCTATACCAATCATAAAAA  
A\_14\_P104319 AACTTTTTTGTTGTTGCAGGAAGAGAAGTTAACTTCTAGAGAAACCTAACAGACAATAT  
A\_14\_P115643 AAATGTCCTCTTACAGTTTCAGGATGCTTGCTCTGAAGTGACAATTTATGGGTTGAAATA  
A\_14\_P130743 AGAGGGAATTATGTATTAAGCAAGAAAATATCATCACGTTTTCAAGAGGGAGTGCCATT  
A\_14\_P127372 AATACTAACTAGTCTTTTTGTAATTGCAGGTGCCGCTTCGTTATTTGTTAGGCATGCTAT  
A\_14\_P115516 TCTGTGCTTGAGGGGAAAGATTGTTTTCTGGTATGCAATTTATATTCTCATCACAGAAG  
A\_14\_P138417 AACATATATGATACTTGGTTTATGCTAAAACATTCCACATACATCTTCCCACCTCCCAAG  
A\_18\_P15409338  
TCAGAAAAACTTTGCATATACCTTTCCATAGACAAATGTAGTAAACACAACCTCAAACCCA  
A\_14\_P108567 TCAGAAGAAAACTCTGATAATTCTTCAATAGTGAGTCAGAATTTATTCCAGCAGCCTCC  
A\_16\_P00310735  
AATGTCCATTCTCACCTAATATGGTCTAGGAACTCACTCTTACCTTTAAAAGTGCTTTG  
A\_14\_P110842 AGAGTTAAATGGTAAAAATCAAAGCCAAGGTATGGAAAGATCTCCCAAGGAGATAAGATT  
CUST\_7597\_PI426210822  
CCACTTGTTGAGTTTTCCGTCAGCCTATAAGGCAAAGGAAAAGAGTGATAGAAAATA  
A\_14\_P104374 TTAGGGAGCAACACCTGTTTTGTAAACCTATATCTTCATACAGGGAATATGCTTAATCTT  
A\_14\_P138505 GATCTAAACACGAGGAAACATTATTCATTGGAAAAGTGCATGGTGTGTATTTTAGGGATT  
A\_16\_P37013836  
TGTCCCATCTCATTGTGATAAATCCTTTGTCTGCCTCATAATACAAAGTGCATTAATTCA  
A\_14\_P132801 ACACTCTGTGACATGCTGGAAAACGTAACCTGGGACACAAGTTACTAGGTAATAATTTTTTA  
A\_16\_P36230990  
TCATGTGATTTTTGTTTACCCGTTTCGGTTCAAAGACAGAACTCTTTATTTGAACACTGAA  
CUST\_9996\_PI426210822 TGCTTTGCCTTGCTTTTTGCTGTGTTTGTTTAAAAAAGCATGGTTGCAGGA  
A\_16\_P15518166  
ATTTTCTTACTTGAAAGCACTCTTAGATGTTCTCTTCCCTTTTACTCAACAAAGAGCCAG  
A\_14\_P104410 AAAACCAGCAAAACTAGCCTCAAAATGAAGGCTGGCAGCATTACAGTAATTGATCA  
CUST\_1392\_PI426210822 AGAGCATCCTGAGAAGGCAGCTTAGACTTTGGGTTTCAGAAACATGAA  
A\_16\_P19483077  
AATGCAGACCTCTTCACTATAAAGGAAAAAACACAAACAAGTTAACATTTTTTCAGACCGT  
A\_14\_P139440  
TACAAAAGACAAGGAAGGGGTGTAATCCTGAAAATAATGACAAAACACAAGGTAAGCAT  
A\_16\_P21246350  
ACTTCGCGGACATCAATATTAATTTATCAGGATTTTGAAAACATGAAGCCAATCTCGAA  
A\_14\_P130253 AAATGACGAGATGTTCTCATGTCAGCAATTATCCAGAGAGCATTTCGTATTTTGCAACATA  
A\_18\_P14136398  
GAGATGGTTCGTAATTGATTAGTGGAAGTTAAATAATGTTAAGGATAGGAGGCTTGTCCC  
A\_16\_P16172401  
AGGTTGGTCTTGAGTGATAAATCTTCAATTTGCCTTATTAACAGAGATATGAGTGTTGGG

CUST\_7323\_PI426210822 CAAGTCACCTGTACAGTTGGGGCCTGAGGAAGTTAGGTCAGTTCT  
A\_16\_P18427932

ACAAGCACCTTAAAAGTCACATCTTACTTACATCAACTTTCAGTATGCTAATTCTCGGAA  
A\_14\_P119602 TTCCCCTTGTTTCATTCTGTATGTTGAGATGTGATCTTGCTTTTAGGAGATCAAAGAAAA  
CUST\_2478\_PI426210822

CTTTAAAGGCACATGAGATAAATGAAGATAAATGCATGAAGTAGAATAATTTTCAGTCTG  
A\_18\_P14134629

TCTCACTTTAAAATAACATATTTCCCTTGAATCCCCAAAACAGTTAAAAATAAAAAGGG  
CUST\_2964\_PI426210822 GTGCTGGTAAAACCTGCCAGTTCGGCTCAGGGCTTTGGAATGAGTG  
A\_14\_P108013 ACTCTTGCCTTCAGAACATAAACAGTAGATCATAGAATTGATACCAGAAATACAGTCCTG  
A\_16\_P00685439

ACTTAAGGATTTAGTAATTTAGTAATGTTTATGTAATTTTTTCAACAAGTTCTTTTCTGTT  
CUST\_10000\_PI426210822 AGCTGTGTGGGATCCAAAGAGCCAGGACCTGAGAAGGCAGACTCT  
A\_14\_P202071 CACTTACCTTCTTTATTAAGCCTCATAACCTCCCTGCTTTTTCCACCCTCTTTTC  
CUST\_1125\_PI426210822

CACGAGGCTCATAATTCTGCATTACTTTCTATTAAGTAGCTGTGGATCATCAGTAGGC  
A\_16\_P01770897

ACACAGATGAATCATAAGGAGAAAAAGATGTTAAGTGCCACAAAAGAAATAGGGAGTGT  
A\_14\_P102351 TCCATAGCAGAAATACACCCAATTTTAAAGTATCTGATACGTGCATTGGGAGTGAAAAAG  
A\_14\_P201831 ACTGATGCTCTTCCTCTAATTTCTTCTAGGAATTTCTATTACATCACAATGTTACGGGAT  
A\_18\_P22840484

GCAAAGGAATATGTTTTAATATATAATCTAGAAGAAAAATGGTCCATGGTGGAGGGGCCT  
A\_16\_P17828735

TTTGCTCAAATGTCAAATGCTACCTGTTACTCTTTATTGTTTCTGGCTAAAATTGCGAGC  
A\_18\_P25339391

TCTATTTGTTCTTACCTACACTGTGATTCAAAGGCAATTTCTACTTCCCTTTGTAATCCC  
CUST\_6744\_PI426210822 ACACATTATAAAAGAGGGCTTAATTTGTTGGTGGCTACTCTGCTGGCTGG  
A\_16\_P37630993

TTCCCCACTACTGAAAATCACATTCAAACCTATTGTATGGCCACTTGAGTTAATAAACTC  
CUST\_3839\_PI426210822

TGAGAACCTATTGATGAGAGGCATGCAGAAATAAAAAGCCCAAATTCAGTGATCTAAATC  
A\_14\_P136342 TCATGCTTCTCTCACTGCAAGTGAAGTACTAGAGCCACTGATTTTAGAGTTTTTAAGAGAGTA  
A\_14\_P114779 CTTTGGCCTGCAACCCCAATACATCTATTTATTTGCTCACTAAGGATATTGTGTAGAAT  
A\_14\_P133563 TATCATATCTGGCCGCCTGGGTTTATCTTATCACAGATTTTTGTATCGATTCAATCAAGT  
A\_14\_P109671

TCCTGAAGAAGAGAACTTACTGAACAAGAGAGATCAAAAAGGTGAGTAGGTATAGAAAT  
A\_18\_P14135139 GCATTTCCCTAGGACAGTGATCATTTCCAGGGAAGGAAATAGATTACCCATTCAAAG  
A\_16\_P16418410

CTATCAAAGACATCATTCAATGGAGACCTCTTACATCTACCTTTGCTGAATTCAAGAGTC  
A\_16\_P41027914  
AAAACCCTTAAACTTATCAAGTATGAACACCCTTTACCTACACTTATGGTTCTCTGCATA  
A\_16\_P19508756  
GGCATAATTCTGTACATCCACATATTCACATGTAATGCTTCTATACATTCATCCCAGT  
A\_18\_P17453652  
AGTGGTGACAATCCTGTAGACTTGACTTAAGCGCTTTTGGATGAACAAAATTCTTAAAAT  
A\_14\_P107847 ACCTTGAAATAAGGCAGATGAAAATAGATCCTGGTGCTATTCTTTCAGGCATATCAAGTA  
A\_16\_P03175380  
AACCCCAAATGGACAAATAACATCTCATTGCTACATACTTCTAACGTTCTTCACAGTTAG  
CUST\_8741\_PI426210822  
TTAGATTCAGACCAAAAAGTATGAAATCTTACTAACTTATTACAGATAGGTATAGTGCAG  
CUST\_4251\_PI426210822  
AGTATATTCCTAATAATGACAATAGCAGCAAACAAACACCATAGTGGTGATTTCCATACTC  
A\_16\_P30952247 TGTGGACCACCCTTTGAAAGCAGCCAGCAGAACATCACTCCTCAA  
A\_14\_P130123 ACTAACATTTTTAATACAGTCTGATCAGATCAATTCACATCACAAGGTCAACCTGGGCTT  
CUST\_2184\_PI426210822 TCCAACAGCCAGACTGTGTGTCTAAATCAGAAGGTGGACTCTTGA  
A\_16\_P02211140  
TGATCACAAGGAGCATTAAATTATCTGCAAGAAGTCAAGAGTAATTTAGTCCTGGCACTAC  
CUST\_8049\_PI426210822 AAAGATGAGAGATTTATGGGACCAGGAAAGGATGTGTCCTGGTTAAGCTT  
A\_14\_P135988 CAACACTCCAGTCAAATTTGATTGTCCCTTTTTCTTTGCACATACTTAACAGAATCTTCT  
A\_14\_P105220 TAATCCTGTTACTGTTATCAAGGTGCTGACATCTGTGACATTCAAACACTATCTAGATGC  
A\_18\_P22839976 GAAACAATCATGGGAAGTCCTGGCTGGTCCGTGTGCTGGGAAGGG  
A\_14\_P105164 CAATCAGCAGAGGAAGTTACTTTCTGTGAGAGAACAGTTGATAGAGAAATTTCTGTTGCA  
A\_14\_P127222 CTCATTTTAGATCTCTGCGATTACTACATTCTCTGTTTTCCACAAGTCAAGCACAGGAAAG  
A\_14\_P118090 CTCATGAAGAATAGAAATGCACACATCACCATTTTTATCAACTGCAAAAATTCAAGAAGAG  
CUST\_9536\_PI426210822 CTGGGAAGTAGTGATGCCTGTCTTCCCTCAGAAGCACACTGATAA  
A\_14\_P126057 GTTCTTTTGTGCATGTTTTTATGGCTGCGAAAACAACCTGCTAGTTAAAATGTTTCCTTTT  
CUST\_831\_PI426210822 CATGCTGCAAAGCTGAGGGTTTTCGTGTGTATTTTTATCCCAGGGAAA  
A\_14\_P137502 GTTTCCTCCTTATAATCATCTCATTGTCATTGGATGGCAGCAGAGACTTTATGAGAA  
A\_18\_P14936214  
TCTTCCTTGCTTACTCCTAACTTAAACCACAATATGAAATAAAACTCTTGTCTCCGAACC  
A\_14\_P100301 ACTGGAAGGAAAAGAAATTCGTATCAATATGTCTTGTGCGGTATTTATCACCATGAATCC  
A\_14\_P128895 TGATTCACAGCCTTCTCAAACCTTACCTAACTTACCTTATATAAGACTATATTGGGCCTCC  
A\_14\_P129224 ATCACAGAGACCTAGTGCTACAAAATCTTAACCATGTGAAGGTCTTATCATGAAACAGAA  
CUST\_9326\_PI426210822 CTTTGCCAAGGAACATGTCCCAGTGACTACTGTCCCCATGGGCCA  
A\_14\_P121209 TTTCTGCTCCAGTCTCAAATTTTCTACACCTGCCAGTTCTTTACATTTTTCCAAG  
A\_14\_P139788 CTTCAAATTACCTGTTTGTGTTCCATTATATTCATAAGCCATGCATTTTACTGGGACCTG

A\_14\_P107653 TTCCTTCATTCCAGGATCTAAGAGAAGAGGGAGATGAAGAGACTACAAATGATGTTCC

A\_14\_P106050

AGTAACAATACAAATGGATTTTGGGAGTGACTCAAGAAGTGAAGAATGCACAAGAATGGA

CUST\_7799\_PI426210822 ACAAAGTGGGTACTGGTGTTCCTTGAATGAAGTGCTCCCCTAAT

A\_16\_P00811000

AAAACCTTGGAAATGTCCCATCCTAATTCATTTGTGTCAAAAAGGGTATCTTGGTTTAGTGTC

A\_14\_P132887 TAAAACCTTTTTTTACCACAAAATGGAGACCTGTAAGGCGAAGTGAGGTTGGATG

A\_14\_P118491 GAAAATAAAAGTGTTTGTCTTTGTAAGAAAAGTCTGGAAAAGTAGCAGAATCATCTCAAGGT

A\_16\_P15455851

AATGCAGTTAATCAACTGATGCTCCATCTACAAGATACAAAAATGATCTGACTCTTCCCT

A\_14\_P102490 CTTCCCTTTTCTTGCCACTTTTATCAAGGAGATAGAAAATAAAATTGGAGCAAGTGGAAT

A\_14\_P122287 TGCAATGTGCCTGGCAGAAAACATTTTAAAACATGTAAAAATATGCTTGGACCAACAAGA

A\_16\_P41495239

TATCTCACACAGAAAATCAGGGACATAACATCAAAAACCGTTCCTCCTTTTCTTTTTATTT

A\_18\_P14137029 CTTCTGACCTCAACTTCAGAGTTGCAGATTCCCTGGATTCTCTCTCTAGT

A\_14\_P103404 TAGGGATGAAGATTTTAATAACCTCATAGGCTACTCTACCCAGAAGACAGATGAAGACAT

A\_14\_P105237 CCTCTCCTCAGTTTAAAAGCCATCTTGATGAAAACAACAAGTCTCATGCCAAAAAAATT

A\_14\_P111487 ACACATCTTGGCAAGCATAGTTGAAACTATTTGTTTCAGCCTTTGATTTAAACCTATGGAT

CUST\_1115\_PI426210822 CAGCAGGGTGATGGAGGCAGTGATTGTTGAACCATACTAGTTATGCAT

A\_14\_P106819 CTTGTTCCAGTCTCTTTTCTGGTAATATTTTCTTCTATCATAATCCAGTCAAAGCGAA

A\_16\_P00685293 ACATGGAGAAAATGTCATGAGGGAGGAAATGCTGGGATTTGCCTTGA

CUST\_6452\_PI426210822 CCAGTGACAGGCCTCACTCACTGGACCATTCTCCTATTCAGAAAAG

A\_16\_P17356894

GACATTTTCATTGGTCTCTGAAGTCTTGTTGTCCAATAACAATCTACCATTCTTGTTCCAAC

A\_14\_P105831 GATTAGATCCAGTTAGTGAGTTAGAATCTTCCAAGCCTCTTTCTGGATCCAAAGAATC

CUST\_9402\_PI426210822

TAGATTTGCTCTACACAATTAACAGCTTTATTTATCCTCAACTCTTTGTGAACATGTCA

A\_16\_P58424373 TAAATATTCCCTCATCCCACAAATGGGATAACTCTGTTCTGCTCATGTGTTGCA

A\_14\_P117584 GGGAAGAAGTGGAGTTTTTTGGTTATTAGGTTAATTTTCTAGTAAAACACGTTGCCTGTT

A\_16\_P38609903

AATATGCTAATCTCACCCCTTCTGTTCAATTCATCCAGCAGTCTTCTGTTTACAAAACCTGA

A\_16\_P16540712

AAAGCCCCTAGAGATAATTATACAGTCACTCCACTATATTACCCTTCAAAGAAACTGA

A\_14\_P117857

AAGAGAAAAATCCAAATAAAGTGCGAAGTAAAAACAAACTCGGGGACCAAAAAAAGTGG

A\_14\_P132787 TCATCATGACTCACTCAGAAAATGCAGTGCTTTCTTATCATTTGTTAAACTGCATCATCC

A\_16\_P16826680

GGAGCCTTTAACTGTATATGCCTTATTTATCTTGAGCAACATATATCTGACCCATCAC



A\_14\_P121304 TATCCAGTTCCTCATCATCACCGTTTCATATAATGCTTTGTTTCCTTAGATCTTTTGCACA  
A\_14\_P115469 GAGTTCCTTAGTGTGGGGATCATAAACTTTTTGAGAATCTGATTAAAGGCAGTGGAGC  
A\_14\_P124470 TAATAGGACCTTATAAGTCATGACTACTTCACCTGACTGTTATTAACCACTGCATACGGT  
A\_18\_P14133100  
TCAGATTCAACAAGGGTGGTATCTTGTGTGTTTCCTTTAAGTTATAACCAGTTTATGGCAG  
A\_14\_P121745 CTCAAATGCAAGATTTCGAAATCATGGAGAGTATGACCTGTATTACTCAAGCAGCACAATT  
A\_14\_P109876 CTCCCTGGAAAGCATCCTGTTTTTAGTGAACCTATTAATGTGTAGACAATTAATGGCTT  
CUST\_8436\_PI426210822  
AGAGGAAAGGCACCTGATATATGTTCTCTAGGCTTTTTAGAAAACATGGAGTTGTTTTTT  
A\_16\_P03457813  
CCCTTTTTCTGGATGCTAAAAATTGACCTACAAAAGTAACTCTGTAACCAACCCAAATAC  
A\_14\_P110220 ACAGGCCATCTTTCTTTTCCAATTACATTCCCTTTAGAGCGGCCATAACTGTTTTAATAAT  
CUST\_4138\_PI426210822 CTGATTTGGATTTAGATGGGCTCAGGAATTTTGTGTTGGAATCCTTTTGGCC  
A\_14\_P127110 TGACAACCTAATACTCTAGAGTGTGTTTACATATGTGCTTGCCATTATCTTTTTCCTC  
A\_14\_P118635 CTTGTATGCAGAAGACTTTTTTGAGAGGCATTTTTAATATCCATTCTGTCTGGAAGATG  
A\_14\_P120682 ATGAAGTAGGATGCTTACCTTTCAGGGTCAGATTCCTTAACTGGTCTGCAAAA  
A\_18\_P11201526  
AAGTTAACATGCATCACCTACTTTTGAGAACTTCCTACCTCTTTATTATCCTTCAATCCC  
A\_16\_P01447635  
AAAAAAGATGTAGAAATGTGCATAGACTGTATGAACCTGCAATATGATGAACAGACCTT  
A\_14\_P103096 TCTCTTTATATTTATTTCACTGGAAATTTTCCCATTTCACTGTGGTTTCCAGGAACAAG  
A\_14\_P202137  
ACAAAAGGGTGGACAGACACATTTGCAAATGCTAACTAAAAGAAAAGGATAATCTCAGAA  
A\_14\_P133525 CTTCAATTTGACACTGTCACACAAAAGCCACACTCAGGGTGAAATCACAC  
A\_14\_P117039 ACTCTACAAGTATTAACAACAACATAAACACAATCGACAAACATGGATCAATGGGGGAA  
A\_16\_P17120841  
AAAAGTGAAAATATGACTAGGCAGTTTAACTGAAAGTTGCACATATACATTGACACCCC  
A\_16\_P35635445  
AAGGCTTGATGCATAGACATCACAAAATGTAGTGCTAGAAATCTAAATTTAGATGGCCA  
A\_14\_P135142 TTATCTCCTTCTGGTGTCTTATCTCTCCTTCGATTTTCGAGCATATTTTCTTTGCACTATT  
CUST\_1892\_PI426210822 GGAAAGAGGTTCTTCAAAACTGAAACCAGATAAACCAGGGCCCTG  
A\_14\_P114151 AAAACATGTTTCCAAGTAGGCTGGAATAAAAATGCTAAATAAGAACTGGGCCAAAAGATC  
A\_14\_P123911 CAAATTGCAAATATCCTCCAGCAATGAATAGAAAGTTGTTTTTCCAGATCTTCTCTCCCT  
A\_14\_P106790 GACAGATCTTCAAAGGGAGGAAGGAGTTCTCATATGAAATTTAAGATAGACTGTCCTG  
CUST\_625\_PI426210822 GCAGCTGCGGCTCAGTCTTCTCTGTACCCGCTCTCCAGAGAAT  
A\_14\_P130344 CTTGGACAAAGAAGAACAATATTCCTCGTGCTAAAGGACAAACCTCTCAGCAG  
A\_16\_P00388079  
AAATTTGGTATGCAAATCTACACTAGGAATGCTTTGTCAGTTACAACTTTTGGGACAGTTC

A\_14\_P116022 TGTTTCCAACCTTTCTTTACCTACGGTATTACTAGGTCAAAGTAAGTAGAGAAATGGCTG  
CUST\_1846\_PI426210822 GAACCCCTGACTGCCCACTCCATTGGAAAGTTCCCTTGAAAG  
A\_18\_P22840131 AAAGCAGGAGACGTTGAGGCTAAGCCTAGGCAATCTTTTCCTTTGTTTCTA  
A\_16\_P02096373  
AGAGAGTTCTCGCCTGAATATGTCATTATGCTTAAGAAATACAAGTTACTCACAGGTAGG  
A\_16\_P15977896  
AAACAGCACATTCATTTTCATCATTTTTTTTTTTCCTTAGAGCCTTTCATTACAATTCAGCCA  
A\_16\_P35571188  
CAACGATGTTGTCTGCTAAAACTTTCTGTGAACAATTCCAAACAGTTAATGTCTTGAC  
CUST\_9079\_PI426210822 GGGGCGATGGCCACAGAGTCCTTAGCCAGCCAAGGAAATGACATT  
A\_16\_P36412564  
AAAAGCCCATATTAACATACCTGTGAGTCTCAATAAATATTCATTGTGATGTTTAGCCCA  
A\_14\_P123188 GTTGCTGGTATCCTCCAAATTCTGCTCAGCAAGTGTTTTCTGTAAGTTGAAAGAAG  
A\_16\_P00685610 GTGGTTTAGGGGATACTGGGGAGGAGACTCTCAGAAAAGAAAACAATTAG  
A\_14\_P200528 CTAAGTTATCCTTTTGTGGGACTCAAACCTTTATCCCTTGGGGCAATGGG  
A\_14\_P135059 AGAAAACTACATGAGAGGCCTTGACTGTGCACCTGGAACCAAGAAAAG  
A\_14\_P129989 CAACATTGTTTCAAGTTGGCCAAATTGACAAGAGCGAGAGGTATACTGCGTT  
CUST\_5280\_PI426210822 AAATTCTGCCACCAGCCTGGGTGTTCTCCTCTGTGGGGACTCCTT  
A\_16\_P16979457  
CGTGAAGTAAGATTGCATAGTTTTAACGTAAATGGTTGCATACAGATCTAAGAGGGGAAC  
A\_16\_P20891401  
AACTCAGGCTCTATCTAAAAGAACATATTTCTCTAGGTTTTTCGTCATCAACTCATCCA  
A\_14\_P134602 TTGTTGGACTCTAAGATCAACACCCTGTTATCATTGTGCCAAGATCCAAATTTGTAAAT  
A\_16\_P16050825  
ACCTGCAAATGGTTTTCTTTATACTGTGGTTATAAACAAGACTGGATCATGAAATGTTGGC  
A\_16\_P01821672  
ATTCCATCACTTTCACACTAACTTTCAGTTTTGAGAAATGTCCCCACATTGAAAAAGTTC  
A\_14\_P116522 ATATACTGATGTCCCTTTACATATGTCCAATCTGGCTAATGCAGAGATACCTGTAAGATC  
A\_16\_P00893078  
AAAACAAGTTGGCTTTGAAGATAGTTTGCATTAAGGAGAATCCTAGAACTATGCGTCTCT  
A\_14\_P107990 TGTTCTTCTCCATTTATATCATCGTTGGAATGGAGATTGTGTTTATTGCTTTCAAGTTGG  
A\_14\_P106343 ACTCCTGACGTTTTGTTAATGCATTTAGCCATTTTCTACGAAGTCTCTCTAAATCTCGAT  
A\_18\_P24392414  
CACAAGTCCTGCTTTATCACTTTAATCAGCCAAATACCCTTAATTTTCTGCCATCATTG  
A\_14\_P106262 TTCATGTGCTAGAGGATTTTTCTTCTCCAGCATATAACTACCTTGAGAATGGATGTGAT  
A\_14\_P103855 ATCATTGATATCTGTGACTGCGACTTCGACTTCACACGTGCTGCTGAAG  
A\_14\_P103472 TTGCATTTCTCCTTCATTCATTAAGAGTTTAACTCCCCCTCCCTTTATTTTTGCAAAT  
A\_16\_P58424451

ATGAACTGGTCAAGTCTCATAACTTCATATCATGGACATGCTGACAACCTCCCAAATTTT  
CUST\_1464\_PI426210822 ATGGTAGGAGGCATCCAAAGCCTCTTTTAGGGAAGATTGGTCTTCT  
A\_16\_P16191094

TTCTTGGGTCTGATTACAGGTATTTTATTTTGGAAATTGTTCTAGAAGACACCAGTGAGG  
A\_14\_P139486 CAATGGCATCCAAAACTTTCCCGGGAATATCCACGATGCTTAAAATTACAATGA  
A\_14\_P136920 CTGTGTGCCATCTCATTCTCCTTTTATTTTCTTCTAGTAAAATCTCTTTGTGGCTTGAA  
A\_14\_P108132

CTGCAAGAAGAAAAATAAAGGAGAGGGTGTTCGAACTACCTATCAAAGAAGACATTTTG  
A\_16\_P00684982

CCACTGAAACATGCAGACACCTTGAGAAAAGTGTTCGAACTACCTATCAAAGAAGACATTTTG  
CUST\_9125\_PI426210822 CTGCCCCTCTCCGCTGGCGTCTTGTGGCCAGATGACAGTGCTAGC  
A\_14\_P107799 CTTTAAAGATCTCCCACCAGCCACTCCTTTCAGTTATGAGGTTCTTCACATG  
A\_16\_P16550480

AAAATAAACCTCTGAATCTCTAAGTAGCACTGCACAATTGGATAGTTCATGTCGTCCTAC  
A\_14\_P105524 TTTTGGATCAACATTTGAAAGTGGAAATCTTTTCAGGCAGATATCTCTGATTATGGCTGT  
A\_14\_P109708 CTATAGTGGCTATGATATTGAAGATGCTCTTGTTCGAAATCAAGGCCTCTTTAGACAGAGG  
A\_14\_P104885 CCAAATGATGAATTCTCTTTTACTCTCCCACCATGCAATTCTGCTTAGTCAATATTAAG  
A\_14\_P126779 AAAATGGACTGAAAGTCTTCGGGTATGACCAATGGCTAAATGCAATTATTTACTCTTGCA  
A\_14\_P106517 CTTGATTTCTCTACAACCTCAATTTTTTTCTGCAAATCAAGCATGAAGCATGATTCCT  
A\_14\_P106480 GGACATGAGTCATTGGGGCATGTTACAGAGAGTTTCAGTAAAATTCAGAAAAATAATA  
A\_14\_P121726 ATCTCTGCGTTGCTTAGTTAAAAATAAGGTGCTAGAAATCCAACATTCTGCTGATCTTTC  
A\_16\_P01536829

TACCATAACTTTGGCTAAGAAACAACCTTGATTTGTGTCCTTTTTTTTATTCCACCCTTTCC  
A\_14\_P119809 TCATTAATAATTTGATATTTCTTCAGGGCCATAATGACTGGGTGATGGATGTTGCCATTAG  
A\_14\_P132086 ATTTACAAACAGGTTCAACACCTTCTTCCTGGTGTCTCTTTCTTATATAACTAGGTCTG  
A\_14\_P201124

GAGATGGAGAGGAGAAAAAAAACCTTAAGTCCATAAAGAAGGCAGAAACATGTTTTTG  
A\_16\_P16480620

CTGCCTCAAAGAGTATCAATCTATCTTCCACACCTATAACATGAAGAACAAGTGACTGAT  
A\_16\_P18358101

AAACATGGTTAATATCACCTATGATAGCAGTTCTCTCAATTGTGTATCTCTCCAGAACC  
A\_14\_P107188 GCAAATCTTCAAGGATAAACTGTGCAATAACTGGCATATTGATGACATGGCATATTTGTG  
A\_14\_P200846 AAATCAGTATCTAAGTGAATGTGTTGATGTTTTATTGATCAGATCTATATAAGTGGGAAT  
A\_14\_P130688 AAAGACATCATCCACTTCTCTTCTAACTTGGACGGGGCCAATTCATAC  
A\_16\_P02941740

ACGGCTCTTACATATCAATTTTCATAGGCAAATAGGTAATTACATAGAGTGGGAACTGGG  
A\_14\_P101505 ATCTTGGTGTAGTAAGATTAGAGGCAATTTCACTTATTTCCCAAATGGAGTCTGATTTTT  
A\_14\_P117978 TCCCTTTCCATTGTAGCGTTCTACAATATAATCATTTATGTGAACAGGGCCCATCTTAAA

A\_14\_P109623 CCTCTGAGCCCTATTTGGTTAAGCATTAAAGACGGGTTTGGGCTATGTTAAAAA  
CUST\_59\_PI426210822 ATGTGAGAGTGAGGTCATGGGTGCTTGGGTTGTGACTCACCTCTC  
A\_14\_P133375 CTCCTGTGCATCCTCCGTAATGTCACACTGAGAACGAAAGTCTTCAAA  
A\_14\_P107661 AGGGAGAGGCATTTTATTTTCTTCCATACCTGGTCTTGGAATATTCTAACAAATGAGATT  
A\_16\_P01952587  
CCCCTTAGACATCCATTTTTCTCCAATAATTTCAACTCTGATTGACTGTTATCTCCACAT  
A\_14\_P136264 ATTCTGAAGTTTTCTCTTTTGATTCCACTTCTCCATCCGAGGACATATATTTCAAAAAGT  
A\_18\_P17178733  
AACCAGACCTTGACAGAATAGATCCATAAGATACTCAAAGACAGACTAATAAGCATTCTT  
A\_16\_P36230684  
AAAAATCTTTTTTTGATGCATTCCATCAGAAATCAGTGGAACATTTTCATTGCTGTCTGGC  
CUST\_9925\_PI426210822 GGGTGGATCATCGCCATCAGTTTGTGGTGGGAATCCTCATCTTC  
A\_14\_P133603 TAATTTGGACATGCAAGACAATGCTGCTGCCAACTAACATTGCATTGATTCATTAAGATG  
A\_14\_P105058 TTGGATCTTTATTTCTGCTTTCTTTTTAGGGGAAATTAATGAGCAAAGGAAGATGTGCA  
A\_14\_P112695 GAGCCAGAAACATTTAACAATGAAACAACCTGGTTATTCAAATAAATGTGAATGGTGGCA  
A\_14\_P107267  
TAAAAATACAACCGGTGTAGAAGAAAATAAATGGGGAGTGAAATAGAAGAAAAGATGAGG  
A\_14\_P102632 GGTAATAAAATCAAGTCTATTTAGCCTAAAGCCTGAAGGGAGATAAAAAGCACAAGGCTA  
A\_14\_P125321  
CAGAAGTGTCACTTAAAAAGAAAACTTTTGACCCAAGACAAGACTAGGGACAATTTGAAA  
A\_14\_P105754 CTAAGCCACCAATTGGGTTTTTCACAGATTATGAAATTGGTCCAGTTTATGAGGTAGAC  
A\_14\_P135415 TGTGCTGATTACCACGAGTTGGGTCCTATTACAAGTGCTTTGCATTTCTTTTTTTTTCTT  
A\_16\_P41186259  
ACTCACACTGTCAATTTGTAGGACATTACTTCCTTATATGTATGAAAAGGATGCGTGTTT  
A\_14\_P101620 TTCCATAGGAGAAAAATGTTTCATCTGACATACCTTAATGTTAGCACAGAGGACTTATTCA  
A\_14\_P137172 ATACATGCCCTTAGAAATGTAAACATGATTGTGGATCTAAGGTTAGGTGTGCATAAGAA  
A\_14\_P105235 CATTTAAAATCTAAACTCTCCGGATTCCCCAAAGCAACAAAACCTTGACTCCTTTATTTGA  
A\_16\_P21069615  
CAAGATGTCACAACAAGAAAAACATCCTTGAAACAAGACTTCTTATAGCAGCCATAGCA  
A\_14\_P126074 CACAAGAAAAACTGTTAAATCACCATTTTGGTCTCATCAGGGAAGTCCATTTGTTAAGAA  
A\_14\_P133674 GCTTCAATGATCATCAACACTTTTATATCTTTCTTGTGTTGTGCTTTAGCCCCCAGGTAT  
A\_16\_P36576107  
CCTTCTCAAGATGATCTATGCACAATCATAATAGCCCTCTTATTTTATCCAAATGGG  
A\_14\_P130334 TTATTTCCATGCTTATTACTGCTTATGGCAAACATCACCCAATTCAGACTTAGAGGTTCA  
A\_16\_P38574854  
TTTGGCATTCAATCCTCATTACTGACTATGTATGGCTTCAATAAATCAAGAGTGTGCT  
A\_14\_P119544 CTCAAAGAACTTATCTGATGTAATTAATGCCTTGTTTGTATGTGCATCTTCCCCTTCAAA  
A\_14\_P109082 ACAAACAAGGTCGATTTTCTCCTGTCACTGAAGATTATACTGCAGTTGTGGG

A\_14\_P105821 CATGGGAAATAGGTAGGAAAGACAGACTGAAATGGATTCATGCATAAAGAAATGCACTTA  
A\_14\_P111772 TGATGACGTGTTTGTCTGTTTTGGATAGCATGGGTATCCCTATAAACCGTGAAATTTT  
A\_14\_P114841 CTAACAACCAGTGCACAGCCTCAGGTTTTAAATTACAACCACAGTTGAATAATAACCTAA  
CUST\_3145\_PI426210822 AGGTCTGTTCAAAAACCTTTCCCTTTAGGTTTCTTTGCAGCTTCTTGCTTTG  
CUST\_2044\_PI426210822 CTAACCTTTGCACCATTCCATAGGCACCCCTTCTTTCTGCCACTC  
A\_14\_P112403 TTCTGATTACCTGCCTCATTCTCTCCTTATGTGATGAGTCATTTGGGCCAATT  
A\_14\_P131927 CTTACCTTTCAAACCTGCGACAGTGTTAGCGTAGGATTTTTTCTTACATCTTCATAATTT  
A\_14\_P116460 TTAATAAGGCAGACTAAGGCTTTTTTTTTTTTTTTGGCTACCCTCAACTTTTGAGTGGAA  
A\_14\_P201536 AGTGTCATAGTGATCAGGTTCTTCACATCACTTTAATAACCTGCTTATTTTGTGAGGGTA  
CUST\_7159\_PI426210822 GCCCTCTCCCAGCCCTCGTTTTTTCAGCTCGGGGTTACCACGTGTA  
A\_14\_P101293 GTCTGTTTTTCTCCAGAAAATGGACTGACTCCAAAGAAAAAAATTCAGGTGAATTCAA  
CUST\_3850\_PI426210822  
TGGTAATTTAGAAGAAAAGAACAAGCCCAATGAATAGTCCCTTATGGGAGGCAT  
A\_16\_P03373320  
GGTGTGCAGAAATTTCTCAAGAACTCATCGATGTAGAATTTACGAATATCTCTGACTTGC  
A\_14\_P107429 ACATTTAACTTTGCTTCATCTCAAAGCACAACCTAGAAGATCATAATCCCTTATCCAACCC  
CUST\_7475\_PI426210822  
AAAATGACTCTATTGAGATTGAATTTAGATCTTATCCATTGCCATAACCAAAAAGCAACCC  
CUST\_7329\_PI426210822 CACAAATATTCAGCTTAGAATGTGCCAGGGAGGGGAGGAACATACC  
CUST\_1422\_PI426210822  
AACTGTTTGTTTAGGTTGAGACATTTTGATCCTTTTTGCCGTTGTGCTATTTGATGC  
A\_16\_P16550012  
GTTGACAGAAAGAACCTTTTCCATTAAACCCAATCGATACTGTATTTCCCCATCACTTAG  
CUST\_2481\_PI426210822  
GTTAGCAATCATCACATCCATTTAGGATTAGGACAATTCACACAATAGAATAGGGTGTTT  
A\_14\_P139759 ATGGCTTCTGTCTTTGTCTTTACAGGGAACCTCTAATGATCCAGGACAAAGAAGTT  
A\_16\_P16191382  
ATGAAAATAGAGTGAAACAGAAATGGTAGAATCAAGTCACCTTGCTCATTACAGTCATG  
A\_18\_P12038481  
CTAACATCATTCCCCAATACTATCTCCTGATCATGAGAGTCTTCAACACAGACAGTAAGT  
CUST\_7706\_PI426210822  
CATTGAGTGCTGCTAATAAAGTGTTTGCTGAGAATGTTTTCTGTAACTCATTGAGCCA  
A\_14\_P114132 CTTCCCTAGGATAGACATATATACAGACCCAGAGAAAACAATAAGGAACATGCATACCAA  
A\_14\_P109688 ACAGGACCTGACATTATAACAATGAGTGGCAGCCATTCTTATTTAATCAGTCCTAACAA  
A\_14\_P111582 TATGTTCTGTCTGTTTATAATCAATGGAAACGCATGGTCAGATCCCGGCAGTT  
A\_14\_P100967 TCAGAAAAAGTTCCAAGTATTAATAATCCAATGGACATCATGGAACAGCAACCTTTCCCTA  
A\_14\_P120786 AAGACCTGCGTCCTTTTTTCGTTTTTTCGGATGATGCCTTCAATACTACCTTTATTTTC  
A\_14\_P126546 TTCACAGGACTCTGGAGGAACGAGAACCTTTCAATGACTCAATATTTATAAATGCTACTGT

CUST\_3311\_PI426210822 GCTCCTCTTCTCTCCCCTAGATCCATAGTATCCTGGCTGAGGACC  
A\_18\_P22840333 TTTCTTGTTC AAGCCAGGCAAGTGCTAGGCACTGGGCTGCAGAAG  
A\_16\_P03711754  
AAACCACTTTTTCTTACCTTTGTTACTCATGTCTACTCTCATTAGTGCACCAAAAAGGTG  
A\_14\_P103055 AAGACAGACTTTCTAAAGTTTCTATATCTTCAATGCCTGCTCTGTAGTGAATCATAAGAA  
CUST\_7272\_PI426210822 GAGCTTGGCACACAGGACAGATCCTTTCTCTTAAGTGTCCCAAGG  
A\_16\_P00603180  
CAGCCTGTCTACAATAACAGTAACAATAGTCCAAGTCTATTATCATAACAGTGTCCAGTG  
A\_14\_P131888 ACAGTATTTATGTTCCTGGCACTTTATTTAAAGATATTTGACCCCTCACTGAGTGTCTGT  
A\_14\_P104240 CTAGGCTTTTTCTTTTTGGGGTTCTACAGTCGTA AAAAGAGATAATAAGATTAGTTGGAC  
A\_16\_P02265054  
TTCTTCAAGAAATCTCACGTTGTATAACAATGCCAAATCTAAACTACTCTACATGCAAGGT  
A\_14\_P124280 GAATGCCATTGCCCTCATTATCGGTTTCTAGAAAATTCTACAACATCAGAATACGGTATT  
A\_16\_P40340498  
TCCTTTTACCTAAAACAAAATGTTGCCTTCCTCAGAATAAGTTCTGCATTA AACCCCTCA  
A\_14\_P109686 CTTTTTACACAAGTTGTAGTAGAAAACTTCTGTGAGTCAGACTTCATTACTTGAAGCAA  
A\_14\_P118071 GTCGTAAATTCTCGTGATGACCTCAAGAGGTAATTCATGCTCTATGGTTACAAATAATG  
A\_16\_P30952343 TCAACTGGTTGCAGATGGGCTCTACTTCGGCTCCTCCTTGTGC  
A\_16\_P18997711  
ACCAACAATTCCTAGTAATCAGAGAGCCTATTAGCCATGAAATTCGATTT CAGTATCAGA  
A\_14\_P201461 GTAAGTAAATTCAGGTGTCATGGAGACTTAAAAGGAAGAGTTTCTAGAGTTTGACAGTGT  
CUST\_2561\_PI426210822 GATGGAGCCATTCACCATTCATGGGCTCTTTCTCTGTCCTGTTC  
CUST\_2649\_PI426210822 CTGGCTATGTTAAGTAGGGGCTTGGCTCAGCCTGGCCTAACTGAT  
A\_14\_P105051 AAGATCACAGTCCGGTAATCAAATAGCCTGAGATACTTATTTGCATTTCTCAAATGCAG  
CUST\_6309\_PI426210822  
AGATTCATAATTTCAATATATTCATTGCTTGTGACTATTTATGGCCGATTTTGGTTCCT  
CUST\_4490\_PI426210822 TGGGTGGGCCCTAGTGGGGGATGGATGAGGGCTAAGGCATGCTTT  
A\_14\_P130127 GTTCATCAGATACAGTTCTCCCTTAACTTGTCTTTCTCTCCTGTGTCTC  
CUST\_5612\_PI426210822 AATATCTAGTGAGGGAAAGGGGAGAGGCCATCTGGACTGGAGATT  
A\_14\_P121411 TTTTATTTGCTTCTCCTGAGTGT TTTAAAAGGTCCACTTGATTTAATACATCTGTGGCTTC  
A\_14\_P138446 TAAGTGACCTGTTTTGTCACTCTCTTGAGCATTTATGCAAAGACACCAATAATTTATTGG  
A\_16\_P16191976 AGAGAACCGAGTCTTGGCCACAGATGGAAATGTTCTGCACTCAGA  
A\_14\_P134286 CCTTTTTCTCTCCAAAGGAACAGTTTCTAAAGTTTTCTGGGGGGAAAAAAA AACTTA  
CUST\_6555\_PI426210822  
AAGAGATCCATGTACAAAGTAATATAACCCACTTAAAAGACTGCACAAGCAAAT TAAAAT  
A\_14\_P113389 TACAATTC AACTTACATACAGTCTATTTGATTA ACTTCCCTTCAAACCAGTGCCTACCA  
A\_16\_P15987970  
ATAGACCCTTAAATGTGTAACGAGAAGCATATAGACTAGCAAATATGGGAAGAACAAGGG

A\_14\_P108648 ATTTTGAATAGAGGAATTTGAAGTTCCAAGTTGAAGTTTTAGTGGTTTAGATGAGGGACC  
A\_16\_P15132653  
AAAACCTACGCCATAAACAATATGAAAACCCAAACATCATTCTGAAAAAGCATATTTGTA  
A\_14\_P121687 GAGTTGGAAAAACAACATTGATCCATAAAGCCAGTGAGGTTTTAAAATCCTCTGGTGT  
A\_14\_P134991 CTAAAAGGCACTTTAGACATCAGTAGTTATTACTAAATCGGGGAGGGAAGTATGAATTC  
A\_14\_P124663 CTGTTTAGATATCCGAGCCAAAATACTATTTTTAAAAACTGTTTCAGAGGGCTTGAAATCA  
A\_16\_P38139883  
CCCATAATGAACAACAAGAGCATTATAGTGAGAATAGCCTGAAATTGTAGAATATGCCCC  
A\_14\_P201522 ACATGAAGCCTCTCCAGTTATGGCCAAATCATTTTTTAAAAATAATTCATTTCTTCCCC  
A\_14\_P136679 CTCTAATGAGAGCAAACAGATAAACATAACTGGTAGGAGGGAAGTACCAATACTAATTG  
A\_14\_P102318 ATCTCCTTTCTCGCTCTTTAATCTCACTCTGCTCTCTTGACACAGTTCCAG  
A\_14\_P107111 CTCACATGATCAAGAGTGTATGAGACTCGCAGTTTTTGTGGTATCTCTAGCATTTTTTTT  
A\_14\_P116555 AATATTGGTGACTTACCTGAAACTGAAATTGTATTTTATCTGGAGGGCTTCTTTACCCAT  
A\_14\_P111660 CTTTGCAGAATGTTTCGCATCTTACCACATACAGTTCTTTACATGGCTGATTCAGAAACTT  
A\_18\_P22839052 GATGAGGATGAAGCAGAGGGTGACCACCCTGGTCTATTCCAGGAG  
A\_14\_P131202 CTTTCTACTTTGACAAATATGATGTCTCTAACTTTGAATTCAGGCTGAAAGGATTGGTTC  
A\_14\_P106990 AATGTGCTTTAAATGCAAAAATATGTCTTAGGCCAGGCCACAGATACTAAAATAGCACT  
A\_16\_P40385506  
CGTTTTTCCACACGCATCTTTGTAAACACTCTCTTGAATACCCTGTAATGTTATCTCTTC  
A\_16\_P17616423  
ACTGCCTTTCACTCTATCAACTAGAAAAAACACCAAGTATACTTCTAGGGCTTTCTTGA  
A\_14\_P202024 CTTGGTCTGTAAGTCGTTTTTATAAAAATGAATATGCGATCACTGCCCTAACTCTCGTTT  
A\_14\_P124932 ATTAGAAAGGACACATTCTTTTTGACGGTCCATGATGCTATACTCTATCTACAGAACCAA  
A\_14\_P139784 GAGAATCTCTAGGTCTTAGTAAACCTACATGCTCAACTTGCCAATAGACATTGTCAAATG  
A\_16\_P17608881  
AAGATTCTCATACTTGTTATCTCTATCATCCCAAACACAGATCTCATACTAAGTGCTCAA  
A\_14\_P120449 CTGTTCCCATGCACATTATTCTAACTTTTTAGTAACTCACACGTGCATTCTTTTTTCAAC  
A\_16\_P18379760  
TAACTGGTTCCTTGTAATAACATCTTAGCAGTCAGGATTGAACAAAAAAAAGCAGGTTGGA  
A\_16\_P36230911 GCAAGAAGCCCTGTTACACCTGTGTAGGTGGTGGGCACGAGAGTG  
A\_18\_P22841417 CTGACCTTGTCTTCCAGCCTCCCTGGACCATGAATGCTGCTGAAG  
A\_14\_P119759 AAAGAAACATTATCCAGTTTGTGTTGGGGATAGCCCATGATCTAAATTCTAAAAAGCACA  
A\_18\_P22841060 AAAAACAACATAATTCACCCTTCTCACTGACCAGTGGAGAAGTCTGGCCTTAT  
A\_16\_P16112342  
TCCCGGACTATGTGCTAATAAGTTACGTTTAAAGAAAACACTACTACTTACCCATCCACTATT  
A\_18\_P14137559 ATCTATGTGAACCCTGATGCCCTAACCTGTGCCTACACCCAAGG  
A\_14\_P110343 TCTGAAGAGTATTTTTTTCGATTGCCCTCTGGTTAGGGTGCACATATAAATCAGAGTTAA  
A\_14\_P119249 TATGCAGGAAAAGCAACACATTAAGTAAAATATCAGGAGATACTGAGATGGAGGGTTGTT

A\_14\_P128266 AAGCCGTCTCTGACTTCTCGTGCGTATTTTGACCCTGATTTCAATCTTCTA  
A\_14\_P111469 CTGACAAAATGTTGAACAGCAAAGTATCAAGCATTCCCTGTCAATGATTTGAGGTAAATT  
A\_14\_P138506 TATGTGACTCATGGCTACATTCTTATAAAAACCTGAATCCGAAGTAGAAGTCGCCTGTT  
A\_14\_P112410 ATTATTGCCATAAACAGACAAGTCTTTAACCTCTCTGACTCTGAAATTGGAGTGACAGTA  
A\_18\_P14134402 AAGGTCAGTCCTCTCCTCCTTTTTATCCTCAAACCTTTGATCTCTGCAGATGTT  
A\_14\_P114363 CTAAATAATATGCTCAGGACTTTCTCTCACCTCTGTGTTTGGCTTTGTATCATTCTCAA  
A\_14\_P102062 CTACTTCACTCTTGTCTTAAACAATTAATACCTGGACTTGGGTGATATTCGTGGGTAT  
A\_16\_P39362511  
ACCAGAGACAATTACATAACCACCTGTTTATAGTAAACAAGTTTATATCCTGAAAAATCCCC  
A\_14\_P103735 AGTTGTAATTATCAAGTTTTCTATGTTTCAGGAATCTAGGCACTCACCTGGATTGAGTAA  
CUST\_5160\_PI426210822 AATCCCAGCCCTTTTCTTTCTGAGCTTTGCCTTTTGTAAATCTCAGTGC  
CUST\_10174\_PI426210822 CAACCCCTCCAGAGGTCAGTGGGTATCACCTTCCCTTCAAACCTG  
A\_14\_P120966 ACTAATCATCTAAATGGCCTCCAGATTCATGTGTCTCTTTTTTCATGCTTTCACTATTG  
A\_14\_P115099 GAAAATAGATGTAGGAACCTAAAGGATGCATTTTCATCCACTTCAAAGTTTTGCCCAAAAA  
A\_16\_P16020919  
AACGGTCAGATTTAGAACACAGTCCATTTATAGACAAAAACAAGAATATGCACCTTTTTG  
A\_14\_P138158 TACCTCTTTAGACAAACATATCAAGAGTTTCTGTTTTCTTCATCCCTTGCTGATGTGAA  
A\_14\_P100510 AAGTAGTTCTAGCAATCTGTGGAAAGGTCTACCTTTTGTTTTTCCCTGTGTTTATAAGTT  
CUST\_10032\_PI426210822  
CTTGAGAGGTCAGGGAGAAAAAAGAATAGCTGTCTCTCCTTAAGATAAGTTCAGAC  
A\_14\_P139528 CTGCTGAGTTGCATCATTCATACGAAAAATTTCCAGAAATGGGTCAGATTTACTGAA  
A\_14\_P113233 GACACTCAGAAGCCTCTTAGAGTGTGTATAATTGTGATAATCACAGACTCTGACAACAAA  
A\_14\_P107540 CTATACAACCTCTCTAGGGTATAACATGGAGATGAGTCACAATTTAAACATTCCCACTGTG  
A\_14\_P101998 AAGTGTCAAGAGAGCAATCATCAATGATAATGTATTGTGTGAGACCTTTGCATCTTGTA  
A\_16\_P16254583  
AGTTTAAATCTCCTCATTGCTCTTCAACTAACATCCAGAATTCTCCATAACTTGCACTCT  
A\_14\_P112842 CTTTCCCTTTTTCCCTCCAATTTCCAATTTAGCATGCATTAAGGTTTAGAATATAAGGTT  
CUST\_9244\_PI426210822  
GAAGTGTACATGACTTCTTAGCCCTCTTATTACCTACCTAATAAATAGGCATGAAAGT  
CUST\_1885\_PI426210822 GGAGCTGACGAACTTTCCAGTTGACTAGGCTTGACTAAGGATAATTTCTGT  
A\_16\_P19125946  
TTATACAATCCTGAACTACCGTTTGTAGCCTACAAAATTTCTCTTGAATTTCTGTGGAGC  
A\_14\_P137515 GATCAGTAGAGTGAATTGCAGGAGTCAGTATTGTCGAGATTGTAACCTTGAGGTTTAGATT  
A\_14\_P134845 CTGGGCACAGTCTGATTATTTTTAGCATTGTTATGGGGCTATTAAGTATGTCTATCCATG  
A\_14\_P114394 CAGTGAGACATTACTTTGCAAATTAGTGGGTCTGCATCTTCTATTTGTGAGTATTAT  
A\_14\_P104819 ATATGTGGATGAAGAAAATAAGGATCAACCTCTACAGTCATACTTCTTCCAGGTAAGAAG  
CUST\_5589\_PI426210822 TTGAATGCTACAAGCCTCCGTACATACAGCCTGATGGGCACACAT  
A\_14\_P115728 CAACCCAATATATAGATTTCTATAGAATTTCTTTTTTCTCTCTCCACCTTTCTCTG



A\_14\_P131947 CAGATAACATGCATGTGATGATGTTTCGTTTAGACAATCACCTATTTGGTCTGGTCATG  
A\_14\_P137195 GATCCGGACACTTCTCTATTCATCAATGTTTGTAGAGACATAGGTATGAATCTTTGTGGG  
A\_18\_P17042660 CACCTTCCCTTTCTGTTGCATTTTTTTTCTCATCTTTCTGCAAGAATTCTCTCTTC  
A\_14\_P135687 TCCAAAGAGATTCAGCATTTCATAACAACAGTGTCTTCTTTTTGCACAAACTCCATTG  
CUST\_9481\_PI426210822 CACCTGGGAAGTGAAAAAGAAAAGTGGTTCCTGCTCATTGTCATAGT  
A\_14\_P116814 CTAAAATTTGAACTAAATCCTCTTTCCAGGTTTGAATGCACTTCTGTGGAGGCA  
A\_14\_P134090 AGGATGTGAAATATTTAAAGGTAATACACAATAATCGGGTTACCAAAGGACGCCTTCCA  
A\_14\_P111173 TTGCCAATTTGAATATCTCAIGTTCTGTTGAAACAATGGCTTCTGAAAAGAGTTGATTG  
A\_16\_P00124277

CCCAAAGTCTAATTTTTCTTCATCCGTTAAAGGTCTATTGATTCACATTATTTGCTGGC

A\_14\_P113240 CTGCATCTTCTCCATTTCAAGTTAAGGCCACAGAAAGGCTTATAAAAAGTAATATGACTT  
A\_14\_P115788 TTGATTTTCGCTGTTTACCCTATCCATTAATCAATACATGTAATTAACCTCCCTCC  
A\_14\_P125468 AAAGGCTCTGGATCAATGATTCTGGAAACCACTTAAGTCCTAAAGACAATTTAAAACAC  
A\_14\_P137357 CTTCTCACTGCTGCTACTCTTTTCTGGACACTCCTTTTTTCCATTTGTCAAAT  
A\_14\_P138411 TTATTTTTGAAAACAATATCTACTACTGTGCACATGTCGGGAAACAGGCCATCCGT  
A\_14\_P114677 TTTCACAGTCTGGACCATTAGAGTGTGAAATTTCAAAAACACAACCTTTTCGTTTGTA  
A\_16\_P02553430

TTTTGAGTTACATACCTGAAGTTCAAAAAGTAAGCCTCTAGTTGCCATTCAAGTTCACAC

A\_14\_P119062 GTTTATTAATCTCAAATAGGTTGGGAATGTCTGGCAACCAGATGCAATAGAAGTTCTTCA  
A\_14\_P103394 TTTTAAAGCACTATGATTGAAGTCCATTTCCATCACGGCAAATGAAAGACAATAACGCAT  
A\_14\_P104151 TTAAAGGATTCTGAAGGTGATACCCTCTTCATGATGCAATAAGTAAGAAACGTGATGAT  
CUST\_1045\_PI426210822 ATCCTACCCCATGGCTTCTGCTACATCATCCCCTCCAACCTCCAG  
CUST\_1648\_PI426210822 CTCAGCCCTGAGGGTTCGAGGCTTGGCCCTGTTTTATGATGATG  
A\_14\_P105314 CTCTTTCTTATCTTATTTAACTTCACCTGCAGGTCTGCCTTATTATTTTCGTCAGTGTT  
A\_14\_P107954 ACAGTCTCATCTGTATCTTTGATTACAGCCCTTCTTAAAGGTTTGAATCTTTTATGGTC  
CUST\_3072\_PI426210822 CCATGGAAGGGTAGGTATCATATGAGATGTGCATGTGATCCTGTGACAA  
A\_14\_P107779 CTATTCATATTTCTAGAAAATGGATCCTCACTTCTTCACTTGGATATAATAATATAGAC  
A\_14\_P116016 ACCCCAAATGAGCAGATAATCTTCAATTCCTCTCTATTTGGATTGTGAACATGCATTAAT  
A\_14\_P125714 TCCCACCAAAAATGGTCAATAGAAAAGAGTCGGTATTGTTCTTTATGAAACCATCATGA  
A\_16\_P16550273

AAAAAATCATTTGTCCTGATGTATACTGGACCCTAGTCTTTCTTTTCAGATTCCATTGGG

A\_14\_P136665 GGAGCCCACGATGGTTGGTATTCATATCAATCAAACGGATTGCACTACAAATTAGTTA  
A\_14\_P126418 TCTTCTCCCTTTGGTTCACAGAAATAGTCCTTTCTTATATCTATTCCCCTTAGAATCCAA  
A\_16\_P03377332

AAATCTGACTGCAGTCAAGTAATCAATAACCCTATTTCCAGTTAAAGATCCTTGTGTTGGC

A\_14\_P107397 TGGGTTGGCTTTCTACTCTACCATTAATAGCACTACCACTGCTATTACTCTGAAAATTA  
A\_14\_P200380 ACTGCTCTGAGTTACATGACCAAAGAGTTTGTAGAGTGAAGTTTAAAACCTGCAGCAAC  
A\_14\_P111717 CTCACTCTTTTTACTAGGTATCAGAGTAACACTGCTTCTGCTGTTCTTGAACAATTACC

A\_14\_P118111 GTCTACATCCGGATAAAAGACGATGAATGGAATATTTATCGCCGGTATACAGAGTTCA  
A\_14\_P133948 CTGGAGGCCAAGTGC GTTAAGAAAGACCCCTTTTTCTCTATAAAAATAGTTTCGCTTTATA  
A\_14\_P113794 AAAAATCTCTAAACACCTGAAAGCCCCACTATTAACATGGACTATGGTAATAAAAAATTT  
A\_14\_P131368 AATCTGTGCGATTTCCCTTTGAATGTCTATGATTTGTTTTAAACTTGCTGCAAGAATGAC  
A\_14\_P111094 CTGTATGAAAAGTGA AAAAAAAAAATGTGATCAGTCATCTAGATACTGTGAGCGAAGGCCAA  
A\_16\_P02242273  
AAAAACATAATCCAAAATACTTTCTGCTCATGAAGATATGTAACCTTAGTCGTCCCTTGTGA  
A\_14\_P201361 CTGCATTTATCTATCCATATTTTAGGAAGAAGAGCCTCTGAATATTCATTCATTCAGCAA  
A\_14\_P135253 TAATGTGTAIGTTTTGGGAGGTTCTGGAGATAAGGTTAGAGTTCATCTTATGATTTCCCA  
A\_14\_P130701 GGTGACTATTTGTTCAGAGAAGCAGAATAAAAATTTCTCACCTGTATGGACCCAGATTTA  
A\_14\_P127784 CATAGGAGGCCCTTCTTGAGAAACAATAAACTAGGTAGA ACTACCCCTATGC  
A\_16\_P30952377 CGGATGTTTGGTCAGTCCATATCGGGAGGCATTGATATGGATGGAAAT  
A\_14\_P116895 TTTAGGTGCCTGCCTTCTAGTGAAGATACAAGTTAACTAGGAAGAAATTCCAAAAACAGA  
A\_16\_P17829527  
ATCCA ACTTCTGATCAAACATGGAGCATTA ACTCTACACTTATATCATCTCTTCCTCCTG  
CUST\_8241\_PI426210822 CACTGAACCCTTGACCCAAATGCAAGCTGAACTTTCTGGAGGTTCT  
A\_14\_P138794 AAGGAAAGAAACAGCAACTCACGTGGGGCATGGTTTTTTAGAACTGATCAAT  
A\_16\_P00685297  
TTTTGATGAAAGTATTGGAATTTTTGATGACCTTTTTTATTACAGGTTTGGGAGCAACTAC  
A\_14\_P132290 TTTTGGGGGAGGGCTTTAACTAAAATAACTTCATGTAGTGTGTTGAGCGAACTAGGTAATA  
A\_14\_P112238 AGTCACCTGAGAAATCTTCTTTCCAAAGTGGACTGTTATATCCCTGGAAAAATATTA ACT  
A\_18\_P11429513  
AAAAAAATATGCATTATTTTCATTAACAGTGATCCTACACAGAGAGAGATTTACCAACCA  
CUST\_7281\_PI426210822 GAGAGCCAGGAGCTGAGTGGCAGCATTGCGGGAGGGCTCTTCCTC  
A\_18\_P14135393 TTAAAAAATCCTGGTTTGCTTGAAACTGGCTGCCCCATTGAAGCATGAGATA  
A\_16\_P01236413  
AACAATTCACTGATTCCATGGAAGAAACATTCTCAGTATTGAAAAACCATTTCTGCATCC  
CUST\_1121\_PI426210822 CCTCTATATATAACCACAAGCACAAGGACAGCCCTCTGAAGAGGGAG  
A\_14\_P118284 CAAGTCCAAAGCCGGTTTTGTTACCTTAAAGTGAGGGAATTTAGAAAACAGTTTATTGAAA  
A\_16\_P15850684  
TGGCACCTAACTTGAGAATAACTGTCGGATAGCAAAAAGTATATTAGCATAGTTGGTGAG  
A\_16\_P03722054  
AAAAAAATGCCAAGGATCAATCTAGACAAATCGCTAAAGCCAATATATTTTCAGAGAGCGC  
CUST\_2362\_PI426210822 CTCCGGGAAGCTTGTTTTCTGACCTCGGAAGCTAATCACACAG  
CUST\_9569\_PI426210822  
GAAAATGTCAGCCTTACGAGTCAGGAAAGCTTTTTACTTTCACTATCACATATGAAGAATG  
A\_14\_P201342 AGTCTCATCTGGAAAGATTATATAAATTGCATTCTCCTTGCTTATGTGGGTAGAATGGGA  
A\_14\_P124076 TGAAGAAAAACACAAGTATCCCCATGTGAAAAGTCTCCAGAGGTTTGAATCAAATTAAG

CUST\_10006\_PI426210822 TAACTAACGGGTGGCAGGAAAGCTTTGAGGAGGCTGTTGAATGAG  
A\_14\_P112500 GCTGAGATGTTTTAGAGCGTTGCTTGTCTTTAACATTTGGGTGATGTGACGTAAG  
A\_14\_P125724 CTTTGTATTTTACACTCCTGTATAGTCCTAAACACTTTTGTCTTTTACAGCATTTCAC  
A\_14\_P201335 AGCCCTTCCACCAATTATCTGATTACCAGCCTCTTCTTGACTGGATTCT  
A\_14\_P124523 AGAATGCTCTTTACCTCTGAAGGAAATATTCTGGACAATGAAGAACTTATTGACACACTC  
A\_14\_P136291 AAAGTTTTCTGGGGGGAAAAAAAAAACTTACATCAAATTTAAACCATATGTTAAACTGCA  
A\_14\_P130134 CTTCTGCTTTGGGTCTAGAGGATTGATTGCATATTAAGCCTCAAACCTTTCACAATATGT  
A\_14\_P104824 CTTACTCTCATTTTACTGGTTTTGAGAATCATATTCATCCTCCAAAGTTCTGGAGTTTGC  
A\_14\_P133151 CTAAGATTCATACCTCAGAGCCCACCAAAGTGGCAAATCATAAATAGGTTAAAGCATCTC  
A\_14\_P202152 CTTGGTAAGATGGACCATCCAGAGGCAAGCAAAAAGGTTAAAATTAGTAAATTTTGTGAT  
A\_16\_P16261654  
AAAATGGTTATTTCTGAAATGTTTGTCTTATGAACCACTGCATTCAGAGATTGATCCC  
A\_14\_P200401 TCTGACTAAGGACTTACTGGTAGTTGTTGACATTTCTGAAGCAGTGGATCTTTTTCTTTT  
A\_14\_P139120 TAAGATAATTCCTGCTCTATCCTTATCATAGGATGAGGTCAACTGAGATCGTGGATATGA  
A\_16\_P01991809  
CAGTGACTTTAACCTTCCATATCATAGGACAACAACCTACCAATTTAGGCTTATCCAGTTG  
A\_14\_P109205 ACAGAGCCAGGCTGTCTGGTAAGGCTTTTGAACCTTTTATTTACTAACCAATAAAAACTT  
A\_14\_P131149 CTTGTTGACCTTTTACACAGGCATTAGCATGATCAATATGCTACAAATTACCTGCATGTT  
A\_16\_P00685037  
GTGTATATATAATGATAATCAAGGCTAAACACAGTCTTCTCTTTCTGTAATTTATATTCA  
A\_14\_P136483 GCTCAACTAAGGTCACCATACATAGCCTCAAGAGAGTAGTATAACCTCACGAAGATATAA  
A\_16\_P19789024  
CAGTCCAGTAGACAAACTTCTCATAAATGTTTTAAACACCTAAAAAGCGACTTAACCAGA  
A\_18\_P11722497  
TACTAGAATTGACCGCTGATCTAGAGTTAACCACAGACCAAGATTTAACCATTAACCTAG  
A\_18\_P14134970 ATATTTTGCAGTTTGGGGAGATCGTAGATGTGCCTCAGGGAGATTGG  
A\_14\_P109185 GTTTTTTAAAATCCAGGAGAATTTCCACTTGGATTTTTTTCAAGTGGCTGTTAGACTGAG  
A\_14\_P111750 TCTCTGTTAATACCTTTCTTCATCCATAAAACACTGGAGATGACTTTACAGGAAACACA  
A\_16\_P32776270  
AAAACCTGTTGGTAAGTAGTCCAGTAAATTAGCATTCTTTAAAAGTATGTTTCCCACCC  
A\_16\_P58424171 TTTGCCCTCTCCAGCCTTGCAGGCTCCCTCCGATGCTCCATATTA  
A\_18\_P22842119  
TTCATGAAAGTCTGCATCTTTTAGAGCAAGATTTCTGCTTCACTCTGTATTTGATTTGCA  
A\_14\_P139708 ATCATGAACACCTGGAAAGACGAGAACTATTTATATGACACCAACTATGGTAGCACAGTA  
A\_14\_P116705 AGACAAAGCAGAAGTTACTGAGATGCCTAATAGTGATTCTTTACCTGAGGATGCAGAAG  
A\_14\_P136361 AAAAATCTATCACTGACTTCCACAGAAAAGAGGAAGTTTCTATTGCCCTGTTTCTTAAGT  
A\_14\_P100484 CTGGCACCTGGACAACATAATTTTTATTGCTGAGTCATTTCTCTGGTAAATTTTATC  
CUST\_2231\_PI426210822 TAAGCAGGTA AAAAGGGACGCATTTT GCCAGCAGGAGAGAGAAGTT

A\_14\_P112507 TTGCAGTGAGATGCTTACAGTTAATATGCATGAAATAGAAGGTGAATCAAGATGGGATGT  
A\_14\_P128647

AGAAAAGATGAGCAACTGGAATTTTCCAATTTTGAACCTGTAGAAAAGATGGGAGAGAA

A\_14\_P114042 TGTAATTTACAGCATCCATCATCATGAGTCCAGAAACAGATACTGTGTATTCTAAGCCTG

A\_14\_P118865 ATTAAAGACAGTCAGTGGGATTAAGTGTCTACCCTGACCTTGCTTCTCTACATTTT

A\_14\_P119053 GAATGTAAAGACAAGACCGCTTCAACCAAGTTAGTCCACTTATTTACACCTAAATTACCT

A\_14\_P132541 CAAAGTTTTTCTTTTCTTCTCCATATATTTGGCTGATATTGTCAGCAGCAAACCTACAA

CUST\_1217\_PI426210822

TAAGTCAATGCATGTGATAAAATCAAGTACAGAGATTTCTTTTCATCCTTTGCCCTTGAGA

A\_14\_P118370 AAAGTGTAAGTCTATTGTTTGTGCTCAGGAAAAAGGTCTGATTTTTTTCCCTCTGAG

A\_18\_P14139082

GCTTGGTGGAGGGGATTTCTTTAGGGAAAAAAATTTTTTTTTCTCAAAAGGCTAACTATG

A\_14\_P127817 CTGCTTCCATAGAGGTTTCTTTTCAGAAATAGGATTCTGCTGCCAACAATTTACAAATGTA

A\_16\_P01918056

TAGGACAAGTAGGAAAGGATTAGAGACAAAATAAAGCACTAAGAGCAATGAGTTAAGCCT

A\_14\_P125095 ATATGGGCCAGTGCTTTAGTTTAGAGATGCTAAGTGACTTCAGAATTCTAGTGTGAAAAT

A\_14\_P112137 TCCGGTCTCTGTATACAAAATGATCTTCTTTTTGTCAGGCATTTTTTTGCTTCTCAAGTT

A\_14\_P103653 AGGTTTCTCACCAACTAGGAATAAAGAGACTAAATGTGGGCATATGGTTAAACTACAATG

A\_14\_P125342

AGAAAAGAAGAACTGTTAAAGTTAATTGCCGTTCTGGAAAAAGAAACAGCACAACCTTCG

CUST\_7771\_PI426210822

GCTTCACTCTGTATTTGATTTGCATTGTATTGTAGTCAGATAATCAGATGTCTGCACTAG

A\_16\_P00060747

AAATCAGTTCTCTGTTGTCCCTACAGAATGAGTCTCAATTGAGTCACATGAATTTCAACA

CUST\_412\_PI426210822 TGAAGAGGTTGAATTGTCTTTCTACTCATAAAACACCGCAGGGCCTGAT

A\_18\_P16237435

CAGCCTCTGTGTCATCAATAATTTATGCAGTGTCTCAAGTAAAAGCGTTAGTGTCCAAG

CUST\_8523\_PI426210822 CGCATGTGAATGTTGAATGTAGAACAGGTCCTCCTCCCGAGATG

A\_16\_P58424370

TCAAGTTAGAGTTATTGCAGATATTTCAAACCTACCATTTACATTCATCCCTCCTTCAGAG

A\_14\_P124157 ACTTTCAAATATAACATATACACCCACTTGCACATGGAAGCATAACTTACACATCACCTT

CUST\_8114\_PI426210822 GACACTTCTGCCTCCACCTAATTCAGGGCTAATCATAACAGTCAGA

A\_14\_P104633 GGTTCAAACGCTGTCATACACGTTTGTCTTTTCGAAAAACAACAGGACACAAAATTTTATA

A\_14\_P126311 ATTAACTTTACCTAGAACTTGCTTGTGCCACCTTCAAAGTTGAATAAAACGATCCACA

A\_14\_P115964 CATCCCTTCATTCTTAACCATGTATGTTTGATAAGGATTTTCAAGGGGGCTAAAATTGTT

A\_16\_P18715752

AAGGCATTTAGACACTCAACATGTATTGATTTGTTTTAGACTTTCTGCAGACTTGGAGG

A\_14\_P139937 AGGGAAAGCATTTATGTGCATTAGTCAGAGTTCTTGACTCCTATGCAGTTTCAATAAACT

A\_14\_P106487 TTGGGGCATAAATGATTTCAAATACATCTTTAGGGGAAGATGGCTAAGTTTCCAACCTTGAT  
A\_16\_P16462764

CCCACAGAAAATCCACTTAGCATTTCATAATACTTAGTTCAGATCATAAAGGCCAGTTGA

A\_14\_P114051 TTAAAATCATTATTAATGTCTGGAGGAGCCTCTCCTGCTCTATAAGGGATACAGGTTAC  
A\_14\_P126820

CAAACAATCAGAGGAAAATAATTGGAAAGGGATGGTCAAAGGAGAAAATAAGCAGTTCA

A\_14\_P117759 GAAAATGCTGACTAATGGGGTAGATGGTTATTCAATTTCCCTGTTTTATAGGTGAACCTA  
A\_16\_P01832485

TGTCCTCTGCAATAAAACAGACATTGCTTTCTATATGTAATTCCTACTCATCCTTTTGGGG

A\_14\_P114329 TTCTTCTTTTCGATCTTGAGTCTTACTCTCCTGGATTCCCAAGAGAACTGCATTAG  
A\_16\_P18093196

TATTTTACTAAACTGACTAGTCCCTTTGAACTACTGTCTTCACTGATCCATAGACCATGC

A\_14\_P134862 TACCGGGGAAAATTTGTGATTGATGACCTGTGGAAAGATTAGAAGAAGGAAAAAATATG  
A\_16\_P00685496

TCTATTGACACTATTTTCAAGATCACATAATTTACATCACATAAAACATGACTGTGATCT

A\_16\_P15380825

AAATCAGGCCAGAAGTCAATAAGTTCTACGAGTAGAAATGTCTTCAGTAACTCCTCTTAC

A\_16\_P19931248

AGGATGTAGTTAAAGTCAGAAGTTTTAGAAGTTGATCAGTCTCGTTTTGTAAACACAGCA

A\_14\_P136639 GATTTTAGATTTACCAAGGTATTTAGTCTTCCAGTTTTCAATTGCTTTGTTGGCTACA

A\_14\_P120152 TGAGTTACTTCTTCTCATTCTCTTCCAGGTGTTTTATTCCAAACGTCTATGCTGCTTTG

CUST\_4282\_PI426210822 CAAGACTGATTGGCTGATTTTTGGACCCTCTTTGTCCCATTCTAGTCA

A\_14\_P113866 ACAAAGCAAAACAGAAAGCAAAACAAAATCCATAGCCATTATTTACCTTGACCCAGTA

A\_14\_P129805 CTTGTTTCAGATGTTTAGGGTCAAAGAGCCTGGCGTATTCTGAGTATTACAAGTAGTTTT

A\_16\_P16977555

AGACGTCTGAATTCTTTCTACAAAAAGCACAATCATATATCAAAGAACTATCAACCACT

CUST\_6311\_PI426210822

CCGTATTTGGTTCCTGAGCTAGAAACAGAAAAGTTATGGCCATGACAGAATTACT

A\_16\_P01192506

AATCTCCTGAAAAATCCACCTCATACTTATACAAGTTGAAACCTATAACCAACCCTTGC

A\_14\_P108410 TCCATTGAATCAACATTTTCTAGTAAAGTGTCTCATGTTCTTTGACATTCATGTGCCAT

CUST\_2840\_PI426210822

CAGTGTTAGACAACGTTCACTTATCGCTGTTGTGAAAGTGAAGGTAAATTGGCATA

CUST\_10417\_PI426210822 CAACACGCATGGTCAACCCTCAGGGGAAAAGTGTACCTAAAGTATTTTTAT

A\_14\_P201615 AAGATGACAGTAGGGAAGAAGCCCGTCAACCTGAACAAAAGAGATATGAAGAA

CUST\_5904\_PI426210822 ACCCCAGTAGTGTCCAAAAGAACACAGGAATTTCTCTTTTTTCCCA

A\_14\_P100284 GCAAATATGCCTAACTATTTTCATATCCCCATCATTTGCTGAGGTATCAACAGGATGCTAA

A\_14\_P118382 GACAATCTCATAAAAGTCATGCATAAACACAGTAAAGAAATTAGGCAGGCAGAGGGC

A\_16\_P21440403

AACTGGATAAATCTGCTGATTCATAAGAGACTCATGTAAAGGAAATCCAATTCATGGTGG

A\_14\_P136169 TTCTAACTTAGCACCATCCCAATCTCTCATGTATGTTTTGAAGTAAGCAAAGGCAATA

A\_14\_P118771 ACGCAGTCTCTAGAATTAGGTATATCTACTGGGGATGACATAAAAATTATAAGGCTTTGT

A\_16\_P21542758

AAAAGCCACATCTGCTATAACAATATTGTCTGGTGATCCATATAAACTCTTTAGGCCACAG

A\_14\_P117154 CTATGAGACATATGTCTAGGTGGGAGACATGAGATATGGAGGTAATTAGTGAGAACTAAG

A\_14\_P202269 CACCTCCAAAACCTTTTCCTAACCTCTTCACCCCTTCCTAACTGCTA

CUST\_5342\_PI426210822 CAGCCGAATGTTTTCTGAACACCAGTAAAAATCATCTGCCAGTCACT

A\_16\_P17576923

CTCATAACAGAGGTCAGTGAATTTAATGTGCATAAGGGTCTTTACATGTTTATGGTTCAGG

A\_14\_P100539 CTTTTGTATTTTTTTTTTTAATTTGAAGGAACACTGATGAAGCCCTGCCATACCCCTCC

A\_14\_P122539 TTTTAGGAATAGAAGATGAACAAACCCATAACACCATCAACATATGTGCGCTGCCTC

A\_14\_P138296 CCAAAGAAGATTATTATCAGATATTAGGAGTGCCTCGAAATGCCAGCCAGAAAGAGATC

A\_14\_P138216 AGCACCACAGATCAATTTAAAGAGTGAATCACCTGTGATTAGTGACCTAATAACACAATG

A\_14\_P126330 CTTCAAGTTGCTGTGGAATGACTGTTTTCAAGAAGAGAGAAGGAGCCAATATATCTACTT

A\_16\_P17725357

AATTGACCACTTCGTAACCTTTTTTATTCTGCTAGATTTTGAGTCCGTAGATGTGTTCA

A\_14\_P201549 TCTTACTAATGCAGAAACAAGGAAAAAAGCAAATTGGCCTGAATATTCTCTTGGGGAAA

A\_14\_P115942 GAGTGAAGGGAATAAGGTCACACTAAAGGCTTTAAAGAAGAGGATGGAAAGTCTTAATAT

A\_14\_P113786 GCTTGGGATGATTGGTCTTTAGCCTAACTCAGTTTTAGAAAAAAATGGATTAAGAGTTT

A\_14\_P114577 AAACCTTCCAATCATTTAACTTTGCTCATGCCATTCTCCACACTACAATCTTACTCTTCT

A\_16\_P40993121

AATCCTATTCACTCTTCCTGATACTTACACCTGACAAAAATTTCTGGTCCTAAAGTAGGT

A\_18\_P11460425

AACACGTTAAGAACAAGAGCAGCAATCAAAGTTTTTCTCAACCATATCTCAGGCTAATG

A\_14\_P110317 ACAAACGCATTAACATGATTTTGTTTTTTCCCCTCCTATTCTATTTGCATTTCCAGAGT

CUST\_3542\_PI426210822 CTTGAAGGACAGTGTGTCAGCAGTCAACTGACTGAGCTTGACTTTTC

A\_14\_P128635 TTCCTATTCTTAACCAATTTACCTGCACCCGAAAGATTACAAACTTCTTCTGCTTCT

A\_14\_P114688 ATGGAGATGAATAAAGCAAACATTTACTCATCATATGCCTGAGAAAATGTCATGTCCCAA

A\_14\_P125528 TAGTTTTATTTGAGACATAAAAACACATGTGTTTCTATTACATAGTGTGGGGTTTAGGGT

A\_14\_P133289 CTCCCCATTCACAAAATCAATCACTCCAGATATTCTCATTCCATTTTTCTTTATGACGTT

A\_14\_P129581 GACAATGCAACCATTATGTGGTTATCTTAGAACATGAAGCCAGACCATATTGTTATGGAT

CUST\_6155\_PI426210822

GCAAAATGCTCAACCAAATGGAACCTTTTTGAATAAGAGTTGACAGATTGCTCATCCTT

A\_16\_P15717175

ATAAACTCACCCCGTATTAGAGAGAAATGTTGTATTCTACCATAACCCCTTTTCAATCAGA

A\_16\_P41043946

AAGCACTGGTGAAATAAATACATTTCCCTTGAAGTAATGAGAGATGCAGAAAAACATCAGA  
A\_18\_P17097566  
ACTTTTCTCCAATACCAAATAACAACCTTTAGCCTCATATTCTACATTAACGAACAGACC  
A\_14\_P116818 CTAAGCAAATAACACTTACGGTGAAATTGTGCAGCCTGAGGCATACGCATGAT  
CUST\_8167\_PI426210822 GCTTGGAGGGGGCAGAGAGAGGGGCACAGAGCAGACAGGGACTCAG  
A\_14\_P123960 CTTCTGTGACCCCCGTAAGTCCCCTTTCATTTGTCTCCATTTCACTTAT  
CUST\_5121\_PI426210822  
AATATGTTAGCCAGTAAATGCCATTTATTGCTTTAGATGTCATCTCAGAAGGATAAGGAG  
A\_14\_P136691 TCCATCCTAGAAGTGTGCCATCTGTATTTATGAATGGAGCCTAAGCAAATCTGAAAAC  
A\_14\_P118065 AGTTTCTTGAACACGATGAAGCCATAGCAACAAGTCTGGTCTAGAAAAGAAGTCTC  
A\_14\_P131570 CTGGTGGCTCTACAGTTAAGATCCATTTTTATTAAGGTTAGTATGTTGTAGTTTGCCTTT  
A\_14\_P129627 TCCGTGGCTTCTCTGCATTTGGGTTATTATTATTTTTGTAACAATCCCAAATCAAATCTG  
A\_18\_P14138016 GAAACTTGAGACTTAATGAAGGACACTGAGGTTTCACTTTTCACTGCTCTGGTGTAT  
A\_16\_P58424431 AGACCTACATGGTTTTGGAAAAATGCTCTTGGGTGCAGAGATGCCGTAATATAG  
A\_14\_P128091 GTGTAAGGCAAAGTTGTTTCTGTTCTATCTTGAGCAGTTCATAAAATAACCTTCAGGTCA  
A\_14\_P121692 ATTTTTAAATAGCACTTTCACCTAGGTATGGCATTTCATTAAGAACTGTTTCAAGCGGT  
A\_14\_P116568 CTACATAAATGGAGAGAAAAGTCAATGATGATTGCTTTAAAAGAAATACAGGAACAAGTG  
A\_14\_P200278 ACTATGATGCTAGTGAAATACCTCCAGTGCGGGCAGATCATTATAGGGAATGAT  
A\_16\_P19922773  
CTGTGTAAGAATGTCTCTGCAATACATATCCATGTATGCAATTAGAAAAGTCATGGGACCT  
A\_14\_P131152 TGTCTTCAGTTTACAAGTCTGTTGCCCTAGGTGATAGATTCAATCTTTTAAGTCTGTTGA  
CUST\_2421\_PI426210822  
CCTAGATAGCTGTAAACCTGGTTCTATTGTACTTTGAAAACAAAGCATTTCTCTTGTCTCCT  
A\_14\_P102599 AGTCAATGCCAGAATATGCTCTGACTAGAAATTATTTGGAACCTTATGGTAGAACTTCCTT  
A\_14\_P117496 CTCAAGCCATACATAAAAGGACCTTGGGACATAAGAACCAATGATTGTGCATAAGTTCTA  
A\_14\_P124803 GAGTTTCTCCAGGAAAAATATGAGAAGAAGAGATGGTAAGGAGTAGGAAAGAGGTTG  
A\_14\_P133158 AACACTAGTCTGTGGAAGACTGTTAATTTCTCCCACTATTAGGGTGGCCATATAATTTAT  
A\_14\_P120157 CTACAAGAATCAGTTAAGGAAATCAATTCACCTCACAAAGTCTATTCTGCCAGTCCCATA  
A\_14\_P202544 TGTAGTCCATTTGCAGAACTGTGCAGTTCAATTCCATATCCACTAGGTGATAGTATTGTT  
A\_14\_P134406 CCCTGAAGCATAATAGAATAGTAACCCATTTGGTTGTAATGTTTCGGAAATTAACCTCC  
A\_18\_P22842260 GGCATTTCAAGTTTCTGCAGCAGTTCTGCAGAAAGCCATGCCTAGAAAATT  
CUST\_7083\_PI426210822 TGCATAAAGAGGCTTATTTACATGTCTTTTGGGGTATGCTGGCTGCTCAC  
A\_14\_P130827 GGAGTTATTTATAAGTTTCTCTTGCAATTTGTTTGGCTGCTTTGTTGCCTAGCAACCAAAT  
A\_14\_P129999 CTCTTCAAATGTCTGGGCAATGGTTATTTTTAAAATTCCTTGGTGCCTTGTTCATACTT  
A\_14\_P128665 CTTTGTGCATACAAGTGATCTGGCTGATCTCCAGTTCCTGCACAAAAAACAGTATAATT  
A\_14\_P136439 TTGCCACTCAAAGTCATTTCTTAATTCCTGACAAATTTTGGATGTCAACTCAATGAGGA  
CUST\_10333\_PI426210822 GCTGAAATCACCAGGAACTCAATATCTGTTTACAAAACCTGGCTTGAGGAT  
A\_14\_P130445 GAACCAACCATAGAATGTTTCAGTTCTAGGAAATAAAACCAGTTGATTAAAGCAAATTTT

A\_14\_P110494 ATTTTAGCCAGTGTAATGATTAAGAACCTGGATACTGGAGAAGAAATACCTTTGAGTCTT  
A\_14\_P111029 AAGTGGGACAAGAACAAAAGCATACTACTGCCACTCGAGGTAAGTTAAATTTTCTTTT  
A\_16\_P1837751  
AAGTGATGGCAGTTAGATACATAGACCAAGATTCAGAATTGAGCATTGACTTTATCCAGA  
A\_14\_P108985 CTCTATTTCCATTTTGTATTTTGTCCATTTTACCATTTCAGTCTCCATCTCCTCGAGACT  
CUST\_2845\_PI426210822 AGTGATTCAGAGCATGAGACAAGTGGTAGAGCAAACCTCTGATTTGAAGGTT  
A\_16\_P21439581  
AAAGTCAAGAAACTACTTTGAATAGAAGTTCAAGGATACAAAGACCTTATGTGTGGGGC  
A\_16\_P16027670  
TGAAAACCTCACTAAATAAGAAGGATACTTACCAAGAGAACCCTACTAACCAAGACTCAA  
A\_14\_P137764 ATAACAACGCTCATTATTACGTCTTCTTTGAAGAACAAGAGGATGAGATCATTGGTTTTG  
A\_14\_P120372 TCAAAACCAAAATGAGGAGTTCTTTGGTTCCTTGCATTGAAACCAAGTATTAGTTCTCATG  
A\_14\_P120906 CTAGACATCTCTGGCCTTATAGCCTGTTATTTCTACTTCATCTTGGTCAATCACTATCAT  
CUST\_9225\_PI426210822  
AGGTTTCAATCAAAAATGTTAAATTTACATTCCAAATCCTATTACCTGGAAAAGGGATAAA  
CUST\_3319\_PI426210822 GGCTTTGTGCCCTTGGCAGGCTCTCCTGGTCTGTAGGTAGCATAG  
A\_14\_P108509 GTAGGTGATGAGCCATCAGGGTTATGTCAGAGGTGATTTATGTTAGTTTTGTTTACAATA  
CUST\_1813\_PI426210822  
GATCATGATATGATGTCATCGCGAAACTCAAACAACCTTACAATCACTTTAGGGTTAGAGG  
A\_14\_P201380 GAATTCTAAGTCTGAGGAAGAAATTTATGGGGTTTGTAAAGTTTCACATTCGTGAAAG  
CUST\_8654\_PI426210822 GGTCTAAGATTGCACCAAGATAACACATCTGTCAAGCTTCATGGCTTATGAA  
A\_16\_P18095544  
AAAAACAAGGTTAGACTCTCATTTTTCTTTGCTCCCACTGAATTAATGCTTCATACTGCC  
A\_16\_P20403912  
AAAAAGGGTAAGAAGTTATAGTTTCTAGCAGGATAGGTGTAATTTCCCACTGAAGTGTGAA  
A\_14\_P116912 CTCTTTTGCCCATATGGTGAATCTGAAGCCTAATATTGAGGGAAAAAGGAATTCTG  
A\_14\_P128780 CATACTTTCTATACATAACCATAACCAGAACAACACCTCCTGCATAGTTTGCATCA  
A\_14\_P124072 GTCCAACCTCCAATTAGTGCATAATTAATTTTATAGTGTGTGATGGCATGCTCTTCCTCTT  
A\_14\_P121276 TTGTCAAAGAAGTTCTCTGAAATTGTTTCAGAAAGTTTTCCCGCAAAGGGTGTATTG  
A\_14\_P130811 AGTTTATTAATAAGACATAGATTCCCTTTAAGTTCACCTACAGAAGTGGGAAACTGTGGG  
A\_16\_P58424238 TATGAATTCTGACTCTACCATTACTGGCTCTGTGACTCTGGACGAGTTGCTTTA  
A\_16\_P21529464  
CGATCCAACCAACATTTTCTAAGAGTCTTTCAAATCTAACAACCTTTGCATCAGTCATGG  
A\_16\_P18150030  
AAACACTTTATTTCAAGACAGGGAAACGAATTAAGATACCTTATTGACCTAGGATGCCC  
A\_18\_P26586378  
CCAACAATCTTGGCAATAGAAGTGATTACCTTTGACTCATAAACTCATTACAAGTGCAT  
A\_16\_P18854531



AAGTCACAGAACAATCATTTCAGTCGATGTTTAGATAATGGCAGAAAATGTGCAATAGG  
A\_16\_P15430347

AAACGTGACCCATTTATAAATGTTGAGTTAGAACTCCATGCAGAATTAAGTGACCTCTG  
A\_16\_P18655803

AAAAATGAATCTTGTTTCATACACTTGAACCTCAAACAGGTCATGATGATGTCTATTGCTCT  
CUST\_270\_PI426210822 CAGGTGACAGCCAGGCCGGGTTGATTTTATTGTGTATTACCAG  
A\_16\_P02742674

TCAGCACAGCATTTTATAATGTTTTTCATTTGCATACTGTTACACAATCCTACACTCTCCA  
A\_14\_P139460 AAACCTATTACCATTCACTGTTGTCATTCCCACATTGCAGATGAGATGCAATAGTTCACTC  
A\_14\_P117254 CTGACAGTAATTAATAATGACTTACACACTGGGGTGGTTTCAAACCTCAAATCTTCGACTG  
CUST\_3276\_PI426210822 GACCATGGCTTCAATCACATTACATGCTGTGGGTTTAGAGTGTGGATG  
A\_14\_P138837 CCAACCAAAAATCTTAGATGAGTTACTTTGTTTTAAGAGTAACAGATCACTAGGAGGGTCC  
A\_14\_P115884 GCAAACCTCCTTTTTCAATTGATAGTGGGTTAAAAGACCTTAACTCTATATTGTGAAGGC  
A\_18\_P15547460

AAGGCACCTTTAACATCAAAAATCCTGATACTGTTTGACAAGAAGTCTCTCAAGTGAA  
A\_14\_P139168 ATTTTTTATAAACACAGATCAATGGGACTGTAAGTGAAGACATGTCTTTAACGGATGCTC  
A\_14\_P107491 TTATTTTATGATAAACAGGTATTCTTTTTGAGTGAGAGAAGTTGGGGACTTGAGAAGTCG  
A\_14\_P112987 CTTTTACTATAACAAGAGACTGGAAGGTAACATCTCCATCCTAAAGGTTCTAAGTCTCATT  
A\_14\_P121409 CTTTGAGACGCATTTAGGTGGCAAATTAACGGGTGATGGATAGCGTC  
A\_14\_P123820 ACAAAGACTAACCTATTCTCACCATTAATAAATAAGGCTTTGTCTCAAGGGCCTGAACC  
A\_14\_P135385 TGAGAAATACTGGAAATTTAGTCAACTGACCTATTTTCTTGTTGGAGCAAACCTGGATCTTT  
A\_14\_P103440 CTCCAAAGCCTGCAGATTTCTTCAATATTTCTAAACATGTGCAGGAAATCACACCTTAAC  
A\_14\_P104123 GAAAGTGAAAATAATTTGCTTTAAGAACGCAGGCAGTGCTTCTGTGAAATCATGCTATTC  
A\_16\_P20232459

AAAAATGTCACCATATGCAGACATTTTCTACATTGTCATGGCATATTAAGGCCTTCCTC  
A\_14\_P126897 AAAATTCTGTCTTCAACAGAAACCTGCTCTCTTTCTACTAGGCCTAAAATCCAGAAAAT  
A\_14\_P114939 TCCCGTATTTCCACCTTCGTTCTAGAGATACAAAGTTTAAGAAAAGTAGATTGTGACTG  
CUST\_7814\_PI426210822

ACAGTAGTAGAAGAGAGGGGTATAGAATTA AAAACATTTGGTCAGGGCAGTTGACAT  
A\_14\_P136315 TTATGTATACGCATGTCCACATACGTGAAGGGCAGGGATAGTATTACCTTCAGTATTATT  
A\_16\_P18741558

AAAGCCTTGCCATTATGAAAAATGGTCCTGAATCCAAAGTAGAAACACATAAAACTGTTCA  
A\_16\_P15266097

AGTATGACCTGTCTCTATAAAAACAAGCCCTTAAGTCTAATTACCATATTGCCTTCAGA  
A\_14\_P125097 TGAATGTATCGTGAAGTTCACACAGTGGAAAAATATTTCCATTCCTCCCTAAGTTACTTTT  
A\_16\_P15686440

AAATTCAAGCATTAGACATTGACCTGTATACATCACCACAAAACCTATGTTCTGGACCTG  
CUST\_3119\_PI426210822 ATGCTGCAGGAATGGCCAGACACTGACCCATGGGCAGGGTCAGAG

A\_14\_P111077 CTTGAGACATTTTATTGTCATCAGCCATATTAAGACCCAGAATCTGTTTTGTGTGTGTGT  
A\_14\_P124554 AACCAAACAAGTGTTTTTTTTGTGCCGGGCTTTACTGATTTTGAAAATATCAAGTCTAGT  
A\_14\_P128930 CTAACAGACACCCAGCGATATTCTTGCTGCTATGAACAAAAGGAGACTATGCAAATTATA  
A\_14\_P115794 AATATTGAAGAAAAATCTTTTCATGATTGCTTTACATGGGCCATCATCCGCCTTGAATGC  
A\_16\_P18509745  
TCAAACCAGAGATCAAAAGAGAATCACATAGTTACATGATGAAATACCTACCCCTAAGTC  
A\_16\_P19241970  
AAGACCTTGTCTACATCGTTGTTATCTACATGATAGGGGCACTCTTACTCTAATACAGTT  
A\_14\_P104876 CTTCTTCTCTTAGTCATTTTATCTTCCCCTTGAGAAATCTGAAAACAAGCAAAAATCTCT  
A\_16\_P17039891  
AAGATGAATCCAGATGATCAAGTTACCCTACCTATGATCTTAGAGACCAGGATAACATTG  
A\_14\_P123038 ACAAGACTAGATGGGGATAAAAATAAGTAAACTTACCGAATATTTACTGTGTCCGCTGCT  
A\_14\_P108534 CTAGATCTTTGTCCACGTCATCTCCTTCATTGCGATTAGCCTAGAAAAATTGACACATT  
A\_14\_P118524 TACCTAGAAAACAATGTTGGGCTGACTTACTGACAAAAGAAATTTAACGAGAGTTGACTC  
A\_14\_P127845 TTTTATTCCTCTGTCTACCTGGCCAGTGACATTGTGGAGTATAATCCTTTTTTATTATCCT  
A\_14\_P127159 TGCCTGTCCAGACAGTTCTTGAAGGTGACAACCTTAGAGACGTAAGTTTGATTTAATATT  
A\_14\_P132809 CATCTTGCCCAATTAATATACATGCTCCCCTACAAAGAAAAGGAAAGGAGTCAAATTTT  
A\_14\_P110469 TATCATTTTGTCTAGGCGGCAAAGATCTTCAACTTCTTCTCTGGTATTCACCTTTAGAAG  
A\_14\_P117699 CCATGAAATAAAAACAGTGACAACCCATCAAGTGTGGATTAAGTACTGTCATAAAGAAGT  
A\_16\_P02390152  
ACTGCATCAGATTCTACAAGAATGTCATAAGCAAGAAAGATAAGTAACAACCTCCTTTTCA  
A\_14\_P115282 TAGATCCTCTTCCAATAAAAATACTTCTGTAAACCTTGAAACAAGGTATCCACTCACTC  
A\_16\_P37111167AGTCAAAGACTAATCCAAGAACTTTCTACCTAAGACTGAAAATTGAACCATCATGAGCA  
A\_14\_P108510 CTGGTCCTCATGTCAATGGTCTCTGCCTTTTCTGAATTCAACTAGAATAGTAAACATAAG  
A\_16\_P16783471  
AAGGTTGGTAATACTCTCACATATCTGGAAGCATTTTGTTTTAAACTCAGGCAAACATGC  
A\_16\_P16111587  
AAAGTCACCTCTCATATCAGACTGTCCTTTTCTATAGTAACAAAAAGTAGGCAATCCTCT  
A\_14\_P132386  
CATACAGAGTTGAAAAAGAAAAAGAAAGACCAGACCATCAGACAACCTGAACATCTGAGA  
A\_16\_P00685071  
CCCTCTAGATTCTAAACTTATCTCTTAAGAAGGTTATTCTTATGTATACTGCAAGTTGG  
A\_14\_P116123 GTCTTCCCTTTAGTGTTAGGAAGATCAAATAGGCACTACAAGAGCATTTTCTTGGTAAAT  
CUST\_9136\_PI426210822 AGAGGTTCTGTTTCTCTAAACCCAGACCAAATGTGTTTGGGTGGC  
A\_14\_P108705 ACAGTAATGACACATCACTCAACAATACTTCAAGGGTAACTAACTCCAAAATTTCTTTATT  
CUST\_6269\_PI426210822  
GACATTAGTGGGAGAGAAAAAAAACAGTTGCTCATTGGCTTTTTTATTTGCCCTCTT  
A\_16\_P21237456

AAGAAAAATTTTATCTCACACCAATTCCTATACACATCACCCCTCACATATAAACTTGGT  
A\_14\_P120708 TGCTTATTTCTATAGAGAACATACTGTAGAGAAGGCTAAAGATTGTCCCACAGATTTCCC  
A\_14\_P125244 CCATAAGACTTTTCATTTGTGGAAAGGATTCTGCAACTGAAAATAATTTCAAAGCCTCCAT  
A\_14\_P137472 TTTTCCTTCCAGTGTCAAACCGACTATCACTTGGTATATGGTAAGGAAAATTAGACTACA  
A\_14\_P120447 ACACTATATTTTCAGCCTTGCAAATCAAGATGTCAGAATATTTTCGGGGAAGAGTAACTGT  
A\_16\_P20106034

GAGCAATGGAGTTACCTTTAATTACTTGGAGCATATTCCTATAGTTGAGTAGCGTCTCTC  
CUST\_2126\_P1426210822 GGCCCCATGTTTTCTGAGATCAGGGATGAGGGACAGGTCAGTGT  
A\_14\_P138085 CTCATCCCTTCATACCCAAAACCTGAACTCAGGGTTTTTTTTCCCTAAAAC  
CUST\_4512\_P1426210822 CTGAGGATAAGCTTTGTGATCTGGGAAGGATCCCTTTCTCCTCATTTT  
A\_18\_P22841387

GAGGTATGTGGCAGGGGGTTATTATTTTTCTAACCATGTGATTCTTTGGTTGAAATTA  
A\_16\_P16612000

GTGCCCTATGTA AAAATGCAACTACAAGATAGCCTCTGATAATGTTCACTAAGGATTCCAA  
A\_16\_P15966868

AACCCTGGAAAAGATCATATATGCAAACCTCTAACTCTACAGAAGCCAAATTTGAAATCGG  
A\_16\_P20238608

AGTCAAACCTGCTTTCTGAGTTAACTAATGTCATTGTCAAAGGAATAGGCATGAGGAAAG  
A\_16\_P20003488

GACAAGCCATTTTATGAACATACCTTTGTTACTCATAACAATACTAAACCTTCTACTGGG  
A\_14\_P123764 CTGTCATTCAGGATTGGATACTAAAAACTTGGCAGTTGTGAAATAGTTTTCTCTCTGTG  
A\_14\_P115147 AGGTCTATTTTCTTTCTTTTTTAGGACTCAGCCCAGGAGAGTGTATTACTCGAGATATT  
CUST\_935\_P1426210822 CACTGTGGACCTGGATGCATGACAAAGGCTTTGGCCATCTCTATG  
A\_14\_P131347 CAACCATGCTTGAATTAATCAGAAGGCCTGAGCCTAGTTCTACTGTCTATATGCTTG  
A\_18\_P17047259

ATCGAATCAACCTTACAAAAAGACAAATTTGACAGTGGTAATAAACATAAGGCATGGTGG  
A\_18\_P14135548

GGTTACAACCAAGGTAGTCTGGCAAGAAATATACATGAATTCAAAGAGGTTTGGGATAAT  
A\_14\_P119792 TGTGTATGTTGGTCTACCCAAACACAATTGGGGGCTTTACTATAGAACCTATTTTCATTAA  
A\_14\_P101760 CATATCATTGTGAATAACATTGTAAATCCTTTTTATATTAAGTAACAGGTAGTTAATCCA  
A\_14\_P115653

CTGTGAAAACAGTGAAGAAAAAGACAAAGGAAAATCTGAGGATTCAGAAAAGTAAGACA  
A\_14\_P104519 CACACAACGATTGTTTTTACAATGGAAATTTCTGGTTGGCAAAAAAAGCAGTTTTTTTTTC  
CUST\_9549\_P1426210822 AATTTCTCAGGTCCCTTCCAATGATCCTGTCCTCTGCTTCTACTTGA  
CUST\_7353\_P1426210822 CTCCCAGAGGGAAGGGTAGATGGATGTGGGTGGCAAGAAACATG  
A\_16\_P00828750

TCCTCATCTAACAGTAAGAAGTATCACCTTACAAAACCTGAAATGCCACTTTCATCTGTGA  
A\_14\_P100900 CTATGTTTACTGACCTTAAGAAACTGAGTCTCTATGTTGCACTCAGTCACCTCGC

A\_16\_P16117705

AAAACCTTTAAGGTTTGACTTTTACACTGATATTAGCCTTCCTGGAGATTATAAACCCCAGC

A\_16\_P41057070

CTTGGCAGTCCTTTTTTATTTAGCATATACCATCAGGGATGACAATAGAAACAGGTTTCA

A\_14\_P112674 TAGTATCCTTTCCACGATATTCCATAACTTTGCTACTTCATCTCTGACCTTTTCACTTGC

CUST\_9534\_PI426210822 TTATCACGTTGAATTCTTCAGCATCTTCTATATCATTTCAGGGCATCTCTGGG

A\_14\_P129062 CAGAATTCCTTTAAATAAATAGACACTGAACCCTGGGTAACACATCTCCTTTCAAGAATC

A\_14\_P132722 TAAGGTAATTCTGTATTCAAATCCAGGGGAGAGGGTCCCTGAATAACTTTAAAAAATGT

A\_14\_P100960 GACAAGTAACATGGTAAGGATAAAGAGAGTCACAGAGTAGAAGAGATCTGTGGAATAGC

A\_14\_P200934 ACTTCTTACTATCCCAAGGATTCTTTTTCTTTTATGCTGCTTTTTCTCCTGTTCTGCACA

A\_14\_P137606 ATCTGTGATTGTGCCTGTTTCTAATGTGCTCTCATTGTGTCTACTCCTGCTTC

A\_14\_P106827 CTTCTTGCATATTCTTCATTTCTAGCATGAAGGAAAAAAGACTATCGTGATGCAAACA

A\_14\_P114319 AAAC TAGATGGCATAGAGGAATAATAGATGGACCAACACTTCTTTCTTACTGAGAAGCAG

A\_18\_P22841379 CTTAGGGCCATAGACCCCGAAACATGCATTCTCCAGAAGTGTAGTATG

A\_16\_P35177048

TGAAACAAATCTTCGTCTGAGTCATAAGGTTGAATACAAGATAGCAAAATGTTGGAAAGG

A\_16\_P38497632

CTCCCCATAATCCAAACAAAATTCACATACCCATCACAATTTTATCTTTAAAGGGCCTTT

A\_14\_P118735 ACTTCATGGCTTCAGCCTTCAGGCAAAGGTCCTCATATATGTTTTGACCT

CUST\_9033\_PI426210822

ACATACTAATAGCACCTAATATTGTATTATTTCCATTGATATCTGAACTCAGTATAGAGA

A\_14\_P119297 AATGTTGACAATGGAAATTTCCGCAGGAAAAGGAAGAGAAAATCAGATGTTTCCT

A\_14\_P128551 ACAGTGATTTTGACAGTGATTTAAACCCGCTTTTGTGTTGTTGGCTTTTCGTTGTT

CUST\_9849\_PI426210822 CCAACGTGGCGTTGCTGGTATGCAGATTTCAAGTGTCCCTAAGAAG

A\_14\_P116086 TCTCCTCAAGACATCAAATTTCAAGATTTGGTCGTCTTCATTTTGGAGAAGAAAATGG

A\_14\_P118234 CACAAAACCTTTTTCAGGTCTTAAGGTAATAAGTTCACAGTCTACAGGTAAAACCAAGG

A\_16\_P15984588

AAACTCATAGGATAGAAGACAGAGATACTCCCTACTTAATCTATTCTCCAAATCTCCCCT

A\_14\_P103919 CATTTTTTTGAACATGTATAAGGCACGGTCTGTAGTATTGGAGAATCCCAGGATGAATTA

A\_16\_P02895687

CTTCAGGAATAAAATCACACAATGACAGGTAGTAACTCTAAGAATCCTGCACAATCAGTG

CUST\_111\_PI426210822

AACCAAATAGTGGATAGTATAGGCTGGATTGTGCATTGTTAAGAACCAAGTGGCTA

A\_14\_P200897 ATCATTTCTGATGTGGGAAAGTAATGCAAGATAACATCAGTGGCCACTTTGAAAATGTAT

A\_18\_P13311649

TGTGTTTACTCCATGTTCTATCCAAATAAAGTCTCCCACTTCTCTTAATTGTTGTGCATC

A\_14\_P136055 CTGTAAGATAATGTTGCTTTCTTATCCCAGTGATCACCTGCCAAATGAATAAGACAACAA

CUST\_2848\_PI426210822 AGATGTGGGTGCCTCCTCATGCTGTTCCCGACCAGTGGCTCTTTC

A\_14\_P115526 GTCAGTGATTTTCCCAATTCCTGCATGACTTTTTCCATTTC AATACCTTGTCTAAAACAC

A\_18\_P24746657

AAACTTTAAGACCCTTTGCAATAAATTCACCTCACATCTACGACAGTGTATTTGACAAGG

CUST\_5761\_PI426210822

ATTTGCCTTTCATTGATTCTTGAGGATATGAATGTTTTAGAAAGCAACAGTGTATGCCTT

A\_14\_P115778 ACTGTATAAACATACTACCATACTACCAAGAGACAAAAGGCAGGACAAATGATTCTTCCT

A\_14\_P138706 GTGTTTTGAGGAAGAAGTTAGTGCAGAGTTCTACTTGAGATAGGTTACCGTGGAG

A\_16\_P15133012

AATCAGTCTGATTAACATCCGTAGGTTAGTGCCAATAAACAGTTTCATGCTATCCACTG

A\_16\_P17311005

CGAAGTCCCTAAAACACTAGTATTACAAGCCACAGTTAGAATATGAACTAGAGACTGCCAG

A\_14\_P100951 CTCCATTTGTCACAATAAATAAATATTTAAACAGTGAGGAGTTCCTGACAGGCTCCAAGA

A\_14\_P105123 CTTTCAAGTTATCTTTCTAGCAGCAGAAACCTTTAATCAAACAAAGCCAAACTCATAAGC

A\_14\_P137544 CTGTTTTCTGCAATGAATTTAGAGGATTCCTGGGATTTAGGAGCCCGT

A\_14\_P118142

AGAATTCTGTGGGCTGATAAGAGAAAAGAGGTTGAGAAAGGCAATGAAAAATTCTGTAGT

A\_16\_P18444112

AAACCCAGTCCCTCTAATATAGTTTATAAAGCACAGAAATACTGATAGTGGATGCTCCTC

CUST\_4205\_PI426210822 AACTTCTAGGGAAAGGGGAAAATCACTGTTGGCCCCACCCTCTA

A\_16\_P36230483

CTGTTCTGGTCTTTTTCTTCCACTTTTTAAAAAGGAAATCAGTTTGGTGGCAAATCTC

A\_14\_P128632 TTGCAGAACTTACCATTTTTTTGGCATGTTCTTCACACAGAGGTGTCTGATGTGTAAT

A\_18\_P13557912

AGAGACAAACACATATTGAGACAGCCTTTGAGAATCAATACATCCATTTCTACCTGTGAT

A\_14\_P120996 TTGTATGTTTCGTCAGTTTGTCTCCAAGTCTTAAAACTAGTAATCAGGCAAACAAGCAAC

A\_16\_P17688929

AATTATTCAATTTGCTCTTCCCTAAGATTTTCTCATGACATCAAATCAACCTTTCAGGC

CUST\_7444\_PI426210822 TTGAAACTGGCTGCCCATTTGAAGCATGAGATAGGACGAGAGATT

A\_16\_P00578094

AAAGTCTTCTGAATTTCCAACCTTTGTTTTATTTTCGCTAATCCCCGAAATACTCACTCAT

A\_14\_P200810 GTTCCATGTGTTATTCTGATGGTTCGAAGTTTACATTTGGAAAAAATGGAAATCACACAC

A\_16\_P20924122

ACCCACTTACCAATTAGAGCATCCTTCTTAAACAAACAAAAGTGATCATGAGAATTCCTT

A\_16\_P19633467

AAAATCCCTTTTGAATAAGAGAATCAAACATCTCTTAGATTTCCCTATGCGTAGAAGGC

A\_16\_P16562512

TGTTTACCCTTTACAGTTCTGCAAAATCTCTCTACTCTCCTTCGTTACATAACAAGAGC

A\_18\_P12987485

TAAAGCCTTAATTGTTCCAGTTCCTTTTCGATATCTAAAAGGACTCACAGTGGAGAAAAAC  
A\_18\_P14140273 ATTGAGGTTCCCTCCAGAGAATTAACAAAATGTCCATGCACTCTTTTCGTTGTTCC  
A\_14\_P116355 AGTCAAAGCATTTTAATTGGATGAACAATGAATGATGAACAGGTTTATTTGCTTTGCCCT  
A\_14\_P138460 TTAATCCCACACGACTATTTCTTTAGTGGCTTATTTGTGTTAATTTCCAAGATAGGGGC  
A\_14\_P107457 TGAGGGAATGCCATAAGTCTGAATTTGTCTTTATGCGAAACCACACTGTAGTAAATGTTA  
A\_16\_P02491030

GCAAATGCTCTCATAACTTCCTAATATCCATCGGTTCTATAATAGAGTCAGATTGTCCA  
A\_14\_P131162 ACTTTGGATCTCAAATGTGCACATACTGAGGTGACAACCTGGTCTCTGTCTAAAG  
A\_16\_P00649601

GATTTGCCACATACTTTGATGTAACCATGAGACACTACATAGAGTTAATTGAATGTGCCG  
CUST\_709\_P1426210822 AAGAGGTATTTTATGCTCCCCAGGTCTTAGAACCTGACCTGTGGAAA  
CUST\_1810\_P1426210822 CTCTTAGGTACTATCAGTCGCCAGTCTGAGAGAAATCAGCCACATGG  
A\_14\_P121525 TCGTCAAAAGTAAAAGTCAGTTGAAAAGTTCCCGTCAAGTTGCACTTTGCAGAGTATTT  
A\_14\_P124326 CATAGTGCAGGTATTAGTAAGGACAAGGTCAGGAGACTGATCCCCATGCATTATATT  
A\_16\_P16097339

CATGGAATAGATGTCTATTTCCGAGAACAACCTTTCATGATAGGATGATAAGGGCTGCTC  
A\_14\_P101107 AACACATCATTTTCAGACATTTGCGTGGTATCGTATTACTTGCCTGTGTTAAGATGTAAC  
A\_14\_P119646 TATAACAATGAAGTAAGAACTGACATAGACATCTTTAGAGGCTCTTCCATTACTGGGACC  
CUST\_2490\_P1426210822 CCGCCCCCTGCCCCTACTCTTGAAATAAAAATGATGGAGAAAGATT  
CUST\_9588\_P1426210822

ATAGGAAATTTTTGTGATTTTCTTCATTTTGATTGTATTGCTTTCTTGTCTTCAGGAGGG  
A\_16\_P19397599

CCTCCCCCTAGAACTATTACTTCGGTTCAATTATCTAAAATTCAGCACTTTCAGAGACT  
A\_14\_P202136 CTCAAATTTCTTTTTAAAAAGGAGAAACAGGAAGGTTTCTTTTGGAGGTGAAATCTAATT  
A\_14\_P120278 GGAAGGCTGAGTGTATAAAAAGGTGGAAGCCTCTAGAAATGAGAAGGCTG  
A\_14\_P136730 TTACATAACAAACACAATCTCAGGTGTCTGGTGTGAACTCCAATCTAAAACAGAGCATTA  
A\_16\_P15713069

ACTTCCTAATCAGACTGAAGCATTCTTTTGTAACTCACTTTCTTAGACTCAAGTCCACT  
A\_14\_P202327 AAAAGGCAGCCAATCCTTCTGTCTGTCATCAAACGTTTCTTTTACAGCATTATTA AAAAGG  
A\_14\_P129284 GTCACATTAGTTACTATGCCTTTTCCTCACTCAAATCCAACCAATTCTACTTTTTAAACCC  
A\_14\_P201752 AGATAAACTTAACCTTTGATCATTTATTCATGGAATGTTTGTGTCTCTTTTGGTGGCC  
A\_14\_P125686 TAAATCTCAATGAATTCCTTTTCATTTGAATAGGCAAACCCAAATCCATGCAAGTGTTTT  
A\_14\_P122793 GTTAGCAAAAAGGAAGCCTAAGTTAGTGCTATTGAAGA ACTTCTATCTTGATTGCCAAGT  
A\_14\_P101426 CCTTTCTTTATTTCTGTAGAATCTATTTTATGGTTGGCATTTTGGGGGAAGATTTTCGATG  
A\_14\_P113856 ATGTTTTTTTTTCCCCTAGACTTAAAAGGACAACAGACATGATGTTTGGTGGAAAGCAAG  
A\_16\_P02103876

GCCCTCCTAACGGTTATTTTCTCCTACTTCAAATGTCTTAAATTGCTGATCTTTCAACTT  
A\_16\_P18673031

AAAGACAAGTTCAAGCCCTATTTTCATCCTGTGTTTCTCTCTAAAGACCAAATTCACCTTTG  
CUST\_9245\_PI426210822

GCCCTCTTATTCACCTACCTAATAAATAGGCATGAAAGTATATTTGCCACTACACAGGT  
A\_16\_P16885230

CCTCACCTTCATGTATTGTCTTTGGATAACATTGCTGTTTTATAACATTCACCTCGGAACT  
A\_14\_P106574 ATTGATATAAAGACGTAGCACCTTGTGGTTTTACGTAGTGTTTCCTTCACCATTAATGTG  
CUST\_1470\_PI426210822

GATCTCTGTCCCTTCTGGAGTAAATGAAATAATTGTCACTAGCCTCCCACTTAAT  
A\_14\_P102958 ATTATCTGCAATAACAAAATGTTGTTTGGCCGAATAAATTAACCAATTAGAGGGGGCTG  
A\_16\_P15089531

AAGTGAGTCATTCTTGAGATTACCCATAGCAGAAGTTTTACTCCTATGAACACTGAAACT  
A\_16\_P18428060

GAACGTTTTACTCTGATTAAGCCACATTGTATTTTACTCTTGCTCATGAAGTATCCTGC  
A\_16\_P20988218

AAAAACCTTTTTACAGAGCCTCTTAGAACAGATCTCTAGAAGAAGGCTTACAATGAGTGG  
A\_14\_P127710

CTATTA AAAATCAGATGTGATCAGAACAACCAAAAGAAAACCTCCAACACCAACTCCAA  
A\_16\_P18884804

ACTCCCAGAAAAAAAATTTTAATGTCTAAGCCTACAAGAGTATCATAAGACCAAACCA  
A\_14\_P113379 ATTTTTGAAAAATAGATTAACAGAATGGGCTCCGTCTTTGAGAATCGAAGTGGAAATATGC  
A\_18\_P11624967

AAGTTACTGAAATCCCCAGATACCAAAAAAGTCGTGAATTCTTTTAACTACACTAGGGTG  
A\_16\_P17278449

TGTATTCTATCCATAACCAGCAAACAAAATCATTACCCAATATCTTCCTTATGTCAGCAT  
A\_14\_P105038 GTGCTGTCCTTTGTAAAATCAATCTCTCAAGGTATTAGAGTGCAAAGTGATCCGATTATT  
A\_16\_P21504406

AAAAGGAGGCATAACTATGCAACTTCCAATAGGTATTTGTTATTTTGCATCCATCTGCAA  
CUST\_99\_PI426210822

ATGATCCAAACCCTTTTTATTTTTTCTGCCTCTTTTGAAAATACTGTGAGGAGCCATC  
A\_14\_P123335 GTCACAAATTAAGTCTTTGTCTCATTTTGGGGCCCGAATTCTACCATAGGAAAAACATT  
A\_14\_P124773 TGACAGGGATGAGGGTGGAGTAGAAAATGGAGTTAGAAGTGATATATATTGGTTTTAGTT

A\_14\_P111500 ATTTGTTTTTATTAGAAAACCCCTTAGTAAGCACTTCTCTAACCCAGAATAGACACTGGG  
A\_14\_P133068 TAGCACTGCTCTGTGTGCTAACATTTTCATGGCCACAGACCTGAAATTATGAAGAATTAT

A\_14\_P110386

CAAAAAGAGGAGTCCATAAATGCATGTATAAAAGGAAAATGGAAGTTTCACAAAACGTGC  
A\_14\_P108076 AATAGGGATTGTAGCAAACGATGTGGTCATAATGGACTCATGTA AATGGAGCCTTATTA  
A\_16\_P36603736

TGCTCTTAAATTGAATAAGAAGTTTACATCGGAGACTAGGAGTTTACATAGGAGTGGCAG

A\_14\_P102713 CTCAACTCAAGTTAGACATTTTTTCCAGAAAGTTTTTCCTTTGTAGGATGTTTTGAGCCA  
A\_14\_P113949 TTATCAGGGAGTAAGAGTGCAAAAATCCAGTCAGGTATATTTGGAAAAGGATCTGCTTAT  
A\_14\_P123292 ATGCTCTTTTTTTTTTTTTCTGGGACGCAGGTCTCCTTTTGTGCACAAATAAATAACATC  
A\_14\_P136962 ACCTGTCTATAAGGAGTCTGCTTATCACAATGGTAGGTAAGTGGTTTTATATATAAAGG  
CUST\_1175\_PI426210822 AATTTCTGCCAGTGTGTACTGCTGGAGCCCGTCCCAAGGGCTT  
A\_18\_P14028799  
AAAGCGGGTAGAAATCACATATGAAGTCCACCGAAGATTTTCCATTGTCTGTTAGAAAAT  
A\_16\_P58424159 GCTGGTCATACCCCTCTCCTGATAGACAACCACTGTTCTGACTTCTAT  
A\_16\_P17645775  
AGGCCACTTTTGCTTTAGTTTTCTCTTTTCAGTTTGCTATTTTCTCGATTTAAATGTCCT  
A\_14\_P135443 ATTGTCTGATGGGACGGTCCGAAAGAAATAAGGGTATTTTTTCTTATCGGCTAGAA  
A\_18\_P11322975  
AAATTCTACCTTGATAACTGATGCAGACATATTAGATGCCACAATTTAAATCATGCCACA  
A\_16\_P20981176  
TACTGGTCAGCATAGAACCTTTTTTCAACATGTGAGTTTCTTCTAATTACTGGATTGTG  
A\_16\_P03268968  
AAATCATAAGCATATACAGTGGCTTTGTTCTATCCTAGTCTTTACTGGTGACCTATGTCC  
A\_14\_P133367  
TAAGCAACGGGGAGAATTGATGCAATTAAGCAAAAGAAAAAATGCGATCAGAATTTGAA  
A\_14\_P126083 GTGTCCTCCTTCATTAAGTTTATGTCTCGTGTGTCAGAACAGGCAGCCTG  
A\_14\_P113680 CTATCCCAGGAGAAAATGGGAAAAGCACTGGAATCAAAGACCAATTCCTG  
A\_16\_P40705025  
ACCAAATCATGAGATGTTGCCATTCTCTATGAAAATCACAAAGGATGACTCCCTAAATAC  
A\_14\_P129553 AAACCACCATCAGTTACCTTCTCTGGGTCAATCTTGTCATAGAGTTTCAATACGTAAAG  
CUST\_4580\_PI426210822 AACCCCTTGACGCTATAGTGGAGAAAACCTGTTTGGTAGCTGTACTCC  
CUST\_7498\_PI426210822  
ATTCACAGTCTTTAAGCCTGATGAAGTTCTGAATAAGTAAACCCTTAGCTACATCAGGC  
A\_14\_P103838 TTTAAGATCATCATTCCTACCAGGAAAACTTCCATTTCTTTTCATATCTCACACCAATC  
A\_16\_P03384707  
GCTGGGTATGCTAGAACTAGGATTGAAAGGTGAGAAAATTCAAACACGTGACTAGAATA  
A\_14\_P107044 GAATGTTGTGTCTAGCATAAGGGTGAATGGAGCAGAATGTGTATCTGACATTAATAGTGA  
A\_18\_P14137353  
AAAGATCAGGGAAAATAAGAAGAAATTCAAACCCTTGTTTTGCTCCTCATCAGCGAC  
A\_16\_P18932649  
AGGAGCAAAAGCCATCATTACACATCTCACAATCCGATATCACCTTTTATATCTATCTCC  
A\_14\_P103922 TATTTACTCTCACTAAAGGAATGGAAAACCTTCCACTACCACCGATTTTCTTTTCAGGGAA  
A\_14\_P130143 GATCCTCAGGCAGTATTTATGCTGGTTAATGAGTAATTTCTCTCTGGGTTTATGGTTGAG  
A\_14\_P200061 TTTCTGTTTTTGTAGATGAAAGGGTTCCGATGATAACGTTCCGATTCTAACTCAGAACT



A\_16\_P00685282

GTGTAGAAATCACGTGCTTAGTCTTGAATTATGATTCACCTTTACTGAATGTCCCTTCTC

A\_14\_P131363 AACATGGTGTGTCAGGCCATTTTCAGCCTTGATGATCCTATGATCTACTTATTTCTTTAGTT

A\_16\_P30952652 TTGAAGAAACCTCATGTAATGAATCCACCAGGCTGGCAGTGGTGCATATAAA

A\_16\_P35511282

AAACCCAACTGGTAATTAGGAAAAACACTCACAAAGTTAGAAAAAAAACAGCGACGTAGA

CUST\_9931\_PI426210822 TCATAGATGCCAGCTCTCCTGCCTTTCCAGGGAAGAAGGAGTAT

A\_14\_P111379 AAGATATGACTCACAGAGCATCTGAGGGAAACAACCTTGACCAGAAGTG

CUST\_7346\_PI426210822 GCTGTCCTTTTTTCTAGGGCCTTGATTAAATTTGCTTCTCTGAACACTGTGAG

A\_16\_P19117213

TGAACTTTCAGTCAAACAATTCTACCCACATCAAATTCATAAAGAACCTGCTTTTGAC

A\_14\_P119737 CTGTTTAGTCCTTGTAAGCATATTCAAGAAGAATTTCTCTCTGAGCCTCAAAGCAGATTT

CUST\_5450\_PI426210822 CAAGATCACACAGATTCAGAACCCTGTGGAAGATCAGGAAAACTGT

A\_16\_P01809304

ATCCAGTTCTCAAGTTTAGCATCTCCTCTTTAACAAGCATCCACTACAAATGTTAGTGAA

A\_14\_P123544 TTTTCTAGACAAAAAGACAAGATTTCTCTAGACAAAACACTCCTGGCTTTCTGGCAAAA

A\_14\_P110588 CTAATGATTGTGACACAAATATACTATGGAAACAGCATGGCTCAGTAACTAGGCAACAGA

A\_16\_P20238522

AGAGTTGTATAATTCAGGTTCCCTCTACAAAGACATGGAAATAGCCCTCTTATACAGAACC

A\_16\_P19286285

AACTGTGTGTGTAAGGCTACATCAGTGATCATTTCAAAATGAACTCAGAGTTCAACTTC

A\_14\_P113862 CTTAAGAGAACAGAGCACTGCTCCAGGACAGAACTTATCCCTTTCTCTGATTT

A\_14\_P112010 ACTCAGTAAATGTTTCTTCTCATGTCAATTCTTGTTTGTCACTTTTCCACTGTCAATCCA

A\_14\_P100317 TTAGGCTTCCAAATTACCCAAGAAAGGCTAATGAGCAATTCTGTAAGTCTTTTCAATAC

A\_14\_P105193 AAGTAATGGTATCGACTATTGTTTCCCTATCTCAGAGAATGAATGAAAATAAGTTGGGG

A\_14\_P109143 TTGCTTTTTTCTCGATTTATCTCCTCTATGCCTTCAATCCAGAGCAATTAATAAGACA

A\_18\_P22841362

ACAGAACCTGCATTAGGAATGGAAGTTAACTTTATCCATTTTGAATTTCAACATGTCAA

A\_14\_P134909 AAACCTTCTCAAACAATACTCTTCTTAAGCCATATCTCAGGCTCTCATATGCCCTACTTTT

A\_14\_P110380 GTCCTCATTGGGTATGGGCTTTGTCTATGGATGTATTAAGAAGGAATATCAACAAAGAA

A\_14\_P120085 GTTTATTCTAACAGGTCTCTCTAAACTTTGAATCTTAGAAAAGTCCCTAGCCTCTTAAGCC

A\_14\_P126444 ATACAGAACTGGAAAATGATAAGCCTTCCCTCTAAGCCCACCATCATATATTCTCATGAAA

A\_16\_P20542808

AAAAGGATACAAAGACCATCAGACCATAAATTGTGATTTTTTCATTGCCATGGCATGTTTC

A\_16\_P01693410

CATGCTACTGTTGGTTTTTCTAATGCCTGTTCAAATTTATCCATACTTTGCCAAACATGG

A\_14\_P109896 GTCAAGAAATTCCTAACCTAAGCACCTTGTATATTTGCACGCCAATGAAATTTGAA

A\_14\_P108686 CTTCAACCTGAAACATAGCCATCAGGGCTTACGGTAGCAAAGGAAG

A\_16\_P15422685

CCCACCTTCCTACATGATACATTCTAGACACTTCTCCTAAAGAACCCTTGATGAGTAAAGT

A\_14\_P101222 CTTACTCTCTTAAGTATCTTTTCATCGCCTGAGTTTCACCTCATTGACCCTGTTTGT

CUST\_1522\_PI426210822 CTGAGGCCACCTCTCTCTTTTCTCCTACTCCAGGAGAGCAGAGAGC

CUST\_485\_PI426210822 ATGTAAGTCCAAGATTGGGAAAAATCTACAGTCTTTGAAACCACGGGCTC

A\_14\_P130973 AAACAATTATGTTTACATAGACCCAACACAACCTTCTTATGATCACAAATGGGAGTTTCC

CUST\_8882\_PI426210822 CACTGAGGTTTCACTTTTCACTGCTCTGGTGTATGTACTCTCAGAAAAGCA

A\_14\_P134968 CACAAATCTTTCTCAAATCTTAGGCATCAGGCTTTAAACCTTTTCAAACAAGATCATCT

A\_14\_P102616 TTTTATCTCATCAATATACATTTAAATCTAACAGTCTAACAGCCTCACACTCCTCAACT

A\_16\_P15845370 TTTTTTCATTAGTGGTTCAGTCTCTGCTGGTTATGGGGGTCTGTTACATTTTC

A\_16\_P03701923

AAAATGGGACATAGGAACTACAGTCTTGAGGACTTTTTGAACATTGACAAATGGACTTTA

A\_14\_P123122 GGGATGAAGTGGGTTGGAGTCTGAGTCTGAAATTGAGTGAAAATACATTTTTTCATTAAT

A\_14\_P129823 TGAAAAAATTCAAAGTCGAATATCATGCTGGTGGCTCTACCCAGAATTCAATTAAGTGG

A\_14\_P103029 GCTTGGTTGCATCTTTTCAATGTGACTACCAAAAAGAGAGAGAATATGACAATGTAATTA

A\_16\_P16191886

TGACACTGATTTTTAAAGCCTGCACATTTACATCAGAAAAGTCCTGGATTTTATGACTT

A\_14\_P121291 CTACTAGCAATAACTAGAGTCCCCACAGAAAATTCCTATCAAGATCTGCAAATCATCTTG

A\_16\_P35882852

TGAACCCTGAAAAAATACCACTATTAATCATACCAACCTTTATCATTATTCAGCAACACA

A\_14\_P103270 TTATCATGGATACAACCAAATGATGGAATGCCTACCGGGTTATAAGCGGGTTAA

CUST\_6507\_PI426210822 TACCCAGAAAGAAGGTTGCCATGAGAGTGGCTAAAGACATCTAGAG

A\_14\_P101786 GTATCCGATCATGATTGCTAGGAGTTGATCTGTTACTGAAAGAGAGATGAGGCAG

A\_14\_P128060 TTCATTTCTTTTTCTTTTAGGTCTCTTTTATTCAAACCTTGTATTTTGTGTGGAAAGAG

A\_14\_P139177 ATCTTTTTAACCCCTGAAAACGTCCACTTGGAGGGCAAGAGCCAAATCTAAAAAATTATTA

A\_14\_P131290 TTGTCTTCCCTGCTGTGATCAAATCACAGAATGTGAACAAGCATCTATAGTGTCAAATA

A\_16\_P03696353

AAATAAGACTGATGGGTAATCTAATACCAGAACCATGAAAAAACTGGAACCTAATCCCGG

A\_18\_P11236949

AAAAACATGCAAAGCCAAAATTTAGAACACTGGAACCTTGTGATATTA AAAACGGAGGATT

A\_16\_P19562061

ACTTCAGATGATTGCCATAATAGAAATGCTGAGTAGAACATAATAAATAGTGCCCGTCCA

A\_14\_P111956 TGCAAACAGACCCTTAAAAGTCATCTGTTCCCTACTCTTGTATTTAAGTTGCTTTGATAC

A\_16\_P18769055

CGACACTCTCACATTAATTGTGCACTTTCATAAAATAACTATGAGGAAAGGCTAATGGGC

A\_18\_P16621356

CCCACAAATGATTGCTTTTGACACAAAATTCACCTTTCTAACCTTTAATCCTGCTGTAA

A\_16\_P00685443 GATAGGTTTTGGAAAGTCCGGAGTAGACAGCATGAATCCAGGGTTTCTAAAGTATA

A\_16\_P00685447 TACTCTGTGGGCTGTCCTTTTTTCTAGGGCCTTGATTAATTTGCTTCTCTGAA  
A\_14\_P138436 GTTTGTATCTGTGATTAAGTTGAGCATGCTCCGCTCTACTGAACTAAATGATCCAATTATT  
A\_14\_P113525 CTCACTTTTTTGTTTAAGTAAGAGACACCCTTCTGTTGAAAAATATCTTAGGAGGAAGCG  
A\_16\_P58424579 GTCTCATTTCAGCAGAATCAGAATGGATTCTGAAGGCTATCCAGTGGAAGTG  
CUST\_1802\_PI426210822 CAGAAGAAAGCCCAGTTTGGATGATGGGTTTGGGGTCTAGAACAG  
A\_16\_P00469228  
GAGAGACCACAAAGTCATTGACAAAGTTTAAAAATCATTAGATTAAAACTTATAGTGCG  
CUST\_8709\_PI426210822  
TGTCTTCAGAGCAATGCAAAAAGACAGTGTTCATGAAACAGAATAAACTAGAGATTTG  
A\_14\_P100441 AACAAAGAAACGCAATTGCCATTTCAGTCATGTGATATCCCAGTGGAATGAAATGTATTTA  
A\_16\_P40047108  
AGGTTATCTCAACATAAACTCTACTGAAACCTACTGTAGGACCTAATTTCAAAGCACTCA  
A\_18\_P14131520 TATATGTCAAACCTCAGTGCTTGCCCTTTGTTGGATGGAAATTCAGCAGCACTG  
A\_14\_P200295 GTTCTATCTGAATCCAAGACAGCCACACCTTAGTATACTGCCCAAATAATGAGTTTAAT  
A\_16\_P18912594  
ATTTTGCCAAGTCTGAACATTATTAATAAAATAAACCCACAAACCTATTACCTACTGTCTCT  
A\_14\_P113277 CTTACATATTTGCATTCTCCATGGATGCAGAAGTCCCTTGATTTCCGAAGACATG  
A\_14\_P139217 CTAAAGGCATTCTTCATGCTGACATTGAAGTCATCATCTCTGCCATCCTCAATG  
A\_14\_P129329 ACAAATATCCCCCGGCCATTTTTTTAAGTTGATTTTTTAAATGCTTATGCTTTCCT  
A\_14\_P135119 TGCCTCTCATCATGGTGTTAACTGTCATGCTAACATATTTCTTTACAAATGCGCTCTTA  
A\_14\_P113007 AAAGGTCTTGGTCTTTGTTTCAGCAAGGAACTAGTGAAATTTATGAAGGGTTTTTATCAG  
A\_14\_P131103 TTTTGATTTTCTTTTCAGTTCTAGGCCTGATTCTTCACTACCTGAGACGTCTAAAAAGGA  
CUST\_814\_PI426210822 CTCAACCCAAGTCTGGCTCTTCTCCTCTTTCTCCAGGGAAGAATC  
A\_16\_P16868596  
TTCCTACCTCTCCAATTATTCACAGAACTTGACTAAGTTCCACTTTACACACTGAAAAC  
A\_16\_P03329951  
ATGAATCCATATTCCTAATGCCTAGTAACAAATCCTACATTCACTCAGTTCTTCAGGAGC  
A\_14\_P103071 GACATGGATCCACTCAAACCTTTGTCCCTGTTTTCATATTTTTGTTCTTTGTTTAGGTAGT  
A\_14\_P100869 ATATGGGGAACAGGAGAATAACTGCTGGATTTTTGGCATTGACACCTAATATATAGAAC  
A\_14\_P121740 ACAATATATTACAACCAACCAAAAAATAGTTGTTTAAAGTAACAGCCGTTAAGAGTGATG  
CUST\_9166\_PI426210822  
TTCTAAATTATGAATTACTAATTATTAATTTTTCTGGTTTAAACCTCACATCCTGTCCAGCC  
A\_16\_P39109779  
ACCCACATATGCATTTCTTGACATACAGGCATTCAAACCTATGTTTTTCTTTCTTCATT  
A\_18\_P14136553 AGTCCTAGGAAGCCGATGTAAGTCCAAGATTGGGAAAAATCTACAGTCTTTGAAA  
A\_14\_P105360 CTTACAAAAGTGAATTCATCGAAAAAGACAGTGCCTTTAAATTCCTTGTTTCCTGATGA  
A\_14\_P103771 TGCATGTCAATATCAATAACATATCTCGGTAGAGATAGGCGGTTAGTCTGTGTCAAAATG  
A\_14\_P133291 ATAATTACCCTGTGGTTAGGGTGCCTTTTTCTGTTTCAGATCTCTGTTCACTTACAC

A\_14\_P111913 ATTGCAGAAACAAATAAGTTTTTAAATCTCTTTCTTAACCCCACTTCCCATGGGTAAGT  
A\_14\_P131545 AGAATTTTCAGCATGATTTTCCATATTGTGCTTCCACCACTGCCAATAACAAAATAACTAG  
A\_14\_P125215 ACCAGGATCCTTAACCCACTCTTACTTGATATGTTTGACACAGTTTGATCCAATTCTT  
A\_14\_P113747 CAATCAGTGCAAAAATGGAAGATATATAAAGCAACAAGTTGTCTGCATTTGATCACTGGT  
CUST\_3407\_PI426210822 CTATTCTTTCTTTGTCTTCTCCACCCATTCCCACGGCATCCATT  
A\_16\_P20816334  
ACAAGCAAAACAAGATAATTGGTCCTTTAGTATGCTCTTCTTCCTAGTCATCTGAACAGT  
A\_16\_P20159012  
AAAACACAACCTGCCCAATAAAAATAGTTTTCTTTTACAATTCAAGTCGAGAGAAAGCC  
A\_16\_P19024794  
AAGACACCAGTAGTCAAAAATGCATCATTCTAAACTTCAGTATCCTATAGCATGCAGGAG  
A\_14\_P105988 TCTGTTTAAGGGTGTGTCATCCCTTTCTTATAGGACCAGAAATTAGATAATGACCAATCA  
A\_14\_P135904 CCTAGTTGTAAAATGTAAATTTGAAGGCACCTGTAGTATTGTAACATAGACTGTTTCTCA  
A\_14\_P119559 AGCCTACAAATGGGTTGCAAGTTAATTAGACTTAAGGGATATGAGAAAACAGCATGAGA  
A\_16\_P19935707  
AGACAGATCAGAATCTAATGAGGGATAACGTATAAGCCAACATGTAAGTGTAAATGGAAGG  
A\_16\_P01411099  
ACTGAAAACACATGGGTTTTACTTAGCAATAGCGTGACATTTTCTTTTCTCAGACTTCTC  
A\_14\_P202302 GCTATTATTATCCAGAGGGCTTACAGACGCTACCTCTTGAAGCAAAAAGTTAAAAAGGTA  
A\_14\_P135488 GAATCTTGGAATTTTTATAGACAGCACCTCAGTTTCTGACTCCAGCCGCAC  
A\_18\_P14136409 CTATCTACCCCACTGGCATCCCAGGCAGTGTGATCAGGGCTTAGT  
A\_14\_P135139 TTACTAGAGTGGGAGAGTCTCCATCCTATGCCACAGTTTTTTCAGAAAAGTATATGTATTC  
A\_14\_P133884 TCTGTTTCACGTTTCGTTGAGTGTAAGCAATGAAAATGTCCCAAATAAGTTTTTTAAGTTT  
A\_16\_P18761176  
TGCTGTTTTTATAACTCCCTTTCACCTATAGCATCCAGAACTTTATTCATCAATGCAACT  
A\_14\_P127230 CTTGACCACATCATTGCCTCAGTGGTAGAAAATAAGAAAACCTCAGATGCTTCAAAG  
A\_14\_P119322 AGGCAATGAAATGGATGCTATAGGATCATTAATTGCTAACTATCCTTTCCCTTCTTCTCA  
A\_14\_P112701 AAGTCGCAGCATGTGAAGAGTTGCCGTTGTTATGGGATTAATAAAGATGAAAG  
CUST\_3675\_PI426210822  
TTTTGGCAGTTATATATTGGTCTGGATTTAAAAGTGATGTTTATTCCATAGCTCTCCTGA  
A\_14\_P107063 TATGTTTGCATTTTATTTCTGCTGTGTTTTCTTGGAGAGTTGGATTTGGGATGCATAAGT  
A\_16\_P03760256  
AGTGGCTTAACAGAATAGTTATGTCTTGACACAAAATTTTACACAGTTTGTAATGGCA  
A\_14\_P126707 CTGAGATATGGGTGGCATAATTTGAGTCTTCTGGCAACATTTGGTGACCTAC  
A\_16\_P00273741  
TCCTATTAATGAACTTCCCAAATTTAAACAAAGCAAGACAAATAGATATCCACACAGCG  
A\_16\_P16899976  
ATCTACCACCATCACATTATCTTCTATATGCTCCATGATTAACCAGAGAAAACAGCATC

A\_14\_P106136 TTCAACATACCATCTCTTCCTTGGTATTTGTTTTTCATTTGTTCTAAGTACTGCGATTCA  
A\_14\_P103314 GAAATGGAATTAGATGGAAAGAGGTTTCATTCATTGATTCATCTTAGAACTGCTTCCTGAG  
A\_14\_P102132 AATTAATCTCAAATAACCAGATTCCAGCCAAATTTTGTGGAATGAATGAAGAAACAAGA  
A\_14\_P134517 CTATCTTGAAAATGGCACCAAAGGCTTTGATTGGGAAGAGTATATCAACAATAAAAGTAG  
A\_16\_P00685233  
GAAAGATTAAGTTCTTTCTGGTGGCTTCTTTAATTTTGAATAACCAGCCTTCCTTCAAC  
CUST\_7881\_PI426210822 AAATGGACTGAAGGGGAAGGAAAGCTCATAGCAGCAGCTACCAA  
A\_16\_P15022487  
GGCACTTCTTTGTTTTTACCGACTTCTCATAGCAATCGCCCATTTTCTTTATTTCATGAAT  
A\_14\_P124475 GATATGCTGCTAATCACCTAGTCAGAGAAATAATTCTCTATGAGTTAAGGGCTCACCTTT  
A\_14\_P124400 GAGGTGGTGAATCTGTAGTTAGCATAAGCAGGGTAGGGAAAAGTAATTTTGTGCTA  
A\_16\_P19111835  
AATCTCGTCTCACCTATAAGCATCCCAATACACTTCTATTTTCATGTGGTCAAGATCATTC  
A\_14\_P103196 GCAGATAAAAAGCAAAACAAAACAGGCCAATCAGATTTGATCATTGGGAATTTAGATGG  
A\_16\_P17917733  
TCTGCTGACCTCATTTTAAGAAATATTGCACCTAATGTCAAATAACACAATCACCTGC  
CUST\_4545\_PI426210822 CATGTTTCTACCCCTGATTCCCAGCCTGAGCGCCTTGGGTTTCTC  
CUST\_679\_PI426210822 CACCTCGTGAGTGTGCATGTGTGTGCATGCCCCCTTATCTCT  
CUST\_8587\_PI426210822 CACCAGCTGGACATGTTAAGCCAAGTGAAGCAGAAACAGATTATAGGCAT  
A\_16\_P00685085  
TCCCGTCTGTATAATAGATTCCATAATGCTGATGAATCTGGTGAAATCTGTTTTTTGTTGC  
A\_14\_P124635 AAAGGAACTAAAACAATTCTAAAGAGTTCATTGTCCTGTTCTCTTCAGGAAGGTCTGAT  
A\_14\_P117376 AAGTGTAAGCAATGAAAAGGTCTATTTTGGTTTTTCAGTGGGCTCACAATTCATTTGTTT  
A\_14\_P121396 GTCTTTGTTTTTTTTATATGAGGTCCTCTCTCCCTTAACATGGAGAAGCATTAAAAGTGT  
A\_14\_P106439 AAAGCATCTTTGGGTGGCAAATTTATCTATCATCTCCACACAAACAAACCAAGATTTT  
CUST\_381\_PI426210822 CCAGAGCCAGCTTCCTCTCCTATAGCTCCCACTCCCTGAGTCTTC  
A\_16\_P20824226  
AGGGAAAGAGAACTACACTTTCATCAGATTTGTTGTAACCTGTAATTAAGAGAGCCCA  
A\_14\_P113812 TTGCCTTAAACATATAAACTACATATAAGTTGCACCTTCCATGGCAGAAAGGATGGTTGG  
A\_14\_P125526  
CTGTTAGAAAGGAAAAAGAAGGAACATGTCACTATGAAACAGAAAGAGGCAGGATGTATA  
A\_16\_P01575778  
AAGAGAATTTCCACAGAAGGTCATCATATTCATTTATGCATCCCATAGTTTTGTCCTGC  
A\_14\_P108895 GGACTCTTGCAAGTTTTCTGTGTTGGCGTTAGTTCCTGTTGTTATTTGTTTGA  
A\_14\_P120747 CTTCTCTACTCATCTTATTCCTGATTGCCTCAGTTTGTCAAAGTTGTGCATTTATCT  
CUST\_10188\_PI426210822 CATGAAGTCTTGAGTTAGTCCAAAAAGGAATTTGTCCCAGGTCCTCAGAA  
A\_18\_P22841193  
TTATTGATTTACTAAAATTACACAGTTGTTTCGGGCCTGGGAGTTAAATTCTCTTCACCAG

A\_14\_P138437 ATTCAACAAACATGTCAGAGAGAAATGAACAGTCTAGTAGCAAATATTTTCATAGAGAAAT  
CUST\_2035\_PI426210822 AACTTCCTGAAGACTTCTGCCATTGAGTTCCAGGACAGGTTCCAGG  
A\_14\_P105561 TCAGGCAGAGAATCTCAGCCAACCAGTTTGTTCCTGGAAAAAGAAGGAAAAAATATATA  
A\_14\_P113463 TTTTTTCCTTTTGTTCATATCCTATTGTATCTGTTTCCTTTTGGGCTTCACATCCTTTT  
A\_14\_P125531 ATAACTGGCATTGGGAAAGACTAGAGAAGACTTTGTCCTTTAACATTTCAAGATGGAAAA  
A\_14\_P121434 CTGATGAACAGATGGAGTCAATGACATATTCTACTGAAAGAAAGACCAACTCACTTCCT  
A\_16\_P38402637  
AGGCCTATGAAAAATCCACTTCACATTTGATAGATCACGTCTTGATGAACATTTTCAGAAA  
A\_14\_P117106 TTTGTTTTCCACTTGTTTGTTTTTTTTAACCATTGGTTTTGGTGCTGTTGACTTAGGTTG  
A\_14\_P111670 CAAGATATGACCTGTAATTTTATTGCAAATATTGTTGTTTGGCTCCCAAGTGGATAG  
CUST\_6492\_PI426210822 TTTTCCCTGAGTTTCTCTTGCCCCTTGATCTTCACCTGTTCCTTT  
A\_16\_P30952493  
CTGCTGATGCCAAATACCACTTCCTTTTTTCACTAGTATGAATTCAGCGTGATCTTTGATA  
A\_18\_P12904256  
GTCGATGTCTGTTTTTTACCCATAAAAATAACTCGAGTATCCAATGTATTAACCACCCCTT  
A\_14\_P102009 CGGGCAACTATCTTATTGTATGGTTCAACAATTTTTGCTTTTATCCTACAGGAAAAGAGA  
A\_18\_P22841341 ATAGAGCATGCTGTTTCAGTTTGCAGCCACTAAGGCTAATGGAAAACCTTCAG  
A\_14\_P128173 GCTGCAATATTATCAGCCAAAGTTTCTTCATCATTGCCCCAGACCTGTAATAGTCATAT  
A\_14\_P124239 CCAAATACCTGAATATAAATCCATGTCTTTGTGACCCCTCACTTCCTCGATATATAGAGTG  
A\_14\_P202322 CTCCCAAGCCAATCTCTGACTTCCCTGATTTATTAACACACCTGATCTATAACTTTTAAT  
A\_16\_P03410662  
AACAAACACCGTTCCTGTAGAAGACTTTTAAACACAGATAAACCACGATAAATGAGTCC  
A\_14\_P105315 AGTTCATACAGGATGCAACCCAAGGACCAGATGTCCTGAAAGCATAAAGAA  
A\_14\_P137264 TACAAAGGAACTTTTTAAGAGAAGACAAGGGTTTATAACATCTTCCGGGGAAAAAATCC  
A\_16\_P18100682  
CAAGAATTCTTAACTATTCTTCTGCCAGACATACCTAAAATATGACACACTCTTCCTAGG  
A\_16\_P00685628 ATACAGTCAGCCTTGTTTTAAAGGAAGATGCAGAGAGGAATGTCTGACCTCATAAAC  
A\_14\_P125746 ACTTTCTTTGTTTTTGGATGAGAACTAAGTTAGGATGAGGGAGTCAAATGAGTTTGAGA  
A\_14\_P135852 TAGCCCTTATCATCATCATTTTTTGTAGAGCCCCAAACACCACTAGGGATAATTTAAAATG  
A\_18\_P22841059 CCCACGGGCAAGAGAGCATGATGTGTGATTTGCAGTGACATATCTATA  
A\_14\_P113652 AGAGCATCTATTTTTGCTCATGTTTTAATTGGAAGTATAGTTACCACTCAAGCCAACTGG  
A\_14\_P125962 ATTAAGATGATTAATTCAAGGCAAGAACAAGTCTGATGGCTGATTAGACTACTGGCTGAA  
CUST\_684\_PI426210822  
ATCTGACCAGCTGATCAGAAGTTTTGAACTGAAAGGTTGTTATCAGGGTTTGAAT  
A\_14\_P133191 TTTAATAAAGAAGAAGTTACCCCTGTCAAATCAGAACAAACCTGATGTCTTTTCTGAAGA  
A\_14\_P128210 CCCCCTTCCACTTTTTTTTTGTATGTTTTTTTTCTGCTGGAAACAGACTCGATTCATATT  
A\_16\_P16611480  
TCCCTCAAACAATAAACTCCTTTATTATCTTAATGCTCCCATGTTAACATGTTTGCTGC

A\_18\_P16833330

TGTTTCATCAGAAAGGTAGAAATTTATCTTCTGTGTGAATTCTCTGATGTGCTGTAAAGTCT

A\_16\_P21276155

TGAATTTTGGACCTCACATTTAATGATGACATGCTAATGCTCACATGATATGGTTTTTCA

A\_14\_P121341 TTTCTCTCAGAGCACTTATCAAGTTGGTTATTAAACTTACGTGTGATCACTGCATCAATG

A\_14\_P125869 CCTATTCTTTTGGAAATTGGAAGCACCGCTGAAAATTTGTGGTATGTAAATGGGTAAAGT

A\_16\_P17597836

GCTTCCCAACATTCATATTTACTGCATCCATCTTAACTTTTAGAACTACCTACTCTTGGC

A\_16\_P36230899

GGAAAACCTTGCAACAGTTTCCATTTTCAATTTTAAACTCCAGCCTATATCACATATCAGACC

A\_14\_P133064 TCTTGGAAATTGAACACCAATAAGGAAATTTACCTCTCTGAAGTTACCAATGATTTCTCT

CUST\_2943\_PI426210822 AAAACTTGCTGGGAGAGACCAGAGCTAGAGTTGATGAGAGACAGC

A\_14\_P109276 GCATATTTTCCAAACTTACTTGCTCAACCTCTCTGTTGAGGGAATCTACTTTTTCTTTT

CUST\_9761\_PI426210822

TTCTTATTTTATATAAATTCCTTCCTTCTATTGAGACAAGTGTGTGATGTTGACTGCAGA

A\_14\_P110185 TGTGTTTCAGATTTTGCCATCATCAGGCTAAAGGTATCTGGACTATGAAAACAAAAAATAA

A\_14\_P138241 ACATTCGCTCAGTAGTGTGAGAGATTAATTGTAGGCAGGTCCCATCTTTTTTACAGTAT

CUST\_7655\_PI426210822 GCTACTATGTCACTGCCTCTCCCATCACAGTATTCACCCAAATGA

A\_14\_P104660 CTTTGGGGCAGAAGATTTTAGAAATAGTAAGCAACGTTTTCTCCAATAATATGTCCTTT

A\_16\_P58424526 CTGCTGAGGCTTTCTCTGGCCAGAGCCACTCACTTGCCTGACAG

A\_14\_P102219 ACATCTCTAATATCCTAAACCTTGGTTCGCAGTTTAGATAATGTGCCAAGTAAGTTACCAT

A\_14\_P107409 GATGACACTTATCTAAGTTTTTAAACGTGCAACCCTTTAGTCTCATAACTGTCTCTGAG

A\_16\_P17546579

AAAAAACCCCATGCTTATATAAAAGGCTGAGTCATTTTCTAAGAGTTAGGCAAGCAACTC

A\_14\_P125038 ATTCTTGTTATTTTTAGACGAAAATCCACAGAATTCAGACTGGGAGGCTTCCATTTCAAA

A\_14\_P101153 GGAGTCTGTGATATTCTTAAATAGGCATCCCATTCACAACCTTGATAGTAATATGCACTGG

CUST\_368\_PI426210822 CTTTTCCAGCCCTGGTGACTGAACCCAGCTCTGTAGCCATATCA

CUST\_9974\_PI426210822

ACATATCAATTACCAAAAAAAGTTGTAAAACACCAGGAGTTCACATCCCAGAAATAACCA

A\_14\_P136345 TCGCTTGTGAGAGGGAACATTTCTCTTATGTGTCTTAGAATATTTTTACCTAACATGC

A\_14\_P201620 GGCTGGAGATACAAGTGATGTAGTTTACTTGGGCAATACAAAACAAAAGTCATAGGAA

A\_14\_P123322 ACGTTTTTGGTATTTCTGTTTTGCCTTTTTCACTGTCGTCTAAAGTCAGTATTTCTACT

A\_14\_P120556 CTATCCATGAATCCTCTATGATAAACTTACACTCCCATATCTGCTTTCCAGAGGCTTAAA

CUST\_7331\_PI426210822 GAACATACCTCCTATGCGGCAGGAGCTGTATTGGGCACAGCCACG

A\_16\_P16192013

GTAGATGAAACCTCATCTCTCTCCCATAGTGTCATAGATAAAATCACAGTTGAACTCCTT

A\_14\_P135602 CTCACTATTCTTTCTATTAAGCCACCTGTCCCTTGTGAAAATTGTGTATCATTTTTGACC

A\_18\_P13579539

GCCCCGAAAGTATGTAGAAGGTCAGAATATGTGTTAGAAACCCTGTATAATCTCATTACA  
A\_18\_P24558946

AAGTGTGCTTAAGCAACAGAAAAACACAGATATTATTCTCCATAGGCAATATTTCCCTGA  
CUST\_6647\_PI426210822

ATGATTAGAACTTTTTTCTTCCTGGGCTTAGAAAACATGTTGGTATAGCCAAAGAAGCAG  
A\_14\_P130010 AAGGAGAGTCAGAAATTTATCATTGTTTGGTTTCACCCTAGGGTTTTGAGGCAAAATTTAT  
A\_14\_P128739 GTCATCCTTGGTTTATCTGTCCCAACTACACTGACAGAGACCTGTAGATAGAGATAA  
A\_16\_P01093079

TGAAGCCAACATAATACTTCTCTCATTGCTAACTCTCCTTTGTGATAAAAATCTGACACCA  
CUST\_5623\_PI426210822 GGGGAGTCTGTGTGATACCCCCAGAGAGTTGACTCCTAATTAAT  
A\_14\_P201597 TGTTATGTCTATTTTCAAGTAACAGAAAATAGAAAAAAGGGATGGAAGTACTAGTGGTCTGG  
A\_16\_P16578016

TCAAAAACAATATCTCCTTCGCTAAAACCTGTTCAAATTGCTCCCACAAACATCAAAAAGTG  
A\_16\_P41646318

CATGATTGGTCTAGGAAGATGAATACTTTAAGACAAAGCCAGTATATTTAAAACACACACA  
A\_14\_P125247 TATCCTAGAGGTATTCTCTTGACTCTGACACTTAATATTCCTCCTTACCACATTTGC  
A\_14\_P127468 GTCTAAAGTAAAGTGCCTCTTTTAAATGGAGAAGAGTTTCATTTGTTTCAGAAATGCTTGG  
A\_14\_P110924 TGCATCTAGAGATATGGCTCTAATATTTACAACCTCCATTGCTTGTCACTGTTTACATGGC  
A\_16\_P15497136

TTGTGACATTGTGCATACTTCTCAATGATCTTCCCTCTTCATACTTTAACTTACTCCTCT  
A\_14\_P122475 TCAGTTTTCTTCCAGCAAGTTCAATCAATGACATGGAGAAAAGGTAAAAGTTGGTATTTTC  
A\_18\_P22841234 CAGTCCTTTAAAGACCCACCAGCGACTTTGTGAGATTCTAGACTCCTTT  
CUST\_7333\_PI426210822 AGTGTCATCCCAGGGAACCTCATGTGAGCCCTGTGGAGCAGGCTCT  
A\_14\_P133830 GAAATCTAAAACAAATGGCCATTTTAAACAGGGAGACAATGTATTCTCCATACTTGTCCCTG  
CUST\_7889\_PI426210822 GATCCTGGGTCTCTGTGTGAATAACTGGCTAAGAGCACAGAGA  
A\_14\_P131573 CTACAGGCATGAACTACGTTTGTGAGAGTGAATGATGCAAAGAACAACATTTTATTATCA  
A\_14\_P202245 TCTCTTCTATTTCCACTTAAAGTTTAGAATCCTGTGTCAGGCTCTAAATGTCACAAACAA  
A\_16\_P19603522

CACCCCAGCATGACAATTATGAACATAACCTAGAGAGATTTCTATCCCCAAAATAAGATT  
A\_16\_P15610836

CATAAAAGCATCCCAAATAAACACGTCATCTTATTCCCTACTAAGCCAAACTGTTCTTAC  
A\_14\_P102104 AACAAATTATTTTTTGCAAAGACTTGACAGAAATGTATAATCCAGGTAATTGCTGGGGTGG  
A\_14\_P104637 CCATTTAAGTGCCTTCTCTGTGACTGAGAGCCCTAGTGTGATGAGAACTAAA  
A\_14\_P135238 CTCTCAAAGAAGCAAAGAGCAACTGCATTAATAATCATCTTAAGCATCCTTAGGAACCT  
CUST\_3237\_PI426210822 GGTTAGCTGGAGTGTGGGGTACAAAAGGCTTCTGATATGGAGTGG  
A\_14\_P200294 CTGCTGTCCTATGACCTCTTTGTCAATTCCTTCTCAGAACTGCTCCAAAA  
CUST\_10361\_PI426210822 AGAGAGGAATGTCTGACCTCATAAACAGAGCCCACCAATGTTAGTGAG  
CUST\_1179\_PI426210822 CAGGGCAAGGGAGGAGGGGGACGGCTGCCTCTAAACCCACTTCTT



A\_14\_P128885 CTGCCCTTGACAAATGAAATCATAGATTGCATAGTGTGTAAAATGTTGAGGCTCTTCGTT  
A\_16\_P38634441

TTAACTATGCCAACCTCTTTTTCTAGAACTTCTCCCTAGACTATCTAAACTCTTGAGGC

A\_14\_P125063 CTTTAAAAACCAAGTCTGAGGAAATATTTGGCTTCATAAAGTAAAGAGACGGTTTGGCAT

A\_14\_P113505 AATGATCTCGTCACTCCTTTCTTTGTGGTCTTCATTTGTGAATACATAGGTAAGATTTCT

A\_18\_P22841056 CTTTCACAACACAAGTGCCCCAGGAGAGTGGCCTGTAAGTCCAC

CUST\_233\_PI426210822 GTGCCTCCCTGGGGTCCCAGCCCAGAGCGTGGGGGGAGAGCCGCT

CUST\_2074\_PI426210822 CTTTGAATGAAACAAATAGTTCCCCTGGGGCTCAGCCAGTGAGC

A\_14\_P123271 ACTTCTTCCTCATTGTTTTCTAGGTAAACTTCACTACTGGTAATTAAGGGGAAGGATATG

A\_14\_P103986 CAGTAAGAGTCCTTGAATTAGTGGGCTCTCTTCTAAGATTTCAAAGCAACAAGGAGATT

A\_14\_P116616 CTCCAGAACAGTTCTCAGACTATGAGAAGAGGAAGGTAAGAAAATGCCTTTA

CUST\_3214\_PI426210822 CACTAGCCAGTCAGGCTGGAGGCCTCTGGTGGATCTCACAGTCAC

A\_16\_P36230679 CTTGATTCATCTTGTCTGGGATGGAATGTGCCCTCCTTTCTTGTTCAAG

A\_14\_P137048 TGTTCCTTTTTTGTCCATTCATCAACCACTTGTTGAGTTTCTCCTGCATATTAACATTTG

CUST\_9792\_PI426210822

TGTTGCAAACCTGAGTCGTGTTTCATACTTCATCTGATTTTATAGCAGAAATGATGTTGAAT

A\_14\_P110788 AAGAAAACCTACATGTATTAAGTCACCACTCCTTTATTTTCCCATGCGTATTCAAAGCCA

A\_14\_P130804 TCTCTTAGTTAGGCTTTCTATTGATGCCAAAGGAATTCCTGTTGATACAATGTGATTGCA

A\_14\_P116873 ATATGCTCACACACAGAATAACATTTACATAGAAGTCAATATTCAGAAGCCCGGAAAAG

CUST\_10404\_PI426210822 ACCAGTCACATGACCTGATCACTAGCCTGTCATCCTTGGTCTTTG

A\_14\_P134433 TAAGTTGAGGTAGTGACGAAGGTCTTTATCAACAATTCCTCCTAAAAATAAAAAAAGTTT

A\_14\_P102241 TTCTCCTGAAACAATGTTTTTGATAAACTTGCCCTTCTCCCTTGAAACTTTTCTAAAAA

A\_16\_P21526769

AAACCTACTTTCTCTTGGAATACTCCCTATTCTGTAAACTAGACTGAACATTCTCTCCA

A\_14\_P115929

ACAGATAAAATGGAGTGTATTCTAGGCAGTGGAATGGACAAAAAATGAAAACATGGACA

A\_14\_P103324 TAACCTATGCATGTGTGATTATGAAGGTGTTTTCTAGGCTCGACCTCAAAACTCATTAAA

A\_14\_P133955 GACCTGCTCCTTCAGAATCCTATAGGTCAAGAGAGATACAAACAAATCAGAATGTAGTAA

A\_14\_P201674 TTTGAAAACAAGATTTATGGAATGCTGCAAGAAGTGCAAAAAGATCTTCCATGTGCTCTA

A\_16\_P17424152

TCCTATTTGCTGAGTGAAATTCCTACTGACACCAACATACTCTATCTCATCTCCAAAATT

A\_18\_P14132967 ATGCTTAGTCATATCCAAAATGTCAATCCCTGTCCTTTCCACCTTGCCTTTG

A\_14\_P103500 CTAATGTGGCAAGATCTGCATTTTGA ACTCTCTCAATTGCTAAAGCCATACCTATAAGAC

A\_16\_P16946452

AGTTTCCTTTCAAACCTTAGTCCTTCTAATTCCTATCAACAACACATTTAACTACCAG

A\_14\_P102294 CTGATCTCATCTCCCTAAGTTAGTTTATAAATGAGGAACTGAGACTTCGGTTCTGTTAC

A\_14\_P109173 GTTTCTAAGAGAGTCCTTCCTTTTGGCATATTCCAGATCATGAAAATGGA ACTGG

A\_14\_P128164 TATTCCAATTTTTGTTTTAGAATTTAGTGCACACGTAGAAAGGGGAAGAAACGCTTTTTGG

A\_18\_P15841985

AAATTTTGCAATCAGAAAAAGCCAAAACCACTTCAGTTTTTACCTCAGGTCTAGTCTAGG

A\_14\_P106074 AAACAATCATAGATGAGACGAGGCTTGAAAGCCACCATTTTTAAAATAAAAGGAAATCGC

CUST\_7932\_PI426210822 CATGAAAAAGTGGGCAGCTGGAAGGGGGCTGGAGACGGCCTGGTC

A\_16\_P00233908 ATCTGTCTGTATGTTTGTCTGATTGTGATGCTCTACTTCATCAGATTCAGGGTTCCTT

A\_14\_P128410 ACCTCATGGATTAGAAGATTTGCTGAACCCCTATTGGTGTACTGGATCAAATCCAAATAA

CUST\_6859\_PI426210822 ATCGGTTGGCCATAAGTCACTGAATTTGGCTAATAAGATGTTGCATTGTCTCTG

A\_16\_P00905863

TGATGCTAAAGCACTCTTCTTGTTTACTTTTCATCCAAAACACCAAATCCTTATGGCATT

A\_14\_P119847 GCCGTTACCCTATTTAAAATTGAGTGATAATTTACATCAGGCAATGTGAACAGACCTTAA

A\_14\_P112229 GATGGCATATGAGAACAGAAAGAAAATCCTTAAGGAAACATAGCCTCCCACCAATTA

A\_16\_P30952448 GACTTAAACACTTTCAGACAATTCTCAGGCTGTTAGAAGTTACAATCCCCTCGAGTT

CUST\_1022\_PI426210822 GGCCACTGTCATGTCCAAGCAGAAGGCAGGGGCATGTTTAGTGTG

A\_14\_P103187 CTTTTTTACCTCAGGGAGATATTTGCGGAATCCCTGACAGAGGAACATG

CUST\_8432\_PI426210822

CCTCTCCTACTTATCCTTTTTAAACATTTAGTTTTAAATTGACAAAACCTTATATATTT

A\_16\_P18306127

AAAATATCAATCATTTAGTCAACCTATCCAACCTGTTCTTTGCATATCCACGGTTCTAGGC

A\_14\_P107846 ACAAAAAGTATGAAAGTGGAAGTTCCTTAAACGAAAATAGTAACCACCACCTGGGTAAATC

A\_14\_P138607 GACTAGGCACCCTGAAGAGCCAAGATGATCGATTAAAATATTCTTAGAATGTTAAGGAAT

CUST\_9117\_PI426210822 GTCACATTGCATCACATCACGCCATCGCCATTACCCTGTTACAG

A\_14\_P133852 AACTTTAAGCCAAAGTAATTTGTATCATCTTTAACACAAAACCCAAAACACGAAAGGCTG

CUST\_4543\_PI426210822 CTGTCTCTACATTCTAACCCATCCCCAGCAGCACTGGCCTTGAGG

A\_14\_P117212 TCCCTTTTTAAAAGAATCTGGGAAGACAACCTTGAAAGTAATTTCTTACTTGAATGCTTT

A\_14\_P100929 TGTCTGAACCAGCCAAATACCCTCATTATGTATATCACTGGCTATAAAAGAAACCAAGTT

A\_14\_P132298 AGTATGAAATACAAATAAAAACAAAGTGTAGCAGCGATGGCCTCAGACAGTAGATGGCA

A\_16\_P02480066

GCCTAGACTCCTTTCAAATCTATTATACTGCTCATCAATGAAAAAAAAAAGGTCCATGTG

A\_14\_P131970 GACAGTTGAGGAAAATAATGCTTCCCCACATTTTGAGCCAGATCTCCATATTGAG

A\_14\_P109835 TATTTTCTCTACCTCAGTAAACCCATCTGCTTTTAAGTTACTGTTGCTGGCCTTTATTTA

A\_16\_P35025062

CTCTCAACAGAGGAACAGATCAATTTAACCTCTCCTACCATACTTGATCTATAGAGCAAA

A\_14\_P103844 TAAAAAATCCATTTGCAAGGTGCTACTGTCAACTATATCATTCCCTTCACACCCTTGCATA

A\_16\_P21556132

GGCCTGAATAACATCAAATGCCTAAGTTCATCTAGCACAGACATCTTAATGTGACACAT

A\_16\_P38473693

AAAAAGGTTTTGTAAACTTGATAATTCGCAAATCCACATTGGTTAGCACTTGGTCAAGTC

A\_16\_P18793616

TGTGAAGACAGTATTCCTCTAGTAAGTATCAATTAATGATCAGTCAATCAGGGATCGGAG  
A\_16\_P36969974

TTTACCCAGATCCTAATCTCAACTTAAACCCAACATTCTATTTTCAACTCAAGTGAACCA  
A\_14\_P100646 CCCCTCCTCAATGTAGTGGCCTTGGATATCCTGTTTGTAAATAAAGACAATTCA  
A\_14\_P103678 TTACAGACTAACTGGATCTTCTGGGTTTGTGACAGATGGACCTGGAAATTATAAATACAA  
A\_14\_P118709 ATTATGCCAGTAATTTCAATTAGATGAGAATTCAGCGTCTGAAAGTTAAGACCTCAGTT  
A\_14\_P117076 ACCTGCCAACATAAAATTACCTGGTATATTTGATTAATGGTGTAGAGTGAGAAGCACACA  
A\_14\_P134878 TTATTACGCATTCATTTGCTAAGAATCATCAAGAACCCAAAGTTAGAGACGTTTCGTGGT  
CUST\_1576\_PI426210822 GAAACTTAGATTTGGCCCTTGCTCATGACTCTCTTAGGGGATGAGTG  
CUST\_4332\_PI426210822

GGGAACATGAAGAATGTTTGTGGCTAAAGAAGTCTCAACACAAGGAAACTACAG  
A\_16\_P00684978

GTCACITTTTCTGTCTTGAGGCACACAAAAAACAAGGTCATATCTTTTAATGTCTCAGT  
A\_14\_P108718 TGAAAAGAATACTATTAATTTTTCTGAGGTGGGGAGGAAACCTATGCCATATGCAGAAAG  
A\_14\_P130708 ATTCTTTAGCCATTTCCCTCAAAGTGCTCACCACATTCCTTACACCCAAAGAAG  
A\_14\_P108976 TGGATCTCGCTTCTATCAATTCACCTGCTAAATTTCTAGATCCTTTTGAGTATTGGGATC  
CUST\_6817\_PI426210822

GCTGGAATATTTGTACTTTCACAGTGATTGCAAGAAGCAGCTAAACTGGAGTTTGAATTT  
A\_14\_P105273 ACTCCAGATCTGGATGGTTTCAGTCACATTTAAATGATAAAGATAGTACTAATGAT  
A\_14\_P200508 TAAAAGTGCTGGAATATGTGTAATTACATTTTTACTACCAGTTCCACCTTCACAGGCAAG  
A\_16\_P03048473

AAAGGGAAATAATTTTGCAGGATGATTATAGTTCATTTGTTACCAGACAGACAGACTTAG  
CUST\_8103\_PI426210822 ATGAGGTTGATGAATTTGATAAGGGGCGGCAGATGCCCATTCAAAC  
A\_14\_P120208 CTTTGCGAAGAACTTTTATGCCCTTGTCTTCTAATCCTTCTATCAGTCAAAAATAGGTG  
A\_14\_P104671 GCTTTTTGTAAAGGACAATAACATTATAGTTATGTGAGACAGTGGGGCATGATTTGGCAG  
A\_14\_P133429 CGCTAAGGAATCTGAGGAGAACAAGGAGAACCTGATCATAAATTCTGAACTCAAAGA  
A\_14\_P128319 AGTGAGAAGTGTGGATGACTGCTTCTACATAGATCATTAGTTAAAGGCCCTGTTTT  
A\_14\_P101050 CTTGTTCAATTTTTTTTACCTTTAATTCATGAATCAGGCACTGTGCTGGTTACAGGAACT  
A\_14\_P114226 CATATTGCATGGAATATGCTCTATAATTGTATTGCAGGAGACTTGGTGACCTATACGCAT  
CUST\_6049\_PI426210822 ATTCATTCTTGTCTGGGATGGAATGTGCCCTCCTTTCTTGTTC AAGC  
A\_14\_P126455 ACCTGACTCAGGCTGATAAGGTATTTATAGTTCAAAAAAAGTTGCTGAATGGCAGTAATC  
A\_14\_P107752 AGTTTGCAGGTAACGTTTGGTGCTTATTTATCCACATGACAGTAAAAGAGCAGTTAACTA  
CUST\_5693\_PI426210822 GCAGCAGTTTGGCTCAGCAGGAGGGGAAAGGGGTGTTAGAGGAAA  
A\_16\_P20092000

AAAGCATCCAAACCTGAAAGAATAACATTCAGATAGGCTAACACTCAGAAAAGATTGGAG  
A\_14\_P102721 AGAATTGTGGTTAATTC AATTTGCAGAATTTTGGATGAAAAATACTGGCTCAGTCACTCT  
A\_18\_P14135701

ACTTTGAATGCAAATCTTCTGTGACAAATCCAGGGGACTTTGGAATAACTCTCAGATAT

A\_14\_P100486 AGGGTTTGAAATTGATCCCTTATTTTACATGAAATAAAAACAATTTCTGTTGCGGCAGGT  
A\_14\_P130644 AATCAGGAAGAAATTCTGGTAATTCTTCCTAATGATAGACAGTTGAGATGGATAGGCAGA  
A\_16\_P20801310  
AAACATGTTCAAAAAGGAGAGATATTAGACAAGGACCATTTCAAACATTTAGCCTGCCTAC  
A\_18\_P14134311 GCTTTATGCTTGCAAGATGGCCAGCACCTTCACTAGGCAAAGAGTAGTA  
A\_14\_P110475 GAGGATCATAGTGAGAGCGGTGGTAAGAATGTCTCTGTAAAATAACAAGAACAAATTTAG  
CUST\_4987\_PI426210822 ACAACATCGTGCCAGAAATAGCCTAGACCTCAGAGTGACATCAG  
A\_16\_P37491605  
TCCTTTCTAAGCATCTCAAGTCATTTCACTAGGTTTGGCTATTCTCAACTCCATCACAAT  
A\_14\_P102603 ATACGTATACACACAGCCTCCGTGGTTTCCTCTGTCACTTTTAATTAAGACACAAGTT  
CUST\_8834\_PI426210822  
CAGTAATGGCCCTAAACTTTCTTTTCTTTTCTTTTGCATTTTCTTCTTTCTGCACAATGT  
A\_14\_P134938 CCTGTGCTGTCCTCTTCAATTATGAAGGATAGCAAATGAAAAAAACTCTGGCAGTATAA  
A\_16\_P03306576  
TTTAAGAAGTAAGCACTCTTTATAAACTCCCCACTTATAATTCTTCAAACCTCTCACCC  
A\_14\_P126003 GGTAACATTACCTTTTCAGAGTCAGATTTCCCAGATAATGAGGTTTTATCACATCCACA  
A\_16\_P16191307  
GCATGTTTGTTAATAAGTTGGTCATATCACTCAAGTCATGCCTGATACACAGATGTTTGA  
A\_16\_P40938249  
TTCCACCTCAAACATCATATAAAGGTTAACTTCCCGATAAACTTCTCAAATTTTCCCCAA  
CUST\_4502\_PI426210822 GTTATCAGGGTGGCTCAGATGCAGGAAGTCCTCGCCTCTGCTGTC  
A\_14\_P123084 AGCAACCTCTCTCTCAGTTGTTAACTTCATTTTTAGAAAGTCTCTCACATTGGTGTATC  
A\_16\_P30952650  
ACTTGCTGTTTAAAAAGACAGATGAAATAAGTTGAAGAAACCTCATGTAATGAATCCACC  
CUST\_5359\_PI426210822  
AGTAAAAACGGAAACAACAACAAAACAGAATAAAATCCTCTTTAACTTTGTTTAACTTG  
A\_18\_P22843010 AAGAACAAGAAACAGTGCTGACAGGCCAGGAAGGTCAGAGACTC  
A\_14\_P134646 TCTTCAATCTACAATTTCCCCTGTTTTTTAATTTGGGAAGGATGAAGATTTAGCAAAGGG  
CUST\_5539\_PI426210822  
ATAATCATGAACCATAATAAAATTAGCACTATTTATGGTTTTCAATATTTATAATTAAG  
A\_14\_P132013 GATTGTTTTGTACAGATGCCATTTAAAACCTTGACCTAGAATTGGAGAAGCAAATAGTC  
A\_18\_P24786702  
AAAAAATGTAGTTCAGTGCTAAAATACACAACATACATGATAATAGACGCAAAGCATGC  
A\_18\_P22840527  
AATATTAGTTTTGGCTTTGGGAAATGAGGTTTCTTTGACTTGGCTGGAAGTATACAGCAA  
A\_14\_P105095 ACTACTGTTACCACCAGATCTTACCTTGAAGAAAATGATTTTGCAATGGAAATCCTTTGT  
A\_14\_P122985 TTCTGCAAGTTTGAGAAATAACTTAGATCAGGCTTAAAAACTGTCCTAAAGTGCTGTTGG  
A\_16\_P15757857

TTGTCAGTTTAAACCTTTCTAAATGCTCGATCACAAAAATCACATTGTTTGCCTCTTCTGT  
A\_16\_P16683871  
AACAAAGGGCAAAACAGTCTTTCTATACCTCTATTTCCTTCGATCTTACATACTCTTTGGT  
A\_14\_P109002 AAACCTGGGATCTATCCAAATCATACTTAGACATAAGTAAGCAAAGGAGCAAACAAACACC  
A\_14\_P125850 ACTTTGCCAATGACGACATTGACTCTTACATGATCGCCATGGAAACCACTATAG  
A\_14\_P132709 CTAGGAAAATTCTTCATGGCTGTGATTTACATGGGATACGAGCATTCTTCTCAGTTTTAG  
A\_14\_P126531 TTATTCATTTTTTCAATCGCTGATGAGCAAAACACTCAGGTGCCAACAATAGGCTATAAG  
CUST\_8644\_PI426210822 CACCTGATTTCCAGGAATAAAATGAGTGAGCCAGACAGCTTATGGGAG  
CUST\_6180\_PI426210822 TCCCCTTCACTAGCAAGCATAACAATATATTATTGCACACATGCAGAAGGGCAT  
CUST\_8861\_PI426210822 ATAGGCGTCAAAAAGTTGGTGGTGAGGAGTTTGCTTACGTTTCATTCCTTA  
A\_18\_P16824679  
CCAGTTTTAATTAGATTGCATCCTTATTCACTTTAAAACACTTAAGAAATGAACAAGTGA  
A\_16\_P00448873  
GATGCACATGCCAAATCTAATTATCCCTTATCTCACAAAGTCATTAATCATTCCCATCCA  
A\_14\_P126401 GACTGAGATTTCCCTCCAGATCCCATCAAGACATTAGATTCCCTTATCATTCAAGTATCTT  
A\_14\_P139090 AATGAAATCTGTCTTCTTCTTTTTCTTGTCTGTGGGGGAGGAACATTCAAGGT  
A\_14\_P134663 TAAAATGTGGCTCTTAAAAACTAAAGTGAACCTGTGTCAATTTGTTTGATGGTCATTACACA  
A\_14\_P104144  
AAAAAAAACAAGAATAAACTAAAGGGCACTGCTGAATAGACAGACAACAGCAACAGTAAG  
A\_14\_P112589 GTGTGCAAGAAAGTAGCATCGTCTGTCTGTGCAAGTCCTTCGAGTTAG  
A\_14\_P101615 ACTGCCTCTTTTATGCTCCTTGTATCCTAAATTTTCATCACCAGTGTTCCCTTTTTATCTT  
CUST\_1561\_PI426210822 GGCCGTGAAGCAACAGGACAGTGTAGAGGGAGGCTTAAGGAATAA  
A\_14\_P110113 CATTGCCACTGTATCGATCATGATCTGTCTCCCGTAAACTTCTATATTTATTCATTCTTC  
A\_14\_P120370 CAAACCAGGCTCATATGAACAAAACGCCTATGGTGGTAAATATGTAGAAGCATATTTTTTC  
A\_14\_P113040 CTTTTCTTATTGCTCTTTATGGCTCACTCCTAACTTTGGAAACCACAAAATCACACTTAG  
CUST\_3120\_PI426210822 ATGGGCAGGGTCAGAGAGCGGAGGAGGTGGAAGAATGCACTTAAT  
A\_14\_P201991 GAAATATTCTCTCACAGGTTCTGTTCCCTATTTCTGTATCTCACAGGTTCTGTTCCCTATTT  
A\_14\_P127971 TATTTGCCTCACTTGTTTCAGAAAATGGAATCATCAAGACAGATAAAGTATTTGAAGTGA  
A\_14\_P113657 AATACACCTGGCCTTGTTGCGTTGTCCTCTGTTCTGTAAAATTAATAAACACTGATAACA  
A\_16\_P19560521  
AAAACACAGAACATTTTCAGTCTCATACTTTGGCAAATCTCAAGTAAACACTCCAGAAGTGA  
A\_18\_P11544240  
AAGCCATGGCTAAGATTTTCTCAAACACTTTTCGATTTTCCTATTACTTTTCATACCGTCATC  
A\_14\_P137318 CTGACAAAATACTACTCACCATCCTAAATGGATTTTCAAAGGACTCCATGATGTTCTG  
A\_14\_P107992 CAAATTTCTTTTTCTTGGAAAGATATCATACTAGGCACAAAGACCCATTTCTAGGAAAGGT  
CUST\_2665\_PI426210822 AGGGGTGAAGGCTCTTTATCTGTCCCTTGCCCTGCAGAAGGCCAAG  
A\_14\_P201245 TCTACTTGGAGAAGTTCTACACAAGTTTGAACCTTCAGGATGATTTTTTCAGAATTTTTGGA  
A\_14\_P137141 CATGTTTCTCCACTGAATTATCTCTGCTTGTCTTTGTTAATTAGGGTTCAGTAATGATCT

A\_14\_P114576 C TACTTGAAGTTCTGTCTCAGTTGACATCCTACTTAATCCTTAGTCCACTTCACACAGAT  
A\_14\_P136875 T AATCTCTAAATCAAGTATTTATTATTGAAGATTTACCATAAGGGACTGTGCCAGATGTT  
A\_14\_P114431 T AAGTCTCTCTGGCTCATAAGTAGCACTGCTTAAAGTAGGAGATAATAGACTACGGAAGA  
A\_14\_P120981 C TGATTGTAGCAGTGATTACAGATATCATGAAAATAAAGTCTATGGTGGCTACCAGTCT  
A\_16\_P18077191  
TAGTGCTTTTTTCACTAGAACAACTGAAC TACTAAGTCTCCAGACACAATTAGTTT GACT  
A\_14\_P111776 A CAAAAAGGGAAAGCAAAGATTTTTACAGGATTCACATTGATGAGTCAACCATTCTGGTA  
A\_14\_P200070 T TCCATAAATAAATGATTTGCCAGAGAGAATAGGGATTTGGCTTTTCAACTCCTGGATAA  
A\_14\_P116002 A GCATCAATGTCAACTTCTTCACAGTATACAGAGCCACTTAAACAAACACACAGCAGA  
A\_14\_P128031 A TGTCATATTTCTATTTTTAAGATTTACAGATATTAACGACTCCTTGGGAAA ACTGGAC  
A\_14\_P123937  
GAGCAACAGAAAATGAGATCAAGGTCAGATCTCATACAAAGTTGCAAGATGAAAGAATGA  
A\_16\_P16221714  
AAACAGGCACAGGAATTGATAAAGAATAGCAATGAAGACTAGAATATTCAAATCAGAGT  
CUST\_2585\_PI426210822 C CAGAGCTTGCTGAGGCCCGTGCAGTCTGCATCTCTCCTGCAAAG  
A\_14\_P113280 C TACTGATGCTGTGCAGATACTTGGAGGCAATGGATTTAATACAGAATATCCTGTAGAAA  
A\_16\_P19971650  
AAATGGCATTTTCATCTGAGAGACAAATGCAACAAACATCACCTCTAGATCCATAAAGTC  
A\_14\_P202293 A TAAACCAAATGCTGTGTATAACTCTATCCTAGCAGTTGGTGATTAGATTGAGGCATCCA  
A\_14\_P124686 A TTCCTTGAATCTGGGGAAAGAGATTTACTCTCTGATTTGCAATTGTCTGACTTATTAA  
CUST\_3081\_PI426210822 C TACTTTGTGCTGCTGGGAGAGACCATGGGTCAGGTCACAGAGAA  
A\_14\_P104230 A AATAATGTCTATACATAAGACTAACTTTTTGCAGTTTCGTTATATTCACAATTCTACAC  
A\_18\_P11283699  
AAAAGAACAGGAAGAGCATAAGTAACAGAGATTTTGTTCACATGGTTTTAGTCATGTTCCC  
CUST\_445\_PI426210822 C TGCTTGCCAGTGGAACCTTCCAGGGCAAGAAGACAGTCTT  
A\_14\_P122139 C GTTTTTCATAGTGCACATGAAGGGAAACATTCTGCTCTATACACATGCCTTTATCCTT  
A\_14\_P111589 G ATAAAGAATTTGTATGGTCTTTGTGGAACGTCTCCAGGTTACAAACCCAGATCTC  
CUST\_886\_PI426210822  
CAAGATACAGTGAGTGTCCCTATTTACATTTGGAGGTCTCATAGCCATTTGCTTTTT  
A\_14\_P101906 A CAATTGAACCTACAATCTCGTCTTTAGTAAAATGAGGCGAAGTCAGATTTGATTACAGG  
CUST\_4429\_PI426210822 T TGTTGTCTTCTCTCCTTGGGAAATCTTCCTGCTATCAGTGAAAAAGGG  
A\_14\_P123798 G AAATGTTTGGCTAAAATATTGCTTTATTCACATTTTTGTCTTGGAGGAAAATCTAGGC  
A\_16\_P17851526  
AAA ACTGAGACCATTGTTCAATAGAATCTCCAGACGGTTTTATTTACCACATGTAATTCCC  
CUST\_9706\_PI426210822  
TCATGATGAGTATGATCATCATCATTATTATTTTTAGGCAACAGAACCCATTTCTAAATT  
A\_14\_P104952 C TAAGGCCACTGACTGGACAAC TTTTCTTATTAGGTGGTTTATAGTTAACTTTTCTTCCT  
A\_14\_P202362 C TGTTACCGAGAGTTTAAGATTCAAGAGATAGCAGGAAATATGCGAGACAGAGAAACTCA

A\_16\_P17229633

AATGCAGCCCTAATGAATTTTACATGTAAGACTTTTGTAGCATTCTTAAGATCACCATGG

A\_14\_P122648 ATAATGTTGATAATGATAACAATATCCCCCAATGATTCTCTCCACTGTGTGTTCCACAGC

A\_14\_P122211 AGAATTAAGAATGCCTAAAAATTAGTCATCCAAAGGTTTTCTTATTGCCAGTTCTCCCC

A\_14\_P130826 CTGCTTTTTAAAAATTCTCTCTCTCACAGTTTTCTTTGCTCTTCTCCTCACTTCCTGTTG

A\_14\_P114437 AGAATAATCTAGTTGGGGCAAACACTGAACTTTGTCAATTAATTTGAGGCTATTTCTAT

A\_14\_P103450 GAAAAAGATGTTTTGTTCATGTATCTTTGATTTTCTGATGCCAAGCACAGAGGGTATACAG

A\_18\_P22842274 AACAACTGGAAAGAATCTCCCCAGTCTGTTGTGATTCCCTCAG

A\_14\_P123799 TTAACAGGGCCTTTAGTGTGCCTGTAGACTTTATGAATTTCTAACGAAGAGAGAGGAT

A\_16\_P16876500

TAGGATTCTTAACACTCATCTATCTGCGCTCTTACAACTTTACCCATACTCGACTCTAA

A\_16\_P17789065

GCACCTGAAAATATCCATCTCTCTAGCCAGTTTTCTTTAATCAAGCAATGTGAACTTCAT

A\_14\_P126505 ATCACTTTTCAGATCGATTTAACTCCTTTTCCTGAAAGTTCACTTTAACTGTCAACCAC

A\_14\_P109828 ATTTGCTCTTCTTGACAACCTCACTCTTCTAACAATGAGAAGGAACTCCAGGAGT

A\_14\_P127966 CTACTATAAATTGCTTCCTAAGGCCTCACTACCTCTGAAATCACCAATTGCTTTGATGAA

A\_16\_P00699456

AAAGTGTAGAGAAGTCCAAAAGTAACTGAATATGCAACAGCCTCTGAATATCACTCTGAG

A\_14\_P129383 CTGTCTTGTGTTGCCAAAACAAATATAATTCTGACCAAAAATATGCTCAATGGTGGGAGAT

A\_16\_P35964496

CCAAAAGGCTTAATCACAGTATTCCTACTCTTCAGCAAATATGCCACTCTTTTTGGATTT

A\_16\_P00685518

TGCTGAAAGAGAATATGGTAGTTTCAAAGTTTGAGATTTTTAGATGCATGTTAGAAGTGT

A\_14\_P201778 ACCCTGGACAGAACTTTAACAAGATTATACTGAAGGTTTGTGGGAAAAGAAAAGGAAAC

A\_14\_P126486 ATTTGGACTTCCAGAGGACTGTGCTTGAACCAAACACACAGGTCT

A\_14\_P103345 TCAGCCATTTATAACCTCCTTTTGTGTTTCTCAACTAAAGAGGTTGGAAACCTAAA

A\_16\_P37227864

ACACAATCATCTCTTAATCTTAGGTCATGTGATACAATTGAATCAAGACAAATCATCCCA

A\_14\_P111460 ACAAGGAACTTCGGACACCCACAAATGCAATTATTATTAACCTGGCTGTTACTGATATAG

A\_16\_P01146584

TATCTCGCAGATTATTTAGAATAACCATCCCAACCTCAAAAATTTAAGTATCCCAGGCCTA

A\_18\_P15155729

ACCCCTATTTGCTTATCATAGCATGATCTATTTAACACATAACCGCAATCTTATCTGACC

A\_14\_P112810 GATGCCTGTAACTTTAAGAGAAATGAGAATAATTTGTTTGTAAATGCCAGGATGCATGTC

A\_14\_P138660 CTGCTGTTTTAGGAAAGCAAGTGAGTCACTGCCTGGCATAATAGAAAAGTTAACTAAAAT

A\_16\_P19842123

CCTTGATTAAGAATGTTTGCCATCATTAATTATTCATAATTGAGGTCCTGGACTTGG

CUST\_7651\_PI426210822 ATACCAGGTATAATGCTGTTTGCCTCCTTCAGAATGCCTCTCACAGG

A\_14\_P126058 GTGTTTTGTCTTTCAGATACATTGGTGAAGTAGGAGACATCGTAGTGGGACGAAT  
A\_14\_P131192 AACATTCCCATTTTCATAGATCACAATGTAAATCACTATAATTACAAATTGGTGTTAAAT  
A\_14\_P114898 CCATTATATGGTGACAATTACAGAAATGCTTTCACCTGTGGAAGAGTCATTCTAACAACA  
A\_14\_P122571 TTACTACCTGCTTTACCTTTCTGATTTCAGGTGAAGTATTTGATTACTTAGTTGCCCATGG  
A\_18\_P15973914

GCTCGGTTTCATTTATTTTCTCAAACCTTACCTCTAAATCTACCTCTACTATGAAGACTCCC  
A\_14\_P132706 ATAATCCTGAGAGATACAGCACAAATCTAAGCAATCATGTGGATGATTTACCACCTTTTC  
A\_14\_P124704 TGTCTTCAGATAAAGGTTTTACCTGTTGGAGCCTCTTATAGTCTGGCTTGAAAATG  
A\_18\_P14140083

TGGAGCAGAGTCTCTCCTTTAAAAAATAAAATGGTTTTACTTGCCTTTAAAATGCTCAA  
A\_18\_P10551034

AGCCACCCATAAAAATAACACCAAATACAATACGATAAAGCCTTATACTTCAGTTTTCCCA  
A\_18\_P14437634

AGTCTCATTCATCTAGTCTGACTTGCCTATTTTATTGACCCTCCTATTTTCATGATTCTGC  
A\_14\_P105753 GAATTCAGACACTTGTATTTGCCTAAGTATGAGCAAACCACATACATGTGCCCAT  
CUST\_2189\_PI426210822 TCCCCTGCCAACCAGTGTTTCTTGATGTTGTATGGTTATTCTAAGTACCA  
A\_18\_P22841621 TTCAGTGTTCCTCAGTTGCTTCTGCAGGCCCTTCCCTTCCTCCTT

A\_14\_P103905 CTCTTTGAGTCTAACTTCAGGATTGCTGTAAGGACAGTTTACTGCTAAAAGGTGGT  
A\_16\_P00685325

ATAAGAGTCCAGTAATTTTCTGGTATGAGTGAAGTAAATGGAAGAGTGTTAGTGGGTGAA  
CUST\_10078\_PI426210822

AAAGGCTAACTATGACTTTTGAGACTTATAAAGTCTCAAAGACTTTATAAGAGGTTAAA  
A\_14\_P126881 CTCATCATCTGCTCCAAAGTAGGATCACAACACAACCTTTTTTTCTTGTTATCACTTAG  
A\_14\_P113764 CTAAACTTACGTGTTAATAACTCCATTGACAGGTCTGAGTGCTCCACATGATTTGGTAG  
A\_14\_P139615 AATGCAATACTATAGGCCCTGCAATGGTTTGCATATTAAGTTCTTCTCTACGGTTGTATT  
A\_16\_P16191649 ATGTCATGGATGTTTCATTCATTCAAGTGTTCACTGAACACCTGCTAGGAGAGA  
A\_16\_P00648232

TTTGGTCACCAACAATATGTCTTCTAGAAGGAACTTTCTAAGACTCAGATCCAATCACAT  
A\_14\_P202448 AGGTTTGCATGAGTGAGTATGATCCATGGACATCAAAGAAGACAGACATAAAAATCTGTA  
A\_14\_P128512 AACACTTTAAATTTAGAATTGCTTAGAATTGACTCAACACTGCCTCCTTGCTGAATGGAT  
A\_16\_P01552997

AAGGTGCATGTAAACAAATAAGATGCTTGGTAAATCACCCATGATATGTTGCTTTCTGAG  
A\_16\_P19909810

CCATGCAACTCTTAAGTCTTACAGAATTAACCATGTTCTACCATTCAAGAAGGGTTTCT  
A\_16\_P03327573

AGGTTATCAGCGAACTTATCATCCACAATCTTAATTTCCAATTACCTGCGTTTTTCAGAC  
A\_14\_P108733 GTCACTGAAGCCCTTCCTTCTTATTCTTTTATAGTCAGTGAGGAAATGAAAGCGAAT  
CUST\_1070\_PI426210822 TTTCTTCCCATGTGGTCTGCAGCCCAGGCAGATGCTGGAGAATT



A\_14\_P115080 AAATATGTTTTGAAGCATTAAAGTATTCCCCTTTTGGGGGTTGCTCTTTTAGTTGGAAA

A\_14\_P105952 CTGTAGTTCCAAAAAGATCTTTCAACTGTTTCGGATCCATGCAAGTATTCTTATGCTGTAA

A\_16\_P17142669

TCAAAATGTCACATTTCAAGGTATAAGAATGGATTAAGCAATAAGCACTAACACTCCCC

A\_14\_P127136 TAAGAAAACTTGTTCTATACTTACCTAGTGGTAGATCTCTCACAGCACACTGCAGGC

CUST\_1554\_PI426210822 AATAGGCAGTGGGAACCACTGTAAGTTCACAAGCAGGTGACACAC

A\_14\_P120038 AAGAGTAATAGGCAATTTCAAGTGGCTGTGGCGATGCCATAAAAAAATTCTAGAAATTGAA

A\_16\_P03287496

AGAAGTGTGCTGAGAAAACTGTTGACATTACCCTCTCATTCTACATTCTAGAACAACA

A\_14\_P109537 AGACAGGAAGAGATGTTTTTCAACAAGTCAGGCAAAATGTTGCACACGAGTTAGATT

A\_14\_P127672 AGAAATTCTGTTATGTCCTGAACGTGAAATTCTGTCAACACTCTCAATGATAAATCAGTC

CUST\_4613\_PI426210822 TCACATCTCTGTCTGTGGGAAGCAGGGCAGAGTGAGGGAGAGTAT

A\_16\_P17644423

ACATCATTACCTGCTCTTCTTAGATCTTACACCCTTTTGCCTATAAAGCCATGTTTTCTT

A\_14\_P115567 CTGTGCTCTAAAGACATTTCTCGCATTACATTATTTCTTGGATACAAAAATTGCC

A\_18\_P13093770

CCCGTCCTAACCAAAATGATCCATAACAAATAACATTCAGATTGTCTAAGGCTAATGAT

A\_14\_P201225 AAGTCTGCCCTCATGCAACATGTGTAAAAATAAAAGCATAACAGATGATCCACAGAGAATA

A\_14\_P123984 TACTGTGCTGGGGAACAGAAAACTCAAAAATACAGTTGTAACAATGGTGTGTAGAGATA

A\_16\_P17149228

CCACAGTGAGTCAATACAAGCCTCTAATTTCTCCTCACCTAAGAAATCAGTAATTCTTCT

CUST\_4541\_PI426210822 GCACTTTCCTTCTTGGCTGTCTGTGGAACCTGTCTCTACATTCTAAC

A\_14\_P115979 GTTTTGAGAGTGTGCAACTCTCAAACAATAATATCAGGGATGCAGTGGAAAAGTTTCTAA

A\_16\_P21524456 ACTCTCCTTTAATTTGCTTATTTCTCACTTCTAATTCATTCCTCTCAATATCATCACCTT

A\_16\_P00912406

ATTACTAGGCAGGAAAATATGAGTTAACTTTACAGCAGGGTAAAAAGACTTAGGTCTCCC

A\_16\_P35533111

GCATTCTGACAGCATAATATTTGGACTAACTGCAAAAATACATCAGGAAAGAGTCTCAG

A\_16\_P41744308

TGCATGATGGTAACCTACCCTAAGGATTCTTTTATATCCAACACCCAATATAATCCAAA

A\_14\_P137490 TAAATGCCAAGGATGTCAGAGATACATGAAATGACATCCTTGAACTTTAAGGCTGCATAA

A\_16\_P15112421

AAGCACTAAATGCATTTGGGTAGATATGTGACTTGATGAAATTCAGACATTCAGGGTTA

A\_18\_P12195649

AAAAATCACCATAGCAAAGAGTTGTAGAGAACTACCTAAGGGTTAACACTTTCACTGCA

CUST\_5977\_PI426210822 CTGATCCAAGTGAGCAGATAGTCTCCTTATTGTTTCAGGGTTTCCTCC

A\_14\_P102324 CAGCGCGTTGACTTATTCATGGGTCAATTCAGCGAAGTCCTCTTAACATCTATAT

A\_14\_P201287 ACGAGTAAGCACAGAATTCAAAGCATTCTGCAGCCTGAATTTTGAAGGTAAGTATGAAC

A\_14\_P134673 CTCATTAGAGTCTACCCCTTCTGTTGCACAAAAAGGAGGTTTACTTTCTTCAACAGC  
A\_14\_P130995 TAGAAAAATATATTTTCGTGTGTATGAAGAAAGGGGAAAAAGAACCCTTCTCTGAGACCTC  
CUST\_4464\_PI426210822 GAAAAAGCAGGTTGTGGCCACCCTTTCATGAGCCTTGACTCTACT  
A\_14\_P120992 CGGCCAAAAGAACCCTAAATGGAATAACTAAAAATAACTAATTTACTCACTGCCACAGGG  
A\_14\_P201581 CTTTCATATTTTCATCCTTTTGCCCAATCTTACCAAGTAGTTAAGGCACTTCTGTTGTTGA  
A\_14\_P134342 CTTACAGAATAAAGATAAAACCTTGGAAAAACACTTGAAAACCTGTGGAAAATGTGGCTT  
CUST\_102\_PI426210822 CTATTGACCACTTCTTCCCTCCACATGATGGCTGGTCTACCTACCT  
CUST\_10084\_PI426210822  
GACCTCTTGTTAACTCTGATTCCCATGTCTACAACCTAAGAATGATACATTATGTTTAGT  
A\_16\_P16643824  
TAAACCCAACAGTTGTATTAAACCTAGTTGTTTAAAGGAAAAAGCATCTCGTCTCTCAGG  
A\_14\_P134014 AGCAGCCACCAGAGATTGACAAGAAAAATGAAAAGGTAAGTTGGGAGCATATGAAATT  
A\_14\_P103642 AGAGTAGCAAAGTATGTGACTGACCAAGTTGAATGAGCATTTCATTTCCATATAAAGTG  
A\_14\_P105555 TGTTTGTGTTGTTTAGACATGCTGATCCACGGACTACAGTTTGTTCATCAAGGTCTAAG  
A\_16\_P21237116  
ACCCAGACAAGATCCTAAAAGAATTGGAGAGATGAAAAAGTGTCCCTAACTCATTAAATCC  
A\_14\_P106937 CCGTCTCTCCAGTGAAATGGTCCTGAAAATTAGGTATCATGTTTTGTTTAACTCTTTATC  
A\_14\_P124428 CTTCCCTAATGCATAATAAATTTACAGTGGTTACTTTTATGTCTTGTGTCTTTTTTTTTAAA  
A\_16\_P20170838  
ATATGTGGTATTCACTGACTCGCTTTCTTTACAATTTCCATTGAGACCTCTTCTAGGAAT  
A\_14\_P137216 CTAGTTTTTGATCCCATCAAAGGAACTTATTCCTCTGAACGCCTATGAAGATGATGTT  
A\_16\_P58424463  
TCTTGTCTGTGCTTAAATGTCACCTGATTAGAAATATCCTACTACTCCAAACACCCTATC  
A\_14\_P137770 TTGGGCTTAGGATGGACTCAGTTTGGATGGTAGCAATTTAAAAATTTTAAACATGTTGCA  
A\_16\_P15570911  
AAAAAAAAGTAGTTCATTGAGGGAAGAAGATACCACTAACCAACAACACAGTCTCTAACCC  
A\_16\_P00685368  
GAAACAAGTTTTGGAAATTCCTCCTATTGCAGAAAGCATTGATTTGCAGTTTCCTGAAT  
A\_16\_P16191043 GAAGGTCTTTTCTCTTCCAAACCCAGCATGCCCTTTGACATGAC  
A\_18\_P10490919  
AAGAGACATTACTTTTACCCCTTAAGCCATAAGTTGGGTTCTAATGATCTTTCTGGTCAG  
A\_14\_P131053 GTGATTTTCAGGAAGTAACTTCAGGTAAAGGTTGTTACAGAACACATTTCTTTGTCTTGGA  
CUST\_5283\_PI426210822  
GAGACAGGAGACTCCCATAGATTTTTAGCAGGAAAAGGTAGATTCTTGCCTTTTA  
A\_14\_P137404 TAAAAGAATTGTCAGACAATATGAGATCCCTGAACTTTCTCCTCTCTACCTCAAAAATC  
A\_14\_P120705 ATTTTCATCTTCCCTCACCTCAAATCCCTGTTCTATGTAATGGACATTAGCAGATCTATAT  
A\_14\_P110857 ATTTTACTCTGCAATGTATTATTAGACTTGGAGAAACACTGCGAGTTTAGGTGGTTGTTG  
A\_16\_P39949113

ACACCTGTCTTCATAATACCTAAATATAAAAATCTCATACCCATCAATAATTCTCAAATGC

A\_16\_P16774265

AAAACCTCCATTTGTATGCATTTATTCTGCTTCACACATTATGTTGTCAGTCACTTGCAA

A\_14\_P118108 TAAGAAAATAAACATAAAGAGAGGAAAGCCTATTTCCCCCACTTAGAATCACAGTCCAAC

A\_14\_P112227 TGTATCAACAGGTGACAGTTAAAGGATTTGAACCTTTAATTCAGTTTGCCTACACTGCTA

A\_14\_P138280 GATCTTTATTCTGCTAATTAGTTTCTGCAAAAAATGGCTGTGATTAATTCAGTGCAT

A\_14\_P200890 CCACACTTCCTTGCAAAACAGCACAAAAACATTAACTATTCTAAACTTCAGCAACTGTAG

A\_14\_P132065 CTGGAATACTACTCGTGTCTAGTCATGTTGTATTGAATGGTTCTTATTACCACCAGG

A\_14\_P108286 ATCTGTCTCTCTTTATGGTCTGCTTGTGCTTTGAGTATCTCAAAATTCAGCCATATCAAGAA

A\_14\_P112932 CTCCAATAGAACTTATTTTACCTTGCCATATATCTAATTTTTCTGGCCATCCCTGGTAAAG

A\_16\_P03666171

TACCATGCTACAATCTACTCACCTAACATAATGAAGTCGGTATCATTCCCTAGAGACACA

CUST\_3408\_PI426210822 CATTCCCACGGCATCCATTCCTAAGGTCATTTGGAGAATTCTCTGT

CUST\_7142\_PI426210822

AAATTTGACCTTAATGAAAATAGAGGATTTTTAATGGAGATCAGAATTTTCACTTATAAA

CUST\_3487\_PI426210822 AGTTTGATTTTTAAGAAGGAGAGGGACAGACTGGACAGACAACTCACA

A\_14\_P125828 GTAAAAACACGGATAAGGTGTAGCAGAACGAACTCAATTTTTTTTTAATGTGATGGGATA

A\_18\_P13181327

ATAACAGGCTGGTATCAATTGTCATGGGTAAGTGCTAATTGCTGAAGATCTACCAATTTG

CUST\_8867\_PI426210822 AAATCTCACTGAGGATAAACAGGGCTCATCGGCCATTGCCGAGAA

A\_14\_P110308 ATACTCAGACATTTTAAAGGAAGGACAGCAAAGCCTATTCTGCCTGCAGTTTAAATAAGAG

A\_14\_P122512 AGAATGGGATGATCAAAGATTGAGCAGAAAGTTTGGAAAGAGGGGTGAAACAA

A\_14\_P103865 CACTTAGTTCATATTTGGGAATTAGAGCCTTTTCAAACCCTTTTGTGCCTGGCTAG

A\_14\_P133916 GAAAATCTCTCCTGCAGTCTAACTTTTATCCCTCTCATACTACTTTCCAGAGTTAAAACC

A\_14\_P114369 AGAAGCAAACATGCATAAATGAATAAAACATTTATTGGGAAGGGAGATTCTGTCATCTTC

A\_14\_P133966 AAATAATTTACTAAGGGGATTGAAAAGGGGCAGAAAATAAGGTCCCTTTAAATAACACCA

A\_14\_P115932 CTCATGGTCCATTTTCTTCTCTCTAGTAATGACCAAAATAGATTCTGTGGCTGGAATCA

A\_18\_P22839046

TGGCCAAATCTATCAGTCTTTTTTTTTTTTTCCCTCTAGATTCTAAACTTATCTCTTAAAG

CUST\_7813\_PI426210822

GGGCCTCCTTGGAATCACAGTAGTAGAAGAGAGGGGTATAGAATTA AAAACAT

A\_14\_P200336 ACCTAGAGTCTGTCATGCTGTATCTAAAACATTGCGCTAGATGTTATTTGGACCTAAATC

A\_16\_P02119069

AACATGGAAAGAAGGTGAATACACAATGCATGTTTCTTAAGGCATTACATGTAAGGCTTG

A\_14\_P137703 CTGGTGCCAAACACATGAAAGGAATATAAGGCTATCATTTTTTCACTTCTAACAATTCT

A\_14\_P135802 CTAAGCCCTTTGATATTAATGAGTGTGTTGTAAGAAGTCAGTATCTTCTGTTGGGTTTGCA

A\_14\_P115192 AGTTAAGGGTCTCCAATAGTCTCTTCTTCATTA AAAATGAACAAGTAAACCCTTCCACAAT

A\_14\_P102704 ACTTGCCTTGGACTGTAGAACAGAACTTAAATGGGAATGTATTAGTTTTACA ACTACAAT

A\_14\_P133561 GGCAGAAACATTATTGTTAAATGTAAACTCATTGCCAAGGCTATGTCATGCTATTCTGG  
CUST\_3754\_PI426210822 CATTACTTTCCCTTGCCCTGTTTTTTTAGGGACCCTGGAGTGTTACCT  
CUST\_1054\_PI426210822 CATGCTCATGATAGGGCAGCACTGTTTGTCCCAGATGGTCTCTT  
A\_14\_P122409 ATAGAGATGTGATGAGCACTGTCCTACTGTCTATAGTGACACACAATTAGGTAGACTGAAAA  
A\_14\_P110949 CAAACACTCACCTTCTATATTTTCGCTGGTTAGCCTTGACTTCATATGCAATAAGATCTGG  
A\_14\_P124832 ACTTCAATAATTCTGCCACTTTTCATCTTGTTCGAATGAAATATTTCAAAGTTTGCCCT  
A\_14\_P113631 ATCCTGGCATGGATGTATACGGAGGAGAAAATATTGAACTGGGAATCAAGGTTT  
A\_16\_P18213890  
TGGACAGCATAGTAAGGGATAAGGAGTATGTAAATTAGAGAAGCAATGCAAATCAAAGCA  
CUST\_3159\_PI426210822 GAAGAGTTTGGAGGCTGAGCTCAGGGCTCTCGAGTGCAGATCCAG  
CUST\_8066\_PI426210822 GAGATGCTACTCAAGAGAGGGCTTAATTTGGAAGCCAAGTGGATGGATA  
CUST\_6169\_PI426210822 GGACATGGATGATACTCCTGTACCCGCTTTCTTAAAGACTCTCAGTTGA  
A\_14\_P111332 CTTTTTCCCCTTTTCTGTTTGGTTTCAGAGTGGAGAGCAGCCCAAAAATATG  
A\_14\_P137899 GAGCAATGAATGTGAGAGATGTGGTCACCAAGATCTAAGTTACTTGTGAAAGAAAAGTTA  
A\_16\_P19742486  
ATCCCCTTTTTGCTGTAAGAAAATAACTCCAGTCTTGTGCTACTAACTCTCCTGATAAAA  
CUST\_2480\_PI426210822  
GTAGAATAATTTTCAGTCTGGTTAGCAATCATCACATCCATTTAGGATTAGGACAATTCA  
A\_14\_P109838 ATACAAGGTAGGCTTTTTACATTTTCCAGGGTAAAAAAGGGGGTAACTCATTGATGTA  
A\_14\_P106725 CTGGATTTACATACTCCAGTGGATTTTCATCATTTCATGCAAAAAGTCAAATAGCAACT  
A\_14\_P105781 TTGCTGTCACTAGGAGGGAGAGTTCTGAATATATTGCAAGATACCTAAAAATAAACAAGC  
CUST\_10275\_PI426210822 GAGCCTTGAATTCACTTTGGGGAAAACAGAAAAAGCTGTCATGATGTTTCAG  
A\_14\_P118847 AACTTCTTTTCTCATGTCACACATCTTTGGGGATTCTGATAAGATATGTTTGGAAATAAG  
CUST\_4837\_PI426210822 CATCTCTAAGTTTCCTTACCAAAAAGTAATCAGACAAAGGGCCATGTGGCAAG  
A\_14\_P200704 GAAGAATGAGAGGTCCAGGATCCAATCTTAATTCTAAATCCAATGCATTTATGTTTTCA  
CUST\_3852\_PI426210822 GCATCTCAGCAGAGGCCCTTTTTGGGGCAGGAGGGATTGCATAG  
A\_16\_P58424213 GTATTTAATGCCAGGAGATTTGATGAGATCACCCAGGGTGTGAGGG  
A\_14\_P104061 ATTTTTAGAGAAATTGAAGGACTTCAGATCAGCAAATCGTTAAGTATGTTTGGACAGTCT  
A\_14\_P106207 AAGGCTCAGAGATCTGCTGGGAGTTACAAGATTTCTCTTTAATTATTGCATCTAGTGTC  
A\_16\_P20693806  
AGGTGAGATCAGAGTAGTTGAACTGTAGATTTGTATGTCAAACTCATAGTAGTAGGTGT  
CUST\_5441\_PI426210822 CTGTGTAGAGAAGCTTTAGTGCGATGGGTGTATCACTCGTATGAAGTAGGA  
A\_14\_P136774 ATTTACAGAGGATTTGGAACCAACGTTAGAAGGGATAATCTACCACGACTTAATGTCAA  
A\_14\_P108930 TCCAATGTGAGAACGAAGATTCATATTTAAAGGGAAATGTGAGGTAATTCTGTGAATCT  
A\_14\_P104446 AGCGGCCTCACTACTATTTTAAAGAATGTTAACAATATGGTGAGTATTTGGGTTACTGTG  
A\_16\_P18825056  
AAAACCCATCTCTCATACTTCAATAGTGCTAATACAGTGAAGTACAGTAACTGACACAGTAATTCGGAA  
A\_14\_P137500 ATATACTTGTCTTCCCTGTCTGGGCTGGTTTCAGAATCTATAATCAGCCATCAGAAAATTA

A\_16\_P18911043

TGTCTGTGCCTCTATGAGTAAACGCAAAATGTCAAGAAAAGGATTCAATTGTCTTGTATC  
CUST\_9905\_PI426210822 AAAGAAGAGCTGCCTTACATGCAGAGCACTCCCCTGTTCTTTGTT

A\_18\_P22841033 GGGAAATGAGTGAGGAGAGAATTAGAAACCCAGACATCTTCTGCCTGATTATAG

A\_16\_P21631800

TCAGAAAACAACCTGCAATCTAAGAATATGAGCCTCTAATACAACCTACCTTTGAGTCTGCG  
CUST\_7021\_PI426210822 TCTCAGAGTCTCAGGAACAGATGTACATGGTCCATCAGAGTGTGG

A\_16\_P00789735

CCCTGCCAAACTTATCATATACAATTGTTTGACATCACAGATATTATCAATCCCTAGGCC  
A\_14\_P129494 CTATTTCTTCTACTGTTTAAAGGTAGACAGGATGGGCAGTATTTTATTAAACCTCTGGCTG  
CUST\_647\_PI426210822 ACATCAGAGTTCTCACTTCAGAGCTGCCCTCAAAGGCTCACTGGG

A\_16\_P01981644

GACGGCACTTTATTATTTGTTAGCGAGTTGTGGTTATTCAAAGATAGACCCAGATCTTAG  
A\_14\_P107224 GGGAAATGACATGACACAAAATTACAAAAGGGTCTTTATTTGTAAAAAGCCAAAGGGGC  
A\_14\_P107154 ACCCATTACCACTTAACACAGCATATAGATATATGCATATACGGATAGATTATATTTATT  
A\_14\_P110977 CAGAATAGGGGCATTTATTTTATCATATTTAGGGTGGGTTAGGAGTATCCTTTCTGGAG  
A\_14\_P109903 TTCAACTTGAGAGTGATTAAATGCTCTCTACCAGAAGCATCTTCTGCTTTTAACTTGATG  
A\_16\_P19774440

AAAAACCCTTTGGAATATAGAGAAGTGGCTTGTTACTGTGCATCACTGTTCACTTAATCC  
A\_14\_P130246 TGTAATGTTAAAGGCATAAAACAGTCCCATATATTGCAGATATGTGTGCAGTGCACCTTG  
A\_18\_P21686054 AGTATGTCCTACGTGAAGTTTATTCCTATCCGTGTGCTAATCTTTACCATAGCGTTTGG  
A\_14\_P103648 CTGCTTTGCAAATTTTAGTTTGTGTATGGAACCCATGGGCTTATTGAGTGAATTTGTTAT  
A\_14\_P130630 CTTCCAAGTTTATATCAGATCACTGTTTAACTTGAGGGACTTCTTCAGATTCTGTGGAAA  
A\_16\_P16556182

AAAAGAAAGGGTAGGTTTAGAATTGAAATGTTACTGTCCACCAGAATTACCACATCTCAGA  
A\_14\_P109626 TAGAGCACTTAGATTTGTGTTATCTTGGAGTCTTAACCAAATGAATCTTTTGTGCCTGGA  
A\_14\_P119887 ATGAGTAATTGCTACGCTAAGTAAATGACTTTGCCATTGAGGACACCACCATAAAGTTAA  
A\_16\_P33027723

AAAGAAGACCCTACCTTTTGAAAAATTTCCCTCTAGATGATGACTCCAAGAATACTCTCTG  
A\_16\_P15227116

ACAACAACCTTACTCCTACCCAAAAAAGAGAAAAAAGTGTCACATGAAGTTAAGACAATCCA  
A\_14\_P120201 ATTCTTTGGGCCAGTGGATTGTAAAAAATAAAAAAAAAAATCATCTCATCTCCAGCACTTG  
A\_14\_P121695 GACACAAGGACATTGGTGCTTCAGAGCCTTTGAAGATGAGAAGAGAG  
A\_14\_P113961 CAGTGACAAGTATCCATACCAACTTCAAAGGCTTTTTGTTTTGTTACAAACCAGCAAAA  
A\_14\_P108512 TGCCCTGTTATAATACTTCTGGTTTTCACTGCAATATAAAGCAAGATTTGATCCACAACC  
A\_16\_P16191298

GCAAAAGGGGACGCCAACCTTAGATATGAGGTCTTCTGAAAACCTTTTAAAATTTGTTTAT  
A\_14\_P137881 AGCACTGAGTGAAATGATTGCTCTTCTTAGTCAAAGTAGAATTTGAGGACCTCATATTGA

A\_14\_P129544 CTATCTTCCCATCCAATACTTGGTGACTGGTCTATTCAAGTTCAAGTGAATGTGAGTATA  
A\_14\_P124013 ATCAACTTCCAGAATTTTTCTAAGAATGCAGTTTTGACTTGCTGAACTGATGAGGATGT  
CUST\_7903\_PI426210822 ACCTTCTCTTCCAAAATCTGTAAACATACTGTTTCCGCTTGGCAGTCTTGATTT  
A\_16\_P18345865  
ATCTATTCATCCTTCTTACGGACTTAACAAGTAGACTGAGCCTTATAATGTCCCACAAAC  
A\_14\_P127228 TAAAACCAAATTTACTATCTTCCTTCAGTCAGACTAGTTCTGCACTTCAACTTCCTTGCA  
A\_16\_P17497099  
AACTTACTCTAGTGCTTTTCATAGTCTTGCAACACATTTTGAATCCCTGGTTCTCATTTC  
A\_16\_P00916247 CTTGCTGATGCTGAGTTATCTGACCTACTCTCCAAATAGCCAACTATCTGCTTTCTT  
A\_14\_P200805 GGGACAAAGGGTATTTCGTATCACTGTTTACAACATTCAACCACGAAGTTCTATTTTCTTA  
A\_14\_P130517 AGAGGACAGTTTTGAGACTTAGAGGAGGACGGCATCAGATTTACATGAAGTC  
A\_16\_P38819342  
AGTGCCCTAAATACATTCTATATTCTGCACCAAATTTTTGTAAATTAGCCACTCCATCCT  
A\_18\_P14134015  
ATTCCTACTTGCTTGGCCTTGTCAAATGTCTGATATAAGGAGCATTTTTTATTATGGTTGT  
A\_14\_P112033 TGTCGGTCATATTTTTCAGCACGTCATCAATCCTATCATCTTCAATAACAAGTGCAAAAA  
A\_14\_P119151 GTGACAGGACGCTGTATTGTTCTATGCCACCATTCTCTATCAATAAATGGTTTAAAGTTTT  
A\_18\_P10607008  
AAGGGCTTCCGTAGATAAATATCTCTCAAGAGGTCGTTATTATCTCAAACCACTGAATTT  
A\_14\_P103783 GGAGAAGATGTTTGAAAAACTGACTCTGCTAATGAGGTGAGAGGTTGAATATGTCAAC  
A\_14\_P119004 AAAGAAGACAGTATTTTTCTCTACTAAGCAAGCAAGATTTTCGACCTAAGATTCCAAGG  
CUST\_1354\_PI426210822 CCCACGGCCTTTGTGTTTGTGCAGGAAAAGTTCTTCCTGGGAACA  
A\_18\_P16990735  
GGCTCATATCCTAAAAACCTAGTTTTTCCCCTATTGTAGTAAAAATGAATCATGTGTGCC  
A\_18\_P14136960  
TGAGCATAGTATTGCCTCATTTTGACCTTTTTCTCTGCATATATAGATATAGACCAGGCA  
A\_14\_P124461 AATCACTGTGGTGAGAGTTCTAAATTATACAGTCTGTGTGAGTGTATCTCCATGTGAT  
A\_16\_P16191538  
GCAGATTGAATATGTTTCTTTTATGGGTAAGAAAAAATAAAAGCATTCAAGACCTCTCA  
A\_16\_P00246621  
ATTTTAGGTTGCTTTTCCACATATGAGTTGAATCAAACAGTGACATCTTCATACCCTCTG  
A\_16\_P20026839  
ACTTACGAACCTCTGACATTTAATATTTTTCCCAAGGCCTAAATTATCCTGCTTGCTACT  
A\_14\_P120059 TGTTGAAGGTTTCAGAATGCTAAGCAAGTAAACAGTGCACTTAAACAGAAAATGGAAGGT  
A\_14\_P105446 AAATTTTAGGAATTCAGAGAGGTCCTCATGTTCTCTGAACTAAATCACTTGACTCAACT  
A\_16\_P03487144  
AATCTGCACATTTTCAAGATCAAAGCAGTTTACAGAAGTATTCAAGACACACCAGTGAAG  
A\_14\_P101267 CTTTAGTATATTTTTATGCAGGCCCCAAAATTTCTGTCTCTAGGTTGCTGGTAAAATTCC

A\_16\_P17216575

AACCCGAATATCTGATCTACGGCTATCAACAGTTACTGTAACATTTTTCTAGATTGGCTC

A\_14\_P111303 CCAACATTTCAAAAACAATCAAGGGAGAGATCTTAGGAACTCCTAGATAAATGCCAATTT  
CUST\_3458\_PI426210822

ATATATTTAAAAACATATACATCCAACATCACTGAAGGTATGTATTTTTAACTCCTCCTT

A\_14\_P110309 TGGATTAATTGATACTTTTCCTTACGATGTCTTAGCCTCCTCGGGAAGATGAACAAAATTA

A\_14\_P117613 ACCCTTGATTTACATGTTTGCACACATATGTAAGGTATCTGTGCTCATGCATGTGAATTA

A\_14\_P102377 ACATATCCCTGAGGGTCTTGGGCAGTGAGACAGAAACATATAGCATTCTAAAATAATTAT

CUST\_5466\_PI426210822 CTTCTTTTCAACAACAAGTGCCCCAGGAGAGTGGCCTGTAAGTC

A\_14\_P127347 CTGGATCTCCATGTAATCAGACTTACTAATGGTAGAGGCCTTCTACTTTTCTTTAGGTC

A\_14\_P201350 CTGCATTTTTCTGCCAATTTCAAACAAACAAATCATCAGGTTGATCTACAGTAATCAGT

A\_14\_P137133 CCTACAGCATCTTTCTATGTTGATACATTAATATCTGTTGTGATGCTTCCTCTTGGCTTG

A\_14\_P104887 ATGGAACAGAATGGTCTGCTTCAATGTTTATCTATGTATGTTTCATCTTCATGGTTAAAGG

A\_14\_P135028 ACTCATTCTAAAGTTTTGTGTTTGTGTTTACCACGTAAGTCAGGAAACATCCAGTTC

CUST\_4189\_PI426210822 TGCCACTTTTCACTCTTTTTTTTCAAGTTTGAAGTACTGTGGAAAGATGGGA

CUST\_873\_PI426210822 CACTCTGTCCTCGGCACTTCTCTTTCTTCCCCTGTATGGGCTCTG

A\_16\_P30952485 AAAGGTAAGGGACACAGACGGGACCCCTCCTCAGCAGCAGGCCCC

A\_14\_P119040 TCTTCCCCTGTCTCTATACTCACCCCTATATATAAGTCATTTCTCTAACACCAGCAG

A\_16\_P18112568

CCTTGCCCCAAGAATTAAGACATCTTTACCCATCCAAAATTTTTGATGATGCCTTAT

A\_14\_P136252 CTTCTTGTGTGGGACTGAGAAGCAAGATATCAATGTAGCAGAATTGCACTTGT

A\_16\_P20814225

ATTGTTTTCCATAATTTTAAGGCCATACAAATCTCAGTTACACAGTCTTTTTACCCCTCC

CUST\_6943\_PI426210822

GTCGGTTTACCTTCAACTGGTTTCCTTCTTGTCTGAAGGATATATTACAAGCATATTGA

A\_16\_P58424505

CAAAAAGGTAATAACTTTCTCACTGTTAGGGTCAATGTTGTTTCAGTGCTGTGTTACATA

A\_14\_P104726 TCTCGTATTTATCTCATTGGCGTCACAGTCTAAGCGATCTATTTCTGTTATGTTTTCTA

A\_16\_P02447379

AACCCGTAACTATCCATTCCTCATGTTAAACTATCTGGAACAAAAATAAGTAAGGCAGAA

A\_16\_P20048175

AATTATTCGACTACATAATCAGACGTTAATGGAGAAAGCATATTACTAAACCTGGCGGGG

A\_16\_P37397816

ACACTCCAAGTAATGCAATTCCTGACTTTACTCATGTTCTCAAACATTTTTTTCAGAAGCA

A\_18\_P10030480

ACTCCACTAACATCTCAGACTCTGTATTGAATGAACTCATGAATTAACTGAATCCCAGA

A\_14\_P135235 AATAATTTTACCTGCAACAGACAACGATCTTGGAAAGTATATCCTATCAACTTGTCCAA

A\_14\_P136638 ACAAACGAAAACACAATAAGGCTTAAATATTCTTGGCATGAAACCAACGTTTACAATGTT

A\_16\_P58424307 ATTCAGAAGCAGAATCTGAGATGGGGATTTTTGCCAGAGATTTATTGGGG  
A\_14\_P128575 TACTGCCCTAAATTCCCCTTAAAAACCATATTTTCAAGTGTCTTCAATTGTGGTAAGAGT  
A\_14\_P101035 ATTTGTTTGGCAGACATCTGTGTAGTTCTGTTTACAGGAGAAAAAAGTCAGATTACTAAA  
A\_14\_P107107 CACCCGAATCTATACTTTTTTAGAACTCCATTCAGCATCTCTTTTGAAACACTGTTTCTC  
A\_18\_P12611058  
AGCATTAGCAATTTTCAATGCACAGTTAGCAGTCAAACCTCTACCCACTTTTCAGTAACTA  
A\_14\_P202090 TTTGTATGCATGTCCATTATAGCAAGATTCTTCAATGTGGTGGTGTATTTGCTTTCACATC  
A\_18\_P22839759 ATGCATGTGTGTGCATGCCCCCTTATCTCTAGCCTGATTTTCCATTG  
A\_14\_P118387 GGTAACATTTAACATGTTTGCTTAAAGATTTTTTTTCTCAGTGAAAACCATCCCAGGTC  
A\_14\_P137290 TAAGGGTTGCATTAAGTGGAAACACACCCTTATAATTCTCTCAAGACCTGCTAGATATT  
A\_14\_P129783 TATTCTGCACAATCAACTGGGATAAGGAAAGTCCTGAAAATGATTTTCAAAAACATGCAA  
A\_14\_P108009 CATGAATTTGAAACTGATGGGAAGAAATGTAATACTACCAGCACTCTCATAATCCACACT  
A\_14\_P132548 CATTCAATTATAAAGACCTGATAGTTGCATTAACCCCTCCAAATTACACCCTTAAACTCC  
A\_14\_P110385 TTGAGGGTTTTCTCTGAAATATACAACTTAAAGGACTCTCTCTGAGGTTCTTTGACTGA  
A\_18\_P16797052  
AATTAAGGTAATTCAGAAGCATCCAAAAGAACCATTGAACTCCCTTACTAATCCTCTTGG  
A\_16\_P20255895  
ACCATCCAAGAAATGTTTACTTTGATACATACTACTACCACCTTTATCACATCAATTGCC  
A\_16\_P21502912  
CCTCATCACAGGCCAAAATATTGCACAGTATTTCAAATCTGGTTCATAACTCAATTCAGT  
A\_14\_P122529 AGACAATACAGCAAATTTCTTATCCTGGTGGCGAGATTTAGGGGTGGATGAAA  
A\_14\_P123376 CGGTTGAGAACTTGCTACCTAAAACCTATCTTTGGTAATGTAATTTTAAGAGGTTTCCTTC  
A\_14\_P123837 GAATTCGACCCTTAAAACACCACACAACTTTTGGTTCAGAGAAGGAAAGTGAC  
A\_14\_P119403 TTAGGGCAGAGCAGCAAAATGTGAGTTTTTACATACATTCTAGTTCTATTTCTGCAAACA  
A\_18\_P24085130  
AGACGCTTTCTGTTGTATTTACTCCATTATCAACCCAATTACATATTACTCACAAAGGCA  
A\_14\_P134629 CATTTTCTTCTTTTGTCTATAGATAGAGAAATTGAGTCAGACTTTTTTGTTCATGGTATC  
A\_14\_P111669 AGAATTCTCTAGTAAAGTGGTTTGGGGAATAGAATTATAGACTTCATCCTCTAAGCCCAT  
A\_14\_P125834 AAGTAACAAACATTTCTCCATTGTAGCCATAATCTGATTCCAGTTTTAGGTAACCCAATT  
A\_14\_P107481 TAATTCCTCTATTTGTTAAGAACGCGTCTCAAGCAGAATATTTTTAGGCAGTCTGGCATT  
A\_14\_P110234 ATGTTTAGGTCTTTCAGGATATTAACATGAAGGTGGATTTGGTTAAATGGGTGTGTTACT  
A\_14\_P138000 GTCATCAAGAACAGCGTGAACCCTGTATGGAATGAGGTATGTGAGTTTTTCTC  
A\_14\_P133281 GTTACTTGAGGAAATGTCTCCATAGTCTGAATGTTGGGACCATTGGATTATAAAAAGATGA  
A\_16\_P17572515  
GTGCACTGTCCTTCTTACTAAGTTGCCAGAAGATTAACAATCCATAATCTCCCTTTCATT  
CUST\_9767\_PI426210822 ATGGTATTGACCGAGCTGTCCCTCCGTCTCTGGAAGCCCTCCATC  
A\_14\_P128097 GCTAGATGTTTCTAAATTGCACTCAGAAATTCCTAAAAGTATAGCAGCAGCATTTCCCAC  
A\_14\_P133405 GTCTACCAAGATCATAAGCAGCCAGAATACATACATGAACAGAACCGATTTTCAGTTAATG



CUST\_9173\_PI426210822

AGAGTGCTGTTCTTAAGGAAATCATCAAGAAAGACTAAGCACCATTGTTTTGTTTCTGAT

A\_14\_P101904 TGAAGTTATTACTGATCTTGACCTTCTCTTTGGCTACCTTTAGACAAAAGAATACGCCAAT

A\_14\_P131466 CTTTCAGGCAGTAACAGAGAAGAATTTTGAAACAAAAGATTTTCGAGCCTCTCTAGAAAA

A\_16\_P01251620

GGTGAAATGACAAGAAGTAAGAGAGCCTGAAAGTAAGAACTTGACTCTACTGTCTTAAGA

A\_14\_P118318 CTTTTCAAGTCAATGTTTTTAGCCTTGCTACCATGGCTGCTCTAGTTATGACTACTTTTT

CUST\_1188\_PI426210822 ATTTACCGCTTTGGGTTATGGTGAGGAGCTCCCGAGAAAACCTCAG

A\_14\_P129597 CAGTGATTTTCTTTCTTTTAAACAGGATTTTCATTTTCAGGTGGATCAAGAAGTGAACGTTG

CUST\_8166\_PI426210822 GTTGAGAGAGGAAGGCAGTGGGGCAGGGCTTGAGGGGGCAGAGA

A\_18\_P25902631

AATGCCCTATTGTATGTTAGAACCACAAAAGCGTTTACATTTCCATTCAAGCCCTCATTTC

CUST\_2022\_PI426210822 TTATGTTTCAGTTGTAGCTGTGCCCCCCAACTGCTTTTCCTTCC

A\_14\_P116781 CTGAAGAAAGAAAAGGAGCCTAATTTCCGAAATATGTTTACTAAAAAGCAGAACACGCTG

A\_14\_P136347 CACTTCATATCTCAACATCATGTGGCTATTCTACGGACATGGAGATTGACTAATTTTAGC

A\_14\_P101773 TTTCTTAAATATCTATACATTTTCATGTCTTTACCCGCCCCATACACACAAGCACGTAT

A\_16\_P20804207

AACTGAGAATCTCTGACAATCCATAAAAAGAACTGAATTTGCATGAGAACTACTTGGTCA

CUST\_10075\_PI426210822

TGTGATAAGGGGCTTGGTGGAGGGGATTTCTTTAGGGAAAAAAATTTTTTTTTTC

A\_14\_P100711 AACCTTACAAGGGAAAATAACACTAGTCGTCCTGAGCATGTGTGTGTTTATGTTAATACA

CUST\_6479\_PI426210822 ACACATATCTACTTGCCTCTCGCTAATCTTTCTGCTAAGAGTGTCTTCTCC

CUST\_1159\_PI426210822 CCTGTAAGAGGAGAGGGGTAGAAGATGCTGAGTATTTTTCTAGAAGACTGG

A\_14\_P137147 CAAGTAAATCACAAAAATGGGTAATTCTCAAAGCACAGAAACAGTGTAGCACATACCTG

A\_14\_P113688 GTTACTTTAATTACTCCATGGAAGACATGGAAAATGTCCCCACTGATTCTTAAACATTTG

CUST\_3691\_PI426210822

AGCACTTTTCTACTCATCCCCAGTTATGGAATGTCTAATTTCTTTCTCATTTTCTCC

A\_14\_P110255 TATTTTGTTCATATCAAATAAAGAGAGAACAGGACTAAAGATGCAGTGGCTCCTGTCTGTT

CUST\_1235\_PI426210822

TTTAGTGACTAGATAATGAAGGGTAGAAAGCTGGATATTCCTAAAATGATTTTAAGAGCC

A\_14\_P130562 TTTGGGTTAGGTTACCCAGTTCTTAGTTGTGTGAATGGACAGTGTAAATTTTATTAGTTCC

A\_16\_P19795204

CGAGGCATGTCAAAGTAAAGAGATGATAGATTCTTGCATAAACCGGTTCTAAATGAAGAG

CUST\_10300\_PI426210822

CATAGTGATGAGAAAGTGAGCCAGCTTTTGCTCTTAGAGATGAACAAGAGAAGTC

A\_14\_P128364 GCTCTATGCTGACCCTTGTCCTGAACCCTGATCTAGACTTATATGAATAAATGAAATTA

A\_14\_P100071 TCACACTTTGGCCTACGTCCTCATGAGGACATCTGCAGATGCTTT

A\_16\_P01720776 ACCCCATATTTCAAACGTATCTGCTATATATTTTTTTTCAATAGGCCTCATCTACCTCACT

CUST\_6179\_PI426210822

TGCATTCGTCTGGACCCTTTTTCCCCTTCACTAGCAAGCATAACAATATATTATTG

A\_14\_P119017 TTCATGATCTCCTGGATTTGACAAATTCAAATTATGATTTACATCAAAGCAAACCTGCCAG
