# Supplementary material for: Genome-Wide Gene Expression Analysis Implicates the Immune Response and Lymphangiogenesis in the Pathogenesis of Fetal Chylothorax
Source: PubMed Central journal article supplement (PMC3329545; doi:10.1371/journal.pone.0034901), 2012-04-18

**Appendix S3.** The *ITGA9* genotypings for the mutation c.1210G>A, p.G404S in the familial members of the index case (Ind). The p.G404S mutation was only found in the female hydropic fetus (*i.e.* the ind, indicated by arrow) and thus was deemed to have arisen *de novo*.

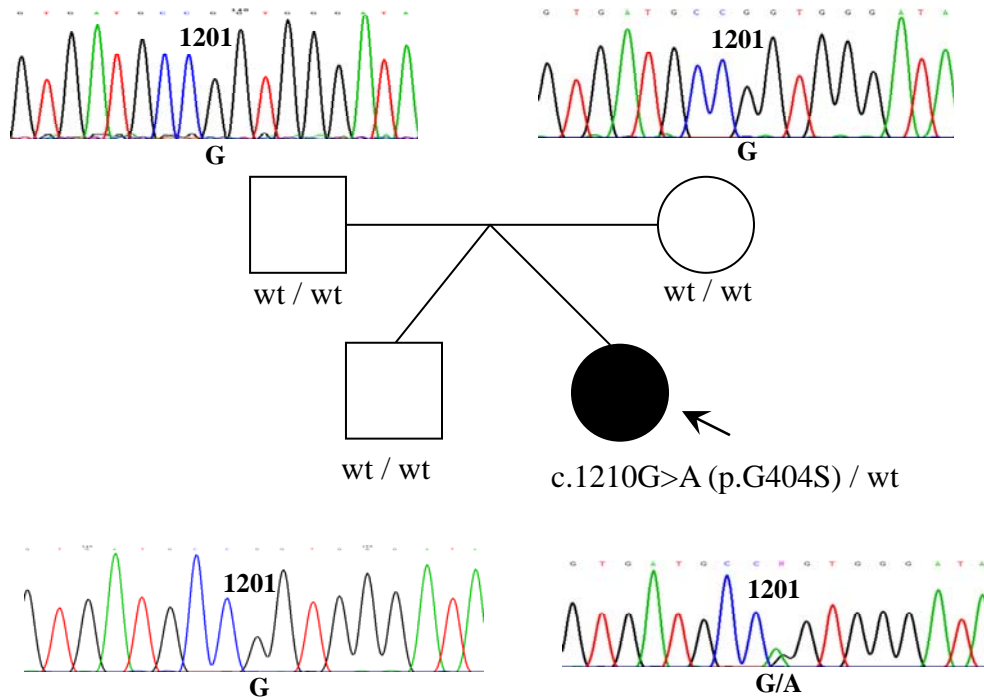

Supplement: pone.0034901.s003.pdf [file pone.0034901.s003.pdf]
